# Supplementary material for: Heat Stress Reduces the Susceptibility of Caenorhabditis elegans to Orsay Virus Infection
Source: MDPI journal article supplement (doi:10.3390/genes12081161), 2021-07-28
Supplement: s1 [file s1]

| strain                                                                                                                          | treatment1 | chromosome | gene_bp_start  | gene_bp_end     | gene_WBID | gene_public_name    |
|---------------------------------------------------------------------------------------------------------------------------------|------------|------------|----------------|-----------------|-----------|---------------------|
| gene_sequence_name                                                                                                              | FC         | spots      |                |                 |           |                     |
| CB4856 CT I                                                                                                                     | 3747       | 3909       | WBGene00023193 | Y74C9A.6        | Y74C9A.6  | 0.0572822361547409  |
| AGIWUR10283                                                                                                                     |            |            |                |                 |           |                     |
| CB4856 CT I                                                                                                                     | 4116       | 10230      | WBGene00022277 | homt-1 Y74C9A.3 |           | 0.038138245083827   |
| AGIWUR36142                                                                                                                     |            |            |                |                 |           |                     |
| CB4856 CT I                                                                                                                     | 11495      | 16837      | WBGene00022276 | nlp-40 Y74C9A.2 |           | -0.290645897988796  |
| AGIWUR15573;AGIWUR25172                                                                                                         |            |            |                |                 |           |                     |
| CB4856 CT I                                                                                                                     | 17487      | 26781      | WBGene00022278 | rcor-1 Y74C9A.4 |           | -0.153594825448508  |
| AGIWUR26476                                                                                                                     |            |            |                |                 |           |                     |
| CB4856 CT I                                                                                                                     | 27591      | 32544      | WBGene00022279 | sesn-1 Y74C9A.5 |           | -0.378278118250027  |
| AGIWUR22971                                                                                                                     |            |            |                |                 |           |                     |
| CB4856 CT I                                                                                                                     | 43733      | 44677      | WBGene00022275 | Y74C9A.1        | Y74C9A.1  | -0.031110273790933  |
| AGIWUR5034                                                                                                                      |            |            |                |                 |           |                     |
| CB4856 CT I                                                                                                                     | 47467      | 49857      | WBGene00044345 | Y48G1C.12       | Y48G1C.12 | -0.225212687792613  |
| AGIWUR8212;AGIWUR32887;AGIWUR43575                                                                                              |            |            |                |                 |           |                     |
| CB4856 CT I                                                                                                                     | 49919      | 54426      | WBGene00021677 | pgs-1 Y48G1C.4  |           | 0.0350669441511222  |
| AGIWUR6338;AGIWUR29294;AGIWUR41966                                                                                              |            |            |                |                 |           |                     |
| CB4856 CT I                                                                                                                     | 55293      | 64066      | WBGene00021678 | Y48G1C.5        | Y48G1C.5  | 0.174870530280208   |
| AGIWUR12519                                                                                                                     |            |            |                |                 |           |                     |
| CB4856 CT I                                                                                                                     | 71425      | 81071      | WBGene00000812 | csk-1 Y48G1C.2  |           | -0.115343558351268  |
| AGIWUR18740;AGIWUR27071;AGIWUR29609;AGIWUR40038                                                                                 |            |            |                |                 |           |                     |
| CB4856 CT I                                                                                                                     | 81193      | 91020      | WBGene00021683 | Y48G1C.10       | Y48G1C.10 | -0.159181607424891  |
| AGIWUR1487;AGIWUR6768;AGIWUR17886                                                                                               |            |            |                |                 |           |                     |
| CB4856 CT I                                                                                                                     | 91380      | 92877      | WBGene00021682 | Y48G1C.9        | Y48G1C.9  | -0.0643977165767584 |
| AGIWUR6641;AGIWUR16497;AGIWUR29495                                                                                              |            |            |                |                 |           |                     |
| CB4856 CT I                                                                                                                     | 93024      | 94884      | WBGene00021676 | Y48G1C.1        | Y48G1C.1  | -0.0886182158283813 |
| AGIWUR20733                                                                                                                     |            |            |                |                 |           |                     |
| CB4856 CT I                                                                                                                     | 96544      | 108223     | WBGene00021681 | Y48G1C.8        | Y48G1C.8  | 0.0847028940421772  |
| AGIWUR2118;AGIWUR4958;AGIWUR17289;AGIWUR20729;AGIWUR23172;AGIWUR25122;AGIWUR30532;AGIWUR33151;AGIWUR37921                       |            |            |                |                 |           |                     |
| CB4856 CT I                                                                                                                     | 108670     | 110107     | WBGene00004274 | rab-11.1        | F53G12.1  | -0.0813247821160523 |
| AGIWUR7280;AGIWUR18237                                                                                                          |            |            |                |                 |           |                     |
| CB4856 CT I                                                                                                                     | 111038     | 112417     | WBGene00004418 | rp1-7 F53G12.10 |           | 0.0604872196828339  |
| AGIWUR2263;AGIWUR3392;AGIWUR5751;AGIWUR6722;AGIWUR12865;AGIWUR17613;AGIWUR21588;AGIWUR25879;AGIWUR34428;AGIWUR39201;AGIWUR39669 |            |            |                |                 |           |                     |
| CB4856 CT I                                                                                                                     | 112285     | 113721     | WBGene00018774 | F53G12.9        | F53G12.9  | 0.162815290391424   |
| AGIWUR6433;AGIWUR10455;AGIWUR10794;AGIWUR22121;AGIWUR25979;AGIWUR27830;AGIWUR36366;AGIWUR36737                                  |            |            |                |                 |           |                     |
| CB4856 CT I                                                                                                                     | 113807     | 114704     | WBGene00018773 | F53G12.8        | F53G12.8  | 0.0867855403734694  |
| AGIWUR11234;AGIWUR20914                                                                                                         |            |            |                |                 |           |                     |

|                                                                                               |   |        |        |                |           |           |                     |             |
|-----------------------------------------------------------------------------------------------|---|--------|--------|----------------|-----------|-----------|---------------------|-------------|
| CB4856 CT                                                                                     | I | 115739 | 117438 | WBGene00000622 | col-45    | F53G12.7  | 0.0393579449488968  |             |
| AGIWUR14279                                                                                   |   |        |        |                |           |           |                     |             |
| CB4856 CT                                                                                     | I | 118109 | 120870 | WBGene00004962 | spe-8     | F53G12.6  | -0.099367608613401  |             |
| AGIWUR621;AGIWUR6081;AGIWUR40104;AGIWUR43527                                                  |   |        |        |                |           |           |                     |             |
| CB4856 CT                                                                                     | I | 127297 | 134065 | WBGene00003229 | mex-3     | F53G12.5  | 0.0468958207680874  |             |
| AGIWUR13975;AGIWUR29437;AGIWUR44108                                                           |   |        |        |                |           |           |                     |             |
| CB4856 CT                                                                                     | I | 134337 | 137282 | WBGene00018772 | F53G12.4  | F53G12.4  | -0.0158516177266748 |             |
| AGIWUR42484                                                                                   |   |        |        |                |           |           |                     |             |
| CB4856 CT                                                                                     | I | 146486 | 154850 | WBGene00000253 | bli-3     | F56C11.1  | -0.0246854270564416 |             |
| AGIWUR3807                                                                                    |   |        |        |                |           |           |                     |             |
| CB4856 CT                                                                                     | I | 160172 | 166819 | WBGene00004225 | ptr-11    | F56C11.2  | 0.0161465713386075  |             |
| AGIWUR42837                                                                                   |   |        |        |                |           |           |                     |             |
| CB4856 CT                                                                                     | I | 171340 | 175989 | WBGene00018958 | F56C11.6  | F56C11.6  | 0.389780367443706   |             |
| AGIWUR6883                                                                                    |   |        |        |                |           |           |                     |             |
| CB4856 CT                                                                                     | I | 178538 | 182161 | WBGene00018957 | F56C11.5  | F56C11.5  | -0.0502291879875365 |             |
| AGIWUR2702                                                                                    |   |        |        |                |           |           |                     |             |
| CB4856 CT                                                                                     | I | 182079 | 182772 | WBGene00018955 | F56C11.3  | F56C11.3  | -0.185917067845597  |             |
| AGIWUR23793                                                                                   |   |        |        |                |           |           |                     |             |
| CB4856 CT                                                                                     | I | 183364 | 208465 | WBGene00000227 | atm-1     | Y48G1BL.2 | -0.151293849699115  |             |
| AGIWUR463;AGIWUR33245;AGIWUR38423;AGIWUR39307                                                 |   |        |        |                |           |           |                     |             |
| CB4856 CT                                                                                     | I | 216028 | 216996 | WBGene00021662 | snpc-3.3  | Y48G1BL.1 | -0.0185274495888024 |             |
| AGIWUR11670                                                                                   |   |        |        |                |           |           |                     |             |
| CB4856 CT                                                                                     | I | 219735 | 221575 | WBGene00021664 | Y48G1BL.5 | Y48G1BL.5 | -0.237189515236789  |             |
| AGIWUR13754                                                                                   |   |        |        |                |           |           |                     |             |
| CB4856 CT                                                                                     | I | 238616 | 239021 | WBGene00021672 | Y48G1BM.7 | Y48G1BM.7 | 0.0882180883144956  |             |
| AGIWUR38722                                                                                   |   |        |        |                |           |           |                     |             |
| CB4856 CT                                                                                     | I | 240491 | 245414 | WBGene00021668 | Y48G1BM.2 | Y48G1BM.2 | 0.181885964170025   |             |
| AGIWUR29927                                                                                   |   |        |        |                |           |           |                     |             |
| CB4856 CT                                                                                     | I | 248624 | 251580 | WBGene00021673 | Y48G1BM.8 | Y48G1BM.8 | -0.0548076430134667 |             |
| AGIWUR38995                                                                                   |   |        |        |                |           |           |                     |             |
| CB4856 CT                                                                                     | I | 252118 | 254277 | WBGene00021667 | snpc-3.2  | Y48G1BM.1 | -0.373210301497416  |             |
| AGIWUR11205                                                                                   |   |        |        |                |           |           |                     |             |
| CB4856 CT                                                                                     | I | 254277 | 259157 | WBGene00021675 | Y48G1BR.1 | Y48G1BR.1 | -0.0178752911133779 |             |
| AGIWUR4179;AGIWUR5959;AGIWUR23967;AGIWUR27432;AGIWUR32377;AGIWUR37148;AGIWUR43002;AGIWUR43138 |   |        |        |                |           |           |                     |             |
| CB4856 CT                                                                                     | I | 280120 | 280445 | WBGene00016904 | C53D5.3   | C53D5.3   | 0.422220948526773   | AGIWUR33409 |
| CB4856 CT                                                                                     | I | 283500 | 286115 | WBGene00016903 | marc-4    | C53D5.2   | 0.819719933843396   | AGIWUR3252  |
| CB4856 CT                                                                                     | I | 286088 | 289185 | WBGene00016905 | ztf-3     | C53D5.4   | -0.21420088809607   | AGIWUR12744 |
| CB4856 CT                                                                                     | I | 291215 | 305468 | WBGene00016902 | C53D5.1   | C53D5.1   | -0.349173554746477  | AGIWUR2825  |
| CB4856 CT                                                                                     | I | 305811 | 311130 | WBGene00016906 | C53D5.5   | C53D5.5   | -0.195706948587421  | AGIWUR41850 |

|                                                                                                                                                           |    |   |        |        |                 |          |          |                      |             |
|-----------------------------------------------------------------------------------------------------------------------------------------------------------|----|---|--------|--------|-----------------|----------|----------|----------------------|-------------|
| CB4856                                                                                                                                                    | CT | I | 310981 | 314989 | WBGene00002077  | imb-3    | C53D5.6  | -0.0708606006805663  |             |
| AGIWUR3906;AGIWUR8209;AGIWUR34608                                                                                                                         |    |   |        |        |                 |          |          |                      |             |
| CB4856                                                                                                                                                    | CT | I | 318390 | 323352 | WBGene00002079  | xpo-2    | Y48G1A.5 | 0.161450280193128    |             |
| AGIWUR26191                                                                                                                                               |    |   |        |        |                 |          |          |                      |             |
| CB4856                                                                                                                                                    | CT | I | 323855 | 330978 | WBGene00021660  | Y48G1A.4 | Y48G1A.4 | -0.150921125701396   |             |
| AGIWUR8979                                                                                                                                                |    |   |        |        |                 |          |          |                      |             |
| CB4856                                                                                                                                                    | CT | I | 332611 | 337839 | WBGene00000917  | daf-25   | Y48G1A.3 | -0.197287697146631   |             |
| AGIWUR35344                                                                                                                                               |    |   |        |        |                 |          |          |                      |             |
| CB4856                                                                                                                                                    | CT | I | 343069 | 348424 | WBGene00021661  | mbtr-1   | Y48G1A.6 | -0.0997927925252426  |             |
| AGIWUR1177                                                                                                                                                |    |   |        |        |                 |          |          |                      |             |
| CB4856                                                                                                                                                    | CT | I | 348460 | 357193 | WBGene00021657  | Y48G1A.1 | Y48G1A.1 | 0.0943400378224055   |             |
| AGIWUR10987                                                                                                                                               |    |   |        |        |                 |          |          |                      |             |
| CB4856                                                                                                                                                    | CT | I | 357240 | 363901 | WBGene00020087  | R119.1   | R119.1   | -0.0891612073275496  | AGIWUR25426 |
| CB4856                                                                                                                                                    | CT | I | 364510 | 368319 | WBGene00020091  | rnp-8    | R119.7   | 0.0331028299221323   | AGIWUR25376 |
| CB4856                                                                                                                                                    | CT | I | 368370 | 373445 | WBGene00020088  | R119.2   | R119.2   | 0.311581015441076    | AGIWUR10202 |
| CB4856                                                                                                                                                    | CT | I | 373571 | 379073 | WBGene00020089  | R119.3   | R119.3   | 0.101971769202334    |             |
| AGIWUR3041;AGIWUR17217;AGIWUR27220;AGIWUR29433;AGIWUR30374;AGIWUR42548                                                                                    |    |   |        |        |                 |          |          |                      |             |
| CB4856                                                                                                                                                    | CT | I | 379071 | 381902 | WBGene00004143  | pqn-59   | R119.4   | -0.00755355376780287 |             |
| AGIWUR5926;AGIWUR7401;AGIWUR13641;AGIWUR16067;AGIWUR19397;AGIWUR19860;AGIWUR21791;AGIWUR26455;AGIWUR28874;AGIWUR32613;AGIWUR36219;AGIWUR36591;AGIWUR38419 |    |   |        |        |                 |          |          |                      |             |
| CB4856                                                                                                                                                    | CT | I | 382648 | 388564 | WBGene00006385  | taf-4    | R119.6   | 0.111638982131804    | AGIWUR11265 |
| CB4856                                                                                                                                                    | CT | I | 388470 | 394415 | WBGene00020090  | R119.5   | R119.5   | 0.00705356294970549  |             |
| AGIWUR1299;AGIWUR1860                                                                                                                                     |    |   |        |        |                 |          |          |                      |             |
| CB4856                                                                                                                                                    | CT | I | 398891 | 412915 | WBGene00021733  | otub-2   | Y50C1A.1 | -0.0144190768681725  |             |
| AGIWUR9308;AGIWUR14492;AGIWUR36666                                                                                                                        |    |   |        |        |                 |          |          |                      |             |
| CB4856                                                                                                                                                    | CT | I | 412911 | 418660 | WBGene00021734  | Y50C1A.2 | Y50C1A.2 | 0.1948161650412      |             |
| AGIWUR12911                                                                                                                                               |    |   |        |        |                 |          |          |                      |             |
| CB4856                                                                                                                                                    | CT | I | 420922 | 423713 | WBGene00015570  | C07F11.2 | C07F11.2 | 0.0410718121082576   |             |
| AGIWUR14464                                                                                                                                               |    |   |        |        |                 |          |          |                      |             |
| CB4856                                                                                                                                                    | CT | I | 443999 | 461605 | WBGene00006593  | tol-1    | C07F11.1 | 0.0842135211940898   |             |
| AGIWUR2677;AGIWUR10919;AGIWUR11990;AGIWUR12403;AGIWUR13788;AGIWUR18746;AGIWUR19485;AGIWUR26817;AGIWUR32956;AGIWUR39071;AGIWUR41796                        |    |   |        |        |                 |          |          |                      |             |
| CB4856                                                                                                                                                    | CT | I | 461995 | 462651 | WBGene00021026  | W04C9.4  | W04C9.4  | -0.0456568870172571  | AGIWUR40613 |
| CB4856                                                                                                                                                    | CT | I | 462657 | 467131 | WBGene00021027  | W04C9.5  | W04C9.5  | 0.0515223369171238   | AGIWUR32438 |
| CB4856                                                                                                                                                    | CT | I | 477582 | 481954 | WBGene00021025  | cutl-13  | W04C9.3  | 0.750713757470874    |             |
| AGIWUR7157;AGIWUR17034;AGIWUR44870                                                                                                                        |    |   |        |        |                 |          |          |                      |             |
| CB4856                                                                                                                                                    | CT | I | 482040 | 483880 | WBGene000235388 | W04C9.9  | W04C9.9  | -0.517608023612533   | AGIWUR43955 |
| CB4856                                                                                                                                                    | CT | I | 488607 | 489905 | WBGene00021024  | W04C9.2  | W04C9.2  | -0.160627648178302   | AGIWUR6890  |
| CB4856                                                                                                                                                    | CT | I | 489969 | 496150 | WBGene00001814  | haf-4    | W04C9.1  | 0.0579868486135879   | AGIWUR32786 |

|                                                                                                                                     |   |        |        |                |           |           |                     |
|-------------------------------------------------------------------------------------------------------------------------------------|---|--------|--------|----------------|-----------|-----------|---------------------|
| CB4856 CT                                                                                                                           | I | 496144 | 502042 | WBGene00022035 | Y65B4BL.3 | Y65B4BL.3 | -0.0827939667261894 |
| AGIWUR355                                                                                                                           |   |        |        |                |           |           |                     |
| CB4856 CT                                                                                                                           | I | 502932 | 506250 | WBGene00022036 | Y65B4BL.4 | Y65B4BL.4 | 0.0610760405113346  |
| AGIWUR42967                                                                                                                         |   |        |        |                |           |           |                     |
| CB4856 CT                                                                                                                           | I | 506469 | 509056 | WBGene00022034 | deps-1    | Y65B4BL.2 | 0.0821849768817398  |
| AGIWUR44389                                                                                                                         |   |        |        |                |           |           |                     |
| CB4856 CT                                                                                                                           | I | 511052 | 519800 | WBGene00022037 | acs-13    | Y65B4BL.5 | 0.0050543734294628  |
| AGIWUR5213;AGIWUR6411;AGIWUR12098;AGIWUR26016;AGIWUR28762;AGIWUR30485;AGIWUR41922                                                   |   |        |        |                |           |           |                     |
| CB4856 CT                                                                                                                           | I | 520109 | 521554 | WBGene00022038 | Y65B4BL.6 | Y65B4BL.6 | -0.217045221787076  |
| AGIWUR10694;AGIWUR14351;AGIWUR18806;AGIWUR24805;AGIWUR30981;AGIWUR33410;AGIWUR36376;AGIWUR36747;AGIWUR36896;AGIWUR42899;AGIWUR44259 |   |        |        |                |           |           |                     |
| CB4856 CT                                                                                                                           | I | 530969 | 533084 | WBGene00022033 | Y65B4BL.1 | Y65B4BL.1 | 0.470045849203705   |
| AGIWUR40224                                                                                                                         |   |        |        |                |           |           |                     |
| CB4856 CT                                                                                                                           | I | 534455 | 535344 | WBGene00022043 | psf-3     | Y65B4BR.8 | -0.199356635367785  |
| AGIWUR31655                                                                                                                         |   |        |        |                |           |           |                     |
| CB4856 CT                                                                                                                           | I | 535791 | 536670 | WBGene00022042 | icd-2     | Y65B4BR.5 | 0.0602303362877965  |
| AGIWUR5033;AGIWUR8895;AGIWUR9943;AGIWUR17402;AGIWUR44103;AGIWUR45197                                                                |   |        |        |                |           |           |                     |
| CB4856 CT                                                                                                                           | I | 537122 | 542200 | WBGene00007009 | wwp-1     | Y65B4BR.4 | 0.0180817802141391  |
| AGIWUR1688;AGIWUR20352;AGIWUR38522                                                                                                  |   |        |        |                |           |           |                     |
| CB4856 CT                                                                                                                           | I | 550696 | 556638 | WBGene00004235 | ptr-21    | Y65B4BR.3 | -0.0854133372573074 |
| AGIWUR8387                                                                                                                          |   |        |        |                |           |           |                     |
| CB4856 CT                                                                                                                           | I | 557375 | 561671 | WBGene00002393 | lpr-1     | Y65B4BR.2 | 0.381466082590725   |
| AGIWUR5420                                                                                                                          |   |        |        |                |           |           |                     |
| CB4856 CT                                                                                                                           | I | 562736 | 565181 | WBGene00022040 | Y65B4BR.1 | Y65B4BR.1 | 0.785507910116486   |
| AGIWUR36108                                                                                                                         |   |        |        |                |           |           |                     |
| CB4856 CT                                                                                                                           | I | 565436 | 566414 | WBGene00000434 | ceh-9     | Y65B4BR.9 | -0.0012082377008249 |
| AGIWUR20254;AGIWUR37142                                                                                                             |   |        |        |                |           |           |                     |
| CB4856 CT                                                                                                                           | I | 572177 | 575120 | WBGene00001725 | grl-16    | Y65B4BR.6 | -0.496892188452303  |
| AGIWUR7933;AGIWUR10290;AGIWUR17115                                                                                                  |   |        |        |                |           |           |                     |
| CB4856 CT                                                                                                                           | I | 582288 | 583748 | WBGene00044427 | F56A6.5   | F56A6.5   | 0.298488160576461   |
| AGIWUR5027;AGIWUR22482;AGIWUR31223                                                                                                  |   |        |        |                |           |           |                     |
| CB4856 CT                                                                                                                           | I | 585831 | 607601 | WBGene00002040 | hum-7     | F56A6.2   | -0.147096106529993  |
| AGIWUR35233                                                                                                                         |   |        |        |                |           |           |                     |
| CB4856 CT                                                                                                                           | I | 614651 | 629444 | WBGene00018923 | eme-1     | F56A6.4   | -0.0666797568102773 |
| AGIWUR9658;AGIWUR17702;AGIWUR40576                                                                                                  |   |        |        |                |           |           |                     |
| CB4856 CT                                                                                                                           | I | 629492 | 636350 | WBGene00022029 | Y65B4A.6  | Y65B4A.6  | -0.315067790522942  |
| AGIWUR16088                                                                                                                         |   |        |        |                |           |           |                     |
| CB4856 CT                                                                                                                           | I | 636804 | 637852 | WBGene00022027 | vps-20    | Y65B4A.3  | -0.200687121144678  |
| AGIWUR2007;AGIWUR15178;AGIWUR23419;AGIWUR28868;AGIWUR29377;AGIWUR42530                                                              |   |        |        |                |           |           |                     |
| CB4856 CT                                                                                                                           | I | 638129 | 653986 | WBGene00022026 | Y65B4A.2  | Y65B4A.2  | -0.0228837148173255 |



|                                                                        |   |        |        |                |                  |                      |                     |  |
|------------------------------------------------------------------------|---|--------|--------|----------------|------------------|----------------------|---------------------|--|
| AGIWUR28421                                                            |   |        |        |                |                  |                      |                     |  |
| CB4856 CT                                                              | I | 654090 | 658810 | WBGene00022025 | Y65B4A.1         | Y65B4A.1             | 0.033133463123022   |  |
| AGIWUR30815                                                            |   |        |        |                |                  |                      |                     |  |
| CB4856 CT                                                              | I | 659557 | 663686 | WBGene00022031 | Y65B4A.8         | Y65B4A.8             | -0.22236907166428   |  |
| AGIWUR33639                                                            |   |        |        |                |                  |                      |                     |  |
| CB4856 CT                                                              | I | 667615 | 674413 | WBGene00044461 | Y18H1A.14        | Y18H1A.14            | 0.194714823821787   |  |
| AGIWUR26159;AGIWUR30290                                                |   |        |        |                |                  |                      |                     |  |
| CB4856 CT                                                              | I | 682876 | 686599 | WBGene00021214 | hasp-2 Y18H1A.10 | 0.104009099859017    |                     |  |
| AGIWUR12962                                                            |   |        |        |                |                  |                      |                     |  |
| CB4856 CT                                                              | I | 688286 | 691267 | WBGene00021207 | Y18H1A.1         | Y18H1A.1             | -0.295719539018139  |  |
| AGIWUR42845                                                            |   |        |        |                |                  |                      |                     |  |
| CB4856 CT                                                              | I | 692026 | 694948 | WBGene00021210 | Y18H1A.4         | Y18H1A.4             | 0.00998442583920678 |  |
| AGIWUR32934;AGIWUR40014                                                |   |        |        |                |                  |                      |                     |  |
| CB4856 CT                                                              | I | 694982 | 698322 | WBGene00021208 | Y18H1A.2         | Y18H1A.2             | 0.044337008904229   |  |
| AGIWUR21289                                                            |   |        |        |                |                  |                      |                     |  |
| CB4856 CT                                                              | I | 700274 | 715874 | WBGene00021209 | hgap-1 Y18H1A.3  | -0.109564898607659   |                     |  |
| AGIWUR7556;AGIWUR13243;AGIWUR29984;AGIWUR33686;AGIWUR39061;AGIWUR39297 |   |        |        |                |                  |                      |                     |  |
| CB4856 CT                                                              | I | 717893 | 719816 | WBGene00004332 | rec-1 Y18H1A.7   | 0.0080689938977212   |                     |  |
| AGIWUR12224                                                            |   |        |        |                |                  |                      |                     |  |
| CB4856 CT                                                              | I | 719929 | 731078 | WBGene00004028 | pif-1 Y18H1A.6   | -0.00209956163948632 |                     |  |
| AGIWUR23096                                                            |   |        |        |                |                  |                      |                     |  |
| CB4856 CT                                                              | I | 731068 | 736552 | WBGene00044434 | Y18H1A.15        | Y18H1A.15            | -0.0969114144793606 |  |
| AGIWUR8664                                                             |   |        |        |                |                  |                      |                     |  |
| CB4856 CT                                                              | I | 741913 | 745570 | WBGene00000623 | col-46 Y18H1A.13 | 1.25672959205179     |                     |  |
| AGIWUR13435                                                            |   |        |        |                |                  |                      |                     |  |
| CB4856 CT                                                              | I | 748228 | 757010 | WBGene00021213 | Y18H1A.9         | Y18H1A.9             | 0.121974987400336   |  |
| AGIWUR1232                                                             |   |        |        |                |                  |                      |                     |  |
| CB4856 CT                                                              | I | 758756 | 760429 | WBGene00021212 | Y18H1A.8         | Y18H1A.8             | -0.363303772415374  |  |
| AGIWUR19119                                                            |   |        |        |                |                  |                      |                     |  |
| CB4856 CT                                                              | I | 760848 | 761849 | WBGene00020282 | mps-3 T06A4.2    | 0.0649145700321814   | AGIWUR43985         |  |
| CB4856 CT                                                              | I | 763597 | 770720 | WBGene00020283 | T06A4.3 T06A4.3  | -0.4560010342373     | AGIWUR4393          |  |
| CB4856 CT                                                              | I | 770892 | 776369 | WBGene00020281 | T06A4.1 T06A4.1  | 0.0430341809898209   | AGIWUR22830         |  |
| CB4856 CT                                                              | I | 803368 | 835277 | WBGene00022518 | zfh-2 ZC123.3    | 0.18634714764485     |                     |  |
| AGIWUR8335;AGIWUR26889;AGIWUR32482;AGIWUR36028;AGIWUR37303;AGIWUR42904 |   |        |        |                |                  |                      |                     |  |
| CB4856 CT                                                              | I | 837996 | 841746 | WBGene00022517 | ZC123.1 ZC123.1  | 0.152289174675247    |                     |  |
| AGIWUR1437;AGIWUR5409;AGIWUR11894;AGIWUR21175;AGIWUR35381;AGIWUR36327  |   |        |        |                |                  |                      |                     |  |
| CB4856 CT                                                              | I | 841742 | 846763 | WBGene00022519 | ZC123.4 ZC123.4  | 0.131686846384255    |                     |  |
| AGIWUR20395;AGIWUR21786;AGIWUR27160;AGIWUR33235;AGIWUR38509            |   |        |        |                |                  |                      |                     |  |
| CB4856 CT                                                              | I | 853451 | 872103 | WBGene00022388 | Y95B8A.8         | Y95B8A.8             | -0.282843410744972  |  |

AGIWUR12290;AGIWUR40942  
 CB4856 CT I 873164 882713 WBGene00022389 pde-6 Y95B8A.10 -0.195001998200536  
 AGIWUR2879;AGIWUR8164;AGIWUR17662;AGIWUR23206;AGIWUR27165;AGIWUR27349  
 CB4856 CT I 882918 890194 WBGene00022386 Y95B8A.6 Y95B8A.6 0.956823940741959  
 AGIWUR26061;AGIWUR39290;AGIWUR39599  
 CB4856 CT I 897286 906077 WBGene00001678 gpa-16 Y95B8A.5 -0.133916880962758  
 AGIWUR36673  
 CB4856 CT I 907448 911189 WBGene00022385 Y95B8A.4 Y95B8A.4 -0.143835048536303  
 AGIWUR27919  
 CB4856 CT I 912415 926877 WBGene00022391 Y95B8A.12 Y95B8A.12 0.0437704107750161  
 AGIWUR20888;AGIWUR31755  
 CB4856 CT I 938464 941773 WBGene00022383 Y95B8A.2 Y95B8A.2 -0.391300169589703  
 AGIWUR3724;AGIWUR34637  
 CB4856 CT I 942257 947710 WBGene00003548 nas-30 Y95B8A.1 -0.341988244277148  
 AGIWUR13336  
 CB4856 CT I 948569 957404 WBGene00003238 mig-1 Y34D9B.1 0.32964244231385  
 AGIWUR19889;AGIWUR24156;AGIWUR39680;AGIWUR41925  
 CB4856 CT I 963700 969426 WBGene00018787 cutl-20 F54A5.2 0.340881374377121 AGIWUR36883  
 CB4856 CT I 969089 976550 WBGene00018788 shc-1 F54A5.3 -0.000317291776342987  
 AGIWUR1520;AGIWUR6328;AGIWUR7799;AGIWUR16360;AGIWUR21266;AGIWUR22224;AGIWUR23180;AGIWUR24163;AGIWUR25177;AGIWUR28900;AGIWUR30401;AGIWUR31527;AGIWUR33487;AGIWUR43199  
 CB4856 CT I 989671 992181 WBGene00018786 hmbx-1 F54A5.1 0.0138910401529992  
 AGIWUR17420;AGIWUR21529;AGIWUR26430;AGIWUR28932;AGIWUR31846;AGIWUR38211  
 CB4856 CT I 996045 1005066 WBGene00016932 C54G6.3 C54G6.3 -0.329660320585722  
 AGIWUR22;AGIWUR16210;AGIWUR29308;AGIWUR31907;AGIWUR35462;AGIWUR41023  
 CB4856 CT I 1006102 1010765 WBGene00016931 C54G6.2 C54G6.2 -0.097224519687753 AGIWUR6501  
 CB4856 CT I 1011371 1014455 WBGene00016930 madf-6 C54G6.1 0.110709753318485  
 AGIWUR5134;AGIWUR11965;AGIWUR20597;AGIWUR20929;AGIWUR32037  
 CB4856 CT I 1016403 1017180 WBGene00005002 spp-17 C54G6.5 0.0278636445245617 AGIWUR29378  
 CB4856 CT I 1018835 1019229 WBGene00021335 spp-23 Y34D9A.11 -0.486721864107726  
 AGIWUR9839;AGIWUR10201;AGIWUR16077;AGIWUR24534;AGIWUR34141;AGIWUR39770  
 CB4856 CT I 1019827 1029910 WBGene00021327 mrp1-38 Y34D9A.1 0.189791431745228  
 AGIWUR42178  
 CB4856 CT I 1030629 1033436 WBGene00004952 spd-1 Y34D9A.4 -0.0378672141904666  
 AGIWUR8339;AGIWUR10414;AGIWUR10601;AGIWUR13233;AGIWUR34053  
 CB4856 CT I 1034443 1040868 WBGene00021329 Y34D9A.3 Y34D9A.3 -0.107873846326134  
 AGIWUR17558;AGIWUR19082;AGIWUR25332;AGIWUR28801;AGIWUR35935;AGIWUR41040;AGIWUR41363  
 CB4856 CT I 1041474 1048329 WBGene00021332 Y34D9A.7 Y34D9A.7 -0.422698518293391  
 AGIWUR3469

|                                                                                                                                                           |   |         |         |                |            |            |                     |                      |             |
|-----------------------------------------------------------------------------------------------------------------------------------------------------------|---|---------|---------|----------------|------------|------------|---------------------|----------------------|-------------|
| CB4856 CT                                                                                                                                                 | I | 1049596 | 1050727 | WBGene00021331 | glrx-10    | Y34D9A.6   |                     | -0.0142175702509899  |             |
| AGIWUR11461                                                                                                                                               |   |         |         |                |            |            |                     |                      |             |
| CB4856 CT                                                                                                                                                 | I | 1050921 | 1053826 | WBGene00021333 | Y34D9A.8   |            | Y34D9A.8            | 0.0191908912235816   |             |
| AGIWUR13006;AGIWUR14778;AGIWUR23259;AGIWUR23416;AGIWUR24085;AGIWUR32213                                                                                   |   |         |         |                |            |            |                     |                      |             |
| CB4856 CT                                                                                                                                                 | I | 1053894 | 1066899 | WBGene00021334 | vps-4      | Y34D9A.10  |                     | 0.0481231804463143   |             |
| AGIWUR2517;AGIWUR33071;AGIWUR33422                                                                                                                        |   |         |         |                |            |            |                     |                      |             |
| CB4856 CT                                                                                                                                                 | I | 1068484 | 1075010 | WBGene00001745 | gsa-1      | R06A10.2   |                     | 0.0219668801763202   |             |
| AGIWUR7028                                                                                                                                                |   |         |         |                |            |            |                     |                      |             |
| CB4856 CT                                                                                                                                                 | I | 1084630 | 1088473 | WBGene00019909 | R06A10.1   |            | R06A10.1            | -0.0569372119365372  |             |
| AGIWUR12833                                                                                                                                               |   |         |         |                |            |            |                     |                      |             |
| CB4856 CT                                                                                                                                                 | I | 1088514 | 1089742 | WBGene00044895 | R06A10.5   |            | R06A10.5            | 0.123956525761516    |             |
| AGIWUR8078;AGIWUR13536;AGIWUR18834;AGIWUR20617;AGIWUR32661                                                                                                |   |         |         |                |            |            |                     |                      |             |
| CB4856 CT                                                                                                                                                 | I | 1089666 | 1095796 | WBGene00019911 | R06A10.4   |            | R06A10.4            | -0.138913005799147   |             |
| AGIWUR18722                                                                                                                                               |   |         |         |                |            |            |                     |                      |             |
| CB4856 CT                                                                                                                                                 | I | 1112418 | 1115501 | WBGene00236809 | ZK993.5    | ZK993.5    | -0.0345491160477929 |                      | AGIWUR41688 |
| CB4856 CT                                                                                                                                                 | I | 1128324 | 1131737 | WBGene00022837 | ceh-45     | ZK993.1    | 0.713128771832602   |                      | AGIWUR30087 |
| CB4856 CT                                                                                                                                                 | I | 1136371 | 1154386 | WBGene00021689 | Y48G8AL.10 |            | Y48G8AL.10          | -0.118209361406406   |             |
| AGIWUR4185;AGIWUR5373;AGIWUR25625                                                                                                                         |   |         |         |                |            |            |                     |                      |             |
| CB4856 CT                                                                                                                                                 | I | 1154511 | 1156020 | WBGene00000165 | aps-3      | Y48G8AL.14 |                     | -0.220657185224148   |             |
| AGIWUR10923                                                                                                                                               |   |         |         |                |            |            |                     |                      |             |
| CB4856 CT                                                                                                                                                 | I | 1156579 | 1157474 | WBGene00004429 | rp1-17     | Y48G8AL.8  |                     | -0.00533880974089129 |             |
| AGIWUR4065;AGIWUR7333;AGIWUR10981;AGIWUR14030;AGIWUR16076;AGIWUR16834;AGIWUR21488;AGIWUR22895;AGIWUR33449;AGIWUR37938;AGIWUR38748;AGIWUR41085;AGIWUR41517 |   |         |         |                |            |            |                     |                      |             |
| CB4856 CT                                                                                                                                                 | I | 1157571 | 1162939 | WBGene00021687 | Y48G8AL.7  |            | Y48G8AL.7           | -0.0640140497313126  |             |
| AGIWUR25543                                                                                                                                               |   |         |         |                |            |            |                     |                      |             |
| CB4856 CT                                                                                                                                                 | I | 1162880 | 1175868 | WBGene00001816 | haf-6      | Y48G8AL.11 |                     | -0.157114358443225   |             |
| AGIWUR20067                                                                                                                                               |   |         |         |                |            |            |                     |                      |             |
| CB4856 CT                                                                                                                                                 | I | 1176471 | 1190829 | WBGene00004880 | smg-2      | Y48G8AL.6  |                     | -0.0932598126143986  |             |
| AGIWUR59                                                                                                                                                  |   |         |         |                |            |            |                     |                      |             |
| CB4856 CT                                                                                                                                                 | I | 1193158 | 1211434 | WBGene00021686 | Y48G8AL.5  |            | Y48G8AL.5           | -0.338679541455603   |             |
| AGIWUR18159;AGIWUR45123                                                                                                                                   |   |         |         |                |            |            |                     |                      |             |
| CB4856 CT                                                                                                                                                 | I | 1211485 | 1254669 | WBGene00021685 | herc-1     | Y48G8AL.1  |                     | -0.136943525767833   |             |
| AGIWUR13334                                                                                                                                               |   |         |         |                |            |            |                     |                      |             |
| CB4856 CT                                                                                                                                                 | I | 1254770 | 1258258 | WBGene00021692 | Y48G8AL.15 |            | Y48G8AL.15          | 0.0377888733602099   |             |
| AGIWUR13059;AGIWUR26397;AGIWUR27751                                                                                                                       |   |         |         |                |            |            |                     |                      |             |
| CB4856 CT                                                                                                                                                 | I | 1259374 | 1268155 | WBGene00001707 | grh-1      | Y48G8AR.1  |                     | -0.0891175296782478  |             |
| AGIWUR17365                                                                                                                                               |   |         |         |                |            |            |                     |                      |             |
| CB4856 CT                                                                                                                                                 | I | 1282101 | 1285435 | WBGene00021693 | Y48G8AR.2  |            | Y48G8AR.2           | 0.253351791572936    |             |
| AGIWUR39120                                                                                                                                               |   |         |         |                |            |            |                     |                      |             |

|                                                                                                                               |   |                 |                |                    |                    |                     |
|-------------------------------------------------------------------------------------------------------------------------------|---|-----------------|----------------|--------------------|--------------------|---------------------|
| CB4856 CT                                                                                                                     | I | 1287304 1287959 | WBGene00021694 | Y48G8AR.3          | Y48G8AR.3          | 0.0993456609134089  |
| AGIWUR41090                                                                                                                   |   |                 |                |                    |                    |                     |
| CB4856 CT                                                                                                                     | I | 1305562 1328348 | WBGene00003400 | dapk-1 K12C11.4    |                    | -0.371603475245288  |
| AGIWUR11986                                                                                                                   |   |                 |                |                    |                    |                     |
| CB4856 CT                                                                                                                     | I | 1332698 1334074 | WBGene00044896 | K12C11.5           | K12C11.5           | -0.0589654310800602 |
| AGIWUR7756;AGIWUR20555;AGIWUR32336                                                                                            |   |                 |                |                    |                    |                     |
| CB4856 CT                                                                                                                     | I | 1335321 1336867 | WBGene00019674 | K12C11.3           | K12C11.3           | -0.231505441650063  |
| AGIWUR13813;AGIWUR27282;AGIWUR39984;AGIWUR42143                                                                               |   |                 |                |                    |                    |                     |
| CB4856 CT                                                                                                                     | I | 1337012 1338216 | WBGene00045052 | K12C11.6           | K12C11.6           |                     |
| -0.00370241809629412 AGIWUR12512;AGIWUR16762;AGIWUR45006                                                                      |   |                 |                |                    |                    |                     |
| CB4856 CT                                                                                                                     | I | 1338749 1339773 | WBGene00045053 | K12C11.7           | K12C11.7           | 0.152043123375619   |
| AGIWUR14477;AGIWUR15520;AGIWUR29050;AGIWUR30108;AGIWUR34743;AGIWUR36565;AGIWUR42371                                           |   |                 |                |                    |                    |                     |
| CB4856 CT                                                                                                                     | I | 1340678 1341258 | WBGene00004888 | smo-1 K12C11.2     |                    | -0.36628676558778   |
| AGIWUR36454;AGIWUR38737                                                                                                       |   |                 |                |                    |                    |                     |
| CB4856 CT                                                                                                                     | I | 1341218 1344692 | WBGene00019673 | K12C11.1           | K12C11.1           | -0.0744633061335636 |
| AGIWUR3302;AGIWUR43117                                                                                                        |   |                 |                |                    |                    |                     |
| CB4856 CT                                                                                                                     | I | 1348503 1359595 | WBGene00022363 | Y92H12BL.1         | Y92H12BL.1         | -0.142484376105614  |
| AGIWUR15759;AGIWUR28550;AGIWUR44414                                                                                           |   |                 |                |                    |                    |                     |
| CB4856 CT                                                                                                                     | I | 1365309 1376409 | WBGene00022366 | Y92H12BL.5         | Y92H12BL.5         | 0.0993744323290819  |
| AGIWUR35560                                                                                                                   |   |                 |                |                    |                    |                     |
| CB4856 CT                                                                                                                     | I | 1376942 1385057 | WBGene00022365 | Y92H12BL.4         | Y92H12BL.4         | -0.0524157035015858 |
| AGIWUR6416;AGIWUR23727                                                                                                        |   |                 |                |                    |                    |                     |
| CB4856 CT                                                                                                                     | I | 1385818 1392759 | WBGene00022367 | Y92H12BM.1         | Y92H12BM.1         | -0.332361493109663  |
| AGIWUR24013;AGIWUR35109                                                                                                       |   |                 |                |                    |                    |                     |
| CB4856 CT                                                                                                                     | I | 1394569 1402975 | WBGene00022372 | Y92H12BR.7         | Y92H12BR.7         | -0.315613575080846  |
| AGIWUR22492                                                                                                                   |   |                 |                |                    |                    |                     |
| CB4856 CT                                                                                                                     | I | 1405935 1413100 | WBGene00022371 | set-29 Y92H12BR.6  |                    | 0.00963345703506135 |
| AGIWUR42567                                                                                                                   |   |                 |                |                    |                    |                     |
| CB4856 CT                                                                                                                     | I | 1413915 1415807 | WBGene00022368 | Y92H12BR.2         | Y92H12BR.2         | -0.0098417602126446 |
| AGIWUR36024                                                                                                                   |   |                 |                |                    |                    |                     |
| CB4856 CT                                                                                                                     | I | 1416586 1425201 | WBGene00022369 | Y92H12BR.3         | Y92H12BR.3         | -0.316740278309293  |
| AGIWUR1737;AGIWUR4253;AGIWUR5022;AGIWUR5477;AGIWUR7001;AGIWUR8655;AGIWUR21433;AGIWUR25311;AGIWUR27839;AGIWUR31391;AGIWUR41245 |   |                 |                |                    |                    |                     |
| CB4856 CT                                                                                                                     | I | 1427227 1433695 | WBGene00022370 | Y92H12BR.4         | Y92H12BR.4         | 0.155496299641678   |
| AGIWUR17553;AGIWUR20837;AGIWUR27978;AGIWUR31709;AGIWUR35420                                                                   |   |                 |                |                    |                    |                     |
| CB4856 CT                                                                                                                     | I | 1436279 1441331 | WBGene00022373 | mrp1-15 Y92H12BR.8 |                    | 0.00168775129001197 |
| AGIWUR31574                                                                                                                   |   |                 |                |                    |                    |                     |
| CB4856 CT                                                                                                                     | I | 1442048 1443942 | WBGene00018159 | F37F2.2 F37F2.2    | -0.327556709845631 | AGIWUR8713          |
| CB4856 CT                                                                                                                     | I | 1446497 1465358 | WBGene00004969 | spe-15 F47G6.4     | -0.102413203682023 |                     |

AGIWUR2637;AGIWUR3005;AGIWUR4351;AGIWUR25255;AGIWUR32395;AGIWUR35658  
 CB4856 CT I 1465597 1469587 WBGene00018580 F47G6.3 F47G6.3 0.00697013485501685 AGIWUR38276  
 CB4856 CT I 1471227 1479920 WBGene00018579 acs-16 F47G6.2 0.440155472248684 AGIWUR42596  
 CB4856 CT I 1483083 1490494 WBGene00001115 dyb-1 F47G6.1 0.110625584304652  
 AGIWUR6684;AGIWUR22860;AGIWUR35939  
 CB4856 CT I 1490887 1514411 WBGene00022361 Y92H12A.5 Y92H12A.5 -0.318499524934  
 AGIWUR13887;AGIWUR31743  
 CB4856 CT I 1514755 1540911 WBGene00022360 Y92H12A.4 Y92H12A.4 -0.295483491749567  
 AGIWUR7916;AGIWUR18838  
 CB4856 CT I 1543525 1556196 WBGene00022358 Y92H12A.2 Y92H12A.2 0.117842093836737  
 AGIWUR12716  
 CB4856 CT I 1566929 1580196 WBGene00005077 src-1 Y92H12A.1 0.174071638648029  
 AGIWUR29323;AGIWUR36808  
 CB4856 CT I 1581394 1593668 WBGene00022270 Y73E7A.3 Y73E7A.3 -0.334295575994757  
 AGIWUR9496  
 CB4856 CT I 1594659 1596184 WBGene00022271 cpx-1 Y73E7A.4 -0.209228927363542  
 AGIWUR20188  
 CB4856 CT I 1600624 1601457 WBGene00022272 Y73E7A.5 Y73E7A.5 -0.127213792145401  
 AGIWUR28873  
 CB4856 CT I 1601838 1606926 WBGene00022269 Y73E7A.2 Y73E7A.2 -0.251131293296261  
 AGIWUR16524  
 CB4856 CT I 1607658 1610041 WBGene00022273 Y73E7A.6 Y73E7A.6 -0.215286803674752  
 AGIWUR32464;AGIWUR39665  
 CB4856 CT I 1610390 1620080 WBGene00044440 adpr-1 Y73E7A.9 -0.099147231154042  
 AGIWUR8254;AGIWUR35568  
 CB4856 CT I 1621346 1628476 WBGene00000269 bre-4 Y73E7A.7 -0.167882617414467  
 AGIWUR34680  
 CB4856 CT I 1629003 1633498 WBGene00022268 Y73E7A.1 Y73E7A.1 0.0260175833198417  
 AGIWUR1633;AGIWUR3458;AGIWUR3977;AGIWUR7843;AGIWUR11159;AGIWUR21506;AGIWUR22736;AGIWUR23690;AGIWUR42544  
 CB4856 CT I 1634613 1644107 WBGene00022274 Y73E7A.8 Y73E7A.8 0.665535684996062  
 AGIWUR20107  
 CB4856 CT I 1644588 1651394 WBGene00003111 mab-20 Y71G12B.20 -0.0115088655884437  
 AGIWUR27582;AGIWUR40456  
 CB4856 CT I 1652901 1655399 WBGene00022156 Y71G12B.18 Y71G12B.18 -0.295360300185104  
 AGIWUR116  
 CB4856 CT I 1655616 1656726 WBGene00004168 pqn-88 Y71G12B.21 -0.113406691381311  
 AGIWUR26050  
 CB4856 CT I 1657513 1663331 WBGene00044358 Y71G12B.33 Y71G12B.33 -0.15353673386176  
 AGIWUR2249;AGIWUR8734;AGIWUR20752;AGIWUR30652

|                                                                         |   |         |         |                |            |            |                     |
|-------------------------------------------------------------------------|---|---------|---------|----------------|------------|------------|---------------------|
| CB4856 CT                                                               | I | 1667501 | 1669792 | WBGene00022155 | Y71G12B.17 | Y71G12B.17 | -0.0421000758689516 |
| AGIWUR42831                                                             |   |         |         |                |            |            |                     |
| CB4856 CT                                                               | I | 1670036 | 1672742 | WBGene00022158 | Y71G12B.23 | Y71G12B.23 | 0.154037533447747   |
| AGIWUR5132;AGIWUR11929;AGIWUR32676                                      |   |         |         |                |            |            |                     |
| CB4856 CT                                                               | I | 1680450 | 1685063 | WBGene00022154 | drag-1     | Y71G12B.16 | -0.199637682338393  |
| AGIWUR35035                                                             |   |         |         |                |            |            |                     |
| CB4856 CT                                                               | I | 1686216 | 1693457 | WBGene00044348 | Y71G12B.31 | Y71G12B.31 | 0.080565079659082   |
| AGIWUR1166;AGIWUR4811;AGIWUR35486                                       |   |         |         |                |            |            |                     |
| CB4856 CT                                                               | I | 1698094 | 1701128 | WBGene00006702 | ubc-3      | Y71G12B.15 | 0.09946902575299    |
| AGIWUR4490;AGIWUR30533                                                  |   |         |         |                |            |            |                     |
| CB4856 CT                                                               | I | 1701361 | 1701808 | WBGene00003080 | lsm-6      | Y71G12B.14 | 0.0287120607881612  |
| AGIWUR4447;AGIWUR11056                                                  |   |         |         |                |            |            |                     |
| CB4856 CT                                                               | I | 1702105 | 1708008 | WBGene00022153 | Y71G12B.13 | Y71G12B.13 | -0.217305842883317  |
| AGIWUR12172                                                             |   |         |         |                |            |            |                     |
| CB4856 CT                                                               | I | 1709587 | 1715568 | WBGene00022152 | atg-5      | Y71G12B.12 | -0.0971791937252373 |
| AGIWUR7357;AGIWUR29374;AGIWUR37289                                      |   |         |         |                |            |            |                     |
| CB4856 CT                                                               | I | 1721592 | 1740670 | WBGene00006771 | tlx-1      | Y71G12B.11 | -0.146765909392495  |
| AGIWUR12058;AGIWUR13591;AGIWUR32962;AGIWUR33419;AGIWUR38217;AGIWUR43568 |   |         |         |                |            |            |                     |
| CB4856 CT                                                               | I | 1740647 | 1751055 | WBGene00022159 | mppa-1     | Y71G12B.24 | -0.26776499784318   |
| AGIWUR24046                                                             |   |         |         |                |            |            |                     |
| CB4856 CT                                                               | I | 1751481 | 1754410 | WBGene00022150 | Y71G12B.10 | Y71G12B.10 | 0.143085799864926   |
| AGIWUR41998                                                             |   |         |         |                |            |            |                     |
| CB4856 CT                                                               | I | 1755329 | 1766400 | WBGene00022149 | lin-65     | Y71G12B.9  | -0.133212198019838  |
| AGIWUR776;AGIWUR21654                                                   |   |         |         |                |            |            |                     |
| CB4856 CT                                                               | I | 1767887 | 1790157 | WBGene00022148 | ddx-27     | Y71G12B.8  | -0.0704284902204737 |
| AGIWUR18548                                                             |   |         |         |                |            |            |                     |
| CB4856 CT                                                               | I | 1793254 | 1796424 | WBGene00022146 | Y71G12B.6  | Y71G12B.6  | -0.118290735577856  |
| AGIWUR4786                                                              |   |         |         |                |            |            |                     |
| CB4856 CT                                                               | I | 1797435 | 1798722 | WBGene00022162 | Y71G12B.27 | Y71G12B.27 | 0.216384100977551   |
| AGIWUR15897                                                             |   |         |         |                |            |            |                     |
| CB4856 CT                                                               | I | 1799717 | 1806986 | WBGene00022145 | Y71G12B.5  | Y71G12B.5  | 0.170293169088531   |
| AGIWUR2625;AGIWUR25042                                                  |   |         |         |                |            |            |                     |
| CB4856 CT                                                               | I | 1808091 | 1811835 | WBGene00022144 | pghm-1     | Y71G12B.4  | 0.573352814295478   |
| AGIWUR4145;AGIWUR9299;AGIWUR10064;AGIWUR17445;AGIWUR18149;AGIWUR45023   |   |         |         |                |            |            |                     |
| CB4856 CT                                                               | I | 1812892 | 1813581 | WBGene00022143 | Y71G12B.3  | Y71G12B.3  | 0.0442587358403301  |
| AGIWUR14630                                                             |   |         |         |                |            |            |                     |
| CB4856 CT                                                               | I | 1813909 | 1816061 | WBGene00044349 | Y71G12B.32 | Y71G12B.32 | 0.0372018710424937  |
| AGIWUR3178;AGIWUR36722;AGIWUR39264                                      |   |         |         |                |            |            |                     |
| CB4856 CT                                                               | I | 1816150 | 1818496 | WBGene00022142 | Y71G12B.2  | Y71G12B.2  | -0.0077973652631993 |

|                                                                                                                                              |    |   |         |         |                |            |            |                     |
|----------------------------------------------------------------------------------------------------------------------------------------------|----|---|---------|---------|----------------|------------|------------|---------------------|
| AGIWUR13069                                                                                                                                  |    |   |         |         |                |            |            |                     |
| CB4856                                                                                                                                       | CT | I | 1818581 | 1822948 | WBGene00044347 | Y71G12B.30 | Y71G12B.30 | -0.159627659531608  |
| AGIWUR19858;AGIWUR26230                                                                                                                      |    |   |         |         |                |            |            |                     |
| CB4856                                                                                                                                       | CT | I | 1823447 | 1825967 | WBGene00022141 | chaf-2     | Y71G12B.1  | 0.098141609492302   |
| AGIWUR6848                                                                                                                                   |    |   |         |         |                |            |            |                     |
| CB4856                                                                                                                                       | CT | I | 1832115 | 1832641 | WBGene00044746 | C53H9.3    | C53H9.3    | -0.131752540027914  |
| AGIWUR17914;AGIWUR20995;AGIWUR22306;AGIWUR23217;AGIWUR33050;AGIWUR42007                                                                      |    |   |         |         |                |            |            |                     |
| CB4856                                                                                                                                       | CT | I | 1832897 | 1834764 | WBGene00016907 | C53H9.2    | C53H9.2    | -0.0124603405802803 |
| AGIWUR5438;AGIWUR6589;AGIWUR6611;AGIWUR16807;AGIWUR17795;AGIWUR20304;AGIWUR26029;AGIWUR27807;AGIWUR31482;AGIWUR33037;AGIWUR34381;AGIWUR34900 |    |   |         |         |                |            |            |                     |
| CB4856                                                                                                                                       | CT | I | 1834881 | 1835439 | WBGene00004441 | rp1-27     | C53H9.1    | 0.0317598927932181  |
| AGIWUR15399                                                                                                                                  |    |   |         |         |                |            |            |                     |
| CB4856                                                                                                                                       | CT | I | 1835631 | 1841936 | WBGene00001196 | egl-30     | M01D7.7    | -0.14306788861719   |
| AGIWUR554;AGIWUR27713                                                                                                                        |    |   |         |         |                |            |            |                     |
| CB4856                                                                                                                                       | CT | I | 1842445 | 1843227 | WBGene00001309 | emr-1      | M01D7.6    | 0.00686540270273284 |
| AGIWUR40352                                                                                                                                  |    |   |         |         |                |            |            |                     |
| CB4856                                                                                                                                       | CT | I | 1843384 | 1843899 | WBGene00003750 | nlp-12     | M01D7.5    | 0.446247393417075   |
| AGIWUR7286;AGIWUR33113                                                                                                                       |    |   |         |         |                |            |            |                     |
| CB4856                                                                                                                                       | CT | I | 1845221 | 1850523 | WBGene00006461 | tag-96     | M01D7.4    | -0.115818793103013  |
| AGIWUR22089                                                                                                                                  |    |   |         |         |                |            |            |                     |
| CB4856                                                                                                                                       | CT | I | 1851681 | 1852280 | WBGene00044897 | M01D7.9    | M01D7.9    | -0.0374113315930877 |
| AGIWUR1984;AGIWUR13390;AGIWUR16714                                                                                                           |    |   |         |         |                |            |            |                     |
| CB4856                                                                                                                                       | CT | I | 1856459 | 1860578 | WBGene00019706 | M01D7.1    | M01D7.1    | 0.287305945143225   |
| AGIWUR43544                                                                                                                                  |    |   |         |         |                |            |            |                     |
| CB4856                                                                                                                                       | CT | I | 1862607 | 1872306 | WBGene00004743 | scm-1      | M01D7.2    | -0.239000723157464  |
| AGIWUR25971                                                                                                                                  |    |   |         |         |                |            |            |                     |
| CB4856                                                                                                                                       | CT | I | 1874033 | 1883639 | WBGene00022139 | tub-2      | Y71G12A.3  | 0.00321894238572185 |
| AGIWUR28588                                                                                                                                  |    |   |         |         |                |            |            |                     |
| CB4856                                                                                                                                       | CT | I | 1885205 | 1894905 | WBGene00022140 | Y71G12A.4  | Y71G12A.4  | -0.0560351321734878 |
| AGIWUR36911                                                                                                                                  |    |   |         |         |                |            |            |                     |
| CB4856                                                                                                                                       | CT | I | 1895161 | 1923088 | WBGene00022138 | trpp-10    | Y71G12A.2  | -0.16665127028644   |
| AGIWUR19988;AGIWUR29483                                                                                                                      |    |   |         |         |                |            |            |                     |
| CB4856                                                                                                                                       | CT | I | 1924300 | 1932260 | WBGene00021766 | hex-4      | Y51F10.5   | -0.405785475712593  |
| AGIWUR620                                                                                                                                    |    |   |         |         |                |            |            |                     |
| CB4856                                                                                                                                       | CT | I | 1932352 | 1945212 | WBGene00021765 | Y51F10.4   | Y51F10.4   | 0.184805845222762   |
| AGIWUR33035                                                                                                                                  |    |   |         |         |                |            |            |                     |
| CB4856                                                                                                                                       | CT | I | 1950594 | 1958527 | WBGene00021771 | spe-48     | Y51F10.10  | 0.138579355406517   |
| AGIWUR38998                                                                                                                                  |    |   |         |         |                |            |            |                     |
| CB4856                                                                                                                                       | CT | I | 1958707 | 1965267 | WBGene00044438 | Y51F10.11  | Y51F10.11  | -0.308773227248803  |
| AGIWUR3528;AGIWUR6982;AGIWUR40531                                                                                                            |    |   |         |         |                |            |            |                     |
| CB4856                                                                                                                                       | CT | I | 1967772 | 1973882 | WBGene00021764 | Y51F10.3   | Y51F10.3   | -0.0805133779309681 |
| AGIWUR6418                                                                                                                                   |    |   |         |         |                |            |            |                     |
| CB4856                                                                                                                                       | CT | I | 1977993 | 1983436 | WBGene00021763 | Y51F10.2   | Y51F10.2   | -0.285995808423666  |
| AGIWUR19000                                                                                                                                  |    |   |         |         |                |            |            |                     |

|                                                                                                                                                         |    |   |         |         |                |            |          |                      |             |
|---------------------------------------------------------------------------------------------------------------------------------------------------------|----|---|---------|---------|----------------|------------|----------|----------------------|-------------|
| CB4856                                                                                                                                                  | CT | I | 1988246 | 2010525 | WBGene00021238 | gap-3      | Y20F4.3  | -0.1718627186208     |             |
| AGIWUR11087;AGIWUR20405;AGIWUR25539;AGIWUR31637;AGIWUR32847;AGIWUR44046                                                                                 |    |   |         |         |                |            |          |                      |             |
| CB4856                                                                                                                                                  | CT | I | 2026277 | 2033966 | WBGene00021237 | crtc-1     | Y20F4.2  | 0.249345436901475    | AGIWUR16307 |
| CB4856                                                                                                                                                  | CT | I | 2034383 | 2043805 | WBGene00021239 | Y20F4.4    | Y20F4.4  | 0.365961641233268    | AGIWUR3718  |
| CB4856                                                                                                                                                  | CT | I | 2049140 | 2050177 | WBGene00044435 | Y20F4.8    | Y20F4.8  | 0.0378564318217212   |             |
| AGIWUR4442;AGIWUR5343;AGIWUR18496                                                                                                                       |    |   |         |         |                |            |          |                      |             |
| CB4856                                                                                                                                                  | CT | I | 2061667 | 2064077 | WBGene00021346 | Y37E3.1    | Y37E3.1  | -0.0225593854601644  | AGIWUR16488 |
| CB4856                                                                                                                                                  | CT | I | 2064909 | 2065481 | WBGene00021348 | moag-4     | Y37E3.4  | -0.14970695989726    | AGIWUR5629  |
| CB4856                                                                                                                                                  | CT | I | 2065727 | 2069049 | WBGene00021349 | arl-13     | Y37E3.5  | 0.49115518545645     | AGIWUR20970 |
| CB4856                                                                                                                                                  | CT | I | 2069086 | 2069587 | WBGene00004409 | rla-1      | Y37E3.7  | 0.20506520625301     |             |
| AGIWUR3039;AGIWUR4288;AGIWUR14249;AGIWUR27765;AGIWUR37184;AGIWUR40288                                                                                   |    |   |         |         |                |            |          |                      |             |
| CB4856                                                                                                                                                  | CT | I | 2069681 | 2070607 | WBGene00021350 | Y37E3.8    | Y37E3.8  | -0.00404132510047894 |             |
| AGIWUR13326;AGIWUR16500;AGIWUR18905;AGIWUR33748;AGIWUR34085;AGIWUR35002;AGIWUR38325;AGIWUR39997                                                         |    |   |         |         |                |            |          |                      |             |
| CB4856                                                                                                                                                  | CT | I | 2071352 | 2072547 | WBGene00004014 | phb-1      | Y37E3.9  | -0.178443770411011   | AGIWUR8000  |
| CB4856                                                                                                                                                  | CT | I | 2072680 | 2076906 | WBGene00021351 | eif-2alpha | Y37E3.10 | -0.23412895273008    |             |
| AGIWUR6037;AGIWUR23060;AGIWUR26110;AGIWUR41959                                                                                                          |    |   |         |         |                |            |          |                      |             |
| CB4856                                                                                                                                                  | CT | I | 2078959 | 2085662 | WBGene00021352 | Y37E3.11   | Y37E3.11 |                      |             |
| -0.00574465042138428 AGIWUR2995                                                                                                                         |    |   |         |         |                |            |          |                      |             |
| CB4856                                                                                                                                                  | CT | I | 2085673 | 2093822 | WBGene00021353 | iglr-3     | Y37E3.13 | 0.165027507907212    |             |
| AGIWUR15489;AGIWUR30008                                                                                                                                 |    |   |         |         |                |            |          |                      |             |
| CB4856                                                                                                                                                  | CT | I | 2097346 | 2123443 | WBGene00003799 | npp-13     | Y37E3.15 | -0.183001576536742   |             |
| AGIWUR11120;AGIWUR13240                                                                                                                                 |    |   |         |         |                |            |          |                      |             |
| CB4856                                                                                                                                                  | CT | I | 2128590 | 2145971 | WBGene00021355 | Y37E3.17   | Y37E3.17 | -0.0481403374042699  |             |
| AGIWUR25279                                                                                                                                             |    |   |         |         |                |            |          |                      |             |
| CB4856                                                                                                                                                  | CT | I | 2160042 | 2209629 | WBGene00021009 | afd-1      | W03F11.6 | -0.00147028269201321 |             |
| AGIWUR4041;AGIWUR5559;AGIWUR9161;AGIWUR9303;AGIWUR14028;AGIWUR14832;AGIWUR15541;AGIWUR17457;AGIWUR21460;AGIWUR36718;AGIWUR37855;AGIWUR39179;AGIWUR39762 |    |   |         |         |                |            |          |                      |             |
| CB4856                                                                                                                                                  | CT | I | 2216100 | 2219479 | WBGene00021008 | W03F11.5   | W03F11.5 | 0.0907856717973328   |             |
| AGIWUR42538                                                                                                                                             |    |   |         |         |                |            |          |                      |             |
| CB4856                                                                                                                                                  | CT | I | 2219471 | 2222313 | WBGene00021005 | ule-1      | W03F11.1 | -0.325321699286706   |             |
| AGIWUR3046                                                                                                                                              |    |   |         |         |                |            |          |                      |             |
| CB4856                                                                                                                                                  | CT | I | 2223307 | 2233099 | WBGene00001542 | gcy-17     | W03F11.2 | 0.0163483334872954   |             |
| AGIWUR33861                                                                                                                                             |    |   |         |         |                |            |          |                      |             |
| CB4856                                                                                                                                                  | CT | I | 2233744 | 2234957 | WBGene00021006 | dct-9      | W03F11.3 | -0.0427674668186775  |             |
| AGIWUR22187                                                                                                                                             |    |   |         |         |                |            |          |                      |             |
| CB4856                                                                                                                                                  | CT | I | 2235617 | 2241210 | WBGene00021007 | W03F11.4   | W03F11.4 | 0.566268782760927    |             |
| AGIWUR9560                                                                                                                                              |    |   |         |         |                |            |          |                      |             |
| CB4856                                                                                                                                                  | CT | I | 2242230 | 2247223 | WBGene00017399 | lgc-51     | F12B6.3  | 0.0957357733485189   | AGIWUR28630 |
| CB4856                                                                                                                                                  | CT | I | 2250131 | 2254901 | WBGene00017398 | slc-17.6   | F12B6.2  | 0.273330269598357    |             |



AGIWUR20287;AGIWUR25238;AGIWUR39652;AGIWUR42417  
 CB4856 CT I 2255923 2272866 WBGene00000020 abt-2 F12B6.1 -0.077767648787173  
 AGIWUR23301;AGIWUR28644  
 CB4856 CT I 2279835 2281516 WBGene00021458 Y39G10AL.1 Y39G10AL.1 0.0313645100019642  
 AGIWUR36209  
 CB4856 CT I 2281504 2291183 WBGene00000408 cdk-7 Y39G10AL.3 0.186629827151613  
 AGIWUR39048  
 CB4856 CT I 2293132 2297312 WBGene00021469 Y39G10AR.11 Y39G10AR.11 0.448950925437682  
 AGIWUR22260  
 CB4856 CT I 2297280 2304393 WBGene00021470 tpxl-1 Y39G10AR.12 0.136680200462402  
 AGIWUR12614;AGIWUR36527  
 CB4856 CT I 2304512 2306816 WBGene00002047 icp-1 Y39G10AR.13 -0.0839428447758657  
 AGIWUR14808;AGIWUR28043;AGIWUR29130;AGIWUR29237;AGIWUR38297  
 CB4856 CT I 2306985 2308975 WBGene00021467 Y39G10AR.9 Y39G10AR.9 -0.257740010333102  
 AGIWUR6667  
 CB4856 CT I 2308976 2312129 WBGene00021476 nsun-4 Y39G10AR.21 -0.145667146214935  
 AGIWUR13426  
 CB4856 CT I 2312496 2313008 WBGene00021475 tbca-1 Y39G10AR.20 0.0586410755619582  
 AGIWUR41500  
 CB4856 CT I 2313271 2316003 WBGene00021466 eif-2gamma Y39G10AR.8 -0.0761671053220296  
 AGIWUR1012;AGIWUR30510  
 CB4856 CT I 2316307 2318305 WBGene00021465 ekl-7 Y39G10AR.7 -0.133329412760503  
 AGIWUR18593  
 CB4856 CT I 2318291 2321847 WBGene00003156 mcm-4 Y39G10AR.14 -0.218110714229272  
 AGIWUR23145  
 CB4856 CT I 2322025 2322596 WBGene00219275 Y39G10AR.32 Y39G10AR.32 -0.286345434539683  
 AGIWUR27494  
 CB4856 CT I 2327989 2330162 WBGene00021477 srbc-64 Y39G10AR.22 0.0814450129596072  
 AGIWUR16180  
 CB4856 CT I 2330895 2332652 WBGene00021472 Y39G10AR.16 Y39G10AR.16 -0.367504325839318  
 AGIWUR4806;AGIWUR12047;AGIWUR19458;AGIWUR24864;AGIWUR39806  
 CB4856 CT I 2333312 2338693 WBGene00021464 ugt-31 Y39G10AR.6 -0.351114341476981  
 AGIWUR16968  
 CB4856 CT I 2342216 2350468 WBGene00021463 zeel-1 Y39G10AR.5 0.210367472326789  
 AGIWUR22312  
 CB4856 CT I 2357883 2372964 WBGene00021461 nekl-1 Y39G10AR.3 -0.0294394267800047  
 AGIWUR3700;AGIWUR12255  
 CB4856 CT I 2377089 2381851 WBGene00021473 sydn-1 Y39G10AR.17 -0.0340003820354449  
 AGIWUR29573;AGIWUR29726

|                                                                         |    |   |         |         |                |            |             |                     |             |
|-------------------------------------------------------------------------|----|---|---------|---------|----------------|------------|-------------|---------------------|-------------|
| CB4856                                                                  | CT | I | 2382953 | 2401492 | WBGene00021474 | dot-1.1    | Y39G10AR.18 | -0.0503584816415543 |             |
| AGIWUR2332;AGIWUR3782;AGIWUR25161;AGIWUR29638                           |    |   |         |         |                |            |             |                     |             |
| CB4856                                                                  | CT | I | 2402232 | 2409987 | WBGene00021460 | zwl-1      | Y39G10AR.2  | 0.080046336783564   |             |
| AGIWUR39214;AGIWUR43207;AGIWUR45076                                     |    |   |         |         |                |            |             |                     |             |
| CB4856                                                                  | CT | I | 2415133 | 2418521 | WBGene00017741 | F23C8.13   | F23C8.13    | 0.0775610562218887  |             |
| AGIWUR805                                                               |    |   |         |         |                |            |             |                     |             |
| CB4856                                                                  | CT | I | 2418450 | 2420801 | WBGene00017734 | F23C8.5    | F23C8.5     | -0.114505169906937  |             |
| AGIWUR9817;AGIWUR12095;AGIWUR12773;AGIWUR21578;AGIWUR22886;AGIWUR43078  |    |   |         |         |                |            |             |                     |             |
| CB4856                                                                  | CT | I | 2420803 | 2421816 | WBGene00017735 | did-2      | F23C8.6     | -0.0213701286267796 | AGIWUR36365 |
| CB4856                                                                  | CT | I | 2429675 | 2432601 | WBGene00017737 | F23C8.8    | F23C8.8     | -0.160961448889015  | AGIWUR29692 |
| CB4856                                                                  | CT | I | 2432570 | 2433755 | WBGene00017738 | F23C8.9    | F23C8.9     | -0.0866295737369485 |             |
| AGIWUR11516;AGIWUR12714;AGIWUR24496;AGIWUR39273;AGIWUR44822;AGIWUR45164 |    |   |         |         |                |            |             |                     |             |
| CB4856                                                                  | CT | I | 2434004 | 2435708 | WBGene00017733 | ubxn-1     | F23C8.4     | -0.277314442252713  | AGIWUR26378 |
| CB4856                                                                  | CT | I | 2438767 | 2442948 | WBGene00017732 | F23C8.3    | F23C8.3     | 0.0855572111447929  |             |
| AGIWUR4209;AGIWUR24398;AGIWUR32650;AGIWUR34132                          |    |   |         |         |                |            |             |                     |             |
| CB4856                                                                  | CT | I | 2445420 | 2445983 | WBGene00023273 | F23C8.2    | F23C8.2     | -0.0175780790194668 | AGIWUR10294 |
| CB4856                                                                  | CT | I | 2446740 | 2448369 | WBGene00017731 | F23C8.1    | F23C8.1     | -0.113035926334772  | AGIWUR34435 |
| CB4856                                                                  | CT | I | 2449414 | 2451366 | WBGene00017739 | F23C8.11   | F23C8.11    | 0.0723684319281777  |             |
| AGIWUR5077                                                              |    |   |         |         |                |            |             |                     |             |
| CB4856                                                                  | CT | I | 2451908 | 2464637 | WBGene00002141 | inx-19     | T16H5.1     | 0.127010426883251   | AGIWUR2403  |
| CB4856                                                                  | CT | I | 2468787 | 2471972 | WBGene00022280 | Y74C10AL.2 | Y74C10AL.2  | 0.0488185192297212  |             |
| AGIWUR21766                                                             |    |   |         |         |                |            |             |                     |             |
| CB4856                                                                  | CT | I | 2472066 | 2485391 | WBGene00022281 | abtm-1     | Y74C10AR.3  | -0.212872059626829  |             |
| AGIWUR5309;AGIWUR8973;AGIWUR10270;AGIWUR25468;AGIWUR30612;AGIWUR33610   |    |   |         |         |                |            |             |                     |             |
| CB4856                                                                  | CT | I | 2485867 | 2489780 | WBGene00001232 | eif-3.I    | Y74C10AR.1  | -0.0473626616542049 |             |
| AGIWUR29413                                                             |    |   |         |         |                |            |             |                     |             |
| CB4856                                                                  | CT | I | 2489976 | 2497371 | WBGene00021277 | Y23H5B.6   | Y23H5B.6    | 0.0247866068912028  |             |
| AGIWUR38087                                                             |    |   |         |         |                |            |             |                     |             |
| CB4856                                                                  | CT | I | 2498134 | 2506259 | WBGene00021276 | Y23H5B.5   | Y23H5B.5    | -0.453978342933237  |             |
| AGIWUR5878;AGIWUR6191;AGIWUR6274;AGIWUR28260                            |    |   |         |         |                |            |             |                     |             |
| CB4856                                                                  | CT | I | 2506891 | 2513710 | WBGene00021278 | Y23H5B.7   | Y23H5B.7    | 0.213020166387357   |             |
| AGIWUR29322;AGIWUR30588                                                 |    |   |         |         |                |            |             |                     |             |
| CB4856                                                                  | CT | I | 2533268 | 2542114 | WBGene00021275 | dmsr-2     | Y23H5B.4    | 0.0747317394240037  |             |
| AGIWUR14185                                                             |    |   |         |         |                |            |             |                     |             |
| CB4856                                                                  | CT | I | 2544749 | 2546163 | WBGene00021274 | Y23H5B.3   | Y23H5B.3    | 0.0677021605501906  |             |
| AGIWUR14576                                                             |    |   |         |         |                |            |             |                     |             |
| CB4856                                                                  | CT | I | 2546897 | 2548358 | WBGene00021279 | Y23H5B.8   | Y23H5B.8    | 0.701657681844123   |             |
| AGIWUR24104                                                             |    |   |         |         |                |            |             |                     |             |
| CB4856                                                                  | CT | I | 2549296 | 2550543 | WBGene00021273 | Y23H5B.2   | Y23H5B.2    | -0.0280328140258135 |             |

|                                                                                                                        |    |   |         |         |                |           |           |                     |             |
|------------------------------------------------------------------------------------------------------------------------|----|---|---------|---------|----------------|-----------|-----------|---------------------|-------------|
| AGIWUR20479                                                                                                            |    |   |         |         |                |           |           |                     |             |
| CB4856                                                                                                                 | CT | I | 2551375 | 2551590 | WBGene00021280 | nspd-8    | Y23H5B.9  | 0.0978310969961864  |             |
| AGIWUR21495                                                                                                            |    |   |         |         |                |           |           |                     |             |
| CB4856                                                                                                                 | CT | I | 2556252 | 2557425 | WBGene00194701 | Y23H5B.12 | Y23H5B.12 | -0.378944345406208  |             |
| AGIWUR19243                                                                                                            |    |   |         |         |                |           |           |                     |             |
| CB4856                                                                                                                 | CT | I | 2558300 | 2560110 | WBGene00016950 | C55C2.4   | C55C2.4   | 0.0602734355122037  | AGIWUR14938 |
| CB4856                                                                                                                 | CT | I | 2560396 | 2561820 | WBGene00016949 | C55C2.3   | C55C2.3   | -0.0112876751365221 |             |
| AGIWUR5924;AGIWUR10632                                                                                                 |    |   |         |         |                |           |           |                     |             |
| CB4856                                                                                                                 | CT | I | 2562616 | 2563049 | WBGene00006047 | ssp-19    | C55C2.2   | 0.302723947522722   | AGIWUR13085 |
| CB4856                                                                                                                 | CT | I | 2568872 | 2570746 | WBGene00016948 | scrt-1    | C55C2.1   | 0.246585507549242   | AGIWUR37839 |
| CB4856                                                                                                                 | CT | I | 2571782 | 2576020 | WBGene00000006 | aat-5     | C55C2.5   | 0.143034479669394   |             |
| AGIWUR2506;AGIWUR10049;AGIWUR18292;AGIWUR40198                                                                         |    |   |         |         |                |           |           |                     |             |
| CB4856                                                                                                                 | CT | I | 2580935 | 2586126 | WBGene00001404 | fbp-1     | K07A3.1   | 0.075870257756808   |             |
| AGIWUR9040;AGIWUR12995;AGIWUR25728;AGIWUR35028;AGIWUR35818                                                             |    |   |         |         |                |           |           |                     |             |
| CB4856                                                                                                                 | CT | I | 2587527 | 2595294 | WBGene00004226 | ptr-12    | K07A3.2   | 0.00692330437249566 |             |
| AGIWUR617;AGIWUR33884;AGIWUR35603                                                                                      |    |   |         |         |                |           |           |                     |             |
| CB4856                                                                                                                 | CT | I | 2599979 | 2602627 | WBGene00019461 | K07A3.3   | K07A3.3   | 0.0247283034490522  |             |
| AGIWUR13808;AGIWUR24193;AGIWUR42169                                                                                    |    |   |         |         |                |           |           |                     |             |
| CB4856                                                                                                                 | CT | I | 2606754 | 2617360 | WBGene00000832 | ctn-1     | Y23H5A.5  | 0.0116868852382397  |             |
| AGIWUR10113;AGIWUR17733;AGIWUR41210;AGIWUR41252                                                                        |    |   |         |         |                |           |           |                     |             |
| CB4856                                                                                                                 | CT | I | 2617560 | 2620425 | WBGene00021271 | spe-47    | Y23H5A.4  | -0.0941352418949357 |             |
| AGIWUR24731                                                                                                            |    |   |         |         |                |           |           |                     |             |
| CB4856                                                                                                                 | CT | I | 2620654 | 2621859 | WBGene00021270 | Y23H5A.3  | Y23H5A.3  | -0.201244015525765  |             |
| AGIWUR40693                                                                                                            |    |   |         |         |                |           |           |                     |             |
| CB4856                                                                                                                 | CT | I | 2621957 | 2623186 | WBGene00021269 | Y23H5A.2  | Y23H5A.2  | 0.0746558718032482  |             |
| AGIWUR22648                                                                                                            |    |   |         |         |                |           |           |                     |             |
| CB4856                                                                                                                 | CT | I | 2623102 | 2628577 | WBGene00000800 | cars-1    | Y23H5A.7  | 0.0962758718745107  |             |
| AGIWUR23131                                                                                                            |    |   |         |         |                |           |           |                     |             |
| CB4856                                                                                                                 | CT | I | 2629685 | 2632320 | WBGene00000801 | cars-2    | Y23H5A.1  | -0.241747789163913  |             |
| AGIWUR1077;AGIWUR6380;AGIWUR10780;AGIWUR19734;AGIWUR20638                                                              |    |   |         |         |                |           |           |                     |             |
| CB4856                                                                                                                 | CT | I | 2632987 | 2634561 | WBGene00023172 | Y23H5A.8  | Y23H5A.8  | -0.0418084241587717 |             |
| AGIWUR14216                                                                                                            |    |   |         |         |                |           |           |                     |             |
| CB4856                                                                                                                 | CT | I | 2638649 | 2639419 | WBGene00018231 | F40E3.3   | F40E3.3   | 0.0487581560320161  |             |
| AGIWUR4066;AGIWUR10758;AGIWUR23936;AGIWUR24120;AGIWUR24171;AGIWUR31356;AGIWUR35745;AGIWUR37922;AGIWUR39709;AGIWUR43197 |    |   |         |         |                |           |           |                     |             |
| CB4856                                                                                                                 | CT | I | 2642724 | 2643778 | WBGene00018230 | mage-1    | F40E3.2   | -0.129553583142181  | AGIWUR23200 |
| CB4856                                                                                                                 | CT | I | 2645273 | 2657241 | WBGene00018232 | F40E3.5   | F40E3.5   | 0.374928232799714   |             |
| AGIWUR26138;AGIWUR32507                                                                                                |    |   |         |         |                |           |           |                     |             |
| CB4856                                                                                                                 | CT | I | 2668160 | 2672434 | WBGene00017979 | F32B5.6   | F32B5.6   | 0.154304993532813   |             |

AGIWUR7646;AGIWUR13992;AGIWUR30184  
 CB4856 CT I 2672940 2682797 WBGene00017980 F32B5.7 F32B5.7 -0.0917314899954076  
 AGIWUR6695;AGIWUR6824;AGIWUR13525;AGIWUR18240;AGIWUR27541;AGIWUR31729  
 CB4856 CT I 2686639 2689493 WBGene00000788 cpz-1 F32B5.8 0.0487105968458899 AGIWUR41569  
 CB4856 CT I 2692074 2692467 WBGene00017978 F32B5.4 F32B5.4 0.196995206193881  
 AGIWUR7463;AGIWUR9486;AGIWUR10833;AGIWUR14697;AGIWUR21940;AGIWUR33121;AGIWUR33897;AGIWUR44678;AGIWUR45085  
 CB4856 CT I 2692757 2694084 WBGene00017977 F32B5.3 F32B5.3 0.0602011650218692 AGIWUR18941  
 CB4856 CT I 2697399 2699955 WBGene00017976 F32B5.2 F32B5.2 0.103323089536907 AGIWUR23268  
 CB4856 CT I 2706883 2717549 WBGene00003006 lin-17 Y71F9B.5 0.281067068351805  
 AGIWUR27001;AGIWUR35050  
 CB4856 CT I 2718027 2721475 WBGene00001048 dnj-30 Y71F9B.16 0.259134579317825  
 AGIWUR40146  
 CB4856 CT I 2721879 2726724 WBGene00022128 Y71F9B.6 Y71F9B.6 -0.511068746431267  
 AGIWUR19507  
 CB4856 CT I 2727014 2727545 WBGene00004920 snr-7 Y71F9B.4 -0.508421060064124  
 AGIWUR7048  
 CB4856 CT I 2730004 2731453 WBGene00022127 yop-1 Y71F9B.3 -0.071856054160377  
 AGIWUR5660;AGIWUR6385;AGIWUR8144;AGIWUR16646;AGIWUR35160;AGIWUR37496  
 CB4856 CT I 2731562 2735371 WBGene00022126 Y71F9B.2 Y71F9B.2 -0.171749000101475  
 AGIWUR8231  
 CB4856 CT I 2735345 2742508 WBGene00022129 lron-11 Y71F9B.8 0.473273217608281  
 AGIWUR4975;AGIWUR8612  
 CB4856 CT I 2755540 2758204 WBGene00004043 plk-2 Y71F9B.7 0.0711141577957815  
 AGIWUR32009  
 CB4856 CT I 2759023 2761044 WBGene00022130 Y71F9B.9 Y71F9B.9 0.940328235803225  
 AGIWUR15089  
 CB4856 CT I 2761158 2776097 WBGene00004946 sop-3 Y71F9B.10 0.071536232032436  
 AGIWUR13710;AGIWUR15065;AGIWUR23349  
 CB4856 CT I 2776370 2778726 WBGene00022131 Y71F9B.13 Y71F9B.13 0.0528564874029476  
 AGIWUR18999;AGIWUR21201  
 CB4856 CT I 2780850 2784276 WBGene00022133 Y71F9B.15 Y71F9B.15 -0.0176407115841504  
 AGIWUR16378;AGIWUR33305  
 CB4856 CT I 2784620 2786077 WBGene00020990 W03D8.9 W03D8.9 -0.00974714552690514 AGIWUR3317  
 CB4856 CT I 2786332 2787514 WBGene00020991 W03D8.10 W03D8.10 -0.0171928225575861  
 AGIWUR21745  
 CB4856 CT I 2791687 2794976 WBGene00020989 W03D8.8 W03D8.8 -0.439508341532813  
 AGIWUR22441;AGIWUR29065;AGIWUR38128  
 CB4856 CT I 2796130 2797238 WBGene00020988 W03D8.7 W03D8.7 -0.160592480030989 AGIWUR11786  
 CB4856 CT I 2798175 2800878 WBGene00020985 W03D8.2 W03D8.2 0.257305534137636 AGIWUR7975

|                                                           |    |   |         |         |                |            |            |                     |             |
|-----------------------------------------------------------|----|---|---------|---------|----------------|------------|------------|---------------------|-------------|
| CB4856                                                    | CT | I | 2802822 | 2815786 | WBGene00002174 | itx-1      | W03D8.6    | 0.292780406083846   | AGIWUR14038 |
| CB4856                                                    | CT | I | 2816415 | 2817646 | WBGene00020987 | W03D8.5    | W03D8.5    | -0.0407385985085824 |             |
| AGIWUR3546;AGIWUR4156;AGIWUR9484;AGIWUR19425;AGIWUR24118  |    |   |         |         |                |            |            |                     |             |
| CB4856                                                    | CT | I | 2818744 | 2820701 | WBGene00044796 | W03D8.11   | W03D8.11   | -0.324575819820188  |             |
| AGIWUR42963                                               |    |   |         |         |                |            |            |                     |             |
| CB4856                                                    | CT | I | 2820869 | 2822300 | WBGene00020986 | W03D8.3    | W03D8.3    | -0.0016488437270219 | AGIWUR40700 |
| CB4856                                                    | CT | I | 2823254 | 2830311 | WBGene00004077 | pop-1      | W10C8.2    | 0.2171446315506     | AGIWUR37103 |
| CB4856                                                    | CT | I | 2832872 | 2833253 | WBGene00021126 | W10C8.3    | W10C8.3    | 0.307512487442198   | AGIWUR28937 |
| CB4856                                                    | CT | I | 2845859 | 2849792 | WBGene00021125 | ccb-2      | W10C8.1    | -0.0585468081748513 |             |
| AGIWUR17713;AGIWUR29981;AGIWUR44951                       |    |   |         |         |                |            |            |                     |             |
| CB4856                                                    | CT | I | 2851963 | 2853903 | WBGene00021127 | W10C8.4    | W10C8.4    | -0.0213313452442572 |             |
| AGIWUR2101;AGIWUR26297;AGIWUR28145                        |    |   |         |         |                |            |            |                     |             |
| CB4856                                                    | CT | I | 2858524 | 2859913 | WBGene00044433 | W10C8.6    | W10C8.6    | 0.445771405999764   |             |
| AGIWUR1574;AGIWUR2177;AGIWUR33520;AGIWUR42210;AGIWUR45158 |    |   |         |         |                |            |            |                     |             |
| CB4856                                                    | CT | I | 2862403 | 2864446 | WBGene00022116 | Y71F9AL.11 | Y71F9AL.11 | 0.71007076668803    |             |
| AGIWUR36633                                               |    |   |         |         |                |            |            |                     |             |
| CB4856                                                    | CT | I | 2866508 | 2870167 | WBGene00022115 | Y71F9AL.10 | Y71F9AL.10 | 0.200427832321594   |             |
| AGIWUR30152                                               |    |   |         |         |                |            |            |                     |             |
| CB4856                                                    | CT | I | 2870608 | 2875289 | WBGene00022117 | Y71F9AL.12 | Y71F9AL.12 | -0.340586149714724  |             |
| AGIWUR29739                                               |    |   |         |         |                |            |            |                     |             |
| CB4856                                                    | CT | I | 2875395 | 2876324 | WBGene00004412 | rp1-1      | Y71F9AL.13 | -0.154465945890202  |             |
| AGIWUR13419;AGIWUR14964                                   |    |   |         |         |                |            |            |                     |             |
| CB4856                                                    | CT | I | 2876932 | 2878523 | WBGene00022114 | Y71F9AL.9  | Y71F9AL.9  | 0.0255641651946457  |             |
| AGIWUR15225;AGIWUR43288                                   |    |   |         |         |                |            |            |                     |             |
| CB4856                                                    | CT | I | 2878578 | 2880929 | WBGene00022113 | Y71F9AL.8  | Y71F9AL.8  | 0.294871031875994   |             |
| AGIWUR29805                                               |    |   |         |         |                |            |            |                     |             |
| CB4856                                                    | CT | I | 2880919 | 2883454 | WBGene00022118 | dnc-5      | Y71F9AL.14 | -0.100247225660718  |             |
| AGIWUR1789;AGIWUR5524;AGIWUR13460;AGIWUR25120;AGIWUR26338 |    |   |         |         |                |            |            |                     |             |
| CB4856                                                    | CT | I | 2883546 | 2893718 | WBGene00000199 | arx-1      | Y71F9AL.16 | 0.273584083883794   |             |
| AGIWUR11177                                               |    |   |         |         |                |            |            |                     |             |
| CB4856                                                    | CT | I | 2895329 | 2900860 | WBGene00022119 | copa-1     | Y71F9AL.17 | -0.0671370584246276 |             |
| AGIWUR19351                                               |    |   |         |         |                |            |            |                     |             |
| CB4856                                                    | CT | I | 2901325 | 2903006 | WBGene00001791 | gst-43     | Y71F9AL.5  | -0.161340289198616  |             |
| AGIWUR21982                                               |    |   |         |         |                |            |            |                     |             |
| CB4856                                                    | CT | I | 2903596 | 2907751 | WBGene00022110 | Y71F9AL.4  | Y71F9AL.4  | 0.235432660638672   |             |
| AGIWUR25316                                               |    |   |         |         |                |            |            |                     |             |
| CB4856                                                    | CT | I | 2925212 | 2928134 | WBGene00022107 | Y71F9AL.1  | Y71F9AL.1  | -0.311092696224438  |             |
| AGIWUR2864                                                |    |   |         |         |                |            |            |                     |             |
| CB4856                                                    | CT | I | 2928395 | 2929687 | WBGene00022122 | trap-1     | Y71F9AM.6  | -0.206254438595735  |             |

AGIWUR4502;AGIWUR4985;AGIWUR5165;AGIWUR5707;AGIWUR13179;AGIWUR27433;AGIWUR45195  
 CB4856 CT I 2929736 2931361 WBGene00003836 nxt-1 Y71F9AM.5 -0.00875922169740662  
 AGIWUR15059  
 CB4856 CT I 2931461 2947152 WBGene00022121 cogc-3 Y71F9AM.4 -0.150514880089421  
 AGIWUR4108;AGIWUR6047;AGIWUR36855;AGIWUR41452  
 CB4856 CT I 2949600 2957910 WBGene00000237 bam-2 Y71F9AR.1 0.385827366396693  
 AGIWUR41421  
 CB4856 CT I 2981531 2983076 WBGene00044894 Y71F9AR.4 Y71F9AR.4 -0.277377553705117  
 AGIWUR18847  
 CB4856 CT I 2983213 2985167 WBGene00022123 Y71F9AR.2 Y71F9AR.2 -0.15857508576501  
 AGIWUR19262  
 CB4856 CT I 2986104 2995914 WBGene00022124 supr-1 Y71F9AR.3 0.337390258483726  
 AGIWUR10209  
 CB4856 CT I 2996401 3001382 WBGene00001046 dnj-28 Y54E10BL.4 -0.546018058732541  
 AGIWUR1394  
 CB4856 CT I 3001360 3002847 WBGene00021839 nduf-5 Y54E10BL.5 -0.0315234252898353  
 AGIWUR6233  
 CB4856 CT I 3015742 3021531 WBGene00021843 Y54E10BR.4 Y54E10BR.4 0.0102445132354418  
 AGIWUR20452  
 CB4856 CT I 3021651 3028396 WBGene00021842 Y54E10BR.3 Y54E10BR.3 -0.0857466104591147  
 AGIWUR41419  
 CB4856 CT I 3028307 3031092 WBGene00021844 Y54E10BR.5 Y54E10BR.5 -0.240459802454834  
 AGIWUR27706;AGIWUR30378  
 CB4856 CT I 3031212 3032938 WBGene00021845 rpb-7 Y54E10BR.6 -0.221506741319324  
 AGIWUR32718  
 CB4856 CT I 3032935 3034761 WBGene00021841 Y54E10BR.2 Y54E10BR.2 -0.21887394829736  
 AGIWUR2238;AGIWUR18683;AGIWUR24455;AGIWUR43905  
 CB4856 CT I 3035193 3047794 WBGene00003387 mod-5 Y54E10BR.7 0.117821999669639  
 AGIWUR24272  
 CB4856 CT I 3052018 3059185 WBGene00021846 ztf-23 Y54E10BR.8 -0.00173035083145834  
 AGIWUR33528  
 CB4856 CT I 3059151 3069393 WBGene00021840 Y54E10BR.1 Y54E10BR.1 0.0531193822105323  
 AGIWUR14801  
 CB4856 CT I 3069325 3070150 WBGene00000205 arx-7 M01B12.3 0.0176913068489952  
 AGIWUR5428  
 CB4856 CT I 3070973 3084874 WBGene00019697 M01B12.4 M01B12.4 -0.120953470851951  
 AGIWUR16943;AGIWUR36776;AGIWUR37540  
 CB4856 CT I 3085011 3096285 WBGene00019698 riok-1 M01B12.5 0.101919626268369  
 AGIWUR5372;AGIWUR5467;AGIWUR12452;AGIWUR27824;AGIWUR28472;AGIWUR30070;AGIWUR34208;AGIWUR36598;AGIWUR41932

|                                                                                              |    |   |         |         |                |            |            |                      |             |
|----------------------------------------------------------------------------------------------|----|---|---------|---------|----------------|------------|------------|----------------------|-------------|
| CB4856                                                                                       | CT | I | 3094513 | 3109596 | WBGene00003654 | nhr-64     | C45E1.1    | 0.304948159869857    | AGIWUR14818 |
| CB4856                                                                                       | CT | I | 3115036 | 3117628 | WBGene00016663 | C45E1.4    | C45E1.4    | 0.210598691932478    | AGIWUR41381 |
| CB4856                                                                                       | CT | I | 3137185 | 3138447 | WBGene00000626 | col-49     | K09H9.3    | -0.430267851157609   | AGIWUR23696 |
| CB4856                                                                                       | CT | I | 3138541 | 3140601 | WBGene00045387 | K09H9.8    | K09H9.8    | 0.445114154300384    |             |
| AGIWUR6683;AGIWUR9499;AGIWUR29974                                                            |    |   |         |         |                |            |            |                      |             |
| CB4856                                                                                       | CT | I | 3141704 | 3143197 | WBGene00019597 | K09H9.5    | K09H9.5    | -0.251370365748761   | AGIWUR19387 |
| CB4856                                                                                       | CT | I | 3144410 | 3147793 | WBGene00003062 | lpd-6      | K09H9.6    | -0.228540193405767   | AGIWUR13406 |
| CB4856                                                                                       | CT | I | 3147996 | 3150349 | WBGene00019595 | K09H9.2    | K09H9.2    | -0.21735289292411    | AGIWUR25014 |
| CB4856                                                                                       | CT | I | 3150346 | 3162387 | WBGene00006888 | vbh-1      | Y54E10A.9  | -0.261980340036692   |             |
| AGIWUR36846                                                                                  |    |   |         |         |                |            |            |                      |             |
| CB4856                                                                                       | CT | I | 3162803 | 3163649 | WBGene00021829 | mrpl-17    | Y54E10A.7  | -0.296363205545637   |             |
| AGIWUR1305                                                                                   |    |   |         |         |                |            |            |                      |             |
| CB4856                                                                                       | CT | I | 3163688 | 3167925 | WBGene00021828 | Y54E10A.6  | Y54E10A.6  | -0.263692982087719   |             |
| AGIWUR24704                                                                                  |    |   |         |         |                |            |            |                      |             |
| CB4856                                                                                       | CT | I | 3167908 | 3171230 | WBGene00021827 | dnc-6      | Y54E10A.5  | 1.77635683940025e-15 |             |
| AGIWUR5057;AGIWUR9073;AGIWUR40125                                                            |    |   |         |         |                |            |            |                      |             |
| CB4856                                                                                       | CT | I | 3173243 | 3176319 | WBGene00021830 | Y54E10A.10 | Y54E10A.10 | 0.263066907648106    |             |
| AGIWUR13178                                                                                  |    |   |         |         |                |            |            |                      |             |
| CB4856                                                                                       | CT | I | 3176419 | 3192857 | WBGene00021831 | Y54E10A.11 | Y54E10A.11 | -0.168643430572669   |             |
| AGIWUR2164;AGIWUR16574                                                                       |    |   |         |         |                |            |            |                      |             |
| CB4856                                                                                       | CT | I | 3193528 | 3198838 | WBGene00021832 | Y54E10A.12 | Y54E10A.12 | -0.0497904681610688  |             |
| AGIWUR12213                                                                                  |    |   |         |         |                |            |            |                      |             |
| CB4856                                                                                       | CT | I | 3199540 | 3203229 | WBGene00021833 | Y54E10A.13 | Y54E10A.13 | -0.150296768977172   |             |
| AGIWUR9596                                                                                   |    |   |         |         |                |            |            |                      |             |
| CB4856                                                                                       | CT | I | 3206730 | 3209294 | WBGene00021835 | Y54E10A.17 | Y54E10A.17 | -0.38294690327783    |             |
| AGIWUR37690                                                                                  |    |   |         |         |                |            |            |                      |             |
| CB4856                                                                                       | CT | I | 3211046 | 3217366 | WBGene00001481 | fog-1      | Y54E10A.4  | -0.306387603085199   |             |
| AGIWUR13603;AGIWUR15435;AGIWUR35965                                                          |    |   |         |         |                |            |            |                      |             |
| CB4856                                                                                       | CT | I | 3217296 | 3222950 | WBGene00004404 | rom-5      | Y54E10A.14 | 0.0715468567598112   |             |
| AGIWUR37258                                                                                  |    |   |         |         |                |            |            |                      |             |
| CB4856                                                                                       | CT | I | 3223160 | 3228104 | WBGene00000413 | cdt-1      | Y54E10A.15 | -0.194094906880602   |             |
| AGIWUR7164;AGIWUR8441;AGIWUR9365;AGIWUR10177;AGIWUR14248;AGIWUR14397;AGIWUR28748;AGIWUR40356 |    |   |         |         |                |            |            |                      |             |
| CB4856                                                                                       | CT | I | 3229431 | 3233294 | WBGene00021826 | txl-1      | Y54E10A.3  | -0.350639975527347   |             |
| AGIWUR39852                                                                                  |    |   |         |         |                |            |            |                      |             |
| CB4856                                                                                       | CT | I | 3233391 | 3255678 | WBGene00003258 | cogc-1     | Y54E10A.2  | -0.375714432025655   |             |
| AGIWUR30427;AGIWUR32820;AGIWUR39620                                                          |    |   |         |         |                |            |            |                      |             |
| CB4856                                                                                       | CT | I | 3259871 | 3264254 | WBGene00021553 | tyr-5      | Y44E3B.2   | -0.09149442114804    |             |
| AGIWUR23134                                                                                  |    |   |         |         |                |            |            |                      |             |
| CB4856                                                                                       | CT | I | 3264237 | 3266762 | WBGene00021552 | zip-4      | Y44E3B.1   | 0.0313821443974085   |             |

AGIWUR2699;AGIWUR20566;AGIWUR20700;AGIWUR26560;AGIWUR28062;AGIWUR30568;AGIWUR32351  
 CB4856 CT I 3267094 3269116 WBGene00020915 nol-5 W01B11.3 0.0636446831431989  
 AGIWUR37743  
 CB4856 CT I 3269406 3280883 WBGene00004154 pqn-72 W01B11.5 -0.244899056609348  
 AGIWUR12149;AGIWUR23263;AGIWUR25848;AGIWUR35656;AGIWUR42564;AGIWUR43889  
 CB4856 CT I 3287336 3293127 WBGene00020914 sulp-6 W01B11.2 -0.000169415945704188  
 AGIWUR2355;AGIWUR10745;AGIWUR30073;AGIWUR36750;AGIWUR37204;AGIWUR39158  
 CB4856 CT I 3293142 3294356 WBGene00020917 W01B11.6 W01B11.6 -0.181199361253189  
 AGIWUR11957;AGIWUR23982;AGIWUR24179  
 CB4856 CT I 3299606 3300490 WBGene00020913 W01B11.1 W01B11.1 -0.243851176394431  
 AGIWUR1462  
 CB4856 CT I 3302001 3307587 WBGene00000036 ace-2 Y44E3A.2 -0.28247718433361  
 AGIWUR33576  
 CB4856 CT I 3317978 3318584 WBGene00021548 trx-4 Y44E3A.3 -0.0894554153599962  
 AGIWUR13327  
 CB4856 CT I 3319540 3330673 WBGene00021549 Y44E3A.4 Y44E3A.4 -0.218224726814245  
 AGIWUR4866;AGIWUR12826;AGIWUR21456;AGIWUR37487  
 CB4856 CT I 3338367 3340219 WBGene00021547 Y44E3A.1 Y44E3A.1 0.294327504837728  
 AGIWUR6438;AGIWUR21696;AGIWUR28706  
 CB4856 CT I 3340231 3349907 WBGene00021551 Y44E3A.6 Y44E3A.6 -0.0276071770248576  
 AGIWUR19599;AGIWUR28799  
 CB4856 CT I 3367640 3368550 WBGene00021035 W05F2.3 W05F2.3 0.0488118551417305  
 AGIWUR11491;AGIWUR17920;AGIWUR23022;AGIWUR38692;AGIWUR40671;AGIWUR42685  
 CB4856 CT I 3368785 3371444 WBGene00021038 W05F2.6 W05F2.6 0.128692000806758 AGIWUR10259  
 CB4856 CT I 3371769 3373834 WBGene00021037 fbxa-203 W05F2.5 -0.156483281186647  
 AGIWUR18896  
 CB4856 CT I 3374776 3407189 WBGene00021036 W05F2.4 W05F2.4 0.324595162761646  
 AGIWUR1629;AGIWUR8478;AGIWUR12583;AGIWUR15753;AGIWUR22393;AGIWUR23436;AGIWUR32189;AGIWUR34613  
 CB4856 CT I 3408033 3415238 WBGene00019362 cdk-2 K03E5.3 -0.336666685847508 AGIWUR23928  
 CB4856 CT I 3419600 3424211 WBGene00019361 K03E5.2 K03E5.2 -0.0893942106166836  
 AGIWUR1571;AGIWUR13604;AGIWUR16735;AGIWUR17165;AGIWUR21604;AGIWUR26478;AGIWUR26766;AGIWUR27970;AGIWUR30728;  
 AGIWUR31092;AGIWUR37714;AGIWUR39861;AGIWUR43156;AGIWUR43908  
 CB4856 CT I 3427177 3433207 WBGene00019360 neto-1 K03E5.1 -0.234794881185541 AGIWUR34916  
 CB4856 CT I 3433157 3438543 WBGene00004775 sep-1 Y47G6A.12 -0.183307053533095  
 AGIWUR2398  
 CB4856 CT I 3439108 3449175 WBGene00006440 tag-63 Y47G6A.28 -0.178315574287014  
 AGIWUR25852  
 CB4856 CT I 3449326 3462177 WBGene00003422 msh-6 Y47G6A.11 -0.126804002591289  
 AGIWUR22181



|                                                                                                                                  |   |         |         |                |           |           |                     |
|----------------------------------------------------------------------------------------------------------------------------------|---|---------|---------|----------------|-----------|-----------|---------------------|
| CB4856 CT                                                                                                                        | I | 3462270 | 3468187 | WBGene00021640 | Y47G6A.14 | Y47G6A.14 | -0.158601049894456  |
| AGIWUR1119                                                                                                                       |   |         |         |                |           |           |                     |
| CB4856 CT                                                                                                                        | I | 3467132 | 3478515 | WBGene00004978 | spg-7     | Y47G6A.10 | -0.26622551739832   |
| AGIWUR21359                                                                                                                      |   |         |         |                |           |           |                     |
| CB4856 CT                                                                                                                        | I | 3479329 | 3481439 | WBGene00021638 | Y47G6A.9  | Y47G6A.9  | -0.164511717251131  |
| AGIWUR35431                                                                                                                      |   |         |         |                |           |           |                     |
| CB4856 CT                                                                                                                        | I | 3481987 | 3484499 | WBGene00000794 | crn-1     | Y47G6A.8  | 0.00362286692886116 |
| AGIWUR13801;AGIWUR22565                                                                                                          |   |         |         |                |           |           |                     |
| CB4856 CT                                                                                                                        | I | 3487812 | 3499706 | WBGene00021643 | ccep-290  | Y47G6A.17 | 0.0474083386460897  |
| AGIWUR3330;AGIWUR15688                                                                                                           |   |         |         |                |           |           |                     |
| CB4856 CT                                                                                                                        | I | 3502738 | 3508421 | WBGene00021637 | Y47G6A.7  | Y47G6A.7  | -0.0538358895503546 |
| AGIWUR6082;AGIWUR7088;AGIWUR24590                                                                                                |   |         |         |                |           |           |                     |
| CB4856 CT                                                                                                                        | I | 3508397 | 3512735 | WBGene00021644 | Y47G6A.18 | Y47G6A.18 | -0.0764321664293064 |
| AGIWUR4776;AGIWUR5770;AGIWUR6663;AGIWUR14345;AGIWUR18070;AGIWUR30279;AGIWUR31587;AGIWUR36047;AGIWUR38200;AGIWUR38330;AGIWUR41216 |   |         |         |                |           |           |                     |
| CB4856 CT                                                                                                                        | I | 3516450 | 3523387 | WBGene00021636 | pcaf-1    | Y47G6A.6  | 0.00249735716046473 |
| AGIWUR32442                                                                                                                      |   |         |         |                |           |           |                     |
| CB4856 CT                                                                                                                        | I | 3523313 | 3529956 | WBGene00021645 | Y47G6A.19 | Y47G6A.19 | -0.602909320963258  |
| AGIWUR31354                                                                                                                      |   |         |         |                |           |           |                     |
| CB4856 CT                                                                                                                        | I | 3533885 | 3539196 | WBGene00021635 | Y47G6A.5  | Y47G6A.5  | 0.237542144345808   |
| AGIWUR37951                                                                                                                      |   |         |         |                |           |           |                     |
| CB4856 CT                                                                                                                        | I | 3539554 | 3546904 | WBGene00004389 | rnp-6     | Y47G6A.20 | -0.200905080719707  |
| AGIWUR16653;AGIWUR31705;AGIWUR35799;AGIWUR39341                                                                                  |   |         |         |                |           |           |                     |
| CB4856 CT                                                                                                                        | I | 3547071 | 3552005 | WBGene00021634 | rde-10    | Y47G6A.4  | -0.0131967975064562 |
| AGIWUR39093                                                                                                                      |   |         |         |                |           |           |                     |
| CB4856 CT                                                                                                                        | I | 3551949 | 3559807 | WBGene00021646 | Y47G6A.21 | Y47G6A.21 | 0.0580467994204774  |
| AGIWUR20916;AGIWUR42118                                                                                                          |   |         |         |                |           |           |                     |
| CB4856 CT                                                                                                                        | I | 3559923 | 3562851 | WBGene00021647 | Y47G6A.22 | Y47G6A.22 | -0.163430684913724  |
| AGIWUR28433                                                                                                                      |   |         |         |                |           |           |                     |
| CB4856 CT                                                                                                                        | I | 3564040 | 3565068 | WBGene00045399 | Y47G6A.33 | Y47G6A.33 | -0.457554109499452  |
| AGIWUR25152;AGIWUR41843                                                                                                          |   |         |         |                |           |           |                     |
| CB4856 CT                                                                                                                        | I | 3565012 | 3600729 | WBGene00003060 | lpd-3     | Y47G6A.23 | -0.076801244827422  |
| AGIWUR25264;AGIWUR43063                                                                                                          |   |         |         |                |           |           |                     |
| CB4856 CT                                                                                                                        | I | 3601291 | 3602908 | WBGene00021633 | Y47G6A.3  | Y47G6A.3  | -0.0330681430173208 |
| AGIWUR21723                                                                                                                      |   |         |         |                |           |           |                     |
| CB4856 CT                                                                                                                        | I | 3603343 | 3604537 | WBGene00044436 | Y47G6A.31 | Y47G6A.31 | -0.110107001353326  |
| AGIWUR2009;AGIWUR4486;AGIWUR11467;AGIWUR16255                                                                                    |   |         |         |                |           |           |                     |
| CB4856 CT                                                                                                                        | I | 3604520 | 3605763 | WBGene00021648 | mis-12    | Y47G6A.24 | 0.155751416388927   |
| AGIWUR31284                                                                                                                      |   |         |         |                |           |           |                     |

|                                                                                    |    |   |         |         |                |           |           |                     |             |
|------------------------------------------------------------------------------------|----|---|---------|---------|----------------|-----------|-----------|---------------------|-------------|
| CB4856                                                                             | CT | I | 3606411 | 3608345 | WBGene00021649 | Y47G6A.25 | Y47G6A.25 | -0.325865145313148  |             |
| AGIWUR16764;AGIWUR17972;AGIWUR30368;AGIWUR34454;AGIWUR38799                        |    |   |         |         |                |           |           |                     |             |
| CB4856                                                                             | CT | I | 3608395 | 3612301 | WBGene00002144 | inx-22    | Y47G6A.2  | -0.244035664414998  |             |
| AGIWUR32737                                                                        |    |   |         |         |                |           |           |                     |             |
| CB4856                                                                             | CT | I | 3611909 | 3618317 | WBGene00002143 | inx-21    | Y47G6A.1  | -0.0545084801580078 |             |
| AGIWUR2419                                                                         |    |   |         |         |                |           |           |                     |             |
| CB4856                                                                             | CT | I | 3618889 | 3619697 | WBGene00021650 | Y47G6A.26 | Y47G6A.26 | 0.336734599910779   |             |
| AGIWUR10804                                                                        |    |   |         |         |                |           |           |                     |             |
| CB4856                                                                             | CT | I | 3620582 | 3625087 | WBGene00044437 | Y47G6A.32 | Y47G6A.32 | 0.0511790298948647  |             |
| AGIWUR28152;AGIWUR35782;AGIWUR39596                                                |    |   |         |         |                |           |           |                     |             |
| CB4856                                                                             | CT | I | 3629471 | 3631112 | WBGene00000284 | cah-6     | T28F2.3   | -0.259967096367112  | AGIWUR29909 |
| CB4856                                                                             | CT | I | 3631086 | 3636485 | WBGene00020902 | jmjc-1    | T28F2.4   | 0.13803396140855    |             |
| AGIWUR10716;AGIWUR27941                                                            |    |   |         |         |                |           |           |                     |             |
| CB4856                                                                             | CT | I | 3637353 | 3638819 | WBGene00020901 | T28F2.2   | T28F2.2   | -0.0739631937052327 |             |
| AGIWUR3655;AGIWUR17862;AGIWUR19553;AGIWUR28347;AGIWUR30674;AGIWUR35823             |    |   |         |         |                |           |           |                     |             |
| CB4856                                                                             | CT | I | 3639648 | 3641347 | WBGene00020900 | T28F2.1   | T28F2.1   | -0.0967512276263758 | AGIWUR41008 |
| CB4856                                                                             | CT | I | 3641668 | 3647009 | WBGene00000368 | ccb-1     | T28F2.5   | -0.062414012200545  |             |
| AGIWUR17902;AGIWUR36522                                                            |    |   |         |         |                |           |           |                     |             |
| CB4856                                                                             | CT | I | 3651230 | 3652599 | WBGene00000627 | col-50    | T28F2.6   | 0.132902543262881   |             |
| AGIWUR28502;AGIWUR33906                                                            |    |   |         |         |                |           |           |                     |             |
| CB4856                                                                             | CT | I | 3653997 | 3655265 | WBGene00000628 | col-51    | T28F2.8   | -0.598297499871173  | AGIWUR29327 |
| CB4856                                                                             | CT | I | 3655413 | 3662183 | WBGene00020903 | acd-5     | T28F2.7   | -0.0551659351833216 | AGIWUR13129 |
| CB4856                                                                             | CT | I | 3666923 | 3671700 | WBGene00004890 | smp-2     | D1037.2   | -0.272144385008527  | AGIWUR14570 |
| CB4856                                                                             | CT | I | 3680178 | 3680944 | WBGene00001501 | ftn-2     | D1037.3   | -0.0972989803561379 |             |
| AGIWUR8517;AGIWUR21576;AGIWUR30113;AGIWUR39905;AGIWUR40881;AGIWUR45149             |    |   |         |         |                |           |           |                     |             |
| CB4856                                                                             | CT | I | 3682772 | 3684118 | WBGene00004272 | rab-8     | D1037.4   | -0.0821745092887909 |             |
| AGIWUR8091;AGIWUR21531;AGIWUR23567;AGIWUR31383;AGIWUR34408;AGIWUR40705;AGIWUR44617 |    |   |         |         |                |           |           |                     |             |
| CB4856                                                                             | CT | I | 3684783 | 3690192 | WBGene00017025 | D1037.1   | D1037.1   | -0.0260639505913076 | AGIWUR23371 |
| CB4856                                                                             | CT | I | 3690181 | 3694021 | WBGene00017026 | ipla-4    | D1037.5   | 0.0827636582554776  | AGIWUR39546 |
| CB4856                                                                             | CT | I | 3694296 | 3697549 | WBGene00003418 | msh-2     | H26D21.2  | -0.100805953673046  |             |
| AGIWUR4168                                                                         |    |   |         |         |                |           |           |                     |             |
| CB4856                                                                             | CT | I | 3698102 | 3699300 | WBGene00002042 | hus-1     | H26D21.1  | -0.328690330858016  |             |
| AGIWUR20692                                                                        |    |   |         |         |                |           |           |                     |             |
| CB4856                                                                             | CT | I | 3706030 | 3709435 | WBGene00017651 | F21A9.2   | F21A9.2   | 0.202243382054709   | AGIWUR4947  |
| CB4856                                                                             | CT | I | 3712133 | 3713134 | WBGene00017650 | F21A9.1   | F21A9.1   | 0.329029187148882   | AGIWUR22805 |
| CB4856                                                                             | CT | I | 3713142 | 3721157 | WBGene00003040 | lin-59    | T12F5.4   | 0.380256021239026   |             |
| AGIWUR22950;AGIWUR24884;AGIWUR25052                                                |    |   |         |         |                |           |           |                     |             |
| CB4856                                                                             | CT | I | 3726011 | 3731265 | WBGene00001601 | glh-4     | T12F5.3   | -0.167044581346108  | AGIWUR15176 |
| CB4856                                                                             | CT | I | 3732982 | 3740479 | WBGene00004147 | larp-5    | T12F5.5   | -0.0241757527844664 |             |

AGIWUR11520;AGIWUR29583;AGIWUR33557  
 CB4856 CT I 3741456 3742646 WBGene00020466 sld-2 T12F5.1 -0.401282770355294 AGIWUR14577  
 CB4856 CT I 3748523 3753958 WBGene00002135 inx-13 Y8G1A.2 -0.104658482512481  
 AGIWUR5735;AGIWUR7745;AGIWUR14145;AGIWUR26568;AGIWUR30702;AGIWUR38532  
 CB4856 CT I 3755457 3759077 WBGene00002134 inx-12 ZK770.3 -0.0896238003671623  
 AGIWUR5815;AGIWUR12211;AGIWUR19906  
 CB4856 CT I 3769681 3773876 WBGene00022815 asic-1 ZK770.1 0.0358950274112262 AGIWUR39041  
 CB4856 CT I 3774706 3777468 WBGene00016324 C32E8.6 C32E8.6 0.232177388990424  
 AGIWUR13968;AGIWUR42073  
 CB4856 CT I 3778089 3781690 WBGene00004368 ric-19 C32E8.7 0.523494626395891 AGIWUR5505  
 CB4856 CT I 3782118 3783294 WBGene00016323 C32E8.5 C32E8.5 0.237065735816377  
 AGIWUR10554;AGIWUR18167  
 CB4856 CT I 3783835 3784435 WBGene00016322 C32E8.4 C32E8.4 0.199730623709966  
 AGIWUR25087;AGIWUR28898;AGIWUR38913  
 CB4856 CT I 3786588 3787494 WBGene00016321 tppp-1 C32E8.3 -0.03913780044752 AGIWUR830  
 CB4856 CT I 3788036 3788909 WBGene00004425 rpl-13 C32E8.2 0.11902363811059  
 AGIWUR4831;AGIWUR12028;AGIWUR21601;AGIWUR24937;AGIWUR36210;AGIWUR40534;AGIWUR40558;AGIWUR40887  
 CB4856 CT I 3789309 3792797 WBGene00004217 ptr-2 C32E8.8 -0.151008640317166  
 AGIWUR13785;AGIWUR26858;AGIWUR38652  
 CB4856 CT I 3794556 3798069 WBGene00016325 C32E8.9 C32E8.9 -0.346784288220736 AGIWUR631  
 CB4856 CT I 3798566 3805737 WBGene00006751 unc-11 C32E8.10 -0.182226552831484  
 AGIWUR7869;AGIWUR17953;AGIWUR22953;AGIWUR24588;AGIWUR25836;AGIWUR39231;AGIWUR39504  
 CB4856 CT I 3807458 3816809 WBGene00016326 ubr-1 C32E8.11 -0.0609687278227717  
 AGIWUR21445  
 CB4856 CT I 3817996 3821505 WBGene00003797 npp-11 F53F10.5 -0.0194238084298242  
 AGIWUR20808  
 CB4856 CT I 3821656 3821990 WBGene00023066 F53F10.7 F53F10.7 0.120629118301774  
 AGIWUR7872;AGIWUR22404;AGIWUR22849;AGIWUR28979;AGIWUR36927  
 CB4856 CT I 3824947 3826514 WBGene00006833 unc-108 F53F10.4 0.18656375822339  
 AGIWUR4694;AGIWUR13234;AGIWUR19555;AGIWUR21037;AGIWUR23542;AGIWUR33385;AGIWUR35111;AGIWUR36324;AGIWUR37033;  
 AGIWUR41608  
 CB4856 CT I 3827219 3828143 WBGene00018765 mpc-2 F53F10.3 -0.303995639385914  
 AGIWUR21074  
 CB4856 CT I 3828239 3829308 WBGene00044423 F53F10.8 F53F10.8  
 -0.00825178941686033 AGIWUR6429;AGIWUR15090;AGIWUR36207;AGIWUR43512  
 CB4856 CT I 3830562 3834124 WBGene00018764 F53F10.2 F53F10.2 -0.199630036615522  
 AGIWUR2264;AGIWUR6729;AGIWUR9892;AGIWUR13356;AGIWUR14555;AGIWUR19732;AGIWUR23173;AGIWUR25744;AGIWUR26007;AG  
 IWUR27943;AGIWUR29611;AGIWUR36716;AGIWUR42029  
 CB4856 CT I 3834115 3837807 WBGene00018763 F53F10.1 F53F10.1 0.352818878753599

AGIWUR22095

|        |    |   |         |         |                |         |         |                    |            |
|--------|----|---|---------|---------|----------------|---------|---------|--------------------|------------|
| CB4856 | CT | I | 3838237 | 3839899 | WBGene00020187 | gsp-4   | T03F1.5 | 0.512086457425774  | AGIWUR8768 |
| CB4856 | CT | I | 3839809 | 3841558 | WBGene00020188 | T03F1.6 | T03F1.6 | 0.0283833139655538 |            |

AGIWUR6276;AGIWUR15360;AGIWUR19567

|        |    |   |         |         |                |          |          |                   |  |
|--------|----|---|---------|---------|----------------|----------|----------|-------------------|--|
| CB4856 | CT | I | 3853810 | 3854233 | WBGene00020192 | T03F1.11 | T03F1.11 | 0.342710584981837 |  |
|--------|----|---|---------|---------|----------------|----------|----------|-------------------|--|

AGIWUR41326

|        |    |   |         |         |                |        |         |                     |             |
|--------|----|---|---------|---------|----------------|--------|---------|---------------------|-------------|
| CB4856 | CT | I | 3854169 | 3859292 | WBGene00020189 | tfbm-1 | T03F1.7 | 0.0249225224429672  | AGIWUR20942 |
| CB4856 | CT | I | 3859376 | 3862729 | WBGene00020190 | guk-1  | T03F1.8 | -0.0808191603658415 |             |

AGIWUR2473;AGIWUR5012;AGIWUR19709;AGIWUR27356

|        |    |   |         |         |                |       |         |                    |  |
|--------|----|---|---------|---------|----------------|-------|---------|--------------------|--|
| CB4856 | CT | I | 3862775 | 3865938 | WBGene00001832 | hcp-4 | T03F1.9 | -0.315985675588366 |  |
|--------|----|---|---------|---------|----------------|-------|---------|--------------------|--|

AGIWUR6379;AGIWUR7648;AGIWUR29704;AGIWUR37109

|        |    |   |         |         |                |       |         |                    |             |
|--------|----|---|---------|---------|----------------|-------|---------|--------------------|-------------|
| CB4856 | CT | I | 3867541 | 3869109 | WBGene00020185 | pgk-1 | T03F1.3 | 0.095067593161918  | AGIWUR13438 |
| CB4856 | CT | I | 3869214 | 3870114 | WBGene00000764 | coq-4 | T03F1.2 | -0.168930058704499 |             |

AGIWUR4077;AGIWUR4428;AGIWUR8265

|        |    |   |         |         |                |         |          |                     |  |
|--------|----|---|---------|---------|----------------|---------|----------|---------------------|--|
| CB4856 | CT | I | 3870642 | 3871267 | WBGene00219725 | linc-63 | T03F1.13 | -0.0464600238862065 |  |
|--------|----|---|---------|---------|----------------|---------|----------|---------------------|--|

AGIWUR21463

|        |    |   |         |         |                |         |          |                    |  |
|--------|----|---|---------|---------|----------------|---------|----------|--------------------|--|
| CB4856 | CT | I | 3871474 | 3873428 | WBGene00020191 | clcc-53 | T03F1.10 | -0.518824490653232 |  |
|--------|----|---|---------|---------|----------------|---------|----------|--------------------|--|

AGIWUR12742

|        |    |   |         |         |                |       |         |                    |  |
|--------|----|---|---------|---------|----------------|-------|---------|--------------------|--|
| CB4856 | CT | I | 3874037 | 3875995 | WBGene00020184 | uba-5 | T03F1.1 | -0.109088503265852 |  |
|--------|----|---|---------|---------|----------------|-------|---------|--------------------|--|

AGIWUR13281;AGIWUR14762;AGIWUR40606

|        |    |   |         |         |                |          |          |                    |  |
|--------|----|---|---------|---------|----------------|----------|----------|--------------------|--|
| CB4856 | CT | I | 3875974 | 3876711 | WBGene00020193 | T03F1.12 | T03F1.12 | -0.159032215114983 |  |
|--------|----|---|---------|---------|----------------|----------|----------|--------------------|--|

AGIWUR6414;AGIWUR30180;AGIWUR33159;AGIWUR36650;AGIWUR37016

|        |    |   |         |         |                |         |         |                    |             |
|--------|----|---|---------|---------|----------------|---------|---------|--------------------|-------------|
| CB4856 | CT | I | 3877063 | 3880747 | WBGene00016837 | C50F2.3 | C50F2.3 | -0.183841211867257 | AGIWUR4648  |
| CB4856 | CT | I | 3881816 | 3888313 | WBGene00016836 | C50F2.2 | C50F2.2 | 0.134212232196866  | AGIWUR20836 |
| CB4856 | CT | I | 3888331 | 3891598 | WBGene00016838 | C50F2.4 | C50F2.4 | -0.239924131917515 | AGIWUR21618 |
| CB4856 | CT | I | 3892332 | 3895271 | WBGene00016835 | C50F2.1 | C50F2.1 | 0.118468165773948  | AGIWUR30897 |
| CB4856 | CT | I | 3898046 | 3899840 | WBGene00001430 | fkf-5   | C50F2.6 | 0.062976161747434  |             |

AGIWUR566;AGIWUR5699;AGIWUR6375;AGIWUR8997;AGIWUR14812;AGIWUR17905;AGIWUR26306

|        |    |   |         |         |                |         |         |                    |             |
|--------|----|---|---------|---------|----------------|---------|---------|--------------------|-------------|
| CB4856 | CT | I | 3900407 | 3901437 | WBGene00016840 | C50F2.7 | C50F2.7 | 0.23045901342107   | AGIWUR34430 |
| CB4856 | CT | I | 3901432 | 3905208 | WBGene00016841 | magu-3  | C50F2.8 | 0.760054123998707  | AGIWUR10248 |
| CB4856 | CT | I | 3908747 | 3909701 | WBGene00003950 | pbs-4   | T20F5.2 | -0.239906139977653 |             |

AGIWUR3637;AGIWUR19846;AGIWUR21083;AGIWUR23708;AGIWUR40592;AGIWUR43430

|        |    |   |         |         |                |         |         |                     |             |
|--------|----|---|---------|---------|----------------|---------|---------|---------------------|-------------|
| CB4856 | CT | I | 3909629 | 3910544 | WBGene00020625 | mrrf-1  | T20F5.3 | 0.0399314711423155  | AGIWUR14724 |
| CB4856 | CT | I | 3912635 | 3915458 | WBGene00020626 | T20F5.4 | T20F5.4 | 1.32316353240973    | AGIWUR17512 |
| CB4856 | CT | I | 3916064 | 3916391 | WBGene00023142 | T20F5.1 | T20F5.1 | 0.00252562096915643 | AGIWUR5544  |
| CB4856 | CT | I | 3917911 | 3920172 | WBGene00020627 | T20F5.5 | T20F5.5 | -0.48373391403711   | AGIWUR7752  |
| CB4856 | CT | I | 3920177 | 3925162 | WBGene00020628 | T20F5.6 | T20F5.6 | -0.0692391648668824 |             |

AGIWUR29764;AGIWUR39526;AGIWUR41846

|        |    |   |         |         |                |         |         |                     |  |
|--------|----|---|---------|---------|----------------|---------|---------|---------------------|--|
| CB4856 | CT | I | 3925434 | 3927887 | WBGene00020629 | T20F5.7 | T20F5.7 | -0.0607879094028014 |  |
|--------|----|---|---------|---------|----------------|---------|---------|---------------------|--|

AGIWUR1843;AGIWUR5114;AGIWUR7038;AGIWUR9628;AGIWUR12435;AGIWUR24370;AGIWUR34443  
 CB4856 CT I 3930830 3931552 WBGene00020653 T21E3.2 T21E3.2 -0.105235862621001 AGIWUR6826  
 CB4856 CT I 3932210 3934813 WBGene00020652 egg-4 T21E3.1 -0.392604037838408 AGIWUR3682  
 CB4856 CT I 3935272 3953991 WBGene00003072 lrp-2 T21E3.3 0.104401946523295  
 AGIWUR29102;AGIWUR33825  
 CB4856 CT I 3968118 3970474 WBGene00018531 F47B3.7 F47B3.7 0.0122594027470662 AGIWUR2971  
 CB4856 CT I 3974063 3977351 WBGene00017909 F28H1.4 F28H1.4 -0.275849487578459 AGIWUR4979  
 CB4856 CT I 3978493 3979538 WBGene00017910 F28H1.5 F28H1.5 0.18523349419505 AGIWUR27721  
 CB4856 CT I 3983171 3986915 WBGene00000197 aars-2 F28H1.3 -0.256424525430124  
 AGIWUR5656;AGIWUR5960;AGIWUR22497;AGIWUR31140;AGIWUR35129;AGIWUR42993  
 CB4856 CT I 3987842 3988699 WBGene00000779 cpn-3 F28H1.2 -0.231929747521347 AGIWUR1643  
 CB4856 CT I 3995709 3996950 WBGene00017908 F28H1.1 F28H1.1 0.503342748342346  
 AGIWUR6699;AGIWUR23035;AGIWUR27226;AGIWUR33403;AGIWUR36968;AGIWUR44156;AGIWUR44775  
 CB4856 CT I 3999348 4031739 WBGene00006805 unc-73 F55C7.7 0.101916017555498  
 AGIWUR1149;AGIWUR3451;AGIWUR8764;AGIWUR9185;AGIWUR9442;AGIWUR24092;AGIWUR29201;AGIWUR29929;AGIWUR30982;AGIWUR34557;AGIWUR35974;AGIWUR36594;AGIWUR42637  
 CB4856 CT I 4035702 4090884 WBGene00006820 unc-89 C09D1.1 -0.211940058809477  
 AGIWUR6300;AGIWUR7462;AGIWUR9086;AGIWUR10960;AGIWUR10976;AGIWUR12117;AGIWUR13718;AGIWUR19966;AGIWUR21298;AGIWUR28254;AGIWUR29472;AGIWUR32385;AGIWUR33294;AGIWUR33479;AGIWUR43580  
 CB4856 CT I 4094179 4098330 WBGene00016066 acd-2 C24G7.4 -0.371547776070718 AGIWUR36711  
 CB4856 CT I 4103713 4108045 WBGene00016064 acd-1 C24G7.2 -0.10336749451591  
 AGIWUR8785;AGIWUR10183  
 CB4856 CT I 4109407 4112385 WBGene00016063 delm-2 C24G7.1 -0.0672771517399626  
 AGIWUR10048;AGIWUR20136  
 CB4856 CT I 4114734 4116370 WBGene00000867 cyb-2.2 H31G24.4 -0.269115123875993  
 AGIWUR32371  
 CB4856 CT I 4123481 4124723 WBGene00019253 H31G24.1 H31G24.1 0.236118687902213  
 AGIWUR24730  
 CB4856 CT I 4126056 4129307 WBGene00003029 lin-44 E01A2.3 0.287510334977423  
 AGIWUR3426;AGIWUR26281;AGIWUR28498;AGIWUR29789;AGIWUR34306;AGIWUR44057  
 CB4856 CT I 4129469 4132292 WBGene00002696 let-504 E01A2.4 0.0201789437291424 AGIWUR28032  
 CB4856 CT I 4132500 4135239 WBGene00017085 E01A2.2 E01A2.2 -0.105484730748188  
 AGIWUR606;AGIWUR16300;AGIWUR28446;AGIWUR41107  
 CB4856 CT I 4135239 4137074 WBGene00017087 E01A2.5 E01A2.5 0.169123537613531 AGIWUR9789  
 CB4856 CT I 4137134 4140634 WBGene00017088 akir-1 E01A2.6 0.079563909965815 AGIWUR15450  
 CB4856 CT I 4139514 4142367 WBGene00017084 E01A2.1 E01A2.1 -0.0199170713895853 AGIWUR44336  
 CB4856 CT I 4148832 4149429 WBGene00020040 R12E2.15 R12E2.15 -0.33063897613443  
 AGIWUR12434;AGIWUR26472  
 CB4856 CT I 4151099 4151761 WBGene00020032 R12E2.6 R12E2.6 0.0122594353085113 AGIWUR21859

|                                                                                               |    |   |         |         |                |           |           |                     |             |
|-----------------------------------------------------------------------------------------------|----|---|---------|---------|----------------|-----------|-----------|---------------------|-------------|
| CB4856                                                                                        | CT | I | 4153957 | 4154550 | WBGene00020033 | R12E2.7   | R12E2.7   | -0.866397996663792  | AGIWUR14061 |
| CB4856                                                                                        | CT | I | 4155542 | 4158733 | WBGene00020034 | R12E2.8   | R12E2.8   | -0.176530073153192  | AGIWUR2190  |
| CB4856                                                                                        | CT | I | 4159014 | 4161149 | WBGene00002137 | inx-15    | R12E2.9   | 0.0172627099505469  | AGIWUR34283 |
| CB4856                                                                                        | CT | I | 4162035 | 4165015 | WBGene00002138 | inx-16    | R12E2.5   | -0.621489151697601  | AGIWUR26075 |
| CB4856                                                                                        | CT | I | 4165135 | 4167229 | WBGene00002139 | inx-17    | R12E2.4   | -0.322620957941601  |             |
| AGIWUR9327;AGIWUR17226;AGIWUR20101;AGIWUR22560                                                |    |   |         |         |                |           |           |                     |             |
| CB4856                                                                                        | CT | I | 4172433 | 4173739 | WBGene00020036 | R12E2.11  | R12E2.11  | -0.221859794475421  |             |
| AGIWUR10106                                                                                   |    |   |         |         |                |           |           |                     |             |
| CB4856                                                                                        | CT | I | 4173743 | 4174774 | WBGene00020037 | mrps-6    | R12E2.12  | -0.216534224697444  |             |
| AGIWUR38727                                                                                   |    |   |         |         |                |           |           |                     |             |
| CB4856                                                                                        | CT | I | 4175319 | 4177271 | WBGene00004464 | rpn-8     | R12E2.3   | -0.123798078303516  |             |
| AGIWUR18623;AGIWUR22338                                                                       |    |   |         |         |                |           |           |                     |             |
| CB4856                                                                                        | CT | I | 4177305 | 4178447 | WBGene00020038 | R12E2.13  | R12E2.13  | -0.169593321069536  |             |
| AGIWUR3754;AGIWUR18414;AGIWUR22505;AGIWUR41014;AGIWUR42132                                    |    |   |         |         |                |           |           |                     |             |
| CB4856                                                                                        | CT | I | 4178812 | 4182158 | WBGene00020031 | suco-1    | R12E2.2   | 0.0657407334831372  | AGIWUR2927  |
| CB4856                                                                                        | CT | I | 4182221 | 4184992 | WBGene00020030 | R12E2.1   | R12E2.1   | 0.0226493809850865  | AGIWUR29439 |
| CB4856                                                                                        | CT | I | 4190142 | 4193129 | WBGene00015975 | cas-2     | C18E3.6   | -0.177132603190742  | AGIWUR19315 |
| CB4856                                                                                        | CT | I | 4193241 | 4203303 | WBGene00015974 | C18E3.5   | C18E3.5   | 0.0877011101144163  | AGIWUR18123 |
| CB4856                                                                                        | CT | I | 4203458 | 4208537 | WBGene00015972 | C18E3.3   | C18E3.3   | 0.232569743859703   | AGIWUR9106  |
| CB4856                                                                                        | CT | I | 4208515 | 4210341 | WBGene00001985 | hop-1     | C18E3.8   | 0.012127022846947   | AGIWUR15216 |
| CB4856                                                                                        | CT | I | 4210979 | 4212667 | WBGene00015971 | swsn-2.2  | C18E3.2   | 0.0146698451108964  |             |
| AGIWUR22115                                                                                   |    |   |         |         |                |           |           |                     |             |
| CB4856                                                                                        | CT | I | 4212708 | 4214317 | WBGene00015970 | C18E3.1   | C18E3.1   | 0.318019748904275   |             |
| AGIWUR5693;AGIWUR8501;AGIWUR13498                                                             |    |   |         |         |                |           |           |                     |             |
| CB4856                                                                                        | CT | I | 4214294 | 4215768 | WBGene00015976 | C18E3.9   | C18E3.9   | -0.410628073355682  | AGIWUR20276 |
| CB4856                                                                                        | CT | I | 4229577 | 4236039 | WBGene00003516 | nab-1     | C43E11.6  | 0.154418182564486   |             |
| AGIWUR2476;AGIWUR3623;AGIWUR14586;AGIWUR14740;AGIWUR15070;AGIWUR28263;AGIWUR34361;AGIWUR39076 |    |   |         |         |                |           |           |                     |             |
| CB4856                                                                                        | CT | I | 4239088 | 4242727 | WBGene00003584 | ndx-7     | C43E11.7  | -0.014619945201499  |             |
| AGIWUR3786                                                                                    |    |   |         |         |                |           |           |                     |             |
| CB4856                                                                                        | CT | I | 4242821 | 4247582 | WBGene00016606 | exoc-7    | C43E11.8  | -0.212297851196048  |             |
| AGIWUR18146                                                                                   |    |   |         |         |                |           |           |                     |             |
| CB4856                                                                                        | CT | I | 4247754 | 4249415 | WBGene00007001 | tufm-2    | C43E11.4  | -0.173600566235853  |             |
| AGIWUR11352;AGIWUR18532;AGIWUR37882;AGIWUR40266                                               |    |   |         |         |                |           |           |                     |             |
| CB4856                                                                                        | CT | I | 4249482 | 4253170 | WBGene00016608 | cogc-5    | C43E11.11 | -0.119164075947737  |             |
| AGIWUR16563                                                                                   |    |   |         |         |                |           |           |                     |             |
| CB4856                                                                                        | CT | I | 4253242 | 4254139 | WBGene00016609 | C43E11.12 | C43E11.12 | -0.0824077733798152 |             |
| AGIWUR19632                                                                                   |    |   |         |         |                |           |           |                     |             |
| CB4856                                                                                        | CT | I | 4254380 | 4264699 | WBGene00016603 | met-1     | C43E11.3  | -0.0981064540768859 |             |
| AGIWUR2423;AGIWUR5245;AGIWUR8984;AGIWUR14864;AGIWUR15911;AGIWUR26980;AGIWUR38107              |    |   |         |         |                |           |           |                     |             |

|                                                                                    |   |                 |                |          |           |                     |             |
|------------------------------------------------------------------------------------|---|-----------------|----------------|----------|-----------|---------------------|-------------|
| CB4856 CT                                                                          | I | 4265109 4267238 | WBGene00016602 | mus-81   | C43E11.2  | -0.0528263356063903 |             |
| AGIWUR1293                                                                         |   |                 |                |          |           |                     |             |
| CB4856 CT                                                                          | I | 4267199 4267967 | WBGene00016607 | C43E11.9 | C43E11.9  | -0.0476253337558266 |             |
| AGIWUR3376;AGIWUR11694                                                             |   |                 |                |          |           |                     |             |
| CB4856 CT                                                                          | I | 4268070 4270287 | WBGene00000382 | cdc-6    | C43E11.10 | -0.128698384342623  |             |
| AGIWUR23938                                                                        |   |                 |                |          |           |                     |             |
| CB4856 CT                                                                          | I | 4270697 4273332 | WBGene00016601 | acin-1   | C43E11.1  | -0.0659104067574052 |             |
| AGIWUR26821                                                                        |   |                 |                |          |           |                     |             |
| CB4856 CT                                                                          | I | 4273896 4274742 | WBGene00021631 | Y47D9A.4 | Y47D9A.4  | -0.66608621710906   |             |
| AGIWUR20658                                                                        |   |                 |                |          |           |                     |             |
| CB4856 CT                                                                          | I | 4277684 4279622 | WBGene00021632 | Y47D9A.5 | Y47D9A.5  | -0.122551722733927  |             |
| AGIWUR13379                                                                        |   |                 |                |          |           |                     |             |
| CB4856 CT                                                                          | I | 4298184 4302243 | WBGene00021629 | scpl-3   | Y47D9A.2  | 0.253087634051961   |             |
| AGIWUR34572;AGIWUR41718                                                            |   |                 |                |          |           |                     |             |
| CB4856 CT                                                                          | I | 4303930 4308244 | WBGene00021628 | Y47D9A.1 | Y47D9A.1  | -0.0625774843612383 |             |
| AGIWUR1935;AGIWUR8700;AGIWUR37027                                                  |   |                 |                |          |           |                     |             |
| CB4856 CT                                                                          | I | 4321095 4359080 | WBGene00000140 | anc-1    | ZK973.6   | 0.0531927372678282  |             |
| AGIWUR2453;AGIWUR11299;AGIWUR11875;AGIWUR21024;AGIWUR28673;AGIWUR37202;AGIWUR38158 |   |                 |                |          |           |                     |             |
| CB4856 CT                                                                          | I | 4359207 4362548 | WBGene00000045 | acr-6    | ZK973.5   | -0.13355214823989   | AGIWUR12825 |
| CB4856 CT                                                                          | I | 4363415 4364048 | WBGene00022833 | ZK973.4  | ZK973.4   | -0.313762002873418  | AGIWUR43472 |
| CB4856 CT                                                                          | I | 4364906 4367049 | WBGene00022834 | ZK973.8  | ZK973.8   | 0.0061863486944187  | AGIWUR38768 |
| CB4856 CT                                                                          | I | 4368089 4370504 | WBGene00022832 | pdp-1    | ZK973.3   | 0.190861994112943   | AGIWUR38319 |
| CB4856 CT                                                                          | I | 4370419 4372138 | WBGene00022835 | ZK973.9  | ZK973.9   | -0.0525223740092731 | AGIWUR26896 |
| CB4856 CT                                                                          | I | 4372255 4373018 | WBGene00003061 | lpd-5    | ZK973.10  | -0.271179746125171  |             |
| AGIWUR9768                                                                         |   |                 |                |          |           |                     |             |
| CB4856 CT                                                                          | I | 4373656 4379329 | WBGene00022831 | cec-10   | ZK973.2   | 0.158534303879131   | AGIWUR11355 |
| CB4856 CT                                                                          | I | 4379325 4381948 | WBGene00022836 | ZK973.11 | ZK973.11  | 0.0833215339901123  |             |
| AGIWUR40438                                                                        |   |                 |                |          |           |                     |             |
| CB4856 CT                                                                          | I | 4382565 4385218 | WBGene00022830 | ZK973.1  | ZK973.1   | -0.137639594732654  | AGIWUR15329 |
| CB4856 CT                                                                          | I | 4386785 4401980 | WBGene00000962 | dhc-1    | T21E12.4  | 0.0103071568651441  |             |
| AGIWUR25546;AGIWUR28865                                                            |   |                 |                |          |           |                     |             |
| CB4856 CT                                                                          | I | 4401956 4404585 | WBGene00020655 | T21E12.3 | T21E12.3  | -0.156160850439187  |             |
| AGIWUR37344                                                                        |   |                 |                |          |           |                     |             |
| CB4856 CT                                                                          | I | 4409689 4426137 | WBGene00015704 | tiam-1   | C11D9.1   | 0.111957008303431   |             |
| AGIWUR16;AGIWUR16270                                                               |   |                 |                |          |           |                     |             |
| CB4856 CT                                                                          | I | 4428467 4444342 | WBGene00016562 | C41D11.3 | C41D11.3  | -0.0895572307788859 |             |
| AGIWUR18411;AGIWUR25427;AGIWUR32861;AGIWUR34009                                    |   |                 |                |          |           |                     |             |
| CB4856 CT                                                                          | I | 4444719 4446598 | WBGene00001231 | EIF-3.H  | C41D11.2  | -0.213089361405377  |             |
| AGIWUR21203                                                                        |   |                 |                |          |           |                     |             |

|                                                                               |    |   |         |         |                |            |            |                              |
|-------------------------------------------------------------------------------|----|---|---------|---------|----------------|------------|------------|------------------------------|
| CB4856                                                                        | CT | I | 4446577 | 4448461 | WBGene00000787 | cps-6      | C41D11.8   | 0.336431945340545            |
| AGIWUR1461;AGIWUR12582;AGIWUR32366                                            |    |   |         |         |                |            |            |                              |
| CB4856                                                                        | CT | I | 4448576 | 4449774 | WBGene00016567 | C41D11.9   | C41D11.9   | 0.375274082547767            |
| AGIWUR9473                                                                    |    |   |         |         |                |            |            |                              |
| CB4856                                                                        | CT | I | 4449879 | 4450927 | WBGene00016564 | cmt-1      | C41D11.5   | 0.041054532784365            |
| AGIWUR43287                                                                   |    |   |         |         |                |            |            |                              |
| CB4856                                                                        | CT | I | 4451200 | 4456805 | WBGene00016566 | eri-7      | C41D11.7   | -0.120288494990621           |
| AGIWUR27075                                                                   |    |   |         |         |                |            |            |                              |
| CB4856                                                                        | CT | I | 4457383 | 4469461 | WBGene00016561 | eri-6      | C41D11.1   | 0.0975816157706078           |
| AGIWUR9474;AGIWUR15095;AGIWUR33241                                            |    |   |         |         |                |            |            |                              |
| CB4856                                                                        | CT | I | 4481203 | 4508930 | WBGene00020131 | gcy-28     | T01A4.1    | -0.0198571224630317          |
| AGIWUR8023;AGIWUR9811;AGIWUR10432;AGIWUR11693;AGIWUR25389;AGIWUR29324         |    |   |         |         |                |            |            |                              |
| CB4856                                                                        | CT | I | 4508917 | 4511126 | WBGene00022470 | mrp1-19    | Y119C1B.4  | -0.419799385617026           |
| AGIWUR28354                                                                   |    |   |         |         |                |            |            |                              |
| CB4856                                                                        | CT | I | 4511440 | 4516512 | WBGene00022471 | Y119C1B.5  | Y119C1B.5  | 0.0275004584742859           |
| AGIWUR39560                                                                   |    |   |         |         |                |            |            |                              |
| CB4856                                                                        | CT | I | 4517260 | 4518491 | WBGene00022472 | Y119C1B.6  | Y119C1B.6  | 0.160621870957328            |
| AGIWUR7587;AGIWUR14994;AGIWUR16399;AGIWUR27205;AGIWUR37427;AGIWUR38985        |    |   |         |         |                |            |            |                              |
| CB4856                                                                        | CT | I | 4520070 | 4522768 | WBGene00044754 | Y119C1B.12 | Y119C1B.12 | -0.308188335514243           |
| AGIWUR5460;AGIWUR27225;AGIWUR42488                                            |    |   |         |         |                |            |            |                              |
| CB4856                                                                        | CT | I | 4526232 | 4534798 | WBGene00022473 | bet-1      | Y119C1B.8  | 0.018455064593633            |
| AGIWUR1031;AGIWUR3966;AGIWUR43474                                             |    |   |         |         |                |            |            |                              |
| CB4856                                                                        | CT | I | 4537449 | 4539725 | WBGene00022474 | zig-9      | Y119C1B.9  | 0.0432380028726165           |
| AGIWUR17606                                                                   |    |   |         |         |                |            |            |                              |
| CB4856                                                                        | CT | I | 4549695 | 4552758 | WBGene00022469 | Y119C1B.3  | Y119C1B.3  | 0.327759676530587            |
| AGIWUR19268                                                                   |    |   |         |         |                |            |            |                              |
| CB4856                                                                        | CT | I | 4552851 | 4553121 | WBGene00044441 | Y119C1B.11 | Y119C1B.11 |                              |
| -0.00467143726293706 AGIWUR4602;AGIWUR7834;AGIWUR9928;AGIWUR28645;AGIWUR31236 |    |   |         |         |                |            |            |                              |
| CB4856                                                                        | CT | I | 4554126 | 4555203 | WBGene00022467 | Y119C1B.1  | Y119C1B.1  | 0.0535291047506128           |
| AGIWUR24218                                                                   |    |   |         |         |                |            |            |                              |
| CB4856                                                                        | CT | I | 4555343 | 4556814 | WBGene00022475 | Y119C1B.10 | Y119C1B.10 | -0.233870211503442           |
| AGIWUR39830                                                                   |    |   |         |         |                |            |            |                              |
| CB4856                                                                        | CT | I | 4557664 | 4563694 | WBGene00017010 | D1007.15   | D1007.15   | 0.117004959188917            |
| AGIWUR9638                                                                    |    |   |         |         |                |            |            |                              |
| CB4856                                                                        | CT | I | 4564035 | 4565976 | WBGene00004113 | pqn-24     | D1007.14   | -0.00521783929903208         |
| AGIWUR5942                                                                    |    |   |         |         |                |            |            |                              |
| CB4856                                                                        | CT | I | 4566495 | 4568385 | WBGene00017009 | D1007.13   | D1007.13   | 0.0388561249330106           |
| AGIWUR36815                                                                   |    |   |         |         |                |            |            |                              |
| CB4856                                                                        | CT | I | 4568962 | 4570027 | WBGene00000440 | ceh-17     | D1007.1    | 0.282638234002125 AGIWUR7465 |



|                                                                                                                                              |    |   |         |         |                |           |           |                     |             |
|----------------------------------------------------------------------------------------------------------------------------------------------|----|---|---------|---------|----------------|-----------|-----------|---------------------|-------------|
| CB4856                                                                                                                                       | CT | I | 4571214 | 4572787 | WBGene00000629 | col-52    | D1007.2   | -0.0211373660297234 | AGIWUR32251 |
| CB4856                                                                                                                                       | CT | I | 4575782 | 4577204 | WBGene00017001 | D1007.3   | D1007.3   | -0.110436016131935  | AGIWUR11775 |
| CB4856                                                                                                                                       | CT | I | 4578695 | 4579740 | WBGene00044421 | D1007.18  | D1007.18  |                     |             |
| -0.00262440781602802 AGIWUR1057;AGIWUR2948;AGIWUR11364;AGIWUR23273;AGIWUR28118                                                               |    |   |         |         |                |           |           |                     |             |
| CB4856                                                                                                                                       | CT | I | 4579964 | 4580601 | WBGene00017002 | D1007.4   | D1007.4   | -0.190537047282378  | AGIWUR33335 |
| CB4856                                                                                                                                       | CT | I | 4580692 | 4583810 | WBGene00017003 | D1007.5   | D1007.5   | -0.0135891563972645 |             |
| AGIWUR6591;AGIWUR13479                                                                                                                       |    |   |         |         |                |           |           |                     |             |
| CB4856                                                                                                                                       | CT | I | 4583873 | 4584505 | WBGene00004479 | rps-10    | D1007.6   | -0.433444783817096  |             |
| AGIWUR23072;AGIWUR34651                                                                                                                      |    |   |         |         |                |           |           |                     |             |
| CB4856                                                                                                                                       | CT | I | 4585115 | 4586177 | WBGene00004436 | rp1-24.1  | D1007.12  | -0.0777814359116178 |             |
| AGIWUR2234;AGIWUR7117;AGIWUR7732;AGIWUR16379;AGIWUR17943;AGIWUR18712;AGIWUR21241;AGIWUR28846;AGIWUR31144;AGIWUR31405;AGIWUR32422;AGIWUR32535 |    |   |         |         |                |           |           |                     |             |
| CB4856                                                                                                                                       | CT | I | 4586273 | 4589463 | WBGene00017007 | D1007.10  | D1007.10  | -0.0899970090407516 |             |
| AGIWUR22139;AGIWUR22225                                                                                                                      |    |   |         |         |                |           |           |                     |             |
| CB4856                                                                                                                                       | CT | I | 4589380 | 4589899 | WBGene00045048 | D1007.19  | D1007.19  | 0.237470314839701   |             |
| AGIWUR9696;AGIWUR15492;AGIWUR15856;AGIWUR24796;AGIWUR32400                                                                                   |    |   |         |         |                |           |           |                     |             |
| CB4856                                                                                                                                       | CT | I | 4590430 | 4591587 | WBGene00017006 | D1007.9   | D1007.9   | -0.0335534231065795 | AGIWUR6994  |
| CB4856                                                                                                                                       | CT | I | 4597914 | 4602666 | WBGene00017004 | nrd-1     | D1007.7   | -0.306483574155251  |             |
| AGIWUR12783;AGIWUR16196;AGIWUR18660;AGIWUR21356;AGIWUR22525;AGIWUR37310                                                                      |    |   |         |         |                |           |           |                     |             |
| CB4856                                                                                                                                       | CT | I | 4603217 | 4604196 | WBGene00017011 | eaf-1     | D1007.16  | -0.0415780560455516 |             |
| AGIWUR42215                                                                                                                                  |    |   |         |         |                |           |           |                     |             |
| CB4856                                                                                                                                       | CT | I | 4604175 | 4605385 | WBGene00017005 | D1007.8   | D1007.8   | -0.174985788123838  | AGIWUR31149 |
| CB4856                                                                                                                                       | CT | I | 4605655 | 4610202 | WBGene00016654 | C44E4.5   | C44E4.5   | -0.24820934391383   |             |
| AGIWUR38528;AGIWUR40268                                                                                                                      |    |   |         |         |                |           |           |                     |             |
| CB4856                                                                                                                                       | CT | I | 4610147 | 4633377 | WBGene00016650 | ubr-4     | C44E4.1   | -0.0776303888677674 |             |
| AGIWUR26053;AGIWUR26807;AGIWUR44636                                                                                                          |    |   |         |         |                |           |           |                     |             |
| CB4856                                                                                                                                       | CT | I | 4634103 | 4635620 | WBGene00016653 | C44E4.4   | C44E4.4   | -0.0859871899102993 |             |
| AGIWUR10614;AGIWUR20679                                                                                                                      |    |   |         |         |                |           |           |                     |             |
| CB4856                                                                                                                                       | CT | I | 4635722 | 4637328 | WBGene00016655 | acbp-1    | C44E4.6   | -0.114222196899501  | AGIWUR39810 |
| CB4856                                                                                                                                       | CT | I | 4637432 | 4640882 | WBGene00016652 | got-2.1   | C44E4.3   | 0.124475025748346   | AGIWUR9876  |
| CB4856                                                                                                                                       | CT | I | 4641003 | 4644069 | WBGene00022466 | Y119C1A.1 | Y119C1A.1 | -0.0658707175583242 |             |
| AGIWUR36777                                                                                                                                  |    |   |         |         |                |           |           |                     |             |
| CB4856                                                                                                                                       | CT | I | 4644677 | 4645657 | WBGene00015008 | lmd-2     | B0041.3   | -0.13025827205189   | AGIWUR22463 |
| CB4856                                                                                                                                       | CT | I | 4645641 | 4646963 | WBGene00004415 | rp1-4     | B0041.4   | 0.0684559733359347  |             |
| AGIWUR1725;AGIWUR9422;AGIWUR14581;AGIWUR19810;AGIWUR33413;AGIWUR42912                                                                        |    |   |         |         |                |           |           |                     |             |
| CB4856                                                                                                                                       | CT | I | 4647280 | 4648275 | WBGene00015011 | B0041.8   | B0041.8   | -0.374182733307293  |             |
| AGIWUR864;AGIWUR12611;AGIWUR13671;AGIWUR30350                                                                                                |    |   |         |         |                |           |           |                     |             |
| CB4856                                                                                                                                       | CT | I | 4648272 | 4650770 | WBGene00015009 | B0041.5   | B0041.5   | -0.154475321691763  | AGIWUR43682 |
| CB4856                                                                                                                                       | CT | I | 4652145 | 4652906 | WBGene00015010 | ptps-1    | B0041.6   | -0.416767574594813  |             |

AGIWUR1589;AGIWUR18373;AGIWUR27336;AGIWUR28856;AGIWUR39809;AGIWUR42507  
 CB4856 CT I 4653471 4660151 WBGene00015007 ain-2 B0041.2 -0.0419044904957966  
 AGIWUR108;AGIWUR2251;AGIWUR8966;AGIWUR12167;AGIWUR12517;AGIWUR13698;AGIWUR29300;AGIWUR30748;AGIWUR30865;AGIWUR32722  
 CB4856 CT I 4665744 4671738 WBGene00006961 xnp-1 B0041.7 0.0472936992653539  
 AGIWUR6803;AGIWUR7645;AGIWUR8360;AGIWUR9104;AGIWUR18059;AGIWUR25526;AGIWUR26185;AGIWUR26197;AGIWUR32396;AGIWUR34797;AGIWUR35523;AGIWUR41946  
 CB4856 CT I 4675135 4679409 WBGene00006791 unc-57 T04D1.3 -0.0467189442808014  
 AGIWUR19596;AGIWUR20386;AGIWUR30589  
 CB4856 CT I 4679671 4682755 WBGene00020212 T04D1.2 T04D1.2 0.313578309838137 AGIWUR20292  
 CB4856 CT I 4685865 4698575 WBGene00007053 chd-7 T04D1.4 0.430103215283054 AGIWUR42196  
 CB4856 CT I 4704598 4705881 WBGene00021112 W09C3.4 W09C3.4 -0.279664999199428 AGIWUR1005  
 CB4856 CT I 4706682 4708762 WBGene00021111 W09C3.3 W09C3.3 -0.22092121398129 AGIWUR16434  
 CB4856 CT I 4709262 4710712 WBGene00021113 gsp-3 W09C3.6 -0.0743516425222417  
 AGIWUR17793;AGIWUR31790  
 CB4856 CT I 4711414 4713572 WBGene00021110 W09C3.2 W09C3.2 0.145507871942139 AGIWUR13150  
 CB4856 CT I 4714320 4715485 WBGene00021114 W09C3.7 W09C3.7 0.511736755693786 AGIWUR37490  
 CB4856 CT I 4716059 4717441 WBGene00021115 W09C3.8 W09C3.8 0.103700955531735 AGIWUR9668  
 CB4856 CT I 4719789 4721098 WBGene00015696 C10H11.7 C10H11.7 -0.187230627651694  
 AGIWUR22151  
 CB4856 CT I 4721131 4723960 WBGene00015695 ugt-26 C10H11.6 -0.463420145411625  
 AGIWUR8772  
 CB4856 CT I 4724065 4726779 WBGene00015694 ugt-27 C10H11.5 -0.0850847629394869  
 AGIWUR3550;AGIWUR34887;AGIWUR35735  
 CB4856 CT I 4727280 4730366 WBGene00015693 ugt-28 C10H11.4 -0.18057200496044  
 AGIWUR10641;AGIWUR42541  
 CB4856 CT I 4731603 4735276 WBGene00015692 ugt-25 C10H11.3 -0.311316624263569  
 AGIWUR33026  
 CB4856 CT I 4735471 4738100 WBGene00015697 mlst-8 C10H11.8 -0.0794181263466029  
 AGIWUR33168  
 CB4856 CT I 4738171 4744321 WBGene00002694 let-502 C10H11.9 0.0846048631384484  
 AGIWUR13661;AGIWUR36987  
 CB4856 CT I 4747490 4759601 WBGene00015691 viln-1 C10H11.1 -0.117618692973389  
 AGIWUR26405  
 CB4856 CT I 4759820 4761321 WBGene00015698 kca-1 C10H11.10 -0.0776273428720531  
 AGIWUR10472;AGIWUR41596  
 CB4856 CT I 4769694 4771358 WBGene00019767 rpa-2 M04F3.1 -0.0269699387442692 AGIWUR40091  
 CB4856 CT I 4771348 4773673 WBGene00019770 M04F3.4 M04F3.4 0.0164854721296539  
 AGIWUR6019;AGIWUR14997;AGIWUR27654;AGIWUR28372;AGIWUR32364

|                                                                                                |    |   |         |         |                |          |         |                     |                     |
|------------------------------------------------------------------------------------------------|----|---|---------|---------|----------------|----------|---------|---------------------|---------------------|
| CB4856                                                                                         | CT | I | 4773818 | 4788358 | WBGene00019771 | M04F3.5  | M04F3.5 | 0.00726790654891829 |                     |
| AGIWUR32895;AGIWUR36661                                                                        |    |   |         |         |                |          |         |                     |                     |
| CB4856                                                                                         | CT | I | 4789190 | 4789592 | WBGene00023067 | rp1-41.1 |         | F54D7.6             | 0.0811010597171293  |
| AGIWUR16924                                                                                    |    |   |         |         |                |          |         |                     |                     |
| CB4856                                                                                         | CT | I | 4790292 | 4790649 | WBGene00023068 | rp1-41.2 |         | F54D7.7             | -0.0246300828454622 |
| AGIWUR5284;AGIWUR28223                                                                         |    |   |         |         |                |          |         |                     |                     |
| CB4856                                                                                         | CT | I | 4790644 | 4792560 | WBGene00006984 | zig-7    | F54D7.4 | 0.485367882834247   | AGIWUR1938          |
| CB4856                                                                                         | CT | I | 4800043 | 4804268 | WBGene00018798 | gnrr-1   | F54D7.3 | 0.154199563320649   | AGIWUR35863         |
| CB4856                                                                                         | CT | I | 4805607 | 4809674 | WBGene00018797 | F54D7.2  | F54D7.2 | -0.1899661470787    |                     |
| AGIWUR13252;AGIWUR32663;AGIWUR38228;AGIWUR41575                                                |    |   |         |         |                |          |         |                     |                     |
| CB4856                                                                                         | CT | I | 4821933 | 4824811 | WBGene00019012 | F57C9.6  | F57C9.6 | 0.209016946925906   | AGIWUR8277          |
| CB4856                                                                                         | CT | I | 4824921 | 4826633 | WBGene00019013 | tofu-4   | F57C9.7 | -0.314227124219803  |                     |
| AGIWUR17499;AGIWUR26308                                                                        |    |   |         |         |                |          |         |                     |                     |
| CB4856                                                                                         | CT | I | 4827072 | 4829794 | WBGene00002034 | htp-3    | F57C9.5 | 0.0449151586873704  | AGIWUR12950         |
| CB4856                                                                                         | CT | I | 4830135 | 4835619 | WBGene00019011 | F57C9.4  | F57C9.4 | -0.196038817940268  |                     |
| AGIWUR3295;AGIWUR5793;AGIWUR12169;AGIWUR24527;AGIWUR27565;AGIWUR37268                          |    |   |         |         |                |          |         |                     |                     |
| CB4856                                                                                         | CT | I | 4836187 | 4844966 | WBGene00019010 | glo-2    | F57C9.3 | -0.139113319012106  | AGIWUR34322         |
| CB4856                                                                                         | CT | I | 4845013 | 4847336 | WBGene00019009 | clcc-90  | F57C9.2 | -0.0799294681176916 |                     |
| AGIWUR3253;AGIWUR3898;AGIWUR4431;AGIWUR28280;AGIWUR28715;AGIWUR32897                           |    |   |         |         |                |          |         |                     |                     |
| CB4856                                                                                         | CT | I | 4848425 | 4850717 | WBGene00019008 | pdxk-1   | F57C9.1 | -0.0466619797273156 |                     |
| AGIWUR4151;AGIWUR8744;AGIWUR38672;AGIWUR42153;AGIWUR43420;AGIWUR43542                          |    |   |         |         |                |          |         |                     |                     |
| CB4856                                                                                         | CT | I | 4850682 | 4867825 | WBGene00015303 | rga-6    | C01F4.2 | 0.0872419997484677  |                     |
| AGIWUR6175;AGIWUR8844                                                                          |    |   |         |         |                |          |         |                     |                     |
| CB4856                                                                                         | CT | I | 4884903 | 4895495 | WBGene00017795 | F25F8.1  | F25F8.1 | 0.300349529475378   | AGIWUR32285         |
| CB4856                                                                                         | CT | I | 4896003 | 4897541 | WBGene00017674 | F21F3.4  | F21F3.4 | -0.23659794662521   | AGIWUR17618         |
| CB4856                                                                                         | CT | I | 4897620 | 4900977 | WBGene00006774 | unc-38   | F21F3.5 | -0.0164939733081475 | AGIWUR19032         |
| CB4856                                                                                         | CT | I | 4901918 | 4903264 | WBGene00017673 | icmt-1   | F21F3.3 | 1.1422043882992     | AGIWUR10653         |
| CB4856                                                                                         | CT | I | 4903437 | 4905138 | WBGene00017672 | F21F3.2  | F21F3.2 | -0.142617274803379  | AGIWUR36704         |
| CB4856                                                                                         | CT | I | 4906786 | 4911829 | WBGene00017671 | pgal-1   | F21F3.1 | 0.170087825840415   |                     |
| AGIWUR10360;AGIWUR11221;AGIWUR39787                                                            |    |   |         |         |                |          |         |                     |                     |
| CB4856                                                                                         | CT | I | 4911805 | 4914047 | WBGene00017675 | F21F3.6  | F21F3.6 | 0.112899154920743   |                     |
| AGIWUR6443;AGIWUR19391;AGIWUR23423;AGIWUR28728                                                 |    |   |         |         |                |          |         |                     |                     |
| CB4856                                                                                         | CT | I | 4918372 | 4920770 | WBGene00017676 | F21F3.7  | F21F3.7 | 0.0907713083755004  |                     |
| AGIWUR4819;AGIWUR10338;AGIWUR11236;AGIWUR12715;AGIWUR18328;AGIWUR22480;AGIWUR36384;AGIWUR42305 |    |   |         |         |                |          |         |                     |                     |
| CB4856                                                                                         | CT | I | 4920707 | 4926233 | WBGene00002075 | imb-1    | F28B3.8 | 0.0272897029755317  |                     |
| AGIWUR17237;AGIWUR19494;AGIWUR21477;AGIWUR23298;AGIWUR26174;AGIWUR40448                        |    |   |         |         |                |          |         |                     |                     |
| CB4856                                                                                         | CT | I | 4926592 | 4928840 | WBGene00017886 | F28B3.5  | F28B3.5 | -0.353266033800613  |                     |
| AGIWUR3834;AGIWUR29211                                                                         |    |   |         |         |                |          |         |                     |                     |
| CB4856                                                                                         | CT | I | 4928654 | 4932147 | WBGene00017888 | ac1-11   | F28B3.9 | -0.296207117697278  | AGIWUR26348         |

|                                                                         |    |   |         |         |                |          |          |                     |             |
|-------------------------------------------------------------------------|----|---|---------|---------|----------------|----------|----------|---------------------|-------------|
| CB4856                                                                  | CT | I | 4934118 | 4949332 | WBGene00017885 | dip-2    | F28B3.4  | -0.0347983165237649 |             |
| AGIWUR3431;AGIWUR18607;AGIWUR29662;AGIWUR33088;AGIWUR34513;AGIWUR42148  |    |   |         |         |                |          |          |                     |             |
| CB4856                                                                  | CT | I | 4949327 | 4950410 | WBGene00017889 | F28B3.10 | F28B3.10 | -0.0882019400314533 |             |
| AGIWUR37298                                                             |    |   |         |         |                |          |          |                     |             |
| CB4856                                                                  | CT | I | 4950583 | 4951550 | WBGene00017887 | F28B3.6  | F28B3.6  | -0.0738548294411387 |             |
| AGIWUR14419;AGIWUR15223;AGIWUR19224;AGIWUR29297;AGIWUR31798;AGIWUR41653 |    |   |         |         |                |          |          |                     |             |
| CB4856                                                                  | CT | I | 4951570 | 4957667 | WBGene00001860 | him-1    | F28B3.7  | -0.177510872740829  | AGIWUR5462  |
| CB4856                                                                  | CT | I | 4957776 | 4958309 | WBGene00044431 | W03G9.8  | W03G9.8  | -0.243410610389883  |             |
| AGIWUR521;AGIWUR2774;AGIWUR10077;AGIWUR19733;AGIWUR42359                |    |   |         |         |                |          |          |                     |             |
| CB4856                                                                  | CT | I | 4962451 | 4964745 | WBGene00021014 | W03G9.2  | W03G9.2  | -0.0115969048627953 | AGIWUR17245 |
| CB4856                                                                  | CT | I | 4964667 | 4967089 | WBGene00000155 | app-1    | W03G9.4  | 0.114682397020083   | AGIWUR31837 |
| CB4856                                                                  | CT | I | 4968007 | 4970245 | WBGene00021016 | W03G9.5  | W03G9.5  | 0.0232091018120979  | AGIWUR898   |
| CB4856                                                                  | CT | I | 4969923 | 4972243 | WBGene00044432 | W03G9.9  | W03G9.9  | 0.0483884152395655  |             |
| AGIWUR4097;AGIWUR15675                                                  |    |   |         |         |                |          |          |                     |             |
| CB4856                                                                  | CT | I | 4980307 | 4983958 | WBGene00004900 | snf-1    | W03G9.1  | 0.116621295099279   | AGIWUR37640 |
| CB4856                                                                  | CT | I | 4984760 | 4986739 | WBGene00003906 | paf-1    | W03G9.6  | 0.0268633134008471  | AGIWUR30136 |
| CB4856                                                                  | CT | I | 4986954 | 4989454 | WBGene00021017 | cil-7    | W03G9.7  | 0.180321885175964   | AGIWUR41717 |
| CB4856                                                                  | CT | I | 4989568 | 4994675 | WBGene00001117 | dyf-1    | F54C1.5  | 0.257387335924801   | AGIWUR4202  |
| CB4856                                                                  | CT | I | 4996839 | 5003161 | WBGene00003221 | mes-3    | F54C1.3  | -0.0467035117246191 |             |
| AGIWUR28141;AGIWUR30866;AGIWUR40884                                     |    |   |         |         |                |          |          |                     |             |
| CB4856                                                                  | CT | I | 5003351 | 5005163 | WBGene00001050 | dom-3    | F54C1.2  | -0.217752645454485  | AGIWUR4782  |
| CB4856                                                                  | CT | I | 5004924 | 5006057 | WBGene00018792 | F54C1.8  | F54C1.8  | 0.176602491310315   |             |
| AGIWUR8345;AGIWUR9536;AGIWUR21501;AGIWUR36845                           |    |   |         |         |                |          |          |                     |             |
| CB4856                                                                  | CT | I | 5006706 | 5007991 | WBGene00006058 | sst-20   | F54C1.9  | 0.397969032640084   | AGIWUR11233 |
| CB4856                                                                  | CT | I | 5008770 | 5013581 | WBGene00018789 | F54C1.1  | F54C1.1  | 0.112815828674114   | AGIWUR29730 |
| CB4856                                                                  | CT | I | 5014351 | 5016260 | WBGene00018791 | F54C1.6  | F54C1.6  | 0.204915200780745   | AGIWUR27151 |
| CB4856                                                                  | CT | I | 5018770 | 5020166 | WBGene00003934 | pat-10   | F54C1.7  | 0.0463013701796324  |             |
| AGIWUR6495;AGIWUR16624;AGIWUR26202;AGIWUR38199                          |    |   |         |         |                |          |          |                     |             |
| CB4856                                                                  | CT | I | 5020748 | 5023210 | WBGene00016730 | C46H11.6 | C46H11.6 | -0.24103905487352   |             |
| AGIWUR39021                                                             |    |   |         |         |                |          |          |                     |             |
| CB4856                                                                  | CT | I | 5023889 | 5041149 | WBGene00002979 | lfe-2    | C46H11.4 | 0.210749156430199   |             |
| AGIWUR527;AGIWUR15498;AGIWUR15600;AGIWUR22329;AGIWUR39734               |    |   |         |         |                |          |          |                     |             |
| CB4856                                                                  | CT | I | 5041492 | 5042055 | WBGene00016729 | C46H11.3 | C46H11.3 | -0.1861644665039    |             |
| AGIWUR2153;AGIWUR17010;AGIWUR19831;AGIWUR31265;AGIWUR41786              |    |   |         |         |                |          |          |                     |             |
| CB4856                                                                  | CT | I | 5042102 | 5043453 | WBGene00016731 | C46H11.7 | C46H11.7 | 0.0573536815279763  |             |
| AGIWUR10507                                                             |    |   |         |         |                |          |          |                     |             |
| CB4856                                                                  | CT | I | 5044201 | 5045720 | WBGene00016732 | phat-1   | C46H11.8 | 0.0409866651787407  |             |
| AGIWUR10717                                                             |    |   |         |         |                |          |          |                     |             |
| CB4856                                                                  | CT | I | 5050040 | 5052523 | WBGene00016728 | C46H11.2 | C46H11.2 | 0.769209671506283   |             |

|                                                                        |    |   |         |         |                |                       |                                |
|------------------------------------------------------------------------|----|---|---------|---------|----------------|-----------------------|--------------------------------|
| AGIWUR43572                                                            |    |   |         |         |                |                       |                                |
| CB4856                                                                 | CT | I | 5052529 | 5054960 | WBGene00016734 | C46H11.10             | C46H11.10 0.184400387793455    |
| AGIWUR25478                                                            |    |   |         |         |                |                       |                                |
| CB4856                                                                 | CT | I | 5055686 | 5056039 | WBGene00016727 | C46H11.1              | C46H11.1 -0.0284946966970545   |
| AGIWUR1249;AGIWUR10642;AGIWUR11922;AGIWUR15339;AGIWUR28513;AGIWUR41170 |    |   |         |         |                |                       |                                |
| CB4856                                                                 | CT | I | 5058251 | 5068829 | WBGene00016735 | fhod-1 C46H11.11      | 0.365473919689567              |
| AGIWUR2364                                                             |    |   |         |         |                |                       |                                |
| CB4856                                                                 | CT | I | 5079911 | 5082279 | WBGene00016258 | vha-16 C30F8.2        | -0.018930925265078             |
| AGIWUR9041;AGIWUR12777;AGIWUR38333                                     |    |   |         |         |                |                       |                                |
| CB4856                                                                 | CT | I | 5086317 | 5093793 | WBGene00002213 | kin-32 C30F8.4        | 0.251699918039636 AGIWUR30640  |
| CB4856                                                                 | CT | I | 5096601 | 5100579 | WBGene00016259 | C30F8.3 C30F8.3       | 0.0336142533661103 AGIWUR38945 |
| CB4856                                                                 | CT | I | 5100751 | 5101674 | WBGene00022465 | ift-20 Y110A7A.20     | 0.647781906773554              |
| AGIWUR43171                                                            |    |   |         |         |                |                       |                                |
| CB4856                                                                 | CT | I | 5101682 | 5103467 | WBGene00004959 | spe-5 Y110A7A.12      | 0.284839997583971              |
| AGIWUR45082                                                            |    |   |         |         |                |                       |                                |
| CB4856                                                                 | CT | I | 5103581 | 5104956 | WBGene00000502 | chp-1 Y110A7A.13      | -0.344626866259972             |
| AGIWUR23337                                                            |    |   |         |         |                |                       |                                |
| CB4856                                                                 | CT | I | 5105110 | 5106204 | WBGene00003924 | pas-3 Y110A7A.14      | -0.229331562230159             |
| AGIWUR17561;AGIWUR38486;AGIWUR39496;AGIWUR41863                        |    |   |         |         |                |                       |                                |
| CB4856                                                                 | CT | I | 5106204 | 5107625 | WBGene00022460 | use-1 Y110A7A.11      | -0.236594000025288             |
| AGIWUR8138;AGIWUR10961;AGIWUR39888                                     |    |   |         |         |                |                       |                                |
| CB4856                                                                 | CT | I | 5107833 | 5110183 | WBGene00000001 | aap-1 Y110A7A.10      | -0.0431859878744856            |
| AGIWUR5137                                                             |    |   |         |         |                |                       |                                |
| CB4856                                                                 | CT | I | 5110075 | 5111154 | WBGene00045212 | Y110A7A.21 Y110A7A.21 | 0.0802448245583172             |
| AGIWUR7396                                                             |    |   |         |         |                |                       |                                |
| CB4856                                                                 | CT | I | 5114119 | 5118852 | WBGene00022463 | elpc-1 Y110A7A.16     | 0.264331692225483              |
| AGIWUR39107                                                            |    |   |         |         |                |                       |                                |
| CB4856                                                                 | CT | I | 5119223 | 5123985 | WBGene00022459 | Y110A7A.9 Y110A7A.9   | 0.0848651088109467             |
| AGIWUR5638;AGIWUR13186;AGIWUR37146                                     |    |   |         |         |                |                       |                                |
| CB4856                                                                 | CT | I | 5123916 | 5127199 | WBGene00003132 | mat-1 Y110A7A.17      | 0.0685089891368271             |
| AGIWUR10232;AGIWUR10763;AGIWUR11746;AGIWUR18147;AGIWUR21523            |    |   |         |         |                |                       |                                |
| CB4856                                                                 | CT | I | 5127828 | 5129611 | WBGene00022458 | prp-31 Y110A7A.8      | -0.267925876727897             |
| AGIWUR13052                                                            |    |   |         |         |                |                       |                                |
| CB4856                                                                 | CT | I | 5129640 | 5131065 | WBGene00022457 | Y110A7A.7 Y110A7A.7   | 0.286167944214295              |
| AGIWUR36758                                                            |    |   |         |         |                |                       |                                |
| CB4856                                                                 | CT | I | 5131288 | 5134101 | WBGene00022456 | pfkb-1.1 Y110A7A.6    | -0.106734863046361             |
| AGIWUR12324;AGIWUR19557;AGIWUR24616;AGIWUR42679                        |    |   |         |         |                |                       |                                |
| CB4856                                                                 | CT | I | 5134709 | 5137971 | WBGene00003475 | mtm-1 Y110A7A.5       | -0.0871759708398514            |
| AGIWUR8180                                                             |    |   |         |         |                |                       |                                |

|                                                                                  |    |   |         |         |                |           |            |                     |             |
|----------------------------------------------------------------------------------|----|---|---------|---------|----------------|-----------|------------|---------------------|-------------|
| CB4856                                                                           | CT | I | 5138256 | 5139382 | WBGene00022455 | tym-1     | Y110A7A.4  | -0.0991267595810488 |             |
| AGIWUR26036;AGIWUR30844;AGIWUR32359                                              |    |   |         |         |                |           |            |                     |             |
| CB4856                                                                           | CT | I | 5141675 | 5149226 | WBGene00006797 | unc-63    | Y110A7A.3  | -0.2669233419145    |             |
| AGIWUR19692                                                                      |    |   |         |         |                |           |            |                     |             |
| CB4856                                                                           | CT | I | 5154529 | 5158467 | WBGene00022454 | Y110A7A.2 | Y110A7A.2  | 0.407604697257714   |             |
| AGIWUR12450                                                                      |    |   |         |         |                |           |            |                     |             |
| CB4856                                                                           | CT | I | 5158511 | 5162231 | WBGene00004094 | ppw-2     | Y110A7A.18 | 0.100190017052046   |             |
| AGIWUR38604                                                                      |    |   |         |         |                |           |            |                     |             |
| CB4856                                                                           | CT | I | 5165152 | 5171313 | WBGene00001833 | hcp-6     | Y110A7A.1  | -0.320314839403     |             |
| AGIWUR23546;AGIWUR27668;AGIWUR29091                                              |    |   |         |         |                |           |            |                     |             |
| CB4856                                                                           | CT | I | 5171285 | 5176664 | WBGene00004955 | spd-5     | F56A3.4    | 0.0719069667356695  | AGIWUR43280 |
| CB4856                                                                           | CT | I | 5176466 | 5182801 | WBGene00003792 | npp-6     | F56A3.3    | -0.124131513145992  |             |
| AGIWUR31488;AGIWUR37695                                                          |    |   |         |         |                |           |            |                     |             |
| CB4856                                                                           | CT | I | 5182736 | 5186234 | WBGene00018909 | slx-1     | F56A3.2    | -0.0424174711677612 | AGIWUR23385 |
| CB4856                                                                           | CT | I | 5186926 | 5188995 | WBGene00000272 | bro-1     | F56A3.5    | 0.254288965398798   | AGIWUR18690 |
| CB4856                                                                           | CT | I | 5190142 | 5195243 | WBGene00018908 | fncm-1    | F56A3.1    | -0.109338005066215  | AGIWUR16044 |
| CB4856                                                                           | CT | I | 5196078 | 5200102 | WBGene00016328 | pde-5     | C32E12.2   | -0.0134277710278363 |             |
| AGIWUR4483;AGIWUR25559;AGIWUR44681                                               |    |   |         |         |                |           |            |                     |             |
| CB4856                                                                           | CT | I | 5200258 | 5203504 | WBGene00016329 | osr-1     | C32E12.3   | 0.186321854046977   |             |
| AGIWUR37480                                                                      |    |   |         |         |                |           |            |                     |             |
| CB4856                                                                           | CT | I | 5204540 | 5215218 | WBGene00004771 | sem-2     | C32E12.5   | -0.220801331978289  |             |
| AGIWUR14738;AGIWUR27347                                                          |    |   |         |         |                |           |            |                     |             |
| CB4856                                                                           | CT | I | 5230549 | 5242607 | WBGene00016330 | C32E12.4  | C32E12.4   | 0.453014837994868   |             |
| AGIWUR34566                                                                      |    |   |         |         |                |           |            |                     |             |
| CB4856                                                                           | CT | I | 5244283 | 5245402 | WBGene00015092 | mrpl-47   | B0261.4    | -0.146073263290331  | AGIWUR25197 |
| CB4856                                                                           | CT | I | 5245743 | 5263413 | WBGene00002583 | let-363   | B0261.2    | 0.249614194714738   | AGIWUR44044 |
| CB4856                                                                           | CT | I | 5263694 | 5268380 | WBGene00015091 | B0261.1   | B0261.1    | 0.0820317181452008  | AGIWUR18289 |
| CB4856                                                                           | CT | I | 5269545 | 5270941 | WBGene00015095 | B0261.7   | B0261.7    | -0.0734029484156125 | AGIWUR8322  |
| CB4856                                                                           | CT | I | 5271265 | 5272037 | WBGene00015096 | B0261.8   | B0261.8    | -0.0414573387603632 | AGIWUR2556  |
| CB4856                                                                           | CT | I | 5272846 | 5274339 | WBGene00015312 | C01G8.1   | C01G8.1    | -0.183117748657143  |             |
| AGIWUR694;AGIWUR16178;AGIWUR34561                                                |    |   |         |         |                |           |            |                     |             |
| CB4856                                                                           | CT | I | 5274693 | 5278708 | WBGene00000540 | cln-3.2   | C01G8.2    | 0.128969900247302   | AGIWUR30422 |
| CB4856                                                                           | CT | I | 5278803 | 5281526 | WBGene00000965 | dhs-1     | C01G8.3    | -0.180902432920584  | AGIWUR15951 |
| CB4856                                                                           | CT | I | 5282085 | 5283944 | WBGene00001022 | dnj-4     | C01G8.4    | -0.0847329937331196 | AGIWUR42    |
| CB4856                                                                           | CT | I | 5284062 | 5291604 | WBGene00001333 | erm-1     | C01G8.5    | 0.160983205576571   | AGIWUR16002 |
| CB4856                                                                           | CT | I | 5298755 | 5300331 | WBGene00015313 | hpo-32    | C01G8.6    | -0.0428538861162586 | AGIWUR26468 |
| CB4856                                                                           | CT | I | 5300901 | 5317392 | WBGene00002717 | let-526   | C01G8.9    | 0.358589045618327   |             |
| AGIWUR7817;AGIWUR8550;AGIWUR8678;AGIWUR20851;AGIWUR25435;AGIWUR30166;AGIWUR37870 |    |   |         |         |                |           |            |                     |             |
| CB4856                                                                           | CT | I | 5317491 | 5318124 | WBGene00018598 | F48C1.5   | F48C1.5    | -0.195323644951785  | AGIWUR33414 |

|                                                                     |    |   |         |         |                |           |           |                            |             |
|---------------------------------------------------------------------|----|---|---------|---------|----------------|-----------|-----------|----------------------------|-------------|
| CB4856                                                              | CT | I | 5318225 | 5319301 | WBGene00018599 | F48C1.6   | F48C1.6   | -0.251279943069536         | AGIWUR37907 |
| CB4856                                                              | CT | I | 5319720 | 5321117 | WBGene00018595 | fbxa-145  |           | F48C1.2 -0.531502495949027 |             |
| AGIWUR1383                                                          |    |   |         |         |                |           |           |                            |             |
| CB4856                                                              | CT | I | 5324511 | 5330222 | WBGene00018594 | aman-3    | F48C1.1   | 0.0353125456695169         |             |
| AGIWUR25737;AGIWUR28725;AGIWUR31540                                 |    |   |         |         |                |           |           |                            |             |
| CB4856                                                              | CT | I | 5330578 | 5332194 | WBGene00004965 | spe-11    | F48C1.7   | 0.153034433135264          | AGIWUR39988 |
| CB4856                                                              | CT | I | 5332249 | 5332780 | WBGene00018601 | F48C1.9   | F48C1.9   | 1.44855835642631           | AGIWUR10340 |
| CB4856                                                              | CT | I | 5338922 | 5342012 | WBGene00018865 | F55A12.6  | F55A12.6  | -0.111144992799664         |             |
| AGIWUR15674                                                         |    |   |         |         |                |           |           |                            |             |
| CB4856                                                              | CT | I | 5342180 | 5344724 | WBGene00000150 | apm-1     | F55A12.7  | 0.194030747544854          |             |
| AGIWUR9311                                                          |    |   |         |         |                |           |           |                            |             |
| CB4856                                                              | CT | I | 5345927 | 5349657 | WBGene00018864 | F55A12.5  | F55A12.5  | -0.0439480565297252        |             |
| AGIWUR43597                                                         |    |   |         |         |                |           |           |                            |             |
| CB4856                                                              | CT | I | 5349646 | 5353767 | WBGene00018866 | nath-10   | F55A12.8  | -0.0426463514463933        |             |
| AGIWUR6506                                                          |    |   |         |         |                |           |           |                            |             |
| CB4856                                                              | CT | I | 5354160 | 5357026 | WBGene00000966 | dhs-2     | F55A12.4  | 0.0392240640433563         |             |
| AGIWUR6834;AGIWUR39323                                              |    |   |         |         |                |           |           |                            |             |
| CB4856                                                              | CT | I | 5358522 | 5365170 | WBGene00004087 | ppk-1     | F55A12.3  | 0.220622938221817          |             |
| AGIWUR9665                                                          |    |   |         |         |                |           |           |                            |             |
| CB4856                                                              | CT | I | 5365265 | 5366875 | WBGene00018863 | F55A12.2  | F55A12.2  | -0.223790224520139         |             |
| AGIWUR5975;AGIWUR16690;AGIWUR23746                                  |    |   |         |         |                |           |           |                            |             |
| CB4856                                                              | CT | I | 5366944 | 5367829 | WBGene00018867 | F55A12.10 | F55A12.10 | 0.118691951026339          |             |
| AGIWUR25431                                                         |    |   |         |         |                |           |           |                            |             |
| CB4856                                                              | CT | I | 5368478 | 5372643 | WBGene00018862 | wago-2    | F55A12.1  | -0.175199483258412         |             |
| AGIWUR28246                                                         |    |   |         |         |                |           |           |                            |             |
| CB4856                                                              | CT | I | 5372854 | 5384508 | WBGene00004131 | pqn-44    | F55A12.9  | -0.112184481491827         |             |
| AGIWUR896;AGIWUR27262                                               |    |   |         |         |                |           |           |                            |             |
| CB4856                                                              | CT | I | 5384639 | 5385737 | WBGene00016042 | C24A11.5  | C24A11.5  | -0.203765415459014         |             |
| AGIWUR7145                                                          |    |   |         |         |                |           |           |                            |             |
| CB4856                                                              | CT | I | 5396269 | 5396503 | WBGene00016043 | C24A11.6  | C24A11.6  | 0.144189670103115          |             |
| AGIWUR14300                                                         |    |   |         |         |                |           |           |                            |             |
| CB4856                                                              | CT | I | 5401757 | 5402896 | WBGene00016040 | C24A11.1  | C24A11.1  | 0.0704996506257487         |             |
| AGIWUR5355                                                          |    |   |         |         |                |           |           |                            |             |
| CB4856                                                              | CT | I | 5402889 | 5408344 | WBGene00001491 | frm-4     | C24A11.8  | 0.010401657932964          |             |
| AGIWUR981;AGIWUR4212;AGIWUR6365;AGIWUR15596;AGIWUR16887;AGIWUR31981 |    |   |         |         |                |           |           |                            |             |
| CB4856                                                              | CT | I | 5412841 | 5415629 | WBGene00000761 | coq-1     | C24A11.9  | -0.1534424240836           |             |
| AGIWUR43800                                                         |    |   |         |         |                |           |           |                            |             |
| CB4856                                                              | CT | I | 5416649 | 5420731 | WBGene00016278 | C30H7.2   | C30H7.2   | 0.00739910633863694        | AGIWUR21269 |
| CB4856                                                              | CT | I | 5421313 | 5428457 | WBGene00017855 | F27C1.6   | F27C1.6   | -0.231954492774721         | AGIWUR3947  |

|                                                                                  |    |   |         |         |                |          |          |                     |             |
|----------------------------------------------------------------------------------|----|---|---------|---------|----------------|----------|----------|---------------------|-------------|
| CB4856                                                                           | CT | I | 5428469 | 5429908 | WBGene00000230 | atp-3    | F27C1.7  | 0.0132764974680244  |             |
| AGIWUR4068;AGIWUR34961                                                           |    |   |         |         |                |          |          |                     |             |
| CB4856                                                                           | CT | I | 5430164 | 5431449 | WBGene00017852 | F27C1.2  | F27C1.2  | 0.0264740358539575  |             |
| AGIWUR2440;AGIWUR34813                                                           |    |   |         |         |                |          |          |                     |             |
| CB4856                                                                           | CT | I | 5432158 | 5433054 | WBGene00001067 | dpy-5    | F27C1.8  | -0.341613860967373  |             |
| AGIWUR27120;AGIWUR44335                                                          |    |   |         |         |                |          |          |                     |             |
| CB4856                                                                           | CT | I | 5433907 | 5443026 | WBGene00017858 | F27C1.11 | F27C1.11 | -0.136714231647839  |             |
| AGIWUR5701;AGIWUR9333;AGIWUR22774;AGIWUR27305;AGIWUR27976                        |    |   |         |         |                |          |          |                     |             |
| CB4856                                                                           | CT | I | 5443878 | 5446855 | WBGene00017860 | F27C1.13 | F27C1.13 | 0.0913776078037967  |             |
| AGIWUR6830;AGIWUR24304;AGIWUR35087;AGIWUR39993;AGIWUR41117;AGIWUR42850           |    |   |         |         |                |          |          |                     |             |
| CB4856                                                                           | CT | I | 5455730 | 5459550 | WBGene00020262 | ferl-1   | T05E8.1  | 0.170872428459797   | AGIWUR22748 |
| CB4856                                                                           | CT | I | 5463480 | 5469627 | WBGene00001859 | hil-8    | T05E8.2  | -0.0674555515838922 |             |
| AGIWUR8595;AGIWUR8928;AGIWUR15131;AGIWUR28796;AGIWUR36374                        |    |   |         |         |                |          |          |                     |             |
| CB4856                                                                           | CT | I | 5472321 | 5479438 | WBGene00020263 | let-355  | T05E8.3  | -0.126954927869033  | AGIWUR30390 |
| CB4856                                                                           | CT | I | 5479550 | 5484643 | WBGene00015635 | C09D4.4  | C09D4.4  | 0.27762841781589    | AGIWUR10054 |
| CB4856                                                                           | CT | I | 5484779 | 5486354 | WBGene00004431 | rpl-19   | C09D4.5  | 0.0567920357888099  | AGIWUR34311 |
| CB4856                                                                           | CT | I | 5486487 | 5487150 | WBGene00015636 | C09D4.6  | C09D4.6  | 0.00824576323056991 | AGIWUR45087 |
| CB4856                                                                           | CT | I | 5488309 | 5490626 | WBGene00015634 | C09D4.3  | C09D4.3  | -0.0454273616923011 | AGIWUR5653  |
| CB4856                                                                           | CT | I | 5491424 | 5493263 | WBGene00015633 | C09D4.2  | C09D4.2  | 0.486264183386119   | AGIWUR16931 |
| CB4856                                                                           | CT | I | 5497679 | 5505447 | WBGene00015632 | C09D4.1  | C09D4.1  | 0.039295527882425   | AGIWUR27450 |
| CB4856                                                                           | CT | I | 5505377 | 5507023 | WBGene00019076 | mrpl-24  | F59A3.3  | 0.0562198288030231  | AGIWUR34650 |
| CB4856                                                                           | CT | I | 5507123 | 5509288 | WBGene00019077 | zipt-11  | F59A3.4  | 0.266839126106852   |             |
| AGIWUR5874;AGIWUR13042;AGIWUR14294;AGIWUR18200                                   |    |   |         |         |                |          |          |                     |             |
| CB4856                                                                           | CT | I | 5509473 | 5511705 | WBGene00019079 | rpa-4    | F59A3.6  | -0.220860233183487  |             |
| AGIWUR22494;AGIWUR27515;AGIWUR32418;AGIWUR38402                                  |    |   |         |         |                |          |          |                     |             |
| CB4856                                                                           | CT | I | 5512048 | 5514557 | WBGene00019075 | F59A3.2  | F59A3.2  | -0.231605843389703  | AGIWUR6715  |
| CB4856                                                                           | CT | I | 5514651 | 5516025 | WBGene00185086 | F59A3.12 | F59A3.12 | -0.118535491326982  |             |
| AGIWUR27384                                                                      |    |   |         |         |                |          |          |                     |             |
| CB4856                                                                           | CT | I | 5520389 | 5529763 | WBGene00019074 | cpd-1    | F59A3.1  | -0.107633068006328  |             |
| AGIWUR832;AGIWUR9804;AGIWUR16154;AGIWUR23805;AGIWUR36548;AGIWUR40265;AGIWUR40556 |    |   |         |         |                |          |          |                     |             |
| CB4856                                                                           | CT | I | 5530618 | 5533710 | WBGene00019082 | pup-3    | F59A3.9  | -0.428914690212974  | AGIWUR5052  |
| CB4856                                                                           | CT | I | 5542630 | 5543334 | WBGene00019083 | F59A3.10 | F59A3.10 | -0.0742769906259522 |             |
| AGIWUR23620                                                                      |    |   |         |         |                |          |          |                     |             |
| CB4856                                                                           | CT | I | 5546120 | 5561642 | WBGene00006594 | tom-1    | M01A10.2 | 0.0233067711090351  |             |
| AGIWUR11147;AGIWUR11431;AGIWUR21101;AGIWUR27403;AGIWUR28716;AGIWUR31664          |    |   |         |         |                |          |          |                     |             |
| CB4856                                                                           | CT | I | 5563827 | 5566265 | WBGene00019692 | M01A10.1 | M01A10.1 | -0.139506025733864  |             |
| AGIWUR14718                                                                      |    |   |         |         |                |          |          |                     |             |
| CB4856                                                                           | CT | I | 5566343 | 5570081 | WBGene00019713 | pqn-52   | M01E11.4 | 0.0374205205394178  |             |
| AGIWUR6355;AGIWUR8778;AGIWUR14340;AGIWUR18170;AGIWUR19043;AGIWUR39174            |    |   |         |         |                |          |          |                     |             |



|                                                                                                                                               |    |   |         |         |                |           |          |                     |                     |             |
|-----------------------------------------------------------------------------------------------------------------------------------------------|----|---|---------|---------|----------------|-----------|----------|---------------------|---------------------|-------------|
| CB4856                                                                                                                                        | CT | I | 5571787 | 5573019 | WBGene00000474 | cey-3     | M01E11.5 |                     | -0.146457876066987  |             |
| AGIWUR15351;AGIWUR34621                                                                                                                       |    |   |         |         |                |           |          |                     |                     |             |
| CB4856                                                                                                                                        | CT | I | 5573214 | 5576749 | WBGene00019712 | rmh-1     | M01E11.3 |                     | -0.23662260466492   |             |
| AGIWUR30964                                                                                                                                   |    |   |         |         |                |           |          |                     |                     |             |
| CB4856                                                                                                                                        | CT | I | 5579666 | 5581979 | WBGene00019711 | M01E11.2  |          | M01E11.2            | -0.156336655656878  |             |
| AGIWUR34357                                                                                                                                   |    |   |         |         |                |           |          |                     |                     |             |
| CB4856                                                                                                                                        | CT | I | 5582005 | 5583471 | WBGene00019710 | M01E11.1  |          | M01E11.1            | -0.10348244254925   |             |
| AGIWUR18685                                                                                                                                   |    |   |         |         |                |           |          |                     |                     |             |
| CB4856                                                                                                                                        | CT | I | 5583407 | 5607529 | WBGene00006508 | tns-1     | M01E11.7 |                     | -0.0645006990775689 |             |
| AGIWUR6532;AGIWUR6811;AGIWUR11533;AGIWUR11928;AGIWUR15727;AGIWUR18697;AGIWUR19135;AGIWUR21857;AGIWUR30199;AGIWUR31547;AGIWUR36030;AGIWUR38255 |    |   |         |         |                |           |          |                     |                     |             |
| CB4856                                                                                                                                        | CT | I | 5607820 | 5608841 | WBGene00006726 | ubl-5     | F46F11.4 |                     | -0.301976676596485  |             |
| AGIWUR38965                                                                                                                                   |    |   |         |         |                |           |          |                     |                     |             |
| CB4856                                                                                                                                        | CT | I | 5609310 | 5610270 | WBGene00006919 | vha-10    | F46F11.5 |                     | -0.244832350341864  |             |
| AGIWUR5301;AGIWUR16359                                                                                                                        |    |   |         |         |                |           |          |                     |                     |             |
| CB4856                                                                                                                                        | CT | I | 5610375 | 5616402 | WBGene00018512 | trpp-8    | F46F11.9 |                     | -0.175249203688386  |             |
| AGIWUR28006                                                                                                                                   |    |   |         |         |                |           |          |                     |                     |             |
| CB4856                                                                                                                                        | CT | I | 5616593 | 5618682 | WBGene00018509 | F46F11.6  |          | F46F11.6            | -0.13429366880843   |             |
| AGIWUR31483                                                                                                                                   |    |   |         |         |                |           |          |                     |                     |             |
| CB4856                                                                                                                                        | CT | I | 5619569 | 5620668 | WBGene00000473 | cey-2     | F46F11.2 |                     | -0.0809807460865937 |             |
| AGIWUR19929;AGIWUR20244;AGIWUR20969;AGIWUR39577;AGIWUR39981;AGIWUR43534                                                                       |    |   |         |         |                |           |          |                     |                     |             |
| CB4856                                                                                                                                        | CT | I | 5620751 | 5623035 | WBGene00018510 | F46F11.7  |          | F46F11.7            | 0.0844560064286686  |             |
| AGIWUR6851                                                                                                                                    |    |   |         |         |                |           |          |                     |                     |             |
| CB4856                                                                                                                                        | CT | I | 5623019 | 5624475 | WBGene00018513 | F46F11.10 |          | F46F11.10           | -0.335367843680059  |             |
| AGIWUR14352;AGIWUR29230                                                                                                                       |    |   |         |         |                |           |          |                     |                     |             |
| CB4856                                                                                                                                        | CT | I | 5624558 | 5626288 | WBGene00018511 | F46F11.8  |          | F46F11.8            | 0.244294678028403   |             |
| AGIWUR13272                                                                                                                                   |    |   |         |         |                |           |          |                     |                     |             |
| CB4856                                                                                                                                        | CT | I | 5627819 | 5637622 | WBGene00018508 | F46F11.1  |          | F46F11.1            | 0.0415426988066816  |             |
| AGIWUR40503                                                                                                                                   |    |   |         |         |                |           |          |                     |                     |             |
| CB4856                                                                                                                                        | CT | I | 5643310 | 5644057 | WBGene00044616 | M01A12.4  |          | M01A12.4            | -0.106637902135096  |             |
| AGIWUR32316                                                                                                                                   |    |   |         |         |                |           |          |                     |                     |             |
| CB4856                                                                                                                                        | CT | I | 5644729 | 5646370 | WBGene00000630 | col-53    | M01A12.1 |                     | 0.0610064500819636  |             |
| AGIWUR31336;AGIWUR38774                                                                                                                       |    |   |         |         |                |           |          |                     |                     |             |
| CB4856                                                                                                                                        | CT | I | 5646369 | 5649656 | WBGene00018890 | F55F8.2   | F55F8.2  | -0.175815271243206  |                     | AGIWUR37570 |
| CB4856                                                                                                                                        | CT | I | 5649756 | 5653648 | WBGene00018891 | F55F8.3   | F55F8.3  | -0.0216003354745027 |                     | AGIWUR43787 |
| CB4856                                                                                                                                        | CT | I | 5653804 | 5655857 | WBGene00018892 | cir-1     | F55F8.4  | 0.0751492075901981  |                     |             |
| AGIWUR18388;AGIWUR44318                                                                                                                       |    |   |         |         |                |           |          |                     |                     |             |
| CB4856                                                                                                                                        | CT | I | 5655950 | 5658118 | WBGene00018893 | wdr-12    | F55F8.5  | -0.10729655874432   |                     | AGIWUR44268 |
| CB4856                                                                                                                                        | CT | I | 5657980 | 5658723 | WBGene00018894 | mff-2     | F55F8.6  | -0.156754397691046  |                     | AGIWUR22067 |

|                                                                                                                                                         |    |   |         |         |                |          |          |                     |             |
|---------------------------------------------------------------------------------------------------------------------------------------------------------|----|---|---------|---------|----------------|----------|----------|---------------------|-------------|
| CB4856                                                                                                                                                  | CT | I | 5662143 | 5667160 | WBGene00004224 | ptr-10   | F55F8.1  | 0.815009340715018   | AGIWUR34950 |
| CB4856                                                                                                                                                  | CT | I | 5667069 | 5668837 | WBGene00018896 | F55F8.8  | F55F8.8  | -0.343119894816471  | AGIWUR44721 |
| CB4856                                                                                                                                                  | CT | I | 5669950 | 5673352 | WBGene00018897 | zipt-2.4 | F55F8.9  | -0.195558855139758  |             |
| AGIWUR33516                                                                                                                                             |    |   |         |         |                |          |          |                     |             |
| CB4856                                                                                                                                                  | CT | I | 5674304 | 5676609 | WBGene00020558 | T19B4.5  | T19B4.5  | -0.123663992107156  |             |
| AGIWUR11276;AGIWUR12993;AGIWUR32131                                                                                                                     |    |   |         |         |                |          |          |                     |             |
| CB4856                                                                                                                                                  | CT | I | 5676827 | 5677646 | WBGene00001039 | dnj-21   | T19B4.4  | -0.282118524201985  | AGIWUR16865 |
| CB4856                                                                                                                                                  | CT | I | 5678638 | 5679862 | WBGene00020557 | T19B4.3  | T19B4.3  | -0.165149720156937  |             |
| AGIWUR27841;AGIWUR39756;AGIWUR40511;AGIWUR44979                                                                                                         |    |   |         |         |                |          |          |                     |             |
| CB4856                                                                                                                                                  | CT | I | 5679844 | 5691503 | WBGene00006776 | unc-40   | T19B4.7  | 0.278604179327033   | AGIWUR10286 |
| CB4856                                                                                                                                                  | CT | I | 5691838 | 5697506 | WBGene00003793 | npp-7    | T19B4.2  | -0.0191409250740842 |             |
| AGIWUR623;AGIWUR6784;AGIWUR10030;AGIWUR11279;AGIWUR12845;AGIWUR28597;AGIWUR30194;AGIWUR36089;AGIWUR37196                                                |    |   |         |         |                |          |          |                     |             |
| CB4856                                                                                                                                                  | CT | I | 5702156 | 5706838 | WBGene00020556 | pamn-1   | T19B4.1  | -0.0406632917537042 |             |
| AGIWUR1427;AGIWUR1919;AGIWUR4740;AGIWUR7671;AGIWUR18929;AGIWUR19185;AGIWUR19546;AGIWUR19808;AGIWUR21670;AGIWUR22000;AGIWUR33507;AGIWUR34825;AGIWUR36338 |    |   |         |         |                |          |          |                     |             |
| CB4856                                                                                                                                                  | CT | I | 5716574 | 5725772 | WBGene00002989 | lim-7    | C04F1.3  | -0.178401478285707  | AGIWUR315   |
| CB4856                                                                                                                                                  | CT | I | 5726308 | 5729310 | WBGene00015442 | C04F1.1  | C04F1.1  | 0.0416830463489379  |             |
| AGIWUR21075;AGIWUR37345                                                                                                                                 |    |   |         |         |                |          |          |                     |             |
| CB4856                                                                                                                                                  | CT | I | 5729793 | 5735842 | WBGene00018994 | F56H1.3  | F56H1.3  | 0.030983375758753   | AGIWUR3566  |
| CB4856                                                                                                                                                  | CT | I | 5741186 | 5741622 | WBGene00269393 | F56H1.11 | F56H1.11 | 0.035189060994341   |             |
| AGIWUR11632                                                                                                                                             |    |   |         |         |                |          |          |                     |             |
| CB4856                                                                                                                                                  | CT | I | 5741868 | 5743571 | WBGene00004505 | rpt-5    | F56H1.4  | 0.0394598340735808  |             |
| AGIWUR4545;AGIWUR10484;AGIWUR34653;AGIWUR44921                                                                                                          |    |   |         |         |                |          |          |                     |             |
| CB4856                                                                                                                                                  | CT | I | 5744148 | 5745617 | WBGene00044305 | rad-8    | F56H1.6  | -0.291133172173573  |             |
| AGIWUR15763;AGIWUR22891                                                                                                                                 |    |   |         |         |                |          |          |                     |             |
| CB4856                                                                                                                                                  | CT | I | 5746633 | 5754278 | WBGene00000493 | che-14   | F56H1.1  | 0.0524905550061225  | AGIWUR27291 |
| CB4856                                                                                                                                                  | CT | I | 5754312 | 5760803 | WBGene00018995 | ccpp-1   | F56H1.5  | -0.108476396675179  |             |
| AGIWUR12374;AGIWUR14910;AGIWUR28454                                                                                                                     |    |   |         |         |                |          |          |                     |             |
| CB4856                                                                                                                                                  | CT | I | 5760897 | 5762435 | WBGene00045483 | oxy-5    | F56H1.7  | 0.0301846475635568  |             |
| AGIWUR6195;AGIWUR37147                                                                                                                                  |    |   |         |         |                |          |          |                     |             |
| CB4856                                                                                                                                                  | CT | I | 5764030 | 5768190 | WBGene00020694 | dhhc-11  | T22E7.2  | 0.626236870361312   | AGIWUR20471 |
| CB4856                                                                                                                                                  | CT | I | 5768919 | 5773627 | WBGene00020693 | lron-8   | T22E7.1  | -0.097086796412349  |             |
| AGIWUR7310;AGIWUR37476                                                                                                                                  |    |   |         |         |                |          |          |                     |             |
| CB4856                                                                                                                                                  | CT | I | 5774585 | 5775610 | WBGene00001856 | hil-5    | B0414.3  | 0.203997385704712   |             |
| AGIWUR31929;AGIWUR38263                                                                                                                                 |    |   |         |         |                |          |          |                     |             |
| CB4856                                                                                                                                                  | CT | I | 5776154 | 5788610 | WBGene00004393 | rnt-1    | B0414.2  | 0.429802852486791   | AGIWUR35389 |
| CB4856                                                                                                                                                  | CT | I | 5788634 | 5791752 | WBGene00000772 | cpb-3    | B0414.5  | 0.385997396422651   | AGIWUR11416 |
| CB4856                                                                                                                                                  | CT | I | 5792324 | 5795114 | WBGene00001600 | glh-3    | B0414.6  | -0.0915767082661585 | AGIWUR26903 |
| CB4856                                                                                                                                                  | CT | I | 5795404 | 5801299 | WBGene00003472 | mtk-1    | B0414.7  | 0.0311047111415474  |             |

AGIWUR5791;AGIWUR9780;AGIWUR32266

|                                                                       |    |   |         |         |                |           |           |                     |             |
|-----------------------------------------------------------------------|----|---|---------|---------|----------------|-----------|-----------|---------------------|-------------|
| CB4856                                                                | CT | I | 5801872 | 5803266 | WBGene00015175 | srz-4     | B0414.1   | 0.0201407268275613  | AGIWUR4046  |
| CB4856                                                                | CT | I | 5803959 | 5807291 | WBGene00015176 | vps-51    | B0414.8   | -0.353416938287252  | AGIWUR1676  |
| CB4856                                                                | CT | I | 5807709 | 5815637 | WBGene00003020 | lin-35    | C32F10.2  | -0.0551505689470382 |             |
| AGIWUR39684                                                           |    |   |         |         |                |           |           |                     |             |
| CB4856                                                                | CT | I | 5815609 | 5818132 | WBGene00001973 | hmg-3     | C32F10.5  | -0.160783112552895  |             |
| AGIWUR20478                                                           |    |   |         |         |                |           |           |                     |             |
| CB4856                                                                | CT | I | 5818477 | 5821134 | WBGene00003601 | nhr-2     | C32F10.6  | -0.0676979852497563 |             |
| AGIWUR39715                                                           |    |   |         |         |                |           |           |                     |             |
| CB4856                                                                | CT | I | 5822841 | 5826148 | WBGene00016333 | C32F10.8  | C32F10.8  | -0.133556671040498  |             |
| AGIWUR11408;AGIWUR13429;AGIWUR22672;AGIWUR24518;AGIWUR28667           |    |   |         |         |                |           |           |                     |             |
| CB4856                                                                | CT | I | 5829072 | 5834640 | WBGene00016331 | obr-4     | C32F10.1  | -0.0289949618357692 |             |
| AGIWUR16969;AGIWUR31133                                               |    |   |         |         |                |           |           |                     |             |
| CB4856                                                                | CT | I | 5834644 | 5837392 | WBGene00018002 | twk-47    | F33D11.5  | 0.31747082486127    |             |
| AGIWUR6580                                                            |    |   |         |         |                |           |           |                     |             |
| CB4856                                                                | CT | I | 5840289 | 5841888 | WBGene00000436 | ceh-12    | F33D11.4  | -0.0296629575491973 |             |
| AGIWUR24005                                                           |    |   |         |         |                |           |           |                     |             |
| CB4856                                                                | CT | I | 5842709 | 5844050 | WBGene00000631 | col-54    | F33D11.3  | -0.41833126104343   |             |
| AGIWUR26608                                                           |    |   |         |         |                |           |           |                     |             |
| CB4856                                                                | CT | I | 5844836 | 5846466 | WBGene00018003 | F33D11.6  | F33D11.6  | 0.032262009455545   |             |
| AGIWUR20606                                                           |    |   |         |         |                |           |           |                     |             |
| CB4856                                                                | CT | I | 5847477 | 5849391 | WBGene00018001 | F33D11.2  | F33D11.2  | -0.334005912398295  |             |
| AGIWUR26643                                                           |    |   |         |         |                |           |           |                     |             |
| CB4856                                                                | CT | I | 5852045 | 5852962 | WBGene00018000 | F33D11.1  | F33D11.1  | -0.21546504209157   |             |
| AGIWUR2935;AGIWUR8296;AGIWUR17179;AGIWUR33917;AGIWUR37035;AGIWUR38448 |    |   |         |         |                |           |           |                     |             |
| CB4856                                                                | CT | I | 5854261 | 5855047 | WBGene00018005 | F33D11.8  | F33D11.8  | -0.0387829414095129 |             |
| AGIWUR1231;AGIWUR12588                                                |    |   |         |         |                |           |           |                     |             |
| CB4856                                                                | CT | I | 5857548 | 5862557 | WBGene00018006 | hpo-3     | F33D11.9  | -0.175670238206177  |             |
| AGIWUR20778;AGIWUR26526;AGIWUR29283                                   |    |   |         |         |                |           |           |                     |             |
| CB4856                                                                | CT | I | 5862644 | 5866431 | WBGene00018009 | dhhc-3    | F33D11.12 | -0.0830386843607709 |             |
| AGIWUR35887                                                           |    |   |         |         |                |           |           |                     |             |
| CB4856                                                                | CT | I | 5866514 | 5868139 | WBGene00018007 | F33D11.10 | F33D11.10 | 0.0726148771547965  |             |
| AGIWUR11065;AGIWUR33616                                               |    |   |         |         |                |           |           |                     |             |
| CB4856                                                                | CT | I | 5868266 | 5869954 | WBGene00018008 | vpr-1     | F33D11.11 | -0.0716569774379821 |             |
| AGIWUR24026                                                           |    |   |         |         |                |           |           |                     |             |
| CB4856                                                                | CT | I | 5872174 | 5874343 | WBGene00016421 | cdc-7     | C34G6.5   | -0.207103589083061  | AGIWUR4240  |
| CB4856                                                                | CT | I | 5874422 | 5878954 | WBGene00016422 | noah-1    | C34G6.6   | 1.14546648364535    | AGIWUR31175 |
| CB4856                                                                | CT | I | 5886613 | 5895970 | WBGene00003996 | pgp-2     | C34G6.4   | -0.34190053916776   | AGIWUR25666 |
| CB4856                                                                | CT | I | 5898303 | 5902112 | WBGene00016419 | tyr-4     | C34G6.2   | -0.0230913497350187 | AGIWUR39659 |

|                                                                                                                                    |    |   |         |         |                |          |          |                      |             |
|------------------------------------------------------------------------------------------------------------------------------------|----|---|---------|---------|----------------|----------|----------|----------------------|-------------|
| CB4856                                                                                                                             | CT | I | 5902106 | 5904695 | WBGene00004109 | stam-1   | C34G6.7  | 0.000120332473565909 |             |
| AGIWUR1601;AGIWUR1672;AGIWUR38163;AGIWUR39752                                                                                      |    |   |         |         |                |          |          |                      |             |
| CB4856                                                                                                                             | CT | I | 5906662 | 5918229 | WBGene00016418 | hpo-27   | C34G6.1  | -0.0717165502927894  |             |
| AGIWUR1717;AGIWUR13154;AGIWUR14544                                                                                                 |    |   |         |         |                |          |          |                      |             |
| CB4856                                                                                                                             | CT | I | 5919055 | 5935416 | WBGene00015028 | B0207.5  | B0207.5  | -0.359438428447493   | AGIWUR5023  |
| CB4856                                                                                                                             | CT | I | 5935370 | 5936957 | WBGene00015029 | B0207.6  | B0207.6  | -0.320599040240367   | AGIWUR21951 |
| CB4856                                                                                                                             | CT | I | 5937477 | 5938885 | WBGene00000099 | air-2    | B0207.4  | -0.0775841339488696  |             |
| AGIWUR8154;AGIWUR34964                                                                                                             |    |   |         |         |                |          |          |                      |             |
| CB4856                                                                                                                             | CT | I | 5942419 | 5945537 | WBGene00001676 | gpa-14   | B0207.3  | 0.175361367326486    | AGIWUR7895  |
| CB4856                                                                                                                             | CT | I | 5945581 | 5947620 | WBGene00015030 | B0207.7  | B0207.7  | -0.363548350113081   | AGIWUR22759 |
| CB4856                                                                                                                             | CT | I | 5951136 | 5951742 | WBGene00015031 | B0207.8  | B0207.8  | 0.028229891365898    | AGIWUR38503 |
| CB4856                                                                                                                             | CT | I | 5955031 | 5956883 | WBGene00015027 | B0207.2  | B0207.2  | -0.447640535220447   |             |
| AGIWUR25443;AGIWUR37060;AGIWUR41309                                                                                                |    |   |         |         |                |          |          |                      |             |
| CB4856                                                                                                                             | CT | I | 5957461 | 5958457 | WBGene00015032 | B0207.9  | B0207.9  | -0.229842772950176   | AGIWUR15640 |
| CB4856                                                                                                                             | CT | I | 5959008 | 5959526 | WBGene00015033 | B0207.10 | B0207.10 | 0.254168154987003    |             |
| AGIWUR5455                                                                                                                         |    |   |         |         |                |          |          |                      |             |
| CB4856                                                                                                                             | CT | I | 5962953 | 5964183 | WBGene00015034 | B0207.11 | B0207.11 | 0.112610017921472    |             |
| AGIWUR25597                                                                                                                        |    |   |         |         |                |          |          |                      |             |
| CB4856                                                                                                                             | CT | I | 5965062 | 5967211 | WBGene00015026 | B0207.1  | B0207.1  | -0.0348771262490661  | AGIWUR35700 |
| CB4856                                                                                                                             | CT | I | 5967250 | 5973320 | WBGene00000232 | avr-14   | B0207.12 | -0.0904601584141682  |             |
| AGIWUR636;AGIWUR9364;AGIWUR18879;AGIWUR37041;AGIWUR37132                                                                           |    |   |         |         |                |          |          |                      |             |
| CB4856                                                                                                                             | CT | I | 5981778 | 5985869 | WBGene00015504 | C06A5.6  | C06A5.6  | -0.135577407152002   | AGIWUR39294 |
| CB4856                                                                                                                             | CT | I | 5986443 | 5990581 | WBGene00015501 | C06A5.3  | C06A5.3  | 0.0469027485746594   | AGIWUR35558 |
| CB4856                                                                                                                             | CT | I | 5990741 | 5992658 | WBGene00004803 | sir-2.4  | C06A5.11 | 0.165448674964029    |             |
| AGIWUR43540                                                                                                                        |    |   |         |         |                |          |          |                      |             |
| CB4856                                                                                                                             | CT | I | 5992661 | 6003363 | WBGene00006823 | unc-94   | C06A5.7  | 0.0259116147593481   |             |
| AGIWUR4768;AGIWUR18849;AGIWUR18987;AGIWUR20008;AGIWUR20709;AGIWUR27311;AGIWUR32220;AGIWUR33730;AGIWUR35148;AGIWUR36712;AGIWUR40863 |    |   |         |         |                |          |          |                      |             |
| CB4856                                                                                                                             | CT | I | 6004599 | 6007595 | WBGene00044414 | C06A5.12 | C06A5.12 | -0.15042957668218    |             |
| AGIWUR28163;AGIWUR31238;AGIWUR34035;AGIWUR42647;AGIWUR42784                                                                        |    |   |         |         |                |          |          |                      |             |
| CB4856                                                                                                                             | CT | I | 6008105 | 6009606 | WBGene00015505 | C06A5.8  | C06A5.8  | 0.106030614312036    |             |
| AGIWUR34087;AGIWUR37759                                                                                                            |    |   |         |         |                |          |          |                      |             |
| CB4856                                                                                                                             | CT | I | 6009782 | 6011586 | WBGene00004380 | rnf-1    | C06A5.9  | -0.31104604688729    |             |
| AGIWUR4178;AGIWUR27456                                                                                                             |    |   |         |         |                |          |          |                      |             |
| CB4856                                                                                                                             | CT | I | 6011977 | 6022516 | WBGene00015499 | inst-1   | C06A5.1  | -0.36582437448453    | AGIWUR33571 |
| CB4856                                                                                                                             | CT | I | 6022660 | 6026874 | WBGene00000814 | csn-2    | B0025.2  | -0.111082360008723   | AGIWUR5887  |
| CB4856                                                                                                                             | CT | I | 6027194 | 6028370 | WBGene00015001 | B0025.4  | B0025.4  | 0.661740433634407    | AGIWUR11731 |
| CB4856                                                                                                                             | CT | I | 6028486 | 6033457 | WBGene00006932 | vps-34   | B0025.1  | -0.0988405408022652  |             |
| AGIWUR18092;AGIWUR25361;AGIWUR41664;AGIWUR42560                                                                                    |    |   |         |         |                |          |          |                      |             |

|                                                                                                                                                                                                                                                                                              |   |                 |                |          |          |                     |             |
|----------------------------------------------------------------------------------------------------------------------------------------------------------------------------------------------------------------------------------------------------------------------------------------------|---|-----------------|----------------|----------|----------|---------------------|-------------|
| CB4856 CT                                                                                                                                                                                                                                                                                    | I | 6035452 6037745 | WBGene00016155 | C27A12.4 | C27A12.4 | -0.0162513578987857 |             |
| AGIWUR43310                                                                                                                                                                                                                                                                                  |   |                 |                |          |          |                     |             |
| CB4856 CT                                                                                                                                                                                                                                                                                    | I | 6038406 6041265 | WBGene00006492 | let-391  | C27A12.3 | -0.290430984935995  |             |
| AGIWUR4733                                                                                                                                                                                                                                                                                   |   |                 |                |          |          |                     |             |
| CB4856 CT                                                                                                                                                                                                                                                                                    | I | 6041672 6046018 | WBGene00016154 | C27A12.2 | C27A12.2 | -0.274154567878838  |             |
| AGIWUR17644                                                                                                                                                                                                                                                                                  |   |                 |                |          |          |                     |             |
| CB4856 CT                                                                                                                                                                                                                                                                                    | I | 6046832 6050462 | WBGene00000429 | ceh-2    | C27A12.5 | 0.527762610553415   |             |
| AGIWUR28248                                                                                                                                                                                                                                                                                  |   |                 |                |          |          |                     |             |
| CB4856 CT                                                                                                                                                                                                                                                                                    | I | 6053785 6055821 | WBGene00016156 | C27A12.6 | C27A12.6 | -0.0364546036819116 |             |
| AGIWUR2214;AGIWUR7904;AGIWUR27980;AGIWUR37666                                                                                                                                                                                                                                                |   |                 |                |          |          |                     |             |
| CB4856 CT                                                                                                                                                                                                                                                                                    | I | 6055947 6058424 | WBGene00016157 | C27A12.7 | C27A12.7 | 0.0780725840645089  |             |
| AGIWUR7052;AGIWUR18453;AGIWUR30076;AGIWUR32444                                                                                                                                                                                                                                               |   |                 |                |          |          |                     |             |
| CB4856 CT                                                                                                                                                                                                                                                                                    | I | 6058546 6061033 | WBGene00016158 | ari-1    | C27A12.8 | 0.0753392163509812  |             |
| AGIWUR43402                                                                                                                                                                                                                                                                                  |   |                 |                |          |          |                     |             |
| CB4856 CT                                                                                                                                                                                                                                                                                    | I | 6061752 6068040 | WBGene00016159 | C27A12.9 | C27A12.9 | -0.0899256316359778 |             |
| AGIWUR2352;AGIWUR10114;AGIWUR11058;AGIWUR38416;AGIWUR44563;AGIWUR45035                                                                                                                                                                                                                       |   |                 |                |          |          |                     |             |
| CB4856 CT                                                                                                                                                                                                                                                                                    | I | 6068526 6070122 | WBGene00022749 | ZK484.3  | ZK484.3  | 0.122950830780979   |             |
| AGIWUR23472;AGIWUR25484;AGIWUR42142                                                                                                                                                                                                                                                          |   |                 |                |          |          |                     |             |
| CB4856 CT                                                                                                                                                                                                                                                                                    | I | 6070236 6078895 | WBGene00022750 | ZK484.4  | ZK484.4  | -0.16437547778658   |             |
| AGIWUR32976;AGIWUR33451                                                                                                                                                                                                                                                                      |   |                 |                |          |          |                     |             |
| CB4856 CT                                                                                                                                                                                                                                                                                    | I | 6081782 6085962 | WBGene00001819 | haf-9    | ZK484.2  | -0.442757887157796  |             |
| AGIWUR2028;AGIWUR12808;AGIWUR25179;AGIWUR39792;AGIWUR43940                                                                                                                                                                                                                                   |   |                 |                |          |          |                     |             |
| CB4856 CT                                                                                                                                                                                                                                                                                    | I | 6087366 6087764 | WBGene00022751 | ZK484.5  | ZK484.5  | 0.398585593109217   | AGIWUR40045 |
| CB4856 CT                                                                                                                                                                                                                                                                                    | I | 6090015 6090919 | WBGene00022752 | ZK484.6  | ZK484.6  | -0.107234523676631  | AGIWUR15679 |
| CB4856 CT                                                                                                                                                                                                                                                                                    | I | 6093305 6094426 | WBGene00022748 | oaz-1    | ZK484.1  | 0.522504135351656   |             |
| AGIWUR5633;AGIWUR6260;AGIWUR9669;AGIWUR10174;AGIWUR10329;AGIWUR11262;AGIWUR14480;AGIWUR16682;AGIWUR17416;AGIWUR18340;AGIWUR18545;AGIWUR22968;AGIWUR23831;AGIWUR23930;AGIWUR25183;AGIWUR25365;AGIWUR26539;AGIWUR26756;AGIWUR30941;AGIWUR34252;AGIWUR34836;AGIWUR40956;AGIWUR41471;AGIWUR45198 |   |                 |                |          |          |                     |             |
| CB4856 CT                                                                                                                                                                                                                                                                                    | I | 6095060 6096589 | WBGene00022753 | ZK484.7  | ZK484.7  | 0.0184534949323059  | AGIWUR24816 |
| CB4856 CT                                                                                                                                                                                                                                                                                    | I | 6097494 6097837 | WBGene00022754 | nspd-1   | ZK484.8  | 0.199115539533061   | AGIWUR17934 |
| CB4856 CT                                                                                                                                                                                                                                                                                    | I | 6098927 6099731 | WBGene00020840 | spch-3   | T27A3.4  | 0.388145025426436   | AGIWUR32101 |
| CB4856 CT                                                                                                                                                                                                                                                                                    | I | 6100261 6101789 | WBGene00020841 | T27A3.5  | T27A3.5  | 0.0692658559231738  | AGIWUR19455 |
| CB4856 CT                                                                                                                                                                                                                                                                                    | I | 6102032 6102463 | WBGene00006044 | ssp-16   | T27A3.3  | -0.165083219286294  |             |
| AGIWUR14575;AGIWUR23833;AGIWUR26401;AGIWUR29267;AGIWUR33358;AGIWUR42127                                                                                                                                                                                                                      |   |                 |                |          |          |                     |             |
| CB4856 CT                                                                                                                                                                                                                                                                                    | I | 6104805 6105589 | WBGene00044611 | T27A3.8  | T27A3.8  | 1.13330836433455    | AGIWUR22882 |
| CB4856 CT                                                                                                                                                                                                                                                                                    | I | 6105863 6107715 | WBGene00020842 | T27A3.6  | T27A3.6  | -0.289074723816148  |             |
| AGIWUR18567;AGIWUR24268;AGIWUR41070                                                                                                                                                                                                                                                          |   |                 |                |          |          |                     |             |
| CB4856 CT                                                                                                                                                                                                                                                                                    | I | 6107809 6109679 | WBGene00020843 | T27A3.7  | T27A3.7  | 0.0573728381600844  | AGIWUR37549 |
| CB4856 CT                                                                                                                                                                                                                                                                                    | I | 6110134 6114537 | WBGene00020839 | usp-5    | T27A3.2  | 0.0849169376603491  | AGIWUR22004 |

|                                                                                                                                    |    |   |         |         |                |         |          |                       |             |
|------------------------------------------------------------------------------------------------------------------------------------|----|---|---------|---------|----------------|---------|----------|-----------------------|-------------|
| CB4856                                                                                                                             | CT | I | 6122590 | 6126851 | WBGene00020838 | trak-1  | T27A3.1  | -0.113087007490307    |             |
| AGIWUR9827;AGIWUR13114;AGIWUR18998;AGIWUR19263;AGIWUR20155;AGIWUR21043;AGIWUR21050;AGIWUR21240;AGIWUR25994;AGIWUR26331;AGIWUR34093 |    |   |         |         |                |         |          |                       |             |
| CB4856                                                                                                                             | CT | I | 6133245 | 6137978 | WBGene00003878 | pept-3  | F56F4.5  | 0.0684534747474004    | AGIWUR25162 |
| CB4856                                                                                                                             | CT | I | 6137994 | 6138955 | WBGene00018981 | F56F4.4 | F56F4.4  | -0.143354321876576    | AGIWUR7191  |
| CB4856                                                                                                                             | CT | I | 6139216 | 6140444 | WBGene00018982 | abt-6   | F56F4.6  | 0.0595262806936461    |             |
| AGIWUR6130;AGIWUR7439;AGIWUR21554                                                                                                  |    |   |         |         |                |         |          |                       |             |
| CB4856                                                                                                                             | CT | I | 6141469 | 6144386 | WBGene00018980 | F56F4.3 | F56F4.3  | -0.0766899572730906   |             |
| AGIWUR1365;AGIWUR31670                                                                                                             |    |   |         |         |                |         |          |                       |             |
| CB4856                                                                                                                             | CT | I | 6145455 | 6146477 | WBGene00018979 | ttr-55  | F56F4.2  | -0.0135353604676345   |             |
| AGIWUR9831;AGIWUR12974;AGIWUR17577;AGIWUR23966;AGIWUR27059                                                                         |    |   |         |         |                |         |          |                       |             |
| CB4856                                                                                                                             | CT | I | 6146461 | 6147068 | WBGene00050896 | ttr-56  | F56F4.9  | 0.266151758245447     | AGIWUR33891 |
| CB4856                                                                                                                             | CT | I | 6149197 | 6150480 | WBGene00045498 | F56F4.8 | F56F4.8  | -0.178854138758062    |             |
| AGIWUR18973;AGIWUR22403;AGIWUR42734                                                                                                |    |   |         |         |                |         |          |                       |             |
| CB4856                                                                                                                             | CT | I | 6154075 | 6157438 | WBGene00020379 | T09B4.5 | T09B4.5  | 0.855505900984634     |             |
| AGIWUR8668;AGIWUR31230                                                                                                             |    |   |         |         |                |         |          |                       |             |
| CB4856                                                                                                                             | CT | I | 6157473 | 6159264 | WBGene00020380 | T09B4.6 | T09B4.6  | 0.173285523666517     | AGIWUR26255 |
| CB4856                                                                                                                             | CT | I | 6164719 | 6166539 | WBGene00020382 | T09B4.8 | T09B4.8  | -0.515125859557649    | AGIWUR22457 |
| CB4856                                                                                                                             | CT | I | 6167940 | 6168642 | WBGene00020378 | T09B4.4 | T09B4.4  | -0.0367057243381552   | AGIWUR8464  |
| CB4856                                                                                                                             | CT | I | 6176252 | 6178057 | WBGene00020377 | T09B4.3 | T09B4.3  | -0.35968302780123     | AGIWUR20677 |
| CB4856                                                                                                                             | CT | I | 6177983 | 6180840 | WBGene00020383 | tin-44  | T09B4.9  | -0.313348157850101    | AGIWUR33554 |
| CB4856                                                                                                                             | CT | I | 6181314 | 6183913 | WBGene00000500 | chn-1   | T09B4.10 | -0.198563639128466    |             |
| AGIWUR3531;AGIWUR14093;AGIWUR30546                                                                                                 |    |   |         |         |                |         |          |                       |             |
| CB4856                                                                                                                             | CT | I | 6184072 | 6185368 | WBGene00020376 | T09B4.2 | T09B4.2  | 0.0574143897248245    | AGIWUR5828  |
| CB4856                                                                                                                             | CT | I | 6185462 | 6188121 | WBGene00020375 | pigv-1  | T09B4.1  | -0.217575868647041    | AGIWUR2739  |
| CB4856                                                                                                                             | CT | I | 6188157 | 6192632 | WBGene00020259 | T05E7.3 | T05E7.3  | -0.0565940638290567   |             |
| AGIWUR8483;AGIWUR13425;AGIWUR16427;AGIWUR36048                                                                                     |    |   |         |         |                |         |          |                       |             |
| CB4856                                                                                                                             | CT | I | 6192552 | 6194897 | WBGene00020260 | T05E7.4 | T05E7.4  | 0.968794507767658     | AGIWUR3464  |
| CB4856                                                                                                                             | CT | I | 6199141 | 6200193 | WBGene00000632 | col-55  | T05E7.2  | -0.0146638717076319   | AGIWUR45093 |
| CB4856                                                                                                                             | CT | I | 6200798 | 6202076 | WBGene00020261 | vet-1   | T05E7.5  | -0.0118932939135306   | AGIWUR29881 |
| CB4856                                                                                                                             | CT | I | 6203897 | 6206927 | WBGene00020258 | T05E7.1 | T05E7.1  | 0.710880380712204     | AGIWUR11566 |
| CB4856                                                                                                                             | CT | I | 6206955 | 6211155 | WBGene00020347 | ech-1.2 | T08B2.7  | -0.186714633941594    |             |
| AGIWUR1878;AGIWUR13286;AGIWUR24847;AGIWUR27700                                                                                     |    |   |         |         |                |         |          |                       |             |
| CB4856                                                                                                                             | CT | I | 6211270 | 6211885 | WBGene00020348 | mrpl-23 | T08B2.8  | -0.240015229266533    | AGIWUR12288 |
| CB4856                                                                                                                             | CT | I | 6211986 | 6214645 | WBGene00001497 | fars-1  | T08B2.9  | -0.265431954329182    |             |
| AGIWUR15691;AGIWUR18498;AGIWUR21754;AGIWUR24091;AGIWUR31467;AGIWUR34640;AGIWUR39566                                                |    |   |         |         |                |         |          |                       |             |
| CB4856                                                                                                                             | CT | I | 6215669 | 6219911 | WBGene00020346 | rbm-5   | T08B2.5  | -0.0852239086376327   |             |
| AGIWUR389;AGIWUR3390;AGIWUR17098;AGIWUR17725;AGIWUR21019;AGIWUR24671;AGIWUR42870;AGIWUR45169                                       |    |   |         |         |                |         |          |                       |             |
| CB4856                                                                                                                             | CT | I | 6220090 | 6220766 | WBGene00004486 | rps-17  | T08B2.10 | -0.000370386724622307 |             |

AGIWUR6912;AGIWUR15081;AGIWUR16480;AGIWUR16946;AGIWUR21104;AGIWUR24229;AGIWUR24253;AGIWUR26223;AGIWUR28324;  
 AGIWUR28853;AGIWUR32494;AGIWUR38938;AGIWUR40673;AGIWUR43660  
 CB4856 CT I 6221245 6223116 WBGene00020349 T08B2.11 T08B2.11 0.429091618909119  
 AGIWUR41230  
 CB4856 CT I 6232777 6234280 WBGene00000633 col-56 T08B2.2 0.25479579684899  
 AGIWUR18477;AGIWUR21810;AGIWUR23961  
 CB4856 CT I 6249556 6250197 WBGene00005000 spp-15 C48E7.10 0.0392992859217092  
 AGIWUR26334  
 CB4856 CT I 6250475 6252834 WBGene00000583 cof-2 C48E7.5 0.113816866739093  
 AGIWUR25222;AGIWUR43373  
 CB4856 CT I 6252986 6253584 WBGene00016754 cebp-2 C48E7.11 -0.12402159732779  
 AGIWUR4905  
 CB4856 CT I 6253701 6254947 WBGene00003059 lpd-2 C48E7.3 -0.182902094982786 AGIWUR36039  
 CB4856 CT I 6255035 6257791 WBGene00016750 let-611 C48E7.2 -0.14839017085319 AGIWUR8583  
 CB4856 CT I 6260249 6264540 WBGene00016749 C48E7.1 C48E7.1 0.18183573647854 AGIWUR25489  
 CB4856 CT I 6265691 6269073 WBGene00016753 oac-9 C48E7.8 -0.15271342310338 AGIWUR7858  
 CB4856 CT I 6269561 6271541 WBGene00006689 twk-37 C48E7.9 -0.127434726302562 AGIWUR32998  
 CB4856 CT I 6271866 6273780 WBGene00015688 C10G11.8 C10G11.8 0.0400829486206575  
 AGIWUR25031;AGIWUR33880;AGIWUR36459  
 CB4856 CT I 6284973 6289340 WBGene00015687 chdp-1 C10G11.7 -0.0548622403111931  
 AGIWUR4250  
 CB4856 CT I 6289433 6293855 WBGene00015686 C10G11.6 C10G11.6 -0.169659662589446  
 AGIWUR8034  
 CB4856 CT I 6295067 6297625 WBGene00004068 pnk-1 C10G11.5 0.529396501940225  
 AGIWUR13687;AGIWUR29299;AGIWUR36480;AGIWUR43272  
 CB4856 CT I 6297767 6299729 WBGene00005272 srh-49 C10G11.4 0.101107298431278  
 AGIWUR16346  
 CB4856 CT I 6300493 6302298 WBGene00005274 srh-51 C10G11.3 -0.171414005755886  
 AGIWUR12171;AGIWUR16140  
 CB4856 CT I 6302474 6304263 WBGene00005273 srh-50 C10G11.2 0.53622773735138  
 AGIWUR41687  
 CB4856 CT I 6304916 6306363 WBGene00015690 C10G11.10 C10G11.10 0.115930723172914  
 AGIWUR33367  
 CB4856 CT I 6309114 6310781 WBGene00017817 F26B1.5 F26B1.5 -0.108134810632919  
 AGIWUR7184;AGIWUR31624  
 CB4856 CT I 6311229 6312413 WBGene00000634 col-58 F26B1.4 -0.189059506961978 AGIWUR2202  
 CB4856 CT I 6312750 6314624 WBGene00005171 srg-14 F26B1.6 -0.539119624752743 AGIWUR3070  
 CB4856 CT I 6315233 6317267 WBGene00002073 ima-2 F26B1.3 0.0499627510023828  
 AGIWUR10902;AGIWUR14196;AGIWUR25439;AGIWUR31579;AGIWUR37813

|                                                                                                                                                                    |    |   |         |         |                |          |          |                      |             |
|--------------------------------------------------------------------------------------------------------------------------------------------------------------------|----|---|---------|---------|----------------|----------|----------|----------------------|-------------|
| CB4856                                                                                                                                                             | CT | I | 6317701 | 6320365 | WBGene00017816 | hrpk-1   | F26B1.2  | -0.0748204268208403  |             |
| AGIWUR1418;AGIWUR1827;AGIWUR3187;AGIWUR5329;AGIWUR9787;AGIWUR16221;AGIWUR17680;AGIWUR18701;AGIWUR18921;AGIWUR26852;AGIWUR27039;AGIWUR36351;AGIWUR39126;AGIWUR43994 |    |   |         |         |                |          |          |                      |             |
| CB4856                                                                                                                                                             | CT | I | 6320289 | 6324018 | WBGene00002601 | let-381  | F26B1.7  | 0.452531441100753    | AGIWUR36974 |
| CB4856                                                                                                                                                             | CT | I | 6342231 | 6356678 | WBGene00000254 | bli-4    | K04F10.4 | 0.000248456192787572 |             |
| AGIWUR3978;AGIWUR12697;AGIWUR17473;AGIWUR25337;AGIWUR32461;AGIWUR34393;AGIWUR42192;AGIWUR44317                                                                     |    |   |         |         |                |          |          |                      |             |
| CB4856                                                                                                                                                             | CT | I | 6356614 | 6358410 | WBGene00003499 | mut-2    | K04F10.6 | -0.071783453249413   |             |
| AGIWUR2874;AGIWUR9366;AGIWUR9500;AGIWUR26345;AGIWUR33780;AGIWUR36604;AGIWUR41011;AGIWUR42263                                                                       |    |   |         |         |                |          |          |                      |             |
| CB4856                                                                                                                                                             | CT | I | 6358585 | 6360457 | WBGene00019396 | K04F10.3 | K04F10.3 | 0.139075926054275    |             |
| AGIWUR13704                                                                                                                                                        |    |   |         |         |                |          |          |                      |             |
| CB4856                                                                                                                                                             | CT | I | 6360844 | 6364172 | WBGene00019395 | K04F10.2 | K04F10.2 | 0.136564562799655    |             |
| AGIWUR4876                                                                                                                                                         |    |   |         |         |                |          |          |                      |             |
| CB4856                                                                                                                                                             | CT | I | 6364886 | 6366224 | WBGene00019394 | K04F10.1 | K04F10.1 | 0.111394386723381    |             |
| AGIWUR3231                                                                                                                                                         |    |   |         |         |                |          |          |                      |             |
| CB4856                                                                                                                                                             | CT | I | 6366331 | 6368078 | WBGene00019399 | K04F10.7 | K04F10.7 | -0.276936373286699   |             |
| AGIWUR6668                                                                                                                                                         |    |   |         |         |                |          |          |                      |             |
| CB4856                                                                                                                                                             | CT | I | 6368270 | 6369598 | WBGene00022586 | ZC308.4  | ZC308.4  | -0.127256548515678   | AGIWUR37754 |
| CB4856                                                                                                                                                             | CT | I | 6369934 | 6386183 | WBGene00001596 | gld-2    | ZC308.1  | -0.0623657034419995  |             |
| AGIWUR1922;AGIWUR5338;AGIWUR9092;AGIWUR24999                                                                                                                       |    |   |         |         |                |          |          |                      |             |
| CB4856                                                                                                                                                             | CT | I | 6386149 | 6392524 | WBGene00022592 | klu-2    | ZC328.2  | 0.00165295865110693  | AGIWUR9565  |
| CB4856                                                                                                                                                             | CT | I | 6404587 | 6405705 | WBGene00022591 | cuti-1   | ZC328.1  | -0.0264682204460591  |             |
| AGIWUR28749;AGIWUR40109;AGIWUR42212                                                                                                                                |    |   |         |         |                |          |          |                      |             |
| CB4856                                                                                                                                                             | CT | I | 6405882 | 6406936 | WBGene00022594 | ZC328.5  | ZC328.5  | 0.0732178302584092   | AGIWUR29601 |
| CB4856                                                                                                                                                             | CT | I | 6407458 | 6409212 | WBGene00004721 | san-1    | ZC328.4  | -0.122956691288113   |             |
| AGIWUR10499;AGIWUR16704;AGIWUR24958;AGIWUR38192;AGIWUR40688                                                                                                        |    |   |         |         |                |          |          |                      |             |
| CB4856                                                                                                                                                             | CT | I | 6409050 | 6417010 | WBGene00022593 | ZC328.3  | ZC328.3  | 0.0354883576365657   |             |
| AGIWUR2496;AGIWUR16461;AGIWUR19232                                                                                                                                 |    |   |         |         |                |          |          |                      |             |
| CB4856                                                                                                                                                             | CT | I | 6418565 | 6418809 | WBGene00019992 | R10A10.1 | R10A10.1 | 0.134867038617328    |             |
| AGIWUR38650                                                                                                                                                        |    |   |         |         |                |          |          |                      |             |
| CB4856                                                                                                                                                             | CT | I | 6420660 | 6421985 | WBGene00019993 | rbx-2    | R10A10.2 | -0.169318599077901   |             |
| AGIWUR20356                                                                                                                                                        |    |   |         |         |                |          |          |                      |             |
| CB4856                                                                                                                                                             | CT | I | 6421978 | 6425794 | WBGene00018156 | ncbp-1   | F37E3.1  | -0.2555658100495     | AGIWUR26304 |
| CB4856                                                                                                                                                             | CT | I | 6425793 | 6428942 | WBGene00018157 | lron-6   | F37E3.2  | -0.0778275384052138  | AGIWUR1813  |
| CB4856                                                                                                                                                             | CT | I | 6429525 | 6431586 | WBGene00018158 | comp-1   | F37E3.3  | -0.139212771197639   |             |
| AGIWUR1030;AGIWUR34352                                                                                                                                             |    |   |         |         |                |          |          |                      |             |
| CB4856                                                                                                                                                             | CT | I | 6436058 | 6441192 | WBGene00004924 | snt-4    | T23H2.2  | 0.364569042967641    | AGIWUR23814 |
| CB4856                                                                                                                                                             | CT | I | 6441637 | 6446465 | WBGene00020742 | T23H2.3  | T23H2.3  | -0.0150549494857088  |             |
| AGIWUR2836;AGIWUR2981;AGIWUR5671;AGIWUR11513;AGIWUR12657;AGIWUR14273;AGIWUR15264;AGIWUR15865;AGIWUR20917;AGIWUR26561;AGIWUR34382;AGIWUR43457                       |    |   |         |         |                |          |          |                      |             |



|                                                                                 |    |   |         |         |                |          |           |                     |             |
|---------------------------------------------------------------------------------|----|---|---------|---------|----------------|----------|-----------|---------------------|-------------|
| CB4856                                                                          | CT | I | 6447304 | 6453933 | WBGene00003798 | npp-12   | T23H2.1   | 0.0121624490321821  |             |
| AGIWUR565;AGIWUR8913;AGIWUR37341;AGIWUR41730                                    |    |   |         |         |                |          |           |                     |             |
| CB4856                                                                          | CT | I | 6453875 | 6456984 | WBGene00020743 | mam-8    | T23H2.4   | 0.113927213878544   | AGIWUR24944 |
| CB4856                                                                          | CT | I | 6457061 | 6458479 | WBGene00004273 | rab-10   | T23H2.5   | -0.116440715238518  |             |
| AGIWUR1929;AGIWUR2575;AGIWUR4282;AGIWUR8097;AGIWUR10011;AGIWUR21666;AGIWUR34705 |    |   |         |         |                |          |           |                     |             |
| CB4856                                                                          | CT | I | 6460433 | 6464286 | WBGene00019432 | kn1-2    | K06A5.4   | 0.0864340537086008  | AGIWUR32152 |
| CB4856                                                                          | CT | I | 6464197 | 6466941 | WBGene00019433 | acdH-3   | K06A5.6   | -0.227081948142075  | AGIWUR7557  |
| CB4856                                                                          | CT | I | 6466752 | 6467515 | WBGene00019431 | K06A5.3  | K06A5.3   | 0.0529194127833499  | AGIWUR8782  |
| CB4856                                                                          | CT | I | 6468113 | 6469392 | WBGene00019430 | K06A5.2  | K06A5.2   | 0.216753591956984   | AGIWUR24586 |
| CB4856                                                                          | CT | I | 6469386 | 6471995 | WBGene00000386 | cdc-25.1 | K06A5.7   | 0.216919581061049   |             |
| AGIWUR40783                                                                     |    |   |         |         |                |          |           |                     |             |
| CB4856                                                                          | CT | I | 6474183 | 6489030 | WBGene00019434 | nmtN-1   | K06A5.8   | 0.300841025707173   |             |
| AGIWUR3470;AGIWUR27663;AGIWUR38621                                              |    |   |         |         |                |          |           |                     |             |
| CB4856                                                                          | CT | I | 6490716 | 6492727 | WBGene00000937 | dbr-1    | C55B7.8   | -0.0923298309147498 | AGIWUR15559 |
| CB4856                                                                          | CT | I | 6492722 | 6494754 | WBGene00007018 | mdt-18   | C55B7.9   | -0.178922405058168  | AGIWUR24134 |
| CB4856                                                                          | CT | I | 6494216 | 6496109 | WBGene00016944 | uri-1    | C55B7.5   | -0.0753551231674763 | AGIWUR23828 |
| CB4856                                                                          | CT | I | 6497436 | 6499560 | WBGene00016943 | acdH-1   | C55B7.4   | -0.451217118144658  |             |
| AGIWUR9071;AGIWUR12896;AGIWUR13562;AGIWUR24409;AGIWUR29961                      |    |   |         |         |                |          |           |                     |             |
| CB4856                                                                          | CT | I | 6507894 | 6511630 | WBGene00001627 | gly-2    | C55B7.2   | 0.169602986313839   | AGIWUR38944 |
| CB4856                                                                          | CT | I | 6511612 | 6513843 | WBGene00016947 | C55B7.11 | C55B7.11  | -0.0566369325608012 |             |
| AGIWUR317;AGIWUR10946;AGIWUR17661;AGIWUR19575;AGIWUR40605                       |    |   |         |         |                |          |           |                     |             |
| CB4856                                                                          | CT | I | 6513928 | 6517507 | WBGene00001599 | glh-2    | C55B7.1   | -0.287604169209679  | AGIWUR14020 |
| CB4856                                                                          | CT | I | 6517575 | 6520879 | WBGene00000483 | che-1    | C55B7.12  | 0.673557970074288   |             |
| AGIWUR40311                                                                     |    |   |         |         |                |          |           |                     |             |
| CB4856                                                                          | CT | I | 6525045 | 6528689 | WBGene00020414 | T10E9.4  | T10E9.4   | 0.95790437082568    | AGIWUR11816 |
| CB4856                                                                          | CT | I | 6529158 | 6530099 | WBGene00020416 | T10E9.6  | T10E9.6   | 0.0037766352651909  | AGIWUR1670  |
| CB4856                                                                          | CT | I | 6530131 | 6533031 | WBGene00020417 | nuo-2    | T10E9.7   | -0.140632450609338  |             |
| AGIWUR3800;AGIWUR20696;AGIWUR23397                                              |    |   |         |         |                |          |           |                     |             |
| CB4856                                                                          | CT | I | 6534072 | 6539193 | WBGene00020413 | T10E9.3  | T10E9.3   | -0.420963820177146  | AGIWUR7632  |
| CB4856                                                                          | CT | I | 6539129 | 6541084 | WBGene00020418 | T10E9.8  | T10E9.8   | -0.110448731450962  |             |
| AGIWUR8524;AGIWUR10486;AGIWUR10560;AGIWUR16490;AGIWUR32642;AGIWUR35271          |    |   |         |         |                |          |           |                     |             |
| CB4856                                                                          | CT | I | 6542090 | 6544966 | WBGene00020412 | T10E9.2  | T10E9.2   | -0.214769609347611  | AGIWUR39070 |
| CB4856                                                                          | CT | I | 6545110 | 6546593 | WBGene00020411 | T10E9.1  | T10E9.1   | -0.227539901187315  | AGIWUR29543 |
| CB4856                                                                          | CT | I | 6548644 | 6550447 | WBGene00019005 | F57B10.8 | F57B10.8  | -0.103161454383358  |             |
| AGIWUR34149                                                                     |    |   |         |         |                |          |           |                     |             |
| CB4856                                                                          | CT | I | 6550536 | 6552665 | WBGene00019006 | spg-20   | F57B10.9  | 0.0771338520881031  |             |
| AGIWUR2257                                                                      |    |   |         |         |                |          |           |                     |             |
| CB4856                                                                          | CT | I | 6552834 | 6553379 | WBGene00019007 | ucr-11   | F57B10.14 | -0.168818349396165  |             |
| AGIWUR26529                                                                     |    |   |         |         |                |          |           |                     |             |

|                                                                         |   |         |         |                |          |           |                       |             |
|-------------------------------------------------------------------------|---|---------|---------|----------------|----------|-----------|-----------------------|-------------|
| CB4856 CT                                                               | I | 6553481 | 6554290 | WBGene00000896 | dad-1    | F57B10.10 | -0.165510001547688    |             |
| AGIWUR15439                                                             |   |         |         |                |          |           |                       |             |
| CB4856 CT                                                               | I | 6554729 | 6558623 | WBGene00006607 | tre-1    | F57B10.7  | 0.061564409670428     |             |
| AGIWUR30347                                                             |   |         |         |                |          |           |                       |             |
| CB4856 CT                                                               | I | 6558696 | 6562346 | WBGene00019004 | xpg-1    | F57B10.6  | 0.27330909155781      |             |
| AGIWUR13434                                                             |   |         |         |                |          |           |                       |             |
| CB4856 CT                                                               | I | 6562699 | 6563660 | WBGene00019003 | F57B10.5 | F57B10.5  | -0.0596399550262703   |             |
| AGIWUR37962                                                             |   |         |         |                |          |           |                       |             |
| CB4856 CT                                                               | I | 6563629 | 6564451 | WBGene00000236 | bag-1    | F57B10.11 | -0.222429746285339    |             |
| AGIWUR18247                                                             |   |         |         |                |          |           |                       |             |
| CB4856 CT                                                               | I | 6564749 | 6565868 | WBGene00003184 | mei-2    | F57B10.12 | -0.22118408211753     |             |
| AGIWUR37281                                                             |   |         |         |                |          |           |                       |             |
| CB4856 CT                                                               | I | 6566173 | 6568905 | WBGene00019002 | F57B10.4 | F57B10.4  | 0.00238710455312585   |             |
| AGIWUR37891                                                             |   |         |         |                |          |           |                       |             |
| CB4856 CT                                                               | I | 6569494 | 6572598 | WBGene00019001 | ipgm-1   | F57B10.3  | -0.110337859323995    |             |
| AGIWUR7348;AGIWUR17880;AGIWUR19488;AGIWUR23845                          |   |         |         |                |          |           |                       |             |
| CB4856 CT                                                               | I | 6574004 | 6585510 | WBGene00002783 | let-607  | F57B10.1  | -0.0497416115332392   |             |
| AGIWUR10303;AGIWUR13630;AGIWUR16293;AGIWUR22955;AGIWUR28124;AGIWUR31341 |   |         |         |                |          |           |                       |             |
| CB4856 CT                                                               | I | 6585039 | 6587882 | WBGene00006624 | try-6    | F48A9.3   | -0.104716673861248    | AGIWUR17630 |
| CB4856 CT                                                               | I | 6592332 | 6593831 | WBGene00018582 | F48A9.2  | F48A9.2   | -0.172317726682158    | AGIWUR22685 |
| CB4856 CT                                                               | I | 6594320 | 6596231 | WBGene00018581 | F48A9.1  | F48A9.1   | -0.297755055105679    | AGIWUR30733 |
| CB4856 CT                                                               | I | 6596919 | 6598928 | WBGene00017067 | D2092.6  | D2092.6   | -0.000264822079050653 | AGIWUR13165 |
| CB4856 CT                                                               | I | 6598981 | 6607520 | WBGene00017066 | maco-1   | D2092.5   | -0.0128461044777186   |             |
| AGIWUR6251;AGIWUR33086                                                  |   |         |         |                |          |           |                       |             |
| CB4856 CT                                                               | I | 6612188 | 6615990 | WBGene00017065 | D2092.4  | D2092.4   | -0.301958792781365    | AGIWUR33325 |
| CB4856 CT                                                               | I | 6616304 | 6618560 | WBGene00006645 | tsp-19   | D2092.7   | -0.262936673415597    | AGIWUR38000 |
| CB4856 CT                                                               | I | 6620665 | 6621292 | WBGene00017068 | D2092.8  | D2092.8   | -0.581827871505506    | AGIWUR24576 |
| CB4856 CT                                                               | I | 6621687 | 6624894 | WBGene00000050 | acr-11   | D2092.3   | -0.257299391457856    | AGIWUR4258  |
| CB4856 CT                                                               | I | 6625066 | 6626788 | WBGene00017064 | ppfr-2   | D2092.2   | -0.0986078156035024   | AGIWUR39480 |
| CB4856 CT                                                               | I | 6627045 | 6627914 | WBGene00044610 | D2092.10 | D2092.10  | 0.0396849596823357    |             |
| AGIWUR21189;AGIWUR22339;AGIWUR38102;AGIWUR40477                         |   |         |         |                |          |           |                       |             |
| CB4856 CT                                                               | I | 6629717 | 6637429 | WBGene00017063 | mctp-1   | D2092.1   | 0.045583273806642     | AGIWUR30994 |
| CB4856 CT                                                               | I | 6640662 | 6642643 | WBGene00006625 | try-7    | ZC581.6   | -0.220100334539859    | AGIWUR4027  |
| CB4856 CT                                                               | I | 6651220 | 6655430 | WBGene00022633 | ZC581.3  | ZC581.3   | 0.398125591839355     | AGIWUR20637 |
| CB4856 CT                                                               | I | 6655608 | 6658371 | WBGene00022632 | ZC581.2  | ZC581.2   | -0.104258149848034    |             |
| AGIWUR13462;AGIWUR32856;AGIWUR33302                                     |   |         |         |                |          |           |                       |             |
| CB4856 CT                                                               | I | 6660436 | 6662315 | WBGene00022634 | ZC581.7  | ZC581.7   | 0.114854354470927     | AGIWUR41254 |
| CB4856 CT                                                               | I | 6663050 | 6665160 | WBGene00022631 | nekl-2   | ZC581.1   | -0.274663305465793    | AGIWUR4970  |
| CB4856 CT                                                               | I | 6665077 | 6673840 | WBGene00022635 | ZC581.9  | ZC581.9   | -0.0636464215822983   | AGIWUR14388 |

|                                                                                    |    |   |         |         |                |          |          |                       |             |
|------------------------------------------------------------------------------------|----|---|---------|---------|----------------|----------|----------|-----------------------|-------------|
| CB4856                                                                             | CT | I | 6687349 | 6691662 | WBGene00020712 | ckr-1    | T23B3.4  | -0.143801813177248    | AGIWUR27855 |
| CB4856                                                                             | CT | I | 6706766 | 6708919 | WBGene00020714 | T23B3.6  | T23B3.6  | 0.607374671689819     | AGIWUR31861 |
| CB4856                                                                             | CT | I | 6711512 | 6712327 | WBGene00020711 | rmd-5    | T23B3.3  | -0.187828006385777    | AGIWUR43249 |
| CB4856                                                                             | CT | I | 6715949 | 6717090 | WBGene00020710 | T23B3.2  | T23B3.2  | 0.181022826095004     | AGIWUR4376  |
| CB4856                                                                             | CT | I | 6717819 | 6719430 | WBGene00020709 | T23B3.1  | T23B3.1  | -0.0386600930339824   | AGIWUR41299 |
| CB4856                                                                             | CT | I | 6719368 | 6723059 | WBGene00020933 | W02D3.4  | W02D3.4  | -0.184911119587625    | AGIWUR22746 |
| CB4856                                                                             | CT | I | 6724917 | 6728330 | WBGene00003170 | mec-6    | W02D3.3  | -0.730695929361662    | AGIWUR969   |
| CB4856                                                                             | CT | I | 6728290 | 6729376 | WBGene00002258 | lbp-6    | W02D3.5  | -0.424793096860791    | AGIWUR30217 |
| CB4856                                                                             | CT | I | 6729996 | 6730959 | WBGene00007057 | ant-1.2  | W02D3.6  | 0.223834974002916     | AGIWUR30633 |
| CB4856                                                                             | CT | I | 6731267 | 6732280 | WBGene00002257 | lbp-5    | W02D3.7  | 0.133257535304323     |             |
| AGIWUR35562;AGIWUR35903                                                            |    |   |         |         |                |          |          |                       |             |
| CB4856                                                                             | CT | I | 6734029 | 6736161 | WBGene00004883 | smg-5    | W02D3.8  | -0.121157521972911    | AGIWUR40678 |
| CB4856                                                                             | CT | I | 6736680 | 6741175 | WBGene00020932 | dhod-1   | W02D3.2  | -0.256246813613842    | AGIWUR16146 |
| CB4856                                                                             | CT | I | 6741274 | 6741877 | WBGene00020931 | cytb-5.2 | W02D3.1  | 0.164107758306178     |             |
| AGIWUR6119;AGIWUR17412                                                             |    |   |         |         |                |          |          |                       |             |
| CB4856                                                                             | CT | I | 6741984 | 6742358 | WBGene00020937 | W02D3.12 | W02D3.12 | -0.244691657387477    |             |
| AGIWUR27444                                                                        |    |   |         |         |                |          |          |                       |             |
| CB4856                                                                             | CT | I | 6742293 | 6745341 | WBGene00006773 | unc-37   | W02D3.9  | -0.0684623600339496   |             |
| AGIWUR5383;AGIWUR17092                                                             |    |   |         |         |                |          |          |                       |             |
| CB4856                                                                             | CT | I | 6745991 | 6753031 | WBGene00020935 | fnci-1   | W02D3.10 | -0.142697950216396    |             |
| AGIWUR9400;AGIWUR35508                                                             |    |   |         |         |                |          |          |                       |             |
| CB4856                                                                             | CT | I | 6753219 | 6756348 | WBGene00020936 | hrpf-1   | W02D3.11 | -0.0359931846926762   |             |
| AGIWUR3301;AGIWUR4929;AGIWUR6674;AGIWUR15926;AGIWUR19943;AGIWUR35377               |    |   |         |         |                |          |          |                       |             |
| CB4856                                                                             | CT | I | 6757763 | 6758178 | WBGene00001682 | gpc-2    | F08B6.2  | -0.118873194519424    |             |
| AGIWUR8016;AGIWUR25894                                                             |    |   |         |         |                |          |          |                       |             |
| CB4856                                                                             | CT | I | 6758181 | 6760179 | WBGene00017240 | calu-2   | F08B6.3  | -0.249678376730726    | AGIWUR31    |
| CB4856                                                                             | CT | I | 6761228 | 6767797 | WBGene00006819 | unc-87   | F08B6.4  | 0.017877070279158     |             |
| AGIWUR5112;AGIWUR7202;AGIWUR19433;AGIWUR32709                                      |    |   |         |         |                |          |          |                       |             |
| CB4856                                                                             | CT | I | 6773976 | 6780151 | WBGene00004111 | pqn-21   | C37A2.5  | -7.44177573448468e-05 |             |
| AGIWUR8188;AGIWUR13214;AGIWUR28740;AGIWUR31351;AGIWUR36292;AGIWUR38150;AGIWUR42687 |    |   |         |         |                |          |          |                       |             |
| CB4856                                                                             | CT | I | 6780806 | 6784396 | WBGene00000871 | cye-1    | C37A2.4  | -0.225951260321166    |             |
| AGIWUR21118;AGIWUR35011                                                            |    |   |         |         |                |          |          |                       |             |
| CB4856                                                                             | CT | I | 6784854 | 6787139 | WBGene00016491 | acd-5    | C37A2.3  | 0.0405723326142464    |             |
| AGIWUR16440;AGIWUR35452;AGIWUR44135                                                |    |   |         |         |                |          |          |                       |             |
| CB4856                                                                             | CT | I | 6788032 | 6789002 | WBGene00016492 | C37A2.6  | C37A2.6  | 0.15049868634428      |             |
| AGIWUR6422;AGIWUR37330                                                             |    |   |         |         |                |          |          |                       |             |
| CB4856                                                                             | CT | I | 6789039 | 6789738 | WBGene00016493 | C37A2.7  | C37A2.7  | 0.0933398601186255    |             |
| AGIWUR6374;AGIWUR44421                                                             |    |   |         |         |                |          |          |                       |             |
| CB4856                                                                             | CT | I | 6791025 | 6797470 | WBGene00004110 | pqn-20   | C37A2.2  | -0.373841455844786    | AGIWUR19579 |

|                                                                                                                                                                                                      |    |   |         |         |                |          |          |                     |             |
|------------------------------------------------------------------------------------------------------------------------------------------------------------------------------------------------------|----|---|---------|---------|----------------|----------|----------|---------------------|-------------|
| CB4856                                                                                                                                                                                               | CT | I | 6798232 | 6799674 | WBGene00016494 | C37A2.8  | C37A2.8  | -0.0245299389767339 |             |
| AGIWUR28525;AGIWUR44472                                                                                                                                                                              |    |   |         |         |                |          |          |                     |             |
| CB4856                                                                                                                                                                                               | CT | I | 6800386 | 6804860 | WBGene00017098 | E02D9.1  | E02D9.1  | 0.103961698054514   |             |
| AGIWUR17002;AGIWUR18835;AGIWUR27530;AGIWUR29337;AGIWUR32622;AGIWUR35400;AGIWUR42665                                                                                                                  |    |   |         |         |                |          |          |                     |             |
| CB4856                                                                                                                                                                                               | CT | I | 6804788 | 6810451 | WBGene00019324 | K02F2.5  | K02F2.5  | -0.101227213539247  |             |
| AGIWUR7002;AGIWUR14204;AGIWUR16418;AGIWUR24188;AGIWUR38556;AGIWUR42759                                                                                                                               |    |   |         |         |                |          |          |                     |             |
| CB4856                                                                                                                                                                                               | CT | I | 6812664 | 6814248 | WBGene00006740 | ulp-5    | K02F2.4  | -0.250373439624944  | AGIWUR25907 |
| CB4856                                                                                                                                                                                               | CT | I | 6814511 | 6834687 | WBGene00019323 | teg-4    | K02F2.3  | 0.0529118509259163  | AGIWUR33779 |
| CB4856                                                                                                                                                                                               | CT | I | 6836375 | 6838140 | WBGene00019322 | ahcy-1   | K02F2.2  | -0.342964765143126  |             |
| AGIWUR287;AGIWUR1378;AGIWUR4956;AGIWUR8493;AGIWUR9338;AGIWUR9562;AGIWUR12159;AGIWUR14900;AGIWUR17808;AGIWUR17829;AGIWUR19142;AGIWUR23216;AGIWUR23428;AGIWUR26001;AGIWUR28582;AGIWUR29154;AGIWUR32426 |    |   |         |         |                |          |          |                     |             |
| CB4856                                                                                                                                                                                               | CT | I | 6838354 | 6843343 | WBGene00001056 | dpy-3    | K02F2.1  | -0.138772906732433  | AGIWUR15334 |
| CB4856                                                                                                                                                                                               | CT | I | 6843589 | 6845134 | WBGene00001075 | dpy-14   | H27M09.4 | 1.74156953270617    |             |
| AGIWUR26750                                                                                                                                                                                          |    |   |         |         |                |          |          |                     |             |
| CB4856                                                                                                                                                                                               | CT | I | 6845175 | 6846952 | WBGene00019248 | H27M09.5 | H27M09.5 | 0.191790847255897   |             |
| AGIWUR12565                                                                                                                                                                                          |    |   |         |         |                |          |          |                     |             |
| CB4856                                                                                                                                                                                               | CT | I | 6847511 | 6849923 | WBGene00019247 | syp-4    | H27M09.3 | -0.116422769272756  |             |
| AGIWUR16231                                                                                                                                                                                          |    |   |         |         |                |          |          |                     |             |
| CB4856                                                                                                                                                                                               | CT | I | 6850409 | 6851356 | WBGene00019246 | rpb-5    | H27M09.2 | -0.0637151346592795 |             |
| AGIWUR41547                                                                                                                                                                                          |    |   |         |         |                |          |          |                     |             |
| CB4856                                                                                                                                                                                               | CT | I | 6851372 | 6854140 | WBGene00019245 | sacy-1   | H27M09.1 | -0.157717693010493  |             |
| AGIWUR16956;AGIWUR24226;AGIWUR38168;AGIWUR39686;AGIWUR41837                                                                                                                                          |    |   |         |         |                |          |          |                     |             |
| CB4856                                                                                                                                                                                               | CT | I | 6862397 | 6870424 | WBGene00044898 | let-383  | T21G5.6  | -0.150688032484352  |             |
| AGIWUR3358;AGIWUR6039;AGIWUR10814;AGIWUR19853;AGIWUR35561                                                                                                                                            |    |   |         |         |                |          |          |                     |             |
| CB4856                                                                                                                                                                                               | CT | I | 6870415 | 6871911 | WBGene00020660 | T21G5.2  | T21G5.2  | 0.00179684885914533 |             |
| AGIWUR21753;AGIWUR29068;AGIWUR35710                                                                                                                                                                  |    |   |         |         |                |          |          |                     |             |
| CB4856                                                                                                                                                                                               | CT | I | 6872597 | 6873755 | WBGene00020661 | smz-2    | T21G5.4  | 0.110391964684272   | AGIWUR42609 |
| CB4856                                                                                                                                                                                               | CT | I | 6874304 | 6876928 | WBGene00020659 | T21G5.1  | T21G5.1  | -0.0706029887024844 | AGIWUR26740 |
| CB4856                                                                                                                                                                                               | CT | I | 6877080 | 6888217 | WBGene00006423 | asd-2    | T21G5.5  | 0.305013257278683   |             |
| AGIWUR22524;AGIWUR24899;AGIWUR25729;AGIWUR34706;AGIWUR38832;AGIWUR43537;AGIWUR44294                                                                                                                  |    |   |         |         |                |          |          |                     |             |
| CB4856                                                                                                                                                                                               | CT | I | 6889254 | 6891501 | WBGene00016742 | C48B6.4  | C48B6.4  | 0.251997962627899   | AGIWUR13786 |
| CB4856                                                                                                                                                                                               | CT | I | 6897755 | 6900619 | WBGene00016743 | srb-15   | C48B6.5  | -0.222058676614871  | AGIWUR12549 |
| CB4856                                                                                                                                                                                               | CT | I | 6900947 | 6913579 | WBGene00004879 | smg-1    | C48B6.6  | 0.0474189206824516  |             |
| AGIWUR26267;AGIWUR29121;AGIWUR35234                                                                                                                                                                  |    |   |         |         |                |          |          |                     |             |
| CB4856                                                                                                                                                                                               | CT | I | 6915049 | 6916609 | WBGene00016741 | C48B6.3  | C48B6.3  | -0.150262050881175  |             |
| AGIWUR3569;AGIWUR8775;AGIWUR16126;AGIWUR22913;AGIWUR32725;AGIWUR33646                                                                                                                                |    |   |         |         |                |          |          |                     |             |
| CB4856                                                                                                                                                                                               | CT | I | 6916766 | 6917560 | WBGene00016740 | C48B6.2  | C48B6.2  | -0.362424257533561  | AGIWUR3988  |
| CB4856                                                                                                                                                                                               | CT | I | 6923076 | 6923688 | WBGene00016746 | C48B6.10 | C48B6.10 | -0.31343092548623   |             |
| AGIWUR2589;AGIWUR8621;AGIWUR26363;AGIWUR28730;AGIWUR30871;AGIWUR44258                                                                                                                                |    |   |         |         |                |          |          |                     |             |



|                                                                                                                       |    |   |         |         |                |          |          |                      |             |
|-----------------------------------------------------------------------------------------------------------------------|----|---|---------|---------|----------------|----------|----------|----------------------|-------------|
| CB4856                                                                                                                | CT | I | 7021946 | 7029076 | WBGene00008852 | ubq1-1   | F15C11.2 | -0.0820162638820863  |             |
| AGIWUR2160;AGIWUR4824;AGIWUR10320;AGIWUR10692;AGIWUR12397;AGIWUR13433;AGIWUR13487;AGIWUR23339;AGIWUR37152;AGIWUR44055 |    |   |         |         |                |          |          |                      |             |
| CB4856                                                                                                                | CT | I | 7038900 | 7048832 | WBGene00004773 | sem-4    | F15C11.1 | 0.2672079400147      |             |
| AGIWUR17306;AGIWUR32821;AGIWUR36613;AGIWUR38195;AGIWUR39733                                                           |    |   |         |         |                |          |          |                      |             |
| CB4856                                                                                                                | CT | I | 7050042 | 7051712 | WBGene00044764 | W01A8.7  | W01A8.7  | 0.0648399420292911   | AGIWUR24025 |
| CB4856                                                                                                                | CT | I | 7057170 | 7059351 | WBGene00007024 | plin-1   | W01A8.1  | -0.0578641706640788  |             |
| AGIWUR6882;AGIWUR21896;AGIWUR25710;AGIWUR39335;AGIWUR41766                                                            |    |   |         |         |                |          |          |                      |             |
| CB4856                                                                                                                | CT | I | 7065263 | 7067899 | WBGene00012165 | cut1-6   | W01A8.3  | 0.13193128527933     | AGIWUR6403  |
| CB4856                                                                                                                | CT | I | 7068106 | 7069186 | WBGene00012166 | nuo-6    | W01A8.4  | -0.348681939243507   |             |
| AGIWUR5024;AGIWUR14516;AGIWUR20848                                                                                    |    |   |         |         |                |          |          |                      |             |
| CB4856                                                                                                                | CT | I | 7069440 | 7070728 | WBGene00012167 | tofu-5   | W01A8.5  | -0.0935593003698365  |             |
| AGIWUR10884;AGIWUR16983;AGIWUR23898;AGIWUR29769;AGIWUR44504                                                           |    |   |         |         |                |          |          |                      |             |
| CB4856                                                                                                                | CT | I | 7070649 | 7074733 | WBGene00012168 | W01A8.6  | W01A8.6  | -0.461273979448233   | AGIWUR2324  |
| CB4856                                                                                                                | CT | I | 7075918 | 7079566 | WBGene00002198 | kin-14   | F22D6.1  | 0.0590256299527372   | AGIWUR11797 |
| CB4856                                                                                                                | CT | I | 7079868 | 7081520 | WBGene00009050 | F22D6.2  | F22D6.2  | 0.295206754071178    |             |
| AGIWUR7047;AGIWUR7697;AGIWUR28913;AGIWUR33699                                                                         |    |   |         |         |                |          |          |                      |             |
| CB4856                                                                                                                | CT | I | 7088030 | 7090062 | WBGene00003815 | nars-1   | F22D6.3  | -0.225190863806272   |             |
| AGIWUR8353;AGIWUR28891;AGIWUR31912                                                                                    |    |   |         |         |                |          |          |                      |             |
| CB4856                                                                                                                | CT | I | 7090623 | 7091371 | WBGene00009051 | nduf-6   | F22D6.4  | -0.156650928026524   | AGIWUR24434 |
| CB4856                                                                                                                | CT | I | 7091309 | 7094537 | WBGene00004186 | prpf-4   | F22D6.5  | 0.65996016345921     | AGIWUR11477 |
| CB4856                                                                                                                | CT | I | 7095486 | 7098406 | WBGene00009052 | ek1-1    | F22D6.6  | -0.221094218737164   | AGIWUR22881 |
| CB4856                                                                                                                | CT | I | 7098981 | 7099497 | WBGene00043279 | F22D6.8  | F22D6.8  | -0.00247600955852612 |             |
| AGIWUR5007;AGIWUR5895;AGIWUR19127;AGIWUR27377;AGIWUR36296;AGIWUR44085                                                 |    |   |         |         |                |          |          |                      |             |
| CB4856                                                                                                                | CT | I | 7099810 | 7101775 | WBGene00009054 | F22D6.9  | F22D6.9  | 0.204447405197659    | AGIWUR19730 |
| CB4856                                                                                                                | CT | I | 7102216 | 7103392 | WBGene00009056 | F22D6.15 | F22D6.15 | 0.0213317222145761   |             |
| AGIWUR11066;AGIWUR24483;AGIWUR44167                                                                                   |    |   |         |         |                |          |          |                      |             |
| CB4856                                                                                                                | CT | I | 7105302 | 7106926 | WBGene00000636 | col-60   | F22D6.10 | -0.433979226447438   |             |
| AGIWUR14941                                                                                                           |    |   |         |         |                |          |          |                      |             |
| CB4856                                                                                                                | CT | I | 7110240 | 7112287 | WBGene00001643 | gly-18   | F22D6.11 | 0.0995759715923974   |             |
| AGIWUR10272                                                                                                           |    |   |         |         |                |          |          |                      |             |
| CB4856                                                                                                                | CT | I | 7112903 | 7115001 | WBGene00001644 | gly-19   | F22D6.12 | 0.139323717345831    |             |
| AGIWUR30017;AGIWUR32849                                                                                               |    |   |         |         |                |          |          |                      |             |
| CB4856                                                                                                                | CT | I | 7116092 | 7116889 | WBGene00010740 | K10D3.6  | K10D3.6  | 2.28108583786673     |             |
| AGIWUR34630;AGIWUR43978                                                                                               |    |   |         |         |                |          |          |                      |             |
| CB4856                                                                                                                | CT | I | 7117808 | 7121545 | WBGene00001614 | glr-3    | K10D3.1  | -0.0544093747325247  |             |
| AGIWUR1117;AGIWUR20863                                                                                                |    |   |         |         |                |          |          |                      |             |
| CB4856                                                                                                                | CT | I | 7121657 | 7122194 | WBGene00219281 | K10D3.8  | K10D3.8  | 0.414557780966465    | AGIWUR40179 |
| CB4856                                                                                                                | CT | I | 7122614 | 7128423 | WBGene00006753 | unc-14   | K10D3.2  | -0.0428167718122507  |             |

AGIWUR5593;AGIWUR16242;AGIWUR16992;AGIWUR17744;AGIWUR22269;AGIWUR37434  
 CB4856 CT I 7132747 7134312 WBGene00006394 taf-11.2 K10D3.3 -0.267359050849556  
 AGIWUR23016;AGIWUR35624;AGIWUR37192  
 CB4856 CT I 7134738 7139973 WBGene00010738 K10D3.4 K10D3.4 1.00245498361598 AGIWUR12834  
 CB4856 CT I 7140278 7147230 WBGene00010427 hpo-11 H37N21.1 -0.0466738854576443  
 AGIWUR9880;AGIWUR43725  
 CB4856 CT I 7149937 7151887 WBGene00010645 fec1-1 K07G5.6 -0.0567179494555408 AGIWUR6918  
 CB4856 CT I 7152463 7156868 WBGene00010641 crml-1 K07G5.1 0.000434510176910763  
 AGIWUR923;AGIWUR2297;AGIWUR24001;AGIWUR40638  
 CB4856 CT I 7159714 7160917 WBGene00006963 xpa-1 K07G5.2 0.273101996104565 AGIWUR9973  
 CB4856 CT I 7161016 7166518 WBGene00010642 mks-6 K07G5.3 0.202606105196749  
 AGIWUR17006;AGIWUR35676  
 CB4856 CT I 7166932 7168783 WBGene00010643 K07G5.4 K07G5.4 0.258360753195005 AGIWUR19839  
 CB4856 CT I 7169997 7172189 WBGene00010644 K07G5.5 K07G5.5 -0.0291832908085965 AGIWUR36732  
 CB4856 CT I 7172463 7174156 WBGene00010870 let-522 M05B5.2 0.619649390227796 AGIWUR13948  
 CB4856 CT I 7177953 7179430 WBGene00010869 M05B5.1 M05B5.1 0.242490355704046 AGIWUR15124  
 CB4856 CT I 7183053 7185709 WBGene00010873 trpa-2 M05B5.6 0.437321686346468 AGIWUR13437  
 CB4856 CT I 7185695 7188298 WBGene00010871 M05B5.3 M05B5.3 0.0308767687465146 AGIWUR6763  
 CB4856 CT I 7188465 7190581 WBGene00010872 M05B5.4 M05B5.4 -0.0894862008897306  
 AGIWUR6384;AGIWUR17510  
 CB4856 CT I 7190834 7193924 WBGene00001949 hlh-2 M05B5.5 -0.0750260887389977  
 AGIWUR8155;AGIWUR10611;AGIWUR18355  
 CB4856 CT I 7202242 7203533 WBGene00000637 col-61 C01H6.1 -0.0573077344776056 AGIWUR17413  
 CB4856 CT I 7204541 7207717 WBGene00007252 mlt-2 C01H6.2 -0.18254362439766 AGIWUR13393  
 CB4856 CT I 7208028 7209866 WBGene00007253 C01H6.3 C01H6.3 0.0683154233710876 AGIWUR12247  
 CB4856 CT I 7210515 7212579 WBGene00007254 C01H6.4 C01H6.4 -0.412015142339713  
 AGIWUR31742;AGIWUR32511  
 CB4856 CT I 7214745 7221781 WBGene00003622 nhr-23 C01H6.5 -0.166609414528182  
 AGIWUR5349;AGIWUR8686;AGIWUR11774;AGIWUR22468;AGIWUR27636;AGIWUR31994;AGIWUR33632;AGIWUR34495;AGIWUR36432  
 CB4856 CT I 7222296 7224381 WBGene00007255 cnm-4 C01H6.6 0.202564887467237  
 AGIWUR485;AGIWUR20649;AGIWUR41720  
 CB4856 CT I 7224656 7227767 WBGene00007256 swsn-9 C01H6.7 0.0897670819628988 AGIWUR16237  
 CB4856 CT I 7227859 7229434 WBGene00007257 C01H6.8 C01H6.8 -0.52953927607063  
 AGIWUR18870;AGIWUR23323;AGIWUR27055;AGIWUR27094  
 CB4856 CT I 7229433 7233121 WBGene00007258 hasp-1 C01H6.9 -0.121270889703902  
 AGIWUR21484;AGIWUR22965  
 CB4856 CT I 7233645 7234501 WBGene00011062 R06C7.2 R06C7.2 -0.14204187885966 AGIWUR43578  
 CB4856 CT I 7235371 7238790 WBGene00011061 wago-1 R06C7.1 -0.157434539172828  
 AGIWUR2605;AGIWUR31860

|                                                                       |    |   |         |         |                |          |          |                     |             |
|-----------------------------------------------------------------------|----|---|---------|---------|----------------|----------|----------|---------------------|-------------|
| CB4856                                                                | CT | I | 7238994 | 7243967 | WBGene00000963 | dhp-1    | R06C7.3  | 0.101139591656294   |             |
| AGIWUR11332;AGIWUR32947                                               |    |   |         |         |                |          |          |                     |             |
| CB4856                                                                | CT | I | 7246849 | 7248741 | WBGene00011064 | adsl-1   | R06C7.5  | -0.235855603791614  |             |
| AGIWUR2006;AGIWUR8376;AGIWUR29052;AGIWUR41518                         |    |   |         |         |                |          |          |                     |             |
| CB4856                                                                | CT | I | 7248828 | 7251422 | WBGene00003041 | lin-61   | R06C7.7  | -0.224589241233766  |             |
| AGIWUR29775;AGIWUR42249                                               |    |   |         |         |                |          |          |                     |             |
| CB4856                                                                | CT | I | 7251941 | 7255223 | WBGene00000275 | bub-1    | R06C7.8  | -0.145253684876202  | AGIWUR20021 |
| CB4856                                                                | CT | I | 7255380 | 7258700 | WBGene00011066 | ztf-15   | R06C7.9  | -0.118174147847693  | AGIWUR32881 |
| CB4856                                                                | CT | I | 7258915 | 7267117 | WBGene00002348 | myo-1    | R06C7.10 | 0.375413958057909   |             |
| AGIWUR24541                                                           |    |   |         |         |                |          |          |                     |             |
| CB4856                                                                | CT | I | 7269179 | 7273005 | WBGene00006656 | twk-1    | F21C3.1  | -0.0231452456112269 | AGIWUR16353 |
| CB4856                                                                | CT | I | 7274282 | 7278573 | WBGene00009001 | tyr-3    | F21C3.2  | -0.221359097946483  | AGIWUR19725 |
| CB4856                                                                | CT | I | 7278802 | 7279609 | WBGene00077548 | F21C3.7  | F21C3.7  | -0.0218432982600163 |             |
| AGIWUR21181;AGIWUR29371;AGIWUR42066                                   |    |   |         |         |                |          |          |                     |             |
| CB4856                                                                | CT | I | 7279658 | 7280501 | WBGene00009002 | hint-1   | F21C3.3  | -0.121716875268065  | AGIWUR34525 |
| CB4856                                                                | CT | I | 7280552 | 7282871 | WBGene00004324 | rde-2    | F21C3.4  | -0.285789319606192  | AGIWUR37884 |
| CB4856                                                                | CT | I | 7282964 | 7283818 | WBGene00009004 | pfd-6    | F21C3.5  | -0.337873266181504  | AGIWUR14191 |
| CB4856                                                                | CT | I | 7283907 | 7285762 | WBGene00009005 | F21C3.6  | F21C3.6  | -0.224614589034596  | AGIWUR6232  |
| CB4856                                                                | CT | I | 7291272 | 7293331 | WBGene00008762 | ztf-2    | F13G3.1  | -0.173215691121419  | AGIWUR38805 |
| CB4856                                                                | CT | I | 7294038 | 7295687 | WBGene00005131 | srd-53   | F13G3.2  | -0.164115991128048  | AGIWUR18194 |
| CB4856                                                                | CT | I | 7295753 | 7297004 | WBGene00008770 | F13G3.12 | F13G3.12 | -0.194155295727602  |             |
| AGIWUR44355                                                           |    |   |         |         |                |          |          |                     |             |
| CB4856                                                                | CT | I | 7296913 | 7299983 | WBGene00008763 | F13G3.3  | F13G3.3  | 0.00801820038816992 | AGIWUR37892 |
| CB4856                                                                | CT | I | 7300062 | 7300913 | WBGene00008764 | dylt-1   | F13G3.4  | 0.00375659437850651 |             |
| AGIWUR23442;AGIWUR40549                                               |    |   |         |         |                |          |          |                     |             |
| CB4856                                                                | CT | I | 7301007 | 7303227 | WBGene00008765 | ttx-7    | F13G3.5  | -0.0992434015266284 |             |
| AGIWUR26166;AGIWUR32307                                               |    |   |         |         |                |          |          |                     |             |
| CB4856                                                                | CT | I | 7303300 | 7304690 | WBGene00008766 | F13G3.6  | F13G3.6  | 0.0902501925040422  | AGIWUR33952 |
| CB4856                                                                | CT | I | 7304918 | 7307010 | WBGene00008767 | F13G3.7  | F13G3.7  | -0.169531541752391  |             |
| AGIWUR7091;AGIWUR24366;AGIWUR27990                                    |    |   |         |         |                |          |          |                     |             |
| CB4856                                                                | CT | I | 7307117 | 7308626 | WBGene00008769 | mrpl-13  | F13G3.11 | -0.132274964814571  |             |
| AGIWUR7546;AGIWUR8371;AGIWUR24043;AGIWUR27410;AGIWUR37354;AGIWUR37886 |    |   |         |         |                |          |          |                     |             |
| CB4856                                                                | CT | I | 7308603 | 7311939 | WBGene00001136 | eat-5    | F13G3.8  | -0.0699117976610326 | AGIWUR15708 |
| CB4856                                                                | CT | I | 7312797 | 7313525 | WBGene00003236 | mif-3    | F13G3.9  | -0.125848639772778  | AGIWUR6050  |
| CB4856                                                                | CT | I | 7313585 | 7314277 | WBGene00008768 | F13G3.10 | F13G3.10 | 0.234661609060883   |             |
| AGIWUR10810                                                           |    |   |         |         |                |          |          |                     |             |
| CB4856                                                                | CT | I | 7317646 | 7318337 | WBGene00009915 | F52A8.1  | F52A8.1  | -0.169182215364309  |             |
| AGIWUR17070;AGIWUR32537                                               |    |   |         |         |                |          |          |                     |             |
| CB4856                                                                | CT | I | 7318290 | 7321085 | WBGene00001680 | gpb-2    | F52A8.2  | 0.298913104578366   |             |



AGIWUR5017;AGIWUR30919  
CB4856 CT I 7322270 7324415 WBGene00009916 F52A8.3 F52A8.3 -0.155462623398251  
AGIWUR15576;AGIWUR38874;AGIWUR39839  
CB4856 CT I 7339204 7345949 WBGene00009917 glb-18 F52A8.4 -0.072583917760257 AGIWUR25073  
CB4856 CT I 7345932 7347427 WBGene00009918 gcsh-2 F52A8.5 0.234147983939689 AGIWUR45177  
CB4856 CT I 7347222 7350386 WBGene00009919 kbrl-1 F52A8.6 -0.211644904561617  
AGIWUR12791;AGIWUR16926;AGIWUR22612;AGIWUR29694;AGIWUR39394;AGIWUR40419  
CB4856 CT I 7350312 7352235 WBGene00002136 inx-14 F07A5.1 -0.0147066292726397  
AGIWUR519;AGIWUR43444  
CB4856 CT I 7352415 7353701 WBGene00008541 F07A5.2 F07A5.2 0.388120675705949 AGIWUR31313  
CB4856 CT I 7354491 7357180 WBGene00008542 scav-6 F07A5.3 -0.464576981762992 AGIWUR34532  
CB4856 CT I 7357180 7359100 WBGene00008543 F07A5.4 F07A5.4 0.176243227200091  
AGIWUR5394;AGIWUR32250;AGIWUR43624  
CB4856 CT I 7360199 7371534 WBGene00006306 sue-1 F07A5.5 0.0758621369732912  
AGIWUR7614;AGIWUR42629  
CB4856 CT I 7376604 7383197 WBGene00006754 unc-15 F07A5.7 -0.093299822285946  
AGIWUR979;AGIWUR5073;AGIWUR7505;AGIWUR11096;AGIWUR28192;AGIWUR34853;AGIWUR44241  
CB4856 CT I 7384398 7388792 WBGene00007597 C15A11.2 C15A11.2 0.0535921102014694  
AGIWUR25007  
CB4856 CT I 7389049 7395918 WBGene00004944 sol-1 C15A11.3 0.44778318692355  
AGIWUR36489  
CB4856 CT I 7398824 7401023 WBGene00007598 C15A11.4 C15A11.4 -0.880892316076086  
AGIWUR3755  
CB4856 CT I 7404950 7408511 WBGene00007599 C15A11.7 C15A11.7 0.327137282630035  
AGIWUR5504;AGIWUR10256;AGIWUR20323  
CB4856 CT I 7422785 7454088 WBGene00006752 unc-13 ZK524.2 0.352644785644572 AGIWUR25843  
CB4856 CT I 7454660 7456953 WBGene00004958 spe-4 ZK524.1 0.366434681859365 AGIWUR9983  
CB4856 CT I 7457153 7460756 WBGene00003074 lars-2 ZK524.3 0.00558529301445532 AGIWUR37098  
CB4856 CT I 7460858 7466424 WBGene00013994 ZK524.4 ZK524.4 0.0658978629567901  
AGIWUR7548;AGIWUR15682;AGIWUR18485;AGIWUR23215;AGIWUR24454;AGIWUR32072;AGIWUR39429;AGIWUR40886  
CB4856 CT I 7472611 7476946 WBGene00012136 T28F4.1 T28F4.1 0.303854720208385 AGIWUR23973  
CB4856 CT I 7480108 7483392 WBGene00012137 asic-2 T28F4.2 0.0885201125038018 AGIWUR28627  
CB4856 CT I 7484159 7486302 WBGene00012138 T28F4.3 T28F4.3 -0.184574728986656  
AGIWUR3863;AGIWUR23076;AGIWUR41466  
CB4856 CT I 7486577 7490174 WBGene00012139 T28F4.4 T28F4.4 -0.122347439858036 AGIWUR26867  
CB4856 CT I 7491816 7492934 WBGene00012140 T28F4.5 T28F4.5 0.191731919572529  
AGIWUR3589;AGIWUR3804;AGIWUR5333;AGIWUR18046;AGIWUR25627;AGIWUR36240  
CB4856 CT I 7492788 7494700 WBGene00012141 T28F4.6 T28F4.6 -0.0998763792409303 AGIWUR22039  
CB4856 CT I 7495437 7503577 WBGene00007042 pbrm-1 C26C6.1 -0.0196883822443912

AGIWUR4581;AGIWUR8361;AGIWUR8965;AGIWUR20774

CB4856 CT I 7503576 7505580 WBGene00007742 C26C6.8 C26C6.8 0.0131628649572115

AGIWUR24774;AGIWUR26471

CB4856 CT I 7505951 7506693 WBGene00007740 C26C6.6 C26C6.6 -0.255497369683026 AGIWUR1050

CB4856 CT I 7508721 7512593 WBGene00007741 glb-8 C26C6.7 -0.00673280359052697 AGIWUR32542

CB4856 CT I 7512918 7513726 WBGene00077553 C26C6.10 C26C6.10 -0.335683051618334

AGIWUR8783;AGIWUR12734;AGIWUR16803;AGIWUR31486;AGIWUR45154

CB4856 CT I 7514117 7515126 WBGene00007743 C26C6.9 C26C6.9 -0.704491962546019 AGIWUR8485

CB4856 CT I 7522116 7526703 WBGene00001648 goa-1 C26C6.2 0.136737331407225

AGIWUR13528;AGIWUR17695;AGIWUR38775;AGIWUR41116

CB4856 CT I 7527224 7531715 WBGene00003552 nas-36 C26C6.3 -0.304085061239477 AGIWUR16556

CB4856 CT I 7532315 7535997 WBGene00007739 C26C6.4 C26C6.4 0.302591900549819 AGIWUR19863

CB4856 CT I 7536204 7542157 WBGene00000938 dcp-66 C26C6.5 -0.00616084859528954

AGIWUR1334;AGIWUR14944;AGIWUR20106;AGIWUR32961;AGIWUR44832

CB4856 CT I 7552975 7554553 WBGene00012029 T25G3.1 T25G3.1 -0.124448140629301 AGIWUR18597

CB4856 CT I 7554855 7559916 WBGene00000496 chs-1 T25G3.2 -0.147378396381441 AGIWUR19128

CB4856 CT I 7559839 7562349 WBGene00012030 T25G3.3 T25G3.3 -0.0179460405465406

AGIWUR3427;AGIWUR4620;AGIWUR5004;AGIWUR7005;AGIWUR12640;AGIWUR22358;AGIWUR23711;AGIWUR27358;AGIWUR31286;AGIWUR31532;AGIWUR40279

CB4856 CT I 7564584 7567719 WBGene00012031 T25G3.4 T25G3.4 0.0772595545874926

AGIWUR186;AGIWUR12674;AGIWUR13829;AGIWUR42301

CB4856 CT I 7567775 7571250 WBGene00008411 mans-1 D2030.1 -0.0805599596926072

AGIWUR1155;AGIWUR3168;AGIWUR4637;AGIWUR12685;AGIWUR20584;AGIWUR26209;AGIWUR26452;AGIWUR30258;AGIWUR38235;AGIWUR41375;AGIWUR42688

CB4856 CT I 7574195 7578564 WBGene00008412 D2030.2 D2030.2 0.689744604105314

AGIWUR13197;AGIWUR43842;AGIWUR43976

CB4856 CT I 7578512 7580833 WBGene00008413 D2030.3 D2030.3 0.221469993257334

AGIWUR13349;AGIWUR37279

CB4856 CT I 7580944 7581628 WBGene00008414 D2030.4 D2030.4 -0.193012288152932 AGIWUR31361

CB4856 CT I 7582106 7583349 WBGene00008415 mce-1 D2030.5 -0.0012748703639085

AGIWUR7421;AGIWUR9392;AGIWUR21647;AGIWUR32440;AGIWUR39252;AGIWUR44166

CB4856 CT I 7583810 7585340 WBGene00008421 D2030.12 D2030.12 0.115554868299643

AGIWUR34170

CB4856 CT I 7585324 7588367 WBGene00004178 prg-1 D2030.6 0.400930423387765 AGIWUR10305

CB4856 CT I 7588580 7590565 WBGene00008417 D2030.7 D2030.7 -0.274751864217162 AGIWUR29435

CB4856 CT I 7590543 7591204 WBGene00008420 D2030.11 D2030.11 -0.0709382060580594

AGIWUR30935

CB4856 CT I 7591288 7595198 WBGene00008418 D2030.8 D2030.8 0.0602004779500867 AGIWUR31838

CB4856 CT I 7596507 7602203 WBGene00008419 wdr-23 D2030.9 0.0316680306901906

AGIWUR1501;AGIWUR4494;AGIWUR8516;AGIWUR23572;AGIWUR25857;AGIWUR41529  
 CB4856 CT I 7602307 7608245 WBGene00000084 aex-1 D2030.10 0.076013363586215  
 AGIWUR10350;AGIWUR16639;AGIWUR17325;AGIWUR19915;AGIWUR29156;AGIWUR30595;AGIWUR37321  
 CB4856 CT I 7614176 7634135 WBGene00003071 lrp-1 F29D11.1 0.346217191181371  
 AGIWUR29566  
 CB4856 CT I 7634494 7639780 WBGene00009254 capg-1 F29D11.2 -0.0652499098739874  
 AGIWUR1032;AGIWUR21417  
 CB4856 CT I 7640338 7641767 WBGene00009140 F26A3.1 F26A3.1 0.0496104216495752  
 AGIWUR2059;AGIWUR17278;AGIWUR34924  
 CB4856 CT I 7642270 7643328 WBGene00009141 ncbp-2 F26A3.2 -0.130266077509713 AGIWUR28835  
 CB4856 CT I 7643431 7649777 WBGene00004508 rrf-1 F26A3.8 -0.133657380876906  
 AGIWUR5335;AGIWUR25229  
 CB4856 CT I 7650418 7656336 WBGene00001214 ego-1 F26A3.3 -0.144315016811264 AGIWUR44352  
 CB4856 CT I 7656978 7658291 WBGene00009142 F26A3.4 F26A3.4 0.817742076832591  
 AGIWUR14432;AGIWUR20058;AGIWUR35343  
 CB4856 CT I 7667729 7669900 WBGene00009143 F26A3.5 F26A3.5 -0.41013149544593 AGIWUR25193  
 CB4856 CT I 7670314 7672714 WBGene00009144 del-3 F26A3.6 0.528785720131898 AGIWUR30425  
 CB4856 CT I 7674734 7676127 WBGene00009145 F26A3.7 F26A3.7 -0.158330065119845 AGIWUR23284  
 CB4856 CT I 7676668 7679061 WBGene00011975 T24B1.1 T24B1.1 -0.273230695694348 AGIWUR18387  
 CB4856 CT I 7679454 7683041 WBGene00011972 T23G11.7 T23G11.7 -0.0823041108551497  
 AGIWUR25258;AGIWUR36273  
 CB4856 CT I 7683341 7694210 WBGene00011970 r1bp-1 T23G11.5 -0.0402616305881587  
 AGIWUR25068  
 CB4856 CT I 7694325 7695233 WBGene00011969 T23G11.4 T23G11.4 -0.17620802147076  
 AGIWUR38478  
 CB4856 CT I 7695661 7698227 WBGene00001595 gld-1 T23G11.3 -0.208760705910668  
 AGIWUR3931;AGIWUR7691;AGIWUR8949;AGIWUR9950;AGIWUR13665;AGIWUR16668;AGIWUR17200;AGIWUR25690;AGIWUR30259;AGI  
 WUR35080;AGIWUR37229;AGIWUR42811  
 CB4856 CT I 7698301 7699037 WBGene00011973 T23G11.10 T23G11.10 0.0614069104078219  
 AGIWUR28833  
 CB4856 CT I 7699543 7700958 WBGene00001647 gna-2 T23G11.2 -0.0767910240100704  
 AGIWUR38355  
 CB4856 CT I 7701365 7702053 WBGene00011968 T23G11.1 T23G11.1 0.306769717594372  
 AGIWUR4190  
 CB4856 CT I 7702429 7704584 WBGene00009187 F27D4.1 F27D4.1 -0.287901707953839 AGIWUR30511  
 CB4856 CT I 7704565 7707049 WBGene00009188 lsy-22 F27D4.2 -0.0985193026921873  
 AGIWUR3195;AGIWUR10700;AGIWUR10886;AGIWUR11509;AGIWUR13652;AGIWUR16965;AGIWUR18957;AGIWUR21690;AGIWUR23469;  
 AGIWUR26882;AGIWUR38016;AGIWUR41279  
 CB4856 CT I 7723754 7724656 WBGene00009191 F27D4.7 F27D4.7 -0.0915873520581307 AGIWUR32828

|                                                                                  |    |   |         |         |                 |          |          |                     |             |
|----------------------------------------------------------------------------------|----|---|---------|---------|-----------------|----------|----------|---------------------|-------------|
| CB4856                                                                           | CT | I | 7725019 | 7727112 | WBGene00009189  | F27D4.4  | F27D4.4  | 0.0505864127345959  | AGIWUR45003 |
| CB4856                                                                           | CT | I | 7727267 | 7729092 | WBGene00006518  | bckd-1B  | F27D4.5  | -0.27447396070361   |             |
| AGIWUR6557;AGIWUR28991;AGIWUR29478                                               |    |   |         |         |                 |          |          |                     |             |
| CB4856                                                                           | CT | I | 7729184 | 7729878 | WBGene00077543  | F27D4.8  | F27D4.8  | 0.119567055816107   |             |
| AGIWUR8217;AGIWUR12100;AGIWUR27032;AGIWUR32572;AGIWUR43980                       |    |   |         |         |                 |          |          |                     |             |
| CB4856                                                                           | CT | I | 7731121 | 7737995 | WBGene00009190  | F27D4.6  | F27D4.6  | 0.371926208241888   |             |
| AGIWUR9006;AGIWUR33873;AGIWUR45113                                               |    |   |         |         |                 |          |          |                     |             |
| CB4856                                                                           | CT | I | 7755778 | 7756353 | WBGene00010291  | F58H10.1 | F58H10.1 | 0.116156366940282   |             |
| AGIWUR742;AGIWUR9492;AGIWUR18367;AGIWUR22334;AGIWUR37012;AGIWUR40797;AGIWUR44521 |    |   |         |         |                 |          |          |                     |             |
| CB4856                                                                           | CT | I | 7766532 | 7772231 | WBGene00003818  | nsf-1    | H15N14.2 | -0.0562962551675348 |             |
| AGIWUR5898;AGIWUR23021;AGIWUR40675                                               |    |   |         |         |                 |          |          |                     |             |
| CB4856                                                                           | CT | I | 7773180 | 7777652 | WBGene00000079  | adr-1    | H15N14.1 | -0.0431201108676147 |             |
| AGIWUR36832;AGIWUR41920                                                          |    |   |         |         |                 |          |          |                     |             |
| CB4856                                                                           | CT | I | 7786205 | 7793539 | WBGene00008401  | D2005.6  | D2005.6  | 0.302628604880126   | AGIWUR22650 |
| CB4856                                                                           | CT | I | 7800458 | 7801822 | WBGene00003746  | nlp-8    | D2005.2  | 0.660241716920275   | AGIWUR14278 |
| CB4856                                                                           | CT | I | 7813761 | 7815042 | WBGene00008398  | D2005.3  | D2005.3  | 0.161516261065358   | AGIWUR39084 |
| CB4856                                                                           | CT | I | 7819579 | 7820489 | WBGene000086551 | D2005.7  | D2005.7  | -0.0730266496256142 | AGIWUR22887 |
| CB4856                                                                           | CT | I | 7820831 | 7826433 | WBGene00008400  | drh-3    | D2005.5  | -0.189633530531351  | AGIWUR6818  |
| CB4856                                                                           | CT | I | 7826442 | 7831629 | WBGene00009271  | glna-3   | F30F8.2  | 0.133955353241952   | AGIWUR18761 |
| CB4856                                                                           | CT | I | 7832692 | 7835453 | WBGene00009270  | F30F8.1  | F30F8.1  | -0.149974286391807  | AGIWUR20487 |
| CB4856                                                                           | CT | I | 7835814 | 7836967 | WBGene00009272  | gras-1   | F30F8.3  | -0.10667685127966   | AGIWUR42039 |
| CB4856                                                                           | CT | I | 7837063 | 7840022 | WBGene00009276  | F30F8.9  | F30F8.9  | -0.055452837579673  |             |
| AGIWUR12971;AGIWUR13463                                                          |    |   |         |         |                 |          |          |                     |             |
| CB4856                                                                           | CT | I | 7840442 | 7846923 | WBGene00009277  | F30F8.10 | F30F8.10 | -0.255646945595532  |             |
| AGIWUR8230;AGIWUR31083;AGIWUR35509;AGIWUR43910                                   |    |   |         |         |                 |          |          |                     |             |
| CB4856                                                                           | CT | I | 7847246 | 7848920 | WBGene00009274  | F30F8.5  | F30F8.5  | -0.0699214885255905 | AGIWUR42023 |
| CB4856                                                                           | CT | I | 7848975 | 7853631 | WBGene00006386  | taf-5    | F30F8.8  | 0.26510367830166    | AGIWUR13028 |
| CB4856                                                                           | CT | I | 7853750 | 7857850 | WBGene00000163  | apb-3    | R11A5.1  | -0.132870237998521  | AGIWUR978   |
| CB4856                                                                           | CT | I | 7857823 | 7859417 | WBGene00011230  | nud-2    | R11A5.2  | 0.00747842472508076 | AGIWUR24764 |
| CB4856                                                                           | CT | I | 7862736 | 7863553 | WBGene00011231  | R11A5.3  | R11A5.3  | 0.239603809761654   | AGIWUR16938 |
| CB4856                                                                           | CT | I | 7866136 | 7872080 | WBGene00011232  | pck-2    | R11A5.4  | 0.158306421826765   | AGIWUR14830 |
| CB4856                                                                           | CT | I | 7872057 | 7875554 | WBGene00011235  | suro-1   | R11A5.7  | -0.341434157396592  |             |
| AGIWUR1591;AGIWUR9643;AGIWUR18550;AGIWUR25192;AGIWUR29119                        |    |   |         |         |                 |          |          |                     |             |
| CB4856                                                                           | CT | I | 7884319 | 7885769 | WBGene00010110  | F55D12.1 | F55D12.1 | -0.228348280061537  |             |
| AGIWUR28202                                                                      |    |   |         |         |                 |          |          |                     |             |
| CB4856                                                                           | CT | I | 7889310 | 7894864 | WBGene00010111  | F55D12.2 | F55D12.2 | -0.372237296164135  |             |
| AGIWUR30725                                                                      |    |   |         |         |                 |          |          |                     |             |
| CB4856                                                                           | CT | I | 7896125 | 7897725 | WBGene00010112  | nhr-191  | F55D12.3 | 0.107145927063351   |             |
| AGIWUR40247                                                                      |    |   |         |         |                 |          |          |                     |             |

|                                                                                                                                              |    |   |         |         |                |          |          |                     |             |
|----------------------------------------------------------------------------------------------------------------------------------------------|----|---|---------|---------|----------------|----------|----------|---------------------|-------------|
| CB4856                                                                                                                                       | CT | I | 7899037 | 7903334 | WBGene00006790 | unc-55   | F55D12.4 | 0.0884452507523719  |             |
| AGIWUR29846                                                                                                                                  |    |   |         |         |                |          |          |                     |             |
| CB4856                                                                                                                                       | CT | I | 7906826 | 7914269 | WBGene00010113 | F55D12.5 | F55D12.5 | 0.038967052128605   |             |
| AGIWUR6230                                                                                                                                   |    |   |         |         |                |          |          |                     |             |
| CB4856                                                                                                                                       | CT | I | 7913937 | 7918341 | WBGene00008991 | F20G4.2  | F20G4.2  | -0.153252167926677  |             |
| AGIWUR833;AGIWUR9193;AGIWUR38969                                                                                                             |    |   |         |         |                |          |          |                     |             |
| CB4856                                                                                                                                       | CT | I | 7918443 | 7926338 | WBGene00008990 | smg1-1   | F20G4.1  | -0.0529073269552391 | AGIWUR24802 |
| CB4856                                                                                                                                       | CT | I | 7926623 | 7934577 | WBGene00003777 | nmy-2    | F20G4.3  | -0.109443339644514  |             |
| AGIWUR1539;AGIWUR3678;AGIWUR4118;AGIWUR15521;AGIWUR21394;AGIWUR21683;AGIWUR26098;AGIWUR31723;AGIWUR36619;AGIWUR38685;AGIWUR42013;AGIWUR45084 |    |   |         |         |                |          |          |                     |             |
| CB4856                                                                                                                                       | CT | I | 7936223 | 7938328 | WBGene00011912 | T22C1.1  | T22C1.1  | -0.288471173109482  | AGIWUR12142 |
| CB4856                                                                                                                                       | CT | I | 7938560 | 7940388 | WBGene00011914 | T22C1.3  | T22C1.3  | -0.0424285818305172 | AGIWUR24799 |
| CB4856                                                                                                                                       | CT | I | 7940893 | 7941994 | WBGene00011916 | T22C1.5  | T22C1.5  | 0.0223711701254494  |             |
| AGIWUR618;AGIWUR3363;AGIWUR8190;AGIWUR8908;AGIWUR9720;AGIWUR28946                                                                            |    |   |         |         |                |          |          |                     |             |
| CB4856                                                                                                                                       | CT | I | 7942719 | 7945588 | WBGene00011917 | T22C1.6  | T22C1.6  | 0.0392626450402656  | AGIWUR19335 |
| CB4856                                                                                                                                       | CT | I | 7946186 | 7951593 | WBGene00002179 | jph-1    | T22C1.7  | -0.107290874216447  |             |
| AGIWUR3743;AGIWUR13804;AGIWUR18557;AGIWUR18715;AGIWUR22762;AGIWUR37124                                                                       |    |   |         |         |                |          |          |                     |             |
| CB4856                                                                                                                                       | CT | I | 7955977 | 7958505 | WBGene00011918 | T22C1.8  | T22C1.8  | -0.0935790604977438 | AGIWUR19143 |
| CB4856                                                                                                                                       | CT | I | 7958647 | 7960158 | WBGene00011919 | T22C1.9  | T22C1.9  | -0.0104746018004418 |             |
| AGIWUR14647;AGIWUR17388;AGIWUR33828;AGIWUR40991                                                                                              |    |   |         |         |                |          |          |                     |             |
| CB4856                                                                                                                                       | CT | I | 7960388 | 7961460 | WBGene00011921 | T22C1.12 | T22C1.12 | -0.153023784496485  |             |
| AGIWUR39086                                                                                                                                  |    |   |         |         |                |          |          |                     |             |
| CB4856                                                                                                                                       | CT | I | 7962052 | 7972443 | WBGene00004318 | rbg-2    | T22C1.10 | 0.217273126773593   |             |
| AGIWUR34380                                                                                                                                  |    |   |         |         |                |          |          |                     |             |
| CB4856                                                                                                                                       | CT | I | 7972473 | 7977078 | WBGene00010366 | H05L14.1 | H05L14.1 | -0.058226267164379  |             |
| AGIWUR3563                                                                                                                                   |    |   |         |         |                |          |          |                     |             |
| CB4856                                                                                                                                       | CT | I | 7980237 | 7993159 | WBGene00010367 | H05L14.2 | H05L14.2 | -0.322408259194546  |             |
| AGIWUR24280                                                                                                                                  |    |   |         |         |                |          |          |                     |             |
| CB4856                                                                                                                                       | CT | I | 7995738 | 7996669 | WBGene00008315 | C54G4.5  | C54G4.5  | -0.121363441551567  | AGIWUR19383 |
| CB4856                                                                                                                                       | CT | I | 7996728 | 8003179 | WBGene00008314 | C54G4.4  | C54G4.4  | -0.0695689194646754 | AGIWUR2268  |
| CB4856                                                                                                                                       | CT | I | 8005127 | 8006448 | WBGene00008313 | C54G4.3  | C54G4.3  | -0.0808485002088339 |             |
| AGIWUR11601;AGIWUR24007;AGIWUR43355                                                                                                          |    |   |         |         |                |          |          |                     |             |
| CB4856                                                                                                                                       | CT | I | 8006650 | 8009118 | WBGene00008312 | C54G4.2  | C54G4.2  | -0.0863445599574488 | AGIWUR25325 |
| CB4856                                                                                                                                       | CT | I | 8014412 | 8019572 | WBGene00008311 | rskn-2   | C54G4.1  | 0.181409909180193   |             |
| AGIWUR7952;AGIWUR17948;AGIWUR28022                                                                                                           |    |   |         |         |                |          |          |                     |             |
| CB4856                                                                                                                                       | CT | I | 8019501 | 8022730 | WBGene00008317 | C54G4.7  | C54G4.7  | 0.144724684141627   |             |
| AGIWUR32071;AGIWUR34039;AGIWUR43802                                                                                                          |    |   |         |         |                |          |          |                     |             |
| CB4856                                                                                                                                       | CT | I | 8022674 | 8024422 | WBGene00000869 | cyc-1    | C54G4.8  | -0.0148603705055139 |             |
| AGIWUR8905;AGIWUR9205;AGIWUR12984;AGIWUR23480;AGIWUR28992;AGIWUR36574                                                                        |    |   |         |         |                |          |          |                     |             |

|                                                                                               |    |   |         |         |                |           |          |                     |             |
|-----------------------------------------------------------------------------------------------|----|---|---------|---------|----------------|-----------|----------|---------------------|-------------|
| CB4856                                                                                        | CT | I | 8024880 | 8026525 | WBGene00008318 | C54G4.9   | C54G4.9  | -0.122636237442208  | AGIWUR42787 |
| CB4856                                                                                        | CT | I | 8026606 | 8028752 | WBGene00010560 | eif-2beta | K04G2.1  | -0.296647814373998  |             |
| AGIWUR9491;AGIWUR22485;AGIWUR24936;AGIWUR35928;AGIWUR40176                                    |    |   |         |         |                |           |          |                     |             |
| CB4856                                                                                        | CT | I | 8030959 | 8032886 | WBGene00045192 | aho-3     | K04G2.2  | -0.0152667936727031 | AGIWUR36029 |
| CB4856                                                                                        | CT | I | 8032863 | 8035696 | WBGene00010562 | cdc-48.3  | K04G2.3  | 0.0560518477067653  |             |
| AGIWUR8959                                                                                    |    |   |         |         |                |           |          |                     |             |
| CB4856                                                                                        | CT | I | 8036944 | 8039752 | WBGene00010564 | ath-1     | K04G2.5  | -0.0993155924507736 |             |
| AGIWUR7565;AGIWUR22477;AGIWUR35481                                                            |    |   |         |         |                |           |          |                     |             |
| CB4856                                                                                        | CT | I | 8039879 | 8040526 | WBGene00010569 | scbp-2    | K04G2.11 | -0.0313156202019638 |             |
| AGIWUR10517                                                                                   |    |   |         |         |                |           |          |                     |             |
| CB4856                                                                                        | CT | I | 8040799 | 8043277 | WBGene00010565 | vac1-14   | K04G2.6  | -0.0837208225868231 | AGIWUR459   |
| CB4856                                                                                        | CT | I | 8047345 | 8049351 | WBGene00010566 | K04G2.7   | K04G2.7  | -0.0246883779381948 | AGIWUR13374 |
| CB4856                                                                                        | CT | I | 8050043 | 8055489 | WBGene00000156 | apr-1     | K04G2.8  | 0.047937313859356   |             |
| AGIWUR2386;AGIWUR8642;AGIWUR15749;AGIWUR23225;AGIWUR24248;AGIWUR24940;AGIWUR33692;AGIWUR41192 |    |   |         |         |                |           |          |                     |             |
| CB4856                                                                                        | CT | I | 8055459 | 8057029 | WBGene00010567 | K04G2.9   | K04G2.9  | -0.135045579012774  | AGIWUR13708 |
| CB4856                                                                                        | CT | I | 8057762 | 8060557 | WBGene00010568 | K04G2.10  | K04G2.10 | 0.0197383346511533  |             |
| AGIWUR31263                                                                                   |    |   |         |         |                |           |          |                     |             |
| CB4856                                                                                        | CT | I | 8060791 | 8061793 | WBGene00008935 | F18C12.4  | F18C12.4 | -0.172839037491405  |             |
| AGIWUR11272                                                                                   |    |   |         |         |                |           |          |                     |             |
| CB4856                                                                                        | CT | I | 8062059 | 8081671 | WBGene00000485 | che-3     | F18C12.1 | 0.302222036913637   |             |
| AGIWUR19754;AGIWUR31660;AGIWUR42151                                                           |    |   |         |         |                |           |          |                     |             |
| CB4856                                                                                        | CT | I | 8083583 | 8095574 | WBGene00004378 | rme-8     | F18C12.2 | -0.0615682481788937 |             |
| AGIWUR1718;AGIWUR4249                                                                         |    |   |         |         |                |           |          |                     |             |
| CB4856                                                                                        | CT | I | 8095740 | 8098444 | WBGene00008934 | F18C12.3  | F18C12.3 | -0.215526745102625  |             |
| AGIWUR23155                                                                                   |    |   |         |         |                |           |          |                     |             |
| CB4856                                                                                        | CT | I | 8103601 | 8109227 | WBGene00005009 | spr-4     | C09H6.1  | 0.0275530414824203  | AGIWUR22535 |
| CB4856                                                                                        | CT | I | 8109746 | 8119314 | WBGene00002999 | lin-10    | C09H6.2  | 0.195066250027043   | AGIWUR34214 |
| CB4856                                                                                        | CT | I | 8125801 | 8130091 | WBGene00003136 | mau-2     | C09H6.3  | -0.114946829181044  | AGIWUR29187 |
| CB4856                                                                                        | CT | I | 8133891 | 8135051 | WBGene00012113 | T28B8.1   | T28B8.1  | 1.15247273670636    |             |
| AGIWUR234;AGIWUR7128;AGIWUR13741;AGIWUR18450;AGIWUR31586;AGIWUR35869                          |    |   |         |         |                |           |          |                     |             |
| CB4856                                                                                        | CT | I | 8139468 | 8142537 | WBGene00012116 | del-4     | T28B8.5  | 0.110856474206926   | AGIWUR41269 |
| CB4856                                                                                        | CT | I | 8147400 | 8149723 | WBGene00002101 | ins-18    | T28B8.2  | 0.397248327984745   | AGIWUR37506 |
| CB4856                                                                                        | CT | I | 8150331 | 8151368 | WBGene00044122 | T28B8.6   | T28B8.6  | -0.114232312658498  |             |
| AGIWUR3015;AGIWUR12297;AGIWUR24914                                                            |    |   |         |         |                |           |          |                     |             |
| CB4856                                                                                        | CT | I | 8151985 | 8159732 | WBGene00012114 | T28B8.3   | T28B8.3  | 0.176143550668042   | AGIWUR24289 |
| CB4856                                                                                        | CT | I | 8160512 | 8168643 | WBGene00012115 | T28B8.4   | T28B8.4  | 0.0788451495639695  |             |
| AGIWUR7458;AGIWUR11534;AGIWUR12150;AGIWUR29517;AGIWUR36686                                    |    |   |         |         |                |           |          |                     |             |
| CB4856                                                                                        | CT | I | 8172721 | 8173489 | WBGene00023413 | H31B20.2  | H31B20.2 | -0.0110671001823883 |             |
| AGIWUR3366;AGIWUR40756                                                                        |    |   |         |         |                |           |          |                     |             |

|                                                                         |    |   |         |         |                |          |          |                     |             |
|-------------------------------------------------------------------------|----|---|---------|---------|----------------|----------|----------|---------------------|-------------|
| CB4856                                                                  | CT | I | 8174888 | 8208740 | WBGene00008570 | kcn1-2   | F08A10.1 | -0.0163102484730562 |             |
| AGIWUR11841;AGIWUR13112;AGIWUR15015;AGIWUR27508;AGIWUR31988;AGIWUR43818 |    |   |         |         |                |          |          |                     |             |
| CB4856                                                                  | CT | I | 8208712 | 8210703 | WBGene00011379 | T02E1.7  | T02E1.7  | -0.0692018024164716 | AGIWUR28236 |
| CB4856                                                                  | CT | I | 8210931 | 8212411 | WBGene00011378 | T02E1.6  | T02E1.6  | 0.379657953738235   | AGIWUR11385 |
| CB4856                                                                  | CT | I | 8212362 | 8218361 | WBGene00000967 | dhs-3    | T02E1.5  | -0.428820111304521  |             |
| AGIWUR11837;AGIWUR21469                                                 |    |   |         |         |                |          |          |                     |             |
| CB4856                                                                  | CT | I | 8219998 | 8223009 | WBGene00011375 | T02E1.2  | T02E1.2  | -0.116578447486155  | AGIWUR13580 |
| CB4856                                                                  | CT | I | 8224539 | 8226297 | WBGene00004966 | spe-12   | T02E1.1  | 0.0967084292336606  | AGIWUR35507 |
| CB4856                                                                  | CT | I | 8226509 | 8240637 | WBGene00013955 | kri-1    | ZK265.1  | -0.032774248874329  |             |
| AGIWUR16436;AGIWUR37773;AGIWUR41475                                     |    |   |         |         |                |          |          |                     |             |
| CB4856                                                                  | CT | I | 8242104 | 8243572 | WBGene00013956 | ZK265.3  | ZK265.3  | -0.0455329486955947 |             |
| AGIWUR13680;AGIWUR16508;AGIWUR18985                                     |    |   |         |         |                |          |          |                     |             |
| CB4856                                                                  | CT | I | 8243695 | 8244963 | WBGene00000639 | col-63   | ZK265.2  | 0.068067670956971   | AGIWUR22009 |
| CB4856                                                                  | CT | I | 8245722 | 8250896 | WBGene00000433 | ceh-8    | ZK265.4  | 0.654936763760716   | AGIWUR32521 |
| CB4856                                                                  | CT | I | 8253452 | 8254961 | WBGene00044094 | fitm-2   | ZK265.9  | -0.0833976907338965 | AGIWUR37013 |
| CB4856                                                                  | CT | I | 8255348 | 8256312 | WBGene00013958 | ZK265.6  | ZK265.6  | -0.122076719116151  |             |
| AGIWUR7197;AGIWUR34833;AGIWUR42498                                      |    |   |         |         |                |          |          |                     |             |
| CB4856                                                                  | CT | I | 8256360 | 8258939 | WBGene00013957 | sre-23   | ZK265.5  | 0.209873488151147   |             |
| AGIWUR18546;AGIWUR38634                                                 |    |   |         |         |                |          |          |                     |             |
| CB4856                                                                  | CT | I | 8262039 | 8268990 | WBGene00013959 | ZK265.7  | ZK265.7  | -0.18481282329417   | AGIWUR1840  |
| CB4856                                                                  | CT | I | 8270304 | 8275701 | WBGene00013960 | cut1-8   | ZK265.8  | 0.258000184100443   |             |
| AGIWUR23965;AGIWUR30635                                                 |    |   |         |         |                |          |          |                     |             |
| CB4856                                                                  | CT | I | 8275611 | 8288124 | WBGene00011344 | T01G9.2  | T01G9.2  | 0.171689161529486   |             |
| AGIWUR22898;AGIWUR27052                                                 |    |   |         |         |                |          |          |                     |             |
| CB4856                                                                  | CT | I | 8288959 | 8291077 | WBGene00002196 | kin-10   | T01G9.6  | -0.084790318683666  |             |
| AGIWUR14009;AGIWUR14529                                                 |    |   |         |         |                |          |          |                     |             |
| CB4856                                                                  | CT | I | 8291289 | 8293640 | WBGene00003788 | npp-2    | T01G9.4  | -0.162855767006612  | AGIWUR31441 |
| CB4856                                                                  | CT | I | 8294881 | 8296940 | WBGene00003183 | mei-1    | T01G9.5  | -0.219302824981825  |             |
| AGIWUR22653;AGIWUR25821;AGIWUR25892;AGIWUR43030                         |    |   |         |         |                |          |          |                     |             |
| CB4856                                                                  | CT | I | 8296917 | 8307566 | WBGene00009920 | abts-1   | F52B5.1  | -0.0590882191736117 | AGIWUR30789 |
| CB4856                                                                  | CT | I | 8313228 | 8315432 | WBGene00009923 | F52B5.7  | F52B5.7  | 0.10520579202333    | AGIWUR36330 |
| CB4856                                                                  | CT | I | 8315898 | 8318250 | WBGene00009921 | F52B5.2  | F52B5.2  | -0.121639670588984  |             |
| AGIWUR12506;AGIWUR37654;AGIWUR39112                                     |    |   |         |         |                |          |          |                     |             |
| CB4856                                                                  | CT | I | 8318347 | 8323987 | WBGene00009922 | F52B5.3  | F52B5.3  | -0.142251254918609  | AGIWUR15537 |
| CB4856                                                                  | CT | I | 8324120 | 8328853 | WBGene00000467 | cep-1    | F52B5.5  | -0.200368440938483  | AGIWUR34163 |
| CB4856                                                                  | CT | I | 8329062 | 8329684 | WBGene00004439 | rpl-25.2 | F52B5.6  | 0.00999946881504776 |             |
| AGIWUR14531;AGIWUR21549;AGIWUR23326;AGIWUR37715;AGIWUR38978;AGIWUR41115 |    |   |         |         |                |          |          |                     |             |
| CB4856                                                                  | CT | I | 8330552 | 8332783 | WBGene00007911 | C34B7.1  | C34B7.1  | -0.388408982966562  |             |
| AGIWUR2961;AGIWUR20830;AGIWUR24915                                      |    |   |         |         |                |          |          |                     |             |

|                                               |    |   |         |         |                |          |          |                     |             |
|-----------------------------------------------|----|---|---------|---------|----------------|----------|----------|---------------------|-------------|
| CB4856                                        | CT | I | 8333082 | 8336144 | WBGene00007914 | mys-4    | C34B7.4  | -0.352008618564771  | AGIWUR30760 |
| CB4856                                        | CT | I | 8336966 | 8341826 | WBGene00007912 | C34B7.2  | C34B7.2  | -0.0804100199183582 |             |
| AGIWUR3075;AGIWUR7142;AGIWUR24662;AGIWUR29512 |    |   |         |         |                |          |          |                     |             |
| CB4856                                        | CT | I | 8341709 | 8346023 | WBGene00007913 | cyp-36A1 | C34B7.3  | -0.460044218220787  |             |
| AGIWUR26344                                   |    |   |         |         |                |          |          |                     |             |
| CB4856                                        | CT | I | 8353410 | 8357828 | WBGene00006531 | tba-5    | F16D3.1  | 0.0468787674215245  |             |
| AGIWUR20180;AGIWUR43630                       |    |   |         |         |                |          |          |                     |             |
| CB4856                                        | CT | I | 8358254 | 8363858 | WBGene00004684 | rsd-6    | F16D3.2  | 0.0479083863761431  | AGIWUR25032 |
| CB4856                                        | CT | I | 8363954 | 8369917 | WBGene00008887 | tbcd-1   | F16D3.4  | -0.284138700536463  | AGIWUR15687 |
| CB4856                                        | CT | I | 8377601 | 8392768 | WBGene00011827 | T19A6.1  | T19A6.1  | -0.0311387898303064 |             |
| AGIWUR416;AGIWUR7327;AGIWUR31170;AGIWUR37062  |    |   |         |         |                |          |          |                     |             |
| CB4856                                        | CT | I | 8394728 | 8398626 | WBGene00003596 | ngp-1    | T19A6.2  | 0.0708368833194282  |             |
| AGIWUR14013;AGIWUR17089;AGIWUR36590           |    |   |         |         |                |          |          |                     |             |
| CB4856                                        | CT | I | 8398918 | 8400472 | WBGene00011828 | nepr-1   | T19A6.3  | -0.110900309284828  | AGIWUR20226 |
| CB4856                                        | CT | I | 8401389 | 8403939 | WBGene00011829 | T19A6.4  | T19A6.4  | 0.344992006994586   |             |
| AGIWUR3638;AGIWUR42337;AGIWUR43968            |    |   |         |         |                |          |          |                     |             |
| CB4856                                        | CT | I | 8404547 | 8405955 | WBGene00008529 | F02E9.3  | F02E9.3  | 0.0416302186967203  |             |
| AGIWUR27790;AGIWUR41404                       |    |   |         |         |                |          |          |                     |             |
| CB4856                                        | CT | I | 8406828 | 8407645 | WBGene00008528 | F02E9.1  | F02E9.1  | -0.216841988162432  | AGIWUR14333 |
| CB4856                                        | CT | I | 8407802 | 8410804 | WBGene00003014 | lin-28   | F02E9.2  | 0.0657871357398636  |             |
| AGIWUR28453;AGIWUR32342                       |    |   |         |         |                |          |          |                     |             |
| CB4856                                        | CT | I | 8413253 | 8416195 | WBGene00008531 | F02E9.7  | F02E9.7  | 0.0382432960205215  | AGIWUR27934 |
| CB4856                                        | CT | I | 8435958 | 8438638 | WBGene00008648 | F10D11.2 | F10D11.2 | 0.0461793471233918  |             |
| AGIWUR38994                                   |    |   |         |         |                |          |          |                     |             |
| CB4856                                        | CT | I | 8439756 | 8440470 | WBGene00008649 | F10D11.3 | F10D11.3 | -0.0702005471731351 |             |
| AGIWUR20074                                   |    |   |         |         |                |          |          |                     |             |
| CB4856                                        | CT | I | 8441543 | 8442452 | WBGene00008650 | F10D11.4 | F10D11.4 | 0.00102689299550995 |             |
| AGIWUR38060                                   |    |   |         |         |                |          |          |                     |             |
| CB4856                                        | CT | I | 8442695 | 8444934 | WBGene00008651 | F10D11.5 | F10D11.5 | -0.429435002450166  |             |
| AGIWUR6906                                    |    |   |         |         |                |          |          |                     |             |
| CB4856                                        | CT | I | 8445351 | 8451023 | WBGene00008652 | F10D11.6 | F10D11.6 | -0.22421577833417   |             |
| AGIWUR25958                                   |    |   |         |         |                |          |          |                     |             |
| CB4856                                        | CT | I | 8460225 | 8463015 | WBGene00006844 | unc-120  | D1081.2  | 0.526153557634364   | AGIWUR32798 |
| CB4856                                        | CT | I | 8463356 | 8469309 | WBGene00008381 | D1081.3  | D1081.3  | -0.176748298100263  | AGIWUR4534  |
| CB4856                                        | CT | I | 8469922 | 8471852 | WBGene00045508 | D1081.10 | D1081.10 | -0.0496489118311239 |             |
| AGIWUR32516;AGIWUR38018                       |    |   |         |         |                |          |          |                     |             |
| CB4856                                        | CT | I | 8472556 | 8473481 | WBGene00050879 | D1081.11 | D1081.11 | -0.345336272433533  |             |
| AGIWUR24143                                   |    |   |         |         |                |          |          |                     |             |
| CB4856                                        | CT | I | 8474061 | 8474767 | WBGene00086554 | D1081.12 | D1081.12 | 0.0363070199199469  |             |



AGIWUR6030;AGIWUR32272

|        |    |   |         |         |                |         |         |                    |             |
|--------|----|---|---------|---------|----------------|---------|---------|--------------------|-------------|
| CB4856 | CT | I | 8481152 | 8482538 | WBGene00008383 | D1081.5 | D1081.5 | -0.124380204852589 | AGIWUR28444 |
| CB4856 | CT | I | 8482759 | 8485694 | WBGene00008384 | D1081.6 | D1081.6 | -0.234575948427491 |             |

AGIWUR9889;AGIWUR12027;AGIWUR23754;AGIWUR31661;AGIWUR41169

|        |    |   |         |         |                |         |          |                     |             |
|--------|----|---|---------|---------|----------------|---------|----------|---------------------|-------------|
| CB4856 | CT | I | 8485876 | 8487043 | WBGene00008387 | D1081.9 | D1081.9  | -0.148490244208702  | AGIWUR17852 |
| CB4856 | CT | I | 8487618 | 8490938 | WBGene00008385 | D1081.7 | D1081.7  | 0.194040263695449   | AGIWUR13110 |
| CB4856 | CT | I | 8491291 | 8495855 | WBGene00008386 | cdc-5L  | D1081.8  | -0.0697650996582748 | AGIWUR1233  |
| CB4856 | CT | I | 8498114 | 8502412 | WBGene00000431 | ceh-6   | K02B12.1 | 0.341778044289494   |             |

AGIWUR39847

|        |    |   |         |         |                |        |          |                   |  |
|--------|----|---|---------|---------|----------------|--------|----------|-------------------|--|
| CB4856 | CT | I | 8509041 | 8511412 | WBGene00010496 | sec-12 | K02B12.3 | 0.179945278681178 |  |
|--------|----|---|---------|---------|----------------|--------|----------|-------------------|--|

AGIWUR33956

|        |    |   |         |         |                |          |          |                   |  |
|--------|----|---|---------|---------|----------------|----------|----------|-------------------|--|
| CB4856 | CT | I | 8511600 | 8512505 | WBGene00010495 | K02B12.2 | K02B12.2 | 0.616683150978989 |  |
|--------|----|---|---------|---------|----------------|----------|----------|-------------------|--|

AGIWUR10637

|        |    |   |         |         |                |       |          |                   |  |
|--------|----|---|---------|---------|----------------|-------|----------|-------------------|--|
| CB4856 | CT | I | 8513919 | 8517535 | WBGene00010497 | axl-1 | K02B12.4 | 0.069014457278759 |  |
|--------|----|---|---------|---------|----------------|-------|----------|-------------------|--|

AGIWUR10856;AGIWUR17622

|        |    |   |         |         |                |          |          |                   |  |
|--------|----|---|---------|---------|----------------|----------|----------|-------------------|--|
| CB4856 | CT | I | 8517481 | 8526621 | WBGene00010498 | K02B12.5 | K02B12.5 | 0.132304126917038 |  |
|--------|----|---|---------|---------|----------------|----------|----------|-------------------|--|

AGIWUR18930

|        |    |   |         |         |                |       |          |                    |  |
|--------|----|---|---------|---------|----------------|-------|----------|--------------------|--|
| CB4856 | CT | I | 8529380 | 8531338 | WBGene00006976 | zhp-3 | K02B12.8 | -0.173549158277055 |  |
|--------|----|---|---------|---------|----------------|-------|----------|--------------------|--|

AGIWUR5845

|        |    |   |         |         |                |         |         |                     |             |
|--------|----|---|---------|---------|----------------|---------|---------|---------------------|-------------|
| CB4856 | CT | I | 8531760 | 8534527 | WBGene00001677 | gpa-15  | M04C7.1 | -0.375845099965295  | AGIWUR18844 |
| CB4856 | CT | I | 8540025 | 8544415 | WBGene00010855 | M04C7.4 | M04C7.4 | -0.0104218136653689 | AGIWUR8927  |
| CB4856 | CT | I | 8546063 | 8546725 | WBGene00010854 | M04C7.3 | M04C7.3 | 0.00556742514536079 | AGIWUR33468 |
| CB4856 | CT | I | 8549513 | 8570998 | WBGene00001651 | gon-2   | T01H8.5 | 0.0155683749987832  |             |

AGIWUR3928;AGIWUR20657;AGIWUR27009;AGIWUR28841;AGIWUR29968;AGIWUR31752;AGIWUR33924

|        |    |   |         |         |                |         |         |                    |             |
|--------|----|---|---------|---------|----------------|---------|---------|--------------------|-------------|
| CB4856 | CT | I | 8571557 | 8573749 | WBGene00011353 | T01H8.2 | T01H8.2 | -0.291600751647874 | AGIWUR21519 |
| CB4856 | CT | I | 8573855 | 8580157 | WBGene00011352 | rskn-1  | T01H8.1 | -0.206364889119454 |             |

AGIWUR2751;AGIWUR11425;AGIWUR16452;AGIWUR19665;AGIWUR25198

|        |    |   |         |         |                |       |          |                    |  |
|--------|----|---|---------|---------|----------------|-------|----------|--------------------|--|
| CB4856 | CT | I | 8584081 | 8587505 | WBGene00000904 | daf-8 | R05D11.1 | 0.0494298632281289 |  |
|--------|----|---|---------|---------|----------------|-------|----------|--------------------|--|

AGIWUR2662;AGIWUR6435;AGIWUR14094

|        |    |   |         |         |                |       |          |                   |  |
|--------|----|---|---------|---------|----------------|-------|----------|-------------------|--|
| CB4856 | CT | I | 8591215 | 8591978 | WBGene00004305 | ran-4 | R05D11.3 | -0.15686075073878 |  |
|--------|----|---|---------|---------|----------------|-------|----------|-------------------|--|

AGIWUR243;AGIWUR4908

|        |    |   |         |         |                |          |          |                    |  |
|--------|----|---|---------|---------|----------------|----------|----------|--------------------|--|
| CB4856 | CT | I | 8592092 | 8592926 | WBGene00011033 | R05D11.5 | R05D11.5 | -0.261561830140867 |  |
|--------|----|---|---------|---------|----------------|----------|----------|--------------------|--|

AGIWUR32579

|        |    |   |         |         |                |          |          |                    |  |
|--------|----|---|---------|---------|----------------|----------|----------|--------------------|--|
| CB4856 | CT | I | 8593027 | 8596225 | WBGene00011037 | R05D11.9 | R05D11.9 | -0.103581096834169 |  |
|--------|----|---|---------|---------|----------------|----------|----------|--------------------|--|

AGIWUR22806

|        |    |   |         |         |                |        |          |                    |  |
|--------|----|---|---------|---------|----------------|--------|----------|--------------------|--|
| CB4856 | CT | I | 8596333 | 8598552 | WBGene00011034 | paxt-1 | R05D11.6 | -0.139575241563962 |  |
|--------|----|---|---------|---------|----------------|--------|----------|--------------------|--|

AGIWUR40684

|        |    |   |         |         |                |          |          |                    |  |
|--------|----|---|---------|---------|----------------|----------|----------|--------------------|--|
| CB4856 | CT | I | 8598658 | 8600923 | WBGene00011032 | R05D11.4 | R05D11.4 | -0.146127158183478 |  |
|--------|----|---|---------|---------|----------------|----------|----------|--------------------|--|

AGIWUR137;AGIWUR4605;AGIWUR11633;AGIWUR20068;AGIWUR30339;AGIWUR31404

|                                                                                                           |    |   |         |         |                |           |           |                      |             |
|-----------------------------------------------------------------------------------------------------------|----|---|---------|---------|----------------|-----------|-----------|----------------------|-------------|
| CB4856                                                                                                    | CT | I | 8601339 | 8602034 | WBGene00011035 | snrp-27   | R05D11.7  | -0.217926694096985   |             |
| AGIWUR38331                                                                                               |    |   |         |         |                |           |           |                      |             |
| CB4856                                                                                                    | CT | I | 8602125 | 8605165 | WBGene00011036 | edc-3     | R05D11.8  | -0.218394798455847   |             |
| AGIWUR28087                                                                                               |    |   |         |         |                |           |           |                      |             |
| CB4856                                                                                                    | CT | I | 8606404 | 8608631 | WBGene00009664 | idha-1    | F43G9.1   | -0.00486314282683686 |             |
| AGIWUR1214;AGIWUR8312;AGIWUR18719;AGIWUR29935;AGIWUR31785;AGIWUR34086;AGIWUR35501;AGIWUR37048;AGIWUR43639 |    |   |         |         |                |           |           |                      |             |
| CB4856                                                                                                    | CT | I | 8609925 | 8611066 | WBGene00009665 | lmd-1     | F43G9.2   | -0.179989315386001   |             |
| AGIWUR9510;AGIWUR16545;AGIWUR21608;AGIWUR26157                                                            |    |   |         |         |                |           |           |                      |             |
| CB4856                                                                                                    | CT | I | 8612728 | 8615175 | WBGene00009666 | slc-25A42 | F43G9.3   | 0.122700316055308    |             |
| AGIWUR38648                                                                                               |    |   |         |         |                |           |           |                      |             |
| CB4856                                                                                                    | CT | I | 8615388 | 8616420 | WBGene00009668 | cfim-1    | F43G9.5   | -0.140174569881911   | AGIWUR2016  |
| CB4856                                                                                                    | CT | I | 8617400 | 8618889 | WBGene00009670 | F43G9.8   | F43G9.8   | 0.272343369365155    | AGIWUR17255 |
| CB4856                                                                                                    | CT | I | 8623017 | 8631184 | WBGene00001414 | fer-1     | F43G9.6   | -0.606380210742801   | AGIWUR32229 |
| CB4856                                                                                                    | CT | I | 8633925 | 8636044 | WBGene00000468 | ces-1     | F43G9.11  | 0.789381090848151    |             |
| AGIWUR40030                                                                                               |    |   |         |         |                |           |           |                      |             |
| CB4856                                                                                                    | CT | I | 8636123 | 8637971 | WBGene00000777 | cpn-1     | F43G9.9   | 0.0437305203150444   | AGIWUR7568  |
| CB4856                                                                                                    | CT | I | 8638514 | 8640236 | WBGene00009671 | mfap-1    | F43G9.10  | 0.133453982056238    |             |
| AGIWUR36870                                                                                               |    |   |         |         |                |           |           |                      |             |
| CB4856                                                                                                    | CT | I | 8640508 | 8644399 | WBGene00009672 | F43G9.12  | F43G9.12  | 0.00843376277592123  |             |
| AGIWUR3156;AGIWUR6132;AGIWUR7150;AGIWUR13796                                                              |    |   |         |         |                |           |           |                      |             |
| CB4856                                                                                                    | CT | I | 8644460 | 8646304 | WBGene00012150 | syx-17    | VF39H2L.1 | -0.0293645620251937  |             |
| AGIWUR33011                                                                                               |    |   |         |         |                |           |           |                      |             |
| CB4856                                                                                                    | CT | I | 8646451 | 8651777 | WBGene00000890 | sig-7     | F39H2.2   | -0.264462192170783   |             |
| AGIWUR6319;AGIWUR9396;AGIWUR10898;AGIWUR19443;AGIWUR40323;AGIWUR41019                                     |    |   |         |         |                |           |           |                      |             |
| CB4856                                                                                                    | CT | I | 8658874 | 8659967 | WBGene00009562 | flp-22    | F39H2.1   | 0.268502128500343    | AGIWUR19806 |
| CB4856                                                                                                    | CT | I | 8660820 | 8663127 | WBGene00045237 | mrt-1     | F39H2.5   | -0.0999322527322803  | AGIWUR15553 |
| CB4856                                                                                                    | CT | I | 8663048 | 8664143 | WBGene00006377 | syp-3     | F39H2.4   | -0.148176009522455   | AGIWUR18940 |
| CB4856                                                                                                    | CT | I | 8664925 | 8666499 | WBGene00009563 | F39H2.3   | F39H2.3   | -0.31196098561043    | AGIWUR1893  |
| CB4856                                                                                                    | CT | I | 8666595 | 8669792 | WBGene00010620 | K07A12.1  | K07A12.1  | -0.310744809983547   |             |
| AGIWUR4177                                                                                                |    |   |         |         |                |           |           |                      |             |
| CB4856                                                                                                    | CT | I | 8676666 | 8681325 | WBGene00010621 | egg-6     | K07A12.2  | -0.0715479242734967  |             |
| AGIWUR2537;AGIWUR6447;AGIWUR13392;AGIWUR18818;AGIWUR31594;AGIWUR44231                                     |    |   |         |         |                |           |           |                      |             |
| CB4856                                                                                                    | CT | I | 8683220 | 8687217 | WBGene00001990 | hot-5     | K07A12.6  | 0.059392353632667    |             |
| AGIWUR18893                                                                                               |    |   |         |         |                |           |           |                      |             |
| CB4856                                                                                                    | CT | I | 8687634 | 8690937 | WBGene00010622 | K07A12.4  | K07A12.4  | -0.193690852879145   |             |
| AGIWUR12861;AGIWUR13225;AGIWUR40426                                                                       |    |   |         |         |                |           |           |                      |             |
| CB4856                                                                                                    | CT | I | 8691039 | 8692622 | WBGene00010624 | mrps-15   | K07A12.7  | -0.493420790970085   |             |
| AGIWUR271                                                                                                 |    |   |         |         |                |           |           |                      |             |
| CB4856                                                                                                    | CT | I | 8692946 | 8693468 | WBGene00000209 | asg-1     | K07A12.3  | -0.0213631370420195  |             |

|                                                                         |    |   |         |         |                |          |          |                      |             |
|-------------------------------------------------------------------------|----|---|---------|---------|----------------|----------|----------|----------------------|-------------|
| AGIWUR21398                                                             |    |   |         |         |                |          |          |                      |             |
| CB4856                                                                  | CT | I | 8693451 | 8695159 | WBGene00010623 | K07A12.5 | K07A12.5 | 0.0700966428484353   |             |
| AGIWUR40                                                                |    |   |         |         |                |          |          |                      |             |
| CB4856                                                                  | CT | I | 8695205 | 8696376 | WBGene00003953 | pbs-7    | F39H11.5 | -0.251001094714908   |             |
| AGIWUR15172;AGIWUR32863;AGIWUR39094;AGIWUR40619                         |    |   |         |         |                |          |          |                      |             |
| CB4856                                                                  | CT | I | 8696603 | 8697596 | WBGene00009565 | F39H11.1 | F39H11.1 | -0.330740540718583   |             |
| AGIWUR20511                                                             |    |   |         |         |                |          |          |                      |             |
| CB4856                                                                  | CT | I | 8697923 | 8701971 | WBGene00006577 | tlf-1    | F39H11.2 | 0.033034551896943    |             |
| AGIWUR18615;AGIWUR19525;AGIWUR27512;AGIWUR44922                         |    |   |         |         |                |          |          |                      |             |
| CB4856                                                                  | CT | I | 8702478 | 8705825 | WBGene00000409 | cdk-8    | F39H11.3 | -0.00827984061129428 |             |
| AGIWUR21102                                                             |    |   |         |         |                |          |          |                      |             |
| CB4856                                                                  | CT | I | 8705670 | 8724279 | WBGene00000527 | cle-1    | C36B1.1  | 0.0658351155399064   |             |
| AGIWUR3067;AGIWUR23941;AGIWUR27821;AGIWUR32409;AGIWUR40629;AGIWUR41723  |    |   |         |         |                |          |          |                      |             |
| CB4856                                                                  | CT | I | 8727214 | 8728497 | WBGene00003925 | pas-4    | C36B1.4  | -0.25459211049996    |             |
| AGIWUR1803;AGIWUR20887;AGIWUR43761                                      |    |   |         |         |                |          |          |                      |             |
| CB4856                                                                  | CT | I | 8728687 | 8730054 | WBGene00007971 | rpb-3    | C36B1.3  | -0.183703595569318   | AGIWUR39563 |
| CB4856                                                                  | CT | I | 8730156 | 8730922 | WBGene00044614 | C36B1.14 | C36B1.14 | -0.207008185445659   |             |
| AGIWUR5597                                                              |    |   |         |         |                |          |          |                      |             |
| CB4856                                                                  | CT | I | 8730905 | 8732125 | WBGene00044120 | C36B1.13 | C36B1.13 | 0.781254642238961    |             |
| AGIWUR3219;AGIWUR15030;AGIWUR36543                                      |    |   |         |         |                |          |          |                      |             |
| CB4856                                                                  | CT | I | 8732219 | 8733436 | WBGene00007973 | C36B1.6  | C36B1.6  | 0.557418705625579    |             |
| AGIWUR10616;AGIWUR14532;AGIWUR16176;AGIWUR16962;AGIWUR17067;AGIWUR30963 |    |   |         |         |                |          |          |                      |             |
| CB4856                                                                  | CT | I | 8733413 | 8735717 | WBGene00007972 | prp-4    | C36B1.5  | -0.0581617634600775  | AGIWUR6599  |
| CB4856                                                                  | CT | I | 8736213 | 8737038 | WBGene00007974 | dhfr-1   | C36B1.7  | -0.306904486612286   |             |
| AGIWUR4679;AGIWUR12507;AGIWUR26096                                      |    |   |         |         |                |          |          |                      |             |
| CB4856                                                                  | CT | I | 8737072 | 8742548 | WBGene00007975 | glc-1    | C36B1.8  | -0.0639408743444037  |             |
| AGIWUR14858;AGIWUR18949                                                 |    |   |         |         |                |          |          |                      |             |
| CB4856                                                                  | CT | I | 8743849 | 8746925 | WBGene00007976 | C36B1.9  | C36B1.9  | -0.302246122830224   | AGIWUR42991 |
| CB4856                                                                  | CT | I | 8749616 | 8751397 | WBGene00007977 | gska-3   | C36B1.10 | 0.151870468455648    |             |
| AGIWUR27792                                                             |    |   |         |         |                |          |          |                      |             |
| CB4856                                                                  | CT | I | 8752236 | 8755678 | WBGene00007979 | imp-1    | C36B1.12 | -0.203088454623206   |             |
| AGIWUR17031                                                             |    |   |         |         |                |          |          |                      |             |
| CB4856                                                                  | CT | I | 8755846 | 8757603 | WBGene00007978 | C36B1.11 | C36B1.11 | -0.355548047406881   |             |
| AGIWUR2671                                                              |    |   |         |         |                |          |          |                      |             |
| CB4856                                                                  | CT | I | 8758156 | 8759032 | WBGene00008440 | DY3.8    | DY3.8    | -0.316485305172186   |             |
| AGIWUR28207;AGIWUR35048                                                 |    |   |         |         |                |          |          |                      |             |
| CB4856                                                                  | CT | I | 8759204 | 8759788 | WBGene00006574 | tin-13   | DY3.1    | -0.256874310532966   |             |
| AGIWUR18692;AGIWUR32809                                                 |    |   |         |         |                |          |          |                      |             |
| CB4856                                                                  | CT | I | 8762986 | 8765633 | WBGene00003052 | lmn-1    | DY3.2    | 0.0803291509144035   |             |

AGIWUR31393;AGIWUR32136;AGIWUR45124

|        |    |   |         |         |                |        |       |                    |             |
|--------|----|---|---------|---------|----------------|--------|-------|--------------------|-------------|
| CB4856 | CT | I | 8768325 | 8771248 | WBGene00006618 | trt-1  | DY3.4 | 0.0812207524328059 | AGIWUR33053 |
| CB4856 | CT | I | 8771275 | 8777514 | WBGene00004115 | pqn-26 | DY3.5 | 0.0109432977531485 | AGIWUR42740 |
| CB4856 | CT | I | 8779731 | 8785415 | WBGene00008439 | mfb-1  | DY3.6 | 0.425085470520428  |             |

AGIWUR12938;AGIWUR30025

|        |    |   |         |         |                |         |         |                    |             |
|--------|----|---|---------|---------|----------------|---------|---------|--------------------|-------------|
| CB4856 | CT | I | 8792965 | 8797293 | WBGene00006324 | sup-17  | DY3.7   | 0.053411746989962  | AGIWUR24707 |
| CB4856 | CT | I | 8798785 | 8801694 | WBGene00009453 | F36A2.3 | F36A2.3 | -0.181421790547578 | AGIWUR5208  |
| CB4856 | CT | I | 8801612 | 8804697 | WBGene00009452 | F36A2.2 | F36A2.2 | 0.216806508229691  | AGIWUR32436 |
| CB4856 | CT | I | 8804799 | 8808081 | WBGene00009451 | cids-2  | F36A2.1 | 0.0699203392923717 | AGIWUR13864 |
| CB4856 | CT | I | 8808775 | 8813298 | WBGene00009455 | phip-1  | F36A2.8 | -0.107447223026805 |             |

AGIWUR9233;AGIWUR16121;AGIWUR31991;AGIWUR34048;AGIWUR40925

|        |    |   |         |         |                |         |         |                    |  |
|--------|----|---|---------|---------|----------------|---------|---------|--------------------|--|
| CB4856 | CT | I | 8813761 | 8814979 | WBGene00009454 | F36A2.7 | F36A2.7 | 0.0468323480849193 |  |
|--------|----|---|---------|---------|----------------|---------|---------|--------------------|--|

AGIWUR18419;AGIWUR27255

|        |    |   |         |         |                |        |         |                    |  |
|--------|----|---|---------|---------|----------------|--------|---------|--------------------|--|
| CB4856 | CT | I | 8815554 | 8816193 | WBGene00004484 | rps-15 | F36A2.6 | 0.0177381565633681 |  |
|--------|----|---|---------|---------|----------------|--------|---------|--------------------|--|

AGIWUR10589;AGIWUR16337;AGIWUR20215;AGIWUR23222;AGIWUR31135;AGIWUR34061

|        |    |   |         |         |                |          |          |                     |             |
|--------|----|---|---------|---------|----------------|----------|----------|---------------------|-------------|
| CB4856 | CT | I | 8816978 | 8821359 | WBGene00009456 | F36A2.9  | F36A2.9  | -0.0529552484989502 | AGIWUR32707 |
| CB4856 | CT | I | 8822188 | 8823637 | WBGene00009458 | F36A2.11 | F36A2.11 | 0.0196139534419491  |             |

AGIWUR14729

|        |    |   |         |         |                |          |          |                   |  |
|--------|----|---|---------|---------|----------------|----------|----------|-------------------|--|
| CB4856 | CT | I | 8824401 | 8825628 | WBGene00023490 | F36A2.14 | F36A2.14 | 0.126026319892762 |  |
|--------|----|---|---------|---------|----------------|----------|----------|-------------------|--|

AGIWUR38352

|        |    |   |         |         |                |          |          |                     |  |
|--------|----|---|---------|---------|----------------|----------|----------|---------------------|--|
| CB4856 | CT | I | 8826167 | 8826670 | WBGene00009459 | F36A2.12 | F36A2.12 | -0.0914143533906424 |  |
|--------|----|---|---------|---------|----------------|----------|----------|---------------------|--|

AGIWUR3383;AGIWUR3491;AGIWUR20812;AGIWUR24892

|        |    |   |         |         |                |       |          |                     |  |
|--------|----|---|---------|---------|----------------|-------|----------|---------------------|--|
| CB4856 | CT | I | 8828048 | 8838719 | WBGene00009460 | ubr-5 | F36A2.13 | -0.0987740119070217 |  |
|--------|----|---|---------|---------|----------------|-------|----------|---------------------|--|

AGIWUR2272;AGIWUR9912;AGIWUR27719;AGIWUR32971;AGIWUR34063;AGIWUR44432

|        |    |   |         |         |                |          |          |                   |  |
|--------|----|---|---------|---------|----------------|----------|----------|-------------------|--|
| CB4856 | CT | I | 8840634 | 8841163 | WBGene00009250 | F29D10.1 | F29D10.1 | 0.399477338566692 |  |
|--------|----|---|---------|---------|----------------|----------|----------|-------------------|--|

AGIWUR6675

|        |    |   |         |         |                |          |          |                    |  |
|--------|----|---|---------|---------|----------------|----------|----------|--------------------|--|
| CB4856 | CT | I | 8841770 | 8842323 | WBGene00009251 | F29D10.2 | F29D10.2 | -0.953553235751436 |  |
|--------|----|---|---------|---------|----------------|----------|----------|--------------------|--|

AGIWUR35680

|        |    |   |         |         |                |          |          |                    |  |
|--------|----|---|---------|---------|----------------|----------|----------|--------------------|--|
| CB4856 | CT | I | 8842552 | 8845595 | WBGene00009252 | F29D10.3 | F29D10.3 | -0.348224594247962 |  |
|--------|----|---|---------|---------|----------------|----------|----------|--------------------|--|

AGIWUR40719

|        |    |   |         |         |                |       |          |                     |  |
|--------|----|---|---------|---------|----------------|-------|----------|---------------------|--|
| CB4856 | CT | I | 8845809 | 8851116 | WBGene00002035 | hum-1 | F29D10.4 | -0.0977109664992106 |  |
|--------|----|---|---------|---------|----------------|-------|----------|---------------------|--|

AGIWUR26300

|        |    |   |         |         |                |        |          |                   |  |
|--------|----|---|---------|---------|----------------|--------|----------|-------------------|--|
| CB4856 | CT | I | 8853686 | 8861274 | WBGene00010137 | ztf-26 | F55H12.6 | 0.104294067556843 |  |
|--------|----|---|---------|---------|----------------|--------|----------|-------------------|--|

AGIWUR10402;AGIWUR26678;AGIWUR32959;AGIWUR43440

|        |    |   |         |         |                |          |          |                  |  |
|--------|----|---|---------|---------|----------------|----------|----------|------------------|--|
| CB4856 | CT | I | 8863996 | 8865475 | WBGene00219283 | F55H12.7 | F55H12.7 | 1.85848472382125 |  |
|--------|----|---|---------|---------|----------------|----------|----------|------------------|--|

AGIWUR10168;AGIWUR13074;AGIWUR22738;AGIWUR23038;AGIWUR37370

|        |    |   |         |         |                |          |          |                   |  |
|--------|----|---|---------|---------|----------------|----------|----------|-------------------|--|
| CB4856 | CT | I | 8866907 | 8868293 | WBGene00010133 | F55H12.2 | F55H12.2 | 0.787948645571248 |  |
|--------|----|---|---------|---------|----------------|----------|----------|-------------------|--|

AGIWUR12233

|        |    |   |         |         |                |          |          |                     |  |
|--------|----|---|---------|---------|----------------|----------|----------|---------------------|--|
| CB4856 | CT | I | 8869709 | 8871698 | WBGene00010136 | F55H12.5 | F55H12.5 | -0.0072410169760424 |  |
|--------|----|---|---------|---------|----------------|----------|----------|---------------------|--|

|                                                                        |    |   |         |         |                |          |          |                      |             |
|------------------------------------------------------------------------|----|---|---------|---------|----------------|----------|----------|----------------------|-------------|
| AGIWUR5794                                                             |    |   |         |         |                |          |          |                      |             |
| CB4856                                                                 | CT | I | 8871791 | 8875253 | WBGene00004901 | snf-2    | F55H12.1 | -0.00510249860486045 |             |
| AGIWUR9487;AGIWUR19311                                                 |    |   |         |         |                |          |          |                      |             |
| CB4856                                                                 | CT | I | 8876319 | 8893051 | WBGene00010134 | F55H12.3 | F55H12.3 | 0.00766889907764678  |             |
| AGIWUR9070                                                             |    |   |         |         |                |          |          |                      |             |
| CB4856                                                                 | CT | I | 8893308 | 8894137 | WBGene00010135 | F55H12.4 | F55H12.4 | -0.43411200920562    |             |
| AGIWUR3304;AGIWUR5417;AGIWUR36249                                      |    |   |         |         |                |          |          |                      |             |
| CB4856                                                                 | CT | I | 8897613 | 8901435 | WBGene00006765 | unc-29   | T08G11.5 | -0.236376861423974   |             |
| AGIWUR16459                                                            |    |   |         |         |                |          |          |                      |             |
| CB4856                                                                 | CT | I | 8902747 | 8905534 | WBGene00011631 | T08G11.4 | T08G11.4 | -0.28371734588454    |             |
| AGIWUR14591                                                            |    |   |         |         |                |          |          |                      |             |
| CB4856                                                                 | CT | I | 8905644 | 8916805 | WBGene00011629 | T08G11.1 | T08G11.1 | 0.054609983693533    |             |
| AGIWUR1995;AGIWUR15550;AGIWUR25916                                     |    |   |         |         |                |          |          |                      |             |
| CB4856                                                                 | CT | I | 8919329 | 8920516 | WBGene00044684 | T08G11.2 | T08G11.2 | 0.267359789368075    |             |
| AGIWUR9790;AGIWUR15705                                                 |    |   |         |         |                |          |          |                      |             |
| CB4856                                                                 | CT | I | 8921190 | 8925327 | WBGene00011630 | T08G11.3 | T08G11.3 | 0.0736688569289567   |             |
| AGIWUR19825                                                            |    |   |         |         |                |          |          |                      |             |
| CB4856                                                                 | CT | I | 8928748 | 8931089 | WBGene00006641 | tsp-15   | F53B6.1  | -0.0565215839455373  | AGIWUR2572  |
| CB4856                                                                 | CT | I | 8931035 | 8942287 | WBGene00009958 | madd-4   | F53B6.2  | -0.01302444728932    |             |
| AGIWUR22167;AGIWUR26682;AGIWUR29905;AGIWUR37895;AGIWUR41106            |    |   |         |         |                |          |          |                      |             |
| CB4856                                                                 | CT | I | 8945533 | 8946205 | WBGene00009964 | fip-6    | F53B6.9  | -0.133762858844385   |             |
| AGIWUR7478;AGIWUR11131;AGIWUR11435;AGIWUR20023;AGIWUR25202;AGIWUR43705 |    |   |         |         |                |          |          |                      |             |
| CB4856                                                                 | CT | I | 8946686 | 8947201 | WBGene00009963 | fipr-26  | F53B6.8  | 0.774474665872372    | AGIWUR33720 |
| CB4856                                                                 | CT | I | 8947304 | 8948711 | WBGene00009959 | F53B6.4  | F53B6.4  | 0.124742909797006    |             |
| AGIWUR31357;AGIWUR34697                                                |    |   |         |         |                |          |          |                      |             |
| CB4856                                                                 | CT | I | 8948778 | 8954394 | WBGene00009962 | F53B6.7  | F53B6.7  | 0.0170964648699687   | AGIWUR3335  |
| CB4856                                                                 | CT | I | 8954559 | 8957482 | WBGene00009961 | cutl-7   | F53B6.6  | 0.33451019881037     | AGIWUR18610 |
| CB4856                                                                 | CT | I | 8958061 | 8960889 | WBGene00043049 | F32H2.11 | F32H2.11 | 0.202939260672963    |             |
| AGIWUR30582                                                            |    |   |         |         |                |          |          |                      |             |
| CB4856                                                                 | CT | I | 8962322 | 8966129 | WBGene00001568 | snpc-4   | F32H2.1  | -0.0630053589919477  | AGIWUR16674 |
| CB4856                                                                 | CT | I | 8966130 | 8967004 | WBGene00007026 | mdt-31   | F32H2.2  | -0.0221998724597618  | AGIWUR34254 |
| CB4856                                                                 | CT | I | 8966985 | 8970158 | WBGene00004953 | spd-2    | F32H2.3  | -0.0487311911110009  | AGIWUR12491 |
| CB4856                                                                 | CT | I | 8970293 | 8971031 | WBGene00009346 | F32H2.10 | F32H2.10 | -0.250062902126182   |             |
| AGIWUR31683                                                            |    |   |         |         |                |          |          |                      |             |
| CB4856                                                                 | CT | I | 8971139 | 8973063 | WBGene00009341 | thoc-3   | F32H2.4  | 0.0472251237481309   | AGIWUR33313 |
| CB4856                                                                 | CT | I | 8973066 | 8974575 | WBGene00050880 | F32H2.12 | F32H2.12 | 0.176915270686502    |             |
| AGIWUR1994;AGIWUR33278                                                 |    |   |         |         |                |          |          |                      |             |
| CB4856                                                                 | CT | I | 8975384 | 8986534 | WBGene00009342 | fasn-1   | F32H2.5  | 0.160626991955588    |             |
| AGIWUR11210;AGIWUR43314                                                |    |   |         |         |                |          |          |                      |             |

|                                                                                                                                                        |    |   |         |         |                |         |          |                      |             |
|--------------------------------------------------------------------------------------------------------------------------------------------------------|----|---|---------|---------|----------------|---------|----------|----------------------|-------------|
| CB4856                                                                                                                                                 | CT | I | 8989938 | 8993461 | WBGene00009345 | F32H2.8 | F32H2.8  | 0.151511232719047    | AGIWUR40399 |
| CB4856                                                                                                                                                 | CT | I | 8994002 | 8998593 | WBGene00006532 | tba-6   | F32H2.9  | 0.360873578660775    |             |
| AGIWUR6102;AGIWUR8788;AGIWUR19549                                                                                                                      |    |   |         |         |                |         |          |                      |             |
| CB4856                                                                                                                                                 | CT | I | 8998532 | 8999564 | WBGene00009343 | F32H2.6 | F32H2.6  | 0.422823416468949    | AGIWUR6481  |
| CB4856                                                                                                                                                 | CT | I | 9000097 | 9001721 | WBGene00009480 | F36F2.7 | F36F2.7  | 0.183711834941146    | AGIWUR19884 |
| CB4856                                                                                                                                                 | CT | I | 9001913 | 9003963 | WBGene00009478 | syx-7   | F36F2.4  | -0.221646764695713   | AGIWUR4349  |
| CB4856                                                                                                                                                 | CT | I | 9004513 | 9008708 | WBGene00009479 | fcf-1   | F36F2.6  | -0.0401680138632416  |             |
| AGIWUR1634;AGIWUR1989;AGIWUR12067;AGIWUR12943;AGIWUR19990;AGIWUR23535;AGIWUR23931;AGIWUR33444;AGIWUR33850;AGIWUR35249;AGIWUR37967;AGIWUR38798          |    |   |         |         |                |         |          |                      |             |
| CB4856                                                                                                                                                 | CT | I | 9009260 | 9013885 | WBGene00009477 | rbp1-1  | F36F2.3  | 0.129623345270158    |             |
| AGIWUR8448;AGIWUR9874;AGIWUR11081;AGIWUR20523;AGIWUR42216;AGIWUR44180                                                                                  |    |   |         |         |                |         |          |                      |             |
| CB4856                                                                                                                                                 | CT | I | 9015357 | 9015711 | WBGene00009481 | F36F2.8 | F36F2.8  | 0.249151875613851    | AGIWUR18272 |
| CB4856                                                                                                                                                 | CT | I | 9016755 | 9017994 | WBGene00009476 | F36F2.2 | F36F2.2  | 0.988550614786643    | AGIWUR2277  |
| CB4856                                                                                                                                                 | CT | I | 9018623 | 9020304 | WBGene00009475 | F36F2.1 | F36F2.1  | 0.048302241147633    | AGIWUR26314 |
| CB4856                                                                                                                                                 | CT | I | 9020945 | 9025553 | WBGene00006525 | tax-2   | F36F2.5  | 0.147030015232213    | AGIWUR29674 |
| CB4856                                                                                                                                                 | CT | I | 9025779 | 9031232 | WBGene00007854 | C31H5.1 | C31H5.1  | 0.251029679961888    | AGIWUR2925  |
| CB4856                                                                                                                                                 | CT | I | 9031274 | 9036695 | WBGene00000058 | acr-19  | C31H5.3  | 0.2429001462858      | AGIWUR7763  |
| CB4856                                                                                                                                                 | CT | I | 9041374 | 9041988 | WBGene00007858 | C31H5.7 | C31H5.7  | 0.39673332661838     | AGIWUR33167 |
| CB4856                                                                                                                                                 | CT | I | 9042270 | 9042599 | WBGene00007855 | C31H5.4 | C31H5.4  | 0.403326713474508    | AGIWUR26962 |
| CB4856                                                                                                                                                 | CT | I | 9043315 | 9046889 | WBGene00007857 | C31H5.6 | C31H5.6  | -0.202693402993503   | AGIWUR44224 |
| CB4856                                                                                                                                                 | CT | I | 9048188 | 9049427 | WBGene00007856 | C31H5.5 | C31H5.5  | -0.0972626512206638  | AGIWUR15377 |
| CB4856                                                                                                                                                 | CT | I | 9049460 | 9055457 | WBGene00001843 | hgo-1   | W06D4.1  | -0.0836491691094654  | AGIWUR36152 |
| CB4856                                                                                                                                                 | CT | I | 9056293 | 9057822 | WBGene00012296 | spe-46  | W06D4.2  | -0.0734807166894207  |             |
| AGIWUR906;AGIWUR18763;AGIWUR24886                                                                                                                      |    |   |         |         |                |         |          |                      |             |
| CB4856                                                                                                                                                 | CT | I | 9058852 | 9060473 | WBGene00012297 | W06D4.3 | W06D4.3  | -0.0959652004350744  |             |
| AGIWUR9186;AGIWUR28315;AGIWUR40836                                                                                                                     |    |   |         |         |                |         |          |                      |             |
| CB4856                                                                                                                                                 | CT | I | 9060493 | 9063160 | WBGene00012298 | prmt-7  | W06D4.4  | -0.235954811168613   | AGIWUR3456  |
| CB4856                                                                                                                                                 | CT | I | 9063588 | 9064403 | WBGene00006503 | snx-3   | W06D4.5  | -0.294334345390681   | AGIWUR28774 |
| CB4856                                                                                                                                                 | CT | I | 9065087 | 9070264 | WBGene00004298 | rad-54  | W06D4.6  | -0.151704273563823   |             |
| AGIWUR159;AGIWUR21282;AGIWUR26162                                                                                                                      |    |   |         |         |                |         |          |                      |             |
| CB4856                                                                                                                                                 | CT | I | 9070247 | 9075077 | WBGene00011531 | rsbp-1  | T06D10.1 | 0.0271814336491243   |             |
| AGIWUR241;AGIWUR1536;AGIWUR4469;AGIWUR5365;AGIWUR12649;AGIWUR14014;AGIWUR18637;AGIWUR23781;AGIWUR24397;AGIWUR26444;AGIWUR26777;AGIWUR40003;AGIWUR43991 |    |   |         |         |                |         |          |                      |             |
| CB4856                                                                                                                                                 | CT | I | 9077565 | 9080024 | WBGene00011532 | chaf-1  | T06D10.2 | -0.00549182792986613 |             |
| AGIWUR26057                                                                                                                                            |    |   |         |         |                |         |          |                      |             |
| CB4856                                                                                                                                                 | CT | I | 9095957 | 9100862 | WBGene00003182 | mef-2   | W10D5.1  | 0.0217422463119745   |             |
| AGIWUR1934;AGIWUR2035;AGIWUR36060;AGIWUR40628                                                                                                          |    |   |         |         |                |         |          |                      |             |
| CB4856                                                                                                                                                 | CT | I | 9100846 | 9107939 | WBGene00001574 | gei-17  | W10D5.3  | 0.0822847662716271   |             |
| AGIWUR1675;AGIWUR2117;AGIWUR7167;AGIWUR7510;AGIWUR9339;AGIWUR11898;AGIWUR12040;AGIWUR15245;AGIWUR21852;AGIWUR                                          |    |   |         |         |                |         |          |                      |             |

UR23780;AGIWUR23859;AGIWUR28852;AGIWUR32519;AGIWUR36685;AGIWUR37731;AGIWUR37792;AGIWUR37857;AGIWUR39942;AGIWUR42717  
 CB4856 CT I 9108173 9110918 WBGene00012376 nduf-7 W10D5.2 0.143286127290358  
 AGIWUR9870;AGIWUR19362;AGIWUR25841;AGIWUR39958;AGIWUR42432  
 CB4856 CT I 9118115 9122398 WBGene00014115 gld-4 ZK858.1 -0.211222811288394  
 AGIWUR8183;AGIWUR20297;AGIWUR27306  
 CB4856 CT I 9123182 9124509 WBGene00014116 ZK858.2 ZK858.2 0.333060099514507 AGIWUR39603  
 CB4856 CT I 9124664 9126155 WBGene00014121 ZK858.8 ZK858.8 0.0737233659699488 AGIWUR34245  
 CB4856 CT I 9126140 9127101 WBGene00014117 clec-91 ZK858.3 -0.15077893786502 AGIWUR32994  
 CB4856 CT I 9132538 9135753 WBGene00003209 mel-26 ZK858.4 -0.0262429732905467 AGIWUR17332  
 CB4856 CT I 9135764 9138361 WBGene00014118 ZK858.5 ZK858.5 -0.0463260633097153 AGIWUR21277  
 CB4856 CT I 9138267 9145632 WBGene00014119 ZK858.6 ZK858.6 -0.0505086479976953 AGIWUR1164  
 CB4856 CT I 9149474 9153252 WBGene00010421 slc-36.4 H32K16.1 0.196551129325109  
 AGIWUR12001;AGIWUR14839;AGIWUR39085  
 CB4856 CT I 9154228 9154789 WBGene00010422 H32K16.2 H32K16.2 1.37388376000834  
 AGIWUR19106  
 CB4856 CT I 9155513 9157411 WBGene00009129 F25H5.7 F25H5.7 -0.00248958055054338 AGIWUR22773  
 CB4856 CT I 9159015 9159757 WBGene00009128 mrpl-54 F25H5.6 -0.210662430143419 AGIWUR41190  
 CB4856 CT I 9159938 9163261 WBGene00009127 clsp-1 F25H5.5 0.00952020773376461 AGIWUR34600  
 CB4856 CT I 9163531 9166952 WBGene00001167 eef-2 F25H5.4 -0.00288647630152283  
 AGIWUR2082;AGIWUR2145;AGIWUR3539;AGIWUR3615;AGIWUR6960;AGIWUR18490;AGIWUR19460;AGIWUR20868;AGIWUR29742;AGIWUR34740;AGIWUR37900;AGIWUR42189;AGIWUR44830  
 CB4856 CT I 9168432 9177488 WBGene00009126 pyk-1 F25H5.3 -0.177916809341336  
 AGIWUR13861;AGIWUR19221;AGIWUR20544;AGIWUR20814  
 CB4856 CT I 9177664 9178703 WBGene00009130 F25H5.8 F25H5.8 -0.108677625676817 AGIWUR17782  
 CB4856 CT I 9179941 9181119 WBGene00009125 F25H5.2 F25H5.2 -0.233415146938457 AGIWUR3832  
 CB4856 CT I 9181819 9220766 WBGene00006407 lim-9 F25H5.1 -0.0416838486892601  
 AGIWUR4251;AGIWUR5434;AGIWUR8051;AGIWUR12308;AGIWUR12581;AGIWUR14843;AGIWUR27883;AGIWUR28401;AGIWUR34213;AGIWUR37608;AGIWUR40066  
 CB4856 CT I 9221834 9226390 WBGene00008107 aspm-1 C45G3.1 0.110170768646249  
 AGIWUR10033;AGIWUR19229;AGIWUR22943;AGIWUR26742;AGIWUR35966;AGIWUR38022  
 CB4856 CT I 9226905 9228184 WBGene00001590 C45G3.3 C45G3.3 -0.306668521256657  
 AGIWUR3937;AGIWUR4120;AGIWUR8367;AGIWUR41921  
 CB4856 CT I 9228163 9232097 WBGene00044008 gip-2 C45G3.5 -0.0263898458782563 AGIWUR39028  
 CB4856 CT I 9232071 9233560 WBGene00000147 aph-1 VF36H2L.1 0.010597393566961  
 AGIWUR20506  
 CB4856 CT I 9234174 9245924 WBGene00009498 tat-5 F36H2.1 0.0799279759536766 AGIWUR33349  
 CB4856 CT I 9246028 9249383 WBGene00009499 ent-6 F36H2.2 0.0759095493726551 AGIWUR33843  
 CB4856 CT I 9249542 9250488 WBGene00044247 F36H2.4 F36H2.4 -0.121263563396835

AGIWUR1039;AGIWUR13806;AGIWUR14703;AGIWUR14903  
 CB4856 CT I 9251838 9261657 WBGene00009500 F36H2.3 F36H2.3 0.0457246255748811  
 AGIWUR5375;AGIWUR18730  
 CB4856 CT I 9265951 9270919 WBGene00008779 F14B4.1 F14B4.1 0.91941161747154 AGIWUR35273  
 CB4856 CT I 9271443 9278689 WBGene00008780 hmk-1 F14B4.2 -0.0544631865722955  
 AGIWUR9996;AGIWUR14587;AGIWUR24932  
 CB4856 CT I 9280963 9286577 WBGene00008781 rpoa-2 F14B4.3 -0.212329131872478 AGIWUR24437  
 CB4856 CT I 9287437 9289770 WBGene00009173 prom-1 F26H9.1 -0.231079333605553 AGIWUR21546  
 CB4856 CT I 9289753 9294035 WBGene00009174 F26H9.2 F26H9.2 -0.103758565902561  
 AGIWUR18009;AGIWUR21415;AGIWUR26246  
 CB4856 CT I 9305751 9306844 WBGene00009176 nmat-2 F26H9.4 -0.36873114190853 AGIWUR38957  
 CB4856 CT I 9308442 9310221 WBGene00004268 rab-5 F26H9.6 0.00526278216070608  
 AGIWUR6586;AGIWUR20214;AGIWUR26895;AGIWUR43354  
 CB4856 CT I 9310329 9312641 WBGene00006732 uev-3 F26H9.7 -0.0476142288982189 AGIWUR29491  
 CB4856 CT I 9312635 9314488 WBGene00009177 F26H9.5 F26H9.5 -0.0174598312154366 AGIWUR38121  
 CB4856 CT I 9317736 9327279 WBGene00009178 uggt-2 F26H9.8 0.0162542221094188 AGIWUR43492  
 CB4856 CT I 9327857 9330928 WBGene00007533 cbl-1 C12C8.2 -0.356701640136316  
 AGIWUR4013;AGIWUR4482;AGIWUR30682;AGIWUR40616  
 CB4856 CT I 9334812 9342496 WBGene00003026 lin-41 C12C8.3 -0.120249369466353  
 AGIWUR30548;AGIWUR38608  
 CB4856 CT I 9344724 9349558 WBGene00010857 M04C9.2 M04C9.2 0.34649431871671  
 AGIWUR9274;AGIWUR27747;AGIWUR37255  
 CB4856 CT I 9350274 9352700 WBGene00010856 M04C9.1 M04C9.1 -0.249982635734984  
 AGIWUR13465;AGIWUR15038;AGIWUR30895;AGIWUR32551;AGIWUR38207  
 CB4856 CT I 9352882 9354541 WBGene00010858 M04C9.3 M04C9.3 -0.105125522155986  
 AGIWUR17011;AGIWUR34564;AGIWUR40124  
 CB4856 CT I 9355072 9357079 WBGene00010859 M04C9.4 M04C9.4 -0.330874073037931 AGIWUR12795  
 CB4856 CT I 9359075 9364180 WBGene00001121 dyf-5 M04C9.5 0.379216642056446 AGIWUR3172  
 CB4856 CT I 9364099 9389982 WBGene00008878 ppfr-1 F16A11.3 -0.136598613737531  
 AGIWUR6600;AGIWUR24113;AGIWUR33603  
 CB4856 CT I 9390829 9393095 WBGene00008877 rtcb-1 F16A11.2 -0.153100199467001  
 AGIWUR39556  
 CB4856 CT I 9393948 9404024 WBGene00008876 F16A11.1 F16A11.1 0.0682587781053652  
 AGIWUR4470  
 CB4856 CT I 9408356 9410094 WBGene00007641 C17E4.1 C17E4.1 0.194462021567533 AGIWUR21934  
 CB4856 CT I 9414456 9416703 WBGene00219313 C17E4.20 C17E4.20 0.197766112111999  
 AGIWUR33741  
 CB4856 CT I 9416704 9418884 WBGene00007643 marc-3 C17E4.3 -0.0376825096851654  
 AGIWUR7149;AGIWUR44386



|                                                                         |    |   |         |         |                |           |           |                     |             |
|-------------------------------------------------------------------------|----|---|---------|---------|----------------|-----------|-----------|---------------------|-------------|
| CB4856                                                                  | CT | I | 9419368 | 9419998 | WBGene00007644 | C17E4.4   | C17E4.4   | 0.0692264776287814  | AGIWUR38083 |
| CB4856                                                                  | CT | I | 9419973 | 9420813 | WBGene00044236 | C17E4.11  | C17E4.11  | 0.0627125394963333  |             |
| AGIWUR27536;AGIWUR36882                                                 |    |   |         |         |                |           |           |                     |             |
| CB4856                                                                  | CT | I | 9420907 | 9421992 | WBGene00003904 | pabp-2    | C17E4.5   | -0.0222635702097511 |             |
| AGIWUR3676;AGIWUR21561;AGIWUR38882;AGIWUR41249                          |    |   |         |         |                |           |           |                     |             |
| CB4856                                                                  | CT | I | 9422556 | 9431120 | WBGene00007645 | C17E4.6   | C17E4.6   | -0.0540569860254809 |             |
| AGIWUR13805;AGIWUR17385;AGIWUR29208                                     |    |   |         |         |                |           |           |                     |             |
| CB4856                                                                  | CT | I | 9431098 | 9433828 | WBGene00007646 | nkb-1     | C17E4.9   | -0.215737535840005  |             |
| AGIWUR8987;AGIWUR12137;AGIWUR17620;AGIWUR22816;AGIWUR23728;AGIWUR43795  |    |   |         |         |                |           |           |                     |             |
| CB4856                                                                  | CT | I | 9435377 | 9441029 | WBGene00007647 | C17E4.10  | C17E4.10  | 0.0166709013270481  |             |
| AGIWUR23779;AGIWUR25582;AGIWUR42996                                     |    |   |         |         |                |           |           |                     |             |
| CB4856                                                                  | CT | I | 9441010 | 9450731 | WBGene00003172 | mec-8     | F46A9.6   | 0.222460527182031   |             |
| AGIWUR10739;AGIWUR11464;AGIWUR28789;AGIWUR38678;AGIWUR43431;AGIWUR44090 |    |   |         |         |                |           |           |                     |             |
| CB4856                                                                  | CT | I | 9457456 | 9458842 | WBGene00009754 | F46A9.1   | F46A9.1   | 0.766239011377678   | AGIWUR34224 |
| CB4856                                                                  | CT | I | 9459287 | 9460550 | WBGene00009755 | F46A9.2   | F46A9.2   | 0.153374313099773   | AGIWUR16726 |
| CB4856                                                                  | CT | I | 9463760 | 9468917 | WBGene00006681 | twk-29    | F46A9.3   | -0.286328147422081  | AGIWUR11445 |
| CB4856                                                                  | CT | I | 9469704 | 9470633 | WBGene00004808 | skr-2     | F46A9.4   | -0.258627858486431  | AGIWUR3845  |
| CB4856                                                                  | CT | I | 9471341 | 9472642 | WBGene00004807 | skr-1     | F46A9.5   | 0.309476534249802   |             |
| AGIWUR10859;AGIWUR17688;AGIWUR21590;AGIWUR24111;AGIWUR37526             |    |   |         |         |                |           |           |                     |             |
| CB4856                                                                  | CT | I | 9472642 | 9474794 | WBGene00009260 | calm-1    | F30A10.1  | -0.214342078161993  |             |
| AGIWUR3316                                                              |    |   |         |         |                |           |           |                     |             |
| CB4856                                                                  | CT | I | 9476597 | 9477181 | WBGene00045473 | F30A10.14 | F30A10.14 | 0.151425223332881   |             |
| AGIWUR13773                                                             |    |   |         |         |                |           |           |                     |             |
| CB4856                                                                  | CT | I | 9477478 | 9478098 | WBGene00009268 | F30A10.11 | F30A10.11 | 0.349637533218017   |             |
| AGIWUR10060                                                             |    |   |         |         |                |           |           |                     |             |
| CB4856                                                                  | CT | I | 9478470 | 9479091 | WBGene00044680 | F30A10.13 | F30A10.13 | -0.307481135582355  |             |
| AGIWUR16460;AGIWUR40269                                                 |    |   |         |         |                |           |           |                     |             |
| CB4856                                                                  | CT | I | 9479101 | 9480774 | WBGene00009261 | F30A10.2  | F30A10.2  | 0.025248354906152   |             |
| AGIWUR14176;AGIWUR14360;AGIWUR22666                                     |    |   |         |         |                |           |           |                     |             |
| CB4856                                                                  | CT | I | 9481629 | 9482275 | WBGene00009269 | F30A10.12 | F30A10.12 | 0.0614242145017347  |             |
| AGIWUR5625;AGIWUR19501                                                  |    |   |         |         |                |           |           |                     |             |
| CB4856                                                                  | CT | I | 9483810 | 9486540 | WBGene00009263 | F30A10.4  | F30A10.4  | -0.303335917552674  |             |
| AGIWUR16094                                                             |    |   |         |         |                |           |           |                     |             |
| CB4856                                                                  | CT | I | 9486642 | 9488229 | WBGene00006061 | stl-1     | F30A10.5  | 0.166198856971683   |             |
| AGIWUR12020                                                             |    |   |         |         |                |           |           |                     |             |
| CB4856                                                                  | CT | I | 9488488 | 9492620 | WBGene00009264 | sac-1     | F30A10.6  | -0.168482017277038  |             |
| AGIWUR8404;AGIWUR15613;AGIWUR21401                                      |    |   |         |         |                |           |           |                     |             |
| CB4856                                                                  | CT | I | 9492615 | 9494589 | WBGene00009262 | F30A10.3  | F30A10.3  | 0.0330086054787362  |             |
| AGIWUR7533;AGIWUR30325;AGIWUR31913                                      |    |   |         |         |                |           |           |                     |             |

|                                                                                               |    |   |         |         |                |          |           |                     |             |
|-----------------------------------------------------------------------------------------------|----|---|---------|---------|----------------|----------|-----------|---------------------|-------------|
| CB4856                                                                                        | CT | I | 9501268 | 9505173 | WBGene00006062 | stn-1    | F30A10.8  | 0.0795217657343104  |             |
| AGIWUR11443;AGIWUR37826                                                                       |    |   |         |         |                |          |           |                     |             |
| CB4856                                                                                        | CT | I | 9506553 | 9511184 | WBGene00009267 | usp-48   | F30A10.10 | 0.0345992818428158  |             |
| AGIWUR41266                                                                                   |    |   |         |         |                |          |           |                     |             |
| CB4856                                                                                        | CT | I | 9511181 | 9512236 | WBGene00004887 | smn-1    | C41G7.1   | -0.124994410844778  | AGIWUR40754 |
| CB4856                                                                                        | CT | I | 9512428 | 9514755 | WBGene00002226 | k1p-16   | C41G7.2   | -0.117365014272212  | AGIWUR16204 |
| CB4856                                                                                        | CT | I | 9515002 | 9516776 | WBGene00077771 | C41G7.9  | C41G7.9   | 0.0501676756149898  |             |
| AGIWUR9965;AGIWUR12718;AGIWUR34772                                                            |    |   |         |         |                |          |           |                     |             |
| CB4856                                                                                        | CT | I | 9519244 | 9521275 | WBGene00008062 | set-32   | C41G7.4   | -0.222587994504581  |             |
| AGIWUR11730;AGIWUR16788;AGIWUR18476                                                           |    |   |         |         |                |          |           |                     |             |
| CB4856                                                                                        | CT | I | 9530816 | 9532831 | WBGene00077525 | C41G7.8  | C41G7.8   | -0.301117360677342  |             |
| AGIWUR15227;AGIWUR15913;AGIWUR20146;AGIWUR21311                                               |    |   |         |         |                |          |           |                     |             |
| CB4856                                                                                        | CT | I | 9533580 | 9536271 | WBGene00008064 | C41G7.7  | C41G7.7   | -0.0656277902839042 | AGIWUR40452 |
| CB4856                                                                                        | CT | I | 9536465 | 9540966 | WBGene00007984 | irx-1    | C36F7.1   | 0.437650287361016   |             |
| AGIWUR3595;AGIWUR4726;AGIWUR12384;AGIWUR15187;AGIWUR40383                                     |    |   |         |         |                |          |           |                     |             |
| CB4856                                                                                        | CT | I | 9544733 | 9558096 | WBGene00007985 | swah-1   | C36F7.2   | -0.3543236138057    |             |
| AGIWUR4941;AGIWUR23912;AGIWUR33178                                                            |    |   |         |         |                |          |           |                     |             |
| CB4856                                                                                        | CT | I | 9565394 | 9574377 | WBGene00004372 | rig-5    | C36F7.4   | 0.341537084197839   |             |
| AGIWUR610;AGIWUR8403;AGIWUR17086;AGIWUR19523;AGIWUR44163                                      |    |   |         |         |                |          |           |                     |             |
| CB4856                                                                                        | CT | I | 9574762 | 9576141 | WBGene00007986 | C36F7.5  | C36F7.5   | -0.274363973418525  | AGIWUR26301 |
| CB4856                                                                                        | CT | I | 9578526 | 9581267 | WBGene00002276 | lem-3    | F42H11.2  | -0.152461995430599  |             |
| AGIWUR4832                                                                                    |    |   |         |         |                |          |           |                     |             |
| CB4856                                                                                        | CT | I | 9581786 | 9582583 | WBGene00044987 | K07A1.17 | K07A1.17  | 0.157237317190482   |             |
| AGIWUR11068                                                                                   |    |   |         |         |                |          |           |                     |             |
| CB4856                                                                                        | CT | I | 9582682 | 9583533 | WBGene00010608 | K07A1.1  | K07A1.1   | -0.122788047510056  |             |
| AGIWUR3309;AGIWUR7293;AGIWUR13669;AGIWUR14108;AGIWUR25109;AGIWUR29244;AGIWUR34922;AGIWUR40044 |    |   |         |         |                |          |           |                     |             |
| CB4856                                                                                        | CT | I | 9583869 | 9584817 | WBGene00010617 | K07A1.13 | K07A1.13  | 0.0435210460827964  |             |
| AGIWUR31686                                                                                   |    |   |         |         |                |          |           |                     |             |
| CB4856                                                                                        | CT | I | 9585317 | 9587206 | WBGene00010609 | dut-1    | K07A1.2   | -0.0944253372272694 |             |
| AGIWUR17209;AGIWUR24219;AGIWUR34406                                                           |    |   |         |         |                |          |           |                     |             |
| CB4856                                                                                        | CT | I | 9587169 | 9588132 | WBGene00010610 | K07A1.3  | K07A1.3   | 0.341252561921245   |             |
| AGIWUR10401;AGIWUR13401;AGIWUR21452                                                           |    |   |         |         |                |          |           |                     |             |
| CB4856                                                                                        | CT | I | 9588710 | 9589931 | WBGene00010611 | K07A1.4  | K07A1.4   | 0.0412345705105714  | AGIWUR21507 |
| CB4856                                                                                        | CT | I | 9591939 | 9593103 | WBGene00010613 | K07A1.6  | K07A1.6   | 0.138599000786328   |             |
| AGIWUR12219;AGIWUR17738;AGIWUR20345;AGIWUR27107;AGIWUR29821                                   |    |   |         |         |                |          |           |                     |             |
| CB4856                                                                                        | CT | I | 9595276 | 9598363 | WBGene00010614 | cri-1    | K07A1.7   | 0.145141968379987   |             |
| AGIWUR6642;AGIWUR9009;AGIWUR42113                                                             |    |   |         |         |                |          |           |                     |             |
| CB4856                                                                                        | CT | I | 9605896 | 9609025 | WBGene00000177 | aqp-9    | K07A1.16  | -0.274300587820919  |             |
| AGIWUR14146;AGIWUR43748                                                                       |    |   |         |         |                |          |           |                     |             |

|                                                                                                                                             |    |   |         |         |                |          |          |                     |             |
|---------------------------------------------------------------------------------------------------------------------------------------------|----|---|---------|---------|----------------|----------|----------|---------------------|-------------|
| CB4856                                                                                                                                      | CT | I | 9608926 | 9609705 | WBGene00010619 | K07A1.15 | K07A1.15 | -0.201924921335342  |             |
| AGIWUR34358                                                                                                                                 |    |   |         |         |                |          |          |                     |             |
| CB4856                                                                                                                                      | CT | I | 9609501 | 9611620 | WBGene00002070 | ile-1    | K07A1.8  | -0.0815512577043656 |             |
| AGIWUR11387;AGIWUR26158;AGIWUR44299;AGIWUR45019                                                                                             |    |   |         |         |                |          |          |                     |             |
| CB4856                                                                                                                                      | CT | I | 9611815 | 9615082 | WBGene00010615 | ate-1    | K07A1.9  | -0.08614803091419   |             |
| AGIWUR5578;AGIWUR19246                                                                                                                      |    |   |         |         |                |          |          |                     |             |
| CB4856                                                                                                                                      | CT | I | 9615195 | 9616474 | WBGene00010616 | K07A1.10 | K07A1.10 | -0.290449295669784  |             |
| AGIWUR8008;AGIWUR36377;AGIWUR40995;AGIWUR43062                                                                                              |    |   |         |         |                |          |          |                     |             |
| CB4856                                                                                                                                      | CT | I | 9616508 | 9618107 | WBGene00004312 | rba-1    | K07A1.11 | -0.174090167992404  |             |
| AGIWUR21971                                                                                                                                 |    |   |         |         |                |          |          |                     |             |
| CB4856                                                                                                                                      | CT | I | 9618207 | 9619760 | WBGene00003036 | lin-53   | K07A1.12 | -0.0168681165027573 |             |
| AGIWUR784;AGIWUR14734;AGIWUR15058;AGIWUR17077;AGIWUR22021;AGIWUR28468                                                                       |    |   |         |         |                |          |          |                     |             |
| CB4856                                                                                                                                      | CT | I | 9621160 | 9625796 | WBGene00004488 | rps-19   | T05F1.3  | -0.0277690261426127 |             |
| AGIWUR1014;AGIWUR3605;AGIWUR6371;AGIWUR9406;AGIWUR15578;AGIWUR17883;AGIWUR19787;AGIWUR21395;AGIWUR23441;AGIWUR32203;AGIWUR35058;AGIWUR41713 |    |   |         |         |                |          |          |                     |             |
| CB4856                                                                                                                                      | CT | I | 9626241 | 9630848 | WBGene00002027 | hsr-9    | T05F1.6  | 0.146857705881207   | AGIWUR37000 |
| CB4856                                                                                                                                      | CT | I | 9631388 | 9632402 | WBGene00011490 | T05F1.4  | T05F1.4  | 0.0298692880138525  | AGIWUR14722 |
| CB4856                                                                                                                                      | CT | I | 9633183 | 9635945 | WBGene00011491 | T05F1.5  | T05F1.5  | -0.356102185242026  | AGIWUR9793  |
| CB4856                                                                                                                                      | CT | I | 9638886 | 9641736 | WBGene00011492 | T05F1.7  | T05F1.7  | -0.378593992432155  | AGIWUR266   |
| CB4856                                                                                                                                      | CT | I | 9642344 | 9643804 | WBGene00011493 | T05F1.8  | T05F1.8  | -0.0362154274944935 | AGIWUR38596 |
| CB4856                                                                                                                                      | CT | I | 9645699 | 9647676 | WBGene00011494 | T05F1.9  | T05F1.9  | 0.740142101887521   | AGIWUR9312  |
| CB4856                                                                                                                                      | CT | I | 9647603 | 9649238 | WBGene00000968 | dhs-4    | T05F1.10 | 0.101798056405489   |             |
| AGIWUR27482                                                                                                                                 |    |   |         |         |                |          |          |                     |             |
| CB4856                                                                                                                                      | CT | I | 9650499 | 9652946 | WBGene00011497 | T05F1.13 | T05F1.13 | -0.199377385580773  |             |
| AGIWUR14401                                                                                                                                 |    |   |         |         |                |          |          |                     |             |
| CB4856                                                                                                                                      | CT | I | 9653021 | 9657040 | WBGene00011495 | T05F1.11 | T05F1.11 | 1.15571436187755    |             |
| AGIWUR25086                                                                                                                                 |    |   |         |         |                |          |          |                     |             |
| CB4856                                                                                                                                      | CT | I | 9657012 | 9657871 | WBGene00007278 | lab-1    | C03D6.6  | 0.255389765530609   | AGIWUR9702  |
| CB4856                                                                                                                                      | CT | I | 9658274 | 9660080 | WBGene00007277 | asf1-1   | C03D6.5  | -0.0809808097846911 | AGIWUR14465 |
| CB4856                                                                                                                                      | CT | I | 9660174 | 9664915 | WBGene00003800 | npp-14   | C03D6.4  | -0.112027115558062  | AGIWUR18409 |
| CB4856                                                                                                                                      | CT | I | 9665194 | 9668664 | WBGene00000466 | cel-1    | C03D6.3  | -0.139043507579758  |             |
| AGIWUR2773;AGIWUR8832;AGIWUR16240;AGIWUR35365                                                                                               |    |   |         |         |                |          |          |                     |             |
| CB4856                                                                                                                                      | CT | I | 9668628 | 9670726 | WBGene00007275 | C03D6.1  | C03D6.1  | -0.229337164483789  | AGIWUR13138 |
| CB4856                                                                                                                                      | CT | I | 9673668 | 9678553 | WBGene00007297 | C04F12.1 | C04F12.1 | 0.114905288790343   |             |
| AGIWUR33114                                                                                                                                 |    |   |         |         |                |          |          |                     |             |
| CB4856                                                                                                                                      | CT | I | 9685398 | 9688653 | WBGene00002069 | ikb-1    | C04F12.3 | 0.759456601008498   |             |
| AGIWUR2266                                                                                                                                  |    |   |         |         |                |          |          |                     |             |
| CB4856                                                                                                                                      | CT | I | 9689185 | 9690084 | WBGene00004426 | rpl-14   | C04F12.4 | 0.0397731336516358  |             |
| AGIWUR38081                                                                                                                                 |    |   |         |         |                |          |          |                     |             |

|                                                                                   |    |   |         |         |                |          |           |                     |
|-----------------------------------------------------------------------------------|----|---|---------|---------|----------------|----------|-----------|---------------------|
| CB4856                                                                            | CT | I | 9690079 | 9690557 | WBGene00007299 | C04F12.5 | C04F12.5  | -0.0262737687221741 |
| AGIWUR2681;AGIWUR6569;AGIWUR15195;AGIWUR17394;AGIWUR19832;AGIWUR21206             |    |   |         |         |                |          |           |                     |
| CB4856                                                                            | CT | I | 9692701 | 9693781 | WBGene00007300 | C04F12.6 | C04F12.6  | 0.0715916119819209  |
| AGIWUR7919                                                                        |    |   |         |         |                |          |           |                     |
| CB4856                                                                            | CT | I | 9695707 | 9696762 | WBGene00007301 | C04F12.7 | C04F12.7  | 0.262720523792527   |
| AGIWUR8242                                                                        |    |   |         |         |                |          |           |                     |
| CB4856                                                                            | CT | I | 9697237 | 9699561 | WBGene00007302 | C04F12.8 | C04F12.8  | -0.0318894188809367 |
| AGIWUR19847                                                                       |    |   |         |         |                |          |           |                     |
| CB4856                                                                            | CT | I | 9710093 | 9710767 | WBGene00007303 | rnh-1.3  | C04F12.9  | -0.408500042362144  |
| AGIWUR2458                                                                        |    |   |         |         |                |          |           |                     |
| CB4856                                                                            | CT | I | 9711064 | 9712719 | WBGene00001405 | fce-1    | C04F12.10 | -0.0913639852611521 |
| AGIWUR36986                                                                       |    |   |         |         |                |          |           |                     |
| CB4856                                                                            | CT | I | 9712825 | 9715230 | WBGene00007621 | C16C2.4  | C16C2.4   | 0.0701345669478108  |
| AGIWUR25185                                                                       |    |   |         |         |                |          |           |                     |
| CB4856                                                                            | CT | I | 9715321 | 9728108 | WBGene00007620 | ocr1-1   | C16C2.3   | -0.182862218025507  |
| AGIWUR34995                                                                       |    |   |         |         |                |          |           |                     |
| CB4856                                                                            | CT | I | 9737823 | 9744190 | WBGene00001582 | gfi-2    | K02A11.1  | 0.0711070840146979  |
| AGIWUR27008;AGIWUR33816                                                           |    |   |         |         |                |          |           |                     |
| CB4856                                                                            | CT | I | 9744242 | 9745990 | WBGene00010487 | K02A11.2 | K02A11.2  | -0.182129334086512  |
| AGIWUR32384                                                                       |    |   |         |         |                |          |           |                     |
| CB4856                                                                            | CT | I | 9745967 | 9747923 | WBGene00010488 | endu-1   | K02A11.3  | 0.371309257732676   |
| AGIWUR26684                                                                       |    |   |         |         |                |          |           |                     |
| CB4856                                                                            | CT | I | 9748517 | 9749953 | WBGene00044607 | K02A11.4 | K02A11.4  | 0.334253405539538   |
| AGIWUR1620;AGIWUR25104;AGIWUR38391;AGIWUR44265;AGIWUR45015                        |    |   |         |         |                |          |           |                     |
| CB4856                                                                            | CT | I | 9754122 | 9757898 | WBGene00006352 | sur-6    | F26E4.1   | 0.14343879840849    |
| AGIWUR2096;AGIWUR2215;AGIWUR9115;AGIWUR12953;AGIWUR13411;AGIWUR24929              |    |   |         |         |                |          |           |                     |
| CB4856                                                                            | CT | I | 9757854 | 9760787 | WBGene00009157 | F26E4.2  | F26E4.2   | -0.223883894137108  |
| AGIWUR8064                                                                        |    |   |         |         |                |          |           |                     |
| CB4856                                                                            | CT | I | 9762403 | 9767873 | WBGene00009158 | F26E4.3  | F26E4.3   | -0.46404787941683   |
| AGIWUR4512;AGIWUR27007                                                            |    |   |         |         |                |          |           |                     |
| CB4856                                                                            | CT | I | 9768836 | 9771068 | WBGene00009160 | F26E4.5  | F26E4.5   | -0.0882562678202099 |
| AGIWUR23988                                                                       |    |   |         |         |                |          |           |                     |
| CB4856                                                                            | CT | I | 9771061 | 9772565 | WBGene00009159 | F26E4.4  | F26E4.4   | 0.0442985308463264  |
| AGIWUR27196                                                                       |    |   |         |         |                |          |           |                     |
| CB4856                                                                            | CT | I | 9773172 | 9774012 | WBGene00009161 | F26E4.6  | F26E4.6   | -0.359888969511672  |
| AGIWUR5123                                                                        |    |   |         |         |                |          |           |                     |
| CB4856                                                                            | CT | I | 9774165 | 9779541 | WBGene00009162 | F26E4.7  | F26E4.7   | 0.245609236384327   |
| AGIWUR18395                                                                       |    |   |         |         |                |          |           |                     |
| CB4856                                                                            | CT | I | 9780287 | 9781418 | WBGene00009165 | gpx-1    | F26E4.12  | -0.158341420825202  |
| AGIWUR41088                                                                       |    |   |         |         |                |          |           |                     |
| CB4856                                                                            | CT | I | 9781338 | 9785722 | WBGene00009163 | drsh-1   | F26E4.10  | -0.0560239658304411 |
| AGIWUR9346;AGIWUR17525                                                            |    |   |         |         |                |          |           |                     |
| CB4856                                                                            | CT | I | 9785778 | 9787624 | WBGene00006528 | tba-1    | F26E4.8   | -0.0839986439858826 |
| AGIWUR26699;AGIWUR27386;AGIWUR38577                                               |    |   |         |         |                |          |           |                     |
| CB4856                                                                            | CT | I | 9788749 | 9790050 | WBGene00000371 | cco-1    | F26E4.9   | -0.0918391797368159 |
| AGIWUR2388;AGIWUR7324;AGIWUR10896;AGIWUR25457;AGIWUR26663;AGIWUR29113;AGIWUR38370 |    |   |         |         |                |          |           |                     |

|                                                                                              |    |   |         |         |                |          |          |                     |             |
|----------------------------------------------------------------------------------------------|----|---|---------|---------|----------------|----------|----------|---------------------|-------------|
| CB4856                                                                                       | CT | I | 9793756 | 9796675 | WBGene00009164 | hrd1-1   | F26E4.11 | 0.130569589713009   |             |
| AGIWUR477;AGIWUR5508;AGIWUR9022                                                              |    |   |         |         |                |          |          |                     |             |
| CB4856                                                                                       | CT | I | 9808904 | 9813075 | WBGene00003569 | ncx-4    | F35C12.2 | 0.0911184381053345  |             |
| AGIWUR18843;AGIWUR26111;AGIWUR27942;AGIWUR30673                                              |    |   |         |         |                |          |          |                     |             |
| CB4856                                                                                       | CT | I | 9813034 | 9823448 | WBGene00009408 | F35C12.3 | F35C12.3 | -0.557695426306639  |             |
| AGIWUR41111                                                                                  |    |   |         |         |                |          |          |                     |             |
| CB4856                                                                                       | CT | I | 9829827 | 9830599 | WBGene00013449 | Y67A6A.1 | Y67A6A.1 | -0.173648237783755  |             |
| AGIWUR44360                                                                                  |    |   |         |         |                |          |          |                     |             |
| CB4856                                                                                       | CT | I | 9839598 | 9844809 | WBGene00003652 | nhr-62   | Y67A6A.2 | -0.147915807837979  |             |
| AGIWUR2485                                                                                   |    |   |         |         |                |          |          |                     |             |
| CB4856                                                                                       | CT | I | 9847406 | 9850082 | WBGene00006978 | zig-1    | K10C3.3  | -0.124443511433654  |             |
| AGIWUR21169;AGIWUR39109;AGIWUR39381                                                          |    |   |         |         |                |          |          |                     |             |
| CB4856                                                                                       | CT | I | 9850020 | 9851791 | WBGene00010730 | ensa-1   | K10C3.2  | 0.0229780010116496  |             |
| AGIWUR18495;AGIWUR30294;AGIWUR30891;AGIWUR35413;AGIWUR35421;AGIWUR41141                      |    |   |         |         |                |          |          |                     |             |
| CB4856                                                                                       | CT | I | 9853658 | 9863492 | WBGene00010731 | K10C3.4  | K10C3.4  | -0.117647797883855  |             |
| AGIWUR1891;AGIWUR30585                                                                       |    |   |         |         |                |          |          |                     |             |
| CB4856                                                                                       | CT | I | 9863588 | 9869055 | WBGene00010732 | K10C3.5  | K10C3.5  | 0.014057689417637   | AGIWUR42407 |
| CB4856                                                                                       | CT | I | 9869632 | 9874676 | WBGene00003639 | nhr-49   | K10C3.6  | 0.156670369552392   |             |
| AGIWUR7928;AGIWUR12085;AGIWUR13755;AGIWUR22758                                               |    |   |         |         |                |          |          |                     |             |
| CB4856                                                                                       | CT | I | 9874698 | 9879119 | WBGene00002142 | inx-20   | T23H4.1  | 0.336721773719441   | AGIWUR21242 |
| CB4856                                                                                       | CT | I | 9879183 | 9881504 | WBGene00003659 | nhr-69   | T23H4.2  | 0.3721284706576     |             |
| AGIWUR5029;AGIWUR19276;AGIWUR24449                                                           |    |   |         |         |                |          |          |                     |             |
| CB4856                                                                                       | CT | I | 9886200 | 9888154 | WBGene00003524 | nas-5    | T23H4.3  | -0.0283767815126978 | AGIWUR21924 |
| CB4856                                                                                       | CT | I | 9888356 | 9892223 | WBGene00003842 | oct-1    | F52F12.1 | -0.0876701600423804 |             |
| AGIWUR6287;AGIWUR17666;AGIWUR21319                                                           |    |   |         |         |                |          |          |                     |             |
| CB4856                                                                                       | CT | I | 9893698 | 9895596 | WBGene00000640 | col-64   | F52F12.2 | 0.156428306681414   |             |
| AGIWUR24554                                                                                  |    |   |         |         |                |          |          |                     |             |
| CB4856                                                                                       | CT | I | 9895693 | 9900817 | WBGene00003396 | mom-4    | F52F12.3 | 0.0799387858096781  |             |
| AGIWUR385;AGIWUR4265;AGIWUR14861;AGIWUR22928;AGIWUR26295;AGIWUR27202;AGIWUR30831;AGIWUR34120 |    |   |         |         |                |          |          |                     |             |
| CB4856                                                                                       | CT | I | 9901255 | 9902929 | WBGene00009937 | ls1-1    | F52F12.4 | -0.132516018709151  |             |
| AGIWUR13054                                                                                  |    |   |         |         |                |          |          |                     |             |
| CB4856                                                                                       | CT | I | 9902943 | 9910545 | WBGene00009939 | ztf-11   | F52F12.6 | 0.298044669356674   |             |
| AGIWUR22662;AGIWUR22912                                                                      |    |   |         |         |                |          |          |                     |             |
| CB4856                                                                                       | CT | I | 9921211 | 9921961 | WBGene00009938 | F52F12.5 | F52F12.5 | -0.0828497322027673 |             |
| AGIWUR14086                                                                                  |    |   |         |         |                |          |          |                     |             |
| CB4856                                                                                       | CT | I | 9923610 | 9924280 | WBGene00009941 | F52F12.8 | F52F12.8 | 0.184511533549353   |             |
| AGIWUR14551                                                                                  |    |   |         |         |                |          |          |                     |             |
| CB4856                                                                                       | CT | I | 9925978 | 9929032 | WBGene00009942 | F52F12.9 | F52F12.9 | -0.0230834136279974 |             |
| AGIWUR9358;AGIWUR35586                                                                       |    |   |         |         |                |          |          |                     |             |

|                                                                                                            |   |          |          |                |           |           |                     |             |
|------------------------------------------------------------------------------------------------------------|---|----------|----------|----------------|-----------|-----------|---------------------|-------------|
| CB4856 CT                                                                                                  | I | 9928946  | 9930885  | WBGene00009940 | str1-1    | F52F12.7  | -0.0773397124837238 |             |
| AGIWUR24560                                                                                                |   |          |          |                |           |           |                     |             |
| CB4856 CT                                                                                                  | I | 9930972  | 9931882  | WBGene00013696 | Y106G6A.4 | Y106G6A.4 | 0.114967689866532   |             |
| AGIWUR2031                                                                                                 |   |          |          |                |           |           |                     |             |
| CB4856 CT                                                                                                  | I | 9931870  | 9934290  | WBGene00013695 | epg-8     | Y106G6A.2 | 0.0278599173875094  |             |
| AGIWUR2744;AGIWUR18245;AGIWUR18984;AGIWUR28290;AGIWUR31270;AGIWUR32991;AGIWUR41204;AGIWUR43220;AGIWUR43432 |   |          |          |                |           |           |                     |             |
| CB4856 CT                                                                                                  | I | 9934639  | 9936022  | WBGene00013697 | dsbn-1    | Y106G6A.5 | -0.147894144064413  |             |
| AGIWUR37460                                                                                                |   |          |          |                |           |           |                     |             |
| CB4856 CT                                                                                                  | I | 9936125  | 9938378  | WBGene00013694 | Y106G6A.1 | Y106G6A.1 | 0.0161281023768467  |             |
| AGIWUR3372;AGIWUR9642;AGIWUR28741                                                                          |   |          |          |                |           |           |                     |             |
| CB4856 CT                                                                                                  | I | 9947805  | 9953387  | WBGene00005023 | sqv-5     | T24D1.1   | 0.222875730223879   |             |
| AGIWUR9388;AGIWUR42746                                                                                     |   |          |          |                |           |           |                     |             |
| CB4856 CT                                                                                                  | I | 9953409  | 9955873  | WBGene00011985 | T24D1.2   | T24D1.2   | -0.0308898860122611 |             |
| AGIWUR6789;AGIWUR19798;AGIWUR22341                                                                         |   |          |          |                |           |           |                     |             |
| CB4856 CT                                                                                                  | I | 9956150  | 9958357  | WBGene00011988 | har-2     | T24D1.5   | 0.0251082607831314  | AGIWUR42509 |
| CB4856 CT                                                                                                  | I | 9958782  | 9960155  | WBGene00011986 | T24D1.3   | T24D1.3   | -0.234861696746226  | AGIWUR3679  |
| CB4856 CT                                                                                                  | I | 9960370  | 9961973  | WBGene00007043 | tag-179   | T24D1.4   | -0.158981010240954  |             |
| AGIWUR14556;AGIWUR29087                                                                                    |   |          |          |                |           |           |                     |             |
| CB4856 CT                                                                                                  | I | 9965580  | 9970037  | WBGene00003397 | mom-5     | T23D8.1   | -0.257640873997223  |             |
| AGIWUR7889;AGIWUR22460                                                                                     |   |          |          |                |           |           |                     |             |
| CB4856 CT                                                                                                  | I | 9970037  | 9973177  | WBGene00006633 | tsp-7     | T23D8.2   | 0.0326901647675406  | AGIWUR25168 |
| CB4856 CT                                                                                                  | I | 9973377  | 9976315  | WBGene00011944 | T23D8.3   | T23D8.3   | 0.0526524686535517  | AGIWUR31007 |
| CB4856 CT                                                                                                  | I | 9976393  | 9979662  | WBGene00001226 | eif-3.C   | T23D8.4   | -0.186828929203759  |             |
| AGIWUR3943;AGIWUR14459                                                                                     |   |          |          |                |           |           |                     |             |
| CB4856 CT                                                                                                  | I | 9980064  | 9984848  | WBGene00006379 | sys-1     | T23D8.9   | 0.035250803993101   |             |
| AGIWUR584;AGIWUR11881;AGIWUR12778;AGIWUR27780;AGIWUR30185;AGIWUR34013;AGIWUR43769                          |   |          |          |                |           |           |                     |             |
| CB4856 CT                                                                                                  | I | 9988341  | 9988826  | WBGene00001941 | his-67    | T23D8.5   | 0.12639989375786    | AGIWUR20059 |
| CB4856 CT                                                                                                  | I | 9989061  | 9989617  | WBGene00001942 | his-68    | T23D8.6   | 0.0225186939718363  |             |
| AGIWUR9020;AGIWUR10398;AGIWUR19130;AGIWUR38394;AGIWUR41721                                                 |   |          |          |                |           |           |                     |             |
| CB4856 CT                                                                                                  | I | 9989802  | 9993975  | WBGene00011945 | hpo-24    | T23D8.7   | -0.188436565575193  |             |
| AGIWUR8843;AGIWUR15233;AGIWUR36871                                                                         |   |          |          |                |           |           |                     |             |
| CB4856 CT                                                                                                  | I | 9994731  | 9999928  | WBGene00000476 | cfi-1     | T23D8.8   | 0.180033308850422   |             |
| AGIWUR4844;AGIWUR34287;AGIWUR44917                                                                         |   |          |          |                |           |           |                     |             |
| CB4856 CT                                                                                                  | I | 10014547 | 10015495 | WBGene00007274 |           | C03C11.1  | C03C11.1            |             |
| -0.187282794119868 AGIWUR25138                                                                             |   |          |          |                |           |           |                     |             |
| CB4856 CT                                                                                                  | I | 10016778 | 10018114 | WBGene00001483 | fog-3     | C03C11.2  |                     |             |
| -0.481334871961201 AGIWUR2227                                                                              |   |          |          |                |           |           |                     |             |
| CB4856 CT                                                                                                  | I | 10023810 | 10025831 | WBGene00008663 | eak-6     | F10G8.4   | -0.0217899337012515 |             |
| AGIWUR19346                                                                                                |   |          |          |                |           |           |                     |             |

|                                                                              |          |          |                |           |         |                    |
|------------------------------------------------------------------------------|----------|----------|----------------|-----------|---------|--------------------|
| CB4856 CT I                                                                  | 10026188 | 10030058 | WBGene00003803 | rae-1     | F10G8.3 | -0.246087832735663 |
| AGIWUR14990                                                                  |          |          |                |           |         |                    |
| CB4856 CT I                                                                  | 10030174 | 10046760 | WBGene00008665 | ercc-1    | F10G8.7 | 0.0189458984837154 |
| AGIWUR7402;AGIWUR8445;AGIWUR8743;AGIWUR10512                                 |          |          |                |           |         |                    |
| CB4856 CT I                                                                  | 10046442 | 10048028 | WBGene00008664 | nubp-1    | F10G8.6 | 0.0351497327617594 |
| AGIWUR7984;AGIWUR8402;AGIWUR9547;AGIWUR44930                                 |          |          |                |           |         |                    |
| CB4856 CT I                                                                  | 10048087 | 10050770 | WBGene00008667 | F10G8.9   | F10G8.9 |                    |
| -0.00686983234939476 AGIWUR18885;AGIWUR29836;AGIWUR32672                     |          |          |                |           |         |                    |
| CB4856 CT I                                                                  | 10050691 | 10062026 | WBGene00008666 | F10G8.8   | F10G8.8 | 0.421428999431759  |
| AGIWUR15028;AGIWUR31677                                                      |          |          |                |           |         |                    |
| CB4856 CT I                                                                  | 10072578 | 10074399 | WBGene00007159 | B0379.7   | B0379.7 | 0.265282261762451  |
| AGIWUR21196                                                                  |          |          |                |           |         |                    |
| CB4856 CT I                                                                  | 10074952 | 10077749 | WBGene00007155 | B0379.1   | B0379.1 | 0.271415397871813  |
| AGIWUR38309;AGIWUR41296;AGIWUR44354                                          |          |          |                |           |         |                    |
| CB4856 CT I                                                                  | 10080159 | 10085777 | WBGene00003508 | mut-16    | B0379.3 | -0.1121600621995   |
| AGIWUR788;AGIWUR33569                                                        |          |          |                |           |         |                    |
| CB4856 CT I                                                                  | 10085713 | 10102012 | WBGene00007054 | scpl-1    | B0379.4 | 0.0554639571006561 |
| AGIWUR35678                                                                  |          |          |                |           |         |                    |
| CB4856 CT I                                                                  | 10107393 | 10109000 | WBGene00013698 | Y106G6D.1 |         | Y106G6D.1          |
| 0.00183849116992008 AGIWUR15930                                              |          |          |                |           |         |                    |
| CB4856 CT I                                                                  | 10110982 | 10111916 | WBGene00013699 | Y106G6D.2 |         | Y106G6D.2          |
| -0.0939297924792974 AGIWUR24239                                              |          |          |                |           |         |                    |
| CB4856 CT I                                                                  | 10112088 | 10114256 | WBGene00013700 | Y106G6D.3 |         | Y106G6D.3          |
| 0.0556358953823137 AGIWUR43241                                               |          |          |                |           |         |                    |
| CB4856 CT I                                                                  | 10114759 | 10116583 | WBGene00013701 | Y106G6D.4 |         | Y106G6D.4          |
| -0.455565480246421 AGIWUR7232;AGIWUR36951                                    |          |          |                |           |         |                    |
| CB4856 CT I                                                                  | 10117061 | 10118134 | WBGene00013704 | Y106G6D.8 |         | Y106G6D.8          |
| -0.0508204710487608 AGIWUR6334;AGIWUR8836;AGIWUR9264;AGIWUR27542;AGIWUR35825 |          |          |                |           |         |                    |
| CB4856 CT I                                                                  | 10119209 | 10122171 | WBGene00014965 | Y106G6D.5 |         | Y106G6D.5          |
| -0.159773939653425 AGIWUR20599;AGIWUR43526                                   |          |          |                |           |         |                    |
| CB4856 CT I                                                                  | 10122459 | 10130215 | WBGene00013703 | Y106G6D.7 |         | Y106G6D.7          |
| 0.0559350331915107 AGIWUR14206;AGIWUR26940                                   |          |          |                |           |         |                    |
| CB4856 CT I                                                                  | 10147325 | 10149888 | WBGene00008885 | F16C3.1   | F16C3.1 | -0.118492191956229 |
| AGIWUR6363                                                                   |          |          |                |           |         |                    |
| CB4856 CT I                                                                  | 10150280 | 10155131 | WBGene00008886 | F16C3.2   | F16C3.2 | 1.14247407345722   |
| AGIWUR7129                                                                   |          |          |                |           |         |                    |
| CB4856 CT I                                                                  | 10155161 | 10158558 | WBGene00023415 | F16C3.3   | F16C3.3 | 0.0690570457885809 |
| AGIWUR25814;AGIWUR41744                                                      |          |          |                |           |         |                    |
| CB4856 CT I                                                                  | 10158951 | 10160034 | WBGene00044243 | F16C3.4   | F16C3.4 | -0.096131772362094 |

|                                                                                                            |    |   |          |          |                |           |           |                     |  |
|------------------------------------------------------------------------------------------------------------|----|---|----------|----------|----------------|-----------|-----------|---------------------|--|
| AGIWUR37530;AGIWUR41968;AGIWUR44496                                                                        |    |   |          |          |                |           |           |                     |  |
| CB4856                                                                                                     | CT | I | 10159982 | 10161883 | WBGene00006447 | tag-72    | C25A1.3   | 0.114430835486949   |  |
| AGIWUR27730                                                                                                |    |   |          |          |                |           |           |                     |  |
| CB4856                                                                                                     | CT | I | 10162379 | 10163578 | WBGene00007705 | C25A1.1   | C25A1.1   | -0.0291183064815144 |  |
| AGIWUR38730                                                                                                |    |   |          |          |                |           |           |                     |  |
| CB4856                                                                                                     | CT | I | 10163475 | 10165135 | WBGene00001442 | fkh-10    | C25A1.2   | -0.113556521911631  |  |
| AGIWUR5426                                                                                                 |    |   |          |          |                |           |           |                     |  |
| CB4856                                                                                                     | CT | I | 10169639 | 10172645 | WBGene00007706 | C25A1.4   | C25A1.4   | -0.0660454856223787 |  |
| AGIWUR7340;AGIWUR20206;AGIWUR39825                                                                         |    |   |          |          |                |           |           |                     |  |
| CB4856                                                                                                     | CT | I | 10177181 | 10178921 | WBGene00007707 | C25A1.5   | C25A1.5   | 0.166540526155341   |  |
| AGIWUR9829                                                                                                 |    |   |          |          |                |           |           |                     |  |
| CB4856                                                                                                     | CT | I | 10179832 | 10184075 | WBGene00002153 | iars-2    | C25A1.7   | -0.180791382673277  |  |
| AGIWUR4515;AGIWUR17911;AGIWUR22885;AGIWUR24106;AGIWUR27797;AGIWUR32150                                     |    |   |          |          |                |           |           |                     |  |
| CB4856                                                                                                     | CT | I | 10184478 | 10185470 | WBGene00007709 | clac-87   | C25A1.8   | 0.0288723877824228  |  |
| AGIWUR10786;AGIWUR12722;AGIWUR14448;AGIWUR17486;AGIWUR31726;AGIWUR32435                                    |    |   |          |          |                |           |           |                     |  |
| CB4856                                                                                                     | CT | I | 10185780 | 10187550 | WBGene00007710 | rsa-1     | C25A1.9   | -0.041094706892439  |  |
| AGIWUR24491                                                                                                |    |   |          |          |                |           |           |                     |  |
| CB4856                                                                                                     | CT | I | 10187515 | 10190896 | WBGene00000931 | dao-5     | C25A1.10  |                     |  |
| 0.0828564195156263 AGIWUR2193;AGIWUR14692;AGIWUR38010;AGIWUR41462                                          |    |   |          |          |                |           |           |                     |  |
| CB4856                                                                                                     | CT | I | 10191273 | 10192894 | WBGene00007711 | lid-1     | C25A1.12  |                     |  |
| -0.108237541479006                                                                                         |    |   |          |          |                |           |           |                     |  |
| AGIWUR7759;AGIWUR12214;AGIWUR12894;AGIWUR18762;AGIWUR24648;AGIWUR30354;AGIWUR37784;AGIWUR42516;AGIWUR43176 |    |   |          |          |                |           |           |                     |  |
| CB4856                                                                                                     | CT | I | 10193242 | 10193999 | WBGene00007712 | mrpl-34   | C25A1.13  |                     |  |
| -0.0731643821759675 AGIWUR6533                                                                             |    |   |          |          |                |           |           |                     |  |
| CB4856                                                                                                     | CT | I | 10193925 | 10197000 | WBGene00000095 | aha-1     | C25A1.11  |                     |  |
| 0.250178717021619 AGIWUR44293                                                                              |    |   |          |          |                |           |           |                     |  |
| CB4856                                                                                                     | CT | I | 10197321 | 10197596 | WBGene00007713 | C25A1.15  | C25A1.15  |                     |  |
| 0.0739371935631681 AGIWUR19876                                                                             |    |   |          |          |                |           |           |                     |  |
| CB4856                                                                                                     | CT | I | 10198286 | 10200440 | WBGene00013705 | Y106G6E.1 | Y106G6E.1 |                     |  |
| 0.0511606583147639 AGIWUR11466                                                                             |    |   |          |          |                |           |           |                     |  |
| CB4856                                                                                                     | CT | I | 10221635 | 10222778 | WBGene00013708 | Y106G6E.4 | Y106G6E.4 |                     |  |
| 0.190158989949642 AGIWUR36816;AGIWUR38525                                                                  |    |   |          |          |                |           |           |                     |  |
| CB4856                                                                                                     | CT | I | 10222881 | 10227009 | WBGene00000426 | ced-12    | Y106G6E.5 |                     |  |
| 0.267456120939263 AGIWUR6640;AGIWUR10649;AGIWUR39379                                                       |    |   |          |          |                |           |           |                     |  |
| CB4856                                                                                                     | CT | I | 10227210 | 10231214 | WBGene00013709 | csnk-1    | Y106G6E.6 |                     |  |
| 0.0892976056587091 AGIWUR6259;AGIWUR41120                                                                  |    |   |          |          |                |           |           |                     |  |
| CB4856                                                                                                     | CT | I | 10248256 | 10255327 | WBGene00003000 | lin-11    | ZC247.3   | 0.0786241154278446  |  |
| AGIWUR5317;AGIWUR13003;AGIWUR24260;AGIWUR25289;AGIWUR33061                                                 |    |   |          |          |                |           |           |                     |  |
| CB4856                                                                                                     | CT | I | 10255632 | 10262250 | WBGene00013860 | ZC247.2   | ZC247.2   | -0.0377264024501152 |  |



|                                                                        |                                                                      |          |                |           |           |                     |  |  |
|------------------------------------------------------------------------|----------------------------------------------------------------------|----------|----------------|-----------|-----------|---------------------|--|--|
| AGIWUR1179                                                             |                                                                      |          |                |           |           |                     |  |  |
| CB4856 CT I                                                            | 10264314                                                             | 10279234 | WBGene00013859 | ZC247.1   | ZC247.1   | 0.525049586345348   |  |  |
| AGIWUR19141                                                            |                                                                      |          |                |           |           |                     |  |  |
| CB4856 CT I                                                            | 10291870                                                             | 10297927 | WBGene00007047 | wts-1     | T20F10.1  |                     |  |  |
| -0.200887966955001                                                     | AGIWUR24166                                                          |          |                |           |           |                     |  |  |
| CB4856 CT I                                                            | 10298140                                                             | 10300598 | WBGene00011864 | T20F10.2  |           | T20F10.2            |  |  |
| -0.16148651092626                                                      | AGIWUR17094;AGIWUR17549;AGIWUR23612;AGIWUR43299                      |          |                |           |           |                     |  |  |
| CB4856 CT I                                                            | 10300573                                                             | 10302945 | WBGene00011866 | T20F10.5  |           | T20F10.5            |  |  |
| -0.0195424436222651                                                    | AGIWUR5199;AGIWUR5957;AGIWUR9005;AGIWUR20137;AGIWUR28724;AGIWUR36038 |          |                |           |           |                     |  |  |
| CB4856 CT I                                                            | 10309757                                                             | 10311591 | WBGene00045057 | Y106G6G.7 |           | Y106G6G.7           |  |  |
| 0.0317609427436221                                                     | AGIWUR20883                                                          |          |                |           |           |                     |  |  |
| CB4856 CT I                                                            | 10319669                                                             | 10321493 | WBGene00013715 | Y106G6G.6 |           | Y106G6G.6           |  |  |
| 0.196684034330012                                                      | AGIWUR13079;AGIWUR28186                                              |          |                |           |           |                     |  |  |
| CB4856 CT I                                                            | 10321711                                                             | 10323398 | WBGene00013713 | Y106G6G.4 |           | Y106G6G.4           |  |  |
| 0.28737365409896                                                       | AGIWUR1645                                                           |          |                |           |           |                     |  |  |
| CB4856 CT I                                                            | 10323511                                                             | 10324145 | WBGene00013712 | d1c-6     | Y106G6G.3 |                     |  |  |
| 0.0400116819389629                                                     | AGIWUR14226                                                          |          |                |           |           |                     |  |  |
| CB4856 CT I                                                            | 10328984                                                             | 10330370 | WBGene00013710 | Y106G6G.1 |           | Y106G6G.1           |  |  |
| -0.0576163981573448                                                    | AGIWUR3549                                                           |          |                |           |           |                     |  |  |
| CB4856 CT I                                                            | 10330879                                                             | 10331808 | WBGene00004476 | rps-7     | ZC434.2   | -0.0414489559023323 |  |  |
| AGIWUR1411;AGIWUR7247;AGIWUR25024                                      |                                                                      |          |                |           |           |                     |  |  |
| CB4856 CT I                                                            | 10331945                                                             | 10333082 | WBGene00013892 | ZC434.4   | ZC434.4   | 0.0296785762384104  |  |  |
| AGIWUR35993                                                            |                                                                      |          |                |           |           |                     |  |  |
| CB4856 CT I                                                            | 10333471                                                             | 10334590 | WBGene00220261 | ZC434.10  |           | ZC434.10            |  |  |
| -0.426126458985402                                                     | AGIWUR43270                                                          |          |                |           |           |                     |  |  |
| CB4856 CT I                                                            | 10334661                                                             | 10335739 | WBGene00013891 | ZC434.3   | ZC434.3   | -0.0571527405140042 |  |  |
| AGIWUR2990;AGIWUR17062;AGIWUR22980;AGIWUR26531                         |                                                                      |          |                |           |           |                     |  |  |
| CB4856 CT I                                                            | 10336395                                                             | 10341178 | WBGene00001337 | ears-1    | ZC434.5   | -0.431479185696245  |  |  |
| AGIWUR436;AGIWUR496;AGIWUR43053                                        |                                                                      |          |                |           |           |                     |  |  |
| CB4856 CT I                                                            | 10340997                                                             | 10345648 | WBGene00000148 | aph-2     | ZC434.6   | -0.205778047428261  |  |  |
| AGIWUR28276                                                            |                                                                      |          |                |           |           |                     |  |  |
| CB4856 CT I                                                            | 10345736                                                             | 10348061 | WBGene00013893 | ZC434.7   | ZC434.7   | -0.26343393953781   |  |  |
| AGIWUR7669;AGIWUR26724;AGIWUR33950;AGIWUR39834;AGIWUR42693;AGIWUR43556 |                                                                      |          |                |           |           |                     |  |  |
| CB4856 CT I                                                            | 10348055                                                             | 10349379 | WBGene00013894 | ZC434.8   | ZC434.8   | -0.131780119762715  |  |  |
| AGIWUR17368;AGIWUR26084                                                |                                                                      |          |                |           |           |                     |  |  |
| CB4856 CT I                                                            | 10356251                                                             | 10360890 | WBGene00013895 | ZC434.9   | ZC434.9   | -0.112494907714943  |  |  |
| AGIWUR44177                                                            |                                                                      |          |                |           |           |                     |  |  |
| CB4856 CT I                                                            | 10366621                                                             | 10371699 | WBGene00009743 | sptf-1    | F45H11.1  |                     |  |  |
| 0.593302361981447                                                      | AGIWUR2830;AGIWUR23379;AGIWUR41497                                   |          |                |           |           |                     |  |  |

|                                                                                                                                   |                                                |          |                |           |                            |
|-----------------------------------------------------------------------------------------------------------------------------------|------------------------------------------------|----------|----------------|-----------|----------------------------|
| CB4856 CT I                                                                                                                       | 10373368                                       | 10373862 | WBGene00003587 | ned-8     | F45H11.2                   |
| -0.174752055777981                                                                                                                | AGIWUR23345                                    |          |                |           |                            |
| CB4856 CT I                                                                                                                       | 10374809                                       | 10379631 | WBGene00009744 | hpo-35    | F45H11.3                   |
| -0.280287796729953                                                                                                                | AGIWUR4287;AGIWUR33299;AGIWUR33740;AGIWUR42031 |          |                |           |                            |
| CB4856 CT I                                                                                                                       | 10381082                                       | 10382040 | WBGene00009745 | F45H11.5  | F45H11.5                   |
| -0.070211248948242                                                                                                                | AGIWUR3840;AGIWUR9168;AGIWUR22568;AGIWUR39623  |          |                |           |                            |
| CB4856 CT I                                                                                                                       | 10382746                                       | 10384222 | WBGene00077521 | maf-1     | F45H11.6                   |
| 0.0459818660027533                                                                                                                |                                                |          |                |           |                            |
| AGIWUR1078;AGIWUR6836;AGIWUR12363;AGIWUR12557;AGIWUR12681;AGIWUR25932;AGIWUR34710;AGIWUR39209;AGIWUR40992;AGIWUR43296;AGIWUR43530 |                                                |          |                |           |                            |
| CB4856 CT I                                                                                                                       | 10384219                                       | 10391388 | WBGene00003233 | mg1-2     | F45H11.4                   |
| 0.155688615855307                                                                                                                 | AGIWUR4879;AGIWUR20282                         |          |                |           |                            |
| CB4856 CT I                                                                                                                       | 10398944                                       | 10400195 | WBGene00000843 | cup-2     | F25D7.1 -0.19625150483372  |
| AGIWUR4401;AGIWUR20500                                                                                                            |                                                |          |                |           |                            |
| CB4856 CT I                                                                                                                       | 10401065                                       | 10402774 | WBGene00009112 | tag-353   | F25D7.2                    |
| -0.00673958142708919                                                                                                              | AGIWUR6582                                     |          |                |           |                            |
| CB4856 CT I                                                                                                                       | 10409302                                       | 10414707 | WBGene00003847 | blmp-1    | F25D7.3 0.0788064372446962 |
| AGIWUR1162;AGIWUR2993;AGIWUR8630;AGIWUR9914;AGIWUR13060;AGIWUR35588;AGIWUR36795;AGIWUR37572                                       |                                                |          |                |           |                            |
| CB4856 CT I                                                                                                                       | 10422958                                       | 10429026 | WBGene00009114 | F25D7.5   | F25D7.5                    |
| -0.00990503377677587                                                                                                              | AGIWUR14538;AGIWUR16277;AGIWUR26686            |          |                |           |                            |
| CB4856 CT I                                                                                                                       | 10429629                                       | 10432336 | WBGene00013716 | Y106G6H.1 | Y106G6H.1                  |
| -0.308396244124841                                                                                                                | AGIWUR3844                                     |          |                |           |                            |
| CB4856 CT I                                                                                                                       | 10432815                                       | 10435882 | WBGene00003902 | pab-1     | Y106G6H.2                  |
| -0.150676501774311                                                                                                                |                                                |          |                |           |                            |
| AGIWUR551;AGIWUR1625;AGIWUR4054;AGIWUR8505;AGIWUR14804;AGIWUR15583;AGIWUR16120;AGIWUR24249;AGIWUR29890;AGIWUR36402                |                                                |          |                |           |                            |
| CB4856 CT I                                                                                                                       | 10436254                                       | 10436884 | WBGene00004444 | rp1-30    | Y106G6H.3                  |
| 0.0826164847729878                                                                                                                | AGIWUR24641                                    |          |                |           |                            |
| CB4856 CT I                                                                                                                       | 10436895                                       | 10437708 | WBGene00013717 | madf-10   | Y106G6H.4                  |
| 0.630542898310765                                                                                                                 | AGIWUR8428                                     |          |                |           |                            |
| CB4856 CT I                                                                                                                       | 10438075                                       | 10443563 | WBGene00013718 | pdpr-1    | Y106G6H.5                  |
| -0.15829946276514                                                                                                                 | AGIWUR3494;AGIWUR4149;AGIWUR31485;AGIWUR40774  |          |                |           |                            |
| CB4856 CT I                                                                                                                       | 10443668                                       | 10446133 | WBGene00013719 | Y106G6H.6 | Y106G6H.6                  |
| -0.36454959147701                                                                                                                 | AGIWUR7986                                     |          |                |           |                            |
| CB4856 CT I                                                                                                                       | 10446661                                       | 10452071 | WBGene00004753 | sec-8     | Y106G6H.7                  |
| -0.0288572352058551                                                                                                               | AGIWUR20305                                    |          |                |           |                            |
| CB4856 CT I                                                                                                                       | 10452178                                       | 10452895 | WBGene00013720 | Y106G6H.8 | Y106G6H.8                  |
| -0.0532363616529388                                                                                                               | AGIWUR6889;AGIWUR24705;AGIWUR26727;AGIWUR31225 |          |                |           |                            |
| CB4856 CT I                                                                                                                       | 10464328                                       | 10471056 | WBGene00001112 | duo-3     | Y106G6H.12                 |

|                                                                                                                                                           |                                    |          |                |            |            |                    |
|-----------------------------------------------------------------------------------------------------------------------------------------------------------|------------------------------------|----------|----------------|------------|------------|--------------------|
| -0.191058740930197                                                                                                                                        | AGIWUR27835                        |          |                |            |            |                    |
| CB4856 CT I                                                                                                                                               | 10472196                           | 10473389 | WBGene00013724 | Y106G6H.14 | Y106G6H.14 |                    |
| -0.207914861786872                                                                                                                                        | AGIWUR4557;AGIWUR19187;AGIWUR19475 |          |                |            |            |                    |
| CB4856 CT I                                                                                                                                               | 10473513                           | 10474449 | WBGene00013725 | ska-1      | Y106G6H.15 |                    |
| 0.157923637087279                                                                                                                                         | AGIWUR32773                        |          |                |            |            |                    |
| CB4856 CT I                                                                                                                                               | 10474835                           | 10475525 | WBGene00013726 | Y106G6H.16 | Y106G6H.16 |                    |
| -0.0392976364112858                                                                                                                                       | AGIWUR31191                        |          |                |            |            |                    |
| CB4856 CT I                                                                                                                                               | 10475522                           | 10478129 | WBGene00009508 | row-1      | F37D6.2    | 0.437793791688634  |
| AGIWUR11222                                                                                                                                               |                                    |          |                |            |            |                    |
| CB4856 CT I                                                                                                                                               | 10479283                           | 10484969 | WBGene00009507 | mus-101    | F37D6.1    | 0.116944366632971  |
| AGIWUR201;AGIWUR29531;AGIWUR41907                                                                                                                         |                                    |          |                |            |            |                    |
| CB4856 CT I                                                                                                                                               | 10486714                           | 10487322 | WBGene00009509 | F37D6.3    | F37D6.3    | -0.134973943185486 |
| AGIWUR26244                                                                                                                                               |                                    |          |                |            |            |                    |
| CB4856 CT I                                                                                                                                               | 10488648                           | 10489569 | WBGene00009510 | F37D6.4    | F37D6.4    | 0.04457786603334   |
| AGIWUR11781;AGIWUR16130;AGIWUR23068;AGIWUR24394;AGIWUR24669;AGIWUR39352                                                                                   |                                    |          |                |            |            |                    |
| CB4856 CT I                                                                                                                                               | 10501585                           | 10505949 | WBGene00006445 | tag-68     | F37D6.6    | 0.0527390566030363 |
| AGIWUR2748;AGIWUR11690;AGIWUR14931;AGIWUR27423;AGIWUR41788;AGIWUR43215                                                                                    |                                    |          |                |            |            |                    |
| CB4856 CT I                                                                                                                                               | 10507000                           | 10515506 | WBGene00000492 | che-13     | F59C6.7    | 0.39172702022546   |
| AGIWUR10651                                                                                                                                               |                                    |          |                |            |            |                    |
| CB4856 CT I                                                                                                                                               | 10516036                           | 10516432 | WBGene00206464 | F59C6.18   | F59C6.18   |                    |
| -0.372118910412375                                                                                                                                        | AGIWUR38691                        |          |                |            |            |                    |
| CB4856 CT I                                                                                                                                               | 10518379                           | 10519263 | WBGene00010325 | exos-3     | F59C6.4    | -0.183631787042358 |
| AGIWUR35660                                                                                                                                               |                                    |          |                |            |            |                    |
| CB4856 CT I                                                                                                                                               | 10519360                           | 10520761 | WBGene00010326 | F59C6.5    | F59C6.5    | 0.0739382277058578 |
| AGIWUR2505                                                                                                                                                |                                    |          |                |            |            |                    |
| CB4856 CT I                                                                                                                                               | 10520863                           | 10521986 | WBGene00044251 | F59C6.12   | F59C6.12   |                    |
| 0.0711574414654841                                                                                                                                        | AGIWUR25235;AGIWUR38986            |          |                |            |            |                    |
| CB4856 CT I                                                                                                                                               | 10522091                           | 10523996 | WBGene00010323 | dhhc-12    | F59C6.2    | -0.18851580205428  |
| AGIWUR23798                                                                                                                                               |                                    |          |                |            |            |                    |
| CB4856 CT I                                                                                                                                               | 10524424                           | 10525509 | WBGene00010324 | F59C6.3    | F59C6.3    | 0.0415372828488088 |
| AGIWUR7210;AGIWUR25869                                                                                                                                    |                                    |          |                |            |            |                    |
| CB4856 CT I                                                                                                                                               | 10526533                           | 10530095 | WBGene00044792 | F59C6.14   | F59C6.14   |                    |
| 0.163246596264003                                                                                                                                         |                                    |          |                |            |            |                    |
| AGIWUR2011;AGIWUR7131;AGIWUR11982;AGIWUR22037;AGIWUR24402;AGIWUR24720;AGIWUR25617;AGIWUR28187;AGIWUR28827;AGIWUR36554;AGIWUR38820;AGIWUR39490;AGIWUR43929 |                                    |          |                |            |            |                    |
| CB4856 CT I                                                                                                                                               | 10530339                           | 10531547 | WBGene00014789 | F59C6.10   | F59C6.10   |                    |
| -0.126244517782972                                                                                                                                        | AGIWUR29319                        |          |                |            |            |                    |
| CB4856 CT I                                                                                                                                               | 10532667                           | 10534484 | WBGene00010328 | F59C6.11   | F59C6.11   |                    |
| -0.558732947962259                                                                                                                                        | AGIWUR14721                        |          |                |            |            |                    |

|                                                                                                                                                                                                                                             |   |          |          |                |          |          |                    |
|---------------------------------------------------------------------------------------------------------------------------------------------------------------------------------------------------------------------------------------------|---|----------|----------|----------------|----------|----------|--------------------|
| CB4856 CT                                                                                                                                                                                                                                   | I | 10543024 | 10546435 | WBGene00009116 | snx-27   | F25H2.2  | -0.224761998002366 |
| AGIWUR29978                                                                                                                                                                                                                                 |   |          |          |                |          |          |                    |
| CB4856 CT                                                                                                                                                                                                                                   | I | 10547721 | 10549876 | WBGene00009117 | F25H2.3  | F25H2.3  | -0.248849991757946 |
| AGIWUR40211                                                                                                                                                                                                                                 |   |          |          |                |          |          |                    |
| CB4856 CT                                                                                                                                                                                                                                   | I | 10551972 | 10553035 | WBGene00009118 | F25H2.4  | F25H2.4  | -0.233620733717901 |
| AGIWUR22807                                                                                                                                                                                                                                 |   |          |          |                |          |          |                    |
| CB4856 CT                                                                                                                                                                                                                                   | I | 10553116 | 10553913 | WBGene00009119 | ndk-1    | F25H2.5  |                    |
| -0.00571806185154244                                                                                                                                                                                                                        |   |          |          |                |          |          |                    |
| AGIWUR1428;AGIWUR4491;AGIWUR7177;AGIWUR8978;AGIWUR10087;AGIWUR11437;AGIWUR13155;AGIWUR13297;AGIWUR14349;AGIWUR23883;AGIWUR25992;AGIWUR32023;AGIWUR32499;AGIWUR33225;AGIWUR36407;AGIWUR39612;AGIWUR41122;AGIWUR42164;AGIWUR44511;AGIWUR45155 |   |          |          |                |          |          |                    |
| CB4856 CT                                                                                                                                                                                                                                   | I | 10554366 | 10557838 | WBGene00009120 | F25H2.6  | F25H2.6  | 0.0938884191276781 |
| AGIWUR32606                                                                                                                                                                                                                                 |   |          |          |                |          |          |                    |
| CB4856 CT                                                                                                                                                                                                                                   | I | 10558323 | 10560006 | WBGene00009121 | F25H2.7  | F25H2.7  | -0.152201274704263 |
| AGIWUR30852                                                                                                                                                                                                                                 |   |          |          |                |          |          |                    |
| CB4856 CT                                                                                                                                                                                                                                   | I | 10562968 | 10564914 | WBGene00006720 | ubc-25   | F25H2.8  | 0.129331901563821  |
| AGIWUR14963;AGIWUR16386;AGIWUR38751                                                                                                                                                                                                         |   |          |          |                |          |          |                    |
| CB4856 CT                                                                                                                                                                                                                                   | I | 10566350 | 10567300 | WBGene00003926 | pas-5    | F25H2.9  | -0.298897175354938 |
| AGIWUR16852                                                                                                                                                                                                                                 |   |          |          |                |          |          |                    |
| CB4856 CT                                                                                                                                                                                                                                   | I | 10567894 | 10569019 | WBGene00004408 | rla-0    | F25H2.10 |                    |
| -0.15863993279315 AGIWUR3634;AGIWUR4230;AGIWUR5948;AGIWUR12550;AGIWUR14129;AGIWUR17615;AGIWUR31740                                                                                                                                          |   |          |          |                |          |          |                    |
| CB4856 CT                                                                                                                                                                                                                                   | I | 10569112 | 10570030 | WBGene00009122 | tct-1    | F25H2.11 |                    |
| 0.0692412661273103 AGIWUR34683                                                                                                                                                                                                              |   |          |          |                |          |          |                    |
| CB4856 CT                                                                                                                                                                                                                                   | I | 10570079 | 10571916 | WBGene00009123 | F25H2.12 | F25H2.12 |                    |
| -0.0593431887278477 AGIWUR42316                                                                                                                                                                                                             |   |          |          |                |          |          |                    |
| CB4856 CT                                                                                                                                                                                                                                   | I | 10571954 | 10577135 | WBGene00009124 | rtel-1   | F25H2.13 |                    |
| -0.216735614942866 AGIWUR14329                                                                                                                                                                                                              |   |          |          |                |          |          |                    |
| CB4856 CT                                                                                                                                                                                                                                   | I | 10579413 | 10580890 | WBGene00009243 | F29C6.1  | F29C6.1  | -0.41964510547117  |
| AGIWUR1176;AGIWUR28962                                                                                                                                                                                                                      |   |          |          |                |          |          |                    |
| CB4856 CT                                                                                                                                                                                                                                   | I | 10581538 | 10582609 | WBGene00011906 | hsp-12.1 | T22A3.2  |                    |
| 0.47842393039042 AGIWUR22241                                                                                                                                                                                                                |   |          |          |                |          |          |                    |
| CB4856 CT                                                                                                                                                                                                                                   | I | 10588177 | 10590464 | WBGene00003083 | lst-1    | T22A3.3  | -0.140424257032498 |
| AGIWUR4603                                                                                                                                                                                                                                  |   |          |          |                |          |          |                    |
| CB4856 CT                                                                                                                                                                                                                                   | I | 10590678 | 10593972 | WBGene00044070 | set-18   | T22A3.4  | -0.431450777110815 |
| AGIWUR474                                                                                                                                                                                                                                   |   |          |          |                |          |          |                    |
| CB4856 CT                                                                                                                                                                                                                                   | I | 10595545 | 10598490 | WBGene00011909 | T22A3.6  | T22A3.6  | -0.166848596108249 |
| AGIWUR40214                                                                                                                                                                                                                                 |   |          |          |                |          |          |                    |
| CB4856 CT                                                                                                                                                                                                                                   | I | 10598673 | 10606620 | WBGene00011908 | pash-1   | T22A3.5  | -0.268738812917681 |
| AGIWUR31209                                                                                                                                                                                                                                 |   |          |          |                |          |          |                    |

|                                                                        |          |          |                |          |          |                     |
|------------------------------------------------------------------------|----------|----------|----------------|----------|----------|---------------------|
| CB4856 CT I                                                            | 10608466 | 10621433 | WBGene00002248 | lam-3    | T22A3.8  | 0.550685928477949   |
| AGIWUR5500;AGIWUR37672                                                 |          |          |                |          |          |                     |
| CB4856 CT I                                                            | 10622952 | 10624361 | WBGene00016622 | mafr-1   | C43H8.2  | 0.270751118430026   |
| AGIWUR45017                                                            |          |          |                |          |          |                     |
| CB4856 CT I                                                            | 10624464 | 10625387 | WBGene00016621 | arch-1   | C43H8.1  | -0.245133486166667  |
| AGIWUR41519                                                            |          |          |                |          |          |                     |
| CB4856 CT I                                                            | 10625388 | 10628387 | WBGene00015232 | B0511.6  | B0511.6  | 0.132641196282066   |
| AGIWUR3687;AGIWUR4208;AGIWUR4272;AGIWUR4753;AGIWUR45010                |          |          |                |          |          |                     |
| CB4856 CT I                                                            | 10628712 | 10631674 | WBGene00015231 | cutl-14  | B0511.5  | 0.166853109976367   |
| AGIWUR12758                                                            |          |          |                |          |          |                     |
| CB4856 CT I                                                            | 10631665 | 10633150 | WBGene00015233 | B0511.7  | B0511.7  | -0.0206744893119293 |
| AGIWUR29044                                                            |          |          |                |          |          |                     |
| CB4856 CT I                                                            | 10633279 | 10634078 | WBGene00255714 | B0511.19 |          | B0511.19            |
| -0.350542059522331 AGIWUR2149                                          |          |          |                |          |          |                     |
| CB4856 CT I                                                            | 10636692 | 10638977 | WBGene00044321 | mrps-30  | B0511.8  | -0.11392926707985   |
| AGIWUR24656                                                            |          |          |                |          |          |                     |
| CB4856 CT I                                                            | 10639079 | 10640230 | WBGene00015235 | cdc-26   | B0511.9  | -0.154598637020798  |
| AGIWUR4793;AGIWUR28476;AGIWUR31998;AGIWUR37074;AGIWUR37096;AGIWUR40826 |          |          |                |          |          |                     |
| CB4856 CT I                                                            | 10640465 | 10642281 | WBGene00001228 | eif-3.E  | B0511.10 |                     |
| 0.0457430355724924 AGIWUR37070                                         |          |          |                |          |          |                     |
| CB4856 CT I                                                            | 10644245 | 10645617 | WBGene00015230 | tag-344  | B0511.4  | 0.0160574472507609  |
| AGIWUR24553                                                            |          |          |                |          |          |                     |
| CB4856 CT I                                                            | 10646762 | 10647777 | WBGene00015229 | fbxa-125 |          | B0511.3             |
| -0.0920607058741609 AGIWUR14685                                        |          |          |                |          |          |                     |
| CB4856 CT I                                                            | 10648606 | 10654179 | WBGene00015236 | B0511.11 |          | B0511.11            |
| -0.00982527415533241 AGIWUR44598                                       |          |          |                |          |          |                     |
| CB4856 CT I                                                            | 10654298 | 10666933 | WBGene00015237 | B0511.12 |          | B0511.12            |
| -0.0437554138112368 AGIWUR11649;AGIWUR13533;AGIWUR15421                |          |          |                |          |          |                     |
| CB4856 CT I                                                            | 10667808 | 10671301 | WBGene00001432 | fkf-7    | B0511.1  | 0.559740860401194   |
| AGIWUR39506                                                            |          |          |                |          |          |                     |
| CB4856 CT I                                                            | 10671460 | 10672589 | WBGene00016389 | C34B2.4  | C34B2.4  | -0.108583226998904  |
| AGIWUR41157                                                            |          |          |                |          |          |                     |
| CB4856 CT I                                                            | 10675167 | 10676811 | WBGene00016390 | C34B2.5  | C34B2.5  | -0.297147958736656  |
| AGIWUR7716;AGIWUR29153                                                 |          |          |                |          |          |                     |
| CB4856 CT I                                                            | 10676922 | 10682374 | WBGene00016391 | lonp-1   | C34B2.6  | -0.0320720442023292 |
| AGIWUR943;AGIWUR2718;AGIWUR5681                                        |          |          |                |          |          |                     |
| CB4856 CT I                                                            | 10682472 | 10683155 | WBGene00016395 | C34B2.10 |          | C34B2.10            |
| -0.41977329530481 AGIWUR14716;AGIWUR15847                              |          |          |                |          |          |                     |
| CB4856 CT I                                                            | 10683270 | 10685664 | WBGene00016392 | sdha-2   | C34B2.7  | 0.0332733453174647  |

|                                                                                             |    |   |          |          |                |          |                             |
|---------------------------------------------------------------------------------------------|----|---|----------|----------|----------------|----------|-----------------------------|
| AGIWUR38680                                                                                 |    |   |          |          |                |          |                             |
| CB4856                                                                                      | CT | I | 10685825 | 10687058 | WBGene00016393 | C34B2.8  | C34B2.8 -0.0546233931933049 |
| AGIWUR1458;AGIWUR3758;AGIWUR26926;AGIWUR36412;AGIWUR43567;AGIWUR44915                       |    |   |          |          |                |          |                             |
| CB4856                                                                                      | CT | I | 10687363 | 10688068 | WBGene00016387 | kbp-5    | C34B2.2 -0.0573079398100091 |
| AGIWUR11015                                                                                 |    |   |          |          |                |          |                             |
| CB4856                                                                                      | CT | I | 10688332 | 10690790 | WBGene00016386 | tag-272  | C34B2.1 0.0517378128668309  |
| AGIWUR21234                                                                                 |    |   |          |          |                |          |                             |
| CB4856                                                                                      | CT | I | 10691345 | 10696783 | WBGene00016396 | C34B2.11 | C34B2.11                    |
| -0.0983375111577747 AGIWUR2570;AGIWUR10840;AGIWUR43723                                      |    |   |          |          |                |          |                             |
| CB4856                                                                                      | CT | I | 10699562 | 10703801 | WBGene00016394 | C34B2.9  | C34B2.9 -0.233529841957084  |
| AGIWUR34791                                                                                 |    |   |          |          |                |          |                             |
| CB4856                                                                                      | CT | I | 10708363 | 10710376 | WBGene00015024 | B0205.10 | B0205.10                    |
| -0.177253740946503 AGIWUR13757                                                              |    |   |          |          |                |          |                             |
| CB4856                                                                                      | CT | I | 10713505 | 10718201 | WBGene00015017 | B0205.1  | B0205.1 -0.0689260607047046 |
| AGIWUR28744                                                                                 |    |   |          |          |                |          |                             |
| CB4856                                                                                      | CT | I | 10720813 | 10723496 | WBGene00015023 | B0205.9  | B0205.9 -0.087887687606429  |
| AGIWUR7558                                                                                  |    |   |          |          |                |          |                             |
| CB4856                                                                                      | CT | I | 10724161 | 10726136 | WBGene00015018 | srz-85   | B0205.2 0.0854523976499237  |
| AGIWUR40535                                                                                 |    |   |          |          |                |          |                             |
| CB4856                                                                                      | CT | I | 10726903 | 10727364 | WBGene00044646 | B0205.14 | B0205.14                    |
| -0.427231464488038 AGIWUR19150;AGIWUR26793;AGIWUR29668;AGIWUR31946;AGIWUR42563              |    |   |          |          |                |          |                             |
| CB4856                                                                                      | CT | I | 10727755 | 10728808 | WBGene00044644 | B0205.13 | B0205.13                    |
| -1.05847362406007 AGIWUR18822;AGIWUR35516;AGIWUR42241                                       |    |   |          |          |                |          |                             |
| CB4856                                                                                      | CT | I | 10728959 | 10730287 | WBGene00015022 | B0205.8  | B0205.8 -0.0920172338082779 |
| AGIWUR1980                                                                                  |    |   |          |          |                |          |                             |
| CB4856                                                                                      | CT | I | 10730467 | 10730743 | WBGene00044413 | B0205.12 | B0205.12                    |
| 0.0994985390136272 AGIWUR32246;AGIWUR34973;AGIWUR40595;AGIWUR42095;AGIWUR44666              |    |   |          |          |                |          |                             |
| CB4856                                                                                      | CT | I | 10730712 | 10732448 | WBGene00004466 | rpn-10   | B0205.3 -0.238576788056143  |
| AGIWUR1283;AGIWUR18646;AGIWUR19121;AGIWUR19902;AGIWUR37875                                  |    |   |          |          |                |          |                             |
| CB4856                                                                                      | CT | I | 10732543 | 10733686 | WBGene00015025 | mrp1-9   | B0205.11                    |
| -0.135115556374533 AGIWUR17494                                                              |    |   |          |          |                |          |                             |
| CB4856                                                                                      | CT | I | 10734022 | 10736615 | WBGene00002191 | kin-3    | B0205.7                     |
| -0.00315339732642261 AGIWUR6814;AGIWUR14979;AGIWUR16721;AGIWUR31425;AGIWUR35891;AGIWUR36826 |    |   |          |          |                |          |                             |
| CB4856                                                                                      | CT | I | 10736697 | 10739911 | WBGene00015021 | B0205.6  | B0205.6 -0.233655362221736  |
| AGIWUR33097                                                                                 |    |   |          |          |                |          |                             |
| CB4856                                                                                      | CT | I | 10740218 | 10740590 | WBGene00015020 | B0205.5  | B0205.5 -0.190881742638758  |
| AGIWUR43771                                                                                 |    |   |          |          |                |          |                             |
| CB4856                                                                                      | CT | I | 10741368 | 10744445 | WBGene00015019 | B0205.4  | B0205.4 0.627788316518761   |
| AGIWUR6510;AGIWUR34542                                                                      |    |   |          |          |                |          |                             |

|                                                                                              |    |   |          |          |                |          |          |                     |
|----------------------------------------------------------------------------------------------|----|---|----------|----------|----------------|----------|----------|---------------------|
| CB4856                                                                                       | CT | I | 10750343 | 10776700 | WBGene00000912 | daf-16   | R13H8.1  | 0.0656835679501295  |
| AGIWUR15683;AGIWUR17069;AGIWUR19627;AGIWUR26737;AGIWUR27096                                  |    |   |          |          |                |          |          |                     |
| CB4856                                                                                       | CT | I | 10781442 | 10782890 | WBGene00018850 | gpx-8    | F55A3.5  | -0.194946202732729  |
| AGIWUR1381                                                                                   |    |   |          |          |                |          |          |                     |
| CB4856                                                                                       | CT | I | 10785128 | 10787863 | WBGene00018852 | F55A3.7  | F55A3.7  | -0.229293690377512  |
| AGIWUR35755                                                                                  |    |   |          |          |                |          |          |                     |
| CB4856                                                                                       | CT | I | 10789130 | 10793152 | WBGene00018849 | F55A3.3  | F55A3.3  |                     |
| -0.00532318268524978 AGIWUR21198;AGIWUR26112;AGIWUR28742;AGIWUR36072;AGIWUR43803;AGIWUR44363 |    |   |          |          |                |          |          |                     |
| CB4856                                                                                       | CT | I | 10793161 | 10798059 | WBGene00018848 | F55A3.2  | F55A3.2  | -0.0486149148742641 |
| AGIWUR32325                                                                                  |    |   |          |          |                |          |          |                     |
| CB4856                                                                                       | CT | I | 10799623 | 10806901 | WBGene00018847 | marc-6   | F55A3.1  | -0.182753525961932  |
| AGIWUR19410                                                                                  |    |   |          |          |                |          |          |                     |
| CB4856                                                                                       | CT | I | 10806922 | 10808238 | WBGene00016461 | C35E7.9  | C35E7.9  | 0.126845449994869   |
| AGIWUR15468;AGIWUR34153                                                                      |    |   |          |          |                |          |          |                     |
| CB4856                                                                                       | CT | I | 10808590 | 10810497 | WBGene00016460 | C35E7.8  | C35E7.8  | -0.397669201377564  |
| AGIWUR12957                                                                                  |    |   |          |          |                |          |          |                     |
| CB4856                                                                                       | CT | I | 10810648 | 10812923 | WBGene00016462 | C35E7.10 | C35E7.10 |                     |
| -0.104046451199075 AGIWUR1500                                                                |    |   |          |          |                |          |          |                     |
| CB4856                                                                                       | CT | I | 10813815 | 10814904 | WBGene00016459 | C35E7.7  | C35E7.7  | -0.0481934128196428 |
| AGIWUR27260                                                                                  |    |   |          |          |                |          |          |                     |
| CB4856                                                                                       | CT | I | 10817352 | 10819963 | WBGene00016458 | C35E7.6  | C35E7.6  | 0.521152771073229   |
| AGIWUR19288                                                                                  |    |   |          |          |                |          |          |                     |
| CB4856                                                                                       | CT | I | 10823363 | 10828454 | WBGene00016457 | C35E7.5  | C35E7.5  | 0.0745361493326415  |
| AGIWUR221;AGIWUR3071;AGIWUR7500;AGIWUR13387;AGIWUR13605;AGIWUR15219;AGIWUR35549              |    |   |          |          |                |          |          |                     |
| CB4856                                                                                       | CT | I | 10831881 | 10834812 | WBGene00016456 | C35E7.4  | C35E7.4  | 0.578068016503412   |
| AGIWUR26878                                                                                  |    |   |          |          |                |          |          |                     |
| CB4856                                                                                       | CT | I | 10836985 | 10838877 | WBGene00016455 | C35E7.3  | C35E7.3  | 0.0107805374910726  |
| AGIWUR38197                                                                                  |    |   |          |          |                |          |          |                     |
| CB4856                                                                                       | CT | I | 10841114 | 10844647 | WBGene00016454 | C35E7.2  | C35E7.2  | 0.131750439236914   |
| AGIWUR9766                                                                                   |    |   |          |          |                |          |          |                     |
| CB4856                                                                                       | CT | I | 10844772 | 10845922 | WBGene00016463 | C35E7.11 | C35E7.11 |                     |
| -0.0242412509819712 AGIWUR28616                                                              |    |   |          |          |                |          |          |                     |
| CB4856                                                                                       | CT | I | 10846777 | 10850103 | WBGene00016453 | vet-2    | C35E7.1  | 0.0921622213113498  |
| AGIWUR10906                                                                                  |    |   |          |          |                |          |          |                     |
| CB4856                                                                                       | CT | I | 10855935 | 10857620 | WBGene00021383 | Y37F4.2  | Y37F4.2  | 0.0616028145465926  |
| AGIWUR3056                                                                                   |    |   |          |          |                |          |          |                     |
| CB4856                                                                                       | CT | I | 10859534 | 10860769 | WBGene00021382 | Y37F4.1  | Y37F4.1  | -0.133557614307193  |
| AGIWUR7087                                                                                   |    |   |          |          |                |          |          |                     |
| CB4856                                                                                       | CT | I | 10861215 | 10863453 | WBGene00021386 | Y37F4.5  | Y37F4.5  | 0.370427156580222   |

|                       |                                                                     |          |                |           |          |                    |
|-----------------------|---------------------------------------------------------------------|----------|----------------|-----------|----------|--------------------|
| AGIWUR44323           |                                                                     |          |                |           |          |                    |
| CB4856 CT I           | 10863880                                                            | 10866495 | WBGene00021388 | Y37F4.7   | Y37F4.7  | -0.425648644784092 |
| AGIWUR1404;AGIWUR3734 |                                                                     |          |                |           |          |                    |
| CB4856 CT I           | 10867554                                                            | 10868530 | WBGene00044289 | Y37F4.8   | Y37F4.8  | 1.28027960428838   |
| AGIWUR36705           |                                                                     |          |                |           |          |                    |
| CB4856 CT I           | 10870023                                                            | 10875046 | WBGene00021387 | Y37F4.6   | Y37F4.6  | -0.273199638742438 |
| AGIWUR44270           |                                                                     |          |                |           |          |                    |
| CB4856 CT I           | 10878047                                                            | 10878378 | WBGene00020860 | nspd-10   | T27C10.7 |                    |
| -0.0880002532370234   | AGIWUR23135                                                         |          |                |           |          |                    |
| CB4856 CT I           | 10879138                                                            | 10879572 | WBGene00269435 | T27C10.9  |          | T27C10.9           |
| 0.11507522100411      | AGIWUR40191                                                         |          |                |           |          |                    |
| CB4856 CT I           | 10879769                                                            | 10894239 | WBGene00003068 | lrk-1     | T27C10.6 |                    |
| 0.240153457420273     | AGIWUR10723                                                         |          |                |           |          |                    |
| CB4856 CT I           | 10899110                                                            | 10902024 | WBGene00020857 | srt-62    | T27C10.2 |                    |
| 0.0307234824357288    | AGIWUR18376;AGIWUR33397                                             |          |                |           |          |                    |
| CB4856 CT I           | 10906812                                                            | 10912203 | WBGene00018630 | F49D11.6  |          | F49D11.6           |
| 0.00405097578870262   | AGIWUR9641                                                          |          |                |           |          |                    |
| CB4856 CT I           | 10912913                                                            | 10915796 | WBGene00018628 | F49D11.4  |          | F49D11.4           |
| 0.0493148121005333    | AGIWUR33044                                                         |          |                |           |          |                    |
| CB4856 CT I           | 10917064                                                            | 10919095 | WBGene00018627 | F49D11.3  |          | F49D11.3           |
| -0.346392969682515    | AGIWUR7428                                                          |          |                |           |          |                    |
| CB4856 CT I           | 10921416                                                            | 10923484 | WBGene00018626 | F49D11.2  |          | F49D11.2           |
| -0.156350408043203    | AGIWUR4503;AGIWUR16229;AGIWUR16872                                  |          |                |           |          |                    |
| CB4856 CT I           | 10923574                                                            | 10923944 | WBGene00018631 | F49D11.7  |          | F49D11.7           |
| 0.105338756689388     | AGIWUR2557;AGIWUR8303;AGIWUR9080;AGIWUR9566;AGIWUR38563;AGIWUR40010 |          |                |           |          |                    |
| CB4856 CT I           | 10924240                                                            | 10925753 | WBGene00000780 | cpn-4     | F49D11.8 |                    |
| -0.123235964346208    | AGIWUR2714;AGIWUR20006;AGIWUR29506                                  |          |                |           |          |                    |
| CB4856 CT I           | 10926883                                                            | 10933705 | WBGene00045433 | F49D11.10 |          | F49D11.10          |
| -0.169685490362001    | AGIWUR42404                                                         |          |                |           |          |                    |
| CB4856 CT I           | 10933810                                                            | 10935712 | WBGene00018632 | tag-296   | F49D11.9 |                    |
| 0.4551816883152       | AGIWUR11932                                                         |          |                |           |          |                    |
| CB4856 CT I           | 10936819                                                            | 10940521 | WBGene00018625 | prp-17    | F49D11.1 |                    |
| -0.167788442374261    | AGIWUR16544                                                         |          |                |           |          |                    |
| CB4856 CT I           | 10940685                                                            | 10943922 | WBGene00045434 | Y95D11A.3 |          | Y95D11A.3          |
| -0.0847591598708348   | AGIWUR10746;AGIWUR23575                                             |          |                |           |          |                    |
| CB4856 CT I           | 10944210                                                            | 10945690 | WBGene00013605 | Y95D11A.1 |          | Y95D11A.1          |
| 0.234562608965922     | AGIWUR11591                                                         |          |                |           |          |                    |
| CB4856 CT I           | 10958297                                                            | 10959906 | WBGene00044262 | Y95D11A.2 |          | Y95D11A.2          |
| 0.156238237515171     | AGIWUR38881                                                         |          |                |           |          |                    |



|                                                                      |                                                                        |          |                |            |            |                     |
|----------------------------------------------------------------------|------------------------------------------------------------------------|----------|----------------|------------|------------|---------------------|
| CB4856 CT I                                                          | 10964473                                                               | 10966348 | WBGene00013121 | spe-38     | Y52B11A.1  |                     |
| -0.147078353115207                                                   | AGIWUR10936;AGIWUR13151;AGIWUR29137                                    |          |                |            |            |                     |
| CB4856 CT I                                                          | 10966394                                                               | 10970166 | WBGene00013122 | impt-1     | Y52B11A.2  |                     |
| -0.223934465932739                                                   | AGIWUR5756;AGIWUR11019;AGIWUR12958;AGIWUR13000;AGIWUR18911;AGIWUR29124 |          |                |            |            |                     |
| CB4856 CT I                                                          | 10970493                                                               | 10980111 | WBGene00013123 | Y52B11A.3  | Y52B11A.3  |                     |
| -0.0433611685615309                                                  | AGIWUR948;AGIWUR8774;AGIWUR10299;AGIWUR30518;AGIWUR35426;AGIWUR35479   |          |                |            |            |                     |
| CB4856 CT I                                                          | 11011435                                                               | 11014274 | WBGene00219422 | Y52B11A.20 | Y52B11A.20 |                     |
| 0.0162194521375438                                                   | AGIWUR3523;AGIWUR43245                                                 |          |                |            |            |                     |
| CB4856 CT I                                                          | 11012959                                                               | 11014739 | WBGene00077539 | Y52B11A.12 | Y52B11A.12 |                     |
| 0.632291807256584                                                    | AGIWUR8711;AGIWUR18783                                                 |          |                |            |            |                     |
| CB4856 CT I                                                          | 11015486                                                               | 11017497 | WBGene00013125 | cllec-92   | Y52B11A.5  |                     |
| -0.436234163573509                                                   | AGIWUR15108                                                            |          |                |            |            |                     |
| CB4856 CT I                                                          | 11018571                                                               | 11025653 | WBGene00013126 | mltn-2     | Y52B11A.7  |                     |
| -0.0536476408351354                                                  | AGIWUR13171;AGIWUR21642                                                |          |                |            |            |                     |
| CB4856 CT I                                                          | 11032339                                                               | 11034055 | WBGene00013127 | Y52B11A.8  | Y52B11A.8  |                     |
| -0.0614152766066436                                                  | AGIWUR32358                                                            |          |                |            |            |                     |
| CB4856 CT I                                                          | 11034057                                                               | 11038857 | WBGene00013128 | dxbp-1     | Y52B11A.9  |                     |
| -0.00933916921782973                                                 | AGIWUR22113                                                            |          |                |            |            |                     |
| CB4856 CT I                                                          | 11039056                                                               | 11052494 | WBGene00013129 | Y52B11A.10 | Y52B11A.10 |                     |
| 0.0114302751149893                                                   | AGIWUR18772;AGIWUR35839;AGIWUR36487                                    |          |                |            |            |                     |
| CB4856 CT I                                                          | 11067699                                                               | 11069996 | WBGene00014914 | Y52B11A.11 | Y52B11A.11 |                     |
| -0.181064297751257                                                   | AGIWUR356;AGIWUR941;AGIWUR13335;AGIWUR18309;AGIWUR23163                |          |                |            |            |                     |
| CB4856 CT I                                                          | 11075758                                                               | 11134667 | WBGene00001980 | hmr-1      | W02B9.1    | 0.184601369495883   |
| AGIWUR2464;AGIWUR4079;AGIWUR7642;AGIWUR14037;AGIWUR25685;AGIWUR25807 |                                                                        |          |                |            |            |                     |
| CB4856 CT I                                                          | 11142113                                                               | 11144090 | WBGene00013929 | cllec-93   | ZK39.4     | 0.262756086931308   |
| AGIWUR16569                                                          |                                                                        |          |                |            |            |                     |
| CB4856 CT I                                                          | 11144652                                                               | 11145696 | WBGene00044266 | ZK39.9     | ZK39.9     | 0.0385011632994612  |
| AGIWUR3953;AGIWUR18942;AGIWUR31124;AGIWUR35697;AGIWUR38465           |                                                                        |          |                |            |            |                     |
| CB4856 CT I                                                          | 11146448                                                               | 11148309 | WBGene00013928 | cllec-94   | ZK39.3     | -0.0377526911271673 |
| AGIWUR7109                                                           |                                                                        |          |                |            |            |                     |
| CB4856 CT I                                                          | 11148973                                                               | 11150295 | WBGene00013927 | cllec-95   | ZK39.2     | -0.498145350279138  |
| AGIWUR14880                                                          |                                                                        |          |                |            |            |                     |
| CB4856 CT I                                                          | 11151241                                                               | 11151972 | WBGene00013930 | cllec-96   | ZK39.5     | -0.828952375839542  |
| AGIWUR38744                                                          |                                                                        |          |                |            |            |                     |
| CB4856 CT I                                                          | 11152704                                                               | 11154329 | WBGene00013931 | cllec-97   | ZK39.6     | -0.411563179192968  |
| AGIWUR3379;AGIWUR10205                                               |                                                                        |          |                |            |            |                     |
| CB4856 CT I                                                          | 11156745                                                               | 11158831 | WBGene00013933 | cllec-99   | ZK39.8     | -0.514207856432543  |
| AGIWUR13126                                                          |                                                                        |          |                |            |            |                     |
| CB4856 CT I                                                          | 11160034                                                               | 11162602 | WBGene00050881 | ZK39.10    | ZK39.10    | -0.0703612748255349 |

AGIWUR15295;AGIWUR25506

|                                                                      |                                                                      |          |                |                 |                    |
|----------------------------------------------------------------------|----------------------------------------------------------------------|----------|----------------|-----------------|--------------------|
| CB4856 CT I                                                          | 11163811                                                             | 11168736 | WBGene00013131 | Y52B11C.1       | Y52B11C.1          |
| -0.0451375644205338                                                  | AGIWUR30055                                                          |          |                |                 |                    |
| CB4856 CT I                                                          | 11177805                                                             | 11182115 | WBGene00004706 | rsr-1 F28D9.1   | 0.0913660656365884 |
| AGIWUR25663                                                          |                                                                      |          |                |                 |                    |
| CB4856 CT I                                                          | 11182817                                                             | 11186137 | WBGene00005517 | sri-5 F28D9.2   | -0.296896803420363 |
| AGIWUR20194                                                          |                                                                      |          |                |                 |                    |
| CB4856 CT I                                                          | 11206922                                                             | 11211842 | WBGene00012317 | ztf-6 W06H12.1  |                    |
| 0.45078534985709                                                     | AGIWUR4883;AGIWUR5680;AGIWUR8022;AGIWUR21252;AGIWUR28412;AGIWUR42642 |          |                |                 |                    |
| CB4856 CT I                                                          | 11212426                                                             | 11215091 | WBGene00002119 | ins-36 Y53H1A.4 |                    |
| -0.0852252966284137                                                  | AGIWUR17879;AGIWUR21406;AGIWUR34002;AGIWUR36162;AGIWUR38489          |          |                |                 |                    |
| CB4856 CT I                                                          | 11216118                                                             | 11221995 | WBGene00013177 | rsy-1 Y53H1A.1  |                    |
| -0.0623119555957325                                                  | AGIWUR974;AGIWUR14921                                                |          |                |                 |                    |
| CB4856 CT I                                                          | 11222326                                                             | 11224400 | WBGene00013178 | Y53H1A.2        | Y53H1A.2           |
| -0.214860327473099                                                   | AGIWUR14334;AGIWUR20569;AGIWUR21366                                  |          |                |                 |                    |
| CB4856 CT I                                                          | 11224836                                                             | 11233334 | WBGene00043056 | nfya-2 Y53H1A.5 |                    |
| -0.0412819413533505                                                  | AGIWUR33672                                                          |          |                |                 |                    |
| CB4856 CT I                                                          | 11234302                                                             | 11235176 | WBGene00013179 | cllec-100       | Y53H1A.3           |
| -0.21251613258959                                                    | AGIWUR16219                                                          |          |                |                 |                    |
| CB4856 CT I                                                          | 11235385                                                             | 11235594 | WBGene00044781 | Y53H1A.6        | Y53H1A.6           |
| -0.0265497411570781                                                  | AGIWUR13135                                                          |          |                |                 |                    |
| CB4856 CT I                                                          | 11243836                                                             | 11245003 | WBGene00009749 | F46A8.6 F46A8.6 | -0.433169932535407 |
| AGIWUR32965                                                          |                                                                      |          |                |                 |                    |
| CB4856 CT I                                                          | 11245823                                                             | 11246765 | WBGene00014760 | F46A8.2 F46A8.2 | 0.0641116411896534 |
| AGIWUR32278;AGIWUR33361                                              |                                                                      |          |                |                 |                    |
| CB4856 CT I                                                          | 11248270                                                             | 11249952 | WBGene00014761 | F46A8.11        | F46A8.11           |
| 0.0842814722143048                                                   | AGIWUR14328;AGIWUR40171                                              |          |                |                 |                    |
| CB4856 CT I                                                          | 11250139                                                             | 11251602 | WBGene00014759 | F46A8.1 F46A8.1 | 0.851120187198253  |
| AGIWUR15744;AGIWUR23653;AGIWUR27635                                  |                                                                      |          |                |                 |                    |
| CB4856 CT I                                                          | 11252238                                                             | 11252981 | WBGene00009752 | F46A8.9 F46A8.9 | 0.069563859639695  |
| AGIWUR9494                                                           |                                                                      |          |                |                 |                    |
| CB4856 CT I                                                          | 11253256                                                             | 11256022 | WBGene00009753 | scrm-6 F46A8.10 |                    |
| 0.0403783846108787                                                   | AGIWUR31148                                                          |          |                |                 |                    |
| CB4856 CT I                                                          | 11256550                                                             | 11259225 | WBGene00009467 | F36D1.8 F36D1.8 | 0.176452709798728  |
| AGIWUR29021                                                          |                                                                      |          |                |                 |                    |
| CB4856 CT I                                                          | 11263066                                                             | 11263661 | WBGene00009466 | F36D1.7 F36D1.7 | 1.01021491558952   |
| AGIWUR2766;AGIWUR3959;AGIWUR7252;AGIWUR15487;AGIWUR32950;AGIWUR45156 |                                                                      |          |                |                 |                    |
| CB4856 CT I                                                          | 11265523                                                             | 11265714 | WBGene00077524 | F36D1.11        | F36D1.11           |
| 0.0281884264411087                                                   | AGIWUR3397;AGIWUR28134                                               |          |                |                 |                    |

|                                                          |                                                             |          |                |                   |                     |
|----------------------------------------------------------|-------------------------------------------------------------|----------|----------------|-------------------|---------------------|
| CB4856 CT I                                              | 11266070                                                    | 11266474 | WBGene00009464 | F36D1.5 F36D1.5   | -0.192201115563904  |
| AGIWUR19361                                              |                                                             |          |                |                   |                     |
| CB4856 CT I                                              | 11268030                                                    | 11268409 | WBGene00044246 | F36D1.10 F36D1.10 |                     |
| -0.01015576297356                                        | AGIWUR2407;AGIWUR4902;AGIWUR6043;AGIWUR20336;AGIWUR24359    |          |                |                   |                     |
| CB4856 CT I                                              | 11269946                                                    | 11271226 | WBGene00009465 | F36D1.6 F36D1.6   | -0.0188870097922846 |
| AGIWUR5059;AGIWUR16986;AGIWUR23497                       |                                                             |          |                |                   |                     |
| CB4856 CT I                                              | 11271708                                                    | 11272346 | WBGene00009463 | F36D1.4 F36D1.4   | -0.0724648561294501 |
| AGIWUR27994                                              |                                                             |          |                |                   |                     |
| CB4856 CT I                                              | 11274899                                                    | 11276346 | WBGene00009468 | F36D1.9 F36D1.9   | -0.0776310503808482 |
| AGIWUR28466;AGIWUR30243;AGIWUR30436                      |                                                             |          |                |                   |                     |
| CB4856 CT I                                              | 11276451                                                    | 11280018 | WBGene00009461 | madf-2 F36D1.1    | -0.0657237152248111 |
| AGIWUR18025                                              |                                                             |          |                |                   |                     |
| CB4856 CT I                                              | 11282473                                                    | 11286290 | WBGene00009462 | sre-22 F36D1.2    | -0.0433708746744657 |
| AGIWUR8829;AGIWUR32183                                   |                                                             |          |                |                   |                     |
| CB4856 CT I                                              | 11289044                                                    | 11291868 | WBGene00005710 | sru-47 F36D1.3    | 0.148050701073606   |
| AGIWUR34147                                              |                                                             |          |                |                   |                     |
| CB4856 CT I                                              | 11292662                                                    | 11294197 | WBGene00013181 | Y53H1B.2 Y53H1B.2 |                     |
| 0.549788987012956                                        | AGIWUR1839                                                  |          |                |                   |                     |
| CB4856 CT I                                              | 11294593                                                    | 11297206 | WBGene00013180 | cutl-10 Y53H1B.1  |                     |
| 0.526968901592901                                        | AGIWUR9275                                                  |          |                |                   |                     |
| CB4856 CT I                                              | 11300743                                                    | 11301662 | WBGene00013182 | Y53H1B.4 Y53H1B.4 |                     |
| 0.322906071191033                                        | AGIWUR40711                                                 |          |                |                   |                     |
| CB4856 CT I                                              | 11305882                                                    | 11307450 | WBGene00219319 | H25P06.5 H25P06.5 |                     |
| 0.0969570820374894                                       | AGIWUR14863;AGIWUR22874;AGIWUR29330;AGIWUR31715;AGIWUR39430 |          |                |                   |                     |
| CB4856 CT I                                              | 11311516                                                    | 11323110 | WBGene00010416 | hxxk-2 H25P06.1   |                     |
| -0.177197375813924                                       | AGIWUR19499                                                 |          |                |                   |                     |
| CB4856 CT I                                              | 11323527                                                    | 11333152 | WBGene00000410 | cdk-9 H25P06.2    |                     |
| -0.239859735983972                                       | AGIWUR2599;AGIWUR5704;AGIWUR16319;AGIWUR18803;AGIWUR22679   |          |                |                   |                     |
| CB4856 CT I                                              | 11334223                                                    | 11337431 | WBGene00014807 | M04D5.1 M04D5.1   | -0.289211883793441  |
| AGIWUR1348;AGIWUR28722                                   |                                                             |          |                |                   |                     |
| CB4856 CT I                                              | 11339787                                                    | 11341521 | WBGene00077770 | M04D5.3 M04D5.3   | -0.0949833802620148 |
| AGIWUR20198                                              |                                                             |          |                |                   |                     |
| CB4856 CT I                                              | 11361090                                                    | 11362900 | WBGene00044250 | F56G4.7 F56G4.7   | -0.139161512478967  |
| AGIWUR219;AGIWUR6931;AGIWUR14752;AGIWUR17788;AGIWUR20636 |                                                             |          |                |                   |                     |
| CB4856 CT I                                              | 11364321                                                    | 11374334 | WBGene00010161 | F56G4.6 F56G4.6   | 0.109980189764155   |
| AGIWUR42088                                              |                                                             |          |                |                   |                     |
| CB4856 CT I                                              | 11374620                                                    | 11380127 | WBGene00010159 | F56G4.4 F56G4.4   | -0.202375025433255  |
| AGIWUR21621                                              |                                                             |          |                |                   |                     |
| CB4856 CT I                                              | 11380231                                                    | 11388751 | WBGene00010160 | png-1 F56G4.5     | -0.103781908677327  |

|                                     |                                                                      |          |                |           |          |                     |
|-------------------------------------|----------------------------------------------------------------------|----------|----------------|-----------|----------|---------------------|
| AGIWUR20127                         |                                                                      |          |                |           |          |                     |
| CB4856 CT I                         | 11388689                                                             | 11396660 | WBGene00000010 | aat-9     | Y53H1C.1 |                     |
| -0.171394850891557                  | AGIWUR16336;AGIWUR17335;AGIWUR18837                                  |          |                |           |          |                     |
| CB4856 CT I                         | 11400612                                                             | 11416427 | WBGene00001215 | ego-2     | Y53H1C.2 |                     |
| -0.149197103390792                  | AGIWUR2467;AGIWUR2804;AGIWUR4341;AGIWUR10016;AGIWUR25366;AGIWUR45207 |          |                |           |          |                     |
| CB4856 CT I                         | 11417844                                                             | 11421236 | WBGene00013186 | Y53H1C.3  | Y53H1C.3 |                     |
| -0.110983329754552                  | AGIWUR20556                                                          |          |                |           |          |                     |
| CB4856 CT I                         | 11422190                                                             | 11423600 | WBGene00007769 | C27C7.7   | C27C7.7  | -0.245769263422937  |
| AGIWUR13993                         |                                                                      |          |                |           |          |                     |
| CB4856 CT I                         | 11423993                                                             | 11426054 | WBGene00007768 | C27C7.5   | C27C7.5  | 0.0263323122385941  |
| AGIWUR1894                          |                                                                      |          |                |           |          |                     |
| CB4856 CT I                         | 11429029                                                             | 11432145 | WBGene00003664 | nhr-74    | C27C7.3  | -0.282634535820938  |
| AGIWUR43950                         |                                                                      |          |                |           |          |                     |
| CB4856 CT I                         | 11443452                                                             | 11446644 | WBGene00014992 | ZK1025.1  | ZK1025.1 |                     |
| 0.00718508150039643                 | AGIWUR9385                                                           |          |                |           |          |                     |
| CB4856 CT I                         | 11460780                                                             | 11463074 | WBGene00014183 | ZK1025.3  | ZK1025.3 |                     |
| -0.217173352311953                  | AGIWUR9770                                                           |          |                |           |          |                     |
| CB4856 CT I                         | 11473218                                                             | 11475677 | WBGene00003703 | nhr-113   | ZK1025.9 |                     |
| -0.0185078216405508                 | AGIWUR19572                                                          |          |                |           |          |                     |
| CB4856 CT I                         | 11483392                                                             | 11484571 | WBGene00010652 | K08C9.5   | K08C9.5  | 0.362784494120348   |
| AGIWUR40298                         |                                                                      |          |                |           |          |                     |
| CB4856 CT I                         | 11484778                                                             | 11486598 | WBGene00010650 | K08C9.1   | K08C9.1  | -0.1337575146208    |
| AGIWUR24763                         |                                                                      |          |                |           |          |                     |
| CB4856 CT I                         | 11486895                                                             | 11488471 | WBGene00010651 | K08C9.2   | K08C9.2  | 0.0760394803732645  |
| AGIWUR16644                         |                                                                      |          |                |           |          |                     |
| CB4856 CT I                         | 11489158                                                             | 11490630 | WBGene00000641 | col-65    | K08C9.4  | -0.192477877290241  |
| AGIWUR17873                         |                                                                      |          |                |           |          |                     |
| CB4856 CT I                         | 11493036                                                             | 11495080 | WBGene00045218 | K08C9.8   | K08C9.8  | -0.178887242159234  |
| AGIWUR14097;AGIWUR39873             |                                                                      |          |                |           |          |                     |
| CB4856 CT I                         | 11498914                                                             | 11499655 | WBGene00010653 | K08C9.6   | K08C9.6  |                     |
| -0.00954491015330738                | AGIWUR354;AGIWUR5663;AGIWUR10669;AGIWUR15581;AGIWUR43275             |          |                |           |          |                     |
| CB4856 CT I                         | 11501625                                                             | 11507129 | WBGene00009318 | F32B4.8   | F32B4.8  | 0.175329271143692   |
| AGIWUR31965                         |                                                                      |          |                |           |          |                     |
| CB4856 CT I                         | 11510066                                                             | 11512769 | WBGene00009312 | F32B4.1   | F32B4.1  | -0.0882477757437261 |
| AGIWUR10881;AGIWUR12015;AGIWUR29788 |                                                                      |          |                |           |          |                     |
| CB4856 CT I                         | 11512840                                                             | 11513853 | WBGene00009313 | F32B4.2   | F32B4.2  | -0.309915693187989  |
| AGIWUR23120;AGIWUR37167;AGIWUR44941 |                                                                      |          |                |           |          |                     |
| CB4856 CT I                         | 11515127                                                             | 11517108 | WBGene00009316 | abhd-11.1 | F32B4.6  |                     |
| 0.188505817592647                   | AGIWUR39042                                                          |          |                |           |          |                     |

|                                                             |          |          |                |                  |                     |
|-------------------------------------------------------------|----------|----------|----------------|------------------|---------------------|
| CB4856 CT I                                                 | 11517558 | 11526962 | WBGene00009314 | F32B4.4 F32B4.4  | -0.0457168489520408 |
| AGIWUR25980;AGIWUR30552                                     |          |          |                |                  |                     |
| CB4856 CT I                                                 | 11526918 | 11557851 | WBGene00001131 | dys-1 F15D3.1    | 0.0899899897266447  |
| AGIWUR12141;AGIWUR22309;AGIWUR24862;AGIWUR34445;AGIWUR40088 |          |          |                |                  |                     |
| CB4856 CT I                                                 | 11557986 | 11558671 | WBGene00077557 | F15D3.9 F15D3.9  | -0.0980554935351368 |
| AGIWUR2903;AGIWUR3479;AGIWUR5850;AGIWUR17559;AGIWUR22084    |          |          |                |                  |                     |
| CB4856 CT I                                                 | 11560637 | 11564387 | WBGene00008853 | clcc-101         | F15D3.2             |
| 0.220107591406723 AGIWUR11727;AGIWUR34026                   |          |          |                |                  |                     |
| CB4856 CT I                                                 | 11565238 | 11570803 | WBGene00008854 | F15D3.4 F15D3.4  | -0.2408236830247    |
| AGIWUR1550                                                  |          |          |                |                  |                     |
| CB4856 CT I                                                 | 11570886 | 11571178 | WBGene00008855 | F15D3.5 F15D3.5  | 0.0666121049470645  |
| AGIWUR38955                                                 |          |          |                |                  |                     |
| CB4856 CT I                                                 | 11572121 | 11577488 | WBGene00008856 | F15D3.6 F15D3.6  | 0.292039390175924   |
| AGIWUR36119;AGIWUR37869                                     |          |          |                |                  |                     |
| CB4856 CT I                                                 | 11578641 | 11579612 | WBGene00008857 | timmm-23 F15D3.7 | 0.111587835079581   |
| AGIWUR37010                                                 |          |          |                |                  |                     |
| CB4856 CT I                                                 | 11579861 | 11581986 | WBGene00008858 | pals-1 F15D3.8   | -0.0112714381360224 |
| AGIWUR20103                                                 |          |          |                |                  |                     |
| CB4856 CT I                                                 | 11582743 | 11586069 | WBGene00004963 | spe-9 C17D12.6   |                     |
| 0.275947200870283 AGIWUR2003                                |          |          |                |                  |                     |
| CB4856 CT I                                                 | 11585922 | 11587294 | WBGene00007639 | C17D12.5         | C17D12.5            |
| -0.319386182519327 AGIWUR29807                              |          |          |                |                  |                     |
| CB4856 CT I                                                 | 11592302 | 11602095 | WBGene00006807 | unc-75 C17D12.2  |                     |
| 0.464469273189947 AGIWUR17392;AGIWUR20095                   |          |          |                |                  |                     |
| CB4856 CT I                                                 | 11604027 | 11611314 | WBGene00007640 | C17D12.7         | C17D12.7            |
| -0.213470372610457 AGIWUR32357                              |          |          |                |                  |                     |
| CB4856 CT I                                                 | 11611672 | 11616244 | WBGene00007637 | dhhc-7 C17D12.1  |                     |
| 0.104130452373312 AGIWUR38592                               |          |          |                |                  |                     |
| CB4856 CT I                                                 | 11616816 | 11620263 | WBGene00007638 | C17D12.3         | C17D12.3            |
| 0.555814495483506 AGIWUR9660                                |          |          |                |                  |                     |
| CB4856 CT I                                                 | 11630064 | 11632879 | WBGene00012265 | W04G5.4 W04G5.4  | 0.0977657247878465  |
| AGIWUR32019;AGIWUR32119;AGIWUR43756                         |          |          |                |                  |                     |
| CB4856 CT I                                                 | 11633002 | 11638491 | WBGene00004275 | rab-11.2         | W04G5.2             |
| 0.0363129109538365 AGIWUR6515;AGIWUR17616;AGIWUR24210       |          |          |                |                  |                     |
| CB4856 CT I                                                 | 11638482 | 11640414 | WBGene00012270 | W04G5.10         | W04G5.10            |
| 0.136469247891621 AGIWUR4128;AGIWUR31161;AGIWUR34859        |          |          |                |                  |                     |
| CB4856 CT I                                                 | 11640687 | 11642206 | WBGene00002205 | kin-23 W04G5.6   | 0.0505087884052431  |
| AGIWUR14720                                                 |          |          |                |                  |                     |
| CB4856 CT I                                                 | 11642625 | 11645420 | WBGene00012269 | W04G5.9 W04G5.9  | -0.246332689964252  |

|                                                                                    |    |   |                                                |          |                |                                     |
|------------------------------------------------------------------------------------|----|---|------------------------------------------------|----------|----------------|-------------------------------------|
| AGIWUR26630                                                                        |    |   |                                                |          |                |                                     |
| CB4856                                                                             | CT | I | 11646525                                       | 11647020 | WBGene00045075 | W04G5.12 W04G5.12                   |
| 0.144063055444611                                                                  |    |   | AGIWUR863;AGIWUR7332;AGIWUR13915               |          |                |                                     |
| CB4856                                                                             | CT | I | 11647753                                       | 11648428 | WBGene00045076 | W04G5.13 W04G5.13                   |
| -0.056781719231684                                                                 |    |   | AGIWUR11630;AGIWUR42286;AGIWUR42442            |          |                |                                     |
| CB4856                                                                             | CT | I | 11649982                                       | 11651912 | WBGene00012268 | W04G5.8 W04G5.8 0.205769951156471   |
| AGIWUR29292                                                                        |    |   |                                                |          |                |                                     |
| CB4856                                                                             | CT | I | 11652789                                       | 11654254 | WBGene00012267 | W04G5.7 W04G5.7 0.123026824740883   |
| AGIWUR227;AGIWUR4758;AGIWUR23631                                                   |    |   |                                                |          |                |                                     |
| CB4856                                                                             | CT | I | 11675850                                       | 11680975 | WBGene00002232 | kpc-1 F11A6.1 0.447608259182147     |
| AGIWUR6129;AGIWUR35941;AGIWUR40036;AGIWUR40532;AGIWUR41868;AGIWUR43223;AGIWUR44060 |    |   |                                                |          |                |                                     |
| CB4856                                                                             | CT | I | 11680913                                       | 11682441 | WBGene00008681 | scrm-4 F11A6.2                      |
| -0.00251908320094074                                                               |    |   | AGIWUR12708;AGIWUR15152;AGIWUR37914            |          |                |                                     |
| CB4856                                                                             | CT | I | 11687811                                       | 11688522 | WBGene00077549 | F11A6.3 F11A6.3 -0.0847745766481953 |
| AGIWUR5970                                                                         |    |   |                                                |          |                |                                     |
| CB4856                                                                             | CT | I | 11688680                                       | 11690830 | WBGene00011935 | scrm-1 T22H2.5 0.0599576674197184   |
| AGIWUR22686;AGIWUR42928                                                            |    |   |                                                |          |                |                                     |
| CB4856                                                                             | CT | I | 11694722                                       | 11694997 | WBGene00011934 | T22H2.4 T22H2.4 -0.215258887271228  |
| AGIWUR33144                                                                        |    |   |                                                |          |                |                                     |
| CB4856                                                                             | CT | I | 11695339                                       | 11697943 | WBGene00005523 | sri-11 T22H2.3 0.214595639870494    |
| AGIWUR24552                                                                        |    |   |                                                |          |                |                                     |
| CB4856                                                                             | CT | I | 11699169                                       | 11701178 | WBGene00005524 | sri-12 T22H2.1 -0.0427959403663518  |
| AGIWUR26364                                                                        |    |   |                                                |          |                |                                     |
| CB4856                                                                             | CT | I | 11701631                                       | 11703698 | WBGene00011936 | pgrn-1 T22H2.6 -0.111263560300892   |
| AGIWUR27058;AGIWUR43309                                                            |    |   |                                                |          |                |                                     |
| CB4856                                                                             | CT | I | 11703718                                       | 11706612 | WBGene00011933 | oac-47 T22H2.2 0.146778428561538    |
| AGIWUR23499                                                                        |    |   |                                                |          |                |                                     |
| CB4856                                                                             | CT | I | 11707818                                       | 11712197 | WBGene00009413 | oac-19 F35E2.6 -0.26222280108917    |
| AGIWUR25636                                                                        |    |   |                                                |          |                |                                     |
| CB4856                                                                             | CT | I | 11714956                                       | 11717616 | WBGene00009414 | F35E2.7 F35E2.7 -0.380703581252723  |
| AGIWUR21665                                                                        |    |   |                                                |          |                |                                     |
| CB4856                                                                             | CT | I | 11718864                                       | 11719790 | WBGene00009415 | F35E2.8 F35E2.8 0.264671223945662   |
| AGIWUR4814                                                                         |    |   |                                                |          |                |                                     |
| CB4856                                                                             | CT | I | 11719902                                       | 11722936 | WBGene00044270 | F35E2.10 F35E2.10                   |
| -0.227745633395248                                                                 |    |   | AGIWUR4911;AGIWUR28015;AGIWUR32014;AGIWUR44280 |          |                |                                     |
| CB4856                                                                             | CT | I | 11723427                                       | 11726326 | WBGene00009416 | F35E2.9 F35E2.9 -0.441810346856808  |
| AGIWUR15496                                                                        |    |   |                                                |          |                |                                     |
| CB4856                                                                             | CT | I | 11733940                                       | 11735964 | WBGene00009411 | F35E2.3 F35E2.3 -0.266849815353072  |
| AGIWUR643;AGIWUR24810;AGIWUR32708;AGIWUR40664;AGIWUR43891                          |    |   |                                                |          |                |                                     |

|                                                                                                           |          |          |                |                 |                    |
|-----------------------------------------------------------------------------------------------------------|----------|----------|----------------|-----------------|--------------------|
| CB4856 CT I                                                                                               | 11736637 | 11737699 | WBGene00009410 | F35E2.2 F35E2.2 | 0.344816769636671  |
| AGIWUR38091                                                                                               |          |          |                |                 |                    |
| CB4856 CT I                                                                                               | 11741603 | 11743951 | WBGene00009412 | F35E2.5 F35E2.5 | -0.135459118299369 |
| AGIWUR19040;AGIWUR31412                                                                                   |          |          |                |                 |                    |
| CB4856 CT I                                                                                               | 11744172 | 11747451 | WBGene00012946 | Y47H9B.2        | Y47H9B.2           |
| -0.00289846661698334 AGIWUR3183;AGIWUR27320;AGIWUR39374;AGIWUR42978                                       |          |          |                |                 |                    |
| CB4856 CT I                                                                                               | 11747428 | 11792118 | WBGene00006876 | vab-10          | ZK1151.1           |
| 0.0109205573916391                                                                                        |          |          |                |                 |                    |
| AGIWUR5594;AGIWUR6483;AGIWUR14405;AGIWUR15572;AGIWUR17308;AGIWUR19666;AGIWUR20230;AGIWUR25708;AGIWUR38637 |          |          |                |                 |                    |
| CB4856 CT I                                                                                               | 11797032 | 11797947 | WBGene00011384 | T02G6.1 T02G6.1 | -0.164917544180385 |
| AGIWUR30583                                                                                               |          |          |                |                 |                    |
| CB4856 CT I                                                                                               | 11800433 | 11804991 | WBGene00011385 | T02G6.2 T02G6.2 | -0.466824717287789 |
| AGIWUR1183;AGIWUR9681;AGIWUR13350;AGIWUR33790;AGIWUR38283;AGIWUR38543                                     |          |          |                |                 |                    |
| CB4856 CT I                                                                                               | 11809132 | 11811266 | WBGene00011387 | T02G6.4 T02G6.4 | 0.0644301540870318 |
| AGIWUR25717                                                                                               |          |          |                |                 |                    |
| CB4856 CT I                                                                                               | 11813779 | 11814451 | WBGene00011386 | T02G6.3 T02G6.3 | 0.0262794993473783 |
| AGIWUR33810                                                                                               |          |          |                |                 |                    |
| CB4856 CT I                                                                                               | 11815910 | 11819277 | WBGene00011388 | T02G6.5 T02G6.5 | -0.278018358874604 |
| AGIWUR1129                                                                                                |          |          |                |                 |                    |
| CB4856 CT I                                                                                               | 11820688 | 11823459 | WBGene00086562 | T02G6.11        | T02G6.11           |
| -0.0293247546269355 AGIWUR4176;AGIWUR10405;AGIWUR11978;AGIWUR13971;AGIWUR40335;AGIWUR44344                |          |          |                |                 |                    |
| CB4856 CT I                                                                                               | 11827549 | 11828619 | WBGene00011390 | T02G6.7 T02G6.7 | -0.130981266658198 |
| AGIWUR6776                                                                                                |          |          |                |                 |                    |
| CB4856 CT I                                                                                               | 11830985 | 11833166 | WBGene00012947 | Y47H9C.1        | Y47H9C.1           |
| -0.097835044078467 AGIWUR41747                                                                            |          |          |                |                 |                    |
| CB4856 CT I                                                                                               | 11836460 | 11849251 | WBGene00012948 | dhhc-2          | Y47H9C.2           |
| 0.0310460431030624 AGIWUR13146                                                                            |          |          |                |                 |                    |
| CB4856 CT I                                                                                               | 11851566 | 11868105 | WBGene00000415 | ced-1           | Y47H9C.4           |
| 0.191872926701646 AGIWUR17222;AGIWUR19662;AGIWUR22787;AGIWUR40343                                         |          |          |                |                 |                    |
| CB4856 CT I                                                                                               | 11888501 | 11890558 | WBGene00000821 | csp-3           | Y47H9C.6           |
| 0.0581992494147627 AGIWUR42697                                                                            |          |          |                |                 |                    |
| CB4856 CT I                                                                                               | 11891549 | 11893727 | WBGene00012950 | eif-2Bbeta      | Y47H9C.7           |
| 0.0264840526788284 AGIWUR36725                                                                            |          |          |                |                 |                    |
| CB4856 CT I                                                                                               | 11893881 | 11896284 | WBGene00012951 | Y47H9C.8        | Y47H9C.8           |
| -0.0444216975775849 AGIWUR13628                                                                           |          |          |                |                 |                    |
| CB4856 CT I                                                                                               | 11898789 | 11901476 | WBGene00012952 | Y47H9C.9        | Y47H9C.9           |
| -0.115612387469815 AGIWUR19718                                                                            |          |          |                |                 |                    |
| CB4856 CT I                                                                                               | 11901608 | 11903305 | WBGene00012953 | fbxa-216        | Y47H9C.10          |
| -0.100692914316882 AGIWUR18820                                                                            |          |          |                |                 |                    |

|                                                                                                                      |                                                            |          |                |                  |                     |
|----------------------------------------------------------------------------------------------------------------------|------------------------------------------------------------|----------|----------------|------------------|---------------------|
| CB4856 CT I                                                                                                          | 11903734                                                   | 11905148 | WBGene00012954 | fbxa-217         | Y47H9C.11           |
| -0.253771208133251                                                                                                   | AGIWUR28607                                                |          |                |                  |                     |
| CB4856 CT I                                                                                                          | 11905957                                                   | 11907484 | WBGene00014820 | R09B3.6 R09B3.6  | 0.0566369958839519  |
| AGIWUR33163;AGIWUR44264                                                                                              |                                                            |          |                |                  |                     |
| CB4856 CT I                                                                                                          | 11907571                                                   | 11909280 | WBGene00001372 | exo-3 R09B3.1    | -0.329506657359028  |
| AGIWUR18555                                                                                                          |                                                            |          |                |                  |                     |
| CB4856 CT I                                                                                                          | 11909366                                                   | 11910104 | WBGene00011155 | R09B3.2 R09B3.2  | -0.116515634114545  |
| AGIWUR1991;AGIWUR2354;AGIWUR5088;AGIWUR17198;AGIWUR19184;AGIWUR19657;AGIWUR32430;AGIWUR32996;AGIWUR36348;AGIWUR38502 |                                                            |          |                |                  |                     |
| CB4856 CT I                                                                                                          | 11910328                                                   | 11911021 | WBGene00011156 | R09B3.3 R09B3.3  | -0.0732003377033443 |
| AGIWUR19760                                                                                                          |                                                            |          |                |                  |                     |
| CB4856 CT I                                                                                                          | 11911324                                                   | 11912052 | WBGene00006707 | ubc-12 R09B3.4   | -0.279423829464525  |
| AGIWUR27816                                                                                                          |                                                            |          |                |                  |                     |
| CB4856 CT I                                                                                                          | 11912791                                                   | 11917719 | WBGene00001836 | hda-3 R06C1.1    | -0.0202952015535338 |
| AGIWUR26718                                                                                                          |                                                            |          |                |                  |                     |
| CB4856 CT I                                                                                                          | 11917834                                                   | 11923915 | WBGene00011058 | fdps-1 R06C1.2   |                     |
| -0.00685518677132357                                                                                                 | AGIWUR5488                                                 |          |                |                  |                     |
| CB4856 CT I                                                                                                          | 11924785                                                   | 11929511 | WBGene00006958 | wve-1 R06C1.3    | -0.159600913136368  |
| AGIWUR2816;AGIWUR28617;AGIWUR38538                                                                                   |                                                            |          |                |                  |                     |
| CB4856 CT I                                                                                                          | 11930704                                                   | 11931757 | WBGene00011059 | R06C1.4 R06C1.4  | -0.163209839566765  |
| AGIWUR13265;AGIWUR15867;AGIWUR18035;AGIWUR19895;AGIWUR36452;AGIWUR40223                                              |                                                            |          |                |                  |                     |
| CB4856 CT I                                                                                                          | 11947001                                                   | 11953126 | WBGene00011060 | R06C1.6 R06C1.6  | 0.298522597009535   |
| AGIWUR16528                                                                                                          |                                                            |          |                |                  |                     |
| CB4856 CT I                                                                                                          | 11953512                                                   | 11961984 | WBGene00002004 | hsf-1 Y53C10A.12 |                     |
| -0.113720764623167                                                                                                   | AGIWUR5003                                                 |          |                |                  |                     |
| CB4856 CT I                                                                                                          | 11966271                                                   | 11967591 | WBGene00014915 | Y53C10A.1        | Y53C10A.1           |
| -0.130210399810029                                                                                                   | AGIWUR3407;AGIWUR13951;AGIWUR27588;AGIWUR39138;AGIWUR40433 |          |                |                  |                     |
| CB4856 CT I                                                                                                          | 11968022                                                   | 11969847 | WBGene00013134 | hsf-2 Y53C10A.3  |                     |
| -0.0855745106183554                                                                                                  | AGIWUR14077;AGIWUR30255                                    |          |                |                  |                     |
| CB4856 CT I                                                                                                          | 11971179                                                   | 11971797 | WBGene00044805 | Y53C10A.15       | Y53C10A.15          |
| -0.0985896667421944                                                                                                  | AGIWUR5972;AGIWUR10075;AGIWUR17097;AGIWUR25230;AGIWUR41924 |          |                |                  |                     |
| CB4856 CT I                                                                                                          | 11979401                                                   | 11985612 | WBGene00013135 | rga-2 Y53C10A.4  |                     |
| 0.650139201797206                                                                                                    | AGIWUR7868                                                 |          |                |                  |                     |
| CB4856 CT I                                                                                                          | 11998781                                                   | 12002643 | WBGene00013136 | Y53C10A.5        | Y53C10A.5           |
| -0.0328701259408088                                                                                                  | AGIWUR35184                                                |          |                |                  |                     |
| CB4856 CT I                                                                                                          | 12002552                                                   | 12004997 | WBGene00013137 | Y53C10A.6        | Y53C10A.6           |
| -0.0945753562562111                                                                                                  | AGIWUR28508                                                |          |                |                  |                     |
| CB4856 CT I                                                                                                          | 12005177                                                   | 12006296 | WBGene00014916 | fbxa-124         | Y53C10A.7           |
| -0.0957968501670852                                                                                                  | AGIWUR32469                                                |          |                |                  |                     |



|                                                          |                                                                                   |          |                |            |                             |
|----------------------------------------------------------|-----------------------------------------------------------------------------------|----------|----------------|------------|-----------------------------|
| CB4856 CT I                                              | 12006911                                                                          | 12008040 | WBGene00014917 | fbxa-122   | Y53C10A.13                  |
| 0.0190573768860283                                       | AGIWUR4146;AGIWUR13689;AGIWUR26279;AGIWUR27755;AGIWUR38162                        |          |                |            |                             |
| CB4856 CT I                                              | 12008625                                                                          | 12009625 | WBGene00014918 | fbxa-123   | Y53C10A.14                  |
| -0.434947258685556                                       | AGIWUR4517                                                                        |          |                |            |                             |
| CB4856 CT I                                              | 12011195                                                                          | 12018668 | WBGene00000023 | abt-5      | Y53C10A.9                   |
| 0.264318979084372                                        | AGIWUR9468                                                                        |          |                |            |                             |
| CB4856 CT I                                              | 12020756                                                                          | 12028313 | WBGene00013138 | Y53C10A.10 | Y53C10A.10                  |
| -0.173575439226553                                       | AGIWUR3846;AGIWUR7803;AGIWUR19726;AGIWUR30908;AGIWUR33643;AGIWUR37169;AGIWUR42595 |          |                |            |                             |
| CB4856 CT I                                              | 12029927                                                                          | 12031762 | WBGene00010247 | F58D5.8    | F58D5.8 0.00213226519735521 |
| AGIWUR33736                                              |                                                                                   |          |                |            |                             |
| CB4856 CT I                                              | 12032289                                                                          | 12033706 | WBGene00010246 | F58D5.7    | F58D5.7 -0.0865047297804615 |
| AGIWUR18434                                              |                                                                                   |          |                |            |                             |
| CB4856 CT I                                              | 12034072                                                                          | 12037230 | WBGene00010245 | F58D5.6    | F58D5.6 0.253604596922878   |
| AGIWUR31967                                              |                                                                                   |          |                |            |                             |
| CB4856 CT I                                              | 12041035                                                                          | 12045200 | WBGene00010244 | F58D5.5    | F58D5.5 0.135599689044094   |
| AGIWUR541;AGIWUR6183;AGIWUR18314;AGIWUR21111;AGIWUR28012 |                                                                                   |          |                |            |                             |
| CB4856 CT I                                              | 12045201                                                                          | 12046617 | WBGene00010248 | F58D5.9    | F58D5.9 0.1394939574662     |
| AGIWUR21103                                              |                                                                                   |          |                |            |                             |
| CB4856 CT I                                              | 12047469                                                                          | 12059798 | WBGene00002240 | ksr-2      | F58D5.4 0.027564299005105   |
| AGIWUR8113                                               |                                                                                   |          |                |            |                             |
| CB4856 CT I                                              | 12060271                                                                          | 12064897 | WBGene00002000 | hrp-2      | F58D5.1 0.429922034335371   |
| AGIWUR10039                                              |                                                                                   |          |                |            |                             |
| CB4856 CT I                                              | 12066010                                                                          | 12068668 | WBGene00010242 | F58D5.2    | F58D5.2 0.105463082309392   |
| AGIWUR41355                                              |                                                                                   |          |                |            |                             |
| CB4856 CT I                                              | 12069806                                                                          | 12072878 | WBGene00010243 | F58D5.3    | F58D5.3 -0.0247703723476267 |
| AGIWUR42289                                              |                                                                                   |          |                |            |                             |
| CB4856 CT I                                              | 12084721                                                                          | 12087830 | WBGene00012958 | Y47H10A.2  | Y47H10A.2                   |
| 0.156681954108164                                        | AGIWUR9810;AGIWUR11617;AGIWUR34817                                                |          |                |            |                             |
| CB4856 CT I                                              | 12088120                                                                          | 12089969 | WBGene00012959 | Y47H10A.3  | Y47H10A.3                   |
| 0.446854777817085                                        | AGIWUR19345                                                                       |          |                |            |                             |
| CB4856 CT I                                              | 12091571                                                                          | 12094740 | WBGene00012960 | Y47H10A.4  | Y47H10A.4                   |
| -0.0144240165853162                                      | AGIWUR7903                                                                        |          |                |            |                             |
| CB4856 CT I                                              | 12095777                                                                          | 12097987 | WBGene00012961 | Y47H10A.5  | Y47H10A.5                   |
| 0.554707981229863                                        | AGIWUR33342                                                                       |          |                |            |                             |
| CB4856 CT I                                              | 12098671                                                                          | 12106112 | WBGene00004509 | rrf-2      | M01G12.12                   |
| 0.304190584935153                                        | AGIWUR44168                                                                       |          |                |            |                             |
| CB4856 CT I                                              | 12106912                                                                          | 12108503 | WBGene00010825 | M01G12.14  | M01G12.14                   |
| 0.407811152429301                                        | AGIWUR13895;AGIWUR22435                                                           |          |                |            |                             |
| CB4856 CT I                                              | 12109096                                                                          | 12112505 | WBGene00010822 | M01G12.9   | M01G12.9                    |

|                                                            |                                     |          |                |           |                             |
|------------------------------------------------------------|-------------------------------------|----------|----------------|-----------|-----------------------------|
| -0.461924542855879                                         | AGIWUR10130;AGIWUR16412;AGIWUR27321 |          |                |           |                             |
| CB4856 CT I                                                | 12114064                            | 12116304 | WBGene00010821 | M01G12.7  | M01G12.7                    |
| 0.251158400737308                                          | AGIWUR27585                         |          |                |           |                             |
| CB4856 CT I                                                | 12117997                            | 12122282 | WBGene00010820 | M01G12.6  | M01G12.6                    |
| 0.111056201075913                                          | AGIWUR15151                         |          |                |           |                             |
| CB4856 CT I                                                | 12122811                            | 12125586 | WBGene00005858 | srw-111   | M01G12.4                    |
| -0.0500796107153274                                        | AGIWUR20447                         |          |                |           |                             |
| CB4856 CT I                                                | 12126455                            | 12128965 | WBGene00010818 | srt-21    | M01G12.3                    |
| 0.0599237738220788                                         | AGIWUR8394                          |          |                |           |                             |
| CB4856 CT I                                                | 12144007                            | 12146977 | WBGene00005529 | sri-17    | F15H9.3 0.213613578405649   |
| AGIWUR6764;AGIWUR41347                                     |                                     |          |                |           |                             |
| CB4856 CT I                                                | 12148080                            | 12150741 | WBGene00005528 | sri-16    | F15H9.4 0.173426755797498   |
| AGIWUR44834                                                |                                     |          |                |           |                             |
| CB4856 CT I                                                | 12151021                            | 12154333 | WBGene00005527 | sri-15    | F15H9.2 0.103307145947786   |
| AGIWUR8549                                                 |                                     |          |                |           |                             |
| CB4856 CT I                                                | 12157151                            | 12158712 | WBGene00008870 | F15H9.1   | F15H9.1 0.0349666691442909  |
| AGIWUR434;AGIWUR33445                                      |                                     |          |                |           |                             |
| CB4856 CT I                                                | 12160100                            | 12162091 | WBGene00077535 | F15H9.7   | F15H9.7 -0.0772369301719578 |
| AGIWUR16743;AGIWUR44656                                    |                                     |          |                |           |                             |
| CB4856 CT I                                                | 12162399                            | 12163703 | WBGene00011026 | R05D7.1   | R05D7.1 -0.351654406918152  |
| AGIWUR27624                                                |                                     |          |                |           |                             |
| CB4856 CT I                                                | 12165729                            | 12168022 | WBGene00011027 | R05D7.2   | R05D7.2 -0.113711054433969  |
| AGIWUR10353;AGIWUR10361;AGIWUR19900                        |                                     |          |                |           |                             |
| CB4856 CT I                                                | 12168238                            | 12177782 | WBGene00011028 | R05D7.3   | R05D7.3 0.179045632593249   |
| AGIWUR20284                                                |                                     |          |                |           |                             |
| CB4856 CT I                                                | 12181046                            | 12183297 | WBGene00011029 | abhd-11.2 | R05D7.4                     |
| 0.144092213942526                                          | AGIWUR12358                         |          |                |           |                             |
| CB4856 CT I                                                | 12183688                            | 12189007 | WBGene00011030 | R05D7.5   | R05D7.5 -0.0740726978404336 |
| AGIWUR7362                                                 |                                     |          |                |           |                             |
| CB4856 CT I                                                | 12189521                            | 12190218 | WBGene00077559 | R05D7.7   | R05D7.7 -0.145432569484885  |
| AGIWUR3082;AGIWUR11879;AGIWUR19486;AGIWUR35942;AGIWUR38583 |                                     |          |                |           |                             |
| CB4856 CT I                                                | 12202232                            | 12203717 | WBGene00007600 | C15C6.1   | C15C6.1 -0.113436296396499  |
| AGIWUR33988                                                |                                     |          |                |           |                             |
| CB4856 CT I                                                | 12203800                            | 12205809 | WBGene00007601 | C15C6.2   | C15C6.2 0.251796492539699   |
| AGIWUR7410;AGIWUR19117                                     |                                     |          |                |           |                             |
| CB4856 CT I                                                | 12207097                            | 12212206 | WBGene00007602 | C15C6.3   | C15C6.3 -0.224179510972412  |
| AGIWUR13087                                                |                                     |          |                |           |                             |
| CB4856 CT I                                                | 12213109                            | 12215184 | WBGene00007603 | C15C6.4   | C15C6.4 -0.20766016013728   |
| AGIWUR2360                                                 |                                     |          |                |           |                             |

|                                                                          |   |                         |          |                |                                    |
|--------------------------------------------------------------------------|---|-------------------------|----------|----------------|------------------------------------|
| CB4856 CT<br>AGIWUR18283                                                 | I | 12218433                | 12222298 | WBGene00008783 | F14B6.2 F14B6.2 0.0296053567942938 |
| CB4856 CT<br>AGIWUR26961                                                 | I | 12230418                | 12232303 | WBGene00008784 | F14B6.3 F14B6.3 0.0379332449004508 |
| CB4856 CT<br>AGIWUR15381                                                 | I | 12232689                | 12235193 | WBGene00008787 | F14B6.6 F14B6.6 -0.146793204401037 |
| CB4856 CT<br>AGIWUR38387                                                 | I | 12236018                | 12238252 | WBGene00008785 | F14B6.4 F14B6.4 0.0976321829287476 |
| CB4856 CT<br>AGIWUR42049                                                 | I | 12239160                | 12241808 | WBGene00008786 | oac-16 F14B6.5 -0.0695658999238473 |
| CB4856 CT<br>AGIWUR30564                                                 | I | 12245456                | 12246751 | WBGene00003672 | nhr-82 F41D3.1 -0.811390013244522  |
| CB4856 CT<br>AGIWUR21424                                                 | I | 12247771                | 12250210 | WBGene00009607 | oac-26 F41D3.2 0.0528660637139007  |
| CB4856 CT<br>AGIWUR20066                                                 | I | 12251906                | 12253554 | WBGene00009608 | nhr-265 F41D3.3 -0.169389277437932 |
| CB4856 CT<br>AGIWUR10798;AGIWUR12390;AGIWUR20094;AGIWUR38069;AGIWUR43226 | I | 12254506                | 12257180 | WBGene00009609 | oac-27 F41D3.4 -0.0671761556831347 |
| CB4856 CT<br>AGIWUR37864                                                 | I | 12264521                | 12266267 | WBGene00009611 | F41D3.6 F41D3.6 -0.122337411264632 |
| CB4856 CT<br>AGIWUR35359                                                 | I | 12267045                | 12267491 | WBGene00009612 | F41D3.7 F41D3.7 0.125619646265072  |
| CB4856 CT<br>AGIWUR42139                                                 | I | 12267499                | 12268128 | WBGene00009613 | F41D3.8 F41D3.8 -0.401212668606602 |
| CB4856 CT<br>AGIWUR39869                                                 | I | 12272981                | 12274636 | WBGene00009614 | F41D3.9 F41D3.9 -0.393309799010649 |
| CB4856 CT<br>-0.0139100404487209                                         | I | 12276893<br>AGIWUR44485 | 12278775 | WBGene00009616 | F41D3.11 F41D3.11                  |
| CB4856 CT<br>AGIWUR18565                                                 | I | 12281221                | 12282615 | WBGene00010162 | F56H6.1 F56H6.1 0.0229113850040967 |
| CB4856 CT<br>-0.0196503389922063                                         | I | 12283270<br>AGIWUR13846 | 12285384 | WBGene00010173 | F56H6.13 F56H6.13                  |
| CB4856 CT<br>AGIWUR39362                                                 | I | 12287199                | 12289307 | WBGene00010163 | F56H6.2 F56H6.2 -0.248126572596535 |
| CB4856 CT<br>AGIWUR16604                                                 | I | 12289552                | 12290191 | WBGene00010164 | F56H6.3 F56H6.3 0.0238713043270344 |
| CB4856 CT<br>AGIWUR18750                                                 | I | 12290449                | 12292212 | WBGene00010165 | F56H6.4 F56H6.4 0.168453725799809  |
| CB4856 CT                                                                | I | 12292269                | 12293936 | WBGene00010166 | gmd-2 F56H6.5 0.532906209282479    |

|                                     |                                     |          |                |                  |                     |  |
|-------------------------------------|-------------------------------------|----------|----------------|------------------|---------------------|--|
| AGIWUR7165                          |                                     |          |                |                  |                     |  |
| CB4856 CT I                         | 12294380                            | 12296263 | WBGene00010167 | bgnt-1.6         | F56H6.6             |  |
| -0.243575043033808                  | AGIWUR963                           |          |                |                  |                     |  |
| CB4856 CT I                         | 12297734                            | 12300817 | WBGene00010168 | F56H6.7 F56H6.7  | 0.729583195897479   |  |
| AGIWUR17051                         |                                     |          |                |                  |                     |  |
| CB4856 CT I                         | 12301424                            | 12303157 | WBGene00010169 | clcc-18 F56H6.8  |                     |  |
| -0.00286634468391345                | AGIWUR41003                         |          |                |                  |                     |  |
| CB4856 CT I                         | 12303599                            | 12306820 | WBGene00010170 | F56H6.9 F56H6.9  | 0.255731654997862   |  |
| AGIWUR1010;AGIWUR14730              |                                     |          |                |                  |                     |  |
| CB4856 CT I                         | 12307731                            | 12310406 | WBGene00010171 | oac-35 F56H6.11  |                     |  |
| 0.522871669664356                   | AGIWUR41513                         |          |                |                  |                     |  |
| CB4856 CT I                         | 12312335                            | 12314895 | WBGene00010172 | oac-36 F56H6.12  |                     |  |
| 0.644310123727334                   | AGIWUR24225;AGIWUR26226;AGIWUR40420 |          |                |                  |                     |  |
| CB4856 CT I                         | 12315193                            | 12316688 | WBGene00008159 | C47F8.3 C47F8.3  | 0.00350877372818026 |  |
| AGIWUR13904                         |                                     |          |                |                  |                     |  |
| CB4856 CT I                         | 12317321                            | 12318735 | WBGene00008160 | glct-4 C47F8.4   | 0.559759113631349   |  |
| AGIWUR15638                         |                                     |          |                |                  |                     |  |
| CB4856 CT I                         | 12319350                            | 12320854 | WBGene00008162 | C47F8.6 C47F8.6  | 0.712067163252534   |  |
| AGIWUR31086                         |                                     |          |                |                  |                     |  |
| CB4856 CT I                         | 12321937                            | 12324062 | WBGene00008161 | C47F8.5 C47F8.5  | -0.0877118823601739 |  |
| AGIWUR37700                         |                                     |          |                |                  |                     |  |
| CB4856 CT I                         | 12326441                            | 12327030 | WBGene00008163 | C47F8.7 C47F8.7  | 0.0896788991473141  |  |
| AGIWUR4906                          |                                     |          |                |                  |                     |  |
| CB4856 CT I                         | 12328100                            | 12329508 | WBGene00003671 | nhr-81 C47F8.8   | 0.974533811229529   |  |
| AGIWUR10579;AGIWUR25388;AGIWUR39749 |                                     |          |                |                  |                     |  |
| CB4856 CT I                         | 12331085                            | 12333413 | WBGene00008158 | nhr-165 C47F8.2  | 0.810495011284606   |  |
| AGIWUR37607                         |                                     |          |                |                  |                     |  |
| CB4856 CT I                         | 12335035                            | 12336605 | WBGene00008157 | C47F8.1 C47F8.1  | -0.202310467544722  |  |
| AGIWUR45                            |                                     |          |                |                  |                     |  |
| CB4856 CT I                         | 12337968                            | 12339239 | WBGene00011650 | glct-1 T09E11.1  |                     |  |
| -0.0567728007025377                 | AGIWUR41546                         |          |                |                  |                     |  |
| CB4856 CT I                         | 12341145                            | 12342826 | WBGene00011651 | nhr-217 T09E11.2 |                     |  |
| -0.0467783359707532                 | AGIWUR38513                         |          |                |                  |                     |  |
| CB4856 CT I                         | 12344167                            | 12345702 | WBGene00011660 | T09E11.11        | T09E11.11           |  |
| 2.01517181131606                    | AGIWUR9231                          |          |                |                  |                     |  |
| CB4856 CT I                         | 12345819                            | 12347265 | WBGene00011659 | T09E11.10        | T09E11.10           |  |
| 0.306646205029448                   | AGIWUR9137;AGIWUR26055;AGIWUR36895  |          |                |                  |                     |  |
| CB4856 CT I                         | 12347700                            | 12349819 | WBGene00011658 | T09E11.9         | T09E11.9            |  |
| 0.0639729161453175                  | AGIWUR36326                         |          |                |                  |                     |  |

|                    |                                    |          |                |           |                             |
|--------------------|------------------------------------|----------|----------------|-----------|-----------------------------|
| CB4856 CT I        | 12350692                           | 12352724 | WBGene00011657 | T09E11.8  | T09E11.8                    |
| 0.130782737740363  | AGIWUR32745                        |          |                |           |                             |
| CB4856 CT I        | 12353506                           | 12356337 | WBGene00011656 | oac-45    | T09E11.7                    |
| 0.748977512438973  | AGIWUR34978                        |          |                |           |                             |
| CB4856 CT I        | 12356942                           | 12359341 | WBGene00011654 | oac-44    | T09E11.5                    |
| 0.544063531686849  | AGIWUR16338;AGIWUR30786            |          |                |           |                             |
| CB4856 CT I        | 12359942                           | 12363416 | WBGene00011653 | oac-43    | T09E11.4                    |
| 0.0184777419185265 | AGIWUR1706                         |          |                |           |                             |
| CB4856 CT I        | 12364718                           | 12365948 | WBGene00045103 | T09E11.12 | T09E11.12                   |
| 0.463786081944525  | AGIWUR13986;AGIWUR27610            |          |                |           |                             |
| CB4856 CT I        | 12366335                           | 12368619 | WBGene00011655 | T09E11.6  | T09E11.6                    |
| 0.0945272088870244 | AGIWUR2283;AGIWUR21346;AGIWUR43303 |          |                |           |                             |
| CB4856 CT I        | 12374205                           | 12376649 | WBGene00011779 | bgnt-1.7  | T15D6.4                     |
| -0.245742133495401 | AGIWUR15806;AGIWUR17941            |          |                |           |                             |
| CB4856 CT I        | 12376904                           | 12378674 | WBGene00001642 | gly-17    | T15D6.3 -0.070649047711635  |
| AGIWUR4623         |                                    |          |                |           |                             |
| CB4856 CT I        | 12379335                           | 12381032 | WBGene00001641 | gly-16    | T15D6.2 -0.179967048576367  |
| AGIWUR19223        |                                    |          |                |           |                             |
| CB4856 CT I        | 12381808                           | 12383259 | WBGene00011780 | T15D6.5   | T15D6.5 -0.0685356210330443 |
| AGIWUR15742        |                                    |          |                |           |                             |
| CB4856 CT I        | 12384277                           | 12385731 | WBGene00003667 | nhr-77    | T15D6.6 -0.123298920114302  |
| AGIWUR37750        |                                    |          |                |           |                             |
| CB4856 CT I        | 12385766                           | 12388791 | WBGene00011781 | glct-3    | T15D6.7 0.0333116857530058  |
| AGIWUR2441         |                                    |          |                |           |                             |
| CB4856 CT I        | 12392009                           | 12393585 | WBGene00011783 | T15D6.9   | T15D6.9 0.119660837637976   |
| AGIWUR21864        |                                    |          |                |           |                             |
| CB4856 CT I        | 12394120                           | 12396322 | WBGene00011784 | T15D6.10  | T15D6.10                    |
| 0.153386988012871  | AGIWUR795                          |          |                |           |                             |
| CB4856 CT I        | 12396644                           | 12398267 | WBGene00011785 | T15D6.11  | T15D6.11                    |
| 0.708365833627942  | AGIWUR40226                        |          |                |           |                             |
| CB4856 CT I        | 12399323                           | 12401206 | WBGene00011786 | T15D6.12  | T15D6.12                    |
| 0.44251184959449   | AGIWUR7270                         |          |                |           |                             |
| CB4856 CT I        | 12403110                           | 12404489 | WBGene00008470 | E03H4.2   | E03H4.2 0.167456642202371   |
| AGIWUR40136        |                                    |          |                |           |                             |
| CB4856 CT I        | 12405525                           | 12406946 | WBGene00008471 | E03H4.3   | E03H4.3 0.316266467060151   |
| AGIWUR39310        |                                    |          |                |           |                             |
| CB4856 CT I        | 12407564                           | 12411435 | WBGene00008472 | E03H4.4   | E03H4.4 0.362786873188178   |
| AGIWUR38190        |                                    |          |                |           |                             |
| CB4856 CT I        | 12413809                           | 12415745 | WBGene00008473 | E03H4.5   | E03H4.5 0.237933896412622   |

|                        |   |                                                             |          |                |          |          |                    |  |
|------------------------|---|-------------------------------------------------------------|----------|----------------|----------|----------|--------------------|--|
| AGIWUR5938             |   |                                                             |          |                |          |          |                    |  |
| CB4856 CT              | I | 12417386                                                    | 12418800 | WBGene00008474 | nhr-174  | E03H4.6  | 0.135045633173321  |  |
| AGIWUR19291            |   |                                                             |          |                |          |          |                    |  |
| CB4856 CT              | I | 12421239                                                    | 12424411 | WBGene00008475 | oac-13   | E03H4.7  | 0.0449311007842113 |  |
| AGIWUR4799             |   |                                                             |          |                |          |          |                    |  |
| CB4856 CT              | I | 12424555                                                    | 12426850 | WBGene00008476 | E03H4.8  | E03H4.8  | -0.101756587445055 |  |
| AGIWUR40478            |   |                                                             |          |                |          |          |                    |  |
| CB4856 CT              | I | 12427388                                                    | 12429094 | WBGene00014729 | E03H4.9  | E03H4.9  | 0.194729076495917  |  |
| AGIWUR6347;AGIWUR40147 |   |                                                             |          |                |          |          |                    |  |
| CB4856 CT              | I | 12430028                                                    | 12431500 | WBGene00008477 | clcc-17  | E03H4.10 |                    |  |
| 1.45743408170223       |   | AGIWUR22801                                                 |          |                |          |          |                    |  |
| CB4856 CT              | I | 12433061                                                    | 12434886 | WBGene00008478 | E03H4.11 | E03H4.11 |                    |  |
| 0.483512216387402      |   | AGIWUR5267                                                  |          |                |          |          |                    |  |
| CB4856 CT              | I | 12435726                                                    | 12437285 | WBGene00008479 | glct-2   | E03H4.12 |                    |  |
| 0.121686063616135      |   | AGIWUR34058                                                 |          |                |          |          |                    |  |
| CB4856 CT              | I | 12439936                                                    | 12441253 | WBGene00003679 | nhr-89   | E03H4.13 |                    |  |
| -0.020441708036242     |   | AGIWUR39890                                                 |          |                |          |          |                    |  |
| CB4856 CT              | I | 12442299                                                    | 12443728 | WBGene00008289 | nhr-169  | C54C8.1  | -0.143943419259516 |  |
| AGIWUR43082            |   |                                                             |          |                |          |          |                    |  |
| CB4856 CT              | I | 12444587                                                    | 12446502 | WBGene00008290 | bgnt-1.8 | C54C8.2  |                    |  |
| 0.335970970163281      |   | AGIWUR19147                                                 |          |                |          |          |                    |  |
| CB4856 CT              | I | 12447167                                                    | 12448421 | WBGene00008291 | C54C8.3  | C54C8.3  | 0.0264887460150369 |  |
| AGIWUR7375             |   |                                                             |          |                |          |          |                    |  |
| CB4856 CT              | I | 12449977                                                    | 12452027 | WBGene00008292 | C54C8.4  | C54C8.4  | 0.797436818699401  |  |
| AGIWUR35933            |   |                                                             |          |                |          |          |                    |  |
| CB4856 CT              | I | 12453389                                                    | 12454764 | WBGene00008293 | glct-5   | C54C8.5  | -0.494863017601157 |  |
| AGIWUR25504            |   |                                                             |          |                |          |          |                    |  |
| CB4856 CT              | I | 12454853                                                    | 12455826 | WBGene00003098 | lys-9    | C54C8.6  | 0.254781158545948  |  |
| AGIWUR2072             |   |                                                             |          |                |          |          |                    |  |
| CB4856 CT              | I | 12456918                                                    | 12457209 | WBGene00044242 | C54C8.12 | C54C8.12 |                    |  |
| 3.19259183115844       |   | AGIWUR19622;AGIWUR21351;AGIWUR24934;AGIWUR29563;AGIWUR35527 |          |                |          |          |                    |  |
| CB4856 CT              | I | 12458028                                                    | 12458996 | WBGene00014714 | C54C8.8  | C54C8.8  | 0.310195640918717  |  |
| AGIWUR2522             |   |                                                             |          |                |          |          |                    |  |
| CB4856 CT              | I | 12459499                                                    | 12460903 | WBGene00008294 | clcc-11  | C54C8.7  | 0.23346194366955   |  |
| AGIWUR6618;AGIWUR36802 |   |                                                             |          |                |          |          |                    |  |
| CB4856 CT              | I | 12461645                                                    | 12461925 | WBGene00008295 | nlp-39   | C54C8.9  | 4.531731879701     |  |
| AGIWUR2285             |   |                                                             |          |                |          |          |                    |  |
| CB4856 CT              | I | 12462176                                                    | 12465831 | WBGene00001640 | gly-15   | C54C8.11 |                    |  |
| 0.173147258604664      |   | AGIWUR4226;AGIWUR19199;AGIWUR41172                          |          |                |          |          |                    |  |

|                                                                                                                                                         |   |             |          |                |          |         |                     |
|---------------------------------------------------------------------------------------------------------------------------------------------------------|---|-------------|----------|----------------|----------|---------|---------------------|
| CB4856 CT                                                                                                                                               | I | 12470620    | 12473404 | WBGene00012102 | T27F6.1  | T27F6.1 | -0.172097593747891  |
| AGIWUR6133                                                                                                                                              |   |             |          |                |          |         |                     |
| CB4856 CT                                                                                                                                               | I | 12474620    | 12475934 | WBGene00077508 | T27F6.10 |         | T27F6.10            |
| -0.0497800151804473                                                                                                                                     |   | AGIWUR40057 |          |                |          |         |                     |
| CB4856 CT                                                                                                                                               | I | 12476685    | 12478588 | WBGene00012103 | clec-12  | T27F6.2 | 0.0524483847124859  |
| AGIWUR32740                                                                                                                                             |   |             |          |                |          |         |                     |
| CB4856 CT                                                                                                                                               | I | 12483809    | 12486235 | WBGene00012104 | sygl-1   | T27F6.4 | -0.0644247875989024 |
| AGIWUR43852                                                                                                                                             |   |             |          |                |          |         |                     |
| CB4856 CT                                                                                                                                               | I | 12486872    | 12490931 | WBGene00004190 | pars-2   | T27F6.5 | -0.189148516750583  |
| AGIWUR1856;AGIWUR2356;AGIWUR8002;AGIWUR8434;AGIWUR11790;AGIWUR11802;AGIWUR15588;AGIWUR16087;AGIWUR28139;AGIWUR29090;AGIWUR41244;AGIWUR43781;AGIWUR45063 |   |             |          |                |          |         |                     |
| CB4856 CT                                                                                                                                               | I | 12490976    | 12494530 | WBGene00012105 | T27F6.6  | T27F6.6 | -0.380360232846385  |
| AGIWUR3497                                                                                                                                              |   |             |          |                |          |         |                     |
| CB4856 CT                                                                                                                                               | I | 12494826    | 12497354 | WBGene00012106 | T27F6.7  | T27F6.7 | 0.0217399988292435  |
| AGIWUR36447                                                                                                                                             |   |             |          |                |          |         |                     |
| CB4856 CT                                                                                                                                               | I | 12497467    | 12505010 | WBGene00010768 | K11D2.1  | K11D2.1 | -0.0710158825098501 |
| AGIWUR17267;AGIWUR40837                                                                                                                                 |   |             |          |                |          |         |                     |
| CB4856 CT                                                                                                                                               | I | 12505028    | 12508064 | WBGene00010769 | asah-1   | K11D2.2 | 1.30208799377506    |
| AGIWUR37730                                                                                                                                             |   |             |          |                |          |         |                     |
| CB4856 CT                                                                                                                                               | I | 12508299    | 12513419 | WBGene00006829 | unc-101  | K11D2.3 | -0.246856772298813  |
| AGIWUR417;AGIWUR2271;AGIWUR7234;AGIWUR18404;AGIWUR20120;AGIWUR22240;AGIWUR26389;AGIWUR38381;AGIWUR40794                                                 |   |             |          |                |          |         |                     |
| CB4856 CT                                                                                                                                               | I | 12513516    | 12518694 | WBGene00010771 | K11D2.5  | K11D2.5 | 0.0594687980044384  |
| AGIWUR11668                                                                                                                                             |   |             |          |                |          |         |                     |
| CB4856 CT                                                                                                                                               | I | 12518787    | 12527906 | WBGene00010770 | K11D2.4  | K11D2.4 | -0.268455967581212  |
| AGIWUR1842                                                                                                                                              |   |             |          |                |          |         |                     |
| CB4856 CT                                                                                                                                               | I | 12528312    | 12532182 | WBGene00004181 | pri-2    | W02D9.1 | 0.0329283549074226  |
| AGIWUR3305                                                                                                                                              |   |             |          |                |          |         |                     |
| CB4856 CT                                                                                                                                               | I | 12532669    | 12534400 | WBGene00012208 | W02D9.2  | W02D9.2 | 0.310810691286946   |
| AGIWUR32177                                                                                                                                             |   |             |          |                |          |         |                     |
| CB4856 CT                                                                                                                                               | I | 12535312    | 12537671 | WBGene00012209 | hmg-20   | W02D9.3 | -0.176321859933061  |
| AGIWUR2684;AGIWUR36464                                                                                                                                  |   |             |          |                |          |         |                     |
| CB4856 CT                                                                                                                                               | I | 12551537    | 12552375 | WBGene00012216 | W02D9.10 |         | W02D9.10            |
| 0.829530721833958                                                                                                                                       |   | AGIWUR8060  |          |                |          |         |                     |
| CB4856 CT                                                                                                                                               | I | 12557164    | 12557563 | WBGene00012215 | W02D9.9  | W02D9.9 | -0.257141654993621  |
| AGIWUR19044                                                                                                                                             |   |             |          |                |          |         |                     |
| CB4856 CT                                                                                                                                               | I | 12558547    | 12558944 | WBGene00012214 | W02D9.8  | W02D9.8 | 0.159472240843774   |
| AGIWUR38870                                                                                                                                             |   |             |          |                |          |         |                     |
| CB4856 CT                                                                                                                                               | I | 12559245    | 12559674 | WBGene00012213 | W02D9.7  | W02D9.7 | -0.0934945037684187 |
| AGIWUR19286                                                                                                                                             |   |             |          |                |          |         |                     |

|                                                                                                                                                                                                                      |   |          |          |                |          |          |                     |
|----------------------------------------------------------------------------------------------------------------------------------------------------------------------------------------------------------------------|---|----------|----------|----------------|----------|----------|---------------------|
| CB4856 CT                                                                                                                                                                                                            | I | 12560292 | 12560714 | WBGene00012212 | W02D9.6  | W02D9.6  | -0.023717361465895  |
| AGIWUR5048                                                                                                                                                                                                           |   |          |          |                |          |          |                     |
| CB4856 CT                                                                                                                                                                                                            | I | 12561040 | 12561560 | WBGene00012211 | ssp-37   | W02D9.5  | 0.195740818261074   |
| AGIWUR14307                                                                                                                                                                                                          |   |          |          |                |          |          |                     |
| CB4856 CT                                                                                                                                                                                                            | I | 12562756 | 12564210 | WBGene00045474 | C49G9.2  | C49G9.2  | -0.433732158897236  |
| AGIWUR20355;AGIWUR23937;AGIWUR31109;AGIWUR35803;AGIWUR35835                                                                                                                                                          |   |          |          |                |          |          |                     |
| CB4856 CT                                                                                                                                                                                                            | I | 12564356 | 12565893 | WBGene00008216 | mec-19   | C49G9.1  | -0.432289810580198  |
| AGIWUR41066                                                                                                                                                                                                          |   |          |          |                |          |          |                     |
| CB4856 CT                                                                                                                                                                                                            | I | 12565804 | 12572801 | WBGene00001008 | dlk-1    | F33E2.2  | 0.00125461468172938 |
| AGIWUR40022;AGIWUR42874                                                                                                                                                                                              |   |          |          |                |          |          |                     |
| CB4856 CT                                                                                                                                                                                                            | I | 12578108 | 12579205 | WBGene00077769 | F33E2.10 |          | F33E2.10            |
| 0.0298527708891498 AGIWUR5546                                                                                                                                                                                        |   |          |          |                |          |          |                     |
| CB4856 CT                                                                                                                                                                                                            | I | 12582074 | 12584711 | WBGene00009360 | F33E2.4  | F33E2.4  | -0.168958071517721  |
| AGIWUR43140                                                                                                                                                                                                          |   |          |          |                |          |          |                     |
| CB4856 CT                                                                                                                                                                                                            | I | 12583786 | 12585119 | WBGene00045254 | F33E2.8  | F33E2.8  | 0.372280539749473   |
| AGIWUR28003;AGIWUR30710                                                                                                                                                                                              |   |          |          |                |          |          |                     |
| CB4856 CT                                                                                                                                                                                                            | I | 12585382 | 12585971 | WBGene00009363 | F33E2.7  | F33E2.7  | -0.0329542377554555 |
| AGIWUR16591                                                                                                                                                                                                          |   |          |          |                |          |          |                     |
| CB4856 CT                                                                                                                                                                                                            | I | 12587242 | 12591091 | WBGene00009362 | F33E2.6  | F33E2.6  | 0.048670846245777   |
| AGIWUR22599                                                                                                                                                                                                          |   |          |          |                |          |          |                     |
| CB4856 CT                                                                                                                                                                                                            | I | 12591116 | 12597442 | WBGene00009361 | F33E2.5  | F33E2.5  | 0.387274238092093   |
| AGIWUR2198;AGIWUR32087;AGIWUR32401                                                                                                                                                                                   |   |          |          |                |          |          |                     |
| CB4856 CT                                                                                                                                                                                                            | I | 12603772 | 12606248 | WBGene00011581 | T07D10.1 |          | T07D10.1            |
| 0.233341196929074 AGIWUR33134                                                                                                                                                                                        |   |          |          |                |          |          |                     |
| CB4856 CT                                                                                                                                                                                                            | I | 12621171 | 12623084 | WBGene00011582 | ntr-1    | T07D10.2 |                     |
| -0.167310022701932 AGIWUR20900                                                                                                                                                                                       |   |          |          |                |          |          |                     |
| CB4856 CT                                                                                                                                                                                                            | I | 12624235 | 12625238 | WBGene00011586 | flp-33   | T07D10.6 |                     |
| 0.665975605050637 AGIWUR26500                                                                                                                                                                                        |   |          |          |                |          |          |                     |
| CB4856 CT                                                                                                                                                                                                            | I | 12626742 | 12628997 | WBGene00011583 | T07D10.3 |          | T07D10.3            |
| 0.541231827217887 AGIWUR36305                                                                                                                                                                                        |   |          |          |                |          |          |                     |
| CB4856 CT                                                                                                                                                                                                            | I | 12640720 | 12641501 | WBGene00195255 | H16D19.7 |          | H16D19.7            |
| -0.0865547173410945 AGIWUR43884                                                                                                                                                                                      |   |          |          |                |          |          |                     |
| CB4856 CT                                                                                                                                                                                                            | I | 12647376 | 12652087 | WBGene00010420 | mcrs-1   | H28O16.2 |                     |
| -0.139510239744897 AGIWUR40821                                                                                                                                                                                       |   |          |          |                |          |          |                     |
| CB4856 CT                                                                                                                                                                                                            | I | 12652277 | 12654646 | WBGene00010419 | H28O16.1 |          | H28O16.1            |
| -0.0144541185824192                                                                                                                                                                                                  |   |          |          |                |          |          |                     |
| AGIWUR1002;AGIWUR6017;AGIWUR9225;AGIWUR15093;AGIWUR18400;AGIWUR19137;AGIWUR20909;AGIWUR21162;AGIWUR22474;AGIWUR25477;AGIWUR30636;AGIWUR30684;AGIWUR33565;AGIWUR37320;AGIWUR37771;AGIWUR38251;AGIWUR40047;AGIWUR42542 |   |          |          |                |          |          |                     |
| CB4856 CT                                                                                                                                                                                                            | I | 12655449 | 12655970 | WBGene00012040 | T26E3.7  | T26E3.7  | -0.0729272518537325 |



|                                                                        |   |                                                                                   |          |                |          |          |                     |
|------------------------------------------------------------------------|---|-----------------------------------------------------------------------------------|----------|----------------|----------|----------|---------------------|
| AGIWUR36996                                                            |   |                                                                                   |          |                |          |          |                     |
| CB4856 CT                                                              | I | 12657762                                                                          | 12659446 | WBGene00012041 | T26E3.8  | T26E3.8  | -0.206622631419782  |
| AGIWUR37661                                                            |   |                                                                                   |          |                |          |          |                     |
| CB4856 CT                                                              | I | 12659729                                                                          | 12660647 | WBGene00044905 | T26E3.11 | T26E3.11 |                     |
| 0.0808058749386937                                                     |   | AGIWUR41658                                                                       |          |                |          |          |                     |
| CB4856 CT                                                              | I | 12661254                                                                          | 12661729 | WBGene00012039 | T26E3.6  | T26E3.6  | -0.0797928785089344 |
| AGIWUR36512                                                            |   |                                                                                   |          |                |          |          |                     |
| CB4856 CT                                                              | I | 12662938                                                                          | 12663833 | WBGene00012038 | T26E3.5  | T26E3.5  | 0.154544814954296   |
| AGIWUR1201                                                             |   |                                                                                   |          |                |          |          |                     |
| CB4856 CT                                                              | I | 12665067                                                                          | 12668893 | WBGene00012037 | T26E3.4  | T26E3.4  | -0.156863491048281  |
| AGIWUR2560;AGIWUR11531;AGIWUR28485;AGIWUR30882;AGIWUR32370;AGIWUR41162 |   |                                                                                   |          |                |          |          |                     |
| CB4856 CT                                                              | I | 12669380                                                                          | 12674447 | WBGene00003921 | par-6    | T26E3.3  | -0.0498621659667897 |
| AGIWUR4153;AGIWUR21135;AGIWUR24877                                     |   |                                                                                   |          |                |          |          |                     |
| CB4856 CT                                                              | I | 12679207                                                                          | 12681816 | WBGene00003578 | ndx-1    | T26E3.2  | 0.202633415110892   |
| AGIWUR36323                                                            |   |                                                                                   |          |                |          |          |                     |
| CB4856 CT                                                              | I | 12681883                                                                          | 12682681 | WBGene00012042 | T26E3.10 | T26E3.10 |                     |
| -0.167541029547844                                                     |   | AGIWUR2023                                                                        |          |                |          |          |                     |
| CB4856 CT                                                              | I | 12683238                                                                          | 12684359 | WBGene00012036 | clcc-103 | T26E3.1  |                     |
| -0.22865147732205                                                      |   | AGIWUR36031                                                                       |          |                |          |          |                     |
| CB4856 CT                                                              | I | 12686116                                                                          | 12688206 | WBGene00005051 | sra-25   | T26E3.9  | -0.0478292978855723 |
| AGIWUR23081                                                            |   |                                                                                   |          |                |          |          |                     |
| CB4856 CT                                                              | I | 12688727                                                                          | 12690572 | WBGene00005043 | sra-17   | F28C12.1 |                     |
| -0.205997978339377                                                     |   | AGIWUR103                                                                         |          |                |          |          |                     |
| CB4856 CT                                                              | I | 12692169                                                                          | 12693724 | WBGene00005044 | sra-18   | F28C12.2 |                     |
| 0.156688185815693                                                      |   | AGIWUR40855                                                                       |          |                |          |          |                     |
| CB4856 CT                                                              | I | 12694406                                                                          | 12695934 | WBGene00005045 | sra-19   | F28C12.3 |                     |
| -0.0793514532749864                                                    |   | AGIWUR2298;AGIWUR5976;AGIWUR10097;AGIWUR12389;AGIWUR26934;AGIWUR30505;AGIWUR39618 |          |                |          |          |                     |
| CB4856 CT                                                              | I | 12696558                                                                          | 12698214 | WBGene00005046 | sra-20   | F28C12.4 |                     |
| 0.207631704879591                                                      |   | AGIWUR24117                                                                       |          |                |          |          |                     |
| CB4856 CT                                                              | I | 12698904                                                                          | 12699200 | WBGene00077555 | F28C12.8 | F28C12.8 |                     |
| -0.0438523639524115                                                    |   | AGIWUR4271;AGIWUR9750;AGIWUR13760;AGIWUR22255;AGIWUR25005                         |          |                |          |          |                     |
| CB4856 CT                                                              | I | 12699430                                                                          | 12701093 | WBGene00005047 | sra-21   | F28C12.5 |                     |
| -0.179393491846798                                                     |   | AGIWUR44687                                                                       |          |                |          |          |                     |
| CB4856 CT                                                              | I | 12701439                                                                          | 12702886 | WBGene00005048 | sra-22   | F28C12.7 |                     |
| -0.0546058840902131                                                    |   | AGIWUR34243                                                                       |          |                |          |          |                     |
| CB4856 CT                                                              | I | 12703435                                                                          | 12704727 | WBGene00005049 | sra-23   | T06G6.1  | -0.0798042516471771 |
| AGIWUR6499                                                             |   |                                                                                   |          |                |          |          |                     |
| CB4856 CT                                                              | I | 12705097                                                                          | 12706983 | WBGene00005050 | sra-24   | T06G6.2  | -0.0137383833305345 |
| AGIWUR44570                                                            |   |                                                                                   |          |                |          |          |                     |

|                                                                      |                         |          |                |                  |                     |
|----------------------------------------------------------------------|-------------------------|----------|----------------|------------------|---------------------|
| CB4856 CT I                                                          | 12707513                | 12708691 | WBGene00011550 | T06G6.11         | T06G6.11            |
| -0.135963228555717                                                   | AGIWUR6450              |          |                |                  |                     |
| CB4856 CT I                                                          | 12708863                | 12711596 | WBGene00011545 | T06G6.3 T06G6.3  | -0.0962604765817954 |
| AGIWUR36658                                                          |                         |          |                |                  |                     |
| CB4856 CT I                                                          | 12712158                | 12714722 | WBGene00011546 | T06G6.4 T06G6.4  | -0.177442548642704  |
| AGIWUR7160                                                           |                         |          |                |                  |                     |
| CB4856 CT I                                                          | 12715648                | 12716583 | WBGene00011547 | T06G6.5 T06G6.5  | 0.206687611610455   |
| AGIWUR30650                                                          |                         |          |                |                  |                     |
| CB4856 CT I                                                          | 12718296                | 12719795 | WBGene00011548 | T06G6.6 T06G6.6  | -0.749475902059697  |
| AGIWUR17689                                                          |                         |          |                |                  |                     |
| CB4856 CT I                                                          | 12720205                | 12722036 | WBGene00005835 | srw-88 T06G6.7   | -0.167675365588426  |
| AGIWUR1507                                                           |                         |          |                |                  |                     |
| CB4856 CT I                                                          | 12722045                | 12722883 | WBGene00011551 | T06G6.12         | T06G6.12            |
| 0.0529060396383993                                                   | AGIWUR32980             |          |                |                  |                     |
| CB4856 CT I                                                          | 12724751                | 12726206 | WBGene00011549 | T06G6.8 T06G6.8  | -0.195522604693216  |
| AGIWUR34628                                                          |                         |          |                |                  |                     |
| CB4856 CT I                                                          | 12728137                | 12729870 | WBGene00006889 | pfd-3 T06G6.9    | -0.236904682238132  |
| AGIWUR1885;AGIWUR2341;AGIWUR7063;AGIWUR17219;AGIWUR19489;AGIWUR31484 |                         |          |                |                  |                     |
| CB4856 CT I                                                          | 12730011                | 12732753 | WBGene00012192 | W02A11.1         | W02A11.1            |
| 0.0204776625130947                                                   | AGIWUR8401              |          |                |                  |                     |
| CB4856 CT I                                                          | 12733287                | 12741275 | WBGene00012193 | vps-25 W02A11.2  |                     |
| -0.208127801682362                                                   | AGIWUR17203             |          |                |                  |                     |
| CB4856 CT I                                                          | 12741588                | 12749318 | WBGene00006700 | uba-2 W02A11.4   |                     |
| -0.297037897881072                                                   | AGIWUR31511             |          |                |                  |                     |
| CB4856 CT I                                                          | 12749890                | 12752087 | WBGene00012195 | bath-34 W02A11.5 |                     |
| -0.0967294462795176                                                  | AGIWUR9884;AGIWUR28264  |          |                |                  |                     |
| CB4856 CT I                                                          | 12758433                | 12759572 | WBGene00012196 | bath-35 W02A11.8 |                     |
| 0.150620386311925                                                    | AGIWUR37753             |          |                |                  |                     |
| CB4856 CT I                                                          | 12759545                | 12764960 | WBGene00000138 | amx-2 B0019.1    | 0.0417397211766044  |
| AGIWUR19037                                                          |                         |          |                |                  |                     |
| CB4856 CT I                                                          | 12773659                | 12782282 | WBGene00007094 | B0019.2 B0019.2  | 0.191653350982253   |
| AGIWUR9959;AGIWUR22906                                               |                         |          |                |                  |                     |
| CB4856 CT I                                                          | 12783358                | 12784978 | WBGene00023459 | Y18D10A.26       | Y18D10A.26          |
| 0.319353750247379                                                    | AGIWUR24786;AGIWUR33759 |          |                |                  |                     |
| CB4856 CT I                                                          | 12787944                | 12806581 | WBGene00012474 | attf-6 Y18D10A.1 |                     |
| 0.0786624673657315                                                   | AGIWUR42137             |          |                |                  |                     |
| CB4856 CT I                                                          | 12807586                | 12809682 | WBGene00012475 | Y18D10A.2        | Y18D10A.2           |
| -0.043344212766927                                                   | AGIWUR13443             |          |                |                  |                     |
| CB4856 CT I                                                          | 12809999                | 12815641 | WBGene00012476 | Y18D10A.3        | Y18D10A.3           |

|                     |                                                                        |          |                |            |            |
|---------------------|------------------------------------------------------------------------|----------|----------------|------------|------------|
| -0.143534200373995  | AGIWUR36104                                                            |          |                |            |            |
| CB4856 CT I         | 12815904                                                               | 12816428 | WBGene00012477 | Y18D10A.4  | Y18D10A.4  |
| -0.0188612054188511 | AGIWUR2617                                                             |          |                |            |            |
| CB4856 CT I         | 12819216                                                               | 12825562 | WBGene00001746 | gsk-3      | Y18D10A.5  |
| -0.16148552868218   | AGIWUR44507                                                            |          |                |            |            |
| CB4856 CT I         | 12825664                                                               | 12834143 | WBGene00003735 | nhx-8      | Y18D10A.6  |
| -0.351377997843757  | AGIWUR10024;AGIWUR18724;AGIWUR35964                                    |          |                |            |            |
| CB4856 CT I         | 12834665                                                               | 12843233 | WBGene00004231 | ptr-17     | Y18D10A.7  |
| 0.00088960883762379 | AGIWUR2500;AGIWUR17127;AGIWUR35830;AGIWUR38073                         |          |                |            |            |
| CB4856 CT I         | 12844269                                                               | 12853105 | WBGene00012478 | mxt-1      | Y18D10A.8  |
| 0.0360082050056896  | AGIWUR4070                                                             |          |                |            |            |
| CB4856 CT I         | 12853088                                                               | 12858272 | WBGene00012479 | Y18D10A.9  | Y18D10A.9  |
| -0.0800431974225635 | AGIWUR18598                                                            |          |                |            |            |
| CB4856 CT I         | 12859499                                                               | 12861197 | WBGene00012480 | cllec-104  | Y18D10A.10 |
| -0.438655613472344  | AGIWUR26490                                                            |          |                |            |            |
| CB4856 CT I         | 12861951                                                               | 12863544 | WBGene00012481 | Y18D10A.11 | Y18D10A.11 |
| -0.105570432947795  | AGIWUR18588                                                            |          |                |            |            |
| CB4856 CT I         | 12864230                                                               | 12865568 | WBGene00012488 | cllec-105  | Y18D10A.24 |
| -0.276607302304612  | AGIWUR22133                                                            |          |                |            |            |
| CB4856 CT I         | 12866120                                                               | 12866896 | WBGene00012482 | cllec-106  | Y18D10A.12 |
| -0.606102306680178  | AGIWUR40586                                                            |          |                |            |            |
| CB4856 CT I         | 12866991                                                               | 12869556 | WBGene00012487 | Y18D10A.23 | Y18D10A.23 |
| 0.114593997474621   | AGIWUR21563                                                            |          |                |            |            |
| CB4856 CT I         | 12878595                                                               | 12902806 | WBGene00003905 | pad-1      | Y18D10A.13 |
| 0.0414342873498335  | AGIWUR16264                                                            |          |                |            |            |
| CB4856 CT I         | 12903059                                                               | 12904072 | WBGene00012483 | Y18D10A.16 | Y18D10A.16 |
| -0.053731585745096  | AGIWUR10347;AGIWUR19850;AGIWUR33702                                    |          |                |            |            |
| CB4856 CT I         | 12904470                                                               | 12906212 | WBGene00012484 | car-1      | Y18D10A.17 |
| -0.0366652106912655 | AGIWUR9634;AGIWUR11573;AGIWUR13065;AGIWUR30240;AGIWUR35163;AGIWUR41272 |          |                |            |            |
| CB4856 CT I         | 12906462                                                               | 12907754 | WBGene00012485 | fbxa-121   | Y18D10A.18 |
| 0.0875111134666895  | AGIWUR33138                                                            |          |                |            |            |
| CB4856 CT I         | 12908304                                                               | 12909436 | WBGene00077556 | Y18D10A.27 | Y18D10A.27 |
| 0.101874904226078   | AGIWUR5790;AGIWUR7354;AGIWUR9630                                       |          |                |            |            |
| CB4856 CT I         | 12916441                                                               | 12918108 | WBGene00001433 | fkf-8      | Y18D10A.25 |
| -0.113421887172871  | AGIWUR3419;AGIWUR11778                                                 |          |                |            |            |
| CB4856 CT I         | 12918722                                                               | 12919278 | WBGene00001427 | fkf-2      | Y18D10A.19 |
| -0.115981811055168  | AGIWUR1517;AGIWUR18093;AGIWUR43780                                     |          |                |            |            |
| CB4856 CT I         | 12922004                                                               | 12923548 | WBGene00003989 | pfk-1      | Y18D10A.20 |
| -0.258648900759659  | AGIWUR749;AGIWUR10648;AGIWUR13965;AGIWUR14413;AGIWUR19323;AGIWUR22987  |          |                |            |            |

|                                                          |                                               |          |                |                 |                     |
|----------------------------------------------------------|-----------------------------------------------|----------|----------------|-----------------|---------------------|
| CB4856 CT I                                              | 12929372                                      | 12931069 | WBGene00012486 | Y18D10A.21      | Y18D10A.21          |
| -0.350867137532958                                       | AGIWUR15932                                   |          |                |                 |                     |
| CB4856 CT I                                              | 12932037                                      | 12933751 | WBGene00014864 | Y18D10A.22      | Y18D10A.22          |
| 0.225853236396162                                        | AGIWUR28353                                   |          |                |                 |                     |
| CB4856 CT I                                              | 12934767                                      | 12937252 | WBGene00006484 | tag-138 F08A8.6 | 0.101784753073133   |
| AGIWUR2434                                               |                                               |          |                |                 |                     |
| CB4856 CT I                                              | 12938555                                      | 12942224 | WBGene00008564 | acox-1.1        | F08A8.1             |
| -0.130475574618449                                       | AGIWUR34581                                   |          |                |                 |                     |
| CB4856 CT I                                              | 12942280                                      | 12946562 | WBGene00008565 | acox-1.2        | F08A8.2             |
| -0.351479122481448                                       | AGIWUR825                                     |          |                |                 |                     |
| CB4856 CT I                                              | 12951025                                      | 12954015 | WBGene00008567 | acox-1.4        | F08A8.4             |
| -0.186557025165775                                       | AGIWUR1174;AGIWUR16821                        |          |                |                 |                     |
| CB4856 CT I                                              | 12953969                                      | 12955322 | WBGene00045468 | F08A8.8 F08A8.8 | -0.301478788725285  |
| AGIWUR441                                                |                                               |          |                |                 |                     |
| CB4856 CT I                                              | 12955328                                      | 12957902 | WBGene00008568 | F08A8.5 F08A8.5 | 0.0274673368921885  |
| AGIWUR26122                                              |                                               |          |                |                 |                     |
| CB4856 CT I                                              | 12958639                                      | 12959955 | WBGene00008569 | fbxa-101        | F08A8.7             |
| -0.0601564514103163                                      | AGIWUR11695                                   |          |                |                 |                     |
| CB4856 CT I                                              | 12960313                                      | 12961606 | WBGene00008130 | fbxa-140        | C47B2.1             |
| -0.0764238276177913                                      | AGIWUR4596                                    |          |                |                 |                     |
| CB4856 CT I                                              | 12962042                                      | 12964579 | WBGene00008131 | C47B2.2 C47B2.2 | -0.253807718533238  |
| AGIWUR30169                                              |                                               |          |                |                 |                     |
| CB4856 CT I                                              | 12964674                                      | 12966876 | WBGene00006529 | tba-2 C47B2.3   |                     |
| -0.00189258843614137                                     | AGIWUR4560;AGIWUR7861;AGIWUR17254;AGIWUR33286 |          |                |                 |                     |
| CB4856 CT I                                              | 12967216                                      | 12968280 | WBGene00003948 | pbs-2 C47B2.4   | -0.074487256964078  |
| AGIWUR41108                                              |                                               |          |                |                 |                     |
| CB4856 CT I                                              | 12968921                                      | 12970238 | WBGene00001234 | eif-6 C47B2.5   | -0.126679972255074  |
| AGIWUR1942;AGIWUR2030;AGIWUR4142;AGIWUR21916;AGIWUR24490 |                                               |          |                |                 |                     |
| CB4856 CT I                                              | 12971120                                      | 12972347 | WBGene00004196 | prx-11 C47B2.8  | 0.15225504435945    |
| AGIWUR1599                                               |                                               |          |                |                 |                     |
| CB4856 CT I                                              | 12975183                                      | 12978749 | WBGene00008132 | gale-1 C47B2.6  |                     |
| -0.00611099397985715                                     | AGIWUR10738;AGIWUR34894                       |          |                |                 |                     |
| CB4856 CT I                                              | 12978839                                      | 12982452 | WBGene00008133 | efsc-1 C47B2.7  | 0.153073540441405   |
| AGIWUR34915                                              |                                               |          |                |                 |                     |
| CB4856 CT I                                              | 12983004                                      | 12983974 | WBGene00008134 | C47B2.9 C47B2.9 | -0.0346726278294458 |
| AGIWUR36090                                              |                                               |          |                |                 |                     |
| CB4856 CT I                                              | 12988223                                      | 12995475 | WBGene00003753 | nlp-15 CC4.2    | 0.346252132073609   |
| AGIWUR1711                                               |                                               |          |                |                 |                     |
| CB4856 CT I                                              | 12995803                                      | 13012859 | WBGene00004895 | smu-1 CC4.3     | -0.129732636399428  |

|                                                                              |    |   |          |          |                |           |                             |
|------------------------------------------------------------------------------|----|---|----------|----------|----------------|-----------|-----------------------------|
| AGIWUR14067                                                                  |    |   |          |          |                |           |                             |
| CB4856                                                                       | CT | I | 13004437 | 13023625 | WBGene00004063 | pmr-1     | ZK256.1 0.0923972034437259  |
| AGIWUR12760;AGIWUR19470;AGIWUR21490;AGIWUR37538                              |    |   |          |          |                |           |                             |
| CB4856                                                                       | CT | I | 13033483 | 13045555 | WBGene00012274 | W05B5.1   | W05B5.1 0.0865108647328365  |
| AGIWUR130;AGIWUR13029;AGIWUR16053;AGIWUR21284;AGIWUR34592;AGIWUR42290        |    |   |          |          |                |           |                             |
| CB4856                                                                       | CT | I | 13050445 | 13057435 | WBGene00012275 | npr-14    | W05B5.2 -0.0738800676199567 |
| AGIWUR22861                                                                  |    |   |          |          |                |           |                             |
| CB4856                                                                       | CT | I | 13066924 | 13069038 | WBGene00012500 | hpo-2     | Y26D4A.2                    |
| 0.247684220584606 AGIWUR24458                                                |    |   |          |          |                |           |                             |
| CB4856                                                                       | CT | I | 13069529 | 13071190 | WBGene00012502 | cllec-107 | Y26D4A.4                    |
| 0.14390507690095 AGIWUR8324                                                  |    |   |          |          |                |           |                             |
| CB4856                                                                       | CT | I | 13073837 | 13075124 | WBGene00044706 | Y26D4A.15 | Y26D4A.15                   |
| 0.0212874503332796 AGIWUR1641;AGIWUR27615                                    |    |   |          |          |                |           |                             |
| CB4856                                                                       | CT | I | 13075122 | 13075381 | WBGene00044710 | Y26D4A.16 | Y26D4A.16                   |
| -0.095234787057823 AGIWUR73                                                  |    |   |          |          |                |           |                             |
| CB4856                                                                       | CT | I | 13077994 | 13078880 | WBGene00045235 | Y26D4A.18 | Y26D4A.18                   |
| -0.398886437575074 AGIWUR39678                                               |    |   |          |          |                |           |                             |
| CB4856                                                                       | CT | I | 13079742 | 13080633 | WBGene00045236 | Y26D4A.19 | Y26D4A.19                   |
| -0.0753590286867034 AGIWUR40017                                              |    |   |          |          |                |           |                             |
| CB4856                                                                       | CT | I | 13081448 | 13082166 | WBGene00012504 | cllec-108 | Y26D4A.6                    |
| 0.0740250840397891 AGIWUR7770                                                |    |   |          |          |                |           |                             |
| CB4856                                                                       | CT | I | 13082681 | 13082966 | WBGene00012509 | Y26D4A.12 | Y26D4A.12                   |
| 0.489215517781814 AGIWUR41342                                                |    |   |          |          |                |           |                             |
| CB4856                                                                       | CT | I | 13083321 | 13085505 | WBGene00012505 | pals-13   | Y26D4A.8                    |
| -0.0649998611131926 AGIWUR17033                                              |    |   |          |          |                |           |                             |
| CB4856                                                                       | CT | I | 13085106 | 13103119 | WBGene00007655 | C17H1.2   | C17H1.2 0.139242171575823   |
| AGIWUR9507;AGIWUR23034;AGIWUR29977;AGIWUR37866;AGIWUR42970                   |    |   |          |          |                |           |                             |
| CB4856                                                                       | CT | I | 13104253 | 13106298 | WBGene00007656 | pals-2    | C17H1.3 1.21204841837648    |
| AGIWUR5622;AGIWUR17946;AGIWUR35948                                           |    |   |          |          |                |           |                             |
| CB4856                                                                       | CT | I | 13107140 | 13107457 | WBGene00044711 | pals-10   | C17H1.11                    |
| 0.833167950892225 AGIWUR9138;AGIWUR27537;AGIWUR32329;AGIWUR37188;AGIWUR42291 |    |   |          |          |                |           |                             |
| CB4856                                                                       | CT | I | 13107492 | 13112443 | WBGene00007657 | pals-3    | C17H1.4 0.801951100935907   |
| AGIWUR37391                                                                  |    |   |          |          |                |           |                             |
| CB4856                                                                       | CT | I | 13113487 | 13116434 | WBGene00007658 | pals-4    | C17H1.5 0.647226746788915   |
| AGIWUR37559                                                                  |    |   |          |          |                |           |                             |
| CB4856                                                                       | CT | I | 13117629 | 13120324 | WBGene00007654 | C17H1.1   | C17H1.1 0.300087322347126   |
| AGIWUR17604;AGIWUR25487;AGIWUR28593                                          |    |   |          |          |                |           |                             |
| CB4856                                                                       | CT | I | 13121092 | 13123513 | WBGene00007662 | pals-8    | C17H1.9 1.17835217317214    |
| AGIWUR32197                                                                  |    |   |          |          |                |           |                             |

|                                                                           |                                                                        |          |                |                  |                     |
|---------------------------------------------------------------------------|------------------------------------------------------------------------|----------|----------------|------------------|---------------------|
| CB4856 CT I<br>1.30104391016556                                           | 13124081<br>AGIWUR17715                                                | 13126650 | WBGene00044708 | pals-11 C17H1.13 |                     |
| CB4856 CT I<br>0.020478359771777                                          | 13127152<br>AGIWUR6757;AGIWUR7071;AGIWUR11735;AGIWUR13554              | 13127876 | WBGene00044722 | C17H1.12         | C17H1.12            |
| CB4856 CT I<br>AGIWUR41771                                                | 13128470                                                               | 13130409 | WBGene00007661 | pals-7 C17H1.8   | 0.894518787235526   |
| CB4856 CT I<br>AGIWUR7049                                                 | 13130808                                                               | 13132464 | WBGene00007659 | pals-5 C17H1.6   | 0.65482123406365    |
| CB4856 CT I<br>2.20776642852047                                           | 13133638<br>AGIWUR18891                                                | 13136156 | WBGene00044237 | pals-9 C17H1.10  |                     |
| CB4856 CT I<br>AGIWUR2479                                                 | 13136467                                                               | 13138521 | WBGene00007660 | pals-6 C17H1.7   | 2.13760744786407    |
| CB4856 CT I<br>1.83288374845099                                           | 13139132<br>AGIWUR8641;AGIWUR17238                                     | 13141789 | WBGene00009061 | pals-14 F22G12.1 |                     |
| CB4856 CT I<br>-0.77029007185345                                          | 13144912<br>AGIWUR2413;AGIWUR10665;AGIWUR28917                         | 13146453 | WBGene00044712 | pals-15 F22G12.8 |                     |
| CB4856 CT I<br>0.208419720688018                                          | 13152575<br>AGIWUR38346                                                | 13153706 | WBGene00009063 | F22G12.3         | F22G12.3            |
| CB4856 CT I<br>-0.0133071385463648                                        | 13155239<br>AGIWUR15762;AGIWUR18080;AGIWUR18882                        | 13161508 | WBGene00009064 | F22G12.4         | F22G12.4            |
| CB4856 CT I<br>-0.0129347361210037                                        | 13162492<br>AGIWUR21603                                                | 13182725 | WBGene00009065 | F22G12.5         | F22G12.5            |
| CB4856 CT I<br>AGIWUR11554                                                | 13184852                                                               | 13188234 | WBGene00008905 | F17B5.1 F17B5.1  | 1.85307399699067    |
| CB4856 CT I<br>-0.270759403763518                                         | 13189792<br>AGIWUR9777                                                 | 13190583 | WBGene00138716 | F17B5.10         | F17B5.10            |
| CB4856 CT I<br>AGIWUR1859;AGIWUR10263;AGIWUR21965;AGIWUR23242;AGIWUR29567 | 13190578                                                               | 13191921 | WBGene00045458 | F17B5.8 F17B5.8  | -0.0161790420059278 |
| CB4856 CT I<br>-0.103915207281909                                         | 13197179<br>AGIWUR6963;AGIWUR18308;AGIWUR20621;AGIWUR21937;AGIWUR41207 | 13198374 | WBGene00008907 | cllec-109        | F17B5.3             |
| CB4856 CT I<br>AGIWUR11419;AGIWUR39916                                    | 13199359                                                               | 13200980 | WBGene00008908 | F17B5.4 F17B5.4  | -0.112855011373654  |
| CB4856 CT I<br>AGIWUR5127                                                 | 13201710                                                               | 13204293 | WBGene00044058 | F17B5.6 F17B5.6  | 0.442391425478152   |
| CB4856 CT I<br>-0.45999729670808                                          | 13204497<br>AGIWUR4687;AGIWUR17223;AGIWUR17887;AGIWUR29019             | 13205403 | WBGene00008909 | cllec-110        | F17B5.5             |
| CB4856 CT I<br>0.310711014688418                                          | 13205664<br>AGIWUR129                                                  | 13207759 | WBGene00014235 | ZK1225.1         | ZK1225.1            |
| CB4856 CT I                                                               | 13208441                                                               | 13210462 | WBGene00014236 | ZK1225.2         | ZK1225.2            |

|                                                                                                           |                                                                        |          |                |                 |                     |
|-----------------------------------------------------------------------------------------------------------|------------------------------------------------------------------------|----------|----------------|-----------------|---------------------|
| 0.0339858631838323                                                                                        | AGIWUR9579;AGIWUR13739;AGIWUR37030                                     |          |                |                 |                     |
| CB4856 CT I                                                                                               | 13210585                                                               | 13211352 | WBGene00044713 | ZK1225.9        | ZK1225.9            |
| -0.0723337050590116                                                                                       | AGIWUR719;AGIWUR16159;AGIWUR31446                                      |          |                |                 |                     |
| CB4856 CT I                                                                                               | 13211826                                                               | 13213806 | WBGene00044714 | ZK1225.10       | ZK1225.10           |
| -0.246670481036293                                                                                        | AGIWUR37508;AGIWUR38006;AGIWUR42906                                    |          |                |                 |                     |
| CB4856 CT I                                                                                               | 13214095                                                               | 13216230 | WBGene00014238 | ZK1225.4        | ZK1225.4            |
| -0.237170983226386                                                                                        | AGIWUR23716                                                            |          |                |                 |                     |
| CB4856 CT I                                                                                               | 13216605                                                               | 13218867 | WBGene00014239 | ZK1225.5        | ZK1225.5            |
| -0.0967066191374535                                                                                       | AGIWUR1722                                                             |          |                |                 |                     |
| CB4856 CT I                                                                                               | 13219056                                                               | 13219545 | WBGene00006048 | ssp-31 ZK1225.6 |                     |
| 0.121955997637836                                                                                         | AGIWUR4043;AGIWUR11256;AGIWUR18577;AGIWUR20890;AGIWUR21770;AGIWUR43896 |          |                |                 |                     |
| CB4856 CT I                                                                                               | 13227995                                                               | 13229751 | WBGene00014196 | ZK1053.1        | ZK1053.1            |
| 0.310056547406004                                                                                         | AGIWUR8882                                                             |          |                |                 |                     |
| CB4856 CT I                                                                                               | 13232121                                                               | 13234686 | WBGene00014197 | ZK1053.2        | ZK1053.2            |
| 0.466994915878891                                                                                         | AGIWUR12680                                                            |          |                |                 |                     |
| CB4856 CT I                                                                                               | 13235367                                                               | 13236662 | WBGene00014200 | scrm-2 ZK1053.5 |                     |
| 0.138385580797465                                                                                         | AGIWUR23919                                                            |          |                |                 |                     |
| CB4856 CT I                                                                                               | 13237054                                                               | 13238302 | WBGene00044786 | ZK1053.7        | ZK1053.7            |
| 0.090371684291445                                                                                         | AGIWUR29991;AGIWUR34385                                                |          |                |                 |                     |
| CB4856 CT I                                                                                               | 13238540                                                               | 13240726 | WBGene00014201 | ZK1053.6        | ZK1053.6            |
| -0.247173554373208                                                                                        | AGIWUR20160                                                            |          |                |                 |                     |
| CB4856 CT I                                                                                               | 13241645                                                               | 13244797 | WBGene00014199 | ZK1053.4        | ZK1053.4            |
| 0.264201168958474                                                                                         | AGIWUR9930                                                             |          |                |                 |                     |
| CB4856 CT I                                                                                               | 13246853                                                               | 13249789 | WBGene00014198 | ZK1053.3        | ZK1053.3            |
| 0.727115749260678                                                                                         | AGIWUR10322                                                            |          |                |                 |                     |
| CB4856 CT I                                                                                               | 13250519                                                               | 13252902 | WBGene00009693 | F44F1.1 F44F1.1 | -0.130426058783291  |
| AGIWUR11569;AGIWUR12707;AGIWUR35981                                                                       |                                                                        |          |                |                 |                     |
| CB4856 CT I                                                                                               | 13254141                                                               | 13257729 | WBGene00009695 | F44F1.3 F44F1.3 | -0.0241304169641623 |
| AGIWUR36983                                                                                               |                                                                        |          |                |                 |                     |
| CB4856 CT I                                                                                               | 13258381                                                               | 13260217 | WBGene00009697 | F44F1.5 F44F1.5 | -0.0434240740211598 |
| AGIWUR24484                                                                                               |                                                                        |          |                |                 |                     |
| CB4856 CT I                                                                                               | 13260933                                                               | 13262727 | WBGene00009698 | F44F1.6 F44F1.6 | 0.433882968344873   |
| AGIWUR2878;AGIWUR9405;AGIWUR14989;AGIWUR18297;AGIWUR19140;AGIWUR22641;AGIWUR25795;AGIWUR33450;AGIWUR43720 |                                                                        |          |                |                 |                     |
| CB4856 CT I                                                                                               | 13263803                                                               | 13265570 | WBGene00009696 | F44F1.4 F44F1.4 | 0.00763632335372311 |
| AGIWUR33801                                                                                               |                                                                        |          |                |                 |                     |
| CB4856 CT I                                                                                               | 13269984                                                               | 13272784 | WBGene00006902 | vet-6 F44F1.7   | -0.135086603043309  |
| AGIWUR16532                                                                                               |                                                                        |          |                |                 |                     |
| CB4856 CT I                                                                                               | 13274111                                                               | 13276462 | WBGene00010804 | M01E5.1 M01E5.1 | -0.0209011941066848 |
| AGIWUR23175;AGIWUR33900;AGIWUR42322                                                                       |                                                                        |          |                |                 |                     |

|                                                                                    |                                                                        |          |                |          |          |                    |
|------------------------------------------------------------------------------------|------------------------------------------------------------------------|----------|----------------|----------|----------|--------------------|
| CB4856 CT I                                                                        | 13277061                                                               | 13280175 | WBGene00010805 | M01E5.2  | M01E5.2  | 0.0854037935624667 |
| AGIWUR39432                                                                        |                                                                        |          |                |          |          |                    |
| CB4856 CT I                                                                        | 13280892                                                               | 13286497 | WBGene00010806 | M01E5.3  | M01E5.3  | 0.0481914766588369 |
| AGIWUR24647;AGIWUR27603;AGIWUR30431;AGIWUR31429                                    |                                                                        |          |                |          |          |                    |
| CB4856 CT I                                                                        | 13287551                                                               | 13289542 | WBGene00010807 | M01E5.4  | M01E5.4  | -0.104813791305279 |
| AGIWUR20792;AGIWUR38781                                                            |                                                                        |          |                |          |          |                    |
| CB4856 CT I                                                                        | 13292506                                                               | 13297555 | WBGene00006595 | top-1    | M01E5.5  | 0.248936649518747  |
| AGIWUR1777;AGIWUR15898;AGIWUR16737;AGIWUR17593;AGIWUR26904;AGIWUR32658;AGIWUR39976 |                                                                        |          |                |          |          |                    |
| CB4856 CT I                                                                        | 13298209                                                               | 13300716 | WBGene00010808 | sepa-1   | M01E5.6  | 0.158232018333928  |
| AGIWUR6207                                                                         |                                                                        |          |                |          |          |                    |
| CB4856 CT I                                                                        | 13302759                                                               | 13304311 | WBGene00011431 | T04D3.1  | T04D3.1  | -0.225526795299075 |
| AGIWUR30784                                                                        |                                                                        |          |                |          |          |                    |
| CB4856 CT I                                                                        | 13307031                                                               | 13308787 | WBGene00011432 | sdz-30   | T04D3.2  | 0.491466622178553  |
| AGIWUR10330;AGIWUR32859;AGIWUR44585                                                |                                                                        |          |                |          |          |                    |
| CB4856 CT I                                                                        | 13309994                                                               | 13310715 | WBGene00011435 | T04D3.8  | T04D3.8  | 0.0645585110557025 |
| AGIWUR31158                                                                        |                                                                        |          |                |          |          |                    |
| CB4856 CT I                                                                        | 13310915                                                               | 13318704 | WBGene00011433 | pde-1    | T04D3.3  | -0.256930015647184 |
| AGIWUR2048                                                                         |                                                                        |          |                |          |          |                    |
| CB4856 CT I                                                                        | 13325230                                                               | 13333508 | WBGene00001555 | gcy-35   | T04D3.4  | -0.115012770958765 |
| AGIWUR30654                                                                        |                                                                        |          |                |          |          |                    |
| CB4856 CT I                                                                        | 13333380                                                               | 13336146 | WBGene00012343 | W08E3.2  | W08E3.2  | 0.117643433658998  |
| AGIWUR23946                                                                        |                                                                        |          |                |          |          |                    |
| CB4856 CT I                                                                        | 13337460                                                               | 13338921 | WBGene00012345 | W08E3.4  | W08E3.4  | -0.420738400779746 |
| AGIWUR15170                                                                        |                                                                        |          |                |          |          |                    |
| CB4856 CT I                                                                        | 13339397                                                               | 13340224 | WBGene00004915 | snr-2    | W08E3.1  | -0.121403088854091 |
| AGIWUR2020;AGIWUR17872;AGIWUR37716                                                 |                                                                        |          |                |          |          |                    |
| CB4856 CT I                                                                        | 13340327                                                               | 13343940 | WBGene00012344 | ola-1    | W08E3.3  | 0.0662314777397626 |
| AGIWUR20746                                                                        |                                                                        |          |                |          |          |                    |
| CB4856 CT I                                                                        | 13344044                                                               | 13346966 | WBGene00012732 | Y40B1A.1 |          | Y40B1A.1           |
| 0.13908341431205                                                                   | AGIWUR8122;AGIWUR14845;AGIWUR22783;AGIWUR24127;AGIWUR30754;AGIWUR33337 |          |                |          |          |                    |
| CB4856 CT I                                                                        | 13347068                                                               | 13349259 | WBGene00012733 | Y40B1A.2 |          | Y40B1A.2           |
| 0.000259478981242012                                                               | AGIWUR39339                                                            |          |                |          |          |                    |
| CB4856 CT I                                                                        | 13349410                                                               | 13358674 | WBGene00012734 | Y40B1A.3 |          | Y40B1A.3           |
| -0.416401317407434                                                                 | AGIWUR7751;AGIWUR14091                                                 |          |                |          |          |                    |
| CB4856 CT I                                                                        | 13360401                                                               | 13366888 | WBGene00012735 | sptf-3   | Y40B1A.4 |                    |
| -0.33612228332496                                                                  | AGIWUR4406                                                             |          |                |          |          |                    |
| CB4856 CT I                                                                        | 13379917                                                               | 13384371 | WBGene00007218 | C01A2.6  | C01A2.6  | 0.190109611523932  |
| AGIWUR11252                                                                        |                                                                        |          |                |          |          |                    |
| CB4856 CT I                                                                        | 13384752                                                               | 13387084 | WBGene00007217 | tads-1   | C01A2.5  | -0.220257994044365 |



|                                                                                            |    |   |          |          |                |           |                            |
|--------------------------------------------------------------------------------------------|----|---|----------|----------|----------------|-----------|----------------------------|
| AGIWUR15887                                                                                |    |   |          |          |                |           |                            |
| CB4856                                                                                     | CT | I | 13387819 | 13391450 | WBGene00007215 | oxa-1     | C01A2.3 -0.190632948487913 |
| AGIWUR15608;AGIWUR16802;AGIWUR22209;AGIWUR26992;AGIWUR29372;AGIWUR30785                    |    |   |          |          |                |           |                            |
| CB4856                                                                                     | CT | I | 13392118 | 13394001 | WBGene00007216 | C01A2.4   | C01A2.4 0.255077206238242  |
| AGIWUR11598                                                                                |    |   |          |          |                |           |                            |
| CB4856                                                                                     | CT | I | 13397270 | 13398529 | WBGene00007214 | C01A2.2   | C01A2.2 0.124066391641927  |
| AGIWUR43823                                                                                |    |   |          |          |                |           |                            |
| CB4856                                                                                     | CT | I | 13402447 | 13404106 | WBGene00007219 | nlp-38    | C01A2.7 0.103503737423838  |
| AGIWUR11225;AGIWUR16600;AGIWUR17922;AGIWUR36114                                            |    |   |          |          |                |           |                            |
| CB4856                                                                                     | CT | I | 13414273 | 13414465 | WBGene00077561 | W05H12.3  | W05H12.3                   |
| -0.0628406084768862 AGIWUR9577;AGIWUR17249;AGIWUR24012;AGIWUR29770;AGIWUR38825             |    |   |          |          |                |           |                            |
| CB4856                                                                                     | CT | I | 13418458 | 13423379 | WBGene00012289 | W05H12.1  | W05H12.1                   |
| -0.153753534594246 AGIWUR2538;AGIWUR7093;AGIWUR42065                                       |    |   |          |          |                |           |                            |
| CB4856                                                                                     | CT | I | 13423994 | 13425148 | WBGene00044066 | fbxb-66   | Y40B1B.3                   |
| 0.567588368295242 AGIWUR5934                                                               |    |   |          |          |                |           |                            |
| CB4856                                                                                     | CT | I | 13426454 | 13428471 | WBGene00012739 | Y40B1B.7  | Y40B1B.7                   |
| 0.068344882187521 AGIWUR19958                                                              |    |   |          |          |                |           |                            |
| CB4856                                                                                     | CT | I | 13428913 | 13434717 | WBGene00012740 | slc-25A46 | Y40B1B.8                   |
| 0.0222524087721796 AGIWUR4532;AGIWUR25826;AGIWUR38819;AGIWUR40634                          |    |   |          |          |                |           |                            |
| CB4856                                                                                     | CT | I | 13435489 | 13437965 | WBGene00012738 | EIF-3.J   | Y40B1B.5                   |
| -0.135306720044451 AGIWUR5279                                                              |    |   |          |          |                |           |                            |
| CB4856                                                                                     | CT | I | 13438058 | 13450216 | WBGene00005010 | spr-5     | Y40B1B.6                   |
| 0.0503205745570163 AGIWUR25838;AGIWUR27172;AGIWUR43055                                     |    |   |          |          |                |           |                            |
| CB4856                                                                                     | CT | I | 13451463 | 13452841 | WBGene00013023 | Y48G10A.6 | Y48G10A.6                  |
| 0.113687754739193 AGIWUR1449;AGIWUR19843;AGIWUR21746;AGIWUR24663;AGIWUR26086;AGIWUR30523   |    |   |          |          |                |           |                            |
| CB4856                                                                                     | CT | I | 13455356 | 13470439 | WBGene00013021 | Y48G10A.4 | Y48G10A.4                  |
| -0.0215235063261705 AGIWUR4727;AGIWUR25796;AGIWUR35731;AGIWUR39194;AGIWUR41307;AGIWUR44612 |    |   |          |          |                |           |                            |
| CB4856                                                                                     | CT | I | 13471683 | 13474185 | WBGene00013020 | Y48G10A.3 | Y48G10A.3                  |
| 0.168713666247063 AGIWUR36511                                                              |    |   |          |          |                |           |                            |
| CB4856                                                                                     | CT | I | 13477214 | 13487404 | WBGene00013019 | Y48G10A.2 | Y48G10A.2                  |
| -0.010602414235569 AGIWUR14937                                                             |    |   |          |          |                |           |                            |
| CB4856                                                                                     | CT | I | 13489552 | 13491226 | WBGene00013018 | Y48G10A.1 | Y48G10A.1                  |
| -0.535757017371479 AGIWUR2483                                                              |    |   |          |          |                |           |                            |
| CB4856                                                                                     | CT | I | 13491425 | 13493317 | WBGene00013603 | soem-1    | Y87G2A.17                  |
| -0.0566337808174762 AGIWUR34580                                                            |    |   |          |          |                |           |                            |
| CB4856                                                                                     | CT | I | 13503045 | 13507064 | WBGene00003585 | ndx-8     | Y87G2A.14                  |
| -0.102776657064254 AGIWUR42138                                                             |    |   |          |          |                |           |                            |
| CB4856                                                                                     | CT | I | 13508785 | 13512026 | WBGene00044260 | Y87G2A.19 | Y87G2A.19                  |
| 0.269016112421728 AGIWUR38809                                                              |    |   |          |          |                |           |                            |

|                                     |                                                                                   |          |                |           |                             |
|-------------------------------------|-----------------------------------------------------------------------------------|----------|----------------|-----------|-----------------------------|
| CB4856 CT I                         | 13512313                                                                          | 13514320 | WBGene00013604 | Y87G2A.18 | Y87G2A.18                   |
| 0.164426230414801                   | AGIWUR37837                                                                       |          |                |           |                             |
| CB4856 CT I                         | 13514550                                                                          | 13526254 | WBGene00013593 | Y87G2A.1  | Y87G2A.1                    |
| -0.0667485003084298                 | AGIWUR10029                                                                       |          |                |           |                             |
| CB4856 CT I                         | 13528706                                                                          | 13531444 | WBGene00044261 | Y87G2A.20 | Y87G2A.20                   |
| 0.170759928576697                   | AGIWUR10888;AGIWUR20595;AGIWUR33352;AGIWUR35074;AGIWUR44230                       |          |                |           |                             |
| CB4856 CT I                         | 13534718                                                                          | 13537014 | WBGene00013594 | Y87G2A.2  | Y87G2A.2                    |
| 0.291806619117011                   | AGIWUR11310                                                                       |          |                |           |                             |
| CB4856 CT I                         | 13536892                                                                          | 13542703 | WBGene00013595 | atg-4.1   | Y87G2A.3                    |
| 0.0165651325586467                  | AGIWUR21404                                                                       |          |                |           |                             |
| CB4856 CT I                         | 13543079                                                                          | 13545188 | WBGene00000089 | aex-6     | Y87G2A.4                    |
| 0.160000530298115                   | AGIWUR6216;AGIWUR10423;AGIWUR15952;AGIWUR20591;AGIWUR26131;AGIWUR43384            |          |                |           |                             |
| CB4856 CT I                         | 13547898                                                                          | 13559361 | WBGene00006936 | glp-4     | Y87G2A.5                    |
| -0.0262200383009308                 | AGIWUR33323                                                                       |          |                |           |                             |
| CB4856 CT I                         | 13560447                                                                          | 13563465 | WBGene00013602 | Y87G2A.16 | Y87G2A.16                   |
| -0.345843749806056                  | AGIWUR9625                                                                        |          |                |           |                             |
| CB4856 CT I                         | 13564567                                                                          | 13566362 | WBGene00001704 | grd-15    | Y87G2A.15                   |
| -0.166758505679052                  | AGIWUR1040                                                                        |          |                |           |                             |
| CB4856 CT I                         | 13566258                                                                          | 13572063 | WBGene00000891 | cyn-15    | Y87G2A.6                    |
| 0.250374320382999                   | AGIWUR11314                                                                       |          |                |           |                             |
| CB4856 CT I                         | 13572379                                                                          | 13575805 | WBGene00013596 | nyn-2     | Y87G2A.7                    |
| 0.13385271413398                    | AGIWUR32583;AGIWUR42958                                                           |          |                |           |                             |
| CB4856 CT I                         | 13576148                                                                          | 13581585 | WBGene00013597 | gpi-1     | Y87G2A.8                    |
| -0.0734095742848728                 | AGIWUR4888;AGIWUR42506                                                            |          |                |           |                             |
| CB4856 CT I                         | 13581698                                                                          | 13585295 | WBGene00006709 | ubc-14    | Y87G2A.9                    |
| -0.0737439563850195                 | AGIWUR13481                                                                       |          |                |           |                             |
| CB4856 CT I                         | 13586037                                                                          | 13588831 | WBGene00013598 | vps-28    | Y87G2A.10                   |
| -0.0832421532318204                 | AGIWUR4233;AGIWUR7451;AGIWUR18989;AGIWUR19541;AGIWUR22158;AGIWUR22997;AGIWUR26235 |          |                |           |                             |
| CB4856 CT I                         | 13589099                                                                          | 13598505 | WBGene00013599 | eipr-1    | Y87G2A.11                   |
| -0.256926547841207                  | AGIWUR26147                                                                       |          |                |           |                             |
| CB4856 CT I                         | 13598618                                                                          | 13603393 | WBGene00013601 | Y87G2A.13 | Y87G2A.13                   |
| -0.322809588058782                  | AGIWUR15125                                                                       |          |                |           |                             |
| CB4856 CT I                         | 13603885                                                                          | 13626225 | WBGene00012386 | agef-1    | Y6B3A.1 -0.041055502093049  |
| AGIWUR25300;AGIWUR33210             |                                                                                   |          |                |           |                             |
| CB4856 CT I                         | 13626522                                                                          | 13628447 | WBGene00012351 | W09C5.1   | W09C5.1 0.0754768009212921  |
| AGIWUR17955;AGIWUR23847;AGIWUR32726 |                                                                                   |          |                |           |                             |
| CB4856 CT I                         | 13629227                                                                          | 13633494 | WBGene00006793 | unc-59    | W09C5.2 0.117069517686403   |
| AGIWUR44683                         |                                                                                   |          |                |           |                             |
| CB4856 CT I                         | 13635042                                                                          | 13635958 | WBGene00014858 | W09C5.3   | W09C5.3 -0.0497467724556788 |

|                                                                                                                                             |    |   |          |          |                |                                     |
|---------------------------------------------------------------------------------------------------------------------------------------------|----|---|----------|----------|----------------|-------------------------------------|
| AGIWUR3493;AGIWUR4777                                                                                                                       |    |   |          |          |                |                                     |
| CB4856                                                                                                                                      | CT | I | 13637845 | 13639311 | WBGene00002116 | ins-33 W09C5.4 0.0686797985513437   |
| AGIWUR10812                                                                                                                                 |    |   |          |          |                |                                     |
| CB4856                                                                                                                                      | CT | I | 13640297 | 13648405 | WBGene00012352 | dkf-1 W09C5.5 -0.0228833947266907   |
| AGIWUR22471                                                                                                                                 |    |   |          |          |                |                                     |
| CB4856                                                                                                                                      | CT | I | 13652939 | 13653704 | WBGene00004445 | rp1-31 W09C5.6 -0.0624129633711732  |
| AGIWUR3290;AGIWUR3645;AGIWUR5928;AGIWUR8527;AGIWUR12729;AGIWUR14128;AGIWUR19084;AGIWUR22677;AGIWUR26990;AGIWUR30940;AGIWUR31232;AGIWUR42891 |    |   |          |          |                |                                     |
| CB4856                                                                                                                                      | CT | I | 13654009 | 13658167 | WBGene00012353 | W09C5.7 W09C5.7 0.0622541608257414  |
| AGIWUR16306                                                                                                                                 |    |   |          |          |                |                                     |
| CB4856                                                                                                                                      | CT | I | 13658171 | 13659128 | WBGene00012354 | W09C5.8 W09C5.8 -0.0882395544557735 |
| AGIWUR1781;AGIWUR3960;AGIWUR9938;AGIWUR16533;AGIWUR18251;AGIWUR25895                                                                        |    |   |          |          |                |                                     |
| CB4856                                                                                                                                      | CT | I | 13663462 | 13674997 | WBGene00012234 | W04A4.5 W04A4.5 -0.158694869058671  |
| AGIWUR2477                                                                                                                                  |    |   |          |          |                |                                     |
| CB4856                                                                                                                                      | CT | I | 13676255 | 13677792 | WBGene00012233 | W04A4.4 W04A4.4 0.40728091253085    |
| AGIWUR39892                                                                                                                                 |    |   |          |          |                |                                     |
| CB4856                                                                                                                                      | CT | I | 13680415 | 13681366 | WBGene00012232 | W04A4.3 W04A4.3 -0.407039528599432  |
| AGIWUR12765                                                                                                                                 |    |   |          |          |                |                                     |
| CB4856                                                                                                                                      | CT | I | 13682137 | 13684417 | WBGene00012231 | W04A4.2 W04A4.2 -0.0914069344260433 |
| AGIWUR12922;AGIWUR28553;AGIWUR29183                                                                                                         |    |   |          |          |                |                                     |
| CB4856                                                                                                                                      | CT | I | 13685303 | 13687582 | WBGene00012235 | W04A4.6 W04A4.6 0.253960650639955   |
| AGIWUR30052;AGIWUR32598                                                                                                                     |    |   |          |          |                |                                     |
| CB4856                                                                                                                                      | CT | I | 13692929 | 13702954 | WBGene00012387 | Y6B3B.1 Y6B3B.1 -0.239493278197706  |
| AGIWUR2983                                                                                                                                  |    |   |          |          |                |                                     |
| CB4856                                                                                                                                      | CT | I | 13709779 | 13719528 | WBGene00012388 | Y6B3B.3 Y6B3B.3 -0.0835772019271879 |
| AGIWUR35375                                                                                                                                 |    |   |          |          |                |                                     |
| CB4856                                                                                                                                      | CT | I | 13720125 | 13724453 | WBGene00012394 | hsd-1 Y6B3B.11                      |
| -0.917529822605113 AGIWUR42334                                                                                                              |    |   |          |          |                |                                     |
| CB4856                                                                                                                                      | CT | I | 13724577 | 13732046 | WBGene00006505 | lagr-1 Y6B3B.10                     |
| 0.173953705813187 AGIWUR14852                                                                                                               |    |   |          |          |                |                                     |
| CB4856                                                                                                                                      | CT | I | 13734958 | 13751124 | WBGene00012393 | Y6B3B.9 Y6B3B.9 -0.230094737801723  |
| AGIWUR2653                                                                                                                                  |    |   |          |          |                |                                     |
| CB4856                                                                                                                                      | CT | I | 13751234 | 13756354 | WBGene00012390 | gpap-1 Y6B3B.5 -0.208485962930197   |
| AGIWUR18956                                                                                                                                 |    |   |          |          |                |                                     |
| CB4856                                                                                                                                      | CT | I | 13756730 | 13771773 | WBGene00012389 | Y6B3B.4 Y6B3B.4 -0.177470347204816  |
| AGIWUR1970;AGIWUR5684;AGIWUR19132;AGIWUR32826                                                                                               |    |   |          |          |                |                                     |
| CB4856                                                                                                                                      | CT | I | 13773067 | 13778782 | WBGene00012576 | Y37H9A.1 Y37H9A.1                   |
| -0.141280010312496 AGIWUR36695                                                                                                              |    |   |          |          |                |                                     |
| CB4856                                                                                                                                      | CT | I | 13778899 | 13792165 | WBGene00012578 | Y37H9A.3 Y37H9A.3                   |

|                                                                         |                                                            |          |                |           |           |                     |
|-------------------------------------------------------------------------|------------------------------------------------------------|----------|----------------|-----------|-----------|---------------------|
| -0.038187460173944                                                      | AGIWUR7845                                                 |          |                |           |           |                     |
| CB4856 CT I                                                             | 13792645                                                   | 13794152 | WBGene00003581 | ndx-4     | Y37H9A.6  |                     |
| 0.172046527798557                                                       | AGIWUR33795                                                |          |                |           |           |                     |
| CB4856 CT I                                                             | 13795277                                                   | 13795867 | WBGene00014870 | Y37H9A.4  | Y37H9A.4  |                     |
| -0.321067928980291                                                      | AGIWUR24358                                                |          |                |           |           |                     |
| CB4856 CT I                                                             | 13802390                                                   | 13806801 | WBGene00044065 | tag-229   | W09G3.3   | -0.215342761547864  |
| AGIWUR9860                                                              |                                                            |          |                |           |           |                     |
| CB4856 CT I                                                             | 13806917                                                   | 13812268 | WBGene00012366 | maea-1    | W09G3.2   | 0.252559031527644   |
| AGIWUR20326;AGIWUR24050;AGIWUR35534                                     |                                                            |          |                |           |           |                     |
| CB4856 CT I                                                             | 13814756                                                   | 13827988 | WBGene00012369 | W09G3.6   | W09G3.6   | -0.0306178576826071 |
| AGIWUR9505                                                              |                                                            |          |                |           |           |                     |
| CB4856 CT I                                                             | 13828102                                                   | 13832146 | WBGene00012365 | W09G3.1   | W09G3.1   | 0.0521679569093152  |
| AGIWUR21708;AGIWUR21737;AGIWUR23876;AGIWUR31807;AGIWUR34127;AGIWUR37740 |                                                            |          |                |           |           |                     |
| CB4856 CT I                                                             | 13835292                                                   | 13840047 | WBGene00012236 | W04A8.1   | W04A8.1   | -0.17240062135043   |
| AGIWUR8302                                                              |                                                            |          |                |           |           |                     |
| CB4856 CT I                                                             | 13840706                                                   | 13841846 | WBGene00012237 | W04A8.2   | W04A8.2   | -0.173439100762569  |
| AGIWUR13981;AGIWUR15281;AGIWUR17643;AGIWUR36920;AGIWUR42788;AGIWUR44916 |                                                            |          |                |           |           |                     |
| CB4856 CT I                                                             | 13841895                                                   | 13843480 | WBGene00012239 | W04A8.4   | W04A8.4   | 0.674116307326618   |
| AGIWUR3994;AGIWUR38834;AGIWUR41125;AGIWUR42044                          |                                                            |          |                |           |           |                     |
| CB4856 CT I                                                             | 13844729                                                   | 13846957 | WBGene00012238 | W04A8.3   | W04A8.3   | 0.054190533450913   |
| AGIWUR41862                                                             |                                                            |          |                |           |           |                     |
| CB4856 CT I                                                             | 13849599                                                   | 13850893 | WBGene00012240 | W04A8.5   | W04A8.5   | -0.288057510952688  |
| AGIWUR25404                                                             |                                                            |          |                |           |           |                     |
| CB4856 CT I                                                             | 13854632                                                   | 13859699 | WBGene00012241 | W04A8.6   | W04A8.6   | -0.121346372297557  |
| AGIWUR43163                                                             |                                                            |          |                |           |           |                     |
| CB4856 CT I                                                             | 13861472                                                   | 13887468 | WBGene00006382 | taf-1     | W04A8.7   | -0.0503457034159034 |
| AGIWUR29095                                                             |                                                            |          |                |           |           |                     |
| CB4856 CT I                                                             | 13899085                                                   | 13913854 | WBGene00006616 | trp-4     | Y71A12B.4 |                     |
| 0.0433151323316405                                                      | AGIWUR41758                                                |          |                |           |           |                     |
| CB4856 CT I                                                             | 13915664                                                   | 13917809 | WBGene00013502 | clec-111  | Y71A12B.5 |                     |
| -0.225288738511022                                                      | AGIWUR36981                                                |          |                |           |           |                     |
| CB4856 CT I                                                             | 13919375                                                   | 13922122 | WBGene00013503 | clec-112  | Y71A12B.6 |                     |
| -0.0487055930344287                                                     | AGIWUR23899                                                |          |                |           |           |                     |
| CB4856 CT I                                                             | 13938185                                                   | 13942016 | WBGene00013505 | Y71A12B.8 | Y71A12B.8 |                     |
| 0.203569956576731                                                       | AGIWUR3434                                                 |          |                |           |           |                     |
| CB4856 CT I                                                             | 13943079                                                   | 13951628 | WBGene00013506 | usp-3     | Y71A12B.9 |                     |
| -0.431956386434489                                                      | AGIWUR41370                                                |          |                |           |           |                     |
| CB4856 CT I                                                             | 13952159                                                   | 13953194 | WBGene00004475 | rps-6     | Y71A12B.1 |                     |
| -0.0334022598539718                                                     | AGIWUR4211;AGIWUR15277;AGIWUR23183;AGIWUR37410;AGIWUR42537 |          |                |           |           |                     |

|                                                          |                                                            |          |                |            |                             |
|----------------------------------------------------------|------------------------------------------------------------|----------|----------------|------------|-----------------------------|
| CB4856 CT I                                              | 13957199                                                   | 13960440 | WBGene00013507 | Y71A12B.10 | Y71A12B.10                  |
| 0.013636293440439                                        | AGIWUR3766                                                 |          |                |            |                             |
| CB4856 CT I                                              | 13978430                                                   | 13980144 | WBGene00013508 | Y71A12B.11 | Y71A12B.11                  |
| 0.167039257926625                                        | AGIWUR15619                                                |          |                |            |                             |
| CB4856 CT I                                              | 13984308                                                   | 13989588 | WBGene00045058 | gadr-5     | Y71A12B.17                  |
| 0.275685320353978                                        | AGIWUR11183;AGIWUR29400                                    |          |                |            |                             |
| CB4856 CT I                                              | 13992582                                                   | 13996221 | WBGene00013511 | Y71A12B.15 | Y71A12B.15                  |
| 0.133904950528404                                        | AGIWUR23417;AGIWUR23555                                    |          |                |            |                             |
| CB4856 CT I                                              | 13997363                                                   | 14007078 | WBGene00045077 | Y71A12B.18 | Y71A12B.18                  |
| 0.130644783666547                                        | AGIWUR33089                                                |          |                |            |                             |
| CB4856 CT I                                              | 14004412                                                   | 14008484 | WBGene00013509 | Y71A12B.12 | Y71A12B.12                  |
| 0.346417150591069                                        | AGIWUR15382;AGIWUR42964                                    |          |                |            |                             |
| CB4856 CT I                                              | 14009871                                                   | 14011521 | WBGene00013865 | ZC334.7    | ZC334.7 0.0210972581729258  |
| AGIWUR38733                                              |                                                            |          |                |            |                             |
| CB4856 CT I                                              | 14012369                                                   | 14013629 | WBGene00002111 | ins-28     | ZC334.9 0.206732908019008   |
| AGIWUR19714                                              |                                                            |          |                |            |                             |
| CB4856 CT I                                              | 14018785                                                   | 14019759 | WBGene00002112 | ins-29     | ZC334.10                    |
| -0.0899278465633095                                      | AGIWUR5899;AGIWUR9154;AGIWUR12469;AGIWUR28025;AGIWUR32013  |          |                |            |                             |
| CB4856 CT I                                              | 14020364                                                   | 14021155 | WBGene00002108 | ins-25     | ZC334.8 -0.143875331072248  |
| AGIWUR2131;AGIWUR3614;AGIWUR5931;AGIWUR17706;AGIWUR32860 |                                                            |          |                |            |                             |
| CB4856 CT I                                              | 14027236                                                   | 14027588 | WBGene00002110 | ins-27     | ZC334.11                    |
| -0.342543932975202                                       | AGIWUR1125;AGIWUR12173;AGIWUR16115;AGIWUR19429;AGIWUR27925 |          |                |            |                             |
| CB4856 CT I                                              | 14028997                                                   | 14029212 | WBGene00045396 | ZC334.12   | ZC334.12                    |
| -0.645096121308493                                       | AGIWUR3784;AGIWUR6250;AGIWUR31903;AGIWUR38530;AGIWUR42619  |          |                |            |                             |
| CB4856 CT I                                              | 14031147                                                   | 14031667 | WBGene00002107 | ins-24     | ZC334.3 0.31687218684403    |
| AGIWUR3689                                               |                                                            |          |                |            |                             |
| CB4856 CT I                                              | 14035096                                                   | 14036057 | WBGene00002113 | ins-30     | ZC334.2 -0.023776749646256  |
| AGIWUR40182                                              |                                                            |          |                |            |                             |
| CB4856 CT I                                              | 14037151                                                   | 14037803 | WBGene00002109 | ins-26     | ZC334.1 -0.29353815233465   |
| AGIWUR2102                                               |                                                            |          |                |            |                             |
| CB4856 CT I                                              | 14041627                                                   | 14043478 | WBGene00013512 | nhr-276    | Y71A12C.1                   |
| -0.0456297914715469                                      | AGIWUR30870                                                |          |                |            |                             |
| CB4856 CT I                                              | 14043531                                                   | 14045694 | WBGene00050878 | Y71A12C.3  | Y71A12C.3                   |
| -0.0892494644478603                                      | AGIWUR19098                                                |          |                |            |                             |
| CB4856 CT I                                              | 14046234                                                   | 14048017 | WBGene00013513 | Y71A12C.2  | Y71A12C.2                   |
| -0.161972133416777                                       | AGIWUR9179;AGIWUR15094                                     |          |                |            |                             |
| CB4856 CT I                                              | 14048085                                                   | 14051003 | WBGene00004875 | smd-1      | F47G4.7 -0.982011233212525  |
| AGIWUR33737                                              |                                                            |          |                |            |                             |
| CB4856 CT I                                              | 14052136                                                   | 14054154 | WBGene00009828 | F47G4.8    | F47G4.8 0.00584023320836824 |

|                                                                                                                                                                                                         |                                    |          |                |          |          |                    |
|---------------------------------------------------------------------------------------------------------------------------------------------------------------------------------------------------------|------------------------------------|----------|----------------|----------|----------|--------------------|
| AGIWUR4404                                                                                                                                                                                              |                                    |          |                |          |          |                    |
| CB4856 CT I                                                                                                                                                                                             | 14054593                           | 14056894 | WBGene00009822 | clec-113 | F47G4.1  |                    |
| 0.0630351138680894                                                                                                                                                                                      | AGIWUR33408                        |          |                |          |          |                    |
| CB4856 CT I                                                                                                                                                                                             | 14059411                           | 14060829 | WBGene00009827 | hmg-6    | F47G4.6  | 0.758777970062559  |
| AGIWUR8349                                                                                                                                                                                              |                                    |          |                |          |          |                    |
| CB4856 CT I                                                                                                                                                                                             | 14060876                           | 14062137 | WBGene00009826 | F47G4.5  | F47G4.5  | 0.365747034625168  |
| AGIWUR13877                                                                                                                                                                                             |                                    |          |                |          |          |                    |
| CB4856 CT I                                                                                                                                                                                             | 14062749                           | 14068803 | WBGene00009825 | F47G4.4  | F47G4.4  | 0.0660957855125588 |
| AGIWUR5650;AGIWUR9090;AGIWUR19297;AGIWUR26208;AGIWUR33296;AGIWUR39500                                                                                                                                   |                                    |          |                |          |          |                    |
| CB4856 CT I                                                                                                                                                                                             | 14075836                           | 14078211 | WBGene00009824 | gpdh-1   | F47G4.3  | -0.524863629967681 |
| AGIWUR20253                                                                                                                                                                                             |                                    |          |                |          |          |                    |
| CB4856 CT I                                                                                                                                                                                             | 14078193                           | 14082643 | WBGene00009823 | gadr-6   | F47G4.2  | 0.149786786835412  |
| AGIWUR14336;AGIWUR14614                                                                                                                                                                                 |                                    |          |                |          |          |                    |
| CB4856 CT I                                                                                                                                                                                             | 14088094                           | 14089858 | WBGene00013404 | fbxb-101 |          | Y63D3A.3           |
| 1.04903661861518                                                                                                                                                                                        | AGIWUR20759                        |          |                |          |          |                    |
| CB4856 CT I                                                                                                                                                                                             | 14090738                           | 14096346 | WBGene00013403 | fbxb-100 |          | Y63D3A.2           |
| 0.555713703529772                                                                                                                                                                                       | AGIWUR42011                        |          |                |          |          |                    |
| CB4856 CT I                                                                                                                                                                                             | 14097492                           | 14101090 | WBGene00013405 | tdpt-1   | Y63D3A.4 |                    |
| 0.159014990747149                                                                                                                                                                                       | AGIWUR8766                         |          |                |          |          |                    |
| CB4856 CT I                                                                                                                                                                                             | 14101236                           | 14104475 | WBGene00006565 | tfg-1    | Y63D3A.5 |                    |
| -0.170934283733445                                                                                                                                                                                      | AGIWUR3031                         |          |                |          |          |                    |
| CB4856 CT I                                                                                                                                                                                             | 14104429                           | 14113179 | WBGene00001047 | dnj-29   | Y63D3A.6 |                    |
| -0.0841409411687337                                                                                                                                                                                     |                                    |          |                |          |          |                    |
| AGIWUR2497;AGIWUR2707;AGIWUR8430;AGIWUR9345;AGIWUR14768;AGIWUR14847;AGIWUR15853;AGIWUR20958;AGIWUR23646;AGIWUR25975;AGIWUR26974;AGIWUR26995;AGIWUR28054;AGIWUR28176;AGIWUR32588;AGIWUR35335;AGIWUR35775 |                                    |          |                |          |          |                    |
| CB4856 CT I                                                                                                                                                                                             | 14113636                           | 14114085 | WBGene00013406 | Y63D3A.7 | Y63D3A.7 |                    |
| -0.275714001728915                                                                                                                                                                                      |                                    |          |                |          |          |                    |
| AGIWUR7230;AGIWUR16354;AGIWUR21021;AGIWUR25749;AGIWUR29079;AGIWUR34860;AGIWUR35530;AGIWUR35904;AGIWUR43091;AGIWUR44857                                                                                  |                                    |          |                |          |          |                    |
| CB4856 CT I                                                                                                                                                                                             | 14114194                           | 14118650 | WBGene00013407 | Y63D3A.8 | Y63D3A.8 |                    |
| -0.040198075892123                                                                                                                                                                                      | AGIWUR5018;AGIWUR21326;AGIWUR39732 |          |                |          |          |                    |
| CB4856 CT I                                                                                                                                                                                             | 14118753                           | 14127199 | WBGene00010537 | mys-2    | K03D10.3 |                    |
| -0.10354350792998                                                                                                                                                                                       | AGIWUR15721;AGIWUR29820            |          |                |          |          |                    |
| CB4856 CT I                                                                                                                                                                                             | 14128594                           | 14142207 | WBGene00002181 | kal-1    | K03D10.1 |                    |
| 0.444549686290014                                                                                                                                                                                       | AGIWUR36370                        |          |                |          |          |                    |
| CB4856 CT I                                                                                                                                                                                             | 14150731                           | 14151041 | WBGene00014700 | C37A5.6  | C37A5.6  | 0.213411428775162  |
| AGIWUR31033                                                                                                                                                                                             |                                    |          |                |          |          |                    |
| CB4856 CT I                                                                                                                                                                                             | 14154769                           | 14155249 | WBGene00014698 | C37A5.3  | C37A5.3  | 0.0874527969783889 |
| AGIWUR138;AGIWUR9321;AGIWUR10493;AGIWUR12985;AGIWUR39666                                                                                                                                                |                                    |          |                |          |          |                    |

|                                                                                      |   |          |          |                |                                     |
|--------------------------------------------------------------------------------------|---|----------|----------|----------------|-------------------------------------|
| CB4856 CT<br>AGIWUR23130                                                             | I | 14157611 | 14158076 | WBGene00007992 | fipr-24 C37A5.8 0.741908858441018   |
| CB4856 CT<br>AGIWUR7467                                                              | I | 14158506 | 14161718 | WBGene00007988 | best-8 C37A5.1 0.173253006634702    |
| CB4856 CT<br>AGIWUR43696                                                             | I | 14163447 | 14168309 | WBGene00007991 | C37A5.7 C37A5.7 0.137347571927148   |
| CB4856 CT<br>-0.0903895141116333                                                     | I | 14171864 | 14172786 | WBGene00077520 | C37A5.11 C37A5.11                   |
| CB4856 CT<br>AGIWUR33395                                                             | I | 14172840 | 14179360 | WBGene00004202 | pry-1 C37A5.9 -0.212984277459164    |
| CB4856 CT<br>AGIWUR13863                                                             | I | 14182787 | 14185717 | WBGene00014100 | ZK849.1 ZK849.1 -0.0779402411110777 |
| CB4856 CT<br>AGIWUR26761;AGIWUR33441;AGIWUR34814;AGIWUR41624;AGIWUR42335;AGIWUR42882 | I | 14185647 | 14196295 | WBGene00014101 | gopc-1 ZK849.2 0.201389700203916    |
| CB4856 CT<br>AGIWUR16143                                                             | I | 14198612 | 14199099 | WBGene00014104 | ZK849.6 ZK849.6 0.0774580975046568  |
| CB4856 CT<br>AGIWUR7283;AGIWUR24096;AGIWUR30353                                      | I | 14200020 | 14204687 | WBGene00014103 | best-26 ZK849.5 -0.402861852712379  |
| CB4856 CT<br>AGIWUR15418                                                             | I | 14205717 | 14208581 | WBGene00014102 | best-25 ZK849.4 -0.189970153534963  |
| CB4856 CT<br>AGIWUR31693                                                             | I | 14209215 | 14212501 | WBGene00008185 | best-10 C49A1.2 0.0685204719938177  |
| CB4856 CT<br>AGIWUR10091                                                             | I | 14213681 | 14215790 | WBGene00008184 | C49A1.1 C49A1.1 0.196284321070939   |
| CB4856 CT<br>AGIWUR23910                                                             | I | 14216756 | 14220624 | WBGene00008186 | best-11 C49A1.3 -0.256932882010082  |
| CB4856 CT<br>AGIWUR4852                                                              | I | 14220783 | 14231360 | WBGene00001377 | eya-1 C49A1.4 0.467121425048354     |
| CB4856 CT<br>AGIWUR33564;AGIWUR41607                                                 | I | 14237359 | 14241188 | WBGene00008187 | C49A1.5 C49A1.5 0.170847544269416   |
| CB4856 CT<br>-0.0174730345836629                                                     | I | 14241898 | 14244452 | WBGene00008191 | C49A1.10 C49A1.10                   |
| CB4856 CT<br>0.0668020322773337                                                      | I | 14246228 | 14247314 | WBGene00008188 | cllec-115 C49A1.6                   |
| CB4856 CT<br>-0.144311389249481                                                      | I | 14251061 | 14252362 | WBGene00010576 | cllec-116 K04H8.1                   |
| CB4856 CT<br>AGIWUR7769                                                              | I | 14252957 | 14255510 | WBGene00010577 | K04H8.2 K04H8.2 -0.319200782053446  |
| CB4856 CT                                                                            | I | 14255684 | 14256970 | WBGene00010578 | K04H8.3 K04H8.3 -0.133839273832716  |

|                                     |   |                                     |          |                |            |            |                     |
|-------------------------------------|---|-------------------------------------|----------|----------------|------------|------------|---------------------|
| AGIWUR23282                         |   |                                     |          |                |            |            |                     |
| CB4856 CT                           | I | 14263301                            | 14271321 | WBGene00003980 | pes-7      | F09C3.1    | -0.0400846173493079 |
| AGIWUR25123                         |   |                                     |          |                |            |            |                     |
| CB4856 CT                           | I | 14271893                            | 14274213 | WBGene00008610 | F09C3.2    | F09C3.2    | 0.409302925469689   |
| AGIWUR42136                         |   |                                     |          |                |            |            |                     |
| CB4856 CT                           | I | 14283464                            | 14285319 | WBGene00008613 | fbxb-69    | F09C3.5    | 0.313855214778605   |
| AGIWUR25537                         |   |                                     |          |                |            |            |                     |
| CB4856 CT                           | I | 14287872                            | 14295898 | WBGene00008612 | fbxa-103   | F09C3.4    |                     |
| 0.362941001607139                   |   | AGIWUR3613                          |          |                |            |            |                     |
| CB4856 CT                           | I | 14297287                            | 14298265 | WBGene00009862 | fbxb-67    | F49B2.2    | -0.113976635320451  |
| AGIWUR34725                         |   |                                     |          |                |            |            |                     |
| CB4856 CT                           | I | 14305070                            | 14307134 | WBGene00086555 | F49B2.7    | F49B2.7    | 0.299925718680753   |
| AGIWUR6124                          |   |                                     |          |                |            |            |                     |
| CB4856 CT                           | I | 14311009                            | 14312871 | WBGene00009863 | F49B2.3    | F49B2.3    | 0.225672518668175   |
| AGIWUR21423                         |   |                                     |          |                |            |            |                     |
| CB4856 CT                           | I | 14319114                            | 14319913 | WBGene00268216 | F49B2.9    | F49B2.9    | -0.113516498548234  |
| AGIWUR17709;AGIWUR21668;AGIWUR35873 |   |                                     |          |                |            |            |                     |
| CB4856 CT                           | I | 14322237                            | 14328965 | WBGene00005078 | src-2      | F49B2.5    | 0.128306267418584   |
| AGIWUR33270                         |   |                                     |          |                |            |            |                     |
| CB4856 CT                           | I | 14331085                            | 14339831 | WBGene00009865 | F49B2.6    | F49B2.6    | 0.17857940661803    |
| AGIWUR8730;AGIWUR31462;AGIWUR36353  |   |                                     |          |                |            |            |                     |
| CB4856 CT                           | I | 14341571                            | 14343815 | WBGene00013666 | Y105E8A.1  | Y105E8A.1  |                     |
| 0.0507648929858142                  |   | AGIWUR26600                         |          |                |            |            |                     |
| CB4856 CT                           | I | 14347514                            | 14358326 | WBGene00013667 | Y105E8A.2  | Y105E8A.2  |                     |
| -0.091389319640415                  |   | AGIWUR28921                         |          |                |            |            |                     |
| CB4856 CT                           | I | 14358502                            | 14367594 | WBGene00013668 | Y105E8A.3  | Y105E8A.3  |                     |
| -0.041761495037024                  |   | AGIWUR38906                         |          |                |            |            |                     |
| CB4856 CT                           | I | 14367608                            | 14369773 | WBGene00001156 | ech-7      | Y105E8A.4  |                     |
| 0.168024155059211                   |   | AGIWUR4586                          |          |                |            |            |                     |
| CB4856 CT                           | I | 14371142                            | 14376025 | WBGene00000241 | bbs-1      | Y105E8A.5  |                     |
| 0.108825632711024                   |   | AGIWUR133                           |          |                |            |            |                     |
| CB4856 CT                           | I | 14378386                            | 14379425 | WBGene00044264 | Y105E8A.32 | Y105E8A.32 |                     |
| 0.139479716957929                   |   | AGIWUR17134                         |          |                |            |            |                     |
| CB4856 CT                           | I | 14381344                            | 14384737 | WBGene00006824 | unc-95     | Y105E8A.6  |                     |
| -0.184178975879302                  |   | AGIWUR23275                         |          |                |            |            |                     |
| CB4856 CT                           | I | 14390333                            | 14400222 | WBGene00002977 | lev-10     | Y105E8A.7  |                     |
| -0.0730492823944342                 |   | AGIWUR23424;AGIWUR35694;AGIWUR38498 |          |                |            |            |                     |
| CB4856 CT                           | I | 14400679                            | 14405649 | WBGene00013669 | Y105E8A.8  | Y105E8A.8  |                     |
| -0.205218195274547                  |   | AGIWUR12986                         |          |                |            |            |                     |



|                                                                                              |                                                                                 |          |                |            |            |
|----------------------------------------------------------------------------------------------|---------------------------------------------------------------------------------|----------|----------------|------------|------------|
| CB4856 CT I                                                                                  | 14406028                                                                        | 14417942 | WBGene00000158 | apg-1      | Y105E8A.9  |
| 0.0325098362915632                                                                           | AGIWUR1586;AGIWUR14637                                                          |          |                |            |            |
| CB4856 CT I                                                                                  | 14418197                                                                        | 14431806 | WBGene00013670 | hpo-13     | Y105E8A.10 |
| 0.0666809076984336                                                                           | AGIWUR42701                                                                     |          |                |            |            |
| CB4856 CT I                                                                                  | 14432793                                                                        | 14433841 | WBGene00013671 | Y105E8A.11 | Y105E8A.11 |
| -0.0614078639610867                                                                          | AGIWUR15864                                                                     |          |                |            |            |
| CB4856 CT I                                                                                  | 14436810                                                                        | 14451880 | WBGene00013672 | catp-1     | Y105E8A.12 |
| 0.0371621735915824                                                                           | AGIWUR4487                                                                      |          |                |            |            |
| CB4856 CT I                                                                                  | 14465380                                                                        | 14468214 | WBGene00013674 | Y105E8A.14 | Y105E8A.14 |
| -0.156648948543437                                                                           |                                                                                 |          |                |            |            |
| AGIWUR918;AGIWUR7311;AGIWUR12133;AGIWUR12400;AGIWUR29395;AGIWUR31736;AGIWUR37639;AGIWUR43745 |                                                                                 |          |                |            |            |
| CB4856 CT I                                                                                  | 14468321                                                                        | 14469354 | WBGene00004489 | rps-20     | Y105E8A.16 |
| -0.0907677651381071                                                                          | AGIWUR26559                                                                     |          |                |            |            |
| CB4856 CT I                                                                                  | 14469506                                                                        | 14476790 | WBGene00013676 | ekl-4      | Y105E8A.17 |
| -0.00885651595846593                                                                         | AGIWUR43665;AGIWUR43829                                                         |          |                |            |            |
| CB4856 CT I                                                                                  | 14476674                                                                        | 14486767 | WBGene00013677 | yars-1     | Y105E8A.19 |
| -0.0206610895460519                                                                          | AGIWUR18952;AGIWUR25570                                                         |          |                |            |            |
| CB4856 CT I                                                                                  | 14486878                                                                        | 14496560 | WBGene00013678 | Y105E8A.20 | Y105E8A.20 |
| 0.414555706015156                                                                            | AGIWUR11146                                                                     |          |                |            |            |
| CB4856 CT I                                                                                  | 14496909                                                                        | 14498291 | WBGene00013685 | Y105E8A.28 | Y105E8A.28 |
| -0.216848255229378                                                                           | AGIWUR6382                                                                      |          |                |            |            |
| CB4856 CT I                                                                                  | 14499727                                                                        | 14510552 | WBGene00013679 | Y105E8A.21 | Y105E8A.21 |
| -0.208156994052329                                                                           | AGIWUR3433                                                                      |          |                |            |            |
| CB4856 CT I                                                                                  | 14511431                                                                        | 14518719 | WBGene00001365 | exc-4      | Y105E8A.22 |
| -0.280430176688474                                                                           | AGIWUR16297;AGIWUR28292                                                         |          |                |            |            |
| CB4856 CT I                                                                                  | 14529531                                                                        | 14546634 | WBGene00013683 | zoo-1      | Y105E8A.26 |
| 0.162926228918636                                                                            | AGIWUR38954                                                                     |          |                |            |            |
| CB4856 CT I                                                                                  | 14552030                                                                        | 14565853 | WBGene00013680 | rpom-1     | Y105E8A.23 |
| -0.0230037657898698                                                                          | AGIWUR36449                                                                     |          |                |            |            |
| CB4856 CT I                                                                                  | 14567169                                                                        | 14616524 | WBGene00013682 | Y105E8A.25 | Y105E8A.25 |
| -0.0174628644061841                                                                          | AGIWUR1343;AGIWUR2683;AGIWUR4821;AGIWUR7929;AGIWUR18859;AGIWUR19624;AGIWUR36825 |          |                |            |            |
| CB4856 CT I                                                                                  | 14620388                                                                        | 14620632 | WBGene00044265 | Y105E8B.11 | Y105E8B.11 |
| 0.212975901569259                                                                            | AGIWUR949;AGIWUR4198;AGIWUR10506;AGIWUR29150;AGIWUR40348                        |          |                |            |            |
| CB4856 CT I                                                                                  | 14621173                                                                        | 14631254 | WBGene00002978 | lev-11     | Y105E8B.1  |
| 0.216714705013759                                                                            | AGIWUR10189;AGIWUR13276;AGIWUR26792;AGIWUR32066                                 |          |                |            |            |
| CB4856 CT I                                                                                  | 14634456                                                                        | 14642653 | WBGene00013687 | exoc-8     | Y105E8B.2  |
| -0.0417153288425371                                                                          | AGIWUR34821;AGIWUR40365;AGIWUR40499;AGIWUR43251                                 |          |                |            |            |
| CB4856 CT I                                                                                  | 14642714                                                                        | 14646600 | WBGene00013692 | Y105E8B.7  | Y105E8B.7  |
| -0.00243054523795116                                                                         | AGIWUR3209                                                                      |          |                |            |            |

|                                                                                  |                                                                        |          |                |                 |                           |  |
|----------------------------------------------------------------------------------|------------------------------------------------------------------------|----------|----------------|-----------------|---------------------------|--|
| CB4856 CT I                                                                      | 14647782                                                               | 14651456 | WBGene00013689 | bath-40         | Y105E8B.4                 |  |
| -0.243857041913413                                                               | AGIWUR35669                                                            |          |                |                 |                           |  |
| CB4856 CT I                                                                      | 14652116                                                               | 14657275 | WBGene00013688 | riok-2          | Y105E8B.3                 |  |
| -0.0395073680439832                                                              | AGIWUR17763;AGIWUR26680;AGIWUR41638                                    |          |                |                 |                           |  |
| CB4856 CT I                                                                      | 14657355                                                               | 14661414 | WBGene00013690 | hprt-1          | Y105E8B.5                 |  |
| -0.350604974599932                                                               | AGIWUR26599                                                            |          |                |                 |                           |  |
| CB4856 CT I                                                                      | 14662524                                                               | 14662873 | WBGene00013691 | Y105E8B.6       | Y105E8B.6                 |  |
| -0.0138021642971817                                                              | AGIWUR6708;AGIWUR11489;AGIWUR23025;AGIWUR33975;AGIWUR37197;AGIWUR39910 |          |                |                 |                           |  |
| CB4856 CT I                                                                      | 14663209                                                               | 14674822 | WBGene00001334 | ero-1           | Y105E8B.8                 |  |
| 0.0578724868111706                                                               | AGIWUR15790;AGIWUR38676                                                |          |                |                 |                           |  |
| CB4856 CT I                                                                      | 14675600                                                               | 14682566 | WBGene00013693 | Y105E8B.9       | Y105E8B.9                 |  |
| 0.0451353701204766                                                               | AGIWUR1425;AGIWUR6556;AGIWUR10139;AGIWUR24148                          |          |                |                 |                           |  |
| CB4856 CT I                                                                      | 14688639                                                               | 14691736 | WBGene00013197 | ttm-5           | Y54E5A.1                  |  |
| -0.0372209260909671                                                              | AGIWUR43809                                                            |          |                |                 |                           |  |
| CB4856 CT I                                                                      | 14694154                                                               | 14700392 | WBGene00013198 | Y54E5A.2        | Y54E5A.2                  |  |
| -0.0717153932938741                                                              | AGIWUR12835;AGIWUR39872                                                |          |                |                 |                           |  |
| CB4856 CT I                                                                      | 14701122                                                               | 14706522 | WBGene00003790 | npp-4           | Y54E5A.4                  |  |
| -0.193627351278694                                                               | AGIWUR665;AGIWUR10793;AGIWUR11371;AGIWUR15099;AGIWUR25502;AGIWUR33722  |          |                |                 |                           |  |
| CB4856 CT I                                                                      | 14707059                                                               | 14707875 | WBGene00013200 | Y54E5A.5        | Y54E5A.5                  |  |
| -0.090115915125601                                                               | AGIWUR39609                                                            |          |                |                 |                           |  |
| CB4856 CT I                                                                      | 14708195                                                               | 14710961 | WBGene00013201 | dus-2           | Y54E5A.6                  |  |
| -0.15238939266186                                                                | AGIWUR32804                                                            |          |                |                 |                           |  |
| CB4856 CT I                                                                      | 14711081                                                               | 14715030 | WBGene00013202 | Y54E5A.7        | Y54E5A.7                  |  |
| 0.103875687981521                                                                | AGIWUR27553                                                            |          |                |                 |                           |  |
| CB4856 CT I                                                                      | 14716528                                                               | 14719027 | WBGene00013203 | Y54E5A.8        | Y54E5A.8                  |  |
| -0.0221195447974223                                                              | AGIWUR31127;AGIWUR33181                                                |          |                |                 |                           |  |
| CB4856 CT I                                                                      | 14719167                                                               | 14720477 | WBGene00003951 | pbs-5           | K05C4.1 -0.38825743888145 |  |
| AGIWUR4323;AGIWUR6843                                                            |                                                                        |          |                |                 |                           |  |
| CB4856 CT I                                                                      | 14720588                                                               | 14721979 | WBGene00010579 | K05C4.2 K05C4.2 | -0.155997788071971        |  |
| AGIWUR97;AGIWUR12763;AGIWUR19503;AGIWUR28718;AGIWUR37026;AGIWUR39116;AGIWUR39497 |                                                                        |          |                |                 |                           |  |
| CB4856 CT I                                                                      | 14725296                                                               | 14726131 | WBGene00010586 | K05C4.10        | K05C4.10                  |  |
| -0.0235847424066602                                                              | AGIWUR6961;AGIWUR7840;AGIWUR25950                                      |          |                |                 |                           |  |
| CB4856 CT I                                                                      | 14726804                                                               | 14730719 | WBGene00010585 | K05C4.9 K05C4.9 | 0.0490351720935447        |  |
| AGIWUR29746                                                                      |                                                                        |          |                |                 |                           |  |
| CB4856 CT I                                                                      | 14732426                                                               | 14733549 | WBGene00010584 | K05C4.8 K05C4.8 | 0.0841779045100139        |  |
| AGIWUR39087                                                                      |                                                                        |          |                |                 |                           |  |
| CB4856 CT I                                                                      | 14735236                                                               | 14736945 | WBGene00010581 | K05C4.4 K05C4.4 | -0.099469947372242        |  |
| AGIWUR43308                                                                      |                                                                        |          |                |                 |                           |  |
| CB4856 CT I                                                                      | 14737702                                                               | 14738796 | WBGene00010583 | K05C4.7 K05C4.7 | -0.182863011902459        |  |

|                                                                                                |   |                                                                         |          |                |          |          |                     |  |
|------------------------------------------------------------------------------------------------|---|-------------------------------------------------------------------------|----------|----------------|----------|----------|---------------------|--|
| AGIWUR26735                                                                                    |   |                                                                         |          |                |          |          |                     |  |
| CB4856 CT                                                                                      | I | 14738882                                                                | 14742657 | WBGene00001979 | hmp-2    | K05C4.6  | -0.212454591735703  |  |
| AGIWUR5348                                                                                     |   |                                                                         |          |                |          |          |                     |  |
| CB4856 CT                                                                                      | I | 14742765                                                                | 14747789 | WBGene00010582 | K05C4.5  | K05C4.5  | 0.143720347560595   |  |
| AGIWUR38011                                                                                    |   |                                                                         |          |                |          |          |                     |  |
| CB4856 CT                                                                                      | I | 14755154                                                                | 14756432 | WBGene00009559 | mtx-1    | F39B2.11 |                     |  |
| -0.192791628736368                                                                             |   | AGIWUR191;AGIWUR5779;AGIWUR11203;AGIWUR43974                            |          |                |          |          |                     |  |
| CB4856 CT                                                                                      | I | 14756858                                                                | 14759354 | WBGene00001030 | dnj-12   | F39B2.10 |                     |  |
| -0.349476678281095                                                                             |   | AGIWUR13540;AGIWUR15860;AGIWUR19114;AGIWUR25936;AGIWUR32563;AGIWUR40305 |          |                |          |          |                     |  |
| CB4856 CT                                                                                      | I | 14759918                                                                | 14760654 | WBGene00004495 | rps-26   | F39B2.6  | -0.0640087266997806 |  |
| AGIWUR5600;AGIWUR11547;AGIWUR15702;AGIWUR16030;AGIWUR26227;AGIWUR35000;AGIWUR36505;AGIWUR42692 |   |                                                                         |          |                |          |          |                     |  |
| CB4856 CT                                                                                      | I | 14760644                                                                | 14768980 | WBGene00009558 | F39B2.8  | F39B2.8  | 0.386283435902026   |  |
| AGIWUR40829                                                                                    |   |                                                                         |          |                |          |          |                     |  |
| CB4856 CT                                                                                      | I | 14770689                                                                | 14775007 | WBGene00009557 | mtcu-1   | F39B2.7  | 0.183637381481372   |  |
| AGIWUR33237                                                                                    |   |                                                                         |          |                |          |          |                     |  |
| CB4856 CT                                                                                      | I | 14775184                                                                | 14776663 | WBGene00009556 | F39B2.5  | F39B2.5  | -0.121067470055637  |  |
| AGIWUR3717                                                                                     |   |                                                                         |          |                |          |          |                     |  |
| CB4856 CT                                                                                      | I | 14777139                                                                | 14787804 | WBGene00006349 | sur-2    | F39B2.4  | -0.0757108030995752 |  |
| AGIWUR2835                                                                                     |   |                                                                         |          |                |          |          |                     |  |
| CB4856 CT                                                                                      | I | 14788125                                                                | 14789517 | WBGene00009554 | F39B2.3  | F39B2.3  | -0.119221287088255  |  |
| AGIWUR9553;AGIWUR10012;AGIWUR18635;AGIWUR19118;AGIWUR28859;AGIWUR38962                         |   |                                                                         |          |                |          |          |                     |  |
| CB4856 CT                                                                                      | I | 14790244                                                                | 14790934 | WBGene00006730 | uev-1    | F39B2.2  | 0.242348395237476   |  |
| AGIWUR32262                                                                                    |   |                                                                         |          |                |          |          |                     |  |
| CB4856 CT                                                                                      | I | 14791040                                                                | 14794371 | WBGene00009553 | hinf-1   | F39B2.1  | -0.0629228791141765 |  |
| AGIWUR523;AGIWUR1351;AGIWUR6152;AGIWUR7485;AGIWUR15969;AGIWUR17279;AGIWUR21722;AGIWUR25305     |   |                                                                         |          |                |          |          |                     |  |
| CB4856 CT                                                                                      | I | 14794899                                                                | 14797166 | WBGene00010766 | K11B4.1  | K11B4.1  | -0.285560063535225  |  |
| AGIWUR14744                                                                                    |   |                                                                         |          |                |          |          |                     |  |
| CB4856 CT                                                                                      | I | 14797660                                                                | 14798705 | WBGene00010767 | blos-9   | K11B4.2  | -0.140004242478602  |  |
| AGIWUR7970                                                                                     |   |                                                                         |          |                |          |          |                     |  |
| CB4856 CT                                                                                      | I | 14807467                                                                | 14815725 | WBGene00004889 | smp-1    | Y54E5B.1 |                     |  |
| 0.154216722014497                                                                              |   | AGIWUR30467;AGIWUR30814                                                 |          |                |          |          |                     |  |
| CB4856 CT                                                                                      | I | 14815706                                                                | 14820222 | WBGene00013204 | Y54E5B.2 |          | Y54E5B.2            |  |
| -0.030212362169165                                                                             |   | AGIWUR11700;AGIWUR39232                                                 |          |                |          |          |                     |  |
| CB4856 CT                                                                                      | I | 14820381                                                                | 14821651 | WBGene00002324 | let-49   | Y54E5B.3 |                     |  |
| -0.425675677050426                                                                             |   | AGIWUR23956                                                             |          |                |          |          |                     |  |
| CB4856 CT                                                                                      | I | 14822050                                                                | 14823996 | WBGene00006711 | ubc-16   | Y54E5B.4 |                     |  |
| 0.0149102384495992                                                                             |   | AGIWUR12386;AGIWUR26881;AGIWUR26984;AGIWUR40178                         |          |                |          |          |                     |  |
| CB4856 CT                                                                                      | I | 14824493                                                                | 14825952 | WBGene00014921 | Y54E5B.5 |          | Y54E5B.5            |  |
| -0.366014593144688                                                                             |   | AGIWUR12811;AGIWUR14671                                                 |          |                |          |          |                     |  |

|                                                                                                                                                                                 |    |   |          |          |                |          |          |                     |
|---------------------------------------------------------------------------------------------------------------------------------------------------------------------------------|----|---|----------|----------|----------------|----------|----------|---------------------|
| CB4856                                                                                                                                                                          | CT | I | 14826558 | 14827779 | WBGene00005839 | srw-92   | F32A7.1  | -0.0151891285749368 |
| AGIWUR1679;AGIWUR23528;AGIWUR25181;AGIWUR30153;AGIWUR41623;AGIWUR41896                                                                                                          |    |   |          |          |                |          |          |                     |
| CB4856                                                                                                                                                                          | CT | I | 14828200 | 14829594 | WBGene00005840 | srw-93   | F32A7.2  | 0.223744820631736   |
| AGIWUR1982;AGIWUR19601;AGIWUR32483;AGIWUR33418                                                                                                                                  |    |   |          |          |                |          |          |                     |
| CB4856                                                                                                                                                                          | CT | I | 14829667 | 14834839 | WBGene00009304 | eva-1    | F32A7.3  | 0.0623972865589746  |
| AGIWUR1324;AGIWUR10089;AGIWUR20986;AGIWUR37717;AGIWUR43383                                                                                                                      |    |   |          |          |                |          |          |                     |
| CB4856                                                                                                                                                                          | CT | I | 14838917 | 14839138 | WBGene00044245 | F32A7.8  | F32A7.8  | -0.0243731268969762 |
| AGIWUR10354;AGIWUR11237;AGIWUR18460;AGIWUR40339;AGIWUR41657                                                                                                                     |    |   |          |          |                |          |          |                     |
| CB4856                                                                                                                                                                          | CT | I | 14839856 | 14843128 | WBGene00009305 | F32A7.4  | F32A7.4  | -0.0522639365612356 |
| AGIWUR13160                                                                                                                                                                     |    |   |          |          |                |          |          |                     |
| CB4856                                                                                                                                                                          | CT | I | 14846476 | 14850137 | WBGene00009306 | mapH-1.1 | F32A7.5  |                     |
| 0.0590037382142867 AGIWUR5224;AGIWUR15454;AGIWUR20881;AGIWUR24422;AGIWUR29527                                                                                                   |    |   |          |          |                |          |          |                     |
| CB4856                                                                                                                                                                          | CT | I | 14850054 | 14855827 | WBGene00000088 | aex-5    | F32A7.6  | 0.0855629417824222  |
| AGIWUR36674                                                                                                                                                                     |    |   |          |          |                |          |          |                     |
| CB4856                                                                                                                                                                          | CT | I | 14855901 | 14863573 | WBGene00006789 | unc-54   | F11C3.3  | 0.256600122641911   |
| AGIWUR25719;AGIWUR36183;AGIWUR43581                                                                                                                                             |    |   |          |          |                |          |          |                     |
| CB4856                                                                                                                                                                          | CT | I | 14867924 | 14871467 | WBGene00008695 | F11C3.1  | F11C3.1  | -0.207775523902773  |
| AGIWUR21606                                                                                                                                                                     |    |   |          |          |                |          |          |                     |
| CB4856                                                                                                                                                                          | CT | I | 14872112 | 14875378 | WBGene00006845 | unc-122  | F11C3.2  | -0.392410552636367  |
| AGIWUR5296                                                                                                                                                                      |    |   |          |          |                |          |          |                     |
| CB4856                                                                                                                                                                          | CT | I | 14875784 | 14900213 | WBGene00001488 | frm-1    | ZK270.2  | -0.279910233363569  |
| AGIWUR29071;AGIWUR39050;AGIWUR42633                                                                                                                                             |    |   |          |          |                |          |          |                     |
| CB4856                                                                                                                                                                          | CT | I | 14909240 | 14913083 | WBGene00004237 | ptr-23   | ZK270.1  | 0.412894905680346   |
| AGIWUR19053                                                                                                                                                                     |    |   |          |          |                |          |          |                     |
| CB4856                                                                                                                                                                          | CT | I | 14913623 | 14915571 | WBGene00009022 | F21F12.1 | F21F12.1 |                     |
| 0.0151383318122695 AGIWUR3298                                                                                                                                                   |    |   |          |          |                |          |          |                     |
| CB4856                                                                                                                                                                          | CT | I | 14919533 | 14951924 | WBGene00002189 | kin-1    | ZK909.2  | -0.0532367783382712 |
| AGIWUR2274;AGIWUR5154;AGIWUR8830;AGIWUR9986;AGIWUR11088;AGIWUR14732;AGIWUR18535;AGIWUR27166;AGIWUR34274;AGIWUR35252;AGIWUR38388;AGIWUR40098;AGIWUR41578;AGIWUR42171;AGIWUR43175 |    |   |          |          |                |          |          |                     |
| CB4856                                                                                                                                                                          | CT | I | 14953490 | 14955492 | WBGene00014148 | ZK909.3  | ZK909.3  | -0.315799033696319  |
| AGIWUR12225;AGIWUR23203;AGIWUR29149;AGIWUR39359;AGIWUR39889                                                                                                                     |    |   |          |          |                |          |          |                     |
| CB4856                                                                                                                                                                          | CT | I | 14955647 | 14957097 | WBGene00014149 | fbxb-70  | ZK909.5  | 0.31901930174361    |
| AGIWUR10119;AGIWUR38208;AGIWUR44401                                                                                                                                             |    |   |          |          |                |          |          |                     |
| CB4856                                                                                                                                                                          | CT | I | 14961501 | 14965361 | WBGene00000469 | ces-2    | ZK909.4  | 1.50360257572717    |
| AGIWUR13093                                                                                                                                                                     |    |   |          |          |                |          |          |                     |
| CB4856                                                                                                                                                                          | CT | I | 14967301 | 14968540 | WBGene00014150 | ZK909.6  | ZK909.6  | -0.315758368536903  |
| AGIWUR20349                                                                                                                                                                     |    |   |          |          |                |          |          |                     |
| CB4856                                                                                                                                                                          | CT | I | 14975419 | 14980586 | WBGene00013970 | klu-1    | ZK337.2  | -0.0893644594190874 |
| AGIWUR38347                                                                                                                                                                     |    |   |          |          |                |          |          |                     |

|                                                                                                                                                          |    |          |          |                |          |          |                    |            |
|----------------------------------------------------------------------------------------------------------------------------------------------------------|----|----------|----------|----------------|----------|----------|--------------------|------------|
| CB4856 CT                                                                                                                                                | I  | 14984178 | 14987658 | WBGene00006399 | tag-4    | ZK337.4  | 0.128531109886122  |            |
| AGIWUR16061                                                                                                                                              |    |          |          |                |          |          |                    |            |
| CB4856 CT                                                                                                                                                | I  | 14993821 | 15001682 | WBGene00013969 | tep-1    | ZK337.1  | 0.464774782218051  |            |
| AGIWUR25691                                                                                                                                              |    |          |          |                |          |          |                    |            |
| CB4856 CT                                                                                                                                                | I  | 15001854 | 15005608 | WBGene00003471 | mtd-1    | ZK337.5  | 0.0170433518247908 |            |
| AGIWUR33354                                                                                                                                              |    |          |          |                |          |          |                    |            |
| CB4856 CT                                                                                                                                                | I  | 15005603 | 15013904 | WBGene00009368 | pole-1   | F33H2.5  | 0.157441528038897  |            |
| AGIWUR7795                                                                                                                                               |    |          |          |                |          |          |                    |            |
| CB4856 CT                                                                                                                                                | I  | 15014851 | 15016595 | WBGene00009369 | F33H2.6  | F33H2.6  | -0.281231519950051 |            |
| AGIWUR26108;AGIWUR28125;AGIWUR29986;AGIWUR34837;AGIWUR37775;AGIWUR38817                                                                                  |    |          |          |                |          |          |                    |            |
| CB4856 CT                                                                                                                                                | I  | 15017283 | 15023017 | WBGene00001049 | dog-1    | F33H2.1  | -0.230768849957791 |            |
| AGIWUR16013                                                                                                                                              |    |          |          |                |          |          |                    |            |
| CB4856 CT                                                                                                                                                | I  | 15023092 | 15027761 | WBGene00009366 | F33H2.2  | F33H2.2  | -0.212587564816896 |            |
| AGIWUR41707                                                                                                                                              |    |          |          |                |          |          |                    |            |
| CB4856 CT                                                                                                                                                | I  | 15027717 | 15030666 | WBGene00009370 | set-10   | F33H2.7  | -0.170303047533546 |            |
| AGIWUR21015;AGIWUR27125                                                                                                                                  |    |          |          |                |          |          |                    |            |
| CB4856 CT                                                                                                                                                | I  | 15031145 | 15033039 | WBGene00009371 | F33H2.8  | F33H2.8  | 0.716130661065259  |            |
| AGIWUR34249                                                                                                                                              |    |          |          |                |          |          |                    |            |
| CB4856 CT                                                                                                                                                | I  | 15034517 | 15035467 | WBGene00009367 | F33H2.3  | F33H2.3  | 0.194867395693166  |            |
| AGIWUR26011                                                                                                                                              |    |          |          |                |          |          |                    |            |
| CB4856 CT                                                                                                                                                | I  | 15036373 | 15040487 | WBGene00009284 | F31C3.2  | F31C3.2  | -0.174811658028622 |            |
| AGIWUR3373                                                                                                                                               |    |          |          |                |          |          |                    |            |
| CB4856 CT                                                                                                                                                | I  | 15040427 | 15041274 | WBGene00000881 | cyn-5    | F31C3.1  | 0.0258078891172975 |            |
| AGIWUR8073;AGIWUR36731                                                                                                                                   |    |          |          |                |          |          |                    |            |
| CB4856 CT                                                                                                                                                | I  | 15041433 | 15050700 | WBGene00009285 | F31C3.3  | F31C3.3  | 0.147027943901143  |            |
| AGIWUR40656                                                                                                                                              |    |          |          |                |          |          |                    |            |
| CB4856 CT                                                                                                                                                | I  | 15050797 | 15052420 | WBGene00009286 | zipt-1   | F31C3.4  | 0.0111173144045988 |            |
| AGIWUR32215;AGIWUR36866;AGIWUR41938                                                                                                                      |    |          |          |                |          |          |                    |            |
| CB4856 CT                                                                                                                                                | I  | 15053025 | 15053670 | WBGene00009287 | psf-2    | F31C3.5  | -0.162836934291672 |            |
| AGIWUR7586                                                                                                                                               |    |          |          |                |          |          |                    |            |
| CB4856 CT                                                                                                                                                | I  | 15053617 | 15059003 | WBGene00009288 | F31C3.6  | F31C3.6  | 0.194862335548302  |            |
| AGIWUR4435;AGIWUR6596;AGIWUR10855;AGIWUR23668;AGIWUR30942;AGIWUR43814                                                                                    |    |          |          |                |          |          |                    |            |
| CB4856 CT                                                                                                                                                | I  | 15064301 | 15064453 | WBGene00004567 | rrn-2.1  | F31C3.11 |                    |            |
| -0.0532743465654022                                                                                                                                      |    |          |          |                |          |          |                    |            |
| AGIWUR3226;AGIWUR10771;AGIWUR23918;AGIWUR33092;AGIWUR34754                                                                                               |    |          |          |                |          |          |                    |            |
| CB4856 CT                                                                                                                                                | I  | 15064838 | 15068346 | WBGene00004622 | rrn-3.1  | F31C3.9  | 0.0367613485213045 |            |
| AGIWUR1682;AGIWUR9181;AGIWUR9854;AGIWUR13031;AGIWUR16753;AGIWUR20764;AGIWUR24344;AGIWUR25995;AGIWUR26866;AGIWUR28966;AGIWUR31062;AGIWUR40604;AGIWUR42613 |    |          |          |                |          |          |                    |            |
| CB4856 CT                                                                                                                                                | II | 1848     | 4717     | WBGene00007063 | 2L52.1   | 2L52.1   | -0.159705177811992 | AGIWUR7229 |
| CB4856 CT                                                                                                                                                | II | 5129     | 5483     | WBGene00022904 | C01B12.9 | C01B12.9 | 0.075794631840342  |            |

AGIWUR3983;AGIWUR13294;AGIWUR20192;AGIWUR35059;AGIWUR42377  
 CB4856 CT II 6664 9486 WBGene00015287 osta-1 C01B12.4 0.0623477043898291  
 AGIWUR4697;AGIWUR29006;AGIWUR40725  
 CB4856 CT II 9485 11846 WBGene00015288 best-4 C01B12.5 0.0533387828059713  
 AGIWUR7492;AGIWUR13932;AGIWUR42239  
 CB4856 CT II 12985 16001 WBGene00015286 best-3 C01B12.3 0.230813058583877  
 AGIWUR14530  
 CB4856 CT II 19538 22169 WBGene00015285 gmeb-1 C01B12.2 -0.0655132188890706  
 AGIWUR30642;AGIWUR31147;AGIWUR31577;AGIWUR43552  
 CB4856 CT II 23328 24458 WBGene00005017 sqt-2 C01B12.1 -0.410984643087556  
 AGIWUR13749;AGIWUR14151;AGIWUR38043  
 CB4856 CT II 24666 25446 WBGene00015291 C01B12.8 C01B12.8 -0.295526475155633  
 AGIWUR4616  
 CB4856 CT II 25382 28423 WBGene00017745 F23F1.4 F23F1.4 0.166779164687463  
 AGIWUR29868;AGIWUR33772  
 CB4856 CT II 30061 31584 WBGene00017746 F23F1.5 F23F1.5 -0.229366342721875 AGIWUR40336  
 CB4856 CT II 31768 33610 WBGene00017744 fbxc-54 F23F1.3 -0.0553286464017511 AGIWUR18725  
 CB4856 CT II 34204 35262 WBGene00017743 F23F1.2 F23F1.2 -0.697957564797708 AGIWUR15988  
 CB4856 CT II 35202 37313 WBGene00017747 F23F1.6 F23F1.6 0.539013548244773 AGIWUR34202  
 CB4856 CT II 38558 39537 WBGene00017748 F23F1.7 F23F1.7 -0.443849393535093 AGIWUR1202  
 CB4856 CT II 41471 41982 WBGene00017750 F23F1.10 F23F1.10 -0.264053578927959  
 AGIWUR3668;AGIWUR12855;AGIWUR14753;AGIWUR19238;AGIWUR28736  
 CB4856 CT II 42181 46216 WBGene00004504 rpt-4 F23F1.8 -0.148742442775799  
 AGIWUR4840;AGIWUR5595;AGIWUR18020;AGIWUR20985;AGIWUR35442  
 CB4856 CT II 45040 47479 WBGene00017749 rpoa-49 F23F1.9 -0.138799287649613 AGIWUR41889  
 CB4856 CT II 47580 50303 WBGene00016021 C23H3.5 C23H3.5 -0.286943163534993 AGIWUR14601  
 CB4856 CT II 51072 57576 WBGene00016020 spt1-1 C23H3.4 -0.46170027184624  
 AGIWUR15255;AGIWUR28293;AGIWUR41602  
 CB4856 CT II 57670 60040 WBGene00016019 C23H3.3 C23H3.3 -0.0824328095523565  
 AGIWUR17330;AGIWUR18749;AGIWUR41138  
 CB4856 CT II 61302 64340 WBGene00016018 C23H3.2 C23H3.2 -0.0416656166429394  
 AGIWUR1906;AGIWUR13184;AGIWUR26164;AGIWUR32918  
 CB4856 CT II 69654 71279 WBGene00001193 eg1-26 C23H3.1 -0.0446226702012815 AGIWUR31601  
 CB4856 CT II 71672 79266 WBGene00016022 C23H3.9 C23H3.9 0.365769986585541  
 AGIWUR6544;AGIWUR37497;AGIWUR38816  
 CB4856 CT II 84434 87823 WBGene00016809 C50D2.6 C50D2.6 0.538738796664287 AGIWUR28282  
 CB4856 CT II 88221 91519 WBGene00016812 C50D2.9 C50D2.9 -0.0976749559758296 AGIWUR14627  
 CB4856 CT II 92169 95277 WBGene00016810 C50D2.7 C50D2.7 0.00542502751848772 AGIWUR26625  
 CB4856 CT II 96127 98027 WBGene00016811 C50D2.8 C50D2.8 -0.405304267144158 AGIWUR13595

|                                                                                                                       |    |    |        |        |                |            |            |                     |             |
|-----------------------------------------------------------------------------------------------------------------------|----|----|--------|--------|----------------|------------|------------|---------------------|-------------|
| CB4856                                                                                                                | CT | II | 98404  | 98961  | WBGene00016808 | C50D2.5    | C50D2.5    | -0.17238322617161   |             |
| AGIWUR3897;AGIWUR20416;AGIWUR21779;AGIWUR31226                                                                        |    |    |        |        |                |            |            |                     |             |
| CB4856                                                                                                                | CT | II | 99647  | 101061 | WBGene00044420 | C50D2.10   | C50D2.10   |                     |             |
| -0.000838827049761903 AGIWUR3739;AGIWUR5801;AGIWUR7174;AGIWUR29349;AGIWUR42173                                        |    |    |        |        |                |            |            |                     |             |
| CB4856                                                                                                                | CT | II | 104534 | 105833 | WBGene00000644 | col-68     | C50D2.4    | -0.287810701873884  | AGIWUR5687  |
| CB4856                                                                                                                | CT | II | 106189 | 107521 | WBGene00016807 | C50D2.3    | C50D2.3    | -0.0758804485258775 | AGIWUR39774 |
| CB4856                                                                                                                | CT | II | 109165 | 111429 | WBGene00016806 | C50D2.2    | C50D2.2    | -0.12396705388705   |             |
| AGIWUR1716;AGIWUR23387;AGIWUR40635                                                                                    |    |    |        |        |                |            |            |                     |             |
| CB4856                                                                                                                | CT | II | 111621 | 114454 | WBGene00016805 | C50D2.1    | C50D2.1    | 0.18479873592053    | AGIWUR33829 |
| CB4856                                                                                                                | CT | II | 114429 | 121222 | WBGene00019615 | K10B4.3    | K10B4.3    | 0.491392720270211   | AGIWUR40135 |
| CB4856                                                                                                                | CT | II | 123270 | 125004 | WBGene00019616 | nmur-2     | K10B4.4    | 0.0663382762766327  | AGIWUR4619  |
| CB4856                                                                                                                | CT | II | 126938 | 128706 | WBGene00005081 | srd-3      | K10B4.5    | 0.172464439840318   | AGIWUR20269 |
| CB4856                                                                                                                | CT | II | 130983 | 133598 | WBGene00000857 | cwn-1      | K10B4.6    | 0.154178292903982   | AGIWUR16463 |
| CB4856                                                                                                                | CT | II | 135466 | 139999 | WBGene00019613 | K10B4.1    | K10B4.1    | -0.14976427488136   | AGIWUR11600 |
| CB4856                                                                                                                | CT | II | 147241 | 152825 | WBGene00020798 | T25D3.4    | T25D3.4    | -0.19733235062114   | AGIWUR37414 |
| CB4856                                                                                                                | CT | II | 152525 | 154936 | WBGene00020797 | T25D3.3    | T25D3.3    | 0.108858334151407   | AGIWUR40922 |
| CB4856                                                                                                                | CT | II | 154875 | 156043 | WBGene00020796 | mrpl-28    | T25D3.2    | -0.202914928551017  |             |
| AGIWUR5393;AGIWUR23054;AGIWUR24701;AGIWUR35171;AGIWUR35915;AGIWUR40250;AGIWUR43080                                    |    |    |        |        |                |            |            |                     |             |
| CB4856                                                                                                                | CT | II | 162374 | 170628 | WBGene00001340 | etr-1      | T01D1.2    | 0.0686789370364735  |             |
| AGIWUR4015;AGIWUR8140;AGIWUR15274;AGIWUR21571;AGIWUR31029;AGIWUR31047;AGIWUR31656;AGIWUR32715;AGIWUR36529;AGIWUR42342 |    |    |        |        |                |            |            |                     |             |
| CB4856                                                                                                                | CT | II | 171386 | 173779 | WBGene00044428 | T01D1.7    | T01D1.7    | 0.0733802104590149  |             |
| AGIWUR33551;AGIWUR37702                                                                                               |    |    |        |        |                |            |            |                     |             |
| CB4856                                                                                                                | CT | II | 174401 | 175642 | WBGene00020148 | T01D1.3    | T01D1.3    | -0.35962132628099   | AGIWUR6933  |
| CB4856                                                                                                                | CT | II | 176997 | 179093 | WBGene00020149 | T01D1.4    | T01D1.4    | -0.385668851520668  | AGIWUR11472 |
| CB4856                                                                                                                | CT | II | 179261 | 192078 | WBGene00044641 | T01D1.8    | T01D1.8    | 0.1841647538851     |             |
| AGIWUR3097;AGIWUR10524;AGIWUR10527;AGIWUR16181;AGIWUR19838;AGIWUR28896                                                |    |    |        |        |                |            |            |                     |             |
| CB4856                                                                                                                | CT | II | 192531 | 194558 | WBGene00000034 | abu-11     | T01D1.6    | -0.738196380218374  | AGIWUR5572  |
| CB4856                                                                                                                | CT | II | 196985 | 211941 | WBGene00000497 | chs-2      | F48A11.1   | 0.0572146205870281  |             |
| AGIWUR6866;AGIWUR9413;AGIWUR12416;AGIWUR12580;AGIWUR13068;AGIWUR28174;AGIWUR32227;AGIWUR38725                         |    |    |        |        |                |            |            |                     |             |
| CB4856                                                                                                                | CT | II | 213169 | 216621 | WBGene00018585 | F48A11.4   | F48A11.4   | 0.12370108120211    |             |
| AGIWUR38865                                                                                                           |    |    |        |        |                |            |            |                     |             |
| CB4856                                                                                                                | CT | II | 217049 | 220667 | WBGene00018586 | ubxn-3     | F48A11.5   | 0.027310532039472   |             |
| AGIWUR38277                                                                                                           |    |    |        |        |                |            |            |                     |             |
| CB4856                                                                                                                | CT | II | 222700 | 232739 | WBGene00021545 | Y43H11AL.1 | Y43H11AL.1 | -0.320789024343473  |             |
| AGIWUR31822                                                                                                           |    |    |        |        |                |            |            |                     |             |
| CB4856                                                                                                                | CT | II | 232852 | 237821 | WBGene00021546 | laat-1     | Y43H11AL.2 | -0.0719338470013824 |             |
| AGIWUR382;AGIWUR607;AGIWUR4019;AGIWUR31192;AGIWUR32769;AGIWUR41132                                                    |    |    |        |        |                |            |            |                     |             |
| CB4856                                                                                                                | CT | II | 240722 | 255182 | WBGene00004166 | pqn-85     | Y43H11AL.3 | 0.441956931726084   |             |

|                                                                                                          |    |    |        |        |                |          |          |                     |             |
|----------------------------------------------------------------------------------------------------------|----|----|--------|--------|----------------|----------|----------|---------------------|-------------|
| AGIWUR10541                                                                                              |    |    |        |        |                |          |          |                     |             |
| CB4856                                                                                                   | CT | II | 257819 | 261063 | WBGene00000296 | cat-2    | B0432.5  | 0.0617109222286869  |             |
| AGIWUR7552;AGIWUR31219                                                                                   |    |    |        |        |                |          |          |                     |             |
| CB4856                                                                                                   | CT | II | 264353 | 266077 | WBGene00044640 | B0432.14 | B0432.14 | 0.251870498434124   |             |
| AGIWUR7508;AGIWUR7619;AGIWUR9732;AGIWUR17555;AGIWUR23611;AGIWUR35504;AGIWUR36059;AGIWUR38673;AGIWUR40321 |    |    |        |        |                |          |          |                     |             |
| CB4856                                                                                                   | CT | II | 266301 | 273966 | WBGene00015188 | B0432.7  | B0432.7  | -0.111885910916659  |             |
| AGIWUR4743;AGIWUR10714                                                                                   |    |    |        |        |                |          |          |                     |             |
| CB4856                                                                                                   | CT | II | 276212 | 278736 | WBGene00015189 | B0432.8  | B0432.8  | -0.190380918551821  | AGIWUR8831  |
| CB4856                                                                                                   | CT | II | 278621 | 282576 | WBGene00015194 | B0432.13 | B0432.13 | -0.244036919730259  |             |
| AGIWUR20880                                                                                              |    |    |        |        |                |          |          |                     |             |
| CB4856                                                                                                   | CT | II | 282576 | 283694 | WBGene00015190 | B0432.9  | B0432.9  | -0.0244060875440368 | AGIWUR23197 |
| CB4856                                                                                                   | CT | II | 283887 | 286275 | WBGene00015191 | B0432.10 | B0432.10 | -0.141175282334103  |             |
| AGIWUR20057                                                                                              |    |    |        |        |                |          |          |                     |             |
| CB4856                                                                                                   | CT | II | 286625 | 288850 | WBGene00015186 | misc-1   | B0432.4  | 0.0964205821362274  | AGIWUR20234 |
| CB4856                                                                                                   | CT | II | 288939 | 290391 | WBGene00015185 | mrp1-41  | B0432.3  | -0.11576943630628   | AGIWUR1350  |
| CB4856                                                                                                   | CT | II | 290582 | 291861 | WBGene00015184 | djr-1.1  | B0432.2  | 0.452529042136639   | AGIWUR11594 |
| CB4856                                                                                                   | CT | II | 293864 | 294706 | WBGene00015192 | B0432.11 | B0432.11 | 0.0961025118916599  |             |
| AGIWUR35985                                                                                              |    |    |        |        |                |          |          |                     |             |
| CB4856                                                                                                   | CT | II | 296291 | 297010 | WBGene00015193 | clec-117 | B0432.12 | 0.271545686661192   |             |
| AGIWUR35170                                                                                              |    |    |        |        |                |          |          |                     |             |
| CB4856                                                                                                   | CT | II | 297399 | 299735 | WBGene00015183 | B0432.1  | B0432.1  | 0.00761661128076341 | AGIWUR9466  |
| CB4856                                                                                                   | CT | II | 302405 | 303659 | WBGene00019280 | K01A2.5  | K01A2.5  | 0.0671250045785392  | AGIWUR41704 |
| CB4856                                                                                                   | CT | II | 303924 | 305530 | WBGene00000645 | col-69   | K01A2.7  | 0.0668075931419558  | AGIWUR24367 |
| CB4856                                                                                                   | CT | II | 307545 | 313969 | WBGene00019279 | K01A2.4  | K01A2.4  | 0.209337433108502   |             |
| AGIWUR1000;AGIWUR1739                                                                                    |    |    |        |        |                |          |          |                     |             |
| CB4856                                                                                                   | CT | II | 319785 | 321445 | WBGene00001391 | far-7    | K01A2.2  | 2.41776848458096    |             |
| AGIWUR24256;AGIWUR29060;AGIWUR40355                                                                      |    |    |        |        |                |          |          |                     |             |
| CB4856                                                                                                   | CT | II | 321442 | 323098 | WBGene00019284 | K01A2.10 | K01A2.10 | 0.940295065738761   |             |
| AGIWUR2318                                                                                               |    |    |        |        |                |          |          |                     |             |
| CB4856                                                                                                   | CT | II | 326262 | 328224 | WBGene00019277 | sgcb-1   | K01A2.1  | -0.245070419133592  |             |
| AGIWUR7196;AGIWUR43662                                                                                   |    |    |        |        |                |          |          |                     |             |
| CB4856                                                                                                   | CT | II | 328564 | 332513 | WBGene00019285 | cbn-1    | K01A2.11 | 0.518112661655986   |             |
| AGIWUR15086;AGIWUR18315;AGIWUR42119                                                                      |    |    |        |        |                |          |          |                     |             |
| CB4856                                                                                                   | CT | II | 337339 | 339248 | WBGene00000778 | cpn-2    | D1069.2  | 0.216313947100499   | AGIWUR32382 |
| CB4856                                                                                                   | CT | II | 341982 | 347891 | WBGene00017037 | D1069.3  | D1069.3  | 0.161770630645082   |             |
| AGIWUR2482;AGIWUR11734;AGIWUR22668;AGIWUR31920                                                           |    |    |        |        |                |          |          |                     |             |
| CB4856                                                                                                   | CT | II | 348266 | 357024 | WBGene00017038 | dmsr-4   | D1069.4  | -0.193325190501895  |             |
| AGIWUR1416;AGIWUR19580                                                                                   |    |    |        |        |                |          |          |                     |             |
| CB4856                                                                                                   | CT | II | 362495 | 367555 | WBGene00004218 | ptr-3    | C41D7.2  | 1.65213052526235    | AGIWUR13713 |



|                                                                                  |    |    |        |        |                |           |           |                     |             |
|----------------------------------------------------------------------------------|----|----|--------|--------|----------------|-----------|-----------|---------------------|-------------|
| CB4856                                                                           | CT | II | 375250 | 375835 | WBGene00015406 | C03H5.4   | C03H5.4   | 0.00900637379663394 |             |
| AGIWUR16004;AGIWUR28127;AGIWUR29633                                              |    |    |        |        |                |           |           |                     |             |
| CB4856                                                                           | CT | II | 380573 | 382257 | WBGene00015409 | C03H5.7   | C03H5.7   | 0.24016527537914    |             |
| AGIWUR1131;AGIWUR3098;AGIWUR42721                                                |    |    |        |        |                |           |           |                     |             |
| CB4856                                                                           | CT | II | 382309 | 385358 | WBGene00015407 | C03H5.5   | C03H5.5   | 0.154553142210888   | AGIWUR9543  |
| CB4856                                                                           | CT | II | 386134 | 387949 | WBGene00015405 | C03H5.3   | C03H5.3   | -0.187620239926472  | AGIWUR35781 |
| CB4856                                                                           | CT | II | 388833 | 392732 | WBGene00015404 | nstp-4    | C03H5.2   | 0.352966732287026   | AGIWUR10131 |
| CB4856                                                                           | CT | II | 402580 | 404235 | WBGene00015403 | clec-10   | C03H5.1   | -0.659014487293917  | AGIWUR17547 |
| CB4856                                                                           | CT | II | 406141 | 410961 | WBGene00016074 | C24H12.5  | C24H12.5  | 0.152250855926011   |             |
| AGIWUR38684                                                                      |    |    |        |        |                |           |           |                     |             |
| CB4856                                                                           | CT | II | 411222 | 416620 | WBGene00016073 | C24H12.4  | C24H12.4  | -0.126195215775828  |             |
| AGIWUR8344;AGIWUR26796;AGIWUR27112;AGIWUR35447;AGIWUR44221                       |    |    |        |        |                |           |           |                     |             |
| CB4856                                                                           | CT | II | 417349 | 418882 | WBGene00016075 | C24H12.6  | C24H12.6  | 0.132364797071994   |             |
| AGIWUR12274                                                                      |    |    |        |        |                |           |           |                     |             |
| CB4856                                                                           | CT | II | 419178 | 420568 | WBGene00016076 | C24H12.7  | C24H12.7  | 0.248798562094976   |             |
| AGIWUR2158                                                                       |    |    |        |        |                |           |           |                     |             |
| CB4856                                                                           | CT | II | 422319 | 423142 | WBGene00016077 | C24H12.8  | C24H12.8  |                     |             |
| -0.001609999092605962 AGIWUR66                                                   |    |    |        |        |                |           |           |                     |             |
| CB4856                                                                           | CT | II | 423624 | 427019 | WBGene00016078 | C24H12.9  | C24H12.9  | 0.236970902255886   |             |
| AGIWUR781;AGIWUR7070;AGIWUR11382;AGIWUR12130;AGIWUR15508;AGIWUR37267;AGIWUR45078 |    |    |        |        |                |           |           |                     |             |
| CB4856                                                                           | CT | II | 427603 | 429152 | WBGene00016080 | C24H12.11 | C24H12.11 | 0.393383220238086   |             |
| AGIWUR31524                                                                      |    |    |        |        |                |           |           |                     |             |
| CB4856                                                                           | CT | II | 436867 | 438748 | WBGene00016072 | C24H12.2  | C24H12.2  | 0.0647163085499312  |             |
| AGIWUR8039                                                                       |    |    |        |        |                |           |           |                     |             |
| CB4856                                                                           | CT | II | 444132 | 446928 | WBGene00235338 | C24H12.19 | C24H12.19 | 0.559809382368138   |             |
| AGIWUR25847                                                                      |    |    |        |        |                |           |           |                     |             |
| CB4856                                                                           | CT | II | 448346 | 453156 | WBGene00021130 | W10D9.2   | W10D9.2   | 0.317660879837966   | AGIWUR34864 |
| CB4856                                                                           | CT | II | 456113 | 457886 | WBGene00185079 | W10D9.6   | W10D9.6   | -0.0312718726569159 | AGIWUR5554  |
| CB4856                                                                           | CT | II | 461667 | 467365 | WBGene00021132 | nfyb-1    | W10D9.4   | -0.27536225365046   | AGIWUR25019 |
| CB4856                                                                           | CT | II | 468374 | 470475 | WBGene00021133 | tomm-22   | W10D9.5   | -0.121881965322327  | AGIWUR7361  |
| CB4856                                                                           | CT | II | 471247 | 475940 | WBGene00021073 | no1-1     | W07E6.1   | -0.147364362403858  |             |
| AGIWUR4767;AGIWUR18751;AGIWUR29814;AGIWUR30790;AGIWUR35336;AGIWUR42846           |    |    |        |        |                |           |           |                     |             |
| CB4856                                                                           | CT | II | 476222 | 478063 | WBGene00021076 | W07E6.5   | W07E6.5   | -0.040975461784722  |             |
| AGIWUR697;AGIWUR10017;AGIWUR17438;AGIWUR35291;AGIWUR42424                        |    |    |        |        |                |           |           |                     |             |
| CB4856                                                                           | CT | II | 480722 | 484386 | WBGene00021074 | W07E6.2   | W07E6.2   | 0.0859038817040378  | AGIWUR43424 |
| CB4856                                                                           | CT | II | 484866 | 490403 | WBGene00004188 | prp-21    | W07E6.4   | -0.0265113608155687 | AGIWUR25405 |
| CB4856                                                                           | CT | II | 495424 | 498659 | WBGene00021075 | W07E6.3   | W07E6.3   | 0.163157527147798   | AGIWUR28387 |
| CB4856                                                                           | CT | II | 503229 | 506014 | WBGene00005324 | T27A1.1   | T27A1.1   | 0.162696776482034   |             |
| AGIWUR10735;AGIWUR24620                                                          |    |    |        |        |                |           |           |                     |             |

|                                                            |    |    |        |        |                 |          |          |                      |             |
|------------------------------------------------------------|----|----|--------|--------|-----------------|----------|----------|----------------------|-------------|
| CB4856                                                     | CT | II | 508245 | 509326 | WBGene00005512  | srh-105  | T27A1.7  | 0.272287262815652    | AGIWUR40738 |
| CB4856                                                     | CT | II | 516014 | 521605 | WBGene00003106  | mab-9    | T27A1.6  | 0.197963840758682    |             |
| AGIWUR7631;AGIWUR14622;AGIWUR24220                         |    |    |        |        |                 |          |          |                      |             |
| CB4856                                                     | CT | II | 522594 | 525983 | WBGene00020837  | slc-36.2 | T27A1.5  | -0.0519289068498132  |             |
| AGIWUR8375                                                 |    |    |        |        |                 |          |          |                      |             |
| CB4856                                                     | CT | II | 526574 | 530374 | WBGene00020836  | lgc-34   | T27A1.4  | 0.00977556572315486  | AGIWUR23718 |
| CB4856                                                     | CT | II | 535578 | 546944 | WBGene00020835  | T27A1.3  | T27A1.3  | -0.00786805329369855 | AGIWUR41722 |
| CB4856                                                     | CT | II | 546705 | 552031 | WBGene00015646  | mlt-10   | C09E8.3  | 0.357787040513132    |             |
| AGIWUR13193;AGIWUR31746                                    |    |    |        |        |                 |          |          |                      |             |
| CB4856                                                     | CT | II | 553086 | 554789 | WBGene00015645  | lips-7   | C09E8.2  | -0.234727409843124   |             |
| AGIWUR27124;AGIWUR27958;AGIWUR30248                        |    |    |        |        |                 |          |          |                      |             |
| CB4856                                                     | CT | II | 556485 | 564215 | WBGene00015644  | C09E8.1  | C09E8.1  | -0.0915628129593342  |             |
| AGIWUR16148;AGIWUR22381;AGIWUR24838;AGIWUR43911            |    |    |        |        |                 |          |          |                      |             |
| CB4856                                                     | CT | II | 569236 | 572110 | WBGene00021095  | mlt-8    | W08F4.6  | 0.500901909541019    | AGIWUR39199 |
| CB4856                                                     | CT | II | 574872 | 577732 | WBGene00021096  | W08F4.7  | W08F4.7  | 0.202197683323581    |             |
| AGIWUR15585;AGIWUR17009;AGIWUR42523                        |    |    |        |        |                 |          |          |                      |             |
| CB4856                                                     | CT | II | 577839 | 580593 | WBGene00021097  | cdc-37   | W08F4.8  | 0.0854375463466415   |             |
| AGIWUR41954;AGIWUR45168                                    |    |    |        |        |                 |          |          |                      |             |
| CB4856                                                     | CT | II | 580602 | 582014 | WBGene00021093  | W08F4.3  | W08F4.3  | -0.159022375919124   | AGIWUR6026  |
| CB4856                                                     | CT | II | 584798 | 586241 | WBGene00044733  | W08F4.13 | W08F4.13 | 0.515545945431847    |             |
| AGIWUR8104                                                 |    |    |        |        |                 |          |          |                      |             |
| CB4856                                                     | CT | II | 589161 | 589993 | WBGene000268207 | W08F4.20 | W08F4.20 | 0.311908826153829    |             |
| AGIWUR27767                                                |    |    |        |        |                 |          |          |                      |             |
| CB4856                                                     | CT | II | 590578 | 591210 | WBGene00021099  | W08F4.10 | W08F4.10 | 0.112203223359797    |             |
| AGIWUR29;AGIWUR12451;AGIWUR19061;AGIWUR26023;AGIWUR36121   |    |    |        |        |                 |          |          |                      |             |
| CB4856                                                     | CT | II | 595207 | 602120 | WBGene00003599  | nhl-3    | W04H10.3 | 0.34070791960799     |             |
| AGIWUR39114                                                |    |    |        |        |                 |          |          |                      |             |
| CB4856                                                     | CT | II | 606350 | 606735 | WBGene000206416 | W04H10.5 | W04H10.5 | 0.528171806956115    |             |
| AGIWUR34751                                                |    |    |        |        |                 |          |          |                      |             |
| CB4856                                                     | CT | II | 614767 | 624543 | WBGene00020207  | T04B8.5  | T04B8.5  | -0.0766143381880857  |             |
| AGIWUR9756;AGIWUR21808;AGIWUR36894;AGIWUR41802;AGIWUR41815 |    |    |        |        |                 |          |          |                      |             |
| CB4856                                                     | CT | II | 627506 | 628662 | WBGene00020205  | arrd-1   | T04B8.3  | 0.525506747661082    | AGIWUR21856 |
| CB4856                                                     | CT | II | 630075 | 631980 | WBGene00020204  | T04B8.2  | T04B8.2  | 0.00695755295858547  | AGIWUR16818 |
| CB4856                                                     | CT | II | 637346 | 639488 | WBGene00019497  | K07E8.6  | K07E8.6  | 0.0870625023064999   |             |
| AGIWUR26831;AGIWUR32972                                    |    |    |        |        |                 |          |          |                      |             |
| CB4856                                                     | CT | II | 641010 | 650367 | WBGene00019498  | K07E8.7  | K07E8.7  | -0.0774307534577314  | AGIWUR8822  |
| CB4856                                                     | CT | II | 650964 | 654062 | WBGene00019496  | frpr-14  | K07E8.5  | 0.074814140744329    | AGIWUR41435 |
| CB4856                                                     | CT | II | 658669 | 659867 | WBGene00019495  | sdz-24   | K07E8.3  | -0.406489416034006   | AGIWUR38836 |
| CB4856                                                     | CT | II | 660091 | 661796 | WBGene00005557  | sri-45   | K07E8.9  | -0.36409353693651    | AGIWUR3487  |

|                                                                                                                                                                                                                                |    |    |        |        |                |           |           |                      |             |
|--------------------------------------------------------------------------------------------------------------------------------------------------------------------------------------------------------------------------------|----|----|--------|--------|----------------|-----------|-----------|----------------------|-------------|
| CB4856                                                                                                                                                                                                                         | CT | II | 667755 | 668444 | WBGene00019494 | K07E8.1   | K07E8.1   | -0.109996619452242   | AGIWUR39454 |
| CB4856                                                                                                                                                                                                                         | CT | II | 669506 | 671125 | WBGene00005558 | sri-46    | K07E8.11  | -0.232752120317928   |             |
| AGIWUR22123                                                                                                                                                                                                                    |    |    |        |        |                |           |           |                      |             |
| CB4856                                                                                                                                                                                                                         | CT | II | 671542 | 673844 | WBGene00005556 | sri-44    | K07E8.12  | 0.042215376762877    |             |
| AGIWUR6105;AGIWUR19807                                                                                                                                                                                                         |    |    |        |        |                |           |           |                      |             |
| CB4856                                                                                                                                                                                                                         | CT | II | 675603 | 678347 | WBGene00021457 | Y39F10C.1 | Y39F10C.1 | -0.0905242598757905  |             |
| AGIWUR14888                                                                                                                                                                                                                    |    |    |        |        |                |           |           |                      |             |
| CB4856                                                                                                                                                                                                                         | CT | II | 679025 | 679714 | WBGene00020179 | T02H6.9   | T02H6.9   | -0.0130133803981511  | AGIWUR35739 |
| CB4856                                                                                                                                                                                                                         | CT | II | 679777 | 680712 | WBGene00020180 | T02H6.10  | T02H6.10  | -0.0606571306446382  |             |
| AGIWUR41544                                                                                                                                                                                                                    |    |    |        |        |                |           |           |                      |             |
| CB4856                                                                                                                                                                                                                         | CT | II | 680832 | 681516 | WBGene00020178 | T02H6.8   | T02H6.8   | 0.00824815409225188  | AGIWUR11615 |
| CB4856                                                                                                                                                                                                                         | CT | II | 682626 | 683320 | WBGene00020177 | T02H6.7   | T02H6.7   | -0.181074569533342   |             |
| AGIWUR2807;AGIWUR31704                                                                                                                                                                                                         |    |    |        |        |                |           |           |                      |             |
| CB4856                                                                                                                                                                                                                         | CT | II | 683767 | 684116 | WBGene00020176 | T02H6.6   | T02H6.6   | -0.0214962930765168  | AGIWUR30315 |
| CB4856                                                                                                                                                                                                                         | CT | II | 685234 | 689014 | WBGene00020175 | T02H6.5   | T02H6.5   | 0.00197133807237293  | AGIWUR10088 |
| CB4856                                                                                                                                                                                                                         | CT | II | 690049 | 691084 | WBGene00020174 | T02H6.4   | T02H6.4   | -0.069870513314668   | AGIWUR35824 |
| CB4856                                                                                                                                                                                                                         | CT | II | 691881 | 693456 | WBGene00020173 | T02H6.3   | T02H6.3   | 0.0807739269705863   |             |
| AGIWUR16045;AGIWUR20376;AGIWUR25904;AGIWUR30689;AGIWUR39982                                                                                                                                                                    |    |    |        |        |                |           |           |                      |             |
| CB4856                                                                                                                                                                                                                         | CT | II | 700482 | 701125 | WBGene00020181 | T02H6.11  | T02H6.11  | -0.0501044108885056  |             |
| AGIWUR22052;AGIWUR36290                                                                                                                                                                                                        |    |    |        |        |                |           |           |                      |             |
| CB4856                                                                                                                                                                                                                         | CT | II | 702107 | 708608 | WBGene00020172 | thoc-1    | T02H6.2   | -0.0856984870920865  |             |
| AGIWUR13124;AGIWUR24834;AGIWUR29393;AGIWUR34043;AGIWUR39938;AGIWUR39989                                                                                                                                                        |    |    |        |        |                |           |           |                      |             |
| CB4856                                                                                                                                                                                                                         | CT | II | 709381 | 723699 | WBGene00020171 | T02H6.1   | T02H6.1   | -0.00925696776886209 |             |
| AGIWUR1925;AGIWUR31002                                                                                                                                                                                                         |    |    |        |        |                |           |           |                      |             |
| CB4856                                                                                                                                                                                                                         | CT | II | 723788 | 732513 | WBGene00021456 | Y39F10B.1 | Y39F10B.1 | 0.132263189964799    |             |
| AGIWUR578                                                                                                                                                                                                                      |    |    |        |        |                |           |           |                      |             |
| CB4856                                                                                                                                                                                                                         | CT | II | 734607 | 738666 | WBGene00015614 | C08G5.1   | C08G5.1   | -0.0525615106635762  |             |
| AGIWUR7483;AGIWUR22598;AGIWUR26950                                                                                                                                                                                             |    |    |        |        |                |           |           |                      |             |
| CB4856                                                                                                                                                                                                                         | CT | II | 739598 | 740852 | WBGene00015615 | fbxc-48   | C08G5.2   | 0.0770981409533089   | AGIWUR33530 |
| CB4856                                                                                                                                                                                                                         | CT | II | 741595 | 745128 | WBGene00015616 | C08G5.3   | C08G5.3   | 0.111863401788365    | AGIWUR34991 |
| CB4856                                                                                                                                                                                                                         | CT | II | 745418 | 750164 | WBGene00004926 | snt-6     | C08G5.4   | 0.160249031043101    | AGIWUR20804 |
| CB4856                                                                                                                                                                                                                         | CT | II | 756195 | 765317 | WBGene00044418 | C08G5.7   | C08G5.7   | -0.00508095360047633 |             |
| AGIWUR1376;AGIWUR2926;AGIWUR3173;AGIWUR7059;AGIWUR8584;AGIWUR11962;AGIWUR14089;AGIWUR15395;AGIWUR16770;AGIWUR16869;AGIWUR17068;AGIWUR17422;AGIWUR31479;AGIWUR32296;AGIWUR33655;AGIWUR35357;AGIWUR38066;AGIWUR38457;AGIWUR40764 |    |    |        |        |                |           |           |                      |             |
| CB4856                                                                                                                                                                                                                         | CT | II | 770553 | 772117 | WBGene00015618 | C08G5.6   | C08G5.6   | 0.420931893787442    |             |
| AGIWUR31084;AGIWUR39491                                                                                                                                                                                                        |    |    |        |        |                |           |           |                      |             |
| CB4856                                                                                                                                                                                                                         | CT | II | 775333 | 776780 | WBGene00021452 | Y39F10A.1 | Y39F10A.1 | 0.280476761298953    |             |
| AGIWUR13624                                                                                                                                                                                                                    |    |    |        |        |                |           |           |                      |             |

|                                    |    |        |        |                |                 |                     |                     |
|------------------------------------|----|--------|--------|----------------|-----------------|---------------------|---------------------|
| CB4856 CT                          | II | 779380 | 779882 | WBGene00269331 | Y39F10A.5       | Y39F10A.5           | -0.417531158179417  |
| AGIWUR43684                        |    |        |        |                |                 |                     |                     |
| CB4856 CT                          | II | 781884 | 783001 | WBGene00021454 | Y39F10A.3       | Y39F10A.3           | 0.17152554999959    |
| AGIWUR5346;AGIWUR32953;AGIWUR43193 |    |        |        |                |                 |                     |                     |
| CB4856 CT                          | II | 787312 | 787994 | WBGene00018507 | F46F5.16        | F46F5.16            | -0.249044244538252  |
| AGIWUR29948                        |    |        |        |                |                 |                     |                     |
| CB4856 CT                          | II | 788378 | 789175 | WBGene00018506 | F46F5.15        | F46F5.15            | 0.667873901791052   |
| AGIWUR11301                        |    |        |        |                |                 |                     |                     |
| CB4856 CT                          | II | 8e+05  | 801454 | WBGene00018505 | F46F5.14        | F46F5.14            | -0.325592217701328  |
| AGIWUR12850                        |    |        |        |                |                 |                     |                     |
| CB4856 CT                          | II | 801728 | 802693 | WBGene00023287 | F46F5.3 F46F5.3 | -0.23760399403936   |                     |
| AGIWUR4664;AGIWUR27371             |    |        |        |                |                 |                     |                     |
| CB4856 CT                          | II | 803309 | 803717 | WBGene00018504 | F46F5.13        | F46F5.13            | -0.151438380988505  |
| AGIWUR26178                        |    |        |        |                |                 |                     |                     |
| CB4856 CT                          | II | 805028 | 806438 | WBGene00018495 | F46F5.4 F46F5.4 | -0.0547776495902177 | AGIWUR10079         |
| CB4856 CT                          | II | 807372 | 808070 | WBGene00018503 | F46F5.12        | F46F5.12            | 0.00109383988834377 |
| AGIWUR5055                         |    |        |        |                |                 |                     |                     |
| CB4856 CT                          | II | 808757 | 811887 | WBGene00018502 | F46F5.11        | F46F5.11            | -0.101236700516459  |
| AGIWUR38924                        |    |        |        |                |                 |                     |                     |
| CB4856 CT                          | II | 812141 | 813708 | WBGene00018496 | F46F5.5 F46F5.5 | -0.274530106207715  | AGIWUR5636          |
| CB4856 CT                          | II | 814452 | 814866 | WBGene00018497 | F46F5.6 F46F5.6 | 0.169783803264027   | AGIWUR40706         |
| CB4856 CT                          | II | 818578 | 820683 | WBGene00018498 | F46F5.7 F46F5.7 | -0.580467681924735  |                     |
| AGIWUR4943;AGIWUR18449             |    |        |        |                |                 |                     |                     |
| CB4856 CT                          | II | 821408 | 821614 | WBGene00018499 | F46F5.8 F46F5.8 | -0.137526352461494  | AGIWUR38844         |
| CB4856 CT                          | II | 823829 | 825245 | WBGene00018501 | F46F5.10        | F46F5.10            | -0.11239145747261   |
| AGIWUR22274                        |    |        |        |                |                 |                     |                     |
| CB4856 CT                          | II | 825848 | 827500 | WBGene00017869 | F28A10.1        | F28A10.1            | 0.0147326987466077  |
| AGIWUR9597                         |    |        |        |                |                 |                     |                     |
| CB4856 CT                          | II | 827891 | 830267 | WBGene00017870 | F28A10.2        | F28A10.2            | -0.460229503963373  |
| AGIWUR44947                        |    |        |        |                |                 |                     |                     |
| CB4856 CT                          | II | 831069 | 831871 | WBGene00017878 | F28A10.10       | F28A10.10           | 0.051386580342113   |
| AGIWUR22041                        |    |        |        |                |                 |                     |                     |
| CB4856 CT                          | II | 833607 | 835270 | WBGene00017877 | F28A10.9        | F28A10.9            | 0.0551641042720683  |
| AGIWUR6656;AGIWUR38454             |    |        |        |                |                 |                     |                     |
| CB4856 CT                          | II | 837719 | 838470 | WBGene00017876 | F28A10.8        | F28A10.8            | -0.0300675897102805 |
| AGIWUR7741                         |    |        |        |                |                 |                     |                     |
| CB4856 CT                          | II | 840567 | 841113 | WBGene00017871 | F28A10.3        | F28A10.3            | -0.39659700187992   |
| AGIWUR37007                        |    |        |        |                |                 |                     |                     |
| CB4856 CT                          | II | 844274 | 845085 | WBGene00017872 | F28A10.4        | F28A10.4            | 0.224165936285893   |

|                                     |    |        |        |                 |          |          |                      |             |
|-------------------------------------|----|--------|--------|-----------------|----------|----------|----------------------|-------------|
| AGIWUR21076                         |    |        |        |                 |          |          |                      |             |
| CB4856 CT                           | II | 845288 | 845686 | WBGene00017875  | F28A10.7 | F28A10.7 | 0.123488610426794    |             |
| AGIWUR26593                         |    |        |        |                 |          |          |                      |             |
| CB4856 CT                           | II | 846864 | 848603 | WBGene00017874  | acdH-9   | F28A10.6 | -0.496887460360753   |             |
| AGIWUR29074                         |    |        |        |                 |          |          |                      |             |
| CB4856 CT                           | II | 849678 | 850654 | WBGene00017873  | F28A10.5 | F28A10.5 | 0.216351999706752    |             |
| AGIWUR39524                         |    |        |        |                 |          |          |                      |             |
| CB4856 CT                           | II | 862927 | 866901 | WBGene00021578  | Y46B2A.3 | Y46B2A.3 | 0.174007538360438    |             |
| AGIWUR35944                         |    |        |        |                 |          |          |                      |             |
| CB4856 CT                           | II | 868814 | 871699 | WBGene00021576  | fbxc-51  | Y46B2A.1 | 0.846442661594544    |             |
| AGIWUR29811                         |    |        |        |                 |          |          |                      |             |
| CB4856 CT                           | II | 873176 | 879001 | WBGene00000106  | alg-2    | T07D3.7  | 0.306905273896222    |             |
| AGIWUR35217;AGIWUR37697;AGIWUR40213 |    |        |        |                 |          |          |                      |             |
| CB4856 CT                           | II | 881576 | 890710 | WBGene00020307  | T07D3.4  | T07D3.4  | -0.356707334217787   |             |
| AGIWUR7775;AGIWUR43697              |    |        |        |                 |          |          |                      |             |
| CB4856 CT                           | II | 893863 | 897379 | WBGene00020306  | T07D3.3  | T07D3.3  | -0.040812303546668   | AGIWUR20372 |
| CB4856 CT                           | II | 898043 | 901164 | WBGene00020311  | T07D3.9  | T07D3.9  | -0.368715199214717   |             |
| AGIWUR4965;AGIWUR39971              |    |        |        |                 |          |          |                      |             |
| CB4856 CT                           | II | 904425 | 906039 | WBGene00020304  | fbxa-200 | T07D3.1  | -0.372467739446639   |             |
| AGIWUR27126                         |    |        |        |                 |          |          |                      |             |
| CB4856 CT                           | II | 907535 | 909631 | WBGene00019927  | fbxc-24  | R07C3.11 | 0.920164634416851    |             |
| AGIWUR15211;AGIWUR21913;AGIWUR26453 |    |        |        |                 |          |          |                      |             |
| CB4856 CT                           | II | 909884 | 911592 | WBGene00019926  | fbxc-27  | R07C3.10 | 0.316799147297163    |             |
| AGIWUR10868                         |    |        |        |                 |          |          |                      |             |
| CB4856 CT                           | II | 912003 | 913030 | WBGene00019925  | fbxc-31  | R07C3.9  | 0.0253277727308969   | AGIWUR14658 |
| CB4856 CT                           | II | 913680 | 915219 | WBGene00019924  | fbxc-33  | R07C3.8  | -0.346994577186848   | AGIWUR1761  |
| CB4856 CT                           | II | 916051 | 917464 | WBGene00019923  | fbxc-29  | R07C3.7  | 0.732030903122026    |             |
| AGIWUR5918;AGIWUR10571              |    |        |        |                 |          |          |                      |             |
| CB4856 CT                           | II | 917624 | 919417 | WBGene00045302  | fbxc-30  | R07C3.15 | 0.0241826166327588   |             |
| AGIWUR27335                         |    |        |        |                 |          |          |                      |             |
| CB4856 CT                           | II | 919575 | 920407 | WBGene000269338 | R07C3.16 | R07C3.16 | -0.413211611675887   |             |
| AGIWUR17863                         |    |        |        |                 |          |          |                      |             |
| CB4856 CT                           | II | 923821 | 925192 | WBGene00019922  | fbxc-28  | R07C3.6  | -0.0156664363853771  |             |
| AGIWUR564;AGIWUR11358;AGIWUR20652   |    |        |        |                 |          |          |                      |             |
| CB4856 CT                           | II | 926496 | 927431 | WBGene00019929  | R07C3.13 | R07C3.13 | 0.0661659288430592   |             |
| AGIWUR7319                          |    |        |        |                 |          |          |                      |             |
| CB4856 CT                           | II | 931171 | 932327 | WBGene00019921  | fbxc-34  | R07C3.5  | 0.206999776828495    | AGIWUR16572 |
| CB4856 CT                           | II | 933018 | 936989 | WBGene00019920  | acs-15   | R07C3.4  | -0.00225571152519599 | AGIWUR7727  |
| CB4856 CT                           | II | 938849 | 940683 | WBGene00019919  | R07C3.3  | R07C3.3  | -0.241157965347004   | AGIWUR9697  |

|                                               |    |    |         |         |                |          |           |                     |             |
|-----------------------------------------------|----|----|---------|---------|----------------|----------|-----------|---------------------|-------------|
| CB4856                                        | CT | II | 940983  | 943162  | WBGene00019918 | fbxc-36  | R07C3.2   | 0.319461050739857   | AGIWUR14198 |
| CB4856                                        | CT | II | 944066  | 946157  | WBGene00019917 | clec-43  | R07C3.1   | -0.202144869920026  | AGIWUR36973 |
| CB4856                                        | CT | II | 946485  | 948191  | WBGene00016303 | fbxc-32  | C32B5.10  | -0.448039162851749  |             |
| AGIWUR7472                                    |    |    |         |         |                |          |           |                     |             |
| CB4856                                        | CT | II | 948432  | 950507  | WBGene00016304 | fbxc-41  | C32B5.11  | 0.070354439214289   |             |
| AGIWUR28739                                   |    |    |         |         |                |          |           |                     |             |
| CB4856                                        | CT | II | 950842  | 952843  | WBGene00016305 | fbxc-57  | C32B5.12  | 0.110609390290775   |             |
| AGIWUR2248;AGIWUR3184;AGIWUR30209;AGIWUR31810 |    |    |         |         |                |          |           |                     |             |
| CB4856                                        | CT | II | 954953  | 956337  | WBGene00016302 | fbxc-7   | C32B5.9   | 0.509319480197551   | AGIWUR10362 |
| CB4856                                        | CT | II | 956674  | 957961  | WBGene00016301 | fbxc-6   | C32B5.8   | 0.156009847177177   | AGIWUR33819 |
| CB4856                                        | CT | II | 958918  | 960179  | WBGene00016309 | sdz-4    | C32B5.16  | 0.0553080042877951  |             |
| AGIWUR17898                                   |    |    |         |         |                |          |           |                     |             |
| CB4856                                        | CT | II | 960528  | 964260  | WBGene00016300 | C32B5.7  | C32B5.7   | -0.0222604535355231 |             |
| AGIWUR15819;AGIWUR28262;AGIWUR37767           |    |    |         |         |                |          |           |                     |             |
| CB4856                                        | CT | II | 965576  | 967062  | WBGene00016307 | fbxc-18  | C32B5.14  | 0.318320604312882   |             |
| AGIWUR34121                                   |    |    |         |         |                |          |           |                     |             |
| CB4856                                        | CT | II | 968406  | 970523  | WBGene00016299 | C32B5.6  | C32B5.6   | 0.101236301998927   | AGIWUR6752  |
| CB4856                                        | CT | II | 970645  | 972950  | WBGene00016308 | C32B5.15 | C32B5.15  | 0.017438551746018   |             |
| AGIWUR41227                                   |    |    |         |         |                |          |           |                     |             |
| CB4856                                        | CT | II | 974290  | 975511  | WBGene00016298 | fbxc-14  | C32B5.5   | 0.413292552348002   | AGIWUR22506 |
| CB4856                                        | CT | II | 976208  | 978951  | WBGene00044419 | fbxc-17  | C32B5.17  | 0.146316294104176   |             |
| AGIWUR25275;AGIWUR40429                       |    |    |         |         |                |          |           |                     |             |
| CB4856                                        | CT | II | 979423  | 980825  | WBGene00016297 | fbxc-15  | C32B5.4   | 0.509046786870813   | AGIWUR41541 |
| CB4856                                        | CT | II | 981282  | 982435  | WBGene00016296 | fbxc-16  | C32B5.3   | -0.036049683188712  |             |
| AGIWUR13034;AGIWUR18974;AGIWUR22521           |    |    |         |         |                |          |           |                     |             |
| CB4856                                        | CT | II | 986003  | 988666  | WBGene00016295 | fbxc-40  | C32B5.1   | 0.469092972912702   |             |
| AGIWUR33276;AGIWUR33872;AGIWUR41781           |    |    |         |         |                |          |           |                     |             |
| CB4856                                        | CT | II | 988737  | 991074  | WBGene00018456 | fbxc-39  | F45D11.10 | 0.352881086604416   |             |
| AGIWUR14227                                   |    |    |         |         |                |          |           |                     |             |
| CB4856                                        | CT | II | 991600  | 993638  | WBGene00018455 | fbxc-42  | F45D11.9  | -0.402292309741096  |             |
| AGIWUR39826                                   |    |    |         |         |                |          |           |                     |             |
| CB4856                                        | CT | II | 993293  | 994189  | WBGene00018454 | fbxb-28  | F45D11.8  | 0.228946416643701   |             |
| AGIWUR11045;AGIWUR15570                       |    |    |         |         |                |          |           |                     |             |
| CB4856                                        | CT | II | 1000437 | 1001449 | WBGene00018458 | fbxb-30  | F45D11.13 | 0.400558324333689   |             |
| AGIWUR44765                                   |    |    |         |         |                |          |           |                     |             |
| CB4856                                        | CT | II | 1001703 | 1002437 | WBGene00018452 | F45D11.5 | F45D11.5  | 0.295438657755804   |             |
| AGIWUR28527                                   |    |    |         |         |                |          |           |                     |             |
| CB4856                                        | CT | II | 1021505 | 1023528 | WBGene00018448 | F45D11.1 | F45D11.1  | -0.549203486179022  |             |
| AGIWUR11280;AGIWUR21120                       |    |    |         |         |                |          |           |                     |             |

|                                                                                     |    |    |         |         |                |          |          |                     |             |
|-------------------------------------------------------------------------------------|----|----|---------|---------|----------------|----------|----------|---------------------|-------------|
| CB4856                                                                              | CT | II | 1023693 | 1024784 | WBGene00019700 | btb-11   | M01D1.3  | 0.17863709234965    | AGIWUR26307 |
| CB4856                                                                              | CT | II | 1028987 | 1033664 | WBGene00019699 | math-34  | M01D1.2  | 1.86336697401181    | AGIWUR42003 |
| CB4856                                                                              | CT | II | 1039697 | 1040564 | WBGene00019702 | fbxb-39  | M01D1.7  | -0.0704317590335144 | AGIWUR12176 |
| CB4856                                                                              | CT | II | 1041321 | 1042327 | WBGene00019703 | fbxb-41  | M01D1.8  | -0.141164011005287  | AGIWUR34886 |
| CB4856                                                                              | CT | II | 1042969 | 1044025 | WBGene00019705 | fbxb-45  | M01D1.10 | 0.0266131767371487  |             |
| AGIWUR40701                                                                         |    |    |         |         |                |          |          |                     |             |
| CB4856                                                                              | CT | II | 1046505 | 1048276 | WBGene00006195 | str-148  | M01D1.1  | -0.0780754689142622 | AGIWUR17949 |
| CB4856                                                                              | CT | II | 1048863 | 1049949 | WBGene00019704 | fbxb-40  | M01D1.9  | 0.310228318676804   |             |
| AGIWUR9353;AGIWUR20714                                                              |    |    |         |         |                |          |          |                     |             |
| CB4856                                                                              | CT | II | 1057212 | 1059280 | WBGene00019311 | K02E7.6  | K02E7.6  | -0.389008832267538  |             |
| AGIWUR13530;AGIWUR14487                                                             |    |    |         |         |                |          |          |                     |             |
| CB4856                                                                              | CT | II | 1059664 | 1060802 | WBGene00019313 | btb-10   | K02E7.9  | -0.0902363555163523 | AGIWUR2350  |
| CB4856                                                                              | CT | II | 1065566 | 1066998 | WBGene00019314 | K02E7.10 | K02E7.10 | 0.0258859892620293  |             |
| AGIWUR12881                                                                         |    |    |         |         |                |          |          |                     |             |
| CB4856                                                                              | CT | II | 1070640 | 1071490 | WBGene00019316 | K02E7.12 | K02E7.12 | -0.0903916650388386 |             |
| AGIWUR28681                                                                         |    |    |         |         |                |          |          |                     |             |
| CB4856                                                                              | CT | II | 1074751 | 1075505 | WBGene00019315 | K02E7.11 | K02E7.11 | 0.00400905655453343 |             |
| AGIWUR7722                                                                          |    |    |         |         |                |          |          |                     |             |
| CB4856                                                                              | CT | II | 1083159 | 1083929 | WBGene00019306 | K02E7.1  | K02E7.1  | 0.57491714339109    |             |
| AGIWUR12424;AGIWUR33478;AGIWUR36865                                                 |    |    |         |         |                |          |          |                     |             |
| CB4856                                                                              | CT | II | 1092006 | 1097899 | WBGene00004902 | snf-3    | T13B5.1  | 0.142839766100209   | AGIWUR19715 |
| CB4856                                                                              | CT | II | 1097926 | 1100819 | WBGene00020471 | pho-14   | T13B5.3  | -0.0545520426478223 |             |
| AGIWUR10194;AGIWUR28391                                                             |    |    |         |         |                |          |          |                     |             |
| CB4856                                                                              | CT | II | 1101371 | 1104509 | WBGene00020476 | T13B5.9  | T13B5.9  | -0.142838897673819  | AGIWUR26618 |
| CB4856                                                                              | CT | II | 1104945 | 1106925 | WBGene00000617 | col-40   | T13B5.4  | 0.0785952107731704  | AGIWUR17459 |
| CB4856                                                                              | CT | II | 1108841 | 1110992 | WBGene00020472 | lips-11  | T13B5.5  | 0.0403510348260658  | AGIWUR21783 |
| CB4856                                                                              | CT | II | 1112189 | 1114226 | WBGene00020473 | lips-12  | T13B5.6  | -0.101236500886156  | AGIWUR1562  |
| CB4856                                                                              | CT | II | 1115641 | 1118033 | WBGene00020474 | lips-13  | T13B5.7  | 0.0831398618595669  | AGIWUR32051 |
| CB4856                                                                              | CT | II | 1121018 | 1123259 | WBGene00020475 | sut-1    | T13B5.8  | 0.0682070298079882  | AGIWUR17492 |
| CB4856                                                                              | CT | II | 1123534 | 1127791 | WBGene00021103 | eri-3    | W09B6.3  | -0.167481899017279  | AGIWUR1524  |
| CB4856                                                                              | CT | II | 1127976 | 1132352 | WBGene00006387 | taf-6.1  | W09B6.2  | -0.120767898313879  | AGIWUR14620 |
| CB4856                                                                              | CT | II | 1132302 | 1134240 | WBGene00021104 | W09B6.4  | W09B6.4  | -0.0446319456618873 |             |
| AGIWUR11511;AGIWUR20518;AGIWUR21674;AGIWUR23256;AGIWUR28565;AGIWUR34057;AGIWUR36897 |    |    |         |         |                |          |          |                     |             |
| CB4856                                                                              | CT | II | 1136781 | 1152701 | WBGene00004076 | pod-2    | W09B6.1  | 0.330004736365201   |             |
| AGIWUR4199;AGIWUR14789                                                              |    |    |         |         |                |          |          |                     |             |
| CB4856                                                                              | CT | II | 1163575 | 1165488 | WBGene00020740 | T23F4.2  | T23F4.2  | 0.418021786065866   | AGIWUR1509  |
| CB4856                                                                              | CT | II | 1166490 | 1169168 | WBGene00020739 | T23F4.1  | T23F4.1  | -0.498231120045105  | AGIWUR11835 |
| CB4856                                                                              | CT | II | 1169546 | 1172130 | WBGene00020741 | dlhd-1   | T23F4.3  | 1.27113684727707    | AGIWUR44663 |
| CB4856                                                                              | CT | II | 1175976 | 1179323 | WBGene00003545 | nas-27   | T23F4.4  | 0.0737969225308088  | AGIWUR14074 |

|                                                                                                |    |    |         |         |                |           |           |                      |
|------------------------------------------------------------------------------------------------|----|----|---------|---------|----------------|-----------|-----------|----------------------|
| CB4856                                                                                         | CT | II | 1197374 | 1230782 | WBGene00018734 | F53A10.2  | F53A10.2  | 0.0256924690625464   |
| AGIWUR30798;AGIWUR41285;AGIWUR43186                                                            |    |    |         |         |                |           |           |                      |
| CB4856                                                                                         | CT | II | 1233236 | 1252359 | WBGene00018572 | lin-42    | F47F6.1   | -0.0255505624969365  |
| AGIWUR15290;AGIWUR36002                                                                        |    |    |         |         |                |           |           |                      |
| CB4856                                                                                         | CT | II | 1255937 | 1258353 | WBGene00018575 | clcc-119  | F47F6.5   | -0.22899171668816    |
| AGIWUR24296;AGIWUR41961                                                                        |    |    |         |         |                |           |           |                      |
| CB4856                                                                                         | CT | II | 1259365 | 1262998 | WBGene00023410 | F47F6.9   | F47F6.9   | 0.0465483481439537   |
| AGIWUR32467;AGIWUR38054                                                                        |    |    |         |         |                |           |           |                      |
| CB4856                                                                                         | CT | II | 1262987 | 1266890 | WBGene00018573 | oac-30    | F47F6.3   | 0.0661973597184451   |
| AGIWUR11993;AGIWUR35046                                                                        |    |    |         |         |                |           |           |                      |
| CB4856                                                                                         | CT | II | 1269540 | 1271914 | WBGene00005813 | srw-66    | Y57G7A.4  | 0.0396426830900936   |
| AGIWUR7731;AGIWUR8027                                                                          |    |    |         |         |                |           |           |                      |
| CB4856                                                                                         | CT | II | 1273169 | 1275539 | WBGene00021968 | Y57G7A.5  | Y57G7A.5  | 0.129646903328439    |
| AGIWUR11546                                                                                    |    |    |         |         |                |           |           |                      |
| CB4856                                                                                         | CT | II | 1275752 | 1276872 | WBGene00021974 | Y57G7A.11 | Y57G7A.11 | -0.145756973100027   |
| AGIWUR17548                                                                                    |    |    |         |         |                |           |           |                      |
| CB4856                                                                                         | CT | II | 1278650 | 1281039 | WBGene00023499 | srz-63    | Y57G7A.12 | 0.000385831153408844 |
| AGIWUR2017;AGIWUR41865;AGIWUR43322                                                             |    |    |         |         |                |           |           |                      |
| CB4856                                                                                         | CT | II | 1281974 | 1285614 | WBGene00021969 | Y57G7A.6  | Y57G7A.6  | 0.341394794125341    |
| AGIWUR17694                                                                                    |    |    |         |         |                |           |           |                      |
| CB4856                                                                                         | CT | II | 1285797 | 1286371 | WBGene00021967 | Y57G7A.3  | Y57G7A.3  | -0.311007179848529   |
| AGIWUR9015;AGIWUR19309;AGIWUR20491;AGIWUR25151;AGIWUR25756;AGIWUR39388                         |    |    |         |         |                |           |           |                      |
| CB4856                                                                                         | CT | II | 1288735 | 1293257 | WBGene00021970 | srz-64    | Y57G7A.7  | 0.137980511814238    |
| AGIWUR34238                                                                                    |    |    |         |         |                |           |           |                      |
| CB4856                                                                                         | CT | II | 1296078 | 1296746 | WBGene00021966 | Y57G7A.2  | Y57G7A.2  | 0.0240489291046853   |
| AGIWUR8814                                                                                     |    |    |         |         |                |           |           |                      |
| CB4856                                                                                         | CT | II | 1298469 | 1299716 | WBGene00021965 | Y57G7A.1  | Y57G7A.1  | -0.292830503127295   |
| AGIWUR20526                                                                                    |    |    |         |         |                |           |           |                      |
| CB4856                                                                                         | CT | II | 1300064 | 1301641 | WBGene00021972 | glb-31    | Y57G7A.9  | -0.0559714687974004  |
| AGIWUR8263                                                                                     |    |    |         |         |                |           |           |                      |
| CB4856                                                                                         | CT | II | 1302497 | 1306136 | WBGene00021973 | emc-2     | Y57G7A.10 | -0.0983347225853173  |
| AGIWUR4278                                                                                     |    |    |         |         |                |           |           |                      |
| CB4856                                                                                         | CT | II | 1306240 | 1310133 | WBGene00000112 | alh-6     | F56D12.1  | -0.274311304012134   |
| AGIWUR21026;AGIWUR21258;AGIWUR24232;AGIWUR28867;AGIWUR34752;AGIWUR36615;AGIWUR43212            |    |    |         |         |                |           |           |                      |
| CB4856                                                                                         | CT | II | 1310518 | 1320437 | WBGene00018974 | fcho-1    | F56D12.6  | 0.155710909461497    |
| AGIWUR3322;AGIWUR10578                                                                         |    |    |         |         |                |           |           |                      |
| CB4856                                                                                         | CT | II | 1321037 | 1323170 | WBGene00006924 | vig-1     | F56D12.5  | 0.276398985384995    |
| AGIWUR2756;AGIWUR18673;AGIWUR22674;AGIWUR30958;AGIWUR33919;AGIWUR35778;AGIWUR35851;AGIWUR41568 |    |    |         |         |                |           |           |                      |
| CB4856                                                                                         | CT | II | 1326995 | 1350136 | WBGene00002176 | jip-1     | F56D12.4  | 0.40558795924319     |



|                                                                                    |    |         |         |                |           |           |                     |
|------------------------------------------------------------------------------------|----|---------|---------|----------------|-----------|-----------|---------------------|
| AGIWUR11259                                                                        |    |         |         |                |           |           |                     |
| CB4856 CT                                                                          | II | 1350720 | 1355641 | WBGene00015728 | C13A10.1  | C13A10.1  | 0.0960196648548202  |
| AGIWUR42053                                                                        |    |         |         |                |           |           |                     |
| CB4856 CT                                                                          | II | 1357177 | 1358005 | WBGene00015729 | C13A10.2  | C13A10.2  | -0.0108845100162611 |
| AGIWUR20549                                                                        |    |         |         |                |           |           |                     |
| CB4856 CT                                                                          | II | 1368103 | 1374988 | WBGene00018819 | rog-1     | F54D12.6  | 0.0963879696719272  |
| AGIWUR42436;AGIWUR43632                                                            |    |         |         |                |           |           |                     |
| CB4856 CT                                                                          | II | 1377628 | 1378359 | WBGene00044424 | F54D12.10 | F54D12.10 | -0.137726071550282  |
| AGIWUR38508                                                                        |    |         |         |                |           |           |                     |
| CB4856 CT                                                                          | II | 1380944 | 1381713 | WBGene00018822 | F54D12.9  | F54D12.9  | -0.404815910201867  |
| AGIWUR30305                                                                        |    |         |         |                |           |           |                     |
| CB4856 CT                                                                          | II | 1381807 | 1385380 | WBGene00018820 | F54D12.7  | F54D12.7  | -0.0289448885583514 |
| AGIWUR17467                                                                        |    |         |         |                |           |           |                     |
| CB4856 CT                                                                          | II | 1386888 | 1391567 | WBGene00000008 | aat-7     | F54D12.3  | -0.461223775205037  |
| AGIWUR12832                                                                        |    |         |         |                |           |           |                     |
| CB4856 CT                                                                          | II | 1393488 | 1394105 | WBGene00044425 | F54D12.11 | F54D12.11 | -0.0468385982981143 |
| AGIWUR1470;AGIWUR23949;AGIWUR28151;AGIWUR37605;AGIWUR41989                         |    |         |         |                |           |           |                     |
| CB4856 CT                                                                          | II | 1395004 | 1398038 | WBGene00018821 | F54D12.8  | F54D12.8  | 0.0390018078276118  |
| AGIWUR36291                                                                        |    |         |         |                |           |           |                     |
| CB4856 CT                                                                          | II | 1398761 | 1400030 | WBGene00018816 | F54D12.2  | F54D12.2  | -0.109643405249264  |
| AGIWUR41051                                                                        |    |         |         |                |           |           |                     |
| CB4856 CT                                                                          | II | 1400405 | 1401371 | WBGene00018815 | F54D12.1  | F54D12.1  | -0.0696553619293399 |
| AGIWUR2284                                                                         |    |         |         |                |           |           |                     |
| CB4856 CT                                                                          | II | 1401774 | 1402134 | WBGene00021786 | Y51H7C.8  | Y51H7C.8  | -0.0704261110357933 |
| AGIWUR23325                                                                        |    |         |         |                |           |           |                     |
| CB4856 CT                                                                          | II | 1402569 | 1403215 | WBGene00021785 | Y51H7C.7  | Y51H7C.7  | -0.189416482307173  |
| AGIWUR3019                                                                         |    |         |         |                |           |           |                     |
| CB4856 CT                                                                          | II | 1403321 | 1409118 | WBGene00021784 | cogc-4    | Y51H7C.6  | -0.190374224747954  |
| AGIWUR9683;AGIWUR21974;AGIWUR26256;AGIWUR35503;AGIWUR35651;AGIWUR37749;AGIWUR41187 |    |         |         |                |           |           |                     |
| CB4856 CT                                                                          | II | 1409184 | 1411472 | WBGene00021787 | Y51H7C.9  | Y51H7C.9  | -0.1725328424557    |
| AGIWUR30133                                                                        |    |         |         |                |           |           |                     |
| CB4856 CT                                                                          | II | 1412409 | 1420150 | WBGene00021783 | Y51H7C.5  | Y51H7C.5  | -0.250913061230882  |
| AGIWUR13720;AGIWUR20788;AGIWUR28870                                                |    |         |         |                |           |           |                     |
| CB4856 CT                                                                          | II | 1420422 | 1423668 | WBGene00021788 | Y51H7C.10 | Y51H7C.10 | 0.570964208996573   |
| AGIWUR18507;AGIWUR32455;AGIWUR33386;AGIWUR37153;AGIWUR38549                        |    |         |         |                |           |           |                     |
| CB4856 CT                                                                          | II | 1425758 | 1437499 | WBGene00021789 | no1-6     | Y51H7C.11 | 0.0225843655920421  |
| AGIWUR11653;AGIWUR20656                                                            |    |         |         |                |           |           |                     |
| CB4856 CT                                                                          | II | 1438490 | 1439697 | WBGene00021781 | Y51H7C.3  | Y51H7C.3  | -0.125740171360114  |
| AGIWUR8694;AGIWUR17307;AGIWUR19226;AGIWUR22706;AGIWUR27660;AGIWUR42418             |    |         |         |                |           |           |                     |

|                                                                                                            |    |         |         |                |           |           |                     |
|------------------------------------------------------------------------------------------------------------|----|---------|---------|----------------|-----------|-----------|---------------------|
| CB4856 CT                                                                                                  | II | 1440066 | 1446746 | WBGene00021790 | Y51H7C.12 | Y51H7C.12 | 0.538591655929382   |
| AGIWUR27053                                                                                                |    |         |         |                |           |           |                     |
| CB4856 CT                                                                                                  | II | 1459140 | 1461307 | WBGene00044439 | Y51H7C.15 | Y51H7C.15 | 0.0493620361079028  |
| AGIWUR793;AGIWUR1636;AGIWUR35924;AGIWUR36322;AGIWUR41340                                                   |    |         |         |                |           |           |                     |
| CB4856 CT                                                                                                  | II | 1463268 | 1466546 | WBGene00021791 | Y51H7C.13 | Y51H7C.13 | -0.49808122275723   |
| AGIWUR16739                                                                                                |    |         |         |                |           |           |                     |
| CB4856 CT                                                                                                  | II | 1467727 | 1469604 | WBGene00021779 | Y51H7C.1  | Y51H7C.1  | -0.760004236722761  |
| AGIWUR40157                                                                                                |    |         |         |                |           |           |                     |
| CB4856 CT                                                                                                  | II | 1472625 | 1473581 | WBGene00044643 | H17B01.5  | H17B01.5  | 0.452203624045288   |
| AGIWUR42937                                                                                                |    |         |         |                |           |           |                     |
| CB4856 CT                                                                                                  | II | 1484094 | 1485764 | WBGene00019208 | lips-14   | H17B01.3  | -0.878618564643556  |
| AGIWUR28063                                                                                                |    |         |         |                |           |           |                     |
| CB4856 CT                                                                                                  | II | 1489930 | 1500330 | WBGene00019209 | emc-1     | H17B01.4  | -0.08410429016336   |
| AGIWUR5311;AGIWUR12574;AGIWUR14027                                                                         |    |         |         |                |           |           |                     |
| CB4856 CT                                                                                                  | II | 1504566 | 1509831 | WBGene00019207 | fgt-1     | H17B01.1  | 0.194481895864577   |
| AGIWUR3961;AGIWUR9439;AGIWUR14822;AGIWUR17175;AGIWUR35685;AGIWUR37584                                      |    |         |         |                |           |           |                     |
| CB4856 CT                                                                                                  | II | 1510288 | 1517454 | WBGene00021772 | math-45   | Y51H7BM.1 | 0.376184800144836   |
| AGIWUR22347                                                                                                |    |         |         |                |           |           |                     |
| CB4856 CT                                                                                                  | II | 1519222 | 1520328 | WBGene00044645 | Y51H7BR.8 | Y51H7BR.8 | 0.0357349242838083  |
| AGIWUR13474;AGIWUR17530;AGIWUR23980;AGIWUR31130;AGIWUR37906                                                |    |         |         |                |           |           |                     |
| CB4856 CT                                                                                                  | II | 1520384 | 1521842 | WBGene00005704 | sru-41    | Y51H7BR.6 | -0.0335212554863471 |
| AGIWUR12775;AGIWUR36218                                                                                    |    |         |         |                |           |           |                     |
| CB4856 CT                                                                                                  | II | 1523565 | 1525598 | WBGene00021778 | Y51H7BR.7 | Y51H7BR.7 | 0.00998475768819951 |
| AGIWUR41969                                                                                                |    |         |         |                |           |           |                     |
| CB4856 CT                                                                                                  | II | 1529359 | 1535208 | WBGene00021776 | Y51H7BR.4 | Y51H7BR.4 | -0.0821401142124394 |
| AGIWUR5447;AGIWUR16636;AGIWUR18616;AGIWUR23149;AGIWUR24516;AGIWUR25783;AGIWUR31085;AGIWUR38742;AGIWUR39425 |    |         |         |                |           |           |                     |
| CB4856 CT                                                                                                  | II | 1536231 | 1537275 | WBGene00021774 | fbxb-43   | Y51H7BR.2 | 0.14087635076005    |
| AGIWUR17877                                                                                                |    |         |         |                |           |           |                     |
| CB4856 CT                                                                                                  | II | 1537621 | 1538666 | WBGene00021773 | fbxb-42   | Y51H7BR.1 | 0.0690292928741973  |
| AGIWUR31502                                                                                                |    |         |         |                |           |           |                     |
| CB4856 CT                                                                                                  | II | 1538891 | 1539901 | WBGene00019416 | fbxb-44   | K05F6.5   | 0.116565717948097   |
| AGIWUR4279;AGIWUR17677                                                                                     |    |         |         |                |           |           |                     |
| CB4856 CT                                                                                                  | II | 1543482 | 1545415 | WBGene00019415 | K05F6.4   | K05F6.4   | -0.140459518387803  |
| AGIWUR24379                                                                                                |    |         |         |                |           |           |                     |
| CB4856 CT                                                                                                  | II | 1545925 | 1546991 | WBGene00045486 | K05F6.12  | K05F6.12  | 0.226837280813927   |
| AGIWUR28538                                                                                                |    |         |         |                |           |           |                     |
| CB4856 CT                                                                                                  | II | 1547060 | 1548182 | WBGene00269420 | K05F6.16  | K05F6.16  | -0.0513440701672749 |
| AGIWUR7272                                                                                                 |    |         |         |                |           |           |                     |
| CB4856 CT                                                                                                  | II | 1555257 | 1556335 | WBGene00019418 | fbxb-54   | K05F6.7   | -0.0344559838511875 |
| AGIWUR5734                                                                                                 |    |         |         |                |           |           |                     |
| CB4856 CT                                                                                                  | II | 1567324 | 1567746 | WBGene00019419 | K05F6.8   | K05F6.8   | -0.0565696507288354 |

AGIWUR4026;AGIWUR22442;AGIWUR26126;AGIWUR30746;AGIWUR36813;AGIWUR44179  
 CB4856 CT II 1570065 1571134 WBGene00019420 fbx-46 K05F6.9 -0.0379270764438431 AGIWUR5730  
 CB4856 CT II 1572522 1573300 WBGene00269419 K05F6.15 K05F6.15 0.143341787307428  
 AGIWUR20317  
 CB4856 CT II 1574557 1576115 WBGene00019421 K05F6.10 K05F6.10 0.303970985525398  
 AGIWUR3384;AGIWUR5668;AGIWUR9394;AGIWUR24867  
 CB4856 CT II 1577471 1579986 WBGene00020326 math-38 T07H3.3 1.99427903978718 AGIWUR28995  
 CB4856 CT II 1582876 1584240 WBGene00020327 clec-21 T07H3.4 -0.200182882964563  
 AGIWUR7239;AGIWUR35909  
 CB4856 CT II 1588542 1589945 WBGene00044429 T07H3.7 T07H3.7 -0.124850615198759  
 AGIWUR11204;AGIWUR19451;AGIWUR40079  
 CB4856 CT II 1593480 1595237 WBGene00020328 clec-20 T07H3.5 0.265150200273092 AGIWUR37368  
 CB4856 CT II 1598029 1599488 WBGene00020325 bath-46 T07H3.2 0.271948416331888 AGIWUR648  
 CB4856 CT II 1599471 1600714 WBGene00020329 bath-26 T07H3.6 -0.417224013276943 AGIWUR27574  
 CB4856 CT II 1601789 1604618 WBGene00006464 bath-47 T07H3.1 0.16455773037525 AGIWUR1261  
 CB4856 CT II 1604666 1606143 WBGene00015595 bath-33 C08E3.3 0.193286656065786 AGIWUR35175  
 CB4856 CT II 1606595 1607603 WBGene00015596 fbxa-161 C08E3.4 1.43149092186227  
 AGIWUR37564  
 CB4856 CT II 1607869 1609014 WBGene00015597 fbxa-162 C08E3.5 0.864771217137826  
 AGIWUR13440  
 CB4856 CT II 1609256 1610715 WBGene00015598 fbxa-163 C08E3.6 1.13378308408527  
 AGIWUR10816;AGIWUR28346;AGIWUR37259  
 CB4856 CT II 1611331 1612510 WBGene00015594 btb-15 C08E3.2 0.79389285087373 AGIWUR30529  
 CB4856 CT II 1612788 1614059 WBGene00015599 fbxa-164 C08E3.7 0.840872973713616  
 AGIWUR28121;AGIWUR30670;AGIWUR34271  
 CB4856 CT II 1614793 1616463 WBGene00015600 fbxa-165 C08E3.8 -0.0109280079247451  
 AGIWUR14879  
 CB4856 CT II 1616912 1619004 WBGene00015601 fbxa-166 C08E3.9 0.104718091188016  
 AGIWUR21789  
 CB4856 CT II 1619894 1621261 WBGene00015602 fbxa-158 C08E3.10 -0.0818205548469031  
 AGIWUR1075;AGIWUR11977;AGIWUR27950  
 CB4856 CT II 1623907 1624672 WBGene00015604 fbxa-160 C08E3.12 0.263512776083937  
 AGIWUR26010  
 CB4856 CT II 1625966 1626883 WBGene00044415 C08E3.14 C08E3.14 -0.0547717853931387  
 AGIWUR16413;AGIWUR35631  
 CB4856 CT II 1627479 1627883 WBGene00044416 C08E3.15 C08E3.15 1.15047335326541  
 AGIWUR12234;AGIWUR14033;AGIWUR20688  
 CB4856 CT II 1639213 1640596 WBGene00005293 srh-72 ZC204.5 0.22206814655444 AGIWUR31572  
 CB4856 CT II 1644249 1644814 WBGene00022556 ZC204.6 ZC204.6 -0.20910242065102 AGIWUR18821

|                                                 |    |         |         |                |          |          |                     |             |
|-------------------------------------------------|----|---------|---------|----------------|----------|----------|---------------------|-------------|
| CB4856 CT                                       | II | 1645410 | 1646299 | WBGene00194714 | ZC204.17 | ZC204.17 | -0.0277100545372795 |             |
| AGIWUR23907                                     |    |         |         |                |          |          |                     |             |
| CB4856 CT                                       | II | 1646597 | 1647568 | WBGene00044695 | fbxb-27  | ZC204.16 | -0.035388533499539  |             |
| AGIWUR5799;AGIWUR21143                          |    |         |         |                |          |          |                     |             |
| CB4856 CT                                       | II | 1647908 | 1648865 | WBGene00022558 | fbxb-21  | ZC204.8  | -0.247561861084572  |             |
| AGIWUR3003;AGIWUR17859                          |    |         |         |                |          |          |                     |             |
| CB4856 CT                                       | II | 1649138 | 1650197 | WBGene00022559 | fbxb-20  | ZC204.9  | 0.0188327419915995  | AGIWUR31394 |
| CB4856 CT                                       | II | 1650819 | 1651580 | WBGene00022560 | fbxb-16  | ZC204.10 | 0.347918682454507   |             |
| AGIWUR12940                                     |    |         |         |                |          |          |                     |             |
| CB4856 CT                                       | II | 1652510 | 1653497 | WBGene00022557 | fbxb-15  | ZC204.7  | 0.091067050986763   | AGIWUR27611 |
| CB4856 CT                                       | II | 1653775 | 1654732 | WBGene00022561 | btb-13   | ZC204.11 | 0.126572602219703   |             |
| AGIWUR16801                                     |    |         |         |                |          |          |                     |             |
| CB4856 CT                                       | II | 1655217 | 1656148 | WBGene00022555 | btb-12   | ZC204.3  | 0.224198944083456   | AGIWUR30043 |
| CB4856 CT                                       | II | 1656263 | 1657302 | WBGene00022562 | ZC204.12 | ZC204.12 | -0.221636923243166  |             |
| AGIWUR4325;AGIWUR23512;AGIWUR25253;AGIWUR38231  |    |         |         |                |          |          |                     |             |
| CB4856 CT                                       | II | 1663699 | 1665764 | WBGene00022554 | dux1-1   | ZC204.2  | -0.210707708777929  |             |
| AGIWUR8677;AGIWUR19314                          |    |         |         |                |          |          |                     |             |
| CB4856 CT                                       | II | 1666325 | 1667482 | WBGene00022553 | ZC204.1  | ZC204.1  | 0.069990530293742   |             |
| AGIWUR14813;AGIWUR30212;AGIWUR36411;AGIWUR42000 |    |         |         |                |          |          |                     |             |
| CB4856 CT                                       | II | 1667522 | 1669013 | WBGene00005844 | srw-97   | ZC204.15 | 0.0304769945195149  |             |
| AGIWUR4173                                      |    |         |         |                |          |          |                     |             |
| CB4856 CT                                       | II | 1670833 | 1674337 | WBGene00003734 | nhx-6    | F58E1.6  | -0.979745530480876  | AGIWUR15556 |
| CB4856 CT                                       | II | 1676388 | 1677439 | WBGene00019037 | fbxb-17  | F58E1.5  | 0.140690331463693   | AGIWUR9617  |
| CB4856 CT                                       | II | 1677449 | 1679252 | WBGene00019038 | irld-37  | F58E1.7  | 0.23027494960402    | AGIWUR21516 |
| CB4856 CT                                       | II | 1679381 | 1682134 | WBGene00019036 | irld-36  | F58E1.4  | -0.419122184013254  | AGIWUR38369 |
| CB4856 CT                                       | II | 1682518 | 1683655 | WBGene00019035 | fbxb-26  | F58E1.3  | 0.298586603842937   | AGIWUR8917  |
| CB4856 CT                                       | II | 1684048 | 1685091 | WBGene00019034 | fbxb-25  | F58E1.2  | -0.0148067545235495 | AGIWUR21302 |
| CB4856 CT                                       | II | 1688235 | 1689172 | WBGene00019040 | fbxb-19  | F58E1.9  | 0.275830414062585   |             |
| AGIWUR2980;AGIWUR24623;AGIWUR33051              |    |         |         |                |          |          |                     |             |
| CB4856 CT                                       | II | 1689696 | 1691077 | WBGene00019041 | fbxc-22  | F58E1.10 | 0.204348715983402   |             |
| AGIWUR38601                                     |    |         |         |                |          |          |                     |             |
| CB4856 CT                                       | II | 1691557 | 1692907 | WBGene00019042 | fbxc-21  | F58E1.11 | -0.0120977869793144 |             |
| AGIWUR28792                                     |    |         |         |                |          |          |                     |             |
| CB4856 CT                                       | II | 1693296 | 1694615 | WBGene00019043 | fbxc-26  | F58E1.12 | -0.324350370235129  |             |
| AGIWUR27871                                     |    |         |         |                |          |          |                     |             |
| CB4856 CT                                       | II | 1694815 | 1695827 | WBGene00019044 | F58E1.13 | F58E1.13 | -0.257718152540821  |             |
| AGIWUR42519                                     |    |         |         |                |          |          |                     |             |
| CB4856 CT                                       | II | 1702384 | 1703463 | WBGene00019045 | fbxb-47  | F58E1.14 | -0.13312579789851   |             |
| AGIWUR1950                                      |    |         |         |                |          |          |                     |             |

|                                                                                                           |    |         |         |                |           |           |                     |             |
|-----------------------------------------------------------------------------------------------------------|----|---------|---------|----------------|-----------|-----------|---------------------|-------------|
| CB4856 CT                                                                                                 | II | 1704904 | 1706476 | WBGene00018442 | sdz-18    | F45C12.11 | 0.136661257140728   |             |
| AGIWUR31803                                                                                               |    |         |         |                |           |           |                     |             |
| CB4856 CT                                                                                                 | II | 1706709 | 1707720 | WBGene00018441 | math-29   | F45C12.10 | 0.00382233357562578 |             |
| AGIWUR29511;AGIWUR39167                                                                                   |    |         |         |                |           |           |                     |             |
| CB4856 CT                                                                                                 | II | 1708432 | 1709696 | WBGene00018440 | F45C12.9  | F45C12.9  | -0.117880193577627  |             |
| AGIWUR37829                                                                                               |    |         |         |                |           |           |                     |             |
| CB4856 CT                                                                                                 | II | 1710259 | 1711417 | WBGene00018439 | fbxa-184  | F45C12.8  | -0.323791547880374  |             |
| AGIWUR11427;AGIWUR15075;AGIWUR21331;AGIWUR23042;AGIWUR42225                                               |    |         |         |                |           |           |                     |             |
| CB4856 CT                                                                                                 | II | 1713238 | 1714397 | WBGene00018443 | btb-7     | F45C12.12 | -0.427258192659925  |             |
| AGIWUR35441                                                                                               |    |         |         |                |           |           |                     |             |
| CB4856 CT                                                                                                 | II | 1715162 | 1716497 | WBGene00018438 | btb-6     | F45C12.7  | -0.194960814396124  |             |
| AGIWUR9254                                                                                                |    |         |         |                |           |           |                     |             |
| CB4856 CT                                                                                                 | II | 1718175 | 1719253 | WBGene00018444 | fbxb-48   | F45C12.13 | 0.0265316854999531  |             |
| AGIWUR32498                                                                                               |    |         |         |                |           |           |                     |             |
| CB4856 CT                                                                                                 | II | 1721323 | 1722423 | WBGene00018445 | fbxb-5    | F45C12.14 | 0.221565625535629   |             |
| AGIWUR6059;AGIWUR14552;AGIWUR42708                                                                        |    |         |         |                |           |           |                     |             |
| CB4856 CT                                                                                                 | II | 1722770 | 1724186 | WBGene00018437 | btb-8     | F45C12.6  | 0.185065994788189   |             |
| AGIWUR19396                                                                                               |    |         |         |                |           |           |                     |             |
| CB4856 CT                                                                                                 | II | 1726141 | 1727106 | WBGene00269388 | F45C12.17 | F45C12.17 | 0.0789983419328335  |             |
| AGIWUR7469;AGIWUR23367                                                                                    |    |         |         |                |           |           |                     |             |
| CB4856 CT                                                                                                 | II | 1728506 | 1730065 | WBGene00018435 | btb-9     | F45C12.4  | 0.0392665507757339  |             |
| AGIWUR20385;AGIWUR29933;AGIWUR32157                                                                       |    |         |         |                |           |           |                     |             |
| CB4856 CT                                                                                                 | II | 1730403 | 1732046 | WBGene00018434 | ceh-81    | F45C12.3  | 0.0808468787569598  |             |
| AGIWUR25864                                                                                               |    |         |         |                |           |           |                     |             |
| CB4856 CT                                                                                                 | II | 1732276 | 1733291 | WBGene00018433 | ceh-82    | F45C12.2  | -0.125470481992716  |             |
| AGIWUR16980                                                                                               |    |         |         |                |           |           |                     |             |
| CB4856 CT                                                                                                 | II | 1733718 | 1736533 | WBGene00018446 | ceh-83    | F45C12.15 | -0.172522067664016  |             |
| AGIWUR43133                                                                                               |    |         |         |                |           |           |                     |             |
| CB4856 CT                                                                                                 | II | 1736866 | 1738944 | WBGene00018447 | irld-9    | F45C12.16 | -0.150874417954765  |             |
| AGIWUR1756                                                                                                |    |         |         |                |           |           |                     |             |
| CB4856 CT                                                                                                 | II | 1739076 | 1741013 | WBGene00018432 | irld-33   | F45C12.1  | 0.270396484900003   |             |
| AGIWUR35733                                                                                               |    |         |         |                |           |           |                     |             |
| CB4856 CT                                                                                                 | II | 1744483 | 1745859 | WBGene00018105 | clcc-19   | F36H5.6   | 0.0777628686961158  | AGIWUR34948 |
| CB4856 CT                                                                                                 | II | 1746189 | 1747582 | WBGene00006223 | str-179   | F36H5.7   | 0.0332570315773104  |             |
| AGIWUR6697;AGIWUR7711;AGIWUR18141;AGIWUR18259;AGIWUR19978;AGIWUR25714;AGIWUR34971;AGIWUR42875;AGIWUR43866 |    |         |         |                |           |           |                     |             |
| CB4856 CT                                                                                                 | II | 1748378 | 1749943 | WBGene00206519 | F36H5.13  | F36H5.13  | 0.335713235064251   |             |
| AGIWUR24315                                                                                               |    |         |         |                |           |           |                     |             |
| CB4856 CT                                                                                                 | II | 1752749 | 1753090 | WBGene00018107 | F36H5.9   | F36H5.9   | -0.224647969606178  | AGIWUR28515 |
| CB4856 CT                                                                                                 | II | 1753526 | 1754439 | WBGene00018109 | fbxb-12   | F36H5.11  | 0.013667934883161   |             |

AGIWUR21376  
CB4856 CT II 1756820 1757761 WBGene00018108 F36H5.10 F36H5.10 0.0670546603415882  
AGIWUR4473;AGIWUR14070;AGIWUR15873;AGIWUR17539;AGIWUR21671;AGIWUR22520;AGIWUR33979;AGIWUR38675;AGIWUR39220  
CB4856 CT II 1758326 1760667 WBGene00018104 fbxb-53 F36H5.5 0.945400305606904 AGIWUR9607  
CB4856 CT II 1761839 1762906 WBGene00018103 F36H5.4 F36H5.4 0.056396703001214  
AGIWUR19793;AGIWUR21756;AGIWUR22590;AGIWUR25767;AGIWUR34490  
CB4856 CT II 1763372 1766555 WBGene00018102 math-28 F36H5.3 -0.13321418282052  
AGIWUR2347;AGIWUR15007;AGIWUR27128  
CB4856 CT II 1767802 1777394 WBGene00018101 math-27 F36H5.2 -0.241382042030857  
AGIWUR11186;AGIWUR32824  
CB4856 CT II 1772085 1778526 WBGene00015608 math-3 C08F1.4 -0.36350698784335  
AGIWUR32321;AGIWUR38372  
CB4856 CT II 1778772 1782409 WBGene00015609 math-4 C08F1.5 -0.745286859406396 AGIWUR13924  
CB4856 CT II 1783451 1784481 WBGene00044417 C08F1.11 C08F1.11 0.646547256240657  
AGIWUR27089  
CB4856 CT II 1785270 1786309 WBGene00015613 C08F1.10 C08F1.10 0.227085627122595  
AGIWUR3444;AGIWUR13602;AGIWUR23231;AGIWUR23253;AGIWUR27163;AGIWUR40491  
CB4856 CT II 1787222 1788187 WBGene00015610 C08F1.6 C08F1.6 0.874123328146414 AGIWUR11918  
CB4856 CT II 1789181 1790217 WBGene00015607 fbxb-13 C08F1.3 0.493866813801359 AGIWUR38059  
CB4856 CT II 1791981 1792962 WBGene00006088 str-21 C08F1.2 0.206111012915491 AGIWUR15309  
CB4856 CT II 1797852 1801377 WBGene00015606 math-2 C08F1.1 -0.114916199563689 AGIWUR37774  
CB4856 CT II 1802107 1803302 WBGene00006089 str-22 C08F1.7 0.24174690181645  
AGIWUR10773;AGIWUR24537  
CB4856 CT II 1817281 1818400 WBGene00020362 fbxb-10 T08E11.6 0.322354446901032  
AGIWUR7747  
CB4856 CT II 1818889 1820094 WBGene00020363 fbxa-3 T08E11.7 -0.0109330382694468  
AGIWUR29418  
CB4856 CT II 1821026 1823034 WBGene00020361 fbxc-19 T08E11.5 -0.0904753355779775  
AGIWUR22962;AGIWUR26801;AGIWUR29434;AGIWUR38598;AGIWUR39671;AGIWUR42018  
CB4856 CT II 1824629 1830195 WBGene00020360 math-41 T08E11.4 -0.49065001007758  
AGIWUR14454  
CB4856 CT II 1830632 1831789 WBGene00020359 math-40 T08E11.3 -0.545656122500995  
AGIWUR21133  
CB4856 CT II 1832343 1833518 WBGene00020358 math-39 T08E11.2 -0.101079631683898  
AGIWUR14134  
CB4856 CT II 1833627 1835783 WBGene00020364 T08E11.8 T08E11.8 -0.0322601122479833  
AGIWUR7322  
CB4856 CT II 1840975 1842942 WBGene00016884 C52E2.5 C52E2.5 0.243180739001517 AGIWUR28213  
CB4856 CT II 1843165 1846234 WBGene00016883 C52E2.4 C52E2.4 0.139583801940655 AGIWUR9343

|                                                            |    |    |         |         |                |          |          |                     |             |
|------------------------------------------------------------|----|----|---------|---------|----------------|----------|----------|---------------------|-------------|
| CB4856                                                     | CT | II | 1846990 | 1848154 | WBGene00016885 | fbxb-97  | C52E2.6  | -0.0982679323511189 | AGIWUR4720  |
| CB4856                                                     | CT | II | 1849430 | 1850403 | WBGene00016886 | fbxb-96  | C52E2.7  | -0.0931266347459854 | AGIWUR33334 |
| CB4856                                                     | CT | II | 1852803 | 1853092 | WBGene00016881 | C52E2.2  | C52E2.2  | -2.24159443132771   | AGIWUR33694 |
| CB4856                                                     | CT | II | 1854394 | 1855360 | WBGene00016880 | fbxb-95  | C52E2.1  | -0.252489450614335  |             |
| AGIWUR16918;AGIWUR31962;AGIWUR36994                        |    |    |         |         |                |          |          |                     |             |
| CB4856                                                     | CT | II | 1862634 | 1863782 | WBGene00015830 | fbxb-98  | C16C4.6  | -0.0961067112579608 | AGIWUR26970 |
| CB4856                                                     | CT | II | 1864578 | 1864884 | WBGene00044359 | C16C4.17 | C16C4.17 | 0.0795526712207266  |             |
| AGIWUR5683;AGIWUR26687;AGIWUR28800;AGIWUR32417;AGIWUR33559 |    |    |         |         |                |          |          |                     |             |
| CB4856                                                     | CT | II | 1866386 | 1867894 | WBGene00015829 | math-15  | C16C4.5  | -0.737425564892327  | AGIWUR14519 |
| CB4856                                                     | CT | II | 1869410 | 1870803 | WBGene00015828 | math-14  | C16C4.4  | -0.536009019817301  | AGIWUR20950 |
| CB4856                                                     | CT | II | 1873480 | 1875106 | WBGene00015840 | math-11  | C16C4.16 | 0.230656023167878   |             |
| AGIWUR33822                                                |    |    |         |         |                |          |          |                     |             |
| CB4856                                                     | CT | II | 1875958 | 1877237 | WBGene00015827 | math-13  | C16C4.3  | -0.128059416677485  | AGIWUR291   |
| CB4856                                                     | CT | II | 1877579 | 1878763 | WBGene00015832 | math-16  | C16C4.8  | -0.0332037788874491 | AGIWUR13056 |
| CB4856                                                     | CT | II | 1879590 | 1880708 | WBGene00015833 | math-17  | C16C4.9  | -0.131370911918383  | AGIWUR27825 |
| CB4856                                                     | CT | II | 1881611 | 1882805 | WBGene00015834 | math-5   | C16C4.10 | -0.132893667337727  |             |
| AGIWUR44984                                                |    |    |         |         |                |          |          |                     |             |
| CB4856                                                     | CT | II | 1883596 | 1884735 | WBGene00015835 | math-6   | C16C4.11 | -0.0944832129889717 |             |
| AGIWUR35980                                                |    |    |         |         |                |          |          |                     |             |
| CB4856                                                     | CT | II | 1885439 | 1886479 | WBGene00015836 | math-7   | C16C4.12 | -0.324998832491334  |             |
| AGIWUR25687                                                |    |    |         |         |                |          |          |                     |             |
| CB4856                                                     | CT | II | 1887209 | 1889171 | WBGene00015837 | math-8   | C16C4.13 | 0.149657708814011   |             |
| AGIWUR20908                                                |    |    |         |         |                |          |          |                     |             |
| CB4856                                                     | CT | II | 1889909 | 1890782 | WBGene00015838 | math-9   | C16C4.14 | -0.0339022155418984 |             |
| AGIWUR34335                                                |    |    |         |         |                |          |          |                     |             |
| CB4856                                                     | CT | II | 1890851 | 1891699 | WBGene00015826 | math-12  | C16C4.2  | 0.149186437156372   | AGIWUR17591 |
| CB4856                                                     | CT | II | 1900238 | 1901921 | WBGene00016719 | math-24  | C46F9.3  | 0.0893050845853658  | AGIWUR32651 |
| CB4856                                                     | CT | II | 1902281 | 1904446 | WBGene00016718 | math-23  | C46F9.2  | 0.168139176488204   | AGIWUR5837  |
| CB4856                                                     | CT | II | 1905429 | 1907775 | WBGene00016717 | math-22  | C46F9.1  | -0.310095981052247  |             |
| AGIWUR15993;AGIWUR33102                                    |    |    |         |         |                |          |          |                     |             |
| CB4856                                                     | CT | II | 1908161 | 1909735 | WBGene00018662 | math-30  | F52C6.5  | 0.0788657501136178  | AGIWUR14125 |
| CB4856                                                     | CT | II | 1912450 | 1912841 | WBGene00018663 | math-31  | F52C6.6  | 0.0766980620191546  | AGIWUR328   |
| CB4856                                                     | CT | II | 1913605 | 1916376 | WBGene00018664 | bath-11  | F52C6.7  | -0.161045110909466  | AGIWUR41813 |
| CB4856                                                     | CT | II | 1916713 | 1917958 | WBGene00018665 | bath-4   | F52C6.8  | -0.349646590015915  | AGIWUR32571 |
| CB4856                                                     | CT | II | 1918319 | 1919439 | WBGene00018666 | bath-6   | F52C6.9  | -0.266920299357505  |             |
| AGIWUR1207;AGIWUR16786;AGIWUR29145;AGIWUR41161             |    |    |         |         |                |          |          |                     |             |
| CB4856                                                     | CT | II | 1919926 | 1921111 | WBGene00018667 | bath-7   | F52C6.10 | -0.233001748534825  |             |
| AGIWUR5473                                                 |    |    |         |         |                |          |          |                     |             |
| CB4856                                                     | CT | II | 1921452 | 1922744 | WBGene00018668 | bath-2   | F52C6.11 | -0.352106272054796  |             |

AGIWUR14381  
CB4856 CT II 1923140 1923827 WBGene00018661 F52C6.4 F52C6.4 -0.0196480400073549  
AGIWUR2439;AGIWUR6117;AGIWUR13431;AGIWUR24905;AGIWUR32132  
CB4856 CT II 1924759 1925752 WBGene00018660 F52C6.3 F52C6.3 -0.345910000803287  
AGIWUR10072;AGIWUR19332  
CB4856 CT II 1926462 1927347 WBGene00018659 F52C6.2 F52C6.2 -0.143440370176056 AGIWUR29257  
CB4856 CT II 1927879 1928734 WBGene00018658 bath-22 F52C6.1 -0.0756073858170563  
AGIWUR7050;AGIWUR16188;AGIWUR18552;AGIWUR42126  
CB4856 CT II 1929149 1930086 WBGene00018669 F52C6.12 F52C6.12 -0.308214875485298  
AGIWUR9215;AGIWUR11588;AGIWUR21193;AGIWUR26570;AGIWUR42282  
CB4856 CT II 1930190 1930747 WBGene00018670 F52C6.13 F52C6.13 -0.163151920163379  
AGIWUR2092  
CB4856 CT II 1930991 1934507 WBGene00018671 F52C6.14 F52C6.14 -0.0427389652969348  
AGIWUR11418  
CB4856 CT II 1937063 1940147 WBGene00235352 ZK250.13 ZK250.13 0.416620408039096  
AGIWUR42114  
CB4856 CT II 1944058 1945168 WBGene00235354 ZK250.14 ZK250.14 0.136382262584445  
AGIWUR9209;AGIWUR37083  
CB4856 CT II 1953680 1955668 WBGene00022690 math-49 ZK250.7 -0.0537818580110976 AGIWUR24489  
CB4856 CT II 1956050 1958255 WBGene00022691 math-50 ZK250.8 -0.256063940175725 AGIWUR41755  
CB4856 CT II 1987285 1990667 WBGene00021193 math-44 Y16E11A.1 0.188943331793729  
AGIWUR42798  
CB4856 CT II 1994047 1995701 WBGene00016556 math-21 C40D2.3 -0.0386448406161604  
AGIWUR9190;AGIWUR26554  
CB4856 CT II 1996537 1998531 WBGene00016555 math-20 C40D2.2 -0.0914659503497024 AGIWUR12840  
CB4856 CT II 1999743 2000820 WBGene00016557 ceh-84 C40D2.4 -0.148541972242278 AGIWUR25294  
CB4856 CT II 2011485 2012838 WBGene00019137 ceh-85 F59H6.6 0.0351351343922284 AGIWUR34788  
CB4856 CT II 2012998 2013386 WBGene00269394 F59H6.15 F59H6.15 -0.327260744004256  
AGIWUR9029  
CB4856 CT II 2019654 2022441 WBGene00019133 F59H6.2 F59H6.2 0.108441991184561 AGIWUR29740  
CB4856 CT II 2025642 2026610 WBGene00019138 bath-21 F59H6.8 0.103442944772407 AGIWUR24725  
CB4856 CT II 2027612 2028812 WBGene00019139 bath-1 F59H6.9 -0.22225435351733 AGIWUR35302  
CB4856 CT II 2029232 2030467 WBGene00019140 bath-3 F59H6.10 -0.343025396862504  
AGIWUR1254  
CB4856 CT II 2030750 2031952 WBGene00019141 bath-5 F59H6.11 -0.398583763646235  
AGIWUR2269  
CB4856 CT II 2032569 2033243 WBGene00019142 btb-4 F59H6.12 -0.124073400412437  
AGIWUR41441;AGIWUR44999  
CB4856 CT II 2033586 2034812 WBGene00206415 F59H6.14 F59H6.14 -0.0988641651918112



|                                                                                 |    |    |         |         |                |           |           |                     |             |
|---------------------------------------------------------------------------------|----|----|---------|---------|----------------|-----------|-----------|---------------------|-------------|
| AGIWUR1220                                                                      |    |    |         |         |                |           |           |                     |             |
| CB4856                                                                          | CT | II | 2035702 | 2039388 | WBGene00019132 | bath-19   | F59H6.1   | -0.28979682691987   | AGIWUR32883 |
| CB4856                                                                          | CT | II | 2040368 | 2041629 | WBGene00015012 | bath-20   | B0047.1   | -0.387675104035614  |             |
| AGIWUR19234;AGIWUR42677;AGIWUR44896                                             |    |    |         |         |                |           |           |                     |             |
| CB4856                                                                          | CT | II | 2043089 | 2044087 | WBGene00015013 | btb-3     | B0047.2   | -0.0444526056396528 | AGIWUR36170 |
| CB4856                                                                          | CT | II | 2044619 | 2045601 | WBGene00015014 | bath-24   | B0047.3   | -0.314926493848384  | AGIWUR9357  |
| CB4856                                                                          | CT | II | 2048061 | 2049175 | WBGene00015016 | bath-14   | B0047.5   | -0.371910231750734  |             |
| AGIWUR22179;AGIWUR23543                                                         |    |    |         |         |                |           |           |                     |             |
| CB4856                                                                          | CT | II | 2050023 | 2051679 | WBGene00017209 | F07E5.4   | F07E5.4   | -0.172303489949218  | AGIWUR13648 |
| CB4856                                                                          | CT | II | 2053919 | 2059072 | WBGene00017210 | F07E5.5   | F07E5.5   | 0.0637338634027902  | AGIWUR43260 |
| CB4856                                                                          | CT | II | 2059869 | 2064018 | WBGene00017211 | fbxb-36   | F07E5.6   | 0.0841342482460412  | AGIWUR21594 |
| CB4856                                                                          | CT | II | 2068354 | 2068971 | WBGene00219315 | F07E5.12  | F07E5.12  | -0.492986371232211  |             |
| AGIWUR2322                                                                      |    |    |         |         |                |           |           |                     |             |
| CB4856                                                                          | CT | II | 2070593 | 2071516 | WBGene00017212 | F07E5.7   | F07E5.7   | 0.0948901150333601  |             |
| AGIWUR2175;AGIWUR23158;AGIWUR36248                                              |    |    |         |         |                |           |           |                     |             |
| CB4856                                                                          | CT | II | 2072221 | 2075830 | WBGene00017213 | F07E5.8   | F07E5.8   | 0.0787899433824135  | AGIWUR11692 |
| CB4856                                                                          | CT | II | 2076291 | 2080526 | WBGene00017214 | F07E5.9   | F07E5.9   | 1.1279444307913     | AGIWUR21892 |
| CB4856                                                                          | CT | II | 2081557 | 2082016 | WBGene00020535 | T16A1.4   | T16A1.4   | -0.150529514949524  | AGIWUR35506 |
| CB4856                                                                          | CT | II | 2083595 | 2083826 | WBGene00020536 | T16A1.5   | T16A1.5   | -0.536229213384987  | AGIWUR15560 |
| CB4856                                                                          | CT | II | 2084129 | 2084891 | WBGene00020534 | fbxc-49   | T16A1.3   | -0.0606476017037423 | AGIWUR3770  |
| CB4856                                                                          | CT | II | 2091772 | 2092111 | WBGene00269431 | T16A1.10  | T16A1.10  | 0.562441368978304   |             |
| AGIWUR5174                                                                      |    |    |         |         |                |           |           |                     |             |
| CB4856                                                                          | CT | II | 2095304 | 2098671 | WBGene00020533 | T16A1.2   | T16A1.2   | -0.150272132815742  | AGIWUR25813 |
| CB4856                                                                          | CT | II | 2098871 | 2104149 | WBGene00020532 | math-42   | T16A1.1   | -0.020152446289865  |             |
| AGIWUR4912;AGIWUR5197;AGIWUR24871;AGIWUR27173;AGIWUR31259                       |    |    |         |         |                |           |           |                     |             |
| CB4856                                                                          | CT | II | 2104524 | 2106866 | WBGene00020075 | math-35   | R52.3     | 0.0637141045668113  | AGIWUR19446 |
| CB4856                                                                          | CT | II | 2107197 | 2108395 | WBGene00020076 | R52.4     | R52.4     | 0.163574811386621   | AGIWUR29766 |
| CB4856                                                                          | CT | II | 2108787 | 2110043 | WBGene00020077 | R52.5     | R52.5     | 0.16331680488244    | AGIWUR35621 |
| CB4856                                                                          | CT | II | 2111227 | 2113048 | WBGene00020078 | R52.6     | R52.6     | 0.0600472992432444  | AGIWUR17386 |
| CB4856                                                                          | CT | II | 2114554 | 2116894 | WBGene00005408 | srh-195   | R52.7     | 0.153377545217452   |             |
| AGIWUR25884;AGIWUR27171;AGIWUR30449                                             |    |    |         |         |                |           |           |                     |             |
| CB4856                                                                          | CT | II | 2117276 | 2122181 | WBGene00020080 | math-37   | R52.9     | 0.223424132572545   |             |
| AGIWUR22322;AGIWUR38481                                                         |    |    |         |         |                |           |           |                     |             |
| CB4856                                                                          | CT | II | 2123687 | 2129281 | WBGene00020081 | sdz-29    | R52.10    | -0.0210786772677025 |             |
| AGIWUR997;AGIWUR7585;AGIWUR9725;AGIWUR17929;AGIWUR24130;AGIWUR36877;AGIWUR39906 |    |    |         |         |                |           |           |                     |             |
| CB4856                                                                          | CT | II | 2131070 | 2132475 | WBGene00020073 | sdz-28    | R52.1     | 0.192836523767019   | AGIWUR26196 |
| CB4856                                                                          | CT | II | 2133666 | 2135704 | WBGene00016548 | hpo-7     | C40A11.5  | 0.102702203399412   |             |
| AGIWUR40590                                                                     |    |    |         |         |                |           |           |                     |             |
| CB4856                                                                          | CT | II | 2136822 | 2136909 | WBGene00016553 | C40A11.10 | C40A11.10 | -0.137686010851374  |             |

|                                                                        |    |         |         |                |                  |                     |                     |  |
|------------------------------------------------------------------------|----|---------|---------|----------------|------------------|---------------------|---------------------|--|
| AGIWUR29844                                                            |    |         |         |                |                  |                     |                     |  |
| CB4856 CT                                                              | II | 2137422 | 2138951 | WBGene00016547 | C40A11.4         | C40A11.4            | 0.143098717546897   |  |
| AGIWUR17400                                                            |    |         |         |                |                  |                     |                     |  |
| CB4856 CT                                                              | II | 2144292 | 2145666 | WBGene00016549 | C40A11.6         | C40A11.6            | -0.0282042264121038 |  |
| AGIWUR8253;AGIWUR18636;AGIWUR31194;AGIWUR37868;AGIWUR39471;AGIWUR42954 |    |         |         |                |                  |                     |                     |  |
| CB4856 CT                                                              | II | 2146950 | 2148775 | WBGene00016545 | C40A11.2         | C40A11.2            | 0.0532553430618314  |  |
| AGIWUR19003                                                            |    |         |         |                |                  |                     |                     |  |
| CB4856 CT                                                              | II | 2148732 | 2150363 | WBGene00016550 | C40A11.7         | C40A11.7            |                     |  |
| -0.00665148756149847                                                   |    |         |         | AGIWUR18171    |                  |                     |                     |  |
| CB4856 CT                                                              | II | 2150552 | 2151290 | WBGene00016551 | C40A11.8         | C40A11.8            | 0.0389674625642105  |  |
| AGIWUR23141;AGIWUR29012;AGIWUR41581                                    |    |         |         |                |                  |                     |                     |  |
| CB4856 CT                                                              | II | 2154008 | 2155220 | WBGene00016544 | math-18 C40A11.1 | -0.32082387467313   |                     |  |
| AGIWUR19325                                                            |    |         |         |                |                  |                     |                     |  |
| CB4856 CT                                                              | II | 2163341 | 2163832 | WBGene00044360 | C33C12.11        | C33C12.11           | -0.17467213956394   |  |
| AGIWUR26375                                                            |    |         |         |                |                  |                     |                     |  |
| CB4856 CT                                                              | II | 2165440 | 2166498 | WBGene00016336 | C33C12.4         | C33C12.4            | 0.327315498898308   |  |
| AGIWUR11200                                                            |    |         |         |                |                  |                     |                     |  |
| CB4856 CT                                                              | II | 2170325 | 2173219 | WBGene00016338 | srb-14 C33C12.6  | -0.0727889190390751 |                     |  |
| AGIWUR212;AGIWUR2539;AGIWUR6574;AGIWUR16245;AGIWUR18339;AGIWUR37823    |    |         |         |                |                  |                     |                     |  |
| CB4856 CT                                                              | II | 2174586 | 2175289 | WBGene00016339 | C33C12.7         | C33C12.7            | -0.33228461949076   |  |
| AGIWUR41219                                                            |    |         |         |                |                  |                     |                     |  |
| CB4856 CT                                                              | II | 2176741 | 2181990 | WBGene00016335 | gba-1 C33C12.3   | 0.140652117546971   |                     |  |
| AGIWUR19527                                                            |    |         |         |                |                  |                     |                     |  |
| CB4856 CT                                                              | II | 2182503 | 2186434 | WBGene00016340 | gba-2 C33C12.8   | 0.210954558950267   |                     |  |
| AGIWUR32624                                                            |    |         |         |                |                  |                     |                     |  |
| CB4856 CT                                                              | II | 2187149 | 2189457 | WBGene00016341 | mtq-2 C33C12.9   | 0.237949895511401   |                     |  |
| AGIWUR36138                                                            |    |         |         |                |                  |                     |                     |  |
| CB4856 CT                                                              | II | 2192339 | 2194114 | WBGene00016342 | C33C12.10        | C33C12.10           | 0.203777662703265   |  |
| AGIWUR44353                                                            |    |         |         |                |                  |                     |                     |  |
| CB4856 CT                                                              | II | 2197846 | 2198675 | WBGene00016334 | C33C12.1         | C33C12.1            | 0.156061821990484   |  |
| AGIWUR20259                                                            |    |         |         |                |                  |                     |                     |  |
| CB4856 CT                                                              | II | 2199143 | 2204139 | WBGene00021985 | Y59C2A.2         | Y59C2A.2            | -0.354674093912147  |  |
| AGIWUR13216                                                            |    |         |         |                |                  |                     |                     |  |
| CB4856 CT                                                              | II | 2208112 | 2212863 | WBGene00021984 | Y59C2A.1         | Y59C2A.1            | 0.562056200564275   |  |
| AGIWUR9506                                                             |    |         |         |                |                  |                     |                     |  |
| CB4856 CT                                                              | II | 2215476 | 2219921 | WBGene00021986 | Y59C2A.3         | Y59C2A.3            | 0.119524410278617   |  |
| AGIWUR15526                                                            |    |         |         |                |                  |                     |                     |  |
| CB4856 CT                                                              | II | 2224359 | 2225708 | WBGene00018784 | F54A3.5 F54A3.5  | -0.254036269983141  | AGIWUR36961         |  |
| CB4856 CT                                                              | II | 2225817 | 2232470 | WBGene00018785 | F54A3.6 F54A3.6  | -0.0112254567629311 | AGIWUR44438         |  |

|                                                           |    |    |         |         |                |          |          |                     |             |
|-----------------------------------------------------------|----|----|---------|---------|----------------|----------|----------|---------------------|-------------|
| CB4856                                                    | CT | II | 2233540 | 2243539 | WBGene00018782 | cct-3    | F54A3.3  | -0.549666540935     |             |
| AGIWUR2521;AGIWUR9717;AGIWUR20960;AGIWUR24186;AGIWUR32791 |    |    |         |         |                |          |          |                     |             |
| CB4856                                                    | CT | II | 2255172 | 2261101 | WBGene00019586 | K09F6.3  | K09F6.3  | -0.306003210987136  |             |
| AGIWUR31678;AGIWUR37475                                   |    |    |         |         |                |          |          |                     |             |
| CB4856                                                    | CT | II | 2262128 | 2265768 | WBGene00019587 | K09F6.4  | K09F6.4  | -0.093716973522282  | AGIWUR10760 |
| CB4856                                                    | CT | II | 2274876 | 2279146 | WBGene00019589 | K09F6.6  | K09F6.6  | -0.120009873824127  | AGIWUR31027 |
| CB4856                                                    | CT | II | 2280139 | 2280580 | WBGene00044361 | K09F6.11 | K09F6.11 | 0.129863912833969   |             |
| AGIWUR660;AGIWUR7865;AGIWUR12531;AGIWUR38262              |    |    |         |         |                |          |          |                     |             |
| CB4856                                                    | CT | II | 2287030 | 2290226 | WBGene00019593 | K09F6.10 | K09F6.10 | -0.249307379371418  |             |
| AGIWUR39646                                               |    |    |         |         |                |          |          |                     |             |
| CB4856                                                    | CT | II | 2290896 | 2292184 | WBGene00019590 | K09F6.7  | K09F6.7  | -0.0676846386678021 | AGIWUR35281 |
| CB4856                                                    | CT | II | 2294693 | 2296265 | WBGene00019591 | fbxc-25  | K09F6.8  | -0.0792194186324142 |             |
| AGIWUR7503;AGIWUR25600                                    |    |    |         |         |                |          |          |                     |             |
| CB4856                                                    | CT | II | 2297847 | 2298793 | WBGene00015111 | B0281.4  | B0281.4  | -0.364623625047344  | AGIWUR32252 |
| CB4856                                                    | CT | II | 2299854 | 2300946 | WBGene00015112 | B0281.5  | B0281.5  | -0.886612437770207  | AGIWUR17596 |
| CB4856                                                    | CT | II | 2301308 | 2302229 | WBGene00015113 | B0281.6  | B0281.6  | 0.446204866256156   | AGIWUR30003 |
| CB4856                                                    | CT | II | 2307041 | 2308361 | WBGene00015110 | B0281.3  | B0281.3  | -0.342994524747096  |             |
| AGIWUR10890;AGIWUR22129;AGIWUR38792                       |    |    |         |         |                |          |          |                     |             |
| CB4856                                                    | CT | II | 2310071 | 2311074 | WBGene00023225 | B0281.7  | B0281.7  | 0.0639856141098782  | AGIWUR19027 |
| CB4856                                                    | CT | II | 2313067 | 2314927 | WBGene00015108 | B0281.1  | B0281.1  | -0.174355799799762  | AGIWUR29422 |
| CB4856                                                    | CT | II | 2315084 | 2315622 | WBGene00022869 | ZK1240.4 | ZK1240.4 | -0.0158250713114496 |             |
| AGIWUR40750                                               |    |    |         |         |                |          |          |                     |             |
| CB4856                                                    | CT | II | 2316163 | 2317877 | WBGene00022870 | ZK1240.5 | ZK1240.5 | 0.217722389231931   |             |
| AGIWUR35040                                               |    |    |         |         |                |          |          |                     |             |
| CB4856                                                    | CT | II | 2318189 | 2320134 | WBGene00022873 | ZK1240.9 | ZK1240.9 | 0.14207393852713    |             |
| AGIWUR6381;AGIWUR34515;AGIWUR37334                        |    |    |         |         |                |          |          |                     |             |
| CB4856                                                    | CT | II | 2320153 | 2321951 | WBGene00022868 | ZK1240.3 | ZK1240.3 | -0.346112545122635  |             |
| AGIWUR2960                                                |    |    |         |         |                |          |          |                     |             |
| CB4856                                                    | CT | II | 2322367 | 2322907 | WBGene00022871 | ZK1240.6 | ZK1240.6 | 0.286690425948246   |             |
| AGIWUR5666                                                |    |    |         |         |                |          |          |                     |             |
| CB4856                                                    | CT | II | 2323376 | 2325215 | WBGene00022867 | ZK1240.2 | ZK1240.2 | -0.592007563975276  |             |
| AGIWUR14511                                               |    |    |         |         |                |          |          |                     |             |
| CB4856                                                    | CT | II | 2326995 | 2329053 | WBGene00022872 | ZK1240.8 | ZK1240.8 | -0.254274842317395  |             |
| AGIWUR42400                                               |    |    |         |         |                |          |          |                     |             |
| CB4856                                                    | CT | II | 2329355 | 2331792 | WBGene00022866 | ZK1240.1 | ZK1240.1 | 0.0183998712842843  |             |
| AGIWUR11319                                               |    |    |         |         |                |          |          |                     |             |
| CB4856                                                    | CT | II | 2332520 | 2334338 | WBGene00018385 | F43C11.8 | F43C11.8 | 0.179486765332876   |             |
| AGIWUR12050                                               |    |    |         |         |                |          |          |                     |             |
| CB4856                                                    | CT | II | 2335933 | 2337696 | WBGene00018384 | F43C11.7 | F43C11.7 | 1.77181167872715    |             |

|                                     |    |         |         |                |                 |                   |                     |
|-------------------------------------|----|---------|---------|----------------|-----------------|-------------------|---------------------|
| AGIWUR27872                         |    |         |         |                |                 |                   |                     |
| CB4856 CT                           | II | 2337897 | 2340746 | WBGene00018386 | F43C11.9        | F43C11.9          | -0.0583328277453106 |
| AGIWUR20373                         |    |         |         |                |                 |                   |                     |
| CB4856 CT                           | II | 2342433 | 2343925 | WBGene00018383 | F43C11.6        | F43C11.6          | -0.209388184789903  |
| AGIWUR25498                         |    |         |         |                |                 |                   |                     |
| CB4856 CT                           | II | 2345118 | 2346028 | WBGene00018382 | F43C11.5        | F43C11.5          | -0.354842785501338  |
| AGIWUR45203                         |    |         |         |                |                 |                   |                     |
| CB4856 CT                           | II | 2347015 | 2350030 | WBGene00018381 | F43C11.4        | F43C11.4          | 0.230442957898209   |
| AGIWUR19877                         |    |         |         |                |                 |                   |                     |
| CB4856 CT                           | II | 2350216 | 2351657 | WBGene00018387 | F43C11.10       | F43C11.10         | 0.0716075085468155  |
| AGIWUR2098;AGIWUR5664;AGIWUR17935   |    |         |         |                |                 |                   |                     |
| CB4856 CT                           | II | 2354776 | 2355972 | WBGene00018379 | F43C11.2        | F43C11.2          | -0.492624705393064  |
| AGIWUR27877                         |    |         |         |                |                 |                   |                     |
| CB4856 CT                           | II | 2357095 | 2358278 | WBGene00018378 | F43C11.1        | F43C11.1          | 0.00202690660144311 |
| AGIWUR35747;AGIWUR36438             |    |         |         |                |                 |                   |                     |
| CB4856 CT                           | II | 2358801 | 2363773 | WBGene00018388 | F43C11.11       | F43C11.11         | 0.052781864810628   |
| AGIWUR6497                          |    |         |         |                |                 |                   |                     |
| CB4856 CT                           | II | 2365573 | 2366720 | WBGene00018389 | F43C11.12       | F43C11.12         | -0.0692104733479475 |
| AGIWUR28662                         |    |         |         |                |                 |                   |                     |
| CB4856 CT                           | II | 2367528 | 2368708 | WBGene00017520 | F16G10.5        | F16G10.5          | -0.418882417641859  |
| AGIWUR7640                          |    |         |         |                |                 |                   |                     |
| CB4856 CT                           | II | 2369256 | 2370089 | WBGene00017519 | hpo-25 F16G10.4 | 0.105625560943625 |                     |
| AGIWUR33028                         |    |         |         |                |                 |                   |                     |
| CB4856 CT                           | II | 2372390 | 2374340 | WBGene00017518 | F16G10.3        | F16G10.3          | 0.0657749798269069  |
| AGIWUR8438                          |    |         |         |                |                 |                   |                     |
| CB4856 CT                           | II | 2375273 | 2376411 | WBGene00017517 | F16G10.2        | F16G10.2          | 0.0356162204295556  |
| AGIWUR3215                          |    |         |         |                |                 |                   |                     |
| CB4856 CT                           | II | 2377199 | 2377851 | WBGene00017521 | F16G10.6        | F16G10.6          | 0.338814583720482   |
| AGIWUR12468                         |    |         |         |                |                 |                   |                     |
| CB4856 CT                           | II | 2379579 | 2380274 | WBGene00017522 | F16G10.7        | F16G10.7          | 0.113548382407339   |
| AGIWUR29225                         |    |         |         |                |                 |                   |                     |
| CB4856 CT                           | II | 2381949 | 2383434 | WBGene00017523 | F16G10.8        | F16G10.8          | -0.0574048171089885 |
| AGIWUR20430                         |    |         |         |                |                 |                   |                     |
| CB4856 CT                           | II | 2384186 | 2385595 | WBGene00017524 | F16G10.9        | F16G10.9          | 0.275333941715273   |
| AGIWUR11291;AGIWUR33652;AGIWUR45181 |    |         |         |                |                 |                   |                     |
| CB4856 CT                           | II | 2394916 | 2395964 | WBGene00017527 | F16G10.13       | F16G10.13         | 0.150878165599027   |
| AGIWUR12983                         |    |         |         |                |                 |                   |                     |
| CB4856 CT                           | II | 2404284 | 2404659 | WBGene00017516 | F16G10.1        | F16G10.1          | -0.0831517500738634 |
| AGIWUR30351                         |    |         |         |                |                 |                   |                     |

|                                                                         |    |    |         |         |                |          |          |                     |             |
|-------------------------------------------------------------------------|----|----|---------|---------|----------------|----------|----------|---------------------|-------------|
| CB4856                                                                  | CT | II | 2409643 | 2412741 | WBGene00018353 | fbxa-182 | F42G2.4  | -0.160735173714297  |             |
| AGIWUR13568;AGIWUR39835                                                 |    |    |         |         |                |          |          |                     |             |
| CB4856                                                                  | CT | II | 2414119 | 2415531 | WBGene00044672 | fbxa-4   | F42G2.8  | -0.246453727458412  |             |
| AGIWUR27382;AGIWUR33844                                                 |    |    |         |         |                |          |          |                     |             |
| CB4856                                                                  | CT | II | 2416101 | 2417971 | WBGene00018354 | F42G2.5  | F42G2.5  | -0.414710416698022  |             |
| AGIWUR9576;AGIWUR25080;AGIWUR33778                                      |    |    |         |         |                |          |          |                     |             |
| CB4856                                                                  | CT | II | 2418448 | 2419025 | WBGene00044362 | F42G2.7  | F42G2.7  | 0.0221200042375926  | AGIWUR35918 |
| CB4856                                                                  | CT | II | 2419472 | 2420794 | WBGene00018352 | fbxc-20  | F42G2.3  | -0.188547046977243  | AGIWUR7061  |
| CB4856                                                                  | CT | II | 2426372 | 2429944 | WBGene00018355 | ceh-86   | F42G2.6  | -0.0523175910454547 | AGIWUR1758  |
| CB4856                                                                  | CT | II | 2443279 | 2451130 | WBGene00006882 | vab-19   | T22D2.1  | 0.21360507124795    |             |
| AGIWUR22528;AGIWUR42638                                                 |    |    |         |         |                |          |          |                     |             |
| CB4856                                                                  | CT | II | 2452970 | 2458981 | WBGene00004129 | pqn-42   | F53G2.4  | 0.151571230173229   |             |
| AGIWUR2755;AGIWUR27831                                                  |    |    |         |         |                |          |          |                     |             |
| CB4856                                                                  | CT | II | 2460866 | 2472862 | WBGene00006647 | tsr-1    | F53G2.6  | 0.0352151212541543  | AGIWUR16260 |
| CB4856                                                                  | CT | II | 2480399 | 2481312 | WBGene00018768 | F53G2.3  | F53G2.3  | -0.195474308138602  | AGIWUR11911 |
| CB4856                                                                  | CT | II | 2481921 | 2485922 | WBGene00018767 | F53G2.2  | F53G2.2  | 0.00141759686159837 | AGIWUR37648 |
| CB4856                                                                  | CT | II | 2488754 | 2496641 | WBGene00018766 | F53G2.1  | F53G2.1  | 0.218030376080311   | AGIWUR38040 |
| CB4856                                                                  | CT | II | 2504878 | 2514846 | WBGene00019130 | gbas-1   | F59H5.1  | -0.13444457973614   | AGIWUR23587 |
| CB4856                                                                  | CT | II | 2514977 | 2516097 | WBGene00019131 | bath-12  | F59H5.3  | -0.107984884737387  |             |
| AGIWUR865;AGIWUR4761;AGIWUR18764                                        |    |    |         |         |                |          |          |                     |             |
| CB4856                                                                  | CT | II | 2520965 | 2522044 | WBGene00018223 | bath-13  | F40B1.1  | -0.0885498436337384 | AGIWUR15079 |
| CB4856                                                                  | CT | II | 2522628 | 2524475 | WBGene00018224 | bath-18  | F40B1.2  | 0.058657827332766   | AGIWUR28245 |
| CB4856                                                                  | CT | II | 2525220 | 2529255 | WBGene00019341 | K02F6.7  | K02F6.7  | -0.0337132936625064 | AGIWUR38714 |
| CB4856                                                                  | CT | II | 2530817 | 2531476 | WBGene00019340 | K02F6.6  | K02F6.6  | -0.224189652174944  | AGIWUR20611 |
| CB4856                                                                  | CT | II | 2546225 | 2553572 | WBGene00019337 | K02F6.3  | K02F6.3  | 0.0439722740750552  |             |
| AGIWUR13728;AGIWUR21707;AGIWUR42219                                     |    |    |         |         |                |          |          |                     |             |
| CB4856                                                                  | CT | II | 2553962 | 2556313 | WBGene00019335 | K02F6.1  | K02F6.1  | -0.0445728368903726 | AGIWUR16350 |
| CB4856                                                                  | CT | II | 2557781 | 2563677 | WBGene00019343 | nep-18   | K02F6.9  | 0.0454662553362706  |             |
| AGIWUR27404;AGIWUR31183;AGIWUR32099                                     |    |    |         |         |                |          |          |                     |             |
| CB4856                                                                  | CT | II | 2565275 | 2575930 | WBGene00017280 | usp-39   | F09D1.1  | -0.251971982233076  | AGIWUR22184 |
| CB4856                                                                  | CT | II | 2578536 | 2579595 | WBGene00005587 | sri-75   | F33H12.3 | -0.165554445556115  |             |
| AGIWUR5883                                                              |    |    |         |         |                |          |          |                     |             |
| CB4856                                                                  | CT | II | 2580901 | 2583346 | WBGene00005586 | sri-74   | F33H12.4 | 0.0130052593340491  |             |
| AGIWUR38546                                                             |    |    |         |         |                |          |          |                     |             |
| CB4856                                                                  | CT | II | 2583782 | 2585593 | WBGene00005548 | sri-36   | F33H12.5 | 0.0392530289379076  |             |
| AGIWUR29515                                                             |    |    |         |         |                |          |          |                     |             |
| CB4856                                                                  | CT | II | 2586078 | 2586911 | WBGene00045457 | F33H12.7 | F33H12.7 | 0.294943087477567   |             |
| AGIWUR10211;AGIWUR11014;AGIWUR14494;AGIWUR20112;AGIWUR21173;AGIWUR27869 |    |    |         |         |                |          |          |                     |             |
| CB4856                                                                  | CT | II | 2587504 | 2589754 | WBGene00005551 | sri-39   | F33H12.2 | -0.0347277077190271 |             |

|                                                                                                         |    |    |         |         |                |          |          |                     |             |
|---------------------------------------------------------------------------------------------------------|----|----|---------|---------|----------------|----------|----------|---------------------|-------------|
| AGIWUR2569;AGIWUR9926                                                                                   |    |    |         |         |                |          |          |                     |             |
| CB4856                                                                                                  | CT | II | 2600553 | 2601779 | WBGene00018019 | F33H12.1 | F33H12.1 | 0.0348519855963785  |             |
| AGIWUR33272                                                                                             |    |    |         |         |                |          |          |                     |             |
| CB4856                                                                                                  | CT | II | 2603208 | 2605419 | WBGene00005589 | sri-77   | D2062.9  | 0.240994727537387   | AGIWUR10343 |
| CB4856                                                                                                  | CT | II | 2610862 | 2612359 | WBGene00005550 | sri-38   | D2062.8  | -0.163134057805788  |             |
| AGIWUR18254;AGIWUR39361                                                                                 |    |    |         |         |                |          |          |                     |             |
| CB4856                                                                                                  | CT | II | 2616905 | 2617374 | WBGene00017059 | D2062.7  | D2062.7  | 0.129800349715357   | AGIWUR30414 |
| CB4856                                                                                                  | CT | II | 2619419 | 2619789 | WBGene00017058 | D2062.6  | D2062.6  | -0.259272276262383  |             |
| AGIWUR152;AGIWUR6988;AGIWUR17021;AGIWUR28623;AGIWUR37201;AGIWUR42200                                    |    |    |         |         |                |          |          |                     |             |
| CB4856                                                                                                  | CT | II | 2623402 | 2624530 | WBGene00017056 | D2062.4  | D2062.4  | -0.213969851182825  |             |
| AGIWUR11959;AGIWUR21825;AGIWUR31235;AGIWUR43927                                                         |    |    |         |         |                |          |          |                     |             |
| CB4856                                                                                                  | CT | II | 2625092 | 2627070 | WBGene00044301 | lgc-28   | D2062.12 | 0.661175926648455   |             |
| AGIWUR30690;AGIWUR43966                                                                                 |    |    |         |         |                |          |          |                     |             |
| CB4856                                                                                                  | CT | II | 2627749 | 2629196 | WBGene00005583 | sri-71   | D2062.3  | -0.0563820065752463 | AGIWUR35298 |
| CB4856                                                                                                  | CT | II | 2629570 | 2631231 | WBGene00005549 | sri-37   | D2062.2  | 0.0017994834742634  | AGIWUR17145 |
| CB4856                                                                                                  | CT | II | 2631473 | 2633054 | WBGene00017055 | D2062.1  | D2062.1  | 0.0174023133914041  | AGIWUR15096 |
| CB4856                                                                                                  | CT | II | 2634210 | 2635321 | WBGene00005553 | sri-41   | F22E5.10 | -0.212553141523916  |             |
| AGIWUR35927;AGIWUR43074                                                                                 |    |    |         |         |                |          |          |                     |             |
| CB4856                                                                                                  | CT | II | 2635360 | 2637608 | WBGene00044363 | F22E5.21 | F22E5.21 | 0.149506020109079   |             |
| AGIWUR6996;AGIWUR13791                                                                                  |    |    |         |         |                |          |          |                     |             |
| CB4856                                                                                                  | CT | II | 2638392 | 2639353 | WBGene00017708 | F22E5.9  | F22E5.9  | 0.0110040613910591  | AGIWUR8605  |
| CB4856                                                                                                  | CT | II | 2640081 | 2641897 | WBGene00017707 | F22E5.8  | F22E5.8  | -0.224510771027802  | AGIWUR29034 |
| CB4856                                                                                                  | CT | II | 2642090 | 2642884 | WBGene00017706 | F22E5.7  | F22E5.7  | -0.212885735303771  | AGIWUR2135  |
| CB4856                                                                                                  | CT | II | 2643685 | 2645703 | WBGene00017709 | F22E5.11 | F22E5.11 | 0.253252599719974   |             |
| AGIWUR16622                                                                                             |    |    |         |         |                |          |          |                     |             |
| CB4856                                                                                                  | CT | II | 2647637 | 2649639 | WBGene00017711 | F22E5.13 | F22E5.13 | -0.160473057650268  |             |
| AGIWUR15725;AGIWUR33628                                                                                 |    |    |         |         |                |          |          |                     |             |
| CB4856                                                                                                  | CT | II | 2649870 | 2650715 | WBGene00017705 | F22E5.6  | F22E5.6  | 0.227444465217088   | AGIWUR39051 |
| CB4856                                                                                                  | CT | II | 2652841 | 2654464 | WBGene00005561 | sri-49   | F22E5.14 | -0.0285211204650233 |             |
| AGIWUR283;AGIWUR4661;AGIWUR8245;AGIWUR13251;AGIWUR28279;AGIWUR32069;AGIWUR33970;AGIWUR35353;AGIWUR37519 |    |    |         |         |                |          |          |                     |             |
| CB4856                                                                                                  | CT | II | 2659670 | 2665022 | WBGene00001546 | gcy-21   | F22E5.3  | 0.0595656546086722  | AGIWUR44744 |
| CB4856                                                                                                  | CT | II | 2666283 | 2668162 | WBGene00005567 | sri-55   | F22E5.15 | 0.0396026403281429  |             |
| AGIWUR3285;AGIWUR11082                                                                                  |    |    |         |         |                |          |          |                     |             |
| CB4856                                                                                                  | CT | II | 2672632 | 2673634 | WBGene00017713 | F22E5.20 | F22E5.20 | 0.346693115708323   |             |
| AGIWUR8172                                                                                              |    |    |         |         |                |          |          |                     |             |
| CB4856                                                                                                  | CT | II | 2673908 | 2677588 | WBGene00017703 | F22E5.1  | F22E5.1  | -0.605934828152904  | AGIWUR18331 |
| CB4856                                                                                                  | CT | II | 2678041 | 2679162 | WBGene00017712 | F22E5.17 | F22E5.17 | 0.022918666565495   |             |
| AGIWUR11407                                                                                             |    |    |         |         |                |          |          |                     |             |
| CB4856                                                                                                  | CT | II | 2679163 | 2681218 | WBGene00018021 | F34D6.1  | F34D6.1  | 0.249578264862235   | AGIWUR32910 |

|                                                             |    |    |         |         |                |          |          |                     |             |
|-------------------------------------------------------------|----|----|---------|---------|----------------|----------|----------|---------------------|-------------|
| CB4856                                                      | CT | II | 2683329 | 2684308 | WBGene00018022 | ceh-87   | F34D6.2  | -0.138334610226845  | AGIWUR1083  |
| CB4856                                                      | CT | II | 2684669 | 2686977 | WBGene00006318 | sup-9    | F34D6.3  | 0.0239552430421099  | AGIWUR35930 |
| CB4856                                                      | CT | II | 2688916 | 2689179 | WBGene00044365 | F34D6.8  | F34D6.8  | -0.288034665469258  |             |
| AGIWUR3570;AGIWUR14833;AGIWUR16546;AGIWUR25095;AGIWUR30598  |    |    |         |         |                |          |          |                     |             |
| CB4856                                                      | CT | II | 2690472 | 2694311 | WBGene00018023 | set-11   | F34D6.4  | -0.571982218588863  | AGIWUR35159 |
| CB4856                                                      | CT | II | 2696939 | 2698478 | WBGene00005574 | sri-62   | F34D6.5  | -0.296766164997219  | AGIWUR37243 |
| CB4856                                                      | CT | II | 2698865 | 2700329 | WBGene00005573 | sri-61   | F34D6.6  | 0.0746990377979522  | AGIWUR26167 |
| CB4856                                                      | CT | II | 2701389 | 2702857 | WBGene00005572 | sri-60   | Y47G7B.3 | -0.288207272872416  |             |
| AGIWUR4730                                                  |    |    |         |         |                |          |          |                     |             |
| CB4856                                                      | CT | II | 2703371 | 2705316 | WBGene00005345 | srh-128  | Y47G7B.1 | 0.16575826951555    |             |
| AGIWUR42635                                                 |    |    |         |         |                |          |          |                     |             |
| CB4856                                                      | CT | II | 2705996 | 2707982 | WBGene00021654 | Y47G7B.2 | Y47G7B.2 | 0.164966980281962   |             |
| AGIWUR5884                                                  |    |    |         |         |                |          |          |                     |             |
| CB4856                                                      | CT | II | 2708438 | 2710096 | WBGene00020227 | T05A8.1  | T05A8.1  | 0.652590807750144   | AGIWUR29682 |
| CB4856                                                      | CT | II | 2709942 | 2711019 | WBGene00020228 | T05A8.2  | T05A8.2  | 0.149386221963198   | AGIWUR23765 |
| CB4856                                                      | CT | II | 2714647 | 2717435 | WBGene00020229 | T05A8.3  | T05A8.3  | -0.297981494641412  |             |
| AGIWUR2639;AGIWUR12034                                      |    |    |         |         |                |          |          |                     |             |
| CB4856                                                      | CT | II | 2717522 | 2725541 | WBGene00020230 | nep-2    | T05A8.4  | -0.0069666413308056 | AGIWUR4193  |
| CB4856                                                      | CT | II | 2731319 | 2735250 | WBGene00020231 | T05A8.5  | T05A8.5  | 0.0852997766941286  | AGIWUR33951 |
| CB4856                                                      | CT | II | 2736678 | 2737556 | WBGene00044367 | T05A8.8  | T05A8.8  | 0.0754619755031918  |             |
| AGIWUR6273;AGIWUR21950;AGIWUR29441;AGIWUR34602;AGIWUR42076  |    |    |         |         |                |          |          |                     |             |
| CB4856                                                      | CT | II | 2738523 | 2739642 | WBGene00020232 | T05A8.6  | T05A8.6  | 0.177366942278203   | AGIWUR36070 |
| CB4856                                                      | CT | II | 2740403 | 2742341 | WBGene00020233 | T05A8.7  | T05A8.7  | 0.461067989524302   | AGIWUR12867 |
| CB4856                                                      | CT | II | 2747393 | 2747728 | WBGene00017915 | F29A7.5  | F29A7.5  | 0.232227703109107   | AGIWUR5403  |
| CB4856                                                      | CT | II | 2748588 | 2751573 | WBGene00017914 | F29A7.4  | F29A7.4  | 0.112739426645954   | AGIWUR35213 |
| CB4856                                                      | CT | II | 2751741 | 2752611 | WBGene00017916 | F29A7.6  | F29A7.6  | -0.164431099046658  |             |
| AGIWUR1148;AGIWUR13132                                      |    |    |         |         |                |          |          |                     |             |
| CB4856                                                      | CT | II | 2753299 | 2754379 | WBGene00017913 | F29A7.3  | F29A7.3  | 0.00981734409001955 |             |
| AGIWUR10580;AGIWUR15672;AGIWUR31599;AGIWUR38911;AGIWUR39414 |    |    |         |         |                |          |          |                     |             |
| CB4856                                                      | CT | II | 2756021 | 2757018 | WBGene00017917 | clcc-120 | F29A7.7  | 0.0416207799466619  |             |
| AGIWUR37125                                                 |    |    |         |         |                |          |          |                     |             |
| CB4856                                                      | CT | II | 2757147 | 2758054 | WBGene00017918 | F29A7.8  | F29A7.8  | 0.179168707150166   | AGIWUR26911 |
| CB4856                                                      | CT | II | 2758625 | 2761856 | WBGene00017912 | fbxb-107 | F29A7.2  | 0.424532321569222   |             |
| AGIWUR35880                                                 |    |    |         |         |                |          |          |                     |             |
| CB4856                                                      | CT | II | 2764964 | 2767230 | WBGene00017249 | fbxb-108 | F08D12.6 | 0.0729726764412995  |             |
| AGIWUR27513                                                 |    |    |         |         |                |          |          |                     |             |
| CB4856                                                      | CT | II | 2767250 | 2769121 | WBGene00017250 | F08D12.7 | F08D12.7 | -0.202050157547106  |             |
| AGIWUR13638                                                 |    |    |         |         |                |          |          |                     |             |
| CB4856                                                      | CT | II | 2769670 | 2770888 | WBGene00017251 | fbxb-105 | F08D12.8 | 0.448376521963695   |             |





|                                                                        |    |         |         |                |             |             |                     |             |
|------------------------------------------------------------------------|----|---------|---------|----------------|-------------|-------------|---------------------|-------------|
| CB4856 CT                                                              | II | 2864529 | 2865363 | WBGene00022442 | Y110A2AL.5  | Y110A2AL.5  | -0.227722937607771  |             |
| AGIWUR26948                                                            |    |         |         |                |             |             |                     |             |
| CB4856 CT                                                              | II | 2865971 | 2866655 | WBGene00022445 | Y110A2AL.9  | Y110A2AL.9  | 0.606618472023563   |             |
| AGIWUR3686;AGIWUR15915;AGIWUR18333;AGIWUR20884;AGIWUR37977;AGIWUR39130 |    |         |         |                |             |             |                     |             |
| CB4856 CT                                                              | II | 2867074 | 2867779 | WBGene00022440 | Y110A2AL.3  | Y110A2AL.3  | 0.448909068689045   |             |
| AGIWUR8722                                                             |    |         |         |                |             |             |                     |             |
| CB4856 CT                                                              | II | 2867993 | 2870758 | WBGene00022439 | Y110A2AL.2  | Y110A2AL.2  | -0.0153287785123268 |             |
| AGIWUR5974;AGIWUR13320;AGIWUR16794;AGIWUR16833;AGIWUR30884             |    |         |         |                |             |             |                     |             |
| CB4856 CT                                                              | II | 2871377 | 2871914 | WBGene00022446 | Y110A2AL.10 | Y110A2AL.10 | 0.240984872210037   |             |
| AGIWUR28531                                                            |    |         |         |                |             |             |                     |             |
| CB4856 CT                                                              | II | 2875101 | 2876618 | WBGene00022438 | Y110A2AL.1  | Y110A2AL.1  | -0.458073615033703  |             |
| AGIWUR6925                                                             |    |         |         |                |             |             |                     |             |
| CB4856 CT                                                              | II | 2878729 | 2884910 | WBGene00022447 | hpo-20      | Y110A2AL.12 | -0.152902869066681  |             |
| AGIWUR1875;AGIWUR11336;AGIWUR14290;AGIWUR30668;AGIWUR40005;AGIWUR44573 |    |         |         |                |             |             |                     |             |
| CB4856 CT                                                              | II | 2886317 | 2889016 | WBGene00022448 | pinn-1      | Y110A2AL.13 | -0.024301505873332  |             |
| AGIWUR13612                                                            |    |         |         |                |             |             |                     |             |
| CB4856 CT                                                              | II | 2889104 | 2894395 | WBGene00005020 | sqv-2       | Y110A2AL.14 | -0.0438694390955501 |             |
| AGIWUR42414                                                            |    |         |         |                |             |             |                     |             |
| CB4856 CT                                                              | II | 2896737 | 2900348 | WBGene00022450 | ubc-26      | Y110A2AM.3  | -0.0477423091045317 |             |
| AGIWUR5889;AGIWUR23227;AGIWUR30571;AGIWUR38183;AGIWUR42075             |    |         |         |                |             |             |                     |             |
| CB4856 CT                                                              | II | 2902962 | 2904001 | WBGene00022449 | Y110A2AM.1  | Y110A2AM.1  | 0.136488911289959   |             |
| AGIWUR17641                                                            |    |         |         |                |             |             |                     |             |
| CB4856 CT                                                              | II | 2913705 | 2919314 | WBGene00022453 | Y110A2AR.3  | Y110A2AR.3  | -0.201647708599213  |             |
| AGIWUR20065;AGIWUR38218;AGIWUR40062                                    |    |         |         |                |             |             |                     |             |
| CB4856 CT                                                              | II | 2919710 | 2920904 | WBGene00022452 | Y110A2AR.1  | Y110A2AR.1  | -0.0861857161485489 |             |
| AGIWUR30954                                                            |    |         |         |                |             |             |                     |             |
| CB4856 CT                                                              | II | 2923899 | 2926533 | WBGene00022712 | ZK355.2     | ZK355.2     | 0.026391441847375   |             |
| AGIWUR36579;AGIWUR38145                                                |    |         |         |                |             |             |                     |             |
| CB4856 CT                                                              | II | 2927017 | 2927633 | WBGene00022713 | ZK355.3     | ZK355.3     | 0.662552423073585   | AGIWUR16281 |
| CB4856 CT                                                              | II | 2928221 | 2930599 | WBGene00022714 | irld-64     | ZK355.4     | 0.0245072106589106  | AGIWUR25390 |
| CB4856 CT                                                              | II | 2930728 | 2933463 | WBGene00022711 | irld-63     | ZK355.1     | 0.140928666074688   | AGIWUR574   |
| CB4856 CT                                                              | II | 2933521 | 2934454 | WBGene00044369 | irld-67     | ZK355.7     | -0.0703147047475268 |             |
| AGIWUR7665;AGIWUR17850;AGIWUR29654                                     |    |         |         |                |             |             |                     |             |
| CB4856 CT                                                              | II | 2934805 | 2937952 | WBGene00022715 | irld-65     | ZK355.5     | 0.335466800491084   | AGIWUR18946 |
| CB4856 CT                                                              | II | 2938143 | 2940847 | WBGene00022716 | irld-66     | ZK355.6     | -0.0395397017253654 | AGIWUR36728 |
| CB4856 CT                                                              | II | 2940996 | 2944077 | WBGene00020431 | irld-50     | T11F1.7     | 0.0384658389433898  | AGIWUR1396  |
| CB4856 CT                                                              | II | 2944176 | 2946533 | WBGene00020430 | irld-49     | T11F1.6     | -0.0727279908248804 | AGIWUR11744 |
| CB4856 CT                                                              | II | 2946738 | 2948434 | WBGene00005826 | srw-79      | T11F1.5     | 0.148896082977976   |             |
| AGIWUR11043;AGIWUR16519;AGIWUR19279;AGIWUR29750                        |    |         |         |                |             |             |                     |             |

|                                                                                                                                               |    |    |         |         |                |          |           |                     |             |
|-----------------------------------------------------------------------------------------------------------------------------------------------|----|----|---------|---------|----------------|----------|-----------|---------------------|-------------|
| CB4856                                                                                                                                        | CT | II | 2948929 | 2952729 | WBGene00077759 | irld-51  | T11F1.9   | 0.183828572508192   | AGIWUR3293  |
| CB4856                                                                                                                                        | CT | II | 2956065 | 2958191 | WBGene00020428 | irld-48  | T11F1.2   | -0.118726381727313  | AGIWUR5921  |
| CB4856                                                                                                                                        | CT | II | 2958608 | 2961883 | WBGene00005807 | srw-60   | T11F1.1   | 0.181270048571114   | AGIWUR20994 |
| CB4856                                                                                                                                        | CT | II | 2976639 | 2987023 | WBGene00003678 | nhr-88   | K08A2.5   | 0.155893493828904   |             |
| AGIWUR9908;AGIWUR25658;AGIWUR25973;AGIWUR31000;AGIWUR33208                                                                                    |    |    |         |         |                |          |           |                     |             |
| CB4856                                                                                                                                        | CT | II | 2988307 | 2991238 | WBGene00019513 | K08A2.4  | K08A2.4   | -0.0155290029175976 | AGIWUR23537 |
| CB4856                                                                                                                                        | CT | II | 2991613 | 2994313 | WBGene00019512 | K08A2.2  | K08A2.2   | -0.201311356109027  | AGIWUR16689 |
| CB4856                                                                                                                                        | CT | II | 2997021 | 3000653 | WBGene00019511 | K08A2.1  | K08A2.1   | 0.136424702747981   | AGIWUR37176 |
| CB4856                                                                                                                                        | CT | II | 3000768 | 3002411 | WBGene00016576 | C41H7.6  | C41H7.6   | -0.202598294282799  | AGIWUR20719 |
| CB4856                                                                                                                                        | CT | II | 3002513 | 3003827 | WBGene00016575 | C41H7.5  | C41H7.5   | -0.164992918984588  | AGIWUR269   |
| CB4856                                                                                                                                        | CT | II | 3003969 | 3005573 | WBGene00016574 | C41H7.4  | C41H7.4   | -0.159814037884409  | AGIWUR2896  |
| CB4856                                                                                                                                        | CT | II | 3005799 | 3007506 | WBGene00016573 | C41H7.3  | C41H7.3   | -0.284289668042243  | AGIWUR27129 |
| CB4856                                                                                                                                        | CT | II | 3014835 | 3015961 | WBGene00016572 | C41H7.2  | C41H7.2   | 0.00339867267714311 | AGIWUR19017 |
| CB4856                                                                                                                                        | CT | II | 3016068 | 3017471 | WBGene00016571 | C41H7.1  | C41H7.1   | -0.200561310492045  | AGIWUR18416 |
| CB4856                                                                                                                                        | CT | II | 3017482 | 3019907 | WBGene00016577 | clec-3   | C41H7.7   | -1.13337958292903   | AGIWUR41295 |
| CB4856                                                                                                                                        | CT | II | 3032780 | 3036122 | WBGene00015197 | B0454.6  | B0454.6   | 0.0741840634673263  | AGIWUR13089 |
| CB4856                                                                                                                                        | CT | II | 3038859 | 3040822 | WBGene00015196 | B0454.5  | B0454.5   | -0.0796189244946017 |             |
| AGIWUR14221;AGIWUR34522                                                                                                                       |    |    |         |         |                |          |           |                     |             |
| CB4856                                                                                                                                        | CT | II | 3040943 | 3043406 | WBGene00015199 | B0454.8  | B0454.8   | -0.164635513209486  |             |
| AGIWUR43750;AGIWUR44012;AGIWUR44391                                                                                                           |    |    |         |         |                |          |           |                     |             |
| CB4856                                                                                                                                        | CT | II | 3044323 | 3046115 | WBGene00005541 | sri-29   | B0454.4   | -0.0614222334783259 | AGIWUR2475  |
| CB4856                                                                                                                                        | CT | II | 3046219 | 3048154 | WBGene00005542 | sri-30   | B0454.10  | 0.10819779656341    |             |
| AGIWUR8463                                                                                                                                    |    |    |         |         |                |          |           |                     |             |
| CB4856                                                                                                                                        | CT | II | 3048678 | 3050435 | WBGene00005540 | sri-28   | B0454.3   | -0.0114782036865941 | AGIWUR12561 |
| CB4856                                                                                                                                        | CT | II | 3051003 | 3052322 | WBGene00005543 | sri-31   | B0454.2   | 0.217878165270324   | AGIWUR14825 |
| CB4856                                                                                                                                        | CT | II | 3052597 | 3054348 | WBGene00015200 | B0454.9  | B0454.9   | 0.0864765202983548  | AGIWUR25688 |
| CB4856                                                                                                                                        | CT | II | 3056822 | 3060207 | WBGene00002997 | lin-8    | B0454.1   | 0.484056363082338   | AGIWUR39951 |
| CB4856                                                                                                                                        | CT | II | 3061082 | 3062112 | WBGene00021293 | Y25C1A.6 | Y25C1A.6  | -0.0551533853511046 |             |
| AGIWUR19149                                                                                                                                   |    |    |         |         |                |          |           |                     |             |
| CB4856                                                                                                                                        | CT | II | 3062542 | 3071381 | WBGene00021294 | Y25C1A.7 | Y25C1A.7  | -0.0258329306740643 |             |
| AGIWUR3099;AGIWUR9962;AGIWUR12918;AGIWUR14161;AGIWUR14668;AGIWUR18126;AGIWUR23317;AGIWUR23438;AGIWUR36817;AGIWUR38161;AGIWUR42714;AGIWUR43276 |    |    |         |         |                |          |           |                     |             |
| CB4856                                                                                                                                        | CT | II | 3071164 | 3076953 | WBGene00021295 | Y25C1A.8 | Y25C1A.8  | -0.0141740012168192 |             |
| AGIWUR29733                                                                                                                                   |    |    |         |         |                |          |           |                     |             |
| CB4856                                                                                                                                        | CT | II | 3078796 | 3087682 | WBGene00021292 | copb-1   | Y25C1A.5  | 0.182053053892878   |             |
| AGIWUR44602                                                                                                                                   |    |    |         |         |                |          |           |                     |             |
| CB4856                                                                                                                                        | CT | II | 3088474 | 3091296 | WBGene00005178 | srg-21   | Y25C1A.9  | 0.230610513194359   |             |
| AGIWUR38380                                                                                                                                   |    |    |         |         |                |          |           |                     |             |
| CB4856                                                                                                                                        | CT | II | 3091503 | 3093452 | WBGene00005179 | srg-22   | Y25C1A.10 | -0.101336034664714  |             |

|                                                             |    |         |         |                |           |           |                      |                     |             |
|-------------------------------------------------------------|----|---------|---------|----------------|-----------|-----------|----------------------|---------------------|-------------|
| AGIWUR15037                                                 |    |         |         |                |           |           |                      |                     |             |
| CB4856 CT                                                   | II | 3093902 | 3096160 | WBGene00005180 | srg-23    | Y25C1A.11 |                      | -0.0216305987649914 |             |
| AGIWUR11917                                                 |    |         |         |                |           |           |                      |                     |             |
| CB4856 CT                                                   | II | 3098403 | 3100646 | WBGene00005181 | srg-24    | Y25C1A.12 |                      | -0.0283350348468758 |             |
| AGIWUR14814                                                 |    |         |         |                |           |           |                      |                     |             |
| CB4856 CT                                                   | II | 3102318 | 3104736 | WBGene00021291 | cllec-121 | Y25C1A.4  |                      | -0.375865672754031  |             |
| AGIWUR11656                                                 |    |         |         |                |           |           |                      |                     |             |
| CB4856 CT                                                   | II | 3106065 | 3108032 | WBGene00021290 | cllec-122 | Y25C1A.3  |                      | -0.0701699457040874 |             |
| AGIWUR39278                                                 |    |         |         |                |           |           |                      |                     |             |
| CB4856 CT                                                   | II | 3109368 | 3111247 | WBGene00021296 | Y25C1A.13 | Y25C1A.13 |                      | -0.0868891593215597 |             |
| AGIWUR14960;AGIWUR25497                                     |    |         |         |                |           |           |                      |                     |             |
| CB4856 CT                                                   | II | 3112613 | 3113337 | WBGene00021289 | Y25C1A.2  | Y25C1A.2  |                      | -0.148163546720866  |             |
| AGIWUR33174                                                 |    |         |         |                |           |           |                      |                     |             |
| CB4856 CT                                                   | II | 3114234 | 3116758 | WBGene00021288 | cllec-123 | Y25C1A.1  |                      | 0.457894456239325   |             |
| AGIWUR10375                                                 |    |         |         |                |           |           |                      |                     |             |
| CB4856 CT                                                   | II | 3117771 | 3118451 | WBGene00020409 | T10D4.7   | T10D4.7   | -0.199898599341394   |                     | AGIWUR8077  |
| CB4856 CT                                                   | II | 3119332 | 3123192 | WBGene00020408 | T10D4.6   | T10D4.6   | -0.0799354675134527  |                     | AGIWUR6156  |
| CB4856 CT                                                   | II | 3123506 | 3124899 | WBGene00005292 | srh-71    | T10D4.5   | -0.0999574932483815  |                     | AGIWUR36043 |
| CB4856 CT                                                   | II | 3126037 | 3126441 | WBGene00002102 | ins-19    | T10D4.13  | -1.08718993519153    |                     |             |
| AGIWUR11814;AGIWUR14823;AGIWUR29537;AGIWUR31712;AGIWUR36904 |    |         |         |                |           |           |                      |                     |             |
| CB4856 CT                                                   | II | 3127041 | 3127790 | WBGene00002114 | ins-31    | T10D4.4   | 0.0716780813778328   |                     |             |
| AGIWUR11011;AGIWUR28105;AGIWUR30924;AGIWUR31563;AGIWUR40948 |    |         |         |                |           |           |                      |                     |             |
| CB4856 CT                                                   | II | 3129179 | 3131288 | WBGene00020407 | chil-24   | T10D4.3   | 0.060774122070276    |                     | AGIWUR34237 |
| CB4856 CT                                                   | II | 3134099 | 3135283 | WBGene00005568 | sri-56    | T10D4.2   | -0.00433571053900161 |                     |             |
| AGIWUR16953;AGIWUR32344                                     |    |         |         |                |           |           |                      |                     |             |
| CB4856 CT                                                   | II | 3135581 | 3137904 | WBGene00005566 | sri-54    | T10D4.8   | 0.0819854656816261   |                     | AGIWUR3261  |
| CB4856 CT                                                   | II | 3140918 | 3142955 | WBGene00005554 | sri-42    | T10D4.9   | 0.00623181233213987  |                     | AGIWUR31287 |
| CB4856 CT                                                   | II | 3143394 | 3144652 | WBGene00005555 | sri-43    | T10D4.10  | 0.094915284146655    |                     |             |
| AGIWUR8985                                                  |    |         |         |                |           |           |                      |                     |             |
| CB4856 CT                                                   | II | 3146142 | 3146992 | WBGene00077522 | T10D4.15  | T10D4.15  | 0.0304854517828343   |                     |             |
| AGIWUR19568;AGIWUR37353                                     |    |         |         |                |           |           |                      |                     |             |
| CB4856 CT                                                   | II | 3148504 | 3149621 | WBGene00020410 | T10D4.11  | T10D4.11  | -0.743422028979799   |                     |             |
| AGIWUR41738                                                 |    |         |         |                |           |           |                      |                     |             |
| CB4856 CT                                                   | II | 3150140 | 3152575 | WBGene00020406 | T10D4.1   | T10D4.1   | 0.300810230303775    |                     | AGIWUR10791 |
| CB4856 CT                                                   | II | 3153050 | 3154483 | WBGene00005544 | sri-32    | T10D4.12  | 0.0599949679163316   |                     |             |
| AGIWUR39838                                                 |    |         |         |                |           |           |                      |                     |             |
| CB4856 CT                                                   | II | 3155167 | 3156849 | WBGene00005545 | sri-33    | Y27F2A.4  | -0.0288626903552114  |                     |             |
| AGIWUR38115                                                 |    |         |         |                |           |           |                      |                     |             |
| CB4856 CT                                                   | II | 3157491 | 3159085 | WBGene00005546 | sri-34    | Y27F2A.7  | 0.0536560224931666   |                     |             |

|                                                                                  |    |    |         |         |                |           |           |                     |                      |
|----------------------------------------------------------------------------------|----|----|---------|---------|----------------|-----------|-----------|---------------------|----------------------|
| AGIWUR36938                                                                      |    |    |         |         |                |           |           |                     |                      |
| CB4856                                                                           | CT | II | 3168767 | 3170189 | WBGene00021297 | fbxc-55   | Y27F2A.5  |                     | -0.00867290046260205 |
| AGIWUR9674                                                                       |    |    |         |         |                |           |           |                     |                      |
| CB4856                                                                           | CT | II | 3171468 | 3172276 | WBGene00045303 | Y27F2A.10 | Y27F2A.10 |                     | 0.193500536768218    |
| AGIWUR17309;AGIWUR17803                                                          |    |    |         |         |                |           |           |                     |                      |
| CB4856                                                                           | CT | II | 3177963 | 3180476 | WBGene00005552 | sri-40    | Y27F2A.3  |                     | -0.00544612926117161 |
| AGIWUR21152;AGIWUR38695                                                          |    |    |         |         |                |           |           |                     |                      |
| CB4856                                                                           | CT | II | 3180479 | 3182676 | WBGene00021298 | Y27F2A.6  | Y27F2A.6  |                     | 0.131412240569139    |
| AGIWUR12463                                                                      |    |    |         |         |                |           |           |                     |                      |
| CB4856                                                                           | CT | II | 3185158 | 3186790 | WBGene00005590 | sri-78    | Y27F2A.2  |                     | 0.262290869870419    |
| AGIWUR16945                                                                      |    |    |         |         |                |           |           |                     |                      |
| CB4856                                                                           | CT | II | 3197613 | 3199098 | WBGene00005563 | sri-51    | ZC239.8   | 0.217984632976224   | AGIWUR36077          |
| CB4856                                                                           | CT | II | 3206020 | 3206541 | WBGene00044371 | ZC239.20  | ZC239.20  |                     | -0.296036813789113   |
| AGIWUR6160;AGIWUR8135;AGIWUR9712;AGIWUR18739;AGIWUR26353;AGIWUR35448;AGIWUR39029 |    |    |         |         |                |           |           |                     |                      |
| CB4856                                                                           | CT | II | 3206939 | 3207388 | WBGene00044372 | ZC239.21  | ZC239.21  |                     | -0.267217985361752   |
| AGIWUR7815;AGIWUR14066;AGIWUR22921                                               |    |    |         |         |                |           |           |                     |                      |
| CB4856                                                                           | CT | II | 3207683 | 3208751 | WBGene00022570 | sdz-35    | ZC239.12  |                     | -0.0238325127113761  |
| AGIWUR30050                                                                      |    |    |         |         |                |           |           |                     |                      |
| CB4856                                                                           | CT | II | 3209478 | 3211181 | WBGene00022569 | ZC239.6   | ZC239.6   | -0.493419672888789  | AGIWUR1572           |
| CB4856                                                                           | CT | II | 3212371 | 3213208 | WBGene00022568 | ZC239.5   | ZC239.5   | -0.430718277288369  | AGIWUR27087          |
| CB4856                                                                           | CT | II | 3214452 | 3215565 | WBGene00022567 | ZC239.4   | ZC239.4   | -0.177221680962273  |                      |
| AGIWUR1430;AGIWUR11052;AGIWUR38797                                               |    |    |         |         |                |           |           |                     |                      |
| CB4856                                                                           | CT | II | 3216081 | 3216600 | WBGene00022566 | ZC239.3   | ZC239.3   | -0.106887534573158  | AGIWUR30364          |
| CB4856                                                                           | CT | II | 3217907 | 3218990 | WBGene00022565 | ZC239.2   | ZC239.2   | -0.101599085043953  | AGIWUR11486          |
| CB4856                                                                           | CT | II | 3221126 | 3222010 | WBGene00022572 | ZC239.14  | ZC239.14  |                     | 0.174241193438885    |
| AGIWUR28231                                                                      |    |    |         |         |                |           |           |                     |                      |
| CB4856                                                                           | CT | II | 3222406 | 3222827 | WBGene00022571 | ZC239.13  | ZC239.13  |                     | -0.253555057382357   |
| AGIWUR7714                                                                       |    |    |         |         |                |           |           |                     |                      |
| CB4856                                                                           | CT | II | 3224770 | 3225285 | WBGene00022574 | ZC239.16  | ZC239.16  |                     | -0.348978383206476   |
| AGIWUR28996                                                                      |    |    |         |         |                |           |           |                     |                      |
| CB4856                                                                           | CT | II | 3225348 | 3225968 | WBGene00022575 | ZC239.17  | ZC239.17  |                     | -0.0860557060003666  |
| AGIWUR8136                                                                       |    |    |         |         |                |           |           |                     |                      |
| CB4856                                                                           | CT | II | 3228885 | 3230522 | WBGene00005501 | srh-297   | C17F4.4   | 0.13680696034703    |                      |
| AGIWUR26598;AGIWUR31997                                                          |    |    |         |         |                |           |           |                     |                      |
| CB4856                                                                           | CT | II | 3230817 | 3234813 | WBGene00015914 | C17F4.8   | C17F4.8   | -0.0673788517163167 | AGIWUR3081           |
| CB4856                                                                           | CT | II | 3235956 | 3237138 | WBGene00023479 | srz-67    | C17F4.10  |                     | -0.132747702683307   |
| AGIWUR21449;AGIWUR34302;AGIWUR41495                                              |    |    |         |         |                |           |           |                     |                      |
| CB4856                                                                           | CT | II | 3237471 | 3238179 | WBGene00044373 | C17F4.11  | C17F4.11  |                     | -0.118212858724438   |
| AGIWUR8847;AGIWUR26875;AGIWUR29109                                               |    |    |         |         |                |           |           |                     |                      |

|                                                                       |    |    |         |         |                |          |          |                     |             |
|-----------------------------------------------------------------------|----|----|---------|---------|----------------|----------|----------|---------------------|-------------|
| CB4856                                                                | CT | II | 3238169 | 3240043 | WBGene00023480 | srz-68   | C17F4.9  | -0.0028808574364998 | AGIWUR40543 |
| CB4856                                                                | CT | II | 3240545 | 3241726 | WBGene00015911 | C17F4.3  | C17F4.3  | 0.186982425406472   | AGIWUR13213 |
| CB4856                                                                | CT | II | 3243676 | 3244162 | WBGene00044374 | C17F4.12 | C17F4.12 | -0.0322155279072849 |             |
| AGIWUR946;AGIWUR4095;AGIWUR14240;AGIWUR31293;AGIWUR35584              |    |    |         |         |                |          |          |                     |             |
| CB4856                                                                | CT | II | 3245087 | 3246015 | WBGene00015913 | C17F4.7  | C17F4.7  | -0.266101168398482  | AGIWUR43953 |
| CB4856                                                                | CT | II | 3246316 | 3248174 | WBGene00015912 | fbxc-50  | C17F4.5  | -0.270429425874589  | AGIWUR5090  |
| CB4856                                                                | CT | II | 3248623 | 3249386 | WBGene00015910 | C17F4.2  | C17F4.2  | -0.752309023156691  | AGIWUR23272 |
| CB4856                                                                | CT | II | 3250313 | 3250856 | WBGene00015909 | clec-124 | C17F4.1  | -0.399067006937894  |             |
| AGIWUR1933                                                            |    |    |         |         |                |          |          |                     |             |
| CB4856                                                                | CT | II | 3250985 | 3259354 | WBGene00001544 | gcy-19   | C17F4.6  | -0.228209912692106  | AGIWUR2396  |
| CB4856                                                                | CT | II | 3267663 | 3271505 | WBGene00195073 | F02E11.7 | F02E11.7 | 0.590053769594455   |             |
| AGIWUR11844                                                           |    |    |         |         |                |          |          |                     |             |
| CB4856                                                                | CT | II | 3272349 | 3275023 | WBGene00017181 | F02E11.3 | F02E11.3 | -0.0387806062602305 |             |
| AGIWUR41749                                                           |    |    |         |         |                |          |          |                     |             |
| CB4856                                                                | CT | II | 3276256 | 3277305 | WBGene00017182 | F02E11.4 | F02E11.4 | -0.182358317175233  |             |
| AGIWUR37077                                                           |    |    |         |         |                |          |          |                     |             |
| CB4856                                                                | CT | II | 3278987 | 3281686 | WBGene00017179 | wht-4    | F02E11.1 | -0.0473167407435335 |             |
| AGIWUR987;AGIWUR15251;AGIWUR17304;AGIWUR24953;AGIWUR30539;AGIWUR35672 |    |    |         |         |                |          |          |                     |             |
| CB4856                                                                | CT | II | 3282653 | 3287158 | WBGene00018196 | nep-13   | F39E9.4  | -0.102838350070357  | AGIWUR35454 |
| CB4856                                                                | CT | II | 3287373 | 3289031 | WBGene00005575 | sri-63   | F39E9.3  | 0.13706540301075    | AGIWUR37501 |
| CB4856                                                                | CT | II | 3290486 | 3290644 | WBGene00044375 | F39E9.14 | F39E9.14 | -0.0738314534282862 |             |
| AGIWUR1826                                                            |    |    |         |         |                |          |          |                     |             |
| CB4856                                                                | CT | II | 3292264 | 3293472 | WBGene00023281 | F39E9.8  | F39E9.8  | 0.065689258116743   | AGIWUR33135 |
| CB4856                                                                | CT | II | 3294021 | 3295068 | WBGene00023282 | F39E9.9  | F39E9.9  | 0.56060930248152    | AGIWUR28424 |
| CB4856                                                                | CT | II | 3295414 | 3296582 | WBGene00018200 | btb-17   | F39E9.11 | 0.0906709458308952  |             |
| AGIWUR14277;AGIWUR18377                                               |    |    |         |         |                |          |          |                     |             |
| CB4856                                                                | CT | II | 3296908 | 3298027 | WBGene00018195 | btb-16   | F39E9.2  | 0.737740104909882   | AGIWUR26250 |
| CB4856                                                                | CT | II | 3299825 | 3300676 | WBGene00269387 | btb-22   | F39E9.27 | -0.107935710490747  |             |
| AGIWUR3343                                                            |    |    |         |         |                |          |          |                     |             |
| CB4856                                                                | CT | II | 3302761 | 3303750 | WBGene00023036 | F39E9.10 | F39E9.10 | 0.212870703458442   |             |
| AGIWUR23026;AGIWUR23331;AGIWUR23832;AGIWUR27066;AGIWUR32012           |    |    |         |         |                |          |          |                     |             |
| CB4856                                                                | CT | II | 3324021 | 3326431 | WBGene00021589 | Y46D2A.1 | Y46D2A.1 | -0.194748079950582  |             |
| AGIWUR28811                                                           |    |    |         |         |                |          |          |                     |             |
| CB4856                                                                | CT | II | 3326492 | 3327197 | WBGene00021591 | Y46D2A.3 | Y46D2A.3 | -0.297033252611197  |             |
| AGIWUR26527                                                           |    |    |         |         |                |          |          |                     |             |
| CB4856                                                                | CT | II | 3331889 | 3334205 | WBGene00077751 | ir1d-27  | F14D2.17 | 0.201740603991466   |             |
| AGIWUR2293                                                            |    |    |         |         |                |          |          |                     |             |
| CB4856                                                                | CT | II | 3335422 | 3337139 | WBGene00206522 | F14D2.19 | F14D2.19 | -0.17848436120645   |             |
| AGIWUR31445                                                           |    |    |         |         |                |          |          |                     |             |

|                                                            |    |    |         |         |                 |          |           |                     |             |
|------------------------------------------------------------|----|----|---------|---------|-----------------|----------|-----------|---------------------|-------------|
| CB4856                                                     | CT | II | 3340556 | 3341260 | WBGene00017453  | F14D2.5  | F14D2.5   | 0.0505311640388282  | AGIWUR12906 |
| CB4856                                                     | CT | II | 3341268 | 3342104 | WBGene00017459  | F14D2.11 | F14D2.11  | -0.11654259403284   |             |
| AGIWUR40910                                                |    |    |         |         |                 |          |           |                     |             |
| CB4856                                                     | CT | II | 3343710 | 3344967 | WBGene00017461  | bath-28  | F14D2.13  | -0.0708363884473666 |             |
| AGIWUR23578;AGIWUR35439;AGIWUR38267;AGIWUR40583            |    |    |         |         |                 |          |           |                     |             |
| CB4856                                                     | CT | II | 3345218 | 3346378 | WBGene00017460  | bath-30  | F14D2.12  | -0.161950353484816  |             |
| AGIWUR37539                                                |    |    |         |         |                 |          |           |                     |             |
| CB4856                                                     | CT | II | 3346745 | 3347519 | WBGene00017462  | F14D2.14 | F14D2.14  | -0.306679658926695  |             |
| AGIWUR23383;AGIWUR28782;AGIWUR38077                        |    |    |         |         |                 |          |           |                     |             |
| CB4856                                                     | CT | II | 3347574 | 3349870 | WBGene00017456  | F14D2.8  | F14D2.8   | -0.0263717277663496 |             |
| AGIWUR8496;AGIWUR16471;AGIWUR17696;AGIWUR37394;AGIWUR38928 |    |    |         |         |                 |          |           |                     |             |
| CB4856                                                     | CT | II | 3350252 | 3358981 | WBGene00017452  | bath-29  | F14D2.4   | -0.189053120782699  |             |
| AGIWUR8805;AGIWUR22859;AGIWUR23701;AGIWUR25164;AGIWUR32290 |    |    |         |         |                 |          |           |                     |             |
| CB4856                                                     | CT | II | 3359139 | 3360255 | WBGene00017451  | F14D2.2  | F14D2.2   | -0.256395118847504  | AGIWUR24777 |
| CB4856                                                     | CT | II | 3361899 | 3365961 | WBGene00021728  | Y49F6C.6 | Y49F6C.6  | -0.184605813419997  |             |
| AGIWUR8396                                                 |    |    |         |         |                 |          |           |                     |             |
| CB4856                                                     | CT | II | 3367258 | 3368197 | WBGene00021729  | Y49F6C.7 | Y49F6C.7  | 0.100712738202548   |             |
| AGIWUR17291                                                |    |    |         |         |                 |          |           |                     |             |
| CB4856                                                     | CT | II | 3369175 | 3370111 | WBGene00021730  | Y49F6C.8 | Y49F6C.8  | -0.344511313415799  |             |
| AGIWUR7299;AGIWUR13872;AGIWUR34677                         |    |    |         |         |                 |          |           |                     |             |
| CB4856                                                     | CT | II | 3371310 | 3372145 | WBGene00021727  | bath-23  | Y49F6C.5  | -0.228850568549796  |             |
| AGIWUR11832                                                |    |    |         |         |                 |          |           |                     |             |
| CB4856                                                     | CT | II | 3373169 | 3374185 | WBGene000219758 | linc-11  | Y49F6C.11 | -0.189809831467703  |             |
| AGIWUR23245;AGIWUR36507                                    |    |    |         |         |                 |          |           |                     |             |
| CB4856                                                     | CT | II | 3375079 | 3376714 | WBGene00021726  | bath-10  | Y49F6C.4  | 0.51474345355313    |             |
| AGIWUR38786                                                |    |    |         |         |                 |          |           |                     |             |
| CB4856                                                     | CT | II | 3377111 | 3378726 | WBGene00021725  | bath-9   | Y49F6C.3  | 0.0635852461899873  |             |
| AGIWUR26956                                                |    |    |         |         |                 |          |           |                     |             |
| CB4856                                                     | CT | II | 3378575 | 3379551 | WBGene00021724  | Y49F6C.2 | Y49F6C.2  | 0.0503210916535339  |             |
| AGIWUR42499                                                |    |    |         |         |                 |          |           |                     |             |
| CB4856                                                     | CT | II | 3380288 | 3381403 | WBGene00021723  | bath-8   | Y49F6C.1  | -0.0754051424631328 |             |
| AGIWUR16875;AGIWUR21492;AGIWUR35386                        |    |    |         |         |                 |          |           |                     |             |
| CB4856                                                     | CT | II | 3381836 | 3384017 | WBGene00020290  | T06D4.1  | T06D4.1   | 0.0172169171897245  | AGIWUR42268 |
| CB4856                                                     | CT | II | 3388280 | 3391586 | WBGene00020292  | nep-19   | T06D4.3   | 0.144582179934923   | AGIWUR35625 |
| CB4856                                                     | CT | II | 3392036 | 3395533 | WBGene00020293  | nep-20   | T06D4.4   | -0.552169045901339  | AGIWUR13318 |
| CB4856                                                     | CT | II | 3395821 | 3399303 | WBGene00017554  | nep-9    | F18A12.5  | -0.194920863605539  |             |
| AGIWUR32423;AGIWUR41571;AGIWUR43562                        |    |    |         |         |                 |          |           |                     |             |
| CB4856                                                     | CT | II | 3399754 | 3402925 | WBGene00017555  | nep-10   | F18A12.6  | -0.701094895267688  |             |
| AGIWUR28365                                                |    |    |         |         |                 |          |           |                     |             |

|                                                                         |    |         |         |                |           |           |                     |             |
|-------------------------------------------------------------------------|----|---------|---------|----------------|-----------|-----------|---------------------|-------------|
| CB4856 CT                                                               | II | 3403835 | 3406838 | WBGene00017553 | nep-8     | F18A12.4  | -0.370707688599877  |             |
| AGIWUR7990                                                              |    |         |         |                |           |           |                     |             |
| CB4856 CT                                                               | II | 3406951 | 3409774 | WBGene00017552 | nep-7     | F18A12.3  | 0.0814829384620022  |             |
| AGIWUR5802;AGIWUR20138                                                  |    |         |         |                |           |           |                     |             |
| CB4856 CT                                                               | II | 3411425 | 3414469 | WBGene00017556 | F18A12.7  | F18A12.7  | 0.327222628390482   |             |
| AGIWUR10742                                                             |    |         |         |                |           |           |                     |             |
| CB4856 CT                                                               | II | 3415005 | 3416250 | WBGene00017551 | F18A12.2  | F18A12.2  | -0.469932350503925  |             |
| AGIWUR39979                                                             |    |         |         |                |           |           |                     |             |
| CB4856 CT                                                               | II | 3416838 | 3420671 | WBGene00017550 | nep-6     | F18A12.1  | 0.0106083018918506  |             |
| AGIWUR29679;AGIWUR39896                                                 |    |         |         |                |           |           |                     |             |
| CB4856 CT                                                               | II | 3420653 | 3425533 | WBGene00017557 | nep-11    | F18A12.8  | 0.593705854981336   |             |
| AGIWUR10985;AGIWUR21992                                                 |    |         |         |                |           |           |                     |             |
| CB4856 CT                                                               | II | 3429406 | 3431303 | WBGene00015855 | C16C8.18  | C16C8.18  | -0.0784880667667061 |             |
| AGIWUR10454                                                             |    |         |         |                |           |           |                     |             |
| CB4856 CT                                                               | II | 3431286 | 3436512 | WBGene00015841 | skpo-2    | C16C8.2   | 0.167017866886198   | AGIWUR13637 |
| CB4856 CT                                                               | II | 3440827 | 3442445 | WBGene00015854 | C16C8.17  | C16C8.17  | -0.101676064029792  |             |
| AGIWUR17336                                                             |    |         |         |                |           |           |                     |             |
| CB4856 CT                                                               | II | 3443488 | 3444380 | WBGene00015842 | C16C8.4   | C16C8.4   | 0.0164875512463212  | AGIWUR11008 |
| CB4856 CT                                                               | II | 3444689 | 3445381 | WBGene00015843 | C16C8.5   | C16C8.5   | 0.238272891429803   | AGIWUR10128 |
| CB4856 CT                                                               | II | 3448206 | 3448759 | WBGene00195071 | C16C8.21  | C16C8.21  | 0.071633665371472   |             |
| AGIWUR6579                                                              |    |         |         |                |           |           |                     |             |
| CB4856 CT                                                               | II | 3449562 | 3450994 | WBGene00015852 | C16C8.14  | C16C8.14  | -0.011199423765424  |             |
| AGIWUR21154                                                             |    |         |         |                |           |           |                     |             |
| CB4856 CT                                                               | II | 3452721 | 3453602 | WBGene00015850 | C16C8.12  | C16C8.12  | 0.0118878934201412  |             |
| AGIWUR31623                                                             |    |         |         |                |           |           |                     |             |
| CB4856 CT                                                               | II | 3453708 | 3454688 | WBGene00015849 | C16C8.11  | C16C8.11  | 0.122071156918633   |             |
| AGIWUR34563                                                             |    |         |         |                |           |           |                     |             |
| CB4856 CT                                                               | II | 3458501 | 3459023 | WBGene00015856 | C16C8.19  | C16C8.19  | -0.519671966968039  |             |
| AGIWUR34765                                                             |    |         |         |                |           |           |                     |             |
| CB4856 CT                                                               | II | 3459619 | 3460314 | WBGene00015845 | C16C8.7   | C16C8.7   | -0.25120911847262   | AGIWUR32514 |
| CB4856 CT                                                               | II | 3461112 | 3461681 | WBGene00015846 | C16C8.8   | C16C8.8   | -0.35007964724028   | AGIWUR41834 |
| CB4856 CT                                                               | II | 3462570 | 3463194 | WBGene00015847 | C16C8.9   | C16C8.9   | -0.37928558465315   | AGIWUR25088 |
| CB4856 CT                                                               | II | 3464155 | 3464680 | WBGene00015848 | C16C8.10  | C16C8.10  | -0.159187746626415  |             |
| AGIWUR44392                                                             |    |         |         |                |           |           |                     |             |
| CB4856 CT                                                               | II | 3470060 | 3471703 | WBGene00044377 | Y49F6B.13 | Y49F6B.13 | -0.0671877824324691 |             |
| AGIWUR18112;AGIWUR21244;AGIWUR23083;AGIWUR31974;AGIWUR35691;AGIWUR36406 |    |         |         |                |           |           |                     |             |
| CB4856 CT                                                               | II | 3472075 | 3472430 | WBGene00044376 | Y49F6B.12 | Y49F6B.12 | -0.150166701812994  |             |
| AGIWUR8840;AGIWUR19052;AGIWUR20133                                      |    |         |         |                |           |           |                     |             |
| CB4856 CT                                                               | II | 3472879 | 3473289 | WBGene00021718 | Y49F6B.6  | Y49F6B.6  | -0.37189881209787   |             |





|                                                             |    |                 |                 |           |           |                     |             |
|-------------------------------------------------------------|----|-----------------|-----------------|-----------|-----------|---------------------|-------------|
| CB4856 CT<br>AGIWUR29457                                    | II | 3568117 3569218 | WBGene00021138  | cllec-127 | W10G11.5  | 0.0714505293117336  |             |
| CB4856 CT<br>AGIWUR17823                                    | II | 3569430 3571027 | WBGene00021139  | cllec-128 | W10G11.6  | 0.223192006813474   |             |
| CB4856 CT<br>AGIWUR20030                                    | II | 3571491 3572883 | WBGene00021145  | cllec-129 | W10G11.15 | -0.228491282005591  |             |
| CB4856 CT<br>AGIWUR4511;AGIWUR10186;AGIWUR26533;AGIWUR28817 | II | 3573556 3574652 | WBGene00021144  | cllec-130 | W10G11.14 | 0.0535665956889981  |             |
| CB4856 CT<br>AGIWUR21113                                    | II | 3574699 3576201 | WBGene00021140  | cllec-131 | W10G11.7  | 0.115461750150692   |             |
| CB4856 CT<br>AGIWUR29293                                    | II | 3577045 3578110 | WBGene00021143  | cllec-132 | W10G11.13 | 0.206502047793515   |             |
| CB4856 CT<br>AGIWUR40246                                    | II | 3578421 3579031 | WBGene00021142  | cllec-133 | W10G11.12 | 0.0357519758777762  |             |
| CB4856 CT<br>AGIWUR34394                                    | II | 3580083 3581433 | WBGene00021141  | cllec-134 | W10G11.11 | -0.0836217568611985 |             |
| CB4856 CT<br>AGIWUR25922                                    | II | 3582052 3583505 | WBGene00005281  | srh-59    | W10G11.10 | 0.386246124643564   |             |
| CB4856 CT<br>AGIWUR8096                                     | II | 3583987 3586063 | WBGene00005282  | srh-60    | W10G11.9  | -0.174723708012309  |             |
| CB4856 CT<br>AGIWUR4569;AGIWUR22972;AGIWUR38323             | II | 3603387 3607384 | WBGene00021711  | wago-11   | Y49F6A.1  | -0.279992559109852  |             |
| CB4856 CT<br>AGIWUR38967                                    | II | 3607937 3609862 | WBGene00021713  | Y49F6A.5  | Y49F6A.5  | -0.270906715078143  |             |
| CB4856 CT<br>AGIWUR15978                                    | II | 3610409 3615352 | WBGene00018235  | F40E12.2  | F40E12.2  | -0.101787498740383  |             |
| CB4856 CT<br>AGIWUR20499                                    | II | 3617812 3618621 | WBGene00018234  | F40E12.1  | F40E12.1  | -0.0356485818996841 |             |
| CB4856 CT                                                   | II | 3624198 3626950 | WBGene00019796  | M151.4    | M151.4    | -0.12465442377718   | AGIWUR7391  |
| CB4856 CT                                                   | II | 3629295 3630860 | WBGene000219238 | M151.9    | M151.9    | 0.0341467939995397  | AGIWUR19947 |
| CB4856 CT                                                   | II | 3631444 3633875 | WBGene00019794  | M151.2    | M151.2    | -0.23933453663665   | AGIWUR40444 |
| CB4856 CT                                                   | II | 3637811 3639338 | WBGene00019797  | fbxb-31   | M151.5    | -0.0197141342151408 | AGIWUR21468 |
| CB4856 CT                                                   | II | 3641500 3644082 | WBGene00019793  | M151.1    | M151.1    | 0.125583932643688   | AGIWUR37972 |
| CB4856 CT                                                   | II | 3645427 3646982 | WBGene00019798  | fbxb-32   | M151.6    | -0.0507356929316281 | AGIWUR21526 |
| CB4856 CT                                                   | II | 3647411 3648599 | WBGene00044314  | fbxb-33   | M151.8    | -0.0309114456274848 | AGIWUR37742 |
| CB4856 CT<br>AGIWUR19558                                    | II | 3651256 3654276 | WBGene00017590  | F19B10.11 | F19B10.11 | -0.19011078160943   |             |
| CB4856 CT<br>AGIWUR136                                      | II | 3655678 3657732 | WBGene00017587  | F19B10.5  | F19B10.5  | -0.312515672514387  |             |

|                                                                                     |    |                 |                 |                  |                     |                     |
|-------------------------------------------------------------------------------------|----|-----------------|-----------------|------------------|---------------------|---------------------|
| CB4856 CT<br>AGIWUR21305                                                            | II | 3662204 3662618 | WBGene000194713 | F19B10.13        | F19B10.13           | 0.195387118587346   |
| CB4856 CT<br>AGIWUR32405                                                            | II | 3663509 3663896 | WBGene00017588  | F19B10.6         | F19B10.6            | 0.088846137349643   |
| CB4856 CT<br>AGIWUR9260                                                             | II | 3664404 3665120 | WBGene00017585  | F19B10.3         | F19B10.3            | -0.111178052505167  |
| CB4856 CT<br>AGIWUR11010                                                            | II | 3667179 3668664 | WBGene00005988  | srx-97 F19B10.7  |                     | -0.0730008912408628 |
| CB4856 CT<br>AGIWUR27383                                                            | II | 3669321 3671056 | WBGene00005989  | srx-98 F19B10.8  |                     | -0.198061059605937  |
| CB4856 CT<br>AGIWUR13545                                                            | II | 3671908 3673593 | WBGene00004750  | sea-1 F19B10.9   |                     | -0.194188434568165  |
| CB4856 CT<br>AGIWUR1693;AGIWUR12007;AGIWUR13921;AGIWUR30059;AGIWUR30085;AGIWUR31919 | II | 3675624 3676733 | WBGene00017584  | F19B10.2         | F19B10.2            | -0.283128084371689  |
| CB4856 CT<br>AGIWUR2171                                                             | II | 3677535 3681415 | WBGene00017589  | F19B10.10        | F19B10.10           | -0.36700836600653   |
| CB4856 CT<br>AGIWUR4480;AGIWUR5713;AGIWUR20096                                      | II | 3683177 3684996 | WBGene00017583  | F19B10.1         | F19B10.1            | -0.302737634498488  |
| CB4856 CT<br>AGIWUR110;AGIWUR17748                                                  | II | 3685952 3687133 | WBGene00005990  | srx-99 F19B10.12 |                     | -0.0205644441621451 |
| CB4856 CT<br>AGIWUR26635                                                            | II | 3687791 3688691 | WBGene00044379  | F40H7.12         | F40H7.12            | 0.0997654228072307  |
| CB4856 CT<br>AGIWUR24580;AGIWUR30666                                                | II | 3689467 3690746 | WBGene00005992  | srx-101 F40H7.4  | 0.00212898296207342 |                     |
| CB4856 CT                                                                           | II | 3691784 3693231 | WBGene00005991  | srx-100 F40H7.3  | -0.184315415757319  | AGIWUR33715         |
| CB4856 CT                                                                           | II | 3693401 3694764 | WBGene00005993  | srx-102 F40H7.5  | 0.0948838347054162  | AGIWUR22545         |
| CB4856 CT<br>AGIWUR8577                                                             | II | 3695383 3698162 | WBGene00005994  | srx-103 F40H7.11 |                     | -0.0947528724744231 |
| CB4856 CT<br>AGIWUR19918;AGIWUR37276                                                | II | 3698599 3699691 | WBGene00005995  | srx-104 F40H7.7  | 0.176676086190374   |                     |
| CB4856 CT                                                                           | II | 3699834 3701405 | WBGene00005996  | srx-105 F40H7.8  | 0.100200380404568   | AGIWUR30107         |
| CB4856 CT                                                                           | II | 3701708 3703250 | WBGene00005997  | srx-106 F40H7.9  | 0.133105942191522   | AGIWUR13997         |
| CB4856 CT<br>AGIWUR31004                                                            | II | 3703721 3704945 | WBGene00005998  | srx-107 F40H7.10 |                     | 0.179302812496315   |
| CB4856 CT                                                                           | II | 3705620 3707065 | WBGene00005999  | srx-108 F40H7.2  | -0.139440732999617  | AGIWUR15821         |
| CB4856 CT<br>AGIWUR710;AGIWUR29482                                                  | II | 3707610 3709221 | WBGene00006000  | srx-109 F40H7.1  | 0.156553367823361   |                     |
| CB4856 CT<br>AGIWUR33826                                                            | II | 3709555 3710952 | WBGene00006001  | srx-110 C46E10.6 |                     | 0.377387235667445   |

|                                                                         |    |    |         |         |                |           |           |                     |             |
|-------------------------------------------------------------------------|----|----|---------|---------|----------------|-----------|-----------|---------------------|-------------|
| CB4856                                                                  | CT | II | 3711293 | 3713048 | WBGene00016711 | fbxc-53   | C46E10.5  | 0.4258677098788     | AGIWUR35329 |
| CB4856                                                                  | CT | II | 3713188 | 3714695 | WBGene00005319 | srh-100   | C46E10.10 | -0.123931234608407  |             |
| AGIWUR15850                                                             |    |    |         |         |                |           |           |                     |             |
| CB4856                                                                  | CT | II | 3715000 | 3716555 | WBGene00005318 | srh-99    | C46E10.7  | 0.395269602866556   |             |
| AGIWUR7220                                                              |    |    |         |         |                |           |           |                     |             |
| CB4856                                                                  | CT | II | 3717138 | 3719768 | WBGene00016710 | fbxc-52   | C46E10.4  | -0.064106955700737  |             |
| AGIWUR29686;AGIWUR42598                                                 |    |    |         |         |                |           |           |                     |             |
| CB4856                                                                  | CT | II | 3721316 | 3723084 | WBGene00016709 | C46E10.3  | C46E10.3  | 0.152677280328518   |             |
| AGIWUR4335                                                              |    |    |         |         |                |           |           |                     |             |
| CB4856                                                                  | CT | II | 3723378 | 3723896 | WBGene00016708 | C46E10.2  | C46E10.2  | -0.0145639775504378 |             |
| AGIWUR1714                                                              |    |    |         |         |                |           |           |                     |             |
| CB4856                                                                  | CT | II | 3724225 | 3725909 | WBGene00016707 | C46E10.1  | C46E10.1  | -0.50107631626908   |             |
| AGIWUR15609                                                             |    |    |         |         |                |           |           |                     |             |
| CB4856                                                                  | CT | II | 3725906 | 3727479 | WBGene00016712 | C46E10.8  | C46E10.8  | -0.178090374113316  |             |
| AGIWUR300;AGIWUR7910;AGIWUR9883;AGIWUR13329;AGIWUR14299;AGIWUR34806     |    |    |         |         |                |           |           |                     |             |
| CB4856                                                                  | CT | II | 3727690 | 3729707 | WBGene00016713 | C46E10.9  | C46E10.9  | -0.228426664816011  |             |
| AGIWUR9856                                                              |    |    |         |         |                |           |           |                     |             |
| CB4856                                                                  | CT | II | 3730152 | 3731548 | WBGene00017406 | sdz-12    | F12E12.5  | -0.264962651117028  |             |
| AGIWUR42036                                                             |    |    |         |         |                |           |           |                     |             |
| CB4856                                                                  | CT | II | 3731973 | 3733203 | WBGene00017405 | bath-31   | F12E12.4  | -0.0309145109865732 |             |
| AGIWUR7461;AGIWUR23673;AGIWUR27896                                      |    |    |         |         |                |           |           |                     |             |
| CB4856                                                                  | CT | II | 3735929 | 3736943 | WBGene00017407 | F12E12.6  | F12E12.6  | -0.359323160901429  |             |
| AGIWUR2208                                                              |    |    |         |         |                |           |           |                     |             |
| CB4856                                                                  | CT | II | 3737334 | 3738282 | WBGene00017404 | F12E12.3  | F12E12.3  | -0.340301553703777  |             |
| AGIWUR1974                                                              |    |    |         |         |                |           |           |                     |             |
| CB4856                                                                  | CT | II | 3739947 | 3740837 | WBGene00017403 | F12E12.2  | F12E12.2  | -0.092213798518717  |             |
| AGIWUR28417                                                             |    |    |         |         |                |           |           |                     |             |
| CB4856                                                                  | CT | II | 3741884 | 3742509 | WBGene00017402 | F12E12.1  | F12E12.1  | -0.0979784902192335 |             |
| AGIWUR38937                                                             |    |    |         |         |                |           |           |                     |             |
| CB4856                                                                  | CT | II | 3742465 | 3743819 | WBGene00044811 | F12E12.11 | F12E12.11 | -0.0308671913400573 |             |
| AGIWUR40004                                                             |    |    |         |         |                |           |           |                     |             |
| CB4856                                                                  | CT | II | 3746474 | 3747459 | WBGene00044693 | fbxb-92   | F12E12.9  | 0.0535063893013392  |             |
| AGIWUR35746                                                             |    |    |         |         |                |           |           |                     |             |
| CB4856                                                                  | CT | II | 3747679 | 3748819 | WBGene00044694 | fbxb-90   | F12E12.10 | 0.103790564495965   |             |
| AGIWUR34471                                                             |    |    |         |         |                |           |           |                     |             |
| CB4856                                                                  | CT | II | 3749061 | 3750785 | WBGene00044692 | fbxb-91   | F12E12.8  | 0.0736689468768277  |             |
| AGIWUR19698;AGIWUR21274;AGIWUR30396;AGIWUR32964;AGIWUR40368;AGIWUR41591 |    |    |         |         |                |           |           |                     |             |
| CB4856                                                                  | CT | II | 3751261 | 3752284 | WBGene00017408 | sdz-11    | F12E12.7  | -0.35202611187886   |             |
| AGIWUR23637;AGIWUR41398                                                 |    |    |         |         |                |           |           |                     |             |

|                                                                                     |    |    |         |         |                |           |           |                     |             |
|-------------------------------------------------------------------------------------|----|----|---------|---------|----------------|-----------|-----------|---------------------|-------------|
| CB4856                                                                              | CT | II | 3753921 | 3757428 | WBGene00020774 | T24E12.5  | T24E12.5  | -0.342411437619464  |             |
| AGIWUR16825;AGIWUR41472                                                             |    |    |         |         |                |           |           |                     |             |
| CB4856                                                                              | CT | II | 3757799 | 3759252 | WBGene00006002 | srx-111   | T24E12.4  | 0.157755202324282   |             |
| AGIWUR28133                                                                         |    |    |         |         |                |           |           |                     |             |
| CB4856                                                                              | CT | II | 3759581 | 3760036 | WBGene00044380 | T24E12.12 | T24E12.12 | -0.0283053864848064 |             |
| AGIWUR2239;AGIWUR5391;AGIWUR24035;AGIWUR25488;AGIWUR25844                           |    |    |         |         |                |           |           |                     |             |
| CB4856                                                                              | CT | II | 3760300 | 3761699 | WBGene00020775 | T24E12.6  | T24E12.6  | 0.0430433458369741  |             |
| AGIWUR13969;AGIWUR17251;AGIWUR23816;AGIWUR33656;AGIWUR36990;AGIWUR38176;AGIWUR40059 |    |    |         |         |                |           |           |                     |             |
| CB4856                                                                              | CT | II | 3763447 | 3764586 | WBGene00006003 | srx-112   | T24E12.8  | 0.0397392190020578  |             |
| AGIWUR14156;AGIWUR23415                                                             |    |    |         |         |                |           |           |                     |             |
| CB4856                                                                              | CT | II | 3765087 | 3773191 | WBGene00020777 | T24E12.10 | T24E12.10 | 0.187331106583484   |             |
| AGIWUR10671;AGIWUR13962                                                             |    |    |         |         |                |           |           |                     |             |
| CB4856                                                                              | CT | II | 3776019 | 3777459 | WBGene00020773 | T24E12.3  | T24E12.3  | -0.300348802014009  |             |
| AGIWUR9708                                                                          |    |    |         |         |                |           |           |                     |             |
| CB4856                                                                              | CT | II | 3778406 | 3779563 | WBGene00020778 | T24E12.11 | T24E12.11 | -0.214261397653242  |             |
| AGIWUR41241                                                                         |    |    |         |         |                |           |           |                     |             |
| CB4856                                                                              | CT | II | 3782950 | 3784156 | WBGene00020772 | T24E12.2  | T24E12.2  | -0.157649212683532  |             |
| AGIWUR44647                                                                         |    |    |         |         |                |           |           |                     |             |
| CB4856                                                                              | CT | II | 3787451 | 3788479 | WBGene00195077 | T24E12.13 | T24E12.13 | 0.244853970134344   |             |
| AGIWUR25725                                                                         |    |    |         |         |                |           |           |                     |             |
| CB4856                                                                              | CT | II | 3790750 | 3791395 | WBGene00021173 | Y8A9A.4   | Y8A9A.4   | -0.29553286697491   | AGIWUR33339 |
| CB4856                                                                              | CT | II | 3791534 | 3792102 | WBGene00021172 | Y8A9A.3   | Y8A9A.3   | 0.0936119784737226  | AGIWUR18649 |
| CB4856                                                                              | CT | II | 3792524 | 3793425 | WBGene00021174 | fbxb-99   | Y8A9A.5   | 0.153839962146009   | AGIWUR23693 |
| CB4856                                                                              | CT | II | 3795623 | 3800608 | WBGene00021171 | Y8A9A.2   | Y8A9A.2   | 1.37818001216684    | AGIWUR2883  |
| CB4856                                                                              | CT | II | 3801171 | 3802589 | WBGene00005380 | srh-164   | Y8A9A.1   | -0.183310934527498  |             |
| AGIWUR8919;AGIWUR15796                                                              |    |    |         |         |                |           |           |                     |             |
| CB4856                                                                              | CT | II | 3802959 | 3803324 | WBGene00002115 | ins-32    | Y8A9A.6   | -0.489478674684762  | AGIWUR20661 |
| CB4856                                                                              | CT | II | 3805493 | 3807053 | WBGene00018805 | F54D10.4  | F54D10.4  | -0.036774551278838  |             |
| AGIWUR4615;AGIWUR13344;AGIWUR27279;AGIWUR40304                                      |    |    |         |         |                |           |           |                     |             |
| CB4856                                                                              | CT | II | 3807096 | 3808223 | WBGene00018806 | F54D10.5  | F54D10.5  | -0.183338578147021  |             |
| AGIWUR8260                                                                          |    |    |         |         |                |           |           |                     |             |
| CB4856                                                                              | CT | II | 3812284 | 3813426 | WBGene00018804 | F54D10.3  | F54D10.3  | 0.0811516565971466  |             |
| AGIWUR4759                                                                          |    |    |         |         |                |           |           |                     |             |
| CB4856                                                                              | CT | II | 3814376 | 3815458 | WBGene00018807 | fbxa-146  | F54D10.6  | 0.333687926489327   |             |
| AGIWUR5537;AGIWUR8359;AGIWUR25939                                                   |    |    |         |         |                |           |           |                     |             |
| CB4856                                                                              | CT | II | 3816686 | 3818238 | WBGene00018803 | fbxa-24   | F54D10.2  | 3.38858573187989    |             |
| AGIWUR14133                                                                         |    |    |         |         |                |           |           |                     |             |
| CB4856                                                                              | CT | II | 3820152 | 3821312 | WBGene00018808 | F54D10.7  | F54D10.7  | -0.739556255012965  |             |
| AGIWUR22587                                                                         |    |    |         |         |                |           |           |                     |             |

|                                                                         |    |    |         |         |                |          |           |                     |                     |
|-------------------------------------------------------------------------|----|----|---------|---------|----------------|----------|-----------|---------------------|---------------------|
| CB4856                                                                  | CT | II | 3824148 | 3825614 | WBGene00004821 | skr-15   | F54D10.1  |                     | -0.0774067332965691 |
| AGIWUR10492;AGIWUR17038;AGIWUR17734;AGIWUR27405;AGIWUR28048;AGIWUR29669 |    |    |         |         |                |          |           |                     |                     |
| CB4856                                                                  | CT | II | 3825661 | 3827879 | WBGene00018809 | F54D10.8 | F54D10.8  |                     | -0.152574230272222  |
| AGIWUR13369                                                             |    |    |         |         |                |          |           |                     |                     |
| CB4856                                                                  | CT | II | 3829584 | 3831914 | WBGene00018810 | F54D10.9 | F54D10.9  |                     | -0.184688597281174  |
| AGIWUR17912                                                             |    |    |         |         |                |          |           |                     |                     |
| CB4856                                                                  | CT | II | 3833250 | 3836015 | WBGene00015873 | oac-4    | C17A2.5   | -0.109069861080251  | AGIWUR26649         |
| CB4856                                                                  | CT | II | 3837338 | 3838948 | WBGene00015874 | C17A2.6  | C17A2.6   | 0.237231670919456   | AGIWUR38752         |
| CB4856                                                                  | CT | II | 3839862 | 3841272 | WBGene00015872 | C17A2.4  | C17A2.4   | 0.252145605810545   | AGIWUR34717         |
| CB4856                                                                  | CT | II | 3841914 | 3843405 | WBGene00015875 | C17A2.7  | C17A2.7   | 0.13433486787511    | AGIWUR18139         |
| CB4856                                                                  | CT | II | 3843609 | 3845509 | WBGene00015871 | C17A2.3  | C17A2.3   | -0.147926275205925  | AGIWUR3940          |
| CB4856                                                                  | CT | II | 3846328 | 3848143 | WBGene00015870 | C17A2.2  | C17A2.2   | 0.0611162720945106  | AGIWUR43109         |
| CB4856                                                                  | CT | II | 3849053 | 3850725 | WBGene00003662 | nhr-72   | C17A2.8   | -0.0663174052032423 | AGIWUR32794         |
| CB4856                                                                  | CT | II | 3852954 | 3854615 | WBGene00015869 | nhr-257  | C17A2.1   | -0.212840131534396  | AGIWUR8067          |
| CB4856                                                                  | CT | II | 3855921 | 3856588 | WBGene00016775 | C49D10.7 | C49D10.7  | 0.0500025233893728  |                     |
| AGIWUR8239                                                              |    |    |         |         |                |          |           |                     |                     |
| CB4856                                                                  | CT | II | 3858142 | 3860926 | WBGene00016776 | oac-11   | C49D10.8  |                     | -0.0417448492368022 |
| AGIWUR15000                                                             |    |    |         |         |                |          |           |                     |                     |
| CB4856                                                                  | CT | II | 3863084 | 3864752 | WBGene00016777 | nhr-261  | C49D10.9  |                     | -0.295818570345523  |
| AGIWUR1635                                                              |    |    |         |         |                |          |           |                     |                     |
| CB4856                                                                  | CT | II | 3866798 | 3868243 | WBGene00003665 | nhr-75   | C49D10.6  |                     | -0.353676522264339  |
| AGIWUR6203                                                              |    |    |         |         |                |          |           |                     |                     |
| CB4856                                                                  | CT | II | 3869901 | 3873010 | WBGene00016773 | oac-10   | C49D10.4  |                     | -0.0105797837609405 |
| AGIWUR323;AGIWUR3711;AGIWUR5110;AGIWUR38159                             |    |    |         |         |                |          |           |                     |                     |
| CB4856                                                                  | CT | II | 3873541 | 3877227 | WBGene00016778 | nep-3    | C49D10.10 |                     | -0.135742099293683  |
| AGIWUR25432;AGIWUR28939;AGIWUR31245                                     |    |    |         |         |                |          |           |                     |                     |
| CB4856                                                                  | CT | II | 3877249 | 3877974 | WBGene00016779 | sdz-7    | C49D10.11 |                     | 0.284473951286259   |
| AGIWUR11675                                                             |    |    |         |         |                |          |           |                     |                     |
| CB4856                                                                  | CT | II | 3878630 | 3879891 | WBGene00005456 | srh-250  | C49D10.3  |                     | -0.109828698884474  |
| AGIWUR11362                                                             |    |    |         |         |                |          |           |                     |                     |
| CB4856                                                                  | CT | II | 3880245 | 3882182 | WBGene00016772 | nhr-166  | C49D10.2  |                     | -0.212126578763311  |
| AGIWUR42489                                                             |    |    |         |         |                |          |           |                     |                     |
| CB4856                                                                  | CT | II | 3885032 | 3887995 | WBGene00005311 | srh-90   | F53C3.10  |                     | 0.205952284642416   |
| AGIWUR14811;AGIWUR30096;AGIWUR37788                                     |    |    |         |         |                |          |           |                     |                     |
| CB4856                                                                  | CT | II | 3891424 | 3893574 | WBGene00018752 | F53C3.8  | F53C3.8   | 0.365735619058167   | AGIWUR22070         |
| CB4856                                                                  | CT | II | 3894841 | 3896239 | WBGene00018751 | F53C3.7  | F53C3.7   | -0.0340444181148456 | AGIWUR24285         |
| CB4856                                                                  | CT | II | 3898142 | 3899663 | WBGene00018750 | F53C3.6  | F53C3.6   | 0.465959837035128   |                     |
| AGIWUR1696;AGIWUR34501                                                  |    |    |         |         |                |          |           |                     |                     |
| CB4856                                                                  | CT | II | 3899851 | 3900783 | WBGene00018749 | F53C3.5  | F53C3.5   | 0.281079378054942   | AGIWUR22853         |

|                                                                                                                                                          |    |    |         |         |                |           |           |                      |             |
|----------------------------------------------------------------------------------------------------------------------------------------------------------|----|----|---------|---------|----------------|-----------|-----------|----------------------|-------------|
| CB4856                                                                                                                                                   | CT | II | 3900788 | 3902773 | WBGene00018748 | F53C3.4   | F53C3.4   | -0.172194414011067   |             |
| AGIWUR7950;AGIWUR9230;AGIWUR14856;AGIWUR22223;AGIWUR35451;AGIWUR35695                                                                                    |    |    |         |         |                |           |           |                      |             |
| CB4856                                                                                                                                                   | CT | II | 3902860 | 3904794 | WBGene00018747 | F53C3.3   | F53C3.3   | -0.683504225787367   | AGIWUR37908 |
| CB4856                                                                                                                                                   | CT | II | 3904816 | 3906620 | WBGene00018754 | F53C3.11  | F53C3.11  | -0.236376560759474   |             |
| AGIWUR18190                                                                                                                                              |    |    |         |         |                |           |           |                      |             |
| CB4856                                                                                                                                                   | CT | II | 3907140 | 3908478 | WBGene00018746 | fbxb-103  | F53C3.2   | 0.0868422951708361   |             |
| AGIWUR2972                                                                                                                                               |    |    |         |         |                |           |           |                      |             |
| CB4856                                                                                                                                                   | CT | II | 3908491 | 3910837 | WBGene00018755 | bcmo-2    | F53C3.12  | 0.609302565320197    |             |
| AGIWUR28605                                                                                                                                              |    |    |         |         |                |           |           |                      |             |
| CB4856                                                                                                                                                   | CT | II | 3912003 | 3913385 | WBGene00018745 | F53C3.1   | F53C3.1   | -0.00113814695027692 | AGIWUR32457 |
| CB4856                                                                                                                                                   | CT | II | 3919794 | 3927982 | WBGene00018756 | F53C3.13  | F53C3.13  | 0.134284257052219    |             |
| AGIWUR8437;AGIWUR8647;AGIWUR8821;AGIWUR10822;AGIWUR13228;AGIWUR16084;AGIWUR17645;AGIWUR19318;AGIWUR24545;AGIWUR27913;AGIWUR30509;AGIWUR33161;AGIWUR39802 |    |    |         |         |                |           |           |                      |             |
| CB4856                                                                                                                                                   | CT | II | 3932178 | 3933740 | WBGene00021192 | Y14H12B.2 | Y14H12B.2 | -0.0900320258928051  |             |
| AGIWUR14725                                                                                                                                              |    |    |         |         |                |           |           |                      |             |
| CB4856                                                                                                                                                   | CT | II | 3934451 | 3936008 | WBGene00021191 | Y14H12B.1 | Y14H12B.1 | 0.0314811001914572   |             |
| AGIWUR6516;AGIWUR9325                                                                                                                                    |    |    |         |         |                |           |           |                      |             |
| CB4856                                                                                                                                                   | CT | II | 3950145 | 3972137 | WBGene00004751 | sea-2     | K10G6.3   | -0.072875002334273   |             |
| AGIWUR6369;AGIWUR29408                                                                                                                                   |    |    |         |         |                |           |           |                      |             |
| CB4856                                                                                                                                                   | CT | II | 3972820 | 3974968 | WBGene00019641 | K10G6.4   | K10G6.4   | 0.83174377329337     | AGIWUR42914 |
| CB4856                                                                                                                                                   | CT | II | 3976246 | 3977969 | WBGene00019640 | dos-2     | K10G6.2   | -0.031729249073571   | AGIWUR16014 |
| CB4856                                                                                                                                                   | CT | II | 3982549 | 3986944 | WBGene00003017 | lin-31    | K10G6.1   | -0.193692496886764   |             |
| AGIWUR37327;AGIWUR44727                                                                                                                                  |    |    |         |         |                |           |           |                      |             |
| CB4856                                                                                                                                                   | CT | II | 3987281 | 3988185 | WBGene00044381 | K10G6.5   | K10G6.5   | -0.365209995653031   |             |
| AGIWUR15812;AGIWUR23686;AGIWUR40325                                                                                                                      |    |    |         |         |                |           |           |                      |             |
| CB4856                                                                                                                                                   | CT | II | 3988700 | 3989677 | WBGene00044382 | Y14H12A.2 | Y14H12A.2 | 0.0275365598494366   |             |
| AGIWUR5795;AGIWUR13726;AGIWUR24093;AGIWUR28723;AGIWUR29110;AGIWUR34219;AGIWUR36017;AGIWUR38335;AGIWUR43600;AGIWUR45160                                   |    |    |         |         |                |           |           |                      |             |
| CB4856                                                                                                                                                   | CT | II | 3993210 | 3993887 | WBGene00021190 | Y14H12A.1 | Y14H12A.1 | -0.434907956701691   |             |
| AGIWUR37602                                                                                                                                              |    |    |         |         |                |           |           |                      |             |
| CB4856                                                                                                                                                   | CT | II | 4004885 | 4016072 | WBGene00019487 | ephx-1    | K07D4.7   | 0.37933837010879     | AGIWUR1973  |
| CB4856                                                                                                                                                   | CT | II | 4016827 | 4018701 | WBGene00019486 | K07D4.6   | K07D4.6   | 0.151555054325877    | AGIWUR37055 |
| CB4856                                                                                                                                                   | CT | II | 4020482 | 4025562 | WBGene00019485 | K07D4.5   | K07D4.5   | 0.137796601784257    |             |
| AGIWUR4273;AGIWUR23840;AGIWUR27598;AGIWUR27867;AGIWUR39078                                                                                               |    |    |         |         |                |           |           |                      |             |
| CB4856                                                                                                                                                   | CT | II | 4028577 | 4029985 | WBGene00019488 | K07D4.9   | K07D4.9   | 0.722464019798139    | AGIWUR12587 |
| CB4856                                                                                                                                                   | CT | II | 4031214 | 4032387 | WBGene00019484 | K07D4.4   | K07D4.4   | -0.0531143971873478  | AGIWUR27836 |
| CB4856                                                                                                                                                   | CT | II | 4038868 | 4043070 | WBGene00004135 | pqn-48    | K07D4.8   | 0.230966193520766    | AGIWUR44569 |
| CB4856                                                                                                                                                   | CT | II | 4043059 | 4044330 | WBGene00004467 | rpn-11    | K07D4.3   | -0.152484822462595   |             |
| AGIWUR2574;AGIWUR13756;AGIWUR14661;AGIWUR25654;AGIWUR35845;AGIWUR37390                                                                                   |    |    |         |         |                |           |           |                      |             |

|                                                                                    |    |    |         |         |                 |          |          |                     |             |
|------------------------------------------------------------------------------------|----|----|---------|---------|-----------------|----------|----------|---------------------|-------------|
| CB4856                                                                             | CT | II | 4044771 | 4047247 | WBGene00019483  | K07D4.2  | K07D4.2  | -0.282604331122764  | AGIWUR20974 |
| CB4856                                                                             | CT | II | 4048525 | 4049129 | WBGene00023318  | K07D4.1  | K07D4.1  | -0.497838129848281  | AGIWUR22099 |
| CB4856                                                                             | CT | II | 4055939 | 4057707 | WBGene00021055  | W06A11.4 | W06A11.4 | -0.199290931113829  |             |
| AGIWUR4127;AGIWUR22591;AGIWUR24503;AGIWUR43789                                     |    |    |         |         |                 |          |          |                     |             |
| CB4856                                                                             | CT | II | 4063008 | 4064057 | WBGene00021054  | fbxb-118 | W06A11.3 | 0.0683895668798309  |             |
| AGIWUR5599;AGIWUR16342;AGIWUR21363;AGIWUR28791                                     |    |    |         |         |                 |          |          |                     |             |
| CB4856                                                                             | CT | II | 4067558 | 4069771 | WBGene00021052  | W06A11.1 | W06A11.1 | -0.159492323658324  |             |
| AGIWUR2631;AGIWUR13752;AGIWUR14821                                                 |    |    |         |         |                 |          |          |                     |             |
| CB4856                                                                             | CT | II | 4070009 | 4072920 | WBGene00020009  | R11F4.3  | R11F4.3  | -0.153984313328527  |             |
| AGIWUR29471;AGIWUR29931                                                            |    |    |         |         |                 |          |          |                     |             |
| CB4856                                                                             | CT | II | 4083065 | 4086226 | WBGene00020008  | R11F4.2  | R11F4.2  | -0.0478171338887918 |             |
| AGIWUR4756;AGIWUR10772;AGIWUR13044;AGIWUR25629;AGIWUR33062;AGIWUR35536             |    |    |         |         |                 |          |          |                     |             |
| CB4856                                                                             | CT | II | 4091837 | 4094349 | WBGene00020007  | R11F4.1  | R11F4.1  | 1.02738751987807    |             |
| AGIWUR5157;AGIWUR18910;AGIWUR23303;AGIWUR32277                                     |    |    |         |         |                 |          |          |                     |             |
| CB4856                                                                             | CT | II | 4100788 | 4127849 | WBGene00006476  | rhgf-2   | T08H4.1  | 0.385317907382378   |             |
| AGIWUR5268;AGIWUR12668;AGIWUR13047;AGIWUR20456;AGIWUR23101;AGIWUR31904;AGIWUR40324 |    |    |         |         |                 |          |          |                     |             |
| CB4856                                                                             | CT | II | 4127848 | 4134867 | WBGene00020368  | ast-1    | T08H4.3  | 0.9316331514981     |             |
| AGIWUR8003;AGIWUR11487                                                             |    |    |         |         |                 |          |          |                     |             |
| CB4856                                                                             | CT | II | 4140901 | 4141105 | WBGene00021822  | Y54C5A.1 | Y54C5A.1 | 0.187886542263729   |             |
| AGIWUR32585                                                                        |    |    |         |         |                 |          |          |                     |             |
| CB4856                                                                             | CT | II | 4142816 | 4149678 | WBGene00018969  | F56D3.1  | F56D3.1  | 0.205128400338574   | AGIWUR37694 |
| CB4856                                                                             | CT | II | 4155773 | 4167368 | WBGene00019855  | R03H10.2 | R03H10.2 | 0.751918872173722   |             |
| AGIWUR7979                                                                         |    |    |         |         |                 |          |          |                     |             |
| CB4856                                                                             | CT | II | 4167555 | 4168500 | WBGene00019856  | R03H10.4 | R03H10.4 | 0.177267250081837   |             |
| AGIWUR36427                                                                        |    |    |         |         |                 |          |          |                     |             |
| CB4856                                                                             | CT | II | 4169723 | 4170608 | WBGene00019857  | R03H10.5 | R03H10.5 | 0.224994702417584   |             |
| AGIWUR35423                                                                        |    |    |         |         |                 |          |          |                     |             |
| CB4856                                                                             | CT | II | 4171294 | 4173875 | WBGene00019858  | R03H10.6 | R03H10.6 | 0.340041260997092   |             |
| AGIWUR30977                                                                        |    |    |         |         |                 |          |          |                     |             |
| CB4856                                                                             | CT | II | 4180271 | 4183545 | WBGene00019854  | R03H10.1 | R03H10.1 | 0.457129466008154   |             |
| AGIWUR32688                                                                        |    |    |         |         |                 |          |          |                     |             |
| CB4856                                                                             | CT | II | 4186666 | 4208499 | WBGene00006495  | cpna-1   | F31D5.3  | 0.442920544922485   |             |
| AGIWUR1322;AGIWUR15868;AGIWUR24333                                                 |    |    |         |         |                 |          |          |                     |             |
| CB4856                                                                             | CT | II | 4211425 | 4213335 | WBGene000206414 | F31D5.7  | F31D5.7  | 0.412716189604965   | AGIWUR22076 |
| CB4856                                                                             | CT | II | 4215605 | 4218243 | WBGene00017945  | F31D5.2  | F31D5.2  | -0.269367832535767  | AGIWUR31542 |
| CB4856                                                                             | CT | II | 4223309 | 4226330 | WBGene00015818  | C16A11.5 | C16A11.5 | -0.263463077250709  |             |
| AGIWUR789;AGIWUR26752;AGIWUR44848                                                  |    |    |         |         |                 |          |          |                     |             |
| CB4856                                                                             | CT | II | 4227046 | 4229157 | WBGene00015817  | C16A11.4 | C16A11.4 | -0.224501355073958  |             |
| AGIWUR4751;AGIWUR14422;AGIWUR22204;AGIWUR24954;AGIWUR35304;AGIWUR42962             |    |    |         |         |                 |          |          |                     |             |

|                                                  |    |                 |                |          |          |                     |             |
|--------------------------------------------------|----|-----------------|----------------|----------|----------|---------------------|-------------|
| CB4856 CT<br>AGIWUR12352                         | II | 4234950 4235982 | WBGene00045297 | fbxc-43  | C16A11.9 | 0.320240034945668   |             |
| CB4856 CT<br>AGIWUR11430;AGIWUR38404             | II | 4236504 4237751 | WBGene00015819 | fbxc-44  | C16A11.6 | -0.0570527700693626 |             |
| CB4856 CT<br>AGIWUR22166                         | II | 4238159 4244830 | WBGene00015815 | C16A11.2 | C16A11.2 | -0.0475485854354893 |             |
| CB4856 CT<br>AGIWUR6819                          | II | 4247197 4255281 | WBGene00001673 | gpa-11   | C16A11.1 | 0.27651276887824    |             |
| CB4856 CT<br>AGIWUR34626                         | II | 4255848 4256989 | WBGene00015820 | C16A11.7 | C16A11.7 | 0.0872954744671697  |             |
| CB4856 CT<br>AGIWUR36533                         | II | 4257092 4258781 | WBGene00015821 | clcc-135 | C16A11.8 | -0.294900798857165  |             |
| CB4856 CT                                        | II | 4276209 4279268 | WBGene00015299 | C01F1.4  | C01F1.4  | -0.137401401075637  | AGIWUR35062 |
| CB4856 CT                                        | II | 4279424 4281967 | WBGene00015300 | C01F1.5  | C01F1.5  | -0.344979793053277  | AGIWUR3406  |
| CB4856 CT                                        | II | 4282321 4288211 | WBGene00015301 | C01F1.6  | C01F1.6  | 0.137462129425213   | AGIWUR39703 |
| CB4856 CT                                        | II | 4295101 4299006 | WBGene00015298 | C01F1.3  | C01F1.3  | 0.161948762851958   | AGIWUR11357 |
| CB4856 CT                                        | II | 4299653 4300919 | WBGene00015297 | sco-1    | C01F1.2  | -0.400862154566042  | AGIWUR1126  |
| CB4856 CT                                        | II | 4301607 4305287 | WBGene00015296 | C01F1.1  | C01F1.1  | -0.102547346015035  | AGIWUR3997  |
| CB4856 CT<br>AGIWUR25352                         | II | 4305262 4307004 | WBGene00021796 | Y52E8A.3 | Y52E8A.3 | 0.11063625330384    |             |
| CB4856 CT<br>AGIWUR31602                         | II | 4309725 4312215 | WBGene00021797 | plep-1   | Y52E8A.4 | -1.06064866086971   |             |
| CB4856 CT<br>AGIWUR31610                         | II | 4314417 4316111 | WBGene00005787 | srw-40   | Y52E8A.5 | 0.147387121691035   |             |
| CB4856 CT<br>AGIWUR8856                          | II | 4316629 4319969 | WBGene00021798 | Y52E8A.6 | Y52E8A.6 | -0.0902396045380058 |             |
| CB4856 CT<br>AGIWUR13205                         | II | 4320836 4321654 | WBGene00021795 | Y52E8A.2 | Y52E8A.2 | 0.0970879166145142  |             |
| CB4856 CT<br>AGIWUR2488                          | II | 4321663 4322616 | WBGene00021794 | Y52E8A.1 | Y52E8A.1 | -0.549901675934173  |             |
| CB4856 CT<br>AGIWUR29158                         | II | 4323256 4324187 | WBGene00019221 | H20J04.6 | H20J04.6 | -0.331896100494106  |             |
| CB4856 CT<br>AGIWUR24324;AGIWUR26270             | II | 4324361 4326089 | WBGene00003390 | mog-2    | H20J04.8 | -0.100239878478377  |             |
| CB4856 CT<br>AGIWUR28829                         | II | 4326720 4328284 | WBGene00019220 | pfd-2    | H20J04.5 | -0.101619277515681  |             |
| CB4856 CT<br>AGIWUR12223;AGIWUR19295;AGIWUR19960 | II | 4329023 4334484 | WBGene00019219 | H20J04.4 | H20J04.4 | -0.0882864554825105 |             |
| CB4856 CT                                        | II | 4335707 4338424 | WBGene00019218 | madf-3   | H20J04.3 | -0.0362166068387495 |             |



|                                                            |    |    |         |         |                |          |          |                                  |
|------------------------------------------------------------|----|----|---------|---------|----------------|----------|----------|----------------------------------|
| AGIWUR41477                                                |    |    |         |         |                |          |          |                                  |
| CB4856                                                     | CT | II | 4340151 | 4350984 | WBGene00019217 | athp-2   | H20J04.2 | 0.0898239666588765               |
| AGIWUR13157                                                |    |    |         |         |                |          |          |                                  |
| CB4856                                                     | CT | II | 4351188 | 4353159 | WBGene00044310 | H20J04.9 | H20J04.9 | -0.0349588276751236              |
| AGIWUR27110;AGIWUR39688                                    |    |    |         |         |                |          |          |                                  |
| CB4856                                                     | CT | II | 4353221 | 4355317 | WBGene00019222 | H20J04.7 | H20J04.7 |                                  |
| 0.000931581112936897 AGIWUR32453                           |    |    |         |         |                |          |          |                                  |
| CB4856                                                     | CT | II | 4355633 | 4358844 | WBGene00019216 | H20J04.1 | H20J04.1 | -0.342212589420789               |
| AGIWUR42306                                                |    |    |         |         |                |          |          |                                  |
| CB4856                                                     | CT | II | 4359082 | 4368332 | WBGene00002252 | lat-2    | B0286.2  | -0.219102567268648 AGIWUR17581   |
| CB4856                                                     | CT | II | 4368490 | 4369692 | WBGene00023425 | try-9    | B0286.6  | -0.225754475770398 AGIWUR47      |
| CB4856                                                     | CT | II | 4369625 | 4372597 | WBGene00015116 | pacs-1   | B0286.3  | -0.510745656464245 AGIWUR37001   |
| CB4856                                                     | CT | II | 4372740 | 4376742 | WBGene00003825 | ntl-2    | B0286.4  | 0.106966820088207                |
| AGIWUR9456;AGIWUR25085;AGIWUR30605;AGIWUR31866;AGIWUR32151 |    |    |         |         |                |          |          |                                  |
| CB4856                                                     | CT | II | 4375504 | 4386343 | WBGene00015115 | B0286.1  | B0286.1  | 0.292539118229319 AGIWUR29486    |
| CB4856                                                     | CT | II | 4392800 | 4404850 | WBGene00022743 | mlt-7    | ZK430.8  | -0.0793018184831844 AGIWUR39940  |
| CB4856                                                     | CT | II | 4405864 | 4416553 | WBGene00022741 | ZK430.5  | ZK430.5  | 0.0773740277959316 AGIWUR214     |
| CB4856                                                     | CT | II | 4417683 | 4419131 | WBGene00007036 | sod-5    | ZK430.3  | -0.0486076299874956 AGIWUR15490  |
| CB4856                                                     | CT | II | 4420255 | 4422319 | WBGene00044063 | bpnt-1   | ZK430.2  | -0.242220803303738 AGIWUR8553    |
| CB4856                                                     | CT | II | 4422463 | 4424902 | WBGene00022742 | ZK430.7  | ZK430.7  | -0.00905125146632635 AGIWUR22253 |
| CB4856                                                     | CT | II | 4425167 | 4432613 | WBGene00022739 | toe-1    | ZK430.1  | -0.239312790216443 AGIWUR7011    |
| CB4856                                                     | CT | II | 4433332 | 4435169 | WBGene00003699 | nhr-109  | T12C9.5  | 0.0666946411700717               |
| AGIWUR376;AGIWUR15168;AGIWUR17704;AGIWUR19399;AGIWUR35164  |    |    |         |         |                |          |          |                                  |
| CB4856                                                     | CT | II | 4435300 | 4436995 | WBGene00020460 | nhr-273  | T12C9.1  | -0.169507095671909 AGIWUR25363   |
| CB4856                                                     | CT | II | 4438867 | 4440867 | WBGene00003615 | nhr-16   | T12C9.6  | -0.195371047331759 AGIWUR908     |
| CB4856                                                     | CT | II | 4441265 | 4453151 | WBGene00006657 | twk-2    | T12C9.3  | -0.139000177377725               |
| AGIWUR27308;AGIWUR39529                                    |    |    |         |         |                |          |          |                                  |
| CB4856                                                     | CT | II | 4458263 | 4460404 | WBGene00020461 | T12C9.7  | T12C9.7  | -0.286633165890612               |
| AGIWUR2066;AGIWUR5575;AGIWUR24733                          |    |    |         |         |                |          |          |                                  |
| CB4856                                                     | CT | II | 4461130 | 4467895 | WBGene00021058 | vps-18   | W06B4.3  | -0.339267009702759 AGIWUR2565    |
| CB4856                                                     | CT | II | 4468169 | 4471038 | WBGene00021057 | W06B4.2  | W06B4.2  | -0.0362049410375676 AGIWUR716    |
| CB4856                                                     | CT | II | 4471401 | 4473553 | WBGene00021056 | W06B4.1  | W06B4.1  | -0.327893824324331 AGIWUR16691   |
| CB4856                                                     | CT | II | 4478613 | 4480948 | WBGene00020248 | T05C1.1  | T05C1.1  | -0.0801770771258052 AGIWUR5570   |
| CB4856                                                     | CT | II | 4481025 | 4483722 | WBGene00020249 | T05C1.2  | T05C1.2  | -0.371721389735598 AGIWUR6661    |
| CB4856                                                     | CT | II | 4487694 | 4489388 | WBGene00020250 | T05C1.3  | T05C1.3  | 0.413854651471993 AGIWUR7186     |
| CB4856                                                     | CT | II | 4490408 | 4490865 | WBGene00020252 | T05C1.5  | T05C1.5  | -0.250263178117222 AGIWUR15261   |
| CB4856                                                     | CT | II | 4491152 | 4505147 | WBGene00020251 | camt-1   | T05C1.4  | 0.0206005819876918               |
| AGIWUR5533;AGIWUR37397;AGIWUR42799                         |    |    |         |         |                |          |          |                                  |
| CB4856                                                     | CT | II | 4512211 | 4516115 | WBGene00015135 | cyp-23A1 | B0304.3  | 0.300288957327224                |

|                                                                                    |    |    |         |         |                |          |           |                      |             |
|------------------------------------------------------------------------------------|----|----|---------|---------|----------------|----------|-----------|----------------------|-------------|
| AGIWUR14628                                                                        |    |    |         |         |                |          |           |                      |             |
| CB4856                                                                             | CT | II | 4518560 | 4522523 | WBGene00001948 | hlh-1    | B0304.1   | 0.481706162329973    |             |
| AGIWUR17528;AGIWUR23856                                                            |    |    |         |         |                |          |           |                      |             |
| CB4856                                                                             | CT | II | 4522465 | 4523222 | WBGene00015136 | B0304.4  | B0304.4   | -0.104880107149405   |             |
| AGIWUR1375;AGIWUR6577;AGIWUR19962;AGIWUR37814                                      |    |    |         |         |                |          |           |                      |             |
| CB4856                                                                             | CT | II | 4523622 | 4524589 | WBGene00015134 | B0304.2  | B0304.2   | -0.241357882865916   | AGIWUR28156 |
| CB4856                                                                             | CT | II | 4524634 | 4527900 | WBGene00005061 | sra-35   | B0304.8   | -0.222803836326669   |             |
| AGIWUR7786;AGIWUR36780;AGIWUR38769                                                 |    |    |         |         |                |          |           |                      |             |
| CB4856                                                                             | CT | II | 4529636 | 4531964 | WBGene00005058 | sra-32   | B0304.5   | -0.34256734698141    | AGIWUR14583 |
| CB4856                                                                             | CT | II | 4534742 | 4537241 | WBGene00005059 | sra-33   | B0304.6   | 0.248501840694893    | AGIWUR42367 |
| CB4856                                                                             | CT | II | 4538988 | 4540731 | WBGene00005062 | sra-36   | B0304.9   | -0.0457827398938218  | AGIWUR37011 |
| CB4856                                                                             | CT | II | 4541865 | 4543668 | WBGene00005060 | sra-34   | B0304.7   | 0.285655718137043    | AGIWUR11853 |
| CB4856                                                                             | CT | II | 4550894 | 4552177 | WBGene00019489 | K07E1.1  | K07E1.1   | 0.0558658846215661   |             |
| AGIWUR7894;AGIWUR11475;AGIWUR11642;AGIWUR17958;AGIWUR35065;AGIWUR35352;AGIWUR38739 |    |    |         |         |                |          |           |                      |             |
| CB4856                                                                             | CT | II | 4557787 | 4559573 | WBGene00019746 | M03A1.3  | M03A1.3   | -0.331758878090975   |             |
| AGIWUR16157;AGIWUR20492                                                            |    |    |         |         |                |          |           |                      |             |
| CB4856                                                                             | CT | II | 4560397 | 4562618 | WBGene00077490 | M03A1.8  | M03A1.8   | 0.269608588708018    | AGIWUR33318 |
| CB4856                                                                             | CT | II | 4562853 | 4563546 | WBGene00000928 | dao-2    | M03A1.7   | 0.681587069252558    | AGIWUR19408 |
| CB4856                                                                             | CT | II | 4572000 | 4590970 | WBGene00006868 | vab-1    | M03A1.1   | 0.108686086063275    |             |
| AGIWUR14824;AGIWUR44039                                                            |    |    |         |         |                |          |           |                      |             |
| CB4856                                                                             | CT | II | 4590952 | 4601354 | WBGene00019747 | ipla-1   | M03A1.6   | -0.00855150545083649 |             |
| AGIWUR4878;AGIWUR35821                                                             |    |    |         |         |                |          |           |                      |             |
| CB4856                                                                             | CT | II | 4601355 | 4602633 | WBGene00018046 | F35D11.5 | F35D11.5  | -0.171525630366638   |             |
| AGIWUR22207                                                                        |    |    |         |         |                |          |           |                      |             |
| CB4856                                                                             | CT | II | 4603406 | 4604161 | WBGene00018045 | F35D11.4 | F35D11.4  |                      |             |
| -0.000209959489108513 AGIWUR14130                                                  |    |    |         |         |                |          |           |                      |             |
| CB4856                                                                             | CT | II | 4608372 | 4612082 | WBGene00018044 | F35D11.3 | F35D11.3  | 0.159083086017057    |             |
| AGIWUR43345                                                                        |    |    |         |         |                |          |           |                      |             |
| CB4856                                                                             | CT | II | 4612989 | 4626107 | WBGene00004122 | pqn-35   | F35D11.2  | 0.101213731162728    |             |
| AGIWUR28360                                                                        |    |    |         |         |                |          |           |                      |             |
| CB4856                                                                             | CT | II | 4626906 | 4627805 | WBGene00018043 | F35D11.1 | F35D11.1  | -0.426262980265643   |             |
| AGIWUR1128                                                                         |    |    |         |         |                |          |           |                      |             |
| CB4856                                                                             | CT | II | 4627811 | 4638384 | WBGene00018051 | che-10   | F35D11.11 | -0.242810436424885   |             |
| AGIWUR23841;AGIWUR35432                                                            |    |    |         |         |                |          |           |                      |             |
| CB4856                                                                             | CT | II | 4649085 | 4653280 | WBGene00022283 | lgc-27   | Y74E4A.1  | 0.413730629174222    |             |
| AGIWUR12849;AGIWUR33651                                                            |    |    |         |         |                |          |           |                      |             |
| CB4856                                                                             | CT | II | 4653189 | 4655934 | WBGene00020222 | fut-6    | T05A7.5   | -0.136355065843957   |             |
| AGIWUR17270;AGIWUR39398                                                            |    |    |         |         |                |          |           |                      |             |
| CB4856                                                                             | CT | II | 4665893 | 4667588 | WBGene00043986 | fut-5    | T05A7.10  | -0.184894375974385   |             |

AGIWUR9107;AGIWUR32803

|        |    |    |         |         |                |         |         |                    |             |
|--------|----|----|---------|---------|----------------|---------|---------|--------------------|-------------|
| CB4856 | CT | II | 4668644 | 4671774 | WBGene00020223 | T05A7.6 | T05A7.6 | 0.0584017875557983 | AGIWUR15019 |
| CB4856 | CT | II | 4672798 | 4673746 | WBGene00001976 | hmg-11  | T05A7.4 | 0.705951112579653  |             |

AGIWUR31120;AGIWUR38858

|        |    |    |         |         |                |          |  |                          |  |
|--------|----|----|---------|---------|----------------|----------|--|--------------------------|--|
| CB4856 | CT | II | 4674420 | 4675729 | WBGene00020220 | clec-140 |  | T05A7.2 0.45269560363095 |  |
|--------|----|----|---------|---------|----------------|----------|--|--------------------------|--|

AGIWUR14366

|        |    |    |         |         |                |         |         |                     |             |
|--------|----|----|---------|---------|----------------|---------|---------|---------------------|-------------|
| CB4856 | CT | II | 4675779 | 4676250 | WBGene00020221 | T05A7.3 | T05A7.3 | 1.28859418797845    | AGIWUR18858 |
| CB4856 | CT | II | 4678026 | 4679638 | WBGene00020219 | T05A7.1 | T05A7.1 | -0.0196197341183613 | AGIWUR40718 |
| CB4856 | CT | II | 4679667 | 4681324 | WBGene00020224 | T05A7.7 | T05A7.7 | 0.0330100972740563  | AGIWUR18383 |
| CB4856 | CT | II | 4681764 | 4683728 | WBGene00020225 | sre-40  | T05A7.8 | 0.137964846032048   | AGIWUR18657 |
| CB4856 | CT | II | 4687241 | 4689392 | WBGene00017371 | sre-39  | F10G7.7 | -0.295248024049968  |             |

AGIWUR4968;AGIWUR29347

|        |    |    |         |         |                |          |  |                              |  |
|--------|----|----|---------|---------|----------------|----------|--|------------------------------|--|
| CB4856 | CT | II | 4689777 | 4690484 | WBGene00044744 | F10G7.12 |  | F10G7.12 -0.0685290176729598 |  |
|--------|----|----|---------|---------|----------------|----------|--|------------------------------|--|

AGIWUR12475

|        |    |    |         |         |                |         |         |                     |             |
|--------|----|----|---------|---------|----------------|---------|---------|---------------------|-------------|
| CB4856 | CT | II | 4691227 | 4693075 | WBGene00017370 | F10G7.6 | F10G7.6 | 0.333483476776712   | AGIWUR6909  |
| CB4856 | CT | II | 4693414 | 4696408 | WBGene00017369 | F10G7.5 | F10G7.5 | -0.0119087428884637 | AGIWUR25609 |
| CB4856 | CT | II | 4696419 | 4698427 | WBGene00004461 | rpn-5   | F10G7.8 | -0.290026164031568  | AGIWUR22904 |
| CB4856 | CT | II | 4698721 | 4700994 | WBGene00004737 | scc-1   | F10G7.4 | -0.106446105698033  | AGIWUR4631  |
| CB4856 | CT | II | 4702069 | 4703219 | WBGene00006817 | unc-85  | F10G7.3 | -0.139314558836315  | AGIWUR32576 |
| CB4856 | CT | II | 4703254 | 4706498 | WBGene00017372 | F10G7.9 | F10G7.9 | -0.0585800652567627 | AGIWUR38407 |
| CB4856 | CT | II | 4706821 | 4710052 | WBGene00006626 | tsn-1   | F10G7.2 | -0.193312699739112  | AGIWUR860   |
| CB4856 | CT | II | 4710277 | 4713690 | WBGene00006497 | tag-151 | F10G7.1 | -0.0302226531168195 |             |

AGIWUR3622;AGIWUR3894;AGIWUR14759;AGIWUR19454;AGIWUR25721;AGIWUR34601;AGIWUR41035

|        |    |    |         |         |                |          |  |                             |  |
|--------|----|----|---------|---------|----------------|----------|--|-----------------------------|--|
| CB4856 | CT | II | 4713674 | 4726264 | WBGene00017373 | F10G7.10 |  | F10G7.10 0.0817994249823921 |  |
|--------|----|----|---------|---------|----------------|----------|--|-----------------------------|--|

AGIWUR1239;AGIWUR33197

|        |    |    |         |         |                |        |          |  |                    |
|--------|----|----|---------|---------|----------------|--------|----------|--|--------------------|
| CB4856 | CT | II | 4727326 | 4727869 | WBGene00017374 | ttr-41 | F10G7.11 |  | -0.294490667390146 |
|--------|----|----|---------|---------|----------------|--------|----------|--|--------------------|

AGIWUR30715

|        |    |    |         |         |                |          |  |                             |  |
|--------|----|----|---------|---------|----------------|----------|--|-----------------------------|--|
| CB4856 | CT | II | 4731178 | 4733949 | WBGene00018275 | F41C3.11 |  | F41C3.11 -0.126270398304168 |  |
|--------|----|----|---------|---------|----------------|----------|--|-----------------------------|--|

AGIWUR43633

|        |    |    |         |         |                |         |         |                    |             |
|--------|----|----|---------|---------|----------------|---------|---------|--------------------|-------------|
| CB4856 | CT | II | 4735113 | 4736850 | WBGene00018272 | F41C3.6 | F41C3.6 | 0.0829825018110668 | AGIWUR15758 |
| CB4856 | CT | II | 4737617 | 4739906 | WBGene00018271 | F41C3.5 | F41C3.5 | -0.149758111516162 | AGIWUR38501 |
| CB4856 | CT | II | 4740412 | 4741616 | WBGene00018270 | F41C3.4 | F41C3.4 | -0.181824641307873 | AGIWUR32312 |
| CB4856 | CT | II | 4742128 | 4745280 | WBGene00018269 | acs-11  | F41C3.3 | 0.978530353359609  | AGIWUR34073 |
| CB4856 | CT | II | 4749968 | 4751822 | WBGene00018268 | F41C3.2 | F41C3.2 | 0.447999934812865  |             |

AGIWUR23211;AGIWUR35292;AGIWUR38772

|        |    |    |         |         |                |         |         |                      |            |
|--------|----|----|---------|---------|----------------|---------|---------|----------------------|------------|
| CB4856 | CT | II | 4752388 | 4752942 | WBGene00018267 | F41C3.1 | F41C3.1 | 1.91813690659794     | AGIWUR4862 |
| CB4856 | CT | II | 4753413 | 4755595 | WBGene00016163 | C27D9.1 | C27D9.1 | -0.00873803200499523 | AGIWUR8054 |
| CB4856 | CT | II | 4755589 | 4756851 | WBGene00016164 | C27D9.2 | C27D9.2 | 0.0365936171811909   |            |

AGIWUR26144;AGIWUR26845

|                                                                        |    |    |         |         |                |           |           |                     |             |
|------------------------------------------------------------------------|----|----|---------|---------|----------------|-----------|-----------|---------------------|-------------|
| CB4856                                                                 | CT | II | 4758762 | 4759289 | WBGene00017839 | F26G1.3   | F26G1.3   | -0.940968146387144  | AGIWUR40801 |
| CB4856                                                                 | CT | II | 4763081 | 4764174 | WBGene00017838 | F26G1.2   | F26G1.2   | 0.824845050152478   |             |
| AGIWUR7212;AGIWUR31440;AGIWUR34452                                     |    |    |         |         |                |           |           |                     |             |
| CB4856                                                                 | CT | II | 4764159 | 4766384 | WBGene00017840 | ttm-2     | F26G1.4   | 1.29809911768535    | AGIWUR36669 |
| CB4856                                                                 | CT | II | 4770534 | 4771382 | WBGene00017841 | F26G1.5   | F26G1.5   | -0.530497587722628  | AGIWUR2996  |
| CB4856                                                                 | CT | II | 4772835 | 4773991 | WBGene00044662 | F26G1.9   | F26G1.9   | 0.100688064088216   |             |
| AGIWUR6370;AGIWUR16681;AGIWUR26642;AGIWUR37047;AGIWUR37704;AGIWUR41281 |    |    |         |         |                |           |           |                     |             |
| CB4856                                                                 | CT | II | 4774382 | 4774883 | WBGene00044663 | F26G1.10  | F26G1.10  | 0.170975232678201   |             |
| AGIWUR6035;AGIWUR18054;AGIWUR22730;AGIWUR24550                         |    |    |         |         |                |           |           |                     |             |
| CB4856                                                                 | CT | II | 4775295 | 4781347 | WBGene00017842 | nep-12    | F26G1.6   | -0.0412221050726291 | AGIWUR16205 |
| CB4856                                                                 | CT | II | 4785861 | 4786316 | WBGene00003424 | msp-3     | F26G1.7   | 0.202633518437954   | AGIWUR39844 |
| CB4856                                                                 | CT | II | 4791620 | 4795643 | WBGene00017837 | F26G1.1   | F26G1.1   | 0.118638958288513   |             |
| AGIWUR6838;AGIWUR8224;AGIWUR11071;AGIWUR12821;AGIWUR17678;AGIWUR38146  |    |    |         |         |                |           |           |                     |             |
| CB4856                                                                 | CT | II | 4795761 | 4797216 | WBGene00016353 | C33F10.4  | C33F10.4  | -0.17148363053814   |             |
| AGIWUR2568;AGIWUR20383;AGIWUR20844;AGIWUR21310                         |    |    |         |         |                |           |           |                     |             |
| CB4856                                                                 | CT | II | 4797371 | 4798176 | WBGene00050941 | C33F10.14 | C33F10.14 | -0.077008497264309  |             |
| AGIWUR4432                                                             |    |    |         |         |                |           |           |                     |             |
| CB4856                                                                 | CT | II | 4798154 | 4812136 | WBGene00016354 | rig-6     | C33F10.5  | -0.0276192455290696 |             |
| AGIWUR8328;AGIWUR10082;AGIWUR34741;AGIWUR37698;AGIWUR37741;AGIWUR40358 |    |    |         |         |                |           |           |                     |             |
| CB4856                                                                 | CT | II | 4818662 | 4821564 | WBGene00016355 | lact-5    | C33F10.7  | 0.0862855931731428  |             |
| AGIWUR440;AGIWUR17904;AGIWUR32830                                      |    |    |         |         |                |           |           |                     |             |
| CB4856                                                                 | CT | II | 4823381 | 4825196 | WBGene00016356 | C33F10.8  | C33F10.8  | -0.183399998411094  |             |
| AGIWUR3888                                                             |    |    |         |         |                |           |           |                     |             |
| CB4856                                                                 | CT | II | 4826507 | 4827884 | WBGene00016359 | fbxb-88   | C33F10.13 | 0.907154301443596   |             |
| AGIWUR8862                                                             |    |    |         |         |                |           |           |                     |             |
| CB4856                                                                 | CT | II | 4828560 | 4832469 | WBGene00016352 | tbck-1    | C33F10.2  | 0.181566270545748   |             |
| AGIWUR11843                                                            |    |    |         |         |                |           |           |                     |             |
| CB4856                                                                 | CT | II | 4836304 | 4837759 | WBGene00016358 | C33F10.12 | C33F10.12 | -0.162373241252944  |             |
| AGIWUR20730                                                            |    |    |         |         |                |           |           |                     |             |
| CB4856                                                                 | CT | II | 4850185 | 4851441 | WBGene00044767 | T23B7.3   | T23B7.3   | -0.177223674987626  |             |
| AGIWUR18343;AGIWUR37964;AGIWUR43618                                    |    |    |         |         |                |           |           |                     |             |
| CB4856                                                                 | CT | II | 4852056 | 4857880 | WBGene00001027 | dnj-9     | F11G11.7  | -0.334361421400089  |             |
| AGIWUR1344;AGIWUR27861                                                 |    |    |         |         |                |           |           |                     |             |
| CB4856                                                                 | CT | II | 4857923 | 4859185 | WBGene00017385 | F11G11.5  | F11G11.5  | 0.176624730413733   |             |
| AGIWUR30732                                                            |    |    |         |         |                |           |           |                     |             |
| CB4856                                                                 | CT | II | 4860064 | 4860411 | WBGene00017386 | nspd-5    | F11G11.8  | 0.237830243873617   |             |
| AGIWUR6006                                                             |    |    |         |         |                |           |           |                     |             |
| CB4856                                                                 | CT | II | 4860594 | 4861696 | WBGene00017384 | F11G11.4  | F11G11.4  | 0.39155359207621    |             |
| AGIWUR9900                                                             |    |    |         |         |                |           |           |                     |             |

|                                                                                                                                              |    |         |         |                |           |           |                      |  |             |
|----------------------------------------------------------------------------------------------------------------------------------------------|----|---------|---------|----------------|-----------|-----------|----------------------|--|-------------|
| CB4856 CT                                                                                                                                    | II | 4862318 | 4863457 | WBGene00017387 | mpst-4    | F11G11.9  | -0.721354834673969   |  |             |
| AGIWUR35205                                                                                                                                  |    |         |         |                |           |           |                      |  |             |
| CB4856 CT                                                                                                                                    | II | 4866436 | 4867576 | WBGene00000606 | col-17    | F11G11.10 | -0.502846201942985   |  |             |
| AGIWUR20968                                                                                                                                  |    |         |         |                |           |           |                      |  |             |
| CB4856 CT                                                                                                                                    | II | 4872098 | 4873127 | WBGene00000649 | col-73    | F11G11.12 | -0.196798764231513   |  |             |
| AGIWUR5980                                                                                                                                   |    |         |         |                |           |           |                      |  |             |
| CB4856 CT                                                                                                                                    | II | 4875280 | 4875666 | WBGene00017388 | F11G11.13 | F11G11.13 | 0.0143193668429951   |  |             |
| AGIWUR13442;AGIWUR18299;AGIWUR24022;AGIWUR39742;AGIWUR43786;AGIWUR44698                                                                      |    |         |         |                |           |           |                      |  |             |
| CB4856 CT                                                                                                                                    | II | 4879885 | 4881105 | WBGene00001754 | gst-6     | F11G11.3  | -0.181852121037847   |  |             |
| AGIWUR24152                                                                                                                                  |    |         |         |                |           |           |                      |  |             |
| CB4856 CT                                                                                                                                    | II | 4882062 | 4883358 | WBGene00001755 | gst-7     | F11G11.2  | -0.0675475971697992  |  |             |
| AGIWUR29841                                                                                                                                  |    |         |         |                |           |           |                      |  |             |
| CB4856 CT                                                                                                                                    | II | 4883749 | 4884602 | WBGene00001756 | gst-8     | F11G11.1  | -0.0291553423697408  |  |             |
| AGIWUR30738                                                                                                                                  |    |         |         |                |           |           |                      |  |             |
| CB4856 CT                                                                                                                                    | II | 4886276 | 4888211 | WBGene00019891 | R05F9.7   | R05F9.7   | -0.00539996014583455 |  | AGIWUR42366 |
| CB4856 CT                                                                                                                                    | II | 4889437 | 4891427 | WBGene00019890 | R05F9.6   | R05F9.6   | -0.289326677686137   |  |             |
| AGIWUR15697;AGIWUR19070;AGIWUR25990;AGIWUR32241                                                                                              |    |         |         |                |           |           |                      |  |             |
| CB4856 CT                                                                                                                                    | II | 4891573 | 4893573 | WBGene00001757 | gst-9     | R05F9.5   | -0.841504334613205   |  | AGIWUR26662 |
| CB4856 CT                                                                                                                                    | II | 4899859 | 4902100 | WBGene00019892 | R05F9.9   | R05F9.9   | -0.244341061622917   |  |             |
| AGIWUR32806;AGIWUR38871                                                                                                                      |    |         |         |                |           |           |                      |  |             |
| CB4856 CT                                                                                                                                    | II | 4902288 | 4903796 | WBGene00019893 | sgt-1     | R05F9.10  | -0.103269045312892   |  |             |
| AGIWUR8466                                                                                                                                   |    |         |         |                |           |           |                      |  |             |
| CB4856 CT                                                                                                                                    | II | 4905008 | 4911835 | WBGene00019888 | btbd-10   | R05F9.1   | -0.0148436903895428  |  |             |
| AGIWUR2401;AGIWUR8282;AGIWUR8547;AGIWUR11478;AGIWUR12754;AGIWUR16406;AGIWUR28362;AGIWUR33870;AGIWUR35150;AGIWUR36112;AGIWUR38514;AGIWUR44911 |    |         |         |                |           |           |                      |  |             |
| CB4856 CT                                                                                                                                    | II | 4911765 | 4914218 | WBGene00019894 | R05F9.11  | R05F9.11  | 0.280895383293018    |  |             |
| AGIWUR11820                                                                                                                                  |    |         |         |                |           |           |                      |  |             |
| CB4856 CT                                                                                                                                    | II | 4914494 | 4925248 | WBGene00019895 | aagr-2    | R05F9.12  | 0.105532387538432    |  |             |
| AGIWUR6585;AGIWUR22779;AGIWUR27231                                                                                                           |    |         |         |                |           |           |                      |  |             |
| CB4856 CT                                                                                                                                    | II | 4930873 | 4932114 | WBGene00022763 | ZK546.7   | ZK546.7   | -0.214513877162707   |  | AGIWUR33470 |
| CB4856 CT                                                                                                                                    | II | 4932991 | 4933450 | WBGene00003470 | msp-152   | ZK546.6   | 0.20007397815874     |  | AGIWUR34259 |
| CB4856 CT                                                                                                                                    | II | 4933883 | 4935038 | WBGene00001778 | gst-30    | ZK546.11  | -0.125921354405669   |  |             |
| AGIWUR12388                                                                                                                                  |    |         |         |                |           |           |                      |  |             |
| CB4856 CT                                                                                                                                    | II | 4935563 | 4937956 | WBGene00022762 | ZK546.5   | ZK546.5   | -0.0520883500015064  |  | AGIWUR12473 |
| CB4856 CT                                                                                                                                    | II | 4938004 | 4938602 | WBGene00022761 | ZK546.4   | ZK546.4   | 0.0652750178244368   |  | AGIWUR18441 |
| CB4856 CT                                                                                                                                    | II | 4938599 | 4941150 | WBGene00022766 | cb1c-1    | ZK546.17  | 0.114087951916484    |  |             |
| AGIWUR34186;AGIWUR38869                                                                                                                      |    |         |         |                |           |           |                      |  |             |
| CB4856 CT                                                                                                                                    | II | 4944042 | 4945838 | WBGene00022765 | ZK546.14  | ZK546.14  | -0.19103276485385    |  |             |
| AGIWUR6967;AGIWUR30274                                                                                                                       |    |         |         |                |           |           |                      |  |             |

|                                                                                                                                   |    |    |         |         |                |          |          |                      |             |
|-----------------------------------------------------------------------------------------------------------------------------------|----|----|---------|---------|----------------|----------|----------|----------------------|-------------|
| CB4856                                                                                                                            | CT | II | 4946025 | 4948070 | WBGene00022759 | ZK546.2  | ZK546.2  | -0.232783983366719   | AGIWUR28619 |
| CB4856                                                                                                                            | CT | II | 4948154 | 4949527 | WBGene00006619 | try-1    | ZK546.15 | -0.306798039210271   |             |
| AGIWUR1091                                                                                                                        |    |    |         |         |                |          |          |                      |             |
| CB4856                                                                                                                            | CT | II | 4949902 | 4953488 | WBGene00006997 | zyg-12   | ZK546.1  | -0.0209635994709725  |             |
| AGIWUR32075;AGIWUR42593                                                                                                           |    |    |         |         |                |          |          |                      |             |
| CB4856                                                                                                                            | CT | II | 4953589 | 4954503 | WBGene00003580 | ndx-3    | Y38A8.1  | 0.0994472617856399   | AGIWUR15903 |
| CB4856                                                                                                                            | CT | II | 4954480 | 4955427 | WBGene00003949 | pbs-3    | Y38A8.2  | -0.191303833585142   |             |
| AGIWUR4506;AGIWUR7923                                                                                                             |    |    |         |         |                |          |          |                      |             |
| CB4856                                                                                                                            | CT | II | 4955646 | 4959876 | WBGene00006737 | ulp-2    | Y38A8.3  | 0.254810559949977    | AGIWUR9197  |
| CB4856                                                                                                                            | CT | II | 4969186 | 4988934 | WBGene00020867 | shc-2    | T27F7.2  | 0.248861170590092    |             |
| AGIWUR4201;AGIWUR16312;AGIWUR17522;AGIWUR25678                                                                                    |    |    |         |         |                |          |          |                      |             |
| CB4856                                                                                                                            | CT | II | 4990831 | 4993580 | WBGene00020868 | eif-1    | T27F7.3  | -0.0288605714775976  |             |
| AGIWUR8012;AGIWUR8543;AGIWUR26232;AGIWUR26466                                                                                     |    |    |         |         |                |          |          |                      |             |
| CB4856                                                                                                                            | CT | II | 4994002 | 4995607 | WBGene00020866 | vps-24   | T27F7.1  | -0.0133232610825278  |             |
| AGIWUR197;AGIWUR18963;AGIWUR28840                                                                                                 |    |    |         |         |                |          |          |                      |             |
| CB4856                                                                                                                            | CT | II | 4995551 | 4998035 | WBGene00004382 | rnh-1.0  | F59A6.6  | 0.274312715815472    |             |
| AGIWUR10797;AGIWUR42154                                                                                                           |    |    |         |         |                |          |          |                      |             |
| CB4856                                                                                                                            | CT | II | 4998007 | 4998757 | WBGene00044664 | F59A6.11 | F59A6.11 | -0.274842611357338   |             |
| AGIWUR3207;AGIWUR22750;AGIWUR28950;AGIWUR37911;AGIWUR43828                                                                        |    |    |         |         |                |          |          |                      |             |
| CB4856                                                                                                                            | CT | II | 4999520 | 5003806 | WBGene00019087 | F59A6.5  | F59A6.5  | 0.0442742660858713   | AGIWUR27627 |
| CB4856                                                                                                                            | CT | II | 5003960 | 5004849 | WBGene00044385 | F59A6.10 | F59A6.10 | 0.0264239657681768   |             |
| AGIWUR1690;AGIWUR3674;AGIWUR12293;AGIWUR17634;AGIWUR18276;AGIWUR24820;AGIWUR29279;AGIWUR29498;AGIWUR31744;AGIWUR32928;AGIWUR42515 |    |    |         |         |                |          |          |                      |             |
| CB4856                                                                                                                            | CT | II | 5005081 | 5008068 | WBGene00019086 | F59A6.4  | F59A6.4  | 0.175840054740394    | AGIWUR44174 |
| CB4856                                                                                                                            | CT | II | 5008341 | 5011179 | WBGene00019085 | F59A6.3  | F59A6.3  | -0.00943039686033043 |             |
| AGIWUR14498;AGIWUR29885;AGIWUR44263                                                                                               |    |    |         |         |                |          |          |                      |             |
| CB4856                                                                                                                            | CT | II | 5011523 | 5012078 | WBGene00044665 | F59A6.12 | F59A6.12 | 0.284997035025223    |             |
| AGIWUR6143;AGIWUR21365                                                                                                            |    |    |         |         |                |          |          |                      |             |
| CB4856                                                                                                                            | CT | II | 5014699 | 5015324 | WBGene00019084 | F59A6.2  | F59A6.2  | 0.101325962412886    | AGIWUR27186 |
| CB4856                                                                                                                            | CT | II | 5022764 | 5029982 | WBGene00003822 | nsy-1    | F59A6.1  | 0.0952933999740804   | AGIWUR7127  |
| CB4856                                                                                                                            | CT | II | 5029942 | 5031712 | WBGene00018014 | F33G12.2 | F33G12.2 | -0.25963538987006    |             |
| AGIWUR1431;AGIWUR6223;AGIWUR12852;AGIWUR14295;AGIWUR14922;AGIWUR15737;AGIWUR24470;AGIWUR34893;AGIWUR41448;AGIWUR44513             |    |    |         |         |                |          |          |                      |             |
| CB4856                                                                                                                            | CT | II | 5031757 | 5034035 | WBGene00018015 | F33G12.3 | F33G12.3 | -0.313451399568059   |             |
| AGIWUR559;AGIWUR909;AGIWUR6263;AGIWUR23996;AGIWUR37724                                                                            |    |    |         |         |                |          |          |                      |             |
| CB4856                                                                                                                            | CT | II | 5034142 | 5036439 | WBGene00018016 | lrr-1    | F33G12.4 | 0.00182640504433529  |             |
| AGIWUR20211                                                                                                                       |    |    |         |         |                |          |          |                      |             |
| CB4856                                                                                                                            | CT | II | 5036561 | 5040196 | WBGene00018017 | golg-2   | F33G12.5 | -0.159080353962301   |             |
| AGIWUR38302                                                                                                                       |    |    |         |         |                |          |          |                      |             |

|                                                                                                |    |    |         |         |                |          |          |                     |             |
|------------------------------------------------------------------------------------------------|----|----|---------|---------|----------------|----------|----------|---------------------|-------------|
| CB4856                                                                                         | CT | II | 5040208 | 5040681 | WBGene00044666 | F33G12.7 | F33G12.7 | -0.155216491575954  |             |
| AGIWUR11782;AGIWUR22608                                                                        |    |    |         |         |                |          |          |                     |             |
| CB4856                                                                                         | CT | II | 5049915 | 5053966 | WBGene00018018 | F33G12.6 | F33G12.6 | 0.28739621165446    |             |
| AGIWUR7871;AGIWUR12854;AGIWUR35039;AGIWUR35780                                                 |    |    |         |         |                |          |          |                     |             |
| CB4856                                                                                         | CT | II | 5054084 | 5055338 | WBGene00002068 | ify-1    | C27A2.3  | -0.200632936863085  | AGIWUR37903 |
| CB4856                                                                                         | CT | II | 5055616 | 5056214 | WBGene00004434 | rp1-22   | C27A2.2  | 0.0590952910562645  |             |
| AGIWUR8338;AGIWUR19216;AGIWUR25761;AGIWUR35665;AGIWUR36144;AGIWUR39113;AGIWUR39990;AGIWUR40550 |    |    |         |         |                |          |          |                     |             |
| CB4856                                                                                         | CT | II | 5056211 | 5058113 | WBGene00206373 | C27A2.12 | C27A2.12 | -0.215999377064701  |             |
| AGIWUR25367                                                                                    |    |    |         |         |                |          |          |                     |             |
| CB4856                                                                                         | CT | II | 5062129 | 5067116 | WBGene00016151 | smc-5    | C27A2.1  | -0.0757465280141938 |             |
| AGIWUR13886;AGIWUR34831;AGIWUR36227                                                            |    |    |         |         |                |          |          |                     |             |
| CB4856                                                                                         | CT | II | 5067088 | 5067980 | WBGene00044387 | C27A2.8  | C27A2.8  | 0.612325936774715   |             |
| AGIWUR9687;AGIWUR23394;AGIWUR34194;AGIWUR44428                                                 |    |    |         |         |                |          |          |                     |             |
| CB4856                                                                                         | CT | II | 5068648 | 5069625 | WBGene00016153 | C27A2.5  | C27A2.5  | -0.124946372089235  | AGIWUR20299 |
| CB4856                                                                                         | CT | II | 5069764 | 5071365 | WBGene00044386 | C27A2.7  | C27A2.7  | -0.0624484261534137 |             |
| AGIWUR320;AGIWUR7549;AGIWUR32727                                                               |    |    |         |         |                |          |          |                     |             |
| CB4856                                                                                         | CT | II | 5078235 | 5081161 | WBGene00001102 | dsh-2    | C27A2.6  | -0.142499897387845  | AGIWUR6526  |
| CB4856                                                                                         | CT | II | 5081490 | 5083441 | WBGene00015454 | C04G6.4  | C04G6.4  | 0.0604443657494702  | AGIWUR13458 |
| CB4856                                                                                         | CT | II | 5083848 | 5091690 | WBGene00004040 | p1d-1    | C04G6.3  | 0.0867303901705458  |             |
| AGIWUR8787;AGIWUR15467                                                                         |    |    |         |         |                |          |          |                     |             |
| CB4856                                                                                         | CT | II | 5093214 | 5094263 | WBGene00015453 | C04G6.2  | C04G6.2  | -0.743562487393706  |             |
| AGIWUR3836;AGIWUR20839                                                                         |    |    |         |         |                |          |          |                     |             |
| CB4856                                                                                         | CT | II | 5094245 | 5095370 | WBGene00077489 | C04G6.13 | C04G6.13 | -0.172747922696745  |             |
| AGIWUR41830                                                                                    |    |    |         |         |                |          |          |                     |             |
| CB4856                                                                                         | CT | II | 5098770 | 5100242 | WBGene00015456 | C04G6.6  | C04G6.6  | -0.416704106086792  | AGIWUR35921 |
| CB4856                                                                                         | CT | II | 5100412 | 5101801 | WBGene00015457 | C04G6.7  | C04G6.7  | 0.0956333211621949  | AGIWUR1649  |
| CB4856                                                                                         | CT | II | 5103341 | 5103834 | WBGene00015459 | C04G6.11 | C04G6.11 | 0.325166157183588   |             |
| AGIWUR4781                                                                                     |    |    |         |         |                |          |          |                     |             |
| CB4856                                                                                         | CT | II | 5104118 | 5108901 | WBGene00003402 | mpk-2    | C04G6.1  | 0.291238732950926   |             |
| AGIWUR2806;AGIWUR28220                                                                         |    |    |         |         |                |          |          |                     |             |
| CB4856                                                                                         | CT | II | 5110029 | 5112232 | WBGene00017277 | F09C12.2 | F09C12.2 | 1.35233020299139    |             |
| AGIWUR15962                                                                                    |    |    |         |         |                |          |          |                     |             |
| CB4856                                                                                         | CT | II | 5112382 | 5114153 | WBGene00017279 | F09C12.8 | F09C12.8 | 0.328885630613879   |             |
| AGIWUR10339                                                                                    |    |    |         |         |                |          |          |                     |             |
| CB4856                                                                                         | CT | II | 5116033 | 5118276 | WBGene00017278 | F09C12.6 | F09C12.6 | -0.539150524244826  |             |
| AGIWUR25931                                                                                    |    |    |         |         |                |          |          |                     |             |
| CB4856                                                                                         | CT | II | 5130384 | 5133215 | WBGene00001588 | ggr-3    | F09C12.1 | -0.153459680228117  |             |
| AGIWUR28057                                                                                    |    |    |         |         |                |          |          |                     |             |
| CB4856                                                                                         | CT | II | 5136717 | 5138568 | WBGene00019023 | F58A6.2  | F58A6.2  | -0.0795314062068373 |             |

AGIWUR11752;AGIWUR14733;AGIWUR23481;AGIWUR27769;AGIWUR37991  
 CB4856 CT II 5138648 5142036 WBGene00003547 nas-29 F58A6.4 -0.110117994630066  
 AGIWUR2730;AGIWUR7599;AGIWUR17429;AGIWUR25274;AGIWUR27316;AGIWUR34128  
 CB4856 CT II 5142343 5144021 WBGene00019022 F58A6.1 F58A6.1 0.227146964384762 AGIWUR19021  
 CB4856 CT II 5146967 5148465 WBGene00019024 F58A6.5 F58A6.5 -0.0147261344993872  
 AGIWUR18647;AGIWUR28907;AGIWUR29036  
 CB4856 CT II 5148530 5150853 WBGene00019025 srb-16 F58A6.6 0.110675957246714 AGIWUR31347  
 CB4856 CT II 5153119 5154638 WBGene00019027 srb-12 F58A6.10 0.130432363262938  
 AGIWUR35711  
 CB4856 CT II 5155436 5157625 WBGene00019028 srb-13 F58A6.11 -0.0362208499441685  
 AGIWUR31294  
 CB4856 CT II 5158566 5158988 WBGene00019026 F58A6.9 F58A6.9 0.209072897890755 AGIWUR42574  
 CB4856 CT II 5159717 5161130 WBGene00044388 C27D6.11 C27D6.11 -0.107152394569399  
 AGIWUR40723  
 CB4856 CT II 5161995 5163383 WBGene00005070 srb-5 C27D6.6 -0.186663838066308 AGIWUR40918  
 CB4856 CT II 5163868 5165020 WBGene00005069 srb-4 C27D6.7 -0.449042755207639 AGIWUR34426  
 CB4856 CT II 5165315 5166838 WBGene00005068 srb-3 C27D6.8 0.046879792363594 AGIWUR21541  
 CB4856 CT II 5168110 5169324 WBGene00005067 srb-2 C27D6.9 0.274609173034396 AGIWUR22739  
 CB4856 CT II 5169726 5171032 WBGene00005066 srb-1 C27D6.10 0.103629824110303  
 AGIWUR9291  
 CB4856 CT II 5171910 5177440 WBGene00016160 C27D6.1 C27D6.1 0.042036991217465 AGIWUR9081  
 CB4856 CT II 5179034 5187569 WBGene00016162 crh-2 C27D6.4 0.0573126523312055  
 AGIWUR6531;AGIWUR9803;AGIWUR31953  
 CB4856 CT II 5195804 5199257 WBGene00016416 C34F11.5 C34F11.5 0.550965180304669  
 AGIWUR10404  
 CB4856 CT II 5199763 5200223 WBGene00003443 msp-50 C34F11.4 0.355680376504711  
 AGIWUR44471  
 CB4856 CT II 5203322 5209799 WBGene00016415 ampd-1 C34F11.3 -0.0373953185787617  
 AGIWUR3205;AGIWUR3377;AGIWUR8618;AGIWUR26632;AGIWUR28743;AGIWUR29238;AGIWUR30148  
 CB4856 CT II 5209780 5210978 WBGene00016417 C34F11.8 C34F11.8 0.342657446205521  
 AGIWUR22884  
 CB4856 CT II 5212270 5212789 WBGene00016414 C34F11.2 C34F11.2 0.408435886386066  
 AGIWUR12844  
 CB4856 CT II 5212932 5213932 WBGene00016413 C34F11.1 C34F11.1 -0.129574464922538  
 AGIWUR34064  
 CB4856 CT II 5214441 5225377 WBGene00001101 dsh-1 C34F11.9 0.335851563107213  
 AGIWUR2992;AGIWUR5381;AGIWUR18371;AGIWUR19496;AGIWUR37180;AGIWUR42341;AGIWUR43485;AGIWUR43880  
 CB4856 CT II 5230081 5230501 WBGene00017148 EGAP2.2 EGAP2.2 0.149776743372737 AGIWUR38655  
 CB4856 CT II 5231424 5233273 WBGene00017147 EGAP2.1 EGAP2.1 0.00237296945462973 AGIWUR19126



|                                                                                                                                                                                                          |    |    |         |         |                |          |          |                     |             |
|----------------------------------------------------------------------------------------------------------------------------------------------------------------------------------------------------------|----|----|---------|---------|----------------|----------|----------|---------------------|-------------|
| CB4856                                                                                                                                                                                                   | CT | II | 5233154 | 5235926 | WBGene00004020 | pho-1    | EGAP2.3  | -0.649372078425198  | AGIWUR29936 |
| CB4856                                                                                                                                                                                                   | CT | II | 5236258 | 5238514 | WBGene00004023 | pho-4    | T16D1.2  | 0.56245544292058    |             |
| AGIWUR3712;AGIWUR12698;AGIWUR37571;AGIWUR39791                                                                                                                                                           |    |    |         |         |                |          |          |                     |             |
| CB4856                                                                                                                                                                                                   | CT | II | 5241233 | 5241660 | WBGene00020539 | T16D1.1  | T16D1.1  | 0.22476404064137    | AGIWUR41030 |
| CB4856                                                                                                                                                                                                   | CT | II | 5242452 | 5246837 | WBGene00004221 | ptr-6    | C54A12.1 | 0.0752868107860634  |             |
| AGIWUR4575;AGIWUR29782;AGIWUR33750;AGIWUR35269;AGIWUR36517;AGIWUR42135                                                                                                                                   |    |    |         |         |                |          |          |                     |             |
| CB4856                                                                                                                                                                                                   | CT | II | 5251121 | 5255529 | WBGene00016909 | frpr-4   | C54A12.2 | 0.00392840172357012 |             |
| AGIWUR34619                                                                                                                                                                                              |    |    |         |         |                |          |          |                     |             |
| CB4856                                                                                                                                                                                                   | CT | II | 5270406 | 5271845 | WBGene00016911 | drn-1    | C54A12.4 | 0.0185769696294775  |             |
| AGIWUR19420                                                                                                                                                                                              |    |    |         |         |                |          |          |                     |             |
| CB4856                                                                                                                                                                                                   | CT | II | 5278137 | 5282525 | WBGene00022781 | pmt-1    | ZK622.3  | 0.894029495677628   |             |
| AGIWUR3942;AGIWUR11991;AGIWUR15724                                                                                                                                                                       |    |    |         |         |                |          |          |                     |             |
| CB4856                                                                                                                                                                                                   | CT | II | 5285329 | 5288908 | WBGene00001806 | gur-5    | ZK622.2  | 0.0869523890108486  | AGIWUR8811  |
| CB4856                                                                                                                                                                                                   | CT | II | 5289442 | 5290326 | WBGene00044667 | ZK622.5  | ZK622.5  | -0.177701478502534  |             |
| AGIWUR12678;AGIWUR42990                                                                                                                                                                                  |    |    |         |         |                |          |          |                     |             |
| CB4856                                                                                                                                                                                                   | CT | II | 5292683 | 5293306 | WBGene00022782 | ZK622.4  | ZK622.4  | 0.0911381142695808  |             |
| AGIWUR12395;AGIWUR36745;AGIWUR38572;AGIWUR41852                                                                                                                                                          |    |    |         |         |                |          |          |                     |             |
| CB4856                                                                                                                                                                                                   | CT | II | 5293800 | 5295612 | WBGene00022780 | ZK622.1  | ZK622.1  | 0.216772328835809   | AGIWUR44091 |
| CB4856                                                                                                                                                                                                   | CT | II | 5312046 | 5319234 | WBGene00001538 | gcy-12   | F08B1.2  | -0.12373545602992   |             |
| AGIWUR12960;AGIWUR42287                                                                                                                                                                                  |    |    |         |         |                |          |          |                     |             |
| CB4856                                                                                                                                                                                                   | CT | II | 5323005 | 5340826 | WBGene00006923 | vhp-1    | F08B1.1  | 0.171718327926342   |             |
| AGIWUR5649;AGIWUR6552;AGIWUR7813;AGIWUR10624;AGIWUR11567;AGIWUR13821;AGIWUR15922;AGIWUR18468;AGIWUR20242;AGIWUR21499;AGIWUR26859;AGIWUR29335;AGIWUR29995;AGIWUR38653;AGIWUR41812;AGIWUR42052;AGIWUR44227 |    |    |         |         |                |          |          |                     |             |
| CB4856                                                                                                                                                                                                   | CT | II | 5342663 | 5344875 | WBGene00017291 | F09E5.14 | F09E5.14 | 0.395395225832306   |             |
| AGIWUR32159                                                                                                                                                                                              |    |    |         |         |                |          |          |                     |             |
| CB4856                                                                                                                                                                                                   | CT | II | 5350669 | 5351993 | WBGene00017286 | F09E5.8  | F09E5.8  | -0.135241932277165  | AGIWUR5675  |
| CB4856                                                                                                                                                                                                   | CT | II | 5352087 | 5353759 | WBGene00017285 | F09E5.7  | F09E5.7  | -0.169999016993989  | AGIWUR39499 |
| CB4856                                                                                                                                                                                                   | CT | II | 5355712 | 5357341 | WBGene00005226 | srg-69   | F09E5.4  | 0.262155195324008   | AGIWUR24261 |
| CB4856                                                                                                                                                                                                   | CT | II | 5357308 | 5358187 | WBGene00017289 | F09E5.11 | F09E5.11 | -0.1605550698686    |             |
| AGIWUR3030                                                                                                                                                                                               |    |    |         |         |                |          |          |                     |             |
| CB4856                                                                                                                                                                                                   | CT | II | 5358695 | 5359469 | WBGene00017293 | bmy-1    | F09E5.17 | -0.138541943279549  |             |
| AGIWUR7837                                                                                                                                                                                               |    |    |         |         |                |          |          |                     |             |
| CB4856                                                                                                                                                                                                   | CT | II | 5359552 | 5372122 | WBGene00017284 | sec-6    | F09E5.5  | 0.0190225572849734  | AGIWUR1999  |
| CB4856                                                                                                                                                                                                   | CT | II | 5371980 | 5373433 | WBGene00000094 | agt-2    | F09E5.13 | -0.381825437873715  |             |
| AGIWUR5697                                                                                                                                                                                               |    |    |         |         |                |          |          |                     |             |
| CB4856                                                                                                                                                                                                   | CT | II | 5373997 | 5375177 | WBGene00017283 | F09E5.3  | F09E5.3  | -0.28492831739287   | AGIWUR233   |
| CB4856                                                                                                                                                                                                   | CT | II | 5375267 | 5377111 | WBGene00017282 | algn-2   | F09E5.2  | -0.0642207199056539 |             |
| AGIWUR12610;AGIWUR34310                                                                                                                                                                                  |    |    |         |         |                |          |          |                     |             |
| CB4856                                                                                                                                                                                                   | CT | II | 5378068 | 5379632 | WBGene00006434 | prdx-2   | F09E5.15 | -0.0509470122650448 |             |

|                                                                       |    |    |         |         |                |          |          |                     |             |
|-----------------------------------------------------------------------|----|----|---------|---------|----------------|----------|----------|---------------------|-------------|
| AGIWUR2121                                                            |    |    |         |         |                |          |          |                     |             |
| CB4856                                                                | CT | II | 5380027 | 5384169 | WBGene00004034 | pkc-3    | F09E5.1  | 0.115360910311361   | AGIWUR11029 |
| CB4856                                                                | CT | II | 5384137 | 5387317 | WBGene00017136 | ccpp-6   | EEED8.6  | 0.16416572223282    | AGIWUR7326  |
| CB4856                                                                | CT | II | 5387411 | 5388830 | WBGene00004701 | rsp-4    | EEED8.7  | 0.037368670019422   |             |
| AGIWUR14445;AGIWUR27407;AGIWUR28507                                   |    |    |         |         |                |          |          |                     |             |
| CB4856                                                                | CT | II | 5388829 | 5390104 | WBGene00003583 | ndx-6    | EEED8.8  | 0.0768913778556275  |             |
| AGIWUR13822;AGIWUR15361;AGIWUR34198;AGIWUR39738                       |    |    |         |         |                |          |          |                     |             |
| CB4856                                                                | CT | II | 5390233 | 5393190 | WBGene00017144 | brap-2   | EEED8.16 | -0.0643939226282484 |             |
| AGIWUR33548                                                           |    |    |         |         |                |          |          |                     |             |
| CB4856                                                                | CT | II | 5393293 | 5395694 | WBGene00017137 | pink-1   | EEED8.9  | -0.172991685129864  | AGIWUR43636 |
| CB4856                                                                | CT | II | 5395889 | 5398902 | WBGene00017138 | EEED8.10 | EEED8.10 | -0.114697451613418  |             |
| AGIWUR13646;AGIWUR29548;AGIWUR32140                                   |    |    |         |         |                |          |          |                     |             |
| CB4856                                                                | CT | II | 5399538 | 5405810 | WBGene00003393 | mog-5    | EEED8.5  | -0.128322521241364  | AGIWUR17482 |
| CB4856                                                                | CT | II | 5405819 | 5407634 | WBGene00017139 | clcc-141 | EEED8.11 | -0.570782464595225  |             |
| AGIWUR19066                                                           |    |    |         |         |                |          |          |                     |             |
| CB4856                                                                | CT | II | 5408260 | 5409024 | WBGene00017140 | EEED8.12 | EEED8.12 | 0.448608036265835   |             |
| AGIWUR11005                                                           |    |    |         |         |                |          |          |                     |             |
| CB4856                                                                | CT | II | 5410467 | 5411235 | WBGene00017135 | EEED8.4  | EEED8.4  | -0.0434094311103568 | AGIWUR16324 |
| CB4856                                                                | CT | II | 5411542 | 5412174 | WBGene00017141 | EEED8.13 | EEED8.13 | -0.226855950104097  |             |
| AGIWUR306                                                             |    |    |         |         |                |          |          |                     |             |
| CB4856                                                                | CT | II | 5412196 | 5412610 | WBGene00194696 | EEED8.18 | EEED8.18 | -0.19325777231684   |             |
| AGIWUR43040                                                           |    |    |         |         |                |          |          |                     |             |
| CB4856                                                                | CT | II | 5414207 | 5415580 | WBGene00017134 | EEED8.3  | EEED8.3  | -0.198253371147683  | AGIWUR17225 |
| CB4856                                                                | CT | II | 5416714 | 5418377 | WBGene00017133 | EEED8.2  | EEED8.2  | 1.1254086193987     | AGIWUR40222 |
| CB4856                                                                | CT | II | 5419233 | 5421093 | WBGene00017143 | EEED8.15 | EEED8.15 | 0.303981412818679   |             |
| AGIWUR2513                                                            |    |    |         |         |                |          |          |                     |             |
| CB4856                                                                | CT | II | 5421248 | 5422737 | WBGene00017132 | tofu-6   | EEED8.1  | -0.248159784011058  | AGIWUR23738 |
| CB4856                                                                | CT | II | 5422735 | 5423858 | WBGene00017219 | F07F6.7  | F07F6.7  | -0.17160943146984   | AGIWUR20957 |
| CB4856                                                                | CT | II | 5424141 | 5425733 | WBGene00017220 | F07F6.8  | F07F6.8  | 0.0628931986151713  | AGIWUR16885 |
| CB4856                                                                | CT | II | 5425750 | 5429572 | WBGene00017217 | F07F6.4  | F07F6.4  | -0.138993164951167  |             |
| AGIWUR4465;AGIWUR5507;AGIWUR9414;AGIWUR22035;AGIWUR28235;AGIWUR34889  |    |    |         |         |                |          |          |                     |             |
| CB4856                                                                | CT | II | 5430392 | 5431422 | WBGene00017216 | F07F6.2  | F07F6.2  | -0.137914963307854  |             |
| AGIWUR3809;AGIWUR9682;AGIWUR16521;AGIWUR28895;AGIWUR36864;AGIWUR42556 |    |    |         |         |                |          |          |                     |             |
| CB4856                                                                | CT | II | 5431476 | 5433048 | WBGene00006005 | srx-114  | F07F6.9  | -0.29016623468029   | AGIWUR27966 |
| CB4856                                                                | CT | II | 5435724 | 5436933 | WBGene00017218 | dct-5    | F07F6.5  | -0.246876372192885  |             |
| AGIWUR15543;AGIWUR21500;AGIWUR27471                                   |    |    |         |         |                |          |          |                     |             |
| CB4856                                                                | CT | II | 5437891 | 5440256 | WBGene00017215 | F07F6.1  | F07F6.1  | 0.166844373136088   | AGIWUR12415 |
| CB4856                                                                | CT | II | 5440243 | 5446705 | WBGene00003774 | nmr-1    | F07F6.6  | 0.126597045609448   | AGIWUR35436 |
| CB4856                                                                | CT | II | 5447681 | 5448634 | WBGene00023407 | cex-1    | F56D1.6  | 0.102239232525019   | AGIWUR41097 |

|                                                             |    |    |         |         |                |          |          |                      |             |
|-------------------------------------------------------------|----|----|---------|---------|----------------|----------|----------|----------------------|-------------|
| CB4856                                                      | CT | II | 5453847 | 5455977 | WBGene00000969 | dhs-5    | F56D1.5  | -0.0939083096496311  | AGIWUR3066  |
| CB4856                                                      | CT | II | 5456305 | 5458609 | WBGene00000935 | daz-1    | F56D1.7  | -0.100373030120801   | AGIWUR29003 |
| CB4856                                                      | CT | II | 5466363 | 5473812 | WBGene00000548 | clr-1    | F56D1.4  | 0.0945593132880518   |             |
| AGIWUR15780;AGIWUR32701;AGIWUR40029                         |    |    |         |         |                |          |          |                      |             |
| CB4856                                                      | CT | II | 5474373 | 5475475 | WBGene00018961 | mrps-16  | F56D1.3  | -0.135403812597931   |             |
| AGIWUR20329;AGIWUR22842;AGIWUR30295                         |    |    |         |         |                |          |          |                      |             |
| CB4856                                                      | CT | II | 5475409 | 5478524 | WBGene00018960 | ilcr-2   | F56D1.2  | -0.414651414579522   | AGIWUR3916  |
| CB4856                                                      | CT | II | 5478578 | 5480490 | WBGene00018959 | F56D1.1  | F56D1.1  | -0.344341245993649   |             |
| AGIWUR12541;AGIWUR32062;AGIWUR39277                         |    |    |         |         |                |          |          |                      |             |
| CB4856                                                      | CT | II | 5480591 | 5482041 | WBGene00017394 | cal-8    | F12A10.5 | -0.185093695346366   |             |
| AGIWUR35593                                                 |    |    |         |         |                |          |          |                      |             |
| CB4856                                                      | CT | II | 5488151 | 5490606 | WBGene00017393 | nep-5    | F12A10.4 | -0.416209063117526   |             |
| AGIWUR35809                                                 |    |    |         |         |                |          |          |                      |             |
| CB4856                                                      | CT | II | 5491111 | 5493192 | WBGene00017392 | basl-2   | F12A10.3 | -0.0257776831730965  |             |
| AGIWUR23641                                                 |    |    |         |         |                |          |          |                      |             |
| CB4856                                                      | CT | II | 5494085 | 5494505 | WBGene00017395 | F12A10.6 | F12A10.6 | -1.26633580665519    |             |
| AGIWUR41057                                                 |    |    |         |         |                |          |          |                      |             |
| CB4856                                                      | CT | II | 5497285 | 5498256 | WBGene00017396 | F12A10.7 | F12A10.7 | -0.491678096305119   |             |
| AGIWUR25210                                                 |    |    |         |         |                |          |          |                      |             |
| CB4856                                                      | CT | II | 5498851 | 5501409 | WBGene00017397 | F12A10.8 | F12A10.8 |                      |             |
| 0.000541551817999419 AGIWUR33792                            |    |    |         |         |                |          |          |                      |             |
| CB4856                                                      | CT | II | 5501633 | 5503908 | WBGene00001511 | fzy-1    | ZK177.6  | -0.231338314736789   | AGIWUR9934  |
| CB4856                                                      | CT | II | 5503966 | 5506115 | WBGene00000375 | cyp-44A1 | ZK177.5  | -0.0279808546835465  |             |
| AGIWUR8962;AGIWUR13879;AGIWUR35034;AGIWUR38693;AGIWUR43217  |    |    |         |         |                |          |          |                      |             |
| CB4856                                                      | CT | II | 5505870 | 5509056 | WBGene00022672 | ZK177.4  | ZK177.4  | 0.0233414414614428   |             |
| AGIWUR12615;AGIWUR36298                                     |    |    |         |         |                |          |          |                      |             |
| CB4856                                                      | CT | II | 5509028 | 5513775 | WBGene00022673 | ZK177.8  | ZK177.8  | -0.26656796973749    |             |
| AGIWUR15416;AGIWUR18492;AGIWUR22202;AGIWUR33128             |    |    |         |         |                |          |          |                      |             |
| CB4856                                                      | CT | II | 5515861 | 5517133 | WBGene00022671 | ZK177.3  | ZK177.3  | -0.00528644312632842 | AGIWUR21731 |
| CB4856                                                      | CT | II | 5517157 | 5517743 | WBGene00022674 | ZK177.9  | ZK177.9  | 0.459433441032379    | AGIWUR36184 |
| CB4856                                                      | CT | II | 5522937 | 5523488 | WBGene00044390 | ZK177.11 | ZK177.11 | 0.092280118646352    |             |
| AGIWUR11132;AGIWUR14057;AGIWUR25550;AGIWUR38479;AGIWUR44677 |    |    |         |         |                |          |          |                      |             |
| CB4856                                                      | CT | II | 5524200 | 5525379 | WBGene00006554 | tbx-35   | ZK177.10 | 0.0313502687790388   |             |
| AGIWUR8139;AGIWUR44660                                      |    |    |         |         |                |          |          |                      |             |
| CB4856                                                      | CT | II | 5528141 | 5529637 | WBGene00022669 | ZK177.1  | ZK177.1  | -0.417161714240283   | AGIWUR3590  |
| CB4856                                                      | CT | II | 5530501 | 5530928 | WBGene00002121 | ins-38   | C17C3.20 | -0.0362572447190219  |             |
| AGIWUR10095;AGIWUR17770;AGIWUR24592;AGIWUR26179;AGIWUR31150 |    |    |         |         |                |          |          |                      |             |
| CB4856                                                      | CT | II | 5531313 | 5532259 | WBGene00015892 | C17C3.9  | C17C3.9  | -0.148978119929717   | AGIWUR3551  |
| CB4856                                                      | CT | II | 5532857 | 5533738 | WBGene00001965 | hlh-26   | C17C3.8  | -0.0992945470953934  | AGIWUR33494 |

|                                                                                                                                          |    |         |         |                |           |           |                       |             |
|------------------------------------------------------------------------------------------------------------------------------------------|----|---------|---------|----------------|-----------|-----------|-----------------------|-------------|
| CB4856 CT                                                                                                                                | II | 5537835 | 5539004 | WBGene00015893 | C17C3.11  | C17C3.11  | -0.173406131956584    |             |
| AGIWUR2886                                                                                                                               |    |         |         |                |           |           |                       |             |
| CB4856 CT                                                                                                                                | II | 5544585 | 5544851 | WBGene00002096 | ins-13    | C17C3.18  | -0.335971015716062    |             |
| AGIWUR11025;AGIWUR15472                                                                                                                  |    |         |         |                |           |           |                       |             |
| CB4856 CT                                                                                                                                | II | 5544781 | 5547492 | WBGene00015894 | acdH-2    | C17C3.12  | -0.630497510635818    |             |
| AGIWUR10216;AGIWUR11158;AGIWUR11868;AGIWUR39769;AGIWUR44925                                                                              |    |         |         |                |           |           |                       |             |
| CB4856 CT                                                                                                                                | II | 5551833 | 5552335 | WBGene00015890 | C17C3.5   | C17C3.5   | -0.245903983598696    | AGIWUR20466 |
| CB4856 CT                                                                                                                                | II | 5554617 | 5555306 | WBGene00002095 | ins-12    | C17C3.19  | 0.113398571607346     |             |
| AGIWUR1112;AGIWUR11658;AGIWUR22944;AGIWUR26429;AGIWUR44694                                                                               |    |         |         |                |           |           |                       |             |
| CB4856 CT                                                                                                                                | II | 5556761 | 5557088 | WBGene00002094 | ins-11    | C17C3.4   | 1.80603255441713      | AGIWUR24660 |
| CB4856 CT                                                                                                                                | II | 5561763 | 5563523 | WBGene00015889 | C17C3.3   | C17C3.3   | 0.594985173322758     | AGIWUR13473 |
| CB4856 CT                                                                                                                                | II | 5570572 | 5574943 | WBGene00015887 | C17C3.1   | C17C3.1   | -0.292746342371787    |             |
| AGIWUR655;AGIWUR1027;AGIWUR2276;AGIWUR3952;AGIWUR5419;AGIWUR9121;AGIWUR18932;AGIWUR33510;AGIWUR36819;AGIWUR37926;AGIWUR38475;AGIWUR42256 |    |         |         |                |           |           |                       |             |
| CB4856 CT                                                                                                                                | II | 5578318 | 5579965 | WBGene00020803 | T25E4.1   | T25E4.1   | -0.221703195697863    |             |
| AGIWUR17629;AGIWUR39775                                                                                                                  |    |         |         |                |           |           |                       |             |
| CB4856 CT                                                                                                                                | II | 5580125 | 5582409 | WBGene00020804 | T25E4.2   | T25E4.2   | -0.0976497715514739   | AGIWUR34051 |
| CB4856 CT                                                                                                                                | II | 5586165 | 5587651 | WBGene00003097 | lys-8     | C17G10.5  | 0.00485265965128434   |             |
| AGIWUR8095                                                                                                                               |    |         |         |                |           |           |                       |             |
| CB4856 CT                                                                                                                                | II | 5587614 | 5589755 | WBGene00270322 | C17G10.13 | C17G10.13 | -0.293301965893264    |             |
| AGIWUR40743                                                                                                                              |    |         |         |                |           |           |                       |             |
| CB4856 CT                                                                                                                                | II | 5589186 | 5593628 | WBGene00000383 | cdc-14    | C17G10.4  | 0.0546726217464446    |             |
| AGIWUR4060;AGIWUR6178;AGIWUR9427;AGIWUR23768;AGIWUR27886;AGIWUR37473;AGIWUR44066                                                         |    |         |         |                |           |           |                       |             |
| CB4856 CT                                                                                                                                | II | 5594714 | 5596463 | WBGene00015916 | C17G10.2  | C17G10.2  | -0.253405128968124    |             |
| AGIWUR5214                                                                                                                               |    |         |         |                |           |           |                       |             |
| CB4856 CT                                                                                                                                | II | 5596547 | 5598449 | WBGene00015915 | C17G10.1  | C17G10.1  | -0.122265897432685    |             |
| AGIWUR10468;AGIWUR25020;AGIWUR29338                                                                                                      |    |         |         |                |           |           |                       |             |
| CB4856 CT                                                                                                                                | II | 5599930 | 5603294 | WBGene00015918 | C17G10.6  | C17G10.6  | 0.0903655898832776    |             |
| AGIWUR4653;AGIWUR5160;AGIWUR9532;AGIWUR11414;AGIWUR33077;AGIWUR39820                                                                     |    |         |         |                |           |           |                       |             |
| CB4856 CT                                                                                                                                | II | 5606542 | 5607856 | WBGene00015919 | C17G10.7  | C17G10.7  | 0.139406773133127     |             |
| AGIWUR34206                                                                                                                              |    |         |         |                |           |           |                       |             |
| CB4856 CT                                                                                                                                | II | 5617122 | 5619319 | WBGene00000970 | dhs-6     | C17G10.8  | -0.000763500560227115 |             |
| AGIWUR41943                                                                                                                              |    |         |         |                |           |           |                       |             |
| CB4856 CT                                                                                                                                | II | 5619590 | 5622483 | WBGene00015920 | eif-3.L   | C17G10.9  | -0.409400412013074    |             |
| AGIWUR6407                                                                                                                               |    |         |         |                |           |           |                       |             |
| CB4856 CT                                                                                                                                | II | 5626316 | 5627263 | WBGene00235269 | F59E12.15 | F59E12.15 | -0.400017225185093    |             |
| AGIWUR35828                                                                                                                              |    |         |         |                |           |           |                       |             |
| CB4856 CT                                                                                                                                | II | 5634528 | 5636926 | WBGene00019123 | F59E12.8  | F59E12.8  | -0.446988703566336    |             |
| AGIWUR11995                                                                                                                              |    |         |         |                |           |           |                       |             |

|                                                                                                                                                           |                                                 |                |          |           |                     |
|-----------------------------------------------------------------------------------------------------------------------------------------------------------|-------------------------------------------------|----------------|----------|-----------|---------------------|
| CB4856 CT II                                                                                                                                              | 5638381 5639752                                 | WBGene00019119 | F59E12.3 | F59E12.3  |                     |
| -0.00210465665991943                                                                                                                                      | AGIWUR18907;AGIWUR24208;AGIWUR40233;AGIWUR42077 |                |          |           |                     |
| CB4856 CT II                                                                                                                                              | 5640063 5647042                                 | WBGene00019124 | F59E12.9 | F59E12.9  | -0.164375448199609  |
| AGIWUR6420                                                                                                                                                |                                                 |                |          |           |                     |
| CB4856 CT II                                                                                                                                              | 5647154 5647884                                 | WBGene00019125 | ddl-1    | F59E12.10 | 0.0866988173044163  |
| AGIWUR42386                                                                                                                                               |                                                 |                |          |           |                     |
| CB4856 CT II                                                                                                                                              | 5647986 5649472                                 | WBGene00019126 | sam-4    | F59E12.11 | -0.0921725258232424 |
| AGIWUR3369                                                                                                                                                |                                                 |                |          |           |                     |
| CB4856 CT II                                                                                                                                              | 5649737 5654422                                 | WBGene00006988 | zyg-1    | F59E12.2  | -0.370769162977048  |
| AGIWUR21062                                                                                                                                               |                                                 |                |          |           |                     |
| CB4856 CT II                                                                                                                                              | 5654515 5657371                                 | WBGene00019118 | F59E12.1 | F59E12.1  | -0.0582667966190087 |
| AGIWUR27965                                                                                                                                               |                                                 |                |          |           |                     |
| CB4856 CT II                                                                                                                                              | 5657710 5659854                                 | WBGene00006402 | fut-3    | F59E12.13 | -0.100770018580398  |
| AGIWUR857                                                                                                                                                 |                                                 |                |          |           |                     |
| CB4856 CT II                                                                                                                                              | 5659937 5660786                                 | WBGene00016121 | C25H3.12 | C25H3.12  | -0.0465153468255384 |
| AGIWUR7009;AGIWUR11907;AGIWUR20481;AGIWUR34018                                                                                                            |                                                 |                |          |           |                     |
| CB4856 CT II                                                                                                                                              | 5661167 5665243                                 | WBGene00016115 | mdt-26   | C25H3.6   | -0.043581713765537  |
| AGIWUR1167;AGIWUR3321;AGIWUR12078;AGIWUR15580;AGIWUR22399;AGIWUR26846;AGIWUR31427;AGIWUR38315;AGIWUR40073;AGIWUR41078;AGIWUR41188;AGIWUR42279;AGIWUR44075 |                                                 |                |          |           |                     |
| CB4856 CT II                                                                                                                                              | 5665408 5666278                                 | WBGene00044391 | C25H3.15 | C25H3.15  | 0.210205792752075   |
| AGIWUR31701;AGIWUR41371                                                                                                                                   |                                                 |                |          |           |                     |
| CB4856 CT II                                                                                                                                              | 5666291 5666850                                 | WBGene00044392 | C25H3.16 | C25H3.16  | -0.239686777861999  |
| AGIWUR1916;AGIWUR4138                                                                                                                                     |                                                 |                |          |           |                     |
| CB4856 CT II                                                                                                                                              | 5666756 5668930                                 | WBGene00016116 | C25H3.7  | C25H3.7   | 0.139490844469247   |
| AGIWUR35607                                                                                                                                               |                                                 |                |          |           |                     |
| CB4856 CT II                                                                                                                                              | 5669788 5679276                                 | WBGene00016117 | C25H3.8  | C25H3.8   | 0.0722277713821784  |
| AGIWUR9610;AGIWUR19861;AGIWUR23395;AGIWUR35785;AGIWUR44190;AGIWUR44837                                                                                    |                                                 |                |          |           |                     |
| CB4856 CT II                                                                                                                                              | 5680980 5682667                                 | WBGene00016114 | flp-27   | C25H3.5   | 0.397125102148228   |
| AGIWUR40585                                                                                                                                               |                                                 |                |          |           |                     |
| CB4856 CT II                                                                                                                                              | 5684479 5689030                                 | WBGene00016120 | C25H3.11 | C25H3.11  | -0.286444261081717  |
| AGIWUR29501                                                                                                                                               |                                                 |                |          |           |                     |
| CB4856 CT II                                                                                                                                              | 5690137 5691355                                 | WBGene00016118 | C25H3.9  | C25H3.9   | -0.0218407815317416 |
| AGIWUR1206;AGIWUR40397                                                                                                                                    |                                                 |                |          |           |                     |
| CB4856 CT II                                                                                                                                              | 5691662 5693939                                 | WBGene00016113 | eif-2D   | C25H3.4   | -0.54337102792554   |
| AGIWUR25622                                                                                                                                               |                                                 |                |          |           |                     |
| CB4856 CT II                                                                                                                                              | 5694195 5695237                                 | WBGene00016112 | C25H3.3  | C25H3.3   | -0.202614187309182  |
| AGIWUR18537                                                                                                                                               |                                                 |                |          |           |                     |
| CB4856 CT II                                                                                                                                              | 5695383 5696358                                 | WBGene00016123 | C25H3.14 | C25H3.14  | 0.167005999926623   |
| AGIWUR41054                                                                                                                                               |                                                 |                |          |           |                     |
| CB4856 CT II                                                                                                                                              | 5696585 5698969                                 | WBGene00016119 | C25H3.10 | C25H3.10  | 1.87066038449854    |
| AGIWUR16686                                                                                                                                               |                                                 |                |          |           |                     |
| CB4856 CT II                                                                                                                                              | 5700170 5701408                                 | WBGene00016111 | C25H3.1  | C25H3.1   | 0.0667592797664689  |
| AGIWUR34742;AGIWUR36546                                                                                                                                   |                                                 |                |          |           |                     |

|                                                                                                                                                          |    |    |         |         |                |          |          |                     |             |
|----------------------------------------------------------------------------------------------------------------------------------------------------------|----|----|---------|---------|----------------|----------|----------|---------------------|-------------|
| CB4856                                                                                                                                                   | CT | II | 5707691 | 5712351 | WBGene00015942 | osta-2   | C18A3.4  | 0.0706226723387653  |             |
| AGIWUR3856;AGIWUR8859;AGIWUR9550;AGIWUR16022;AGIWUR17152;AGIWUR18066;AGIWUR25677;AGIWUR26532                                                             |    |    |         |         |                |          |          |                     |             |
| CB4856                                                                                                                                                   | CT | II | 5712351 | 5714823 | WBGene00015943 | tiar-1   | C18A3.5  | -0.152442171452543  |             |
| AGIWUR9718;AGIWUR16952;AGIWUR31759;AGIWUR34523;AGIWUR37236                                                                                               |    |    |         |         |                |          |          |                     |             |
| CB4856                                                                                                                                                   | CT | II | 5714924 | 5716250 | WBGene00015945 | C18A3.9  | C18A3.9  | -0.113618275153396  | AGIWUR43356 |
| CB4856                                                                                                                                                   | CT | II | 5716307 | 5718038 | WBGene00015941 | C18A3.3  | C18A3.3  | -0.225136846817064  | AGIWUR23308 |
| CB4856                                                                                                                                                   | CT | II | 5718129 | 5720052 | WBGene00015940 | zipt-3   | C18A3.2  | 0.00830352391560041 | AGIWUR30196 |
| CB4856                                                                                                                                                   | CT | II | 5720148 | 5721791 | WBGene00015939 | C18A3.1  | C18A3.1  | 0.112931075834998   |             |
| AGIWUR17352;AGIWUR27379;AGIWUR35544                                                                                                                      |    |    |         |         |                |          |          |                     |             |
| CB4856                                                                                                                                                   | CT | II | 5721791 | 5727651 | WBGene00004267 | rab-3    | C18A3.6  | -0.0802317450294545 |             |
| AGIWUR6991;AGIWUR23755;AGIWUR42885                                                                                                                       |    |    |         |         |                |          |          |                     |             |
| CB4856                                                                                                                                                   | CT | II | 5729597 | 5730443 | WBGene00015944 | C18A3.7  | C18A3.7  | -0.171781930120831  | AGIWUR39731 |
| CB4856                                                                                                                                                   | CT | II | 5731033 | 5731741 | WBGene00044668 | C18A3.11 | C18A3.11 | -0.0603205792196246 |             |
| AGIWUR3854;AGIWUR14342                                                                                                                                   |    |    |         |         |                |          |          |                     |             |
| CB4856                                                                                                                                                   | CT | II | 5737790 | 5738888 | WBGene00001958 | hlh-14   | C18A3.8  | 0.666748033976377   | AGIWUR37206 |
| CB4856                                                                                                                                                   | CT | II | 5742971 | 5745284 | WBGene00044296 | F10C1.9  | F10C1.9  | -0.0740841160586463 |             |
| AGIWUR25000;AGIWUR40035                                                                                                                                  |    |    |         |         |                |          |          |                     |             |
| CB4856                                                                                                                                                   | CT | II | 5750190 | 5754140 | WBGene00002054 | ifb-2    | F10C1.7  | -0.0352182546174209 |             |
| AGIWUR2064;AGIWUR4264;AGIWUR9690;AGIWUR16751;AGIWUR17005;AGIWUR20723;AGIWUR23981;AGIWUR25070;AGIWUR25591;AGIWUR32916;AGIWUR36312;AGIWUR36639;AGIWUR39866 |    |    |         |         |                |          |          |                     |             |
| CB4856                                                                                                                                                   | CT | II | 5754468 | 5756684 | WBGene00017327 | F10C1.8  | F10C1.8  | 0.0642226256564609  |             |
| AGIWUR11828;AGIWUR20400;AGIWUR23510                                                                                                                      |    |    |         |         |                |          |          |                     |             |
| CB4856                                                                                                                                                   | CT | II | 5756891 | 5758421 | WBGene00017325 | F10C1.3  | F10C1.3  | 0.124673512552727   | AGIWUR28265 |
| CB4856                                                                                                                                                   | CT | II | 5765618 | 5772084 | WBGene00002053 | ifb-1    | F10C1.2  | -0.19733674834802   |             |
| AGIWUR3359;AGIWUR9541;AGIWUR22649;AGIWUR27085;AGIWUR32186;AGIWUR35412                                                                                    |    |    |         |         |                |          |          |                     |             |
| CB4856                                                                                                                                                   | CT | II | 5772065 | 5774220 | WBGene00017326 | dmd-5    | F10C1.5  | 0.977669776770973   | AGIWUR29796 |
| CB4856                                                                                                                                                   | CT | II | 5774229 | 5774420 | WBGene00017324 | F10C1.1  | F10C1.1  | 0.177908606259731   | AGIWUR41388 |
| CB4856                                                                                                                                                   | CT | II | 5782524 | 5787658 | WBGene00019408 | K05F1.6  | K05F1.6  | 0.0315485305981333  | AGIWUR25660 |
| CB4856                                                                                                                                                   | CT | II | 5790726 | 5794402 | WBGene00019407 | lect-2   | K05F1.5  | 0.371764692877655   | AGIWUR42763 |
| CB4856                                                                                                                                                   | CT | II | 5794495 | 5796185 | WBGene00019406 | acdh-8   | K05F1.3  | 0.40308127549714    | AGIWUR44040 |
| CB4856                                                                                                                                                   | CT | II | 5797893 | 5798341 | WBGene00003469 | msp-142  | K05F1.2  | 0.21010370944645    | AGIWUR20776 |
| CB4856                                                                                                                                                   | CT | II | 5799321 | 5799642 | WBGene00019409 | K05F1.8  | K05F1.8  | -0.0238568153647805 | AGIWUR38573 |
| CB4856                                                                                                                                                   | CT | II | 5800067 | 5801175 | WBGene00019410 | K05F1.9  | K05F1.9  | 0.0955239296113906  | AGIWUR22440 |
| CB4856                                                                                                                                                   | CT | II | 5801382 | 5803680 | WBGene00019405 | K05F1.1  | K05F1.1  | -0.284030587220965  | AGIWUR16912 |
| CB4856                                                                                                                                                   | CT | II | 5804717 | 5805475 | WBGene00019411 | K05F1.10 | K05F1.10 | 0.259608806724815   |             |
| AGIWUR32783                                                                                                                                              |    |    |         |         |                |          |          |                     |             |
| CB4856                                                                                                                                                   | CT | II | 5810514 | 5811749 | WBGene00022876 | ZK1248.5 | ZK1248.5 | 0.23580662987726    |             |
| AGIWUR38632                                                                                                                                              |    |    |         |         |                |          |          |                     |             |
| CB4856                                                                                                                                                   | CT | II | 5812375 | 5815482 | WBGene00022877 | wago-5   | ZK1248.7 | -0.156555171466424  |             |

AGIWUR11337;AGIWUR33360;AGIWUR40670  
 CB4856 CT II 5816573 5817306 WBGene00044393 ZK1248.20 ZK1248.20 -0.301354559574445  
 AGIWUR2122;AGIWUR2856;AGIWUR13420;AGIWUR13878;AGIWUR19625  
 CB4856 CT II 5820712 5823919 WBGene00001224 ehs-1 ZK1248.3 -0.0278264196759599  
 AGIWUR724;AGIWUR6312;AGIWUR10853;AGIWUR12575;AGIWUR17892;AGIWUR33127;AGIWUR37745;AGIWUR37955;AGIWUR41914;AGIWUR42738  
 CB4856 CT II 5827587 5828586 WBGene00022881 ZK1248.11 ZK1248.11 -0.040740506372952  
 AGIWUR34944;AGIWUR43813  
 CB4856 CT II 5828683 5833232 WBGene00022882 ZK1248.13 ZK1248.13 -0.22266186854678  
 AGIWUR29446  
 CB4856 CT II 5833328 5836203 WBGene00001509 fzo-1 ZK1248.14 -0.0406305822993343  
 AGIWUR6222;AGIWUR26024;AGIWUR34210  
 CB4856 CT II 5836777 5838553 WBGene00022883 ZK1248.15 ZK1248.15 -0.179263118706606  
 AGIWUR3262  
 CB4856 CT II 5838663 5839414 WBGene00022885 ZK1248.19 ZK1248.19 -0.0586639684586761  
 AGIWUR11421;AGIWUR22217;AGIWUR44302  
 CB4856 CT II 5839639 5841134 WBGene00002268 lec-5 ZK1248.16 -0.251734314753733  
 AGIWUR24252  
 CB4856 CT II 5842243 5844575 WBGene00022874 nep-25 ZK1248.1 -0.36137985417151  
 AGIWUR2152  
 CB4856 CT II 5845254 5845541 WBGene00022884 ZK1248.17 ZK1248.17 -0.477058581285281  
 AGIWUR39346  
 CB4856 CT II 5845777 5850308 WBGene00019270 H41C03.3 H41C03.3 -0.347211171646379  
 AGIWUR11954  
 CB4856 CT II 5850362 5852038 WBGene00019269 H41C03.2 H41C03.2 -0.208671322042891  
 AGIWUR25991  
 CB4856 CT II 5854422 5857172 WBGene00019268 H41C03.1 H41C03.1 -0.119311540314722  
 AGIWUR44238  
 CB4856 CT II 5857080 5858422 WBGene00018871 F55C12.4 F55C12.4 -0.204925349975843  
 AGIWUR14984  
 CB4856 CT II 5864182 5867041 WBGene00018874 tag-234 F55C12.7 -0.0115859763532185  
 AGIWUR1948;AGIWUR3530;AGIWUR13556;AGIWUR25750;AGIWUR29295;AGIWUR32862;AGIWUR33273;AGIWUR35149  
 CB4856 CT II 5867268 5873614 WBGene00018872 F55C12.5 F55C12.5 -0.348391582818826  
 AGIWUR8048;AGIWUR12256;AGIWUR13416;AGIWUR22582;AGIWUR25368;AGIWUR29569;AGIWUR29585;AGIWUR32447;AGIWUR37960  
 CB4856 CT II 5874507 5876101 WBGene00018873 F55C12.6 F55C12.6 -0.0156202538656718  
 AGIWUR10598  
 CB4856 CT II 5884552 5892664 WBGene00018869 rfip-1 F55C12.1 0.136484791303824  
 AGIWUR14819;AGIWUR33856  
 CB4856 CT II 5896170 5904588 WBGene00019128 F59G1.4 F59G1.4 0.0278339766224951

AGIWUR4397;AGIWUR8473;AGIWUR22602;AGIWUR24898;AGIWUR27600;AGIWUR29800;AGIWUR33108;AGIWUR36179  
 CB4856 CT II 5904552 5906308 WBGene00006644 tsp-18 F59G1.2 -0.119785213794966 AGIWUR36316  
 CB4856 CT II 5906545 5907613 WBGene00019129 F59G1.8 F59G1.8 0.0640596489648928 AGIWUR13867  
 CB4856 CT II 5907794 5911222 WBGene00006933 vps-35 F59G1.3 -0.228032361620973  
 AGIWUR7216;AGIWUR8177;AGIWUR32419;AGIWUR39608  
 CB4856 CT II 5911324 5916910 WBGene00019127 cgt-3 F59G1.1 -0.0713383087053954  
 AGIWUR12481;AGIWUR21844;AGIWUR24749;AGIWUR30188;AGIWUR36709;AGIWUR43677  
 CB4856 CT II 5917422 5918564 WBGene00001486 frh-1 F59G1.7 -0.21150299357565 AGIWUR21616  
 CB4856 CT II 5918626 5921617 WBGene00004214 ptp-2 F59G1.5 0.0589866459117898  
 AGIWUR4553;AGIWUR27592  
 CB4856 CT II 5921967 5924838 WBGene00017895 vrk-1 F28B12.3 -0.00668448024891077  
 AGIWUR36435  
 CB4856 CT II 5933493 5940815 WBGene00001208 egl-44 F28B12.2 0.264623937142493  
 AGIWUR7961;AGIWUR17363;AGIWUR42207  
 CB4856 CT II 5942927 5943990 WBGene00017894 F28B12.1 F28B12.1 0.0664378137000341  
 AGIWUR3006  
 CB4856 CT II 5945418 5956683 WBGene00000403 casy-1 B0034.3 0.187049880263179  
 AGIWUR3914;AGIWUR14297;AGIWUR18652;AGIWUR18713;AGIWUR34228;AGIWUR37542;AGIWUR44343  
 CB4856 CT II 5961677 5962024 WBGene00044394 B0034.7 B0034.7 -0.209391049343385  
 AGIWUR5321;AGIWUR14988;AGIWUR15791;AGIWUR20321;AGIWUR43460  
 CB4856 CT II 5968079 5969058 WBGene00015004 B0034.4 B0034.4 -0.0348749586068253 AGIWUR14408  
 CB4856 CT II 5970105 5972658 WBGene00015002 B0034.1 B0034.1 -0.272883083007674 AGIWUR972  
 CB4856 CT II 5988526 5989394 WBGene00002085 ins-2 ZK75.2 0.810427382012787 AGIWUR17557  
 CB4856 CT II 5990103 5990818 WBGene00002086 ins-3 ZK75.3 -0.00753505165825885  
 AGIWUR17233;AGIWUR19321;AGIWUR27154;AGIWUR37216  
 CB4856 CT II 5996370 5997007 WBGene00002087 ins-4 ZK75.1 -0.022051783266976 AGIWUR27264  
 CB4856 CT II 5997803 5999019 WBGene00002088 ins-5 ZK84.3 -0.100217930208269  
 AGIWUR3314;AGIWUR4383;AGIWUR12709;AGIWUR18430;AGIWUR32680;AGIWUR37567;AGIWUR41810  
 CB4856 CT II 6000421 6001009 WBGene00002089 ins-6 ZK84.6 -0.0936901587943382 AGIWUR2430  
 CB4856 CT II 6010844 6011321 WBGene00002103 ins-20 ZK84.7 1.77343593011383  
 AGIWUR16068;AGIWUR20676;AGIWUR23288;AGIWUR27852;AGIWUR27895;AGIWUR32162;AGIWUR38494;AGIWUR41736;AGIWUR44906  
 CB4856 CT II 6014357 6015891 WBGene00022650 ZK84.2 ZK84.2 -0.15126432749746 AGIWUR25039  
 CB4856 CT II 6016229 6016561 WBGene00022652 ZK84.5 ZK84.5 0.139184815780308 AGIWUR12563  
 CB4856 CT II 6020653 6023349 WBGene00022649 ZK84.1 ZK84.1 -0.123407581629762 AGIWUR20753  
 CB4856 CT II 6023323 6025035 WBGene00020029 R12C12.9 R12C12.9 -0.367739942066855  
 AGIWUR15643  
 CB4856 CT II 6029514 6031206 WBGene00020023 frpr-16 R12C12.3 -0.0489002596002628  
 AGIWUR26305  
 CB4856 CT II 6039344 6039650 WBGene00020024 R12C12.4 R12C12.4 0.106787377411232



|                                                                        |    |    |         |         |                |           |           |                     |
|------------------------------------------------------------------------|----|----|---------|---------|----------------|-----------|-----------|---------------------|
| AGIWUR16314                                                            |    |    |         |         |                |           |           |                     |
| CB4856                                                                 | CT | II | 6042797 | 6043266 | WBGene00044395 | R12C12.10 | R12C12.10 | 0.103216214583685   |
| AGIWUR4656;AGIWUR11468;AGIWUR14971;AGIWUR28761;AGIWUR34529             |    |    |         |         |                |           |           |                     |
| CB4856                                                                 | CT | II | 6044145 | 6045218 | WBGene00020025 | R12C12.5  | R12C12.5  | -0.215271411174182  |
| AGIWUR4312                                                             |    |    |         |         |                |           |           |                     |
| CB4856                                                                 | CT | II | 6046286 | 6047867 | WBGene00020026 | R12C12.6  | R12C12.6  | -0.141870525411008  |
| AGIWUR2250;AGIWUR7065;AGIWUR32439;AGIWUR39270                          |    |    |         |         |                |           |           |                     |
| CB4856                                                                 | CT | II | 6048109 | 6049686 | WBGene00004306 | ran-5     | R12C12.2  | 0.0167276500143991  |
| AGIWUR19265;AGIWUR21585;AGIWUR31081                                    |    |    |         |         |                |           |           |                     |
| CB4856                                                                 | CT | II | 6050332 | 6054307 | WBGene00020022 | gldc-1    | R12C12.1  | -0.39565660415027   |
| AGIWUR2327;AGIWUR4982;AGIWUR19292;AGIWUR33072                          |    |    |         |         |                |           |           |                     |
| CB4856                                                                 | CT | II | 6055039 | 6056388 | WBGene00020027 | R12C12.7  | R12C12.7  | 0.0454976208475699  |
| AGIWUR16099                                                            |    |    |         |         |                |           |           |                     |
| CB4856                                                                 | CT | II | 6057379 | 6061520 | WBGene00020028 | R12C12.8  | R12C12.8  | -0.0555633398265245 |
| AGIWUR4081;AGIWUR13422;AGIWUR28711;AGIWUR30011;AGIWUR31749;AGIWUR44325 |    |    |         |         |                |           |           |                     |
| CB4856                                                                 | CT | II | 6061977 | 6067166 | WBGene00019190 | H12I13.1  | H12I13.1  | 0.0228415502517567  |
| AGIWUR31215;AGIWUR31279                                                |    |    |         |         |                |           |           |                     |
| CB4856                                                                 | CT | II | 6071386 | 6073251 | WBGene00019192 | H12I13.3  | H12I13.3  | 0.158376174554371   |
| AGIWUR33937                                                            |    |    |         |         |                |           |           |                     |
| CB4856                                                                 | CT | II | 6077700 | 6078230 | WBGene00019193 | H12I13.5  | H12I13.5  | -0.0806410710390928 |
| AGIWUR4388;AGIWUR15709;AGIWUR23079;AGIWUR35963;AGIWUR38074             |    |    |         |         |                |           |           |                     |
| CB4856                                                                 | CT | II | 6077904 | 6078235 | WBGene00019194 | H12I13.6  | H12I13.6  | -0.467814858816997  |
| AGIWUR13378                                                            |    |    |         |         |                |           |           |                     |
| CB4856                                                                 | CT | II | 6078265 | 6080843 | WBGene00001401 | fbf-1     | H12I13.4  | 0.410137239900433   |
| AGIWUR10379                                                            |    |    |         |         |                |           |           |                     |
| CB4856                                                                 | CT | II | 6083060 | 6083232 | WBGene00201452 | F21H12.9  | F21H12.9  | -0.227523288139282  |
| AGIWUR20248                                                            |    |    |         |         |                |           |           |                     |
| CB4856                                                                 | CT | II | 6088008 | 6088202 | WBGene00017684 | F21H12.2  | F21H12.2  | -0.503132998570528  |
| AGIWUR3403                                                             |    |    |         |         |                |           |           |                     |
| CB4856                                                                 | CT | II | 6088866 | 6091480 | WBGene00001402 | fbf-2     | F21H12.5  | -0.102210115397151  |
| AGIWUR38480                                                            |    |    |         |         |                |           |           |                     |
| CB4856                                                                 | CT | II | 6091820 | 6092789 | WBGene00044287 | F21H12.7  | F21H12.7  | 0.347183586237112   |
| AGIWUR13232;AGIWUR24259                                                |    |    |         |         |                |           |           |                     |
| CB4856                                                                 | CT | II | 6092766 | 6097597 | WBGene00017686 | tpp-2     | F21H12.6  | -0.325339607032896  |
| AGIWUR1355;AGIWUR10802;AGIWUR13569;AGIWUR39948                         |    |    |         |         |                |           |           |                     |
| CB4856                                                                 | CT | II | 6100060 | 6110122 | WBGene00004346 | rgs-3     | C29H12.3  | -0.0543005920129938 |
| AGIWUR13208;AGIWUR30201;AGIWUR31773;AGIWUR42877                        |    |    |         |         |                |           |           |                     |
| CB4856                                                                 | CT | II | 6110452 | 6113194 | WBGene00016236 | cec-9     | C29H12.5  | 0.00505529699341167 |
| AGIWUR31509                                                            |    |    |         |         |                |           |           |                     |

|                                                                                                |    |         |         |                |          |          |                     |             |
|------------------------------------------------------------------------------------------------|----|---------|---------|----------------|----------|----------|---------------------|-------------|
| CB4856 CT                                                                                      | II | 6114423 | 6118263 | WBGene00016237 | C29H12.6 | C29H12.6 | 0.368883380060993   |             |
| AGIWUR19780                                                                                    |    |         |         |                |          |          |                     |             |
| CB4856 CT                                                                                      | II | 6123809 | 6125438 | WBGene00016235 | C29H12.2 | C29H12.2 | 0.0664967438949251  |             |
| AGIWUR7944;AGIWUR11819;AGIWUR29712;AGIWUR41243                                                 |    |         |         |                |          |          |                     |             |
| CB4856 CT                                                                                      | II | 6125559 | 6127942 | WBGene00004680 | rars-2   | C29H12.1 | 0.0900928077002696  |             |
| AGIWUR265                                                                                      |    |         |         |                |          |          |                     |             |
| CB4856 CT                                                                                      | II | 6136094 | 6157176 | WBGene00019018 | abts-3   | F57F10.1 | 0.245135449984776   |             |
| AGIWUR36284                                                                                    |    |         |         |                |          |          |                     |             |
| CB4856 CT                                                                                      | II | 6157167 | 6161094 | WBGene00001373 | exp-1    | H35N03.1 | -0.111778410978484  |             |
| AGIWUR28654                                                                                    |    |         |         |                |          |          |                     |             |
| CB4856 CT                                                                                      | II | 6165721 | 6169231 | WBGene00002030 | hst-3.1  | F40H3.5  | 0.174626244843568   |             |
| AGIWUR1423;AGIWUR14920;AGIWUR33288;AGIWUR34425;AGIWUR35649;AGIWUR36354;AGIWUR38927;AGIWUR43602 |    |         |         |                |          |          |                     |             |
| CB4856 CT                                                                                      | II | 6171507 | 6173159 | WBGene00018251 | F40H3.3  | F40H3.3  | 0.0139094483264106  | AGIWUR15632 |
| CB4856 CT                                                                                      | II | 6173568 | 6174863 | WBGene00018250 | F40H3.2  | F40H3.2  | -0.455544456464246  | AGIWUR22105 |
| CB4856 CT                                                                                      | II | 6179867 | 6184684 | WBGene00018249 | F40H3.1  | F40H3.1  | -0.243563131205047  |             |
| AGIWUR2525;AGIWUR3859;AGIWUR26674                                                              |    |         |         |                |          |          |                     |             |
| CB4856 CT                                                                                      | II | 6187010 | 6187722 | WBGene00018252 | F40H3.6  | F40H3.6  | -0.654054252053816  | AGIWUR7675  |
| CB4856 CT                                                                                      | II | 6189580 | 6191402 | WBGene00001440 | fkx-8    | F40H3.4  | 0.3928170045365     | AGIWUR19154 |
| CB4856 CT                                                                                      | II | 6192784 | 6195170 | WBGene00000771 | cpb-2    | C30B5.3  | -0.0161697740298177 |             |
| AGIWUR9692;AGIWUR28077;AGIWUR33384                                                             |    |         |         |                |          |          |                     |             |
| CB4856 CT                                                                                      | II | 6195813 | 6196959 | WBGene00016245 | C30B5.4  | C30B5.4  | -0.0168082066986166 | AGIWUR20508 |
| CB4856 CT                                                                                      | II | 6197180 | 6198308 | WBGene00016244 | C30B5.2  | C30B5.2  | -0.0995777386267331 |             |
| AGIWUR1981;AGIWUR4452;AGIWUR6505;AGIWUR36902;AGIWUR41508;AGIWUR42485;AGIWUR43717               |    |         |         |                |          |          |                     |             |
| CB4856 CT                                                                                      | II | 6198696 | 6201628 | WBGene00077732 | szy-4    | C30B5.1  | -0.103302810148719  | AGIWUR38892 |
| CB4856 CT                                                                                      | II | 6219526 | 6222658 | WBGene00016247 | C30B5.6  | C30B5.6  | -0.0723710880442194 |             |
| AGIWUR8793;AGIWUR34758;AGIWUR36628;AGIWUR38666                                                 |    |         |         |                |          |          |                     |             |
| CB4856 CT                                                                                      | II | 6224892 | 6227095 | WBGene00016248 | C30B5.7  | C30B5.7  | 0.23182645203787    | AGIWUR14114 |
| CB4856 CT                                                                                      | II | 6234483 | 6244287 | WBGene00020784 | tat-4    | T24H7.5  | 0.134041527705206   |             |
| AGIWUR10956;AGIWUR15388;AGIWUR17815;AGIWUR27470;AGIWUR28746                                    |    |         |         |                |          |          |                     |             |
| CB4856 CT                                                                                      | II | 6245748 | 6246257 | WBGene00020783 | blos-4   | T24H7.4  | -0.209923645124039  | AGIWUR43685 |
| CB4856 CT                                                                                      | II | 6246354 | 6247334 | WBGene00020782 | T24H7.3  | T24H7.3  | -0.119936467128422  |             |
| AGIWUR2657;AGIWUR5181;AGIWUR13345;AGIWUR28033;AGIWUR30272                                      |    |         |         |                |          |          |                     |             |
| CB4856 CT                                                                                      | II | 6247311 | 6250841 | WBGene00020781 | T24H7.2  | T24H7.2  | -0.0503232597613881 |             |
| AGIWUR14735;AGIWUR28910;AGIWUR33691                                                            |    |         |         |                |          |          |                     |             |
| CB4856 CT                                                                                      | II | 6251411 | 6252797 | WBGene00004015 | phb-2    | T24H7.1  | -0.286240411209953  | AGIWUR1862  |
| CB4856 CT                                                                                      | II | 6252774 | 6256124 | WBGene00017438 | F13H8.5  | F13H8.5  | 0.0171097896652332  | AGIWUR39790 |
| CB4856 CT                                                                                      | II | 6257628 | 6260021 | WBGene00017443 | F13H8.11 | F13H8.11 | 0.470513849864957   |             |
| AGIWUR32496                                                                                    |    |         |         |                |          |          |                     |             |
| CB4856 CT                                                                                      | II | 6260857 | 6262524 | WBGene00017437 | nmgp-1   | F13H8.4  | -0.04011632907355   | AGIWUR27005 |

|                                                                        |    |    |         |         |                |          |          |                      |             |
|------------------------------------------------------------------------|----|----|---------|---------|----------------|----------|----------|----------------------|-------------|
| CB4856                                                                 | CT | II | 6262522 | 6263325 | WBGene00017444 | F13H8.12 | F13H8.12 |                      |             |
| -0.00530582825153392 AGIWUR31676                                       |    |    |         |         |                |          |          |                      |             |
| CB4856                                                                 | CT | II | 6264050 | 6265502 | WBGene00017436 | F13H8.3  | F13H8.3  | -0.634347331650503   | AGIWUR33928 |
| CB4856                                                                 | CT | II | 6265612 | 6268083 | WBGene00017441 | F13H8.8  | F13H8.8  | 0.0567254818732446   |             |
| AGIWUR9280;AGIWUR18592;AGIWUR29470;AGIWUR42923                         |    |    |         |         |                |          |          |                      |             |
| CB4856                                                                 | CT | II | 6270370 | 6274005 | WBGene00017435 | F13H8.2  | F13H8.2  | -0.214602485307413   |             |
| AGIWUR6887;AGIWUR11903;AGIWUR22150;AGIWUR23635                         |    |    |         |         |                |          |          |                      |             |
| CB4856                                                                 | CT | II | 6274115 | 6279699 | WBGene00000259 | bp1-1    | F13H8.10 | -0.0476549405518831  |             |
| AGIWUR5304;AGIWUR14955;AGIWUR24067;AGIWUR41077;AGIWUR44743             |    |    |         |         |                |          |          |                      |             |
| CB4856                                                                 | CT | II | 6279676 | 6281102 | WBGene00017442 | F13H8.9  | F13H8.9  | 0.0362436615700759   | AGIWUR41405 |
| CB4856                                                                 | CT | II | 6283386 | 6284724 | WBGene00017434 | F13H8.1  | F13H8.1  | 0.583076031223214    | AGIWUR4875  |
| CB4856                                                                 | CT | II | 6284817 | 6286869 | WBGene00017439 | F13H8.6  | F13H8.6  | -0.237478580594725   | AGIWUR37478 |
| CB4856                                                                 | CT | II | 6288413 | 6290097 | WBGene00017440 | upb-1    | F13H8.7  | 0.289359761739336    |             |
| AGIWUR9195;AGIWUR17843;AGIWUR21426;AGIWUR32208;AGIWUR41349;AGIWUR41634 |    |    |         |         |                |          |          |                      |             |
| CB4856                                                                 | CT | II | 6290652 | 6292524 | WBGene00016212 | C29F5.3  | C29F5.3  | 0.0550614812987575   | AGIWUR44222 |
| CB4856                                                                 | CT | II | 6292652 | 6294356 | WBGene00003403 | mps-1    | C29F5.4  | 0.157697437663371    | AGIWUR17874 |
| CB4856                                                                 | CT | II | 6297243 | 6298675 | WBGene00016213 | C29F5.5  | C29F5.5  | 0.0507405373452592   | AGIWUR11702 |
| CB4856                                                                 | CT | II | 6299502 | 6301398 | WBGene00016211 | sdz-3    | C29F5.2  | -0.019366032736885   | AGIWUR5265  |
| CB4856                                                                 | CT | II | 6303424 | 6306283 | WBGene00016210 | C29F5.1  | C29F5.1  | 0.124339071616109    | AGIWUR39617 |
| CB4856                                                                 | CT | II | 6306429 | 6308073 | WBGene00044589 | C29F5.8  | C29F5.8  | -0.0587519984492388  |             |
| AGIWUR12713;AGIWUR30405                                                |    |    |         |         |                |          |          |                      |             |
| CB4856                                                                 | CT | II | 6308114 | 6309298 | WBGene00016215 | glb-10   | C29F5.7  | -0.426099111142193   | AGIWUR22465 |
| CB4856                                                                 | CT | II | 6318087 | 6321159 | WBGene00016311 | C32D5.3  | C32D5.3  | 0.0775596986898837   |             |
| AGIWUR24680;AGIWUR44562                                                |    |    |         |         |                |          |          |                      |             |
| CB4856                                                                 | CT | II | 6321340 | 6323079 | WBGene00016312 | C32D5.4  | C32D5.4  | 0.0252400514950439   | AGIWUR36431 |
| CB4856                                                                 | CT | II | 6324484 | 6327355 | WBGene00004860 | sma-6    | C32D5.2  | 0.00258495318181851  |             |
| AGIWUR49;AGIWUR39534                                                   |    |    |         |         |                |          |          |                      |             |
| CB4856                                                                 | CT | II | 6329850 | 6331341 | WBGene00016313 | set-4    | C32D5.5  | 0.211387423959753    | AGIWUR32781 |
| CB4856                                                                 | CT | II | 6331899 | 6333987 | WBGene00016314 | C32D5.6  | C32D5.6  | -0.00916391247076831 | AGIWUR23810 |
| CB4856                                                                 | CT | II | 6335478 | 6336334 | WBGene00044755 | C32D5.14 | C32D5.14 | 0.0336275128448218   |             |
| AGIWUR1397;AGIWUR12037;AGIWUR13449;AGIWUR17048;AGIWUR39841             |    |    |         |         |                |          |          |                      |             |
| CB4856                                                                 | CT | II | 6336345 | 6339557 | WBGene00016315 | C32D5.7  | C32D5.7  | -0.118455846402886   | AGIWUR24724 |
| CB4856                                                                 | CT | II | 6343058 | 6345925 | WBGene00016316 | C32D5.8  | C32D5.8  | -0.0367870505491932  |             |
| AGIWUR20118;AGIWUR36064;AGIWUR41359;AGIWUR41461                        |    |    |         |         |                |          |          |                      |             |
| CB4856                                                                 | CT | II | 6346960 | 6347719 | WBGene00002980 | lgg-1    | C32D5.9  | 0.826743750047477    |             |
| AGIWUR21157;AGIWUR39449;AGIWUR39870                                    |    |    |         |         |                |          |          |                      |             |
| CB4856                                                                 | CT | II | 6349207 | 6351987 | WBGene00016317 | C32D5.10 | C32D5.10 | -0.132796338283189   |             |
| AGIWUR18554                                                            |    |    |         |         |                |          |          |                      |             |
| CB4856                                                                 | CT | II | 6352542 | 6355911 | WBGene00016318 | C32D5.11 | C32D5.11 | 0.126874325211751    |             |

AGIWUR20770;AGIWUR26037;AGIWUR28595;AGIWUR31352;AGIWUR38108;AGIWUR38590  
 CB4856 CT II 6356416 6359005 WBGene00016319 C32D5.12 C32D5.12 0.276931503952493  
 AGIWUR30696  
 CB4856 CT II 6360331 6360959 WBGene00019607 K10B2.4 K10B2.4 -0.0441529853865923 AGIWUR3646  
 CB4856 CT II 6361159 6365367 WBGene00019608 ani-2 K10B2.5 0.0127158365712727 AGIWUR26224  
 CB4856 CT II 6365722 6367002 WBGene00019606 clec-88 K10B2.3 -0.0693439126319362  
 AGIWUR692;AGIWUR9567;AGIWUR33254;AGIWUR42994  
 CB4856 CT II 6366990 6369210 WBGene00019605 ctsa-1 K10B2.2 -0.41669597052906  
 AGIWUR12427;AGIWUR18699;AGIWUR19182;AGIWUR31523;AGIWUR41372  
 CB4856 CT II 6371295 6374544 WBGene00003009 lin-23 K10B2.1 0.0305400240309606 AGIWUR16062  
 CB4856 CT II 6383645 6384692 WBGene00019061 F58F12.1 F58F12.1 0.10428449897053  
 AGIWUR9471;AGIWUR23871  
 CB4856 CT II 6386767 6387568 WBGene00044756 F58F12.4 F58F12.4 -0.0389935709866158  
 AGIWUR4742;AGIWUR26851;AGIWUR28350  
 CB4856 CT II 6387525 6388242 WBGene00019062 F58F12.2 F58F12.2 -0.243899476736955  
 AGIWUR32553  
 CB4856 CT II 6389275 6391295 WBGene00019063 F58F12.3 F58F12.3 0.0332917210158659  
 AGIWUR1198;AGIWUR7481;AGIWUR10443;AGIWUR30768;AGIWUR37971;AGIWUR43033  
 CB4856 CT II 6398706 6400940 WBGene00020800 zig-10 T25D10.2 0.383329930420361  
 AGIWUR4485;AGIWUR9846;AGIWUR26601;AGIWUR27441;AGIWUR36937  
 CB4856 CT II 6401949 6403102 WBGene00020802 btb-2 T25D10.5 0.0827546732437794  
 AGIWUR34805  
 CB4856 CT II 6403401 6405040 WBGene00020799 T25D10.1 T25D10.1 0.0726929455248619  
 AGIWUR43640  
 CB4856 CT II 6405391 6407346 WBGene00004996 spp-11 T25D10.3 0.33265030270004  
 AGIWUR32974  
 CB4856 CT II 6407537 6410281 WBGene00020801 T25D10.4 T25D10.4 0.747261781440208  
 AGIWUR42618  
 CB4856 CT II 6423112 6424925 WBGene00019372 K03H9.3 K03H9.3 -0.135550862212487 AGIWUR5579  
 CB4856 CT II 6426293 6427513 WBGene00000651 col-75 K03H9.2 -0.132677776197468 AGIWUR25302  
 CB4856 CT II 6431261 6431875 WBGene00019371 K03H9.1 K03H9.1 -0.144046051459522 AGIWUR43614  
 CB4856 CT II 6441428 6443921 WBGene00019426 cutl-16 K06A1.3 0.506532578808205 AGIWUR25549  
 CB4856 CT II 6444010 6446134 WBGene00019425 K06A1.2 K06A1.2 0.0842865460582507 AGIWUR15893  
 CB4856 CT II 6446079 6449819 WBGene00003621 nhr-22 K06A1.4 0.0223073702607532 AGIWUR30016  
 CB4856 CT II 6450889 6453391 WBGene00019427 atg-16.2 K06A1.5 -0.00262665664126072  
 AGIWUR13723;AGIWUR19569;AGIWUR29959;AGIWUR42434  
 CB4856 CT II 6454974 6456440 WBGene00019424 aptf-1 K06A1.1 0.255278702869273 AGIWUR35064  
 CB4856 CT II 6456522 6467642 WBGene00019428 dgk-5 K06A1.6 0.164419815512622 AGIWUR36916  
 CB4856 CT II 6470095 6470506 WBGene00044669 T28D9.12 T28D9.12 0.0796877046772249

AGIWUR1436;AGIWUR13032;AGIWUR16320;AGIWUR20238;AGIWUR35214  
 CB4856 CT II 6474338 6482125 WBGene00020897 del-10 T28D9.7 -0.362951294646864 AGIWUR19065  
 CB4856 CT II 6483953 6484967 WBGene00020898 T28D9.9 T28D9.9 0.053815812275797 AGIWUR13709  
 CB4856 CT II 6485677 6488861 WBGene00020895 T28D9.3 T28D9.3 0.0596159078831171  
 AGIWUR31909;AGIWUR38236;AGIWUR43877  
 CB4856 CT II 6488830 6489761 WBGene00004916 snr-3 T28D9.10 -0.286640504160705  
 AGIWUR4000;AGIWUR15440;AGIWUR22068;AGIWUR22293;AGIWUR29265;AGIWUR37787;AGIWUR42229  
 CB4856 CT II 6490158 6491340 WBGene00004702 rsp-5 T28D9.2 -0.126680566257656  
 AGIWUR5146;AGIWUR5155;AGIWUR10143;AGIWUR12090;AGIWUR17860;AGIWUR27025;AGIWUR28242;AGIWUR40736  
 CB4856 CT II 6491469 6491993 WBGene00020899 T28D9.11 T28D9.11 0.0776917752376787  
 AGIWUR21047;AGIWUR34760  
 CB4856 CT II 6492402 6493778 WBGene00020894 T28D9.1 T28D9.1 -0.488281140283362 AGIWUR5642  
 CB4856 CT II 6493720 6498633 WBGene00019904 twk-49 R05G9.2 -0.241522321392173 AGIWUR26459  
 CB4856 CT II 6500397 6501520 WBGene00019905 R05G9.3 R05G9.3 -0.118682896325774 AGIWUR11317  
 CB4856 CT II 6503360 6526333 WBGene00016970 C56E6.2 C56E6.2 -0.371399458022197  
 AGIWUR8020;AGIWUR8720;AGIWUR8781;AGIWUR28926  
 CB4856 CT II 6526372 6528801 WBGene00016972 C56E6.4 C56E6.4 0.0369690078458138  
 AGIWUR11683;AGIWUR17423;AGIWUR23906  
 CB4856 CT II 6528933 6531610 WBGene00016973 abch-1 C56E6.5 -0.00363405337868983 AGIWUR23341  
 CB4856 CT II 6536380 6554846 WBGene00007050 utp-20 F18C5.3 0.00682615529337216  
 AGIWUR10754;AGIWUR11524;AGIWUR42658;AGIWUR43051  
 CB4856 CT II 6554977 6559267 WBGene00006944 wrn-1 F18C5.2 0.0235458298427034 AGIWUR29106  
 CB4856 CT II 6559258 6561583 WBGene00017563 F18C5.10 F18C5.10 0.73205908273662  
 AGIWUR207;AGIWUR5082;AGIWUR13583;AGIWUR14924;AGIWUR17027;AGIWUR27722;AGIWUR36568;AGIWUR37877  
 CB4856 CT II 6563796 6565154 WBGene00017559 mpz-3 F18C5.4 -0.114709514357465 AGIWUR16305  
 CB4856 CT II 6567134 6567870 WBGene00017562 F18C5.9 F18C5.9 1.23308225274401 AGIWUR27361  
 CB4856 CT II 6569014 6570434 WBGene00005053 sra-27 F18C5.1 0.173074534883368 AGIWUR39606  
 CB4856 CT II 6570547 6573777 WBGene00005054 sra-28 F18C5.6 0.832070592277251 AGIWUR37994  
 CB4856 CT II 6574378 6575747 WBGene00005055 sra-29 F18C5.8 -0.188406283540717 AGIWUR25113  
 CB4856 CT II 6576974 6578478 WBGene00005057 sra-31 C56C10.5 -0.0966574159954234  
 AGIWUR32720  
 CB4856 CT II 6583039 6584514 WBGene00016962 C56C10.4 C56C10.4 0.341205009693954  
 AGIWUR12231  
 CB4856 CT II 6584409 6587569 WBGene00016964 C56C10.7 C56C10.7 -0.172522676314308  
 AGIWUR10789;AGIWUR13070;AGIWUR19595;AGIWUR43494;AGIWUR44239  
 CB4856 CT II 6587577 6588679 WBGene00002045 icd-1 C56C10.8 -0.0119723291463778  
 AGIWUR11449;AGIWUR16844;AGIWUR16923;AGIWUR19543;AGIWUR37015;AGIWUR43221  
 CB4856 CT II 6589290 6591081 WBGene00016961 vps-32.1 C56C10.3 0.0547035803003695  
 AGIWUR32474

|                                                                                                |    |                 |                |           |           |                      |             |
|------------------------------------------------------------------------------------------------|----|-----------------|----------------|-----------|-----------|----------------------|-------------|
| CB4856 CT<br>AGIWUR19535                                                                       | II | 6591048 6592351 | WBGene00016965 | C56C10.9  | C56C10.9  | -0.0949351414543731  |             |
| CB4856 CT<br>AGIWUR35463                                                                       | II | 6592440 6594251 | WBGene00016966 | aipr-1    | C56C10.10 | 0.078084277644443    |             |
| CB4856 CT<br>AGIWUR18501                                                                       | II | 6594382 6598080 | WBGene00001026 | dnj-8     | C56C10.13 | -0.00285975086386614 |             |
| CB4856 CT<br>AGIWUR37942                                                                       | II | 6598349 6601119 | WBGene00016967 | C56C10.11 | C56C10.11 | 0.342456928089689    |             |
| CB4856 CT<br>AGIWUR11698                                                                       | II | 6601216 6603449 | WBGene00016960 | vps-33.2  | C56C10.1  | -0.328250684210701   |             |
| CB4856 CT<br>AGIWUR42321                                                                       | II | 6603441 6609356 | WBGene00016968 | epg-5     | C56C10.12 | -0.124981250170375   |             |
| CB4856 CT                                                                                      | II | 6618218 6622168 | WBGene00003480 | k1f-3     | F54H5.4   | 0.176193296423587    | AGIWUR40709 |
| CB4856 CT                                                                                      | II | 6622189 6623500 | WBGene00018840 | F54H5.3   | F54H5.3   | 0.212534647804109    | AGIWUR32792 |
| CB4856 CT<br>AGIWUR17284                                                                       | II | 6623423 6625389 | WBGene00255600 | F54H5.14  | F54H5.14  | -0.283827578912893   |             |
| CB4856 CT<br>AGIWUR31097;AGIWUR40733                                                           | II | 6631105 6637099 | WBGene00020579 | T19D12.4  | T19D12.4  | 0.0224630168520541   |             |
| CB4856 CT<br>AGIWUR5677;AGIWUR11762;AGIWUR34722;AGIWUR35376                                    | II | 6637093 6643117 | WBGene00020581 | T19D12.6  | T19D12.6  | -0.0805738507659592  |             |
| CB4856 CT<br>AGIWUR13576                                                                       | II | 6647166 6649126 | WBGene00020582 | oig-8     | T19D12.7  | -0.0544171653111212  |             |
| CB4856 CT<br>AGIWUR43747                                                                       | II | 6649789 6651819 | WBGene00005052 | sra-26    | T19D12.8  | -0.445508155387919   |             |
| CB4856 CT<br>AGIWUR13667                                                                       | II | 6652339 6654384 | WBGene00020583 | T19D12.9  | T19D12.9  | 0.100630079612513    |             |
| CB4856 CT<br>AGIWUR11924                                                                       | II | 6655096 6658866 | WBGene00020584 | T19D12.10 | T19D12.10 | 0.0997164301126343   |             |
| CB4856 CT<br>AGIWUR14410                                                                       | II | 6660274 6660994 | WBGene00020578 | T19D12.3  | T19D12.3  | 1.09731431152954     |             |
| CB4856 CT<br>AGIWUR3051;AGIWUR10166;AGIWUR16961;AGIWUR29672                                    | II | 6661335 6665206 | WBGene00020577 | T19D12.2  | T19D12.2  | 0.203276698333201    |             |
| CB4856 CT<br>AGIWUR44211                                                                       | II | 6666898 6673752 | WBGene00020576 | T19D12.1  | T19D12.1  | 0.256197442649075    |             |
| CB4856 CT<br>AGIWUR6136;AGIWUR30081                                                            | II | 6674268 6679363 | WBGene00019273 | H43E16.1  | H43E16.1  | -0.079531870736159   |             |
| CB4856 CT                                                                                      | II | 6679545 6682971 | WBGene00016005 | ift-74    | C18H9.8   | 0.184427546951519    | AGIWUR238   |
| CB4856 CT<br>AGIWUR206;AGIWUR13368;AGIWUR18047;AGIWUR23125;AGIWUR37969;AGIWUR38975;AGIWUR41873 | II | 6684236 6691841 | WBGene00016002 | C18H9.3   | C18H9.3   | -0.318304130472987   |             |

|                                                           |    |    |         |         |                |          |          |                      |             |
|-----------------------------------------------------------|----|----|---------|---------|----------------|----------|----------|----------------------|-------------|
| CB4856                                                    | CT | II | 6692748 | 6695566 | WBGene00016003 | C18H9.5  | C18H9.5  | 0.230239501502972    |             |
| AGIWUR4158;AGIWUR8718;AGIWUR38275                         |    |    |         |         |                |          |          |                      |             |
| CB4856                                                    | CT | II | 6699084 | 6700482 | WBGene00016000 | C18H9.1  | C18H9.1  | 0.0684286220379011   | AGIWUR2090  |
| CB4856                                                    | CT | II | 6700660 | 6701625 | WBGene00016004 | C18H9.6  | C18H9.6  | -0.127112625345825   | AGIWUR41807 |
| CB4856                                                    | CT | II | 6702233 | 6705643 | WBGene00004507 | rpy-1    | C18H9.7  | -0.00609290587608768 | AGIWUR37590 |
| CB4856                                                    | CT | II | 6710156 | 6712931 | WBGene00001072 | dpy-10   | T14B4.7  | 0.301767358429888    |             |
| AGIWUR5189;AGIWUR7679;AGIWUR8899;AGIWUR9246               |    |    |         |         |                |          |          |                      |             |
| CB4856                                                    | CT | II | 6714292 | 6715971 | WBGene00001064 | dpy-2    | T14B4.6  | 1.0246157862209      | AGIWUR7774  |
| CB4856                                                    | CT | II | 6716863 | 6717868 | WBGene00020501 | T14B4.5  | T14B4.5  | -0.118856572354421   | AGIWUR38846 |
| CB4856                                                    | CT | II | 6718532 | 6720294 | WBGene00006636 | tsp-10   | T14B4.4  | -0.196343950493175   | AGIWUR4910  |
| CB4856                                                    | CT | II | 6720177 | 6729302 | WBGene00020502 | T14B4.8  | T14B4.8  | -0.16449819851807    | AGIWUR25786 |
| CB4856                                                    | CT | II | 6730207 | 6733795 | WBGene00020503 | T14B4.9  | T14B4.9  | -0.220724395143901   |             |
| AGIWUR6731;AGIWUR12919;AGIWUR20426                        |    |    |         |         |                |          |          |                      |             |
| CB4856                                                    | CT | II | 6734907 | 6736110 | WBGene00020500 | T14B4.3  | T14B4.3  | -0.250268453819123   | AGIWUR16797 |
| CB4856                                                    | CT | II | 6736203 | 6736793 | WBGene00020499 | T14B4.2  | T14B4.2  | -0.278825618230803   | AGIWUR20086 |
| CB4856                                                    | CT | II | 6736904 | 6741482 | WBGene00020498 | T14B4.1  | T14B4.1  | 0.000322586868339858 |             |
| AGIWUR1770;AGIWUR25503;AGIWUR37363;AGIWUR39875            |    |    |         |         |                |          |          |                      |             |
| CB4856                                                    | CT | II | 6741663 | 6742819 | WBGene00018305 | exos-8   | F41G3.14 | 0.0332396154881103   |             |
| AGIWUR34684                                               |    |    |         |         |                |          |          |                      |             |
| CB4856                                                    | CT | II | 6742914 | 6744267 | WBGene00018302 | F41G3.6  | F41G3.6  | -0.183647390602237   | AGIWUR4505  |
| CB4856                                                    | CT | II | 6744339 | 6744735 | WBGene00002098 | ins-15   | F41G3.17 | 0.133879293483541    |             |
| AGIWUR6727;AGIWUR34476;AGIWUR39415                        |    |    |         |         |                |          |          |                      |             |
| CB4856                                                    | CT | II | 6745435 | 6745960 | WBGene00002097 | ins-14   | F41G3.16 | -0.0584532639699491  |             |
| AGIWUR3224;AGIWUR9228;AGIWUR29224;AGIWUR40668;AGIWUR40844 |    |    |         |         |                |          |          |                      |             |
| CB4856                                                    | CT | II | 6746704 | 6748586 | WBGene00018301 | F41G3.5  | F41G3.5  | 0.193356045546508    | AGIWUR8791  |
| CB4856                                                    | CT | II | 6748632 | 6749522 | WBGene00018303 | F41G3.10 | F41G3.10 | 0.351308445703236    |             |
| AGIWUR22145                                               |    |    |         |         |                |          |          |                      |             |
| CB4856                                                    | CT | II | 6749793 | 6751029 | WBGene00044315 | F41G3.20 | F41G3.20 | 0.150528552801662    |             |
| AGIWUR22149;AGIWUR35617                                   |    |    |         |         |                |          |          |                      |             |
| CB4856                                                    | CT | II | 6751624 | 6752127 | WBGene00044317 | F41G3.19 | F41G3.19 | 0.140270425109321    |             |
| AGIWUR18381;AGIWUR41751                                   |    |    |         |         |                |          |          |                      |             |
| CB4856                                                    | CT | II | 6752352 | 6752950 | WBGene00044316 | F41G3.21 | F41G3.21 | -0.371586727268484   |             |
| AGIWUR6402;AGIWUR13731;AGIWUR34977                        |    |    |         |         |                |          |          |                      |             |
| CB4856                                                    | CT | II | 6753126 | 6754774 | WBGene00005986 | srx-95   | F41G3.11 | 0.131032943403284    |             |
| AGIWUR36254                                               |    |    |         |         |                |          |          |                      |             |
| CB4856                                                    | CT | II | 6755136 | 6755965 | WBGene00001424 | fis-1    | F41G3.4  | 0.296547682947759    | AGIWUR36073 |
| CB4856                                                    | CT | II | 6756476 | 6758934 | WBGene00018300 | F41G3.3  | F41G3.3  | 0.179169671714439    | AGIWUR26073 |
| CB4856                                                    | CT | II | 6758885 | 6760385 | WBGene00018299 | F41G3.2  | F41G3.2  | 0.303565513988927    | AGIWUR26874 |
| CB4856                                                    | CT | II | 6760684 | 6775176 | WBGene00018304 | agr-1    | F41G3.12 | 0.741408891868233    |             |

AGIWUR11141;AGIWUR41695

|        |    |    |         |         |                |         |         |                    |             |
|--------|----|----|---------|---------|----------------|---------|---------|--------------------|-------------|
| CB4856 | CT | II | 6777076 | 6777889 | WBGene00020480 | ssup-72 | T13C2.4 | -0.304798632775158 | AGIWUR39899 |
| CB4856 | CT | II | 6779464 | 6781686 | WBGene00020482 | T13C2.7 | T13C2.7 | -0.220961728863626 | AGIWUR34416 |
| CB4856 | CT | II | 6783427 | 6788255 | WBGene00020481 | T13C2.6 | T13C2.6 | 0.0183466476154397 | AGIWUR25670 |
| CB4856 | CT | II | 6789248 | 6791782 | WBGene00020479 | T13C2.3 | T13C2.3 | 0.0264753545261049 | AGIWUR27932 |
| CB4856 | CT | II | 6799114 | 6800154 | WBGene00017954 | F31E8.4 | F31E8.4 | -0.264888032107772 | AGIWUR13901 |
| CB4856 | CT | II | 6803758 | 6804863 | WBGene00006380 | tab-1   | F31E8.3 | 0.426731887736192  |             |

AGIWUR2387;AGIWUR23684

|        |    |    |         |         |                |         |         |                    |             |
|--------|----|----|---------|---------|----------------|---------|---------|--------------------|-------------|
| CB4856 | CT | II | 6805022 | 6807262 | WBGene00017955 | F31E8.5 | F31E8.5 | 0.197392222352715  | AGIWUR41168 |
| CB4856 | CT | II | 6810963 | 6816443 | WBGene00004921 | snt-1   | F31E8.2 | -0.144765092964351 |             |

AGIWUR14122;AGIWUR14322;AGIWUR16861;AGIWUR34583;AGIWUR41369

|        |    |    |         |         |                |         |         |                    |  |
|--------|----|----|---------|---------|----------------|---------|---------|--------------------|--|
| CB4856 | CT | II | 6817750 | 6819328 | WBGene00017956 | F31E8.6 | F31E8.6 | 0.0413350560700909 |  |
|--------|----|----|---------|---------|----------------|---------|---------|--------------------|--|

AGIWUR2540;AGIWUR4379;AGIWUR9978;AGIWUR12041;AGIWUR20457;AGIWUR24482

|        |    |    |         |         |                |         |         |                     |            |
|--------|----|----|---------|---------|----------------|---------|---------|---------------------|------------|
| CB4856 | CT | II | 6828119 | 6830456 | WBGene00017953 | F31E8.1 | F31E8.1 | -0.0529919459752559 | AGIWUR8839 |
|--------|----|----|---------|---------|----------------|---------|---------|---------------------|------------|

|        |    |    |         |         |                |        |         |                    |  |
|--------|----|----|---------|---------|----------------|--------|---------|--------------------|--|
| CB4856 | CT | II | 6835021 | 6847906 | WBGene00001194 | egl-27 | C04A2.3 | 0.0128549294137663 |  |
|--------|----|----|---------|---------|----------------|--------|---------|--------------------|--|

AGIWUR11721;AGIWUR12570;AGIWUR20852;AGIWUR21383;AGIWUR35051;AGIWUR36106;AGIWUR43838

|        |    |    |         |         |                |       |         |                    |  |
|--------|----|----|---------|---------|----------------|-------|---------|--------------------|--|
| CB4856 | CT | II | 6848060 | 6851531 | WBGene00015410 | tbc-6 | C04A2.1 | 0.0607350371848341 |  |
|--------|----|----|---------|---------|----------------|-------|---------|--------------------|--|

AGIWUR21486;AGIWUR36834

|        |    |    |         |         |                |       |         |                    |  |
|--------|----|----|---------|---------|----------------|-------|---------|--------------------|--|
| CB4856 | CT | II | 6853464 | 6858298 | WBGene00001023 | dnj-5 | C04A2.7 | -0.028887635529312 |  |
|--------|----|----|---------|---------|----------------|-------|---------|--------------------|--|

AGIWUR4098;AGIWUR14610;AGIWUR24347;AGIWUR32490;AGIWUR43650

|        |    |    |         |         |                |       |         |                   |             |
|--------|----|----|---------|---------|----------------|-------|---------|-------------------|-------------|
| CB4856 | CT | II | 6860582 | 6863752 | WBGene00016625 | aff-1 | C44B7.3 | 0.363985226472161 | AGIWUR33412 |
|--------|----|----|---------|---------|----------------|-------|---------|-------------------|-------------|

|        |    |    |         |         |                |        |         |                     |             |
|--------|----|----|---------|---------|----------------|--------|---------|---------------------|-------------|
| CB4856 | CT | II | 6868946 | 6871039 | WBGene00016626 | clhm-1 | C44B7.4 | -0.0848569854076722 | AGIWUR13362 |
|--------|----|----|---------|---------|----------------|--------|---------|---------------------|-------------|

|        |    |    |         |         |                |         |         |                     |             |
|--------|----|----|---------|---------|----------------|---------|---------|---------------------|-------------|
| CB4856 | CT | II | 6871376 | 6872593 | WBGene00016627 | C44B7.5 | C44B7.5 | 0.00705441308827304 | AGIWUR26083 |
|--------|----|----|---------|---------|----------------|---------|---------|---------------------|-------------|

|        |    |    |         |         |                |          |         |                   |  |
|--------|----|----|---------|---------|----------------|----------|---------|-------------------|--|
| CB4856 | CT | II | 6872829 | 6877089 | WBGene00016628 | slc-36.5 | C44B7.6 | 0.681896700159005 |  |
|--------|----|----|---------|---------|----------------|----------|---------|-------------------|--|

AGIWUR8784;AGIWUR36690

|        |    |    |         |         |                |         |         |                    |             |
|--------|----|----|---------|---------|----------------|---------|---------|--------------------|-------------|
| CB4856 | CT | II | 6879185 | 6880180 | WBGene00016629 | C44B7.7 | C44B7.7 | -0.322706008459274 | AGIWUR28103 |
|--------|----|----|---------|---------|----------------|---------|---------|--------------------|-------------|

|        |    |    |         |         |                |       |         |                    |             |
|--------|----|----|---------|---------|----------------|-------|---------|--------------------|-------------|
| CB4856 | CT | II | 6880701 | 6883754 | WBGene00004058 | pmp-1 | C44B7.8 | -0.311693518466788 | AGIWUR27618 |
|--------|----|----|---------|---------|----------------|-------|---------|--------------------|-------------|

|        |    |    |         |         |                |       |         |                    |  |
|--------|----|----|---------|---------|----------------|-------|---------|--------------------|--|
| CB4856 | CT | II | 6884049 | 6887805 | WBGene00004059 | pmp-2 | C44B7.9 | -0.115739696670378 |  |
|--------|----|----|---------|---------|----------------|-------|---------|--------------------|--|

AGIWUR16453;AGIWUR17155;AGIWUR31533;AGIWUR41323

|        |    |    |         |         |                |        |          |                   |  |
|--------|----|----|---------|---------|----------------|--------|----------|-------------------|--|
| CB4856 | CT | II | 6888553 | 6890418 | WBGene00016630 | acer-1 | C44B7.10 | 0.816217283436901 |  |
|--------|----|----|---------|---------|----------------|--------|----------|-------------------|--|

AGIWUR7035;AGIWUR9317;AGIWUR30334;AGIWUR34052;AGIWUR44700

|        |    |    |         |         |                |          |          |                    |  |
|--------|----|----|---------|---------|----------------|----------|----------|--------------------|--|
| CB4856 | CT | II | 6891709 | 6893639 | WBGene00016632 | C44B7.12 | C44B7.12 | -0.217419887140803 |  |
|--------|----|----|---------|---------|----------------|----------|----------|--------------------|--|

AGIWUR40790

|        |    |    |         |         |                |          |          |                    |  |
|--------|----|----|---------|---------|----------------|----------|----------|--------------------|--|
| CB4856 | CT | II | 6894179 | 6897540 | WBGene00016631 | C44B7.11 | C44B7.11 | -0.260305781093649 |  |
|--------|----|----|---------|---------|----------------|----------|----------|--------------------|--|

AGIWUR3641;AGIWUR13332

|        |    |    |         |         |                |         |         |                     |  |
|--------|----|----|---------|---------|----------------|---------|---------|---------------------|--|
| CB4856 | CT | II | 6898736 | 6901792 | WBGene00016624 | C44B7.2 | C44B7.2 | -0.0307100260759814 |  |
|--------|----|----|---------|---------|----------------|---------|---------|---------------------|--|

AGIWUR11113;AGIWUR17944;AGIWUR27708

|        |    |    |         |         |                |        |         |                     |             |
|--------|----|----|---------|---------|----------------|--------|---------|---------------------|-------------|
| CB4856 | CT | II | 6902095 | 6902937 | WBGene00016623 | psmd-9 | C44B7.1 | -0.0791453425375188 | AGIWUR30804 |
|--------|----|----|---------|---------|----------------|--------|---------|---------------------|-------------|

|        |    |    |         |         |                |         |         |                    |  |
|--------|----|----|---------|---------|----------------|---------|---------|--------------------|--|
| CB4856 | CT | II | 6902853 | 6907757 | WBGene00015088 | B0252.3 | B0252.3 | -0.133862884639875 |  |
|--------|----|----|---------|---------|----------------|---------|---------|--------------------|--|



AGIWUR18014;AGIWUR18631;AGIWUR31815;AGIWUR42012  
 CB4856 CT II 6910031 6912697 WBGene00000211 asm-1 B0252.2 0.17679155622681 AGIWUR20342  
 CB4856 CT II 6912543 6913365 WBGene00000886 cyn-10 B0252.4 -0.150685699918407 AGIWUR2938  
 CB4856 CT II 6916110 6916963 WBGene00044615 B0252.8 B0252.8 0.217823864170988  
 AGIWUR6502;AGIWUR23113;AGIWUR26771;AGIWUR28445;AGIWUR32697  
 CB4856 CT II 6917032 6918922 WBGene00015089 B0252.5 B0252.5 0.0777605488231146 AGIWUR35704  
 CB4856 CT II 6919680 6923665 WBGene00015087 B0252.1 B0252.1 -0.259882602805737 AGIWUR6212  
 CB4856 CT II 6924115 6925951 WBGene00017700 F22D3.4 F22D3.4 -0.0347819064616552  
 AGIWUR14957;AGIWUR25809;AGIWUR26039;AGIWUR30794  
 CB4856 CT II 6928770 6947899 WBGene00017699 flcn-1 F22D3.2 -0.00964713230331871  
 AGIWUR26716;AGIWUR31344;AGIWUR32445;AGIWUR42782  
 CB4856 CT II 6947855 6951300 WBGene00017702 F22D3.6 F22D3.6 0.0178825162674716  
 AGIWUR15369;AGIWUR32339;AGIWUR36734;AGIWUR42314  
 CB4856 CT II 6951640 6955381 WBGene00000459 ceh-38 F22D3.1 0.153801606823095 AGIWUR24803  
 CB4856 CT II 6955402 6965687 WBGene00006605 tra-2 C15F1.3 0.147446049300132  
 AGIWUR13352;AGIWUR31857  
 CB4856 CT II 6965800 6967648 WBGene00004090 eif-2Bgamma C15F1.4 -0.164219250259293  
 AGIWUR19676  
 CB4856 CT II 6967900 6970615 WBGene00015796 C15F1.5 C15F1.5 -0.173913257152963 AGIWUR28615  
 CB4856 CT II 6970668 6972235 WBGene00000198 art-1 C15F1.6 -0.238285945923842  
 AGIWUR4636;AGIWUR10000;AGIWUR14253;AGIWUR15413;AGIWUR17324;AGIWUR25159;AGIWUR31374;AGIWUR45180  
 CB4856 CT II 6972712 6973892 WBGene00004930 sod-1 C15F1.7 -0.167128877781398  
 AGIWUR2953;AGIWUR3132;AGIWUR7934;AGIWUR9931;AGIWUR10748;AGIWUR12065;AGIWUR14775;AGIWUR21755;AGIWUR23619;AGI  
 WUR42900;AGIWUR44763  
 CB4856 CT II 6976031 6977790 WBGene00015797 C15F1.8 C15F1.8 0.148917415948079 AGIWUR9736  
 CB4856 CT II 6979953 6988629 WBGene00015795 C15F1.2 C15F1.2 0.433701889328505 AGIWUR8419  
 CB4856 CT II 6988778 6991797 WBGene00015794 C15F1.1 C15F1.1 -0.245119552562274 AGIWUR39010  
 CB4856 CT II 6994987 7010624 WBGene00006831 unc-104 C52E12.2 -0.0893013350030847  
 AGIWUR5540;AGIWUR13662;AGIWUR16843  
 CB4856 CT II 7010798 7012690 WBGene00005025 sqv-7 C52E12.3 -0.053362791669354  
 AGIWUR39600  
 CB4856 CT II 7012787 7022509 WBGene00016889 lst-6 C52E12.4 0.202101305318868  
 AGIWUR35200  
 CB4856 CT II 7022913 7024930 WBGene00016890 lst-5 C52E12.6 -0.17990327902956  
 AGIWUR36634  
 CB4856 CT II 7025802 7030152 WBGene00016888 C52E12.1 C52E12.1 -0.0239921908576939  
 AGIWUR28857  
 CB4856 CT II 7038292 7041685 WBGene00022854 cin-4 ZK1127.7 -0.00470005768038817  
 AGIWUR8703

|                                                                                                                                                                                 |    |                 |                |          |           |                     |             |
|---------------------------------------------------------------------------------------------------------------------------------------------------------------------------------|----|-----------------|----------------|----------|-----------|---------------------|-------------|
| CB4856 CT                                                                                                                                                                       | II | 7046041 7050071 | WBGene00022855 | tcer-1   | ZK1127.9  | 0.792642125623502   |             |
| AGIWUR38935                                                                                                                                                                     |    |                 |                |          |           |                     |             |
| CB4856 CT                                                                                                                                                                       | II | 7050672 7052001 | WBGene00022852 | ZK1127.5 | ZK1127.5  |                     |             |
| -0.00840357274279313 AGIWUR12643                                                                                                                                                |    |                 |                |          |           |                     |             |
| CB4856 CT                                                                                                                                                                       | II | 7053949 7055208 | WBGene00022851 | ZK1127.4 | ZK1127.4  | -0.334378625729912  |             |
| AGIWUR22920                                                                                                                                                                     |    |                 |                |          |           |                     |             |
| CB4856 CT                                                                                                                                                                       | II | 7055287 7056185 | WBGene00022850 | ZK1127.3 | ZK1127.3  | -0.237079206161164  |             |
| AGIWUR20341                                                                                                                                                                     |    |                 |                |          |           |                     |             |
| CB4856 CT                                                                                                                                                                       | II | 7056173 7058014 | WBGene00022856 | cth-2    | ZK1127.10 | -0.262640376365283  |             |
| AGIWUR40731                                                                                                                                                                     |    |                 |                |          |           |                     |             |
| CB4856 CT                                                                                                                                                                       | II | 7061999 7064777 | WBGene00022849 | acs-6    | ZK1127.2  | 0.200989037989222   |             |
| AGIWUR7902;AGIWUR26493;AGIWUR32029;AGIWUR35905                                                                                                                                  |    |                 |                |          |           |                     |             |
| CB4856 CT                                                                                                                                                                       | II | 7065020 7069966 | WBGene00001872 | him-14   | ZK1127.11 | -0.066057765613273  |             |
| AGIWUR32896                                                                                                                                                                     |    |                 |                |          |           |                     |             |
| CB4856 CT                                                                                                                                                                       | II | 7070183 7072415 | WBGene00002238 | kars-1   | T02G5.9   | -0.235245362821638  |             |
| AGIWUR8558;AGIWUR8762;AGIWUR9241;AGIWUR9623;AGIWUR14316;AGIWUR16111;AGIWUR16580;AGIWUR16967;AGIWUR17504;AGIWUR19670;AGIWUR19785;AGIWUR20560;AGIWUR24332;AGIWUR25804;AGIWUR29473 |    |                 |                |          |           |                     |             |
| CB4856 CT                                                                                                                                                                       | II | 7073796 7075551 | WBGene00002183 | kat-1    | T02G5.8   | -0.502395625645882  | AGIWUR30245 |
| CB4856 CT                                                                                                                                                                       | II | 7075614 7077188 | WBGene00020166 | T02G5.7  | T02G5.7   | 0.0683433468881542  | AGIWUR17844 |
| CB4856 CT                                                                                                                                                                       | II | 7089674 7093102 | WBGene00020170 | T02G5.14 | T02G5.14  | -0.0672901733322835 |             |
| AGIWUR23431                                                                                                                                                                     |    |                 |                |          |           |                     |             |
| CB4856 CT                                                                                                                                                                       | II | 7094159 7099348 | WBGene00020163 | T02G5.3  | T02G5.3   | -0.0869628509916351 |             |
| AGIWUR16849;AGIWUR21511;AGIWUR23413                                                                                                                                             |    |                 |                |          |           |                     |             |
| CB4856 CT                                                                                                                                                                       | II | 7099587 7101163 | WBGene00020169 | mmaa-1   | T02G5.13  | -0.137872084518673  |             |
| AGIWUR11168;AGIWUR18345;AGIWUR31200                                                                                                                                             |    |                 |                |          |           |                     |             |
| CB4856 CT                                                                                                                                                                       | II | 7101218 7105030 | WBGene00017349 | farl-11  | F10E7.8   | -0.204283047861846  |             |
| AGIWUR11964;AGIWUR23533;AGIWUR42834                                                                                                                                             |    |                 |                |          |           |                     |             |
| CB4856 CT                                                                                                                                                                       | II | 7105556 7106462 | WBGene00004447 | rpl-33   | F10E7.7   | 0.107240012191314   |             |
| AGIWUR11876;AGIWUR26736                                                                                                                                                         |    |                 |                |          |           |                     |             |
| CB4856 CT                                                                                                                                                                       | II | 7106412 7110056 | WBGene00017350 | F10E7.9  | F10E7.9   | 0.0838249690921664  |             |
| AGIWUR16688;AGIWUR32795;AGIWUR33226                                                                                                                                             |    |                 |                |          |           |                     |             |
| CB4856 CT                                                                                                                                                                       | II | 7111978 7112982 | WBGene00017347 | F10E7.5  | F10E7.5   | -0.045916928837066  |             |
| AGIWUR4400;AGIWUR7502;AGIWUR24469;AGIWUR42014                                                                                                                                   |    |                 |                |          |           |                     |             |
| CB4856 CT                                                                                                                                                                       | II | 7113080 7113732 | WBGene00017348 | F10E7.6  | F10E7.6   | -0.201097350301882  |             |
| AGIWUR1488;AGIWUR7762;AGIWUR13851;AGIWUR26019;AGIWUR37859                                                                                                                       |    |                 |                |          |           |                     |             |
| CB4856 CT                                                                                                                                                                       | II | 7113683 7115906 | WBGene00017351 | cutl-5   | F10E7.10  | -0.335439288003474  |             |
| AGIWUR13722;AGIWUR22484                                                                                                                                                         |    |                 |                |          |           |                     |             |
| CB4856 CT                                                                                                                                                                       | II | 7116557 7120558 | WBGene00006893 | spon-1   | F10E7.4   | -0.304939692768283  | AGIWUR20876 |
| CB4856 CT                                                                                                                                                                       | II | 7122242 7124386 | WBGene00017344 | F10E7.2  | F10E7.2   | -0.441995091769435  | AGIWUR15200 |

|                                                                         |    |    |         |         |                |          |          |                     |             |
|-------------------------------------------------------------------------|----|----|---------|---------|----------------|----------|----------|---------------------|-------------|
| CB4856                                                                  | CT | II | 7126757 | 7129015 | WBGene00017343 | F10E7.1  | F10E7.1  | 0.337250562264213   | AGIWUR10452 |
| CB4856                                                                  | CT | II | 7132643 | 7137522 | WBGene00001597 | gld-3    | T07F8.3  | -0.158214521969873  |             |
| AGIWUR22578;AGIWUR44550                                                 |    |    |         |         |                |          |          |                     |             |
| CB4856                                                                  | CT | II | 7144607 | 7147253 | WBGene00020319 | npr-31   | T07F8.2  | -0.0684447005819244 |             |
| AGIWUR9277;AGIWUR13635                                                  |    |    |         |         |                |          |          |                     |             |
| CB4856                                                                  | CT | II | 7149248 | 7151760 | WBGene00020318 | T07F8.1  | T07F8.1  | 0.247660617268329   | AGIWUR36349 |
| CB4856                                                                  | CT | II | 7152566 | 7155474 | WBGene00016173 | fust-1   | C27H5.3  | 0.0185284038931517  |             |
| AGIWUR14809;AGIWUR16435;AGIWUR22532;AGIWUR27041;AGIWUR27422;AGIWUR32056 |    |    |         |         |                |          |          |                     |             |
| CB4856                                                                  | CT | II | 7155581 | 7160950 | WBGene00016172 | C27H5.2  | C27H5.2  | 0.284687843576211   |             |
| AGIWUR2348;AGIWUR28082;AGIWUR37493                                      |    |    |         |         |                |          |          |                     |             |
| CB4856                                                                  | CT | II | 7167513 | 7168662 | WBGene00000613 | col-36   | C27H5.5  | -0.125230402781437  | AGIWUR24577 |
| CB4856                                                                  | CT | II | 7168817 | 7171355 | WBGene00001129 | dyf-13   | C27H5.7  | 0.462565194340073   | AGIWUR24706 |
| CB4856                                                                  | CT | II | 7172204 | 7174936 | WBGene00001594 | glc-4    | C27H5.8  | -0.377523602437497  | AGIWUR4113  |
| CB4856                                                                  | CT | II | 7183806 | 7185192 | WBGene00003966 | pd1-1    | C27H5.1  | 0.292781869325184   | AGIWUR41484 |
| CB4856                                                                  | CT | II | 7185277 | 7187210 | WBGene00016175 | C27H5.6  | C27H5.6  | 0.225319698483427   | AGIWUR5202  |
| CB4856                                                                  | CT | II | 7189420 | 7192507 | WBGene00017124 | E04F6.4  | E04F6.4  | 0.279004423809011   | AGIWUR27694 |
| CB4856                                                                  | CT | II | 7192436 | 7194815 | WBGene00017125 | acdH-12  | E04F6.5  | -0.173103205572319  |             |
| AGIWUR7890;AGIWUR8115                                                   |    |    |         |         |                |          |          |                     |             |
| CB4856                                                                  | CT | II | 7196276 | 7197495 | WBGene00017123 | maoc-1   | E04F6.3  | 0.436256036094528   | AGIWUR36730 |
| CB4856                                                                  | CT | II | 7197415 | 7199565 | WBGene00017126 | E04F6.6  | E04F6.6  | 0.0589433932633381  |             |
| AGIWUR3875;AGIWUR9971                                                   |    |    |         |         |                |          |          |                     |             |
| CB4856                                                                  | CT | II | 7200233 | 7200418 | WBGene00045095 | mrpr-1   | E04F6.16 | 0.318044317147873   |             |
| AGIWUR7702;AGIWUR18469;AGIWUR20475;AGIWUR43358;AGIWUR43666              |    |    |         |         |                |          |          |                     |             |
| CB4856                                                                  | CT | II | 7200611 | 7201880 | WBGene00017122 | pcrg-1   | E04F6.2  | 0.0161403742213633  | AGIWUR38515 |
| CB4856                                                                  | CT | II | 7202016 | 7203210 | WBGene00005134 | srd-56   | E04F6.14 | -0.148668238310587  |             |
| AGIWUR7886                                                              |    |    |         |         |                |          |          |                     |             |
| CB4856                                                                  | CT | II | 7203911 | 7205051 | WBGene00005135 | srd-58   | E04F6.13 | 0.212038435718576   |             |
| AGIWUR34211                                                             |    |    |         |         |                |          |          |                     |             |
| CB4856                                                                  | CT | II | 7205688 | 7206892 | WBGene00005136 | srd-59   | E04F6.1  | 0.136604044870433   | AGIWUR2527  |
| CB4856                                                                  | CT | II | 7206990 | 7208460 | WBGene00000971 | dhs-7    | E04F6.7  | -0.569228648668249  | AGIWUR40494 |
| CB4856                                                                  | CT | II | 7208773 | 7210287 | WBGene00017131 | E04F6.15 | E04F6.15 | -0.293841356835291  |             |
| AGIWUR13348                                                             |    |    |         |         |                |          |          |                     |             |
| CB4856                                                                  | CT | II | 7210731 | 7211380 | WBGene00017127 | E04F6.8  | E04F6.8  | -0.11243534426815   |             |
| AGIWUR14338;AGIWUR16369;AGIWUR26017;AGIWUR26803;AGIWUR27394;AGIWUR44297 |    |    |         |         |                |          |          |                     |             |
| CB4856                                                                  | CT | II | 7211625 | 7212159 | WBGene00017128 | E04F6.9  | E04F6.9  | 0.167999579465318   |             |
| AGIWUR19581;AGIWUR30555;AGIWUR35295                                     |    |    |         |         |                |          |          |                     |             |
| CB4856                                                                  | CT | II | 7214055 | 7216957 | WBGene00017129 | E04F6.10 | E04F6.10 |                     |             |
| -0.00520811748914873 AGIWUR3141;AGIWUR7507;AGIWUR15684;AGIWUR26762      |    |    |         |         |                |          |          |                     |             |
| CB4856                                                                  | CT | II | 7217076 | 7217478 | WBGene00017130 | E04F6.12 | E04F6.12 | -0.103985363967617  |             |

|                                                                      |    |    |         |         |                |          |                                        |
|----------------------------------------------------------------------|----|----|---------|---------|----------------|----------|----------------------------------------|
| AGIWUR22286                                                          |    |    |         |         |                |          |                                        |
| CB4856                                                               | CT | II | 7217955 | 7225648 | WBGene00000530 | clh-3    | E04F6.11 -0.11849478457875             |
| AGIWUR15731;AGIWUR24176;AGIWUR25909;AGIWUR41732                      |    |    |         |         |                |          |                                        |
| CB4856                                                               | CT | II | 7228784 | 7230616 | WBGene00017970 | F32A5.4  | F32A5.4 0.34050757833058               |
| AGIWUR1286;AGIWUR8256;AGIWUR16085;AGIWUR39884                        |    |    |         |         |                |          |                                        |
| CB4856                                                               | CT | II | 7232853 | 7235920 | WBGene00017969 | F32A5.3  | F32A5.3 -0.377575341805485             |
| AGIWUR12121;AGIWUR13016;AGIWUR27135;AGIWUR36318                      |    |    |         |         |                |          |                                        |
| CB4856                                                               | CT | II | 7235834 | 7238349 | WBGene00000169 | aqp-1    | F32A5.5 1.4403775274477                |
| AGIWUR4628;AGIWUR5582                                                |    |    |         |         |                |          |                                        |
| CB4856                                                               | CT | II | 7245876 | 7250181 | WBGene00017968 | skpo-3   | F32A5.2 -0.16659824167325              |
| AGIWUR884;AGIWUR9594;AGIWUR11173;AGIWUR29384;AGIWUR34437;AGIWUR41351 |    |    |         |         |                |          |                                        |
| CB4856                                                               | CT | II | 7250151 | 7252010 | WBGene00004198 | prx-13   | F32A5.6 0.190994207891816 AGIWUR18591  |
| CB4856                                                               | CT | II | 7252259 | 7255735 | WBGene00017967 | ada-2    | F32A5.1 -0.167615377324051 AGIWUR15959 |
| CB4856                                                               | CT | II | 7256112 | 7258112 | WBGene00017971 | F32A5.8  | F32A5.8 0.00607008702426359            |
| AGIWUR24468;AGIWUR31093                                              |    |    |         |         |                |          |                                        |
| CB4856                                                               | CT | II | 7258389 | 7258829 | WBGene00023021 | F32A5.9  | F32A5.9 -0.0154839810993135            |
| AGIWUR9798;AGIWUR18140;AGIWUR30385                                   |    |    |         |         |                |          |                                        |
| CB4856                                                               | CT | II | 7261648 | 7263654 | WBGene00016276 | C30G12.4 | C30G12.4 -0.0581739853233278           |
| AGIWUR13871;AGIWUR19260;AGIWUR31662;AGIWUR32334                      |    |    |         |         |                |          |                                        |
| CB4856                                                               | CT | II | 7274732 | 7277223 | WBGene00016275 | C30G12.3 | C30G12.3 0.0549938906869114            |
| AGIWUR23627                                                          |    |    |         |         |                |          |                                        |
| CB4856                                                               | CT | II | 7290373 | 7291882 | WBGene00016274 | C30G12.2 | C30G12.2 -0.794038922101063            |
| AGIWUR32700                                                          |    |    |         |         |                |          |                                        |
| CB4856                                                               | CT | II | 7292192 | 7296015 | WBGene00016277 | C30G12.6 | C30G12.6 -0.0734961426731111           |
| AGIWUR13314                                                          |    |    |         |         |                |          |                                        |
| CB4856                                                               | CT | II | 7296110 | 7298247 | WBGene00004244 | puf-8    | C30G12.7 0.00864957672300637           |
| AGIWUR29920;AGIWUR31561;AGIWUR36265                                  |    |    |         |         |                |          |                                        |
| CB4856                                                               | CT | II | 7299514 | 7301632 | WBGene00016273 | C30G12.1 | C30G12.1 -0.0843629736744003           |
| AGIWUR26118                                                          |    |    |         |         |                |          |                                        |
| CB4856                                                               | CT | II | 7302101 | 7305760 | WBGene00000839 | cul-4    | F45E12.3 -0.0544715157518532           |
| AGIWUR495;AGIWUR13180;AGIWUR36169                                    |    |    |         |         |                |          |                                        |
| CB4856                                                               | CT | II | 7305861 | 7308738 | WBGene00000271 | brf-1    | F45E12.2 -0.451212125593813            |
| AGIWUR18584                                                          |    |    |         |         |                |          |                                        |
| CB4856                                                               | CT | II | 7308702 | 7310115 | WBGene00018475 | mrpl-14  | F45E12.5 -0.0839586405099766           |
| AGIWUR11390;AGIWUR37904                                              |    |    |         |         |                |          |                                        |
| CB4856                                                               | CT | II | 7310348 | 7313787 | WBGene00018474 | cnep-1   | F45E12.1 0.034628293188435             |
| AGIWUR35826                                                          |    |    |         |         |                |          |                                        |
| CB4856                                                               | CT | II | 7313774 | 7314181 | WBGene00018476 | F45E12.6 | F45E12.6                               |
| -0.00467195645196661 AGIWUR27968                                     |    |    |         |         |                |          |                                        |

|                                                             |    |         |         |                |          |          |                     |             |
|-------------------------------------------------------------|----|---------|---------|----------------|----------|----------|---------------------|-------------|
| CB4856 CT                                                   | II | 7318684 | 7319153 | WBGene00017662 | F21D12.2 | F21D12.2 | -0.0149186072650895 |             |
| AGIWUR25324                                                 |    |         |         |                |          |          |                     |             |
| CB4856 CT                                                   | II | 7319910 | 7323200 | WBGene00017663 | F21D12.3 | F21D12.3 | 0.603551024073656   |             |
| AGIWUR34329                                                 |    |         |         |                |          |          |                     |             |
| CB4856 CT                                                   | II | 7328736 | 7331324 | WBGene00017664 | npax-1   | F21D12.5 | -0.0909671970058623 |             |
| AGIWUR29093                                                 |    |         |         |                |          |          |                     |             |
| CB4856 CT                                                   | II | 7339229 | 7349124 | WBGene00003620 | nhr-21   | F21D12.1 | 1.64421188353225    |             |
| AGIWUR32353;AGIWUR34044;AGIWUR38422                         |    |         |         |                |          |          |                     |             |
| CB4856 CT                                                   | II | 7350121 | 7352636 | WBGene00002008 | hsp-4    | F43E2.8  | -0.456416650111485  | AGIWUR16929 |
| CB4856 CT                                                   | II | 7353576 | 7356426 | WBGene00001812 | haf-2    | F43E2.4  | -0.122364722091067  | AGIWUR37462 |
| CB4856 CT                                                   | II | 7358913 | 7359504 | WBGene00018396 | F43E2.9  | F43E2.9  | 0.227847285510749   | AGIWUR10546 |
| CB4856 CT                                                   | II | 7359961 | 7363247 | WBGene00018392 | insc-1   | F43E2.3  | 0.153129237220604   | AGIWUR35459 |
| CB4856 CT                                                   | II | 7363216 | 7364107 | WBGene00018393 | msra-1   | F43E2.5  | -0.851943144692235  | AGIWUR8710  |
| CB4856 CT                                                   | II | 7366591 | 7369049 | WBGene00018394 | F43E2.6  | F43E2.6  | -0.197970244246253  |             |
| AGIWUR14479;AGIWUR28754;AGIWUR30906;AGIWUR36753;AGIWUR37020 |    |         |         |                |          |          |                     |             |
| CB4856 CT                                                   | II | 7369992 | 7371275 | WBGene00018397 | F43E2.11 | F43E2.11 | 0.155875792080939   |             |
| AGIWUR28564                                                 |    |         |         |                |          |          |                     |             |
| CB4856 CT                                                   | II | 7372594 | 7374172 | WBGene00018395 | mtch-1   | F43E2.7  | -0.0178685861037762 |             |
| AGIWUR157;AGIWUR28677                                       |    |         |         |                |          |          |                     |             |
| CB4856 CT                                                   | II | 7374501 | 7375237 | WBGene00018391 | rpb-4    | F43E2.2  | 0.0337371097712964  | AGIWUR21679 |
| CB4856 CT                                                   | II | 7379177 | 7379612 | WBGene00044673 | C07D10.6 | C07D10.6 | 0.099077007128324   |             |
| AGIWUR13270;AGIWUR14746;AGIWUR30620;AGIWUR31090;AGIWUR44996 |    |         |         |                |          |          |                     |             |
| CB4856 CT                                                   | II | 7381561 | 7383499 | WBGene00015569 | C07D10.5 | C07D10.5 | 0.544235698439332   |             |
| AGIWUR44000                                                 |    |         |         |                |          |          |                     |             |
| CB4856 CT                                                   | II | 7387162 | 7389142 | WBGene00015568 | sre-3    | C07D10.3 | 0.148129631937995   |             |
| AGIWUR45007                                                 |    |         |         |                |          |          |                     |             |
| CB4856 CT                                                   | II | 7394765 | 7397351 | WBGene00015567 | bath-44  | C07D10.2 | 0.00186499627607972 |             |
| AGIWUR36096                                                 |    |         |         |                |          |          |                     |             |
| CB4856 CT                                                   | II | 7399012 | 7400540 | WBGene00015566 | C07D10.1 | C07D10.1 | -0.0322228314167639 |             |
| AGIWUR18473                                                 |    |         |         |                |          |          |                     |             |
| CB4856 CT                                                   | II | 7400544 | 7402724 | WBGene00003526 | nas-7    | C07D10.4 | -0.603713807908431  |             |
| AGIWUR3626;AGIWUR16232;AGIWUR39221                          |    |         |         |                |          |          |                     |             |
| CB4856 CT                                                   | II | 7408492 | 7410747 | WBGene00005133 | srd-55   | K02A2.2  | 0.256377196060638   | AGIWUR21751 |
| CB4856 CT                                                   | II | 7411075 | 7412030 | WBGene00019290 | K02A2.5  | K02A2.5  | 0.139747545550073   |             |
| AGIWUR3083;AGIWUR17628;AGIWUR20926                          |    |         |         |                |          |          |                     |             |
| CB4856 CT                                                   | II | 7425935 | 7431390 | WBGene00019289 | kcc-3    | K02A2.3  | 0.0195949878524599  | AGIWUR7656  |
| CB4856 CT                                                   | II | 7432696 | 7434216 | WBGene00005132 | srd-54   | K02A2.7  | -0.278431583016248  |             |
| AGIWUR9242;AGIWUR28397                                      |    |         |         |                |          |          |                     |             |
| CB4856 CT                                                   | II | 7435852 | 7436999 | WBGene00005130 | srd-52   | K02A2.4  | 0.288828626289649   |             |

AGIWUR5866;AGIWUR13963;AGIWUR24611;AGIWUR39878  
 CB4856 CT II 7456242 7457380 WBGene00017023 D1022.4 D1022.4 -0.114157706577103 AGIWUR19967  
 CB4856 CT II 7457667 7458806 WBGene00017024 D1022.5 D1022.5 0.216449640748247  
 AGIWUR30740;AGIWUR45185  
 CB4856 CT II 7459531 7460076 WBGene00017021 D1022.2 D1022.2 0.134905640054071 AGIWUR8681  
 CB4856 CT II 7460110 7463614 WBGene00005641 sro-1 D1022.6 -0.0731123377037335 AGIWUR15307  
 CB4856 CT II 7472729 7478959 WBGene00000101 aka-1 D1022.7 -0.151399827064945  
 AGIWUR3114;AGIWUR3158;AGIWUR6829;AGIWUR12669;AGIWUR17212;AGIWUR18049;AGIWUR24183;AGIWUR40155  
 CB4856 CT II 7479064 7480713 WBGene00006703 ubc-6 D1022.1 -0.141182438975349 AGIWUR40011  
 CB4856 CT II 7480751 7483109 WBGene00000280 cah-2 D1022.8 -0.0315667987999166 AGIWUR1356  
 CB4856 CT II 7488242 7489661 WBGene00044300 D1022.9 D1022.9 0.145950105124017  
 AGIWUR33482;AGIWUR42517  
 CB4856 CT II 7491399 7493699 WBGene00003542 nas-23 R10H1.5 -0.0316607242008304  
 AGIWUR4989;AGIWUR8815;AGIWUR12650;AGIWUR18219;AGIWUR22957;AGIWUR30287  
 CB4856 CT II 7494460 7496174 WBGene00019998 R10H1.1 R10H1.1 0.480518463256153 AGIWUR6877  
 CB4856 CT II 7496247 7497369 WBGene00023416 spi-1 R10H1.4 0.0977034524402018  
 AGIWUR2722;AGIWUR5494;AGIWUR8413;AGIWUR33980;AGIWUR34800;AGIWUR41809  
 CB4856 CT II 7497286 7499475 WBGene00019999 srab-14 R10H1.2 0.188059549584549  
 AGIWUR20225;AGIWUR41600  
 CB4856 CT II 7505351 7506595 WBGene00016183 C28F5.1 C28F5.1 -0.288461714834931 AGIWUR23368  
 CB4856 CT II 7507319 7513975 WBGene00016184 glb-9 C28F5.2 0.0431340549772692  
 AGIWUR3730;AGIWUR40072  
 CB4856 CT II 7519860 7523368 WBGene00016185 C28F5.4 C28F5.4 -0.0623967576033362 AGIWUR19483  
 CB4856 CT II 7523581 7524421 WBGene00044775 ZK1290.15 ZK1290.15 -0.406837532554825  
 AGIWUR634;AGIWUR9068;AGIWUR12802;AGIWUR26783;AGIWUR31840  
 CB4856 CT II 7524467 7525558 WBGene00022889 ZK1290.7 ZK1290.7 -0.425832085610483  
 AGIWUR43100  
 CB4856 CT II 7525738 7528241 WBGene00022888 rnh-1.1 ZK1290.6 -0.0219835255903451  
 AGIWUR18436  
 CB4856 CT II 7529643 7530991 WBGene00022887 ZK1290.5 ZK1290.5 -0.045203463657483  
 AGIWUR13403  
 CB4856 CT II 7531145 7533246 WBGene00006947 wrt-1 ZK1290.12 0.444595683356443  
 AGIWUR18642  
 CB4856 CT II 7533300 7534563 WBGene00006956 wrt-10 ZK1290.8 0.939125709919111  
 AGIWUR42222  
 CB4856 CT II 7535006 7536989 WBGene00022893 ZK1290.13 ZK1290.13 0.308799999175855  
 AGIWUR16643  
 CB4856 CT II 7538187 7543000 WBGene00003592 nfi-1 ZK1290.4 -0.155912426810319  
 AGIWUR3009;AGIWUR17692;AGIWUR20277;AGIWUR43039

|                                                                                                             |    |    |         |         |                |           |           |                     |             |
|-------------------------------------------------------------------------------------------------------------|----|----|---------|---------|----------------|-----------|-----------|---------------------|-------------|
| CB4856                                                                                                      | CT | II | 7544069 | 7545335 | WBGene00004398 | rol-8     | ZK1290.3  | -0.347653301012324  |             |
| AGIWUR40755;AGIWUR41897                                                                                     |    |    |         |         |                |           |           |                     |             |
| CB4856                                                                                                      | CT | II | 7546807 | 7548129 | WBGene00022890 | fbxa-224  | ZK1290.9  | 0.221382324724594   |             |
| AGIWUR8162;AGIWUR22574;AGIWUR33222                                                                          |    |    |         |         |                |           |           |                     |             |
| CB4856                                                                                                      | CT | II | 7549335 | 7551977 | WBGene00006600 | tph-1     | ZK1290.2  | 0.0649599591221275  |             |
| AGIWUR15624;AGIWUR34300;AGIWUR45200                                                                         |    |    |         |         |                |           |           |                     |             |
| CB4856                                                                                                      | CT | II | 7551951 | 7553906 | WBGene00022891 | ZK1290.10 | ZK1290.10 | -0.233601006252089  |             |
| AGIWUR20209                                                                                                 |    |    |         |         |                |           |           |                     |             |
| CB4856                                                                                                      | CT | II | 7554092 | 7554844 | WBGene00044396 | ZK1290.14 | ZK1290.14 | 0.609885154946095   |             |
| AGIWUR31327                                                                                                 |    |    |         |         |                |           |           |                     |             |
| CB4856                                                                                                      | CT | II | 7560925 | 7561594 | WBGene00022892 | ZK1290.11 | ZK1290.11 | -0.154572041050878  |             |
| AGIWUR11550                                                                                                 |    |    |         |         |                |           |           |                     |             |
| CB4856                                                                                                      | CT | II | 7561753 | 7562701 | WBGene00022886 | ZK1290.1  | ZK1290.1  | 0.029892028523598   |             |
| AGIWUR14827                                                                                                 |    |    |         |         |                |           |           |                     |             |
| CB4856                                                                                                      | CT | II | 7570605 | 7572444 | WBGene00018041 | F35D2.3   | F35D2.3   | 0.811194679210292   | AGIWUR25303 |
| CB4856                                                                                                      | CT | II | 7574431 | 7575830 | WBGene00018040 | F35D2.2   | F35D2.2   | 0.254879412178354   | AGIWUR28100 |
| CB4856                                                                                                      | CT | II | 7577723 | 7580244 | WBGene00194916 | F35D2.6   | F35D2.6   | -0.0509314007057906 | AGIWUR5613  |
| CB4856                                                                                                      | CT | II | 7580270 | 7583557 | WBGene00018042 | mks-3     | F35D2.4   | 0.392638733883182   |             |
| AGIWUR1760;AGIWUR12494;AGIWUR15947                                                                          |    |    |         |         |                |           |           |                     |             |
| CB4856                                                                                                      | CT | II | 7585731 | 7594912 | WBGene00006363 | syd-1     | F35D2.5   | 0.376231865410277   |             |
| AGIWUR5413;AGIWUR13745;AGIWUR15444;AGIWUR20159;AGIWUR24267;AGIWUR33701                                      |    |    |         |         |                |           |           |                     |             |
| CB4856                                                                                                      | CT | II | 7597545 | 7598752 | WBGene00019941 | pgam-5    | R07G3.5   | -0.139058064756186  |             |
| AGIWUR8443;AGIWUR16940;AGIWUR37105;AGIWUR38237                                                              |    |    |         |         |                |           |           |                     |             |
| CB4856                                                                                                      | CT | II | 7599657 | 7608014 | WBGene00019940 | npp-21    | R07G3.3   | 0.0195105310422505  |             |
| AGIWUR8835;AGIWUR16750;AGIWUR44811                                                                          |    |    |         |         |                |           |           |                     |             |
| CB4856                                                                                                      | CT | II | 7608253 | 7610986 | WBGene00019939 | lips-17   | R07G3.2   | -0.333005446178445  | AGIWUR37450 |
| CB4856                                                                                                      | CT | II | 7610986 | 7613730 | WBGene00019943 | R07G3.7   | R07G3.7   | -0.164621604122603  | AGIWUR29343 |
| CB4856                                                                                                      | CT | II | 7613541 | 7614434 | WBGene00043050 | oig-4     | R07G3.9   | 0.337857583541263   |             |
| AGIWUR43422;AGIWUR44530                                                                                     |    |    |         |         |                |           |           |                     |             |
| CB4856                                                                                                      | CT | II | 7616452 | 7618245 | WBGene00000390 | cdc-42    | R07G3.1   | 0.0879079018603655  |             |
| AGIWUR19545;AGIWUR38027                                                                                     |    |    |         |         |                |           |           |                     |             |
| CB4856                                                                                                      | CT | II | 7618238 | 7620513 | WBGene00019944 | R07G3.8   | R07G3.8   | 0.157937054481567   |             |
| AGIWUR9490;AGIWUR14987;AGIWUR16684;AGIWUR38424                                                              |    |    |         |         |                |           |           |                     |             |
| CB4856                                                                                                      | CT | II | 7627250 | 7651295 | WBGene00020114 | pde-4     | R153.1    | 0.073422056851256   |             |
| AGIWUR19305;AGIWUR24964;AGIWUR29067;AGIWUR34488;AGIWUR36443;AGIWUR36503;AGIWUR36847;AGIWUR39101;AGIWUR40129 |    |    |         |         |                |           |           |                     |             |
| ;AGIWUR40871;AGIWUR41328                                                                                    |    |    |         |         |                |           |           |                     |             |
| CB4856                                                                                                      | CT | II | 7658324 | 7662522 | WBGene00017547 | alfa-1    | F18A1.6   | 0.0209943639079846  | AGIWUR39387 |
| CB4856                                                                                                      | CT | II | 7662706 | 7663754 | WBGene00017548 | F18A1.7   | F18A1.7   | -0.181184213977573  |             |
| AGIWUR4578;AGIWUR9651;AGIWUR31096                                                                           |    |    |         |         |                |           |           |                     |             |

|                                                                                   |    |    |         |         |                |          |          |                     |             |
|-----------------------------------------------------------------------------------|----|----|---------|---------|----------------|----------|----------|---------------------|-------------|
| CB4856                                                                            | CT | II | 7664582 | 7667110 | WBGene00017546 | rpa-1    | F18A1.5  | -0.240781266690581  | AGIWUR6934  |
| CB4856                                                                            | CT | II | 7667993 | 7671905 | WBGene00003045 | lir-2    | F18A1.4  | -0.163555251557295  | AGIWUR26034 |
| CB4856                                                                            | CT | II | 7672010 | 7682359 | WBGene00003044 | lir-1    | F18A1.3  | -0.119166069224583  |             |
| AGIWUR17589;AGIWUR35849;AGIWUR42838                                               |    |    |         |         |                |          |          |                     |             |
| CB4856                                                                            | CT | II | 7682198 | 7684760 | WBGene00003012 | lin-26   | F18A1.2  | 0.11905450624284    |             |
| AGIWUR3543;AGIWUR19668;AGIWUR28083;AGIWUR31105;AGIWUR32625                        |    |    |         |         |                |          |          |                     |             |
| CB4856                                                                            | CT | II | 7684889 | 7689689 | WBGene00017545 | F18A1.1  | F18A1.1  | 0.0523876963968011  |             |
| AGIWUR23601;AGIWUR25978;AGIWUR40021                                               |    |    |         |         |                |          |          |                     |             |
| CB4856                                                                            | CT | II | 7689710 | 7690572 | WBGene00017549 | pid-1    | F18A1.8  | -0.208879251190794  | AGIWUR21471 |
| CB4856                                                                            | CT | II | 7690711 | 7693957 | WBGene00003730 | nhx-2    | B0495.4  | -0.179800678633336  | AGIWUR12604 |
| CB4856                                                                            | CT | II | 7695935 | 7698506 | WBGene00015204 | B0495.5  | B0495.5  | 0.046808925867813   | AGIWUR31611 |
| CB4856                                                                            | CT | II | 7698613 | 7699046 | WBGene00015205 | moa-2    | B0495.6  | 0.0177903661330028  | AGIWUR24473 |
| CB4856                                                                            | CT | II | 7699254 | 7702012 | WBGene00015203 | cdk-11.1 | B0495.2  | -0.0236689063483624 |             |
| AGIWUR6112;AGIWUR35553;AGIWUR42351                                                |    |    |         |         |                |          |          |                     |             |
| CB4856                                                                            | CT | II | 7701948 | 7705276 | WBGene00015206 | B0495.7  | B0495.7  | 0.0271306690270015  |             |
| AGIWUR15900;AGIWUR33473                                                           |    |    |         |         |                |          |          |                     |             |
| CB4856                                                                            | CT | II | 7705536 | 7707483 | WBGene00015207 | B0495.8  | B0495.8  | 0.012317322678848   |             |
| AGIWUR1814;AGIWUR6376;AGIWUR14232;AGIWUR18839;AGIWUR31518;AGIWUR45176             |    |    |         |         |                |          |          |                     |             |
| CB4856                                                                            | CT | II | 7707586 | 7708725 | WBGene00015208 | B0495.9  | B0495.9  | -0.114723810006893  | AGIWUR13090 |
| CB4856                                                                            | CT | II | 7709789 | 7711444 | WBGene00005149 | sre-1    | B0495.1  | 0.0297622074207187  | AGIWUR10241 |
| CB4856                                                                            | CT | II | 7711871 | 7718591 | WBGene00007044 | cpna-5   | B0495.10 | 0.326706749331787   |             |
| AGIWUR11799;AGIWUR15380;AGIWUR25684                                               |    |    |         |         |                |          |          |                     |             |
| CB4856                                                                            | CT | II | 7724903 | 7752715 | WBGene00015061 | cpna-2   | B0228.4  | -0.099954412904415  |             |
| AGIWUR6619;AGIWUR9887;AGIWUR16731;AGIWUR25986;AGIWUR31582;AGIWUR34570;AGIWUR38002 |    |    |         |         |                |          |          |                     |             |
| CB4856                                                                            | CT | II | 7752637 | 7753607 | WBGene00015062 | trx-1    | B0228.5  | 0.229819401494149   |             |
| AGIWUR23893;AGIWUR30447;AGIWUR42639                                               |    |    |         |         |                |          |          |                     |             |
| CB4856                                                                            | CT | II | 7754147 | 7755156 | WBGene00015063 | B0228.6  | B0228.6  | 0.16287074921245    | AGIWUR23399 |
| CB4856                                                                            | CT | II | 7755997 | 7756907 | WBGene00015059 | B0228.1  | B0228.1  | -0.128041626621943  |             |
| AGIWUR36033;AGIWUR39436;AGIWUR45163                                               |    |    |         |         |                |          |          |                     |             |
| CB4856                                                                            | CT | II | 7757190 | 7758922 | WBGene00015064 | B0228.7  | B0228.7  | 0.198160183826797   | AGIWUR30631 |
| CB4856                                                                            | CT | II | 7759710 | 7761540 | WBGene00015065 | B0228.8  | B0228.8  | 0.0963439658737819  | AGIWUR32882 |
| CB4856                                                                            | CT | II | 7762062 | 7763669 | WBGene00015066 | B0228.9  | B0228.9  | -0.273616563991671  |             |
| AGIWUR2478;AGIWUR10101                                                            |    |    |         |         |                |          |          |                     |             |
| CB4856                                                                            | CT | II | 7763937 | 7765516 | WBGene00005262 | srh-39   | C06A8.7  | 0.239654059525781   |             |
| AGIWUR17170;AGIWUR21579;AGIWUR36225                                               |    |    |         |         |                |          |          |                     |             |
| CB4856                                                                            | CT | II | 7765545 | 7772017 | WBGene00015517 | C06A8.8  | C06A8.8  | 0.027838805230215   |             |
| AGIWUR13385;AGIWUR31560                                                           |    |    |         |         |                |          |          |                     |             |
| CB4856                                                                            | CT | II | 7772499 | 7773914 | WBGene00015516 | C06A8.6  | C06A8.6  | -0.0358797345457518 | AGIWUR378   |
| CB4856                                                                            | CT | II | 7773880 | 7777827 | WBGene00015512 | mthf-1   | C06A8.1  | 0.0496672201019877  | AGIWUR23482 |



|                                                |    |    |         |         |                |          |          |                     |             |
|------------------------------------------------|----|----|---------|---------|----------------|----------|----------|---------------------|-------------|
| CB4856                                         | CT | II | 7779297 | 7781301 | WBGene00015513 | snpc-1.1 | C06A8.2  | -0.10036968478401   |             |
| AGIWUR28830                                    |    |    |         |         |                |          |          |                     |             |
| CB4856                                         | CT | II | 7781566 | 7783354 | WBGene00015515 | spd1-1   | C06A8.5  | -0.0310099404887829 | AGIWUR5128  |
| CB4856                                         | CT | II | 7783829 | 7784654 | WBGene00004823 | skr-17   | C06A8.4  | -0.0983815584401864 | AGIWUR37247 |
| CB4856                                         | CT | II | 7785100 | 7794319 | WBGene00001615 | glr-4    | C06A8.9  | -0.174941232679579  |             |
| AGIWUR6451;AGIWUR19537;AGIWUR21410             |    |    |         |         |                |          |          |                     |             |
| CB4856                                         | CT | II | 7811240 | 7812105 | WBGene00000516 | cki-1    | T05A6.1  | 1.01374067557076    | AGIWUR39862 |
| CB4856                                         | CT | II | 7816509 | 7820301 | WBGene00000517 | cki-2    | T05A6.2  | -0.0462823257435954 |             |
| AGIWUR15835;AGIWUR32206                        |    |    |         |         |                |          |          |                     |             |
| CB4856                                         | CT | II | 7820333 | 7822554 | WBGene00011458 | irld-47  | T05A6.4  | 0.160382748482809   | AGIWUR4446  |
| CB4856                                         | CT | II | 7822749 | 7825196 | WBGene00011459 | T05A6.5  | T05A6.5  | -0.0455015442136038 | AGIWUR10914 |
| CB4856                                         | CT | II | 7825407 | 7826694 | WBGene00005809 | srw-62   | T05A6.6  | 0.0211055023606339  |             |
| AGIWUR14075;AGIWUR40775                        |    |    |         |         |                |          |          |                     |             |
| CB4856                                         | CT | II | 7832391 | 7832668 | WBGene00011640 | T09A5.14 | T09A5.14 | -0.314207003224835  |             |
| AGIWUR35                                       |    |    |         |         |                |          |          |                     |             |
| CB4856                                         | CT | II | 7832844 | 7835414 | WBGene00023408 | cex-2    | T09A5.1  | 0.721711645960058   | AGIWUR34455 |
| CB4856                                         | CT | II | 7842353 | 7845653 | WBGene00002216 | klp-3    | T09A5.2  | -0.396984848239372  |             |
| AGIWUR4382;AGIWUR20513;AGIWUR29273;AGIWUR36971 |    |    |         |         |                |          |          |                     |             |
| CB4856                                         | CT | II | 7845662 | 7849797 | WBGene00000046 | acr-7    | T09A5.3  | -0.141219141859576  | AGIWUR3882  |
| CB4856                                         | CT | II | 7852821 | 7853779 | WBGene00011634 | T09A5.5  | T09A5.5  | -0.290137442219628  | AGIWUR19073 |
| CB4856                                         | CT | II | 7853880 | 7855042 | WBGene00007014 | mdt-10   | T09A5.6  | -0.0357238315702588 | AGIWUR41745 |
| CB4856                                         | CT | II | 7855135 | 7855719 | WBGene00011635 | T09A5.7  | T09A5.7  | -0.356202322910551  | AGIWUR7525  |
| CB4856                                         | CT | II | 7855814 | 7857600 | WBGene00011636 | cec-3    | T09A5.8  | 0.0185082503758096  | AGIWUR33974 |
| CB4856                                         | CT | II | 7857811 | 7858334 | WBGene00011641 | T09A5.15 | T09A5.15 | -0.226257495695817  |             |
| AGIWUR23369                                    |    |    |         |         |                |          |          |                     |             |
| CB4856                                         | CT | II | 7858401 | 7859781 | WBGene00011637 | sds-22   | T09A5.9  | -0.131555884308128  |             |
| AGIWUR24015;AGIWUR38639;AGIWUR40986            |    |    |         |         |                |          |          |                     |             |
| CB4856                                         | CT | II | 7860574 | 7863563 | WBGene00002994 | lin-5    | T09A5.10 | -0.20668743589489   |             |
| AGIWUR1605;AGIWUR16198;AGIWUR34726             |    |    |         |         |                |          |          |                     |             |
| CB4856                                         | CT | II | 7864074 | 7866256 | WBGene00011638 | ostb-1   | T09A5.11 | -0.441001413428692  |             |
| AGIWUR20189;AGIWUR29057;AGIWUR41636            |    |    |         |         |                |          |          |                     |             |
| CB4856                                         | CT | II | 7866256 | 7870162 | WBGene00011639 | ztf-17   | T09A5.12 | -0.0389657452959211 |             |
| AGIWUR4682;AGIWUR13291;AGIWUR19500;AGIWUR22289 |    |    |         |         |                |          |          |                     |             |
| CB4856                                         | CT | II | 7870881 | 7873893 | WBGene00011349 | T01H3.3  | T01H3.3  | -0.0628049767555474 | AGIWUR23452 |
| CB4856                                         | CT | II | 7874242 | 7878097 | WBGene00011348 | T01H3.2  | T01H3.2  | -0.115912395038638  | AGIWUR24353 |
| CB4856                                         | CT | II | 7878083 | 7879406 | WBGene00006913 | vha-4    | T01H3.1  | -0.295828399684397  |             |
| AGIWUR1184;AGIWUR10620;AGIWUR20756;AGIWUR24307 |    |    |         |         |                |          |          |                     |             |
| CB4856                                         | CT | II | 7879720 | 7880464 | WBGene00011351 | T01H3.5  | T01H3.5  | -0.278609268351197  | AGIWUR24996 |
| CB4856                                         | CT | II | 7880812 | 7882767 | WBGene00011350 | perm-1   | T01H3.4  | -0.285967991719929  | AGIWUR7835  |

|                                                                                            |    |    |         |         |                |          |          |                     |             |
|--------------------------------------------------------------------------------------------|----|----|---------|---------|----------------|----------|----------|---------------------|-------------|
| CB4856                                                                                     | CT | II | 7893229 | 7900510 | WBGene00004208 | ptc-1    | ZK675.1  | 0.0715546335147943  |             |
| AGIWUR3463;AGIWUR7183;AGIWUR24141;AGIWUR37844;AGIWUR40130;AGIWUR41556                      |    |    |         |         |                |          |          |                     |             |
| CB4856                                                                                     | CT | II | 7900647 | 7904636 | WBGene00014066 | rev-1    | ZK675.2  | 0.0586619100150632  | AGIWUR37852 |
| CB4856                                                                                     | CT | II | 7904639 | 7907589 | WBGene00014989 | best-23  | ZK675.3  | 0.299167815143618   |             |
| AGIWUR3527;AGIWUR8672;AGIWUR13711;AGIWUR14386;AGIWUR17626;AGIWUR32827;AGIWUR39001          |    |    |         |         |                |          |          |                     |             |
| CB4856                                                                                     | CT | II | 7911323 | 7912113 | WBGene00014067 | ZK675.4  | ZK675.4  | 1.11565596327376    | AGIWUR20932 |
| CB4856                                                                                     | CT | II | 7912093 | 7928694 | WBGene00014051 | spv-1    | ZK669.1  | -0.0253763359512256 |             |
| AGIWUR26977;AGIWUR30516;AGIWUR36509                                                        |    |    |         |         |                |          |          |                     |             |
| CB4856                                                                                     | CT | II | 7936592 | 7938583 | WBGene00014052 | ZK669.2  | ZK669.2  | -0.165381647697272  | AGIWUR4723  |
| CB4856                                                                                     | CT | II | 7942463 | 7945206 | WBGene00014054 | dbt-1    | ZK669.4  | -0.0948760014669325 | AGIWUR37925 |
| CB4856                                                                                     | CT | II | 7945501 | 7946894 | WBGene00014055 | ZK669.5  | ZK669.5  | 0.0788378084811754  |             |
| AGIWUR4467;AGIWUR5732;AGIWUR27011;AGIWUR33319;AGIWUR33597                                  |    |    |         |         |                |          |          |                     |             |
| CB4856                                                                                     | CT | II | 7958844 | 7960237 | WBGene00007311 | C04H4.1  | C04H4.1  | -0.0119215090663349 | AGIWUR17895 |
| CB4856                                                                                     | CT | II | 7976614 | 7994206 | WBGene00008438 | DH11.5   | DH11.5   | 0.133085649257535   |             |
| AGIWUR8512;AGIWUR15852;AGIWUR17295;AGIWUR34568                                             |    |    |         |         |                |          |          |                     |             |
| CB4856                                                                                     | CT | II | 7995587 | 8003152 | WBGene00004005 | pgp-11   | DH11.3   | -0.0722510249370885 | AGIWUR43425 |
| CB4856                                                                                     | CT | II | 8008619 | 8011633 | WBGene00008435 | glna-2   | DH11.1   | 0.179548395594326   | AGIWUR29345 |
| CB4856                                                                                     | CT | II | 8012816 | 8015264 | WBGene00008436 | DH11.2   | DH11.2   | 0.67460245819014    | AGIWUR42760 |
| CB4856                                                                                     | CT | II | 8017669 | 8020785 | WBGene00006996 | zyg-11   | C08B11.1 | -0.245862505005209  |             |
| AGIWUR3394;AGIWUR3850;AGIWUR10462;AGIWUR19652                                              |    |    |         |         |                |          |          |                     |             |
| CB4856                                                                                     | CT | II | 8020780 | 8022561 | WBGene00001835 | hda-2    | C08B11.2 | -0.265765299249367  |             |
| AGIWUR26485                                                                                |    |    |         |         |                |          |          |                     |             |
| CB4856                                                                                     | CT | II | 8022649 | 8027756 | WBGene00007433 | swsn-7   | C08B11.3 | -0.0646145633805837 |             |
| AGIWUR43476                                                                                |    |    |         |         |                |          |          |                     |             |
| CB4856                                                                                     | CT | II | 8028953 | 8032742 | WBGene00003813 | nr-f-6   | C08B11.4 | -0.258325154059527  |             |
| AGIWUR7101                                                                                 |    |    |         |         |                |          |          |                     |             |
| CB4856                                                                                     | CT | II | 8034250 | 8035767 | WBGene00004723 | sap-49   | C08B11.5 | -0.0750339409946434 |             |
| AGIWUR2998;AGIWUR3824;AGIWUR4991;AGIWUR5242;AGIWUR6636;AGIWUR32094;AGIWUR42094;AGIWUR43153 |    |    |         |         |                |          |          |                     |             |
| CB4856                                                                                     | CT | II | 8035869 | 8037346 | WBGene00007434 | arp-6    | C08B11.6 | 0.0942478036376544  |             |
| AGIWUR5868;AGIWUR37186;AGIWUR38567;AGIWUR42177                                             |    |    |         |         |                |          |          |                     |             |
| CB4856                                                                                     | CT | II | 8037316 | 8038167 | WBGene00007436 | C08B11.9 | C08B11.9 | -0.0303556577150026 |             |
| AGIWUR14890                                                                                |    |    |         |         |                |          |          |                     |             |
| CB4856                                                                                     | CT | II | 8038271 | 8039597 | WBGene00006724 | ubh-4    | C08B11.7 | -0.111729898023903  |             |
| AGIWUR8971;AGIWUR33365;AGIWUR43766                                                         |    |    |         |         |                |          |          |                     |             |
| CB4856                                                                                     | CT | II | 8040006 | 8041732 | WBGene00007435 | C08B11.8 | C08B11.8 | -0.117615131522607  |             |
| AGIWUR31312                                                                                |    |    |         |         |                |          |          |                     |             |
| CB4856                                                                                     | CT | II | 8042589 | 8047452 | WBGene00011507 | T05H10.1 | T05H10.1 | -0.17280581170974   |             |
| AGIWUR7238;AGIWUR35900;AGIWUR42683                                                         |    |    |         |         |                |          |          |                     |             |
| CB4856                                                                                     | CT | II | 8047564 | 8049105 | WBGene00000151 | apn-1    | T05H10.2 | -0.0731485159467233 |             |

AGIWUR5389;AGIWUR33387;AGIWUR40600

|        |    |    |         |         |                |          |          |                  |
|--------|----|----|---------|---------|----------------|----------|----------|------------------|
| CB4856 | CT | II | 8049049 | 8050564 | WBGene00011508 | T05H10.3 | T05H10.3 | 1.26465944016232 |
|--------|----|----|---------|---------|----------------|----------|----------|------------------|

AGIWUR35674

|        |    |    |         |         |                |          |          |                    |
|--------|----|----|---------|---------|----------------|----------|----------|--------------------|
| CB4856 | CT | II | 8053137 | 8054965 | WBGene00011509 | T05H10.4 | T05H10.4 | -0.129024931694516 |
|--------|----|----|---------|---------|----------------|----------|----------|--------------------|

AGIWUR18325

|        |    |    |         |         |                |          |          |                    |
|--------|----|----|---------|---------|----------------|----------|----------|--------------------|
| CB4856 | CT | II | 8059069 | 8061464 | WBGene00011512 | T05H10.8 | T05H10.8 | -0.501182527662656 |
|--------|----|----|---------|---------|----------------|----------|----------|--------------------|

AGIWUR2912

|        |    |    |         |         |                |       |          |                    |
|--------|----|----|---------|---------|----------------|-------|----------|--------------------|
| CB4856 | CT | II | 8062741 | 8066193 | WBGene00006734 | ufd-2 | T05H10.5 | -0.104720450971747 |
|--------|----|----|---------|---------|----------------|-------|----------|--------------------|

AGIWUR6799

|        |    |    |         |         |                |        |          |                   |
|--------|----|----|---------|---------|----------------|--------|----------|-------------------|
| CB4856 | CT | II | 8066111 | 8068184 | WBGene00011510 | pdha-1 | T05H10.6 | 0.103965282158553 |
|--------|----|----|---------|---------|----------------|--------|----------|-------------------|

AGIWUR31011

|        |    |    |         |         |                |        |          |                    |
|--------|----|----|---------|---------|----------------|--------|----------|--------------------|
| CB4856 | CT | II | 8067990 | 8073372 | WBGene00011511 | gpcp-2 | T05H10.7 | -0.124382216252427 |
|--------|----|----|---------|---------|----------------|--------|----------|--------------------|

AGIWUR983;AGIWUR13509;AGIWUR13688;AGIWUR15497

|        |    |    |         |         |                |         |         |                   |
|--------|----|----|---------|---------|----------------|---------|---------|-------------------|
| CB4856 | CT | II | 8075760 | 8076836 | WBGene00010501 | K02C4.2 | K02C4.2 | 0.286956907283906 |
|--------|----|----|---------|---------|----------------|---------|---------|-------------------|

AGIWUR7423;AGIWUR23396;AGIWUR28188

|        |    |    |         |         |                |         |         |                   |             |
|--------|----|----|---------|---------|----------------|---------|---------|-------------------|-------------|
| CB4856 | CT | II | 8078457 | 8080847 | WBGene00010503 | K02C4.5 | K02C4.5 | 0.438557655571275 | AGIWUR17113 |
|--------|----|----|---------|---------|----------------|---------|---------|-------------------|-------------|

|        |    |    |         |         |                |         |         |                     |
|--------|----|----|---------|---------|----------------|---------|---------|---------------------|
| CB4856 | CT | II | 8080789 | 8086849 | WBGene00010502 | K02C4.3 | K02C4.3 | -0.0595418067267897 |
|--------|----|----|---------|---------|----------------|---------|---------|---------------------|

AGIWUR5833;AGIWUR12426;AGIWUR31499

|        |    |    |         |         |                |       |         |                   |            |
|--------|----|----|---------|---------|----------------|-------|---------|-------------------|------------|
| CB4856 | CT | II | 8088427 | 8092754 | WBGene00003089 | ltd-1 | K02C4.4 | 0.603623829187951 | AGIWUR7221 |
|--------|----|----|---------|---------|----------------|-------|---------|-------------------|------------|

|        |    |    |         |         |                |       |         |                    |             |
|--------|----|----|---------|---------|----------------|-------|---------|--------------------|-------------|
| CB4856 | CT | II | 8100375 | 8102141 | WBGene00005150 | sre-2 | C41C4.2 | -0.268571915579969 | AGIWUR22986 |
|--------|----|----|---------|---------|----------------|-------|---------|--------------------|-------------|

|        |    |    |         |         |                |        |          |                     |
|--------|----|----|---------|---------|----------------|--------|----------|---------------------|
| CB4856 | CT | II | 8102108 | 8105052 | WBGene00044049 | sfxn-5 | C41C4.10 | -0.0894288527506415 |
|--------|----|----|---------|---------|----------------|--------|----------|---------------------|

AGIWUR5877;AGIWUR16602;AGIWUR26988

|        |    |    |         |         |                |        |         |                   |            |
|--------|----|----|---------|---------|----------------|--------|---------|-------------------|------------|
| CB4856 | CT | II | 8105614 | 8106967 | WBGene00008050 | chst-1 | C41C4.1 | 0.136914893184478 | AGIWUR7477 |
|--------|----|----|---------|---------|----------------|--------|---------|-------------------|------------|

|        |    |    |         |         |                |         |         |                    |             |
|--------|----|----|---------|---------|----------------|---------|---------|--------------------|-------------|
| CB4856 | CT | II | 8107645 | 8108954 | WBGene00008054 | C41C4.9 | C41C4.9 | 0.0961310007720613 | AGIWUR16390 |
|--------|----|----|---------|---------|----------------|---------|---------|--------------------|-------------|

|        |    |    |         |         |                |        |         |                      |            |
|--------|----|----|---------|---------|----------------|--------|---------|----------------------|------------|
| CB4856 | CT | II | 8108941 | 8112163 | WBGene00008051 | lron-4 | C41C4.3 | -0.00715620531788019 | AGIWUR2733 |
|--------|----|----|---------|---------|----------------|--------|---------|----------------------|------------|

|        |    |    |         |         |                |       |         |                      |             |
|--------|----|----|---------|---------|----------------|-------|---------|----------------------|-------------|
| CB4856 | CT | II | 8112262 | 8124910 | WBGene00002147 | ire-1 | C41C4.4 | -0.00815289383342588 | AGIWUR29507 |
|--------|----|----|---------|---------|----------------|-------|---------|----------------------|-------------|

|        |    |    |         |         |                |       |         |                     |
|--------|----|----|---------|---------|----------------|-------|---------|---------------------|
| CB4856 | CT | II | 8129960 | 8134742 | WBGene00006739 | ulp-4 | C41C4.6 | -0.0344188555911371 |
|--------|----|----|---------|---------|----------------|-------|---------|---------------------|

AGIWUR2044;AGIWUR6926

|        |    |    |         |         |                |        |         |                     |
|--------|----|----|---------|---------|----------------|--------|---------|---------------------|
| CB4856 | CT | II | 8134765 | 8136916 | WBGene00008052 | ctns-1 | C41C4.7 | -0.0148804559319942 |
|--------|----|----|---------|---------|----------------|--------|---------|---------------------|

AGIWUR22871;AGIWUR30307;AGIWUR39329

|        |    |    |         |         |                |          |         |                    |
|--------|----|----|---------|---------|----------------|----------|---------|--------------------|
| CB4856 | CT | II | 8137880 | 8141276 | WBGene00008053 | cdc-48.2 | C41C4.8 | -0.310966243746437 |
|--------|----|----|---------|---------|----------------|----------|---------|--------------------|

AGIWUR22177;AGIWUR23786

|        |    |    |         |         |                |         |         |                   |             |
|--------|----|----|---------|---------|----------------|---------|---------|-------------------|-------------|
| CB4856 | CT | II | 8141213 | 8143478 | WBGene00008642 | F10B5.8 | F10B5.8 | 0.282129066645346 | AGIWUR42674 |
|--------|----|----|---------|---------|----------------|---------|---------|-------------------|-------------|

|        |    |    |         |         |                |        |         |                  |
|--------|----|----|---------|---------|----------------|--------|---------|------------------|
| CB4856 | CT | II | 8143863 | 8144671 | WBGene00004421 | rp1-10 | F10B5.1 | 0.10282212731758 |
|--------|----|----|---------|---------|----------------|--------|---------|------------------|

AGIWUR15626;AGIWUR19210;AGIWUR25935;AGIWUR27480;AGIWUR38463;AGIWUR42597;AGIWUR44548

|        |    |    |         |         |                |         |         |                     |             |
|--------|----|----|---------|---------|----------------|---------|---------|---------------------|-------------|
| CB4856 | CT | II | 8144762 | 8147236 | WBGene00008639 | F10B5.2 | F10B5.2 | 0.00882504837381504 | AGIWUR23843 |
|--------|----|----|---------|---------|----------------|---------|---------|---------------------|-------------|

|        |    |    |         |         |                |         |         |                    |             |
|--------|----|----|---------|---------|----------------|---------|---------|--------------------|-------------|
| CB4856 | CT | II | 8147190 | 8150030 | WBGene00008640 | F10B5.3 | F10B5.3 | -0.173119075116162 | AGIWUR14621 |
|--------|----|----|---------|---------|----------------|---------|---------|--------------------|-------------|

|        |    |    |         |         |                |       |         |                    |             |
|--------|----|----|---------|---------|----------------|-------|---------|--------------------|-------------|
| CB4856 | CT | II | 8154096 | 8156937 | WBGene00006655 | tub-1 | F10B5.4 | -0.218984154680566 | AGIWUR23466 |
|--------|----|----|---------|---------|----------------|-------|---------|--------------------|-------------|

|        |    |    |         |         |                |          |         |                     |
|--------|----|----|---------|---------|----------------|----------|---------|---------------------|
| CB4856 | CT | II | 8157362 | 8158045 | WBGene00008643 | tmem-138 | F10B5.9 | 0.00706614670029371 |
|--------|----|----|---------|---------|----------------|----------|---------|---------------------|

|                                                                                    |    |    |         |         |                |           |           |                     |             |
|------------------------------------------------------------------------------------|----|----|---------|---------|----------------|-----------|-----------|---------------------|-------------|
| AGIWUR3504                                                                         |    |    |         |         |                |           |           |                     |             |
| CB4856                                                                             | CT | II | 8158349 | 8159925 | WBGene00008641 | pch-2     | F10B5.5   | -0.172119863421013  | AGIWUR2022  |
| CB4856                                                                             | CT | II | 8159865 | 8162170 | WBGene00001281 | emb-27    | F10B5.6   | -0.249659441056602  | AGIWUR21615 |
| CB4856                                                                             | CT | II | 8162465 | 8168644 | WBGene00004510 | rrf-3     | F10B5.7   | 0.23612304695912    | AGIWUR12684 |
| CB4856                                                                             | CT | II | 8168682 | 8170358 | WBGene00011473 | T05C12.11 | T05C12.11 | 0.0653902574988479  |             |
| AGIWUR37097                                                                        |    |    |         |         |                |           |           |                     |             |
| CB4856                                                                             | CT | II | 8172229 | 8173562 | WBGene00011467 | decr-1.3  | T05C12.3  | 0.0331073339260808  |             |
| AGIWUR7309                                                                         |    |    |         |         |                |           |           |                     |             |
| CB4856                                                                             | CT | II | 8173680 | 8174866 | WBGene00011466 | T05C12.1  | T05C12.1  | -0.1186469398183    |             |
| AGIWUR8960;AGIWUR11009;AGIWUR38979                                                 |    |    |         |         |                |           |           |                     |             |
| CB4856                                                                             | CT | II | 8174845 | 8177195 | WBGene00000053 | acr-14    | T05C12.2  | 0.235197435637587   |             |
| AGIWUR222;AGIWUR34520;AGIWUR36830                                                  |    |    |         |         |                |           |           |                     |             |
| CB4856                                                                             | CT | II | 8177578 | 8180381 | WBGene00011468 | T05C12.4  | T05C12.4  | 0.0439022117753884  |             |
| AGIWUR8536                                                                         |    |    |         |         |                |           |           |                     |             |
| CB4856                                                                             | CT | II | 8181737 | 8182309 | WBGene00011469 | dylt-3    | T05C12.5  | -0.198869947535974  |             |
| AGIWUR19498                                                                        |    |    |         |         |                |           |           |                     |             |
| CB4856                                                                             | CT | II | 8182323 | 8185023 | WBGene00003241 | mig-5     | T05C12.6  | -0.0661192939819149 |             |
| AGIWUR41036                                                                        |    |    |         |         |                |           |           |                     |             |
| CB4856                                                                             | CT | II | 8185443 | 8187601 | WBGene00000377 | cct-1     | T05C12.7  | -0.298274792834574  |             |
| AGIWUR2764;AGIWUR11724;AGIWUR14998;AGIWUR15680;AGIWUR20879;AGIWUR28442;AGIWUR29277 |    |    |         |         |                |           |           |                     |             |
| CB4856                                                                             | CT | II | 8187607 | 8190528 | WBGene00011471 | T05C12.8  | T05C12.8  | 0.31208285912609    |             |
| AGIWUR13267                                                                        |    |    |         |         |                |           |           |                     |             |
| CB4856                                                                             | CT | II | 8191773 | 8193329 | WBGene00011472 | T05C12.9  | T05C12.9  | -0.0892583903893378 |             |
| AGIWUR22375                                                                        |    |    |         |         |                |           |           |                     |             |
| CB4856                                                                             | CT | II | 8198803 | 8204001 | WBGene00004264 | qua-1     | T05C12.10 | 0.0284395130305288  |             |
| AGIWUR18808                                                                        |    |    |         |         |                |           |           |                     |             |
| CB4856                                                                             | CT | II | 8204341 | 8207491 | WBGene00000652 | col-76    | M110.1    | 0.108057810564031   | AGIWUR5673  |
| CB4856                                                                             | CT | II | 8208000 | 8209444 | WBGene00010916 | M110.8    | M110.8    | 0.0910535411940874  | AGIWUR18001 |
| CB4856                                                                             | CT | II | 8210662 | 8212751 | WBGene00006658 | twk-3     | M110.2    | -0.224494372376594  | AGIWUR10521 |
| CB4856                                                                             | CT | II | 8214575 | 8216616 | WBGene00010913 | M110.3    | M110.3    | -0.0646573937742065 | AGIWUR23590 |
| CB4856                                                                             | CT | II | 8217231 | 8222395 | WBGene00002066 | ifg-1     | M110.4    | -0.18706307193607   |             |
| AGIWUR3842;AGIWUR23909;AGIWUR24055                                                 |    |    |         |         |                |           |           |                     |             |
| CB4856                                                                             | CT | II | 8226132 | 8229122 | WBGene00000894 | dab-1     | M110.5    | -0.0668444908728976 |             |
| AGIWUR2336;AGIWUR6350;AGIWUR30204;AGIWUR38810                                      |    |    |         |         |                |           |           |                     |             |
| CB4856                                                                             | CT | II | 8231239 | 8232769 | WBGene00010917 | M110.9    | M110.9    | -0.129255366093142  | AGIWUR35202 |
| CB4856                                                                             | CT | II | 8232789 | 8237202 | WBGene00010915 | M110.7    | M110.7    | -0.152122228733454  | AGIWUR27439 |
| CB4856                                                                             | CT | II | 8238455 | 8243747 | WBGene00003743 | nlp-5     | F35C11.1  | 0.322605152582911   |             |
| AGIWUR18693                                                                        |    |    |         |         |                |           |           |                     |             |
| CB4856                                                                             | CT | II | 8246776 | 8248263 | WBGene00009402 | F35C11.3  | F35C11.3  | -0.301953590407965  |             |



|                                                                         |    |    |         |         |                |           |          |                             |             |
|-------------------------------------------------------------------------|----|----|---------|---------|----------------|-----------|----------|-----------------------------|-------------|
| CB4856                                                                  | CT | II | 8358228 | 8359381 | WBGene00000653 | col-77    | M195.1   | -0.40717272422447           | AGIWUR23505 |
| CB4856                                                                  | CT | II | 8359712 | 8363196 | WBGene00010948 | M195.2    | M195.2   | -0.507561931727109          | AGIWUR30560 |
| CB4856                                                                  | CT | II | 8363196 | 8369159 | WBGene00000135 | amt-3     | M195.3   | -0.0627733201440321         | AGIWUR26721 |
| CB4856                                                                  | CT | II | 8376611 | 8377357 | WBGene00010949 | M195.4    | M195.4   | -0.303375731693904          | AGIWUR139   |
| CB4856                                                                  | CT | II | 8381497 | 8383905 | WBGene00009904 | F49E12.12 |          | F49E12.12 0.118434513535442 |             |
| AGIWUR41004                                                             |    |    |         |         |                |           |          |                             |             |
| CB4856                                                                  | CT | II | 8388051 | 8389891 | WBGene00009902 | drd-1     | F49E12.9 | -0.139686951608141          |             |
| AGIWUR3152;AGIWUR16685;AGIWUR28016;AGIWUR44394                          |    |    |         |         |                |           |          |                             |             |
| CB4856                                                                  | CT | II | 8391088 | 8392281 | WBGene00009903 | F49E12.10 |          | F49E12.10 0.696599592809967 |             |
| AGIWUR8922                                                              |    |    |         |         |                |           |          |                             |             |
| CB4856                                                                  | CT | II | 8392571 | 8394202 | WBGene00009901 | F49E12.8  |          | F49E12.8 -0.139656567962318 |             |
| AGIWUR7589                                                              |    |    |         |         |                |           |          |                             |             |
| CB4856                                                                  | CT | II | 8395276 | 8396141 | WBGene00009900 | F49E12.7  |          | F49E12.7 0.0357745662523721 |             |
| AGIWUR21880                                                             |    |    |         |         |                |           |          |                             |             |
| CB4856                                                                  | CT | II | 8398161 | 8399160 | WBGene00009898 | dod-23    | F49E12.2 | -0.143429658950373          |             |
| AGIWUR23090                                                             |    |    |         |         |                |           |          |                             |             |
| CB4856                                                                  | CT | II | 8400299 | 8404848 | WBGene00009897 | skpo-1    | F49E12.1 | -0.306441459353351          |             |
| AGIWUR22459                                                             |    |    |         |         |                |           |          |                             |             |
| CB4856                                                                  | CT | II | 8405603 | 8406924 | WBGene00006719 | ubc-24    | F49E12.4 | -0.265219829483556          |             |
| AGIWUR30944                                                             |    |    |         |         |                |           |          |                             |             |
| CB4856                                                                  | CT | II | 8407685 | 8409237 | WBGene00005039 | sra-13    | F49E12.5 | -0.0326981431400677         |             |
| AGIWUR5312;AGIWUR21380;AGIWUR38003                                      |    |    |         |         |                |           |          |                             |             |
| CB4856                                                                  | CT | II | 8412671 | 8416857 | WBGene00009899 | efl-3     | F49E12.6 | 0.667904279906851           |             |
| AGIWUR13219;AGIWUR15145;AGIWUR32279;AGIWUR38296;AGIWUR43804;AGIWUR44927 |    |    |         |         |                |           |          |                             |             |
| CB4856                                                                  | CT | II | 8417618 | 8419758 | WBGene00008799 | F14E5.1   | F14E5.1  | -0.329960542453048          | AGIWUR18246 |
| CB4856                                                                  | CT | II | 8423951 | 8428855 | WBGene00008800 | F14E5.2   | F14E5.2  | -0.0966601634324658         |             |
| AGIWUR3167;AGIWUR17171;AGIWUR35433                                      |    |    |         |         |                |           |          |                             |             |
| CB4856                                                                  | CT | II | 8429959 | 8432054 | WBGene00008802 | acp-2     | F14E5.4  | -0.448330830162509          | AGIWUR23377 |
| CB4856                                                                  | CT | II | 8432773 | 8435105 | WBGene00008804 | acp-4     | F14E5.6  | -0.233003972130508          | AGIWUR21718 |
| CB4856                                                                  | CT | II | 8435347 | 8437135 | WBGene00008801 | acp-3     | F14E5.3  | -0.0517932774056202         | AGIWUR26233 |
| CB4856                                                                  | CT | II | 8439118 | 8442151 | WBGene00008803 | lips-10   | F14E5.5  | 0.106925594539714           | AGIWUR4094  |
| CB4856                                                                  | CT | II | 8442765 | 8444239 | WBGene00001230 | eif-3.G   | F22B5.2  | -0.0841861747746435         |             |
| AGIWUR9270;AGIWUR19095;AGIWUR24859;AGIWUR29721;AGIWUR29987;AGIWUR38375  |    |    |         |         |                |           |          |                             |             |
| CB4856                                                                  | CT | II | 8444307 | 8445177 | WBGene00001358 | evl-20    | F22B5.1  | 0.113466213356752           | AGIWUR34115 |
| CB4856                                                                  | CT | II | 8445168 | 8446831 | WBGene00009041 | cut-3     | F22B5.3  | 1.48994325735261            | AGIWUR30519 |
| CB4856                                                                  | CT | II | 8449701 | 8452739 | WBGene00009042 | F22B5.4   | F22B5.4  | 0.287755917655332           | AGIWUR24088 |
| CB4856                                                                  | CT | II | 8453254 | 8454613 | WBGene00009043 | F22B5.5   | F22B5.5  | -0.303207598631928          | AGIWUR2516  |
| CB4856                                                                  | CT | II | 8454612 | 8456194 | WBGene00009044 | F22B5.6   | F22B5.6  | 0.0863501783001048          | AGIWUR11320 |
| CB4856                                                                  | CT | II | 8457818 | 8464517 | WBGene00006994 | zyg-9     | F22B5.7  | 0.000709492827102309        | AGIWUR36027 |

|                                                                                                           |    |    |         |         |                |          |          |                     |             |
|-----------------------------------------------------------------------------------------------------------|----|----|---------|---------|----------------|----------|----------|---------------------|-------------|
| CB4856                                                                                                    | CT | II | 8464848 | 8467072 | WBGene00001498 | fars-3   | F22B5.9  | 0.0331027441188638  | AGIWUR34112 |
| CB4856                                                                                                    | CT | II | 8467174 | 8468010 | WBGene00009045 | F22B5.10 | F22B5.10 | -0.0417467219738783 |             |
| AGIWUR6122;AGIWUR11334;AGIWUR27711;AGIWUR28547                                                            |    |    |         |         |                |          |          |                     |             |
| CB4856                                                                                                    | CT | II | 8468109 | 8470162 | WBGene00010875 | M05D6.2  | M05D6.2  | 0.0781885820188961  | AGIWUR31827 |
| CB4856                                                                                                    | CT | II | 8470079 | 8471217 | WBGene00010880 | M05D6.8  | M05D6.8  | -0.184861729765128  | AGIWUR15604 |
| CB4856                                                                                                    | CT | II | 8471880 | 8473522 | WBGene00044168 | M05D6.10 | M05D6.10 | 0.264348200453795   |             |
| AGIWUR11206;AGIWUR35547                                                                                   |    |    |         |         |                |          |          |                     |             |
| CB4856                                                                                                    | CT | II | 8473819 | 8475568 | WBGene00010874 | M05D6.1  | M05D6.1  | -0.176282893024487  | AGIWUR35206 |
| CB4856                                                                                                    | CT | II | 8478010 | 8480478 | WBGene00010877 | lact-4   | M05D6.4  | -0.244393798095832  |             |
| AGIWUR13800;AGIWUR34952                                                                                   |    |    |         |         |                |          |          |                     |             |
| CB4856                                                                                                    | CT | II | 8480457 | 8482216 | WBGene00010878 | M05D6.5  | M05D6.5  | -0.141062786452347  |             |
| AGIWUR3221;AGIWUR10469;AGIWUR10734;AGIWUR41286                                                            |    |    |         |         |                |          |          |                     |             |
| CB4856                                                                                                    | CT | II | 8482376 | 8483872 | WBGene00010879 | M05D6.6  | M05D6.6  | -0.0947601750406672 | AGIWUR33291 |
| CB4856                                                                                                    | CT | II | 8485879 | 8487571 | WBGene00001523 | gbh-2    | M05D6.7  | 0.391162384704863   |             |
| AGIWUR2809;AGIWUR14517;AGIWUR29356;AGIWUR29456;AGIWUR39469;AGIWUR39551                                    |    |    |         |         |                |          |          |                     |             |
| CB4856                                                                                                    | CT | II | 8487571 | 8509055 | WBGene00011755 | T13H5.1  | T13H5.1  | 0.0457092208917445  |             |
| AGIWUR6797;AGIWUR8690;AGIWUR15118;AGIWUR15740;AGIWUR16271;AGIWUR21225;AGIWUR27017;AGIWUR30143;AGIWUR33771 |    |    |         |         |                |          |          |                     |             |
| CB4856                                                                                                    | CT | II | 8514118 | 8516891 | WBGene00011756 | ctg-2    | T13H5.2  | -0.0451648316964741 |             |
| AGIWUR9249;AGIWUR11176;AGIWUR25165;AGIWUR25634;AGIWUR26294;AGIWUR32840                                    |    |    |         |         |                |          |          |                     |             |
| CB4856                                                                                                    | CT | II | 8517150 | 8518412 | WBGene00004383 | rnh-2    | T13H5.7  | -0.170747203609167  | AGIWUR12815 |
| CB4856                                                                                                    | CT | II | 8518510 | 8520700 | WBGene00011761 | T13H5.8  | T13H5.8  | -0.0363844465905583 | AGIWUR1284  |
| CB4856                                                                                                    | CT | II | 8520905 | 8523490 | WBGene00011757 | cht-2    | T13H5.3  | -0.0694988003141397 | AGIWUR8100  |
| CB4856                                                                                                    | CT | II | 8523494 | 8525396 | WBGene00011758 | T13H5.4  | T13H5.4  | 0.189012085976248   |             |
| AGIWUR4164;AGIWUR25257;AGIWUR28277;AGIWUR39003                                                            |    |    |         |         |                |          |          |                     |             |
| CB4856                                                                                                    | CT | II | 8525685 | 8526804 | WBGene00011759 | mrps-18B | T13H5.5  | -0.10280468759975   |             |
| AGIWUR26447                                                                                               |    |    |         |         |                |          |          |                     |             |
| CB4856                                                                                                    | CT | II | 8526799 | 8531222 | WBGene00011760 | T13H5.6  | T13H5.6  | -0.180597920845388  | AGIWUR15371 |
| CB4856                                                                                                    | CT | II | 8533095 | 8534363 | WBGene00012175 | W01C9.1  | W01C9.1  | 0.248870925790223   | AGIWUR17469 |
| CB4856                                                                                                    | CT | II | 8536133 | 8538603 | WBGene00012176 | W01C9.2  | W01C9.2  | -0.418798046615693  | AGIWUR13147 |
| CB4856                                                                                                    | CT | II | 8540720 | 8545452 | WBGene00004155 | pqn-73   | W01C9.3  | 1.83980033277039    | AGIWUR70    |
| CB4856                                                                                                    | CT | II | 8545652 | 8546854 | WBGene00012177 | decr-1.2 | W01C9.4  | 0.171419849648037   |             |
| AGIWUR35156                                                                                               |    |    |         |         |                |          |          |                     |             |
| CB4856                                                                                                    | CT | II | 8547339 | 8556258 | WBGene00012178 | glb-27   | W01C9.5  | -0.306146056719781  | AGIWUR20195 |
| CB4856                                                                                                    | CT | II | 8559394 | 8561352 | WBGene00002065 | iff-2    | F54C9.1  | -0.224993300120214  |             |
| AGIWUR1041;AGIWUR13119;AGIWUR18172;AGIWUR31956;AGIWUR34294;AGIWUR35827;AGIWUR38745                        |    |    |         |         |                |          |          |                     |             |
| CB4856                                                                                                    | CT | II | 8563714 | 8566139 | WBGene00006059 | stc-1    | F54C9.2  | -0.0813128845380415 | AGIWUR27084 |
| CB4856                                                                                                    | CT | II | 8566508 | 8566857 | WBGene00010041 | F54C9.3  | F54C9.3  | 0.44097741297913    | AGIWUR35414 |
| CB4856                                                                                                    | CT | II | 8568035 | 8569089 | WBGene00000615 | col-38   | F54C9.4  | -0.625895386165906  | AGIWUR17395 |
| CB4856                                                                                                    | CT | II | 8569927 | 8571100 | WBGene00004416 | rpl-5    | F54C9.5  | 0.0164623601471181  |             |

AGIWUR9145;AGIWUR16011;AGIWUR23458  
 CB4856 CT II 8571085 8572904 WBGene00010042 bcs-1 F54C9.6 -0.187333340772603  
 AGIWUR6986;AGIWUR16748;AGIWUR26834;AGIWUR38862  
 CB4856 CT II 8573355 8575045 WBGene00010043 F54C9.7 F54C9.7 0.159464685558726  
 AGIWUR42579;AGIWUR43932  
 CB4856 CT II 8575541 8577732 WBGene00004241 puf-5 F54C9.8 -0.0730814493470362 AGIWUR17244  
 CB4856 CT II 8578049 8581513 WBGene00010044 F54C9.9 F54C9.9 -0.164343379232854  
 AGIWUR1419;AGIWUR4848;AGIWUR15723  
 CB4856 CT II 8581945 8583080 WBGene00000187 arl-1 F54C9.10 -0.103427229383737  
 AGIWUR21476  
 CB4856 CT II 8583034 8585086 WBGene00010045 F54C9.11 F54C9.11 0.202268796278423  
 AGIWUR34137  
 CB4856 CT II 8590984 8593010 WBGene00009202 aptf-4 F28C6.1 0.0337029288476955  
 AGIWUR10388;AGIWUR16446;AGIWUR39555  
 CB4856 CT II 8594190 8596294 WBGene00009203 aptf-3 F28C6.2 0.00660454861266579  
 AGIWUR12578;AGIWUR32441;AGIWUR42969  
 CB4856 CT II 8596286 8600265 WBGene00009204 F28C6.4 F28C6.4 0.0557828424827758  
 AGIWUR10920;AGIWUR17476;AGIWUR38808  
 CB4856 CT II 8599508 8600506 WBGene00009205 F28C6.5 F28C6.5 -0.100398367181061 AGIWUR22408  
 CB4856 CT II 8600435 8602479 WBGene00000773 cpf-1 F28C6.3 -0.147200506315237 AGIWUR30019  
 CB4856 CT II 8602787 8603581 WBGene00004440 rpl-26 F28C6.7 0.0428263995849658  
 AGIWUR22308;AGIWUR42774  
 CB4856 CT II 8603846 8606744 WBGene00006307 suf-1 F28C6.6 0.0168048635321707  
 AGIWUR15406;AGIWUR42122;AGIWUR43954  
 CB4856 CT II 8606849 8607749 WBGene00009207 F28C6.8 F28C6.8 -0.313812687708637 AGIWUR35865  
 CB4856 CT II 8607889 8608865 WBGene00009209 F28C6.10 F28C6.10 -0.446640547000614  
 AGIWUR30551  
 CB4856 CT II 8608876 8610110 WBGene00009208 F28C6.9 F28C6.9 -0.103967999867639 AGIWUR41437  
 CB4856 CT II 8612770 8614426 WBGene00011922 T22C8.1 T22C8.1 -0.167023096029947 AGIWUR25354  
 CB4856 CT II 8614546 8617603 WBGene00011923 chhy-1 T22C8.2 -0.408582237822626 AGIWUR21816  
 CB4856 CT II 8620397 8621978 WBGene00011924 T22C8.3 T22C8.3 -0.0940343006540818 AGIWUR1762  
 CB4856 CT II 8622447 8624254 WBGene00011925 T22C8.4 T22C8.4 -0.226528326048738  
 AGIWUR1196;AGIWUR12798;AGIWUR30886  
 CB4856 CT II 8625728 8627620 WBGene00011926 sptf-2 T22C8.5 -0.0421031654967798 AGIWUR21226  
 CB4856 CT II 8627573 8630239 WBGene00011927 T22C8.6 T22C8.6 0.519073370787243 AGIWUR8779  
 CB4856 CT II 8630710 8634464 WBGene00011928 cutl-12 T22C8.7 0.0210201161814161  
 AGIWUR11556;AGIWUR39206  
 CB4856 CT II 8636233 8637711 WBGene00006875 vab-9 T22C8.8 -0.220556487338343 AGIWUR25044  
 CB4856 CT II 8641381 8648227 WBGene00008432 D2085.7 D2085.7 -0.291386531080098 AGIWUR40175



|                                                                                                                                                                                                            |    |    |         |         |                |               |         |                      |             |
|------------------------------------------------------------------------------------------------------------------------------------------------------------------------------------------------------------|----|----|---------|---------|----------------|---------------|---------|----------------------|-------------|
| CB4856                                                                                                                                                                                                     | CT | II | 8651109 | 8658808 | WBGene00004259 | pyr-1         | D2085.1 | -0.0552146735034715  |             |
| AGIWUR22823;AGIWUR41113                                                                                                                                                                                    |    |    |         |         |                |               |         |                      |             |
| CB4856                                                                                                                                                                                                     | CT | II | 8659135 | 8659800 | WBGene00008427 | atg-10        | D2085.2 | -0.0765918724689598  | AGIWUR42128 |
| CB4856                                                                                                                                                                                                     | CT | II | 8659782 | 8661712 | WBGene00008431 | piga-1        | D2085.6 | -0.186063989166417   | AGIWUR5013  |
| CB4856                                                                                                                                                                                                     | CT | II | 8661869 | 8664721 | WBGene00008428 | eif-2Bepsilon | D2085.3 | -0.288151296195212   |             |
| AGIWUR41224                                                                                                                                                                                                |    |    |         |         |                |               |         |                      |             |
| CB4856                                                                                                                                                                                                     | CT | II | 8664833 | 8669154 | WBGene00008429 |               | D2085.4 | -0.082386453518243   | AGIWUR36593 |
| CB4856                                                                                                                                                                                                     | CT | II | 8669133 | 8684897 | WBGene00008430 | hgap-2        | D2085.5 | 0.0485686755328638   |             |
| AGIWUR23447;AGIWUR45090                                                                                                                                                                                    |    |    |         |         |                |               |         |                      |             |
| CB4856                                                                                                                                                                                                     | CT | II | 8691789 | 8694180 | WBGene00007916 | C34C6.3       | C34C6.3 | 0.787179091886938    | AGIWUR9910  |
| CB4856                                                                                                                                                                                                     | CT | II | 8696591 | 8698928 | WBGene00007917 | C34C6.4       | C34C6.4 | -0.0918742782172526  | AGIWUR465   |
| CB4856                                                                                                                                                                                                     | CT | II | 8699045 | 8702193 | WBGene00007918 | sphk-1        | C34C6.5 | -0.0204817961685633  |             |
| AGIWUR4466;AGIWUR18165;AGIWUR24595;AGIWUR30041                                                                                                                                                             |    |    |         |         |                |               |         |                      |             |
| CB4856                                                                                                                                                                                                     | CT | II | 8703368 | 8703829 | WBGene00000432 | ceh-7         | C34C6.8 | 0.224355496659337    | AGIWUR28771 |
| CB4856                                                                                                                                                                                                     | CT | II | 8704824 | 8706768 | WBGene00004194 | prx-5         | C34C6.6 | 0.146355348136233    |             |
| AGIWUR1248;AGIWUR5786;AGIWUR10847;AGIWUR40056                                                                                                                                                              |    |    |         |         |                |               |         |                      |             |
| CB4856                                                                                                                                                                                                     | CT | II | 8707155 | 8708860 | WBGene00007919 | C34C6.7       | C34C6.7 | 2.16331197139565     | AGIWUR29170 |
| CB4856                                                                                                                                                                                                     | CT | II | 8709069 | 8710413 | WBGene00005172 | srg-15        | C34C6.1 | 0.0195115665026595   | AGIWUR33606 |
| CB4856                                                                                                                                                                                                     | CT | II | 8711589 | 8712035 | WBGene00014827 | T01B7.1       | T01B7.1 | 0.0206642821282284   |             |
| AGIWUR3554;AGIWUR8918;AGIWUR20861;AGIWUR27845;AGIWUR35574                                                                                                                                                  |    |    |         |         |                |               |         |                      |             |
| CB4856                                                                                                                                                                                                     | CT | II | 8712068 | 8713412 | WBGene00005175 | srg-18        | T01B7.2 | -0.331732617088994   | AGIWUR21000 |
| CB4856                                                                                                                                                                                                     | CT | II | 8713992 | 8715013 | WBGene00004279 | rab-21        | T01B7.3 | -0.139780278564025   | AGIWUR4900  |
| CB4856                                                                                                                                                                                                     | CT | II | 8715132 | 8716281 | WBGene00000887 | cyn-11        | T01B7.4 | 0.00232931370270251  | AGIWUR26435 |
| CB4856                                                                                                                                                                                                     | CT | II | 8716834 | 8721691 | WBGene00011311 | T01B7.5       | T01B7.5 | -0.0132352349255491  |             |
| AGIWUR20070;AGIWUR27309;AGIWUR31333;AGIWUR43034                                                                                                                                                            |    |    |         |         |                |               |         |                      |             |
| CB4856                                                                                                                                                                                                     | CT | II | 8722474 | 8725522 | WBGene00011312 | trcs-2        | T01B7.6 | -0.00289735128052371 | AGIWUR22900 |
| CB4856                                                                                                                                                                                                     | CT | II | 8725533 | 8729777 | WBGene00011314 | T01B7.9       | T01B7.9 | 0.168829682021022    | AGIWUR6767  |
| CB4856                                                                                                                                                                                                     | CT | II | 8733050 | 8734314 | WBGene00004397 | rol-6         | T01B7.7 | -0.217023519716941   | AGIWUR25131 |
| CB4856                                                                                                                                                                                                     | CT | II | 8736726 | 8737556 | WBGene00011313 | T01B7.8       | T01B7.8 | -0.270847785245576   | AGIWUR14303 |
| CB4856                                                                                                                                                                                                     | CT | II | 8743725 | 8747234 | WBGene00010681 | mak-1         | K08F8.1 | 0.429346575777007    |             |
| AGIWUR4577;AGIWUR13470;AGIWUR14854;AGIWUR18734;AGIWUR19560;AGIWUR20333;AGIWUR20930;AGIWUR21944;AGIWUR22982;AGIWUR25100;AGIWUR30687;AGIWUR31970;AGIWUR32850;AGIWUR34735;AGIWUR37918;AGIWUR40571;AGIWUR42916 |    |    |         |         |                |               |         |                      |             |
| CB4856                                                                                                                                                                                                     | CT | II | 8751986 | 8753939 | WBGene00000220 | atf-2         | K08F8.2 | 1.18335178634244     | AGIWUR24767 |
| CB4856                                                                                                                                                                                                     | CT | II | 8754113 | 8755248 | WBGene00010683 | K08F8.7       | K08F8.7 | 0.133771779874772    | AGIWUR32053 |
| CB4856                                                                                                                                                                                                     | CT | II | 8756291 | 8758723 | WBGene00001505 | fut-1         | K08F8.3 | -0.0640805459172178  | AGIWUR29855 |
| CB4856                                                                                                                                                                                                     | CT | II | 8762668 | 8766922 | WBGene00000240 | pah-1         | K08F8.4 | -0.426572733790336   |             |
| AGIWUR3575;AGIWUR4523;AGIWUR22284;AGIWUR29197;AGIWUR45094                                                                                                                                                  |    |    |         |         |                |               |         |                      |             |
| CB4856                                                                                                                                                                                                     | CT | II | 8767185 | 8769307 | WBGene00010682 | K08F8.5       | K08F8.5 | -0.318087056359932   | AGIWUR39492 |
| CB4856                                                                                                                                                                                                     | CT | II | 8770975 | 8782020 | WBGene00002295 | let-19        | K08F8.6 | 0.100176831289569    |             |

AGIWUR4540;AGIWUR10212;AGIWUR18372;AGIWUR25471;AGIWUR28734;AGIWUR42522  
 CB4856 CT II 8782029 8783670 WBGene00004790 sgn-1 F07H5.2 -0.0987032688015077 AGIWUR29530  
 CB4856 CT II 8784535 8785513 WBGene00014307 F07H5.3 F07H5.3 -0.0781542111772549 AGIWUR41665  
 CB4856 CT II 8786457 8787119 WBGene00014308 F07H5.4 F07H5.4 0.500588783129331 AGIWUR18538  
 CB4856 CT II 8787770 8789716 WBGene00014309 F07H5.5 F07H5.5 0.387875905786171  
 AGIWUR17372;AGIWUR24243;AGIWUR28524;AGIWUR32492;AGIWUR39338;AGIWUR44699  
 CB4856 CT II 8790558 8791318 WBGene00008563 F07H5.13 F07H5.13 0.807221691325029  
 AGIWUR7414;AGIWUR39817  
 CB4856 CT II 8791927 8792740 WBGene00008557 F07H5.6 F07H5.6 -0.207733556071314  
 AGIWUR4059;AGIWUR10978;AGIWUR39366  
 CB4856 CT II 8792912 8794162 WBGene00008558 F07H5.7 F07H5.7 -0.0939744779576674 AGIWUR34161  
 CB4856 CT II 8801130 8804889 WBGene00008559 F07H5.8 F07H5.8 -0.163231089000488  
 AGIWUR9599;AGIWUR12195;AGIWUR14389;AGIWUR26173;AGIWUR29115  
 CB4856 CT II 8804835 8807021 WBGene00008560 pho-13 F07H5.9 -0.887799132140714 AGIWUR21693  
 CB4856 CT II 8807133 8808582 WBGene00008561 F07H5.10 F07H5.10 -0.01938262494809  
 AGIWUR28131  
 CB4856 CT II 8808636 8810729 WBGene00009784 F46C5.9 F46C5.9 0.216038267894495 AGIWUR9698  
 CB4856 CT II 8811353 8812633 WBGene00009783 rer-1 F46C5.8 -0.162590162664713  
 AGIWUR2840;AGIWUR4345;AGIWUR39178  
 CB4856 CT II 8817593 8818426 WBGene00009785 F46C5.10 F46C5.10 0.0410612939376023  
 AGIWUR30007  
 CB4856 CT II 8820149 8821248 WBGene00009778 F46C5.1 F46C5.1 5.75103865089278 AGIWUR19741  
 CB4856 CT II 8826069 8828215 WBGene00003544 nas-25 F46C5.3 0.0985634352349876  
 AGIWUR2053;AGIWUR14007;AGIWUR15314;AGIWUR18326;AGIWUR22006;AGIWUR25476  
 CB4856 CT II 8828196 8829287 WBGene00009779 F46C5.2 F46C5.2 0.146838482571045 AGIWUR36211  
 CB4856 CT II 8836175 8839313 WBGene00009780 F46C5.4 F46C5.4 -0.0521349365374757 AGIWUR4321  
 CB4856 CT II 8839325 8840243 WBGene00009782 F46C5.7 F46C5.7 -0.0132265084699128 AGIWUR12915  
 CB4856 CT II 8840200 8844515 WBGene00009781 F46C5.6 F46C5.6 -0.206160199070267 AGIWUR15946  
 CB4856 CT II 8845598 8848902 WBGene00011767 agxt-1 T14D7.1 0.0521957626025369  
 AGIWUR23608;AGIWUR43545  
 CB4856 CT II 8848843 8852096 WBGene00011768 oac-46 T14D7.2 0.20248358716078  
 AGIWUR22936;AGIWUR29185;AGIWUR31496;AGIWUR34912;AGIWUR35792;AGIWUR37935  
 CB4856 CT II 8859074 8859696 WBGene00044062 snb-6 T14D7.3 0.294221012842762 AGIWUR10821  
 CB4856 CT II 8860913 8865173 WBGene00011578 npr-20 T07D4.1 0.233334760013316 AGIWUR14786  
 CB4856 CT II 8869549 8874020 WBGene00011579 T07D4.2 T07D4.2 0.17471227409022 AGIWUR34616  
 CB4856 CT II 8878496 8883659 WBGene00004355 rha-1 T07D4.3 -0.117828497242794 AGIWUR8834  
 CB4856 CT II 8883763 8884418 WBGene00045407 T07D4.5 T07D4.5 -0.295947723130628  
 AGIWUR2542;AGIWUR42808  
 CB4856 CT II 8884901 8889673 WBGene00011580 ddx-19 T07D4.4 -0.15303832305786

AGIWUR1657;AGIWUR3284;AGIWUR7547

CB4856 CT II 8896841 8908666 WBGene00002251 lat-1 B0457.1 -0.0310661759104729  
AGIWUR4436;AGIWUR10719;AGIWUR13483;AGIWUR16585;AGIWUR16626;AGIWUR21725;AGIWUR23036;AGIWUR29098;AGIWUR29801;  
AGIWUR36610;AGIWUR38597;AGIWUR44924

CB4856 CT II 8909008 8909994 WBGene00014660 B0457.3 B0457.3 -0.0442383401636239

AGIWUR20307;AGIWUR37158

CB4856 CT II 8910913 8912029 WBGene00007179 B0457.4 B0457.4 -0.0719346425412555 AGIWUR5875  
CB4856 CT II 8922423 8924373 WBGene00007180 B0457.6 B0457.6 -0.166481523292056 AGIWUR30915  
CB4856 CT II 8924572 8926678 WBGene00007178 B0457.2 B0457.2 0.0898067363210693 AGIWUR32452  
CB4856 CT II 8927741 8929820 WBGene00000378 cct-2 T21B10.7 -0.243034692408413

AGIWUR1976;AGIWUR8551;AGIWUR9167;AGIWUR14051;AGIWUR22008;AGIWUR22119;AGIWUR23132;AGIWUR25480;AGIWUR29685;AGIWUR30090;AGIWUR34863;AGIWUR35363;AGIWUR40687;AGIWUR42308;AGIWUR42836

CB4856 CT II 8929841 8930937 WBGene00011883 mrp1-50 T21B10.1 -0.515297532747756

AGIWUR14079

CB4856 CT II 8930985 8933833 WBGene00011884 eno1-1 T21B10.2 -0.0675065661123746

AGIWUR5548;AGIWUR7435;AGIWUR9458;AGIWUR12492;AGIWUR12639;AGIWUR30121;AGIWUR31823

CB4856 CT II 8934382 8939033 WBGene00011885 T21B10.3 T21B10.3 0.0310692666483501

AGIWUR25642

CB4856 CT II 8939204 8940488 WBGene00011887 set-17 T21B10.5 -0.093919963499058

AGIWUR5839

CB4856 CT II 8940894 8942718 WBGene00011886 T21B10.4 T21B10.4 0.00456950503994236

AGIWUR40409

CB4856 CT II 8942674 8947688 WBGene00011888 cut1-15 T21B10.6 0.0375539747636209

AGIWUR8379;AGIWUR37786

CB4856 CT II 8955240 8964149 WBGene00007690 sftd-3 C18E9.10 0.0875069573418266

AGIWUR39676

CB4856 CT II 8964238 8964901 WBGene00007684 C18E9.4 C18E9.4 -0.309730900497735 AGIWUR2027  
CB4856 CT II 8965006 8966919 WBGene00007683 C18E9.2 C18E9.2 -0.520790811803314 AGIWUR19427  
CB4856 CT II 8966921 8969473 WBGene00004105 szy-20 C18E9.3 -0.270000136414033 AGIWUR232  
CB4856 CT II 8969980 8971967 WBGene00007685 C18E9.5 C18E9.5 -0.555521185971848 AGIWUR9657  
CB4856 CT II 8971965 8973566 WBGene00007686 tomm-40 C18E9.6 -0.133914648076285 AGIWUR15552  
CB4856 CT II 8978475 8982678 WBGene00007687 C18E9.7 C18E9.7 -0.133432343667465 AGIWUR29598  
CB4856 CT II 8985900 8988062 WBGene00007688 C18E9.8 C18E9.8 -0.139461267046305 AGIWUR27516  
CB4856 CT II 8988359 8989544 WBGene00007689 C18E9.9 C18E9.9 0.0901145920565849 AGIWUR34240  
CB4856 CT II 8993169 8994533 WBGene00003870 ooc-5 C18E9.11 -0.10154578985567

AGIWUR34657

CB4856 CT II 8994636 8996269 WBGene00009711 F44G4.1 F44G4.1 -0.0624149309073552 AGIWUR36515

CB4856 CT II 8996364 8997037 WBGene00009712 F44G4.2 F44G4.2 -0.0510557575355648

AGIWUR26656;AGIWUR29476;AGIWUR37899

|                                                                                                 |    |    |         |         |                |          |          |                      |             |
|-------------------------------------------------------------------------------------------------|----|----|---------|---------|----------------|----------|----------|----------------------|-------------|
| CB4856                                                                                          | CT | II | 8997027 | 8997662 | WBGene00009713 | F44G4.3  | F44G4.3  | -0.305938176222082   | AGIWUR39850 |
| CB4856                                                                                          | CT | II | 8997827 | 8999722 | WBGene00006514 | tdp-1    | F44G4.4  | -0.0916903350191136  |             |
| AGIWUR6241;AGIWUR23305;AGIWUR31169;AGIWUR40138;AGIWUR43127;AGIWUR43210                          |    |    |         |         |                |          |          |                      |             |
| CB4856                                                                                          | CT | II | 8999727 | 9000431 | WBGene00009714 | F44G4.5  | F44G4.5  | 0.231658245639387    | AGIWUR28065 |
| CB4856                                                                                          | CT | II | 9000872 | 9001793 | WBGene00009715 | F44G4.6  | F44G4.6  | -0.110766408912465   | AGIWUR23769 |
| CB4856                                                                                          | CT | II | 9002527 | 9005167 | WBGene00009716 | F44G4.7  | F44G4.7  | 0.167854770542527    | AGIWUR41942 |
| CB4856                                                                                          | CT | II | 9005796 | 9019775 | WBGene00009717 | dep-1    | F44G4.8  | 0.464681592929534    |             |
| AGIWUR4980;AGIWUR14304;AGIWUR27995                                                              |    |    |         |         |                |          |          |                      |             |
| CB4856                                                                                          | CT | II | 9026968 | 9029263 | WBGene00009504 | F37B12.1 | F37B12.1 | 0.00596581065751423  |             |
| AGIWUR28129                                                                                     |    |    |         |         |                |          |          |                      |             |
| CB4856                                                                                          | CT | II | 9035562 | 9038301 | WBGene00001527 | gcs-1    | F37B12.2 | -0.159209885535451   |             |
| AGIWUR36032;AGIWUR39622                                                                         |    |    |         |         |                |          |          |                      |             |
| CB4856                                                                                          | CT | II | 9039820 | 9041406 | WBGene00009505 | F37B12.3 | F37B12.3 | -0.0708633725461763  |             |
| AGIWUR6571                                                                                      |    |    |         |         |                |          |          |                      |             |
| CB4856                                                                                          | CT | II | 9042180 | 9053824 | WBGene00011980 | T24B8.7  | T24B8.7  | -0.142067329211564   |             |
| AGIWUR3801;AGIWUR7738;AGIWUR38682                                                               |    |    |         |         |                |          |          |                      |             |
| CB4856                                                                                          | CT | II | 9054972 | 9056504 | WBGene00011976 | T24B8.2  | T24B8.2  | 0.330424919369918    | AGIWUR38510 |
| CB4856                                                                                          | CT | II | 9056499 | 9057111 | WBGene00004446 | rp1-32   | T24B8.1  | -0.0268485206179383  |             |
| AGIWUR17408;AGIWUR18356;AGIWUR19434;AGIWUR19524;AGIWUR26213;AGIWUR26733;AGIWUR34869;AGIWUR36838 |    |    |         |         |                |          |          |                      |             |
| CB4856                                                                                          | CT | II | 9059389 | 9061138 | WBGene00011977 | T24B8.3  | T24B8.3  | 0.243120169963777    |             |
| AGIWUR8853;AGIWUR15171;AGIWUR15912;AGIWUR22651;AGIWUR28452;AGIWUR38847                          |    |    |         |         |                |          |          |                      |             |
| CB4856                                                                                          | CT | II | 9063687 | 9070904 | WBGene00011978 | T24B8.4  | T24B8.4  | 0.174605419372091    |             |
| AGIWUR11315;AGIWUR11955;AGIWUR12228;AGIWUR35707                                                 |    |    |         |         |                |          |          |                      |             |
| CB4856                                                                                          | CT | II | 9082626 | 9083146 | WBGene00011979 | T24B8.5  | T24B8.5  | -0.738032263262415   |             |
| AGIWUR4785;AGIWUR5986;AGIWUR16640;AGIWUR24375;AGIWUR34447;AGIWUR40012                           |    |    |         |         |                |          |          |                      |             |
| CB4856                                                                                          | CT | II | 9086608 | 9087917 | WBGene00001950 | h1h-3    | T24B8.6  | 0.341589521942197    | AGIWUR14966 |
| CB4856                                                                                          | CT | II | 9091109 | 9093696 | WBGene00007421 | C07H4.1  | C07H4.1  | -0.390375450866358   | AGIWUR20829 |
| CB4856                                                                                          | CT | II | 9094710 | 9098605 | WBGene00000532 | c1h-5    | C07H4.2  | 0.128757170235346    | AGIWUR9749  |
| CB4856                                                                                          | CT | II | 9099371 | 9100639 | WBGene00012000 | T24H10.1 | T24H10.1 | -0.133630430152476   |             |
| AGIWUR27507                                                                                     |    |    |         |         |                |          |          |                      |             |
| CB4856                                                                                          | CT | II | 9101098 | 9105451 | WBGene00012003 | T24H10.5 | T24H10.5 | 0.180128489144053    |             |
| AGIWUR7016                                                                                      |    |    |         |         |                |          |          |                      |             |
| CB4856                                                                                          | CT | II | 9106515 | 9107145 | WBGene00012004 | dyrb-1   | T24H10.6 | -0.112628883188655   |             |
| AGIWUR14292                                                                                     |    |    |         |         |                |          |          |                      |             |
| CB4856                                                                                          | CT | II | 9107382 | 9108600 | WBGene00001041 | dnj-23   | T24H10.3 | -0.00240997483164662 |             |
| AGIWUR28826                                                                                     |    |    |         |         |                |          |          |                      |             |
| CB4856                                                                                          | CT | II | 9109534 | 9111240 | WBGene00012002 | T24H10.4 | T24H10.4 | 0.0356364379991572   |             |
| AGIWUR39308                                                                                     |    |    |         |         |                |          |          |                      |             |
| CB4856                                                                                          | CT | II | 9113219 | 9132213 | WBGene00012005 | jun-1    | T24H10.7 | -0.0239221613320515  |             |

AGIWUR15041;AGIWUR15175;AGIWUR39207;AGIWUR43228  
 CB4856 CT II 9131663 9134543 WBGene00007633 C16D2.1 C16D2.1 0.132453930260589  
 AGIWUR3556;AGIWUR11436;AGIWUR25167;AGIWUR25792;AGIWUR35378;AGIWUR43292  
 CB4856 CT II 9139651 9145352 WBGene00012421 Y9C2UA.1 Y9C2UA.1 0.264110176823669  
 AGIWUR28136;AGIWUR44101  
 CB4856 CT II 9146261 9146641 WBGene00012422 Y9C2UA.2 Y9C2UA.2 -0.0317710214763682  
 AGIWUR34874  
 CB4856 CT II 9148356 9152311 WBGene00012322 W07A12.4 W07A12.4 0.0333454275765384  
 AGIWUR14184  
 CB4856 CT II 9152531 9154310 WBGene00000654 col-78 W07A12.5 -0.179900876678156  
 AGIWUR17535  
 CB4856 CT II 9158108 9159874 WBGene00012323 oac-54 W07A12.6 -0.334135754924986  
 AGIWUR12447  
 CB4856 CT II 9161379 9163448 WBGene00012324 rhy-1 W07A12.7 -0.464678813494519  
 AGIWUR26959  
 CB4856 CT II 9163368 9165800 WBGene00012325 W07A12.8 W07A12.8 -0.79474779533335  
 AGIWUR12569  
 CB4856 CT II 9165929 9167830 WBGene00011966 T23G7.3 T23G7.3 0.183725273903569 AGIWUR30241  
 CB4856 CT II 9167933 9172991 WBGene00011965 T23G7.2 T23G7.2 0.0542672966090372 AGIWUR12448  
 CB4856 CT II 9173175 9177152 WBGene00004752 sec-5 T23G7.4 -0.0877219176436626 AGIWUR6458  
 CB4856 CT II 9177300 9178585 WBGene00011967 pir-1 T23G7.5 -0.0119777196563184  
 AGIWUR12789;AGIWUR28676;AGIWUR35975  
 CB4856 CT II 9178514 9188480 WBGene00006367 sym-2 ZK1067.6 0.263393936813921  
 AGIWUR16239  
 CB4856 CT II 9197518 9207210 WBGene00002299 let-23 ZK1067.1 0.269578408698784  
 AGIWUR38958  
 CB4856 CT II 9210376 9213100 WBGene00014210 ZK1067.4 ZK1067.4 -0.148900483459515  
 AGIWUR18196  
 CB4856 CT II 9213658 9222798 WBGene00014208 ZK1067.2 ZK1067.2 -0.233537207597936  
 AGIWUR280;AGIWUR30742;AGIWUR36429;AGIWUR38565  
 CB4856 CT II 9223269 9225176 WBGene00014209 ZK1067.3 ZK1067.3 -0.122306081589183  
 AGIWUR11545  
 CB4856 CT II 9225186 9227261 WBGene00004174 abu-14 ZK1067.7 -0.0774412430626779  
 AGIWUR14252;AGIWUR36345;AGIWUR43716  
 CB4856 CT II 9231457 9232340 WBGene00001761 gst-13 T26C5.1 -0.405680255245793 AGIWUR6051  
 CB4856 CT II 9233223 9236202 WBGene00012032 T26C5.2 T26C5.2 0.298237933840935  
 AGIWUR22340;AGIWUR30572;AGIWUR39818  
 CB4856 CT II 9236583 9249123 WBGene00012033 T26C5.3 T26C5.3 0.0677078675256784 AGIWUR43937  
 CB4856 CT II 9249048 9250522 WBGene00012034 T26C5.4 T26C5.4 0.232351203800871 AGIWUR5499

|                                                                                                                                  |    |    |         |         |                |          |          |                      |             |
|----------------------------------------------------------------------------------------------------------------------------------|----|----|---------|---------|----------------|----------|----------|----------------------|-------------|
| CB4856                                                                                                                           | CT | II | 9251788 | 9254312 | WBGene00044006 | H32K21.1 | H32K21.1 | 0.224006300234066    |             |
| AGIWUR9374;AGIWUR14634;AGIWUR29552;AGIWUR32187;AGIWUR33749                                                                       |    |    |         |         |                |          |          |                      |             |
| CB4856                                                                                                                           | CT | II | 9258913 | 9261994 | WBGene00000170 | aqp-2    | C01G6.1  | 1.18952880981641     |             |
| AGIWUR6503;AGIWUR16119;AGIWUR16505;AGIWUR16669;AGIWUR38863;AGIWUR42186;AGIWUR43505                                               |    |    |         |         |                |          |          |                      |             |
| CB4856                                                                                                                           | CT | II | 9267336 | 9268303 | WBGene00007224 | C01G6.2  | C01G6.2  | -0.406088197498356   | AGIWUR904   |
| CB4856                                                                                                                           | CT | II | 9269888 | 9271267 | WBGene00007225 | C01G6.3  | C01G6.3  | 0.703627963828103    | AGIWUR10148 |
| CB4856                                                                                                                           | CT | II | 9271265 | 9273042 | WBGene00007226 | C01G6.4  | C01G6.4  | 0.134904083670236    | AGIWUR4309  |
| CB4856                                                                                                                           | CT | II | 9275024 | 9280098 | WBGene00007227 | C01G6.5  | C01G6.5  | 0.0155009516672306   |             |
| AGIWUR7512;AGIWUR15656;AGIWUR20663;AGIWUR34921                                                                                   |    |    |         |         |                |          |          |                      |             |
| CB4856                                                                                                                           | CT | II | 9285932 | 9289136 | WBGene00006510 | mtrr-1   | C01G6.6  | -0.304716570515659   |             |
| AGIWUR4599;AGIWUR5472;AGIWUR6166;AGIWUR8083;AGIWUR10918;AGIWUR36993                                                              |    |    |         |         |                |          |          |                      |             |
| CB4856                                                                                                                           | CT | II | 9289506 | 9291539 | WBGene00014663 | C01G6.10 | C01G6.10 | -0.17092399975022    |             |
| AGIWUR10768;AGIWUR33227                                                                                                          |    |    |         |         |                |          |          |                      |             |
| CB4856                                                                                                                           | CT | II | 9292017 | 9294050 | WBGene00007228 | acs-7    | C01G6.7  | 0.177875396295684    |             |
| AGIWUR16134;AGIWUR20204;AGIWUR41951                                                                                              |    |    |         |         |                |          |          |                      |             |
| CB4856                                                                                                                           | CT | II | 9294029 | 9295753 | WBGene00007229 | C01G6.9  | C01G6.9  | 0.780282076477057    | AGIWUR9968  |
| CB4856                                                                                                                           | CT | II | 9295918 | 9310304 | WBGene00000289 | cam-1    | C01G6.8  | 0.185098169775369    | AGIWUR22200 |
| CB4856                                                                                                                           | CT | II | 9317551 | 9319627 | WBGene00008403 | csa-1    | D2013.3  | -0.250775697509816   | AGIWUR20055 |
| CB4856                                                                                                                           | CT | II | 9319865 | 9321888 | WBGene00008402 | wdfy-2   | D2013.2  | -0.156453962107001   | AGIWUR11794 |
| CB4856                                                                                                                           | CT | II | 9321858 | 9322916 | WBGene00004286 | rab-39   | D2013.1  | -0.00419200376854256 | AGIWUR37896 |
| CB4856                                                                                                                           | CT | II | 9323955 | 9324873 | WBGene00006520 | tag-175  | D2013.10 | -0.0217967671089063  |             |
| AGIWUR7498;AGIWUR13845;AGIWUR37776                                                                                               |    |    |         |         |                |          |          |                      |             |
| CB4856                                                                                                                           | CT | II | 9324874 | 9329665 | WBGene00001134 | eat-3    | D2013.5  | -0.344920525574132   |             |
| AGIWUR5032;AGIWUR9059;AGIWUR14969                                                                                                |    |    |         |         |                |          |          |                      |             |
| CB4856                                                                                                                           | CT | II | 9329757 | 9331510 | WBGene00008404 | D2013.6  | D2013.6  | 0.224040098643528    | AGIWUR9103  |
| CB4856                                                                                                                           | CT | II | 9331643 | 9333925 | WBGene00001229 | eif-3.F  | D2013.7  | -0.283591671551143   | AGIWUR26638 |
| CB4856                                                                                                                           | CT | II | 9334014 | 9338896 | WBGene00004744 | scp-1    | D2013.8  | -0.0983549821623253  | AGIWUR31494 |
| CB4856                                                                                                                           | CT | II | 9338890 | 9341394 | WBGene00008405 | ttl1-12  | D2013.9  | 0.0180609002671339   |             |
| AGIWUR4157;AGIWUR10715;AGIWUR42764                                                                                               |    |    |         |         |                |          |          |                      |             |
| CB4856                                                                                                                           | CT | II | 9341397 | 9346590 | WBGene00009626 | F42A8.1  | F42A8.1  | -0.673053095019888   | AGIWUR629   |
| CB4856                                                                                                                           | CT | II | 9350648 | 9352801 | WBGene00006433 | sdhb-1   | F42A8.2  | 0.0900390743756923   |             |
| AGIWUR10676;AGIWUR41853                                                                                                          |    |    |         |         |                |          |          |                      |             |
| CB4856                                                                                                                           | CT | II | 9353000 | 9354327 | WBGene00009627 | F42A8.3  | F42A8.3  | -0.266452610282165   | AGIWUR6749  |
| CB4856                                                                                                                           | CT | II | 9358531 | 9369098 | WBGene00003196 | mel-11   | C06C3.1  | 0.0332911555282234   |             |
| AGIWUR488;AGIWUR8877;AGIWUR12482;AGIWUR18840;AGIWUR22152;AGIWUR27473;AGIWUR28945;AGIWUR31426;AGIWUR32983;AGIWUR35345;AGIWUR41789 |    |    |         |         |                |          |          |                      |             |
| CB4856                                                                                                                           | CT | II | 9369178 | 9372485 | WBGene00007374 | C06C3.3  | C06C3.3  | 0.21040237783724     | AGIWUR42015 |
| CB4856                                                                                                                           | CT | II | 9375845 | 9377258 | WBGene00044169 | C06C3.10 | C06C3.10 | -0.187769804287017   |             |
| AGIWUR7373;AGIWUR19914;AGIWUR21399;AGIWUR24535;AGIWUR35394;AGIWUR42353;AGIWUR44149                                               |    |    |         |         |                |          |          |                      |             |

|                                                                                    |    |    |         |         |                |          |          |                      |             |
|------------------------------------------------------------------------------------|----|----|---------|---------|----------------|----------|----------|----------------------|-------------|
| CB4856                                                                             | CT | II | 9378557 | 9379596 | WBGene00045404 | C06C3.11 | C06C3.11 | -0.380112314400556   |             |
| AGIWUR14892;AGIWUR22768                                                            |    |    |         |         |                |          |          |                      |             |
| CB4856                                                                             | CT | II | 9380106 | 9381355 | WBGene00007376 | C06C3.5  | C06C3.5  | -0.306143249773133   |             |
| AGIWUR7789;AGIWUR43989                                                             |    |    |         |         |                |          |          |                      |             |
| CB4856                                                                             | CT | II | 9380822 | 9384995 | WBGene00005271 | srh-48   | C06C3.6  | 0.0530426249626945   |             |
| AGIWUR777;AGIWUR30993;AGIWUR41635                                                  |    |    |         |         |                |          |          |                      |             |
| CB4856                                                                             | CT | II | 9385541 | 9386537 | WBGene00007377 | C06C3.7  | C06C3.7  | -0.0839249911527435  | AGIWUR9039  |
| CB4856                                                                             | CT | II | 9386584 | 9390900 | WBGene00007378 | C06C3.8  | C06C3.8  | 0.560631321954553    | AGIWUR24997 |
| CB4856                                                                             | CT | II | 9395493 | 9397596 | WBGene00013091 | Y51B9A.9 | Y51B9A.9 | 0.671941949004276    |             |
| AGIWUR15463                                                                        |    |    |         |         |                |          |          |                      |             |
| CB4856                                                                             | CT | II | 9398866 | 9399828 | WBGene00013090 | Y51B9A.8 | Y51B9A.8 | 0.159080976846226    |             |
| AGIWUR38154                                                                        |    |    |         |         |                |          |          |                      |             |
| CB4856                                                                             | CT | II | 9400053 | 9400567 | WBGene00013089 | Y51B9A.7 | Y51B9A.7 |                      |             |
| 0.000114448694899849 AGIWUR18686                                                   |    |    |         |         |                |          |          |                      |             |
| CB4856                                                                             | CT | II | 9400717 | 9403187 | WBGene00013088 | Y51B9A.6 | Y51B9A.6 | 0.0977577015916467   |             |
| AGIWUR41585                                                                        |    |    |         |         |                |          |          |                      |             |
| CB4856                                                                             | CT | II | 9404146 | 9404779 | WBGene00013087 | Y51B9A.5 | Y51B9A.5 | 0.0701785304744611   |             |
| AGIWUR8521                                                                         |    |    |         |         |                |          |          |                      |             |
| CB4856                                                                             | CT | II | 9405539 | 9407114 | WBGene00013085 | mpz-6    | Y51B9A.3 | 0.0211745197588016   |             |
| AGIWUR30524                                                                        |    |    |         |         |                |          |          |                      |             |
| CB4856                                                                             | CT | II | 9407270 | 9407547 | WBGene00014909 | Y51B9A.2 | Y51B9A.2 | -0.188733631861202   |             |
| AGIWUR27725                                                                        |    |    |         |         |                |          |          |                      |             |
| CB4856                                                                             | CT | II | 9407769 | 9409017 | WBGene00013086 | arrd-2   | Y51B9A.4 | -0.143556444520073   |             |
| AGIWUR1161;AGIWUR16056;AGIWUR19379                                                 |    |    |         |         |                |          |          |                      |             |
| CB4856                                                                             | CT | II | 9409341 | 9411597 | WBGene00014813 | M176.9   | M176.9   | -0.0803976041279917  |             |
| AGIWUR5800;AGIWUR17079;AGIWUR29430;AGIWUR30418;AGIWUR33537;AGIWUR38628;AGIWUR42401 |    |    |         |         |                |          |          |                      |             |
| CB4856                                                                             | CT | II | 9412565 | 9414144 | WBGene00006429 | arrd-3   | M176.1   | -0.634883329972665   | AGIWUR39634 |
| CB4856                                                                             | CT | II | 9414559 | 9416431 | WBGene00010941 | gss-1    | M176.2   | -0.179202439364856   |             |
| AGIWUR3744;AGIWUR7901;AGIWUR17536;AGIWUR39771                                      |    |    |         |         |                |          |          |                      |             |
| CB4856                                                                             | CT | II | 9417013 | 9418316 | WBGene00010942 | chch-3   | M176.3   | -0.0143443225182835  |             |
| AGIWUR14876;AGIWUR32165                                                            |    |    |         |         |                |          |          |                      |             |
| CB4856                                                                             | CT | II | 9420178 | 9422196 | WBGene00010943 | M176.4   | M176.4   | 0.449657899077268    | AGIWUR16670 |
| CB4856                                                                             | CT | II | 9422269 | 9423296 | WBGene00010947 | M176.11  | M176.11  | -0.389428091799003   | AGIWUR6138  |
| CB4856                                                                             | CT | II | 9423331 | 9426173 | WBGene00010946 | M176.10  | M176.10  | -0.00299425076349458 | AGIWUR8173  |
| CB4856                                                                             | CT | II | 9426229 | 9427744 | WBGene00010944 | M176.5   | M176.5   | -0.140937546483254   | AGIWUR437   |
| CB4856                                                                             | CT | II | 9431383 | 9433709 | WBGene00002199 | kin-15   | M176.6   | -0.830242147364668   | AGIWUR9251  |
| CB4856                                                                             | CT | II | 9434021 | 9436120 | WBGene00002200 | kin-16   | M176.7   | -0.137845734175526   | AGIWUR37351 |
| CB4856                                                                             | CT | II | 9436649 | 9438327 | WBGene00010945 | chil-13  | M176.8   | -0.0459583330217317  |             |
| AGIWUR14242;AGIWUR18118;AGIWUR20828;AGIWUR22939;AGIWUR39368                        |    |    |         |         |                |          |          |                      |             |

|                                                                                                                      |    |    |         |         |                |          |          |                      |             |
|----------------------------------------------------------------------------------------------------------------------|----|----|---------|---------|----------------|----------|----------|----------------------|-------------|
| CB4856                                                                                                               | CT | II | 9438609 | 9440160 | WBGene00011159 | chil-17  | R09D1.3  | 0.0581729490039216   | AGIWUR9661  |
| CB4856                                                                                                               | CT | II | 9440441 | 9441959 | WBGene00011158 | chil-16  | R09D1.2  | 0.0648244800376432   | AGIWUR12002 |
| CB4856                                                                                                               | CT | II | 9442168 | 9443629 | WBGene00011157 | chil-15  | R09D1.1  | 0.184580232484664    | AGIWUR22130 |
| CB4856                                                                                                               | CT | II | 9443827 | 9445468 | WBGene00011169 | R09D1.13 | R09D1.13 | -0.202199929480916   |             |
| AGIWUR9592                                                                                                           |    |    |         |         |                |          |          |                      |             |
| CB4856                                                                                                               | CT | II | 9446090 | 9447705 | WBGene00011160 | R09D1.4  | R09D1.4  | 0.22017425057087     | AGIWUR21760 |
| CB4856                                                                                                               | CT | II | 9448273 | 9449726 | WBGene00011161 | chil-18  | R09D1.5  | 0.192801671801053    | AGIWUR17840 |
| CB4856                                                                                                               | CT | II | 9450028 | 9452263 | WBGene00011168 | R09D1.12 | R09D1.12 | 0.0681779907342652   |             |
| AGIWUR2982;AGIWUR9608;AGIWUR10424;AGIWUR16494                                                                        |    |    |         |         |                |          |          |                      |             |
| CB4856                                                                                                               | CT | II | 9455417 | 9456617 | WBGene00011163 | chil-20  | R09D1.7  | 0.00438647673367143  | AGIWUR41221 |
| CB4856                                                                                                               | CT | II | 9462537 | 9464093 | WBGene00011165 | R09D1.9  | R09D1.9  | -0.156407372330615   |             |
| AGIWUR13346;AGIWUR21482;AGIWUR21719;AGIWUR24513                                                                      |    |    |         |         |                |          |          |                      |             |
| CB4856                                                                                                               | CT | II | 9464470 | 9466195 | WBGene00011166 | chil-22  | R09D1.10 | 0.000572242079774909 |             |
| AGIWUR31774                                                                                                          |    |    |         |         |                |          |          |                      |             |
| CB4856                                                                                                               | CT | II | 9466960 | 9468477 | WBGene00011167 | chil-23  | R09D1.11 | 0.458556529372663    |             |
| AGIWUR22536                                                                                                          |    |    |         |         |                |          |          |                      |             |
| CB4856                                                                                                               | CT | II | 9469119 | 9470082 | WBGene00044807 | T19H5.6  | T19H5.6  | 0.610755705728327    | AGIWUR34993 |
| CB4856                                                                                                               | CT | II | 9470521 | 9471924 | WBGene00044806 | T19H5.5  | T19H5.5  | 0.0405448815540455   | AGIWUR44827 |
| CB4856                                                                                                               | CT | II | 9472691 | 9474467 | WBGene00011846 | chil-25  | T19H5.1  | -0.152310207996719   |             |
| AGIWUR41436;AGIWUR41503                                                                                              |    |    |         |         |                |          |          |                      |             |
| CB4856                                                                                                               | CT | II | 9475055 | 9476375 | WBGene00011847 | chil-26  | T19H5.2  | 0.18137823519305     | AGIWUR15275 |
| CB4856                                                                                                               | CT | II | 9477867 | 9479536 | WBGene00011848 | chil-27  | T19H5.3  | -0.241274934533485   | AGIWUR1801  |
| CB4856                                                                                                               | CT | II | 9479641 | 9480106 | WBGene00045414 | T19H5.7  | T19H5.7  | -0.156685383114791   |             |
| AGIWUR267;AGIWUR4245;AGIWUR12414;AGIWUR16867;AGIWUR18186;AGIWUR18396;AGIWUR19091;AGIWUR23500;AGIWUR26261;AGIWUR36288 |    |    |         |         |                |          |          |                      |             |
| CB4856                                                                                                               | CT | II | 9486377 | 9488260 | WBGene00011849 | T19H5.4  | T19H5.4  | 0.807536955158259    | AGIWUR33194 |
| CB4856                                                                                                               | CT | II | 9502757 | 9507281 | WBGene00001530 | gcy-3    | R134.1   | -0.0408547751936119  | AGIWUR20905 |
| CB4856                                                                                                               | CT | II | 9507604 | 9512095 | WBGene00001529 | gcy-2    | R134.2   | 0.194724489796297    | AGIWUR21956 |
| CB4856                                                                                                               | CT | II | 9512490 | 9516936 | WBGene00001528 | gcy-1    | AH6.1    | 0.260842328570684    | AGIWUR34842 |
| CB4856                                                                                                               | CT | II | 9517567 | 9518876 | WBGene00007080 | sfxn-1.1 | AH6.2    | -0.203749188099923   |             |
| AGIWUR30366                                                                                                          |    |    |         |         |                |          |          |                      |             |
| CB4856                                                                                                               | CT | II | 9519055 | 9520205 | WBGene00007081 | AH6.3    | AH6.3    | 0.0407244547949368   | AGIWUR10180 |
| CB4856                                                                                                               | CT | II | 9520200 | 9521670 | WBGene00005027 | sra-1    | AH6.4    | 0.107870838423366    | AGIWUR40761 |
| CB4856                                                                                                               | CT | II | 9524174 | 9526390 | WBGene00003231 | mex-6    | AH6.5    | 0.0503980856305652   | AGIWUR26335 |
| CB4856                                                                                                               | CT | II | 9527031 | 9528253 | WBGene00005041 | sra-15   | AH6.16   | 0.0566840052627775   |             |
| AGIWUR9384;AGIWUR33043;AGIWUR38123                                                                                   |    |    |         |         |                |          |          |                      |             |
| CB4856                                                                                                               | CT | II | 9528780 | 9529862 | WBGene00005028 | sra-2    | AH6.6    | -0.0684170252177836  | AGIWUR45064 |
| CB4856                                                                                                               | CT | II | 9530517 | 9531253 | WBGene00005042 | sra-16   | AH6.13   | -0.0970113442561029  |             |
| AGIWUR12292;AGIWUR13397;AGIWUR19197;AGIWUR27224;AGIWUR30160;AGIWUR39965;AGIWUR43396;AGIWUR44805                      |    |    |         |         |                |          |          |                      |             |



|                                                                      |    |    |         |         |                |          |         |                     |                     |
|----------------------------------------------------------------------|----|----|---------|---------|----------------|----------|---------|---------------------|---------------------|
| CB4856                                                               | CT | II | 9532299 | 9533974 | WBGene00005035 | sra-9    | AH6.14  | -0.79634081362544   | AGIWUR20488         |
| CB4856                                                               | CT | II | 9537729 | 9539085 | WBGene00005034 | sra-8    | AH6.12  | -0.0555638842899535 | AGIWUR26993         |
| CB4856                                                               | CT | II | 9539274 | 9540823 | WBGene00005029 | sra-3    | AH6.7   | -0.0879004408960462 | AGIWUR22844         |
| CB4856                                                               | CT | II | 9541601 | 9542885 | WBGene00005030 | sra-4    | AH6.8   | 0.0542726651620029  | AGIWUR22321         |
| CB4856                                                               | CT | II | 9544686 | 9546208 | WBGene00005033 | sra-7    | AH6.11  | -0.565947040074713  | AGIWUR39696         |
| CB4856                                                               | CT | II | 9546438 | 9547647 | WBGene00005031 | sra-5    | AH6.9   | -0.081062818657379  |                     |
| AGIWUR15593;AGIWUR21584                                              |    |    |         |         |                |          |         |                     |                     |
| CB4856                                                               | CT | II | 9548405 | 9549698 | WBGene00005032 | sra-6    | AH6.10  | 0.00104016084499126 | AGIWUR7915          |
| CB4856                                                               | CT | II | 9552631 | 9553279 | WBGene00009446 | F35H8.1  | F35H8.1 | 0.173085345358563   |                     |
| AGIWUR10695;AGIWUR11849;AGIWUR16382                                  |    |    |         |         |                |          |         |                     |                     |
| CB4856                                                               | CT | II | 9555503 | 9557532 | WBGene00009447 | F35H8.2  | F35H8.2 | -0.094254675775737  | AGIWUR43323         |
| CB4856                                                               | CT | II | 9557646 | 9559516 | WBGene00009448 | zfp-2    | F35H8.3 | 0.0213573289556273  | AGIWUR44357         |
| CB4856                                                               | CT | II | 9559497 | 9560029 | WBGene00009449 | F35H8.4  | F35H8.4 | 0.161106647744997   | AGIWUR31921         |
| CB4856                                                               | CT | II | 9575971 | 9581490 | WBGene00001368 | exc-7    | F35H8.5 | 0.39593869604073    |                     |
| AGIWUR723;AGIWUR8197;AGIWUR12981;AGIWUR13353;AGIWUR20665;AGIWUR38098 |    |    |         |         |                |          |         |                     |                     |
| CB4856                                                               | CT | II | 9581756 | 9583548 | WBGene00006938 | wee-1.1  | F35H8.7 | 0.0948853111983974  |                     |
| AGIWUR8384;AGIWUR24870;AGIWUR25452                                   |    |    |         |         |                |          |         |                     |                     |
| CB4856                                                               | CT | II | 9584384 | 9586815 | WBGene00009450 | ugt-58   | F35H8.6 | 0.186828570452954   | AGIWUR29447         |
| CB4856                                                               | CT | II | 9588212 | 9589767 | WBGene00008456 | E02H1.2  | E02H1.2 | -0.456158471129973  | AGIWUR5067          |
| CB4856                                                               | CT | II | 9589865 | 9591221 | WBGene00008455 | E02H1.1  | E02H1.1 | -0.100176991722233  |                     |
| AGIWUR4770;AGIWUR6968;AGIWUR20250                                    |    |    |         |         |                |          |         |                     |                     |
| CB4856                                                               | CT | II | 9591292 | 9592936 | WBGene00006473 | tag-124  | E02H1.3 | -0.260150714015012  | AGIWUR30273         |
| CB4856                                                               | CT | II | 9593037 | 9595128 | WBGene00004050 | parp-2   | E02H1.4 | 0.0752468516679556  |                     |
| AGIWUR16193;AGIWUR17717;AGIWUR35231;AGIWUR43516                      |    |    |         |         |                |          |         |                     |                     |
| CB4856                                                               | CT | II | 9595224 | 9596598 | WBGene00008457 | E02H1.5  | E02H1.5 | -0.249429070570741  | AGIWUR4642          |
| CB4856                                                               | CT | II | 9596701 | 9597528 | WBGene00008458 | E02H1.6  | E02H1.6 | -0.133659640631718  | AGIWUR24417         |
| CB4856                                                               | CT | II | 9597622 | 9598201 | WBGene00008459 | mrpl-53  | E02H1.8 | 0.245075043170676   | AGIWUR10408         |
| CB4856                                                               | CT | II | 9598197 | 9605526 | WBGene00003618 | nhr-19   | E02H1.7 | 1.43788242479012    | AGIWUR17743         |
| CB4856                                                               | CT | II | 9607533 | 9609396 | WBGene00011791 | T15H9.6  | T15H9.6 | -0.239615077994326  | AGIWUR2463          |
| CB4856                                                               | CT | II | 9610678 | 9611372 | WBGene00011790 | T15H9.5  | T15H9.5 | -0.153911504996101  | AGIWUR29738         |
| CB4856                                                               | CT | II | 9611873 | 9613403 | WBGene00011789 | T15H9.4  | T15H9.4 | -0.103562477697558  |                     |
| AGIWUR14684;AGIWUR16096;AGIWUR22993                                  |    |    |         |         |                |          |         |                     |                     |
| CB4856                                                               | CT | II | 9613463 | 9614812 | WBGene00001952 | hlh-6    | T15H9.3 | 0.711849538953427   | AGIWUR7175          |
| CB4856                                                               | CT | II | 9615800 | 9617125 | WBGene00011788 | T15H9.2  | T15H9.2 | -0.0103693403849956 | AGIWUR40983         |
| CB4856                                                               | CT | II | 9617426 | 9624176 | WBGene00001038 | dnj-20   | T15H9.7 | -0.0298194899205608 |                     |
| AGIWUR32249;AGIWUR37878;AGIWUR41905;AGIWUR44083                      |    |    |         |         |                |          |         |                     |                     |
| CB4856                                                               | CT | II | 9624590 | 9626641 | WBGene00014249 | ZK1307.8 |         | ZK1307.8            | -0.299419401091736  |
| AGIWUR2824                                                           |    |    |         |         |                |          |         |                     |                     |
| CB4856                                                               | CT | II | 9636628 | 9640170 | WBGene00014248 | ZK1307.7 |         | ZK1307.7            | -0.0909809502843144 |

AGIWUR17502;AGIWUR21999;AGIWUR22593

|        |    |    |         |         |                |       |          |                     |
|--------|----|----|---------|---------|----------------|-------|----------|---------------------|
| CB4856 | CT | II | 9640167 | 9644466 | WBGene00001510 | fzr-1 | ZK1307.6 | -0.0108462155608038 |
|--------|----|----|---------|---------|----------------|-------|----------|---------------------|

AGIWUR711;AGIWUR5820;AGIWUR6478;AGIWUR13776;AGIWUR16291;AGIWUR25244;AGIWUR44524

|        |    |    |         |         |                |       |          |                     |
|--------|----|----|---------|---------|----------------|-------|----------|---------------------|
| CB4856 | CT | II | 9647887 | 9649367 | WBGene00005026 | sqv-8 | ZK1307.5 | -0.0397835617217943 |
|--------|----|----|---------|---------|----------------|-------|----------|---------------------|

AGIWUR27876

|        |    |    |         |         |                |          |          |                   |
|--------|----|----|---------|---------|----------------|----------|----------|-------------------|
| CB4856 | CT | II | 9649491 | 9650959 | WBGene00014250 | ZK1307.9 | ZK1307.9 | 0.145970173539055 |
|--------|----|----|---------|---------|----------------|----------|----------|-------------------|

AGIWUR32506

|        |    |    |         |         |                |          |          |                    |
|--------|----|----|---------|---------|----------------|----------|----------|--------------------|
| CB4856 | CT | II | 9652308 | 9653019 | WBGene00014246 | ZK1307.3 | ZK1307.3 | -0.184969004776516 |
|--------|----|----|---------|---------|----------------|----------|----------|--------------------|

AGIWUR3583

|        |    |    |         |         |                |          |          |                    |
|--------|----|----|---------|---------|----------------|----------|----------|--------------------|
| CB4856 | CT | II | 9653109 | 9653952 | WBGene00014245 | ZK1307.2 | ZK1307.2 | 0.0932544485401134 |
|--------|----|----|---------|---------|----------------|----------|----------|--------------------|

AGIWUR13506;AGIWUR21858;AGIWUR23126;AGIWUR32393;AGIWUR33914

|        |    |    |         |         |                |          |          |                   |
|--------|----|----|---------|---------|----------------|----------|----------|-------------------|
| CB4856 | CT | II | 9654345 | 9655616 | WBGene00014244 | ZK1307.1 | ZK1307.1 | 0.163101189692533 |
|--------|----|----|---------|---------|----------------|----------|----------|-------------------|

AGIWUR3698;AGIWUR8636;AGIWUR32380

|        |    |    |         |         |                |        |          |                   |
|--------|----|----|---------|---------|----------------|--------|----------|-------------------|
| CB4856 | CT | II | 9656689 | 9657719 | WBGene00014251 | gstk-1 | ZK1320.1 | 0.125931641828814 |
|--------|----|----|---------|---------|----------------|--------|----------|-------------------|

AGIWUR2086;AGIWUR2871;AGIWUR24119;AGIWUR28278;AGIWUR28822;AGIWUR32853

|        |    |    |         |         |                |          |          |                    |
|--------|----|----|---------|---------|----------------|----------|----------|--------------------|
| CB4856 | CT | II | 9657876 | 9659002 | WBGene00014252 | ZK1320.2 | ZK1320.2 | -0.121642038199788 |
|--------|----|----|---------|---------|----------------|----------|----------|--------------------|

AGIWUR25137

|        |    |    |         |         |                |          |          |                    |
|--------|----|----|---------|---------|----------------|----------|----------|--------------------|
| CB4856 | CT | II | 9659246 | 9660442 | WBGene00014253 | ZK1320.3 | ZK1320.3 | -0.401407503512386 |
|--------|----|----|---------|---------|----------------|----------|----------|--------------------|

AGIWUR6554;AGIWUR24271;AGIWUR40507

|        |    |    |         |         |                |           |          |                   |
|--------|----|----|---------|---------|----------------|-----------|----------|-------------------|
| CB4856 | CT | II | 9660839 | 9663007 | WBGene00014254 | cyp-13A10 | ZK1320.4 | 0.565953509392308 |
|--------|----|----|---------|---------|----------------|-----------|----------|-------------------|

AGIWUR16893

|        |    |    |         |         |                |          |          |                     |
|--------|----|----|---------|---------|----------------|----------|----------|---------------------|
| CB4856 | CT | II | 9663616 | 9665664 | WBGene00014255 | ZK1320.5 | ZK1320.5 | -0.0520483902396096 |
|--------|----|----|---------|---------|----------------|----------|----------|---------------------|

AGIWUR36576

|        |    |    |         |         |                |           |           |                   |
|--------|----|----|---------|---------|----------------|-----------|-----------|-------------------|
| CB4856 | CT | II | 9667624 | 9668555 | WBGene00014259 | ZK1320.11 | ZK1320.11 | 0.152019391936513 |
|--------|----|----|---------|---------|----------------|-----------|-----------|-------------------|

AGIWUR41760

|        |    |    |         |         |                |       |           |                    |
|--------|----|----|---------|---------|----------------|-------|-----------|--------------------|
| CB4856 | CT | II | 9669324 | 9671499 | WBGene00006390 | taf-8 | ZK1320.12 | -0.192586227563815 |
|--------|----|----|---------|---------|----------------|-------|-----------|--------------------|

AGIWUR7931

|        |    |    |         |         |                |          |          |                    |
|--------|----|----|---------|---------|----------------|----------|----------|--------------------|
| CB4856 | CT | II | 9671608 | 9673263 | WBGene00014256 | ZK1320.7 | ZK1320.7 | -0.177195485022219 |
|--------|----|----|---------|---------|----------------|----------|----------|--------------------|

AGIWUR28766

|        |    |    |         |         |                |       |          |                      |
|--------|----|----|---------|---------|----------------|-------|----------|----------------------|
| CB4856 | CT | II | 9674978 | 9677210 | WBGene00000180 | arc-1 | ZK1320.6 | -0.00302915774382839 |
|--------|----|----|---------|---------|----------------|-------|----------|----------------------|

AGIWUR30528

|        |    |    |         |         |                |           |           |                    |
|--------|----|----|---------|---------|----------------|-----------|-----------|--------------------|
| CB4856 | CT | II | 9680798 | 9683089 | WBGene00044007 | ZK1320.13 | ZK1320.13 | -0.274298102148848 |
|--------|----|----|---------|---------|----------------|-----------|-----------|--------------------|

AGIWUR2819;AGIWUR11856;AGIWUR29269;AGIWUR29780;AGIWUR42776

|        |    |    |         |         |                |          |          |                   |
|--------|----|----|---------|---------|----------------|----------|----------|-------------------|
| CB4856 | CT | II | 9684088 | 9686713 | WBGene00014258 | ZK1320.9 | ZK1320.9 | 0.281527442384952 |
|--------|----|----|---------|---------|----------------|----------|----------|-------------------|

AGIWUR8317;AGIWUR20469;AGIWUR20978;AGIWUR24292;AGIWUR33498

|        |    |    |         |         |                |        |           |                   |
|--------|----|----|---------|---------|----------------|--------|-----------|-------------------|
| CB4856 | CT | II | 9689664 | 9691939 | WBGene00003749 | nlp-11 | ZK1320.10 | 0.275734734634019 |
|--------|----|----|---------|---------|----------------|--------|-----------|-------------------|

AGIWUR11616

|        |    |    |         |         |                |           |           |                     |
|--------|----|----|---------|---------|----------------|-----------|-----------|---------------------|
| CB4856 | CT | II | 9698281 | 9700463 | WBGene00044158 | Y53C12A.8 | Y53C12A.8 | -0.0116310698906146 |
|--------|----|----|---------|---------|----------------|-----------|-----------|---------------------|

AGIWUR32060;AGIWUR36415

|                                                                                                                                                          |    |                 |                |            |            |                      |
|----------------------------------------------------------------------------------------------------------------------------------------------------------|----|-----------------|----------------|------------|------------|----------------------|
| CB4856 CT<br>AGIWUR2909                                                                                                                                  | II | 9700543 9701839 | WBGene00013142 | Y53C12A.7  | Y53C12A.7  | 0.113804773319536    |
| CB4856 CT<br>AGIWUR20398                                                                                                                                 | II | 9701402 9703732 | WBGene00013140 | mop-25.2   | Y53C12A.4  | -0.129047856852601   |
| CB4856 CT<br>AGIWUR40049                                                                                                                                 | II | 9703812 9704789 | WBGene00175030 | Y53C12A.10 | Y53C12A.10 | -0.0706930774442256  |
| CB4856 CT<br>AGIWUR40808                                                                                                                                 | II | 9706483 9708885 | WBGene00001623 | glt-5      | Y53C12A.2  | 2.41519879216727     |
| CB4856 CT<br>AGIWUR7842;AGIWUR12273;AGIWUR14315;AGIWUR16110;AGIWUR25779;AGIWUR30829;AGIWUR39441                                                          | II | 9713737 9716467 | WBGene00006940 | wee-1.3    | Y53C12A.1  | -0.017493110379478   |
| CB4856 CT<br>AGIWUR20674                                                                                                                                 | II | 9717478 9717775 | WBGene00013141 | Y53C12A.6  | Y53C12A.6  | -0.461780051139423   |
| CB4856 CT<br>AGIWUR17058                                                                                                                                 | II | 9721828 9724526 | WBGene00013145 | cutl-2     | Y53C12B.6  | 0.924352014662027    |
| CB4856 CT<br>AGIWUR19751;AGIWUR21247;AGIWUR42412                                                                                                         | II | 9732137 9738035 | WBGene00003100 | mab-3      | Y53C12B.5  | -0.00191596012821904 |
| CB4856 CT<br>AGIWUR29533                                                                                                                                 | II | 9738982 9742884 | WBGene00013144 | Y53C12B.2  | Y53C12B.2  | -0.327042566552343   |
| CB4856 CT<br>AGIWUR19337                                                                                                                                 | II | 9742982 9746074 | WBGene00013143 | Y53C12B.1  | Y53C12B.1  | -0.194021890058801   |
| CB4856 CT<br>AGIWUR1727;AGIWUR1776;AGIWUR3921;AGIWUR9435;AGIWUR15558;AGIWUR20432;AGIWUR20708;AGIWUR27214;AGIWUR31897;AGIWUR31923;AGIWUR37671;AGIWUR39396 | II | 9746316 9750454 | WBGene00003785 | nos-3      | Y53C12B.3  | -0.189089996379936   |
| CB4856 CT<br>AGIWUR35367                                                                                                                                 | II | 9750442 9752317 | WBGene00013146 | Y53C12B.7  | Y53C12B.7  | 0.796163232092113    |
| CB4856 CT<br>AGIWUR35488                                                                                                                                 | II | 9754030 9754967 | WBGene00014260 | ZK1321.1   | ZK1321.1   | 0.131963978743483    |
| CB4856 CT<br>AGIWUR5056;AGIWUR8325;AGIWUR11748;AGIWUR15319;AGIWUR22352;AGIWUR25944;AGIWUR35532;AGIWUR37189;AGIWUR38830                                   | II | 9758234 9768265 | WBGene00014261 | shk-1      | ZK1321.2   | 0.0470160700632825   |
| CB4856 CT<br>AGIWUR6508;AGIWUR9418;AGIWUR15485;AGIWUR21502;AGIWUR23911;AGIWUR30029;AGIWUR33320;AGIWUR44993                                               | II | 9768357 9769847 | WBGene00000178 | aqp-10     | ZK1321.3   | -0.239890440578405   |
| CB4856 CT<br>AGIWUR28204                                                                                                                                 | II | 9770759 9774292 | WBGene00014262 | ZK1321.4   | ZK1321.4   | 0.0254353701136338   |
| CB4856 CT<br>AGIWUR10407                                                                                                                                 | II | 9775146 9775883 | WBGene00011678 | T10B9.9    | T10B9.9    | 0.402239862426699    |
| CB4856 CT<br>AGIWUR9781;AGIWUR17049;AGIWUR32347                                                                                                          | II | 9779182 9781950 | WBGene00011677 | cyp-13A1   | T10B9.8    | 1.66396853889234     |
| CB4856 CT                                                                                                                                                | II | 9783403 9787419 | WBGene00011676 | cyp-13A2   | T10B9.7    | -0.233631031239533   |
| CB4856 CT                                                                                                                                                | II | 9788801 9793284 | WBGene00011675 | cyp-13A3   | T10B9.5    | 0.402435193212535    |

|                                     |    |    |         |         |                |          |           |                     |             |
|-------------------------------------|----|----|---------|---------|----------------|----------|-----------|---------------------|-------------|
| AGIWUR19245;AGIWUR23212;AGIWUR33620 |    |    |         |         |                |          |           |                     |             |
| CB4856                              | CT | II | 9793754 | 9795541 | WBGene00014838 | cyp-13A9 | T10B9.6   | -0.540704268799906  |             |
| AGIWUR6915;AGIWUR29141              |    |    |         |         |                |          |           |                     |             |
| CB4856                              | CT | II | 9795848 | 9797740 | WBGene00011671 | cyp-13A4 | T10B9.1   | 0.472265615584345   |             |
| AGIWUR2689;AGIWUR6539               |    |    |         |         |                |          |           |                     |             |
| CB4856                              | CT | II | 9798277 | 9800363 | WBGene00011672 | cyp-13A5 | T10B9.2   | 0.786991800902216   |             |
| AGIWUR2802;AGIWUR22628;AGIWUR37154  |    |    |         |         |                |          |           |                     |             |
| CB4856                              | CT | II | 9800761 | 9802721 | WBGene00011673 | cyp-13A6 | T10B9.3   | 0.170103653621948   |             |
| AGIWUR22808                         |    |    |         |         |                |          |           |                     |             |
| CB4856                              | CT | II | 9803620 | 9805510 | WBGene00000372 | cyp-13A7 | T10B9.10  | 0.891043074353036   |             |
| AGIWUR29039                         |    |    |         |         |                |          |           |                     |             |
| CB4856                              | CT | II | 9805627 | 9807532 | WBGene00011674 | cyp-13A8 | T10B9.4   | 0.0956849500985513  |             |
| AGIWUR14110                         |    |    |         |         |                |          |           |                     |             |
| CB4856                              | CT | II | 9826513 | 9827926 | WBGene00013147 | eyg-1    | Y53C12C.1 | 0.931122765243805   |             |
| AGIWUR28836                         |    |    |         |         |                |          |           |                     |             |
| CB4856                              | CT | II | 9829408 | 9830753 | WBGene00014158 | ZK938.1  | ZK938.1   | 0.219955155405928   | AGIWUR42641 |
| CB4856                              | CT | II | 9831648 | 9834364 | WBGene00014160 | ZK938.3  | ZK938.3   | -0.432090739483874  | AGIWUR21525 |
| CB4856                              | CT | II | 9835221 | 9836925 | WBGene00014161 | arrd-5   | ZK938.4   | -0.0194926992550428 |             |
| AGIWUR12573;AGIWUR33602;AGIWUR41879 |    |    |         |         |                |          |           |                     |             |
| CB4856                              | CT | II | 9837089 | 9838305 | WBGene00014159 | arrd-4   | ZK938.2   | 0.401182246445169   | AGIWUR18357 |
| CB4856                              | CT | II | 9839191 | 9840288 | WBGene00270290 | ZK938.11 | ZK938.11  | -0.157768976337026  |             |
| AGIWUR4886                          |    |    |         |         |                |          |           |                     |             |
| CB4856                              | CT | II | 9843380 | 9847006 | WBGene00014162 | chil-9   | ZK938.6   | 0.0234428100019368  | AGIWUR32304 |
| CB4856                              | CT | II | 9847483 | 9849597 | WBGene00003863 | old-2    | ZK938.5   | -0.10597668492214   | AGIWUR2536  |
| CB4856                              | CT | II | 9851471 | 9853394 | WBGene00007468 | C08H9.8  | C08H9.8   | -0.0633644686393193 | AGIWUR35968 |
| CB4856                              | CT | II | 9855936 | 9857857 | WBGene00007471 | chil-6   | C08H9.12  | 0.174772502342556   |             |
| AGIWUR26676                         |    |    |         |         |                |          |           |                     |             |
| CB4856                              | CT | II | 9858110 | 9859639 | WBGene00007470 | chil-5   | C08H9.11  | 0.401881938234487   |             |
| AGIWUR37372                         |    |    |         |         |                |          |           |                     |             |
| CB4856                              | CT | II | 9859784 | 9861473 | WBGene00007467 | chil-3   | C08H9.7   | 0.43622517636109    | AGIWUR7823  |
| CB4856                              | CT | II | 9862431 | 9866404 | WBGene00007465 | chil-1   | C08H9.4   | -0.298495936604716  |             |
| AGIWUR1457;AGIWUR28590;AGIWUR41487  |    |    |         |         |                |          |           |                     |             |
| CB4856                              | CT | II | 9869456 | 9871172 | WBGene00007472 | chil-7   | C08H9.13  | 0.285965874871247   |             |
| AGIWUR8656                          |    |    |         |         |                |          |           |                     |             |
| CB4856                              | CT | II | 9871608 | 9872986 | WBGene00007473 | chil-8   | C08H9.14  | 0.457321339226849   |             |
| AGIWUR37468                         |    |    |         |         |                |          |           |                     |             |
| CB4856                              | CT | II | 9873249 | 9874521 | WBGene00007466 | chil-2   | C08H9.6   | -0.251099142322873  | AGIWUR604   |
| CB4856                              | CT | II | 9875179 | 9878008 | WBGene00007462 | C08H9.1  | C08H9.1   | 0.0500951586564362  | AGIWUR39315 |
| CB4856                              | CT | II | 9881193 | 9882530 | WBGene00007474 | C08H9.15 | C08H9.15  | -0.217582818610284  |             |

AGIWUR35591  
CB4856 CT II 9882728 9886442 WBGene00007464 C08H9.3 C08H9.3 0.0549456179197882  
AGIWUR38534;AGIWUR38815;AGIWUR42777  
CB4856 CT II 9886557 9891081 WBGene00007463 vgl-1 C08H9.2 -0.170908603198111  
AGIWUR2728;AGIWUR6936;AGIWUR12035;AGIWUR13504;AGIWUR14455;AGIWUR19542;AGIWUR20507;AGIWUR25206;AGIWUR25934;AGIWUR32289;AGIWUR34288;AGIWUR34470;AGIWUR35940;AGIWUR40340;AGIWUR43517  
CB4856 CT II 9895538 9897351 WBGene00009146 F26C11.1 F26C11.1 -0.72704750677773  
AGIWUR8276  
CB4856 CT II 9897754 9900376 WBGene00006744 unc-4 F26C11.2 0.158870357191349  
AGIWUR19606;AGIWUR34527;AGIWUR35185  
CB4856 CT II 9903059 9915099 WBGene00009147 F26C11.3 F26C11.3 0.128667841086425  
AGIWUR33285  
CB4856 CT II 9915438 9916289 WBGene00044159 F26C11.4 F26C11.4 -0.375594775996032  
AGIWUR26120;AGIWUR28479;AGIWUR32920;AGIWUR35033  
CB4856 CT II 9917122 9917943 WBGene00086567 C05C10.8 C05C10.8 0.0972671149746986  
AGIWUR38038  
CB4856 CT II 9922248 9930830 WBGene00007329 C05C10.2 C05C10.2 -0.0741016538207901  
AGIWUR6878;AGIWUR29477;AGIWUR44420  
CB4856 CT II 9931845 9934443 WBGene00007331 pho-11 C05C10.4 0.0647953347834846  
AGIWUR2532;AGIWUR6049;AGIWUR22087;AGIWUR30141;AGIWUR34634;AGIWUR34659;AGIWUR36019  
CB4856 CT II 9934403 9936893 WBGene00007330 C05C10.3 C05C10.3 -0.321075873301957  
AGIWUR2054;AGIWUR3537;AGIWUR18491;AGIWUR21068;AGIWUR21521;AGIWUR25993;AGIWUR37963  
CB4856 CT II 9938106 9938971 WBGene00007334 C05C10.7 C05C10.7 -0.233747602445252  
AGIWUR37632  
CB4856 CT II 9939040 9940432 WBGene00007332 C05C10.5 C05C10.5 -0.109383937187754  
AGIWUR22090;AGIWUR32414  
CB4856 CT II 9940758 9944006 WBGene00007333 ufd-3 C05C10.6 0.0213542463329368  
AGIWUR3612;AGIWUR5667;AGIWUR10944;AGIWUR24102;AGIWUR24734;AGIWUR35125;AGIWUR39205;AGIWUR41062;AGIWUR42078;AGIWUR42640  
CB4856 CT II 9944026 9947121 WBGene00011271 flad-1 R53.1 0.14152333951419  
AGIWUR12784;AGIWUR21392;AGIWUR30921;AGIWUR33515  
CB4856 CT II 9955185 9962344 WBGene00001207 egl-43 R53.3 0.208963092964085 AGIWUR28128  
CB4856 CT II 9962966 9967132 WBGene00011272 dtmk-1 R53.2 -0.00818073873636038  
AGIWUR14400;AGIWUR44983  
CB4856 CT II 9967277 9968049 WBGene00011273 R53.4 R53.4 0.00241021939185693  
AGIWUR274;AGIWUR839;AGIWUR1651;AGIWUR2205;AGIWUR2273;AGIWUR19713;AGIWUR21938;AGIWUR30159;AGIWUR30299;AGIWUR30811;AGIWUR33954  
CB4856 CT II 9968659 9969631 WBGene00011275 psf-1 R53.6 -0.399691686538666  
AGIWUR651;AGIWUR4183;AGIWUR19144;AGIWUR19922

|                                                                                    |    |    |          |          |                |         |         |                     |             |
|------------------------------------------------------------------------------------|----|----|----------|----------|----------------|---------|---------|---------------------|-------------|
| CB4856                                                                             | CT | II | 9969620  | 9970515  | WBGene00011274 | R53.5   | R53.5   | 0.344273230596233   | AGIWUR39788 |
| CB4856                                                                             | CT | II | 9971035  | 9975125  | WBGene00011276 | aakg-5  | R53.7   | 0.0750001507935991  | AGIWUR19477 |
| CB4856                                                                             | CT | II | 9976705  | 9977877  | WBGene00011277 | R53.8   | R53.8   | -0.34299350200204   | AGIWUR38025 |
| CB4856                                                                             | CT | II | 9978765  | 9980076  | WBGene00014130 | ZK892.6 | ZK892.6 | -0.401146898051055  | AGIWUR41533 |
| CB4856                                                                             | CT | II | 9980886  | 9981752  | WBGene00014131 | sdz-38  | ZK892.7 | 0.0216445616082215  | AGIWUR12129 |
| CB4856                                                                             | CT | II | 9991160  | 10000350 | WBGene00002266 | lec-3   | ZK892.1 | 0.220287820107725   |             |
| AGIWUR8893;AGIWUR9049;AGIWUR11331;AGIWUR11760;AGIWUR36080                          |    |    |          |          |                |         |         |                     |             |
| CB4856                                                                             | CT | II | 10000335 | 10001198 | WBGene00003773 | nlt-1   | ZK892.2 | 0.0852446080808775  |             |
| AGIWUR9175;AGIWUR15509;AGIWUR22828;AGIWUR25447;AGIWUR39257;AGIWUR39674;AGIWUR42147 |    |    |          |          |                |         |         |                     |             |
| CB4856                                                                             | CT | II | 10001846 | 10003987 | WBGene00014127 | ZK892.3 | ZK892.3 | 0.23323241377719    |             |
| AGIWUR26549                                                                        |    |    |          |          |                |         |         |                     |             |
| CB4856                                                                             | CT | II | 10006111 | 10006535 | WBGene00044037 | ZK892.8 | ZK892.8 | -0.285830160999364  |             |
| AGIWUR23204                                                                        |    |    |          |          |                |         |         |                     |             |
| CB4856                                                                             | CT | II | 10006642 | 10008089 | WBGene00014128 | ZK892.4 | ZK892.4 | 0.103098016307394   |             |
| AGIWUR41562                                                                        |    |    |          |          |                |         |         |                     |             |
| CB4856                                                                             | CT | II | 10008217 | 10009401 | WBGene00014129 | ZK892.5 | ZK892.5 | -0.132094745531351  |             |
| AGIWUR7848;AGIWUR20371;AGIWUR34857                                                 |    |    |          |          |                |         |         |                     |             |
| CB4856                                                                             | CT | II | 10009608 | 10016183 | WBGene00002265 | lec-2   | F52H3.7 | 0.922170582566734   |             |
| AGIWUR7658;AGIWUR10730;AGIWUR27476;AGIWUR34199                                     |    |    |          |          |                |         |         |                     |             |
| CB4856                                                                             | CT | II | 10030195 | 10030970 | WBGene00009947 | F52H3.5 | F52H3.5 | 0.010243462477284   |             |
| AGIWUR26508                                                                        |    |    |          |          |                |         |         |                     |             |
| CB4856                                                                             | CT | II | 10030895 | 10033213 | WBGene00009944 | mtcu-2  | F52H3.2 | 0.166522458979479   |             |
| AGIWUR8504                                                                         |    |    |          |          |                |         |         |                     |             |
| CB4856                                                                             | CT | II | 10033309 | 10039980 | WBGene00002497 | let-268 | F52H3.1 | -0.0186560884113174 |             |
| AGIWUR26464                                                                        |    |    |          |          |                |         |         |                     |             |
| CB4856                                                                             | CT | II | 10041134 | 10042515 | WBGene00009946 | F52H3.4 | F52H3.4 | -0.086449665706585  |             |
| AGIWUR8233                                                                         |    |    |          |          |                |         |         |                     |             |
| CB4856                                                                             | CT | II | 10042780 | 10045270 | WBGene00009945 | bath-38 | F52H3.3 | 0.26612065884078    |             |
| AGIWUR38471                                                                        |    |    |          |          |                |         |         |                     |             |
| CB4856                                                                             | CT | II | 10054623 | 10055594 | WBGene00001447 | flp-4   | C18D1.3 | 0.237603332553846   |             |
| AGIWUR27802                                                                        |    |    |          |          |                |         |         |                     |             |
| CB4856                                                                             | CT | II | 10056311 | 10060582 | WBGene00007670 | stg-1   | C18D1.4 | 0.393498334542087   |             |
| AGIWUR14704                                                                        |    |    |          |          |                |         |         |                     |             |
| CB4856                                                                             | CT | II | 10061287 | 10074443 | WBGene00000995 | die-1   | C18D1.1 | 0.0932716804201057  |             |
| AGIWUR1596;AGIWUR11535;AGIWUR23819;AGIWUR27718;AGIWUR27931;AGIWUR31103;AGIWUR42675 |    |    |          |          |                |         |         |                     |             |
| CB4856                                                                             | CT | II | 10094873 | 10098785 | WBGene00014164 | lact-2  | ZK945.1 | 0.649679648226005   |             |
| AGIWUR39450                                                                        |    |    |          |          |                |         |         |                     |             |
| CB4856                                                                             | CT | II | 10098782 | 10099867 | WBGene00003928 | pas-7   | ZK945.2 | -0.0916774343049189 |             |
| AGIWUR12828;AGIWUR14425                                                            |    |    |          |          |                |         |         |                     |             |

|                                                                         |    |          |          |                |          |         |                     |
|-------------------------------------------------------------------------|----|----------|----------|----------------|----------|---------|---------------------|
| CB4856 CT<br>AGIWUR15434                                                | II | 10100310 | 10103059 | WBGene00014165 | puf-12   | ZK945.3 | -0.171095206344882  |
| CB4856 CT<br>AGIWUR3719;AGIWUR12972;AGIWUR17154;AGIWUR23722;AGIWUR35881 | II | 10102975 | 10105704 | WBGene00014166 | ZK945.4  | ZK945.4 | -0.312240031127647  |
| CB4856 CT<br>AGIWUR30388                                                | II | 10106080 | 10106970 | WBGene00014168 | ZK945.6  | ZK945.6 | 0.0925489296094124  |
| CB4856 CT<br>AGIWUR37463                                                | II | 10107473 | 10108477 | WBGene00014169 | ZK945.7  | ZK945.7 | 0.320420836987967   |
| CB4856 CT<br>AGIWUR37452                                                | II | 10108702 | 10109081 | WBGene00014170 | ZK945.8  | ZK945.8 | -0.223073062286962  |
| CB4856 CT<br>AGIWUR1185                                                 | II | 10109279 | 10121825 | WBGene00003058 | lov-1    | ZK945.9 | 0.112672391047518   |
| CB4856 CT<br>AGIWUR32500                                                | II | 10122765 | 10125015 | WBGene00044035 | F27E5.7  | F27E5.7 | -0.24788888199291   |
| CB4856 CT<br>AGIWUR25811                                                | II | 10125898 | 10127455 | WBGene00044027 | F27E5.8  | F27E5.8 | -0.0862385397810517 |
| CB4856 CT<br>AGIWUR7390                                                 | II | 10128254 | 10131860 | WBGene00009194 | F27E5.5  | F27E5.5 | -0.0910800753405967 |
| CB4856 CT<br>AGIWUR40529                                                | II | 10137658 | 10139216 | WBGene00004017 | phg-1    | F27E5.4 | -0.0530027552344752 |
| CB4856 CT<br>AGIWUR18928;AGIWUR22197;AGIWUR33073                        | II | 10139590 | 10141406 | WBGene00009192 | asah-2   | F27E5.1 | 0.320473713712017   |
| CB4856 CT<br>AGIWUR44100                                                | II | 10141457 | 10144192 | WBGene00009193 | F27E5.3  | F27E5.3 | 0.0982323242510912  |
| CB4856 CT<br>AGIWUR18917                                                | II | 10146746 | 10152445 | WBGene00003939 | pax-3    | F27E5.2 | 0.335506422901423   |
| CB4856 CT<br>AGIWUR5814;AGIWUR10380;AGIWUR29406;AGIWUR40440;AGIWUR44519 | II | 10155413 | 10156220 | WBGene00044028 | F33H1.6  | F33H1.6 | -0.420089193643058  |
| CB4856 CT<br>AGIWUR10712;AGIWUR11493;AGIWUR14380                        | II | 10157537 | 10169346 | WBGene00000914 | daf-19   | F33H1.1 | 0.507392231528197   |
| CB4856 CT<br>AGIWUR16485                                                | II | 10172923 | 10174346 | WBGene00009364 | F33H1.3  | F33H1.3 | 0.152076509543543   |
| CB4856 CT<br>AGIWUR21472;AGIWUR27653;AGIWUR34930                        | II | 10174572 | 10180183 | WBGene00009365 | F33H1.4  | F33H1.4 | -0.168760579872088  |
| CB4856 CT<br>AGIWUR18723                                                | II | 10180199 | 10182734 | WBGene00005079 | srd-1    | F33H1.5 | -0.0491855769713858 |
| CB4856 CT<br>AGIWUR14572                                                | II | 10185789 | 10187908 | WBGene00005080 | srd-2    | R05H5.1 | 0.0354077995161886  |
| CB4856 CT                                                               | II | 10188263 | 10189469 | WBGene00000389 | cdc-25.4 |         | R05H5.2             |

|                                                                         |             |          |                |         |         |                     |  |  |
|-------------------------------------------------------------------------|-------------|----------|----------------|---------|---------|---------------------|--|--|
| -0.00849393626851214                                                    | AGIWUR15999 |          |                |         |         |                     |  |  |
| CB4856 CT II                                                            | 10192529    | 10193451 | WBGene00011041 | R05H5.7 | R05H5.7 | -0.0416842112261486 |  |  |
| AGIWUR6013;AGIWUR11895;AGIWUR21955;AGIWUR26462                          |             |          |                |         |         |                     |  |  |
| CB4856 CT II                                                            | 10194905    | 10196835 | WBGene00005071 | srb-6   | R05H5.6 | -0.150781847161512  |  |  |
| AGIWUR32602                                                             |             |          |                |         |         |                     |  |  |
| CB4856 CT II                                                            | 10197625    | 10198324 | WBGene00011038 | R05H5.3 | R05H5.3 | 0.0569536974980345  |  |  |
| AGIWUR6581;AGIWUR9461;AGIWUR24214;AGIWUR29342;AGIWUR31178;AGIWUR37075   |             |          |                |         |         |                     |  |  |
| CB4856 CT II                                                            | 10198309    | 10199768 | WBGene00011039 | R05H5.4 | R05H5.4 | 0.477709240996044   |  |  |
| AGIWUR10312                                                             |             |          |                |         |         |                     |  |  |
| CB4856 CT II                                                            | 10199810    | 10200819 | WBGene00011040 | R05H5.5 | R05H5.5 | 0.441841270307531   |  |  |
| AGIWUR12341                                                             |             |          |                |         |         |                     |  |  |
| CB4856 CT II                                                            | 10201125    | 10202230 | WBGene00006651 | tts-2   | R05H5.8 | 1.22435609121238    |  |  |
| AGIWUR23370                                                             |             |          |                |         |         |                     |  |  |
| CB4856 CT II                                                            | 10206715    | 10209391 | WBGene00011331 | T01E8.1 | T01E8.1 | 0.396908824914171   |  |  |
| AGIWUR29024                                                             |             |          |                |         |         |                     |  |  |
| CB4856 CT II                                                            | 10218471    | 10220025 | WBGene00004334 | ref-1   | T01E8.2 | 0.0647468862110756  |  |  |
| AGIWUR8907                                                              |             |          |                |         |         |                     |  |  |
| CB4856 CT II                                                            | 10222877    | 10229440 | WBGene00004038 | plc-3   | T01E8.3 | 0.0549123918401575  |  |  |
| AGIWUR14929;AGIWUR18912;AGIWUR22081;AGIWUR24082;AGIWUR28683;AGIWUR42469 |             |          |                |         |         |                     |  |  |
| CB4856 CT II                                                            | 10231272    | 10236014 | WBGene00011335 | T01E8.8 | T01E8.8 | -0.136428944353082  |  |  |
| AGIWUR33309                                                             |             |          |                |         |         |                     |  |  |
| CB4856 CT II                                                            | 10236936    | 10239695 | WBGene00003177 | mec-15  | T01E8.4 | -0.221487682310699  |  |  |
| AGIWUR1407;AGIWUR9774;AGIWUR10357;AGIWUR34006                           |             |          |                |         |         |                     |  |  |
| CB4856 CT II                                                            | 10240277    | 10242490 | WBGene00011334 | mrps-14 | T01E8.6 | -0.218567355532018  |  |  |
| AGIWUR1632;AGIWUR18563;AGIWUR25105                                      |             |          |                |         |         |                     |  |  |
| CB4856 CT II                                                            | 10242595    | 10247638 | WBGene00011333 | nrde-2  | T01E8.5 |                     |  |  |
| -0.00575316300126705 AGIWUR1484;AGIWUR28560                             |             |          |                |         |         |                     |  |  |
| CB4856 CT II                                                            | 10248991    | 10251165 | WBGene00010015 | atad-3  | F54B3.3 | -0.245721486839628  |  |  |
| AGIWUR20261;AGIWUR36134;AGIWUR44377                                     |             |          |                |         |         |                     |  |  |
| CB4856 CT II                                                            | 10251266    | 10268168 | WBGene00010013 | F54B3.1 | F54B3.1 | -0.0879096202365837 |  |  |
| AGIWUR11170;AGIWUR12967;AGIWUR28208                                     |             |          |                |         |         |                     |  |  |
| CB4856 CT II                                                            | 10268143    | 10270152 | WBGene00010014 | F54B3.2 | F54B3.2 | -0.0924617434183759 |  |  |
| AGIWUR39268                                                             |             |          |                |         |         |                     |  |  |
| CB4856 CT II                                                            | 10278732    | 10280459 | WBGene00014175 | ZK971.1 | ZK971.1 | 1.09673868947924    |  |  |
| AGIWUR39627;AGIWUR39902                                                 |             |          |                |         |         |                     |  |  |
| CB4856 CT II                                                            | 10283466    | 10300132 | WBGene00014171 | nep-26  | ZK970.1 | 0.280358730383576   |  |  |
| AGIWUR41540                                                             |             |          |                |         |         |                     |  |  |
| CB4856 CT II                                                            | 10300789    | 10302859 | WBGene00014172 | clpp-1  | ZK970.2 | 0.0747265178685215  |  |  |
| AGIWUR39591                                                             |             |          |                |         |         |                     |  |  |



|                                                                                                |    |          |          |                |          |          |                     |
|------------------------------------------------------------------------------------------------|----|----------|----------|----------------|----------|----------|---------------------|
| CB4856 CT<br>AGIWUR29615                                                                       | II | 10303007 | 10303713 | WBGene00006918 | vha-9    | ZK970.4  | -0.0102527491628077 |
| CB4856 CT<br>AGIWUR24821                                                                       | II | 10304139 | 10308826 | WBGene00001531 | gcy-4    | ZK970.5  | -0.723026508012637  |
| CB4856 CT<br>AGIWUR15415                                                                       | II | 10309418 | 10310068 | WBGene00014174 | ZK970.8  | ZK970.8  | -0.239897627044067  |
| CB4856 CT<br>AGIWUR35870                                                                       | II | 10310400 | 10316219 | WBGene00001532 | gcy-5    | ZK970.6  | -0.217841773374404  |
| CB4856 CT<br>AGIWUR754                                                                         | II | 10318228 | 10319970 | WBGene00010832 | M02G9.3  | M02G9.3  | -0.289772862171883  |
| CB4856 CT<br>AGIWUR29671                                                                       | II | 10321460 | 10324850 | WBGene00010831 | M02G9.2  | M02G9.2  | -0.35801630430529   |
| CB4856 CT<br>AGIWUR21007                                                                       | II | 10326041 | 10335807 | WBGene00010830 | M02G9.1  | M02G9.1  | 0.15767777522664    |
| CB4856 CT<br>AGIWUR25738                                                                       | II | 10339692 | 10345112 | WBGene00007413 | pro-2    | C07E3.2  | -0.0855874933497383 |
| CB4856 CT<br>-0.330443593299412                                                                | II | 10346375 | 10347001 | WBGene00007420 | C07E3.10 | C07E3.10 |                     |
| CB4856 CT<br>AGIWUR16235;AGIWUR18632;AGIWUR37575                                               | II | 10346981 | 10350007 | WBGene00007412 | stip-1   | C07E3.1  | -0.177466848520652  |
| CB4856 CT<br>0.000560842365347369                                                              | II | 10350760 | 10351613 | WBGene00007419 | C07E3.9  | C07E3.9  |                     |
| CB4856 CT<br>AGIWUR42376                                                                       | II | 10353584 | 10357518 | WBGene00007414 | C07E3.3  | C07E3.3  | 0.739925398559485   |
| CB4856 CT<br>AGIWUR12801                                                                       | II | 10363584 | 10365709 | WBGene00007416 | ceh-57   | C07E3.5  | 0.118942191753002   |
| CB4856 CT<br>AGIWUR5364;AGIWUR14869                                                            | II | 10367741 | 10369597 | WBGene00007417 | ceh-58   | C07E3.6  | -0.116878487317519  |
| CB4856 CT<br>AGIWUR9306                                                                        | II | 10385333 | 10388133 | WBGene00011661 | ztf-27   | T09F3.1  | 0.336699675723377   |
| CB4856 CT<br>AGIWUR3756;AGIWUR5121;AGIWUR16551;AGIWUR28159;AGIWUR35682;AGIWUR38281;AGIWUR39478 | II | 10391154 | 10393614 | WBGene00011662 | T09F3.2  | T09F3.2  | -0.0206195136736946 |
| CB4856 CT<br>AGIWUR11243                                                                       | II | 10394114 | 10395349 | WBGene00001683 | gpd-1    | T09F3.3  | 0.0366186445505505  |
| CB4856 CT<br>AGIWUR881;AGIWUR42449                                                             | II | 10395707 | 10396756 | WBGene00011663 | T09F3.4  | T09F3.4  | 0.0237879208977398  |
| CB4856 CT<br>AGIWUR17018                                                                       | II | 10396878 | 10399320 | WBGene00011664 | T09F3.5  | T09F3.5  | -0.0809954097766017 |
| CB4856 CT                                                                                      | II | 10411289 | 10412670 | WBGene00008484 | E04D5.5  | E04D5.5  | -0.223814599738297  |

|                                                                                 |    |    |          |          |                |          |          |                     |
|---------------------------------------------------------------------------------|----|----|----------|----------|----------------|----------|----------|---------------------|
| AGIWUR2989                                                                      |    |    |          |          |                |          |          |                     |
| CB4856                                                                          | CT | II | 10416786 | 10419237 | WBGene00008480 | eif-2A   | E04D5.1  | 0.0504300787505425  |
| AGIWUR21663;AGIWUR24337;AGIWUR42583                                             |    |    |          |          |                |          |          |                     |
| CB4856                                                                          | CT | II | 10419230 | 10422026 | WBGene00008481 | E04D5.2  | E04D5.2  | 0.112783540930799   |
| AGIWUR1199                                                                      |    |    |          |          |                |          |          |                     |
| CB4856                                                                          | CT | II | 10440286 | 10442515 | WBGene00008483 | E04D5.4  | E04D5.4  | -0.0681110223981065 |
| AGIWUR3398;AGIWUR37195;AGIWUR39288                                              |    |    |          |          |                |          |          |                     |
| CB4856                                                                          | CT | II | 10443327 | 10445233 | WBGene00014057 | ZK673.1  | ZK673.1  | 0.415529801653605   |
| AGIWUR43812                                                                     |    |    |          |          |                |          |          |                     |
| CB4856                                                                          | CT | II | 10448266 | 10450222 | WBGene00014058 | ZK673.2  | ZK673.2  | 0.609203364664687   |
| AGIWUR4328;AGIWUR10658;AGIWUR17853;AGIWUR37680                                  |    |    |          |          |                |          |          |                     |
| CB4856                                                                          | CT | II | 10450607 | 10452004 | WBGene00003038 | lin-56   | ZK673.3  | -0.335052236288465  |
| AGIWUR25094                                                                     |    |    |          |          |                |          |          |                     |
| CB4856                                                                          | CT | II | 10452920 | 10455200 | WBGene00014060 | ZK673.4  | ZK673.4  | -0.0916922101818169 |
| AGIWUR34906                                                                     |    |    |          |          |                |          |          |                     |
| CB4856                                                                          | CT | II | 10457786 | 10462672 | WBGene00014065 | ZK673.11 |          | ZK673.11            |
| -0.0611017173053234 AGIWUR1953                                                  |    |    |          |          |                |          |          |                     |
| CB4856                                                                          | CT | II | 10462870 | 10464330 | WBGene00014062 | ZK673.6  | ZK673.6  | -0.329342385196716  |
| AGIWUR41397                                                                     |    |    |          |          |                |          |          |                     |
| CB4856                                                                          | CT | II | 10464870 | 10465298 | WBGene00014064 | sdz-37   | ZK673.10 |                     |
| -0.620382122753901 AGIWUR36805                                                  |    |    |          |          |                |          |          |                     |
| CB4856                                                                          | CT | II | 10466852 | 10468344 | WBGene00006583 | tnc-2    | ZK673.7  | 0.481829765591325   |
| AGIWUR23392                                                                     |    |    |          |          |                |          |          |                     |
| CB4856                                                                          | CT | II | 10468351 | 10470297 | WBGene00014063 | clec-143 |          | ZK673.9             |
| 0.022444998698802 AGIWUR27744                                                   |    |    |          |          |                |          |          |                     |
| CB4856                                                                          | CT | II | 10470934 | 10471347 | WBGene00014041 | ZK666.1  | ZK666.1  | -0.124825957734455  |
| AGIWUR24121                                                                     |    |    |          |          |                |          |          |                     |
| CB4856                                                                          | CT | II | 10471696 | 10471890 | WBGene00014042 | ZK666.2  | ZK666.2  | -0.124126529786881  |
| AGIWUR4815;AGIWUR39373                                                          |    |    |          |          |                |          |          |                     |
| CB4856                                                                          | CT | II | 10472439 | 10473726 | WBGene00005520 | sri-8    | ZK666.10 |                     |
| 0.0914986173988783 AGIWUR876;AGIWUR12313;AGIWUR40432                            |    |    |          |          |                |          |          |                     |
| CB4856                                                                          | CT | II | 10474221 | 10476139 | WBGene00014043 | clec-58  | ZK666.3  | 0.0126100503022721  |
| AGIWUR14034;AGIWUR18180;AGIWUR26359                                             |    |    |          |          |                |          |          |                     |
| CB4856                                                                          | CT | II | 10478022 | 10479448 | WBGene00014045 | clec-59  | ZK666.5  | 0.150397915257392   |
| AGIWUR30540                                                                     |    |    |          |          |                |          |          |                     |
| CB4856                                                                          | CT | II | 10479920 | 10480081 | WBGene00044046 | ZK666.13 |          | ZK666.13            |
| -0.0178361049267091 AGIWUR12895;AGIWUR23306;AGIWUR31826;AGIWUR35627;AGIWUR39741 |    |    |          |          |                |          |          |                     |
| CB4856                                                                          | CT | II | 10480152 | 10481846 | WBGene00014046 | clec-60  | ZK666.6  | 3.10438525101614    |
| AGIWUR2509;AGIWUR31381;AGIWUR35871                                              |    |    |          |          |                |          |          |                     |

|                         |                                                                        |          |                |          |          |                     |
|-------------------------|------------------------------------------------------------------------|----------|----------------|----------|----------|---------------------|
| CB4856 CT II            | 10488747                                                               | 10490514 | WBGene00014047 | clec-61  | ZK666.7  | 1.23320760332113    |
| AGIWUR38848             |                                                                        |          |                |          |          |                     |
| CB4856 CT II            | 10491662                                                               | 10493134 | WBGene00014048 | ZK666.8  | ZK666.8  | -0.063214916564263  |
| AGIWUR3288              |                                                                        |          |                |          |          |                     |
| CB4856 CT II            | 10496212                                                               | 10496703 | WBGene00014050 | ZK666.12 |          | ZK666.12            |
| 0.166586531615586       | AGIWUR8874                                                             |          |                |          |          |                     |
| CB4856 CT II            | 10496987                                                               | 10502541 | WBGene00004134 | myrf-1   | F59B10.1 |                     |
| 0.0296479200536943      | AGIWUR131                                                              |          |                |          |          |                     |
| CB4856 CT II            | 10507269                                                               | 10509932 | WBGene00010318 | F59B10.2 |          | F59B10.2            |
| 0.309622710962357       | AGIWUR23868                                                            |          |                |          |          |                     |
| CB4856 CT II            | 10510542                                                               | 10512991 | WBGene00010319 | F59B10.3 |          | F59B10.3            |
| -0.350491894605304      | AGIWUR38198                                                            |          |                |          |          |                     |
| CB4856 CT II            | 10513827                                                               | 10519108 | WBGene00010320 | F59B10.4 |          | F59B10.4            |
| -0.0163806036921876     | AGIWUR38327                                                            |          |                |          |          |                     |
| CB4856 CT II            | 10521788                                                               | 10523191 | WBGene00010321 | F59B10.5 |          | F59B10.5            |
| -0.123774453902853      | AGIWUR6528                                                             |          |                |          |          |                     |
| CB4856 CT II            | 10523274                                                               | 10524474 | WBGene00010322 | F59B10.6 |          | F59B10.6            |
| -0.0205320959697772     | AGIWUR5739;AGIWUR23280;AGIWUR29381;AGIWUR36335;AGIWUR40116;AGIWUR44732 |          |                |          |          |                     |
| CB4856 CT II            | 10528084                                                               | 10533880 | WBGene00003107 | mab-10   | R166.1   | -0.517644356671362  |
| AGIWUR1300              |                                                                        |          |                |          |          |                     |
| CB4856 CT II            | 10534332                                                               | 10537671 | WBGene00011302 | R166.2   | R166.2   | 0.0781412991967017  |
| AGIWUR39289             |                                                                        |          |                |          |          |                     |
| CB4856 CT II            | 10537799                                                               | 10539332 | WBGene00011303 | R166.3   | R166.3   | -0.154951592542613  |
| AGIWUR36948             |                                                                        |          |                |          |          |                     |
| CB4856 CT II            | 10539438                                                               | 10541996 | WBGene00004185 | pro-1    | R166.4   | -0.281279757717396  |
| AGIWUR31553             |                                                                        |          |                |          |          |                     |
| CB4856 CT II            | 10542428                                                               | 10555044 | WBGene00011304 | mnk-1    | R166.5   | 0.264224652431729   |
| AGIWUR34539             |                                                                        |          |                |          |          |                     |
| CB4856 CT II            | 10560018                                                               | 10563407 | WBGene00007352 | cdc-48.1 |          | C06A1.1             |
| -0.273443295648981      | AGIWUR11455;AGIWUR13116;AGIWUR21063;AGIWUR26985;AGIWUR43969            |          |                |          |          |                     |
| CB4856 CT II            | 10570602                                                               | 10572530 | WBGene00007353 | C06A1.2  | C06A1.2  | 0.270313816742629   |
| AGIWUR9060              |                                                                        |          |                |          |          |                     |
| CB4856 CT II            | 10572247                                                               | 10574067 | WBGene00007354 | C06A1.3  | C06A1.3  | -0.0369822886477742 |
| AGIWUR6893              |                                                                        |          |                |          |          |                     |
| CB4856 CT II            | 10574842                                                               | 10578193 | WBGene00014667 | C06A1.4  | C06A1.4  | -0.349501540804823  |
| AGIWUR25976;AGIWUR30602 |                                                                        |          |                |          |          |                     |
| CB4856 CT II            | 10579366                                                               | 10579955 | WBGene00007355 | rpb-6    | C06A1.5  | -0.0308052072052725 |
| AGIWUR5821              |                                                                        |          |                |          |          |                     |
| CB4856 CT II            | 10579955                                                               | 10581045 | WBGene00007555 | dohh-1   | C14A4.1  | 0.13175253077382    |

|                                                                                                         |    |    |          |          |                |          |                             |
|---------------------------------------------------------------------------------------------------------|----|----|----------|----------|----------------|----------|-----------------------------|
| AGIWUR2970;AGIWUR7187;AGIWUR19048                                                                       |    |    |          |          |                |          |                             |
| CB4856                                                                                                  | CT | II | 10581133 | 10582519 | WBGene00000933 | dap-3    | C14A4.2 -0.309310587286713  |
| AGIWUR24770;AGIWUR27331;AGIWUR27823;AGIWUR32317                                                         |    |    |          |          |                |          |                             |
| CB4856                                                                                                  | CT | II | 10582618 | 10584236 | WBGene00007564 | mrps-22  | C14A4.14                    |
| -0.0522411507709455 AGIWUR11916;AGIWUR14585;AGIWUR17314;AGIWUR19277;AGIWUR22350;AGIWUR33834;AGIWUR36123 |    |    |          |          |                |          |                             |
| CB4856                                                                                                  | CT | II | 10584336 | 10587928 | WBGene00007556 | C14A4.3  | C14A4.3 -0.201008515234353  |
| AGIWUR41411                                                                                             |    |    |          |          |                |          |                             |
| CB4856                                                                                                  | CT | II | 10588042 | 10592652 | WBGene00000796 | crn-3    | C14A4.4 -0.0734036194933765 |
| AGIWUR23554;AGIWUR44213                                                                                 |    |    |          |          |                |          |                             |
| CB4856                                                                                                  | CT | II | 10592752 | 10593591 | WBGene00000798 | crn-5    | C14A4.5 -0.0636574277171249 |
| AGIWUR22345;AGIWUR34177;AGIWUR35482                                                                     |    |    |          |          |                |          |                             |
| CB4856                                                                                                  | CT | II | 10593529 | 10594776 | WBGene00007557 | C14A4.6  | C14A4.6 0.0749710988268983  |
| AGIWUR4051;AGIWUR21431;AGIWUR24456                                                                      |    |    |          |          |                |          |                             |
| CB4856                                                                                                  | CT | II | 10595266 | 10596562 | WBGene00007558 | C14A4.7  | C14A4.7 -0.215114704933695  |
| AGIWUR15049;AGIWUR25017;AGIWUR26477;AGIWUR39292                                                         |    |    |          |          |                |          |                             |
| CB4856                                                                                                  | CT | II | 10597174 | 10598100 | WBGene00007559 | C14A4.8  | C14A4.8 -0.328661098481822  |
| AGIWUR22102                                                                                             |    |    |          |          |                |          |                             |
| CB4856                                                                                                  | CT | II | 10599337 | 10600529 | WBGene00007560 | C14A4.9  | C14A4.9 0.564026766235617   |
| AGIWUR25127                                                                                             |    |    |          |          |                |          |                             |
| CB4856                                                                                                  | CT | II | 10600599 | 10602276 | WBGene00005713 | srv-2    | C14A4.15                    |
| 0.0624941723868844 AGIWUR22923                                                                          |    |    |          |          |                |          |                             |
| CB4856                                                                                                  | CT | II | 10605030 | 10605612 | WBGene00006397 | taf-13   | C14A4.10                    |
| 0.0977762742166153 AGIWUR24634                                                                          |    |    |          |          |                |          |                             |
| CB4856                                                                                                  | CT | II | 10605717 | 10607275 | WBGene00007561 | ccm-3    | C14A4.11                    |
| -0.159980806423341 AGIWUR27434                                                                          |    |    |          |          |                |          |                             |
| CB4856                                                                                                  | CT | II | 10613020 | 10618332 | WBGene00007562 | C14A4.12 | C14A4.12                    |
| 0.0775204258591238 AGIWUR29508                                                                          |    |    |          |          |                |          |                             |
| CB4856                                                                                                  | CT | II | 10618471 | 10620503 | WBGene00007563 | C14A4.13 | C14A4.13                    |
| -0.0157995272437681 AGIWUR32603                                                                         |    |    |          |          |                |          |                             |
| CB4856                                                                                                  | CT | II | 10622265 | 10625943 | WBGene00010893 | cut1-9   | M28.1 0.887213519679328     |
| AGIWUR4593;AGIWUR17552;AGIWUR21126;AGIWUR23189;AGIWUR36371;AGIWUR36670;AGIWUR40197                      |    |    |          |          |                |          |                             |
| CB4856                                                                                                  | CT | II | 10628263 | 10633216 | WBGene00010899 | M28.8    | M28.8 0.691060744988931     |
| AGIWUR44648                                                                                             |    |    |          |          |                |          |                             |
| CB4856                                                                                                  | CT | II | 10633476 | 10639112 | WBGene00010894 | M28.2    | M28.2 0.00524871877183131   |
| AGIWUR2316;AGIWUR15524;AGIWUR29354                                                                      |    |    |          |          |                |          |                             |
| CB4856                                                                                                  | CT | II | 10639410 | 10643536 | WBGene00010900 | M28.9    | M28.9 0.0323969423635084    |
| AGIWUR4478                                                                                              |    |    |          |          |                |          |                             |
| CB4856                                                                                                  | CT | II | 10643703 | 10646978 | WBGene00010895 | M28.4    | M28.4 0.498972504337816     |
| AGIWUR26377                                                                                             |    |    |          |          |                |          |                             |

|                                                                                                                                                                       |    |          |          |                |          |          |                     |
|-----------------------------------------------------------------------------------------------------------------------------------------------------------------------|----|----------|----------|----------------|----------|----------|---------------------|
| CB4856 CT                                                                                                                                                             | II | 10647480 | 10648676 | WBGene00010901 | M28.10   | M28.10   | -0.328361565101957  |
| AGIWUR21717                                                                                                                                                           |    |          |          |                |          |          |                     |
| CB4856 CT                                                                                                                                                             | II | 10648938 | 10652256 | WBGene00010898 | nphp-1   | M28.7    | 0.613839464512935   |
| AGIWUR6755                                                                                                                                                            |    |          |          |                |          |          |                     |
| CB4856 CT                                                                                                                                                             | II | 10652353 | 10657841 | WBGene00010897 | lact-3   | M28.6    | 0.327275109750587   |
| AGIWUR25318                                                                                                                                                           |    |          |          |                |          |          |                     |
| CB4856 CT                                                                                                                                                             | II | 10658027 | 10658626 | WBGene00010896 | M28.5    | M28.5    | -0.109654363146138  |
| AGIWUR25451;AGIWUR33760                                                                                                                                               |    |          |          |                |          |          |                     |
| CB4856 CT                                                                                                                                                             | II | 10659206 | 10662317 | WBGene00004704 | rsp-7    | D2089.1  | -0.0102412306426052 |
| AGIWUR4646;AGIWUR11930;AGIWUR13996;AGIWUR17240;AGIWUR21144;AGIWUR29901;AGIWUR38441;AGIWUR40407;AGIWUR43998                                                            |    |          |          |                |          |          |                     |
| CB4856 CT                                                                                                                                                             | II | 10662256 | 10665131 | WBGene00008434 | D2089.3  | D2089.3  | 0.0485692155001245  |
| AGIWUR26579;AGIWUR27148;AGIWUR28093;AGIWUR33867                                                                                                                       |    |          |          |                |          |          |                     |
| CB4856 CT                                                                                                                                                             | II | 10675602 | 10690271 | WBGene00004207 | ptb-1    | D2089.4  | 0.0217816228965901  |
| AGIWUR6285;AGIWUR12901;AGIWUR21246                                                                                                                                    |    |          |          |                |          |          |                     |
| CB4856 CT                                                                                                                                                             | II | 10690452 | 10693863 | WBGene00001522 | gbh-1    | D2089.5  | -0.261263809378027  |
| AGIWUR19935                                                                                                                                                           |    |          |          |                |          |          |                     |
| CB4856 CT                                                                                                                                                             | II | 10695013 | 10702524 | WBGene00001586 | ggr-1    | C09G5.1  | -0.121380035512618  |
| AGIWUR2899;AGIWUR11942                                                                                                                                                |    |          |          |                |          |          |                     |
| CB4856 CT                                                                                                                                                             | II | 10702509 | 10714297 | WBGene00007488 | dph-2    | C09G5.2  | -0.037098155095725  |
| AGIWUR23621                                                                                                                                                           |    |          |          |                |          |          |                     |
| CB4856 CT                                                                                                                                                             | II | 10714886 | 10716416 | WBGene00007489 | C09G5.7  | C09G5.7  | -0.214849011169579  |
| AGIWUR23618                                                                                                                                                           |    |          |          |                |          |          |                     |
| CB4856 CT                                                                                                                                                             | II | 10720231 | 10729252 | WBGene00007490 | mks-5    | C09G5.8  | 0.814587678267283   |
| AGIWUR34107                                                                                                                                                           |    |          |          |                |          |          |                     |
| CB4856 CT                                                                                                                                                             | II | 10729804 | 10731627 | WBGene00008256 | glb-12   | C52A11.2 |                     |
| 0.195202719684954 AGIWUR27689                                                                                                                                         |    |          |          |                |          |          |                     |
| CB4856 CT                                                                                                                                                             | II | 10737402 | 10738628 | WBGene00008257 | C52A11.3 |          | C52A11.3            |
| 0.114389376349225 AGIWUR42803                                                                                                                                         |    |          |          |                |          |          |                     |
| CB4856 CT                                                                                                                                                             | II | 10738635 | 10775061 | WBGene00003404 | mpz-1    | C52A11.4 |                     |
| 0.105631986469411                                                                                                                                                     |    |          |          |                |          |          |                     |
| AGIWUR6677;AGIWUR9212;AGIWUR16617;AGIWUR19487;AGIWUR20489;AGIWUR20775;AGIWUR25775;AGIWUR27445;AGIWUR28484;AGIWUR30306;AGIWUR32704;AGIWUR32857;AGIWUR39509;AGIWUR40262 |    |          |          |                |          |          |                     |
| CB4856 CT                                                                                                                                                             | II | 10778389 | 10783962 | WBGene00002297 | ect-2    | T19E10.1 |                     |
| 0.0719200119238312 AGIWUR1328;AGIWUR5981;AGIWUR9727;AGIWUR21337;AGIWUR24688;AGIWUR44022                                                                               |    |          |          |                |          |          |                     |
| CB4856 CT                                                                                                                                                             | II | 10785452 | 10787272 | WBGene00000411 | cd1-1    | R06F6.1  | -0.122888810254172  |
| AGIWUR1579;AGIWUR4225                                                                                                                                                 |    |          |          |                |          |          |                     |
| CB4856 CT                                                                                                                                                             | II | 10787312 | 10787914 | WBGene00011072 | tag-209  | R06F6.11 |                     |
| 0.0939751481221087 AGIWUR5104                                                                                                                                         |    |          |          |                |          |          |                     |
| CB4856 CT                                                                                                                                                             | II | 10788106 | 10793493 | WBGene00011067 | vps-11   | R06F6.2  | 0.235948765069535   |

|                                                            |    |                                     |          |                |          |          |                     |  |
|------------------------------------------------------------|----|-------------------------------------|----------|----------------|----------|----------|---------------------|--|
| AGIWUR9444                                                 |    |                                     |          |                |          |          |                     |  |
| CB4856 CT                                                  | II | 10793575                            | 10796294 | WBGene00011068 | set-14   | R06F6.4  | -0.192591108089484  |  |
| AGIWUR9082                                                 |    |                                     |          |                |          |          |                     |  |
| CB4856 CT                                                  | II | 10796646                            | 10798479 | WBGene00003805 | npp-19   | R06F6.5  | -0.0935570544880342 |  |
| AGIWUR27834;AGIWUR30360                                    |    |                                     |          |                |          |          |                     |  |
| CB4856 CT                                                  | II | 10809279                            | 10809847 | WBGene00269421 | R06F6.14 |          | R06F6.14            |  |
| 0.419036655584126                                          |    | AGIWUR20089                         |          |                |          |          |                     |  |
| CB4856 CT                                                  | II | 10811016                            | 10812188 | WBGene00011070 | R06F6.7  | R06F6.7  | 0.730988713827317   |  |
| AGIWUR37319                                                |    |                                     |          |                |          |          |                     |  |
| CB4856 CT                                                  | II | 10812949                            | 10819978 | WBGene00011071 | R06F6.8  | R06F6.8  | -0.0383518754078658 |  |
| AGIWUR13413                                                |    |                                     |          |                |          |          |                     |  |
| CB4856 CT                                                  | II | 10821015                            | 10822443 | WBGene00001153 | ech-4    | R06F6.9  | 0.0226804253555635  |  |
| AGIWUR32397                                                |    |                                     |          |                |          |          |                     |  |
| CB4856 CT                                                  | II | 10822328                            | 10824081 | WBGene00023418 | R06F6.12 |          | R06F6.12            |  |
| -0.2980526319323                                           |    | AGIWUR23823                         |          |                |          |          |                     |  |
| CB4856 CT                                                  | II | 10824294                            | 10841424 | WBGene00003367 | mix-1    | M106.1   | -0.0765835026068711 |  |
| AGIWUR7474;AGIWUR7521;AGIWUR30139;AGIWUR39827              |    |                                     |          |                |          |          |                     |  |
| CB4856 CT                                                  | II | 10855642                            | 10857177 | WBGene00044924 | M106.7   | M106.7   | 0.0627761474660602  |  |
| AGIWUR22794                                                |    |                                     |          |                |          |          |                     |  |
| CB4856 CT                                                  | II | 10857473                            | 10860909 | WBGene00010911 | M106.3   | M106.3   | -0.205906138548009  |  |
| AGIWUR25515;AGIWUR38047                                    |    |                                     |          |                |          |          |                     |  |
| CB4856 CT                                                  | II | 10863682                            | 10868714 | WBGene00010912 | gmps-1   | M106.4   | -0.267062039232098  |  |
| AGIWUR4592;AGIWUR25800;AGIWUR26865;AGIWUR30939;AGIWUR33439 |    |                                     |          |                |          |          |                     |  |
| CB4856 CT                                                  | II | 10869196                            | 10870827 | WBGene00000293 | cap-2    | M106.5   | -0.0703918777862542 |  |
| AGIWUR17286;AGIWUR17665;AGIWUR38899;AGIWUR40831            |    |                                     |          |                |          |          |                     |  |
| CB4856 CT                                                  | II | 10870779                            | 10872611 | WBGene00000880 | cyn-4    | F59E10.2 |                     |  |
| 0.0656792044197267                                         |    | AGIWUR17570;AGIWUR29891;AGIWUR33211 |          |                |          |          |                     |  |
| CB4856 CT                                                  | II | 10872879                            | 10873796 | WBGene00010333 | copz-1   | F59E10.3 |                     |  |
| 0.0908058066856512                                         |    | AGIWUR33271                         |          |                |          |          |                     |  |
| CB4856 CT                                                  | II | 10873931                            | 10877934 | WBGene00003882 | orc-2    | F59E10.1 |                     |  |
| -0.067880378769031                                         |    | AGIWUR32871;AGIWUR40159             |          |                |          |          |                     |  |
| CB4856 CT                                                  | II | 10880925                            | 10882427 | WBGene00009700 | lurp-1   | F44F4.1  | 0.182148613598642   |  |
| AGIWUR27458                                                |    |                                     |          |                |          |          |                     |  |
| CB4856 CT                                                  | II | 10882408                            | 10884462 | WBGene00009701 | egg-3    | F44F4.2  | -0.251127896211333  |  |
| AGIWUR20772                                                |    |                                     |          |                |          |          |                     |  |
| CB4856 CT                                                  | II | 10884705                            | 10885878 | WBGene00009702 | F44F4.3  | F44F4.3  | 0.077277486206178   |  |
| AGIWUR21067                                                |    |                                     |          |                |          |          |                     |  |
| CB4856 CT                                                  | II | 10889279                            | 10893288 | WBGene00004222 | pnr-8    | F44F4.4  | 0.0245318153316774  |  |
| AGIWUR37161                                                |    |                                     |          |                |          |          |                     |  |

|                                                                       |    |          |          |                |          |          |                     |
|-----------------------------------------------------------------------|----|----------|----------|----------------|----------|----------|---------------------|
| CB4856 CT                                                             | II | 10893275 | 10895088 | WBGene00005036 | sra-10   | F44F4.5  | 0.181716160516702   |
| AGIWUR12637                                                           |    |          |          |                |          |          |                     |
| CB4856 CT                                                             | II | 10900042 | 10902204 | WBGene00001626 | gly-1    | F44F4.6  | -0.268791480837275  |
| AGIWUR1846                                                            |    |          |          |                |          |          |                     |
| CB4856 CT                                                             | II | 10902756 | 10904479 | WBGene00005038 | sra-12   | F44F4.7  | -0.185913598143162  |
| AGIWUR16841;AGIWUR26876                                               |    |          |          |                |          |          |                     |
| CB4856 CT                                                             | II | 10908808 | 10910319 | WBGene00005037 | sra-11   | F44F4.13 |                     |
| 0.39336845645153 AGIWUR9493;AGIWUR17231;AGIWUR40553                   |    |          |          |                |          |          |                     |
| CB4856 CT                                                             | II | 10915901 | 10917274 | WBGene00009705 | F44F4.10 | F44F4.10 |                     |
| 0.0374289312585461 AGIWUR15150                                        |    |          |          |                |          |          |                     |
| CB4856 CT                                                             | II | 10918706 | 10920202 | WBGene00006530 | tba-4    | F44F4.11 |                     |
| -0.607539976724353 AGIWUR1211;AGIWUR23556                             |    |          |          |                |          |          |                     |
| CB4856 CT                                                             | II | 10922672 | 10922974 | WBGene00012489 | Y19D2B.1 | Y19D2B.1 |                     |
| -0.437883134621632 AGIWUR43206                                        |    |          |          |                |          |          |                     |
| CB4856 CT                                                             | II | 10923716 | 10924595 | WBGene00012490 | Y19D2B.2 | Y19D2B.2 |                     |
| -0.065307241048326 AGIWUR25225                                        |    |          |          |                |          |          |                     |
| CB4856 CT                                                             | II | 10926561 | 10931075 | WBGene00010988 | metr-1   | R03D7.1  | -0.0219582997803389 |
| AGIWUR5757;AGIWUR6884;AGIWUR43211                                     |    |          |          |                |          |          |                     |
| CB4856 CT                                                             | II | 10935726 | 10942198 | WBGene00014814 | R03D7.3  | R03D7.3  | -0.147972373303486  |
| AGIWUR4633;AGIWUR35952                                                |    |          |          |                |          |          |                     |
| CB4856 CT                                                             | II | 10943390 | 10945660 | WBGene00010990 | R03D7.4  | R03D7.4  | -0.0959042997566257 |
| AGIWUR31576                                                           |    |          |          |                |          |          |                     |
| CB4856 CT                                                             | II | 10947610 | 10949184 | WBGene00010991 | R03D7.5  | R03D7.5  | 0.0191043029601303  |
| AGIWUR30739                                                           |    |          |          |                |          |          |                     |
| CB4856 CT                                                             | II | 10950350 | 10951604 | WBGene00001753 | gst-5    | R03D7.6  | -0.064084138877206  |
| AGIWUR32044                                                           |    |          |          |                |          |          |                     |
| CB4856 CT                                                             | II | 10951879 | 10953165 | WBGene00003783 | nos-1    | R03D7.7  | -0.127305833176788  |
| AGIWUR19424                                                           |    |          |          |                |          |          |                     |
| CB4856 CT                                                             | II | 10953594 | 10956878 | WBGene00010992 | R03D7.8  | R03D7.8  | 0.0138172574125974  |
| AGIWUR44506                                                           |    |          |          |                |          |          |                     |
| CB4856 CT                                                             | II | 10968386 | 11012247 | WBGene00004215 | ptp-3    | C09D8.1  | 0.0939962477513632  |
| AGIWUR3429;AGIWUR6662;AGIWUR13959;AGIWUR34474;AGIWUR35314;AGIWUR37980 |    |          |          |                |          |          |                     |
| CB4856 CT                                                             | II | 11012397 | 11013820 | WBGene00000657 | col-81   | F38A3.1  | -0.065566175201246  |
| AGIWUR3425                                                            |    |          |          |                |          |          |                     |
| CB4856 CT                                                             | II | 11015588 | 11016881 | WBGene00004300 | ram-2    | F38A3.2  | -0.259343184368195  |
| AGIWUR4854;AGIWUR6326;AGIWUR11647                                     |    |          |          |                |          |          |                     |
| CB4856 CT                                                             | II | 11022370 | 11027909 | WBGene00002957 | let-858  | F33A8.1  | 0.0338679067909844  |
| AGIWUR12874;AGIWUR29582                                               |    |          |          |                |          |          |                     |
| CB4856 CT                                                             | II | 11027962 | 11030404 | WBGene00003756 | nlp-18   | F33A8.2  | 0.203609297534961   |

|                                                                        |    |    |          |          |                |           |                             |
|------------------------------------------------------------------------|----|----|----------|----------|----------------|-----------|-----------------------------|
| AGIWUR5506;AGIWUR38400                                                 |    |    |          |          |                |           |                             |
| CB4856                                                                 | CT | II | 11036074 | 11039471 | WBGene00009356 | F33A8.10  | F33A8.10                    |
| -0.571890973944088 AGIWUR20869                                         |    |    |          |          |                |           |                             |
| CB4856                                                                 | CT | II | 11039348 | 11041206 | WBGene00000472 | cey-1     | F33A8.3 0.329679610012002   |
| AGIWUR534;AGIWUR9013;AGIWUR15336;AGIWUR29341;AGIWUR30653               |    |    |          |          |                |           |                             |
| CB4856                                                                 | CT | II | 11044135 | 11045968 | WBGene00000658 | col-83    | F33A8.9 0.275797687092383   |
| AGIWUR40812                                                            |    |    |          |          |                |           |                             |
| CB4856                                                                 | CT | II | 11045786 | 11049030 | WBGene00009352 | F33A8.4   | F33A8.4 -0.181880007240824  |
| AGIWUR17337                                                            |    |    |          |          |                |           |                             |
| CB4856                                                                 | CT | II | 11049144 | 11049913 | WBGene00009353 | sdhd-1    | F33A8.5 0.0792100374920608  |
| AGIWUR2216                                                             |    |    |          |          |                |           |                             |
| CB4856                                                                 | CT | II | 11058096 | 11089456 | WBGene00006788 | unc-53    | F45E10.1                    |
| 0.284449956193341 AGIWUR14085                                          |    |    |          |          |                |           |                             |
| CB4856                                                                 | CT | II | 11092713 | 11093871 | WBGene00004455 | rpl-42    | C09H10.1                    |
| 0.116548719290702 AGIWUR24645                                          |    |    |          |          |                |           |                             |
| CB4856                                                                 | CT | II | 11095048 | 11096475 | WBGene00007504 | C09H10.10 | C09H10.10                   |
| -0.217519736481258 AGIWUR31480                                         |    |    |          |          |                |           |                             |
| CB4856                                                                 | CT | II | 11096542 | 11097204 | WBGene00004454 | rpl-36.A  | C09H10.2                    |
| 0.117671498795179 AGIWUR20646                                          |    |    |          |          |                |           |                             |
| CB4856                                                                 | CT | II | 11097841 | 11100146 | WBGene00003831 | nuo-1     | C09H10.3                    |
| 0.0846967608163824 AGIWUR11037;AGIWUR44982                             |    |    |          |          |                |           |                             |
| CB4856                                                                 | CT | II | 11100141 | 11100462 | WBGene00043120 | C09H10.4  | C09H10.4                    |
| -0.0504567141994565 AGIWUR35898                                        |    |    |          |          |                |           |                             |
| CB4856                                                                 | CT | II | 11100479 | 11103779 | WBGene00007499 | C09H10.5  | C09H10.5                    |
| -0.409603465173209 AGIWUR19231                                         |    |    |          |          |                |           |                             |
| CB4856                                                                 | CT | II | 11104462 | 11106046 | WBGene00007503 | C09H10.9  | C09H10.9                    |
| 0.112799382106729 AGIWUR20653                                          |    |    |          |          |                |           |                             |
| CB4856                                                                 | CT | II | 11106616 | 11108070 | WBGene00007500 | nasp-1    | C09H10.6                    |
| -0.0789467436443445 AGIWUR24585                                        |    |    |          |          |                |           |                             |
| CB4856                                                                 | CT | II | 11108159 | 11109583 | WBGene00007501 | apc-17    | C09H10.7                    |
| -0.333385970963137 AGIWUR44608                                         |    |    |          |          |                |           |                             |
| CB4856                                                                 | CT | II | 11109584 | 11111169 | WBGene00007502 | glb-4     | C09H10.8                    |
| -0.137183511360593 AGIWUR34694                                         |    |    |          |          |                |           |                             |
| CB4856                                                                 | CT | II | 11112719 | 11120788 | WBGene00003133 | mat-2     | W10C6.1 0.00834411117612843 |
| AGIWUR1142;AGIWUR11753;AGIWUR12091;AGIWUR12124;AGIWUR13946;AGIWUR26553 |    |    |          |          |                |           |                             |
| CB4856                                                                 | CT | II | 11120882 | 11121900 | WBGene00044160 | W10C6.2   | W10C6.2 0.0163538918405148  |
| AGIWUR3254;AGIWUR7000;AGIWUR13656;AGIWUR14327;AGIWUR41178              |    |    |          |          |                |           |                             |
| CB4856                                                                 | CT | II | 11125371 | 11126362 | WBGene00004478 | rps-9     | F40F8.10                    |
| 0.00922073467106799 AGIWUR13095;AGIWUR27232;AGIWUR44243                |    |    |          |          |                |           |                             |



|                                                                                |    |          |          |                |          |          |                     |
|--------------------------------------------------------------------------------|----|----------|----------|----------------|----------|----------|---------------------|
| CB4856 CT                                                                      | II | 11126932 | 11127530 | WBGene00003076 | lsm-1    | F40F8.9  | -0.148219779575292  |
| AGIWUR21932                                                                    |    |          |          |                |          |          |                     |
| CB4856 CT                                                                      | II | 11127634 | 11129256 | WBGene00009575 | F40F8.1  | F40F8.1  | 0.0945147452284871  |
| AGIWUR30901                                                                    |    |          |          |                |          |          |                     |
| CB4856 CT                                                                      | II | 11129289 | 11130187 | WBGene00009576 | F40F8.3  | F40F8.3  | 0.154344118451633   |
| AGIWUR8310;AGIWUR20158;AGIWUR29689;AGIWUR34395;AGIWUR34689                     |    |          |          |                |          |          |                     |
| CB4856 CT                                                                      | II | 11130275 | 11130698 | WBGene00044917 | F40F8.12 |          | F40F8.12            |
| -0.0956191055908455 AGIWUR40447                                                |    |          |          |                |          |          |                     |
| CB4856 CT                                                                      | II | 11130690 | 11132648 | WBGene00044916 | F40F8.11 |          | F40F8.11            |
| -0.0609394766429219 AGIWUR7480;AGIWUR13537;AGIWUR13618;AGIWUR40789;AGIWUR42894 |    |          |          |                |          |          |                     |
| CB4856 CT                                                                      | II | 11132861 | 11135140 | WBGene00009578 | F40F8.5  | F40F8.5  | 0.0713271247437746  |
| AGIWUR4445;AGIWUR33682                                                         |    |          |          |                |          |          |                     |
| CB4856 CT                                                                      | II | 11139407 | 11140275 | WBGene00009577 | F40F8.4  | F40F8.4  | 0.0577824480895694  |
| AGIWUR8970;AGIWUR28271;AGIWUR29838;AGIWUR35430                                 |    |          |          |                |          |          |                     |
| CB4856 CT                                                                      | II | 11142751 | 11150381 | WBGene00009579 | arrd-6   | F40F8.8  | 0.360510116923485   |
| AGIWUR36363                                                                    |    |          |          |                |          |          |                     |
| CB4856 CT                                                                      | II | 11150299 | 11152600 | WBGene00004096 | pqm-1    | F40F8.7  | 0.871819074196218   |
| AGIWUR28055                                                                    |    |          |          |                |          |          |                     |
| CB4856 CT                                                                      | II | 11157094 | 11162481 | WBGene00004227 | ptr-13   | K07C10.1 |                     |
| -0.179425574488696 AGIWUR42577                                                 |    |          |          |                |          |          |                     |
| CB4856 CT                                                                      | II | 11171446 | 11175479 | WBGene00009511 | F37H8.2  | F37H8.2  | -0.32136930707979   |
| AGIWUR28562                                                                    |    |          |          |                |          |          |                     |
| CB4856 CT                                                                      | II | 11181654 | 11183147 | WBGene00009512 | F37H8.3  | F37H8.3  | 0.688218615681407   |
| AGIWUR7905                                                                     |    |          |          |                |          |          |                     |
| CB4856 CT                                                                      | II | 11183075 | 11184807 | WBGene00003046 | lir-3    | F37H8.1  | -0.327339617904023  |
| AGIWUR1936                                                                     |    |          |          |                |          |          |                     |
| CB4856 CT                                                                      | II | 11186028 | 11188080 | WBGene00009513 | sfxn-1.2 |          | F37H8.4             |
| 0.145473088469101 AGIWUR24608                                                  |    |          |          |                |          |          |                     |
| CB4856 CT                                                                      | II | 11188206 | 11189437 | WBGene00009514 | F37H8.5  | F37H8.5  | -0.404542175509544  |
| AGIWUR7339                                                                     |    |          |          |                |          |          |                     |
| CB4856 CT                                                                      | II | 11203221 | 11220642 | WBGene00011522 | srp-1    | T06D8.1  | 0.562154128868578   |
| AGIWUR17063;AGIWUR23459;AGIWUR36933                                            |    |          |          |                |          |          |                     |
| CB4856 CT                                                                      | II | 11222305 | 11226548 | WBGene00011524 | T06D8.3  | T06D8.3  | 0.177934895172917   |
| AGIWUR21094                                                                    |    |          |          |                |          |          |                     |
| CB4856 CT                                                                      | II | 11226679 | 11232835 | WBGene00011523 | T06D8.2  | T06D8.2  | 0.0136858272904696  |
| AGIWUR9844;AGIWUR12839;AGIWUR36573                                             |    |          |          |                |          |          |                     |
| CB4856 CT                                                                      | II | 11232756 | 11234952 | WBGene00011526 | cox-15   | T06D8.5  | 0.144632347418234   |
| AGIWUR17356                                                                    |    |          |          |                |          |          |                     |
| CB4856 CT                                                                      | II | 11235053 | 11236450 | WBGene00011527 | cchl-1   | T06D8.6  | 0.00619834987342482 |

|                                                            |    |    |          |          |                                                    |
|------------------------------------------------------------|----|----|----------|----------|----------------------------------------------------|
| AGIWUR20738;AGIWUR29488                                    |    |    |          |          |                                                    |
| CB4856                                                     | CT | II | 11236624 | 11237323 | WBGene00011528 T06D8.7 T06D8.7 0.0047504857807823  |
| AGIWUR41769                                                |    |    |          |          |                                                    |
| CB4856                                                     | CT | II | 11237447 | 11239092 | WBGene00004465 rpn-9 T06D8.8 -0.256501663218558    |
| AGIWUR3086;AGIWUR16274                                     |    |    |          |          |                                                    |
| CB4856                                                     | CT | II | 11239407 | 11240988 | WBGene00011529 T06D8.9 T06D8.9 -0.135010827520206  |
| AGIWUR7515;AGIWUR38105                                     |    |    |          |          |                                                    |
| CB4856                                                     | CT | II | 11240932 | 11247514 | WBGene00011530 T06D8.10 T06D8.10                   |
| 0.101983959175874 AGIWUR28942                              |    |    |          |          |                                                    |
| CB4856                                                     | CT | II | 11257081 | 11258506 | WBGene00011465 T05B9.2 T05B9.2 0.15783734986092    |
| AGIWUR1889;AGIWUR27281;AGIWUR29593;AGIWUR34102;AGIWUR38410 |    |    |          |          |                                                    |
| CB4856                                                     | CT | II | 11260087 | 11261256 | WBGene00011464 T05B9.1 T05B9.1 -0.321542450895194  |
| AGIWUR5135                                                 |    |    |          |          |                                                    |
| CB4856                                                     | CT | II | 11269124 | 11271599 | WBGene00000851 cut-1 C47G2.1 -0.268005273263924    |
| AGIWUR10983                                                |    |    |          |          |                                                    |
| CB4856                                                     | CT | II | 11281986 | 11283953 | WBGene00006853 unc-130 C47G2.2 0.638605053656773   |
| AGIWUR15293                                                |    |    |          |          |                                                    |
| CB4856                                                     | CT | II | 11288690 | 11290159 | WBGene00008164 C47G2.3 C47G2.3 -0.0682500437583609 |
| AGIWUR4536;AGIWUR5872                                      |    |    |          |          |                                                    |
| CB4856                                                     | CT | II | 11290843 | 11293606 | WBGene00008165 C47G2.4 C47G2.4 -0.124474611801999  |
| AGIWUR17801                                                |    |    |          |          |                                                    |
| CB4856                                                     | CT | II | 11293997 | 11294579 | WBGene00044038 C47G2.6 C47G2.6 -0.202680338523835  |
| AGIWUR25886                                                |    |    |          |          |                                                    |
| CB4856                                                     | CT | II | 11295563 | 11296019 | WBGene00044039 C47G2.7 C47G2.7 -0.331180411137996  |
| AGIWUR23223                                                |    |    |          |          |                                                    |
| CB4856                                                     | CT | II | 11297700 | 11301254 | WBGene00008166 saps-1 C47G2.5 -0.145603320491862   |
| AGIWUR26416;AGIWUR31317;AGIWUR39412                        |    |    |          |          |                                                    |
| CB4856                                                     | CT | II | 11301359 | 11302783 | WBGene00006414 raga-1 T24F1.1 -0.0778855130332907  |
| AGIWUR32876                                                |    |    |          |          |                                                    |
| CB4856                                                     | CT | II | 11302891 | 11305683 | WBGene00011994 samp-1 T24F1.2                      |
| -0.00474855177360212 AGIWUR30                              |    |    |          |          |                                                    |
| CB4856                                                     | CT | II | 11306399 | 11311940 | WBGene00011995 rsf-1 T24F1.3 0.476759891852721     |
| AGIWUR16058                                                |    |    |          |          |                                                    |
| CB4856                                                     | CT | II | 11312460 | 11313346 | WBGene00011999 T24F1.7 T24F1.7 -0.119167535945727  |
| AGIWUR545                                                  |    |    |          |          |                                                    |
| CB4856                                                     | CT | II | 11313331 | 11314265 | WBGene00011996 T24F1.4 T24F1.4 -0.103727222485379  |
| AGIWUR38428                                                |    |    |          |          |                                                    |
| CB4856                                                     | CT | II | 11319241 | 11319691 | WBGene00011997 nlp-51 T24F1.5 1.02300043786755     |
| AGIWUR32939                                                |    |    |          |          |                                                    |

|                                                 |                                                            |
|-------------------------------------------------|------------------------------------------------------------|
| CB4856 CT II 11323051 11329429                  | WBGene00007041 tag-180 T24F1.6 -0.124109017894769          |
| AGIWUR3735;AGIWUR11884;AGIWUR43713              |                                                            |
| CB4856 CT II 11336693 11337837                  | WBGene00005016 sqt-1 B0491.2 -0.329674927639315            |
| AGIWUR5183                                      |                                                            |
| CB4856 CT II 11338451 11339620                  | WBGene00007190 rmd-3 B0491.3 -0.0739488124093661           |
| AGIWUR3162;AGIWUR18812;AGIWUR39848              |                                                            |
| CB4856 CT II 11340134 11343530                  | WBGene00007191 lgc-20 B0491.4 -0.0818068601980748          |
| AGIWUR19561                                     |                                                            |
| CB4856 CT II 11343716 11345743                  | WBGene00007192 B0491.5 B0491.5 0.107624600174896           |
| AGIWUR6670;AGIWUR9367                           |                                                            |
| CB4856 CT II 11345943 11348248                  | WBGene00007193 B0491.6 B0491.6 -0.095842434979275          |
| AGIWUR12652                                     |                                                            |
| CB4856 CT II 11348430 11349946                  | WBGene00007189 B0491.1 B0491.1 0.280051016129633           |
| AGIWUR37232                                     |                                                            |
| CB4856 CT II 11350192 11351373                  | WBGene00007194 B0491.7 B0491.7 -0.21749667789036           |
| AGIWUR41619                                     |                                                            |
| CB4856 CT II 11358447 11370311                  | WBGene00000529 clh-2 B0491.8 0.0116372731865373            |
| AGIWUR16507;AGIWUR21676;AGIWUR31905;AGIWUR39721 |                                                            |
| CB4856 CT II 11370315 11372145                  | WBGene00007891 C33B4.2 C33B4.2 -0.532818592823276          |
| AGIWUR36998                                     |                                                            |
| CB4856 CT II 11375608 11376269                  | WBGene00007892 C33B4.4 C33B4.4 -0.120674916163303          |
| AGIWUR17076                                     |                                                            |
| CB4856 CT II 11383327 11384570                  | WBGene00007893 C33B4.5 C33B4.5 -0.155957735105075          |
| AGIWUR19815                                     |                                                            |
| CB4856 CT II 11384594 11390862                  | WBGene00006444 shn-1 C33B4.3 0.789816048237403             |
| AGIWUR34943                                     |                                                            |
| CB4856 CT II 11410091 11412280                  | WBGene00044029 C05D12.7 C05D12.7                           |
| -0.146431338508973                              | AGIWUR1320;AGIWUR20111;AGIWUR26683;AGIWUR26954;AGIWUR33534 |
| CB4856 CT II 11412232 11415820                  | WBGene00007339 C05D12.1 C05D12.1                           |
| 0.00251446225627738                             | AGIWUR12511                                                |
| CB4856 CT II 11418314 11423393                  | WBGene00007340 C05D12.2 C05D12.2                           |
| 0.640762805237713                               | AGIWUR10538                                                |
| CB4856 CT II 11424830 11430607                  | WBGene00014666 C05D12.3 C05D12.3                           |
| -0.697386358516767                              | AGIWUR21963;AGIWUR23327                                    |
| CB4856 CT II 11431709 11432766                  | WBGene00007341 C05D12.4 C05D12.4                           |
| -0.274980878353002                              | AGIWUR6395                                                 |
| CB4856 CT II 11434221 11434958                  | WBGene00007342 C05D12.5 C05D12.5                           |
| -0.0538845995246717                             | AGIWUR19686;AGIWUR25321;AGIWUR39345                        |
| CB4856 CT II 11435212 11438464                  | WBGene00006915 vha-6 VW02B12L.1                            |

|                      |                                                            |                |                 |                             |
|----------------------|------------------------------------------------------------|----------------|-----------------|-----------------------------|
| -0.549690364713518   | AGIWUR891;AGIWUR8238;AGIWUR15957                           |                |                 |                             |
| CB4856 CT II         | 11439177 11439762                                          | WBGene00012155 | VW02B12L.2      | VW02B12L.2                  |
| 0.0669136822644489   | AGIWUR3395                                                 |                |                 |                             |
| CB4856 CT II         | 11442693 11444009                                          | WBGene00012156 | ebp-2           | VW02B12L.3                  |
| 0.000511073297119857 | AGIWUR7374;AGIWUR30744                                     |                |                 |                             |
| CB4856 CT II         | 11444162 11445255                                          | WBGene00012157 | adbp-1          | VW02B12L.4                  |
| -0.227081684643979   | AGIWUR1736                                                 |                |                 |                             |
| CB4856 CT II         | 11445289 11448895                                          | WBGene00043534 | W02B12.13       | W02B12.13                   |
| 0.0680834527577865   | AGIWUR23311;AGIWUR26362;AGIWUR40669                        |                |                 |                             |
| CB4856 CT II         | 11448965 11451445                                          | WBGene00012201 | W02B12.1        | W02B12.1                    |
| -0.0435154445697385  | AGIWUR3778                                                 |                |                 |                             |
| CB4856 CT II         | 11451444 11452955                                          | WBGene00004699 | rsp-2           | W02B12.2                    |
| -0.139021989495667   | AGIWUR7342;AGIWUR16886;AGIWUR19469;AGIWUR24287;AGIWUR28283 |                |                 |                             |
| CB4856 CT II         | 11453362 11455864                                          | WBGene00004698 | rsp-1           | W02B12.3                    |
| -0.109886777321221   | AGIWUR8808;AGIWUR19633;AGIWUR44613                         |                |                 |                             |
| CB4856 CT II         | 11455759 11459356                                          | WBGene00012202 | W02B12.4        | W02B12.4                    |
| 0.0570994892806329   | AGIWUR9639;AGIWUR25066;AGIWUR32512                         |                |                 |                             |
| CB4856 CT II         | 11460215 11464129                                          | WBGene00000196 | aars-1          | W02B12.6                    |
| -0.244604574469632   | AGIWUR42057                                                |                |                 |                             |
| CB4856 CT II         | 11464892 11468653                                          | WBGene00012203 | rga-1           | W02B12.8                    |
| 0.0582861818473885   | AGIWUR9836;AGIWUR17737;AGIWUR20910;AGIWUR37766             |                |                 |                             |
| CB4856 CT II         | 11468552 11469624                                          | WBGene00044026 | cisd-1          | W02B12.15                   |
| -0.0487471663008154  | AGIWUR9645;AGIWUR11244;AGIWUR30877;AGIWUR36766;AGIWUR43387 |                |                 |                             |
| CB4856 CT II         | 11470010 11472033                                          | WBGene00012204 | mfn-1           | W02B12.9                    |
| 0.252194887882492    | AGIWUR7193;AGIWUR40221                                     |                |                 |                             |
| CB4856 CT II         | 11472135 11473571                                          | WBGene00012205 | W02B12.10       | W02B12.10                   |
| -0.193786671125521   | AGIWUR25960                                                |                |                 |                             |
| CB4856 CT II         | 11473861 11476019                                          | WBGene00012206 | W02B12.11       | W02B12.11                   |
| -0.00924773521167666 | AGIWUR16635;AGIWUR22977;AGIWUR44267                        |                |                 |                             |
| CB4856 CT II         | 11476757 11479176                                          | WBGene00012207 | W02B12.12       | W02B12.12                   |
| 0.0728653150860001   | AGIWUR13834;AGIWUR34835;AGIWUR35852                        |                |                 |                             |
| CB4856 CT II         | 11480432 11482385                                          | WBGene00007147 | B0334.9 B0334.9 | -0.45831029035898           |
| AGIWUR3847           |                                                            |                |                 |                             |
| CB4856 CT II         | 11483201 11485359                                          | WBGene00006660 | twk-5           | B0334.2 -0.0278391468659631 |
| AGIWUR24833          |                                                            |                |                 |                             |
| CB4856 CT II         | 11485510 11486774                                          | WBGene00007142 | ttr-18          | B0334.1 0.0883257602942162  |
| AGIWUR35879          |                                                            |                |                 |                             |
| CB4856 CT II         | 11488302 11489619                                          | WBGene00007149 | B0334.13        | B0334.13                    |
| -0.625264743307392   | AGIWUR2411                                                 |                |                 |                             |

|                                     |                                                             |          |                |                 |                     |
|-------------------------------------|-------------------------------------------------------------|----------|----------------|-----------------|---------------------|
| CB4856 CT II                        | 11489605                                                    | 11493039 | WBGene00007143 | B0334.3 B0334.3 | 0.642767612361084   |
| AGIWUR8770                          |                                                             |          |                |                 |                     |
| CB4856 CT II                        | 11493231                                                    | 11495321 | WBGene00003868 | ooc-3 B0334.11  |                     |
| -0.107339880815433                  | AGIWUR41973                                                 |          |                |                 |                     |
| CB4856 CT II                        | 11495692                                                    | 11496663 | WBGene00007144 | B0334.4 B0334.4 | -0.162276514130035  |
| AGIWUR44324                         |                                                             |          |                |                 |                     |
| CB4856 CT II                        | 11497665                                                    | 11499620 | WBGene00007145 | B0334.5 B0334.5 | 0.0211421495619604  |
| AGIWUR1708                          |                                                             |          |                |                 |                     |
| CB4856 CT II                        | 11510673                                                    | 11513890 | WBGene00007146 | B0334.6 B0334.6 | -0.0337105318955579 |
| AGIWUR18391                         |                                                             |          |                |                 |                     |
| CB4856 CT II                        | 11515075                                                    | 11518154 | WBGene00005267 | srh-44 B0334.7  | 0.0635457446197387  |
| AGIWUR18781                         |                                                             |          |                |                 |                     |
| CB4856 CT II                        | 11519323                                                    | 11527062 | WBGene00000090 | age-1 B0334.8   | -0.0604253382482351 |
| AGIWUR6065;AGIWUR20151;AGIWUR40421  |                                                             |          |                |                 |                     |
| CB4856 CT II                        | 11527172                                                    | 11533814 | WBGene00007013 | mdt-8 Y62F5A.1  |                     |
| -0.0111545422260253                 | AGIWUR10085;AGIWUR18350                                     |          |                |                 |                     |
| CB4856 CT II                        | 11533925                                                    | 11534479 | WBGene00077453 | Y62F5A.12       | Y62F5A.12           |
| -0.138100204445138                  | AGIWUR15635;AGIWUR22508;AGIWUR29852;AGIWUR30561;AGIWUR32531 |          |                |                 |                     |
| CB4856 CT II                        | 11535165                                                    | 11538841 | WBGene00013387 | Y62F5A.9        | Y62F5A.9            |
| 0.383511860771884                   | AGIWUR2621                                                  |          |                |                 |                     |
| CB4856 CT II                        | 11538904                                                    | 11540630 | WBGene00010055 | F54D5.12        | F54D5.12            |
| -0.253315991052034                  | AGIWUR4071;AGIWUR32091;AGIWUR43219                          |          |                |                 |                     |
| CB4856 CT II                        | 11540772                                                    | 11542579 | WBGene00010054 | F54D5.11        | F54D5.11            |
| -0.0700842832638688                 | AGIWUR23057                                                 |          |                |                 |                     |
| CB4856 CT II                        | 11542636                                                    | 11544875 | WBGene00010053 | F54D5.9 F54D5.9 | 0.0578223286531241  |
| AGIWUR20809                         |                                                             |          |                |                 |                     |
| CB4856 CT II                        | 11545563                                                    | 11547366 | WBGene00001031 | dnj-13 F54D5.8  | -0.0596768986873553 |
| AGIWUR32433                         |                                                             |          |                |                 |                     |
| CB4856 CT II                        | 11547481                                                    | 11549313 | WBGene00010052 | F54D5.7 F54D5.7 |                     |
| -0.00950984543136801                | AGIWUR16917;AGIWUR18203                                     |          |                |                 |                     |
| CB4856 CT II                        | 11558715                                                    | 11564227 | WBGene00010057 | F54D5.15        | F54D5.15            |
| -0.292301772493318                  | AGIWUR23389                                                 |          |                |                 |                     |
| CB4856 CT II                        | 11564385                                                    | 11567020 | WBGene00010051 | F54D5.5 F54D5.5 | 0.0489456153947536  |
| AGIWUR4180;AGIWUR8631               |                                                             |          |                |                 |                     |
| CB4856 CT II                        | 11569818                                                    | 11571002 | WBGene00010050 | F54D5.4 F54D5.4 | -0.376390328901243  |
| AGIWUR25511;AGIWUR35726;AGIWUR43286 |                                                             |          |                |                 |                     |
| CB4856 CT II                        | 11571805                                                    | 11573025 | WBGene00010049 | F54D5.3 F54D5.3 | 0.2209453743602     |
| AGIWUR31038                         |                                                             |          |                |                 |                     |
| CB4856 CT II                        | 11573180                                                    | 11575000 | WBGene00010048 | F54D5.2 F54D5.2 | -0.055481181442671  |

|                                                                                                                       |    |    |          |          |                |                 |                            |
|-----------------------------------------------------------------------------------------------------------------------|----|----|----------|----------|----------------|-----------------|----------------------------|
| AGIWUR14382                                                                                                           |    |    |          |          |                |                 |                            |
| CB4856                                                                                                                | CT | II | 11574940 | 11577258 | WBGene00003960 | pcs-1           | F54D5.1 0.0264200787844651 |
| AGIWUR12093;AGIWUR26991;AGIWUR27917                                                                                   |    |    |          |          |                |                 |                            |
| CB4856                                                                                                                | CT | II | 11578716 | 11582758 | WBGene00010056 | smc-6           | F54D5.14                   |
| 0.255588642744191 AGIWUR9293;AGIWUR28985;AGIWUR42540                                                                  |    |    |          |          |                |                 |                            |
| CB4856                                                                                                                | CT | II | 11582849 | 11588536 | WBGene00008361 | D1043.1 D1043.1 | -0.0250310151548376        |
| AGIWUR31695                                                                                                           |    |    |          |          |                |                 |                            |
| CB4856                                                                                                                | CT | II | 11588464 | 11592060 | WBGene00008545 | F07A11.1        | F07A11.1                   |
| 0.337510287867546 AGIWUR540                                                                                           |    |    |          |          |                |                 |                            |
| CB4856                                                                                                                | CT | II | 11592392 | 11596590 | WBGene00008546 | gfat-1          | F07A11.2                   |
| -0.229294812603545 AGIWUR7924                                                                                         |    |    |          |          |                |                 |                            |
| CB4856                                                                                                                | CT | II | 11596767 | 11599809 | WBGene00003791 | npp-5           | F07A11.3                   |
| -0.105878496220692 AGIWUR15789                                                                                        |    |    |          |          |                |                 |                            |
| CB4856                                                                                                                | CT | II | 11603956 | 11611532 | WBGene00008547 | F07A11.4        | F07A11.4                   |
| -0.25979697779643 AGIWUR16553                                                                                         |    |    |          |          |                |                 |                            |
| CB4856                                                                                                                | CT | II | 11612257 | 11614391 | WBGene00008548 | F07A11.5        | F07A11.5                   |
| -0.0811193270614829 AGIWUR34591                                                                                       |    |    |          |          |                |                 |                            |
| CB4856                                                                                                                | CT | II | 11614636 | 11633609 | WBGene00008549 | din-1           | F07A11.6                   |
| 0.316429718340214                                                                                                     |    |    |          |          |                |                 |                            |
| AGIWUR2384;AGIWUR5574;AGIWUR20351;AGIWUR26081;AGIWUR29000;AGIWUR30375;AGIWUR35211;AGIWUR35355;AGIWUR40727;AGIWUR42354 |    |    |          |          |                |                 |                            |
| CB4856                                                                                                                | CT | II | 11640454 | 11641778 | WBGene00002194 | kin-6           | ZK20.2 -0.294824568078583  |
| AGIWUR20410                                                                                                           |    |    |          |          |                |                 |                            |
| CB4856                                                                                                                | CT | II | 11646747 | 11649139 | WBGene00013923 | ghi-1           | ZK20.1 0.146367605721906   |
| AGIWUR21946                                                                                                           |    |    |          |          |                |                 |                            |
| CB4856                                                                                                                | CT | II | 11649096 | 11651213 | WBGene00013925 | ZK20.4 ZK20.4   | -0.354847807763061         |
| AGIWUR28663                                                                                                           |    |    |          |          |                |                 |                            |
| CB4856                                                                                                                | CT | II | 11651261 | 11652906 | WBGene00013924 | rad-23          | ZK20.3 -0.19739255365459   |
| AGIWUR7698;AGIWUR12477;AGIWUR32141;AGIWUR39417                                                                        |    |    |          |          |                |                 |                            |
| CB4856                                                                                                                | CT | II | 11653096 | 11654194 | WBGene00004468 | rpn-12          | ZK20.5 -0.225148258270472  |
| AGIWUR27674                                                                                                           |    |    |          |          |                |                 |                            |
| CB4856                                                                                                                | CT | II | 11654214 | 11657172 | WBGene00013926 | nep-1           | ZK20.6 -0.0920171124591356 |
| AGIWUR2710                                                                                                            |    |    |          |          |                |                 |                            |
| CB4856                                                                                                                | CT | II | 11661583 | 11675927 | WBGene00007028 | trr-1           | C47D12.1                   |
| 0.174257986914302 AGIWUR5325;AGIWUR12751;AGIWUR31535                                                                  |    |    |          |          |                |                 |                            |
| CB4856                                                                                                                | CT | II | 11676306 | 11679197 | WBGene00008136 | C47D12.2        | C47D12.2                   |
| -0.26042630091448 AGIWUR5784                                                                                          |    |    |          |          |                |                 |                            |
| CB4856                                                                                                                | CT | II | 11679091 | 11681068 | WBGene00008137 | sfxn-1.4        | C47D12.3                   |
| 0.0929767924035936 AGIWUR19634                                                                                        |    |    |          |          |                |                 |                            |

|                                                                                                                                                                                                                                                           |             |          |                |            |                             |
|-----------------------------------------------------------------------------------------------------------------------------------------------------------------------------------------------------------------------------------------------------------|-------------|----------|----------------|------------|-----------------------------|
| CB4856 CT II                                                                                                                                                                                                                                              | 11681825    | 11682881 | WBGene00008138 | C47D12.4   | C47D12.4                    |
| 0.349823974488894                                                                                                                                                                                                                                         | AGIWUR23593 |          |                |            |                             |
| CB4856 CT II                                                                                                                                                                                                                                              | 11683479    | 11685289 | WBGene00008139 | C47D12.5   | C47D12.5                    |
| 0.177286022078842                                                                                                                                                                                                                                         | AGIWUR40843 |          |                |            |                             |
| CB4856 CT II                                                                                                                                                                                                                                              | 11696171    | 11705371 | WBGene00008140 | xpf-1      | C47D12.8                    |
| 0.183539353041411                                                                                                                                                                                                                                         | AGIWUR41402 |          |                |            |                             |
| CB4856 CT II                                                                                                                                                                                                                                              | 11705989    | 11713610 | WBGene00012149 | VF13D12L.3 | VF13D12L.3                  |
| -0.012645926407167                                                                                                                                                                                                                                        | AGIWUR3208  |          |                |            |                             |
| CB4856 CT II                                                                                                                                                                                                                                              | 11713721    | 11716785 | WBGene00008744 | F13D12.10  | F13D12.10                   |
| 0.359962272369884                                                                                                                                                                                                                                         | AGIWUR10883 |          |                |            |                             |
| CB4856 CT II                                                                                                                                                                                                                                              | 11720444    | 11722308 | WBGene00008739 | F13D12.3   | F13D12.3                    |
| -0.0516414446262772                                                                                                                                                                                                                                       | AGIWUR43065 |          |                |            |                             |
| CB4856 CT II                                                                                                                                                                                                                                              | 11724204    | 11726533 | WBGene00002262 | ldh-1      | F13D12.2                    |
| -0.0229112397595905                                                                                                                                                                                                                                       | AGIWUR13529 |          |                |            |                             |
| CB4856 CT II                                                                                                                                                                                                                                              | 11726814    | 11728541 | WBGene00008740 | F13D12.5   | F13D12.5                    |
| -0.173166224221461                                                                                                                                                                                                                                        | AGIWUR26392 |          |                |            |                             |
| CB4856 CT II                                                                                                                                                                                                                                              | 11728949    | 11731226 | WBGene00000114 | alh-8      | F13D12.4                    |
| -0.0453022262559291                                                                                                                                                                                                                                       |             |          |                |            |                             |
| AGIWUR1224;AGIWUR5891;AGIWUR12029;AGIWUR14165;AGIWUR15757;AGIWUR16773;AGIWUR17567;AGIWUR18235;AGIWUR20123;AGIWUR20401;AGIWUR22020;AGIWUR24172;AGIWUR24755;AGIWUR29296;AGIWUR34759;AGIWUR38206;AGIWUR41118;AGIWUR41506;AGIWUR42887;AGIWUR43612;AGIWUR44212 |             |          |                |            |                             |
| CB4856 CT II                                                                                                                                                                                                                                              | 11731165    | 11732594 | WBGene00008742 | F13D12.8   | F13D12.8                    |
| -0.0484239026182287                                                                                                                                                                                                                                       | AGIWUR8447  |          |                |            |                             |
| CB4856 CT II                                                                                                                                                                                                                                              | 11739456    | 11742876 | WBGene00008741 | F13D12.6   | F13D12.6                    |
| -0.0884592442686518                                                                                                                                                                                                                                       | AGIWUR13795 |          |                |            |                             |
| CB4856 CT II                                                                                                                                                                                                                                              | 11742814    | 11748611 | WBGene00001679 | gpb-1      | F13D12.7                    |
| -0.0396966838324655                                                                                                                                                                                                                                       |             |          |                |            |                             |
| AGIWUR1044;AGIWUR6942;AGIWUR12617;AGIWUR16349;AGIWUR22503;AGIWUR22766;AGIWUR27763;AGIWUR37448;AGIWUR38234;AGIWUR39837                                                                                                                                     |             |          |                |            |                             |
| CB4856 CT II                                                                                                                                                                                                                                              | 11762166    | 11765662 | WBGene00009690 | F44E5.3    | F44E5.3 0.562445141432045   |
| AGIWUR39880                                                                                                                                                                                                                                               |             |          |                |            |                             |
| CB4856 CT II                                                                                                                                                                                                                                              | 11771978    | 11774039 | WBGene00206377 | F44E5.15   | F44E5.15                    |
| 0.273892763746858                                                                                                                                                                                                                                         | AGIWUR4924  |          |                |            |                             |
| CB4856 CT II                                                                                                                                                                                                                                              | 11774144    | 11774559 | WBGene00009688 | F44E5.1    | F44E5.1 -0.121382694687721  |
| AGIWUR4219;AGIWUR6573;AGIWUR8599;AGIWUR12421;AGIWUR14398;AGIWUR25459;AGIWUR41823                                                                                                                                                                          |             |          |                |            |                             |
| CB4856 CT II                                                                                                                                                                                                                                              | 11774669    | 11777943 | WBGene00009661 | patr-1     | F43G6.9 -0.0294239858381289 |
| AGIWUR8301;AGIWUR9463;AGIWUR35105                                                                                                                                                                                                                         |             |          |                |            |                             |
| CB4856 CT II                                                                                                                                                                                                                                              | 11778435    | 11782231 | WBGene00001016 | dna-2      | F43G6.1 0.0476838464018279  |
| AGIWUR42987                                                                                                                                                                                                                                               |             |          |                |            |                             |

|                                                                                                       |                                                    |
|-------------------------------------------------------------------------------------------------------|----------------------------------------------------|
| CB4856 CT II 11782987 11784086                                                                        | WBGene00009656 F43G6.3 F43G6.3 0.0613751633288686  |
| AGIWUR7939;AGIWUR9994;AGIWUR39798                                                                     |                                                    |
| CB4856 CT II 11790759 11797322                                                                        | WBGene00009657 F43G6.4 F43G6.4 0.555538376979085   |
| AGIWUR3169;AGIWUR32275                                                                                |                                                    |
| CB4856 CT II 11806567 11808805                                                                        | WBGene00005013 jmjd-1.1 F43G6.6                    |
| -0.0131081189596571 AGIWUR21925                                                                       |                                                    |
| CB4856 CT II 11812294 11814113                                                                        | WBGene00009660 F43G6.8 F43G6.8 0.784694697758962   |
| AGIWUR840                                                                                             |                                                    |
| CB4856 CT II 11814839 11816706                                                                        | WBGene00009658 F43G6.5 F43G6.5 -0.0385467064804832 |
| AGIWUR34108                                                                                           |                                                    |
| CB4856 CT II 11818248 11819924                                                                        | WBGene00012396 Y6D1A.2 Y6D1A.2 0.422376890099708   |
| AGIWUR3568                                                                                            |                                                    |
| CB4856 CT II 11827933 11830020                                                                        | WBGene00003979 pes-5 T27D12.4                      |
| -0.196516341492419 AGIWUR42789                                                                        |                                                    |
| CB4856 CT II 11831062 11832575                                                                        | WBGene00012086 clec-144 T27D12.3                   |
| -0.0616245911291529 AGIWUR3999                                                                        |                                                    |
| CB4856 CT II 11842617 11846026                                                                        | WBGene00012085 T27D12.1 T27D12.1                   |
| 0.27261260279208 AGIWUR43883                                                                          |                                                    |
| CB4856 CT II 11846508 11854743                                                                        | WBGene00000528 clh-1 T27D12.2                      |
| -0.0329852142040021 AGIWUR11100;AGIWUR27732;AGIWUR44823                                               |                                                    |
| CB4856 CT II 11861029 11863420                                                                        | WBGene00010787 K12D12.5 K12D12.5                   |
| -0.384235178944323 AGIWUR27714                                                                        |                                                    |
| CB4856 CT II 11863525 11865506                                                                        | WBGene00010786 K12D12.4 K12D12.4                   |
| 0.132343370930258 AGIWUR32968                                                                         |                                                    |
| CB4856 CT II 11865523 11874702                                                                        | WBGene00003789 npp-3 K12D12.2                      |
| 0.0822334747446654 AGIWUR28569                                                                        |                                                    |
| CB4856 CT II 11875145 11880588                                                                        | WBGene00010785 top-2 K12D12.1                      |
| 0.0788807703235843 AGIWUR7051;AGIWUR16104;AGIWUR21962;AGIWUR37958;AGIWUR39538;AGIWUR40938;AGIWUR41350 |                                                    |
| CB4856 CT II 11882614 11883685                                                                        | WBGene00014155 ZK930.5 ZK930.5 -0.232432965229151  |
| AGIWUR19690                                                                                           |                                                    |
| CB4856 CT II 11885588 11886601                                                                        | WBGene00014156 ZK930.6 ZK930.6 0.332503583149688   |
| AGIWUR43651                                                                                           |                                                    |
| CB4856 CT II 11890992 11893423                                                                        | WBGene00014152 ZK930.2 ZK930.2 1.16998925716826    |
| AGIWUR42824                                                                                           |                                                    |
| CB4856 CT II 11897365 11901210                                                                        | WBGene00014153 vab-23 ZK930.3 0.357918966498268    |
| AGIWUR3989;AGIWUR8215;AGIWUR15786                                                                     |                                                    |
| CB4856 CT II 11906517 11908601                                                                        | WBGene00014154 ZK930.4 ZK930.4 0.041219716841308   |
| AGIWUR34030                                                                                           |                                                    |
| CB4856 CT II 11908714 11915852                                                                        | WBGene00014151 vps-15 ZK930.1 0.0227906770264035   |



|                                                                                                |    |    |                                                                                            |          |                |                                    |
|------------------------------------------------------------------------------------------------|----|----|--------------------------------------------------------------------------------------------|----------|----------------|------------------------------------|
| AGIWUR6792                                                                                     |    |    |                                                                                            |          |                |                                    |
| CB4856                                                                                         | CT | II | 11916513                                                                                   | 11917643 | WBGene00001977 | hmg-12 Y17G7A.1                    |
|                                                                                                |    |    | -0.24633439978076 AGIWUR3120;AGIWUR4269;AGIWUR7020;AGIWUR18198;AGIWUR21727;AGIWUR26983     |          |                |                                    |
| CB4856                                                                                         | CT | II | 11917642                                                                                   | 11935343 | WBGene00003015 | lin-29 W03C9.4 -0.220260598132854  |
| AGIWUR21089;AGIWUR27180                                                                        |    |    |                                                                                            |          |                |                                    |
| CB4856                                                                                         | CT | II | 11948727                                                                                   | 11949474 | WBGene00012223 | W03C9.8 W03C9.8 -0.115674396215272 |
| AGIWUR29013                                                                                    |    |    |                                                                                            |          |                |                                    |
| CB4856                                                                                         | CT | II | 11953239                                                                                   | 11960743 | WBGene00012222 | W03C9.6 W03C9.6                    |
|                                                                                                |    |    | -0.00911019189793194 AGIWUR32907                                                           |          |                |                                    |
| CB4856                                                                                         | CT | II | 11960989                                                                                   | 11962128 | WBGene00012219 | W03C9.1 W03C9.1 -0.372350417300325 |
| AGIWUR38306                                                                                    |    |    |                                                                                            |          |                |                                    |
| CB4856                                                                                         | CT | II | 11962111                                                                                   | 11965258 | WBGene00012220 | W03C9.2 W03C9.2 -0.139971217134752 |
| AGIWUR29253                                                                                    |    |    |                                                                                            |          |                |                                    |
| CB4856                                                                                         | CT | II | 11965339                                                                                   | 11966931 | WBGene00004271 | rab-7 W03C9.3 -0.0446119556365989  |
| AGIWUR4192;AGIWUR4526;AGIWUR8098;AGIWUR17129;AGIWUR22447;AGIWUR23927;AGIWUR25730;AGIWUR33425   |    |    |                                                                                            |          |                |                                    |
| CB4856                                                                                         | CT | II | 11967048                                                                                   | 11967533 | WBGene00012221 | W03C9.5 W03C9.5 0.0629488376381282 |
| AGIWUR2780;AGIWUR8954;AGIWUR14848;AGIWUR18824;AGIWUR24306;AGIWUR42497                          |    |    |                                                                                            |          |                |                                    |
| CB4856                                                                                         | CT | II | 11968637                                                                                   | 11972334 | WBGene00003228 | mex-1 W03C9.7 0.172899014293485    |
| AGIWUR43188                                                                                    |    |    |                                                                                            |          |                |                                    |
| CB4856                                                                                         | CT | II | 11972310                                                                                   | 11973732 | WBGene00012457 | acbp-6 Y17G7B.1                    |
|                                                                                                |    |    | 0.107290185321343 AGIWUR920;AGIWUR15194;AGIWUR16203;AGIWUR37119;AGIWUR38415;AGIWUR39380    |          |                |                                    |
| CB4856                                                                                         | CT | II | 11975190                                                                                   | 11977659 | WBGene00012472 | Y17G7B.21 Y17G7B.21                |
|                                                                                                |    |    | -0.052892009700539 AGIWUR31694                                                             |          |                |                                    |
| CB4856                                                                                         | CT | II | 11977784                                                                                   | 11979859 | WBGene00012471 | Y17G7B.20 Y17G7B.20                |
|                                                                                                |    |    | 0.0855146924943355 AGIWUR10903                                                             |          |                |                                    |
| CB4856                                                                                         | CT | II | 11979838                                                                                   | 11989017 | WBGene00012458 | ash-2 Y17G7B.2                     |
|                                                                                                |    |    | 0.0288362499889558 AGIWUR10526;AGIWUR16389;AGIWUR28205;AGIWUR36922;AGIWUR39383             |          |                |                                    |
| CB4856                                                                                         | CT | II | 11989024                                                                                   | 11992823 | WBGene00012459 | Y17G7B.3 Y17G7B.3                  |
|                                                                                                |    |    | -0.0482874183248896 AGIWUR1664                                                             |          |                |                                    |
| CB4856                                                                                         | CT | II | 11993001                                                                                   | 11998009 | WBGene00012460 | dhps-1 Y17G7B.4                    |
|                                                                                                |    |    | -0.0839755893151057 AGIWUR8348                                                             |          |                |                                    |
| CB4856                                                                                         | CT | II | 11999260                                                                                   | 12001422 | WBGene00044030 | Y17G7B.23 Y17G7B.23                |
|                                                                                                |    |    | -0.222215376754164 AGIWUR22822                                                             |          |                |                                    |
| CB4856                                                                                         | CT | II | 12001510                                                                                   | 12006625 | WBGene00003154 | mcm-2 Y17G7B.5                     |
| 0.0458627398521605                                                                             |    |    |                                                                                            |          |                |                                    |
| AGIWUR6431;AGIWUR14362;AGIWUR22034;AGIWUR22863;AGIWUR24320;AGIWUR27510;AGIWUR31581;AGIWUR43987 |    |    |                                                                                            |          |                |                                    |
| CB4856                                                                                         | CT | II | 12009077                                                                                   | 12023825 | WBGene00012461 | glb-29 Y17G7B.6                    |
|                                                                                                |    |    | -0.120705868993364 AGIWUR14390;AGIWUR23983;AGIWUR25092;AGIWUR26552;AGIWUR34236;AGIWUR39129 |          |                |                                    |
| CB4856                                                                                         | CT | II | 12023861                                                                                   | 12025932 | WBGene00012465 | Y17G7B.12 Y17G7B.12                |

|                     |                                                                         |          |                |           |           |
|---------------------|-------------------------------------------------------------------------|----------|----------------|-----------|-----------|
| 0.0324751828180609  | AGIWUR29467                                                             |          |                |           |           |
| CB4856 CT II        | 12028763                                                                | 12036742 | WBGene00000892 | cyn-16    | Y17G7B.9  |
| -0.221428373820528  | AGIWUR4024;AGIWUR23109                                                  |          |                |           |           |
| CB4856 CT II        | 12036842                                                                | 12039139 | WBGene00006601 | tpi-1     | Y17G7B.7  |
| 0.0619059708824059  | AGIWUR1217;AGIWUR2688;AGIWUR4294;AGIWUR7287;AGIWUR8391;AGIWUR11326      |          |                |           |           |
| CB4856 CT II        | 12042910                                                                | 12049260 | WBGene00012466 | ippk-1    | Y17G7B.13 |
| 0.158756035745583   | AGIWUR17013;AGIWUR20129;AGIWUR22244;AGIWUR29786;AGIWUR35371;AGIWUR35857 |          |                |           |           |
| CB4856 CT II        | 12049583                                                                | 12059866 | WBGene00012463 | Y17G7B.10 | Y17G7B.10 |
| 0.137949578593215   | AGIWUR3151;AGIWUR18392;AGIWUR21813;AGIWUR22929;AGIWUR30218;AGIWUR30266  |          |                |           |           |
| CB4856 CT II        | 12060228                                                                | 12062621 | WBGene00012464 | arrd-7    | Y17G7B.11 |
| -0.345585166647515  | AGIWUR8573                                                              |          |                |           |           |
| CB4856 CT II        | 12065085                                                                | 12067568 | WBGene00012467 | arrd-8    | Y17G7B.14 |
| -0.0448876127911069 | AGIWUR8442                                                              |          |                |           |           |
| CB4856 CT II        | 12068099                                                                | 12070675 | WBGene00012473 | Y17G7B.22 | Y17G7B.22 |
| 0.156006920766412   | AGIWUR5117;AGIWUR30056;AGIWUR39044                                      |          |                |           |           |
| CB4856 CT II        | 12072082                                                                | 12088868 | WBGene00000565 | cnt-1     | Y17G7B.15 |
| 0.18093677211632    | AGIWUR32973                                                             |          |                |           |           |
| CB4856 CT II        | 12092422                                                                | 12099989 | WBGene00012468 | Y17G7B.17 | Y17G7B.17 |
| 0.0502810524892894  | AGIWUR39390                                                             |          |                |           |           |
| CB4856 CT II        | 12103331                                                                | 12107857 | WBGene00012469 | Y17G7B.18 | Y17G7B.18 |
| 0.0811748193484298  | AGIWUR21167;AGIWUR32919                                                 |          |                |           |           |
| CB4856 CT II        | 12108273                                                                | 12112552 | WBGene00012470 | Y17G7B.19 | Y17G7B.19 |
| 0.12760126967977    | AGIWUR15320                                                             |          |                |           |           |
| CB4856 CT II        | 12114971                                                                | 12130968 | WBGene00012845 | set-24    | Y43F11A.5 |
| -0.318900482484249  | AGIWUR1402;AGIWUR10026;AGIWUR26909;AGIWUR33032;AGIWUR43098              |          |                |           |           |
| CB4856 CT II        | 12131530                                                                | 12132894 | WBGene00014576 | Y43F11A.6 | Y43F11A.6 |
| -0.0104204509066292 | AGIWUR3471;AGIWUR10296                                                  |          |                |           |           |
| CB4856 CT II        | 12133535                                                                | 12147134 | WBGene00013246 | Y57A10A.1 | Y57A10A.1 |
| -0.35794612029801   | AGIWUR4370                                                              |          |                |           |           |
| CB4856 CT II        | 12147633                                                                | 12150216 | WBGene00013247 | Y57A10A.2 | Y57A10A.2 |
| -0.0759177926008725 | AGIWUR26512                                                             |          |                |           |           |
| CB4856 CT II        | 12154486                                                                | 12156812 | WBGene00013250 | Y57A10A.5 | Y57A10A.5 |
| -0.13200812735629   | AGIWUR27774                                                             |          |                |           |           |
| CB4856 CT II        | 12156940                                                                | 12159252 | WBGene00013251 | Y57A10A.6 | Y57A10A.6 |
| 0.104132997820146   | AGIWUR7730                                                              |          |                |           |           |
| CB4856 CT II        | 12159472                                                                | 12162671 | WBGene00013252 | Y57A10A.7 | Y57A10A.7 |
| 0.0713924706922295  | AGIWUR6939                                                              |          |                |           |           |
| CB4856 CT II        | 12164839                                                                | 12170762 | WBGene00013253 | Y57A10A.8 | Y57A10A.8 |
| -0.131834717176886  | AGIWUR22872                                                             |          |                |           |           |

|                     |                                                             |          |                |            |            |
|---------------------|-------------------------------------------------------------|----------|----------------|------------|------------|
| CB4856 CT II        | 12172571                                                    | 12176069 | WBGene00004394 | rol-1      | Y57A10A.11 |
| -0.212194411459134  | AGIWUR34088                                                 |          |                |            |            |
| CB4856 CT II        | 12176880                                                    | 12184875 | WBGene00013256 | Y57A10A.13 | Y57A10A.13 |
| -0.321037471991614  | AGIWUR5797                                                  |          |                |            |            |
| CB4856 CT II        | 12186007                                                    | 12189265 | WBGene00013257 | Y57A10A.14 | Y57A10A.14 |
| -0.239478583586387  | AGIWUR43593                                                 |          |                |            |            |
| CB4856 CT II        | 12189795                                                    | 12199959 | WBGene00013258 | polg-1     | Y57A10A.15 |
| -0.107741361657723  | AGIWUR23407                                                 |          |                |            |            |
| CB4856 CT II        | 12200607                                                    | 12202381 | WBGene00013259 | trpp-5     | Y57A10A.16 |
| -0.0200919371417392 | AGIWUR40094                                                 |          |                |            |            |
| CB4856 CT II        | 12203309                                                    | 12209160 | WBGene00013272 | aqp-12     | Y57A10A.35 |
| 0.0789557730154726  | AGIWUR11399                                                 |          |                |            |            |
| CB4856 CT II        | 12209228                                                    | 12225086 | WBGene00004167 | pqn-87     | Y57A10A.18 |
| 0.0285963525231807  | AGIWUR40602                                                 |          |                |            |            |
| CB4856 CT II        | 12225356                                                    | 12227265 | WBGene00013260 | rsr-2      | Y57A10A.19 |
| -0.374467538843003  | AGIWUR30536                                                 |          |                |            |            |
| CB4856 CT II        | 12228305                                                    | 12237051 | WBGene00013261 | sinh-1     | Y57A10A.20 |
| -0.10079243296202   | AGIWUR11106;AGIWUR29352;AGIWUR30256;AGIWUR35620;AGIWUR42257 |          |                |            |            |
| CB4856 CT II        | 12240388                                                    | 12242567 | WBGene00013263 | Y57A10A.23 | Y57A10A.23 |
| -0.0738228051579597 | AGIWUR11981                                                 |          |                |            |            |
| CB4856 CT II        | 12242946                                                    | 12247611 | WBGene00013264 | Y57A10A.24 | Y57A10A.24 |
| 0.303457216276298   | AGIWUR40090                                                 |          |                |            |            |
| CB4856 CT II        | 12248125                                                    | 12249135 | WBGene00013254 | tag-276    | Y57A10A.9  |
| -0.35670416762601   | AGIWUR11305                                                 |          |                |            |            |
| CB4856 CT II        | 12251667                                                    | 12256628 | WBGene00013265 | parn-2     | Y57A10A.25 |
| -0.158114684241358  | AGIWUR36791                                                 |          |                |            |            |
| CB4856 CT II        | 12256950                                                    | 12269706 | WBGene00013255 | Y57A10A.10 | Y57A10A.10 |
| -0.324219552119153  | AGIWUR16522                                                 |          |                |            |            |
| CB4856 CT II        | 12269815                                                    | 12275044 | WBGene00013267 | Y57A10A.27 | Y57A10A.27 |
| -0.0196750967649066 | AGIWUR37762                                                 |          |                |            |            |
| CB4856 CT II        | 12275936                                                    | 12279383 | WBGene00013268 | Y57A10A.28 | Y57A10A.28 |
| -0.299313278831161  | AGIWUR8915                                                  |          |                |            |            |
| CB4856 CT II        | 12279561                                                    | 12280595 | WBGene00013269 | Y57A10A.29 | Y57A10A.29 |
| -0.058506962934251  | AGIWUR12646                                                 |          |                |            |            |
| CB4856 CT II        | 12280662                                                    | 12284133 | WBGene00002063 | ife-5      | Y57A10A.30 |
| -0.28492103142916   | AGIWUR30348                                                 |          |                |            |            |
| CB4856 CT II        | 12289385                                                    | 12300573 | WBGene00013270 | Y57A10A.31 | Y57A10A.31 |
| 0.0661033143718535  | AGIWUR15857;AGIWUR44592                                     |          |                |            |            |
| CB4856 CT II        | 12301077                                                    | 12302429 | WBGene00016825 | C50E10.1   | C50E10.1   |

|                         |                                     |          |                |           |                           |  |
|-------------------------|-------------------------------------|----------|----------------|-----------|---------------------------|--|
| 0.524096778565177       | AGIWUR13445                         |          |                |           |                           |  |
| CB4856 CT II            | 12303525                            | 12305132 | WBGene00016834 | sre-50    | C50E10.11                 |  |
| 0.116776733149591       | AGIWUR26514                         |          |                |           |                           |  |
| CB4856 CT II            | 12311860                            | 12313660 | WBGene00016833 | sre-51    | C50E10.10                 |  |
| 0.000927466039651215    | AGIWUR26368                         |          |                |           |                           |  |
| CB4856 CT II            | 12318841                            | 12321070 | WBGene00016832 | sre-49    | C50E10.9                  |  |
| -0.0161876399811067     | AGIWUR24431                         |          |                |           |                           |  |
| CB4856 CT II            | 12321193                            | 12323405 | WBGene00016827 | sre-53    | C50E10.3                  |  |
| -0.206925217972323      | AGIWUR15154                         |          |                |           |                           |  |
| CB4856 CT II            | 12325544                            | 12327514 | WBGene00016831 | sre-56    | C50E10.8                  |  |
| 0.122382608091829       | AGIWUR15130                         |          |                |           |                           |  |
| CB4856 CT II            | 12329294                            | 12331122 | WBGene00016830 | sre-55    | C50E10.7                  |  |
| 0.308226606465343       | AGIWUR35147                         |          |                |           |                           |  |
| CB4856 CT II            | 12332924                            | 12335044 | WBGene00016829 | sre-54    | C50E10.6                  |  |
| -0.167633883312847      | AGIWUR21803                         |          |                |           |                           |  |
| CB4856 CT II            | 12335730                            | 12338093 | WBGene00016828 | sre-52    | C50E10.5                  |  |
| 0.0481690877492111      | AGIWUR10613                         |          |                |           |                           |  |
| CB4856 CT II            | 12339944                            | 12344795 | WBGene00004945 | sop-2     | C50E10.4                  |  |
| 0.30308383843413        | AGIWUR34187                         |          |                |           |                           |  |
| CB4856 CT II            | 12345285                            | 12352243 | WBGene00004310 | ras-1     | C44C11.1                  |  |
| 0.267236570551194       | AGIWUR23461;AGIWUR41923             |          |                |           |                           |  |
| CB4856 CT II            | 12358756                            | 12367023 | WBGene00013273 | marc-5    | Y57A10B.1                 |  |
| 0.319515663465468       | AGIWUR22652                         |          |                |           |                           |  |
| CB4856 CT II            | 12373522                            | 12379511 | WBGene00013274 | Y57A10B.2 | Y57A10B.2                 |  |
| 0.416429067135167       | AGIWUR19618                         |          |                |           |                           |  |
| CB4856 CT II            | 12383463                            | 12384692 | WBGene00013275 | btb-14    | Y57A10B.3                 |  |
| -0.409744345753099      | AGIWUR16330;AGIWUR18091;AGIWUR33933 |          |                |           |                           |  |
| CB4856 CT II            | 12384593                            | 12386881 | WBGene00013276 | sre-42    | Y57A10B.4                 |  |
| 0.28901090036837        | AGIWUR5074                          |          |                |           |                           |  |
| CB4856 CT II            | 12388293                            | 12389839 | WBGene00013277 | sre-41    | Y57A10B.5                 |  |
| -0.285701286025458      | AGIWUR11779                         |          |                |           |                           |  |
| CB4856 CT II            | 12390083                            | 12392662 | WBGene00013278 | Y57A10B.6 | Y57A10B.6                 |  |
| -0.197501079761604      | AGIWUR7958                          |          |                |           |                           |  |
| CB4856 CT II            | 12392701                            | 12393743 | WBGene00013279 | Y57A10B.7 | Y57A10B.7                 |  |
| 0.0520339665668992      | AGIWUR36071                         |          |                |           |                           |  |
| CB4856 CT II            | 12394856                            | 12397756 | WBGene00044048 | F57G9.7   | F57G9.7 0.14601174087336  |  |
| AGIWUR25016;AGIWUR42871 |                                     |          |                |           |                           |  |
| CB4856 CT II            | 12399399                            | 12401891 | WBGene00010220 | sre-29    | F57G9.4 0.180177617810646 |  |
| AGIWUR10397             |                                     |          |                |           |                           |  |

|                                                                               |          |          |                |                  |                     |
|-------------------------------------------------------------------------------|----------|----------|----------------|------------------|---------------------|
| CB4856 CT II                                                                  | 12402434 | 12404887 | WBGene00044041 | F57G9.6 F57G9.6  | -0.0858700124489005 |
| AGIWUR4855;AGIWUR19927;AGIWUR33180                                            |          |          |                |                  |                     |
| CB4856 CT II                                                                  | 12404951 | 12406494 | WBGene00010218 | sre-30 F57G9.2   | -0.147764954036277  |
| AGIWUR12686                                                                   |          |          |                |                  |                     |
| CB4856 CT II                                                                  | 12406822 | 12408817 | WBGene00010217 | sre-31 F57G9.1   | -0.456863644944494  |
| AGIWUR19812                                                                   |          |          |                |                  |                     |
| CB4856 CT II                                                                  | 12409320 | 12410207 | WBGene00010219 | F57G9.3 F57G9.3  | 0.159733184049536   |
| AGIWUR30827                                                                   |          |          |                |                  |                     |
| CB4856 CT II                                                                  | 12411622 | 12412517 | WBGene00013280 | Y57A10C.1        | Y57A10C.1           |
| 0.288024980432661 AGIWUR20533                                                 |          |          |                |                  |                     |
| CB4856 CT II                                                                  | 12412723 | 12412957 | WBGene00044052 | Y57A10C.12       | Y57A10C.12          |
| 0.0269833457935551 AGIWUR4626;AGIWUR12188;AGIWUR26299;AGIWUR31376;AGIWUR36187 |          |          |                |                  |                     |
| CB4856 CT II                                                                  | 12414036 | 12414905 | WBGene00044047 | Y57A10C.11       | Y57A10C.11          |
| 0.310317383837636 AGIWUR3841;AGIWUR14115                                      |          |          |                |                  |                     |
| CB4856 CT II                                                                  | 12415527 | 12417527 | WBGene00013281 | sre-27 Y57A10C.3 |                     |
| 0.152062631666794 AGIWUR5752                                                  |          |          |                |                  |                     |
| CB4856 CT II                                                                  | 12419133 | 12420586 | WBGene00013282 | sre-26 Y57A10C.4 |                     |
| 0.153303584697735 AGIWUR220                                                   |          |          |                |                  |                     |
| CB4856 CT II                                                                  | 12421204 | 12422623 | WBGene00013283 | sre-25 Y57A10C.5 |                     |
| 0.648532273492434 AGIWUR38853                                                 |          |          |                |                  |                     |
| CB4856 CT II                                                                  | 12423514 | 12425694 | WBGene00013284 | daf-22 Y57A10C.6 |                     |
| 0.117312135319258 AGIWUR5216                                                  |          |          |                |                  |                     |
| CB4856 CT II                                                                  | 12427986 | 12429946 | WBGene00013286 | Y57A10C.8        | Y57A10C.8           |
| -0.110250233627951 AGIWUR24902                                                |          |          |                |                  |                     |
| CB4856 CT II                                                                  | 12430788 | 12432311 | WBGene00013285 | dct-12 Y57A10C.7 |                     |
| -0.254200307162172 AGIWUR17519                                                |          |          |                |                  |                     |
| CB4856 CT II                                                                  | 12433608 | 12435846 | WBGene00013287 | Y57A10C.9        | Y57A10C.9           |
| 0.437990243052599 AGIWUR21893                                                 |          |          |                |                  |                     |
| CB4856 CT II                                                                  | 12442142 | 12442367 | WBGene00012284 | W05H5.2 W05H5.2  | -0.0717272903758506 |
| AGIWUR19090                                                                   |          |          |                |                  |                     |
| CB4856 CT II                                                                  | 12443119 | 12444779 | WBGene00012283 | W05H5.1 W05H5.1  | -0.0464580382553592 |
| AGIWUR12242                                                                   |          |          |                |                  |                     |
| CB4856 CT II                                                                  | 12445332 | 12447769 | WBGene00012285 | pit-6 W05H5.3    | 0.525989061400125   |
| AGIWUR13105;AGIWUR15362;AGIWUR30498                                           |          |          |                |                  |                     |
| CB4856 CT II                                                                  | 12448541 | 12449887 | WBGene00005250 | srh-27 W05H5.4   | -0.454787030228223  |
| AGIWUR3233                                                                    |          |          |                |                  |                     |
| CB4856 CT II                                                                  | 12450149 | 12451407 | WBGene00043058 | sre-34 W05H5.8   | -0.154150557613578  |
| AGIWUR10523                                                                   |          |          |                |                  |                     |
| CB4856 CT II                                                                  | 12453302 | 12454693 | WBGene00012287 | sre-33 W05H5.6   | 0.226144995745845   |

|                                   |    |                                                |          |                |          |          |                     |
|-----------------------------------|----|------------------------------------------------|----------|----------------|----------|----------|---------------------|
| AGIWUR3814                        |    |                                                |          |                |          |          |                     |
| CB4856 CT                         | II | 12454954                                       | 12456733 | WBGene00012288 | sre-32   | W05H5.7  | 0.301403280134472   |
| AGIWUR4582                        |    |                                                |          |                |          |          |                     |
| CB4856 CT                         | II | 12457575                                       | 12459510 | WBGene00008837 | sre-38   | F15A4.1  | -0.0415923888647276 |
| AGIWUR35287                       |    |                                                |          |                |          |          |                     |
| CB4856 CT                         | II | 12459772                                       | 12460551 | WBGene00044323 | tag-281  | F15A4.11 |                     |
| -0.26642306324479                 |    | AGIWUR7257;AGIWUR25748;AGIWUR28954;AGIWUR31949 |          |                |          |          |                     |
| CB4856 CT                         | II | 12460641                                       | 12461471 | WBGene00044322 | tag-280  | F15A4.12 |                     |
| 0.0457532292917868                |    | AGIWUR18364                                    |          |                |          |          |                     |
| CB4856 CT                         | II | 12462418                                       | 12464078 | WBGene00008838 | F15A4.2  | F15A4.2  | -0.131533516417184  |
| AGIWUR36102                       |    |                                                |          |                |          |          |                     |
| CB4856 CT                         | II | 12465872                                       | 12467519 | WBGene00008839 | sre-37   | F15A4.3  | 0.118521322833242   |
| AGIWUR20272                       |    |                                                |          |                |          |          |                     |
| CB4856 CT                         | II | 12467732                                       | 12469369 | WBGene00005173 | srg-16   | F15A4.4  | -0.0845360566029605 |
| AGIWUR3092                        |    |                                                |          |                |          |          |                     |
| CB4856 CT                         | II | 12469374                                       | 12471211 | WBGene00008840 | F15A4.5  | F15A4.5  | -0.0446825793626289 |
| AGIWUR32638                       |    |                                                |          |                |          |          |                     |
| CB4856 CT                         | II | 12471805                                       | 12473084 | WBGene00008841 | F15A4.6  | F15A4.6  | 0.318094305142871   |
| AGIWUR44991                       |    |                                                |          |                |          |          |                     |
| CB4856 CT                         | II | 12473706                                       | 12475234 | WBGene00005174 | srg-17   | F15A4.7  | -0.0852607616903915 |
| AGIWUR23534                       |    |                                                |          |                |          |          |                     |
| CB4856 CT                         | II | 12475514                                       | 12478917 | WBGene00008842 | chil-28  | F15A4.8  | -0.0735010721184048 |
| AGIWUR2093;AGIWUR3251;AGIWUR33896 |    |                                                |          |                |          |          |                     |
| CB4856 CT                         | II | 12479590                                       | 12480910 | WBGene00008843 | arrd-9   | F15A4.9  | -0.232092389383959  |
| AGIWUR34011                       |    |                                                |          |                |          |          |                     |
| CB4856 CT                         | II | 12482931                                       | 12484279 | WBGene00008847 | fbxb-102 |          | F15A4.13            |
| 0.322510465372073                 |    | AGIWUR8569                                     |          |                |          |          |                     |
| CB4856 CT                         | II | 12484544                                       | 12485160 | WBGene00008844 | F15A4.10 |          | F15A4.10            |
| -0.169532057677456                |    | AGIWUR7846                                     |          |                |          |          |                     |
| CB4856 CT                         | II | 12490214                                       | 12491815 | WBGene00043054 | T21B4.15 |          | T21B4.15            |
| 0.152544505192157                 |    | AGIWUR19166;AGIWUR22620;AGIWUR28953            |          |                |          |          |                     |
| CB4856 CT                         | II | 12492398                                       | 12493623 | WBGene00011876 | srz-6    | T21B4.1  | 0.410278158498484   |
| AGIWUR12887                       |    |                                                |          |                |          |          |                     |
| CB4856 CT                         | II | 12493800                                       | 12495106 | WBGene00000660 | col-85   | T21B4.2  | -0.340738153402167  |
| AGIWUR28426                       |    |                                                |          |                |          |          |                     |
| CB4856 CT                         | II | 12495487                                       | 12496387 | WBGene00011877 | T21B4.3  | T21B4.3  | 0.0944280894192486  |
| AGIWUR379                         |    |                                                |          |                |          |          |                     |
| CB4856 CT                         | II | 12497217                                       | 12502878 | WBGene00011878 | ador-1   | T21B4.4  | 0.430306328286047   |
| AGIWUR925;AGIWUR19024             |    |                                                |          |                |          |          |                     |

|                                                                                                                                                                   |                       |          |                |           |          |                     |
|-------------------------------------------------------------------------------------------------------------------------------------------------------------------|-----------------------|----------|----------------|-----------|----------|---------------------|
| CB4856 CT II                                                                                                                                                      | 12507338              | 12508452 | WBGene00005289 | srh-68    | T21B4.5  | 0.120092711370486   |
| AGIWUR27004                                                                                                                                                       |                       |          |                |           |          |                     |
| CB4856 CT II                                                                                                                                                      | 12508950              | 12510135 | WBGene00005288 | srh-67    | T21B4.6  | -0.0773581794742855 |
| AGIWUR19619                                                                                                                                                       |                       |          |                |           |          |                     |
| CB4856 CT II                                                                                                                                                      | 12510682              | 12511814 | WBGene00005287 | srh-66    | T21B4.10 |                     |
| -0.204542527589734                                                                                                                                                | AGIWUR21685           |          |                |           |          |                     |
| CB4856 CT II                                                                                                                                                      | 12512166              | 12513316 | WBGene00005294 | srh-73    | T21B4.14 |                     |
| -0.147202552166259                                                                                                                                                | AGIWUR29018           |          |                |           |          |                     |
| CB4856 CT II                                                                                                                                                      | 12513618              | 12514715 | WBGene00005290 | srh-69    | T21B4.7  | 0.0186381878272082  |
| AGIWUR18370                                                                                                                                                       |                       |          |                |           |          |                     |
| CB4856 CT II                                                                                                                                                      | 12514972              | 12516413 | WBGene00005283 | srh-61    | T21B4.8  | 0.067695363201123   |
| AGIWUR32493                                                                                                                                                       |                       |          |                |           |          |                     |
| CB4856 CT II                                                                                                                                                      | 12516753              | 12517858 | WBGene00005291 | srh-70    | T21B4.9  |                     |
| -0.00476347053308235                                                                                                                                              | AGIWUR1997            |          |                |           |          |                     |
| CB4856 CT II                                                                                                                                                      | 12520004              | 12524478 | WBGene00044032 | ceh-99    | T21B4.17 |                     |
| -0.356474125168024                                                                                                                                                | AGIWUR22947           |          |                |           |          |                     |
| CB4856 CT II                                                                                                                                                      | 12525828              | 12527868 | WBGene00006009 | srx-118   | T21B4.12 |                     |
| 0.126270218331655                                                                                                                                                 | AGIWUR15515           |          |                |           |          |                     |
| CB4856 CT II                                                                                                                                                      | 12528247              | 12529746 | WBGene00006010 | srx-119   | F49C5.1  | -0.105490121185622  |
| AGIWUR7947                                                                                                                                                        |                       |          |                |           |          |                     |
| CB4856 CT II                                                                                                                                                      | 12531258              | 12532977 | WBGene00006011 | srx-120   | F49C5.2  | 0.00761201021403313 |
| AGIWUR44058                                                                                                                                                       |                       |          |                |           |          |                     |
| CB4856 CT II                                                                                                                                                      | 12535760              | 12542569 | WBGene00009867 | F49C5.4   | F49C5.4  | -0.456742529058517  |
| AGIWUR1250;AGIWUR15649;AGIWUR16749;AGIWUR42084                                                                                                                    |                       |          |                |           |          |                     |
| CB4856 CT II                                                                                                                                                      | 12542754              | 12544633 | WBGene00044031 | F49C5.9   | F49C5.9  | -0.445445921808039  |
| AGIWUR19466;AGIWUR27810                                                                                                                                           |                       |          |                |           |          |                     |
| CB4856 CT II                                                                                                                                                      | 12546030              | 12546513 | WBGene00009868 | F49C5.5   | F49C5.5  | -0.126394571794195  |
| AGIWUR5768                                                                                                                                                        |                       |          |                |           |          |                     |
| CB4856 CT II                                                                                                                                                      | 12546761              | 12548249 | WBGene00044162 | F49C5.10  |          | F49C5.10            |
| 0.128940878648759                                                                                                                                                 | AGIWUR8807;AGIWUR9074 |          |                |           |          |                     |
| CB4856 CT II                                                                                                                                                      | 12555884              | 12557129 | WBGene00044163 | F49C5.11  |          | F49C5.11            |
| -0.357491791133206                                                                                                                                                |                       |          |                |           |          |                     |
| AGIWUR1347;AGIWUR3489;AGIWUR3872;AGIWUR3883;AGIWUR6795;AGIWUR7306;AGIWUR11761;AGIWUR12963;AGIWUR20946;AGIWUR22899;AGIWUR26088;AGIWUR31262;AGIWUR39486;AGIWUR44001 |                       |          |                |           |          |                     |
| CB4856 CT II                                                                                                                                                      | 12564185              | 12565943 | WBGene00006254 | str-223   | F49C5.6  | -0.681664404385632  |
| AGIWUR36858                                                                                                                                                       |                       |          |                |           |          |                     |
| CB4856 CT II                                                                                                                                                      | 12566165              | 12568297 | WBGene00009869 | F49C5.7   | F49C5.7  | 0.119059937888439   |
| AGIWUR10009                                                                                                                                                       |                       |          |                |           |          |                     |
| CB4856 CT II                                                                                                                                                      | 12570198              | 12570623 | WBGene00012579 | Y38E10A.1 |          | Y38E10A.1           |

|                     |                                                                         |          |                |                    |            |
|---------------------|-------------------------------------------------------------------------|----------|----------------|--------------------|------------|
| -0.395013378177461  | AGIWUR18619                                                             |          |                |                    |            |
| CB4856 CT II        | 12571572                                                                | 12573529 | WBGene00012580 | Y38E10A.2          | Y38E10A.2  |
| 0.118299042523545   | AGIWUR4355                                                              |          |                |                    |            |
| CB4856 CT II        | 12573940                                                                | 12574768 | WBGene00012581 | Y38E10A.3          | Y38E10A.3  |
| -0.437430382276853  | AGIWUR18800                                                             |          |                |                    |            |
| CB4856 CT II        | 12575691                                                                | 12577748 | WBGene00012582 | cllec-8 Y38E10A.4  |            |
| 0.242088541481242   | AGIWUR5171;AGIWUR8397;AGIWUR26584;AGIWUR28388;AGIWUR36068;AGIWUR41478   |          |                |                    |            |
| CB4856 CT II        | 12578356                                                                | 12581098 | WBGene00012583 | cllec-4 Y38E10A.5  |            |
| -0.72848939156248   | AGIWUR23230                                                             |          |                |                    |            |
| CB4856 CT II        | 12582179                                                                | 12603680 | WBGene00012584 | ceh-100 Y38E10A.6  |            |
| 0.0429346805090933  | AGIWUR17963                                                             |          |                |                    |            |
| CB4856 CT II        | 12605968                                                                | 12607027 | WBGene00012585 | lips-15 Y38E10A.7  |            |
| 0.181944156992646   | AGIWUR14642;AGIWUR19800                                                 |          |                |                    |            |
| CB4856 CT II        | 12607200                                                                | 12608788 | WBGene00012586 | Y38E10A.8          | Y38E10A.8  |
| 0.14295486340329    | AGIWUR40371                                                             |          |                |                    |            |
| CB4856 CT II        | 12608953                                                                | 12609630 | WBGene00012587 | Y38E10A.9          | Y38E10A.9  |
| 0.77000166510281    | AGIWUR17764                                                             |          |                |                    |            |
| CB4856 CT II        | 12610313                                                                | 12612357 | WBGene00012588 | lips-16 Y38E10A.10 |            |
| -0.499880400851234  | AGIWUR39472                                                             |          |                |                    |            |
| CB4856 CT II        | 12613564                                                                | 12613939 | WBGene00012589 | nspe-4 Y38E10A.11  |            |
| 0.298870989518484   | AGIWUR11054;AGIWUR13607;AGIWUR20167;AGIWUR22819;AGIWUR26536;AGIWUR41154 |          |                |                    |            |
| CB4856 CT II        | 12615897                                                                | 12616166 | WBGene00012603 | nspe-6 Y38E10A.25  |            |
| 0.524929812148802   | AGIWUR27393                                                             |          |                |                    |            |
| CB4856 CT II        | 12617886                                                                | 12618209 | WBGene00012590 | nspe-3 Y38E10A.12  |            |
| -0.812410949181482  | AGIWUR8742                                                              |          |                |                    |            |
| CB4856 CT II        | 12620548                                                                | 12620888 | WBGene00012591 | nspe-1 Y38E10A.13  |            |
| -0.439908700970829  | AGIWUR7082                                                              |          |                |                    |            |
| CB4856 CT II        | 12623215                                                                | 12624506 | WBGene00012592 | Y38E10A.14         | Y38E10A.14 |
| -0.667000100075629  | AGIWUR14522;AGIWUR18602;AGIWUR33881                                     |          |                |                    |            |
| CB4856 CT II        | 12627187                                                                | 12627570 | WBGene00012593 | nspe-7 Y38E10A.15  |            |
| -1.31237411626242   | AGIWUR13856                                                             |          |                |                    |            |
| CB4856 CT II        | 12628936                                                                | 12629380 | WBGene00012594 | nspe-5 Y38E10A.16  |            |
| -0.47144790585833   | AGIWUR8167                                                              |          |                |                    |            |
| CB4856 CT II        | 12629687                                                                | 12631995 | WBGene00044034 | Y38E10A.28         | Y38E10A.28 |
| 0.228640418923192   | AGIWUR22063                                                             |          |                |                    |            |
| CB4856 CT II        | 12632593                                                                | 12634799 | WBGene00012595 | Y38E10A.17         | Y38E10A.17 |
| -0.0643359322834627 | AGIWUR10282                                                             |          |                |                    |            |
| CB4856 CT II        | 12636699                                                                | 12638448 | WBGene00012596 | nhr-234 Y38E10A.18 |            |
| 0.269626147262684   | AGIWUR6486;AGIWUR13527;AGIWUR40928                                      |          |                |                    |            |



|                     |                                                |          |                |            |            |
|---------------------|------------------------------------------------|----------|----------------|------------|------------|
| CB4856 CT II        | 12640670                                       | 12642740 | WBGene00012597 | nhr-235    | Y38E10A.19 |
| -0.0601387885811242 | AGIWUR37120                                    |          |                |            |            |
| CB4856 CT II        | 12662759                                       | 12671920 | WBGene00004347 | rgs-4      | Y38E10A.21 |
| 0.110798241373951   | AGIWUR13627                                    |          |                |            |            |
| CB4856 CT II        | 12673166                                       | 12677803 | WBGene00012600 | Y38E10A.22 | Y38E10A.22 |
| -0.593342374397254  | AGIWUR14395;AGIWUR15734                        |          |                |            |            |
| CB4856 CT II        | 12679035                                       | 12679413 | WBGene00012602 | Y38E10A.24 | Y38E10A.24 |
| 0.0828637569222792  | AGIWUR20712                                    |          |                |            |            |
| CB4856 CT II        | 12679954                                       | 12686713 | WBGene00012895 | cox-10     | Y46G5A.2   |
| -0.414709046846129  | AGIWUR34531                                    |          |                |            |            |
| CB4856 CT II        | 12694412                                       | 12725483 | WBGene00012894 | tbc-17     | Y46G5A.1   |
| 0.0726520271242652  | AGIWUR733;AGIWUR2958;AGIWUR13448               |          |                |            |            |
| CB4856 CT II        | 12726963                                       | 12736910 | WBGene00012896 | snrp-200   | Y46G5A.4   |
| 0.237305076767861   | AGIWUR35032                                    |          |                |            |            |
| CB4856 CT II        | 12737032                                       | 12738334 | WBGene00012897 | pisyl-1    | Y46G5A.5   |
| -0.151126014803735  | AGIWUR12144                                    |          |                |            |            |
| CB4856 CT II        | 12742546                                       | 12744256 | WBGene00077636 | Y46G5A.43  | Y46G5A.43  |
| 0.102467461116868   | AGIWUR35875                                    |          |                |            |            |
| CB4856 CT II        | 12752854                                       | 12753813 | WBGene00044164 | Y46G5A.39  | Y46G5A.39  |
| -0.151774500088401  | AGIWUR7494;AGIWUR40442                         |          |                |            |            |
| CB4856 CT II        | 12754610                                       | 12754877 | WBGene00077634 | Y46G5A.41  | Y46G5A.41  |
| 0.0872206587433695  | AGIWUR17785                                    |          |                |            |            |
| CB4856 CT II        | 12756353                                       | 12757677 | WBGene00012900 | Y46G5A.8   | Y46G5A.8   |
| -0.0440355375884964 | AGIWUR8892                                     |          |                |            |            |
| CB4856 CT II        | 12760797                                       | 12767232 | WBGene00012901 | cnpl-2     | Y46G5A.10  |
| -0.146192070356431  | AGIWUR11892;AGIWUR14337                        |          |                |            |            |
| CB4856 CT II        | 12767221                                       | 12768217 | WBGene00012903 | vps-2      | Y46G5A.12  |
| 0.0582268233414496  | AGIWUR25006                                    |          |                |            |            |
| CB4856 CT II        | 12768686                                       | 12773903 | WBGene00012904 | tiar-2     | Y46G5A.13  |
| -0.125690036283459  | AGIWUR40126                                    |          |                |            |            |
| CB4856 CT II        | 12774646                                       | 12781705 | WBGene00012919 | Y46G5A.34  | Y46G5A.34  |
| 0.0354505258688533  | AGIWUR34502                                    |          |                |            |            |
| CB4856 CT II        | 12782751                                       | 12785412 | WBGene00012906 | Y46G5A.15  | Y46G5A.15  |
| 0.0249413437207515  | AGIWUR19252                                    |          |                |            |            |
| CB4856 CT II        | 12786322                                       | 12788153 | WBGene00012920 | Y46G5A.35  | Y46G5A.35  |
| -0.060814175554583  | AGIWUR1477                                     |          |                |            |            |
| CB4856 CT II        | 12788252                                       | 12796452 | WBGene00012907 | cpt-1      | Y46G5A.17  |
| 0.336614828579864   | AGIWUR9426;AGIWUR17814;AGIWUR24235;AGIWUR34373 |          |                |            |            |
| CB4856 CT II        | 12800449                                       | 12805383 | WBGene00012908 | Y46G5A.18  | Y46G5A.18  |

|                     |                                                                        |
|---------------------|------------------------------------------------------------------------|
| 0.0468480991110667  | AGIWUR2765;AGIWUR7180;AGIWUR7666;AGIWUR13153;AGIWUR35086;AGIWUR44753   |
| CB4856 CT II        | 12804862 12810872 WBGene00012909 spds-1 Y46G5A.19                      |
| -0.210935599336418  | AGIWUR24011                                                            |
| CB4856 CT II        | 12811009 12811934 WBGene00012910 Y46G5A.20 Y46G5A.20                   |
| 0.678457822385603   | AGIWUR1526;AGIWUR11175;AGIWUR20331;AGIWUR20731;AGIWUR23358;AGIWUR29839 |
| CB4856 CT II        | 12811802 12816462 WBGene00012911 ac1-7 Y46G5A.21                       |
| 0.62673026333891    | AGIWUR8222                                                             |
| CB4856 CT II        | 12816820 12818588 WBGene00012912 Y46G5A.22 Y46G5A.22                   |
| -0.0252875187322661 | AGIWUR29260;AGIWUR39522                                                |
| CB4856 CT II        | 12823649 12824177 WBGene00012921 Y46G5A.36 Y46G5A.36                   |
| 0.057701432857451   | AGIWUR40412                                                            |
| CB4856 CT II        | 12825546 12825833 WBGene00044042 Y46G5A.37 Y46G5A.37                   |
| -0.151955078787184  | AGIWUR4500;AGIWUR9007;AGIWUR9678;AGIWUR17026;AGIWUR33153               |
| CB4856 CT II        | 12827032 12827519 WBGene00044043 Y46G5A.38 Y46G5A.38                   |
| 0.0944361654844252  | AGIWUR15102;AGIWUR25500;AGIWUR37081;AGIWUR40350;AGIWUR44577            |
| CB4856 CT II        | 12830707 12832720 WBGene00012914 bcmo-1 Y46G5A.24                      |
| 0.130035124257255   | AGIWUR15666                                                            |
| CB4856 CT II        | 12832915 12835824 WBGene00004903 snf-4 Y46G5A.25                       |
| 0.154621499138738   | AGIWUR35822                                                            |
| CB4856 CT II        | 12836548 12840157 WBGene00012915 lgc-35 Y46G5A.26                      |
| -0.330746867129071  | AGIWUR22436;AGIWUR38636                                                |
| CB4856 CT II        | 12846203 12847836 WBGene00003983 pes-10 Y46G5A.27                      |
| -0.0926971655196187 | AGIWUR14951                                                            |
| CB4856 CT II        | 12856200 12862058 WBGene00012917 Y46G5A.29 Y46G5A.29                   |
| -0.728542527988185  | AGIWUR21330                                                            |
| CB4856 CT II        | 12861963 12865883 WBGene00004904 snf-5 Y46G5A.30                       |
| 0.143399294918385   | AGIWUR7331                                                             |
| CB4856 CT II        | 12866448 12878116 WBGene00001793 gsy-1 Y46G5A.31                       |
| -0.0695295131732472 | AGIWUR37228                                                            |
| CB4856 CT II        | 12880815 12881968 WBGene00009390 F35C5.1 F35C5.1 0.165142132888576     |
| AGIWUR36217         |                                                                        |
| CB4856 CT II        | 12885276 12888606 WBGene00005040 sra-14 F35C5.2 -0.121839424502172     |
| AGIWUR40027         |                                                                        |
| CB4856 CT II        | 12888762 12890460 WBGene00009391 F35C5.3 F35C5.3 0.111333103617195     |
| AGIWUR32174         |                                                                        |
| CB4856 CT II        | 12890630 12892024 WBGene00009392 F35C5.4 F35C5.4 -0.0751331210420894   |
| AGIWUR25875         |                                                                        |
| CB4856 CT II        | 12893065 12895098 WBGene00009393 clec-62 F35C5.5 0.252376410259016     |
| AGIWUR31973         |                                                                        |

|                                                                                                          |    |          |          |                |                  |                    |
|----------------------------------------------------------------------------------------------------------|----|----------|----------|----------------|------------------|--------------------|
| CB4856 CT                                                                                                | II | 12895638 | 12897462 | WBGene00009394 | cllec-63 F35C5.6 | 0.0783123854252352 |
| AGIWUR2709;AGIWUR9580;AGIWUR9637;AGIWUR12263;AGIWUR24969;AGIWUR26563;AGIWUR27914;AGIWUR39707;AGIWUR40319 |    |          |          |                |                  |                    |
| CB4856 CT                                                                                                | II | 12898242 | 12900435 | WBGene00009395 | cllec-64 F35C5.7 | -0.255849819115014 |
| AGIWUR25751                                                                                              |    |          |          |                |                  |                    |
| CB4856 CT                                                                                                | II | 12901264 | 12903336 | WBGene00009396 | cllec-65 F35C5.8 | -0.081868778852316 |
| AGIWUR13763                                                                                              |    |          |          |                |                  |                    |
| CB4856 CT                                                                                                | II | 12904398 | 12906686 | WBGene00009397 | cllec-66 F35C5.9 | -0.29314884908596  |
| AGIWUR15704;AGIWUR25952                                                                                  |    |          |          |                |                  |                    |
| CB4856 CT                                                                                                | II | 12907370 | 12907783 | WBGene00009398 | nspb-11 F35C5.10 |                    |
| -0.296456144618105 AGIWUR40518                                                                           |    |          |          |                |                  |                    |
| CB4856 CT                                                                                                | II | 12909079 | 12910334 | WBGene00009399 | F35C5.11         | F35C5.11           |
| 0.227948786646347 AGIWUR13730;AGIWUR21453;AGIWUR45080                                                    |    |          |          |                |                  |                    |
| CB4856 CT                                                                                                | II | 12910229 | 12914603 | WBGene00009400 | F35C5.12         | F35C5.12           |
| -0.134303088388116 AGIWUR17427;AGIWUR23921;AGIWUR31371;AGIWUR33008                                       |    |          |          |                |                  |                    |
| CB4856 CT                                                                                                | II | 12915417 | 12919018 | WBGene00010264 | F58G1.2 F58G1.2  | -0.163449158178569 |
| AGIWUR4611                                                                                               |    |          |          |                |                  |                    |
| CB4856 CT                                                                                                | II | 12919551 | 12923377 | WBGene00010263 | wago-4 F58G1.1   | 0.164473365626413  |
| AGIWUR13287;AGIWUR32641                                                                                  |    |          |          |                |                  |                    |
| CB4856 CT                                                                                                | II | 12924026 | 12925241 | WBGene00010271 | F58G1.9 F58G1.9  |                    |
| -0.00375894415050126 AGIWUR28772                                                                         |    |          |          |                |                  |                    |
| CB4856 CT                                                                                                | II | 12925304 | 12925602 | WBGene00010270 | F58G1.8 F58G1.8  | -0.159165777096848 |
| AGIWUR43158                                                                                              |    |          |          |                |                  |                    |
| CB4856 CT                                                                                                | II | 12925981 | 12928341 | WBGene00010265 | F58G1.3 F58G1.3  | -0.307124341823467 |
| AGIWUR22297                                                                                              |    |          |          |                |                  |                    |
| CB4856 CT                                                                                                | II | 12931873 | 12933515 | WBGene00010266 | dct-18 F58G1.4   | -0.247254973232394 |
| AGIWUR44081                                                                                              |    |          |          |                |                  |                    |
| CB4856 CT                                                                                                | II | 12933854 | 12935362 | WBGene00010267 | lips-9 F58G1.5   | -0.121741893181382 |
| AGIWUR25581                                                                                              |    |          |          |                |                  |                    |
| CB4856 CT                                                                                                | II | 12938869 | 12943867 | WBGene00010268 | arrd-10 F58G1.6  | -0.702705187193027 |
| AGIWUR3865                                                                                               |    |          |          |                |                  |                    |
| CB4856 CT                                                                                                | II | 12943862 | 12948143 | WBGene00010269 | F58G1.7 F58G1.7  | 0.111357978547239  |
| AGIWUR3737                                                                                               |    |          |          |                |                  |                    |
| CB4856 CT                                                                                                | II | 12952490 | 12954832 | WBGene00012605 | Y38F1A.1         | Y38F1A.1           |
| 0.251155112775706 AGIWUR25647                                                                            |    |          |          |                |                  |                    |
| CB4856 CT                                                                                                | II | 12954962 | 12958018 | WBGene00012606 | Y38F1A.2         | Y38F1A.2           |
| -0.12899586175099 AGIWUR36625                                                                            |    |          |          |                |                  |                    |
| CB4856 CT                                                                                                | II | 12965546 | 12978168 | WBGene00004232 | ptr-18 Y38F1A.3  |                    |
| 0.0207482532425205 AGIWUR718                                                                             |    |          |          |                |                  |                    |
| CB4856 CT                                                                                                | II | 12980591 | 12993118 | WBGene00000870 | cyd-1 Y38F1A.5   |                    |

|                                                 |                                                                                 |
|-------------------------------------------------|---------------------------------------------------------------------------------|
| -0.0240463348547451                             | AGIWUR2519;AGIWUR4218;AGIWUR4651;AGIWUR8981;AGIWUR24138;AGIWUR33027;AGIWUR42526 |
| CB4856 CT II                                    | 12994358 12996571 WBGene00012608 hphd-1 Y38F1A.6                                |
| -0.550206270127447                              | AGIWUR17199;AGIWUR23064;AGIWUR41550                                             |
| CB4856 CT II                                    | 12996921 12997804 WBGene00012609 Y38F1A.7 Y38F1A.7                              |
| 0.0121335927153883                              | AGIWUR12368                                                                     |
| CB4856 CT II                                    | 12997986 13000853 WBGene00012610 Y38F1A.8 Y38F1A.8                              |
| 0.215218845108085                               | AGIWUR15880                                                                     |
| CB4856 CT II                                    | 13006610 13008164 WBGene00003860 oig-2 Y38F1A.9                                 |
| -0.334623752662297                              | AGIWUR43827                                                                     |
| CB4856 CT II                                    | 13014331 13025838 WBGene00003144 max-2 Y38F1A.10                                |
| 0.0207992326335003                              | AGIWUR11822;AGIWUR27909;AGIWUR29030;AGIWUR41651;AGIWUR42104                     |
| CB4856 CT II                                    | 13032778 13036505 WBGene00008929 F18A11.2 F18A11.2                              |
| 0.0429473393579816                              | AGIWUR33087                                                                     |
| CB4856 CT II                                    | 13047941 13050807 WBGene00009641 F42G4.2 F42G4.2 0.0013609248163533             |
| AGIWUR32122                                     |                                                                                 |
| CB4856 CT II                                    | 13056814 13071530 WBGene00006999 zyx-1 F42G4.3 0.0347638592640265               |
| AGIWUR13740;AGIWUR22966;AGIWUR35979;AGIWUR44121 |                                                                                 |
| CB4856 CT II                                    | 13073493 13076223 WBGene00009642 F42G4.5 F42G4.5 0.0276502767880444             |
| AGIWUR61;AGIWUR9936;AGIWUR27632                 |                                                                                 |
| CB4856 CT II                                    | 13081776 13082322 WBGene00195150 Y81G3A.6 Y81G3A.6                              |
| -0.307379906842635                              | AGIWUR7372                                                                      |
| CB4856 CT II                                    | 13083989 13091483 WBGene00013591 gcn-2 Y81G3A.3                                 |
| -0.208851863630048                              | AGIWUR1733;AGIWUR23403;AGIWUR36942                                              |
| CB4856 CT II                                    | 13091587 13094241 WBGene00013592 Y81G3A.4 Y81G3A.4                              |
| 0.100279316091498                               | AGIWUR27760                                                                     |
| CB4856 CT II                                    | 13096009 13098275 WBGene00000661 col-86 Y81G3A.5                                |
| -0.0704593479437285                             | AGIWUR17449                                                                     |
| CB4856 CT II                                    | 13098249 13116806 WBGene00009245 rict-1 F29C12.3                                |
| -0.115816805493773                              | AGIWUR30701;AGIWUR40860                                                         |
| CB4856 CT II                                    | 13117483 13122085 WBGene00009246 gfm-1 F29C12.4                                 |
| 0.0427507166052035                              | AGIWUR22803                                                                     |
| CB4856 CT II                                    | 13123038 13124789 WBGene00009247 bath-45 F29C12.5                               |
| -0.296552374620418                              | AGIWUR30834                                                                     |
| CB4856 CT II                                    | 13129902 13130189 WBGene00009248 F29C12.6 F29C12.6                              |
| -0.0359363562337212                             | AGIWUR16796                                                                     |
| CB4856 CT II                                    | 13131009 13134212 WBGene00009310 F32A11.5 F32A11.5                              |
| -0.103377197624556                              | AGIWUR15642;AGIWUR20935;AGIWUR21948;AGIWUR22348;AGIWUR36357;AGIWUR36804         |
| CB4856 CT II                                    | 13139465 13145225 WBGene00009311 mltn-1 F32A11.7                                |
| 0.581460930367153                               | AGIWUR6903                                                                      |

|                                                                                              |                                     |          |                |          |                             |
|----------------------------------------------------------------------------------------------|-------------------------------------|----------|----------------|----------|-----------------------------|
| CB4856 CT II                                                                                 | 13151459                            | 13153399 | WBGene00009308 | F32A11.3 | F32A11.3                    |
| -0.0838969444692879                                                                          | AGIWUR807                           |          |                |          |                             |
| CB4856 CT II                                                                                 | 13153461                            | 13157093 | WBGene00001998 | hpr-17   | F32A11.2                    |
| 0.0113772119730271                                                                           | AGIWUR7794                          |          |                |          |                             |
| CB4856 CT II                                                                                 | 13157333                            | 13160462 | WBGene00009307 | F32A11.1 | F32A11.1                    |
| 0.0065609676057079                                                                           | AGIWUR31770                         |          |                |          |                             |
| CB4856 CT II                                                                                 | 13160545                            | 13165733 | WBGene00003388 | moe-3    | F32A11.6                    |
| 0.266965280896858                                                                            | AGIWUR6208                          |          |                |          |                             |
| CB4856 CT II                                                                                 | 13175857                            | 13181561 | WBGene00012372 | W09H1.1  | W09H1.1 0.0392122405735087  |
| AGIWUR5978                                                                                   |                                     |          |                |          |                             |
| CB4856 CT II                                                                                 | 13183450                            | 13183845 | WBGene00001947 | his-73   | W09H1.2 0.117088016624225   |
| AGIWUR31054                                                                                  |                                     |          |                |          |                             |
| CB4856 CT II                                                                                 | 13184429                            | 13185023 | WBGene00012373 | W09H1.3  | W09H1.3 -0.0167544747662252 |
| AGIWUR24666                                                                                  |                                     |          |                |          |                             |
| CB4856 CT II                                                                                 | 13185092                            | 13185914 | WBGene00012374 | W09H1.4  | W09H1.4 0.0314936114041071  |
| AGIWUR21145                                                                                  |                                     |          |                |          |                             |
| CB4856 CT II                                                                                 | 13185987                            | 13187351 | WBGene00012375 | mecr-1   | W09H1.5 0.0904590597955917  |
| AGIWUR34282                                                                                  |                                     |          |                |          |                             |
| CB4856 CT II                                                                                 | 13195549                            | 13199603 | WBGene00002264 | lec-1    | W09H1.6 0.0675209957134957  |
| AGIWUR18206;AGIWUR41352;AGIWUR41572                                                          |                                     |          |                |          |                             |
| CB4856 CT II                                                                                 | 13200165                            | 13215701 | WBGene00000274 | btf-1    | F15D4.1 0.0425094081676018  |
| AGIWUR12208;AGIWUR39267                                                                      |                                     |          |                |          |                             |
| CB4856 CT II                                                                                 | 13216092                            | 13216764 | WBGene00008859 | F15D4.2  | F15D4.2 0.216626636168067   |
| AGIWUR8652;AGIWUR29706;AGIWUR37514                                                           |                                     |          |                |          |                             |
| CB4856 CT II                                                                                 | 13235306                            | 13237417 | WBGene00001459 | flp-16   | F15D4.8 0.101717537878957   |
| AGIWUR3652;AGIWUR16501;AGIWUR36244;AGIWUR39440                                               |                                     |          |                |          |                             |
| CB4856 CT II                                                                                 | 13239249                            | 13243121 | WBGene00008861 | F15D4.4  | F15D4.4 0.443351506261437   |
| AGIWUR28570;AGIWUR37736                                                                      |                                     |          |                |          |                             |
| CB4856 CT II                                                                                 | 13245348                            | 13247774 | WBGene00008862 | F15D4.5  | F15D4.5 -0.401449772804833  |
| AGIWUR1585                                                                                   |                                     |          |                |          |                             |
| CB4856 CT II                                                                                 | 13249189                            | 13249895 | WBGene00008863 | F15D4.6  | F15D4.6 -0.269403915606533  |
| AGIWUR859;AGIWUR4033;AGIWUR13762;AGIWUR13873;AGIWUR18842;AGIWUR26669;AGIWUR33094;AGIWUR43311 |                                     |          |                |          |                             |
| CB4856 CT II                                                                                 | 13260495                            | 13261201 | WBGene00012985 | Y48C3A.1 | Y48C3A.1                    |
| -0.0176012878788869                                                                          | AGIWUR22693                         |          |                |          |                             |
| CB4856 CT II                                                                                 | 13272634                            | 13304229 | WBGene00012989 | Y48C3A.5 | Y48C3A.5                    |
| 0.413487441270693                                                                            | AGIWUR11657                         |          |                |          |                             |
| CB4856 CT II                                                                                 | 13309290                            | 13311488 | WBGene00012987 | Y48C3A.3 | Y48C3A.3                    |
| 0.0249695857202603                                                                           | AGIWUR12236;AGIWUR12626;AGIWUR21275 |          |                |          |                             |
| CB4856 CT II                                                                                 | 13311459                            | 13320911 | WBGene00003119 | mac-1    | Y48C3A.7                    |

|                                                                       |                                                                                   |          |                |           |                             |
|-----------------------------------------------------------------------|-----------------------------------------------------------------------------------|----------|----------------|-----------|-----------------------------|
| -0.00781651527238569                                                  | AGIWUR9960;AGIWUR9979;AGIWUR21632;AGIWUR43284                                     |          |                |           |                             |
| CB4856 CT II                                                          | 13321954                                                                          | 13330825 | WBGene00012990 | sam-10    | Y48C3A.8                    |
| 0.028581147746249                                                     | AGIWUR19200                                                                       |          |                |           |                             |
| CB4856 CT II                                                          | 13338281                                                                          | 13339961 | WBGene00012992 | mrpl-20   | Y48C3A.10                   |
| -0.29950643093977                                                     | AGIWUR16972                                                                       |          |                |           |                             |
| CB4856 CT II                                                          | 13340644                                                                          | 13347884 | WBGene00012993 | dmsr-3    | Y48C3A.11                   |
| -0.0159253538915349                                                   | AGIWUR8773                                                                        |          |                |           |                             |
| CB4856 CT II                                                          | 13369607                                                                          | 13375290 | WBGene00012998 | Y48C3A.20 | Y48C3A.20                   |
| -0.132242109229191                                                    | AGIWUR6602;AGIWUR34545                                                            |          |                |           |                             |
| CB4856 CT II                                                          | 13376412                                                                          | 13388879 | WBGene00012994 | Y48C3A.12 | Y48C3A.12                   |
| -0.307353667129369                                                    | AGIWUR4627;AGIWUR21344                                                            |          |                |           |                             |
| CB4856 CT II                                                          | 13389761                                                                          | 13401992 | WBGene00012995 | Y48C3A.14 | Y48C3A.14                   |
| -0.0883811509943957                                                   | AGIWUR13908                                                                       |          |                |           |                             |
| CB4856 CT II                                                          | 13402980                                                                          | 13404629 | WBGene00012996 | pinn-4    | Y48C3A.16                   |
| -0.0327853647367462                                                   | AGIWUR26311                                                                       |          |                |           |                             |
| CB4856 CT II                                                          | 13406160                                                                          | 13411483 | WBGene00001162 | efl-2     | Y48C3A.17                   |
| -0.206111783943474                                                    | AGIWUR25742;AGIWUR26124;AGIWUR26605                                               |          |                |           |                             |
| CB4856 CT II                                                          | 13412635                                                                          | 13414906 | WBGene00012997 | Y48C3A.18 | Y48C3A.18                   |
| 0.0881076856535907                                                    | AGIWUR8883;AGIWUR13097;AGIWUR13111;AGIWUR16520;AGIWUR24033;AGIWUR25801            |          |                |           |                             |
| CB4856 CT II                                                          | 13415024                                                                          | 13424446 | WBGene00013014 | Y48E1C.1  | Y48E1C.1                    |
| -0.00209790741647176                                                  | AGIWUR2649;AGIWUR5616;AGIWUR12338;AGIWUR16989;AGIWUR19071;AGIWUR32260;AGIWUR41231 |          |                |           |                             |
| CB4856 CT II                                                          | 13424506                                                                          | 13428970 | WBGene00013015 | Y48E1C.2  | Y48E1C.2                    |
| -0.0703609514332904                                                   | AGIWUR13917                                                                       |          |                |           |                             |
| CB4856 CT II                                                          | 13433880                                                                          | 13436825 | WBGene00013017 | Y48E1C.4  | Y48E1C.4                    |
| 0.353530985249371                                                     | AGIWUR10395                                                                       |          |                |           |                             |
| CB4856 CT II                                                          | 13437579                                                                          | 13447593 | WBGene00008444 | tbc-14    | E01G4.1 0.00875785463767986 |
| AGIWUR5556;AGIWUR44407                                                |                                                                                   |          |                |           |                             |
| CB4856 CT II                                                          | 13448835                                                                          | 13460642 | WBGene00004116 | pqn-27    | E01G4.4 -0.169039543480423  |
| AGIWUR25;AGIWUR10877;AGIWUR44806                                      |                                                                                   |          |                |           |                             |
| CB4856 CT II                                                          | 13460991                                                                          | 13469602 | WBGene00008446 | E01G4.3   | E01G4.3 -0.103472576246553  |
| AGIWUR10416;AGIWUR28784;AGIWUR33582;AGIWUR41256;AGIWUR44661           |                                                                                   |          |                |           |                             |
| CB4856 CT II                                                          | 13472401                                                                          | 13473995 | WBGene00008447 | E01G4.5   | E01G4.5 -0.195492029177736  |
| AGIWUR4017;AGIWUR39799                                                |                                                                                   |          |                |           |                             |
| CB4856 CT II                                                          | 13477471                                                                          | 13478929 | WBGene00045410 | E01G4.7   | E01G4.7 -0.201944789540908  |
| AGIWUR4005;AGIWUR8184;AGIWUR21131;AGIWUR27985;AGIWUR29964;AGIWUR39135 |                                                                                   |          |                |           |                             |
| CB4856 CT II                                                          | 13482405                                                                          | 13485780 | WBGene00008448 | E01G4.6   | E01G4.6 -0.180621545478852  |
| AGIWUR7121                                                            |                                                                                   |          |                |           |                             |
| CB4856 CT II                                                          | 13485792                                                                          | 13491786 | WBGene00000113 | alh-7     | F45H10.1                    |
| -0.147247862012762                                                    | AGIWUR37785                                                                       |          |                |           |                             |

|                                                                                                                                   |                                                             |          |                |          |           |
|-----------------------------------------------------------------------------------------------------------------------------------|-------------------------------------------------------------|----------|----------------|----------|-----------|
| CB4856 CT II                                                                                                                      | 13491803                                                    | 13493050 | WBGene00009739 | F45H10.2 | F45H10.2  |
| -0.0183666326827971                                                                                                               | AGIWUR16910                                                 |          |                |          |           |
| CB4856 CT II                                                                                                                      | 13493181                                                    | 13494600 | WBGene00009740 | F45H10.3 | F45H10.3  |
| -0.103219609030748                                                                                                                | AGIWUR19029;AGIWUR22747                                     |          |                |          |           |
| CB4856 CT II                                                                                                                      | 13495050                                                    | 13495900 | WBGene00009741 | drp-1    | F45H10.4  |
| -0.106340875316633                                                                                                                | AGIWUR8290                                                  |          |                |          |           |
| CB4856 CT II                                                                                                                      | 13501877                                                    | 13503822 | WBGene00009742 | F45H10.5 | F45H10.5  |
| 0.138141222437207                                                                                                                 |                                                             |          |                |          |           |
| AGIWUR5292;AGIWUR9571;AGIWUR12387;AGIWUR12768;AGIWUR21572;AGIWUR25012;AGIWUR29346;AGIWUR34331;AGIWUR35280;AGIWUR39653;AGIWUR40900 |                                                             |          |                |          |           |
| CB4856 CT II                                                                                                                      | 13504082                                                    | 13506905 | WBGene00010069 | F54F11.1 | F54F11.1  |
| 0.566734268727075                                                                                                                 | AGIWUR34937                                                 |          |                |          |           |
| CB4856 CT II                                                                                                                      | 13507806                                                    | 13516479 | WBGene00010070 | nep-17   | F54F11.2  |
| -0.209630336759538                                                                                                                | AGIWUR31258                                                 |          |                |          |           |
| CB4856 CT II                                                                                                                      | 13517912                                                    | 13522925 | WBGene00010071 | sre-45   | F54F11.3  |
| -0.245543754447986                                                                                                                | AGIWUR27402                                                 |          |                |          |           |
| CB4856 CT II                                                                                                                      | 13522919                                                    | 13531218 | WBGene00013011 | snx-14   | Y48E1B.14 |
| -0.125286781120552                                                                                                                | AGIWUR11452;AGIWUR18223;AGIWUR20153;AGIWUR36079;AGIWUR41053 |          |                |          |           |
| CB4856 CT II                                                                                                                      | 13533486                                                    | 13541084 | WBGene00013001 | Y48E1B.2 | Y48E1B.2  |
| -0.260051985915316                                                                                                                | AGIWUR24617;AGIWUR29266                                     |          |                |          |           |
| CB4856 CT II                                                                                                                      | 13542007                                                    | 13547645 | WBGene00013000 | ddl-2    | Y48E1B.1  |
| -0.0330963944987817                                                                                                               | AGIWUR8887;AGIWUR16973                                      |          |                |          |           |
| CB4856 CT II                                                                                                                      | 13547739                                                    | 13567999 | WBGene00013002 | Y48E1B.3 | Y48E1B.3  |
| -0.149441769397809                                                                                                                |                                                             |          |                |          |           |
| AGIWUR15123;AGIWUR19802;AGIWUR31063;AGIWUR31692;AGIWUR33404;AGIWUR34595;AGIWUR44162;AGIWUR44251                                   |                                                             |          |                |          |           |
| CB4856 CT II                                                                                                                      | 13568077                                                    | 13575068 | WBGene00013004 | mrp1-37  | Y48E1B.5  |
| -0.270266297112356                                                                                                                | AGIWUR2143                                                  |          |                |          |           |
| CB4856 CT II                                                                                                                      | 13575925                                                    | 13584732 | WBGene00013006 | lin-38   | Y48E1B.7  |
| -0.0485488602870303                                                                                                               | AGIWUR2850;AGIWUR25413                                      |          |                |          |           |
| CB4856 CT II                                                                                                                      | 13585705                                                    | 13589033 | WBGene00013007 | Y48E1B.8 | Y48E1B.8  |
| -0.566704663580037                                                                                                                | AGIWUR15064                                                 |          |                |          |           |
| CB4856 CT II                                                                                                                      | 13589036                                                    | 13590552 | WBGene00013013 | clcc-145 | Y48E1B.16 |
| 0.824041865613665                                                                                                                 | AGIWUR7883                                                  |          |                |          |           |
| CB4856 CT II                                                                                                                      | 13590640                                                    | 13593797 | WBGene00013008 | clcc-146 | Y48E1B.9  |
| 0.346299802580504                                                                                                                 | AGIWUR7912;AGIWUR21835;AGIWUR41929                          |          |                |          |           |
| CB4856 CT II                                                                                                                      | 13595006                                                    | 13596551 | WBGene00013009 | fbxc-23  | Y48E1B.11 |
| 0.105194805183565                                                                                                                 |                                                             |          |                |          |           |
| AGIWUR11623;AGIWUR14076;AGIWUR30753;AGIWUR33903;AGIWUR35723;AGIWUR38420;AGIWUR39312;AGIWUR42220                                   |                                                             |          |                |          |           |
| CB4856 CT II                                                                                                                      | 13596955                                                    | 13598068 | WBGene00000804 | csc-1    | Y48E1B.12 |

|                                                                       |                         |          |                |          |                            |
|-----------------------------------------------------------------------|-------------------------|----------|----------------|----------|----------------------------|
| -0.0430469273772909                                                   | AGIWUR7181;AGIWUR27268  |          |                |          |                            |
| CB4856 CT II                                                          | 13601204                | 13605057 | WBGene00000819 | csp-1    | Y48E1B.13                  |
| 0.257814636180474                                                     | AGIWUR13033             |          |                |          |                            |
| CB4856 CT II                                                          | 13608154                | 13609824 | WBGene00001768 | gst-20   | Y48E1B.10                  |
| -0.147346532649948                                                    | AGIWUR21650             |          |                |          |                            |
| CB4856 CT II                                                          | 13610443                | 13611349 | WBGene00001772 | gst-24   | F37B1.1 -0.46440590412942  |
| AGIWUR15934                                                           |                         |          |                |          |                            |
| CB4856 CT II                                                          | 13611771                | 13613196 | WBGene00001763 | gst-15   | F37B1.4 0.683413031348527  |
| AGIWUR43213                                                           |                         |          |                |          |                            |
| CB4856 CT II                                                          | 13614788                | 13616100 | WBGene00001762 | gst-14   | F37B1.3 0.199867347016651  |
| AGIWUR27122                                                           |                         |          |                |          |                            |
| CB4856 CT II                                                          | 13616685                | 13618061 | WBGene00001760 | gst-12   | F37B1.2 0.421659717249078  |
| AGIWUR11751                                                           |                         |          |                |          |                            |
| CB4856 CT II                                                          | 13622967                | 13624502 | WBGene00001764 | gst-16   | F37B1.5 -0.52581245627468  |
| AGIWUR31264                                                           |                         |          |                |          |                            |
| CB4856 CT II                                                          | 13625544                | 13627141 | WBGene00001767 | gst-19   | F37B1.8 0.209455143653454  |
| AGIWUR3777;AGIWUR36800                                                |                         |          |                |          |                            |
| CB4856 CT II                                                          | 13628017                | 13628774 | WBGene00001765 | gst-17   | F37B1.6 0.0689685981734627 |
| AGIWUR36475                                                           |                         |          |                |          |                            |
| CB4856 CT II                                                          | 13629799                | 13630887 | WBGene00001766 | gst-18   | F37B1.7 0.0214660467911134 |
| AGIWUR12330;AGIWUR24948;AGIWUR32902;AGIWUR38232;AGIWUR44742           |                         |          |                |          |                            |
| CB4856 CT II                                                          | 13632655                | 13636986 | WBGene00006404 | tag-10   | C31C9.1 0.0962853553723466 |
| AGIWUR37940                                                           |                         |          |                |          |                            |
| CB4856 CT II                                                          | 13636929                | 13638480 | WBGene00007836 | C31C9.2  | C31C9.2 0.316511069114546  |
| AGIWUR3095;AGIWUR8721;AGIWUR10783;AGIWUR21035;AGIWUR28229;AGIWUR36644 |                         |          |                |          |                            |
| CB4856 CT II                                                          | 13641495                | 13643821 | WBGene00007837 | fbxa-167 | C31C9.3                    |
| -0.112437368797412                                                    | AGIWUR44122             |          |                |          |                            |
| CB4856 CT II                                                          | 13645781                | 13648850 | WBGene00007838 | fbxa-168 | C31C9.4                    |
| 0.0354875518751401                                                    | AGIWUR1946              |          |                |          |                            |
| CB4856 CT II                                                          | 13648530                | 13655347 | WBGene00045289 | fbxa-169 | C31C9.8                    |
| -0.133685014715725                                                    | AGIWUR7582              |          |                |          |                            |
| CB4856 CT II                                                          | 13669104                | 13669713 | WBGene00007841 | C31C9.7  | C31C9.7 0.0964845557610374 |
| AGIWUR36149                                                           |                         |          |                |          |                            |
| CB4856 CT II                                                          | 13670633                | 13694787 | WBGene00012999 | rpoa-1   | Y48E1A.1                   |
| 0.218847701207896                                                     | AGIWUR5492;AGIWUR11083  |          |                |          |                            |
| CB4856 CT II                                                          | 13703877                | 13712911 | WBGene00002235 | kqt-3    | Y54G9A.3                   |
| -0.248348032450044                                                    | AGIWUR17672;AGIWUR41149 |          |                |          |                            |
| CB4856 CT II                                                          | 13712921                | 13715893 | WBGene00013207 | zipt-2.3 | Y54G9A.4                   |
| -0.398078491158051                                                    | AGIWUR31247             |          |                |          |                            |



|                                                            |                                                                                     |          |                |          |                             |
|------------------------------------------------------------|-------------------------------------------------------------------------------------|----------|----------------|----------|-----------------------------|
| CB4856 CT II                                               | 13718185                                                                            | 13721318 | WBGene00044084 | sre-46   | Y54G9A.10                   |
| -0.0619031910901473                                        | AGIWUR9584;AGIWUR39918                                                              |          |                |          |                             |
| CB4856 CT II                                               | 13722964                                                                            | 13725037 | WBGene00013208 | Y54G9A.5 | Y54G9A.5                    |
| 0.22910397130418                                           | AGIWUR38181                                                                         |          |                |          |                             |
| CB4856 CT II                                               | 13724978                                                                            | 13725805 | WBGene00013210 | Y54G9A.7 | Y54G9A.7                    |
| 0.0307273914211361                                         | AGIWUR8650                                                                          |          |                |          |                             |
| CB4856 CT II                                               | 13726062                                                                            | 13729610 | WBGene00013209 | bub-3    | Y54G9A.6                    |
| -0.0732937296939298                                        | AGIWUR27299                                                                         |          |                |          |                             |
| CB4856 CT II                                               | 13729716                                                                            | 13731543 | WBGene00013211 | Y54G9A.9 | Y54G9A.9                    |
| -0.596769664817304                                         | AGIWUR6367                                                                          |          |                |          |                             |
| CB4856 CT II                                               | 13736349                                                                            | 13736933 | WBGene00011056 | R06B9.5  | R06B9.5 -0.0352453610071661 |
| AGIWUR29910                                                |                                                                                     |          |                |          |                             |
| CB4856 CT II                                               | 13741742                                                                            | 13749983 | WBGene00003246 | mig-14   | R06B9.6 0.0238137830801151  |
| AGIWUR3974                                                 |                                                                                     |          |                |          |                             |
| CB4856 CT II                                               | 13752316                                                                            | 13756267 | WBGene00011055 | arrd-14  | R06B9.4 0.497595967902921   |
| AGIWUR11577                                                |                                                                                     |          |                |          |                             |
| CB4856 CT II                                               | 13758408                                                                            | 13761233 | WBGene00011054 | arrd-13  | R06B9.3 0.0183952681791943  |
| AGIWUR21367                                                |                                                                                     |          |                |          |                             |
| CB4856 CT II                                               | 13792229                                                                            | 13817398 | WBGene00013934 | ZK131.11 | ZK131.11                    |
| 0.573294310397299                                          | AGIWUR2862;AGIWUR10799                                                              |          |                |          |                             |
| CB4856 CT II                                               | 13821778                                                                            | 13822333 | WBGene00001885 | his-11   | ZK131.5 -0.519454398991123  |
| AGIWUR9952;AGIWUR15972;AGIWUR16772;AGIWUR23210;AGIWUR36528 |                                                                                     |          |                |          |                             |
| CB4856 CT II                                               | 13828287                                                                            | 13828697 | WBGene00001916 | his-42   | F08G2.3 0.170150260230956   |
| AGIWUR34096                                                |                                                                                     |          |                |          |                             |
| CB4856 CT II                                               | 13830592                                                                            | 13831213 | WBGene00008576 | F08G2.4  | F08G2.4 0.33998647109615    |
| AGIWUR31364                                                |                                                                                     |          |                |          |                             |
| CB4856 CT II                                               | 13832870                                                                            | 13833653 | WBGene00008577 | F08G2.5  | F08G2.5 0.00654747334990891 |
| AGIWUR43189                                                |                                                                                     |          |                |          |                             |
| CB4856 CT II                                               | 13835103                                                                            | 13835709 | WBGene00002120 | ins-37   | F08G2.6 0.539403820350175   |
| AGIWUR44380                                                |                                                                                     |          |                |          |                             |
| CB4856 CT II                                               | 13836241                                                                            | 13841139 | WBGene00008578 | F08G2.7  | F08G2.7 0.104274701986469   |
| AGIWUR28240                                                |                                                                                     |          |                |          |                             |
| CB4856 CT II                                               | 13852311                                                                            | 13855290 | WBGene00008579 | F08G2.8  | F08G2.8 0.161418318821287   |
| AGIWUR5634                                                 |                                                                                     |          |                |          |                             |
| CB4856 CT II                                               | 13855788                                                                            | 13872315 | WBGene00013093 | Y51H1A.2 | Y51H1A.2                    |
| -0.0217938546171697                                        | AGIWUR10118;AGIWUR12948;AGIWUR15961;AGIWUR23741;AGIWUR29105;AGIWUR32778;AGIWUR41195 |          |                |          |                             |
| CB4856 CT II                                               | 13872869                                                                            | 13875423 | WBGene00013094 | Y51H1A.3 | Y51H1A.3                    |
| -0.0684697654671993                                        | AGIWUR11740;AGIWUR14779;AGIWUR19083;AGIWUR23307;AGIWUR31503;AGIWUR38345;AGIWUR41980 |          |                |          |                             |
| CB4856 CT II                                               | 13876034                                                                            | 13882585 | WBGene00013095 | ing-3    | Y51H1A.4                    |

|                                     |                                                                        |          |  |                |           |                             |
|-------------------------------------|------------------------------------------------------------------------|----------|--|----------------|-----------|-----------------------------|
| -0.130528373931181                  | AGIWUR539                                                              |          |  | WBGene00001838 | hda-10    | Y51H1A.5                    |
| CB4856 CT II                        | 13882705                                                               | 13888031 |  |                |           |                             |
| 0.211384513424143                   | AGIWUR33508                                                            |          |  | WBGene00013096 | mcd-1     | Y51H1A.6                    |
| CB4856 CT II                        | 13888583                                                               | 13898394 |  |                |           |                             |
| 0.172250496514147                   | AGIWUR8763;AGIWUR38762                                                 |          |  | WBGene00012197 | W02B8.1   | W02B8.1 0.0785567345679716  |
| CB4856 CT II                        | 13898366                                                               | 13902114 |  |                |           |                             |
| AGIWUR36040                         |                                                                        |          |  | WBGene00012198 | W02B8.2   | W02B8.2 0.362381395820417   |
| CB4856 CT II                        | 13908921                                                               | 13915254 |  |                |           |                             |
| AGIWUR13508                         |                                                                        |          |  | WBGene00012199 | mltn-3    | W02B8.3 0.100460287070804   |
| CB4856 CT II                        | 13916340                                                               | 13919838 |  |                |           |                             |
| AGIWUR4662;AGIWUR18634;AGIWUR35203  |                                                                        |          |  | WBGene00012200 | mltn-4    | W02B8.4 0.109390403376743   |
| CB4856 CT II                        | 13920555                                                               | 13924724 |  |                |           |                             |
| AGIWUR36510;AGIWUR40714             |                                                                        |          |  | WBGene00044074 | mltn-5    | W02B8.6 -0.234434912464453  |
| CB4856 CT II                        | 13925268                                                               | 13930516 |  |                |           |                             |
| AGIWUR39189                         |                                                                        |          |  | WBGene00001988 | hot-3     | W02B8.5 0.126031776026044   |
| CB4856 CT II                        | 13930648                                                               | 13931997 |  |                |           |                             |
| AGIWUR31128;AGIWUR40137             |                                                                        |          |  | WBGene00012328 | W07G1.1   | W07G1.1 -0.0948303266093653 |
| CB4856 CT II                        | 13937995                                                               | 13939631 |  |                |           |                             |
| AGIWUR33574                         |                                                                        |          |  | WBGene00012329 | sre-44    | W07G1.2 -0.274248273381597  |
| CB4856 CT II                        | 13949590                                                               | 13951869 |  |                |           |                             |
| AGIWUR23234;AGIWUR24414;AGIWUR34747 |                                                                        |          |  | WBGene00012330 | zip-3     | W07G1.3 -0.136322386907479  |
| CB4856 CT II                        | 13951906                                                               | 13957543 |  |                |           |                             |
| AGIWUR18520;AGIWUR40639             |                                                                        |          |  | WBGene00012332 | rpi-1     | W07G1.5 -0.0698744310644441 |
| CB4856 CT II                        | 13959239                                                               | 13962417 |  |                |           |                             |
| AGIWUR29081;AGIWUR34293;AGIWUR44572 |                                                                        |          |  | WBGene00012334 | W07G1.7   | W07G1.7 0.0905420734202398  |
| CB4856 CT II                        | 13964891                                                               | 13966333 |  |                |           |                             |
| AGIWUR15265                         |                                                                        |          |  | WBGene00012333 | sre-43    | W07G1.6 0.127064033780981   |
| CB4856 CT II                        | 13966534                                                               | 13969079 |  |                |           |                             |
| AGIWUR27997                         |                                                                        |          |  | WBGene00012722 | Y39G8B.1  | Y39G8B.1                    |
| CB4856 CT II                        | 13970584                                                               | 13972970 |  |                |           |                             |
| -0.1609487820089                    | AGIWUR15112;AGIWUR16525                                                |          |  | WBGene00012723 | Y39G8B.2  | Y39G8B.2                    |
| CB4856 CT II                        | 13973690                                                               | 13976221 |  |                |           |                             |
| -0.248862987515832                  | AGIWUR6405                                                             |          |  | WBGene00012724 | sre-48    | Y39G8B.3                    |
| CB4856 CT II                        | 13977164                                                               | 13979883 |  |                |           |                             |
| 0.308626222874724                   | AGIWUR23507                                                            |          |  | WBGene00012728 | Y39G8B.9  | Y39G8B.9                    |
| CB4856 CT II                        | 13981330                                                               | 13981785 |  |                |           |                             |
| -0.158127528322101                  | AGIWUR1280;AGIWUR18970;AGIWUR25187;AGIWUR37328;AGIWUR41482;AGIWUR44093 |          |  | WBGene00012729 | Y39G8B.10 | Y39G8B.10                   |
| CB4856 CT II                        | 13982048                                                               | 13983115 |  |                |           |                             |
| 0.329731754011471                   | AGIWUR44923                                                            |          |  |                |           |                             |

|                                                                        |                                                 |          |                |                 |                             |  |
|------------------------------------------------------------------------|-------------------------------------------------|----------|----------------|-----------------|-----------------------------|--|
| CB4856 CT II                                                           | 13983397                                        | 13984651 | WBGene00012725 | sre-47          | Y39G8B.4                    |  |
| -0.0352529599448168                                                    | AGIWUR14222                                     |          |                |                 |                             |  |
| CB4856 CT II                                                           | 13987616                                        | 13991838 | WBGene00012726 | Y39G8B.5        | Y39G8B.5                    |  |
| 0.358119994125827                                                      | AGIWUR5997;AGIWUR29173                          |          |                |                 |                             |  |
| CB4856 CT II                                                           | 13993009                                        | 13993527 | WBGene00014885 | Y39G8B.8        | Y39G8B.8                    |  |
| -0.16570332545157                                                      | AGIWUR4346;AGIWUR37185;AGIWUR43820              |          |                |                 |                             |  |
| CB4856 CT II                                                           | 13994411                                        | 13995045 | WBGene00012727 | Y39G8B.7        | Y39G8B.7                    |  |
| -0.105005295836486                                                     | AGIWUR25154                                     |          |                |                 |                             |  |
| CB4856 CT II                                                           | 13995401                                        | 13995876 | WBGene00008501 | fbxa-177        | F01D5.11                    |  |
| -0.153086874945207                                                     | AGIWUR13019                                     |          |                |                 |                             |  |
| CB4856 CT II                                                           | 13996958                                        | 13997606 | WBGene00008492 | F01D5.1 F01D5.1 | -0.81008251679909           |  |
| AGIWUR10090                                                            |                                                 |          |                |                 |                             |  |
| CB4856 CT II                                                           | 13998497                                        | 13999064 | WBGene00008493 | F01D5.2 F01D5.2 | -0.699773988626923          |  |
| AGIWUR45174                                                            |                                                 |          |                |                 |                             |  |
| CB4856 CT II                                                           | 13999059                                        | 14000144 | WBGene00008494 | F01D5.3 F01D5.3 | -0.501802926517758          |  |
| AGIWUR16727                                                            |                                                 |          |                |                 |                             |  |
| CB4856 CT II                                                           | 14001686                                        | 14002306 | WBGene00008495 | F01D5.5 F01D5.5 | -0.50948883280053           |  |
| AGIWUR8659                                                             |                                                 |          |                |                 |                             |  |
| CB4856 CT II                                                           | 14006511                                        | 14008514 | WBGene00008496 | F01D5.6 F01D5.6 | 0.352702676337541           |  |
| AGIWUR18402                                                            |                                                 |          |                |                 |                             |  |
| CB4856 CT II                                                           | 14008666                                        | 14010583 | WBGene00008497 | F01D5.7 F01D5.7 | -0.225865170873444          |  |
| AGIWUR41689                                                            |                                                 |          |                |                 |                             |  |
| CB4856 CT II                                                           | 14010706                                        | 14013826 | WBGene00008498 | F01D5.8 F01D5.8 | -0.238733631523015          |  |
| AGIWUR10871                                                            |                                                 |          |                |                 |                             |  |
| CB4856 CT II                                                           | 14013825                                        | 14016965 | WBGene00008499 | cyp-37A1        | F01D5.9                     |  |
| 0.504218958753301                                                      | AGIWUR11139;AGIWUR13421;AGIWUR31528;AGIWUR34500 |          |                |                 |                             |  |
| CB4856 CT II                                                           | 14017839                                        | 14021330 | WBGene00008500 | F01D5.10        | F01D5.10                    |  |
| 0.0563877396939469                                                     | AGIWUR9014                                      |          |                |                 |                             |  |
| CB4856 CT II                                                           | 14031402                                        | 14032644 | WBGene00014851 | W01G7.2 W01G7.2 | 0.0989039108031653          |  |
| AGIWUR33995                                                            |                                                 |          |                |                 |                             |  |
| CB4856 CT II                                                           | 14033233                                        | 14037721 | WBGene00000901 | daf-5           | W01G7.1 -0.0350311718035998 |  |
| AGIWUR2777;AGIWUR3143;AGIWUR4552;AGIWUR23271;AGIWUR42691;AGIWUR43981   |                                                 |          |                |                 |                             |  |
| CB4856 CT II                                                           | 14060061                                        | 14060624 | WBGene00012187 | rpb-11          | W01G7.3 -0.182666646386672  |  |
| AGIWUR1799                                                             |                                                 |          |                |                 |                             |  |
| CB4856 CT II                                                           | 14060739                                        | 14062960 | WBGene00012188 | W01G7.4 W01G7.4 | -0.0172194608659728         |  |
| AGIWUR6293;AGIWUR13407;AGIWUR25133;AGIWUR39814;AGIWUR41628;AGIWUR42037 |                                                 |          |                |                 |                             |  |
| CB4856 CT II                                                           | 14063450                                        | 14066170 | WBGene00002275 | lem-2           | W01G7.5 -0.1096912411251    |  |
| AGIWUR36856                                                            |                                                 |          |                |                 |                             |  |
| CB4856 CT II                                                           | 14068907                                        | 14089119 | WBGene00012730 | xrn-1           | Y39G8C.1                    |  |

|                                                                                                                                                                       |                                                 |                        |                |          |          |                     |  |
|-----------------------------------------------------------------------------------------------------------------------------------------------------------------------|-------------------------------------------------|------------------------|----------------|----------|----------|---------------------|--|
| -0.162034589941259                                                                                                                                                    |                                                 | AGIWUR3029;AGIWUR27428 |                |          |          |                     |  |
| CB4856 CT II                                                                                                                                                          | 14090075                                        | 14094690               | WBGene00000662 | col-87   | Y39G8C.4 |                     |  |
| 0.0691337865288215                                                                                                                                                    | AGIWUR21941                                     |                        |                |          |          |                     |  |
| CB4856 CT II                                                                                                                                                          | 14095447                                        | 14097390               | WBGene00012731 | Y39G8C.2 | Y39G8C.2 |                     |  |
| -0.320104292417062                                                                                                                                                    | AGIWUR18523                                     |                        |                |          |          |                     |  |
| CB4856 CT II                                                                                                                                                          | 14101263                                        | 14102961               | WBGene00014569 | bkip-1   | Y39G8C.3 |                     |  |
| 0.123756405260076                                                                                                                                                     |                                                 |                        |                |          |          |                     |  |
| AGIWUR2676;AGIWUR3891;AGIWUR12056;AGIWUR14174;AGIWUR15841;AGIWUR15877;AGIWUR16335;AGIWUR23672;AGIWUR35130;AGIWUR37737;AGIWUR38371;AGIWUR40259;AGIWUR41719;AGIWUR43332 |                                                 |                        |                |          |          |                     |  |
| CB4856 CT II                                                                                                                                                          | 14104773                                        | 14108072               | WBGene00001805 | gur-4    | K09E4.5  | -0.0338546467803758 |  |
| AGIWUR819                                                                                                                                                             |                                                 |                        |                |          |          |                     |  |
| CB4856 CT II                                                                                                                                                          | 14108016                                        | 14109635               | WBGene00010723 | cpg-7    | K09E4.6  | 0.780389593204319   |  |
| AGIWUR861                                                                                                                                                             |                                                 |                        |                |          |          |                     |  |
| CB4856 CT II                                                                                                                                                          | 14114213                                        | 14122165               | WBGene00010722 | K09E4.4  | K09E4.4  | 0.224821094033725   |  |
| AGIWUR36499                                                                                                                                                           |                                                 |                        |                |          |          |                     |  |
| CB4856 CT II                                                                                                                                                          | 14123945                                        | 14126941               | WBGene00010721 | K09E4.3  | K09E4.3  | 0.0897184553057144  |  |
| AGIWUR12853                                                                                                                                                           |                                                 |                        |                |          |          |                     |  |
| CB4856 CT II                                                                                                                                                          | 14127687                                        | 14132833               | WBGene00010720 | K09E4.2  | K09E4.2  | -0.115616917243354  |  |
| AGIWUR6171                                                                                                                                                            |                                                 |                        |                |          |          |                     |  |
| CB4856 CT II                                                                                                                                                          | 14133397                                        | 14142289               | WBGene00012230 | cacn-1   | W03H9.4  | -0.18322281073425   |  |
| AGIWUR27840                                                                                                                                                           |                                                 |                        |                |          |          |                     |  |
| CB4856 CT II                                                                                                                                                          | 14142949                                        | 14143874               | WBGene00012228 | W03H9.2  | W03H9.2  | -0.0244234528438541 |  |
| AGIWUR7297;AGIWUR20495                                                                                                                                                |                                                 |                        |                |          |          |                     |  |
| CB4856 CT II                                                                                                                                                          | 14151040                                        | 14154373               | WBGene00012978 | Y48B6A.1 | Y48B6A.1 |                     |  |
| 0.0164220705239062                                                                                                                                                    | AGIWUR7453;AGIWUR18959                          |                        |                |          |          |                     |  |
| CB4856 CT II                                                                                                                                                          | 14155280                                        | 14155660               | WBGene00004456 | rpl-43   | Y48B6A.2 |                     |  |
| -0.168588254104838                                                                                                                                                    |                                                 |                        |                |          |          |                     |  |
| AGIWUR3534;AGIWUR4568;AGIWUR11626;AGIWUR13510;AGIWUR21750;AGIWUR21886;AGIWUR26463;AGIWUR33415;AGIWUR36339;AGIWUR38880                                                 |                                                 |                        |                |          |          |                     |  |
| CB4856 CT II                                                                                                                                                          | 14155768                                        | 14166018               | WBGene00006964 | xrn-2    | Y48B6A.3 |                     |  |
| 0.0475500014694461                                                                                                                                                    | AGIWUR40875                                     |                        |                |          |          |                     |  |
| CB4856 CT II                                                                                                                                                          | 14172833                                        | 14175174               | WBGene00012979 | Y48B6A.5 | Y48B6A.5 |                     |  |
| -0.32579568580479                                                                                                                                                     | AGIWUR8342                                      |                        |                |          |          |                     |  |
| CB4856 CT II                                                                                                                                                          | 14178814                                        | 14189917               | WBGene00012980 | efhd-1   | Y48B6A.6 |                     |  |
| 0.0162538013250653                                                                                                                                                    | AGIWUR14476;AGIWUR16862;AGIWUR19411;AGIWUR21777 |                        |                |          |          |                     |  |
| CB4856 CT II                                                                                                                                                          | 14205633                                        | 14210214               | WBGene00000037 | ace-3    | Y48B6A.8 |                     |  |
| 0.386218277894496                                                                                                                                                     | AGIWUR33827                                     |                        |                |          |          |                     |  |
| CB4856 CT II                                                                                                                                                          | 14211439                                        | 14213123               | WBGene00001992 | hot-7    | Y48B6A.9 |                     |  |
| -0.26096859985952                                                                                                                                                     | AGIWUR20114;AGIWUR22691                         |                        |                |          |          |                     |  |

|                                                                                                         |                                                                       |          |                |            |            |
|---------------------------------------------------------------------------------------------------------|-----------------------------------------------------------------------|----------|----------------|------------|------------|
| CB4856 CT II                                                                                            | 14214409                                                              | 14217139 | WBGene00012981 | Y48B6A.10  | Y48B6A.10  |
| 0.00408643048661439                                                                                     | AGIWUR21643                                                           |          |                |            |            |
| CB4856 CT II                                                                                            | 14217107                                                              | 14218064 | WBGene00050948 | Y48B6A.16  | Y48B6A.16  |
| -0.0481226787250542                                                                                     | AGIWUR4514;AGIWUR21323;AGIWUR24184;AGIWUR35402;AGIWUR42266            |          |                |            |            |
| CB4856 CT II                                                                                            | 14220938                                                              | 14226287 | WBGene00012984 | Y48B6A.13  | Y48B6A.13  |
| -0.13878951867005                                                                                       | AGIWUR31036                                                           |          |                |            |            |
| CB4856 CT II                                                                                            | 14226377                                                              | 14234120 | WBGene00012983 | men-1      | Y48B6A.12  |
| 0.162049424472329                                                                                       | AGIWUR33695                                                           |          |                |            |            |
| CB4856 CT II                                                                                            | 14234972                                                              | 14243603 | WBGene00012982 | jmjd-2     | Y48B6A.11  |
| -0.0424777210525846                                                                                     |                                                                       |          |                |            |            |
| AGIWUR484;AGIWUR4107;AGIWUR9451;AGIWUR12375;AGIWUR17242;AGIWUR26629;AGIWUR28009;AGIWUR35789;AGIWUR40210 |                                                                       |          |                |            |            |
| CB4856 CT II                                                                                            | 14250683                                                              | 14251448 | WBGene00001971 | hmg-1.1    | Y48B6A.14  |
| 0.308356011576062                                                                                       | AGIWUR2307;AGIWUR6488;AGIWUR12701;AGIWUR18413;AGIWUR19350;AGIWUR40655 |          |                |            |            |
| CB4856 CT II                                                                                            | 14252357                                                              | 14255705 | WBGene00013213 | Y54G11A.2  | Y54G11A.2  |
| 0.0609549878714688                                                                                      | AGIWUR11933                                                           |          |                |            |            |
| CB4856 CT II                                                                                            | 14256610                                                              | 14256987 | WBGene00235256 | Y54G11A.19 | Y54G11A.19 |
| -0.0931951402934565                                                                                     | AGIWUR5247                                                            |          |                |            |            |
| CB4856 CT II                                                                                            | 14276621                                                              | 14283973 | WBGene00013214 | Y54G11A.3  | Y54G11A.3  |
| -0.0836020257296752                                                                                     | AGIWUR26523                                                           |          |                |            |            |
| CB4856 CT II                                                                                            | 14285780                                                              | 14287377 | WBGene00005264 | srh-41     | Y54G11A.12 |
| 0.189306821047776                                                                                       | AGIWUR23858                                                           |          |                |            |            |
| CB4856 CT II                                                                                            | 14287632                                                              | 14289068 | WBGene00005265 | srh-42     | Y54G11A.15 |
| 0.111557117600976                                                                                       | AGIWUR36608                                                           |          |                |            |            |
| CB4856 CT II                                                                                            | 14289696                                                              | 14290875 | WBGene00005266 | srh-43     | Y54G11A.16 |
| 0.132674279416165                                                                                       | AGIWUR8458                                                            |          |                |            |            |
| CB4856 CT II                                                                                            | 14292824                                                              | 14296055 | WBGene00013215 | Y54G11A.4  | Y54G11A.4  |
| -0.0796021790302373                                                                                     | AGIWUR27775                                                           |          |                |            |            |
| CB4856 CT II                                                                                            | 14297305                                                              | 14299633 | WBGene00013216 | Y54G11A.7  | Y54G11A.7  |
| -0.0278401665003827                                                                                     | AGIWUR2686                                                            |          |                |            |            |
| CB4856 CT II                                                                                            | 14299553                                                              | 14302083 | WBGene00000831 | ctl-2      | Y54G11A.5  |
| 0.253551611563111                                                                                       | AGIWUR8751                                                            |          |                |            |            |
| CB4856 CT II                                                                                            | 14318158                                                              | 14320917 | WBGene00013221 | Y54G11A.14 | Y54G11A.14 |
| 0.000482129746892213                                                                                    | AGIWUR43300                                                           |          |                |            |            |
| CB4856 CT II                                                                                            | 14340068                                                              | 14344454 | WBGene00013217 | ddl-3      | Y54G11A.8  |
| -0.292801599784121                                                                                      | AGIWUR17300;AGIWUR32646                                               |          |                |            |            |
| CB4856 CT II                                                                                            | 14346877                                                              | 14348792 | WBGene00002996 | lin-7      | Y54G11A.10 |
| -0.217909050725456                                                                                      | AGIWUR14816                                                           |          |                |            |            |
| CB4856 CT II                                                                                            | 14349783                                                              | 14350795 | WBGene00013219 | Y54G11A.11 | Y54G11A.11 |
| -0.0366965858028898                                                                                     | AGIWUR20166;AGIWUR32611                                               |          |                |            |            |

|                                                                                                                                                                      |    |          |          |                |          |           |                     |
|----------------------------------------------------------------------------------------------------------------------------------------------------------------------|----|----------|----------|----------------|----------|-----------|---------------------|
| CB4856 CT                                                                                                                                                            | II | 14350719 | 14358113 | WBGene00011050 | agl-1    | R06A4.8   | -0.0824040965587542 |
| AGIWUR23864                                                                                                                                                          |    |          |          |                |          |           |                     |
| CB4856 CT                                                                                                                                                            | II | 14358366 | 14361701 | WBGene00011051 | pfs-2    | R06A4.9   | -0.0876896852803757 |
| AGIWUR11966                                                                                                                                                          |    |          |          |                |          |           |                     |
| CB4856 CT                                                                                                                                                            | II | 14362019 | 14365177 | WBGene00011047 | R06A4.2  | R06A4.2   | 0.0440471137022307  |
| AGIWUR31139                                                                                                                                                          |    |          |          |                |          |           |                     |
| CB4856 CT                                                                                                                                                            | II | 14365705 | 14373899 | WBGene00002076 | imb-2    | R06A4.4   | -0.0219613925449202 |
| AGIWUR3727;AGIWUR8967;AGIWUR15087;AGIWUR16722;AGIWUR22315                                                                                                            |    |          |          |                |          |           |                     |
| CB4856 CT                                                                                                                                                            | II | 14373831 | 14377890 | WBGene00000059 | acr-20   | R06A4.10  |                     |
| 0.0619770373696618 AGIWUR3520                                                                                                                                        |    |          |          |                |          |           |                     |
| CB4856 CT                                                                                                                                                            | II | 14381772 | 14383376 | WBGene00011049 | sdz-26   | R06A4.6   | -0.0732333658391582 |
| AGIWUR11439                                                                                                                                                          |    |          |          |                |          |           |                     |
| CB4856 CT                                                                                                                                                            | II | 14383973 | 14388454 | WBGene00003220 | mes-2    | R06A4.7   | 0.11355144797038    |
| AGIWUR7454                                                                                                                                                           |    |          |          |                |          |           |                     |
| CB4856 CT                                                                                                                                                            | II | 14389236 | 14390116 | WBGene00009179 | kbp-3    | F26H11.1  |                     |
| 0.04499058391918 AGIWUR37325                                                                                                                                         |    |          |          |                |          |           |                     |
| CB4856 CT                                                                                                                                                            | II | 14390718 | 14407905 | WBGene00009180 | nurf-1   | F26H11.2  |                     |
| 0.0514876042855903                                                                                                                                                   |    |          |          |                |          |           |                     |
| AGIWUR1055;AGIWUR3235;AGIWUR7486;AGIWUR10576;AGIWUR22291;AGIWUR22413;AGIWUR23878;AGIWUR26556;AGIWUR26933;AGIWUR27114;AGIWUR29545;AGIWUR33257;AGIWUR38259;AGIWUR40676 |    |          |          |                |          |           |                     |
| CB4856 CT                                                                                                                                                            | II | 14411095 | 14412218 | WBGene00194892 | dsb-2    | F26H11.6  |                     |
| -0.21211994122001 AGIWUR17446                                                                                                                                        |    |          |          |                |          |           |                     |
| CB4856 CT                                                                                                                                                            | II | 14412201 | 14413516 | WBGene00001371 | exl-1    | F26H11.5  |                     |
| 0.123527936807655 AGIWUR41988                                                                                                                                        |    |          |          |                |          |           |                     |
| CB4856 CT                                                                                                                                                            | II | 14417889 | 14424891 | WBGene00004048 | plx-2    | K04B12.1  |                     |
| 0.457503236159883 AGIWUR4508;AGIWUR33866;AGIWUR38759;AGIWUR44043                                                                                                     |    |          |          |                |          |           |                     |
| CB4856 CT                                                                                                                                                            | II | 14434419 | 14438977 | WBGene00010550 | K04B12.2 | K04B12.2  |                     |
| 0.451912321807303 AGIWUR8514                                                                                                                                         |    |          |          |                |          |           |                     |
| CB4856 CT                                                                                                                                                            | II | 14441409 | 14447219 | WBGene00010551 | smg-8    | K04B12.3  |                     |
| -0.145684841480451 AGIWUR21796                                                                                                                                       |    |          |          |                |          |           |                     |
| CB4856 CT                                                                                                                                                            | II | 14455632 | 14464911 | WBGene00013222 | dmsr-6   | Y54G11B.1 |                     |
| 0.316369764267714 AGIWUR16816                                                                                                                                        |    |          |          |                |          |           |                     |
| CB4856 CT                                                                                                                                                            | II | 14470371 | 14479627 | WBGene00007545 | C13B4.1  | C13B4.1   | 0.0486465940115117  |
| AGIWUR7062                                                                                                                                                           |    |          |          |                |          |           |                     |
| CB4856 CT                                                                                                                                                            | II | 14485624 | 14488688 | WBGene00006856 | usp-14   | C13B4.2   | 0.140986950878151   |
| AGIWUR9141;AGIWUR11923;AGIWUR27616;AGIWUR28554;AGIWUR34325;AGIWUR36729;AGIWUR43933                                                                                   |    |          |          |                |          |           |                     |
| CB4856 CT                                                                                                                                                            | II | 14489802 | 14492901 | WBGene00010758 | vnut-1   | K10H10.1  |                     |
| -0.169884339853644 AGIWUR5410                                                                                                                                        |    |          |          |                |          |           |                     |
| CB4856 CT                                                                                                                                                            | II | 14492826 | 14494514 | WBGene00010759 | cysl-2   | K10H10.2  |                     |

|                                                                                                                     |             |          |                |           |           |                     |
|---------------------------------------------------------------------------------------------------------------------|-------------|----------|----------------|-----------|-----------|---------------------|
| -0.0799149350825274                                                                                                 | AGIWUR25107 |          |                |           |           |                     |
| CB4856 CT II                                                                                                        | 14498026    | 14499755 | WBGene00000972 | dhs-8     | K10H10.3  |                     |
| 0.58305996539525                                                                                                    | AGIWUR22194 |          |                |           |           |                     |
| CB4856 CT II                                                                                                        | 14500422    | 14501663 | WBGene00010760 | K10H10.4  | K10H10.4  |                     |
| -0.834394100370833                                                                                                  | AGIWUR44601 |          |                |           |           |                     |
| CB4856 CT II                                                                                                        | 14501747    | 14502543 | WBGene00010761 | K10H10.5  | K10H10.5  |                     |
| -0.0147152909944541                                                                                                 | AGIWUR33435 |          |                |           |           |                     |
| CB4856 CT II                                                                                                        | 14505015    | 14506409 | WBGene00045403 | K10H10.12 | K10H10.12 |                     |
| 0.109121841082077                                                                                                   |             |          |                |           |           |                     |
| AGIWUR871;AGIWUR3702;AGIWUR4293;AGIWUR13405;AGIWUR18072;AGIWUR18318;AGIWUR20971;AGIWUR23433;AGIWUR28318;AGIWUR29134 |             |          |                |           |           |                     |
| CB4856 CT II                                                                                                        | 14507092    | 14507663 | WBGene00010763 | K10H10.7  | K10H10.7  |                     |
| -0.421601365129124                                                                                                  | AGIWUR17523 |          |                |           |           |                     |
| CB4856 CT II                                                                                                        | 14508068    | 14510162 | WBGene00010765 | K10H10.10 | K10H10.10 |                     |
| 0.56529854335918                                                                                                    | AGIWUR37841 |          |                |           |           |                     |
| CB4856 CT II                                                                                                        | 14513191    | 14515117 | WBGene00010764 | K10H10.9  | K10H10.9  |                     |
| -0.00699217484717352                                                                                                | AGIWUR826   |          |                |           |           |                     |
| CB4856 CT II                                                                                                        | 14524173    | 14525112 | WBGene00010195 | pot-2     | F57C2.3   | -0.450792052692753  |
| AGIWUR14166                                                                                                         |             |          |                |           |           |                     |
| CB4856 CT II                                                                                                        | 14525312    | 14526031 | WBGene00010196 | F57C2.4   | F57C2.4   | 0.227712316850154   |
| AGIWUR38942                                                                                                         |             |          |                |           |           |                     |
| CB4856 CT II                                                                                                        | 14526213    | 14528296 | WBGene00010197 | F57C2.5   | F57C2.5   | 0.0277331813096318  |
| AGIWUR20898                                                                                                         |             |          |                |           |           |                     |
| CB4856 CT II                                                                                                        | 14528754    | 14534173 | WBGene00010198 | spat-1    | F57C2.6   | -0.0380263526324907 |
| AGIWUR21485                                                                                                         |             |          |                |           |           |                     |
| CB4856 CT II                                                                                                        | 14534300    | 14535365 | WBGene00007312 | C04H5.1   | C04H5.1   | -0.544429908493974  |
| AGIWUR6314                                                                                                          |             |          |                |           |           |                     |
| CB4856 CT II                                                                                                        | 14535923    | 14537579 | WBGene00007313 | cllec-147 | C04H5.2   |                     |
| 0.346661029251528                                                                                                   | AGIWUR37021 |          |                |           |           |                     |
| CB4856 CT II                                                                                                        | 14537946    | 14539162 | WBGene00007315 | C04H5.7   | C04H5.7   | -0.031627670486321  |
| AGIWUR11910;AGIWUR32330;AGIWUR41692;AGIWUR42941                                                                     |             |          |                |           |           |                     |
| CB4856 CT II                                                                                                        | 14540895    | 14548791 | WBGene00007314 | gcy-29    | C04H5.3   | 0.244890684568294   |
| AGIWUR12134                                                                                                         |             |          |                |           |           |                     |
| CB4856 CT II                                                                                                        | 14550913    | 14552476 | WBGene00007316 | nlp-41    | C04H5.8   | 0.126723760955628   |
| AGIWUR1866;AGIWUR5601;AGIWUR7581;AGIWUR9920;AGIWUR14170;AGIWUR37811                                                 |             |          |                |           |           |                     |
| CB4856 CT II                                                                                                        | 14552501    | 14561599 | WBGene00003392 | mog-4     | C04H5.6   | -0.283918917109002  |
| AGIWUR18263                                                                                                         |             |          |                |           |           |                     |
| CB4856 CT II                                                                                                        | 14573615    | 14576558 | WBGene00007242 | madf-5    | C01G12.1  |                     |
| 0.465163740080701                                                                                                   | AGIWUR44209 |          |                |           |           |                     |

|                                                                         |                                    |          |                |           |                             |
|-------------------------------------------------------------------------|------------------------------------|----------|----------------|-----------|-----------------------------|
| CB4856 CT II                                                            | 14576957                           | 14578075 | WBGene00044333 | C01G12.13 | C01G12.13                   |
| -0.173884994580499                                                      | AGIWUR14353;AGIWUR44551            |          |                |           |                             |
| CB4856 CT II                                                            | 14579016                           | 14580124 | WBGene00007249 | C01G12.9  | C01G12.9                    |
| -0.17089266734559                                                       | AGIWUR34770                        |          |                |           |                             |
| CB4856 CT II                                                            | 14580254                           | 14581043 | WBGene00007250 | nspb-8    | C01G12.10                   |
| -0.107295245609707                                                      | AGIWUR8498;AGIWUR34778;AGIWUR36101 |          |                |           |                             |
| CB4856 CT II                                                            | 14581377                           | 14582361 | WBGene00007244 | C01G12.3  | C01G12.3                    |
| -0.103681553057385                                                      | AGIWUR28563                        |          |                |           |                             |
| CB4856 CT II                                                            | 14583706                           | 14585733 | WBGene00006939 | wee-1.2   | C01G12.4                    |
| 0.0530962503877173                                                      | AGIWUR12799;AGIWUR41845            |          |                |           |                             |
| CB4856 CT II                                                            | 14586527                           | 14587507 | WBGene00007245 | C01G12.5  | C01G12.5                    |
| 0.16212018103976                                                        | AGIWUR21158                        |          |                |           |                             |
| CB4856 CT II                                                            | 14587957                           | 14588241 | WBGene00007246 | nspb-10   | C01G12.6                    |
| -0.164969989041856                                                      | AGIWUR22159                        |          |                |           |                             |
| CB4856 CT II                                                            | 14588621                           | 14591893 | WBGene00007247 | C01G12.7  | C01G12.7                    |
| 0.0673752228344693                                                      | AGIWUR6995                         |          |                |           |                             |
| CB4856 CT II                                                            | 14593581                           | 14597657 | WBGene00007248 | catp-4    | C01G12.8                    |
| 0.166966837873129                                                       | AGIWUR22850;AGIWUR29822            |          |                |           |                             |
| CB4856 CT II                                                            | 14600902                           | 14610554 | WBGene00006603 | tps-2     | F19H8.1 0.036316637980228   |
| AGIWUR35888                                                             |                                    |          |                |           |                             |
| CB4856 CT II                                                            | 14616068                           | 14622612 | WBGene00008964 | mltn-9    | F19H8.4 0.288662385111964   |
| AGIWUR22280                                                             |                                    |          |                |           |                             |
| CB4856 CT II                                                            | 14627630                           | 14630121 | WBGene00007999 | tag-297   | C38C6.6 0.338286190745622   |
| AGIWUR1156                                                              |                                    |          |                |           |                             |
| CB4856 CT II                                                            | 14630553                           | 14632636 | WBGene00007998 | C38C6.5   | C38C6.5 -0.0776061669611776 |
| AGIWUR2409;AGIWUR16695                                                  |                                    |          |                |           |                             |
| CB4856 CT II                                                            | 14633123                           | 14634657 | WBGene00007996 | C38C6.3   | C38C6.3 0.0903356684569125  |
| AGIWUR29542                                                             |                                    |          |                |           |                             |
| CB4856 CT II                                                            | 14634656                           | 14636837 | WBGene00007997 | sre-13    | C38C6.4 -0.0181110007913343 |
| AGIWUR30223                                                             |                                    |          |                |           |                             |
| CB4856 CT II                                                            | 14640096                           | 14644083 | WBGene00000225 | atgp-2    | C38C6.2 0.0178561027596027  |
| AGIWUR3765;AGIWUR21389;AGIWUR21804;AGIWUR28905                          |                                    |          |                |           |                             |
| CB4856 CT II                                                            | 14647325                           | 14666943 | WBGene00006787 | unc-52    | ZC101.2 0.265915725270055   |
| AGIWUR18169;AGIWUR31295;AGIWUR36135                                     |                                    |          |                |           |                             |
| CB4856 CT II                                                            | 14675263                           | 14684296 | WBGene00013851 | ZC101.1   | ZC101.1 0.358538249149058   |
| AGIWUR35897                                                             |                                    |          |                |           |                             |
| CB4856 CT II                                                            | 14694192                           | 14695299 | WBGene00010491 | K02B7.3   | K02B7.3 0.078439546958168   |
| AGIWUR13831;AGIWUR17035;AGIWUR22360;AGIWUR27365;AGIWUR31050;AGIWUR37046 |                                    |          |                |           |                             |
| CB4856 CT II                                                            | 14698701                           | 14699362 | WBGene00007478 | C09F9.1   | C09F9.1 -0.334650962939714  |



|                                                 |    |                                                            |          |                |           |           |                    |
|-------------------------------------------------|----|------------------------------------------------------------|----------|----------------|-----------|-----------|--------------------|
| AGIWUR371                                       |    |                                                            |          |                |           |           |                    |
| CB4856 CT                                       | II | 14705512                                                   | 14712800 | WBGene00007479 | C09F9.2   | C09F9.2   | 0.396586835621514  |
| AGIWUR3438                                      |    |                                                            |          |                |           |           |                    |
| CB4856 CT                                       | II | 14713340                                                   | 14718225 | WBGene00045322 | C09F9.7   | C09F9.7   |                    |
| -0.00775940441966938                            |    | AGIWUR30576                                                |          |                |           |           |                    |
| CB4856 CT                                       | II | 14734410                                                   | 14739243 | WBGene00013187 | npr-34    | Y54E2A.1  |                    |
| -0.0639529564875954                             |    | AGIWUR27662                                                |          |                |           |           |                    |
| CB4856 CT                                       | II | 14746890                                                   | 14752489 | WBGene00013188 | smg-9     | Y54E2A.2  |                    |
| -0.191510604611903                              |    | AGIWUR8749;AGIWUR25196;AGIWUR38912                         |          |                |           |           |                    |
| CB4856 CT                                       | II | 14752891                                                   | 14753907 | WBGene00006381 | tac-1     | Y54E2A.3  |                    |
| -0.0683258731481544                             |    | AGIWUR18103                                                |          |                |           |           |                    |
| CB4856 CT                                       | II | 14754622                                                   | 14778149 | WBGene00013189 | Y54E2A.4  |           | Y54E2A.4           |
| -0.0578446989956962                             |    | AGIWUR9156;AGIWUR23342                                     |          |                |           |           |                    |
| CB4856 CT                                       | II | 14778345                                                   | 14782723 | WBGene00013193 | Y54E2A.8  |           | Y54E2A.8           |
| 0.101094530485835                               |    | AGIWUR8170                                                 |          |                |           |           |                    |
| CB4856 CT                                       | II | 14785184                                                   | 14785995 | WBGene00013194 | Y54E2A.9  |           | Y54E2A.9           |
| -0.191070178901018                              |    | AGIWUR1495                                                 |          |                |           |           |                    |
| CB4856 CT                                       | II | 14786198                                                   | 14786512 | WBGene00044171 | Y54E2A.13 |           | Y54E2A.13          |
| -0.0826694293323289                             |    | AGIWUR8457;AGIWUR19675;AGIWUR30747;AGIWUR37073;AGIWUR43089 |          |                |           |           |                    |
| CB4856 CT                                       | II | 14791101                                                   | 14792554 | WBGene00013195 | Y54E2A.10 |           | Y54E2A.10          |
| 0.203190964345925                               |    | AGIWUR30769                                                |          |                |           |           |                    |
| CB4856 CT                                       | II | 14795404                                                   | 14798224 | WBGene00001225 | eif-3.B   | Y54E2A.11 |                    |
| -0.0637176887309607                             |    | AGIWUR3619;AGIWUR7825;AGIWUR11053;AGIWUR11745;AGIWUR15942  |          |                |           |           |                    |
| CB4856 CT                                       | II | 14798472                                                   | 14800971 | WBGene00013196 | tbc-20    | Y54E2A.12 |                    |
| 0.0398948701543613                              |    | AGIWUR13816;AGIWUR17503;AGIWUR33262                        |          |                |           |           |                    |
| CB4856 CT                                       | II | 14800918                                                   | 14804309 | WBGene00012180 | W01D2.3   | W01D2.3   | -0.336785872805887 |
| AGIWUR5729                                      |    |                                                            |          |                |           |           |                    |
| CB4856 CT                                       | II | 14805986                                                   | 14808087 | WBGene00012181 | srt-11    | W01D2.4   | 0.283172895037477  |
| AGIWUR13564                                     |    |                                                            |          |                |           |           |                    |
| CB4856 CT                                       | II | 14808922                                                   | 14809204 | WBGene00012183 | W01D2.6   | W01D2.6   | 0.076892836822692  |
| AGIWUR19703                                     |    |                                                            |          |                |           |           |                    |
| CB4856 CT                                       | II | 14812182                                                   | 14814889 | WBGene00012182 | osta-3    | W01D2.5   | -0.114588251719731 |
| AGIWUR28930                                     |    |                                                            |          |                |           |           |                    |
| CB4856 CT                                       | II | 14816136                                                   | 14840005 | WBGene00003651 | nhr-61    | W01D2.2   | 0.0683158364835617 |
| AGIWUR20157;AGIWUR25353;AGIWUR29518;AGIWUR30187 |    |                                                            |          |                |           |           |                    |
| CB4856 CT                                       | II | 14843177                                                   | 14850905 | WBGene00000399 | cdh-7     | R05H10.6  |                    |
| 0.00959243669713139                             |    | AGIWUR6629                                                 |          |                |           |           |                    |
| CB4856 CT                                       | II | 14852430                                                   | 14853594 | WBGene00011042 | R05H10.1  |           | R05H10.1           |
| 0.391737439105842                               |    | AGIWUR42783                                                |          |                |           |           |                    |

|                                                                                                                                 |                                                            |          |                |                 |                    |
|---------------------------------------------------------------------------------------------------------------------------------|------------------------------------------------------------|----------|----------------|-----------------|--------------------|
| CB4856 CT II                                                                                                                    | 14855529                                                   | 14857010 | WBGene00011046 | R05H10.7        | R05H10.7           |
| 0.108992257473199                                                                                                               | AGIWUR24851                                                |          |                |                 |                    |
| CB4856 CT II                                                                                                                    | 14857259                                                   | 14866636 | WBGene00011043 | rbm-28 R05H10.2 |                    |
| -0.345951962966684                                                                                                              | AGIWUR4595                                                 |          |                |                 |                    |
| CB4856 CT II                                                                                                                    | 14866716                                                   | 14869577 | WBGene00011045 | gpx-2 R05H10.5  |                    |
| -0.0516799981105613                                                                                                             | AGIWUR24659                                                |          |                |                 |                    |
| CB4856 CT II                                                                                                                    | 14869944                                                   | 14883054 | WBGene00011044 | R05H10.3        | R05H10.3           |
| 0.10201492308693                                                                                                                | AGIWUR38905                                                |          |                |                 |                    |
| CB4856 CT II                                                                                                                    | 14902493                                                   | 14907533 | WBGene00000584 | cog-1 R03C1.3   | 0.164829684151371  |
| AGIWUR6298;AGIWUR13164;AGIWUR13360;AGIWUR13897;AGIWUR23597;AGIWUR32475                                                          |                                                            |          |                |                 |                    |
| CB4856 CT II                                                                                                                    | 14907508                                                   | 14910405 | WBGene00010987 | R03C1.1 R03C1.1 | -0.315167282104676 |
| AGIWUR36717;AGIWUR40106                                                                                                         |                                                            |          |                |                 |                    |
| CB4856 CT II                                                                                                                    | 14919705                                                   | 14953312 | WBGene00008443 | pde-3 E01F3.1   | 0.0516051829383901 |
| AGIWUR2735;AGIWUR5932;AGIWUR6278;AGIWUR7192;AGIWUR10161;AGIWUR10894;AGIWUR16006;AGIWUR25584;AGIWUR29713;AGIWUR40204;AGIWUR41494 |                                                            |          |                |                 |                    |
| CB4856 CT II                                                                                                                    | 14954278                                                   | 14958189 | WBGene00013149 | Y53F4B.1        | Y53F4B.1           |
| 0.216104345392923                                                                                                               | AGIWUR36946                                                |          |                |                 |                    |
| CB4856 CT II                                                                                                                    | 14959675                                                   | 14964108 | WBGene00001247 | elo-9 Y53F4B.2  |                    |
| -0.737208374315749                                                                                                              | AGIWUR40927                                                |          |                |                 |                    |
| CB4856 CT II                                                                                                                    | 14968633                                                   | 14969354 | WBGene00013150 | Y53F4B.3        | Y53F4B.3           |
| 0.0845631265319913                                                                                                              | AGIWUR40915                                                |          |                |                 |                    |
| CB4856 CT II                                                                                                                    | 14969617                                                   | 14977005 | WBGene00013151 | nsun-5 Y53F4B.4 |                    |
| -0.128202343716527                                                                                                              | AGIWUR13954;AGIWUR28834                                    |          |                |                 |                    |
| CB4856 CT II                                                                                                                    | 14982592                                                   | 14984009 | WBGene00013152 | Y53F4B.5        | Y53F4B.5           |
| -0.498442132916393                                                                                                              | AGIWUR25839                                                |          |                |                 |                    |
| CB4856 CT II                                                                                                                    | 14985806                                                   | 14987225 | WBGene00013153 | Y53F4B.6        | Y53F4B.6           |
| 0.0302641093110783                                                                                                              | AGIWUR3788;AGIWUR23842;AGIWUR26105;AGIWUR36212;AGIWUR36748 |          |                |                 |                    |
| CB4856 CT II                                                                                                                    | 14988471                                                   | 14992667 | WBGene00044726 | Y53F4B.43       | Y53F4B.43          |
| 0.185872689320963                                                                                                               | AGIWUR13396;AGIWUR22421;AGIWUR27105                        |          |                |                 |                    |
| CB4856 CT II                                                                                                                    | 14994197                                                   | 14997444 | WBGene00013155 | Y53F4B.8        | Y53F4B.8           |
| 0.172009894974296                                                                                                               | AGIWUR38021                                                |          |                |                 |                    |
| CB4856 CT II                                                                                                                    | 15001896                                                   | 15003510 | WBGene00013157 | Y53F4B.10       | Y53F4B.10          |
| 0.161190738006901                                                                                                               | AGIWUR34468                                                |          |                |                 |                    |
| CB4856 CT II                                                                                                                    | 15004869                                                   | 15010416 | WBGene00013156 | Y53F4B.9        | Y53F4B.9           |
| 0.265452828768325                                                                                                               | AGIWUR36328                                                |          |                |                 |                    |
| CB4856 CT II                                                                                                                    | 15010748                                                   | 15013408 | WBGene00013158 | Y53F4B.11       | Y53F4B.11          |
| -0.153212224519558                                                                                                              | AGIWUR2609                                                 |          |                |                 |                    |
| CB4856 CT II                                                                                                                    | 15019223                                                   | 15025768 | WBGene00013159 | Y53F4B.12       | Y53F4B.12          |
| -0.0696426514174391                                                                                                             | AGIWUR38902                                                |          |                |                 |                    |

|                     |                                                            |          |                |                  |           |
|---------------------|------------------------------------------------------------|----------|----------------|------------------|-----------|
| CB4856 CT II        | 15026137                                                   | 15037807 | WBGene00013160 | Y53F4B.13        | Y53F4B.13 |
| 0.0214010294677909  | AGIWUR26575                                                |          |                |                  |           |
| CB4856 CT II        | 15037991                                                   | 15039297 | WBGene00013161 | Y53F4B.14        | Y53F4B.14 |
| 0.133019070373211   | AGIWUR12472;AGIWUR18353                                    |          |                |                  |           |
| CB4856 CT II        | 15039404                                                   | 15048904 | WBGene00000208 | asc-1 Y53F4B.15  |           |
| 0.288885507810342   | AGIWUR15313;AGIWUR41331;AGIWUR44728                        |          |                |                  |           |
| CB4856 CT II        | 15052085                                                   | 15055718 | WBGene00013162 | Y53F4B.16        | Y53F4B.16 |
| -0.017231399638562  | AGIWUR16810                                                |          |                |                  |           |
| CB4856 CT II        | 15064267                                                   | 15071671 | WBGene00013164 | Y53F4B.18        | Y53F4B.18 |
| 0.00353901064692863 | AGIWUR33080                                                |          |                |                  |           |
| CB4856 CT II        | 15077218                                                   | 15079475 | WBGene00013165 | Y53F4B.19        | Y53F4B.19 |
| 0.0816894386889429  | AGIWUR8305;AGIWUR20252;AGIWUR43799                         |          |                |                  |           |
| CB4856 CT II        | 15084476                                                   | 15089626 | WBGene00013166 | Y53F4B.20        | Y53F4B.20 |
| -0.0126871509749451 | AGIWUR10663                                                |          |                |                  |           |
| CB4856 CT II        | 15090172                                                   | 15109042 | WBGene00013167 | Y53F4B.21        | Y53F4B.21 |
| -0.215745513934703  | AGIWUR3656;AGIWUR23425;AGIWUR24369;AGIWUR38305;AGIWUR42729 |          |                |                  |           |
| CB4856 CT II        | 15110144                                                   | 15116306 | WBGene00013176 | Y53F4B.39        | Y53F4B.39 |
| 0.111303046956872   | AGIWUR38178                                                |          |                |                  |           |
| CB4856 CT II        | 15117686                                                   | 15117963 | WBGene00044729 | Y53F4B.46        | Y53F4B.46 |
| 0.0139806772211095  | AGIWUR5825;AGIWUR8271;AGIWUR12857;AGIWUR33283;AGIWUR37234  |          |                |                  |           |
| CB4856 CT II        | 15118282                                                   | 15118951 | WBGene00014920 | Y53F4B.38        | Y53F4B.38 |
| -0.11764036074347   | AGIWUR17970;AGIWUR35908                                    |          |                |                  |           |
| CB4856 CT II        | 15120301                                                   | 15123345 | WBGene00013168 | arp-1 Y53F4B.22  |           |
| -0.189836958005641  | AGIWUR3603                                                 |          |                |                  |           |
| CB4856 CT II        | 15124504                                                   | 15126365 | WBGene00013169 | Y53F4B.23        | Y53F4B.23 |
| 0.0575041648068799  | AGIWUR31793;AGIWUR32003                                    |          |                |                  |           |
| CB4856 CT II        | 15136186                                                   | 15145370 | WBGene00013171 | Y53F4B.25        | Y53F4B.25 |
| 0.283872999157982   | AGIWUR5360                                                 |          |                |                  |           |
| CB4856 CT II        | 15145894                                                   | 15151934 | WBGene00013173 | Y53F4B.27        | Y53F4B.27 |
| 0.0795286937251456  | AGIWUR27560                                                |          |                |                  |           |
| CB4856 CT II        | 15158180                                                   | 15163614 | WBGene00004234 | ptr-20 Y53F4B.28 |           |
| 0.181943332861598   | AGIWUR24814                                                |          |                |                  |           |
| CB4856 CT II        | 15163808                                                   | 15164646 | WBGene00001774 | gst-26 Y53F4B.29 |           |
| -0.60473434746473   | AGIWUR6018                                                 |          |                |                  |           |
| CB4856 CT II        | 15164890                                                   | 15165731 | WBGene00001775 | gst-27 Y53F4B.30 |           |
| -0.551402692138595  | AGIWUR31989                                                |          |                |                  |           |
| CB4856 CT II        | 15166194                                                   | 15167406 | WBGene00001776 | gst-28 Y53F4B.31 |           |
| -0.223744881249475  | AGIWUR1127                                                 |          |                |                  |           |
| CB4856 CT II        | 15168538                                                   | 15169860 | WBGene00001777 | gst-29 Y53F4B.32 |           |

|                                   |                        |                |                |            |            |                    |  |
|-----------------------------------|------------------------|----------------|----------------|------------|------------|--------------------|--|
| 0.463053512561                    | AGIWUR31465            |                |                |            |            |                    |  |
| CB4856 CT II                      | 15171163               | 15171912       | WBGene00001787 | gst-39     | Y53F4B.33  |                    |  |
| -0.182736374743982                | AGIWUR6423             |                |                |            |            |                    |  |
| CB4856 CT II                      | 15174271               | 15174965       | WBGene00001779 | gst-31     | Y53F4B.35  |                    |  |
| 0.134264363914876                 | AGIWUR37191            |                |                |            |            |                    |  |
| CB4856 CT II                      | 15175943               | 15177271       | WBGene00013175 | Y53F4B.36  |            | Y53F4B.36          |  |
| -0.0202601480210927               | AGIWUR4348;AGIWUR23408 |                |                |            |            |                    |  |
| CB4856 CT II                      | 15177372               | 15178594       | WBGene00001780 | gst-32     | Y53F4B.37  |                    |  |
| 0.0269013645331952                | AGIWUR32214            |                |                |            |            |                    |  |
| CB4856 CT II                      | 15179971               | 15183232       | WBGene00001782 | gst-34     | Y1H11.1    | -0.288967458574227 |  |
| AGIWUR779;AGIWUR18828;AGIWUR37638 |                        |                |                |            |            |                    |  |
| CB4856 CT II                      | 15183801               | 15185385       | WBGene00001783 | gst-35     | Y1H11.2    | 0.583768194320731  |  |
| AGIWUR2855                        |                        |                |                |            |            |                    |  |
| CB4856 CT II                      | 15196214               | 15198075       | WBGene00021598 | Y46E12BR.1 |            | Y46E12BR.1         |  |
| 1.33201616629279                  | AGIWUR26873            |                |                |            |            |                    |  |
| CB4856 CT II                      | 15207443               | 15229725       | WBGene00021597 | spsb-1     | Y46E12BL.4 |                    |  |
| 0.32491557709869                  | AGIWUR15839            |                |                |            |            |                    |  |
| CB4856 CT II                      | 15230343               | 15232803       | WBGene00021596 | spsb-2     | Y46E12BL.3 |                    |  |
| 0.055735621588882                 | AGIWUR17487            |                |                |            |            |                    |  |
| CB4856 CT II                      | 15233153               | 15244931       | WBGene00021595 | Y46E12BL.2 |            | Y46E12BL.2         |  |
| 0.192407523896552                 | AGIWUR12187            |                |                |            |            |                    |  |
| CB4856 CT II                      | 15268212               | 15275689       | WBGene00007064 | 2RSSE.1    | 2RSSE.1    | 0.133898320762639  |  |
| AGIWUR40832;AGIWUR43546           |                        |                |                |            |            |                    |  |
| CB4856 CT III                     | 1271 3092              | WBGene00008352 | fbxa-6         | cTel154X.1 |            | -0.171066142426852 |  |
| AGIWUR922;AGIWUR23412;AGIWUR38130 |                        |                |                |            |            |                    |  |
| CB4856 CT III                     | 3321 11940             | WBGene00019183 | npr-30         | H10E21.2   |            | -0.281522536766681 |  |
| AGIWUR33824                       |                        |                |                |            |            |                    |  |
| CB4856 CT III                     | 12170 14869            | WBGene00003670 | nhr-80         | H10E21.3   |            | 0.084027507651486  |  |
| AGIWUR301                         |                        |                |                |            |            |                    |  |
| CB4856 CT III                     | 15720 17332            | WBGene00019182 | H10E21.1       | H10E21.1   |            | -0.065834163897561 |  |
| AGIWUR6087;AGIWUR27387            |                        |                |                |            |            |                    |  |
| CB4856 CT III                     | 17316 19675            | WBGene00019184 | H10E21.4       | H10E21.4   |            | -0.363566058963649 |  |
| AGIWUR9512                        |                        |                |                |            |            |                    |  |
| CB4856 CT III                     | 20531 23962            | WBGene00019185 | H10E21.5       | H10E21.5   |            | 0.271425034865935  |  |
| AGIWUR42375                       |                        |                |                |            |            |                    |  |
| CB4856 CT III                     | 35454 39462            | WBGene00021041 | W05G11.4       | W05G11.4   |            | 0.25579970472377   |  |
| AGIWUR21738                       |                        |                |                |            |            |                    |  |
| CB4856 CT III                     | 41061 42021            | WBGene00000663 | col-88         | W05G11.3   |            | -0.445090519216041 |  |
| AGIWUR40441                       |                        |                |                |            |            |                    |  |

|                                                                                                             |     |        |        |                 |          |          |                     |             |
|-------------------------------------------------------------------------------------------------------------|-----|--------|--------|-----------------|----------|----------|---------------------|-------------|
| CB4856 CT                                                                                                   | III | 57702  | 58682  | WBGene00021040  | W05G11.2 | W05G11.2 | -0.145343078182268  |             |
| AGIWUR3886                                                                                                  |     |        |        |                 |          |          |                     |             |
| CB4856 CT                                                                                                   | III | 62888  | 66261  | WBGene00021043  | pck-1    | W05G11.6 | -0.0126830378163927 |             |
| AGIWUR11857;AGIWUR14639;AGIWUR19103;AGIWUR23802;AGIWUR24065;AGIWUR25842;AGIWUR34655;AGIWUR38529;AGIWUR41918 |     |        |        |                 |          |          |                     |             |
| CB4856 CT                                                                                                   | III | 69073  | 69817  | WBGene00005014  | spt-4    | F54C4.2  | 0.176785939876853   | AGIWUR11937 |
| CB4856 CT                                                                                                   | III | 70442  | 86384  | WBGene00018794  | attf-3   | F54C4.3  | -0.148381975972772  | AGIWUR6291  |
| CB4856 CT                                                                                                   | III | 86677  | 87381  | WBGene00018795  | F54C4.4  | F54C4.4  | 0.449491576459593   | AGIWUR11681 |
| CB4856 CT                                                                                                   | III | 87559  | 89243  | WBGene00018793  | mrp1-40  | F54C4.1  | -0.098480963225537  | AGIWUR18193 |
| CB4856 CT                                                                                                   | III | 89453  | 94809  | WBGene00003931  | pat-4    | C29F9.7  | -0.0426199339455806 | AGIWUR26748 |
| CB4856 CT                                                                                                   | III | 95394  | 97726  | WBGene00016222  | C29F9.8  | C29F9.8  | -0.0679077805472392 | AGIWUR17287 |
| CB4856 CT                                                                                                   | III | 106824 | 107899 | WBGene00016224  | fbxa-57  | C29F9.10 | -0.205994098250439  |             |
| AGIWUR32662                                                                                                 |     |        |        |                 |          |          |                     |             |
| CB4856 CT                                                                                                   | III | 109322 | 110185 | WBGene00016225  | fbxa-58  | C29F9.11 | 0.177711186177678   |             |
| AGIWUR32908                                                                                                 |     |        |        |                 |          |          |                     |             |
| CB4856 CT                                                                                                   | III | 114903 | 116619 | WBGene00016221  | C29F9.6  | C29F9.6  | 0.0623317828332786  | AGIWUR41447 |
| CB4856 CT                                                                                                   | III | 117707 | 118767 | WBGene00016220  | C29F9.5  | C29F9.5  | -1.01778667213528   | AGIWUR24053 |
| CB4856 CT                                                                                                   | III | 120492 | 124641 | WBGene00016219  | pals-24  | C29F9.4  | -0.250519379003546  |             |
| AGIWUR14875;AGIWUR40400                                                                                     |     |        |        |                 |          |          |                     |             |
| CB4856 CT                                                                                                   | III | 124778 | 126527 | WBGene00016218  | pals-23  | C29F9.3  | -0.535061157913591  |             |
| AGIWUR245;AGIWUR5444;AGIWUR26093;AGIWUR30406;AGIWUR30704;AGIWUR34729;AGIWUR34764                            |     |        |        |                 |          |          |                     |             |
| CB4856 CT                                                                                                   | III | 130180 | 130750 | WBGene00016227  | nhr-280  | C29F9.13 | 0.0212801162877509  |             |
| AGIWUR8933;AGIWUR19189;AGIWUR27290;AGIWUR38196;AGIWUR39253                                                  |     |        |        |                 |          |          |                     |             |
| CB4856 CT                                                                                                   | III | 130947 | 131751 | WBGene00016217  | C29F9.2  | C29F9.2  | -0.205934686351929  | AGIWUR9509  |
| CB4856 CT                                                                                                   | III | 132418 | 134401 | WBGene00016216  | pals-22  | C29F9.1  | -0.215174579079147  | AGIWUR40864 |
| CB4856 CT                                                                                                   | III | 134494 | 137975 | WBGene00020540  | pals-25  | T17A3.2  | -0.035351271538751  | AGIWUR36367 |
| CB4856 CT                                                                                                   | III | 142121 | 143217 | WBGene00020542  | fbxb-82  | T17A3.4  | 0.333074261263603   | AGIWUR11919 |
| CB4856 CT                                                                                                   | III | 143631 | 144792 | WBGene00020543  | fbxb-83  | T17A3.6  | -0.0133842120007639 | AGIWUR12633 |
| CB4856 CT                                                                                                   | III | 144994 | 145299 | WBGene00020548  | T17A3.12 | T17A3.12 | -0.187328222124609  |             |
| AGIWUR35103                                                                                                 |     |        |        |                 |          |          |                     |             |
| CB4856 CT                                                                                                   | III | 145360 | 146491 | WBGene00020544  | fbxb-84  | T17A3.7  | -0.0658605514980994 | AGIWUR4909  |
| CB4856 CT                                                                                                   | III | 146917 | 147607 | WBGene000269434 | sqst-5   | T17A3.13 | -0.228108552905274  |             |
| AGIWUR8165;AGIWUR15973;AGIWUR24457                                                                          |     |        |        |                 |          |          |                     |             |
| CB4856 CT                                                                                                   | III | 150481 | 151805 | WBGene00020547  | srz-7    | T17A3.11 | -0.0350774073281315 |             |
| AGIWUR1435                                                                                                  |     |        |        |                 |          |          |                     |             |
| CB4856 CT                                                                                                   | III | 152572 | 153418 | WBGene00020545  | adbp-2   | T17A3.9  | 0.182878807584201   | AGIWUR16101 |
| CB4856 CT                                                                                                   | III | 154475 | 156674 | WBGene00020546  | T17A3.10 | T17A3.10 | 0.0875111643557123  |             |
| AGIWUR19180                                                                                                 |     |        |        |                 |          |          |                     |             |
| CB4856 CT                                                                                                   | III | 156824 | 163542 | WBGene00006894  | ver-1    | T17A3.1  | 0.313606354818529   | AGIWUR29063 |
| CB4856 CT                                                                                                   | III | 163598 | 164875 | WBGene00018244  | F40G9.8  | F40G9.8  | 0.0442192991209591  | AGIWUR31936 |

|                                                            |    |     |        |        |                 |           |          |                     |                       |
|------------------------------------------------------------|----|-----|--------|--------|-----------------|-----------|----------|---------------------|-----------------------|
| CB4856                                                     | CT | III | 165690 | 166285 | WBGene00018243  | F40G9.7   | F40G9.7  | -0.456896960239241  | AGIWUR25649           |
| CB4856                                                     | CT | III | 167385 | 169556 | WBGene000189954 | F40G9.18  |          | F40G9.18            | -0.0322599176047369   |
| AGIWUR35541                                                |    |     |        |        |                 |           |          |                     |                       |
| CB4856                                                     | CT | III | 173797 | 174558 | WBGene000189955 | F40G9.19  |          | F40G9.19            | 0.0577627405254209    |
| AGIWUR17083                                                |    |     |        |        |                 |           |          |                     |                       |
| CB4856                                                     | CT | III | 174609 | 175833 | WBGene00018246  | clec-148  |          | F40G9.10            | 0.18261590736724      |
| AGIWUR4961                                                 |    |     |        |        |                 |           |          |                     |                       |
| CB4856                                                     | CT | III | 176111 | 177815 | WBGene00018248  | F40G9.14  |          | F40G9.14            | -0.152642063624723    |
| AGIWUR9016                                                 |    |     |        |        |                 |           |          |                     |                       |
| CB4856                                                     | CT | III | 179542 | 180140 | WBGene00018242  | F40G9.6   | F40G9.6  | -0.0129009013224355 | AGIWUR33631           |
| CB4856                                                     | CT | III | 181561 | 182981 | WBGene00077531  | F40G9.15  |          | F40G9.15            | -0.416710157889188    |
| AGIWUR32497;AGIWUR36577;AGIWUR39549                        |    |     |        |        |                 |           |          |                     |                       |
| CB4856                                                     | CT | III | 183231 | 184915 | WBGene00018241  | F40G9.5   | F40G9.5  | -0.142802726027236  | AGIWUR37387           |
| CB4856                                                     | CT | III | 185652 | 186922 | WBGene00001963  | btb-1     | F40G9.4  | -0.134736609071621  | AGIWUR9514            |
| CB4856                                                     | CT | III | 186951 | 188131 | WBGene00003510  | mxl-2     | F40G9.11 |                     | 0.224776551642647     |
| AGIWUR14877                                                |    |     |        |        |                 |           |          |                     |                       |
| CB4856                                                     | CT | III | 188838 | 190974 | WBGene00006715  | ubc-20    | F40G9.3  | -0.0241101120519431 |                       |
| AGIWUR5501;AGIWUR11356;AGIWUR36186;AGIWUR37947;AGIWUR38131 |    |     |        |        |                 |           |          |                     |                       |
| CB4856                                                     | CT | III | 190986 | 191981 | WBGene00018240  | cox-17    | F40G9.2  | -0.242959010973559  | AGIWUR31562           |
| CB4856                                                     | CT | III | 194460 | 210063 | WBGene000185078 | F40G9.17  |          | F40G9.17            | -0.173201672730205    |
| AGIWUR33957                                                |    |     |        |        |                 |           |          |                     |                       |
| CB4856                                                     | CT | III | 209992 | 230450 | WBGene00002230  | k1p-20    | Y50D7A.6 |                     | -0.000291987493225676 |
| AGIWUR17698                                                |    |     |        |        |                 |           |          |                     |                       |
| CB4856                                                     | CT | III | 230429 | 235121 | WBGene00021755  | hpo-38    | Y50D7A.5 |                     | 0.282968855077666     |
| AGIWUR10164                                                |    |     |        |        |                 |           |          |                     |                       |
| CB4856                                                     | CT | III | 235844 | 254067 | WBGene00021754  | hpo-29    | Y50D7A.4 |                     | -0.398509631633999    |
| AGIWUR23049                                                |    |     |        |        |                 |           |          |                     |                       |
| CB4856                                                     | CT | III | 254535 | 264636 | WBGene00021753  | Y50D7A.3  |          | Y50D7A.3            | -0.195321837738902    |
| AGIWUR3020;AGIWUR32669;AGIWUR45172                         |    |     |        |        |                 |           |          |                     |                       |
| CB4856                                                     | CT | III | 265090 | 266593 | WBGene00021759  | Y50D7A.11 |          | Y50D7A.11           | -0.175875546812971    |
| AGIWUR17396                                                |    |     |        |        |                 |           |          |                     |                       |
| CB4856                                                     | CT | III | 268458 | 283009 | WBGene00021752  | xpd-1     | Y50D7A.2 |                     | -0.322164179830665    |
| AGIWUR16560                                                |    |     |        |        |                 |           |          |                     |                       |
| CB4856                                                     | CT | III | 284117 | 289444 | WBGene00021757  | taco-1    | Y50D7A.9 |                     | -0.390114569129768    |
| AGIWUR6437                                                 |    |     |        |        |                 |           |          |                     |                       |
| CB4856                                                     | CT | III | 292640 | 314266 | WBGene00021751  | Y50D7A.1  |          | Y50D7A.1            | -0.041787710170663    |
| AGIWUR30024                                                |    |     |        |        |                 |           |          |                     |                       |
| CB4856                                                     | CT | III | 315460 | 321721 | WBGene00021758  | Y50D7A.10 |          | Y50D7A.10           | -0.0385453824725195   |
| AGIWUR2997;AGIWUR9957;AGIWUR40637                          |    |     |        |        |                 |           |          |                     |                       |

|                                                                                           |     |        |        |                |           |           |                      |
|-------------------------------------------------------------------------------------------|-----|--------|--------|----------------|-----------|-----------|----------------------|
| CB4856 CT                                                                                 | III | 335956 | 343241 | WBGene00021756 | Y50D7A.8  | Y50D7A.8  | -0.0117433771069173  |
| AGIWUR15243                                                                               |     |        |        |                |           |           |                      |
| CB4856 CT                                                                                 | III | 344307 | 378250 | WBGene00001561 | gei-4     | W07B3.2   | 0.276152071213056    |
| AGIWUR34;AGIWUR2203;AGIWUR4322;AGIWUR9947;AGIWUR12564;AGIWUR37982;AGIWUR38490;AGIWUR43785 |     |        |        |                |           |           |                      |
| CB4856 CT                                                                                 | III | 378004 | 381298 | WBGene00019636 | gst-3     | K10F12.4  | 0.24803250469509     |
| AGIWUR38396                                                                               |     |        |        |                |           |           |                      |
| CB4856 CT                                                                                 | III | 381900 | 382570 | WBGene00019639 | K10F12.7  | K10F12.7  | -0.034757916263878   |
| AGIWUR31688                                                                               |     |        |        |                |           |           |                      |
| CB4856 CT                                                                                 | III | 383771 | 384827 | WBGene00023104 | K10F12.8  | K10F12.8  | 0.0591554237874075   |
| AGIWUR25628;AGIWUR32699;AGIWUR33484;AGIWUR37265;AGIWUR42159                               |     |        |        |                |           |           |                      |
| CB4856 CT                                                                                 | III | 398730 | 399392 | WBGene00019638 | K10F12.6  | K10F12.6  | 0.0601756951814565   |
| AGIWUR36075                                                                               |     |        |        |                |           |           |                      |
| CB4856 CT                                                                                 | III | 402384 | 405589 | WBGene00021909 | Y55B1BL.1 | Y55B1BL.1 | 0.42436074973592     |
| AGIWUR8894;AGIWUR10666;AGIWUR13026;AGIWUR20424                                            |     |        |        |                |           |           |                      |
| CB4856 CT                                                                                 | III | 408094 | 418738 | WBGene00021910 | stim-1    | Y55B1BM.1 | -0.217347589411425   |
| AGIWUR37725                                                                               |     |        |        |                |           |           |                      |
| CB4856 CT                                                                                 | III | 429300 | 431750 | WBGene00021913 | cec-8     | Y55B1BR.3 | 0.48158597788988     |
| AGIWUR21073                                                                               |     |        |        |                |           |           |                      |
| CB4856 CT                                                                                 | III | 434891 | 440142 | WBGene00021912 | Y55B1BR.2 | Y55B1BR.2 | -0.0814783558120755  |
| AGIWUR10365                                                                               |     |        |        |                |           |           |                      |
| CB4856 CT                                                                                 | III | 453785 | 463811 | WBGene00044401 | Y55B1BR.6 | Y55B1BR.6 | 0.113034025670586    |
| AGIWUR16016;AGIWUR19782;AGIWUR25028;AGIWUR28804;AGIWUR32799                               |     |        |        |                |           |           |                      |
| CB4856 CT                                                                                 | III | 464715 | 471702 | WBGene00021914 | magu-1    | Y55B1BR.4 | -0.157774474901204   |
| AGIWUR9636;AGIWUR33177;AGIWUR35853                                                        |     |        |        |                |           |           |                      |
| CB4856 CT                                                                                 | III | 472301 | 475349 | WBGene00017328 | F10C5.2   | F10C5.2   | 0.0608271515370937   |
| AGIWUR41874                                                                               |     |        |        |                |           |           |                      |
| CB4856 CT                                                                                 | III | 475454 | 482322 | WBGene00003134 | mat-3     | F10C5.1   | 0.0231545196576519   |
| AGIWUR30332                                                                               |     |        |        |                |           |           |                      |
| CB4856 CT                                                                                 | III | 486123 | 486547 | WBGene00003770 | nlp-32    | F30H5.2   | 0.147043100537493    |
| AGIWUR5416                                                                                |     |        |        |                |           |           |                      |
| CB4856 CT                                                                                 | III | 488764 | 489452 | WBGene00044288 | F30H5.5   | F30H5.5   | -0.0895332617160909  |
| AGIWUR1090;AGIWUR12017;AGIWUR13475;AGIWUR25827                                            |     |        |        |                |           |           |                      |
| CB4856 CT                                                                                 | III | 491547 | 502625 | WBGene00006781 | unc-45    | F30H5.1   | -0.464482039007077   |
| AGIWUR15042                                                                               |     |        |        |                |           |           |                      |
| CB4856 CT                                                                                 | III | 505241 | 512217 | WBGene00017937 | F30H5.3   | F30H5.3   | 0.55947730422269     |
| AGIWUR28952                                                                               |     |        |        |                |           |           |                      |
| CB4856 CT                                                                                 | III | 513720 | 516614 | WBGene00020704 | T22F7.5   | T22F7.5   | -0.12660065163419    |
| AGIWUR18109                                                                               |     |        |        |                |           |           |                      |
| CB4856 CT                                                                                 | III | 518356 | 524044 | WBGene00020702 | T22F7.3   | T22F7.3   | 0.100959981107196    |
| AGIWUR35438                                                                               |     |        |        |                |           |           |                      |
| CB4856 CT                                                                                 | III | 525234 | 526924 | WBGene00020703 | T22F7.4   | T22F7.4   | -0.80458631586461    |
| AGIWUR20184                                                                               |     |        |        |                |           |           |                      |
| CB4856 CT                                                                                 | III | 542066 | 546537 | WBGene00020701 | T22F7.1   | T22F7.1   | 0.230712735814501    |
| AGIWUR2200                                                                                |     |        |        |                |           |           |                      |
| CB4856 CT                                                                                 | III | 557518 | 572137 | WBGene00015155 | B0353.1   | B0353.1   | -0.00831584104965266 |
| AGIWUR21682;AGIWUR27532;AGIWUR33521                                                       |     |        |        |                |           |           |                      |
| CB4856 CT                                                                                 | III | 573984 | 576447 | WBGene00021903 | Y55B1AL.1 | Y55B1AL.1 | 0.289315420514834    |
| AGIWUR5302                                                                                |     |        |        |                |           |           |                      |

|                                                                        |    |     |        |        |                |           |           |                      |             |
|------------------------------------------------------------------------|----|-----|--------|--------|----------------|-----------|-----------|----------------------|-------------|
| CB4856                                                                 | CT | III | 576956 | 577567 | WBGene00021904 | Y55B1AL.2 | Y55B1AL.2 | 0.0950196165765576   |             |
| AGIWUR5763;AGIWUR12164;AGIWUR16417;AGIWUR23626;AGIWUR25079;AGIWUR43817 |    |     |        |        |                |           |           |                      |             |
| CB4856                                                                 | CT | III | 577684 | 587105 | WBGene00021905 | helq-1    | Y55B1AL.3 | -0.0325124899546374  |             |
| AGIWUR20903                                                            |    |     |        |        |                |           |           |                      |             |
| CB4856                                                                 | CT | III | 587244 | 598117 | WBGene00021906 | Y55B1AR.2 | Y55B1AR.2 | -0.159082912003569   |             |
| AGIWUR1743;AGIWUR21403;AGIWUR32389                                     |    |     |        |        |                |           |           |                      |             |
| CB4856                                                                 | CT | III | 599509 | 600366 | WBGene00002269 | lec-6     | Y55B1AR.1 | -0.326216832811707   |             |
| AGIWUR670;AGIWUR6324;AGIWUR18866;AGIWUR21263;AGIWUR33575;AGIWUR43375   |    |     |        |        |                |           |           |                      |             |
| CB4856                                                                 | CT | III | 602708 | 603822 | WBGene00021907 | Y55B1AR.3 | Y55B1AR.3 | -0.26858880981003    |             |
| AGIWUR22782                                                            |    |     |        |        |                |           |           |                      |             |
| CB4856                                                                 | CT | III | 604003 | 605515 | WBGene00021908 | Y55B1AR.4 | Y55B1AR.4 | -0.178977358441969   |             |
| AGIWUR6153                                                             |    |     |        |        |                |           |           |                      |             |
| CB4856                                                                 | CT | III | 606004 | 606994 | WBGene00020566 | ttr-7     | T19C3.9   | 0.141686571609679    | AGIWUR12291 |
| CB4856                                                                 | CT | III | 607045 | 609973 | WBGene00020559 | best-17   | T19C3.1   | -0.255020949163535   | AGIWUR246   |
| CB4856                                                                 | CT | III | 610881 | 614547 | WBGene00020561 | T19C3.3   | T19C3.3   | -0.0918668543866197  | AGIWUR28405 |
| CB4856                                                                 | CT | III | 614707 | 617447 | WBGene00020560 | T19C3.2   | T19C3.2   | -0.28144147764403    |             |
| AGIWUR27733;AGIWUR37800                                                |    |     |        |        |                |           |           |                      |             |
| CB4856                                                                 | CT | III | 618246 | 620254 | WBGene00020562 | T19C3.4   | T19C3.4   | 0.206071170169038    | AGIWUR19194 |
| CB4856                                                                 | CT | III | 624607 | 627938 | WBGene00020563 | T19C3.5   | T19C3.5   | -0.00865403471339832 | AGIWUR17749 |
| CB4856                                                                 | CT | III | 628175 | 630987 | WBGene00020564 | T19C3.6   | T19C3.6   | -0.0450993578164134  | AGIWUR11209 |
| CB4856                                                                 | CT | III | 631938 | 634645 | WBGene00001412 | fem-2     | T19C3.8   | 0.151517941988608    | AGIWUR12509 |
| CB4856                                                                 | CT | III | 634893 | 636167 | WBGene00020565 | T19C3.7   | T19C3.7   | 0.394177364555407    | AGIWUR7024  |
| CB4856                                                                 | CT | III | 636479 | 638419 | WBGene00021063 | sbds-1    | W06E11.4  | -0.133648787291804   |             |
| AGIWUR37227                                                            |    |     |        |        |                |           |           |                      |             |
| CB4856                                                                 | CT | III | 638531 | 640226 | WBGene00044319 | tag-266   | W06E11.5  | -0.105431196043861   |             |
| AGIWUR19835;AGIWUR27606                                                |    |     |        |        |                |           |           |                      |             |
| CB4856                                                                 | CT | III | 640790 | 641625 | WBGene00044318 | tag-267   | W06E11.2  | -0.0672094576417059  |             |
| AGIWUR22516                                                            |    |     |        |        |                |           |           |                      |             |
| CB4856                                                                 | CT | III | 642059 | 645613 | WBGene00021061 | W06E11.1  | W06E11.1  | -0.150183237225118   |             |
| AGIWUR14099;AGIWUR36340                                                |    |     |        |        |                |           |           |                      |             |
| CB4856                                                                 | CT | III | 646754 | 654463 | WBGene00015648 | orai-1    | C09F5.2   | -0.261572045766735   |             |
| AGIWUR14468;AGIWUR23243                                                |    |     |        |        |                |           |           |                      |             |
| CB4856                                                                 | CT | III | 658709 | 662732 | WBGene00015647 | C09F5.1   | C09F5.1   | 0.456341749272227    | AGIWUR8004  |
| CB4856                                                                 | CT | III | 662847 | 666265 | WBGene00015649 | C09F5.3   | C09F5.3   | 0.292406883228913    | AGIWUR9052  |
| CB4856                                                                 | CT | III | 668098 | 668433 | WBGene00020923 | W02B3.3   | W02B3.3   | 0.123875420664643    | AGIWUR26697 |
| CB4856                                                                 | CT | III | 676122 | 680253 | WBGene00001709 | grk-2     | W02B3.2   | -0.0149925660711219  |             |
| AGIWUR2530;AGIWUR28189                                                 |    |     |        |        |                |           |           |                      |             |
| CB4856                                                                 | CT | III | 680634 | 683418 | WBGene00020924 | W02B3.4   | W02B3.4   | -0.0166931747695802  | AGIWUR42698 |
| CB4856                                                                 | CT | III | 686237 | 692033 | WBGene00020927 | W02B3.7   | W02B3.7   | -0.0618967631954428  | AGIWUR7724  |



|                                                                                    |    |     |        |        |                |          |          |                     |             |
|------------------------------------------------------------------------------------|----|-----|--------|--------|----------------|----------|----------|---------------------|-------------|
| CB4856                                                                             | CT | III | 688739 | 715823 | WBGene00016029 | elf-1    | C24A1.2  | 0.232495413929518   | AGIWUR13322 |
| CB4856                                                                             | CT | III | 725022 | 726155 | WBGene00016028 | flp-24   | C24A1.1  | 0.145044584948083   |             |
| AGIWUR8330;AGIWUR16177                                                             |    |     |        |        |                |          |          |                     |             |
| CB4856                                                                             | CT | III | 727211 | 752426 | WBGene00003936 | pat-12   | T17H7.4  | -0.118779118345472  |             |
| AGIWUR17747;AGIWUR24713;AGIWUR43935                                                |    |     |        |        |                |          |          |                     |             |
| CB4856                                                                             | CT | III | 755298 | 758080 | WBGene00020551 | T17H7.7  | T17H7.7  | 0.239993852136539   | AGIWUR17028 |
| CB4856                                                                             | CT | III | 761779 | 762392 | WBGene00018363 | nlp-52   | F42G9.4  | 0.635202990406633   | AGIWUR13691 |
| CB4856                                                                             | CT | III | 763810 | 771366 | WBGene00004212 | ptl-1    | F42G9.9  | -0.0596700847627796 |             |
| AGIWUR17260;AGIWUR23112;AGIWUR30034;AGIWUR30114;AGIWUR31642;AGIWUR43414            |    |     |        |        |                |          |          |                     |             |
| CB4856                                                                             | CT | III | 771577 | 772819 | WBGene00018365 | tpst-2   | F42G9.8  | 0.387848802849148   | AGIWUR18955 |
| CB4856                                                                             | CT | III | 773403 | 774159 | WBGene00000882 | cyn-6    | F42G9.2  | -0.0741075179593227 |             |
| AGIWUR2632;AGIWUR7089;AGIWUR13686;AGIWUR21840;AGIWUR23853;AGIWUR42813              |    |     |        |        |                |          |          |                     |             |
| CB4856                                                                             | CT | III | 774321 | 778871 | WBGene00000117 | alh-11   | F42G9.5  | 0.00845264716776439 |             |
| AGIWUR25312;AGIWUR36861                                                            |    |     |        |        |                |          |          |                     |             |
| CB4856                                                                             | CT | III | 783714 | 786092 | WBGene00018362 | F42G9.1  | F42G9.1  | -0.0938956708824854 |             |
| AGIWUR2021;AGIWUR26590;AGIWUR41729                                                 |    |     |        |        |                |          |          |                     |             |
| CB4856                                                                             | CT | III | 786532 | 793733 | WBGene00004922 | snt-2    | F42G9.7  | -0.342213402997301  |             |
| AGIWUR6947;AGIWUR14223;AGIWUR27057;AGIWUR28596;AGIWUR35258;AGIWUR42534             |    |     |        |        |                |          |          |                     |             |
| CB4856                                                                             | CT | III | 794300 | 795120 | WBGene00004498 | rps-29   | B0412.4  | -0.141674193641126  |             |
| AGIWUR4823;AGIWUR17511;AGIWUR19190;AGIWUR30443;AGIWUR33838;AGIWUR34596;AGIWUR44337 |    |     |        |        |                |          |          |                     |             |
| CB4856                                                                             | CT | III | 795136 | 809439 | WBGene00015173 | trpp-11  | B0412.3  | -0.0470536136633939 | AGIWUR28634 |
| CB4856                                                                             | CT | III | 811828 | 813773 | WBGene00000903 | daf-7    | B0412.2  | 0.19600735202555    | AGIWUR34983 |
| CB4856                                                                             | CT | III | 816145 | 821730 | WBGene00000895 | dac-1    | B0412.1  | -0.300694477486022  | AGIWUR21958 |
| CB4856                                                                             | CT | III | 823222 | 826408 | WBGene00019328 | clcc-149 | K02F3.5  | -0.151518755167496  |             |
| AGIWUR8225;AGIWUR30863                                                             |    |     |        |        |                |          |          |                     |             |
| CB4856                                                                             | CT | III | 828590 | 832277 | WBGene00019329 | ceeh-1   | K02F3.6  | 0.143710411145002   |             |
| AGIWUR5535;AGIWUR20354;AGIWUR29930;AGIWUR42060                                     |    |     |        |        |                |          |          |                     |             |
| CB4856                                                                             | CT | III | 833858 | 835808 | WBGene00019327 | zip-2    | K02F3.4  | 0.220399112776811   | AGIWUR37051 |
| CB4856                                                                             | CT | III | 835815 | 839591 | WBGene00019331 | dos-3    | K02F3.8  | 0.204473007947374   |             |
| AGIWUR14933;AGIWUR21593                                                            |    |     |        |        |                |          |          |                     |             |
| CB4856                                                                             | CT | III | 840460 | 841366 | WBGene00019332 | K02F3.9  | K02F3.9  | 0.209887600555263   | AGIWUR30193 |
| CB4856                                                                             | CT | III | 842935 | 843802 | WBGene00001392 | far-8    | K02F3.3  | -0.020538710382187  | AGIWUR16155 |
| CB4856                                                                             | CT | III | 845842 | 850586 | WBGene00019326 | K02F3.2  | K02F3.2  | -0.106092357056539  | AGIWUR6966  |
| CB4856                                                                             | CT | III | 851328 | 852396 | WBGene00019333 | moma-1   | K02F3.10 | 0.114858322609837   |             |
| AGIWUR42016                                                                        |    |     |        |        |                |          |          |                     |             |
| CB4856                                                                             | CT | III | 852801 | 853909 | WBGene00004388 | rnp-5    | K02F3.11 | 0.0284949621753707  |             |
| AGIWUR17078                                                                        |    |     |        |        |                |          |          |                     |             |
| CB4856                                                                             | CT | III | 854219 | 856535 | WBGene00006430 | tag-51   | K02F3.1  | -0.321828780112877  |             |
| AGIWUR1565;AGIWUR16267;AGIWUR32843                                                 |    |     |        |        |                |          |          |                     |             |

|                                                                                            |    |     |        |        |                |          |          |                     |             |
|--------------------------------------------------------------------------------------------|----|-----|--------|--------|----------------|----------|----------|---------------------|-------------|
| CB4856                                                                                     | CT | III | 856560 | 860090 | WBGene00019334 | K02F3.12 | K02F3.12 | -0.0917045778707175 |             |
| AGIWUR15344;AGIWUR19706;AGIWUR40168                                                        |    |     |        |        |                |          |          |                     |             |
| CB4856                                                                                     | CT | III | 860198 | 861324 | WBGene00000202 | exos-4.2 | Y6D11A.1 | 0.0112878015025935  |             |
| AGIWUR23712;AGIWUR35800                                                                    |    |     |        |        |                |          |          |                     |             |
| CB4856                                                                                     | CT | III | 862306 | 865399 | WBGene00021170 | arx-4    | Y6D11A.2 | -0.0339770341926062 |             |
| AGIWUR30094                                                                                |    |     |        |        |                |          |          |                     |             |
| CB4856                                                                                     | CT | III | 867512 | 869987 | WBGene00020758 | T24C4.2  | T24C4.2  | 0.178335786500624   |             |
| AGIWUR25065;AGIWUR38112;AGIWUR42624                                                        |    |     |        |        |                |          |          |                     |             |
| CB4856                                                                                     | CT | III | 871783 | 872385 | WBGene00020759 | T24C4.3  | T24C4.3  | 0.0375191036351867  |             |
| AGIWUR14423;AGIWUR16344;AGIWUR41032;AGIWUR42660                                            |    |     |        |        |                |          |          |                     |             |
| CB4856                                                                                     | CT | III | 872622 | 873531 | WBGene00020760 | T24C4.4  | T24C4.4  | -0.0599508885673088 |             |
| AGIWUR2930;AGIWUR34970;AGIWUR38120;AGIWUR39190                                             |    |     |        |        |                |          |          |                     |             |
| CB4856                                                                                     | CT | III | 874310 | 875325 | WBGene00044681 | T24C4.8  | T24C4.8  | -0.248205941507763  |             |
| AGIWUR2329;AGIWUR6257;AGIWUR26491                                                          |    |     |        |        |                |          |          |                     |             |
| CB4856                                                                                     | CT | III | 877435 | 879734 | WBGene00020761 | T24C4.5  | T24C4.5  | -0.341307689854169  | AGIWUR2668  |
| CB4856                                                                                     | CT | III | 879860 | 881506 | WBGene00020757 | ucr-2.3  | T24C4.1  | -0.0237952138949122 | AGIWUR35884 |
| CB4856                                                                                     | CT | III | 881443 | 886789 | WBGene00020762 | zer-1    | T24C4.6  | 0.322693303339131   |             |
| AGIWUR39357;AGIWUR44580                                                                    |    |     |        |        |                |          |          |                     |             |
| CB4856                                                                                     | CT | III | 889955 | 895634 | WBGene00020763 | ztf-18   | T24C4.7  | 0.203324376171936   |             |
| AGIWUR8590;AGIWUR22251;AGIWUR24829;AGIWUR30563;AGIWUR41360;AGIWUR43319                     |    |     |        |        |                |          |          |                     |             |
| CB4856                                                                                     | CT | III | 895786 | 900158 | WBGene00017758 | F23H11.2 | F23H11.2 | -0.0206139024240919 |             |
| AGIWUR11974                                                                                |    |     |        |        |                |          |          |                     |             |
| CB4856                                                                                     | CT | III | 900138 | 901444 | WBGene00017759 | suc1-2   | F23H11.3 | -0.0823609142528881 |             |
| AGIWUR17484                                                                                |    |     |        |        |                |          |          |                     |             |
| CB4856                                                                                     | CT | III | 902151 | 907539 | WBGene00017760 | F23H11.4 | F23H11.4 | -0.123602819512195  |             |
| AGIWUR6869;AGIWUR39276                                                                     |    |     |        |        |                |          |          |                     |             |
| CB4856                                                                                     | CT | III | 908328 | 909902 | WBGene00017763 | cr1s-1   | F23H11.9 | 0.151951182175329   |             |
| AGIWUR8468                                                                                 |    |     |        |        |                |          |          |                     |             |
| CB4856                                                                                     | CT | III | 909957 | 910589 | WBGene00000263 | F23H11.5 | F23H11.5 |                     |             |
| -0.00955183768296308 AGIWUR6932;AGIWUR8088;AGIWUR33553;AGIWUR37413;AGIWUR37756;AGIWUR41694 |    |     |        |        |                |          |          |                     |             |
| CB4856                                                                                     | CT | III | 911261 | 912243 | WBGene00017757 | bra-2    | F23H11.1 | -0.186786705542904  |             |
| AGIWUR1147                                                                                 |    |     |        |        |                |          |          |                     |             |
| CB4856                                                                                     | CT | III | 913248 | 916997 | WBGene00017761 | F23H11.6 | F23H11.6 | -0.105423150156428  |             |
| AGIWUR33605                                                                                |    |     |        |        |                |          |          |                     |             |
| CB4856                                                                                     | CT | III | 917088 | 919422 | WBGene00017762 | F23H11.7 | F23H11.7 | 0.220721762810337   |             |
| AGIWUR13839                                                                                |    |     |        |        |                |          |          |                     |             |
| CB4856                                                                                     | CT | III | 919528 | 926314 | WBGene00003969 | pef-1    | F23H11.8 | 0.638921338030487   |             |
| AGIWUR10891;AGIWUR36664                                                                    |    |     |        |        |                |          |          |                     |             |
| CB4856                                                                                     | CT | III | 933585 | 936067 | WBGene00020453 | fbxa-55  | T12B5.6  | 0.0151226635165003  | AGIWUR1047  |

|                                                             |    |     |         |         |                |             |             |                     |             |
|-------------------------------------------------------------|----|-----|---------|---------|----------------|-------------|-------------|---------------------|-------------|
| CB4856                                                      | CT | III | 937302  | 938061  | WBGene00020454 | fbxa-56     | T12B5.7     | -0.403841922262373  | AGIWUR34001 |
| CB4856                                                      | CT | III | 938869  | 939437  | WBGene00020452 | fbxa-22     | T12B5.5     | -0.847039514795992  | AGIWUR25671 |
| CB4856                                                      | CT | III | 940879  | 943469  | WBGene00020455 | fbxa-59     | T12B5.8     | -0.0877378881079203 | AGIWUR41567 |
| CB4856                                                      | CT | III | 944795  | 946298  | WBGene00020456 | fbxa-60     | T12B5.10    | -0.629957676224571  |             |
| AGIWUR20061                                                 |    |     |         |         |                |             |             |                     |             |
| CB4856                                                      | CT | III | 947848  | 949092  | WBGene00020459 | fbxa-23     | T12B5.13    | 2.36330694025098    |             |
| AGIWUR31728                                                 |    |     |         |         |                |             |             |                     |             |
| CB4856                                                      | CT | III | 950869  | 952264  | WBGene00020451 | fbxa-11     | T12B5.4     | -0.429566134660313  | AGIWUR23723 |
| CB4856                                                      | CT | III | 952419  | 953803  | WBGene00020450 | fbxa-10     | T12B5.3     | 0.0840645524683783  | AGIWUR38989 |
| CB4856                                                      | CT | III | 954291  | 954653  | WBGene00050914 | T12B5.15    | T12B5.15    | -0.973942800319897  |             |
| AGIWUR1132;AGIWUR1851;AGIWUR22450;AGIWUR38458;AGIWUR39446   |    |     |         |         |                |             |             |                     |             |
| CB4856                                                      | CT | III | 954873  | 955295  | WBGene00050913 | T12B5.14    | T12B5.14    | -0.76650079402279   |             |
| AGIWUR18737;AGIWUR28984;AGIWUR31470;AGIWUR32166;AGIWUR41902 |    |     |         |         |                |             |             |                     |             |
| CB4856                                                      | CT | III | 956334  | 957947  | WBGene00020449 | fbxa-54     | T12B5.2     | -0.338576831919813  | AGIWUR27557 |
| CB4856                                                      | CT | III | 960268  | 961347  | WBGene00020458 | fbxa-70     | T12B5.12    | -0.0684744034939495 |             |
| AGIWUR18579                                                 |    |     |         |         |                |             |             |                     |             |
| CB4856                                                      | CT | III | 962304  | 963679  | WBGene00020448 | fbxa-51     | T12B5.1     | 0.0456263917342392  | AGIWUR21655 |
| CB4856                                                      | CT | III | 966654  | 972269  | WBGene00019912 | R06B10.1    | R06B10.1    | -0.188864502458175  |             |
| AGIWUR22141                                                 |    |     |         |         |                |             |             |                     |             |
| CB4856                                                      | CT | III | 973311  | 980451  | WBGene00019913 | R06B10.2    | R06B10.2    | -0.405334555940555  |             |
| AGIWUR38698                                                 |    |     |         |         |                |             |             |                     |             |
| CB4856                                                      | CT | III | 977386  | 988446  | WBGene00019915 | tbx-10      | R06B10.5    | -0.0946647106107026 |             |
| AGIWUR23747;AGIWUR27330;AGIWUR30813                         |    |     |         |         |                |             |             |                     |             |
| CB4856                                                      | CT | III | 991881  | 1001907 | WBGene00006615 | trp-2       | R06B10.4    | 0.0557504336208612  |             |
| AGIWUR18580;AGIWUR36258                                     |    |     |         |         |                |             |             |                     |             |
| CB4856                                                      | CT | III | 1002707 | 1006298 | WBGene00019914 | clcc-150    | R06B10.3    | -0.212024340772274  |             |
| AGIWUR43057                                                 |    |     |         |         |                |             |             |                     |             |
| CB4856                                                      | CT | III | 1010535 | 1011385 | WBGene00021337 | Y34F4.2     | Y34F4.2     | -0.331271289422034  | AGIWUR37101 |
| CB4856                                                      | CT | III | 1015680 | 1016136 | WBGene00021338 | Y34F4.3     | Y34F4.3     | -0.0811518334574828 | AGIWUR27784 |
| CB4856                                                      | CT | III | 1020954 | 1021876 | WBGene00021336 | Y34F4.1     | Y34F4.1     | 0.441921047492465   |             |
| AGIWUR24935;AGIWUR25182                                     |    |     |         |         |                |             |             |                     |             |
| CB4856                                                      | CT | III | 1023221 | 1024561 | WBGene00021339 | Y34F4.4     | Y34F4.4     | -0.369886100231311  | AGIWUR4205  |
| CB4856                                                      | CT | III | 1026916 | 1031065 | WBGene00021340 | Y34F4.5     | Y34F4.5     | 0.353637560539305   | AGIWUR17466 |
| CB4856                                                      | CT | III | 1031324 | 1037212 | WBGene00015267 | chin-1      | BE0003N10.2 | -0.0224318386409337 |             |
| AGIWUR40526                                                 |    |     |         |         |                |             |             |                     |             |
| CB4856                                                      | CT | III | 1037492 | 1046261 | WBGene00015266 | BE0003N10.1 | BE0003N10.1 | -0.108404850213457  |             |
| AGIWUR20325;AGIWUR32995                                     |    |     |         |         |                |             |             |                     |             |
| CB4856                                                      | CT | III | 1045809 | 1053246 | WBGene00015268 | BE0003N10.3 | BE0003N10.3 | 0.191398791345984   |             |
| AGIWUR996                                                   |    |     |         |         |                |             |             |                     |             |

|                                                                                    |    |     |         |         |                |            |            |                     |             |
|------------------------------------------------------------------------------------|----|-----|---------|---------|----------------|------------|------------|---------------------|-------------|
| CB4856                                                                             | CT | III | 1062793 | 1076555 | WBGene00006697 | uaf-1      | Y92C3B.2   | 0.0965594384298107  |             |
| AGIWUR8964;AGIWUR25966                                                             |    |     |         |         |                |            |            |                     |             |
| CB4856                                                                             | CT | III | 1078150 | 1080775 | WBGene00004277 | rab-18     | Y92C3B.3   | -0.180466304060765  |             |
| AGIWUR11765;AGIWUR17720;AGIWUR21390;AGIWUR30018;AGIWUR33466;AGIWUR38575            |    |     |         |         |                |            |            |                     |             |
| CB4856                                                                             | CT | III | 1080901 | 1081300 | WBGene00022357 | kbp-4      | Y92C3B.1   | 0.0649383277289974  |             |
| AGIWUR33018                                                                        |    |     |         |         |                |            |            |                     |             |
| CB4856                                                                             | CT | III | 1081402 | 1095073 | WBGene00003917 | par-2      | F58B6.3    | -0.027386975938879  |             |
| AGIWUR17088;AGIWUR25963                                                            |    |     |         |         |                |            |            |                     |             |
| CB4856                                                                             | CT | III | 1103224 | 1111923 | WBGene00019030 | exc-6      | F58B6.2    | 0.0311392816580529  | AGIWUR41199 |
| CB4856                                                                             | CT | III | 1112279 | 1116374 | WBGene00019029 | F58B6.1    | F58B6.1    | -0.340654167601494  |             |
| AGIWUR6761;AGIWUR17185;AGIWUR25640;AGIWUR33066;AGIWUR42074                         |    |     |         |         |                |            |            |                     |             |
| CB4856                                                                             | CT | III | 1116424 | 1142927 | WBGene00022104 | acsd-1     | Y71D11A.3  | 0.205231792596983   |             |
| AGIWUR10744                                                                        |    |     |         |         |                |            |            |                     |             |
| CB4856                                                                             | CT | III | 1143172 | 1145211 | WBGene00004891 | smr-1      | Y71D11A.2  | 0.134513025769241   |             |
| AGIWUR35021;AGIWUR39134                                                            |    |     |         |         |                |            |            |                     |             |
| CB4856                                                                             | CT | III | 1152044 | 1181137 | WBGene00022103 | cdh-12     | Y71D11A.1  | 0.00530612907720318 |             |
| AGIWUR9139;AGIWUR11394;AGIWUR17116;AGIWUR32780;AGIWUR32922                         |    |     |         |         |                |            |            |                     |             |
| CB4856                                                                             | CT | III | 1181990 | 1184942 | WBGene00022490 | Y119D3B.13 | Y119D3B.13 | -0.169870179880835  |             |
| AGIWUR31799                                                                        |    |     |         |         |                |            |            |                     |             |
| CB4856                                                                             | CT | III | 1185248 | 1193812 | WBGene00022491 | Y119D3B.14 | Y119D3B.14 | 0.00052440916746832 |             |
| AGIWUR26380                                                                        |    |     |         |         |                |            |            |                     |             |
| CB4856                                                                             | CT | III | 1194367 | 1196292 | WBGene00022492 | dss-1      | Y119D3B.15 | 0.416502223776467   |             |
| AGIWUR8941                                                                         |    |     |         |         |                |            |            |                     |             |
| CB4856                                                                             | CT | III | 1196560 | 1202008 | WBGene00022493 | mrpl-45    | Y119D3B.16 | -0.594686606108064  |             |
| AGIWUR3926                                                                         |    |     |         |         |                |            |            |                     |             |
| CB4856                                                                             | CT | III | 1202548 | 1207346 | WBGene00022489 | Y119D3B.12 | Y119D3B.12 | -0.12196506170258   |             |
| AGIWUR3387;AGIWUR12866;AGIWUR16578;AGIWUR21705;AGIWUR27552;AGIWUR35374;AGIWUR36012 |    |     |         |         |                |            |            |                     |             |
| CB4856                                                                             | CT | III | 1208104 | 1213650 | WBGene00022488 | orc-3      | Y119D3B.11 | -0.0256139603550594 |             |
| AGIWUR15068                                                                        |    |     |         |         |                |            |            |                     |             |
| CB4856                                                                             | CT | III | 1214951 | 1215293 | WBGene00022497 | Y119D3B.21 | Y119D3B.21 | -0.20542684213882   |             |
| AGIWUR32793                                                                        |    |     |         |         |                |            |            |                     |             |
| CB4856                                                                             | CT | III | 1216116 | 1222072 | WBGene00003978 | pes-4      | Y119D3B.17 | 0.356586758664875   |             |
| AGIWUR25541                                                                        |    |     |         |         |                |            |            |                     |             |
| CB4856                                                                             | CT | III | 1225459 | 1226065 | WBGene00023205 | Y119D3B.10 | Y119D3B.10 | 0.235185363688966   |             |
| AGIWUR12248                                                                        |    |     |         |         |                |            |            |                     |             |
| CB4856                                                                             | CT | III | 1236015 | 1237142 | WBGene00022487 | fbxa-21    | Y119D3B.9  | 1.1894837375987     | AGIWUR39017 |
| CB4856                                                                             | CT | III | 1239260 | 1242780 | WBGene00022486 | fbxa-61    | Y119D3B.8  | 0.259039152805098   |             |
| AGIWUR8976;AGIWUR34220;AGIWUR38464                                                 |    |     |         |         |                |            |            |                     |             |
| CB4856                                                                             | CT | III | 1243513 | 1245283 | WBGene00022485 | fbxa-63    | Y119D3B.7  | -0.362558614481774  |             |

|                        |    |     |         |         |                |            |            |                                 |
|------------------------|----|-----|---------|---------|----------------|------------|------------|---------------------------------|
| AGIWUR29215            |    |     |         |         |                |            |            |                                 |
| CB4856                 | CT | III | 1247618 | 1249153 | WBGene00044675 | fbxa-76    | Y119D3B.22 | -0.150589021016208              |
| AGIWUR7976;AGIWUR28206 |    |     |         |         |                |            |            |                                 |
| CB4856                 | CT | III | 1249493 | 1251838 | WBGene00022484 | fbxa-77    | Y119D3B.6  | -0.474666167243864              |
| AGIWUR5949             |    |     |         |         |                |            |            |                                 |
| CB4856                 | CT | III | 1253384 | 1254401 | WBGene00022494 | fbxa-91    | Y119D3B.18 | -0.65574634159217               |
| AGIWUR20168            |    |     |         |         |                |            |            |                                 |
| CB4856                 | CT | III | 1267338 | 1269256 | WBGene00013839 | fbxa-32    | ZC47.6     | -0.239701141492231 AGIWUR6737   |
| CB4856                 | CT | III | 1269558 | 1271451 | WBGene00013838 | fbxa-31    | ZC47.5     | -0.367775370363571 AGIWUR2303   |
| CB4856                 | CT | III | 1272474 | 1273676 | WBGene00013836 | fbxa-29    | ZC47.3     | -0.157292086152107 AGIWUR25699  |
| CB4856                 | CT | III | 1276249 | 1277360 | WBGene00014979 | ZC47.11    | ZC47.11    | -0.113834959228476 AGIWUR3704   |
| CB4856                 | CT | III | 1277960 | 1278991 | WBGene00014978 | ZC47.8     | ZC47.8     | 0.193402524931065 AGIWUR7537    |
| CB4856                 | CT | III | 1279627 | 1281725 | WBGene00013841 | fbxa-33    | ZC47.9     | -0.0185495981526351 AGIWUR29339 |
| CB4856                 | CT | III | 1282401 | 1284144 | WBGene00013842 | fbxa-34    | ZC47.10    | -0.012311523796626 AGIWUR33731  |
| CB4856                 | CT | III | 1285016 | 1287119 | WBGene00013845 | fbxa-37    | ZC47.14    | -0.344174435756956 AGIWUR16699  |
| CB4856                 | CT | III | 1287299 | 1288523 | WBGene00013844 | fbxa-50    | ZC47.13    | -0.229228297630845 AGIWUR40231  |
| CB4856                 | CT | III | 1289747 | 1290938 | WBGene00013843 | fbxa-49    | ZC47.12    | -0.0359466487266715 AGIWUR28291 |
| CB4856                 | CT | III | 1292051 | 1293215 | WBGene00022479 | fbxa-36    | Y119D3A.4  | -0.566868288980688              |
| AGIWUR23896            |    |     |         |         |                |            |            |                                 |
| CB4856                 | CT | III | 1297904 | 1299484 | WBGene00022477 | fbxa-28    | Y119D3A.2  | 0.0111378836996892              |
| AGIWUR43481            |    |     |         |         |                |            |            |                                 |
| CB4856                 | CT | III | 1303714 | 1305461 | WBGene00022476 | fbxa-75    | Y119D3A.1  | -0.63627085817204               |
| AGIWUR17956            |    |     |         |         |                |            |            |                                 |
| CB4856                 | CT | III | 1305716 | 1308294 | WBGene00022329 | fbxa-79    | Y82E9BL.13 | 0.0542380785708936              |
| AGIWUR43569            |    |     |         |         |                |            |            |                                 |
| CB4856                 | CT | III | 1309187 | 1311226 | WBGene00022328 | Y82E9BL.12 | Y82E9BL.12 | -0.0378128836937082             |
| AGIWUR33175            |    |     |         |         |                |            |            |                                 |
| CB4856                 | CT | III | 1311228 | 1313148 | WBGene00022332 | fbxa-20    | Y82E9BL.16 | -0.398650800324925              |
| AGIWUR37149            |    |     |         |         |                |            |            |                                 |
| CB4856                 | CT | III | 1313297 | 1315229 | WBGene00022330 | fbxa-80    | Y82E9BL.14 | -0.155715171026083              |
| AGIWUR6535             |    |     |         |         |                |            |            |                                 |
| CB4856                 | CT | III | 1315264 | 1316665 | WBGene00022331 | fbxa-19    | Y82E9BL.15 | -0.380165638975599              |
| AGIWUR35810            |    |     |         |         |                |            |            |                                 |
| CB4856                 | CT | III | 1319016 | 1321671 | WBGene00022327 | fbxa-15    | Y82E9BL.11 | -0.701003680317646              |
| AGIWUR44682            |    |     |         |         |                |            |            |                                 |
| CB4856                 | CT | III | 1322133 | 1324633 | WBGene00022326 | fbxa-14    | Y82E9BL.10 | -0.528999795988538              |
| AGIWUR6137             |    |     |         |         |                |            |            |                                 |
| CB4856                 | CT | III | 1332016 | 1333708 | WBGene00194735 | Y82E9BL.19 | Y82E9BL.19 | 0.306779661495528               |
| AGIWUR2791;AGIWUR6751  |    |     |         |         |                |            |            |                                 |

|                                      |     |         |         |                 |            |            |                     |
|--------------------------------------|-----|---------|---------|-----------------|------------|------------|---------------------|
| CB4856 CT<br>AGIWUR32587             | III | 1333921 | 1335467 | WBGene00023395  | Y82E9BL.9  | Y82E9BL.9  | -0.259941388958341  |
| CB4856 CT<br>AGIWUR16200             | III | 1336707 | 1340333 | WBGene00022325  | fbxa-5     | Y82E9BL.8  | 0.018994051323963   |
| CB4856 CT<br>AGIWUR41167             | III | 1340597 | 1342494 | WBGene00022324  | fbxa-26    | Y82E9BL.7  | 0.103023878950628   |
| CB4856 CT<br>AGIWUR35505             | III | 1342975 | 1344692 | WBGene00022333  | fbxa-27    | Y82E9BL.17 | 0.292494127124786   |
| CB4856 CT<br>AGIWUR17019             | III | 1344874 | 1345794 | WBGene00022323  | Y82E9BL.6  | Y82E9BL.6  | 0.404849736029637   |
| CB4856 CT<br>AGIWUR43463             | III | 1346315 | 1347128 | WBGene00022322  | Y82E9BL.5  | Y82E9BL.5  | 0.066158038372496   |
| CB4856 CT<br>AGIWUR40811             | III | 1347787 | 1349400 | WBGene00022321  | fbxa-25    | Y82E9BL.4  | 0.398158570246363   |
| CB4856 CT<br>AGIWUR12446             | III | 1349752 | 1350836 | WBGene00022320  | Y82E9BL.3  | Y82E9BL.3  | 0.233001847741829   |
| CB4856 CT<br>AGIWUR708               | III | 1351216 | 1353371 | WBGene00022319  | Y82E9BL.2  | Y82E9BL.2  | 0.0338538778091504  |
| CB4856 CT<br>AGIWUR13081             | III | 1354997 | 1355420 | WBGene00022318  | Y82E9BL.1  | Y82E9BL.1  | 0.187865294020827   |
| CB4856 CT<br>AGIWUR34134             | III | 1357080 | 1359135 | WBGene00022341  | Y82E9BR.8  | Y82E9BR.8  | 0.12896228902328    |
| CB4856 CT<br>AGIWUR2133              | III | 1359254 | 1359769 | WBGene00022342  | Y82E9BR.9  | Y82E9BR.9  | -0.244614762281882  |
| CB4856 CT<br>AGIWUR31551             | III | 1360507 | 1362676 | WBGene00022340  | Y82E9BR.7  | Y82E9BR.7  | -0.0108483531239605 |
| CB4856 CT<br>AGIWUR2628;AGIWUR9977   | III | 1374152 | 1376542 | WBGene00022352  | Y82E9BR.20 | Y82E9BR.20 | 0.226207651487564   |
| CB4856 CT<br>AGIWUR18767             | III | 1376945 | 1378003 | WBGene00022344  | Y82E9BR.11 | Y82E9BR.11 | 1.59884726961734    |
| CB4856 CT<br>AGIWUR43451             | III | 1379140 | 1380663 | WBGene000255597 | pals-21    | Y82E9BR.32 | 0.142258102536085   |
| CB4856 CT<br>AGIWUR19418             | III | 1390450 | 1391852 | WBGene00022346  | pals-17    | Y82E9BR.13 | -0.421968581074882  |
| CB4856 CT<br>AGIWUR19480;AGIWUR25923 | III | 1399972 | 1401305 | WBGene00022337  | pals-16    | Y82E9BR.4  | -0.43612221364117   |
| CB4856 CT<br>AGIWUR1993              | III | 1401946 | 1403460 | WBGene00044761  | pals-19    | Y82E9BR.23 | -0.459889549725011  |
| CB4856 CT                            | III | 1404792 | 1406230 | WBGene00022353  | pals-18    | Y82E9BR.21 | -0.0684284025978776 |

|                                                                                                        |    |     |         |         |                |                  |                               |
|--------------------------------------------------------------------------------------------------------|----|-----|---------|---------|----------------|------------------|-------------------------------|
| AGIWUR7285                                                                                             |    |     |         |         |                |                  |                               |
| CB4856                                                                                                 | CT | III | 1406463 | 1409239 | WBGene00022354 | Y82E9BR.22       | Y82E9BR.22 0.135811971858548  |
| AGIWUR4189;AGIWUR14797;AGIWUR32752;AGIWUR42719;AGIWUR45183                                             |    |     |         |         |                |                  |                               |
| CB4856                                                                                                 | CT | III | 1409243 | 1414116 | WBGene00022347 | Y82E9BR.14       | Y82E9BR.14 0.0296842744822925 |
| AGIWUR7123;AGIWUR10710;AGIWUR14676;AGIWUR29289                                                         |    |     |         |         |                |                  |                               |
| CB4856                                                                                                 | CT | III | 1415152 | 1417188 | WBGene00001236 | elc-1 Y82E9BR.15 | -0.24079231281935             |
| AGIWUR1874                                                                                             |    |     |         |         |                |                  |                               |
| CB4856                                                                                                 | CT | III | 1419196 | 1419914 | WBGene00022336 | Y82E9BR.3        | Y82E9BR.3                     |
| -0.00989169089857711 AGIWUR2471;AGIWUR6917;AGIWUR26470;AGIWUR28885;AGIWUR32675;AGIWUR33117;AGIWUR38718 |    |     |         |         |                |                  |                               |
| CB4856                                                                                                 | CT | III | 1419863 | 1427228 | WBGene00022348 | Y82E9BR.16       | Y82E9BR.16 0.0645681283486592 |
| AGIWUR3732;AGIWUR21213;AGIWUR28839;AGIWUR29791;AGIWUR32813;AGIWUR36733;AGIWUR40929                     |    |     |         |         |                |                  |                               |
| CB4856                                                                                                 | CT | III | 1438832 | 1443190 | WBGene00022335 | Y82E9BR.2        | Y82E9BR.2 0.0864173599112146  |
| AGIWUR14741                                                                                            |    |     |         |         |                |                  |                               |
| CB4856                                                                                                 | CT | III | 1447495 | 1455770 | WBGene00022349 | Y82E9BR.17       | Y82E9BR.17 0.618128297444505  |
| AGIWUR27623                                                                                            |    |     |         |         |                |                  |                               |
| CB4856                                                                                                 | CT | III | 1458536 | 1466732 | WBGene00022334 | Y82E9BR.1        | Y82E9BR.1 0.597783765438445   |
| AGIWUR31260                                                                                            |    |     |         |         |                |                  |                               |
| CB4856                                                                                                 | CT | III | 1467876 | 1483507 | WBGene00022350 | Y82E9BR.18       | Y82E9BR.18 -0.106810229166598 |
| AGIWUR44514                                                                                            |    |     |         |         |                |                  |                               |
| CB4856                                                                                                 | CT | III | 1468643 | 1517993 | WBGene00019716 | M01G5.3 M01G5.3  | 0.147787733147883 AGIWUR43524 |
| CB4856                                                                                                 | CT | III | 1520224 | 1532768 | WBGene00004905 | snf-6 M01G5.5    | -0.151679518151786            |
| AGIWUR10711;AGIWUR30660                                                                                |    |     |         |         |                |                  |                               |
| CB4856                                                                                                 | CT | III | 1533774 | 1538198 | WBGene00022054 | Y67D2.4 Y67D2.4  | -0.121248205758146            |
| AGIWUR16840;AGIWUR18256;AGIWUR19412;AGIWUR33162;AGIWUR38801;AGIWUR39025                                |    |     |         |         |                |                  |                               |
| CB4856                                                                                                 | CT | III | 1538472 | 1540244 | WBGene00022055 | Y67D2.5 Y67D2.5  | -0.213984122370497            |
| AGIWUR4238;AGIWUR4934;AGIWUR24164;AGIWUR41948                                                          |    |     |         |         |                |                  |                               |
| CB4856                                                                                                 | CT | III | 1555395 | 1558529 | WBGene00022057 | Y67D2.7 Y67D2.7  | 0.0805476593869727 AGIWUR7019 |
| CB4856                                                                                                 | CT | III | 1558800 | 1570129 | WBGene00022052 | Y67D2.2 Y67D2.2  | 0.14781094011974 AGIWUR42933  |
| CB4856                                                                                                 | CT | III | 1570306 | 1576638 | WBGene00022051 | rep-1 Y67D2.1    | -0.176988135494021            |
| AGIWUR13469;AGIWUR21879                                                                                |    |     |         |         |                |                  |                               |
| CB4856                                                                                                 | CT | III | 1576751 | 1580857 | WBGene00021246 | Y22D7AL.7        | Y22D7AL.7 -0.0995928604769958 |
| AGIWUR30553                                                                                            |    |     |         |         |                |                  |                               |
| CB4856                                                                                                 | CT | III | 1583155 | 1601140 | WBGene00004894 | sms-3 Y22D7AL.8  | 0.107235151970434             |
| AGIWUR22781                                                                                            |    |     |         |         |                |                  |                               |
| CB4856                                                                                                 | CT | III | 1604955 | 1606850 | WBGene00021245 | Y22D7AL.6        | Y22D7AL.6 0.016531905298371   |
| AGIWUR11587;AGIWUR13083                                                                                |    |     |         |         |                |                  |                               |
| CB4856                                                                                                 | CT | III | 1606829 | 1614033 | WBGene00021247 | Y22D7AL.9        | Y22D7AL.9 0.248690230415753   |
| AGIWUR10604;AGIWUR11815;AGIWUR13461;AGIWUR20754                                                        |    |     |         |         |                |                  |                               |
| CB4856                                                                                                 | CT | III | 1617151 | 1618954 | WBGene00021248 | Y22D7AL.10       | Y22D7AL.10 -0.443520668186854 |

AGIWUR3499;AGIWUR30303  
CB4856 CT III 1619742 1625797 WBGene00002025 hsp-60 Y22D7AL.5 -0.256856478821283  
AGIWUR10628;AGIWUR19794;AGIWUR20849;AGIWUR20967;AGIWUR21651;AGIWUR26390;AGIWUR33280;AGIWUR34824;AGIWUR42555  
;AGIWUR43856  
CB4856 CT III 1626632 1637561 WBGene00021244 Y22D7AL.4 Y22D7AL.4 -0.0117439481695092  
AGIWUR9679;AGIWUR24031  
CB4856 CT III 1641463 1641735 WBGene00021243 Y22D7AL.3 Y22D7AL.3 -0.159443686011503  
AGIWUR6951  
CB4856 CT III 1642649 1644563 WBGene00021250 Y22D7AL.12 Y22D7AL.12 -0.220838972646666  
AGIWUR44260  
CB4856 CT III 1648621 1648806 WBGene00021251 Y22D7AL.13 Y22D7AL.13 -0.130824244352084  
AGIWUR43504  
CB4856 CT III 1650302 1652669 WBGene00021241 Y22D7AL.1 Y22D7AL.1 -0.125393700196448  
AGIWUR26222  
CB4856 CT III 1653731 1657480 WBGene00021252 cht-4 Y22D7AL.14 0.216409233459411  
AGIWUR39024  
CB4856 CT III 1658207 1659863 WBGene00021253 Y22D7AL.15 Y22D7AL.15 0.741749950723381  
AGIWUR28095  
CB4856 CT III 1662104 1665152 WBGene00021254 Y22D7AL.16 Y22D7AL.16 -0.0570798912942161  
AGIWUR14048;AGIWUR28872;AGIWUR29282;AGIWUR35626;AGIWUR42920;AGIWUR43018  
CB4856 CT III 1665493 1665793 WBGene00021257 Y22D7AR.3 Y22D7AR.3 -0.26124091653512  
AGIWUR37407  
CB4856 CT III 1665913 1668634 WBGene00021259 glb-30 Y22D7AR.5 0.087737025714417  
AGIWUR3197;AGIWUR7436;AGIWUR12048;AGIWUR14806;AGIWUR16613;AGIWUR17397;AGIWUR19490;AGIWUR21379;AGIWUR26038;A  
GIWUR36213;AGIWUR38898;AGIWUR40232;AGIWUR41393  
CB4856 CT III 1672517 1676721 WBGene00021260 Y22D7AR.6 Y22D7AR.6 0.0810208460769726  
AGIWUR542;AGIWUR6397  
CB4856 CT III 1683630 1688099 WBGene00021261 Y22D7AR.7 Y22D7AR.7 0.181237999471951  
AGIWUR43214  
CB4856 CT III 1688144 1691770 WBGene00021266 Y22D7AR.14 Y22D7AR.14 -0.313488414473197  
AGIWUR43757  
CB4856 CT III 1692081 1695106 WBGene00005141 srd-64 Y22D7AR.8 0.020419611149733  
AGIWUR1225  
CB4856 CT III 1697221 1698986 WBGene00021262 fbxa-74 Y22D7AR.9 -0.315325397951728  
AGIWUR2493  
CB4856 CT III 1701714 1702437 WBGene00021263 Y22D7AR.10 Y22D7AR.10 -0.23039232632296  
AGIWUR35366  
CB4856 CT III 1703500 1705899 WBGene00021264 fbxa-13 Y22D7AR.11 -0.254466526302055  
AGIWUR33164



|                                                  |     |                 |                |                  |                    |                     |
|--------------------------------------------------|-----|-----------------|----------------|------------------|--------------------|---------------------|
| CB4856 CT<br>AGIWUR21273                         | III | 1705946 1713729 | WBGene00021256 | Y22D7AR.2        | Y22D7AR.2          | -0.191855160426591  |
| CB4856 CT<br>AGIWUR30137                         | III | 1716527 1722605 | WBGene00021265 | Y22D7AR.12       | Y22D7AR.12         | 0.213460590393902   |
| CB4856 CT<br>AGIWUR29875;AGIWUR39631;AGIWUR41915 | III | 1723194 1733101 | WBGene00004779 | ser-4 Y22D7AR.13 | 0.410340430808802  |                     |
| CB4856 CT<br>AGIWUR10721                         | III | 1752183 1754942 | WBGene00021593 | Y46E12A.3        | Y46E12A.3          | 0.333009273104539   |
| CB4856 CT<br>AGIWUR26043                         | III | 1758721 1759783 | WBGene00021592 | Y46E12A.2        | Y46E12A.2          | -0.0946154033069107 |
| CB4856 CT<br>AGIWUR12088                         | III | 1763524 1764836 | WBGene00000560 | cnc-6 Y46E12A.1  | 0.837665033132154  |                     |
| CB4856 CT<br>AGIWUR9296;AGIWUR9677               | III | 1765458 1770091 | WBGene00044798 | tbx-43 Y46E12A.4 | 0.18850874425202   |                     |
| CB4856 CT<br>AGIWUR34744                         | III | 1772531 1778069 | WBGene00021442 | Y39A3CL.4        | Y39A3CL.4          | -0.0307346350878781 |
| CB4856 CT<br>-0.00871497950828015                | III | 1777802 1778309 | WBGene00021441 | Y39A3CL.3        | Y39A3CL.3          |                     |
| CB4856 CT<br>AGIWUR16195                         | III | 1789084 1806859 | WBGene00006513 | rimb-1 Y39A3CL.2 | -0.227813795133658 |                     |
| CB4856 CT<br>AGIWUR8475;AGIWUR36088              | III | 1807740 1818323 | WBGene00000545 | clp-4 Y39A3CL.5  | 0.191576307871915  |                     |
| CB4856 CT<br>AGIWUR2416                          | III | 1821150 1824180 | WBGene00004249 | pvf-1 Y39A3CL.6  | 0.128124948535147  |                     |
| CB4856 CT<br>AGIWUR20246;AGIWUR32428             | III | 1824919 1834347 | WBGene00021443 | Y39A3CL.7        | Y39A3CL.7          | -0.327847459421504  |
| CB4856 CT<br>AGIWUR36420                         | III | 1834513 1846758 | WBGene00021440 | Y39A3CL.1        | Y39A3CL.1          | -0.0702684016583408 |
| CB4856 CT<br>AGIWUR18098                         | III | 1849047 1852902 | WBGene00004163 | pqn-82 Y39A3CR.7 | -0.124023416932518 |                     |
| CB4856 CT<br>AGIWUR4579                          | III | 1855390 1858884 | WBGene00021446 | hlh-33 Y39A3CR.6 | 0.258728717328893  |                     |
| CB4856 CT<br>AGIWUR25527                         | III | 1858913 1859569 | WBGene00021445 | Y39A3CR.5        | Y39A3CR.5          | 0.115585532278796   |
| CB4856 CT<br>AGIWUR11023;AGIWUR17766             | III | 1859888 1860381 | WBGene00000941 | ddp-1 Y39A3CR.4  | -0.113817659228586 |                     |
| CB4856 CT<br>AGIWUR13456                         | III | 1860429 1877514 | WBGene00021444 | ttc-7 Y39A3CR.3  | 0.137523103715582  |                     |
| CB4856 CT                                        | III | 1878365 1880866 | WBGene00004886 | smi-1 Y39A3CR.1  | -0.171374489758647 |                     |

AGIWUR12074;AGIWUR28726

|        |    |     |         |         |                |           |           |                    |
|--------|----|-----|---------|---------|----------------|-----------|-----------|--------------------|
| CB4856 | CT | III | 1881158 | 1883017 | WBGene00021447 | Y39A3CR.8 | Y39A3CR.8 | -0.283242951100426 |
|--------|----|-----|---------|---------|----------------|-----------|-----------|--------------------|

AGIWUR17516

|        |    |     |         |         |                |         |         |                   |             |
|--------|----|-----|---------|---------|----------------|---------|---------|-------------------|-------------|
| CB4856 | CT | III | 1883607 | 1886218 | WBGene00015243 | B0524.4 | B0524.4 | 0.196529613893007 | AGIWUR13914 |
|--------|----|-----|---------|---------|----------------|---------|---------|-------------------|-------------|

|        |    |     |         |         |                |         |         |                     |             |
|--------|----|-----|---------|---------|----------------|---------|---------|---------------------|-------------|
| CB4856 | CT | III | 1887558 | 1889691 | WBGene00015242 | B0524.3 | B0524.3 | -0.0838781930793324 | AGIWUR39402 |
|--------|----|-----|---------|---------|----------------|---------|---------|---------------------|-------------|

|        |    |     |         |         |                |         |         |                   |             |
|--------|----|-----|---------|---------|----------------|---------|---------|-------------------|-------------|
| CB4856 | CT | III | 1891383 | 1893842 | WBGene00015244 | B0524.5 | B0524.5 | 0.145758606133474 | AGIWUR13306 |
|--------|----|-----|---------|---------|----------------|---------|---------|-------------------|-------------|

|        |    |     |         |         |                |         |         |                    |             |
|--------|----|-----|---------|---------|----------------|---------|---------|--------------------|-------------|
| CB4856 | CT | III | 1894057 | 1899856 | WBGene00015241 | B0524.2 | B0524.2 | 0.0146487785251974 | AGIWUR35356 |
|--------|----|-----|---------|---------|----------------|---------|---------|--------------------|-------------|

|        |    |     |         |         |                |         |         |                    |             |
|--------|----|-----|---------|---------|----------------|---------|---------|--------------------|-------------|
| CB4856 | CT | III | 1902193 | 1905640 | WBGene00015245 | B0524.6 | B0524.6 | -0.450158204710821 | AGIWUR23257 |
|--------|----|-----|---------|---------|----------------|---------|---------|--------------------|-------------|

|        |    |     |         |         |                |        |         |                    |  |
|--------|----|-----|---------|---------|----------------|--------|---------|--------------------|--|
| CB4856 | CT | III | 1905962 | 1939568 | WBGene00004128 | pqn-41 | F53A3.4 | 0.0369718741353835 |  |
|--------|----|-----|---------|---------|----------------|--------|---------|--------------------|--|

AGIWUR1642;AGIWUR6490;AGIWUR7208;AGIWUR8911;AGIWUR9570;AGIWUR11776;AGIWUR13585;AGIWUR18268;AGIWUR19636;AGIWUR19977;AGIWUR22432;AGIWUR27099;AGIWUR34458;AGIWUR40424

|        |    |     |         |         |                |         |         |                    |             |
|--------|----|-----|---------|---------|----------------|---------|---------|--------------------|-------------|
| CB4856 | CT | III | 1939546 | 1943653 | WBGene00018720 | F53A3.1 | F53A3.1 | -0.066605443322107 | AGIWUR44653 |
|--------|----|-----|---------|---------|----------------|---------|---------|--------------------|-------------|

|        |    |     |         |         |                |        |         |                   |             |
|--------|----|-----|---------|---------|----------------|--------|---------|-------------------|-------------|
| CB4856 | CT | III | 1945058 | 1950270 | WBGene00018721 | polh-1 | F53A3.2 | 0.112706970635227 | AGIWUR34536 |
|--------|----|-----|---------|---------|----------------|--------|---------|-------------------|-------------|

|        |    |     |         |         |                |        |         |                    |  |
|--------|----|-----|---------|---------|----------------|--------|---------|--------------------|--|
| CB4856 | CT | III | 1950492 | 1951426 | WBGene00004491 | rps-22 | F53A3.3 | -0.125770997932015 |  |
|--------|----|-----|---------|---------|----------------|--------|---------|--------------------|--|

AGIWUR12230;AGIWUR28690;AGIWUR34975;AGIWUR38589;AGIWUR39036;AGIWUR41473;AGIWUR43706

|        |    |     |         |         |                |         |         |                   |            |
|--------|----|-----|---------|---------|----------------|---------|---------|-------------------|------------|
| CB4856 | CT | III | 1951526 | 1952032 | WBGene00018723 | F53A3.7 | F53A3.7 | 0.119847287267325 | AGIWUR7627 |
|--------|----|-----|---------|---------|----------------|---------|---------|-------------------|------------|

|        |    |     |         |         |                |        |        |                    |             |
|--------|----|-----|---------|---------|----------------|--------|--------|--------------------|-------------|
| CB4856 | CT | III | 1952014 | 1961945 | WBGene00020115 | mboa-6 | R155.1 | -0.126387590946434 | AGIWUR26427 |
|--------|----|-----|---------|---------|----------------|--------|--------|--------------------|-------------|

|        |    |     |         |         |                |       |        |                    |             |
|--------|----|-----|---------|---------|----------------|-------|--------|--------------------|-------------|
| CB4856 | CT | III | 1963566 | 1969902 | WBGene00020116 | moa-1 | R155.2 | 0.0202472197823225 | AGIWUR40050 |
|--------|----|-----|---------|---------|----------------|-------|--------|--------------------|-------------|

|        |    |     |         |         |                |        |        |                      |             |
|--------|----|-----|---------|---------|----------------|--------|--------|----------------------|-------------|
| CB4856 | CT | III | 1971182 | 1975709 | WBGene00020117 | R155.3 | R155.3 | -0.00630254968785771 | AGIWUR28349 |
|--------|----|-----|---------|---------|----------------|--------|--------|----------------------|-------------|

|        |    |     |         |         |                |        |        |                   |             |
|--------|----|-----|---------|---------|----------------|--------|--------|-------------------|-------------|
| CB4856 | CT | III | 1977315 | 1980462 | WBGene00020118 | R155.4 | R155.4 | 0.268252695181991 | AGIWUR10910 |
|--------|----|-----|---------|---------|----------------|--------|--------|-------------------|-------------|

|        |    |     |         |         |                |        |          |                    |  |
|--------|----|-----|---------|---------|----------------|--------|----------|--------------------|--|
| CB4856 | CT | III | 1980823 | 1982647 | WBGene00005143 | srd-66 | Y39A3B.4 | 0.0830350493121124 |  |
|--------|----|-----|---------|---------|----------------|--------|----------|--------------------|--|

AGIWUR24540

|        |    |     |         |         |                |          |          |                     |  |
|--------|----|-----|---------|---------|----------------|----------|----------|---------------------|--|
| CB4856 | CT | III | 1985109 | 1987466 | WBGene00021438 | Y39A3B.3 | Y39A3B.3 | -0.0525142152270179 |  |
|--------|----|-----|---------|---------|----------------|----------|----------|---------------------|--|

AGIWUR29085

|        |    |     |         |         |                |        |          |                    |  |
|--------|----|-----|---------|---------|----------------|--------|----------|--------------------|--|
| CB4856 | CT | III | 1997841 | 2002438 | WBGene00021437 | lgc-42 | Y39A3B.2 | 0.0217637101718955 |  |
|--------|----|-----|---------|---------|----------------|--------|----------|--------------------|--|

AGIWUR39318

|        |    |     |         |         |                |          |          |                   |  |
|--------|----|-----|---------|---------|----------------|----------|----------|-------------------|--|
| CB4856 | CT | III | 2006029 | 2009196 | WBGene00021436 | Y39A3B.1 | Y39A3B.1 | 0.113387326248748 |  |
|--------|----|-----|---------|---------|----------------|----------|----------|-------------------|--|

AGIWUR42754

|        |    |     |         |         |                |       |          |                   |  |
|--------|----|-----|---------|---------|----------------|-------|----------|-------------------|--|
| CB4856 | CT | III | 2009302 | 2021589 | WBGene00021439 | ckr-2 | Y39A3B.5 | 0.224924429310689 |  |
|--------|----|-----|---------|---------|----------------|-------|----------|-------------------|--|

AGIWUR1930;AGIWUR17361;AGIWUR30236;AGIWUR38253;AGIWUR44531

|        |    |     |         |         |                |       |          |                   |  |
|--------|----|-----|---------|---------|----------------|-------|----------|-------------------|--|
| CB4856 | CT | III | 2035036 | 2048007 | WBGene00001063 | dpy-1 | M01E10.2 | 0.497057130092969 |  |
|--------|----|-----|---------|---------|----------------|-------|----------|-------------------|--|

AGIWUR23010

|        |    |     |         |         |                |          |          |                    |  |
|--------|----|-----|---------|---------|----------------|----------|----------|--------------------|--|
| CB4856 | CT | III | 2053872 | 2054449 | WBGene00019709 | M01E10.3 | M01E10.3 | -0.618419644756337 |  |
|--------|----|-----|---------|---------|----------------|----------|----------|--------------------|--|

AGIWUR23384

|        |    |     |         |         |                |          |          |                    |  |
|--------|----|-----|---------|---------|----------------|----------|----------|--------------------|--|
| CB4856 | CT | III | 2056730 | 2057670 | WBGene00021433 | Y39A3A.2 | Y39A3A.2 | -0.259153938521694 |  |
|--------|----|-----|---------|---------|----------------|----------|----------|--------------------|--|

AGIWUR20632

|        |    |     |         |         |                |        |          |                     |  |
|--------|----|-----|---------|---------|----------------|--------|----------|---------------------|--|
| CB4856 | CT | III | 2060673 | 2060957 | WBGene00002099 | ins-16 | Y39A3A.5 | -0.0295352185422981 |  |
|--------|----|-----|---------|---------|----------------|--------|----------|---------------------|--|

AGIWUR14112;AGIWUR31180;AGIWUR32785;AGIWUR34303;AGIWUR38456

|        |    |     |         |         |                |        |          |                    |  |
|--------|----|-----|---------|---------|----------------|--------|----------|--------------------|--|
| CB4856 | CT | III | 2063442 | 2065855 | WBGene00023471 | srz-86 | Y39A3A.7 | 0.0379707097127073 |  |
|--------|----|-----|---------|---------|----------------|--------|----------|--------------------|--|

|                                    |    |     |         |         |                |           |           |                      |             |
|------------------------------------|----|-----|---------|---------|----------------|-----------|-----------|----------------------|-------------|
| AGIWUR3884;AGIWUR32374             |    |     |         |         |                |           |           |                      |             |
| CB4856                             | CT | III | 2066640 | 2068350 | WBGene00021434 | Y39A3A.3  | Y39A3A.3  | 0.165889980867066    |             |
| AGIWUR13923                        |    |     |         |         |                |           |           |                      |             |
| CB4856                             | CT | III | 2071513 | 2072347 | WBGene00023470 | srz-87    | Y39A3A.6  | 0.0839707546093833   |             |
| AGIWUR7389;AGIWUR23252             |    |     |         |         |                |           |           |                      |             |
| CB4856                             | CT | III | 2073009 | 2076520 | WBGene00021435 | Y39A3A.4  | Y39A3A.4  | 0.109035391570101    |             |
| AGIWUR36719                        |    |     |         |         |                |           |           |                      |             |
| CB4856                             | CT | III | 2082819 | 2088248 | WBGene00021703 | cpt-3     | Y48G9A.10 | -0.00869110515684568 |             |
| AGIWUR30430                        |    |     |         |         |                |           |           |                      |             |
| CB4856                             | CT | III | 2092709 | 2099881 | WBGene00021702 | Y48G9A.9  | Y48G9A.9  | -0.0283476979434862  |             |
| AGIWUR713                          |    |     |         |         |                |           |           |                      |             |
| CB4856                             | CT | III | 2102295 | 2107497 | WBGene00004088 | ppk-2     | Y48G9A.8  | 0.0882438519348803   |             |
| AGIWUR28088                        |    |     |         |         |                |           |           |                      |             |
| CB4856                             | CT | III | 2111802 | 2112427 | WBGene00021701 | Y48G9A.7  | Y48G9A.7  | 0.0850297112251432   |             |
| AGIWUR5690                         |    |     |         |         |                |           |           |                      |             |
| CB4856                             | CT | III | 2112416 | 2116897 | WBGene00021704 | Y48G9A.11 | Y48G9A.11 | -0.0115349267184595  |             |
| AGIWUR39784                        |    |     |         |         |                |           |           |                      |             |
| CB4856                             | CT | III | 2117842 | 2119091 | WBGene00021700 | Y48G9A.6  | Y48G9A.6  | 0.11663404806454     |             |
| AGIWUR31978                        |    |     |         |         |                |           |           |                      |             |
| CB4856                             | CT | III | 2124137 | 2151550 | WBGene00021698 | frl-1     | Y48G9A.4  | 0.000357617704429103 |             |
| AGIWUR33287                        |    |     |         |         |                |           |           |                      |             |
| CB4856                             | CT | III | 2151968 | 2197908 | WBGene00021697 | gcn-1     | Y48G9A.3  | -0.456146707849782   |             |
| AGIWUR2499;AGIWUR24890;AGIWUR39089 |    |     |         |         |                |           |           |                      |             |
| CB4856                             | CT | III | 2198006 | 2206882 | WBGene00016524 | C39B5.6   | C39B5.6   | -0.0648662331127561  | AGIWUR32372 |
| CB4856                             | CT | III | 2211420 | 2217095 | WBGene00189950 | C39B5.14  | C39B5.14  | 1.40697943871104     |             |
| AGIWUR9309;AGIWUR17915;AGIWUR33312 |    |     |         |         |                |           |           |                      |             |
| CB4856                             | CT | III | 2217173 | 2219494 | WBGene00016526 | fbxa-8    | C39B5.8   | 0.376502463679369    | AGIWUR33756 |
| CB4856                             | CT | III | 2219797 | 2222365 | WBGene00016525 | fbxa-12   | C39B5.7   | -0.387389874495716   | AGIWUR19075 |
| CB4856                             | CT | III | 2222438 | 2224000 | WBGene00005142 | srd-65    | C39B5.12  | -0.0631631855787944  |             |
| AGIWUR31417                        |    |     |         |         |                |           |           |                      |             |
| CB4856                             | CT | III | 2224672 | 2227198 | WBGene00016522 | fbxa-38   | C39B5.4   | 0.0130176648702793   | AGIWUR24971 |
| CB4856                             | CT | III | 2227707 | 2229228 | WBGene00016521 | fbxa-62   | C39B5.3   | -0.0868588987361321  | AGIWUR15201 |
| CB4856                             | CT | III | 2229992 | 2232460 | WBGene00016527 | fbxa-47   | C39B5.9   | -0.00597581506421196 | AGIWUR41580 |
| CB4856                             | CT | III | 2233888 | 2236987 | WBGene00016520 | C39B5.2   | C39B5.2   | 0.533948293542064    | AGIWUR33275 |
| CB4856                             | CT | III | 2238967 | 2240172 | WBGene00016528 | C39B5.10  | C39B5.10  | -0.25228892760455    |             |
| AGIWUR18177                        |    |     |         |         |                |           |           |                      |             |
| CB4856                             | CT | III | 2240771 | 2243843 | WBGene00016519 | srz-56    | C39B5.1   | 0.244259787071643    | AGIWUR37544 |
| CB4856                             | CT | III | 2244165 | 2245827 | WBGene00005144 | srd-67    | C39B5.11  | 0.177855039082816    |             |
| AGIWUR34479                        |    |     |         |         |                |           |           |                      |             |

|                                                                                                       |    |     |         |         |                 |             |             |                     |             |
|-------------------------------------------------------------------------------------------------------|----|-----|---------|---------|-----------------|-------------|-------------|---------------------|-------------|
| CB4856                                                                                                | CT | III | 2246016 | 2249404 | WBGene00020642  | T20H9.6     | T20H9.6     | 0.146705086884818   | AGIWUR25745 |
| CB4856                                                                                                | CT | III | 2249932 | 2251448 | WBGene00020637  | fbxa-7      | T20H9.1     | 0.68469754420541    | AGIWUR37127 |
| CB4856                                                                                                | CT | III | 2251957 | 2252989 | WBGene00020641  | fbxa-68     | T20H9.5     | 1.00941614132621    | AGIWUR3648  |
| CB4856                                                                                                | CT | III | 2253449 | 2254783 | WBGene00020640  | fbxa-73     | T20H9.4     | 0.12043843731721    | AGIWUR32193 |
| CB4856                                                                                                | CT | III | 2257554 | 2258941 | WBGene00020638  | fbxa-43     | T20H9.2     | -0.073577922438572  |             |
| AGIWUR4357;AGIWUR25103;AGIWUR25937;AGIWUR41236;AGIWUR44639                                            |    |     |         |         |                 |             |             |                     |             |
| CB4856                                                                                                | CT | III | 2260004 | 2261445 | WBGene00044676  | fbxa-42     | Y54F10BL.1  | 0.123099644228919   |             |
| AGIWUR13364                                                                                           |    |     |         |         |                 |             |             |                     |             |
| CB4856                                                                                                | CT | III | 2266980 | 2272175 | WBGene00021862  | fbxa-48     | Y54F10BM.7  | 0.660647915577655   |             |
| AGIWUR4973                                                                                            |    |     |         |         |                 |             |             |                     |             |
| CB4856                                                                                                | CT | III | 2272453 | 2276965 | WBGene00021859  | fbxa-39     | Y54F10BM.4  | 0.432077547039436   |             |
| AGIWUR40392                                                                                           |    |     |         |         |                 |             |             |                     |             |
| CB4856                                                                                                | CT | III | 2277279 | 2289967 | WBGene00021858  | Y54F10BM.3  | Y54F10BM.3  | -0.173275438802743  |             |
| AGIWUR2267                                                                                            |    |     |         |         |                 |             |             |                     |             |
| CB4856                                                                                                | CT | III | 2291419 | 2294124 | WBGene00044403  | fbxa-219    | Y54F10BM.15 | -0.0102830542451819 |             |
| AGIWUR28098                                                                                           |    |     |         |         |                 |             |             |                     |             |
| CB4856                                                                                                | CT | III | 2295344 | 2304920 | WBGene00021863  | Y54F10BM.9  | Y54F10BM.9  | -0.168088288472163  |             |
| AGIWUR29475                                                                                           |    |     |         |         |                 |             |             |                     |             |
| CB4856                                                                                                | CT | III | 2305942 | 2308008 | WBGene00021864  | fbxa-1      | Y54F10BM.10 | 0.0362677486724099  |             |
| AGIWUR24508                                                                                           |    |     |         |         |                 |             |             |                     |             |
| CB4856                                                                                                | CT | III | 2308256 | 2309744 | WBGene000206486 | Y54F10BM.20 | Y54F10BM.20 | -0.102008829761578  |             |
| AGIWUR32548                                                                                           |    |     |         |         |                 |             |             |                     |             |
| CB4856                                                                                                | CT | III | 2309924 | 2314073 | WBGene00021865  | fbxa-66     | Y54F10BM.11 | 0.49242749931515    |             |
| AGIWUR7609                                                                                            |    |     |         |         |                 |             |             |                     |             |
| CB4856                                                                                                | CT | III | 2314436 | 2326901 | WBGene00021857  | iffb-1      | Y54F10BM.2  | -0.266972874446303  |             |
| AGIWUR5626;AGIWUR10411;AGIWUR23707                                                                    |    |     |         |         |                 |             |             |                     |             |
| CB4856                                                                                                | CT | III | 2326921 | 2329644 | WBGene00021866  | Y54F10BM.12 | Y54F10BM.12 | -0.0676377027080077 |             |
| AGIWUR29344                                                                                           |    |     |         |         |                 |             |             |                     |             |
| CB4856                                                                                                | CT | III | 2329577 | 2331183 | WBGene00021867  | Y54F10BM.13 | Y54F10BM.13 | -0.153525112052323  |             |
| AGIWUR19905;AGIWUR36281                                                                               |    |     |         |         |                 |             |             |                     |             |
| CB4856                                                                                                | CT | III | 2331572 | 2342184 | WBGene00021856  | Y54F10BM.1  | Y54F10BM.1  | -0.234267150937381  |             |
| AGIWUR20766                                                                                           |    |     |         |         |                 |             |             |                     |             |
| CB4856                                                                                                | CT | III | 2343573 | 2347329 | WBGene00004016  | phf-5       | Y54F10BM.14 | -0.0835631183121315 |             |
| AGIWUR869;AGIWUR3182;AGIWUR4589;AGIWUR5858;AGIWUR6693;AGIWUR10165;AGIWUR12970;AGIWUR22995;AGIWUR41822 |    |     |         |         |                 |             |             |                     |             |
| CB4856                                                                                                | CT | III | 2347591 | 2362056 | WBGene00001589  | gip-1       | H04J21.3    | -0.074749312638418  |             |
| AGIWUR2869;AGIWUR12151;AGIWUR21514                                                                    |    |     |         |         |                 |             |             |                     |             |
| CB4856                                                                                                | CT | III | 2362948 | 2366278 | WBGene00005146  | srd-69      | H04J21.2    | 0.0117654726920229  |             |
| AGIWUR37224                                                                                           |    |     |         |         |                 |             |             |                     |             |
| CB4856                                                                                                | CT | III | 2366884 | 2372655 | WBGene00019150  | H04J21.1    | H04J21.1    | 0.181637920122878   |             |

|                                                                                             |    |     |         |         |                |            |             |                     |             |
|---------------------------------------------------------------------------------------------|----|-----|---------|---------|----------------|------------|-------------|---------------------|-------------|
| AGIWUR14406                                                                                 |    |     |         |         |                |            |             |                     |             |
| CB4856                                                                                      | CT | III | 2376193 | 2384840 | WBGene00019199 | H14E04.2   | H14E04.2    | -0.107834177017127  |             |
| AGIWUR2073;AGIWUR27203                                                                      |    |     |         |         |                |            |             |                     |             |
| CB4856                                                                                      | CT | III | 2384892 | 2386579 | WBGene00019200 | H14E04.3   | H14E04.3    | -0.366391116518717  |             |
| AGIWUR20025                                                                                 |    |     |         |         |                |            |             |                     |             |
| CB4856                                                                                      | CT | III | 2390203 | 2392116 | WBGene00019201 | H14E04.4   | H14E04.4    | -0.142938040912144  |             |
| AGIWUR24047                                                                                 |    |     |         |         |                |            |             |                     |             |
| CB4856                                                                                      | CT | III | 2394325 | 2401308 | WBGene00000506 | cic-1      | H14E04.5    | 0.215479448033699   |             |
| AGIWUR12520                                                                                 |    |     |         |         |                |            |             |                     |             |
| CB4856                                                                                      | CT | III | 2402070 | 2406332 | WBGene00019198 | strm-1     | H14E04.1    | 0.382525040358551   |             |
| AGIWUR40650                                                                                 |    |     |         |         |                |            |             |                     |             |
| CB4856                                                                                      | CT | III | 2406308 | 2410985 | WBGene00021021 | mrpl-30    | W04B5.4     | -0.302190871408119  | AGIWUR43598 |
| CB4856                                                                                      | CT | III | 2411090 | 2418205 | WBGene00021022 | W04B5.5    | W04B5.5     | -0.261291446422277  | AGIWUR8262  |
| CB4856                                                                                      | CT | III | 2418345 | 2423912 | WBGene00021020 | W04B5.3    | W04B5.3     | -0.146299790664086  |             |
| AGIWUR42343;AGIWUR43483                                                                     |    |     |         |         |                |            |             |                     |             |
| CB4856                                                                                      | CT | III | 2424355 | 2427738 | WBGene00021019 | W04B5.2    | W04B5.2     | 0.159769126893012   | AGIWUR18604 |
| CB4856                                                                                      | CT | III | 2436105 | 2442328 | WBGene00017104 | E02H9.6    | E02H9.6     | 0.00343245668509518 | AGIWUR23811 |
| CB4856                                                                                      | CT | III | 2445228 | 2446142 | WBGene00017105 | E02H9.7    | E02H9.7     | -0.199486530141016  |             |
| AGIWUR25516;AGIWUR35139;AGIWUR40542                                                         |    |     |         |         |                |            |             |                     |             |
| CB4856                                                                                      | CT | III | 2446223 | 2448696 | WBGene00017103 | klo-2      | E02H9.5     | -0.299965823504461  |             |
| AGIWUR3705;AGIWUR22017;AGIWUR43846                                                          |    |     |         |         |                |            |             |                     |             |
| CB4856                                                                                      | CT | III | 2449382 | 2454949 | WBGene00003711 | nhr-121    | E02H9.8     | 0.834750969953756   | AGIWUR34209 |
| CB4856                                                                                      | CT | III | 2461911 | 2465079 | WBGene00017101 | E02H9.3    | E02H9.3     | -0.183472357984456  | AGIWUR12571 |
| CB4856                                                                                      | CT | III | 2465474 | 2466800 | WBGene00017100 | E02H9.2    | E02H9.2     | 0.252389378746218   | AGIWUR12410 |
| CB4856                                                                                      | CT | III | 2467347 | 2468302 | WBGene00017106 | E02H9.9    | E02H9.9     | -0.0875477568589931 | AGIWUR3644  |
| CB4856                                                                                      | CT | III | 2468486 | 2469443 | WBGene00017099 | E02H9.1    | E02H9.1     | -0.126548191120202  |             |
| AGIWUR672;AGIWUR6778;AGIWUR8337;AGIWUR36905                                                 |    |     |         |         |                |            |             |                     |             |
| CB4856                                                                                      | CT | III | 2473868 | 2486620 | WBGene00004884 | smg-6      | Y54F10AL.2  | -0.0602829432039833 |             |
| AGIWUR11295;AGIWUR20339;AGIWUR22367;AGIWUR22837;AGIWUR26612;AGIWUR28035;AGIWUR28767         |    |     |         |         |                |            |             |                     |             |
| CB4856                                                                                      | CT | III | 2487769 | 2494340 | WBGene00021847 | Y54F10AL.1 | Y54F10AL.1  |                     |             |
| -0.000716233607325201 AGIWUR905;AGIWUR13399;AGIWUR33083;AGIWUR33626;AGIWUR33848;AGIWUR42816 |    |     |         |         |                |            |             |                     |             |
| CB4856                                                                                      | CT | III | 2503448 | 2507972 | WBGene00021852 | Y54F10AM.8 | Y54F10AM.8  | -0.171700747749215  |             |
| AGIWUR2335;AGIWUR25672;AGIWUR32210;AGIWUR35648;AGIWUR36425                                  |    |     |         |         |                |            |             |                     |             |
| CB4856                                                                                      | CT | III | 2508848 | 2511802 | WBGene00021850 | Y54F10AM.6 | Y54F10AM.6  | 0.0724682561229204  |             |
| AGIWUR27666;AGIWUR38314                                                                     |    |     |         |         |                |            |             |                     |             |
| CB4856                                                                                      | CT | III | 2512283 | 2528628 | WBGene00004314 | rbc-2      | Y54F10AM.10 | -0.261739511536099  |             |
| AGIWUR29963;AGIWUR39097                                                                     |    |     |         |         |                |            |             |                     |             |
| CB4856                                                                                      | CT | III | 2529063 | 2530502 | WBGene00021849 | Y54F10AM.5 | Y54F10AM.5  | 0.0383924111844287  |             |
| AGIWUR19611                                                                                 |    |     |         |         |                |            |             |                     |             |

|                                                                                                             |     |         |         |                |            |            |                     |
|-------------------------------------------------------------------------------------------------------------|-----|---------|---------|----------------|------------|------------|---------------------|
| CB4856 CT                                                                                                   | III | 2530615 | 2546420 | WBGene00000464 | ceh-44     | Y54F10AM.4 | -0.253264528109339  |
| AGIWUR4705;AGIWUR16518;AGIWUR24433                                                                          |     |         |         |                |            |            |                     |
| CB4856 CT                                                                                                   | III | 2549927 | 2560684 | WBGene00001410 | feh-1      | Y54F10AM.2 | 0.0678617121708225  |
| AGIWUR4773                                                                                                  |     |         |         |                |            |            |                     |
| CB4856 CT                                                                                                   | III | 2561710 | 2566589 | WBGene00021848 | nhr-239    | Y54F10AM.1 | 0.0291742355557072  |
| AGIWUR14239;AGIWUR19746;AGIWUR25060;AGIWUR30065                                                             |     |         |         |                |            |            |                     |
| CB4856 CT                                                                                                   | III | 2567404 | 2571547 | WBGene00021855 | Y54F10AR.2 | Y54F10AR.2 | 0.162447174365049   |
| AGIWUR40408                                                                                                 |     |         |         |                |            |            |                     |
| CB4856 CT                                                                                                   | III | 2572031 | 2575723 | WBGene00021854 | Y54F10AR.1 | Y54F10AR.1 | -0.169508689895865  |
| AGIWUR16208                                                                                                 |     |         |         |                |            |            |                     |
| CB4856 CT                                                                                                   | III | 2579314 | 2580664 | WBGene00022197 | Y71H2B.8   | Y71H2B.8   | 0.18880955320597    |
| AGIWUR12764                                                                                                 |     |         |         |                |            |            |                     |
| CB4856 CT                                                                                                   | III | 2583953 | 2597034 | WBGene00000160 | apb-1      | Y71H2B.10  | -0.0443794882620523 |
| AGIWUR28860;AGIWUR38318                                                                                     |     |         |         |                |            |            |                     |
| CB4856 CT                                                                                                   | III | 2598057 | 2603299 | WBGene00007019 | mdt-19     | Y71H2B.6   | 0.00331150655346235 |
| AGIWUR9849                                                                                                  |     |         |         |                |            |            |                     |
| CB4856 CT                                                                                                   | III | 2604236 | 2606541 | WBGene00022198 | Y71H2B.11  | Y71H2B.11  | -0.0431884887290854 |
| AGIWUR3768;AGIWUR39503                                                                                      |     |         |         |                |            |            |                     |
| CB4856 CT                                                                                                   | III | 2608017 | 2618856 | WBGene00022195 | Y71H2B.5   | Y71H2B.5   | -0.0457379082679434 |
| AGIWUR16225                                                                                                 |     |         |         |                |            |            |                     |
| CB4856 CT                                                                                                   | III | 2618963 | 2619375 | WBGene00022194 | Y71H2B.4   | Y71H2B.4   | -0.29017870463432   |
| AGIWUR6650                                                                                                  |     |         |         |                |            |            |                     |
| CB4856 CT                                                                                                   | III | 2619936 | 2622709 | WBGene00022193 | ppfr-4     | Y71H2B.3   | 0.27772264111195    |
| AGIWUR44844                                                                                                 |     |         |         |                |            |            |                     |
| CB4856 CT                                                                                                   | III | 2623170 | 2627771 | WBGene00022192 | Y71H2B.2   | Y71H2B.2   | 0.100897240718131   |
| AGIWUR42251                                                                                                 |     |         |         |                |            |            |                     |
| CB4856 CT                                                                                                   | III | 2629013 | 2631439 | WBGene00022191 | Y71H2B.1   | Y71H2B.1   | -0.0972609975293874 |
| AGIWUR20164;AGIWUR34065;AGIWUR41211                                                                         |     |         |         |                |            |            |                     |
| CB4856 CT                                                                                                   | III | 2636405 | 2642848 | WBGene00019212 | zmp-2      | H19M22.3   | 0.21748125386429    |
| AGIWUR10196;AGIWUR17797;AGIWUR22540;AGIWUR22981;AGIWUR30381;AGIWUR30911;AGIWUR35936;AGIWUR39133;AGIWUR42071 |     |         |         |                |            |            |                     |
| CB4856 CT                                                                                                   | III | 2650851 | 2651565 | WBGene00023084 | H19M22.4   | H19M22.4   | -0.0556106397564218 |
| AGIWUR7023;AGIWUR25650;AGIWUR36609;AGIWUR42415;AGIWUR43101                                                  |     |         |         |                |            |            |                     |
| CB4856 CT                                                                                                   | III | 2658083 | 2681112 | WBGene00002915 | let-805    | H19M22.2   | -0.0724498167526741 |
| AGIWUR2534;AGIWUR15885;AGIWUR16395;AGIWUR16752;AGIWUR18969;AGIWUR21421;AGIWUR25034;AGIWUR30471;AGIWUR34160; |     |         |         |                |            |            |                     |
| AGIWUR35690;AGIWUR40260;AGIWUR42896                                                                         |     |         |         |                |            |            |                     |
| CB4856 CT                                                                                                   | III | 2681451 | 2686463 | WBGene00003941 | pbo-1      | Y71H2AL.1  | -0.0594937227627472 |
| AGIWUR16024                                                                                                 |     |         |         |                |            |            |                     |
| CB4856 CT                                                                                                   | III | 2686791 | 2688997 | WBGene00022165 | Y71H2AL.2  | Y71H2AL.2  | 0.117852329498094   |
| AGIWUR36616                                                                                                 |     |         |         |                |            |            |                     |

|                                                                                                |     |         |         |                |            |            |                     |
|------------------------------------------------------------------------------------------------|-----|---------|---------|----------------|------------|------------|---------------------|
| CB4856 CT<br>AGIWUR44591                                                                       | III | 2690160 | 2698817 | WBGene00022174 | Y71H2AM.9  | Y71H2AM.9  | -0.3057641610215    |
| CB4856 CT<br>AGIWUR19608                                                                       | III | 2700937 | 2707818 | WBGene00022173 | set-27     | Y71H2AM.8  | -0.552640521004481  |
| CB4856 CT<br>AGIWUR31620                                                                       | III | 2707737 | 2716447 | WBGene00022175 | Y71H2AM.10 | Y71H2AM.10 | -0.161232727590056  |
| CB4856 CT<br>AGIWUR34264                                                                       | III | 2718158 | 2725092 | WBGene00022176 | Y71H2AM.11 | Y71H2AM.11 | 0.0084655156565514  |
| CB4856 CT<br>AGIWUR29754                                                                       | III | 2734080 | 2739531 | WBGene00022178 | Y71H2AM.13 | Y71H2AM.13 | -0.186623464775037  |
| CB4856 CT<br>AGIWUR1759                                                                        | III | 2743719 | 2746653 | WBGene00022179 | Y71H2AM.14 | Y71H2AM.14 | 0.237501624636012   |
| CB4856 CT<br>AGIWUR14045                                                                       | III | 2747130 | 2756512 | WBGene00022180 | Y71H2AM.15 | Y71H2AM.15 | 0.521090154983805   |
| CB4856 CT<br>AGIWUR1582;AGIWUR7980;AGIWUR12398;AGIWUR14707;AGIWUR22714                         | III | 2757087 | 2760816 | WBGene00022181 | pho-9      | Y71H2AM.16 | 0.182225247444292   |
| CB4856 CT<br>AGIWUR22386;AGIWUR25232                                                           | III | 2764037 | 2768675 | WBGene00022182 | swsn-3     | Y71H2AM.17 | -0.203137953617545  |
| CB4856 CT<br>AGIWUR3116;AGIWUR3798;AGIWUR9004;AGIWUR23603;AGIWUR24974;AGIWUR25228;AGIWUR30455  | III | 2769358 | 2779053 | WBGene00002244 | laf-1      | Y71H2AM.19 | -0.161091695065299  |
| CB4856 CT<br>-0.000916145160324788                                                             | III | 2781039 | 2782817 | WBGene00022171 | Y71H2AM.6  | Y71H2AM.6  | AGIWUR24357         |
| CB4856 CT<br>AGIWUR33509;AGIWUR38426                                                           | III | 2782733 | 2785993 | WBGene00022185 | Y71H2AM.20 | Y71H2AM.20 | 0.254672280650635   |
| CB4856 CT<br>AGIWUR2693;AGIWUR6440;AGIWUR17716;AGIWUR32055;AGIWUR36884;AGIWUR38719;AGIWUR41121 | III | 2786117 | 2786859 | WBGene00022170 | Y71H2AM.5  | Y71H2AM.5  | -0.0853562992825481 |
| CB4856 CT<br>AGIWUR36947;AGIWUR43443                                                           | III | 2786854 | 2788028 | WBGene00022169 | Y71H2AM.4  | Y71H2AM.4  | 0.0900727213940273  |
| CB4856 CT<br>AGIWUR23229;AGIWUR33566                                                           | III | 2788441 | 2792973 | WBGene00044609 | tbcc-1     | Y71H2AM.24 | -0.135211440885456  |
| CB4856 CT<br>AGIWUR3799;AGIWUR4712;AGIWUR14874;AGIWUR21233;AGIWUR27245;AGIWUR35937             | III | 2793323 | 2801900 | WBGene00006695 | twk-45     | Y71H2AM.22 | -0.0173246535306681 |
| CB4856 CT<br>AGIWUR36266                                                                       | III | 2802450 | 2803681 | WBGene00044760 | Y71H2AM.25 | Y71H2AM.25 | -0.0366633673744117 |
| CB4856 CT<br>AGIWUR192                                                                         | III | 2805430 | 2811096 | WBGene00022168 | Y71H2AM.3  | Y71H2AM.3  | -0.217906658143534  |
| CB4856 CT<br>AGIWUR44719                                                                       | III | 2811870 | 2814969 | WBGene00007000 | tufm-1     | Y71H2AM.23 | -0.0201854933100876 |
| CB4856 CT                                                                                      | III | 2819280 | 2826153 | WBGene00022167 | Y71H2AM.2  | Y71H2AM.2  | -0.412390994377107  |

|                                                 |    |     |         |         |                |           |           |                     |
|-------------------------------------------------|----|-----|---------|---------|----------------|-----------|-----------|---------------------|
| AGIWUR9342                                      |    |     |         |         |                |           |           |                     |
| CB4856                                          | CT | III | 2827070 | 2833824 | WBGene00022166 | Y71H2AM.1 | Y71H2AM.1 | -0.0595857904467101 |
| AGIWUR25268;AGIWUR25695                         |    |     |         |         |                |           |           |                     |
| CB4856                                          | CT | III | 2834663 | 2836261 | WBGene00022188 | Y71H2AR.1 | Y71H2AR.1 | 0.0321592393667309  |
| AGIWUR8952                                      |    |     |         |         |                |           |           |                     |
| CB4856                                          | CT | III | 2836639 | 2838453 | WBGene00022190 | josd-1    | Y71H2AR.3 | 0.0305003366942258  |
| AGIWUR10191;AGIWUR14524;AGIWUR20442;AGIWUR42988 |    |     |         |         |                |           |           |                     |
| CB4856                                          | CT | III | 2838763 | 2840927 | WBGene00022189 | Y71H2AR.2 | Y71H2AR.2 | -0.106510007488839  |
| AGIWUR36642                                     |    |     |         |         |                |           |           |                     |
| CB4856                                          | CT | III | 2842044 | 2845197 | WBGene00019261 | H34I24.2  | H34I24.2  | -0.0749830466169037 |
| AGIWUR22219                                     |    |     |         |         |                |           |           |                     |
| CB4856                                          | CT | III | 2847016 | 2848582 | WBGene00019260 | H34I24.1  | H34I24.1  | 0.0466556236542015  |
| AGIWUR16301                                     |    |     |         |         |                |           |           |                     |
| CB4856                                          | CT | III | 2849066 | 2855419 | WBGene00018992 | trp1-1    | F56F11.5  | 0.264353019083474   |
| AGIWUR13328;AGIWUR37474;AGIWUR40427             |    |     |         |         |                |           |           |                     |
| CB4856                                          | CT | III | 2855554 | 2865497 | WBGene00018991 | F56F11.4  | F56F11.4  | -0.480226520512279  |
| AGIWUR5816                                      |    |     |         |         |                |           |           |                     |
| CB4856                                          | CT | III | 2874818 | 2880705 | WBGene00018990 | k1f-1     | F56F11.3  | 0.092759854235962   |
| AGIWUR37613                                     |    |     |         |         |                |           |           |                     |
| CB4856                                          | CT | III | 2882304 | 2884967 | WBGene00018989 | F56F11.2  | F56F11.2  | -0.451285377348626  |
| AGIWUR6833;AGIWUR13653;AGIWUR40840              |    |     |         |         |                |           |           |                     |
| CB4856                                          | CT | III | 2891762 | 2892613 | WBGene00018988 | F56F11.1  | F56F11.1  | -0.371125010109775  |
| AGIWUR13941                                     |    |     |         |         |                |           |           |                     |
| CB4856                                          | CT | III | 2893433 | 2897183 | WBGene00020598 | T20B6.2   | T20B6.2   | -0.329266419190534  |
| CB4856                                          | CT | III | 2897711 | 2898802 | WBGene00020597 | T20B6.1   | T20B6.1   | 0.116214071191877   |
| CB4856                                          | CT | III | 2899441 | 2900402 | WBGene00020599 | T20B6.3   | T20B6.3   | -0.223561433058428  |
| CB4856                                          | CT | III | 2910910 | 2935740 | WBGene00019994 | cdh-1     | R10F2.1   | 0.113961304392181   |
| CB4856                                          | CT | III | 2937103 | 2944044 | WBGene00019997 | R10F2.6   | R10F2.6   | 0.120147246711027   |
| CB4856                                          | CT | III | 2947091 | 2960574 | WBGene00019157 | H05C05.1  | H05C05.1  | -0.297490236512088  |
| AGIWUR1750;AGIWUR25924                          |    |     |         |         |                |           |           |                     |
| CB4856                                          | CT | III | 2962170 | 2965634 | WBGene00019158 | H05C05.2  | H05C05.2  | 0.024391913996042   |
| AGIWUR33855;AGIWUR33898                         |    |     |         |         |                |           |           |                     |
| CB4856                                          | CT | III | 2970677 | 2975785 | WBGene00021917 | Y55D5A.3  | Y55D5A.3  | -0.127497035373796  |
| AGIWUR1723                                      |    |     |         |         |                |           |           |                     |
| CB4856                                          | CT | III | 2982414 | 2988150 | WBGene00021915 | Y55D5A.1  | Y55D5A.1  | 0.688874153328412   |
| AGIWUR10708;AGIWUR39069                         |    |     |         |         |                |           |           |                     |
| CB4856                                          | CT | III | 2988081 | 2990057 | WBGene00021918 | Y55D5A.4  | Y55D5A.4  |                     |
| 3.98584217693454e-05 AGIWUR22699;AGIWUR34129    |    |     |         |         |                |           |           |                     |
| CB4856                                          | CT | III | 2995487 | 3040860 | WBGene00000898 | daf-2     | Y55D5A.5  | 0.250493615749537   |



AGIWUR7133;AGIWUR13223;AGIWUR19374;AGIWUR30665;AGIWUR30985;AGIWUR34221;AGIWUR38552  
 CB4856 CT III 3042726 3047125 WBGene00021919 cut1-25 Y55D5A.6 0.306201047499117  
 AGIWUR4266  
 CB4856 CT III 3052916 3057550 WBGene00019169 H06I04.5 H06I04.5 -0.0327907776378753  
 AGIWUR17811  
 CB4856 CT III 3059598 3059943 WBGene00019171 fipr-29 H06I04.7 0.349594786260597  
 AGIWUR3286  
 CB4856 CT III 3061192 3064328 WBGene00019170 H06I04.6 H06I04.6 0.225177244025776  
 AGIWUR17697;AGIWUR28831  
 CB4856 CT III 3068306 3069210 WBGene00006725 ubl-1 H06I04.4 0.105333077287174  
 AGIWUR40097  
 CB4856 CT III 3070523 3085268 WBGene00019168 H06I04.3 H06I04.3 -0.121078236850699  
 AGIWUR19571;AGIWUR26916;AGIWUR43041;AGIWUR43553  
 CB4856 CT III 3086693 3091738 WBGene00004787 sft-1 H06I04.2 -0.191418679305091  
 AGIWUR34593  
 CB4856 CT III 3091850 3100468 WBGene00019167 H06I04.1 H06I04.1 0.120923990316387  
 AGIWUR8697;AGIWUR11825;AGIWUR19377;AGIWUR24950;AGIWUR25370;AGIWUR27115;AGIWUR30206;AGIWUR37893  
 CB4856 CT III 3101267 3103955 WBGene00021818 Y53G8B.2 Y53G8B.2 0.0165589490418974  
 AGIWUR23098  
 CB4856 CT III 3105668 3111828 WBGene00021819 Y53G8B.3 Y53G8B.3 0.00787324811215884  
 AGIWUR20240;AGIWUR39483  
 CB4856 CT III 3112428 3127124 WBGene00021820 nipa-1 Y53G8B.4 0.0107899348121245  
 AGIWUR13380;AGIWUR15191;AGIWUR20673;AGIWUR22382;AGIWUR27257;AGIWUR28555  
 CB4856 CT III 3129277 3131399 WBGene00021817 Y53G8B.1 Y53G8B.1 0.0172065940575372  
 AGIWUR8460  
 CB4856 CT III 3131574 3139234 WBGene00003175 mec-12 C44B11.3 0.0618429278147445  
 AGIWUR9745  
 CB4856 CT III 3142198 3143757 WBGene00016634 C44B11.4 C44B11.4 0.209693153596845  
 AGIWUR35263  
 CB4856 CT III 3152722 3153471 WBGene00016635 C44B11.6 C44B11.6 0.0503804318599883  
 AGIWUR35468  
 CB4856 CT III 3155268 3158393 WBGene00016633 C44B11.1 C44B11.1 -0.379955943167092  
 AGIWUR38618  
 CB4856 CT III 3166285 3171198 WBGene00020104 R148.5 R148.5 0.477193490014084  
 AGIWUR3695;AGIWUR8574;AGIWUR10518;AGIWUR10971;AGIWUR23515;AGIWUR35283;AGIWUR40568  
 CB4856 CT III 3171592 3174845 WBGene00020103 R148.4 R148.4 -0.114527007654727  
 AGIWUR2853;AGIWUR12459;AGIWUR13273;AGIWUR20228;AGIWUR20610;AGIWUR30751;AGIWUR38883  
 CB4856 CT III 3175339 3183498 WBGene00020102 R148.3 R148.3 -0.112772161748353  
 AGIWUR12884;AGIWUR22527

|                                                                                                        |    |     |         |         |                |           |           |                    |                     |
|--------------------------------------------------------------------------------------------------------|----|-----|---------|---------|----------------|-----------|-----------|--------------------|---------------------|
| CB4856                                                                                                 | CT | III | 3183677 | 3185237 | WBGene00020101 | lmtr-5    | R148.2    | -0.272853361936603 |                     |
| AGIWUR96;AGIWUR32957                                                                                   |    |     |         |         |                |           |           |                    |                     |
| CB4856                                                                                                 | CT | III | 3186700 | 3192206 | WBGene00020100 | mks-1     | R148.1    | 0.182980049496274  |                     |
| AGIWUR15590;AGIWUR23354                                                                                |    |     |         |         |                |           |           |                    |                     |
| CB4856                                                                                                 | CT | III | 3195561 | 3198407 | WBGene00020105 | R148.7    | R148.7    | 0.22570995935456   | AGIWUR42091         |
| CB4856                                                                                                 | CT | III | 3198477 | 3199516 | WBGene00006452 | heh-1     | R148.6    | -0.16591647131373  | AGIWUR16994         |
| CB4856                                                                                                 | CT | III | 3200795 | 3219150 | WBGene00001494 | frm-8     | H09G03.2  | 0.0153730978949316 |                     |
| AGIWUR6857                                                                                             |    |     |         |         |                |           |           |                    |                     |
| CB4856                                                                                                 | CT | III | 3226352 | 3230652 | WBGene00019174 | H09G03.1  |           | H09G03.1           | -0.0610131206356654 |
| AGIWUR20902;AGIWUR38539                                                                                |    |     |         |         |                |           |           |                    |                     |
| CB4856                                                                                                 | CT | III | 3233102 | 3241263 | WBGene00021799 | Y53G8AL.1 |           | Y53G8AL.1          | 0.0661763790266852  |
| AGIWUR3746;AGIWUR9132;AGIWUR27505                                                                      |    |     |         |         |                |           |           |                    |                     |
| CB4856                                                                                                 | CT | III | 3241717 | 3248575 | WBGene00021800 | Y53G8AL.2 |           | Y53G8AL.2          | -0.106279824241081  |
| AGIWUR11969                                                                                            |    |     |         |         |                |           |           |                    |                     |
| CB4856                                                                                                 | CT | III | 3249346 | 3250538 | WBGene00050917 | Y53G8AL.4 |           | Y53G8AL.4          | -0.109338349791056  |
| AGIWUR98;AGIWUR2795;AGIWUR8581;AGIWUR11247;AGIWUR12880;AGIWUR27907;AGIWUR29640;AGIWUR31983;AGIWUR32616 |    |     |         |         |                |           |           |                    |                     |
| CB4856                                                                                                 | CT | III | 3251461 | 3253143 | WBGene00021801 | Y53G8AL.3 |           | Y53G8AL.3          | 0.113191049536578   |
| AGIWUR3567                                                                                             |    |     |         |         |                |           |           |                    |                     |
| CB4856                                                                                                 | CT | III | 3253969 | 3255619 | WBGene00021804 | Y53G8AM.4 |           | Y53G8AM.4          | 0.0747939028824574  |
| AGIWUR11618;AGIWUR14433;AGIWUR15534                                                                    |    |     |         |         |                |           |           |                    |                     |
| CB4856                                                                                                 | CT | III | 3256730 | 3258395 | WBGene00021805 | Y53G8AM.5 |           | Y53G8AM.5          | -0.198371410712506  |
| AGIWUR6953                                                                                             |    |     |         |         |                |           |           |                    |                     |
| CB4856                                                                                                 | CT | III | 3259331 | 3260882 | WBGene00021806 | Y53G8AM.6 |           | Y53G8AM.6          | 0.135932814185802   |
| AGIWUR37373                                                                                            |    |     |         |         |                |           |           |                    |                     |
| CB4856                                                                                                 | CT | III | 3263682 | 3266608 | WBGene00021807 | Y53G8AM.7 |           | Y53G8AM.7          | 0.278929806005808   |
| AGIWUR31082                                                                                            |    |     |         |         |                |           |           |                    |                     |
| CB4856                                                                                                 | CT | III | 3267178 | 3278710 | WBGene00021808 | Y53G8AM.8 |           | Y53G8AM.8          | 0.197356372286436   |
| AGIWUR2613;AGIWUR10843                                                                                 |    |     |         |         |                |           |           |                    |                     |
| CB4856                                                                                                 | CT | III | 3282308 | 3290215 | WBGene00021814 | Y53G8AR.7 |           | Y53G8AR.7          | -0.427924083149289  |
| AGIWUR17390;AGIWUR29595;AGIWUR30914                                                                    |    |     |         |         |                |           |           |                    |                     |
| CB4856                                                                                                 | CT | III | 3290117 | 3294330 | WBGene00021815 | Y53G8AR.8 |           | Y53G8AR.8          | -0.298355713370409  |
| AGIWUR37995                                                                                            |    |     |         |         |                |           |           |                    |                     |
| CB4856                                                                                                 | CT | III | 3294743 | 3297115 | WBGene00021813 | Y53G8AR.6 |           | Y53G8AR.6          | -0.189845254614664  |
| AGIWUR4561;AGIWUR24284;AGIWUR24788;AGIWUR38114                                                         |    |     |         |         |                |           |           |                    |                     |
| CB4856                                                                                                 | CT | III | 3297454 | 3302151 | WBGene00021812 | Y53G8AR.5 |           | Y53G8AR.5          | -0.0303082244246191 |
| AGIWUR41086                                                                                            |    |     |         |         |                |           |           |                    |                     |
| CB4856                                                                                                 | CT | III | 3311423 | 3317713 | WBGene00021811 | ral-1     | Y53G8AR.3 | -0.341546438499714 |                     |
| AGIWUR39100                                                                                            |    |     |         |         |                |           |           |                    |                     |
| CB4856                                                                                                 | CT | III | 3317737 | 3321245 | WBGene00021816 | Y53G8AR.9 |           | Y53G8AR.9          | -0.167827848191251  |

|                                                                                    |    |     |         |         |                |           |           |                    |             |
|------------------------------------------------------------------------------------|----|-----|---------|---------|----------------|-----------|-----------|--------------------|-------------|
| AGIWUR331                                                                          |    |     |         |         |                |           |           |                    |             |
| CB4856                                                                             | CT | III | 3322962 | 3331727 | WBGene00021810 | phf-15    | Y53G8AR.2 | 0.0325776110594624 |             |
| AGIWUR35836                                                                        |    |     |         |         |                |           |           |                    |             |
| CB4856                                                                             | CT | III | 3333036 | 3333957 | WBGene00021809 | Y53G8AR.1 | Y53G8AR.1 | -0.29829449240545  |             |
| AGIWUR12431;AGIWUR18982;AGIWUR22098                                                |    |     |         |         |                |           |           |                    |             |
| CB4856                                                                             | CT | III | 3344875 | 3363409 | WBGene00001559 | gei-1     | F45H7.2   | 0.201333040098491  |             |
| AGIWUR6128;AGIWUR42668                                                             |    |     |         |         |                |           |           |                    |             |
| CB4856                                                                             | CT | III | 3363668 | 3370209 | WBGene00004183 | prk-2     | F45H7.4   | 0.102256577223908  | AGIWUR39213 |
| CB4856                                                                             | CT | III | 3377408 | 3389970 | WBGene00009738 | hecw-1    | F45H7.6   | 0.0318605341570266 |             |
| AGIWUR2775;AGIWUR13999                                                             |    |     |         |         |                |           |           |                    |             |
| CB4856                                                                             | CT | III | 3389894 | 3392525 | WBGene00008348 | C56G7.3   | C56G7.3   | 0.122623378607411  | AGIWUR39672 |
| CB4856                                                                             | CT | III | 3392514 | 3393787 | WBGene00003372 | mlc-4     | C56G7.1   | 0.225651178269349  |             |
| AGIWUR30999;AGIWUR42250;AGIWUR42527                                                |    |     |         |         |                |           |           |                    |             |
| CB4856                                                                             | CT | III | 3396585 | 3397675 | WBGene00010303 | cri-3     | F59A2.3   | -0.277861375914956 |             |
| AGIWUR13117;AGIWUR25564;AGIWUR26708;AGIWUR37141;AGIWUR43589                        |    |     |         |         |                |           |           |                    |             |
| CB4856                                                                             | CT | III | 3397743 | 3400644 | WBGene00010304 | clpf-1    | F59A2.4   | -0.157836726244156 | AGIWUR17293 |
| CB4856                                                                             | CT | III | 3400644 | 3404479 | WBGene00003795 | npp-9     | F59A2.1   | -0.103685182458459 |             |
| AGIWUR8688;AGIWUR12216;AGIWUR18359;AGIWUR29274;AGIWUR32884;AGIWUR34620;AGIWUR35151 |    |     |         |         |                |           |           |                    |             |
| CB4856                                                                             | CT | III | 3404863 | 3405469 | WBGene00010305 | F59A2.5   | F59A2.5   | -0.15514407192456  | AGIWUR18938 |
| CB4856                                                                             | CT | III | 3405576 | 3411624 | WBGene00010302 | F59A2.2   | F59A2.2   | 0.0106000068502246 | AGIWUR22160 |
| CB4856                                                                             | CT | III | 3415552 | 3425447 | WBGene00010306 | golg-4    | F59A2.6   | -0.22737677971605  | AGIWUR43196 |
| CB4856                                                                             | CT | III | 3425736 | 3428094 | WBGene00010450 | K01A11.2  | K01A11.2  |                    |             |
| -0.00644969391999162 AGIWUR41248                                                   |    |     |         |         |                |           |           |                    |             |
| CB4856                                                                             | CT | III | 3428080 | 3431366 | WBGene00010449 | K01A11.1  | K01A11.1  | -0.441024621749118 |             |
| AGIWUR37728                                                                        |    |     |         |         |                |           |           |                    |             |
| CB4856                                                                             | CT | III | 3439023 | 3444207 | WBGene00004976 | spe-41    | K01A11.4  | 0.123136572750539  |             |
| AGIWUR42753                                                                        |    |     |         |         |                |           |           |                    |             |
| CB4856                                                                             | CT | III | 3447140 | 3452613 | WBGene00010451 | K01A11.3  | K01A11.3  | -0.243196715584444 |             |
| AGIWUR12199                                                                        |    |     |         |         |                |           |           |                    |             |
| CB4856                                                                             | CT | III | 3454345 | 3455850 | WBGene00007920 | C34C12.1  | C34C12.1  | 0.104050610908299  |             |
| AGIWUR8950                                                                         |    |     |         |         |                |           |           |                    |             |
| CB4856                                                                             | CT | III | 3456435 | 3460106 | WBGene00007921 | C34C12.2  | C34C12.2  |                    |             |
| -0.00429668951898776 AGIWUR33347                                                   |    |     |         |         |                |           |           |                    |             |
| CB4856                                                                             | CT | III | 3460406 | 3461590 | WBGene00007927 | C34C12.8  | C34C12.8  | -0.15486814899354  |             |
| AGIWUR23839                                                                        |    |     |         |         |                |           |           |                    |             |
| CB4856                                                                             | CT | III | 3461703 | 3467687 | WBGene00007922 | pph-6     | C34C12.3  | -0.035833747654042 |             |
| AGIWUR15982                                                                        |    |     |         |         |                |           |           |                    |             |
| CB4856                                                                             | CT | III | 3467664 | 3469827 | WBGene00007923 | C34C12.4  | C34C12.4  | -0.400325108539085 |             |
| AGIWUR4591;AGIWUR11505;AGIWUR14624;AGIWUR27106;AGIWUR34870                         |    |     |         |         |                |           |           |                    |             |

|                                                                                                       |    |     |         |         |                |          |          |                     |             |
|-------------------------------------------------------------------------------------------------------|----|-----|---------|---------|----------------|----------|----------|---------------------|-------------|
| CB4856                                                                                                | CT | III | 3472003 | 3473718 | WBGene00007924 | rsu-1    | C34C12.5 | -0.212501138763576  |             |
| AGIWUR68;AGIWUR4021;AGIWUR7201;AGIWUR8236;AGIWUR24702;AGIWUR27827;AGIWUR32997;AGIWUR37412;AGIWUR44729 |    |     |         |         |                |          |          |                     |             |
| CB4856                                                                                                | CT | III | 3474019 | 3475450 | WBGene00007928 | C34C12.9 | C34C12.9 | 0.455099367806769   |             |
| AGIWUR12359                                                                                           |    |     |         |         |                |          |          |                     |             |
| CB4856                                                                                                | CT | III | 3482591 | 3484843 | WBGene00007925 | C34C12.6 | C34C12.6 | 0.132798373038506   |             |
| AGIWUR31348                                                                                           |    |     |         |         |                |          |          |                     |             |
| CB4856                                                                                                | CT | III | 3484813 | 3488341 | WBGene00007926 | C34C12.7 | C34C12.7 | 0.456064344138261   |             |
| AGIWUR32822                                                                                           |    |     |         |         |                |          |          |                     |             |
| CB4856                                                                                                | CT | III | 3490363 | 3493234 | WBGene00001639 | gly-14   | M01F1.1  | -0.0393222694479745 | AGIWUR22529 |
| CB4856                                                                                                | CT | III | 3493811 | 3499057 | WBGene00010815 | M01F1.9  | M01F1.9  | -0.123818104311285  |             |
| AGIWUR15859;AGIWUR37865;AGIWUR43079                                                                   |    |     |         |         |                |          |          |                     |             |
| CB4856                                                                                                | CT | III | 3499375 | 3502547 | WBGene00010814 | M01F1.8  | M01F1.8  | -0.310416077916948  | AGIWUR4692  |
| CB4856                                                                                                | CT | III | 3502841 | 3503724 | WBGene00004428 | rpl-16   | M01F1.2  | -0.0721067240409017 |             |
| AGIWUR5475;AGIWUR9044;AGIWUR10626;AGIWUR28475;AGIWUR28655;AGIWUR34090                                 |    |     |         |         |                |          |          |                     |             |
| CB4856                                                                                                | CT | III | 3503710 | 3505355 | WBGene00010809 | M01F1.3  | M01F1.3  | 0.275936145746938   | AGIWUR14202 |
| CB4856                                                                                                | CT | III | 3505649 | 3510033 | WBGene00010810 | M01F1.4  | M01F1.4  | 0.243520642920361   | AGIWUR40566 |
| CB4856                                                                                                | CT | III | 3510237 | 3511011 | WBGene00010812 | mrpl-35  | M01F1.6  | -0.120431674776139  | AGIWUR6204  |
| CB4856                                                                                                | CT | III | 3510964 | 3519607 | WBGene00010811 | hmit-1.3 | M01F1.5  | 0.505274035127115   |             |
| AGIWUR26004                                                                                           |    |     |         |         |                |          |          |                     |             |
| CB4856                                                                                                | CT | III | 3521133 | 3529838 | WBGene00010813 | pitp-1   | M01F1.7  | 0.0383369060518817  | AGIWUR42568 |
| CB4856                                                                                                | CT | III | 3534660 | 3537496 | WBGene00008288 | C54C6.6  | C54C6.6  | -0.0764382748511547 | AGIWUR25423 |
| CB4856                                                                                                | CT | III | 3537688 | 3541628 | WBGene00000248 | ben-1    | C54C6.2  | -0.13346929348123   | AGIWUR19529 |
| CB4856                                                                                                | CT | III | 3545740 | 3546419 | WBGene00044166 | C54C6.7  | C54C6.7  | 0.523493593992102   | AGIWUR16866 |
| CB4856                                                                                                | CT | III | 3549410 | 3549850 | WBGene00008287 | C54C6.5  | C54C6.5  | -0.0932089392151791 |             |
| AGIWUR3248;AGIWUR7930;AGIWUR11537;AGIWUR12523;AGIWUR12823;AGIWUR23202                                 |    |     |         |         |                |          |          |                     |             |
| CB4856                                                                                                | CT | III | 3553649 | 3556627 | WBGene00008286 | C54C6.4  | C54C6.4  | -0.10043563067922   |             |
| AGIWUR2455;AGIWUR20439;AGIWUR35219                                                                    |    |     |         |         |                |          |          |                     |             |
| CB4856                                                                                                | CT | III | 3573585 | 3578771 | WBGene00003605 | nhr-6    | C48D5.1  | 0.467538214024033   | AGIWUR30336 |
| CB4856                                                                                                | CT | III | 3578716 | 3581736 | WBGene00008180 | C48D5.3  | C48D5.3  | -0.0982129999065711 | AGIWUR23414 |
| CB4856                                                                                                | CT | III | 3590734 | 3611993 | WBGene00004213 | ptp-1    | C48D5.2  | 0.236907730299451   |             |
| AGIWUR6891;AGIWUR25035;AGIWUR35090                                                                    |    |     |         |         |                |          |          |                     |             |
| CB4856                                                                                                | CT | III | 3612951 | 3627142 | WBGene00004765 | sel-8    | C32A3.1  | -0.552267599509204  | AGIWUR25533 |
| CB4856                                                                                                | CT | III | 3627986 | 3630368 | WBGene00007859 | mrps-31  | C32A3.2  | -0.533891378481854  | AGIWUR2977  |
| CB4856                                                                                                | CT | III | 3635876 | 3643670 | WBGene00007860 | rilp-1   | C32A3.3  | 0.0985566852805597  | AGIWUR12909 |
| CB4856                                                                                                | CT | III | 3644375 | 3648822 | WBGene00006822 | unc-93   | C46F11.1 | -0.368391511535481  |             |
| AGIWUR19227                                                                                           |    |     |         |         |                |          |          |                     |             |
| CB4856                                                                                                | CT | III | 3648792 | 3650832 | WBGene00008118 | madf-8   | C46F11.3 | -0.0614240934972266 |             |
| AGIWUR4896                                                                                            |    |     |         |         |                |          |          |                     |             |
| CB4856                                                                                                | CT | III | 3650905 | 3652973 | WBGene00008117 | gsr-1    | C46F11.2 | -0.0413709508606424 |             |

|                                                                                   |    |     |         |         |                |          |          |                      |             |
|-----------------------------------------------------------------------------------|----|-----|---------|---------|----------------|----------|----------|----------------------|-------------|
| AGIWUR3922;AGIWUR4457;AGIWUR11413;AGIWUR16538;AGIWUR21036;AGIWUR25473;AGIWUR30459 |    |     |         |         |                |          |          |                      |             |
| CB4856                                                                            | CT | III | 3652866 | 3657602 | WBGene00008120 | C46F11.5 | C46F11.5 | -0.144113744993801   |             |
| AGIWUR2103;AGIWUR17982;AGIWUR19818                                                |    |     |         |         |                |          |          |                      |             |
| CB4856                                                                            | CT | III | 3657716 | 3664494 | WBGene00008119 | C46F11.4 | C46F11.4 | 0.418996406829848    |             |
| AGIWUR9635                                                                        |    |     |         |         |                |          |          |                      |             |
| CB4856                                                                            | CT | III | 3667022 | 3670436 | WBGene00008121 | C46F11.6 | C46F11.6 | 0.106893532006399    |             |
| AGIWUR5194                                                                        |    |     |         |         |                |          |          |                      |             |
| CB4856                                                                            | CT | III | 3683253 | 3685808 | WBGene00012084 | npr-15   | T27D1.3  | 0.222320701104628    | AGIWUR45091 |
| CB4856                                                                            | CT | III | 3697821 | 3699640 | WBGene00000885 | cyn-9    | T27D1.1  | -0.0351776973209343  |             |
| AGIWUR5691;AGIWUR22866                                                            |    |     |         |         |                |          |          |                      |             |
| CB4856                                                                            | CT | III | 3699740 | 3701476 | WBGene00003962 | pdi-1    | C14B1.1  | -0.0321821924439583  | AGIWUR26524 |
| CB4856                                                                            | CT | III | 3702260 | 3703172 | WBGene00007573 | C14B1.2  | C14B1.2  | -0.00147796585911308 | AGIWUR35229 |
| CB4856                                                                            | CT | III | 3703564 | 3705046 | WBGene00007574 | C14B1.3  | C14B1.3  | 0.176164005998903    | AGIWUR36098 |
| CB4856                                                                            | CT | III | 3705265 | 3706784 | WBGene00006474 | wdr-5.1  | C14B1.4  | 0.191318470598032    | AGIWUR43195 |
| CB4856                                                                            | CT | III | 3706886 | 3709225 | WBGene00007576 | dph-1    | C14B1.5  | 0.204501436993318    | AGIWUR42170 |
| CB4856                                                                            | CT | III | 3709330 | 3713282 | WBGene00007581 | alkb-8   | C14B1.10 | -0.105468286309739   |             |
| AGIWUR43295                                                                       |    |     |         |         |                |          |          |                      |             |
| CB4856                                                                            | CT | III | 3713463 | 3718745 | WBGene00007577 | nrde-1   | C14B1.6  | 0.0336390018266535   | AGIWUR30630 |
| CB4856                                                                            | CT | III | 3718655 | 3719722 | WBGene00007579 | C14B1.8  | C14B1.8  | -0.242507461787583   |             |
| AGIWUR1479;AGIWUR19965;AGIWUR23671;AGIWUR36535                                    |    |     |         |         |                |          |          |                      |             |
| CB4856                                                                            | CT | III | 3719904 | 3723597 | WBGene00007578 | C14B1.7  | C14B1.7  | 1.77635683940025e-15 |             |
| AGIWUR3899;AGIWUR7683;AGIWUR11406;AGIWUR14763;AGIWUR18063;AGIWUR23634;AGIWUR27561 |    |     |         |         |                |          |          |                      |             |
| CB4856                                                                            | CT | III | 3724222 | 3724980 | WBGene00184990 | C14B1.12 | C14B1.12 | -0.0646010862545747  |             |
| AGIWUR40467                                                                       |    |     |         |         |                |          |          |                      |             |
| CB4856                                                                            | CT | III | 3726683 | 3729570 | WBGene00045484 | F34D10.9 | F34D10.9 | 0.108626272966394    |             |
| AGIWUR26415                                                                       |    |     |         |         |                |          |          |                      |             |
| CB4856                                                                            | CT | III | 3729493 | 3735039 | WBGene00009372 | evl-18   | F34D10.2 | -0.0425616251996441  |             |
| AGIWUR31255;AGIWUR41733                                                           |    |     |         |         |                |          |          |                      |             |
| CB4856                                                                            | CT | III | 3736602 | 3739765 | WBGene00009374 | F34D10.4 | F34D10.4 | -0.0389955107774931  |             |
| AGIWUR6706                                                                        |    |     |         |         |                |          |          |                      |             |
| CB4856                                                                            | CT | III | 3745461 | 3747451 | WBGene00003033 | lin-48   | F34D10.5 | 0.138030220613489    |             |
| AGIWUR8297;AGIWUR33973                                                            |    |     |         |         |                |          |          |                      |             |
| CB4856                                                                            | CT | III | 3747560 | 3759412 | WBGene00009375 | F34D10.6 | F34D10.6 | -0.0767906827263012  |             |
| AGIWUR24321;AGIWUR27132                                                           |    |     |         |         |                |          |          |                      |             |
| CB4856                                                                            | CT | III | 3760378 | 3765556 | WBGene00008091 | C44F1.1  | C44F1.1  | 0.0164179239371851   | AGIWUR34530 |
| CB4856                                                                            | CT | III | 3768500 | 3770321 | WBGene00008092 | gmeb-3   | C44F1.2  | -0.109766952705904   |             |
| AGIWUR17407;AGIWUR28024;AGIWUR36161                                               |    |     |         |         |                |          |          |                      |             |
| CB4856                                                                            | CT | III | 3771425 | 3773394 | WBGene00002267 | lec-4    | C44F1.3  | 0.0940151461115146   | AGIWUR34709 |
| CB4856                                                                            | CT | III | 3774896 | 3786640 | WBGene00000070 | acy-3    | C44F1.5  | 0.0464898104498204   | AGIWUR26920 |

|                                                                                                                                                                    |     |         |         |                |          |          |                     |             |
|--------------------------------------------------------------------------------------------------------------------------------------------------------------------|-----|---------|---------|----------------|----------|----------|---------------------|-------------|
| CB4856 CT                                                                                                                                                          | III | 3789982 | 3800547 | WBGene00003476 | mtm-3    | T24A11.1 | 0.0719335871575746  |             |
| AGIWUR9591;AGIWUR13492                                                                                                                                             |     |         |         |                |          |          |                     |             |
| CB4856 CT                                                                                                                                                          | III | 3802452 | 3804438 | WBGene00011974 | xbx-5    | T24A11.2 | 0.130572568218177   |             |
| AGIWUR16614;AGIWUR30028                                                                                                                                            |     |         |         |                |          |          |                     |             |
| CB4856 CT                                                                                                                                                          | III | 3804772 | 3809030 | WBGene00006591 | toh-1    | T24A11.3 | 0.0159086069627499  |             |
| AGIWUR2545;AGIWUR10073;AGIWUR17610;AGIWUR19116;AGIWUR29103;AGIWUR29370;AGIWUR36519                                                                                 |     |         |         |                |          |          |                     |             |
| CB4856 CT                                                                                                                                                          | III | 3813519 | 3819679 | WBGene00001086 | dpy-27   | R13G10.1 | 0.14659389470514    |             |
| AGIWUR14664                                                                                                                                                        |     |         |         |                |          |          |                     |             |
| CB4856 CT                                                                                                                                                          | III | 3822403 | 3826261 | WBGene00000137 | amx-1    | R13G10.2 | 0.116272477051865   |             |
| AGIWUR18369                                                                                                                                                        |     |         |         |                |          |          |                     |             |
| CB4856 CT                                                                                                                                                          | III | 3826378 | 3829205 | WBGene00011260 | cnm-5    | R13G10.4 | -0.34460914674502   |             |
| AGIWUR24264                                                                                                                                                        |     |         |         |                |          |          |                     |             |
| CB4856 CT                                                                                                                                                          | III | 3832591 | 3834522 | WBGene00007963 | cyp-25A1 | C36A4.1  | -0.0764435765317772 |             |
| AGIWUR27481;AGIWUR44867                                                                                                                                            |     |         |         |                |          |          |                     |             |
| CB4856 CT                                                                                                                                                          | III | 3835221 | 3837211 | WBGene00007964 | cyp-25A2 | C36A4.2  | 0.02514027707638    |             |
| AGIWUR18068                                                                                                                                                        |     |         |         |                |          |          |                     |             |
| CB4856 CT                                                                                                                                                          | III | 3837551 | 3839477 | WBGene00014697 | cyp-25A3 | C36A4.3  | 0.407682302163542   |             |
| AGIWUR33808                                                                                                                                                        |     |         |         |                |          |          |                     |             |
| CB4856 CT                                                                                                                                                          | III | 3841262 | 3843614 | WBGene00007965 | C36A4.4  | C36A4.4  | -0.0482415499281679 | AGIWUR21773 |
| CB4856 CT                                                                                                                                                          | III | 3853026 | 3862958 | WBGene00000264 | brc-1    | C36A4.8  | -0.27400821530086   | AGIWUR18213 |
| CB4856 CT                                                                                                                                                          | III | 3864036 | 3867098 | WBGene00007969 | acs-19   | C36A4.9  | 0.471512422626265   |             |
| AGIWUR5743;AGIWUR8131;AGIWUR18162;AGIWUR24888;AGIWUR42768                                                                                                          |     |         |         |                |          |          |                     |             |
| CB4856 CT                                                                                                                                                          | III | 3867852 | 3869587 | WBGene00004414 | rpl-3    | F13B10.2 | -0.0197683874176606 |             |
| AGIWUR4750;AGIWUR29310                                                                                                                                             |     |         |         |                |          |          |                     |             |
| CB4856 CT                                                                                                                                                          | III | 3869591 | 3901466 | WBGene00006575 | tir-1    | F13B10.1 | 0.613742815436205   |             |
| AGIWUR2597;AGIWUR3084;AGIWUR3265;AGIWUR5178;AGIWUR9784;AGIWUR15222;AGIWUR19101;AGIWUR21064;AGIWUR30859;AGIWUR30875;AGIWUR34308;AGIWUR38888;AGIWUR39275;AGIWUR40787 |     |         |         |                |          |          |                     |             |
| CB4856 CT                                                                                                                                                          | III | 3903114 | 3907687 | WBGene00014202 | mmcm-1   | ZK1058.1 | 0.10802546188165    |             |
| AGIWUR1795;AGIWUR2675;AGIWUR8381;AGIWUR12443;AGIWUR14231;AGIWUR16597;AGIWUR17881;AGIWUR33357;AGIWUR39146;AGIWUR41856                                               |     |         |         |                |          |          |                     |             |
| CB4856 CT                                                                                                                                                          | III | 3908929 | 3914149 | WBGene00003930 | pat-3    | ZK1058.2 | 0.228891754965687   |             |
| AGIWUR35961                                                                                                                                                        |     |         |         |                |          |          |                     |             |
| CB4856 CT                                                                                                                                                          | III | 3916933 | 3918809 | WBGene00014204 | ccdc-47  | ZK1058.4 | 0.0244848961141493  |             |
| AGIWUR44755                                                                                                                                                        |     |         |         |                |          |          |                     |             |
| CB4856 CT                                                                                                                                                          | III | 3918871 | 3920700 | WBGene00014203 | ZK1058.3 | ZK1058.3 | -0.0193846311899453 |             |
| AGIWUR18587                                                                                                                                                        |     |         |         |                |          |          |                     |             |
| CB4856 CT                                                                                                                                                          | III | 3920626 | 3921711 | WBGene00014205 | ZK1058.5 | ZK1058.5 | -0.0649149307204322 |             |
| AGIWUR39458                                                                                                                                                        |     |         |         |                |          |          |                     |             |
| CB4856 CT                                                                                                                                                          | III | 3922207 | 3923869 | WBGene00014206 | nit-1    | ZK1058.6 | 0.146015092741983   |             |

|                                                                                                                                                                      |    |     |         |         |                |          |          |                                 |
|----------------------------------------------------------------------------------------------------------------------------------------------------------------------|----|-----|---------|---------|----------------|----------|----------|---------------------------------|
| AGIWUR42259                                                                                                                                                          |    |     |         |         |                |          |          |                                 |
| CB4856                                                                                                                                                               | CT | III | 3923792 | 3926238 | WBGene00014207 | ZK1058.9 | ZK1058.9 | 0.20289311243447                |
| AGIWUR27933                                                                                                                                                          |    |     |         |         |                |          |          |                                 |
| CB4856                                                                                                                                                               | CT | III | 3929530 | 3931523 | WBGene00009502 | F37A8.2  | F37A8.2  | -0.0315393191272335 AGIWUR14427 |
| CB4856                                                                                                                                                               | CT | III | 3933577 | 3935908 | WBGene00003748 | nlp-10   | F37A8.4  | 0.13084284714586 AGIWUR40346    |
| CB4856                                                                                                                                                               | CT | III | 3956624 | 3958161 | WBGene00009503 | F37A8.5  | F37A8.5  | 1.21893993371745 AGIWUR6158     |
| CB4856                                                                                                                                                               | CT | III | 3960258 | 3961825 | WBGene00011215 | R10E9.3  | R10E9.3  | 0.191926681523745 AGIWUR21427   |
| CB4856                                                                                                                                                               | CT | III | 3962731 | 3964158 | WBGene00011214 | R10E9.2  | R10E9.2  | 0.0230300292883676 AGIWUR23439  |
| CB4856                                                                                                                                                               | CT | III | 3964663 | 3976391 | WBGene00003423 | msi-1    | R10E9.1  | 0.235215116174531               |
| AGIWUR32590;AGIWUR33464                                                                                                                                              |    |     |         |         |                |          |          |                                 |
| CB4856                                                                                                                                                               | CT | III | 3984367 | 3984670 | WBGene00012380 | Y1A5A.2  | Y1A5A.2  | 0.0576969901335449 AGIWUR12504  |
| CB4856                                                                                                                                                               | CT | III | 3985565 | 3986809 | WBGene00012379 | Y1A5A.1  | Y1A5A.1  | -0.0439709276840983             |
| AGIWUR35450;AGIWUR37937                                                                                                                                              |    |     |         |         |                |          |          |                                 |
| CB4856                                                                                                                                                               | CT | III | 3988059 | 3988575 | WBGene00044230 | C36E8.6  | C36E8.6  | -0.126793927059177 AGIWUR30001  |
| CB4856                                                                                                                                                               | CT | III | 3989298 | 3992174 | WBGene00007981 | glb-11   | C36E8.2  | 0.204187238419749 AGIWUR33067   |
| CB4856                                                                                                                                                               | CT | III | 3999286 | 4004143 | WBGene00007980 | C36E8.1  | C36E8.1  | 0.0812572489223591              |
| AGIWUR1345;AGIWUR21250;AGIWUR23164                                                                                                                                   |    |     |         |         |                |          |          |                                 |
| CB4856                                                                                                                                                               | CT | III | 4006142 | 4009960 | WBGene00007982 | pxd-1    | C36E8.3  | 0.105027805134997 AGIWUR29639   |
| CB4856                                                                                                                                                               | CT | III | 4012336 | 4015763 | WBGene00007983 | C36E8.4  | C36E8.4  | 0.358263361324443 AGIWUR41273   |
| CB4856                                                                                                                                                               | CT | III | 4015769 | 4017643 | WBGene00006537 | tbb-2    | C36E8.5  | -0.0736284385952573             |
| AGIWUR668;AGIWUR1222;AGIWUR16069;AGIWUR18887;AGIWUR19179;AGIWUR42288                                                                                                 |    |     |         |         |                |          |          |                                 |
| CB4856                                                                                                                                                               | CT | III | 4020037 | 4021867 | WBGene00011367 | snpc-3.4 | T02C12.2 | -0.174665813030963              |
| AGIWUR24584                                                                                                                                                          |    |     |         |         |                |          |          |                                 |
| CB4856                                                                                                                                                               | CT | III | 4022166 | 4025658 | WBGene00011368 | tftc-5   | T02C12.3 | -0.0604859873184047             |
| AGIWUR29547                                                                                                                                                          |    |     |         |         |                |          |          |                                 |
| CB4856                                                                                                                                                               | CT | III | 4029115 | 4036840 | WBGene00002038 | hum-5    | T02C12.1 | 0.00488316737435568             |
| AGIWUR9502                                                                                                                                                           |    |     |         |         |                |          |          |                                 |
| CB4856                                                                                                                                                               | CT | III | 4052807 | 4057976 | WBGene00004322 | rcq-5    | E03A3.2  | -0.11922380449235               |
| AGIWUR3697;AGIWUR26154;AGIWUR31769                                                                                                                                   |    |     |         |         |                |          |          |                                 |
| CB4856                                                                                                                                                               | CT | III | 4058272 | 4058743 | WBGene00001943 | his-69   | E03A3.3  | -0.0184533130750637 AGIWUR40118 |
| CB4856                                                                                                                                                               | CT | III | 4059647 | 4060172 | WBGene00001944 | his-70   | E03A3.4  | -0.325867652683824 AGIWUR14280  |
| CB4856                                                                                                                                                               | CT | III | 4060591 | 4062822 | WBGene00008465 | E03A3.5  | E03A3.5  | -0.295743008851659 AGIWUR14656  |
| CB4856                                                                                                                                                               | CT | III | 4066717 | 4082794 | WBGene00006811 | unc-79   | E03A3.6  | -0.0320515052106387             |
| AGIWUR4423;AGIWUR5142;AGIWUR15798;AGIWUR15963;AGIWUR18293;AGIWUR20493;AGIWUR28967;AGIWUR39605;AGIWUR41832                                                            |    |     |         |         |                |          |          |                                 |
| CB4856                                                                                                                                                               | CT | III | 4084003 | 4086636 | WBGene00002202 | kin-19   | C03C10.1 | 0.0765261333601082              |
| AGIWUR1828;AGIWUR5712;AGIWUR8099;AGIWUR15304;AGIWUR16042;AGIWUR21790;AGIWUR22763;AGIWUR30118;AGIWUR32074;AGIWUR33100;AGIWUR34225;AGIWUR34996;AGIWUR37313;AGIWUR37347 |    |     |         |         |                |          |          |                                 |
| CB4856                                                                                                                                                               | CT | III | 4090291 | 4092120 | WBGene00007271 | C03C10.5 | C03C10.5 | 1.25832891010337                |
| AGIWUR25475                                                                                                                                                          |    |     |         |         |                |          |          |                                 |

|                                                                                                                        |     |         |         |                |           |           |                     |
|------------------------------------------------------------------------------------------------------------------------|-----|---------|---------|----------------|-----------|-----------|---------------------|
| CB4856 CT<br>AGIWUR111                                                                                                 | III | 4091126 | 4093311 | WBGene00007269 | C03C10.2  | C03C10.2  | -0.0076831776770474 |
| CB4856 CT<br>AGIWUR10602;AGIWUR20109;AGIWUR25130;AGIWUR33669;AGIWUR38097;AGIWUR44770                                   | III | 4093306 | 4094921 | WBGene00004392 | rnr-2     | C03C10.3  | -0.214955084629947  |
| CB4856 CT<br>AGIWUR44164                                                                                               | III | 4096045 | 4096915 | WBGene00007273 | C03C10.7  | C03C10.7  | -0.0198253540183888 |
| CB4856 CT<br>AGIWUR20043                                                                                               | III | 4096896 | 4098190 | WBGene00007270 | rei-1     | C03C10.4  | -0.0115029756944267 |
| CB4856 CT<br>AGIWUR8148;AGIWUR9828;AGIWUR16874;AGIWUR24520;AGIWUR31702;AGIWUR35136;AGIWUR35765;AGIWUR38831;AGIWUR41941 | III | 4115226 | 4147255 | WBGene00006830 | unc-103   | C30D11.1  | 0.119787520523774   |
| CB4856 CT<br>AGIWUR39934                                                                                               | III | 4147425 | 4151598 | WBGene00007631 | wht-3     | C16C10.12 | -0.328559534260307  |
| CB4856 CT<br>AGIWUR2630;AGIWUR3696;AGIWUR4247;AGIWUR8756;AGIWUR24873;AGIWUR36702                                       | III | 4152054 | 4152915 | WBGene00007630 | har-1     | C16C10.11 | -0.439572336835602  |
| CB4856 CT<br>AGIWUR16289                                                                                               | III | 4153599 | 4154650 | WBGene00006448 | glod-4    | C16C10.10 | -0.221749279257132  |
| CB4856 CT<br>AGIWUR38186                                                                                               | III | 4155388 | 4157394 | WBGene00007629 | C16C10.9  | C16C10.9  | 0.0968076204948574  |
| CB4856 CT<br>AGIWUR15159                                                                                               | III | 4161951 | 4164171 | WBGene00007628 | C16C10.8  | C16C10.8  | -0.128626030328167  |
| CB4856 CT<br>AGIWUR10393                                                                                               | III | 4164275 | 4166845 | WBGene00004381 | rnf-5     | C16C10.7  | 0.320626647353222   |
| CB4856 CT<br>AGIWUR21267                                                                                               | III | 4166944 | 4168765 | WBGene00007627 | ccdc-55   | C16C10.6  | -0.0178365760431358 |
| CB4856 CT<br>AGIWUR2199                                                                                                | III | 4168797 | 4170949 | WBGene00007626 | rnf-121   | C16C10.5  | -0.115302927990351  |
| CB4856 CT<br>AGIWUR17931                                                                                               | III | 4171336 | 4172223 | WBGene00007625 | C16C10.4  | C16C10.4  | 0.0340280890414384  |
| CB4856 CT<br>AGIWUR20823                                                                                               | III | 4172337 | 4176159 | WBGene00007624 | hrde-1    | C16C10.3  | -0.0266445429602111 |
| CB4856 CT<br>AGIWUR1567                                                                                                | III | 4176678 | 4177578 | WBGene00007632 | C16C10.13 | C16C10.13 | -0.178598218636603  |
| CB4856 CT<br>AGIWUR10585;AGIWUR12996;AGIWUR21393;AGIWUR27638;AGIWUR30103                                               | III | 4177532 | 4178664 | WBGene00007623 | C16C10.2  | C16C10.2  | -0.0646537271436429 |
| CB4856 CT<br>AGIWUR31291                                                                                               | III | 4178783 | 4181438 | WBGene00007622 | C16C10.1  | C16C10.1  | 0.0581560497855591  |
| CB4856 CT                                                                                                              | III | 4181543 | 4186825 | WBGene00003073 | lars-1    | R74.1     | -0.139726967546684  |
| CB4856 CT<br>AGIWUR27575;AGIWUR27987;AGIWUR31182;AGIWUR31227;AGIWUR43478                                               | III | 4188160 | 4189285 | WBGene00011278 | R74.2     | R74.2     | -0.548129148281859  |
|                                                                                                                        |     |         |         |                |           |           | AGIWUR30809         |



|                                                                        |    |     |         |         |                |          |          |                      |             |
|------------------------------------------------------------------------|----|-----|---------|---------|----------------|----------|----------|----------------------|-------------|
| CB4856                                                                 | CT | III | 4189380 | 4190341 | WBGene00206525 | R74.10   | R74.10   | -0.0713102393256762  | AGIWUR44068 |
| CB4856                                                                 | CT | III | 4191141 | 4193427 | WBGene00001034 | dnj-16   | R74.4    | -0.318531810829245   |             |
| AGIWUR19228;AGIWUR30349                                                |    |     |         |         |                |          |          |                      |             |
| CB4856                                                                 | CT | III | 4193809 | 4195358 | WBGene00006959 | xbp-1    | R74.3    | -0.084840535377392   |             |
| AGIWUR16166;AGIWUR22379;AGIWUR37406                                    |    |     |         |         |                |          |          |                      |             |
| CB4856                                                                 | CT | III | 4197285 | 4202289 | WBGene00011279 | asd-1    | R74.5    | 0.000975754766546544 |             |
| AGIWUR33402;AGIWUR35999                                                |    |     |         |         |                |          |          |                      |             |
| CB4856                                                                 | CT | III | 4202253 | 4204269 | WBGene00011280 | R74.6    | R74.6    | -0.284111386205872   |             |
| AGIWUR1687;AGIWUR16800;AGIWUR35134                                     |    |     |         |         |                |          |          |                      |             |
| CB4856                                                                 | CT | III | 4204429 | 4205814 | WBGene00011281 | R74.7    | R74.7    | -0.202914851527103   | AGIWUR28021 |
| CB4856                                                                 | CT | III | 4206253 | 4208265 | WBGene00011282 | R74.8    | R74.8    | -0.163068253590007   |             |
| AGIWUR5769;AGIWUR22059                                                 |    |     |         |         |                |          |          |                      |             |
| CB4856                                                                 | CT | III | 4210562 | 4216724 | WBGene00009647 | F43C1.1  | F43C1.1  | 0.598213225109276    | AGIWUR35794 |
| CB4856                                                                 | CT | III | 4216764 | 4228108 | WBGene00003401 | mpk-1    | F43C1.2  | -0.0979806524537379  |             |
| AGIWUR1958;AGIWUR9733;AGIWUR14898;AGIWUR14905;AGIWUR17406;AGIWUR40763  |    |     |         |         |                |          |          |                      |             |
| CB4856                                                                 | CT | III | 4229141 | 4230427 | WBGene00009649 | F43C1.5  | F43C1.5  | -0.335536836528298   | AGIWUR1306  |
| CB4856                                                                 | CT | III | 4230436 | 4233219 | WBGene00003619 | nhr-20   | F43C1.4  | 0.0737823990593842   | AGIWUR42423 |
| CB4856                                                                 | CT | III | 4241477 | 4242593 | WBGene00023423 | F43C1.7  | F43C1.7  | -0.17267051605681    |             |
| AGIWUR8452;AGIWUR19266;AGIWUR33069                                     |    |     |         |         |                |          |          |                      |             |
| CB4856                                                                 | CT | III | 4242672 | 4243561 | WBGene00023422 | mrpl-21  | F43C1.6  | -0.0807728142961537  | AGIWUR5851  |
| CB4856                                                                 | CT | III | 4243674 | 4244385 | WBGene00009648 | zhit-2   | F43C1.3  | 0.0567175435839062   |             |
| AGIWUR3825;AGIWUR22128;AGIWUR36936;AGIWUR44159                         |    |     |         |         |                |          |          |                      |             |
| CB4856                                                                 | CT | III | 4244858 | 4247671 | WBGene00012858 | Y44F5A.1 | Y44F5A.1 | -0.20838580927059    |             |
| AGIWUR13909                                                            |    |     |         |         |                |          |          |                      |             |
| CB4856                                                                 | CT | III | 4248155 | 4263048 | WBGene00011604 | T08A11.1 | T08A11.1 | 0.0206921938630571   |             |
| AGIWUR8299;AGIWUR14489;AGIWUR20691;AGIWUR32732;AGIWUR33366;AGIWUR37156 |    |     |         |         |                |          |          |                      |             |
| CB4856                                                                 | CT | III | 4263785 | 4269270 | WBGene00011605 | sftb-1   | T08A11.2 | -0.191596174376222   |             |
| AGIWUR1553;AGIWUR11891;AGIWUR19820;AGIWUR25548                         |    |     |         |         |                |          |          |                      |             |
| CB4856                                                                 | CT | III | 4269743 | 4272506 | WBGene00011198 | R10E4.1  | R10E4.1  | 0.013308491697396    |             |
| AGIWUR7076;AGIWUR9157;AGIWUR18471                                      |    |     |         |         |                |          |          |                      |             |
| CB4856                                                                 | CT | III | 4276266 | 4280217 | WBGene00006331 | sup-26   | R10E4.2  | 0.712304109783651    |             |
| AGIWUR6823;AGIWUR16442;AGIWUR16959;AGIWUR20757;AGIWUR24961;AGIWUR41251 |    |     |         |         |                |          |          |                      |             |
| CB4856                                                                 | CT | III | 4285861 | 4287472 | WBGene00011200 | R10E4.3  | R10E4.3  | 0.0431644814828838   | AGIWUR36049 |
| CB4856                                                                 | CT | III | 4288264 | 4291283 | WBGene00003157 | mcm-5    | R10E4.4  | 0.0205620429455777   |             |
| AGIWUR11433;AGIWUR14883;AGIWUR23176;AGIWUR25320;AGIWUR33448            |    |     |         |         |                |          |          |                      |             |
| CB4856                                                                 | CT | III | 4291543 | 4293413 | WBGene00011201 | nth-1    | R10E4.5  | -0.136618743271047   | AGIWUR25315 |
| CB4856                                                                 | CT | III | 4293408 | 4295142 | WBGene00011202 | R10E4.6  | R10E4.6  | 0.234600727737837    | AGIWUR16345 |
| CB4856                                                                 | CT | III | 4295224 | 4296599 | WBGene00011203 | R10E4.7  | R10E4.7  | 0.400266425619629    | AGIWUR34301 |
| CB4856                                                                 | CT | III | 4297239 | 4301039 | WBGene00011206 | R10E4.11 | R10E4.11 | -0.339928655800399   |             |

|                                                             |    |     |         |         |                |          |          |                     |             |
|-------------------------------------------------------------|----|-----|---------|---------|----------------|----------|----------|---------------------|-------------|
| AGIWUR3790                                                  |    |     |         |         |                |          |          |                     |             |
| CB4856                                                      | CT | III | 4301620 | 4302393 | WBGene00011205 | R10E4.9  | R10E4.9  | 0.0459315931593647  | AGIWUR33427 |
| CB4856                                                      | CT | III | 4303096 | 4313128 | WBGene00001352 | evl-14   | H38K22.1 | -0.0382007705079133 |             |
| AGIWUR33989                                                 |    |     |         |         |                |          |          |                     |             |
| CB4856                                                      | CT | III | 4313927 | 4317608 | WBGene00010428 | dcn-1    | H38K22.2 | -0.151800754184164  |             |
| AGIWUR30845                                                 |    |     |         |         |                |          |          |                     |             |
| CB4856                                                      | CT | III | 4317702 | 4320341 | WBGene00006478 | tag-131  | H38K22.3 | 0.128441557310353   |             |
| AGIWUR20634                                                 |    |     |         |         |                |          |          |                     |             |
| CB4856                                                      | CT | III | 4320389 | 4321348 | WBGene00044911 | H38K22.6 | H38K22.6 | -0.238096774773156  |             |
| AGIWUR13317;AGIWUR17809;AGIWUR26894;AGIWUR40933;AGIWUR41799 |    |     |         |         |                |          |          |                     |             |
| CB4856                                                      | CT | III | 4321748 | 4322867 | WBGene00044912 | H38K22.7 | H38K22.7 | -0.173372198667662  |             |
| AGIWUR917;AGIWUR9416;AGIWUR19948;AGIWUR20893;AGIWUR30626    |    |     |         |         |                |          |          |                     |             |
| CB4856                                                      | CT | III | 4324280 | 4331227 | WBGene00001631 | gly-6    | H38K22.5 | 0.0706090144165543  |             |
| AGIWUR11179;AGIWUR26035;AGIWUR27415;AGIWUR29155;AGIWUR39994 |    |     |         |         |                |          |          |                     |             |
| CB4856                                                      | CT | III | 4332996 | 4340464 | WBGene00007135 | cdk-12   | B0285.1  | -0.115838290638708  | AGIWUR15012 |
| CB4856                                                      | CT | III | 4341983 | 4343336 | WBGene00007136 | B0285.3  | B0285.3  | -0.0121462086975708 | AGIWUR31964 |
| CB4856                                                      | CT | III | 4343446 | 4345366 | WBGene00007137 | B0285.4  | B0285.4  | 0.291998300412345   | AGIWUR9788  |
| CB4856                                                      | CT | III | 4345339 | 4350079 | WBGene00002003 | hse-5    | B0285.5  | -0.0111737284884583 | AGIWUR25929 |
| CB4856                                                      | CT | III | 4352246 | 4355888 | WBGene00007138 | B0285.6  | B0285.6  | -0.0762984507237157 | AGIWUR18506 |
| CB4856                                                      | CT | III | 4356539 | 4364974 | WBGene00007139 | mnp-1    | B0285.7  | 0.405748826079963   | AGIWUR19898 |
| CB4856                                                      | CT | III | 4365285 | 4367469 | WBGene00000511 | ckb-1    | B0285.8  | -0.390007863366122  | AGIWUR25566 |
| CB4856                                                      | CT | III | 4367832 | 4370160 | WBGene00000512 | ckb-2    | B0285.9  | -0.951254959914598  | AGIWUR19613 |
| CB4856                                                      | CT | III | 4370885 | 4372820 | WBGene00000513 | ckb-3    | B0285.10 | -0.122721866959082  |             |
| AGIWUR12272                                                 |    |     |         |         |                |          |          |                     |             |
| CB4856                                                      | CT | III | 4373179 | 4375323 | WBGene00045188 | B0284.5  | B0284.5  | 0.155354907072569   |             |
| AGIWUR6647;AGIWUR44597                                      |    |     |         |         |                |          |          |                     |             |
| CB4856                                                      | CT | III | 4376503 | 4379200 | WBGene00007131 | pals-26  | B0284.1  | 1.11866494551985    |             |
| AGIWUR659;AGIWUR34401                                       |    |     |         |         |                |          |          |                     |             |
| CB4856                                                      | CT | III | 4379368 | 4381041 | WBGene00007133 | B0284.3  | B0284.3  | -0.162891821107074  | AGIWUR22476 |
| CB4856                                                      | CT | III | 4381739 | 4384141 | WBGene00007132 | pals-27  | B0284.2  | 0.939023885803728   | AGIWUR2667  |
| CB4856                                                      | CT | III | 4384787 | 4387757 | WBGene00007134 | pals-28  | B0284.4  | 0.462170980565065   | AGIWUR31960 |
| CB4856                                                      | CT | III | 4394796 | 4396617 | WBGene00011112 | R07E5.4  | R07E5.4  | -0.462156958030345  | AGIWUR14612 |
| CB4856                                                      | CT | III | 4397415 | 4398576 | WBGene00011113 | R07E5.5  | R07E5.5  | -0.0997334428771381 | AGIWUR38210 |
| CB4856                                                      | CT | III | 4398763 | 4400942 | WBGene00011114 | R07E5.6  | R07E5.6  | 0.0462817334631396  | AGIWUR35081 |
| CB4856                                                      | CT | III | 4401442 | 4402505 | WBGene00011120 | R07E5.15 | R07E5.15 | -0.225347588494837  |             |
| AGIWUR37803                                                 |    |     |         |         |                |          |          |                     |             |
| CB4856                                                      | CT | III | 4402595 | 4404436 | WBGene00011121 | R07E5.17 | R07E5.17 | 0.312912328334975   |             |
| AGIWUR2552;AGIWUR38683                                      |    |     |         |         |                |          |          |                     |             |
| CB4856                                                      | CT | III | 4404786 | 4406285 | WBGene00011111 | snfc-5   | R07E5.3  | -0.192862021021273  |             |

AGIWUR11492;AGIWUR14649;AGIWUR22515;AGIWUR25831;AGIWUR28126;AGIWUR28837;AGIWUR29804;AGIWUR32754;AGIWUR35093  
 CB4856 CT III 4406286 4407326 WBGene00004387 rnp-4 R07E5.14 -0.0938343450226355  
 AGIWUR11861;AGIWUR14460;AGIWUR19160;AGIWUR24049;AGIWUR25412;AGIWUR25790;AGIWUR27926  
 CB4856 CT III 4407444 4408437 WBGene00011110 prdx-3 R07E5.2 -0.17258584873211  
 AGIWUR25524;AGIWUR35814;AGIWUR37579;AGIWUR41024  
 CB4856 CT III 4408551 4412149 WBGene00011109 R07E5.1 R07E5.1 -0.224855030291346 AGIWUR8228  
 CB4856 CT III 4413457 4414748 WBGene00011119 mpc-1 R07E5.13 -0.118378393557611  
 AGIWUR5754;AGIWUR9776;AGIWUR19771;AGIWUR33099;AGIWUR40240  
 CB4856 CT III 4414732 4415235 WBGene00011117 R07E5.11 R07E5.11 -0.390529318070355  
 AGIWUR32637  
 CB4856 CT III 4415520 4418058 WBGene00011116 pdcd-2 R07E5.10 -0.0671905714915191  
 AGIWUR4236;AGIWUR6736;AGIWUR6974;AGIWUR15557;AGIWUR19842;AGIWUR20601;AGIWUR20807;AGIWUR36005;AGIWUR38031;AGIWUR38783  
 CB4856 CT III 4418343 4419167 WBGene00011115 R07E5.7 R07E5.7 -0.1323338073647  
 AGIWUR1971;AGIWUR7078;AGIWUR8963;AGIWUR28166;AGIWUR32271  
 CB4856 CT III 4419848 4423368 WBGene00000520 cku-80 R07E5.8 -0.246155247371554 AGIWUR29231  
 CB4856 CT III 4423711 4429499 WBGene00007791 C28A5.6 C28A5.6 -0.106194736692498 AGIWUR37808  
 CB4856 CT III 4442081 4444237 WBGene00003590 nex-3 C28A5.3 -0.384087073217355 AGIWUR30120  
 CB4856 CT III 4446637 4449943 WBGene00000463 ceh-43 C28A5.4 1.04037616270002 AGIWUR11902  
 CB4856 CT III 4462833 4467377 WBGene00003577 ndg-4 F56F3.2 -0.412601777363854  
 AGIWUR18135;AGIWUR26646  
 CB4856 CT III 4468878 4470808 WBGene00010155 F56F3.4 F56F3.4 0.11980801570312 AGIWUR33529  
 CB4856 CT III 4471407 4475150 WBGene00004132 ifet-1 F56F3.1 -0.221485350159389  
 AGIWUR13827;AGIWUR40868;AGIWUR42975  
 CB4856 CT III 4475918 4476887 WBGene00004470 rps-1 F56F3.5 -0.0903020525944083  
 AGIWUR7578;AGIWUR16537;AGIWUR18534;AGIWUR24392;AGIWUR34321;AGIWUR36331  
 CB4856 CT III 4476888 4477583 WBGene00002100 ins-17 F56F3.6 0.402112386784972  
 AGIWUR7314;AGIWUR9236;AGIWUR11108;AGIWUR13900;AGIWUR16963;AGIWUR24675  
 CB4856 CT III 4489359 4491392 WBGene00000465 cpg-1 C07G2.1 -0.0465916228419267  
 AGIWUR3126;AGIWUR4450;AGIWUR6962;AGIWUR9701;AGIWUR25056;AGIWUR28301;AGIWUR33939  
 CB4856 CT III 4491627 4499043 WBGene00000223 atf-7 C07G2.2 0.0920190031170129  
 AGIWUR4927;AGIWUR5314;AGIWUR14974;AGIWUR20820;AGIWUR24837;AGIWUR29854;AGIWUR31507;AGIWUR34947;AGIWUR35619;AGIWUR37894;AGIWUR42736  
 CB4856 CT III 4499191 4508114 WBGene00000380 cct-5 C07G2.3 -0.223986571485724  
 AGIWUR3833;AGIWUR4408;AGIWUR31324;AGIWUR40854  
 CB4856 CT III 4508855 4512162 WBGene00009115 F25F2.1 F25F2.1 -0.0217380998210324 AGIWUR307  
 CB4856 CT III 4520363 4536991 WBGene00000396 cdh-4 F25F2.2 0.206983308538145 AGIWUR20794  
 CB4856 CT III 4537277 4540644 WBGene00010904 ugt-62 M88.1 -0.67877988516757 AGIWUR13910  
 CB4856 CT III 4541326 4542452 WBGene00010905 mrps-34 M88.2 -0.165142143293703 AGIWUR38242

|                                                                                                |     |         |         |                |          |           |                     |                    |
|------------------------------------------------------------------------------------------------|-----|---------|---------|----------------|----------|-----------|---------------------|--------------------|
| CB4856 CT                                                                                      | III | 4542881 | 4546025 | WBGene00010909 | cisd-3.1 | M88.7     | -0.145234517870154  |                    |
| AGIWUR21078                                                                                    |     |         |         |                |          |           |                     |                    |
| CB4856 CT                                                                                      | III | 4549063 | 4551567 | WBGene00010907 | M88.4    | M88.4     | -0.171853378648883  | AGIWUR44096        |
| CB4856 CT                                                                                      | III | 4553618 | 4560350 | WBGene00010908 | zbp-1    | M88.5     | 0.10225025359976    |                    |
| AGIWUR6561;AGIWUR6686;AGIWUR36835                                                              |     |         |         |                |          |           |                     |                    |
| CB4856 CT                                                                                      | III | 4562738 | 4566276 | WBGene00003915 | pan-1    | M88.6     | 0.241267788537851   | AGIWUR26141        |
| CB4856 CT                                                                                      | III | 4566279 | 4568144 | WBGene00009439 | mlcd-1   | F35G12.1  | 0.0911847162136068  |                    |
| AGIWUR2770;AGIWUR2817;AGIWUR13489;AGIWUR27496;AGIWUR33025;AGIWUR39632                          |     |         |         |                |          |           |                     |                    |
| CB4856 CT                                                                                      | III | 4567325 | 4571835 | WBGene00009440 | idhg-1   | F35G12.2  | 0.234626711097922   |                    |
| AGIWUR3341;AGIWUR9882;AGIWUR23281                                                              |     |         |         |                |          |           |                     |                    |
| CB4856 CT                                                                                      | III | 4571753 | 4578437 | WBGene00004762 | sel-5    | F35G12.3  | -0.0743842570831887 |                    |
| AGIWUR4191;AGIWUR10977;AGIWUR11373;AGIWUR15605;AGIWUR17298;AGIWUR22658;AGIWUR30054;AGIWUR38843 |     |         |         |                |          |           |                     |                    |
| CB4856 CT                                                                                      | III | 4578855 | 4581696 | WBGene00009441 | wdr-48   | F35G12.4  | -0.0618972745360074 |                    |
| AGIWUR16083;AGIWUR31303;AGIWUR33315                                                            |     |         |         |                |          |           |                     |                    |
| CB4856 CT                                                                                      | III | 4581795 | 4583893 | WBGene00009445 |          | F35G12.12 | F35G12.12           | -0.19504035395261  |
| AGIWUR19409                                                                                    |     |         |         |                |          |           |                     |                    |
| CB4856 CT                                                                                      | III | 4584583 | 4586753 | WBGene00009442 |          | F35G12.5  | F35G12.5            | 0.168821914337773  |
| AGIWUR40495                                                                                    |     |         |         |                |          |           |                     |                    |
| CB4856 CT                                                                                      | III | 4586628 | 4587330 | WBGene00009443 |          | F35G12.7  | F35G12.7            | -0.103230761492174 |
| AGIWUR3544                                                                                     |     |         |         |                |          |           |                     |                    |
| CB4856 CT                                                                                      | III | 4587415 | 4593124 | WBGene00004874 | smc-4    | F35G12.8  | 0.0295275465801019  |                    |
| AGIWUR39484                                                                                    |     |         |         |                |          |           |                     |                    |
| CB4856 CT                                                                                      | III | 4593176 | 4593832 | WBGene00009444 |          | F35G12.11 | F35G12.11           | -0.372168771141032 |
| AGIWUR25108                                                                                    |     |         |         |                |          |           |                     |                    |
| CB4856 CT                                                                                      | III | 4593769 | 4594426 | WBGene00000145 | apc-11   | F35G12.9  | 0.0919696626975028  |                    |
| AGIWUR11099                                                                                    |     |         |         |                |          |           |                     |                    |
| CB4856 CT                                                                                      | III | 4594543 | 4595944 | WBGene00000206 | asb-1    | F35G12.10 | -0.137580669778377  |                    |
| AGIWUR14757;AGIWUR15446;AGIWUR18553                                                            |     |         |         |                |          |           |                     |                    |
| CB4856 CT                                                                                      | III | 4596134 | 4612384 | WBGene00004760 | sel-2    | F10F2.1   | 0.0675584570429244  | AGIWUR7358         |
| CB4856 CT                                                                                      | III | 4616479 | 4618893 | WBGene00008655 | lips-3   | F10F2.3   | -0.13326172455269   |                    |
| AGIWUR2515;AGIWUR12349;AGIWUR13166;AGIWUR21826;AGIWUR35962;AGIWUR38897                         |     |         |         |                |          |           |                     |                    |
| CB4856 CT                                                                                      | III | 4618853 | 4643305 | WBGene00008654 | F10F2.2  | F10F2.2   | -0.0394842352166993 | AGIWUR33800        |
| CB4856 CT                                                                                      | III | 4643999 | 4646346 | WBGene00004118 | pqn-29   | F10F2.9   | 0.0068495010455738  | AGIWUR32867        |
| CB4856 CT                                                                                      | III | 4646507 | 4647854 | WBGene00011957 | T23F11.6 | T23F11.6  | 0.0193465768755914  |                    |
| AGIWUR29047                                                                                    |     |         |         |                |          |           |                     |                    |
| CB4856 CT                                                                                      | III | 4648591 | 4653929 | WBGene00011953 | ppm-2    | T23F11.1  | 0.0625418877875319  |                    |
| AGIWUR2592;AGIWUR7677;AGIWUR16510;AGIWUR23088;AGIWUR31765                                      |     |         |         |                |          |           |                     |                    |
| CB4856 CT                                                                                      | III | 4658739 | 4662697 | WBGene00011955 | cdka-1   | T23F11.3  | 0.145164017520031   |                    |
| AGIWUR5542;AGIWUR14846;AGIWUR38432;AGIWUR39512                                                 |     |         |         |                |          |           |                     |                    |

|                                                                                                                          |     |         |         |                |           |          |                                |
|--------------------------------------------------------------------------------------------------------------------------|-----|---------|---------|----------------|-----------|----------|--------------------------------|
| CB4856 CT<br>AGIWUR1001                                                                                                  | III | 4663185 | 4665368 | WBGene00011956 | T23F11.4  | T23F11.4 | -0.435466026319924             |
| CB4856 CT<br>AGIWUR40917                                                                                                 | III | 4672249 | 4674207 | WBGene00005170 | srg-13    | T23F11.5 | 0.235943369032393              |
| CB4856 CT                                                                                                                | III | 4677766 | 4679663 | WBGene00005168 | srg-10    | T04A8.1  | 0.127760552495555 AGIWUR27750  |
| CB4856 CT                                                                                                                | III | 4680013 | 4681562 | WBGene00005169 | srg-11    | T04A8.2  | -0.140034081571085 AGIWUR13241 |
| CB4856 CT<br>AGIWUR11086                                                                                                 | III | 4682774 | 4685533 | WBGene00011405 | cllec-155 | T04A8.3  | -0.116504639619258             |
| CB4856 CT<br>AGIWUR18509;AGIWUR24487                                                                                     | III | 4686088 | 4688210 | WBGene00044078 | tag-243   | T04A8.4  | 0.668533492482755              |
| CB4856 CT                                                                                                                | III | 4689280 | 4692166 | WBGene00011407 | ppat-1    | T04A8.5  | -0.400852358328862 AGIWUR40473 |
| CB4856 CT                                                                                                                | III | 4692098 | 4693303 | WBGene00011408 | T04A8.6   | T04A8.6  | -0.171883806199698 AGIWUR18609 |
| CB4856 CT                                                                                                                | III | 4694003 | 4695270 | WBGene00011410 | T04A8.8   | T04A8.8  | 0.123093207372696 AGIWUR12099  |
| CB4856 CT<br>AGIWUR21833;AGIWUR25655;AGIWUR27695;AGIWUR37122                                                             | III | 4695361 | 4698010 | WBGene00011409 | T04A8.7   | T04A8.7  | -0.0432620638657575            |
| CB4856 CT<br>AGIWUR2611;AGIWUR38656;AGIWUR41916                                                                          | III | 4697987 | 4699453 | WBGene00001036 | dnj-18    | T04A8.9  | 0.0206006774340466             |
| CB4856 CT<br>AGIWUR32048                                                                                                 | III | 4699407 | 4700224 | WBGene00011411 | sel-13    | T04A8.10 | -0.0133166901235988            |
| CB4856 CT<br>AGIWUR21921                                                                                                 | III | 4700325 | 4704054 | WBGene00000543 | clp-2     | T04A8.16 | -0.115234129640072             |
| CB4856 CT<br>AGIWUR8495;AGIWUR22631;AGIWUR34099                                                                          | III | 4704404 | 4705404 | WBGene00011412 | mrpl-16   | T04A8.11 | -0.099026057871896             |
| CB4856 CT<br>AGIWUR964;AGIWUR10737;AGIWUR33930                                                                           | III | 4705413 | 4706949 | WBGene00007045 | tag-189   | T04A8.12 | -0.154649515305186             |
| CB4856 CT<br>AGIWUR29768                                                                                                 | III | 4709248 | 4712547 | WBGene00119203 | T04A8.18  | T04A8.18 | -0.283756767198725             |
| CB4856 CT<br>AGIWUR14976                                                                                                 | III | 4712572 | 4715188 | WBGene00011415 | him-18    | T04A8.15 | -0.0132775739561666            |
| CB4856 CT<br>AGIWUR10332;AGIWUR10446;AGIWUR22030;AGIWUR23199;AGIWUR23677;AGIWUR30711;AGIWUR33433;AGIWUR34113;AGIWUR36496 | III | 4715293 | 4720670 | WBGene00001259 | emb-5     | T04A8.14 | 0.0543403446893134             |
| CB4856 CT                                                                                                                | III | 4722126 | 4730919 | WBGene00000068 | acy-1     | F17C8.1  | 0.0598613172689291 AGIWUR11552 |
| CB4856 CT<br>AGIWUR14597;AGIWUR41893                                                                                     | III | 4734356 | 4736065 | WBGene00185014 | F17C8.9   | F17C8.9  | -0.36191449858312              |
| CB4856 CT                                                                                                                | III | 4736050 | 4737258 | WBGene00008912 | F17C8.7   | F17C8.7  | -0.414347170751377 AGIWUR19939 |
| CB4856 CT<br>AGIWUR2834;AGIWUR17837;AGIWUR26706;AGIWUR32802                                                              | III | 4737589 | 4740075 | WBGene00004311 | ras-2     | F17C8.4  | -0.140278591046241             |
| CB4856 CT                                                                                                                | III | 4748127 | 4749164 | WBGene00000664 | col-89    | F17C8.2  | -0.15358260753003 AGIWUR18994  |
| CB4856 CT                                                                                                                | III | 4752998 | 4754083 | WBGene00004469 | rps-0     | B0393.1  | -0.0669748963977668            |

AGIWUR193;AGIWUR6226;AGIWUR6783

|        |    |     |         |         |                |         |         |                     |             |
|--------|----|-----|---------|---------|----------------|---------|---------|---------------------|-------------|
| CB4856 | CT | III | 4754432 | 4757017 | WBGene00007167 | rbg-3   | B0393.2 | -0.156786114798692  | AGIWUR3240  |
| CB4856 | CT | III | 4757201 | 4759728 | WBGene00007168 | B0393.3 | B0393.3 | -0.0631100439854357 | AGIWUR43498 |
| CB4856 | CT | III | 4759744 | 4763609 | WBGene00007169 | B0393.4 | B0393.4 | -0.221549634915846  | AGIWUR6601  |
| CB4856 | CT | III | 4765833 | 4776342 | WBGene00007170 | B0393.5 | B0393.5 | 0.527524113430539   | AGIWUR34080 |
| CB4856 | CT | III | 4776264 | 4778065 | WBGene00007172 | B0393.7 | B0393.7 | 0.0681605938512142  | AGIWUR36678 |
| CB4856 | CT | III | 4778390 | 4780157 | WBGene00044636 | B0393.9 | B0393.9 | -0.0850210568774461 |             |

AGIWUR1374;AGIWUR3283;AGIWUR40762

|        |    |     |         |         |                |         |         |                    |             |
|--------|----|-----|---------|---------|----------------|---------|---------|--------------------|-------------|
| CB4856 | CT | III | 4780130 | 4781987 | WBGene00007171 | B0393.6 | B0393.6 | 0.382596345342403  | AGIWUR45184 |
| CB4856 | CT | III | 4786080 | 4792391 | WBGene00003210 | mel-28  | C38D4.3 | -0.100090065558859 | AGIWUR40516 |
| CB4856 | CT | III | 4793086 | 4795423 | WBGene00008005 | C38D4.4 | C38D4.4 | -0.242024953440968 | AGIWUR5766  |
| CB4856 | CT | III | 4796839 | 4802907 | WBGene00008006 | tag-325 | C38D4.5 | -0.152886762323877 | AGIWUR17735 |
| CB4856 | CT | III | 4803007 | 4804753 | WBGene00008008 | C38D4.9 | C38D4.9 | 0.0742855198983499 |             |

AGIWUR4922;AGIWUR26328;AGIWUR39586

|        |    |     |         |         |                |       |         |                     |  |
|--------|----|-----|---------|---------|----------------|-------|---------|---------------------|--|
| CB4856 | CT | III | 4804708 | 4809489 | WBGene00003912 | pal-1 | C38D4.6 | -0.0165130023294351 |  |
|--------|----|-----|---------|---------|----------------|-------|---------|---------------------|--|

AGIWUR3503;AGIWUR8986;AGIWUR17483;AGIWUR25142;AGIWUR26070;AGIWUR26964;AGIWUR29813;AGIWUR34020

|        |    |     |         |         |                |         |          |                    |             |
|--------|----|-----|---------|---------|----------------|---------|----------|--------------------|-------------|
| CB4856 | CT | III | 4810031 | 4811162 | WBGene00008007 | C38D4.7 | C38D4.7  | -0.192743015153388 | AGIWUR275   |
| CB4856 | CT | III | 4813309 | 4814814 | WBGene00000193 | arl-6   | C38D4.8  | 0.443387716466138  | AGIWUR6297  |
| CB4856 | CT | III | 4816040 | 4817078 | WBGene00017804 | F26A1.6 | F26A1.6  | -0.028612030743405 | AGIWUR20049 |
| CB4856 | CT | III | 4818042 | 4819073 | WBGene00017803 | F26A1.4 | F26A1.4  | -0.212518718413031 | AGIWUR21527 |
| CB4856 | CT | III | 4819328 | 4819943 | WBGene00017805 | F26A1.7 | F26A1.7  | 0.0602120988148407 | AGIWUR34354 |
| CB4856 | CT | III | 4820670 | 4822226 | WBGene00017806 | F26A1.8 | F26A1.8  | -0.510585161022332 | AGIWUR25170 |
| CB4856 | CT | III | 4825345 | 4829509 | WBGene00017807 | F26A1.9 | F26A1.9  | -0.352797521349032 | AGIWUR16711 |
| CB4856 | CT | III | 4830010 | 4830349 | WBGene00017808 | nspd-9  | F26A1.10 | 0.020601183688747  |             |

AGIWUR5361

|        |    |     |         |         |                |          |          |                    |  |
|--------|----|-----|---------|---------|----------------|----------|----------|--------------------|--|
| CB4856 | CT | III | 4837731 | 4839931 | WBGene00270319 | F26A1.19 | F26A1.19 | 0.0970427906880094 |  |
|--------|----|-----|---------|---------|----------------|----------|----------|--------------------|--|

AGIWUR745

|        |    |     |         |         |                |        |          |                    |  |
|--------|----|-----|---------|---------|----------------|--------|----------|--------------------|--|
| CB4856 | CT | III | 4840187 | 4841024 | WBGene00044603 | acbp-7 | F26A1.15 | 0.0369689467527605 |  |
|--------|----|-----|---------|---------|----------------|--------|----------|--------------------|--|

AGIWUR8465;AGIWUR28608

|        |    |     |         |         |                |           |          |                    |  |
|--------|----|-----|---------|---------|----------------|-----------|----------|--------------------|--|
| CB4856 | CT | III | 4841039 | 4842273 | WBGene00017809 | cllec-156 | F26A1.11 | -0.367748842156153 |  |
|--------|----|-----|---------|---------|----------------|-----------|----------|--------------------|--|

AGIWUR40380

|        |    |     |         |         |                |           |          |                    |  |
|--------|----|-----|---------|---------|----------------|-----------|----------|--------------------|--|
| CB4856 | CT | III | 4843493 | 4844410 | WBGene00017810 | cllec-157 | F26A1.12 | -0.309564630844259 |  |
|--------|----|-----|---------|---------|----------------|-----------|----------|--------------------|--|

AGIWUR41337

|        |    |     |         |         |                |       |         |                    |  |
|--------|----|-----|---------|---------|----------------|-------|---------|--------------------|--|
| CB4856 | CT | III | 4844662 | 4846546 | WBGene00001437 | fkh-5 | F26A1.2 | 0.0723379136420288 |  |
|--------|----|-----|---------|---------|----------------|-------|---------|--------------------|--|

AGIWUR10841;AGIWUR35894;AGIWUR40674

|        |    |     |         |         |                |          |          |                    |  |
|--------|----|-----|---------|---------|----------------|----------|----------|--------------------|--|
| CB4856 | CT | III | 4847072 | 4848967 | WBGene00017811 | F26A1.13 | F26A1.13 | -0.260632980341396 |  |
|--------|----|-----|---------|---------|----------------|----------|----------|--------------------|--|

AGIWUR9823;AGIWUR14986;AGIWUR25874

|        |    |     |         |         |                |          |          |                    |  |
|--------|----|-----|---------|---------|----------------|----------|----------|--------------------|--|
| CB4856 | CT | III | 4849266 | 4849850 | WBGene00017812 | F26A1.14 | F26A1.14 | -0.377981365285153 |  |
|--------|----|-----|---------|---------|----------------|----------|----------|--------------------|--|

AGIWUR21644;AGIWUR25758;AGIWUR38856

|                                                 |    |     |         |         |                |           |           |                     |             |
|-------------------------------------------------|----|-----|---------|---------|----------------|-----------|-----------|---------------------|-------------|
| CB4856                                          | CT | III | 4850507 | 4851910 | WBGene00017801 | F26A1.1   | F26A1.1   | -0.0602845091505397 | AGIWUR13881 |
| CB4856                                          | CT | III | 4852313 | 4855177 | WBGene00000418 | ced-4     | C35D10.9  | -0.0802187175870639 |             |
| AGIWUR5354;AGIWUR5654;AGIWUR41670               |    |     |         |         |                |           |           |                     |             |
| CB4856                                          | CT | III | 4855250 | 4856101 | WBGene00016445 | C35D10.8  | C35D10.8  | 0.136610696833902   |             |
| AGIWUR5688                                      |    |     |         |         |                |           |           |                     |             |
| CB4856                                          | CT | III | 4856193 | 4859240 | WBGene00016444 | C35D10.7  | C35D10.7  | -0.155811632213147  |             |
| AGIWUR24486;AGIWUR38743                         |    |     |         |         |                |           |           |                     |             |
| CB4856                                          | CT | III | 4859339 | 4860772 | WBGene00016443 | C35D10.6  | C35D10.6  | -0.131163214326204  |             |
| AGIWUR6719                                      |    |     |         |         |                |           |           |                     |             |
| CB4856                                          | CT | III | 4860669 | 4861794 | WBGene00016446 | C35D10.10 | C35D10.10 | -0.28118827782618   |             |
| AGIWUR44106                                     |    |     |         |         |                |           |           |                     |             |
| CB4856                                          | CT | III | 4862351 | 4863426 | WBGene00016442 | C35D10.5  | C35D10.5  | -0.240889977219608  |             |
| AGIWUR10145;AGIWUR15024;AGIWUR19643;AGIWUR27288 |    |     |         |         |                |           |           |                     |             |
| CB4856                                          | CT | III | 4863427 | 4866949 | WBGene00000767 | coq-8     | C35D10.4  | -0.181065676930576  |             |
| AGIWUR31304;AGIWUR41201;AGIWUR43913             |    |     |         |         |                |           |           |                     |             |
| CB4856                                          | CT | III | 4867062 | 4867469 | WBGene00016452 | C35D10.17 | C35D10.17 | 0.154887702993191   |             |
| AGIWUR26941                                     |    |     |         |         |                |           |           |                     |             |
| CB4856                                          | CT | III | 4868333 | 4868769 | WBGene00016447 | msd-4     | C35D10.11 | 0.0476941577456422  |             |
| AGIWUR19153                                     |    |     |         |         |                |           |           |                     |             |
| CB4856                                          | CT | III | 4868921 | 4870106 | WBGene00016441 | C35D10.3  | C35D10.3  | -0.225216292426769  |             |
| AGIWUR25259                                     |    |     |         |         |                |           |           |                     |             |
| CB4856                                          | CT | III | 4870762 | 4872046 | WBGene00016440 | gipc-1    | C35D10.2  | 0.156485747208706   |             |
| AGIWUR18831;AGIWUR36466                         |    |     |         |         |                |           |           |                     |             |
| CB4856                                          | CT | III | 4872501 | 4874751 | WBGene00016448 | C35D10.12 | C35D10.12 | 0.02609038259091    |             |
| AGIWUR21860                                     |    |     |         |         |                |           |           |                     |             |
| CB4856                                          | CT | III | 4877526 | 4878311 | WBGene00016449 | C35D10.13 | C35D10.13 | -0.0227950338079754 |             |
| AGIWUR28892                                     |    |     |         |         |                |           |           |                     |             |
| CB4856                                          | CT | III | 4878658 | 4879643 | WBGene00000204 | arx-6     | C35D10.16 | 0.0299448577435193  |             |
| AGIWUR41105                                     |    |     |         |         |                |           |           |                     |             |
| CB4856                                          | CT | III | 4879745 | 4881497 | WBGene00016439 | C35D10.1  | C35D10.1  | -0.0422786735928309 |             |
| AGIWUR11893;AGIWUR14564                         |    |     |         |         |                |           |           |                     |             |
| CB4856                                          | CT | III | 4881909 | 4883606 | WBGene00016450 | cllec-5   | C35D10.14 | -0.655218017138772  |             |
| AGIWUR14533                                     |    |     |         |         |                |           |           |                     |             |
| CB4856                                          | CT | III | 4885697 | 4887442 | WBGene00016451 | cllec-6   | C35D10.15 | -0.201666848784583  |             |
| AGIWUR7022                                      |    |     |         |         |                |           |           |                     |             |
| CB4856                                          | CT | III | 4887921 | 4891252 | WBGene00017827 | F26F4.5   | F26F4.5   | -0.259040618022647  | AGIWUR19753 |
| CB4856                                          | CT | III | 4891609 | 4893409 | WBGene00017828 | F26F4.6   | F26F4.6   | 0.151645969089735   |             |
| AGIWUR3837;AGIWUR40615                          |    |     |         |         |                |           |           |                     |             |
| CB4856                                          | CT | III | 4894647 | 4899085 | WBGene00003598 | nhl-2     | F26F4.7   | 0.104386558980915   | AGIWUR5479  |

|                                                                                                                                   |    |     |         |         |                |          |          |                      |             |
|-----------------------------------------------------------------------------------------------------------------------------------|----|-----|---------|---------|----------------|----------|----------|----------------------|-------------|
| CB4856                                                                                                                            | CT | III | 4900073 | 4903143 | WBGene00017826 | tag-340  | F26F4.4  | -0.136568795545816   | AGIWUR3465  |
| CB4856                                                                                                                            | CT | III | 4903177 | 4903884 | WBGene00017832 | kbp-2    | F26F4.13 | -0.172838233324086   |             |
| AGIWUR33560                                                                                                                       |    |     |         |         |                |          |          |                      |             |
| CB4856                                                                                                                            | CT | III | 4903997 | 4905473 | WBGene00005011 | F26F4.8  | F26F4.8  | -0.00433714554875486 | AGIWUR28628 |
| CB4856                                                                                                                            | CT | III | 4907217 | 4908968 | WBGene00004400 | rom-1    | F26F4.3  | -0.143301667088792   | AGIWUR39550 |
| CB4856                                                                                                                            | CT | III | 4908960 | 4910038 | WBGene00017831 | F26F4.12 | F26F4.12 | -0.110679714175941   |             |
| AGIWUR21349;AGIWUR24383;AGIWUR27298;AGIWUR33398                                                                                   |    |     |         |         |                |          |          |                      |             |
| CB4856                                                                                                                            | CT | III | 4910475 | 4912521 | WBGene00017829 | F26F4.9  | F26F4.9  | -0.217259268472421   |             |
| AGIWUR42549;AGIWUR44256                                                                                                           |    |     |         |         |                |          |          |                      |             |
| CB4856                                                                                                                            | CT | III | 4912207 | 4914133 | WBGene00017825 | cee-1    | F26F4.1  | -0.307821795381111   |             |
| AGIWUR2541;AGIWUR6238;AGIWUR9786;AGIWUR15199;AGIWUR42030                                                                          |    |     |         |         |                |          |          |                      |             |
| CB4856                                                                                                                            | CT | III | 4914096 | 4917129 | WBGene00004679 | rars-1   | F26F4.10 | -0.131052111793039   |             |
| AGIWUR12;AGIWUR6520;AGIWUR9621;AGIWUR21567;AGIWUR22168;AGIWUR24027;AGIWUR30044;AGIWUR36014;AGIWUR36740                            |    |     |         |         |                |          |          |                      |             |
| CB4856                                                                                                                            | CT | III | 4917104 | 4918008 | WBGene00017830 | rpb-8    | F26F4.11 | -0.304049348503353   |             |
| AGIWUR18230;AGIWUR19441;AGIWUR25054;AGIWUR29048                                                                                   |    |     |         |         |                |          |          |                      |             |
| CB4856                                                                                                                            | CT | III | 4918277 | 4920319 | WBGene00006735 | ula-1    | C26E6.8  | -0.0298907555667842  |             |
| AGIWUR12372;AGIWUR16420;AGIWUR26326                                                                                               |    |     |         |         |                |          |          |                      |             |
| CB4856                                                                                                                            | CT | III | 4920442 | 4921747 | WBGene00016144 | mmab-1   | C26E6.11 | 0.243795008842998    |             |
| AGIWUR11339                                                                                                                       |    |     |         |         |                |          |          |                      |             |
| CB4856                                                                                                                            | CT | III | 4922446 | 4930204 | WBGene00004782 | set-2    | C26E6.9  | -0.0750602425019755  |             |
| AGIWUR1720;AGIWUR9964;AGIWUR18640;AGIWUR33687;AGIWUR35092;AGIWUR36053                                                             |    |     |         |         |                |          |          |                      |             |
| CB4856                                                                                                                            | CT | III | 4930602 | 4932253 | WBGene00016145 | C26E6.12 | C26E6.12 | -0.145781412718764   |             |
| AGIWUR1262                                                                                                                        |    |     |         |         |                |          |          |                      |             |
| CB4856                                                                                                                            | CT | III | 4932450 | 4934945 | WBGene00016143 | eri-9    | C26E6.7  | 0.0218578341520743   | AGIWUR36611 |
| CB4856                                                                                                                            | CT | III | 4935578 | 4937223 | WBGene00016142 | mrps-18C | C26E6.6  | -0.216655668390788   |             |
| AGIWUR8152;AGIWUR10057;AGIWUR17312;AGIWUR26927;AGIWUR38877;AGIWUR40105                                                            |    |     |         |         |                |          |          |                      |             |
| CB4856                                                                                                                            | CT | III | 4937322 | 4939453 | WBGene00001499 | fsn-1    | C26E6.5  | -0.173372456627272   | AGIWUR21648 |
| CB4856                                                                                                                            | CT | III | 4939567 | 4944404 | WBGene00016140 | rpb-2    | C26E6.4  | 0.0192467189242187   |             |
| AGIWUR1292;AGIWUR7484;AGIWUR13354;AGIWUR26461;AGIWUR26734;AGIWUR28828;AGIWUR31075;AGIWUR31332;AGIWUR34633;AGIWUR36394;AGIWUR38499 |    |     |         |         |                |          |          |                      |             |
| CB4856                                                                                                                            | CT | III | 4944513 | 4947317 | WBGene00016139 | ntl-9    | C26E6.3  | -0.211997450625226   |             |
| AGIWUR4765;AGIWUR6733;AGIWUR29362                                                                                                 |    |     |         |         |                |          |          |                      |             |
| CB4856                                                                                                                            | CT | III | 4952124 | 4955171 | WBGene00016138 | flh-2    | C26E6.2  | 0.188678856474585    |             |
| AGIWUR7622;AGIWUR8591;AGIWUR17173;AGIWUR26133;AGIWUR26422;AGIWUR33680                                                             |    |     |         |         |                |          |          |                      |             |
| CB4856                                                                                                                            | CT | III | 4956891 | 4957539 | WBGene00016137 | C26E6.1  | C26E6.1  | 0.200365237849195    | AGIWUR6750  |
| CB4856                                                                                                                            | CT | III | 4958329 | 4960305 | WBGene00016166 | C27F2.4  | C27F2.4  | -0.0906903099563046  | AGIWUR5822  |
| CB4856                                                                                                                            | CT | III | 4960390 | 4961715 | WBGene00016167 | vps-22   | C27F2.5  | -0.155963291101841   |             |
| AGIWUR27289;AGIWUR30151;AGIWUR37552                                                                                               |    |     |         |         |                |          |          |                      |             |
| CB4856                                                                                                                            | CT | III | 4961817 | 4963092 | WBGene00043156 | C27F2.9  | C27F2.9  | -0.271393729806995   |             |



AGIWUR5606;AGIWUR22616;AGIWUR34511;AGIWUR35346;AGIWUR35703;AGIWUR36189  
 CB4856 CT III 4965571 4979729 WBGene00003558 nca-2 C27F2.2 -0.0764024410106501 AGIWUR38222  
 CB4856 CT III 4979796 4980418 WBGene00016168 C27F2.6 C27F2.6 -0.0139527790832261 AGIWUR5107  
 CB4856 CT III 4980644 4984474 WBGene00016169 C27F2.7 C27F2.7 -0.205168639560497  
 AGIWUR3709;AGIWUR13500;AGIWUR26613;AGIWUR44036  
 CB4856 CT III 4985019 4986931 WBGene00016171 C27F2.10 C27F2.10 0.0272430298440263  
 AGIWUR8510  
 CB4856 CT III 4987209 4991450 WBGene00016165 C27F2.1 C27F2.1 -0.100012915538091 AGIWUR8370  
 CB4856 CT III 4991439 4998161 WBGene00016170 C27F2.8 C27F2.8 -0.0517647213879151  
 AGIWUR7004;AGIWUR15438;AGIWUR21077;AGIWUR22621;AGIWUR35360  
 CB4856 CT III 4999379 5001336 WBGene00020095 R144.5 R144.5 0.415445388123389 AGIWUR12094  
 CB4856 CT III 5001297 5002331 WBGene00020098 R144.10 R144.10 -0.389780513435044 AGIWUR808  
 CB4856 CT III 5003197 5004721 WBGene00020096 R144.6 R144.6 0.0323074017796365 AGIWUR16813  
 CB4856 CT III 5004820 5006981 WBGene00043060 R144.12 R144.12 -0.189263452468017 AGIWUR1049  
 CB4856 CT III 5007100 5008830 WBGene00020099 R144.11 R144.11 -0.213840005429958 AGIWUR11854  
 CB4856 CT III 5008933 5017860 WBGene00020097 larp-1 R144.7 -0.0553372069379137  
 AGIWUR5277;AGIWUR8701;AGIWUR34641  
 CB4856 CT III 5018645 5021118 WBGene00020094 wip-1 R144.4 0.00405149749026634  
 AGIWUR10954;AGIWUR22155;AGIWUR23908  
 CB4856 CT III 5021224 5021910 WBGene00007015 mdt-11 R144.9 0.00116498674956844 AGIWUR43452  
 CB4856 CT III 5022047 5023200 WBGene00020093 R144.3 R144.3 -0.109079711255667  
 AGIWUR20707;AGIWUR39793  
 CB4856 CT III 5023264 5024064 WBGene00044648 R144.13 R144.13 -0.237332887056082 AGIWUR7341  
 CB4856 CT III 5024966 5029540 WBGene00020092 pcf-11 R144.2 -0.0979885210834865  
 AGIWUR6885;AGIWUR28587;AGIWUR41768  
 CB4856 CT III 5030929 5036548 WBGene00002218 klp-6 R144.1 0.0450399955580978  
 AGIWUR6002;AGIWUR10422;AGIWUR27584;AGIWUR31010  
 CB4856 CT III 5036381 5040413 WBGene00016677 C45G9.6 C45G9.6 -0.00691360118743667  
 AGIWUR2247;AGIWUR31234  
 CB4856 CT III 5042412 5044672 WBGene00016684 nlp-43 C45G9.13 0.349017326823478  
 AGIWUR41739  
 CB4856 CT III 5045009 5045667 WBGene00044409 C45G9.14 C45G9.14  
 -0.00185604471611889 AGIWUR6835;AGIWUR12672;AGIWUR13383;AGIWUR37679  
 CB4856 CT III 5046170 5047161 WBGene00016678 C45G9.7 C45G9.7 -0.214426668144743 AGIWUR3268  
 CB4856 CT III 5048117 5050158 WBGene00016676 C45G9.5 C45G9.5 -0.257239359197738 AGIWUR13838  
 CB4856 CT III 5050107 5052068 WBGene00050919 C45G9.15 C45G9.15 -0.0163210475630446  
 AGIWUR35385  
 CB4856 CT III 5052529 5053341 WBGene00016679 C45G9.8 C45G9.8 0.0783282274772796  
 AGIWUR5777;AGIWUR13001;AGIWUR13513;AGIWUR30470;AGIWUR36583

|                                                                                                       |     |         |         |                |          |          |                     |             |
|-------------------------------------------------------------------------------------------------------|-----|---------|---------|----------------|----------|----------|---------------------|-------------|
| CB4856 CT<br>AGIWUR12766                                                                              | III | 5056847 | 5061888 | WBGene00016681 | C45G9.10 | C45G9.10 | -0.145569611411895  |             |
| CB4856 CT<br>AGIWUR36530                                                                              | III | 5063993 | 5068725 | WBGene00016682 | C45G9.11 | C45G9.11 | -0.080216057353617  |             |
| CB4856 CT<br>AGIWUR38185;AGIWUR39760                                                                  | III | 5069001 | 5070418 | WBGene00016674 | C45G9.2  | C45G9.2  | -0.10866778516979   |             |
| CB4856 CT<br>AGIWUR39034                                                                              | III | 5070431 | 5071597 | WBGene00016683 | C45G9.12 | C45G9.12 | -0.261056413354783  |             |
| CB4856 CT                                                                                             | III | 5074698 | 5075968 | WBGene00016673 | C45G9.1  | C45G9.1  | -0.290751799615458  | AGIWUR22776 |
| CB4856 CT<br>AGIWUR22754;AGIWUR36700                                                                  | III | 5077765 | 5080665 | WBGene00000107 | alh-1    | F54D8.3  | 0.552691302859747   |             |
| CB4856 CT<br>AGIWUR58;AGIWUR4165;AGIWUR4356;AGIWUR6331;AGIWUR6584;AGIWUR26746;AGIWUR28653;AGIWUR34083 | III | 5081726 | 5082995 | WBGene00006519 | tag-174  | F54D8.2  | -0.031773711968567  |             |
| CB4856 CT                                                                                             | III | 5083206 | 5085289 | WBGene00000279 | cah-1    | F54D8.4  | -0.0322710808914906 | AGIWUR22257 |
| CB4856 CT<br>AGIWUR15008;AGIWUR28987                                                                  | III | 5102991 | 5106955 | WBGene00018802 | F54D8.6  | F54D8.6  | -0.293335620645742  |             |
| CB4856 CT<br>AGIWUR26534;AGIWUR31818                                                                  | III | 5107330 | 5108497 | WBGene00001076 | dpy-17   | F54D8.1  | 1.50966149019313    |             |
| CB4856 CT<br>AGIWUR6192;AGIWUR7162;AGIWUR12049;AGIWUR17202;AGIWUR32090                                | III | 5109701 | 5130673 | WBGene00004728 | sax-2    | F21H11.2 | 0.0370268567478487  |             |
| CB4856 CT<br>AGIWUR14269                                                                              | III | 5130923 | 5136319 | WBGene00006543 | tbx-2    | F21H11.3 | 0.466900259145097   |             |
| CB4856 CT<br>AGIWUR5297;AGIWUR36403;AGIWUR39420                                                       | III | 5137252 | 5149578 | WBGene00021900 | Y54H5A.2 | Y54H5A.2 | -0.123362633990848  |             |
| CB4856 CT<br>AGIWUR36811                                                                              | III | 5151907 | 5153229 | WBGene00021901 | tag-262  | Y54H5A.3 | 0.0938285613494863  |             |
| CB4856 CT<br>AGIWUR27003                                                                              | III | 5153406 | 5155465 | WBGene00021899 | Y54H5A.1 | Y54H5A.1 | -0.108392302218355  |             |
| CB4856 CT<br>AGIWUR33031                                                                              | III | 5155472 | 5158774 | WBGene00021902 | oxy-4    | Y54H5A.4 | -0.13957660879225   |             |
| CB4856 CT<br>AGIWUR16189;AGIWUR34183;AGIWUR37130                                                      | III | 5158873 | 5159605 | WBGene00044604 | T10F2.5  | T10F2.5  | -0.140278961417076  |             |
| CB4856 CT<br>AGIWUR8674;AGIWUR17893                                                                   | III | 5159729 | 5163627 | WBGene00001744 | gars-1   | T10F2.1  | -0.246575462130618  |             |
| CB4856 CT                                                                                             | III | 5163766 | 5165311 | WBGene00020422 | T10F2.2  | T10F2.2  | -0.193282851597987  | AGIWUR5009  |
| CB4856 CT<br>AGIWUR17583;AGIWUR39466;AGIWUR39693                                                      | III | 5165659 | 5169799 | WBGene00006736 | ulp-1    | T10F2.3  | 0.0172311836210746  |             |
| CB4856 CT<br>AGIWUR8511;AGIWUR11498;AGIWUR12677;AGIWUR16041;AGIWUR16667;AGIWUR42332                   | III | 5169933 | 5172045 | WBGene00020423 | prp-19   | T10F2.4  | 0.338355835711513   |             |

|                                                                                  |    |     |         |         |                |           |           |                      |             |
|----------------------------------------------------------------------------------|----|-----|---------|---------|----------------|-----------|-----------|----------------------|-------------|
| CB4856                                                                           | CT | III | 5172720 | 5173338 | WBGene00019631 | K10D2.5   | K10D2.5   | 0.0766618690475065   |             |
| AGIWUR12667;AGIWUR13199;AGIWUR17632;AGIWUR36997                                  |    |     |         |         |                |           |           |                      |             |
| CB4856                                                                           | CT | III | 5173439 | 5173809 | WBGene00019630 | emb-1     | K10D2.4   | -0.120686064448838   | AGIWUR2253  |
| CB4856                                                                           | CT | III | 5173922 | 5180507 | WBGene00019629 | cid-1     | K10D2.3   | 0.0918445827883492   | AGIWUR29111 |
| CB4856                                                                           | CT | III | 5185920 | 5188646 | WBGene00019628 | pup-2     | K10D2.2   | 0.108296041836724    |             |
| AGIWUR6106;AGIWUR24493;AGIWUR28776;AGIWUR33868;AGIWUR45004;AGIWUR45089           |    |     |         |         |                |           |           |                      |             |
| CB4856                                                                           | CT | III | 5191131 | 5196028 | WBGene00019627 | K10D2.1   | K10D2.1   | -0.198325912603839   |             |
| AGIWUR535;AGIWUR40874                                                            |    |     |         |         |                |           |           |                      |             |
| CB4856                                                                           | CT | III | 5196027 | 5196709 | WBGene00019633 | K10D2.7   | K10D2.7   | -0.0326407203053911  |             |
| AGIWUR525;AGIWUR7607;AGIWUR14899                                                 |    |     |         |         |                |           |           |                      |             |
| CB4856                                                                           | CT | III | 5196678 | 5199688 | WBGene00001262 | emb-8     | K10D2.6   | 0.00832432894537405  |             |
| AGIWUR318;AGIWUR7707;AGIWUR14019;AGIWUR19026;AGIWUR23518;AGIWUR30421;AGIWUR38124 |    |     |         |         |                |           |           |                      |             |
| CB4856                                                                           | CT | III | 5203713 | 5206911 | WBGene00022531 | morc-1    | ZC155.3   | -0.147688451908405   | AGIWUR31982 |
| CB4856                                                                           | CT | III | 5207567 | 5209557 | WBGene00022534 | syx-16    | ZC155.7   | -0.093275893251783   |             |
| AGIWUR5863;AGIWUR22835;AGIWUR32681                                               |    |     |         |         |                |           |           |                      |             |
| CB4856                                                                           | CT | III | 5211781 | 5215512 | WBGene00022532 | ZC155.4   | ZC155.4   | -0.443927094362859   | AGIWUR17968 |
| CB4856                                                                           | CT | III | 5215949 | 5217604 | WBGene00022533 | cutl-19   | ZC155.5   | -0.102970606635386   | AGIWUR43291 |
| CB4856                                                                           | CT | III | 5219280 | 5220093 | WBGene00022530 | ZC155.2   | ZC155.2   | 0.0398572675990154   | AGIWUR24241 |
| CB4856                                                                           | CT | III | 5225621 | 5226801 | WBGene00003588 | nex-1     | ZC155.1   | -0.0668301872097947  |             |
| AGIWUR20142;AGIWUR20359                                                          |    |     |         |         |                |           |           |                      |             |
| CB4856                                                                           | CT | III | 5226818 | 5227884 | WBGene00016411 | C34E10.10 | C34E10.10 | -0.269358778368256   |             |
| AGIWUR29112                                                                      |    |     |         |         |                |           |           |                      |             |
| CB4856                                                                           | CT | III | 5228417 | 5230536 | WBGene00000229 | atp-2     | C34E10.6  | -0.026208190098707   |             |
| AGIWUR5070;AGIWUR12032;AGIWUR19582;AGIWUR21091;AGIWUR26182;AGIWUR37558           |    |     |         |         |                |           |           |                      |             |
| CB4856                                                                           | CT | III | 5230555 | 5234530 | WBGene00016408 | prmt-5    | C34E10.5  | -0.179557510058624   |             |
| AGIWUR31212;AGIWUR33990                                                          |    |     |         |         |                |           |           |                      |             |
| CB4856                                                                           | CT | III | 5234617 | 5236364 | WBGene00016412 | mrps-26   | C34E10.11 | -0.0750779926707708  |             |
| AGIWUR42475                                                                      |    |     |         |         |                |           |           |                      |             |
| CB4856                                                                           | CT | III | 5236410 | 5240055 | WBGene00006946 | prx-10    | C34E10.4  | -0.111318606459026   |             |
| AGIWUR4880                                                                       |    |     |         |         |                |           |           |                      |             |
| CB4856                                                                           | CT | III | 5240593 | 5242108 | WBGene00000561 | cnd-1     | C34E10.7  | 0.495816258690501    |             |
| AGIWUR4625                                                                       |    |     |         |         |                |           |           |                      |             |
| CB4856                                                                           | CT | III | 5249075 | 5254187 | WBGene00016409 | sumv-1    | C34E10.8  | -0.268382612558629   |             |
| AGIWUR6645                                                                       |    |     |         |         |                |           |           |                      |             |
| CB4856                                                                           | CT | III | 5254438 | 5258922 | WBGene00001660 | gop-1     | C34E10.3  | -0.205472182567998   |             |
| AGIWUR33981                                                                      |    |     |         |         |                |           |           |                      |             |
| CB4856                                                                           | CT | III | 5259023 | 5260512 | WBGene00001661 | gop-2     | C34E10.2  | -0.00857267684516483 |             |
| AGIWUR3830;AGIWUR7839;AGIWUR12289;AGIWUR26150                                    |    |     |         |         |                |           |           |                      |             |
| CB4856                                                                           | CT | III | 5260693 | 5263837 | WBGene00001662 | gop-3     | C34E10.1  | -0.16612908516613    |             |

AGIWUR3380;AGIWUR23142;AGIWUR26880

|        |    |     |         |         |                |       |          |                     |                    |
|--------|----|-----|---------|---------|----------------|-------|----------|---------------------|--------------------|
| CB4856 | CT | III | 5263943 | 5264996 | WBGene00001823 | hap-1 | ZC395.7  | -0.333152640847334  | AGIWUR27062        |
| CB4856 | CT | III | 5265113 | 5267204 | WBGene00001740 | gro-1 | ZC395.6  | -0.148907822314371  | AGIWUR27294        |
| CB4856 | CT | III | 5267809 | 5268581 | WBGene00022597 |       | ZC395.5  | ZC395.5             | 1.11155641595043   |
| CB4856 | CT | III | 5268682 | 5273471 | WBGene00022598 | ztf-8 | ZC395.8  | -0.0519542064519438 | AGIWUR13066        |
| CB4856 | CT | III | 5273800 | 5274787 | WBGene00022599 |       | ZC395.10 | ZC395.10            | -0.269946200134028 |

AGIWUR16003;AGIWUR22790

|        |    |     |         |         |                |       |          |                     |                    |
|--------|----|-----|---------|---------|----------------|-------|----------|---------------------|--------------------|
| CB4856 | CT | III | 5275225 | 5277797 | WBGene00006590 | toc-1 | ZC395.3  | -0.340590090456439  | AGIWUR21186        |
| CB4856 | CT | III | 5277894 | 5279344 | WBGene00000536 | clk-1 | ZC395.2  | -0.0339998316960166 | AGIWUR12724        |
| CB4856 | CT | III | 5286086 | 5286305 | WBGene00022600 |       | ZC395.11 | ZC395.11            | 0.0416518694030019 |

AGIWUR24858

|        |    |     |         |         |                |          |  |          |                   |
|--------|----|-----|---------|---------|----------------|----------|--|----------|-------------------|
| CB4856 | CT | III | 5288180 | 5298361 | WBGene00020530 | T15B12.1 |  | T15B12.1 | 0.138452989558525 |
|--------|----|-----|---------|---------|----------------|----------|--|----------|-------------------|

AGIWUR295;AGIWUR35679

|        |    |     |         |         |                |          |  |          |                    |
|--------|----|-----|---------|---------|----------------|----------|--|----------|--------------------|
| CB4856 | CT | III | 5300008 | 5301886 | WBGene00020531 | T15B12.2 |  | T15B12.2 | -0.287198377295406 |
|--------|----|-----|---------|---------|----------------|----------|--|----------|--------------------|

AGIWUR13248

|        |    |     |         |         |                |         |         |                     |             |
|--------|----|-----|---------|---------|----------------|---------|---------|---------------------|-------------|
| CB4856 | CT | III | 5302218 | 5306324 | WBGene00018675 | F52C9.5 | F52C9.5 | 0.452772734831289   | AGIWUR11007 |
| CB4856 | CT | III | 5308600 | 5311140 | WBGene00003391 | mog-3   | F52C9.7 | -0.136807875954219  | AGIWUR40263 |
| CB4856 | CT | III | 5311246 | 5321732 | WBGene00004095 | pqe-1   | F52C9.8 | -0.0702619284435695 |             |

AGIWUR2071;AGIWUR19151;AGIWUR21084;AGIWUR30521;AGIWUR39453;AGIWUR40792;AGIWUR40889

|        |    |     |         |         |                |         |         |                    |             |
|--------|----|-----|---------|---------|----------------|---------|---------|--------------------|-------------|
| CB4856 | CT | III | 5321885 | 5326345 | WBGene00018674 | F52C9.3 | F52C9.3 | -0.322158544376226 | AGIWUR18125 |
| CB4856 | CT | III | 5326623 | 5333620 | WBGene00018672 | sorf-2  | F52C9.1 | 0.135679105825695  |             |

AGIWUR14541;AGIWUR27235;AGIWUR30565

|        |    |     |         |         |                |         |         |                    |  |
|--------|----|-----|---------|---------|----------------|---------|---------|--------------------|--|
| CB4856 | CT | III | 5341682 | 5344273 | WBGene00022664 | ZK121.2 | ZK121.2 | 0.0526826040001982 |  |
|--------|----|-----|---------|---------|----------------|---------|---------|--------------------|--|

AGIWUR10875;AGIWUR28689;AGIWUR36103

|        |    |     |         |         |                |         |         |                    |  |
|--------|----|-----|---------|---------|----------------|---------|---------|--------------------|--|
| CB4856 | CT | III | 5345252 | 5346117 | WBGene00022663 | glrx-21 | ZK121.1 | -0.217021825241808 |  |
|--------|----|-----|---------|---------|----------------|---------|---------|--------------------|--|

AGIWUR4869;AGIWUR43468

|        |    |     |         |         |                |           |  |           |                    |
|--------|----|-----|---------|---------|----------------|-----------|--|-----------|--------------------|
| CB4856 | CT | III | 5345982 | 5349401 | WBGene00021311 | Y32H12A.2 |  | Y32H12A.2 | -0.260488995146073 |
|--------|----|-----|---------|---------|----------------|-----------|--|-----------|--------------------|

AGIWUR28001

|        |    |     |         |         |                |           |  |           |                   |
|--------|----|-----|---------|---------|----------------|-----------|--|-----------|-------------------|
| CB4856 | CT | III | 5362209 | 5364372 | WBGene00021310 | Y32H12A.1 |  | Y32H12A.1 | 0.288906759894997 |
|--------|----|-----|---------|---------|----------------|-----------|--|-----------|-------------------|

AGIWUR5008

|        |    |     |         |         |                |       |           |  |                  |
|--------|----|-----|---------|---------|----------------|-------|-----------|--|------------------|
| CB4856 | CT | III | 5364512 | 5368045 | WBGene00000973 | dhs-9 | Y32H12A.3 |  | 0.43795945815756 |
|--------|----|-----|---------|---------|----------------|-------|-----------|--|------------------|

AGIWUR9949;AGIWUR33255

|        |    |     |         |         |                |       |           |  |                    |
|--------|----|-----|---------|---------|----------------|-------|-----------|--|--------------------|
| CB4856 | CT | III | 5368967 | 5371274 | WBGene00021312 | szy-2 | Y32H12A.4 |  | 0.0201487891844554 |
|--------|----|-----|---------|---------|----------------|-------|-----------|--|--------------------|

AGIWUR12268;AGIWUR40185

|        |    |     |         |         |                |        |           |  |                       |
|--------|----|-----|---------|---------|----------------|--------|-----------|--|-----------------------|
| CB4856 | CT | III | 5375698 | 5379929 | WBGene00021313 | paqr-2 | Y32H12A.5 |  | -0.000446652433035766 |
|--------|----|-----|---------|---------|----------------|--------|-----------|--|-----------------------|

AGIWUR28786

|        |    |     |         |         |                |           |  |           |  |
|--------|----|-----|---------|---------|----------------|-----------|--|-----------|--|
| CB4856 | CT | III | 5380906 | 5382173 | WBGene00021314 | Y32H12A.6 |  | Y32H12A.6 |  |
|--------|----|-----|---------|---------|----------------|-----------|--|-----------|--|

-0.00623447047234649

|        |    |     |         |         |                |           |  |           |                   |
|--------|----|-----|---------|---------|----------------|-----------|--|-----------|-------------------|
| CB4856 | CT | III | 5382288 | 5385415 | WBGene00021315 | Y32H12A.7 |  | Y32H12A.7 | 0.186246286326512 |
|--------|----|-----|---------|---------|----------------|-----------|--|-----------|-------------------|

|                                                                                     |    |     |         |         |                |           |           |                     |
|-------------------------------------------------------------------------------------|----|-----|---------|---------|----------------|-----------|-----------|---------------------|
| AGIWUR41756                                                                         |    |     |         |         |                |           |           |                     |
| CB4856                                                                              | CT | III | 5385617 | 5406037 | WBGene00021316 | Y32H12A.8 | Y32H12A.8 | -0.0387723457696083 |
| AGIWUR44435                                                                         |    |     |         |         |                |           |           |                     |
| CB4856                                                                              | CT | III | 5406102 | 5407968 | WBGene00020967 | W03A5.2   | W03A5.2   | -0.519875561171458  |
| CB4856                                                                              | CT | III | 5407888 | 5413177 | WBGene00020966 | W03A5.1   | W03A5.1   | -0.267883250677626  |
| CB4856                                                                              | CT | III | 5413137 | 5413993 | WBGene00001731 | gr1-22    | W03A5.3   | -0.275618557707012  |
| CB4856                                                                              | CT | III | 5415556 | 5419565 | WBGene00001042 | dnj-24    | W03A5.7   | -0.0603737028027753 |
| AGIWUR24399;AGIWUR33765                                                             |    |     |         |         |                |           |           |                     |
| CB4856                                                                              | CT | III | 5431407 | 5434467 | WBGene00020968 | W03A5.4   | W03A5.4   | -0.0788777353902645 |
| CB4856                                                                              | CT | III | 5438826 | 5440632 | WBGene00020970 | W03A5.6   | W03A5.6   | -0.186869429321187  |
| AGIWUR6394;AGIWUR38349                                                              |    |     |         |         |                |           |           |                     |
| CB4856                                                                              | CT | III | 5440862 | 5442761 | WBGene00020779 | T24G10.2  | T24G10.2  | 0.147625367585984   |
| AGIWUR29411                                                                         |    |     |         |         |                |           |           |                     |
| CB4856                                                                              | CT | III | 5443167 | 5446506 | WBGene00018612 | dis1-2    | F48E8.6   | -0.304742255926434  |
| AGIWUR13480;AGIWUR16272;AGIWUR25335;AGIWUR32043                                     |    |     |         |         |                |           |           |                     |
| CB4856                                                                              | CT | III | 5446510 | 5448419 | WBGene00018613 | skpt-1    | F48E8.7   | -0.0871882580537253 |
| CB4856                                                                              | CT | III | 5448838 | 5449868 | WBGene00044410 | F48E8.8   | F48E8.8   | -0.0991343593368774 |
| AGIWUR7055;AGIWUR24195;AGIWUR37290;AGIWUR42009                                      |    |     |         |         |                |           |           |                     |
| CB4856                                                                              | CT | III | 5450106 | 5453137 | WBGene00003901 | paa-1     | F48E8.5   | 0.032540365576267   |
| AGIWUR21505;AGIWUR27982;AGIWUR29246                                                 |    |     |         |         |                |           |           |                     |
| CB4856                                                                              | CT | III | 5453590 | 5459516 | WBGene00018611 | F48E8.4   | F48E8.4   | -0.366790522210094  |
| AGIWUR12928;AGIWUR13899;AGIWUR38555                                                 |    |     |         |         |                |           |           |                     |
| CB4856                                                                              | CT | III | 5461379 | 5464382 | WBGene00018610 | F48E8.3   | F48E8.3   | 0.142095454887524   |
| AGIWUR5788;AGIWUR6747;AGIWUR21003;AGIWUR34646;AGIWUR36155;AGIWUR36413;AGIWUR40162   |    |     |         |         |                |           |           |                     |
| CB4856                                                                              | CT | III | 5464381 | 5467992 | WBGene00018609 | F48E8.2   | F48E8.2   | -0.137153987159756  |
| AGIWUR16941;AGIWUR22846                                                             |    |     |         |         |                |           |           |                     |
| CB4856                                                                              | CT | III | 5474478 | 5478005 | WBGene00003055 | lon-1     | F48E8.1   | -0.420372899301409  |
| CB4856                                                                              | CT | III | 5478682 | 5478924 | WBGene00019835 | R02F2.6   | R02F2.6   | -0.321517803173423  |
| AGIWUR13517;AGIWUR30140                                                             |    |     |         |         |                |           |           |                     |
| CB4856                                                                              | CT | III | 5479318 | 5480278 | WBGene00019834 | R02F2.5   | R02F2.5   | -0.212069622944197  |
| CB4856                                                                              | CT | III | 5480262 | 5483784 | WBGene00019836 | R02F2.7   | R02F2.7   | -0.314906416598491  |
| AGIWUR16860;AGIWUR18493;AGIWUR20223;AGIWUR37735                                     |    |     |         |         |                |           |           |                     |
| CB4856                                                                              | CT | III | 5484200 | 5486005 | WBGene00019833 | R02F2.4   | R02F2.4   | -0.0032378500946173 |
| CB4856                                                                              | CT | III | 5487642 | 5498943 | WBGene00019832 | osg-1     | R02F2.2   | 0.502098657405725   |
| CB4856                                                                              | CT | III | 5499190 | 5499976 | WBGene00019838 | R02F2.9   | R02F2.9   | -0.178105142138111  |
| CB4856                                                                              | CT | III | 5501861 | 5506392 | WBGene00019831 | R02F2.1   | R02F2.1   | 0.337487660542351   |
| AGIWUR11309;AGIWUR20593;AGIWUR33029;AGIWUR36550;AGIWUR37726;AGIWUR40000;AGIWUR40694 |    |     |         |         |                |           |           |                     |
| CB4856                                                                              | CT | III | 5507050 | 5508738 | WBGene00017032 | D1044.7   | D1044.7   | 0.132279980364773   |
| CB4856                                                                              | CT | III | 5512927 | 5517523 | WBGene00017033 | nekl-4    | D1044.8   | -0.0990639613104625 |

|                                                                                               |    |     |         |         |                |          |         |                     |                   |
|-----------------------------------------------------------------------------------------------|----|-----|---------|---------|----------------|----------|---------|---------------------|-------------------|
| CB4856                                                                                        | CT | III | 5524181 | 5524439 | WBGene00017030 | D1044.5  | D1044.5 | -0.0322838310874092 | AGIWUR8736        |
| CB4856                                                                                        | CT | III | 5526071 | 5535481 | WBGene00017028 | dex-1    | D1044.2 | 0.596404840669006   |                   |
| AGIWUR21827;AGIWUR23018;AGIWUR23267                                                           |    |     |         |         |                |          |         |                     |                   |
| CB4856                                                                                        | CT | III | 5535660 | 5543218 | WBGene00017031 | D1044.6  | D1044.6 | -0.128437119988686  | AGIWUR15083       |
| CB4856                                                                                        | CT | III | 5544304 | 5546287 | WBGene00017027 | D1044.1  | D1044.1 | -0.0390310234593656 | AGIWUR40892       |
| CB4856                                                                                        | CT | III | 5546987 | 5551231 | WBGene00017302 | F09F7.5  | F09F7.5 | -0.0378360713536718 |                   |
| AGIWUR4529;AGIWUR6227;AGIWUR12534;AGIWUR18161;AGIWUR23373;AGIWUR25157;AGIWUR35306;AGIWUR40309 |    |     |         |         |                |          |         |                     |                   |
| CB4856                                                                                        | CT | III | 5551232 | 5552131 | WBGene00017303 | F09F7.6  | F09F7.6 | 2.029032077614      | AGIWUR225         |
| CB4856                                                                                        | CT | III | 5553489 | 5554934 | WBGene00017304 | F09F7.7  | F09F7.7 | 0.644876706455944   |                   |
| AGIWUR5737;AGIWUR9245;AGIWUR35372;AGIWUR35725                                                 |    |     |         |         |                |          |         |                     |                   |
| CB4856                                                                                        | CT | III | 5555404 | 5557318 | WBGene00017301 | hach-1   | F09F7.4 | -0.636700166282542  |                   |
| AGIWUR605;AGIWUR4972;AGIWUR14052;AGIWUR26931                                                  |    |     |         |         |                |          |         |                     |                   |
| CB4856                                                                                        | CT | III | 5557344 | 5564837 | WBGene00017300 | rpc-2    | F09F7.3 | -0.0724154702822348 |                   |
| AGIWUR897;AGIWUR31854;AGIWUR34704;AGIWUR43566                                                 |    |     |         |         |                |          |         |                     |                   |
| CB4856                                                                                        | CT | III | 5565025 | 5567382 | WBGene00003371 | mlc-3    | F09F7.2 | 0.125372369903964   |                   |
| AGIWUR3571;AGIWUR7969;AGIWUR9563;AGIWUR9855;AGIWUR23139;AGIWUR26212;AGIWUR31710               |    |     |         |         |                |          |         |                     |                   |
| CB4856                                                                                        | CT | III | 5568213 | 5568779 | WBGene00017305 | nspb-12  | F09F7.8 | -0.13498965044927   | AGIWUR36124       |
| CB4856                                                                                        | CT | III | 5573994 | 5576684 | WBGene00017299 | mol-1    | F09F7.1 | -0.104271465904897  | AGIWUR5547        |
| CB4856                                                                                        | CT | III | 5578435 | 5581343 | WBGene00018966 | F56D2.5  | F56D2.5 | -0.303764677160615  | AGIWUR36564       |
| CB4856                                                                                        | CT | III | 5581582 | 5582411 | WBGene00018968 | F56D2.8  | F56D2.8 | -0.272518403593867  | AGIWUR43983       |
| CB4856                                                                                        | CT | III | 5583135 | 5584213 | WBGene00006731 | uev-2    | F56D2.4 | 0.118825774362755   | AGIWUR10384       |
| CB4856                                                                                        | CT | III | 5584687 | 5587110 | WBGene00018965 | F56D2.3  | F56D2.3 | 0.632144283723009   | AGIWUR32222       |
| CB4856                                                                                        | CT | III | 5587263 | 5589095 | WBGene00018964 | F56D2.2  | F56D2.2 | -0.175617600406019  |                   |
| AGIWUR12096;AGIWUR16038;AGIWUR18564                                                           |    |     |         |         |                |          |         |                     |                   |
| CB4856                                                                                        | CT | III | 5589036 | 5591718 | WBGene00018967 | ddx-15   | F56D2.6 | 0.016299083474216   |                   |
| AGIWUR1234;AGIWUR6210;AGIWUR11625;AGIWUR28848;AGIWUR44724                                     |    |     |         |         |                |          |         |                     |                   |
| CB4856                                                                                        | CT | III | 5592135 | 5594785 | WBGene00018963 | ucr-1    | F56D2.1 | -0.0803767852503645 |                   |
| AGIWUR396;AGIWUR17595;AGIWUR18618;AGIWUR33070;AGIWUR33417;AGIWUR39900                         |    |     |         |         |                |          |         |                     |                   |
| CB4856                                                                                        | CT | III | 5595771 | 5598066 | WBGene00000420 | ced-6    | F56D2.7 | 0.276963808146437   |                   |
| AGIWUR21338;AGIWUR38804                                                                       |    |     |         |         |                |          |         |                     |                   |
| CB4856                                                                                        | CT | III | 5597947 | 5600058 | WBGene00015470 | C05D2.10 |         | C05D2.10            | 0.153224280458003 |
| AGIWUR30330                                                                                   |    |     |         |         |                |          |         |                     |                   |
| CB4856                                                                                        | CT | III | 5600393 | 5603656 | WBGene00015468 | madf-11  | C05D2.6 | -0.077140926340558  | AGIWUR20578       |
| CB4856                                                                                        | CT | III | 5604460 | 5607549 | WBGene00001514 | xnd-1    | C05D2.5 | -0.136697773749578  | AGIWUR12205       |
| CB4856                                                                                        | CT | III | 5607509 | 5610346 | WBGene00015469 | C05D2.8  | C05D2.8 | -0.157140546528661  | AGIWUR22365       |
| CB4856                                                                                        | CT | III | 5612274 | 5614700 | WBGene00000239 | bas-1    | C05D2.4 | -0.50023421934406   |                   |
| AGIWUR11865;AGIWUR22234;AGIWUR25155                                                           |    |     |         |         |                |          |         |                     |                   |
| CB4856                                                                                        | CT | III | 5614972 | 5617257 | WBGene00015467 | basl-1   | C05D2.3 | 0.0806902724966871  |                   |
| AGIWUR5686;AGIWUR25855;AGIWUR41332;AGIWUR44004                                                |    |     |         |         |                |          |         |                     |                   |

|                                                                                                         |    |     |         |         |                |          |          |                     |             |
|---------------------------------------------------------------------------------------------------------|----|-----|---------|---------|----------------|----------|----------|---------------------|-------------|
| CB4856                                                                                                  | CT | III | 5625014 | 5632322 | WBGene00000900 | daf-4    | C05D2.1  | 0.0420462131991783  |             |
| AGIWUR741;AGIWUR4499;AGIWUR13629;AGIWUR26026;AGIWUR28955                                                |    |     |         |         |                |          |          |                     |             |
| CB4856                                                                                                  | CT | III | 5635479 | 5654558 | WBGene00000518 | ckk-1    | C05H8.1  | 0.0195809722472311  |             |
| AGIWUR35270;AGIWUR44158                                                                                 |    |     |         |         |                |          |          |                     |             |
| CB4856                                                                                                  | CT | III | 5654984 | 5656994 | WBGene00018828 | sdz-21   | F54E7.5  | 0.387844660540403   | AGIWUR8561  |
| CB4856                                                                                                  | CT | III | 5659889 | 5661085 | WBGene00018829 | F54E7.6  | F54E7.6  | -0.216937166679628  | AGIWUR2470  |
| CB4856                                                                                                  | CT | III | 5664234 | 5676732 | WBGene00003918 | par-3    | F54E7.3  | 0.0829825849510604  |             |
| AGIWUR5765;AGIWUR39210                                                                                  |    |     |         |         |                |          |          |                     |             |
| CB4856                                                                                                  | CT | III | 5676612 | 5677890 | WBGene00018831 | F54E7.9  | F54E7.9  | 0.00150658048278274 |             |
| AGIWUR7591;AGIWUR27414;AGIWUR31239;AGIWUR42631                                                          |    |     |         |         |                |          |          |                     |             |
| CB4856                                                                                                  | CT | III | 5677953 | 5679038 | WBGene00018830 | ska-3    | F54E7.8  | -0.303681335270429  | AGIWUR242   |
| CB4856                                                                                                  | CT | III | 5679298 | 5680187 | WBGene00004481 | rps-12   | F54E7.2  | 0.0596382181905959  | AGIWUR34405 |
| CB4856                                                                                                  | CT | III | 5680433 | 5682326 | WBGene00018827 | pst-2    | F54E7.1  | -0.220816144959532  | AGIWUR2823  |
| CB4856                                                                                                  | CT | III | 5682310 | 5684098 | WBGene00004321 | rca-1    | F54E7.7  | 0.399474516723636   |             |
| AGIWUR2604;AGIWUR22461                                                                                  |    |     |         |         |                |          |          |                     |             |
| CB4856                                                                                                  | CT | III | 5690107 | 5692740 | WBGene00015146 | abi-1    | B0336.6  | -0.0489826376529194 | AGIWUR34075 |
| CB4856                                                                                                  | CT | III | 5692896 | 5693938 | WBGene00015145 | B0336.5  | B0336.5  | -0.157742633889965  | AGIWUR40695 |
| CB4856                                                                                                  | CT | III | 5694036 | 5694784 | WBGene00015150 | B0336.13 | B0336.13 | -0.185048295862911  |             |
| AGIWUR6621                                                                                              |    |     |         |         |                |          |          |                     |             |
| CB4856                                                                                                  | CT | III | 5694735 | 5697366 | WBGene00015147 | B0336.7  | B0336.7  | -0.209890789895448  |             |
| AGIWUR24198;AGIWUR34686                                                                                 |    |     |         |         |                |          |          |                     |             |
| CB4856                                                                                                  | CT | III | 5697477 | 5698013 | WBGene00002982 | lgg-3    | B0336.8  | 0.158406357792309   | AGIWUR43374 |
| CB4856                                                                                                  | CT | III | 5698430 | 5702304 | WBGene00004348 | rgs-5    | B0336.4  | -0.0292921168035605 |             |
| AGIWUR7851;AGIWUR7993;AGIWUR20937                                                                       |    |     |         |         |                |          |          |                     |             |
| CB4856                                                                                                  | CT | III | 5702248 | 5705464 | WBGene00006359 | swp-1    | B0336.9  | -0.124836117083119  |             |
| AGIWUR12277;AGIWUR15861;AGIWUR22510;AGIWUR29765;AGIWUR33611;AGIWUR35913;AGIWUR40245                     |    |     |         |         |                |          |          |                     |             |
| CB4856                                                                                                  | CT | III | 5705521 | 5706129 | WBGene00004435 | rp1-23   | B0336.10 | -0.0614934149222428 |             |
| AGIWUR5646;AGIWUR25265                                                                                  |    |     |         |         |                |          |          |                     |             |
| CB4856                                                                                                  | CT | III | 5706718 | 5709329 | WBGene00015148 | hpo-28   | B0336.11 | -0.0497998424472708 |             |
| AGIWUR204;AGIWUR5819;AGIWUR30382;AGIWUR44654                                                            |    |     |         |         |                |          |          |                     |             |
| CB4856                                                                                                  | CT | III | 5710062 | 5710509 | WBGene00015149 | B0336.12 | B0336.12 | -0.0221560804241072 |             |
| AGIWUR43192                                                                                             |    |     |         |         |                |          |          |                     |             |
| CB4856                                                                                                  | CT | III | 5711548 | 5714846 | WBGene00015143 | B0336.3  | B0336.3  | 0.0947683738587113  | AGIWUR38024 |
| CB4856                                                                                                  | CT | III | 5714861 | 5717585 | WBGene00000182 | arf-1.2  | B0336.2  | -0.147031126727751  |             |
| AGIWUR6417;AGIWUR10593;AGIWUR23258;AGIWUR26259                                                          |    |     |         |         |                |          |          |                     |             |
| CB4856                                                                                                  | CT | III | 5722824 | 5727115 | WBGene00006943 | wrm-1    | B0336.1  | 0.042484640786105   | AGIWUR16540 |
| CB4856                                                                                                  | CT | III | 5728180 | 5730159 | WBGene00015083 | egg-1    | B0244.8  | -0.0917502127974608 |             |
| AGIWUR973;AGIWUR2213;AGIWUR8633;AGIWUR12270;AGIWUR15368;AGIWUR28877;AGIWUR30186;AGIWUR35008;AGIWUR44144 |    |     |         |         |                |          |          |                     |             |
| CB4856                                                                                                  | CT | III | 5730118 | 5731030 | WBGene00015084 | B0244.9  | B0244.9  | -0.278066453322703  | AGIWUR29575 |

|                                                                        |    |     |         |         |                |           |           |                     |                    |
|------------------------------------------------------------------------|----|-----|---------|---------|----------------|-----------|-----------|---------------------|--------------------|
| CB4856                                                                 | CT | III | 5731501 | 5732854 | WBGene00015082 | B0244.7   | B0244.7   | 0.101302821084131   | AGIWUR27688        |
| CB4856                                                                 | CT | III | 5733997 | 5737481 | WBGene00015085 | B0244.10  |           | B0244.10            | 0.0215465877213585 |
| AGIWUR3640;AGIWUR11691;AGIWUR22636                                     |    |     |         |         |                |           |           |                     |                    |
| CB4856                                                                 | CT | III | 5742556 | 5744820 | WBGene00206513 | B0244.15  |           | B0244.15            | 0.0373901552389952 |
| AGIWUR27006                                                            |    |     |         |         |                |           |           |                     |                    |
| CB4856                                                                 | CT | III | 5744870 | 5747195 | WBGene00015080 | B0244.5   | B0244.5   | -0.0144276789201694 | AGIWUR35844        |
| CB4856                                                                 | CT | III | 5747485 | 5751637 | WBGene00015079 | B0244.4   | B0244.4   | -0.685564059497652  | AGIWUR28304        |
| CB4856                                                                 | CT | III | 5755496 | 5765815 | WBGene00002048 | ida-1     | B0244.2   | 0.40913676039786    | AGIWUR14657        |
| CB4856                                                                 | CT | III | 5767882 | 5768665 | WBGene00015086 | B0244.11  |           | B0244.11            | 0.122548436478708  |
| AGIWUR6678                                                             |    |     |         |         |                |           |           |                     |                    |
| CB4856                                                                 | CT | III | 5770185 | 5774703 | WBGene00021343 | cutl-23   | Y37B11A.1 |                     | 0.673721788633871  |
| AGIWUR41663                                                            |    |     |         |         |                |           |           |                     |                    |
| CB4856                                                                 | CT | III | 5774679 | 5790707 | WBGene00021344 | Y37B11A.2 |           | Y37B11A.2           | 0.464172100872347  |
| AGIWUR10288                                                            |    |     |         |         |                |           |           |                     |                    |
| CB4856                                                                 | CT | III | 5791171 | 5803042 | WBGene00020964 | polq-1    | W03A3.2   | -0.0819814129581697 |                    |
| AGIWUR5084;AGIWUR19096                                                 |    |     |         |         |                |           |           |                     |                    |
| CB4856                                                                 | CT | III | 5803260 | 5805112 | WBGene00001869 | him-10    | R12B2.4   | -0.105058083982549  | AGIWUR38298        |
| CB4856                                                                 | CT | III | 5805563 | 5806975 | WBGene00020019 | R12B2.3   | R12B2.3   | -0.0263723979182267 | AGIWUR18560        |
| CB4856                                                                 | CT | III | 5807052 | 5809206 | WBGene00020018 | R12B2.2   | R12B2.2   | 0.0742547556434729  | AGIWUR31538        |
| CB4856                                                                 | CT | III | 5815045 | 5815513 | WBGene00020021 | R12B2.7   | R12B2.7   | -0.035740689614693  | AGIWUR42938        |
| CB4856                                                                 | CT | III | 5816203 | 5820200 | WBGene00004858 | sma-4     | R12B2.1   | 0.334795061072894   |                    |
| AGIWUR15423;AGIWUR34046;AGIWUR34858;AGIWUR38559                        |    |     |         |         |                |           |           |                     |                    |
| CB4856                                                                 | CT | III | 5823957 | 5828651 | WBGene00044411 | R12B2.8   | R12B2.8   | 0.218817032839056   |                    |
| AGIWUR7783;AGIWUR23563;AGIWUR28200;AGIWUR28780;AGIWUR28810             |    |     |         |         |                |           |           |                     |                    |
| CB4856                                                                 | CT | III | 5828603 | 5833745 | WBGene00007016 | mdt-15    | R12B2.5   | 0.2161346109196     | AGIWUR4471         |
| CB4856                                                                 | CT | III | 5834022 | 5835756 | WBGene00020020 | R12B2.6   | R12B2.6   | 0.0200374248211759  | AGIWUR33024        |
| CB4856                                                                 | CT | III | 5836926 | 5837183 | WBGene00021029 | W04D12.1  |           | W04D12.1            | 0.0642247444060926 |
| AGIWUR33001                                                            |    |     |         |         |                |           |           |                     |                    |
| CB4856                                                                 | CT | III | 5848838 | 5853269 | WBGene00017162 | ddx-23    | F01F1.7   | -0.100835453567932  | AGIWUR17455        |
| CB4856                                                                 | CT | III | 5853532 | 5855687 | WBGene00000381 | cct-6     | F01F1.8   | -0.205185790733379  |                    |
| AGIWUR6023;AGIWUR22509;AGIWUR24670;AGIWUR31718;AGIWUR33596;AGIWUR43085 |    |     |         |         |                |           |           |                     |                    |
| CB4856                                                                 | CT | III | 5856018 | 5859186 | WBGene00000115 | alh-9     | F01F1.6   | -0.245318552724003  |                    |
| AGIWUR7791;AGIWUR17410;AGIWUR18827;AGIWUR41022;AGIWUR44087             |    |     |         |         |                |           |           |                     |                    |
| CB4856                                                                 | CT | III | 5859308 | 5861907 | WBGene00001057 | dprf-4    | F01F1.5   | 0.157100660954843   |                    |
| AGIWUR11864;AGIWUR27021;AGIWUR45153                                    |    |     |         |         |                |           |           |                     |                    |
| CB4856                                                                 | CT | III | 5861855 | 5863546 | WBGene00017163 | dnpp-1    | F01F1.9   | -0.0671142923504924 |                    |
| AGIWUR4140;AGIWUR30765;AGIWUR43330                                     |    |     |         |         |                |           |           |                     |                    |
| CB4856                                                                 | CT | III | 5864500 | 5866541 | WBGene00017161 | rabn-5    | F01F1.4   | 0                   | AGIWUR7226         |
| CB4856                                                                 | CT | III | 5866495 | 5868501 | WBGene00017164 | eng-1     | F01F1.10  | -0.0415189907247733 |                    |



AGIWUR8283  
CB4856 CT III 5868587 5869620 WBGene00017169 F01F1.15 F01F1.15  
-0.00645301622409633 AGIWUR26321;AGIWUR33269  
CB4856 CT III 5869685 5872396 WBGene00017165 F01F1.11 F01F1.11 -0.0602213063860297  
AGIWUR12560  
CB4856 CT III 5873025 5874680 WBGene00017160 F01F1.3 F01F1.3 0.253569530287759 AGIWUR13608  
CB4856 CT III 5874672 5876625 WBGene00017166 aldo-2 F01F1.12 0.0665714903497596  
AGIWUR12260;AGIWUR18058;AGIWUR25115;AGIWUR25603;AGIWUR31691;AGIWUR40498  
CB4856 CT III 5877020 5878419 WBGene00003252 mig-21 F01F1.13 -0.138606163605514  
AGIWUR44500  
CB4856 CT III 5878521 5879415 WBGene00017159 F01F1.2 F01F1.2 -0.0316533914861736  
AGIWUR400;AGIWUR17259;AGIWUR18227;AGIWUR28252;AGIWUR33591;AGIWUR38436  
CB4856 CT III 5879489 5882428 WBGene00017158 hpo-10 F01F1.1 -0.17850964867524  
AGIWUR1028;AGIWUR18342;AGIWUR23790  
CB4856 CT III 5882319 5882923 WBGene00017168 F01F1.14 F01F1.14 0.129990472237127  
AGIWUR11771  
CB4856 CT III 5884307 5885848 WBGene00016196 C28H8.5 C28H8.5 -0.354679386525973 AGIWUR19907  
CB4856 CT III 5885847 5886956 WBGene00016198 C28H8.7 C28H8.7 0.157510062872126 AGIWUR7242  
CB4856 CT III 5887104 5888775 WBGene00016199 C28H8.8 C28H8.8 0.120493963112355 AGIWUR21123  
CB4856 CT III 5889721 5896013 WBGene00016197 pxl-1 C28H8.6 -0.0935880414120085  
AGIWUR2647;AGIWUR6131;AGIWUR10300;AGIWUR12567;AGIWUR13793;AGIWUR15805;AGIWUR18173;AGIWUR21049;AGIWUR24758;A  
GIWUR30067;AGIWUR33589;AGIWUR42592  
CB4856 CT III 5903576 5906122 WBGene00016200 dpff-1 C28H8.9 0.118687883262805  
AGIWUR5400;AGIWUR12108;AGIWUR23801  
CB4856 CT III 5907044 5908457 WBGene00016195 C28H8.4 C28H8.4 -0.197952486763201  
AGIWUR5053;AGIWUR10268;AGIWUR28529  
CB4856 CT III 5908700 5914734 WBGene00016194 C28H8.3 C28H8.3 -0.0649394012988873  
AGIWUR4907;AGIWUR5521;AGIWUR5753;AGIWUR8116;AGIWUR15977;AGIWUR18776;AGIWUR38328;AGIWUR38602;AGIWUR41317;AGI  
WUR44843  
CB4856 CT III 5917628 5920086 WBGene00016201 tdo-2 C28H8.11 -0.218665017671864  
AGIWUR189;AGIWUR9055;AGIWUR37615;AGIWUR44015  
CB4856 CT III 5923187 5924431 WBGene00016193 C28H8.2 C28H8.2 0.117100863757397 AGIWUR33140  
CB4856 CT III 5924394 5925754 WBGene00001018 dnc-2 C28H8.12 -0.0569902098999258  
AGIWUR7289;AGIWUR28714;AGIWUR32259  
CB4856 CT III 5926086 5926987 WBGene00016192 bcl-7 C28H8.1 -0.0963321905817036 AGIWUR14967  
CB4856 CT III 5926898 5932953 WBGene00006987 zmp-1 EGAP1.3 -0.0867493884140802  
AGIWUR7925;AGIWUR17769  
CB4856 CT III 5935749 5937220 WBGene00017146 EGAP1.1 EGAP1.1 0.412606466099057 AGIWUR25306  
CB4856 CT III 5940244 5943835 WBGene00006727 ubq-1 F25B5.4 0.0397828343142166

AGIWUR8687;AGIWUR12178;AGIWUR21911;AGIWUR22522;AGIWUR22721;AGIWUR23032;AGIWUR27981;AGIWUR32258;AGIWUR40838  
 CB4856 CT III 5943833 5946124 WBGene00017776 F25B5.5 F25B5.5 -0.338035699618452 AGIWUR17556  
 CB4856 CT III 5946217 5948711 WBGene00017777 F25B5.6 F25B5.6 -0.0545287960051919  
 AGIWUR4867;AGIWUR36391;AGIWUR42299  
 CB4856 CT III 5948890 5953534 WBGene00017775 F25B5.3 F25B5.3 -0.176781050924423  
 AGIWUR1552;AGIWUR4298;AGIWUR15197;AGIWUR41985  
 CB4856 CT III 5953526 5958246 WBGene00017778 nono-1 F25B5.7 -0.182663966885217  
 AGIWUR5396;AGIWUR8117;AGIWUR13268;AGIWUR16611;AGIWUR18055;AGIWUR20561;AGIWUR37674;AGIWUR38427  
 CB4856 CT III 5958722 5962322 WBGene00017774 nop-1 F25B5.2 -0.0624539076392754 AGIWUR31282  
 CB4856 CT III 5966413 5971510 WBGene00017773 dct-6 F25B5.1 -0.555180831011427 AGIWUR14598  
 CB4856 CT III 5971530 5973664 WBGene00003375 mlp-1 T04C9.4 -0.487869665438068  
 AGIWUR33014;AGIWUR37421  
 CB4856 CT III 5976781 5982126 WBGene00001489 frm-2 T04C9.6 0.362186257952995 AGIWUR3828  
 CB4856 CT III 5985640 5985858 WBGene00020211 T04C9.3 T04C9.3 0.239105686145749 AGIWUR38664  
 CB4856 CT III 5991880 5992230 WBGene00020210 T04C9.2 T04C9.2 -0.158953794159043 AGIWUR36256  
 CB4856 CT III 5993219 6006360 WBGene00020209 T04C9.1 T04C9.1 0.109929552964468  
 AGIWUR11458;AGIWUR16358;AGIWUR30105;AGIWUR35380;AGIWUR39302;AGIWUR42067  
 CB4856 CT III 6006344 6009084 WBGene00022694 gcna-1 ZK328.4 -0.220690631326754 AGIWUR18288  
 CB4856 CT III 6009550 6012839 WBGene00001166 eftu-2 ZK328.2 -0.0792798883407428  
 AGIWUR1543;AGIWUR1621;AGIWUR23124;AGIWUR33224;AGIWUR33784;AGIWUR39115;AGIWUR42275  
 CB4856 CT III 6013536 6019562 WBGene00003796 npp-10 ZK328.5 -0.146828311929048  
 AGIWUR17451;AGIWUR18497;AGIWUR19359;AGIWUR19986;AGIWUR31346;AGIWUR35634;AGIWUR38716  
 CB4856 CT III 6020165 6024659 WBGene00000874 cyk-3 ZK328.1 -0.258855958157956  
 AGIWUR587;AGIWUR7409  
 CB4856 CT III 6025090 6028532 WBGene00006544 tbx-7 ZK328.8 0.400988847441734 AGIWUR35350  
 CB4856 CT III 6028790 6030583 WBGene00022695 ZK328.6 ZK328.6 0.117357269786238 AGIWUR13455  
 CB4856 CT III 6032696 6039475 WBGene00022696 ZK328.7 ZK328.7 -0.0142645947324191  
 AGIWUR21256;AGIWUR23219  
 CB4856 CT III 6040334 6045125 WBGene00018254 F40H6.2 F40H6.2 0.13447247342131 AGIWUR42043  
 CB4856 CT III 6045771 6046981 WBGene00006547 tbx-11 F40H6.4 0.216746258412556  
 AGIWUR31993;AGIWUR39421  
 CB4856 CT III 6049316 6055448 WBGene00018255 F40H6.5 F40H6.5 0.112087945208404  
 AGIWUR16778;AGIWUR34353  
 CB4856 CT III 6057055 6058444 WBGene00018253 F40H6.1 F40H6.1 0.0702061418150741 AGIWUR16150  
 CB4856 CT III 6065139 6066217 WBGene00044412 F40H6.6 F40H6.6 0.262772622357009 AGIWUR6163  
 CB4856 CT III 6067857 6072076 WBGene00015478 C05D10.2 C05D10.2 -0.0969849762646513  
 AGIWUR106;AGIWUR11939;AGIWUR23889;AGIWUR29361;AGIWUR43021  
 CB4856 CT III 6080563 6084748 WBGene00015477 attf-4 C05D10.1 0.124482906013192  
 AGIWUR35938

|                                                                                    |    |     |         |         |                |          |          |                      |
|------------------------------------------------------------------------------------|----|-----|---------|---------|----------------|----------|----------|----------------------|
| CB4856                                                                             | CT | III | 6084665 | 6087721 | WBGene00015479 | wht-1    | C05D10.3 | 0.00811878630754137  |
| AGIWUR18060                                                                        |    |     |         |         |                |          |          |                      |
| CB4856                                                                             | CT | III | 6088684 | 6102862 | WBGene00015480 | C05D10.4 | C05D10.4 | 0.154007893583375    |
| AGIWUR2123;AGIWUR4314;AGIWUR4703;AGIWUR8809;AGIWUR10254;AGIWUR27781;AGIWUR42360    |    |     |         |         |                |          |          |                      |
| CB4856                                                                             | CT | III | 6114482 | 6116331 | WBGene00020549 | nmt-1    | T17E9.2  | 0.0389012709459795   |
| AGIWUR27138;AGIWUR31541;AGIWUR41341                                                |    |     |         |         |                |          |          |                      |
| CB4856                                                                             | CT | III | 6118627 | 6124055 | WBGene00002201 | kin-18   | T17E9.1  | 0.00234100274204518  |
| AGIWUR1170;AGIWUR5256                                                              |    |     |         |         |                |          |          |                      |
| CB4856                                                                             | CT | III | 6124184 | 6136276 | WBGene00021534 | mvk-1    | Y42G9A.4 | -0.0677125738862667  |
| AGIWUR12699;AGIWUR40028                                                            |    |     |         |         |                |          |          |                      |
| CB4856                                                                             | CT | III | 6142123 | 6149590 | WBGene00021535 | wht-7    | Y42G9A.6 | 0.00694828976784656  |
| AGIWUR12629                                                                        |    |     |         |         |                |          |          |                      |
| CB4856                                                                             | CT | III | 6149961 | 6154933 | WBGene00021531 | Y42G9A.1 | Y42G9A.1 | 0.284927301667857    |
| AGIWUR36020                                                                        |    |     |         |         |                |          |          |                      |
| CB4856                                                                             | CT | III | 6154844 | 6157758 | WBGene00018340 | anmt-2   | F42A10.3 | -0.00847987240529946 |
| AGIWUR34997                                                                        |    |     |         |         |                |          |          |                      |
| CB4856                                                                             | CT | III | 6159842 | 6164588 | WBGene00003593 | nfm-1    | F42A10.2 | 0.232408831271       |
| AGIWUR1316;AGIWUR1497;AGIWUR7359;AGIWUR41587                                       |    |     |         |         |                |          |          |                      |
| CB4856                                                                             | CT | III | 6164645 | 6171165 | WBGene00023489 | F42A10.9 | F42A10.9 | -0.646581703124987   |
| AGIWUR19772;AGIWUR40858                                                            |    |     |         |         |                |          |          |                      |
| CB4856                                                                             | CT | III | 6171147 | 6172800 | WBGene00018341 | F42A10.5 | F42A10.5 | -0.400907614357701   |
| AGIWUR24355;AGIWUR30556                                                            |    |     |         |         |                |          |          |                      |
| CB4856                                                                             | CT | III | 6173305 | 6176171 | WBGene00018339 | abcf-3   | F42A10.1 | 0.0157180046903935   |
| AGIWUR32812                                                                        |    |     |         |         |                |          |          |                      |
| CB4856                                                                             | CT | III | 6176148 | 6176861 | WBGene00018342 | F42A10.6 | F42A10.6 | -0.224533560804758   |
| AGIWUR14546                                                                        |    |     |         |         |                |          |          |                      |
| CB4856                                                                             | CT | III | 6177916 | 6178686 | WBGene00018343 | F42A10.7 | F42A10.7 | 0.0556879385395836   |
| AGIWUR20743;AGIWUR44549                                                            |    |     |         |         |                |          |          |                      |
| CB4856                                                                             | CT | III | 6181078 | 6183218 | WBGene00003546 | nas-28   | F42A10.8 | 0.203068673850265    |
| AGIWUR10042;AGIWUR38272                                                            |    |     |         |         |                |          |          |                      |
| CB4856                                                                             | CT | III | 6191110 | 6192081 | WBGene00016012 | C23G10.5 | C23G10.5 |                      |
| -0.00384337605488039 AGIWUR42032                                                   |    |     |         |         |                |          |          |                      |
| CB4856                                                                             | CT | III | 6192116 | 6194580 | WBGene00016013 | C23G10.6 | C23G10.6 | 1.2842315163522      |
| AGIWUR42473                                                                        |    |     |         |         |                |          |          |                      |
| CB4856                                                                             | CT | III | 6195984 | 6198414 | WBGene00016014 | C23G10.7 | C23G10.7 | -0.283075390568312   |
| AGIWUR1598;AGIWUR10377;AGIWUR17777;AGIWUR19282                                     |    |     |         |         |                |          |          |                      |
| CB4856                                                                             | CT | III | 6198902 | 6202594 | WBGene00004459 | rpn-2    | C23G10.4 | -0.409495591971142   |
| AGIWUR2174;AGIWUR13729;AGIWUR23688;AGIWUR24196;AGIWUR24746;AGIWUR38535;AGIWUR43344 |    |     |         |         |                |          |          |                      |
| CB4856                                                                             | CT | III | 6202619 | 6206211 | WBGene00016015 | C23G10.8 | C23G10.8 | 0.0833976461015169   |

|                                                                                                                                                |     |         |         |                |           |           |                     |                     |
|------------------------------------------------------------------------------------------------------------------------------------------------|-----|---------|---------|----------------|-----------|-----------|---------------------|---------------------|
| AGIWUR39422                                                                                                                                    |     |         |         |                |           |           |                     |                     |
| CB4856 CT                                                                                                                                      | III | 6206803 | 6207971 | WBGene00004472 | rps-3     | C23G10.3  |                     | 0.00993160876055299 |
| AGIWUR7661;AGIWUR40667                                                                                                                         |     |         |         |                |           |           |                     |                     |
| CB4856 CT                                                                                                                                      | III | 6208064 | 6209140 | WBGene00016011 | C23G10.2  | C23G10.2  |                     | -0.0572078697762102 |
| AGIWUR31032                                                                                                                                    |     |         |         |                |           |           |                     |                     |
| CB4856 CT                                                                                                                                      | III | 6209284 | 6212904 | WBGene00016010 | C23G10.1  | C23G10.1  |                     | -0.320991347602228  |
| AGIWUR19899                                                                                                                                    |     |         |         |                |           |           |                     |                     |
| CB4856 CT                                                                                                                                      | III | 6213112 | 6213923 | WBGene00016016 | C23G10.10 | C23G10.10 |                     | 1.24585087760602    |
| AGIWUR15153                                                                                                                                    |     |         |         |                |           |           |                     |                     |
| CB4856 CT                                                                                                                                      | III | 6215164 | 6215576 | WBGene00016017 | C23G10.11 | C23G10.11 |                     | 5.80553719785489    |
| AGIWUR44734                                                                                                                                    |     |         |         |                |           |           |                     |                     |
| CB4856 CT                                                                                                                                      | III | 6220537 | 6224451 | WBGene00001989 | hot-4     | T12A2.16  |                     | 0.28208529257042    |
| AGIWUR4554;AGIWUR11038;AGIWUR14225;AGIWUR34548;AGIWUR41379                                                                                     |     |         |         |                |           |           |                     |                     |
| CB4856 CT                                                                                                                                      | III | 6224491 | 6229403 | WBGene00020443 | esyt-2    | T12A2.15  |                     | -0.275637652922914  |
| AGIWUR11091;AGIWUR17234;AGIWUR18813;AGIWUR22069;AGIWUR27544                                                                                    |     |         |         |                |           |           |                     |                     |
| CB4856 CT                                                                                                                                      | III | 6233718 | 6239336 | WBGene00020439 | T12A2.5   | T12A2.5   | -0.159730249569995  | AGIWUR41851         |
| CB4856 CT                                                                                                                                      | III | 6240775 | 6241581 | WBGene00020438 | T12A2.3   | T12A2.3   | -0.256703718275206  |                     |
| AGIWUR17752;AGIWUR29138;AGIWUR37203;AGIWUR43278                                                                                                |     |         |         |                |           |           |                     |                     |
| CB4856 CT                                                                                                                                      | III | 6241850 | 6244383 | WBGene00020440 | T12A2.6   | T12A2.6   | 0.0612756923203674  |                     |
| AGIWUR10318;AGIWUR21837;AGIWUR24481                                                                                                            |     |         |         |                |           |           |                     |                     |
| CB4856 CT                                                                                                                                      | III | 6244672 | 6246039 | WBGene00020441 | T12A2.7   | T12A2.7   | -0.29857655772711   | AGIWUR27093         |
| CB4856 CT                                                                                                                                      | III | 6245932 | 6248234 | WBGene00020442 | gen-1     | T12A2.8   | -0.0678020802716937 |                     |
| AGIWUR5759;AGIWUR14650;AGIWUR23445                                                                                                             |     |         |         |                |           |           |                     |                     |
| CB4856 CT                                                                                                                                      | III | 6248317 | 6251607 | WBGene00020437 | stt-3     | T12A2.2   | -0.024999336688142  |                     |
| AGIWUR3513;AGIWUR9746;AGIWUR13447;AGIWUR19992;AGIWUR22561;AGIWUR28326;AGIWUR35902;AGIWUR38028;AGIWUR39066;AGIWUR41574                          |     |         |         |                |           |           |                     |                     |
| CB4856 CT                                                                                                                                      | III | 6251811 | 6271282 | WBGene00020436 | T12A2.1   | T12A2.1   | -0.36156589522659   | AGIWUR4320          |
| CB4856 CT                                                                                                                                      | III | 6271561 | 6272959 | WBGene00015979 | C18F10.9  | C18F10.9  | -0.268102255286175  |                     |
| AGIWUR9386                                                                                                                                     |     |         |         |                |           |           |                     |                     |
| CB4856 CT                                                                                                                                      | III | 6273160 | 6276016 | WBGene00015977 | C18F10.2  | C18F10.2  | 0.332084587924762   |                     |
| AGIWUR41470                                                                                                                                    |     |         |         |                |           |           |                     |                     |
| CB4856 CT                                                                                                                                      | III | 6276048 | 6278351 | WBGene00015978 | C18F10.7  | C18F10.7  | -0.084258371120054  |                     |
| AGIWUR5641;AGIWUR11223;AGIWUR19375;AGIWUR26373;AGIWUR27221;AGIWUR27295;AGIWUR29666;AGIWUR29857;AGIWUR30170;AGIWUR32153;AGIWUR36457;AGIWUR40713 |     |         |         |                |           |           |                     |                     |
| CB4856 CT                                                                                                                                      | III | 6280380 | 6282411 | WBGene00001972 | hmg-1.2   | F47D12.4  | -0.0336774908063742 |                     |
| AGIWUR26400;AGIWUR26979                                                                                                                        |     |         |         |                |           |           |                     |                     |
| CB4856 CT                                                                                                                                      | III | 6282444 | 6286231 | WBGene00018561 | gadr-3    | F47D12.5  | -0.0237683427843702 |                     |
| AGIWUR26317                                                                                                                                    |     |         |         |                |           |           |                     |                     |
| CB4856 CT                                                                                                                                      | III | 6286629 | 6287293 | WBGene00018562 | F47D12.6  | F47D12.6  | 0.153613531431118   |                     |

|                                                                                            |    |     |         |         |                |                   |                                 |
|--------------------------------------------------------------------------------------------|----|-----|---------|---------|----------------|-------------------|---------------------------------|
| AGIWUR17571                                                                                |    |     |         |         |                |                   |                                 |
| CB4856                                                                                     | CT | III | 6293247 | 6296022 | WBGene00018563 | F47D12.7          | F47D12.7 0.0416987508314719     |
| AGIWUR28697                                                                                |    |     |         |         |                |                   |                                 |
| CB4856                                                                                     | CT | III | 6298461 | 6299338 | WBGene00018560 | F47D12.3          | F47D12.3 -0.234709154922552     |
| AGIWUR29555                                                                                |    |     |         |         |                |                   |                                 |
| CB4856                                                                                     | CT | III | 6299331 | 6303217 | WBGene00018564 | F47D12.9          | F47D12.9 -0.162985121109861     |
| AGIWUR6888;AGIWUR10228;AGIWUR20703;AGIWUR25146;AGIWUR30129;AGIWUR30161                     |    |     |         |         |                |                   |                                 |
| CB4856                                                                                     | CT | III | 6309378 | 6320872 | WBGene00001518 | gar-2 F47D12.1    | -0.0584175481409233             |
| AGIWUR3654;AGIWUR4396;AGIWUR18671;AGIWUR18967;AGIWUR29649;AGIWUR38247;AGIWUR38822          |    |     |         |         |                |                   |                                 |
| CB4856                                                                                     | CT | III | 6321176 | 6324239 | WBGene00016980 | C56G2.5 C56G2.5   | -0.263018049665663              |
| AGIWUR2514;AGIWUR14213;AGIWUR15494;AGIWUR37144;AGIWUR40562;AGIWUR43714                     |    |     |         |         |                |                   |                                 |
| CB4856                                                                                     | CT | III | 6331732 | 6335829 | WBGene00016979 | C56G2.4 C56G2.4   | 0.316038054977216 AGIWUR28406   |
| CB4856                                                                                     | CT | III | 6338508 | 6340228 | WBGene00002891 | let-767 C56G2.6   | -0.0958557829654225             |
| AGIWUR23719;AGIWUR39408                                                                    |    |     |         |         |                |                   |                                 |
| CB4856                                                                                     | CT | III | 6342481 | 6343287 | WBGene00016982 | C56G2.9 C56G2.9   | -0.0622162914894 AGIWUR27081    |
| CB4856                                                                                     | CT | III | 6346285 | 6348121 | WBGene00016978 | C56G2.3 C56G2.3   | -0.433487785064989 AGIWUR7248   |
| CB4856                                                                                     | CT | III | 6353384 | 6366660 | WBGene00016977 | akap-1 C56G2.1    | 0.0873854675206531              |
| AGIWUR630;AGIWUR2907;AGIWUR8486;AGIWUR8983;AGIWUR15005;AGIWUR20081;AGIWUR29898;AGIWUR38741 |    |     |         |         |                |                   |                                 |
| CB4856                                                                                     | CT | III | 6366582 | 6367899 | WBGene00016983 | C56G2.15 C56G2.15 | -0.0787625721918577             |
| AGIWUR37593                                                                                |    |     |         |         |                |                   |                                 |
| CB4856                                                                                     | CT | III | 6368042 | 6373904 | WBGene00015813 | thoc-2 C16A3.8    | 0.131559344145197 AGIWUR35223   |
| CB4856                                                                                     | CT | III | 6374048 | 6374997 | WBGene00004482 | rps-13 C16A3.9    | 0.0291373512532793              |
| AGIWUR19240;AGIWUR42951                                                                    |    |     |         |         |                |                   |                                 |
| CB4856                                                                                     | CT | III | 6375379 | 6379190 | WBGene00007048 | nfx-1 C16A3.7     | 0.0081546420696057 AGIWUR32264  |
| CB4856                                                                                     | CT | III | 6379449 | 6380671 | WBGene00015811 | C16A3.6 C16A3.6   | 0.399179136436224               |
| AGIWUR10740;AGIWUR41642                                                                    |    |     |         |         |                |                   |                                 |
| CB4856                                                                                     | CT | III | 6380695 | 6381517 | WBGene00015810 | C16A3.5 C16A3.5   | -0.0874310231377642 AGIWUR18873 |
| CB4856                                                                                     | CT | III | 6381634 | 6383024 | WBGene00015809 | C16A3.4 C16A3.4   | -0.0640041599671406 AGIWUR8037  |
| CB4856                                                                                     | CT | III | 6383552 | 6389401 | WBGene00002850 | let-716 C16A3.3   | -0.117126265510308 AGIWUR5062   |
| CB4856                                                                                     | CT | III | 6389833 | 6390841 | WBGene00015807 | C16A3.2 C16A3.2   | -0.361503006994864 AGIWUR37881  |
| CB4856                                                                                     | CT | III | 6390946 | 6393843 | WBGene00015806 | smrc-1 C16A3.1    | 0.0404785670444312              |
| AGIWUR10053;AGIWUR20541;AGIWUR34378                                                        |    |     |         |         |                |                   |                                 |
| CB4856                                                                                     | CT | III | 6394223 | 6396182 | WBGene00015814 | oatr-1 C16A3.10   | -0.304453901643893              |
| AGIWUR29129;AGIWUR41871;AGIWUR42636                                                        |    |     |         |         |                |                   |                                 |
| CB4856                                                                                     | CT | III | 6407129 | 6410018 | WBGene00002881 | let-756 C05D11.4  | 0.0647342256411809              |
| AGIWUR36676;AGIWUR40092;AGIWUR44667                                                        |    |     |         |         |                |                   |                                 |
| CB4856                                                                                     | CT | III | 6410033 | 6412014 | WBGene00015483 | C05D11.5 C05D11.5 | 0.35544737871512                |
| AGIWUR25683;AGIWUR32018;AGIWUR33469;AGIWUR36116                                            |    |     |         |         |                |                   |                                 |
| CB4856                                                                                     | CT | III | 6411816 | 6414993 | WBGene00003523 | nas-4 C05D11.6    | -0.0891223610968837             |

AGIWUR26546;AGIWUR27915;AGIWUR35771  
CB4856 CT III 6415774 6421885 WBGene00015484 atgl-1 C05D11.7 0.138979862843456  
AGIWUR16740;AGIWUR21361;AGIWUR28752  
CB4856 CT III 6422459 6427305 WBGene00015485 C05D11.8 C05D11.8 -0.0456223914543905  
AGIWUR13966  
CB4856 CT III 6427529 6430934 WBGene00015486 C05D11.9 C05D11.9 -0.175017408739006  
AGIWUR7701  
CB4856 CT III 6431153 6431792 WBGene00015487 mrps-17 C05D11.10 -0.247550249351793  
AGIWUR30900  
CB4856 CT III 6432178 6433145 WBGene00006515 txdc-9 C05D11.3 -0.598115518774463  
AGIWUR13727  
CB4856 CT III 6433239 6436502 WBGene00006516 vps-16 C05D11.2 -0.103414497644959  
AGIWUR12562  
CB4856 CT III 6436608 6439959 WBGene00015481 C05D11.1 C05D11.1 -0.0514946155383944  
AGIWUR20542;AGIWUR28535  
CB4856 CT III 6440145 6443000 WBGene00003214 mel-32 C05D11.11 -0.408631881927219  
AGIWUR4122;AGIWUR20891;AGIWUR29394;AGIWUR41655  
CB4856 CT III 6443044 6444079 WBGene00015488 C05D11.13 C05D11.13 0.105290051401585  
AGIWUR6024  
CB4856 CT III 6444693 6446943 WBGene00002855 let-721 C05D11.12 0.0668636721078002  
AGIWUR6107;AGIWUR19355;AGIWUR41545  
CB4856 CT III 6448075 6450696 WBGene00020822 T26A5.6 T26A5.6 -0.225522079292983 AGIWUR16995  
CB4856 CT III 6454483 6460014 WBGene00020821 jhdm-1 T26A5.5 -0.195375166791113  
AGIWUR22295;AGIWUR37371  
CB4856 CT III 6460120 6462222 WBGene00020820 algn-1 T26A5.4 -0.0940286906554082 AGIWUR10349  
CB4856 CT III 6462216 6462856 WBGene00020823 T26A5.8 T26A5.8 -0.156164813200617 AGIWUR29912  
CB4856 CT III 6462907 6463801 WBGene00001005 dlc-1 T26A5.9 -0.235791606582657  
AGIWUR2065;AGIWUR7456;AGIWUR14904;AGIWUR27849  
CB4856 CT III 6465157 6467208 WBGene00006463 nduf-2.2 T26A5.3 -0.28086414925497  
AGIWUR33657  
CB4856 CT III 6467382 6471510 WBGene00020819 T26A5.2 T26A5.2 0.498402191005264 AGIWUR11165  
CB4856 CT III 6471720 6475246 WBGene00007060 wht-6 T26A5.1 0.199833383462103 AGIWUR31046  
CB4856 CT III 6478961 6481226 WBGene00017755 zip-8 F23F12.9 0.678891361167593  
AGIWUR18229;AGIWUR25746  
CB4856 CT III 6483218 6488875 WBGene00017754 F23F12.8 F23F12.8 0.441327832790623  
AGIWUR7260;AGIWUR7807;AGIWUR20366  
CB4856 CT III 6489793 6491282 WBGene00004503 rpt-3 F23F12.6 -0.112526361452044  
AGIWUR5122;AGIWUR30499;AGIWUR41391  
CB4856 CT III 6491368 6492907 WBGene00005076 srb-11 F23F12.10 0.0931547028516881

|                                                                       |    |     |         |         |                |           |           |                     |             |
|-----------------------------------------------------------------------|----|-----|---------|---------|----------------|-----------|-----------|---------------------|-------------|
| AGIWUR30246                                                           |    |     |         |         |                |           |           |                     |             |
| CB4856                                                                | CT | III | 6493553 | 6494781 | WBGene00005075 | srb-10    | F23F12.11 | -0.18310322765671   |             |
| AGIWUR24014                                                           |    |     |         |         |                |           |           |                     |             |
| CB4856                                                                | CT | III | 6495677 | 6498198 | WBGene00044455 | F23F12.13 | F23F12.13 | 0.405789683300342   |             |
| AGIWUR33864;AGIWUR45117                                               |    |     |         |         |                |           |           |                     |             |
| CB4856                                                                | CT | III | 6498476 | 6500023 | WBGene00017752 | sdz-15    | F23F12.4  | -0.231209061780169  |             |
| AGIWUR867;AGIWUR22937;AGIWUR25799                                     |    |     |         |         |                |           |           |                     |             |
| CB4856                                                                | CT | III | 6500514 | 6507717 | WBGene00017751 | F23F12.3  | F23F12.3  | -0.499891500560967  |             |
| AGIWUR12746;AGIWUR22390;AGIWUR33264;AGIWUR43307                       |    |     |         |         |                |           |           |                     |             |
| CB4856                                                                | CT | III | 6508132 | 6509499 | WBGene00017756 | F23F12.12 | F23F12.12 | 0.363925623104489   |             |
| AGIWUR24827                                                           |    |     |         |         |                |           |           |                     |             |
| CB4856                                                                | CT | III | 6509699 | 6514768 | WBGene00000044 | acr-5     | K03F8.2   | -0.0404687143167184 |             |
| AGIWUR945;AGIWUR2385;AGIWUR14698;AGIWUR31814                          |    |     |         |         |                |           |           |                     |             |
| CB4856                                                                | CT | III | 6518714 | 6520049 | WBGene00044295 | C09E7.10  | C09E7.10  | -0.0371334793799694 |             |
| AGIWUR9196;AGIWUR10502;AGIWUR25243                                    |    |     |         |         |                |           |           |                     |             |
| CB4856                                                                | CT | III | 6524051 | 6525660 | WBGene00003859 | oig-1     | C09E7.3   | -0.0725078015342122 | AGIWUR44575 |
| CB4856                                                                | CT | III | 6528202 | 6532088 | WBGene00004102 | pqn-10    | C09E7.2   | 0.0265952876476128  | AGIWUR41366 |
| CB4856                                                                | CT | III | 6532560 | 6533819 | WBGene00015637 | srxa-5    | C09E7.1   | -0.168593901209842  | AGIWUR26008 |
| CB4856                                                                | CT | III | 6534467 | 6536995 | WBGene00015638 | C09E7.4   | C09E7.4   | 0.11302691458037    | AGIWUR8849  |
| CB4856                                                                | CT | III | 6538101 | 6541312 | WBGene00015639 | C09E7.5   | C09E7.5   | 0.0718362660475265  | AGIWUR9379  |
| CB4856                                                                | CT | III | 6541550 | 6546425 | WBGene00015640 | C09E7.6   | C09E7.6   | -0.210560171343311  |             |
| AGIWUR1061;AGIWUR30995                                                |    |     |         |         |                |           |           |                     |             |
| CB4856                                                                | CT | III | 6553575 | 6558575 | WBGene00015642 | C09E7.8   | C09E7.8   | -0.343537426181033  | AGIWUR2078  |
| CB4856                                                                | CT | III | 6559097 | 6563666 | WBGene00017849 | F27B3.7   | F27B3.7   | -0.327402054988543  | AGIWUR40502 |
| CB4856                                                                | CT | III | 6577827 | 6578584 | WBGene00017848 | F27B3.6   | F27B3.6   | -0.256692259333217  | AGIWUR29969 |
| CB4856                                                                | CT | III | 6579698 | 6579877 | WBGene00044454 | F27B3.8   | F27B3.8   | 0.299900881870606   | AGIWUR13094 |
| CB4856                                                                | CT | III | 6583461 | 6585617 | WBGene00000060 | acr-21    | F27B3.2   | 0.2894746407021     | AGIWUR28720 |
| CB4856                                                                | CT | III | 6587864 | 6589398 | WBGene00017648 | ddo-3     | F20H11.5  | 0.138382316692431   |             |
| AGIWUR24363;AGIWUR41686                                               |    |     |         |         |                |           |           |                     |             |
| CB4856                                                                | CT | III | 6589377 | 6592175 | WBGene00017646 | F20H11.1  | F20H11.1  | 0.0927820409275419  |             |
| AGIWUR29171                                                           |    |     |         |         |                |           |           |                     |             |
| CB4856                                                                | CT | III | 6592567 | 6601171 | WBGene00002889 | let-765   | F20H11.2  | -0.232526890097155  |             |
| AGIWUR17640;AGIWUR25140;AGIWUR27253;AGIWUR43209                       |    |     |         |         |                |           |           |                     |             |
| CB4856                                                                | CT | III | 6606247 | 6608106 | WBGene00003162 | mdh-2     | F20H11.3  | 0.0454892282654491  |             |
| AGIWUR5742;AGIWUR9105;AGIWUR11499;AGIWUR32191;AGIWUR32225;AGIWUR43317 |    |     |         |         |                |           |           |                     |             |
| CB4856                                                                | CT | III | 6608622 | 6610455 | WBGene00017647 | F20H11.4  | F20H11.4  | 0.13852114909033    |             |
| AGIWUR25769                                                           |    |     |         |         |                |           |           |                     |             |
| CB4856                                                                | CT | III | 6610822 | 6612263 | WBGene00005263 | srh-40    | Y40D12A.3 | -0.0612630420263294 |             |
| AGIWUR28492                                                           |    |     |         |         |                |           |           |                     |             |

|                                                            |    |     |         |         |                |           |           |                     |             |
|------------------------------------------------------------|----|-----|---------|---------|----------------|-----------|-----------|---------------------|-------------|
| CB4856                                                     | CT | III | 6612516 | 6615134 | WBGene00021503 | ctsa-2    | Y40D12A.2 | 0.207829899524281   |             |
| AGIWUR11341                                                |    |     |         |         |                |           |           |                     |             |
| CB4856                                                     | CT | III | 6615414 | 6620051 | WBGene00021502 | Y40D12A.1 | Y40D12A.1 | -0.0355773273895927 |             |
| AGIWUR14140;AGIWUR35368;AGIWUR38777                        |    |     |         |         |                |           |           |                     |             |
| CB4856                                                     | CT | III | 6620254 | 6622265 | WBGene00015733 | C13B9.2   | C13B9.2   | 0.104224465250422   | AGIWUR32233 |
| CB4856                                                     | CT | III | 6622676 | 6624972 | WBGene00015734 | copd-1    | C13B9.3   | -0.110898895594767  | AGIWUR24038 |
| CB4856                                                     | CT | III | 6632841 | 6652083 | WBGene00015735 | pdfr-1    | C13B9.4   | 0.0260649681361302  |             |
| AGIWUR2877;AGIWUR3657;AGIWUR9278;AGIWUR12756;AGIWUR39212   |    |     |         |         |                |           |           |                     |             |
| CB4856                                                     | CT | III | 6664960 | 6665374 | WBGene00019714 | M01G4.1   | M01G4.1   | 0.365932328486666   | AGIWUR17124 |
| CB4856                                                     | CT | III | 6675801 | 6703974 | WBGene00004316 | rbf-1     | F37A4.7   | 0.197036310211272   |             |
| AGIWUR809;AGIWUR10220;AGIWUR21533;AGIWUR33340;AGIWUR35132  |    |     |         |         |                |           |           |                     |             |
| CB4856                                                     | CT | III | 6703993 | 6710084 | WBGene00002169 | isw-1     | F37A4.8   | -0.0706473469211919 |             |
| AGIWUR21624;AGIWUR25898;AGIWUR35837;AGIWUR38143            |    |     |         |         |                |           |           |                     |             |
| CB4856                                                     | CT | III | 6711869 | 6713191 | WBGene00018135 | F37A4.5   | F37A4.5   | 0.0705588444048324  | AGIWUR10785 |
| CB4856                                                     | CT | III | 6713583 | 6718022 | WBGene00018134 | F37A4.4   | F37A4.4   | 0.24850592927652    | AGIWUR38765 |
| CB4856                                                     | CT | III | 6718570 | 6720487 | WBGene00018133 | F37A4.3   | F37A4.3   | 0.144932570082862   | AGIWUR28310 |
| CB4856                                                     | CT | III | 6720415 | 6722258 | WBGene00018137 | bath-41   | F37A4.9   | -0.213211184672058  | AGIWUR38646 |
| CB4856                                                     | CT | III | 6722454 | 6723284 | WBGene00018132 | F37A4.2   | F37A4.2   | -0.164461471933999  | AGIWUR15914 |
| CB4856                                                     | CT | III | 6723389 | 6725711 | WBGene00018131 | F37A4.1   | F37A4.1   | 0.0302486341103041  | AGIWUR31813 |
| CB4856                                                     | CT | III | 6725789 | 6728058 | WBGene00022420 | wdr-4     | Y102E9.2  | -0.12925627482015   |             |
| AGIWUR29143                                                |    |     |         |         |                |           |           |                     |             |
| CB4856                                                     | CT | III | 6728155 | 6730170 | WBGene00044452 | Y102E9.5  | Y102E9.5  | -0.289064084145547  |             |
| AGIWUR3681;AGIWUR14452                                     |    |     |         |         |                |           |           |                     |             |
| CB4856                                                     | CT | III | 6730781 | 6733935 | WBGene00003851 | odr-4     | Y102E9.1  | -0.173582003637573  |             |
| AGIWUR7032;AGIWUR24539;AGIWUR26097;AGIWUR33738             |    |     |         |         |                |           |           |                     |             |
| CB4856                                                     | CT | III | 6733992 | 6734520 | WBGene00022421 | Y102E9.3  | Y102E9.3  | 0.156110104293129   |             |
| AGIWUR36461                                                |    |     |         |         |                |           |           |                     |             |
| CB4856                                                     | CT | III | 6735968 | 6736642 | WBGene00044453 | Y102E9.6  | Y102E9.6  | 0.0691921314746295  |             |
| AGIWUR2619;AGIWUR10795;AGIWUR16286;AGIWUR21903;AGIWUR28604 |    |     |         |         |                |           |           |                     |             |
| CB4856                                                     | CT | III | 6737271 | 6737783 | WBGene00019501 | K07E12.2  | K07E12.2  | 0.0212883376785129  |             |
| AGIWUR36836                                                |    |     |         |         |                |           |           |                     |             |
| CB4856                                                     | CT | III | 6746308 | 6794764 | WBGene00000998 | dig-1     | K07E12.1  | 0.116982719778113   |             |
| AGIWUR27360                                                |    |     |         |         |                |           |           |                     |             |
| CB4856                                                     | CT | III | 6795626 | 6797774 | WBGene00019907 | R05H11.1  | R05H11.1  | -0.296064665095841  |             |
| AGIWUR12904;AGIWUR43298                                    |    |     |         |         |                |           |           |                     |             |
| CB4856                                                     | CT | III | 6798299 | 6800489 | WBGene00019908 | R05H11.2  | R05H11.2  | 0.0887305510907508  |             |
| AGIWUR9915                                                 |    |     |         |         |                |           |           |                     |             |
| CB4856                                                     | CT | III | 6802788 | 6816132 | WBGene00017904 | lim-8     | F28F5.3   | 0.205895419631497   |             |
| AGIWUR16870;AGIWUR44041                                    |    |     |         |         |                |           |           |                     |             |



|                                                                                                             |    |     |         |         |                |           |          |                            |             |
|-------------------------------------------------------------------------------------------------------------|----|-----|---------|---------|----------------|-----------|----------|----------------------------|-------------|
| CB4856                                                                                                      | CT | III | 6816643 | 6816880 | WBGene00043297 | F28F5.4   | F28F5.4  | 0.244209691732924          |             |
| AGIWUR16112;AGIWUR20630;AGIWUR25870;AGIWUR27417;AGIWUR29321;AGIWUR35286                                     |    |     |         |         |                |           |          |                            |             |
| CB4856                                                                                                      | CT | III | 6817316 | 6819372 | WBGene00017905 | F28F5.6   | F28F5.6  | -0.152515191383728         | AGIWUR24831 |
| CB4856                                                                                                      | CT | III | 6820935 | 6847283 | WBGene00006498 | ten-1     | R13F6.4  | 0.134779934697137          |             |
| AGIWUR35629;AGIWUR38757;AGIWUR41531                                                                         |    |     |         |         |                |           |          |                            |             |
| CB4856                                                                                                      | CT | III | 6847390 | 6849055 | WBGene00020066 | dhhc-5    | R13F6.5  | -0.333480091043551         | AGIWUR6886  |
| CB4856                                                                                                      | CT | III | 6851254 | 6853130 | WBGene00005712 | srv-1     | R13F6.3  | -0.0570952619928811        | AGIWUR24472 |
| CB4856                                                                                                      | CT | III | 6853113 | 6856804 | WBGene00006971 | zak-1     | R13F6.6  | -0.123551913373959         | AGIWUR29484 |
| CB4856                                                                                                      | CT | III | 6858793 | 6859571 | WBGene00020067 | cllec-158 |          | R13F6.8 -0.101376165018585 |             |
| AGIWUR19949;AGIWUR39355                                                                                     |    |     |         |         |                |           |          |                            |             |
| CB4856                                                                                                      | CT | III | 6859863 | 6860786 | WBGene00020065 | cllec-159 |          | R13F6.2 0.0935184823375312 |             |
| AGIWUR5341                                                                                                  |    |     |         |         |                |           |          |                            |             |
| CB4856                                                                                                      | CT | III | 6860939 | 6863968 | WBGene00004857 | sma-3     | R13F6.9  | 0.313376874604566          | AGIWUR29198 |
| CB4856                                                                                                      | CT | III | 6865207 | 6869460 | WBGene00020068 | cra-1     | R13F6.10 | -0.157316576564632         |             |
| AGIWUR6115                                                                                                  |    |     |         |         |                |           |          |                            |             |
| CB4856                                                                                                      | CT | III | 6869634 | 6870298 | WBGene00020064 | kbp-1     | R13F6.1  | 0.0357187736454243         | AGIWUR9178  |
| CB4856                                                                                                      | CT | III | 6870296 | 6871171 | WBGene00044312 | K04C2.8   | K04C2.8  | -0.00502459790898335       |             |
| AGIWUR8796;AGIWUR11686;AGIWUR12275;AGIWUR21315;AGIWUR28990;AGIWUR41699;AGIWUR44588                          |    |     |         |         |                |           |          |                            |             |
| CB4856                                                                                                      | CT | III | 6873048 | 6873729 | WBGene00019381 | K04C2.3   | K04C2.3  | 0.115475048660677          |             |
| AGIWUR13400;AGIWUR14947;AGIWUR25514;AGIWUR26287;AGIWUR31355;AGIWUR34016;AGIWUR34276;AGIWUR34672;AGIWUR40758 |    |     |         |         |                |           |          |                            |             |
| CB4856                                                                                                      | CT | III | 6880947 | 6883853 | WBGene00044311 | K04C2.7   | K04C2.7  | -0.148664821919835         |             |
| AGIWUR7543;AGIWUR16799;AGIWUR39321                                                                          |    |     |         |         |                |           |          |                            |             |
| CB4856                                                                                                      | CT | III | 6885204 | 6889523 | WBGene00000265 | brd-1     | K04C2.4  | -0.0319415014707616        | AGIWUR29695 |
| CB4856                                                                                                      | CT | III | 6889749 | 6895089 | WBGene00019380 | K04C2.2   | K04C2.2  | 0.276305908179769          | AGIWUR9457  |
| CB4856                                                                                                      | CT | III | 6898016 | 6900605 | WBGene00020315 | T07E3.4   | T07E3.4  | -0.0557802256251598        | AGIWUR17150 |
| CB4856                                                                                                      | CT | III | 6900568 | 6903106 | WBGene00020316 | brc-2     | T07E3.5  | -0.263118414542854         | AGIWUR23409 |
| CB4856                                                                                                      | CT | III | 6903895 | 6905170 | WBGene00020314 | T07E3.3   | T07E3.3  | -0.0517469424379096        |             |
| AGIWUR6606;AGIWUR7386                                                                                       |    |     |         |         |                |           |          |                            |             |
| CB4856                                                                                                      | CT | III | 6907441 | 6908012 | WBGene00020313 | T07E3.2   | T07E3.2  | -0.188173876872191         | AGIWUR40870 |
| CB4856                                                                                                      | CT | III | 6909438 | 6912481 | WBGene00020317 | pdf-1     | T07E3.6  | 0.421709432324626          | AGIWUR21194 |
| CB4856                                                                                                      | CT | III | 6924097 | 6928817 | WBGene00018998 | flap-1    | F57B9.7  | -0.130063045635431         | AGIWUR38961 |
| CB4856                                                                                                      | CT | III | 6930039 | 6931953 | WBGene00002083 | inf-1     | F57B9.6  | -0.0290558129938923        | AGIWUR32955 |
| CB4856                                                                                                      | CT | III | 6932001 | 6935862 | WBGene00000276 | byn-1     | F57B9.5  | 0.0109312505041768         |             |
| AGIWUR2887;AGIWUR9859;AGIWUR13290                                                                           |    |     |         |         |                |           |          |                            |             |
| CB4856                                                                                                      | CT | III | 6935967 | 6939443 | WBGene00000762 | coq-2     | F57B9.4  | 0.0428003380578827         |             |
| AGIWUR7144;AGIWUR9523;AGIWUR12892;AGIWUR31473;AGIWUR38173;AGIWUR43114                                       |    |     |         |         |                |           |          |                            |             |
| CB4856                                                                                                      | CT | III | 6939888 | 6941736 | WBGene00018997 | F57B9.3   | F57B9.3  | -0.0672095726510076        |             |
| AGIWUR23882;AGIWUR25698;AGIWUR38042                                                                         |    |     |         |         |                |           |          |                            |             |
| CB4856                                                                                                      | CT | III | 6941889 | 6945895 | WBGene00004133 | abu-13    | F57B9.9  | 0.550524830418556          | AGIWUR40209 |

|                                                                                                           |    |     |         |         |                |          |          |                      |             |
|-----------------------------------------------------------------------------------------------------------|----|-----|---------|---------|----------------|----------|----------|----------------------|-------------|
| CB4856                                                                                                    | CT | III | 6946718 | 6958882 | WBGene00002845 | let-711  | F57B9.2  | 0.244702975887858    | AGIWUR10152 |
| CB4856                                                                                                    | CT | III | 6959110 | 6962027 | WBGene00004462 | rpn-6.1  | F57B9.10 | -0.0304193968702702  |             |
| AGIWUR2602;AGIWUR16836;AGIWUR22959                                                                        |    |     |         |         |                |          |          |                      |             |
| CB4856                                                                                                    | CT | III | 6962090 | 6963319 | WBGene00018996 | F57B9.1  | F57B9.1  | 0.0238110230943356   | AGIWUR37456 |
| CB4856                                                                                                    | CT | III | 6963620 | 6968130 | WBGene00017951 | pan1-2   | F31E3.4  | -0.092652712413603   | AGIWUR3878  |
| CB4856                                                                                                    | CT | III | 6970026 | 6972003 | WBGene00001168 | eef-1A.1 | F31E3.5  | -0.00645151711195879 |             |
| AGIWUR14568;AGIWUR18769;AGIWUR22122;AGIWUR25445;AGIWUR25772;AGIWUR41301;AGIWUR42112                       |    |     |         |         |                |          |          |                      |             |
| CB4856                                                                                                    | CT | III | 6972210 | 6973717 | WBGene00004340 | rfc-4    | F31E3.3  | -0.0976877023356906  | AGIWUR37637 |
| CB4856                                                                                                    | CT | III | 6974338 | 6978025 | WBGene00017950 | F31E3.2  | F31E3.2  | 0.112607293713749    |             |
| AGIWUR6472;AGIWUR9830;AGIWUR20256;AGIWUR21734;AGIWUR27342;AGIWUR35926;AGIWUR37116;AGIWUR37915;AGIWUR39344 |    |     |         |         |                |          |          |                      |             |
| CB4856                                                                                                    | CT | III | 6979884 | 6981785 | WBGene00000443 | ceh-20   | F31E3.1  | 0.400360210051286    | AGIWUR8244  |
| CB4856                                                                                                    | CT | III | 6990168 | 7002310 | WBGene00004182 | prk-1    | C06E8.3  | 0.141962178623142    |             |
| AGIWUR1009;AGIWUR20404;AGIWUR20919;AGIWUR43839                                                            |    |     |         |         |                |          |          |                      |             |
| CB4856                                                                                                    | CT | III | 7002301 | 7005450 | WBGene00015544 | C06E8.5  | C06E8.5  | -0.32365366783257    | AGIWUR44652 |
| CB4856                                                                                                    | CT | III | 7009136 | 7019574 | WBGene00017389 | lgc-38   | F11H8.2  | 0.356556721994527    |             |
| AGIWUR127;AGIWUR44935                                                                                     |    |     |         |         |                |          |          |                      |             |
| CB4856                                                                                                    | CT | III | 7019583 | 7020600 | WBGene00000597 | col-8    | F11H8.3  | -0.190713213553401   | AGIWUR25771 |
| CB4856                                                                                                    | CT | III | 7021167 | 7023652 | WBGene00004341 | rfl-1    | F11H8.1  | -0.00952146011353605 | AGIWUR25920 |
| CB4856                                                                                                    | CT | III | 7023642 | 7029203 | WBGene00000872 | cyk-1    | F11H8.4  | 0.042512961919166    |             |
| AGIWUR2929;AGIWUR7188;AGIWUR9447;AGIWUR31305;AGIWUR34755;AGIWUR36247                                      |    |     |         |         |                |          |          |                      |             |
| CB4856                                                                                                    | CT | III | 7035432 | 7045724 | WBGene00023414 | R01H2.7  | R01H2.7  | -0.0116467472147943  |             |
| AGIWUR10603;AGIWUR22901;AGIWUR23233;AGIWUR41509                                                           |    |     |         |         |                |          |          |                      |             |
| CB4856                                                                                                    | CT | III | 7056541 | 7058526 | WBGene00019810 | R01H2.2  | R01H2.2  | 0.0897509290525971   |             |
| AGIWUR6400;AGIWUR27609;AGIWUR33698                                                                        |    |     |         |         |                |          |          |                      |             |
| CB4856                                                                                                    | CT | III | 7058516 | 7060597 | WBGene00019811 | egg-2    | R01H2.3  | -0.0101099019067536  | AGIWUR39983 |
| CB4856                                                                                                    | CT | III | 7061111 | 7064275 | WBGene00019812 | R01H2.4  | R01H2.4  | 0.0918395408458661   | AGIWUR17584 |
| CB4856                                                                                                    | CT | III | 7065439 | 7067477 | WBGene00019813 | ger-1    | R01H2.5  | -0.167404519792338   |             |
| AGIWUR8609;AGIWUR22100;AGIWUR34387                                                                        |    |     |         |         |                |          |          |                      |             |
| CB4856                                                                                                    | CT | III | 7067686 | 7068570 | WBGene00006713 | ubc-18   | R01H2.6  | -0.0400102861660052  |             |
| AGIWUR20704;AGIWUR29116;AGIWUR36145;AGIWUR38951                                                           |    |     |         |         |                |          |          |                      |             |
| CB4856                                                                                                    | CT | III | 7069103 | 7069580 | WBGene00045190 | R01H2.8  | R01H2.8  | 0.663522111138806    |             |
| AGIWUR613;AGIWUR4684;AGIWUR11900;AGIWUR31809;AGIWUR39639                                                  |    |     |         |         |                |          |          |                      |             |
| CB4856                                                                                                    | CT | III | 7070800 | 7072552 | WBGene00003022 | lin-37   | ZK418.4  | -0.222370188129821   | AGIWUR4353  |
| CB4856                                                                                                    | CT | III | 7072613 | 7073851 | WBGene00022734 | ZK418.5  | ZK418.5  | -0.149947682446586   | AGIWUR5961  |
| CB4856                                                                                                    | CT | III | 7074250 | 7076349 | WBGene00220259 | ZK418.13 | ZK418.13 | 0.0962085472369196   |             |
| AGIWUR31633;AGIWUR36398;AGIWUR37087                                                                       |    |     |         |         |                |          |          |                      |             |
| CB4856                                                                                                    | CT | III | 7079077 | 7080789 | WBGene00022736 | ZK418.7  | ZK418.7  | -0.373335965943893   |             |
| AGIWUR15775;AGIWUR28330;AGIWUR32337                                                                       |    |     |         |         |                |          |          |                      |             |
| CB4856                                                                                                    | CT | III | 7083684 | 7085088 | WBGene00022737 | tofu-7   | ZK418.8  | -0.385158433854761   | AGIWUR1384  |

|                                                                                               |    |     |         |         |                |          |           |                     |             |
|-----------------------------------------------------------------------------------------------|----|-----|---------|---------|----------------|----------|-----------|---------------------|-------------|
| CB4856                                                                                        | CT | III | 7085197 | 7087741 | WBGene00022738 | ZK418.9  | ZK418.9   | -0.263775465251776  |             |
| AGIWUR5350;AGIWUR11967;AGIWUR12779;AGIWUR22635;AGIWUR44900                                    |    |     |         |         |                |          |           |                     |             |
| CB4856                                                                                        | CT | III | 7088644 | 7090132 | WBGene00044353 | ZK418.10 | ZK418.10  | 0.121890494534649   |             |
| AGIWUR33945                                                                                   |    |     |         |         |                |          |           |                     |             |
| CB4856                                                                                        | CT | III | 7091330 | 7093408 | WBGene00022732 | ZK418.2  | ZK418.2   | -0.0899429020653386 |             |
| AGIWUR26774;AGIWUR38970;AGIWUR43419                                                           |    |     |         |         |                |          |           |                     |             |
| CB4856                                                                                        | CT | III | 7095553 | 7097079 | WBGene00003608 | nhr-9    | ZK418.1   | 0.0214604656566522  | AGIWUR40203 |
| CB4856                                                                                        | CT | III | 7100482 | 7102033 | WBGene00044354 | ZK418.11 | ZK418.11  | -0.134567245434448  |             |
| AGIWUR12692;AGIWUR40894                                                                       |    |     |         |         |                |          |           |                     |             |
| CB4856                                                                                        | CT | III | 7102086 | 7103990 | WBGene00015102 | cpg-2    | B0280.5   | 0.0439267139543205  |             |
| AGIWUR14788;AGIWUR26818                                                                       |    |     |         |         |                |          |           |                     |             |
| CB4856                                                                                        | CT | III | 7108322 | 7109741 | WBGene00003845 | odd-1    | B0280.4   | 0.114311661907712   | AGIWUR21681 |
| CB4856                                                                                        | CT | III | 7110302 | 7111893 | WBGene00015103 | B0280.7  | B0280.7   | -0.290519306258521  | AGIWUR8179  |
| CB4856                                                                                        | CT | III | 7112300 | 7115438 | WBGene00003609 | nhr-10   | B0280.8   | 0.0251300641220826  | AGIWUR15057 |
| CB4856                                                                                        | CT | III | 7120905 | 7122895 | WBGene00015104 | B0280.9  | B0280.9   | 0.204373439191732   | AGIWUR38406 |
| CB4856                                                                                        | CT | III | 7123128 | 7124329 | WBGene00015101 | rpia-1   | B0280.3   | -0.200148846755051  |             |
| AGIWUR24377;AGIWUR29690;AGIWUR34957;AGIWUR43357                                               |    |     |         |         |                |          |           |                     |             |
| CB4856                                                                                        | CT | III | 7132038 | 7133674 | WBGene00015105 | pot-1    | B0280.10  | -0.0902415112753392 |             |
| AGIWUR17608                                                                                   |    |     |         |         |                |          |           |                     |             |
| CB4856                                                                                        | CT | III | 7133766 | 7136460 | WBGene00015099 | ggtb-1   | B0280.1   | -0.129398815864413  |             |
| AGIWUR26;AGIWUR16425;AGIWUR21558;AGIWUR29845                                                  |    |     |         |         |                |          |           |                     |             |
| CB4856                                                                                        | CT | III | 7136510 | 7138278 | WBGene00015106 | B0280.11 | B0280.11  | -0.0797243303230668 |             |
| AGIWUR27947;AGIWUR34409                                                                       |    |     |         |         |                |          |           |                     |             |
| CB4856                                                                                        | CT | III | 7138683 | 7144832 | WBGene00001613 | glr-2    | B0280.12  | 0.486920097366682   |             |
| AGIWUR21369                                                                                   |    |     |         |         |                |          |           |                     |             |
| CB4856                                                                                        | CT | III | 7145816 | 7153795 | WBGene00003858 | ogt-1    | K04G7.3   | 0.0857335464206637  |             |
| AGIWUR5550;AGIWUR36960                                                                        |    |     |         |         |                |          |           |                     |             |
| CB4856                                                                                        | CT | III | 7156032 | 7158809 | WBGene00019401 | nuo-4    | K04G7.4   | -0.066859377118865  |             |
| AGIWUR1349;AGIWUR3103;AGIWUR11949;AGIWUR15549;AGIWUR17066;AGIWUR21918;AGIWUR42710;AGIWUR44306 |    |     |         |         |                |          |           |                     |             |
| CB4856                                                                                        | CT | III | 7158912 | 7161157 | WBGene00004390 | rnp-7    | K04G7.10  | -0.193454775485536  |             |
| AGIWUR27127                                                                                   |    |     |         |         |                |          |           |                     |             |
| CB4856                                                                                        | CT | III | 7161157 | 7162115 | WBGene00019402 | K04G7.11 | K04G7.11  | -0.0655635893989448 |             |
| AGIWUR41126                                                                                   |    |     |         |         |                |          |           |                     |             |
| CB4856                                                                                        | CT | III | 7162694 | 7165261 | WBGene00019400 | K04G7.1  | K04G7.1   | -0.0741312978692239 | AGIWUR11536 |
| CB4856                                                                                        | CT | III | 7167838 | 7170990 | WBGene00018152 | acs-4    | F37C12.7  | 0.0185064232669783  |             |
| AGIWUR33729;AGIWUR35716                                                                       |    |     |         |         |                |          |           |                     |             |
| CB4856                                                                                        | CT | III | 7177530 | 7178853 | WBGene00005072 | srb-7    | F37C12.17 | -0.319620559733675  |             |
| AGIWUR8880                                                                                    |    |     |         |         |                |          |           |                     |             |
| CB4856                                                                                        | CT | III | 7178984 | 7179606 | WBGene00004483 | rps-14   | F37C12.9  | 0.048645736899287   |             |

AGIWUR2374;AGIWUR32041  
 CB4856 CT III 7180249 7180677 WBGene00004450 rpl-36 F37C12.4 -0.0138508950022214  
 AGIWUR3760;AGIWUR5590;AGIWUR25437  
 CB4856 CT III 7180730 7181925 WBGene00018151 F37C12.3 F37C12.3 -0.441685840148705  
 AGIWUR5900;AGIWUR21081  
 CB4856 CT III 7181970 7184049 WBGene00018150 epg-4 F37C12.2 0.00273232232475706  
 AGIWUR42197  
 CB4856 CT III 7184348 7187868 WBGene00018149 F37C12.1 F37C12.1 0.0839225936722414  
 AGIWUR4488  
 CB4856 CT III 7187841 7188430 WBGene00018153 F37C12.10 F37C12.10  
 -0.00625430031176677 AGIWUR22078  
 CB4856 CT III 7189142 7189631 WBGene00004490 rps-21 F37C12.11 -0.00110256067023329  
 AGIWUR12006;AGIWUR31276;AGIWUR34444  
 CB4856 CT III 7190207 7192992 WBGene00003176 mec-14 F37C12.12 -0.0611575040554819  
 AGIWUR9445;AGIWUR17804;AGIWUR28649;AGIWUR39147  
 CB4856 CT III 7194094 7195425 WBGene00044005 F37C12.18 F37C12.18 0.0679455306829819  
 AGIWUR11612  
 CB4856 CT III 7196225 7232172 WBGene00018154 exos-9 F37C12.13 -0.339612915856772  
 AGIWUR7392;AGIWUR7814;AGIWUR20734;AGIWUR21953;AGIWUR33274  
 CB4856 CT III 7232926 7234202 WBGene00020636 T20H4.5 T20H4.5 -0.192238851172772  
 AGIWUR19610;AGIWUR21920;AGIWUR24242;AGIWUR33423  
 CB4856 CT III 7238607 7241284 WBGene00004189 pars-1 T20H4.3 0.0556096717426033  
 AGIWUR4343;AGIWUR9909;AGIWUR36586  
 CB4856 CT III 7241365 7242950 WBGene00020635 T20H4.2 T20H4.2 -0.00683651249520523 AGIWUR15565  
 CB4856 CT III 7243305 7245743 WBGene00003890 osm-10 T20H4.1 0.0964584821549916 AGIWUR39413  
 CB4856 CT III 7245703 7247937 WBGene00020646 zmp-6 T21D11.1 -0.261084724853456  
 AGIWUR9527  
 CB4856 CT III 7268414 7275396 WBGene00015159 psd-1 B0361.5 0.325393767858048  
 AGIWUR9371;AGIWUR25166  
 CB4856 CT III 7275502 7277274 WBGene00015160 B0361.6 B0361.6 -0.27308497180427 AGIWUR42062  
 CB4856 CT III 7277604 7281217 WBGene00015165 B0361.11 B0361.11 0.0758963673414712  
 AGIWUR44378  
 CB4856 CT III 7281377 7283959 WBGene00015157 B0361.3 B0361.3 -0.197835806180901 AGIWUR22638  
 CB4856 CT III 7283915 7285883 WBGene00015161 pho-5 B0361.7 0.0519100192696542  
 AGIWUR4284;AGIWUR4841;AGIWUR6453;AGIWUR19407;AGIWUR27150;AGIWUR32167  
 CB4856 CT III 7285983 7287603 WBGene00015164 ykt-6 B0361.10 -0.163937733385586  
 AGIWUR22374  
 CB4856 CT III 7287848 7290562 WBGene00015162 algn-11 B0361.8 -0.0624180893717714 AGIWUR25298  
 CB4856 CT III 7293632 7308364 WBGene00015156 B0361.2 B0361.2 -0.240577305493993 AGIWUR464

|        |    |     |         |         |                |          |          |                     |                                                                                                          |
|--------|----|-----|---------|---------|----------------|----------|----------|---------------------|----------------------------------------------------------------------------------------------------------|
| CB4856 | CT | III | 7308354 | 7308975 | WBGene00018949 | acbp-4   | F56C9.5  | 0.153912452909136   | AGIWUR42872                                                                                              |
| CB4856 | CT | III | 7308998 | 7310773 | WBGene00018950 | F56C9.6  | F56C9.6  | -0.0254236705621729 | AGIWUR36977                                                                                              |
| CB4856 | CT | III | 7311290 | 7313195 | WBGene00018948 | F56C9.3  | F56C9.3  | -0.207853259447571  | AGIWUR2658                                                                                               |
| CB4856 | CT | III | 7313149 | 7314977 | WBGene00018951 | F56C9.7  | F56C9.7  | -0.522753616011371  | AGIWUR21582                                                                                              |
| CB4856 | CT | III | 7315903 | 7319595 | WBGene00018952 | F56C9.8  | F56C9.8  | 0.449522597009953   | AGIWUR35334                                                                                              |
| CB4856 | CT | III | 7324940 | 7329649 | WBGene00018954 | F56C9.11 | F56C9.11 | -0.360994430568528  | AGIWUR145                                                                                                |
| CB4856 | CT | III | 7329714 | 7335316 | WBGene00018953 | F56C9.10 | F56C9.10 | -0.0502094163789675 | AGIWUR4974;AGIWUR6930;AGIWUR7997;AGIWUR15213;AGIWUR25399;AGIWUR25573;AGIWUR40411;AGIWUR43493;AGIWUR43851 |
| CB4856 | CT | III | 7336587 | 7338765 | WBGene00001748 | gsp-2    | F56C9.1  | 0.0272409710466448  | AGIWUR26543                                                                                              |
| CB4856 | CT | III | 7339001 | 7343626 | WBGene00002182 | kap-1    | F08F8.3  | 0.206063894744429   | AGIWUR23181;AGIWUR29263                                                                                  |
| CB4856 | CT | III | 7343675 | 7345855 | WBGene00017271 | F08F8.6  | F08F8.6  | -0.0235714703366643 | AGIWUR6914                                                                                               |
| CB4856 | CT | III | 7345861 | 7347149 | WBGene00017272 | F08F8.7  | F08F8.7  | -0.114332342973833  | AGIWUR3256;AGIWUR12445;AGIWUR15029;AGIWUR17210;AGIWUR17376;AGIWUR43081                                   |
| CB4856 | CT | III | 7347237 | 7349175 | WBGene00017273 | gos-28   | F08F8.8  | -0.0308101904671076 | AGIWUR19819                                                                                              |
| CB4856 | CT | III | 7349291 | 7354090 | WBGene00017274 | F08F8.9  | F08F8.9  | -0.0517804544839287 | AGIWUR6831;AGIWUR31117;AGIWUR42085                                                                       |
| CB4856 | CT | III | 7354159 | 7357395 | WBGene00017275 | F08F8.10 | F08F8.10 | -0.142536173040956  | AGIWUR3820                                                                                               |
| CB4856 | CT | III | 7357663 | 7359183 | WBGene00017269 | F08F8.4  | F08F8.4  | -0.227501344605896  | AGIWUR6271                                                                                               |
| CB4856 | CT | III | 7359498 | 7362132 | WBGene00017268 | hmgr-1   | F08F8.2  | -0.139096914666034  | AGIWUR15001;AGIWUR25419;AGIWUR25776                                                                      |
| CB4856 | CT | III | 7365902 | 7366448 | WBGene00269381 | F08F8.11 | F08F8.11 | -0.265713072189804  | AGIWUR5929                                                                                               |
| CB4856 | CT | III | 7366717 | 7367112 | WBGene00020603 | T20B12.5 | T20B12.5 | 0.105970550230921   | AGIWUR45073                                                                                              |
| CB4856 | CT | III | 7367710 | 7369538 | WBGene00020602 | T20B12.4 | T20B12.4 | -0.115386470453973  | AGIWUR29818                                                                                              |
| CB4856 | CT | III | 7370131 | 7374731 | WBGene00003378 | mm1-1    | T20B12.6 | 0.135854286324516   | AGIWUR277;AGIWUR27528;AGIWUR27964                                                                        |
| CB4856 | CT | III | 7377854 | 7379045 | WBGene00020604 | T20B12.7 | T20B12.7 | 0.0466870957437973  | AGIWUR17909;AGIWUR18286;AGIWUR31122;AGIWUR35623;AGIWUR36772;AGIWUR43617                                  |
| CB4856 | CT | III | 7379143 | 7381609 | WBGene00001974 | hmg-4    | T20B12.8 | -0.222007522146818  | AGIWUR13021;AGIWUR13254;AGIWUR15814;AGIWUR16997;AGIWUR37862                                              |
| CB4856 | CT | III | 7382115 | 7383906 | WBGene00020601 | T20B12.3 | T20B12.3 | -0.0246090500733089 | AGIWUR22514                                                                                              |
| CB4856 | CT | III | 7384033 | 7386132 | WBGene00006542 | tbp-1    | T20B12.2 | -0.193998936886938  | AGIWUR1258;AGIWUR1790;AGIWUR12732;AGIWUR19590;AGIWUR40034                                                |

|                                                                                                                               |    |     |         |         |                |           |           |                      |             |
|-------------------------------------------------------------------------------------------------------------------------------|----|-----|---------|---------|----------------|-----------|-----------|----------------------|-------------|
| CB4856                                                                                                                        | CT | III | 7386229 | 7391135 | WBGene00020600 | trd-1     | T20B12.1  | -0.00768515895678235 |             |
| AGIWUR24657;AGIWUR32413;AGIWUR36042                                                                                           |    |     |         |         |                |           |           |                      |             |
| CB4856                                                                                                                        | CT | III | 7391482 | 7395454 | WBGene00020605 | lgc-50    | T20B12.9  | 0.0437304507714185   |             |
| AGIWUR5207                                                                                                                    |    |     |         |         |                |           |           |                      |             |
| CB4856                                                                                                                        | CT | III | 7454012 | 7455980 | WBGene00000118 | alh-12    | Y69F12A.2 | -0.351768073798326   |             |
| AGIWUR29059;AGIWUR34442                                                                                                       |    |     |         |         |                |           |           |                      |             |
| CB4856                                                                                                                        | CT | III | 7456734 | 7458544 | WBGene00022102 | Y69F12A.1 | Y69F12A.1 | 0.0884503233826681   |             |
| AGIWUR11528;AGIWUR13958;AGIWUR44146                                                                                           |    |     |         |         |                |           |           |                      |             |
| CB4856                                                                                                                        | CT | III | 7460341 | 7461931 | WBGene00003376 | mls-1     | H14A12.4  | 0.0671056194605022   |             |
| AGIWUR13598                                                                                                                   |    |     |         |         |                |           |           |                      |             |
| CB4856                                                                                                                        | CT | III | 7463797 | 7465238 | WBGene00019196 | H14A12.3  | H14A12.3  | -0.213919811129779   |             |
| AGIWUR2821                                                                                                                    |    |     |         |         |                |           |           |                      |             |
| CB4856                                                                                                                        | CT | III | 7465605 | 7467633 | WBGene00001503 | fum-1     | H14A12.2  | -0.0124986561353779  |             |
| AGIWUR21960;AGIWUR44920                                                                                                       |    |     |         |         |                |           |           |                      |             |
| CB4856                                                                                                                        | CT | III | 7467574 | 7468676 | WBGene00019197 | H14A12.5  | H14A12.5  | 0.0652519721362577   |             |
| AGIWUR34074                                                                                                                   |    |     |         |         |                |           |           |                      |             |
| CB4856                                                                                                                        | CT | III | 7479680 | 7489075 | WBGene00003497 | mup-4     | K07D8.1   | -0.337359123983074   | AGIWUR31451 |
| CB4856                                                                                                                        | CT | III | 7495320 | 7497832 | WBGene00000479 | cgh-1     | C07H6.5   | -0.0424774367524741  |             |
| AGIWUR3774;AGIWUR4099;AGIWUR15533;AGIWUR16780;AGIWUR28635;AGIWUR38324;AGIWUR42561                                             |    |     |         |         |                |           |           |                      |             |
| CB4856                                                                                                                        | CT | III | 7498819 | 7499447 | WBGene00015582 | C07H6.9   | C07H6.9   | 0.943130309872066    | AGIWUR10743 |
| CB4856                                                                                                                        | CT | III | 7499677 | 7503241 | WBGene00015581 | C07H6.4   | C07H6.4   | 0.12259347726746     |             |
| AGIWUR706;AGIWUR875;AGIWUR5973;AGIWUR7898;AGIWUR15254;AGIWUR15464;AGIWUR21636;AGIWUR23127;AGIWUR33052;AGIWUR33165;AGIWUR38055 |    |     |         |         |                |           |           |                      |             |
| CB4856                                                                                                                        | CT | III | 7508178 | 7515285 | WBGene00015580 | cls-1     | C07H6.3   | 0.0403945313290102   |             |
| AGIWUR6187;AGIWUR26175;AGIWUR28060;AGIWUR38483                                                                                |    |     |         |         |                |           |           |                      |             |
| CB4856                                                                                                                        | CT | III | 7515223 | 7518524 | WBGene00000537 | clk-2     | C07H6.6   | -0.0284677175213304  |             |
| AGIWUR5586;AGIWUR7836                                                                                                         |    |     |         |         |                |           |           |                      |             |
| CB4856                                                                                                                        | CT | III | 7518628 | 7520845 | WBGene00000854 | cux-7     | C07H6.8   | -0.0296821909524265  |             |
| AGIWUR12788;AGIWUR23553;AGIWUR39468;AGIWUR43244                                                                               |    |     |         |         |                |           |           |                      |             |
| CB4856                                                                                                                        | CT | III | 7521004 | 7524836 | WBGene00002986 | lig-4     | C07H6.1   | 0.343777785896473    | AGIWUR12502 |
| CB4856                                                                                                                        | CT | III | 7528641 | 7536632 | WBGene00003024 | lin-39    | C07H6.7   | 0.0112059208465478   | AGIWUR2784  |
| CB4856                                                                                                                        | CT | III | 7555617 | 7558208 | WBGene00000437 | ceh-13    | R13A5.5   | 0.324683235816028    | AGIWUR6653  |
| CB4856                                                                                                                        | CT | III | 7562172 | 7564529 | WBGene00020048 | lgc-12    | R13A5.4   | -0.0170387339709137  | AGIWUR22283 |
| CB4856                                                                                                                        | CT | III | 7564500 | 7565347 | WBGene00020049 | ttr-8     | R13A5.6   | 0.225719113943709    | AGIWUR10718 |
| CB4856                                                                                                                        | CT | III | 7566411 | 7567486 | WBGene00020047 | ttr-32    | R13A5.3   | 0.0908523054963002   | AGIWUR44767 |
| CB4856                                                                                                                        | CT | III | 7567475 | 7570133 | WBGene00020050 | R13A5.7   | R13A5.7   | -0.111070656623047   | AGIWUR8137  |
| CB4856                                                                                                                        | CT | III | 7572105 | 7572831 | WBGene00004420 | rp1-9     | R13A5.8   | 0.0821245265796122   | AGIWUR14686 |
| CB4856                                                                                                                        | CT | III | 7573350 | 7575263 | WBGene00003063 | lpd-7     | R13A5.12  | 0.297737308929857    |             |
| AGIWUR3802;AGIWUR36129;AGIWUR45192                                                                                            |    |     |         |         |                |           |           |                      |             |

|                                                                                   |    |     |         |         |                |          |         |                     |                    |
|-----------------------------------------------------------------------------------|----|-----|---------|---------|----------------|----------|---------|---------------------|--------------------|
| CB4856                                                                            | CT | III | 7575274 | 7579411 | WBGene00020051 | R13A5.9  | R13A5.9 | -0.199794778962852  | AGIWUR25499        |
| CB4856                                                                            | CT | III | 7582033 | 7582999 | WBGene00020052 | R13A5.10 |         | R13A5.10            | -0.525861195521266 |
| AGIWUR14155                                                                       |    |     |         |         |                |          |         |                     |                    |
| CB4856                                                                            | CT | III | 7584181 | 7591570 | WBGene00000846 | cup-5    | R13A5.1 | 0.129446349859252   |                    |
| AGIWUR8333;AGIWUR37240                                                            |    |     |         |         |                |          |         |                     |                    |
| CB4856                                                                            | CT | III | 7605949 | 7608290 | WBGene00020202 | T04A6.3  | T04A6.3 | -0.338057318419614  | AGIWUR19994        |
| CB4856                                                                            | CT | III | 7614862 | 7615699 | WBGene00020201 | T04A6.2  | T04A6.2 | 0.122604828369287   |                    |
| AGIWUR4917;AGIWUR9169;AGIWUR22596;AGIWUR28490                                     |    |     |         |         |                |          |         |                     |                    |
| CB4856                                                                            | CT | III | 7616528 | 7617590 | WBGene00020200 | T04A6.1  | T04A6.1 | 0.508166495619652   |                    |
| AGIWUR22210;AGIWUR23187;AGIWUR23913;AGIWUR27973                                   |    |     |         |         |                |          |         |                     |                    |
| CB4856                                                                            | CT | III | 7625376 | 7641053 | WBGene00022816 | fbn-1    | ZK783.1 | 0.282266209059654   |                    |
| AGIWUR3202;AGIWUR4339;AGIWUR28751;AGIWUR30718;AGIWUR36180;AGIWUR43017             |    |     |         |         |                |          |         |                     |                    |
| CB4856                                                                            | CT | III | 7641034 | 7643101 | WBGene00022817 | upp-1    | ZK783.2 | 0.0220250922259977  |                    |
| AGIWUR33056;AGIWUR36827;AGIWUR44756;AGIWUR44950                                   |    |     |         |         |                |          |         |                     |                    |
| CB4856                                                                            | CT | III | 7648788 | 7650005 | WBGene00044448 | ZK783.6  | ZK783.6 | -0.400376842707932  | AGIWUR41156        |
| CB4856                                                                            | CT | III | 7650549 | 7656032 | WBGene00001470 | baz-2    | ZK783.4 | -0.19030664545866   | AGIWUR33055        |
| CB4856                                                                            | CT | III | 7662428 | 7672153 | WBGene00015988 | C18H2.1  | C18H2.1 | -0.254583394779768  | AGIWUR27375        |
| CB4856                                                                            | CT | III | 7684357 | 7688917 | WBGene00015990 | C18H2.3  | C18H2.3 | -0.145010971700794  | AGIWUR18472        |
| CB4856                                                                            | CT | III | 7689356 | 7694398 | WBGene00015992 | C18H2.5  | C18H2.5 | 0.198579348049262   | AGIWUR36085        |
| CB4856                                                                            | CT | III | 7694554 | 7700381 | WBGene00015991 | C18H2.4  | C18H2.4 | 0.0705148530501916  | AGIWUR28887        |
| CB4856                                                                            | CT | III | 7700338 | 7709491 | WBGene00003002 | lin-13   | C03B8.4 | 0.231865200851821   |                    |
| AGIWUR1136;AGIWUR13351;AGIWUR42089                                                |    |     |         |         |                |          |         |                     |                    |
| CB4856                                                                            | CT | III | 7712309 | 7717314 | WBGene00015386 | C03B8.3  | C03B8.3 | 0.0333959491890159  |                    |
| AGIWUR4334;AGIWUR7654;AGIWUR10933;AGIWUR12045;AGIWUR13588;AGIWUR22325;AGIWUR26403 |    |     |         |         |                |          |         |                     |                    |
| CB4856                                                                            | CT | III | 7719791 | 7738105 | WBGene00003559 | nc1-1    | ZK112.2 | -0.0589347215322995 |                    |
| AGIWUR29632;AGIWUR30707;AGIWUR44134                                               |    |     |         |         |                |          |         |                     |                    |
| CB4856                                                                            | CT | III | 7738085 | 7739656 | WBGene00022661 | ZK112.5  | ZK112.5 | 0.41697962766249    | AGIWUR8890         |
| CB4856                                                                            | CT | III | 7739855 | 7740541 | WBGene00022662 | ZK112.6  | ZK112.6 | -0.03661575340894   | AGIWUR34004        |
| CB4856                                                                            | CT | III | 7741326 | 7754448 | WBGene00000395 | cdh-3    | ZK112.7 | 0.199824351418311   | AGIWUR26163        |
| CB4856                                                                            | CT | III | 7758730 | 7761273 | WBGene00003956 | pcp-1    | ZK112.1 | -0.32555678266996   | AGIWUR32149        |
| CB4856                                                                            | CT | III | 7761977 | 7763603 | WBGene00022516 | mtx-2    | ZC97.1  | -0.298183934867133  | AGIWUR33978        |
| CB4856                                                                            | CT | III | 7763698 | 7766052 | WBGene00022792 | ZK686.2  | ZK686.2 | -0.150673984101585  | AGIWUR29287        |
| CB4856                                                                            | CT | III | 7766389 | 7767515 | WBGene00022795 | ZK686.5  | ZK686.5 | 0.113812021378746   | AGIWUR15013        |
| CB4856                                                                            | CT | III | 7767571 | 7769063 | WBGene00022793 | ZK686.3  | ZK686.3 | -0.305354751350229  |                    |
| AGIWUR1330;AGIWUR17964                                                            |    |     |         |         |                |          |         |                     |                    |
| CB4856                                                                            | CT | III | 7769165 | 7770149 | WBGene00022794 | snu-23   | ZK686.4 | 0.0464880605693159  |                    |
| AGIWUR31585;AGIWUR44773                                                           |    |     |         |         |                |          |         |                     |                    |
| CB4856                                                                            | CT | III | 7771591 | 7772559 | WBGene00044799 | ZK686.6  | ZK686.6 | -0.294977762605783  |                    |
| AGIWUR10543;AGIWUR38278                                                           |    |     |         |         |                |          |         |                     |                    |

|                                                                                                                                   |    |     |         |         |                |          |          |                      |             |
|-----------------------------------------------------------------------------------------------------------------------------------|----|-----|---------|---------|----------------|----------|----------|----------------------|-------------|
| CB4856                                                                                                                            | CT | III | 7773134 | 7773849 | WBGene00022791 | ZK686.1  | ZK686.1  | -0.235714808932987   |             |
| AGIWUR3542;AGIWUR27040;AGIWUR33797                                                                                                |    |     |         |         |                |          |          |                      |             |
| CB4856                                                                                                                            | CT | III | 7774778 | 7776039 | WBGene00015590 | bath-15  | C08C3.2  | -0.135705218953824   | AGIWUR30918 |
| CB4856                                                                                                                            | CT | III | 7776835 | 7783454 | WBGene00003102 | mab-5    | C08C3.3  | -0.106349061854151   | AGIWUR524   |
| CB4856                                                                                                                            | CT | III | 7793446 | 7795409 | WBGene00015591 | cyk-7    | C08C3.4  | 0.0148325136276171   | AGIWUR39828 |
| CB4856                                                                                                                            | CT | III | 7814380 | 7817127 | WBGene00001174 | egl-5    | C08C3.1  | 0.170801339229997    |             |
| AGIWUR9619;AGIWUR10136;AGIWUR23410;AGIWUR31673;AGIWUR34828;AGIWUR41220                                                            |    |     |         |         |                |          |          |                      |             |
| CB4856                                                                                                                            | CT | III | 7824377 | 7828626 | WBGene00001209 | egl-45   | C27D11.1 | -0.0172256719254307  |             |
| AGIWUR16837                                                                                                                       |    |     |         |         |                |          |          |                      |             |
| CB4856                                                                                                                            | CT | III | 7829411 | 7832503 | WBGene00022785 | ZK652.6  | ZK652.6  | -0.112647128600273   |             |
| AGIWUR22114;AGIWUR26296;AGIWUR34734                                                                                               |    |     |         |         |                |          |          |                      |             |
| CB4856                                                                                                                            | CT | III | 7839594 | 7841491 | WBGene00000446 | ceh-23   | ZK652.5  | 0.0208361673957826   | AGIWUR4590  |
| CB4856                                                                                                                            | CT | III | 7842381 | 7843636 | WBGene00022786 | ZK652.8  | ZK652.8  | -0.00985311840708469 | AGIWUR21230 |
| CB4856                                                                                                                            | CT | III | 7855118 | 7855680 | WBGene00004449 | rp1-35   | ZK652.4  | -0.0370563933227004  |             |
| AGIWUR1318;AGIWUR7271;AGIWUR13592;AGIWUR15530;AGIWUR19789;AGIWUR21396;AGIWUR22629;AGIWUR23860;AGIWUR27111;AGIWUR36006;AGIWUR41499 |    |     |         |         |                |          |          |                      |             |
| CB4856                                                                                                                            | CT | III | 7855840 | 7857242 | WBGene00022787 | tag-307  | ZK652.10 | -0.198899678558687   |             |
| AGIWUR7350                                                                                                                        |    |     |         |         |                |          |          |                      |             |
| CB4856                                                                                                                            | CT | III | 7857315 | 7858457 | WBGene00000765 | coq-5    | ZK652.9  | -0.376054469226386   | AGIWUR16679 |
| CB4856                                                                                                                            | CT | III | 7858979 | 7859512 | WBGene00044324 | ufm-1    | ZK652.3  | -0.0373899060488356  |             |
| AGIWUR7099;AGIWUR15272                                                                                                            |    |     |         |         |                |          |          |                      |             |
| CB4856                                                                                                                            | CT | III | 7859613 | 7860159 | WBGene00022783 | tomm-7   | ZK652.2  | 0.0986190502583426   |             |
| AGIWUR10295;AGIWUR25626;AGIWUR26385;AGIWUR36387;AGIWUR38431;AGIWUR41648                                                           |    |     |         |         |                |          |          |                      |             |
| CB4856                                                                                                                            | CT | III | 7860466 | 7861004 | WBGene00000835 | cuc-1    | ZK652.11 | -0.524209340280038   |             |
| AGIWUR21223                                                                                                                       |    |     |         |         |                |          |          |                      |             |
| CB4856                                                                                                                            | CT | III | 7862070 | 7862577 | WBGene00004918 | snr-5    | ZK652.1  | -0.13654226589067    |             |
| AGIWUR7207;AGIWUR8160;AGIWUR18084;AGIWUR22192;AGIWUR27998;AGIWUR30639                                                             |    |     |         |         |                |          |          |                      |             |
| CB4856                                                                                                                            | CT | III | 7862583 | 7865306 | WBGene00015333 | slc-17.3 | C02C2.4  | -0.230669241665804   |             |
| AGIWUR31202                                                                                                                       |    |     |         |         |                |          |          |                      |             |
| CB4856                                                                                                                            | CT | III | 7866509 | 7868732 | WBGene00000845 | cup-4    | C02C2.3  | -0.162665507827402   | AGIWUR37722 |
| CB4856                                                                                                                            | CT | III | 7873781 | 7877194 | WBGene00015332 | tyr-1    | C02C2.1  | 0.00852442039088608  | AGIWUR41080 |
| CB4856                                                                                                                            | CT | III | 7877176 | 7878839 | WBGene00015334 | sup-18   | C02C2.5  | 0.0946858567701341   | AGIWUR39722 |
| CB4856                                                                                                                            | CT | III | 7881113 | 7883003 | WBGene00022803 | ZK688.9  | ZK688.9  | 0.192775643106813    | AGIWUR43699 |
| CB4856                                                                                                                            | CT | III | 7883574 | 7884963 | WBGene00044762 | ZK688.11 | ZK688.11 | 0.0997323217283679   |             |
| AGIWUR19621;AGIWUR27683                                                                                                           |    |     |         |         |                |          |          |                      |             |
| CB4856                                                                                                                            | CT | III | 7885088 | 7891615 | WBGene00022800 | ZK688.5  | ZK688.5  | -0.124629343436407   |             |
| AGIWUR14059;AGIWUR42115                                                                                                           |    |     |         |         |                |          |          |                      |             |
| CB4856                                                                                                                            | CT | III | 7892256 | 7894625 | WBGene00022798 | fahd-1   | ZK688.3  | 0.529685420616794    | AGIWUR9390  |
| CB4856                                                                                                                            | CT | III | 7895024 | 7895270 | WBGene00022799 | ZK688.4  | ZK688.4  | -0.0318400589317971  |             |



AGIWUR13823;AGIWUR16019;AGIWUR16901;AGIWUR19883;AGIWUR19970;AGIWUR22563;AGIWUR28504;AGIWUR37484;AGIWUR37746  
 ;AGIWUR38268;AGIWUR40686  
 CB4856 CT III 7895752 7897025 WBGene00044447 ZK688.10 ZK688.10 -0.111237897873445  
 AGIWUR2695;AGIWUR9783  
 CB4856 CT III 7901033 7904473 WBGene00022797 best-24 ZK688.2 0.118459458326516  
 AGIWUR3194;AGIWUR10548;AGIWUR22051  
 CB4856 CT III 7904945 7907843 WBGene00022801 pcp-5 ZK688.6 -0.213713669807342 AGIWUR20771  
 CB4856 CT III 7909563 7910758 WBGene00022796 ZK688.1 ZK688.1 -0.101088708608733 AGIWUR6214  
 CB4856 CT III 7910798 7911630 WBGene00022802 ZK688.7 ZK688.7 0.366970415273776 AGIWUR42017  
 CB4856 CT III 7912698 7913600 WBGene00044763 ZK688.12 ZK688.12 -0.131560687717759  
 AGIWUR36930;AGIWUR43391;AGIWUR44954  
 CB4856 CT III 7914314 7917767 WBGene00001628 gly-3 ZK688.8 0.0706211577499918  
 AGIWUR13062;AGIWUR36778;AGIWUR36892  
 CB4856 CT III 7917987 7924917 WBGene00016203 tag-250 C29E4.5 -0.0861440662115909  
 AGIWUR16151;AGIWUR24388;AGIWUR44595;AGIWUR44893  
 CB4856 CT III 7926999 7928734 WBGene00043051 C29E4.13 C29E4.13 -0.313865803515079  
 AGIWUR727;AGIWUR15228  
 CB4856 CT III 7929013 7932993 WBGene00003801 npp-15 C29E4.4 -0.178225461556998 AGIWUR31543  
 CB4856 CT III 7933535 7937708 WBGene00004303 ran-2 C29E4.3 0.0447869815905939 AGIWUR24556  
 CB4856 CT III 7937827 7940931 WBGene00016207 C29E4.10 C29E4.10 -0.166039577766197  
 AGIWUR39117  
 CB4856 CT III 7941057 7941614 WBGene00016209 C29E4.12 C29E4.12 0.511033415994051  
 AGIWUR10229  
 CB4856 CT III 7941717 7945593 WBGene00016202 kle-2 C29E4.2 -0.0620051685789331 AGIWUR24070  
 CB4856 CT III 7945544 7947018 WBGene00016204 gsto-1 C29E4.7 -0.0518069834862089 AGIWUR31884  
 CB4856 CT III 7948838 7950068 WBGene00000665 col-90 C29E4.1 -0.424579184320803  
 AGIWUR12003;AGIWUR43808  
 CB4856 CT III 7949975 7951915 WBGene00002879 let-754 C29E4.8 -0.172619409134959  
 AGIWUR3078;AGIWUR6977;AGIWUR16207;AGIWUR24532  
 CB4856 CT III 7952623 7955816 WBGene00045246 C29E4.15 C29E4.15 -0.312283430085294  
 AGIWUR7251;AGIWUR10062;AGIWUR39986  
 CB4856 CT III 7955828 7958105 WBGene00016206 C29E4.9 C29E4.9 0.158465863568932  
 AGIWUR3333;AGIWUR5912;AGIWUR14429;AGIWUR23987;AGIWUR24372;AGIWUR27083;AGIWUR27187;AGIWUR37254;AGIWUR40677  
 CB4856 CT III 7961596 7962741 WBGene00018844 F54H12.4 F54H12.4 0.278409805963856  
 AGIWUR22335  
 CB4856 CT III 7966601 7969221 WBGene00045247 F54H12.8 F54H12.8 -0.174287134555211  
 AGIWUR229  
 CB4856 CT III 7969319 7970283 WBGene00044633 F54H12.7 F54H12.7 -0.0693591697353249  
 AGIWUR4710;AGIWUR17387;AGIWUR38904

|                                                                                           |    |     |         |         |                |          |          |                      |             |
|-------------------------------------------------------------------------------------------|----|-----|---------|---------|----------------|----------|----------|----------------------|-------------|
| CB4856                                                                                    | CT | III | 7970263 | 7972161 | WBGene00018845 | F54H12.5 | F54H12.5 | -0.460003724041846   |             |
| AGIWUR34607                                                                               |    |     |         |         |                |          |          |                      |             |
| CB4856                                                                                    | CT | III | 7972382 | 7973386 | WBGene00018846 | eef-1B.1 | F54H12.6 | 0.0507376555296783   |             |
| AGIWUR27194;AGIWUR33538                                                                   |    |     |         |         |                |          |          |                      |             |
| CB4856                                                                                    | CT | III | 7973717 | 7977355 | WBGene00000041 | aco-2    | F54H12.1 | 0.0256971281001652   |             |
| AGIWUR550;AGIWUR666;AGIWUR7264;AGIWUR7765;AGIWUR11526;AGIWUR32513;AGIWUR33054;AGIWUR39786 |    |     |         |         |                |          |          |                      |             |
| CB4856                                                                                    | CT | III | 7977216 | 7977803 | WBGene00015558 | C06G4.4  | C06G4.4  | 0.0976706975074793   |             |
| AGIWUR12183;AGIWUR18220;AGIWUR45108                                                       |    |     |         |         |                |          |          |                      |             |
| CB4856                                                                                    | CT | III | 7980913 | 7986327 | WBGene00000542 | clp-1    | C06G4.2  | 0.31582112792276     |             |
| AGIWUR2782;AGIWUR10623;AGIWUR24515                                                        |    |     |         |         |                |          |          |                      |             |
| CB4856                                                                                    | CT | III | 7987121 | 7990613 | WBGene00015557 | C06G4.1  | C06G4.1  | -0.182960172530455   | AGIWUR11719 |
| CB4856                                                                                    | CT | III | 7990789 | 7996438 | WBGene00015559 | npr-17   | C06G4.5  | -0.147306000656654   | AGIWUR34939 |
| CB4856                                                                                    | CT | III | 8004397 | 8005887 | WBGene00044446 | C06G4.6  | C06G4.6  | -0.110112986706384   | AGIWUR299   |
| CB4856                                                                                    | CT | III | 8005935 | 8009821 | WBGene00000507 | cit-1.1  | F44B9.4  | -0.0620940927571674  |             |
| AGIWUR4816;AGIWUR18943;AGIWUR28638                                                        |    |     |         |         |                |          |          |                      |             |
| CB4856                                                                                    | CT | III | 8010778 | 8013774 | WBGene00000508 | cit-1.2  | F44B9.3  | -0.196726887619379   |             |
| AGIWUR8542;AGIWUR15822;AGIWUR17269                                                        |    |     |         |         |                |          |          |                      |             |
| CB4856                                                                                    | CT | III | 8013753 | 8016538 | WBGene00018408 | F44B9.5  | F44B9.5  | -0.1906713906123     | AGIWUR17897 |
| CB4856                                                                                    | CT | III | 8016648 | 8020873 | WBGene00003021 | lin-36   | F44B9.6  | 0.0821773806739499   |             |
| AGIWUR12990;AGIWUR14761;AGIWUR20035;AGIWUR29449;AGIWUR36188;AGIWUR44489;AGIWUR45031       |    |     |         |         |                |          |          |                      |             |
| CB4856                                                                                    | CT | III | 8022463 | 8025195 | WBGene00018407 | F44B9.2  | F44B9.2  | -0.00787540153280375 | AGIWUR33109 |
| CB4856                                                                                    | CT | III | 8025210 | 8028042 | WBGene00004125 | mdt-30   | F44B9.7  | -0.242154616756235   | AGIWUR34503 |
| CB4856                                                                                    | CT | III | 8028133 | 8029649 | WBGene00018409 | F44B9.8  | F44B9.8  | -0.370154203349732   |             |
| AGIWUR1353;AGIWUR8841;AGIWUR14148;AGIWUR15772                                             |    |     |         |         |                |          |          |                      |             |
| CB4856                                                                                    | CT | III | 8029858 | 8031063 | WBGene00018410 | F44B9.9  | F44B9.9  | 0.122493905721524    | AGIWUR21414 |
| CB4856                                                                                    | CT | III | 8031413 | 8033727 | WBGene00018411 | F44B9.10 | F44B9.10 | 0.143934457384516    |             |
| AGIWUR27975                                                                               |    |     |         |         |                |          |          |                      |             |
| CB4856                                                                                    | CT | III | 8038241 | 8041374 | WBGene00001059 | dpf-6    | F44B9.1  | 0.28563025680555     |             |
| AGIWUR786;AGIWUR7937;AGIWUR10600;AGIWUR12968;AGIWUR15899;AGIWUR39780                      |    |     |         |         |                |          |          |                      |             |
| CB4856                                                                                    | CT | III | 8042577 | 8042875 | WBGene00019681 | K12H4.6  | K12H4.6  | -0.0271682299438432  | AGIWUR27362 |
| CB4856                                                                                    | CT | III | 8044481 | 8044916 | WBGene00019680 | K12H4.5  | K12H4.5  | -0.295889524470933   | AGIWUR19414 |
| CB4856                                                                                    | CT | III | 8045017 | 8045931 | WBGene00019679 | K12H4.4  | K12H4.4  | -0.113217981587765   | AGIWUR20073 |
| CB4856                                                                                    | CT | III | 8046034 | 8047612 | WBGene00019678 | K12H4.3  | K12H4.3  | -0.253454752186201   | AGIWUR25530 |
| CB4856                                                                                    | CT | III | 8047712 | 8048461 | WBGene00019677 | K12H4.2  | K12H4.2  | -0.0204906538226446  | AGIWUR20148 |
| CB4856                                                                                    | CT | III | 8048424 | 8051155 | WBGene00019682 | K12H4.7  | K12H4.7  | -0.341144118043609   |             |
| AGIWUR10819;AGIWUR15259;AGIWUR34223                                                       |    |     |         |         |                |          |          |                      |             |
| CB4856                                                                                    | CT | III | 8067289 | 8071455 | WBGene00000448 | pros-1   | K12H4.1  | 0.83779019461387     | AGIWUR34802 |
| CB4856                                                                                    | CT | III | 8071916 | 8080281 | WBGene00000939 | dcr-1    | K12H4.8  | -0.163846617541775   | AGIWUR15164 |
| CB4856                                                                                    | CT | III | 8080570 | 8083701 | WBGene00000143 | apc-2    | K06H7.6  | -0.0423624140341659  | AGIWUR44183 |

|                                                                        |    |     |         |         |                |          |          |                      |             |
|------------------------------------------------------------------------|----|-----|---------|---------|----------------|----------|----------|----------------------|-------------|
| CB4856                                                                 | CT | III | 8083692 | 8085538 | WBGene00019458 | K06H7.7  | K06H7.7  | 0.0115579763648537   | AGIWUR13531 |
| CB4856                                                                 | CT | III | 8085705 | 8088449 | WBGene00001743 | grp-1    | K06H7.4  | -0.11536455565558    |             |
| AGIWUR12843;AGIWUR21602;AGIWUR32200                                    |    |     |         |         |                |          |          |                      |             |
| CB4856                                                                 | CT | III | 8088482 | 8091730 | WBGene00019457 | vms-1    | K06H7.3  | -0.239069712917223   | AGIWUR34576 |
| CB4856                                                                 | CT | III | 8091708 | 8093042 | WBGene00019460 | idi-1    | K06H7.9  | -0.0328042314452546  | AGIWUR11791 |
| CB4856                                                                 | CT | III | 8093570 | 8096311 | WBGene00019456 | K06H7.2  | K06H7.2  | 0.10614244439933     | AGIWUR11874 |
| CB4856                                                                 | CT | III | 8096736 | 8098216 | WBGene00019459 | K06H7.8  | K06H7.8  | -0.0150566288810126  | AGIWUR25434 |
| CB4856                                                                 | CT | III | 8099327 | 8100638 | WBGene00019455 | K06H7.1  | K06H7.1  | -0.0260971228925833  | AGIWUR23564 |
| CB4856                                                                 | CT | III | 8101348 | 8104076 | WBGene00004042 | plk-1    | C14B9.4  | -0.0378633620383493  |             |
| AGIWUR7884;AGIWUR22550                                                 |    |     |         |         |                |          |          |                      |             |
| CB4856                                                                 | CT | III | 8108703 | 8111245 | WBGene00015753 | C14B9.3  | C14B9.3  | 0.0776925372215214   |             |
| AGIWUR5914;AGIWUR11983;AGIWUR39945;AGIWUR43369;AGIWUR44024;AGIWUR44415 |    |     |         |         |                |          |          |                      |             |
| CB4856                                                                 | CT | III | 8111166 | 8126222 | WBGene00001565 | gei-8    | C14B9.6  | 0.0334944830491004   |             |
| AGIWUR22239;AGIWUR29182;AGIWUR35088                                    |    |     |         |         |                |          |          |                      |             |
| CB4856                                                                 | CT | III | 8129551 | 8130227 | WBGene00004433 | rp1-21   | C14B9.7  | 0.153103511370155    | AGIWUR13555 |
| CB4856                                                                 | CT | III | 8130852 | 8132436 | WBGene00015755 | C14B9.10 | C14B9.10 | -0.060350182896892   |             |
| AGIWUR9726;AGIWUR20003;AGIWUR24913;AGIWUR25956;AGIWUR27149;AGIWUR34179 |    |     |         |         |                |          |          |                      |             |
| CB4856                                                                 | CT | III | 8133665 | 8136649 | WBGene00015752 | C14B9.2  | C14B9.2  | 0.148460599360593    |             |
| AGIWUR8508;AGIWUR11821;AGIWUR19513;AGIWUR30168;AGIWUR41633             |    |     |         |         |                |          |          |                      |             |
| CB4856                                                                 | CT | III | 8138090 | 8139645 | WBGene00002011 | hsp-12.2 | C14B9.1  | 0.161550575774574    |             |
| AGIWUR13046;AGIWUR29749                                                |    |     |         |         |                |          |          |                      |             |
| CB4856                                                                 | CT | III | 8139610 | 8144629 | WBGene00015754 | C14B9.8  | C14B9.8  | -0.0420893282309542  | AGIWUR1876  |
| CB4856                                                                 | CT | III | 8145015 | 8145974 | WBGene00017044 | mrp1-18  | D2007.4  | -0.18754838719023    |             |
| AGIWUR3327;AGIWUR16310;AGIWUR26805                                     |    |     |         |         |                |          |          |                      |             |
| CB4856                                                                 | CT | III | 8148967 | 8154619 | WBGene00017042 | D2007.2  | D2007.2  | -0.00397813068381225 |             |
| AGIWUR24883;AGIWUR30242                                                |    |     |         |         |                |          |          |                      |             |
| CB4856                                                                 | CT | III | 8155470 | 8155989 | WBGene00017041 | D2007.1  | D2007.1  | -0.175776716733516   | AGIWUR34639 |
| CB4856                                                                 | CT | III | 8155928 | 8158245 | WBGene00017045 | atg-13   | D2007.5  | -0.0207895561017928  | AGIWUR4063  |
| CB4856                                                                 | CT | III | 8159155 | 8161338 | WBGene00086546 | cil-1    | C50C3.7  | -0.166137262152128   | AGIWUR24538 |
| CB4856                                                                 | CT | III | 8161449 | 8163383 | WBGene00016803 | bath-42  | C50C3.8  | 0.0456354023791068   |             |
| AGIWUR3146;AGIWUR20862;AGIWUR21544;AGIWUR34384                         |    |     |         |         |                |          |          |                      |             |
| CB4856                                                                 | CT | III | 8164373 | 8172702 | WBGene00004187 | prp-8    | C50C3.6  | 0.116037773319264    |             |
| AGIWUR12014;AGIWUR25090;AGIWUR31758                                    |    |     |         |         |                |          |          |                      |             |
| CB4856                                                                 | CT | III | 8176484 | 8177243 | WBGene00016804 | C50C3.12 | C50C3.12 | -0.0212887881239805  |             |
| AGIWUR1160;AGIWUR13818;AGIWUR27621                                     |    |     |         |         |                |          |          |                      |             |
| CB4856                                                                 | CT | III | 8179224 | 8180549 | WBGene00016801 | C50C3.5  | C50C3.5  | -0.365108611472411   |             |
| AGIWUR2594;AGIWUR18155;AGIWUR27487                                     |    |     |         |         |                |          |          |                      |             |
| CB4856                                                                 | CT | III | 8181881 | 8189372 | WBGene00016800 | C50C3.2  | C50C3.2  | -0.0487831109879249  | AGIWUR16251 |
| CB4856                                                                 | CT | III | 8191817 | 8193847 | WBGene00016799 | C50C3.1  | C50C3.1  | 0.0150508991086067   | AGIWUR10522 |

|                                                                        |    |     |         |         |                |          |          |                     |             |
|------------------------------------------------------------------------|----|-----|---------|---------|----------------|----------|----------|---------------------|-------------|
| CB4856                                                                 | CT | III | 8193844 | 8201206 | WBGene00006772 | unc-36   | C50C3.9  | 0.0673414985607952  |             |
| AGIWUR10266;AGIWUR11145;AGIWUR18480                                    |    |     |         |         |                |          |          |                     |             |
| CB4856                                                                 | CT | III | 8205124 | 8209945 | WBGene00016242 | C30A5.10 | C30A5.10 | 0.0488444774813601  |             |
| AGIWUR5775;AGIWUR37751;AGIWUR40981                                     |    |     |         |         |                |          |          |                     |             |
| CB4856                                                                 | CT | III | 8212750 | 8216336 | WBGene00006818 | unc-86   | C30A5.7  | 0.584668565731276   | AGIWUR37956 |
| CB4856                                                                 | CT | III | 8225097 | 8226386 | WBGene00016238 | C30A5.3  | C30A5.3  | -0.0562701432182529 |             |
| AGIWUR1588;AGIWUR5145;AGIWUR13733;AGIWUR20984;AGIWUR34110;AGIWUR39012  |    |     |         |         |                |          |          |                     |             |
| CB4856                                                                 | CT | III | 8226478 | 8227650 | WBGene00004342 | rfs-1    | C30A5.2  | -0.174093183436796  | AGIWUR40272 |
| CB4856                                                                 | CT | III | 8227362 | 8232660 | WBGene00015350 | fbx1-1   | C02F5.7  | 0.707656043860791   |             |
| AGIWUR32117;AGIWUR40156;AGIWUR40691;AGIWUR41092                        |    |     |         |         |                |          |          |                     |             |
| CB4856                                                                 | CT | III | 8232651 | 8234591 | WBGene00015349 | henn-1   | C02F5.6  | -0.110689925865014  |             |
| AGIWUR13862;AGIWUR17509;AGIWUR20220;AGIWUR33609;AGIWUR35010            |    |     |         |         |                |          |          |                     |             |
| CB4856                                                                 | CT | III | 8234526 | 8235543 | WBGene00044445 | C02F5.14 | C02F5.14 | -0.27071833682503   |             |
| AGIWUR3399;AGIWUR8250;AGIWUR16249;AGIWUR19857;AGIWUR33544;AGIWUR37801  |    |     |         |         |                |          |          |                     |             |
| CB4856                                                                 | CT | III | 8236126 | 8236908 | WBGene00015348 | C02F5.5  | C02F5.5  | 0.190855067791496   | AGIWUR24696 |
| CB4856                                                                 | CT | III | 8236984 | 8237881 | WBGene00006628 | tsp-2    | C02F5.11 | 0.62197688111778    |             |
| AGIWUR37744;AGIWUR39045                                                |    |     |         |         |                |          |          |                     |             |
| CB4856                                                                 | CT | III | 8237995 | 8239423 | WBGene00006627 | tsp-1    | C02F5.8  | 1.38859030981279    | AGIWUR1230  |
| CB4856                                                                 | CT | III | 8240872 | 8243029 | WBGene00015352 | C02F5.12 | C02F5.12 | 0.0389214914950813  |             |
| AGIWUR8531                                                             |    |     |         |         |                |          |          |                     |             |
| CB4856                                                                 | CT | III | 8243122 | 8244092 | WBGene00003952 | pbs-6    | C02F5.9  | -0.23310062770028   |             |
| AGIWUR1154;AGIWUR35929                                                 |    |     |         |         |                |          |          |                     |             |
| CB4856                                                                 | CT | III | 8244445 | 8245794 | WBGene00015347 | cids-1   | C02F5.4  | -0.0406615796612044 | AGIWUR42649 |
| CB4856                                                                 | CT | III | 8245891 | 8247258 | WBGene00015346 | C02F5.3  | C02F5.3  | -0.187033505352931  | AGIWUR2618  |
| CB4856                                                                 | CT | III | 8247351 | 8248814 | WBGene00015353 | C02F5.13 | C02F5.13 | 0.277589767502629   |             |
| AGIWUR12182                                                            |    |     |         |         |                |          |          |                     |             |
| CB4856                                                                 | CT | III | 8248685 | 8249512 | WBGene00015351 | C02F5.10 | C02F5.10 | -0.0824947016097362 |             |
| AGIWUR11304                                                            |    |     |         |         |                |          |          |                     |             |
| CB4856                                                                 | CT | III | 8249619 | 8250193 | WBGene00015345 | C02F5.2  | C02F5.2  | -0.121785825435737  |             |
| AGIWUR134;AGIWUR4847;AGIWUR16620;AGIWUR19511;AGIWUR28543;AGIWUR31316   |    |     |         |         |                |          |          |                     |             |
| CB4856                                                                 | CT | III | 8250636 | 8254286 | WBGene00002231 | kn1-1    | C02F5.1  | -0.198735609160918  | AGIWUR21785 |
| CB4856                                                                 | CT | III | 8254975 | 8257638 | WBGene00017320 | F09G8.5  | F09G8.5  | -0.540759275821362  | AGIWUR1808  |
| CB4856                                                                 | CT | III | 8258345 | 8265805 | WBGene00003562 | ncr-2    | F09G8.4  | 0.361401305189373   | AGIWUR10674 |
| CB4856                                                                 | CT | III | 8266062 | 8267841 | WBGene00017319 | mrps-9   | F09G8.3  | -0.056283094820234  | AGIWUR33013 |
| CB4856                                                                 | CT | III | 8267921 | 8268355 | WBGene00017321 | F09G8.7  | F09G8.7  | -0.200239670281897  |             |
| AGIWUR5913;AGIWUR16944;AGIWUR22226;AGIWUR22263;AGIWUR22551;AGIWUR34486 |    |     |         |         |                |          |          |                     |             |
| CB4856                                                                 | CT | III | 8268609 | 8270680 | WBGene00007056 | crn-7    | F09G8.2  | -0.581824638040562  | AGIWUR29025 |
| CB4856                                                                 | CT | III | 8272960 | 8275971 | WBGene00017322 | clcc-160 | F09G8.8  | -0.158903202646844  |             |
| AGIWUR31776                                                            |    |     |         |         |                |          |          |                     |             |

|                                                                                                             |    |     |         |         |                |          |          |                     |             |
|-------------------------------------------------------------------------------------------------------------|----|-----|---------|---------|----------------|----------|----------|---------------------|-------------|
| CB4856                                                                                                      | CT | III | 8279108 | 8305832 | WBGene00003243 | mig-10   | F10E9.6  | 0.377999530240515   |             |
| AGIWUR9097;AGIWUR10503;AGIWUR26773                                                                          |    |     |         |         |                |          |          |                     |             |
| CB4856                                                                                                      | CT | III | 8305733 | 8326818 | WBGene00017358 | F10E9.7  | F10E9.7  | -0.219451709086169  | AGIWUR4437  |
| CB4856                                                                                                      | CT | III | 8326516 | 8330947 | WBGene00022580 | iglr-2   | ZC262.3  | 0.00838870512743384 |             |
| AGIWUR8953;AGIWUR24237;AGIWUR26998                                                                          |    |     |         |         |                |          |          |                     |             |
| CB4856                                                                                                      | CT | III | 8331047 | 8331919 | WBGene00022583 | mrps-18A | ZC262.8  | -0.301129791773647  |             |
| AGIWUR27397                                                                                                 |    |     |         |         |                |          |          |                     |             |
| CB4856                                                                                                      | CT | III | 8332223 | 8333572 | WBGene00022579 | ZC262.2  | ZC262.2  | 0.137284402547658   |             |
| AGIWUR6868;AGIWUR9361;AGIWUR12810;AGIWUR18704;AGIWUR34135;AGIWUR42356                                       |    |     |         |         |                |          |          |                     |             |
| CB4856                                                                                                      | CT | III | 8333663 | 8334233 | WBGene00022581 | ZC262.4  | ZC262.4  | 0.199613832536796   | AGIWUR15636 |
| CB4856                                                                                                      | CT | III | 8351249 | 8355174 | WBGene00006840 | unc-116  | R05D3.7  | -0.0683771679295573 |             |
| AGIWUR1060;AGIWUR21329                                                                                      |    |     |         |         |                |          |          |                     |             |
| CB4856                                                                                                      | CT | III | 8356887 | 8358844 | WBGene00019881 | R05D3.8  | R05D3.8  | 0.0677034675571635  |             |
| AGIWUR1460;AGIWUR10567                                                                                      |    |     |         |         |                |          |          |                     |             |
| CB4856                                                                                                      | CT | III | 8358625 | 8362496 | WBGene00007008 | rfp-1    | R05D3.4  | 0.137677028888247   | AGIWUR37669 |
| CB4856                                                                                                      | CT | III | 8362408 | 8368848 | WBGene00019882 | R05D3.9  | R05D3.9  | 0.0746034270063198  |             |
| AGIWUR23033;AGIWUR30286                                                                                     |    |     |         |         |                |          |          |                     |             |
| CB4856                                                                                                      | CT | III | 8372255 | 8375175 | WBGene00019877 | R05D3.2  | R05D3.2  | 0.0971055162260761  |             |
| AGIWUR4020;AGIWUR13106;AGIWUR43656                                                                          |    |     |         |         |                |          |          |                     |             |
| CB4856                                                                                                      | CT | III | 8375300 | 8380833 | WBGene00019883 | met-2    | R05D3.11 | -0.137106789816254  |             |
| AGIWUR27065                                                                                                 |    |     |         |         |                |          |          |                     |             |
| CB4856                                                                                                      | CT | III | 8380943 | 8387529 | WBGene00019884 | R05D3.12 | R05D3.12 | -0.0799501379829808 |             |
| AGIWUR9424;AGIWUR40415                                                                                      |    |     |         |         |                |          |          |                     |             |
| CB4856                                                                                                      | CT | III | 8388466 | 8389639 | WBGene00022700 | ZK353.4  | ZK353.4  | 0.276170111512128   | AGIWUR10980 |
| CB4856                                                                                                      | CT | III | 8389882 | 8394424 | WBGene00044677 | ZK353.10 | ZK353.10 | -0.238075654143987  |             |
| AGIWUR43758                                                                                                 |    |     |         |         |                |          |          |                     |             |
| CB4856                                                                                                      | CT | III | 8395985 | 8396727 | WBGene00022699 | ZK353.3  | ZK353.3  | 0.0391008367747334  |             |
| AGIWUR7042;AGIWUR10899;AGIWUR11298;AGIWUR16527;AGIWUR22949                                                  |    |     |         |         |                |          |          |                     |             |
| CB4856                                                                                                      | CT | III | 8398711 | 8399240 | WBGene00022698 | ZK353.2  | ZK353.2  | 0.166022759208952   | AGIWUR43243 |
| CB4856                                                                                                      | CT | III | 8399190 | 8401928 | WBGene00002249 | lap-1    | ZK353.6  | -0.0703801625783118 |             |
| AGIWUR19824;AGIWUR21981;AGIWUR31549                                                                         |    |     |         |         |                |          |          |                     |             |
| CB4856                                                                                                      | CT | III | 8402049 | 8403607 | WBGene00022702 | cutc-1   | ZK353.7  | -0.0491413809088677 |             |
| AGIWUR11611;AGIWUR15249;AGIWUR19716;AGIWUR22359;AGIWUR28520;AGIWUR30902;AGIWUR34334;AGIWUR35842;AGIWUR37404 |    |     |         |         |                |          |          |                     |             |
| CB4856                                                                                                      | CT | III | 8403715 | 8405562 | WBGene00022703 | ubxn-4   | ZK353.8  | -0.0623330275403582 | AGIWUR17659 |
| CB4856                                                                                                      | CT | III | 8405874 | 8409406 | WBGene00022697 | cyy-1    | ZK353.1  | -0.0302940634152034 |             |
| AGIWUR158;AGIWUR1847;AGIWUR4594;AGIWUR6679;AGIWUR26066;AGIWUR33796                                          |    |     |         |         |                |          |          |                     |             |
| CB4856                                                                                                      | CT | III | 8409496 | 8412017 | WBGene00022704 | ZK353.9  | ZK353.9  | 0.0995073603912395  | AGIWUR9955  |
| CB4856                                                                                                      | CT | III | 8416227 | 8422650 | WBGene00023405 | sor-1    | ZK1236.3 | -0.15749652988848   |             |
| AGIWUR14064                                                                                                 |    |     |         |         |                |          |          |                     |             |

|                                                                         |     |         |         |                |          |          |                     |             |
|-------------------------------------------------------------------------|-----|---------|---------|----------------|----------|----------|---------------------|-------------|
| CB4856 CT<br>AGIWUR35155                                                | III | 8426334 | 8428583 | WBGene00000414 | cec-1    | ZK1236.2 | 0.438232897384452   |             |
| CB4856 CT<br>AGIWUR10904                                                | III | 8429307 | 8431586 | WBGene00022862 | ZK1236.1 | ZK1236.1 | 0.231856353924103   |             |
| CB4856 CT<br>AGIWUR44607                                                | III | 8431552 | 8432214 | WBGene00022864 | ZK1236.5 | ZK1236.5 | -0.059525622318974  |             |
| CB4856 CT<br>AGIWUR16787;AGIWUR29697                                    | III | 8432469 | 8435174 | WBGene00044588 | ZK1236.9 | ZK1236.9 | -0.0859247062361841 |             |
| CB4856 CT<br>AGIWUR5337;AGIWUR11160;AGIWUR24137;AGIWUR26002;AGIWUR37523 | III | 8436700 | 8437811 | WBGene00023223 | ZK1236.8 | ZK1236.8 | 0.0963499362333051  |             |
| CB4856 CT<br>AGIWUR25763                                                | III | 8438061 | 8439412 | WBGene00004175 | pqn-96   | ZK1236.6 | 0.0926793742718601  |             |
| CB4856 CT<br>AGIWUR21809;AGIWUR40300;AGIWUR43834                        | III | 8439468 | 8443607 | WBGene00022865 | ufbp-1   | ZK1236.7 | 0.09271532293711    |             |
| CB4856 CT<br>AGIWUR13298;AGIWUR24695;AGIWUR24876                        | III | 8443917 | 8446920 | WBGene00016250 | hsp-110  | C30C11.4 | -0.235036504671239  |             |
| CB4856 CT<br>AGIWUR40229                                                | III | 8447353 | 8449346 | WBGene00004460 | rpn-3    | C30C11.2 | 0.0977871718322056  |             |
| CB4856 CT<br>AGIWUR42312                                                | III | 8449757 | 8450519 | WBGene00016249 | mrpl-32  | C30C11.1 | -0.232139002790792  |             |
| CB4856 CT<br>AGIWUR20369                                                | III | 8467035 | 8478377 | WBGene00018369 | mig-39   | F42H10.5 | 0.155439148021767   |             |
| CB4856 CT<br>AGIWUR13388                                                | III | 8478382 | 8480455 | WBGene00018370 | F42H10.6 | F42H10.6 | -0.12592755463413   |             |
| CB4856 CT<br>AGIWUR11127;AGIWUR40428                                    | III | 8484153 | 8488365 | WBGene00018367 | F42H10.3 | F42H10.3 | -0.0870423587048927 |             |
| CB4856 CT<br>AGIWUR20825                                                | III | 8488344 | 8490347 | WBGene00018371 | ess-2    | F42H10.7 | -0.146704613461033  |             |
| CB4856 CT<br>AGIWUR6373                                                 | III | 8490624 | 8491097 | WBGene00018366 | F42H10.2 | F42H10.2 | -0.218089035928868  |             |
| CB4856 CT<br>AGIWUR8499;AGIWUR21807                                     | III | 8493878 | 8518879 | WBGene00015418 | pac-1    | C04D8.1  | -0.050263572733463  |             |
| CB4856 CT                                                               | III | 8518904 | 8519945 | WBGene00022507 | ZC21.8   | ZC21.8   | -0.153391185290253  | AGIWUR36373 |
| CB4856 CT                                                               | III | 8525073 | 8528650 | WBGene00022505 | ZC21.3   | ZC21.3   | -0.261959520478501  |             |
| AGIWUR6744;AGIWUR18379;AGIWUR21048;AGIWUR26702;AGIWUR33777;AGIWUR41319  | III | 8530077 | 8531123 | WBGene00044443 | ZC21.10  | ZC21.10  | -0.146954676636517  |             |
| AGIWUR25900;AGIWUR30228;AGIWUR41931                                     | III | 8535131 | 8542748 | WBGene00006614 | trp-1    | ZC21.2   | 0.0713608736524147  | AGIWUR12908 |
| CB4856 CT                                                               | III | 8542952 | 8545608 | WBGene00022506 | ZC21.6   | ZC21.6   | 0.209233199340861   | AGIWUR43550 |

|                                                                                                                        |    |     |         |         |                |          |          |                     |             |
|------------------------------------------------------------------------------------------------------------------------|----|-----|---------|---------|----------------|----------|----------|---------------------|-------------|
| CB4856                                                                                                                 | CT | III | 8552555 | 8553839 | WBGene00043097 | C02D5.4  | C02D5.4  | 0.549269275215629   |             |
| AGIWUR11444;AGIWUR40140;AGIWUR42459                                                                                    |    |     |         |         |                |          |          |                     |             |
| CB4856                                                                                                                 | CT | III | 8554772 | 8555821 | WBGene00015337 | gst-2    | C02D5.3  | 0.238459929445915   |             |
| AGIWUR16755;AGIWUR36587;AGIWUR38455                                                                                    |    |     |         |         |                |          |          |                     |             |
| CB4856                                                                                                                 | CT | III | 8557335 | 8559194 | WBGene00015336 | C02D5.2  | C02D5.2  | -0.0243953166847675 | AGIWUR27961 |
| CB4856                                                                                                                 | CT | III | 8561136 | 8563026 | WBGene00015335 | acd-6    | C02D5.1  | -0.167884595672222  | AGIWUR2682  |
| CB4856                                                                                                                 | CT | III | 8581102 | 8583928 | WBGene00015519 | doxa-1   | C06E1.3  | -0.340814476392248  | AGIWUR20889 |
| CB4856                                                                                                                 | CT | III | 8584186 | 8588642 | WBGene00001612 | glr-1    | C06E1.4  | -0.283525362980424  | AGIWUR5066  |
| CB4856                                                                                                                 | CT | III | 8589336 | 8589488 | WBGene00015520 | fip-3    | C06E1.5  | -0.312399721883958  | AGIWUR5323  |
| CB4856                                                                                                                 | CT | III | 8590833 | 8590982 | WBGene00015521 | fipr-16  | C06E1.6  | -0.215947429002758  |             |
| AGIWUR15253;AGIWUR15387;AGIWUR16496;AGIWUR18026;AGIWUR21580;AGIWUR34124                                                |    |     |         |         |                |          |          |                     |             |
| CB4856                                                                                                                 | CT | III | 8591239 | 8593720 | WBGene00015522 | C06E1.7  | C06E1.7  | 0.17344517966872    | AGIWUR10879 |
| CB4856                                                                                                                 | CT | III | 8595339 | 8597870 | WBGene00015523 | ztf-30   | C06E1.8  | 0.431372080901649   | AGIWUR16028 |
| CB4856                                                                                                                 | CT | III | 8605832 | 8606622 | WBGene00015518 | C06E1.1  | C06E1.1  | 0.203882992099898   |             |
| AGIWUR2461;AGIWUR14714;AGIWUR20169;AGIWUR35713                                                                         |    |     |         |         |                |          |          |                     |             |
| CB4856                                                                                                                 | CT | III | 8609882 | 8614569 | WBGene00015525 | rha-2    | C06E1.10 | -0.235058330616274  |             |
| AGIWUR2692;AGIWUR15564;AGIWUR31321                                                                                     |    |     |         |         |                |          |          |                     |             |
| CB4856                                                                                                                 | CT | III | 8614762 | 8616381 | WBGene00015526 | C06E1.11 | C06E1.11 | -0.054394633688263  |             |
| AGIWUR14844                                                                                                            |    |     |         |         |                |          |          |                     |             |
| CB4856                                                                                                                 | CT | III | 8616781 | 8626917 | WBGene00015747 | C13G5.2  | C13G5.2  | -0.300628848131916  | AGIWUR17169 |
| CB4856                                                                                                                 | CT | III | 8626291 | 8628571 | WBGene00017696 | polk-1   | F22B7.6  | -0.051565745688162  |             |
| AGIWUR4510;AGIWUR37658;AGIWUR39072                                                                                     |    |     |         |         |                |          |          |                     |             |
| CB4856                                                                                                                 | CT | III | 8631165 | 8633549 | WBGene00001028 | dnj-10   | F22B7.5  | -0.204774386757177  |             |
| AGIWUR815;AGIWUR6507;AGIWUR26820;AGIWUR28613                                                                           |    |     |         |         |                |          |          |                     |             |
| CB4856                                                                                                                 | CT | III | 8634078 | 8643739 | WBGene00006662 | twk-7    | F22B7.7  | 0.17927574083604    |             |
| AGIWUR395;AGIWUR39525                                                                                                  |    |     |         |         |                |          |          |                     |             |
| CB4856                                                                                                                 | CT | III | 8648889 | 8649477 | WBGene00017694 | F22B7.3  | F22B7.3  | -0.242153141337561  | AGIWUR43782 |
| CB4856                                                                                                                 | CT | III | 8650764 | 8652190 | WBGene00017693 | f1p-23   | F22B7.2  | 0.0144410499696219  |             |
| AGIWUR4182;AGIWUR16416;AGIWUR16449;AGIWUR17359;AGIWUR25271;AGIWUR29653;AGIWUR30956;AGIWUR37005;AGIWUR42211;AGIWUR43285 |    |     |         |         |                |          |          |                     |             |
| CB4856                                                                                                                 | CT | III | 8652578 | 8653925 | WBGene00017698 | F22B7.9  | F22B7.9  | 0.916843923406269   |             |
| AGIWUR3277;AGIWUR19821;AGIWUR23277;AGIWUR25110;AGIWUR27887;AGIWUR28497                                                 |    |     |         |         |                |          |          |                     |             |
| CB4856                                                                                                                 | CT | III | 8659872 | 8667482 | WBGene00001078 | dpy-19   | F22B7.10 | -0.131415701598321  |             |
| AGIWUR34986                                                                                                            |    |     |         |         |                |          |          |                     |             |
| CB4856                                                                                                                 | CT | III | 8670543 | 8675051 | WBGene00003993 | pgl-2    | B0523.3  | -0.129623084872701  | AGIWUR18234 |
| CB4856                                                                                                                 | CT | III | 8675297 | 8683732 | WBGene00001443 | f1i-1    | B0523.5  | -0.0526777672836438 |             |
| AGIWUR4414;AGIWUR25594;AGIWUR32485                                                                                     |    |     |         |         |                |          |          |                     |             |
| CB4856                                                                                                                 | CT | III | 8686118 | 8688457 | WBGene00015125 | B0303.3  | B0303.3  | -0.156836068738555  |             |
| AGIWUR2262;AGIWUR10093;AGIWUR21243;AGIWUR36276                                                                         |    |     |         |         |                |          |          |                     |             |

|                                                                                              |    |     |         |         |                |          |          |                              |             |
|----------------------------------------------------------------------------------------------|----|-----|---------|---------|----------------|----------|----------|------------------------------|-------------|
| CB4856                                                                                       | CT | III | 8689850 | 8693473 | WBGene00015126 | B0303.4  | B0303.4  | 0.0829211943850119           | AGIWUR16137 |
| CB4856                                                                                       | CT | III | 8693638 | 8699497 | WBGene00015128 | B0303.7  | B0303.7  | 0.0230456941933674           | AGIWUR39808 |
| CB4856                                                                                       | CT | III | 8699481 | 8700333 | WBGene00015129 | sdz-1    | B0303.8  | -0.0658260925627392          | AGIWUR26442 |
| CB4856                                                                                       | CT | III | 8700927 | 8703341 | WBGene00015130 | vps-33.1 |          | B0303.9 -0.195210841024672   |             |
| AGIWUR13675                                                                                  |    |     |         |         |                |          |          |                              |             |
| CB4856                                                                                       | CT | III | 8703300 | 8710410 | WBGene00015131 | B0303.11 |          | B0303.11 -0.0204903358009982 |             |
| AGIWUR39482                                                                                  |    |     |         |         |                |          |          |                              |             |
| CB4856                                                                                       | CT | III | 8713993 | 8716184 | WBGene00015132 | B0303.14 |          | B0303.14 -0.27425954476417   |             |
| AGIWUR29492                                                                                  |    |     |         |         |                |          |          |                              |             |
| CB4856                                                                                       | CT | III | 8717644 | 8718567 | WBGene00015133 | mrpl-11  | B0303.15 | 0.077609350952244            |             |
| AGIWUR38117;AGIWUR41229                                                                      |    |     |         |         |                |          |          |                              |             |
| CB4856                                                                                       | CT | III | 8720201 | 8725334 | WBGene00022717 | hipr-1   | ZK370.3  | -0.0876784388120111          | AGIWUR1623  |
| CB4856                                                                                       | CT | III | 8725323 | 8731373 | WBGene00022718 | ZK370.4  | ZK370.4  | 0.165039014486545            |             |
| AGIWUR393;AGIWUR13330;AGIWUR23503;AGIWUR25689;AGIWUR29681;AGIWUR34771;AGIWUR35829            |    |     |         |         |                |          |          |                              |             |
| CB4856                                                                                       | CT | III | 8737686 | 8741412 | WBGene00022719 | pdhk-2   | ZK370.5  | 0.382116844465431            | AGIWUR9815  |
| CB4856                                                                                       | CT | III | 8742007 | 8743842 | WBGene00022720 | ZK370.6  | ZK370.6  | -0.168589947628759           | AGIWUR11574 |
| CB4856                                                                                       | CT | III | 8746216 | 8748701 | WBGene00022721 | ugtp-1   | ZK370.7  | -0.196829464788337           | AGIWUR25896 |
| CB4856                                                                                       | CT | III | 8749763 | 8757069 | WBGene00004856 | sma-2    | ZK370.2  | 0.396405437555204            | AGIWUR33081 |
| CB4856                                                                                       | CT | III | 8756995 | 8761101 | WBGene00019801 | aak-1    | PAR2.3   | -0.0530295317794547          |             |
| AGIWUR5774;AGIWUR7517;AGIWUR34094                                                            |    |     |         |         |                |          |          |                              |             |
| CB4856                                                                                       | CT | III | 8763291 | 8767342 | WBGene00003253 | mig-22   | PAR2.4   | -0.214146642544425           |             |
| AGIWUR7118;AGIWUR40525                                                                       |    |     |         |         |                |          |          |                              |             |
| CB4856                                                                                       | CT | III | 8768311 | 8769252 | WBGene00019800 | mtss-1   | PAR2.1   | -0.133302863767792           | AGIWUR33250 |
| CB4856                                                                                       | CT | III | 8769502 | 8776141 | WBGene00019301 | K02D10.1 |          | K02D10.1 -0.0962424189689495 |             |
| AGIWUR3144;AGIWUR5099;AGIWUR7470;AGIWUR11325;AGIWUR18329;AGIWUR25715;AGIWUR39553;AGIWUR42939 |    |     |         |         |                |          |          |                              |             |
| CB4856                                                                                       | CT | III | 8776183 | 8777895 | WBGene00019305 | snap-29  | K02D10.5 | -0.212566751181695           |             |
| AGIWUR2012                                                                                   |    |     |         |         |                |          |          |                              |             |
| CB4856                                                                                       | CT | III | 8777890 | 8780012 | WBGene00019304 | K02D10.4 |          | K02D10.4 0.0670521032769749  |             |
| AGIWUR11635;AGIWUR12464;AGIWUR16357                                                          |    |     |         |         |                |          |          |                              |             |
| CB4856                                                                                       | CT | III | 8787092 | 8792346 | WBGene00018833 | ztf-1    | F54F2.5  | -0.225051006403996           |             |
| AGIWUR12987;AGIWUR35878                                                                      |    |     |         |         |                |          |          |                              |             |
| CB4856                                                                                       | CT | III | 8792847 | 8806305 | WBGene00006975 | zfp-1    | F54F2.2  | 0.152886494146654            |             |
| AGIWUR16269;AGIWUR28175                                                                      |    |     |         |         |                |          |          |                              |             |
| CB4856                                                                                       | CT | III | 8806231 | 8807346 | WBGene00018835 | F54F2.7  | F54F2.7  | -0.0772992284910128          | AGIWUR45086 |
| CB4856                                                                                       | CT | III | 8807482 | 8809329 | WBGene00004201 | prx-19   | F54F2.8  | -0.0498259627586588          | AGIWUR28794 |
| CB4856                                                                                       | CT | III | 8818899 | 8825270 | WBGene00003929 | pat-2    | F54F2.1  | 0.129358841344086            | AGIWUR44985 |
| CB4856                                                                                       | CT | III | 8825243 | 8827228 | WBGene00018836 | F54F2.9  | F54F2.9  | -0.382233413036374           | AGIWUR21876 |
| CB4856                                                                                       | CT | III | 8827358 | 8829305 | WBGene00018417 | F44E2.3  | F44E2.3  | -0.118618064326534           |             |
| AGIWUR13313;AGIWUR22083                                                                      |    |     |         |         |                |          |          |                              |             |



|                                                                         |     |         |         |                |          |          |                      |             |
|-------------------------------------------------------------------------|-----|---------|---------|----------------|----------|----------|----------------------|-------------|
| CB4856 CT                                                               | III | 8829493 | 8831109 | WBGene00018423 | F44E2.10 | F44E2.10 | -0.376270328056739   |             |
| AGIWUR14243                                                             |     |         |         |                |          |          |                      |             |
| CB4856 CT                                                               | III | 8832479 | 8838424 | WBGene00018418 | F44E2.4  | F44E2.4  | 0.586962036087304    | AGIWUR21160 |
| CB4856 CT                                                               | III | 8844494 | 8845214 | WBGene00018419 | F44E2.6  | F44E2.6  | -0.138224281367251   |             |
| AGIWUR15400;AGIWUR16092;AGIWUR16254;AGIWUR16985;AGIWUR34165;AGIWUR38620 |     |         |         |                |          |          |                      |             |
| CB4856 CT                                                               | III | 8845856 | 8848486 | WBGene00018420 | F44E2.7  | F44E2.7  | -0.163107668831437   |             |
| AGIWUR16197;AGIWUR37883;AGIWUR40627                                     |     |         |         |                |          |          |                      |             |
| CB4856 CT                                                               | III | 8848582 | 8849877 | WBGene00018421 | F44E2.8  | F44E2.8  | -0.14024390369098    | AGIWUR26871 |
| CB4856 CT                                                               | III | 8849994 | 8850532 | WBGene00018422 | F44E2.9  | F44E2.9  | -0.289827355781744   | AGIWUR30697 |
| CB4856 CT                                                               | III | 8852264 | 8864451 | WBGene00004041 | plg-1    | F44E2.11 | -0.646108507352702   |             |
| AGIWUR5095;AGIWUR10027;AGIWUR20923;AGIWUR36446                          |     |         |         |                |          |          |                      |             |
| CB4856 CT                                                               | III | 8870099 | 8877128 | WBGene00010475 | K01F9.2  | K01F9.2  | 0.784918730300634    | AGIWUR30346 |
| CB4856 CT                                                               | III | 8882707 | 8885482 | WBGene00014021 | svop-1   | ZK637.1  | 0.238863689303805    | AGIWUR11249 |
| CB4856 CT                                                               | III | 8887751 | 8890143 | WBGene00014022 | ZK637.2  | ZK637.2  | 0.467657884844252    | AGIWUR45186 |
| CB4856 CT                                                               | III | 8890231 | 8894208 | WBGene00014023 | lnkn-1   | ZK637.3  | 0.144002539748611    | AGIWUR10243 |
| CB4856 CT                                                               | III | 8894209 | 8894691 | WBGene00014024 | ZK637.4  | ZK637.4  | 0.0565341304860603   | AGIWUR37235 |
| CB4856 CT                                                               | III | 8895082 | 8896654 | WBGene00014025 | asna-1   | ZK637.5  | 0.00909315412664569  | AGIWUR17798 |
| CB4856 CT                                                               | III | 8898622 | 8899530 | WBGene00014987 | ZK637.6  | ZK637.6  | -0.0927188271595369  |             |
| AGIWUR11772;AGIWUR16118                                                 |     |         |         |                |          |          |                      |             |
| CB4856 CT                                                               | III | 8900237 | 8904160 | WBGene00002998 | lin-9    | ZK637.7  | 0.009245488482442    |             |
| AGIWUR7682;AGIWUR11606;AGIWUR14623                                      |     |         |         |                |          |          |                      |             |
| CB4856 CT                                                               | III | 8905615 | 8911749 | WBGene00006768 | unc-32   | ZK637.8  | 0.0402806950995078   |             |
| AGIWUR30237;AGIWUR33688;AGIWUR37194                                     |     |         |         |                |          |          |                      |             |
| CB4856 CT                                                               | III | 8912144 | 8913632 | WBGene00014027 | tpk-1    | ZK637.9  | -0.00657117156886144 |             |
| AGIWUR23783;AGIWUR40284;AGIWUR42847                                     |     |         |         |                |          |          |                      |             |
| CB4856 CT                                                               | III | 8913769 | 8916450 | WBGene00014028 | trxr-2   | ZK637.10 | -0.151548592072499   |             |
| AGIWUR2437                                                              |     |         |         |                |          |          |                      |             |
| CB4856 CT                                                               | III | 8916351 | 8917929 | WBGene00000388 | cdc-25.3 | ZK637.11 | -0.407650715373222   |             |
| AGIWUR1926                                                              |     |         |         |                |          |          |                      |             |
| CB4856 CT                                                               | III | 8922292 | 8925302 | WBGene00014029 | ZK637.12 | ZK637.12 | 0.041905072155739    |             |
| AGIWUR11063                                                             |     |         |         |                |          |          |                      |             |
| CB4856 CT                                                               | III | 8925607 | 8926529 | WBGene00014038 | ZK643.7  | ZK643.7  | 0.000753513084105428 | AGIWUR30593 |
| CB4856 CT                                                               | III | 8930036 | 8936682 | WBGene00014033 | arrd-15  | ZK643.1  | -0.148900430325043   | AGIWUR3131  |
| CB4856 CT                                                               | III | 8944686 | 8952953 | WBGene00014035 | seb-2    | ZK643.3  | 0.117999660808312    |             |
| AGIWUR21977;AGIWUR41246;AGIWUR42198                                     |     |         |         |                |          |          |                      |             |
| CB4856 CT                                                               | III | 8952886 | 8956216 | WBGene00014036 | ZK643.5  | ZK643.5  | -0.104156943815017   | AGIWUR1264  |
| CB4856 CT                                                               | III | 8956459 | 8957731 | WBGene00014034 | ZK643.2  | ZK643.2  | -0.315221066315583   | AGIWUR7832  |
| CB4856 CT                                                               | III | 8957704 | 8960693 | WBGene00014037 | ZK643.6  | ZK643.6  | 0.0722259601802842   | AGIWUR15236 |
| CB4856 CT                                                               | III | 8962295 | 8965638 | WBGene00001734 | grl-25   | ZK643.8  | -0.274943078334777   | AGIWUR45029 |

|                                                                       |    |     |         |         |                |          |          |                     |             |
|-----------------------------------------------------------------------|----|-----|---------|---------|----------------|----------|----------|---------------------|-------------|
| CB4856                                                                | CT | III | 8966022 | 8967727 | WBGene00011142 | R08D7.1  | R08D7.1  | -0.199745017355692  | AGIWUR42741 |
| CB4856                                                                | CT | III | 8967917 | 8969658 | WBGene00011143 | R08D7.2  | R08D7.2  | -0.0897431703603182 | AGIWUR1150  |
| CB4856                                                                | CT | III | 8969638 | 8971578 | WBGene00001227 | eif-3.D  | R08D7.3  | -0.0307766494494341 |             |
| AGIWUR1208;AGIWUR4378;AGIWUR22575;AGIWUR33307;AGIWUR34559;AGIWUR43455 |    |     |         |         |                |          |          |                     |             |
| CB4856                                                                | CT | III | 8971892 | 8973672 | WBGene00011144 | R08D7.4  | R08D7.4  | 0.00177131638936867 |             |
| AGIWUR13868;AGIWUR41913                                               |    |     |         |         |                |          |          |                     |             |
| CB4856                                                                | CT | III | 8974126 | 8975061 | WBGene00011145 | R08D7.5  | R08D7.5  | 0.0177644429206758  | AGIWUR41124 |
| CB4856                                                                | CT | III | 8975070 | 8981897 | WBGene00011146 | pde-2    | R08D7.6  | -0.0202638796529238 |             |
| AGIWUR20156;AGIWUR22060;AGIWUR24440;AGIWUR33393                       |    |     |         |         |                |          |          |                     |             |
| CB4856                                                                | CT | III | 8992205 | 8994827 | WBGene00011147 | R08D7.7  | R08D7.7  | 0.104659683225476   | AGIWUR24736 |
| CB4856                                                                | CT | III | 8996418 | 8999785 | WBGene00010308 | F59B2.3  | F59B2.3  | -0.0509831251027348 |             |
| AGIWUR2749;AGIWUR3789;AGIWUR8329;AGIWUR22566;AGIWUR25535;AGIWUR35192  |    |     |         |         |                |          |          |                     |             |
| CB4856                                                                | CT | III | 8999828 | 9001973 | WBGene00010309 | rpn-6.2  | F59B2.5  | 0.234130775498981   | AGIWUR44151 |
| CB4856                                                                | CT | III | 9002779 | 9004839 | WBGene00006977 | zif-1    | F59B2.6  | -0.0974584593795598 | AGIWUR43029 |
| CB4856                                                                | CT | III | 9004821 | 9005955 | WBGene00004269 | rab-6.1  | F59B2.7  | -0.211107403073349  |             |
| AGIWUR5493;AGIWUR6537;AGIWUR18805;AGIWUR36400;AGIWUR44152             |    |     |         |         |                |          |          |                     |             |
| CB4856                                                                | CT | III | 9007974 | 9010121 | WBGene00010310 | F59B2.8  | F59B2.8  | 0.969571276805722   | AGIWUR43386 |
| CB4856                                                                | CT | III | 9010676 | 9012409 | WBGene00010311 | F59B2.9  | F59B2.9  | 0.326148958501548   |             |
| AGIWUR8241;AGIWUR25616;AGIWUR28441                                    |    |     |         |         |                |          |          |                     |             |
| CB4856                                                                | CT | III | 9013003 | 9016961 | WBGene00010313 | F59B2.11 | F59B2.11 | -0.0218559491785717 |             |
| AGIWUR5273;AGIWUR14502;AGIWUR15535                                    |    |     |         |         |                |          |          |                     |             |
| CB4856                                                                | CT | III | 9017607 | 9020960 | WBGene00010314 | F59B2.12 | F59B2.12 | -0.357323673963178  |             |
| AGIWUR35085                                                           |    |     |         |         |                |          |          |                     |             |
| CB4856                                                                | CT | III | 9021370 | 9022635 | WBGene00050931 | F59B2.14 | F59B2.14 | -0.0390997696768167 |             |
| AGIWUR25458;AGIWUR30439;AGIWUR39247                                   |    |     |         |         |                |          |          |                     |             |
| CB4856                                                                | CT | III | 9023964 | 9027044 | WBGene00010315 | F59B2.13 | F59B2.13 | -0.120642756809595  |             |
| AGIWUR39438                                                           |    |     |         |         |                |          |          |                     |             |
| CB4856                                                                | CT | III | 9038779 | 9043300 | WBGene00003518 | nac-2    | R107.1   | 0.219364304523605   | AGIWUR17074 |
| CB4856                                                                | CT | III | 9043886 | 9045938 | WBGene00011298 | R107.2   | R107.2   | 0.0344042015499575  | AGIWUR29941 |
| CB4856                                                                | CT | III | 9046055 | 9050693 | WBGene00011299 | ikke-1   | R107.4   | 0.094744682869802   |             |
| AGIWUR24852;AGIWUR26951                                               |    |     |         |         |                |          |          |                     |             |
| CB4856                                                                | CT | III | 9051592 | 9053793 | WBGene00011300 | R107.5   | R107.5   | -0.332228267070503  |             |
| AGIWUR19646;AGIWUR26520                                               |    |     |         |         |                |          |          |                     |             |
| CB4856                                                                | CT | III | 9055052 | 9058882 | WBGene00000549 | cls-2    | R107.6   | 0.103127794898356   | AGIWUR39897 |
| CB4856                                                                | CT | III | 9059314 | 9060181 | WBGene00001749 | gst-1    | R107.7   | -0.138254960400229  | AGIWUR24754 |
| CB4856                                                                | CT | III | 9060096 | 9071760 | WBGene00003001 | lin-12   | R107.8   | 0.463336403056337   | AGIWUR31911 |
| CB4856                                                                | CT | III | 9074872 | 9075639 | WBGene00044406 | F02A9.7  | F02A9.7  | 0.0937190213191439  | AGIWUR800   |
| CB4856                                                                | CT | III | 9075726 | 9077804 | WBGene00008513 | F02A9.1  | F02A9.1  | 0.111889691453148   |             |
| AGIWUR6275;AGIWUR14081;AGIWUR19721;AGIWUR31244;AGIWUR37134            |    |     |         |         |                |          |          |                     |             |

|                                                                                            |    |     |         |         |                |          |          |                      |             |
|--------------------------------------------------------------------------------------------|----|-----|---------|---------|----------------|----------|----------|----------------------|-------------|
| CB4856                                                                                     | CT | III | 9080371 | 9081179 | WBGene00001385 | far-1    | F02A9.2  | -0.0816083453095402  |             |
| AGIWUR9075;AGIWUR11257;AGIWUR19678;AGIWUR20921;AGIWUR23169;AGIWUR26703;AGIWUR42791         |    |     |         |         |                |          |          |                      |             |
| CB4856                                                                                     | CT | III | 9081679 | 9082511 | WBGene00001386 | far-2    | F02A9.3  | -0.00518242626671928 |             |
| AGIWUR6957;AGIWUR13264;AGIWUR15268;AGIWUR31229                                             |    |     |         |         |                |          |          |                      |             |
| CB4856                                                                                     | CT | III | 9084306 | 9089386 | WBGene00008514 | F02A9.4  | F02A9.4  | -0.156522683124837   |             |
| AGIWUR2606;AGIWUR4621;AGIWUR4931;AGIWUR5859;AGIWUR8562;AGIWUR27392;AGIWUR31943;AGIWUR43479 |    |     |         |         |                |          |          |                      |             |
| CB4856                                                                                     | CT | III | 9092241 | 9099698 | WBGene00001609 | glp-1    | F02A9.6  | 0.259160263302787    | AGIWUR41673 |
| CB4856                                                                                     | CT | III | 9101367 | 9103095 | WBGene00013979 | ZK507.3  | ZK507.3  | 0.0706631124706965   | AGIWUR8624  |
| CB4856                                                                                     | CT | III | 9103943 | 9106805 | WBGene00013980 | dos-1    | ZK507.4  | 0.0185226432731511   |             |
| AGIWUR121;AGIWUR22323;AGIWUR25063                                                          |    |     |         |         |                |          |          |                      |             |
| CB4856                                                                                     | CT | III | 9106702 | 9109272 | WBGene00000863 | cya-1    | ZK507.6  | 0.0456308896591118   | AGIWUR31862 |
| CB4856                                                                                     | CT | III | 9115082 | 9117270 | WBGene00013982 | ZK512.1  | ZK512.1  | 0.765729283377523    | AGIWUR11510 |
| CB4856                                                                                     | CT | III | 9117349 | 9118364 | WBGene00001720 | grl-11   | ZK512.9  | -0.184445190388938   | AGIWUR20150 |
| CB4856                                                                                     | CT | III | 9119559 | 9125153 | WBGene00000425 | ced-11   | ZK512.3  | 0.21856486533998     | AGIWUR9162  |
| CB4856                                                                                     | CT | III | 9125641 | 9130807 | WBGene00013985 | sec-16   | ZK512.5  | 0.0585113907993229   |             |
| AGIWUR8065;AGIWUR12160;AGIWUR25926;AGIWUR42645                                             |    |     |         |         |                |          |          |                      |             |
| CB4856                                                                                     | CT | III | 9130844 | 9131360 | WBGene00013988 | ZK512.10 | ZK512.10 | 0.18495127603288     |             |
| AGIWUR14773                                                                                |    |     |         |         |                |          |          |                      |             |
| CB4856                                                                                     | CT | III | 9136916 | 9141822 | WBGene00001135 | eat-4    | ZK512.6  | -0.249653580154712   | AGIWUR15306 |
| CB4856                                                                                     | CT | III | 9141789 | 9144794 | WBGene00013983 | ZK512.2  | ZK512.2  | 0.0314790129813503   |             |
| AGIWUR2192;AGIWUR3650;AGIWUR7066                                                           |    |     |         |         |                |          |          |                      |             |
| CB4856                                                                                     | CT | III | 9145325 | 9145976 | WBGene00013984 | ZK512.4  | ZK512.4  | -0.180276576189476   | AGIWUR25270 |
| CB4856                                                                                     | CT | III | 9146031 | 9147411 | WBGene00013987 | ZK512.8  | ZK512.8  | 0.00307763110250825  | AGIWUR44998 |
| CB4856                                                                                     | CT | III | 9147395 | 9153909 | WBGene00003597 | nhl-1    | F54G8.4  | 0.102900451926843    | AGIWUR7367  |
| CB4856                                                                                     | CT | III | 9155116 | 9157165 | WBGene00010074 | irld-34  | F54G8.1  | 0.094519973484724    | AGIWUR18148 |
| CB4856                                                                                     | CT | III | 9157243 | 9161653 | WBGene00004223 | ptr-9    | F54G8.5  | 0.368157528152789    | AGIWUR15185 |
| CB4856                                                                                     | CT | III | 9163077 | 9168027 | WBGene00000960 | dgk-3    | F54G8.2  | 0.031278230474868    | AGIWUR30352 |
| CB4856                                                                                     | CT | III | 9168040 | 9172802 | WBGene00002081 | ina-1    | F54G8.3  | -0.0639340428713222  | AGIWUR3362  |
| CB4856                                                                                     | CT | III | 9181550 | 9185649 | WBGene00006526 | tax-4    | ZC84.2   | 0.0397556499794973   | AGIWUR15160 |
| CB4856                                                                                     | CT | III | 9186077 | 9192951 | WBGene00013850 | ZC84.7   | ZC84.7   | 0.160423601311256    | AGIWUR31325 |
| CB4856                                                                                     | CT | III | 9192983 | 9199507 | WBGene00013849 | ZC84.6   | ZC84.6   | 0.495233027310569    | AGIWUR6565  |
| CB4856                                                                                     | CT | III | 9199450 | 9206285 | WBGene00013846 | ZC84.1   | ZC84.1   | 0.0721870400744122   |             |
| AGIWUR1559;AGIWUR10301;AGIWUR12527;AGIWUR22077                                             |    |     |         |         |                |          |          |                      |             |
| CB4856                                                                                     | CT | III | 9206966 | 9207854 | WBGene00014980 | ZC84.5   | ZC84.5   | 0.197583086805194    | AGIWUR15239 |
| CB4856                                                                                     | CT | III | 9208288 | 9215440 | WBGene00013848 | npr-29   | ZC84.4   | 0.00565881677864866  | AGIWUR25356 |
| CB4856                                                                                     | CT | III | 9225374 | 9228786 | WBGene00004391 | rnr-1    | T23G5.1  | -0.115236798528166   |             |
| AGIWUR21235;AGIWUR28652;AGIWUR34624                                                        |    |     |         |         |                |          |          |                      |             |
| CB4856                                                                                     | CT | III | 9229235 | 9231210 | WBGene00011963 | T23G5.3  | T23G5.3  | 0.323620967731536    | AGIWUR12934 |
| CB4856                                                                                     | CT | III | 9231421 | 9236322 | WBGene00011962 | T23G5.2  | T23G5.2  | -0.199361662322975   |             |

AGIWUR21176;AGIWUR33460;AGIWUR36304  
 CB4856 CT III 9240337 9242514 WBGene00011964 saeg-2 T23G5.6 0.0333008526328502  
 AGIWUR6898;AGIWUR13321;AGIWUR38443  
 CB4856 CT III 9242914 9246802 WBGene00000934 dat-1 T23G5.5 0.129307002607715 AGIWUR22310  
 CB4856 CT III 9247422 9248618 WBGene00011365 T02C1.1 T02C1.1 -0.0199172926506108 AGIWUR26963  
 CB4856 CT III 9251029 9253126 WBGene00011366 T02C1.2 T02C1.2 -0.0103577726008215 AGIWUR13854  
 CB4856 CT III 9257259 9260222 WBGene00010795 M01A8.1 M01A8.1 0.196743226521609  
 AGIWUR13143;AGIWUR15928;AGIWUR16043;AGIWUR38473;AGIWUR38524;AGIWUR45013  
 CB4856 CT III 9260191 9269062 WBGene00010796 clip-1 M01A8.2 0.0618720208698704  
 AGIWUR9838;AGIWUR11840;AGIWUR19871  
 CB4856 CT III 9281785 9296668 WBGene00010453 fozi-1 K01B6.1 0.320209538313224 AGIWUR1508  
 CB4856 CT III 9296627 9297394 WBGene00010455 K01B6.4 K01B6.4 -0.0121529929849142 AGIWUR5362  
 CB4856 CT III 9300219 9303928 WBGene00010454 K01B6.3 K01B6.3 -0.2786605386656 AGIWUR27244  
 CB4856 CT III 9304034 9306696 WBGene00005936 srx-45 K01B6.2 0.170703102926369  
 AGIWUR8476;AGIWUR18281;AGIWUR39530  
 CB4856 CT III 9314714 9317365 WBGene00008043 C40H1.8 C40H1.8 -0.261914809972364 AGIWUR23496  
 CB4856 CT III 9318044 9319271 WBGene00008038 C40H1.2 C40H1.2 -0.170043411034736 AGIWUR40443  
 CB4856 CT III 9320040 9321663 WBGene00008044 C40H1.9 C40H1.9 0.153017058143647 AGIWUR14266  
 CB4856 CT III 9322316 9324733 WBGene00000770 cpb-1 C40H1.1 0.0953918380402303 AGIWUR13573  
 CB4856 CT III 9325048 9327031 WBGene00008042 C40H1.7 C40H1.7 0.316824108997338 AGIWUR16820  
 CB4856 CT III 9327307 9329366 WBGene00008039 C40H1.3 C40H1.3 0.3560006038723 AGIWUR27686  
 CB4856 CT III 9330316 9330928 WBGene00008040 ttr-5 C40H1.5 0.718923278938862 AGIWUR40524  
 CB4856 CT III 9331514 9332284 WBGene00008041 ufc-1 C40H1.6 0.0959095315812171 AGIWUR41584  
 CB4856 CT III 9332269 9334274 WBGene00001242 elo-4 C40H1.4 -0.125155871439709 AGIWUR23388  
 CB4856 CT III 9336881 9344447 WBGene00001263 emb-9 K04H4.1 0.169488429038626  
 AGIWUR9539;AGIWUR9984  
 CB4856 CT III 9347714 9355480 WBGene00010573 K04H4.2 K04H4.2 0.392766159319166  
 AGIWUR7753;AGIWUR12418;AGIWUR14842;AGIWUR21373;AGIWUR22356;AGIWUR23321;AGIWUR25593;AGIWUR36790;AGIWUR39493;  
 AGIWUR40643;AGIWUR41480;AGIWUR42869;AGIWUR43596  
 CB4856 CT III 9360269 9361333 WBGene00010574 K04H4.5 K04H4.5 0.121960558685714 AGIWUR28137  
 CB4856 CT III 9361528 9365380 WBGene00010575 flp-25 K04H4.7 -0.149567753419237  
 AGIWUR2661;AGIWUR28217;AGIWUR28904;AGIWUR38699  
 CB4856 CT III 9367238 9370385 WBGene00000799 crn-6 K04H4.6 0.240737795556649  
 AGIWUR3728;AGIWUR24581  
 CB4856 CT III 9383796 9387605 WBGene00006576 tkr-1 C38C10.1 -0.0808364573599132  
 AGIWUR1367  
 CB4856 CT III 9387601 9390107 WBGene00008000 slc-17.2 C38C10.2 -0.121016111605044  
 AGIWUR8053;AGIWUR12304;AGIWUR18680;AGIWUR21362;AGIWUR22003;AGIWUR28566  
 CB4856 CT III 9393981 9404532 WBGene00004343 rgr-1 C38C10.5 0.157959665547333

|                                                                                                                                 |    |     |         |         |                |                 |                                 |
|---------------------------------------------------------------------------------------------------------------------------------|----|-----|---------|---------|----------------|-----------------|---------------------------------|
| AGIWUR31939                                                                                                                     |    |     |         |         |                |                 |                                 |
| CB4856                                                                                                                          | CT | III | 9404484 | 9406641 | WBGene00012059 | T26G10.1        | T26G10.1 -0.0838737305863457    |
| AGIWUR39909                                                                                                                     |    |     |         |         |                |                 |                                 |
| CB4856                                                                                                                          | CT | III | 9412854 | 9413440 | WBGene00012060 | T26G10.3        | T26G10.3 -0.237410210796939     |
| AGIWUR18817                                                                                                                     |    |     |         |         |                |                 |                                 |
| CB4856                                                                                                                          | CT | III | 9420531 | 9421574 | WBGene00012061 | T26G10.4        | T26G10.4 0.107363520145187      |
| AGIWUR40905                                                                                                                     |    |     |         |         |                |                 |                                 |
| CB4856                                                                                                                          | CT | III | 9425536 | 9426674 | WBGene00012062 | T26G10.5        | T26G10.5 0.203943575904242      |
| AGIWUR17340                                                                                                                     |    |     |         |         |                |                 |                                 |
| CB4856                                                                                                                          | CT | III | 9434057 | 9435100 | WBGene00010036 | cpar-1 F54C8.2  | -0.257381094254402 AGIWUR14509  |
| CB4856                                                                                                                          | CT | III | 9435083 | 9441539 | WBGene00001284 | emb-30 F54C8.3  | -0.0387110693429022             |
| AGIWUR12925;AGIWUR43849                                                                                                         |    |     |         |         |                |                 |                                 |
| CB4856                                                                                                                          | CT | III | 9441557 | 9443634 | WBGene00010037 | F54C8.4 F54C8.4 | -0.0412078310823043             |
| AGIWUR12673;AGIWUR18539;AGIWUR19722;AGIWUR26404                                                                                 |    |     |         |         |                |                 |                                 |
| CB4856                                                                                                                          | CT | III | 9444360 | 9449931 | WBGene00010039 | F54C8.6 F54C8.6 | 0.273085707371233 AGIWUR35169   |
| CB4856                                                                                                                          | CT | III | 9451595 | 9454062 | WBGene00010040 | F54C8.7 F54C8.7 | -0.0327141646871247 AGIWUR30464 |
| CB4856                                                                                                                          | CT | III | 9454163 | 9456030 | WBGene00010038 | rheb-1 F54C8.5  | -0.271310114227083 AGIWUR34422  |
| CB4856                                                                                                                          | CT | III | 9456563 | 9463004 | WBGene00004980 | spk-1 B0464.5   | -0.102629159325225              |
| AGIWUR2559;AGIWUR3910;AGIWUR29612                                                                                               |    |     |         |         |                |                 |                                 |
| CB4856                                                                                                                          | CT | III | 9462989 | 9465965 | WBGene00007186 | B0464.6 B0464.6 | -0.0603961401255702             |
| AGIWUR956;AGIWUR34359                                                                                                           |    |     |         |         |                |                 |                                 |
| CB4856                                                                                                                          | CT | III | 9465767 | 9467177 | WBGene00007188 | B0464.9 B0464.9 | 0.356703187894908 AGIWUR10494   |
| CB4856                                                                                                                          | CT | III | 9467464 | 9468058 | WBGene00000235 | baf-1 B0464.7   | -0.0514381489892166             |
| AGIWUR652;AGIWUR2228;AGIWUR3386;AGIWUR20361;AGIWUR21114;AGIWUR22416;AGIWUR27119;AGIWUR28155;AGIWUR29069;AGIWUR31986;AGIWUR33673 |    |     |         |         |                |                 |                                 |
| CB4856                                                                                                                          | CT | III | 9468157 | 9469899 | WBGene00007187 | tag-342 B0464.8 | -0.0573936398331059             |
| AGIWUR1236;AGIWUR26705                                                                                                          |    |     |         |         |                |                 |                                 |
| CB4856                                                                                                                          | CT | III | 9469920 | 9485451 | WBGene00000268 | bre-3 B0464.4   | 0.380373483950072 AGIWUR9948    |
| CB4856                                                                                                                          | CT | III | 9488731 | 9489188 | WBGene00007185 | nlp-36 B0464.3  | -0.439253153432354 AGIWUR14705  |
| CB4856                                                                                                                          | CT | III | 9489176 | 9491236 | WBGene00001094 | dars-1 B0464.1  | -0.148902793525876              |
| AGIWUR10366;AGIWUR28818;AGIWUR37587                                                                                             |    |     |         |         |                |                 |                                 |
| CB4856                                                                                                                          | CT | III | 9491640 | 9497044 | WBGene00007184 | ctr-9 B0464.2   | -0.0655995653500883             |
| AGIWUR4327;AGIWUR4818;AGIWUR5388;AGIWUR16073;AGIWUR26585;AGIWUR26624                                                            |    |     |         |         |                |                 |                                 |
| CB4856                                                                                                                          | CT | III | 9497019 | 9500202 | WBGene00004933 | sod-4 F55H2.1   | 0.34131824443552                |
| AGIWUR16498;AGIWUR25425;AGIWUR32411;AGIWUR40264;AGIWUR40842                                                                     |    |     |         |         |                |                 |                                 |
| CB4856                                                                                                                          | CT | III | 9504764 | 9507081 | WBGene00003067 | lrg-1 F55H2.4   | -0.150039040814476              |
| AGIWUR20208;AGIWUR34899                                                                                                         |    |     |         |         |                |                 |                                 |
| CB4856                                                                                                                          | CT | III | 9508074 | 9509806 | WBGene00010130 | vha-14 F55H2.2  | -0.269899650352842              |
| AGIWUR3972;AGIWUR25785;AGIWUR39739                                                                                              |    |     |         |         |                |                 |                                 |

|                                                                                     |    |     |         |         |                |             |           |                     |             |
|-------------------------------------------------------------------------------------|----|-----|---------|---------|----------------|-------------|-----------|---------------------|-------------|
| CB4856                                                                              | CT | III | 9511470 | 9513375 | WBGene00010131 | F55H2.5     | F55H2.5   | -0.107354897987589  |             |
| AGIWUR15384;AGIWUR16468;AGIWUR17057;AGIWUR18183;AGIWUR21757;AGIWUR32281;AGIWUR39797 |    |     |         |         |                |             |           |                     |             |
| CB4856                                                                              | CT | III | 9513348 | 9516248 | WBGene00010132 | F55H2.7     | F55H2.7   | -0.397212826146522  | AGIWUR21357 |
| CB4856                                                                              | CT | III | 9516631 | 9521460 | WBGene00000550 | clu-1       | F55H2.6   | -0.211762178710961  |             |
| AGIWUR6012;AGIWUR12781;AGIWUR24985;AGIWUR25703                                      |    |     |         |         |                |             |           |                     |             |
| CB4856                                                                              | CT | III | 9522075 | 9525437 | WBGene00014218 | ZK1098.1    | ZK1098.1  | -0.0204558520492988 |             |
| AGIWUR40242                                                                         |    |     |         |         |                |             |           |                     |             |
| CB4856                                                                              | CT | III | 9525552 | 9527068 | WBGene00014222 | trpp-3      | ZK1098.5  | -0.147451166261787  |             |
| AGIWUR27234;AGIWUR28384;AGIWUR35407;AGIWUR36975                                     |    |     |         |         |                |             |           |                     |             |
| CB4856                                                                              | CT | III | 9527151 | 9528689 | WBGene00014223 | ZK1098.6    | ZK1098.6  | -0.114787972127454  |             |
| AGIWUR23405                                                                         |    |     |         |         |                |             |           |                     |             |
| CB4856                                                                              | CT | III | 9529166 | 9531888 | WBGene00014219 | ZK1098.2    | ZK1098.2  | -0.136280759888237  |             |
| AGIWUR25200                                                                         |    |     |         |         |                |             |           |                     |             |
| CB4856                                                                              | CT | III | 9532427 | 9538700 | WBGene00014220 | ZK1098.3    | ZK1098.3  | -0.17418947513074   |             |
| AGIWUR7676;AGIWUR9497;AGIWUR42452                                                   |    |     |         |         |                |             |           |                     |             |
| CB4856                                                                              | CT | III | 9539031 | 9542380 | WBGene00003504 | mut-7       | ZK1098.8  | -0.193187015009897  |             |
| AGIWUR25701                                                                         |    |     |         |         |                |             |           |                     |             |
| CB4856                                                                              | CT | III | 9543069 | 9544404 | WBGene00014221 | eif-2Balpha | ZK1098.4  | -0.358913500538147  |             |
| AGIWUR18997                                                                         |    |     |         |         |                |             |           |                     |             |
| CB4856                                                                              | CT | III | 9545120 | 9545897 | WBGene00194691 | ZK1098.12   | ZK1098.12 | 0.124881773343944   |             |
| AGIWUR12008                                                                         |    |     |         |         |                |             |           |                     |             |
| CB4856                                                                              | CT | III | 9546258 | 9556514 | WBGene00006755 | unc-16      | ZK1098.10 | 0.091430083126081   |             |
| AGIWUR5621;AGIWUR33196;AGIWUR42349                                                  |    |     |         |         |                |             |           |                     |             |
| CB4856                                                                              | CT | III | 9556507 | 9557454 | WBGene00014226 | ZK1098.11   | ZK1098.11 | -0.0964927662016031 |             |
| AGIWUR25774                                                                         |    |     |         |         |                |             |           |                     |             |
| CB4856                                                                              | CT | III | 9557448 | 9558563 | WBGene00008169 | C48B4.6     | C48B4.6   | -0.150039018996507  | AGIWUR1145  |
| CB4856                                                                              | CT | III | 9558669 | 9559427 | WBGene00008170 | C48B4.7     | C48B4.7   | 0.208460575950536   | AGIWUR8640  |
| CB4856                                                                              | CT | III | 9559831 | 9561258 | WBGene00008171 | C48B4.8     | C48B4.8   | -0.020205594342892  | AGIWUR29752 |
| CB4856                                                                              | CT | III | 9562336 | 9563335 | WBGene00008172 | C48B4.9     | C48B4.9   | -0.0320495505356373 | AGIWUR12846 |
| CB4856                                                                              | CT | III | 9563437 | 9564510 | WBGene00008173 | C48B4.10    | C48B4.10  | -0.366682746672861  |             |
| AGIWUR29101                                                                         |    |     |         |         |                |             |           |                     |             |
| CB4856                                                                              | CT | III | 9564605 | 9566115 | WBGene00008174 | C48B4.11    | C48B4.11  | -0.235153757067067  |             |
| AGIWUR9676                                                                          |    |     |         |         |                |             |           |                     |             |
| CB4856                                                                              | CT | III | 9568751 | 9570460 | WBGene00008176 | C48B4.13    | C48B4.13  | -0.133752459608441  |             |
| AGIWUR5852                                                                          |    |     |         |         |                |             |           |                     |             |
| CB4856                                                                              | CT | III | 9570394 | 9580081 | WBGene00000421 | ced-7       | C48B4.4   | 0.0701157861245356  |             |
| AGIWUR15134;AGIWUR15652;AGIWUR41526                                                 |    |     |         |         |                |             |           |                     |             |
| CB4856                                                                              | CT | III | 9581220 | 9582361 | WBGene00008168 | C48B4.3     | C48B4.3   | 0.579941806963447   | AGIWUR39224 |
| CB4856                                                                              | CT | III | 9586617 | 9592192 | WBGene00008167 | acox-1.5    | C48B4.1   | 0.380118453190001   |             |

AGIWUR40965  
CB4856 CT III 9592282 9595667 WBGene00004401 rom-2 C48B4.2 -0.425372472480992 AGIWUR30006  
CB4856 CT III 9597359 9598361 WBGene00008175 C48B4.12 C48B4.12 -0.152037595253134  
AGIWUR33971  
CB4856 CT III 9598475 9600049 WBGene00010226 F58A4.1 F58A4.1 -0.227686093930632 AGIWUR44129  
CB4856 CT III 9600038 9600745 WBGene00010227 F58A4.2 F58A4.2 -0.121459133749489 AGIWUR17790  
CB4856 CT III 9603030 9608688 WBGene00010228 clec-161 F58A4.5 -0.125252028683303  
AGIWUR38854  
CB4856 CT III 9609568 9612191 WBGene00043992 bbs-4 F58A4.14 0.170173456000177  
AGIWUR13700;AGIWUR30878  
CB4856 CT III 9614425 9615332 WBGene00010229 F58A4.6 F58A4.6 0.0430740347581402 AGIWUR11369  
CB4856 CT III 9615306 9616470 WBGene00001831 hcp-3 F58A4.3 -0.243768092662101 AGIWUR41202  
CB4856 CT III 9619711 9626537 WBGene00001955 h1h-11 F58A4.7 0.130937443464207  
AGIWUR1204;AGIWUR18661;AGIWUR29302  
CB4856 CT III 9626532 9629154 WBGene00006540 tbg-1 F58A4.8 -0.0309587032211898  
AGIWUR5583;AGIWUR6671;AGIWUR8319;AGIWUR23541;AGIWUR24863;AGIWUR27460;AGIWUR31856;AGIWUR39229;AGIWUR39539  
CB4856 CT III 9629246 9629917 WBGene00010230 rpac-19 F58A4.9 -0.0955319327342616  
AGIWUR15916;AGIWUR37629  
CB4856 CT III 9630085 9631167 WBGene00006704 ubc-7 F58A4.10 0.0165506627201459  
AGIWUR18406;AGIWUR20044;AGIWUR40951;AGIWUR43784  
CB4856 CT III 9631994 9637116 WBGene00001570 gei-13 F58A4.11 0.551024255069697  
AGIWUR30688  
CB4856 CT III 9650422 9651971 WBGene00007610 C15H7.3 C15H7.3 0.0420677723618956 AGIWUR41659  
CB4856 CT III 9652313 9653641 WBGene00014678 C15H7.2 C15H7.2 -0.0930281488754696 AGIWUR3998  
CB4856 CT III 9654409 9655859 WBGene00007611 C15H7.4 C15H7.4 -0.117121253831409 AGIWUR12873  
CB4856 CT III 9663290 9667640 WBGene00007405 C07A9.9 C07A9.9 0.10109744776752  
AGIWUR2793;AGIWUR21425;AGIWUR40053;AGIWUR40663  
CB4856 CT III 9676320 9679051 WBGene00007402 ugt-60 C07A9.6 -0.584527259731409 AGIWUR2544  
CB4856 CT III 9679698 9681269 WBGene00044227 C07A9.13 C07A9.13 0.450502071228646  
AGIWUR9129  
CB4856 CT III 9681524 9682829 WBGene00007401 C07A9.5 C07A9.5 0.06852303228455  
AGIWUR35061;AGIWUR41297  
CB4856 CT III 9686990 9690253 WBGene00007404 best-5 C07A9.8 1.71290077563258 AGIWUR16656  
CB4856 CT III 9691030 9694572 WBGene00007403 set-3 C07A9.7 -0.0802571470534232  
AGIWUR6874;AGIWUR16066  
CB4856 CT III 9694668 9696517 WBGene00007400 C07A9.2 C07A9.2 -0.137756295790616  
AGIWUR2106;AGIWUR8528;AGIWUR23710;AGIWUR30448;AGIWUR44233  
CB4856 CT III 9699876 9710268 WBGene00006579 tlk-1 C07A9.3 0.170803326243686  
AGIWUR28026;AGIWUR28045;AGIWUR37049

|                                                                         |    |     |         |         |                |          |          |                     |             |
|-------------------------------------------------------------------------|----|-----|---------|---------|----------------|----------|----------|---------------------|-------------|
| CB4856                                                                  | CT | III | 9710312 | 9713928 | WBGene00003571 | ncx-6    | C07A9.4  | 0.106897546525243   | AGIWUR5692  |
| CB4856                                                                  | CT | III | 9715883 | 9720291 | WBGene00003572 | ncx-7    | C07A9.11 | -0.229393653288692  |             |
| AGIWUR41131                                                             |    |     |         |         |                |          |          |                     |             |
| CB4856                                                                  | CT | III | 9723282 | 9725214 | WBGene00007399 | clcc-162 | C07A9.1  | -0.0758186781844197 |             |
| AGIWUR18;AGIWUR21283;AGIWUR43658                                        |    |     |         |         |                |          |          |                     |             |
| CB4856                                                                  | CT | III | 9725285 | 9727539 | WBGene00043994 | C07A9.12 | C07A9.12 | 0.351951764086297   |             |
| AGIWUR23015;AGIWUR42131                                                 |    |     |         |         |                |          |          |                     |             |
| CB4856                                                                  | CT | III | 9735265 | 9736057 | WBGene00000932 | dao-6    | T05G5.12 | 0.186320886137014   |             |
| AGIWUR8538;AGIWUR16163;AGIWUR36321                                      |    |     |         |         |                |          |          |                     |             |
| CB4856                                                                  | CT | III | 9736030 | 9736869 | WBGene00004097 | pqm-96   | T05G5.11 | -0.0106081871156753 |             |
| AGIWUR4087;AGIWUR11001;AGIWUR19161;AGIWUR25569;AGIWUR34670              |    |     |         |         |                |          |          |                     |             |
| CB4856                                                                  | CT | III | 9737469 | 9738839 | WBGene00001951 | hlh-4    | T05G5.2  | 0.149635563830703   | AGIWUR41294 |
| CB4856                                                                  | CT | III | 9745864 | 9747193 | WBGene00002064 | iff-1    | T05G5.10 | -0.143624439995765  |             |
| AGIWUR21180                                                             |    |     |         |         |                |          |          |                     |             |
| CB4856                                                                  | CT | III | 9747432 | 9748852 | WBGene00000405 | cdk-1    | T05G5.3  | -0.120725648909669  |             |
| AGIWUR18204;AGIWUR25840;AGIWUR26140                                     |    |     |         |         |                |          |          |                     |             |
| CB4856                                                                  | CT | III | 9748863 | 9749673 | WBGene00011499 | T05G5.4  | T05G5.4  | 0.326182623326908   | AGIWUR44760 |
| CB4856                                                                  | CT | III | 9751440 | 9752922 | WBGene00001155 | ech-6    | T05G5.6  | -0.487104918923645  |             |
| AGIWUR4728;AGIWUR22276;AGIWUR32179;AGIWUR36972;AGIWUR39062              |    |     |         |         |                |          |          |                     |             |
| CB4856                                                                  | CT | III | 9753672 | 9757514 | WBGene00011502 | vps-53   | T05G5.8  | -0.251708410724333  | AGIWUR12730 |
| CB4856                                                                  | CT | III | 9757616 | 9762143 | WBGene00011503 | gcc-2    | T05G5.9  | -0.12649307632449   | AGIWUR26271 |
| CB4856                                                                  | CT | III | 9766516 | 9774825 | WBGene00000366 | cbp-1    | R10E11.1 | 0.0744088227605344  |             |
| AGIWUR3680;AGIWUR20510;AGIWUR23302;AGIWUR36765                          |    |     |         |         |                |          |          |                     |             |
| CB4856                                                                  | CT | III | 9776532 | 9778850 | WBGene00011216 | usp-46   | R10E11.3 | -0.156681114355276  |             |
| AGIWUR828;AGIWUR9155;AGIWUR27956;AGIWUR35299                            |    |     |         |         |                |          |          |                     |             |
| CB4856                                                                  | CT | III | 9778782 | 9780350 | WBGene00005021 | sqv-3    | R10E11.4 | 0.00389138330452177 |             |
| AGIWUR4791                                                              |    |     |         |         |                |          |          |                     |             |
| CB4856                                                                  | CT | III | 9781243 | 9782057 | WBGene00006910 | vha-1    | R10E11.8 | -0.100452659429301  |             |
| AGIWUR12283;AGIWUR14952;AGIWUR20193;AGIWUR21407;AGIWUR26765;AGIWUR32083 |    |     |         |         |                |          |          |                     |             |
| CB4856                                                                  | CT | III | 9782164 | 9783212 | WBGene00006911 | vha-2    | R10E11.2 | -0.0304093234972971 |             |
| AGIWUR28465                                                             |    |     |         |         |                |          |          |                     |             |
| CB4856                                                                  | CT | III | 9783325 | 9786038 | WBGene00011218 | R10E11.6 | R10E11.6 | 0.0228806797408518  |             |
| AGIWUR4535;AGIWUR8860                                                   |    |     |         |         |                |          |          |                     |             |
| CB4856                                                                  | CT | III | 9785957 | 9789657 | WBGene00011217 | R10E11.5 | R10E11.5 | -0.330419353309813  |             |
| AGIWUR32181;AGIWUR38562;AGIWUR42235                                     |    |     |         |         |                |          |          |                     |             |
| CB4856                                                                  | CT | III | 9792548 | 9793642 | WBGene00011220 | R10E11.9 | R10E11.9 | 0.0655740083594525  |             |
| AGIWUR44902                                                             |    |     |         |         |                |          |          |                     |             |
| CB4856                                                                  | CT | III | 9794367 | 9798643 | WBGene00003158 | mcm-6    | ZK632.1  | -0.068581963428394  |             |
| AGIWUR3400;AGIWUR44759                                                  |    |     |         |         |                |          |          |                     |             |



|                                                                                                                       |    |     |         |         |                |          |          |                      |             |
|-----------------------------------------------------------------------------------------------------------------------|----|-----|---------|---------|----------------|----------|----------|----------------------|-------------|
| CB4856                                                                                                                | CT | III | 9799107 | 9802333 | WBGene00014011 | ZK632.2  | ZK632.2  | -0.126931994683336   | AGIWUR31557 |
| CB4856                                                                                                                | CT | III | 9802354 | 9805093 | WBGene00014012 | riok-3   | ZK632.3  | 0.000197968117412017 | AGIWUR17835 |
| CB4856                                                                                                                | CT | III | 9805515 | 9807454 | WBGene00014013 | ZK632.4  | ZK632.4  | -0.0168011331574931  | AGIWUR36478 |
| CB4856                                                                                                                | CT | III | 9808544 | 9812639 | WBGene00014014 | ZK632.5  | ZK632.5  | -0.14944675878758    | AGIWUR40919 |
| CB4856                                                                                                                | CT | III | 9813446 | 9814424 | WBGene00014020 | ZK632.14 | ZK632.14 | -0.0838255182990308  |             |
| AGIWUR10501;AGIWUR29646;AGIWUR30662;AGIWUR44427                                                                       |    |     |         |         |                |          |          |                      |             |
| CB4856                                                                                                                | CT | III | 9814364 | 9817137 | WBGene00000567 | cnx-1    | ZK632.6  | 0.23281698958737     | AGIWUR9035  |
| CB4856                                                                                                                | CT | III | 9819294 | 9823120 | WBGene00014015 | panl-3   | ZK632.7  | 0.0571786955286946   | AGIWUR30337 |
| CB4856                                                                                                                | CT | III | 9823242 | 9824132 | WBGene00000189 | arl-5    | ZK632.8  | 0.0519843448762352   | AGIWUR25912 |
| CB4856                                                                                                                | CT | III | 9824877 | 9825445 | WBGene00014016 | ZK632.9  | ZK632.9  | 0.114172938983189    |             |
| AGIWUR16999;AGIWUR17140;AGIWUR17442;AGIWUR20289;AGIWUR29675;AGIWUR30283                                               |    |     |         |         |                |          |          |                      |             |
| CB4856                                                                                                                | CT | III | 9826130 | 9827178 | WBGene00014017 | ZK632.10 | ZK632.10 | 0.213044440284726    |             |
| AGIWUR30752                                                                                                           |    |     |         |         |                |          |          |                      |             |
| CB4856                                                                                                                | CT | III | 9827915 | 9829719 | WBGene00014018 | ZK632.11 | ZK632.11 | -0.393495509328346   |             |
| AGIWUR24674                                                                                                           |    |     |         |         |                |          |          |                      |             |
| CB4856                                                                                                                | CT | III | 9830792 | 9832430 | WBGene00014019 | ZK632.12 | ZK632.12 | 0.094683959512416    |             |
| AGIWUR42050                                                                                                           |    |     |         |         |                |          |          |                      |             |
| CB4856                                                                                                                | CT | III | 9835192 | 9838311 | WBGene00185002 | K11H3.8  | K11H3.8  | -0.0297753337693027  | AGIWUR26726 |
| CB4856                                                                                                                | CT | III | 9843782 | 9845733 | WBGene00010782 | K11H3.5  | K11H3.5  | 0.242140422206103    | AGIWUR35882 |
| CB4856                                                                                                                | CT | III | 9846393 | 9847521 | WBGene00010779 | K11H3.2  | K11H3.2  | -0.213866269503305   | AGIWUR4923  |
| CB4856                                                                                                                | CT | III | 9847626 | 9848116 | WBGene00010783 | mrpl-36  | K11H3.6  | 0.13281322766414     | AGIWUR40294 |
| CB4856                                                                                                                | CT | III | 9851854 | 9854102 | WBGene00010780 | K11H3.3  | K11H3.3  | 0.090060118341885    | AGIWUR32929 |
| CB4856                                                                                                                | CT | III | 9854077 | 9859183 | WBGene00010778 | gpdh-2   | K11H3.1  | 0.031965502792012    |             |
| AGIWUR18384;AGIWUR23070                                                                                               |    |     |         |         |                |          |          |                      |             |
| CB4856                                                                                                                | CT | III | 9860730 | 9863302 | WBGene00010784 | twk-48   | K11H3.7  | -0.0155473725904578  |             |
| AGIWUR9189;AGIWUR22564;AGIWUR37335                                                                                    |    |     |         |         |                |          |          |                      |             |
| CB4856                                                                                                                | CT | III | 9863251 | 9867786 | WBGene00014075 | dhhc-4   | ZK757.4  | -0.237061809835012   |             |
| AGIWUR2140;AGIWUR3995;AGIWUR20382;AGIWUR33633                                                                         |    |     |         |         |                |          |          |                      |             |
| CB4856                                                                                                                | CT | III | 9868594 | 9871124 | WBGene00014073 | ZK757.1  | ZK757.1  | 0.00323011905531878  | AGIWUR24918 |
| CB4856                                                                                                                | CT | III | 9874142 | 9877476 | WBGene00014074 | ZK757.2  | ZK757.2  | 0.265502653727638    | AGIWUR40144 |
| CB4856                                                                                                                | CT | III | 9887210 | 9891458 | WBGene00006449 | alg-4    | ZK757.3  | 0.0364785792805291   |             |
| AGIWUR21301;AGIWUR22137                                                                                               |    |     |         |         |                |          |          |                      |             |
| CB4856                                                                                                                | CT | III | 9893155 | 9898426 | WBGene00009593 | mam-7    | F40F12.4 | 0.17928105369258     |             |
| AGIWUR30722                                                                                                           |    |     |         |         |                |          |          |                      |             |
| CB4856                                                                                                                | CT | III | 9898602 | 9910658 | WBGene00009594 | cyld-1   | F40F12.5 | 0.192140909821262    |             |
| AGIWUR11679;AGIWUR20472                                                                                               |    |     |         |         |                |          |          |                      |             |
| CB4856                                                                                                                | CT | III | 9913021 | 9914075 | WBGene00043995 | F40F12.9 | F40F12.9 | 0.536887690979757    |             |
| AGIWUR3535;AGIWUR7077;AGIWUR10893;AGIWUR13925;AGIWUR16426;AGIWUR21462;AGIWUR23195;AGIWUR30134;AGIWUR31059;AGIWUR34499 |    |     |         |         |                |          |          |                      |             |

|                                                                         |     |                  |                |                |          |                      |
|-------------------------------------------------------------------------|-----|------------------|----------------|----------------|----------|----------------------|
| CB4856 CT<br>AGIWUR20178                                                | III | 9918645 9920864  | WBGene00009592 | F40F12.3       | F40F12.3 | 0.0918762797052466   |
| CB4856 CT<br>AGIWUR19378                                                | III | 9921200 9921892  | WBGene00014755 | F40F12.8       | F40F12.8 | 0.0865921600311994   |
| CB4856 CT<br>AGIWUR37099                                                | III | 9923174 9925443  | WBGene00010545 | cbp-2          | K03H1.10 | 0.635684560732788    |
| CB4856 CT                                                               | III | 9927732 9929004  | WBGene00010539 | ttr-2          | K03H1.4  | -0.229286213714719   |
| CB4856 CT                                                               | III | 9929058 9930413  | WBGene00010541 | ttr-1          | K03H1.6  | 0.0883073659269797   |
| AGIWUR9772;AGIWUR14636;AGIWUR19049;AGIWUR34888                          |     |                  |                |                |          |                      |
| CB4856 CT                                                               | III | 9932398 9939712  | WBGene00010540 | K03H1.5        | K03H1.5  | 0.0251840247677357   |
| CB4856 CT                                                               | III | 9940771 9941464  | WBGene00010544 | K03H1.9        | K03H1.9  | 0.299107017024856    |
| CB4856 CT<br>AGIWUR11705                                                | III | 9941624 9942345  | WBGene00010547 | K03H1.12       | K03H1.12 | 0.0472991682512056   |
| CB4856 CT                                                               | III | 9943243 9944823  | WBGene00001603 | gln-2          | K03H1.1  | -0.011407887319244   |
| CB4856 CT                                                               | III | 9945395 9946663  | WBGene00010543 | K03H1.8        | K03H1.8  | -0.366783988889759   |
| CB4856 CT                                                               | III | 9950381 9951964  | WBGene00010546 | K03H1.11       | K03H1.11 | -0.128386489234295   |
| AGIWUR27779;AGIWUR29848;AGIWUR39811                                     |     |                  |                |                |          |                      |
| CB4856 CT                                                               | III | 9952056 9956271  | WBGene00003389 | mog-1          | K03H1.2  | -0.0602902032574484  |
| CB4856 CT                                                               | III | 9957357 9963171  | WBGene00007010 | alx-1          | R10E12.1 | -0.00873638541744448 |
| AGIWUR17080;AGIWUR21528;AGIWUR23807;AGIWUR38367;AGIWUR41652;AGIWUR44473 |     |                  |                |                |          |                      |
| CB4856 CT<br>AGIWUR40690                                                | III | 9963121 9973865  | WBGene00011221 | R10E12.2       | R10E12.2 | -0.0985429935867135  |
| CB4856 CT<br>AGIWUR29906                                                | III | 9987367 9987728  | WBGene00194886 | C05B5.12       | C05B5.12 | 0.0410576892631438   |
| CB4856 CT                                                               | III | 9993885 9996235  | WBGene00007321 | C05B5.4        | C05B5.4  | 0.52379468411346     |
| CB4856 CT                                                               | III | 9996205 9997955  | WBGene00004100 | pqn-8          | C05B5.3  | -0.205242126732776   |
| CB4856 CT<br>AGIWUR44836                                                | III | 9998542 9999335  | WBGene00219314 | C05B5.17       | C05B5.17 | 0.112517167615053    |
| CB4856 CT<br>AGIWUR23685                                                | III | 9999819 10000528 | WBGene00007320 | C05B5.2        | C05B5.2  | 0.379852855042268    |
| CB4856 CT<br>AGIWUR28548                                                | III | 10001400         | 10003856       | WBGene00007322 | C05B5.5  | C05B5.5              |
| CB4856 CT                                                               | III | 10005459         | 10006784       | WBGene00007324 | C05B5.8  | C05B5.8              |
| AGIWUR10471;AGIWUR21687;AGIWUR31806                                     |     |                  |                |                |          |                      |
| CB4856 CT                                                               | III | 10007966         | 10010177       | WBGene00007323 | fbxa-155 | C05B5.6              |
| 0.0720277347941121 AGIWUR33096                                          |     |                  |                |                |          |                      |
| CB4856 CT                                                               | III | 10010843         | 10011065       | WBGene00044130 | C05B5.10 | C05B5.10             |
| -0.221761979578691 AGIWUR30379                                          |     |                  |                |                |          |                      |
| CB4856 CT                                                               | III | 10014188         | 10016558       | WBGene00004344 | rgs-1    | C05B5.7              |
| -0.0898297001724213                                                     |     |                  |                |                |          |                      |

|                                                |     |                                     |          |                |           |          |                     |
|------------------------------------------------|-----|-------------------------------------|----------|----------------|-----------|----------|---------------------|
| AGIWUR23156                                    |     |                                     |          |                |           |          |                     |
| CB4856 CT                                      | III | 10023804                            | 10024120 | WBGene00002104 | ins-21    | M04D8.1  | -0.276718686822625  |
| AGIWUR44786                                    |     |                                     |          |                |           |          |                     |
| CB4856 CT                                      | III | 10026289                            | 10026673 | WBGene00002105 | ins-22    | M04D8.2  | 0.330897456958338   |
| AGIWUR4200                                     |     |                                     |          |                |           |          |                     |
| CB4856 CT                                      | III | 10028247                            | 10028600 | WBGene00002106 | ins-23    | M04D8.3  | 1.84330980036527    |
| AGIWUR37017                                    |     |                                     |          |                |           |          |                     |
| CB4856 CT                                      | III | 10029991                            | 10030600 | WBGene00010862 | M04D8.4   | M04D8.4  | -0.331754791787038  |
| AGIWUR2895                                     |     |                                     |          |                |           |          |                     |
| CB4856 CT                                      | III | 10032344                            | 10033313 | WBGene00010863 | M04D8.5   | M04D8.5  | 0.175404906296891   |
| AGIWUR3713;AGIWUR20119;AGIWUR22864;AGIWUR36190 |     |                                     |          |                |           |          |                     |
| CB4856 CT                                      | III | 10034181                            | 10035102 | WBGene00010866 | M04D8.8   | M04D8.8  | -0.355963998305223  |
| AGIWUR36738                                    |     |                                     |          |                |           |          |                     |
| CB4856 CT                                      | III | 10036004                            | 10036796 | WBGene00010864 | xbx-3     | M04D8.6  | 0.00923997936631604 |
| AGIWUR28393                                    |     |                                     |          |                |           |          |                     |
| CB4856 CT                                      | III | 10037450                            | 10038247 | WBGene00010865 | M04D8.7   | M04D8.7  | 0.519263283934695   |
| AGIWUR9287                                     |     |                                     |          |                |           |          |                     |
| CB4856 CT                                      | III | 10038458                            | 10040113 | WBGene00011808 | T16G12.7  |          | T16G12.7            |
| -0.0434270513407586                            |     | AGIWUR12066;AGIWUR16783;AGIWUR24474 |          |                |           |          |                     |
| CB4856 CT                                      | III | 10040191                            | 10049857 | WBGene00011803 | T16G12.1  |          | T16G12.1            |
| -0.583120266230363                             |     | AGIWUR9573;AGIWUR22085;AGIWUR24630  |          |                |           |          |                     |
| CB4856 CT                                      | III | 10055604                            | 10056133 | WBGene00044222 | T16G12.10 |          | T16G12.10           |
| -0.432118318850828                             |     | AGIWUR15645;AGIWUR32508             |          |                |           |          |                     |
| CB4856 CT                                      | III | 10057822                            | 10058684 | WBGene00011805 | T16G12.4  |          | T16G12.4            |
| 0.15239433120915                               |     | AGIWUR43984                         |          |                |           |          |                     |
| CB4856 CT                                      | III | 10059302                            | 10061982 | WBGene00011809 | T16G12.8  |          | T16G12.8            |
| -0.221148613588186                             |     | AGIWUR26835                         |          |                |           |          |                     |
| CB4856 CT                                      | III | 10064337                            | 10069201 | WBGene00011806 | ekl-6     | T16G12.5 |                     |
| -0.262992307133706                             |     | AGIWUR57                            |          |                |           |          |                     |
| CB4856 CT                                      | III | 10069564                            | 10075995 | WBGene00011807 | T16G12.6  |          | T16G12.6            |
| -0.101044050598585                             |     | AGIWUR23002                         |          |                |           |          |                     |
| CB4856 CT                                      | III | 10076387                            | 10078707 | WBGene00011810 | T16G12.9  |          | T16G12.9            |
| -0.235894846289311                             |     | AGIWUR25375                         |          |                |           |          |                     |
| CB4856 CT                                      | III | 10081443                            | 10083286 | WBGene00011813 | T16H12.3  |          | T16H12.3            |
| -0.235650403422241                             |     | AGIWUR17981                         |          |                |           |          |                     |
| CB4856 CT                                      | III | 10085403                            | 10086064 | WBGene00194725 | T16H12.13 |          | T16H12.13           |
| -0.204331021169859                             |     | AGIWUR21108                         |          |                |           |          |                     |
| CB4856 CT                                      | III | 10086303                            | 10087171 | WBGene00011812 | T16H12.2  |          | T16H12.2            |
| -0.0981956808059685                            |     | AGIWUR2932                          |          |                |           |          |                     |

|                                     |                                     |          |                |          |                            |
|-------------------------------------|-------------------------------------|----------|----------------|----------|----------------------------|
| CB4856 CT III                       | 10087223                            | 10088673 | WBGene00011819 | hal-2    | T16H12.11                  |
| -0.316503837464403                  | AGIWUR1595;AGIWUR7708;AGIWUR15104   |          |                |          |                            |
| CB4856 CT III                       | 10088757                            | 10090800 | WBGene00011814 | T16H12.4 | T16H12.4                   |
| 0.174486927324357                   | AGIWUR28361;AGIWUR38433             |          |                |          |                            |
| CB4856 CT III                       | 10090862                            | 10098081 | WBGene00011815 | bath-43  | T16H12.5                   |
| 0.0573307019899332                  | AGIWUR20784                         |          |                |          |                            |
| CB4856 CT III                       | 10098469                            | 10101608 | WBGene00002186 | kel-10   | T16H12.6                   |
| -0.0923701137843285                 | AGIWUR6246;AGIWUR10107;AGIWUR40683  |          |                |          |                            |
| CB4856 CT III                       | 10104841                            | 10106490 | WBGene00011816 | srt-55   | T16H12.8                   |
| -0.0983581778722531                 | AGIWUR16209                         |          |                |          |                            |
| CB4856 CT III                       | 10109423                            | 10112108 | WBGene00011817 | T16H12.9 | T16H12.9                   |
| 0.578561099910187                   | AGIWUR24769;AGIWUR33645;AGIWUR40685 |          |                |          |                            |
| CB4856 CT III                       | 10112100                            | 10113046 | WBGene00014234 | vps-29   | ZK1128.8                   |
| 0.099837865383547                   | AGIWUR6205;AGIWUR11659              |          |                |          |                            |
| CB4856 CT III                       | 10113146                            | 10114826 | WBGene00014227 | ZK1128.1 | ZK1128.1                   |
| -0.159531230598688                  | AGIWUR23994;AGIWUR27881;AGIWUR29799 |          |                |          |                            |
| CB4856 CT III                       | 10115042                            | 10116760 | WBGene00014228 | mett-10  | ZK1128.2                   |
| -0.30221001536289                   | AGIWUR25608                         |          |                |          |                            |
| CB4856 CT III                       | 10116967                            | 10118918 | WBGene00014229 | ZK1128.3 | ZK1128.3                   |
| 0.13179390325514                    | AGIWUR10949;AGIWUR26661;AGIWUR29008 |          |                |          |                            |
| CB4856 CT III                       | 10118961                            | 10120148 | WBGene00014230 | ZK1128.4 | ZK1128.4                   |
| 0.00672292656320295                 | AGIWUR26863                         |          |                |          |                            |
| CB4856 CT III                       | 10120781                            | 10122928 | WBGene00044072 | ham-3    | ZK1128.5                   |
| 0.0620217392462212                  | AGIWUR31504                         |          |                |          |                            |
| CB4856 CT III                       | 10124183                            | 10132411 | WBGene00014232 | ttl1-4   | ZK1128.6                   |
| 0.155416523609874                   | AGIWUR8363;AGIWUR19920;AGIWUR35531  |          |                |          |                            |
| CB4856 CT III                       | 10136982                            | 10139241 | WBGene00014233 | ZK1128.7 | ZK1128.7                   |
| 0.689288610815501                   | AGIWUR2705;AGIWUR17993;AGIWUR31730  |          |                |          |                            |
| CB4856 CT III                       | 10141573                            | 10146801 | WBGene00014801 | K08E5.1  | K08E5.1 -0.284587928124455 |
| AGIWUR5036                          |                                     |          |                |          |                            |
| CB4856 CT III                       | 10152795                            | 10157923 | WBGene00003519 | nac-3    | K08E5.2 0.141733641134458  |
| AGIWUR13516;AGIWUR34351             |                                     |          |                |          |                            |
| CB4856 CT III                       | 10159027                            | 10160482 | WBGene00077703 | K08E5.5  | K08E5.5 0.0283155442506731 |
| AGIWUR38527;AGIWUR38946;AGIWUR39699 |                                     |          |                |          |                            |
| CB4856 CT III                       | 10160697                            | 10183529 | WBGene00003482 | mua-3    | K08E5.3 -0.242465328385862 |
| AGIWUR10672                         |                                     |          |                |          |                            |
| CB4856 CT III                       | 10183794                            | 10186390 | WBGene00006783 | unc-47   | T20G5.6 0.039265112774773  |
| AGIWUR12361                         |                                     |          |                |          |                            |
| CB4856 CT III                       | 10189218                            | 10195399 | WBGene00004255 | epac-1   | T20G5.5 -0.140222241331328 |

|                                                                                         |    |     |          |          |                |           |                             |
|-----------------------------------------------------------------------------------------|----|-----|----------|----------|----------------|-----------|-----------------------------|
| AGIWUR25467                                                                             |    |     |          |          |                |           |                             |
| CB4856                                                                                  | CT | III | 10197716 | 10198352 | WBGene00011869 | dod-6     | T20G5.7 0.528129675075681   |
| AGIWUR14195;AGIWUR22878;AGIWUR26343;AGIWUR29516                                         |    |     |          |          |                |           |                             |
| CB4856                                                                                  | CT | III | 10199337 | 10199859 | WBGene00011870 | T20G5.8   | T20G5.8 0.0308328725315477  |
| AGIWUR6691;AGIWUR18399;AGIWUR22022;AGIWUR40445                                          |    |     |          |          |                |           |                             |
| CB4856                                                                                  | CT | III | 10199894 | 10201326 | WBGene00011874 | T20G5.13  | T20G5.13                    |
| -0.0622331239322715 AGIWUR48;AGIWUR21088                                                |    |     |          |          |                |           |                             |
| CB4856                                                                                  | CT | III | 10201623 | 10202528 | WBGene00011873 | T20G5.12  | T20G5.12                    |
| -0.259343154991146 AGIWUR37044                                                          |    |     |          |          |                |           |                             |
| CB4856                                                                                  | CT | III | 10203821 | 10209704 | WBGene00011867 | chc-1     | T20G5.1 -0.0197883681736206 |
| AGIWUR23019;AGIWUR39562;AGIWUR40241                                                     |    |     |          |          |                |           |                             |
| CB4856                                                                                  | CT | III | 10209840 | 10211093 | WBGene00011871 | T20G5.9   | T20G5.9 -0.342242588917477  |
| AGIWUR1557                                                                              |    |     |          |          |                |           |                             |
| CB4856                                                                                  | CT | III | 10211041 | 10211946 | WBGene00011872 | blos-1    | T20G5.10                    |
| -0.0307896484661114 AGIWUR28631                                                         |    |     |          |          |                |           |                             |
| CB4856                                                                                  | CT | III | 10212396 | 10214825 | WBGene00011868 | best-18   | T20G5.4 0.0019120744424912  |
| AGIWUR1668;AGIWUR12462;AGIWUR19724;AGIWUR27812;AGIWUR32888;AGIWUR33217;AGIWUR41702      |    |     |          |          |                |           |                             |
| CB4856                                                                                  | CT | III | 10214814 | 10216635 | WBGene00000833 | cts-1     | T20G5.2 0.203073256872992   |
| AGIWUR6067;AGIWUR20186;AGIWUR25038;AGIWUR27140;AGIWUR44892                              |    |     |          |          |                |           |                             |
| CB4856                                                                                  | CT | III | 10217302 | 10218646 | WBGene00004326 | rde-4     | T20G5.11                    |
| -0.395999415612788 AGIWUR1070                                                           |    |     |          |          |                |           |                             |
| CB4856                                                                                  | CT | III | 10218943 | 10222935 | WBGene00011875 | T20G5.14  | T20G5.14                    |
| -0.196691811774183 AGIWUR13544;AGIWUR16763;AGIWUR17186;AGIWUR21489;AGIWUR33131          |    |     |          |          |                |           |                             |
| CB4856                                                                                  | CT | III | 10223524 | 10224162 | WBGene00014946 | Y70G10A.1 | Y70G10A.1                   |
| -0.1094506285287 AGIWUR14372                                                            |    |     |          |          |                |           |                             |
| CB4856                                                                                  | CT | III | 10228164 | 10234079 | WBGene00013498 | Y70G10A.2 | Y70G10A.2                   |
| 0.171524687612844 AGIWUR17841;AGIWUR20918;AGIWUR22136;AGIWUR38703;AGIWUR41816           |    |     |          |          |                |           |                             |
| CB4856                                                                                  | CT | III | 10238672 | 10244810 | WBGene00013499 | Y70G10A.3 | Y70G10A.3                   |
| 0.807855854581852 AGIWUR42684                                                           |    |     |          |          |                |           |                             |
| CB4856                                                                                  | CT | III | 10245056 | 10248905 | WBGene00001002 | div-1     | R01H10.1                    |
| 0.174132609177121 AGIWUR32960                                                           |    |     |          |          |                |           |                             |
| CB4856                                                                                  | CT | III | 10249111 | 10254709 | WBGene00000768 | cor-1     | R01H10.3                    |
| -0.115909803578307 AGIWUR4531;AGIWUR25414;AGIWUR37845;AGIWUR40559                       |    |     |          |          |                |           |                             |
| CB4856                                                                                  | CT | III | 10254800 | 10257221 | WBGene00010972 | R01H10.4  | R01H10.4                    |
| -0.162912056676285 AGIWUR39750                                                          |    |     |          |          |                |           |                             |
| CB4856                                                                                  | CT | III | 10257181 | 10258736 | WBGene00010973 | rip-1     | R01H10.5                    |
| 0.113780197894746 AGIWUR2959;AGIWUR5367;AGIWUR14748;AGIWUR29061;AGIWUR36636;AGIWUR38963 |    |     |          |          |                |           |                             |
| CB4856                                                                                  | CT | III | 10258856 | 10261679 | WBGene00010974 | bbs-5     | R01H10.6                    |
| 0.0919289864904589 AGIWUR28666;AGIWUR30482                                              |    |     |          |          |                |           |                             |

|                                                                       |     |             |          |                |          |                             |
|-----------------------------------------------------------------------|-----|-------------|----------|----------------|----------|-----------------------------|
| CB4856 CT                                                             | III | 10261799    | 10267381 | WBGene00010975 | R01H10.7 | R01H10.7                    |
| -0.0380501346734121                                                   |     | AGIWUR23476 |          |                |          |                             |
| CB4856 CT                                                             | III | 10271257    | 10278579 | WBGene00000564 | cnk-1    | R01H10.8                    |
| -0.140903088381895                                                    |     | AGIWUR31863 |          |                |          |                             |
| CB4856 CT                                                             | III | 10279127    | 10281476 | WBGene00010757 | pad-2    | K10G9.3 -0.178544303183877  |
| AGIWUR15507                                                           |     |             |          |                |          |                             |
| CB4856 CT                                                             | III | 10285923    | 10288621 | WBGene00010756 | K10G9.2  | K10G9.2 0.0268939814443439  |
| AGIWUR11899                                                           |     |             |          |                |          |                             |
| CB4856 CT                                                             | III | 10295137    | 10298687 | WBGene00010755 | vglu-2   | K10G9.1 0.0928516342670189  |
| AGIWUR9593                                                            |     |             |          |                |          |                             |
| CB4856 CT                                                             | III | 10299164    | 10299949 | WBGene00011557 | ostf-4   | T07A5.4 -0.314075597237041  |
| AGIWUR24598                                                           |     |             |          |                |          |                             |
| CB4856 CT                                                             | III | 10300293    | 10303423 | WBGene00011556 | vglu-3   | T07A5.3 -0.565717872668504  |
| AGIWUR19587                                                           |     |             |          |                |          |                             |
| CB4856 CT                                                             | III | 10303368    | 10306188 | WBGene00011554 | T07A5.1  | T07A5.1 0.153291899876149   |
| AGIWUR10153                                                           |     |             |          |                |          |                             |
| CB4856 CT                                                             | III | 10306756    | 10311100 | WBGene00045475 | T07A5.7  | T07A5.7 0.00624216219882801 |
| AGIWUR11178;AGIWUR39351;AGIWUR42277;AGIWUR43222                       |     |             |          |                |          |                             |
| CB4856 CT                                                             | III | 10314490    | 10318162 | WBGene00006785 | unc-50   | T07A5.2 -0.142834133927688  |
| AGIWUR8024;AGIWUR9434;AGIWUR11973;AGIWUR25507;AGIWUR29014;AGIWUR32340 |     |             |          |                |          |                             |
| CB4856 CT                                                             | III | 10318939    | 10320021 | WBGene00006802 | unc-69   | T07A5.6 0.115401156407842   |
| AGIWUR30280;AGIWUR32788;AGIWUR33203;AGIWUR41320                       |     |             |          |                |          |                             |
| CB4856 CT                                                             | III | 10321019    | 10325675 | WBGene00011562 | T07C4.10 | T07C4.10                    |
| -0.0469794512919819                                                   |     | AGIWUR29783 |          |                |          |                             |
| CB4856 CT                                                             | III | 10325613    | 10330422 | WBGene00003589 | nex-2    | T07C4.9 0.368423441930391   |
| AGIWUR2964;AGIWUR5102;AGIWUR5328;AGIWUR10659;AGIWUR41869;AGIWUR42232  |     |             |          |                |          |                             |
| CB4856 CT                                                             | III | 10331551    | 10332480 | WBGene00044891 | T07C4.12 | T07C4.12                    |
| -0.0774899474028601                                                   |     | AGIWUR11953 |          |                |          |                             |
| CB4856 CT                                                             | III | 10334267    | 10335171 | WBGene00003225 | mev-1    | T07C4.7 0.0829042417471486  |
| AGIWUR10210;AGIWUR33889                                               |     |             |          |                |          |                             |
| CB4856 CT                                                             | III | 10335172    | 10337536 | WBGene00000423 | ced-9    | T07C4.8 -0.0439390359057352 |
| AGIWUR286;AGIWUR6854;AGIWUR9572;AGIWUR16216;AGIWUR23511;AGIWUR33329   |     |             |          |                |          |                             |
| CB4856 CT                                                             | III | 10337840    | 10339440 | WBGene00011561 | ttr-15   | T07C4.5 -0.0798489734697405 |
| AGIWUR12663                                                           |     |             |          |                |          |                             |
| CB4856 CT                                                             | III | 10339984    | 10341858 | WBGene00006546 | tbx-9    | T07C4.6 -0.428567398332884  |
| AGIWUR5722                                                            |     |             |          |                |          |                             |
| CB4856 CT                                                             | III | 10347575    | 10349740 | WBGene00006545 | tbx-8    | T07C4.2 0.344042509231922   |
| AGIWUR29064                                                           |     |             |          |                |          |                             |
| CB4856 CT                                                             | III | 10352157    | 10355117 | WBGene00011560 | T07C4.3  | T07C4.3                     |

|                                                                         |                                                 |          |                |          |          |                    |
|-------------------------------------------------------------------------|-------------------------------------------------|----------|----------------|----------|----------|--------------------|
| -0.00230449700773683                                                    | AGIWUR20793;AGIWUR29934;AGIWUR31453;AGIWUR31839 |          |                |          |          |                    |
| CB4856 CT III                                                           | 10355122                                        | 10355982 | WBGene00004986 | spp-1    | T07C4.4  | 0.677787444118479  |
| AGIWUR237;AGIWUR7718;AGIWUR8291;AGIWUR10149;AGIWUR21291;AGIWUR35483     |                                                 |          |                |          |          |                    |
| CB4856 CT III                                                           | 10355799                                        | 10357761 | WBGene00011559 | umps-1   | T07C4.1  | 0.0671991303786985 |
| AGIWUR7994;AGIWUR33842                                                  |                                                 |          |                |          |          |                    |
| CB4856 CT III                                                           | 10364951                                        | 10373231 | WBGene00008018 | tbc-8    | C38H2.1  | 0.0952049439889056 |
| AGIWUR4274;AGIWUR22656;AGIWUR25009;AGIWUR35189;AGIWUR38326;AGIWUR43448  |                                                 |          |                |          |          |                    |
| CB4856 CT III                                                           | 10381740                                        | 10385335 | WBGene00008019 | C38H2.2  | C38H2.2  | 0.0893401106011726 |
| AGIWUR1650;AGIWUR12814;AGIWUR18659;AGIWUR32985;AGIWUR34960;AGIWUR36869  |                                                 |          |                |          |          |                    |
| CB4856 CT III                                                           | 10385313                                        | 10386572 | WBGene00008020 | C38H2.3  | C38H2.3  | 0.142369449221723  |
| AGIWUR33304                                                             |                                                 |          |                |          |          |                    |
| CB4856 CT III                                                           | 10393389                                        | 10396081 | WBGene00010838 | M03C11.1 |          | M03C11.1           |
| 0.0892317748246239                                                      | AGIWUR36458                                     |          |                |          |          |                    |
| CB4856 CT III                                                           | 10399174                                        | 10405240 | WBGene00010839 | chl-1    | M03C11.2 |                    |
| 0.18240981302788                                                        | AGIWUR44839                                     |          |                |          |          |                    |
| CB4856 CT III                                                           | 10405070                                        | 10415150 | WBGene00010840 | M03C11.3 |          | M03C11.3           |
| -0.547611126501421                                                      | AGIWUR3706                                      |          |                |          |          |                    |
| CB4856 CT III                                                           | 10416069                                        | 10421785 | WBGene00010842 | ymel-1   | M03C11.5 |                    |
| 0.024664994714966                                                       | AGIWUR16409;AGIWUR23999                         |          |                |          |          |                    |
| CB4856 CT III                                                           | 10421781                                        | 10424006 | WBGene00010843 | M03C11.6 |          | M03C11.6           |
| -0.0267646728293691                                                     | AGIWUR23661                                     |          |                |          |          |                    |
| CB4856 CT III                                                           | 10424112                                        | 10427982 | WBGene00010844 | prp-3    | M03C11.7 |                    |
| 0.00719411111644064                                                     | AGIWUR586;AGIWUR12218                           |          |                |          |          |                    |
| CB4856 CT III                                                           | 10428334                                        | 10435988 | WBGene00010845 | M03C11.8 |          | M03C11.8           |
| -0.228449736601743                                                      | AGIWUR27739                                     |          |                |          |          |                    |
| CB4856 CT III                                                           | 10445805                                        | 10451112 | WBGene00010365 | H04D03.4 |          | H04D03.4           |
| 0.058241226538235                                                       | AGIWUR7036                                      |          |                |          |          |                    |
| CB4856 CT III                                                           | 10461389                                        | 10468051 | WBGene00000231 | atx-2    | D2045.1  | 0.132688903195101  |
| AGIWUR11012;AGIWUR23942;AGIWUR24350;AGIWUR38378;AGIWUR40827;AGIWUR43539 |                                                 |          |                |          |          |                    |
| CB4856 CT III                                                           | 10471237                                        | 10475245 | WBGene00000836 | cul-1    | D2045.6  | 0.0876928936361701 |
| AGIWUR42378                                                             |                                                 |          |                |          |          |                    |
| CB4856 CT III                                                           | 10475245                                        | 10479758 | WBGene00008426 | D2045.9  | D2045.9  | 0.0915490766253058 |
| AGIWUR4407;AGIWUR25018;AGIWUR30597;AGIWUR35709;AGIWUR36584;AGIWUR39005  |                                                 |          |                |          |          |                    |
| CB4856 CT III                                                           | 10479807                                        | 10482285 | WBGene00008424 | D2045.7  | D2045.7  | 0.0753844459554731 |
| AGIWUR14104                                                             |                                                 |          |                |          |          |                    |
| CB4856 CT III                                                           | 10482288                                        | 10483926 | WBGene00008425 | D2045.8  | D2045.8  | 0.225714598964752  |
| AGIWUR39626                                                             |                                                 |          |                |          |          |                    |
| CB4856 CT III                                                           | 10488128                                        | 10500267 | WBGene00009653 | F43D9.1  | F43D9.1  | 0.911803997764949  |
| AGIWUR22640                                                             |                                                 |          |                |          |          |                    |

|                                                                                                                                                                                            |    |     |                     |                                                                       |                |          |          |                    |
|--------------------------------------------------------------------------------------------------------------------------------------------------------------------------------------------|----|-----|---------------------|-----------------------------------------------------------------------|----------------|----------|----------|--------------------|
| CB4856                                                                                                                                                                                     | CT | III | 10500284            | 10503853                                                              | WBGene00004283 | rab-33   | F43D9.2  | -0.100743812231176 |
| AGIWUR9622;AGIWUR24413;AGIWUR29010;AGIWUR31447;AGIWUR32558;AGIWUR42267                                                                                                                     |    |     |                     |                                                                       |                |          |          |                    |
| CB4856                                                                                                                                                                                     | CT | III | 10503965            | 10505250                                                              | WBGene00006395 | taf-11.3 | F43D9.5  |                    |
|                                                                                                                                                                                            |    |     | -0.206107865301334  | AGIWUR20041                                                           |                |          |          |                    |
| CB4856                                                                                                                                                                                     | CT | III | 10506106            | 10506801                                                              | WBGene00004798 | sip-1    | F43D9.4  | 0.206562791734463  |
| AGIWUR7686;AGIWUR13613;AGIWUR38909                                                                                                                                                         |    |     |                     |                                                                       |                |          |          |                    |
| CB4856                                                                                                                                                                                     | CT | III | 10507058            | 10518391                                                              | WBGene00009654 | sly-1    | F43D9.3  | -0.170604476805829 |
| AGIWUR8732;AGIWUR19708;AGIWUR29661;AGIWUR35705                                                                                                                                             |    |     |                     |                                                                       |                |          |          |                    |
| CB4856                                                                                                                                                                                     | CT | III | 10520676            | 10532705                                                              | WBGene00006784 | unc-49   | T21C12.1 |                    |
| 0.120549802522005                                                                                                                                                                          |    |     |                     |                                                                       |                |          |          |                    |
| AGIWUR1626;AGIWUR2943;AGIWUR6217;AGIWUR7139;AGIWUR8761;AGIWUR13176;AGIWUR14305;AGIWUR15017;AGIWUR15943;AGIWUR16705;AGIWUR21882;AGIWUR26074;AGIWUR26395;AGIWUR29204;AGIWUR33200;AGIWUR36268 |    |     |                     |                                                                       |                |          |          |                    |
| CB4856                                                                                                                                                                                     | CT | III | 10535526            | 10537682                                                              | WBGene00001993 | hpd-1    | T21C12.2 |                    |
|                                                                                                                                                                                            |    |     | -0.532955393760485  | AGIWUR15910;AGIWUR42722;AGIWUR43555                                   |                |          |          |                    |
| CB4856                                                                                                                                                                                     | CT | III | 10538081            | 10539163                                                              | WBGene00011899 | T21C12.3 | T21C12.3 |                    |
|                                                                                                                                                                                            |    |     | 0.0450825782218911  | AGIWUR24461;AGIWUR33959;AGIWUR35118;AGIWUR39927                       |                |          |          |                    |
| CB4856                                                                                                                                                                                     | CT | III | 10551102            | 10552955                                                              | WBGene00043998 | T21C12.8 | T21C12.8 |                    |
| -0.133794073512897                                                                                                                                                                         |    |     |                     |                                                                       |                |          |          |                    |
| AGIWUR4565;AGIWUR7449;AGIWUR8399;AGIWUR15232;AGIWUR17836;AGIWUR21442;AGIWUR42310;AGIWUR43489;AGIWUR44757                                                                                   |    |     |                     |                                                                       |                |          |          |                    |
| CB4856                                                                                                                                                                                     | CT | III | 10553005            | 10558009                                                              | WBGene00011900 | T21C12.4 | T21C12.4 |                    |
|                                                                                                                                                                                            |    |     | -0.23096974383134   | AGIWUR7867;AGIWUR22646;AGIWUR32575                                    |                |          |          |                    |
| CB4856                                                                                                                                                                                     | CT | III | 10558189            | 10561948                                                              | WBGene00012859 | Y45F3A.1 | Y45F3A.1 |                    |
|                                                                                                                                                                                            |    |     | 0.104655277531904   | AGIWUR32679                                                           |                |          |          |                    |
| CB4856                                                                                                                                                                                     | CT | III | 10563026            | 10565603                                                              | WBGene00004282 | rab-30   | Y45F3A.2 |                    |
|                                                                                                                                                                                            |    |     | -0.193499075750154  | AGIWUR1388;AGIWUR2446;AGIWUR25760;AGIWUR28411;AGIWUR29148;AGIWUR37905 |                |          |          |                    |
| CB4856                                                                                                                                                                                     | CT | III | 10566181            | 10571606                                                              | WBGene00012860 | acdH-11  | Y45F3A.3 |                    |
|                                                                                                                                                                                            |    |     | -0.0494386237811604 | AGIWUR23517                                                           |                |          |          |                    |
| CB4856                                                                                                                                                                                     | CT | III | 10572475            | 10575420                                                              | WBGene00012861 | Y45F3A.4 | Y45F3A.4 |                    |
|                                                                                                                                                                                            |    |     | 0.0343880386410849  | AGIWUR20000;AGIWUR21324;AGIWUR36197                                   |                |          |          |                    |
| CB4856                                                                                                                                                                                     | CT | III | 10585848            | 10586343                                                              | WBGene00012862 | Y45F3A.5 | Y45F3A.5 |                    |
|                                                                                                                                                                                            |    |     | -0.30240556343611   | AGIWUR39377                                                           |                |          |          |                    |
| CB4856                                                                                                                                                                                     | CT | III | 10586407            | 10587706                                                              | WBGene00014898 | Y45F3A.6 | Y45F3A.6 |                    |
|                                                                                                                                                                                            |    |     | -0.115298221089564  | AGIWUR12638                                                           |                |          |          |                    |
| CB4856                                                                                                                                                                                     | CT | III | 10589865            | 10592801                                                              | WBGene00012863 | Y45F3A.8 | Y45F3A.8 |                    |
|                                                                                                                                                                                            |    |     | 0.348253017249558   | AGIWUR28002                                                           |                |          |          |                    |
| CB4856                                                                                                                                                                                     | CT | III | 10592754            | 10595166                                                              | WBGene00012864 | Y45F3A.9 | Y45F3A.9 |                    |
|                                                                                                                                                                                            |    |     | 0.309811975591565   | AGIWUR12357                                                           |                |          |          |                    |
| CB4856                                                                                                                                                                                     | CT | III | 10595258            | 10596487                                                              | WBGene00012643 | Y39A1A.3 | Y39A1A.3 |                    |
|                                                                                                                                                                                            |    |     | -0.155973051319215  | AGIWUR113                                                             |                |          |          |                    |



|                     |                                                |          |                |           |           |
|---------------------|------------------------------------------------|----------|----------------|-----------|-----------|
| CB4856 CT III       | 10596615                                       | 10600184 | WBGene00012641 | epg-6     | Y39A1A.1  |
| 0.039746423797375   | AGIWUR29369                                    |          |                |           |           |
| CB4856 CT III       | 10601905                                       | 10603566 | WBGene00012642 | Y39A1A.2  | Y39A1A.2  |
| -0.0189740712806223 | AGIWUR308;AGIWUR29627;AGIWUR38468;AGIWUR41990  |          |                |           |           |
| CB4856 CT III       | 10605349                                       | 10613294 | WBGene00012644 | rabx-5    | Y39A1A.5  |
| -0.420978096648986  | AGIWUR5300                                     |          |                |           |           |
| CB4856 CT III       | 10613567                                       | 10614931 | WBGene00012660 | Y39A1A.24 | Y39A1A.24 |
| -0.0232815237049486 | AGIWUR9172                                     |          |                |           |           |
| CB4856 CT III       | 10615466                                       | 10617862 | WBGene00012645 | mrp1-22   | Y39A1A.6  |
| -0.0810402547632734 | AGIWUR27121                                    |          |                |           |           |
| CB4856 CT III       | 10617863                                       | 10621369 | WBGene00012646 | Iron-10   | Y39A1A.7  |
| 0.136667611584093   | AGIWUR6665;AGIWUR11602;AGIWUR35533;AGIWUR39777 |          |                |           |           |
| CB4856 CT III       | 10630070                                       | 10633501 | WBGene00012648 | Y39A1A.9  | Y39A1A.9  |
| 0.11494459083311    | AGIWUR11161                                    |          |                |           |           |
| CB4856 CT III       | 10640828                                       | 10642872 | WBGene00000974 | dhs-11    | Y39A1A.11 |
| -0.0558215288496804 | AGIWUR10943                                    |          |                |           |           |
| CB4856 CT III       | 10643002                                       | 10646107 | WBGene00012650 | orc-1     | Y39A1A.12 |
| -0.0202754323855707 | AGIWUR7399                                     |          |                |           |           |
| CB4856 CT III       | 10646170                                       | 10648861 | WBGene00012651 | orc-4     | Y39A1A.13 |
| -0.0315255448300409 | AGIWUR18023;AGIWUR45072                        |          |                |           |           |
| CB4856 CT III       | 10649519                                       | 10650908 | WBGene00012652 | Y39A1A.14 | Y39A1A.14 |
| -0.219121011662509  | AGIWUR5717                                     |          |                |           |           |
| CB4856 CT III       | 10655018                                       | 10677521 | WBGene00000566 | cnt-2     | Y39A1A.15 |
| 0.0948630623601581  | AGIWUR9480;AGIWUR11595;AGIWUR17227;AGIWUR22673 |          |                |           |           |
| CB4856 CT III       | 10679474                                       | 10682212 | WBGene00012654 | Y39A1A.16 | Y39A1A.16 |
| -0.134592677962636  | AGIWUR3345                                     |          |                |           |           |
| CB4856 CT III       | 10687127                                       | 10691101 | WBGene00012655 | Y39A1A.17 | Y39A1A.17 |
| 0.111498166060504   | AGIWUR3054                                     |          |                |           |           |
| CB4856 CT III       | 10692221                                       | 10694391 | WBGene00012656 | Y39A1A.18 | Y39A1A.18 |
| -0.350099423160501  | AGIWUR6126                                     |          |                |           |           |
| CB4856 CT III       | 10694590                                       | 10698861 | WBGene00001478 | fmo-3     | Y39A1A.19 |
| -0.151481715658537  | AGIWUR32081                                    |          |                |           |           |
| CB4856 CT III       | 10699216                                       | 10700560 | WBGene00012657 | Y39A1A.20 | Y39A1A.20 |
| -0.377349805564153  | AGIWUR2587                                     |          |                |           |           |
| CB4856 CT III       | 10700652                                       | 10707024 | WBGene00012658 | Y39A1A.21 | Y39A1A.21 |
| -0.0880327252311641 | AGIWUR23804;AGIWUR30508;AGIWUR38450            |          |                |           |           |
| CB4856 CT III       | 10707761                                       | 10708518 | WBGene00012361 | mrp1-12   | W09D10.3  |
| -0.167330494388262  | AGIWUR11263;AGIWUR27960;AGIWUR37422            |          |                |           |           |
| CB4856 CT III       | 10708484                                       | 10711527 | WBGene00012363 | W09D10.5  | W09D10.5  |

|                                                                                                 |                                                                                     |          |                |           |          |                     |
|-------------------------------------------------------------------------------------------------|-------------------------------------------------------------------------------------|----------|----------------|-----------|----------|---------------------|
| -0.0545926416032803                                                                             | AGIWUR24376                                                                         |          |                |           |          |                     |
| CB4856 CT III                                                                                   | 10711724                                                                            | 10716191 | WBGene00012362 | W09D10.4  | W09D10.4 |                     |
| 0.0104240491690391                                                                              | AGIWUR23890                                                                         |          |                |           |          |                     |
| CB4856 CT III                                                                                   | 10722148                                                                            | 10730705 | WBGene00012360 | tat-3     | W09D10.2 |                     |
| -0.0517110960506564                                                                             | AGIWUR23128                                                                         |          |                |           |          |                     |
| CB4856 CT III                                                                                   | 10736893                                                                            | 10739824 | WBGene00012359 | W09D10.1  | W09D10.1 |                     |
| 0.411922002188424                                                                               | AGIWUR9099                                                                          |          |                |           |          |                     |
| CB4856 CT III                                                                                   | 10740280                                                                            | 10740772 | WBGene00010479 | K01G5.8   | K01G5.8  | 0.0341714789941427  |
| AGIWUR1395;AGIWUR8920;AGIWUR21836;AGIWUR27800;AGIWUR30550;AGIWUR36735;AGIWUR42856               |                                                                                     |          |                |           |          |                     |
| CB4856 CT III                                                                                   | 10740868                                                                            | 10742461 | WBGene00006536 | tbb-1     | K01G5.7  | 0.0511485985609621  |
| AGIWUR12340;AGIWUR24533                                                                         |                                                                                     |          |                |           |          |                     |
| CB4856 CT III                                                                                   | 10742777                                                                            | 10746675 | WBGene00004361 | rib-2     | K01G5.6  | 0.208180025678248   |
| AGIWUR18008                                                                                     |                                                                                     |          |                |           |          |                     |
| CB4856 CT III                                                                                   | 10746581                                                                            | 10747728 | WBGene00004302 | ran-1     | K01G5.4  | -0.132471382349475  |
| AGIWUR4222;AGIWUR5342;AGIWUR31873;AGIWUR37645;AGIWUR37954;AGIWUR44185                           |                                                                                     |          |                |           |          |                     |
| CB4856 CT III                                                                                   | 10748429                                                                            | 10750080 | WBGene00010478 | K01G5.5   | K01G5.5  | -0.0415525255894202 |
| AGIWUR2813                                                                                      |                                                                                     |          |                |           |          |                     |
| CB4856 CT III                                                                                   | 10752254                                                                            | 10755523 | WBGene00001996 | hpl-2     | K01G5.2  | -0.0748766631589071 |
| AGIWUR26193                                                                                     |                                                                                     |          |                |           |          |                     |
| CB4856 CT III                                                                                   | 10755624                                                                            | 10757640 | WBGene00010476 | rnf-113   | K01G5.1  | -0.209256659965462  |
| AGIWUR5623;AGIWUR16936;AGIWUR23877;AGIWUR30190;AGIWUR33377                                      |                                                                                     |          |                |           |          |                     |
| CB4856 CT III                                                                                   | 10757641                                                                            | 10758522 | WBGene00010481 | K01G5.10  | K01G5.10 |                     |
| -0.102555580356295                                                                              | AGIWUR42363                                                                         |          |                |           |          |                     |
| CB4856 CT III                                                                                   | 10759290                                                                            | 10763006 | WBGene00010480 | K01G5.9   | K01G5.9  |                     |
| -0.00943322427416504                                                                            | AGIWUR2342;AGIWUR26214;AGIWUR43246                                                  |          |                |           |          |                     |
| CB4856 CT III                                                                                   | 10763131                                                                            | 10777343 | WBGene00001087 | dpy-28    | Y39A1B.3 |                     |
| 0.259207980873416                                                                               | AGIWUR19814;AGIWUR31824;AGIWUR37311;AGIWUR39594;AGIWUR42588;AGIWUR44785;AGIWUR44913 |          |                |           |          |                     |
| CB4856 CT III                                                                                   | 10781853                                                                            | 10791252 | WBGene00004233 | ptr-19    | Y39A1B.2 |                     |
| -0.224418467664648                                                                              | AGIWUR2310                                                                          |          |                |           |          |                     |
| CB4856 CT III                                                                                   | 10794349                                                                            | 10796369 | WBGene00012661 | cllec-163 | Y39A1B.1 |                     |
| -0.0644012356936328                                                                             | AGIWUR4091;AGIWUR16942;AGIWUR30849                                                  |          |                |           |          |                     |
| CB4856 CT III                                                                                   | 10796711                                                                            | 10802212 | WBGene00010772 | K11D9.3   | K11D9.3  | 0.0785546250518827  |
| AGIWUR43139                                                                                     |                                                                                     |          |                |           |          |                     |
| CB4856 CT III                                                                                   | 10805930                                                                            | 10810999 | WBGene00002219 | k1p-7     | K11D9.1  | 0.174669845424949   |
| AGIWUR11370;AGIWUR12933;AGIWUR13168;AGIWUR23162;AGIWUR34095;AGIWUR34776;AGIWUR35301             |                                                                                     |          |                |           |          |                     |
| CB4856 CT III                                                                                   | 10811906                                                                            | 10816844 | WBGene00004736 | sca-1     | K11D9.2  | 0.538005826351862   |
| AGIWUR12804;AGIWUR13224;AGIWUR18711;AGIWUR22264;AGIWUR22479;AGIWUR26781;AGIWUR32116;AGIWUR40601 |                                                                                     |          |                |           |          |                     |
| CB4856 CT III                                                                                   | 10832936                                                                            | 10839451 | WBGene00011269 | R17.3     | R17.3    | -0.613582870220877  |
| AGIWUR22883                                                                                     |                                                                                     |          |                |           |          |                     |

|                                                              |     |          |          |                |          |          |                     |
|--------------------------------------------------------------|-----|----------|----------|----------------|----------|----------|---------------------|
| CB4856 CT<br>AGIWUR23043                                     | III | 10840023 | 10845020 | WBGene00011268 | pde-12   | R17.2    | 0.0196149895236477  |
| CB4856 CT<br>AGIWUR2734                                      | III | 10847619 | 10848670 | WBGene00011267 | fbxb-85  | R17.1    | -0.0101278175256763 |
| CB4856 CT<br>-0.223241167492347                              | III | 10849222 | 10854561 | WBGene00012663 | hex-3    | Y39A1C.4 |                     |
| CB4856 CT<br>0.0395856049826264                              | III | 10856776 | 10858186 | WBGene00012662 | Y39A1C.1 | Y39A1C.1 |                     |
| CB4856 CT<br>0.0786211111862443                              | III | 10858284 | 10866994 | WBGene00003898 | oxi-1    | Y39A1C.2 |                     |
| CB4856 CT<br>-0.137157608699078                              | III | 10866870 | 10868727 | WBGene00000475 | cey-4    | Y39A1C.3 |                     |
| CB4856 CT<br>AGIWUR35718                                     | III | 10869193 | 10874528 | WBGene00008078 | vps-50   | C44B9.1  | -0.0972620104601596 |
| CB4856 CT<br>AGIWUR32805                                     | III | 10875459 | 10878061 | WBGene00008079 | C44B9.2  | C44B9.2  | -0.19971444977765   |
| CB4856 CT<br>AGIWUR18192                                     | III | 10878191 | 10880183 | WBGene00008080 | C44B9.3  | C44B9.3  | 0.00226925251257271 |
| CB4856 CT<br>AGIWUR37057                                     | III | 10882345 | 10893672 | WBGene00008081 | athp-1   | C44B9.4  | -0.0865623869277456 |
| CB4856 CT<br>AGIWUR31035;AGIWUR40977                         | III | 10894520 | 10895732 | WBGene00043996 | fbxb-87  | C44B9.6  | 0.22627609901799    |
| CB4856 CT<br>AGIWUR17334;AGIWUR29610;AGIWUR37809             | III | 10896363 | 10901836 | WBGene00008082 | com-1    | C44B9.5  | 0.0587986924072332  |
| CB4856 CT<br>AGIWUR42584                                     | III | 10902648 | 10908927 | WBGene00006843 | unc-119  | M142.1   | 0.234914082633587   |
| CB4856 CT<br>AGIWUR20219;AGIWUR21209;AGIWUR27188;AGIWUR37502 | III | 10911460 | 10916567 | WBGene00000853 | cut-6    | M142.2   | 0.834716731185803   |
| CB4856 CT<br>AGIWUR44250                                     | III | 10920336 | 10926041 | WBGene00006873 | vab-7    | M142.4   | -0.0114198507314125 |
| CB4856 CT<br>AGIWUR38763                                     | III | 10927093 | 10928909 | WBGene00014809 | M142.3   | M142.3   | 0.242366597736094   |
| CB4856 CT<br>AGIWUR29358                                     | III | 10931208 | 10932226 | WBGene00010922 | M142.5   | M142.5   | -0.197538207822259  |
| CB4856 CT<br>AGIWUR36829                                     | III | 10933631 | 10936129 | WBGene00043057 | M142.8   | M142.8   | 0.0951330761355109  |
| CB4856 CT<br>AGIWUR4139                                      | III | 10936246 | 10946834 | WBGene00010923 | r1e-1    | M142.6   | -0.385481068761737  |
| CB4856 CT                                                    | III | 10947446 | 10951169 | WBGene00013132 | strd-1   | Y52D3.1  | 0.0528839020709739  |

|                                                                                                          |    |     |          |          |                |          |                             |
|----------------------------------------------------------------------------------------------------------|----|-----|----------|----------|----------------|----------|-----------------------------|
| AGIWUR11800;AGIWUR26861;AGIWUR34611                                                                      |    |     |          |          |                |          |                             |
| CB4856                                                                                                   | CT | III | 10951225 | 10953505 | WBGene00006982 | zig-5    | Y48A6A.1                    |
| 0.00887476806203757 AGIWUR7315;AGIWUR13367;AGIWUR16414;AGIWUR26225;AGIWUR43305                           |    |     |          |          |                |          |                             |
| CB4856                                                                                                   | CT | III | 10960243 | 10966996 | WBGene00012271 | W05B2.2  | W05B2.2 0.157381794089271   |
| AGIWUR10851;AGIWUR17598                                                                                  |    |     |          |          |                |          |                             |
| CB4856                                                                                                   | CT | III | 10967779 | 10969472 | WBGene00014854 | W05B2.3  | W05B2.3 -0.0917079150410824 |
| AGIWUR18948                                                                                              |    |     |          |          |                |          |                             |
| CB4856                                                                                                   | CT | III | 10969944 | 10981848 | WBGene00012272 | dhc-4    | W05B2.4 0.0763285011100203  |
| AGIWUR14770                                                                                              |    |     |          |          |                |          |                             |
| CB4856                                                                                                   | CT | III | 10982166 | 10983253 | WBGene00000667 | col-92   | W05B2.6 -0.215001892914252  |
| AGIWUR6521                                                                                               |    |     |          |          |                |          |                             |
| CB4856                                                                                                   | CT | III | 10988133 | 10991912 | WBGene00012273 | W05B2.7  | W05B2.7 -0.522904580550698  |
| AGIWUR7734;AGIWUR9067;AGIWUR9729;AGIWUR17657;AGIWUR26332;AGIWUR29538;AGIWUR33745;AGIWUR37673;AGIWUR38793 |    |     |          |          |                |          |                             |
| CB4856                                                                                                   | CT | III | 10992129 | 10995237 | WBGene00012962 | dmsr-5   | Y48A6B.1                    |
| 0.0885106833034746 AGIWUR32538;AGIWUR40488;AGIWUR43570                                                   |    |     |          |          |                |          |                             |
| CB4856                                                                                                   | CT | III | 11007415 | 11007620 | WBGene00012965 | fipr-17  | Y48A6B.4                    |
| -0.233100922922118 AGIWUR446;AGIWUR13076;AGIWUR15516;AGIWUR36422;AGIWUR41315                             |    |     |          |          |                |          |                             |
| CB4856                                                                                                   | CT | III | 11008222 | 11008934 | WBGene00012964 | Y48A6B.3 | Y48A6B.3                    |
| -0.238256137997127 AGIWUR29078;AGIWUR40689                                                               |    |     |          |          |                |          |                             |
| CB4856                                                                                                   | CT | III | 11009043 | 11010595 | WBGene00012966 | exos-1   | Y48A6B.5                    |
| -0.145628199515881 AGIWUR7404                                                                            |    |     |          |          |                |          |                             |
| CB4856                                                                                                   | CT | III | 11012566 | 11025292 | WBGene00012967 | kvs-4    | Y48A6B.6                    |
| 0.0403438047143467 AGIWUR4045                                                                            |    |     |          |          |                |          |                             |
| CB4856                                                                                                   | CT | III | 11033172 | 11036080 | WBGene00012970 | Y48A6B.9 | Y48A6B.9                    |
| 0.632104671002493 AGIWUR8842                                                                             |    |     |          |          |                |          |                             |
| CB4856                                                                                                   | CT | III | 11036943 | 11063027 | WBGene00012973 | spat-2   | Y48A6B.13                   |
| 0.0310239153531802 AGIWUR11863;AGIWUR15358;AGIWUR26237;AGIWUR29100                                       |    |     |          |          |                |          |                             |
| CB4856                                                                                                   | CT | III | 11063479 | 11068753 | WBGene00012972 | rsa-2    | Y48A6B.11                   |
| -0.0586417749500203 AGIWUR29460                                                                          |    |     |          |          |                |          |                             |
| CB4856                                                                                                   | CT | III | 11068858 | 11072981 | WBGene00012356 | W09D6.1  | W09D6.1 0.203326158751482   |
| AGIWUR7033                                                                                               |    |     |          |          |                |          |                             |
| CB4856                                                                                                   | CT | III | 11074536 | 11077494 | WBGene00006287 | str-261  | W09D6.2 0.0795344372866644  |
| AGIWUR26409                                                                                              |    |     |          |          |                |          |                             |
| CB4856                                                                                                   | CT | III | 11077704 | 11079446 | WBGene00006273 | str-246  | W09D6.3 0.287149096931958   |
| AGIWUR13621                                                                                              |    |     |          |          |                |          |                             |
| CB4856                                                                                                   | CT | III | 11079745 | 11080413 | WBGene00012357 | W09D6.4  | W09D6.4 0.0517428160387112  |
| AGIWUR2936                                                                                               |    |     |          |          |                |          |                             |
| CB4856                                                                                                   | CT | III | 11088487 | 11091616 | WBGene00012358 | W09D6.5  | W09D6.5 0.155506478796866   |
| AGIWUR27195                                                                                              |    |     |          |          |                |          |                             |

|                                                                                               |          |          |                |           |                           |
|-----------------------------------------------------------------------------------------------|----------|----------|----------------|-----------|---------------------------|
| CB4856 CT III                                                                                 | 11091548 | 11099964 | WBGene00001815 | hmt-1     | W09D6.6 0.165657172101426 |
| AGIWUR10993;AGIWUR34799;AGIWUR37401                                                           |          |          |                |           |                           |
| CB4856 CT III                                                                                 | 11101268 | 11107206 | WBGene00012974 | Y48A6C.1  | Y48A6C.1                  |
| -0.385891302975542 AGIWUR35097                                                                |          |          |                |           |                           |
| CB4856 CT III                                                                                 | 11116994 | 11119222 | WBGene00012976 | sup-35    | Y48A6C.3                  |
| -0.166387558590166 AGIWUR22107                                                                |          |          |                |           |                           |
| CB4856 CT III                                                                                 | 11131775 | 11136380 | WBGene00004010 | pha-1     | Y48A6C.5                  |
| -0.116180571611496 AGIWUR37170                                                                |          |          |                |           |                           |
| CB4856 CT III                                                                                 | 11136802 | 11138905 | WBGene00012923 | fbxa-128  | Y47D3A.2                  |
| -0.0812613177881181 AGIWUR43741                                                               |          |          |                |           |                           |
| CB4856 CT III                                                                                 | 11139241 | 11141825 | WBGene00012922 | Y47D3A.1  | Y47D3A.1                  |
| -0.0574195935435879 AGIWUR18483                                                               |          |          |                |           |                           |
| CB4856 CT III                                                                                 | 11142448 | 11154287 | WBGene00012936 | Y47D3A.29 | Y47D3A.29                 |
| -0.151463451344206 AGIWUR2112                                                                 |          |          |                |           |                           |
| CB4856 CT III                                                                                 | 11154827 | 11168820 | WBGene00000519 | cku-70    | Y47D3A.4                  |
| 0.0174416039119905 AGIWUR31521                                                                |          |          |                |           |                           |
| CB4856 CT III                                                                                 | 11168923 | 11170865 | WBGene00012924 | Y47D3A.5  | Y47D3A.5                  |
| -0.175919198393078 AGIWUR42591                                                                |          |          |                |           |                           |
| CB4856 CT III                                                                                 | 11170889 | 11195207 | WBGene00006604 | tra-1     | Y47D3A.6                  |
| -0.194202353879837                                                                            |          |          |                |           |                           |
| AGIWUR1689;AGIWUR2672;AGIWUR17668;AGIWUR22313;AGIWUR25374;AGIWUR29878;AGIWUR35190;AGIWUR38829 |          |          |                |           |                           |
| CB4856 CT III                                                                                 | 11216398 | 11218260 | WBGene00006553 | tbx-34    | Y47D3A.10                 |
| -0.11426874655584 AGIWUR45039                                                                 |          |          |                |           |                           |
| CB4856 CT III                                                                                 | 11218797 | 11222666 | WBGene00012925 | wht-8     | Y47D3A.11                 |
| 0.0639333113470597 AGIWUR5856;AGIWUR6471;AGIWUR18518                                          |          |          |                |           |                           |
| CB4856 CT III                                                                                 | 11223439 | 11224106 | WBGene00012926 | Y47D3A.13 | Y47D3A.13                 |
| -0.0208258142026914 AGIWUR20032;AGIWUR22061                                                   |          |          |                |           |                           |
| CB4856 CT III                                                                                 | 11224800 | 11227125 | WBGene00006556 | tbx-37    | Y47D3A.12                 |
| 0.0195579304513132 AGIWUR19564                                                                |          |          |                |           |                           |
| CB4856 CT III                                                                                 | 11235581 | 11236868 | WBGene00012927 | Y47D3A.14 | Y47D3A.14                 |
| -0.160470649691176 AGIWUR18209;AGIWUR21353                                                    |          |          |                |           |                           |
| CB4856 CT III                                                                                 | 11237149 | 11238252 | WBGene00012928 | aakb-2    | Y47D3A.15                 |
| -0.0366260945755137 AGIWUR26897                                                               |          |          |                |           |                           |
| CB4856 CT III                                                                                 | 11245120 | 11252281 | WBGene00012929 | rsks-1    | Y47D3A.16                 |
| -0.198911370583157 AGIWUR17817;AGIWUR19720                                                    |          |          |                |           |                           |
| CB4856 CT III                                                                                 | 11252391 | 11256646 | WBGene00012938 | Y47D3A.32 | Y47D3A.32                 |
| 0.281817577757721 AGIWUR9222                                                                  |          |          |                |           |                           |
| CB4856 CT III                                                                                 | 11257307 | 11270875 | WBGene00012930 | obr-1     | Y47D3A.17                 |
| -0.0248773133419959 AGIWUR4034                                                                |          |          |                |           |                           |

|                                                                                        |                                                                                             |          |                |           |                             |
|----------------------------------------------------------------------------------------|---------------------------------------------------------------------------------------------|----------|----------------|-----------|-----------------------------|
| CB4856 CT III<br>-0.00369467202297358                                                  | 11274901<br>AGIWUR17656                                                                     | 11276032 | WBGene00012931 | Y47D3A.20 | Y47D3A.20                   |
| CB4856 CT III<br>-0.0398231726040983                                                   | 11276292<br>AGIWUR43113                                                                     | 11278917 | WBGene00012932 | Y47D3A.21 | Y47D3A.21                   |
| CB4856 CT III<br>-0.297924915790283                                                    | 11279021<br>AGIWUR10346                                                                     | 11290580 | WBGene00012934 | gly-9     | Y47D3A.23                   |
| CB4856 CT III<br>0.245106102816056                                                     | 11290911<br>AGIWUR11729                                                                     | 11306145 | WBGene00004873 | smc-3     | Y47D3A.26                   |
| CB4856 CT III<br>-0.0722840985383506                                                   | 11306560<br>AGIWUR2957;AGIWUR6937;AGIWUR24812;AGIWUR25485;AGIWUR28738;AGIWUR36629           | 11311566 | WBGene00004284 | rab-35    | Y47D3A.25                   |
| CB4856 CT III<br>-0.110579184760079                                                    | 11312251<br>AGIWUR30380                                                                     | 11317055 | WBGene00006563 | teg-1     | Y47D3A.27                   |
| CB4856 CT III<br>0.0201364032022617                                                    | 11317570<br>AGIWUR37595                                                                     | 11326664 | WBGene00012935 | mcm-10    | Y47D3A.28                   |
| CB4856 CT III<br>-0.000811595414276667                                                 | 11326654<br>AGIWUR8625                                                                      | 11343108 | WBGene00012126 | T28D6.6   | T28D6.6                     |
| CB4856 CT III<br>AGIWUR8411                                                            | 11343272                                                                                    | 11344147 | WBGene00003975 | pen-2     | T28D6.9 0.0101130137170724  |
| CB4856 CT III<br>AGIWUR10769                                                           | 11344255                                                                                    | 11346789 | WBGene00012127 | T28D6.7   | T28D6.7 -0.0489922386342627 |
| CB4856 CT III<br>AGIWUR36605                                                           | 11360456                                                                                    | 11366214 | WBGene00012124 | T28D6.4   | T28D6.4 0.352505881594336   |
| CB4856 CT III<br>AGIWUR3710;AGIWUR7468;AGIWUR14018;AGIWUR35762;AGIWUR40316;AGIWUR41376 | 11366618                                                                                    | 11368435 | WBGene00012123 | T28D6.3   | T28D6.3 -0.115296367999898  |
| CB4856 CT III<br>AGIWUR715;AGIWUR5371;AGIWUR29133;AGIWUR32168;AGIWUR42111              | 11368415                                                                                    | 11371775 | WBGene00006533 | tba-7     | T28D6.2 -0.0563522264607119 |
| CB4856 CT III<br>0.143861624413716                                                     | 11372886<br>AGIWUR12436;AGIWUR13772                                                         | 11377980 | WBGene00001077 | dpy-18    | Y47D3B.10                   |
| CB4856 CT III<br>0.476171814968513                                                     | 11382222<br>AGIWUR1218;AGIWUR5068;AGIWUR16542                                               | 11388669 | WBGene00012939 | Y47D3B.1  | Y47D3B.1                    |
| CB4856 CT III<br>-0.197689784790373                                                    | 11388606<br>AGIWUR821;AGIWUR1951;AGIWUR3467;AGIWUR16106;AGIWUR18641;AGIWUR34936;AGIWUR40877 | 11393261 | WBGene00003759 | nlp-21    | Y47D3B.2                    |
| CB4856 CT III<br>-0.381840457063403                                                    | 11403017<br>AGIWUR10572;AGIWUR15106;AGIWUR27216                                             | 11404197 | WBGene00185055 | Y47D3B.12 | Y47D3B.12                   |
| CB4856 CT III<br>-0.0167845272398424                                                   | 11405361<br>AGIWUR6626;AGIWUR12982;AGIWUR13920;AGIWUR22355;AGIWUR36034                      | 11409425 | WBGene00012941 | Y47D3B.4  | Y47D3B.4                    |
| CB4856 CT III<br>0.240108007738542                                                     | 11410712<br>AGIWUR26655                                                                     | 11424655 | WBGene00006683 | twk-31    | Y47D3B.5                    |
| CB4856 CT III                                                                          | 11427135                                                                                    | 11428414 | WBGene00012942 | Y47D3B.6  | Y47D3B.6                    |

|                     |                                                                                  |
|---------------------|----------------------------------------------------------------------------------|
| -0.0585999441739151 | AGIWUR2691;AGIWUR6711;AGIWUR8090;AGIWUR16063;AGIWUR19274;AGIWUR21033;AGIWUR42739 |
| CB4856 CT III       | 11428367 11442566 WBGene00004735 sbp-1 Y47D3B.7                                  |
| 0.329457709308787   | AGIWUR35305                                                                      |
| CB4856 CT III       | 11456877 11462897 WBGene00023404 plr-1 Y47D3B.11                                 |
| 0.0845879822820166  | AGIWUR38850                                                                      |
| CB4856 CT III       | 11463665 11470805 WBGene00012943 bed-2 Y47D3B.9                                  |
| 0.184565694451567   | AGIWUR34421                                                                      |
| CB4856 CT III       | 11482603 11484244 WBGene00013421 fbxa-220 Y66A7A.1                               |
| 0.194108468325247   | AGIWUR9425                                                                       |
| CB4856 CT III       | 11485474 11487345 WBGene00013422 Y66A7A.2 Y66A7A.2                               |
| -0.220376135889801  | AGIWUR6555                                                                       |
| CB4856 CT III       | 11488355 11500747 WBGene00013447 nars-2 Y66D12A.23                               |
| -0.348240441221611  | AGIWUR8032;AGIWUR18572;AGIWUR36913                                               |
| CB4856 CT III       | 11500867 11502852 WBGene00006573 tin-10 Y66D12A.22                               |
| -0.348529492102957  | AGIWUR23071                                                                      |
| CB4856 CT III       | 11502963 11505291 WBGene00013446 Y66D12A.21 Y66D12A.21                           |
| -0.0555814692081755 | AGIWUR236;AGIWUR33308                                                            |
| CB4856 CT III       | 11505535 11508919 WBGene00004960 spe-6 Y66D12A.20                                |
| -0.222982686023858  | AGIWUR19592                                                                      |
| CB4856 CT III       | 11509081 11511467 WBGene00013445 Y66D12A.19 Y66D12A.19                           |
| -0.321874333556411  | AGIWUR6432;AGIWUR11711                                                           |
| CB4856 CT III       | 11512860 11523759 WBGene00013443 such-1 Y66D12A.17                               |
| 0.177527254050588   | AGIWUR42355                                                                      |
| CB4856 CT III       | 11524322 11526564 WBGene00013442 Y66D12A.16 Y66D12A.16                           |
| -0.232878568763034  | AGIWUR24201                                                                      |
| CB4856 CT III       | 11526372 11534595 WBGene00013441 xpb-1 Y66D12A.15                                |
| -0.0125817880076369 | AGIWUR3323                                                                       |
| CB4856 CT III       | 11534674 11546669 WBGene00013440 nrps-1 Y66D12A.14                               |
| 0.392516107759096   | AGIWUR32086                                                                      |
| CB4856 CT III       | 11548377 11552398 WBGene00013439 Y66D12A.13 Y66D12A.13                           |
| 0.0418956790754041  | AGIWUR43703                                                                      |
| CB4856 CT III       | 11561152 11562655 WBGene00013438 ztf-29 Y66D12A.12                               |
| -0.162475746420359  | AGIWUR30629                                                                      |
| CB4856 CT III       | 11563467 11565536 WBGene00013437 Y66D12A.11 Y66D12A.11                           |
| 0.0637039282068379  | AGIWUR7037;AGIWUR9963;AGIWUR19649                                                |
| CB4856 CT III       | 11565833 11568007 WBGene00013436 Y66D12A.10 Y66D12A.10                           |
| -0.252438201811387  | AGIWUR19129                                                                      |
| CB4856 CT III       | 11568137 11573343 WBGene00013435 Y66D12A.9 Y66D12A.9                             |
| 0.519044544728883   | AGIWUR11078                                                                      |

|                                                                                                                                                                                 |                                                                      |          |                |           |           |
|---------------------------------------------------------------------------------------------------------------------------------------------------------------------------------|----------------------------------------------------------------------|----------|----------------|-----------|-----------|
| CB4856 CT III                                                                                                                                                                   | 11574221                                                             | 11578752 | WBGene00013434 | Y66D12A.8 | Y66D12A.8 |
| -0.0890783020614441                                                                                                                                                             | AGIWUR27440;AGIWUR44945                                              |          |                |           |           |
| CB4856 CT III                                                                                                                                                                   | 11579265                                                             | 11580478 | WBGene00013433 | Y66D12A.7 | Y66D12A.7 |
| -0.0889950100169923                                                                                                                                                             | AGIWUR7522                                                           |          |                |           |           |
| CB4856 CT III                                                                                                                                                                   | 11580694                                                             | 11581402 | WBGene00013432 | Y66D12A.6 | Y66D12A.6 |
| 0.109908339056055                                                                                                                                                               | AGIWUR18421                                                          |          |                |           |           |
| CB4856 CT III                                                                                                                                                                   | 11581600                                                             | 11589133 | WBGene00013431 | ceh-92    | Y66D12A.5 |
| -0.338387425018541                                                                                                                                                              | AGIWUR8014;AGIWUR41570                                               |          |                |           |           |
| CB4856 CT III                                                                                                                                                                   | 11589211                                                             | 11592837 | WBGene00013429 | Y66D12A.3 | Y66D12A.3 |
| 0.0791942469624516                                                                                                                                                              | AGIWUR32063                                                          |          |                |           |           |
| CB4856 CT III                                                                                                                                                                   | 11608170                                                             | 11609082 | WBGene00013427 | Y66D12A.1 | Y66D12A.1 |
| 0.107296852861058                                                                                                                                                               | AGIWUR31529                                                          |          |                |           |           |
| CB4856 CT III                                                                                                                                                                   | 11612607                                                             | 11615707 | WBGene00013424 | Y66A7A.4  | Y66A7A.4  |
| 0.110501794697701                                                                                                                                                               | AGIWUR22804                                                          |          |                |           |           |
| CB4856 CT III                                                                                                                                                                   | 11616758                                                             | 11623991 | WBGene00013425 | ceh-91    | Y66A7A.5  |
| 0.0292227341434081                                                                                                                                                              | AGIWUR26537                                                          |          |                |           |           |
| CB4856 CT III                                                                                                                                                                   | 11624991                                                             | 11628238 | WBGene00001633 | gly-8     | Y66A7A.6  |
| -0.480153917533894                                                                                                                                                              | AGIWUR39593                                                          |          |                |           |           |
| CB4856 CT III                                                                                                                                                                   | 11628386                                                             | 11631014 | WBGene00013426 | Y66A7A.7  | Y66A7A.7  |
| -0.168510448896582                                                                                                                                                              | AGIWUR39184                                                          |          |                |           |           |
| CB4856 CT III                                                                                                                                                                   | 11633216                                                             | 11636840 | WBGene00006552 | tbx-33    | Y66A7A.8  |
| -0.0205322969644115                                                                                                                                                             | AGIWUR1180                                                           |          |                |           |           |
| CB4856 CT III                                                                                                                                                                   | 11641461                                                             | 11641861 | WBGene00012760 | Y41C4A.17 | Y41C4A.17 |
| -0.0321098526178059                                                                                                                                                             | AGIWUR15250;AGIWUR16680;AGIWUR23606;AGIWUR24686;AGIWUR39423          |          |                |           |           |
| CB4856 CT III                                                                                                                                                                   | 11647769                                                             | 11649893 | WBGene00012749 | Y41C4A.1  | Y41C4A.1  |
| -0.111552107247185                                                                                                                                                              | AGIWUR15681                                                          |          |                |           |           |
| CB4856 CT III                                                                                                                                                                   | 11650471                                                             | 11656185 | WBGene00012750 | faah-6    | Y41C4A.2  |
| 0.417857578119197                                                                                                                                                               | AGIWUR17139                                                          |          |                |           |           |
| CB4856 CT III                                                                                                                                                                   | 11657738                                                             | 11693837 | WBGene00000793 | crh-1     | Y41C4A.4  |
| -0.0600383431467861                                                                                                                                                             |                                                                      |          |                |           |           |
| AGIWUR743;AGIWUR3806;AGIWUR4913;AGIWUR12286;AGIWUR22855;AGIWUR24059;AGIWUR26704;AGIWUR27210;AGIWUR28416;AGIWUR33693;AGIWUR35499;AGIWUR40809;AGIWUR41451;AGIWUR42718;AGIWUR43847 |                                                                      |          |                |           |           |
| CB4856 CT III                                                                                                                                                                   | 11696599                                                             | 11698306 | WBGene00012753 | Y41C4A.6  | Y41C4A.6  |
| -0.115446822971863                                                                                                                                                              | AGIWUR279;AGIWUR8193;AGIWUR16575;AGIWUR27230;AGIWUR37467;AGIWUR44508 |          |                |           |           |
| CB4856 CT III                                                                                                                                                                   | 11698869                                                             | 11700087 | WBGene00012754 | Y41C4A.7  | Y41C4A.7  |
| -0.321103339935763                                                                                                                                                              | AGIWUR34332                                                          |          |                |           |           |
| CB4856 CT III                                                                                                                                                                   | 11700285                                                             | 11702856 | WBGene00004165 | pqn-84    | Y41C4A.5  |
| -0.206966550209426                                                                                                                                                              | AGIWUR28537                                                          |          |                |           |           |
| CB4856 CT III                                                                                                                                                                   | 11703885                                                             | 11705091 | WBGene00000670 | col-95    | Y41C4A.16 |



|                     |                                                                        |          |                |           |           |
|---------------------|------------------------------------------------------------------------|----------|----------------|-----------|-----------|
| 0.94016343822587    | AGIWUR43392                                                            |          |                |           |           |
| CB4856 CT III       | 11705713                                                               | 11706644 | WBGene00000671 | col-96    | Y41C4A.19 |
| -0.403787655797608  | AGIWUR15044                                                            |          |                |           |           |
| CB4856 CT III       | 11706969                                                               | 11708820 | WBGene00012755 | Y41C4A.8  | Y41C4A.8  |
| -0.301838029739702  | AGIWUR314                                                              |          |                |           |           |
| CB4856 CT III       | 11710827                                                               | 11718741 | WBGene00012756 | Y41C4A.9  | Y41C4A.9  |
| 0.262068449824206   | AGIWUR36806                                                            |          |                |           |           |
| CB4856 CT III       | 11718834                                                               | 11719450 | WBGene00001235 | elb-1     | Y41C4A.10 |
| -0.0343891351634689 | AGIWUR44409                                                            |          |                |           |           |
| CB4856 CT III       | 11721706                                                               | 11723602 | WBGene00270321 | Y41C4A.32 | Y41C4A.32 |
| -1.50737829347757   | AGIWUR18044                                                            |          |                |           |           |
| CB4856 CT III       | 11724038                                                               | 11726690 | WBGene00012758 | Y41C4A.12 | Y41C4A.12 |
| 0.0925744181585824  | AGIWUR11342;AGIWUR37933                                                |          |                |           |           |
| CB4856 CT III       | 11730612                                                               | 11731305 | WBGene00012761 | Y41C4A.18 | Y41C4A.18 |
| -0.0736319515455399 | AGIWUR22498                                                            |          |                |           |           |
| CB4856 CT III       | 11733346                                                               | 11737627 | WBGene00012759 | sup-1     | Y41C4A.13 |
| -0.234013469809998  | AGIWUR24400                                                            |          |                |           |           |
| CB4856 CT III       | 11747042                                                               | 11750160 | WBGene00003417 | mrt-2     | Y41C4A.14 |
| -0.145596710312331  | AGIWUR6066                                                             |          |                |           |           |
| CB4856 CT III       | 11751320                                                               | 11773681 | WBGene00007703 | gbf-1     | C24H11.7  |
| -0.252231421601378  | AGIWUR21724                                                            |          |                |           |           |
| CB4856 CT III       | 11774950                                                               | 11776675 | WBGene00007021 | immp-1    | C24H11.6  |
| -0.206904341390061  | AGIWUR14285;AGIWUR14709;AGIWUR24365;AGIWUR28971;AGIWUR37179            |          |                |           |           |
| CB4856 CT III       | 11777625                                                               | 11779629 | WBGene00007704 | mdt-21    | C24H11.9  |
| -0.416431998033531  | AGIWUR15738                                                            |          |                |           |           |
| CB4856 CT III       | 11780235                                                               | 11781035 | WBGene00007702 | C24H11.5  | C24H11.5  |
| -0.0776194219862143 | AGIWUR9878;AGIWUR11324;AGIWUR14573;AGIWUR14995;AGIWUR23570;AGIWUR25385 |          |                |           |           |
| CB4856 CT III       | 11782112                                                               | 11784074 | WBGene00007701 | srd-74    | C24H11.4  |
| -0.179514855850409  | AGIWUR22266                                                            |          |                |           |           |
| CB4856 CT III       | 11784147                                                               | 11786052 | WBGene00006557 | tbx-38    | C24H11.3  |
| -0.0412596695604606 | AGIWUR8227                                                             |          |                |           |           |
| CB4856 CT III       | 11795748                                                               | 11803243 | WBGene00006690 | twk-39    | C24H11.8  |
| -0.0626262974072804 | AGIWUR3472;AGIWUR15834                                                 |          |                |           |           |
| CB4856 CT III       | 11804547                                                               | 11806795 | WBGene00044232 | C18D11.7  | C18D11.7  |
| -0.196135918692066  | AGIWUR6793;AGIWUR14078                                                 |          |                |           |           |
| CB4856 CT III       | 11809118                                                               | 11809561 | WBGene00045211 | C18D11.9  | C18D11.9  |
| -0.789141760745357  | AGIWUR1937;AGIWUR17901;AGIWUR26015;AGIWUR27348                         |          |                |           |           |
| CB4856 CT III       | 11810556                                                               | 11811046 | WBGene00007682 | C18D11.6  | C18D11.6  |
| 0.393230561492231   | AGIWUR24374;AGIWUR28866                                                |          |                |           |           |

|                                      |                                                                                                                                                          |          |                |           |           |
|--------------------------------------|----------------------------------------------------------------------------------------------------------------------------------------------------------|----------|----------------|-----------|-----------|
| CB4856 CT III<br>-0.217302357014903  | 11816569<br>AGIWUR30952                                                                                                                                  | 11819806 | WBGene00007679 | C18D11.1  | C18D11.1  |
| CB4856 CT III<br>0.104649838124288   | 11819745<br>AGIWUR10358;AGIWUR12232;AGIWUR27929                                                                                                          | 11822526 | WBGene00007680 | maa-1     | C18D11.2  |
| CB4856 CT III<br>-0.056284644016408  | 11823327<br>AGIWUR37930                                                                                                                                  | 11824975 | WBGene00007681 | C18D11.3  | C18D11.3  |
| CB4856 CT III<br>-0.228085364860508  | 11826215<br>AGIWUR491;AGIWUR962                                                                                                                          | 11830996 | WBGene00004705 | rsp-8     | C18D11.4  |
| CB4856 CT III<br>0.159137461688866   | 11831008<br>AGIWUR15901;AGIWUR41835                                                                                                                      | 11846465 | WBGene00003826 | ntl-3     | Y56A3A.1  |
| CB4856 CT III<br>0.0513628186254333  | 11848152<br>AGIWUR51                                                                                                                                     | 11849522 | WBGene00003234 | mif-1     | Y56A3A.3  |
| CB4856 CT III<br>0.0754136267902235  | 11849951<br>AGIWUR6842;AGIWUR31751                                                                                                                       | 11862249 | WBGene00013225 | Y56A3A.2  | Y56A3A.2  |
| CB4856 CT III<br>-0.055128050549949  | 11862393<br>AGIWUR32671;AGIWUR32932                                                                                                                      | 11869281 | WBGene00006396 | taf-12    | Y56A3A.4  |
| CB4856 CT III<br>0.368492926487075   | 11871252<br>AGIWUR9530                                                                                                                                   | 11878889 | WBGene00013227 | Y56A3A.6  | Y56A3A.6  |
| CB4856 CT III<br>-0.100631281374231  | 11886485<br>AGIWUR23762                                                                                                                                  | 11891435 | WBGene00013226 | faah-5    | Y56A3A.5  |
| CB4856 CT III<br>-0.0808366637506666 | 11894784<br>AGIWUR30976;AGIWUR31534;AGIWUR41043                                                                                                          | 11898269 | WBGene00013231 | tsen-2    | Y56A3A.11 |
| CB4856 CT III<br>-0.259913860074402  | 11899337<br>AGIWUR22557                                                                                                                                  | 11907387 | WBGene00013232 | faah-4    | Y56A3A.12 |
| CB4856 CT III<br>0.229753497925833   | 11907477<br>AGIWUR5241                                                                                                                                   | 11908474 | WBGene00013233 | sdz-33    | Y56A3A.14 |
| CB4856 CT III<br>-0.42617561726146   | 11915151<br>AGIWUR10004;AGIWUR20598;AGIWUR30622                                                                                                          | 11915712 | WBGene00013237 | Y56A3A.19 | Y56A3A.19 |
| CB4856 CT III<br>-0.122572934197998  | 11915891<br>AGIWUR6396;AGIWUR6847;AGIWUR9066;AGIWUR15726;AGIWUR16215;AGIWUR18214;AGIWUR27133;AGIWUR28029;AGIWUR29924;AGIWUR30267;AGIWUR33353;AGIWUR41005 | 11917876 | WBGene00003802 | npp-16    | Y56A3A.17 |
| CB4856 CT III<br>-0.225837799007691  | 11918828<br>AGIWUR3851;AGIWUR4029;AGIWUR6652;AGIWUR15305;AGIWUR22050;AGIWUR33330;AGIWUR35362;AGIWUR41944                                                 | 11920237 | WBGene00000369 | ccf-1     | Y56A3A.20 |
| CB4856 CT III<br>0.113065948744502   | 11920716<br>AGIWUR42080                                                                                                                                  | 11921590 | WBGene00013238 | trap-4    | Y56A3A.21 |
| CB4856 CT III<br>-0.245091948425809  | 11921692<br>AGIWUR24269                                                                                                                                  | 11923825 | WBGene00013239 | Y56A3A.22 | Y56A3A.22 |

|                     |                                                                                 |          |                |           |           |
|---------------------|---------------------------------------------------------------------------------|----------|----------------|-----------|-----------|
| CB4856 CT III       | 11923886                                                                        | 11929376 | WBGene00003594 | nft-1     | Y56A3A.13 |
| -0.0491492350356015 | AGIWUR21699                                                                     |          |                |           |           |
| CB4856 CT III       | 11929889                                                                        | 11933639 | WBGene00044233 | Y56A3A.36 | Y56A3A.36 |
| -0.327676159187463  | AGIWUR5818;AGIWUR35337;AGIWUR37064                                              |          |                |           |           |
| CB4856 CT III       | 11934002                                                                        | 11947017 | WBGene00013228 | Y56A3A.7  | Y56A3A.7  |
| -0.0135695299143537 | AGIWUR6563;AGIWUR12033                                                          |          |                |           |           |
| CB4856 CT III       | 11949918                                                                        | 11960180 | WBGene00006596 | top-3     | Y56A3A.27 |
| -0.254408253763877  | AGIWUR2678                                                                      |          |                |           |           |
| CB4856 CT III       | 11961470                                                                        | 11971367 | WBGene00013240 | Y56A3A.28 | Y56A3A.28 |
| -0.295341810692231  | AGIWUR1138;AGIWUR8487                                                           |          |                |           |           |
| CB4856 CT III       | 11971461                                                                        | 11974092 | WBGene00013241 | ung-1     | Y56A3A.29 |
| -0.0487914071801523 | AGIWUR5152;AGIWUR6264;AGIWUR7720                                                |          |                |           |           |
| CB4856 CT III       | 11974077                                                                        | 11979065 | WBGene00013242 | Y56A3A.30 | Y56A3A.30 |
| -0.077228538999627  | AGIWUR1081                                                                      |          |                |           |           |
| CB4856 CT III       | 11974477                                                                        | 11989885 | WBGene00013243 | Y56A3A.31 | Y56A3A.31 |
| -0.314365705580368  | AGIWUR3812                                                                      |          |                |           |           |
| CB4856 CT III       | 11990167                                                                        | 11999552 | WBGene00006937 | wah-1     | Y56A3A.32 |
| -0.184395897817421  | AGIWUR2501;AGIWUR3631;AGIWUR34419;AGIWUR35517;AGIWUR35901;AGIWUR45018           |          |                |           |           |
| CB4856 CT III       | 11999497                                                                        | 12002950 | WBGene00013244 | Y56A3A.33 | Y56A3A.33 |
| 0.0333633443475536  | AGIWUR10400;AGIWUR17573;AGIWUR27018                                             |          |                |           |           |
| CB4856 CT III       | 12020552                                                                        | 12025325 | WBGene00000273 | brp-1     | Y79H2A.1  |
| 0.371968348946814   | AGIWUR20615                                                                     |          |                |           |           |
| CB4856 CT III       | 12025559                                                                        | 12028811 | WBGene00043997 | Y79H2A.12 | Y79H2A.12 |
| 0.160057099606504   | AGIWUR31274;AGIWUR37681                                                         |          |                |           |           |
| CB4856 CT III       | 12028969                                                                        | 12030769 | WBGene00013579 | Y79H2A.2  | Y79H2A.2  |
| 0.128387743039062   | AGIWUR21385;AGIWUR43928                                                         |          |                |           |           |
| CB4856 CT III       | 12031516                                                                        | 12052303 | WBGene00013580 | Y79H2A.3  | Y79H2A.3  |
| -0.238937266087892  | AGIWUR3496;AGIWUR4375;AGIWUR5043;AGIWUR7222;AGIWUR15628;AGIWUR20046;AGIWUR38151 |          |                |           |           |
| CB4856 CT III       | 12052424                                                                        | 12058458 | WBGene00000201 | arx-3     | Y79H2A.6  |
| -0.0440907599645666 | AGIWUR26668                                                                     |          |                |           |           |
| CB4856 CT III       | 12058844                                                                        | 12072293 | WBGene00006993 | zyg-8     | Y79H2A.11 |
| 0.127253363077275   | AGIWUR36623;AGIWUR44842                                                         |          |                |           |           |
| CB4856 CT III       | 12074290                                                                        | 12077556 | WBGene00004024 | php-3     | Y75B8A.1  |
| 0.108096231912784   | AGIWUR9119                                                                      |          |                |           |           |
| CB4856 CT III       | 12077788                                                                        | 12084320 | WBGene00003779 | nob-1     | Y75B8A.2  |
| 0.393424393278269   | AGIWUR2669;AGIWUR13194                                                          |          |                |           |           |
| CB4856 CT III       | 12101810                                                                        | 12106597 | WBGene00013540 | Y75B8A.3  | Y75B8A.3  |
| 0.187394496830876   | AGIWUR41000                                                                     |          |                |           |           |
| CB4856 CT III       | 12107774                                                                        | 12113471 | WBGene00013541 | lonp-2    | Y75B8A.4  |

|                      |                                                                        |          |                |           |           |
|----------------------|------------------------------------------------------------------------|----------|----------------|-----------|-----------|
| 0.0921619216957712   | AGIWUR44655                                                            |          |                |           |           |
| CB4856 CT III        | 12114577                                                               | 12118470 | WBGene00013542 | Iron-12   | Y75B8A.5  |
| -0.324045461331659   | AGIWUR24439                                                            |          |                |           |           |
| CB4856 CT III        | 12123881                                                               | 12130352 | WBGene00013543 | Y75B8A.6  | Y75B8A.6  |
| 0.393553464515493    | AGIWUR12891                                                            |          |                |           |           |
| CB4856 CT III        | 12152899                                                               | 12160100 | WBGene00013544 | Y75B8A.7  | Y75B8A.7  |
| -0.455777842656362   | AGIWUR40081                                                            |          |                |           |           |
| CB4856 CT III        | 12160758                                                               | 12171356 | WBGene00013545 | Y75B8A.8  | Y75B8A.8  |
| 0.027436849678784    | AGIWUR8629                                                             |          |                |           |           |
| CB4856 CT III        | 12171353                                                               | 12177245 | WBGene00001636 | gly-11    | Y75B8A.9  |
| 0.0949019027976461   | AGIWUR185;AGIWUR4639;AGIWUR34343;AGIWUR43642                           |          |                |           |           |
| CB4856 CT III        | 12180960                                                               | 12183013 | WBGene00013547 | Y75B8A.10 | Y75B8A.10 |
| -0.302660946537172   | AGIWUR41582                                                            |          |                |           |           |
| CB4856 CT III        | 12186411                                                               | 12190116 | WBGene00013548 | Y75B8A.11 | Y75B8A.11 |
| 0.406024974561672    | AGIWUR9380                                                             |          |                |           |           |
| CB4856 CT III        | 12191056                                                               | 12202450 | WBGene00003892 | osm-12    | Y75B8A.12 |
| 0.603134718779577    | AGIWUR1812;AGIWUR18881;AGIWUR24126                                     |          |                |           |           |
| CB4856 CT III        | 12203822                                                               | 12215686 | WBGene00013549 | Y75B8A.13 | Y75B8A.13 |
| -0.218967668748944   | AGIWUR19945;AGIWUR20922;AGIWUR30232;AGIWUR36978                        |          |                |           |           |
| CB4856 CT III        | 12216779                                                               | 12218634 | WBGene00013550 | Y75B8A.14 | Y75B8A.14 |
| 0.359750591685184    | AGIWUR9294                                                             |          |                |           |           |
| CB4856 CT III        | 12218990                                                               | 12223934 | WBGene00013551 | Y75B8A.16 | Y75B8A.16 |
| -0.254521136223051   | AGIWUR33754                                                            |          |                |           |           |
| CB4856 CT III        | 12224487                                                               | 12225331 | WBGene00013552 | gmn-1     | Y75B8A.17 |
| 0.0266412461298837   | AGIWUR1240;AGIWUR23735;AGIWUR30289;AGIWUR30706;AGIWUR31045;AGIWUR33207 |          |                |           |           |
| CB4856 CT III        | 12225638                                                               | 12226267 | WBGene00013553 | Y75B8A.18 | Y75B8A.18 |
| -0.00747760142503751 | AGIWUR31363                                                            |          |                |           |           |
| CB4856 CT III        | 12226632                                                               | 12232241 | WBGene00013554 | Y75B8A.19 | Y75B8A.19 |
| 0.095554574393768    | AGIWUR15908;AGIWUR16398;AGIWUR29200                                    |          |                |           |           |
| CB4856 CT III        | 12232632                                                               | 12235711 | WBGene00001724 | grl-15    | Y75B8A.20 |
| -0.11424020903838    | AGIWUR20943                                                            |          |                |           |           |
| CB4856 CT III        | 12240367                                                               | 12250164 | WBGene00006571 | tim-1     | Y75B8A.22 |
| -0.221168377960639   | AGIWUR1647;AGIWUR6048;AGIWUR11763                                      |          |                |           |           |
| CB4856 CT III        | 12250602                                                               | 12251009 | WBGene00013556 | Y75B8A.23 | Y75B8A.23 |
| 0.00355843790524446  | AGIWUR30023                                                            |          |                |           |           |
| CB4856 CT III        | 12251492                                                               | 12273692 | WBGene00013557 | Y75B8A.24 | Y75B8A.24 |
| -0.142991347925468   | AGIWUR17796                                                            |          |                |           |           |
| CB4856 CT III        | 12274040                                                               | 12282221 | WBGene00013558 | Y75B8A.25 | Y75B8A.25 |
| 0.0200537630765272   | AGIWUR29151                                                            |          |                |           |           |

|                                                                                               |                                                             |          |                |           |           |           |
|-----------------------------------------------------------------------------------------------|-------------------------------------------------------------|----------|----------------|-----------|-----------|-----------|
| CB4856 CT III                                                                                 | 12283208                                                    | 12303216 | WBGene00003414 | mrp-8     | Y75B8A.26 |           |
| -0.0250614006231831                                                                           | AGIWUR6025;AGIWUR14868;AGIWUR30937;AGIWUR39033              |          |                |           |           |           |
| CB4856 CT III                                                                                 | 12307771                                                    | 12311924 | WBGene00004172 | pqn-92    | Y75B8A.27 |           |
| 0.329852313735213                                                                             | AGIWUR41336                                                 |          |                |           |           |           |
| CB4856 CT III                                                                                 | 12313287                                                    | 12314403 | WBGene00023483 | Y75B8A.39 |           | Y75B8A.39 |
| 0.848497018249763                                                                             | AGIWUR2361                                                  |          |                |           |           |           |
| CB4856 CT III                                                                                 | 12315479                                                    | 12315857 | WBGene00013565 | Y75B8A.37 |           | Y75B8A.37 |
| 0.140202539670053                                                                             | AGIWUR38393                                                 |          |                |           |           |           |
| CB4856 CT III                                                                                 | 12319108                                                    | 12323771 | WBGene00013559 | Y75B8A.28 |           | Y75B8A.28 |
| -0.271616841127308                                                                            | AGIWUR24263                                                 |          |                |           |           |           |
| CB4856 CT III                                                                                 | 12327667                                                    | 12332274 | WBGene00013560 | zip-12    | Y75B8A.29 |           |
| -0.14298759349837                                                                             | AGIWUR20625                                                 |          |                |           |           |           |
| CB4856 CT III                                                                                 | 12333745                                                    | 12345347 | WBGene00006986 | zip-1     | Y75B8A.35 |           |
| 0.279877864897587                                                                             | AGIWUR10170                                                 |          |                |           |           |           |
| CB4856 CT III                                                                                 | 12345323                                                    | 12351336 | WBGene00004085 | pph-4.1   | Y75B8A.30 |           |
| 0.161729810887017                                                                             | AGIWUR12115                                                 |          |                |           |           |           |
| CB4856 CT III                                                                                 | 12351642                                                    | 12354925 | WBGene00013561 | Y75B8A.31 |           | Y75B8A.31 |
| -0.0331863805120207                                                                           | AGIWUR12456                                                 |          |                |           |           |           |
| CB4856 CT III                                                                                 | 12354944                                                    | 12358561 | WBGene00013562 | Y75B8A.32 |           | Y75B8A.32 |
| -0.120505829707487                                                                            | AGIWUR36648                                                 |          |                |           |           |           |
| CB4856 CT III                                                                                 | 12359565                                                    | 12361248 | WBGene00013564 | Y75B8A.34 |           | Y75B8A.34 |
| 0.0379160535886758                                                                            | AGIWUR19352;AGIWUR29568;AGIWUR38384                         |          |                |           |           |           |
| CB4856 CT III                                                                                 | 12361859                                                    | 12367373 | WBGene00013563 | Y75B8A.33 |           | Y75B8A.33 |
| 0.0794545553006838                                                                            | AGIWUR20947;AGIWUR37137;AGIWUR37178                         |          |                |           |           |           |
| CB4856 CT III                                                                                 | 12367474                                                    | 12369050 | WBGene00001946 | his-72    | Y49E10.6  |           |
| 0.277032728569791                                                                             | AGIWUR13672;AGIWUR22973;AGIWUR24494;AGIWUR28018;AGIWUR42852 |          |                |           |           |           |
| CB4856 CT III                                                                                 | 12370456                                                    | 12372625 | WBGene00004506 | rpt-6     | Y49E10.1  |           |
| 0.0444643256784119                                                                            | AGIWUR41530                                                 |          |                |           |           |           |
| CB4856 CT III                                                                                 | 12372583                                                    | 12373857 | WBGene00013029 | glrx-5    | Y49E10.2  |           |
| -0.10117698856255                                                                             | AGIWUR36243                                                 |          |                |           |           |           |
| CB4856 CT III                                                                                 | 12374126                                                    | 12377248 | WBGene00004086 | pph-4.2   | Y49E10.3  |           |
| -0.124807384564722                                                                            |                                                             |          |                |           |           |           |
| AGIWUR6473;AGIWUR7787;AGIWUR15115;AGIWUR24606;AGIWUR27782;AGIWUR33390;AGIWUR42004;AGIWUR43090 |                                                             |          |                |           |           |           |
| CB4856 CT III                                                                                 | 12377731                                                    | 12378829 | WBGene00013031 | Y49E10.7  |           | Y49E10.7  |
| 0.159080314428275                                                                             | AGIWUR33767                                                 |          |                |           |           |           |
| CB4856 CT III                                                                                 | 12378724                                                    | 12380647 | WBGene00013030 | Y49E10.4  |           | Y49E10.4  |
| -0.175925692093802                                                                            | AGIWUR12131;AGIWUR22301;AGIWUR32211;AGIWUR38930             |          |                |           |           |           |
| CB4856 CT III                                                                                 | 12387891                                                    | 12388985 | WBGene00014904 | Y49E10.26 |           | Y49E10.26 |
| -0.20304791741744                                                                             | AGIWUR30780                                                 |          |                |           |           |           |

|                       |                                                                         |          |                |            |            |
|-----------------------|-------------------------------------------------------------------------|----------|----------------|------------|------------|
| CB4856 CT III         | 12389885                                                                | 12390556 | WBGene00014903 | Y49E10.8   | Y49E10.8   |
| 0.472026082830336     | AGIWUR24628                                                             |          |                |            |            |
| CB4856 CT III         | 12398901                                                                | 12421570 | WBGene00013034 | tat-1      | Y49E10.11  |
| -0.133672971167618    | AGIWUR15617;AGIWUR18057;AGIWUR27355;AGIWUR34118                         |          |                |            |            |
| CB4856 CT III         | 12426862                                                                | 12429195 | WBGene00004027 | pie-1      | Y49E10.14  |
| -0.0108675004166239   | AGIWUR4842;AGIWUR43801                                                  |          |                |            |            |
| CB4856 CT III         | 12429172                                                                | 12429630 | WBGene00004919 | snr-6      | Y49E10.15  |
| -1.77635683940025e-15 | AGIWUR43554                                                             |          |                |            |            |
| CB4856 CT III         | 12430430                                                                | 12433892 | WBGene00013035 | Y49E10.16  | Y49E10.16  |
| 0.335581648414067     | AGIWUR15845;AGIWUR27141;AGIWUR43362                                     |          |                |            |            |
| CB4856 CT III         | 12436552                                                                | 12441056 | WBGene00013036 | fbxa-218   | Y49E10.17  |
| -0.321781296003233    | AGIWUR23422                                                             |          |                |            |            |
| CB4856 CT III         | 12442630                                                                | 12446145 | WBGene00013037 | Y49E10.18  | Y49E10.18  |
| 0.10956819209496      | AGIWUR10529;AGIWUR24845;AGIWUR26960;AGIWUR29787;AGIWUR32268;AGIWUR34014 |          |                |            |            |
| CB4856 CT III         | 12446353                                                                | 12453202 | WBGene00013038 | ani-1      | Y49E10.19  |
| 0.0737627797232641    | AGIWUR4746                                                              |          |                |            |            |
| CB4856 CT III         | 12453588                                                                | 12456850 | WBGene00013039 | scav-3     | Y49E10.20  |
| 0.0727113571894638    | AGIWUR22103;AGIWUR31816;AGIWUR37790;AGIWUR43918                         |          |                |            |            |
| CB4856 CT III         | 12457599                                                                | 12465821 | WBGene00013040 | Y49E10.21  | Y49E10.21  |
| -0.129574201081947    | AGIWUR105;AGIWUR15140;AGIWUR38802                                       |          |                |            |            |
| CB4856 CT III         | 12466610                                                                | 12468277 | WBGene00013041 | pstk-1     | Y49E10.22  |
| -0.00899450577567507  | AGIWUR13994                                                             |          |                |            |            |
| CB4856 CT III         | 12469169                                                                | 12472541 | WBGene00045239 | Y49E10.29  | Y49E10.29  |
| -0.00956154995777592  | AGIWUR11208;AGIWUR22942;AGIWUR28929;AGIWUR33709;AGIWUR34350;AGIWUR38560 |          |                |            |            |
| CB4856 CT III         | 12472868                                                                | 12484651 | WBGene00013042 | cccp-1     | Y49E10.23  |
| -0.0791818809173641   | AGIWUR13894                                                             |          |                |            |            |
| CB4856 CT III         | 12484732                                                                | 12488339 | WBGene00013043 | arrd-16    | Y49E10.24  |
| -0.0483771259029977   | AGIWUR7495;AGIWUR21391;AGIWUR42175                                      |          |                |            |            |
| CB4856 CT III         | 12488679                                                                | 12492084 | WBGene00013044 | Y49E10.25  | Y49E10.25  |
| -0.445137590290381    | AGIWUR10386                                                             |          |                |            |            |
| CB4856 CT III         | 12492793                                                                | 12495640 | WBGene00013727 | Y111B2A.1  | Y111B2A.1  |
| -0.250788023342642    | AGIWUR15820                                                             |          |                |            |            |
| CB4856 CT III         | 12496538                                                                | 12499352 | WBGene00013729 | Y111B2A.3  | Y111B2A.3  |
| -0.0858548866537898   | AGIWUR8789                                                              |          |                |            |            |
| CB4856 CT III         | 12499557                                                                | 12527924 | WBGene00013730 | sql-1      | Y111B2A.4  |
| -0.14204328285097     | AGIWUR4403;AGIWUR5215;AGIWUR17830;AGIWUR26217;AGIWUR27811               |          |                |            |            |
| CB4856 CT III         | 12528287                                                                | 12536848 | WBGene00014613 | Y111B2A.25 | Y111B2A.25 |
| -0.0421322424312915   | AGIWUR5020;AGIWUR7629;AGIWUR17399;AGIWUR32936;AGIWUR37551               |          |                |            |            |
| CB4856 CT III         | 12538664                                                                | 12575401 | WBGene00013732 | aakg-1     | Y111B2A.8  |

|                                    |                                                                        |          |                |                                     |
|------------------------------------|------------------------------------------------------------------------|----------|----------------|-------------------------------------|
| 0.279483902723097                  | AGIWUR17518;AGIWUR19289;AGIWUR39040;AGIWUR41104;AGIWUR42689            |          |                |                                     |
| CB4856 CT III                      | 12595994                                                               | 12598604 | WBGene00013734 | Y111B2A.10 Y111B2A.10               |
| 0.180453099168765                  | AGIWUR31114;AGIWUR32437                                                |          |                |                                     |
| CB4856 CT III                      | 12599304                                                               | 12608604 | WBGene00007030 | epc-1 Y111B2A.11                    |
| -0.0579887566699888                | AGIWUR24947                                                            |          |                |                                     |
| CB4856 CT III                      | 12609289                                                               | 12623740 | WBGene00013735 | Y111B2A.12 Y111B2A.12               |
| -0.123139977692932                 | AGIWUR1326;AGIWUR15735;AGIWUR23494;AGIWUR25188;AGIWUR27817;AGIWUR29975 |          |                |                                     |
| CB4856 CT III                      | 12624766                                                               | 12625890 | WBGene00013736 | Y111B2A.13 Y111B2A.13               |
| 0.076405544193392                  | AGIWUR7917;AGIWUR20589;AGIWUR21701;AGIWUR22852;AGIWUR24926             |          |                |                                     |
| CB4856 CT III                      | 12626568                                                               | 12651757 | WBGene00004161 | pqn-80 Y111B2A.14                   |
| 0.0542869069394749                 | AGIWUR3950;AGIWUR19275;AGIWUR36462;AGIWUR45159                         |          |                |                                     |
| CB4856 CT III                      | 12652344                                                               | 12662286 | WBGene00013737 | tpst-1 Y111B2A.15                   |
| -0.140485954229032                 | AGIWUR30331                                                            |          |                |                                     |
| CB4856 CT III                      | 12671307                                                               | 12673421 | WBGene00006389 | taf-7.2 Y111B2A.16                  |
| -0.17031817351989                  | AGIWUR31423                                                            |          |                |                                     |
| CB4856 CT III                      | 12673633                                                               | 12686230 | WBGene00013738 | elpc-2 Y111B2A.17                   |
| 0.0773947744114114                 | AGIWUR37084                                                            |          |                |                                     |
| CB4856 CT III                      | 12686243                                                               | 12687916 | WBGene00004700 | rsp-3 Y111B2A.18                    |
| -0.129715819847178                 | AGIWUR5188;AGIWUR13561;AGIWUR19588                                     |          |                |                                     |
| CB4856 CT III                      | 12699494                                                               | 12710888 | WBGene00013742 | sas-1 Y111B2A.24                    |
| -0.182574208945145                 | AGIWUR24021                                                            |          |                |                                     |
| CB4856 CT III                      | 12711506                                                               | 12713874 | WBGene00013740 | hut-1 Y111B2A.20                    |
| -0.335176399017795                 | AGIWUR14912                                                            |          |                |                                     |
| CB4856 CT III                      | 12714566                                                               | 12743929 | WBGene00007027 | ssl-1 Y111B2A.22                    |
| 0.0326573086271154                 | AGIWUR15732;AGIWUR31590;AGIWUR43765                                    |          |                |                                     |
| CB4856 CT III                      | 12746450                                                               | 12747621 | WBGene00013741 | Y111B2A.21 Y111B2A.21               |
| 0.105283954886301                  | AGIWUR15341                                                            |          |                |                                     |
| CB4856 CT III                      | 12747899                                                               | 12750927 | WBGene00013911 | irld-60 ZC482.2 0.153019175697439   |
| AGIWUR8989                         |                                                                        |          |                |                                     |
| CB4856 CT III                      | 12751109                                                               | 12753634 | WBGene00013915 | irld-20 ZC482.7                     |
| -0.000426039884002805              | AGIWUR6282                                                             |          |                |                                     |
| CB4856 CT III                      | 12755348                                                               | 12756613 | WBGene00005757 | srw-10 ZC482.6 0.341984249518188    |
| AGIWUR3866;AGIWUR16156;AGIWUR34190 |                                                                        |          |                |                                     |
| CB4856 CT III                      | 12757667                                                               | 12759619 | WBGene00005756 | srw-9 ZC482.8 -0.0930292101729204   |
| AGIWUR4324                         |                                                                        |          |                |                                     |
| CB4856 CT III                      | 12760684                                                               | 12764341 | WBGene00013912 | irld-19 ZC482.3 -0.0445055224973867 |
| AGIWUR17913                        |                                                                        |          |                |                                     |
| CB4856 CT III                      | 12764553                                                               | 12769048 | WBGene00013913 | irld-61 ZC482.4 -0.0441071206248225 |
| AGIWUR489;AGIWUR22473;AGIWUR34972  |                                                                        |          |                |                                     |

|                                                                   |          |          |                |           |           |                     |
|-------------------------------------------------------------------|----------|----------|----------------|-----------|-----------|---------------------|
| CB4856 CT III                                                     | 12769564 | 12771594 | WBGene00005752 | srw-5     | ZC482.9   | 0.0991243599436595  |
| AGIWUR1998;AGIWUR30084                                            |          |          |                |           |           |                     |
| CB4856 CT III                                                     | 12771878 | 12779726 | WBGene00001512 | gab-1     | ZC482.1   | 0.0480821754576048  |
| AGIWUR28927;AGIWUR31006;AGIWUR38849                               |          |          |                |           |           |                     |
| CB4856 CT III                                                     | 12785154 | 12793128 | WBGene00013914 | lgc-37    | ZC482.5   | 0.0195881097230264  |
| AGIWUR454;AGIWUR11920;AGIWUR37953;AGIWUR45122                     |          |          |                |           |           |                     |
| CB4856 CT III                                                     | 12793386 | 12798157 | WBGene00007210 | agmo-1    | BE10.2    | -0.183105743043701  |
| AGIWUR5835;AGIWUR38227                                            |          |          |                |           |           |                     |
| CB4856 CT III                                                     | 12804599 | 12804761 | WBGene00044128 | BE10.6    | BE10.6    | -0.049172528467988  |
| AGIWUR12532                                                       |          |          |                |           |           |                     |
| CB4856 CT III                                                     | 12806175 | 12806855 | WBGene00044127 | BE10.5    | BE10.5    | -0.0792088560269413 |
| AGIWUR6016;AGIWUR6428;AGIWUR33191;AGIWUR37207;AGIWUR42255         |          |          |                |           |           |                     |
| CB4856 CT III                                                     | 12813541 | 12816798 | WBGene00007212 | BE10.4    | BE10.4    | 0.0403389758680182  |
| AGIWUR5283;AGIWUR14355;AGIWUR17624;AGIWUR23051                    |          |          |                |           |           |                     |
| CB4856 CT III                                                     | 12816789 | 12818100 | WBGene00000203 | arx-5     | Y37D8A.1  |                     |
| -0.242106431341367 AGIWUR8540;AGIWUR16491;AGIWUR26323;AGIWUR42562 |          |          |                |           |           |                     |
| CB4856 CT III                                                     | 12818658 | 12820252 | WBGene00012560 | Y37D8A.25 |           | Y37D8A.25           |
| -0.309406338061388 AGIWUR1537                                     |          |          |                |           |           |                     |
| CB4856 CT III                                                     | 12820141 | 12825651 | WBGene00012544 | Y37D8A.2  |           | Y37D8A.2            |
| -0.191072880264912 AGIWUR281                                      |          |          |                |           |           |                     |
| CB4856 CT III                                                     | 12829368 | 12837274 | WBGene00012545 | Y37D8A.3  |           | Y37D8A.3            |
| 0.0375207745451309 AGIWUR42989                                    |          |          |                |           |           |                     |
| CB4856 CT III                                                     | 12837189 | 12838959 | WBGene00012546 | Y37D8A.4  |           | Y37D8A.4            |
| 0.11732744913976 AGIWUR26272                                      |          |          |                |           |           |                     |
| CB4856 CT III                                                     | 12854051 | 12855315 | WBGene00012547 | Y37D8A.5  |           | Y37D8A.5            |
| 0.181148901518162 AGIWUR12221                                     |          |          |                |           |           |                     |
| CB4856 CT III                                                     | 12855844 | 12856728 | WBGene00012561 | Y37D8A.26 |           | Y37D8A.26           |
| -0.520860216956528 AGIWUR29792                                    |          |          |                |           |           |                     |
| CB4856 CT III                                                     | 12856833 | 12857911 | WBGene00012548 | Y37D8A.6  |           | Y37D8A.6            |
| -0.379178626175035 AGIWUR19054                                    |          |          |                |           |           |                     |
| CB4856 CT III                                                     | 12864948 | 12867591 | WBGene00012549 | Y37D8A.8  |           | Y37D8A.8            |
| 0.259183267060502 AGIWUR42474                                     |          |          |                |           |           |                     |
| CB4856 CT III                                                     | 12871195 | 12874654 | WBGene00003406 | mrg-1     | Y37D8A.9  |                     |
| -0.202956279616092 AGIWUR13050;AGIWUR24765;AGIWUR32619            |          |          |                |           |           |                     |
| CB4856 CT III                                                     | 12875007 | 12875831 | WBGene00012550 | hpo-21    | Y37D8A.10 |                     |
| -0.0396437759107258 AGIWUR36621                                   |          |          |                |           |           |                     |
| CB4856 CT III                                                     | 12875771 | 12877577 | WBGene00012551 | cec-7     | Y37D8A.11 |                     |
| -0.153446910188308 AGIWUR21609                                    |          |          |                |           |           |                     |
| CB4856 CT III                                                     | 12881037 | 12891738 | WBGene00006804 | unc-71    | Y37D8A.13 |                     |



|                                                                                              |                                                                      |          |                |           |           |  |
|----------------------------------------------------------------------------------------------|----------------------------------------------------------------------|----------|----------------|-----------|-----------|--|
| -0.0386898386141858                                                                          | AGIWUR35864                                                          |          |                |           |           |  |
| CB4856 CT III                                                                                | 12905491                                                             | 12906619 | WBGene00012553 | cco-2     | Y37D8A.14 |  |
| -0.0764782343140702                                                                          |                                                                      |          |                |           |           |  |
| AGIWUR611;AGIWUR5718;AGIWUR11609;AGIWUR18775;AGIWUR29351;AGIWUR29790;AGIWUR39376;AGIWUR42144 |                                                                      |          |                |           |           |  |
| CB4856 CT III                                                                                | 12910510                                                             | 12914930 | WBGene0001457  | flp-14    | Y37D8A.15 |  |
| 0.542840835348304                                                                            | AGIWUR36571                                                          |          |                |           |           |  |
| CB4856 CT III                                                                                | 12915118                                                             | 12918675 | WBGene00012554 | Y37D8A.16 | Y37D8A.16 |  |
| 0.705427496044261                                                                            | AGIWUR1963;AGIWUR9465;AGIWUR12505;AGIWUR19886                        |          |                |           |           |  |
| CB4856 CT III                                                                                | 12921282                                                             | 12925997 | WBGene00012555 | Y37D8A.17 | Y37D8A.17 |  |
| -0.0827555350315876                                                                          | AGIWUR34460                                                          |          |                |           |           |  |
| CB4856 CT III                                                                                | 12926557                                                             | 12927886 | WBGene00012556 | mrps-10   | Y37D8A.18 |  |
| -0.0168659785141791                                                                          | AGIWUR32331                                                          |          |                |           |           |  |
| CB4856 CT III                                                                                | 12928370                                                             | 12931867 | WBGene00012558 | Y37D8A.21 | Y37D8A.21 |  |
| -0.157504879511073                                                                           | AGIWUR8071                                                           |          |                |           |           |  |
| CB4856 CT III                                                                                | 12934717                                                             | 12941069 | WBGene00012559 | epg-3     | Y37D8A.22 |  |
| -0.147480831041957                                                                           | AGIWUR15032                                                          |          |                |           |           |  |
| CB4856 CT III                                                                                | 12942617                                                             | 12949899 | WBGene00006762 | unc-25    | Y37D8A.23 |  |
| 0.000426278858800089                                                                         | AGIWUR1644;AGIWUR15904;AGIWUR33380                                   |          |                |           |           |  |
| CB4856 CT III                                                                                | 12951429                                                             | 12952342 | WBGene00012711 | Y39E4A.1  | Y39E4A.1  |  |
| 0.14515644334066                                                                             | AGIWUR25309                                                          |          |                |           |           |  |
| CB4856 CT III                                                                                | 12952969                                                             | 12966995 | WBGene00012712 | ttm-1     | Y39E4A.2  |  |
| -0.158150020754157                                                                           | AGIWUR32890                                                          |          |                |           |           |  |
| CB4856 CT III                                                                                | 12967898                                                             | 12972498 | WBGene00012713 | bckd-1A   | Y39E4A.3  |  |
| -0.237948698887021                                                                           | AGIWUR27070;AGIWUR27757;AGIWUR28392;AGIWUR44309                      |          |                |           |           |  |
| CB4856 CT III                                                                                | 12975068                                                             | 12977862 | WBGene00014176 | ZK1010.2  | ZK1010.2  |  |
| 0.158014054148239                                                                            | AGIWUR29594                                                          |          |                |           |           |  |
| CB4856 CT III                                                                                | 12977910                                                             | 12978523 | WBGene00006728 | ubq-2     | ZK1010.1  |  |
| 0.0071937501683994                                                                           | AGIWUR20435;AGIWUR37225                                              |          |                |           |           |  |
| CB4856 CT III                                                                                | 12979162                                                             | 12980163 | WBGene00014177 | frg-1     | ZK1010.3  |  |
| -0.228012183939659                                                                           | AGIWUR3936;AGIWUR5758;AGIWUR6372;AGIWUR13721;AGIWUR15815;AGIWUR41903 |          |                |           |           |  |
| CB4856 CT III                                                                                | 12981070                                                             | 12984423 | WBGene00014178 | ZK1010.4  | ZK1010.4  |  |
| -0.0618404228550933                                                                          | AGIWUR27206                                                          |          |                |           |           |  |
| CB4856 CT III                                                                                | 12984493                                                             | 12987542 | WBGene00014179 | ZK1010.5  | ZK1010.5  |  |
| 0.0630796690090474                                                                           | AGIWUR17826                                                          |          |                |           |           |  |
| CB4856 CT III                                                                                | 12987672                                                             | 12992492 | WBGene00014180 | ZK1010.6  | ZK1010.6  |  |
| -0.0540375855350455                                                                          | AGIWUR37174                                                          |          |                |           |           |  |
| CB4856 CT III                                                                                | 12992405                                                             | 12993707 | WBGene00000672 | col-97    | ZK1010.7  |  |
| -0.674327968342709                                                                           | AGIWUR142;AGIWUR14870;AGIWUR16747;AGIWUR17138;AGIWUR42663            |          |                |           |           |  |
| CB4856 CT III                                                                                | 12995738                                                             | 13000670 | WBGene00014181 | ZK1010.8  | ZK1010.8  |  |

|                                                                                            |                                     |          |                |                 |                           |
|--------------------------------------------------------------------------------------------|-------------------------------------|----------|----------------|-----------------|---------------------------|
| 0.538709284703936                                                                          | AGIWUR29793                         |          |                |                 |                           |
| CB4856 CT III                                                                              | 13005461                            | 13011130 | WBGene00004906 | snf-7           | ZK1010.9                  |
| -0.107185838314786                                                                         | AGIWUR16387                         |          |                |                 |                           |
| CB4856 CT III                                                                              | 13018935                            | 13020226 | WBGene00000673 | col-98          | F14F7.1 -0.15752499627175 |
| AGIWUR16447                                                                                |                                     |          |                |                 |                           |
| CB4856 CT III                                                                              | 13021009                            | 13023949 | WBGene00008809 | cyp-13A11       | F14F7.2                   |
| -0.0723459300389591                                                                        | AGIWUR22639                         |          |                |                 |                           |
| CB4856 CT III                                                                              | 13024547                            | 13028012 | WBGene00008810 | cyp-13A12       | F14F7.3                   |
| -0.380585956744056                                                                         | AGIWUR44517                         |          |                |                 |                           |
| CB4856 CT III                                                                              | 13028393                            | 13029708 | WBGene00008811 | F14F7.4 F14F7.4 | -0.151334952941143        |
| AGIWUR6007                                                                                 |                                     |          |                |                 |                           |
| CB4856 CT III                                                                              | 13032001                            | 13036344 | WBGene00008812 | F14F7.5 F14F7.5 | -0.423548828342327        |
| AGIWUR42336                                                                                |                                     |          |                |                 |                           |
| CB4856 CT III                                                                              | 13040100                            | 13049434 | WBGene00010073 | F54F12.2        | F54F12.2                  |
| -0.227921264471346                                                                         | AGIWUR36521                         |          |                |                 |                           |
| CB4856 CT III                                                                              | 13049588                            | 13055485 | WBGene00010072 | F54F12.1        | F54F12.1                  |
| 0.372449694923244                                                                          | AGIWUR38600                         |          |                |                 |                           |
| CB4856 CT III                                                                              | 13070756                            | 13074697 | WBGene00012717 | Y39E4B.6        | Y39E4B.6                  |
| 0.227968355308535                                                                          |                                     |          |                |                 |                           |
| AGIWUR1705;AGIWUR3123;AGIWUR5764;AGIWUR6739;AGIWUR9897;AGIWUR11950;AGIWUR14953;AGIWUR16922 |                                     |          |                |                 |                           |
| CB4856 CT III                                                                              | 13087479                            | 13099455 | WBGene00004164 | pqn-83          | Y39E4B.3                  |
| -0.285054107879332                                                                         | AGIWUR3211;AGIWUR22318              |          |                |                 |                           |
| CB4856 CT III                                                                              | 13107607                            | 13119042 | WBGene00012718 | dhhc-8          | Y39E4B.7                  |
| -0.250734822246252                                                                         | AGIWUR17580;AGIWUR37080;AGIWUR41866 |          |                |                 |                           |
| CB4856 CT III                                                                              | 13119820                            | 13133938 | WBGene00006985 | zig-8           | Y39E4B.8                  |
| 0.0292969706160413                                                                         | AGIWUR17456                         |          |                |                 |                           |
| CB4856 CT III                                                                              | 13134014                            | 13139614 | WBGene00000267 | bre-2           | Y39E4B.9                  |
| 0.0129759462271331                                                                         | AGIWUR38640                         |          |                |                 |                           |
| CB4856 CT III                                                                              | 13143373                            | 13152858 | WBGene00012719 | Y39E4B.10       | Y39E4B.10                 |
| -0.38797344869103                                                                          | AGIWUR33059                         |          |                |                 |                           |
| CB4856 CT III                                                                              | 13153817                            | 13160284 | WBGene00012714 | abce-1          | Y39E4B.1                  |
| -0.339001888736291                                                                         | AGIWUR6306                          |          |                |                 |                           |
| CB4856 CT III                                                                              | 13162475                            | 13164864 | WBGene00014884 | Y39E4B.14       | Y39E4B.14                 |
| 0.178706023891408                                                                          | AGIWUR12326;AGIWUR36130;AGIWUR36504 |          |                |                 |                           |
| CB4856 CT III                                                                              | 13165659                            | 13169520 | WBGene00012715 | snpc-1.2        | Y39E4B.2                  |
| -0.0694812527499327                                                                        | AGIWUR31060                         |          |                |                 |                           |
| CB4856 CT III                                                                              | 13169916                            | 13173106 | WBGene00012716 | Y39E4B.5        | Y39E4B.5                  |
| 0.142368124007756                                                                          | AGIWUR43541                         |          |                |                 |                           |
| CB4856 CT III                                                                              | 13187392                            | 13204897 | WBGene00001630 | gly-5           | Y39E4B.12                 |

|                                                                                                             |          |          |                                                                                   |
|-------------------------------------------------------------------------------------------------------------|----------|----------|-----------------------------------------------------------------------------------|
| 0.0720758723446027                                                                                          |          |          | AGIWUR9158;AGIWUR10483;AGIWUR11255;AGIWUR15746;AGIWUR16404;AGIWUR18625            |
| CB4856 CT III                                                                                               | 13204982 | 13207393 | WBGene00012720 Y39E4B.11 Y39E4B.11                                                |
| -0.24935889314734                                                                                           |          |          | AGIWUR445;AGIWUR13620;AGIWUR31679                                                 |
| CB4856 CT III                                                                                               | 13212666 | 13214371 | WBGene00006629 tsp-3 Y39E4B.4                                                     |
| 0.297110550834768                                                                                           |          |          | AGIWUR20275;AGIWUR27390;AGIWUR42535                                               |
| CB4856 CT III                                                                                               | 13223072 | 13229465 | WBGene00012796 Y43F4A.1 Y43F4A.1                                                  |
| 0.175901413050013                                                                                           |          |          | AGIWUR3573;AGIWUR8389;AGIWUR13912;AGIWUR15547;AGIWUR19301;AGIWUR23348;AGIWUR38773 |
| CB4856 CT III                                                                                               | 13254675 | 13256456 | WBGene00185001 F56A8.9 F56A8.9 -0.0342263213861145                                |
| AGIWUR12170                                                                                                 |          |          |                                                                                   |
| CB4856 CT III                                                                                               | 13256878 | 13262905 | WBGene00010139 F56A8.3 F56A8.3 -0.0428119040299064                                |
| AGIWUR10753;AGIWUR11459;AGIWUR13812;AGIWUR14851;AGIWUR20482;AGIWUR33389;AGIWUR34133;AGIWUR35104;AGIWUR37135 |          |          |                                                                                   |
| ;AGIWUR37646                                                                                                |          |          |                                                                                   |
| CB4856 CT III                                                                                               | 13263268 | 13265038 | WBGene00010140 F56A8.4 F56A8.4 -0.0698672212885345                                |
| AGIWUR38160                                                                                                 |          |          |                                                                                   |
| CB4856 CT III                                                                                               | 13265866 | 13266932 | WBGene00010141 F56A8.5 F56A8.5 0.0504400024826257                                 |
| AGIWUR4737                                                                                                  |          |          |                                                                                   |
| CB4856 CT III                                                                                               | 13266874 | 13268897 | WBGene00000774 cpf-2 F56A8.6                                                      |
| -0.00707718679931091                                                                                        |          |          | AGIWUR820;AGIWUR36539;AGIWUR44328                                                 |
| CB4856 CT III                                                                                               | 13277261 | 13283883 | WBGene00006798 unc-64 F56A8.7 0.0504119729722774                                  |
| AGIWUR4899;AGIWUR14105;AGIWUR27209;AGIWUR27682;AGIWUR28092;AGIWUR28579;AGIWUR30962;AGIWUR34538;AGIWUR37059  |          |          |                                                                                   |
| CB4856 CT III                                                                                               | 13283892 | 13293088 | WBGene00012802 set-25 Y43F4B.3                                                    |
| -0.107628606382166                                                                                          |          |          |                                                                                   |
| AGIWUR6872;AGIWUR10552;AGIWUR11103;AGIWUR20458;AGIWUR33492;AGIWUR35107;AGIWUR37662;AGIWUR39018              |          |          |                                                                                   |
| CB4856 CT III                                                                                               | 13296853 | 13299122 | WBGene00003804 npp-18 Y43F4B.4                                                    |
| -0.123458023064025                                                                                          |          |          | AGIWUR1607;AGIWUR7364                                                             |
| CB4856 CT III                                                                                               | 13299378 | 13302760 | WBGene00012803 Y43F4B.5 Y43F4B.5                                                  |
| -0.0806120717988019                                                                                         |          |          | AGIWUR12941;AGIWUR17119;AGIWUR18458;AGIWUR30210                                   |
| CB4856 CT III                                                                                               | 13302743 | 13307259 | WBGene00002229 klp-19 Y43F4B.6                                                    |
| -0.14990757436511                                                                                           |          |          | AGIWUR17050;AGIWUR26586;AGIWUR31738;AGIWUR38118;AGIWUR39195;AGIWUR39404           |
| CB4856 CT III                                                                                               | 13307502 | 13313389 | WBGene00012804 Y43F4B.7 Y43F4B.7                                                  |
| 0.00888264738548372                                                                                         |          |          | AGIWUR45165                                                                       |
| CB4856 CT III                                                                                               | 13314011 | 13314721 | WBGene00012807 Y43F4B.10 Y43F4B.10                                                |
| -0.059530417803753                                                                                          |          |          | AGIWUR3272                                                                        |
| CB4856 CT III                                                                                               | 13315088 | 13318597 | WBGene00012806 Y43F4B.9 Y43F4B.9                                                  |
| -0.101282652671987                                                                                          |          |          | AGIWUR2346;AGIWUR5832;AGIWUR10132;AGIWUR20720;AGIWUR31478;AGIWUR32629             |
| CB4856 CT III                                                                                               | 13319265 | 13321892 | WBGene00194870 F53A2.11 F53A2.11                                                  |
| -0.0633203251436409                                                                                         |          |          | AGIWUR27265                                                                       |
| CB4856 CT III                                                                                               | 13334600 | 13336422 | WBGene00009950 sdz-20 F53A2.2 0.142932954808122                                   |
| AGIWUR36368                                                                                                 |          |          |                                                                                   |

|                                                                                     |     |          |          |                |          |          |                     |
|-------------------------------------------------------------------------------------|-----|----------|----------|----------------|----------|----------|---------------------|
| CB4856 CT<br>AGIWUR1393                                                             | III | 13336940 | 13339768 | WBGene00009951 | F53A2.3  | F53A2.3  | -0.307206511652129  |
| CB4856 CT<br>AGIWUR7935;AGIWUR15431;AGIWUR29058;AGIWUR34024;AGIWUR35551;AGIWUR45037 | III | 13341527 | 13342607 | WBGene00003829 | nud-1    | F53A2.4  | -0.260641925340256  |
| CB4856 CT<br>AGIWUR18467                                                            | III | 13342684 | 13343337 | WBGene00001092 | dro-1    | F53A2.5  | -0.429988922005787  |
| CB4856 CT<br>AGIWUR10155;AGIWUR12605;AGIWUR23772;AGIWUR29803;AGIWUR38165            | III | 13343574 | 13344616 | WBGene00002059 | ife-1    | F53A2.6  | -0.0931803381315319 |
| CB4856 CT<br>AGIWUR17228;AGIWUR29233;AGIWUR44741                                    | III | 13344917 | 13346866 | WBGene00009952 | acaa-2   | F53A2.7  | -0.174977916199916  |
| CB4856 CT<br>AGIWUR13022;AGIWUR20098;AGIWUR41009;AGIWUR43895                        | III | 13347085 | 13355683 | WBGene00003478 | mtm-6    | F53A2.8  | -0.0482725426055821 |
| CB4856 CT<br>AGIWUR15428                                                            | III | 13356610 | 13359354 | WBGene00009953 | F53A2.9  | F53A2.9  | 0.168260587476682   |
| CB4856 CT<br>AGIWUR5376;AGIWUR39849                                                 | III | 13361299 | 13364765 | WBGene00044229 | T03F6.8  | T03F6.8  | -0.438849339195051  |
| CB4856 CT<br>AGIWUR7179;AGIWUR21758                                                 | III | 13365425 | 13367747 | WBGene00044228 | T03F6.7  | T03F6.7  | -0.267484251736976  |
| CB4856 CT<br>AGIWUR31129;AGIWUR33220;AGIWUR43152                                    | III | 13368087 | 13371072 | WBGene00045482 | T03F6.9  | T03F6.9  | -0.0707441665969668 |
| CB4856 CT<br>AGIWUR9723                                                             | III | 13371175 | 13376710 | WBGene00003047 | lis-1    | T03F6.5  | 0.365434339189861   |
| CB4856 CT<br>-0.578022846278335<br>AGIWUR20586                                      | III | 13377830 | 13378342 | WBGene00185005 | T03F6.10 | T03F6.10 |                     |
| CB4856 CT<br>AGIWUR11909;AGIWUR29629                                                | III | 13386150 | 13388353 | WBGene00011400 | T03F6.4  | T03F6.4  | 0.193953089283058   |
| CB4856 CT<br>AGIWUR5191;AGIWUR9832;AGIWUR24981;AGIWUR25586;AGIWUR32831;AGIWUR41743  | III | 13389399 | 13390857 | WBGene00011399 | T03F6.3  | T03F6.3  | -0.236533657139594  |
| CB4856 CT<br>AGIWUR42653                                                            | III | 13390850 | 13393339 | WBGene00001035 | dnj-17   | T03F6.2  | -0.162906219389509  |
| CB4856 CT<br>AGIWUR43190                                                            | III | 13393910 | 13394979 | WBGene00011398 | qdpr-1   | T03F6.1  | 0.00696674483640791 |
| CB4856 CT<br>AGIWUR36166                                                            | III | 13395633 | 13400563 | WBGene00008714 | F11F1.1  | F11F1.1  | -0.336305160582603  |
| CB4856 CT<br>AGIWUR45038                                                            | III | 13400962 | 13401773 | WBGene00008716 | F11F1.4  | F11F1.4  | -0.181301521840837  |
| CB4856 CT<br>AGIWUR34265                                                            | III | 13403234 | 13404514 | WBGene00003249 | mig-18   | F11F1.6  | 0.431358090827773   |
| CB4856 CT                                                                           | III | 13404737 | 13405645 | WBGene00008719 | ttr-52   | F11F1.7  | 0.559283951282716   |

|                                                                                                                                                |    |     |          |          |                |          |          |                     |
|------------------------------------------------------------------------------------------------------------------------------------------------|----|-----|----------|----------|----------------|----------|----------|---------------------|
| AGIWUR4329;AGIWUR6840;AGIWUR26823;AGIWUR27520;AGIWUR33186;AGIWUR34462;AGIWUR38554;AGIWUR45068                                                  |    |     |          |          |                |          |          |                     |
| CB4856                                                                                                                                         | CT | III | 13405965 | 13409292 | WBGene00003520 | nas-1    | F45G2.1  | -0.271275505760485  |
| AGIWUR7337                                                                                                                                     |    |     |          |          |                |          |          |                     |
| CB4856                                                                                                                                         | CT | III | 13409895 | 13423537 | WBGene00009730 | myo-6    | F45G2.2  | 0.312089807081991   |
| AGIWUR9322                                                                                                                                     |    |     |          |          |                |          |          |                     |
| CB4856                                                                                                                                         | CT | III | 13423514 | 13426204 | WBGene00009731 | exo-1    | F45G2.3  | -0.200161475840876  |
| AGIWUR34496                                                                                                                                    |    |     |          |          |                |          |          |                     |
| CB4856                                                                                                                                         | CT | III | 13426100 | 13427715 | WBGene00009732 | cope-1   | F45G2.4  | -0.225333462412923  |
| AGIWUR20389                                                                                                                                    |    |     |          |          |                |          |          |                     |
| CB4856                                                                                                                                         | CT | III | 13427642 | 13429713 | WBGene00000255 | bli-5    | F45G2.5  | -0.629229762381864  |
| AGIWUR30064                                                                                                                                    |    |     |          |          |                |          |          |                     |
| CB4856                                                                                                                                         | CT | III | 13430462 | 13433394 | WBGene00006612 | trf-1    | F45G2.6  | -0.335596392193214  |
| AGIWUR18199                                                                                                                                    |    |     |          |          |                |          |          |                     |
| CB4856                                                                                                                                         | CT | III | 13433447 | 13434504 | WBGene00009733 | F45G2.7  | F45G2.7  | 0.0545743146788702  |
| AGIWUR31301                                                                                                                                    |    |     |          |          |                |          |          |                     |
| CB4856                                                                                                                                         | CT | III | 13434861 | 13435670 | WBGene00009734 | F45G2.8  | F45G2.8  | -0.140037662442428  |
| AGIWUR8725                                                                                                                                     |    |     |          |          |                |          |          |                     |
| CB4856                                                                                                                                         | CT | III | 13435771 | 13436943 | WBGene00009735 | F45G2.9  | F45G2.9  |                     |
| -0.00854260689345487 AGIWUR15689;AGIWUR32039;AGIWUR40076                                                                                       |    |     |          |          |                |          |          |                     |
| CB4856                                                                                                                                         | CT | III | 13437054 | 13439586 | WBGene00009736 | F45G2.10 | F45G2.10 |                     |
| 0.162691097872703 AGIWUR41087                                                                                                                  |    |     |          |          |                |          |          |                     |
| CB4856                                                                                                                                         | CT | III | 13439730 | 13455307 | WBGene00000834 | cua-1    | Y76A2A.2 |                     |
| -0.158868326247047 AGIWUR21350                                                                                                                 |    |     |          |          |                |          |          |                     |
| CB4856                                                                                                                                         | CT | III | 13457687 | 13462238 | WBGene00012097 | abcf-2   | T27E9.7  | 0.0123563201288839  |
| AGIWUR9395;AGIWUR15925;AGIWUR26658;AGIWUR29496;AGIWUR39154                                                                                     |    |     |          |          |                |          |          |                     |
| CB4856                                                                                                                                         | CT | III | 13462239 | 13462594 | WBGene00012094 | T27E9.2  | T27E9.2  | -0.139996487572649  |
| AGIWUR44257                                                                                                                                    |    |     |          |          |                |          |          |                     |
| CB4856                                                                                                                                         | CT | III | 13463163 | 13464657 | WBGene00006439 | ant-1.1  | T27E9.1  | 0.0755889729616488  |
| AGIWUR9898;AGIWUR15073;AGIWUR22154;AGIWUR23463;AGIWUR23557;AGIWUR24064;AGIWUR24262;AGIWUR24722;AGIWUR25282;AGIWUR26293;AGIWUR27044;AGIWUR30394 |    |     |          |          |                |          |          |                     |
| CB4856                                                                                                                                         | CT | III | 13464829 | 13471348 | WBGene00002185 | kel-3    | T27E9.4  | -0.0449452393227556 |
| AGIWUR39681                                                                                                                                    |    |     |          |          |                |          |          |                     |
| CB4856                                                                                                                                         | CT | III | 13471708 | 13475385 | WBGene00012095 | pssy-2   | T27E9.5  | -0.0557242631265744 |
| AGIWUR30488                                                                                                                                    |    |     |          |          |                |          |          |                     |
| CB4856                                                                                                                                         | CT | III | 13475406 | 13476107 | WBGene00012096 | T27E9.6  | T27E9.6  | 0.0180666147309108  |
| AGIWUR32016                                                                                                                                    |    |     |          |          |                |          |          |                     |
| CB4856                                                                                                                                         | CT | III | 13478561 | 13479629 | WBGene00012098 | fbxb-86  | T27E9.8  | 0.0815063406423455  |
| AGIWUR728                                                                                                                                      |    |     |          |          |                |          |          |                     |
| CB4856                                                                                                                                         | CT | III | 13480665 | 13484155 | WBGene00012099 | acc-4    | T27E9.9  | 0.254559216037014   |

|                                                                                                      |    |     |          |          |                |          |          |                    |  |
|------------------------------------------------------------------------------------------------------|----|-----|----------|----------|----------------|----------|----------|--------------------|--|
| AGIWUR43609                                                                                          |    |     |          |          |                |          |          |                    |  |
| CB4856                                                                                               | CT | III | 13486643 | 13492430 | WBGene00006691 | twk-40   | T28A8.1  | -0.072443814607019 |  |
| AGIWUR11101;AGIWUR18718;AGIWUR21352                                                                  |    |     |          |          |                |          |          |                    |  |
| CB4856                                                                                               | CT | III | 13493892 | 13495671 | WBGene00012108 | T28A8.2  | T28A8.2  | -0.372077581097869 |  |
| AGIWUR17099                                                                                          |    |     |          |          |                |          |          |                    |  |
| CB4856                                                                                               | CT | III | 13499199 | 13501510 | WBGene00012112 | T28A8.6  | T28A8.6  | 0.038863141564895  |  |
| AGIWUR4827;AGIWUR27619;AGIWUR28503                                                                   |    |     |          |          |                |          |          |                    |  |
| CB4856                                                                                               | CT | III | 13502813 | 13503578 | WBGene00194852 | T28A8.8  | T28A8.8  | 0.167166741993769  |  |
| AGIWUR5587                                                                                           |    |     |          |          |                |          |          |                    |  |
| CB4856                                                                                               | CT | III | 13503679 | 13505536 | WBGene00012110 | T28A8.4  | T28A8.4  | -0.224995757005015 |  |
| AGIWUR32059                                                                                          |    |     |          |          |                |          |          |                    |  |
| CB4856                                                                                               | CT | III | 13506018 | 13508650 | WBGene00012109 | T28A8.3  | T28A8.3  | -0.142195021432624 |  |
| AGIWUR27068                                                                                          |    |     |          |          |                |          |          |                    |  |
| CB4856                                                                                               | CT | III | 13509301 | 13514570 | WBGene00003373 | mlh-1    | T28A8.7  | 0.338585131614892  |  |
| AGIWUR32352                                                                                          |    |     |          |          |                |          |          |                    |  |
| CB4856                                                                                               | CT | III | 13514945 | 13524110 | WBGene00004075 | pod-1    | Y76A2B.1 |                    |  |
| -0.0923403818439108 AGIWUR15436;AGIWUR24420;AGIWUR33016;AGIWUR34472;AGIWUR37115;AGIWUR43659          |    |     |          |          |                |          |          |                    |  |
| CB4856                                                                                               | CT | III | 13527438 | 13539971 | WBGene00013574 | lron-13  | Y76A2B.2 |                    |  |
| 0.170404586827381 AGIWUR25269                                                                        |    |     |          |          |                |          |          |                    |  |
| CB4856                                                                                               | CT | III | 13540139 | 13543534 | WBGene00013575 | acs-5    | Y76A2B.3 |                    |  |
| -0.222021563692172 AGIWUR9452;AGIWUR9888;AGIWUR28530;AGIWUR31495;AGIWUR36463;AGIWUR43869;AGIWUR44980 |    |     |          |          |                |          |          |                    |  |
| CB4856                                                                                               | CT | III | 13545245 | 13546777 | WBGene00013576 | Y76A2B.4 |          | Y76A2B.4           |  |
| 0.0328108670009968 AGIWUR28901                                                                       |    |     |          |          |                |          |          |                    |  |
| CB4856                                                                                               | CT | III | 13546889 | 13549020 | WBGene00013577 | Y76A2B.5 |          | Y76A2B.5           |  |
| 0.142493313645174 AGIWUR2571                                                                         |    |     |          |          |                |          |          |                    |  |
| CB4856                                                                                               | CT | III | 13550699 | 13555334 | WBGene00013578 | scav-2   | Y76A2B.6 |                    |  |
| -0.353636832489613 AGIWUR3260                                                                        |    |     |          |          |                |          |          |                    |  |
| CB4856                                                                                               | CT | III | 13561729 | 13563082 | WBGene00011475 | T05D4.2  | T05D4.2  | 0.389013935186192  |  |
| AGIWUR7893                                                                                           |    |     |          |          |                |          |          |                    |  |
| CB4856                                                                                               | CT | III | 13563346 | 13564990 | WBGene00011474 | aldo-1   | T05D4.1  | -0.11840360029409  |  |
| AGIWUR4857;AGIWUR14566                                                                               |    |     |          |          |                |          |          |                    |  |
| CB4856                                                                                               | CT | III | 13566874 | 13570447 | WBGene00011476 | T05D4.3  | T05D4.3  | -0.095751123500758 |  |
| AGIWUR23312                                                                                          |    |     |          |          |                |          |          |                    |  |
| CB4856                                                                                               | CT | III | 13576188 | 13580662 | WBGene00003887 | osm-7    | T05D4.4  | 0.0170172276482425 |  |
| AGIWUR27770                                                                                          |    |     |          |          |                |          |          |                    |  |
| CB4856                                                                                               | CT | III | 13580850 | 13583589 | WBGene00011478 | T05D4.5  | T05D4.5  | 0.151190967212775  |  |
| AGIWUR33116                                                                                          |    |     |          |          |                |          |          |                    |  |
| CB4856                                                                                               | CT | III | 13601760 | 13603156 | WBGene00001605 | gln-4    | T25C8.3  | 0.230537873025309  |  |
| AGIWUR11582                                                                                          |    |     |          |          |                |          |          |                    |  |

|                                                                                                                    |     |          |          |                |          |          |                     |
|--------------------------------------------------------------------------------------------------------------------|-----|----------|----------|----------------|----------|----------|---------------------|
| CB4856 CT                                                                                                          | III | 13604339 | 13606067 | WBGene00000067 | act-5    | T25C8.2  | -0.37659395868835   |
| AGIWUR17983;AGIWUR31487;AGIWUR45107                                                                                |     |          |          |                |          |          |                     |
| CB4856 CT                                                                                                          | III | 13608072 | 13614704 | WBGene00012017 | T25C8.1  | T25C8.1  | -0.335761954097125  |
| AGIWUR34341                                                                                                        |     |          |          |                |          |          |                     |
| CB4856 CT                                                                                                          | III | 13614699 | 13622489 | WBGene00011735 | hip-1    | T12D8.8  | -0.0323158090160067 |
| AGIWUR3805;AGIWUR19795;AGIWUR30111;AGIWUR38096                                                                     |     |          |          |                |          |          |                     |
| CB4856 CT                                                                                                          | III | 13623279 | 13624172 | WBGene00011734 | mlc-5    | T12D8.6  | -0.190218126136557  |
| AGIWUR11723                                                                                                        |     |          |          |                |          |          |                     |
| CB4856 CT                                                                                                          | III | 13624195 | 13626007 | WBGene00006391 | taf-9    | T12D8.7  | -0.164974337285201  |
| AGIWUR19328                                                                                                        |     |          |          |                |          |          |                     |
| CB4856 CT                                                                                                          | III | 13625968 | 13626750 | WBGene00011733 | T12D8.5  | T12D8.5  | 2.75038616724689    |
| AGIWUR44006                                                                                                        |     |          |          |                |          |          |                     |
| CB4856 CT                                                                                                          | III | 13626994 | 13630808 | WBGene00011732 | arrd-17  | T12D8.4  | 0.205126207019357   |
| AGIWUR9273;AGIWUR23751;AGIWUR25808;AGIWUR30362                                                                     |     |          |          |                |          |          |                     |
| CB4856 CT                                                                                                          | III | 13639893 | 13641688 | WBGene00011731 | acbp-5   | T12D8.3  | 0.0448929809866891  |
| AGIWUR15630;AGIWUR23888;AGIWUR25272;AGIWUR27449;AGIWUR38615;AGIWUR39949                                            |     |          |          |                |          |          |                     |
| CB4856 CT                                                                                                          | III | 13641795 | 13642327 | WBGene00023450 | T12D8.10 | T12D8.10 |                     |
| 0.50155154173482 AGIWUR44933                                                                                       |     |          |          |                |          |          |                     |
| CB4856 CT                                                                                                          | III | 13642420 | 13643570 | WBGene00011730 | drr-2    | T12D8.2  | 0.0761544754314691  |
| AGIWUR27572;AGIWUR36635                                                                                            |     |          |          |                |          |          |                     |
| CB4856 CT                                                                                                          | III | 13643916 | 13656637 | WBGene00011729 | set-16   | T12D8.1  | 0.220133051723181   |
| AGIWUR27385;AGIWUR40824                                                                                            |     |          |          |                |          |          |                     |
| CB4856 CT                                                                                                          | III | 13663400 | 13667839 | WBGene00001458 | flp-15   | ZK525.1  | 0.518755377524514   |
| AGIWUR11195                                                                                                        |     |          |          |                |          |          |                     |
| CB4856 CT                                                                                                          | III | 13673280 | 13674746 | WBGene00000179 | aqp-11   | ZK525.2  | -0.322341088926464  |
| AGIWUR16789                                                                                                        |     |          |          |                |          |          |                     |
| CB4856 CT                                                                                                          | III | 13674917 | 13686445 | WBGene00001118 | dyf-2    | ZK520.3  | 0.772332499135038   |
| AGIWUR11571                                                                                                        |     |          |          |                |          |          |                     |
| CB4856 CT                                                                                                          | III | 13687199 | 13692683 | WBGene00000837 | cul-2    | ZK520.4  | 0.00404112822316804 |
| AGIWUR20;AGIWUR1441;AGIWUR1540;AGIWUR13518;AGIWUR13995;AGIWUR14723;AGIWUR23792;AGIWUR28327;AGIWUR41222;AGIWUR42608 |     |          |          |                |          |          |                     |
| CB4856 CT                                                                                                          | III | 13692668 | 13693811 | WBGene00000878 | cyn-2    | ZK520.5  | 0.0355019492755186  |
| AGIWUR39498                                                                                                        |     |          |          |                |          |          |                     |
| CB4856 CT                                                                                                          | III | 13701993 | 13724401 | WBGene00003048 | lit-1    | W06F12.1 |                     |
| 0.514876183820229 AGIWUR6941;AGIWUR12354;AGIWUR32350                                                               |     |          |          |                |          |          |                     |
| CB4856 CT                                                                                                          | III | 13726641 | 13731679 | WBGene00012306 | W06F12.2 | W06F12.2 |                     |
| 0.427988329100982 AGIWUR33882;AGIWUR37683;AGIWUR40574                                                              |     |          |          |                |          |          |                     |
| CB4856 CT                                                                                                          | III | 13735071 | 13736541 | WBGene00012307 | W06F12.3 | W06F12.3 |                     |
| 0.157568161779992 AGIWUR25203                                                                                      |     |          |          |                |          |          |                     |

|                                                                                                             |     |          |          |                |           |           |                     |             |
|-------------------------------------------------------------------------------------------------------------|-----|----------|----------|----------------|-----------|-----------|---------------------|-------------|
| CB4856 CT                                                                                                   | III | 13744222 | 13747287 | WBGene00010661 | tyr-2     | K08E3.1   | -0.240551389670614  |             |
| AGIWUR5503                                                                                                  |     |          |          |                |           |           |                     |             |
| CB4856 CT                                                                                                   | III | 13747472 | 13748686 | WBGene00010662 | K08E3.2   | K08E3.2   | 0.326895895710781   |             |
| AGIWUR9724                                                                                                  |     |          |          |                |           |           |                     |             |
| CB4856 CT                                                                                                   | III | 13752406 | 13755861 | WBGene00023451 | mlc-7     | K08E3.10  |                     |             |
| 0.31654011571252 AGIWUR4778;AGIWUR24245;AGIWUR35195;AGIWUR44855                                             |     |          |          |                |           |           |                     |             |
| CB4856 CT                                                                                                   | III | 13755896 | 13759434 | WBGene00010663 | toca-2    | K08E3.3   | -0.102095009650911  |             |
| AGIWUR13679;AGIWUR25876;AGIWUR25927;AGIWUR33111                                                             |     |          |          |                |           |           |                     |             |
| CB4856 CT                                                                                                   | III | 13759444 | 13762069 | WBGene00010664 | dbn-1     | K08E3.4   | 0.0110560373211808  |             |
| AGIWUR34377                                                                                                 |     |          |          |                |           |           |                     |             |
| CB4856 CT                                                                                                   | III | 13764030 | 13768092 | WBGene00010665 | K08E3.5   | K08E3.5   | -0.0926842187048447 |             |
| AGIWUR9559;AGIWUR16248;AGIWUR17000;AGIWUR18925;AGIWUR25456;AGIWUR26080;AGIWUR27983;AGIWUR30514              |     |          |          |                |           |           |                     |             |
| CB4856 CT                                                                                                   | III | 13768541 | 13771242 | WBGene00000875 | cyk-4     | K08E3.6   | -0.0171588384460839 |             |
| AGIWUR11676;AGIWUR19991;AGIWUR24305;AGIWUR25234                                                             |     |          |          |                |           |           |                     |             |
| CB4856 CT                                                                                                   | III | 13771448 | 13773348 | WBGene00003967 | pdr-1     | K08E3.7   | 0.0365646699522291  |             |
| AGIWUR30328                                                                                                 |     |          |          |                |           |           |                     |             |
| CB4856 CT                                                                                                   | III | 13773456 | 13778896 | WBGene00007025 | mdt-29    | K08E3.8   | -0.0580452292888647 |             |
| AGIWUR9180;AGIWUR10608                                                                                      |     |          |          |                |           |           |                     |             |
| CB4856 CT                                                                                                   | III | 13780220 | 13781133 | WBGene00007065 | pot-3     | 3R5.1     | 0.159707689858744   |             |
| AGIWUR9200                                                                                                  |     |          |          |                |           |           |                     |             |
| CB4856 CT                                                                                                   | IV  | 32481    | 48880    | WBGene00001492 | frm-5.1   | Y38C1AB.8 | -0.187930714118707  |             |
| AGIWUR11307;AGIWUR23830                                                                                     |     |          |          |                |           |           |                     |             |
| CB4856 CT                                                                                                   | IV  | 86890    | 90082    | WBGene00015246 | sc1-23    | B0545.3   | -0.296872495655075  | AGIWUR11368 |
| CB4856 CT                                                                                                   | IV  | 112408   | 118629   | WBGene00001111 | duo-2     | F29C4.5   | -0.115514661449216  | AGIWUR31597 |
| CB4856 CT                                                                                                   | IV  | 119272   | 121707   | WBGene00017928 | tut-1     | F29C4.6   | -0.0077551644566034 |             |
| AGIWUR33251;AGIWUR36931                                                                                     |     |          |          |                |           |           |                     |             |
| CB4856 CT                                                                                                   | IV  | 121797   | 126225   | WBGene00017929 | grld-1    | F29C4.7   | -0.0813566226550266 |             |
| AGIWUR23201;AGIWUR26391                                                                                     |     |          |          |                |           |           |                     |             |
| CB4856 CT                                                                                                   | IV  | 126731   | 127640   | WBGene00017926 | F29C4.2   | F29C4.2   | -0.0644637495778966 |             |
| AGIWUR6362;AGIWUR10252;AGIWUR12097;AGIWUR12529;AGIWUR16172;AGIWUR23544;AGIWUR27558;AGIWUR31184;AGIWUR37211; |     |          |          |                |           |           |                     |             |
| AGIWUR37885;AGIWUR40280                                                                                     |     |          |          |                |           |           |                     |             |
| CB4856 CT                                                                                                   | IV  | 132416   | 138076   | WBGene00000897 | daf-1     | F29C4.1   | -0.112168891610033  | AGIWUR34627 |
| CB4856 CT                                                                                                   | IV  | 138346   | 147919   | WBGene00000674 | col-99    | F29C4.8   | 0.187911211564308   |             |
| AGIWUR2432;AGIWUR9402                                                                                       |     |          |          |                |           |           |                     |             |
| CB4856 CT                                                                                                   | IV  | 156071   | 157901   | WBGene00021400 | Y38C1AA.9 | Y38C1AA.9 | 0.16710644009332    |             |
| AGIWUR3829                                                                                                  |     |          |          |                |           |           |                     |             |
| CB4856 CT                                                                                                   | IV  | 158962   | 159836   | WBGene00021398 | Y38C1AA.7 | Y38C1AA.7 | -0.0819549811516427 |             |
| AGIWUR10389;AGIWUR17218;AGIWUR26513;AGIWUR30309;AGIWUR31337;AGIWUR38359                                     |     |          |          |                |           |           |                     |             |
| CB4856 CT                                                                                                   | IV  | 162830   | 164814   | WBGene00021397 | Y38C1AA.6 | Y38C1AA.6 | 0.393223868725451   |             |



|                                                                         |    |    |        |        |                |            |            |                     |             |
|-------------------------------------------------------------------------|----|----|--------|--------|----------------|------------|------------|---------------------|-------------|
| AGIWUR38082                                                             |    |    |        |        |                |            |            |                     |             |
| CB4856                                                                  | CT | IV | 165077 | 169980 | WBGene00021396 | cut1-24    | Y38C1AA.5  | 0.280036985868891   |             |
| AGIWUR7334;AGIWUR11652;AGIWUR32978                                      |    |    |        |        |                |            |            |                     |             |
| CB4856                                                                  | CT | IV | 179008 | 183261 | WBGene00006561 | tc1-2      | Y38C1AA.4  | 0.68946414354812    |             |
| AGIWUR34449                                                             |    |    |        |        |                |            |            |                     |             |
| CB4856                                                                  | CT | IV | 184554 | 192151 | WBGene00021395 | pnc-1      | Y38C1AA.3  | -0.104926991537361  |             |
| AGIWUR1594;AGIWUR5204                                                   |    |    |        |        |                |            |            |                     |             |
| CB4856                                                                  | CT | IV | 192256 | 194745 | WBGene00021402 | Y38C1AA.12 | Y38C1AA.12 | -0.330673013698548  |             |
| AGIWUR6999;AGIWUR31095                                                  |    |    |        |        |                |            |            |                     |             |
| CB4856                                                                  | CT | IV | 194745 | 202586 | WBGene00000815 | csn-3      | Y38C1AA.2  | -0.0736241460440858 |             |
| AGIWUR42984                                                             |    |    |        |        |                |            |            |                     |             |
| CB4856                                                                  | CT | IV | 205239 | 208049 | WBGene00195063 | Y38C1AA.14 | Y38C1AA.14 | -0.149589657096621  |             |
| AGIWUR12592;AGIWUR34861                                                 |    |    |        |        |                |            |            |                     |             |
| CB4856                                                                  | CT | IV | 208189 | 217390 | WBGene00021394 | Y38C1AA.1  | Y38C1AA.1  | -0.0534385607947523 |             |
| AGIWUR10055;AGIWUR19059;AGIWUR22478;AGIWUR30888;AGIWUR35437;AGIWUR44502 |    |    |        |        |                |            |            |                     |             |
| CB4856                                                                  | CT | IV | 218551 | 220854 | WBGene00021401 | prdx-6     | Y38C1AA.11 | -0.036453420512002  |             |
| AGIWUR8871;AGIWUR23470;AGIWUR26757                                      |    |    |        |        |                |            |            |                     |             |
| CB4856                                                                  | CT | IV | 225439 | 231773 | WBGene00019821 | R02D3.3    | R02D3.3    | -0.110289144003556  | AGIWUR3185  |
| CB4856                                                                  | CT | IV | 232473 | 237450 | WBGene00019822 | R02D3.4    | R02D3.4    | 0.00794569596117967 | AGIWUR39185 |
| CB4856                                                                  | CT | IV | 237591 | 240307 | WBGene00019823 | fnta-1     | R02D3.5    | -0.136593144138968  |             |
| AGIWUR5534;AGIWUR12653;AGIWUR22990;AGIWUR24412;AGIWUR29214;AGIWUR29389  |    |    |        |        |                |            |            |                     |             |
| CB4856                                                                  | CT | IV | 240451 | 244129 | WBGene00019820 | cogc-8     | R02D3.2    | -0.119492847856844  | AGIWUR1137  |
| CB4856                                                                  | CT | IV | 245114 | 251925 | WBGene00019819 | R02D3.1    | R02D3.1    | -0.541419873216986  |             |
| AGIWUR3486;AGIWUR11047;AGIWUR27639;AGIWUR30392;AGIWUR39481              |    |    |        |        |                |            |            |                     |             |
| CB4856                                                                  | CT | IV | 251970 | 252554 | WBGene00001728 | gr1-19     | R02D3.6    | 0.156994698369447   |             |
| AGIWUR9545;AGIWUR9685;AGIWUR13103;AGIWUR30596;AGIWUR32729;AGIWUR41213   |    |    |        |        |                |            |            |                     |             |
| CB4856                                                                  | CT | IV | 253571 | 255429 | WBGene00019824 | R02D3.7    | R02D3.7    | -0.217328022723141  | AGIWUR39002 |
| CB4856                                                                  | CT | IV | 255966 | 257199 | WBGene00019825 | R02D3.8    | R02D3.8    | 0.115314803775263   | AGIWUR22427 |
| CB4856                                                                  | CT | IV | 257384 | 259204 | WBGene00001071 | dpy-9      | T21D12.2   | -0.3349562341335    |             |
| AGIWUR18790;AGIWUR27258                                                 |    |    |        |        |                |            |            |                     |             |
| CB4856                                                                  | CT | IV | 261886 | 264232 | WBGene00003932 | pat-6      | T21D12.4   | -0.171683732228338  |             |
| AGIWUR43224                                                             |    |    |        |        |                |            |            |                     |             |
| CB4856                                                                  | CT | IV | 266448 | 268322 | WBGene00020651 | T21D12.12  | T21D12.12  | -0.108750722793811  |             |
| AGIWUR14769;AGIWUR43154;AGIWUR43734                                     |    |    |        |        |                |            |            |                     |             |
| CB4856                                                                  | CT | IV | 269407 | 272099 | WBGene00020650 | T21D12.11  | T21D12.11  | -0.0191929030113274 |             |
| AGIWUR37598                                                             |    |    |        |        |                |            |            |                     |             |
| CB4856                                                                  | CT | IV | 272315 | 273263 | WBGene00005487 | srh-282    | T21D12.5   | 0.194488911438495   |             |
| AGIWUR7137                                                              |    |    |        |        |                |            |            |                     |             |
| CB4856                                                                  | CT | IV | 274570 | 279940 | WBGene00020649 | sma-10     | T21D12.9   | 0.583088828814171   |             |

AGIWUR15332;AGIWUR23401;AGIWUR28389;AGIWUR36460  
 CB4856 CT IV 283647 287212 WBGene00206487 best-19 T21D12.15 -0.165398565148243  
 AGIWUR28322  
 CB4856 CT IV 287305 288127 WBGene00045177 T21D12.14 T21D12.14 1.32583169550576  
 AGIWUR14474  
 CB4856 CT IV 288803 291456 WBGene00020648 T21D12.7 T21D12.7 1.03250920622477  
 AGIWUR8323;AGIWUR24804  
 CB4856 CT IV 292429 298280 WBGene00019298 K02D7.1 K02D7.1 0.510319085431737 AGIWUR22001  
 CB4856 CT IV 307505 311232 WBGene00019300 swt-1 K02D7.5 1.1037803465868 AGIWUR44079  
 CB4856 CT IV 311512 313697 WBGene00019299 snai-1 K02D7.2 0.412907870967182 AGIWUR5231  
 CB4856 CT IV 315056 320605 WBGene00001099 dsc-4 K02D7.4 -0.425005105301635 AGIWUR35592  
 CB4856 CT IV 321571 323022 WBGene00001735 grl-26 K02D7.6 0.0674818857581583 AGIWUR36277  
 CB4856 CT IV 325063 330631 WBGene00017578 drl-1 F18F11.5 -0.152229947009751  
 AGIWUR15146  
 CB4856 CT IV 330823 334385 WBGene00017577 F18F11.4 F18F11.4 0.0542140701918488  
 AGIWUR18816;AGIWUR18855;AGIWUR32242;AGIWUR34618  
 CB4856 CT IV 334809 337178 WBGene00017574 F18F11.1 F18F11.1 0.0165639504008475  
 AGIWUR39978  
 CB4856 CT IV 339629 358976 WBGene00017576 cdh-8 F18F11.3 0.104407693154737  
 AGIWUR3867;AGIWUR7444;AGIWUR27378  
 CB4856 CT IV 359204 376062 WBGene00022048 fln-1 Y66H1B.2 0.188186017863162  
 AGIWUR6229;AGIWUR12057;AGIWUR34969  
 CB4856 CT IV 379898 383185 WBGene00004981 spl-1 Y66H1B.4 -0.344341589680877  
 AGIWUR14485  
 CB4856 CT IV 385894 386607 WBGene00004493 rps-24 T07A9.11 -0.0219606592073092  
 AGIWUR18988  
 CB4856 CT IV 386699 387949 WBGene00044789 T07A9.14 T07A9.14 -0.107868042502114  
 AGIWUR18205  
 CB4856 CT IV 388084 388733 WBGene00020300 tag-261 T07A9.13 -0.315347351436563  
 AGIWUR1038  
 CB4856 CT IV 388686 390468 WBGene00001338 ears-2 T07A9.2 -0.135255847965947 AGIWUR4672  
 CB4856 CT IV 390512 393158 WBGene00020298 T07A9.10 T07A9.10 -0.161394830185849  
 AGIWUR8392;AGIWUR29528;AGIWUR35867  
 CB4856 CT IV 393156 393546 WBGene00045249 T07A9.15 T07A9.15 -0.147353245861751  
 AGIWUR8754;AGIWUR11842;AGIWUR20015;AGIWUR22125;AGIWUR24642;AGIWUR30586;AGIWUR31937;AGIWUR33298;AGIWUR34076  
 CB4856 CT IV 393880 396554 WBGene00020297 nog-1 T07A9.9 0.257210179354955  
 AGIWUR8931;AGIWUR9531;AGIWUR16928;AGIWUR20629;AGIWUR28111;AGIWUR30284;AGIWUR32858;AGIWUR34292;AGIWUR35408;A  
 GIWUR39296;AGIWUR40218;AGIWUR41675;AGIWUR44447  
 CB4856 CT IV 396545 399095 WBGene00020296 T07A9.8 T07A9.8 0.142047669625082 AGIWUR13100

|                                                                                    |    |    |        |        |                 |          |          |                     |             |
|------------------------------------------------------------------------------------|----|----|--------|--------|-----------------|----------|----------|---------------------|-------------|
| CB4856                                                                             | CT | IV | 401695 | 405346 | WBGene00001666  | gpa-4    | T07A9.7  | 0.250943369988545   |             |
| AGIWUR11240;AGIWUR23437;AGIWUR40058                                                |    |    |        |        |                 |          |          |                     |             |
| CB4856                                                                             | CT | IV | 405621 | 410033 | WBGene00002187  | kgb-1    | T07A9.3  | 0.0541704718352136  | AGIWUR7146  |
| CB4856                                                                             | CT | IV | 410831 | 415615 | WBGene000020299 | T07A9.12 | T07A9.12 | 0.132801466552375   |             |
| AGIWUR10654;AGIWUR20490;AGIWUR28756;AGIWUR37082                                    |    |    |        |        |                 |          |          |                     |             |
| CB4856                                                                             | CT | IV | 415635 | 419958 | WBGene00001332  | eri-1    | T07A9.5  | -0.250012401437491  |             |
| AGIWUR3022;AGIWUR3334;AGIWUR17888;AGIWUR20131;AGIWUR41811                          |    |    |        |        |                 |          |          |                     |             |
| CB4856                                                                             | CT | IV | 419938 | 425181 | WBGene00000913  | daf-18   | T07A9.6  | 0.0128481087913892  |             |
| AGIWUR2814;AGIWUR14949;AGIWUR15080;AGIWUR23347;AGIWUR28679;AGIWUR32747;AGIWUR39915 |    |    |        |        |                 |          |          |                     |             |
| CB4856                                                                             | CT | IV | 425972 | 427204 | WBGene00022046  | Y66H1A.4 | Y66H1A.4 | 0.00880257980811727 |             |
| AGIWUR14850                                                                        |    |    |        |        |                 |          |          |                     |             |
| CB4856                                                                             | CT | IV | 428070 | 429133 | WBGene00022047  | Y66H1A.5 | Y66H1A.5 | 0.213317511020602   |             |
| AGIWUR29648                                                                        |    |    |        |        |                 |          |          |                     |             |
| CB4856                                                                             | CT | IV | 429214 | 440554 | WBGene00002041  | hum-8    | Y66H1A.6 | -0.187621288048733  |             |
| AGIWUR34330                                                                        |    |    |        |        |                 |          |          |                     |             |
| CB4856                                                                             | CT | IV | 443985 | 444783 | WBGene00022045  | mrp1-55  | Y66H1A.3 | 0.0077886546582917  |             |
| AGIWUR35396                                                                        |    |    |        |        |                 |          |          |                     |             |
| CB4856                                                                             | CT | IV | 445677 | 448439 | WBGene00022044  | dpm-1    | Y66H1A.2 | -0.118849258006165  |             |
| AGIWUR39955                                                                        |    |    |        |        |                 |          |          |                     |             |
| CB4856                                                                             | CT | IV | 455726 | 457099 | WBGene00019772  | M04G7.1  | M04G7.1  | 0.159081750863209   | AGIWUR737   |
| CB4856                                                                             | CT | IV | 458032 | 461029 | WBGene00019773  | M04G7.2  | M04G7.2  | -0.129653898341526  | AGIWUR13061 |
| CB4856                                                                             | CT | IV | 461292 | 481167 | WBGene00019774  | M04G7.3  | M04G7.3  | 0.0473700833093496  | AGIWUR16593 |
| CB4856                                                                             | CT | IV | 505069 | 506600 | WBGene00021011  | W03G1.5  | W03G1.5  | 0.70459871615348    | AGIWUR7800  |
| CB4856                                                                             | CT | IV | 506737 | 519457 | WBGene00021012  | pig-1    | W03G1.6  | -0.0437280884573088 |             |
| AGIWUR1369;AGIWUR2867;AGIWUR7710;AGIWUR12794;AGIWUR15026;AGIWUR38661;AGIWUR43168   |    |    |        |        |                 |          |          |                     |             |
| CB4856                                                                             | CT | IV | 520214 | 523809 | WBGene00000213  | asm-3    | W03G1.7  | -0.132061666489413  |             |
| AGIWUR17779;AGIWUR43469                                                            |    |    |        |        |                 |          |          |                     |             |
| CB4856                                                                             | CT | IV | 524652 | 526479 | WBGene00021010  | W03G1.2  | W03G1.2  | -0.159956070352816  | AGIWUR7043  |
| CB4856                                                                             | CT | IV | 527379 | 528583 | WBGene00021013  | W03G1.8  | W03G1.8  | 0.101443703648462   | AGIWUR8211  |
| CB4856                                                                             | CT | IV | 532135 | 535703 | WBGene00001625  | glt-7    | W03G1.1  | -0.192024476669046  | AGIWUR40008 |
| CB4856                                                                             | CT | IV | 543231 | 544086 | WBGene00017276  | F09C11.1 | F09C11.1 | 0.104405896669178   |             |
| AGIWUR1852                                                                         |    |    |        |        |                 |          |          |                     |             |
| CB4856                                                                             | CT | IV | 548302 | 553231 | WBGene00018924  | F56A11.4 | F56A11.4 | 0.104196298605038   |             |
| AGIWUR5465                                                                         |    |    |        |        |                 |          |          |                     |             |
| CB4856                                                                             | CT | IV | 559234 | 568076 | WBGene00001165  | efn-4    | F56A11.3 | 0.186832109975992   |             |
| AGIWUR31786                                                                        |    |    |        |        |                 |          |          |                     |             |
| CB4856                                                                             | CT | IV | 568372 | 570875 | WBGene00018925  | F56A11.5 | F56A11.5 | -0.118214461407769  |             |
| AGIWUR35066                                                                        |    |    |        |        |                 |          |          |                     |             |
| CB4856                                                                             | CT | IV | 572723 | 583577 | WBGene00001579  | gex-2    | F56A11.1 | 0.00670208554112506 |             |

|                                                             |    |    |        |        |                 |           |           |                                  |
|-------------------------------------------------------------|----|----|--------|--------|-----------------|-----------|-----------|----------------------------------|
| AGIWUR20233                                                 |    |    |        |        |                 |           |           |                                  |
| CB4856                                                      | CT | IV | 583813 | 587829 | WBGene000189987 | C18H7.12  | C18H7.12  | 0.034999078107985                |
| AGIWUR4609                                                  |    |    |        |        |                 |           |           |                                  |
| CB4856                                                      | CT | IV | 589030 | 592485 | WBGene00015996  | C18H7.6   | C18H7.6   | 0.301593883797246 AGIWUR16736    |
| CB4856                                                      | CT | IV | 593329 | 595233 | WBGene00015994  | C18H7.4   | C18H7.4   | -0.179484920010301 AGIWUR16422   |
| CB4856                                                      | CT | IV | 595722 | 596419 | WBGene00015997  | C18H7.7   | C18H7.7   | 0.107073737683386                |
| AGIWUR12555;AGIWUR23432;AGIWUR33157;AGIWUR40236             |    |    |        |        |                 |           |           |                                  |
| CB4856                                                      | CT | IV | 596864 | 598771 | WBGene00044457  | C18H7.11  | C18H7.11  | -0.552774524457508               |
| AGIWUR26978                                                 |    |    |        |        |                 |           |           |                                  |
| CB4856                                                      | CT | IV | 599449 | 601695 | WBGene00015998  | srt-59    | C18H7.8   | -0.00330851788664965 AGIWUR38612 |
| CB4856                                                      | CT | IV | 602991 | 603643 | WBGene00015999  | prmt-4    | C18H7.9   | 0.0963472986065979 AGIWUR21044   |
| CB4856                                                      | CT | IV | 604444 | 605876 | WBGene00000676  | col-102   | C18H7.3   | -0.0253546239837528 AGIWUR16403  |
| CB4856                                                      | CT | IV | 606355 | 614021 | WBGene00002140  | inx-18    | C18H7.2   | -0.238285925529973 AGIWUR28351   |
| CB4856                                                      | CT | IV | 615544 | 620925 | WBGene00015993  | C18H7.1   | C18H7.1   | 2.79688980696768 AGIWUR4760      |
| CB4856                                                      | CT | IV | 627537 | 633954 | WBGene00015497  | nhr-76    | C05G6.1   | -0.211030993524879               |
| AGIWUR2051;AGIWUR7810                                       |    |    |        |        |                 |           |           |                                  |
| CB4856                                                      | CT | IV | 649665 | 651994 | WBGene00019665  | K11H12.9  | K11H12.9  | -0.102390168786003               |
| AGIWUR23645                                                 |    |    |        |        |                 |           |           |                                  |
| CB4856                                                      | CT | IV | 652130 | 653421 | WBGene00019658  | K11H12.1  | K11H12.1  | -0.110226308370361               |
| AGIWUR13212                                                 |    |    |        |        |                 |           |           |                                  |
| CB4856                                                      | CT | IV | 653436 | 654576 | WBGene00004427  | rp1-15    | K11H12.2  | -0.0115469102137746              |
| AGIWUR18481;AGIWUR24381                                     |    |    |        |        |                 |           |           |                                  |
| CB4856                                                      | CT | IV | 655353 | 658604 | WBGene00019664  | K11H12.8  | K11H12.8  | 0.0975118420151215               |
| AGIWUR33789;AGIWUR35461                                     |    |    |        |        |                 |           |           |                                  |
| CB4856                                                      | CT | IV | 665525 | 666917 | WBGene00019663  | K11H12.7  | K11H12.7  | -0.177858916715092               |
| AGIWUR16784;AGIWUR20600;AGIWUR28935;AGIWUR34976;AGIWUR35464 |    |    |        |        |                 |           |           |                                  |
| CB4856                                                      | CT | IV | 667291 | 668556 | WBGene00019662  | K11H12.6  | K11H12.6  | 0.138139020377153                |
| AGIWUR21661                                                 |    |    |        |        |                 |           |           |                                  |
| CB4856                                                      | CT | IV | 668962 | 670555 | WBGene00044723  | K11H12.11 | K11H12.11 | -0.0953540059933089              |
| AGIWUR4530;AGIWUR41020                                      |    |    |        |        |                 |           |           |                                  |
| CB4856                                                      | CT | IV | 674036 | 675883 | WBGene00019660  | K11H12.4  | K11H12.4  | -0.519624951991041               |
| AGIWUR12851                                                 |    |    |        |        |                 |           |           |                                  |
| CB4856                                                      | CT | IV | 676075 | 676687 | WBGene00044458  | K11H12.10 | K11H12.10 | -0.283232873544895               |
| AGIWUR22675                                                 |    |    |        |        |                 |           |           |                                  |
| CB4856                                                      | CT | IV | 677616 | 679171 | WBGene00019661  | K11H12.5  | K11H12.5  | 0.178599656881797                |
| AGIWUR26759                                                 |    |    |        |        |                 |           |           |                                  |
| CB4856                                                      | CT | IV | 684497 | 688336 | WBGene00018256  | cut1-28   | F41A4.1   | 1.1055866124634 AGIWUR7323       |
| CB4856                                                      | CT | IV | 698761 | 707719 | WBGene00021950  | cut1-26   | Y55F3C.7  | -0.00914352784290173             |
| AGIWUR3838                                                  |    |    |        |        |                 |           |           |                                  |

|                                                                                     |    |        |        |                |            |            |                     |             |
|-------------------------------------------------------------------------------------|----|--------|--------|----------------|------------|------------|---------------------|-------------|
| CB4856 CT                                                                           | IV | 717925 | 719451 | WBGene00044460 | Y55F3C.10  | Y55F3C.10  | 0.0938579039811973  |             |
| AGIWUR29659                                                                         |    |        |        |                |            |            |                     |             |
| CB4856 CT                                                                           | IV | 719766 | 727481 | WBGene00044459 | Y55F3C.9   | Y55F3C.9   | -0.0081395283350032 |             |
| AGIWUR3147;AGIWUR17197                                                              |    |        |        |                |            |            |                     |             |
| CB4856 CT                                                                           | IV | 728500 | 731037 | WBGene00021951 | srt-24     | Y55F3C.8   | 0.107921328890411   |             |
| AGIWUR31555;AGIWUR35044                                                             |    |        |        |                |            |            |                     |             |
| CB4856 CT                                                                           | IV | 736675 | 753316 | WBGene00021948 | kvs-5      | Y55F3C.3   | -0.267026442539638  |             |
| AGIWUR4683;AGIWUR4981;AGIWUR12075;AGIWUR25624                                       |    |        |        |                |            |            |                     |             |
| CB4856 CT                                                                           | IV | 756721 | 759084 | WBGene00021947 | srt-23     | Y55F3C.2   | -0.33752613168835   |             |
| AGIWUR19631;AGIWUR28671                                                             |    |        |        |                |            |            |                     |             |
| CB4856 CT                                                                           | IV | 760610 | 762342 | WBGene00001788 | gst-40     | F56B3.10   | -0.212664813734182  |             |
| AGIWUR6114                                                                          |    |        |        |                |            |            |                     |             |
| CB4856 CT                                                                           | IV | 762416 | 763680 | WBGene00000677 | col-103    | F56B3.1    | -0.0407195252068622 |             |
| AGIWUR8934;AGIWUR12460                                                              |    |        |        |                |            |            |                     |             |
| CB4856 CT                                                                           | IV | 764078 | 768584 | WBGene00018928 | F56B3.2    | F56B3.2    | 0.163843690949562   | AGIWUR34465 |
| CB4856 CT                                                                           | IV | 773228 | 776655 | WBGene00018932 | mrp1-2     | F56B3.8    | -0.152637605352364  | AGIWUR13207 |
| CB4856 CT                                                                           | IV | 778784 | 784182 | WBGene00018931 | ugt-52     | F56B3.7    | 0.650679528725682   | AGIWUR43381 |
| CB4856 CT                                                                           | IV | 786234 | 794326 | WBGene00004824 | F56B3.4    | F56B3.4    | -0.196105772420411  | AGIWUR4977  |
| CB4856 CT                                                                           | IV | 794632 | 795689 | WBGene00018935 | skr-18     | F56B3.12   | -0.149590707403323  |             |
| AGIWUR20815                                                                         |    |        |        |                |            |            |                     |             |
| CB4856 CT                                                                           | IV | 795755 | 796567 | WBGene00018934 | F56B3.11   | F56B3.11   | -0.0374039112122801 |             |
| AGIWUR10110;AGIWUR20027;AGIWUR22185;AGIWUR26451;AGIWUR30559;AGIWUR37301;AGIWUR43312 |    |        |        |                |            |            |                     |             |
| CB4856 CT                                                                           | IV | 797023 | 799922 | WBGene00001154 | ech-5      | F56B3.5    | -0.430328052672998  | AGIWUR22304 |
| CB4856 CT                                                                           | IV | 805102 | 806236 | WBGene00185088 | Y55F3BL.4  | Y55F3BL.4  | -0.0436807701502939 |             |
| AGIWUR21165                                                                         |    |        |        |                |            |            |                     |             |
| CB4856 CT                                                                           | IV | 807439 | 824954 | WBGene00021936 | zipt-20    | Y55F3BL.2  | 0.05102222981385802 |             |
| AGIWUR5347;AGIWUR13156;AGIWUR14357                                                  |    |        |        |                |            |            |                     |             |
| CB4856 CT                                                                           | IV | 830359 | 831896 | WBGene00021942 | madf-1     | Y55F3BR.5  | -0.0405493170104965 |             |
| AGIWUR35663                                                                         |    |        |        |                |            |            |                     |             |
| CB4856 CT                                                                           | IV | 832362 | 833329 | WBGene00044742 | Y55F3BR.10 | Y55F3BR.10 | -0.257673006031275  |             |
| AGIWUR13482;AGIWUR20780;AGIWUR28506;AGIWUR42338                                     |    |        |        |                |            |            |                     |             |
| CB4856 CT                                                                           | IV | 835033 | 842126 | WBGene00021943 | Y55F3BR.6  | Y55F3BR.6  | -0.129569248547054  |             |
| AGIWUR15121;AGIWUR42889                                                             |    |        |        |                |            |            |                     |             |
| CB4856 CT                                                                           | IV | 845881 | 848850 | WBGene00021941 | lgc-33     | Y55F3BR.4  | 0.190535422699011   |             |
| AGIWUR12929                                                                         |    |        |        |                |            |            |                     |             |
| CB4856 CT                                                                           | IV | 849269 | 854780 | WBGene00021945 | lem-4      | Y55F3BR.8  | -0.119872841018863  |             |
| AGIWUR6239                                                                          |    |        |        |                |            |            |                     |             |
| CB4856 CT                                                                           | IV | 857327 | 874724 | WBGene00021939 | Y55F3BR.2  | Y55F3BR.2  | 0.0164504711565261  |             |
| AGIWUR2219;AGIWUR14690;AGIWUR43144                                                  |    |        |        |                |            |            |                     |             |

|                                                                                     |    |         |         |                |            |            |                     |
|-------------------------------------------------------------------------------------|----|---------|---------|----------------|------------|------------|---------------------|
| CB4856 CT                                                                           | IV | 874791  | 881910  | WBGene00021938 | Y55F3BR.1  | Y55F3BR.1  | -0.169690824807708  |
| AGIWUR8321                                                                          |    |         |         |                |            |            |                     |
| CB4856 CT                                                                           | IV | 885346  | 890200  | WBGene00007007 | mak-2      | C44C8.6    | 0.373233489953294   |
| AGIWUR5736;AGIWUR10731;AGIWUR10982;AGIWUR40813                                      |    |         |         |                |            |            |                     |
| CB4856 CT                                                                           | IV | 919990  | 920808  | WBGene00019070 | F58H7.5    | F58H7.5    | 0.0834919157226421  |
| AGIWUR34903                                                                         |    |         |         |                |            |            |                     |
| CB4856 CT                                                                           | IV | 924936  | 939667  | WBGene00019069 | lgc-30     | F58H7.3    | 0.207901678061712   |
| AGIWUR10043                                                                         |    |         |         |                |            |            |                     |
| CB4856 CT                                                                           | IV | 940017  | 945653  | WBGene00019068 | faah-3     | F58H7.2    | 0.117367658404866   |
| AGIWUR10182                                                                         |    |         |         |                |            |            |                     |
| CB4856 CT                                                                           | IV | 959452  | 984392  | WBGene00004047 | plx-1      | Y55F3AL.1  | 0.320455126212297   |
| AGIWUR24475                                                                         |    |         |         |                |            |            |                     |
| CB4856 CT                                                                           | IV | 984405  | 990521  | WBGene00043705 | egrh-2     | Y55F3AM.7  | 0.0643050666991325  |
| AGIWUR6981                                                                          |    |         |         |                |            |            |                     |
| CB4856 CT                                                                           | IV | 992240  | 998348  | WBGene00021924 | Y55F3AM.6  | Y55F3AM.6  | -0.426628747819081  |
| AGIWUR12792;AGIWUR15312;AGIWUR16365;AGIWUR19661                                     |    |         |         |                |            |            |                     |
| CB4856 CT                                                                           | IV | 999214  | 1003639 | WBGene00021923 | Y55F3AM.5  | Y55F3AM.5  | -0.120437799558569  |
| AGIWUR1547;AGIWUR20689;AGIWUR44614                                                  |    |         |         |                |            |            |                     |
| CB4856 CT                                                                           | IV | 1003600 | 1005864 | WBGene00021925 | immp-2     | Y55F3AM.8  | -0.0668611080138763 |
| AGIWUR9588                                                                          |    |         |         |                |            |            |                     |
| CB4856 CT                                                                           | IV | 1006083 | 1009734 | WBGene00021926 | Y55F3AM.9  | Y55F3AM.9  | 0.160174784951064   |
| AGIWUR35970                                                                         |    |         |         |                |            |            |                     |
| CB4856 CT                                                                           | IV | 1010054 | 1012502 | WBGene00021922 | atg-3      | Y55F3AM.4  | 0.0907450042742717  |
| AGIWUR44533                                                                         |    |         |         |                |            |            |                     |
| CB4856 CT                                                                           | IV | 1012624 | 1019558 | WBGene00021921 | Y55F3AM.3  | Y55F3AM.3  | -0.0138511094872769 |
| AGIWUR19334;AGIWUR19775;AGIWUR20515;AGIWUR20761;AGIWUR24236;AGIWUR37138;AGIWUR42157 |    |         |         |                |            |            |                     |
| CB4856 CT                                                                           | IV | 1027787 | 1030024 | WBGene00021927 | abhd-14    | Y55F3AM.10 | 0.402640512607029   |
| AGIWUR26712                                                                         |    |         |         |                |            |            |                     |
| CB4856 CT                                                                           | IV | 1038671 | 1041008 | WBGene00021928 | Y55F3AM.11 | Y55F3AM.11 | -0.0922512427736137 |
| AGIWUR19979                                                                         |    |         |         |                |            |            |                     |
| CB4856 CT                                                                           | IV | 1045983 | 1049506 | WBGene00005903 | srx-12     | Y55F3AM.2  | -0.0463831022194725 |
| AGIWUR42547                                                                         |    |         |         |                |            |            |                     |
| CB4856 CT                                                                           | IV | 1052524 | 1054794 | WBGene00021929 | dcap-1     | Y55F3AM.12 | 0.21559209084355    |
| AGIWUR13844;AGIWUR14536;AGIWUR15020;AGIWUR20920;AGIWUR35100;AGIWUR36637             |    |         |         |                |            |            |                     |
| CB4856 CT                                                                           | IV | 1056890 | 1057620 | WBGene00021920 | mrps-25    | Y55F3AM.1  | -0.218707964542158  |
| AGIWUR31309                                                                         |    |         |         |                |            |            |                     |
| CB4856 CT                                                                           | IV | 1058695 | 1067525 | WBGene00021931 | Y55F3AM.14 | Y55F3AM.14 | 0.0103229951654429  |
| AGIWUR14109                                                                         |    |         |         |                |            |            |                     |
| CB4856 CT                                                                           | IV | 1077463 | 1087013 | WBGene00000816 | csn-4      | Y55F3AM.15 | -0.290814699937084  |
| AGIWUR14506;AGIWUR35063;AGIWUR36445;AGIWUR38851                                     |    |         |         |                |            |            |                     |
| CB4856 CT                                                                           | IV | 1087095 | 1093920 | WBGene00021934 | cct-8      | Y55F3AR.3  | -0.47540883685401   |
| AGIWUR7621                                                                          |    |         |         |                |            |            |                     |

|                                                                          |    |                 |                |                   |                    |                     |             |
|--------------------------------------------------------------------------|----|-----------------|----------------|-------------------|--------------------|---------------------|-------------|
| CB4856 CT<br>AGIWUR7254                                                  | IV | 1094545 1096723 | WBGene00021933 | Y55F3AR.2         | Y55F3AR.2          | -0.341268817398063  |             |
| CB4856 CT<br>AGIWUR2526                                                  | IV | 1097453 1102980 | WBGene00021932 | Y55F3AR.1         | Y55F3AR.1          | -0.294044210259422  |             |
| CB4856 CT<br>AGIWUR13870;AGIWUR22722;AGIWUR29440;AGIWUR34768;AGIWUR38469 | IV | 1103541 1104609 | WBGene00044462 | C44B12.9          | C44B12.9           | -0.318555749617149  |             |
| CB4856 CT<br>AGIWUR35036;AGIWUR44237                                     | IV | 1107396 1110856 | WBGene00003893 | ost-1 C44B12.2    |                    | -0.0558079074669768 |             |
| CB4856 CT<br>AGIWUR3271                                                  | IV | 1111462 1114820 | WBGene00005905 | srx-14 C44B12.8   |                    | 0.0549468276846117  |             |
| CB4856 CT<br>AGIWUR26071                                                 | IV | 1114969 1118666 | WBGene00005904 | srx-13 C44B12.4   |                    | 0.0988489065980946  |             |
| CB4856 CT<br>AGIWUR36087                                                 | IV | 1121457 1125107 | WBGene00016638 | perm-4 C44B12.5   |                    | 0.14137749212184    |             |
| CB4856 CT<br>AGIWUR12455;AGIWUR35647                                     | IV | 1126790 1128848 | WBGene00016636 | perm-2 C44B12.1   |                    | 0.164770053495538   |             |
| CB4856 CT<br>AGIWUR17771                                                 | IV | 1128964 1136947 | WBGene00016639 | C44B12.6          | C44B12.6           | -0.13041610395419   |             |
| CB4856 CT                                                                | IV | 1145681 1158028 | WBGene00016797 | C50A2.3 C50A2.3   | -0.361262322752662 |                     | AGIWUR22624 |
| CB4856 CT                                                                | IV | 1159637 1160484 | WBGene00016798 | ets-8 C50A2.4     | 0.0747785246702497 |                     | AGIWUR6703  |
| CB4856 CT                                                                | IV | 1170672 1177776 | WBGene00016796 | cec-2 C50A2.2     | -0.216659137264005 |                     | AGIWUR29859 |
| CB4856 CT<br>AGIWUR25304                                                 | IV | 1178022 1182837 | WBGene00022426 | Y104H12D.2        | Y104H12D.2         | 0.0559414543938779  |             |
| CB4856 CT<br>AGIWUR14593                                                 | IV | 1182592 1186604 | WBGene00022428 | Y104H12D.4        | Y104H12D.4         | -0.179433567532399  |             |
| CB4856 CT<br>AGIWUR13101                                                 | IV | 1187799 1192977 | WBGene00007020 | mdt-20 Y104H12D.1 |                    | 0.329327535213652   |             |
| CB4856 CT<br>AGIWUR34307                                                 | IV | 1193065 1201846 | WBGene00022427 | Y104H12D.3        | Y104H12D.3         | 0.0505401487137078  |             |
| CB4856 CT<br>AGIWUR13919                                                 | IV | 1202651 1204970 | WBGene00001104 | ds1-2 W09G12.1    |                    | -0.0249654850903482 |             |
| CB4856 CT<br>-0.00868312826132067                                        | IV | 1205868 1206377 | WBGene00023163 | W09G12.3          | W09G12.3           |                     |             |
| CB4856 CT<br>AGIWUR14118                                                 | IV | 1207255 1208102 | WBGene00001103 | ds1-1 W09G12.4    |                    | 0.532830369482651   |             |
| CB4856 CT<br>AGIWUR34992                                                 | IV | 1216590 1218527 | WBGene00021123 | W09G12.9          | W09G12.9           | 0.0445213667819768  |             |
| CB4856 CT<br>AGIWUR6676;AGIWUR24423;AGIWUR28632;AGIWUR31254;AGIWUR40883  | IV | 1219333 1221287 | WBGene00044463 | W09G12.10         | W09G12.10          | -0.272354620070089  |             |

|                                                                                                                       |    |         |         |                |           |             |                     |
|-----------------------------------------------------------------------------------------------------------------------|----|---------|---------|----------------|-----------|-------------|---------------------|
| CB4856 CT                                                                                                             | IV | 1226182 | 1227668 | WBGene00021122 | W09G12.8  | W09G12.8    | -0.400622124037932  |
| AGIWUR26633                                                                                                           |    |         |         |                |           |             |                     |
| CB4856 CT                                                                                                             | IV | 1229080 | 1230789 | WBGene00021121 | W09G12.7  | W09G12.7    | 1.93108859769767    |
| AGIWUR44787                                                                                                           |    |         |         |                |           |             |                     |
| CB4856 CT                                                                                                             | IV | 1231897 | 1232812 | WBGene00021120 | W09G12.6  | W09G12.6    | -0.0669453581166035 |
| AGIWUR15970                                                                                                           |    |         |         |                |           |             |                     |
| CB4856 CT                                                                                                             | IV | 1232872 | 1239852 | WBGene00009521 | F38A1.8   | F38A1.8     | -0.392558104478304  |
| AGIWUR1399;AGIWUR42823                                                                                                |    |         |         |                |           |             |                     |
| CB4856 CT                                                                                                             | IV | 1241332 | 1243402 | WBGene00044908 | F38A1.15  | F38A1.15    | 0.368317881084019   |
| AGIWUR6368                                                                                                            |    |         |         |                |           |             |                     |
| CB4856 CT                                                                                                             | IV | 1244247 | 1245344 | WBGene00009522 | F38A1.9   | F38A1.9     | -0.114003974148899  |
| CB4856 CT                                                                                                             | IV | 1245399 | 1246886 | WBGene00009523 | cllec-165 | F38A1.10    | 0.166518790948215   |
| AGIWUR18756                                                                                                           |    |         |         |                |           |             |                     |
| CB4856 CT                                                                                                             | IV | 1247386 | 1249025 | WBGene00009524 | F38A1.11  | F38A1.11    | -0.358755246714157  |
| AGIWUR15217                                                                                                           |    |         |         |                |           |             |                     |
| CB4856 CT                                                                                                             | IV | 1249018 | 1251366 | WBGene00009518 | cllec-166 | F38A1.5     | 0.330430171885325   |
| AGIWUR3404                                                                                                            |    |         |         |                |           |             |                     |
| CB4856 CT                                                                                                             | IV | 1251861 | 1252470 | WBGene00009519 | F38A1.6   | F38A1.6     | 0.00921096503557628 |
| CB4856 CT                                                                                                             | IV | 1253137 | 1255732 | WBGene00009517 | cllec-167 | F38A1.4     | -0.222669381179735  |
| AGIWUR32291                                                                                                           |    |         |         |                |           |             |                     |
| CB4856 CT                                                                                                             | IV | 1256956 | 1259344 | WBGene00009520 | cllec-168 | F38A1.7     | -0.157306541098475  |
| AGIWUR22643                                                                                                           |    |         |         |                |           |             |                     |
| CB4856 CT                                                                                                             | IV | 1261272 | 1264622 | WBGene00009526 | cllec-169 | F38A1.14    | -0.349412226651511  |
| AGIWUR1769                                                                                                            |    |         |         |                |           |             |                     |
| CB4856 CT                                                                                                             | IV | 1265228 | 1265848 | WBGene00009525 | F38A1.13  | F38A1.13    | -0.034488590744111  |
| AGIWUR34868                                                                                                           |    |         |         |                |           |             |                     |
| CB4856 CT                                                                                                             | IV | 1266866 | 1274425 | WBGene00009515 | cllec-170 | F38A1.1     | -0.144906749283287  |
| AGIWUR120;AGIWUR3055;AGIWUR12336;AGIWUR18316;AGIWUR25656;AGIWUR28250;AGIWUR29831;AGIWUR31041;AGIWUR35445;AGIWUR35831  |    |         |         |                |           |             |                     |
| CB4856 CT                                                                                                             | IV | 1275865 | 1277091 | WBGene00007476 | C09E9.1   | C09E9.1     | -0.109585518287669  |
| AGIWUR1226;AGIWUR23153;AGIWUR24526;AGIWUR25781;AGIWUR28437;AGIWUR38895                                                |    |         |         |                |           |             |                     |
| CB4856 CT                                                                                                             | IV | 1289627 | 1296897 | WBGene00022425 | plst-1    | Y104H12BR.1 | -0.321218626668928  |
| AGIWUR6341;AGIWUR8186;AGIWUR19456;AGIWUR20224;AGIWUR30101;AGIWUR30260;AGIWUR33915;AGIWUR35453;AGIWUR36595;AGIWUR41949 |    |         |         |                |           |             |                     |
| CB4856 CT                                                                                                             | IV | 1297222 | 1309652 | WBGene00018776 | F53H1.1   | F53H1.1     | 0.0486888635995371  |
| CB4856 CT                                                                                                             | IV | 1310166 | 1328241 | WBGene00018778 | F53H1.4   | F53H1.4     | -0.236068675451609  |
| AGIWUR7608;AGIWUR20200;AGIWUR20748;AGIWUR22712                                                                        |    |         |         |                |           |             |                     |
| CB4856 CT                                                                                                             | IV | 1329162 | 1339376 | WBGene00018777 | F53H1.3   | F53H1.3     | 0.139520400725889   |
| CB4856 CT                                                                                                             | IV | 1347316 | 1352977 | WBGene00004338 | rfc-2     | F58F6.4     | -0.111572227037204  |



|                                                                                              |    |    |         |         |                |            |            |                     |             |
|----------------------------------------------------------------------------------------------|----|----|---------|---------|----------------|------------|------------|---------------------|-------------|
| CB4856                                                                                       | CT | IV | 1353636 | 1355305 | WBGene00000678 | col-104    | F58F6.1    | -0.0541034512821135 | AGIWUR9061  |
| CB4856                                                                                       | CT | IV | 1357816 | 1359225 | WBGene00000679 | col-105    | F58F6.2    | -0.136582975517893  | AGIWUR12554 |
| CB4856                                                                                       | CT | IV | 1375369 | 1376563 | WBGene00019052 | F58F6.3    | F58F6.3    | 0.0253195463705227  | AGIWUR5879  |
| CB4856                                                                                       | CT | IV | 1386045 | 1399538 | WBGene00022423 | nhr-41     | Y104H12A.1 | 0.131605596881236   |             |
| AGIWUR7746;AGIWUR10431;AGIWUR12457;AGIWUR30123                                               |    |    |         |         |                |            |            |                     |             |
| CB4856                                                                                       | CT | IV | 1406542 | 1408131 | WBGene00022314 | Y77E11A.14 | Y77E11A.14 | 0.942041992936394   |             |
| AGIWUR40359                                                                                  |    |    |         |         |                |            |            |                     |             |
| CB4856                                                                                       | CT | IV | 1408582 | 1410041 | WBGene00022309 | rpc-11     | Y77E11A.6  | -0.0749982416373101 |             |
| AGIWUR12229                                                                                  |    |    |         |         |                |            |            |                     |             |
| CB4856                                                                                       | CT | IV | 1410786 | 1419847 | WBGene00022310 | Y77E11A.7  | Y77E11A.7  | -0.151607415102919  |             |
| AGIWUR268;AGIWUR9813;AGIWUR11788;AGIWUR15813;AGIWUR17418;AGIWUR22112;AGIWUR22493;AGIWUR34355 |    |    |         |         |                |            |            |                     |             |
| CB4856                                                                                       | CT | IV | 1420929 | 1421770 | WBGene00002180 | jtr-1      | Y77E11A.4  | -0.142989391654108  |             |
| AGIWUR20279                                                                                  |    |    |         |         |                |            |            |                     |             |
| CB4856                                                                                       | CT | IV | 1425482 | 1426887 | WBGene00022312 | clcc-171   | Y77E11A.9  | 0.0815395983698552  |             |
| AGIWUR15284;AGIWUR26848;AGIWUR35309                                                          |    |    |         |         |                |            |            |                     |             |
| CB4856                                                                                       | CT | IV | 1429041 | 1430367 | WBGene00235267 | Y77E11A.23 | Y77E11A.23 | 0.265430564781364   |             |
| AGIWUR20360                                                                                  |    |    |         |         |                |            |            |                     |             |
| CB4856                                                                                       | CT | IV | 1435465 | 1446182 | WBGene00000547 | clp-7      | Y77E11A.11 | -0.0163524328059808 |             |
| AGIWUR14913                                                                                  |    |    |         |         |                |            |            |                     |             |
| CB4856                                                                                       | CT | IV | 1447594 | 1448316 | WBGene00022308 | Y77E11A.3  | Y77E11A.3  | 0.221523074392673   |             |
| AGIWUR17454                                                                                  |    |    |         |         |                |            |            |                     |             |
| CB4856                                                                                       | CT | IV | 1457075 | 1459521 | WBGene00022307 | Y77E11A.2  | Y77E11A.2  | 0.502296803096371   |             |
| AGIWUR20302                                                                                  |    |    |         |         |                |            |            |                     |             |
| CB4856                                                                                       | CT | IV | 1459866 | 1460786 | WBGene00000680 | col-106    | Y77E11A.15 | 0.0340174980198711  |             |
| AGIWUR30247                                                                                  |    |    |         |         |                |            |            |                     |             |
| CB4856                                                                                       | CT | IV | 1461899 | 1475109 | WBGene00022313 | Y77E11A.12 | Y77E11A.12 | 0.0588800455587712  |             |
| AGIWUR10496                                                                                  |    |    |         |         |                |            |            |                     |             |
| CB4856                                                                                       | CT | IV | 1485286 | 1489762 | WBGene00044464 | Y77E11A.16 | Y77E11A.16 | 0.0699834253208085  |             |
| AGIWUR7338                                                                                   |    |    |         |         |                |            |            |                     |             |
| CB4856                                                                                       | CT | IV | 1490653 | 1496022 | WBGene00003806 | npp-20     | Y77E11A.13 | -0.0944553950447951 |             |
| AGIWUR4990;AGIWUR24613;AGIWUR40679                                                           |    |    |         |         |                |            |            |                     |             |
| CB4856                                                                                       | CT | IV | 1497630 | 1509965 | WBGene00022306 | hxx-3      | Y77E11A.1  | 0.182382707859507   |             |
| AGIWUR29596                                                                                  |    |    |         |         |                |            |            |                     |             |
| CB4856                                                                                       | CT | IV | 1510546 | 1515251 | WBGene00019368 | K03H6.2    | K03H6.2    | -0.124311098345315  | AGIWUR12991 |
| CB4856                                                                                       | CT | IV | 1515510 | 1516627 | WBGene00044719 | clcc-172   | K03H6.7    | 1.26587479967747    |             |
| AGIWUR18366                                                                                  |    |    |         |         |                |            |            |                     |             |
| CB4856                                                                                       | CT | IV | 1517969 | 1521324 | WBGene00019369 | K03H6.4    | K03H6.4    | 0.212463251356411   |             |
| AGIWUR24843;AGIWUR40141                                                                      |    |    |         |         |                |            |            |                     |             |
| CB4856                                                                                       | CT | IV | 1523718 | 1526599 | WBGene00019367 | K03H6.1    | K03H6.1    | -0.0347067100843299 | AGIWUR37618 |

|                                                                                                                                                          |    |    |         |         |                |           |           |                     |
|----------------------------------------------------------------------------------------------------------------------------------------------------------|----|----|---------|---------|----------------|-----------|-----------|---------------------|
| CB4856                                                                                                                                                   | CT | IV | 1527221 | 1536398 | WBGene00019370 | K03H6.5   | K03H6.5   | 0.0159749483930796  |
| AGIWUR25528;AGIWUR39670                                                                                                                                  |    |    |         |         |                |           |           |                     |
| CB4856                                                                                                                                                   | CT | IV | 1545296 | 1566192 | WBGene00016427 | C34H4.5   | C34H4.5   | 0.0969455369539123  |
| AGIWUR13;AGIWUR480;AGIWUR7571;AGIWUR10154;AGIWUR15441;AGIWUR21312;AGIWUR36966;AGIWUR38213;AGIWUR44132                                                    |    |    |         |         |                |           |           |                     |
| CB4856                                                                                                                                                   | CT | IV | 1567921 | 1595824 | WBGene00003794 | npp-8     | Y41D4B.19 | 0.185026927813849   |
| AGIWUR451;AGIWUR7749;AGIWUR13128;AGIWUR14605;AGIWUR16223;AGIWUR17183;AGIWUR19609;AGIWUR27086;AGIWUR33432;AGIWUR35153;AGIWUR37403;AGIWUR38651;AGIWUR42141 |    |    |         |         |                |           |           |                     |
| CB4856                                                                                                                                                   | CT | IV | 1597316 | 1601620 | WBGene00000416 | ced-2     | Y41D4B.13 | 0.0486881536919022  |
| AGIWUR16139                                                                                                                                              |    |    |         |         |                |           |           |                     |
| CB4856                                                                                                                                                   | CT | IV | 1602985 | 1605609 | WBGene00021515 | set-23    | Y41D4B.12 | 0.161610322199417   |
| AGIWUR12103                                                                                                                                              |    |    |         |         |                |           |           |                     |
| CB4856                                                                                                                                                   | CT | IV | 1605712 | 1608901 | WBGene00021514 | Y41D4B.11 | Y41D4B.11 | -0.10410408994777   |
| AGIWUR41173                                                                                                                                              |    |    |         |         |                |           |           |                     |
| CB4856                                                                                                                                                   | CT | IV | 1610236 | 1612915 | WBGene00001105 | dsl-3     | Y41D4B.10 | 0.913618757104445   |
| AGIWUR20853                                                                                                                                              |    |    |         |         |                |           |           |                     |
| CB4856                                                                                                                                                   | CT | IV | 1613897 | 1616766 | WBGene00003712 | nhr-122   | Y41D4B.9  | 0.460725198946216   |
| AGIWUR37999                                                                                                                                              |    |    |         |         |                |           |           |                     |
| CB4856                                                                                                                                                   | CT | IV | 1626973 | 1630756 | WBGene00045255 | nhr-146   | Y41D4B.27 | 0.0650637130916163  |
| AGIWUR21898;AGIWUR30984;AGIWUR32578;AGIWUR38940;AGIWUR43528                                                                                              |    |    |         |         |                |           |           |                     |
| CB4856                                                                                                                                                   | CT | IV | 1631951 | 1633257 | WBGene00021525 | Y41D4B.26 | Y41D4B.26 | 1.00912700649036    |
| AGIWUR36375                                                                                                                                              |    |    |         |         |                |           |           |                     |
| CB4856                                                                                                                                                   | CT | IV | 1633772 | 1637367 | WBGene00021513 | Y41D4B.6  | Y41D4B.6  | 1.56287235734671    |
| AGIWUR39537                                                                                                                                              |    |    |         |         |                |           |           |                     |
| CB4856                                                                                                                                                   | CT | IV | 1659691 | 1660011 | WBGene00004497 | rps-28    | Y41D4B.5  | 0.160122824256032   |
| AGIWUR42056                                                                                                                                              |    |    |         |         |                |           |           |                     |
| CB4856                                                                                                                                                   | CT | IV | 1660112 | 1669707 | WBGene00021512 | Y41D4B.4  | Y41D4B.4  | -0.159734579843656  |
| AGIWUR30269                                                                                                                                              |    |    |         |         |                |           |           |                     |
| CB4856                                                                                                                                                   | CT | IV | 1672706 | 1676209 | WBGene00021511 | Y41D4B.1  | Y41D4B.1  | -0.14137246591388   |
| AGIWUR2885                                                                                                                                               |    |    |         |         |                |           |           |                     |
| CB4856                                                                                                                                                   | CT | IV | 1676720 | 1682159 | WBGene00021524 | Y41D4B.24 | Y41D4B.24 | 0.133297320043428   |
| AGIWUR572;AGIWUR2148;AGIWUR10477;AGIWUR11515;AGIWUR12627;AGIWUR16482;AGIWUR19697;AGIWUR25338;AGIWUR29364;AGIWUR30172;AGIWUR38879                         |    |    |         |         |                |           |           |                     |
| CB4856                                                                                                                                                   | CT | IV | 1699899 | 1702820 | WBGene00044618 | bus-2     | K08D12.5  | -0.0685618617666099 |
| AGIWUR6907                                                                                                                                               |    |    |         |         |                |           |           |                     |
| CB4856                                                                                                                                                   | CT | IV | 1707296 | 1708691 | WBGene00019538 | K08D12.4  | K08D12.4  | -0.0223407894075258 |
| AGIWUR41649                                                                                                                                              |    |    |         |         |                |           |           |                     |
| CB4856                                                                                                                                                   | CT | IV | 1708804 | 1709745 | WBGene00003947 | pbs-1     | K08D12.1  | -0.26516173753731   |
| AGIWUR526                                                                                                                                                |    |    |         |         |                |           |           |                     |
| CB4856                                                                                                                                                   | CT | IV | 1710265 | 1711127 | WBGene00019537 | K08D12.3  | K08D12.3  | -0.0150126422607997 |

AGIWUR1281;AGIWUR4072;AGIWUR7432;AGIWUR7623;AGIWUR10035;AGIWUR15285;AGIWUR19577;AGIWUR24436;AGIWUR25955;AGIWUR29099;AGIWUR32333;AGIWUR32915;AGIWUR33849;AGIWUR36200;AGIWUR42283  
 CB4856 CT IV 1711279 1714179 WBGene00019536 rpi-2 K08D12.2 0.065476160089716  
 AGIWUR9019  
 CB4856 CT IV 1720790 1723067 WBGene00019540 K08D12.6 K08D12.6 -0.0506290927766253  
 AGIWUR1415;AGIWUR2340;AGIWUR41859;AGIWUR42751  
 CB4856 CT IV 1723199 1724143 WBGene00044293 K08D12.7 K08D12.7 -0.08343022104558  
 AGIWUR27413  
 CB4856 CT IV 1727438 1737884 WBGene00021507 Y41D4A.5 Y41D4A.5 0.0744327550512285  
 AGIWUR8940  
 CB4856 CT IV 1740921 1745587 WBGene00021508 Y41D4A.6 Y41D4A.6 0.276315793851285  
 AGIWUR11580  
 CB4856 CT IV 1745875 1751633 WBGene00021506 Y41D4A.4 Y41D4A.4 0.292875871043982  
 AGIWUR9031;AGIWUR10979;AGIWUR20429  
 CB4856 CT IV 1752270 1761647 WBGene00021509 Y41D4A.7 Y41D4A.7 0.221709678464284  
 AGIWUR14956  
 CB4856 CT IV 1768621 1769667 WBGene00000682 col-108 Y41D4A.2 -0.32240376376042  
 AGIWUR23691  
 CB4856 CT IV 1772144 1774695 WBGene00021504 Y41D4A.1 Y41D4A.1 -0.161546596659509  
 AGIWUR38771  
 CB4856 CT IV 1775277 1781562 WBGene00021510 frpr-19 Y41D4A.8 0.0895309257124941  
 AGIWUR8492  
 CB4856 CT IV 1802026 1803982 WBGene00021410 Y38C1BA.1 Y38C1BA.1 0.355849871196472  
 AGIWUR12252  
 CB4856 CT IV 1805037 1815099 WBGene00004913 snn-1 Y38C1BA.2 0.148403192524431  
 AGIWUR9737  
 CB4856 CT IV 1817311 1820253 WBGene00000683 col-109 Y38C1BA.3 -0.310226878352427  
 AGIWUR41439  
 CB4856 CT IV 1824481 1834029 WBGene00000553 cmk-1 K07A9.2 0.174466580570758  
 AGIWUR6980;AGIWUR44640  
 CB4856 CT IV 1834628 1847336 WBGene00019462 K07A9.3 K07A9.3 -0.182306978057156  
 AGIWUR8587;AGIWUR9835;AGIWUR41314  
 CB4856 CT IV 1847968 1880587 WBGene00001173 egl-4 F55A8.2 0.102155779749111  
 AGIWUR6005;AGIWUR7284;AGIWUR8769;AGIWUR10842;AGIWUR11592;AGIWUR11699;AGIWUR19320;AGIWUR20152;AGIWUR29949;AGIWUR30504;AGIWUR34266;AGIWUR36671;AGIWUR37765;AGIWUR44393;AGIWUR44568  
 CB4856 CT IV 1902323 1917841 WBGene00001186 egl-18 F55A8.1 0.375611706221323  
 AGIWUR5983;AGIWUR11851;AGIWUR22220;AGIWUR24154;AGIWUR26660;AGIWUR35388  
 CB4856 CT IV 1917854 1921644 WBGene00001253 elt-6 F52C12.5 0.7879875429611 AGIWUR35073  
 CB4856 CT IV 1923939 1948040 WBGene00018681 denn-4 F52C12.4 -0.391121439409249



|                                                                                                                       |    |    |         |         |                |            |            |                     |             |
|-----------------------------------------------------------------------------------------------------------------------|----|----|---------|---------|----------------|------------|------------|---------------------|-------------|
| CB4856                                                                                                                | CT | IV | 2091929 | 2099890 | WBGene00044649 | C23H5.11   | C23H5.11   | -0.290494338115134  |             |
| AGIWUR6993                                                                                                            |    |    |         |         |                |            |            |                     |             |
| CB4856                                                                                                                | CT | IV | 2104056 | 2111605 | WBGene00000487 | che-6      | C23H5.7    | 0.00341225035473247 | AGIWUR31703 |
| CB4856                                                                                                                | CT | IV | 2111894 | 2113422 | WBGene00016027 | C23H5.8    | C23H5.8    | -0.80678914335792   |             |
| AGIWUR13732;AGIWUR14068;AGIWUR24032;AGIWUR24904;AGIWUR36120;AGIWUR42627                                               |    |    |         |         |                |            |            |                     |             |
| CB4856                                                                                                                | CT | IV | 2114626 | 2115625 | WBGene00016025 | xbx-4      | C23H5.3    | -0.0240710189719779 |             |
| AGIWUR4935;AGIWUR5289;AGIWUR12000;AGIWUR18510;AGIWUR36867;AGIWUR37752                                                 |    |    |         |         |                |            |            |                     |             |
| CB4856                                                                                                                | CT | IV | 2122797 | 2126038 | WBGene00016024 | glb-7      | C23H5.2    | -0.0769416529255089 | AGIWUR1915  |
| CB4856                                                                                                                | CT | IV | 2126145 | 2128852 | WBGene00001729 | gr1-20     | C23H5.9    | 0.127909714607135   |             |
| AGIWUR3649;AGIWUR24293;AGIWUR25291;AGIWUR31492;AGIWUR35279;AGIWUR40828                                                |    |    |         |         |                |            |            |                     |             |
| CB4856                                                                                                                | CT | IV | 2130965 | 2133025 | WBGene00016023 | prmt-6     | C23H5.1    | -0.643385467634898  |             |
| AGIWUR5424;AGIWUR17274                                                                                                |    |    |         |         |                |            |            |                     |             |
| CB4856                                                                                                                | CT | IV | 2133481 | 2134708 | WBGene00077523 | C23H5.12   | C23H5.12   | 0.0183606915041654  |             |
| AGIWUR6775                                                                                                            |    |    |         |         |                |            |            |                     |             |
| CB4856                                                                                                                | CT | IV | 2136895 | 2146461 | WBGene00016918 | test-1     | C54E4.2    | -0.366254686028306  |             |
| AGIWUR1237;AGIWUR8185                                                                                                 |    |    |         |         |                |            |            |                     |             |
| CB4856                                                                                                                | CT | IV | 2146672 | 2149297 | WBGene00016920 | C54E4.5    | C54E4.5    | -0.240882512775386  | AGIWUR24380 |
| CB4856                                                                                                                | CT | IV | 2150650 | 2159162 | WBGene00001557 | gcy-37     | C54E4.3    | 0.43340170752376    | AGIWUR40786 |
| CB4856                                                                                                                | CT | IV | 2161252 | 2168626 | WBGene00016919 | C54E4.4    | C54E4.4    | 0.283541764270128   | AGIWUR28881 |
| CB4856                                                                                                                | CT | IV | 2175606 | 2177579 | WBGene00016917 | C54E4.1    | C54E4.1    | 0.033407270851324   | AGIWUR7652  |
| CB4856                                                                                                                | CT | IV | 2177900 | 2198871 | WBGene00022134 | Y71G10AL.1 | Y71G10AL.1 | -0.231392493492674  |             |
| AGIWUR6949;AGIWUR10218;AGIWUR16899;AGIWUR23265;AGIWUR37024;AGIWUR38505;AGIWUR43268                                    |    |    |         |         |                |            |            |                     |             |
| CB4856                                                                                                                | CT | IV | 2199041 | 2209051 | WBGene00044650 | Y71G10AR.4 | Y71G10AR.4 | -0.163884519624979  |             |
| AGIWUR10691;AGIWUR30628;AGIWUR30812                                                                                   |    |    |         |         |                |            |            |                     |             |
| CB4856                                                                                                                | CT | IV | 2222828 | 2235795 | WBGene00020208 | T04C4.1    | T04C4.1    | -0.0900474706227365 |             |
| AGIWUR5060;AGIWUR9922;AGIWUR18558;AGIWUR18666;AGIWUR22407;AGIWUR24849;AGIWUR26201;AGIWUR34832;AGIWUR35575;AGIWUR38382 |    |    |         |         |                |            |            |                     |             |
| CB4856                                                                                                                | CT | IV | 2237663 | 2242449 | WBGene00019785 | M70.3      | M70.3      | 0.0829834239662901  | AGIWUR21308 |
| CB4856                                                                                                                | CT | IV | 2243060 | 2243699 | WBGene00019784 | M70.2      | M70.2      | -0.51576166831207   | AGIWUR43594 |
| CB4856                                                                                                                | CT | IV | 2245874 | 2252370 | WBGene00019783 | M70.1      | M70.1      | 0.00965111066367541 | AGIWUR44404 |
| CB4856                                                                                                                | CT | IV | 2253004 | 2263704 | WBGene00019786 | M70.4      | M70.4      | 0.499674975541941   | AGIWUR8671  |
| CB4856                                                                                                                | CT | IV | 2264309 | 2275622 | WBGene00019787 | M70.5      | M70.5      | -0.188002082477396  | AGIWUR41044 |
| CB4856                                                                                                                | CT | IV | 2275864 | 2300351 | WBGene00002990 | lin-1      | C37F5.1    | 0.237704546831625   |             |
| AGIWUR2520;AGIWUR11089;AGIWUR14119;AGIWUR19872;AGIWUR40161;AGIWUR43471                                                |    |    |         |         |                |            |            |                     |             |
| CB4856                                                                                                                | CT | IV | 2304446 | 2306540 | WBGene00021416 | mksr-2     | Y38F2AL.2  | 0.207012143542343   |             |
| AGIWUR19462                                                                                                           |    |    |         |         |                |            |            |                     |             |
| CB4856                                                                                                                | CT | IV | 2307819 | 2314567 | WBGene00006920 | vha-11     | Y38F2AL.3  | -0.300947643350366  |             |
| AGIWUR5573;AGIWUR21184;AGIWUR35616;AGIWUR38366                                                                        |    |    |         |         |                |            |            |                     |             |
| CB4856                                                                                                                | CT | IV | 2314589 | 2315990 | WBGene00006912 | vha-3      | Y38F2AL.4  | -0.0508565042745559 |             |



|                                                                                                |    |         |         |                 |            |            |                     |
|------------------------------------------------------------------------------------------------|----|---------|---------|-----------------|------------|------------|---------------------|
| CB4856 CT                                                                                      | IV | 2497801 | 2530296 | WBGene00022087  | Y69A2AR.16 | Y69A2AR.16 | -0.210361644327013  |
| AGIWUR8327;AGIWUR23283;AGIWUR27495;AGIWUR40391                                                 |    |         |         |                 |            |            |                     |
| CB4856 CT                                                                                      | IV | 2542326 | 2548719 | WBGene00022086  | sprn-3     | Y69A2AR.15 | -0.264841784995987  |
| AGIWUR36441                                                                                    |    |         |         |                 |            |            |                     |
| CB4856 CT                                                                                      | IV | 2549926 | 2551697 | WBGene00022094  | Y69A2AR.23 | Y69A2AR.23 | -0.118025745780868  |
| AGIWUR21548                                                                                    |    |         |         |                 |            |            |                     |
| CB4856 CT                                                                                      | IV | 2551872 | 2557106 | WBGene00022085  | Y69A2AR.14 | Y69A2AR.14 | 0.0619562904749067  |
| AGIWUR24129                                                                                    |    |         |         |                 |            |            |                     |
| CB4856 CT                                                                                      | IV | 2563778 | 2564069 | WBGene00022095  | Y69A2AR.24 | Y69A2AR.24 | -0.0209121446743454 |
| AGIWUR38735                                                                                    |    |         |         |                 |            |            |                     |
| CB4856 CT                                                                                      | IV | 2565820 | 2568367 | WBGene00022096  | Y69A2AR.25 | Y69A2AR.25 | -0.536339042614648  |
| AGIWUR31094                                                                                    |    |         |         |                 |            |            |                     |
| CB4856 CT                                                                                      | IV | 2568614 | 2572056 | WBGene00022083  | Y69A2AR.12 | Y69A2AR.12 | -0.276273324154424  |
| AGIWUR43136                                                                                    |    |         |         |                 |            |            |                     |
| CB4856 CT                                                                                      | IV | 2592395 | 2596786 | WBGene00022079  | Y69A2AR.8  | Y69A2AR.8  | -0.381013053711029  |
| AGIWUR43208;AGIWUR44094                                                                        |    |         |         |                 |            |            |                     |
| CB4856 CT                                                                                      | IV | 2597574 | 2597970 | WBGene000235294 | Y69A2AR.47 | Y69A2AR.47 | -0.184986742849793  |
| AGIWUR35460                                                                                    |    |         |         |                 |            |            |                     |
| CB4856 CT                                                                                      | IV | 2601141 | 2607571 | WBGene00022078  | epg-9      | Y69A2AR.7  | 0.621033761705495   |
| AGIWUR7888;AGIWUR11032;AGIWUR12009;AGIWUR21991;AGIWUR24627;AGIWUR31250;AGIWUR33586;AGIWUR44851 |    |         |         |                 |            |            |                     |
| CB4856 CT                                                                                      | IV | 2608051 | 2610200 | WBGene00022077  | vamp-7     | Y69A2AR.6  | 0.185486087883277   |
| AGIWUR41890                                                                                    |    |         |         |                 |            |            |                     |
| CB4856 CT                                                                                      | IV | 2610408 | 2612435 | WBGene00022101  | Y69A2AR.32 | Y69A2AR.32 | 0.162474689161956   |
| AGIWUR1713;AGIWUR9524;AGIWUR20374;AGIWUR24017;AGIWUR36001;AGIWUR38697                          |    |         |         |                 |            |            |                     |
| CB4856 CT                                                                                      | IV | 2614200 | 2617135 | WBGene00022076  | daao-1     | Y69A2AR.5  | 0.092341023366405   |
| AGIWUR1766;AGIWUR3255;AGIWUR8311;AGIWUR25091;AGIWUR35754;AGIWUR36807                           |    |         |         |                 |            |            |                     |
| CB4856 CT                                                                                      | IV | 2619875 | 2625438 | WBGene00004878  | smf-3      | Y69A2AR.4  | 1.41699982630244    |
| AGIWUR7804                                                                                     |    |         |         |                 |            |            |                     |
| CB4856 CT                                                                                      | IV | 2626132 | 2628271 | WBGene00003595  | ngn-1      | Y69A2AR.29 | 0.577899770322628   |
| AGIWUR28661                                                                                    |    |         |         |                 |            |            |                     |
| CB4856 CT                                                                                      | IV | 2636228 | 2641117 | WBGene00003161  | mdf-2      | Y69A2AR.30 | -0.109822537148477  |
| AGIWUR3452;AGIWUR25205;AGIWUR38116;AGIWUR39583                                                 |    |         |         |                 |            |            |                     |
| CB4856 CT                                                                                      | IV | 2641310 | 2642113 | WBGene00022075  | Y69A2AR.3  | Y69A2AR.3  | -0.218704203238705  |
| AGIWUR24450                                                                                    |    |         |         |                 |            |            |                     |
| CB4856 CT                                                                                      | IV | 2642979 | 2650104 | WBGene00004367  | ric-8      | Y69A2AR.2  | -0.096081036149398  |
| AGIWUR22951;AGIWUR44852                                                                        |    |         |         |                 |            |            |                     |
| CB4856 CT                                                                                      | IV | 2650384 | 2664003 | WBGene00022100  | Y69A2AR.31 | Y69A2AR.31 | 0.118856937125003   |
| AGIWUR15525                                                                                    |    |         |         |                 |            |            |                     |
| CB4856 CT                                                                                      | IV | 2667050 | 2672202 | WBGene00022074  | Y69A2AR.1  | Y69A2AR.1  | 0.140211837742051   |

|                                                                         |    |    |         |         |                |           |           |                      |
|-------------------------------------------------------------------------|----|----|---------|---------|----------------|-----------|-----------|----------------------|
| AGIWUR16654;AGIWUR29046;AGIWUR35364                                     |    |    |         |         |                |           |           |                      |
| CB4856                                                                  | CT | IV | 2673098 | 2675015 | WBGene00022377 | gpx-4     | Y94H6A.4  | 0.267022108378181    |
| AGIWUR32332                                                             |    |    |         |         |                |           |           |                      |
| CB4856                                                                  | CT | IV | 2676512 | 2678162 | WBGene00022376 | Y94H6A.3  | Y94H6A.3  | 0.0220776816076587   |
| AGIWUR1371                                                              |    |    |         |         |                |           |           |                      |
| CB4856                                                                  | CT | IV | 2680098 | 2688808 | WBGene00044651 | egrh-3    | Y94H6A.11 | -0.0906440983323682  |
| AGIWUR18045;AGIWUR18215                                                 |    |    |         |         |                |           |           |                      |
| CB4856                                                                  | CT | IV | 2688947 | 2703977 | WBGene00022378 | Y94H6A.5  | Y94H6A.5  | 0.0325884955241165   |
| AGIWUR39570                                                             |    |    |         |         |                |           |           |                      |
| CB4856                                                                  | CT | IV | 2704693 | 2707231 | WBGene00006705 | ubc-8     | Y94H6A.6  | 0.747988288554489    |
| AGIWUR17647                                                             |    |    |         |         |                |           |           |                      |
| CB4856                                                                  | CT | IV | 2709942 | 2711374 | WBGene00022382 | Y94H6A.10 | Y94H6A.10 | -0.671216212311773   |
| AGIWUR41705                                                             |    |    |         |         |                |           |           |                      |
| CB4856                                                                  | CT | IV | 2711939 | 2713035 | WBGene00050885 | Y94H6A.12 | Y94H6A.12 | -0.0705074264224699  |
| AGIWUR4052                                                              |    |    |         |         |                |           |           |                      |
| CB4856                                                                  | CT | IV | 2713907 | 2716574 | WBGene00022379 | Y94H6A.7  | Y94H6A.7  | -0.368202852542185   |
| AGIWUR2447;AGIWUR5357;AGIWUR6386;AGIWUR7246                             |    |    |         |         |                |           |           |                      |
| CB4856                                                                  | CT | IV | 2716661 | 2719834 | WBGene00022380 | Y94H6A.8  | Y94H6A.8  | -0.17476539463275    |
| AGIWUR29445                                                             |    |    |         |         |                |           |           |                      |
| CB4856                                                                  | CT | IV | 2720323 | 2725858 | WBGene00022381 | ubxn-2    | Y94H6A.9  | -0.00935937279555255 |
| AGIWUR14157;AGIWUR22376;AGIWUR23767;AGIWUR25071;AGIWUR28469;AGIWUR30699 |    |    |         |         |                |           |           |                      |
| CB4856                                                                  | CT | IV | 2730252 | 2732404 | WBGene00022375 | Y94H6A.2  | Y94H6A.2  | 1.07993687346641     |
| AGIWUR29436                                                             |    |    |         |         |                |           |           |                      |
| CB4856                                                                  | CT | IV | 2743007 | 2747476 | WBGene00022374 | nhr-277   | Y94H6A.1  | 0.156549419143182    |
| AGIWUR28763                                                             |    |    |         |         |                |           |           |                      |
| CB4856                                                                  | CT | IV | 2751868 | 2753461 | WBGene00044485 | Y54G2A.41 | Y54G2A.41 | -0.204491044915695   |
| AGIWUR14592;AGIWUR15871;AGIWUR18786;AGIWUR23658;AGIWUR44244             |    |    |         |         |                |           |           |                      |
| CB4856                                                                  | CT | IV | 2762680 | 2765612 | WBGene00235350 | Y54G2A.77 | Y54G2A.77 | 0.0500447133226203   |
| AGIWUR18732                                                             |    |    |         |         |                |           |           |                      |
| CB4856                                                                  | CT | IV | 2765719 | 2771790 | WBGene00021876 | Y54G2A.11 | Y54G2A.11 | 0.931559181604933    |
| AGIWUR7881;AGIWUR8693;AGIWUR10151;AGIWUR12762;AGIWUR13973;AGIWUR16616   |    |    |         |         |                |           |           |                      |
| CB4856                                                                  | CT | IV | 2777232 | 2782843 | WBGene00021877 | Y54G2A.12 | Y54G2A.12 | -0.294777650512266   |
| AGIWUR4693;AGIWUR23522                                                  |    |    |         |         |                |           |           |                      |
| CB4856                                                                  | CT | IV | 2788692 | 2796805 | WBGene00021868 | atln-1    | Y54G2A.2  | -0.171059515083495   |
| AGIWUR33912                                                             |    |    |         |         |                |           |           |                      |
| CB4856                                                                  | CT | IV | 2797061 | 2798573 | WBGene00045397 | Y54G2A.52 | Y54G2A.52 | 0.439120587409796    |
| AGIWUR10865;AGIWUR18487;AGIWUR25860;AGIWUR31076;AGIWUR40561;AGIWUR45067 |    |    |         |         |                |           |           |                      |
| CB4856                                                                  | CT | IV | 2799689 | 2801039 | WBGene00021875 | Y54G2A.10 | Y54G2A.10 | 1.04126659516663     |
| AGIWUR7140;AGIWUR12331;AGIWUR26440                                      |    |    |         |         |                |           |           |                      |



|                                                                                                                       |    |    |         |         |                |           |           |                             |
|-----------------------------------------------------------------------------------------------------------------------|----|----|---------|---------|----------------|-----------|-----------|-----------------------------|
| CB4856                                                                                                                | CT | IV | 2801902 | 2803240 | WBGene00044487 | Y54G2A.44 | Y54G2A.44 | 0.0617316945128294          |
| AGIWUR24750;AGIWUR34109                                                                                               |    |    |         |         |                |           |           |                             |
| CB4856                                                                                                                | CT | IV | 2803589 | 2804916 | WBGene00021894 | Y54G2A.32 | Y54G2A.32 | 0.569361767088814           |
| AGIWUR13210                                                                                                           |    |    |         |         |                |           |           |                             |
| CB4856                                                                                                                | CT | IV | 2805839 | 2809504 | WBGene00044488 | Y54G2A.45 | Y54G2A.45 | -0.438731605958452          |
| AGIWUR7243;AGIWUR20787                                                                                                |    |    |         |         |                |           |           |                             |
| CB4856                                                                                                                | CT | IV | 2814568 | 2819733 | WBGene00021878 | Y54G2A.13 | Y54G2A.13 | -0.0322674912278522         |
| AGIWUR42785                                                                                                           |    |    |         |         |                |           |           |                             |
| CB4856                                                                                                                | CT | IV | 2823746 | 2828069 | WBGene00043062 | clec-80   | Y54G2A.39 | 0.257733492106215           |
| AGIWUR35552                                                                                                           |    |    |         |         |                |           |           |                             |
| CB4856                                                                                                                | CT | IV | 2831477 | 2832687 | WBGene00044491 | Y54G2A.48 | Y54G2A.48 | -0.0106138440964161         |
| AGIWUR2292;AGIWUR8308;AGIWUR23599;AGIWUR35331;AGIWUR36640                                                             |    |    |         |         |                |           |           |                             |
| CB4856                                                                                                                | CT | IV | 2832877 | 2833480 | WBGene00044489 | pudl-1    | Y54G2A.46 | 0.351414348663054           |
| AGIWUR15460;AGIWUR22792                                                                                               |    |    |         |         |                |           |           |                             |
| CB4856                                                                                                                | CT | IV | 2834816 | 2835357 | WBGene00044490 | pudl-2    | Y54G2A.47 | 0.288560788606981           |
| AGIWUR3206;AGIWUR12409;AGIWUR21422                                                                                    |    |    |         |         |                |           |           |                             |
| CB4856                                                                                                                | CT | IV | 2835664 | 2838583 | WBGene00021873 | clec-82   | Y54G2A.8  | 1.7377816158785 AGIWUR28251 |
| CB4856                                                                                                                | CT | IV | 2838608 | 2839422 | WBGene00043702 | Y54G2A.7  | Y54G2A.7  | 0.00630069250457232         |
| AGIWUR6401;AGIWUR8166;AGIWUR14841;AGIWUR23759;AGIWUR31835;AGIWUR32286;AGIWUR34675;AGIWUR36900;AGIWUR37090;AGIWUR40142 |    |    |         |         |                |           |           |                             |
| CB4856                                                                                                                | CT | IV | 2839375 | 2841434 | WBGene00021879 | clec-83   | Y54G2A.14 | 0.272040512932342           |
| AGIWUR41939                                                                                                           |    |    |         |         |                |           |           |                             |
| CB4856                                                                                                                | CT | IV | 2842474 | 2845604 | WBGene00021895 | clec-84   | Y54G2A.33 | 0.196501808918722           |
| AGIWUR29146                                                                                                           |    |    |         |         |                |           |           |                             |
| CB4856                                                                                                                | CT | IV | 2846476 | 2851282 | WBGene00044495 | Y54G2A.40 | Y54G2A.40 | -0.295675375411856          |
| AGIWUR3193;AGIWUR17597                                                                                                |    |    |         |         |                |           |           |                             |
| CB4856                                                                                                                | CT | IV | 2851691 | 2854293 | WBGene00044492 | Y54G2A.49 | Y54G2A.49 | 0.26751918227749            |
| AGIWUR13172;AGIWUR17819;AGIWUR31750;AGIWUR41764;AGIWUR42281                                                           |    |    |         |         |                |           |           |                             |
| CB4856                                                                                                                | CT | IV | 2854339 | 2855456 | WBGene00021872 | clec-85   | Y54G2A.6  | -0.301152091473041          |
| AGIWUR3905                                                                                                            |    |    |         |         |                |           |           |                             |
| CB4856                                                                                                                | CT | IV | 2855607 | 2864843 | WBGene00021881 | Y54G2A.16 | Y54G2A.16 | -0.210082244382789          |
| AGIWUR29314                                                                                                           |    |    |         |         |                |           |           |                             |
| CB4856                                                                                                                | CT | IV | 2872050 | 2890449 | WBGene00021882 | nprrt-1   | Y54G2A.17 | -0.0754948812967342         |
| AGIWUR2046;AGIWUR6560;AGIWUR18981;AGIWUR41129                                                                         |    |    |         |         |                |           |           |                             |
| CB4856                                                                                                                | CT | IV | 2890888 | 2891636 | WBGene00235102 | Y54G2A.75 | Y54G2A.75 |                             |
| -3.5527136788005e-15 AGIWUR32909                                                                                      |    |    |         |         |                |           |           |                             |
| CB4856                                                                                                                | CT | IV | 2891560 | 2892495 | WBGene00021883 | Y54G2A.18 | Y54G2A.18 | -0.166457271196973          |
| AGIWUR14241;AGIWUR28071                                                                                               |    |    |         |         |                |           |           |                             |
| CB4856                                                                                                                | CT | IV | 2893819 | 2894730 | WBGene00021884 | Y54G2A.19 | Y54G2A.19 | -0.173375437872863          |

|                                                                                                |    |         |         |                |           |           |                     |
|------------------------------------------------------------------------------------------------|----|---------|---------|----------------|-----------|-----------|---------------------|
| AGIWUR2785                                                                                     |    |         |         |                |           |           |                     |
| CB4856 CT                                                                                      | IV | 2896968 | 2900638 | WBGene00021885 | Y54G2A.20 | Y54G2A.20 | -0.0207325968592356 |
| AGIWUR17990                                                                                    |    |         |         |                |           |           |                     |
| CB4856 CT                                                                                      | IV | 2902436 | 2914816 | WBGene00021886 | Y54G2A.21 | Y54G2A.21 | -0.29008067670214   |
| AGIWUR473;AGIWUR4090;AGIWUR6409;AGIWUR28153                                                    |    |         |         |                |           |           |                     |
| CB4856 CT                                                                                      | IV | 2918441 | 2919780 | WBGene00044493 | Y54G2A.50 | Y54G2A.50 | -0.243381717767439  |
| AGIWUR14616;AGIWUR16703                                                                        |    |         |         |                |           |           |                     |
| CB4856 CT                                                                                      | IV | 2919826 | 2922251 | WBGene00021887 | fbxc-45   | Y54G2A.22 | -0.0516808895756906 |
| AGIWUR4439                                                                                     |    |         |         |                |           |           |                     |
| CB4856 CT                                                                                      | IV | 2922591 | 2925691 | WBGene00006708 | ubc-13    | Y54G2A.31 | -0.0706457972150059 |
| AGIWUR3658                                                                                     |    |         |         |                |           |           |                     |
| CB4856 CT                                                                                      | IV | 2927515 | 2928421 | WBGene00021888 | Y54G2A.23 | Y54G2A.23 | -0.238095690654607  |
| AGIWUR8295                                                                                     |    |         |         |                |           |           |                     |
| CB4856 CT                                                                                      | IV | 2931403 | 2936843 | WBGene00021870 | samt-1    | Y54G2A.4  | -0.109192979407579  |
| AGIWUR10505                                                                                    |    |         |         |                |           |           |                     |
| CB4856 CT                                                                                      | IV | 2937990 | 2939862 | WBGene00021889 | Y54G2A.24 | Y54G2A.24 | 0.0442477538982118  |
| AGIWUR20311                                                                                    |    |         |         |                |           |           |                     |
| CB4856 CT                                                                                      | IV | 2960123 | 2964395 | WBGene00021897 | ser-6     | Y54G2A.35 | 0.139848257542336   |
| AGIWUR7278                                                                                     |    |         |         |                |           |           |                     |
| CB4856 CT                                                                                      | IV | 2964365 | 2978461 | WBGene00002243 | lad-2     | Y54G2A.25 | 0.390351388049006   |
| AGIWUR29465;AGIWUR35601;AGIWUR41610                                                            |    |         |         |                |           |           |                     |
| CB4856 CT                                                                                      | IV | 2986104 | 2995573 | WBGene00021890 | Y54G2A.26 | Y54G2A.26 | -0.088748880932112  |
| AGIWUR29419;AGIWUR31009;AGIWUR39038                                                            |    |         |         |                |           |           |                     |
| CB4856 CT                                                                                      | IV | 2998877 | 2999485 | WBGene00021891 | Y54G2A.27 | Y54G2A.27 | -0.0025943404432569 |
| AGIWUR32480                                                                                    |    |         |         |                |           |           |                     |
| CB4856 CT                                                                                      | IV | 3000541 | 3008892 | WBGene00219425 | Y54G2A.73 | Y54G2A.73 | -0.0717095418741067 |
| AGIWUR14853;AGIWUR19329;AGIWUR28296;AGIWUR28643;AGIWUR37339                                    |    |         |         |                |           |           |                     |
| CB4856 CT                                                                                      | IV | 3012587 | 3014440 | WBGene00021869 | vrp-1     | Y54G2A.3  | -0.406236780316867  |
| AGIWUR26458                                                                                    |    |         |         |                |           |           |                     |
| CB4856 CT                                                                                      | IV | 3019738 | 3022315 | WBGene00003008 | lin-22    | Y54G2A.1  | 0.117882108251942   |
| AGIWUR15555;AGIWUR17357;AGIWUR23870                                                            |    |         |         |                |           |           |                     |
| CB4856 CT                                                                                      | IV | 3023403 | 3028942 | WBGene00021893 | ndnf-1    | Y54G2A.29 | 0.116825860817181   |
| AGIWUR24891                                                                                    |    |         |         |                |           |           |                     |
| CB4856 CT                                                                                      | IV | 3032578 | 3050102 | WBGene00022069 | ee1-1     | Y67D8C.5  | 0.195540981332685   |
| AGIWUR9265;AGIWUR12793;AGIWUR16370;AGIWUR19875;AGIWUR25410;AGIWUR32832;AGIWUR34877;AGIWUR36944 |    |         |         |                |           |           |                     |
| CB4856 CT                                                                                      | IV | 3053730 | 3062053 | WBGene00022067 | Y67D8C.3  | Y67D8C.3  | 0.151113372069264   |
| AGIWUR20090;AGIWUR34714                                                                        |    |         |         |                |           |           |                     |
| CB4856 CT                                                                                      | IV | 3062524 | 3063366 | WBGene00022070 | Y67D8C.6  | Y67D8C.6  | -0.276810586397012  |
| AGIWUR18899                                                                                    |    |         |         |                |           |           |                     |

|                                                                                                                                              |    |    |         |         |                |           |           |                     |
|----------------------------------------------------------------------------------------------------------------------------------------------|----|----|---------|---------|----------------|-----------|-----------|---------------------|
| CB4856                                                                                                                                       | CT | IV | 3065568 | 3066934 | WBGene00022071 | Y67D8C.7  | Y67D8C.7  | -0.100957432774284  |
| AGIWUR3480;AGIWUR14950;AGIWUR36360                                                                                                           |    |    |         |         |                |           |           |                     |
| CB4856                                                                                                                                       | CT | IV | 3067848 | 3069876 | WBGene00022072 | cp9-9     | Y67D8C.8  | -0.582654445572865  |
| AGIWUR798;AGIWUR6063;AGIWUR12656;AGIWUR20171;AGIWUR23004;AGIWUR23055;AGIWUR23636;AGIWUR24578;AGIWUR25102;AGIWUR33268;AGIWUR38111;AGIWUR39434 |    |    |         |         |                |           |           |                     |
| CB4856                                                                                                                                       | CT | IV | 3070134 | 3076307 | WBGene00235279 | Y67D8C.22 | Y67D8C.22 | -0.22396238525995   |
| AGIWUR11754                                                                                                                                  |    |    |         |         |                |           |           |                     |
| CB4856                                                                                                                                       | CT | IV | 3077466 | 3086923 | WBGene00022073 | Y67D8C.9  | Y67D8C.9  | 0.147880064037387   |
| AGIWUR128;AGIWUR18909;AGIWUR22466;AGIWUR23929;AGIWUR24530;AGIWUR24619;AGIWUR26816;AGIWUR34605;AGIWUR35226;AGIWUR38622;AGIWUR39640            |    |    |         |         |                |           |           |                     |
| CB4856                                                                                                                                       | CT | IV | 3103157 | 3133147 | WBGene00003153 | mca-3     | Y67D8C.10 | -0.0769739827742661 |
| AGIWUR13343;AGIWUR25220                                                                                                                      |    |    |         |         |                |           |           |                     |
| CB4856                                                                                                                                       | CT | IV | 3139833 | 3146723 | WBGene00020729 | T23E1.2   | T23E1.2   | 0.0741539858265847  |
| AGIWUR8351;AGIWUR39712                                                                                                                       |    |    |         |         |                |           |           |                     |
| CB4856                                                                                                                                       | CT | IV | 3146894 | 3148882 | WBGene00020730 | T23E1.3   | T23E1.3   | 0.0569803163427842  |
| AGIWUR38188                                                                                                                                  |    |    |         |         |                |           |           |                     |
| CB4856                                                                                                                                       | CT | IV | 3151361 | 3155987 | WBGene00020728 | T23E1.1   | T23E1.1   | 0.106227135373084   |
| AGIWUR1768;AGIWUR6637;AGIWUR10515;AGIWUR12603;AGIWUR17243;AGIWUR18643;AGIWUR19244;AGIWUR27038;AGIWUR33531;AGIWUR33996;AGIWUR38671            |    |    |         |         |                |           |           |                     |
| CB4856                                                                                                                                       | CT | IV | 3169946 | 3172610 | WBGene00022061 | Y67D8B.1  | Y67D8B.1  |                     |
| -0.00222535554991499 AGIWUR30463                                                                                                             |    |    |         |         |                |           |           |                     |
| CB4856                                                                                                                                       | CT | IV | 3173550 | 3176115 | WBGene00022063 | Y67D8B.4  | Y67D8B.4  | 0.236310303032953   |
| AGIWUR12437;AGIWUR15848;AGIWUR18862;AGIWUR23118;AGIWUR31340;AGIWUR32394;AGIWUR33681;AGIWUR36083;AGIWUR39191                                  |    |    |         |         |                |           |           |                     |
| CB4856                                                                                                                                       | CT | IV | 3186080 | 3191562 | WBGene00022062 | Y67D8B.2  | Y67D8B.2  | 0.163107224299081   |
| AGIWUR9123;AGIWUR35608                                                                                                                       |    |    |         |         |                |           |           |                     |
| CB4856                                                                                                                                       | CT | IV | 3202333 | 3203861 | WBGene00022064 | Y67D8B.5  | Y67D8B.5  | 0.253469305109507   |
| AGIWUR29258                                                                                                                                  |    |    |         |         |                |           |           |                     |
| CB4856                                                                                                                                       | CT | IV | 3204559 | 3210582 | WBGene00004240 | puf-4     | M4.2      | 0.273447869936582   |
| AGIWUR19536                                                                                                                                  |    |    |         |         |                |           |           |                     |
| CB4856                                                                                                                                       | CT | IV | 3213764 | 3219825 | WBGene00019766 | M4.1      | M4.1      | -0.121168041639169  |
| AGIWUR39578                                                                                                                                  |    |    |         |         |                |           |           |                     |
| CB4856                                                                                                                                       | CT | IV | 3222440 | 3252601 | WBGene00022059 | Y67D8A.2  | Y67D8A.2  | -0.17230119243877   |
| AGIWUR4774;AGIWUR19074;AGIWUR21542;AGIWUR25290                                                                                               |    |    |         |         |                |           |           |                     |
| CB4856                                                                                                                                       | CT | IV | 3253263 | 3254543 | WBGene00022060 | dmd-9     | Y67D8A.3  | 0.0680288569580352  |
| AGIWUR7989                                                                                                                                   |    |    |         |         |                |           |           |                     |
| CB4856                                                                                                                                       | CT | IV | 3258910 | 3263489 | WBGene00020831 | T26C12.1  | T26C12.1  | 0.188275359774572   |
| AGIWUR7690;AGIWUR10912;AGIWUR32472                                                                                                           |    |    |         |         |                |           |           |                     |
| CB4856                                                                                                                                       | CT | IV | 3263851 | 3265372 | WBGene00020832 | T26C12.2  | T26C12.2  | 0.0963345118591814  |
| AGIWUR6073                                                                                                                                   |    |    |         |         |                |           |           |                     |
| CB4856                                                                                                                                       | CT | IV | 3266404 | 3267677 | WBGene00044469 | c1ec-173  | T26C12.6  | -0.226487828266153  |
| AGIWUR20423                                                                                                                                  |    |    |         |         |                |           |           |                     |
| CB4856                                                                                                                                       | CT | IV | 3269527 | 3273397 | WBGene00020833 | T26C12.3  | T26C12.3  | 0.642729576825044   |

|                                                                                                             |    |    |         |         |                |           |           |                      |             |
|-------------------------------------------------------------------------------------------------------------|----|----|---------|---------|----------------|-----------|-----------|----------------------|-------------|
| AGIWUR1492;AGIWUR16675;AGIWUR27212;AGIWUR38075                                                              |    |    |         |         |                |           |           |                      |             |
| CB4856                                                                                                      | CT | IV | 3282885 | 3289337 | WBGene00001548 | gcy-23    | T26C12.4  | -0.00496207388707326 |             |
| AGIWUR42079                                                                                                 |    |    |         |         |                |           |           |                      |             |
| CB4856                                                                                                      | CT | IV | 3292120 | 3294633 | WBGene00021089 | W08E12.8  | W08E12.8  | -0.10222805490266    |             |
| AGIWUR25114                                                                                                 |    |    |         |         |                |           |           |                      |             |
| CB4856                                                                                                      | CT | IV | 3295135 | 3297225 | WBGene00021088 | W08E12.7  | W08E12.7  | -0.093140078488096   |             |
| AGIWUR209;AGIWUR14640                                                                                       |    |    |         |         |                |           |           |                      |             |
| CB4856                                                                                                      | CT | IV | 3298629 | 3299687 | WBGene00021087 | W08E12.6  | W08E12.6  | 0.553844171000896    |             |
| AGIWUR36833                                                                                                 |    |    |         |         |                |           |           |                      |             |
| CB4856                                                                                                      | CT | IV | 3305898 | 3306541 | WBGene00021083 | W08E12.2  | W08E12.2  | 0.0860955492684834   |             |
| AGIWUR27318                                                                                                 |    |    |         |         |                |           |           |                      |             |
| CB4856                                                                                                      | CT | IV | 3306664 | 3307563 | WBGene00021090 | W08E12.9  | W08E12.9  | 0.324204816276395    |             |
| AGIWUR887                                                                                                   |    |    |         |         |                |           |           |                      |             |
| CB4856                                                                                                      | CT | IV | 3311276 | 3313180 | WBGene00021082 | zip-11    | W08E12.1  | -0.114510001567748   |             |
| AGIWUR24069                                                                                                 |    |    |         |         |                |           |           |                      |             |
| CB4856                                                                                                      | CT | IV | 3320013 | 3324950 | WBGene00018325 | F42A6.3   | F42A6.3   | -0.125072705977557   | AGIWUR41089 |
| CB4856                                                                                                      | CT | IV | 3334042 | 3336868 | WBGene00018328 | F42A6.6   | F42A6.6   | -0.1268014087129     | AGIWUR33815 |
| CB4856                                                                                                      | CT | IV | 3336927 | 3338867 | WBGene00001999 | hrp-1     | F42A6.7   | -0.103045581538375   |             |
| AGIWUR11495;AGIWUR13108;AGIWUR16261;AGIWUR18729;AGIWUR24759;AGIWUR30889;AGIWUR35196;AGIWUR42971;AGIWUR43704 |    |    |         |         |                |           |           |                      |             |
| CB4856                                                                                                      | CT | IV | 3339792 | 3340953 | WBGene00018329 | fbxa-130  | F42A6.8   | -0.362067016729601   |             |
| AGIWUR41895                                                                                                 |    |    |         |         |                |           |           |                      |             |
| CB4856                                                                                                      | CT | IV | 3341470 | 3341939 | WBGene00018324 | F42A6.2   | F42A6.2   | 0.0296679887088001   | AGIWUR28289 |
| CB4856                                                                                                      | CT | IV | 3342519 | 3350027 | WBGene00018330 | elks-1    | F42A6.9   | 0.0361795195624168   | AGIWUR3955  |
| CB4856                                                                                                      | CT | IV | 3363553 | 3366079 | WBGene00021953 | Y55H10A.2 | Y55H10A.2 | 0.174342504806288    |             |
| AGIWUR44245                                                                                                 |    |    |         |         |                |           |           |                      |             |
| CB4856                                                                                                      | CT | IV | 3369197 | 3373467 | WBGene00021952 | vha-19    | Y55H10A.1 | -0.123657235331949   |             |
| AGIWUR27642                                                                                                 |    |    |         |         |                |           |           |                      |             |
| CB4856                                                                                                      | CT | IV | 3373387 | 3378130 | WBGene00015249 | otub-4    | B0546.2   | 0.095359483124227    |             |
| AGIWUR36668;AGIWUR40143                                                                                     |    |    |         |         |                |           |           |                      |             |
| CB4856                                                                                                      | CT | IV | 3382949 | 3384147 | WBGene00015251 | B0546.4   | B0546.4   | 0.322492993730206    | AGIWUR8456  |
| CB4856                                                                                                      | CT | IV | 3385903 | 3386904 | WBGene00015248 | mai-2     | B0546.1   | 0.0143773086581298   | AGIWUR23582 |
| CB4856                                                                                                      | CT | IV | 3396581 | 3399123 | WBGene00001119 | dyf-3     | C04C3.5   | 0.0675353235795821   | AGIWUR32839 |
| CB4856                                                                                                      | CT | IV | 3399672 | 3403904 | WBGene00015413 | pdhb-1    | C04C3.3   | 0.212500905946641    |             |
| AGIWUR9048;AGIWUR21733                                                                                      |    |    |         |         |                |           |           |                      |             |
| CB4856                                                                                                      | CT | IV | 3415683 | 3419234 | WBGene00015412 | lgc-9     | C04C3.2   | -0.296480831612806   | AGIWUR16793 |
| CB4856                                                                                                      | CT | IV | 3419813 | 3422607 | WBGene00015416 | C04C3.6   | C04C3.6   | -0.0563764696231797  |             |
| AGIWUR7655;AGIWUR10839;AGIWUR23041                                                                          |    |    |         |         |                |           |           |                      |             |
| CB4856                                                                                                      | CT | IV | 3428900 | 3430327 | WBGene00015411 | srz-60    | C04C3.1   | -0.346164861072951   | AGIWUR41151 |
| CB4856                                                                                                      | CT | IV | 3430310 | 3432470 | WBGene00219646 | linc-89   | C04C3.15  | -0.048220544173561   |             |

|                                               |    |    |         |         |                |          |           |                     |             |
|-----------------------------------------------|----|----|---------|---------|----------------|----------|-----------|---------------------|-------------|
| AGIWUR39779                                   |    |    |         |         |                |          |           |                     |             |
| CB4856                                        | CT | IV | 3436319 | 3437878 | WBGene00021033 | srz-32   | W05E7.2   | 0.00755327965762564 |             |
| AGIWUR8896;AGIWUR37518;AGIWUR39643            |    |    |         |         |                |          |           |                     |             |
| CB4856                                        | CT | IV | 3438312 | 3439503 | WBGene00001702 | grd-13   | W05E7.3   | -0.607838312814312  | AGIWUR1917  |
| CB4856                                        | CT | IV | 3439655 | 3440453 | WBGene00001692 | grd-3    | W05E7.1   | -0.525481408736912  |             |
| AGIWUR6630;AGIWUR31335                        |    |    |         |         |                |          |           |                     |             |
| CB4856                                        | CT | IV | 3441055 | 3441770 | WBGene00001699 | grd-10   | F09D12.1  | -0.508977978756024  |             |
| AGIWUR27659                                   |    |    |         |         |                |          |           |                     |             |
| CB4856                                        | CT | IV | 3442303 | 3444201 | WBGene00017281 | F09D12.2 | F09D12.2  | -0.110314138990613  |             |
| AGIWUR38734                                   |    |    |         |         |                |          |           |                     |             |
| CB4856                                        | CT | IV | 3444914 | 3446528 | WBGene00019049 | F58E2.5  | F58E2.5   | 0.0179618013224427  | AGIWUR34019 |
| CB4856                                        | CT | IV | 3447216 | 3448708 | WBGene00023302 | F58E2.6  | F58E2.6   | 0.169219025770056   | AGIWUR18347 |
| CB4856                                        | CT | IV | 3453608 | 3454788 | WBGene00019051 | srz-23   | F58E2.9   | 0.170875786517282   | AGIWUR34738 |
| CB4856                                        | CT | IV | 3455893 | 3457113 | WBGene00019050 | srz-88   | F58E2.7   | -0.0765572175806071 |             |
| AGIWUR19533;AGIWUR37029                       |    |    |         |         |                |          |           |                     |             |
| CB4856                                        | CT | IV | 3458600 | 3460440 | WBGene00023481 | srz-22   | F58E2.10  | -0.0344176158916625 |             |
| AGIWUR42395                                   |    |    |         |         |                |          |           |                     |             |
| CB4856                                        | CT | IV | 3462027 | 3462929 | WBGene00023303 | F58E2.8  | F58E2.8   | -0.0256417418907695 | AGIWUR12004 |
| CB4856                                        | CT | IV | 3463567 | 3466276 | WBGene00019048 | F58E2.4  | F58E2.4   | -0.0618127872887069 |             |
| AGIWUR16957;AGIWUR18621;AGIWUR27185           |    |    |         |         |                |          |           |                     |             |
| CB4856                                        | CT | IV | 3467430 | 3469828 | WBGene00019047 | F58E2.3  | F58E2.3   | 0.0326382392482198  | AGIWUR6323  |
| CB4856                                        | CT | IV | 3470042 | 3470711 | WBGene00019046 | F58E2.2  | F58E2.2   | -0.2957947942499    | AGIWUR15414 |
| CB4856                                        | CT | IV | 3471563 | 3473584 | WBGene00023301 | F58E2.1  | F58E2.1   | -0.101200073157883  |             |
| AGIWUR9201;AGIWUR12704                        |    |    |         |         |                |          |           |                     |             |
| CB4856                                        | CT | IV | 3477392 | 3479011 | WBGene00015656 | srz-70   | C09G12.6  | 0.0485808495966822  |             |
| AGIWUR23116                                   |    |    |         |         |                |          |           |                     |             |
| CB4856                                        | CT | IV | 3479335 | 3479730 | WBGene00015655 | C09G12.5 | C09G12.5  | -0.440579893437514  |             |
| AGIWUR37214                                   |    |    |         |         |                |          |           |                     |             |
| CB4856                                        | CT | IV | 3480011 | 3481860 | WBGene00023474 | srz-37   | C09G12.16 | 0.15406081152695    |             |
| AGIWUR18826;AGIWUR38245                       |    |    |         |         |                |          |           |                     |             |
| CB4856                                        | CT | IV | 3482112 | 3482565 | WBGene00023476 | srz-55   | C09G12.14 | 0.144847401817545   |             |
| AGIWUR278;AGIWUR16470;AGIWUR33376;AGIWUR34469 |    |    |         |         |                |          |           |                     |             |
| CB4856                                        | CT | IV | 3482895 | 3484706 | WBGene00023463 | srz-82   | C09G12.11 | 0.0279392228211517  |             |
| AGIWUR5025;AGIWUR33887                        |    |    |         |         |                |          |           |                     |             |
| CB4856                                        | CT | IV | 3485316 | 3487105 | WBGene00023465 | srz-81   | C09G12.13 | 0.0644077869735269  |             |
| AGIWUR5334;AGIWUR17762                        |    |    |         |         |                |          |           |                     |             |
| CB4856                                        | CT | IV | 3487524 | 3489089 | WBGene00015654 | srz-77   | C09G12.4  | -0.0633085041833628 |             |
| AGIWUR30868                                   |    |    |         |         |                |          |           |                     |             |
| CB4856                                        | CT | IV | 3489858 | 3491519 | WBGene00023464 | srz-80   | C09G12.12 | 0.223769207466319   |             |

|                                                                       |    |    |         |         |                |            |            |                      |             |
|-----------------------------------------------------------------------|----|----|---------|---------|----------------|------------|------------|----------------------|-------------|
| AGIWUR1603                                                            |    |    |         |         |                |            |            |                      |             |
| CB4856                                                                | CT | IV | 3491777 | 3493216 | WBGene00015653 | srz-78     | C09G12.3   | -0.157472495684822   |             |
| AGIWUR40657                                                           |    |    |         |         |                |            |            |                      |             |
| CB4856                                                                | CT | IV | 3493610 | 3495179 | WBGene00015652 | srz-79     | C09G12.2   | -0.157846521913221   |             |
| AGIWUR2191                                                            |    |    |         |         |                |            |            |                      |             |
| CB4856                                                                | CT | IV | 3495296 | 3496440 | WBGene00044470 | C09G12.17  | C09G12.17  | 0.0553438247516613   |             |
| AGIWUR671;AGIWUR27248;AGIWUR36976;AGIWUR39683;AGIWUR40123             |    |    |         |         |                |            |            |                      |             |
| CB4856                                                                | CT | IV | 3498218 | 3503912 | WBGene00015651 | ceh-53     | C09G12.1   | 0.251591335525628    |             |
| AGIWUR21847                                                           |    |    |         |         |                |            |            |                      |             |
| CB4856                                                                | CT | IV | 3504444 | 3506115 | WBGene00023462 | srz-83     | C09G12.10  | 0.169808696997135    |             |
| AGIWUR26431;AGIWUR37625                                               |    |    |         |         |                |            |            |                      |             |
| CB4856                                                                | CT | IV | 3506328 | 3509527 | WBGene00000424 | ced-10     | C09G12.8   | -0.318098955625076   |             |
| AGIWUR21339;AGIWUR26580;AGIWUR27559                                   |    |    |         |         |                |            |            |                      |             |
| CB4856                                                                | CT | IV | 3510046 | 3514572 | WBGene00015658 | tsg-101    | C09G12.9   | -0.29404477390576    |             |
| AGIWUR3762;AGIWUR5733;AGIWUR14214                                     |    |    |         |         |                |            |            |                      |             |
| CB4856                                                                | CT | IV | 3516819 | 3526602 | WBGene00006769 | unc-33     | Y37E11C.1  | 0.0807989856723044   |             |
| AGIWUR33833                                                           |    |    |         |         |                |            |            |                      |             |
| CB4856                                                                | CT | IV | 3527354 | 3532521 | WBGene00019778 | M57.2      | M57.2      | 0.0528743697903042   | AGIWUR38368 |
| CB4856                                                                | CT | IV | 3543628 | 3547600 | WBGene00015038 | nstp-6     | B0212.4    | 0.0254244771649041   | AGIWUR32216 |
| CB4856                                                                | CT | IV | 3551090 | 3557431 | WBGene00003889 | osm-9      | B0212.5    | -0.48875092754244    | AGIWUR16919 |
| CB4856                                                                | CT | IV | 3565201 | 3567814 | WBGene00015036 | sre-5      | B0212.2    | -0.129551791501449   | AGIWUR39523 |
| CB4856                                                                | CT | IV | 3568979 | 3577630 | WBGene00015035 | otpl-1     | B0212.1    | -0.180097820259763   |             |
| AGIWUR6709;AGIWUR25191                                                |    |    |         |         |                |            |            |                      |             |
| CB4856                                                                | CT | IV | 3578937 | 3581020 | WBGene00021374 | Y37E11B.1  | Y37E11B.1  | -0.105716918158095   |             |
| AGIWUR42712                                                           |    |    |         |         |                |            |            |                      |             |
| CB4856                                                                | CT | IV | 3580970 | 3582909 | WBGene00021376 | blos-7     | Y37E11B.3  | -0.00712970298429738 |             |
| AGIWUR24972                                                           |    |    |         |         |                |            |            |                      |             |
| CB4856                                                                | CT | IV | 3584314 | 3593615 | WBGene00006383 | taf-2      | Y37E11B.4  | 0.00314938974839407  |             |
| AGIWUR40540                                                           |    |    |         |         |                |            |            |                      |             |
| CB4856                                                                | CT | IV | 3593960 | 3598552 | WBGene00021377 | Y37E11B.5  | Y37E11B.5  | -0.0587193598462208  |             |
| AGIWUR27479;AGIWUR36703                                               |    |    |         |         |                |            |            |                      |             |
| CB4856                                                                | CT | IV | 3598656 | 3599299 | WBGene00021378 | Y37E11B.6  | Y37E11B.6  | -0.0297301496934192  |             |
| AGIWUR32299                                                           |    |    |         |         |                |            |            |                      |             |
| CB4856                                                                | CT | IV | 3599497 | 3600164 | WBGene00021379 | Y37E11B.7  | Y37E11B.7  | -0.178589758998446   |             |
| AGIWUR1502;AGIWUR9722;AGIWUR10223;AGIWUR10260;AGIWUR10569;AGIWUR32668 |    |    |         |         |                |            |            |                      |             |
| CB4856                                                                | CT | IV | 3601735 | 3603401 | WBGene00021380 | Y37E11B.9  | Y37E11B.9  | -0.312289996806642   |             |
| AGIWUR23524                                                           |    |    |         |         |                |            |            |                      |             |
| CB4856                                                                | CT | IV | 3603550 | 3606466 | WBGene00021381 | Y37E11B.10 | Y37E11B.10 | -0.0658399951361912  |             |
| AGIWUR4295;AGIWUR39675                                                |    |    |         |         |                |            |            |                      |             |

|                                              |    |    |         |         |                |            |            |                     |             |
|----------------------------------------------|----|----|---------|---------|----------------|------------|------------|---------------------|-------------|
| CB4856                                       | CT | IV | 3606784 | 3609229 | WBGene00002188 | kgb-2      | ZC416.4    | 0.212537019938914   | AGIWUR24635 |
| CB4856                                       | CT | IV | 3609218 | 3613072 | WBGene00022610 | ZC416.6    | ZC416.6    | 0.208038300175602   | AGIWUR9980  |
| CB4856                                       | CT | IV | 3613934 | 3624697 | WBGene00000481 | cha-1      | ZC416.8    | 0.0409973606343783  | AGIWUR11212 |
| CB4856                                       | CT | IV | 3633619 | 3635472 | WBGene00022609 | ZC416.2    | ZC416.2    | 0.290076022731523   | AGIWUR44932 |
| CB4856                                       | CT | IV | 3637079 | 3640265 | WBGene00022608 | madf-9     | ZC416.1    | -0.24493924761131   |             |
| AGIWUR25395;AGIWUR25919                      |    |    |         |         |                |            |            |                     |             |
| CB4856                                       | CT | IV | 3645166 | 3648684 | WBGene00016987 | CC8.2      | CC8.2      | -0.0399030257098296 | AGIWUR24618 |
| CB4856                                       | CT | IV | 3658877 | 3668703 | WBGene00021362 | Y37E11AL.6 | Y37E11AL.6 | 0.278856711085921   |             |
| AGIWUR14654;AGIWUR28359                      |    |    |         |         |                |            |            |                     |             |
| CB4856                                       | CT | IV | 3683537 | 3686865 | WBGene00003129 | map-1      | Y37E11AL.7 | -0.15598022113981   |             |
| AGIWUR16605                                  |    |    |         |         |                |            |            |                     |             |
| CB4856                                       | CT | IV | 3687565 | 3694837 | WBGene00021363 | taf-6.2    | Y37E11AL.8 | -0.274197324481847  |             |
| AGIWUR18124                                  |    |    |         |         |                |            |            |                     |             |
| CB4856                                       | CT | IV | 3694905 | 3698436 | WBGene00021359 | Y37E11AL.3 | Y37E11AL.3 | -0.0832433121679088 |             |
| AGIWUR8174;AGIWUR10767;AGIWUR17784           |    |    |         |         |                |            |            |                     |             |
| CB4856                                       | CT | IV | 3698501 | 3699722 | WBGene00021358 | Y37E11AL.2 | Y37E11AL.2 | 0.214725458588404   |             |
| AGIWUR187                                    |    |    |         |         |                |            |            |                     |             |
| CB4856                                       | CT | IV | 3699804 | 3700654 | WBGene00021364 | Y37E11AL.9 | Y37E11AL.9 | 0.118222338253073   |             |
| AGIWUR38046                                  |    |    |         |         |                |            |            |                     |             |
| CB4856                                       | CT | IV | 3709515 | 3715381 | WBGene00021357 | Y37E11AL.1 | Y37E11AL.1 | -0.158802793228839  |             |
| AGIWUR20687                                  |    |    |         |         |                |            |            |                     |             |
| CB4856                                       | CT | IV | 3715782 | 3722790 | WBGene00021367 | Y37E11AM.3 | Y37E11AM.3 | -0.485249773844339  |             |
| AGIWUR3608;AGIWUR8546;AGIWUR9320;AGIWUR16402 |    |    |         |         |                |            |            |                     |             |
| CB4856                                       | CT | IV | 3722886 | 3725461 | WBGene00021366 | Y37E11AM.2 | Y37E11AM.2 | 0.126052504421876   |             |
| AGIWUR29009                                  |    |    |         |         |                |            |            |                     |             |
| CB4856                                       | CT | IV | 3726112 | 3735495 | WBGene00021365 | smgl-2     | Y37E11AM.1 | 0.101553162904688   |             |
| AGIWUR41488                                  |    |    |         |         |                |            |            |                     |             |
| CB4856                                       | CT | IV | 3735845 | 3738917 | WBGene00021370 | nape-2     | Y37E11AR.3 | 0.292992653445446   |             |
| AGIWUR1805;AGIWUR6459                        |    |    |         |         |                |            |            |                     |             |
| CB4856                                       | CT | IV | 3739524 | 3740876 | WBGene00021371 | nape-1     | Y37E11AR.4 | 0.102255603182497   |             |
| AGIWUR1499;AGIWUR10188                       |    |    |         |         |                |            |            |                     |             |
| CB4856                                       | CT | IV | 3744048 | 3747655 | WBGene00021369 | siah-1     | Y37E11AR.2 | 0.391057063640174   |             |
| AGIWUR32287                                  |    |    |         |         |                |            |            |                     |             |
| CB4856                                       | CT | IV | 3748210 | 3751101 | WBGene00021372 | ugt-45     | Y37E11AR.5 | -0.0342943447465771 |             |
| AGIWUR35655                                  |    |    |         |         |                |            |            |                     |             |
| CB4856                                       | CT | IV | 3752612 | 3755419 | WBGene00021373 | Y37E11AR.7 | Y37E11AR.7 | -0.225622460292882  |             |
| AGIWUR15651                                  |    |    |         |         |                |            |            |                     |             |
| CB4856                                       | CT | IV | 3756242 | 3759910 | WBGene00021368 | best-20    | Y37E11AR.1 | 0.429709087074519   |             |
| AGIWUR14000                                  |    |    |         |         |                |            |            |                     |             |

|                                                                                   |    |    |         |         |                 |          |            |                     |             |
|-----------------------------------------------------------------------------------|----|----|---------|---------|-----------------|----------|------------|---------------------|-------------|
| CB4856                                                                            | CT | IV | 3761192 | 3766826 | WBGene00006869  | vab-2    | Y37E11AR.6 | 0.367813413624127   |             |
| AGIWUR5528                                                                        |    |    |         |         |                 |          |            |                     |             |
| CB4856                                                                            | CT | IV | 3784358 | 3794044 | WBGene00019546  | glct-6   | W07G9.2    | -0.33449045685498   |             |
| AGIWUR20512;AGIWUR38088                                                           |    |    |         |         |                 |          |            |                     |             |
| CB4856                                                                            | CT | IV | 3794767 | 3796267 | WBGene00019545  | K09B3.1  | K09B3.1    | -0.140930454110564  |             |
| AGIWUR2928;AGIWUR10590;AGIWUR15949;AGIWUR18365;AGIWUR32674;AGIWUR43271            |    |    |         |         |                 |          |            |                     |             |
| CB4856                                                                            | CT | IV | 3796306 | 3800461 | WBGene00003884  | osm-3    | M02B7.3    | 0.24016922784746    | AGIWUR1662  |
| CB4856                                                                            | CT | IV | 3801864 | 3803426 | WBGene00019725  | algn-14  | M02B7.4    | -0.332552865372447  | AGIWUR4303  |
| CB4856                                                                            | CT | IV | 3803581 | 3804949 | WBGene00019724  | M02B7.2  | M02B7.2    | 0.0224914333848938  |             |
| AGIWUR13365;AGIWUR36768                                                           |    |    |         |         |                 |          |            |                     |             |
| CB4856                                                                            | CT | IV | 3806703 | 3807190 | WBGene00044690  | M02B7.7  | M02B7.7    | -0.22400238340281   | AGIWUR2282  |
| CB4856                                                                            | CT | IV | 3807870 | 3819328 | WBGene00019726  | bris-1   | M02B7.5    | -0.0910230119215356 |             |
| AGIWUR3769;AGIWUR15598;AGIWUR33890                                                |    |    |         |         |                 |          |            |                     |             |
| CB4856                                                                            | CT | IV | 3839720 | 3841628 | WBGene00017906  | F28F9.2  | F28F9.2    | 0.0180395925696661  | AGIWUR21998 |
| CB4856                                                                            | CT | IV | 3855843 | 3861552 | WBGene00006970  | zag-1    | F28F9.1    | 0.768212979638653   | AGIWUR16716 |
| CB4856                                                                            | CT | IV | 3862129 | 3865042 | WBGene00000009  | aat-8    | F28F9.4    | 0.647288366643095   | AGIWUR6881  |
| CB4856                                                                            | CT | IV | 3867147 | 3871842 | WBGene00018144  | F37C4.4  | F37C4.4    | 0.173549435733418   |             |
| AGIWUR1949;AGIWUR44847                                                            |    |    |         |         |                 |          |            |                     |             |
| CB4856                                                                            | CT | IV | 3871829 | 3874416 | WBGene00018145  | F37C4.5  | F37C4.5    | -0.220228189254302  |             |
| AGIWUR4389;AGIWUR8043;AGIWUR22760;AGIWUR31925;AGIWUR35017;AGIWUR38139;AGIWUR42284 |    |    |         |         |                 |          |            |                     |             |
| CB4856                                                                            | CT | IV | 3875410 | 3878372 | WBGene00018146  | F37C4.6  | F37C4.6    | -0.217637284365662  | AGIWUR24044 |
| CB4856                                                                            | CT | IV | 3878547 | 3881187 | WBGene00018148  | F37C4.8  | F37C4.8    | 0.00509147172451296 |             |
| AGIWUR10242;AGIWUR16117                                                           |    |    |         |         |                 |          |            |                     |             |
| CB4856                                                                            | CT | IV | 3881852 | 3884683 | WBGene00018143  | oac-23   | F37C4.3    | -0.0514382679054659 | AGIWUR37307 |
| CB4856                                                                            | CT | IV | 3885665 | 3888836 | WBGene00018142  | oac-22   | F37C4.2    | 0.414215184173919   | AGIWUR8307  |
| CB4856                                                                            | CT | IV | 3889263 | 3892563 | WBGene00018141  | oac-21   | F37C4.1    | 0.132252603493837   | AGIWUR40823 |
| CB4856                                                                            | CT | IV | 3892998 | 3893283 | WBGene00044471  | F56D6.9  | F56D6.9    | 0.568839682781924   | AGIWUR9848  |
| CB4856                                                                            | CT | IV | 3894058 | 3894430 | WBGene00044292  | F56D6.8  | F56D6.8    | 0.647554671832749   | AGIWUR20004 |
| CB4856                                                                            | CT | IV | 3895070 | 3895506 | WBGene00044472  | dct-8    | F56D6.10   | 0.349434055100366   |             |
| AGIWUR2226                                                                        |    |    |         |         |                 |          |            |                     |             |
| CB4856                                                                            | CT | IV | 3895963 | 3897997 | WBGene000219307 | F56D6.17 | F56D6.17   | 0.0642211403187352  |             |
| AGIWUR26987;AGIWUR37616                                                           |    |    |         |         |                 |          |            |                     |             |
| CB4856                                                                            | CT | IV | 3898478 | 3899806 | WBGene000219304 | F56D6.16 | F56D6.16   | -0.387680504924584  |             |
| AGIWUR30419                                                                       |    |    |         |         |                 |          |            |                     |             |
| CB4856                                                                            | CT | IV | 3900571 | 3902326 | WBGene00023478  | srz-62   | F56D6.7    | -0.360124986581922  |             |
| AGIWUR2650;AGIWUR24689                                                            |    |    |         |         |                 |          |            |                     |             |
| CB4856                                                                            | CT | IV | 3906113 | 3906493 | WBGene00044473  | F56D6.11 | F56D6.11   | 0.421895824607565   |             |
| AGIWUR10325;AGIWUR14565;AGIWUR22261;AGIWUR29588                                   |    |    |         |         |                 |          |            |                     |             |
| CB4856                                                                            | CT | IV | 3908107 | 3908509 | WBGene00044474  | F56D6.12 | F56D6.12   | 0.0530045793585607  |             |



AGIWUR39239  
CB4856 CT IV 3909381 3909799 WBGene00044475 F56D6.13 F56D6.13  
0.000286009849364888 AGIWUR35300  
CB4856 CT IV 3915610 3916901 WBGene00018973 srz-20 F56D6.5 -0.0836865807104052 AGIWUR43400  
CB4856 CT IV 3917679 3918056 WBGene00044476 F56D6.14 F56D6.14 -0.133157418122807  
AGIWUR7218;AGIWUR7742;AGIWUR31197;AGIWUR39159;AGIWUR42565  
CB4856 CT IV 3919806 3921613 WBGene00018972 srz-19 F56D6.4 -0.0663344860218729 AGIWUR5228  
CB4856 CT IV 3926417 3929024 WBGene00018970 clec-68 F56D6.1 -0.0843832460361416  
AGIWUR28660;AGIWUR41001  
CB4856 CT IV 3932733 3936238 WBGene00021581 clec-70 Y46C8AL.3 0.430390440110827  
AGIWUR30235  
CB4856 CT IV 3937464 3939924 WBGene00021582 clec-71 Y46C8AL.4 -0.0936907063931365  
AGIWUR21185  
CB4856 CT IV 3940259 3941702 WBGene00021580 clec-174 Y46C8AL.2 1.83318730077063  
AGIWUR33517  
CB4856 CT IV 3944816 3947364 WBGene00021583 clec-72 Y46C8AL.5 -0.164415450128656  
AGIWUR25323  
CB4856 CT IV 3953935 3956210 WBGene00021579 clec-73 Y46C8AL.1 0.211278368426209  
AGIWUR38603  
CB4856 CT IV 3957005 3960139 WBGene00021585 clec-74 Y46C8AL.8 -0.777782829155694  
AGIWUR2330;AGIWUR6622;AGIWUR11329  
CB4856 CT IV 3960734 3964657 WBGene00021586 clec-75 Y46C8AL.9 0.0357533110522024  
AGIWUR14291;AGIWUR22989;AGIWUR29616;AGIWUR30729;AGIWUR31166  
CB4856 CT IV 3965246 3969025 WBGene00021587 clec-76 Y46C8AR.1 0.0181108820359341  
AGIWUR23862  
CB4856 CT IV 3969931 3972616 WBGene00044343 clec-77 Y46C8AR.3 1.08571889385271  
AGIWUR31568  
CB4856 CT IV 3973349 3975721 WBGene00018548 clec-79 F47C12.4 -0.0296845520831983  
AGIWUR4310;AGIWUR7539;AGIWUR26372  
CB4856 CT IV 3976429 3978015 WBGene00005430 srh-220 F47C12.5 -0.308662397129355  
AGIWUR20619  
CB4856 CT IV 3979825 3981205 WBGene00005432 srh-222 F47C12.10 0.143175572847675  
AGIWUR24878;AGIWUR41002;AGIWUR42461  
CB4856 CT IV 3981901 3983609 WBGene00005433 srh-223 F47C12.3 -0.165262641358777  
AGIWUR17687  
CB4856 CT IV 3989102 4014195 WBGene00018547 clec-78 F47C12.2 0.88760666018107  
AGIWUR12467;AGIWUR29123;AGIWUR35382  
CB4856 CT IV 4014799 4028127 WBGene00020930 h1h-30 W02C12.3 0.39515706093826  
AGIWUR12568;AGIWUR14682;AGIWUR22585

|                                                                         |    |    |         |         |                |          |          |                      |             |
|-------------------------------------------------------------------------|----|----|---------|---------|----------------|----------|----------|----------------------|-------------|
| CB4856                                                                  | CT | IV | 4040308 | 4041532 | WBGene00018065 | F35F11.2 | F35F11.2 | 0.0305552308031496   |             |
| AGIWUR4078;AGIWUR9316;AGIWUR38890                                       |    |    |         |         |                |          |          |                      |             |
| CB4856                                                                  | CT | IV | 4042575 | 4047786 | WBGene00018064 | cdc-73   | F35F11.1 | -0.12096503915454    |             |
| AGIWUR4520;AGIWUR41674                                                  |    |    |         |         |                |          |          |                      |             |
| CB4856                                                                  | CT | IV | 4047937 | 4049448 | WBGene00003955 | pcn-1    | W03D2.4  | 0.0789278294550861   |             |
| AGIWUR1229;AGIWUR1452;AGIWUR10565;AGIWUR13258;AGIWUR27822;AGIWUR40277   |    |    |         |         |                |          |          |                      |             |
| CB4856                                                                  | CT | IV | 4050049 | 4051639 | WBGene00006951 | wrt-5    | W03D2.5  | -0.168324827226016   | AGIWUR29565 |
| CB4856                                                                  | CT | IV | 4056586 | 4058243 | WBGene00020981 | W03D2.6  | W03D2.6  | 0.382779031105336    | AGIWUR34941 |
| CB4856                                                                  | CT | IV | 4062567 | 4063673 | WBGene00020982 | ilys-6   | W03D2.7  | 2.49903551654618     | AGIWUR15927 |
| CB4856                                                                  | CT | IV | 4065905 | 4068412 | WBGene00006173 | str-122  | W03D2.10 | -0.0254715280814617  |             |
| AGIWUR12209                                                             |    |    |         |         |                |          |          |                      |             |
| CB4856                                                                  | CT | IV | 4068780 | 4069548 | WBGene00020979 | fbxb-55  | W03D2.2  | 0.444621275155057    | AGIWUR30957 |
| CB4856                                                                  | CT | IV | 4072327 | 4077644 | WBGene00004157 | pqn-75   | W03D2.1  | 0.803260179244017    | AGIWUR43269 |
| CB4856                                                                  | CT | IV | 4077671 | 4078953 | WBGene00016437 | C35B1.8  | C35B1.8  | 0.00118699071541739  |             |
| AGIWUR13784;AGIWUR23914;AGIWUR29188;AGIWUR29380;AGIWUR30138;AGIWUR44411 |    |    |         |         |                |          |          |                      |             |
| CB4856                                                                  | CT | IV | 4079804 | 4080207 | WBGene00016434 | C35B1.4  | C35B1.4  | -0.264707410681066   | AGIWUR17839 |
| CB4856                                                                  | CT | IV | 4081136 | 4081348 | WBGene00016433 | C35B1.3  | C35B1.3  | -0.223986840385923   |             |
| AGIWUR12609;AGIWUR19585;AGIWUR39717                                     |    |    |         |         |                |          |          |                      |             |
| CB4856                                                                  | CT | IV | 4083603 | 4084209 | WBGene00016435 | C35B1.5  | C35B1.5  | 0.0848834238865823   | AGIWUR696   |
| CB4856                                                                  | CT | IV | 4086212 | 4102907 | WBGene00016432 | C35B1.2  | C35B1.2  | 0.0155326963841809   |             |
| AGIWUR34404;AGIWUR40227                                                 |    |    |         |         |                |          |          |                      |             |
| CB4856                                                                  | CT | IV | 4103020 | 4106220 | WBGene00006701 | ubc-1    | C35B1.1  | 0.067380651990657    |             |
| AGIWUR11827;AGIWUR34071                                                 |    |    |         |         |                |          |          |                      |             |
| CB4856                                                                  | CT | IV | 4109067 | 4110471 | WBGene00016436 | C35B1.7  | C35B1.7  | -0.194161149164188   | AGIWUR19562 |
| CB4856                                                                  | CT | IV | 4110544 | 4112487 | WBGene00044477 | F49F1.14 | F49F1.14 | -0.150353803554265   |             |
| AGIWUR17789;AGIWUR24698;AGIWUR25509;AGIWUR28648                         |    |    |         |         |                |          |          |                      |             |
| CB4856                                                                  | CT | IV | 4117732 | 4119179 | WBGene00018643 | drd-50   | F49F1.1  | -0.59758376002539    | AGIWUR14882 |
| CB4856                                                                  | CT | IV | 4119460 | 4120399 | WBGene00018645 | F49F1.5  | F49F1.5  | 1.79446721410939     | AGIWUR27910 |
| CB4856                                                                  | CT | IV | 4121342 | 4123166 | WBGene00018646 | mul-1    | F49F1.6  | -0.518910920571214   |             |
| AGIWUR37789;AGIWUR40067                                                 |    |    |         |         |                |          |          |                      |             |
| CB4856                                                                  | CT | IV | 4123525 | 4125757 | WBGene00018647 | F49F1.7  | F49F1.7  | 0.000867923077039201 | AGIWUR4538  |
| CB4856                                                                  | CT | IV | 4130503 | 4134631 | WBGene00018648 | F49F1.8  | F49F1.8  | -0.0698869455774673  |             |
| AGIWUR23704;AGIWUR29660                                                 |    |    |         |         |                |          |          |                      |             |
| CB4856                                                                  | CT | IV | 4138408 | 4139122 | WBGene00018650 | F49F1.10 | F49F1.10 |                      |             |
| -0.000924909531116569 AGIWUR29551                                       |    |    |         |         |                |          |          |                      |             |
| CB4856                                                                  | CT | IV | 4139685 | 4140363 | WBGene00235368 | F49F1.18 | F49F1.18 | -0.0240823404605042  |             |
| AGIWUR21703                                                             |    |    |         |         |                |          |          |                      |             |
| CB4856                                                                  | CT | IV | 4141734 | 4143019 | WBGene00018652 | F49F1.12 | F49F1.12 | -0.360595933927393   |             |
| AGIWUR15653;AGIWUR25495                                                 |    |    |         |         |                |          |          |                      |             |

|                                                                        |    |                 |                |                   |                            |                     |
|------------------------------------------------------------------------|----|-----------------|----------------|-------------------|----------------------------|---------------------|
| CB4856 CT<br>AGIWUR35115                                               | IV | 4145084 4147064 | WBGene00019933 | R07C12.3          | R07C12.3                   | 0.173673612264241   |
| CB4856 CT<br>AGIWUR2270                                                | IV | 4148141 4150055 | WBGene00019932 | R07C12.2          | R07C12.2                   | -0.855203441052968  |
| CB4856 CT<br>AGIWUR36113                                               | IV | 4152547 4154029 | WBGene00019931 | R07C12.1          | R07C12.1                   | 0.0405696529751642  |
| CB4856 CT<br>AGIWUR27539                                               | IV | 4155273 4157185 | WBGene00219216 | K08D10.14         | K08D10.14                  | -0.506119138393199  |
| CB4856 CT<br>AGIWUR39171                                               | IV | 4157634 4161789 | WBGene00019532 | K08D10.9          | K08D10.9                   | -0.406775742966835  |
| CB4856 CT<br>AGIWUR3106                                                | IV | 4162517 4164481 | WBGene00019531 | scrm-5 K08D10.8   |                            | -0.789434320170181  |
| CB4856 CT<br>AGIWUR9450                                                | IV | 4164692 4166230 | WBGene00019530 | scrm-8 K08D10.7   |                            | -0.501604433570459  |
| CB4856 CT<br>AGIWUR35321                                               | IV | 4166541 4168120 | WBGene00235369 | K08D10.18         | K08D10.18                  | 0.130259520916492   |
| CB4856 CT<br>AGIWUR13883                                               | IV | 4168038 4169891 | WBGene00019529 | K08D10.5          | K08D10.5                   | -0.159575835895031  |
| CB4856 CT<br>AGIWUR23011                                               | IV | 4172076 4173988 | WBGene00004385 | rnp-2 K08D10.4    |                            | -0.144221397626275  |
| CB4856 CT<br>AGIWUR32748                                               | IV | 4174089 4176279 | WBGene00004386 | rnp-3 K08D10.3    |                            | -0.0218240781076737 |
| CB4856 CT<br>AGIWUR41604                                               | IV | 4176388 4178364 | WBGene00001033 | dnj-15 K08D10.2   |                            | 0.0412187166026321  |
| CB4856 CT<br>AGIWUR8924;AGIWUR19233;AGIWUR22445                        | IV | 4178463 4179531 | WBGene00019535 | tsen-34 K08D10.12 |                            | -0.0618863105907046 |
| CB4856 CT<br>AGIWUR1235;AGIWUR5457;AGIWUR15755;AGIWUR17854;AGIWUR29162 | IV | 4196173 4196695 | WBGene00044478 | K06B9.6 K06B9.6   | 0.803358612265816          |                     |
| CB4856 CT                                                              | IV | 4199501 4204375 | WBGene00003938 | pax-2 K06B9.5     | 0.419046403514402          | AGIWUR38588         |
| CB4856 CT                                                              | IV | 4205975 4218259 | WBGene00017934 | F30B5.4 F30B5.4   | -0.195639969484789         | AGIWUR34612         |
| CB4856 CT<br>AGIWUR18478                                               | IV | 4219271 4220083 | WBGene00235371 | F30B5.11          | F30B5.11                   | 0.0512605978516252  |
| CB4856 CT<br>AGIWUR5787;AGIWUR27677;AGIWUR41288                        | IV | 4222183 4223140 | WBGene00044093 | srbc-72 F30B5.9   | 0.136538907215134          |                     |
| CB4856 CT<br>AGIWUR25867;AGIWUR30376                                   | IV | 4223857 4225946 | WBGene00044092 | srbc-71 F30B5.8   | -0.133000995595343         |                     |
| CB4856 CT                                                              | IV | 4226858 4228017 | WBGene00017935 | srbc-70 F30B5.6   | -0.14136554910712          | AGIWUR22342         |
| CB4856 CT<br>AGIWUR42862                                               | IV | 4229195 4231861 | WBGene00017936 | zipt-2.2          | F30B5.7 -0.154917936800976 |                     |

|                                                                         |    |    |         |         |                |          |          |                     |             |
|-------------------------------------------------------------------------|----|----|---------|---------|----------------|----------|----------|---------------------|-------------|
| CB4856                                                                  | CT | IV | 4235614 | 4236710 | WBGene00001074 | dpy-13   | F30B5.1  | -0.317734273912436  |             |
| AGIWUR16246;AGIWUR43234                                                 |    |    |         |         |                |          |          |                     |             |
| CB4856                                                                  | CT | IV | 4239853 | 4240855 | WBGene00023279 | F36A4.9  | F36A4.9  | -0.194166132695678  |             |
| AGIWUR6068;AGIWUR29161                                                  |    |    |         |         |                |          |          |                     |             |
| CB4856                                                                  | CT | IV | 4243548 | 4244610 | WBGene00000611 | col-34   | F36A4.10 | 0.165812593880007   |             |
| AGIWUR6058                                                              |    |    |         |         |                |          |          |                     |             |
| CB4856                                                                  | CT | IV | 4244956 | 4245620 | WBGene00018086 | F36A4.11 | F36A4.11 | 0.150380188109617   |             |
| AGIWUR22161                                                             |    |    |         |         |                |          |          |                     |             |
| CB4856                                                                  | CT | IV | 4246760 | 4247486 | WBGene00018085 | ttr-20   | F36A4.8  | 0.372430644085759   | AGIWUR31794 |
| CB4856                                                                  | CT | IV | 4248020 | 4258173 | WBGene00000123 | ama-1    | F36A4.7  | 0.0482513546204655  |             |
| AGIWUR3117;AGIWUR13557;AGIWUR21122;AGIWUR27884;AGIWUR30437;AGIWUR40528  |    |    |         |         |                |          |          |                     |             |
| CB4856                                                                  | CT | IV | 4263293 | 4265202 | WBGene00000610 | col-33   | F36A4.6  | -0.349809556485967  | AGIWUR7365  |
| CB4856                                                                  | CT | IV | 4265524 | 4266598 | WBGene00018084 | F36A4.5  | F36A4.5  | 0.14752401933613    | AGIWUR32046 |
| CB4856                                                                  | CT | IV | 4267582 | 4268236 | WBGene00018083 | F36A4.4  | F36A4.4  | 0.364119686233902   | AGIWUR41627 |
| CB4856                                                                  | CT | IV | 4269608 | 4270186 | WBGene00018082 | F36A4.3  | F36A4.3  | 0.0893698122425928  | AGIWUR2033  |
| CB4856                                                                  | CT | IV | 4271215 | 4271820 | WBGene00018081 | F36A4.2  | F36A4.2  | 0.050876686474707   |             |
| AGIWUR6627;AGIWUR15954;AGIWUR37357                                      |    |    |         |         |                |          |          |                     |             |
| CB4856                                                                  | CT | IV | 4272473 | 4272899 | WBGene00018080 | F36A4.1  | F36A4.1  | 0.0296971493324572  | AGIWUR37819 |
| CB4856                                                                  | CT | IV | 4274341 | 4277875 | WBGene00003668 | nhr-78   | F36A4.14 | 0.174338479004261   |             |
| AGIWUR11194                                                             |    |    |         |         |                |          |          |                     |             |
| CB4856                                                                  | CT | IV | 4278825 | 4284120 | WBGene00017487 | F15E6.6  | F15E6.6  | -0.0280526511158534 | AGIWUR27430 |
| CB4856                                                                  | CT | IV | 4285403 | 4288432 | WBGene00005715 | srv-4    | F15E6.7  | 0.128945818744894   |             |
| AGIWUR4587;AGIWUR9840;AGIWUR33733                                       |    |    |         |         |                |          |          |                     |             |
| CB4856                                                                  | CT | IV | 4289567 | 4290061 | WBGene00017486 | F15E6.5  | F15E6.5  | 0.145946508577229   | AGIWUR24506 |
| CB4856                                                                  | CT | IV | 4290189 | 4290703 | WBGene00017488 | dct-7    | F15E6.8  | 0.328892161905388   | AGIWUR18791 |
| CB4856                                                                  | CT | IV | 4291467 | 4291872 | WBGene00017485 | F15E6.4  | F15E6.4  | -0.366797244564054  |             |
| AGIWUR10390;AGIWUR18519;AGIWUR29557;AGIWUR30230;AGIWUR37617;AGIWUR43915 |    |    |         |         |                |          |          |                     |             |
| CB4856                                                                  | CT | IV | 4292869 | 4293611 | WBGene00044479 | F15E6.10 | F15E6.10 | 1.04105296133449    |             |
| AGIWUR14420;AGIWUR18856;AGIWUR23310;AGIWUR31892;AGIWUR36814             |    |    |         |         |                |          |          |                     |             |
| CB4856                                                                  | CT | IV | 4293620 | 4299083 | WBGene00017489 | F15E6.9  | F15E6.9  | 0.137300813064408   | AGIWUR4362  |
| CB4856                                                                  | CT | IV | 4301308 | 4304437 | WBGene00017483 | lgc-22   | F15E6.2  | 0.762570098012153   | AGIWUR23008 |
| CB4856                                                                  | CT | IV | 4326656 | 4332018 | WBGene00020972 | trp1-2   | W03B1.2  | -0.300269003344908  | AGIWUR25968 |
| CB4856                                                                  | CT | IV | 4332692 | 4335372 | WBGene00020973 | W03B1.3  | W03B1.3  | 0.31969726551064    | AGIWUR32449 |
| CB4856                                                                  | CT | IV | 4336834 | 4341304 | WBGene00020976 | oac-51   | W03B1.7  | 0.0510002849189943  |             |
| AGIWUR63;AGIWUR4276                                                     |    |    |         |         |                |          |          |                     |             |
| CB4856                                                                  | CT | IV | 4342357 | 4346558 | WBGene00020977 | oac-52   | W03B1.8  | -0.0277772110442225 | AGIWUR14080 |
| CB4856                                                                  | CT | IV | 4357631 | 4359936 | WBGene00005662 | sars-2   | W03B1.4  | -0.0204235115662499 |             |
| AGIWUR1886;AGIWUR40320;AGIWUR44856                                      |    |    |         |         |                |          |          |                     |             |
| CB4856                                                                  | CT | IV | 4359953 | 4360657 | WBGene00050916 | F55F10.3 | F55F10.3 | -0.240773556295164  |             |

AGIWUR16657;AGIWUR29416;AGIWUR41260  
 CB4856 CT IV 4360837 4386533 WBGene00018898 F55F10.1 F55F10.1 -0.107249012453963  
 AGIWUR28847  
 CB4856 CT IV 4386630 4388878 WBGene00021286 tal-1 Y24D9A.8 -0.0703519608938343  
 AGIWUR1068;AGIWUR23705  
 CB4856 CT IV 4389135 4390649 WBGene00004419 rpl-7A Y24D9A.4 -0.060474001946627  
 AGIWUR8205  
 CB4856 CT IV 4390848 4393403 WBGene00021282 set-21 Y24D9A.2 -0.237388778913752  
 AGIWUR34746  
 CB4856 CT IV 4394410 4415622 WBGene00021281 ell-1 Y24D9A.1 0.0801170939939571  
 AGIWUR632;AGIWUR12116  
 CB4856 CT IV 4422339 4426566 WBGene00019950 clec-175 R08C7.6 0.0562461667330165  
 AGIWUR5192;AGIWUR14417;AGIWUR21071  
 CB4856 CT IV 4427713 4429782 WBGene00006228 str-185 R08C7.7 0.167157134410722 AGIWUR27  
 CB4856 CT IV 4433049 4434541 WBGene00019951 R08C7.8 R08C7.8 -0.113054253556078 AGIWUR24643  
 CB4856 CT IV 4435127 4437318 WBGene00019948 R08C7.4 R08C7.4 -0.0164856558048037 AGIWUR1608  
 CB4856 CT IV 4437786 4439290 WBGene00019952 fbx-74 R08C7.9 0.0841660738924173  
 AGIWUR6404;AGIWUR13245;AGIWUR18904;AGIWUR24042;AGIWUR27521;AGIWUR30324  
 CB4856 CT IV 4442399 4445876 WBGene00019953 wap-1 R08C7.10 -0.0925316016721833  
 AGIWUR3049;AGIWUR3502;AGIWUR5857;AGIWUR6345;AGIWUR8110;AGIWUR14201;AGIWUR16332;AGIWUR20448;AGIWUR45027  
 CB4856 CT IV 4445990 4446997 WBGene00019947 htz-1 R08C7.3 0.158962609710088  
 AGIWUR35276;AGIWUR40345  
 CB4856 CT IV 4447299 4449897 WBGene00019946 chat-1 R08C7.2 0.102925935205864  
 AGIWUR23617;AGIWUR24421  
 CB4856 CT IV 4450000 4460027 WBGene00019955 R08C7.12 R08C7.12 0.470419484859928  
 AGIWUR26172;AGIWUR28842;AGIWUR31454;AGIWUR40599;AGIWUR43621  
 CB4856 CT IV 4460179 4462061 WBGene00019718 M01H9.2 M01H9.2 0.32334223721897 AGIWUR8857  
 CB4856 CT IV 4465484 4468509 WBGene00019721 M01H9.5 M01H9.5 -0.123081624535313 AGIWUR11586  
 CB4856 CT IV 4468505 4477059 WBGene00019719 M01H9.3 M01H9.3 0.56665478501812  
 AGIWUR3461;AGIWUR16506;AGIWUR18811;AGIWUR37123;AGIWUR42973  
 CB4856 CT IV 4479693 4482764 WBGene00019720 M01H9.4 M01H9.4 0.525213557070143  
 AGIWUR1939;AGIWUR17950;AGIWUR22449;AGIWUR29216;AGIWUR30278;AGIWUR36545  
 CB4856 CT IV 4487028 4489000 WBGene00019717 trx-3 M01H9.1 1.46375042127451 AGIWUR33279  
 CB4856 CT IV 4489012 4506708 WBGene00022675 gbb-2 ZK180.1 -0.00381006262142503  
 AGIWUR3783;AGIWUR5291;AGIWUR12774;AGIWUR13601;AGIWUR20036;AGIWUR29856;AGIWUR31024;AGIWUR31657;AGIWUR32763;AGIWUR33247;AGIWUR33381;AGIWUR33807;AGIWUR35502;AGIWUR41532;AGIWUR42433  
 CB4856 CT IV 4508499 4511320 WBGene00022677 ZK180.3 ZK180.3 0.0649324639584412  
 AGIWUR25175;AGIWUR32103  
 CB4856 CT IV 4511896 4513319 WBGene00022678 sar-1 ZK180.4 -0.156269641772131 AGIWUR17236

|                                                                                                            |    |    |         |         |                |          |          |                     |             |
|------------------------------------------------------------------------------------------------------------|----|----|---------|---------|----------------|----------|----------|---------------------|-------------|
| CB4856                                                                                                     | CT | IV | 4515044 | 4517169 | WBGene00022679 | ZK180.5  | ZK180.5  | -0.429680613961975  |             |
| AGIWUR13104;AGIWUR17731;AGIWUR25887;AGIWUR38271                                                            |    |    |         |         |                |          |          |                     |             |
| CB4856                                                                                                     | CT | IV | 4520181 | 4525043 | WBGene00022680 | ZK180.6  | ZK180.6  | -0.547469972564635  | AGIWUR1519  |
| CB4856                                                                                                     | CT | IV | 4528730 | 4530382 | WBGene00022683 | ZK185.3  | ZK185.3  | -0.304731209811184  | AGIWUR18708 |
| CB4856                                                                                                     | CT | IV | 4531222 | 4533121 | WBGene00044480 | ZK185.4  | ZK185.4  | -0.0977104695448827 |             |
| AGIWUR32050;AGIWUR33234                                                                                    |    |    |         |         |                |          |          |                     |             |
| CB4856                                                                                                     | CT | IV | 4536553 | 4541771 | WBGene00022682 | ZK185.2  | ZK185.2  | 0.0732135990855012  | AGIWUR38270 |
| CB4856                                                                                                     | CT | IV | 4541769 | 4545918 | WBGene00044481 | ZK185.5  | ZK185.5  | -0.355537315630089  |             |
| AGIWUR5901;AGIWUR10425                                                                                     |    |    |         |         |                |          |          |                     |             |
| CB4856                                                                                                     | CT | IV | 4548553 | 4552742 | WBGene00022681 | ZK185.1  | ZK185.1  | -0.415422503217218  | AGIWUR11021 |
| CB4856                                                                                                     | CT | IV | 4562654 | 4565674 | WBGene00017901 | igeg-1   | F28E10.2 | 0.522150208232652   |             |
| AGIWUR35893                                                                                                |    |    |         |         |                |          |          |                     |             |
| CB4856                                                                                                     | CT | IV | 4566018 | 4567443 | WBGene00017902 | F28E10.4 | F28E10.4 |                     |             |
| -0.00380302975342417 AGIWUR500;AGIWUR10120;AGIWUR31071;AGIWUR32695;AGIWUR32757;AGIWUR32829                 |    |    |         |         |                |          |          |                     |             |
| CB4856                                                                                                     | CT | IV | 4568841 | 4590297 | WBGene00017900 | F28E10.1 | F28E10.1 | 0.184918146473642   |             |
| AGIWUR450;AGIWUR3642;AGIWUR15545;AGIWUR26942;AGIWUR33923;AGIWUR35572;AGIWUR36232;AGIWUR41759               |    |    |         |         |                |          |          |                     |             |
| CB4856                                                                                                     | CT | IV | 4595052 | 4595530 | WBGene00017596 | F19C7.6  | F19C7.6  | 0.366012903389812   | AGIWUR35427 |
| CB4856                                                                                                     | CT | IV | 4595958 | 4596732 | WBGene00017595 | F19C7.5  | F19C7.5  | 0.433000832744231   | AGIWUR33005 |
| CB4856                                                                                                     | CT | IV | 4605786 | 4608216 | WBGene00017591 | F19C7.1  | F19C7.1  | -0.145837440344227  | AGIWUR43965 |
| CB4856                                                                                                     | CT | IV | 4608201 | 4609679 | WBGene00000684 | col-110  | F19C7.7  | -0.452655089886363  |             |
| AGIWUR14499;AGIWUR24835                                                                                    |    |    |         |         |                |          |          |                     |             |
| CB4856                                                                                                     | CT | IV | 4610576 | 4638095 | WBGene00017597 | F19C7.8  | F19C7.8  | 0.228733658390595   |             |
| AGIWUR16659;AGIWUR19393;AGIWUR23800;AGIWUR28813;AGIWUR29521                                                |    |    |         |         |                |          |          |                     |             |
| CB4856                                                                                                     | CT | IV | 4647202 | 4649743 | WBGene00017923 | F29B9.8  | F29B9.8  | -0.179581702897645  | AGIWUR11048 |
| CB4856                                                                                                     | CT | IV | 4649744 | 4650654 | WBGene00017922 | F29B9.7  | F29B9.7  | 0.0894250080802106  | AGIWUR18836 |
| CB4856                                                                                                     | CT | IV | 4651044 | 4652468 | WBGene00006706 | ubc-9    | F29B9.6  | -0.285066363269054  |             |
| AGIWUR18958;AGIWUR43174                                                                                    |    |    |         |         |                |          |          |                     |             |
| CB4856                                                                                                     | CT | IV | 4652459 | 4653159 | WBGene00017921 | F29B9.5  | F29B9.5  | -0.220816566052315  | AGIWUR26617 |
| CB4856                                                                                                     | CT | IV | 4653293 | 4655848 | WBGene00004205 | psr-1    | F29B9.4  | -0.197911676125401  | AGIWUR21294 |
| CB4856                                                                                                     | CT | IV | 4655776 | 4657783 | WBGene00000685 | col-111  | F29B9.9  | -0.159105576668125  |             |
| AGIWUR4023;AGIWUR27103;AGIWUR31068;AGIWUR31841;AGIWUR33074;AGIWUR37890;AGIWUR38286;AGIWUR39857;AGIWUR41390 |    |    |         |         |                |          |          |                     |             |
| CB4856                                                                                                     | CT | IV | 4659049 | 4659517 | WBGene00017924 | mrps-21  | F29B9.10 | -0.240744666511103  |             |
| AGIWUR3956                                                                                                 |    |    |         |         |                |          |          |                     |             |
| CB4856                                                                                                     | CT | IV | 4659521 | 4660203 | WBGene00017925 | F29B9.11 | F29B9.11 | -0.0980434914137049 |             |
| AGIWUR3042;AGIWUR27108;AGIWUR33457;AGIWUR35521;AGIWUR41724;AGIWUR43364                                     |    |    |         |         |                |          |          |                     |             |
| CB4856                                                                                                     | CT | IV | 4660991 | 4665204 | WBGene00017920 | jmjd-1.2 | F29B9.2  | -0.113109598955997  |             |
| AGIWUR352;AGIWUR20412;AGIWUR21912                                                                          |    |    |         |         |                |          |          |                     |             |
| CB4856                                                                                                     | CT | IV | 4665251 | 4667293 | WBGene00017919 | F29B9.1  | F29B9.1  | 0.011546542233555   | AGIWUR28303 |
| CB4856                                                                                                     | CT | IV | 4669529 | 4671992 | WBGene00044482 | F29B9.12 | F29B9.12 | -0.037025117192246  |             |

|                                                                                                                                   |    |    |         |         |                |             |          |                       |             |
|-----------------------------------------------------------------------------------------------------------------------------------|----|----|---------|---------|----------------|-------------|----------|-----------------------|-------------|
| AGIWUR10537                                                                                                                       |    |    |         |         |                |             |          |                       |             |
| CB4856                                                                                                                            | CT | IV | 4679018 | 4685168 | WBGene00020678 | T22B11.4    | T22B11.4 | 0.328678320067493     |             |
| AGIWUR181;AGIWUR5515;AGIWUR9417;AGIWUR13970;AGIWUR23451;AGIWUR32601;AGIWUR33091                                                   |    |    |         |         |                |             |          |                       |             |
| CB4856                                                                                                                            | CT | IV | 4688269 | 4691936 | WBGene00044620 | bus-4       | T22B11.2 | 0.0628409114537938    |             |
| AGIWUR34594                                                                                                                       |    |    |         |         |                |             |          |                       |             |
| CB4856                                                                                                                            | CT | IV | 4692793 | 4696826 | WBGene00020675 | T22B11.1    | T22B11.1 | 0.137823689381416     |             |
| AGIWUR44942                                                                                                                       |    |    |         |         |                |             |          |                       |             |
| CB4856                                                                                                                            | CT | IV | 4696982 | 4704011 | WBGene00020679 | ogdh-1      | T22B11.5 | 0.0182350393526134    |             |
| AGIWUR20048;AGIWUR28410                                                                                                           |    |    |         |         |                |             |          |                       |             |
| CB4856                                                                                                                            | CT | IV | 4706777 | 4710755 | WBGene00019543 | cif-1       | K08F11.3 | 0.107723853039803     |             |
| AGIWUR36907;AGIWUR44735                                                                                                           |    |    |         |         |                |             |          |                       |             |
| CB4856                                                                                                                            | CT | IV | 4710861 | 4712624 | WBGene00006968 | yars-2      | K08F11.4 | -0.127492925127436    |             |
| AGIWUR1336;AGIWUR23561;AGIWUR33150                                                                                                |    |    |         |         |                |             |          |                       |             |
| CB4856                                                                                                                            | CT | IV | 4712825 | 4715807 | WBGene00019544 | miro-1      | K08F11.5 | -0.000798539025578471 |             |
| AGIWUR13942;AGIWUR43333                                                                                                           |    |    |         |         |                |             |          |                       |             |
| CB4856                                                                                                                            | CT | IV | 4724862 | 4725332 | WBGene00019541 | K08F11.1    | K08F11.1 | -0.156907212641285    |             |
| AGIWUR16904                                                                                                                       |    |    |         |         |                |             |          |                       |             |
| CB4856                                                                                                                            | CT | IV | 4730636 | 4732750 | WBGene00017118 | E04A4.3     | E04A4.3  | 1.39949552747857      | AGIWUR23548 |
| CB4856                                                                                                                            | CT | IV | 4734305 | 4735876 | WBGene00017117 | fbxb-80     | E04A4.2  | 0.278683906599271     | AGIWUR35293 |
| CB4856                                                                                                                            | CT | IV | 4737558 | 4738734 | WBGene00017116 | fbxb-78     | E04A4.1  | 0.472383505248546     | AGIWUR23218 |
| CB4856                                                                                                                            | CT | IV | 4739490 | 4744269 | WBGene00001983 | hoe-1       | E04A4.4  | -0.293760035256934    | AGIWUR18753 |
| CB4856                                                                                                                            | CT | IV | 4744377 | 4745492 | WBGene00017119 | timmm-17B.1 | E04A4.5  | -0.0785766104786667   |             |
| AGIWUR16514                                                                                                                       |    |    |         |         |                |             |          |                       |             |
| CB4856                                                                                                                            | CT | IV | 4745825 | 4747832 | WBGene00017120 | tctn-1      | E04A4.6  | 0.409999176539287     | AGIWUR11344 |
| CB4856                                                                                                                            | CT | IV | 4747901 | 4749113 | WBGene00017121 | cyc-2.1     | E04A4.7  | 0.0906719459341616    |             |
| AGIWUR322;AGIWUR10063;AGIWUR11494;AGIWUR16074;AGIWUR24498;AGIWUR26130;AGIWUR28305;AGIWUR30014;AGIWUR36824;AGIWUR38385;AGIWUR43982 |    |    |         |         |                |             |          |                       |             |
| CB4856                                                                                                                            | CT | IV | 4749012 | 4749778 | WBGene00004432 | rp1-20      | E04A4.8  | 0.0130668217736645    |             |
| AGIWUR2616;AGIWUR4332;AGIWUR15631;AGIWUR18334;AGIWUR27175;AGIWUR37198                                                             |    |    |         |         |                |             |          |                       |             |
| CB4856                                                                                                                            | CT | IV | 4750240 | 4751491 | WBGene00021202 | Y17G9B.5    | Y17G9B.5 | -0.104443778233271    |             |
| AGIWUR26981                                                                                                                       |    |    |         |         |                |             |          |                       |             |
| CB4856                                                                                                                            | CT | IV | 4752119 | 4753163 | WBGene00021201 | Y17G9B.4    | Y17G9B.4 | 0.169946416559144     |             |
| AGIWUR20135                                                                                                                       |    |    |         |         |                |             |          |                       |             |
| CB4856                                                                                                                            | CT | IV | 4754199 | 4756157 | WBGene00021204 | fbxb-77     | Y17G9B.7 | -0.005815423155763    |             |
| AGIWUR5085;AGIWUR28574                                                                                                            |    |    |         |         |                |             |          |                       |             |
| CB4856                                                                                                                            | CT | IV | 4757179 | 4758840 | WBGene00021205 | Y17G9B.8    | Y17G9B.8 | -0.122182669827696    |             |
| AGIWUR17568                                                                                                                       |    |    |         |         |                |             |          |                       |             |
| CB4856                                                                                                                            | CT | IV | 4758982 | 4760428 | WBGene00003216 | memi-1      | Y17G9B.9 | -0.310395454579808    |             |
| AGIWUR30173                                                                                                                       |    |    |         |         |                |             |          |                       |             |

|                                                 |    |         |         |                |           |           |                     |
|-------------------------------------------------|----|---------|---------|----------------|-----------|-----------|---------------------|
| CB4856 CT                                       | IV | 4761049 | 4762856 | WBGene00021200 | cyp-31A3  | Y17G9B.3  | -0.134400041585007  |
| AGIWUR18877                                     |    |         |         |                |           |           |                     |
| CB4856 CT                                       | IV | 4764182 | 4764602 | WBGene00021199 | Y17G9B.2  | Y17G9B.2  | 0.579306896196368   |
| AGIWUR35670                                     |    |         |         |                |           |           |                     |
| CB4856 CT                                       | IV | 4764748 | 4767839 | WBGene00021198 | Y17G9B.1  | Y17G9B.1  | 0.141456291454746   |
| AGIWUR6283;AGIWUR20407;AGIWUR41861              |    |         |         |                |           |           |                     |
| CB4856 CT                                       | IV | 4772092 | 4775133 | WBGene00020004 | R11E3.2   | R11E3.2   | 0.00920193307847583 |
| CB4856 CT                                       | IV | 4775242 | 4776096 | WBGene00235374 | R11E3.19  | R11E3.19  | 0.664200057854702   |
| AGIWUR17262                                     |    |         |         |                |           |           |                     |
| CB4856 CT                                       | IV | 4784233 | 4788692 | WBGene00003694 | nhr-104   | R11E3.5   | 0.0189268618369867  |
| AGIWUR26636;AGIWUR33735                         |    |         |         |                |           |           |                     |
| CB4856 CT                                       | IV | 4789503 | 4791983 | WBGene00020003 | R11E3.1   | R11E3.1   | 0.0115858049879005  |
| AGIWUR18867;AGIWUR23382                         |    |         |         |                |           |           |                     |
| CB4856 CT                                       | IV | 4793202 | 4799378 | WBGene00001324 | eor-1     | R11E3.6   | 0.0436948898995331  |
| AGIWUR23443;AGIWUR36822                         |    |         |         |                |           |           |                     |
| CB4856 CT                                       | IV | 4799388 | 4802592 | WBGene00001060 | dpf-7     | R11E3.7   | -0.238450673160796  |
| AGIWUR20072;AGIWUR31018                         |    |         |         |                |           |           |                     |
| CB4856 CT                                       | IV | 4802702 | 4806586 | WBGene00001058 | dpf-5     | R11E3.8   | -0.137479504051087  |
| AGIWUR4930;AGIWUR6015;AGIWUR20859;AGIWUR21375   |    |         |         |                |           |           |                     |
| CB4856 CT                                       | IV | 4806697 | 4807319 | WBGene00044483 | H06H21.11 | H06H21.11 | -0.258810882947504  |
| AGIWUR21364                                     |    |         |         |                |           |           |                     |
| CB4856 CT                                       | IV | 4807426 | 4809976 | WBGene00019163 | ubxn-6    | H06H21.6  | -0.246119438248249  |
| AGIWUR12053;AGIWUR32125;AGIWUR41983;AGIWUR43407 |    |         |         |                |           |           |                     |
| CB4856 CT                                       | IV | 4810934 | 4811983 | WBGene00019162 | eif-1.A   | H06H21.3  | -0.219891144571614  |
| AGIWUR17674                                     |    |         |         |                |           |           |                     |
| CB4856 CT                                       | IV | 4812075 | 4814029 | WBGene00005842 | srw-95    | H06H21.2  | 0.050048113663852   |
| AGIWUR17290                                     |    |         |         |                |           |           |                     |
| CB4856 CT                                       | IV | 4817388 | 4821131 | WBGene00019164 | H06H21.8  | H06H21.8  | -0.417547344095589  |
| AGIWUR3945;AGIWUR19556                          |    |         |         |                |           |           |                     |
| CB4856 CT                                       | IV | 4825488 | 4827281 | WBGene00019165 | mpz-4     | H06H21.9  | -0.152457336165888  |
| AGIWUR14973                                     |    |         |         |                |           |           |                     |
| CB4856 CT                                       | IV | 4827853 | 4846893 | WBGene00019166 | tat-2     | H06H21.10 | 0.0688462747907472  |
| AGIWUR3450                                      |    |         |         |                |           |           |                     |
| CB4856 CT                                       | IV | 4854394 | 4856287 | WBGene00021195 | Y17G9A.2  | Y17G9A.2  | -0.136761556800611  |
| AGIWUR6330;AGIWUR26489;AGIWUR39776              |    |         |         |                |           |           |                     |
| CB4856 CT                                       | IV | 4859255 | 4860255 | WBGene00235375 | Y17G9A.91 | Y17G9A.91 | 0.112015708123084   |
| AGIWUR30819                                     |    |         |         |                |           |           |                     |
| CB4856 CT                                       | IV | 4862185 | 4864141 | WBGene00006217 | str-173   | Y17G9A.1  | 0.716168420118484   |
| AGIWUR43543                                     |    |         |         |                |           |           |                     |



|                                     |    |         |         |                |          |          |                     |             |
|-------------------------------------|----|---------|---------|----------------|----------|----------|---------------------|-------------|
| CB4856 CT                           | IV | 4864978 | 4867659 | WBGene00006216 | str-172  | Y17G9A.5 | 0.0274494656495232  |             |
| AGIWUR33017                         |    |         |         |                |          |          |                     |             |
| CB4856 CT                           | IV | 4872267 | 4874703 | WBGene00006218 | str-174  | Y17G9A.7 | -0.180979803679399  |             |
| AGIWUR26745                         |    |         |         |                |          |          |                     |             |
| CB4856 CT                           | IV | 4877402 | 4880315 | WBGene00006214 | str-170  | T08B6.7  | -0.594617319442462  | AGIWUR41481 |
| CB4856 CT                           | IV | 4884296 | 4886897 | WBGene00006211 | str-166  | T08B6.6  | -0.0775723527862704 | AGIWUR31779 |
| CB4856 CT                           | IV | 4886885 | 4887358 | WBGene00020351 | T08B6.1  | T08B6.1  | 0.0735209547909861  | AGIWUR34344 |
| CB4856 CT                           | IV | 4889918 | 4890672 | WBGene00020354 | T08B6.5  | T08B6.5  | -0.0541624809073191 | AGIWUR30916 |
| CB4856 CT                           | IV | 4890843 | 4894085 | WBGene00020356 | T08B6.9  | T08B6.9  | 0.270466032207871   | AGIWUR3587  |
| CB4856 CT                           | IV | 4894370 | 4897043 | WBGene00020352 | T08B6.2  | T08B6.2  | 0.0762150774716446  | AGIWUR36141 |
| CB4856 CT                           | IV | 4902422 | 4904061 | WBGene00006206 | str-161  | T08B6.3  | -0.475723718957742  | AGIWUR22867 |
| CB4856 CT                           | IV | 4905658 | 4908498 | WBGene00020353 | T08B6.4  | T08B6.4  | 0.0366748345559742  | AGIWUR25964 |
| CB4856 CT                           | IV | 4909339 | 4910962 | WBGene00006204 | str-159  | Y9C9A.18 | 0.078032738583659   |             |
| AGIWUR10470;AGIWUR14777             |    |         |         |                |          |          |                     |             |
| CB4856 CT                           | IV | 4911320 | 4912780 | WBGene00021184 | Y9C9A.17 | Y9C9A.17 | 0.0238949367144645  |             |
| AGIWUR25700                         |    |         |         |                |          |          |                     |             |
| CB4856 CT                           | IV | 4915989 | 4917553 | WBGene00006201 | str-155  | Y9C9A.10 | -0.0122068273029496 |             |
| AGIWUR21959                         |    |         |         |                |          |          |                     |             |
| CB4856 CT                           | IV | 4918074 | 4919632 | WBGene00006203 | str-158  | Y9C9A.9  | -0.0909183716403774 |             |
| AGIWUR11250;AGIWUR15567;AGIWUR22659 |    |         |         |                |          |          |                     |             |
| CB4856 CT                           | IV | 4930365 | 4932217 | WBGene00021178 | Y9C9A.8  | Y9C9A.8  | 0.0210115952213012  | AGIWUR14229 |
| CB4856 CT                           | IV | 4934414 | 4936643 | WBGene00006199 | str-153  | Y9C9A.7  | 0.120995673526917   | AGIWUR15918 |
| CB4856 CT                           | IV | 4936655 | 4938011 | WBGene00021179 | fbxa-86  | Y9C9A.12 | -0.227831074846863  |             |
| AGIWUR44600                         |    |         |         |                |          |          |                     |             |
| CB4856 CT                           | IV | 4939315 | 4941506 | WBGene00006212 | str-168  | Y9C9A.6  | -0.423562641897993  |             |
| AGIWUR1074;AGIWUR27267;AGIWUR41906  |    |         |         |                |          |          |                     |             |
| CB4856 CT                           | IV | 4941981 | 4944588 | WBGene00021177 | Y9C9A.5  | Y9C9A.5  | 0.194122072383848   | AGIWUR25885 |
| CB4856 CT                           | IV | 4946105 | 4948518 | WBGene00006213 | str-169  | Y9C9A.4  | 0.0249371679188446  |             |
| AGIWUR13121;AGIWUR15955             |    |         |         |                |          |          |                     |             |
| CB4856 CT                           | IV | 4954187 | 4958206 | WBGene00006208 | str-163  | Y9C9A.3  | 0.776531757169852   |             |
| AGIWUR3410;AGIWUR26106;AGIWUR29004  |    |         |         |                |          |          |                     |             |
| CB4856 CT                           | IV | 4960735 | 4963147 | WBGene00006209 | str-164  | Y9C9A.2  | -0.141034679759521  | AGIWUR26339 |
| CB4856 CT                           | IV | 4963883 | 4965369 | WBGene00021176 | Y9C9A.1  | Y9C9A.1  | 0.616765964565225   | AGIWUR19033 |
| CB4856 CT                           | IV | 4966097 | 4969540 | WBGene00021180 | Y9C9A.13 | Y9C9A.13 | -0.0866931821238923 |             |
| AGIWUR32536                         |    |         |         |                |          |          |                     |             |
| CB4856 CT                           | IV | 4969840 | 4971145 | WBGene00021181 | srz-27   | Y9C9A.14 | -0.294197754921704  |             |
| AGIWUR18744                         |    |         |         |                |          |          |                     |             |
| CB4856 CT                           | IV | 4971671 | 4973203 | WBGene00021182 | srz-28   | Y9C9A.15 | 0.053494647622216   |             |
| AGIWUR11092                         |    |         |         |                |          |          |                     |             |

|                                                             |    |    |         |         |                |           |          |                     |
|-------------------------------------------------------------|----|----|---------|---------|----------------|-----------|----------|---------------------|
| CB4856                                                      | CT | IV | 4973622 | 4976089 | WBGene00021183 | Y9C9A.16  | Y9C9A.16 | -0.106186143447101  |
| AGIWUR10233;AGIWUR14926;AGIWUR24909                         |    |    |         |         |                |           |          |                     |
| CB4856                                                      | CT | IV | 4977201 | 4978084 | WBGene00017112 | E03H12.5  | E03H12.5 | 0.551003630725219   |
| AGIWUR2197;AGIWUR17016;AGIWUR28451;AGIWUR35167;AGIWUR38500  |    |    |         |         |                |           |          |                     |
| CB4856                                                      | CT | IV | 4979789 | 4981127 | WBGene00017113 | srz-24    | E03H12.6 | 0.0891648913210634  |
| AGIWUR17310;AGIWUR19064;AGIWUR20580                         |    |    |         |         |                |           |          |                     |
| CB4856                                                      | CT | IV | 4982596 | 4983892 | WBGene00017111 | E03H12.4  | E03H12.4 | -0.0913740459105465 |
| AGIWUR11663                                                 |    |    |         |         |                |           |          |                     |
| CB4856                                                      | CT | IV | 4984046 | 4985375 | WBGene00017110 | cllec-176 | E03H12.3 | 0.650445754427027   |
| AGIWUR27091                                                 |    |    |         |         |                |           |          |                     |
| CB4856                                                      | CT | IV | 4986546 | 4987725 | WBGene00017109 | cllec-177 | E03H12.2 | 0.0811203693882412  |
| AGIWUR12062                                                 |    |    |         |         |                |           |          |                     |
| CB4856                                                      | CT | IV | 4987702 | 4988642 | WBGene00017114 | E03H12.7  | E03H12.7 | -0.179836831562181  |
| AGIWUR45032                                                 |    |    |         |         |                |           |          |                     |
| CB4856                                                      | CT | IV | 4989065 | 4989717 | WBGene00023265 | E03H12.8  | E03H12.8 | 0.0877137556289123  |
| AGIWUR18233;AGIWUR28268;AGIWUR31646;AGIWUR32544;AGIWUR39099 |    |    |         |         |                |           |          |                     |
| CB4856                                                      | CT | IV | 4990255 | 4991433 | WBGene00017115 | E03H12.9  | E03H12.9 | -0.0226719626522653 |
| AGIWUR469                                                   |    |    |         |         |                |           |          |                     |
| CB4856                                                      | CT | IV | 4992389 | 4993857 | WBGene00006207 | str-162   | E03H12.1 | 0.0946923593091968  |
| AGIWUR15331                                                 |    |    |         |         |                |           |          |                     |
| CB4856                                                      | CT | IV | 4996142 | 4997559 | WBGene00006051 | ssq-2     | T28H11.5 | 0.580899894104792   |
| AGIWUR44466                                                 |    |    |         |         |                |           |          |                     |
| CB4856                                                      | CT | IV | 4999434 | 4999853 | WBGene00006040 | ssp-11    | T28H11.6 | -0.0312989520285107 |
| AGIWUR6740                                                  |    |    |         |         |                |           |          |                     |
| CB4856                                                      | CT | IV | 5002752 | 5005418 | WBGene00003976 | pes-1     | T28H11.4 | -0.0651031369773598 |
| AGIWUR30072                                                 |    |    |         |         |                |           |          |                     |
| CB4856                                                      | CT | IV | 5008678 | 5010789 | WBGene00005639 | srm-2     | T28H11.3 | 0.00792212698313222 |
| AGIWUR22655                                                 |    |    |         |         |                |           |          |                     |
| CB4856                                                      | CT | IV | 5012549 | 5014604 | WBGene00005638 | srm-1     | T28H11.2 | -0.309773623914369  |
| AGIWUR3163                                                  |    |    |         |         |                |           |          |                     |
| CB4856                                                      | CT | IV | 5017989 | 5020654 | WBGene00020906 | T28H11.8  | T28H11.8 | 0.0226106719608712  |
| AGIWUR17781                                                 |    |    |         |         |                |           |          |                     |
| CB4856                                                      | CT | IV | 5021188 | 5025746 | WBGene00220250 | C09B9.85  | C09B9.85 | -0.0461666018175828 |
| AGIWUR21248;AGIWUR39960                                     |    |    |         |         |                |           |          |                     |
| CB4856                                                      | CT | IV | 5029250 | 5031046 | WBGene00015627 | C09B9.2   | C09B9.2  | 0.228295911780108   |
| AGIWUR33878                                                 |    |    |         |         |                |           |          |                     |
| CB4856                                                      | CT | IV | 5031596 | 5033395 | WBGene00015629 | C09B9.4   | C09B9.4  | 0.139019400315489   |
| AGIWUR41775                                                 |    |    |         |         |                |           |          |                     |
| CB4856                                                      | CT | IV | 5037815 | 5040495 | WBGene00015626 | C09B9.1   | C09B9.1  | 0.194586557902771   |
| AGIWUR7046;AGIWUR28974;AGIWUR34100                          |    |    |         |         |                |           |          |                     |
| CB4856                                                      | CT | IV | 5040859 | 5045485 | WBGene00044484 | hot-9     | C09B9.8  | 0.0946133925664232  |

AGIWUR33253;AGIWUR38760

|        |    |    |         |         |                |         |         |                     |             |
|--------|----|----|---------|---------|----------------|---------|---------|---------------------|-------------|
| CB4856 | CT | IV | 5056973 | 5061012 | WBGene00015630 | C09B9.7 | C09B9.7 | -0.0874180073272441 | AGIWUR22172 |
|--------|----|----|---------|---------|----------------|---------|---------|---------------------|-------------|

|        |    |    |         |         |                |          |  |          |                    |
|--------|----|----|---------|---------|----------------|----------|--|----------|--------------------|
| CB4856 | CT | IV | 5083303 | 5086887 | WBGene00015330 | C02B10.5 |  | C02B10.5 | 0.0375994700995719 |
|--------|----|----|---------|---------|----------------|----------|--|----------|--------------------|

AGIWUR12136;AGIWUR16791;AGIWUR30192

|        |    |    |         |         |                |       |          |  |                    |
|--------|----|----|---------|---------|----------------|-------|----------|--|--------------------|
| CB4856 | CT | IV | 5086839 | 5088883 | WBGene00015326 | ivd-1 | C02B10.1 |  | -0.108401593631103 |
|--------|----|----|---------|---------|----------------|-------|----------|--|--------------------|

AGIWUR9354;AGIWUR17617;AGIWUR18265;AGIWUR20484;AGIWUR26324;AGIWUR27425;AGIWUR35957;AGIWUR42479

|        |    |    |         |         |                |        |          |  |                    |
|--------|----|----|---------|---------|----------------|--------|----------|--|--------------------|
| CB4856 | CT | IV | 5090243 | 5091043 | WBGene00015327 | snpn-1 | C02B10.2 |  | -0.156299020389046 |
|--------|----|----|---------|---------|----------------|--------|----------|--|--------------------|

AGIWUR16347

|        |    |    |         |         |                |          |  |          |                    |
|--------|----|----|---------|---------|----------------|----------|--|----------|--------------------|
| CB4856 | CT | IV | 5091586 | 5092807 | WBGene00015329 | C02B10.4 |  | C02B10.4 | -0.172862878188257 |
|--------|----|----|---------|---------|----------------|----------|--|----------|--------------------|

AGIWUR7850;AGIWUR23239;AGIWUR33462

|        |    |    |         |         |                |          |  |          |                    |
|--------|----|----|---------|---------|----------------|----------|--|----------|--------------------|
| CB4856 | CT | IV | 5092823 | 5103279 | WBGene00015328 | C02B10.3 |  | C02B10.3 | -0.087007126985208 |
|--------|----|----|---------|---------|----------------|----------|--|----------|--------------------|

AGIWUR17458;AGIWUR21441;AGIWUR22579;AGIWUR29397;AGIWUR32557;AGIWUR37173

|        |    |    |         |         |                |       |       |                    |            |
|--------|----|----|---------|---------|----------------|-------|-------|--------------------|------------|
| CB4856 | CT | IV | 5111839 | 5112917 | WBGene00014997 | AC7.3 | AC7.3 | -0.214225498496823 | AGIWUR5318 |
|--------|----|----|---------|---------|----------------|-------|-------|--------------------|------------|

|        |    |    |         |         |                |       |       |                    |            |
|--------|----|----|---------|---------|----------------|-------|-------|--------------------|------------|
| CB4856 | CT | IV | 5112929 | 5122019 | WBGene00006428 | tkr-3 | AC7.1 | -0.372266581784759 | AGIWUR3307 |
|--------|----|----|---------|---------|----------------|-------|-------|--------------------|------------|

|        |    |    |         |         |                |       |       |                    |  |
|--------|----|----|---------|---------|----------------|-------|-------|--------------------|--|
| CB4856 | CT | IV | 5127006 | 5152485 | WBGene00004929 | soc-2 | AC7.2 | 0.0035507700833346 |  |
|--------|----|----|---------|---------|----------------|-------|-------|--------------------|--|

AGIWUR7562;AGIWUR17527;AGIWUR17969;AGIWUR20865;AGIWUR22829;AGIWUR24095;AGIWUR29132

|        |    |    |         |         |                |          |  |          |                     |
|--------|----|----|---------|---------|----------------|----------|--|----------|---------------------|
| CB4856 | CT | IV | 5159427 | 5160248 | WBGene00016057 | C24D10.6 |  | C24D10.6 | -0.0713273331379618 |
|--------|----|----|---------|---------|----------------|----------|--|----------|---------------------|

AGIWUR2577

|        |    |    |         |         |                |          |  |          |                     |
|--------|----|----|---------|---------|----------------|----------|--|----------|---------------------|
| CB4856 | CT | IV | 5160522 | 5161388 | WBGene00016055 | C24D10.4 |  | C24D10.4 | -0.0989701254661206 |
|--------|----|----|---------|---------|----------------|----------|--|----------|---------------------|

AGIWUR2286

|        |    |    |         |         |                |          |  |          |                    |
|--------|----|----|---------|---------|----------------|----------|--|----------|--------------------|
| CB4856 | CT | IV | 5162223 | 5162712 | WBGene00023243 | C24D10.3 |  | C24D10.3 | -0.556048522115197 |
|--------|----|----|---------|---------|----------------|----------|--|----------|--------------------|

AGIWUR38800

|        |    |    |         |         |                |        |          |  |                   |
|--------|----|----|---------|---------|----------------|--------|----------|--|-------------------|
| CB4856 | CT | IV | 5162743 | 5163074 | WBGene00016058 | nspd-3 | C24D10.7 |  | 0.186560706129525 |
|--------|----|----|---------|---------|----------------|--------|----------|--|-------------------|

AGIWUR5468

|        |    |    |         |         |                |          |  |          |                     |
|--------|----|----|---------|---------|----------------|----------|--|----------|---------------------|
| CB4856 | CT | IV | 5163293 | 5164351 | WBGene00016054 | C24D10.2 |  | C24D10.2 | -0.0144771314031757 |
|--------|----|----|---------|---------|----------------|----------|--|----------|---------------------|

AGIWUR653;AGIWUR1095;AGIWUR1370;AGIWUR2640;AGIWUR5782;AGIWUR12706;AGIWUR23865;AGIWUR26333;AGIWUR30473;AGIWUR31756;AGIWUR34688

|        |    |    |         |         |                |          |  |          |                    |
|--------|----|----|---------|---------|----------------|----------|--|----------|--------------------|
| CB4856 | CT | IV | 5166330 | 5168427 | WBGene00016053 | C24D10.1 |  | C24D10.1 | -0.146313043509238 |
|--------|----|----|---------|---------|----------------|----------|--|----------|--------------------|

AGIWUR4016

|        |    |    |         |         |                |       |         |                     |  |
|--------|----|----|---------|---------|----------------|-------|---------|---------------------|--|
| CB4856 | CT | IV | 5173280 | 5183708 | WBGene00002247 | lam-1 | W03F8.5 | -0.0663504648449766 |  |
|--------|----|----|---------|---------|----------------|-------|---------|---------------------|--|

AGIWUR8912;AGIWUR20019;AGIWUR22298;AGIWUR26640;AGIWUR31449;AGIWUR36076;AGIWUR42853;AGIWUR43042

|        |    |    |         |         |                |         |         |                    |            |
|--------|----|----|---------|---------|----------------|---------|---------|--------------------|------------|
| CB4856 | CT | IV | 5184123 | 5185240 | WBGene00020994 | W03F8.4 | W03F8.4 | -0.219845842175339 | AGIWUR5806 |
|--------|----|----|---------|---------|----------------|---------|---------|--------------------|------------|

|        |    |    |         |         |                |         |         |                    |             |
|--------|----|----|---------|---------|----------------|---------|---------|--------------------|-------------|
| CB4856 | CT | IV | 5185333 | 5189096 | WBGene00020993 | W03F8.3 | W03F8.3 | -0.150472330955253 | AGIWUR31727 |
|--------|----|----|---------|---------|----------------|---------|---------|--------------------|-------------|

|        |    |    |         |         |                |        |         |                    |  |
|--------|----|----|---------|---------|----------------|--------|---------|--------------------|--|
| CB4856 | CT | IV | 5189042 | 5195627 | WBGene00020997 | gpa-18 | W03F8.9 | 0.0132637713602635 |  |
|--------|----|----|---------|---------|----------------|--------|---------|--------------------|--|

AGIWUR32817;AGIWUR45125

|        |    |    |         |         |                |       |         |                   |  |
|--------|----|----|---------|---------|----------------|-------|---------|-------------------|--|
| CB4856 | CT | IV | 5204591 | 5207138 | WBGene00006586 | tni-4 | W03F8.1 | 0.135653465346858 |  |
|--------|----|----|---------|---------|----------------|-------|---------|-------------------|--|

AGIWUR13736;AGIWUR40275

|        |    |    |         |         |                |            |  |            |                    |
|--------|----|----|---------|---------|----------------|------------|--|------------|--------------------|
| CB4856 | CT | IV | 5207109 | 5209481 | WBGene00195093 | Y59E9AL.36 |  | Y59E9AL.36 | 0.0615784342032288 |
|--------|----|----|---------|---------|----------------|------------|--|------------|--------------------|

AGIWUR6575;AGIWUR10992

|                                                                                                |    |         |         |                |           |           |                     |             |
|------------------------------------------------------------------------------------------------|----|---------|---------|----------------|-----------|-----------|---------------------|-------------|
| CB4856 CT                                                                                      | IV | 5209501 | 5210690 | WBGene00043064 | nbet-1    | Y59E9AL.7 | -0.133496324980516  |             |
| AGIWUR26374                                                                                    |    |         |         |                |           |           |                     |             |
| CB4856 CT                                                                                      | IV | 5221284 | 5222133 | WBGene00021995 | Y59E9AL.5 | Y59E9AL.5 | 0.168010033861636   |             |
| AGIWUR35112                                                                                    |    |         |         |                |           |           |                     |             |
| CB4856 CT                                                                                      | IV | 5223237 | 5224172 | WBGene00044346 | Y59E9AL.8 | Y59E9AL.8 | -0.026418859869084  |             |
| AGIWUR20183;AGIWUR32714                                                                        |    |         |         |                |           |           |                     |             |
| CB4856 CT                                                                                      | IV | 5224899 | 5225772 | WBGene00021996 | Y59E9AL.6 | Y59E9AL.6 | 0.366903498871419   |             |
| AGIWUR7006;AGIWUR23221                                                                         |    |         |         |                |           |           |                     |             |
| CB4856 CT                                                                                      | IV | 5228919 | 5230083 | WBGene00021992 | thn-6     | Y59E9AL.1 | -0.243461784425275  |             |
| AGIWUR7330                                                                                     |    |         |         |                |           |           |                     |             |
| CB4856 CT                                                                                      | IV | 5230830 | 5232479 | WBGene00021999 | thn-5     | Y59E9AR.4 | 0.898979182568701   |             |
| AGIWUR38274                                                                                    |    |         |         |                |           |           |                     |             |
| CB4856 CT                                                                                      | IV | 5241364 | 5241794 | WBGene00022002 | Y59E9AR.7 | Y59E9AR.7 | 0.187651063581491   |             |
| AGIWUR31205                                                                                    |    |         |         |                |           |           |                     |             |
| CB4856 CT                                                                                      | IV | 5262786 | 5264433 | WBGene00018127 | F36H12.14 | F36H12.14 | 0.0347623547619453  |             |
| AGIWUR3951;AGIWUR14943;AGIWUR16218;AGIWUR19616;AGIWUR23777;AGIWUR30541;AGIWUR36641;AGIWUR44470 |    |         |         |                |           |           |                     |             |
| CB4856 CT                                                                                      | IV | 5268049 | 5278070 | WBGene00018130 | F36H12.17 | F36H12.17 | -0.211396597045786  |             |
| AGIWUR29954;AGIWUR36873;AGIWUR44131                                                            |    |         |         |                |           |           |                     |             |
| CB4856 CT                                                                                      | IV | 5290847 | 5293689 | WBGene00018117 | nlp-47    | F36H12.1  | -0.0258977003810532 |             |
| AGIWUR9348                                                                                     |    |         |         |                |           |           |                     |             |
| CB4856 CT                                                                                      | IV | 5295931 | 5297487 | WBGene00022707 | ZK354.6   | ZK354.6   | 0.0358182659477517  | AGIWUR43447 |
| CB4856 CT                                                                                      | IV | 5302141 | 5303078 | WBGene00022708 | ZK354.7   | ZK354.7   | -0.186285302743979  | AGIWUR14632 |
| CB4856 CT                                                                                      | IV | 5304021 | 5306140 | WBGene00022709 | ZK354.8   | ZK354.8   | -0.0551709779715956 | AGIWUR16814 |
| CB4856 CT                                                                                      | IV | 5310042 | 5311445 | WBGene00022706 | ZK354.3   | ZK354.3   | -0.330240877431093  | AGIWUR4701  |
| CB4856 CT                                                                                      | IV | 5313405 | 5315525 | WBGene00022705 | ZK354.2   | ZK354.2   | -0.0466124549753633 |             |
| AGIWUR1753;AGIWUR19004                                                                         |    |         |         |                |           |           |                     |             |
| CB4856 CT                                                                                      | IV | 5319253 | 5325033 | WBGene00021159 | Y4C6B.5   | Y4C6B.5   | -0.231486925051669  | AGIWUR27808 |
| CB4856 CT                                                                                      | IV | 5326444 | 5329640 | WBGene00021158 | Y4C6B.4   | Y4C6B.4   | 0.467432889298407   |             |
| AGIWUR21358;AGIWUR34632                                                                        |    |         |         |                |           |           |                     |             |
| CB4856 CT                                                                                      | IV | 5332478 | 5336827 | WBGene00021157 | Y4C6B.3   | Y4C6B.3   | 0.193366855679733   | AGIWUR25646 |
| CB4856 CT                                                                                      | IV | 5340890 | 5344204 | WBGene00021156 | Y4C6B.2   | Y4C6B.2   | 0.68946596102214    | AGIWUR21116 |
| CB4856 CT                                                                                      | IV | 5344592 | 5350947 | WBGene00021160 | gba-4     | Y4C6B.6   | -0.187216513958623  |             |
| AGIWUR20362;AGIWUR23005;AGIWUR28435;AGIWUR39463                                                |    |         |         |                |           |           |                     |             |
| CB4856 CT                                                                                      | IV | 5351420 | 5353464 | WBGene00021161 | Y4C6B.7   | Y4C6B.7   | -0.134785485037308  |             |
| AGIWUR1244;AGIWUR12051;AGIWUR17871;AGIWUR26058;AGIWUR41428;AGIWUR41479                         |    |         |         |                |           |           |                     |             |
| CB4856 CT                                                                                      | IV | 5354488 | 5356539 | WBGene00021155 | Y4C6B.1   | Y4C6B.1   | 0.0392200512318048  | AGIWUR23550 |
| CB4856 CT                                                                                      | IV | 5356538 | 5364306 | WBGene00018319 | hda-6     | F41H10.6  | -0.0632103740809278 |             |
| AGIWUR3721;AGIWUR16258;AGIWUR17382;AGIWUR27562                                                 |    |         |         |                |           |           |                     |             |
| CB4856 CT                                                                                      | IV | 5364559 | 5366751 | WBGene00018317 | F41H10.4  | F41H10.4  | -0.172821696652514  |             |

|                                                                        |    |    |         |         |                |           |           |                     |             |
|------------------------------------------------------------------------|----|----|---------|---------|----------------|-----------|-----------|---------------------|-------------|
| AGIWUR8752                                                             |    |    |         |         |                |           |           |                     |             |
| CB4856                                                                 | CT | IV | 5366867 | 5368866 | WBGene00018321 | sand-1    | F41H10.11 | 0.10303766271128    |             |
| AGIWUR18778;AGIWUR36540;AGIWUR44444                                    |    |    |         |         |                |           |           |                     |             |
| CB4856                                                                 | CT | IV | 5369797 | 5374673 | WBGene00018316 | F41H10.3  | F41H10.3  | -0.0513705211892783 |             |
| AGIWUR28505;AGIWUR32473;AGIWUR39991;AGIWUR42589                        |    |    |         |         |                |           |           |                     |             |
| CB4856                                                                 | CT | IV | 5374598 | 5377275 | WBGene00001243 | elo-5     | F41H10.7  | -0.203710831442935  |             |
| AGIWUR38049                                                            |    |    |         |         |                |           |           |                     |             |
| CB4856                                                                 | CT | IV | 5381634 | 5382470 | WBGene00018315 | F41H10.2  | F41H10.2  |                     |             |
| 0.000794904779800376 AGIWUR10409                                       |    |    |         |         |                |           |           |                     |             |
| CB4856                                                                 | CT | IV | 5385320 | 5386080 | WBGene00018322 | F41H10.12 | F41H10.12 | -0.0161578257868538 |             |
| AGIWUR27702                                                            |    |    |         |         |                |           |           |                     |             |
| CB4856                                                                 | CT | IV | 5386629 | 5388559 | WBGene00001244 | elo-6     | F41H10.8  | -0.129164881115928  |             |
| AGIWUR12198;AGIWUR38050                                                |    |    |         |         |                |           |           |                     |             |
| CB4856                                                                 | CT | IV | 5390184 | 5391557 | WBGene00002032 | htp-1     | F41H10.10 | -0.243682778736765  |             |
| AGIWUR17040                                                            |    |    |         |         |                |           |           |                     |             |
| CB4856                                                                 | CT | IV | 5391912 | 5393572 | WBGene00022775 | ZK616.5   | ZK616.5   | -0.085051155230321  | AGIWUR17545 |
| CB4856                                                                 | CT | IV | 5393843 | 5394849 | WBGene00022776 | perm-3    | ZK616.6   | -0.106439580596748  |             |
| AGIWUR3289;AGIWUR10280;AGIWUR14230;AGIWUR37025;AGIWUR37266;AGIWUR42327 |    |    |         |         |                |           |           |                     |             |
| CB4856                                                                 | CT | IV | 5394962 | 5396966 | WBGene00022774 | swsn-6    | ZK616.4   | -0.0137799168398516 | AGIWUR19887 |
| CB4856                                                                 | CT | IV | 5397069 | 5397694 | WBGene00022773 | ZK616.3   | ZK616.3   | -0.287361227937637  | AGIWUR16868 |
| CB4856                                                                 | CT | IV | 5397839 | 5398591 | WBGene00022772 | ZK616.2   | ZK616.2   | 0.166117610854851   | AGIWUR16916 |
| CB4856                                                                 | CT | IV | 5405645 | 5407375 | WBGene00194816 | ZK616.61  | ZK616.61  | 0.14931984383988    |             |
| AGIWUR8298                                                             |    |    |         |         |                |           |           |                     |             |
| CB4856                                                                 | CT | IV | 5408426 | 5411166 | WBGene00235383 | ZK616.65  | ZK616.65  | -0.161272857788781  |             |
| AGIWUR31061                                                            |    |    |         |         |                |           |           |                     |             |
| CB4856                                                                 | CT | IV | 5412827 | 5415771 | WBGene00004992 | spp-7     | ZK616.9   | 1.09452271635818    | AGIWUR2110  |
| CB4856                                                                 | CT | IV | 5416906 | 5419195 | WBGene00001223 | ehn-3     | ZK616.10  | 0.261224093630749   |             |
| AGIWUR26234                                                            |    |    |         |         |                |           |           |                     |             |
| CB4856                                                                 | CT | IV | 5423576 | 5450802 | WBGene00021152 | mg1-3     | Y4C6A.2   | 0.0642378206555061  |             |
| AGIWUR24178;AGIWUR32618                                                |    |    |         |         |                |           |           |                     |             |
| CB4856                                                                 | CT | IV | 5450993 | 5452455 | WBGene00021153 | Y4C6A.3   | Y4C6A.3   | 0.0682785744739345  | AGIWUR10331 |
| CB4856                                                                 | CT | IV | 5452967 | 5453640 | WBGene00021154 | Y4C6A.4   | Y4C6A.4   | -0.427405568207975  | AGIWUR8178  |
| CB4856                                                                 | CT | IV | 5458767 | 5460735 | WBGene00021151 | Y4C6A.1   | Y4C6A.1   | 0.0735654914858115  |             |
| AGIWUR37588;AGIWUR42972                                                |    |    |         |         |                |           |           |                     |             |
| CB4856                                                                 | CT | IV | 5462501 | 5464448 | WBGene00021793 | Y52D5A.2  | Y52D5A.2  |                     |             |
| 0.000237172183289225 AGIWUR31886                                       |    |    |         |         |                |           |           |                     |             |
| CB4856                                                                 | CT | IV | 5467393 | 5469134 | WBGene00021792 | Y52D5A.1  | Y52D5A.1  | -0.307806859462385  |             |
| AGIWUR17822                                                            |    |    |         |         |                |           |           |                     |             |
| CB4856                                                                 | CT | IV | 5469961 | 5473174 | WBGene00004374 | rme-2     | T11F8.3   | -0.110836033489193  | AGIWUR29033 |

|                                                                                     |    |    |         |         |                |          |          |                     |             |
|-------------------------------------------------------------------------------------|----|----|---------|---------|----------------|----------|----------|---------------------|-------------|
| CB4856                                                                              | CT | IV | 5474162 | 5476568 | WBGene00020435 | T11F8.4  | T11F8.4  | -0.0668128917187216 | AGIWUR40747 |
| CB4856                                                                              | CT | IV | 5477214 | 5478708 | WBGene00020434 | T11F8.2  | T11F8.2  | -0.21273116615803   |             |
| AGIWUR8500;AGIWUR20411;AGIWUR27745;AGIWUR38023                                      |    |    |         |         |                |          |          |                     |             |
| CB4856                                                                              | CT | IV | 5479589 | 5480644 | WBGene00020433 | T11F8.1  | T11F8.1  | -0.18097967437085   | AGIWUR14895 |
| CB4856                                                                              | CT | IV | 5493992 | 5495252 | WBGene00015097 | B0273.1  | B0273.1  | 0.355949762286251   | AGIWUR31928 |
| CB4856                                                                              | CT | IV | 5495666 | 5528338 | WBGene00006745 | unc-5    | B0273.4  | 0.532472084734025   | AGIWUR31044 |
| CB4856                                                                              | CT | IV | 5533142 | 5537992 | WBGene00001411 | fem-1    | F35D6.1  | -0.121215971419026  |             |
| AGIWUR3074;AGIWUR5563;AGIWUR31665;AGIWUR31934;AGIWUR33987;AGIWUR37509;AGIWUR44674   |    |    |         |         |                |          |          |                     |             |
| CB4856                                                                              | CT | IV | 5537981 | 5541365 | WBGene00001093 | drp-1    | T12E12.4 | -0.119743148909495  |             |
| AGIWUR7638;AGIWUR8632;AGIWUR21497;AGIWUR26100;AGIWUR26830;AGIWUR27798               |    |    |         |         |                |          |          |                     |             |
| CB4856                                                                              | CT | IV | 5541607 | 5544765 | WBGene00020464 | T12E12.3 | T12E12.3 | -0.24557434492559   |             |
| AGIWUR16529                                                                         |    |    |         |         |                |          |          |                     |             |
| CB4856                                                                              | CT | IV | 5544860 | 5548459 | WBGene00020463 | cec-6    | T12E12.2 | -0.017970601566029  |             |
| AGIWUR35802                                                                         |    |    |         |         |                |          |          |                     |             |
| CB4856                                                                              | CT | IV | 5551134 | 5558820 | WBGene00020462 | T12E12.1 | T12E12.1 | -0.0965543614307727 |             |
| AGIWUR4873;AGIWUR8315;AGIWUR18358;AGIWUR20163;AGIWUR28072;AGIWUR31360               |    |    |         |         |                |          |          |                     |             |
| CB4856                                                                              | CT | IV | 5567020 | 5574133 | WBGene00020465 | T12E12.6 | T12E12.6 | 0.0122756141454339  |             |
| AGIWUR22199;AGIWUR35240;AGIWUR35383                                                 |    |    |         |         |                |          |          |                     |             |
| CB4856                                                                              | CT | IV | 5584661 | 5610368 | WBGene00001439 | fkh-7    | F26D12.1 | 0.743226866126284   |             |
| AGIWUR21093;AGIWUR25106;AGIWUR27035;AGIWUR32201;AGIWUR38013;AGIWUR38887;AGIWUR42087 |    |    |         |         |                |          |          |                     |             |
| CB4856                                                                              | CT | IV | 5611950 | 5614608 | WBGene00016542 | C39H7.4  | C39H7.4  | -0.0525847654254097 | AGIWUR23749 |
| CB4856                                                                              | CT | IV | 5615522 | 5619685 | WBGene00044125 | srsx-16  | C39H7.9  | 0.208357713470819   |             |
| AGIWUR32633;AGIWUR34370                                                             |    |    |         |         |                |          |          |                     |             |
| CB4856                                                                              | CT | IV | 5622063 | 5623818 | WBGene00044124 | srsx-15  | C39H7.8  | 0.126116613587701   |             |
| AGIWUR25141;AGIWUR35563;AGIWUR45008                                                 |    |    |         |         |                |          |          |                     |             |
| CB4856                                                                              | CT | IV | 5624855 | 5627156 | WBGene00016543 | srsx-14  | C39H7.5  | 0.172358725148361   | AGIWUR22984 |
| CB4856                                                                              | CT | IV | 5628792 | 5630239 | WBGene00005090 | srd-12   | C39H7.6  | -0.074647158135865  | AGIWUR14655 |
| CB4856                                                                              | CT | IV | 5633818 | 5635651 | WBGene00005091 | srd-13   | C39H7.7  | 0.152853262920009   | AGIWUR33901 |
| CB4856                                                                              | CT | IV | 5637835 | 5640190 | WBGene00005092 | srd-14   | B0547.3  | -0.602689679819409  |             |
| AGIWUR37068;AGIWUR42849                                                             |    |    |         |         |                |          |          |                     |             |
| CB4856                                                                              | CT | IV | 5643252 | 5645614 | WBGene00005086 | srd-8    | B0547.4  | 0.235061637398448   | AGIWUR13315 |
| CB4856                                                                              | CT | IV | 5645831 | 5646233 | WBGene00015253 | B0547.2  | B0547.2  | -0.151059113049037  | AGIWUR4167  |
| CB4856                                                                              | CT | IV | 5647432 | 5648910 | WBGene00005084 | srd-6    | B0547.5  | -0.0639044188286606 |             |
| AGIWUR15071;AGIWUR24916                                                             |    |    |         |         |                |          |          |                     |             |
| CB4856                                                                              | CT | IV | 5649533 | 5651079 | WBGene00000817 | csn-5    | B0547.1  | -0.0366393407660377 |             |
| AGIWUR15023;AGIWUR26838;AGIWUR30038;AGIWUR44781                                     |    |    |         |         |                |          |          |                     |             |
| CB4856                                                                              | CT | IV | 5651087 | 5660523 | WBGene00004804 | skn-1    | T19E7.2  | -0.119651931610462  |             |
| AGIWUR1037;AGIWUR1729;AGIWUR7018;AGIWUR30483                                        |    |    |         |         |                |          |          |                     |             |
| CB4856                                                                              | CT | IV | 5661141 | 5664425 | WBGene00000247 | bec-1    | T19E7.3  | -0.0419861566498128 | AGIWUR28646 |

|                                                                                   |    |    |         |         |                |          |          |                       |             |
|-----------------------------------------------------------------------------------|----|----|---------|---------|----------------|----------|----------|-----------------------|-------------|
| CB4856                                                                            | CT | IV | 5667525 | 5669583 | WBGene00044500 | T19E7.6  | T19E7.6  | 0.899602333723385     |             |
| AGIWUR1961;AGIWUR7360;AGIWUR13107;AGIWUR18108;AGIWUR28425;AGIWUR31204;AGIWUR37038 |    |    |         |         |                |          |          |                       |             |
| CB4856                                                                            | CT | IV | 5672633 | 5674542 | WBGene00005083 | srd-5    | T19E7.5  | -0.251870941375832    |             |
| AGIWUR18363;AGIWUR21112;AGIWUR40940                                               |    |    |         |         |                |          |          |                       |             |
| CB4856                                                                            | CT | IV | 5676212 | 5678144 | WBGene00016954 | C55C3.4  | C55C3.4  | -0.154014646438714    | AGIWUR31025 |
| CB4856                                                                            | CT | IV | 5678847 | 5682639 | WBGene00043065 | C55C3.7  | C55C3.7  | -0.184332029965662    |             |
| AGIWUR20678;AGIWUR31895;AGIWUR44145                                               |    |    |         |         |                |          |          |                       |             |
| CB4856                                                                            | CT | IV | 5683184 | 5684672 | WBGene00016956 | C55C3.6  | C55C3.6  | -0.147745105276171    |             |
| AGIWUR3247;AGIWUR44402                                                            |    |    |         |         |                |          |          |                       |             |
| CB4856                                                                            | CT | IV | 5685287 | 5688273 | WBGene00016953 | C55C3.3  | C55C3.3  | 0.0524409961948038    | AGIWUR31711 |
| CB4856                                                                            | CT | IV | 5691030 | 5694646 | WBGene00044501 | C55C3.8  | C55C3.8  | -0.000668872458147618 |             |
| AGIWUR11565;AGIWUR14365;AGIWUR41535                                               |    |    |         |         |                |          |          |                       |             |
| CB4856                                                                            | CT | IV | 5695777 | 5703468 | WBGene00016955 | perm-5   | C55C3.5  | 0.117252403356013     |             |
| AGIWUR2558;AGIWUR12926;AGIWUR13869                                                |    |    |         |         |                |          |          |                       |             |
| CB4856                                                                            | CT | IV | 5709096 | 5714336 | WBGene00016951 | C55C3.1  | C55C3.1  | -0.116517842350488    | AGIWUR33858 |
| CB4856                                                                            | CT | IV | 5725600 | 5729727 | WBGene00019263 | H35B03.1 | H35B03.1 | 0.0939692130652467    |             |
| AGIWUR12168;AGIWUR15462;AGIWUR16089;AGIWUR21515;AGIWUR42466                       |    |    |         |         |                |          |          |                       |             |
| CB4856                                                                            | CT | IV | 5729658 | 5732636 | WBGene00019264 | H35B03.2 | H35B03.2 | -0.189799913189248    |             |
| AGIWUR20162;AGIWUR24408;AGIWUR43047;AGIWUR44813                                   |    |    |         |         |                |          |          |                       |             |
| CB4856                                                                            | CT | IV | 5735019 | 5737106 | WBGene00016667 | C45E5.4  | C45E5.4  | -0.106326408236479    | AGIWUR28686 |
| CB4856                                                                            | CT | IV | 5744336 | 5747110 | WBGene00016664 | C45E5.1  | C45E5.1  | 0.0323932393102258    |             |
| AGIWUR3135;AGIWUR7956;AGIWUR37449                                                 |    |    |         |         |                |          |          |                       |             |
| CB4856                                                                            | CT | IV | 5747376 | 5757862 | WBGene00003636 | nhr-46   | C45E5.6  | 0.0581999852996447    |             |
| AGIWUR3975;AGIWUR15663;AGIWUR18429;AGIWUR27946;AGIWUR29904                        |    |    |         |         |                |          |          |                       |             |
| CB4856                                                                            | CT | IV | 5791296 | 5793457 | WBGene00016287 | C31H1.2  | C31H1.2  | -0.0275352547374981   |             |
| AGIWUR7772;AGIWUR9298;AGIWUR24041                                                 |    |    |         |         |                |          |          |                       |             |
| CB4856                                                                            | CT | IV | 5794932 | 5796825 | WBGene00016288 | C31H1.5  | C31H1.5  | 0.175471381115827     | AGIWUR15801 |
| CB4856                                                                            | CT | IV | 5797453 | 5800233 | WBGene00016286 | C31H1.1  | C31H1.1  | 0.0842026475747284    | AGIWUR44740 |
| CB4856                                                                            | CT | IV | 5800336 | 5807093 | WBGene00016289 | Int1-1   | C31H1.6  | 0.0106915844745137    |             |
| AGIWUR1036;AGIWUR26901                                                            |    |    |         |         |                |          |          |                       |             |
| CB4856                                                                            | CT | IV | 5811583 | 5814142 | WBGene00016291 | C31H1.8  | C31H1.8  | -0.111183093901218    | AGIWUR28224 |
| CB4856                                                                            | CT | IV | 5820370 | 5830199 | WBGene00015680 | egal-1   | C10G6.1  | 0.0468603128304386    |             |
| AGIWUR11282;AGIWUR38980                                                           |    |    |         |         |                |          |          |                       |             |
| CB4856                                                                            | CT | IV | 5839387 | 5844004 | WBGene00015539 | C06E7.2  | C06E7.2  | -0.166979822332923    | AGIWUR16132 |
| CB4856                                                                            | CT | IV | 5843890 | 5846398 | WBGene00015540 | sams-4   | C06E7.3  | 0.157335176263674     | AGIWUR33922 |
| CB4856                                                                            | CT | IV | 5848657 | 5850845 | WBGene00015538 | sams-3   | C06E7.1  | 0.22169130704852      | AGIWUR8961  |
| CB4856                                                                            | CT | IV | 5850826 | 5859976 | WBGene00015541 | C06E7.4  | C06E7.4  | 0.247729867853943     | AGIWUR4608  |
| CB4856                                                                            | CT | IV | 5864529 | 5865918 | WBGene00004973 | spe-27   | C06E7.6  | -0.105088816466942    | AGIWUR7261  |
| CB4856                                                                            | CT | IV | 5867689 | 5870172 | WBGene00005728 | srv-17   | C06E7.7  | -0.651838628070667    | AGIWUR11136 |

|                                                                                                                                                                                                           |    |         |         |                |           |           |                     |             |
|-----------------------------------------------------------------------------------------------------------------------------------------------------------------------------------------------------------|----|---------|---------|----------------|-----------|-----------|---------------------|-------------|
| CB4856 CT                                                                                                                                                                                                 | IV | 5871143 | 5871737 | WBGene00005729 | srv-18    | H04M03.5  | 0.0493294860821605  |             |
| AGIWUR72;AGIWUR9244;AGIWUR19701;AGIWUR19952;AGIWUR27219                                                                                                                                                   |    |         |         |                |           |           |                     |             |
| CB4856 CT                                                                                                                                                                                                 | IV | 5871976 | 5874081 | WBGene00005730 | srv-19    | H04M03.6  | 0.330046799245582   |             |
| AGIWUR30456                                                                                                                                                                                               |    |         |         |                |           |           |                     |             |
| CB4856 CT                                                                                                                                                                                                 | IV | 5874559 | 5875659 | WBGene00005731 | srv-20    | H04M03.7  | -0.0318280485201434 |             |
| AGIWUR1978;AGIWUR4326;AGIWUR7692;AGIWUR11512;AGIWUR32527                                                                                                                                                  |    |         |         |                |           |           |                     |             |
| CB4856 CT                                                                                                                                                                                                 | IV | 5876092 | 5877346 | WBGene00005732 | srv-21    | H04M03.8  | 0.0399843715895791  |             |
| AGIWUR15833                                                                                                                                                                                               |    |         |         |                |           |           |                     |             |
| CB4856 CT                                                                                                                                                                                                 | IV | 5878470 | 5879953 | WBGene00005733 | srv-22    | H04M03.9  | 0.126976525402885   |             |
| AGIWUR31893                                                                                                                                                                                               |    |         |         |                |           |           |                     |             |
| CB4856 CT                                                                                                                                                                                                 | IV | 5882707 | 5884529 | WBGene00019155 | H04M03.11 | H04M03.11 | -0.307808032950236  |             |
| AGIWUR17441                                                                                                                                                                                               |    |         |         |                |           |           |                     |             |
| CB4856 CT                                                                                                                                                                                                 | IV | 5885835 | 5889821 | WBGene00019154 | glf-1     | H04M03.4  | 0.627315534291863   |             |
| AGIWUR44615                                                                                                                                                                                               |    |         |         |                |           |           |                     |             |
| CB4856 CT                                                                                                                                                                                                 | IV | 5891565 | 5893329 | WBGene00019153 | H04M03.3  | H04M03.3  | -0.236646684727841  |             |
| AGIWUR27890                                                                                                                                                                                               |    |         |         |                |           |           |                     |             |
| CB4856 CT                                                                                                                                                                                                 | IV | 5895490 | 5895888 | WBGene00019152 | nspb-6    | H04M03.2  | -0.315033838552571  |             |
| AGIWUR11992                                                                                                                                                                                               |    |         |         |                |           |           |                     |             |
| CB4856 CT                                                                                                                                                                                                 | IV | 5896623 | 5899112 | WBGene00019151 | pck-3     | H04M03.1  | 0.0837180777417839  |             |
| AGIWUR8619                                                                                                                                                                                                |    |         |         |                |           |           |                     |             |
| CB4856 CT                                                                                                                                                                                                 | IV | 5899586 | 5903355 | WBGene00019156 | H04M03.12 | H04M03.12 | 0.419529362839125   |             |
| AGIWUR14194                                                                                                                                                                                               |    |         |         |                |           |           |                     |             |
| CB4856 CT                                                                                                                                                                                                 | IV | 5917326 | 5921446 | WBGene00019257 | dhhc-13   | H32C10.3  | 0.0201988491689811  |             |
| AGIWUR33658                                                                                                                                                                                               |    |         |         |                |           |           |                     |             |
| CB4856 CT                                                                                                                                                                                                 | IV | 5930645 | 5933326 | WBGene00003019 | lin-33    | H32C10.2  | -0.0693030921218583 |             |
| AGIWUR31530                                                                                                                                                                                               |    |         |         |                |           |           |                     |             |
| CB4856 CT                                                                                                                                                                                                 | IV | 5934346 | 5937497 | WBGene00019255 | H32C10.1  | H32C10.1  | -0.0164873269908812 |             |
| AGIWUR5965;AGIWUR20503;AGIWUR32526                                                                                                                                                                        |    |         |         |                |           |           |                     |             |
| CB4856 CT                                                                                                                                                                                                 | IV | 5937445 | 5939230 | WBGene00019296 | mcu-1     | K02B2.3   | 0.0400179524613691  |             |
| AGIWUR5511;AGIWUR16477;AGIWUR17572                                                                                                                                                                        |    |         |         |                |           |           |                     |             |
| CB4856 CT                                                                                                                                                                                                 | IV | 5941926 | 5943998 | WBGene00019295 | pfkb-1.2  | K02B2.1   | 0.00907705879686826 |             |
| AGIWUR3026;AGIWUR7954                                                                                                                                                                                     |    |         |         |                |           |           |                     |             |
| CB4856 CT                                                                                                                                                                                                 | IV | 5943981 | 5946754 | WBGene00002129 | inx-7     | K02B2.4   | 0.102597703336542   | AGIWUR7168  |
| CB4856 CT                                                                                                                                                                                                 | IV | 5947036 | 5947607 | WBGene00004494 | rps-25    | K02B2.5   | 0.0903491187640224  |             |
| AGIWUR37136;AGIWUR39980                                                                                                                                                                                   |    |         |         |                |           |           |                     |             |
| CB4856 CT                                                                                                                                                                                                 | IV | 5961690 | 5962132 | WBGene00019297 | K02B2.6   | K02B2.6   | 0.225845553067778   | AGIWUR24823 |
| CB4856 CT                                                                                                                                                                                                 | IV | 5966656 | 6004857 | WBGene00006780 | unc-44    | B0350.2   | 0.323122073695817   |             |
| AGIWUR7735;AGIWUR8509;AGIWUR10238;AGIWUR12013;AGIWUR12342;AGIWUR14441;AGIWUR17621;AGIWUR19110;AGIWUR25248;AGIWUR27550;AGIWUR27667;AGIWUR29096;AGIWUR32226;AGIWUR35643;AGIWUR38125;AGIWUR39293;AGIWUR44581 |    |         |         |                |           |           |                     |             |



|                                                                                                                                                                                                                                           |    |    |         |         |                |          |          |                     |             |
|-------------------------------------------------------------------------------------------------------------------------------------------------------------------------------------------------------------------------------------------|----|----|---------|---------|----------------|----------|----------|---------------------|-------------|
| CB4856                                                                                                                                                                                                                                    | CT | IV | 6010352 | 6011645 | WBGene00044502 | C46G7.5  | C46G7.5  | 0.197404868440445   | AGIWUR17759 |
| CB4856                                                                                                                                                                                                                                    | CT | IV | 6015195 | 6017803 | WBGene00016722 | C46G7.2  | C46G7.2  | -0.0957461367121084 | AGIWUR4371  |
| CB4856                                                                                                                                                                                                                                    | CT | IV | 6018003 | 6019713 | WBGene00016721 | C46G7.1  | C46G7.1  | 0.0534271606181651  | AGIWUR8440  |
| CB4856                                                                                                                                                                                                                                    | CT | IV | 6019705 | 6033639 | WBGene00004112 | pqn-22   | C46G7.4  | -0.197131297779372  | AGIWUR19188 |
| CB4856                                                                                                                                                                                                                                    | CT | IV | 6040976 | 6074507 | WBGene00019205 | kcc-2    | H16014.1 | 0.129192194936153   |             |
| AGIWUR1911;AGIWUR2231;AGIWUR5271;AGIWUR6446;AGIWUR7025;AGIWUR8507;AGIWUR13439;AGIWUR13842;AGIWUR14139;AGIWUR15302;AGIWUR17542;AGIWUR19667;AGIWUR21985;AGIWUR26651;AGIWUR27097;AGIWUR28020;AGIWUR29762;AGIWUR34185;AGIWUR42611;AGIWUR42648 |    |    |         |         |                |          |          |                     |             |
| CB4856                                                                                                                                                                                                                                    | CT | IV | 6075301 | 6076157 | WBGene00019514 | K08B4.2  | K08B4.2  | 0.973814105283866   | AGIWUR42732 |
| CB4856                                                                                                                                                                                                                                    | CT | IV | 6076692 | 6079945 | WBGene00019515 | ugt-19   | K08B4.3  | -0.679262501548569  | AGIWUR11886 |
| CB4856                                                                                                                                                                                                                                    | CT | IV | 6080907 | 6083592 | WBGene00019516 | ugt-20   | K08B4.4  | -0.428406885797084  | AGIWUR914   |
| CB4856                                                                                                                                                                                                                                    | CT | IV | 6086350 | 6089404 | WBGene00019517 | K08B4.5  | K08B4.5  | 0.0673509849119149  | AGIWUR15458 |
| CB4856                                                                                                                                                                                                                                    | CT | IV | 6091536 | 6092413 | WBGene00023486 | K08B4.7  | K08B4.7  | -0.501405609024024  |             |
| AGIWUR5558;AGIWUR16663;AGIWUR19385                                                                                                                                                                                                        |    |    |         |         |                |          |          |                     |             |
| CB4856                                                                                                                                                                                                                                    | CT | IV | 6095411 | 6110639 | WBGene00002245 | lag-1    | K08B4.1  | 0.100475195851597   |             |
| AGIWUR1113;AGIWUR12391;AGIWUR34040                                                                                                                                                                                                        |    |    |         |         |                |          |          |                     |             |
| CB4856                                                                                                                                                                                                                                    | CT | IV | 6110651 | 6112391 | WBGene00019750 | M03D4.3  | M03D4.3  | 0.668534703101926   | AGIWUR34204 |
| CB4856                                                                                                                                                                                                                                    | CT | IV | 6118219 | 6121775 | WBGene00006974 | zen-4    | M03D4.1  | -0.0517214274463527 |             |
| AGIWUR6721;AGIWUR7368;AGIWUR10759;AGIWUR19300;AGIWUR31924                                                                                                                                                                                 |    |    |         |         |                |          |          |                     |             |
| CB4856                                                                                                                                                                                                                                    | CT | IV | 6143183 | 6149923 | WBGene00019176 | H10D12.2 | H10D12.2 | 0.199727241176793   |             |
| AGIWUR2783;AGIWUR6943;AGIWUR11080;AGIWUR17501;AGIWUR23031;AGIWUR44002                                                                                                                                                                     |    |    |         |         |                |          |          |                     |             |
| CB4856                                                                                                                                                                                                                                    | CT | IV | 6152437 | 6154623 | WBGene00015701 | C11D2.3  | C11D2.3  | -0.0273905323328929 | AGIWUR2737  |
| CB4856                                                                                                                                                                                                                                    | CT | IV | 6154558 | 6155396 | WBGene00015703 | C11D2.7  | C11D2.7  | -0.0493080493418763 | AGIWUR26177 |
| CB4856                                                                                                                                                                                                                                    | CT | IV | 6155492 | 6156960 | WBGene00015702 | C11D2.4  | C11D2.4  | 0.00514565406818246 |             |
| AGIWUR9202;AGIWUR10951;AGIWUR18099;AGIWUR20572                                                                                                                                                                                            |    |    |         |         |                |          |          |                     |             |
| CB4856                                                                                                                                                                                                                                    | CT | IV | 6157310 | 6183857 | WBGene00006809 | unc-77   | C11D2.6  | -0.0801032604924705 |             |
| AGIWUR18031;AGIWUR29623;AGIWUR40642;AGIWUR43664                                                                                                                                                                                           |    |    |         |         |                |          |          |                     |             |
| CB4856                                                                                                                                                                                                                                    | CT | IV | 6185888 | 6189205 | WBGene00015700 | asp-9    | C11D2.2  | 0.229217487987194   |             |
| AGIWUR3747;AGIWUR12177                                                                                                                                                                                                                    |    |    |         |         |                |          |          |                     |             |
| CB4856                                                                                                                                                                                                                                    | CT | IV | 6202080 | 6205703 | WBGene00016761 | tkr-2    | C49A9.7  | 0.0458997301731028  | AGIWUR14708 |
| CB4856                                                                                                                                                                                                                                    | CT | IV | 6205793 | 6206344 | WBGene00016764 | C49A9.10 | C49A9.10 | -0.327870124758235  |             |
| AGIWUR23758                                                                                                                                                                                                                               |    |    |         |         |                |          |          |                     |             |
| CB4856                                                                                                                                                                                                                                    | CT | IV | 6206843 | 6209527 | WBGene00016762 | ugt-24   | C49A9.8  | 0.0789693756042027  | AGIWUR14772 |
| CB4856                                                                                                                                                                                                                                    | CT | IV | 6210936 | 6213181 | WBGene00016760 | C49A9.6  | C49A9.6  | -0.427472997699336  | AGIWUR38078 |
| CB4856                                                                                                                                                                                                                                    | CT | IV | 6213822 | 6216371 | WBGene00016759 | C49A9.5  | C49A9.5  | -0.48395853174223   | AGIWUR8070  |
| CB4856                                                                                                                                                                                                                                    | CT | IV | 6217349 | 6219449 | WBGene00016763 | C49A9.9  | C49A9.9  | -0.0252334941278232 |             |
| AGIWUR1773;AGIWUR15196                                                                                                                                                                                                                    |    |    |         |         |                |          |          |                     |             |
| CB4856                                                                                                                                                                                                                                    | CT | IV | 6219604 | 6222346 | WBGene00016758 | C49A9.4  | C49A9.4  | -0.0706269053115225 | AGIWUR12726 |
| CB4856                                                                                                                                                                                                                                    | CT | IV | 6222089 | 6225009 | WBGene00016757 | C49A9.3  | C49A9.3  | 0.0761358118414055  | AGIWUR37712 |

|                                                            |    |    |         |         |                |          |            |                     |             |
|------------------------------------------------------------|----|----|---------|---------|----------------|----------|------------|---------------------|-------------|
| CB4856                                                     | CT | IV | 6225443 | 6228046 | WBGene00016756 | C49A9.2  | C49A9.2    | -0.531547885462285  | AGIWUR23748 |
| CB4856                                                     | CT | IV | 6228203 | 6230025 | WBGene00016755 | C49A9.1  | C49A9.1    | -0.0851960201384969 | AGIWUR3139  |
| CB4856                                                     | CT | IV | 6231023 | 6232607 | WBGene00019058 | F58F9.4  | F58F9.4    | -0.392820706186345  | AGIWUR41348 |
| CB4856                                                     | CT | IV | 6233246 | 6235666 | WBGene00019057 | F58F9.3  | F58F9.3    | -0.523775272549802  |             |
| AGIWUR7538;AGIWUR20237                                     |    |    |         |         |                |          |            |                     |             |
| CB4856                                                     | CT | IV | 6235977 | 6237543 | WBGene00019059 | F58F9.6  | F58F9.6    | 0.18086089230101    | AGIWUR19018 |
| CB4856                                                     | CT | IV | 6238192 | 6239437 | WBGene00044306 | F58F9.8  | F58F9.8    | -0.0702979092342981 |             |
| AGIWUR9116;AGIWUR24570                                     |    |    |         |         |                |          |            |                     |             |
| CB4856                                                     | CT | IV | 6240306 | 6241389 | WBGene00044307 | F58F9.9  | F58F9.9    | 0.0231089374300506  |             |
| AGIWUR18241;AGIWUR29280                                    |    |    |         |         |                |          |            |                     |             |
| CB4856                                                     | CT | IV | 6241855 | 6242795 | WBGene00044308 | F58F9.10 | F58F9.10   | 0.0639187002849444  |             |
| AGIWUR26484;AGIWUR38991                                    |    |    |         |         |                |          |            |                     |             |
| CB4856                                                     | CT | IV | 6243382 | 6244374 | WBGene00044309 | F58F9.11 | F58F9.11   | -0.136489110484063  |             |
| AGIWUR17345                                                |    |    |         |         |                |          |            |                     |             |
| CB4856                                                     | CT | IV | 6245341 | 6248492 | WBGene00019060 | acox-3   | F58F9.7    | 0.487581328493871   | AGIWUR24700 |
| CB4856                                                     | CT | IV | 6249874 | 6253083 | WBGene00019055 | F58F9.1  | F58F9.1    | 0.113852458901037   | AGIWUR12407 |
| CB4856                                                     | CT | IV | 6255071 | 6259858 | WBGene00003754 | nlp-16   | T13A10.5   | 0.0570241300494096  |             |
| AGIWUR21097;AGIWUR24636                                    |    |    |         |         |                |          |            |                     |             |
| CB4856                                                     | CT | IV | 6261058 | 6263344 | WBGene00005739 | srv-28   | T13A10.14  | 0.266360135710158   |             |
| AGIWUR7801                                                 |    |    |         |         |                |          |            |                     |             |
| CB4856                                                     | CT | IV | 6267457 | 6269446 | WBGene00005741 | srv-30   | T13A10.7   | 0.129874604315797   |             |
| AGIWUR37058                                                |    |    |         |         |                |          |            |                     |             |
| CB4856                                                     | CT | IV | 6269773 | 6272023 | WBGene00005742 | srv-31   | T13A10.9   | -0.114043694548509  |             |
| AGIWUR40378                                                |    |    |         |         |                |          |            |                     |             |
| CB4856                                                     | CT | IV | 6272529 | 6275713 | WBGene00000005 | aat-4    | T13A10.10  | -0.495837584181555  |             |
| AGIWUR15818                                                |    |    |         |         |                |          |            |                     |             |
| CB4856                                                     | CT | IV | 6277435 | 6279572 | WBGene00006416 | sams-5   | T13A10.11  | 0.00863266769109217 |             |
| AGIWUR3761;AGIWUR11823;AGIWUR19459;AGIWUR20660;AGIWUR41960 |    |    |         |         |                |          |            |                     |             |
| CB4856                                                     | CT | IV | 6280147 | 6282243 | WBGene00005743 | srv-32   | T13A10.12  | -0.159655821371558  |             |
| AGIWUR18255                                                |    |    |         |         |                |          |            |                     |             |
| CB4856                                                     | CT | IV | 6282931 | 6284387 | WBGene00005744 | ops-1    | T13A10.13  | 0.228050169256726   |             |
| AGIWUR33785                                                |    |    |         |         |                |          |            |                     |             |
| CB4856                                                     | CT | IV | 6288364 | 6290841 | WBGene00005735 | srv-24   | Y73B6BL.10 | 0.298066808839971   |             |
| AGIWUR42294                                                |    |    |         |         |                |          |            |                     |             |
| CB4856                                                     | CT | IV | 6294234 | 6295219 | WBGene00001853 | hil-2    | Y73B6BL.9  | 0.24117896952475    |             |
| AGIWUR18626                                                |    |    |         |         |                |          |            |                     |             |
| CB4856                                                     | CT | IV | 6296279 | 6298347 | WBGene00005738 | srv-27   | Y73B6BL.41 | 0.0270299764285138  |             |
| AGIWUR7755;AGIWUR37612;AGIWUR39406                         |    |    |         |         |                |          |            |                     |             |
| CB4856                                                     | CT | IV | 6299273 | 6301864 | WBGene00005737 | srv-26   | Y73B6BL.40 | 0.172988954849788   |             |



|                                                            |    |         |         |                |            |            |                     |             |
|------------------------------------------------------------|----|---------|---------|----------------|------------|------------|---------------------|-------------|
| CB4856 CT                                                  | IV | 6421036 | 6421200 | WBGene00044752 | Y73B6BL.45 | Y73B6BL.45 | 0.623688950910553   |             |
| AGIWUR9734                                                 |    |         |         |                |            |            |                     |             |
| CB4856 CT                                                  | IV | 6421589 | 6423489 | WBGene00022257 | puf-11     | Y73B6BL.38 | -0.0390249267922478 |             |
| AGIWUR28069                                                |    |         |         |                |            |            |                     |             |
| CB4856 CT                                                  | IV | 6424600 | 6426139 | WBGene00022245 | acp-6      | Y73B6BL.24 | -0.456863950044591  |             |
| AGIWUR5531;AGIWUR20296;AGIWUR22193                         |    |         |         |                |            |            |                     |             |
| CB4856 CT                                                  | IV | 6428305 | 6431707 | WBGene00022246 | acp-7      | Y73B6BL.25 | -0.290102757418312  |             |
| AGIWUR31201                                                |    |         |         |                |            |            |                     |             |
| CB4856 CT                                                  | IV | 6438223 | 6440032 | WBGene00043067 | d1c-5      | Y73B6BL.43 | -0.0575980789371968 |             |
| AGIWUR5344;AGIWUR7316;AGIWUR16502;AGIWUR29630              |    |         |         |                |            |            |                     |             |
| CB4856 CT                                                  | IV | 6442229 | 6446532 | WBGene00022252 | Y73B6BL.31 | Y73B6BL.31 | 0.042158017091495   |             |
| AGIWUR10068;AGIWUR14224;AGIWUR30990                        |    |         |         |                |            |            |                     |             |
| CB4856 CT                                                  | IV | 6446573 | 6457543 | WBGene00022247 | lgc-10     | Y73B6BL.26 | -0.0514839302708845 |             |
| AGIWUR18076                                                |    |         |         |                |            |            |                     |             |
| CB4856 CT                                                  | IV | 6464352 | 6468327 | WBGene00043066 | acr-25     | Y73B6BL.42 | -0.244567141609511  |             |
| AGIWUR38243                                                |    |         |         |                |            |            |                     |             |
| CB4856 CT                                                  | IV | 6469955 | 6471384 | WBGene00022255 | Y73B6BL.36 | Y73B6BL.36 | 0.526682218937883   |             |
| AGIWUR11423;AGIWUR14886                                    |    |         |         |                |            |            |                     |             |
| CB4856 CT                                                  | IV | 6472155 | 6473235 | WBGene00022248 | Y73B6BL.27 | Y73B6BL.27 | -0.240689686998826  |             |
| AGIWUR42102                                                |    |         |         |                |            |            |                     |             |
| CB4856 CT                                                  | IV | 6480521 | 6486971 | WBGene00022231 | tyr-6      | Y73B6BL.1  | -0.239553810487177  |             |
| AGIWUR1895                                                 |    |         |         |                |            |            |                     |             |
| CB4856 CT                                                  | IV | 6487347 | 6489090 | WBGene00022256 | Y73B6BL.37 | Y73B6BL.37 | 0.684423600418408   |             |
| AGIWUR12748                                                |    |         |         |                |            |            |                     |             |
| CB4856 CT                                                  | IV | 6493599 | 6497378 | WBGene00044350 | Y73B6BL.44 | Y73B6BL.44 | 0.159088744915412   |             |
| AGIWUR1321;AGIWUR8689                                      |    |         |         |                |            |            |                     |             |
| CB4856 CT                                                  | IV | 6506726 | 6511042 | WBGene00004169 | pqn-89     | Y73B6BR.1  | 0.222717306351457   |             |
| AGIWUR2166;AGIWUR18201;AGIWUR33782;AGIWUR35889;AGIWUR41226 |    |         |         |                |            |            |                     |             |
| CB4856 CT                                                  | IV | 6518174 | 6519502 | WBGene00015309 | C01G5.7    | C01G5.7    | 0.00849533051939755 | AGIWUR30933 |
| CB4856 CT                                                  | IV | 6519926 | 6522242 | WBGene00015311 | C01G5.9    | C01G5.9    | -0.233713152362228  | AGIWUR16070 |
| CB4856 CT                                                  | IV | 6522874 | 6524568 | WBGene00015308 | ddi-1      | C01G5.6    | -0.411804689586779  | AGIWUR695   |
| CB4856 CT                                                  | IV | 6524610 | 6526524 | WBGene00015307 | C01G5.5    | C01G5.5    | 0.0540641457814051  | AGIWUR13057 |
| CB4856 CT                                                  | IV | 6526729 | 6529802 | WBGene00004179 | prg-2      | C01G5.2    | 0.0272604547095074  |             |
| AGIWUR19766;AGIWUR25037;AGIWUR35662                        |    |         |         |                |            |            |                     |             |
| CB4856 CT                                                  | IV | 6531750 | 6535677 | WBGene00015306 | C01G5.4    | C01G5.4    | 0.377669377577843   | AGIWUR12939 |
| CB4856 CT                                                  | IV | 6548818 | 6552511 | WBGene00015310 | fan-1      | C01G5.8    | -0.0985267176034892 | AGIWUR30930 |
| CB4856 CT                                                  | IV | 6552479 | 6555920 | WBGene00016610 | paqr-1     | C43G2.1    | 0.113801433728209   |             |
| AGIWUR6337;AGIWUR20140;AGIWUR39059                         |    |         |         |                |            |            |                     |             |
| CB4856 CT                                                  | IV | 6557171 | 6560881 | WBGene00006621 | try-3      | C43G2.5    | -0.491630271005654  | AGIWUR22974 |

|                                                                                   |    |    |         |         |                |           |           |                     |             |
|-----------------------------------------------------------------------------------|----|----|---------|---------|----------------|-----------|-----------|---------------------|-------------|
| CB4856                                                                            | CT | IV | 6560736 | 6565261 | WBGene00016613 | best-9    | C43G2.4   | -0.256894088532795  | AGIWUR27424 |
| CB4856                                                                            | CT | IV | 6565384 | 6572338 | WBGene00016611 | bicd-1    | C43G2.2   | -0.169260368416452  | AGIWUR13162 |
| CB4856                                                                            | CT | IV | 6578197 | 6579402 | WBGene00016612 | C43G2.3   | C43G2.3   | -0.083406926424539  | AGIWUR21928 |
| CB4856                                                                            | CT | IV | 6579840 | 6582676 | WBGene00018160 | odr-8     | F38A5.1   | -0.0913852040577918 |             |
| AGIWUR2601;AGIWUR3004;AGIWUR4843;AGIWUR31954;AGIWUR33472;AGIWUR34492;AGIWUR44384  |    |    |         |         |                |           |           |                     |             |
| CB4856                                                                            | CT | IV | 6582703 | 6585571 | WBGene00018161 | F38A5.2   | F38A5.2   | 0.0805925893485711  |             |
| AGIWUR1637;AGIWUR1880;AGIWUR26971;AGIWUR31257;AGIWUR33703;AGIWUR41277;AGIWUR42545 |    |    |         |         |                |           |           |                     |             |
| CB4856                                                                            | CT | IV | 6585871 | 6588186 | WBGene00001029 | dnj-11    | F38A5.13  | -0.152171222798669  |             |
| AGIWUR26044;AGIWUR32851;AGIWUR33015;AGIWUR41606                                   |    |    |         |         |                |           |           |                     |             |
| CB4856                                                                            | CT | IV | 6588184 | 6590307 | WBGene00002274 | lec-11    | F38A5.3   | -0.0201401313586675 |             |
| AGIWUR6492;AGIWUR16105;AGIWUR16475;AGIWUR27350                                    |    |    |         |         |                |           |           |                     |             |
| CB4856                                                                            | CT | IV | 6592666 | 6594529 | WBGene00018168 | irld-7    | F38A5.11  | -0.334479023590408  |             |
| AGIWUR3776                                                                        |    |    |         |         |                |           |           |                     |             |
| CB4856                                                                            | CT | IV | 6596108 | 6597398 | WBGene00018163 | F38A5.6   | F38A5.6   | 0.0972602713792199  | AGIWUR30197 |
| CB4856                                                                            | CT | IV | 6599882 | 6600491 | WBGene00018165 | F38A5.8   | F38A5.8   | -0.269077577660956  | AGIWUR19468 |
| CB4856                                                                            | CT | IV | 6601678 | 6602443 | WBGene00018164 | sup-36    | F38A5.7   | 0.592657280267902   | AGIWUR35277 |
| CB4856                                                                            | CT | IV | 6602680 | 6603966 | WBGene00017481 | F15B10.3  | F15B10.3  | 0.486651050673022   |             |
| AGIWUR29802                                                                       |    |    |         |         |                |           |           |                     |             |
| CB4856                                                                            | CT | IV | 6604001 | 6606188 | WBGene00017480 | nstp-2    | F15B10.1  | -0.193627179522833  |             |
| AGIWUR9501                                                                        |    |    |         |         |                |           |           |                     |             |
| CB4856                                                                            | CT | IV | 6607376 | 6613353 | WBGene00001090 | drh-1     | F15B10.2  | -0.200767868562894  |             |
| AGIWUR1034;AGIWUR9440;AGIWUR42915                                                 |    |    |         |         |                |           |           |                     |             |
| CB4856                                                                            | CT | IV | 6613918 | 6618498 | WBGene00001091 | drh-2     | C01B10.1  | -0.523531780131787  |             |
| AGIWUR7926;AGIWUR18407                                                            |    |    |         |         |                |           |           |                     |             |
| CB4856                                                                            | CT | IV | 6619468 | 6621352 | WBGene00015278 | C01B10.3  | C01B10.3  | -0.278517619637618  |             |
| AGIWUR34609                                                                       |    |    |         |         |                |           |           |                     |             |
| CB4856                                                                            | CT | IV | 6624528 | 6627992 | WBGene00015284 | C01B10.10 | C01B10.10 | -0.0934431004684648 |             |
| AGIWUR10607;AGIWUR34060                                                           |    |    |         |         |                |           |           |                     |             |
| CB4856                                                                            | CT | IV | 6628366 | 6631745 | WBGene00015279 | C01B10.4  | C01B10.4  | -0.336079376505992  |             |
| AGIWUR31155                                                                       |    |    |         |         |                |           |           |                     |             |
| CB4856                                                                            | CT | IV | 6632222 | 6634986 | WBGene00015283 | C01B10.9  | C01B10.9  | -0.188598857116281  |             |
| AGIWUR27315                                                                       |    |    |         |         |                |           |           |                     |             |
| CB4856                                                                            | CT | IV | 6635039 | 6638155 | WBGene00015282 | C01B10.8  | C01B10.8  | -0.104447514484214  |             |
| AGIWUR40431                                                                       |    |    |         |         |                |           |           |                     |             |
| CB4856                                                                            | CT | IV | 6638556 | 6639271 | WBGene00015281 | C01B10.7  | C01B10.7  | -0.501415400768341  |             |
| AGIWUR44495                                                                       |    |    |         |         |                |           |           |                     |             |
| CB4856                                                                            | CT | IV | 6640161 | 6645352 | WBGene00015280 | C01B10.6  | C01B10.6  | 0.0105142358498931  |             |
| AGIWUR35272;AGIWUR40404;AGIWUR42883                                               |    |    |         |         |                |           |           |                     |             |
| CB4856                                                                            | CT | IV | 6646034 | 6646936 | WBGene00001858 | hil-7     | C01B10.5  | 1.64115313901484    |             |

AGIWUR1319;AGIWUR11770;AGIWUR16609;AGIWUR22740;AGIWUR24965;AGIWUR25043;AGIWUR29174;AGIWUR31187;AGIWUR40020;  
 AGIWUR42223  
 CB4856 CT IV 6657981 6660434 WBGene00044294 C01B10.11 C01B10.11 -0.499173004069565  
 AGIWUR27716  
 CB4856 CT IV 6661234 6668054 WBGene00022228 Y73B6A.1 Y73B6A.1 0.146182467151645  
 AGIWUR26914  
 CB4856 CT IV 6704925 6707052 WBGene00044503 Y73B6A.6 Y73B6A.6 -0.124494976448781  
 AGIWUR2811;AGIWUR15743;AGIWUR23600  
 CB4856 CT IV 6732980 6736110 WBGene00022229 Y73B6A.2 Y73B6A.2 -0.19782995380096  
 AGIWUR33883  
 CB4856 CT IV 6738727 6740374 WBGene00022230 Y73B6A.3 Y73B6A.3 -0.337051661660411  
 AGIWUR7831  
 CB4856 CT IV 6740496 6742443 WBGene00004885 smg-7 Y73B6A.4 -0.0951909461739096  
 AGIWUR5239  
 CB4856 CT IV 6742538 6748424 WBGene00003030 lin-45 Y73B6A.5 -0.216044764281544  
 AGIWUR561;AGIWUR3602;AGIWUR11674;AGIWUR12654;AGIWUR18197;AGIWUR21509;AGIWUR22879;AGIWUR32207  
 CB4856 CT IV 6757311 6762609 WBGene00019259 H34C03.2 H34C03.2 -0.424387521432497  
 AGIWUR4690;AGIWUR5240;AGIWUR6955;AGIWUR32986;AGIWUR33475  
 CB4856 CT IV 6762716 6765200 WBGene00004954 spd-3 H34C03.1 -0.362648103757703  
 AGIWUR42614  
 CB4856 CT IV 6770810 6779859 WBGene00015938 anat-1 C17H12.13 -0.127482769768209  
 AGIWUR5446;AGIWUR28862;AGIWUR30020;AGIWUR40363  
 CB4856 CT IV 6779848 6784340 WBGene00015927 dyci-1 C17H12.1 -0.0965104492971314  
 AGIWUR20301  
 CB4856 CT IV 6786858 6789644 WBGene00015928 C17H12.2 C17H12.2 -0.0967005985929479  
 AGIWUR4069  
 CB4856 CT IV 6791074 6792629 WBGene00006917 vha-8 C17H12.14 -0.164559479648393  
 AGIWUR10144;AGIWUR10801;AGIWUR12310;AGIWUR12618;AGIWUR34885  
 CB4856 CT IV 6793912 6795629 WBGene00015929 C17H12.3 C17H12.3 -0.0552236507869868  
 AGIWUR18330  
 CB4856 CT IV 6795913 6798789 WBGene00015937 C17H12.12 C17H12.12 -0.0216386961624302  
 AGIWUR20007  
 CB4856 CT IV 6798921 6802337 WBGene00015930 C17H12.4 C17H12.4 -0.436663589699531  
 AGIWUR24155;AGIWUR26596  
 CB4856 CT IV 6805115 6805908 WBGene00236786 C17H12.37 C17H12.37 -0.118910499816311  
 AGIWUR25400  
 CB4856 CT IV 6806810 6809630 WBGene00015935 C17H12.10 C17H12.10 -0.0628597762090806  
 AGIWUR32645  
 CB4856 CT IV 6812108 6815607 WBGene00015934 ceh-48 C17H12.9 0.246345193447334

|                                                            |    |    |         |         |                |                 |                                 |
|------------------------------------------------------------|----|----|---------|---------|----------------|-----------------|---------------------------------|
| AGIWUR28941                                                |    |    |         |         |                |                 |                                 |
| CB4856                                                     | CT | IV | 6815912 | 6817654 | WBGene00015931 | C17H12.5        | C17H12.5 0.106146585498474      |
| AGIWUR15237;AGIWUR24685;AGIWUR36468                        |    |    |         |         |                |                 |                                 |
| CB4856                                                     | CT | IV | 6818606 | 6820643 | WBGene00015933 | C17H12.8        | C17H12.8 -0.721383015540383     |
| AGIWUR24325                                                |    |    |         |         |                |                 |                                 |
| CB4856                                                     | CT | IV | 6821077 | 6822506 | WBGene00015932 | C17H12.6        | C17H12.6 -0.803989459585846     |
| AGIWUR28820                                                |    |    |         |         |                |                 |                                 |
| CB4856                                                     | CT | IV | 6824894 | 6826763 | WBGene00019215 | H20E11.3        | H20E11.3 -0.156544384635911     |
| AGIWUR43547                                                |    |    |         |         |                |                 |                                 |
| CB4856                                                     | CT | IV | 6827777 | 6829490 | WBGene00019214 | H20E11.2        | H20E11.2 0.0912097478026332     |
| AGIWUR41422                                                |    |    |         |         |                |                 |                                 |
| CB4856                                                     | CT | IV | 6830145 | 6833464 | WBGene00019213 | H20E11.1        | H20E11.1 -0.0992904344607819    |
| AGIWUR1515;AGIWUR24083;AGIWUR24257;AGIWUR26117;AGIWUR34547 |    |    |         |         |                |                 |                                 |
| CB4856                                                     | CT | IV | 6839064 | 6839199 | WBGene00202332 | C05B10.21       | C05B10.21 0.0793811559783282    |
| AGIWUR14375;AGIWUR36755                                    |    |    |         |         |                |                 |                                 |
| CB4856                                                     | CT | IV | 6841485 | 6841609 | WBGene00202097 | C05B10.20       | C05B10.20 0.117014836988021     |
| AGIWUR28691                                                |    |    |         |         |                |                 |                                 |
| CB4856                                                     | CT | IV | 6842964 | 6845805 | WBGene00003043 | lip-1 C05B10.1  | -0.240111821472381              |
| AGIWUR28238                                                |    |    |         |         |                |                 |                                 |
| CB4856                                                     | CT | IV | 6846129 | 6859370 | WBGene00020069 | R13H7.2 R13H7.2 | -0.0938427316104917             |
| AGIWUR6354;AGIWUR17959;AGIWUR26946                         |    |    |         |         |                |                 |                                 |
| CB4856                                                     | CT | IV | 6868091 | 6869137 | WBGene00005911 | srx-20 R13H7.1  | -0.0503217993871345 AGIWUR15324 |
| CB4856                                                     | CT | IV | 6873258 | 6874774 | WBGene00005910 | srx-19 T05A12.1 | -0.210798043737137              |
| AGIWUR25873;AGIWUR26519                                    |    |    |         |         |                |                 |                                 |
| CB4856                                                     | CT | IV | 6876737 | 6883461 | WBGene00006608 | tre-2 T05A12.2  | -0.204166836460564              |
| AGIWUR3771;AGIWUR16934;AGIWUR34702;AGIWUR35029;AGIWUR37513 |    |    |         |         |                |                 |                                 |
| CB4856                                                     | CT | IV | 6883576 | 6887662 | WBGene00020234 | T05A12.3        | T05A12.3 -0.240241812553966     |
| AGIWUR16023                                                |    |    |         |         |                |                 |                                 |
| CB4856                                                     | CT | IV | 6887948 | 6897777 | WBGene00020235 | T05A12.4        | T05A12.4 -0.182439021984219     |
| AGIWUR17582;AGIWUR23680;AGIWUR36204                        |    |    |         |         |                |                 |                                 |
| CB4856                                                     | CT | IV | 6899519 | 6900056 | WBGene00020685 | T22D1.6 T22D1.6 | -0.177864361672971 AGIWUR24019  |
| CB4856                                                     | CT | IV | 6900326 | 6903624 | WBGene00020686 | T22D1.8 T22D1.8 | -0.129885068001489              |
| AGIWUR7978;AGIWUR22377;AGIWUR36253                         |    |    |         |         |                |                 |                                 |
| CB4856                                                     | CT | IV | 6903950 | 6905546 | WBGene00020684 | T22D1.5 T22D1.5 | -0.277928939519441 AGIWUR28419  |
| CB4856                                                     | CT | IV | 6906415 | 6909913 | WBGene00004458 | rpn-1 T22D1.9   | -0.137697844156509 AGIWUR2624   |
| CB4856                                                     | CT | IV | 6910683 | 6912865 | WBGene00020683 | ribo-1 T22D1.4  | -0.06784965052071 AGIWUR17258   |
| CB4856                                                     | CT | IV | 6913536 | 6917110 | WBGene00020682 | T22D1.3 T22D1.3 | 0.101613647337797               |
| AGIWUR30821;AGIWUR45070                                    |    |    |         |         |                |                 |                                 |
| CB4856                                                     | CT | IV | 6917111 | 6919454 | WBGene00020687 | ruvb-2 T22D1.10 | -0.151958341583029              |

|                                                                         |    |    |         |         |                |          |            |                      |                     |
|-------------------------------------------------------------------------|----|----|---------|---------|----------------|----------|------------|----------------------|---------------------|
| AGIWUR21494                                                             |    |    |         |         |                |          |            |                      |                     |
| CB4856                                                                  | CT | IV | 6921855 | 6922852 | WBGene00020681 | T22D1.2  | T22D1.2    | -0.150328101538129   | AGIWUR30873         |
| CB4856                                                                  | CT | IV | 6926140 | 6928517 | WBGene00020688 | T22D1.11 |            | T22D1.11             | -0.0172957575283714 |
| AGIWUR32365                                                             |    |    |         |         |                |          |            |                      |                     |
| CB4856                                                                  | CT | IV | 6928942 | 6937713 | WBGene00020689 | npr-12   | T22D1.12   |                      | -0.176926391737156  |
| AGIWUR16564                                                             |    |    |         |         |                |          |            |                      |                     |
| CB4856                                                                  | CT | IV | 6957641 | 6963716 | WBGene00002178 | jnk-1    | B0478.1    | -0.00614914680803569 |                     |
| AGIWUR5169;AGIWUR22314                                                  |    |    |         |         |                |          |            |                      |                     |
| CB4856                                                                  | CT | IV | 6963716 | 6964654 | WBGene00015202 | B0478.3  | B0478.3    | 0.107988192231132    | AGIWUR3282          |
| CB4856                                                                  | CT | IV | 6965492 | 6967806 | WBGene00022725 | ZK381.2  | ZK381.2    | 0.165109470001375    |                     |
| AGIWUR31292;AGIWUR35750                                                 |    |    |         |         |                |          |            |                      |                     |
| CB4856                                                                  | CT | IV | 6968209 | 6970280 | WBGene00044352 | ZK381.8  | ZK381.8    | -0.0537959927663736  |                     |
| AGIWUR21041;AGIWUR21905                                                 |    |    |         |         |                |          |            |                      |                     |
| CB4856                                                                  | CT | IV | 6971898 | 6972527 | WBGene00022726 | nhr-249  | ZK381.3    | -0.278706953501095   | AGIWUR41593         |
| CB4856                                                                  | CT | IV | 6974401 | 6977318 | WBGene00003992 | pgl-1    | ZK381.4    | 0.151416911146889    | AGIWUR9053          |
| CB4856                                                                  | CT | IV | 6977517 | 6978943 | WBGene00001862 | him-3    | ZK381.1    | -0.106811088027129   | AGIWUR7115          |
| CB4856                                                                  | CT | IV | 6978775 | 6986935 | WBGene00022727 | prkl-1   | ZK381.5    | 0.868905189506299    |                     |
| AGIWUR33041;AGIWUR40133                                                 |    |    |         |         |                |          |            |                      |                     |
| CB4856                                                                  | CT | IV | 6999557 | 7001493 | WBGene00016085 | C25A8.5  | C25A8.5    | -0.0996486668740779  | AGIWUR40307         |
| CB4856                                                                  | CT | IV | 7003623 | 7009268 | WBGene00016084 | cht-3    | C25A8.4    | -0.0461738287303852  | AGIWUR32990         |
| CB4856                                                                  | CT | IV | 7009841 | 7010744 | WBGene00016083 | C25A8.2  | C25A8.2    | -0.0807276146970226  |                     |
| AGIWUR4076;AGIWUR20082                                                  |    |    |         |         |                |          |            |                      |                     |
| CB4856                                                                  | CT | IV | 7011960 | 7016542 | WBGene00015553 | trxr-1   | C06G3.7    | -0.00151250995987873 | AGIWUR31747         |
| CB4856                                                                  | CT | IV | 7017626 | 7020210 | WBGene00015552 | C06G3.6  | C06G3.6    | 0.270071253663167    |                     |
| AGIWUR7736;AGIWUR28620;AGIWUR44593                                      |    |    |         |         |                |          |            |                      |                     |
| CB4856                                                                  | CT | IV | 7024211 | 7028144 | WBGene00015551 | C06G3.5  | C06G3.5    | 0.79054837949727     |                     |
| AGIWUR30316;AGIWUR36250;AGIWUR38569                                     |    |    |         |         |                |          |            |                      |                     |
| CB4856                                                                  | CT | IV | 7028173 | 7030967 | WBGene00015550 | C06G3.4  | C06G3.4    | 0.0685689434030792   | AGIWUR44247         |
| CB4856                                                                  | CT | IV | 7031298 | 7032559 | WBGene00015554 | C06G3.8  | C06G3.8    | -0.127639368221425   | AGIWUR5950          |
| CB4856                                                                  | CT | IV | 7032716 | 7036982 | WBGene00015555 | ufl-1    | C06G3.9    | -0.222927152818841   | AGIWUR13922         |
| CB4856                                                                  | CT | IV | 7036960 | 7039580 | WBGene00000585 | cogc-2   | C06G3.10   | -0.543544016992012   |                     |
| AGIWUR23147                                                             |    |    |         |         |                |          |            |                      |                     |
| CB4856                                                                  | CT | IV | 7040211 | 7043694 | WBGene00002228 | klp-18   | C06G3.2    | 0.166055435624446    |                     |
| AGIWUR14117;AGIWUR15370;AGIWUR19879;AGIWUR28610;AGIWUR31615;AGIWUR38249 |    |    |         |         |                |          |            |                      |                     |
| CB4856                                                                  | CT | IV | 7043935 | 7044604 | WBGene00006572 | tin-9.1  | C06G3.11   | -0.0989791650245788  |                     |
| AGIWUR17497;AGIWUR24565;AGIWUR36287;AGIWUR41579                         |    |    |         |         |                |          |            |                      |                     |
| CB4856                                                                  | CT | IV | 7049954 | 7053450 | WBGene00003695 | nhr-105  | C06G3.1    | 0.26289926309526     |                     |
| AGIWUR8408;AGIWUR25401;AGIWUR27613;AGIWUR38972;AGIWUR39864              |    |    |         |         |                |          |            |                      |                     |
| CB4856                                                                  | CT | IV | 7057977 | 7059911 | WBGene00005941 | srx-50   | Y43B11AL.2 | 0.0390669532214272   |                     |



|                                                 |    |    |         |         |                |            |            |                       |             |
|-------------------------------------------------|----|----|---------|---------|----------------|------------|------------|-----------------------|-------------|
| AGIWUR10633                                     |    |    |         |         |                |            |            |                       |             |
| CB4856                                          | CT | IV | 7060192 | 7061778 | WBGene00005811 | srw-64     | Y43B11AL.3 | 0.0123047451757174    |             |
| AGIWUR25631;AGIWUR29248;AGIWUR34284;AGIWUR38179 |    |    |         |         |                |            |            |                       |             |
| CB4856                                          | CT | IV | 7065322 | 7068035 | WBGene00021542 | Y43B11AL.1 | Y43B11AL.1 | 0.0467474899226552    |             |
| AGIWUR28733                                     |    |    |         |         |                |            |            |                       |             |
| CB4856                                          | CT | IV | 7070858 | 7071736 | WBGene00005206 | srg-49     | Y43B11AR.6 | 0.395810674561855     |             |
| AGIWUR28710                                     |    |    |         |         |                |            |            |                       |             |
| CB4856                                          | CT | IV | 7072410 | 7073625 | WBGene00005205 | srg-48     | Y43B11AR.5 | 0.0382021162212958    |             |
| AGIWUR9062                                      |    |    |         |         |                |            |            |                       |             |
| CB4856                                          | CT | IV | 7074030 | 7075163 | WBGene00005207 | srg-50     | Y43B11AR.2 | 0.156709554234864     |             |
| AGIWUR25216                                     |    |    |         |         |                |            |            |                       |             |
| CB4856                                          | CT | IV | 7081514 | 7082266 | WBGene00021543 | Y43B11AR.1 | Y43B11AR.1 | -0.0728151653349336   |             |
| AGIWUR4163                                      |    |    |         |         |                |            |            |                       |             |
| CB4856                                          | CT | IV | 7082220 | 7083716 | WBGene00021544 | Y43B11AR.3 | Y43B11AR.3 | 0.462868359647155     |             |
| AGIWUR16252                                     |    |    |         |         |                |            |            |                       |             |
| CB4856                                          | CT | IV | 7083694 | 7084682 | WBGene00004473 | rps-4      | Y43B11AR.4 | -0.0135124965405353   |             |
| AGIWUR360;AGIWUR10099                           |    |    |         |         |                |            |            |                       |             |
| CB4856                                          | CT | IV | 7085216 | 7094364 | WBGene00000942 | deb-1      | ZC477.9    | -0.175950321188052    |             |
| AGIWUR22512;AGIWUR25757;AGIWUR32217;AGIWUR32771 |    |    |         |         |                |            |            |                       |             |
| CB4856                                          | CT | IV | 7101375 | 7103261 | WBGene00022620 | rde-8      | ZC477.5    | -0.000963944100611513 | AGIWUR23519 |
| CB4856                                          | CT | IV | 7103492 | 7105096 | WBGene00022618 | ZC477.3    | ZC477.3    | -0.237311512024752    |             |
| AGIWUR6342;AGIWUR8916;AGIWUR23991;AGIWUR24712   |    |    |         |         |                |            |            |                       |             |
| CB4856                                          | CT | IV | 7105169 | 7107733 | WBGene00022622 | ZC477.10   | ZC477.10   | 0.218701401299451     |             |
| AGIWUR38280                                     |    |    |         |         |                |            |            |                       |             |
| CB4856                                          | CT | IV | 7108221 | 7109912 | WBGene00022617 | ZC477.2    | ZC477.2    | 0.0373616737035647    | AGIWUR23545 |
| CB4856                                          | CT | IV | 7114899 | 7119926 | WBGene00003527 | nas-8      | C34D4.9    | -0.30563730412577     | AGIWUR2427  |
| CB4856                                          | CT | IV | 7119918 | 7121413 | WBGene00016402 | C34D4.10   | C34D4.10   | -0.286255356422082    |             |
| AGIWUR17282                                     |    |    |         |         |                |            |            |                       |             |
| CB4856                                          | CT | IV | 7122194 | 7123947 | WBGene00006113 | str-48     | C34D4.8    | 0.166431855509813     |             |
| AGIWUR19828;AGIWUR35417;AGIWUR42209             |    |    |         |         |                |            |            |                       |             |
| CB4856                                          | CT | IV | 7124481 | 7125516 | WBGene00006114 | str-49     | C34D4.7    | -0.0225154520403237   | AGIWUR31208 |
| CB4856                                          | CT | IV | 7127683 | 7130462 | WBGene00006115 | str-50     | C34D4.16   | -0.174525922801458    |             |
| AGIWUR42325                                     |    |    |         |         |                |            |            |                       |             |
| CB4856                                          | CT | IV | 7130701 | 7131928 | WBGene00016403 | grsp-3     | C34D4.11   | 0.16788773915782      |             |
| AGIWUR9753                                      |    |    |         |         |                |            |            |                       |             |
| CB4856                                          | CT | IV | 7132132 | 7133217 | WBGene00000888 | cyn-12     | C34D4.12   | -0.190257517647549    |             |
| AGIWUR701                                       |    |    |         |         |                |            |            |                       |             |
| CB4856                                          | CT | IV | 7133448 | 7134083 | WBGene00016404 | mutd-1     | C34D4.13   | -0.218823156472777    |             |
| AGIWUR16341                                     |    |    |         |         |                |            |            |                       |             |

|                                                                                                |    |    |         |         |                |          |          |                       |             |
|------------------------------------------------------------------------------------------------|----|----|---------|---------|----------------|----------|----------|-----------------------|-------------|
| CB4856                                                                                         | CT | IV | 7134347 | 7144898 | WBGene00016405 | hecd-1   | C34D4.14 | 0.183613322823975     |             |
| AGIWUR20390                                                                                    |    |    |         |         |                |          |          |                       |             |
| CB4856                                                                                         | CT | IV | 7149361 | 7150692 | WBGene00016400 | C34D4.4  | C34D4.4  | -0.131935436969354    | AGIWUR3381  |
| CB4856                                                                                         | CT | IV | 7150663 | 7152501 | WBGene00000687 | col-113  | C34D4.15 | -0.355412810457901    |             |
| AGIWUR33931                                                                                    |    |    |         |         |                |          |          |                       |             |
| CB4856                                                                                         | CT | IV | 7153623 | 7154193 | WBGene00016399 | C34D4.3  | C34D4.3  | 0.286205440936856     | AGIWUR8606  |
| CB4856                                                                                         | CT | IV | 7154656 | 7156010 | WBGene00016398 | C34D4.2  | C34D4.2  | 0.0684083433911891    | AGIWUR28894 |
| CB4856                                                                                         | CT | IV | 7156900 | 7160109 | WBGene00016397 | maph-9   | C34D4.1  | 0.414594463875361     | AGIWUR21448 |
| CB4856                                                                                         | CT | IV | 7160135 | 7165748 | WBGene00004411 | rpc-1    | C42D4.8  | 0.157329362593781     | AGIWUR40633 |
| CB4856                                                                                         | CT | IV | 7168710 | 7169346 | WBGene00004822 | skr-16   | C42D4.6  | -0.0922738645949668   | AGIWUR44191 |
| CB4856                                                                                         | CT | IV | 7169931 | 7171322 | WBGene00006251 | str-220  | C42D4.9  | 0.292843041508056     | AGIWUR13622 |
| CB4856                                                                                         | CT | IV | 7171489 | 7172691 | WBGene00006250 | str-219  | C42D4.10 | -0.000299505637359143 |             |
| AGIWUR984;AGIWUR38838                                                                          |    |    |         |         |                |          |          |                       |             |
| CB4856                                                                                         | CT | IV | 7173789 | 7175008 | WBGene00006069 | str-1    | C42D4.5  | 0.0185651349196867    | AGIWUR28880 |
| CB4856                                                                                         | CT | IV | 7177187 | 7178423 | WBGene00006109 | str-44   | C42D4.4  | 0.173284987442281     | AGIWUR8855  |
| CB4856                                                                                         | CT | IV | 7179239 | 7180484 | WBGene00016596 | C42D4.3  | C42D4.3  | -0.608460539933786    | AGIWUR3239  |
| CB4856                                                                                         | CT | IV | 7180535 | 7182993 | WBGene00016595 | C42D4.2  | C42D4.2  | -0.888290968553381    | AGIWUR26269 |
| CB4856                                                                                         | CT | IV | 7183412 | 7184697 | WBGene00016597 | clec-179 | C42D4.11 | -0.33451562879476     |             |
| AGIWUR42822                                                                                    |    |    |         |         |                |          |          |                       |             |
| CB4856                                                                                         | CT | IV | 7185283 | 7186856 | WBGene00006276 | str-249  | C42D4.12 | -0.196219585727736    |             |
| AGIWUR22230;AGIWUR41333                                                                        |    |    |         |         |                |          |          |                       |             |
| CB4856                                                                                         | CT | IV | 7187189 | 7188130 | WBGene00016598 | C42D4.13 | C42D4.13 | 0.190284819622342     |             |
| AGIWUR12548                                                                                    |    |    |         |         |                |          |          |                       |             |
| CB4856                                                                                         | CT | IV | 7189191 | 7190331 | WBGene00016594 | C42D4.1  | C42D4.1  | 0.188133695214125     | AGIWUR18620 |
| CB4856                                                                                         | CT | IV | 7191076 | 7191841 | WBGene00020043 | R13A1.5  | R13A1.5  | -0.132672398195188    | AGIWUR28017 |
| CB4856                                                                                         | CT | IV | 7193520 | 7195834 | WBGene00020046 | best-16  | R13A1.9  | 0.138118407093222     | AGIWUR33813 |
| CB4856                                                                                         | CT | IV | 7197153 | 7203643 | WBGene00006748 | unc-8    | R13A1.4  | -0.302564521452986    | AGIWUR37063 |
| CB4856                                                                                         | CT | IV | 7206246 | 7218000 | WBGene00006504 | kcc-1    | R13A1.2  | 0.00239749073824758   |             |
| AGIWUR8066;AGIWUR11215;AGIWUR19432;AGIWUR21562;AGIWUR24569;AGIWUR25696;AGIWUR27820;AGIWUR29249 |    |    |         |         |                |          |          |                       |             |
| CB4856                                                                                         | CT | IV | 7218049 | 7219485 | WBGene00020045 | glb-23   | R13A1.8  | -0.0768329689605434   | AGIWUR17701 |
| CB4856                                                                                         | CT | IV | 7220104 | 7220607 | WBGene00020041 | R13A1.1  | R13A1.1  | -0.170202926612516    | AGIWUR17265 |
| CB4856                                                                                         | CT | IV | 7225416 | 7227172 | WBGene00044504 | R13A1.10 | R13A1.10 | 0.0778731478174066    |             |
| AGIWUR11055;AGIWUR15267                                                                        |    |    |         |         |                |          |          |                       |             |
| CB4856                                                                                         | CT | IV | 7227274 | 7228306 | WBGene00017053 | D2024.5  | D2024.5  | -0.0806664828262429   |             |
| AGIWUR23426;AGIWUR37950                                                                        |    |    |         |         |                |          |          |                       |             |
| CB4856                                                                                         | CT | IV | 7228403 | 7230223 | WBGene00000292 | cap-1    | D2024.6  | 0.16515959943936      | AGIWUR37009 |
| CB4856                                                                                         | CT | IV | 7231235 | 7232822 | WBGene00017052 | D2024.4  | D2024.4  | -0.158854905069104    |             |
| AGIWUR13170;AGIWUR14444;AGIWUR40395                                                            |    |    |         |         |                |          |          |                       |             |
| CB4856                                                                                         | CT | IV | 7237722 | 7239976 | WBGene00001241 | elo-3    | D2024.3  | -0.103136267312486    | AGIWUR10615 |

|                                                                                 |    |    |         |         |                |          |          |                      |             |
|---------------------------------------------------------------------------------|----|----|---------|---------|----------------|----------|----------|----------------------|-------------|
| CB4856                                                                          | CT | IV | 7240445 | 7242270 | WBGene00017054 | gstk-2   | D2024.7  | 0.678092641342486    | AGIWUR35947 |
| CB4856                                                                          | CT | IV | 7244208 | 7245502 | WBGene00017051 | afmd-1   | D2024.2  | -0.660552190966229   |             |
| AGIWUR4942;AGIWUR16746                                                          |    |    |         |         |                |          |          |                      |             |
| CB4856                                                                          | CT | IV | 7247543 | 7249437 | WBGene00017050 | D2024.1  | D2024.1  | -0.304617727192529   | AGIWUR40720 |
| CB4856                                                                          | CT | IV | 7254990 | 7255909 | WBGene00015534 | C06E4.5  | C06E4.5  | 0.0172238105640314   | AGIWUR6487  |
| CB4856                                                                          | CT | IV | 7257217 | 7258248 | WBGene00015535 | C06E4.6  | C06E4.6  | 0.00960346934700684  | AGIWUR40975 |
| CB4856                                                                          | CT | IV | 7258653 | 7259622 | WBGene00015533 | C06E4.4  | C06E4.4  | 0.343883701435776    | AGIWUR32146 |
| CB4856                                                                          | CT | IV | 7260875 | 7262132 | WBGene00015532 | C06E4.3  | C06E4.3  | 0.493909784050961    | AGIWUR15367 |
| CB4856                                                                          | CT | IV | 7262237 | 7263237 | WBGene00015536 | glb-2    | C06E4.7  | -0.0271509744528924  | AGIWUR22556 |
| CB4856                                                                          | CT | IV | 7276961 | 7283086 | WBGene00015531 | C06E4.2  | C06E4.2  | 0.2000435207305      | AGIWUR4170  |
| CB4856                                                                          | CT | IV | 7283257 | 7283871 | WBGene00015530 | C06E4.1  | C06E4.1  | -0.0734123647338389  | AGIWUR38303 |
| CB4856                                                                          | CT | IV | 7284219 | 7285873 | WBGene00015537 | C06E4.8  | C06E4.8  | 1.24938004817737     | AGIWUR19169 |
| CB4856                                                                          | CT | IV | 7286182 | 7287526 | WBGene00018345 | F42C5.3  | F42C5.3  | 2.28776209024841     | AGIWUR36799 |
| CB4856                                                                          | CT | IV | 7288074 | 7292127 | WBGene00018346 | F42C5.4  | F42C5.4  | 0.709703056783319    | AGIWUR22927 |
| CB4856                                                                          | CT | IV | 7292536 | 7294221 | WBGene00018347 | F42C5.5  | F42C5.5  | 0.0521854480239661   | AGIWUR27276 |
| CB4856                                                                          | CT | IV | 7305628 | 7308350 | WBGene00018344 | npr-27   | F42C5.2  | 0.196845472788327    | AGIWUR10249 |
| CB4856                                                                          | CT | IV | 7308486 | 7309057 | WBGene00018348 | F42C5.6  | F42C5.6  | 0.00952086721184653  | AGIWUR32176 |
| CB4856                                                                          | CT | IV | 7309838 | 7310760 | WBGene00001713 | grl-4    | F42C5.7  | -0.557596333713068   | AGIWUR17540 |
| CB4856                                                                          | CT | IV | 7312981 | 7313864 | WBGene00004477 | rps-8    | F42C5.8  | 0.0358702719689319   |             |
| AGIWUR14443;AGIWUR25098;AGIWUR29580;AGIWUR41164;AGIWUR41234;AGIWUR43049         |    |    |         |         |                |          |          |                      |             |
| CB4856                                                                          | CT | IV | 7314371 | 7317163 | WBGene00018349 | F42C5.9  | F42C5.9  | 0.216633006741305    |             |
| AGIWUR6426;AGIWUR34872                                                          |    |    |         |         |                |          |          |                      |             |
| CB4856                                                                          | CT | IV | 7320734 | 7326663 | WBGene00018350 | ifo-1    | F42C5.10 | 0.0167670153481119   |             |
| AGIWUR19909                                                                     |    |    |         |         |                |          |          |                      |             |
| CB4856                                                                          | CT | IV | 7327110 | 7329108 | WBGene00021495 | sqst-2   | Y40C5A.1 | -0.2514081706837     |             |
| AGIWUR16543                                                                     |    |    |         |         |                |          |          |                      |             |
| CB4856                                                                          | CT | IV | 7329620 | 7332811 | WBGene00003841 | ocr-4    | Y40C5A.2 | 0.185829061061041    |             |
| AGIWUR23250                                                                     |    |    |         |         |                |          |          |                      |             |
| CB4856                                                                          | CT | IV | 7349283 | 7365111 | WBGene00021497 | Y40C5A.4 | Y40C5A.4 | 0.19028554675787     |             |
| AGIWUR41795;AGIWUR44488                                                         |    |    |         |         |                |          |          |                      |             |
| CB4856                                                                          | CT | IV | 7375147 | 7376635 | WBGene00020446 | T12B3.3  | T12B3.3  | 0.747887292049635    | AGIWUR11785 |
| CB4856                                                                          | CT | IV | 7376811 | 7378906 | WBGene00020445 | T12B3.2  | T12B3.2  | -0.457020037401259   | AGIWUR26548 |
| CB4856                                                                          | CT | IV | 7382415 | 7384752 | WBGene00020444 | T12B3.1  | T12B3.1  | -0.548953217606575   |             |
| AGIWUR11306;AGIWUR19404;AGIWUR43250                                             |    |    |         |         |                |          |          |                      |             |
| CB4856                                                                          | CT | IV | 7384756 | 7388943 | WBGene00020447 | T12B3.4  | T12B3.4  | 0.000441923513115228 | AGIWUR28778 |
| CB4856                                                                          | CT | IV | 7393221 | 7397555 | WBGene00016739 | pitr-1   | C48A7.2  | -0.0690262442544611  | AGIWUR21517 |
| CB4856                                                                          | CT | IV | 7405460 | 7418733 | WBGene00001187 | egl-19   | C48A7.1  | 0.140987914955023    |             |
| AGIWUR364;AGIWUR4859;AGIWUR5340;AGIWUR16650;AGIWUR17147;AGIWUR31639;AGIWUR43178 |    |    |         |         |                |          |          |                      |             |
| CB4856                                                                          | CT | IV | 7419118 | 7419971 | WBGene00015215 | B0496.6  | B0496.6  | -0.0358662294547383  | AGIWUR8028  |

|                                                |    |    |         |         |                |          |          |                      |                    |
|------------------------------------------------|----|----|---------|---------|----------------|----------|----------|----------------------|--------------------|
| CB4856                                         | CT | IV | 7420958 | 7422671 | WBGene00015214 | srtx-1   | B0496.5  | 0.0388515329071115   |                    |
| AGIWUR6765;AGIWUR18892;AGIWUR42651             |    |    |         |         |                |          |          |                      |                    |
| CB4856                                         | CT | IV | 7424498 | 7444660 | WBGene00006814 | unc-82   | B0496.3  | 0.177578312882896    |                    |
| AGIWUR29816;AGIWUR33821                        |    |    |         |         |                |          |          |                      |                    |
| CB4856                                         | CT | IV | 7444639 | 7445432 | WBGene00015216 | valv-1   | B0496.7  | 0.18780437817443     | AGIWUR490          |
| CB4856                                         | CT | IV | 7446390 | 7447466 | WBGene00015210 |          | B0496.1  | B0496.1              | -0.243088129955584 |
| CB4856                                         | CT | IV | 7447856 | 7449169 | WBGene00015211 |          | B0496.2  | B0496.2              | -0.115307432598367 |
| AGIWUR6296;AGIWUR8092;AGIWUR26012              |    |    |         |         |                |          |          |                      |                    |
| CB4856                                         | CT | IV | 7449067 | 7451445 | WBGene00015217 | tes-1    | B0496.8  | 0.257836117178568    | AGIWUR15116        |
| CB4856                                         | CT | IV | 7456525 | 7458214 | WBGene00017416 | F13B6.1  | F13B6.1  | 1.17105771533563     |                    |
| AGIWUR11830;AGIWUR14383;AGIWUR42047            |    |    |         |         |                |          |          |                      |                    |
| CB4856                                         | CT | IV | 7458836 | 7460424 | WBGene00017417 | F13B6.2  | F13B6.2  | -0.586146581172891   | AGIWUR26063        |
| CB4856                                         | CT | IV | 7461966 | 7465957 | WBGene00017418 | F13B6.3  | F13B6.3  | -0.25741097465044    | AGIWUR17248        |
| CB4856                                         | CT | IV | 7466702 | 7469832 | WBGene00018903 | F55G1.7  | F55G1.7  | 0.0335395347655822   | AGIWUR216          |
| CB4856                                         | CT | IV | 7470860 | 7473340 | WBGene00004044 | plk-3    | F55G1.8  | -0.00355402581010278 |                    |
| AGIWUR16334;AGIWUR37685                        |    |    |         |         |                |          |          |                      |                    |
| CB4856                                         | CT | IV | 7473476 | 7474957 | WBGene00018902 | F55G1.6  | F55G1.6  | -0.120232895371851   | AGIWUR23448        |
| CB4856                                         | CT | IV | 7475041 | 7476215 | WBGene00018901 | F55G1.5  | F55G1.5  | -0.416525431567512   | AGIWUR31696        |
| CB4856                                         | CT | IV | 7476171 | 7477344 | WBGene00018904 | F55G1.9  | F55G1.9  | -0.0503013308347189  | AGIWUR9261         |
| CB4856                                         | CT | IV | 7478171 | 7485523 | WBGene00018900 | rod-1    | F55G1.4  | -0.133333004556082   | AGIWUR3348         |
| CB4856                                         | CT | IV | 7486519 | 7486962 | WBGene00001936 | his-62   | F55G1.3  | 0.0685786888881612   | AGIWUR11523        |
| CB4856                                         | CT | IV | 7487560 | 7488025 | WBGene00001934 | his-60   | F55G1.11 | 0.00246011076877117  |                    |
| AGIWUR12606;AGIWUR26290                        |    |    |         |         |                |          |          |                      |                    |
| CB4856                                         | CT | IV | 7488216 | 7488956 | WBGene00001933 | his-59   | F55G1.2  | 0.0897756135200112   | AGIWUR33079        |
| CB4856                                         | CT | IV | 7491771 | 7493764 | WBGene00018899 | F55G1.1  | F55G1.1  | 0.023317437785277    | AGIWUR18883        |
| CB4856                                         | CT | IV | 7493843 | 7497850 | WBGene00018906 | egas-4   | F55G1.13 | 0.0254836801059062   |                    |
| AGIWUR4429;AGIWUR13990                         |    |    |         |         |                |          |          |                      |                    |
| CB4856                                         | CT | IV | 7498129 | 7501437 | WBGene00018907 | F55G1.15 | F55G1.15 | -0.0497112921555267  |                    |
| AGIWUR15014                                    |    |    |         |         |                |          |          |                      |                    |
| CB4856                                         | CT | IV | 7503622 | 7506447 | WBGene00001624 | glt-6    | R05G6.6  | -0.174452987717402   | AGIWUR44783        |
| CB4856                                         | CT | IV | 7506425 | 7507891 | WBGene00019900 | vdac-1   | R05G6.7  | -0.086318742660461   |                    |
| AGIWUR7516;AGIWUR13358;AGIWUR26690;AGIWUR34696 |    |    |         |         |                |          |          |                      |                    |
| CB4856                                         | CT | IV | 7508514 | 7509475 | WBGene00019899 | R05G6.5  | R05G6.5  | 0.0626015454734876   | AGIWUR24234        |
| CB4856                                         | CT | IV | 7509479 | 7512667 | WBGene00004039 | plc-4    | R05G6.8  | 0.178017038777511    |                    |
| AGIWUR15511;AGIWUR15657;AGIWUR38392            |    |    |         |         |                |          |          |                      |                    |
| CB4856                                         | CT | IV | 7513233 | 7514459 | WBGene00019898 | R05G6.4  | R05G6.4  | -0.259345455671077   | AGIWUR24319        |
| CB4856                                         | CT | IV | 7514366 | 7516267 | WBGene00019901 | R05G6.9  | R05G6.9  | 0.102058736018371    | AGIWUR43722        |
| CB4856                                         | CT | IV | 7516585 | 7517035 | WBGene00043466 | R05G6.3  | R05G6.3  | -0.200481329222173   | AGIWUR30281        |
| CB4856                                         | CT | IV | 7517445 | 7542535 | WBGene00019902 | R05G6.10 | R05G6.10 | -0.0418804599989411  |                    |

AGIWUR4083;AGIWUR9586;AGIWUR17594;AGIWUR19402;AGIWUR21095;AGIWUR22162;AGIWUR23598;AGIWUR30608;AGIWUR35767;AGIWUR37498;AGIWUR39891;AGIWUR44953  
 CB4856 CT IV 7543984 7550812 WBGene00003914 pam-1 F49E8.3 -0.538306561425545  
 AGIWUR2787;AGIWUR8214;AGIWUR17602;AGIWUR18876;AGIWUR23932  
 CB4856 CT IV 7548417 7551511 WBGene00018636 F49E8.2 F49E8.2 0.0942395011683121 AGIWUR43872  
 CB4856 CT IV 7551550 7553008 WBGene00000996 dif-1 F49E8.5 0.152143650313093  
 AGIWUR12711;AGIWUR41882  
 CB4856 CT IV 7553532 7554488 WBGene00018637 F49E8.6 F49E8.6 0.301304149902874 AGIWUR10807  
 CB4856 CT IV 7554489 7556447 WBGene00018638 F49E8.7 F49E8.7 -0.325838589778158 AGIWUR26569  
 CB4856 CT IV 7556637 7558759 WBGene00018635 npr1-2 F49E8.1 -0.226179597174836  
 AGIWUR6442;AGIWUR23027;AGIWUR37510  
 CB4856 CT IV 7558726 7561664 WBGene00002074 ima-3 F32E10.4 0.098250661237735  
 AGIWUR4573;AGIWUR43964  
 CB4856 CT IV 7562220 7563724 WBGene00043068 F32E10.9 F32E10.9 -0.127089445698727  
 AGIWUR22062  
 CB4856 CT IV 7567607 7568507 WBGene00017995 F32E10.8 F32E10.8 0.134704180500767  
 AGIWUR42705  
 CB4856 CT IV 7568893 7573761 WBGene00017991 clec-180 F32E10.3 -0.198767588901403  
 AGIWUR7560  
 CB4856 CT IV 7574355 7578381 WBGene00017992 F32E10.5 F32E10.5 -0.137698724438113  
 AGIWUR30292  
 CB4856 CT IV 7578501 7580269 WBGene00017993 cec-5 F32E10.6 0.0701104800894798  
 AGIWUR26501;AGIWUR38094  
 CB4856 CT IV 7580597 7583726 WBGene00017989 nol-10 F32E10.1 -0.178169719690501  
 AGIWUR40007  
 CB4856 CT IV 7588931 7628234 WBGene00018468 tag-80 F45E4.3 0.0054592198103669  
 AGIWUR2833;AGIWUR3482;AGIWUR15919;AGIWUR21429;AGIWUR30093;AGIWUR30681;AGIWUR33742;AGIWUR34251  
 CB4856 CT IV 7628206 7629042 WBGene00018470 F45E4.5 F45E4.5 0.256875800961394  
 AGIWUR1969;AGIWUR7378;AGIWUR9519;AGIWUR11474;AGIWUR13230;AGIWUR18375;AGIWUR19195;AGIWUR20605;AGIWUR22249;AGIWUR35994;AGIWUR42005  
 CB4856 CT IV 7633360 7634657 WBGene00004046 plp-1 F45E4.2 -0.147548456292472  
 AGIWUR13584;AGIWUR15669  
 CB4856 CT IV 7634786 7635710 WBGene00000190 arf-1.1 F45E4.1 -0.41457935234165  
 AGIWUR9982;AGIWUR29192  
 CB4856 CT IV 7635655 7641925 WBGene00018472 nep-16 F45E4.7 0.175095130492831  
 AGIWUR10429;AGIWUR19799;AGIWUR25987;AGIWUR37128;AGIWUR37568;AGIWUR39304  
 CB4856 CT IV 7642052 7643096 WBGene00003758 nlp-20 F45E4.8 0.167338982019476 AGIWUR31298  
 CB4856 CT IV 7644895 7646219 WBGene00001975 hmg-5 F45E4.9 -0.0227567959902135 AGIWUR23274  
 CB4856 CT IV 7646200 7654230 WBGene00001584 nrde-4 F45E4.10 0.0996338522830325

AGIWUR36051  
CB4856 CT IV 7658734 7664166 WBGene00015619 C08G9.1 C08G9.1 0.343635893113181  
AGIWUR8284;AGIWUR21343;AGIWUR34698  
CB4856 CT IV 7664157 7672972 WBGene00015620 C08G9.2 C08G9.2 0.135717443602161  
AGIWUR12102;AGIWUR35330;AGIWUR39246;AGIWUR40267;AGIWUR44579  
CB4856 CT IV 7675174 7696923 WBGene00002173 itr-1 F33D4.2 -0.184348131528173  
AGIWUR1811;AGIWUR9866;AGIWUR11333;AGIWUR16479;AGIWUR20010;AGIWUR24951;AGIWUR24980;AGIWUR25962;AGIWUR27452;AGIWUR27554;AGIWUR31844;AGIWUR40796  
CB4856 CT IV 7696932 7698420 WBGene00001456 flp-13 F33D4.3 0.552868907804397 AGIWUR40385  
CB4856 CT IV 7703873 7706905 WBGene00017996 F33D4.4 F33D4.4 0.186083867386213 AGIWUR40904  
CB4856 CT IV 7707575 7709084 WBGene00017997 mrp1-1 F33D4.5 -0.0445639779444775  
AGIWUR23551;AGIWUR40906;AGIWUR40985  
CB4856 CT IV 7709192 7709736 WBGene00017999 emc-6 F33D4.7 -0.278697968663666 AGIWUR3453  
CB4856 CT IV 7710045 7710826 WBGene00023487 mrps-24 F33D4.8 -0.0811097489349741  
AGIWUR1782;AGIWUR18029;AGIWUR24110;AGIWUR41310  
CB4856 CT IV 7710975 7714198 WBGene00003607 nhr-8 F33D4.1 -0.163552714407257  
AGIWUR9043;AGIWUR11051;AGIWUR20855;AGIWUR37299  
CB4856 CT IV 7714164 7718009 WBGene00017998 F33D4.6 F33D4.6 0.0512369113609683  
AGIWUR2259;AGIWUR4489;AGIWUR4741;AGIWUR6491;AGIWUR20721;AGIWUR21072;AGIWUR30717;AGIWUR34578;AGIWUR41364  
CB4856 CT IV 7720566 7723199 WBGene00016846 C50F7.6 C50F7.6 0.183263656759371 AGIWUR29864  
CB4856 CT IV 7726718 7727951 WBGene00016845 C50F7.5 C50F7.5 2.07508594001138  
AGIWUR5278;AGIWUR18042;AGIWUR42280  
CB4856 CT IV 7728913 7730645 WBGene00016844 sucg-1 C50F7.4 -0.360684011379178 AGIWUR31058  
CB4856 CT IV 7730669 7732060 WBGene00016847 C50F7.9 C50F7.9 -0.244778435670325 AGIWUR29923  
CB4856 CT IV 7732329 7734210 WBGene00016843 C50F7.3 C50F7.3 0.24863566982818 AGIWUR22357  
CB4856 CT IV 7734647 7736409 WBGene00000551 clx-1 C50F7.2 -0.0185675240399652 AGIWUR36592  
CB4856 CT IV 7743906 7746074 WBGene00016842 npr-35 C50F7.1 -0.0301769712815059  
AGIWUR5063;AGIWUR17132;AGIWUR28609  
CB4856 CT IV 7745979 7748225 WBGene00016848 klo-1 C50F7.10 -0.0807432178849261  
AGIWUR5356  
CB4856 CT IV 7748157 7757358 WBGene00016700 C46A5.4 C46A5.4 0.269298820301726 AGIWUR5385  
CB4856 CT IV 7757513 7759627 WBGene00016701 C46A5.5 C46A5.5 -0.0331109923006601 AGIWUR36380  
CB4856 CT IV 7760000 7763848 WBGene00016702 C46A5.6 C46A5.6 -0.0629954780747308 AGIWUR4718  
CB4856 CT IV 7763931 7767094 WBGene00016698 C46A5.1 C46A5.1 0.134227678546751 AGIWUR10952  
CB4856 CT IV 7768395 7770025 WBGene00016703 rd1-1 C46A5.8 0.198113144333377 AGIWUR19222  
CB4856 CT IV 7770770 7774275 WBGene00001827 hcf-1 C46A5.9 0.132396488103835  
AGIWUR14670;AGIWUR29125;AGIWUR34534  
CB4856 CT IV 7774411 7775956 WBGene00016374 swd-2.2 C33H5.7 -0.0348361956872818 AGIWUR13567  
CB4856 CT IV 7776025 7778022 WBGene00016373 swd-2.1 C33H5.6 -0.0626942674818984 AGIWUR4839

|                                                                                                                                                                         |    |    |         |         |                |          |          |                     |             |
|-------------------------------------------------------------------------------------------------------------------------------------------------------------------------|----|----|---------|---------|----------------|----------|----------|---------------------|-------------|
| CB4856                                                                                                                                                                  | CT | IV | 7779379 | 7782499 | WBGene00016376 | sec-10   | C33H5.9  | -0.25606343483684   |             |
| AGIWUR24432;AGIWUR29650;AGIWUR29677;AGIWUR35758;AGIWUR37825                                                                                                             |    |    |         |         |                |          |          |                     |             |
| CB4856                                                                                                                                                                  | CT | IV | 7782599 | 7783851 | WBGene00044325 | tag-321  | C33H5.19 | -0.0264282918897969 |             |
| AGIWUR8294                                                                                                                                                              |    |    |         |         |                |          |          |                     |             |
| CB4856                                                                                                                                                                  | CT | IV | 7783970 | 7785556 | WBGene00044326 | tag-322  | C33H5.10 | -0.0362242298503883 |             |
| AGIWUR5860                                                                                                                                                              |    |    |         |         |                |          |          |                     |             |
| CB4856                                                                                                                                                                  | CT | IV | 7786000 | 7789613 | WBGene00016378 | imp-3    | C33H5.11 | 0.038448912142055   |             |
| AGIWUR351;AGIWUR4509;AGIWUR18679;AGIWUR19177;AGIWUR28518                                                                                                                |    |    |         |         |                |          |          |                     |             |
| CB4856                                                                                                                                                                  | CT | IV | 7789847 | 7791229 | WBGene00004703 | rsp-6    | C33H5.12 | 0.019497168323598   |             |
| AGIWUR2502;AGIWUR3624;AGIWUR21741;AGIWUR27504;AGIWUR32559;AGIWUR34162;AGIWUR37983;AGIWUR38089                                                                           |    |    |         |         |                |          |          |                     |             |
| CB4856                                                                                                                                                                  | CT | IV | 7791704 | 7792263 | WBGene00016379 | C33H5.13 | C33H5.13 | 0.444684832003564   |             |
| AGIWUR285;AGIWUR2593;AGIWUR16455;AGIWUR20732;AGIWUR31399;AGIWUR41305                                                                                                    |    |    |         |         |                |          |          |                     |             |
| CB4856                                                                                                                                                                  | CT | IV | 7792349 | 7794809 | WBGene00016380 | ntp-1    | C33H5.14 | 0.0364960720396228  |             |
| AGIWUR738;AGIWUR12371;AGIWUR31554                                                                                                                                       |    |    |         |         |                |          |          |                     |             |
| CB4856                                                                                                                                                                  | CT | IV | 7794871 | 7796376 | WBGene00016381 | sgo-1    | C33H5.15 | 0.0165968276127018  |             |
| AGIWUR36220                                                                                                                                                             |    |    |         |         |                |          |          |                     |             |
| CB4856                                                                                                                                                                  | CT | IV | 7797192 | 7800252 | WBGene00002221 | klp-10   | C33H5.4  | -0.22288398538438   |             |
| AGIWUR403;AGIWUR20408;AGIWUR24076;AGIWUR44025                                                                                                                           |    |    |         |         |                |          |          |                     |             |
| CB4856                                                                                                                                                                  | CT | IV | 7801916 | 7803350 | WBGene00016382 | C33H5.16 | C33H5.16 | -0.204292908991571  |             |
| AGIWUR39505                                                                                                                                                             |    |    |         |         |                |          |          |                     |             |
| CB4856                                                                                                                                                                  | CT | IV | 7805040 | 7807948 | WBGene00016371 | C33H5.2  | C33H5.2  | 0.118657825405071   | AGIWUR22667 |
| CB4856                                                                                                                                                                  | CT | IV | 7808912 | 7810681 | WBGene00016370 | C33H5.1  | C33H5.1  | -0.0668410669120805 | AGIWUR4459  |
| CB4856                                                                                                                                                                  | CT | IV | 7811157 | 7812809 | WBGene00016383 | zgap-1   | C33H5.17 | -0.315140503445562  |             |
| AGIWUR8182                                                                                                                                                              |    |    |         |         |                |          |          |                     |             |
| CB4856                                                                                                                                                                  | CT | IV | 7812770 | 7815733 | WBGene00016384 | cdgs-1   | C33H5.18 | 0.0449049186060324  |             |
| AGIWUR10278;AGIWUR14325;AGIWUR20433;AGIWUR20750;AGIWUR21303;AGIWUR21397;AGIWUR25679;AGIWUR28313;AGIWUR28334;AGIWUR29500;AGIWUR30310;AGIWUR36176;AGIWUR39157;AGIWUR44187 |    |    |         |         |                |          |          |                     |             |
| CB4856                                                                                                                                                                  | CT | IV | 7818251 | 7821195 | WBGene00004363 | ric-3    | T14A8.1  | 0.465357572111744   | AGIWUR12936 |
| CB4856                                                                                                                                                                  | CT | IV | 7821673 | 7822700 | WBGene00020497 | T14A8.2  | T14A8.2  | -0.153947702921801  | AGIWUR21984 |
| CB4856                                                                                                                                                                  | CT | IV | 7826334 | 7829301 | WBGene00015509 | C06A6.4  | C06A6.4  | -0.106798619908625  | AGIWUR17848 |
| CB4856                                                                                                                                                                  | CT | IV | 7830525 | 7832401 | WBGene00015508 | mvb-12   | C06A6.3  | -0.0676280952685815 | AGIWUR28526 |
| CB4856                                                                                                                                                                  | CT | IV | 7832344 | 7834675 | WBGene00015510 | C06A6.5  | C06A6.5  | 0.0027044924686308  | AGIWUR44246 |
| CB4856                                                                                                                                                                  | CT | IV | 7837350 | 7838548 | WBGene00015511 | C06A6.7  | C06A6.7  | 0.0305982791870196  |             |
| AGIWUR1094;AGIWUR1440;AGIWUR43137                                                                                                                                       |    |    |         |         |                |          |          |                     |             |
| CB4856                                                                                                                                                                  | CT | IV | 7846630 | 7854224 | WBGene00015507 | C06A6.2  | C06A6.2  | -0.103670442159764  | AGIWUR3948  |
| CB4856                                                                                                                                                                  | CT | IV | 7868907 | 7870100 | WBGene00001453 | f1p-10   | T06C10.4 | 0.104474302609486   |             |
| AGIWUR12836;AGIWUR17073;AGIWUR17722;AGIWUR20675;AGIWUR29234                                                                                                             |    |    |         |         |                |          |          |                     |             |
| CB4856                                                                                                                                                                  | CT | IV | 7870865 | 7873034 | WBGene00020289 | T06C10.3 | T06C10.3 | -0.299086210339274  |             |
| AGIWUR11575                                                                                                                                                             |    |    |         |         |                |          |          |                     |             |

|                                                                                |    |         |         |                |          |          |                      |             |
|--------------------------------------------------------------------------------|----|---------|---------|----------------|----------|----------|----------------------|-------------|
| CB4856 CT                                                                      | IV | 7875727 | 7877881 | WBGene00002208 | kin-26   | T06C10.6 | 0.270424205091329    |             |
| AGIWUR12261                                                                    |    |         |         |                |          |          |                      |             |
| CB4856 CT                                                                      | IV | 7879317 | 7881034 | WBGene00020288 | srt-73   | T06C10.2 | -0.406098503309366   |             |
| AGIWUR1450                                                                     |    |         |         |                |          |          |                      |             |
| CB4856 CT                                                                      | IV | 7882028 | 7900247 | WBGene00016957 | atic-1   | C55F2.1  | -0.652321777151185   |             |
| AGIWUR11020;AGIWUR15539;AGIWUR31631;AGIWUR40721                                |    |         |         |                |          |          |                      |             |
| CB4856 CT                                                                      | IV | 7900200 | 7902271 | WBGene00016793 | arp-11   | C49H3.8  | -0.0681872988245535  |             |
| AGIWUR22789;AGIWUR27681;AGIWUR41817                                            |    |         |         |                |          |          |                      |             |
| CB4856 CT                                                                      | IV | 7903740 | 7907083 | WBGene00016792 | C49H3.6  | C49H3.6  | 0.140932843426418    | AGIWUR35959 |
| CB4856 CT                                                                      | IV | 7907093 | 7909474 | WBGene00016794 | C49H3.9  | C49H3.9  | 0.0404209494640249   |             |
| AGIWUR7966;AGIWUR10533;AGIWUR33949                                             |    |         |         |                |          |          |                      |             |
| CB4856 CT                                                                      | IV | 7910575 | 7915184 | WBGene00003827 | ntl-4    | C49H3.5  | -0.0698752215294114  |             |
| AGIWUR1118;AGIWUR2358;AGIWUR7312;AGIWUR8161;AGIWUR8439;AGIWUR19950;AGIWUR23304 |    |         |         |                |          |          |                      |             |
| CB4856 CT                                                                      | IV | 7915291 | 7916711 | WBGene00016791 | C49H3.4  | C49H3.4  | -0.130649326138037   |             |
| AGIWUR3522;AGIWUR10447;AGIWUR11519;AGIWUR14805                                 |    |         |         |                |          |          |                      |             |
| CB4856 CT                                                                      | IV | 7916699 | 7924129 | WBGene00002080 | xpo-3    | C49H3.10 | -0.0501385132545629  |             |
| AGIWUR39598                                                                    |    |         |         |                |          |          |                      |             |
| CB4856 CT                                                                      | IV | 7924350 | 7924968 | WBGene00016790 | C49H3.3  | C49H3.3  | -0.225370721335917   | AGIWUR2622  |
| CB4856 CT                                                                      | IV | 7925298 | 7926391 | WBGene00004471 | rps-2    | C49H3.11 | -0.00954018756354102 |             |
| AGIWUR7606;AGIWUR9077                                                          |    |         |         |                |          |          |                      |             |
| CB4856 CT                                                                      | IV | 7926748 | 7927315 | WBGene00016795 | C49H3.12 | C49H3.12 | 0.928438213364741    |             |
| AGIWUR44761                                                                    |    |         |         |                |          |          |                      |             |
| CB4856 CT                                                                      | IV | 7928159 | 7933775 | WBGene00001535 | gcy-8    | C49H3.1  | 0.272526561167263    | AGIWUR30693 |
| CB4856 CT                                                                      | IV | 7934097 | 7937746 | WBGene00000242 | bbs-2    | F20D12.3 | 0.531217687995983    |             |
| AGIWUR5162                                                                     |    |         |         |                |          |          |                      |             |
| CB4856 CT                                                                      | IV | 7937959 | 7938934 | WBGene00017645 | F20D12.7 | F20D12.7 | 0.16215351021443     |             |
| AGIWUR12975                                                                    |    |         |         |                |          |          |                      |             |
| CB4856 CT                                                                      | IV | 7939812 | 7941064 | WBGene00017644 | exc-9    | F20D12.5 | 0.510437868033396    |             |
| AGIWUR36421                                                                    |    |         |         |                |          |          |                      |             |
| CB4856 CT                                                                      | IV | 7943617 | 7946819 | WBGene00017643 | czw-1    | F20D12.4 | -0.332848755856204   |             |
| AGIWUR16838;AGIWUR18511;AGIWUR27746;AGIWUR30226                                |    |         |         |                |          |          |                      |             |
| CB4856 CT                                                                      | IV | 7948643 | 7953548 | WBGene00017642 | F20D12.2 | F20D12.2 | -0.0612280724691558  |             |
| AGIWUR4597                                                                     |    |         |         |                |          |          |                      |             |
| CB4856 CT                                                                      | IV | 7953509 | 7955898 | WBGene00000442 | ceh-19   | F20D12.6 | 0.236983423814078    |             |
| AGIWUR15960;AGIWUR38313                                                        |    |         |         |                |          |          |                      |             |
| CB4856 CT                                                                      | IV | 7957580 | 7962129 | WBGene00017641 | csr-1    | F20D12.1 | 0.182422749997237    |             |
| AGIWUR32004                                                                    |    |         |         |                |          |          |                      |             |
| CB4856 CT                                                                      | IV | 7967363 | 7969600 | WBGene00019020 | F57H12.5 | F57H12.5 | -0.340325796842201   |             |
| AGIWUR37274                                                                    |    |         |         |                |          |          |                      |             |



|                                                                                                |    |                 |                |           |           |                     |                     |
|------------------------------------------------------------------------------------------------|----|-----------------|----------------|-----------|-----------|---------------------|---------------------|
| CB4856 CT<br>AGIWUR12162                                                                       | IV | 7970525 7973363 | WBGene00019019 | frpr-10   | F57H12.4  |                     | -0.0844418407523806 |
| CB4856 CT<br>AGIWUR23322                                                                       | IV | 7975430 7976406 | WBGene00019021 | F57H12.6  | F57H12.6  |                     | -0.574812939021307  |
| CB4856 CT<br>AGIWUR273                                                                         | IV | 7977836 7979014 | WBGene00003879 | ora-1     | F57H12.3  |                     | -0.364490163737356  |
| CB4856 CT<br>AGIWUR28958                                                                       | IV | 7979823 7982005 | WBGene00006761 | unc-24    | F57H12.2  |                     | 0.13214062482278    |
| CB4856 CT<br>AGIWUR17772                                                                       | IV | 7982526 7983919 | WBGene00000183 | arf-3     | F57H12.1  |                     | 0.0596937303198928  |
| CB4856 CT<br>AGIWUR6494                                                                        | IV | 7983854 7987183 | WBGene00003178 | mec-17    | F57H12.7  |                     | -0.136258225261171  |
| CB4856 CT<br>AGIWUR29817                                                                       | IV | 7988685 7991425 | WBGene00000689 | col-115   | Y42H9B.1  |                     | -0.466574840889855  |
| CB4856 CT<br>AGIWUR2109                                                                        | IV | 7991410 8004136 | WBGene00004371 | rig-4     | Y42H9B.2  |                     | 0.14718259730698    |
| CB4856 CT<br>AGIWUR16920                                                                       | IV | 8011031 8012430 | WBGene00021541 | Y42H9B.3  | Y42H9B.3  |                     | -0.130243199532313  |
| CB4856 CT<br>AGIWUR8660;AGIWUR13048;AGIWUR25460                                                | IV | 8014149 8015722 | WBGene00016130 | C26B2.8   | C26B2.8   |                     | -0.552914348200339  |
| CB4856 CT<br>AGIWUR10974;AGIWUR14635;AGIWUR23376;AGIWUR29971                                   | IV | 8016153 8016882 | WBGene00016129 | C26B2.7   | C26B2.7   |                     | -0.331886963847134  |
| CB4856 CT                                                                                      | IV | 8016994 8018221 | WBGene00016128 | elpc-4    | C26B2.6   | 0.0319590104915406  | AGIWUR32454         |
| CB4856 CT<br>AGIWUR7415;AGIWUR34884;AGIWUR41679;AGIWUR42082;AGIWUR42711                        | IV | 8018130 8019808 | WBGene00016124 | dnc-4     | C26B2.1   | -0.0361348688463039 |                     |
| CB4856 CT                                                                                      | IV | 8021146 8022122 | WBGene00016125 | C26B2.2   | C26B2.2   | -0.134692950760501  | AGIWUR33968         |
| CB4856 CT<br>AGIWUR5390;AGIWUR12112;AGIWUR24589;AGIWUR24612;AGIWUR28272;AGIWUR38754            | IV | 8022656 8029513 | WBGene00003625 | nhr-31    | C26B2.3   | -0.414455475866733  |                     |
| CB4856 CT                                                                                      | IV | 8045045 8047363 | WBGene00016126 | nhr-258   | C26B2.4   | -0.137408462361259  | AGIWUR15286         |
| CB4856 CT<br>AGIWUR1466;AGIWUR9755;AGIWUR15045;AGIWUR23315;AGIWUR30426;AGIWUR32779;AGIWUR34494 | IV | 8062669 8084087 | WBGene00004732 | sax-7     | C18F3.2   | -0.200805280141292  |                     |
| CB4856 CT<br>AGIWUR33662                                                                       | IV | 8099918 8101424 | WBGene00021537 | Y42H9AR.2 | Y42H9AR.2 |                     | -0.169952721185773  |
| CB4856 CT<br>-0.00185772632331904                                                              | IV | 8102501 8104323 | WBGene00021540 | Y42H9AR.5 | Y42H9AR.5 |                     |                     |
| CB4856 CT<br>AGIWUR18906                                                                       | IV | 8104287 8107600 | WBGene00021538 | rabs-5    | Y42H9AR.3 |                     | -0.295636420744104  |
| CB4856 CT<br>AGIWUR1965;AGIWUR5037;AGIWUR6631;AGIWUR23066;AGIWUR30445;AGIWUR33465              | IV | 8107766 8112241 | WBGene00021539 | Y42H9AR.4 | Y42H9AR.4 |                     | -0.0240202777284484 |

|                                                                                    |    |         |         |                |           |           |                      |             |
|------------------------------------------------------------------------------------|----|---------|---------|----------------|-----------|-----------|----------------------|-------------|
| CB4856 CT                                                                          | IV | 8113384 | 8115670 | WBGene00021536 | Y42H9AR.1 | Y42H9AR.1 | 0.0877148786221813   |             |
| AGIWUR31877                                                                        |    |         |         |                |           |           |                      |             |
| CB4856 CT                                                                          | IV | 8115762 | 8118445 | WBGene00018360 | irld-8    | F42G8.9   | -0.00966295686985319 | AGIWUR18758 |
| CB4856 CT                                                                          | IV | 8121908 | 8122240 | WBGene00249816 | F42G8.18  | F42G8.18  | -0.0486501754122841  |             |
| AGIWUR20867                                                                        |    |         |         |                |           |           |                      |             |
| CB4856 CT                                                                          | IV | 8127734 | 8128909 | WBGene00249817 | F42G8.19  | F42G8.19  | -0.636290336388637   |             |
| AGIWUR34512                                                                        |    |         |         |                |           |           |                      |             |
| CB4856 CT                                                                          | IV | 8128940 | 8130256 | WBGene00018361 | F42G8.10  | F42G8.10  | -0.168733401344364   |             |
| AGIWUR2781;AGIWUR14396;AGIWUR19987;AGIWUR20573;AGIWUR25865;AGIWUR33090;AGIWUR34700 |    |         |         |                |           |           |                      |             |
| CB4856 CT                                                                          | IV | 8130561 | 8132213 | WBGene00018357 | moc-3     | F42G8.6   | -0.225379219447344   | AGIWUR33514 |
| CB4856 CT                                                                          | IV | 8132175 | 8133692 | WBGene00004979 | sph-1     | F42G8.11  | 0.0257357503381357   |             |
| AGIWUR35585                                                                        |    |         |         |                |           |           |                      |             |
| CB4856 CT                                                                          | IV | 8133789 | 8136055 | WBGene00002162 | isp-1     | F42G8.12  | 0.285605388628062    |             |
| AGIWUR2986;AGIWUR42505                                                             |    |         |         |                |           |           |                      |             |
| CB4856 CT                                                                          | IV | 8136325 | 8139087 | WBGene00018356 | islo-1    | F42G8.5   | -0.0129876851797119  |             |
| AGIWUR16021;AGIWUR21631;AGIWUR44443;AGIWUR44737                                    |    |         |         |                |           |           |                      |             |
| CB4856 CT                                                                          | IV | 8139219 | 8143151 | WBGene00004057 | pmk-3     | F42G8.4   | 0.364372686356614    | AGIWUR35419 |
| CB4856 CT                                                                          | IV | 8143500 | 8148647 | WBGene00004056 | pmk-2     | F42G8.3   | 0.0195516408176717   |             |
| AGIWUR24;AGIWUR6567;AGIWUR11118;AGIWUR28986;AGIWUR30474;AGIWUR41777;AGIWUR42922    |    |         |         |                |           |           |                      |             |
| CB4856 CT                                                                          | IV | 8148794 | 8151156 | WBGene00004055 | pmk-1     | B0218.3   | 0.0531025870860802   |             |
| AGIWUR2001;AGIWUR5179;AGIWUR10399;AGIWUR20441;AGIWUR23734;AGIWUR34850;AGIWUR36924  |    |         |         |                |           |           |                      |             |
| CB4856 CT                                                                          | IV | 8152445 | 8154857 | WBGene00015048 | faah-2    | B0218.2   | -0.028261889022545   | AGIWUR16601 |
| CB4856 CT                                                                          | IV | 8155211 | 8156587 | WBGene00015049 | B0218.5   | B0218.5   | -0.251847595330585   | AGIWUR3420  |
| CB4856 CT                                                                          | IV | 8159358 | 8162042 | WBGene00015047 | faah-1    | B0218.1   | 0.143235055703697    | AGIWUR22394 |
| CB4856 CT                                                                          | IV | 8161967 | 8163795 | WBGene00015050 | cllec-51  | B0218.6   | -0.432186375287364   |             |
| AGIWUR5196;AGIWUR44442                                                             |    |         |         |                |           |           |                      |             |
| CB4856 CT                                                                          | IV | 8164590 | 8166050 | WBGene00015051 | B0218.7   | B0218.7   | 0.117461629997228    | AGIWUR5993  |
| CB4856 CT                                                                          | IV | 8167164 | 8168813 | WBGene00015052 | cllec-52  | B0218.8   | 0.188737029179137    | AGIWUR921   |
| CB4856 CT                                                                          | IV | 8176479 | 8188879 | WBGene00003961 | pct-1     | C07G1.3   | 0.171782977408005    |             |
| AGIWUR35135;AGIWUR38001                                                            |    |         |         |                |           |           |                      |             |
| CB4856 CT                                                                          | IV | 8188904 | 8198951 | WBGene00006957 | wsp-1     | C07G1.4   | -0.0655453798063821  |             |
| AGIWUR1941;AGIWUR4372;AGIWUR9072;AGIWUR9845;AGIWUR15505;AGIWUR19474;AGIWUR41409    |    |         |         |                |           |           |                      |             |
| CB4856 CT                                                                          | IV | 8200604 | 8201233 | WBGene00044608 | glrx-22   | C07G1.8   | -0.0174572760483329  |             |
| AGIWUR2696;AGIWUR10561;AGIWUR19689;AGIWUR27723;AGIWUR33581                         |    |         |         |                |           |           |                      |             |
| CB4856 CT                                                                          | IV | 8201378 | 8206048 | WBGene00004101 | hgrs-1    | C07G1.5   | 0.203377331310621    | AGIWUR13098 |
| CB4856 CT                                                                          | IV | 8206614 | 8213723 | WBGene00006620 | svh-1     | C07G1.1   | -0.0698615013568782  |             |
| AGIWUR22767;AGIWUR25262                                                            |    |         |         |                |           |           |                      |             |
| CB4856 CT                                                                          | IV | 8213826 | 8220036 | WBGene00003839 | ocr-2     | T09A12.3  | -0.409775705252835   |             |
| AGIWUR7008                                                                         |    |         |         |                |           |           |                      |             |

|                                                                                    |    |    |         |         |                |           |           |                     |             |
|------------------------------------------------------------------------------------|----|----|---------|---------|----------------|-----------|-----------|---------------------|-------------|
| CB4856                                                                             | CT | IV | 8222202 | 8223459 | WBGene00020373 | gpx-6     | T09A12.2  | 0.203383787317306   |             |
| AGIWUR5259;AGIWUR30035                                                             |    |    |         |         |                |           |           |                     |             |
| CB4856                                                                             | CT | IV | 8225674 | 8226366 | WBGene00020374 | T09A12.5  | T09A12.5  | 0.0130035332743486  |             |
| AGIWUR19944                                                                        |    |    |         |         |                |           |           |                     |             |
| CB4856                                                                             | CT | IV | 8226337 | 8236602 | WBGene00003656 | nhr-66    | T09A12.4  | -0.110154911474288  |             |
| AGIWUR5339;AGIWUR18857;AGIWUR19208;AGIWUR25358;AGIWUR26631;AGIWUR30253;AGIWUR43015 |    |    |         |         |                |           |           |                     |             |
| CB4856                                                                             | CT | IV | 8259248 | 8259979 | WBGene00019507 | K07H8.7   | K07H8.7   | 0.113470150074519   |             |
| AGIWUR3973;AGIWUR19600                                                             |    |    |         |         |                |           |           |                     |             |
| CB4856                                                                             | CT | IV | 8261134 | 8266462 | WBGene00006930 | vit-6     | K07H8.6   | 0.0390003084246668  |             |
| AGIWUR8837;AGIWUR35220                                                             |    |    |         |         |                |           |           |                     |             |
| CB4856                                                                             | CT | IV | 8266752 | 8268435 | WBGene00019508 | K07H8.8   | K07H8.8   | 0.175750750496698   | AGIWUR19784 |
| CB4856                                                                             | CT | IV | 8273226 | 8275332 | WBGene00044510 | K07H8.11  | K07H8.11  | 1.07928609346465    |             |
| AGIWUR24203;AGIWUR36263                                                            |    |    |         |         |                |           |           |                     |             |
| CB4856                                                                             | CT | IV | 8275621 | 8276709 | WBGene00044509 | K07H8.12  | K07H8.12  | -0.0820249462542462 |             |
| AGIWUR17978;AGIWUR27697;AGIWUR31520;AGIWUR37850;AGIWUR38264                        |    |    |         |         |                |           |           |                     |             |
| CB4856                                                                             | CT | IV | 8285175 | 8286566 | WBGene00019509 | K07H8.9   | K07H8.9   | 0.361182528177373   | AGIWUR36215 |
| CB4856                                                                             | CT | IV | 8286587 | 8289531 | WBGene00019510 | K07H8.10  | K07H8.10  | -0.0805288665671586 |             |
| AGIWUR657;AGIWUR2486;AGIWUR8519;AGIWUR15273;AGIWUR22002;AGIWUR26379;AGIWUR28977    |    |    |         |         |                |           |           |                     |             |
| CB4856                                                                             | CT | IV | 8290273 | 8291496 | WBGene00000923 | daf-31    | K07H8.3   | -0.0951400866643475 | AGIWUR20212 |
| CB4856                                                                             | CT | IV | 8291515 | 8294596 | WBGene00019504 | K07H8.2   | K07H8.2   | 0.010133654879156   |             |
| AGIWUR2279;AGIWUR6071;AGIWUR17654;AGIWUR26947                                      |    |    |         |         |                |           |           |                     |             |
| CB4856                                                                             | CT | IV | 8294690 | 8297283 | WBGene00019503 | tbce-1    | K07H8.1   | -0.174867028335761  | AGIWUR15141 |
| CB4856                                                                             | CT | IV | 8297197 | 8299843 | WBGene00018072 | npr1-3    | F35H10.7  | -0.0384377698636538 |             |
| AGIWUR4422;AGIWUR42532                                                             |    |    |         |         |                |           |           |                     |             |
| CB4856                                                                             | CT | IV | 8299936 | 8300647 | WBGene00018071 | F35H10.6  | F35H10.6  | -0.0770649637663574 |             |
| AGIWUR17331                                                                        |    |    |         |         |                |           |           |                     |             |
| CB4856                                                                             | CT | IV | 8300755 | 8301165 | WBGene00018070 | F35H10.5  | F35H10.5  | 0.182905863847537   |             |
| AGIWUR44449                                                                        |    |    |         |         |                |           |           |                     |             |
| CB4856                                                                             | CT | IV | 8303968 | 8307369 | WBGene00006914 | vha-5     | F35H10.4  | -0.19374354130251   |             |
| AGIWUR21901;AGIWUR30912;AGIWUR35131                                                |    |    |         |         |                |           |           |                     |             |
| CB4856                                                                             | CT | IV | 8307294 | 8312946 | WBGene00018073 | F35H10.10 | F35H10.10 | -0.157826101303819  |             |
| AGIWUR17187                                                                        |    |    |         |         |                |           |           |                     |             |
| CB4856                                                                             | CT | IV | 8325967 | 8327062 | WBGene00018069 | F35H10.3  | F35H10.3  | -0.105550437115159  |             |
| AGIWUR9334                                                                         |    |    |         |         |                |           |           |                     |             |
| CB4856                                                                             | CT | IV | 8329205 | 8329956 | WBGene00018068 | F35H10.2  | F35H10.2  | 0.0895924583264485  |             |
| AGIWUR36343                                                                        |    |    |         |         |                |           |           |                     |             |
| CB4856                                                                             | CT | IV | 8332826 | 8333559 | WBGene00003099 | lys-10    | F17E9.11  | 0.220489795738708   |             |
| AGIWUR42956                                                                        |    |    |         |         |                |           |           |                     |             |
| CB4856                                                                             | CT | IV | 8333557 | 8334021 | WBGene00001905 | his-31    | F17E9.12  | 0.0576867083550034  |             |

AGIWUR22692  
CB4856 CT IV 8334298 8334862 WBGene00001906 his-32 F17E9.10 0.387679948206898  
AGIWUR5672;AGIWUR14633;AGIWUR15754;AGIWUR21832;AGIWUR32746  
CB4856 CT IV 8336807 8338172 WBGene00023270 F17E9.14 F17E9.14 -0.299353336693732  
AGIWUR44242  
CB4856 CT IV 8342685 8344485 WBGene00017543 lgc-5 F17E9.7 0.265240640167049 AGIWUR8436  
CB4856 CT IV 8345818 8346546 WBGene00017542 F17E9.5 F17E9.5 -0.499952596430226 AGIWUR38365  
CB4856 CT IV 8348373 8349169 WBGene00017541 F17E9.4 F17E9.4 0.379637734855642 AGIWUR2460  
CB4856 CT IV 8354874 8355433 WBGene00017540 F17E9.3 F17E9.3 -0.610455212614539 AGIWUR9498  
CB4856 CT IV 8355892 8356503 WBGene00017539 F17E9.2 F17E9.2 -0.31896740654013 AGIWUR27596  
CB4856 CT IV 8356776 8357854 WBGene00000690 col-116 F17E9.1 0.316226676838989 AGIWUR39272  
CB4856 CT IV 8357938 8358592 WBGene00044953 D2096.13 D2096.13 -0.112375133086333  
AGIWUR4484;AGIWUR9578;AGIWUR10373;AGIWUR22490  
CB4856 CT IV 8359165 8359716 WBGene00017072 D2096.5 D2096.5 -0.593101374818906 AGIWUR14138  
CB4856 CT IV 8361089 8363370 WBGene00005019 sqv-1 D2096.4 -0.122792872882918  
AGIWUR5412;AGIWUR24328;AGIWUR41399  
CB4856 CT IV 8363463 8366376 WBGene00017079 D2096.12 D2096.12 -0.264496683168126  
AGIWUR8270  
CB4856 CT IV 8366539 8375371 WBGene00017071 aagr-1 D2096.3 0.662604160459228 AGIWUR12328  
CB4856 CT IV 8375720 8377698 WBGene00017074 D2096.7 D2096.7 -0.216214413416291  
AGIWUR3581;AGIWUR8824;AGIWUR12898;AGIWUR41238  
CB4856 CT IV 8377703 8379319 WBGene00017075 nap-1 D2096.8 -0.199225862447395 AGIWUR22992  
CB4856 CT IV 8379984 8381925 WBGene00017070 praf-3 D2096.2 -0.0701344152901031  
AGIWUR9038;AGIWUR18527;AGIWUR31847;AGIWUR40100  
CB4856 CT IV 8381922 8382814 WBGene00017076 D2096.9 D2096.9 0.232665744594474 AGIWUR3892  
CB4856 CT IV 8387626 8389239 WBGene00017077 D2096.10 D2096.10  
0.000246438543156202 AGIWUR19057  
CB4856 CT IV 8398923 8399762 WBGene00019789 M116.2 M116.2 0.0248824668480978 AGIWUR34103  
CB4856 CT IV 8414293 8421061 WBGene00019792 M116.5 M116.5 0.0103343479843598 AGIWUR4969  
CB4856 CT IV 8422053 8424146 WBGene00023488 srz-84 T26A8.5 0.0555003156813649  
AGIWUR7668;AGIWUR26211;AGIWUR32005;AGIWUR37031;AGIWUR38715;AGIWUR44688  
CB4856 CT IV 8424278 8428512 WBGene00020825 tmem-231 T26A8.2 0.535787402928444  
AGIWUR2333  
CB4856 CT IV 8428961 8431493 WBGene00020827 T26A8.4 T26A8.4 -0.12627247548399 AGIWUR31550  
CB4856 CT IV 8433038 8438004 WBGene00020824 T26A8.1 T26A8.1 -0.0811000164207343 AGIWUR25557  
CB4856 CT IV 8447204 8449048 WBGene00020138 T01B11.1 T01B11.1 -0.0685213452913072  
AGIWUR23119  
CB4856 CT IV 8449353 8451771 WBGene00020139 T01B11.2 T01B11.2 -0.283033602760121  
AGIWUR1975;AGIWUR23355;AGIWUR24343;AGIWUR27969;AGIWUR37585

|                                                                                              |    |         |         |                |           |            |                      |             |
|----------------------------------------------------------------------------------------------|----|---------|---------|----------------|-----------|------------|----------------------|-------------|
| CB4856 CT                                                                                    | IV | 8457280 | 8458933 | WBGene00006374 | syx-4     | T01B11.3   | -0.0153765238913675  |             |
| AGIWUR12060                                                                                  |    |         |         |                |           |            |                      |             |
| CB4856 CT                                                                                    | IV | 8459178 | 8460327 | WBGene00020140 | ant-1.4   | T01B11.4   | -0.0504088036588963  |             |
| AGIWUR8471;AGIWUR23208                                                                       |    |         |         |                |           |            |                      |             |
| CB4856 CT                                                                                    | IV | 8460999 | 8463816 | WBGene00006220 | str-176   | T01B11.5   | -0.0339937457330528  |             |
| AGIWUR2743;AGIWUR7347;AGIWUR17297;AGIWUR25379;AGIWUR28348                                    |    |         |         |                |           |            |                      |             |
| CB4856 CT                                                                                    | IV | 8464752 | 8472605 | WBGene00003837 | oat-1     | T01B11.7   | -0.530666733863661   |             |
| AGIWUR1624;AGIWUR6649;AGIWUR13136                                                            |    |         |         |                |           |            |                      |             |
| CB4856 CT                                                                                    | IV | 8474056 | 8475278 | WBGene00016181 | C28C12.11 | C28C12.11  | 0.213621554459438    |             |
| AGIWUR8444                                                                                   |    |         |         |                |           |            |                      |             |
| CB4856 CT                                                                                    | IV | 8477182 | 8480656 | WBGene00004995 | spp-10    | C28C12.7   | 0.255493283479097    |             |
| AGIWUR10234;AGIWUR13523;AGIWUR23082;AGIWUR44161                                              |    |         |         |                |           |            |                      |             |
| CB4856 CT                                                                                    | IV | 8481664 | 8483710 | WBGene00004993 | spp-8     | C28C12.5   | 1.27656085922146     |             |
| AGIWUR19253                                                                                  |    |         |         |                |           |            |                      |             |
| CB4856 CT                                                                                    | IV | 8487497 | 8488481 | WBGene00016180 | C28C12.4  | C28C12.4   | 0.049505749334612    |             |
| AGIWUR31231                                                                                  |    |         |         |                |           |            |                      |             |
| CB4856 CT                                                                                    | IV | 8490221 | 8490857 | WBGene00016179 | C28C12.3  | C28C12.3   | -0.14554961014859    |             |
| AGIWUR40139                                                                                  |    |         |         |                |           |            |                      |             |
| CB4856 CT                                                                                    | IV | 8492542 | 8494487 | WBGene00005670 | sru-7     | C28C12.13  | 0.0947224576113772   |             |
| AGIWUR1844                                                                                   |    |         |         |                |           |            |                      |             |
| CB4856 CT                                                                                    | IV | 8494550 | 8496363 | WBGene00016182 | C28C12.12 | C28C12.12  | -0.137795465913812   |             |
| AGIWUR5702;AGIWUR6603;AGIWUR6924;AGIWUR25765;AGIWUR26275;AGIWUR26545;AGIWUR29922;AGIWUR41298 |    |         |         |                |           |            |                      |             |
| CB4856 CT                                                                                    | IV | 8496486 | 8498871 | WBGene00001566 | acd-13    | C28C12.9   | -0.195916011250326   |             |
| AGIWUR33202                                                                                  |    |         |         |                |           |            |                      |             |
| CB4856 CT                                                                                    | IV | 8499310 | 8500076 | WBGene00016178 | mesp-1    | C28C12.2   | 0.0381105593782713   |             |
| AGIWUR28639                                                                                  |    |         |         |                |           |            |                      |             |
| CB4856 CT                                                                                    | IV | 8501479 | 8502983 | WBGene00016177 | C28C12.1  | C28C12.1   | -0.113399601913134   |             |
| AGIWUR1654;AGIWUR16632;AGIWUR31146;AGIWUR32280;AGIWUR34091;AGIWUR39245                       |    |         |         |                |           |            |                      |             |
| CB4856 CT                                                                                    | IV | 8503493 | 8510559 | WBGene00006450 | tag-77    | C28C12.10  | 0.118128554500675    |             |
| AGIWUR11253;AGIWUR18212;AGIWUR32240;AGIWUR36697                                              |    |         |         |                |           |            |                      |             |
| CB4856 CT                                                                                    | IV | 8513205 | 8513916 | WBGene00044001 | C09G4.4   | C09G4.4    | -0.0178099820805659  |             |
| AGIWUR28241;AGIWUR42704                                                                      |    |         |         |                |           |            |                      |             |
| CB4856 CT                                                                                    | IV | 8513919 | 8514725 | WBGene00001051 | cks-1     | C09G4.3    | 0.00246570613093766  | AGIWUR43376 |
| CB4856 CT                                                                                    | IV | 8520894 | 8538182 | WBGene00015650 | pkg-2     | C09G4.2    | 0.0031766949588885   |             |
| AGIWUR4010;AGIWUR11603;AGIWUR13590;AGIWUR16392;AGIWUR23473;AGIWUR31328;AGIWUR39930           |    |         |         |                |           |            |                      |             |
| CB4856 CT                                                                                    | IV | 8539123 | 8544403 | WBGene00002043 | hyl-1     | C09G4.1    | -0.00139964826285421 |             |
| AGIWUR19450;AGIWUR23662;AGIWUR38311                                                          |    |         |         |                |           |            |                      |             |
| CB4856 CT                                                                                    | IV | 8559434 | 8563159 | WBGene00022004 | npr-22    | Y59H11AL.1 | 0.00618447062926508  |             |
| AGIWUR20346;AGIWUR29725                                                                      |    |         |         |                |           |            |                      |             |

|                                                                        |    |         |         |                 |            |            |                      |             |
|------------------------------------------------------------------------|----|---------|---------|-----------------|------------|------------|----------------------|-------------|
| CB4856 CT                                                              | IV | 8569144 | 8570353 | WBGene00022008  | Y59H11AM.4 | Y59H11AM.4 | 0.184015910597295    |             |
| AGIWUR21150                                                            |    |         |         |                 |            |            |                      |             |
| CB4856 CT                                                              | IV | 8571438 | 8571821 | WBGene00022005  | Y59H11AM.1 | Y59H11AM.1 | 0.29724837873092     |             |
| AGIWUR27952                                                            |    |         |         |                 |            |            |                      |             |
| CB4856 CT                                                              | IV | 8585516 | 8594613 | WBGene00022010  | catp-7     | Y59H11AR.2 | 0.635360602193753    |             |
| AGIWUR26104                                                            |    |         |         |                 |            |            |                      |             |
| CB4856 CT                                                              | IV | 8594871 | 8595417 | WBGene00022011  | Y59H11AR.3 | Y59H11AR.3 | -0.474174353497415   |             |
| AGIWUR27882                                                            |    |         |         |                 |            |            |                      |             |
| CB4856 CT                                                              | IV | 8596067 | 8596943 | WBGene00044511  | clec-181   | Y59H11AR.5 | 0.0488567155144892   |             |
| AGIWUR10135;AGIWUR12743;AGIWUR39931                                    |    |         |         |                 |            |            |                      |             |
| CB4856 CT                                                              | IV | 8597762 | 8598727 | WBGene00077437  | Y59H11AR.6 | Y59H11AR.6 | 0.0145282843225214   |             |
| AGIWUR1141;AGIWUR20626;AGIWUR26591;AGIWUR30910;AGIWUR39286;AGIWUR45101 |    |         |         |                 |            |            |                      |             |
| CB4856 CT                                                              | IV | 8598739 | 8600742 | WBGene00022012  | Y59H11AR.4 | Y59H11AR.4 | 0.18570424211789     |             |
| AGIWUR9861;AGIWUR14711                                                 |    |         |         |                 |            |            |                      |             |
| CB4856 CT                                                              | IV | 8609239 | 8611595 | WBGene00018335  | F42A9.6    | F42A9.6    | -0.336174401805724   | AGIWUR15055 |
| CB4856 CT                                                              | IV | 8612363 | 8614683 | WBGene00018334  | cyp-33E2   | F42A9.5    | -0.406236190920639   |             |
| AGIWUR4458                                                             |    |         |         |                 |            |            |                      |             |
| CB4856 CT                                                              | IV | 8616006 | 8617147 | WBGene00018336  | F42A9.7    | F42A9.7    | 0.0158589839113592   | AGIWUR26310 |
| CB4856 CT                                                              | IV | 8617285 | 8618153 | WBGene00018332  | F42A9.3    | F42A9.3    | -0.0848065657998482  | AGIWUR21805 |
| CB4856 CT                                                              | IV | 8618244 | 8618788 | WBGene00018337  | F42A9.8    | F42A9.8    | 0.0940287625386613   | AGIWUR17831 |
| CB4856 CT                                                              | IV | 8620683 | 8626149 | WBGene00003034  | lin-49     | F42A9.2    | -0.147581595605851   | AGIWUR15629 |
| CB4856 CT                                                              | IV | 8631334 | 8644019 | WBGene00006483  | dgk-4      | F42A9.1    | -0.191387147912216   | AGIWUR31290 |
| CB4856 CT                                                              | IV | 8644732 | 8645345 | WBGene00016767  | C49C8.3    | C49C8.3    | 0.141643124738039    | AGIWUR16082 |
| CB4856 CT                                                              | IV | 8645521 | 8648429 | WBGene00016768  | cyp-33E1   | C49C8.4    | 0.34553813406092     |             |
| AGIWUR34645                                                            |    |         |         |                 |            |            |                      |             |
| CB4856 CT                                                              | IV | 8648596 | 8653677 | WBGene00016769  | C49C8.5    | C49C8.5    | -0.00106143977793671 | AGIWUR21299 |
| CB4856 CT                                                              | IV | 8654604 | 8656829 | WBGene00016765  | C49C8.1    | C49C8.1    | -0.352307677524256   | AGIWUR6466  |
| CB4856 CT                                                              | IV | 8657455 | 8658184 | WBGene00016770  | C49C8.6    | C49C8.6    | -0.138335476132466   | AGIWUR9489  |
| CB4856 CT                                                              | IV | 8666252 | 8667177 | WBGene00017235  | F08B4.3    | F08B4.3    | 0.0194101007563248   | AGIWUR5523  |
| CB4856 CT                                                              | IV | 8668941 | 8676542 | WBGene00000397  | cdh-5      | F08B4.2    | 0.438033044127178    |             |
| AGIWUR11543;AGIWUR30314;AGIWUR32142                                    |    |         |         |                 |            |            |                      |             |
| CB4856 CT                                                              | IV | 8677590 | 8678019 | WBGene000255375 | F08B4.8    | F08B4.8    | 0.31031006496635     | AGIWUR22110 |
| CB4856 CT                                                              | IV | 8678695 | 8679325 | WBGene00017236  | F08B4.4    | F08B4.4    | -0.0793657520176483  | AGIWUR989   |
| CB4856 CT                                                              | IV | 8682239 | 8686610 | WBGene00017237  | pole-2     | F08B4.5    | -0.150563620747168   |             |
| AGIWUR19783;AGIWUR31958                                                |    |         |         |                 |            |            |                      |             |
| CB4856 CT                                                              | IV | 8686756 | 8687810 | WBGene00017238  | F08B4.7    | F08B4.7    | -0.256208092647249   |             |
| AGIWUR1268;AGIWUR30177                                                 |    |         |         |                 |            |            |                      |             |
| CB4856 CT                                                              | IV | 8688273 | 8691513 | WBGene00002028  | hst-1      | F08B4.6    | 0.189175222826943    | AGIWUR10146 |
| CB4856 CT                                                              | IV | 8692086 | 8696553 | WBGene00000994  | dic-1      | F08B4.1    | -0.279360855309296   |             |

|                                                                        |    |    |         |         |                |          |          |                     |                    |
|------------------------------------------------------------------------|----|----|---------|---------|----------------|----------|----------|---------------------|--------------------|
| AGIWUR9759;AGIWUR35715                                                 |    |    |         |         |                |          |          |                     |                    |
| CB4856                                                                 | CT | IV | 8697736 | 8702699 | WBGene00019230 | ttl1-11  | H23L24.3 |                     | -0.132583305577096 |
| AGIWUR37576                                                            |    |    |         |         |                |          |          |                     |                    |
| CB4856                                                                 | CT | IV | 8703043 | 8705606 | WBGene00019231 | H23L24.4 | H23L24.4 |                     | -0.193224217497642 |
| AGIWUR33495                                                            |    |    |         |         |                |          |          |                     |                    |
| CB4856                                                                 | CT | IV | 8712635 | 8715027 | WBGene00004052 | parg-2   | H23L24.5 |                     | -0.460622056707235 |
| AGIWUR20011                                                            |    |    |         |         |                |          |          |                     |                    |
| CB4856                                                                 | CT | IV | 8715247 | 8717881 | WBGene00019229 | ipla-5   | H23L24.2 |                     | -0.111319064168107 |
| AGIWUR35798                                                            |    |    |         |         |                |          |          |                     |                    |
| CB4856                                                                 | CT | IV | 8724020 | 8724876 | WBGene00009014 | F21D5.9  | F21D5.9  | 0.47640969696114    | AGIWUR22252        |
| CB4856                                                                 | CT | IV | 8725722 | 8728060 | WBGene00009006 | F21D5.1  | F21D5.1  | -0.138502281072406  |                    |
| AGIWUR5139;AGIWUR23171;AGIWUR26887;AGIWUR27754;AGIWUR34703;AGIWUR36880 |    |    |         |         |                |          |          |                     |                    |
| CB4856                                                                 | CT | IV | 8728139 | 8730510 | WBGene00009007 | otub-3   | F21D5.2  | -0.368428919461826  |                    |
| AGIWUR5723;AGIWUR5991;AGIWUR13125;AGIWUR18617;AGIWUR25556              |    |    |         |         |                |          |          |                     |                    |
| CB4856                                                                 | CT | IV | 8730721 | 8735686 | WBGene00009008 | F21D5.3  | F21D5.3  | -0.369527560332411  | AGIWUR19369        |
| CB4856                                                                 | CT | IV | 8735695 | 8739394 | WBGene00009010 | F21D5.5  | F21D5.5  | -0.102038241688568  | AGIWUR8645         |
| CB4856                                                                 | CT | IV | 8739504 | 8740026 | WBGene00009013 | mrps-33  | F21D5.8  | -0.0608439531719611 | AGIWUR26351        |
| CB4856                                                                 | CT | IV | 8740140 | 8741388 | WBGene00009011 | F21D5.6  | F21D5.6  | -0.246578078841939  | AGIWUR32885        |
| CB4856                                                                 | CT | IV | 8741383 | 8743704 | WBGene00009012 | F21D5.7  | F21D5.7  | -0.182176578995895  |                    |
| AGIWUR448;AGIWUR7143;AGIWUR44082                                       |    |    |         |         |                |          |          |                     |                    |
| CB4856                                                                 | CT | IV | 8744411 | 8745691 | WBGene00008972 | F20C5.7  | F20C5.7  | 0.159273654450773   | AGIWUR17508        |
| CB4856                                                                 | CT | IV | 8746252 | 8752676 | WBGene00004051 | parg-1   | F20C5.1  | -0.175895273748869  |                    |
| AGIWUR4893;AGIWUR38395;AGIWUR43587                                     |    |    |         |         |                |          |          |                     |                    |
| CB4856                                                                 | CT | IV | 8753195 | 8754823 | WBGene00008968 | F20C5.3  | F20C5.3  | 0.100892234627924   | AGIWUR12683        |
| CB4856                                                                 | CT | IV | 8755038 | 8762057 | WBGene00002222 | k1p-11   | F20C5.2  | 0.270390572320773   |                    |
| AGIWUR5353;AGIWUR17348;AGIWUR26051;AGIWUR27395                         |    |    |         |         |                |          |          |                     |                    |
| CB4856                                                                 | CT | IV | 8764867 | 8767450 | WBGene00008969 | F20C5.4  | F20C5.4  | -0.0288469483899902 | AGIWUR25943        |
| CB4856                                                                 | CT | IV | 8767688 | 8770092 | WBGene00008970 | F20C5.5  | F20C5.5  | 0.28968009906243    | AGIWUR33556        |
| CB4856                                                                 | CT | IV | 8771558 | 8773206 | WBGene00008971 | F20C5.6  | F20C5.6  | 0.545509001724861   |                    |
| AGIWUR25050;AGIWUR31933;AGIWUR40251                                    |    |    |         |         |                |          |          |                     |                    |
| CB4856                                                                 | CT | IV | 8773977 | 8778145 | WBGene00007900 | C33D9.6  | C33D9.6  | 0.450569520680256   |                    |
| AGIWUR13080;AGIWUR24131;AGIWUR35116;AGIWUR41899;AGIWUR42317            |    |    |         |         |                |          |          |                     |                    |
| CB4856                                                                 | CT | IV | 8778721 | 8780872 | WBGene00007899 | C33D9.5  | C33D9.5  | 0.786327252763424   | AGIWUR13505        |
| CB4856                                                                 | CT | IV | 8783271 | 8785254 | WBGene00194651 | C33D9.13 | C33D9.13 | 0.353498835404494   |                    |
| AGIWUR30795                                                            |    |    |         |         |                |          |          |                     |                    |
| CB4856                                                                 | CT | IV | 8787459 | 8788057 | WBGene00044239 | C33D9.10 | C33D9.10 | 0.259009620016241   |                    |
| AGIWUR14289;AGIWUR29107;AGIWUR29938;AGIWUR33034;AGIWUR38129            |    |    |         |         |                |          |          |                     |                    |
| CB4856                                                                 | CT | IV | 8788449 | 8790244 | WBGene00005698 | sru-35   | C33D9.4  | -0.113276906772985  | AGIWUR3912         |
| CB4856                                                                 | CT | IV | 8790742 | 8793294 | WBGene00007898 | C33D9.3  | C33D9.3  | 0.257327576296435   | AGIWUR40327        |

|                                                                                  |    |    |         |         |                |          |          |                      |             |
|----------------------------------------------------------------------------------|----|----|---------|---------|----------------|----------|----------|----------------------|-------------|
| CB4856                                                                           | CT | IV | 8796881 | 8798355 | WBGene00007897 | clec-182 | C33D9.2  | 0.029835654799963    |             |
| AGIWUR38966                                                                      |    |    |         |         |                |          |          |                      |             |
| CB4856                                                                           | CT | IV | 8799089 | 8813539 | WBGene00001366 | exc-5    | C33D9.1  | 0.172736372436076    |             |
| AGIWUR702;AGIWUR39104                                                            |    |    |         |         |                |          |          |                      |             |
| CB4856                                                                           | CT | IV | 8816335 | 8818525 | WBGene00012118 | grsp-2   | T28C6.1  | -0.0863869903864938  |             |
| AGIWUR5776;AGIWUR8431;AGIWUR8780;AGIWUR11470;AGIWUR29223;AGIWUR29771;AGIWUR34493 |    |    |         |         |                |          |          |                      |             |
| CB4856                                                                           | CT | IV | 8818555 | 8819158 | WBGene00045183 | T28C6.10 | T28C6.10 | 0.542736332060853    |             |
| AGIWUR2357;AGIWUR9034;AGIWUR27977;AGIWUR30031;AGIWUR41136                        |    |    |         |         |                |          |          |                      |             |
| CB4856                                                                           | CT | IV | 8820356 | 8821265 | WBGene00012119 | T28C6.3  | T28C6.3  | 0.0907240657902673   | AGIWUR3511  |
| CB4856                                                                           | CT | IV | 8821447 | 8822874 | WBGene00012120 | T28C6.5  | T28C6.5  | -0.235026595644019   | AGIWUR23333 |
| CB4856                                                                           | CT | IV | 8840725 | 8842805 | WBGene00011706 | T11B7.1  | T11B7.1  | 0.0964144994553369   | AGIWUR462   |
| CB4856                                                                           | CT | IV | 8843621 | 8844491 | WBGene00011707 | T11B7.2  | T11B7.2  | -0.104084160831734   | AGIWUR18714 |
| CB4856                                                                           | CT | IV | 8848182 | 8849673 | WBGene00000692 | col-118  | T11B7.3  | 0.107483905084337    |             |
| AGIWUR9680;AGIWUR43006                                                           |    |    |         |         |                |          |          |                      |             |
| CB4856                                                                           | CT | IV | 8850865 | 8851127 | WBGene00044914 | T11B7.6  | T11B7.6  | -0.49236529436778    | AGIWUR38341 |
| CB4856                                                                           | CT | IV | 8852500 | 8862228 | WBGene00001132 | alp-1    | T11B7.4  | -0.419525713769379   |             |
| AGIWUR1301;AGIWUR11637;AGIWUR14354;AGIWUR16309                                   |    |    |         |         |                |          |          |                      |             |
| CB4856                                                                           | CT | IV | 8862173 | 8865483 | WBGene00007492 | C09G9.1  | C09G9.1  | 0.24070397071533     |             |
| AGIWUR6290;AGIWUR24125;AGIWUR40398                                               |    |    |         |         |                |          |          |                      |             |
| CB4856                                                                           | CT | IV | 8868036 | 8869679 | WBGene00007493 | npp-23   | C09G9.2  | -0.0320612583142648  | AGIWUR42471 |
| CB4856                                                                           | CT | IV | 8869962 | 8873057 | WBGene00007494 | C09G9.3  | C09G9.3  | 0.0555373551941067   |             |
| AGIWUR10147;AGIWUR37282                                                          |    |    |         |         |                |          |          |                      |             |
| CB4856                                                                           | CT | IV | 8873820 | 8874007 | WBGene00045323 | C09G9.9  | C09G9.9  | -0.0362314357806692  |             |
| AGIWUR13666;AGIWUR14560;AGIWUR17102;AGIWUR28067;AGIWUR33063                      |    |    |         |         |                |          |          |                      |             |
| CB4856                                                                           | CT | IV | 8874129 | 8877022 | WBGene00006409 | hdl-2    | C09G9.4  | -0.00944521660774811 | AGIWUR18595 |
| CB4856                                                                           | CT | IV | 8877553 | 8879910 | WBGene00007496 | npax-4   | C09G9.7  | -0.397688919296981   | AGIWUR3477  |
| CB4856                                                                           | CT | IV | 8881481 | 8882240 | WBGene00007497 | C09G9.8  | C09G9.8  | 0.0599809971377141   | AGIWUR35470 |
| CB4856                                                                           | CT | IV | 8886528 | 8888602 | WBGene00007495 | C09G9.5  | C09G9.5  | 0.0285943382139635   |             |
| AGIWUR1804;AGIWUR30771                                                           |    |    |         |         |                |          |          |                      |             |
| CB4856                                                                           | CT | IV | 8888976 | 8890999 | WBGene00003864 | oma-1    | C09G9.6  | 0.182113583941472    | AGIWUR35807 |
| CB4856                                                                           | CT | IV | 8891466 | 8892747 | WBGene00005007 | spr-2    | C27B7.1  | -0.152329793970861   |             |
| AGIWUR5937;AGIWUR16694                                                           |    |    |         |         |                |          |          |                      |             |
| CB4856                                                                           | CT | IV | 8892858 | 8893854 | WBGene00007760 | C27B7.2  | C27B7.2  | -0.0643576412413758  | AGIWUR23338 |
| CB4856                                                                           | CT | IV | 8894083 | 8901386 | WBGene00007761 | rad-26   | C27B7.4  | -0.244009741373156   |             |
| AGIWUR14504;AGIWUR17257;AGIWUR21870;AGIWUR23761;AGIWUR27573;AGIWUR42108          |    |    |         |         |                |          |          |                      |             |
| CB4856                                                                           | CT | IV | 8901646 | 8903177 | WBGene00007762 | C27B7.5  | C27B7.5  | -0.122022213503982   | AGIWUR23632 |
| CB4856                                                                           | CT | IV | 8903222 | 8906205 | WBGene00007763 | C27B7.6  | C27B7.6  | -0.173376195598119   | AGIWUR44147 |
| CB4856                                                                           | CT | IV | 8907047 | 8915383 | WBGene00007764 | C27B7.7  | C27B7.7  | 0.573952387590918    | AGIWUR44416 |
| CB4856                                                                           | CT | IV | 8915472 | 8916110 | WBGene00007765 | C27B7.9  | C27B7.9  | 0.105679816141228    | AGIWUR39920 |



|                                                                        |    |    |         |         |                |           |         |                      |                     |
|------------------------------------------------------------------------|----|----|---------|---------|----------------|-----------|---------|----------------------|---------------------|
| CB4856                                                                 | CT | IV | 8916408 | 8918890 | WBGene00004307 | rap-1     | C27B7.8 | 0.132558327249638    |                     |
| AGIWUR9710;AGIWUR16339;AGIWUR18115;AGIWUR32787;AGIWUR38012;AGIWUR39863 |    |    |         |         |                |           |         |                      |                     |
| CB4856                                                                 | CT | IV | 8924161 | 8926112 | WBGene00008363 | D1046.2   | D1046.2 | -0.196629818880643   |                     |
| AGIWUR2947;AGIWUR32878                                                 |    |    |         |         |                |           |         |                      |                     |
| CB4856                                                                 | CT | IV | 8926335 | 8930315 | WBGene00008362 | cfim-2    | D1046.1 | -0.124121037108353   | AGIWUR43416         |
| CB4856                                                                 | CT | IV | 8930442 | 8932791 | WBGene00008364 | slc-25A26 |         | D1046.3              | 0.0835283683791843  |
| AGIWUR37641                                                            |    |    |         |         |                |           |         |                      |                     |
| CB4856                                                                 | CT | IV | 8933997 | 8937400 | WBGene00008365 | D1046.4   | D1046.4 | -0.23225396472121    |                     |
| AGIWUR4421;AGIWUR21306;AGIWUR29332                                     |    |    |         |         |                |           |         |                      |                     |
| CB4856                                                                 | CT | IV | 8956489 | 8965534 | WBGene00008366 | tpa-1     | D1046.5 | 0.478098789261054    | AGIWUR13759         |
| CB4856                                                                 | CT | IV | 8966133 | 8967903 | WBGene00008272 | C53B4.2   | C53B4.2 | -0.242697575379971   | AGIWUR12201         |
| CB4856                                                                 | CT | IV | 8968290 | 8970565 | WBGene00008271 | C53B4.1   | C53B4.1 | 0.129745556388244    | AGIWUR35347         |
| CB4856                                                                 | CT | IV | 8970868 | 8973707 | WBGene00008273 | C53B4.3   | C53B4.3 | -0.454875651338908   | AGIWUR18768         |
| CB4856                                                                 | CT | IV | 8975532 | 8984706 | WBGene00008274 | C53B4.4   | C53B4.4 | -0.00375329905910959 | AGIWUR9423          |
| CB4856                                                                 | CT | IV | 8984866 | 8986774 | WBGene00008275 | nstp-1    | C53B4.6 | -0.0630543117996041  | AGIWUR16097         |
| CB4856                                                                 | CT | IV | 8987130 | 8990444 | WBGene00000266 | bre-1     | C53B4.7 | -0.135413682325424   |                     |
| AGIWUR2014;AGIWUR6820;AGIWUR10995;AGIWUR14717;AGIWUR21811;AGIWUR33573  |    |    |         |         |                |           |         |                      |                     |
| CB4856                                                                 | CT | IV | 8993086 | 9000774 | WBGene00008277 | mltn-12   | C53B4.8 | 0.26897164131524     | AGIWUR43232         |
| CB4856                                                                 | CT | IV | 9001145 | 9002734 | WBGene00008285 | C53D6.8   | C53D6.8 | 0.200779162119735    | AGIWUR36472         |
| CB4856                                                                 | CT | IV | 9002837 | 9005410 | WBGene00006852 | unc-129   | C53D6.2 | 0.448745358254197    | AGIWUR24153         |
| CB4856                                                                 | CT | IV | 9010584 | 9012339 | WBGene00044241 | C53D6.11  |         | C53D6.11             | -0.128644844818019  |
| AGIWUR9918;AGIWUR38669                                                 |    |    |         |         |                |           |         |                      |                     |
| CB4856                                                                 | CT | IV | 9016788 | 9019101 | WBGene00008280 | acc-2     | C53D6.3 | -0.0164867087485163  |                     |
| AGIWUR5422;AGIWUR31435;AGIWUR43909                                     |    |    |         |         |                |           |         |                      |                     |
| CB4856                                                                 | CT | IV | 9019175 | 9020940 | WBGene00008281 | C53D6.4   | C53D6.4 | -0.221856097163819   | AGIWUR14521         |
| CB4856                                                                 | CT | IV | 9021515 | 9023607 | WBGene00005906 | srx-15    | C53D6.9 | 0.134706983796511    |                     |
| AGIWUR17975;AGIWUR34822                                                |    |    |         |         |                |           |         |                      |                     |
| CB4856                                                                 | CT | IV | 9024738 | 9027598 | WBGene00008282 | C53D6.5   | C53D6.5 | -0.217701172288879   | AGIWUR44862         |
| CB4856                                                                 | CT | IV | 9027686 | 9032659 | WBGene00008283 | C53D6.6   | C53D6.6 | -0.28495383928519    | AGIWUR17419         |
| CB4856                                                                 | CT | IV | 9033576 | 9034440 | WBGene00023424 | C53D6.10  |         | C53D6.10             | -0.0728114676892631 |
| AGIWUR7408                                                             |    |    |         |         |                |           |         |                      |                     |
| CB4856                                                                 | CT | IV | 9034845 | 9037163 | WBGene00008284 | C53D6.7   | C53D6.7 | -0.373203575600398   | AGIWUR3673          |
| CB4856                                                                 | CT | IV | 9039575 | 9040504 | WBGene00013516 | Y73F4A.3  |         | Y73F4A.3             | 0.64549140130176    |
| AGIWUR10887                                                            |    |    |         |         |                |           |         |                      |                     |
| CB4856                                                                 | CT | IV | 9042387 | 9043347 | WBGene00013515 | Y73F4A.2  |         | Y73F4A.2             | 0.691109850501157   |
| AGIWUR3643                                                             |    |    |         |         |                |           |         |                      |                     |
| CB4856                                                                 | CT | IV | 9043938 | 9045369 | WBGene00013514 | Y73F4A.1  |         | Y73F4A.1             | 0.00510994275523657 |
| AGIWUR9218                                                             |    |    |         |         |                |           |         |                      |                     |
| CB4856                                                                 | CT | IV | 9070010 | 9073622 | WBGene00003610 | nhr-11    | ZC410.1 | 0.0108748574076509   |                     |

AGIWUR7171;AGIWUR11583;AGIWUR23108;AGIWUR39961  
 CB4856 CT IV 9074673 9076571 WBGene00013880 mppb-1 ZC410.2 -0.312224909465378 AGIWUR19324  
 CB4856 CT IV 9076501 9078807 WBGene00013881 mans-4 ZC410.3 -0.0678255586794965  
 AGIWUR9478;AGIWUR18890;AGIWUR19559  
 CB4856 CT IV 9082361 9087554 WBGene00006663 twk-8 ZC410.4 -0.332877221426467  
 AGIWUR23492;AGIWUR23900  
 CB4856 CT IV 9088594 9092193 WBGene00013882 msa-1 ZC410.5 0.0892296061818163  
 AGIWUR3044;AGIWUR5696;AGIWUR19247;AGIWUR31771  
 CB4856 CT IV 9092217 9094468 WBGene00003066 lp1-1 ZC410.7 -0.115387380296404  
 AGIWUR13244;AGIWUR23652;AGIWUR27179  
 CB4856 CT IV 9094541 9095653 WBGene00002046 icln-1 C01F6.8 -0.262852367320468  
 AGIWUR3303;AGIWUR13660  
 CB4856 CT IV 9095754 9096231 WBGene00007223 C01F6.9 C01F6.9 -0.121699887923313  
 AGIWUR1398;AGIWUR29038  
 CB4856 CT IV 9096842 9099364 WBGene00007221 cpna-3 C01F6.1 0.0222408737593112  
 AGIWUR2412;AGIWUR10869;AGIWUR24822  
 CB4856 CT IV 9099242 9101592 WBGene00007222 C01F6.2 C01F6.2 0.345911281004394 AGIWUR12163  
 CB4856 CT IV 9101773 9103851 WBGene00000374 cyp-31A1 C01F6.3 -0.599404914048623  
 AGIWUR3245  
 CB4856 CT IV 9104966 9107609 WBGene00001413 fem-3 C01F6.4 -0.0701307178205433 AGIWUR43635  
 CB4856 CT IV 9108931 9109753 WBGene00000120 aly-1 C01F6.5 0.132758511951623 AGIWUR13547  
 CB4856 CT IV 9119098 9130378 WBGene00006438 nrfl-1 C01F6.6 -0.16224425164638  
 AGIWUR548;AGIWUR8424;AGIWUR27484;AGIWUR31768;AGIWUR33238;AGIWUR34798;AGIWUR37061  
 CB4856 CT IV 9132600 9135477 WBGene00009073 delm-1 F23B2.3 0.0515916960420313  
 AGIWUR2991;AGIWUR25145;AGIWUR25402  
 CB4856 CT IV 9136933 9146210 WBGene00000906 daf-10 F23B2.4 -0.136501869311353 AGIWUR2652  
 CB4856 CT IV 9146337 9146869 WBGene00009078 rpb-12 F23B2.13 -0.189606626672905  
 AGIWUR18561  
 CB4856 CT IV 9147468 9148579 WBGene00000121 aly-2 F23B2.6 -0.315898149632986 AGIWUR995  
 CB4856 CT IV 9148949 9149297 WBGene00043283 F23B2.9 F23B2.9 0.0518765981179925 AGIWUR32127  
 CB4856 CT IV 9150491 9152043 WBGene00009075 F23B2.7 F23B2.7 -0.119590675991432 AGIWUR26059  
 CB4856 CT IV 9152819 9154320 WBGene00009077 F23B2.10 F23B2.10 0.133087558645226  
 AGIWUR26346;AGIWUR39763  
 CB4856 CT IV 9155079 9159019 WBGene00003958 pcp-3 F23B2.11 -0.668561778690179  
 AGIWUR14667  
 CB4856 CT IV 9160640 9165127 WBGene00003957 pcp-2 F23B2.12 -0.539439529561168  
 AGIWUR25329  
 CB4856 CT IV 9185064 9186023 WBGene00007411 C07C7.1 C07C7.1 0.162984348166098 AGIWUR28190  
 CB4856 CT IV 9186815 9191122 WBGene00008112 C46C2.4 C46C2.4 0.064084015661896 AGIWUR34546

|                                                                        |    |    |         |         |                |           |           |                     |             |
|------------------------------------------------------------------------|----|----|---------|---------|----------------|-----------|-----------|---------------------|-------------|
| CB4856                                                                 | CT | IV | 9191639 | 9192622 | WBGene00008113 | C46C2.5   | C46C2.5   | -0.742148887812096  | AGIWUR15595 |
| CB4856                                                                 | CT | IV | 9200102 | 9212235 | WBGene00006941 | wnk-1     | C46C2.1   | 0.17012283143784    | AGIWUR29399 |
| CB4856                                                                 | CT | IV | 9212375 | 9214236 | WBGene00008114 | C46C2.6   | C46C2.6   | -0.302514326615415  |             |
| AGIWUR1073;AGIWUR10519;AGIWUR11852;AGIWUR15701;AGIWUR29304;AGIWUR30848 |    |    |         |         |                |           |           |                     |             |
| CB4856                                                                 | CT | IV | 9216952 | 9220397 | WBGene00008110 | C46C2.2   | C46C2.2   | 0.160722513442526   | AGIWUR14022 |
| CB4856                                                                 | CT | IV | 9225125 | 9227781 | WBGene00008111 | C46C2.3   | C46C2.3   | -0.264078947188204  | AGIWUR26119 |
| CB4856                                                                 | CT | IV | 9228277 | 9231051 | WBGene00012426 | Y11D7A.1  | Y11D7A.1  | -0.02715701031455   |             |
| AGIWUR3515;AGIWUR25965                                                 |    |    |         |         |                |           |           |                     |             |
| CB4856                                                                 | CT | IV | 9233028 | 9241387 | WBGene00012428 | Y11D7A.3  | Y11D7A.3  | -0.0368335327309293 |             |
| AGIWUR29448                                                            |    |    |         |         |                |           |           |                     |             |
| CB4856                                                                 | CT | IV | 9242225 | 9243999 | WBGene00004281 | rab-28    | Y11D7A.4  | 0.70024457594412    |             |
| AGIWUR8803                                                             |    |    |         |         |                |           |           |                     |             |
| CB4856                                                                 | CT | IV | 9244520 | 9245523 | WBGene00012429 | Y11D7A.5  | Y11D7A.5  | -0.165568273707932  |             |
| AGIWUR33747;AGIWUR38826                                                |    |    |         |         |                |           |           |                     |             |
| CB4856                                                                 | CT | IV | 9247156 | 9248088 | WBGene00014863 | Y11D7A.16 | Y11D7A.16 | -0.21990979405891   |             |
| AGIWUR12333;AGIWUR24561                                                |    |    |         |         |                |           |           |                     |             |
| CB4856                                                                 | CT | IV | 9251379 | 9253913 | WBGene00012432 | Y11D7A.8  | Y11D7A.8  | -0.176194855828508  |             |
| AGIWUR23676;AGIWUR37799;AGIWUR40803                                    |    |    |         |         |                |           |           |                     |             |
| CB4856                                                                 | CT | IV | 9253979 | 9256117 | WBGene00012433 | Y11D7A.9  | Y11D7A.9  | -0.108419536875227  |             |
| AGIWUR1652                                                             |    |    |         |         |                |           |           |                     |             |
| CB4856                                                                 | CT | IV | 9258913 | 9259764 | WBGene00012434 | Y11D7A.10 | Y11D7A.10 | -0.0349848355297304 |             |
| AGIWUR39649                                                            |    |    |         |         |                |           |           |                     |             |
| CB4856                                                                 | CT | IV | 9260610 | 9261787 | WBGene00000694 | col-120   | Y11D7A.11 | -0.268140131726188  |             |
| AGIWUR34720                                                            |    |    |         |         |                |           |           |                     |             |
| CB4856                                                                 | CT | IV | 9261808 | 9264265 | WBGene00012435 | flh-1     | Y11D7A.12 | -0.0293251075913723 |             |
| AGIWUR26190                                                            |    |    |         |         |                |           |           |                     |             |
| CB4856                                                                 | CT | IV | 9270096 | 9271935 | WBGene00012436 | flh-3     | Y11D7A.13 | -0.0660922345664012 |             |
| AGIWUR12856                                                            |    |    |         |         |                |           |           |                     |             |
| CB4856                                                                 | CT | IV | 9272582 | 9273639 | WBGene00045309 | srg-52    | Y11D7A.18 | 0.0252032381154157  |             |
| AGIWUR14678;AGIWUR16760                                                |    |    |         |         |                |           |           |                     |             |
| CB4856                                                                 | CT | IV | 9274416 | 9283113 | WBGene00012437 | hum-9     | Y11D7A.14 | -0.233473146474192  |             |
| AGIWUR20979                                                            |    |    |         |         |                |           |           |                     |             |
| CB4856                                                                 | CT | IV | 9292296 | 9293925 | WBGene00008778 | nhr-264   | F14A5.1   | -1.00333315802997   | AGIWUR42246 |
| CB4856                                                                 | CT | IV | 9294899 | 9296406 | WBGene00009871 | F49C12.1  | F49C12.1  | -0.0896419053606579 |             |
| AGIWUR18302                                                            |    |    |         |         |                |           |           |                     |             |
| CB4856                                                                 | CT | IV | 9298024 | 9299220 | WBGene00009872 | F49C12.2  | F49C12.2  | -0.0995697410621599 |             |
| AGIWUR7653                                                             |    |    |         |         |                |           |           |                     |             |
| CB4856                                                                 | CT | IV | 9300427 | 9301951 | WBGene00009873 | F49C12.3  | F49C12.3  | 0.327646117779431   |             |
| AGIWUR10306                                                            |    |    |         |         |                |           |           |                     |             |

|                                                                                               |    |                 |                |                  |                     |                     |             |
|-----------------------------------------------------------------------------------------------|----|-----------------|----------------|------------------|---------------------|---------------------|-------------|
| CB4856 CT<br>AGIWUR44441                                                                      | IV | 9302665 9304094 | WBGene00009874 | F49C12.4         | F49C12.4            | -0.381448714222574  |             |
| CB4856 CT<br>AGIWUR36045                                                                      | IV | 9304917 9307165 | WBGene00009875 | F49C12.5         | F49C12.5            | -0.155522175028612  |             |
| CB4856 CT<br>AGIWUR22142                                                                      | IV | 9307338 9309109 | WBGene00009876 | F49C12.6         | F49C12.6            | 0.0541760825573085  |             |
| CB4856 CT<br>AGIWUR25176                                                                      | IV | 9309108 9312927 | WBGene00009877 | F49C12.7         | F49C12.7            | 0.808645618177717   |             |
| CB4856 CT<br>AGIWUR30770                                                                      | IV | 9314810 9316215 | WBGene00009878 | F49C12.9         | F49C12.9            | 0.00550652790659534 |             |
| CB4856 CT<br>AGIWUR30692;AGIWUR41894                                                          | IV | 9316639 9318632 | WBGene00004463 | rpn-7 F49C12.8   |                     | -0.226013235010585  |             |
| CB4856 CT<br>AGIWUR5414                                                                       | IV | 9319380 9320143 | WBGene00009880 | F49C12.11        | F49C12.11           | -0.0630886593397406 |             |
| CB4856 CT<br>AGIWUR29619                                                                      | IV | 9320122 9321089 | WBGene00009881 | F49C12.12        | F49C12.12           | -0.135314680966472  |             |
| CB4856 CT<br>AGIWUR10460;AGIWUR33594                                                          | IV | 9321801 9322528 | WBGene00009882 | vha-17 F49C12.13 |                     | 0.041035619066462   |             |
| CB4856 CT<br>AGIWUR1749                                                                       | IV | 9324435 9327516 | WBGene00009884 | F49C12.15        | F49C12.15           | 0.206877911547029   |             |
| CB4856 CT<br>AGIWUR27131                                                                      | IV | 9328010 9328745 | WBGene00011855 | clec-183         | T20D3.1             | -0.284910330460647  |             |
| CB4856 CT<br>AGIWUR37376;AGIWUR43822                                                          | IV | 9328973 9330855 | WBGene00011856 | T20D3.2 T20D3.2  |                     | -0.280993418103209  |             |
| CB4856 CT<br>AGIWUR640;AGIWUR2173;AGIWUR11482;AGIWUR21374;AGIWUR24100;AGIWUR25036;AGIWUR34649 | IV | 9333342 9335916 | WBGene00011857 | T20D3.3 T20D3.3  |                     | -0.21603433480195   |             |
| CB4856 CT<br>AGIWUR6055;AGIWUR15510;AGIWUR24330                                               | IV | 9337044 9338567 | WBGene00011858 | T20D3.5 T20D3.5  |                     | -0.100889027421871  |             |
| CB4856 CT                                                                                     | IV | 9338587 9339305 | WBGene00011859 | T20D3.6 T20D3.6  | 0.0389064993016319  |                     | AGIWUR10001 |
| CB4856 CT                                                                                     | IV | 9339403 9341790 | WBGene00006931 | vps-26 T20D3.7   | -0.247977688172323  |                     | AGIWUR22148 |
| CB4856 CT                                                                                     | IV | 9341964 9343152 | WBGene00011860 | T20D3.8 T20D3.8  | 0.0249230711624051  |                     | AGIWUR6522  |
| CB4856 CT<br>AGIWUR3741;AGIWUR15461;AGIWUR19565;AGIWUR37952                                   | IV | 9343358 9366506 | WBGene00007505 | pezo-1 C10C5.1   | -0.151322012287498  |                     |             |
| CB4856 CT<br>AGIWUR14726;AGIWUR25513                                                          | IV | 9371508 9373636 | WBGene00007506 | C10C5.2 C10C5.2  | -0.0492054365451455 |                     |             |
| CB4856 CT                                                                                     | IV | 9374733 9376492 | WBGene00007507 | C10C5.3 C10C5.3  | 0.272633908259987   |                     | AGIWUR3415  |
| CB4856 CT                                                                                     | IV | 9378552 9380450 | WBGene00007508 | C10C5.4 C10C5.4  | 0.588525839880859   |                     | AGIWUR32390 |
| CB4856 CT                                                                                     | IV | 9381515 9383115 | WBGene00007509 | C10C5.5 C10C5.5  | 0.659961007110583   |                     | AGIWUR3133  |
| CB4856 CT                                                                                     | IV | 9385126 9385713 | WBGene00007511 | C10C5.7 C10C5.7  | 0.284963034107443   |                     | AGIWUR28883 |

|                                                                        |    |    |         |         |                |           |           |                     |             |
|------------------------------------------------------------------------|----|----|---------|---------|----------------|-----------|-----------|---------------------|-------------|
| CB4856                                                                 | CT | IV | 9386208 | 9394930 | WBGene00000911 | daf-15    | C10C5.6   | 0.171996837838485   |             |
| AGIWUR15043;AGIWUR24389                                                |    |    |         |         |                |           |           |                     |             |
| CB4856                                                                 | CT | IV | 9394934 | 9396218 | WBGene00000695 | col-121   | F56D5.1   | 1.5431070741227     | AGIWUR43719 |
| CB4856                                                                 | CT | IV | 9396920 | 9398603 | WBGene00010147 | F56D5.2   | F56D5.2   | 0.160529835625726   | AGIWUR29719 |
| CB4856                                                                 | CT | IV | 9399653 | 9401293 | WBGene00010148 | F56D5.3   | F56D5.3   | -0.595011138673566  | AGIWUR947   |
| CB4856                                                                 | CT | IV | 9401922 | 9412653 | WBGene00010150 | F56D5.6   | F56D5.6   | 0.240844998969227   | AGIWUR16853 |
| CB4856                                                                 | CT | IV | 9418432 | 9422506 | WBGene00010152 | F56D5.9   | F56D5.9   | -0.473772012634928  | AGIWUR9437  |
| CB4856                                                                 | CT | IV | 9423395 | 9424415 | WBGene00010153 | srx-2     | F56D5.10  | -0.117684921540384  |             |
| AGIWUR11246                                                            |    |    |         |         |                |           |           |                     |             |
| CB4856                                                                 | CT | IV | 9428259 | 9439077 | WBGene00010316 | F59B8.1   | F59B8.1   | 0.0682673888768788  |             |
| AGIWUR9633;AGIWUR25189;AGIWUR27633                                     |    |    |         |         |                |           |           |                     |             |
| CB4856                                                                 | CT | IV | 9439043 | 9440893 | WBGene00010317 | idh-1     | F59B8.2   | -0.104187044252082  | AGIWUR21726 |
| CB4856                                                                 | CT | IV | 9442877 | 9444516 | WBGene00009544 | F38E11.9  | F38E11.9  | -0.180115169124084  |             |
| AGIWUR6817                                                             |    |    |         |         |                |           |           |                     |             |
| CB4856                                                                 | CT | IV | 9444791 | 9445507 | WBGene00002012 | hsp-12.3  | F38E11.1  | 0.206630482716522   |             |
| AGIWUR5661;AGIWUR7122;AGIWUR9794;AGIWUR13490;AGIWUR20005;AGIWUR20124   |    |    |         |         |                |           |           |                     |             |
| CB4856                                                                 | CT | IV | 9446385 | 9446884 | WBGene00002013 | hsp-12.6  | F38E11.2  | 0.907985627338759   |             |
| AGIWUR6281;AGIWUR11904;AGIWUR17211;AGIWUR25673;AGIWUR30513;AGIWUR35348 |    |    |         |         |                |           |           |                     |             |
| CB4856                                                                 | CT | IV | 9449473 | 9457501 | WBGene00009541 | cutl-17   | F38E11.4  | 0.125531151452811   |             |
| AGIWUR12258;AGIWUR20388;AGIWUR31001;AGIWUR36293                        |    |    |         |         |                |           |           |                     |             |
| CB4856                                                                 | CT | IV | 9459731 | 9463998 | WBGene00009542 | copb-2    | F38E11.5  | -0.0847128774477293 |             |
| AGIWUR4755;AGIWUR16599;AGIWUR26454;AGIWUR34313;AGIWUR34549;AGIWUR40798 |    |    |         |         |                |           |           |                     |             |
| CB4856                                                                 | CT | IV | 9463951 | 9467518 | WBGene00009543 | F38E11.6  | F38E11.6  | 0.277768825780099   |             |
| AGIWUR2349                                                             |    |    |         |         |                |           |           |                     |             |
| CB4856                                                                 | CT | IV | 9473680 | 9475365 | WBGene00014752 | F38E11.8  | F38E11.8  | 0.042654815319132   |             |
| AGIWUR40862                                                            |    |    |         |         |                |           |           |                     |             |
| CB4856                                                                 | CT | IV | 9475863 | 9477446 | WBGene00006949 | wrt-3     | F38E11.7  | -0.518111919195475  |             |
| AGIWUR3094;AGIWUR9220;AGIWUR33893;AGIWUR39063                          |    |    |         |         |                |           |           |                     |             |
| CB4856                                                                 | CT | IV | 9482053 | 9485140 | WBGene00007887 | gadr-2    | C33A12.12 | -0.0787162873390823 |             |
| AGIWUR36875                                                            |    |    |         |         |                |           |           |                     |             |
| CB4856                                                                 | CT | IV | 9486272 | 9487631 | WBGene00005665 | sru-2     | C33A12.13 | 0.0761526547995448  |             |
| AGIWUR3401;AGIWUR6766;AGIWUR23330                                      |    |    |         |         |                |           |           |                     |             |
| CB4856                                                                 | CT | IV | 9488670 | 9490194 | WBGene00005664 | sru-1     | C33A12.14 | 0.117424566748294   |             |
| AGIWUR1098                                                             |    |    |         |         |                |           |           |                     |             |
| CB4856                                                                 | CT | IV | 9490620 | 9491991 | WBGene00005669 | sru-6     | C33A12.8  | -0.135124742130753  |             |
| AGIWUR6449                                                             |    |    |         |         |                |           |           |                     |             |
| CB4856                                                                 | CT | IV | 9492576 | 9493220 | WBGene00014693 | C33A12.18 | C33A12.18 | -0.179663587205811  |             |
| AGIWUR3246;AGIWUR34967                                                 |    |    |         |         |                |           |           |                     |             |
| CB4856                                                                 | CT | IV | 9494032 | 9495519 | WBGene00005668 | sru-5     | C33A12.9  | 0.0154074407346667  |             |

|                                                                        |    |    |         |         |                |           |           |                               |
|------------------------------------------------------------------------|----|----|---------|---------|----------------|-----------|-----------|-------------------------------|
| AGIWUR15262;AGIWUR38061                                                |    |    |         |         |                |           |           |                               |
| CB4856                                                                 | CT | IV | 9496606 | 9497888 | WBGene00005666 | sru-3     | C33A12.11 | -0.225417735525701            |
| AGIWUR19248                                                            |    |    |         |         |                |           |           |                               |
| CB4856                                                                 | CT | IV | 9498388 | 9499588 | WBGene00005667 | sru-4     | C33A12.10 | 0.0419883277027138            |
| AGIWUR18393                                                            |    |    |         |         |                |           |           |                               |
| CB4856                                                                 | CT | IV | 9500311 | 9502568 | WBGene00007885 | ugt-21    | C33A12.6  | -0.561524569778838            |
| AGIWUR7536;AGIWUR29751                                                 |    |    |         |         |                |           |           |                               |
| CB4856                                                                 | CT | IV | 9502572 | 9505292 | WBGene00007889 | C33A12.16 | C33A12.16 | 0.071169152391521             |
| AGIWUR21842;AGIWUR26855;AGIWUR30931                                    |    |    |         |         |                |           |           |                               |
| CB4856                                                                 | CT | IV | 9505615 | 9506326 | WBGene00007888 | ttr-9     | C33A12.15 | -0.106682473370161            |
| AGIWUR33075                                                            |    |    |         |         |                |           |           |                               |
| CB4856                                                                 | CT | IV | 9506936 | 9508779 | WBGene00007886 | ethe-1    | C33A12.7  | -0.0605502628169496           |
| AGIWUR27815                                                            |    |    |         |         |                |           |           |                               |
| CB4856                                                                 | CT | IV | 9510055 | 9510594 | WBGene00007883 | C33A12.4  | C33A12.4  | 0.441503324989778             |
| AGIWUR14783                                                            |    |    |         |         |                |           |           |                               |
| CB4856                                                                 | CT | IV | 9510748 | 9513002 | WBGene00007882 | C33A12.3  | C33A12.3  | 0.19535668485311              |
| AGIWUR38679                                                            |    |    |         |         |                |           |           |                               |
| CB4856                                                                 | CT | IV | 9516992 | 9518410 | WBGene00007890 | C33A12.19 | C33A12.19 | 0.0143066038286044            |
| AGIWUR12496                                                            |    |    |         |         |                |           |           |                               |
| CB4856                                                                 | CT | IV | 9518367 | 9518927 | WBGene00007881 | nlp-35    | C33A12.2  | 0.0734795523651908            |
| AGIWUR14739                                                            |    |    |         |         |                |           |           |                               |
| CB4856                                                                 | CT | IV | 9523764 | 9524895 | WBGene00007880 | C33A12.1  | C33A12.1  | 0.0279561234979102            |
| AGIWUR15621                                                            |    |    |         |         |                |           |           |                               |
| CB4856                                                                 | CT | IV | 9526359 | 9528350 | WBGene00001239 | elo-1     | F56H11.4  | -0.166360876584919            |
| AGIWUR19591;AGIWUR20671;AGIWUR26778                                    |    |    |         |         |                |           |           |                               |
| CB4856                                                                 | CT | IV | 9528355 | 9529569 | WBGene00010176 | F56H11.6  | F56H11.6  | -0.137252326488334            |
| AGIWUR44359                                                            |    |    |         |         |                |           |           |                               |
| CB4856                                                                 | CT | IV | 9529947 | 9531378 | WBGene00001245 | elo-7     | F56H11.3  | 0.0203132772247692            |
| AGIWUR10588;AGIWUR38339;AGIWUR44859                                    |    |    |         |         |                |           |           |                               |
| CB4856                                                                 | CT | IV | 9531357 | 9533171 | WBGene00010175 | F56H11.2  | F56H11.2  | 0.940283652233695             |
| AGIWUR38244                                                            |    |    |         |         |                |           |           |                               |
| CB4856                                                                 | CT | IV | 9540808 | 9546250 | WBGene00001403 | fb1-1     | F56H11.1  | -0.344943109871451            |
| AGIWUR3088;AGIWUR21630;AGIWUR27626;AGIWUR31406;AGIWUR35333;AGIWUR35815 |    |    |         |         |                |           |           |                               |
| CB4856                                                                 | CT | IV | 9546286 | 9560428 | WBGene00011456 | T05A1.5   | T05A1.5   | -0.0199669946883265           |
| AGIWUR30574;AGIWUR36667;AGIWUR36862                                    |    |    |         |         |                |           |           |                               |
| CB4856                                                                 | CT | IV | 9568828 | 9580071 | WBGene00003808 | npr-2     | T05A1.1   | 0.491707657123477 AGIWUR9649  |
| CB4856                                                                 | CT | IV | 9587100 | 9588834 | WBGene00009186 | trcs-1    | F27C8.6   | -0.0857501823624496           |
| AGIWUR23993;AGIWUR24542;AGIWUR43108                                    |    |    |         |         |                |           |           |                               |
| CB4856                                                                 | CT | IV | 9589795 | 9592529 | WBGene00009185 | F27C8.5   | F27C8.5   | 0.167204153850705 AGIWUR25567 |

|                                                                                              |    |    |         |         |                |          |           |                     |             |
|----------------------------------------------------------------------------------------------|----|----|---------|---------|----------------|----------|-----------|---------------------|-------------|
| CB4856                                                                                       | CT | IV | 9593667 | 9594425 | WBGene00005003 | spp-18   | F27C8.4   | 0.584855170547023   | AGIWUR21130 |
| CB4856                                                                                       | CT | IV | 9595088 | 9595933 | WBGene00009184 | F27C8.3  | F27C8.3   | 0.0692905854013981  |             |
| AGIWUR17532;AGIWUR18902;AGIWUR31320;AGIWUR33452;AGIWUR35776                                  |    |    |         |         |                |          |           |                     |             |
| CB4856                                                                                       | CT | IV | 9596497 | 9599081 | WBGene00009183 | F27C8.2  | F27C8.2   | -0.19455534289105   |             |
| AGIWUR11750;AGIWUR19540;AGIWUR21046;AGIWUR26418                                              |    |    |         |         |                |          |           |                     |             |
| CB4856                                                                                       | CT | IV | 9598986 | 9601695 | WBGene00000002 | aat-1    | F27C8.1   | 0.0569794378772936  | AGIWUR12999 |
| CB4856                                                                                       | CT | IV | 9614970 | 9620140 | WBGene00001249 | elt-1    | W09C2.1   | 0.0548981661042713  | AGIWUR18559 |
| CB4856                                                                                       | CT | IV | 9625910 | 9634948 | WBGene00003151 | mca-1    | W09C2.3   | 0.152528400851368   |             |
| AGIWUR8635;AGIWUR13889;AGIWUR15173;AGIWUR23235;AGIWUR27015;AGIWUR29670                       |    |    |         |         |                |          |           |                     |             |
| CB4856                                                                                       | CT | IV | 9636980 | 9642003 | WBGene00000953 | del-2    | F58G6.6   | 0.368690950098481   | AGIWUR33261 |
| CB4856                                                                                       | CT | IV | 9643422 | 9644268 | WBGene00010278 | F58G6.8  | F58G6.8   | 0.372709180091459   | AGIWUR25483 |
| CB4856                                                                                       | CT | IV | 9644245 | 9647934 | WBGene00010272 | amph-1   | F58G6.1   | -0.0523108914553845 |             |
| AGIWUR8192;AGIWUR9748;AGIWUR15924;AGIWUR32381;AGIWUR43634                                    |    |    |         |         |                |          |           |                     |             |
| CB4856                                                                                       | CT | IV | 9649043 | 9650490 | WBGene00010273 | srm-3    | F58G6.2   | -0.346820052344594  |             |
| AGIWUR28922;AGIWUR39645                                                                      |    |    |         |         |                |          |           |                     |             |
| CB4856                                                                                       | CT | IV | 9651394 | 9652484 | WBGene00044107 | F58G6.9  | F58G6.9   | -0.934690871860061  |             |
| AGIWUR735;AGIWUR3220;AGIWUR14260;AGIWUR23851;AGIWUR29022                                     |    |    |         |         |                |          |           |                     |             |
| CB4856                                                                                       | CT | IV | 9653535 | 9654175 | WBGene00010274 | F58G6.3  | F58G6.3   | -1.23832447805706   | AGIWUR40504 |
| CB4856                                                                                       | CT | IV | 9654317 | 9655588 | WBGene00010277 | F58G6.7  | F58G6.7   | -0.780966059564973  | AGIWUR22873 |
| CB4856                                                                                       | CT | IV | 9658053 | 9663941 | WBGene00010275 | acc-1    | F58G6.4   | -0.154097341544784  | AGIWUR29262 |
| CB4856                                                                                       | CT | IV | 9664365 | 9675672 | WBGene00003627 | nhr-34   | F58G6.5   | -0.0843529228659774 |             |
| AGIWUR3607;AGIWUR9087;AGIWUR9865;AGIWUR17700;AGIWUR20213;AGIWUR38487;AGIWUR39401;AGIWUR43484 |    |    |         |         |                |          |           |                     |             |
| CB4856                                                                                       | CT | IV | 9680387 | 9680941 | WBGene00002091 | ins-8    | ZK1251.11 | 0.53517216227487    |             |
| AGIWUR12964                                                                                  |    |    |         |         |                |          |           |                     |             |
| CB4856                                                                                       | CT | IV | 9682013 | 9682826 | WBGene00002090 | ins-7    | ZK1251.2  | -0.211088341947743  |             |
| AGIWUR35925                                                                                  |    |    |         |         |                |          |           |                     |             |
| CB4856                                                                                       | CT | IV | 9682984 | 9683533 | WBGene00014240 | htas-1   | ZK1251.1  | 0.280460638320688   |             |
| AGIWUR13934                                                                                  |    |    |         |         |                |          |           |                     |             |
| CB4856                                                                                       | CT | IV | 9683617 | 9684473 | WBGene00014241 | ZK1251.3 | ZK1251.3  | -0.396144042662621  |             |
| AGIWUR19628                                                                                  |    |    |         |         |                |          |           |                     |             |
| CB4856                                                                                       | CT | IV | 9687049 | 9688392 | WBGene00014996 | ZK1251.5 | ZK1251.5  | 0.0162719608157187  |             |
| AGIWUR16631;AGIWUR36524                                                                      |    |    |         |         |                |          |           |                     |             |
| CB4856                                                                                       | CT | IV | 9690932 | 9691465 | WBGene00014242 | sdz-36   | ZK1251.7  | -0.0582195370678491 |             |
| AGIWUR42072                                                                                  |    |    |         |         |                |          |           |                     |             |
| CB4856                                                                                       | CT | IV | 9693202 | 9697005 | WBGene00006664 | twk-9    | ZK1251.8  | -0.0385786300457323 |             |
| AGIWUR5316;AGIWUR12010;AGIWUR41514                                                           |    |    |         |         |                |          |           |                     |             |
| CB4856                                                                                       | CT | IV | 9696989 | 9706723 | WBGene00014243 | dcaf-1   | ZK1251.9  | 0.154994314002291   |             |
| AGIWUR40370                                                                                  |    |    |         |         |                |          |           |                     |             |
| CB4856                                                                                       | CT | IV | 9707148 | 9707764 | WBGene00010484 | dph-3    | K01H12.1  | 0.190379009216441   |             |

AGIWUR11984;AGIWUR15311;AGIWUR21907;AGIWUR29882;AGIWUR39442;AGIWUR44342  
 CB4856 CT IV 9708170 9709305 WBGene00010485 ant-1.3 K01H12.2 0.0761298975109366  
 AGIWUR22865  
 CB4856 CT IV 9710202 9712419 WBGene00003629 nhr-38 K01H12.3 0.134212589922729  
 AGIWUR15627;AGIWUR30641;AGIWUR42905  
 CB4856 CT IV 9713082 9714886 WBGene00010486 K01H12.4 K01H12.4 0.285311202145067  
 AGIWUR42932  
 CB4856 CT IV 9725251 9728576 WBGene00003728 nhr-138 C28D4.9 0.0178638835712288 AGIWUR5703  
 CB4856 CT IV 9728676 9731314 WBGene00003690 nhr-100 C28D4.1 -0.0307843284231772 AGIWUR14259  
 CB4856 CT IV 9731737 9737621 WBGene00000509 cka-1 C28D4.2 0.136995285830402 AGIWUR39127  
 CB4856 CT IV 9738510 9739220 WBGene00007796 C28D4.10 C28D4.10 0.0670981832218578  
 AGIWUR28516  
 CB4856 CT IV 9739219 9740908 WBGene00001607 gln-6 C28D4.3 -0.0315598734377467  
 AGIWUR8252;AGIWUR27183;AGIWUR32269  
 CB4856 CT IV 9741875 9743147 WBGene00007794 C28D4.7 C28D4.7 -0.00362338507431836 AGIWUR7363  
 CB4856 CT IV 9743765 9745003 WBGene00007792 C28D4.4 C28D4.4 -0.0590712435928555 AGIWUR43339  
 CB4856 CT IV 9745555 9746862 WBGene00007793 C28D4.5 C28D4.5 -0.244999354121661  
 AGIWUR8420;AGIWUR34963  
 CB4856 CT IV 9757648 9764494 WBGene00003687 nhr-97 H27C11.1 0.0355881443517809  
 AGIWUR10437;AGIWUR25208;AGIWUR26811;AGIWUR42455;AGIWUR44637  
 CB4856 CT IV 9765669 9766436 WBGene00011749 ssp-36 T13F2.12 0.270372182805916  
 AGIWUR11597  
 CB4856 CT IV 9772510 9773470 WBGene00000301 cav-1 T13F2.8 0.590279016484306  
 AGIWUR3025;AGIWUR6303;AGIWUR17426;AGIWUR24603;AGIWUR43155  
 CB4856 CT IV 9774563 9777634 WBGene00011747 sna-2 T13F2.7 -0.0140703807063698 AGIWUR32315  
 CB4856 CT IV 9778288 9781203 WBGene00011746 T13F2.6 T13F2.6 -0.0478882112769359 AGIWUR39516  
 CB4856 CT IV 9789808 9791917 WBGene00011744 T13F2.4 T13F2.4 0.282264050674569 AGIWUR39540  
 CB4856 CT IV 9791945 9796592 WBGene00004031 pis-1 T13F2.3 -0.0486466566662997 AGIWUR17460  
 CB4856 CT IV 9796688 9797354 WBGene00011743 T13F2.2 T13F2.2 -0.163083523529689  
 AGIWUR2648;AGIWUR40457  
 CB4856 CT IV 9799429 9802638 WBGene00001396 fat-4 T13F2.1 0.596829988341856  
 AGIWUR13144;AGIWUR23506;AGIWUR33115  
 CB4856 CT IV 9803023 9806119 WBGene00001395 fat-3 W08D2.4 1.73596006476699 AGIWUR19711  
 CB4856 CT IV 9806416 9810733 WBGene00012340 dct-15 W08D2.3 -0.0955598001187337 AGIWUR20257  
 CB4856 CT IV 9812444 9815526 WBGene00001188 eg1-20 W08D2.1 0.011239329782557  
 AGIWUR16385;AGIWUR23531;AGIWUR27673;AGIWUR33623  
 CB4856 CT IV 9817412 9824632 WBGene00012341 catp-6 W08D2.5 -0.0490028025269464  
 AGIWUR6997;AGIWUR17095;AGIWUR22958;AGIWUR43986  
 CB4856 CT IV 9825694 9830620 WBGene00012342 mtr-4 W08D2.7 0.02739390360437 AGIWUR36980



|                                                           |    |    |         |         |                |          |          |                     |             |
|-----------------------------------------------------------|----|----|---------|---------|----------------|----------|----------|---------------------|-------------|
| CB4856                                                    | CT | IV | 9832935 | 9834822 | WBGene00002204 | kin-21   | W08D2.8  | -0.256635262273399  | AGIWUR37340 |
| CB4856                                                    | CT | IV | 9839057 | 9841084 | WBGene00002206 | kin-24   | K07F5.4  | -0.043683869102435  | AGIWUR26938 |
| CB4856                                                    | CT | IV | 9842371 | 9842992 | WBGene00045180 | K07F5.17 | K07F5.17 | -0.0477268008378502 |             |
| AGIWUR7217;AGIWUR9095;AGIWUR18583                         |    |    |         |         |                |          |          |                     |             |
| CB4856                                                    | CT | IV | 9844014 | 9844344 | WBGene00010633 | nspd-2   | K07F5.5  | 0.359555081652086   | AGIWUR17317 |
| CB4856                                                    | CT | IV | 9844989 | 9846674 | WBGene00010634 | K07F5.6  | K07F5.6  | -0.0378862003090319 | AGIWUR23014 |
| CB4856                                                    | CT | IV | 9847724 | 9848175 | WBGene00010635 | K07F5.7  | K07F5.7  | -0.035796420800323  | AGIWUR25972 |
| CB4856                                                    | CT | IV | 9848491 | 9849796 | WBGene00010636 | K07F5.8  | K07F5.8  | -0.373826230552573  |             |
| AGIWUR2188;AGIWUR2399;AGIWUR24222                         |    |    |         |         |                |          |          |                     |             |
| CB4856                                                    | CT | IV | 9852550 | 9853609 | WBGene00006050 | ssq-1    | K07F5.11 | 0.614772120132525   |             |
| AGIWUR10720                                               |    |    |         |         |                |          |          |                     |             |
| CB4856                                                    | CT | IV | 9856012 | 9858067 | WBGene00010637 | K07F5.12 | K07F5.12 | -0.436994962467346  |             |
| AGIWUR15523;AGIWUR22601                                   |    |    |         |         |                |          |          |                     |             |
| CB4856                                                    | CT | IV | 9858488 | 9862118 | WBGene00003787 | npp-1    | K07F5.13 | -0.207533740428705  |             |
| AGIWUR8201;AGIWUR16295;AGIWUR35932                        |    |    |         |         |                |          |          |                     |             |
| CB4856                                                    | CT | IV | 9862221 | 9864076 | WBGene00010638 | K07F5.14 | K07F5.14 | -0.163989831681565  |             |
| AGIWUR39713                                               |    |    |         |         |                |          |          |                     |             |
| CB4856                                                    | CT | IV | 9864179 | 9864954 | WBGene00010640 | K07F5.16 | K07F5.16 | 0.268288590057027   |             |
| AGIWUR43013                                               |    |    |         |         |                |          |          |                     |             |
| CB4856                                                    | CT | IV | 9865078 | 9866163 | WBGene00010639 | K07F5.15 | K07F5.15 | 0.011997429669421   |             |
| AGIWUR2940;AGIWUR3047;AGIWUR17907;AGIWUR19206;AGIWUR41539 |    |    |         |         |                |          |          |                     |             |
| CB4856                                                    | CT | IV | 9879329 | 9882152 | WBGene00003603 | nhr-4    | F32B6.1  | 0.00686852236504798 | AGIWUR40095 |
| CB4856                                                    | CT | IV | 9882132 | 9884383 | WBGene00009320 | F32B6.3  | F32B6.3  | -0.216447320249662  | AGIWUR38724 |
| CB4856                                                    | CT | IV | 9884556 | 9887150 | WBGene00009319 | mccc-1   | F32B6.2  | -0.274731693280894  |             |
| AGIWUR14175;AGIWUR25051;AGIWUR30913;AGIWUR44689           |    |    |         |         |                |          |          |                     |             |
| CB4856                                                    | CT | IV | 9887190 | 9889929 | WBGene00009324 | F32B6.10 | F32B6.10 | 0.039579178578582   |             |
| AGIWUR12556                                               |    |    |         |         |                |          |          |                     |             |
| CB4856                                                    | CT | IV | 9890585 | 9892038 | WBGene00009321 | F32B6.4  | F32B6.4  | -0.0304920319852311 | AGIWUR10939 |
| CB4856                                                    | CT | IV | 9892739 | 9893779 | WBGene00006056 | sss-1    | F32B6.5  | 0.308894708874313   | AGIWUR38254 |
| CB4856                                                    | CT | IV | 9895388 | 9896147 | WBGene00006049 | ssp-32   | F32B6.7  | -0.211248765138771  | AGIWUR1266  |
| CB4856                                                    | CT | IV | 9899012 | 9902513 | WBGene00009322 | tbc-3    | F32B6.8  | -0.115532872727195  | AGIWUR19284 |
| CB4856                                                    | CT | IV | 9903908 | 9905903 | WBGene00009323 | best-13  | F32B6.9  | -0.152347208188525  | AGIWUR3199  |
| CB4856                                                    | CT | IV | 9916530 | 9921996 | WBGene00009133 | bed-3    | F25H8.6  | 0.0275089104308925  | AGIWUR41049 |
| CB4856                                                    | CT | IV | 9921955 | 9928223 | WBGene00001113 | dur-1    | F25H8.5  | 1.41091814586444    |             |
| AGIWUR18088;AGIWUR37175;AGIWUR44758                       |    |    |         |         |                |          |          |                     |             |
| CB4856                                                    | CT | IV | 9930899 | 9932240 | WBGene00009131 | F25H8.1  | F25H8.1  | -0.192286177963172  |             |
| AGIWUR3558;AGIWUR13798;AGIWUR38273                        |    |    |         |         |                |          |          |                     |             |
| CB4856                                                    | CT | IV | 9932235 | 9933879 | WBGene00009132 | F25H8.2  | F25H8.2  | -0.249602719566797  | AGIWUR23509 |
| CB4856                                                    | CT | IV | 9933910 | 9934285 | WBGene00004974 | spe-29   | F25H8.7  | -0.274401664576876  |             |

AGIWUR12135;AGIWUR14054;AGIWUR16647;AGIWUR19696;AGIWUR25093;AGIWUR25417  
 CB4856 CT IV 9934767 9953433 WBGene00001650 gon-1 F25H8.3 -0.267822416483993  
 AGIWUR15816;AGIWUR29887;AGIWUR40536  
 CB4856 CT IV 9964245 9966630 WBGene00011762 T13H10.2 T13H10.2 0.181297816234586  
 AGIWUR3038;AGIWUR9024;AGIWUR17513;AGIWUR18569  
 CB4856 CT IV 9967095 9969181 WBGene00002193 kin-5 T13H10.1 0.0357069294388488  
 AGIWUR4224  
 CB4856 CT IV 9969400 9971200 WBGene00008154 C47E12.11 C47E12.11 -0.207193262390433  
 AGIWUR13467  
 CB4856 CT IV 9972037 9972652 WBGene00008155 C47E12.12 C47E12.12 0.0598154868784171  
 AGIWUR27207  
 CB4856 CT IV 9972800 9973984 WBGene00008153 C47E12.10 C47E12.10  
 -0.00433469414117482 AGIWUR34366  
 CB4856 CT IV 9974672 9975484 WBGene00008152 C47E12.9 C47E12.9 0.323082835037491  
 AGIWUR29301  
 CB4856 CT IV 9975496 9976384 WBGene00044240 C47E12.14 C47E12.14 0.10001475463429  
 AGIWUR30214;AGIWUR33392;AGIWUR34516  
 CB4856 CT IV 9978122 9980770 WBGene00000964 dhp-2 C47E12.8 0.368827603274539  
 AGIWUR34299  
 CB4856 CT IV 9980724 9982276 WBGene00008151 C47E12.7 C47E12.7 -0.208991456869782  
 AGIWUR18656  
 CB4856 CT IV 9983195 9989678 WBGene00008150 mam-2 C47E12.6 -0.24054910473718  
 AGIWUR29556  
 CB4856 CT IV 9989670 9995034 WBGene00006699 uba-1 C47E12.5 -0.272725805204569  
 AGIWUR10534;AGIWUR11941;AGIWUR17729;AGIWUR18720;AGIWUR28621;AGIWUR29207;AGIWUR32686;AGIWUR34505;AGIWUR35578  
 ;AGIWUR41605  
 CB4856 CT IV 9995472 9999032 WBGene00008149 pyp-1 C47E12.4 0.175609883090253  
 AGIWUR3161;AGIWUR26414  
 CB4856 CT IV 9999047 10001846 WBGene00008148 C47E12.3 C47E12.3  
 -0.246066689902245 AGIWUR23502  
 CB4856 CT IV 10001972 10003534 WBGene00008147 C47E12.2 C47E12.2  
 -0.2227367644272 AGIWUR44403  
 CB4856 CT IV 10003726 10005599 WBGene00005663 sars-1 C47E12.1  
 -0.215548763165321 AGIWUR1796;AGIWUR5322;AGIWUR11890;AGIWUR31242  
 CB4856 CT IV 10009354 10014187 WBGene00009678 magu-4 F44D12.1  
 -0.0393247768952101 AGIWUR3382  
 CB4856 CT IV 10013958 10016398 WBGene00009679 F44D12.2 F44D12.2  
 0.10106074805703 AGIWUR6307  
 CB4856 CT IV 10017425 10021286 WBGene00009686 ent-7 F44D12.9

|                                                                                                                                   |                                    |          |                |           |           |                     |
|-----------------------------------------------------------------------------------------------------------------------------------|------------------------------------|----------|----------------|-----------|-----------|---------------------|
| -0.594526353835699                                                                                                                | AGIWUR21559                        |          |                |           |           |                     |
| CB4856 CT IV                                                                                                                      | 10023291                           | 10025226 | WBGene00009685 | F44D12.8  | F44D12.8  |                     |
| 0.299431041394049                                                                                                                 | AGIWUR19688                        |          |                |           |           |                     |
| CB4856 CT IV                                                                                                                      | 10026413                           | 10027666 | WBGene00009681 | gipc-2    | F44D12.4  |                     |
| -0.112635558238733                                                                                                                | AGIWUR34255                        |          |                |           |           |                     |
| CB4856 CT IV                                                                                                                      | 10032972                           | 10033155 | WBGene00045002 | F44D12.12 | F44D12.12 |                     |
| 0.260307075338369                                                                                                                 | AGIWUR20102                        |          |                |           |           |                     |
| CB4856 CT IV                                                                                                                      | 10033363                           | 10034820 | WBGene00009683 | F44D12.6  | F44D12.6  |                     |
| -0.0629347244607459                                                                                                               | AGIWUR8676;AGIWUR30156;AGIWUR38109 |          |                |           |           |                     |
| CB4856 CT IV                                                                                                                      | 10036627                           | 10037066 | WBGene00009687 | F44D12.10 | F44D12.10 |                     |
| 0.00387716518522652                                                                                                               |                                    |          |                |           |           |                     |
| AGIWUR7081;AGIWUR7294;AGIWUR15394;AGIWUR18459;AGIWUR19867;AGIWUR22633;AGIWUR27241;AGIWUR33146;AGIWUR34661;AGIWUR40121;AGIWUR40462 |                                    |          |                |           |           |                     |
| CB4856 CT IV                                                                                                                      | 10037452                           | 10039043 | WBGene00014375 | F44D12.11 | F44D12.11 |                     |
| -0.0846580560570942                                                                                                               | AGIWUR25592                        |          |                |           |           |                     |
| CB4856 CT IV                                                                                                                      | 10039773                           | 10040903 | WBGene00011424 | dhs-31    | T04B2.6   | -0.0716075374717313 |
| AGIWUR19849;AGIWUR41560                                                                                                           |                                    |          |                |           |           |                     |
| CB4856 CT IV                                                                                                                      | 10041130                           | 10042432 | WBGene00011421 | T04B2.1   | T04B2.1   | 0.092615958117658   |
| AGIWUR7713;AGIWUR10342;AGIWUR36383;AGIWUR38194                                                                                    |                                    |          |                |           |           |                     |
| CB4856 CT IV                                                                                                                      | 10043183                           | 10045739 | WBGene00001487 | frk-1     | T04B2.2   | -0.2662836843358    |
| AGIWUR40759                                                                                                                       |                                    |          |                |           |           |                     |
| CB4856 CT IV                                                                                                                      | 10047408                           | 10050554 | WBGene00011422 | T04B2.3   | T04B2.3   | -0.466116082135006  |
| AGIWUR18224                                                                                                                       |                                    |          |                |           |           |                     |
| CB4856 CT IV                                                                                                                      | 10050581                           | 10051188 | WBGene00044018 | T04B2.8   | T04B2.8   | -0.0547034128458783 |
| AGIWUR4874;AGIWUR8285;AGIWUR24191;AGIWUR35191;AGIWUR38908                                                                         |                                    |          |                |           |           |                     |
| CB4856 CT IV                                                                                                                      | 10051286                           | 10053650 | WBGene00005723 | srv-12    | T04B2.4   | 0.0495630986020146  |
| AGIWUR15022                                                                                                                       |                                    |          |                |           |           |                     |
| CB4856 CT IV                                                                                                                      | 10054036                           | 10056250 | WBGene00011425 | T04B2.7   | T04B2.7   | 0.00735935797628606 |
| AGIWUR36502                                                                                                                       |                                    |          |                |           |           |                     |
| CB4856 CT IV                                                                                                                      | 10056591                           | 10062849 | WBGene00011423 | ipla-7    | T04B2.5   | 0.204932657875299   |
| AGIWUR712;AGIWUR11375;AGIWUR21307;AGIWUR21939;AGIWUR30091;AGIWUR33006;AGIWUR41031;AGIWUR44901                                     |                                    |          |                |           |           |                     |
| CB4856 CT IV                                                                                                                      | 10067824                           | 10070251 | WBGene00000858 | cwn-2     | W01B6.1   | 0.58269048795794    |
| AGIWUR9085;AGIWUR12598;AGIWUR15419;AGIWUR28973;AGIWUR37317                                                                        |                                    |          |                |           |           |                     |
| CB4856 CT IV                                                                                                                      | 10070270                           | 10072626 | WBGene00012170 | W01B6.3   | W01B6.3   | -0.272532635113917  |
| AGIWUR22414                                                                                                                       |                                    |          |                |           |           |                     |
| CB4856 CT IV                                                                                                                      | 10075414                           | 10075775 | WBGene00012171 | W01B6.4   | W01B6.4   | -0.306094920186791  |
| AGIWUR5168                                                                                                                        |                                    |          |                |           |           |                     |
| CB4856 CT IV                                                                                                                      | 10076325                           | 10078705 | WBGene00012172 | W01B6.5   | W01B6.5   | -0.0446795415171888 |
| AGIWUR27903                                                                                                                       |                                    |          |                |           |           |                     |

|                                              |                         |          |                |          |          |                     |
|----------------------------------------------|-------------------------|----------|----------------|----------|----------|---------------------|
| CB4856 CT IV                                 | 10081155                | 10082610 | WBGene00012173 | W01B6.6  | W01B6.6  | -0.100653038536117  |
| AGIWUR5015;AGIWUR41383                       |                         |          |                |          |          |                     |
| CB4856 CT IV                                 | 10082867                | 10082962 | WBGene00045182 | W01B6.10 | W01B6.10 |                     |
| 0.0952616193471947                           | AGIWUR29759             |          |                |          |          |                     |
| CB4856 CT IV                                 | 10083491                | 10084440 | WBGene00012174 | W01B6.8  | W01B6.8  | -0.257078066557929  |
| AGIWUR34753                                  |                         |          |                |          |          |                     |
| CB4856 CT IV                                 | 10084454                | 10085438 | WBGene00000593 | col-2    | W01B6.7  | -0.0988088022672349 |
| AGIWUR30833                                  |                         |          |                |          |          |                     |
| CB4856 CT IV                                 | 10086137                | 10088437 | WBGene00003576 | ndc-80   | W01B6.9  | -0.17786582034876   |
| AGIWUR293;AGIWUR3177;AGIWUR28049             |                         |          |                |          |          |                     |
| CB4856 CT IV                                 | 10088367                | 10089894 | WBGene00007304 | ttr-39   | C04G2.1  | 0.164743205443784   |
| AGIWUR35819                                  |                         |          |                |          |          |                     |
| CB4856 CT IV                                 | 10090658                | 10092379 | WBGene00007305 | C04G2.2  | C04G2.2  | -0.0832703418002758 |
| AGIWUR3541                                   |                         |          |                |          |          |                     |
| CB4856 CT IV                                 | 10094198                | 10095259 | WBGene00007306 | C04G2.5  | C04G2.5  | 0.114494953412301   |
| AGIWUR33346                                  |                         |          |                |          |          |                     |
| CB4856 CT IV                                 | 10097196                | 10106556 | WBGene00001001 | dis-3    | C04G2.6  | -0.26195733555234   |
| AGIWUR33485                                  |                         |          |                |          |          |                     |
| CB4856 CT IV                                 | 10106917                | 10110412 | WBGene00001204 | egl-38   | C04G2.7  | -0.147915584573702  |
| AGIWUR43499                                  |                         |          |                |          |          |                     |
| CB4856 CT IV                                 | 10110347                | 10111577 | WBGene00007307 | spch-1   | C04G2.8  | 0.1188196214943     |
| AGIWUR2944                                   |                         |          |                |          |          |                     |
| CB4856 CT IV                                 | 10111721                | 10112028 | WBGene00045104 | C04G2.12 | C04G2.12 |                     |
| -0.023728039615198                           | AGIWUR10102;AGIWUR30391 |          |                |          |          |                     |
| CB4856 CT IV                                 | 10112870                | 10114287 | WBGene00007308 | C04G2.9  | C04G2.9  | 0.253144068432023   |
| AGIWUR3561                                   |                         |          |                |          |          |                     |
| CB4856 CT IV                                 | 10115389                | 10118084 | WBGene00007309 | C04G2.10 | C04G2.10 |                     |
| -0.354601733669889                           | AGIWUR41110             |          |                |          |          |                     |
| CB4856 CT IV                                 | 10119460                | 10122305 | WBGene00007310 | ir1d-21  | C04G2.11 |                     |
| -0.278932088575456                           | AGIWUR43001             |          |                |          |          |                     |
| CB4856 CT IV                                 | 10122120                | 10126675 | WBGene00010676 | K08F4.1  | K08F4.1  | -0.247530484701823  |
| AGIWUR6421;AGIWUR24373;AGIWUR44754           |                         |          |                |          |          |                     |
| CB4856 CT IV                                 | 10126749                | 10128956 | WBGene00010677 | gtbp-1   | K08F4.2  | -0.122538786325057  |
| AGIWUR444;AGIWUR1140;AGIWUR31820;AGIWUR42248 |                         |          |                |          |          |                     |
| CB4856 CT IV                                 | 10129257                | 10130244 | WBGene00010678 | K08F4.3  | K08F4.3  | -0.32459239658731   |
| AGIWUR6612                                   |                         |          |                |          |          |                     |
| CB4856 CT IV                                 | 10130257                | 10133283 | WBGene00001621 | glt-3    | K08F4.4  | 0.150217431367217   |
| AGIWUR13198                                  |                         |          |                |          |          |                     |
| CB4856 CT IV                                 | 10134932                | 10135887 | WBGene00010679 | K08F4.5  | K08F4.5  | 0.202937720587256   |

AGIWUR28659

|                                                                                                |    |    |          |          |                |          |                            |
|------------------------------------------------------------------------------------------------|----|----|----------|----------|----------------|----------|----------------------------|
| CB4856                                                                                         | CT | IV | 10138124 | 10139104 | WBGene00010680 | K08F4.12 | K08F4.12                   |
| -0.0747475510592075 AGIWUR43473                                                                |    |    |          |          |                |          |                            |
| CB4856                                                                                         | CT | IV | 10139380 | 10140285 | WBGene00001751 | gst-3    | K08F4.11                   |
| 0.269850178805253 AGIWUR15799                                                                  |    |    |          |          |                |          |                            |
| CB4856                                                                                         | CT | IV | 10145249 | 10146222 | WBGene00000975 | dhs-12   | K08F4.9 -0.318028531925419 |
| AGIWUR15183;AGIWUR15296;AGIWUR17821;AGIWUR17973                                                |    |    |          |          |                |          |                            |
| CB4856                                                                                         | CT | IV | 10146226 | 10147105 | WBGene00011777 | T14G10.8 | T14G10.8                   |
| 0.0445819712560134 AGIWUR34844                                                                 |    |    |          |          |                |          |                            |
| CB4856                                                                                         | CT | IV | 10147031 | 10149038 | WBGene00011776 | hpo-5    | T14G10.7                   |
| -0.0493683798773041 AGIWUR43385                                                                |    |    |          |          |                |          |                            |
| CB4856                                                                                         | CT | IV | 10149166 | 10150602 | WBGene00006638 | tsp-12   | T14G10.6                   |
| 0.157674145327379 AGIWUR33375                                                                  |    |    |          |          |                |          |                            |
| CB4856                                                                                         | CT | IV | 10151949 | 10155636 | WBGene00011775 | T14G10.5 | T14G10.5                   |
| -0.0281463900030339 AGIWUR16222;AGIWUR42213;AGIWUR44173                                        |    |    |          |          |                |          |                            |
| CB4856                                                                                         | CT | IV | 10155775 | 10156771 | WBGene00011774 | ttr-54   | T14G10.4                   |
| 0.22410252723239 AGIWUR25565                                                                   |    |    |          |          |                |          |                            |
| CB4856                                                                                         | CT | IV | 10158038 | 10159243 | WBGene00011773 | ttr-53   | T14G10.3                   |
| -0.102203370373903 AGIWUR43146                                                                 |    |    |          |          |                |          |                            |
| CB4856                                                                                         | CT | IV | 10162008 | 10164390 | WBGene00004091 | pps-1    | T14G10.1                   |
| 0.148422091075497 AGIWUR14039                                                                  |    |    |          |          |                |          |                            |
| CB4856                                                                                         | CT | IV | 10164331 | 10174341 | WBGene00004254 | pxf-1    | T14G10.2                   |
| 0.0120843124493426 AGIWUR18067;AGIWUR19827;AGIWUR21600;AGIWUR27870;AGIWUR36386                 |    |    |          |          |                |          |                            |
| CB4856                                                                                         | CT | IV | 10176680 | 10178099 | WBGene00010556 | rack-1   | K04D7.1 0.0369119133759845 |
| AGIWUR2243;AGIWUR11655;AGIWUR14450;AGIWUR16648;AGIWUR24842;AGIWUR43131                         |    |    |          |          |                |          |                            |
| CB4856                                                                                         | CT | IV | 10177968 | 10180304 | WBGene00010557 | mispn-1  | K04D7.2 -0.250501949971635 |
| AGIWUR29722;AGIWUR30885                                                                        |    |    |          |          |                |          |                            |
| CB4856                                                                                         | CT | IV | 10180660 | 10183939 | WBGene00001794 | gta-1    | K04D7.3 -0.382528274611879 |
| AGIWUR3779;AGIWUR5118;AGIWUR12585                                                              |    |    |          |          |                |          |                            |
| CB4856                                                                                         | CT | IV | 10183851 | 10194424 | WBGene00010558 | ptp-4    | K04D7.4 0.131791716797194  |
| AGIWUR7030;AGIWUR11134;AGIWUR22388;AGIWUR24476;AGIWUR27283;AGIWUR40206;AGIWUR41498;AGIWUR42425 |    |    |          |          |                |          |                            |
| CB4856                                                                                         | CT | IV | 10197820 | 10202993 | WBGene00001653 | gon-4    | K04D7.5 -0.197867615844459 |
| AGIWUR17084                                                                                    |    |    |          |          |                |          |                            |
| CB4856                                                                                         | CT | IV | 10203729 | 10203964 | WBGene00045022 | K04D7.7  | K04D7.7 0.148621415734717  |
| AGIWUR28428;AGIWUR30611                                                                        |    |    |          |          |                |          |                            |
| CB4856                                                                                         | CT | IV | 10204185 | 10206073 | WBGene00010559 | K04D7.6  | K04D7.6 0.312905649946554  |
| AGIWUR27252;AGIWUR44586                                                                        |    |    |          |          |                |          |                            |
| CB4856                                                                                         | CT | IV | 10206189 | 10214911 | WBGene00000019 | abt-1    | C24F3.5 -0.230823880531471 |
| AGIWUR25441                                                                                    |    |    |          |          |                |          |                            |

|                                                                                             |    |    |          |          |                |           |          |                     |
|---------------------------------------------------------------------------------------------|----|----|----------|----------|----------------|-----------|----------|---------------------|
| CB4856                                                                                      | CT | IV | 10214986 | 10219308 | WBGene00007698 | qns-1     | C24F3.4  | 0.00649010128977334 |
| AGIWUR200;AGIWUR9742;AGIWUR16857;AGIWUR29306                                                |    |    |          |          |                |           |          |                     |
| CB4856                                                                                      | CT | IV | 10219373 | 10221281 | WBGene00007696 | tram-1    | C24F3.1  | -0.170612115941881  |
| AGIWUR296;AGIWUR3729;AGIWUR4771;AGIWUR13767;AGIWUR14881;AGIWUR20042;AGIWUR32443;AGIWUR32814 |    |    |          |          |                |           |          |                     |
| CB4856                                                                                      | CT | IV | 10222472 | 10223745 | WBGene00007697 | C24F3.2   | C24F3.2  | 0.0406942132409895  |
| AGIWUR16729                                                                                 |    |    |          |          |                |           |          |                     |
| CB4856                                                                                      | CT | IV | 10224023 | 10226342 | WBGene00003531 | nas-12    | C24F3.3  | -0.197653207751657  |
| AGIWUR9183;AGIWUR18486;AGIWUR23887;AGIWUR39103;AGIWUR42188;AGIWUR44445                      |    |    |          |          |                |           |          |                     |
| CB4856                                                                                      | CT | IV | 10226334 | 10227639 | WBGene00008509 | F01G10.6  |          | F01G10.6            |
| -0.0523693722001646 AGIWUR38080                                                             |    |    |          |          |                |           |          |                     |
| CB4856                                                                                      | CT | IV | 10227987 | 10231060 | WBGene00008508 | F01G10.5  |          | F01G10.5            |
| -0.27871418429032 AGIWUR18121                                                               |    |    |          |          |                |           |          |                     |
| CB4856                                                                                      | CT | IV | 10231375 | 10232552 | WBGene00008507 | F01G10.4  |          | F01G10.4            |
| 0.480792887993564 AGIWUR16428                                                               |    |    |          |          |                |           |          |                     |
| CB4856                                                                                      | CT | IV | 10233321 | 10235329 | WBGene00001158 | ech-9     | F01G10.3 |                     |
| 0.334782804664945 AGIWUR33647                                                               |    |    |          |          |                |           |          |                     |
| CB4856                                                                                      | CT | IV | 10236626 | 10239176 | WBGene00001157 | ech-8     | F01G10.2 |                     |
| 0.0872941380804839 AGIWUR30960                                                              |    |    |          |          |                |           |          |                     |
| CB4856                                                                                      | CT | IV | 10239278 | 10241859 | WBGene00008510 | lip1-7    | F01G10.7 |                     |
| 0.144829748278471 AGIWUR3315;AGIWUR11327                                                    |    |    |          |          |                |           |          |                     |
| CB4856                                                                                      | CT | IV | 10243591 | 10245752 | WBGene00008506 | tk1-1     | F01G10.1 |                     |
| -0.239374101200148 AGIWUR22815;AGIWUR24020;AGIWUR41119;AGIWUR43337                          |    |    |          |          |                |           |          |                     |
| CB4856                                                                                      | CT | IV | 10246160 | 10249785 | WBGene00008512 | F01G10.10 |          | F01G10.10           |
| -0.113912359034574 AGIWUR10003                                                              |    |    |          |          |                |           |          |                     |
| CB4856                                                                                      | CT | IV | 10250646 | 10255844 | WBGene00000910 | daf-14    | F01G10.8 |                     |
| 0.0748951062868919 AGIWUR20358                                                              |    |    |          |          |                |           |          |                     |
| CB4856                                                                                      | CT | IV | 10255755 | 10259657 | WBGene00008511 | F01G10.9  |          | F01G10.9            |
| 0.00761818001983094 AGIWUR6188;AGIWUR9546;AGIWUR10240;AGIWUR14914;AGIWUR44928               |    |    |          |          |                |           |          |                     |
| CB4856                                                                                      | CT | IV | 10268882 | 10269228 | WBGene00012781 | nspd-7    | Y43C5A.1 |                     |
| -0.680914847741382 AGIWUR14919                                                              |    |    |          |          |                |           |          |                     |
| CB4856                                                                                      | CT | IV | 10269883 | 10272691 | WBGene00012782 | Y43C5A.2  |          | Y43C5A.2            |
| -0.314728079283247 AGIWUR16256;AGIWUR17505;AGIWUR22870;AGIWUR44812                          |    |    |          |          |                |           |          |                     |
| CB4856                                                                                      | CT | IV | 10274036 | 10275411 | WBGene00012783 | Y43C5A.3  |          | Y43C5A.3            |
| 0.959935560242528 AGIWUR4497;AGIWUR10434;AGIWUR13683                                        |    |    |          |          |                |           |          |                     |
| CB4856                                                                                      | CT | IV | 10277264 | 10277918 | WBGene00044922 | Y43C5A.7  |          | Y43C5A.7            |
| -0.718081832662628 AGIWUR34336                                                              |    |    |          |          |                |           |          |                     |
| CB4856                                                                                      | CT | IV | 10277989 | 10279501 | WBGene00012784 | Y43C5A.4  |          | Y43C5A.4            |
| -0.0198741556589592 AGIWUR28573                                                             |    |    |          |          |                |           |          |                     |
| CB4856                                                                                      | CT | IV | 10279457 | 10281582 | WBGene00006568 | thk-1     | Y43C5A.5 |                     |

|                                                                                                                                                                                                                                          |                                     |          |                |           |          |                    |
|------------------------------------------------------------------------------------------------------------------------------------------------------------------------------------------------------------------------------------------|-------------------------------------|----------|----------------|-----------|----------|--------------------|
| 0.0162680644455264                                                                                                                                                                                                                       | AGIWUR5016                          |          |                |           |          |                    |
| CB4856 CT IV                                                                                                                                                                                                                             | 10281637                            | 10284244 | WBGene00004297 | rad-51    | Y43C5A.6 |                    |
| -0.0490388260688412                                                                                                                                                                                                                      | AGIWUR18645;AGIWUR33535;AGIWUR36015 |          |                |           |          |                    |
| CB4856 CT IV                                                                                                                                                                                                                             | 10286955                            | 10293013 | WBGene00004140 | ebax-1    | R09E10.7 |                    |
| -0.0052006276595371                                                                                                                                                                                                                      | AGIWUR43680                         |          |                |           |          |                    |
| CB4856 CT IV                                                                                                                                                                                                                             | 10292928                            | 10294130 | WBGene00011176 | R09E10.6  |          | R09E10.6           |
| 0.48680901562161                                                                                                                                                                                                                         | AGIWUR21841                         |          |                |           |          |                    |
| CB4856 CT IV                                                                                                                                                                                                                             | 10296046                            | 10302310 | WBGene00011175 | R09E10.5  |          | R09E10.5           |
| 0.748290320905231                                                                                                                                                                                                                        | AGIWUR27517                         |          |                |           |          |                    |
| CB4856 CT IV                                                                                                                                                                                                                             | 10304845                            | 10307880 | WBGene00011174 | acs-23    | R09E10.4 |                    |
| -0.138024909656156                                                                                                                                                                                                                       | AGIWUR1309;AGIWUR21443;AGIWUR21599  |          |                |           |          |                    |
| CB4856 CT IV                                                                                                                                                                                                                             | 10310116                            | 10310429 | WBGene00011177 | R09E10.8  |          | R09E10.8           |
| -0.747680303907057                                                                                                                                                                                                                       | AGIWUR29195                         |          |                |           |          |                    |
| CB4856 CT IV                                                                                                                                                                                                                             | 10310772                            | 10313670 | WBGene00011173 | acs-18    | R09E10.3 |                    |
| 0.561393460630732                                                                                                                                                                                                                        | AGIWUR13284                         |          |                |           |          |                    |
| CB4856 CT IV                                                                                                                                                                                                                             | 10314139                            | 10314576 | WBGene00044254 | R09E10.10 |          | R09E10.10          |
| 0.0541950835970031                                                                                                                                                                                                                       | AGIWUR31311;AGIWUR33716;AGIWUR36979 |          |                |           |          |                    |
| CB4856 CT IV                                                                                                                                                                                                                             | 10314989                            | 10317377 | WBGene00011178 | R09E10.9  |          | R09E10.9           |
| -0.256961374934295                                                                                                                                                                                                                       | AGIWUR3962                          |          |                |           |          |                    |
| CB4856 CT IV                                                                                                                                                                                                                             | 10317558                            | 10318293 | WBGene00011172 | R09E10.2  |          | R09E10.2           |
| -0.114011687728065                                                                                                                                                                                                                       | AGIWUR38681                         |          |                |           |          |                    |
| CB4856 CT IV                                                                                                                                                                                                                             | 10319351                            | 10321170 | WBGene00011171 | R09E10.1  |          | R09E10.1           |
| 0.201810223510869                                                                                                                                                                                                                        | AGIWUR35003                         |          |                |           |          |                    |
| CB4856 CT IV                                                                                                                                                                                                                             | 10324255                            | 10350217 | WBGene00006779 | unc-43    | K11E8.1  |                    |
| -0.00429559648718225                                                                                                                                                                                                                     |                                     |          |                |           |          |                    |
| AGIWUR4340;AGIWUR6349;AGIWUR7878;AGIWUR7921;AGIWUR8651;AGIWUR9769;AGIWUR9871;AGIWUR10142;AGIWUR10176;AGIWUR11503;AGIWUR12155;AGIWUR18114;AGIWUR20811;AGIWUR30344;AGIWUR37623;AGIWUR39280;AGIWUR39753;AGIWUR41763;AGIWUR42419;AGIWUR44510 |                                     |          |                |           |          |                    |
| CB4856 CT IV                                                                                                                                                                                                                             | 10351445                            | 10352343 | WBGene00012785 | Y43C5B.2  |          | Y43C5B.2           |
| -0.450348000756339                                                                                                                                                                                                                       | AGIWUR22600                         |          |                |           |          |                    |
| CB4856 CT IV                                                                                                                                                                                                                             | 10353167                            | 10355120 | WBGene00012786 | Y43C5B.3  |          | Y43C5B.3           |
| 0.20572864354893                                                                                                                                                                                                                         | AGIWUR29043                         |          |                |           |          |                    |
| CB4856 CT IV                                                                                                                                                                                                                             | 10355046                            | 10357170 | WBGene00011236 | R11A8.1   | R11A8.1  | -0.148962700601377 |
| AGIWUR20547                                                                                                                                                                                                                              |                                     |          |                |           |          |                    |
| CB4856 CT IV                                                                                                                                                                                                                             | 10358141                            | 10360219 | WBGene00011237 | gkow-1    | R11A8.2  | -0.20480850869097  |
| AGIWUR16364                                                                                                                                                                                                                              |                                     |          |                |           |          |                    |
| CB4856 CT IV                                                                                                                                                                                                                             | 10360800                            | 10363331 | WBGene00011238 | ugt-59    | R11A8.3  | 0.209940395557769  |
| AGIWUR31384                                                                                                                                                                                                                              |                                     |          |                |           |          |                    |
| CB4856 CT IV                                                                                                                                                                                                                             | 10366333                            | 10367790 | WBGene00011239 | pges-2    | R11A8.5  | -0.378191805731291 |

|                                                                                                         |    |    |          |          |                |          |          |                    |  |
|---------------------------------------------------------------------------------------------------------|----|----|----------|----------|----------------|----------|----------|--------------------|--|
| AGIWUR18136                                                                                             |    |    |          |          |                |          |          |                    |  |
| CB4856                                                                                                  | CT | IV | 10368607 | 10373136 | WBGene00002152 | iars-1   | R11A8.6  | -0.278456307107291 |  |
| AGIWUR822;AGIWUR2745;AGIWUR7114                                                                         |    |    |          |          |                |          |          |                    |  |
| CB4856                                                                                                  | CT | IV | 10372638 | 10373821 | WBGene00011241 | mpz-5    | R11A8.8  | 0.181228973797215  |  |
| AGIWUR16355;AGIWUR25461                                                                                 |    |    |          |          |                |          |          |                    |  |
| CB4856                                                                                                  | CT | IV | 10374905 | 10387318 | WBGene00011240 | R11A8.7  | R11A8.7  | -0.117280321513599 |  |
| AGIWUR902;AGIWUR3127;AGIWUR9042;AGIWUR10806;AGIWUR18248;AGIWUR18961;AGIWUR24502;AGIWUR29166;AGIWUR43502 |    |    |          |          |                |          |          |                    |  |
| CB4856                                                                                                  | CT | IV | 10387413 | 10388345 | WBGene00003064 | lpd-8    | R10H10.1 |                    |  |
| -0.357890811808865 AGIWUR20350                                                                          |    |    |          |          |                |          |          |                    |  |
| CB4856                                                                                                  | CT | IV | 10388483 | 10393294 | WBGene00011222 | R10H10.3 |          | R10H10.3           |  |
| -0.438147319993888 AGIWUR6660;AGIWUR15226;AGIWUR31267                                                   |    |    |          |          |                |          |          |                    |  |
| CB4856                                                                                                  | CT | IV | 10394591 | 10394958 | WBGene00011223 | R10H10.4 |          | R10H10.4           |  |
| -0.14254085364123 AGIWUR22287                                                                           |    |    |          |          |                |          |          |                    |  |
| CB4856                                                                                                  | CT | IV | 10404012 | 10408530 | WBGene00001669 | gpa-7    | R10H10.5 |                    |  |
| -0.0476801405071186 AGIWUR26769                                                                         |    |    |          |          |                |          |          |                    |  |
| CB4856                                                                                                  | CT | IV | 10408703 | 10409477 | WBGene00011224 | R10H10.6 |          | R10H10.6           |  |
| -0.134860841870243 AGIWUR6359                                                                           |    |    |          |          |                |          |          |                    |  |
| CB4856                                                                                                  | CT | IV | 10409985 | 10413928 | WBGene00011225 | R10H10.7 |          | R10H10.7           |  |
| 0.0989432282267444 AGIWUR12860                                                                          |    |    |          |          |                |          |          |                    |  |
| CB4856                                                                                                  | CT | IV | 10414030 | 10417881 | WBGene00008733 | F13B12.6 |          | F13B12.6           |  |
| 0.0903381023309926 AGIWUR8525;AGIWUR10975;AGIWUR19192                                                   |    |    |          |          |                |          |          |                    |  |
| CB4856                                                                                                  | CT | IV | 10422610 | 10424635 | WBGene00008729 | F13B12.1 |          | F13B12.1           |  |
| -0.0421012968385526 AGIWUR21607;AGIWUR33993;AGIWUR37529                                                 |    |    |          |          |                |          |          |                    |  |
| CB4856                                                                                                  | CT | IV | 10426231 | 10429110 | WBGene00008730 | F13B12.2 |          | F13B12.2           |  |
| -0.147950753983215 AGIWUR28816;AGIWUR37040;AGIWUR38086                                                  |    |    |          |          |                |          |          |                    |  |
| CB4856                                                                                                  | CT | IV | 10436708 | 10438410 | WBGene00002084 | ins-1    | F13B12.5 |                    |  |
| 0.146081900730819 AGIWUR33522;AGIWUR34508;AGIWUR37691                                                   |    |    |          |          |                |          |          |                    |  |
| CB4856                                                                                                  | CT | IV | 10439123 | 10443819 | WBGene00008731 | F13B12.3 |          | F13B12.3           |  |
| -0.0174774147412711 AGIWUR6185;AGIWUR43439                                                              |    |    |          |          |                |          |          |                    |  |
| CB4856                                                                                                  | CT | IV | 10444094 | 10444584 | WBGene00008734 | F13B12.7 |          | F13B12.7           |  |
| 0.134057821289621 AGIWUR41881                                                                           |    |    |          |          |                |          |          |                    |  |
| CB4856                                                                                                  | CT | IV | 10444583 | 10449899 | WBGene00008732 | F13B12.4 |          | F13B12.4           |  |
| -0.0552907803844036 AGIWUR16795                                                                         |    |    |          |          |                |          |          |                    |  |
| CB4856                                                                                                  | CT | IV | 10450802 | 10453098 | WBGene00008490 | F01D4.8  | F01D4.8  |                    |  |
| -0.00827539921689624 AGIWUR41212                                                                        |    |    |          |          |                |          |          |                    |  |
| CB4856                                                                                                  | CT | IV | 10454432 | 10457237 | WBGene00008489 | srb-17   | F01D4.7  | 0.153332640536146  |  |
| AGIWUR4263;AGIWUR34342;AGIWUR35770                                                                      |    |    |          |          |                |          |          |                    |  |
| CB4856                                                                                                  | CT | IV | 10458863 | 10461766 | WBGene00003167 | mec-3    | F01D4.6  | 0.496099554234113  |  |
| AGIWUR1570;AGIWUR4280;AGIWUR9851;AGIWUR12694                                                            |    |    |          |          |                |          |          |                    |  |



|                                                                                          |    |    |          |          |                |          |           |                     |
|------------------------------------------------------------------------------------------|----|----|----------|----------|----------------|----------|-----------|---------------------|
| CB4856                                                                                   | CT | IV | 10464588 | 10467240 | WBGene00008485 | ugt-43   | F01D4.1   | 0.134319640829393   |
| AGIWUR3944;AGIWUR9096;AGIWUR16273;AGIWUR17471;AGIWUR27317;AGIWUR30495                    |    |    |          |          |                |          |           |                     |
| CB4856                                                                                   | CT | IV | 10469741 | 10471899 | WBGene00008486 | ugt-44   | F01D4.2   | -0.281181496902118  |
| AGIWUR4885                                                                               |    |    |          |          |                |          |           |                     |
| CB4856                                                                                   | CT | IV | 10472778 | 10478168 | WBGene00008491 | bgnt-1.1 | F01D4.9   |                     |
| 0.0114587864700635 AGIWUR42817                                                           |    |    |          |          |                |          |           |                     |
| CB4856                                                                                   | CT | IV | 10478450 | 10481844 | WBGene00001189 | egl-21   | F01D4.4   | 0.323321785872096   |
| AGIWUR782;AGIWUR10945;AGIWUR21638;AGIWUR30012                                            |    |    |          |          |                |          |           |                     |
| CB4856                                                                                   | CT | IV | 10482629 | 10483655 | WBGene00008488 | F01D4.5  | F01D4.5   | -0.0397695544008361 |
| AGIWUR31233;AGIWUR39452                                                                  |    |    |          |          |                |          |           |                     |
| CB4856                                                                                   | CT | IV | 10484110 | 10492952 | WBGene00000419 | ced-5    | C02F4.1   | -0.0481984785785068 |
| AGIWUR14004;AGIWUR17614;AGIWUR20229;AGIWUR21408;AGIWUR36560;AGIWUR37218                  |    |    |          |          |                |          |           |                     |
| CB4856                                                                                   | CT | IV | 10493071 | 10501599 | WBGene00006527 | tax-6    | C02F4.2   | 0.0885774114143922  |
| AGIWUR16185;AGIWUR24485                                                                  |    |    |          |          |                |          |           |                     |
| CB4856                                                                                   | CT | IV | 10513887 | 10515228 | WBGene00007264 | C02F4.4  | C02F4.4   | 0.952463582973866   |
| AGIWUR24466                                                                              |    |    |          |          |                |          |           |                     |
| CB4856                                                                                   | CT | IV | 10521422 | 10530597 | WBGene00000288 | cal-4    | T07G12.1  |                     |
| -0.0874263450543777 AGIWUR9574;AGIWUR15671;AGIWUR30680                                   |    |    |          |          |                |          |           |                     |
| CB4856                                                                                   | CT | IV | 10533943 | 10536442 | WBGene00011594 | T07G12.3 | T07G12.3  |                     |
| 0.186815102714821 AGIWUR2713                                                             |    |    |          |          |                |          |           |                     |
| CB4856                                                                                   | CT | IV | 10541495 | 10545091 | WBGene00011596 | T07G12.5 | T07G12.5  |                     |
| 4.58730438037668 AGIWUR14244                                                             |    |    |          |          |                |          |           |                     |
| CB4856                                                                                   | CT | IV | 10547088 | 10555442 | WBGene00011597 | zim-1    | T07G12.6  |                     |
| -0.108255275878657 AGIWUR9315;AGIWUR9412;AGIWUR20517;AGIWUR36426;AGIWUR43050;AGIWUR45065 |    |    |          |          |                |          |           |                     |
| CB4856                                                                                   | CT | IV | 10555247 | 10558221 | WBGene00011600 | zim-2    | T07G12.10 |                     |
| 0.00853378355870049 AGIWUR17323                                                          |    |    |          |          |                |          |           |                     |
| CB4856                                                                                   | CT | IV | 10558721 | 10561130 | WBGene00011601 | zim-3    | T07G12.11 |                     |
| -0.107331637301954 AGIWUR20579                                                           |    |    |          |          |                |          |           |                     |
| CB4856                                                                                   | CT | IV | 10561905 | 10563947 | WBGene00001867 | him-8    | T07G12.12 |                     |
| -0.125590021605396 AGIWUR11669;AGIWUR17932;AGIWUR29184                                   |    |    |          |          |                |          |           |                     |
| CB4856                                                                                   | CT | IV | 10576350 | 10578288 | WBGene00001163 | efn-2    | C43F9.8   | -0.128167746955947  |
| AGIWUR576                                                                                |    |    |          |          |                |          |           |                     |
| CB4856                                                                                   | CT | IV | 10578667 | 10581786 | WBGene00008076 | lgc-43   | C43F9.9   | -0.13007506761339   |
| AGIWUR35328                                                                              |    |    |          |          |                |          |           |                     |
| CB4856                                                                                   | CT | IV | 10584537 | 10587400 | WBGene00008077 | oac-8    | C43F9.10  |                     |
| -0.167774515344175 AGIWUR11560                                                           |    |    |          |          |                |          |           |                     |
| CB4856                                                                                   | CT | IV | 10587553 | 10589147 | WBGene00008072 | C43F9.4  | C43F9.4   | -0.437219132365875  |
| AGIWUR21238;AGIWUR31087;AGIWUR37630                                                      |    |    |          |          |                |          |           |                     |
| CB4856                                                                                   | CT | IV | 10589294 | 10590749 | WBGene00008073 | C43F9.5  | C43F9.5   | 0.121913352089525   |



|                                                                       |    |    |          |          |                |         |         |                     |
|-----------------------------------------------------------------------|----|----|----------|----------|----------------|---------|---------|---------------------|
| CB4856                                                                | CT | IV | 10679383 | 10680475 | WBGene00010647 | K08C7.4 | K08C7.4 | 0.158455960279908   |
| AGIWUR4296;AGIWUR4337;AGIWUR23573;AGIWUR30664;AGIWUR41434;AGIWUR43000 |    |    |          |          |                |         |         |                     |
| CB4856                                                                | CT | IV | 10682524 | 10684385 | WBGene00001477 | fmo-2   | K08C7.5 | 4.50470774961473    |
| AGIWUR10619;AGIWUR14319                                               |    |    |          |          |                |         |         |                     |
| CB4856                                                                | CT | IV | 10684432 | 10685894 | WBGene00010648 | K08C7.6 | K08C7.6 | 0.272120951099035   |
| AGIWUR34138                                                           |    |    |          |          |                |         |         |                     |
| CB4856                                                                | CT | IV | 10687592 | 10688135 | WBGene00011289 | R102.2  | R102.2  | 0.0235599199272869  |
| AGIWUR40102                                                           |    |    |          |          |                |         |         |                     |
| CB4856                                                                | CT | IV | 10689640 | 10690309 | WBGene00194984 | R102.15 | R102.15 | -0.0503587497941229 |
| AGIWUR2156;AGIWUR35917;AGIWUR40196                                    |    |    |          |          |                |         |         |                     |
| CB4856                                                                | CT | IV | 10690444 | 10691789 | WBGene00011290 | R102.3  | R102.3  | -0.0122776402702822 |
| AGIWUR24495;AGIWUR25359;AGIWUR30903                                   |    |    |          |          |                |         |         |                     |
| CB4856                                                                | CT | IV | 10691991 | 10695303 | WBGene00011291 | R102.4  | R102.4  | -0.421026639454215  |
| AGIWUR37470                                                           |    |    |          |          |                |         |         |                     |
| CB4856                                                                | CT | IV | 10695309 | 10697071 | WBGene00011292 | R102.5  | R102.5  | 0.11598337888327    |
| AGIWUR29945                                                           |    |    |          |          |                |         |         |                     |
| CB4856                                                                | CT | IV | 10705463 | 10707313 | WBGene00011297 | R102.10 | R102.10 | -0.494148220690211  |
| AGIWUR149                                                             |    |    |          |          |                |         |         |                     |
| CB4856                                                                | CT | IV | 10710057 | 10711794 | WBGene00011296 | glb-21  | R102.9  | 0.0344900551780922  |
| AGIWUR23699                                                           |    |    |          |          |                |         |         |                     |
| CB4856                                                                | CT | IV | 10716648 | 10721755 | WBGene00003568 | ncx-3   | ZC168.1 | 0.257353569291922   |
| AGIWUR15067                                                           |    |    |          |          |                |         |         |                     |
| CB4856                                                                | CT | IV | 10728572 | 10729003 | WBGene00013856 | ZC168.2 | ZC168.2 | -0.0781921147092426 |
| AGIWUR30191                                                           |    |    |          |          |                |         |         |                     |
| CB4856                                                                | CT | IV | 10732832 | 10734632 | WBGene00013857 | orc-5   | ZC168.3 | -0.0706823366105684 |
| AGIWUR27343                                                           |    |    |          |          |                |         |         |                     |
| CB4856                                                                | CT | IV | 10735259 | 10737177 | WBGene00000865 | cyb-1   | ZC168.4 | 0.0719905398386835  |
| AGIWUR26407                                                           |    |    |          |          |                |         |         |                     |
| CB4856                                                                | CT | IV | 10737474 | 10738189 | WBGene00001730 | grl-21  | ZC168.5 | -0.0120303350085145 |
| AGIWUR10750;AGIWUR29076;AGIWUR30387;AGIWUR33665;AGIWUR33768           |    |    |          |          |                |         |         |                     |
| CB4856                                                                | CT | IV | 10738204 | 10738658 | WBGene00013858 | ssp-34  | ZC168.6 | 0.392073573564938   |
| AGIWUR33627                                                           |    |    |          |          |                |         |         |                     |
| CB4856                                                                | CT | IV | 10744779 | 10748275 | WBGene00012009 | T25B9.3 | T25B9.3 | 0.608577950930121   |
| AGIWUR11156                                                           |    |    |          |          |                |         |         |                     |
| CB4856                                                                | CT | IV | 10748385 | 10750153 | WBGene00012007 | T25B9.1 | T25B9.1 | -0.578893207345313  |
| AGIWUR23959                                                           |    |    |          |          |                |         |         |                     |
| CB4856                                                                | CT | IV | 10755760 | 10757716 | WBGene00012010 | T25B9.4 | T25B9.4 | 0.198904040789835   |
| AGIWUR34909                                                           |    |    |          |          |                |         |         |                     |
| CB4856                                                                | CT | IV | 10758126 | 10760795 | WBGene00012012 | T25B9.6 | T25B9.6 | 0.301898908651586   |



|                                                     |          |          |                |                 |                     |
|-----------------------------------------------------|----------|----------|----------------|-----------------|---------------------|
| CB4856 CT IV                                        | 10864331 | 10873632 | WBGene00008750 | F13E9.1 F13E9.1 | -0.0175533539196486 |
| AGIWUR12104;AGIWUR13811;AGIWUR16606                 |          |          |                |                 |                     |
| CB4856 CT IV                                        | 10873673 | 10874627 | WBGene00008761 | F13E9.12        | F13E9.12            |
| -0.130725972587248 AGIWUR31437                      |          |          |                |                 |                     |
| CB4856 CT IV                                        | 10877144 | 10877296 | WBGene00008751 | fipr-14 F13E9.2 | -0.231030400544235  |
| AGIWUR28316                                         |          |          |                |                 |                     |
| CB4856 CT IV                                        | 10877836 | 10879727 | WBGene00008755 | sdz-13 F13E9.6  | 0.28130340892847    |
| AGIWUR10549                                         |          |          |                |                 |                     |
| CB4856 CT IV                                        | 10881549 | 10882523 | WBGene00044797 | F13E9.13        | F13E9.13            |
| 0.36069966610404 AGIWUR13634                        |          |          |                |                 |                     |
| CB4856 CT IV                                        | 10882972 | 10884363 | WBGene00008754 | F13E9.5 F13E9.5 | -0.0783083987913997 |
| AGIWUR4319                                          |          |          |                |                 |                     |
| CB4856 CT IV                                        | 10885238 | 10886015 | WBGene00008759 | F13E9.10        | F13E9.10            |
| -0.559101809260694 AGIWUR20583                      |          |          |                |                 |                     |
| CB4856 CT IV                                        | 10889471 | 10889878 | WBGene00045208 | F13E9.15        | F13E9.15            |
| 0.771762656556945 AGIWUR34664                       |          |          |                |                 |                     |
| CB4856 CT IV                                        | 10891333 | 10892093 | WBGene00045207 | F13E9.14        | F13E9.14            |
| 0.164765448380423 AGIWUR7566;AGIWUR9516;AGIWUR42487 |          |          |                |                 |                     |
| CB4856 CT IV                                        | 10893648 | 10894355 | WBGene00008757 | F13E9.8 F13E9.8 | 0.411034629340611   |
| AGIWUR24368                                         |          |          |                |                 |                     |
| CB4856 CT IV                                        | 10895225 | 10896612 | WBGene00008753 | F13E9.4 F13E9.4 | 0.446049815753266   |
| AGIWUR12837                                         |          |          |                |                 |                     |
| CB4856 CT IV                                        | 10897655 | 10899180 | WBGene00008758 | F13E9.9 F13E9.9 | -0.107693874451718  |
| AGIWUR22978                                         |          |          |                |                 |                     |
| CB4856 CT IV                                        | 10900370 | 10901386 | WBGene00014006 | ZK596.1 ZK596.1 | 0.689691696959802   |
| AGIWUR11142                                         |          |          |                |                 |                     |
| CB4856 CT IV                                        | 10901913 | 10904382 | WBGene00014008 | ZK596.3 ZK596.3 | 0.324738204877901   |
| AGIWUR13858                                         |          |          |                |                 |                     |
| CB4856 CT IV                                        | 10908131 | 10909306 | WBGene00014007 | ZK596.2 ZK596.2 | 0.0787460558182413  |
| AGIWUR43993                                         |          |          |                |                 |                     |
| CB4856 CT IV                                        | 10909915 | 10913078 | WBGene00014001 | pyk-2 ZK593.1   | 0.0571543073923557  |
| AGIWUR19204                                         |          |          |                |                 |                     |
| CB4856 CT IV                                        | 10913361 | 10914582 | WBGene00014002 | ZK593.2 ZK593.2 | 0.589542262759995   |
| AGIWUR208                                           |          |          |                |                 |                     |
| CB4856 CT IV                                        | 10916597 | 10917718 | WBGene00014003 | ZK593.3 ZK593.3 | -0.913419979659107  |
| AGIWUR15333                                         |          |          |                |                 |                     |
| CB4856 CT IV                                        | 10920075 | 10926807 | WBGene00004319 | rbr-2 ZK593.4   | 0.263620731422317   |
| AGIWUR10324;AGIWUR33503                             |          |          |                |                 |                     |
| CB4856 CT IV                                        | 10926730 | 10933203 | WBGene00001017 | dnc-1 ZK593.5   | -0.331583643329544  |

|                                                                                                           |    |    |          |          |                |           |                            |
|-----------------------------------------------------------------------------------------------------------|----|----|----------|----------|----------------|-----------|----------------------------|
| AGIWUR4036;AGIWUR15883;AGIWUR30150                                                                        |    |    |          |          |                |           |                            |
| CB4856                                                                                                    | CT | IV | 10933502 | 10934200 | WBGene00003081 | lsm-7     | ZK593.7 -0.249971847362307 |
| AGIWUR7816                                                                                                |    |    |          |          |                |           |                            |
| CB4856                                                                                                    | CT | IV | 10934186 | 10935914 | WBGene00002981 | lgg-2     | ZK593.6 0.466992716674209  |
| AGIWUR5996;AGIWUR9128;AGIWUR16430;AGIWUR18825;AGIWUR28298;AGIWUR28809;AGIWUR32345;AGIWUR36092;AGIWUR37432 |    |    |          |          |                |           |                            |
| CB4856                                                                                                    | CT | IV | 10937454 | 10939935 | WBGene00014004 | fic-1     | ZK593.8 0.336097254246466  |
| AGIWUR10636                                                                                               |    |    |          |          |                |           |                            |
| CB4856                                                                                                    | CT | IV | 10940959 | 10942869 | WBGene00014005 | ZK593.9   | ZK593.9 0.309037324957949  |
| AGIWUR27344                                                                                               |    |    |          |          |                |           |                            |
| CB4856                                                                                                    | CT | IV | 10949767 | 10951133 | WBGene00013474 | Y69E1A.2  | Y69E1A.2                   |
| 0.319807345551702 AGIWUR34021                                                                             |    |    |          |          |                |           |                            |
| CB4856                                                                                                    | CT | IV | 10956863 | 10957698 | WBGene00013477 | Y69E1A.5  | Y69E1A.5                   |
| -0.0528148508516217 AGIWUR15234                                                                           |    |    |          |          |                |           |                            |
| CB4856                                                                                                    | CT | IV | 10958372 | 10961208 | WBGene00005531 | sri-19    | Y69E1A.6                   |
| 0.138238999260959 AGIWUR24828;AGIWUR40891                                                                 |    |    |          |          |                |           |                            |
| CB4856                                                                                                    | CT | IV | 10961355 | 10966459 | WBGene00000171 | aqp-3     | Y69E1A.7                   |
| -0.136668399620335 AGIWUR16033                                                                            |    |    |          |          |                |           |                            |
| CB4856                                                                                                    | CT | IV | 10966590 | 10968166 | WBGene00013478 | Y69E1A.8  | Y69E1A.8                   |
| -0.296124864931821 AGIWUR36844                                                                            |    |    |          |          |                |           |                            |
| CB4856                                                                                                    | CT | IV | 10982068 | 10985030 | WBGene00012794 | Y43E12A.2 | Y43E12A.2                  |
| 0.330599161675011 AGIWUR19508;AGIWUR21438                                                                 |    |    |          |          |                |           |                            |
| CB4856                                                                                                    | CT | IV | 10990999 | 10994137 | WBGene00008776 | F13H10.5  | F13H10.5                   |
| 0.706363563515417 AGIWUR23815;AGIWUR29827;AGIWUR37699                                                     |    |    |          |          |                |           |                            |
| CB4856                                                                                                    | CT | IV | 11002119 | 11003801 | WBGene00045056 | F13H10.9  | F13H10.9                   |
| -0.103995615138381 AGIWUR837;AGIWUR25734;AGIWUR43446                                                      |    |    |          |          |                |           |                            |
| CB4856                                                                                                    | CT | IV | 11004573 | 11005070 | WBGene00008773 | F13H10.1  | F13H10.1                   |
| 0.281648700175761 AGIWUR8767                                                                              |    |    |          |          |                |           |                            |
| CB4856                                                                                                    | CT | IV | 11009296 | 11010103 | WBGene00008777 | F13H10.6  | F13H10.6                   |
| 0.246566463449735 AGIWUR18010                                                                             |    |    |          |          |                |           |                            |
| CB4856                                                                                                    | CT | IV | 11009981 | 11012020 | WBGene00003586 | ndx-9     | F13H10.2                   |
| 0.0175670445792449 AGIWUR43255                                                                            |    |    |          |          |                |           |                            |
| CB4856                                                                                                    | CT | IV | 11012119 | 11015883 | WBGene00008774 | F13H10.3  | F13H10.3                   |
| -0.308375517795518 AGIWUR736                                                                              |    |    |          |          |                |           |                            |
| CB4856                                                                                                    | CT | IV | 11016229 | 11021902 | WBGene00008775 | mogs-1    | F13H10.4                   |
| 0.0929879920717145 AGIWUR8586;AGIWUR8727;AGIWUR15668;AGIWUR24442;AGIWUR44599                              |    |    |          |          |                |           |                            |
| CB4856                                                                                                    | CT | IV | 11022603 | 11025870 | WBGene00000109 | alh-3     | F36H1.6 0.167932915923824  |
| AGIWUR5136;AGIWUR12312;AGIWUR17773;AGIWUR30861;AGIWUR35885;AGIWUR37536                                    |    |    |          |          |                |           |                            |
| CB4856                                                                                                    | CT | IV | 11028477 | 11029105 | WBGene00009494 | hrg-5     | F36H1.9 0.24087287806271   |
| AGIWUR23826                                                                                               |    |    |          |          |                |           |                            |

|                                                                                                                                                  |             |          |                |          |          |                     |
|--------------------------------------------------------------------------------------------------------------------------------------------------|-------------|----------|----------------|----------|----------|---------------------|
| CB4856 CT IV                                                                                                                                     | 11030160    | 11031082 | WBGene00009493 | hrg-4    | F36H1.5  | -0.651619582031183  |
| AGIWUR2400                                                                                                                                       |             |          |                |          |          |                     |
| CB4856 CT IV                                                                                                                                     | 11031171    | 11033581 | WBGene00009495 | hrg-6    | F36H1.10 |                     |
| -0.780209386668265                                                                                                                               | AGIWUR18494 |          |                |          |          |                     |
| CB4856 CT IV                                                                                                                                     | 11036548    | 11038148 | WBGene00001426 | fkf-1    | F36H1.1  | -0.233601639771237  |
| AGIWUR3040;AGIWUR12315;AGIWUR21537;AGIWUR37162                                                                                                   |             |          |                |          |          |                     |
| CB4856 CT IV                                                                                                                                     | 11038662    | 11047422 | WBGene00006490 | kdn-1    | F36H1.2  | -0.0654598854643513 |
| AGIWUR7040;AGIWUR17878;AGIWUR22372;AGIWUR28170;AGIWUR36853;AGIWUR43480                                                                           |             |          |                |          |          |                     |
| CB4856 CT IV                                                                                                                                     | 11049171    | 11049632 | WBGene00009496 | F36H1.11 | F36H1.11 |                     |
| 0.501383403871836                                                                                                                                | AGIWUR32032 |          |                |          |          |                     |
| CB4856 CT IV                                                                                                                                     | 11050128    | 11052430 | WBGene00009492 | F36H1.3  | F36H1.3  | -0.456056281076123  |
| AGIWUR19348                                                                                                                                      |             |          |                |          |          |                     |
| CB4856 CT IV                                                                                                                                     | 11052816    | 11053634 | WBGene00009497 | F36H1.12 | F36H1.12 |                     |
| 0.213715695429972                                                                                                                                | AGIWUR34392 |          |                |          |          |                     |
| CB4856 CT IV                                                                                                                                     | 11054308    | 11063613 | WBGene00002992 | lin-3    | F36H1.4  | -0.0562250272851967 |
| AGIWUR54;AGIWUR748;AGIWUR2711;AGIWUR5458;AGIWUR5804;AGIWUR6726;AGIWUR7349;AGIWUR8580;AGIWUR16415;AGIWUR26047;AGIWUR26767;AGIWUR40552;AGIWUR42101 |             |          |                |          |          |                     |
| CB4856 CT IV                                                                                                                                     | 11063512    | 11064152 | WBGene00012382 | ttr-16   | Y5F2A.1  | 0.00605189838661957 |
| AGIWUR35777                                                                                                                                      |             |          |                |          |          |                     |
| CB4856 CT IV                                                                                                                                     | 11066018    | 11067072 | WBGene00012383 | ttr-17   | Y5F2A.2  | 0.28410175003517    |
| AGIWUR20365;AGIWUR35910;AGIWUR38875                                                                                                              |             |          |                |          |          |                     |
| CB4856 CT IV                                                                                                                                     | 11069387    | 11070950 | WBGene00012384 | Y5F2A.3  | Y5F2A.3  | -0.0342846063821867 |
| AGIWUR8611;AGIWUR10963;AGIWUR19805;AGIWUR20173;AGIWUR21012;AGIWUR29326;AGIWUR35458;AGIWUR43963                                                   |             |          |                |          |          |                     |
| CB4856 CT IV                                                                                                                                     | 11076085    | 11078582 | WBGene00012385 | Y5F2A.4  | Y5F2A.4  | 0.0057331889219725  |
| AGIWUR43902                                                                                                                                      |             |          |                |          |          |                     |
| CB4856 CT IV                                                                                                                                     | 11078677    | 11081055 | WBGene00010882 | atg-7    | M7.5     | 0.05804406554227    |
| AGIWUR36657;AGIWUR43525                                                                                                                          |             |          |                |          |          |                     |
| CB4856 CT IV                                                                                                                                     | 11080989    | 11082253 | WBGene00002344 | let-70   | M7.1     | 0.104685669571815   |
| AGIWUR11476;AGIWUR18418;AGIWUR19817;AGIWUR24836;AGIWUR40767;AGIWUR43507                                                                          |             |          |                |          |          |                     |
| CB4856 CT IV                                                                                                                                     | 11083735    | 11086050 | WBGene00002214 | k1c-1    | M7.2     | -0.308711621969004  |
| AGIWUR2976;AGIWUR21767;AGIWUR40967;AGIWUR41854                                                                                                   |             |          |                |          |          |                     |
| CB4856 CT IV                                                                                                                                     | 11086074    | 11092552 | WBGene00000246 | bcc-1    | M7.3     | -0.0371581970958523 |
| AGIWUR38663                                                                                                                                      |             |          |                |          |          |                     |
| CB4856 CT IV                                                                                                                                     | 11093843    | 11095085 | WBGene00010884 | M7.8     | M7.8     | 0.724681938846732   |
| AGIWUR42600                                                                                                                                      |             |          |                |          |          |                     |
| CB4856 CT IV                                                                                                                                     | 11096724    | 11097982 | WBGene00010887 | M7.12    | M7.12    | -0.250552378377927  |
| AGIWUR32734                                                                                                                                      |             |          |                |          |          |                     |
| CB4856 CT IV                                                                                                                                     | 11098448    | 11100371 | WBGene00006071 | str-3    | M7.13    | 0.25130125853916    |
| AGIWUR28180                                                                                                                                      |             |          |                |          |          |                     |

|                                                                                                                                                       |                         |          |                |          |          |                     |
|-------------------------------------------------------------------------------------------------------------------------------------------------------|-------------------------|----------|----------------|----------|----------|---------------------|
| CB4856 CT IV                                                                                                                                          | 11100631                | 11101478 | WBGene00010885 | M7.9     | M7.9     | -0.364045419559977  |
| AGIWUR41741                                                                                                                                           |                         |          |                |          |          |                     |
| CB4856 CT IV                                                                                                                                          | 11101962                | 11102695 | WBGene00010886 | M7.10    | M7.10    | 0.361929145111777   |
| AGIWUR13450                                                                                                                                           |                         |          |                |          |          |                     |
| CB4856 CT IV                                                                                                                                          | 11103255                | 11104262 | WBGene00011483 | T05E11.7 |          | T05E11.7            |
| -0.251625446112613                                                                                                                                    | AGIWUR19919             |          |                |          |          |                     |
| CB4856 CT IV                                                                                                                                          | 11104743                | 11105820 | WBGene00011484 | T05E11.8 |          | T05E11.8            |
| 0.0604812708902962                                                                                                                                    | AGIWUR34023             |          |                |          |          |                     |
| CB4856 CT IV                                                                                                                                          | 11108494                | 11110017 | WBGene00011482 | hpo-4    | T05E11.6 |                     |
| -0.45231112679795                                                                                                                                     | AGIWUR2772              |          |                |          |          |                     |
| CB4856 CT IV                                                                                                                                          | 11110102                | 11111045 | WBGene00004474 | rps-5    | T05E11.1 |                     |
| -0.00759276709664292                                                                                                                                  | AGIWUR15009;AGIWUR19637 |          |                |          |          |                     |
| CB4856 CT IV                                                                                                                                          | 11112999                | 11116754 | WBGene00011479 | T05E11.2 |          | T05E11.2            |
| 0.330523672302212                                                                                                                                     | AGIWUR5936              |          |                |          |          |                     |
| CB4856 CT IV                                                                                                                                          | 11116732                | 11118887 | WBGene00011481 | imp-2    | T05E11.5 |                     |
| 0.078009838453454                                                                                                                                     | AGIWUR34176             |          |                |          |          |                     |
| CB4856 CT IV                                                                                                                                          | 11119298                | 11123155 | WBGene00011480 | enpl-1   | T05E11.3 |                     |
| 0.329580650698777                                                                                                                                     | AGIWUR8786              |          |                |          |          |                     |
| CB4856 CT IV                                                                                                                                          | 11123133                | 11124862 | WBGene00004985 | spo-11   | T05E11.4 |                     |
| -0.233523794090724                                                                                                                                    | AGIWUR29114             |          |                |          |          |                     |
| CB4856 CT IV                                                                                                                                          | 11126024                | 11131162 | WBGene00004204 | swsn-4   | F01G4.1  | 0.119727041479679   |
| AGIWUR11401;AGIWUR19740;AGIWUR26530;AGIWUR29970;AGIWUR39043;AGIWUR39371                                                                               |                         |          |                |          |          |                     |
| CB4856 CT IV                                                                                                                                          | 11131279                | 11133785 | WBGene00000181 | ard-1    | F01G4.2  | -0.0728957804461317 |
| AGIWUR9929;AGIWUR40487;AGIWUR41787                                                                                                                    |                         |          |                |          |          |                     |
| CB4856 CT IV                                                                                                                                          | 11135566                | 11142360 | WBGene00008502 | skih-2   | F01G4.3  | -0.0941350647774897 |
| AGIWUR33640                                                                                                                                           |                         |          |                |          |          |                     |
| CB4856 CT IV                                                                                                                                          | 11143345                | 11145923 | WBGene00008503 | F01G4.4  | F01G4.4  | -0.0528522855381617 |
| AGIWUR41438                                                                                                                                           |                         |          |                |          |          |                     |
| CB4856 CT IV                                                                                                                                          | 11146106                | 11147247 | WBGene00008504 | F01G4.5  | F01G4.5  | 0.195142694822682   |
| AGIWUR42508                                                                                                                                           |                         |          |                |          |          |                     |
| CB4856 CT IV                                                                                                                                          | 11146940                | 11149504 | WBGene00008505 | F01G4.6  | F01G4.6  | 0.146757294975663   |
| AGIWUR886;AGIWUR1602;AGIWUR3823;AGIWUR7003;AGIWUR7501;AGIWUR15287;AGIWUR15503;AGIWUR17652;AGIWUR23154;AGIWUR25021;AGIWUR29635;AGIWUR34643;AGIWUR36572 |                         |          |                |          |          |                     |
| CB4856 CT IV                                                                                                                                          | 11149189                | 11154334 | WBGene00007444 | C08F8.2  | C08F8.2  | -0.0471090926708797 |
| AGIWUR32022                                                                                                                                           |                         |          |                |          |          |                     |
| CB4856 CT IV                                                                                                                                          | 11155029                | 11156634 | WBGene00007445 | C08F8.3  | C08F8.3  | -0.243614452515882  |
| AGIWUR20028                                                                                                                                           |                         |          |                |          |          |                     |
| CB4856 CT IV                                                                                                                                          | 11157102                | 11159492 | WBGene00007446 | mboa-4   | C08F8.4  | -0.0552092037815326 |
| AGIWUR35424                                                                                                                                           |                         |          |                |          |          |                     |



|                                    |                                                                     |          |                |          |                             |
|------------------------------------|---------------------------------------------------------------------|----------|----------------|----------|-----------------------------|
| CB4856 CT IV                       | 11159570                                                            | 11160807 | WBGene00219217 | C08F8.15 | C08F8.15                    |
| 0.349066742555019                  | AGIWUR36439                                                         |          |                |          |                             |
| CB4856 CT IV                       | 11162768                                                            | 11164622 | WBGene00007448 | C08F8.6  | C08F8.6 0.777162912821842   |
| AGIWUR10293                        |                                                                     |          |                |          |                             |
| CB4856 CT IV                       | 11169834                                                            | 11174783 | WBGene00003657 | nhr-67   | C08F8.8 -0.0358056194191949 |
| AGIWUR32104                        |                                                                     |          |                |          |                             |
| CB4856 CT IV                       | 11177286                                                            | 11178200 | WBGene00004309 | rap-3    | C08F8.7 -0.241438231606892  |
| AGIWUR40303                        |                                                                     |          |                |          |                             |
| CB4856 CT IV                       | 11179645                                                            | 11183001 | WBGene00011122 | cpt-2    | R07H5.2 0.0126386642929894  |
| AGIWUR7927                         |                                                                     |          |                |          |                             |
| CB4856 CT IV                       | 11183132                                                            | 11184310 | WBGene00004199 | prx-14   | R07H5.1 0.061319828038588   |
| AGIWUR7532                         |                                                                     |          |                |          |                             |
| CB4856 CT IV                       | 11184243                                                            | 11186000 | WBGene00011123 | nuaf-3   | R07H5.3 0.185433984493971   |
| AGIWUR41396                        |                                                                     |          |                |          |                             |
| CB4856 CT IV                       | 11187012                                                            | 11188264 | WBGene00011124 | sdz-27   | R07H5.4 -0.265972979715174  |
| AGIWUR7288                         |                                                                     |          |                |          |                             |
| CB4856 CT IV                       | 11188891                                                            | 11189613 | WBGene00011127 | fbxb-79  | R07H5.7 0.0131186249121651  |
| AGIWUR16050                        |                                                                     |          |                |          |                             |
| CB4856 CT IV                       | 11207531                                                            | 11209359 | WBGene00011129 | R07H5.9  | R07H5.9 0.295689121927772   |
| AGIWUR30176                        |                                                                     |          |                |          |                             |
| CB4856 CT IV                       | 11209309                                                            | 11210831 | WBGene00011128 | R07H5.8  | R07H5.8 -0.197522491584249  |
| AGIWUR8968;AGIWUR15795;AGIWUR30053 |                                                                     |          |                |          |                             |
| CB4856 CT IV                       | 11213651                                                            | 11218137 | WBGene00011130 | zip-6    | R07H5.10                    |
| 0.13670795969666                   | AGIWUR28427                                                         |          |                |          |                             |
| CB4856 CT IV                       | 11220727                                                            | 11221755 | WBGene00045197 | C29F4.4  | C29F4.4 0.13801056638351    |
| AGIWUR19584;AGIWUR24136            |                                                                     |          |                |          |                             |
| CB4856 CT IV                       | 11222048                                                            | 11223936 | WBGene00007809 | C29F4.3  | C29F4.3 -0.0665912452333215 |
| AGIWUR2326;AGIWUR18475;AGIWUR33132 |                                                                     |          |                |          |                             |
| CB4856 CT IV                       | 11226502                                                            | 11230307 | WBGene00007808 | best-7   | C29F4.2 0.536177610245961   |
| AGIWUR9612                         |                                                                     |          |                |          |                             |
| CB4856 CT IV                       | 11231670                                                            | 11233124 | WBGene00007338 | C05C12.6 | C05C12.6                    |
| -0.3988292317497                   | AGIWUR18612;AGIWUR23713                                             |          |                |          |                             |
| CB4856 CT IV                       | 11246451                                                            | 11248081 | WBGene00007336 | C05C12.4 | C05C12.4                    |
| 0.0476621881335886                 | AGIWUR5435;AGIWUR7534;AGIWUR8031;AGIWUR9057;AGIWUR27100;AGIWUR28815 |          |                |          |                             |
| CB4856 CT IV                       | 11248884                                                            | 11259535 | WBGene00001795 | gtl-1    | C05C12.3                    |
| 0.153469140335575                  | AGIWUR22273                                                         |          |                |          |                             |
| CB4856 CT IV                       | 11260412                                                            | 11261185 | WBGene00007337 | C05C12.5 | C05C12.5                    |
| 0.260732402118265                  | AGIWUR44003                                                         |          |                |          |                             |
| CB4856 CT IV                       | 11261844                                                            | 11263075 | WBGene00010046 | F54D1.1  | F54D1.1 0.416273173056089   |

|                                                            |    |                                              |          |                |          |          |                     |  |
|------------------------------------------------------------|----|----------------------------------------------|----------|----------------|----------|----------|---------------------|--|
| AGIWUR12500                                                |    |                                              |          |                |          |          |                     |  |
| CB4856 CT                                                  | IV | 11266290                                     | 11271352 | WBGene00003606 | nhr-7    | F54D1.4  | 0.0478506784708781  |  |
| AGIWUR30721                                                |    |                                              |          |                |          |          |                     |  |
| CB4856 CT                                                  | IV | 11273483                                     | 11281924 | WBGene00001796 | gtl-2    | F54D1.5  | 0.0269310245554166  |  |
| AGIWUR24761                                                |    |                                              |          |                |          |          |                     |  |
| CB4856 CT                                                  | IV | 11287811                                     | 11294913 | WBGene00010047 | F54D1.6  | F54D1.6  | 0.259397520934009   |  |
| AGIWUR32639                                                |    |                                              |          |                |          |          |                     |  |
| CB4856 CT                                                  | IV | 11295074                                     | 11296887 | WBGene00007114 | mttu-1   | B0035.16 |                     |  |
| 0.108599747286211                                          |    | AGIWUR8709                                   |          |                |          |          |                     |  |
| CB4856 CT                                                  | IV | 11296952                                     | 11298388 | WBGene00007113 | B0035.15 |          | B0035.15            |  |
| -0.242321532609278                                         |    | AGIWUR19989                                  |          |                |          |          |                     |  |
| CB4856 CT                                                  | IV | 11299008                                     | 11304789 | WBGene00001019 | dnj-1    | B0035.14 |                     |  |
| -0.0748404002128957                                        |    | AGIWUR32054;AGIWUR41709                      |          |                |          |          |                     |  |
| CB4856 CT                                                  | IV | 11304721                                     | 11306762 | WBGene00007112 | B0035.13 |          | B0035.13            |  |
| 0.0370789723207663                                         |    | AGIWUR33214;AGIWUR41564;AGIWUR42935          |          |                |          |          |                     |  |
| CB4856 CT                                                  | IV | 11310972                                     | 11312515 | WBGene00007105 | B0035.1  | B0035.1  | -0.0963716931623164 |  |
| AGIWUR6910;AGIWUR24062;AGIWUR36481;AGIWUR37302             |    |                                              |          |                |          |          |                     |  |
| CB4856 CT                                                  | IV | 11312437                                     | 11313980 | WBGene00001020 | dnj-2    | B0035.2  | -0.178265919300571  |  |
| AGIWUR39962                                                |    |                                              |          |                |          |          |                     |  |
| CB4856 CT                                                  | IV | 11314078                                     | 11315116 | WBGene00007106 | B0035.3  | B0035.3  | -0.223582368732238  |  |
| AGIWUR7573                                                 |    |                                              |          |                |          |          |                     |  |
| CB4856 CT                                                  | IV | 11315142                                     | 11315877 | WBGene00007107 | pfd-4    | B0035.4  | -0.175901752449519  |  |
| AGIWUR34374;AGIWUR43014;AGIWUR44476                        |    |                                              |          |                |          |          |                     |  |
| CB4856 CT                                                  | IV | 11317419                                     | 11319951 | WBGene00007108 | gsdpd-1  | B0035.5  | 0.0108750588528874  |  |
| AGIWUR239;AGIWUR15655;AGIWUR34155                          |    |                                              |          |                |          |          |                     |  |
| CB4856 CT                                                  | IV | 11320320                                     | 11320697 | WBGene00044290 | B0035.18 |          | B0035.18            |  |
| 0.17302492759835                                           |    | AGIWUR42866                                  |          |                |          |          |                     |  |
| CB4856 CT                                                  | IV | 11320800                                     | 11323634 | WBGene00007109 | B0035.6  | B0035.6  | -0.0497247511250425 |  |
| AGIWUR28931                                                |    |                                              |          |                |          |          |                     |  |
| CB4856 CT                                                  | IV | 11323885                                     | 11324470 | WBGene00001921 | his-47   | B0035.7  | -0.585385796601091  |  |
| AGIWUR2738;AGIWUR21949;AGIWUR27672;AGIWUR30476;AGIWUR39690 |    |                                              |          |                |          |          |                     |  |
| CB4856 CT                                                  | IV | 11327356                                     | 11327569 | WBGene00235095 | B0035.21 |          | B0035.21            |  |
| -0.164268377712681                                         |    | AGIWUR7626                                   |          |                |          |          |                     |  |
| CB4856 CT                                                  | IV | 11327576                                     | 11329369 | WBGene00007110 | leo-1    | B0035.11 |                     |  |
| -0.240581444391117                                         |    | AGIWUR878;AGIWUR4853;AGIWUR30506;AGIWUR39319 |          |                |          |          |                     |  |
| CB4856 CT                                                  | IV | 11329466                                     | 11332969 | WBGene00007111 | sart-3   | B0035.12 |                     |  |
| -0.0905539890557172                                        |    | AGIWUR40276                                  |          |                |          |          |                     |  |
| CB4856 CT                                                  | IV | 11333079                                     | 11337184 | WBGene00010061 | F54E12.2 |          | F54E12.2            |  |
| -0.142289276725751                                         |    | AGIWUR14228;AGIWUR28750                      |          |                |          |          |                     |  |

|                                                                                                        |                |          |          |                     |
|--------------------------------------------------------------------------------------------------------|----------------|----------|----------|---------------------|
| CB4856 CT IV 11341325 11359863                                                                         | WBGene00002223 | klp-12   | T01G1.1  | -0.0398871260606182 |
| AGIWUR4114;AGIWUR19671;AGIWUR23903                                                                     |                |          |          |                     |
| CB4856 CT IV 11359864 11361509                                                                         | WBGene00044025 | T01G1.4  | T01G1.4  | -0.129595429715025  |
| AGIWUR18422                                                                                            |                |          |          |                     |
| CB4856 CT IV 11365605 11371836                                                                         | WBGene00011338 | sec-31   | T01G1.3  | 0.0164654120844503  |
| AGIWUR30781                                                                                            |                |          |          |                     |
| CB4856 CT IV 11372991 11377627                                                                         | WBGene00010351 | cbd-1    | H02I12.1 |                     |
| -0.154163100308921 AGIWUR1977                                                                          |                |          |          |                     |
| CB4856 CT IV 11378174 11379348                                                                         | WBGene00010352 | fbxb-76  | H02I12.2 |                     |
| 0.275210453797033 AGIWUR41180                                                                          |                |          |          |                     |
| CB4856 CT IV 11394543 11396728                                                                         | WBGene00006459 | tag-89   | H02I12.3 |                     |
| 0.183817691862686 AGIWUR8649;AGIWUR21996;AGIWUR42002                                                   |                |          |          |                     |
| CB4856 CT IV 11396788 11398317                                                                         | WBGene00001108 | dsl-6    | H02I12.4 |                     |
| 1.19395146885749 AGIWUR3759                                                                            |                |          |          |                     |
| CB4856 CT IV 11401884 11403338                                                                         | WBGene00010353 | memi-3   | H02I12.5 |                     |
| -0.00885821356874139 AGIWUR44329                                                                       |                |          |          |                     |
| CB4856 CT IV 11403961 11406066                                                                         | WBGene00010354 | cyp-31A2 | H02I12.8 |                     |
| -0.590650555652925 AGIWUR1332                                                                          |                |          |          |                     |
| CB4856 CT IV 11410228 11413001                                                                         | WBGene00009035 | gfat-2   | F22B3.4  | -0.232085423206367  |
| AGIWUR910;AGIWUR3963;AGIWUR6608;AGIWUR8102;AGIWUR15198;AGIWUR18863;AGIWUR32594;AGIWUR40623;AGIWUR43992 |                |          |          |                     |
| CB4856 CT IV 11413208 11415020                                                                         | WBGene00045122 | F22B3.10 | F22B3.10 |                     |
| 0.50398726324385 AGIWUR37720                                                                           |                |          |          |                     |
| CB4856 CT IV 11415598 11416824                                                                         | WBGene00009036 | F22B3.5  | F22B3.5  | 0.556682010946142   |
| AGIWUR8998;AGIWUR21522;AGIWUR32760;AGIWUR38677                                                         |                |          |          |                     |
| CB4856 CT IV 11417581 11421796                                                                         | WBGene00009038 | F22B3.7  | F22B3.7  | -0.379911086437989  |
| AGIWUR44684                                                                                            |                |          |          |                     |
| CB4856 CT IV 11422711 11425251                                                                         | WBGene00009039 | F22B3.8  | F22B3.8  | -0.0352652049753495 |
| AGIWUR9347;AGIWUR15133;AGIWUR19339;AGIWUR27538                                                         |                |          |          |                     |
| CB4856 CT IV 11425742 11447060                                                                         | WBGene00002192 | kin-4    | C10C6.1  | -0.0266663379290715 |
| AGIWUR13495;AGIWUR36397                                                                                |                |          |          |                     |
| CB4856 CT IV 11459984 11463195                                                                         | WBGene00007006 | npr-3    | C10C6.2  | -0.326525945742027  |
| AGIWUR4533                                                                                             |                |          |          |                     |
| CB4856 CT IV 11463609 11465189                                                                         | WBGene00007512 | C10C6.3  | C10C6.3  | -0.389412728595176  |
| AGIWUR17673;AGIWUR28120                                                                                |                |          |          |                     |
| CB4856 CT IV 11465433 11467239                                                                         | WBGene00007515 | C10C6.7  | C10C6.7  | -0.43515205864319   |
| AGIWUR1267;AGIWUR1584;AGIWUR20291                                                                      |                |          |          |                     |
| CB4856 CT IV 11470185 11473419                                                                         | WBGene00007513 | wht-2    | C10C6.5  | 0.0148394748597358  |
| AGIWUR1848;AGIWUR11284;AGIWUR22623;AGIWUR29007;AGIWUR39331;AGIWUR45150                                 |                |          |          |                     |
| CB4856 CT IV 11473363 11479251                                                                         | WBGene00007514 | catp-8   | C10C6.6  | -0.0717768393036113 |

|                                                                                            |    |    |          |          |                |          |                             |
|--------------------------------------------------------------------------------------------|----|----|----------|----------|----------------|----------|-----------------------------|
| AGIWUR10656;AGIWUR17810;AGIWUR31938                                                        |    |    |          |          |                |          |                             |
| CB4856                                                                                     | CT | IV | 11479358 | 11480369 | WBGene00003148 | mbf-1    | H21P03.1                    |
| -0.161611500503001 AGIWUR28512                                                             |    |    |          |          |                |          |                             |
| CB4856                                                                                     | CT | IV | 11480846 | 11482437 | WBGene00010409 | H21P03.2 | H21P03.2                    |
| -0.169361619619478 AGIWUR27589                                                             |    |    |          |          |                |          |                             |
| CB4856                                                                                     | CT | IV | 11482668 | 11498167 | WBGene00004892 | sms-1    | H21P03.3                    |
| -0.0355596471949386 AGIWUR6928;AGIWUR20047;AGIWUR27142;AGIWUR32836;AGIWUR41669;AGIWUR44350 |    |    |          |          |                |          |                             |
| CB4856                                                                                     | CT | IV | 11504716 | 11509723 | WBGene00006678 | twk-25   | M04B2.5 -0.0255141478650138 |
| AGIWUR24160                                                                                |    |    |          |          |                |          |                             |
| CB4856                                                                                     | CT | IV | 11509726 | 11510764 | WBGene00010848 | M04B2.6  | M04B2.6 0.39343383280071    |
| AGIWUR43084                                                                                |    |    |          |          |                |          |                             |
| CB4856                                                                                     | CT | IV | 11517186 | 11517620 | WBGene00045319 | M04B2.8  | M04B2.8 0.028522322737647   |
| AGIWUR8716;AGIWUR25069;AGIWUR38609;AGIWUR40846                                             |    |    |          |          |                |          |                             |
| CB4856                                                                                     | CT | IV | 11518422 | 11521031 | WBGene00010847 | M04B2.4  | M04B2.4 -0.273427831096537  |
| AGIWUR40957                                                                                |    |    |          |          |                |          |                             |
| CB4856                                                                                     | CT | IV | 11521290 | 11522214 | WBGene00001585 | gfl-1    | M04B2.3 -0.0142374310759692 |
| AGIWUR38859                                                                                |    |    |          |          |                |          |                             |
| CB4856                                                                                     | CT | IV | 11524642 | 11527954 | WBGene00003218 | mep-1    | M04B2.1 0.108101131932608   |
| AGIWUR26739                                                                                |    |    |          |          |                |          |                             |
| CB4856                                                                                     | CT | IV | 11528052 | 11530715 | WBGene00010846 | M04B2.2  | M04B2.2 -0.105329099082116  |
| AGIWUR2719                                                                                 |    |    |          |          |                |          |                             |
| CB4856                                                                                     | CT | IV | 11530650 | 11548586 | WBGene00010849 | M04B2.7  | M04B2.7 -0.0178444813145902 |
| AGIWUR40341                                                                                |    |    |          |          |                |          |                             |
| CB4856                                                                                     | CT | IV | 11550002 | 11551987 | WBGene00000702 | col-128  | F12F6.9 -0.428080769445899  |
| AGIWUR26388                                                                                |    |    |          |          |                |          |                             |
| CB4856                                                                                     | CT | IV | 11554489 | 11558261 | WBGene00008723 | F12F6.8  | F12F6.8 0.136879464804415   |
| AGIWUR31855                                                                                |    |    |          |          |                |          |                             |
| CB4856                                                                                     | CT | IV | 11558737 | 11561891 | WBGene00008722 | F12F6.7  | F12F6.7 -0.107151574834129  |
| AGIWUR18979                                                                                |    |    |          |          |                |          |                             |
| CB4856                                                                                     | CT | IV | 11561986 | 11566194 | WBGene00004755 | sec-24.1 | F12F6.6                     |
| -0.368728597584896 AGIWUR11185;AGIWUR12547;AGIWUR14071;AGIWUR40393                         |    |    |          |          |                |          |                             |
| CB4856                                                                                     | CT | IV | 11570500 | 11578699 | WBGene00006406 | srgp-1   | F12F6.5 0.213936519527699   |
| AGIWUR5747                                                                                 |    |    |          |          |                |          |                             |
| CB4856                                                                                     | CT | IV | 11578757 | 11584066 | WBGene00004360 | rib-1    | F12F6.3 0.0853195307021175  |
| AGIWUR21192;AGIWUR34748                                                                    |    |    |          |          |                |          |                             |
| CB4856                                                                                     | CT | IV | 11585224 | 11588321 | WBGene00008720 | F12F6.1  | F12F6.1 0.0633484865367109  |
| AGIWUR20751                                                                                |    |    |          |          |                |          |                             |
| CB4856                                                                                     | CT | IV | 11588263 | 11592240 | WBGene00009589 | F40F11.4 | F40F11.4                    |
| 0.0848534467393236 AGIWUR22717                                                             |    |    |          |          |                |          |                             |

|                                                 |                                                            |          |                |           |                             |
|-------------------------------------------------|------------------------------------------------------------|----------|----------------|-----------|-----------------------------|
| CB4856 CT IV                                    | 11592351                                                   | 11594003 | WBGene00009588 | F40F11.3  | F40F11.3                    |
| 0.00819831348385769                             | AGIWUR10426                                                |          |                |           |                             |
| CB4856 CT IV                                    | 11594244                                                   | 11601695 | WBGene00009587 | mig-38    | F40F11.2                    |
| 0.266406482354309                               | AGIWUR15204                                                |          |                |           |                             |
| CB4856 CT IV                                    | 11602641                                                   | 11603283 | WBGene00004480 | rps-11    | F40F11.1                    |
| 0.0311363048140549                              | AGIWUR3267;AGIWUR24771;AGIWUR29833;AGIWUR41945;AGIWUR42716 |          |                |           |                             |
| CB4856 CT IV                                    | 11603613                                                   | 11604927 | WBGene00012497 | ragc-1    | Y24F12A.2                   |
| 0.199742985480341                               | AGIWUR10140                                                |          |                |           |                             |
| CB4856 CT IV                                    | 11605254                                                   | 11607457 | WBGene00012496 | Y24F12A.1 | Y24F12A.1                   |
| -0.0796624087542881                             | AGIWUR38440                                                |          |                |           |                             |
| CB4856 CT IV                                    | 11619502                                                   | 11620938 | WBGene00001107 | ds1-5     | F58B3.8 0.222169789180601   |
| AGIWUR547;AGIWUR15690                           |                                                            |          |                |           |                             |
| CB4856 CT IV                                    | 11621443                                                   | 11623174 | WBGene00003093 | lys-4     | F58B3.1 0.259982213795988   |
| AGIWUR39966                                     |                                                            |          |                |           |                             |
| CB4856 CT IV                                    | 11624255                                                   | 11625582 | WBGene00003094 | lys-5     | F58B3.2 0.287000445246344   |
| AGIWUR19394                                     |                                                            |          |                |           |                             |
| CB4856 CT IV                                    | 11626910                                                   | 11627947 | WBGene00003095 | lys-6     | F58B3.3 0.0139338669492339  |
| AGIWUR36906                                     |                                                            |          |                |           |                             |
| CB4856 CT IV                                    | 11628757                                                   | 11631850 | WBGene00010231 | F58B3.4   | F58B3.4 -0.296558552830557  |
| AGIWUR6455                                      |                                                            |          |                |           |                             |
| CB4856 CT IV                                    | 11631941                                                   | 11635487 | WBGene00003415 | mars-1    | F58B3.5 -0.170507262384865  |
| AGIWUR12127;AGIWUR12383;AGIWUR19727             |                                                            |          |                |           |                             |
| CB4856 CT IV                                    | 11636648                                                   | 11638208 | WBGene00010232 | F58B3.6   | F58B3.6 -0.0233689380023065 |
| AGIWUR1821;AGIWUR13189;AGIWUR24826              |                                                            |          |                |           |                             |
| CB4856 CT IV                                    | 11638316                                                   | 11640097 | WBGene00010233 | F58B3.7   | F58B3.7 -0.13239759202569   |
| AGIWUR25433                                     |                                                            |          |                |           |                             |
| CB4856 CT IV                                    | 11640047                                                   | 11641015 | WBGene00010234 | ttr-50    | F58B3.9 0.958287035358051   |
| AGIWUR38959                                     |                                                            |          |                |           |                             |
| CB4856 CT IV                                    | 11645597                                                   | 11648893 | WBGene00014088 | ZK809.8   | ZK809.8 0.312966382892402   |
| AGIWUR6247                                      |                                                            |          |                |           |                             |
| CB4856 CT IV                                    | 11650715                                                   | 11652033 | WBGene00006491 | ac1-3     | ZK809.2 -0.140265890723597  |
| AGIWUR44861                                     |                                                            |          |                |           |                             |
| CB4856 CT IV                                    | 11652403                                                   | 11653461 | WBGene00014086 | ZK809.3   | ZK809.3 0.0553284163090995  |
| AGIWUR10668;AGIWUR32126;AGIWUR34914;AGIWUR37719 |                                                            |          |                |           |                             |
| CB4856 CT IV                                    | 11653422                                                   | 11655470 | WBGene00001320 | ent-1     | ZK809.4 -0.203932148527796  |
| AGIWUR14683                                     |                                                            |          |                |           |                             |
| CB4856 CT IV                                    | 11656730                                                   | 11659425 | WBGene00014087 | ZK809.5   | ZK809.5 -0.280927013308419  |
| AGIWUR4363                                      |                                                            |          |                |           |                             |
| CB4856 CT IV                                    | 11659800                                                   | 11665203 | WBGene00014076 | ZK792.1   | ZK792.1                     |

|                                                                                          |          |             |                |         |         |                     |  |  |
|------------------------------------------------------------------------------------------|----------|-------------|----------------|---------|---------|---------------------|--|--|
| -0.00304307266750925                                                                     |          | AGIWUR15773 |                |         |         |                     |  |  |
| CB4856 CT IV                                                                             | 11665310 | 11667989    | WBGene00194934 | ZK809.9 | ZK809.9 | 0.304679460608726   |  |  |
| AGIWUR32942                                                                              |          |             |                |         |         |                     |  |  |
| CB4856 CT IV                                                                             | 11668024 | 11671505    | WBGene00014080 | atg-4.2 | ZK792.8 | 0.0757373287702769  |  |  |
| AGIWUR33183                                                                              |          |             |                |         |         |                     |  |  |
| CB4856 CT IV                                                                             | 11673816 | 11675635    | WBGene00002130 | inx-8   | ZK792.2 | 0.133919318859999   |  |  |
| AGIWUR42581                                                                              |          |             |                |         |         |                     |  |  |
| CB4856 CT IV                                                                             | 11676354 | 11678497    | WBGene00002131 | inx-9   | ZK792.3 | -0.124695447530886  |  |  |
| AGIWUR16911                                                                              |          |             |                |         |         |                     |  |  |
| CB4856 CT IV                                                                             | 11678440 | 11682005    | WBGene00014077 | ZK792.4 | ZK792.4 | -0.064160207897153  |  |  |
| AGIWUR14826                                                                              |          |             |                |         |         |                     |  |  |
| CB4856 CT IV                                                                             | 11684975 | 11688118    | WBGene00014078 | ZK792.5 | ZK792.5 | -0.295303074197101  |  |  |
| AGIWUR21899                                                                              |          |             |                |         |         |                     |  |  |
| CB4856 CT IV                                                                             | 11688227 | 11691088    | WBGene00002335 | let-60  | ZK792.6 | 0.108080160745073   |  |  |
| AGIWUR34480                                                                              |          |             |                |         |         |                     |  |  |
| CB4856 CT IV                                                                             | 11694359 | 11696464    | WBGene00014079 | ZK792.7 | ZK792.7 | 0.289054734156323   |  |  |
| AGIWUR44766                                                                              |          |             |                |         |         |                     |  |  |
| CB4856 CT IV                                                                             | 11696443 | 11699895    | WBGene00001079 | dpy-20  | T22B3.1 | -0.682573387594021  |  |  |
| AGIWUR28561                                                                              |          |             |                |         |         |                     |  |  |
| CB4856 CT IV                                                                             | 11703185 | 11704016    | WBGene00011911 | T22B3.3 | T22B3.3 | 0.170874662332576   |  |  |
| AGIWUR45199                                                                              |          |             |                |         |         |                     |  |  |
| CB4856 CT IV                                                                             | 11704246 | 11708264    | WBGene00011910 | alg-3   | T22B3.2 | 0.38007702985362    |  |  |
| AGIWUR42929                                                                              |          |             |                |         |         |                     |  |  |
| CB4856 CT IV                                                                             | 11715039 | 11729276    | WBGene00010444 | magi-1  | K01A6.2 | 0.094459557254484   |  |  |
| AGIWUR7822; AGIWUR13519; AGIWUR17756; AGIWUR24742; AGIWUR27030; AGIWUR34487; AGIWUR43990 |          |             |                |         |         |                     |  |  |
| CB4856 CT IV                                                                             | 11735325 | 11742305    | WBGene00010448 | K01A6.6 | K01A6.6 | -0.062237512161996  |  |  |
| AGIWUR29459                                                                              |          |             |                |         |         |                     |  |  |
| CB4856 CT IV                                                                             | 11742706 | 11743789    | WBGene00010447 | K01A6.5 | K01A6.5 | -0.108634623840716  |  |  |
| AGIWUR16888                                                                              |          |             |                |         |         |                     |  |  |
| CB4856 CT IV                                                                             | 11745640 | 11748640    | WBGene00001577 | gem-4   | T12A7.1 | 0.574050977467868   |  |  |
| AGIWUR14415                                                                              |          |             |                |         |         |                     |  |  |
| CB4856 CT IV                                                                             | 11749154 | 11751074    | WBGene00011727 | T12A7.6 | T12A7.6 | 1.34714993080132    |  |  |
| AGIWUR14379                                                                              |          |             |                |         |         |                     |  |  |
| CB4856 CT IV                                                                             | 11751872 | 11752945    | WBGene00011728 | T12A7.7 | T12A7.7 | -0.0930950566319364 |  |  |
| AGIWUR3767                                                                               |          |             |                |         |         |                     |  |  |
| CB4856 CT IV                                                                             | 11752987 | 11754387    | WBGene00011724 | scl-18  | T12A7.3 | 0.147398012726036   |  |  |
| AGIWUR26905                                                                              |          |             |                |         |         |                     |  |  |
| CB4856 CT IV                                                                             | 11755274 | 11755970    | WBGene00185100 | T12A7.9 | T12A7.9 | -0.0474106935388567 |  |  |
| AGIWUR37943                                                                              |          |             |                |         |         |                     |  |  |

|                                                                                  |    |    |          |          |                |          |          |                     |
|----------------------------------------------------------------------------------|----|----|----------|----------|----------------|----------|----------|---------------------|
| CB4856                                                                           | CT | IV | 11756381 | 11761064 | WBGene00011723 | T12A7.2  | T12A7.2  | 0.374478696947726   |
| AGIWUR3478;AGIWUR5238;AGIWUR7874;AGIWUR16576;AGIWUR22434;AGIWUR34793;AGIWUR37106 |    |    |          |          |                |          |          |                     |
| CB4856                                                                           | CT | IV | 11768639 | 11773742 | WBGene00011725 | lips-5   | T12A7.4  | 0.134696658158397   |
| AGIWUR10418;AGIWUR26358;AGIWUR39694                                              |    |    |          |          |                |          |          |                     |
| CB4856                                                                           | CT | IV | 11779216 | 11786969 | WBGene00011726 | lpr-2    | T12A7.5  | 0.436098745927458   |
| AGIWUR8854;AGIWUR12875                                                           |    |    |          |          |                |          |          |                     |
| CB4856                                                                           | CT | IV | 11783941 | 11792593 | WBGene00010350 | H01G02.3 |          | H01G02.3            |
| -0.141638457283999 AGIWUR13502;AGIWUR21251;AGIWUR40362                           |    |    |          |          |                |          |          |                     |
| CB4856                                                                           | CT | IV | 11798667 | 11801088 | WBGene00010349 | dyf-18   | H01G02.2 |                     |
| 0.614169077051296 AGIWUR32927                                                    |    |    |          |          |                |          |          |                     |
| CB4856                                                                           | CT | IV | 11801697 | 11803144 | WBGene00045108 | H01G02.4 |          | H01G02.4            |
| -0.311604350015662 AGIWUR9688;AGIWUR24665                                        |    |    |          |          |                |          |          |                     |
| CB4856                                                                           | CT | IV | 11803273 | 11804152 | WBGene00010348 | H01G02.1 |          | H01G02.1            |
| -0.300836788907076 AGIWUR1707;AGIWUR8257;AGIWUR23953;AGIWUR25577                 |    |    |          |          |                |          |          |                     |
| CB4856                                                                           | CT | IV | 11814247 | 11819612 | WBGene00010918 | M117.1   | M117.1   | -0.0381416874113381 |
| AGIWUR3124                                                                       |    |    |          |          |                |          |          |                     |
| CB4856                                                                           | CT | IV | 11820505 | 11821917 | WBGene00003920 | par-5    | M117.2   | -0.0436380959495466 |
| AGIWUR5263;AGIWUR5896;AGIWUR26028;AGIWUR34257                                    |    |    |          |          |                |          |          |                     |
| CB4856                                                                           | CT | IV | 11823516 | 11823938 | WBGene00010919 | M117.3   | M117.3   | -0.230993974841954  |
| AGIWUR43702                                                                      |    |    |          |          |                |          |          |                     |
| CB4856                                                                           | CT | IV | 11828973 | 11830446 | WBGene00010921 | fbxb-4   | M117.5   | 0.0569567249987442  |
| AGIWUR5287;AGIWUR17122;AGIWUR27546                                               |    |    |          |          |                |          |          |                     |
| CB4856                                                                           | CT | IV | 11830799 | 11833556 | WBGene00010920 | M117.4   | M117.4   |                     |
| 0.000589748221987207 AGIWUR6805                                                  |    |    |          |          |                |          |          |                     |
| CB4856                                                                           | CT | IV | 11834390 | 11836020 | WBGene00044768 | M117.7   | M117.7   | 0.174762550750077   |
| AGIWUR38728                                                                      |    |    |          |          |                |          |          |                     |
| CB4856                                                                           | CT | IV | 11838980 | 11840423 | WBGene00009546 | fbxb-3   | F38H4.2  | 0.407194207524054   |
| AGIWUR38113                                                                      |    |    |          |          |                |          |          |                     |
| CB4856                                                                           | CT | IV | 11842421 | 11846350 | WBGene00009547 | F38H4.3  | F38H4.3  | -0.138572794122172  |
| AGIWUR6905                                                                       |    |    |          |          |                |          |          |                     |
| CB4856                                                                           | CT | IV | 11847009 | 11847871 | WBGene00009550 | F38H4.6  | F38H4.6  | 0.0597087299660544  |
| AGIWUR21232                                                                      |    |    |          |          |                |          |          |                     |
| CB4856                                                                           | CT | IV | 11848232 | 11850309 | WBGene00009548 | F38H4.4  | F38H4.4  | 0.137054792690565   |
| AGIWUR3661                                                                       |    |    |          |          |                |          |          |                     |
| CB4856                                                                           | CT | IV | 11850950 | 11855159 | WBGene00006415 | tag-30   | F38H4.7  | -0.199523695382297  |
| AGIWUR2752                                                                       |    |    |          |          |                |          |          |                     |
| CB4856                                                                           | CT | IV | 11854828 | 11856376 | WBGene00001151 | ech-2    | F38H4.8  | -0.397740959924583  |
| AGIWUR23837                                                                      |    |    |          |          |                |          |          |                     |
| CB4856                                                                           | CT | IV | 11856629 | 11860460 | WBGene00002363 | let-92   | F38H4.9  | 0.0267759919212951  |

|                                                                     |    |    |                                                            |            |                |           |                             |
|---------------------------------------------------------------------|----|----|------------------------------------------------------------|------------|----------------|-----------|-----------------------------|
| AGIWUR5253;AGIWUR5272;AGIWUR5474;AGIWUR5480;AGIWUR11755;AGIWUR36054 |    |    |                                                            |            |                |           |                             |
| CB4856                                                              | CT | IV | 11860555                                                   | 11862498   | WBGene00009551 | F38H4.10  | F38H4.10                    |
|                                                                     |    |    | 0.210009752733573                                          | AGIWUR7377 |                |           |                             |
| CB4856                                                              | CT | IV | 11864532                                                   | 11875738   | WBGene00007801 | trpa-1    | C29E6.2 -0.16927066647229   |
|                                                                     |    |    | AGIWUR16343;AGIWUR19719;AGIWUR26134;AGIWUR40717            |            |                |           |                             |
| CB4856                                                              | CT | IV | 11878549                                                   | 11883407   | WBGene00007802 | cut1-27   | C29E6.4 0.0499739320311399  |
|                                                                     |    |    | AGIWUR40702                                                |            |                |           |                             |
| CB4856                                                              | CT | IV | 11885530                                                   | 11891081   | WBGene00002827 | let-653   | C29E6.1 0.308291571742934   |
|                                                                     |    |    | AGIWUR20827                                                |            |                |           |                             |
| CB4856                                                              | CT | IV | 11899683                                                   | 11902910   | WBGene00003633 | nhr-43    | C29E6.5 0.308812904172761   |
|                                                                     |    |    | AGIWUR3447                                                 |            |                |           |                             |
| CB4856                                                              | CT | IV | 11912005                                                   | 11913245   | WBGene00012163 | VZK822L.2 | VZK822L.2                   |
|                                                                     |    |    | -0.567918887522467 AGIWUR895                               |            |                |           |                             |
| CB4856                                                              | CT | IV | 11913691                                                   | 11915796   | WBGene00001398 | fat-6     | VZK822L.1                   |
|                                                                     |    |    | 0.727680756459513 AGIWUR11968;AGIWUR32999;AGIWUR39182      |            |                |           |                             |
| CB4856                                                              | CT | IV | 11922358                                                   | 11923174   | WBGene00014090 | ZK822.2   | ZK822.2 0.183681372258803   |
|                                                                     |    |    | AGIWUR13802                                                |            |                |           |                             |
| CB4856                                                              | CT | IV | 11924685                                                   | 11925397   | WBGene00044009 | ZK822.6   | ZK822.6 0.143074778571178   |
|                                                                     |    |    | AGIWUR16060;AGIWUR25195;AGIWUR36482                        |            |                |           |                             |
| CB4856                                                              | CT | IV | 11926023                                                   | 11928415   | WBGene00014091 | ZK822.4   | ZK822.4 0.0190202641388346  |
|                                                                     |    |    | AGIWUR4838                                                 |            |                |           |                             |
| CB4856                                                              | CT | IV | 11930872                                                   | 11935718   | WBGene00003736 | nhx-9     | ZK822.3 0.262697300689059   |
|                                                                     |    |    | AGIWUR30705;AGIWUR32431;AGIWUR41714                        |            |                |           |                             |
| CB4856                                                              | CT | IV | 11937384                                                   | 11940604   | WBGene00014092 | ZK822.5   | ZK822.5 -0.168983548418179  |
|                                                                     |    |    | AGIWUR14263;AGIWUR25076;AGIWUR28171                        |            |                |           |                             |
| CB4856                                                              | CT | IV | 11940603                                                   | 11942385   | WBGene00014093 | ZK829.1   | ZK829.1 -0.275824409660116  |
|                                                                     |    |    | AGIWUR980;AGIWUR26330;AGIWUR43730                          |            |                |           |                             |
| CB4856                                                              | CT | IV | 11943314                                                   | 11945721   | WBGene00014094 | ZK829.3   | ZK829.3 -0.112198319918261  |
|                                                                     |    |    | AGIWUR18368                                                |            |                |           |                             |
| CB4856                                                              | CT | IV | 11946106                                                   | 11949817   | WBGene00001839 | hdl-1     | ZK829.2 -0.180025123386744  |
|                                                                     |    |    | AGIWUR17660                                                |            |                |           |                             |
| CB4856                                                              | CT | IV | 11950570                                                   | 11952208   | WBGene00006555 | tbx-36    | ZK829.5 -0.251257341874908  |
|                                                                     |    |    | AGIWUR30920                                                |            |                |           |                             |
| CB4856                                                              | CT | IV | 11953249                                                   | 11955541   | WBGene00014095 | gdh-1     | ZK829.4 -0.0277403506160532 |
|                                                                     |    |    | AGIWUR3935;AGIWUR10461;AGIWUR14208;AGIWUR20797;AGIWUR40982 |            |                |           |                             |
| CB4856                                                              | CT | IV | 11957547                                                   | 11959804   | WBGene00006566 | tgt-1     | ZK829.6 -0.0251888681711332 |
|                                                                     |    |    | AGIWUR1767                                                 |            |                |           |                             |
| CB4856                                                              | CT | IV | 11959823                                                   | 11961535   | WBGene00014096 | ZK829.7   | ZK829.7 -0.0196664426016238 |
|                                                                     |    |    | AGIWUR14518                                                |            |                |           |                             |



|                                                                        |    |          |          |                |         |          |                     |
|------------------------------------------------------------------------|----|----------|----------|----------------|---------|----------|---------------------|
| CB4856 CT                                                              | IV | 11963910 | 11965427 | WBGene00005591 | srj-1   | ZK829.8  | -0.220679108230225  |
| AGIWUR2300                                                             |    |          |          |                |         |          |                     |
| CB4856 CT                                                              | IV | 11965665 | 11968703 | WBGene00004907 | snf-8   | ZK829.10 |                     |
| -0.0865824209863586 AGIWUR38948                                        |    |          |          |                |         |          |                     |
| CB4856 CT                                                              | IV | 11970534 | 11972789 | WBGene00014097 | ZK829.9 | ZK829.9  | -0.233866091036699  |
| AGIWUR8490                                                             |    |          |          |                |         |          |                     |
| CB4856 CT                                                              | IV | 11972697 | 12011007 | WBGene00006759 | unc-22  | ZK617.1  | -0.0810860559313031 |
| AGIWUR3562;AGIWUR13699;AGIWUR28418;AGIWUR39579                         |    |          |          |                |         |          |                     |
| CB4856 CT                                                              | IV | 12013420 | 12014045 | WBGene00004971 | spe-17  | ZK617.3  | -0.135469492945429  |
| AGIWUR42758                                                            |    |          |          |                |         |          |                     |
| CB4856 CT                                                              | IV | 12014189 | 12015686 | WBGene00014009 | lips-6  | ZK617.2  | 0.294100432363511   |
| AGIWUR5897                                                             |    |          |          |                |         |          |                     |
| CB4856 CT                                                              | IV | 12026882 | 12029174 | WBGene00011742 | tgn-38  | T12G3.7  | -0.0216849205941179 |
| AGIWUR3714;AGIWUR14906;AGIWUR17093;AGIWUR20016;AGIWUR24430;AGIWUR44919 |    |          |          |                |         |          |                     |
| CB4856 CT                                                              | IV | 12030047 | 12031271 | WBGene00011741 | T12G3.6 | T12G3.6  | -0.30329276315895   |
| AGIWUR28845                                                            |    |          |          |                |         |          |                     |
| CB4856 CT                                                              | IV | 12031314 | 12032154 | WBGene00011740 | mrpl-51 | T12G3.5  | -0.0815005096858066 |
| AGIWUR4307;AGIWUR6927;AGIWUR43099                                      |    |          |          |                |         |          |                     |
| CB4856 CT                                                              | IV | 12034252 | 12037051 | WBGene00011737 | sqst-1  | T12G3.1  | 0.914627661744831   |
| AGIWUR1200                                                             |    |          |          |                |         |          |                     |
| CB4856 CT                                                              | IV | 12038985 | 12046967 | WBGene00011738 | T12G3.2 | T12G3.2  | 0.214325539819239   |
| AGIWUR16765;AGIWUR33601;AGIWUR44249                                    |    |          |          |                |         |          |                     |
| CB4856 CT                                                              | IV | 12048256 | 12049943 | WBGene00011739 | T12G3.4 | T12G3.4  | 0.243461314890498   |
| AGIWUR36660                                                            |    |          |          |                |         |          |                     |
| CB4856 CT                                                              | IV | 12049862 | 12051226 | WBGene00000270 | bre-5   | T12G3.8  | -0.127695894861096  |
| AGIWUR24329                                                            |    |          |          |                |         |          |                     |
| CB4856 CT                                                              | IV | 12051484 | 12055785 | WBGene00005015 | spt-5   | K08E4.1  | 0.0326425595577113  |
| AGIWUR6774                                                             |    |          |          |                |         |          |                     |
| CB4856 CT                                                              | IV | 12055670 | 12056656 | WBGene00010666 | K08E4.2 | K08E4.2  | -0.272052721517689  |
| AGIWUR24105                                                            |    |          |          |                |         |          |                     |
| CB4856 CT                                                              | IV | 12057626 | 12059951 | WBGene00010667 | K08E4.3 | K08E4.3  | -0.201550722870572  |
| AGIWUR26770                                                            |    |          |          |                |         |          |                     |
| CB4856 CT                                                              | IV | 12060397 | 12061329 | WBGene00045283 | K08E4.8 | K08E4.8  | -0.109288102627281  |
| AGIWUR35311;AGIWUR41068                                                |    |          |          |                |         |          |                     |
| CB4856 CT                                                              | IV | 12066572 | 12066884 | WBGene00010668 | K08E4.4 | K08E4.4  | -0.85547593017049   |
| AGIWUR16321                                                            |    |          |          |                |         |          |                     |
| CB4856 CT                                                              | IV | 12068890 | 12074914 | WBGene00010669 | bath-37 | K08E4.5  | 0.0803248502618281  |
| AGIWUR5644;AGIWUR10958                                                 |    |          |          |                |         |          |                     |
| CB4856 CT                                                              | IV | 12075744 | 12076950 | WBGene00045036 | K08E4.7 | K08E4.7  | 0.254256723775846   |

|                                       |    |    |                                      |          |                |          |          |                     |
|---------------------------------------|----|----|--------------------------------------|----------|----------------|----------|----------|---------------------|
| AGIWUR10309                           |    |    |                                      |          |                |          |          |                     |
| CB4856                                | CT | IV | 12077107                             | 12078162 | WBGene00010670 | K08E4.6  | K08E4.6  | 0.00516388894799924 |
| AGIWUR20378                           |    |    |                                      |          |                |          |          |                     |
| CB4856                                | CT | IV | 12079463                             | 12084362 | WBGene00008682 | lex-1    | F11A10.1 |                     |
| -0.0401203616920061                   |    |    | AGIWUR18425; AGIWUR36995             |          |                |          |          |                     |
| CB4856                                | CT | IV | 12084478                             | 12085320 | WBGene00008683 | repo-1   | F11A10.2 |                     |
| -0.0533629026458442                   |    |    | AGIWUR23785                          |          |                |          |          |                     |
| CB4856                                | CT | IV | 12085423                             | 12087060 | WBGene00008688 | F11A10.7 |          | F11A10.7            |
| 0.0885242895539449                    |    |    | AGIWUR34296                          |          |                |          |          |                     |
| CB4856                                | CT | IV | 12087017                             | 12089095 | WBGene00008687 | F11A10.6 |          | F11A10.6            |
| -0.112405180839367                    |    |    | AGIWUR28237                          |          |                |          |          |                     |
| CB4856                                | CT | IV | 12089247                             | 12092213 | WBGene00008684 | mig-32   | F11A10.3 |                     |
| 0.00745584737904181                   |    |    | AGIWUR38996                          |          |                |          |          |                     |
| CB4856                                | CT | IV | 12092322                             | 12093472 | WBGene00044329 | cpsf-4   | F11A10.8 |                     |
| -0.162608592821378                    |    |    | AGIWUR15808; AGIWUR22988             |          |                |          |          |                     |
| CB4856                                | CT | IV | 12094372                             | 12096692 | WBGene00008686 | F11A10.5 |          | F11A10.5            |
| -0.109122587847619                    |    |    | AGIWUR17214                          |          |                |          |          |                     |
| CB4856                                | CT | IV | 12096779                             | 12105762 | WBGene00008685 | mon-2    | F11A10.4 |                     |
| 0.109043118795888                     |    |    | AGIWUR9219; AGIWUR38240; AGIWUR38547 |          |                |          |          |                     |
| CB4856                                | CT | IV | 12105858                             | 12108388 | WBGene00010889 | M18.3    | M18.3    | -0.0948757562601727 |
| AGIWUR41362                           |    |    |                                      |          |                |          |          |                     |
| CB4856                                | CT | IV | 12108672                             | 12110275 | WBGene00000703 | col-129  | M18.1    | 0.101025198020132   |
| AGIWUR8374                            |    |    |                                      |          |                |          |          |                     |
| CB4856                                | CT | IV | 12110586                             | 12111577 | WBGene00010888 | dlc-2    | M18.2    | -0.121745608010205  |
| AGIWUR14688; AGIWUR15276; AGIWUR15586 |    |    |                                      |          |                |          |          |                     |
| CB4856                                | CT | IV | 12114810                             | 12121183 | WBGene00010890 | ddb-1    | M18.5    | 0.393012878573041   |
| AGIWUR10292                           |    |    |                                      |          |                |          |          |                     |
| CB4856                                | CT | IV | 12121266                             | 12122881 | WBGene00010891 | M18.6    | M18.6    | 0.0981991383921486  |
| AGIWUR34671; AGIWUR40569; AGIWUR42513 |    |    |                                      |          |                |          |          |                     |
| CB4856                                | CT | IV | 12123155                             | 12124807 | WBGene00000122 | aly-3    | M18.7    | -0.147157507133027  |
| AGIWUR20179; AGIWUR27251              |    |    |                                      |          |                |          |          |                     |
| CB4856                                | CT | IV | 12124952                             | 12126785 | WBGene00010892 | dhhc-6   | M18.8    |                     |
| -0.00667757944055936                  |    |    | AGIWUR26917                          |          |                |          |          |                     |
| CB4856                                | CT | IV | 12129504                             | 12135096 | WBGene00003010 | lin-24   | B0001.1  | -0.142590533417263  |
| AGIWUR998                             |    |    |                                      |          |                |          |          |                     |
| CB4856                                | CT | IV | 12135074                             | 12138193 | WBGene00007089 | B0001.4  | B0001.4  | 0.0890879276150223  |
| AGIWUR34195                           |    |    |                                      |          |                |          |          |                     |
| CB4856                                | CT | IV | 12138847                             | 12141057 | WBGene00007093 | B0001.8  | B0001.8  | -0.0320154756262845 |
| AGIWUR38687                           |    |    |                                      |          |                |          |          |                     |

|                                                             |                                                            |          |                |                 |                     |
|-------------------------------------------------------------|------------------------------------------------------------|----------|----------------|-----------------|---------------------|
| CB4856 CT IV                                                | 12141161                                                   | 12143331 | WBGene00007090 | B0001.5 B0001.5 | -0.0105442793212323 |
| AGIWUR38103                                                 |                                                            |          |                |                 |                     |
| CB4856 CT IV                                                | 12143431                                                   | 12145731 | WBGene00007088 | B0001.3 B0001.3 | 0.0124416440239656  |
| AGIWUR14977;AGIWUR37338;AGIWUR44425                         |                                                            |          |                |                 |                     |
| CB4856 CT IV                                                | 12146486                                                   | 12150975 | WBGene00007087 | B0001.2 B0001.2 | -0.448662110845419  |
| AGIWUR25713                                                 |                                                            |          |                |                 |                     |
| CB4856 CT IV                                                | 12151170                                                   | 12154245 | WBGene00007092 | B0001.7 B0001.7 | 0.0658075076359719  |
| AGIWUR41334                                                 |                                                            |          |                |                 |                     |
| CB4856 CT IV                                                | 12156838                                                   | 12164266 | WBGene00007091 | eri-12 B0001.6  | 0.389940848050745   |
| AGIWUR36393                                                 |                                                            |          |                |                 |                     |
| CB4856 CT IV                                                | 12168244                                                   | 12169216 | WBGene00008967 | F20B10.3        | F20B10.3            |
| -0.364795356966123                                          | AGIWUR43417                                                |          |                |                 |                     |
| CB4856 CT IV                                                | 12170824                                                   | 12178335 | WBGene00003772 | nlr-1           | F20B10.1            |
| 0.447736228064352                                           | AGIWUR2056                                                 |          |                |                 |                     |
| CB4856 CT IV                                                | 12200978                                                   | 12207956 | WBGene00009435 | F35G2.1 F35G2.1 | 0.378708795151027   |
| AGIWUR2732;AGIWUR28383;AGIWUR39547                          |                                                            |          |                |                 |                     |
| CB4856 CT IV                                                | 12208192                                                   | 12209010 | WBGene00009436 | marb-1 F35G2.2  | -0.0657438888417756 |
| AGIWUR18307;AGIWUR25328;AGIWUR26517;AGIWUR34553;AGIWUR42977 |                                                            |          |                |                 |                     |
| CB4856 CT IV                                                | 12209708                                                   | 12210737 | WBGene00009437 | F35G2.3 F35G2.3 | -0.317684293797943  |
| AGIWUR26562                                                 |                                                            |          |                |                 |                     |
| CB4856 CT IV                                                | 12211098                                                   | 12215987 | WBGene00004025 | phy-2           | F35G2.4             |
| -0.00966133642535283                                        | AGIWUR7106                                                 |          |                |                 |                     |
| CB4856 CT IV                                                | 12219609                                                   | 12222889 | WBGene00009438 | F35G2.5 F35G2.5 | 0.110203536299187   |
| AGIWUR10427;AGIWUR24979;AGIWUR25805                         |                                                            |          |                |                 |                     |
| CB4856 CT IV                                                | 12222872                                                   | 12227112 | WBGene00012704 | mlt-3           | Y39C12A.1           |
| -0.244677113963295                                          | AGIWUR25518                                                |          |                |                 |                     |
| CB4856 CT IV                                                | 12227910                                                   | 12229779 | WBGene00012705 | sre-18          | Y39C12A.3           |
| 0.0436687518179912                                          | AGIWUR22014                                                |          |                |                 |                     |
| CB4856 CT IV                                                | 12231310                                                   | 12231631 | WBGene00045314 | Y39C12A.10      | Y39C12A.10          |
| -0.184957219939187                                          | AGIWUR4014;AGIWUR15890;AGIWUR23137;AGIWUR25704;AGIWUR38992 |          |                |                 |                     |
| CB4856 CT IV                                                | 12232489                                                   | 12233408 | WBGene00012706 | sre-17          | Y39C12A.4           |
| -0.0943329418394043                                         | AGIWUR6305;AGIWUR6896                                      |          |                |                 |                     |
| CB4856 CT IV                                                | 12234139                                                   | 12236111 | WBGene00012707 | sre-16          | Y39C12A.5           |
| 0.100268704971816                                           | AGIWUR7617;AGIWUR22914;AGIWUR39281                         |          |                |                 |                     |
| CB4856 CT IV                                                | 12237175                                                   | 12238951 | WBGene00012708 | sre-19          | Y39C12A.6           |
| -0.0589681721600748                                         | AGIWUR11239                                                |          |                |                 |                     |
| CB4856 CT IV                                                | 12241363                                                   | 12244806 | WBGene00012709 | sre-15          | Y39C12A.7           |
| -0.0193883169818232                                         | AGIWUR8094                                                 |          |                |                 |                     |
| CB4856 CT IV                                                | 12251111                                                   | 12252663 | WBGene00001044 | dnj-26          | Y39C12A.8           |

|                                                                                   |                                                 |          |                |           |           |                     |
|-----------------------------------------------------------------------------------|-------------------------------------------------|----------|----------------|-----------|-----------|---------------------|
| -0.203997492977912                                                                | AGIWUR15323                                     |          |                |           |           |                     |
| CB4856 CT IV                                                                      | 12257637                                        | 12259192 | WBGene00012710 | Y39C12A.9 | Y39C12A.9 |                     |
| 0.276696337730824                                                                 | AGIWUR9675                                      |          |                |           |           |                     |
| CB4856 CT IV                                                                      | 12259797                                        | 12261449 | WBGene00016579 | sre-14    | C42C1.1   | 0.185519553726563   |
| AGIWUR9188                                                                        |                                                 |          |                |           |           |                     |
| CB4856 CT IV                                                                      | 12265526                                        | 12268306 | WBGene00016580 | C42C1.2   | C42C1.2   | -0.433419568729271  |
| AGIWUR27865                                                                       |                                                 |          |                |           |           |                     |
| CB4856 CT IV                                                                      | 12268995                                        | 12269533 | WBGene00004448 | rp1-34    | C42C1.14  |                     |
| 0.10032155912684                                                                  | AGIWUR8628                                      |          |                |           |           |                     |
| CB4856 CT IV                                                                      | 12269594                                        | 12270492 | WBGene00016581 | C42C1.3   | C42C1.3   | -0.286334631490963  |
| AGIWUR17440                                                                       |                                                 |          |                |           |           |                     |
| CB4856 CT IV                                                                      | 12270490                                        | 12275992 | WBGene00016582 | C42C1.4   | C42C1.4   | -0.0930691600628464 |
| AGIWUR1169                                                                        |                                                 |          |                |           |           |                     |
| CB4856 CT IV                                                                      | 12276083                                        | 12278059 | WBGene00016583 | tag-335   | C42C1.5   | -0.23439689768184   |
| AGIWUR1600                                                                        |                                                 |          |                |           |           |                     |
| CB4856 CT IV                                                                      | 12278729                                        | 12279546 | WBGene00016591 | C42C1.13  | C42C1.13  |                     |
| -0.0281091640955751                                                               | AGIWUR38119                                     |          |                |           |           |                     |
| CB4856 CT IV                                                                      | 12279659                                        | 12281917 | WBGene00016589 | C42C1.11  | C42C1.11  |                     |
| -0.178359980587343                                                                | AGIWUR9093;AGIWUR25940;AGIWUR37458;AGIWUR41625  |          |                |           |           |                     |
| CB4856 CT IV                                                                      | 12282739                                        | 12287820 | WBGene00016588 | hpo-12    | C42C1.10  |                     |
| 0.0534920941217347                                                                | AGIWUR12191;AGIWUR14023;AGIWUR25224;AGIWUR43531 |          |                |           |           |                     |
| CB4856 CT IV                                                                      | 12287928                                        | 12289392 | WBGene00016592 | erl-1     | C42C1.15  |                     |
| 0.291113783790022                                                                 | AGIWUR8866                                      |          |                |           |           |                     |
| CB4856 CT IV                                                                      | 12289449                                        | 12290994 | WBGene00016587 | C42C1.9   | C42C1.9   | 0.0976539231567912  |
| AGIWUR18105                                                                       |                                                 |          |                |           |           |                     |
| CB4856 CT IV                                                                      | 12291046                                        | 12293317 | WBGene00016586 | C42C1.8   | C42C1.8   | -0.0555298849282195 |
| AGIWUR41507                                                                       |                                                 |          |                |           |           |                     |
| CB4856 CT IV                                                                      | 12293234                                        | 12301280 | WBGene00016585 | oac-59    | C42C1.7   | -0.0152239262033853 |
| AGIWUR32855;AGIWUR37511                                                           |                                                 |          |                |           |           |                     |
| CB4856 CT IV                                                                      | 12304462                                        | 12307820 | WBGene00019579 | oac-57    | K09E10.1  |                     |
| 0.115005075067994                                                                 | AGIWUR4366                                      |          |                |           |           |                     |
| CB4856 CT IV                                                                      | 12308293                                        | 12311606 | WBGene00019580 | oac-58    | K09E10.2  |                     |
| -0.0554985335467246                                                               | AGIWUR12521;AGIWUR19198                         |          |                |           |           |                     |
| CB4856 CT IV                                                                      | 12327190                                        | 12328718 | WBGene00008949 | F19B6.3   | F19B6.3   | 0.18185110068603    |
| AGIWUR9173                                                                        |                                                 |          |                |           |           |                     |
| CB4856 CT IV                                                                      | 12329407                                        | 12331054 | WBGene00006733 | ufd-1     | F19B6.2   | -0.334966704632323  |
| AGIWUR14233;AGIWUR22664                                                           |                                                 |          |                |           |           |                     |
| CB4856 CT IV                                                                      | 12330984                                        | 12336041 | WBGene00008948 | F19B6.1   | F19B6.1   | -0.117728236256159  |
| AGIWUR7069;AGIWUR8219;AGIWUR16393;AGIWUR19254;AGIWUR20477;AGIWUR24504;AGIWUR37312 |                                                 |          |                |           |           |                     |

|                                                                                          |    |    |          |          |                |          |          |                    |
|------------------------------------------------------------------------------------------|----|----|----------|----------|----------------|----------|----------|--------------------|
| CB4856                                                                                   | CT | IV | 12337577 | 12340436 | WBGene00008950 | wht-5    | F19B6.4  | 0.0543048238232462 |
| AGIWUR16742                                                                              |    |    |          |          |                |          |          |                    |
| CB4856                                                                                   | CT | IV | 12349946 | 12355724 | WBGene00013921 | best-22  | ZC518.1  | 0.118633057952412  |
| AGIWUR7513;AGIWUR23782;AGIWUR28936;AGIWUR30454;AGIWUR37902;AGIWUR39697;AGIWUR40257       |    |    |          |          |                |          |          |                    |
| CB4856                                                                                   | CT | IV | 12355604 | 12360792 | WBGene00004756 | sec-24.2 | ZC518.2  |                    |
| -0.104215076114728 AGIWUR2099;AGIWUR8661                                                 |    |    |          |          |                |          |          |                    |
| CB4856                                                                                   | CT | IV | 12361542 | 12371852 | WBGene00000376 | ccr-4    | ZC518.3  | -0.284711028758494 |
| AGIWUR10657;AGIWUR14172;AGIWUR15335;AGIWUR16124;AGIWUR26381;AGIWUR34290;AGIWUR39356      |    |    |          |          |                |          |          |                    |
| CB4856                                                                                   | CT | IV | 12372253 | 12374908 | WBGene00009211 | wdr-46   | F28D1.1  | -0.297829625474115 |
| AGIWUR3214;AGIWUR10643;AGIWUR30836;AGIWUR37610;AGIWUR39901                               |    |    |          |          |                |          |          |                    |
| CB4856                                                                                   | CT | IV | 12374709 | 12376121 | WBGene00009212 | F28D1.2  | F28D1.2  | 0.215259017375307  |
| AGIWUR1712;AGIWUR9248;AGIWUR12535;AGIWUR43721                                            |    |    |          |          |                |          |          |                    |
| CB4856                                                                                   | CT | IV | 12376869 | 12378050 | WBGene00044285 | thn-8    | F28D1.12 |                    |
| 0.158276794920505 AGIWUR7166;AGIWUR25211                                                 |    |    |          |          |                |          |          |                    |
| CB4856                                                                                   | CT | IV | 12380104 | 12380857 | WBGene00009213 | thn-1    | F28D1.3  | 0.360111256854225  |
| AGIWUR40381                                                                              |    |    |          |          |                |          |          |                    |
| CB4856                                                                                   | CT | IV | 12381592 | 12382339 | WBGene00009214 | thn-3    | F28D1.4  | 0.181400838125114  |
| AGIWUR32234                                                                              |    |    |          |          |                |          |          |                    |
| CB4856                                                                                   | CT | IV | 12383170 | 12384019 | WBGene00009215 | thn-2    | F28D1.5  | 0.504331816448261  |
| AGIWUR9895                                                                               |    |    |          |          |                |          |          |                    |
| CB4856                                                                                   | CT | IV | 12384507 | 12385161 | WBGene00009216 | F28D1.6  | F28D1.6  | -0.113413661613858 |
| AGIWUR43733                                                                              |    |    |          |          |                |          |          |                    |
| CB4856                                                                                   | CT | IV | 12387720 | 12390095 | WBGene00009217 | spe-45   | F28D1.8  | -0.367015464664773 |
| AGIWUR28423                                                                              |    |    |          |          |                |          |          |                    |
| CB4856                                                                                   | CT | IV | 12390264 | 12391396 | WBGene00004492 | rps-23   | F28D1.7  | -0.014944320266272 |
| AGIWUR15756;AGIWUR39218                                                                  |    |    |          |          |                |          |          |                    |
| CB4856                                                                                   | CT | IV | 12391591 | 12392120 | WBGene00009219 | dpm-3    | F28D1.11 |                    |
| -0.173464810374008 AGIWUR3122;AGIWUR6771;AGIWUR17201;AGIWUR23209;AGIWUR32254;AGIWUR34150 |    |    |          |          |                |          |          |                    |
| CB4856                                                                                   | CT | IV | 12392121 | 12398706 | WBGene00009218 | acs-20   | F28D1.9  | -0.110993872995385 |
| AGIWUR6360;AGIWUR11480;AGIWUR27506;AGIWUR34666;AGIWUR37887;AGIWUR43532                   |    |    |          |          |                |          |          |                    |
| CB4856                                                                                   | CT | IV | 12404374 | 12408697 | WBGene00001580 | gex-3    | F28D1.10 |                    |
| 0.017062111938694 AGIWUR23995;AGIWUR30797;AGIWUR40839                                    |    |    |          |          |                |          |          |                    |
| CB4856                                                                                   | CT | IV | 12408895 | 12410468 | WBGene00008580 | dsb-1    | F08G5.1  | 0.144331876876286  |
| AGIWUR7802                                                                               |    |    |          |          |                |          |          |                    |
| CB4856                                                                                   | CT | IV | 12410467 | 12412219 | WBGene00008581 | ac1-13   | F08G5.2  | 0.0438760139420005 |
| AGIWUR15747                                                                              |    |    |          |          |                |          |          |                    |
| CB4856                                                                                   | CT | IV | 12412923 | 12417582 | WBGene00008582 | F08G5.3  | F08G5.3  | 0.0779178398539164 |
| AGIWUR1489;AGIWUR11150;AGIWUR22785;AGIWUR39630                                           |    |    |          |          |                |          |          |                    |
| CB4856                                                                                   | CT | IV | 12425217 | 12432533 | WBGene00008583 | ugt-65   | F08G5.5  | -0.130487025453038 |

AGIWUR12087;AGIWUR17157;AGIWUR24039;AGIWUR37416  
 CB4856 CT IV 12432640 12435001  
 -0.296697339417824 AGIWUR18437  
 CB4856 CT IV 12435802 12438274  
 AGIWUR38591  
 CB4856 CT IV 12442068 12443035  
 -0.139490334693111 AGIWUR25856  
 CB4856 CT IV 12443236 12444046  
 AGIWUR13600  
 CB4856 CT IV 12444450 12445884  
 AGIWUR12772  
 CB4856 CT IV 12445801 12451299  
 AGIWUR4086;AGIWUR33667;AGIWUR34816  
 CB4856 CT IV 12452066 12454215  
 AGIWUR9240  
 CB4856 CT IV 12455097 12456175  
 -0.00116696610670353 AGIWUR21117  
 CB4856 CT IV 12456913 12458561  
 AGIWUR28094  
 CB4856 CT IV 12459819 12463412  
 AGIWUR12518;AGIWUR34070  
 CB4856 CT IV 12468658 12474889  
 0.0492431118150662 AGIWUR26780  
 CB4856 CT IV 12487579 12489721  
 0.0136324191918966 AGIWUR37757  
 CB4856 CT IV 12490791 12495298  
 0.249278809421861 AGIWUR44976  
 CB4856 CT IV 12496065 12497844  
 0.053098077117391 AGIWUR43611  
 CB4856 CT IV 12498538 12500413  
 0.122393104938023 AGIWUR38884  
 CB4856 CT IV 12502256 12504055  
 -0.00548136614345562 AGIWUR22213  
 CB4856 CT IV 12507409 12507566  
 0.00165599815832707 AGIWUR14695  
 CB4856 CT IV 12517110 12518128  
 AGIWUR10830  
 CB4856 CT IV 12521239 12522621  
 AGIWUR38780

WBGene00023502 clec-184 F08G5.7  
 WBGene00008584 irg-4 F08G5.6 -0.364904069241021  
 WBGene00255469 C25G4.17 C25G4.17  
 WBGene00007730 C25G4.2 C25G4.2 0.344839658392779  
 WBGene00007731 C25G4.3 C25G4.3 0.250579001103882  
 WBGene00001085 dpy-26 C25G4.5 -0.0128748429573999  
 WBGene00007732 spe-44 C25G4.4 -0.0919879559244325  
 WBGene00007733 smz-1 C25G4.6  
 WBGene00007734 C25G4.7 C25G4.7 -0.169055868898353  
 WBGene00007735 C25G4.8 C25G4.8 0.0761883127621212  
 WBGene00007736 igdb-2 C25G4.10  
 WBGene00005689 sru-26 T04A11.12  
 WBGene00001865 him-6 T04A11.6  
 WBGene00005683 sru-20 T04A11.7  
 WBGene00005682 sru-19 T04A11.8  
 WBGene00005681 sru-18 T04A11.9  
 WBGene00045131 T04A11.14 T04A11.14  
 WBGene00009954 F53B2.1 F53B2.1 0.0875358759871894  
 WBGene00005676 sru-13 F53B2.4 -0.0441839688632299

|                                                                                                                                  |    |          |          |                |          |          |                     |
|----------------------------------------------------------------------------------------------------------------------------------|----|----------|----------|----------------|----------|----------|---------------------|
| CB4856 CT                                                                                                                        | IV | 12524478 | 12525509 | WBGene00009955 | eak-4    | F53B2.3  | 0.173923544981795   |
| AGIWUR40563                                                                                                                      |    |          |          |                |          |          |                     |
| CB4856 CT                                                                                                                        | IV | 12526260 | 12527339 | WBGene00009957 | F53B2.8  | F53B2.8  | 1.33405871545876    |
| AGIWUR11000                                                                                                                      |    |          |          |                |          |          |                     |
| CB4856 CT                                                                                                                        | IV | 12528529 | 12531166 | WBGene00009956 | F53B2.5  | F53B2.5  | 0.0200357334773988  |
| AGIWUR2861;AGIWUR19916;AGIWUR28988                                                                                               |    |          |          |                |          |          |                     |
| CB4856 CT                                                                                                                        | IV | 12542034 | 12545729 | WBGene00001820 | ham-1    | F53B2.6  | 0.100784436009416   |
| AGIWUR1006;AGIWUR4237;AGIWUR6168;AGIWUR14548;AGIWUR16905;AGIWUR17346;AGIWUR23386;AGIWUR25307;AGIWUR33707;AGIWUR34203;AGIWUR41967 |    |          |          |                |          |          |                     |
| CB4856 CT                                                                                                                        | IV | 12548129 | 12554681 | WBGene00014081 | ZK795.1  | ZK795.1  | 0.0338571903394094  |
| AGIWUR38827                                                                                                                      |    |          |          |                |          |          |                     |
| CB4856 CT                                                                                                                        | IV | 12557072 | 12558975 | WBGene00014082 | ZK795.2  | ZK795.2  | 0.0471654145563782  |
| AGIWUR8412;AGIWUR17586;AGIWUR33634                                                                                               |    |          |          |                |          |          |                     |
| CB4856 CT                                                                                                                        | IV | 12559365 | 12560719 | WBGene00014083 | ZK795.3  | ZK795.3  | 0.0434848139993314  |
| AGIWUR11867                                                                                                                      |    |          |          |                |          |          |                     |
| CB4856 CT                                                                                                                        | IV | 12560749 | 12561201 | WBGene00014084 | snb-7    | ZK795.4  | -0.291945337740421  |
| AGIWUR15016;AGIWUR39153                                                                                                          |    |          |          |                |          |          |                     |
| CB4856 CT                                                                                                                        | IV | 12563775 | 12566111 | WBGene00010671 | eak-7    | K08E7.1  | 0.0107851559742151  |
| AGIWUR8409                                                                                                                       |    |          |          |                |          |          |                     |
| CB4856 CT                                                                                                                        | IV | 12565983 | 12567226 | WBGene00002002 | hsb-1    | K08E7.2  | 0.255330857422111   |
| AGIWUR9703                                                                                                                       |    |          |          |                |          |          |                     |
| CB4856 CT                                                                                                                        | IV | 12567842 | 12570622 | WBGene00002368 | let-99   | K08E7.3  | 0.00480636647344923 |
| AGIWUR12809                                                                                                                      |    |          |          |                |          |          |                     |
| CB4856 CT                                                                                                                        | IV | 12573370 | 12578870 | WBGene00010673 | K08E7.5  | K08E7.5  | 0.0622595989107619  |
| AGIWUR8564;AGIWUR19836;AGIWUR31015;AGIWUR31638;AGIWUR38386;AGIWUR39800;AGIWUR40401                                               |    |          |          |                |          |          |                     |
| CB4856 CT                                                                                                                        | IV | 12579055 | 12581128 | WBGene00010674 | K08E7.6  | K08E7.6  | 0.292277272575372   |
| AGIWUR39385                                                                                                                      |    |          |          |                |          |          |                     |
| CB4856 CT                                                                                                                        | IV | 12585192 | 12586216 | WBGene00010675 | K08E7.8  | K08E7.8  | -0.48203065853823   |
| AGIWUR21419                                                                                                                      |    |          |          |                |          |          |                     |
| CB4856 CT                                                                                                                        | IV | 12586511 | 12590428 | WBGene00000841 | cul-6    | K08E7.7  | 0.157965861623792   |
| AGIWUR28440                                                                                                                      |    |          |          |                |          |          |                     |
| CB4856 CT                                                                                                                        | IV | 12591697 | 12599169 | WBGene00003995 | pgp-1    | K08E7.9  | -0.196475538468981  |
| AGIWUR12495                                                                                                                      |    |          |          |                |          |          |                     |
| CB4856 CT                                                                                                                        | IV | 12601126 | 12605425 | WBGene00013224 | Y55D9A.2 | Y55D9A.2 |                     |
| 0.00195240416484754 AGIWUR8804;AGIWUR26146                                                                                       |    |          |          |                |          |          |                     |
| CB4856 CT                                                                                                                        | IV | 12605700 | 12614723 | WBGene00013223 | efa-6    | Y55D9A.1 |                     |
| 0.133078728633313                                                                                                                |    |          |          |                |          |          |                     |
| AGIWUR231;AGIWUR5658;AGIWUR8719;AGIWUR14800;AGIWUR29089;AGIWUR32656;AGIWUR33205;AGIWUR34962;AGIWUR36389;AGIWUR45118              |    |          |          |                |          |          |                     |

|                                                                                                            |    |          |          |                |         |          |                     |
|------------------------------------------------------------------------------------------------------------|----|----------|----------|----------------|---------|----------|---------------------|
| CB4856 CT                                                                                                  | IV | 12622093 | 12631022 | WBGene00000186 | ark-1   | C01C7.1  | -0.0549242046578371 |
| AGIWUR6011                                                                                                 |    |          |          |                |         |          |                     |
| CB4856 CT                                                                                                  | IV | 12640447 | 12650652 | WBGene00006916 | vha-7   | C26H9A.1 |                     |
| -0.11784383211768 AGIWUR10849;AGIWUR20516;AGIWUR33193;AGIWUR40517;AGIWUR43760                              |    |          |          |                |         |          |                     |
| CB4856 CT                                                                                                  | IV | 12653403 | 12674773 | WBGene00007752 | wdfy-3  | C26H9A.2 |                     |
| -0.13908383362317 AGIWUR6728;AGIWUR14116;AGIWUR23638;AGIWUR41522;AGIWUR41680                               |    |          |          |                |         |          |                     |
| CB4856 CT                                                                                                  | IV | 12675207 | 12676000 | WBGene00011941 | T23B5.4 | T23B5.4  | -0.14889332686592   |
| AGIWUR7224                                                                                                 |    |          |          |                |         |          |                     |
| CB4856 CT                                                                                                  | IV | 12677398 | 12684378 | WBGene00011939 | prmt-9  | T23B5.1  | 0.104623436418709   |
| AGIWUR15729;AGIWUR21183;AGIWUR36147                                                                        |    |          |          |                |         |          |                     |
| CB4856 CT                                                                                                  | IV | 12688655 | 12703991 | WBGene00011940 | T23B5.3 | T23B5.3  | 0.167216563464402   |
| AGIWUR2290;AGIWUR2511;AGIWUR8373;AGIWUR17180;AGIWUR29168;AGIWUR32930;AGIWUR32938                           |    |          |          |                |         |          |                     |
| CB4856 CT                                                                                                  | IV | 12704111 | 12706755 | WBGene00007780 | C27D8.4 | C27D8.4  | -0.184601573239039  |
| AGIWUR3968                                                                                                 |    |          |          |                |         |          |                     |
| CB4856 CT                                                                                                  | IV | 12706714 | 12711744 | WBGene00007779 | C27D8.3 | C27D8.3  | 0.0469516037932713  |
| AGIWUR7885                                                                                                 |    |          |          |                |         |          |                     |
| CB4856 CT                                                                                                  | IV | 12712765 | 12714771 | WBGene00007778 | C27D8.2 | C27D8.2  | 0.144045400784357   |
| AGIWUR37386                                                                                                |    |          |          |                |         |          |                     |
| CB4856 CT                                                                                                  | IV | 12717831 | 12719391 | WBGene00007777 | C27D8.1 | C27D8.1  | -0.111772838569117  |
| AGIWUR19597                                                                                                |    |          |          |                |         |          |                     |
| CB4856 CT                                                                                                  | IV | 12719960 | 12720997 | WBGene00011949 | T23F6.1 | T23F6.1  | -0.507160266511918  |
| AGIWUR555;AGIWUR21553;AGIWUR25722;AGIWUR27233;AGIWUR42033;AGIWUR44778                                      |    |          |          |                |         |          |                     |
| CB4856 CT                                                                                                  | IV | 12721356 | 12723015 | WBGene00011950 | T23F6.2 | T23F6.2  | 0.161424540322086   |
| AGIWUR6919                                                                                                 |    |          |          |                |         |          |                     |
| CB4856 CT                                                                                                  | IV | 12723103 | 12724651 | WBGene00011951 | T23F6.3 | T23F6.3  | -0.445412596324431  |
| AGIWUR6892                                                                                                 |    |          |          |                |         |          |                     |
| CB4856 CT                                                                                                  | IV | 12724948 | 12730095 | WBGene00004315 | rbd-1   | T23F6.4  | -0.177414001660458  |
| AGIWUR7447;AGIWUR20940;AGIWUR22173;AGIWUR25199;AGIWUR27648;AGIWUR29331;AGIWUR34066;AGIWUR35698;AGIWUR39765 |    |          |          |                |         |          |                     |
| CB4856 CT                                                                                                  | IV | 12734262 | 12734895 | WBGene00045184 | T23F6.7 | T23F6.7  | 0.0920595739706602  |
| AGIWUR9615;AGIWUR15641;AGIWUR31164;AGIWUR31497;AGIWUR33297                                                 |    |          |          |                |         |          |                     |
| CB4856 CT                                                                                                  | IV | 12735187 | 12741523 | WBGene00011952 | T23F6.5 | T23F6.5  | 0.0266513280532976  |
| AGIWUR36912                                                                                                |    |          |          |                |         |          |                     |
| CB4856 CT                                                                                                  | IV | 12743039 | 12744813 | WBGene00007987 | C36H8.1 | C36H8.1  | 0.280376421359048   |
| AGIWUR11471;AGIWUR16086;AGIWUR26266                                                                        |    |          |          |                |         |          |                     |
| CB4856 CT                                                                                                  | IV | 12746584 | 12749721 | WBGene00002128 | inx-6   | C36H8.2  | 0.350149859225084   |
| AGIWUR8891;AGIWUR37533;AGIWUR44695                                                                         |    |          |          |                |         |          |                     |
| CB4856 CT                                                                                                  | IV | 12754558 | 12757673 | WBGene00001452 | flp-9   | C36H8.3  | 0.531288662300115   |
| AGIWUR15622;AGIWUR17526;AGIWUR21930;AGIWUR25621;AGIWUR28951;AGIWUR31273;AGIWUR34191;AGIWUR34712            |    |          |          |                |         |          |                     |
| CB4856 CT                                                                                                  | IV | 12773862 | 12787513 | WBGene00006767 | unc-31  | ZK897.1  | -0.0800375158235873 |



|                       |              |              |              |              |                |          |         |                     |
|-----------------------|--------------|--------------|--------------|--------------|----------------|----------|---------|---------------------|
| AGIWUR40041           |              |              |              |              |                |          |         |                     |
| CB4856                | CT           | IV           | 12789041     | 12790512     | WBGene00008554 | F07C6.3  | F07C6.3 | -0.0299616594499756 |
| AGIWUR872             |              |              |              |              |                |          |         |                     |
| CB4856                | CT           | IV           | 12791171     | 12791685     | WBGene00008553 | F07C6.2  | F07C6.2 | -0.158840136837707  |
| AGIWUR329;            | AGIWUR28099; | AGIWUR28140; | AGIWUR32182; | AGIWUR39821  |                |          |         |                     |
| CB4856                | CT           | IV           | 12792795     | 12793274     | WBGene00045067 | F07C6.6  | F07C6.6 | -0.125871610789046  |
| AGIWUR17651;          | AGIWUR27327; | AGIWUR27461; | AGIWUR32761; | AGIWUR42888  |                |          |         |                     |
| CB4856                | CT           | IV           | 12793816     | 12796164     | WBGene00004030 | pin-2    | F07C6.1 | 0.239132035283102   |
| AGIWUR12942           |              |              |              |              |                |          |         |                     |
| CB4856                | CT           | IV           | 12805931     | 12830112     | WBGene00008555 | F07C6.4  | F07C6.4 |                     |
| -0.000853337215861671 | AGIWUR5109;  | AGIWUR10157; | AGIWUR13724; | AGIWUR35786  |                |          |         |                     |
| CB4856                | CT           | IV           | 12836510     | 12840674     | WBGene00010828 | M02B1.3  | M02B1.3 | 0.0852736843901418  |
| AGIWUR28765;          | AGIWUR40819; | AGIWUR42206  |              |              |                |          |         |                     |
| CB4856                | CT           | IV           | 12845696     | 12848428     | WBGene00010827 | M02B1.2  | M02B1.2 | -0.0449589550545078 |
| AGIWUR34338           |              |              |              |              |                |          |         |                     |
| CB4856                | CT           | IV           | 12849506     | 12854408     | WBGene00005153 | srf-3    | M02B1.1 | -0.19231567114755   |
| AGIWUR41492           |              |              |              |              |                |          |         |                     |
| CB4856                | CT           | IV           | 12855549     | 12859928     | WBGene00014139 | nstp-5   | ZK896.9 | -0.289348888865669  |
| AGIWUR18936           |              |              |              |              |                |          |         |                     |
| CB4856                | CT           | IV           | 12860137     | 12865935     | WBGene00001543 | gcy-18   | ZK896.8 | -0.0384877577778511 |
| AGIWUR29403           |              |              |              |              |                |          |         |                     |
| CB4856                | CT           | IV           | 12869270     | 12871513     | WBGene00014137 | clec-187 |         | ZK896.6             |
| -0.0924833707291519   | AGIWUR9398   |              |              |              |                |          |         |                     |
| CB4856                | CT           | IV           | 12872829     | 12875360     | WBGene00014132 | ZK896.1  | ZK896.1 | -0.146289295009965  |
| AGIWUR32204           |              |              |              |              |                |          |         |                     |
| CB4856                | CT           | IV           | 12876965     | 12879667     | WBGene00014136 | ZK896.5  | ZK896.5 | -0.263619057013665  |
| AGIWUR21817           |              |              |              |              |                |          |         |                     |
| CB4856                | CT           | IV           | 12880634     | 12883146     | WBGene00014135 | ZK896.4  | ZK896.4 | 0.0284385394797795  |
| AGIWUR34775           |              |              |              |              |                |          |         |                     |
| CB4856                | CT           | IV           | 12883505     | 12886127     | WBGene00014134 | ZK896.3  | ZK896.3 | -0.595806231183887  |
| AGIWUR4993;           | AGIWUR16444; | AGIWUR24848  |              |              |                |          |         |                     |
| CB4856                | CT           | IV           | 12887102     | 12890508     | WBGene00010660 | K08D8.6  | K08D8.6 | -0.501009008520004  |
| AGIWUR3610;           | AGIWUR16326; | AGIWUR20149; | AGIWUR20866; | AGIWUR21444  |                |          |         |                     |
| CB4856                | CT           | IV           | 12892513     | 12893283     | WBGene00010655 | K08D8.1  | K08D8.1 | 0.238506557179294   |
| AGIWUR25160;          | AGIWUR34928; | AGIWUR42392; | AGIWUR43870; | AGIWUR44833  |                |          |         |                     |
| CB4856                | CT           | IV           | 12893773     | 12894724     | WBGene00194926 | K08D8.12 |         | K08D8.12            |
| 0.268810152530097     | AGIWUR11140; | AGIWUR27285; | AGIWUR30099; | AGIWUR39581; | AGIWUR39736    |          |         |                     |
| CB4856                | CT           | IV           | 12903785     | 12906659     | WBGene00010657 | K08D8.3  | K08D8.3 | -0.472818519435515  |
| AGIWUR5630            |              |              |              |              |                |          |         |                     |

|                                                                                         |    |    |          |          |                |          |           |                   |
|-----------------------------------------------------------------------------------------|----|----|----------|----------|----------------|----------|-----------|-------------------|
| CB4856                                                                                  | CT | IV | 12907469 | 12909998 | WBGene00010658 | K08D8.4  | K08D8.4   | 0.276915352048412 |
| AGIWUR633;AGIWUR4055;AGIWUR20476                                                        |    |    |          |          |                |          |           |                   |
| CB4856                                                                                  | CT | IV | 12910647 | 12912145 | WBGene00010659 | K08D8.5  | K08D8.5   | -0.54828448634856 |
| AGIWUR5854;AGIWUR9526;AGIWUR32040;AGIWUR33244;AGIWUR40070                               |    |    |          |          |                |          |           |                   |
| CB4856                                                                                  | CT | IV | 12912790 | 12914969 | WBGene00007864 | irg-6    | C32H11.1  |                   |
| -0.0114597062319 AGIWUR10713;AGIWUR12335;AGIWUR31481                                    |    |    |          |          |                |          |           |                   |
| CB4856                                                                                  | CT | IV | 12916043 | 12917293 | WBGene00007865 | srz-15   | C32H11.2  |                   |
| -0.108555654786269 AGIWUR4336                                                           |    |    |          |          |                |          |           |                   |
| CB4856                                                                                  | CT | IV | 12918611 | 12920393 | WBGene00007866 | C32H11.3 | C32H11.3  |                   |
| -0.415218081800031 AGIWUR563                                                            |    |    |          |          |                |          |           |                   |
| CB4856                                                                                  | CT | IV | 12921264 | 12923288 | WBGene00007867 | C32H11.4 | C32H11.4  |                   |
| -0.105406108034806 AGIWUR12257                                                          |    |    |          |          |                |          |           |                   |
| CB4856                                                                                  | CT | IV | 12923525 | 12924432 | WBGene00007868 | C32H11.5 | C32H11.5  |                   |
| 0.0199872265455436 AGIWUR971;AGIWUR25407                                                |    |    |          |          |                |          |           |                   |
| CB4856                                                                                  | CT | IV | 12925866 | 12926805 | WBGene00007869 | C32H11.6 | C32H11.6  |                   |
| -0.24068367710536 AGIWUR15139                                                           |    |    |          |          |                |          |           |                   |
| CB4856                                                                                  | CT | IV | 12930707 | 12931514 | WBGene00007870 | C32H11.7 | C32H11.7  |                   |
| -0.2062541143003 AGIWUR18444                                                            |    |    |          |          |                |          |           |                   |
| CB4856                                                                                  | CT | IV | 12940106 | 12941405 | WBGene00007875 | dod-24   | C32H11.12 |                   |
| -0.249924091172915 AGIWUR33110                                                          |    |    |          |          |                |          |           |                   |
| CB4856                                                                                  | CT | IV | 12942933 | 12944526 | WBGene00007876 | dct-19   | C32H11.13 |                   |
| -0.657724294368196 AGIWUR9992                                                           |    |    |          |          |                |          |           |                   |
| CB4856                                                                                  | CT | IV | 12944887 | 12946577 | WBGene00010122 | F55G11.1 | F55G11.1  |                   |
| -0.477158758947976 AGIWUR12449                                                          |    |    |          |          |                |          |           |                   |
| CB4856                                                                                  | CT | IV | 12950315 | 12957128 | WBGene00000021 | abt-3    | F55G11.9  |                   |
| -0.137572072591349 AGIWUR38787                                                          |    |    |          |          |                |          |           |                   |
| CB4856                                                                                  | CT | IV | 12958030 | 12959594 | WBGene00010126 | F55G11.6 | F55G11.6  |                   |
| -0.123939584035345 AGIWUR8760                                                           |    |    |          |          |                |          |           |                   |
| CB4856                                                                                  | CT | IV | 12960436 | 12962120 | WBGene00010127 | F55G11.7 | F55G11.7  |                   |
| 0.154565575630489 AGIWUR9714                                                            |    |    |          |          |                |          |           |                   |
| CB4856                                                                                  | CT | IV | 12962808 | 12964625 | WBGene00010128 | F55G11.8 | F55G11.8  |                   |
| -0.700256169830112 AGIWUR22605                                                          |    |    |          |          |                |          |           |                   |
| CB4856                                                                                  | CT | IV | 12965387 | 12967318 | WBGene00010125 | dod-22   | F55G11.5  |                   |
| 0.443304361720593 AGIWUR25463                                                           |    |    |          |          |                |          |           |                   |
| CB4856                                                                                  | CT | IV | 12967448 | 12969289 | WBGene00010123 | F55G11.2 | F55G11.2  |                   |
| -1.24200797098225 AGIWUR27920                                                           |    |    |          |          |                |          |           |                   |
| CB4856                                                                                  | CT | IV | 12970270 | 12971974 | WBGene00014771 | F55G11.3 | F55G11.3  |                   |
| 0.03894004962895 AGIWUR2906;AGIWUR28495;AGIWUR33446;AGIWUR34281;AGIWUR34577;AGIWUR40510 |    |    |          |          |                |          |           |                   |
| CB4856                                                                                  | CT | IV | 12973624 | 12975591 | WBGene00010124 | F55G11.4 | F55G11.4  |                   |

|                                                                                                                                                                                                                                                                                                                                                                |                                                            |          |                |          |           |
|----------------------------------------------------------------------------------------------------------------------------------------------------------------------------------------------------------------------------------------------------------------------------------------------------------------------------------------------------------------|------------------------------------------------------------|----------|----------------|----------|-----------|
| -0.713927769265357                                                                                                                                                                                                                                                                                                                                             | AGIWUR16709                                                |          |                |          |           |
| CB4856 CT IV                                                                                                                                                                                                                                                                                                                                                   | 12976231                                                   | 12978343 | WBGene00010745 | dod-17   | K10D11.1  |
| -0.904398807310997                                                                                                                                                                                                                                                                                                                                             | AGIWUR40735                                                |          |                |          |           |
| CB4856 CT IV                                                                                                                                                                                                                                                                                                                                                   | 12979017                                                   | 12981940 | WBGene00010746 | K10D11.2 | K10D11.2  |
| 0.774653269139086                                                                                                                                                                                                                                                                                                                                              | AGIWUR16720;AGIWUR27060                                    |          |                |          |           |
| CB4856 CT IV                                                                                                                                                                                                                                                                                                                                                   | 12982119                                                   | 12986088 | WBGene00010747 | K10D11.3 | K10D11.3  |
| 0.0889126538739315                                                                                                                                                                                                                                                                                                                                             | AGIWUR375                                                  |          |                |          |           |
| CB4856 CT IV                                                                                                                                                                                                                                                                                                                                                   | 12986726                                                   | 12989455 | WBGene00010750 | K10D11.6 | K10D11.6  |
| -0.21703723201947                                                                                                                                                                                                                                                                                                                                              | AGIWUR38923                                                |          |                |          |           |
| CB4856 CT IV                                                                                                                                                                                                                                                                                                                                                   | 12989685                                                   | 12991843 | WBGene00010749 | K10D11.5 | K10D11.5  |
| -0.165377798711482                                                                                                                                                                                                                                                                                                                                             | AGIWUR32026                                                |          |                |          |           |
| CB4856 CT IV                                                                                                                                                                                                                                                                                                                                                   | 12992157                                                   | 12994462 | WBGene00010748 | K10D11.4 | K10D11.4  |
| -0.0216909879495351                                                                                                                                                                                                                                                                                                                                            | AGIWUR23605                                                |          |                |          |           |
| CB4856 CT IV                                                                                                                                                                                                                                                                                                                                                   | 12994676                                                   | 12995924 | WBGene00045198 | K10D11.7 | K10D11.7  |
| 0.35628328201453                                                                                                                                                                                                                                                                                                                                               | AGIWUR9382;AGIWUR15214;AGIWUR16890;AGIWUR33905;AGIWUR34781 |          |                |          |           |
| CB4856 CT IV                                                                                                                                                                                                                                                                                                                                                   | 13009116                                                   | 13035955 | WBGene00003150 | mbk-2    | F49E11.1  |
| -0.00782862732995815                                                                                                                                                                                                                                                                                                                                           |                                                            |          |                |          |           |
| AGIWUR1792;AGIWUR5161;AGIWUR6014;AGIWUR7031;AGIWUR7450;AGIWUR7488;AGIWUR8472;AGIWUR8614;AGIWUR9221;AGIWUR11544;AGIWUR14795;AGIWUR17676;AGIWUR17802;AGIWUR18717;AGIWUR18810;AGIWUR19747;AGIWUR20031;AGIWUR20460;AGIWUR21573;AGIWUR21792;AGIWUR22205;AGIWUR25369;AGIWUR26815;AGIWUR28415;AGIWUR30531;AGIWUR31681;AGIWUR33258;AGIWUR34682;AGIWUR35026;AGIWUR44228 |                                                            |          |                |          |           |
| CB4856 CT IV                                                                                                                                                                                                                                                                                                                                                   | 13035956                                                   | 13039021 | WBGene00009889 | F49E11.2 | F49E11.2  |
| -0.066181494388414                                                                                                                                                                                                                                                                                                                                             | AGIWUR885;AGIWUR18578;AGIWUR28259;AGIWUR32335              |          |                |          |           |
| CB4856 CT IV                                                                                                                                                                                                                                                                                                                                                   | 13042391                                                   | 13046858 | WBGene00000134 | amt-2    | F49E11.3  |
| 0.166328227256352                                                                                                                                                                                                                                                                                                                                              | AGIWUR13890                                                |          |                |          |           |
| CB4856 CT IV                                                                                                                                                                                                                                                                                                                                                   | 13047197                                                   | 13048262 | WBGene00009890 | sc1-9    | F49E11.4  |
| -0.609133333820659                                                                                                                                                                                                                                                                                                                                             | AGIWUR5966                                                 |          |                |          |           |
| CB4856 CT IV                                                                                                                                                                                                                                                                                                                                                   | 13048457                                                   | 13049835 | WBGene00009891 | sc1-10   | F49E11.5  |
| -0.514896356617442                                                                                                                                                                                                                                                                                                                                             | AGIWUR31865                                                |          |                |          |           |
| CB4856 CT IV                                                                                                                                                                                                                                                                                                                                                   | 13051377                                                   | 13052149 | WBGene00009892 | sc1-11   | F49E11.6  |
| -0.232584692064226                                                                                                                                                                                                                                                                                                                                             | AGIWUR843                                                  |          |                |          |           |
| CB4856 CT IV                                                                                                                                                                                                                                                                                                                                                   | 13053297                                                   | 13055154 | WBGene00009893 | F49E11.7 | F49E11.7  |
| -0.1717077770790976                                                                                                                                                                                                                                                                                                                                            | AGIWUR44526                                                |          |                |          |           |
| CB4856 CT IV                                                                                                                                                                                                                                                                                                                                                   | 13055357                                                   | 13055768 | WBGene00009894 | F49E11.8 | F49E11.8  |
| 0.0799992095286761                                                                                                                                                                                                                                                                                                                                             | AGIWUR30147                                                |          |                |          |           |
| CB4856 CT IV                                                                                                                                                                                                                                                                                                                                                   | 13056376                                                   | 13057271 | WBGene00004742 | sc1-1    | F49E11.9  |
| 0.336233917610283                                                                                                                                                                                                                                                                                                                                              | AGIWUR25578                                                |          |                |          |           |
| CB4856 CT IV                                                                                                                                                                                                                                                                                                                                                   | 13057678                                                   | 13059085 | WBGene00009895 | sc1-2    | F49E11.10 |
| 3.02214621700526                                                                                                                                                                                                                                                                                                                                               | AGIWUR22496                                                |          |                |          |           |

|                        |                                               |          |                |          |                            |
|------------------------|-----------------------------------------------|----------|----------------|----------|----------------------------|
| CB4856 CT IV           | 13059618                                      | 13060695 | WBGene00009896 | sc1-3    | F49E11.11                  |
| 0.0131506345802386     | AGIWUR1835                                    |          |                |          |                            |
| CB4856 CT IV           | 13061774                                      | 13063205 | WBGene00008026 | sc1-4    | C39E9.1 0.20935183951463   |
| AGIWUR40780            |                                               |          |                |          |                            |
| CB4856 CT IV           | 13064003                                      | 13065159 | WBGene00008027 | sc1-5    | C39E9.2 0.776670544616103  |
| AGIWUR16531            |                                               |          |                |          |                            |
| CB4856 CT IV           | 13065766                                      | 13067300 | WBGene00000705 | col-131  | C39E9.3 0.335055775680716  |
| AGIWUR12644            |                                               |          |                |          |                            |
| CB4856 CT IV           | 13068751                                      | 13070290 | WBGene00008028 | sc1-6    | C39E9.4 -0.70417751056952  |
| AGIWUR458              |                                               |          |                |          |                            |
| CB4856 CT IV           | 13070479                                      | 13071221 | WBGene00008029 | sc1-7    | C39E9.5 0.217666536641762  |
| AGIWUR12072            |                                               |          |                |          |                            |
| CB4856 CT IV           | 13071754                                      | 13072478 | WBGene00008030 | sc1-8    | C39E9.6 0.146125940395804  |
| AGIWUR44929            |                                               |          |                |          |                            |
| CB4856 CT IV           | 13072660                                      | 13076720 | WBGene00008031 | C39E9.7  | C39E9.7 -0.161450936331986 |
| AGIWUR36436            |                                               |          |                |          |                            |
| CB4856 CT IV           | 13079446                                      | 13082781 | WBGene00008032 | C39E9.8  | C39E9.8 -0.200395836600086 |
| AGIWUR612;AGIWUR22734  |                                               |          |                |          |                            |
| CB4856 CT IV           | 13087005                                      | 13089619 | WBGene00008033 | spin-2   | C39E9.10                   |
| 0.200828824030346      | AGIWUR29849                                   |          |                |          |                            |
| CB4856 CT IV           | 13089578                                      | 13091067 | WBGene00000706 | col-132  | C39E9.9 0.0670745099196131 |
| AGIWUR15066            |                                               |          |                |          |                            |
| CB4856 CT IV           | 13091187                                      | 13093853 | WBGene00008034 | C39E9.11 | C39E9.11                   |
| -0.139388341847857     | AGIWUR17054                                   |          |                |          |                            |
| CB4856 CT IV           | 13094007                                      | 13095490 | WBGene00008035 | C39E9.12 | C39E9.12                   |
| -0.132734479275594     | AGIWUR24925                                   |          |                |          |                            |
| CB4856 CT IV           | 13095762                                      | 13097065 | WBGene00004339 | rfc-3    | C39E9.13                   |
| -0.153594770329535     | AGIWUR144;AGIWUR10555;AGIWUR13424;AGIWUR40682 |          |                |          |                            |
| CB4856 CT IV           | 13096958                                      | 13098836 | WBGene00001007 | dli-1    | C39E9.14                   |
| -0.225010176030646     | AGIWUR3418;AGIWUR7426;AGIWUR35722;AGIWUR37928 |          |                |          |                            |
| CB4856 CT IV           | 13099378                                      | 13100608 | WBGene00007201 | exos-4.1 | B0564.1                    |
| 0.00123658018284711    | AGIWUR27813;AGIWUR33869                       |          |                |          |                            |
| CB4856 CT IV           | 13100715                                      | 13104641 | WBGene00007207 | B0564.7  | B0564.7 -0.392080737965244 |
| AGIWUR2841             |                                               |          |                |          |                            |
| CB4856 CT IV           | 13105323                                      | 13106927 | WBGene00023421 | rde-11   | B0564.11                   |
| -0.0740544537814927    | AGIWUR1580                                    |          |                |          |                            |
| CB4856 CT IV           | 13107659                                      | 13111500 | WBGene00007202 | B0564.2  | B0564.2 0.0416267576980367 |
| AGIWUR9047;AGIWUR11732 |                                               |          |                |          |                            |
| CB4856 CT IV           | 13119096                                      | 13124387 | WBGene00006766 | unc-30   | B0564.10                   |

|                                                                     |          |          |                                                                       |         |         |                     |  |
|---------------------------------------------------------------------|----------|----------|-----------------------------------------------------------------------|---------|---------|---------------------|--|
| 0.334280008637236                                                   |          |          | AGIWUR1590;AGIWUR3331;AGIWUR27447;AGIWUR33252;AGIWUR35405;AGIWUR36465 |         |         |                     |  |
| CB4856 CT IV                                                        | 13138991 | 13142354 | WBGene00008623                                                        | F09E8.1 | F09E8.1 | -0.41212231447251   |  |
| AGIWUR42795                                                         |          |          |                                                                       |         |         |                     |  |
| CB4856 CT IV                                                        | 13149576 | 13150569 | WBGene00008626                                                        | F09E8.8 | F09E8.8 | 0.219000565873021   |  |
| AGIWUR38329                                                         |          |          |                                                                       |         |         |                     |  |
| CB4856 CT IV                                                        | 13150552 | 13154441 | WBGene00008624                                                        | F09E8.2 | F09E8.2 | -0.0773071626684505 |  |
| AGIWUR3879;AGIWUR41374;AGIWUR44977                                  |          |          |                                                                       |         |         |                     |  |
| CB4856 CT IV                                                        | 13155228 | 13164056 | WBGene00003421                                                        | msh-5   | F09E8.3 | -0.153742979001924  |  |
| AGIWUR6808;AGIWUR7907;AGIWUR22916                                   |          |          |                                                                       |         |         |                     |  |
| CB4856 CT IV                                                        | 13165516 | 13166815 | WBGene00008625                                                        | sc1-14  | F09E8.5 | 0.793223904256964   |  |
| AGIWUR19778;AGIWUR27818                                             |          |          |                                                                       |         |         |                     |  |
| CB4856 CT IV                                                        | 13170544 | 13173694 | WBGene00003533                                                        | nas-14  | F09E8.6 |                     |  |
| -0.00994380326434907                                                |          |          | AGIWUR5805;AGIWUR19870;AGIWUR28940                                    |         |         |                     |  |
| CB4856 CT IV                                                        | 13174157 | 13179457 | WBGene00002974                                                        | lev-1   | F09E8.7 | -0.446229630884293  |  |
| AGIWUR20176                                                         |          |          |                                                                       |         |         |                     |  |
| CB4856 CT IV                                                        | 13180179 | 13180911 | WBGene00044978                                                        | F58D2.3 | F58D2.3 | 0.322749224372728   |  |
| AGIWUR31280                                                         |          |          |                                                                       |         |         |                     |  |
| CB4856 CT IV                                                        | 13183072 | 13186984 | WBGene00010240                                                        | gadr-1  | F58D2.1 | 0.130002770133126   |  |
| AGIWUR28122                                                         |          |          |                                                                       |         |         |                     |  |
| CB4856 CT IV                                                        | 13193563 | 13197382 | WBGene00008177                                                        | C48D1.1 | C48D1.1 | -0.0328975939409801 |  |
| AGIWUR2280                                                          |          |          |                                                                       |         |         |                     |  |
| CB4856 CT IV                                                        | 13206783 | 13207278 | WBGene00044909                                                        | C48D1.7 | C48D1.7 | -0.0351864654156824 |  |
| AGIWUR16247;AGIWUR19522;AGIWUR20384;AGIWUR37541;AGIWUR42217         |          |          |                                                                       |         |         |                     |  |
| CB4856 CT IV                                                        | 13209729 | 13214566 | WBGene00000501                                                        | cho-1   | C48D1.3 | -0.0997677085512514 |  |
| AGIWUR26521                                                         |          |          |                                                                       |         |         |                     |  |
| CB4856 CT IV                                                        | 13221961 | 13232974 | WBGene00008178                                                        | C48D1.5 | C48D1.5 | 0.0354802878680758  |  |
| AGIWUR9021;AGIWUR9601;AGIWUR33314                                   |          |          |                                                                       |         |         |                     |  |
| CB4856 CT IV                                                        | 13232943 | 13236585 | WBGene00010435                                                        | JC8.2   | JC8.2   | -0.166493635228999  |  |
| AGIWUR24175                                                         |          |          |                                                                       |         |         |                     |  |
| CB4856 CT IV                                                        | 13237281 | 13239441 | WBGene00006466                                                        | tag-115 | JC8.13  | 0.121133214059309   |  |
| AGIWUR9056                                                          |          |          |                                                                       |         |         |                     |  |
| CB4856 CT IV                                                        | 13239588 | 13240651 | WBGene00004424                                                        | rpl-12  | JC8.3   | 0.0089114623710902  |  |
| AGIWUR4632;AGIWUR6964;AGIWUR7060;AGIWUR9613;AGIWUR11217;AGIWUR13131 |          |          |                                                                       |         |         |                     |  |
| CB4856 CT IV                                                        | 13241051 | 13243401 | WBGene00003037                                                        | lin-54  | JC8.6   | -0.202340836959905  |  |
| AGIWUR35358                                                         |          |          |                                                                       |         |         |                     |  |
| CB4856 CT IV                                                        | 13243673 | 13244296 | WBGene00010436                                                        | JC8.4   | JC8.4   | -0.346729269231783  |  |
| AGIWUR18188                                                         |          |          |                                                                       |         |         |                     |  |
| CB4856 CT IV                                                        | 13244324 | 13247160 | WBGene00010437                                                        | cox-11  | JC8.5   | -0.0533421562779868 |  |
| AGIWUR39629                                                         |          |          |                                                                       |         |         |                     |  |

|                                                                       |    |    |                      |                                                                       |                |           |          |                     |
|-----------------------------------------------------------------------|----|----|----------------------|-----------------------------------------------------------------------|----------------|-----------|----------|---------------------|
| CB4856                                                                | CT | IV | 13247261             | 13250699                                                              | WBGene00010439 | JC8.7     | JC8.7    | -0.0950861900938555 |
| AGIWUR3986;AGIWUR23796;AGIWUR29016                                    |    |    |                      |                                                                       |                |           |          |                     |
| CB4856                                                                | CT | IV | 13250648             | 13252311                                                              | WBGene00010440 | ttr-51    | JC8.8    | 0.269997941376658   |
| AGIWUR1763;AGIWUR9407;AGIWUR17465;AGIWUR24987;AGIWUR39926;AGIWUR40897 |    |    |                      |                                                                       |                |           |          |                     |
| CB4856                                                                | CT | IV | 13254225             | 13255538                                                              | WBGene00044737 | ttr-45    | JC8.14   | 0.204373310749318   |
| AGIWUR7141;AGIWUR15386;AGIWUR23834;AGIWUR25802;AGIWUR36581            |    |    |                      |                                                                       |                |           |          |                     |
| CB4856                                                                | CT | IV | 13256051             | 13259076                                                              | WBGene00010442 | bus-12    | JC8.12   | 0.58598553977345    |
| AGIWUR24223                                                           |    |    |                      |                                                                       |                |           |          |                     |
| CB4856                                                                | CT | IV | 13261556             | 13272514                                                              | WBGene00006763 | unc-26    | JC8.10   | -0.0862961135495572 |
| AGIWUR3166;AGIWUR31782;AGIWUR33371                                    |    |    |                      |                                                                       |                |           |          |                     |
| CB4856                                                                | CT | IV | 13273911             | 13282878                                                              | WBGene00013460 | cpsf-3    | Y67H2A.1 |                     |
|                                                                       |    |    | -0.273572805781718   | AGIWUR210                                                             |                |           |          |                     |
| CB4856                                                                | CT | IV | 13283002             | 13289536                                                              | WBGene00013465 | Y67H2A.10 |          | Y67H2A.10           |
|                                                                       |    |    | -0.00497215255850847 | AGIWUR36969                                                           |                |           |          |                     |
| CB4856                                                                | CT | IV | 13289776             | 13297869                                                              | WBGene00013461 | Y67H2A.2  |          | Y67H2A.2            |
|                                                                       |    |    | -0.157367067324438   | AGIWUR41344                                                           |                |           |          |                     |
| CB4856                                                                | CT | IV | 13297926             | 13300066                                                              | WBGene00013462 | micu-1    | Y67H2A.4 |                     |
|                                                                       |    |    | -0.115471712101317   | AGIWUR5915;AGIWUR6075                                                 |                |           |          |                     |
| CB4856                                                                | CT | IV | 13300179             | 13300720                                                              | WBGene00013463 | kdp-1     | Y67H2A.5 |                     |
|                                                                       |    |    | -0.421664805896816   | AGIWUR747                                                             |                |           |          |                     |
| CB4856                                                                | CT | IV | 13300828             | 13304145                                                              | WBGene00000818 | csn-6     | Y67H2A.6 |                     |
|                                                                       |    |    | 0.124434434417555    | AGIWUR12038                                                           |                |           |          |                     |
| CB4856                                                                | CT | IV | 13303746             | 13310818                                                              | WBGene00013464 | Y67H2A.7  |          | Y67H2A.7            |
|                                                                       |    |    | 0.0542035603868847   | AGIWUR15280                                                           |                |           |          |                     |
| CB4856                                                                | CT | IV | 13315644             | 13318811                                                              | WBGene00001393 | fat-1     | Y67H2A.8 |                     |
|                                                                       |    |    | 0.484807439014423    | AGIWUR12237;AGIWUR36063                                               |                |           |          |                     |
| CB4856                                                                | CT | IV | 13320158             | 13321831                                                              | WBGene00014941 | Y67H2A.9  |          | Y67H2A.9            |
|                                                                       |    |    | -0.412635477765644   | AGIWUR1097;AGIWUR1417;AGIWUR12240;AGIWUR18964;AGIWUR22391;AGIWUR43346 |                |           |          |                     |
| CB4856                                                                | CT | IV | 13323850             | 13326394                                                              | WBGene00001394 | fat-2     | W02A2.1  | 0.73380288640935    |
| AGIWUR34363                                                           |    |    |                      |                                                                       |                |           |          |                     |
| CB4856                                                                | CT | IV | 13328359             | 13329497                                                              | WBGene00001390 | far-6     | W02A2.2  | -0.0179605518854515 |
| AGIWUR29425                                                           |    |    |                      |                                                                       |                |           |          |                     |
| CB4856                                                                | CT | IV | 13329508             | 13331406                                                              | WBGene00004156 | pqn-74    | W02A2.3  | -0.525368076969675  |
| AGIWUR7098                                                            |    |    |                      |                                                                       |                |           |          |                     |
| CB4856                                                                | CT | IV | 13342858             | 13346189                                                              | WBGene00012190 | W02A2.5   | W02A2.5  | 0.147492613605933   |
| AGIWUR2236;AGIWUR38536                                                |    |    |                      |                                                                       |                |           |          |                     |
| CB4856                                                                | CT | IV | 13347665             | 13348599                                                              | WBGene00044280 | W02A2.9   | W02A2.9  | 0.876383161607258   |
| AGIWUR39519                                                           |    |    |                      |                                                                       |                |           |          |                     |
| CB4856                                                                | CT | IV | 13348870             | 13353193                                                              | WBGene00004333 | rec-8     | W02A2.6  | -0.128853111267166  |

|                                                                                               |    |                                                                                     |          |                |            |            |                    |
|-----------------------------------------------------------------------------------------------|----|-------------------------------------------------------------------------------------|----------|----------------|------------|------------|--------------------|
| AGIWUR6839                                                                                    |    |                                                                                     |          |                |            |            |                    |
| CB4856 CT                                                                                     | IV | 13353723                                                                            | 13356104 | WBGene00003230 | mex-5      | W02A2.7    | 0.0048076562899606 |
| AGIWUR24629                                                                                   |    |                                                                                     |          |                |            |            |                    |
| CB4856 CT                                                                                     | IV | 13356113                                                                            | 13358601 | WBGene00012191 | W02A2.8    | W02A2.8    | 0.154377584114449  |
| AGIWUR29239                                                                                   |    |                                                                                     |          |                |            |            |                    |
| CB4856 CT                                                                                     | IV | 13365169                                                                            | 13368435 | WBGene00013375 | srsx-25    | Y62E10A.4  |                    |
| -0.208332913464444                                                                            |    | AGIWUR37939                                                                         |          |                |            |            |                    |
| CB4856 CT                                                                                     | IV | 13368368                                                                            | 13369417 | WBGene00000093 | agt-1      | Y62E10A.5  |                    |
| -0.138227070441506                                                                            |    | AGIWUR14160;AGIWUR35728;AGIWUR37488                                                 |          |                |            |            |                    |
| CB4856 CT                                                                                     | IV | 13369424                                                                            | 13370285 | WBGene00004410 | rla-2      | Y62E10A.1  |                    |
| 0.0629808277885395                                                                            |    | AGIWUR9256;AGIWUR30171;AGIWUR41654                                                  |          |                |            |            |                    |
| CB4856 CT                                                                                     | IV | 13370653                                                                            | 13371613 | WBGene00013373 | Y62E10A.2  | Y62E10A.2  |                    |
| -0.0797621003734594                                                                           |    | AGIWUR32819                                                                         |          |                |            |            |                    |
| CB4856 CT                                                                                     | IV | 13371999                                                                            | 13377383 | WBGene00013376 | Y62E10A.6  | Y62E10A.6  |                    |
| -0.119507488815028                                                                            |    | AGIWUR36222                                                                         |          |                |            |            |                    |
| CB4856 CT                                                                                     | IV | 13378016                                                                            | 13380407 | WBGene00003142 | mau-8      | Y62E10A.8  |                    |
| 0.0829796319899856                                                                            |    | AGIWUR11971                                                                         |          |                |            |            |                    |
| CB4856 CT                                                                                     | IV | 13380387                                                                            | 13381923 | WBGene00013378 | emc-3      | Y62E10A.10 |                    |
| 0.107627147676002                                                                             |    | AGIWUR43645                                                                         |          |                |            |            |                    |
| CB4856 CT                                                                                     | IV | 13382055                                                                            | 13384316 | WBGene00004278 | rab-19     | Y62E10A.9  |                    |
| 0.0917044466194952                                                                            |    | AGIWUR22027;AGIWUR43076;AGIWUR44348                                                 |          |                |            |            |                    |
| CB4856 CT                                                                                     | IV | 13383905                                                                            | 13386091 | WBGene00044745 | Y62E10A.20 | Y62E10A.20 |                    |
| -0.19281034745856                                                                             |    | AGIWUR15148;AGIWUR29097                                                             |          |                |            |            |                    |
| CB4856 CT                                                                                     | IV | 13386294                                                                            | 13387358 | WBGene00014938 | mdt-9      | Y62E10A.11 |                    |
| -0.414861453454665                                                                            |    | AGIWUR19242;AGIWUR26065                                                             |          |                |            |            |                    |
| CB4856 CT                                                                                     | IV | 13387469                                                                            | 13389209 | WBGene00003077 | lsm-3      | Y62E10A.12 |                    |
| -0.164841599383585                                                                            |    | AGIWUR5031;AGIWUR29539;AGIWUR33021;AGIWUR35748;AGIWUR38348;AGIWUR40337              |          |                |            |            |                    |
| CB4856 CT                                                                                     | IV | 13389146                                                                            | 13398799 | WBGene00013379 | Y62E10A.13 | Y62E10A.13 |                    |
| 0.0169022684609601                                                                            |    |                                                                                     |          |                |            |            |                    |
| AGIWUR1459;AGIWUR1661;AGIWUR21061;AGIWUR32539;AGIWUR32818;AGIWUR34098;AGIWUR35714;AGIWUR43565 |    |                                                                                     |          |                |            |            |                    |
| CB4856 CT                                                                                     | IV | 13399068                                                                            | 13400506 | WBGene00013380 | memi-2     | Y62E10A.14 |                    |
| -0.346503821492144                                                                            |    | AGIWUR5865;AGIWUR34235                                                              |          |                |            |            |                    |
| CB4856 CT                                                                                     | IV | 13401306                                                                            | 13403831 | WBGene00013381 | cyp-31A5   | Y62E10A.15 |                    |
| -0.402157932111667                                                                            |    | AGIWUR28184                                                                         |          |                |            |            |                    |
| CB4856 CT                                                                                     | IV | 13403769                                                                            | 13408306 | WBGene00013385 | Y62E10A.19 | Y62E10A.19 |                    |
| -0.346079968416612                                                                            |    | AGIWUR10040;AGIWUR18675;AGIWUR20403;AGIWUR23523;AGIWUR39058;AGIWUR42855;AGIWUR44771 |          |                |            |            |                    |
| CB4856 CT                                                                                     | IV | 13408606                                                                            | 13412895 | WBGene00013382 | gcl-1      | Y62E10A.16 |                    |
| 0.0148345525320579                                                                            |    | AGIWUR39074                                                                         |          |                |            |            |                    |
| CB4856 CT                                                                                     | IV | 13413560                                                                            | 13415954 | WBGene00013383 | aptf-2     | Y62E10A.17 |                    |

|                                     |                                                                        |                |                 |                            |  |
|-------------------------------------|------------------------------------------------------------------------|----------------|-----------------|----------------------------|--|
| -0.152940693494739                  | AGIWUR2952;AGIWUR10679                                                 |                |                 |                            |  |
| CB4856 CT IV                        | 13416041 13421927                                                      | WBGene00004029 | pik-1           | K09B11.1                   |  |
| 0.114702013963393                   | AGIWUR40481                                                            |                |                 |                            |  |
| CB4856 CT IV                        | 13422500 13429379                                                      | WBGene00010709 | nol-9           | K09B11.2                   |  |
| -0.0230746919711571                 | AGIWUR32343                                                            |                |                 |                            |  |
| CB4856 CT IV                        | 13431288 13434068                                                      | WBGene00010712 | K09B11.5        | K09B11.5                   |  |
| -0.0409570499251051                 | AGIWUR1133;AGIWUR37524                                                 |                |                 |                            |  |
| CB4856 CT IV                        | 13434188 13445375                                                      | WBGene00010714 | mam-3           | K09B11.10                  |  |
| 0.162151620165908                   | AGIWUR34784                                                            |                |                 |                            |  |
| CB4856 CT IV                        | 13445819 13454954                                                      | WBGene00010713 | uso-1           | K09B11.9                   |  |
| -0.454085507192405                  | AGIWUR22969                                                            |                |                 |                            |  |
| CB4856 CT IV                        | 13456976 13458841                                                      | WBGene00045062 | Y38H8A.8        | Y38H8A.8                   |  |
| -0.549985797430509                  | AGIWUR24056                                                            |                |                 |                            |  |
| CB4856 CT IV                        | 13466139 13469402                                                      | WBGene00012639 | fezf-1          | Y38H8A.5                   |  |
| 0.193575453468823                   | AGIWUR31080                                                            |                |                 |                            |  |
| CB4856 CT IV                        | 13474432 13476225                                                      | WBGene00012636 | Y38H8A.2        | Y38H8A.2                   |  |
| -0.0367333597053614                 | AGIWUR3266;AGIWUR12111;AGIWUR37091;AGIWUR38610;AGIWUR44125;AGIWUR44481 |                |                 |                            |  |
| CB4856 CT IV                        | 13476935 13502852                                                      | WBGene00012868 | tbc-9           | Y45F10A.6                  |  |
| -0.157931675475801                  | AGIWUR31457                                                            |                |                 |                            |  |
| CB4856 CT IV                        | 13505270 13505762                                                      | WBGene00003755 | nlp-17          | Y45F10A.5                  |  |
| -0.0951609273510714                 | AGIWUR8556;AGIWUR23648                                                 |                |                 |                            |  |
| CB4856 CT IV                        | 13506079 13509225                                                      | WBGene00012867 | seld-1          | Y45F10A.4                  |  |
| 0.191323187468743                   | AGIWUR10820                                                            |                |                 |                            |  |
| CB4856 CT IV                        | 13509224 13513426                                                      | WBGene00012866 | afmd-2          | Y45F10A.3                  |  |
| 0.139853470545528                   | AGIWUR33223                                                            |                |                 |                            |  |
| CB4856 CT IV                        | 13513369 13521870                                                      | WBGene00003582 | dcap-2          | F52G2.1 0.0984929064925524 |  |
| AGIWUR14135;AGIWUR28797;AGIWUR33187 |                                                                        |                |                 |                            |  |
| CB4856 CT IV                        | 13521970 13540271                                                      | WBGene00004681 | rsd-2           | F52G2.2 0.0235902556834198 |  |
| AGIWUR42570                         |                                                                        |                |                 |                            |  |
| CB4856 CT IV                        | 13543402 13548230                                                      | WBGene00009943 | F52G2.3 F52G2.3 | -0.145642242240099         |  |
| AGIWUR43070                         |                                                                        |                |                 |                            |  |
| CB4856 CT IV                        | 13549605 13561729                                                      | WBGene00012875 | Y45F10B.13      | Y45F10B.13                 |  |
| -0.547065250198428                  | AGIWUR1433;AGIWUR1775;AGIWUR16615;AGIWUR37079                          |                |                 |                            |  |
| CB4856 CT IV                        | 13561861 13574440                                                      | WBGene00004265 | qui-1           | Y45F10B.10                 |  |
| -0.0729062588348253                 | AGIWUR414;AGIWUR5539;AGIWUR38295                                       |                |                 |                            |  |
| CB4856 CT IV                        | 13575058 13576740                                                      | WBGene00005088 | srd-10          | Y45F10B.14                 |  |
| 0.0564091869866923                  | AGIWUR31343                                                            |                |                 |                            |  |
| CB4856 CT IV                        | 13579253 13582112                                                      | WBGene00005679 | sru-16          | Y45F10B.4                  |  |
| -0.0329175079429822                 | AGIWUR16693;AGIWUR38014                                                |                |                 |                            |  |



|                     |                                                            |          |                |            |            |
|---------------------|------------------------------------------------------------|----------|----------------|------------|------------|
| CB4856 CT IV        | 13583209                                                   | 13584479 | WBGene00005675 | sru-12     | Y45F10B.5  |
| -0.0780359054873916 | AGIWUR43576                                                |          |                |            |            |
| CB4856 CT IV        | 13584946                                                   | 13587288 | WBGene00005674 | sru-11     | Y45F10B.6  |
| -0.0525034293805886 | AGIWUR21838                                                |          |                |            |            |
| CB4856 CT IV        | 13587475                                                   | 13588237 | WBGene00012874 | Y45F10B.12 | Y45F10B.12 |
| 0.147840148056256   | AGIWUR35600                                                |          |                |            |            |
| CB4856 CT IV        | 13588993                                                   | 13590337 | WBGene00005672 | sru-9      | Y45F10B.11 |
| -0.148730604364004  | AGIWUR34417                                                |          |                |            |            |
| CB4856 CT IV        | 13594517                                                   | 13596279 | WBGene00012870 | Y45F10B.2  | Y45F10B.2  |
| -0.158392352210636  | AGIWUR36105;AGIWUR41860                                    |          |                |            |            |
| CB4856 CT IV        | 13598755                                                   | 13600436 | WBGene00045045 | Y45F10B.17 | Y45F10B.17 |
| 0.160494044385675   | AGIWUR21237                                                |          |                |            |            |
| CB4856 CT IV        | 13603549                                                   | 13604197 | WBGene00012876 | Y45F10B.15 | Y45F10B.15 |
| -0.0942136565006013 | AGIWUR4125                                                 |          |                |            |            |
| CB4856 CT IV        | 13604969                                                   | 13607263 | WBGene00045059 | Y45F10B.18 | Y45F10B.18 |
| 0.107614753718542   | AGIWUR6109;AGIWUR28546                                     |          |                |            |            |
| CB4856 CT IV        | 13607436                                                   | 13609892 | WBGene00007460 | C08F11.13  | C08F11.13  |
| 0.871403830220175   | AGIWUR8724;AGIWUR37159                                     |          |                |            |            |
| CB4856 CT IV        | 13611328                                                   | 13611579 | WBGene00045286 | C08F11.19  | C08F11.19  |
| 0.0460246434914762  | AGIWUR5449;AGIWUR14418;AGIWUR21976;AGIWUR24286;AGIWUR27726 |          |                |            |            |
| CB4856 CT IV        | 13611812                                                   | 13612210 | WBGene00045285 | C08F11.18  | C08F11.18  |
| 0.0138945032190634  | AGIWUR5645;AGIWUR11696;AGIWUR15085;AGIWUR23111;AGIWUR33000 |          |                |            |            |
| CB4856 CT IV        | 13612805                                                   | 13618061 | WBGene00007461 | C08F11.14  | C08F11.14  |
| -0.282064239097057  | AGIWUR961                                                  |          |                |            |            |
| CB4856 CT IV        | 13619508                                                   | 13621513 | WBGene00007452 | C08F11.3   | C08F11.3   |
| 0.514941210262745   | AGIWUR13220;AGIWUR13316;AGIWUR20736;AGIWUR33351            |          |                |            |            |
| CB4856 CT IV        | 13621987                                                   | 13623134 | WBGene00007451 | C08F11.2   | C08F11.2   |
| 0.0627922968207741  | AGIWUR638;AGIWUR12018;AGIWUR15459;AGIWUR39370              |          |                |            |            |
| CB4856 CT IV        | 13633499                                                   | 13635179 | WBGene00007453 | fbxa-98    | C08F11.5   |
| -0.245566210522751  | AGIWUR5958                                                 |          |                |            |            |
| CB4856 CT IV        | 13637288                                                   | 13638525 | WBGene00007454 | C08F11.7   | C08F11.7   |
| 0.173291590744823   | AGIWUR19769                                                |          |                |            |            |
| CB4856 CT IV        | 13639260                                                   | 13644402 | WBGene00007455 | ugt-22     | C08F11.8   |
| -0.621790910210464  | AGIWUR2529                                                 |          |                |            |            |
| CB4856 CT IV        | 13644463                                                   | 13645923 | WBGene00007456 | srz-29     | C08F11.9   |
| 0.0948843750310715  | AGIWUR41021                                                |          |                |            |            |
| CB4856 CT IV        | 13646735                                                   | 13647658 | WBGene00007458 | ule-4      | C08F11.11  |
| -0.218450518717678  | AGIWUR11720                                                |          |                |            |            |
| CB4856 CT IV        | 13648039                                                   | 13649335 | WBGene00007457 | C08F11.10  | C08F11.10  |

|                                     |                                                             |          |                |                   |                     |  |
|-------------------------------------|-------------------------------------------------------------|----------|----------------|-------------------|---------------------|--|
| -0.0386988663190024                 | AGIWUR11031                                                 |          |                |                   |                     |  |
| CB4856 CT IV                        | 13649836                                                    | 13650338 | WBGene00045069 | C08F11.17         | C08F11.17           |  |
| -0.0765197301491591                 | AGIWUR16107;AGIWUR16421;AGIWUR19761;AGIWUR37431             |          |                |                   |                     |  |
| CB4856 CT IV                        | 13651014                                                    | 13651512 | WBGene00007459 | C08F11.12         | C08F11.12           |  |
| -0.600318319323328                  | AGIWUR9420                                                  |          |                |                   |                     |  |
| CB4856 CT IV                        | 13653955                                                    | 13655851 | WBGene00044256 | Y45F10C.6         | Y45F10C.6           |  |
| -0.22700620733871                   | AGIWUR23085                                                 |          |                |                   |                     |  |
| CB4856 CT IV                        | 13662116                                                    | 13662671 | WBGene00012878 | Y45F10C.2         | Y45F10C.2           |  |
| -0.330945667004098                  | AGIWUR37828                                                 |          |                |                   |                     |  |
| CB4856 CT IV                        | 13663398                                                    | 13664190 | WBGene00012880 | Y45F10C.4         | Y45F10C.4           |  |
| -0.463568161406119                  | AGIWUR23361                                                 |          |                |                   |                     |  |
| CB4856 CT IV                        | 13665345                                                    | 13666909 | WBGene00012879 | fbxa-215          | Y45F10C.3           |  |
| -0.166818405723095                  | AGIWUR42106                                                 |          |                |                   |                     |  |
| CB4856 CT IV                        | 13673804                                                    | 13677823 | WBGene00011960 | oac-48 T23G4.4    | -0.0913922085903547 |  |
| AGIWUR10707;AGIWUR24857;AGIWUR40749 |                                                             |          |                |                   |                     |  |
| CB4856 CT IV                        | 13678951                                                    | 13680333 | WBGene00011961 | T23G4.5 T23G4.5   | -0.517322391857038  |  |
| AGIWUR35188                         |                                                             |          |                |                   |                     |  |
| CB4856 CT IV                        | 13685076                                                    | 13687016 | WBGene00011959 | nyn-1 T23G4.3     | -0.244095664800879  |  |
| AGIWUR1504                          |                                                             |          |                |                   |                     |  |
| CB4856 CT IV                        | 13688324                                                    | 13689131 | WBGene00011958 | T23G4.2 T23G4.2   | -0.0486233408864818 |  |
| AGIWUR41972                         |                                                             |          |                |                   |                     |  |
| CB4856 CT IV                        | 13701240                                                    | 13704082 | WBGene00006580 | tlp-1 T23G4.1     | 0.466149453839806   |  |
| AGIWUR28090                         |                                                             |          |                |                   |                     |  |
| CB4856 CT IV                        | 13726930                                                    | 13732829 | WBGene00008123 | ent-4 C47A4.2     | -0.363571970850289  |  |
| AGIWUR21058                         |                                                             |          |                |                   |                     |  |
| CB4856 CT IV                        | 13740951                                                    | 13742344 | WBGene00008124 | C47A4.3 C47A4.3   | -0.211887688972615  |  |
| AGIWUR42090                         |                                                             |          |                |                   |                     |  |
| CB4856 CT IV                        | 13742550                                                    | 13742985 | WBGene00045287 | C47A4.7 C47A4.7   | -0.0427668978514273 |  |
| AGIWUR25662                         |                                                             |          |                |                   |                     |  |
| CB4856 CT IV                        | 13744155                                                    | 13744988 | WBGene00014703 | C47A4.4 C47A4.4   | -0.277396146459407  |  |
| AGIWUR17605                         |                                                             |          |                |                   |                     |  |
| CB4856 CT IV                        | 13745709                                                    | 13745967 | WBGene00008125 | C47A4.5 C47A4.5   | 0.328667991725982   |  |
| AGIWUR36297                         |                                                             |          |                |                   |                     |  |
| CB4856 CT IV                        | 13750334                                                    | 13770495 | WBGene00012891 | sorb-1 Y45F10D.13 |                     |  |
| -0.0828557565634895                 | AGIWUR13231;AGIWUR15599;AGIWUR20295;AGIWUR24204;AGIWUR26844 |          |                |                   |                     |  |
| CB4856 CT IV                        | 13773548                                                    | 13774678 | WBGene00012883 | Y45F10D.2         | Y45F10D.2           |  |
| 0.211573182569122                   | AGIWUR13053                                                 |          |                |                   |                     |  |
| CB4856 CT IV                        | 13776415                                                    | 13777149 | WBGene00044257 | Y45F10D.16        | Y45F10D.16          |  |
| 0.101044301908061                   | AGIWUR729;AGIWUR6269;AGIWUR9214                             |          |                |                   |                     |  |

|                                                                                                                                              |                                                                     |          |                |            |            |                    |
|----------------------------------------------------------------------------------------------------------------------------------------------|---------------------------------------------------------------------|----------|----------------|------------|------------|--------------------|
| CB4856 CT IV                                                                                                                                 | 13777808                                                            | 13778812 | WBGene00004430 | rp1-18     | Y45F10D.12 |                    |
| 0.0208459243905903                                                                                                                           | AGIWUR319;AGIWUR4112;AGIWUR9238;AGIWUR37931;AGIWUR41838;AGIWUR44465 |          |                |            |            |                    |
| CB4856 CT IV                                                                                                                                 | 13778866                                                            | 13782396 | WBGene00001635 | gly-10     | Y45F10D.3  |                    |
| 0.0487068631923062                                                                                                                           | AGIWUR9113                                                          |          |                |            |            |                    |
| CB4856 CT IV                                                                                                                                 | 13782385                                                            | 13785646 | WBGene00012890 | lact-9     | Y45F10D.11 |                    |
| 0.0501436467406187                                                                                                                           | AGIWUR40217                                                         |          |                |            |            |                    |
| CB4856 CT IV                                                                                                                                 | 13785743                                                            | 13786961 | WBGene00012889 | Y45F10D.10 | Y45F10D.10 |                    |
| -0.067473810195728                                                                                                                           | AGIWUR23138;AGIWUR33058;AGIWUR36898;AGIWUR39358                     |          |                |            |            |                    |
| CB4856 CT IV                                                                                                                                 | 13786945                                                            | 13788727 | WBGene00012888 | sas-6      | Y45F10D.9  |                    |
| 0.494523536442156                                                                                                                            | AGIWUR12327                                                         |          |                |            |            |                    |
| CB4856 CT IV                                                                                                                                 | 13788936                                                            | 13796224 | WBGene00012887 | Y45F10D.7  | Y45F10D.7  |                    |
| -0.216093144489555                                                                                                                           | AGIWUR26040                                                         |          |                |            |            |                    |
| CB4856 CT IV                                                                                                                                 | 13796255                                                            | 13797904 | WBGene00012886 | Y45F10D.6  | Y45F10D.6  |                    |
| 0.773536916334349                                                                                                                            | AGIWUR33489                                                         |          |                |            |            |                    |
| CB4856 CT IV                                                                                                                                 | 13804206                                                            | 13807777 | WBGene00012892 | Y45F10D.14 | Y45F10D.14 |                    |
| -0.327960105080655                                                                                                                           | AGIWUR25961                                                         |          |                |            |            |                    |
| CB4856 CT IV                                                                                                                                 | 13817487                                                            | 13820962 | WBGene00012893 | Y45F10D.15 | Y45F10D.15 |                    |
| -0.039426701977094                                                                                                                           | AGIWUR3598                                                          |          |                |            |            |                    |
| CB4856 CT IV                                                                                                                                 | 13827886                                                            | 13844997 | WBGene00010374 | rga-5      | H08M01.2   |                    |
| -0.058484678039072                                                                                                                           |                                                                     |          |                |            |            |                    |
| AGIWUR1256;AGIWUR6570;AGIWUR6804;AGIWUR16603;AGIWUR18694;AGIWUR19134;AGIWUR25806;AGIWUR34783;AGIWUR35545;AGIWUR39495;AGIWUR43718;AGIWUR44172 |                                                                     |          |                |            |            |                    |
| CB4856 CT IV                                                                                                                                 | 13847777                                                            | 13852712 | WBGene00007199 | B0513.7    | B0513.7    | -0.100052978281303 |
| AGIWUR5510;AGIWUR40527                                                                                                                       |                                                                     |          |                |            |            |                    |
| CB4856 CT IV                                                                                                                                 | 13880138                                                            | 13881546 | WBGene00007196 | B0513.4    | B0513.4    | 0.478974788531691  |
| AGIWUR10382                                                                                                                                  |                                                                     |          |                |            |            |                    |
| CB4856 CT IV                                                                                                                                 | 13882225                                                            | 13882620 | WBGene00004443 | rp1-29     | B0513.3    | 0.0434302112713922 |
| AGIWUR3930;AGIWUR14691;AGIWUR15375;AGIWUR30112;AGIWUR30805;AGIWUR35741;AGIWUR42921                                                           |                                                                     |          |                |            |            |                    |
| CB4856 CT IV                                                                                                                                 | 13882734                                                            | 13884177 | WBGene00007195 | B0513.2    | B0513.2    | -0.185551863795599 |
| AGIWUR4762;AGIWUR15258;AGIWUR30424;AGIWUR32810                                                                                               |                                                                     |          |                |            |            |                    |
| CB4856 CT IV                                                                                                                                 | 13888089                                                            | 13893985 | WBGene00001562 | lin-66     | B0513.1    | 0.150981212252221  |
| AGIWUR19479;AGIWUR20559;AGIWUR42857;AGIWUR43601                                                                                              |                                                                     |          |                |            |            |                    |
| CB4856 CT IV                                                                                                                                 | 13897817                                                            | 13902874 | WBGene00012536 | Y37A1A.3   | Y37A1A.3   |                    |
| -0.559865685391782                                                                                                                           | AGIWUR7072                                                          |          |                |            |            |                    |
| CB4856 CT IV                                                                                                                                 | 13905991                                                            | 13912297 | WBGene00012535 | Y37A1A.2   | Y37A1A.2   |                    |
| -0.225018867674926                                                                                                                           | AGIWUR23675;AGIWUR39180;AGIWUR42520                                 |          |                |            |            |                    |
| CB4856 CT IV                                                                                                                                 | 13934445                                                            | 13964001 | WBGene00045063 | Y37A1A.4   | Y37A1A.4   |                    |
| -0.225378466662089                                                                                                                           |                                                                     |          |                |            |            |                    |
| AGIWUR6496;AGIWUR7639;AGIWUR12903;AGIWUR16192;AGIWUR20473;AGIWUR20664;AGIWUR21287;AGIWUR22079;AGIWUR26424;A                                  |                                                                     |          |                |            |            |                    |

GIWUR28173;AGIWUR29843;AGIWUR38442;AGIWUR38689

|                     |                                                            |          |                |           |           |
|---------------------|------------------------------------------------------------|----------|----------------|-----------|-----------|
| CB4856 CT IV        | 13964359                                                   | 13979847 | WBGene00044989 | Y37A1B.17 | Y37A1B.17 |
| -0.0437669570704706 | AGIWUR3355;AGIWUR8863;AGIWUR21633;AGIWUR27631;AGIWUR29167  |          |                |           |           |
| CB4856 CT IV        | 13981087                                                   | 13982525 | WBGene00001575 | gei-18    | Y37A1B.15 |
| -0.308466309570403  | AGIWUR19287;AGIWUR27437                                    |          |                |           |           |
| CB4856 CT IV        | 13982636                                                   | 13984141 | WBGene00006598 | tor-2     | Y37A1B.13 |
| -0.448724128583145  | AGIWUR21555                                                |          |                |           |           |
| CB4856 CT IV        | 13989094                                                   | 14012026 | WBGene00001190 | egl-23    | Y37A1B.11 |
| 0.0697979674542992  | AGIWUR25296                                                |          |                |           |           |
| CB4856 CT IV        | 14014024                                                   | 14015944 | WBGene00005810 | srw-63    | Y37A1B.10 |
| 0.0704894571596144  | AGIWUR34340                                                |          |                |           |           |
| CB4856 CT IV        | 14016099                                                   | 14019983 | WBGene00012542 | irld-56   | Y37A1B.9  |
| -0.0657332838168507 | AGIWUR18144                                                |          |                |           |           |
| CB4856 CT IV        | 14020198                                                   | 14024628 | WBGene00012541 | irld-55   | Y37A1B.8  |
| -0.0397794997686649 | AGIWUR38811                                                |          |                |           |           |
| CB4856 CT IV        | 14042595                                                   | 14043780 | WBGene00012540 | Y37A1B.7  | Y37A1B.7  |
| 0.434206995748355   | AGIWUR38138                                                |          |                |           |           |
| CB4856 CT IV        | 14051200                                                   | 14056676 | WBGene00012538 | Y37A1B.5  | Y37A1B.5  |
| 0.330691332081219   | AGIWUR6852;AGIWUR40734                                     |          |                |           |           |
| CB4856 CT IV        | 14059551                                                   | 14060712 | WBGene00012537 | Y37A1B.4  | Y37A1B.4  |
| -0.0506828551703435 | AGIWUR1505;AGIWUR10911;AGIWUR16676;AGIWUR44769             |          |                |           |           |
| CB4856 CT IV        | 14061005                                                   | 14069854 | WBGene00003086 | lst-4     | Y37A1B.2  |
| 0.00299614950677984 | AGIWUR3964;AGIWUR20485;AGIWUR37987                         |          |                |           |           |
| CB4856 CT IV        | 14071503                                                   | 14076743 | WBGene00003085 | ccar-1    | Y37A1B.1  |
| -0.0990704078978979 | AGIWUR19476;AGIWUR27341                                    |          |                |           |           |
| CB4856 CT IV        | 14077441                                                   | 14083559 | WBGene00009924 | cfp-1     | F52B11.1  |
| 0.0228276434486077  | AGIWUR34871                                                |          |                |           |           |
| CB4856 CT IV        | 14083318                                                   | 14084695 | WBGene00009925 | F52B11.2  | F52B11.2  |
| -0.313562129288179  | AGIWUR6410                                                 |          |                |           |           |
| CB4856 CT IV        | 14091254                                                   | 14096617 | WBGene00009926 | noah-2    | F52B11.3  |
| 0.931414150850465   | AGIWUR42435                                                |          |                |           |           |
| CB4856 CT IV        | 14098325                                                   | 14099368 | WBGene00000707 | col-133   | F52B11.4  |
| -0.257587780923133  | AGIWUR23056                                                |          |                |           |           |
| CB4856 CT IV        | 14102095                                                   | 14103231 | WBGene00009927 | F52B11.5  | F52B11.5  |
| -0.30807671963996   | AGIWUR2614;AGIWUR25317;AGIWUR39751                         |          |                |           |           |
| CB4856 CT IV        | 14106584                                                   | 14107715 | WBGene00002117 | ins-34    | F52B11.6  |
| 0.168509720391112   | AGIWUR41432                                                |          |                |           |           |
| CB4856 CT IV        | 14107721                                                   | 14116034 | WBGene00012543 | nkcc-1    | Y37A1C.1  |
| -0.297456277423622  | AGIWUR2790;AGIWUR15781;AGIWUR21124;AGIWUR37379;AGIWUR39725 |          |                |           |           |

|                                                 |                                                                        |          |                |                 |                    |          |
|-------------------------------------------------|------------------------------------------------------------------------|----------|----------------|-----------------|--------------------|----------|
| CB4856 CT IV                                    | 14129391                                                               | 14131061 | WBGene00010388 | srz-42          | H12I19.1           |          |
| 0.246625142084545                               | AGIWUR30887                                                            |          |                |                 |                    |          |
| CB4856 CT IV                                    | 14132070                                                               | 14134330 | WBGene00010394 | srz-59          | H12I19.7           |          |
| -0.0609709989290224                             | AGIWUR36275                                                            |          |                |                 |                    |          |
| CB4856 CT IV                                    | 14142081                                                               | 14143873 | WBGene00010390 | srz-30          | H12I19.3           |          |
| 0.0325396394067665                              | AGIWUR3130;AGIWUR15872;AGIWUR25242;AGIWUR29676;AGIWUR32133;AGIWUR42099 |          |                |                 |                    |          |
| CB4856 CT IV                                    | 14145665                                                               | 14148869 | WBGene00010391 | oac-37          | H12I19.4           |          |
| 0.01215283180548                                | AGIWUR12381                                                            |          |                |                 |                    |          |
| CB4856 CT IV                                    | 14150331                                                               | 14153361 | WBGene00010392 | oac-38          | H12I19.5           |          |
| 0.0229793429026861                              | AGIWUR26448                                                            |          |                |                 |                    |          |
| CB4856 CT IV                                    | 14154511                                                               | 14154913 | WBGene00010395 | H12I19.8        |                    | H12I19.8 |
| -0.161315666679467                              | AGIWUR15654                                                            |          |                |                 |                    |          |
| CB4856 CT IV                                    | 14155270                                                               | 14158048 | WBGene00011025 | R05A10.8        |                    | R05A10.8 |
| 0.534264447913082                               | AGIWUR20126;AGIWUR41257                                                |          |                |                 |                    |          |
| CB4856 CT IV                                    | 14160354                                                               | 14162872 | WBGene00011024 | R05A10.7        |                    | R05A10.7 |
| 0.103787044492036                               | AGIWUR13597                                                            |          |                |                 |                    |          |
| CB4856 CT IV                                    | 14165776                                                               | 14168487 | WBGene00011023 | R05A10.6        |                    | R05A10.6 |
| -0.29121504346895                               | AGIWUR7296                                                             |          |                |                 |                    |          |
| CB4856 CT IV                                    | 14168906                                                               | 14170838 | WBGene00011022 | R05A10.5        |                    | R05A10.5 |
| -0.397066128363034                              | AGIWUR17174                                                            |          |                |                 |                    |          |
| CB4856 CT IV                                    | 14172481                                                               | 14173216 | WBGene00011021 | R05A10.4        |                    | R05A10.4 |
| 0.401711510695257                               | AGIWUR13880                                                            |          |                |                 |                    |          |
| CB4856 CT IV                                    | 14173642                                                               | 14176473 | WBGene00011020 | R05A10.3        |                    | R05A10.3 |
| -0.0271622327174814                             | AGIWUR1079                                                             |          |                |                 |                    |          |
| CB4856 CT IV                                    | 14177200                                                               | 14178940 | WBGene00011019 | R05A10.2        |                    | R05A10.2 |
| 0.0119609212343867                              | AGIWUR9589                                                             |          |                |                 |                    |          |
| CB4856 CT IV                                    | 14182377                                                               | 14192674 | WBGene00011018 | R05A10.1        |                    | R05A10.1 |
| 0.0555739007339469                              | AGIWUR11624;AGIWUR43235                                                |          |                |                 |                    |          |
| CB4856 CT IV                                    | 14193430                                                               | 14195989 | WBGene00010483 | K01G12.3        |                    | K01G12.3 |
| -0.473406620776937                              | AGIWUR23314;AGIWUR30947                                                |          |                |                 |                    |          |
| CB4856 CT IV                                    | 14196440                                                               | 14198824 | WBGene00008535 | F02H6.2 F02H6.2 | -0.264342134747027 |          |
| AGIWUR3140;AGIWUR7706                           |                                                                        |          |                |                 |                    |          |
| CB4856 CT IV                                    | 14199263                                                               | 14201780 | WBGene00008534 | F02H6.1 F02H6.1 | -0.498048623402738 |          |
| AGIWUR21214                                     |                                                                        |          |                |                 |                    |          |
| CB4856 CT IV                                    | 14203427                                                               | 14205357 | WBGene00008536 | F02H6.3 F02H6.3 | -0.278205515171344 |          |
| AGIWUR10428;AGIWUR21966;AGIWUR28377;AGIWUR31985 |                                                                        |          |                |                 |                    |          |
| CB4856 CT IV                                    | 14207564                                                               | 14219159 | WBGene00008537 | F02H6.4 F02H6.4 | -0.127860772683555 |          |
| AGIWUR12439                                     |                                                                        |          |                |                 |                    |          |
| CB4856 CT IV                                    | 14219871                                                               | 14224439 | WBGene00008538 | sqrd-1 F02H6.5  | -0.196986517407336 |          |

|                                    |                                                                         |          |                |            |           |                    |
|------------------------------------|-------------------------------------------------------------------------|----------|----------------|------------|-----------|--------------------|
| AGIWUR17864                        |                                                                         |          |                |            |           |                    |
| CB4856 CT IV                       | 14225918                                                                | 14228169 | WBGene00008540 | F02H6.7    | F02H6.7   | 0.0537645735729804 |
| AGIWUR14179                        |                                                                         |          |                |            |           |                    |
| CB4856 CT IV                       | 14229336                                                                | 14230899 | WBGene00008539 | F02H6.6    | F02H6.6   | -0.215518545351475 |
| AGIWUR2933;AGIWUR31731;AGIWUR36044 |                                                                         |          |                |            |           |                    |
| CB4856 CT IV                       | 14234341                                                                | 14239076 | WBGene00013411 | Y64G10A.1  |           | Y64G10A.1          |
| -0.132983310893343                 | AGIWUR24728                                                             |          |                |            |           |                    |
| CB4856 CT IV                       | 14245439                                                                | 14250213 | WBGene00013417 | srab-24    | Y64G10A.8 |                    |
| -0.0872657267299255                | AGIWUR31275;AGIWUR33166;AGIWUR42828                                     |          |                |            |           |                    |
| CB4856 CT IV                       | 14276466                                                                | 14285523 | WBGene00013415 | ilcr-1     | Y64G10A.6 |                    |
| 0.129402587594466                  | AGIWUR37644                                                             |          |                |            |           |                    |
| CB4856 CT IV                       | 14291901                                                                | 14319564 | WBGene00013416 | Y64G10A.7  |           | Y64G10A.7          |
| 0.0730913858046014                 | AGIWUR16745;AGIWUR24103;AGIWUR27809;AGIWUR41358;AGIWUR41377;AGIWUR42644 |          |                |            |           |                    |
| CB4856 CT IV                       | 14319834                                                                | 14321755 | WBGene00013454 | fbxa-126   |           | Y67A10A.5          |
| 0.0420659867884385                 | AGIWUR8515                                                              |          |                |            |           |                    |
| CB4856 CT IV                       | 14323244                                                                | 14325665 | WBGene00013453 | fbxa-83    | Y67A10A.4 |                    |
| -0.332347386732767                 | AGIWUR15944                                                             |          |                |            |           |                    |
| CB4856 CT IV                       | 14328995                                                                | 14334459 | WBGene00013452 | Y67A10A.3  |           | Y67A10A.3          |
| 0.163752087802246                  | AGIWUR42727                                                             |          |                |            |           |                    |
| CB4856 CT IV                       | 14335194                                                                | 14336491 | WBGene00045099 | Y67A10A.13 |           | Y67A10A.13         |
| 0.231799658686201                  | AGIWUR19281;AGIWUR37071                                                 |          |                |            |           |                    |
| CB4856 CT IV                       | 14338057                                                                | 14339279 | WBGene00013451 | Y67A10A.2  |           | Y67A10A.2          |
| -0.350299726760278                 | AGIWUR26715;AGIWUR40793                                                 |          |                |            |           |                    |
| CB4856 CT IV                       | 14339968                                                                | 14342112 | WBGene00044906 | Y67A10A.11 |           | Y67A10A.11         |
| -0.224891089963484                 | AGIWUR5989                                                              |          |                |            |           |                    |
| CB4856 CT IV                       | 14342660                                                                | 14343856 | WBGene00013459 | Y67A10A.10 |           | Y67A10A.10         |
| -0.142865853244306                 | AGIWUR41956                                                             |          |                |            |           |                    |
| CB4856 CT IV                       | 14345435                                                                | 14350751 | WBGene00013450 | oac-56     | Y67A10A.1 |                    |
| 0.583309031449097                  | AGIWUR22040                                                             |          |                |            |           |                    |
| CB4856 CT IV                       | 14374114                                                                | 14379643 | WBGene00013456 | Y67A10A.7  |           | Y67A10A.7          |
| 0.320209622388672                  | AGIWUR10747;AGIWUR41785                                                 |          |                |            |           |                    |
| CB4856 CT IV                       | 14379953                                                                | 14383701 | WBGene00013457 | paqr-3     | Y67A10A.8 |                    |
| -0.181441850154608                 | AGIWUR12238                                                             |          |                |            |           |                    |
| CB4856 CT IV                       | 14394138                                                                | 14400368 | WBGene00013458 | Y67A10A.9  |           | Y67A10A.9          |
| 0.20689374102494                   | AGIWUR35244                                                             |          |                |            |           |                    |
| CB4856 CT IV                       | 14419711                                                                | 14422038 | WBGene00045060 | F55B11.7   |           | F55B11.7           |
| -0.212081059231444                 | AGIWUR20609;AGIWUR37396                                                 |          |                |            |           |                    |
| CB4856 CT IV                       | 14422268                                                                | 14423294 | WBGene00010084 | F55B11.2   |           | F55B11.2           |
| -0.0302427962046359                | AGIWUR9340                                                              |          |                |            |           |                    |

|                                    |                                                           |          |                |                   |                     |
|------------------------------------|-----------------------------------------------------------|----------|----------------|-------------------|---------------------|
| CB4856 CT IV                       | 14424693                                                  | 14425859 | WBGene00010085 | F55B11.3          | F55B11.3            |
| -0.851786293292218                 | AGIWUR26421                                               |          |                |                   |                     |
| CB4856 CT IV                       | 14427695                                                  | 14428464 | WBGene00010087 | F55B11.5          | F55B11.5            |
| -0.131784522275435                 | AGIWUR37102                                               |          |                |                   |                     |
| CB4856 CT IV                       | 14429574                                                  | 14430920 | WBGene00010086 | F55B11.4          | F55B11.4            |
| -0.114408481933465                 | AGIWUR5871;AGIWUR7295;AGIWUR13797;AGIWUR39876;AGIWUR41646 |          |                |                   |                     |
| CB4856 CT IV                       | 14436367                                                  | 14444183 | WBGene00006606 | tra-3 LLC1.1      | -0.36870127445475   |
| AGIWUR18748                        |                                                           |          |                |                   |                     |
| CB4856 CT IV                       | 14456900                                                  | 14464098 | WBGene00010793 | LLC1.2 LLC1.2     | -0.545721113809655  |
| AGIWUR19648                        |                                                           |          |                |                   |                     |
| CB4856 CT IV                       | 14464517                                                  | 14469136 | WBGene00010794 | dld-1 LLC1.3      | -0.0621106899468646 |
| AGIWUR1832;AGIWUR15974;AGIWUR42021 |                                                           |          |                |                   |                     |
| CB4856 CT IV                       | 14482334                                                  | 14486439 | WBGene00013292 | Y57G11A.4         | Y57G11A.4           |
| -0.0204150093315398                | AGIWUR25101                                               |          |                |                   |                     |
| CB4856 CT IV                       | 14487086                                                  | 14505166 | WBGene00013289 | tag-273 Y57G11A.1 |                     |
| -0.036430416669825                 | AGIWUR3903;AGIWUR7605;AGIWUR27692                         |          |                |                   |                     |
| CB4856 CT IV                       | 14511884                                                  | 14512505 | WBGene00013293 | Y57G11A.5         | Y57G11A.5           |
| -0.0821507723754413                | AGIWUR30207                                               |          |                |                   |                     |
| CB4856 CT IV                       | 14514376                                                  | 14515118 | WBGene00044097 | srh-64 Y57G11A.6  |                     |
| 0.110903450165401                  | AGIWUR28692                                               |          |                |                   |                     |
| CB4856 CT IV                       | 14517022                                                  | 14519539 | WBGene00013290 | Y57G11A.2         | Y57G11A.2           |
| 0.172464584603778                  | AGIWUR16288                                               |          |                |                   |                     |
| CB4856 CT IV                       | 14519759                                                  | 14520999 | WBGene00012087 | T27E7.1 T27E7.1   | 0.0578565002792857  |
| AGIWUR4550                         |                                                           |          |                |                   |                     |
| CB4856 CT IV                       | 14522464                                                  | 14523677 | WBGene00005286 | srh-65 T27E7.2    | 0.264062246565034   |
| AGIWUR5005                         |                                                           |          |                |                   |                     |
| CB4856 CT IV                       | 14523868                                                  | 14525197 | WBGene00005285 | srh-63 T27E7.8    | -0.161667378254776  |
| AGIWUR20602                        |                                                           |          |                |                   |                     |
| CB4856 CT IV                       | 14527093                                                  | 14527343 | WBGene00045313 | T27E7.12          | T27E7.12            |
| -0.146060964761862                 | AGIWUR32313                                               |          |                |                   |                     |
| CB4856 CT IV                       | 14529018                                                  | 14530809 | WBGene00012088 | T27E7.3 T27E7.3   | 0.0704629518002946  |
| AGIWUR32906                        |                                                           |          |                |                   |                     |
| CB4856 CT IV                       | 14531180                                                  | 14531646 | WBGene00044268 | T27E7.10          | T27E7.10            |
| -0.148295457716565                 | AGIWUR17144;AGIWUR40545                                   |          |                |                   |                     |
| CB4856 CT IV                       | 14533518                                                  | 14535067 | WBGene00012089 | T27E7.4 T27E7.4   | -0.196463925363231  |
| AGIWUR36082                        |                                                           |          |                |                   |                     |
| CB4856 CT IV                       | 14537163                                                  | 14538325 | WBGene00012090 | T27E7.5 T27E7.5   | 0.0774554201105513  |
| AGIWUR17253                        |                                                           |          |                |                   |                     |
| CB4856 CT IV                       | 14539762                                                  | 14542602 | WBGene00012091 | pals-29 T27E7.6   | 1.14226243067419    |

AGIWUR2847;AGIWUR6198;AGIWUR10921

CB4856 CT IV 14546933 14549386

AGIWUR33290

CB4856 CT IV 14549827 14551957

0.0834587280738726 AGIWUR43995

CB4856 CT IV 14553598 14554883

-0.0799961526756476 AGIWUR21498

CB4856 CT IV 14565330 14567331

0.125575393942812 AGIWUR36699

CB4856 CT IV 14570160 14572721

0.14379364693074 AGIWUR12079;AGIWUR37121

CB4856 CT IV 14574819 14576580

-0.150621565116452 AGIWUR33753

CB4856 CT IV 14577004 14577273

0.140076366191308 AGIWUR36876

CB4856 CT IV 14616603 14623961

0.0152210349209989 AGIWUR18122;AGIWUR41975

CB4856 CT IV 14633099 14634405

-0.456888608618028 AGIWUR19940

CB4856 CT IV 14635126 14636051

0.0140540100577127 AGIWUR16361

CB4856 CT IV 14637751 14641229

0.514675777169681 AGIWUR36645

CB4856 CT IV 14643025 14653376

0.354427138004041 AGIWUR13955

CB4856 CT IV 14655535 14655916

0.157465994550767 AGIWUR27072;AGIWUR40230

CB4856 CT IV 14657081 14658165

-0.170289535738793 AGIWUR11773;AGIWUR31272

CB4856 CT IV 14658319 14675141

0.230733302398043 AGIWUR43237

CB4856 CT IV 14683043 14687405

0.0250579253416561 AGIWUR12323

CB4856 CT IV 14694032 14699940

0.130641160303642 AGIWUR32154

CB4856 CT IV 14703209 14704255

-0.436822003280803 AGIWUR30195

CB4856 CT IV 14705536 14706402

-0.766562080650253 AGIWUR28191

WBGene00012093 T27E7.9 T27E7.9 0.205841382214181

WBGene00013294 pals-30 Y57G11B.1

WBGene00013298 Y57G11B.6 Y57G11B.6

WBGene00013295 Y57G11B.2 Y57G11B.2

WBGene00077763 Y57G11B.97 Y57G11B.97

WBGene00013297 Y57G11B.5 Y57G11B.5

WBGene00255522 Y57G11B.223 Y57G11B.223

WBGene00007058 dmd-6 F13G11.1

WBGene00008772 irl-4 F13G11.2

WBGene00045038 ule-2 F13G11.3

WBGene00013328 Y57G11C.39 Y57G11C.39

WBGene00013322 Y57G11C.32 Y57G11C.32

WBGene00045282 Y57G11C.56 Y57G11C.56

WBGene00013323 Y57G11C.33 Y57G11C.33

WBGene00013326 anoh-2 Y57G11C.37

WBGene00013321 Y57G11C.31 Y57G11C.31

WBGene00001818 haf-8 Y57G11C.1

WBGene00013329 Y57G11C.40 Y57G11C.40

WBGene00013330 Y57G11C.41 Y57G11C.41



|                                                                                                                                  |                                                            |          |                |              |              |
|----------------------------------------------------------------------------------------------------------------------------------|------------------------------------------------------------|----------|----------------|--------------|--------------|
| CB4856 CT IV                                                                                                                     | 14728534                                                   | 14745676 | WBGene00013331 | Y57G11C.42   | Y57G11C.42   |
| -0.254344100403515                                                                                                               | AGIWUR6177;AGIWUR42172;AGIWUR44605                         |          |                |              |              |
| CB4856 CT IV                                                                                                                     | 14754089                                                   | 14754969 | WBGene00077762 | Y57G11C.499  | Y57G11C.499  |
| -0.158460277506911                                                                                                               | AGIWUR36923                                                |          |                |              |              |
| CB4856 CT IV                                                                                                                     | 14758362                                                   | 14760945 | WBGene00013304 | Y57G11C.6    | Y57G11C.6    |
| 0.184151447643684                                                                                                                | AGIWUR5415;AGIWUR6344                                      |          |                |              |              |
| CB4856 CT IV                                                                                                                     | 14761818                                                   | 14765434 | WBGene00013303 | Y57G11C.5    | Y57G11C.5    |
| 0.636594377072407                                                                                                                | AGIWUR557                                                  |          |                |              |              |
| CB4856 CT IV                                                                                                                     | 14765629                                                   | 14766665 | WBGene00013302 | vti-1        | Y57G11C.4    |
| -0.253959331095249                                                                                                               | AGIWUR18568                                                |          |                |              |              |
| CB4856 CT IV                                                                                                                     | 14766773                                                   | 14767730 | WBGene00013324 | mrps-7       | Y57G11C.34   |
| -0.303369783476832                                                                                                               | AGIWUR41282                                                |          |                |              |              |
| CB4856 CT IV                                                                                                                     | 14768155                                                   | 14769282 | WBGene00013301 | Y57G11C.3    | Y57G11C.3    |
| -0.151327606713537                                                                                                               | AGIWUR1560;AGIWUR3449;AGIWUR5876                           |          |                |              |              |
| CB4856 CT IV                                                                                                                     | 14769441                                                   | 14770719 | WBGene00013332 | Y57G11C.43   | Y57G11C.43   |
| 0.290360808751668                                                                                                                | AGIWUR11667                                                |          |                |              |              |
| CB4856 CT IV                                                                                                                     | 14770654                                                   | 14771425 | WBGene00013333 | Y57G11C.44   | Y57G11C.44   |
| 0.274066023675699                                                                                                                | AGIWUR25285                                                |          |                |              |              |
| CB4856 CT IV                                                                                                                     | 14771419                                                   | 14773535 | WBGene00013325 | Y57G11C.36   | Y57G11C.36   |
| 0.260232732375183                                                                                                                | AGIWUR44730                                                |          |                |              |              |
| CB4856 CT IV                                                                                                                     | 14773598                                                   | 14774634 | WBGene00044258 | Y57G11C.51   | Y57G11C.51   |
| -0.0946437590845406                                                                                                              | AGIWUR44818                                                |          |                |              |              |
| CB4856 CT IV                                                                                                                     | 14780940                                                   | 14781266 | WBGene00045311 | Y57G11C.57   | Y57G11C.57   |
| -0.0813165615867391                                                                                                              | AGIWUR23356                                                |          |                |              |              |
| CB4856 CT IV                                                                                                                     | 14782644                                                   | 14783342 | WBGene00194649 | Y57G11C.1130 | Y57G11C.1130 |
| 0.101156636496983                                                                                                                | AGIWUR29716                                                |          |                |              |              |
| CB4856 CT IV                                                                                                                     | 14783341                                                   | 14784252 | WBGene00013334 | nlp-56       | Y57G11C.45   |
| -0.0644637273317077                                                                                                              | AGIWUR32710                                                |          |                |              |              |
| CB4856 CT IV                                                                                                                     | 14787168                                                   | 14790843 | WBGene00013307 | Y57G11C.9    | Y57G11C.9    |
| -0.0201462675218123                                                                                                              |                                                            |          |                |              |              |
| AGIWUR12676;AGIWUR14588;AGIWUR17507;AGIWUR18185;AGIWUR18687;AGIWUR32905;AGIWUR40587;AGIWUR43681                                  |                                                            |          |                |              |              |
| CB4856 CT IV                                                                                                                     | 14790818                                                   | 14792887 | WBGene00001558 | gdi-1        | Y57G11C.10   |
| -0.229319827013132                                                                                                               | AGIWUR20763;AGIWUR35736;AGIWUR44186                        |          |                |              |              |
| CB4856 CT IV                                                                                                                     | 14793119                                                   | 14796375 | WBGene00000763 | coq-3        | Y57G11C.11   |
| -0.220645575780498                                                                                                               | AGIWUR3632;AGIWUR32574;AGIWUR39151;AGIWUR42391;AGIWUR43225 |          |                |              |              |
| CB4856 CT IV                                                                                                                     | 14796417                                                   | 14797544 | WBGene00013308 | nuo-3        | Y57G11C.12   |
| -0.0269912303443185                                                                                                              |                                                            |          |                |              |              |
| AGIWUR900;AGIWUR4845;AGIWUR13485;AGIWUR14053;AGIWUR19896;AGIWUR20504;AGIWUR26997;AGIWUR35472;AGIWUR38753;AGIWUR41292;AGIWUR42681 |                                                            |          |                |              |              |

|                      |                                                                        |          |                |            |            |
|----------------------|------------------------------------------------------------------------|----------|----------------|------------|------------|
| CB4856 CT IV         | 14798149                                                               | 14799229 | WBGene00000192 | arl-8      | Y57G11C.13 |
| -0.159945480532611   | AGIWUR2999;AGIWUR15427;AGIWUR15779;AGIWUR17064;AGIWUR28321;AGIWUR41048 |          |                |            |            |
| CB4856 CT IV         | 14799311                                                               | 14801063 | WBGene00013310 | Y57G11C.14 | Y57G11C.14 |
| -0.130023123593254   | AGIWUR26615                                                            |          |                |            |            |
| CB4856 CT IV         | 14803103                                                               | 14803480 | WBGene00045029 | Y57G11C.54 | Y57G11C.54 |
| -0.0602312135912566  | AGIWUR4085;AGIWUR6020;AGIWUR12212;AGIWUR20576;AGIWUR28328              |          |                |            |            |
| CB4856 CT IV         | 14807189                                                               | 14809958 | WBGene00023520 | oig-5      | Y57G11C.50 |
| -0.0156942591159588  | AGIWUR17302;AGIWUR29275                                                |          |                |            |            |
| CB4856 CT IV         | 14822540                                                               | 14825264 | WBGene00013311 | sec-61     | Y57G11C.15 |
| -0.298058049856618   | AGIWUR26320                                                            |          |                |            |            |
| CB4856 CT IV         | 14825679                                                               | 14826448 | WBGene00004487 | rps-18     | Y57G11C.16 |
| 0.00598745816712665  | AGIWUR31968;AGIWUR37362                                                |          |                |            |            |
| CB4856 CT IV         | 14826449                                                               | 14829115 | WBGene00013312 | hhat-2     | Y57G11C.17 |
| 0.385437223510914    | AGIWUR33555                                                            |          |                |            |            |
| CB4856 CT IV         | 14837112                                                               | 14853662 | WBGene00013317 | Y57G11C.22 | Y57G11C.22 |
| 0.258280989025247    | AGIWUR3328;AGIWUR9873                                                  |          |                |            |            |
| CB4856 CT IV         | 14854003                                                               | 14854426 | WBGene00044741 | Y57G11C.52 | Y57G11C.52 |
| -0.517812511327964   | AGIWUR2076;AGIWUR10413;AGIWUR32636;AGIWUR36749;AGIWUR37684             |          |                |            |            |
| CB4856 CT IV         | 14855331                                                               | 14861791 | WBGene00013318 | Y57G11C.23 | Y57G11C.23 |
| -0.0813578842944676  | AGIWUR4719                                                             |          |                |            |            |
| CB4856 CT IV         | 14862447                                                               | 14869951 | WBGene00013327 | Y57G11C.38 | Y57G11C.38 |
| -0.232951332887088   | AGIWUR15936                                                            |          |                |            |            |
| CB4856 CT IV         | 14879490                                                               | 14900652 | WBGene00001330 | eps-8      | Y57G11C.24 |
| -0.0399290998179822  | AGIWUR641;AGIWUR27191;AGIWUR32076;AGIWUR35401;AGIWUR36433              |          |                |            |            |
| CB4856 CT IV         | 14904994                                                               | 14909686 | WBGene00013336 | pnc-2      | Y57G11C.47 |
| 0.133104654889477    | AGIWUR24181                                                            |          |                |            |            |
| CB4856 CT IV         | 14919610                                                               | 14920421 | WBGene00013319 | ccch-5     | Y57G11C.25 |
| -0.313936957404007   | AGIWUR21538                                                            |          |                |            |            |
| CB4856 CT IV         | 14924444                                                               | 14926046 | WBGene00014923 | Y57G11C.26 | Y57G11C.26 |
| 0.163802402983126    | AGIWUR14344;AGIWUR26021                                                |          |                |            |            |
| CB4856 CT IV         | 14927059                                                               | 14928623 | WBGene00014925 | Y57G11C.29 | Y57G11C.29 |
| 0.00637581123996167  | AGIWUR7530;AGIWUR39249                                                 |          |                |            |            |
| CB4856 CT IV         | 14929721                                                               | 14931931 | WBGene00014924 | Y57G11C.28 | Y57G11C.28 |
| 0.122570705373589    | AGIWUR40086                                                            |          |                |            |            |
| CB4856 CT IV         | 14938896                                                               | 14941898 | WBGene00014926 | Y57G11C.30 | Y57G11C.30 |
| 0.000240575470336069 | AGIWUR37285                                                            |          |                |            |            |
| CB4856 CT IV         | 14942286                                                               | 14945328 | WBGene00013337 | Y57G11C.48 | Y57G11C.48 |
| 0.195778313145182    | AGIWUR33033                                                            |          |                |            |            |
| CB4856 CT IV         | 14950652                                                               | 14954226 | WBGene00045146 | Y41E3.22   | Y41E3.22   |

|                                                |                                                                       |
|------------------------------------------------|-----------------------------------------------------------------------|
| -0.147370943116879                             | AGIWUR11004;AGIWUR13696;AGIWUR31781;AGIWUR44633                       |
| CB4856 CT IV                                   | 14954206 14958914 WBGene00012762 Y41E3.1 Y41E3.1 0.133022388436814    |
| AGIWUR33798                                    |                                                                       |
| CB4856 CT IV                                   | 14974292 14974561 WBGene00045000 Y41E3.20 Y41E3.20                    |
| -0.21683571288725                              | AGIWUR5211                                                            |
| CB4856 CT IV                                   | 14981609 14996306 WBGene00012763 atln-2 Y41E3.3 0.109432983297064     |
| AGIWUR39088                                    |                                                                       |
| CB4856 CT IV                                   | 15008503 15013183 WBGene00001336 qars-1 Y41E3.4 0.0365369246391403    |
| AGIWUR33851                                    |                                                                       |
| CB4856 CT IV                                   | 15014042 15025513 WBGene00012765 Y41E3.7 Y41E3.7 0.0428512067201492   |
| AGIWUR7796;AGIWUR32310;AGIWUR32659;AGIWUR37732 |                                                                       |
| CB4856 CT IV                                   | 15025710 15037036 WBGene00012767 fcd-2 Y41E3.9 -0.0915882148919938    |
| AGIWUR24036                                    |                                                                       |
| CB4856 CT IV                                   | 15037321 15039551 WBGene00012768 eef-1B.2 Y41E3.10                    |
| -0.0744042993143896                            | AGIWUR22719;AGIWUR28123;AGIWUR37620                                   |
| CB4856 CT IV                                   | 15039619 15049273 WBGene00012769 Y41E3.11 Y41E3.11                    |
| 0.0404739500375837                             | AGIWUR7425;AGIWUR12350;AGIWUR28909;AGIWUR36823                        |
| CB4856 CT IV                                   | 15049411 15053371 WBGene00012770 srt-47 Y41E3.12                      |
| 0.0338655594030719                             | AGIWUR5695                                                            |
| CB4856 CT IV                                   | 15056131 15057889 WBGene00044979 Y41E3.19 Y41E3.19                    |
| 0.154303482559436                              | AGIWUR38414                                                           |
| CB4856 CT IV                                   | 15058294 15058694 WBGene00012771 Y41E3.13 Y41E3.13                    |
| -0.0616331953008231                            | AGIWUR39152                                                           |
| CB4856 CT IV                                   | 15061929 15065748 WBGene00044003 Y41E3.18 Y41E3.18                    |
| -0.0594261529946181                            | AGIWUR10034;AGIWUR15352                                               |
| CB4856 CT IV                                   | 15065866 15068918 WBGene00012773 srt-48 Y41E3.15                      |
| -0.17414049711241                              | AGIWUR37577;AGIWUR44448                                               |
| CB4856 CT IV                                   | 15074692 15088581 WBGene00012775 srt-50 Y41E3.17                      |
| -0.0806716449784139                            | AGIWUR4268;AGIWUR5689;AGIWUR13957;AGIWUR21801;AGIWUR28319;AGIWUR36582 |
| CB4856 CT IV                                   | 15092881 15098376 WBGene00012772 srt-49 Y41E3.14                      |
| 0.0946705006790518                             | AGIWUR25669                                                           |
| CB4856 CT IV                                   | 15103629 15106483 WBGene00010950 srt-44 M199.1 0.0644184382305237     |
| AGIWUR28281                                    |                                                                       |
| CB4856 CT IV                                   | 15108775 15110915 WBGene00010951 M199.2 M199.2 -0.258031362896284     |
| AGIWUR10267                                    |                                                                       |
| CB4856 CT IV                                   | 15115569 15117823 WBGene00010952 clec-188 M199.3                      |
| 0.0823971193576671                             | AGIWUR27564                                                           |
| CB4856 CT IV                                   | 15120519 15122548 WBGene00010954 clec-189 M199.6                      |
| 0.188939507865435                              | AGIWUR32713                                                           |

|                                                                                                |                                                             |          |                |           |          |                    |
|------------------------------------------------------------------------------------------------|-------------------------------------------------------------|----------|----------------|-----------|----------|--------------------|
| CB4856 CT IV                                                                                   | 15123182                                                    | 15124393 | WBGene00010955 | M199.7    | M199.7   | 0.142048587243739  |
| AGIWUR22985                                                                                    |                                                             |          |                |           |          |                    |
| CB4856 CT IV                                                                                   | 15124931                                                    | 15126122 | WBGene00010953 | clec-190  |          | M199.4             |
| -0.482767021034439                                                                             | AGIWUR10019                                                 |          |                |           |          |                    |
| CB4856 CT IV                                                                                   | 15127491                                                    | 15127794 | WBGene00044998 | M199.9    | M199.9   | -0.388526800088384 |
| AGIWUR14687;AGIWUR16889;AGIWUR27904;AGIWUR31600;AGIWUR42202                                    |                                                             |          |                |           |          |                    |
| CB4856 CT IV                                                                                   | 15129666                                                    | 15131797 | WBGene00000708 | col-135   | M199.5   | 0.713048786934957  |
| AGIWUR42402                                                                                    |                                                             |          |                |           |          |                    |
| CB4856 CT IV                                                                                   | 15139101                                                    | 15140932 | WBGene00005208 | srg-51    | Y40H7A.8 |                    |
| 0.0655804609117174                                                                             | AGIWUR28884                                                 |          |                |           |          |                    |
| CB4856 CT IV                                                                                   | 15143773                                                    | 15147204 | WBGene00006138 | str-78    | Y40H7A.1 |                    |
| 0.04129347785815                                                                               | AGIWUR5149                                                  |          |                |           |          |                    |
| CB4856 CT IV                                                                                   | 15167800                                                    | 15175536 | WBGene00012744 | Y40H7A.4  |          | Y40H7A.4           |
| -0.187258754074667                                                                             |                                                             |          |                |           |          |                    |
| AGIWUR1824;AGIWUR18651;AGIWUR20328;AGIWUR20976;AGIWUR27625;AGIWUR34304;AGIWUR40849;AGIWUR41662 |                                                             |          |                |           |          |                    |
| CB4856 CT IV                                                                                   | 15179922                                                    | 15182953 | WBGene00005101 | srd-23    | Y40H7A.5 |                    |
| -0.0902431649256563                                                                            | AGIWUR6509                                                  |          |                |           |          |                    |
| CB4856 CT IV                                                                                   | 15192299                                                    | 15203023 | WBGene00005056 | sra-30    | Y40H7A.6 |                    |
| -0.225657584085073                                                                             | AGIWUR24500                                                 |          |                |           |          |                    |
| CB4856 CT IV                                                                                   | 15207593                                                    | 15209522 | WBGene00012746 | Y40H7A.9  |          | Y40H7A.9           |
| -0.216347757595761                                                                             | AGIWUR21815                                                 |          |                |           |          |                    |
| CB4856 CT IV                                                                                   | 15210123                                                    | 15215626 | WBGene00012747 | Y40H7A.10 |          | Y40H7A.10          |
| 0.0359074477033197                                                                             | AGIWUR12949                                                 |          |                |           |          |                    |
| CB4856 CT IV                                                                                   | 15219686                                                    | 15220346 | WBGene00012748 | Y40H7A.11 |          | Y40H7A.11          |
| -0.228053671352669                                                                             | AGIWUR36967                                                 |          |                |           |          |                    |
| CB4856 CT IV                                                                                   | 15236251                                                    | 15243675 | WBGene00013517 | lgc-52    | Y73F8A.2 |                    |
| 0.0820713644024078                                                                             | AGIWUR9569                                                  |          |                |           |          |                    |
| CB4856 CT IV                                                                                   | 15245955                                                    | 15246371 | WBGene00044259 | Y73F8A.36 |          | Y73F8A.36          |
| 0.0852235223037727                                                                             | AGIWUR13828;AGIWUR18916;AGIWUR29753;AGIWUR30089;AGIWUR40751 |          |                |           |          |                    |
| CB4856 CT IV                                                                                   | 15250152                                                    | 15252257 | WBGene00005625 | srj-42    | Y73F8A.3 |                    |
| 0.0860808272225508                                                                             | AGIWUR32614;AGIWUR37734;AGIWUR41029                         |          |                |           |          |                    |
| CB4856 CT IV                                                                                   | 15255690                                                    | 15257628 | WBGene00014948 | Y73F8A.4  |          | Y73F8A.4           |
| 0.0949800763608257                                                                             | AGIWUR6659;AGIWUR23773                                      |          |                |           |          |                    |
| CB4856 CT IV                                                                                   | 15259879                                                    | 15269045 | WBGene00013518 | Y73F8A.5  |          | Y73F8A.5           |
| 0.031452274651361                                                                              | AGIWUR5580                                                  |          |                |           |          |                    |
| CB4856 CT IV                                                                                   | 15270160                                                    | 15275835 | WBGene00000370 | cgc-1     | Y73F8A.6 |                    |
| 0.594659497605406                                                                              | AGIWUR40979                                                 |          |                |           |          |                    |
| CB4856 CT IV                                                                                   | 15288019                                                    | 15289505 | WBGene00006079 | str-11    | Y73F8A.7 |                    |
| 0.0701186283171857                                                                             | AGIWUR13196;AGIWUR43672                                     |          |                |           |          |                    |

|                                                                                                                                   |                                                                        |          |                |                   |           |
|-----------------------------------------------------------------------------------------------------------------------------------|------------------------------------------------------------------------|----------|----------------|-------------------|-----------|
| CB4856 CT IV                                                                                                                      | 15294340                                                               | 15295297 | WBGene00013519 | Y73F8A.10         | Y73F8A.10 |
| -0.139225865196643                                                                                                                | AGIWUR2474                                                             |          |                |                   |           |
| CB4856 CT IV                                                                                                                      | 15302421                                                               | 15309408 | WBGene00013520 | best-21 Y73F8A.11 |           |
| -0.0554678295212199                                                                                                               | AGIWUR25474                                                            |          |                |                   |           |
| CB4856 CT IV                                                                                                                      | 15312247                                                               | 15313982 | WBGene00013522 | Y73F8A.13         | Y73F8A.13 |
| -0.242521669807525                                                                                                                | AGIWUR16964                                                            |          |                |                   |           |
| CB4856 CT IV                                                                                                                      | 15321579                                                               | 15322183 | WBGene00013524 | Y73F8A.15         | Y73F8A.15 |
| -0.208164321536785                                                                                                                | AGIWUR25245                                                            |          |                |                   |           |
| CB4856 CT IV                                                                                                                      | 15323893                                                               | 15325189 | WBGene00006558 | tbx-39 Y73F8A.16  |           |
| 0.152219687582918                                                                                                                 | AGIWUR40555                                                            |          |                |                   |           |
| CB4856 CT IV                                                                                                                      | 15326939                                                               | 15328186 | WBGene00006559 | tbx-40 Y73F8A.17  |           |
| -0.0539153595959139                                                                                                               | AGIWUR22353                                                            |          |                |                   |           |
| CB4856 CT IV                                                                                                                      | 15337078                                                               | 15339821 | WBGene00013525 | irld-59 Y73F8A.18 |           |
| 0.182915481854963                                                                                                                 | AGIWUR27948                                                            |          |                |                   |           |
| CB4856 CT IV                                                                                                                      | 15361555                                                               | 15368260 | WBGene00006441 | cpna-4 Y73F8A.19  |           |
| 0.287692560645624                                                                                                                 | AGIWUR10706                                                            |          |                |                   |           |
| CB4856 CT IV                                                                                                                      | 15378460                                                               | 15381686 | WBGene00013526 | Y73F8A.20         | Y73F8A.20 |
| 0.240174269572865                                                                                                                 | AGIWUR35971                                                            |          |                |                   |           |
| CB4856 CT IV                                                                                                                      | 15423920                                                               | 15424366 | WBGene00045025 | Y73F8A.39         | Y73F8A.39 |
| -0.0198716496147568                                                                                                               | AGIWUR8018;AGIWUR20983;AGIWUR30345;AGIWUR42566;AGIWUR43731             |          |                |                   |           |
| CB4856 CT IV                                                                                                                      | 15442960                                                               | 15444581 | WBGene00013528 | Y73F8A.23         | Y73F8A.23 |
| 0.00292890663704881                                                                                                               | AGIWUR39226                                                            |          |                |                   |           |
| CB4856 CT IV                                                                                                                      | 15445368                                                               | 15453187 | WBGene00013529 | Y73F8A.24         | Y73F8A.24 |
| 0.0216345767514454                                                                                                                | AGIWUR6088                                                             |          |                |                   |           |
| CB4856 CT IV                                                                                                                      | 15455137                                                               | 15471488 | WBGene00013530 | ntl-11 Y73F8A.25  |           |
| -0.362189442817641                                                                                                                |                                                                        |          |                |                   |           |
| AGIWUR1774;AGIWUR2229;AGIWUR11645;AGIWUR12402;AGIWUR18303;AGIWUR25732;AGIWUR28053;AGIWUR29737;AGIWUR35606;AGIWUR37418;AGIWUR42623 |                                                                        |          |                |                   |           |
| CB4856 CT IV                                                                                                                      | 15472809                                                               | 15473682 | WBGene00013532 | Y73F8A.27         | Y73F8A.27 |
| -0.00967698842728026                                                                                                              | AGIWUR8366;AGIWUR15188;AGIWUR20529;AGIWUR21845;AGIWUR23023;AGIWUR31382 |          |                |                   |           |
| CB4856 CT IV                                                                                                                      | 15473660                                                               | 15477512 | WBGene00013531 | Y73F8A.26         | Y73F8A.26 |
| -0.00255814926477971                                                                                                              | AGIWUR6318;AGIWUR34926                                                 |          |                |                   |           |
| CB4856 CT IV                                                                                                                      | 15497567                                                               | 15510980 | WBGene00013534 | acr-24 Y73F8A.30  |           |
| -0.394754039520862                                                                                                                | AGIWUR3707                                                             |          |                |                   |           |
| CB4856 CT IV                                                                                                                      | 15513786                                                               | 15514464 | WBGene00013535 | gyg-3 Y73F8A.31   |           |
| -0.0497531480603479                                                                                                               | AGIWUR1385;AGIWUR8902;AGIWUR21518;AGIWUR34407                          |          |                |                   |           |
| CB4856 CT IV                                                                                                                      | 15514537                                                               | 15521258 | WBGene00013536 | Y73F8A.32         | Y73F8A.32 |
| -0.0447766622972265                                                                                                               | AGIWUR2334;AGIWUR33625                                                 |          |                |                   |           |
| CB4856 CT IV                                                                                                                      | 15533167                                                               | 15539959 | WBGene00013539 | Y73F8A.35         | Y73F8A.35 |

|                       |                                                                                    |          |                |              |              |
|-----------------------|------------------------------------------------------------------------------------|----------|----------------|--------------|--------------|
| 0.0360147025029409    | AGIWUR42953                                                                        |          |                |              |              |
| CB4856 CT IV          | 15550854                                                                           | 15554721 | WBGene00013632 | Y105C5A.1    | Y105C5A.1    |
| -0.0220320002056482   | AGIWUR3354;AGIWUR13296;AGIWUR13372;AGIWUR23799;AGIWUR23986;AGIWUR28284;AGIWUR43025 |          |                |              |              |
| CB4856 CT IV          | 15591973                                                                           | 15592386 | WBGene00045016 | Y105C5A.30   | Y105C5A.30   |
| 0.0941900610929469    | AGIWUR25604;AGIWUR37634;AGIWUR39230                                                |          |                |              |              |
| CB4856 CT IV          | 15612768                                                                           | 15617087 | WBGene00013633 | Y105C5A.8    | Y105C5A.8    |
| 0.366181352647725     | AGIWUR28785                                                                        |          |                |              |              |
| CB4856 CT IV          | 15646031                                                                           | 15646433 | WBGene00185102 | Y105C5A.1268 | Y105C5A.1268 |
| -0.000712178005018771 | AGIWUR29947                                                                        |          |                |              |              |
| CB4856 CT IV          | 15689201                                                                           | 15722267 | WBGene00013639 | Y105C5A.15   | Y105C5A.15   |
| 0.192964187359923     | AGIWUR7273;AGIWUR15147;AGIWUR15364;AGIWUR16294;AGIWUR25313                         |          |                |              |              |
| CB4856 CT IV          | 15820059                                                                           | 15825617 | WBGene00013642 | daf-38       | Y105C5A.23   |
| -0.234514252582912    | AGIWUR18586                                                                        |          |                |              |              |
| CB4856 CT IV          | 15849875                                                                           | 15852905 | WBGene00013643 | Y105C5A.24   | Y105C5A.24   |
| -0.0998488928914352   | AGIWUR15451                                                                        |          |                |              |              |
| CB4856 CT IV          | 15860221                                                                           | 15861442 | WBGene00013644 | Y105C5A.25   | Y105C5A.25   |
| -0.151316089232338    | AGIWUR14488                                                                        |          |                |              |              |
| CB4856 CT IV          | 15870643                                                                           | 15872221 | WBGene00013645 | Y105C5B.1    | Y105C5B.1    |
| 0.28131795275247      | AGIWUR22250                                                                        |          |                |              |              |
| CB4856 CT IV          | 15872933                                                                           | 15882377 | WBGene00001549 | gcy-25       | Y105C5B.2    |
| 0.238962070258736     | AGIWUR4121;AGIWUR28709                                                             |          |                |              |              |
| CB4856 CT IV          | 15899935                                                                           | 15901225 | WBGene00013647 | Y105C5B.5    | Y105C5B.5    |
| 0.0470737851003413    | AGIWUR10199                                                                        |          |                |              |              |
| CB4856 CT IV          | 15906582                                                                           | 15910091 | WBGene00005726 | srv-15       | Y105C5B.6    |
| -0.0697116290636348   | AGIWUR43627                                                                        |          |                |              |              |
| CB4856 CT IV          | 15914997                                                                           | 15919234 | WBGene00013648 | Y105C5B.7    | Y105C5B.7    |
| 0.589634592676289     | AGIWUR5491                                                                         |          |                |              |              |
| CB4856 CT IV          | 15930581                                                                           | 15931813 | WBGene00013650 | Y105C5B.9    | Y105C5B.9    |
| 0.340275361378586     | AGIWUR9620                                                                         |          |                |              |              |
| CB4856 CT IV          | 15937112                                                                           | 15941491 | WBGene00013651 | Y105C5B.11   | Y105C5B.11   |
| -0.134882694436747    | AGIWUR4903;AGIWUR15594;AGIWUR21513                                                 |          |                |              |              |
| CB4856 CT IV          | 15942535                                                                           | 15944430 | WBGene00013652 | sams-2       | Y105C5B.12   |
| -0.0925490198064551   | AGIWUR43488                                                                        |          |                |              |              |
| CB4856 CT IV          | 15946784                                                                           | 15947438 | WBGene00004816 | skr-10       | Y105C5B.13   |
| -0.0561657633401609   | AGIWUR4957                                                                         |          |                |              |              |
| CB4856 CT IV          | 15949725                                                                           | 15950861 | WBGene00013653 | Y105C5B.14   | Y105C5B.14   |
| -0.0188031397090365   | AGIWUR42421                                                                        |          |                |              |              |
| CB4856 CT IV          | 15951909                                                                           | 15954836 | WBGene00013654 | Y105C5B.15   | Y105C5B.15   |
| -0.563321587408295    | AGIWUR569                                                                          |          |                |              |              |

|                     |                                                                                    |          |                |              |                            |
|---------------------|------------------------------------------------------------------------------------|----------|----------------|--------------|----------------------------|
| CB4856 CT IV        | 15956571                                                                           | 15962712 | WBGene00013655 | lgc-19       | Y105C5B.16                 |
| -0.391172556159637  | AGIWUR44188                                                                        |          |                |              |                            |
| CB4856 CT IV        | 15963124                                                                           | 15964425 | WBGene00013656 | Y105C5B.17   | Y105C5B.17                 |
| -0.154268973066952  | AGIWUR25817                                                                        |          |                |              |                            |
| CB4856 CT IV        | 15964640                                                                           | 15965679 | WBGene00013657 | Y105C5B.18   | Y105C5B.18                 |
| -0.071511302009315  | AGIWUR24962;AGIWUR28919;AGIWUR31362;AGIWUR33863                                    |          |                |              |                            |
| CB4856 CT IV        | 15981575                                                                           | 15983970 | WBGene00013658 | Y105C5B.19   | Y105C5B.19                 |
| -0.0450935115744144 | AGIWUR13191                                                                        |          |                |              |                            |
| CB4856 CT IV        | 15993454                                                                           | 15994605 | WBGene00013659 | Y105C5B.20   | Y105C5B.20                 |
| -0.243776089516452  | AGIWUR44271                                                                        |          |                |              |                            |
| CB4856 CT IV        | 15997858                                                                           | 16026847 | WBGene00002175 | jac-1        | Y105C5B.21                 |
| -0.179765624474919  | AGIWUR19039;AGIWUR20231                                                            |          |                |              |                            |
| CB4856 CT IV        | 16057283                                                                           | 16061358 | WBGene00013661 | Y105C5B.23   | Y105C5B.23                 |
| 0.161540220372562   | AGIWUR25871                                                                        |          |                |              |                            |
| CB4856 CT IV        | 16063326                                                                           | 16064132 | WBGene00005220 | srg-63       | Y105C5B.24                 |
| -0.0455192055286315 | AGIWUR7527;AGIWUR22419;AGIWUR32294;AGIWUR38092                                     |          |                |              |                            |
| CB4856 CT IV        | 16090484                                                                           | 16091939 | WBGene00044085 | Y105C5B.30   | Y105C5B.30                 |
| 0.158735845949115   | AGIWUR13023;AGIWUR28227                                                            |          |                |              |                            |
| CB4856 CT IV        | 16132464                                                                           | 16134179 | WBGene00013665 | h1h-32       | Y105C5B.29                 |
| -0.433046150194929  | AGIWUR21888                                                                        |          |                |              |                            |
| CB4856 CT IV        | 16142544                                                                           | 16147155 | WBGene00013662 | Y105C5B.25   | Y105C5B.25                 |
| -0.219093180853186  | AGIWUR6295                                                                         |          |                |              |                            |
| CB4856 CT IV        | 16156908                                                                           | 16165267 | WBGene00220260 | Y105C5B.1420 | Y105C5B.1420               |
| 0.0214253902161579  | AGIWUR30234;AGIWUR35772                                                            |          |                |              |                            |
| CB4856 CT IV        | 16167785                                                                           | 16170859 | WBGene00001604 | gln-3        | Y105C5B.28                 |
| -0.144436300924728  | AGIWUR3320;AGIWUR11501;AGIWUR13974;AGIWUR21293;AGIWUR27036;AGIWUR32466;AGIWUR38304 |          |                |              |                            |
| CB4856 CT IV        | 16197048                                                                           | 16201417 | WBGene00012416 | Y7A9A.1      | Y7A9A.1 -0.081902067921277 |
| AGIWUR22558         |                                                                                    |          |                |              |                            |
| CB4856 CT IV        | 16202374                                                                           | 16205321 | WBGene00010411 | H25K10.1     | H25K10.1                   |
| -0.78146688529645   | AGIWUR28701;AGIWUR41997                                                            |          |                |              |                            |
| CB4856 CT IV        | 16210723                                                                           | 16211013 | WBGene00010412 | H25K10.2     | H25K10.2                   |
| -0.416237311693724  | AGIWUR41059                                                                        |          |                |              |                            |
| CB4856 CT IV        | 16219652                                                                           | 16221659 | WBGene00005722 | srv-11       | H25K10.3                   |
| -0.311144779505087  | AGIWUR41993                                                                        |          |                |              |                            |
| CB4856 CT IV        | 16226047                                                                           | 16227122 | WBGene00010413 | H25K10.4     | H25K10.4                   |
| 0.194404574949683   | AGIWUR19112                                                                        |          |                |              |                            |
| CB4856 CT IV        | 16230452                                                                           | 16233128 | WBGene00010414 | hpa-1        | H25K10.5                   |
| 0.06680658042864    | AGIWUR1004                                                                         |          |                |              |                            |
| CB4856 CT IV        | 16233148                                                                           | 16236555 | WBGene00010415 | irld-39      | H25K10.6                   |

|                                                             |                                                             |          |                |          |          |                     |
|-------------------------------------------------------------|-------------------------------------------------------------|----------|----------------|----------|----------|---------------------|
| -0.0418155827756488                                         | AGIWUR12877                                                 |          |                |          |          |                     |
| CB4856 CT IV                                                | 16236732                                                    | 16238655 | WBGene00005808 | srw-61   | H25K10.7 |                     |
| 0.122512502541321                                           | AGIWUR20698                                                 |          |                |          |          |                     |
| CB4856 CT IV                                                | 16247431                                                    | 16251790 | WBGene00009535 | F38C2.1  | F38C2.1  | 0.511087096724014   |
| AGIWUR1967                                                  |                                                             |          |                |          |          |                     |
| CB4856 CT IV                                                | 16254764                                                    | 16256274 | WBGene00001961 | h1h-17   | F38C2.2  | 0.155054878061728   |
| AGIWUR39384                                                 |                                                             |          |                |          |          |                     |
| CB4856 CT IV                                                | 16257668                                                    | 16259417 | WBGene00009540 | h1h-31   | F38C2.8  | -0.0616351349577271 |
| AGIWUR14645;AGIWUR37847                                     |                                                             |          |                |          |          |                     |
| CB4856 CT IV                                                | 16271263                                                    | 16273187 | WBGene00009536 | F38C2.4  | F38C2.4  | -0.120780313932169  |
| AGIWUR16881                                                 |                                                             |          |                |          |          |                     |
| CB4856 CT IV                                                | 16276647                                                    | 16277391 | WBGene00009539 | F38C2.7  | F38C2.7  | -0.124456372209438  |
| AGIWUR36786                                                 |                                                             |          |                |          |          |                     |
| CB4856 CT IV                                                | 16278202                                                    | 16279018 | WBGene00009537 | ccch-2   | F38C2.5  | -0.166673327002397  |
| AGIWUR2753                                                  |                                                             |          |                |          |          |                     |
| CB4856 CT IV                                                | 16279634                                                    | 16280714 | WBGene00009538 | c1ec-191 | F38C2.6  |                     |
| -0.204806992975286                                          | AGIWUR43506                                                 |          |                |          |          |                     |
| CB4856 CT IV                                                | 16281520                                                    | 16283423 | WBGene00045026 | Y7A9C.10 | Y7A9C.10 |                     |
| -0.0618849827661609                                         | AGIWUR25908                                                 |          |                |          |          |                     |
| CB4856 CT IV                                                | 16286655                                                    | 16287825 | WBGene00023517 | srz-75   | Y7A9C.9  | 0.104784198935249   |
| AGIWUR5516;AGIWUR11469                                      |                                                             |          |                |          |          |                     |
| CB4856 CT IV                                                | 16288113                                                    | 16289310 | WBGene00023518 | srz-76   | Y7A9C.8  | -0.0205540532384738 |
| AGIWUR29943                                                 |                                                             |          |                |          |          |                     |
| CB4856 CT IV                                                | 16289558                                                    | 16290835 | WBGene00012419 | srz-73   | Y7A9C.3  | 0.101165151839639   |
| AGIWUR4987;AGIWUR29474;AGIWUR31684                          |                                                             |          |                |          |          |                     |
| CB4856 CT IV                                                | 16291988                                                    | 16293070 | WBGene00023510 | srz-40   | Y7A9C.5  | 0.0604406563020925  |
| AGIWUR3818                                                  |                                                             |          |                |          |          |                     |
| CB4856 CT IV                                                | 16293199                                                    | 16293482 | WBGene00045105 | Y7A9C.11 | Y7A9C.11 |                     |
| 0.691521148628283                                           | AGIWUR1833                                                  |          |                |          |          |                     |
| CB4856 CT IV                                                | 16293619                                                    | 16293923 | WBGene00045106 | Y7A9C.12 | Y7A9C.12 |                     |
| -0.140545849831011                                          | AGIWUR18794;AGIWUR27829;AGIWUR41685                         |          |                |          |          |                     |
| CB4856 CT IV                                                | 16294154                                                    | 16298479 | WBGene00012418 | Y7A9C.1  | Y7A9C.1  | 0.0351912257846383  |
| AGIWUR10327;AGIWUR12900;AGIWUR29256;AGIWUR40799;AGIWUR44868 |                                                             |          |                |          |          |                     |
| CB4856 CT IV                                                | 16298813                                                    | 16299012 | WBGene00045107 | Y7A9C.13 | Y7A9C.13 |                     |
| 0.0474067305568893                                          | AGIWUR10892;AGIWUR11887;AGIWUR12721;AGIWUR22530;AGIWUR23429 |          |                |          |          |                     |
| CB4856 CT IV                                                | 16299151                                                    | 16300272 | WBGene00023514 | srz-72   | Y7A9C.7  | 0.0856633394757651  |
| AGIWUR953;AGIWUR34466                                       |                                                             |          |                |          |          |                     |
| CB4856 CT IV                                                | 16300588                                                    | 16301746 | WBGene00023511 | srz-41   | Y7A9C.6  | -0.150459091042001  |
| AGIWUR22366;AGIWUR29053                                     |                                                             |          |                |          |          |                     |



|                                                                              |          |          |                |          |          |                     |
|------------------------------------------------------------------------------|----------|----------|----------------|----------|----------|---------------------|
| CB4856 CT IV                                                                 | 16303614 | 16306235 | WBGene00014862 | Y7A9C.2  | Y7A9C.2  | 0.145933724781047   |
| AGIWUR2421;AGIWUR8717                                                        |          |          |                |          |          |                     |
| CB4856 CT IV                                                                 | 16306312 | 16306839 | WBGene00023509 | srz-39   | Y7A9C.4  | 0.0543321008664073  |
| AGIWUR19605;AGIWUR25345;AGIWUR35351;AGIWUR39465;AGIWUR42243                  |          |          |                |          |          |                     |
| CB4856 CT IV                                                                 | 16308225 | 16309829 | WBGene00004287 | rac-2    | K03D3.10 |                     |
| -0.256540641372514 AGIWUR1338                                                |          |          |                |          |          |                     |
| CB4856 CT IV                                                                 | 16311079 | 16319703 | WBGene00044670 | rac-3    | K03D3.13 |                     |
| -0.0778294723545749 AGIWUR12250;AGIWUR12813;AGIWUR35498;AGIWUR44020          |          |          |                |          |          |                     |
| CB4856 CT IV                                                                 | 16320139 | 16320506 | WBGene00010531 | K03D3.5  | K03D3.5  | -0.516927014337446  |
| AGIWUR6101                                                                   |          |          |                |          |          |                     |
| CB4856 CT IV                                                                 | 16321166 | 16323195 | WBGene00010530 | srz-61   | K03D3.4  | -0.117153131590075  |
| AGIWUR38770;AGIWUR43421                                                      |          |          |                |          |          |                     |
| CB4856 CT IV                                                                 | 16323673 | 16324973 | WBGene00043052 | srz-104  | K03D3.11 |                     |
| -0.033724730850782 AGIWUR19731                                               |          |          |                |          |          |                     |
| CB4856 CT IV                                                                 | 16325172 | 16326601 | WBGene00044587 | srz-105  | K03D3.12 |                     |
| 0.582782199602722 AGIWUR40134                                                |          |          |                |          |          |                     |
| CB4856 CT IV                                                                 | 16326718 | 16327965 | WBGene00010529 | srz-21   | K03D3.3  | 0.143637661002193   |
| AGIWUR40769                                                                  |          |          |                |          |          |                     |
| CB4856 CT IV                                                                 | 16328135 | 16328614 | WBGene00010528 | K03D3.2  | K03D3.2  | -0.20204617067182   |
| AGIWUR13565                                                                  |          |          |                |          |          |                     |
| CB4856 CT IV                                                                 | 16329459 | 16331059 | WBGene00010527 | srz-74   | K03D3.1  | 0.154376957858573   |
| AGIWUR13697                                                                  |          |          |                |          |          |                     |
| CB4856 CT IV                                                                 | 16331365 | 16332611 | WBGene00045100 | K03D3.14 | K03D3.14 |                     |
| -0.141440882933233 AGIWUR7604                                                |          |          |                |          |          |                     |
| CB4856 CT IV                                                                 | 16332885 | 16334461 | WBGene00023513 | srz-71   | C35D6.10 |                     |
| -0.0031547592442811 AGIWUR20690                                              |          |          |                |          |          |                     |
| CB4856 CT IV                                                                 | 16335337 | 16336503 | WBGene00023508 | srz-38   | C35D6.9  | 0.108059485958712   |
| AGIWUR21322;AGIWUR27500                                                      |          |          |                |          |          |                     |
| CB4856 CT IV                                                                 | 16337021 | 16338502 | WBGene00045101 | C35D6.13 | C35D6.13 |                     |
| 0.145719737663689 AGIWUR22054;AGIWUR25308                                    |          |          |                |          |          |                     |
| CB4856 CT IV                                                                 | 16338562 | 16339098 | WBGene00045040 | C35D6.12 | C35D6.12 |                     |
| -0.0666306290612502 AGIWUR33321                                              |          |          |                |          |          |                     |
| CB4856 CT IV                                                                 | 16341625 | 16345442 | WBGene00005434 | srh-224  | C35D6.8  | -0.0727016189908922 |
| AGIWUR7329;AGIWUR13640                                                       |          |          |                |          |          |                     |
| CB4856 CT IV                                                                 | 16347168 | 16347430 | WBGene00007960 | C35D6.3  | C35D6.3  | 0.168944187087943   |
| AGIWUR40446                                                                  |          |          |                |          |          |                     |
| CB4856 CT IV                                                                 | 16348409 | 16348751 | WBGene00045028 | C35D6.11 | C35D6.11 |                     |
| -0.042876538761691 AGIWUR2973;AGIWUR5282;AGIWUR16135;AGIWUR20681;AGIWUR36159 |          |          |                |          |          |                     |
| CB4856 CT IV                                                                 | 16350990 | 16351601 | WBGene00007961 | C35D6.4  | C35D6.4  | 0.138202233983992   |

|                                                                         |    |                                                             |          |                |            |           |                   |
|-------------------------------------------------------------------------|----|-------------------------------------------------------------|----------|----------------|------------|-----------|-------------------|
| AGIWUR5086                                                              |    |                                                             |          |                |            |           |                   |
| CB4856 CT                                                               | IV | 16366996                                                    | 16368943 | WBGene00007962 | C35D6.5    | C35D6.5   | -0.20883913097618 |
| AGIWUR5610                                                              |    |                                                             |          |                |            |           |                   |
| CB4856 CT                                                               | IV | 16381378                                                    | 16382235 | WBGene00012420 | Y7A9D.1    | Y7A9D.1   | 0.687820648021147 |
| AGIWUR32721;AGIWUR33229;AGIWUR37237;AGIWUR41776;AGIWUR43445;AGIWUR45148 |    |                                                             |          |                |            |           |                   |
| CB4856 CT                                                               | IV | 16398839                                                    | 16399875 | WBGene00013418 | Y65A5A.1   |           | Y65A5A.1          |
| 0.474000124007395                                                       |    | AGIWUR30411                                                 |          |                |            |           |                   |
| CB4856 CT                                                               | IV | 16412020                                                    | 16416808 | WBGene00013419 | Y65A5A.2   |           | Y65A5A.2          |
| -0.30383352269895                                                       |    | AGIWUR26456                                                 |          |                |            |           |                   |
| CB4856 CT                                                               | IV | 16424637                                                    | 16429895 | WBGene00012423 | Y10G11A.1  |           | Y10G11A.1         |
| -0.108546656807342                                                      |    | AGIWUR5130;AGIWUR7085                                       |          |                |            |           |                   |
| CB4856 CT                                                               | IV | 16432231                                                    | 16437953 | WBGene00012424 | d1c-3      | Y10G11A.2 |                   |
| 0.285354705846508                                                       |    | AGIWUR19845                                                 |          |                |            |           |                   |
| CB4856 CT                                                               | IV | 16443263                                                    | 16446683 | WBGene00012425 | d1c-4      | Y10G11A.3 |                   |
| 0.171026340947001                                                       |    | AGIWUR23539                                                 |          |                |            |           |                   |
| CB4856 CT                                                               | IV | 16454270                                                    | 16454579 | WBGene00045185 | VY10G11R.4 |           | VY10G11R.4        |
| -0.0276376912169747                                                     |    | AGIWUR10617;AGIWUR13766;AGIWUR19304;AGIWUR37200;AGIWUR40802 |          |                |            |           |                   |
| CB4856 CT                                                               | IV | 16468723                                                    | 16469064 | WBGene00045097 | VY10G11R.2 |           | VY10G11R.2        |
| 0.0732253049217508                                                      |    | AGIWUR6952;AGIWUR14946;AGIWUR15445;AGIWUR29398;AGIWUR36369  |          |                |            |           |                   |
| CB4856 CT                                                               | IV | 16469580                                                    | 16470881 | WBGene00012159 | VY10G11R.1 |           | VY10G11R.1        |
| -0.0298695998479026                                                     |    | AGIWUR4731                                                  |          |                |            |           |                   |
| CB4856 CT                                                               | IV | 16474044                                                    | 16477192 | WBGene00013098 | Y51H4A.1   |           | Y51H4A.1          |
| 0.922636667754169                                                       |    | AGIWUR13939                                                 |          |                |            |           |                   |
| CB4856 CT                                                               | IV | 16482784                                                    | 16489021 | WBGene00004357 | rho-1      | Y51H4A.3  |                   |
| -0.174097034632599                                                      |    | AGIWUR2147;AGIWUR39259                                      |          |                |            |           |                   |
| CB4856 CT                                                               | IV | 16493428                                                    | 16494510 | WBGene00013099 | Y51H4A.2   |           | Y51H4A.2          |
| -0.870586808556121                                                      |    | AGIWUR5454                                                  |          |                |            |           |                   |
| CB4856 CT                                                               | IV | 16503249                                                    | 16505682 | WBGene00013100 | zip-7      | Y51H4A.4  |                   |
| -0.0895819203038242                                                     |    | AGIWUR8385;AGIWUR41524                                      |          |                |            |           |                   |
| CB4856 CT                                                               | IV | 16522529                                                    | 16526132 | WBGene00013101 | Y51H4A.5   |           | Y51H4A.5          |
| 0.923571793818348                                                       |    | AGIWUR31950                                                 |          |                |            |           |                   |
| CB4856 CT                                                               | IV | 16533661                                                    | 16533962 | WBGene00013102 | Y51H4A.6   |           | Y51H4A.6          |
| -0.0906610743263245                                                     |    | AGIWUR42976                                                 |          |                |            |           |                   |
| CB4856 CT                                                               | IV | 16535730                                                    | 16542894 | WBGene00013103 | Y51H4A.7   |           | Y51H4A.7          |
| -0.197236299505013                                                      |    | AGIWUR18320                                                 |          |                |            |           |                   |
| CB4856 CT                                                               | IV | 16551492                                                    | 16554348 | WBGene00000709 | col-136    | Y51H4A.28 |                   |
| -0.168323264188216                                                      |    | AGIWUR28306;AGIWUR33242                                     |          |                |            |           |                   |
| CB4856 CT                                                               | IV | 16575102                                                    | 16578549 | WBGene00013104 | Y51H4A.8   |           | Y51H4A.8          |
| 0.412279414888923                                                       |    | AGIWUR43151                                                 |          |                |            |           |                   |

|                                                                                             |                                                            |          |                |            |            |
|---------------------------------------------------------------------------------------------|------------------------------------------------------------|----------|----------------|------------|------------|
| CB4856 CT IV                                                                                | 16601480                                                   | 16602776 | WBGene00000710 | col-137    | Y51H4A.9   |
| -0.377558414868199                                                                          | AGIWUR17787                                                |          |                |            |            |
| CB4856 CT IV                                                                                | 16627976                                                   | 16628441 | WBGene00013120 | fipr-28    | Y51H4A.26  |
| -0.0821924110700749                                                                         | AGIWUR12842                                                |          |                |            |            |
| CB4856 CT IV                                                                                | 16656613                                                   | 16657359 | WBGene00013109 | Y51H4A.15  | Y51H4A.15  |
| -0.0518011203978119                                                                         | AGIWUR26764                                                |          |                |            |            |
| CB4856 CT IV                                                                                | 16664320                                                   | 16671467 | WBGene00013111 | sta-1      | Y51H4A.17  |
| 0.074734105607988                                                                           |                                                            |          |                |            |            |
| AGIWUR1252;AGIWUR2004;AGIWUR3505;AGIWUR5230;AGIWUR21787;AGIWUR22093;AGIWUR26957;AGIWUR34933 |                                                            |          |                |            |            |
| CB4856 CT IV                                                                                | 16720715                                                   | 16722736 | WBGene00013116 | Y51H4A.22  | Y51H4A.22  |
| 0.0128818673685238                                                                          | AGIWUR3435                                                 |          |                |            |            |
| CB4856 CT IV                                                                                | 16722916                                                   | 16723892 | WBGene00013117 | Y51H4A.23  | Y51H4A.23  |
| 0.32161951246348                                                                            | AGIWUR39803                                                |          |                |            |            |
| CB4856 CT IV                                                                                | 16736329                                                   | 16743178 | WBGene00013119 | Y51H4A.25  | Y51H4A.25  |
| 0.599312090678024                                                                           | AGIWUR25777;AGIWUR38342                                    |          |                |            |            |
| CB4856 CT IV                                                                                | 16758420                                                   | 16758769 | WBGene00045321 | Y43D4A.10  | Y43D4A.10  |
| -0.478385686519992                                                                          | AGIWUR15417;AGIWUR20545;AGIWUR31612;AGIWUR34955            |          |                |            |            |
| CB4856 CT IV                                                                                | 16775827                                                   | 16785172 | WBGene00012791 | Y43D4A.5   | Y43D4A.5   |
| -0.245139713979405                                                                          | AGIWUR9735                                                 |          |                |            |            |
| CB4856 CT IV                                                                                | 16787327                                                   | 16788510 | WBGene00012792 | Y43D4A.6   | Y43D4A.6   |
| -0.0660719031579973                                                                         | AGIWUR21279;AGIWUR36471;AGIWUR42890                        |          |                |            |            |
| CB4856 CT IV                                                                                | 16826324                                                   | 16828020 | WBGene00013776 | Y116A8A.6  | Y116A8A.6  |
| 0.216871281052212                                                                           | AGIWUR7119                                                 |          |                |            |            |
| CB4856 CT IV                                                                                | 16831666                                                   | 16832984 | WBGene00013778 | cllec-194  | Y116A8A.8  |
| 0.0946476867345858                                                                          | AGIWUR35391                                                |          |                |            |            |
| CB4856 CT IV                                                                                | 16847829                                                   | 16854943 | WBGene00003130 | map-2      | Y116A8A.9  |
| 0.19735873242683                                                                            | AGIWUR9535                                                 |          |                |            |            |
| CB4856 CT IV                                                                                | 16855044                                                   | 16863443 | WBGene00020284 | mel-46     | T06A10.1   |
| -0.183133677272323                                                                          | AGIWUR38585                                                |          |                |            |            |
| CB4856 CT IV                                                                                | 16862396                                                   | 16865479 | WBGene00020287 | lsy-13     | T06A10.4   |
| -0.330864712811636                                                                          | AGIWUR21297                                                |          |                |            |            |
| CB4856 CT IV                                                                                | 16865838                                                   | 16866504 | WBGene00020286 | T06A10.3   | T06A10.3   |
| 0.087950806068676                                                                           | AGIWUR18852                                                |          |                |            |            |
| CB4856 CT IV                                                                                | 16920341                                                   | 16924071 | WBGene00013785 | nep-23     | Y116A8C.4  |
| 0.109557085398365                                                                           | AGIWUR7228                                                 |          |                |            |            |
| CB4856 CT IV                                                                                | 16928334                                                   | 16929067 | WBGene00014976 | Y116A8C.7  | Y116A8C.7  |
| -0.190194615138876                                                                          | AGIWUR6180;AGIWUR11548;AGIWUR21776;AGIWUR22996;AGIWUR37782 |          |                |            |            |
| CB4856 CT IV                                                                                | 16930837                                                   | 16931177 | WBGene00045128 | Y116A8C.49 | Y116A8C.49 |
| -0.0116890393724187                                                                         | AGIWUR4096                                                 |          |                |            |            |

|                                                                                               |                                                                                   |          |                |            |            |
|-----------------------------------------------------------------------------------------------|-----------------------------------------------------------------------------------|----------|----------------|------------|------------|
| CB4856 CT IV                                                                                  | 16931990                                                                          | 16933113 | WBGene00013788 | Y116A8C.8  | Y116A8C.8  |
| -0.114840540987809                                                                            | AGIWUR929;AGIWUR9903                                                              |          |                |            |            |
| CB4856 CT IV                                                                                  | 16934266                                                                          | 16939111 | WBGene00013790 | Y116A8C.10 | Y116A8C.10 |
| 0.0432350574106382                                                                            | AGIWUR1366;AGIWUR8901;AGIWUR28542;AGIWUR34521;AGIWUR40850;AGIWUR42572;AGIWUR44503 |          |                |            |            |
| CB4856 CT IV                                                                                  | 16939804                                                                          | 16946910 | WBGene00013789 | Y116A8C.9  | Y116A8C.9  |
| -0.244918801710723                                                                            | AGIWUR37459                                                                       |          |                |            |            |
| CB4856 CT IV                                                                                  | 16947120                                                                          | 16949734 | WBGene00000184 | arf-6      | Y116A8C.12 |
| 0.0421898145008122                                                                            | AGIWUR22709                                                                       |          |                |            |            |
| CB4856 CT IV                                                                                  | 16950065                                                                          | 16962868 | WBGene00013792 | Y116A8C.13 | Y116A8C.13 |
| 0.0856320816352856                                                                            | AGIWUR12465                                                                       |          |                |            |            |
| CB4856 CT IV                                                                                  | 16965284                                                                          | 16970490 | WBGene00004402 | rom-3      | Y116A8C.14 |
| -0.245034157632396                                                                            | AGIWUR10932                                                                       |          |                |            |            |
| CB4856 CT IV                                                                                  | 16988828                                                                          | 16989771 | WBGene00013791 | Y116A8C.11 | Y116A8C.11 |
| 0.0102533125836453                                                                            | AGIWUR673;AGIWUR30500;AGIWUR33757;AGIWUR38152;AGIWUR41182;AGIWUR42358             |          |                |            |            |
| CB4856 CT IV                                                                                  | 16995777                                                                          | 17014953 | WBGene00004403 | rom-4      | Y116A8C.16 |
| -0.221848942595408                                                                            | AGIWUR5163;AGIWUR22741;AGIWUR30005                                                |          |                |            |            |
| CB4856 CT IV                                                                                  | 17022990                                                                          | 17023922 | WBGene00045315 | Y116A8C.52 | Y116A8C.52 |
| -0.367707809377894                                                                            | AGIWUR38540                                                                       |          |                |            |            |
| CB4856 CT IV                                                                                  | 17024318                                                                          | 17025132 | WBGene00013794 | dct-13     | Y116A8C.17 |
| -0.00270258476593099                                                                          | AGIWUR4796                                                                        |          |                |            |            |
| CB4856 CT IV                                                                                  | 17028931                                                                          | 17030594 | WBGene00013795 | nhr-229    | Y116A8C.18 |
| -0.0461153860506065                                                                           | AGIWUR8246;AGIWUR27868                                                            |          |                |            |            |
| CB4856 CT IV                                                                                  | 17038923                                                                          | 17039667 | WBGene00013796 | Y116A8C.19 | Y116A8C.19 |
| -0.191193009976576                                                                            | AGIWUR10845                                                                       |          |                |            |            |
| CB4856 CT IV                                                                                  | 17040913                                                                          | 17041523 | WBGene00013797 | Y116A8C.20 | Y116A8C.20 |
| -0.153093547842852                                                                            | AGIWUR14834                                                                       |          |                |            |            |
| CB4856 CT IV                                                                                  | 17046470                                                                          | 17048357 | WBGene00013799 | athp-3     | Y116A8C.22 |
| -0.497032021428563                                                                            | AGIWUR26399                                                                       |          |                |            |            |
| CB4856 CT IV                                                                                  | 17053594                                                                          | 17055513 | WBGene00013800 | Y116A8C.23 | Y116A8C.23 |
| 0.149421475829943                                                                             | AGIWUR13331                                                                       |          |                |            |            |
| CB4856 CT IV                                                                                  | 17056746                                                                          | 17057831 | WBGene00045280 | Y116A8C.51 | Y116A8C.51 |
| 0.0378069376490595                                                                            | AGIWUR4143;AGIWUR15519;AGIWUR36264                                                |          |                |            |            |
| CB4856 CT IV                                                                                  | 17068795                                                                          | 17070903 | WBGene00013801 | Y116A8C.24 | Y116A8C.24 |
| 0.134188474577376                                                                             | AGIWUR12026                                                                       |          |                |            |            |
| CB4856 CT IV                                                                                  | 17079606                                                                          | 17087438 | WBGene00013803 | snx-13     | Y116A8C.26 |
| -0.263170791007052                                                                            | AGIWUR1253;AGIWUR16582;AGIWUR22196;AGIWUR30792;AGIWUR39567;AGIWUR41148            |          |                |            |            |
| CB4856 CT IV                                                                                  | 17088058                                                                          | 17088834 | WBGene00004914 | snr-1      | Y116A8C.42 |
| -0.221600507251431                                                                            |                                                                                   |          |                |            |            |
| AGIWUR2910;AGIWUR2945;AGIWUR15577;AGIWUR21296;AGIWUR22559;AGIWUR27398;AGIWUR34517;AGIWUR40521 |                                                                                   |          |                |            |            |

|                     |                                                                       |          |                |            |            |
|---------------------|-----------------------------------------------------------------------|----------|----------------|------------|------------|
| CB4856 CT IV        | 17088851                                                              | 17090646 | WBGene00013814 | Y116A8C.43 | Y116A8C.43 |
| 0.131451413734247   | AGIWUR9877                                                            |          |                |            |            |
| CB4856 CT IV        | 17090630                                                              | 17096286 | WBGene00013804 | Y116A8C.27 | Y116A8C.27 |
| -0.0616294650297959 | AGIWUR14712                                                           |          |                |            |            |
| CB4856 CT IV        | 17096386                                                              | 17100246 | WBGene00013805 | bca-2      | Y116A8C.28 |
| 0.159815442626514   | AGIWUR8202;AGIWUR34891                                                |          |                |            |            |
| CB4856 CT IV        | 17100225                                                              | 17103715 | WBGene00013807 | Y116A8C.30 | Y116A8C.30 |
| -0.0877514987413726 | AGIWUR15694                                                           |          |                |            |            |
| CB4856 CT IV        | 17104179                                                              | 17110982 | WBGene00013808 | sfa-1      | Y116A8C.32 |
| -0.42093234675721   | AGIWUR19437                                                           |          |                |            |            |
| CB4856 CT IV        | 17111082                                                              | 17116666 | WBGene00000889 | cyn-13     | Y116A8C.34 |
| -0.143270702116578  | AGIWUR20202                                                           |          |                |            |            |
| CB4856 CT IV        | 17116763                                                              | 17118760 | WBGene00006698 | uaf-2      | Y116A8C.35 |
| -0.243370875187146  | AGIWUR22742                                                           |          |                |            |            |
| CB4856 CT IV        | 17119684                                                              | 17126266 | WBGene00006405 | itsn-1     | Y116A8C.36 |
| -0.0394584384598708 | AGIWUR25288;AGIWUR26969;AGIWUR31401;AGIWUR32319                       |          |                |            |            |
| CB4856 CT IV        | 17130066                                                              | 17131075 | WBGene00013810 | Y116A8C.37 | Y116A8C.37 |
| -0.205943952822842  | AGIWUR9715                                                            |          |                |            |            |
| CB4856 CT IV        | 17137348                                                              | 17142989 | WBGene00045043 | Y116A8C.48 | Y116A8C.48 |
| -0.0117485849635393 | AGIWUR3839;AGIWUR13359;AGIWUR17919;AGIWUR22945                        |          |                |            |            |
| CB4856 CT IV        | 17144355                                                              | 17150971 | WBGene00013812 | Y116A8C.40 | Y116A8C.40 |
| 0.19340946393352    | AGIWUR9796;AGIWUR10092                                                |          |                |            |            |
| CB4856 CT IV        | 17162024                                                              | 17162634 | WBGene00004819 | skr-13     | C52D10.8   |
| 0.437388540780494   | AGIWUR30480                                                           |          |                |            |            |
| CB4856 CT IV        | 17163554                                                              | 17164226 | WBGene00004815 | skr-9      | C52D10.7   |
| 0.062876237129629   | AGIWUR42025                                                           |          |                |            |            |
| CB4856 CT IV        | 17167253                                                              | 17168051 | WBGene00004818 | skr-12     | C52D10.6   |
| 0.551731497602486   | AGIWUR11514                                                           |          |                |            |            |
| CB4856 CT IV        | 17176477                                                              | 17189805 | WBGene00016877 | C52D10.3   | C52D10.3   |
| -0.216291038490682  | AGIWUR28085;AGIWUR36872;AGIWUR39260                                   |          |                |            |            |
| CB4856 CT IV        | 17190177                                                              | 17191891 | WBGene00001460 | flp-17     | C52D10.11  |
| -0.0571908013315579 | AGIWUR23495                                                           |          |                |            |            |
| CB4856 CT IV        | 17197905                                                              | 17206845 | WBGene00016879 | cnm-1      | C52D10.12  |
| 0.0683899596674848  | AGIWUR25040                                                           |          |                |            |            |
| CB4856 CT IV        | 17216333                                                              | 17217368 | WBGene00013779 | Y116A8B.1  | Y116A8B.1  |
| -0.197958778541262  | AGIWUR6796                                                            |          |                |            |            |
| CB4856 CT IV        | 17223774                                                              | 17225019 | WBGene00013781 | Y116A8B.4  | Y116A8B.4  |
| -0.19754198872458   | AGIWUR5030;AGIWUR6033;AGIWUR28449;AGIWUR32021;AGIWUR35102;AGIWUR37333 |          |                |            |            |
| CB4856 CT IV        | 17226014                                                              | 17231056 | WBGene00013782 | npr-32     | Y116A8B.5  |

|                                                                                                             |                                                |          |                |           |           |                     |  |
|-------------------------------------------------------------------------------------------------------------|------------------------------------------------|----------|----------------|-----------|-----------|---------------------|--|
| -0.109094113817313                                                                                          | AGIWUR8559                                     |          |                |           |           |                     |  |
| CB4856 CT IV                                                                                                | 17239941                                       | 17243212 | WBGene00013995 | mboa-5    | ZK550.1   | -0.0931204548495046 |  |
| AGIWUR11027;AGIWUR21565;AGIWUR26813                                                                         |                                                |          |                |           |           |                     |  |
| CB4856 CT IV                                                                                                | 17245584                                       | 17249750 | WBGene00013996 | ZK550.2   | ZK550.2   | 0.127466143188785   |  |
| AGIWUR37560                                                                                                 |                                                |          |                |           |           |                     |  |
| CB4856 CT IV                                                                                                | 17250131                                       | 17254964 | WBGene00013997 | ZK550.3   | ZK550.3   | -0.0338203223254236 |  |
| AGIWUR13238                                                                                                 |                                                |          |                |           |           |                     |  |
| CB4856 CT IV                                                                                                | 17255301                                       | 17257562 | WBGene00013998 | ZK550.4   | ZK550.4   | -0.0672647208479429 |  |
| AGIWUR2456;AGIWUR42569                                                                                      |                                                |          |                |           |           |                     |  |
| CB4856 CT IV                                                                                                | 17257504                                       | 17259410 | WBGene00013999 | ZK550.5   | ZK550.5   | 0.0764907012311955  |  |
| AGIWUR2165;AGIWUR11834;AGIWUR37733                                                                          |                                                |          |                |           |           |                     |  |
| CB4856 CT IV                                                                                                | 17260307                                       | 17262485 | WBGene00014000 | ZK550.6   | ZK550.6   | 0.702027010539315   |  |
| AGIWUR2507;AGIWUR7827                                                                                       |                                                |          |                |           |           |                     |  |
| CB4856 CT IV                                                                                                | 17264297                                       | 17264814 | WBGene00044244 | F26D10.13 |           | F26D10.13           |  |
| -0.569067278418844                                                                                          | AGIWUR8280;AGIWUR10704;AGIWUR24795;AGIWUR25868 |          |                |           |           |                     |  |
| CB4856 CT IV                                                                                                | 17265579                                       | 17266926 | WBGene00006229 | str-187   | F26D10.8  |                     |  |
| -0.26661917813867                                                                                           | AGIWUR1710                                     |          |                |           |           |                     |  |
| CB4856 CT IV                                                                                                | 17269342                                       | 17272183 | WBGene00000224 | atgp-1    | F26D10.9  |                     |  |
| 0.184422302066132                                                                                           | AGIWUR31914                                    |          |                |           |           |                     |  |
| CB4856 CT IV                                                                                                | 17272231                                       | 17273652 | WBGene00001606 | gln-5     | F26D10.10 |                     |  |
| 0.0950359326100454                                                                                          | AGIWUR34181                                    |          |                |           |           |                     |  |
| CB4856 CT IV                                                                                                | 17275581                                       | 17276864 | WBGene00009155 | lhfp-4    | F26D10.11 |                     |  |
| 0.810394385504479                                                                                           | AGIWUR42728                                    |          |                |           |           |                     |  |
| CB4856 CT IV                                                                                                | 17276956                                       | 17277748 | WBGene00009156 | cllec-196 |           | F26D10.12           |  |
| 0.658769333781706                                                                                           | AGIWUR7487                                     |          |                |           |           |                     |  |
| CB4856 CT IV                                                                                                | 17278959                                       | 17281330 | WBGene00002005 | hsp-1     | F26D10.3  |                     |  |
| -0.159217713062279                                                                                          |                                                |          |                |           |           |                     |  |
| AGIWUR6894;AGIWUR15751;AGIWUR17478;AGIWUR18500;AGIWUR21587;AGIWUR23964;AGIWUR26492;AGIWUR28010;AGIWUR33671; |                                                |          |                |           |           |                     |  |
| AGIWUR41303;AGIWUR41534                                                                                     |                                                |          |                |           |           |                     |  |
| CB4856 CT IV                                                                                                | 17281456                                       | 17284199 | WBGene00012128 | nra-1     | T28F3.1   | -0.219288983313682  |  |
| AGIWUR2747                                                                                                  |                                                |          |                |           |           |                     |  |
| CB4856 CT IV                                                                                                | 17285733                                       | 17287454 | WBGene00044067 | zipt-7.1  |           | T28F3.3             |  |
| -0.084731645524176                                                                                          | AGIWUR20648                                    |          |                |           |           |                     |  |
| CB4856 CT IV                                                                                                | 17288171                                       | 17291733 | WBGene00012130 | slc-17.4  |           | T28F3.4             |  |
| -0.503281679089901                                                                                          | AGIWUR18244;AGIWUR18531                        |          |                |           |           |                     |  |
| CB4856 CT IV                                                                                                | 17294793                                       | 17300629 | WBGene00012131 | T28F3.5   | T28F3.5   | 0.0469853119416381  |  |
| AGIWUR41791                                                                                                 |                                                |          |                |           |           |                     |  |
| CB4856 CT IV                                                                                                | 17300809                                       | 17302033 | WBGene00012132 | ifta-2    | T28F3.6   | 0.247660358813837   |  |
| AGIWUR19088                                                                                                 |                                                |          |                |           |           |                     |  |

|                                                |    |                         |          |                |           |          |                     |
|------------------------------------------------|----|-------------------------|----------|----------------|-----------|----------|---------------------|
| CB4856 CT                                      | IV | 17302242                | 17304370 | WBGene00012133 | T28F3.7   | T28F3.7  | -0.13278365348339   |
| AGIWUR43806                                    |    |                         |          |                |           |          |                     |
| CB4856 CT                                      | IV | 17308525                | 17311695 | WBGene00012135 | T28F3.9   | T28F3.9  | 0.284616239714909   |
| AGIWUR31439                                    |    |                         |          |                |           |          |                     |
| CB4856 CT                                      | IV | 17312141                | 17315462 | WBGene00004908 | snf-9     | C49C3.1  | -0.0777070445641783 |
| AGIWUR27569                                    |    |                         |          |                |           |          |                     |
| CB4856 CT                                      | IV | 17316710                | 17318246 | WBGene00008192 | C49C3.2   | C49C3.2  | 0.106581114114688   |
| AGIWUR38738                                    |    |                         |          |                |           |          |                     |
| CB4856 CT                                      | IV | 17319353                | 17320027 | WBGene00008193 | C49C3.3   | C49C3.3  | -0.225384702329817  |
| AGIWUR29862;AGIWUR35793                        |    |                         |          |                |           |          |                     |
| CB4856 CT                                      | IV | 17320795                | 17328662 | WBGene00008194 | C49C3.4   | C49C3.4  | -0.215244860717279  |
| AGIWUR38518                                    |    |                         |          |                |           |          |                     |
| CB4856 CT                                      | IV | 17329192                | 17330737 | WBGene00008195 | ceh-88    | C49C3.5  | 0.186344928364572   |
| AGIWUR8331;AGIWUR13535;AGIWUR24087;AGIWUR35702 |    |                         |          |                |           |          |                     |
| CB4856 CT                                      | IV | 17331527                | 17332447 | WBGene00008196 | C49C3.6   | C49C3.6  | 0.133769006674971   |
| AGIWUR10924                                    |    |                         |          |                |           |          |                     |
| CB4856 CT                                      | IV | 17332573                | 17333645 | WBGene00008197 | C49C3.7   | C49C3.7  | -0.0350662063512885 |
| AGIWUR42814                                    |    |                         |          |                |           |          |                     |
| CB4856 CT                                      | IV | 17334193                | 17335094 | WBGene00008204 | C49C3.15  | C49C3.15 |                     |
| 0.166804542640804                              |    | AGIWUR31876;AGIWUR40425 |          |                |           |          |                     |
| CB4856 CT                                      | IV | 17335203                | 17336681 | WBGene00008198 | C49C3.8   | C49C3.8  | 0.190350564477878   |
| AGIWUR42771                                    |    |                         |          |                |           |          |                     |
| CB4856 CT                                      | IV | 17336800                | 17338984 | WBGene00008200 | C49C3.10  | C49C3.10 |                     |
| -0.418056982221028                             |    | AGIWUR30175             |          |                |           |          |                     |
| CB4856 CT                                      | IV | 17339640                | 17342314 | WBGene00008199 | C49C3.9   | C49C3.9  | -0.455489992233323  |
| AGIWUR35239                                    |    |                         |          |                |           |          |                     |
| CB4856 CT                                      | IV | 17343782                | 17344805 | WBGene00008201 | C49C3.11  | C49C3.11 |                     |
| -0.320994913273333                             |    | AGIWUR37871             |          |                |           |          |                     |
| CB4856 CT                                      | IV | 17345568                | 17346695 | WBGene00008202 | cllec-197 | C49C3.12 |                     |
| -0.131760799300757                             |    | AGIWUR31392             |          |                |           |          |                     |
| CB4856 CT                                      | IV | 17347168                | 17351076 | WBGene00008203 | cllec-198 | C49C3.13 |                     |
| 0.11098647236132                               |    | AGIWUR33042             |          |                |           |          |                     |
| CB4856 CT                                      | IV | 17351886                | 17357895 | WBGene00007820 | cllec-199 | C30H6.1  |                     |
| 0.00947311682697727                            |    | AGIWUR19025;AGIWUR33156 |          |                |           |          |                     |
| CB4856 CT                                      | IV | 17358139                | 17360635 | WBGene00007821 | cllec-201 | C30H6.3  |                     |
| 0.213172224428215                              |    | AGIWUR43767             |          |                |           |          |                     |
| CB4856 CT                                      | IV | 17361443                | 17364583 | WBGene00007822 | cllec-202 | C30H6.4  |                     |
| -0.128129621616308                             |    | AGIWUR8247              |          |                |           |          |                     |
| CB4856 CT                                      | IV | 17364791                | 17366491 | WBGene00006487 | zipt-22   | C30H6.2  | -0.103776505061902  |

|                                                            |    |    |                                                                            |          |                |          |                             |
|------------------------------------------------------------|----|----|----------------------------------------------------------------------------|----------|----------------|----------|-----------------------------|
| AGIWUR20952                                                |    |    |                                                                            |          |                |          |                             |
| CB4856                                                     | CT | IV | 17368592                                                                   | 17370618 | WBGene00007827 | nlp-54   | C30H6.10                    |
|                                                            |    |    | 0.276578087123615 AGIWUR11946;AGIWUR16831;AGIWUR19598;AGIWUR29665          |          |                |          |                             |
| CB4856                                                     | CT | IV | 17371769                                                                   | 17375638 | WBGene00007823 | C30H6.5  | C30H6.5 -0.64767077685565   |
| AGIWUR18277;AGIWUR21420;AGIWUR21814                        |    |    |                                                                            |          |                |          |                             |
| CB4856                                                     | CT | IV | 17376427                                                                   | 17379317 | WBGene00001811 | haf-1    | C30H6.6                     |
|                                                            |    |    | -0.00533199287509234 AGIWUR2043;AGIWUR5177;AGIWUR21139                     |          |                |          |                             |
| CB4856                                                     | CT | IV | 17379247                                                                   | 17380188 | WBGene00007826 | C30H6.9  | C30H6.9 -0.0890939236144419 |
| AGIWUR21945                                                |    |    |                                                                            |          |                |          |                             |
| CB4856                                                     | CT | IV | 17380626                                                                   | 17382225 | WBGene00007824 | dlat-2   | C30H6.7 0.354936770807578   |
| AGIWUR33786                                                |    |    |                                                                            |          |                |          |                             |
| CB4856                                                     | CT | IV | 17382298                                                                   | 17383087 | WBGene00007825 | C30H6.8  | C30H6.8 -0.0545206532413616 |
| AGIWUR8005;AGIWUR25239;AGIWUR26763;AGIWUR40999             |    |    |                                                                            |          |                |          |                             |
| CB4856                                                     | CT | IV | 17383370                                                                   | 17386783 | WBGene00044238 | C30H6.12 | C30H6.12                    |
|                                                            |    |    | 0.208656695540355 AGIWUR303;AGIWUR4607;AGIWUR11706;AGIWUR32487;AGIWUR34320 |          |                |          |                             |
| CB4856                                                     | CT | IV | 17386763                                                                   | 17387492 | WBGene00011374 | T02D1.8  | T02D1.8 -0.380554429210221  |
| AGIWUR20749;AGIWUR36007;AGIWUR36236                        |    |    |                                                                            |          |                |          |                             |
| CB4856                                                     | CT | IV | 17393974                                                                   | 17395333 | WBGene00005677 | sru-14   | T02D1.2 0.0623903823023353  |
| AGIWUR1863;AGIWUR12530                                     |    |    |                                                                            |          |                |          |                             |
| CB4856                                                     | CT | IV | 17396210                                                                   | 17397491 | WBGene00005678 | sru-15   | T02D1.3 0.287822803881268   |
| AGIWUR43037                                                |    |    |                                                                            |          |                |          |                             |
| CB4856                                                     | CT | IV | 17399776                                                                   | 17402336 | WBGene00011371 | T02D1.4  | T02D1.4 0.289025046954583   |
| AGIWUR37043                                                |    |    |                                                                            |          |                |          |                             |
| CB4856                                                     | CT | IV | 17402463                                                                   | 17405630 | WBGene00004061 | pmp-4    | T02D1.5 -0.136665055947619  |
| AGIWUR9352;AGIWUR13782;AGIWUR30490;AGIWUR37445             |    |    |                                                                            |          |                |          |                             |
| CB4856                                                     | CT | IV | 17408231                                                                   | 17417794 | WBGene00011372 | npr-26   | T02D1.6 0.0459347255629972  |
| AGIWUR6871                                                 |    |    |                                                                            |          |                |          |                             |
| CB4856                                                     | CT | IV | 17427717                                                                   | 17429602 | WBGene00007357 | C06A12.3 | C06A12.3                    |
|                                                            |    |    | 0.0851827198793558 AGIWUR31400                                             |          |                |          |                             |
| CB4856                                                     | CT | IV | 17429637                                                                   | 17431968 | WBGene00007358 | lact-6   | C06A12.5                    |
|                                                            |    |    | -0.0621710008653809 AGIWUR4456;AGIWUR12935                                 |          |                |          |                             |
| CB4856                                                     | CT | IV | 17432977                                                                   | 17436652 | WBGene00001550 | gcy-27   | C06A12.4                    |
|                                                            |    |    | 0.332332652185921 AGIWUR31564                                              |          |                |          |                             |
| CB4856                                                     | CT | IV | 17437338                                                                   | 17438155 | WBGene00007359 | C06A12.8 | C06A12.8                    |
|                                                            |    |    | 0.223877826494328 AGIWUR32750                                              |          |                |          |                             |
| CB4856                                                     | CT | IV | 17440642                                                                   | 17442125 | WBGene00045013 | F08A7.1  | F08A7.1 0.72483052921023    |
| AGIWUR6277;AGIWUR17924;AGIWUR26032;AGIWUR39716;AGIWUR45208 |    |    |                                                                            |          |                |          |                             |
| CB4856                                                     | CT | IV | 17442827                                                                   | 17443738 | WBGene00023501 | F11E6.11 | F11E6.11                    |
|                                                            |    |    | 2.13424510931847 AGIWUR41389                                               |          |                |          |                             |



|                                                                                    |       |          |          |                |          |          |                     |
|------------------------------------------------------------------------------------|-------|----------|----------|----------------|----------|----------|---------------------|
| CB4856 CT                                                                          | IV    | 17444125 | 17450543 | WBGene00008711 | F11E6.8  | F11E6.8  | 0.117716746854967   |
| AGIWUR924                                                                          |       |          |          |                |          |          |                     |
| CB4856 CT                                                                          | IV    | 17457834 | 17461272 | WBGene00008710 | F11E6.7  | F11E6.7  | 0.0948541650737376  |
| AGIWUR37764                                                                        |       |          |          |                |          |          |                     |
| CB4856 CT                                                                          | IV    | 17461909 | 17463158 | WBGene00008713 | F11E6.10 | F11E6.10 |                     |
| -0.0695728870016339 AGIWUR15528;AGIWUR19371;AGIWUR28688                            |       |          |          |                |          |          |                     |
| CB4856 CT                                                                          | IV    | 17464451 | 17465986 | WBGene00008709 | F11E6.6  | F11E6.6  | 0.183934278490902   |
| AGIWUR38814                                                                        |       |          |          |                |          |          |                     |
| CB4856 CT                                                                          | IV    | 17466060 | 17467408 | WBGene00001240 | elo-2    | F11E6.5  | 0.233939422015604   |
| AGIWUR15442                                                                        |       |          |          |                |          |          |                     |
| CB4856 CT                                                                          | IV    | 17469347 | 17470387 | WBGene00008708 | F11E6.4  | F11E6.4  | -0.0378041641944336 |
| AGIWUR25207                                                                        |       |          |          |                |          |          |                     |
| CB4856 CT                                                                          | IV    | 17470510 | 17472025 | WBGene00008707 | F11E6.3  | F11E6.3  | 0.0193478565374292  |
| AGIWUR753;AGIWUR11490                                                              |       |          |          |                |          |          |                     |
| CB4856 CT                                                                          | IV    | 17473334 | 17479397 | WBGene00008706 | gba-3    | F11E6.1  | 0.0494267743779089  |
| AGIWUR26597;AGIWUR26714                                                            |       |          |          |                |          |          |                     |
| CB4856 CT                                                                          | IV    | 17480396 | 17483332 | WBGene00007067 | 4R79.2   | 4R79.2   | 0.138004342399534   |
| AGIWUR14144                                                                        |       |          |          |                |          |          |                     |
| CB4856 CT                                                                          | IV    | 17486871 | 17490779 | WBGene00003525 | nas-6    | 4R79.1   | 0.150953694420762   |
| AGIWUR30655                                                                        |       |          |          |                |          |          |                     |
| CB4856 CT                                                                          | MtDNA | 113      | 549      | WBGene00010957 | nduo-6   | MTCE.3   | -0.320041493899401  |
| AGIWUR24989;AGIWUR35041                                                            |       |          |          |                |          |          |                     |
| CB4856 CT                                                                          | MtDNA | 549      | 783      | WBGene00010958 | ndf1-4   | MTCE.4   | 0.384039815012515   |
| AGIWUR23526;AGIWUR34575                                                            |       |          |          |                |          |          |                     |
| CB4856 CT                                                                          | MtDNA | 898      | 1593     | WBGene00014454 | MTCE.7   | MTCE.7   | 0.0668317567902701  |
| AGIWUR7913;AGIWUR13747;AGIWUR22917;AGIWUR36868;AGIWUR41384                         |       |          |          |                |          |          |                     |
| CB4856 CT                                                                          | MtDNA | 1763     | 2635     | WBGene00010959 | nduo-1   | MTCE.11  | 0.0502096988305292  |
| AGIWUR28777;AGIWUR31173                                                            |       |          |          |                |          |          |                     |
| CB4856 CT                                                                          | MtDNA | 2634     | 3235     | WBGene00010960 | atp-6    | MTCE.12  | -0.0336569563901383 |
| AGIWUR4315;AGIWUR23319                                                             |       |          |          |                |          |          |                     |
| CB4856 CT                                                                          | MtDNA | 3389     | 4269     | WBGene00010961 | nduo-2   | MTCE.16  | -0.152501572099116  |
| AGIWUR13582;AGIWUR27453;AGIWUR34174                                                |       |          |          |                |          |          |                     |
| CB4856 CT                                                                          | MtDNA | 4504     | 5621     | WBGene00000829 | ctb-1    | MTCE.21  | 0.0962321809866733  |
| AGIWUR13075;AGIWUR32293                                                            |       |          |          |                |          |          |                     |
| CB4856 CT                                                                          | MtDNA | 5678     | 6449     | WBGene00010962 | ctc-3    | MTCE.23  | 0.109322290237593   |
| AGIWUR16275;AGIWUR21151;AGIWUR33004                                                |       |          |          |                |          |          |                     |
| CB4856 CT                                                                          | MtDNA | 6506     | 7808     | WBGene00010963 | nduo-4   | MTCE.25  | -0.0545372073554979 |
| AGIWUR2185;AGIWUR25147;AGIWUR28528;AGIWUR32111;AGIWUR33776;AGIWUR38430;AGIWUR43128 |       |          |          |                |          |          |                     |
| CB4856 CT                                                                          | MtDNA | 7827     | 9428     | WBGene00010964 | ctc-1    | MTCE.26  | 0.0699131688589212  |

AGIWUR14543;AGIWUR27788;AGIWUR34673;AGIWUR38561;AGIWUR40016  
 CB4856 CT MtDNA 9649 10348 WBGene00010965 ctc-2 MTCE.31 0.0358483627416568  
 AGIWUR3817;AGIWUR15036  
 CB4856 CT MtDNA 10403 11354 WBGene00014472 MTCE.33 MTCE.33 0.513349013196071  
 AGIWUR35310;AGIWUR39867  
 CB4856 CT MtDNA 11356 11691 WBGene00010966 nduo-3 MTCE.34 0.0416723902981215  
 AGIWUR35958;AGIWUR36046  
 CB4856 CT MtDNA 11691 13272 WBGene00010967 nduo-5 MTCE.35 -0.191409115082463  
 AGIWUR5384;AGIWUR5608;AGIWUR6469;AGIWUR27940;AGIWUR29535;AGIWUR34029  
 CB4856 CT V 1663 6632 WBGene00015153 B0348.5 B0348.5 0.128787429675904 AGIWUR43464  
 CB4856 CT V 6588 7822 WBGene00002061 ife-3 B0348.6 -0.172768851571858  
 AGIWUR1089;AGIWUR2583;AGIWUR3915;AGIWUR15574;AGIWUR31428;AGIWUR34420;AGIWUR35684;AGIWUR40770  
 CB4856 CT V 20825 43697 WBGene00001177 egl-8 B0348.4 0.137859179070601  
 AGIWUR27169;AGIWUR28430;AGIWUR43926  
 CB4856 CT V 45310 46916 WBGene00015152 B0348.2 B0348.2 0.518932202732218 AGIWUR29175  
 CB4856 CT V 48922 49619 WBGene00015151 B0348.1 B0348.1 0.135096421723458  
 AGIWUR7437;AGIWUR12945;AGIWUR15241;AGIWUR19933;AGIWUR38670;AGIWUR42802  
 CB4856 CT V 49956 56046 WBGene00021413 srt-52 Y38C9B.2 0.0891362428044502  
 AGIWUR8074  
 CB4856 CT V 59239 63509 WBGene00021412 cyp-29A3 Y38C9B.1 -0.474433006147613  
 AGIWUR1490  
 CB4856 CT V 63726 64503 WBGene00021414 Y38C9B.3 Y38C9B.3 0.150063302924089  
 AGIWUR15767  
 CB4856 CT V 64564 83831 WBGene00018976 daam-1 F56E10.2 0.170948951251718  
 AGIWUR12745;AGIWUR21333  
 CB4856 CT V 103394 104064 WBGene00004496 rps-27 F56E10.4 -0.157436157645474  
 AGIWUR15986  
 CB4856 CT V 104826 118188 WBGene00018975 F56E10.1 F56E10.1 -0.177749091137073  
 AGIWUR30224;AGIWUR37479  
 CB4856 CT V 118043 122966 WBGene00000480 cgp-1 Y38C9A.2 -0.0177257711719392  
 AGIWUR7387;AGIWUR17842;AGIWUR23609  
 CB4856 CT V 124010 126758 WBGene00020999 W03F9.1 W03F9.1 -0.0828306056935837 AGIWUR40968  
 CB4856 CT V 127000 128034 WBGene00021000 W03F9.2 W03F9.2 -0.0400843680527299  
 AGIWUR413;AGIWUR3259;AGIWUR9935;AGIWUR38374  
 CB4856 CT V 128237 131754 WBGene00021004 sftb-2 W03F9.10 0.0409029992282406  
 AGIWUR1576;AGIWUR40301  
 CB4856 CT V 132450 134993 WBGene00021001 W03F9.3 W03F9.3 0.145207041779164 AGIWUR9969  
 CB4856 CT V 137177 141370 WBGene00044512 W03F9.11 W03F9.11 0.209048604847419  
 AGIWUR452

|                                                            |    |   |        |        |                |          |            |                      |             |
|------------------------------------------------------------|----|---|--------|--------|----------------|----------|------------|----------------------|-------------|
| CB4856                                                     | CT | V | 142449 | 142799 | WBGene00023356 | W03F9.8  | W03F9.8    | 0.0811904119706437   |             |
| AGIWUR15929;AGIWUR34727                                    |    |   |        |        |                |          |            |                      |             |
| CB4856                                                     | CT | V | 143047 | 144617 | WBGene00005302 | srh-81   | W03F9.7    | 0.0583236908589146   |             |
| AGIWUR8210;AGIWUR27656;AGIWUR28230                         |    |   |        |        |                |          |            |                      |             |
| CB4856                                                     | CT | V | 145194 | 146931 | WBGene00005303 | srh-82   | W03F9.6    | 0.246613100542577    | AGIWUR27502 |
| CB4856                                                     | CT | V | 147538 | 152104 | WBGene00021002 | W03F9.4  | W03F9.4    | 0.78459507854204     | AGIWUR22684 |
| CB4856                                                     | CT | V | 156825 | 166866 | WBGene00006648 | tth-1    | W03F9.5    | -0.0202562704613491  | AGIWUR17082 |
| CB4856                                                     | CT | V | 177421 | 184966 | WBGene00000838 | cul-3    | Y108G3AL.1 | 0.022069311037157    |             |
| AGIWUR7760;AGIWUR19520;AGIWUR25925;AGIWUR29443;AGIWUR44731 |    |   |        |        |                |          |            |                      |             |
| CB4856                                                     | CT | V | 186169 | 200777 | WBGene00044689 | arid-1   | Y108G3AL.7 | -0.0921257509979916  |             |
| AGIWUR8634;AGIWUR41275                                     |    |   |        |        |                |          |            |                      |             |
| CB4856                                                     | CT | V | 201600 | 204279 | WBGene00077643 | trpp-1   | DC2.8      | -0.246749703970618   | AGIWUR13239 |
| CB4856                                                     | CT | V | 204382 | 209758 | WBGene00017080 | lec-12   | DC2.3      | 0.0117634843827439   | AGIWUR11135 |
| CB4856                                                     | CT | V | 210148 | 212787 | WBGene00017082 | DC2.5    | DC2.5      | -0.592674589307963   | AGIWUR26784 |
| CB4856                                                     | CT | V | 217154 | 219473 | WBGene00005299 | srh-78   | DC2.2      | -0.246162564276292   | AGIWUR34036 |
| CB4856                                                     | CT | V | 219932 | 222776 | WBGene00005301 | srh-80   | DC2.1      | -0.00863129454603673 | AGIWUR15830 |
| CB4856                                                     | CT | V | 222995 | 226947 | WBGene00005298 | srh-77   | DC2.6      | 0.096278744751281    | AGIWUR24387 |
| CB4856                                                     | CT | V | 228858 | 234672 | WBGene00017083 | kin-33   | DC2.7      | 0.120895723078479    |             |
| AGIWUR2580;AGIWUR6254;AGIWUR15785;AGIWUR20620              |    |   |        |        |                |          |            |                      |             |
| CB4856                                                     | CT | V | 236750 | 238192 | WBGene00019814 | R02C2.1  | R02C2.1    | 0.099948658652055    | AGIWUR19767 |
| CB4856                                                     | CT | V | 238963 | 240362 | WBGene00019817 | R02C2.6  | R02C2.6    | 0.0228477460795746   | AGIWUR5843  |
| CB4856                                                     | CT | V | 241326 | 242618 | WBGene00019818 | R02C2.7  | R02C2.7    | 0.780397629146622    | AGIWUR28807 |
| CB4856                                                     | CT | V | 244469 | 245846 | WBGene00019815 | kin-34   | R02C2.2    | 0.0732510286720238   | AGIWUR21942 |
| CB4856                                                     | CT | V | 246618 | 251756 | WBGene00006419 | oac-39   | R02C2.3    | 0.215951376805097    | AGIWUR18420 |
| CB4856                                                     | CT | V | 252364 | 254691 | WBGene00006172 | str-121  | R02C2.5    | -0.240684021239606   | AGIWUR29847 |
| CB4856                                                     | CT | V | 254912 | 257992 | WBGene00019816 | nhr-204  | R02C2.4    | -0.0615973506913932  | AGIWUR43394 |
| CB4856                                                     | CT | V | 268238 | 271419 | WBGene00021981 | lgc-26   | Y58G8A.1   | 0.00370495785817138  |             |
| AGIWUR1175                                                 |    |   |        |        |                |          |            |                      |             |
| CB4856                                                     | CT | V | 271984 | 272937 | WBGene00044513 | Y58G8A.5 | Y58G8A.5   | 0.325783326207967    |             |
| AGIWUR3273;AGIWUR7079;AGIWUR9802;AGIWUR25645;AGIWUR36238   |    |   |        |        |                |          |            |                      |             |
| CB4856                                                     | CT | V | 276989 | 281716 | WBGene00021983 | npr-5    | Y58G8A.4   | -0.0812339314270076  |             |
| AGIWUR6860;AGIWUR37723;AGIWUR42426                         |    |   |        |        |                |          |            |                      |             |
| CB4856                                                     | CT | V | 297949 | 300005 | WBGene00018010 | F33E11.2 | F33E11.2   | 0                    | AGIWUR15878 |
| CB4856                                                     | CT | V | 300015 | 304713 | WBGene00018011 | F33E11.3 | F33E11.3   | -0.195376133339987   |             |
| AGIWUR16662                                                |    |   |        |        |                |          |            |                      |             |
| CB4856                                                     | CT | V | 305457 | 311565 | WBGene00018013 | phf-10   | F33E11.6   | -0.0776600076667822  |             |
| AGIWUR7995;AGIWUR39428                                     |    |   |        |        |                |          |            |                      |             |
| CB4856                                                     | CT | V | 320204 | 323647 | WBGene00003614 | nhr-15   | F33E11.1   | -0.0289980260294422  |             |
| AGIWUR9738;AGIWUR22028;AGIWUR23891;AGIWUR36943;AGIWUR43837 |    |   |        |        |                |          |            |                      |             |

|                                                                                                                      |    |   |        |        |                |          |          |                     |             |
|----------------------------------------------------------------------------------------------------------------------|----|---|--------|--------|----------------|----------|----------|---------------------|-------------|
| CB4856                                                                                                               | CT | V | 323774 | 330725 | WBGene00000022 | abt-4    | Y39D8C.1 | -0.326985974386917  |             |
| AGIWUR5072                                                                                                           |    |   |        |        |                |          |          |                     |             |
| CB4856                                                                                                               | CT | V | 334646 | 336861 | WBGene00020708 | dmd-8    | T22H9.4  | -0.196575597982343  | AGIWUR27406 |
| CB4856                                                                                                               | CT | V | 343428 | 347623 | WBGene00020707 | wago-10  | T22H9.3  | 0.0406725864046127  |             |
| AGIWUR2687;AGIWUR8699;AGIWUR10606;AGIWUR26893;AGIWUR28965;AGIWUR40430                                                |    |   |        |        |                |          |          |                     |             |
| CB4856                                                                                                               | CT | V | 349374 | 359016 | WBGene00020706 | atg-9    | T22H9.2  | 0.110086897860803   |             |
| AGIWUR12285;AGIWUR27158                                                                                              |    |   |        |        |                |          |          |                     |             |
| CB4856                                                                                                               | CT | V | 359766 | 363705 | WBGene00020705 | T22H9.1  | T22H9.1  | 0.241993480563416   | AGIWUR40024 |
| CB4856                                                                                                               | CT | V | 364950 | 369088 | WBGene00021450 | mltn-6   | Y39D8B.2 | 0.246771248378135   |             |
| AGIWUR25789                                                                                                          |    |   |        |        |                |          |          |                     |             |
| CB4856                                                                                                               | CT | V | 374408 | 379672 | WBGene00021451 | mltn-8   | Y39D8B.3 | -0.730141317302167  |             |
| AGIWUR24991                                                                                                          |    |   |        |        |                |          |          |                     |             |
| CB4856                                                                                                               | CT | V | 381901 | 384688 | WBGene00022643 | ZK6.8    | ZK6.8    | 0.0675764126852201  | AGIWUR3417  |
| CB4856                                                                                                               | CT | V | 385713 | 388090 | WBGene00022642 | lip1-5   | ZK6.7    | 0.251946268225561   | AGIWUR40960 |
| CB4856                                                                                                               | CT | V | 388697 | 391598 | WBGene00022641 | ZK6.6    | ZK6.6    | -0.537473574481707  | AGIWUR42231 |
| CB4856                                                                                                               | CT | V | 392628 | 395117 | WBGene00022640 | nhr-254  | ZK6.5    | -0.309332983272659  | AGIWUR28089 |
| CB4856                                                                                                               | CT | V | 396827 | 398756 | WBGene00022639 | nhr-253  | ZK6.4    | -0.0640221753185504 | AGIWUR19862 |
| CB4856                                                                                                               | CT | V | 400192 | 401602 | WBGene00022638 | sc1-27   | ZK6.3    | -0.0312093928236603 | AGIWUR22678 |
| CB4856                                                                                                               | CT | V | 401688 | 403128 | WBGene00005284 | srh-62   | ZK6.9    | -0.141764510019289  | AGIWUR9555  |
| CB4856                                                                                                               | CT | V | 404619 | 405997 | WBGene00022637 | nhr-252  | ZK6.2    | 0.127823481205208   | AGIWUR27857 |
| CB4856                                                                                                               | CT | V | 408265 | 410080 | WBGene00022636 | nhr-278  | ZK6.1    | -0.0923685434839268 | AGIWUR41645 |
| CB4856                                                                                                               | CT | V | 411782 | 414760 | WBGene00022644 | dod-19   | ZK6.10   | -0.894266731795065  | AGIWUR35435 |
| CB4856                                                                                                               | CT | V | 415713 | 417708 | WBGene00022645 | ZK6.11   | ZK6.11   | -0.921085674130493  | AGIWUR21388 |
| CB4856                                                                                                               | CT | V | 419435 | 421839 | WBGene00021448 | Y39D8A.1 | Y39D8A.1 | -0.243558082671261  |             |
| AGIWUR327;AGIWUR8494;AGIWUR13402;AGIWUR17855;AGIWUR18239;AGIWUR18452;AGIWUR22056;AGIWUR35812;AGIWUR41891;AGIWUR43529 |    |   |        |        |                |          |          |                     |             |
| CB4856                                                                                                               | CT | V | 422498 | 424064 | WBGene00015259 | dod-20   | B0554.6  | -0.475703073229829  | AGIWUR38983 |
| CB4856                                                                                                               | CT | V | 424440 | 426560 | WBGene00015258 | B0554.5  | B0554.5  | 0.723628584808959   | AGIWUR9976  |
| CB4856                                                                                                               | CT | V | 429144 | 433574 | WBGene00015257 | B0554.4  | B0554.4  | -0.0191420484981464 |             |
| AGIWUR2740;AGIWUR5771;AGIWUR24531                                                                                    |    |   |        |        |                |          |          |                     |             |
| CB4856                                                                                                               | CT | V | 434198 | 436726 | WBGene00015255 | B0554.2  | B0554.2  | 0.0972984046294898  |             |
| AGIWUR11783;AGIWUR41253                                                                                              |    |   |        |        |                |          |          |                     |             |
| CB4856                                                                                                               | CT | V | 437576 | 441023 | WBGene00015260 | B0554.7  | B0554.7  | -0.0417789503918193 | AGIWUR16317 |
| CB4856                                                                                                               | CT | V | 441820 | 443293 | WBGene00005256 | srh-33   | M02H5.9  | 0.155799742842157   | AGIWUR7920  |
| CB4856                                                                                                               | CT | V | 444893 | 446674 | WBGene00005257 | srh-34   | M02H5.10 | -0.279658180925772  |             |
| AGIWUR28651                                                                                                          |    |   |        |        |                |          |          |                     |             |
| CB4856                                                                                                               | CT | V | 447569 | 449230 | WBGene00005258 | srh-35   | M02H5.11 | 0.0244654499670069  |             |
| AGIWUR18900                                                                                                          |    |   |        |        |                |          |          |                     |             |
| CB4856                                                                                                               | CT | V | 449915 | 450438 | WBGene00019744 | M02H5.8  | M02H5.8  | 0.175318960540668   | AGIWUR37280 |

|                                     |    |   |        |        |                |          |           |                      |             |
|-------------------------------------|----|---|--------|--------|----------------|----------|-----------|----------------------|-------------|
| CB4856                              | CT | V | 451451 | 453746 | WBGene00003713 | nhr-123  | M02H5.7   | -0.0738913432962711  | AGIWUR38106 |
| CB4856                              | CT | V | 454009 | 456772 | WBGene00003688 | nhr-98   | M02H5.6   | -0.00790937685350457 | AGIWUR11409 |
| CB4856                              | CT | V | 459734 | 461899 | WBGene00019743 | nhr-203  | M02H5.5   | -0.253595638045564   | AGIWUR39587 |
| CB4856                              | CT | V | 462600 | 464963 | WBGene00019742 | nhr-202  | M02H5.4   | -0.221433001165732   | AGIWUR16331 |
| CB4856                              | CT | V | 465757 | 467491 | WBGene00019741 | nhr-201  | M02H5.3   | 0.311869627285576    | AGIWUR3037  |
| CB4856                              | CT | V | 467567 | 468560 | WBGene00019745 | srbc-57  | M02H5.12  | 0.0608109255979912   |             |
| AGIWUR15097                         |    |   |        |        |                |          |           |                      |             |
| CB4856                              | CT | V | 472889 | 474631 | WBGene00019740 | srt-31   | M02H5.2   | 0.00575762103267063  | AGIWUR43022 |
| CB4856                              | CT | V | 474791 | 477150 | WBGene00003689 | nhr-99   | M02H5.1   | 0.262389439533903    |             |
| AGIWUR14192;AGIWUR23003;AGIWUR43277 |    |   |        |        |                |          |           |                      |             |
| CB4856                              | CT | V | 478162 | 480710 | WBGene00003645 | nhr-55   | T01G6.7   | 0.851159060913879    | AGIWUR25933 |
| CB4856                              | CT | V | 480811 | 483355 | WBGene00003720 | nhr-130  | T01G6.8   | 0.0450231818193298   | AGIWUR34491 |
| CB4856                              | CT | V | 484901 | 486895 | WBGene00020153 | nhr-212  | T01G6.6   | 0.593087898566724    | AGIWUR23170 |
| CB4856                              | CT | V | 486990 | 489104 | WBGene00020152 | nhr-211  | T01G6.5   | 0.346131016642238    |             |
| AGIWUR16625;AGIWUR39859;AGIWUR39924 |    |   |        |        |                |          |           |                      |             |
| CB4856                              | CT | V | 489647 | 491430 | WBGene00003696 | nhr-106  | T01G6.4   | -0.155209659309371   | AGIWUR18097 |
| CB4856                              | CT | V | 491732 | 493641 | WBGene00006233 | str-196  | T01G6.3   | -0.0640646741916271  | AGIWUR30475 |
| CB4856                              | CT | V | 494499 | 497287 | WBGene00003721 | nhr-131  | T01G6.2   | 0.0508206430134841   | AGIWUR5940  |
| CB4856                              | CT | V | 497839 | 498943 | WBGene00020151 | T01G6.1  | T01G6.1   | 0.0797750762354514   | AGIWUR24893 |
| CB4856                              | CT | V | 499770 | 501330 | WBGene00006282 | str-256  | T01G6.9   | 0.0734191136351683   | AGIWUR27783 |
| CB4856                              | CT | V | 502142 | 503223 | WBGene00020154 | T01G6.10 | T01G6.10  | 0.0520447535983823   |             |
| AGIWUR4126;AGIWUR17221;AGIWUR38447  |    |   |        |        |                |          |           |                      |             |
| CB4856                              | CT | V | 504028 | 504616 | WBGene00004144 | pqn-60   | R11G11.7  | -0.369681075095334   |             |
| AGIWUR13341                         |    |   |        |        |                |          |           |                      |             |
| CB4856                              | CT | V | 505491 | 506068 | WBGene00020014 | R11G11.6 | R11G11.6  | -0.440077310427837   |             |
| AGIWUR21543                         |    |   |        |        |                |          |           |                      |             |
| CB4856                              | CT | V | 508112 | 509803 | WBGene00005851 | srw-104  | R11G11.8  | -0.0838195345737436  |             |
| AGIWUR15163;AGIWUR43712             |    |   |        |        |                |          |           |                      |             |
| CB4856                              | CT | V | 511194 | 512520 | WBGene00005260 | srh-37   | R11G11.9  | -0.0200661612830295  |             |
| AGIWUR6632                          |    |   |        |        |                |          |           |                      |             |
| CB4856                              | CT | V | 513390 | 515226 | WBGene00005852 | srw-105  | R11G11.10 | 0.289618486616847    |             |
| AGIWUR41200                         |    |   |        |        |                |          |           |                      |             |
| CB4856                              | CT | V | 515787 | 517388 | WBGene00005853 | srw-106  | R11G11.11 | 0.0879444732617172   |             |
| AGIWUR15100                         |    |   |        |        |                |          |           |                      |             |
| CB4856                              | CT | V | 519852 | 521617 | WBGene00005854 | srw-107  | R11G11.13 | 0.24830963776011     |             |
| AGIWUR24048                         |    |   |        |        |                |          |           |                      |             |
| CB4856                              | CT | V | 521702 | 524218 | WBGene00020016 | lip1-3   | R11G11.14 | 3.72018579076178     |             |
| AGIWUR43454                         |    |   |        |        |                |          |           |                      |             |
| CB4856                              | CT | V | 525666 | 526691 | WBGene00006119 | str-54   | R11G11.15 | -0.0743836776526559  |             |

|                         |    |   |        |        |                |          |          |                     |             |
|-------------------------|----|---|--------|--------|----------------|----------|----------|---------------------|-------------|
| AGIWUR10962;AGIWUR38855 |    |   |        |        |                |          |          |                     |             |
| CB4856                  | CT | V | 527902 | 528869 | WBGene00005855 | srw-108  | R11G11.5 | 0.0131437765232256  |             |
| AGIWUR42181             |    |   |        |        |                |          |          |                     |             |
| CB4856                  | CT | V | 529277 | 530557 | WBGene00005600 | srj-12   | R11G11.4 | -0.0143279377695693 |             |
| AGIWUR9716;AGIWUR30691  |    |   |        |        |                |          |          |                     |             |
| CB4856                  | CT | V | 530799 | 532024 | WBGene00020013 | R11G11.3 | R11G11.3 | 0.226241226304646   |             |
| AGIWUR39705             |    |   |        |        |                |          |          |                     |             |
| CB4856                  | CT | V | 532290 | 534064 | WBGene00003648 | nhr-58   | R11G11.2 | -0.198178638108612  |             |
| AGIWUR814;AGIWUR43924   |    |   |        |        |                |          |          |                     |             |
| CB4856                  | CT | V | 534446 | 536226 | WBGene00003722 | nhr-132  | R11G11.1 | 0.323330200414125   |             |
| AGIWUR30967             |    |   |        |        |                |          |          |                     |             |
| CB4856                  | CT | V | 536628 | 537418 | WBGene00015759 | C14C6.5  | C14C6.5  | -0.824372373426195  |             |
| AGIWUR33256;AGIWUR33998 |    |   |        |        |                |          |          |                     |             |
| CB4856                  | CT | V | 539460 | 541485 | WBGene00015758 | nhr-155  | C14C6.4  | -0.257490059198716  | AGIWUR27454 |
| CB4856                  | CT | V | 543469 | 545359 | WBGene00015757 | C14C6.3  | C14C6.3  | -0.417579511667713  | AGIWUR38250 |
| CB4856                  | CT | V | 545844 | 548080 | WBGene00015760 | C14C6.6  | C14C6.6  | 0.145082923851332   | AGIWUR30450 |
| CB4856                  | CT | V | 548713 | 550619 | WBGene00015761 | C14C6.7  | C14C6.7  | 0.115763394189858   | AGIWUR41855 |
| CB4856                  | CT | V | 554374 | 556155 | WBGene00005899 | srx-8    | C14C6.9  | 0.113085580114742   | AGIWUR30075 |
| CB4856                  | CT | V | 560195 | 562956 | WBGene00005898 | srx-7    | C14C6.1  | -0.0665177647659494 | AGIWUR985   |
| CB4856                  | CT | V | 563134 | 564446 | WBGene00015756 | C14C6.2  | C14C6.2  | 1.03244872694961    | AGIWUR44552 |
| CB4856                  | CT | V | 564391 | 566084 | WBGene00005585 | sri-73   | C14C6.10 | -0.368722670626145  |             |
| AGIWUR19650             |    |   |        |        |                |          |          |                     |             |
| CB4856                  | CT | V | 566719 | 568205 | WBGene00005584 | sri-72   | C14C6.11 | -0.564105251765247  |             |
| AGIWUR20755             |    |   |        |        |                |          |          |                     |             |
| CB4856                  | CT | V | 570571 | 571205 | WBGene00015763 | C14C6.12 | C14C6.12 | -0.229222697083953  |             |
| AGIWUR2344              |    |   |        |        |                |          |          |                     |             |
| CB4856                  | CT | V | 572031 | 574739 | WBGene00015764 | C14C6.13 | C14C6.13 | -0.0636287434393346 |             |
| AGIWUR20391             |    |   |        |        |                |          |          |                     |             |
| CB4856                  | CT | V | 576370 | 578428 | WBGene00019453 | K06H6.5  | K06H6.5  | 0.0795321563879021  | AGIWUR27993 |
| CB4856                  | CT | V | 581916 | 583431 | WBGene00019451 | nstp-7   | K06H6.3  | 0.00627680429611566 | AGIWUR29404 |
| CB4856                  | CT | V | 583801 | 585308 | WBGene00019454 | K06H6.6  | K06H6.6  | -0.0329969448095087 | AGIWUR29139 |
| CB4856                  | CT | V | 585848 | 587250 | WBGene00019450 | K06H6.2  | K06H6.2  | -0.108443272260876  | AGIWUR32952 |
| CB4856                  | CT | V | 588135 | 589646 | WBGene00019449 | K06H6.1  | K06H6.1  | -0.197958782050275  | AGIWUR36953 |
| CB4856                  | CT | V | 590482 | 592463 | WBGene00022758 | ZK488.6  | ZK488.6  | 0.184727081631352   | AGIWUR10298 |
| CB4856                  | CT | V | 593259 | 595677 | WBGene00022757 | ZK488.5  | ZK488.5  | 0.122263137720169   | AGIWUR11121 |
| CB4856                  | CT | V | 600595 | 602482 | WBGene00022756 | nhr-251  | ZK488.4  | -0.4435318546485    | AGIWUR21345 |
| CB4856                  | CT | V | 603665 | 604205 | WBGene00004177 | pqn-98   | ZK488.7  | -0.0093662979431306 | AGIWUR12119 |
| CB4856                  | CT | V | 604723 | 606183 | WBGene00005857 | srw-110  | ZK488.8  | 0.080929224014072   |             |
| AGIWUR4227;AGIWUR21610  |    |   |        |        |                |          |          |                     |             |

|                                                          |    |   |        |        |                |          |          |                     |             |
|----------------------------------------------------------|----|---|--------|--------|----------------|----------|----------|---------------------|-------------|
| CB4856                                                   | CT | V | 606781 | 608944 | WBGene00005856 | srw-109  | ZK488.9  | -0.155725965152802  | AGIWUR43361 |
| CB4856                                                   | CT | V | 609144 | 609726 | WBGene00004176 | pqn-97   | ZK488.10 | 0.129218855738223   |             |
| AGIWUR11417                                              |    |   |        |        |                |          |          |                     |             |
| CB4856                                                   | CT | V | 610445 | 612513 | WBGene00003680 | nhr-90   | ZK488.2  | 0.529548180003193   | AGIWUR33832 |
| CB4856                                                   | CT | V | 612781 | 614908 | WBGene00022755 | nhr-250  | ZK488.1  | 0.171915816423036   | AGIWUR20154 |
| CB4856                                                   | CT | V | 615576 | 616728 | WBGene00018624 | F48G7.13 | F48G7.13 | -0.0742807740876703 |             |
| AGIWUR8576                                               |    |   |        |        |                |          |          |                     |             |
| CB4856                                                   | CT | V | 619434 | 621679 | WBGene00018615 | F48G7.4  | F48G7.4  | -0.159030552327403  | AGIWUR43563 |
| CB4856                                                   | CT | V | 622170 | 622951 | WBGene00018616 | F48G7.5  | F48G7.5  | -0.720414886882413  | AGIWUR20604 |
| CB4856                                                   | CT | V | 623298 | 625022 | WBGene00018617 | srt-17   | F48G7.6  | 0.235602976890406   | AGIWUR22569 |
| CB4856                                                   | CT | V | 625752 | 626390 | WBGene00018618 | F48G7.7  | F48G7.7  | 0.229011784808035   | AGIWUR42807 |
| CB4856                                                   | CT | V | 627095 | 627650 | WBGene00018619 | F48G7.8  | F48G7.8  | -0.169005701926302  | AGIWUR25428 |
| CB4856                                                   | CT | V | 628059 | 628623 | WBGene00018620 | F48G7.9  | F48G7.9  | -0.0532776135541129 | AGIWUR23150 |
| CB4856                                                   | CT | V | 634142 | 634893 | WBGene00018621 | F48G7.10 | F48G7.10 | -0.0156485995485909 |             |
| AGIWUR39400                                              |    |   |        |        |                |          |          |                     |             |
| CB4856                                                   | CT | V | 636587 | 637501 | WBGene00018614 | pals-31  | F48G7.2  | 1.00651154593172    | AGIWUR42892 |
| CB4856                                                   | CT | V | 638628 | 639928 | WBGene00005621 | srj-37   | F48G7.1  | 0.323461575378642   | AGIWUR42858 |
| CB4856                                                   | CT | V | 640799 | 642893 | WBGene00018622 | nhr-190  | F48G7.11 | 0.0197490090777634  |             |
| AGIWUR20655                                              |    |   |        |        |                |          |          |                     |             |
| CB4856                                                   | CT | V | 643762 | 646199 | WBGene00018623 | F48G7.12 | F48G7.12 | 0.363528105731532   |             |
| AGIWUR5201                                               |    |   |        |        |                |          |          |                     |             |
| CB4856                                                   | CT | V | 647188 | 649741 | WBGene00017959 | ugt-42   | F31F4.7  | -0.523329320548356  | AGIWUR22094 |
| CB4856                                                   | CT | V | 651837 | 653040 | WBGene00005593 | srj-5    | F31F4.16 | -0.156069919112609  |             |
| AGIWUR33839                                              |    |   |        |        |                |          |          |                     |             |
| CB4856                                                   | CT | V | 653303 | 654502 | WBGene00005594 | srj-6    | F31F4.8  | 0.178477611425801   | AGIWUR31845 |
| CB4856                                                   | CT | V | 654727 | 655923 | WBGene00005451 | srh-245  | F31F4.9  | -0.164142351328721  | AGIWUR1794  |
| CB4856                                                   | CT | V | 656499 | 657778 | WBGene00005452 | srh-246  | F31F4.18 | 0.478535477600463   |             |
| AGIWUR12239                                              |    |   |        |        |                |          |          |                     |             |
| CB4856                                                   | CT | V | 658476 | 660310 | WBGene00017963 | F31F4.17 | F31F4.17 | -0.0879897499702009 |             |
| AGIWUR26694                                              |    |   |        |        |                |          |          |                     |             |
| CB4856                                                   | CT | V | 660681 | 661954 | WBGene00005320 | srh-101  | F31F4.10 | -0.0994953953471933 |             |
| AGIWUR14309;AGIWUR23039                                  |    |   |        |        |                |          |          |                     |             |
| CB4856                                                   | CT | V | 662479 | 664443 | WBGene00017960 | F31F4.11 | F31F4.11 | 0.144900110720882   |             |
| AGIWUR28684                                              |    |   |        |        |                |          |          |                     |             |
| CB4856                                                   | CT | V | 664797 | 665923 | WBGene00005472 | srh-266  | F31F4.6  | 0.528313407240425   | AGIWUR12540 |
| CB4856                                                   | CT | V | 665919 | 667494 | WBGene00017961 | nhr-180  | F31F4.12 | 0.84307067980679    |             |
| AGIWUR13553;AGIWUR38977;AGIWUR39200                      |    |   |        |        |                |          |          |                     |             |
| CB4856                                                   | CT | V | 667896 | 671442 | WBGene00005687 | sru-24   | F31F4.13 | 0.0175380851113909  |             |
| AGIWUR1691;AGIWUR6096;AGIWUR7045;AGIWUR16318;AGIWUR18111 |    |   |        |        |                |          |          |                     |             |

|                                                                                                |   |        |        |                |           |          |                     |             |
|------------------------------------------------------------------------------------------------|---|--------|--------|----------------|-----------|----------|---------------------|-------------|
| CB4856 CT                                                                                      | V | 672245 | 674313 | WBGene00005688 | sru-25    | F31F4.14 | -0.564309333321539  |             |
| AGIWUR29944                                                                                    |   |        |        |                |           |          |                     |             |
| CB4856 CT                                                                                      | V | 674911 | 676754 | WBGene00017962 | fbxa-72   | F31F4.15 | -0.770789912631448  |             |
| AGIWUR29718                                                                                    |   |        |        |                |           |          |                     |             |
| CB4856 CT                                                                                      | V | 677034 | 678920 | WBGene00005912 | srx-21    | F31F4.4  | -0.246939490729266  | AGIWUR21802 |
| CB4856 CT                                                                                      | V | 679963 | 681465 | WBGene00005913 | srx-22    | F31F4.3  | 0.201208239946715   |             |
| AGIWUR42097;AGIWUR43628                                                                        |   |        |        |                |           |          |                     |             |
| CB4856 CT                                                                                      | V | 682331 | 683970 | WBGene00005914 | srx-23    | F31F4.2  | -0.143355188392278  | AGIWUR41650 |
| CB4856 CT                                                                                      | V | 684060 | 686289 | WBGene00017957 | F31F4.1   | F31F4.1  | -0.409667747142448  | AGIWUR15879 |
| CB4856 CT                                                                                      | V | 687684 | 690004 | WBGene00019244 | H25P19.1  | H25P19.1 | -0.0828649423387482 |             |
| AGIWUR40390                                                                                    |   |        |        |                |           |          |                     |             |
| CB4856 CT                                                                                      | V | 690875 | 692770 | WBGene00005895 | srx-4     | Y49C4A.5 | 0.0643890711821902  |             |
| AGIWUR19415                                                                                    |   |        |        |                |           |          |                     |             |
| CB4856 CT                                                                                      | V | 696523 | 699614 | WBGene00021709 | ugt-29    | Y49C4A.8 | -0.356618163791615  |             |
| AGIWUR1072;AGIWUR38841                                                                         |   |        |        |                |           |          |                     |             |
| CB4856 CT                                                                                      | V | 700079 | 701669 | WBGene00005896 | srx-5     | Y49C4A.4 | -0.0858581251766708 |             |
| AGIWUR28320                                                                                    |   |        |        |                |           |          |                     |             |
| CB4856 CT                                                                                      | V | 702560 | 703745 | WBGene00021708 | srbc-37   | Y49C4A.3 | 0.00909620601525152 |             |
| AGIWUR3871;AGIWUR30163                                                                         |   |        |        |                |           |          |                     |             |
| CB4856 CT                                                                                      | V | 707218 | 708453 | WBGene00021707 | srbc-38   | Y49C4A.2 | -0.0267474651303079 |             |
| AGIWUR5061;AGIWUR12514;AGIWUR28023                                                             |   |        |        |                |           |          |                     |             |
| CB4856 CT                                                                                      | V | 709108 | 710566 | WBGene00021706 | srbc-39   | Y49C4A.1 | -0.328782178276168  |             |
| AGIWUR2939                                                                                     |   |        |        |                |           |          |                     |             |
| CB4856 CT                                                                                      | V | 710642 | 712921 | WBGene00021710 | cyp-33C11 | Y49C4A.9 | 0.0616246495440258  |             |
| AGIWUR24386                                                                                    |   |        |        |                |           |          |                     |             |
| CB4856 CT                                                                                      | V | 715833 | 719831 | WBGene00019242 | srbc-40   | H24009.1 | -0.0287649417086859 |             |
| AGIWUR36794                                                                                    |   |        |        |                |           |          |                     |             |
| CB4856 CT                                                                                      | V | 722695 | 723827 | WBGene00019243 | fbxb-72   | H24009.2 | 0.496909486726286   |             |
| AGIWUR15315                                                                                    |   |        |        |                |           |          |                     |             |
| CB4856 CT                                                                                      | V | 724207 | 728103 | WBGene00001564 | icl-1     | C05E4.9  | 2.46287913154572    |             |
| AGIWUR3072;AGIWUR10341;AGIWUR12073;AGIWUR15664;AGIWUR16363;AGIWUR22644;AGIWUR33040;AGIWUR42667 |   |        |        |                |           |          |                     |             |
| CB4856 CT                                                                                      | V | 728312 | 734279 | WBGene00005228 | srh-2     | C05E4.14 | 1.78199378919581    |             |
| AGIWUR538;AGIWUR4676;AGIWUR34038                                                               |   |        |        |                |           |          |                     |             |
| CB4856 CT                                                                                      | V | 734420 | 736271 | WBGene00005613 | srj-25    | C05E4.10 | -0.0491834442579417 |             |
| AGIWUR37614                                                                                    |   |        |        |                |           |          |                     |             |
| CB4856 CT                                                                                      | V | 736803 | 738870 | WBGene00005612 | srj-24    | C05E4.11 | -0.188352507345367  |             |
| AGIWUR42876                                                                                    |   |        |        |                |           |          |                     |             |
| CB4856 CT                                                                                      | V | 742120 | 743273 | WBGene00015489 | C05E4.7   | C05E4.7  | 0.0631373723479935  | AGIWUR5225  |
| CB4856 CT                                                                                      | V | 743648 | 745475 | WBGene00006182 | str-134   | C05E4.6  | 0.0954220660418077  | AGIWUR31792 |



|                                     |    |   |        |        |                |          |          |                     |             |
|-------------------------------------|----|---|--------|--------|----------------|----------|----------|---------------------|-------------|
| CB4856                              | CT | V | 746397 | 747649 | WBGene00006181 | str-133  | C05E4.5  | 0.119056235792366   | AGIWUR2230  |
| CB4856                              | CT | V | 748344 | 750467 | WBGene00005516 | sri-4    | C05E4.4  | 0.144170270649026   | AGIWUR39397 |
| CB4856                              | CT | V | 751326 | 752779 | WBGene00006288 | str-262  | C05E4.13 | 0.45662272612899    |             |
| AGIWUR34956                         |    |   |        |        |                |          |          |                     |             |
| CB4856                              | CT | V | 753283 | 755124 | WBGene00005642 | srp-1    | C05E4.3  | 0.288128194275675   | AGIWUR27054 |
| CB4856                              | CT | V | 756469 | 757892 | WBGene00006087 | str-20   | C05E4.2  | 0.123269544809314   | AGIWUR33476 |
| CB4856                              | CT | V | 762734 | 764593 | WBGene00005643 | srp-2    | C05E4.1  | 0.235678779548724   | AGIWUR41978 |
| CB4856                              | CT | V | 765032 | 772585 | WBGene00006266 | str-238  | R09E12.4 | -0.104505522855353  |             |
| AGIWUR4387                          |    |   |        |        |                |          |          |                     |             |
| CB4856                              | CT | V | 773518 | 774854 | WBGene00019983 | sti-1    | R09E12.3 | -0.160689599808472  |             |
| AGIWUR10844;AGIWUR12820             |    |   |        |        |                |          |          |                     |             |
| CB4856                              | CT | V | 774995 | 777272 | WBGene00019982 | srbc-58  | R09E12.2 | 0.0534530909043962  |             |
| AGIWUR39807                         |    |   |        |        |                |          |          |                     |             |
| CB4856                              | CT | V | 777571 | 778235 | WBGene00044514 | R09E12.9 | R09E12.9 | 0.104469268124152   |             |
| AGIWUR2083;AGIWUR5324;AGIWUR43324   |    |   |        |        |                |          |          |                     |             |
| CB4856                              | CT | V | 778639 | 780223 | WBGene00019981 | srbc-59  | R09E12.1 | 0.0825507229040499  |             |
| AGIWUR13673;AGIWUR16438             |    |   |        |        |                |          |          |                     |             |
| CB4856                              | CT | V | 780299 | 781803 | WBGene00044091 | srbc-60  | R09E12.8 | -0.273733659059939  |             |
| AGIWUR11174                         |    |   |        |        |                |          |          |                     |             |
| CB4856                              | CT | V | 782732 | 784763 | WBGene00020060 | srab-16  | R13D11.6 | 0.139681319658461   |             |
| AGIWUR39334                         |    |   |        |        |                |          |          |                     |             |
| CB4856                              | CT | V | 787431 | 789888 | WBGene00020059 | srab-15  | R13D11.5 | 0.161502092584874   |             |
| AGIWUR26822;AGIWUR31101;AGIWUR41356 |    |   |        |        |                |          |          |                     |             |
| CB4856                              | CT | V | 802550 | 804741 | WBGene00020062 | nhr-270  | R13D11.8 | 0.388937765859344   |             |
| AGIWUR7489                          |    |   |        |        |                |          |          |                     |             |
| CB4856                              | CT | V | 810793 | 814726 | WBGene00020058 | R13D11.4 | R13D11.4 | 0.136043342082925   |             |
| AGIWUR25263                         |    |   |        |        |                |          |          |                     |             |
| CB4856                              | CT | V | 815016 | 816873 | WBGene00020057 | R13D11.3 | R13D11.3 | -0.0401772413255195 |             |
| AGIWUR20422                         |    |   |        |        |                |          |          |                     |             |
| CB4856                              | CT | V | 817482 | 818733 | WBGene00020056 | R13D11.1 | R13D11.1 | 0.153577793444299   |             |
| AGIWUR27687                         |    |   |        |        |                |          |          |                     |             |
| CB4856                              | CT | V | 823156 | 824972 | WBGene00005921 | srx-30   | F41H8.3  | -0.068873927556536  |             |
| AGIWUR13632;AGIWUR38148             |    |   |        |        |                |          |          |                     |             |
| CB4856                              | CT | V | 826411 | 828761 | WBGene00018313 | F41H8.2  | F41H8.2  | 0.145617273213824   | AGIWUR34562 |
| CB4856                              | CT | V | 833668 | 835463 | WBGene00018312 | F41H8.1  | F41H8.1  | 0.235910288849212   | AGIWUR32946 |
| CB4856                              | CT | V | 839421 | 839934 | WBGene00044778 | K09C6.10 | K09C6.10 | 0.305102116181836   |             |
| AGIWUR2115                          |    |   |        |        |                |          |          |                     |             |
| CB4856                              | CT | V | 844450 | 845373 | WBGene00019560 | K09C6.6  | K09C6.6  | -0.267328532960919  | AGIWUR19380 |
| CB4856                              | CT | V | 846715 | 848858 | WBGene00019559 | srbc-13  | K09C6.5  | 0.336395683718555   | AGIWUR23450 |

|                                                                                                           |    |   |        |        |                |          |          |                     |             |
|-----------------------------------------------------------------------------------------------------------|----|---|--------|--------|----------------|----------|----------|---------------------|-------------|
| CB4856                                                                                                    | CT | V | 849499 | 851332 | WBGene00019558 | srbc-12  | K09C6.4  | 0.174423861993929   | AGIWUR39150 |
| CB4856                                                                                                    | CT | V | 852484 | 853126 | WBGene00019557 | K09C6.3  | K09C6.3  | -0.239256313862681  | AGIWUR19218 |
| CB4856                                                                                                    | CT | V | 853436 | 855082 | WBGene00019563 | K09C6.9  | K09C6.9  | 0.0908768782859326  | AGIWUR1931  |
| CB4856                                                                                                    | CT | V | 856849 | 862061 | WBGene00019556 | K09C6.2  | K09C6.2  | -0.0339379425635453 |             |
| AGIWUR23309;AGIWUR31796                                                                                   |    |   |        |        |                |          |          |                     |             |
| CB4856                                                                                                    | CT | V | 865074 | 866829 | WBGene00020155 | T02B11.3 | T02B11.3 | 0.211562474667897   |             |
| AGIWUR9089;AGIWUR9821;AGIWUR16661;AGIWUR23990;AGIWUR26089;AGIWUR29584;AGIWUR40374;AGIWUR41779;AGIWUR44136 |    |   |        |        |                |          |          |                     |             |
| CB4856                                                                                                    | CT | V | 869481 | 871129 | WBGene00020156 | T02B11.4 | T02B11.4 | 0.266462190953547   |             |
| AGIWUR4354;AGIWUR20286;AGIWUR37778                                                                        |    |   |        |        |                |          |          |                     |             |
| CB4856                                                                                                    | CT | V | 874008 | 875728 | WBGene00006118 | str-53   | T02B11.2 | 0.0458349733806553  |             |
| AGIWUR25762;AGIWUR42040                                                                                   |    |   |        |        |                |          |          |                     |             |
| CB4856                                                                                                    | CT | V | 876245 | 877265 | WBGene00044777 | T02B11.9 | T02B11.9 | 0.00530596075334344 |             |
| AGIWUR7027;AGIWUR16432;AGIWUR24052                                                                        |    |   |        |        |                |          |          |                     |             |
| CB4856                                                                                                    | CT | V | 877530 | 878667 | WBGene00044776 | T02B11.8 | T02B11.8 | -0.218906190345844  |             |
| AGIWUR5303;AGIWUR25999;AGIWUR31851;AGIWUR40465;AGIWUR41074                                                |    |   |        |        |                |          |          |                     |             |
| CB4856                                                                                                    | CT | V | 879793 | 881574 | WBGene00005210 | srg-53   | T02B11.1 | 0.182782839163862   |             |
| AGIWUR879                                                                                                 |    |   |        |        |                |          |          |                     |             |
| CB4856                                                                                                    | CT | V | 882176 | 884424 | WBGene00005622 | srj-38   | T02B11.5 | -0.0464844319654256 |             |
| AGIWUR650                                                                                                 |    |   |        |        |                |          |          |                     |             |
| CB4856                                                                                                    | CT | V | 884881 | 889274 | WBGene00020157 | T02B11.6 | T02B11.6 | 0.243674842571292   |             |
| AGIWUR2914;AGIWUR43173                                                                                    |    |   |        |        |                |          |          |                     |             |
| CB4856                                                                                                    | CT | V | 894930 | 899187 | WBGene00003550 | nas-32   | T02B11.7 | 0.0843900770944122  |             |
| AGIWUR18338;AGIWUR20939;AGIWUR32505;AGIWUR38638;AGIWUR39727;AGIWUR42992                                   |    |   |        |        |                |          |          |                     |             |
| CB4856                                                                                                    | CT | V | 899310 | 903665 | WBGene00001480 | fmo-5    | H24K24.5 | 0.511428664598725   |             |
| AGIWUR16238                                                                                               |    |   |        |        |                |          |          |                     |             |
| CB4856                                                                                                    | CT | V | 904950 | 911214 | WBGene00019241 | H24K24.4 | H24K24.4 | -0.432037912177096  |             |
| AGIWUR38390                                                                                               |    |   |        |        |                |          |          |                     |             |
| CB4856                                                                                                    | CT | V | 911776 | 916315 | WBGene00019240 | H24K24.3 | H24K24.3 | -0.281878888412924  |             |
| AGIWUR3416;AGIWUR23565                                                                                    |    |   |        |        |                |          |          |                     |             |
| CB4856                                                                                                    | CT | V | 917817 | 925945 | WBGene00019239 | H24K24.2 | H24K24.2 | 0.453028038954082   |             |
| AGIWUR26433                                                                                               |    |   |        |        |                |          |          |                     |             |
| CB4856                                                                                                    | CT | V | 936464 | 939228 | WBGene00021747 | Y50D4C.2 | Y50D4C.2 | -0.0762624097312532 |             |
| AGIWUR14286                                                                                               |    |   |        |        |                |          |          |                     |             |
| CB4856                                                                                                    | CT | V | 939391 | 945244 | WBGene00021748 | Y50D4C.3 | Y50D4C.3 | 0.204843507786499   |             |
| AGIWUR37729                                                                                               |    |   |        |        |                |          |          |                     |             |
| CB4856                                                                                                    | CT | V | 946732 | 949860 | WBGene00021750 | Y50D4C.6 | Y50D4C.6 | -0.124407157669911  |             |
| AGIWUR25709                                                                                               |    |   |        |        |                |          |          |                     |             |
| CB4856                                                                                                    | CT | V | 951454 | 964800 | WBGene00005024 | sqv-6    | Y50D4C.4 | -0.620933155994806  |             |
| AGIWUR5529                                                                                                |    |   |        |        |                |          |          |                     |             |

|                                                                                               |    |   |         |         |                |          |          |                     |                     |             |
|-----------------------------------------------------------------------------------------------|----|---|---------|---------|----------------|----------|----------|---------------------|---------------------|-------------|
| CB4856                                                                                        | CT | V | 982534  | 996207  | WBGene00006770 | unc-34   | Y50D4C.1 |                     | 0.00487083690952783 |             |
| AGIWUR16552;AGIWUR41806                                                                       |    |   |         |         |                |          |          |                     |                     |             |
| CB4856                                                                                        | CT | V | 998289  | 1003753 | WBGene00021749 | Y50D4C.5 | Y50D4C.5 |                     | -0.179926660421442  |             |
| AGIWUR35566                                                                                   |    |   |         |         |                |          |          |                     |                     |             |
| CB4856                                                                                        | CT | V | 1008803 | 1018350 | WBGene00019971 | ergo-1   | R09A1.1  | -0.0159973562837585 |                     | AGIWUR24215 |
| CB4856                                                                                        | CT | V | 1018337 | 1023144 | WBGene00019972 | R09A1.2  | R09A1.2  | -0.103628417618037  |                     | AGIWUR32045 |
| CB4856                                                                                        | CT | V | 1023782 | 1027073 | WBGene00019973 | R09A1.3  | R09A1.3  | -0.171679392573767  |                     | AGIWUR40489 |
| CB4856                                                                                        | CT | V | 1027904 | 1033385 | WBGene00019975 | f1p-34   | R09A1.5  | -0.0845896127901042 |                     |             |
| AGIWUR18884;AGIWUR30787                                                                       |    |   |         |         |                |          |          |                     |                     |             |
| CB4856                                                                                        | CT | V | 1042692 | 1048580 | WBGene00015344 | nra-4    | C02E11.1 |                     | -0.0848257852984009 |             |
| AGIWUR11453;AGIWUR24900;AGIWUR31213;AGIWUR39654                                               |    |   |         |         |                |          |          |                     |                     |             |
| CB4856                                                                                        | CT | V | 1050126 | 1053014 | WBGene00019625 | K10C9.4  | K10C9.4  | -0.211472057094483  |                     | AGIWUR13036 |
| CB4856                                                                                        | CT | V | 1054602 | 1055773 | WBGene00044515 | K10C9.9  | K10C9.9  | -0.343790086238174  |                     |             |
| AGIWUR16400;AGIWUR22203;AGIWUR27064;AGIWUR31901;AGIWUR40912                                   |    |   |         |         |                |          |          |                     |                     |             |
| CB4856                                                                                        | CT | V | 1056548 | 1058987 | WBGene00006255 | str-224  | K10C9.8  | 0.236646803511801   |                     | AGIWUR16313 |
| CB4856                                                                                        | CT | V | 1061595 | 1067908 | WBGene00019624 | K10C9.3  | K10C9.3  | 0.455499257718998   |                     |             |
| AGIWUR40890;AGIWUR44492                                                                       |    |   |         |         |                |          |          |                     |                     |             |
| CB4856                                                                                        | CT | V | 1075200 | 1079597 | WBGene00019623 | K10C9.1  | K10C9.1  | 0.31175595042657    |                     |             |
| AGIWUR25743;AGIWUR26540;AGIWUR29157;AGIWUR32093;AGIWUR32144;AGIWUR38999                       |    |   |         |         |                |          |          |                     |                     |             |
| CB4856                                                                                        | CT | V | 1081483 | 1082372 | WBGene00268189 | Y50D4B.9 | Y50D4B.9 |                     | 0.0619277569569068  |             |
| AGIWUR36491                                                                                   |    |   |         |         |                |          |          |                     |                     |             |
| CB4856                                                                                        | CT | V | 1084316 | 1087272 | WBGene00021745 | Y50D4B.6 | Y50D4B.6 |                     | -0.589459425049044  |             |
| AGIWUR26156                                                                                   |    |   |         |         |                |          |          |                     |                     |             |
| CB4856                                                                                        | CT | V | 1088283 | 1089891 | WBGene00021744 | clec-203 | Y50D4B.5 |                     | -0.23330973862705   |             |
| AGIWUR24505                                                                                   |    |   |         |         |                |          |          |                     |                     |             |
| CB4856                                                                                        | CT | V | 1092657 | 1098951 | WBGene00021743 | Y50D4B.4 | Y50D4B.4 |                     | -0.395236602600552  |             |
| AGIWUR42320;AGIWUR44641                                                                       |    |   |         |         |                |          |          |                     |                     |             |
| CB4856                                                                                        | CT | V | 1101186 | 1104046 | WBGene00021741 | Y50D4B.2 | Y50D4B.2 |                     | 0.123319835129847   |             |
| AGIWUR11172                                                                                   |    |   |         |         |                |          |          |                     |                     |             |
| CB4856                                                                                        | CT | V | 1112933 | 1129360 | WBGene00021740 | Y50D4B.1 | Y50D4B.1 |                     | 0.114499470969116   |             |
| AGIWUR41609;AGIWUR44635                                                                       |    |   |         |         |                |          |          |                     |                     |             |
| CB4856                                                                                        | CT | V | 1130088 | 1131942 | WBGene00021072 | W07B8.4  | W07B8.4  | 0.108252928119978   |                     | AGIWUR31431 |
| CB4856                                                                                        | CT | V | 1132598 | 1134036 | WBGene00000785 | cpr-5    | W07B8.5  | -0.239937190854835  |                     |             |
| AGIWUR9037;AGIWUR27737;AGIWUR39996                                                            |    |   |         |         |                |          |          |                     |                     |             |
| CB4856                                                                                        | CT | V | 1134485 | 1139172 | WBGene00021070 | cpr-8    | W07B8.1  | -0.364166215203042  |                     | AGIWUR5094  |
| CB4856                                                                                        | CT | V | 1141770 | 1146498 | WBGene00020663 | cut1-22  | T21H3.4  | 0.15373012815635    |                     | AGIWUR17117 |
| CB4856                                                                                        | CT | V | 1156271 | 1158174 | WBGene00000552 | cmd-1    | T21H3.3  | 0.0576600450364726  |                     |             |
| AGIWUR2590;AGIWUR9349;AGIWUR13292;AGIWUR33879;AGIWUR34932;AGIWUR37455;AGIWUR40916;AGIWUR45191 |    |   |         |         |                |          |          |                     |                     |             |
| CB4856                                                                                        | CT | V | 1165673 | 1174969 | WBGene00004230 | ptr-16   | T21H3.2  | -0.160326517013809  |                     | AGIWUR7971  |

|                                                                                                                                             |    |   |         |         |                |           |           |                     |             |
|---------------------------------------------------------------------------------------------------------------------------------------------|----|---|---------|---------|----------------|-----------|-----------|---------------------|-------------|
| CB4856                                                                                                                                      | CT | V | 1176724 | 1178864 | WBGene00020662 | T21H3.1   | T21H3.1   | -0.0285662411914451 |             |
| AGIWUR5708;AGIWUR6366;AGIWUR13610;AGIWUR28256;AGIWUR28832;AGIWUR36759                                                                       |    |   |         |         |                |           |           |                     |             |
| CB4856                                                                                                                                      | CT | V | 1179604 | 1181548 | WBGene00017764 | F25A2.1   | F25A2.1   | 0.00552866538436447 |             |
| AGIWUR19707;AGIWUR22186;AGIWUR32036;AGIWUR37356                                                                                             |    |   |         |         |                |           |           |                     |             |
| CB4856                                                                                                                                      | CT | V | 1182806 | 1184644 | WBGene00021737 | Y50D4A.3  | Y50D4A.3  | 0.0269629555067041  |             |
| AGIWUR37975                                                                                                                                 |    |   |         |         |                |           |           |                     |             |
| CB4856                                                                                                                                      | CT | V | 1196072 | 1207792 | WBGene00021736 | wrb-1     | Y50D4A.2  | 0.112762300180551   |             |
| AGIWUR29205                                                                                                                                 |    |   |         |         |                |           |           |                     |             |
| CB4856                                                                                                                                      | CT | V | 1207889 | 1219874 | WBGene00021735 | Y50D4A.1  | Y50D4A.1  | -0.0289691121469193 |             |
| AGIWUR17146                                                                                                                                 |    |   |         |         |                |           |           |                     |             |
| CB4856                                                                                                                                      | CT | V | 1223901 | 1235445 | WBGene00016539 | madd-2    | C39F7.2   | 0.479329801577002   | AGIWUR12478 |
| CB4856                                                                                                                                      | CT | V | 1260465 | 1262616 | WBGene00016538 | C39F7.1   | C39F7.1   | -0.102957307462207  | AGIWUR27762 |
| CB4856                                                                                                                                      | CT | V | 1262628 | 1263989 | WBGene00004266 | rab-1     | C39F7.4   | 0.0123355438559116  |             |
| AGIWUR8106;AGIWUR10175;AGIWUR15670;AGIWUR20977;AGIWUR30892;AGIWUR40582;AGIWUR43515                                                          |    |   |         |         |                |           |           |                     |             |
| CB4856                                                                                                                                      | CT | V | 1264773 | 1270160 | WBGene00016540 | C39F7.5   | C39F7.5   | 0.304988332098898   | AGIWUR14855 |
| CB4856                                                                                                                                      | CT | V | 1270911 | 1273043 | WBGene00022288 | Y75B7B.1  | Y75B7B.1  | -0.215647167926926  |             |
| AGIWUR43411                                                                                                                                 |    |   |         |         |                |           |           |                     |             |
| CB4856                                                                                                                                      | CT | V | 1274210 | 1276006 | WBGene00022289 | Y75B7B.2  | Y75B7B.2  | 0.0143457908373641  |             |
| AGIWUR15950                                                                                                                                 |    |   |         |         |                |           |           |                     |             |
| CB4856                                                                                                                                      | CT | V | 1276420 | 1285700 | WBGene00004053 | tank-1    | ZK1005.1  | -0.0214567732425266 |             |
| AGIWUR2481;AGIWUR29658;AGIWUR32914                                                                                                          |    |   |         |         |                |           |           |                     |             |
| CB4856                                                                                                                                      | CT | V | 1288841 | 1299332 | WBGene00001171 | egl-2     | F16B3.1   | -0.0424368432773656 | AGIWUR41827 |
| CB4856                                                                                                                                      | CT | V | 1315105 | 1315524 | WBGene00017502 | F16B3.2   | F16B3.2   | 1.14134067736088    | AGIWUR34396 |
| CB4856                                                                                                                                      | CT | V | 1315643 | 1317919 | WBGene00044774 | F16B3.3   | F16B3.3   | 0.150593650897743   |             |
| AGIWUR2659;AGIWUR2880;AGIWUR5172;AGIWUR5984;AGIWUR14866;AGIWUR18012;AGIWUR23552;AGIWUR24334;AGIWUR24824;AGIWUR30074;AGIWUR33277;AGIWUR37172 |    |   |         |         |                |           |           |                     |             |
| CB4856                                                                                                                                      | CT | V | 1332275 | 1358164 | WBGene00022285 | Y75B7AL.2 | Y75B7AL.2 | 0.267039560358764   |             |
| AGIWUR8365;AGIWUR16645;AGIWUR25866;AGIWUR41586                                                                                              |    |   |         |         |                |           |           |                     |             |
| CB4856                                                                                                                                      | CT | V | 1373120 | 1383254 | WBGene00022286 | rga-4     | Y75B7AL.4 | 0.0146755245613228  |             |
| AGIWUR36713                                                                                                                                 |    |   |         |         |                |           |           |                     |             |
| CB4856                                                                                                                                      | CT | V | 1391163 | 1392103 | WBGene00022287 | Y75B7AR.1 | Y75B7AR.1 | -0.27529384388297   |             |
| AGIWUR8594                                                                                                                                  |    |   |         |         |                |           |           |                     |             |
| CB4856                                                                                                                                      | CT | V | 1393112 | 1411616 | WBGene00004925 | snt-5     | R12A1.2   | -0.214381052815799  |             |
| AGIWUR15426;AGIWUR26619;AGIWUR28167                                                                                                         |    |   |         |         |                |           |           |                     |             |
| CB4856                                                                                                                                      | CT | V | 1422796 | 1425794 | WBGene00020017 | R12A1.3   | R12A1.3   | -0.0601228543456473 |             |
| AGIWUR1907;AGIWUR36237                                                                                                                      |    |   |         |         |                |           |           |                     |             |
| CB4856                                                                                                                                      | CT | V | 1427653 | 1432137 | WBGene00001578 | ges-1     | R12A1.4   | -0.092476650643416  | AGIWUR39263 |
| CB4856                                                                                                                                      | CT | V | 1434339 | 1435804 | WBGene00019976 | fbxa-195  | R09B5.1   | 0.015100223258897   |             |
| AGIWUR15706                                                                                                                                 |    |   |         |         |                |           |           |                     |             |

|                                                                                                                                                       |    |   |         |         |                |          |          |                       |             |
|-------------------------------------------------------------------------------------------------------------------------------------------------------|----|---|---------|---------|----------------|----------|----------|-----------------------|-------------|
| CB4856                                                                                                                                                | CT | V | 1439179 | 1441871 | WBGene00019979 | R09B5.11 | R09B5.11 | 0.189009873811916     |             |
| AGIWUR21597                                                                                                                                           |    |   |         |         |                |          |          |                       |             |
| CB4856                                                                                                                                                | CT | V | 1442588 | 1442876 | WBGene00044900 | cnc-11   | R09B5.13 | 0.585555270216959     |             |
| AGIWUR2922;AGIWUR7262;AGIWUR9640;AGIWUR41712;AGIWUR43465                                                                                              |    |   |         |         |                |          |          |                       |             |
| CB4856                                                                                                                                                | CT | V | 1444044 | 1444280 | WBGene00000555 | cnc-1    | R09B5.2  | 0.0170410772735572    | AGIWUR36656 |
| CB4856                                                                                                                                                | CT | V | 1445381 | 1445832 | WBGene00000559 | cnc-5    | R09B5.10 | -0.129706424250248    |             |
| AGIWUR14026                                                                                                                                           |    |   |         |         |                |          |          |                       |             |
| CB4856                                                                                                                                                | CT | V | 1447195 | 1447707 | WBGene00000558 | cnc-4    | R09B5.9  | 0.0302281544239822    | AGIWUR28592 |
| CB4856                                                                                                                                                | CT | V | 1448004 | 1448790 | WBGene00000557 | cnc-3    | R09B5.8  | -0.231375678266884    | AGIWUR39532 |
| CB4856                                                                                                                                                | CT | V | 1449665 | 1450189 | WBGene00000556 | cnc-2    | R09B5.3  | -0.926324345174246    |             |
| AGIWUR1432;AGIWUR12946;AGIWUR14737;AGIWUR38057;AGIWUR40413;AGIWUR45034                                                                                |    |   |         |         |                |          |          |                       |             |
| CB4856                                                                                                                                                | CT | V | 1451634 | 1454340 | WBGene00005611 | srj-23   | R09B5.7  | -0.0916750955753924   |             |
| AGIWUR498;AGIWUR28473;AGIWUR36052                                                                                                                     |    |   |         |         |                |          |          |                       |             |
| CB4856                                                                                                                                                | CT | V | 1455062 | 1456646 | WBGene00019980 | chil-14  | R09B5.12 | -0.000100053755134333 |             |
| AGIWUR44056                                                                                                                                           |    |   |         |         |                |          |          |                       |             |
| CB4856                                                                                                                                                | CT | V | 1460369 | 1461613 | WBGene00019978 | hacd-1   | R09B5.6  | 0.874167306048296     |             |
| AGIWUR5379;AGIWUR19041;AGIWUR34145                                                                                                                    |    |   |         |         |                |          |          |                       |             |
| CB4856                                                                                                                                                | CT | V | 1462063 | 1464699 | WBGene00019977 | fpn-1.2  | R09B5.4  | 0.476598007748496     | AGIWUR31821 |
| CB4856                                                                                                                                                | CT | V | 1464990 | 1466360 | WBGene00004139 | pqn-54   | R09B5.5  | -0.760697458942918    | AGIWUR41618 |
| CB4856                                                                                                                                                | CT | V | 1467744 | 1471105 | WBGene00018757 | tag-304  | F53E2.1  | 0.270131720238307     | AGIWUR29558 |
| CB4856                                                                                                                                                | CT | V | 1475072 | 1479576 | WBGene00006794 | unc-60   | C38C3.5  | -0.091421667473206    |             |
| AGIWUR324;AGIWUR2449;AGIWUR2803;AGIWUR4564;AGIWUR7681;AGIWUR10222;AGIWUR18543;AGIWUR20925;AGIWUR26152;AGIWUR28373;AGIWUR29218;AGIWUR39824;AGIWUR42409 |    |   |         |         |                |          |          |                       |             |
| CB4856                                                                                                                                                | CT | V | 1482042 | 1484015 | WBGene00016513 | C38C3.4  | C38C3.4  | 0.524139097873061     |             |
| AGIWUR1850;AGIWUR9335;AGIWUR14308                                                                                                                     |    |   |         |         |                |          |          |                       |             |
| CB4856                                                                                                                                                | CT | V | 1484828 | 1491604 | WBGene00016514 | C38C3.6  | C38C3.6  | 0.142154358462227     | AGIWUR43075 |
| CB4856                                                                                                                                                | CT | V | 1494769 | 1495453 | WBGene00045390 | C38C3.10 | C38C3.10 | 0.142506164650311     |             |
| AGIWUR32515                                                                                                                                           |    |   |         |         |                |          |          |                       |             |
| CB4856                                                                                                                                                | CT | V | 1495634 | 1497985 | WBGene00016512 | C38C3.3  | C38C3.3  | 0.498550645142281     | AGIWUR42559 |
| CB4856                                                                                                                                                | CT | V | 1499440 | 1500687 | WBGene00005690 | sru-27   | C38C3.2  | 0.0784875243637853    | AGIWUR29744 |
| CB4856                                                                                                                                                | CT | V | 1501420 | 1505310 | WBGene00016516 | C38C3.8  | C38C3.8  | 0.00077348553917389   |             |
| AGIWUR29041;AGIWUR31012                                                                                                                               |    |   |         |         |                |          |          |                       |             |
| CB4856                                                                                                                                                | CT | V | 1510024 | 1511630 | WBGene00016517 | nhr-260  | C38C3.9  | 0.142333662189456     | AGIWUR14282 |
| CB4856                                                                                                                                                | CT | V | 1518736 | 1519807 | WBGene00023317 | K02H11.8 | K02H11.8 | -0.487799695686156    |             |
| AGIWUR4057                                                                                                                                            |    |   |         |         |                |          |          |                       |             |
| CB4856                                                                                                                                                | CT | V | 1520463 | 1521945 | WBGene00006268 | str-240  | K02H11.2 | -0.84232681196328     |             |
| AGIWUR41821                                                                                                                                           |    |   |         |         |                |          |          |                       |             |
| CB4856                                                                                                                                                | CT | V | 1522785 | 1524224 | WBGene00006270 | str-243  | K02H11.7 | 0.105714193329713     |             |
| AGIWUR35522                                                                                                                                           |    |   |         |         |                |          |          |                       |             |

|                                                                         |    |   |         |         |                |          |          |                     |             |
|-------------------------------------------------------------------------|----|---|---------|---------|----------------|----------|----------|---------------------|-------------|
| CB4856                                                                  | CT | V | 1524502 | 1525687 | WBGene00006267 | str-239  | K02H11.1 | 0.0128512586507328  |             |
| AGIWUR17216;AGIWUR44671                                                 |    |   |         |         |                |          |          |                     |             |
| CB4856                                                                  | CT | V | 1526467 | 1528085 | WBGene00006265 | str-236  | K02H11.3 | 0.247626795389758   |             |
| AGIWUR25872                                                             |    |   |         |         |                |          |          |                     |             |
| CB4856                                                                  | CT | V | 1528824 | 1531259 | WBGene00019348 | K02H11.4 | K02H11.4 | 0.196816183794146   |             |
| AGIWUR31621                                                             |    |   |         |         |                |          |          |                     |             |
| CB4856                                                                  | CT | V | 1532030 | 1533304 | WBGene00006248 | str-216  | K02H11.5 | -0.320396248400105  |             |
| AGIWUR16290;AGIWUR33379                                                 |    |   |         |         |                |          |          |                     |             |
| CB4856                                                                  | CT | V | 1533892 | 1534415 | WBGene00019349 | trx-5    | K02H11.6 | 0.0943346702650629  |             |
| AGIWUR5711                                                              |    |   |         |         |                |          |          |                     |             |
| CB4856                                                                  | CT | V | 1535224 | 1537079 | WBGene00019350 | K02H11.9 | K02H11.9 | 0.140718370030126   |             |
| AGIWUR7169                                                              |    |   |         |         |                |          |          |                     |             |
| CB4856                                                                  | CT | V | 1538364 | 1541824 | WBGene00018707 | oac-31   | F52F10.3 | 1.55538895133182    |             |
| AGIWUR3780                                                              |    |   |         |         |                |          |          |                     |             |
| CB4856                                                                  | CT | V | 1542517 | 1545791 | WBGene00018708 | oac-32   | F52F10.4 | -0.354221232868326  |             |
| AGIWUR37337                                                             |    |   |         |         |                |          |          |                     |             |
| CB4856                                                                  | CT | V | 1548143 | 1550701 | WBGene00018706 | F52F10.2 | F52F10.2 | 0.18136933432609    |             |
| AGIWUR30363                                                             |    |   |         |         |                |          |          |                     |             |
| CB4856                                                                  | CT | V | 1551044 | 1553102 | WBGene00018709 | srsx-8   | F52F10.5 | 0.186832621646873   |             |
| AGIWUR4739                                                              |    |   |         |         |                |          |          |                     |             |
| CB4856                                                                  | CT | V | 1567076 | 1585532 | WBGene00000387 | cdc-25.2 | F16B4.8  | 0.217276573062147   |             |
| AGIWUR22718;AGIWUR23475;AGIWUR34143;AGIWUR38017;AGIWUR40845             |    |   |         |         |                |          |          |                     |             |
| CB4856                                                                  | CT | V | 1585722 | 1586028 | WBGene00017509 | F16B4.7  | F16B4.7  | 0.649756994112585   |             |
| AGIWUR2074;AGIWUR36242                                                  |    |   |         |         |                |          |          |                     |             |
| CB4856                                                                  | CT | V | 1588548 | 1591727 | WBGene00017507 | F16B4.5  | F16B4.5  | -0.163015472359618  |             |
| AGIWUR22275;AGIWUR23024;AGIWUR35644                                     |    |   |         |         |                |          |          |                     |             |
| CB4856                                                                  | CT | V | 1594019 | 1594665 | WBGene00017506 | F16B4.4  | F16B4.4  | -0.174621090866394  |             |
| AGIWUR14436;AGIWUR21983;AGIWUR24255;AGIWUR25347;AGIWUR31339;AGIWUR42496 |    |   |         |         |                |          |          |                     |             |
| CB4856                                                                  | CT | V | 1596144 | 1598689 | WBGene00017505 | F16B4.3  | F16B4.3  | -0.0993834837924172 | AGIWUR20497 |
| CB4856                                                                  | CT | V | 1601038 | 1603916 | WBGene00017504 | F16B4.2  | F16B4.2  | -0.196597469264486  | AGIWUR28708 |
| CB4856                                                                  | CT | V | 1603934 | 1607846 | WBGene00017510 | nhr-178  | F16B4.9  | 0.296083863376385   | AGIWUR31021 |
| CB4856                                                                  | CT | V | 1610263 | 1612747 | WBGene00017503 | nhr-177  | F16B4.1  | -0.189315241896422  | AGIWUR1914  |
| CB4856                                                                  | CT | V | 1612803 | 1614826 | WBGene00017511 | srbc-41  | F16B4.10 | -0.145756811010344  |             |
| AGIWUR42512                                                             |    |   |         |         |                |          |          |                     |             |
| CB4856                                                                  | CT | V | 1615723 | 1618072 | WBGene00017512 | nhr-179  | F16B4.11 | 0.32210746117959    |             |
| AGIWUR12425                                                             |    |   |         |         |                |          |          |                     |             |
| CB4856                                                                  | CT | V | 1619194 | 1621536 | WBGene00003707 | nhr-117  | F16B4.12 | 0.600871090469698   |             |
| AGIWUR11701;AGIWUR28007;AGIWUR41153;AGIWUR42311                         |    |   |         |         |                |          |          |                     |             |
| CB4856                                                                  | CT | V | 1622636 | 1624433 | WBGene00003700 | nhr-110  | Y46H3D.5 | 0.326762325488025   |             |

|                                                                                    |   |         |         |                |          |          |                     |                     |
|------------------------------------------------------------------------------------|---|---------|---------|----------------|----------|----------|---------------------|---------------------|
| AGIWUR16766                                                                        |   |         |         |                |          |          |                     |                     |
| CB4856 CT                                                                          | V | 1625225 | 1626818 | WBGene00021610 | nhp-237  | Y46H3D.6 |                     | -0.212856151407593  |
| AGIWUR3104                                                                         |   |         |         |                |          |          |                     |                     |
| CB4856 CT                                                                          | V | 1628106 | 1629432 | WBGene00021611 | nhp-238  | Y46H3D.7 |                     | 0.012518058068105   |
| AGIWUR1379                                                                         |   |         |         |                |          |          |                     |                     |
| CB4856 CT                                                                          | V | 1630309 | 1631248 | WBGene00021612 | Y46H3D.8 | Y46H3D.8 |                     | -0.0448712724733529 |
| AGIWUR27368                                                                        |   |         |         |                |          |          |                     |                     |
| CB4856 CT                                                                          | V | 1632017 | 1635883 | WBGene00021609 | irld-17  | Y46H3D.4 |                     | 0.0700576675004854  |
| AGIWUR27296                                                                        |   |         |         |                |          |          |                     |                     |
| CB4856 CT                                                                          | V | 1636159 | 1639281 | WBGene00006253 | str-222  | Y46H3D.3 |                     | 0.116775046023865   |
| AGIWUR13494;AGIWUR21212;AGIWUR21818                                                |   |         |         |                |          |          |                     |                     |
| CB4856 CT                                                                          | V | 1640308 | 1642287 | WBGene00006252 | str-221  | Y46H3D.2 |                     | 0.0461082624585183  |
| AGIWUR10629;AGIWUR12769;AGIWUR24631                                                |   |         |         |                |          |          |                     |                     |
| CB4856 CT                                                                          | V | 1642499 | 1643121 | WBGene00021608 | Y46H3D.1 | Y46H3D.1 |                     | -0.511298278083675  |
| AGIWUR2223;AGIWUR11726;AGIWUR13295;AGIWUR14828;AGIWUR29088;AGIWUR32631;AGIWUR39494 |   |         |         |                |          |          |                     |                     |
| CB4856 CT                                                                          | V | 1644169 | 1647728 | WBGene00000108 | alh-2    | K04F1.15 |                     | -0.258877936489031  |
| AGIWUR6897                                                                         |   |         |         |                |          |          |                     |                     |
| CB4856 CT                                                                          | V | 1648300 | 1651143 | WBGene00019393 | irld-45  | K04F1.14 |                     | -0.075381449234488  |
| AGIWUR7514                                                                         |   |         |         |                |          |          |                     |                     |
| CB4856 CT                                                                          | V | 1651345 | 1654444 | WBGene00019392 | irld-44  | K04F1.13 |                     | -0.100081069461194  |
| AGIWUR8683                                                                         |   |         |         |                |          |          |                     |                     |
| CB4856 CT                                                                          | V | 1655090 | 1657364 | WBGene00019391 | irld-11  | K04F1.12 |                     | 0.294519309979566   |
| AGIWUR2258                                                                         |   |         |         |                |          |          |                     |                     |
| CB4856 CT                                                                          | V | 1658072 | 1659636 | WBGene00019384 | K04F1.1  | K04F1.1  | 0.0432968603609698  | AGIWUR27851         |
| CB4856 CT                                                                          | V | 1660297 | 1662150 | WBGene00019390 | irld-43  | K04F1.11 |                     | -0.120731616670201  |
| AGIWUR17985;AGIWUR42790                                                            |   |         |         |                |          |          |                     |                     |
| CB4856 CT                                                                          | V | 1662570 | 1664503 | WBGene00019389 | irld-40  | K04F1.10 |                     | 0.0582388246835448  |
| AGIWUR26847                                                                        |   |         |         |                |          |          |                     |                     |
| CB4856 CT                                                                          | V | 1664650 | 1665950 | WBGene00019388 | K04F1.9  | K04F1.9  | -0.620442932092971  | AGIWUR20834         |
| CB4856 CT                                                                          | V | 1667204 | 1667813 | WBGene00019387 | K04F1.8  | K04F1.8  | -0.279535995774246  | AGIWUR38947         |
| CB4856 CT                                                                          | V | 1668516 | 1670630 | WBGene00019386 | irld-42  | K04F1.7  | -0.195086751571878  | AGIWUR31674         |
| CB4856 CT                                                                          | V | 1670973 | 1673439 | WBGene00019385 | irld-41  | K04F1.6  | 0.09199018572623    | AGIWUR21923         |
| CB4856 CT                                                                          | V | 1673543 | 1675613 | WBGene00005843 | srw-96   | K04F1.2  | 0.023001476594577   | AGIWUR42752         |
| CB4856 CT                                                                          | V | 1676474 | 1678328 | WBGene00005845 | srw-98   | K04F1.3  | -0.445268257091452  | AGIWUR42917         |
| CB4856 CT                                                                          | V | 1679208 | 1680870 | WBGene00005838 | srw-91   | K04F1.4  | 0.14179062029317    | AGIWUR23336         |
| CB4856 CT                                                                          | V | 1682579 | 1685089 | WBGene00005229 | srh-3    | K04F1.5  | -0.0372964521539991 | AGIWUR13668         |
| CB4856 CT                                                                          | V | 1685628 | 1686864 | WBGene00005231 | srh-5    | K04F1.16 |                     | -0.382412204541616  |
| AGIWUR20402                                                                        |   |         |         |                |          |          |                     |                     |
| CB4856 CT                                                                          | V | 1687495 | 1689687 | WBGene00021604 | Y46H3C.4 | Y46H3C.4 |                     | 0.0574326592020977  |

|                                                                         |   |         |         |                |          |          |                     |             |
|-------------------------------------------------------------------------|---|---------|---------|----------------|----------|----------|---------------------|-------------|
| AGIWUR18415                                                             |   |         |         |                |          |          |                     |             |
| CB4856 CT                                                               | V | 1691029 | 1692052 | WBGene00021605 | Y46H3C.5 | Y46H3C.5 | -0.461491209020982  |             |
| AGIWUR3831                                                              |   |         |         |                |          |          |                     |             |
| CB4856 CT                                                               | V | 1697889 | 1701617 | WBGene00021606 | Y46H3C.6 | Y46H3C.6 | 0.120743831058149   |             |
| AGIWUR43236                                                             |   |         |         |                |          |          |                     |             |
| CB4856 CT                                                               | V | 1702051 | 1704053 | WBGene00005837 | srw-90   | Y46H3C.3 | 0.226160857799806   |             |
| AGIWUR9837                                                              |   |         |         |                |          |          |                     |             |
| CB4856 CT                                                               | V | 1708741 | 1710663 | WBGene00005846 | srw-99   | Y46H3C.2 | 0.0540156937887026  |             |
| AGIWUR13161                                                             |   |         |         |                |          |          |                     |             |
| CB4856 CT                                                               | V | 1711209 | 1715399 | WBGene00005847 | srw-100  | Y46H3C.1 | 0.123274774769103   |             |
| AGIWUR25705                                                             |   |         |         |                |          |          |                     |             |
| CB4856 CT                                                               | V | 1717243 | 1719464 | WBGene00005850 | srw-103  | ZK697.5  | 0.0117242423405619  | AGIWUR13701 |
| CB4856 CT                                                               | V | 1720227 | 1721973 | WBGene00005849 | srw-102  | ZK697.12 | 0.178337618958709   |             |
| AGIWUR23406                                                             |   |         |         |                |          |          |                     |             |
| CB4856 CT                                                               | V | 1722266 | 1725261 | WBGene00005848 | srw-101  | ZK697.13 | 0.204360141119221   |             |
| AGIWUR6004                                                              |   |         |         |                |          |          |                     |             |
| CB4856 CT                                                               | V | 1725653 | 1727632 | WBGene00005539 | sri-27   | ZK697.4  | -0.0425895043569842 | AGIWUR23655 |
| CB4856 CT                                                               | V | 1729116 | 1730649 | WBGene00022806 | ZK697.3  | ZK697.3  | -0.0562367839067122 | AGIWUR32139 |
| CB4856 CT                                                               | V | 1730759 | 1732000 | WBGene00001769 | gst-21   | ZK697.6  | -0.381808106163009  | AGIWUR36708 |
| CB4856 CT                                                               | V | 1734869 | 1736767 | WBGene00006205 | str-160  | ZK697.10 | 0.0975470880233615  |             |
| AGIWUR1209                                                              |   |         |         |                |          |          |                     |             |
| CB4856 CT                                                               | V | 1738927 | 1741157 | WBGene00022807 | srab-25  | ZK697.7  | 0.226685779458969   | AGIWUR16633 |
| CB4856 CT                                                               | V | 1743771 | 1747969 | WBGene00022805 | nhr-256  | ZK697.2  | -0.0477264669894648 |             |
| AGIWUR7017;AGIWUR8600;AGIWUR28647                                       |   |         |         |                |          |          |                     |             |
| CB4856 CT                                                               | V | 1748432 | 1749153 | WBGene00022808 | ZK697.8  | ZK697.8  | 0.251989930888247   |             |
| AGIWUR17448;AGIWUR25011;AGIWUR27665;AGIWUR31649                         |   |         |         |                |          |          |                     |             |
| CB4856 CT                                                               | V | 1750001 | 1751549 | WBGene00005410 | srh-199  | ZK697.11 | 0.535957730668755   |             |
| AGIWUR10138;AGIWUR40344;AGIWUR44497                                     |   |         |         |                |          |          |                     |             |
| CB4856 CT                                                               | V | 1752796 | 1753856 | WBGene00022804 | ZK697.1  | ZK697.1  | -0.173983884655766  | AGIWUR8405  |
| CB4856 CT                                                               | V | 1754238 | 1755689 | WBGene00022809 | ZK697.14 | ZK697.14 | -0.226744456235386  |             |
| AGIWUR31379                                                             |   |         |         |                |          |          |                     |             |
| CB4856 CT                                                               | V | 1760861 | 1765305 | WBGene00021602 | clcc-205 | Y46H3B.1 | -0.416430748737017  |             |
| AGIWUR8341                                                              |   |         |         |                |          |          |                     |             |
| CB4856 CT                                                               | V | 1765311 | 1771734 | WBGene00000976 | dhs-13   | F36H9.3  | -0.0905692853859694 |             |
| AGIWUR16906;AGIWUR23989;AGIWUR24571;AGIWUR29221;AGIWUR33084;AGIWUR37543 |   |         |         |                |          |          |                     |             |
| CB4856 CT                                                               | V | 1773826 | 1774918 | WBGene00018115 | F36H9.7  | F36H9.7  | 0.0436907987867006  |             |
| AGIWUR6284;AGIWUR24760;AGIWUR25424;AGIWUR26480                          |   |         |         |                |          |          |                     |             |
| CB4856 CT                                                               | V | 1779657 | 1782022 | WBGene00018113 | F36H9.5  | F36H9.5  | -0.226325431866393  | AGIWUR32450 |
| CB4856 CT                                                               | V | 1788511 | 1793250 | WBGene00018111 | F36H9.2  | F36H9.2  | -0.119930314261461  | AGIWUR7637  |



|                                                            |   |         |         |                |           |          |                       |             |
|------------------------------------------------------------|---|---------|---------|----------------|-----------|----------|-----------------------|-------------|
| CB4856 CT                                                  | V | 1798200 | 1799694 | WBGene00268194 | F36H9.10  | F36H9.10 | 0.23510267044969      |             |
| AGIWUR33123                                                |   |         |         |                |           |          |                       |             |
| CB4856 CT                                                  | V | 1799726 | 1803143 | WBGene00018114 | srt-41    | F36H9.6  | 0.0669237330394825    |             |
| AGIWUR1923;AGIWUR21739;AGIWUR39411                         |   |         |         |                |           |          |                       |             |
| CB4856 CT                                                  | V | 1804334 | 1804971 | WBGene00002016 | hsp-16.2  | Y46H3A.3 | 0.567398390425119     |             |
| AGIWUR33481                                                |   |         |         |                |           |          |                       |             |
| CB4856 CT                                                  | V | 1805178 | 1805875 | WBGene00002018 | hsp-16.41 | Y46H3A.2 | 0.512334747160087     |             |
| AGIWUR5399;AGIWUR40972                                     |   |         |         |                |           |          |                       |             |
| CB4856 CT                                                  | V | 1807450 | 1809468 | WBGene00021599 | srt-42    | Y46H3A.1 | 0.165768659009745     |             |
| AGIWUR28255;AGIWUR43360                                    |   |         |         |                |           |          |                       |             |
| CB4856 CT                                                  | V | 1809560 | 1811135 | WBGene00021600 | Y46H3A.4  | Y46H3A.4 | 0.0445435438667925    |             |
| AGIWUR20038                                                |   |         |         |                |           |          |                       |             |
| CB4856 CT                                                  | V | 1811423 | 1814116 | WBGene00021601 | Y46H3A.5  | Y46H3A.5 | 0.0119550765469203    |             |
| AGIWUR26944;AGIWUR42495                                    |   |         |         |                |           |          |                       |             |
| CB4856 CT                                                  | V | 1815852 | 1821323 | WBGene00001632 | gly-7     | Y46H3A.6 | 0.0965331517213119    |             |
| AGIWUR9988                                                 |   |         |         |                |           |          |                       |             |
| CB4856 CT                                                  | V | 1821579 | 1823096 | WBGene00044344 | mrp1-39   | Y46H3A.7 | -0.375903948347645    |             |
| AGIWUR20002                                                |   |         |         |                |           |          |                       |             |
| CB4856 CT                                                  | V | 1823077 | 1830073 | WBGene00021309 | Y32G9B.1  | Y32G9B.1 | -0.0831079090235818   |             |
| AGIWUR23123                                                |   |         |         |                |           |          |                       |             |
| CB4856 CT                                                  | V | 1842044 | 1844807 | WBGene00020394 | T10B5.8   | T10B5.8  | -0.0695252009642222   |             |
| AGIWUR20519;AGIWUR29587                                    |   |         |         |                |           |          |                       |             |
| CB4856 CT                                                  | V | 1846201 | 1848015 | WBGene00020393 | T10B5.7   | T10B5.7  | -0.030790753559792    | AGIWUR22131 |
| CB4856 CT                                                  | V | 1848073 | 1851445 | WBGene00020388 | T10B5.2   | T10B5.2  | -0.116648930483843    | AGIWUR27215 |
| CB4856 CT                                                  | V | 1852449 | 1856276 | WBGene00020396 | T10B5.10  | T10B5.10 | -0.166215517782025    |             |
| AGIWUR30645                                                |   |         |         |                |           |          |                       |             |
| CB4856 CT                                                  | V | 1864181 | 1868571 | WBGene00020389 | T10B5.3   | T10B5.3  | -0.0977577151303555   |             |
| AGIWUR38;AGIWUR4999;AGIWUR9987;AGIWUR31559                 |   |         |         |                |           |          |                       |             |
| CB4856 CT                                                  | V | 1869213 | 1870558 | WBGene00020392 | kn1-3     | T10B5.6  | -0.279062582967544    | AGIWUR5520  |
| CB4856 CT                                                  | V | 1870421 | 1871789 | WBGene00020390 | T10B5.4   | T10B5.4  | -0.372268666991447    | AGIWUR20357 |
| CB4856 CT                                                  | V | 1872246 | 1875526 | WBGene00020391 | cct-7     | T10B5.5  | -0.152869714292683    |             |
| AGIWUR3536;AGIWUR13115;AGIWUR17600;AGIWUR24679;AGIWUR37923 |   |         |         |                |           |          |                       |             |
| CB4856 CT                                                  | V | 1875478 | 1882265 | WBGene00021305 | zig-11    | Y32G9A.8 | -0.357309250644564    |             |
| AGIWUR22727                                                |   |         |         |                |           |          |                       |             |
| CB4856 CT                                                  | V | 1895797 | 1906560 | WBGene00021304 | nphp-2    | Y32G9A.6 | 0.0103488104346319    |             |
| AGIWUR40867                                                |   |         |         |                |           |          |                       |             |
| CB4856 CT                                                  | V | 1907654 | 1908528 | WBGene00021303 | Y32G9A.5  | Y32G9A.5 | 0.0433395939944488    |             |
| AGIWUR12249                                                |   |         |         |                |           |          |                       |             |
| CB4856 CT                                                  | V | 1908855 | 1910692 | WBGene00005644 | srp-3     | Y32G9A.4 | -0.000373541149670586 |             |

|                                                                                                                                |    |   |         |         |                |                  |                                |
|--------------------------------------------------------------------------------------------------------------------------------|----|---|---------|---------|----------------|------------------|--------------------------------|
| AGIWUR13979                                                                                                                    |    |   |         |         |                |                  |                                |
| CB4856                                                                                                                         | CT | V | 1911402 | 1913572 | WBGene00021302 | Y32G9A.3         | Y32G9A.3 0.39395327403501      |
| AGIWUR15769                                                                                                                    |    |   |         |         |                |                  |                                |
| CB4856                                                                                                                         | CT | V | 1913627 | 1917986 | WBGene00044517 | Y32G9A.13        | Y32G9A.13 -0.0206143164446022  |
| AGIWUR6335;AGIWUR14178;AGIWUR20443;AGIWUR22055;AGIWUR33726;AGIWUR37482                                                         |    |   |         |         |                |                  |                                |
| CB4856                                                                                                                         | CT | V | 1918539 | 1921029 | WBGene00021301 | Y32G9A.2         | Y32G9A.2 0.0107461367881854    |
| AGIWUR19923                                                                                                                    |    |   |         |         |                |                  |                                |
| CB4856                                                                                                                         | CT | V | 1921621 | 1922381 | WBGene00001785 | gst-37 Y32G9A.1  | 0.0606499695546749             |
| AGIWUR4468;AGIWUR15840                                                                                                         |    |   |         |         |                |                  |                                |
| CB4856                                                                                                                         | CT | V | 1923116 | 1925565 | WBGene00020277 | T06A1.1 T06A1.1  | -0.194843006997663 AGIWUR34808 |
| CB4856                                                                                                                         | CT | V | 1927223 | 1931413 | WBGene00020280 | T06A1.5 T06A1.5  | -0.546358038822159 AGIWUR21341 |
| CB4856                                                                                                                         | CT | V | 1944955 | 1953349 | WBGene00020279 | glb-25 T06A1.4   | -0.0200390917615447            |
| AGIWUR627;AGIWUR1111;AGIWUR4223;AGIWUR7808;AGIWUR17908;AGIWUR20988;AGIWUR21891;AGIWUR23733;AGIWUR24723;AGIWUR37834;AGIWUR45105 |    |   |         |         |                |                  |                                |
| CB4856                                                                                                                         | CT | V | 1953912 | 1956560 | WBGene00005604 | srj-16 T06A1.2   | 0.0376198905727883 AGIWUR33567 |
| CB4856                                                                                                                         | CT | V | 1957417 | 1957932 | WBGene00044518 | fipr-25 T06A1.7  | 0.0225855406838846             |
| AGIWUR1522;AGIWUR16811;AGIWUR24089;AGIWUR29190;AGIWUR41979                                                                     |    |   |         |         |                |                  |                                |
| CB4856                                                                                                                         | CT | V | 1960137 | 1961403 | WBGene00021494 | Y40B10B.1        | Y40B10B.1 1.78742410156884     |
| AGIWUR15579                                                                                                                    |    |   |         |         |                |                  |                                |
| CB4856                                                                                                                         | CT | V | 1962815 | 1964906 | WBGene00005603 | srj-15 Y40B10B.2 | -0.102453437152307             |
| AGIWUR9421;AGIWUR25828                                                                                                         |    |   |         |         |                |                  |                                |
| CB4856                                                                                                                         | CT | V | 1969528 | 1974514 | WBGene00020343 | acs-3 T08B1.6    | 0.62613636506598 AGIWUR39853   |
| CB4856                                                                                                                         | CT | V | 1975418 | 1977261 | WBGene00020342 | fbxa-201 T08B1.5 | -0.0988464747209452            |
| AGIWUR23246;AGIWUR29026;AGIWUR35886                                                                                            |    |   |         |         |                |                  |                                |
| CB4856                                                                                                                         | CT | V | 1979435 | 1982664 | WBGene00020341 | T08B1.4 T08B1.4  | -0.00433825518155162           |
| AGIWUR13175;AGIWUR14799;AGIWUR20161;AGIWUR27409;AGIWUR38153;AGIWUR43363                                                        |    |   |         |         |                |                  |                                |
| CB4856                                                                                                                         | CT | V | 1982631 | 1987045 | WBGene00020340 | T08B1.1 T08B1.1  | -0.565644689124785 AGIWUR23266 |
| CB4856                                                                                                                         | CT | V | 1989476 | 1992918 | WBGene00006589 | tnt-4 T08B1.2    | 0.355618230598294              |
| AGIWUR21520;AGIWUR45074                                                                                                        |    |   |         |         |                |                  |                                |
| CB4856                                                                                                                         | CT | V | 1996100 | 1999581 | WBGene00000111 | alh-5 T08B1.3    | 2.0133902348546 AGIWUR37322    |
| CB4856                                                                                                                         | CT | V | 2000418 | 2004329 | WBGene00019089 | clec-206 F59A7.1 | 0.0298505485742977             |
| AGIWUR8715                                                                                                                     |    |   |         |         |                |                  |                                |
| CB4856                                                                                                                         | CT | V | 2005057 | 2006804 | WBGene00019096 | cysl-4 F59A7.9   | -0.334082759816491 AGIWUR38987 |
| CB4856                                                                                                                         | CT | V | 2007360 | 2007709 | WBGene00023306 | F59A7.10         | F59A7.10 -0.158757333278913    |
| AGIWUR28358                                                                                                                    |    |   |         |         |                |                  |                                |
| CB4856                                                                                                                         | CT | V | 2008609 | 2011620 | WBGene00019095 | F59A7.8 F59A7.8  | -0.671695028824954 AGIWUR11972 |
| CB4856                                                                                                                         | CT | V | 2013418 | 2013860 | WBGene00044519 | F59A7.11         | F59A7.11 0.190665590135053     |
| AGIWUR11090;AGIWUR18576                                                                                                        |    |   |         |         |                |                  |                                |
| CB4856                                                                                                                         | CT | V | 2015836 | 2016541 | WBGene00019090 | F59A7.2 F59A7.2  | 0.469026342781453              |

|                                                                                                                                                           |    |   |         |         |                |           |           |                     |             |
|-----------------------------------------------------------------------------------------------------------------------------------------------------------|----|---|---------|---------|----------------|-----------|-----------|---------------------|-------------|
| AGIWUR3374;AGIWUR38564                                                                                                                                    |    |   |         |         |                |           |           |                     |             |
| CB4856                                                                                                                                                    | CT | V | 2022674 | 2024710 | WBGene00019092 | F59A7.5   | F59A7.5   | 0.429795826244831   |             |
| AGIWUR8988;AGIWUR21220                                                                                                                                    |    |   |         |         |                |           |           |                     |             |
| CB4856                                                                                                                                                    | CT | V | 2030177 | 2030407 | WBGene00044520 | F59A7.12  | F59A7.12  | -0.0795076684782146 |             |
| AGIWUR13534                                                                                                                                               |    |   |         |         |                |           |           |                     |             |
| CB4856                                                                                                                                                    | CT | V | 2030619 | 2031475 | WBGene00001857 | hil-6     | F59A7.4   | 0.407328319320007   |             |
| AGIWUR4410;AGIWUR41283                                                                                                                                    |    |   |         |         |                |           |           |                     |             |
| CB4856                                                                                                                                                    | CT | V | 2033792 | 2035645 | WBGene00021488 | srab-23   | Y40B10A.3 | -0.0620545427814889 |             |
| AGIWUR34938;AGIWUR35892;AGIWUR36570                                                                                                                       |    |   |         |         |                |           |           |                     |             |
| CB4856                                                                                                                                                    | CT | V | 2038193 | 2042359 | WBGene00021489 | Y40B10A.4 | Y40B10A.4 | -0.0844291579329326 |             |
| AGIWUR1482                                                                                                                                                |    |   |         |         |                |           |           |                     |             |
| CB4856                                                                                                                                                    | CT | V | 2043352 | 2046253 | WBGene00021490 | Y40B10A.5 | Y40B10A.5 | -0.0311579158489916 |             |
| AGIWUR16333                                                                                                                                               |    |   |         |         |                |           |           |                     |             |
| CB4856                                                                                                                                                    | CT | V | 2049223 | 2050172 | WBGene00021491 | comt-4    | Y40B10A.6 | 0.780988779695596   |             |
| AGIWUR40501                                                                                                                                               |    |   |         |         |                |           |           |                     |             |
| CB4856                                                                                                                                                    | CT | V | 2052231 | 2053600 | WBGene00021492 | comt-5    | Y40B10A.7 | -0.376809123473883  |             |
| AGIWUR41205                                                                                                                                               |    |   |         |         |                |           |           |                     |             |
| CB4856                                                                                                                                                    | CT | V | 2057537 | 2061129 | WBGene00021487 | comt-3    | Y40B10A.2 | -0.701215474760629  |             |
| AGIWUR4448                                                                                                                                                |    |   |         |         |                |           |           |                     |             |
| CB4856                                                                                                                                                    | CT | V | 2061111 | 2066844 | WBGene00003676 | nhr-86    | Y40B10A.8 | -0.0600497012559842 |             |
| AGIWUR16383                                                                                                                                               |    |   |         |         |                |           |           |                     |             |
| CB4856                                                                                                                                                    | CT | V | 2068449 | 2069143 | WBGene00021486 | lbp-9     | Y40B10A.1 | -0.122964208695053  |             |
| AGIWUR759;AGIWUR42829                                                                                                                                     |    |   |         |         |                |           |           |                     |             |
| CB4856                                                                                                                                                    | CT | V | 2069207 | 2072896 | WBGene00021493 | Y40B10A.9 | Y40B10A.9 | 0.683045466175507   |             |
| AGIWUR9779                                                                                                                                                |    |   |         |         |                |           |           |                     |             |
| CB4856                                                                                                                                                    | CT | V | 2086279 | 2089819 | WBGene00018094 | F36F12.3  | F36F12.3  | 0.0369325710346295  |             |
| AGIWUR2494;AGIWUR8943;AGIWUR11717;AGIWUR13195;AGIWUR14727;AGIWUR15308;AGIWUR15958;AGIWUR17370;AGIWUR21645;AGIWUR21769;AGIWUR24549;AGIWUR30250;AGIWUR30745 |    |   |         |         |                |           |           |                     |             |
| CB4856                                                                                                                                                    | CT | V | 2090669 | 2091735 | WBGene00018099 | ztf-28    | F36F12.8  | -0.13447037981474   |             |
| AGIWUR35689                                                                                                                                               |    |   |         |         |                |           |           |                     |             |
| CB4856                                                                                                                                                    | CT | V | 2096072 | 2097257 | WBGene00018096 | cllec-207 | F36F12.5  | -0.517646787173264  |             |
| AGIWUR13902                                                                                                                                               |    |   |         |         |                |           |           |                     |             |
| CB4856                                                                                                                                                    | CT | V | 2097953 | 2099153 | WBGene00018097 | cllec-208 | F36F12.6  | -0.465954484049446  |             |
| AGIWUR17623                                                                                                                                               |    |   |         |         |                |           |           |                     |             |
| CB4856                                                                                                                                                    | CT | V | 2099349 | 2100051 | WBGene00018098 | F36F12.7  | F36F12.7  | 0.0511045592604535  |             |
| AGIWUR13503                                                                                                                                               |    |   |         |         |                |           |           |                     |             |
| CB4856                                                                                                                                                    | CT | V | 2100062 | 2103218 | WBGene00018092 | F36F12.1  | F36F12.1  | 0.483551971032971   |             |
| AGIWUR13743                                                                                                                                               |    |   |         |         |                |           |           |                     |             |
| CB4856                                                                                                                                                    | CT | V | 2103658 | 2106076 | WBGene00017722 | F22F7.4   | F22F7.4   | 0.312943293741526   | AGIWUR23521 |

|                                     |    |   |         |         |                |           |          |                      |             |
|-------------------------------------|----|---|---------|---------|----------------|-----------|----------|----------------------|-------------|
| CB4856                              | CT | V | 2106398 | 2109418 | WBGene00000514 | ckb-4     | F22F7.5  | -0.395938768257247   |             |
| AGIWUR17305;AGIWUR28551;AGIWUR34233 |    |   |         |         |                |           |          |                      |             |
| CB4856                              | CT | V | 2115490 | 2118644 | WBGene00017723 | bgnt-1.2  | F22F7.6  | 0.294961506391655    |             |
| AGIWUR5028                          |    |   |         |         |                |           |          |                      |             |
| CB4856                              | CT | V | 2122866 | 2127299 | WBGene00017720 | F22F7.2   | F22F7.2  | -0.5074266639897     |             |
| AGIWUR13725;AGIWUR30695             |    |   |         |         |                |           |          |                      |             |
| CB4856                              | CT | V | 2127535 | 2130100 | WBGene00017719 | ldp-1     | F22F7.1  | -0.0304503778297445  | AGIWUR26701 |
| CB4856                              | CT | V | 2131476 | 2140042 | WBGene00017724 | F22F7.7   | F22F7.7  | 0.0666554528936238   | AGIWUR38755 |
| CB4856                              | CT | V | 2144020 | 2144508 | WBGene00268198 | F22F7.12  | F22F7.12 | 0.071780894811651    |             |
| AGIWUR29493                         |    |   |         |         |                |           |          |                      |             |
| CB4856                              | CT | V | 2147095 | 2148626 | WBGene00016693 | srbc-20   | C45H4.11 | 0.29482368403711     |             |
| AGIWUR11502                         |    |   |         |         |                |           |          |                      |             |
| CB4856                              | CT | V | 2151762 | 2153010 | WBGene00016692 | srbc-24   | C45H4.10 | -0.0309137438275995  |             |
| AGIWUR29865                         |    |   |         |         |                |           |          |                      |             |
| CB4856                              | CT | V | 2153574 | 2155112 | WBGene00016691 | srbc-23   | C45H4.9  | 0.000753297753041338 | AGIWUR35642 |
| CB4856                              | CT | V | 2155532 | 2156635 | WBGene00016689 | srbc-21   | C45H4.7  | 0.128582098141027    | AGIWUR9672  |
| CB4856                              | CT | V | 2157130 | 2158274 | WBGene00016690 | srbc-22   | C45H4.8  | 0.0465002588590337   | AGIWUR18608 |
| CB4856                              | CT | V | 2158674 | 2159427 | WBGene00016695 | C45H4.14  | C45H4.14 | -0.316257631612597   |             |
| AGIWUR5246;AGIWUR27391;AGIWUR40317  |    |   |         |         |                |           |          |                      |             |
| CB4856                              | CT | V | 2161500 | 2163835 | WBGene00006281 | str-255   | C45H4.15 | 0.146957262456146    |             |
| AGIWUR39636                         |    |   |         |         |                |           |          |                      |             |
| CB4856                              | CT | V | 2164826 | 2166779 | WBGene00016696 | srbc-19   | C45H4.16 | 0.0189703306862228   |             |
| AGIWUR16474;AGIWUR35248;AGIWUR37129 |    |   |         |         |                |           |          |                      |             |
| CB4856                              | CT | V | 2169306 | 2170668 | WBGene00016688 | srbc-18   | C45H4.6  | -0.0608779928116761  | AGIWUR30026 |
| CB4856                              | CT | V | 2171418 | 2174412 | WBGene00005709 | sru-46    | C45H4.5  | 0.245278988853958    | AGIWUR11450 |
| CB4856                              | CT | V | 2175542 | 2177503 | WBGene00044087 | C45H4.18  | C45H4.18 | 0.0715135606629742   |             |
| AGIWUR4518;AGIWUR36492              |    |   |         |         |                |           |          |                      |             |
| CB4856                              | CT | V | 2177714 | 2179116 | WBGene00016687 | srbc-17   | C45H4.3  | 0.194416996626674    | AGIWUR32870 |
| CB4856                              | CT | V | 2179586 | 2181759 | WBGene00016686 | cyp-33C1  | C45H4.2  | 0.138168478075441    |             |
| AGIWUR43067                         |    |   |         |         |                |           |          |                      |             |
| CB4856                              | CT | V | 2182038 | 2183191 | WBGene00016685 | srbc-16   | C45H4.1  | -0.271316394620184   | AGIWUR28585 |
| CB4856                              | CT | V | 2183521 | 2186535 | WBGene00016697 | cyp-33C2  | C45H4.17 | 0.84792847393517     |             |
| AGIWUR13520                         |    |   |         |         |                |           |          |                      |             |
| CB4856                              | CT | V | 2188280 | 2189062 | WBGene00021165 | Y5H2B.3   | Y5H2B.3  | -0.0492525940127422  | AGIWUR30403 |
| CB4856                              | CT | V | 2189586 | 2191222 | WBGene00021166 | srbc-42   | Y5H2B.4  | 0.0779400191873876   | AGIWUR16020 |
| CB4856                              | CT | V | 2192477 | 2196823 | WBGene00003612 | nhr-13    | Y5H2B.2  | 0.0509811601032233   | AGIWUR31918 |
| CB4856                              | CT | V | 2198059 | 2201415 | WBGene00021167 | cyp-32B1  | Y5H2B.5  | 1.34525008170031     |             |
| AGIWUR20546                         |    |   |         |         |                |           |          |                      |             |
| CB4856                              | CT | V | 2201581 | 2204397 | WBGene00021168 | cyp-33C12 | Y5H2B.6  | -0.00475951668510355 |             |

AGIWUR27493  
CB4856 CT V 2205030 2206281 WBGene00021169 srt-40 Y5H2B.7 0.12542044394365  
AGIWUR17162;AGIWUR26968;AGIWUR27794  
CB4856 CT V 2207180 2210209 WBGene00021164 Y5H2B.1 Y5H2B.1 0.790531577346478 AGIWUR20260  
CB4856 CT V 2210516 2212114 WBGene00003723 nhr-133 F44C8.8 0.333047058810536 AGIWUR22577  
CB4856 CT V 2212899 2214460 WBGene00018415 nhr-184 F44C8.9 -0.185691893017299  
AGIWUR15480;AGIWUR20409;AGIWUR32815;AGIWUR32949;AGIWUR33909  
CB4856 CT V 2215724 2218091 WBGene00018414 nstp-8 F44C8.7 -0.133044930134519 AGIWUR5605  
CB4856 CT V 2219004 2221305 WBGene00003646 nhr-56 F44C8.6 0.386075347382697 AGIWUR16627  
CB4856 CT V 2221948 2225296 WBGene00003718 nhr-128 F44C8.5 0.0740838764815654  
AGIWUR14749;AGIWUR18311;AGIWUR25768;AGIWUR26935  
CB4856 CT V 2225430 2227042 WBGene00003693 nhr-103 F44C8.4 0.366725519166236 AGIWUR14265  
CB4856 CT V 2227203 2228981 WBGene00003617 nhr-18 F44C8.3 0.717810769378101 AGIWUR23493  
CB4856 CT V 2229081 2230984 WBGene00003716 nhr-126 F44C8.10 0.0680893998518304  
AGIWUR3148;AGIWUR9146;AGIWUR11153;AGIWUR13084  
CB4856 CT V 2231124 2233381 WBGene00003724 nhr-134 F44C8.2 0.492961258694713 AGIWUR787  
CB4856 CT V 2233482 2235138 WBGene00003686 nhr-96 F44C8.11 0.217795426773719  
AGIWUR29784  
CB4856 CT V 2236162 2237937 WBGene00018413 cyp-33C4 F44C8.1 0.242081688089975  
AGIWUR1806;AGIWUR8637  
CB4856 CT V 2242196 2242772 WBGene00023039 F41B5.11 F41B5.11 0.0329763219453181  
AGIWUR16567  
CB4856 CT V 2242778 2244871 WBGene00018262 cyp-33C3 F41B5.4 0.30138558857859  
AGIWUR43831  
CB4856 CT V 2245015 2247015 WBGene00018261 cyp-33C5 F41B5.3 0.479042024512298  
AGIWUR42271  
CB4856 CT V 2247472 2249335 WBGene00018264 cyp-33C6 F41B5.7 0.167497198938484  
AGIWUR36205  
CB4856 CT V 2250545 2252553 WBGene00018260 cyp-33C7 F41B5.2 -0.082752534756418  
AGIWUR39759  
CB4856 CT V 2252804 2254603 WBGene00006279 str-253 F41B5.8 -0.104212102734246 AGIWUR43104  
CB4856 CT V 2255533 2256658 WBGene00023284 F41B5.1 F41B5.1 0.0066443262450111 AGIWUR11202  
CB4856 CT V 2257420 2259913 WBGene00018265 nhr-182 F41B5.9 -0.0100964195509938 AGIWUR41433  
CB4856 CT V 2262489 2264634 WBGene00018266 nhr-183 F41B5.10 -0.138212663212597  
AGIWUR34818;AGIWUR34908  
CB4856 CT V 2264909 2267058 WBGene00021163 nhr-275 Y5H2A.2 0.505694330743055 AGIWUR10872  
CB4856 CT V 2271175 2271861 WBGene00021162 Y5H2A.1 Y5H2A.1 -0.114913142068219 AGIWUR20420  
CB4856 CT V 2272441 2274353 WBGene00044521 Y5H2A.4 Y5H2A.4 -0.251127308932038 AGIWUR553  
CB4856 CT V 2274842 2275977 WBGene00000027 abu-4 Y5H2A.3 -0.358553566224389 AGIWUR11350

|                                                |    |   |         |         |                |           |            |                       |             |
|------------------------------------------------|----|---|---------|---------|----------------|-----------|------------|-----------------------|-------------|
| CB4856                                         | CT | V | 2276018 | 2278246 | WBGene00003649 | nhr-59    | T27B7.1    | 0.661579311086447     | AGIWUR5243  |
| CB4856                                         | CT | V | 2278826 | 2281387 | WBGene00020853 | fbxa-137  | T27B7.7    | 0.978914054317864     |             |
| AGIWUR29600                                    |    |   |         |         |                |           |            |                       |             |
| CB4856                                         | CT | V | 2281828 | 2284963 | WBGene00020852 | nhr-228   | T27B7.6    | 0.233910175327392     | AGIWUR36659 |
| CB4856                                         | CT | V | 2285279 | 2287520 | WBGene00020851 | nhr-227   | T27B7.5    | -0.184467963201612    | AGIWUR14453 |
| CB4856                                         | CT | V | 2288328 | 2290468 | WBGene00020849 | nhr-225   | T27B7.2    | -0.475948201491496    | AGIWUR19641 |
| CB4856                                         | CT | V | 2288487 | 2294798 | WBGene00003705 | nhr-115   | T27B7.4    | -0.536237403300046    | AGIWUR29278 |
| CB4856                                         | CT | V | 2294822 | 2296967 | WBGene00020850 | nhr-226   | T27B7.3    | -0.231449721267317    | AGIWUR5248  |
| CB4856                                         | CT | V | 2298945 | 2301005 | WBGene00235117 | Y19D10B.8 | Y19D10B.8  | -0.0291735092325602   |             |
| AGIWUR33818                                    |    |   |         |         |                |           |            |                       |             |
| CB4856                                         | CT | V | 2301743 | 2303868 | WBGene00021232 | irld-15   | Y19D10B.3  | 0.0236621858539081    |             |
| AGIWUR1695                                     |    |   |         |         |                |           |            |                       |             |
| CB4856                                         | CT | V | 2304355 | 2309159 | WBGene00021233 | Y19D10B.4 | Y19D10B.4  | -0.323997122392827    |             |
| AGIWUR30881                                    |    |   |         |         |                |           |            |                       |             |
| CB4856                                         | CT | V | 2311291 | 2313809 | WBGene00021230 | Y19D10B.1 | Y19D10B.1  | -0.982501673173429    |             |
| AGIWUR23689                                    |    |   |         |         |                |           |            |                       |             |
| CB4856                                         | CT | V | 2313962 | 2318163 | WBGene00021234 | irld-16   | Y19D10B.5  | -0.383619253448956    |             |
| AGIWUR19389                                    |    |   |         |         |                |           |            |                       |             |
| CB4856                                         | CT | V | 2324510 | 2326827 | WBGene00017501 | pud-3     | F15E11.15  | -0.42084311823069     |             |
| AGIWUR26728                                    |    |   |         |         |                |           |            |                       |             |
| CB4856                                         | CT | V | 2326678 | 2327262 | WBGene00017498 | pud-4     | F15E11.12  | -0.644435930057527    |             |
| AGIWUR26194                                    |    |   |         |         |                |           |            |                       |             |
| CB4856                                         | CT | V | 2339567 | 2341408 | WBGene00017493 | irld-30   | F15E11.4   | 0.0717232274928143    |             |
| AGIWUR10991                                    |    |   |         |         |                |           |            |                       |             |
| CB4856                                         | CT | V | 2342016 | 2344508 | WBGene00017494 | irld-31   | F15E11.5   | 0.167006178348256     |             |
| AGIWUR16975                                    |    |   |         |         |                |           |            |                       |             |
| CB4856                                         | CT | V | 2453414 | 2456147 | WBGene00018911 | F56A4.3   | F56A4.3    | -0.116285804671693    | AGIWUR27891 |
| CB4856                                         | CT | V | 2561690 | 2564701 | WBGene00001758 | gst-10    | Y45G12C.2  | -0.691188948854242    |             |
| AGIWUR3108;AGIWUR12703;AGIWUR23562;AGIWUR42382 |    |   |         |         |                |           |            |                       |             |
| CB4856                                         | CT | V | 2565683 | 2568878 | WBGene00021565 | Y45G12C.1 | Y45G12C.1  | -0.512456400970208    |             |
| AGIWUR33496                                    |    |   |         |         |                |           |            |                       |             |
| CB4856                                         | CT | V | 2568876 | 2570743 | WBGene00005607 | srj-19    | Y45G12C.14 | -0.0544018205314845   |             |
| AGIWUR27902;AGIWUR41936                        |    |   |         |         |                |           |            |                       |             |
| CB4856                                         | CT | V | 2571527 | 2573208 | WBGene00005608 | srj-20    | Y45G12C.15 | 0.266493245709333     |             |
| AGIWUR27705                                    |    |   |         |         |                |           |            |                       |             |
| CB4856                                         | CT | V | 2577903 | 2579816 | WBGene00016232 | srt-4     | C29G2.4    | 0.137990246202191     | AGIWUR20535 |
| CB4856                                         | CT | V | 2580872 | 2582939 | WBGene00016231 | C29G2.3   | C29G2.3    | -0.0203053248510532   | AGIWUR37256 |
| CB4856                                         | CT | V | 2582867 | 2585908 | WBGene00016234 | C29G2.6   | C29G2.6    | -0.110656539227939    | AGIWUR28534 |
| CB4856                                         | CT | V | 2590393 | 2591758 | WBGene00016230 | C29G2.2   | C29G2.2    | -0.000198791710264601 |             |

AGIWUR19539;AGIWUR20711;AGIWUR24384;AGIWUR28086;AGIWUR35312;AGIWUR36193;AGIWUR41857  
 CB4856 CT V 2592487 2595062 WBGene00018760 irg-3 F53E10.4 0.0303800791378688  
 AGIWUR34840  
 CB4856 CT V 2596020 2598930 WBGene00018761 F53E10.5 F53E10.5 -0.0930319080275464  
 AGIWUR19102  
 CB4856 CT V 2602153 2603063 WBGene00018762 F53E10.6 F53E10.6 -0.141876295255386  
 AGIWUR3618  
 CB4856 CT V 2608656 2615247 WBGene00000056 acr-17 F53E10.2 0.0547830376269793  
 AGIWUR21260  
 CB4856 CT V 2615790 2618554 WBGene00018758 F53E10.1 F53E10.1 0.281730104204788  
 AGIWUR8011;AGIWUR15797  
 CB4856 CT V 2618999 2620714 WBGene00005477 srh-271 W02H5.6 0.137939687705628  
 AGIWUR10433;AGIWUR18408;AGIWUR35984  
 CB4856 CT V 2638843 2646620 WBGene00020957 W02H5.2 W02H5.2 -0.0704979932975256  
 AGIWUR11330;AGIWUR17167;AGIWUR19063  
 CB4856 CT V 2647037 2652712 WBGene00020962 W02H5.8 W02H5.8 0.298343029129168 AGIWUR17071  
 CB4856 CT V 2653079 2662655 WBGene00020955 ang1-1 W02G9.5 0.102143836464746 AGIWUR10994  
 CB4856 CT V 2662964 2665003 WBGene00003579 ndx-2 W02G9.1 -0.360720486186562 AGIWUR24002  
 CB4856 CT V 2666866 2670234 WBGene00020954 W02G9.4 W02G9.4 0.501245760261533 AGIWUR29410  
 CB4856 CT V 2671464 2688500 WBGene00020952 kel-8 W02G9.2 -0.0827636927979567  
 AGIWUR3574;AGIWUR4374;AGIWUR14073;AGIWUR18975;AGIWUR23190;AGIWUR25226;AGIWUR30569;AGIWUR37100  
 CB4856 CT V 2688461 2694430 WBGene00021564 Y45G12B.3 Y45G12B.3 0.0742179983245279  
 AGIWUR43901  
 CB4856 CT V 2694768 2698864 WBGene00021563 Y45G12B.2 Y45G12B.2 -0.176038469590208  
 AGIWUR18287;AGIWUR25218  
 CB4856 CT V 2698972 2707024 WBGene00021562 nuo-5 Y45G12B.1 0.0821519667898718  
 AGIWUR20241;AGIWUR25712;AGIWUR38658;AGIWUR42997  
 CB4856 CT V 2706781 2711599 WBGene00016048 C24B9.3 C24B9.3 -0.246520156508561  
 AGIWUR966;AGIWUR17192;AGIWUR41142;AGIWUR41995  
 CB4856 CT V 2712034 2713632 WBGene00016049 srt-28 C24B9.4 -0.201697000806481 AGIWUR19236  
 CB4856 CT V 2715274 2717000 WBGene00016047 srt-26 C24B9.2 -0.158919765393355 AGIWUR15766  
 CB4856 CT V 2717395 2719135 WBGene00016050 srt-29 C24B9.5 0.0649564755390486 AGIWUR16487  
 CB4856 CT V 2719696 2720863 WBGene00016051 srt-27 C24B9.6 0.101666141956684 AGIWUR9939  
 CB4856 CT V 2721290 2722655 WBGene00005217 srg-60 C24B9.15 0.0342414592664699  
 AGIWUR14062  
 CB4856 CT V 2722903 2725325 WBGene00005216 srg-59 C24B9.7 0.381287245106597 AGIWUR30333  
 CB4856 CT V 2725902 2727201 WBGene00006081 str-13 C24B9.8 0.142242450428917 AGIWUR5432  
 CB4856 CT V 2728536 2730243 WBGene00006099 str-33 C24B9.1 0.186079522191983 AGIWUR17470  
 CB4856 CT V 2730594 2731098 WBGene00016052 dod-3 C24B9.9 1.69646476625955 AGIWUR30647

|                                                                                   |   |         |         |                |          |          |                     |             |
|-----------------------------------------------------------------------------------|---|---------|---------|----------------|----------|----------|---------------------|-------------|
| CB4856 CT                                                                         | V | 2732177 | 2734460 | WBGene00005214 | srg-57   | C24B9.14 | -0.0892544645820266 |             |
| AGIWUR28096                                                                       |   |         |         |                |          |          |                     |             |
| CB4856 CT                                                                         | V | 2735531 | 2738274 | WBGene00005213 | srg-56   | C24B9.10 | -0.431720557005776  |             |
| AGIWUR39080                                                                       |   |         |         |                |          |          |                     |             |
| CB4856 CT                                                                         | V | 2740444 | 2744326 | WBGene00005219 | srg-62   | C24B9.12 | -0.572508476013203  |             |
| AGIWUR2554                                                                        |   |         |         |                |          |          |                     |             |
| CB4856 CT                                                                         | V | 2745013 | 2746947 | WBGene00005916 | srx-25   | C24B9.13 | 0.235257805196775   |             |
| AGIWUR10481                                                                       |   |         |         |                |          |          |                     |             |
| CB4856 CT                                                                         | V | 2748152 | 2750106 | WBGene00005915 | srx-24   | C24B9.16 | 0.0968259247290879  |             |
| AGIWUR13684                                                                       |   |         |         |                |          |          |                     |             |
| CB4856 CT                                                                         | V | 2751256 | 2753107 | WBGene00005917 | srx-26   | R05D8.4  | 0.196523196677067   | AGIWUR33456 |
| CB4856 CT                                                                         | V | 2753306 | 2755158 | WBGene00005918 | srx-27   | R05D8.12 | 0.0849459287324983  |             |
| AGIWUR5205;AGIWUR11166;AGIWUR30165                                                |   |         |         |                |          |          |                     |             |
| CB4856 CT                                                                         | V | 2755701 | 2757276 | WBGene00005919 | srx-28   | R05D8.5  | 0.00881044243658646 | AGIWUR31039 |
| CB4856 CT                                                                         | V | 2758174 | 2759556 | WBGene00005215 | srg-58   | R05D8.6  | 0.360642003077212   | AGIWUR6399  |
| CB4856 CT                                                                         | V | 2761825 | 2763208 | WBGene00019885 | R05D8.7  | R05D8.7  | 0.507879409609895   | AGIWUR20612 |
| CB4856 CT                                                                         | V | 2763981 | 2765274 | WBGene00000977 | dhs-14   | R05D8.8  | -0.098641464811116  |             |
| AGIWUR14412;AGIWUR30446                                                           |   |         |         |                |          |          |                     |             |
| CB4856 CT                                                                         | V | 2766271 | 2767503 | WBGene00019886 | R05D8.9  | R05D8.9  | 0.272726120379785   | AGIWUR42273 |
| CB4856 CT                                                                         | V | 2768419 | 2769854 | WBGene00000978 | dhs-15   | R05D8.10 | 0.127100951375727   |             |
| AGIWUR36965                                                                       |   |         |         |                |          |          |                     |             |
| CB4856 CT                                                                         | V | 2771860 | 2773519 | WBGene00005279 | srh-56   | R05D8.3  | 0.0508024732007923  |             |
| AGIWUR17184;AGIWUR31165;AGIWUR34838                                               |   |         |         |                |          |          |                     |             |
| CB4856 CT                                                                         | V | 2774342 | 2776258 | WBGene00005606 | srj-18   | R05D8.2  | 0.0699779284354847  |             |
| AGIWUR22116;AGIWUR30340;AGIWUR37772                                               |   |         |         |                |          |          |                     |             |
| CB4856 CT                                                                         | V | 2776442 | 2779233 | WBGene00005605 | srj-17   | R05D8.1  | -0.0558028186053283 |             |
| AGIWUR18696;AGIWUR37375                                                           |   |         |         |                |          |          |                     |             |
| CB4856 CT                                                                         | V | 2779384 | 2780845 | WBGene00019887 | R05D8.11 | R05D8.11 | 0.0386946988791763  |             |
| AGIWUR37072                                                                       |   |         |         |                |          |          |                     |             |
| CB4856 CT                                                                         | V | 2781943 | 2807934 | WBGene00004130 | ketn-1   | F54E2.3  | -0.086044010180454  |             |
| AGIWUR1666;AGIWUR8340;AGIWUR14563;AGIWUR30694;AGIWUR35122;AGIWUR39274;AGIWUR40581 |   |         |         |                |          |          |                     |             |
| CB4856 CT                                                                         | V | 2810398 | 2812017 | WBGene00018823 | F54E2.1  | F54E2.1  | -0.724056294224891  | AGIWUR29760 |
| CB4856 CT                                                                         | V | 2812531 | 2813948 | WBGene00268206 | F54E2.9  | F54E2.9  | 0.358079656738669   | AGIWUR14121 |
| CB4856 CT                                                                         | V | 2816883 | 2818217 | WBGene00018826 | srt-34   | F54E2.6  | -0.228469705513996  | AGIWUR25520 |
| CB4856 CT                                                                         | V | 2819581 | 2821668 | WBGene00005259 | srh-36   | T03D3.4  | -0.0151338093305071 |             |
| AGIWUR3593;AGIWUR4361;AGIWUR7859                                                  |   |         |         |                |          |          |                     |             |
| CB4856 CT                                                                         | V | 2823806 | 2826831 | WBGene00020183 | T03D3.5  | T03D3.5  | -0.295425320118245  | AGIWUR3087  |
| CB4856 CT                                                                         | V | 2832966 | 2834921 | WBGene00005629 | srj-50   | T03D3.2  | 0.151637121719952   | AGIWUR22775 |
| CB4856 CT                                                                         | V | 2835411 | 2836601 | WBGene00005627 | srj-45   | T03D3.6  | 0.0576746999061921  | AGIWUR33727 |



|                                                                                               |    |   |         |         |                |          |           |                     |             |
|-----------------------------------------------------------------------------------------------|----|---|---------|---------|----------------|----------|-----------|---------------------|-------------|
| CB4856                                                                                        | CT | V | 2837634 | 2838805 | WBGene00023335 | T03D3.7  | T03D3.7   | -0.0409839393561677 | AGIWUR15810 |
| CB4856                                                                                        | CT | V | 2839154 | 2840318 | WBGene00023336 | T03D3.8  | T03D3.8   | -0.159980465718754  | AGIWUR29605 |
| CB4856                                                                                        | CT | V | 2841018 | 2842241 | WBGene00023337 | T03D3.9  | T03D3.9   | 0.0488892706118782  |             |
| AGIWUR19942;AGIWUR44223                                                                       |    |   |         |         |                |          |           |                     |             |
| CB4856                                                                                        | CT | V | 2842946 | 2844240 | WBGene00023338 | T03D3.10 | T03D3.10  | -0.0289174995198973 |             |
| AGIWUR12011;AGIWUR26145                                                                       |    |   |         |         |                |          |           |                     |             |
| CB4856                                                                                        | CT | V | 2844563 | 2845871 | WBGene00005626 | srj-44   | T03D3.11  | 0.384699542270153   |             |
| AGIWUR10080                                                                                   |    |   |         |         |                |          |           |                     |             |
| CB4856                                                                                        | CT | V | 2846250 | 2848340 | WBGene00005628 | srj-49   | T03D3.12  | 0.0123317385195758  |             |
| AGIWUR8827                                                                                    |    |   |         |         |                |          |           |                     |             |
| CB4856                                                                                        | CT | V | 2849343 | 2852031 | WBGene00020182 | ugt-53   | T03D3.1   | -0.215554957688983  | AGIWUR43938 |
| CB4856                                                                                        | CT | V | 2852425 | 2853605 | WBGene00023339 | T03D3.13 | T03D3.13  | 0.0638477285161407  |             |
| AGIWUR40784                                                                                   |    |   |         |         |                |          |           |                     |             |
| CB4856                                                                                        | CT | V | 2854393 | 2855573 | WBGene00005635 | srj-57   | T03D3.14  | 0.0784940833211314  |             |
| AGIWUR481                                                                                     |    |   |         |         |                |          |           |                     |             |
| CB4856                                                                                        | CT | V | 2856082 | 2857942 | WBGene00005634 | srj-55   | Y45G12A.1 | -0.266034865488831  |             |
| AGIWUR42694                                                                                   |    |   |         |         |                |          |           |                     |             |
| CB4856                                                                                        | CT | V | 2858660 | 2859838 | WBGene00005633 | srj-54   | F37B4.11  | -0.0130245639894992 |             |
| AGIWUR8532                                                                                    |    |   |         |         |                |          |           |                     |             |
| CB4856                                                                                        | CT | V | 2860130 | 2861605 | WBGene00005476 | srh-270  | F37B4.5   | 0.127325796752364   | AGIWUR30782 |
| CB4856                                                                                        | CT | V | 2863333 | 2865001 | WBGene00005478 | srh-272  | F37B4.4   | 0.0262900927155068  | AGIWUR6780  |
| CB4856                                                                                        | CT | V | 2865199 | 2867284 | WBGene00005447 | srh-240  | F37B4.13  | 0.120732575932708   |             |
| AGIWUR1223                                                                                    |    |   |         |         |                |          |           |                     |             |
| CB4856                                                                                        | CT | V | 2867792 | 2869603 | WBGene00005448 | srh-241  | F37B4.6   | -0.388507174840481  | AGIWUR3234  |
| CB4856                                                                                        | CT | V | 2870427 | 2872106 | WBGene00005449 | srh-243  | F37B4.3   | -0.255620864849694  | AGIWUR44846 |
| CB4856                                                                                        | CT | V | 2872465 | 2875600 | WBGene00018138 | folr-2   | F37B4.7   | -0.668591284075165  |             |
| AGIWUR5700;AGIWUR9537;AGIWUR14965;AGIWUR15205;AGIWUR27435;AGIWUR30621;AGIWUR32404;AGIWUR43045 |    |   |         |         |                |          |           |                     |             |
| CB4856                                                                                        | CT | V | 2875734 | 2877609 | WBGene00018140 | F37B4.10 | F37B4.10  | -0.19041513545889   |             |
| AGIWUR38144                                                                                   |    |   |         |         |                |          |           |                     |             |
| CB4856                                                                                        | CT | V | 2877804 | 2879901 | WBGene00006104 | str-39   | F37B4.12  | 0.277409703386535   |             |
| AGIWUR16037                                                                                   |    |   |         |         |                |          |           |                     |             |
| CB4856                                                                                        | CT | V | 2881393 | 2883753 | WBGene00002055 | ifc-1    | F37B4.2   | 0.0571372756654167  | AGIWUR20904 |
| CB4856                                                                                        | CT | V | 2884711 | 2886425 | WBGene00018139 | sre-24   | F37B4.9   | -0.0556518916038256 | AGIWUR25959 |
| CB4856                                                                                        | CT | V | 2887191 | 2888781 | WBGene00005751 | srw-4    | F37B4.8   | 0.0335591408133808  | AGIWUR17156 |
| CB4856                                                                                        | CT | V | 2889302 | 2890029 | WBGene00044523 | F37B4.14 | F37B4.14  | 0.0972873138373873  |             |
| AGIWUR7633;AGIWUR13078;AGIWUR13575;AGIWUR31735                                                |    |   |         |         |                |          |           |                     |             |
| CB4856                                                                                        | CT | V | 2893276 | 2895584 | WBGene00005344 | srh-127  | F37B4.1   | 0.217875855183724   | AGIWUR1744  |
| CB4856                                                                                        | CT | V | 2896637 | 2898434 | WBGene00016281 | pals-32  | C31B8.4   | 1.51885493586814    |             |
| AGIWUR7768;AGIWUR16666;AGIWUR29442                                                            |    |   |         |         |                |          |           |                     |             |

|                                                                                              |    |   |         |         |                |          |          |                      |             |
|----------------------------------------------------------------------------------------------|----|---|---------|---------|----------------|----------|----------|----------------------|-------------|
| CB4856                                                                                       | CT | V | 2898436 | 2899967 | WBGene00006111 | str-46   | C31B8.6  | -0.0646157382174879  | AGIWUR23220 |
| CB4856                                                                                       | CT | V | 2900448 | 2903355 | WBGene00016282 | C31B8.7  | C31B8.7  | -0.156342225368527   | AGIWUR647   |
| CB4856                                                                                       | CT | V | 2905767 | 2909698 | WBGene00016283 | zmp-3    | C31B8.8  | -0.258004975796773   | AGIWUR28295 |
| CB4856                                                                                       | CT | V | 2911082 | 2913001 | WBGene00016284 | C31B8.9  | C31B8.9  | 0.01168858342617     | AGIWUR31880 |
| CB4856                                                                                       | CT | V | 2914248 | 2916172 | WBGene00005362 | srh-146  | C31B8.3  | 0.159211338108974    |             |
| AGIWUR10530;AGIWUR20427;AGIWUR23935;AGIWUR23968;AGIWUR32765                                  |    |   |         |         |                |          |          |                      |             |
| CB4856                                                                                       | CT | V | 2916523 | 2918034 | WBGene00016280 | C31B8.2  | C31B8.2  | 0.124372730174795    |             |
| AGIWUR4147;AGIWUR9281;AGIWUR9646;AGIWUR12282;AGIWUR15923;AGIWUR18521;AGIWUR19038;AGIWUR43160 |    |   |         |         |                |          |          |                      |             |
| CB4856                                                                                       | CT | V | 2918830 | 2920008 | WBGene00005630 | srj-51   | C31B8.10 | 0.0105973377191626   |             |
| AGIWUR20464;AGIWUR28135;AGIWUR28956;AGIWUR32501;AGIWUR33894                                  |    |   |         |         |                |          |          |                      |             |
| CB4856                                                                                       | CT | V | 2920600 | 2922694 | WBGene00005261 | srh-38   | C31B8.11 | 0.0560829463299779   |             |
| AGIWUR43647                                                                                  |    |   |         |         |                |          |          |                      |             |
| CB4856                                                                                       | CT | V | 2925193 | 2927722 | WBGene00016285 | C31B8.12 | C31B8.12 | -0.117553624351808   |             |
| AGIWUR15874                                                                                  |    |   |         |         |                |          |          |                      |             |
| CB4856                                                                                       | CT | V | 2930053 | 2931170 | WBGene00044602 | C31B8.16 | C31B8.16 | -0.143266480458645   |             |
| AGIWUR3699;AGIWUR42580                                                                       |    |   |         |         |                |          |          |                      |             |
| CB4856                                                                                       | CT | V | 2931552 | 2932988 | WBGene00016279 | C31B8.1  | C31B8.1  | -0.055964103692169   | AGIWUR38619 |
| CB4856                                                                                       | CT | V | 2933143 | 2934175 | WBGene00005453 | srh-247  | C31B8.13 | 0.0597617959503456   |             |
| AGIWUR18435                                                                                  |    |   |         |         |                |          |          |                      |             |
| CB4856                                                                                       | CT | V | 2935178 | 2936199 | WBGene00005455 | srh-249  | C31B8.14 | 0.31866713230993     |             |
| AGIWUR23607                                                                                  |    |   |         |         |                |          |          |                      |             |
| CB4856                                                                                       | CT | V | 2937311 | 2938597 | WBGene00005888 | srw-141  | H27D07.2 | 0.133584272179507    |             |
| AGIWUR4724;AGIWUR39410                                                                       |    |   |         |         |                |          |          |                      |             |
| CB4856                                                                                       | CT | V | 2939603 | 2941505 | WBGene00005890 | srw-143  | H27D07.3 | -0.00572361646529451 |             |
| AGIWUR2779                                                                                   |    |   |         |         |                |          |          |                      |             |
| CB4856                                                                                       | CT | V | 2942571 | 2943959 | WBGene00005884 | srw-137  | H27D07.4 | -0.145685090936      | AGIWUR8026  |
| CB4856                                                                                       | CT | V | 2944379 | 2945682 | WBGene00005308 | srh-87   | H27D07.6 | 0.0175596039861112   |             |
| AGIWUR13211                                                                                  |    |   |         |         |                |          |          |                      |             |
| CB4856                                                                                       | CT | V | 2946813 | 2948416 | WBGene00005875 | srw-128  | H27D07.1 | 0.174241163031309    |             |
| AGIWUR26758                                                                                  |    |   |         |         |                |          |          |                      |             |
| CB4856                                                                                       | CT | V | 2950712 | 2952202 | WBGene00005869 | srw-122  | H27D07.5 | -0.0709501251869025  |             |
| AGIWUR25472                                                                                  |    |   |         |         |                |          |          |                      |             |
| CB4856                                                                                       | CT | V | 2953193 | 2954289 | WBGene00005873 | srw-126  | H05B21.1 | -0.0137684527201269  |             |
| AGIWUR1897;AGIWUR37067                                                                       |    |   |         |         |                |          |          |                      |             |
| CB4856                                                                                       | CT | V | 2954404 | 2955442 | WBGene00005454 | srh-248  | H05B21.2 | -0.0838850268492237  |             |
| AGIWUR39328                                                                                  |    |   |         |         |                |          |          |                      |             |
| CB4856                                                                                       | CT | V | 2957016 | 2958302 | WBGene00005889 | srw-142  | H05B21.3 | -0.146433014888894   |             |
| AGIWUR29592                                                                                  |    |   |         |         |                |          |          |                      |             |
| CB4856                                                                                       | CT | V | 2961632 | 2963060 | WBGene00005885 | srw-138  | C44C3.3  | -0.0274581251453876  | AGIWUR39049 |

|                                    |    |   |         |         |                |         |          |                      |             |
|------------------------------------|----|---|---------|---------|----------------|---------|----------|----------------------|-------------|
| CB4856                             | CT | V | 2965422 | 2966702 | WBGene00005863 | srw-116 | C44C3.10 | 0.140749901601881    |             |
| AGIWUR13677;AGIWUR28717            |    |   |         |         |                |         |          |                      |             |
| CB4856                             | CT | V | 2969349 | 2971164 | WBGene00005307 | srh-86  | C44C3.4  | 0.0607254588115382   |             |
| AGIWUR9864;AGIWUR24809             |    |   |         |         |                |         |          |                      |             |
| CB4856                             | CT | V | 2971949 | 2973485 | WBGene00005876 | srw-129 | C44C3.2  | 0.145788795121435    | AGIWUR12878 |
| CB4856                             | CT | V | 2974029 | 2975385 | WBGene00005870 | srw-123 | C44C3.11 | 0.0508934236778877   |             |
| AGIWUR33523                        |    |   |         |         |                |         |          |                      |             |
| CB4856                             | CT | V | 2976587 | 2977886 | WBGene00005871 | srw-124 | C44C3.1  | 0.0329306561471423   | AGIWUR15851 |
| CB4856                             | CT | V | 2978760 | 2980078 | WBGene00005865 | srw-118 | C44C3.5  | -0.0513624777036084  | AGIWUR29350 |
| CB4856                             | CT | V | 2982152 | 2983451 | WBGene00005864 | srw-117 | C44C3.6  | -0.0162478056630757  | AGIWUR23329 |
| CB4856                             | CT | V | 2984077 | 2985409 | WBGene00005886 | srw-139 | C44C3.7  | -0.00146186989591746 |             |
| AGIWUR23695;AGIWUR44571            |    |   |         |         |                |         |          |                      |             |
| CB4856                             | CT | V | 2986192 | 2987507 | WBGene00005306 | srh-85  | C44C3.8  | 0.163838113442241    | AGIWUR31725 |
| CB4856                             | CT | V | 2988460 | 2990091 | WBGene00005305 | srh-84  | K12D9.2  | 0.0118275912050301   |             |
| AGIWUR2561;AGIWUR25386;AGIWUR32591 |    |   |         |         |                |         |          |                      |             |
| CB4856                             | CT | V | 2990313 | 2991585 | WBGene00005868 | srw-121 | K12D9.3  | 0.101932872966133    | AGIWUR8427  |
| CB4856                             | CT | V | 2992622 | 2993916 | WBGene00005862 | srw-115 | K12D9.4  | 0.23906591845598     | AGIWUR18613 |
| CB4856                             | CT | V | 2994899 | 2996205 | WBGene00005867 | srw-120 | K12D9.5  | 0.0343916621586473   | AGIWUR28704 |
| CB4856                             | CT | V | 2997092 | 2997917 | WBGene00005872 | srw-125 | K12D9.6  | 0.0556326848480175   | AGIWUR18143 |
| CB4856                             | CT | V | 2998542 | 2999836 | WBGene00005866 | srw-119 | K12D9.7  | 0.199920629075999    | AGIWUR20695 |
| CB4856                             | CT | V | 3000426 | 3002016 | WBGene00005861 | srw-114 | K12D9.8  | -0.102270627073309   |             |
| AGIWUR11996;AGIWUR30855            |    |   |         |         |                |         |          |                      |             |
| CB4856                             | CT | V | 3004141 | 3006064 | WBGene00005859 | srw-112 | K12D9.9  | 0.0270363025932667   | AGIWUR21370 |
| CB4856                             | CT | V | 3006728 | 3008123 | WBGene00005878 | srw-131 | K12D9.13 | -0.103023375804805   |             |
| AGIWUR23697;AGIWUR25350            |    |   |         |         |                |         |          |                      |             |
| CB4856                             | CT | V | 3008907 | 3010568 | WBGene00005883 | srw-136 | K12D9.10 | 0.0594074246953653   |             |
| AGIWUR6161                         |    |   |         |         |                |         |          |                      |             |
| CB4856                             | CT | V | 3010927 | 3011671 | WBGene00005882 | srw-135 | K12D9.11 | -0.667290808507389   |             |
| AGIWUR15455;AGIWUR35172            |    |   |         |         |                |         |          |                      |             |
| CB4856                             | CT | V | 3014485 | 3016034 | WBGene00019675 | K12D9.1 | K12D9.1  | 0.195333175398879    | AGIWUR7110  |
| CB4856                             | CT | V | 3018361 | 3021406 | WBGene00077758 | irld-12 | K12D9.14 | 0.173485101292629    |             |
| AGIWUR16081                        |    |   |         |         |                |         |          |                      |             |
| CB4856                             | CT | V | 3024520 | 3027931 | WBGene00019105 | asp-8   | F59D6.3  | 0.176285472228848    | AGIWUR35580 |
| CB4856                             | CT | V | 3028294 | 3029583 | WBGene00019104 | asp-7   | F59D6.2  | -0.432130617362883   | AGIWUR31111 |
| CB4856                             | CT | V | 3029655 | 3032443 | WBGene00019106 | irld-38 | F59D6.4  | 0.220143050533664    | AGIWUR24135 |
| CB4856                             | CT | V | 3032578 | 3034336 | WBGene00005755 | srw-8   | F59D6.5  | -0.0439679326451508  | AGIWUR2680  |
| CB4856                             | CT | V | 3035130 | 3037689 | WBGene00019107 | irld-10 | F59D6.6  | -0.279913452654983   | AGIWUR22111 |
| CB4856                             | CT | V | 3037812 | 3039382 | WBGene00019108 | chpf-2  | F59D6.7  | 0.26268851736204     | AGIWUR34475 |
| CB4856                             | CT | V | 3045144 | 3052149 | WBGene00019103 | F59D6.1 | F59D6.1  | 0.185232873640462    | AGIWUR3414  |

|                                                            |   |                 |                |           |           |                      |
|------------------------------------------------------------|---|-----------------|----------------|-----------|-----------|----------------------|
| CB4856 CT<br>AGIWUR27749                                   | V | 3054553 3055667 | WBGene00016855 | C50H11.8  | C50H11.8  | -0.146964463024789   |
| CB4856 CT<br>AGIWUR750                                     | V | 3057699 3059096 | WBGene00006271 | str-244   | C50H11.9  | 0.0019010614276409   |
| CB4856 CT<br>AGIWUR24385                                   | V | 3059640 3062178 | WBGene00016856 | srt-15    | C50H11.10 | 0.115954807883421    |
| CB4856 CT<br>AGIWUR21675                                   | V | 3063160 3064518 | WBGene00016857 | srt-16    | C50H11.11 | 0.241925733201827    |
| CB4856 CT<br>AGIWUR8079                                    | V | 3066228 3067497 | WBGene00005400 | srh-185   | C50H11.7  | -0.0411087947907296  |
| CB4856 CT<br>AGIWUR10195                                   | V | 3068135 3069201 | WBGene00006105 | str-40    | C50H11.12 | 0.258931145344957    |
| CB4856 CT<br>AGIWUR5643;AGIWUR9917;AGIWUR18242;AGIWUR24776 | V | 3069898 3071648 | WBGene00016858 | C50H11.13 | C50H11.13 | 0.0463877652931357   |
| CB4856 CT<br>AGIWUR36442                                   | V | 3075407 3077173 | WBGene00016854 | srt-10    | C50H11.6  | -0.0200148578071069  |
| CB4856 CT<br>AGIWUR7906                                    | V | 3078072 3079300 | WBGene00016853 | srt-9     | C50H11.5  | -0.0919280856110154  |
| CB4856 CT<br>AGIWUR35025                                   | V | 3079449 3080892 | WBGene00016859 | srt-5     | C50H11.14 | 0.00437662183030341  |
| CB4856 CT<br>AGIWUR42233                                   | V | 3081771 3083027 | WBGene00016852 | srt-7     | C50H11.4  | -0.386592869314893   |
| CB4856 CT<br>AGIWUR15342;AGIWUR18706                       | V | 3083645 3085127 | WBGene00016851 | srt-71    | C50H11.3  | -0.175270547370663   |
| CB4856 CT<br>AGIWUR25845                                   | V | 3086560 3087986 | WBGene00016850 | srt-8     | C50H11.2  | -0.125962089855288   |
| CB4856 CT<br>AGIWUR12607;AGIWUR13127;AGIWUR34615           | V | 3089074 3091351 | WBGene00016849 | acs-21    | C50H11.1  | -0.133805767260776   |
| CB4856 CT<br>AGIWUR35734                                   | V | 3091815 3094501 | WBGene00016860 | cyp-33C9  | C50H11.15 | 0.019508299512708    |
| CB4856 CT<br>AGIWUR12740;AGIWUR36852                       | V | 3095090 3096177 | WBGene00006132 | str-70    | C50H11.16 | 0.198091542499109    |
| CB4856 CT<br>AGIWUR26203                                   | V | 3097130 3098688 | WBGene00016861 | C50H11.17 | C50H11.17 | -0.10747354261014    |
| CB4856 CT<br>AGIWUR21799                                   | V | 3103128 3104234 | WBGene00006128 | str-66    | Y73C8C.5  | 0.0145455183345193   |
| CB4856 CT<br>AGIWUR16419                                   | V | 3104790 3105910 | WBGene00006131 | str-69    | Y73C8C.11 | -5.80681446322566    |
| CB4856 CT                                                  | V | 3106228 3107550 | WBGene00006130 | str-68    | Y73C8C.6  | -0.00461748376674187 |

|                                                            |   |         |         |                |           |           |                     |             |
|------------------------------------------------------------|---|---------|---------|----------------|-----------|-----------|---------------------|-------------|
| AGIWUR38915                                                |   |         |         |                |           |           |                     |             |
| CB4856 CT                                                  | V | 3107792 | 3109664 | WBGene00022264 | sdz-34    | Y73C8C.7  | -0.133455912928083  |             |
| AGIWUR9429                                                 |   |         |         |                |           |           |                     |             |
| CB4856 CT                                                  | V | 3110089 | 3113851 | WBGene00022265 | Y73C8C.8  | Y73C8C.8  | 0.129092385150642   |             |
| AGIWUR8522                                                 |   |         |         |                |           |           |                     |             |
| CB4856 CT                                                  | V | 3115303 | 3118128 | WBGene00022262 | Y73C8C.3  | Y73C8C.3  | 0.125352236693422   |             |
| AGIWUR20824                                                |   |         |         |                |           |           |                     |             |
| CB4856 CT                                                  | V | 3118377 | 3120323 | WBGene00022261 | clec-210  | Y73C8C.2  | -0.247464800369547  |             |
| AGIWUR326                                                  |   |         |         |                |           |           |                     |             |
| CB4856 CT                                                  | V | 3122969 | 3124222 | WBGene00006269 | str-242   | Y73C8C.1  | 0.0619918934434285  |             |
| AGIWUR33082;AGIWUR37993                                    |   |         |         |                |           |           |                     |             |
| CB4856 CT                                                  | V | 3125212 | 3125469 | WBGene00044524 | Y73C8C.12 | Y73C8C.12 | 0.0535319749599221  |             |
| AGIWUR1216;AGIWUR12325;AGIWUR26265;AGIWUR28602;AGIWUR39102 |   |         |         |                |           |           |                     |             |
| CB4856 CT                                                  | V | 3125566 | 3127770 | WBGene00022267 | Y73C8C.10 | Y73C8C.10 | -0.0894613852821475 |             |
| AGIWUR10724;AGIWUR12344;AGIWUR40970                        |   |         |         |                |           |           |                     |             |
| CB4856 CT                                                  | V | 3129125 | 3133406 | WBGene00017174 | tat-6     | F02C9.3   | 0.0184421253040874  |             |
| AGIWUR38702;AGIWUR40033;AGIWUR44141                        |   |         |         |                |           |           |                     |             |
| CB4856 CT                                                  | V | 3133705 | 3137382 | WBGene00017173 | F02C9.2   | F02C9.2   | -0.0273409106230398 |             |
| AGIWUR2321;AGIWUR4262;AGIWUR29080                          |   |         |         |                |           |           |                     |             |
| CB4856 CT                                                  | V | 3137431 | 3138588 | WBGene00017175 | irld-3    | F02C9.4   | -0.251940523469028  | AGIWUR39610 |
| CB4856 CT                                                  | V | 3138703 | 3139090 | WBGene00017172 | F02C9.1   | F02C9.1   | -0.130774889511411  | AGIWUR34685 |
| CB4856 CT                                                  | V | 3139931 | 3141290 | WBGene00016475 | srab-9    | C36C5.6   | -0.0684580622815538 |             |
| AGIWUR11504;AGIWUR26115;AGIWUR32463                        |   |         |         |                |           |           |                     |             |
| CB4856 CT                                                  | V | 3143094 | 3144597 | WBGene00016476 | srab-10   | C36C5.7   | -0.06259799012218   | AGIWUR23471 |
| CB4856 CT                                                  | V | 3145203 | 3147032 | WBGene00016477 | srab-11   | C36C5.8   | 0.151107471046921   | AGIWUR35579 |
| CB4856 CT                                                  | V | 3148215 | 3149489 | WBGene00016478 | srt-72    | C36C5.9   | -0.0248515175836221 | AGIWUR19941 |
| CB4856 CT                                                  | V | 3150488 | 3151962 | WBGene00016479 | srab-6    | C36C5.10  | 0.00371321425722382 |             |
| AGIWUR37693                                                |   |         |         |                |           |           |                     |             |
| CB4856 CT                                                  | V | 3153485 | 3155172 | WBGene00016480 | srab-7    | C36C5.11  | 0.00330133246571584 |             |
| AGIWUR42020                                                |   |         |         |                |           |           |                     |             |
| CB4856 CT                                                  | V | 3157077 | 3157870 | WBGene00016474 | C36C5.5   | C36C5.5   | -0.198291850593233  | AGIWUR24051 |
| CB4856 CT                                                  | V | 3158406 | 3159165 | WBGene00016481 | C36C5.12  | C36C5.12  | -0.177535523045485  |             |
| AGIWUR4426                                                 |   |         |         |                |           |           |                     |             |
| CB4856 CT                                                  | V | 3166560 | 3167268 | WBGene00016473 | C36C5.4   | C36C5.4   | 0.345619050573467   | AGIWUR29268 |
| CB4856 CT                                                  | V | 3167968 | 3168750 | WBGene00016484 | C36C5.15  | C36C5.15  | -0.555539922672764  |             |
| AGIWUR21646                                                |   |         |         |                |           |           |                     |             |
| CB4856 CT                                                  | V | 3170138 | 3171408 | WBGene00016472 | srbc-6    | C36C5.3   | 0.18278372493182    | AGIWUR19765 |
| CB4856 CT                                                  | V | 3176461 | 3177978 | WBGene00016471 | srab-8    | C36C5.2   | 0.144462184239499   | AGIWUR31318 |
| CB4856 CT                                                  | V | 3179527 | 3181064 | WBGene00016470 | srab-5    | C36C5.1   | -0.816572104919169  | AGIWUR38960 |

|                                                                        |   |         |         |                |           |           |                     |             |
|------------------------------------------------------------------------|---|---------|---------|----------------|-----------|-----------|---------------------|-------------|
| CB4856 CT                                                              | V | 3188350 | 3189841 | WBGene00002246 | lag-2     | Y73C8B.4  | 0.224561602406692   |             |
| AGIWUR4259                                                             |   |         |         |                |           |           |                     |             |
| CB4856 CT                                                              | V | 3191302 | 3193233 | WBGene00022260 | Y73C8B.3  | Y73C8B.3  | -0.0564123151467655 |             |
| AGIWUR26298                                                            |   |         |         |                |           |           |                     |             |
| CB4856 CT                                                              | V | 3193394 | 3195002 | WBGene00022259 | Y73C8B.2  | Y73C8B.2  | 0.0282559005635505  |             |
| AGIWUR43261                                                            |   |         |         |                |           |           |                     |             |
| CB4856 CT                                                              | V | 3197268 | 3198333 | WBGene00044525 | Y73C8B.5  | Y73C8B.5  | 0.00816280094100286 |             |
| AGIWUR5299;AGIWUR26367;AGIWUR32194;AGIWUR34388;AGIWUR40466             |   |         |         |                |           |           |                     |             |
| CB4856 CT                                                              | V | 3210189 | 3223218 | WBGene00000168 | apx-1     | K08D9.3   | -0.127230863047632  | AGIWUR37888 |
| CB4856 CT                                                              | V | 3223612 | 3227058 | WBGene00019526 | K08D9.5   | K08D9.5   | 0.0301924983185233  |             |
| AGIWUR6970;AGIWUR8617;AGIWUR19552;AGIWUR20987                          |   |         |         |                |           |           |                     |             |
| CB4856 CT                                                              | V | 3227796 | 3230128 | WBGene00019524 | K08D9.2   | K08D9.2   | -0.219543798517775  | AGIWUR21368 |
| CB4856 CT                                                              | V | 3231398 | 3234987 | WBGene00019527 | K08D9.6   | K08D9.6   | -0.331169118299369  | AGIWUR23029 |
| CB4856 CT                                                              | V | 3236874 | 3240436 | WBGene00006084 | str-16    | Y73C8A.1  | -0.0221319128088489 |             |
| AGIWUR24411;AGIWUR28177                                                |   |         |         |                |           |           |                     |             |
| CB4856 CT                                                              | V | 3241424 | 3242636 | WBGene00005599 | srj-11    | T28A11.12 | 0.0216074380038105  |             |
| AGIWUR41289                                                            |   |         |         |                |           |           |                     |             |
| CB4856 CT                                                              | V | 3243287 | 3244495 | WBGene00001771 | gst-23    | T28A11.11 | 0.210232030343482   |             |
| AGIWUR10803;AGIWUR16486;AGIWUR36289;AGIWUR37107                        |   |         |         |                |           |           |                     |             |
| CB4856 CT                                                              | V | 3245003 | 3246722 | WBGene00005595 | srj-7     | T28A11.10 | -0.0306508684222759 |             |
| AGIWUR19781                                                            |   |         |         |                |           |           |                     |             |
| CB4856 CT                                                              | V | 3247815 | 3249140 | WBGene00005596 | srj-8     | T28A11.9  | 0.178240954245155   |             |
| AGIWUR41430                                                            |   |         |         |                |           |           |                     |             |
| CB4856 CT                                                              | V | 3249743 | 3250205 | WBGene00020875 | T28A11.13 | T28A11.13 | 0.139385750112817   |             |
| AGIWUR12351                                                            |   |         |         |                |           |           |                     |             |
| CB4856 CT                                                              | V | 3253469 | 3254590 | WBGene00006123 | str-58    | T28A11.8  | 0.021824836454539   |             |
| AGIWUR28675;AGIWUR34848                                                |   |         |         |                |           |           |                     |             |
| CB4856 CT                                                              | V | 3254602 | 3256151 | WBGene00020877 | srt-63    | T28A11.15 | 0.197787657306347   |             |
| AGIWUR20639                                                            |   |         |         |                |           |           |                     |             |
| CB4856 CT                                                              | V | 3257577 | 3258289 | WBGene00044526 | T28A11.22 | T28A11.22 | 0.357660398436932   |             |
| AGIWUR8845;AGIWUR24114;AGIWUR31464;AGIWUR39416                         |   |         |         |                |           |           |                     |             |
| CB4856 CT                                                              | V | 3258372 | 3259218 | WBGene00020878 | T28A11.16 | T28A11.16 | 0.318036511098606   |             |
| AGIWUR33578                                                            |   |         |         |                |           |           |                     |             |
| CB4856 CT                                                              | V | 3260375 | 3262082 | WBGene00020874 | srbc-5    | T28A11.7  | 0.188599303252003   |             |
| AGIWUR12723                                                            |   |         |         |                |           |           |                     |             |
| CB4856 CT                                                              | V | 3262571 | 3263235 | WBGene00020873 | T28A11.6  | T28A11.6  | -0.448096070859278  |             |
| AGIWUR7694;AGIWUR29877;AGIWUR32742;AGIWUR38034;AGIWUR40987;AGIWUR44557 |   |         |         |                |           |           |                     |             |
| CB4856 CT                                                              | V | 3266828 | 3268050 | WBGene00020880 | T28A11.18 | T28A11.18 | 0.652668772078446   |             |
| AGIWUR38778                                                            |   |         |         |                |           |           |                     |             |

|                                                                        |   |                 |                |                   |                     |                     |  |
|------------------------------------------------------------------------|---|-----------------|----------------|-------------------|---------------------|---------------------|--|
| CB4856 CT<br>AGIWUR7073                                                | V | 3268809 3269510 | WBGene00020881 | T28A11.19         | T28A11.19           | 1.94718707780296    |  |
| CB4856 CT<br>AGIWUR18249;AGIWUR35583                                   | V | 3270553 3271242 | WBGene00020872 | T28A11.5          | T28A11.5            | 0.0750151657334768  |  |
| CB4856 CT<br>AGIWUR17791                                               | V | 3271395 3273256 | WBGene00020882 | T28A11.20         | T28A11.20           | 1.36368395447741    |  |
| CB4856 CT<br>AGIWUR24975                                               | V | 3274054 3274374 | WBGene00020871 | T28A11.4          | T28A11.4            | 3.17830925242977    |  |
| CB4856 CT<br>AGIWUR35661                                               | V | 3275333 3276110 | WBGene00020870 | T28A11.3          | T28A11.3            | 0.128290049429276   |  |
| CB4856 CT<br>AGIWUR21947                                               | V | 3276956 3278147 | WBGene00020883 | fbxa-64 T28A11.21 | -0.155063320752394  |                     |  |
| CB4856 CT<br>AGIWUR45206                                               | V | 3280379 3281169 | WBGene00020869 | T28A11.2          | T28A11.2            | -0.177924301943506  |  |
| CB4856 CT<br>AGIWUR7972                                                | V | 3281828 3282704 | WBGene00269355 | T28A11.25         | T28A11.25           | 1.09321922530563    |  |
| CB4856 CT<br>AGIWUR3736;AGIWUR6694                                     | V | 3283257 3284930 | WBGene00006127 | str-64 T28A11.1   | -0.0146628400801947 |                     |  |
| CB4856 CT<br>AGIWUR4804                                                | V | 3286432 3287460 | WBGene00018057 | F35F10.7          | F35F10.7            | -0.33425631969827   |  |
| CB4856 CT<br>AGIWUR20667                                               | V | 3287995 3289385 | WBGene00018056 | F35F10.6          | F35F10.6            | -0.298217537653054  |  |
| CB4856 CT<br>AGIWUR4521;AGIWUR5943;AGIWUR14466;AGIWUR23650;AGIWUR36797 | V | 3289635 3293435 | WBGene00018054 | F35F10.4          | F35F10.4            | -0.0829251774876019 |  |
| CB4856 CT<br>AGIWUR6060                                                | V | 3296108 3297864 | WBGene00006013 | srx-122 F35F10.8  | -0.0500011083684306 |                     |  |
| CB4856 CT<br>AGIWUR12295                                               | V | 3298885 3301998 | WBGene00018058 | srbc-1 F35F10.9   | -0.0278389730505717 |                     |  |
| CB4856 CT<br>AGIWUR44417                                               | V | 3302415 3307363 | WBGene00018059 | F35F10.10         | F35F10.10           | -0.125878696235307  |  |
| CB4856 CT<br>AGIWUR20747                                               | V | 3308469 3309689 | WBGene00018053 | srbc-3 F35F10.2   | -0.499710787458456  |                     |  |
| CB4856 CT<br>AGIWUR34169                                               | V | 3310123 3312117 | WBGene00018060 | arrd-18 F35F10.11 | -0.467112874839183  |                     |  |
| CB4856 CT<br>AGIWUR3862;AGIWUR22827                                    | V | 3313286 3315516 | WBGene00018061 | arrd-19 F35F10.12 | -0.37948391446796   |                     |  |
| CB4856 CT                                                              | V | 3320720 3324279 | WBGene00015882 | C17B7.8 C17B7.8   | 0.178714705853929   | AGIWUR4566          |  |
| CB4856 CT                                                              | V | 3330915 3332113 | WBGene00015883 | C17B7.9 C17B7.9   | -0.207295312180143  | AGIWUR42983         |  |
| CB4856 CT                                                              | V | 3333635 3339070 | WBGene00015879 | C17B7.5 C17B7.5   | -0.176212427050399  | AGIWUR30643         |  |

|                                                |   |         |         |                |           |           |                      |             |
|------------------------------------------------|---|---------|---------|----------------|-----------|-----------|----------------------|-------------|
| CB4856 CT                                      | V | 3339348 | 3340092 | WBGene00015878 | C17B7.4   | C17B7.4   | 0.0749622440900906   |             |
| AGIWUR14925;AGIWUR28398                        |   |         |         |                |           |           |                      |             |
| CB4856 CT                                      | V | 3340179 | 3342006 | WBGene00015884 | C17B7.10  | C17B7.10  | 0.751041462580108    |             |
| AGIWUR25791                                    |   |         |         |                |           |           |                      |             |
| CB4856 CT                                      | V | 3345307 | 3346484 | WBGene00015885 | fbxa-65   | C17B7.11  | -0.605194223630284   |             |
| AGIWUR19694                                    |   |         |         |                |           |           |                      |             |
| CB4856 CT                                      | V | 3350177 | 3350967 | WBGene00268213 | C17B7.15  | C17B7.15  | -0.0350937902702571  |             |
| AGIWUR5840                                     |   |         |         |                |           |           |                      |             |
| CB4856 CT                                      | V | 3354667 | 3355513 | WBGene00015436 | C04E12.6  | C04E12.6  | -0.0304527555384251  |             |
| AGIWUR22660                                    |   |         |         |                |           |           |                      |             |
| CB4856 CT                                      | V | 3355848 | 3357193 | WBGene00015437 | scrm-3    | C04E12.7  | -0.0828849630301258  |             |
| AGIWUR284;AGIWUR27159;AGIWUR40065              |   |         |         |                |           |           |                      |             |
| CB4856 CT                                      | V | 3358567 | 3361093 | WBGene00015435 | C04E12.5  | C04E12.5  | -0.058292098260897   |             |
| AGIWUR14815                                    |   |         |         |                |           |           |                      |             |
| CB4856 CT                                      | V | 3362775 | 3368340 | WBGene00015434 | C04E12.4  | C04E12.4  | -0.230427695580671   |             |
| AGIWUR40921                                    |   |         |         |                |           |           |                      |             |
| CB4856 CT                                      | V | 3370942 | 3372773 | WBGene00006012 | srx-121   | C04E12.8  | -0.169321598191596   |             |
| AGIWUR41071                                    |   |         |         |                |           |           |                      |             |
| CB4856 CT                                      | V | 3374362 | 3377073 | WBGene00015438 | srbc-2    | C04E12.9  | -0.00397695777262497 |             |
| AGIWUR9314;AGIWUR10084;AGIWUR15107;AGIWUR26825 |   |         |         |                |           |           |                      |             |
| CB4856 CT                                      | V | 3377536 | 3382850 | WBGene00015439 | C04E12.10 | C04E12.10 | -0.304810581511644   |             |
| AGIWUR28568                                    |   |         |         |                |           |           |                      |             |
| CB4856 CT                                      | V | 3385695 | 3388156 | WBGene00015440 | arrd-20   | C04E12.11 | -0.193166675435107   |             |
| AGIWUR9441                                     |   |         |         |                |           |           |                      |             |
| CB4856 CT                                      | V | 3392111 | 3393296 | WBGene00020619 | T20D4.13  | T20D4.13  | -0.240906995203463   |             |
| AGIWUR32543;AGIWUR44356;AGIWUR44364            |   |         |         |                |           |           |                      |             |
| CB4856 CT                                      | V | 3393478 | 3394688 | WBGene00020620 | T20D4.15  | T20D4.15  | 0.105395388502874    |             |
| AGIWUR13888;AGIWUR26446;AGIWUR32049            |   |         |         |                |           |           |                      |             |
| CB4856 CT                                      | V | 3395275 | 3395966 | WBGene00020622 | T20D4.17  | T20D4.17  | -0.015592910819147   |             |
| AGIWUR9905                                     |   |         |         |                |           |           |                      |             |
| CB4856 CT                                      | V | 3397065 | 3397800 | WBGene00020618 | T20D4.12  | T20D4.12  | 0.492741738007744    |             |
| AGIWUR10809                                    |   |         |         |                |           |           |                      |             |
| CB4856 CT                                      | V | 3398690 | 3399640 | WBGene00020617 | T20D4.11  | T20D4.11  | 1.4784961955391      |             |
| AGIWUR32038                                    |   |         |         |                |           |           |                      |             |
| CB4856 CT                                      | V | 3400252 | 3401063 | WBGene00020616 | T20D4.10  | T20D4.10  | -0.347954110473086   |             |
| AGIWUR23484                                    |   |         |         |                |           |           |                      |             |
| CB4856 CT                                      | V | 3401645 | 3402356 | WBGene00044718 | T20D4.20  | T20D4.20  | 0.15009849046857     |             |
| AGIWUR29094                                    |   |         |         |                |           |           |                      |             |
| CB4856 CT                                      | V | 3405709 | 3407893 | WBGene00020614 | T20D4.8   | T20D4.8   | -0.196551546057442   | AGIWUR34715 |



|                                                                                  |    |   |         |         |                |          |           |                     |             |
|----------------------------------------------------------------------------------|----|---|---------|---------|----------------|----------|-----------|---------------------|-------------|
| CB4856                                                                           | CT | V | 3408912 | 3409519 | WBGene00020613 | T20D4.7  | T20D4.7   | -0.0529271721472204 | AGIWUR41765 |
| CB4856                                                                           | CT | V | 3410520 | 3412858 | WBGene00020612 | arrd-22  | T20D4.6   | -0.563373077569679  | AGIWUR24818 |
| CB4856                                                                           | CT | V | 3413344 | 3417770 | WBGene00020611 | T20D4.5  | T20D4.5   | -0.424446495095726  |             |
| AGIWUR18362;AGIWUR36984                                                          |    |   |         |         |                |          |           |                     |             |
| CB4856                                                                           | CT | V | 3418263 | 3422733 | WBGene00020609 | T20D4.3  | T20D4.3   | -0.103383802293757  |             |
| AGIWUR14715;AGIWUR23453                                                          |    |   |         |         |                |          |           |                     |             |
| CB4856                                                                           | CT | V | 3422949 | 3424441 | WBGene00020623 | srab-21  | T20D4.18  | -0.0809157272253769 |             |
| AGIWUR23103                                                                      |    |   |         |         |                |          |           |                     |             |
| CB4856                                                                           | CT | V | 3426376 | 3427733 | WBGene00020608 | srab-22  | T20D4.2   | 0.0472122502095296  | AGIWUR42868 |
| CB4856                                                                           | CT | V | 3428999 | 3430408 | WBGene00020607 | srab-20  | T20D4.1   | -0.304180208313987  | AGIWUR3585  |
| CB4856                                                                           | CT | V | 3430669 | 3431446 | WBGene00020624 | T20D4.19 | T20D4.19  | 0.0238161161820187  |             |
| AGIWUR15291                                                                      |    |   |         |         |                |          |           |                     |             |
| CB4856                                                                           | CT | V | 3432259 | 3433658 | WBGene00005597 | srj-9    | T20C4.1   | -0.915772233569072  | AGIWUR11391 |
| CB4856                                                                           | CT | V | 3441504 | 3444877 | WBGene00000478 | cfz-2    | F27E11.3  | -0.143614136372468  |             |
| AGIWUR757;AGIWUR7380;AGIWUR10239;AGIWUR15707;AGIWUR27031;AGIWUR28201;AGIWUR30282 |    |   |         |         |                |          |           |                     |             |
| CB4856                                                                           | CT | V | 3459740 | 3463071 | WBGene00017868 | slc-28.2 | F27E11.2  | 0.482606709034837   |             |
| AGIWUR6289                                                                       |    |   |         |         |                |          |           |                     |             |
| CB4856                                                                           | CT | V | 3463814 | 3466150 | WBGene00017867 | slc-28.1 | F27E11.1  | 0.540705024406215   |             |
| AGIWUR29163                                                                      |    |   |         |         |                |          |           |                     |             |
| CB4856                                                                           | CT | V | 3467453 | 3468545 | WBGene00001781 | gst-33   | C02A12.1  | 0.270985653240094   |             |
| AGIWUR37263                                                                      |    |   |         |         |                |          |           |                     |             |
| CB4856                                                                           | CT | V | 3469445 | 3470882 | WBGene00015315 | srbc-29  | C02A12.2  | -0.329196037304726  |             |
| AGIWUR20182                                                                      |    |   |         |         |                |          |           |                     |             |
| CB4856                                                                           | CT | V | 3471870 | 3475121 | WBGene00044088 | oac-2    | C02A12.8  | 0.121332895872224   |             |
| AGIWUR9707;AGIWUR37879                                                           |    |   |         |         |                |          |           |                     |             |
| CB4856                                                                           | CT | V | 3476405 | 3477596 | WBGene00044089 | srbc-31  | C02A12.9  | -0.013321765918378  |             |
| AGIWUR25970                                                                      |    |   |         |         |                |          |           |                     |             |
| CB4856                                                                           | CT | V | 3478031 | 3480446 | WBGene00015316 | srbc-30  | C02A12.3  | 0.148577579383863   |             |
| AGIWUR22138;AGIWUR22731                                                          |    |   |         |         |                |          |           |                     |             |
| CB4856                                                                           | CT | V | 3481421 | 3482600 | WBGene00003096 | lys-7    | C02A12.4  | 0.64722502517715    |             |
| AGIWUR21327                                                                      |    |   |         |         |                |          |           |                     |             |
| CB4856                                                                           | CT | V | 3483091 | 3484781 | WBGene00044090 | srbc-33  | C02A12.10 | -0.473940655608833  |             |
| AGIWUR15981                                                                      |    |   |         |         |                |          |           |                     |             |
| CB4856                                                                           | CT | V | 3485549 | 3486957 | WBGene00015317 | srbc-32  | C02A12.5  | -0.112460623233296  |             |
| AGIWUR13444;AGIWUR26033                                                          |    |   |         |         |                |          |           |                     |             |
| CB4856                                                                           | CT | V | 3489228 | 3490535 | WBGene00015318 | srbc-36  | C02A12.6  | -0.0201092588255172 |             |
| AGIWUR44918                                                                      |    |   |         |         |                |          |           |                     |             |
| CB4856                                                                           | CT | V | 3491361 | 3492598 | WBGene00015575 | srbc-35  | C07G3.7   | 0.0361261863864879  | AGIWUR14490 |
| CB4856                                                                           | CT | V | 3493637 | 3496943 | WBGene00269378 | C07G3.15 | C07G3.15  | 0.169374349954055   |             |

|                                                                                                 |    |   |         |         |                |                   |                                 |
|-------------------------------------------------------------------------------------------------|----|---|---------|---------|----------------|-------------------|---------------------------------|
| AGIWUR44418                                                                                     |    |   |         |         |                |                   |                                 |
| CB4856                                                                                          | CT | V | 3502307 | 3503077 | WBGene00015578 | C07G3.10          | C07G3.10 0.296641278764505      |
| AGIWUR38399                                                                                     |    |   |         |         |                |                   |                                 |
| CB4856                                                                                          | CT | V | 3503130 | 3506352 | WBGene00015577 | ugt-64 C07G3.9    | -0.235267928654476              |
| AGIWUR4206;AGIWUR16194;AGIWUR27047                                                              |    |   |         |         |                |                   |                                 |
| CB4856                                                                                          | CT | V | 3507822 | 3509251 | WBGene00006256 | str-225 C07G3.6   | 0.0438353376673248 AGIWUR1173   |
| CB4856                                                                                          | CT | V | 3510178 | 3512038 | WBGene00006259 | str-228 C07G3.5   | -0.363613532056281 AGIWUR27547  |
| CB4856                                                                                          | CT | V | 3512681 | 3514343 | WBGene00006257 | str-226 C07G3.4   | -0.183550841620276 AGIWUR29424  |
| CB4856                                                                                          | CT | V | 3518189 | 3519801 | WBGene00006258 | str-227 C07G3.3   | -0.212478833376794 AGIWUR20857  |
| CB4856                                                                                          | CT | V | 3522496 | 3523373 | WBGene00044119 | srh-191 C07G3.11  | 0.213118816797782               |
| AGIWUR3466;AGIWUR20550                                                                          |    |   |         |         |                |                   |                                 |
| CB4856                                                                                          | CT | V | 3523587 | 3524575 | WBGene00015574 | irg-1 C07G3.2     | -0.343545847422865              |
| AGIWUR3896;AGIWUR15501;AGIWUR26755;AGIWUR27297;AGIWUR35590;AGIWUR39514                          |    |   |         |         |                |                   |                                 |
| CB4856                                                                                          | CT | V | 3525274 | 3526178 | WBGene00020747 | T24A6.7 T24A6.7   | -0.0278339757301529 AGIWUR2091  |
| CB4856                                                                                          | CT | V | 3527182 | 3530413 | WBGene00006286 | str-260 T24A6.6   | 0.0214935838930632 AGIWUR17196  |
| CB4856                                                                                          | CT | V | 3530703 | 3532380 | WBGene00020746 | srbc-66 T24A6.5   | -0.020609137114965 AGIWUR11780  |
| CB4856                                                                                          | CT | V | 3533003 | 3535235 | WBGene00020748 | nhr-221 T24A6.8   | 0.286832758127475 AGIWUR27511   |
| CB4856                                                                                          | CT | V | 3536196 | 3538407 | WBGene00003683 | nhr-93 T24A6.9    | -0.166827875074941              |
| AGIWUR14893;AGIWUR35485                                                                         |    |   |         |         |                |                   |                                 |
| CB4856                                                                                          | CT | V | 3538929 | 3540329 | WBGene00020749 | srbc-67 T24A6.10  | 0.0910885807527322              |
| AGIWUR29858                                                                                     |    |   |         |         |                |                   |                                 |
| CB4856                                                                                          | CT | V | 3541586 | 3543444 | WBGene00020750 | nhr-222 T24A6.11  | -0.0928008455181342             |
| AGIWUR45167                                                                                     |    |   |         |         |                |                   |                                 |
| CB4856                                                                                          | CT | V | 3544081 | 3544969 | WBGene00020751 | srbc-69 T24A6.12  | -0.0139732723565116             |
| AGIWUR18305                                                                                     |    |   |         |         |                |                   |                                 |
| CB4856                                                                                          | CT | V | 3545677 | 3546617 | WBGene00020752 | srbc-68 T24A6.13  | 0.0715844210079322              |
| AGIWUR22134                                                                                     |    |   |         |         |                |                   |                                 |
| CB4856                                                                                          | CT | V | 3546969 | 3549685 | WBGene00005877 | srw-130 T24A6.14  | 0.136532967847461               |
| AGIWUR40579                                                                                     |    |   |         |         |                |                   |                                 |
| CB4856                                                                                          | CT | V | 3549853 | 3551269 | WBGene00005533 | sri-21 T24A6.4    | -0.0637457393286844 AGIWUR24721 |
| CB4856                                                                                          | CT | V | 3551346 | 3551865 | WBGene00001737 | gr1-28 T24A6.15   | -0.354052650900666              |
| AGIWUR25251                                                                                     |    |   |         |         |                |                   |                                 |
| CB4856                                                                                          | CT | V | 3553134 | 3554568 | WBGene00020756 | T24A6.20 T24A6.20 | -0.345344672791426              |
| AGIWUR993;AGIWUR6754;AGIWUR17149;AGIWUR29084                                                    |    |   |         |         |                |                   |                                 |
| CB4856                                                                                          | CT | V | 3554611 | 3555236 | WBGene00001738 | gr1-29 T24A6.18   | 0.13595261405937                |
| AGIWUR36854                                                                                     |    |   |         |         |                |                   |                                 |
| CB4856                                                                                          | CT | V | 3556286 | 3556804 | WBGene00001739 | gr1-30 T24A6.3    | -0.0805637086894766             |
| AGIWUR11277;AGIWUR13308;AGIWUR16687;AGIWUR26402;AGIWUR30986;AGIWUR32654;AGIWUR40692;AGIWUR44446 |    |   |         |         |                |                   |                                 |
| CB4856                                                                                          | CT | V | 3557206 | 3557778 | WBGene00020755 | gr1-31 T24A6.19   | -0.234533520644167              |

|                                                            |    |   |         |         |                |           |           |                              |                   |
|------------------------------------------------------------|----|---|---------|---------|----------------|-----------|-----------|------------------------------|-------------------|
| AGIWUR44762                                                |    |   |         |         |                |           |           |                              |                   |
| CB4856                                                     | CT | V | 3575055 | 3575874 | WBGene00001736 | gr1-27    | F40C5.3   | -0.643921113074565           | AGIWUR25823       |
| CB4856                                                     | CT | V | 3579023 | 3585042 | WBGene00020696 | T22F3.3   | T22F3.3   | 0.0496310192869522           |                   |
| AGIWUR8623;AGIWUR10935                                     |    |   |         |         |                |           |           |                              |                   |
| CB4856                                                     | CT | V | 3585313 | 3586064 | WBGene00004422 | rp1-11.1  |           | T22F3.4 -0.0234395545986352  |                   |
| AGIWUR6406;AGIWUR22697;AGIWUR26264                         |    |   |         |         |                |           |           |                              |                   |
| CB4856                                                     | CT | V | 3586639 | 3589015 | WBGene00020695 | T22F3.2   | T22F3.2   | 0.0124930884021985           | AGIWUR7830        |
| CB4856                                                     | CT | V | 3589029 | 3592199 | WBGene00044705 | T22F3.12  |           | T22F3.12 0.395807090701139   |                   |
| AGIWUR15774;AGIWUR32295                                    |    |   |         |         |                |           |           |                              |                   |
| CB4856                                                     | CT | V | 3592768 | 3594973 | WBGene00005423 | srh-213   | T22F3.5   | -0.0107345905016247          | AGIWUR3939        |
| CB4856                                                     | CT | V | 3595191 | 3597152 | WBGene00005422 | srh-212   | T22F3.6   | 0.197148858356845            | AGIWUR13236       |
| CB4856                                                     | CT | V | 3597753 | 3601021 | WBGene00020697 | T22F3.7   | T22F3.7   | 0.108639647358963            | AGIWUR44509       |
| CB4856                                                     | CT | V | 3602052 | 3605425 | WBGene00020698 | T22F3.8   | T22F3.8   | 1.59631391982166             | AGIWUR21890       |
| CB4856                                                     | CT | V | 3606818 | 3610927 | WBGene00020699 | T22F3.10  |           | T22F3.10 1.08927465183934    |                   |
| AGIWUR38785                                                |    |   |         |         |                |           |           |                              |                   |
| CB4856                                                     | CT | V | 3612173 | 3614551 | WBGene00020700 | T22F3.11  |           | T22F3.11 3.77110473248091    |                   |
| AGIWUR707;AGIWUR22769                                      |    |   |         |         |                |           |           |                              |                   |
| CB4856                                                     | CT | V | 3622382 | 3623698 | WBGene00005985 | srx-94    | F59B1.5   | -0.332704650130212           | AGIWUR22337       |
| CB4856                                                     | CT | V | 3625022 | 3627044 | WBGene00019098 | F59B1.4   | F59B1.4   | 0.0130983128441713           | AGIWUR36888       |
| CB4856                                                     | CT | V | 3629473 | 3631691 | WBGene00019099 | F59B1.6   | F59B1.6   | -0.466746927986065           | AGIWUR21295       |
| CB4856                                                     | CT | V | 3633341 | 3634683 | WBGene00019097 | F59B1.2   | F59B1.2   | 0.0341675191454502           |                   |
| AGIWUR6873;AGIWUR19168;AGIWUR41274;AGIWUR41970;AGIWUR43406 |    |   |         |         |                |           |           |                              |                   |
| CB4856                                                     | CT | V | 3634688 | 3637173 | WBGene00005932 | srx-41    | F59B1.7   | 0.330550585920765            | AGIWUR40658       |
| CB4856                                                     | CT | V | 3641858 | 3644243 | WBGene00019100 | F59B1.8   | F59B1.8   | -0.25429779502662            | AGIWUR25579       |
| CB4856                                                     | CT | V | 3644745 | 3647954 | WBGene00019101 | F59B1.10  |           | F59B1.10 -0.383321952128588  |                   |
| AGIWUR11522                                                |    |   |         |         |                |           |           |                              |                   |
| CB4856                                                     | CT | V | 3649773 | 3651457 | WBGene00006165 | str-114   | F59B1.1   | 0.141672660160483            | AGIWUR26857       |
| CB4856                                                     | CT | V | 3651686 | 3659499 | WBGene00000062 | acr-23    | F59B1.9   | -0.132169115648979           | AGIWUR24298       |
| CB4856                                                     | CT | V | 3664871 | 3666987 | WBGene00006164 | str-113   | Y39H10B.1 | -0.331138436536845           |                   |
| AGIWUR42664                                                |    |   |         |         |                |           |           |                              |                   |
| CB4856                                                     | CT | V | 3668728 | 3670631 | WBGene00044527 | Y39H10B.2 |           | Y39H10B.2 -0.379518340031707 |                   |
| AGIWUR1568;AGIWUR10702                                     |    |   |         |         |                |           |           |                              |                   |
| CB4856                                                     | CT | V | 3673380 | 3676632 | WBGene00021081 | pals-33   | W08A12.4  |                              | 2.59812804494683  |
| AGIWUR25982                                                |    |   |         |         |                |           |           |                              |                   |
| CB4856                                                     | CT | V | 3682853 | 3686474 | WBGene00021080 | W08A12.3  |           | W08A12.3 -0.3034351037037    |                   |
| AGIWUR23717                                                |    |   |         |         |                |           |           |                              |                   |
| CB4856                                                     | CT | V | 3687110 | 3701864 | WBGene00021078 | unc-132   | W08A12.1  |                              | 0.117187863420702 |
| AGIWUR10957                                                |    |   |         |         |                |           |           |                              |                   |
| CB4856                                                     | CT | V | 3704988 | 3712796 | WBGene00003025 | lin-40    | T27C4.4   | 0.233341103086545            |                   |

AGIWUR6346;AGIWUR11359;AGIWUR19273;AGIWUR20650;AGIWUR24147;AGIWUR30880;AGIWUR43792  
 CB4856 CT V 3712779 3715969 WBGene00020854 T27C4.1 T27C4.1 0.47359859984354  
 AGIWUR5398;AGIWUR38936;AGIWUR42805;AGIWUR44078  
 CB4856 CT V 3725072 3726775 WBGene00006096 str-30 T27C4.3 0.0139662401859137 AGIWUR43466  
 CB4856 CT V 3727482 3739398 WBGene00020855 hpo-36 T27C4.2 0.0424404795408737  
 AGIWUR10356;AGIWUR40347;AGIWUR42612  
 CB4856 CT V 3743576 3749401 WBGene00003479 mtm-9 Y39H10A.3 -0.165185884945291  
 AGIWUR25442;AGIWUR36850;AGIWUR39616  
 CB4856 CT V 3749494 3757074 WBGene00021482 Y39H10A.6 Y39H10A.6 0.123610237152175  
 AGIWUR15606  
 CB4856 CT V 3757047 3759469 WBGene00000498 chk-1 Y39H10A.7 -0.1929498144964  
 AGIWUR1558;AGIWUR23006;AGIWUR31592;AGIWUR32015;AGIWUR42878  
 CB4856 CT V 3761139 3766306 WBGene00021479 oac-55 Y39H10A.2 -0.219374970956791  
 AGIWUR21286  
 CB4856 CT V 3767204 3767734 WBGene00021478 Y39H10A.1 Y39H10A.1 1.60403875864315  
 AGIWUR30517  
 CB4856 CT V 3768570 3769776 WBGene00019964 R08E5.4 R08E5.4 -0.093972278417878 AGIWUR19614  
 CB4856 CT V 3769801 3771518 WBGene00019961 R08E5.1 R08E5.1 -0.189476752660473  
 AGIWUR22836;AGIWUR35303;AGIWUR37563  
 CB4856 CT V 3772021 3775546 WBGene00019963 R08E5.3 R08E5.3 -0.487084656509298 AGIWUR19259  
 CB4856 CT V 3774533 3776136 WBGene00019962 cys1-3 R08E5.2 -0.279754652863989  
 AGIWUR7833;AGIWUR18152;AGIWUR20551;AGIWUR20799  
 CB4856 CT V 3777553 3784213 WBGene00019965 R08F11.1 R08F11.1 -0.293898797015409  
 AGIWUR4405  
 CB4856 CT V 3790133 3793766 WBGene00019970 R08F11.7 R08F11.7 -0.0173311452726903  
 AGIWUR24390  
 CB4856 CT V 3794733 3798587 WBGene00019969 fpn-1.3 R08F11.6 -0.152494317154488  
 AGIWUR18782  
 CB4856 CT V 3798605 3800478 WBGene00019966 srt-30 R08F11.2 -0.36512359880243  
 AGIWUR24318  
 CB4856 CT V 3800782 3803531 WBGene00019967 cyp-33C8 R08F11.3 -0.276548366721173  
 AGIWUR2301  
 CB4856 CT V 3803845 3805531 WBGene00019968 R08F11.4 R08F11.4 -0.186270832307668  
 AGIWUR3076  
 CB4856 CT V 3806261 3807752 WBGene00005754 srw-7 R08F11.5 0.131575747735026  
 AGIWUR27147  
 CB4856 CT V 3808636 3810708 WBGene00005753 srw-6 H10D18.3 0.06064685720865  
 AGIWUR12194  
 CB4856 CT V 3810786 3811634 WBGene00019179 scl-13 H10D18.4 0.139408193565602

|                                                                        |   |         |         |                |          |          |                     |                     |             |
|------------------------------------------------------------------------|---|---------|---------|----------------|----------|----------|---------------------|---------------------|-------------|
| AGIWUR5987                                                             |   |         |         |                |          |          |                     |                     |             |
| CB4856 CT                                                              | V | 3812596 | 3813363 | WBGene00019178 | scl-12   | H10D18.2 |                     | 0.087062536533498   |             |
| AGIWUR34033                                                            |   |         |         |                |          |          |                     |                     |             |
| CB4856 CT                                                              | V | 3813737 | 3831659 | WBGene00019180 | H10D18.5 | H10D18.5 |                     | 0.0995133884675137  |             |
| AGIWUR1798;AGIWUR17439;AGIWUR39972;AGIWUR40273;AGIWUR42309;AGIWUR43558 |   |         |         |                |          |          |                     |                     |             |
| CB4856 CT                                                              | V | 3841859 | 3844007 | WBGene00018543 | ugt-32   | F47C10.6 |                     | -0.0336341680828056 |             |
| AGIWUR43683                                                            |   |         |         |                |          |          |                     |                     |             |
| CB4856 CT                                                              | V | 3844645 | 3847151 | WBGene00018539 | nhr-185  | F47C10.1 |                     | 0.325602739764356   |             |
| AGIWUR24112                                                            |   |         |         |                |          |          |                     |                     |             |
| CB4856 CT                                                              | V | 3850127 | 3851796 | WBGene00018540 | btb-21   | F47C10.2 |                     | 0.406301920073536   |             |
| AGIWUR37295                                                            |   |         |         |                |          |          |                     |                     |             |
| CB4856 CT                                                              | V | 3852286 | 3854947 | WBGene00018541 | nhr-186  | F47C10.3 |                     | -0.0679467247191727 |             |
| AGIWUR37709                                                            |   |         |         |                |          |          |                     |                     |             |
| CB4856 CT                                                              | V | 3856329 | 3857861 | WBGene00018544 | nhr-188  | F47C10.7 |                     | 0.182876778498981   |             |
| AGIWUR32751                                                            |   |         |         |                |          |          |                     |                     |             |
| CB4856 CT                                                              | V | 3858461 | 3860243 | WBGene00018545 | nhr-189  | F47C10.8 |                     | 0.0249016516721401  |             |
| AGIWUR23666                                                            |   |         |         |                |          |          |                     |                     |             |
| CB4856 CT                                                              | V | 3861089 | 3862933 | WBGene00018542 | nhr-187  | F47C10.4 |                     | 0.293899061287233   |             |
| AGIWUR31141                                                            |   |         |         |                |          |          |                     |                     |             |
| CB4856 CT                                                              | V | 3866556 | 3869005 | WBGene00015900 | nhr-157  | C17E7.5  | 0.0600906143952233  |                     | AGIWUR31162 |
| CB4856 CT                                                              | V | 3871174 | 3873216 | WBGene00015901 | nhr-158  | C17E7.6  | -0.169746852897198  |                     | AGIWUR18937 |
| CB4856 CT                                                              | V | 3875245 | 3878382 | WBGene00015902 | nhr-159  | C17E7.7  | 0.0767342126569925  |                     | AGIWUR34504 |
| CB4856 CT                                                              | V | 3880798 | 3886204 | WBGene00003714 | nhr-124  | C17E7.8  | 0.241443046520111   |                     | AGIWUR12597 |
| CB4856 CT                                                              | V | 3887750 | 3889286 | WBGene00015906 | C17E7.13 | C17E7.13 | 0.545898436959519   |                     |             |
| AGIWUR26604                                                            |   |         |         |                |          |          |                     |                     |             |
| CB4856 CT                                                              | V | 3889287 | 3890861 | WBGene00015903 | C17E7.9  | C17E7.9  | -0.0476149487686399 |                     | AGIWUR10808 |
| CB4856 CT                                                              | V | 3890968 | 3892026 | WBGene00015905 | C17E7.12 | C17E7.12 | -0.198726126958793  |                     |             |
| AGIWUR20122                                                            |   |         |         |                |          |          |                     |                     |             |
| CB4856 CT                                                              | V | 3892856 | 3894573 | WBGene00015899 | C17E7.4  | C17E7.4  | 0.0156689621245203  |                     | AGIWUR36235 |
| CB4856 CT                                                              | V | 3894961 | 3898208 | WBGene00015898 | sre-9    | C17E7.3  | -0.0860892467264192 |                     |             |
| AGIWUR1726;AGIWUR23776;AGIWUR40013                                     |   |         |         |                |          |          |                     |                     |             |
| CB4856 CT                                                              | V | 3898800 | 3900202 | WBGene00015904 | irld-22  | C17E7.10 | 0.274763323477309   |                     |             |
| AGIWUR29385                                                            |   |         |         |                |          |          |                     |                     |             |
| CB4856 CT                                                              | V | 3900497 | 3902558 | WBGene00006260 | str-229  | C17E7.11 | -0.0163430102420978 |                     |             |
| AGIWUR39812                                                            |   |         |         |                |          |          |                     |                     |             |
| CB4856 CT                                                              | V | 3903107 | 3904545 | WBGene00005404 | srh-190  | C17E7.2  | 0.139008117105848   |                     | AGIWUR3000  |
| CB4856 CT                                                              | V | 3906141 | 3908435 | WBGene00015897 | nhr-156  | C17E7.1  | -0.393335742973818  |                     |             |
| AGIWUR558;AGIWUR5994;AGIWUR33341;AGIWUR41453                           |   |         |         |                |          |          |                     |                     |             |
| CB4856 CT                                                              | V | 3909098 | 3910945 | WBGene00005952 | srx-61   | T20C7.1  | 0.494522643093489   |                     | AGIWUR14959 |

|                                                                                   |   |         |         |                |           |          |                     |             |
|-----------------------------------------------------------------------------------|---|---------|---------|----------------|-----------|----------|---------------------|-------------|
| CB4856 CT                                                                         | V | 3912772 | 3914597 | WBGene00005959 | srx-68    | K07C6.11 | -0.0253436077998259 |             |
| AGIWUR25156                                                                       |   |         |         |                |           |          |                     |             |
| CB4856 CT                                                                         | V | 3916839 | 3918446 | WBGene00005958 | srx-67    | K07C6.10 | 0.456491456596887   |             |
| AGIWUR12123                                                                       |   |         |         |                |           |          |                     |             |
| CB4856 CT                                                                         | V | 3919589 | 3920825 | WBGene00005957 | srx-66    | K07C6.9  | 0.48732512010212    | AGIWUR27346 |
| CB4856 CT                                                                         | V | 3921935 | 3922964 | WBGene00005956 | srx-65    | K07C6.8  | 0.128877767681663   | AGIWUR41357 |
| CB4856 CT                                                                         | V | 3923376 | 3926642 | WBGene00005960 | srx-69    | K07C6.13 | -0.361610527274653  |             |
| AGIWUR20121                                                                       |   |         |         |                |           |          |                     |             |
| CB4856 CT                                                                         | V | 3929399 | 3930678 | WBGene00005955 | srx-64    | K07C6.7  | 0.0767704229104735  | AGIWUR27079 |
| CB4856 CT                                                                         | V | 3931626 | 3933394 | WBGene00005954 | srx-63    | K07C6.6  | 0.138453484198368   |             |
| AGIWUR24551;AGIWUR26628                                                           |   |         |         |                |           |          |                     |             |
| CB4856 CT                                                                         | V | 3933960 | 3934950 | WBGene00005961 | srx-70    | K07C6.15 | -0.0931031268830016 |             |
| AGIWUR30774;AGIWUR36074                                                           |   |         |         |                |           |          |                     |             |
| CB4856 CT                                                                         | V | 3936326 | 3938496 | WBGene00019473 | cyp-35A5  | K07C6.5  | -0.069946118785797  |             |
| AGIWUR1573;AGIWUR21781;AGIWUR22277;AGIWUR42606                                    |   |         |         |                |           |          |                     |             |
| CB4856 CT                                                                         | V | 3939032 | 3941235 | WBGene00019472 | cyp-35B1  | K07C6.4  | -0.0323865236166476 |             |
| AGIWUR32263                                                                       |   |         |         |                |           |          |                     |             |
| CB4856 CT                                                                         | V | 3942215 | 3944457 | WBGene00019471 | cyp-35B2  | K07C6.3  | -0.0250810726799671 |             |
| AGIWUR11302                                                                       |   |         |         |                |           |          |                     |             |
| CB4856 CT                                                                         | V | 3945353 | 3947044 | WBGene00019470 | cyp-35B3  | K07C6.2  | -0.0643321102851768 |             |
| AGIWUR44312                                                                       |   |         |         |                |           |          |                     |             |
| CB4856 CT                                                                         | V | 3947365 | 3948952 | WBGene00019469 | srz-89    | K07C6.1  | -0.0584833223578931 | AGIWUR17566 |
| CB4856 CT                                                                         | V | 3950027 | 3952097 | WBGene00020386 | cyp-34A4  | T09H2.1  | -0.234102999058827  |             |
| AGIWUR16851                                                                       |   |         |         |                |           |          |                     |             |
| CB4856 CT                                                                         | V | 3954039 | 3955460 | WBGene00006274 | str-247   | B0213.9  | 0.190840513150077   |             |
| AGIWUR29066;AGIWUR30225;AGIWUR30460                                               |   |         |         |                |           |          |                     |             |
| CB4856 CT                                                                         | V | 3955766 | 3957715 | WBGene00015040 | cyp-34A5  | B0213.10 | 0.0381096252173023  |             |
| AGIWUR2873;AGIWUR4685;AGIWUR10311;AGIWUR11935;AGIWUR17491;AGIWUR28198;AGIWUR39604 |   |         |         |                |           |          |                     |             |
| CB4856 CT                                                                         | V | 3958160 | 3961358 | WBGene00015041 | cyp-34A6  | B0213.11 | 0.106118522977205   |             |
| AGIWUR10465                                                                       |   |         |         |                |           |          |                     |             |
| CB4856 CT                                                                         | V | 3961760 | 3963815 | WBGene00015042 | cyp-34A7  | B0213.12 | 0.48369848640791    |             |
| AGIWUR36195                                                                       |   |         |         |                |           |          |                     |             |
| CB4856 CT                                                                         | V | 3964779 | 3967880 | WBGene00015043 | cyp-34A8  | B0213.14 | -0.199814841459986  |             |
| AGIWUR14373                                                                       |   |         |         |                |           |          |                     |             |
| CB4856 CT                                                                         | V | 3968134 | 3970514 | WBGene00015044 | cyp-34A9  | B0213.15 | 1.51014145233351    |             |
| AGIWUR2584;AGIWUR10028;AGIWUR10829;AGIWUR16241;AGIWUR18901;AGIWUR23794            |   |         |         |                |           |          |                     |             |
| CB4856 CT                                                                         | V | 3970712 | 3973001 | WBGene00015045 | cyp-34A10 | B0213.16 | 1.49692537554564    |             |
| AGIWUR35138                                                                       |   |         |         |                |           |          |                     |             |
| CB4856 CT                                                                         | V | 3974661 | 3976264 | WBGene00006141 | str-82    | B0213.8  | 0.0183016823913889  | AGIWUR36544 |

|                                                                                                                      |    |   |         |         |                |          |          |                     |             |
|----------------------------------------------------------------------------------------------------------------------|----|---|---------|---------|----------------|----------|----------|---------------------|-------------|
| CB4856                                                                                                               | CT | V | 3977264 | 3978811 | WBGene00006142 | str-83   | B0213.7  | -0.283325698353309  | AGIWUR26623 |
| CB4856                                                                                                               | CT | V | 3978836 | 3979134 | WBGene00015046 | nlp-34   | B0213.17 | -0.251916974552035  |             |
| AGIWUR5401                                                                                                           |    |   |         |         |                |          |          |                     |             |
| CB4856                                                                                                               | CT | V | 3980055 | 3980622 | WBGene00003769 | nlp-31   | B0213.6  | -0.237803690266162  | AGIWUR18556 |
| CB4856                                                                                                               | CT | V | 3981980 | 3982741 | WBGene00003768 | nlp-30   | B0213.5  | -0.0327634932312968 | AGIWUR27472 |
| CB4856                                                                                                               | CT | V | 3984413 | 3984847 | WBGene00003767 | nlp-29   | B0213.4  | 0.375398997592381   |             |
| AGIWUR3874;AGIWUR24246;AGIWUR25364;AGIWUR35635;AGIWUR36359                                                           |    |   |         |         |                |          |          |                     |             |
| CB4856                                                                                                               | CT | V | 3987900 | 3988312 | WBGene00003766 | nlp-28   | B0213.3  | 0.400772810394831   |             |
| AGIWUR1823;AGIWUR3034;AGIWUR3079;AGIWUR11292;AGIWUR12737;AGIWUR20737;AGIWUR31288;AGIWUR32617;AGIWUR33370;AGIWUR33926 |    |   |         |         |                |          |          |                     |             |
| CB4856                                                                                                               | CT | V | 3989377 | 3989770 | WBGene00003765 | nlp-27   | B0213.2  | -0.152725258494231  |             |
| AGIWUR23726;AGIWUR25464                                                                                              |    |   |         |         |                |          |          |                     |             |
| CB4856                                                                                                               | CT | V | 3992655 | 3994180 | WBGene00019567 | K09D9.9  | K09D9.9  | -0.313202910972668  | AGIWUR20835 |
| CB4856                                                                                                               | CT | V | 3994780 | 3995938 | WBGene00005953 | srx-62   | K09D9.10 | 0.0409948006395471  |             |
| AGIWUR14251                                                                                                          |    |   |         |         |                |          |          |                     |             |
| CB4856                                                                                                               | CT | V | 3997124 | 4001465 | WBGene00019568 | K09D9.11 | K09D9.11 | -0.014947114799952  |             |
| AGIWUR4967                                                                                                           |    |   |         |         |                |          |          |                     |             |
| CB4856                                                                                                               | CT | V | 4002327 | 4004309 | WBGene00019569 | K09D9.12 | K09D9.12 | -0.273371955340366  |             |
| AGIWUR11640                                                                                                          |    |   |         |         |                |          |          |                     |             |
| CB4856                                                                                                               | CT | V | 4005567 | 4007517 | WBGene00005234 | srh-8    | K09D9.8  | 0.17974709512845    | AGIWUR42726 |
| CB4856                                                                                                               | CT | V | 4008227 | 4009818 | WBGene00005233 | srh-7    | K09D9.7  | -0.091974648640333  | AGIWUR28976 |
| CB4856                                                                                                               | CT | V | 4010470 | 4011966 | WBGene00005230 | srh-4    | K09D9.6  | -0.368338311535751  | AGIWUR42420 |
| CB4856                                                                                                               | CT | V | 4013021 | 4014628 | WBGene00006107 | str-42   | K09D9.5  | 0.0123197935740538  |             |
| AGIWUR22127;AGIWUR24418                                                                                              |    |   |         |         |                |          |          |                     |             |
| CB4856                                                                                                               | CT | V | 4015587 | 4016938 | WBGene00005232 | srh-6    | K09D9.4  | -0.0208536153417    |             |
| AGIWUR28540;AGIWUR41631                                                                                              |    |   |         |         |                |          |          |                     |             |
| CB4856                                                                                                               | CT | V | 4017080 | 4019026 | WBGene00005836 | srw-89   | K09D9.13 | 0.00727289465849168 |             |
| AGIWUR9432                                                                                                           |    |   |         |         |                |          |          |                     |             |
| CB4856                                                                                                               | CT | V | 4019488 | 4020601 | WBGene00019566 | K09D9.3  | K09D9.3  | 0.0827124732481526  | AGIWUR17366 |
| CB4856                                                                                                               | CT | V | 4022609 | 4024475 | WBGene00019565 | cyp-35A3 | K09D9.2  | -0.0941637175499501 |             |
| AGIWUR21092;AGIWUR23742;AGIWUR29860;AGIWUR40665                                                                      |    |   |         |         |                |          |          |                     |             |
| CB4856                                                                                                               | CT | V | 4025091 | 4026212 | WBGene00019564 | K09D9.1  | K09D9.1  | -0.475167267488644  | AGIWUR30594 |
| CB4856                                                                                                               | CT | V | 4031619 | 4033446 | WBGene00016786 | cyp-35A4 | C49G7.8  | -0.421206396927408  |             |
| AGIWUR16323;AGIWUR38020;AGIWUR39215                                                                                  |    |   |         |         |                |          |          |                     |             |
| CB4856                                                                                                               | CT | V | 4038821 | 4039934 | WBGene00077593 | C49G7.12 | C49G7.12 | -0.304125479436836  |             |
| AGIWUR1545                                                                                                           |    |   |         |         |                |          |          |                     |             |
| CB4856                                                                                                               | CT | V | 4040409 | 4042004 | WBGene00016788 | C49G7.10 | C49G7.10 | 0.00680549452442669 |             |
| AGIWUR1228;AGIWUR4669;AGIWUR11163;AGIWUR13514;AGIWUR28269;AGIWUR31558;AGIWUR39242                                    |    |   |         |         |                |          |          |                     |             |
| CB4856                                                                                                               | CT | V | 4042404 | 4043599 | WBGene00016783 | irg-2    | C49G7.5  | -0.543879538199502  | AGIWUR19682 |

|                                                                                  |    |   |         |         |                |           |           |                     |             |
|----------------------------------------------------------------------------------|----|---|---------|---------|----------------|-----------|-----------|---------------------|-------------|
| CB4856                                                                           | CT | V | 4047841 | 4049354 | WBGene00005385 | srh-169   | C49G7.2   | -0.0669576704562047 | AGIWUR21978 |
| CB4856                                                                           | CT | V | 4054191 | 4055109 | WBGene00016789 | djr-1.2   | C49G7.11  | 0.192480540890021   |             |
| AGIWUR30122                                                                      |    |   |         |         |                |           |           |                     |             |
| CB4856                                                                           | CT | V | 4056165 | 4062184 | WBGene00017035 | D1065.3   | D1065.3   | -0.0219653382676297 |             |
| AGIWUR9655;AGIWUR15863;AGIWUR37113;AGIWUR40042                                   |    |   |         |         |                |           |           |                     |             |
| CB4856                                                                           | CT | V | 4062497 | 4068573 | WBGene00023264 | D1065.2   | D1065.2   | 0.0618409503089676  | AGIWUR24744 |
| CB4856                                                                           | CT | V | 4069424 | 4071542 | WBGene00005420 | srh-210   | D1065.4   | 0.0125717793365236  | AGIWUR36401 |
| CB4856                                                                           | CT | V | 4073755 | 4077548 | WBGene00017034 | otpl-2    | D1065.1   | 0.214624907257703   | AGIWUR30779 |
| CB4856                                                                           | CT | V | 4078061 | 4079813 | WBGene00005421 | srh-211   | D1065.5   | -0.466472626166279  | AGIWUR12980 |
| CB4856                                                                           | CT | V | 4081228 | 4083052 | WBGene00018190 | F38H12.5  | F38H12.5  | 0.154690197217437   |             |
| AGIWUR6655;AGIWUR32282;AGIWUR40051                                               |    |   |         |         |                |           |           |                     |             |
| CB4856                                                                           | CT | V | 4095040 | 4100541 | WBGene00018189 | nhr-181   | F38H12.3  | -0.333588050753818  |             |
| AGIWUR23566                                                                      |    |   |         |         |                |           |           |                     |             |
| CB4856                                                                           | CT | V | 4101867 | 4103893 | WBGene00005624 | srj-40    | F38H12.2  | 0.033082327736027   |             |
| AGIWUR1960                                                                       |    |   |         |         |                |           |           |                     |             |
| CB4856                                                                           | CT | V | 4104598 | 4106244 | WBGene00005623 | srj-39    | F38H12.1  | 0.0800522962859764  |             |
| AGIWUR19120                                                                      |    |   |         |         |                |           |           |                     |             |
| CB4856                                                                           | CT | V | 4106373 | 4108138 | WBGene00005879 | srw-132   | T05B4.5   | 0.0458363834579689  | AGIWUR44738 |
| CB4856                                                                           | CT | V | 4110634 | 4112616 | WBGene00005881 | srw-134   | T05B4.7   | 0.292190627678267   | AGIWUR38922 |
| CB4856                                                                           | CT | V | 4113335 | 4114727 | WBGene00005880 | srw-133   | T05B4.6   | -0.226967412256049  | AGIWUR11913 |
| CB4856                                                                           | CT | V | 4117585 | 4118432 | WBGene00020240 | T05B4.9   | T05B4.9   | 0.0600966894963211  | AGIWUR20216 |
| CB4856                                                                           | CT | V | 4119890 | 4120729 | WBGene00020241 | T05B4.10  | T05B4.10  | -0.0842477010721794 |             |
| AGIWUR25881                                                                      |    |   |         |         |                |           |           |                     |             |
| CB4856                                                                           | CT | V | 4121489 | 4122517 | WBGene00020242 | phat-5    | T05B4.11  | 0.825334412994653   |             |
| AGIWUR8147;AGIWUR9076;AGIWUR14271;AGIWUR30063;AGIWUR41290;AGIWUR44095            |    |   |         |         |                |           |           |                     |             |
| CB4856                                                                           | CT | V | 4123329 | 4124862 | WBGene00020243 | T05B4.12  | T05B4.12  | 0.28003647165248    |             |
| AGIWUR35874                                                                      |    |   |         |         |                |           |           |                     |             |
| CB4856                                                                           | CT | V | 4126319 | 4127535 | WBGene00020244 | T05B4.13  | T05B4.13  | 0.0577452225999053  |             |
| AGIWUR21784                                                                      |    |   |         |         |                |           |           |                     |             |
| CB4856                                                                           | CT | V | 4127868 | 4129602 | WBGene00020238 | T05B4.4   | T05B4.4   | 0.0412924119821856  | AGIWUR27590 |
| CB4856                                                                           | CT | V | 4129904 | 4130909 | WBGene00020237 | phat-4    | T05B4.3   | -0.131901837484702  |             |
| AGIWUR24108;AGIWUR28429                                                          |    |   |         |         |                |           |           |                     |             |
| CB4856                                                                           | CT | V | 4131925 | 4134981 | WBGene00003647 | nhr-57    | T05B4.2   | 0.210903826321758   |             |
| AGIWUR4984;AGIWUR6609;AGIWUR9301;AGIWUR10813;AGIWUR15809;AGIWUR19457;AGIWUR36903 |    |   |         |         |                |           |           |                     |             |
| CB4856                                                                           | CT | V | 4134968 | 4138825 | WBGene00020236 | lgc-1     | T05B4.1   | 0.0543239059886975  |             |
| AGIWUR12300;AGIWUR14909                                                          |    |   |         |         |                |           |           |                     |             |
| CB4856                                                                           | CT | V | 4139008 | 4143120 | WBGene00044528 | lgc-29    | Y45G5AL.2 | 0.0627134349850063  |             |
| AGIWUR6685;AGIWUR40865                                                           |    |   |         |         |                |           |           |                     |             |
| CB4856                                                                           | CT | V | 4144505 | 4147571 | WBGene00021554 | Y45G5AL.1 | Y45G5AL.1 | 0.131289478972963   |             |



|                                                |   |         |         |                |                  |                      |                     |             |
|------------------------------------------------|---|---------|---------|----------------|------------------|----------------------|---------------------|-------------|
| AGIWUR44946                                    |   |         |         |                |                  |                      |                     |             |
| CB4856 CT                                      | V | 4147550 | 4152296 | WBGene00021558 | Y45G5AM.6        | Y45G5AM.6            | 0.0630343538161711  |             |
| AGIWUR15909                                    |   |         |         |                |                  |                      |                     |             |
| CB4856 CT                                      | V | 4160383 | 4160889 | WBGene00021557 | Y45G5AM.5        | Y45G5AM.5            | 0.555655445296791   |             |
| AGIWUR43106                                    |   |         |         |                |                  |                      |                     |             |
| CB4856 CT                                      | V | 4163222 | 4163611 | WBGene00043666 | Y45G5AM.4        | Y45G5AM.4            | 0.261084696382446   |             |
| AGIWUR36153                                    |   |         |         |                |                  |                      |                     |             |
| CB4856 CT                                      | V | 4164554 | 4166825 | WBGene00021556 | Y45G5AM.3        | Y45G5AM.3            | -0.0350390104225831 |             |
| AGIWUR26169                                    |   |         |         |                |                  |                      |                     |             |
| CB4856 CT                                      | V | 4166796 | 4169837 | WBGene00021559 | Y45G5AM.7        | Y45G5AM.7            | -0.0339540951010022 |             |
| AGIWUR22011                                    |   |         |         |                |                  |                      |                     |             |
| CB4856 CT                                      | V | 4175882 | 4181357 | WBGene00021555 | Y45G5AM.2        | Y45G5AM.2            | -0.3116046932002    |             |
| AGIWUR12069                                    |   |         |         |                |                  |                      |                     |             |
| CB4856 CT                                      | V | 4181332 | 4191515 | WBGene00021561 | Y45G5AM.9        | Y45G5AM.9            | -0.0386479147600927 |             |
| AGIWUR11428;AGIWUR18622;AGIWUR43252            |   |         |         |                |                  |                      |                     |             |
| CB4856 CT                                      | V | 4195577 | 4199399 | WBGene00019276 | H43I07.3         | H43I07.3             | -0.10599442260642   |             |
| AGIWUR27848                                    |   |         |         |                |                  |                      |                     |             |
| CB4856 CT                                      | V | 4199485 | 4203696 | WBGene00019275 | rpac-40 H43I07.2 |                      | -0.0816896055584344 |             |
| AGIWUR7057                                     |   |         |         |                |                  |                      |                     |             |
| CB4856 CT                                      | V | 4204721 | 4209303 | WBGene00019274 | H43I07.1         | H43I07.1             | 0.0773337189656758  |             |
| AGIWUR18443                                    |   |         |         |                |                  |                      |                     |             |
| CB4856 CT                                      | V | 4219643 | 4222197 | WBGene00003747 | nlp-9 E03D2.2    | 0.331280576116644    |                     | AGIWUR39554 |
| CB4856 CT                                      | V | 4236418 | 4238056 | WBGene00003751 | nlp-13 E03D2.1   | 0.0908792051946214   |                     | AGIWUR6822  |
| CB4856 CT                                      | V | 4239150 | 4240392 | WBGene00005415 | srh-204 E03D2.3  | -0.0161250326660038  |                     | AGIWUR34830 |
| CB4856 CT                                      | V | 4240952 | 4242531 | WBGene00017107 | srt-12 E03D2.4   | -0.0772846385969927  |                     | AGIWUR44820 |
| CB4856 CT                                      | V | 4247969 | 4250147 | WBGene00022528 | srt-13 ZC142.1   | -0.0259916857018236  |                     | AGIWUR2916  |
| CB4856 CT                                      | V | 4253502 | 4256574 | WBGene00022529 | srt-14 ZC142.2   | -0.0964989225769894  |                     | AGIWUR28474 |
| CB4856 CT                                      | V | 4257957 | 4260190 | WBGene00018554 | srt-3 F47D2.3    | -0.00482266358903072 |                     | AGIWUR40923 |
| CB4856 CT                                      | V | 4261485 | 4264616 | WBGene00018555 | srt-35 F47D2.4   | 0.120549077049107    |                     | AGIWUR26325 |
| CB4856 CT                                      | V | 4269486 | 4271358 | WBGene00018557 | srt-38 F47D2.6   | 0.142717511210624    |                     | AGIWUR30244 |
| CB4856 CT                                      | V | 4288412 | 4290193 | WBGene00005406 | srh-193 F47D2.9  | 0.0251253161248339   |                     | AGIWUR36547 |
| CB4856 CT                                      | V | 4291836 | 4293525 | WBGene00005407 | srh-194 F47D2.10 | -0.0370330008203092  |                     |             |
| AGIWUR29375                                    |   |         |         |                |                  |                      |                     |             |
| CB4856 CT                                      | V | 4296721 | 4298089 | WBGene00269432 | ZC132.11         | ZC132.11             | 0.088176490771537   |             |
| AGIWUR1308;AGIWUR24756;AGIWUR30767;AGIWUR35418 |   |         |         |                |                  |                      |                     |             |
| CB4856 CT                                      | V | 4300626 | 4311784 | WBGene00022521 | ZC132.2          | ZC132.2              | -0.0374519307685253 |             |
| AGIWUR3578;AGIWUR5811;AGIWUR38417              |   |         |         |                |                  |                      |                     |             |
| CB4856 CT                                      | V | 4311993 | 4315157 | WBGene00005405 | srh-192 ZC132.7  | 0.0168570966251931   |                     | AGIWUR31160 |
| CB4856 CT                                      | V | 4315725 | 4317713 | WBGene00022526 | ZC132.8          | ZC132.8              | -0.153082766051041  | AGIWUR24614 |

|                                                             |    |   |         |         |                 |          |          |                      |             |
|-------------------------------------------------------------|----|---|---------|---------|-----------------|----------|----------|----------------------|-------------|
| CB4856                                                      | CT | V | 4317920 | 4320001 | WBGene00022527  | ZC132.9  | ZC132.9  | 0.0463111775083496   | AGIWUR4580  |
| CB4856                                                      | CT | V | 4320460 | 4322218 | WBGene000235310 | R02D1.2  | R02D1.2  | -0.484079282280305   |             |
| AGIWUR24861;AGIWUR42264                                     |    |   |         |         |                 |          |          |                      |             |
| CB4856                                                      | CT | V | 4327121 | 4328736 | WBGene00017060  | D2063.1  | D2063.1  | 0.317396954285838    |             |
| AGIWUR2289;AGIWUR6390;AGIWUR22124;AGIWUR40360               |    |   |         |         |                 |          |          |                      |             |
| CB4856                                                      | CT | V | 4329039 | 4332550 | WBGene00017061  | oac-12   | D2063.2  | -0.0907728133687762  | AGIWUR6604  |
| CB4856                                                      | CT | V | 4336762 | 4338925 | WBGene00044529  | ir1d-1   | D2063.4  | 0.0033880354146163   |             |
| AGIWUR17360;AGIWUR26355                                     |    |   |         |         |                 |          |          |                      |             |
| CB4856                                                      | CT | V | 4338854 | 4341308 | WBGene00017062  | glrx-3   | D2063.3  | -0.303349949345893   | AGIWUR5206  |
| CB4856                                                      | CT | V | 4341443 | 4346050 | WBGene00017981  | fig1-1   | F32D1.1  | -0.0622071887160658  | AGIWUR37838 |
| CB4856                                                      | CT | V | 4346089 | 4346425 | WBGene00017982  | hpo-18   | F32D1.2  | -0.337252260477675   |             |
| AGIWUR18888;AGIWUR34489                                     |    |   |         |         |                 |          |          |                      |             |
| CB4856                                                      | CT | V | 4347166 | 4349768 | WBGene00003159  | mcm-7    | F32D1.10 | -0.0490393497784369  |             |
| AGIWUR26538;AGIWUR27545                                     |    |   |         |         |                 |          |          |                      |             |
| CB4856                                                      | CT | V | 4349774 | 4361552 | WBGene00017983  | F32D1.3  | F32D1.3  | 0.613586748908167    | AGIWUR39251 |
| CB4856                                                      | CT | V | 4362722 | 4364650 | WBGene00001722  | gr1-13   | F32D1.4  | 0.1182164219715      | AGIWUR27074 |
| CB4856                                                      | CT | V | 4365447 | 4366483 | WBGene00044530  | F32D1.11 | F32D1.11 |                      |             |
| -0.00540848006257022 AGIWUR14449;AGIWUR19290;AGIWUR22820    |    |   |         |         |                 |          |          |                      |             |
| CB4856                                                      | CT | V | 4369351 | 4371383 | WBGene00017984  | F32D1.5  | F32D1.5  | -0.0685598576757425  |             |
| AGIWUR12479;AGIWUR18525;AGIWUR24068                         |    |   |         |         |                 |          |          |                      |             |
| CB4856                                                      | CT | V | 4371807 | 4373811 | WBGene00017988  | fipp-1   | F32D1.9  | -0.117405244295924   | AGIWUR17104 |
| CB4856                                                      | CT | V | 4373760 | 4374874 | WBGene00017985  | neg-1    | F32D1.6  | 0.0463304160410694   | AGIWUR35653 |
| CB4856                                                      | CT | V | 4374974 | 4376173 | WBGene00017986  | F32D1.7  | F32D1.7  | -0.145576992022121   | AGIWUR15298 |
| CB4856                                                      | CT | V | 4376619 | 4377722 | WBGene00017987  | F32D1.8  | F32D1.8  | -0.0456277195134209  |             |
| AGIWUR9211;AGIWUR17294;AGIWUR17529;AGIWUR23378;AGIWUR26753  |    |   |         |         |                 |          |          |                      |             |
| CB4856                                                      | CT | V | 4379643 | 4381592 | WBGene00269436  | F13A2.14 | F13A2.14 | 0.139352989816619    |             |
| AGIWUR4194                                                  |    |   |         |         |                 |          |          |                      |             |
| CB4856                                                      | CT | V | 4382916 | 4385242 | WBGene00017411  | F13A2.2  | F13A2.2  | 0.243751622156823    | AGIWUR6317  |
| CB4856                                                      | CT | V | 4386808 | 4387502 | WBGene00044531  | F13A2.9  | F13A2.9  | 0.000332084752522555 |             |
| AGIWUR12461;AGIWUR18733;AGIWUR36382;AGIWUR40455;AGIWUR41304 |    |   |         |         |                 |          |          |                      |             |
| CB4856                                                      | CT | V | 4393540 | 4396357 | WBGene00017412  | F13A2.3  | F13A2.3  | -0.0486820967951509  | AGIWUR8025  |
| CB4856                                                      | CT | V | 4398635 | 4400218 | WBGene00017413  | F13A2.4  | F13A2.4  | -0.384438625630633   | AGIWUR7096  |
| CB4856                                                      | CT | V | 4401298 | 4401940 | WBGene00017414  | F13A2.5  | F13A2.5  | -0.354645724942484   | AGIWUR2818  |
| CB4856                                                      | CT | V | 4402749 | 4404530 | WBGene00017415  | F13A2.6  | F13A2.6  | -0.488094574682039   | AGIWUR43256 |
| CB4856                                                      | CT | V | 4407819 | 4410280 | WBGene00003708  | nhr-118  | F13A2.8  | 0.0955332606626005   |             |
| AGIWUR5659;AGIWUR18832;AGIWUR26406;AGIWUR33940;AGIWUR39095  |    |   |         |         |                 |          |          |                      |             |
| CB4856                                                      | CT | V | 4410943 | 4412401 | WBGene00021617  | Y47D7A.3 | Y47D7A.3 | 0.160767984604989    |             |
| AGIWUR407                                                   |    |   |         |         |                 |          |          |                      |             |
| CB4856                                                      | CT | V | 4412748 | 4414663 | WBGene00001714  | gr1-5    | Y47D7A.5 | -0.107864815374692   |             |

|                                                                                                                   |   |         |         |                |                 |                    |                     |
|-------------------------------------------------------------------------------------------------------------------|---|---------|---------|----------------|-----------------|--------------------|---------------------|
| AGIWUR456                                                                                                         |   |         |         |                |                 |                    |                     |
| CB4856 CT                                                                                                         | V | 4416022 | 4416814 | WBGene00235165 | Y47D7A.18       | Y47D7A.18          | 0.00643343290742138 |
| AGIWUR35916                                                                                                       |   |         |         |                |                 |                    |                     |
| CB4856 CT                                                                                                         | V | 4419454 | 4419867 | WBGene00021620 | Y47D7A.7        | Y47D7A.7           | 0.808125994718605   |
| AGIWUR9054                                                                                                        |   |         |         |                |                 |                    |                     |
| CB4856 CT                                                                                                         | V | 4420275 | 4420746 | WBGene00021616 | Y47D7A.2        | Y47D7A.2           | 0.511619278795669   |
| AGIWUR14377                                                                                                       |   |         |         |                |                 |                    |                     |
| CB4856 CT                                                                                                         | V | 4420997 | 4421596 | WBGene00004820 | skr-14 Y47D7A.8 | -0.174110990411458 |                     |
| AGIWUR20702                                                                                                       |   |         |         |                |                 |                    |                     |
| CB4856 CT                                                                                                         | V | 4422406 | 4423065 | WBGene00004813 | skr-7 Y47D7A.1  | 0.245723456717377  |                     |
| AGIWUR38009                                                                                                       |   |         |         |                |                 |                    |                     |
| CB4856 CT                                                                                                         | V | 4423609 | 4423968 | WBGene00021621 | Y47D7A.9        | Y47D7A.9           | -0.154649498247132  |
| AGIWUR12979                                                                                                       |   |         |         |                |                 |                    |                     |
| CB4856 CT                                                                                                         | V | 4427769 | 4428302 | WBGene00021623 | Y47D7A.11       | Y47D7A.11          | -0.144319533078592  |
| AGIWUR626;AGIWUR1575;AGIWUR3659;AGIWUR6144;AGIWUR8714;AGIWUR19752;AGIWUR36378;AGIWUR38334;AGIWUR38504;AGIWUR43833 |   |         |         |                |                 |                    |                     |
| CB4856 CT                                                                                                         | V | 4428950 | 4429676 | WBGene00021624 | Y47D7A.12       | Y47D7A.12          | 0.126357662375417   |
| AGIWUR3137                                                                                                        |   |         |         |                |                 |                    |                     |
| CB4856 CT                                                                                                         | V | 4431791 | 4433185 | WBGene00021627 | Y47D7A.15       | Y47D7A.15          | -0.278140462035807  |
| AGIWUR1754;AGIWUR7726;AGIWUR11111;AGIWUR23580;AGIWUR27475                                                         |   |         |         |                |                 |                    |                     |
| CB4856 CT                                                                                                         | V | 4434883 | 4435928 | WBGene00021625 | Y47D7A.13       | Y47D7A.13          | -0.152507591717532  |
| AGIWUR10566                                                                                                       |   |         |         |                |                 |                    |                     |
| CB4856 CT                                                                                                         | V | 4438932 | 4443223 | WBGene00044637 | rft-1 Y47D7A.16 | -0.320279395740793 |                     |
| AGIWUR20975;AGIWUR25736                                                                                           |   |         |         |                |                 |                    |                     |
| CB4856 CT                                                                                                         | V | 4443110 | 4450555 | WBGene00021626 | rft-2 Y47D7A.14 | -0.059800065225037 |                     |
| AGIWUR10755;AGIWUR11742;AGIWUR12084;AGIWUR23538;AGIWUR28386;AGIWUR30389;AGIWUR33218;AGIWUR39710                   |   |         |         |                |                 |                    |                     |
| CB4856 CT                                                                                                         | V | 4451049 | 4454734 | WBGene00019224 | gnrr-5 H22D07.1 | 0.0650101386444657 |                     |
| AGIWUR44776                                                                                                       |   |         |         |                |                 |                    |                     |
| CB4856 CT                                                                                                         | V | 4471365 | 4473602 | WBGene00020370 | T08H10.3        | T08H10.3           | 0.0508561899941604  |
| AGIWUR30288                                                                                                       |   |         |         |                |                 |                    |                     |
| CB4856 CT                                                                                                         | V | 4474843 | 4476996 | WBGene00006101 | str-35 T08H10.2 | 0.0300387288023924 |                     |
| AGIWUR27901;AGIWUR32256                                                                                           |   |         |         |                |                 |                    |                     |
| CB4856 CT                                                                                                         | V | 4477561 | 4479191 | WBGene00006100 | str-34 T08H10.5 | 0.106044204377244  |                     |
| AGIWUR19786                                                                                                       |   |         |         |                |                 |                    |                     |
| CB4856 CT                                                                                                         | V | 4480680 | 4481546 | WBGene00020371 | T08H10.4        | T08H10.4           | -0.285191093132973  |
| AGIWUR43086                                                                                                       |   |         |         |                |                 |                    |                     |
| CB4856 CT                                                                                                         | V | 4483459 | 4486543 | WBGene00020369 | T08H10.1        | T08H10.1           | -0.243612869781405  |
| AGIWUR990                                                                                                         |   |         |         |                |                 |                    |                     |
| CB4856 CT                                                                                                         | V | 4497463 | 4511449 | WBGene00006796 | unc-62 T28F12.2 | 0.152587129570396  |                     |

AGIWUR15699;AGIWUR16484;AGIWUR18052;AGIWUR21053;AGIWUR21660;AGIWUR22015;AGIWUR25612;AGIWUR26913;AGIWUR30675  
 ;AGIWUR35589;AGIWUR41385  
 CB4856 CT V 4511977 4516947 WBGene00020904 T28F12.1 T28F12.1 0.0787042175350852  
 AGIWUR17708  
 CB4856 CT V 4517643 4549291 WBGene00004947 sos-1 T28F12.3 0.284287059139544  
 AGIWUR4204  
 CB4856 CT V 4556055 4557114 WBGene00022017 Y61A9LA.5 Y61A9LA.5 -0.259023882899045  
 AGIWUR15931  
 CB4856 CT V 4558318 4559801 WBGene00022018 Y61A9LA.7 Y61A9LA.7 -0.136045723104297  
 AGIWUR8198;AGIWUR13524;AGIWUR17992;AGIWUR19357;AGIWUR39108;AGIWUR41819  
 CB4856 CT V 4562215 4570043 WBGene00022019 sut-2 Y61A9LA.8 0.06965098657321  
 AGIWUR20263;AGIWUR29703;AGIWUR34769;AGIWUR39327;AGIWUR39758;AGIWUR44236;AGIWUR45069  
 CB4856 CT V 4571143 4585167 WBGene00022015 Y61A9LA.3 Y61A9LA.3 0.0147555722345709  
 AGIWUR3402;AGIWUR4011;AGIWUR10244;AGIWUR10368  
 CB4856 CT V 4592838 4602014 WBGene00022014 Y61A9LA.1 Y61A9LA.1 0.0876532630259206  
 AGIWUR28333  
 CB4856 CT V 4605004 4606926 WBGene00022022 Y61A9LA.11 Y61A9LA.11 0.111295801167577  
 AGIWUR34478  
 CB4856 CT V 4607039 4615817 WBGene00022021 Y61A9LA.10 Y61A9LA.10 -0.276691094491458  
 AGIWUR16782  
 CB4856 CT V 4616156 4617766 WBGene00018814 F54D11.4 F54D11.4 0.133240616128141  
 AGIWUR40577  
 CB4856 CT V 4617938 4628510 WBGene00018812 sumv-2 F54D11.2 0.0280998868852098  
 AGIWUR7205;AGIWUR11926;AGIWUR16823;AGIWUR22271;AGIWUR34312;AGIWUR35666  
 CB4856 CT V 4628580 4635263 WBGene00018811 pmt-2 F54D11.1 -0.329028039228996  
 AGIWUR42429;AGIWUR44478  
 CB4856 CT V 4635327 4637145 WBGene00018813 F54D11.3 F54D11.3 0.231366947557625  
 AGIWUR10374  
 CB4856 CT V 4642952 4646931 WBGene00004928 soc-1 F41F3.2 -0.0420336336313198 AGIWUR29213  
 CB4856 CT V 4647665 4648241 WBGene00018297 F41F3.3 F41F3.3 0.405412462783453 AGIWUR8735  
 CB4856 CT V 4648832 4650726 WBGene00044533 F41F3.8 F41F3.8 0.0743284623487419  
 AGIWUR3540;AGIWUR11934;AGIWUR30905;AGIWUR34907;AGIWUR43347  
 CB4856 CT V 4652863 4654007 WBGene00000712 col-139 F41F3.4 0.125941923683488 AGIWUR17250  
 CB4856 CT V 4655475 4655786 WBGene00269385 F41F3.9 F41F3.9 -0.130412061946313 AGIWUR18253  
 CB4856 CT V 4656158 4657812 WBGene00005966 srx-75 F41F3.5 -0.553671870055066 AGIWUR38791  
 CB4856 CT V 4658949 4662500 WBGene00005965 srx-74 F41F3.6 0.32081562006213 AGIWUR37537  
 CB4856 CT V 4663616 4665751 WBGene00005964 srx-73 F41F3.7 0.15895675341516 AGIWUR39489  
 CB4856 CT V 4666745 4668736 WBGene00005968 srx-77 K03B4.5 0.187462605196261 AGIWUR36430  
 CB4856 CT V 4671030 4672610 WBGene00219236 K03B4.9 K03B4.9 -0.00091019755194921 AGIWUR10250

|                                                                        |    |   |         |         |                |          |          |                      |             |
|------------------------------------------------------------------------|----|---|---------|---------|----------------|----------|----------|----------------------|-------------|
| CB4856                                                                 | CT | V | 4681975 | 4685110 | WBGene00019355 | K03B4.4  | K03B4.4  | -0.130313023511544   | AGIWUR20172 |
| CB4856                                                                 | CT | V | 4687107 | 4688028 | WBGene00006392 | taf-10   | K03B4.3  | 0.148627993838254    | AGIWUR45166 |
| CB4856                                                                 | CT | V | 4687974 | 4689231 | WBGene00019354 | K03B4.2  | K03B4.2  | 0.367500794733262    | AGIWUR5490  |
| CB4856                                                                 | CT | V | 4689330 | 4691611 | WBGene00019353 | K03B4.1  | K03B4.1  | 0.206412625571671    | AGIWUR43290 |
| CB4856                                                                 | CT | V | 4691605 | 4692433 | WBGene00019357 | cpg-8    | K03B4.7  | 0.0991384023773403   |             |
| AGIWUR20437;AGIWUR38950                                                |    |   |         |         |                |          |          |                      |             |
| CB4856                                                                 | CT | V | 4694974 | 4700289 | WBGene00022584 | ZC266.1  | ZC266.1  | -0.109941745977133   |             |
| AGIWUR1042;AGIWUR25299                                                 |    |   |         |         |                |          |          |                      |             |
| CB4856                                                                 | CT | V | 4710764 | 4714911 | WBGene00018211 | oac-24   | F39G3.6  | -0.0426329204716351  | AGIWUR31878 |
| CB4856                                                                 | CT | V | 4715388 | 4720148 | WBGene00004195 | prx-6    | F39G3.7  | 0.0936426221394555   | AGIWUR44604 |
| CB4856                                                                 | CT | V | 4722618 | 4724621 | WBGene00018210 | F39G3.5  | F39G3.5  | 0.0277140669234051   | AGIWUR29741 |
| CB4856                                                                 | CT | V | 4724663 | 4726726 | WBGene00018209 | F39G3.4  | F39G3.4  | 0.125110401834266    | AGIWUR3506  |
| CB4856                                                                 | CT | V | 4726721 | 4730234 | WBGene00006570 | tig-2    | F39G3.8  | -0.111758077447657   | AGIWUR18954 |
| CB4856                                                                 | CT | V | 4731911 | 4734723 | WBGene00018208 | F39G3.3  | F39G3.3  | -0.245072886006312   |             |
| AGIWUR460;AGIWUR10436;AGIWUR41800                                      |    |   |         |         |                |          |          |                      |             |
| CB4856                                                                 | CT | V | 4737834 | 4741169 | WBGene00018207 | F39G3.2  | F39G3.2  | -0.186745829518388   | AGIWUR7231  |
| CB4856                                                                 | CT | V | 4742427 | 4745373 | WBGene00018206 | ugt-61   | F39G3.1  | -0.388978683040438   | AGIWUR3749  |
| CB4856                                                                 | CT | V | 4745569 | 4748089 | WBGene00015985 | C18G1.7  | C18G1.7  | -0.0115951794065126  | AGIWUR40127 |
| CB4856                                                                 | CT | V | 4750580 | 4753808 | WBGene00015984 | C18G1.6  | C18G1.6  | 0.0893130965834308   | AGIWUR27193 |
| CB4856                                                                 | CT | V | 4754313 | 4755469 | WBGene00001855 | hil-4    | C18G1.5  | -0.00838438724503021 |             |
| AGIWUR2414;AGIWUR12114;AGIWUR20399;AGIWUR21732;AGIWUR40557;AGIWUR42531 |    |   |         |         |                |          |          |                      |             |
| CB4856                                                                 | CT | V | 4755985 | 4758584 | WBGene00003994 | pgl-3    | C18G1.4  | -0.170242260326795   | AGIWUR829   |
| CB4856                                                                 | CT | V | 4760974 | 4764179 | WBGene00015982 | bgnt-1.4 | C18G1.3  | 0.23094788148795     |             |
| AGIWUR39744                                                            |    |   |         |         |                |          |          |                      |             |
| CB4856                                                                 | CT | V | 4764266 | 4766601 | WBGene00015986 | C18G1.8  | C18G1.8  | 0.239837821902372    | AGIWUR16977 |
| CB4856                                                                 | CT | V | 4767886 | 4769753 | WBGene00015987 | C18G1.9  | C18G1.9  | 0.185968249565232    | AGIWUR27591 |
| CB4856                                                                 | CT | V | 4770670 | 4773091 | WBGene00015981 | elt-7    | C18G1.2  | 0.361674725701866    | AGIWUR25029 |
| CB4856                                                                 | CT | V | 4777960 | 4780019 | WBGene00015980 | C18G1.1  | C18G1.1  | 0.499554328547806    | AGIWUR10156 |
| CB4856                                                                 | CT | V | 4783613 | 4786140 | WBGene00022013 | Y60C6A.1 | Y60C6A.1 | 0.0354202373348551   |             |
| AGIWUR16948                                                            |    |   |         |         |                |          |          |                      |             |
| CB4856                                                                 | CT | V | 4794599 | 4796996 | WBGene00019840 | R02F11.2 | R02F11.2 | -0.0410858034050583  |             |
| AGIWUR2726;AGIWUR5721;AGIWUR23238;AGIWUR35491                          |    |   |         |         |                |          |          |                      |             |
| CB4856                                                                 | CT | V | 4801094 | 4802626 | WBGene00019839 | R02F11.1 | R02F11.1 | 0.178888200462858    |             |
| AGIWUR29210                                                            |    |   |         |         |                |          |          |                      |             |
| CB4856                                                                 | CT | V | 4802647 | 4805947 | WBGene00019841 | R02F11.3 | R02F11.3 | -0.355817296911316   |             |
| AGIWUR17799;AGIWUR29564                                                |    |   |         |         |                |          |          |                      |             |
| CB4856                                                                 | CT | V | 4810865 | 4818663 | WBGene00019842 | R02F11.4 | R02F11.4 | -0.267187655096755   |             |
| AGIWUR17550                                                            |    |   |         |         |                |          |          |                      |             |
| CB4856                                                                 | CT | V | 4818701 | 4823344 | WBGene00016509 | adss-1   | C37H5.6  | 0.140692461125884    |             |

AGIWUR3440;AGIWUR8948;AGIWUR9961;AGIWUR22132;AGIWUR22362;AGIWUR36251;AGIWUR36473  
 CB4856 CT V 4824130 4826760 WBGene00002010 hsp-6 C37H5.8 -0.194827827351982  
 AGIWUR10444;AGIWUR26791  
 CB4856 CT V 4827360 4836025 WBGene00016508 C37H5.5 C37H5.5 0.143392855431502 AGIWUR32683  
 CB4856 CT V 4836027 4840010 WBGene00003528 nas-9 C37H5.9 0.754651081295281 AGIWUR7821  
 CB4856 CT V 4840619 4841269 WBGene00000859 cwp-1 C37H5.10 -0.270447791028186  
 AGIWUR10874  
 CB4856 CT V 4841940 4842567 WBGene00000860 cwp-2 C37H5.11 -0.121043214674291  
 AGIWUR292  
 CB4856 CT V 4842836 4843845 WBGene00000861 cwp-3 C37H5.4 -0.23268954164905 AGIWUR2144  
 CB4856 CT V 4844685 4846984 WBGene00016507 abhd-5.2 C37H5.3 -0.13138528490157  
 AGIWUR26648;AGIWUR36638  
 CB4856 CT V 4847653 4849838 WBGene00016506 abhd-5.1 C37H5.2 0.232304166473263  
 AGIWUR25974  
 CB4856 CT V 4851472 4857260 WBGene00003591 nex-4 C37H5.1 -0.0616611275558974 AGIWUR22444  
 CB4856 CT V 4857149 4862965 WBGene00016511 C37H5.13 C37H5.13 -0.12815728029099  
 AGIWUR894;AGIWUR6151;AGIWUR15127;AGIWUR17736;AGIWUR20020;AGIWUR22385;AGIWUR27555  
 CB4856 CT V 4865648 4870355 WBGene00005110 srd-32 T19H12.5 -0.294218016665367  
 AGIWUR40248  
 CB4856 CT V 4872303 4874200 WBGene00005111 srd-33 T19H12.4 -0.0257873093975558  
 AGIWUR15862  
 CB4856 CT V 4874923 4879319 WBGene00020590 T19H12.6 T19H12.6 -0.451328101577678  
 AGIWUR28964  
 CB4856 CT V 4879945 4881477 WBGene00006098 str-32 T19H12.7 0.0133192068286583  
 AGIWUR24416  
 CB4856 CT V 4882178 4884319 WBGene00020591 nhr-220 T19H12.8 -0.0788896712396472  
 AGIWUR21627  
 CB4856 CT V 4884790 4885420 WBGene00044282 T19H12.12 T19H12.12 -0.0963198039590818  
 AGIWUR7237  
 CB4856 CT V 4885672 4886809 WBGene00020589 T19H12.3 T19H12.3 0.0179892675214504  
 AGIWUR21961  
 CB4856 CT V 4887187 4889629 WBGene00020592 ugt-12 T19H12.9 -0.464332557014997  
 AGIWUR26207  
 CB4856 CT V 4890429 4891422 WBGene00020588 T19H12.2 T19H12.2 0.098789009049316  
 AGIWUR8639;AGIWUR8820  
 CB4856 CT V 4892588 4895071 WBGene00020593 ugt-11 T19H12.10 -0.0970935893610374  
 AGIWUR33007  
 CB4856 CT V 4896028 4897969 WBGene00020587 ugt-9 T19H12.1 -0.58288374131399  
 AGIWUR1830

|                                                                                   |   |         |         |                |          |           |                     |             |
|-----------------------------------------------------------------------------------|---|---------|---------|----------------|----------|-----------|---------------------|-------------|
| CB4856 CT                                                                         | V | 4898217 | 4900082 | WBGene00020594 | ugt-10   | T19H12.11 | 0.0268251047965222  |             |
| AGIWUR2113                                                                        |   |         |         |                |          |           |                     |             |
| CB4856 CT                                                                         | V | 4901374 | 4903010 | WBGene00019235 | H23N18.4 | H23N18.4  | -0.15811034730898   |             |
| AGIWUR15965;AGIWUR37437;AGIWUR41886                                               |   |         |         |                |          |           |                     |             |
| CB4856 CT                                                                         | V | 4903930 | 4905918 | WBGene00019234 | ugt-8    | H23N18.3  | 0.368420808423192   |             |
| AGIWUR35284                                                                       |   |         |         |                |          |           |                     |             |
| CB4856 CT                                                                         | V | 4906253 | 4908258 | WBGene00019233 | ugt-14   | H23N18.2  | -0.381793239534026  |             |
| AGIWUR1674                                                                        |   |         |         |                |          |           |                     |             |
| CB4856 CT                                                                         | V | 4908868 | 4911399 | WBGene00019232 | ugt-13   | H23N18.1  | -0.542686147313699  |             |
| AGIWUR10867;AGIWUR24424;AGIWUR29728                                               |   |         |         |                |          |           |                     |             |
| CB4856 CT                                                                         | V | 4911712 | 4912381 | WBGene00019236 | H23N18.5 | H23N18.5  | -0.535542695843951  |             |
| AGIWUR19342                                                                       |   |         |         |                |          |           |                     |             |
| CB4856 CT                                                                         | V | 4913061 | 4915079 | WBGene00044534 | H23N18.6 | H23N18.6  | -0.0885513530874231 |             |
| AGIWUR26450;AGIWUR31107;AGIWUR36453                                               |   |         |         |                |          |           |                     |             |
| CB4856 CT                                                                         | V | 4918154 | 4918585 | WBGene00015340 | C02E7.7  | C02E7.7   | -1.04687841563277   | AGIWUR24668 |
| CB4856 CT                                                                         | V | 4919207 | 4919586 | WBGene00015339 | C02E7.6  | C02E7.6   | -0.215116951362051  |             |
| AGIWUR2706;AGIWUR4643;AGIWUR16815;AGIWUR18589;AGIWUR20623;AGIWUR37703;AGIWUR43853 |   |         |         |                |          |           |                     |             |
| CB4856 CT                                                                         | V | 4920342 | 4920790 | WBGene00015341 | C02E7.8  | C02E7.8   | -0.123173020998179  | AGIWUR11061 |
| CB4856 CT                                                                         | V | 4921102 | 4922616 | WBGene00005248 | srh-23   | C02E7.5   | 0.188588167066615   | AGIWUR18669 |
| CB4856 CT                                                                         | V | 4923292 | 4924594 | WBGene00005247 | srh-22   | C02E7.4   | 0.0245213987146506  | AGIWUR33717 |
| CB4856 CT                                                                         | V | 4924918 | 4926224 | WBGene00005245 | srh-20   | C02E7.3   | 0.176036222982857   | AGIWUR34535 |
| CB4856 CT                                                                         | V | 4926671 | 4928181 | WBGene00005246 | srh-21   | C02E7.2   | 0.319426995247984   | AGIWUR37003 |
| CB4856 CT                                                                         | V | 4928278 | 4929942 | WBGene00006238 | str-205  | C02E7.9   | -0.271673992708134  | AGIWUR22281 |
| CB4856 CT                                                                         | V | 4930817 | 4933027 | WBGene00015342 | C02E7.10 | C02E7.10  | 0.0421885892324472  |             |
| AGIWUR2084                                                                        |   |         |         |                |          |           |                     |             |
| CB4856 CT                                                                         | V | 4934706 | 4939085 | WBGene00015338 | catp-2   | C02E7.1   | -0.535472711985651  | AGIWUR11404 |
| CB4856 CT                                                                         | V | 4939260 | 4940641 | WBGene00006246 | str-213  | C02E7.11  | 0.0465192905997069  |             |
| AGIWUR9176                                                                        |   |         |         |                |          |           |                     |             |
| CB4856 CT                                                                         | V | 4941196 | 4942414 | WBGene00006245 | str-212  | C02E7.12  | -0.432252103689252  |             |
| AGIWUR13654;AGIWUR26919                                                           |   |         |         |                |          |           |                     |             |
| CB4856 CT                                                                         | V | 4943116 | 4944319 | WBGene00006244 | str-211  | C02E7.13  | 0.0681834752846235  |             |
| AGIWUR19419                                                                       |   |         |         |                |          |           |                     |             |
| CB4856 CT                                                                         | V | 4945662 | 4948299 | WBGene00006243 | str-210  | F26G5.11  | -0.250766082379779  |             |
| AGIWUR5249;AGIWUR20666                                                            |   |         |         |                |          |           |                     |             |
| CB4856 CT                                                                         | V | 4948935 | 4951024 | WBGene00006242 | str-209  | F26G5.5   | 0.271701559725212   | AGIWUR31438 |
| CB4856 CT                                                                         | V | 4951734 | 4953035 | WBGene00006240 | str-207  | F26G5.4   | 0.00489339368358621 | AGIWUR2049  |
| CB4856 CT                                                                         | V | 4954250 | 4955989 | WBGene00005100 | srd-22   | F26G5.3   | 0.163320731031632   | AGIWUR12411 |
| CB4856 CT                                                                         | V | 4956829 | 4958572 | WBGene00006241 | str-208  | F26G5.2   | 0.341849368730431   | AGIWUR12648 |
| CB4856 CT                                                                         | V | 4958603 | 4963098 | WBGene00006523 | tam-1    | F26G5.9   | -0.0214844046645277 |             |

AGIWUR8886;AGIWUR16292;AGIWUR16850;AGIWUR17900;AGIWUR35397;AGIWUR35895;AGIWUR38065  
 CB4856 CT V 4971770 4973043 WBGene00017845 srsx-9 F26G5.10 -0.0104903018294893  
 AGIWUR35069  
 CB4856 CT V 4973314 4974777 WBGene00044117 srsx-10 F26G5.12 0.190210433729933  
 AGIWUR29835;AGIWUR29983  
 CB4856 CT V 4975485 4977502 WBGene00017843 F26G5.1 F26G5.1 -0.0232503172913283 AGIWUR21735  
 CB4856 CT V 4977934 4979160 WBGene00015736 srsx-11 C13D9.4 -0.252172728797876  
 AGIWUR6710;AGIWUR18113  
 CB4856 CT V 4979947 4980973 WBGene00015737 srsx-12 C13D9.5 0.120320263749191 AGIWUR26886  
 CB4856 CT V 4981809 4983191 WBGene00015738 srsx-13 C13D9.6 -0.363098461102264 AGIWUR42234  
 CB4856 CT V 4983748 4987197 WBGene00003573 ncx-8 C13D9.7 0.0327968719599978  
 AGIWUR6415;AGIWUR24815;AGIWUR31203  
 CB4856 CT V 4991505 4995064 WBGene00003574 ncx-9 C13D9.8 0.144107876238735 AGIWUR19023  
 CB4856 CT V 4997048 5000558 WBGene00015739 ugt-7 C13D9.9 -0.488140301756538 AGIWUR21056  
 CB4856 CT V 5001686 5003414 WBGene00005659 srr-8 C13D9.3 0.0374578833862991 AGIWUR3691  
 CB4856 CT V 5007229 5011702 WBGene00005656 srr-5 C13D9.2 0.140160070371801 AGIWUR31596  
 CB4856 CT V 5012994 5015059 WBGene00005657 srr-6 C13D9.1 0.210793299086051 AGIWUR19957  
 CB4856 CT V 5019224 5022369 WBGene00005655 srr-4 K11D12.3 -0.147246277587463  
 AGIWUR16882  
 CB4856 CT V 5023706 5027723 WBGene00019644 cpt-4 K11D12.4 1.25293622715841  
 AGIWUR10491  
 CB4856 CT V 5029324 5030811 WBGene00019645 swt-7 K11D12.5 -0.0190393261681301  
 AGIWUR6855  
 CB4856 CT V 5033398 5034171 WBGene00044535 K11D12.13 K11D12.13 -0.209878216626141  
 AGIWUR6605;AGIWUR23117;AGIWUR31448  
 CB4856 CT V 5034528 5035169 WBGene00019646 K11D12.6 K11D12.6 -0.480332436520168  
 AGIWUR6484  
 CB4856 CT V 5035252 5036464 WBGene00019647 K11D12.7 K11D12.7 -0.297353434493834  
 AGIWUR25453  
 CB4856 CT V 5036572 5038658 WBGene00019650 K11D12.11 K11D12.11 -0.0733226561214355  
 AGIWUR11290  
 CB4856 CT V 5039669 5041003 WBGene00019648 K11D12.8 K11D12.8 -0.03178925678339  
 AGIWUR31955  
 CB4856 CT V 5042408 5046203 WBGene00019649 K11D12.9 K11D12.9 0.188361020739176  
 AGIWUR32970  
 CB4856 CT V 5049541 5052214 WBGene00004136 pqn-51 K11D12.2 -0.0414385444208669  
 AGIWUR12989;AGIWUR15695;AGIWUR15696;AGIWUR25674;AGIWUR31797  
 CB4856 CT V 5052261 5053490 WBGene00019651 K11D12.12 K11D12.12 0.19595155945138  
 AGIWUR37796



|                                                                                                        |   |         |         |                |          |           |                     |             |
|--------------------------------------------------------------------------------------------------------|---|---------|---------|----------------|----------|-----------|---------------------|-------------|
| CB4856 CT                                                                                              | V | 5053619 | 5056473 | WBGene00000862 | cwp-4    | K11D12.1  | -0.268772898010731  |             |
| AGIWUR40515                                                                                            |   |         |         |                |          |           |                     |             |
| CB4856 CT                                                                                              | V | 5056378 | 5064803 | WBGene00003374 | mlk-1    | K11D12.10 | 0.20451970911728    |             |
| AGIWUR16397;AGIWUR31783;AGIWUR32510                                                                    |   |         |         |                |          |           |                     |             |
| CB4856 CT                                                                                              | V | 5067637 | 5069665 | WBGene00021975 | Y58A7A.1 | Y58A7A.1  | -0.42201017508682   |             |
| AGIWUR8433                                                                                             |   |         |         |                |          |           |                     |             |
| CB4856 CT                                                                                              | V | 5071695 | 5072231 | WBGene00021976 | Y58A7A.2 | Y58A7A.2  | 0.0670400354973388  |             |
| AGIWUR32706                                                                                            |   |         |         |                |          |           |                     |             |
| CB4856 CT                                                                                              | V | 5077849 | 5080903 | WBGene00021977 | Y58A7A.3 | Y58A7A.3  |                     |             |
| 0.000960535129672202 AGIWUR2789;AGIWUR17112;AGIWUR33812;AGIWUR39349                                    |   |         |         |                |          |           |                     |             |
| CB4856 CT                                                                                              | V | 5082002 | 5085007 | WBGene00021978 | Y58A7A.4 | Y58A7A.4  | 0.0992467029380055  |             |
| AGIWUR35117                                                                                            |   |         |         |                |          |           |                     |             |
| CB4856 CT                                                                                              | V | 5085886 | 5087121 | WBGene00021979 | Y58A7A.5 | Y58A7A.5  | 0.248131345269783   |             |
| AGIWUR37032                                                                                            |   |         |         |                |          |           |                     |             |
| CB4856 CT                                                                                              | V | 5087601 | 5089484 | WBGene00021980 | glb-32   | Y58A7A.6  | -0.189686408286375  |             |
| AGIWUR16777                                                                                            |   |         |         |                |          |           |                     |             |
| CB4856 CT                                                                                              | V | 5093715 | 5096277 | WBGene00015444 | C04F5.2  | C04F5.2   | -0.0826889694441206 | AGIWUR36566 |
| CB4856 CT                                                                                              | V | 5097150 | 5098907 | WBGene00006782 | unc-46   | C04F5.3   | -0.0332263266711843 |             |
| AGIWUR3171;AGIWUR5049;AGIWUR16856;AGIWUR35187                                                          |   |         |         |                |          |           |                     |             |
| CB4856 CT                                                                                              | V | 5100098 | 5102117 | WBGene00015446 | srab-1   | C04F5.4   | -0.246917877738416  | AGIWUR42529 |
| CB4856 CT                                                                                              | V | 5103042 | 5105034 | WBGene00015447 | srab-2   | C04F5.5   | 0.0585448370176138  | AGIWUR4344  |
| CB4856 CT                                                                                              | V | 5105764 | 5107916 | WBGene00015448 | srab-3   | C04F5.6   | -0.0076189070434296 | AGIWUR1011  |
| CB4856 CT                                                                                              | V | 5108180 | 5110791 | WBGene00015449 | ugt-63   | C04F5.7   | -0.180845737357937  |             |
| AGIWUR27307;AGIWUR28572;AGIWUR30566;AGIWUR40417                                                        |   |         |         |                |          |           |                     |             |
| CB4856 CT                                                                                              | V | 5111518 | 5113754 | WBGene00015450 | C04F5.8  | C04F5.8   | 0.0346761368055759  | AGIWUR35055 |
| CB4856 CT                                                                                              | V | 5114749 | 5119209 | WBGene00015451 | C04F5.9  | C04F5.9   | -0.0123281351711952 | AGIWUR31490 |
| CB4856 CT                                                                                              | V | 5119939 | 5126916 | WBGene00004795 | sid-1    | C04F5.1   | 0.07996419174005    | AGIWUR24735 |
| CB4856 CT                                                                                              | V | 5127055 | 5130076 | WBGene00017468 | F14F9.5  | F14F9.5   | 0.167467419889258   | AGIWUR36714 |
| CB4856 CT                                                                                              | V | 5130318 | 5131538 | WBGene00044536 | F14F9.8  | F14F9.8   | 0.380726397540625   |             |
| AGIWUR74;AGIWUR1622;AGIWUR6008;AGIWUR25330;AGIWUR26386;AGIWUR29636;AGIWUR32108;AGIWUR40651;AGIWUR45182 |   |         |         |                |          |           |                     |             |
| CB4856 CT                                                                                              | V | 5132741 | 5137100 | WBGene00017467 | F14F9.4  | F14F9.4   | -0.0719830957454501 | AGIWUR4813  |
| CB4856 CT                                                                                              | V | 5142300 | 5143798 | WBGene00005346 | srh-129  | F14F9.7   | 0.286717022866462   | AGIWUR36675 |
| CB4856 CT                                                                                              | V | 5144831 | 5145781 | WBGene00017465 | F14F9.2  | F14F9.2   | 0.158783349930853   | AGIWUR10319 |
| CB4856 CT                                                                                              | V | 5146179 | 5150464 | WBGene00017469 | F14F9.6  | F14F9.6   | 0.385968570969426   | AGIWUR44128 |
| CB4856 CT                                                                                              | V | 5151180 | 5152982 | WBGene00005347 | srh-130  | F14F9.1   | 0.175330996025302   |             |
| AGIWUR15975;AGIWUR23770;AGIWUR45119                                                                    |   |         |         |                |          |           |                     |             |
| CB4856 CT                                                                                              | V | 5154057 | 5155516 | WBGene00005929 | srx-38   | C03A7.5   | 0.115803541652703   | AGIWUR24941 |
| CB4856 CT                                                                                              | V | 5156653 | 5157760 | WBGene00005930 | srx-39   | C03A7.6   | 0.0690932162666495  |             |
| AGIWUR7660;AGIWUR15660                                                                                 |   |         |         |                |          |           |                     |             |

|                                                                                    |    |   |         |         |                |          |          |                      |             |
|------------------------------------------------------------------------------------|----|---|---------|---------|----------------|----------|----------|----------------------|-------------|
| CB4856                                                                             | CT | V | 5163269 | 5194608 | WBGene00000031 | abu-8    | C03A7.14 | -0.346597314078693   |             |
| AGIWUR5374;AGIWUR13664;AGIWUR21378;AGIWUR26006;AGIWUR37231;AGIWUR39433;AGIWUR43459 |    |   |         |         |                |          |          |                      |             |
| CB4856                                                                             | CT | V | 5195926 | 5198340 | WBGene00021614 | Y47A7.2  | Y47A7.2  | -0.0855109415192583  | AGIWUR32030 |
| CB4856                                                                             | CT | V | 5204481 | 5213468 | WBGene00021613 | Y47A7.1  | Y47A7.1  | -0.0599792720650889  | AGIWUR43172 |
| CB4856                                                                             | CT | V | 5223423 | 5230471 | WBGene00021732 | Y49G5B.1 | Y49G5B.1 | 0.00606440948718401  |             |
| AGIWUR10915;AGIWUR30491;AGIWUR42762                                                |    |   |         |         |                |          |          |                      |             |
| CB4856                                                                             | CT | V | 5230475 | 5233891 | WBGene00016862 | C52A10.1 | C52A10.1 | -0.518748838708484   |             |
| AGIWUR38429                                                                        |    |   |         |         |                |          |          |                      |             |
| CB4856                                                                             | CT | V | 5237417 | 5239440 | WBGene00016864 | C52A10.3 | C52A10.3 | -0.11788134252604    |             |
| AGIWUR9942;AGIWUR17072;AGIWUR18741;AGIWUR27518;AGIWUR32753;AGIWUR35543             |    |   |         |         |                |          |          |                      |             |
| CB4856                                                                             | CT | V | 5240203 | 5240451 | WBGene00044537 | B0238.15 | B0238.15 | -0.453723195241483   |             |
| AGIWUR20789                                                                        |    |   |         |         |                |          |          |                      |             |
| CB4856                                                                             | CT | V | 5240768 | 5243136 | WBGene00015067 | B0238.1  | B0238.1  | 0.0612010635704081   | AGIWUR23849 |
| CB4856                                                                             | CT | V | 5243815 | 5248021 | WBGene00015077 | B0238.13 | B0238.13 | -0.198284956780475   |             |
| AGIWUR7988;AGIWUR21729;AGIWUR22553;AGIWUR24752;AGIWUR44017                         |    |   |         |         |                |          |          |                      |             |
| CB4856                                                                             | CT | V | 5249037 | 5249873 | WBGene00015078 | srt-66   | B0238.14 | 0.0785333902222032   |             |
| AGIWUR4331                                                                         |    |   |         |         |                |          |          |                      |             |
| CB4856                                                                             | CT | V | 5250604 | 5252116 | WBGene00015068 | srt-68   | B0238.3  | 0.104142868107338    |             |
| AGIWUR6333;AGIWUR7946;AGIWUR27879                                                  |    |   |         |         |                |          |          |                      |             |
| CB4856                                                                             | CT | V | 5256142 | 5257458 | WBGene00015069 | srt-67   | B0238.5  | -0.0160668758603446  | AGIWUR13781 |
| CB4856                                                                             | CT | V | 5258036 | 5259548 | WBGene00015070 | srt-70   | B0238.6  | 0.0227233778218787   |             |
| AGIWUR7541;AGIWUR44643                                                             |    |   |         |         |                |          |          |                      |             |
| CB4856                                                                             | CT | V | 5260332 | 5263099 | WBGene00015071 | B0238.7  | B0238.7  | 0.104819475591065    |             |
| AGIWUR18267;AGIWUR28110                                                            |    |   |         |         |                |          |          |                      |             |
| CB4856                                                                             | CT | V | 5263951 | 5265776 | WBGene00015072 | srt-69   | B0238.8  | 0.0410069533310269   | AGIWUR1864  |
| CB4856                                                                             | CT | V | 5267822 | 5268823 | WBGene00015076 | B0238.12 | B0238.12 | 0.0189794033473856   |             |
| AGIWUR2000;AGIWUR4711;AGIWUR8300;AGIWUR10378;AGIWUR21191;AGIWUR31864               |    |   |         |         |                |          |          |                      |             |
| CB4856                                                                             | CT | V | 5269485 | 5270744 | WBGene00015075 | B0238.11 | B0238.11 | -0.0108918363553183  |             |
| AGIWUR5198;AGIWUR8055;AGIWUR32992                                                  |    |   |         |         |                |          |          |                      |             |
| CB4856                                                                             | CT | V | 5274074 | 5275615 | WBGene00015074 | natc-2   | B0238.10 | -0.00108896910946399 |             |
| AGIWUR18864                                                                        |    |   |         |         |                |          |          |                      |             |
| CB4856                                                                             | CT | V | 5275554 | 5278101 | WBGene00015073 | B0238.9  | B0238.9  | 0.0315561875651866   | AGIWUR26181 |
| CB4856                                                                             | CT | V | 5286407 | 5287360 | WBGene00021731 | Y49G5A.1 | Y49G5A.1 | -0.565422938431686   |             |
| AGIWUR10627                                                                        |    |   |         |         |                |          |          |                      |             |
| CB4856                                                                             | CT | V | 5303689 | 5311246 | WBGene00003567 | ncx-2    | C10G8.5  | 0.0254442259386458   |             |
| AGIWUR16673;AGIWUR28589;AGIWUR39724;AGIWUR40302                                    |    |   |         |         |                |          |          |                      |             |
| CB4856                                                                             | CT | V | 5311935 | 5312349 | WBGene00015683 | C10G8.4  | C10G8.4  | -0.349134776194154   |             |
| AGIWUR16031;AGIWUR16827;AGIWUR17490                                                |    |   |         |         |                |          |          |                      |             |
| CB4856                                                                             | CT | V | 5312890 | 5314289 | WBGene00015682 | C10G8.3  | C10G8.3  | -0.0140542710422444  | AGIWUR6462  |

|                                                                         |    |   |         |         |                |          |          |                     |                     |
|-------------------------------------------------------------------------|----|---|---------|---------|----------------|----------|----------|---------------------|---------------------|
| CB4856                                                                  | CT | V | 5314404 | 5315589 | WBGene00015681 | C10G8.2  | C10G8.2  | 0.0602336533166943  | AGIWUR37429         |
| CB4856                                                                  | CT | V | 5315513 | 5319577 | WBGene00000455 | ceh-34   | C10G8.6  | 0.658027836100082   | AGIWUR37117         |
| CB4856                                                                  | CT | V | 5323204 | 5324616 | WBGene00000454 | ceh-33   | C10G8.7  | -0.207094489672176  | AGIWUR5584          |
| CB4856                                                                  | CT | V | 5324806 | 5328470 | WBGene00015684 | C10G8.8  | C10G8.8  | -0.540526657754932  |                     |
| AGIWUR1144;AGIWUR21620                                                  |    |   |         |         |                |          |          |                     |                     |
| CB4856                                                                  | CT | V | 5331267 | 5333055 | WBGene00005183 | srg-26   | C10G8.1  | 0.240581843053198   | AGIWUR38452         |
| CB4856                                                                  | CT | V | 5334888 | 5336329 | WBGene00005185 | srg-28   | T09D3.2  | -0.268691543436898  | AGIWUR7914          |
| CB4856                                                                  | CT | V | 5337184 | 5339013 | WBGene00005186 | srg-29   | T09D3.6  | 0.208104050155981   | AGIWUR18570         |
| CB4856                                                                  | CT | V | 5339797 | 5341309 | WBGene00005184 | srg-27   | T09D3.7  | -0.0130376275267512 | AGIWUR20874         |
| CB4856                                                                  | CT | V | 5342139 | 5344365 | WBGene00005182 | srg-25   | T09D3.5  | 0.313093130999375   | AGIWUR33862         |
| CB4856                                                                  | CT | V | 5346619 | 5349571 | WBGene00020384 | T09D3.3  | T09D3.3  | 0.598217860175815   | AGIWUR21034         |
| CB4856                                                                  | CT | V | 5351783 | 5353067 | WBGene00005087 | srd-9    | T09D3.1  | 0.171449232263779   | AGIWUR34801         |
| CB4856                                                                  | CT | V | 5354062 | 5358225 | WBGene00020385 | nhr-216  | T09D3.4  | 0.12247593272351    | AGIWUR17754         |
| CB4856                                                                  | CT | V | 5365163 | 5366792 | WBGene00044538 | T09D3.8  | T09D3.8  | -0.249972585150639  |                     |
| AGIWUR11112;AGIWUR28461;AGIWUR31607                                     |    |   |         |         |                |          |          |                     |                     |
| CB4856                                                                  | CT | V | 5372418 | 5377500 | WBGene00016430 | C35A11.3 |          | C35A11.3            | -0.0521284195547569 |
| AGIWUR6176                                                              |    |   |         |         |                |          |          |                     |                     |
| CB4856                                                                  | CT | V | 5386110 | 5389409 | WBGene00016429 | C35A11.2 |          | C35A11.2            | 0.0493079046784493  |
| AGIWUR35099                                                             |    |   |         |         |                |          |          |                     |                     |
| CB4856                                                                  | CT | V | 5389480 | 5393148 | WBGene00016431 | C35A11.4 |          | C35A11.4            | -0.582369318499101  |
| AGIWUR5955                                                              |    |   |         |         |                |          |          |                     |                     |
| CB4856                                                                  | CT | V | 5405358 | 5408386 | WBGene00016428 | dmsr-7   | C35A11.1 |                     | 0.0621843929574215  |
| AGIWUR31595                                                             |    |   |         |         |                |          |          |                     |                     |
| CB4856                                                                  | CT | V | 5410955 | 5413001 | WBGene00017262 | F08F3.4  | F08F3.4  | -0.325850802874696  | AGIWUR23133         |
| CB4856                                                                  | CT | V | 5413320 | 5415073 | WBGene00017266 | F08F3.10 |          | F08F3.10            | 0.145167443773799   |
| AGIWUR16702                                                             |    |   |         |         |                |          |          |                     |                     |
| CB4856                                                                  | CT | V | 5418044 | 5420067 | WBGene00017263 | F08F3.6  | F08F3.6  | -0.220410630612015  |                     |
| AGIWUR143;AGIWUR10790;AGIWUR29581                                       |    |   |         |         |                |          |          |                     |                     |
| CB4856                                                                  | CT | V | 5421018 | 5423488 | WBGene00000373 | cyp-14A5 |          | F08F3.7             | -0.589519519459778  |
| AGIWUR43753                                                             |    |   |         |         |                |          |          |                     |                     |
| CB4856                                                                  | CT | V | 5428160 | 5430431 | WBGene00004358 | rhr-1    | F08F3.3  | -0.323068806485337  |                     |
| AGIWUR15061;AGIWUR22455;AGIWUR28598;AGIWUR30549;AGIWUR31196;AGIWUR43016 |    |   |         |         |                |          |          |                     |                     |
| CB4856                                                                  | CT | V | 5431316 | 5432557 | WBGene00017264 | F08F3.8  | F08F3.8  | 0.0938284432447869  | AGIWUR15174         |
| CB4856                                                                  | CT | V | 5433392 | 5437066 | WBGene00017261 | ac1-6    | F08F3.2  | -0.0550713229792485 | AGIWUR43644         |
| CB4856                                                                  | CT | V | 5437084 | 5439161 | WBGene00017265 | snpc-1.3 |          | F08F3.9             | 0.13900633060492    |
| AGIWUR14435                                                             |    |   |         |         |                |          |          |                     |                     |
| CB4856                                                                  | CT | V | 5446138 | 5448721 | WBGene00017260 | F08F3.1  | F08F3.1  | 0.00933486610239598 |                     |
| AGIWUR13926;AGIWUR43486                                                 |    |   |         |         |                |          |          |                     |                     |
| CB4856                                                                  | CT | V | 5449287 | 5453715 | WBGene00001593 | glc-3    | ZC317.3  | -0.137442808851178  | AGIWUR2075          |

|                                                                        |    |   |         |         |                |         |          |                      |             |
|------------------------------------------------------------------------|----|---|---------|---------|----------------|---------|----------|----------------------|-------------|
| CB4856                                                                 | CT | V | 5460106 | 5461438 | WBGene00022588 | ZC317.2 | ZC317.2  | -0.461276744375966   | AGIWUR27671 |
| CB4856                                                                 | CT | V | 5461528 | 5462994 | WBGene00005224 | srg-67  | ZC317.4  | 0.0478249783286699   | AGIWUR10677 |
| CB4856                                                                 | CT | V | 5463791 | 5465435 | WBGene00005225 | srg-68  | ZC317.5  | -0.00554957419497004 | AGIWUR23244 |
| CB4856                                                                 | CT | V | 5471779 | 5473144 | WBGene00022587 | ZC317.1 | ZC317.1  | -0.19993422753895    | AGIWUR23867 |
| CB4856                                                                 | CT | V | 5480750 | 5482415 | WBGene00005223 | srg-66  | T05C3.7  | 0.198617161433519    | AGIWUR30145 |
| CB4856                                                                 | CT | V | 5483086 | 5484966 | WBGene00005222 | srg-65  | T05C3.8  | -0.106878188698603   | AGIWUR24244 |
| CB4856                                                                 | CT | V | 5485697 | 5488866 | WBGene00001727 | grl-18  | T05C3.4  | -0.407770595835688   | AGIWUR3326  |
| CB4856                                                                 | CT | V | 5490370 | 5493646 | WBGene00020256 | T05C3.6 | T05C3.6  | -0.329781704537664   | AGIWUR20647 |
| CB4856                                                                 | CT | V | 5493747 | 5503010 | WBGene00020254 | T05C3.2 | T05C3.2  | -0.0278004685248172  | AGIWUR30515 |
| CB4856                                                                 | CT | V | 5503033 | 5504856 | WBGene00001037 | dnj-19  | T05C3.5  | -0.148303588522143   |             |
| AGIWUR6756;AGIWUR15692;AGIWUR18960;AGIWUR39985;AGIWUR40578;AGIWUR44931 |    |   |         |         |                |         |          |                      |             |
| CB4856                                                                 | CT | V | 5505253 | 5509956 | WBGene00003637 | nhr-47  | C24G6.4  | 0.0788849903514093   |             |
| AGIWUR39007;AGIWUR40807                                                |    |   |         |         |                |         |          |                      |             |
| CB4856                                                                 | CT | V | 5509934 | 5513830 | WBGene00016061 | hpo-15  | C24G6.6  | 0.527712404455201    |             |
| AGIWUR5425;AGIWUR7430;AGIWUR10964                                      |    |   |         |         |                |         |          |                      |             |
| CB4856                                                                 | CT | V | 5514348 | 5520458 | WBGene00016060 | mms-19  | C24G6.3  | 0.272297308086522    | AGIWUR12501 |
| CB4856                                                                 | CT | V | 5523727 | 5530733 | WBGene00016059 | C24G6.2 | C24G6.2  | 0.0849734922910592   | AGIWUR41996 |
| CB4856                                                                 | CT | V | 5530725 | 5533845 | WBGene00001710 | grl-1   | C24G6.7  | 0.318457071331856    | AGIWUR32944 |
| CB4856                                                                 | CT | V | 5534101 | 5536243 | WBGene00016062 | C24G6.8 | C24G6.8  | -0.166245840058128   |             |
| AGIWUR4807;AGIWUR34241;AGIWUR34262                                     |    |   |         |         |                |         |          |                      |             |
| CB4856                                                                 | CT | V | 5536681 | 5537713 | WBGene00006376 | syp-2   | C24G6.1  | -0.202743945084052   | AGIWUR15027 |
| CB4856                                                                 | CT | V | 5538800 | 5545766 | WBGene00000477 | cft-1   | C18C4.2  | -0.272696293700065   | AGIWUR14907 |
| CB4856                                                                 | CT | V | 5545669 | 5548073 | WBGene00015965 | ugt-48  | C18C4.3  | -0.421678976371881   |             |
| AGIWUR1728;AGIWUR19654;AGIWUR22191                                     |    |   |         |         |                |         |          |                      |             |
| CB4856                                                                 | CT | V | 5550315 | 5557281 | WBGene00015966 | C18C4.5 | C18C4.5  | 0.533973525029577    | AGIWUR35146 |
| CB4856                                                                 | CT | V | 5558890 | 5564298 | WBGene00015964 | glb-5   | C18C4.1  | 0.390886729682853    | AGIWUR36782 |
| CB4856                                                                 | CT | V | 5564306 | 5567219 | WBGene00015968 | C18C4.7 | C18C4.7  | -0.0415938697072038  |             |
| AGIWUR6245;AGIWUR44207                                                 |    |   |         |         |                |         |          |                      |             |
| CB4856                                                                 | CT | V | 5568209 | 5570533 | WBGene00015969 | glb-6   | C18C4.9  | -0.00369444843727518 |             |
| AGIWUR5075;AGIWUR34571;AGIWUR42521                                     |    |   |         |         |                |         |          |                      |             |
| CB4856                                                                 | CT | V | 5575410 | 5581713 | WBGene00002215 | klc-2   | C18C4.10 | -0.0452518578434669  |             |
| AGIWUR16149;AGIWUR18996;AGIWUR28335;AGIWUR33837                        |    |   |         |         |                |         |          |                      |             |
| CB4856                                                                 | CT | V | 5583161 | 5584343 | WBGene00003927 | pas-6   | CD4.6    | -0.160792208527667   | AGIWUR23093 |
| CB4856                                                                 | CT | V | 5585182 | 5586500 | WBGene00044542 | CD4.11  | CD4.11   | 0.0629059332782447   | AGIWUR10838 |
| CB4856                                                                 | CT | V | 5589652 | 5591838 | WBGene00016991 | CD4.5   | CD4.5    | 0.277827345893552    | AGIWUR15443 |
| CB4856                                                                 | CT | V | 5592685 | 5593612 | WBGene00016990 | vps-37  | CD4.4    | 0.0905611426675357   | AGIWUR41592 |
| CB4856                                                                 | CT | V | 5593706 | 5594499 | WBGene00016989 | CD4.3   | CD4.3    | -0.17627775875145    |             |
| AGIWUR5478;AGIWUR13375                                                 |    |   |         |         |                |         |          |                      |             |
| CB4856                                                                 | CT | V | 5594615 | 5595842 | WBGene00000795 | crn-2   | CD4.2    | -0.0135773635997971  | AGIWUR2005  |

|                                                                        |    |   |         |         |                |          |          |                     |             |
|------------------------------------------------------------------------|----|---|---------|---------|----------------|----------|----------|---------------------|-------------|
| CB4856                                                                 | CT | V | 5595653 | 5596551 | WBGene00016992 | zhit-1   | CD4.7    | -0.0903555517955397 |             |
| AGIWUR26205;AGIWUR29405;AGIWUR29560                                    |    |   |         |         |                |          |          |                     |             |
| CB4856                                                                 | CT | V | 5597061 | 5597450 | WBGene00022970 | CD4.10   | CD4.10   | -0.118033880109085  |             |
| AGIWUR2884;AGIWUR10510;AGIWUR37326;AGIWUR37399;AGIWUR38444             |    |   |         |         |                |          |          |                     |             |
| CB4856                                                                 | CT | V | 5606555 | 5609368 | WBGene00016988 | CD4.1    | CD4.1    | -0.122303089382904  |             |
| AGIWUR3887;AGIWUR12184;AGIWUR16190;AGIWUR22946                         |    |   |         |         |                |          |          |                     |             |
| CB4856                                                                 | CT | V | 5609414 | 5613219 | WBGene00019756 | M03E7.4  | M03E7.4  | 0.0891091173124972  |             |
| AGIWUR1269;AGIWUR7806;AGIWUR36925                                      |    |   |         |         |                |          |          |                     |             |
| CB4856                                                                 | CT | V | 5617601 | 5618319 | WBGene00019754 | M03E7.2  | M03E7.2  | 0.193727327057231   | AGIWUR15374 |
| CB4856                                                                 | CT | V | 5618291 | 5620140 | WBGene00019757 | memb-2   | M03E7.5  | -0.19218850162976   | AGIWUR23665 |
| CB4856                                                                 | CT | V | 5623642 | 5624637 | WBGene00019753 | M03E7.1  | M03E7.1  | 0.126415732374511   | AGIWUR18874 |
| CB4856                                                                 | CT | V | 5624727 | 5630892 | WBGene00000071 | acy-4    | T01C2.1  | -0.342205769471381  | AGIWUR6301  |
| CB4856                                                                 | CT | V | 5644487 | 5646231 | WBGene00006008 | srx-117  | C14C11.5 | -0.0510791770790959 |             |
| AGIWUR26107;AGIWUR33030;AGIWUR41327                                    |    |   |         |         |                |          |          |                     |             |
| CB4856                                                                 | CT | V | 5647564 | 5651040 | WBGene00015768 | C14C11.4 | C14C11.4 | -0.0599596154637467 |             |
| AGIWUR5796                                                             |    |   |         |         |                |          |          |                     |             |
| CB4856                                                                 | CT | V | 5654449 | 5658699 | WBGene00015767 | hex-2    | C14C11.3 | 0.134160394738384   |             |
| AGIWUR28993                                                            |    |   |         |         |                |          |          |                     |             |
| CB4856                                                                 | CT | V | 5658713 | 5660704 | WBGene00003507 | mut-14   | C14C11.6 | -0.275777462619033  |             |
| AGIWUR17638                                                            |    |   |         |         |                |          |          |                     |             |
| CB4856                                                                 | CT | V | 5665242 | 5666082 | WBGene00015769 | C14C11.7 | C14C11.7 | -0.132766690577494  |             |
| AGIWUR15135                                                            |    |   |         |         |                |          |          |                     |             |
| CB4856                                                                 | CT | V | 5669611 | 5676111 | WBGene00004104 | pqn-13   | C14C11.8 | 0.83001969656992    |             |
| AGIWUR30520                                                            |    |   |         |         |                |          |          |                     |             |
| CB4856                                                                 | CT | V | 5678600 | 5682630 | WBGene00017768 | F25B4.5  | F25B4.5  | 0.100092711687097   | AGIWUR37076 |
| CB4856                                                                 | CT | V | 5682721 | 5684589 | WBGene00017769 | hmg-1    | F25B4.6  | -0.126230508214242  | AGIWUR30393 |
| CB4856                                                                 | CT | V | 5684875 | 5685728 | WBGene00017767 | F25B4.4  | F25B4.4  | -0.371579713085341  | AGIWUR17106 |
| CB4856                                                                 | CT | V | 5685726 | 5687381 | WBGene00017770 | F25B4.7  | F25B4.7  | -0.132889908376923  |             |
| AGIWUR7148;AGIWUR16812;AGIWUR20659;AGIWUR31628;AGIWUR32518;AGIWUR34484 |    |   |         |         |                |          |          |                     |             |
| CB4856                                                                 | CT | V | 5690103 | 5691715 | WBGene00017771 | F25B4.8  | F25B4.8  | -0.348876045598351  |             |
| AGIWUR8731;AGIWUR13190;AGIWUR19738;AGIWUR20436;AGIWUR21867;AGIWUR31668 |    |   |         |         |                |          |          |                     |             |
| CB4856                                                                 | CT | V | 5700010 | 5701080 | WBGene00017772 | clec-1   | F25B4.9  | -0.209668759025771  | AGIWUR31369 |
| CB4856                                                                 | CT | V | 5709418 | 5712335 | WBGene00017766 | pel-1    | F25B4.2  | 0.070439991792262   |             |
| AGIWUR7805;AGIWUR31214                                                 |    |   |         |         |                |          |          |                     |             |
| CB4856                                                                 | CT | V | 5712818 | 5714756 | WBGene00017765 | gcst-1   | F25B4.1  | -0.33478150899461   |             |
| AGIWUR11264;AGIWUR16183;AGIWUR16623                                    |    |   |         |         |                |          |          |                     |             |
| CB4856                                                                 | CT | V | 5714760 | 5716581 | WBGene00044539 | K09H11.9 | K09H11.9 | 0.369854909323157   |             |
| AGIWUR370;AGIWUR8555;AGIWUR16863                                       |    |   |         |         |                |          |          |                     |             |
| CB4856                                                                 | CT | V | 5723079 | 5726545 | WBGene00019601 | K09H11.4 | K09H11.4 | -0.199416262346309  |             |

|                                                                        |    |   |         |         |                |                     |                                 |
|------------------------------------------------------------------------|----|---|---------|---------|----------------|---------------------|---------------------------------|
| AGIWUR37085                                                            |    |   |         |         |                |                     |                                 |
| CB4856                                                                 | CT | V | 5727290 | 5729593 | WBGene00006015 | srx-124 K09H11.8    | -0.294659260881565              |
| AGIWUR20319                                                            |    |   |         |         |                |                     |                                 |
| CB4856                                                                 | CT | V | 5731312 | 5734595 | WBGene00006014 | srx-123 K09H11.2    | 0.048284061120671               |
| AGIWUR35596                                                            |    |   |         |         |                |                     |                                 |
| CB4856                                                                 | CT | V | 5734844 | 5735984 | WBGene00019603 | K09H11.6 K09H11.6   | -0.125706376767083              |
| AGIWUR198;AGIWUR28113                                                  |    |   |         |         |                |                     |                                 |
| CB4856                                                                 | CT | V | 5747723 | 5752033 | WBGene00019599 | K09H11.1 K09H11.1   | 0.0836140854588354              |
| AGIWUR6658;AGIWUR25254;AGIWUR40166                                     |    |   |         |         |                |                     |                                 |
| CB4856                                                                 | CT | V | 5754670 | 5755558 | WBGene00044541 | K09H11.11 K09H11.11 | -0.201869222743476              |
| AGIWUR3096;AGIWUR11398;AGIWUR36361;AGIWUR37461;AGIWUR41423             |    |   |         |         |                |                     |                                 |
| CB4856                                                                 | CT | V | 5758224 | 5760232 | WBGene00016891 | C53A3.1 C53A3.1     | -0.195855069156018              |
| AGIWUR3869;AGIWUR8455;AGIWUR10857                                      |    |   |         |         |                |                     |                                 |
| CB4856                                                                 | CT | V | 5770456 | 5771767 | WBGene00018424 | F44E7.2 F44E7.2     | 0.267265173571372               |
| AGIWUR39531;AGIWUR43941                                                |    |   |         |         |                |                     |                                 |
| CB4856                                                                 | CT | V | 5771945 | 5772497 | WBGene00018425 | F44E7.3 F44E7.3     | 0.308141520987474 AGIWUR27519   |
| CB4856                                                                 | CT | V | 5772831 | 5777034 | WBGene00018426 | F44E7.4 F44E7.4     | -0.174374787170077              |
| AGIWUR6258;AGIWUR7214;AGIWUR10257;AGIWUR17718;AGIWUR37927              |    |   |         |         |                |                     |                                 |
| CB4856                                                                 | CT | V | 5778818 | 5780947 | WBGene00018427 | F44E7.5 F44E7.5     | 0.0261650465976224              |
| AGIWUR4722;AGIWUR5044;AGIWUR5808;AGIWUR15449;AGIWUR16199;AGIWUR28981   |    |   |         |         |                |                     |                                 |
| CB4856                                                                 | CT | V | 5781317 | 5782787 | WBGene00018428 | fbxa-183 F44E7.6    | -0.311670501638298              |
| AGIWUR22543                                                            |    |   |         |         |                |                     |                                 |
| CB4856                                                                 | CT | V | 5782893 | 5785648 | WBGene00018429 | F44E7.7 F44E7.7     | -0.304599993690513 AGIWUR13903  |
| CB4856                                                                 | CT | V | 5785959 | 5790066 | WBGene00018430 | nhr-142 F44E7.8     | 0.158086948730407               |
| AGIWUR35477;AGIWUR37111                                                |    |   |         |         |                |                     |                                 |
| CB4856                                                                 | CT | V | 5791230 | 5792122 | WBGene00018431 | F44E7.9 F44E7.9     | -0.0375419675288384 AGIWUR43388 |
| CB4856                                                                 | CT | V | 5792331 | 5794857 | WBGene00022576 | ZC250.2 ZC250.2     | -0.145075400171663 AGIWUR34319  |
| CB4856                                                                 | CT | V | 5794688 | 5798232 | WBGene00022577 | nstp-3 ZC250.3      | 0.34310684723326 AGIWUR3913     |
| CB4856                                                                 | CT | V | 5799673 | 5805666 | WBGene00000893 | cyn-17 ZC250.1      | 0.267923422542339               |
| AGIWUR16547;AGIWUR26654                                                |    |   |         |         |                |                     |                                 |
| CB4856                                                                 | CT | V | 5805767 | 5807532 | WBGene00045306 | ZC250.5 ZC250.5     | -0.146999300507041 AGIWUR35199  |
| CB4856                                                                 | CT | V | 5812316 | 5813157 | WBGene00045305 | ZC250.4 ZC250.4     | -0.368760029193141              |
| AGIWUR1578;AGIWUR13681;AGIWUR26046;AGIWUR43378                         |    |   |         |         |                |                     |                                 |
| CB4856                                                                 | CT | V | 5826833 | 5832866 | WBGene00002637 | let-418 F26F12.7    | -0.0796180022066224             |
| AGIWUR6725;AGIWUR13247;AGIWUR14742;AGIWUR30477;AGIWUR34699;AGIWUR43629 |    |   |         |         |                |                     |                                 |
| CB4856                                                                 | CT | V | 5833831 | 5835183 | WBGene00005297 | srh-76 F26F12.6     | -0.0672816810986356             |
| AGIWUR2120                                                             |    |   |         |         |                |                     |                                 |
| CB4856                                                                 | CT | V | 5835855 | 5836871 | WBGene00000713 | col-140 F26F12.1    | 0.0139327661816324              |
| AGIWUR18993                                                            |    |   |         |         |                |                     |                                 |

|                                                                                                |    |   |         |         |                |          |          |                     |             |
|------------------------------------------------------------------------------------------------|----|---|---------|---------|----------------|----------|----------|---------------------|-------------|
| CB4856                                                                                         | CT | V | 5837572 | 5838613 | WBGene00017833 | F26F12.2 | F26F12.2 | -0.136559739051241  |             |
| AGIWUR15256                                                                                    |    |   |         |         |                |          |          |                     |             |
| CB4856                                                                                         | CT | V | 5838960 | 5845739 | WBGene00017834 | F26F12.3 | F26F12.3 | 0.894639439256697   |             |
| AGIWUR290;AGIWUR8936;AGIWUR9237;AGIWUR16429;AGIWUR17239;AGIWUR19312;AGIWUR28755;AGIWUR42064    |    |   |         |         |                |          |          |                     |             |
| CB4856                                                                                         | CT | V | 5854848 | 5856414 | WBGene00044544 | F26F12.8 | F26F12.8 | -0.374996582520359  |             |
| AGIWUR1899;AGIWUR8610;AGIWUR12476;AGIWUR24453;AGIWUR34690                                      |    |   |         |         |                |          |          |                     |             |
| CB4856                                                                                         | CT | V | 5863984 | 5865149 | WBGene00017836 | F26F12.5 | F26F12.5 | 0.0931011583126864  |             |
| AGIWUR289;AGIWUR1983;AGIWUR2375;AGIWUR2704;AGIWUR33158                                         |    |   |         |         |                |          |          |                     |             |
| CB4856                                                                                         | CT | V | 5866134 | 5867952 | WBGene00017835 | F26F12.4 | F26F12.4 | 0.572971619736153   |             |
| AGIWUR9893                                                                                     |    |   |         |         |                |          |          |                     |             |
| CB4856                                                                                         | CT | V | 5872084 | 5874914 | WBGene00015360 | C02G6.2  | C02G6.2  | 0.0163547344702746  |             |
| AGIWUR18549;AGIWUR32969;AGIWUR35538;AGIWUR39767                                                |    |   |         |         |                |          |          |                     |             |
| CB4856                                                                                         | CT | V | 5876370 | 5879942 | WBGene00015359 | C02G6.1  | C02G6.1  | -0.421869406391117  | AGIWUR15967 |
| CB4856                                                                                         | CT | V | 5881052 | 5882450 | WBGene00044803 | C02G6.3  | C02G6.3  | -0.107034789189628  |             |
| AGIWUR3176;AGIWUR25574;AGIWUR28650                                                             |    |   |         |         |                |          |          |                     |             |
| CB4856                                                                                         | CT | V | 5882665 | 5883835 | WBGene00015424 | C04E6.8  | C04E6.8  | -0.254295500343253  |             |
| AGIWUR2858;AGIWUR5076;AGIWUR11028;AGIWUR19894;AGIWUR31647;AGIWUR40369                          |    |   |         |         |                |          |          |                     |             |
| CB4856                                                                                         | CT | V | 5893312 | 5895208 | WBGene00015423 | C04E6.7  | C04E6.7  | -0.0786516192209454 |             |
| AGIWUR2831;AGIWUR4042;AGIWUR17377                                                              |    |   |         |         |                |          |          |                     |             |
| CB4856                                                                                         | CT | V | 5895388 | 5898602 | WBGene00001698 | grd-9    | C04E6.6  | -0.401929604110414  | AGIWUR37827 |
| CB4856                                                                                         | CT | V | 5902133 | 5904831 | WBGene00015422 | C04E6.5  | C04E6.5  | -0.159805458850736  | AGIWUR16915 |
| CB4856                                                                                         | CT | V | 5904917 | 5906352 | WBGene00005093 | srd-15   | C04E6.10 | 0.0731631361532941  |             |
| AGIWUR25561                                                                                    |    |   |         |         |                |          |          |                     |             |
| CB4856                                                                                         | CT | V | 5907408 | 5909620 | WBGene00015421 | C04E6.4  | C04E6.4  | -0.160162772626064  | AGIWUR38659 |
| CB4856                                                                                         | CT | V | 5912726 | 5913757 | WBGene00015427 | C04E6.13 | C04E6.13 | 0.266241075914539   |             |
| AGIWUR30644                                                                                    |    |   |         |         |                |          |          |                     |             |
| CB4856                                                                                         | CT | V | 5914097 | 5917891 | WBGene00015425 | C04E6.11 | C04E6.11 | -0.0361379169328204 |             |
| AGIWUR4820;AGIWUR13300;AGIWUR16133;AGIWUR18878;AGIWUR25001;AGIWUR33865;AGIWUR34856;AGIWUR41339 |    |   |         |         |                |          |          |                     |             |
| CB4856                                                                                         | CT | V | 5918062 | 5919835 | WBGene00015426 | C04E6.12 | C04E6.12 | 0.285553693225247   |             |
| AGIWUR19866                                                                                    |    |   |         |         |                |          |          |                     |             |
| CB4856                                                                                         | CT | V | 5920121 | 5920395 | WBGene00015420 | C04E6.3  | C04E6.3  | 0.0446889302777951  |             |
| AGIWUR4955;AGIWUR10644;AGIWUR19172;AGIWUR27814;AGIWUR40512                                     |    |   |         |         |                |          |          |                     |             |
| CB4856                                                                                         | CT | V | 5922545 | 5924297 | WBGene00015419 | srsx-18  | C04E6.2  | -0.128360820491489  | AGIWUR18814 |
| CB4856                                                                                         | CT | V | 5927647 | 5930417 | WBGene00019032 | srsx-17  | F58D7.1  | -0.103735413592544  | AGIWUR41420 |
| CB4856                                                                                         | CT | V | 5930847 | 5933435 | WBGene00019763 | galt-1   | M03F8.4  | -0.215957404690588  |             |
| AGIWUR21765;AGIWUR37492                                                                        |    |   |         |         |                |          |          |                     |             |
| CB4856                                                                                         | CT | V | 5933662 | 5936791 | WBGene00019764 | M03F8.5  | M03F8.5  | 0.0759959554219538  | AGIWUR31881 |
| CB4856                                                                                         | CT | V | 5940024 | 5943362 | WBGene00019762 | M03F8.3  | M03F8.3  | -0.150809228425832  |             |
| AGIWUR17052;AGIWUR27293                                                                        |    |   |         |         |                |          |          |                     |             |

|                                                                                              |    |   |         |         |                |           |           |                     |             |
|----------------------------------------------------------------------------------------------|----|---|---------|---------|----------------|-----------|-----------|---------------------|-------------|
| CB4856                                                                                       | CT | V | 5943474 | 5950991 | WBGene00004206 | pst-1     | M03F8.2   | -0.0843035110078372 |             |
| AGIWUR2524;AGIWUR6470;AGIWUR8666;AGIWUR11767;AGIWUR17252;AGIWUR22609                         |    |   |         |         |                |           |           |                     |             |
| CB4856                                                                                       | CT | V | 5951433 | 5953872 | WBGene00019761 | M03F8.1   | M03F8.1   | -0.14549522597018   | AGIWUR14350 |
| CB4856                                                                                       | CT | V | 5953831 | 5954840 | WBGene00019765 | M03F8.6   | M03F8.6   | -0.0621084994644798 |             |
| AGIWUR29423;AGIWUR41081                                                                      |    |   |         |         |                |           |           |                     |             |
| CB4856                                                                                       | CT | V | 5960585 | 5963882 | WBGene00003954 | pcm-1     | C10F3.5   | -0.135381000527351  |             |
| AGIWUR9721;AGIWUR22533;AGIWUR32790;AGIWUR39510                                               |    |   |         |         |                |           |           |                     |             |
| CB4856                                                                                       | CT | V | 5961813 | 5969175 | WBGene00015678 | mcp-1     | C10F3.4   | 0.0203753485014975  | AGIWUR6540  |
| CB4856                                                                                       | CT | V | 5976029 | 5981513 | WBGene00000069 | acy-2     | C10F3.3   | -0.165847639042164  | AGIWUR29420 |
| CB4856                                                                                       | CT | V | 5983745 | 5985473 | WBGene00000979 | dhs-16    | C10F3.2   | -0.297749212422856  | AGIWUR25144 |
| CB4856                                                                                       | CT | V | 5985440 | 5986855 | WBGene00015679 | C10F3.7   | C10F3.7   | 0.536176910846205   | AGIWUR30945 |
| CB4856                                                                                       | CT | V | 5987003 | 5990252 | WBGene00001508 | fut-8     | C10F3.6   | -0.427612462465776  | AGIWUR8362  |
| CB4856                                                                                       | CT | V | 5996323 | 5999344 | WBGene00015677 | cpg-4     | C10F3.1   | -0.0193876802767168 | AGIWUR29999 |
| CB4856                                                                                       | CT | V | 6003601 | 6016087 | WBGene00001345 | fos-1     | F29G9.4   | 0.247836347177595   | AGIWUR34164 |
| CB4856                                                                                       | CT | V | 6016049 | 6017669 | WBGene00004502 | rpt-2     | F29G9.5   | -0.0141247640667785 | AGIWUR8467  |
| CB4856                                                                                       | CT | V | 6017970 | 6018886 | WBGene00000159 | aps-1     | F29G9.3   | -0.211918880020718  |             |
| AGIWUR5131;AGIWUR10646;AGIWUR26206                                                           |    |   |         |         |                |           |           |                     |             |
| CB4856                                                                                       | CT | V | 6018994 | 6026337 | WBGene00017931 | picc-1    | F29G9.2   | 0.0706037174182539  |             |
| AGIWUR14915;AGIWUR30183;AGIWUR39248                                                          |    |   |         |         |                |           |           |                     |             |
| CB4856                                                                                       | CT | V | 6026330 | 6034923 | WBGene00000980 | dhs-17    | F29G9.6   | 0.108114938171546   | AGIWUR9125  |
| CB4856                                                                                       | CT | V | 6041196 | 6043185 | WBGene00019804 | R01B10.2  | R01B10.2  | -0.0856006204880781 |             |
| AGIWUR39768                                                                                  |    |   |         |         |                |           |           |                     |             |
| CB4856                                                                                       | CT | V | 6044028 | 6045671 | WBGene00000534 | cpi-2     | R01B10.1  | -0.0998595282056369 |             |
| AGIWUR363;AGIWUR9475;AGIWUR13614;AGIWUR15479;AGIWUR17723;AGIWUR37763;AGIWUR40451;AGIWUR43366 |    |   |         |         |                |           |           |                     |             |
| CB4856                                                                                       | CT | V | 6045640 | 6047908 | WBGene00019806 | R01B10.4  | R01B10.4  | 0.186815433712555   |             |
| AGIWUR5448                                                                                   |    |   |         |         |                |           |           |                     |             |
| CB4856                                                                                       | CT | V | 6047922 | 6051259 | WBGene00019807 | jamp-1    | R01B10.5  | -0.0485909600968659 |             |
| AGIWUR6308;AGIWUR24410;AGIWUR39284;AGIWUR42295                                               |    |   |         |         |                |           |           |                     |             |
| CB4856                                                                                       | CT | V | 6055589 | 6056743 | WBGene00005098 | srd-20    | Y38A10A.1 | -0.0339820977141114 |             |
| AGIWUR5427                                                                                   |    |   |         |         |                |           |           |                     |             |
| CB4856                                                                                       | CT | V | 6057366 | 6063430 | WBGene00021389 | Y38A10A.2 | Y38A10A.2 | 0.264846401500821   |             |
| AGIWUR24984                                                                                  |    |   |         |         |                |           |           |                     |             |
| CB4856                                                                                       | CT | V | 6065507 | 6067089 | WBGene00005236 | srh-10    | Y38A10A.3 | -0.0415349375958618 |             |
| AGIWUR32924                                                                                  |    |   |         |         |                |           |           |                     |             |
| CB4856                                                                                       | CT | V | 6067811 | 6070068 | WBGene00021390 | fbxa-214  | Y38A10A.4 | -0.0479707761707742 |             |
| AGIWUR4835;AGIWUR25614;AGIWUR35294                                                           |    |   |         |         |                |           |           |                     |             |
| CB4856                                                                                       | CT | V | 6096028 | 6096903 | WBGene00021392 | Y38A10A.7 | Y38A10A.7 | -0.152899283950934  |             |
| AGIWUR40565                                                                                  |    |   |         |         |                |           |           |                     |             |
| CB4856                                                                                       | CT | V | 6097105 | 6099083 | WBGene00021391 | smut-1    | Y38A10A.6 | 0.164786462991721   |             |



AGIWUR34126  
CB4856 CT V 6098993 6100553 WBGene00000802 crt-1 Y38A10A.5 -0.0108111415871548  
AGIWUR5761;AGIWUR21954;AGIWUR27741;AGIWUR42525;AGIWUR42873  
CB4856 CT V 6105607 6107530 WBGene00017535 atf-8 F17A9.3 0.637234671122197 AGIWUR8129  
CB4856 CT V 6107828 6114856 WBGene00017534 F17A9.2 F17A9.2 -0.217911993993901 AGIWUR1903  
CB4856 CT V 6116521 6117849 WBGene00017533 fbxa-178 F17A9.1 -0.0118887127272664  
AGIWUR12696;AGIWUR27014;AGIWUR43258  
CB4856 CT V 6118332 6120206 WBGene00017538 ceh-49 F17A9.6 -0.540530212143024 AGIWUR6485  
CB4856 CT V 6120909 6202626 WBGene00006436 ttn-1 W06H8.8 -0.0149779430888248  
AGIWUR467;AGIWUR2055;AGIWUR18482;AGIWUR20833;AGIWUR24654;AGIWUR27263;AGIWUR27556;AGIWUR28812;AGIWUR29196;AGIWUR30343;AGIWUR31761;AGIWUR35868;AGIWUR38312;AGIWUR39023;AGIWUR40449  
CB4856 CT V 6204875 6206134 WBGene00021067 W06H8.4 W06H8.4 -0.0784053898707908 AGIWUR32308  
CB4856 CT V 6206755 6208551 WBGene00021066 W06H8.2 W06H8.2 -0.00385488057658101 AGIWUR36532  
CB4856 CT V 6208840 6217647 WBGene00004373 rme-1 W06H8.1 -0.324797174156712  
AGIWUR7403;AGIWUR21968;AGIWUR28544;AGIWUR35361;AGIWUR35611;AGIWUR40187  
CB4856 CT V 6218134 6219562 WBGene00006239 str-206 W06H8.7 -0.136833249738677 AGIWUR20590  
CB4856 CT V 6221249 6227047 WBGene00021068 W06H8.6 W06H8.6 0.0923002369725481 AGIWUR39330  
CB4856 CT V 6235176 6237807 WBGene00019522 K08B12.3 K08B12.3 -0.136906840383212  
AGIWUR32080  
CB4856 CT V 6249172 6252453 WBGene00019521 dmd-7 K08B12.2 0.203454886284943  
AGIWUR4928;AGIWUR11191;AGIWUR24510;AGIWUR30182;AGIWUR41338  
CB4856 CT V 6268565 6270481 WBGene00017966 F31F7.3 F31F7.3 0.134690717056017 AGIWUR14173  
CB4856 CT V 6270852 6274911 WBGene00017965 F31F7.2 F31F7.2 -0.156656374158782 AGIWUR26123  
CB4856 CT V 6276439 6278160 WBGene00017964 F31F7.1 F31F7.1 0.843139817255935  
AGIWUR7941;AGIWUR24895;AGIWUR30996  
CB4856 CT V 6279005 6280146 WBGene00019668 fil-2 K12B6.3 0.759702504484828 AGIWUR22934  
CB4856 CT V 6280380 6281136 WBGene00019669 K12B6.4 K12B6.4 0.232103325030634 AGIWUR1920  
CB4856 CT V 6281359 6284865 WBGene00019667 K12B6.2 K12B6.2 -0.0560021725461413  
AGIWUR5809;AGIWUR7245;AGIWUR34843  
CB4856 CT V 6284920 6286434 WBGene00005640 srn-1 K12B6.5 0.0963453689718676 AGIWUR6389  
CB4856 CT V 6291390 6292666 WBGene00023432 K12B6.9 K12B6.9 0.334349271252766  
AGIWUR4049;AGIWUR4367;AGIWUR38219  
CB4856 CT V 6293920 6294342 WBGene00019670 K12B6.6 K12B6.6 0.04918020924414 AGIWUR36632  
CB4856 CT V 6303771 6308337 WBGene00019666 sago-1 K12B6.1 -0.0230929535349151 AGIWUR3629  
CB4856 CT V 6308811 6312001 WBGene00019672 K12B6.8 K12B6.8 -0.184234288153948  
AGIWUR2931;AGIWUR42737  
CB4856 CT V 6314176 6316467 WBGene00020892 T28C12.5 T28C12.5 0.112576754288265  
AGIWUR9229  
CB4856 CT V 6316932 6326390 WBGene00020891 T28C12.4 T28C12.4 0.303425707412657



|                                                                                 |    |   |         |         |                |          |           |                      |             |
|---------------------------------------------------------------------------------|----|---|---------|---------|----------------|----------|-----------|----------------------|-------------|
| CB4856                                                                          | CT | V | 6450898 | 6452231 | WBGene00020264 | ac1-8    | T05H4.1   | 0.0382158693508181   | AGIWUR9693  |
| CB4856                                                                          | CT | V | 6453196 | 6454973 | WBGene00022646 | ac1-9    | ZK40.1    | -0.080889846512048   |             |
| AGIWUR1627;AGIWUR3340;AGIWUR5728;AGIWUR8126;AGIWUR14958;AGIWUR27729;AGIWUR36534 |    |   |         |         |                |          |           |                      |             |
| CB4856                                                                          | CT | V | 6465065 | 6487880 | WBGene00006815 | unc-83   | W01A11.3  | 0.398831755380371    |             |
| AGIWUR16191;AGIWUR27240;AGIWUR35896;AGIWUR39953                                 |    |   |         |         |                |          |           |                      |             |
| CB4856                                                                          | CT | V | 6488203 | 6489120 | WBGene00002273 | lec-10   | W01A11.4  | -0.486564454864258   |             |
| AGIWUR24405                                                                     |    |   |         |         |                |          |           |                      |             |
| CB4856                                                                          | CT | V | 6490068 | 6493921 | WBGene00020911 | cpt-6    | W01A11.5  | -0.0518972558276793  |             |
| AGIWUR6635                                                                      |    |   |         |         |                |          |           |                      |             |
| CB4856                                                                          | CT | V | 6497110 | 6498484 | WBGene00020910 | dgtr-1   | W01A11.2  | 0.0657889145073796   |             |
| AGIWUR41901                                                                     |    |   |         |         |                |          |           |                      |             |
| CB4856                                                                          | CT | V | 6499224 | 6502428 | WBGene00020909 | W01A11.1 | W01A11.1  | 0.344058343939437    |             |
| AGIWUR19791                                                                     |    |   |         |         |                |          |           |                      |             |
| CB4856                                                                          | CT | V | 6502369 | 6504181 | WBGene00003385 | moc-2    | W01A11.6  | 0.0719720102861343   |             |
| AGIWUR8181;AGIWUR17085                                                          |    |   |         |         |                |          |           |                      |             |
| CB4856                                                                          | CT | V | 6504538 | 6505500 | WBGene00020912 | W01A11.7 | W01A11.7  | -0.0838404406672861  |             |
| AGIWUR9030;AGIWUR22292                                                          |    |   |         |         |                |          |           |                      |             |
| CB4856                                                                          | CT | V | 6506752 | 6508803 | WBGene00006723 | ubh-3    | Y40G12A.1 | -0.0453594999128004  |             |
| AGIWUR32889                                                                     |    |   |         |         |                |          |           |                      |             |
| CB4856                                                                          | CT | V | 6508831 | 6509884 | WBGene00006722 | ubh-2    | Y40G12A.2 | -0.0720496915964084  |             |
| AGIWUR21082                                                                     |    |   |         |         |                |          |           |                      |             |
| CB4856                                                                          | CT | V | 6509910 | 6511409 | WBGene00006721 | ubh-1    | F46E10.8  | -0.0323066530848433  |             |
| AGIWUR1295;AGIWUR2582;AGIWUR31493                                               |    |   |         |         |                |          |           |                      |             |
| CB4856                                                                          | CT | V | 6511588 | 6515240 | WBGene00001073 | dpy-11   | F46E10.9  | -0.00727915971378934 |             |
| AGIWUR4187;AGIWUR9323;AGIWUR27533                                               |    |   |         |         |                |          |           |                      |             |
| CB4856                                                                          | CT | V | 6515276 | 6516526 | WBGene00018491 | mdh-1    | F46E10.10 | -0.0540153634968554  |             |
| AGIWUR17671;AGIWUR18530;AGIWUR23213;AGIWUR25558                                 |    |   |         |         |                |          |           |                      |             |
| CB4856                                                                          | CT | V | 6520435 | 6521099 | WBGene00018489 | F46E10.2 | F46E10.2  | 0.721303336044699    |             |
| AGIWUR21257;AGIWUR44482                                                         |    |   |         |         |                |          |           |                      |             |
| CB4856                                                                          | CT | V | 6524989 | 6532089 | WBGene00018488 | acs-1    | F46E10.1  | -0.328366692431409   |             |
| AGIWUR5838;AGIWUR11960;AGIWUR12542;AGIWUR35496;AGIWUR41551                      |    |   |         |         |                |          |           |                      |             |
| CB4856                                                                          | CT | V | 6532071 | 6533074 | WBGene00018492 | hpo-26   | F46E10.11 | -0.0562115773232978  |             |
| AGIWUR13002                                                                     |    |   |         |         |                |          |           |                      |             |
| CB4856                                                                          | CT | V | 6533614 | 6546491 | WBGene00001089 | dre-1    | K04A8.6   | 0.172426482231174    | AGIWUR39647 |
| CB4856                                                                          | CT | V | 6550171 | 6551817 | WBGene00019376 | lip1-4   | K04A8.5   | -0.307173506835442   | AGIWUR28247 |
| CB4856                                                                          | CT | V | 6552348 | 6560196 | WBGene00006665 | twk-10   | K04A8.4   | -0.224681284278344   |             |
| AGIWUR20906;AGIWUR24464;AGIWUR32424;AGIWUR34785;AGIWUR35009                     |    |   |         |         |                |          |           |                      |             |
| CB4856                                                                          | CT | V | 6562048 | 6564181 | WBGene00019374 | K04A8.2  | K04A8.2   | -0.0722160432917107  | AGIWUR12303 |
| CB4856                                                                          | CT | V | 6566336 | 6568747 | WBGene00019373 | K04A8.1  | K04A8.1   | -0.0474144460018842  | AGIWUR25697 |

|                                                |    |   |         |         |                |          |          |                     |             |
|------------------------------------------------|----|---|---------|---------|----------------|----------|----------|---------------------|-------------|
| CB4856                                         | CT | V | 6573983 | 6575797 | WBGene00001506 | fut-2    | EGAP9.2  | 0.271058202901305   | AGIWUR15948 |
| CB4856                                         | CT | V | 6576867 | 6577541 | WBGene00044545 | EGAP9.4  | EGAP9.4  | 0.0768097854079155  | AGIWUR3584  |
| CB4856                                         | CT | V | 6578185 | 6580182 | WBGene00017151 | EGAP9.3  | EGAP9.3  | 0.12041677530709    | AGIWUR32024 |
| CB4856                                         | CT | V | 6580843 | 6584390 | WBGene00022846 | ZK1055.5 | ZK1055.5 | -0.0410234036198753 |             |
| AGIWUR17780                                    |    |   |         |         |                |          |          |                     |             |
| CB4856                                         | CT | V | 6585632 | 6587421 | WBGene00022845 | ZK1055.4 | ZK1055.4 | -0.203250561547549  |             |
| AGIWUR17432                                    |    |   |         |         |                |          |          |                     |             |
| CB4856                                         | CT | V | 6590583 | 6593634 | WBGene00022843 | ZK1055.2 | ZK1055.2 | 0.0612289509890114  |             |
| AGIWUR3803;AGIWUR37365                         |    |   |         |         |                |          |          |                     |             |
| CB4856                                         | CT | V | 6594194 | 6599208 | WBGene00001829 | hcp-1    | ZK1055.1 | 0.10122865480824    |             |
| AGIWUR35243                                    |    |   |         |         |                |          |          |                     |             |
| CB4856                                         | CT | V | 6599190 | 6602604 | WBGene00022847 | ZK1055.6 | ZK1055.6 | -0.179658587185654  |             |
| AGIWUR6987;AGIWUR12831;AGIWUR22387;AGIWUR34246 |    |   |         |         |                |          |          |                     |             |
| CB4856                                         | CT | V | 6602728 | 6605375 | WBGene00022848 | ZK1055.7 | ZK1055.7 | -0.214664604994704  |             |
| AGIWUR2670                                     |    |   |         |         |                |          |          |                     |             |
| CB4856                                         | CT | V | 6606439 | 6611158 | WBGene00002148 | gon-14   | F44C4.4  | -0.171075887551463  |             |
| AGIWUR14569;AGIWUR23270                        |    |   |         |         |                |          |          |                     |             |
| CB4856                                         | CT | V | 6614674 | 6615845 | WBGene00000784 | cpr-4    | F44C4.3  | -0.473470344240802  | AGIWUR3924  |
| CB4856                                         | CT | V | 6622268 | 6624694 | WBGene00018412 | nhr-37   | F44C4.2  | 0.174202025281201   | AGIWUR9206  |
| CB4856                                         | CT | V | 6624702 | 6626344 | WBGene00004092 | ppt-1    | F44C4.5  | -0.272579623664919  |             |
| AGIWUR1731;AGIWUR34415;AGIWUR35478             |    |   |         |         |                |          |          |                     |             |
| CB4856                                         | CT | V | 6633269 | 6639665 | WBGene00004740 | scd-2    | T10H9.2  | 0.245554100929912   | AGIWUR40660 |
| CB4856                                         | CT | V | 6649617 | 6652050 | WBGene00020424 | T10H9.1  | T10H9.1  | -0.267222777037562  | AGIWUR5182  |
| CB4856                                         | CT | V | 6652353 | 6653742 | WBGene00044779 | T10H9.8  | T10H9.8  | 0.593999291350438   |             |
| AGIWUR8114;AGIWUR33853;AGIWUR35324;AGIWUR44021 |    |   |         |         |                |          |          |                     |             |
| CB4856                                         | CT | V | 6653613 | 6655449 | WBGene00020425 | syx-18   | T10H9.3  | -0.0463509705305967 | AGIWUR31028 |
| CB4856                                         | CT | V | 6655562 | 6656501 | WBGene00004897 | snb-1    | T10H9.4  | 0.073773847733186   | AGIWUR27645 |
| CB4856                                         | CT | V | 6662191 | 6665813 | WBGene00004062 | pmp-5    | T10H9.5  | -0.530043462499958  |             |
| AGIWUR4313;AGIWUR10836;AGIWUR26677;AGIWUR39783 |    |   |         |         |                |          |          |                     |             |
| CB4856                                         | CT | V | 6667400 | 6668841 | WBGene00006224 | str-180  | T10H9.6  | -0.827378696953406  | AGIWUR37919 |
| CB4856                                         | CT | V | 6669823 | 6672036 | WBGene00019654 | K11G9.3  | K11G9.3  | -0.763320036980073  | AGIWUR27046 |
| CB4856                                         | CT | V | 6674267 | 6676426 | WBGene00019653 | K11G9.2  | K11G9.2  | -0.643708010218543  |             |
| AGIWUR7173;AGIWUR12294;AGIWUR20235             |    |   |         |         |                |          |          |                     |             |
| CB4856                                         | CT | V | 6676799 | 6679072 | WBGene00019652 | K11G9.1  | K11G9.1  | 0.0673901182794339  | AGIWUR25997 |
| CB4856                                         | CT | V | 6679317 | 6681573 | WBGene00001210 | egl-46   | K11G9.4  | 1.39430037286084    |             |
| AGIWUR43254;AGIWUR44810                        |    |   |         |         |                |          |          |                     |             |
| CB4856                                         | CT | V | 6685807 | 6688492 | WBGene00019655 | K11G9.5  | K11G9.5  | -0.338771501774378  | AGIWUR27658 |
| CB4856                                         | CT | V | 6691371 | 6691863 | WBGene00003473 | mtl-1    | K11G9.6  | 3.46338995179843    | AGIWUR30106 |
| CB4856                                         | CT | V | 6692247 | 6694768 | WBGene00175027 | W02F12.8 | W02F12.8 | 0.014322998950294   |             |

AGIWUR7094;AGIWUR16478;AGIWUR25256;AGIWUR25915;AGIWUR27056  
 CB4856 CT V 6695147 6697652 WBGene00020947 W02F12.2 W02F12.2 0.0140802628833252  
 AGIWUR16259;AGIWUR29622  
 CB4856 CT V 6703057 6704573 WBGene00020948 era-1 W02F12.3 -0.204331115877034  
 AGIWUR2317;AGIWUR14785  
 CB4856 CT V 6704551 6706932 WBGene00020949 W02F12.4 W02F12.4 -0.176322083765537  
 AGIWUR4588;AGIWUR5119;AGIWUR7662;AGIWUR14147;AGIWUR32770;AGIWUR42348;AGIWUR43423;AGIWUR44413  
 CB4856 CT V 6707058 6709101 WBGene00020950 d1st-1 W02F12.5 0.0665221255929573  
 AGIWUR25914;AGIWUR28729;AGIWUR41820  
 CB4856 CT V 6709579 6710679 WBGene00020951 sna-1 W02F12.6 -0.0761576518582547  
 AGIWUR32989  
 CB4856 CT V 6714990 6716302 WBGene00023355 W02F12.1 W02F12.1 0.103366761584642  
 AGIWUR37104  
 CB4856 CT V 6716855 6718297 WBGene00005187 srg-30 W02F12.7 0.120720503678763  
 AGIWUR4155;AGIWUR7870  
 CB4856 CT V 6720397 6723005 WBGene00022624 ZC487.2 ZC487.2 -0.116968903332243 AGIWUR22572  
 CB4856 CT V 6723466 6723764 WBGene00022625 ZC487.3 ZC487.3 -0.205589006982048 AGIWUR39508  
 CB4856 CT V 6727812 6730262 WBGene00022623 ZC487.1 ZC487.1 0.0978102537834395  
 AGIWUR2837;AGIWUR31367;AGIWUR40962  
 CB4856 CT V 6730281 6731694 WBGene00001718 gr1-9 ZC487.4 -0.0326082169737898 AGIWUR23579  
 CB4856 CT V 6731831 6733092 WBGene00001717 gr1-8 ZC487.5 -0.539200263803483 AGIWUR7134  
 CB4856 CT V 6745039 6748613 WBGene00020806 T25F10.3 T25F10.3 0.0290557540474232  
 AGIWUR8750  
 CB4856 CT V 6758135 6760418 WBGene00000936 db1-1 T25F10.2 0.0488947482275002  
 AGIWUR23643;AGIWUR28633  
 CB4856 CT V 6760442 6762461 WBGene00020807 T25F10.4 T25F10.4 -0.147465240767653  
 AGIWUR39846  
 CB4856 CT V 6762476 6765072 WBGene00000244 bbs-8 T25F10.5 0.0655183634953485  
 AGIWUR14361  
 CB4856 CT V 6765560 6768732 WBGene00020808 clik-1 T25F10.6 0.0494540471384148  
 AGIWUR2591;AGIWUR4800;AGIWUR6940;AGIWUR20249;AGIWUR35744;AGIWUR37233;AGIWUR37861  
 CB4856 CT V 6768429 6768788 WBGene00020805 T25F10.1 T25F10.1 0.209354343761392  
 AGIWUR11123  
 CB4856 CT V 6769662 6771704 WBGene00005253 srh-30 ZC404.12 0.285548141471329  
 AGIWUR35108  
 CB4856 CT V 6774351 6776196 WBGene00005251 srh-28 ZC404.5 0.00546876962925147  
 AGIWUR20842;AGIWUR25637;AGIWUR33788  
 CB4856 CT V 6778551 6779700 WBGene00022602 ZC404.7 ZC404.7 -0.143491091803213 AGIWUR31102  
 CB4856 CT V 6783187 6784922 WBGene00004984 spn-4 ZC404.8 0.0355773354646658 AGIWUR39701

|                                     |    |   |         |         |                |          |          |                     |             |
|-------------------------------------|----|---|---------|---------|----------------|----------|----------|---------------------|-------------|
| CB4856                              | CT | V | 6785457 | 6787866 | WBGene00004975 | spe-39   | ZC404.3  | -0.434382015732238  |             |
| AGIWUR16328;AGIWUR19002;AGIWUR26551 |    |   |         |         |                |          |          |                     |             |
| CB4856                              | CT | V | 6788449 | 6792665 | WBGene00022603 | gck-2    | ZC404.9  | -0.011622263413722  | AGIWUR1270  |
| CB4856                              | CT | V | 6793936 | 6795130 | WBGene00022601 | ZC404.1  | ZC404.1  | 0.132899522305356   | AGIWUR30969 |
| CB4856                              | CT | V | 6798151 | 6799664 | WBGene00022606 | dmsr-9   | ZC404.13 | 0.339352323761604   |             |
| AGIWUR43059                         |    |   |         |         |                |          |          |                     |             |
| CB4856                              | CT | V | 6800724 | 6801950 | WBGene00022604 | dmsr-10  | ZC404.10 | 0.144458541826972   |             |
| AGIWUR16456                         |    |   |         |         |                |          |          |                     |             |
| CB4856                              | CT | V | 6802412 | 6804096 | WBGene00022605 | dmsr-11  | ZC404.11 | 0.359445690391986   |             |
| AGIWUR11218                         |    |   |         |         |                |          |          |                     |             |
| CB4856                              | CT | V | 6804512 | 6806440 | WBGene00019262 | dmsr-12  | H34P18.1 | -0.0907791987228119 |             |
| AGIWUR24451                         |    |   |         |         |                |          |          |                     |             |
| CB4856                              | CT | V | 6810421 | 6813449 | WBGene00020522 | T15B7.10 | T15B7.10 | 0.230715706583963   |             |
| AGIWUR30507                         |    |   |         |         |                |          |          |                     |             |
| CB4856                              | CT | V | 6813700 | 6815016 | WBGene00020529 | T15B7.17 | T15B7.17 | 0.293256756615134   |             |
| AGIWUR1853                          |    |   |         |         |                |          |          |                     |             |
| CB4856                              | CT | V | 6815666 | 6817284 | WBGene00020523 | dmsr-14  | T15B7.11 | -0.320306471350102  |             |
| AGIWUR43501                         |    |   |         |         |                |          |          |                     |             |
| CB4856                              | CT | V | 6817890 | 6819912 | WBGene00020524 | dmsr-13  | T15B7.12 | 0.191669486387214   |             |
| AGIWUR552                           |    |   |         |         |                |          |          |                     |             |
| CB4856                              | CT | V | 6821809 | 6826872 | WBGene00020520 | T15B7.8  | T15B7.8  | -0.0344219304485396 |             |
| AGIWUR2448;AGIWUR29808;AGIWUR37151  |    |   |         |         |                |          |          |                     |             |
| CB4856                              | CT | V | 6827146 | 6828886 | WBGene00020525 | dmsr-15  | T15B7.13 | -0.171221105597956  |             |
| AGIWUR34598                         |    |   |         |         |                |          |          |                     |             |
| CB4856                              | CT | V | 6829666 | 6830721 | WBGene00000714 | col-141  | T15B7.5  | -0.892059271751625  | AGIWUR38706 |
| CB4856                              | CT | V | 6831163 | 6832256 | WBGene00000715 | col-142  | T15B7.4  | 0                   | AGIWUR2207  |
| CB4856                              | CT | V | 6832290 | 6835342 | WBGene00020526 | T15B7.14 | T15B7.14 | -0.782789775670679  |             |
| AGIWUR1085                          |    |   |         |         |                |          |          |                     |             |
| CB4856                              | CT | V | 6835635 | 6836700 | WBGene00000716 | col-143  | T15B7.3  | -0.270364673707252  |             |
| AGIWUR14313;AGIWUR35443             |    |   |         |         |                |          |          |                     |             |
| CB4856                              | CT | V | 6836725 | 6838630 | WBGene00020527 | T15B7.15 | T15B7.15 | 0.112948105964634   |             |
| AGIWUR28460                         |    |   |         |         |                |          |          |                     |             |
| CB4856                              | CT | V | 6839256 | 6840254 | WBGene00020517 | hpo-8    | T15B7.2  | 0.0346716338236224  |             |
| AGIWUR8620;AGIWUR16296;AGIWUR22235  |    |   |         |         |                |          |          |                     |             |
| CB4856                              | CT | V | 6840217 | 6842970 | WBGene00020528 | lgc-54   | T15B7.16 | -0.613218534267896  |             |
| AGIWUR22007                         |    |   |         |         |                |          |          |                     |             |
| CB4856                              | CT | V | 6842737 | 6846652 | WBGene00020516 | T15B7.1  | T15B7.1  | -0.803598254631982  |             |
| AGIWUR1514;AGIWUR38289              |    |   |         |         |                |          |          |                     |             |
| CB4856                              | CT | V | 6850538 | 6851900 | WBGene00016959 | C55H1.1  | C55H1.1  | -0.129964290443529  | AGIWUR44315 |

|                                                                                                                                                                                                                                                                                                                                                                                                                                                                                                                                                                                                                                                                                                                                                                                                                                                                                                                                                                                                                          |    |   |         |         |                |           |           |                      |             |
|--------------------------------------------------------------------------------------------------------------------------------------------------------------------------------------------------------------------------------------------------------------------------------------------------------------------------------------------------------------------------------------------------------------------------------------------------------------------------------------------------------------------------------------------------------------------------------------------------------------------------------------------------------------------------------------------------------------------------------------------------------------------------------------------------------------------------------------------------------------------------------------------------------------------------------------------------------------------------------------------------------------------------|----|---|---------|---------|----------------|-----------|-----------|----------------------|-------------|
| CB4856                                                                                                                                                                                                                                                                                                                                                                                                                                                                                                                                                                                                                                                                                                                                                                                                                                                                                                                                                                                                                   | CT | V | 6852568 | 6854803 | WBGene00001672 | gpa-10    | C55H1.2   | -0.104854854899485   | AGIWUR35673 |
| CB4856                                                                                                                                                                                                                                                                                                                                                                                                                                                                                                                                                                                                                                                                                                                                                                                                                                                                                                                                                                                                                   | CT | V | 6870304 | 6873809 | WBGene00020586 | frpr-18   | T19F4.1   | 0.0257583562887662   |             |
| AGIWUR16517;AGIWUR27580;AGIWUR38008;AGIWUR43783                                                                                                                                                                                                                                                                                                                                                                                                                                                                                                                                                                                                                                                                                                                                                                                                                                                                                                                                                                          |    |   |         |         |                |           |           |                      |             |
| CB4856                                                                                                                                                                                                                                                                                                                                                                                                                                                                                                                                                                                                                                                                                                                                                                                                                                                                                                                                                                                                                   | CT | V | 6881340 | 6891836 | WBGene00006803 | unc-70    | K11C4.3   | -0.240572545887786   |             |
| AGIWUR18280;AGIWUR30869                                                                                                                                                                                                                                                                                                                                                                                                                                                                                                                                                                                                                                                                                                                                                                                                                                                                                                                                                                                                  |    |   |         |         |                |           |           |                      |             |
| CB4856                                                                                                                                                                                                                                                                                                                                                                                                                                                                                                                                                                                                                                                                                                                                                                                                                                                                                                                                                                                                                   | CT | V | 6895078 | 6896922 | WBGene00019643 | K11C4.2   | K11C4.2   | -0.0623102170641197  | AGIWUR8851  |
| CB4856                                                                                                                                                                                                                                                                                                                                                                                                                                                                                                                                                                                                                                                                                                                                                                                                                                                                                                                                                                                                                   | CT | V | 6896999 | 6898497 | WBGene00019642 | K11C4.1   | K11C4.1   | 0.211065112920993    | AGIWUR38868 |
| CB4856                                                                                                                                                                                                                                                                                                                                                                                                                                                                                                                                                                                                                                                                                                                                                                                                                                                                                                                                                                                                                   | CT | V | 6898540 | 6900223 | WBGene00003844 | odc-1     | K11C4.4   | -0.725966441231296   |             |
| AGIWUR2487;AGIWUR11379                                                                                                                                                                                                                                                                                                                                                                                                                                                                                                                                                                                                                                                                                                                                                                                                                                                                                                                                                                                                   |    |   |         |         |                |           |           |                      |             |
| CB4856                                                                                                                                                                                                                                                                                                                                                                                                                                                                                                                                                                                                                                                                                                                                                                                                                                                                                                                                                                                                                   | CT | V | 6901697 | 6929038 | WBGene00006801 | unc-68    | K11C4.5   | -0.115621680645065   |             |
| AGIWUR14992;AGIWUR39287                                                                                                                                                                                                                                                                                                                                                                                                                                                                                                                                                                                                                                                                                                                                                                                                                                                                                                                                                                                                  |    |   |         |         |                |           |           |                      |             |
| CB4856                                                                                                                                                                                                                                                                                                                                                                                                                                                                                                                                                                                                                                                                                                                                                                                                                                                                                                                                                                                                                   | CT | V | 6931539 | 6934288 | WBGene00021963 | lip1-6    | Y57E12B.3 | 0.242251100716075    |             |
| AGIWUR4700                                                                                                                                                                                                                                                                                                                                                                                                                                                                                                                                                                                                                                                                                                                                                                                                                                                                                                                                                                                                               |    |   |         |         |                |           |           |                      |             |
| CB4856                                                                                                                                                                                                                                                                                                                                                                                                                                                                                                                                                                                                                                                                                                                                                                                                                                                                                                                                                                                                                   | CT | V | 6945711 | 6947547 | WBGene00021964 | Y57E12B.4 | Y57E12B.4 | -0.128816827894851   |             |
| AGIWUR1238;AGIWUR29950;AGIWUR43060                                                                                                                                                                                                                                                                                                                                                                                                                                                                                                                                                                                                                                                                                                                                                                                                                                                                                                                                                                                       |    |   |         |         |                |           |           |                      |             |
| CB4856                                                                                                                                                                                                                                                                                                                                                                                                                                                                                                                                                                                                                                                                                                                                                                                                                                                                                                                                                                                                                   | CT | V | 6948543 | 6948831 | WBGene00021961 | Y57E12B.1 | Y57E12B.1 | 0.702894864654438    |             |
| AGIWUR26340                                                                                                                                                                                                                                                                                                                                                                                                                                                                                                                                                                                                                                                                                                                                                                                                                                                                                                                                                                                                              |    |   |         |         |                |           |           |                      |             |
| CB4856                                                                                                                                                                                                                                                                                                                                                                                                                                                                                                                                                                                                                                                                                                                                                                                                                                                                                                                                                                                                                   | CT | V | 6950835 | 6953897 | WBGene00005188 | srg-31    | T07H8.5   | -0.101228872343653   | AGIWUR25906 |
| CB4856                                                                                                                                                                                                                                                                                                                                                                                                                                                                                                                                                                                                                                                                                                                                                                                                                                                                                                                                                                                                                   | CT | V | 6956537 | 6966422 | WBGene00003165 | mec-1     | T07H8.4   | -0.0825157328136812  |             |
| AGIWUR183;AGIWUR1152;AGIWUR1352;AGIWUR1406;AGIWUR2128;AGIWUR2365;AGIWUR3217;AGIWUR3635;AGIWUR4131;AGIWUR4455;AGIWUR4803;AGIWUR5260;AGIWUR5262;AGIWUR5882;AGIWUR6045;AGIWUR6798;AGIWUR6876;AGIWUR7189;AGIWUR7519;AGIWUR7826;AGIWUR8269;AGIWUR8453;AGIWUR10141;AGIWUR10410;AGIWUR10495;AGIWUR11070;AGIWUR12307;AGIWUR13928;AGIWUR14095;AGIWUR14680;AGIWUR15177;AGIWUR15278;AGIWUR15432;AGIWUR15854;AGIWUR16054;AGIWUR16955;AGIWUR17421;AGIWUR17962;AGIWUR17979;AGIWUR18581;AGIWUR19416;AGIWUR19924;AGIWUR23324;AGIWUR24879;AGIWUR25606;AGIWUR25850;AGIWUR25949;AGIWUR26192;AGIWUR26221;AGIWUR26245;AGIWUR26710;AGIWUR26836;AGIWUR26958;AGIWUR28366;AGIWUR28379;AGIWUR28699;AGIWUR28906;AGIWUR29899;AGIWUR29988;AGIWUR30069;AGIWUR32078;AGIWUR32276;AGIWUR32477;AGIWUR32711;AGIWUR33705;AGIWUR34629;AGIWUR34984;AGIWUR37874;AGIWUR38167;AGIWUR38861;AGIWUR39597;AGIWUR39601;AGIWUR39607;AGIWUR40195;AGIWUR41223;AGIWUR41367;AGIWUR41615;AGIWUR42408;AGIWUR42450;AGIWUR43092;AGIWUR43763;AGIWUR43791;AGIWUR45104;AGIWUR45161 |    |   |         |         |                |           |           |                      |             |
| CB4856                                                                                                                                                                                                                                                                                                                                                                                                                                                                                                                                                                                                                                                                                                                                                                                                                                                                                                                                                                                                                   | CT | V | 6966396 | 6970127 | WBGene00004229 | ptr-15    | T07H8.6   | 0.441738878349879    | AGIWUR38294 |
| CB4856                                                                                                                                                                                                                                                                                                                                                                                                                                                                                                                                                                                                                                                                                                                                                                                                                                                                                                                                                                                                                   | CT | V | 6971867 | 6973149 | WBGene00005950 | srx-59    | T07H8.3   | 0.110444295836492    | AGIWUR9812  |
| CB4856                                                                                                                                                                                                                                                                                                                                                                                                                                                                                                                                                                                                                                                                                                                                                                                                                                                                                                                                                                                                                   | CT | V | 6973523 | 6974832 | WBGene00006029 | srx-138   | T07H8.2   | 0.04989645109546     |             |
| AGIWUR5395;AGIWUR15714;AGIWUR23100;AGIWUR38964;AGIWUR40330                                                                                                                                                                                                                                                                                                                                                                                                                                                                                                                                                                                                                                                                                                                                                                                                                                                                                                                                                               |    |   |         |         |                |           |           |                      |             |
| CB4856                                                                                                                                                                                                                                                                                                                                                                                                                                                                                                                                                                                                                                                                                                                                                                                                                                                                                                                                                                                                                   | CT | V | 6976347 | 6977387 | WBGene00005907 | srx-16    | T07H8.1   | -0.00724784408260692 |             |
| AGIWUR3703;AGIWUR34635                                                                                                                                                                                                                                                                                                                                                                                                                                                                                                                                                                                                                                                                                                                                                                                                                                                                                                                                                                                                   |    |   |         |         |                |           |           |                      |             |
| CB4856                                                                                                                                                                                                                                                                                                                                                                                                                                                                                                                                                                                                                                                                                                                                                                                                                                                                                                                                                                                                                   | CT | V | 6977754 | 6979116 | WBGene00020333 | sre-12    | T07H8.7   | 0.333550019909303    | AGIWUR40082 |
| CB4856                                                                                                                                                                                                                                                                                                                                                                                                                                                                                                                                                                                                                                                                                                                                                                                                                                                                                                                                                                                                                   | CT | V | 6980595 | 6982913 | WBGene00016364 | nhr-161   | C33G8.7   | -0.236477784551337   | AGIWUR40108 |
| CB4856                                                                                                                                                                                                                                                                                                                                                                                                                                                                                                                                                                                                                                                                                                                                                                                                                                                                                                                                                                                                                   | CT | V | 6983411 | 6986043 | WBGene00016368 | nhr-163   | C33G8.12  | 0.344155867005917    |             |
| AGIWUR12632                                                                                                                                                                                                                                                                                                                                                                                                                                                                                                                                                                                                                                                                                                                                                                                                                                                                                                                                                                                                              |    |   |         |         |                |           |           |                      |             |

|                                                                        |    |   |         |         |                |            |            |                     |             |
|------------------------------------------------------------------------|----|---|---------|---------|----------------|------------|------------|---------------------|-------------|
| CB4856                                                                 | CT | V | 6986141 | 6987773 | WBGene00016365 | nhr-139    | C33G8.8    | 0.847132774744518   | AGIWUR32935 |
| CB4856                                                                 | CT | V | 6987864 | 6989676 | WBGene00016366 | nhr-140    | C33G8.9    | 0.16823994503063    | AGIWUR40078 |
| CB4856                                                                 | CT | V | 6990148 | 6991863 | WBGene00016367 | nhr-162    | C33G8.10   | 0.463399061957594   |             |
| AGIWUR9428                                                             |    |   |         |         |                |            |            |                     |             |
| CB4856                                                                 | CT | V | 6995215 | 6997123 | WBGene00003697 | nhr-107    | C33G8.11   | 0.441473630872505   |             |
| AGIWUR39250                                                            |    |   |         |         |                |            |            |                     |             |
| CB4856                                                                 | CT | V | 6998819 | 7000651 | WBGene00003632 | nhr-42     | C33G8.6    | 0.517700205802214   | AGIWUR147   |
| CB4856                                                                 | CT | V | 7004150 | 7005825 | WBGene00016363 | srab-4     | C33G8.5    | -0.0569516333406703 | AGIWUR23745 |
| CB4856                                                                 | CT | V | 7006264 | 7006818 | WBGene00016362 | C33G8.4    | C33G8.4    | 0.220970514314111   | AGIWUR4418  |
| CB4856                                                                 | CT | V | 7009761 | 7012244 | WBGene00016360 | C33G8.2    | C33G8.2    | -0.321540858430435  | AGIWUR21137 |
| CB4856                                                                 | CT | V | 7012917 | 7014412 | WBGene00005874 | srw-127    | C33G8.1    | 0.0163954832724409  | AGIWUR16566 |
| CB4856                                                                 | CT | V | 7014462 | 7015972 | WBGene00016369 | C33G8.13   | C33G8.13   | -0.0408051626970867 |             |
| AGIWUR31072                                                            |    |   |         |         |                |            |            |                     |             |
| CB4856                                                                 | CT | V | 7017359 | 7018851 | WBGene00017615 | srsx-32    | F20A1.3    | 0.186014320220276   | AGIWUR30545 |
| CB4856                                                                 | CT | V | 7018901 | 7021803 | WBGene00017616 | F20A1.4    | F20A1.4    | 0.0877206029874427  |             |
| AGIWUR24840;AGIWUR41280                                                |    |   |         |         |                |            |            |                     |             |
| CB4856                                                                 | CT | V | 7024632 | 7027083 | WBGene00017618 | F20A1.6    | F20A1.6    | 0.166766675153159   |             |
| AGIWUR12474;AGIWUR24968                                                |    |   |         |         |                |            |            |                     |             |
| CB4856                                                                 | CT | V | 7028329 | 7036570 | WBGene00006666 | twk-11     | F20A1.7    | 0.143580419431296   |             |
| AGIWUR1314;AGIWUR5939;AGIWUR10417;AGIWUR31941                          |    |   |         |         |                |            |            |                     |             |
| CB4856                                                                 | CT | V | 7046312 | 7049250 | WBGene00017614 | F20A1.2    | F20A1.2    | -0.252120162585859  | AGIWUR26504 |
| CB4856                                                                 | CT | V | 7049434 | 7051311 | WBGene00017620 | tofu-2     | F20A1.9    | -0.134380336583305  | AGIWUR11374 |
| CB4856                                                                 | CT | V | 7051679 | 7052179 | WBGene00017613 | F20A1.1    | F20A1.1    | 0.295140518380727   | AGIWUR18795 |
| CB4856                                                                 | CT | V | 7052717 | 7053200 | WBGene00017621 | F20A1.10   | F20A1.10   | 0.419294178718363   |             |
| AGIWUR22725                                                            |    |   |         |         |                |            |            |                     |             |
| CB4856                                                                 | CT | V | 7054738 | 7055410 | WBGene00021958 | Y57E12AL.4 | Y57E12AL.4 | -0.400689368659572  |             |
| AGIWUR14197                                                            |    |   |         |         |                |            |            |                     |             |
| CB4856                                                                 | CT | V | 7058095 | 7058507 | WBGene00021957 | Y57E12AL.2 | Y57E12AL.2 | 0.0641783884175027  |             |
| AGIWUR14838                                                            |    |   |         |         |                |            |            |                     |             |
| CB4856                                                                 | CT | V | 7058547 | 7059624 | WBGene00003164 | mdt-6      | Y57E12AL.5 | -0.164419479505334  |             |
| AGIWUR41027                                                            |    |   |         |         |                |            |            |                     |             |
| CB4856                                                                 | CT | V | 7059698 | 7060470 | WBGene00021959 | Y57E12AL.6 | Y57E12AL.6 | -0.045683282881015  |             |
| AGIWUR8481                                                             |    |   |         |         |                |            |            |                     |             |
| CB4856                                                                 | CT | V | 7060811 | 7062695 | WBGene00021956 | Y57E12AL.1 | Y57E12AL.1 | 0.414835161089904   |             |
| AGIWUR34298                                                            |    |   |         |         |                |            |            |                     |             |
| CB4856                                                                 | CT | V | 7063174 | 7063718 | WBGene00021960 | Y57E12AM.1 | Y57E12AM.1 | -0.11352370279789   |             |
| AGIWUR2965;AGIWUR29220;AGIWUR31548;AGIWUR36754;AGIWUR39340;AGIWUR40810 |    |   |         |         |                |            |            |                     |             |
| CB4856                                                                 | CT | V | 7063703 | 7065322 | WBGene00044612 | Y57E12AR.1 | Y57E12AR.1 | 0.284339782247695   |             |
| AGIWUR20069;AGIWUR42428;AGIWUR45178                                    |    |   |         |         |                |            |            |                     |             |



|                                                                                                |    |   |         |         |                |          |          |                      |             |
|------------------------------------------------------------------------------------------------|----|---|---------|---------|----------------|----------|----------|----------------------|-------------|
| CB4856                                                                                         | CT | V | 7072585 | 7075835 | WBGene00017850 | F27B10.1 | F27B10.1 | 0.168605741471346    |             |
| AGIWUR41140                                                                                    |    |   |         |         |                |          |          |                      |             |
| CB4856                                                                                         | CT | V | 7075877 | 7081569 | WBGene00003786 | npa-1    | VC5.3    | -0.320892384259055   |             |
| AGIWUR3667;AGIWUR14589;AGIWUR16472;AGIWUR29431;AGIWUR32224;AGIWUR34728;AGIWUR35446;AGIWUR36991 |    |   |         |         |                |          |          |                      |             |
| CB4856                                                                                         | CT | V | 7081537 | 7084662 | WBGene00007029 | mys-1    | VC5.4    | 0.176677812356949    | AGIWUR13192 |
| CB4856                                                                                         | CT | V | 7085916 | 7088854 | WBGene00020908 | VC5.2    | VC5.2    | 0.476835679937601    | AGIWUR24342 |
| CB4856                                                                                         | CT | V | 7089498 | 7091601 | WBGene00044699 | nhr-286  | VC5.6    | 0.159514794849271    | AGIWUR9847  |
| CB4856                                                                                         | CT | V | 7091714 | 7093770 | WBGene00003725 | nhr-135  | VC5.5    | 0.285481452321498    | AGIWUR10215 |
| CB4856                                                                                         | CT | V | 7102478 | 7103442 | WBGene00020907 | VC5.1    | VC5.1    | -0.0143815429073175  | AGIWUR22964 |
| CB4856                                                                                         | CT | V | 7103697 | 7114436 | WBGene00003849 | odr-2    | T01C4.2  | 0.0243110004503322   |             |
| AGIWUR17952;AGIWUR24443;AGIWUR32476                                                            |    |   |         |         |                |          |          |                      |             |
| CB4856                                                                                         | CT | V | 7117452 | 7118896 | WBGene00005924 | srx-33   | T01C4.3  | 0.187667965866112    | AGIWUR29466 |
| CB4856                                                                                         | CT | V | 7119063 | 7120268 | WBGene00005925 | srx-34   | T01C4.4  | 0.0649888430418732   | AGIWUR11889 |
| CB4856                                                                                         | CT | V | 7120717 | 7122495 | WBGene00005926 | srx-35   | T01C4.5  | 0.230147380812636    | AGIWUR12316 |
| CB4856                                                                                         | CT | V | 7123658 | 7128890 | WBGene00020141 | lmd-5    | T01C4.1  | -0.20596590152498    | AGIWUR29072 |
| CB4856                                                                                         | CT | V | 7129146 | 7129560 | WBGene00044546 | T01C4.8  | T01C4.8  | 0.0586881692703294   | AGIWUR22183 |
| CB4856                                                                                         | CT | V | 7129707 | 7131074 | WBGene00005927 | srx-36   | T01C4.6  | 0.087194549286167    | AGIWUR30051 |
| CB4856                                                                                         | CT | V | 7131595 | 7132324 | WBGene00005928 | srx-37   | T01C4.7  | -0.467089992313906   |             |
| AGIWUR38511;AGIWUR40716                                                                        |    |   |         |         |                |          |          |                      |             |
| CB4856                                                                                         | CT | V | 7134263 | 7135682 | WBGene00271437 | F10D2.16 | F10D2.16 | 0.196401300602076    |             |
| AGIWUR25074                                                                                    |    |   |         |         |                |          |          |                      |             |
| CB4856                                                                                         | CT | V | 7136277 | 7138417 | WBGene00006163 | str-112  | F10D2.4  | 0.133906018059138    | AGIWUR35411 |
| CB4856                                                                                         | CT | V | 7139477 | 7141964 | WBGene00017331 | ugt-40   | F10D2.5  | -0.194516040621497   | AGIWUR19001 |
| CB4856                                                                                         | CT | V | 7141942 | 7145318 | WBGene00017332 | ugt-37   | F10D2.6  | 0.469423826577247    | AGIWUR35557 |
| CB4856                                                                                         | CT | V | 7145656 | 7147470 | WBGene00017333 | ugt-38   | F10D2.7  | -0.0273121025033056  | AGIWUR35761 |
| CB4856                                                                                         | CT | V | 7148688 | 7150692 | WBGene00017334 | F10D2.8  | F10D2.8  | -0.00387923965506287 |             |
| AGIWUR20425;AGIWUR31721                                                                        |    |   |         |         |                |          |          |                      |             |
| CB4856                                                                                         | CT | V | 7151353 | 7153146 | WBGene00001399 | fat-7    | F10D2.9  | 0.113160152851151    | AGIWUR40290 |
| CB4856                                                                                         | CT | V | 7154503 | 7156224 | WBGene00017335 | F10D2.10 | F10D2.10 | 0.180735188943308    |             |
| AGIWUR33513                                                                                    |    |   |         |         |                |          |          |                      |             |
| CB4856                                                                                         | CT | V | 7157142 | 7159190 | WBGene00017329 | ugt-39   | F10D2.2  | -0.609847755204381   |             |
| AGIWUR8332;AGIWUR25276;AGIWUR40193                                                             |    |   |         |         |                |          |          |                      |             |
| CB4856                                                                                         | CT | V | 7159691 | 7161016 | WBGene00006237 | str-204  | F10D2.1  | -0.014411720218769   | AGIWUR22344 |
| CB4856                                                                                         | CT | V | 7161068 | 7163595 | WBGene00017336 | ugt-41   | F10D2.11 | -0.533665365630799   |             |
| AGIWUR39992                                                                                    |    |   |         |         |                |          |          |                      |             |
| CB4856                                                                                         | CT | V | 7164510 | 7165895 | WBGene00005304 | srh-83   | F09G2.7  | 0.044560126135849    | AGIWUR25097 |
| CB4856                                                                                         | CT | V | 7167009 | 7169281 | WBGene00017315 | ugt-36   | F09G2.6  | 0.403972477310393    | AGIWUR43649 |
| CB4856                                                                                         | CT | V | 7175501 | 7178783 | WBGene00017314 | lgc-39   | F09G2.5  | -0.0834216982449014  | AGIWUR13218 |
| CB4856                                                                                         | CT | V | 7179172 | 7182853 | WBGene00017313 | cpsf-2   | F09G2.4  | 0.0523572018956635   | AGIWUR10595 |

|                                                                        |    |   |         |         |                |          |          |                       |             |
|------------------------------------------------------------------------|----|---|---------|---------|----------------|----------|----------|-----------------------|-------------|
| CB4856                                                                 | CT | V | 7184910 | 7188483 | WBGene00017312 | pitr-5   | F09G2.3  | -0.000886184697492354 | AGIWUR38058 |
| CB4856                                                                 | CT | V | 7188332 | 7193662 | WBGene00017316 | F09G2.8  | F09G2.8  | -0.0491917371583472   | AGIWUR31237 |
| CB4856                                                                 | CT | V | 7193766 | 7196137 | WBGene00017317 | attf-2   | F09G2.9  | 0.112336202549278     |             |
| AGIWUR9026;AGIWUR17703;AGIWUR19961;AGIWUR24522;AGIWUR29842;AGIWUR38507 |    |   |         |         |                |          |          |                       |             |
| CB4856                                                                 | CT | V | 7196916 | 7198437 | WBGene00017311 | F09G2.2  | F09G2.2  | 0.138084895062281     | AGIWUR36789 |
| CB4856                                                                 | CT | V | 7200224 | 7205609 | WBGene00017310 | F09G2.1  | F09G2.1  | 0.0809317721585181    | AGIWUR11948 |
| CB4856                                                                 | CT | V | 7205626 | 7214903 | WBGene00015743 | soap-1   | C13F10.4 | 0.12676201868614      |             |
| AGIWUR35914                                                            |    |   |         |         |                |          |          |                       |             |
| CB4856                                                                 | CT | V | 7215010 | 7219088 | WBGene00015744 | C13F10.5 | C13F10.5 | -0.044182530098217    |             |
| AGIWUR4255;AGIWUR25008;AGIWUR34248;AGIWUR38845                         |    |   |         |         |                |          |          |                       |             |
| CB4856                                                                 | CT | V | 7219054 | 7221039 | WBGene00015745 | C13F10.6 | C13F10.6 | -0.0971119816432822   |             |
| AGIWUR13009;AGIWUR21878;AGIWUR40522                                    |    |   |         |         |                |          |          |                       |             |
| CB4856                                                                 | CT | V | 7221473 | 7222156 | WBGene00015742 | kxd-1    | C13F10.2 | -0.318655977301328    |             |
| AGIWUR14508                                                            |    |   |         |         |                |          |          |                       |             |
| CB4856                                                                 | CT | V | 7222049 | 7223279 | WBGene00015746 | C13F10.7 | C13F10.7 | -0.159029487120268    |             |
| AGIWUR38641                                                            |    |   |         |         |                |          |          |                       |             |
| CB4856                                                                 | CT | V | 7224078 | 7225204 | WBGene00015741 | C13F10.1 | C13F10.1 | -0.158813703208605    |             |
| AGIWUR38607;AGIWUR42008                                                |    |   |         |         |                |          |          |                       |             |
| CB4856                                                                 | CT | V | 7225223 | 7226320 | WBGene00001428 | fkf-3    | C05C8.3  | -0.0371155688808464   | AGIWUR9907  |
| CB4856                                                                 | CT | V | 7226376 | 7230848 | WBGene00001563 | gei-6    | C05C8.4  | -0.0909013410900741   | AGIWUR15203 |
| CB4856                                                                 | CT | V | 7232434 | 7234826 | WBGene00015462 | C05C8.5  | C05C8.5  | -0.130939344737115    | AGIWUR31801 |
| CB4856                                                                 | CT | V | 7234922 | 7237130 | WBGene00015463 | hpo-9    | C05C8.6  | -0.260483427024401    |             |
| AGIWUR2698;AGIWUR3991;AGIWUR12483;AGIWUR16790                          |    |   |         |         |                |          |          |                       |             |
| CB4856                                                                 | CT | V | 7237381 | 7239658 | WBGene00015466 | hyls-1   | C05C8.9  | -0.161477029733787    |             |
| AGIWUR11456;AGIWUR25540;AGIWUR31894;AGIWUR37578                        |    |   |         |         |                |          |          |                       |             |
| CB4856                                                                 | CT | V | 7239771 | 7241366 | WBGene00015460 | C05C8.1  | C05C8.1  | -0.111014085623449    | AGIWUR26908 |
| CB4856                                                                 | CT | V | 7242907 | 7247321 | WBGene00015464 | C05C8.7  | C05C8.7  | -0.155081680758558    |             |
| AGIWUR1752;AGIWUR8368;AGIWUR16592;AGIWUR22581;AGIWUR36915;AGIWUR40208  |    |   |         |         |                |          |          |                       |             |
| CB4856                                                                 | CT | V | 7252325 | 7255157 | WBGene00015465 | C05C8.8  | C05C8.8  | -0.443052674003822    | AGIWUR39223 |
| CB4856                                                                 | CT | V | 7258808 | 7260157 | WBGene00044547 | C13A2.12 | C13A2.12 | 0.179231783613508     |             |
| AGIWUR12736;AGIWUR45175                                                |    |   |         |         |                |          |          |                       |             |
| CB4856                                                                 | CT | V | 7262565 | 7264148 | WBGene00015725 | C13A2.9  | C13A2.9  | 0.065470139088859     | AGIWUR21866 |
| CB4856                                                                 | CT | V | 7264576 | 7265377 | WBGene00023235 | C13A2.8  | C13A2.8  | 0.0237518126295857    |             |
| AGIWUR1246;AGIWUR26717;AGIWUR31889;AGIWUR33907;AGIWUR43367             |    |   |         |         |                |          |          |                       |             |
| CB4856                                                                 | CT | V | 7266353 | 7268806 | WBGene00015724 | C13A2.7  | C13A2.7  | -0.0189747655807722   |             |
| AGIWUR13134;AGIWUR23165;AGIWUR32284                                    |    |   |         |         |                |          |          |                       |             |
| CB4856                                                                 | CT | V | 7269731 | 7272787 | WBGene00015723 | C13A2.6  | C13A2.6  | 0.177846369767748     | AGIWUR4210  |
| CB4856                                                                 | CT | V | 7275791 | 7278472 | WBGene00015722 | C13A2.5  | C13A2.5  | -0.0384367930064187   | AGIWUR16539 |
| CB4856                                                                 | CT | V | 7279310 | 7280530 | WBGene00015721 | C13A2.4  | C13A2.4  | 0.320740572304427     | AGIWUR20014 |

|                                    |    |   |         |         |                |          |          |                     |             |
|------------------------------------|----|---|---------|---------|----------------|----------|----------|---------------------|-------------|
| CB4856                             | CT | V | 7282337 | 7284667 | WBGene00015720 | C13A2.3  | C13A2.3  | -0.12473343738414   | AGIWUR37246 |
| CB4856                             | CT | V | 7286185 | 7287399 | WBGene00015719 | C13A2.2  | C13A2.2  | -0.012284710339558  | AGIWUR24599 |
| CB4856                             | CT | V | 7289027 | 7291831 | WBGene00015718 | C13A2.1  | C13A2.1  | 0.103296801620861   | AGIWUR21997 |
| CB4856                             | CT | V | 7292754 | 7295381 | WBGene00017231 | F07G11.4 | F07G11.4 | 0.136513675067491   |             |
| AGIWUR33430                        |    |   |         |         |                |          |          |                     |             |
| CB4856                             | CT | V | 7296300 | 7297363 | WBGene00005617 | srj-32   | F07G11.5 | -0.423836571276956  |             |
| AGIWUR2894                         |    |   |         |         |                |          |          |                     |             |
| CB4856                             | CT | V | 7298771 | 7301472 | WBGene00017230 | F07G11.3 | F07G11.3 | 0.178325554698729   |             |
| AGIWUR25605                        |    |   |         |         |                |          |          |                     |             |
| CB4856                             | CT | V | 7307389 | 7309556 | WBGene00017228 | F07G11.1 | F07G11.1 | 0.133738683235558   |             |
| AGIWUR9956                         |    |   |         |         |                |          |          |                     |             |
| CB4856                             | CT | V | 7311726 | 7313333 | WBGene00005897 | srx-6    | F07G11.8 | -0.475740748140447  |             |
| AGIWUR38568                        |    |   |         |         |                |          |          |                     |             |
| CB4856                             | CT | V | 7314136 | 7321009 | WBGene00017233 | lmd-4    | F07G11.9 | 0.111660911174479   |             |
| AGIWUR7636                         |    |   |         |         |                |          |          |                     |             |
| CB4856                             | CT | V | 7324038 | 7325385 | WBGene00005983 | srx-92   | F10G2.6  | 0.0379805030383764  | AGIWUR32095 |
| CB4856                             | CT | V | 7327135 | 7327755 | WBGene00017365 | F10G2.4  | F10G2.4  | 0.0706939552133434  | AGIWUR43997 |
| CB4856                             | CT | V | 7328392 | 7330001 | WBGene00017364 | clec-7   | F10G2.3  | 0.207604558049427   | AGIWUR26607 |
| CB4856                             | CT | V | 7331168 | 7331779 | WBGene00017363 | F10G2.2  | F10G2.2  | -0.138119427436383  | AGIWUR45026 |
| CB4856                             | CT | V | 7332562 | 7333424 | WBGene00017362 | F10G2.1  | F10G2.1  | -0.217383261804752  | AGIWUR5849  |
| CB4856                             | CT | V | 7333774 | 7337168 | WBGene00017366 | F10G2.7  | F10G2.7  | -0.163185931463138  | AGIWUR18051 |
| CB4856                             | CT | V | 7338633 | 7339831 | WBGene00005402 | srh-187  | F10G2.8  | -0.0384229935840654 | AGIWUR19069 |
| CB4856                             | CT | V | 7340436 | 7341484 | WBGene00017367 | nhr-263  | F10G2.9  | -0.140910581597164  |             |
| AGIWUR27218;AGIWUR32274            |    |   |         |         |                |          |          |                     |             |
| CB4856                             | CT | V | 7342156 | 7343838 | WBGene00015396 | nhr-148  | C03G6.10 | -0.429035379747186  |             |
| AGIWUR1793                         |    |   |         |         |                |          |          |                     |             |
| CB4856                             | CT | V | 7344061 | 7345234 | WBGene00005450 | srh-244  | C03G6.9  | 0.139398026349067   | AGIWUR1764  |
| CB4856                             | CT | V | 7346301 | 7348135 | WBGene00015395 | nhr-147  | C03G6.8  | -0.368229745678526  |             |
| AGIWUR6976;AGIWUR17637;AGIWUR20992 |    |   |         |         |                |          |          |                     |             |
| CB4856                             | CT | V | 7348211 | 7349664 | WBGene00015397 | nhr-149  | C03G6.12 | -0.110715875380627  |             |
| AGIWUR44680                        |    |   |         |         |                |          |          |                     |             |
| CB4856                             | CT | V | 7350881 | 7352236 | WBGene00005439 | srh-231  | C03G6.11 | 0.307081560897501   |             |
| AGIWUR34403                        |    |   |         |         |                |          |          |                     |             |
| CB4856                             | CT | V | 7353040 | 7354254 | WBGene00005480 | srh-275  | C03G6.7  | 0.0605867818637158  | AGIWUR3671  |
| CB4856                             | CT | V | 7354445 | 7355510 | WBGene00015398 | tag-293  | C03G6.13 | -0.0697570209681615 |             |
| AGIWUR31359                        |    |   |         |         |                |          |          |                     |             |
| CB4856                             | CT | V | 7357451 | 7358882 | WBGene00015394 | C03G6.6  | C03G6.6  | 0.573750413349905   | AGIWUR4749  |
| CB4856                             | CT | V | 7359997 | 7361773 | WBGene00015399 | cyp-35A1 | C03G6.14 | -0.541552796015405  |             |
| AGIWUR26541;AGIWUR41697            |    |   |         |         |                |          |          |                     |             |

|                                   |    |   |         |         |                |          |          |                      |             |
|-----------------------------------|----|---|---------|---------|----------------|----------|----------|----------------------|-------------|
| CB4856                            | CT | V | 7365251 | 7366204 | WBGene00015393 | C03G6.5  | C03G6.5  | 0.460952009848612    | AGIWUR1692  |
| CB4856                            | CT | V | 7366534 | 7367619 | WBGene00005403 | srh-189  | C03G6.20 | 0.0121031447308004   |             |
| AGIWUR5041;AGIWUR36294            |    |   |         |         |                |          |          |                      |             |
| CB4856                            | CT | V | 7369759 | 7372131 | WBGene00005602 | srj-14   | C03G6.3  | 0.560447880638332    |             |
| AGIWUR3412;AGIWUR3516;AGIWUR34953 |    |   |         |         |                |          |          |                      |             |
| CB4856                            | CT | V | 7374390 | 7375594 | WBGene00005947 | srx-56   | C03G6.2  | -0.0073773103394128  |             |
| AGIWUR5407;AGIWUR32097            |    |   |         |         |                |          |          |                      |             |
| CB4856                            | CT | V | 7376409 | 7377742 | WBGene00005948 | srx-57   | C03G6.1  | -0.00284390896204822 | AGIWUR19687 |
| CB4856                            | CT | V | 7377897 | 7379484 | WBGene00015401 | srsx-24  | C03G6.16 | -0.235270137735705   |             |
| AGIWUR31434                       |    |   |         |         |                |          |          |                      |             |
| CB4856                            | CT | V | 7379745 | 7381069 | WBGene00015402 | C03G6.17 | C03G6.17 | 0.484564999676117    |             |
| AGIWUR32749                       |    |   |         |         |                |          |          |                      |             |
| CB4856                            | CT | V | 7382021 | 7383309 | WBGene00005646 | srp-5    | C03G6.18 | -0.00938942150212085 |             |
| AGIWUR4547                        |    |   |         |         |                |          |          |                      |             |
| CB4856                            | CT | V | 7384232 | 7386173 | WBGene00005647 | srp-6    | C03G6.19 | -0.139430814325708   |             |
| AGIWUR1521                        |    |   |         |         |                |          |          |                      |             |
| CB4856                            | CT | V | 7388390 | 7389871 | WBGene00015361 | C02H6.1  | C02H6.1  | 0.0238643886050562   | AGIWUR15685 |
| CB4856                            | CT | V | 7390529 | 7392111 | WBGene00015362 | fbxa-105 | C02H6.2  | 0.0313733316108955   |             |
| AGIWUR44525                       |    |   |         |         |                |          |          |                      |             |
| CB4856                            | CT | V | 7393550 | 7395459 | WBGene00005900 | srx-9    | R13D7.6  | -0.249441754966115   | AGIWUR37970 |
| CB4856                            | CT | V | 7398390 | 7399302 | WBGene00001789 | gst-41   | R13D7.7  | 0.417233189635583    | AGIWUR42946 |
| CB4856                            | CT | V | 7399904 | 7400199 | WBGene00044548 | cnc-9    | R13D7.11 | -0.393410147353986   |             |
| AGIWUR6901;AGIWUR8643;AGIWUR11457 |    |   |         |         |                |          |          |                      |             |
| CB4856                            | CT | V | 7400888 | 7402192 | WBGene00005951 | srx-60   | R13D7.4  | 0.0166037746308509   | AGIWUR37472 |
| CB4856                            | CT | V | 7402655 | 7403910 | WBGene00005601 | srj-13   | R13D7.3  | 0.187035591230813    | AGIWUR29550 |
| CB4856                            | CT | V | 7404821 | 7405871 | WBGene00006091 | str-24   | R13D7.9  | 0.183521512089374    |             |
| AGIWUR4229;AGIWUR12780            |    |   |         |         |                |          |          |                      |             |
| CB4856                            | CT | V | 7407547 | 7408814 | WBGene00020055 | srt-6    | R13D7.10 | 0.0853635500448275   |             |
| AGIWUR18133                       |    |   |         |         |                |          |          |                      |             |
| CB4856                            | CT | V | 7409899 | 7411253 | WBGene00020054 | R13D7.2  | R13D7.2  | -0.226856969925176   | AGIWUR23364 |
| CB4856                            | CT | V | 7411995 | 7413059 | WBGene00006106 | str-41   | R13D7.1  | 0.0671231950117166   | AGIWUR39155 |
| CB4856                            | CT | V | 7413437 | 7413840 | WBGene00017567 | F18E3.11 | F18E3.11 | -0.741673446136859   |             |
| AGIWUR16027;AGIWUR28494           |    |   |         |         |                |          |          |                      |             |
| CB4856                            | CT | V | 7414941 | 7415344 | WBGene00045275 | F18E3.12 | F18E3.12 | -0.813569195469923   |             |
| AGIWUR26393;AGIWUR34940           |    |   |         |         |                |          |          |                      |             |
| CB4856                            | CT | V | 7416116 | 7416628 | WBGene00045276 | F18E3.13 | F18E3.13 | -0.743825396527507   |             |
| AGIWUR790                         |    |   |         |         |                |          |          |                      |             |
| CB4856                            | CT | V | 7417660 | 7419828 | WBGene00005814 | srw-67   | F18E3.2  | 0.0634858257708926   | AGIWUR22042 |
| CB4856                            | CT | V | 7420462 | 7421713 | WBGene00017564 | srxa-4   | F18E3.1  | 0.076728270839995    | AGIWUR22088 |

|                                                                                    |    |   |         |         |                |          |          |                     |             |
|------------------------------------------------------------------------------------|----|---|---------|---------|----------------|----------|----------|---------------------|-------------|
| CB4856                                                                             | CT | V | 7421855 | 7422937 | WBGene00005343 | srh-126  | F18E3.3  | -0.134026188035691  |             |
| AGIWUR3174;AGIWUR10542;AGIWUR11741;AGIWUR22896;AGIWUR25510;AGIWUR35121;AGIWUR39022 |    |   |         |         |                |          |          |                     |             |
| CB4856                                                                             | CT | V | 7423573 | 7424578 | WBGene00017566 | F18E3.10 | F18E3.10 | 0.157369706241346   |             |
| AGIWUR24955                                                                        |    |   |         |         |                |          |          |                     |             |
| CB4856                                                                             | CT | V | 7425259 | 7426694 | WBGene00005815 | srw-68   | F18E3.4  | 0.513631244588079   | AGIWUR25357 |
| CB4856                                                                             | CT | V | 7427326 | 7428980 | WBGene00005816 | srw-69   | F18E3.5  | 0.082482293580834   | AGIWUR18382 |
| CB4856                                                                             | CT | V | 7429684 | 7431116 | WBGene00005818 | srw-71   | F18E3.6  | 0.295377410813821   | AGIWUR31118 |
| CB4856                                                                             | CT | V | 7431822 | 7433160 | WBGene00005825 | srw-78   | F18E3.9  | 0.0859675531504687  |             |
| AGIWUR1755;AGIWUR3992;AGIWUR8503;AGIWUR12691;AGIWUR15111;AGIWUR29806;AGIWUR31635   |    |   |         |         |                |          |          |                     |             |
| CB4856                                                                             | CT | V | 7433401 | 7435650 | WBGene00017565 | ddo-2    | F18E3.7  | 0.25303856106499    |             |
| AGIWUR31689;AGIWUR40261;AGIWUR42918;AGIWUR43676                                    |    |   |         |         |                |          |          |                     |             |
| CB4856                                                                             | CT | V | 7435413 | 7436962 | WBGene00017789 | F25E5.8  | F25E5.8  | 0.844933708539101   |             |
| AGIWUR5670;AGIWUR27478;AGIWUR29340;AGIWUR42027                                     |    |   |         |         |                |          |          |                     |             |
| CB4856                                                                             | CT | V | 7437506 | 7437919 | WBGene00017790 | F25E5.9  | F25E5.9  | 0.0767958823213313  |             |
| AGIWUR4161;AGIWUR18222;AGIWUR20571;AGIWUR21570;AGIWUR30302;AGIWUR35467             |    |   |         |         |                |          |          |                     |             |
| CB4856                                                                             | CT | V | 7438285 | 7439933 | WBGene00017792 | F25E5.16 | F25E5.16 | 0.110180531230071   |             |
| AGIWUR26187                                                                        |    |   |         |         |                |          |          |                     |             |
| CB4856                                                                             | CT | V | 7440107 | 7441483 | WBGene00017788 | F25E5.7  | F25E5.7  | -0.435537937616635  | AGIWUR16933 |
| CB4856                                                                             | CT | V | 7445065 | 7446712 | WBGene00017787 | nhr-141  | F25E5.6  | 0.114975832059771   | AGIWUR40405 |
| CB4856                                                                             | CT | V | 7447273 | 7448884 | WBGene00017786 | F25E5.5  | F25E5.5  | -0.067017865904333  |             |
| AGIWUR3591;AGIWUR4736;AGIWUR41263                                                  |    |   |         |         |                |          |          |                     |             |
| CB4856                                                                             | CT | V | 7449353 | 7451149 | WBGene00017785 | F25E5.4  | F25E5.4  | -0.199075569493967  | AGIWUR3460  |
| CB4856                                                                             | CT | V | 7451721 | 7452899 | WBGene00017784 | F25E5.3  | F25E5.3  | -0.230818349895669  | AGIWUR44505 |
| CB4856                                                                             | CT | V | 7452946 | 7454318 | WBGene00017791 | try-8    | F25E5.10 | -0.0628447607160769 |             |
| AGIWUR13538                                                                        |    |   |         |         |                |          |          |                     |             |
| CB4856                                                                             | CT | V | 7455819 | 7457597 | WBGene00017783 | F25E5.2  | F25E5.2  | -0.0803039638793344 | AGIWUR35524 |
| CB4856                                                                             | CT | V | 7458252 | 7459150 | WBGene00005314 | srh-93   | F25E5.15 | -0.13005195529052   |             |
| AGIWUR42344                                                                        |    |   |         |         |                |          |          |                     |             |
| CB4856                                                                             | CT | V | 7459685 | 7460998 | WBGene00005313 | srh-92   | F25E5.13 | -0.102693522484966  |             |
| AGIWUR8682                                                                         |    |   |         |         |                |          |          |                     |             |
| CB4856                                                                             | CT | V | 7461750 | 7462949 | WBGene00005312 | srh-91   | F25E5.11 | 0.0300551957020132  |             |
| AGIWUR5456;AGIWUR11180                                                             |    |   |         |         |                |          |          |                     |             |
| CB4856                                                                             | CT | V | 7465889 | 7471223 | WBGene00017782 | F25E5.1  | F25E5.1  | -0.142324376248446  | AGIWUR4137  |
| CB4856                                                                             | CT | V | 7471651 | 7472915 | WBGene00006094 | str-28   | F25E5.12 | 0.0185980411101827  |             |
| AGIWUR9253                                                                         |    |   |         |         |                |          |          |                     |             |
| CB4856                                                                             | CT | V | 7473299 | 7475013 | WBGene00006095 | str-29   | C18B10.9 | 0.0370280281811031  |             |
| AGIWUR4836;AGIWUR23362                                                             |    |   |         |         |                |          |          |                     |             |
| CB4856                                                                             | CT | V | 7475626 | 7476866 | WBGene00005342 | srh-125  | C18B10.8 | 0.203746872124334   |             |
| AGIWUR21451                                                                        |    |   |         |         |                |          |          |                     |             |

|                                                            |    |   |         |         |                |          |           |                     |             |
|------------------------------------------------------------|----|---|---------|---------|----------------|----------|-----------|---------------------|-------------|
| CB4856                                                     | CT | V | 7477241 | 7478504 | WBGene00006231 | str-190  | C18B10.7  | 0.121068816558084   |             |
| AGIWUR10689                                                |    |   |         |         |                |          |           |                     |             |
| CB4856                                                     | CT | V | 7479217 | 7481049 | WBGene00015963 | C18B10.6 | C18B10.6  | -0.0412456372615928 |             |
| AGIWUR838;AGIWUR10121;AGIWUR43551                          |    |   |         |         |                |          |           |                     |             |
| CB4856                                                     | CT | V | 7481868 | 7483171 | WBGene00006285 | str-259  | C18B10.10 | 0.0562559072554909  |             |
| AGIWUR6434;AGIWUR33505                                     |    |   |         |         |                |          |           |                     |             |
| CB4856                                                     | CT | V | 7483316 | 7485100 | WBGene00015962 | srbc-8   | C18B10.5  | -0.167727264916305  |             |
| AGIWUR2319;AGIWUR21711                                     |    |   |         |         |                |          |           |                     |             |
| CB4856                                                     | CT | V | 7486131 | 7487618 | WBGene00015961 | srbc-7   | C18B10.4  | 0.181698313797288   |             |
| AGIWUR18606                                                |    |   |         |         |                |          |           |                     |             |
| CB4856                                                     | CT | V | 7489134 | 7490440 | WBGene00015960 | srbc-9   | C18B10.3  | 0.188141547516008   |             |
| AGIWUR15347;AGIWUR27013                                    |    |   |         |         |                |          |           |                     |             |
| CB4856                                                     | CT | V | 7491875 | 7493024 | WBGene00015959 | srbc-10  | C18B10.2  | 0.155248649650887   |             |
| AGIWUR44235                                                |    |   |         |         |                |          |           |                     |             |
| CB4856                                                     | CT | V | 7493880 | 7495289 | WBGene00015958 | srbc-11  | C18B10.1  | 0.163671776630089   |             |
| AGIWUR38818                                                |    |   |         |         |                |          |           |                     |             |
| CB4856                                                     | CT | V | 7497740 | 7499055 | WBGene00005300 | srh-79   | C04F2.1   | 0.212328555389286   | AGIWUR34383 |
| CB4856                                                     | CT | V | 7499652 | 7500958 | WBGene00005431 | srh-221  | C04F2.2   | -0.0519559278865964 |             |
| AGIWUR22231;AGIWUR40815                                    |    |   |         |         |                |          |           |                     |             |
| CB4856                                                     | CT | V | 7501534 | 7502673 | WBGene00005438 | srh-230  | C04F2.3   | 0.0161304089981114  |             |
| AGIWUR36299;AGIWUR42880                                    |    |   |         |         |                |          |           |                     |             |
| CB4856                                                     | CT | V | 7502840 | 7504371 | WBGene00005437 | srh-229  | C04F2.4   | 0.0200974436726415  |             |
| AGIWUR4123;AGIWUR13226;AGIWUR20592                         |    |   |         |         |                |          |           |                     |             |
| CB4856                                                     | CT | V | 7504653 | 7505945 | WBGene00005473 | srh-267  | C04F2.5   | 0.107027467452287   |             |
| AGIWUR12092;AGIWUR19173                                    |    |   |         |         |                |          |           |                     |             |
| CB4856                                                     | CT | V | 7506914 | 7508265 | WBGene00006097 | str-31   | C54F6.10  | 0.206210412911156   |             |
| AGIWUR37093                                                |    |   |         |         |                |          |           |                     |             |
| CB4856                                                     | CT | V | 7508994 | 7510602 | WBGene00016927 | nhr-172  | C54F6.9   | 0.410800280751592   | AGIWUR8052  |
| CB4856                                                     | CT | V | 7511765 | 7513684 | WBGene00016926 | nhr-171  | C54F6.8   | 0.442855169506304   | AGIWUR21182 |
| CB4856                                                     | CT | V | 7515245 | 7517307 | WBGene00016925 | srb-18   | C54F6.7   | 0.148212960398537   | AGIWUR22330 |
| CB4856                                                     | CT | V | 7517685 | 7520177 | WBGene00016928 | srb-19   | C54F6.11  | 0.322251007747072   |             |
| AGIWUR6103                                                 |    |   |         |         |                |          |           |                     |             |
| CB4856                                                     | CT | V | 7522032 | 7522364 | WBGene00044113 | C54F6.15 | C54F6.15  | 1.22455394721715    |             |
| AGIWUR3238;AGIWUR29620;AGIWUR37411;AGIWUR39092;AGIWUR40472 |    |   |         |         |                |          |           |                     |             |
| CB4856                                                     | CT | V | 7523692 | 7525421 | WBGene00016924 | C54F6.6  | C54F6.6   | 0.107618756188861   | AGIWUR42339 |
| CB4856                                                     | CT | V | 7529116 | 7529450 | WBGene00016923 | C54F6.5  | C54F6.5   | 1.50637508760125    | AGIWUR8243  |
| CB4856                                                     | CT | V | 7530261 | 7531463 | WBGene00016922 | swt-2    | C54F6.4   | 0.621452909637795   | AGIWUR34665 |
| CB4856                                                     | CT | V | 7533247 | 7535074 | WBGene00016921 | C54F6.3  | C54F6.3   | 0.141025721793543   | AGIWUR10479 |
| CB4856                                                     | CT | V | 7536919 | 7537909 | WBGene00016929 | C54F6.12 | C54F6.12  | 0.699418559675588   |             |

|                                                                     |    |   |         |         |                |           |           |                     |             |
|---------------------------------------------------------------------|----|---|---------|---------|----------------|-----------|-----------|---------------------|-------------|
| AGIWUR901                                                           |    |   |         |         |                |           |           |                     |             |
| CB4856                                                              | CT | V | 7539315 | 7540891 | WBGene00005474 | srh-268   | C54F6.1   | -0.0604658307332473 | AGIWUR38594 |
| CB4856                                                              | CT | V | 7540890 | 7544838 | WBGene00003731 | nhx-3     | C54F6.13  | -0.279015571862702  |             |
| AGIWUR24901                                                         |    |   |         |         |                |           |           |                     |             |
| CB4856                                                              | CT | V | 7546468 | 7548012 | WBGene00001500 | ftn-1     | C54F6.14  | 0.455051702829969   |             |
| AGIWUR4104;AGIWUR10941;AGIWUR19302;AGIWUR25571                      |    |   |         |         |                |           |           |                     |             |
| CB4856                                                              | CT | V | 7552121 | 7552708 | WBGene00017599 | F19F10.3  | F19F10.3  | -0.14139004534937   |             |
| AGIWUR17858                                                         |    |   |         |         |                |           |           |                     |             |
| CB4856                                                              | CT | V | 7552756 | 7553923 | WBGene00017600 | ttr-10    | F19F10.4  | -0.126839737911435  |             |
| AGIWUR205                                                           |    |   |         |         |                |           |           |                     |             |
| CB4856                                                              | CT | V | 7555810 | 7557387 | WBGene00005534 | sri-22    | F19F10.2  | -0.0110365994357426 |             |
| AGIWUR26691;AGIWUR41410                                             |    |   |         |         |                |           |           |                     |             |
| CB4856                                                              | CT | V | 7557541 | 7558783 | WBGene00017601 | ets-7     | F19F10.5  | 0.165489052224645   |             |
| AGIWUR4260                                                          |    |   |         |         |                |           |           |                     |             |
| CB4856                                                              | CT | V | 7560252 | 7561615 | WBGene00017602 | cllec-211 | F19F10.6  | -0.143093439394041  |             |
| AGIWUR30534                                                         |    |   |         |         |                |           |           |                     |             |
| CB4856                                                              | CT | V | 7562714 | 7564245 | WBGene00017598 | F19F10.1  | F19F10.1  | 0.0242193929372121  |             |
| AGIWUR44088                                                         |    |   |         |         |                |           |           |                     |             |
| CB4856                                                              | CT | V | 7566232 | 7567059 | WBGene00017603 | cllec-212 | F19F10.7  | 0.020763783920227   |             |
| AGIWUR868                                                           |    |   |         |         |                |           |           |                     |             |
| CB4856                                                              | CT | V | 7569696 | 7570390 | WBGene00017604 | F19F10.8  | F19F10.8  | 0.102701702551915   |             |
| AGIWUR12944;AGIWUR17120;AGIWUR21096;AGIWUR29979                     |    |   |         |         |                |           |           |                     |             |
| CB4856                                                              | CT | V | 7571950 | 7575715 | WBGene00017605 | F19F10.9  | F19F10.9  | -0.0482907197133038 |             |
| AGIWUR36257                                                         |    |   |         |         |                |           |           |                     |             |
| CB4856                                                              | CT | V | 7575750 | 7581532 | WBGene00017608 | F19F10.12 | F19F10.12 | -0.0465789574813513 |             |
| AGIWUR21931;AGIWUR36890;AGIWUR40367                                 |    |   |         |         |                |           |           |                     |             |
| CB4856                                                              | CT | V | 7581473 | 7587698 | WBGene00017607 | F19F10.11 | F19F10.11 | -0.140203781435666  |             |
| AGIWUR22956;AGIWUR25815                                             |    |   |         |         |                |           |           |                     |             |
| CB4856                                                              | CT | V | 7587996 | 7594740 | WBGene00016816 | C50E3.5   | C50E3.5   | -0.0391385642836539 | AGIWUR38076 |
| CB4856                                                              | CT | V | 7594875 | 7596409 | WBGene00016818 | C50E3.7   | C50E3.7   | 0.188679600416712   | AGIWUR27300 |
| CB4856                                                              | CT | V | 7598029 | 7598369 | WBGene00016819 | C50E3.8   | C50E3.8   | 0.16214396714725    | AGIWUR20841 |
| CB4856                                                              | CT | V | 7599257 | 7600424 | WBGene00016820 | C50E3.9   | C50E3.9   | -0.679751169995789  | AGIWUR37388 |
| CB4856                                                              | CT | V | 7600609 | 7601543 | WBGene00016821 | sc1-26    | C50E3.10  | -0.55003143924334   |             |
| AGIWUR39347                                                         |    |   |         |         |                |           |           |                     |             |
| CB4856                                                              | CT | V | 7602213 | 7603486 | WBGene00016822 | C50E3.11  | C50E3.11  | -0.818334074338471  |             |
| AGIWUR3880;AGIWUR6076;AGIWUR9166;AGIWUR9454;AGIWUR18332;AGIWUR20959 |    |   |         |         |                |           |           |                     |             |
| CB4856                                                              | CT | V | 7603806 | 7609946 | WBGene00044738 | fol1t-3   | C50E3.16  | -0.249762769071096  |             |
| AGIWUR7594;AGIWUR28960                                              |    |   |         |         |                |           |           |                     |             |
| CB4856                                                              | CT | V | 7610370 | 7610963 | WBGene00016814 | C50E3.2   | C50E3.2   | -0.331823984744004  | AGIWUR43867 |

|                                                                         |         |         |                |          |          |                     |             |
|-------------------------------------------------------------------------|---------|---------|----------------|----------|----------|---------------------|-------------|
| CB4856 CT V                                                             | 7611267 | 7611905 | WBGene00016813 | clec-214 | C50E3.1  | -0.0397919673082647 |             |
| AGIWUR9667                                                              |         |         |                |          |          |                     |             |
| CB4856 CT V                                                             | 7612344 | 7615648 | WBGene00044549 | clec-215 | C50E3.14 | 0.139882848800494   |             |
| AGIWUR7336;AGIWUR28371                                                  |         |         |                |          |          |                     |             |
| CB4856 CT V                                                             | 7618414 | 7620349 | WBGene00044550 | C50E3.15 | C50E3.15 | 0.0903364822868467  |             |
| AGIWUR35919;AGIWUR36118                                                 |         |         |                |          |          |                     |             |
| CB4856 CT V                                                             | 7620504 | 7622061 | WBGene00016823 | C50E3.12 | C50E3.12 | -0.311737528902636  |             |
| AGIWUR7090;AGIWUR16388;AGIWUR17311                                      |         |         |                |          |          |                     |             |
| CB4856 CT V                                                             | 7622335 | 7624252 | WBGene00016824 | C50E3.13 | C50E3.13 | -0.204432657322076  |             |
| AGIWUR29608                                                             |         |         |                |          |          |                     |             |
| CB4856 CT V                                                             | 7624952 | 7626453 | WBGene00017201 | grsp-4   | F07C4.7  | 0.462496858222824   | AGIWUR10100 |
| CB4856 CT V                                                             | 7626850 | 7627780 | WBGene00017200 | F07C4.6  | F07C4.6  | 0.107203201121947   | AGIWUR39813 |
| CB4856 CT V                                                             | 7629804 | 7631298 | WBGene00005108 | srd-30   | F07C4.5  | 0.689098509316068   | AGIWUR14520 |
| CB4856 CT V                                                             | 7632032 | 7633172 | WBGene00005103 | srd-25   | F07C4.4  | 0.253916397618598   | AGIWUR30077 |
| CB4856 CT V                                                             | 7633399 | 7634757 | WBGene00005109 | srd-31   | F07C4.8  | 0.0218958074475175  | AGIWUR41386 |
| CB4856 CT V                                                             | 7635769 | 7636882 | WBGene00005107 | srd-29   | F07C4.3  | 0.199822872292458   | AGIWUR1831  |
| CB4856 CT V                                                             | 7637277 | 7637792 | WBGene00017202 | clec-46  | F07C4.9  | 0.263291623671876   | AGIWUR9953  |
| CB4856 CT V                                                             | 7638105 | 7638622 | WBGene00017199 | clec-45  | F07C4.2  | 0.157589955380947   | AGIWUR24928 |
| CB4856 CT V                                                             | 7638944 | 7639869 | WBGene00017203 | F07C4.10 | F07C4.10 | -0.0146282304917209 |             |
| AGIWUR22824                                                             |         |         |                |          |          |                     |             |
| CB4856 CT V                                                             | 7642558 | 7643516 | WBGene00017204 | F07C4.11 | F07C4.11 | 0.0696509852070015  |             |
| AGIWUR37360                                                             |         |         |                |          |          |                     |             |
| CB4856 CT V                                                             | 7645754 | 7647069 | WBGene00006112 | str-47   | F07C4.1  | -0.0384113798130246 | AGIWUR28091 |
| CB4856 CT V                                                             | 7647836 | 7649817 | WBGene00017205 | F07C4.12 | F07C4.12 | 2.14840183876536    |             |
| AGIWUR14177;AGIWUR21706                                                 |         |         |                |          |          |                     |             |
| CB4856 CT V                                                             | 7650242 | 7651857 | WBGene00005441 | srh-234  | F07C4.14 | 0.166244584676035   |             |
| AGIWUR30304                                                             |         |         |                |          |          |                     |             |
| CB4856 CT V                                                             | 7652338 | 7653667 | WBGene00005411 | srh-200  | F07C4.13 | -0.237661821628038  |             |
| AGIWUR44692                                                             |         |         |                |          |          |                     |             |
| CB4856 CT V                                                             | 7668240 | 7669000 | WBGene00015708 | C12D5.5  | C12D5.5  | 0.141571490385979   | AGIWUR34402 |
| CB4856 CT V                                                             | 7672089 | 7673253 | WBGene00015707 | C12D5.4  | C12D5.4  | -0.0150296544955211 |             |
| AGIWUR2897;AGIWUR42966;AGIWUR44218                                      |         |         |                |          |          |                     |             |
| CB4856 CT V                                                             | 7676204 | 7676965 | WBGene00015706 | C12D5.3  | C12D5.3  | 0.717798292716497   | AGIWUR1116  |
| CB4856 CT V                                                             | 7679314 | 7681615 | WBGene00015709 | cyp-33A1 | C12D5.7  | 0.376575313869896   |             |
| AGIWUR36221                                                             |         |         |                |          |          |                     |             |
| CB4856 CT V                                                             | 7681820 | 7683957 | WBGene00015712 | sre-11   | C12D5.11 | -0.255592256095848  |             |
| AGIWUR29774                                                             |         |         |                |          |          |                     |             |
| CB4856 CT V                                                             | 7684363 | 7686335 | WBGene00003684 | nhr-94   | C12D5.8  | 0.333747740374382   |             |
| AGIWUR17409;AGIWUR18470;AGIWUR24192;AGIWUR38643;AGIWUR40479;AGIWUR43922 |         |         |                |          |          |                     |             |



|                                                                                    |    |   |         |         |                |           |           |                     |             |
|------------------------------------------------------------------------------------|----|---|---------|---------|----------------|-----------|-----------|---------------------|-------------|
| CB4856                                                                             | CT | V | 7686350 | 7688228 | WBGene00015705 | nhr-152   | C12D5.2   | 0.381844342342383   | AGIWUR41171 |
| CB4856                                                                             | CT | V | 7688237 | 7689988 | WBGene00015710 | C12D5.9   | C12D5.9   | 0.246424296793929   | AGIWUR41038 |
| CB4856                                                                             | CT | V | 7690594 | 7692043 | WBGene00006194 | str-147   | C12D5.1   | 0.21247580191823    |             |
| AGIWUR29458;AGIWUR43240                                                            |    |   |         |         |                |           |           |                     |             |
| CB4856                                                                             | CT | V | 7692071 | 7693488 | WBGene00015711 | C12D5.10  | C12D5.10  | -0.0413125290928633 |             |
| AGIWUR4130;AGIWUR17148;AGIWUR35652                                                 |    |   |         |         |                |           |           |                     |             |
| CB4856                                                                             | CT | V | 7697142 | 7700760 | WBGene00022654 | ZK105.3   | ZK105.3   | -0.448568768637221  | AGIWUR26366 |
| CB4856                                                                             | CT | V | 7701048 | 7703636 | WBGene00022655 | srsx-40   | ZK105.4   | 0.186772294944703   | AGIWUR24681 |
| CB4856                                                                             | CT | V | 7705616 | 7706955 | WBGene00005750 | srw-3     | ZK105.2   | -0.258042289919649  | AGIWUR44099 |
| CB4856                                                                             | CT | V | 7709050 | 7710037 | WBGene00022658 | srh-188   | ZK105.7   | 0.140325127171469   |             |
| AGIWUR17472;AGIWUR35760                                                            |    |   |         |         |                |           |           |                     |             |
| CB4856                                                                             | CT | V | 7712239 | 7713168 | WBGene00235114 | ZK105.13  | ZK105.13  | 0.239939731746036   |             |
| AGIWUR5750                                                                         |    |   |         |         |                |           |           |                     |             |
| CB4856                                                                             | CT | V | 7713990 | 7714698 | WBGene00022653 | ZK105.1   | ZK105.1   | -0.20801490150212   | AGIWUR5908  |
| CB4856                                                                             | CT | V | 7721181 | 7724065 | WBGene00022657 | ZK105.6   | ZK105.6   | -0.284858434941745  | AGIWUR40107 |
| CB4856                                                                             | CT | V | 7724494 | 7726110 | WBGene00044551 | ZK105.8   | ZK105.8   | 0.0883936685179876  |             |
| AGIWUR6482;AGIWUR39137;AGIWUR42851                                                 |    |   |         |         |                |           |           |                     |             |
| CB4856                                                                             | CT | V | 7728813 | 7730317 | WBGene00022410 | Y97E10C.1 | Y97E10C.1 | -0.027178642370405  |             |
| AGIWUR23151                                                                        |    |   |         |         |                |           |           |                     |             |
| CB4856                                                                             | CT | V | 7731839 | 7733495 | WBGene00044342 | T05B11.7  | T05B11.7  | 0.220731231269943   |             |
| AGIWUR3311;AGIWUR35193                                                             |    |   |         |         |                |           |           |                     |             |
| CB4856                                                                             | CT | V | 7735619 | 7737024 | WBGene00005661 | srr-10    | T05B11.6  | -0.100838688978936  |             |
| AGIWUR44351                                                                        |    |   |         |         |                |           |           |                     |             |
| CB4856                                                                             | CT | V | 7738010 | 7739596 | WBGene00005660 | srr-9     | T05B11.2  | 0.017181659556222   |             |
| AGIWUR42129                                                                        |    |   |         |         |                |           |           |                     |             |
| CB4856                                                                             | CT | V | 7748863 | 7751368 | WBGene00020245 | T05B11.1  | T05B11.1  | 0.0316020869419908  |             |
| AGIWUR26544                                                                        |    |   |         |         |                |           |           |                     |             |
| CB4856                                                                             | CT | V | 7751901 | 7754139 | WBGene00020247 | T05B11.4  | T05B11.4  | -0.467117872294338  |             |
| AGIWUR36773                                                                        |    |   |         |         |                |           |           |                     |             |
| CB4856                                                                             | CT | V | 7756749 | 7757854 | WBGene00023340 | T05B11.5  | T05B11.5  | -0.0375929702311124 |             |
| AGIWUR12624;AGIWUR27525;AGIWUR40406                                                |    |   |         |         |                |           |           |                     |             |
| CB4856                                                                             | CT | V | 7760474 | 7761633 | WBGene00016150 | hint-3    | C26F1.7   | -0.166737602962653  | AGIWUR28712 |
| CB4856                                                                             | CT | V | 7771328 | 7773273 | WBGene00016149 | frpr-3    | C26F1.6   | -0.104454049390618  | AGIWUR21381 |
| CB4856                                                                             | CT | V | 7774441 | 7775759 | WBGene00001719 | grl-10    | C26F1.5   | 0.413075891277554   | AGIWUR700   |
| CB4856                                                                             | CT | V | 7775742 | 7776079 | WBGene00004453 | rpl-39    | C26F1.9   | 0.0832980550975151  | AGIWUR17213 |
| CB4856                                                                             | CT | V | 7776576 | 7777236 | WBGene00004499 | rps-30    | C26F1.4   | -0.0270810261065009 |             |
| AGIWUR2827;AGIWUR13715;AGIWUR20076;AGIWUR25322;AGIWUR32322;AGIWUR33401;AGIWUR40641 |    |   |         |         |                |           |           |                     |             |
| CB4856                                                                             | CT | V | 7777300 | 7778985 | WBGene00016148 | C26F1.3   | C26F1.3   | -0.0759928855333261 |             |
| AGIWUR60;AGIWUR12951;AGIWUR33169;AGIWUR36881                                       |    |   |         |         |                |           |           |                     |             |

|                                                                                                                                                         |    |   |         |         |                |          |           |                     |             |
|---------------------------------------------------------------------------------------------------------------------------------------------------------|----|---|---------|---------|----------------|----------|-----------|---------------------|-------------|
| CB4856                                                                                                                                                  | CT | V | 7781811 | 7784595 | WBGene00016147 | cyp-32A1 | C26F1.2   | 0.073536241468128   |             |
| AGIWUR44527                                                                                                                                             |    |   |         |         |                |          |           |                     |             |
| CB4856                                                                                                                                                  | CT | V | 7785417 | 7787712 | WBGene00016146 | C26F1.1  | C26F1.1   | 0.137215449567994   |             |
| AGIWUR6041;AGIWUR11348;AGIWUR18024;AGIWUR29985;AGIWUR33124;AGIWUR33236                                                                                  |    |   |         |         |                |          |           |                     |             |
| CB4856                                                                                                                                                  | CT | V | 7793367 | 7794025 | WBGene00001464 | flp-21   | C26F1.10  | 0.554853901092724   |             |
| AGIWUR8251                                                                                                                                              |    |   |         |         |                |          |           |                     |             |
| CB4856                                                                                                                                                  | CT | V | 7801518 | 7803727 | WBGene00022812 | uvs-1    | ZK742.2   | -0.108973906824097  | AGIWUR34269 |
| CB4856                                                                                                                                                  | CT | V | 7805064 | 7814656 | WBGene00002078 | xpo-1    | ZK742.1   | 0.037059325621307   |             |
| AGIWUR721;AGIWUR1219;AGIWUR5682;AGIWUR11323;AGIWUR14384;AGIWUR15800;AGIWUR23048;AGIWUR23160;AGIWUR26928;AGIWUR28172;AGIWUR34718;AGIWUR39925;AGIWUR40454 |    |   |         |         |                |          |           |                     |             |
| CB4856                                                                                                                                                  | CT | V | 7820578 | 7821477 | WBGene00002256 | lbp-4    | ZK742.5   | -0.0979472351458259 | AGIWUR42605 |
| CB4856                                                                                                                                                  | CT | V | 7827201 | 7842388 | WBGene00003242 | mig-6    | C37C3.6   | 0.326425093610279   |             |
| AGIWUR27540;AGIWUR30637;AGIWUR44675                                                                                                                     |    |   |         |         |                |          |           |                     |             |
| CB4856                                                                                                                                                  | CT | V | 7842543 | 7844299 | WBGene00001697 | grd-8    | C37C3.4   | 0.24852585083177    | AGIWUR13235 |
| CB4856                                                                                                                                                  | CT | V | 7844343 | 7847164 | WBGene00016500 | memo-1   | C37C3.8   | 0.675242455503112   |             |
| AGIWUR21318;AGIWUR38933;AGIWUR42472;AGIWUR43233                                                                                                         |    |   |         |         |                |          |           |                     |             |
| CB4856                                                                                                                                                  | CT | V | 7849984 | 7851029 | WBGene00016497 | vps-32.2 | C37C3.3   | -0.164599638361929  |             |
| AGIWUR16738                                                                                                                                             |    |   |         |         |                |          |           |                     |             |
| CB4856                                                                                                                                                  | CT | V | 7852286 | 7853975 | WBGene00016501 | C37C3.9  | C37C3.9   | -0.124572383630742  | AGIWUR18544 |
| CB4856                                                                                                                                                  | CT | V | 7854991 | 7857925 | WBGene00016496 | C37C3.2  | C37C3.2   | -0.133480378370377  |             |
| AGIWUR10421;AGIWUR15189;AGIWUR29926;AGIWUR38035                                                                                                         |    |   |         |         |                |          |           |                     |             |
| CB4856                                                                                                                                                  | CT | V | 7857963 | 7859909 | WBGene00016495 | C37C3.1  | C37C3.1   | -0.105400425249123  | AGIWUR30764 |
| CB4856                                                                                                                                                  | CT | V | 7862275 | 7863070 | WBGene00016502 | C37C3.10 | C37C3.10  | -0.165659752711652  |             |
| AGIWUR21569                                                                                                                                             |    |   |         |         |                |          |           |                     |             |
| CB4856                                                                                                                                                  | CT | V | 7863458 | 7864731 | WBGene00016503 | C37C3.11 | C37C3.11  | -0.153356123510044  |             |
| AGIWUR13987                                                                                                                                             |    |   |         |         |                |          |           |                     |             |
| CB4856                                                                                                                                                  | CT | V | 7868470 | 7870807 | WBGene00077712 | nipi-4   | F40A3.5   | -0.159857235800634  | AGIWUR32728 |
| CB4856                                                                                                                                                  | CT | V | 7875756 | 7876789 | WBGene00018219 | F40A3.4  | F40A3.4   | -0.263703744496297  |             |
| AGIWUR390;AGIWUR13174;AGIWUR23869                                                                                                                       |    |   |         |         |                |          |           |                     |             |
| CB4856                                                                                                                                                  | CT | V | 7877490 | 7878514 | WBGene00018218 | F40A3.3  | F40A3.3   | -0.0613064534334136 | AGIWUR4725  |
| CB4856                                                                                                                                                  | CT | V | 7878914 | 7881403 | WBGene00018217 | F40A3.2  | F40A3.2   | 0.203156152723952   | AGIWUR10577 |
| CB4856                                                                                                                                                  | CT | V | 7891530 | 7895518 | WBGene00018216 | F40A3.1  | F40A3.1   | 0.436290933624221   | AGIWUR36055 |
| CB4856                                                                                                                                                  | CT | V | 7895465 | 7899861 | WBGene00018222 | F40A3.7  | F40A3.7   | 0.410039942953544   | AGIWUR45014 |
| CB4856                                                                                                                                                  | CT | V | 7914420 | 7915728 | WBGene00005902 | srx-11   | Y97E10B.6 | 0.0390175330096909  |             |
| AGIWUR27174                                                                                                                                             |    |   |         |         |                |          |           |                     |             |
| CB4856                                                                                                                                                  | CT | V | 7925783 | 7926756 | WBGene00022406 | srsx-7   | Y97E10B.4 | 0.390170566904818   |             |
| AGIWUR17411                                                                                                                                             |    |   |         |         |                |          |           |                     |             |
| CB4856                                                                                                                                                  | CT | V | 7927084 | 7928451 | WBGene00022405 | srsx-6   | Y97E10B.3 | 0.089881035774825   |             |
| AGIWUR18933                                                                                                                                             |    |   |         |         |                |          |           |                     |             |

|                                                  |   |                 |                |            |            |                     |
|--------------------------------------------------|---|-----------------|----------------|------------|------------|---------------------|
| CB4856 CT<br>AGIWUR15793                         | V | 7928960 7930337 | WBGene00022404 | srsx-5     | Y97E10B.2  | 0.0374614558032045  |
| CB4856 CT<br>AGIWUR25969                         | V | 7930475 7933098 | WBGene00003575 | ncx-10     | Y97E10B.7  | -0.305998992685126  |
| CB4856 CT<br>AGIWUR8695                          | V | 7934457 7935113 | WBGene00022407 | srsx-4     | Y97E10B.8  | 0.0113529673572845  |
| CB4856 CT<br>AGIWUR41183                         | V | 7936144 7937252 | WBGene00022408 | srsx-3     | Y97E10B.9  | -0.322709214119772  |
| CB4856 CT<br>AGIWUR12412;AGIWUR36109;AGIWUR44229 | V | 7938605 7940383 | WBGene00022409 | srt-53     | Y97E10B.10 | 0.0447690466469384  |
| CB4856 CT<br>AGIWUR9706                          | V | 7943868 7946857 | WBGene00022403 | Y97E10B.1  | Y97E10B.1  | 0.107434980117742   |
| CB4856 CT<br>AGIWUR33936                         | V | 7947231 7948615 | WBGene00017821 | F26D11.4   | F26D11.4   | 0.412431580058129   |
| CB4856 CT<br>AGIWUR19386;AGIWUR35862;AGIWUR41728 | V | 7951625 7952955 | WBGene00017822 | cllec-216  | F26D11.5   | -0.346065142662681  |
| CB4856 CT<br>AGIWUR5740                          | V | 7953354 7954652 | WBGene00045393 | F26D11.13  | F26D11.13  | 0.519826675655266   |
| CB4856 CT<br>AGIWUR21854                         | V | 7954793 7955363 | WBGene00045392 | pals-35    | F26D11.12  | -0.0758315798060849 |
| CB4856 CT<br>AGIWUR4877;AGIWUR18296              | V | 7955404 7956497 | WBGene00017823 | pals-34    | F26D11.6   | -0.276677157906998  |
| CB4856 CT<br>AGIWUR38445                         | V | 7957277 7958840 | WBGene00017824 | cllec-217  | F26D11.9   | -0.330119911010957  |
| CB4856 CT<br>AGIWUR14036                         | V | 7959270 7960958 | WBGene00017819 | F26D11.2   | F26D11.2   | 0.0993519238157994  |
| CB4856 CT<br>AGIWUR33539                         | V | 7961539 7968899 | WBGene00000488 | che-7      | F26D11.10  | 0.402408926592626   |
| CB4856 CT<br>AGIWUR7383;AGIWUR44679              | V | 7972924 7977774 | WBGene00002632 | let-413    | F26D11.11  | 0.178163774698559   |
| CB4856 CT<br>AGIWUR42437                         | V | 7981545 7982662 | WBGene00017818 | F26D11.1   | F26D11.1   | -0.0128528102963834 |
| CB4856 CT<br>AGIWUR7366                          | V | 7982656 7983431 | WBGene00022394 | Y97E10AL.3 | Y97E10AL.3 | -0.301552422759524  |
| CB4856 CT<br>AGIWUR23178                         | V | 7983849 7985954 | WBGene00022393 | abhd-12    | Y97E10AL.2 | 0.0372616468372531  |
| CB4856 CT<br>AGIWUR36575                         | V | 7993789 7994666 | WBGene00022395 | ceh-76     | Y97E10AM.1 | 0.049322537792202   |
| CB4856 CT                                        | V | 7996178 8000233 | WBGene00022397 | Y97E10AR.2 | Y97E10AR.2 | -0.197273553268935  |

|                                                                        |    |   |         |         |                |            |            |                     |             |
|------------------------------------------------------------------------|----|---|---------|---------|----------------|------------|------------|---------------------|-------------|
| AGIWUR41368                                                            |    |   |         |         |                |            |            |                     |             |
| CB4856                                                                 | CT | V | 8001451 | 8004690 | WBGene00022396 | Y97E10AR.1 | Y97E10AR.1 | 0.731658573631623   |             |
| AGIWUR6325;AGIWUR21011;AGIWUR26692;AGIWUR31456;AGIWUR38523;AGIWUR39332 |    |   |         |         |                |            |            |                     |             |
| CB4856                                                                 | CT | V | 8005326 | 8005692 | WBGene00044552 | Y97E10AR.8 | Y97E10AR.8 | 0.13305884038172    |             |
| AGIWUR24477;AGIWUR28438;AGIWUR30489;AGIWUR37606;AGIWUR41982            |    |   |         |         |                |            |            |                     |             |
| CB4856                                                                 | CT | V | 8006179 | 8007510 | WBGene00022398 | Y97E10AR.3 | Y97E10AR.3 | -0.075726828980315  |             |
| AGIWUR4548                                                             |    |   |         |         |                |            |            |                     |             |
| CB4856                                                                 | CT | V | 8008028 | 8010443 | WBGene00022399 | Y97E10AR.4 | Y97E10AR.4 | -0.202087127509119  |             |
| AGIWUR31544                                                            |    |   |         |         |                |            |            |                     |             |
| CB4856                                                                 | CT | V | 8010475 | 8011108 | WBGene00022402 | lmtr-2     | Y97E10AR.7 | 0.181565274703816   |             |
| AGIWUR44898                                                            |    |   |         |         |                |            |            |                     |             |
| CB4856                                                                 | CT | V | 8011219 | 8012345 | WBGene00022400 | rpb-9      | Y97E10AR.5 | -0.370697148711379  |             |
| AGIWUR14983                                                            |    |   |         |         |                |            |            |                     |             |
| CB4856                                                                 | CT | V | 8012401 | 8014182 | WBGene00022401 | Y97E10AR.6 | Y97E10AR.6 | 0.0160472101565823  |             |
| AGIWUR2712                                                             |    |   |         |         |                |            |            |                     |             |
| CB4856                                                                 | CT | V | 8017947 | 8021715 | WBGene00018398 | spt1-2     | F43H9.2    | -0.269044087835543  |             |
| AGIWUR12380;AGIWUR16581;AGIWUR21967;AGIWUR31278                        |    |   |         |         |                |            |            |                     |             |
| CB4856                                                                 | CT | V | 8022218 | 8023308 | WBGene00001152 | ech-3      | F43H9.1    | -0.16251752132198   | AGIWUR38133 |
| CB4856                                                                 | CT | V | 8023195 | 8024940 | WBGene00018399 | F43H9.3    | F43H9.3    | -0.0780706790260552 | AGIWUR30800 |
| CB4856                                                                 | CT | V | 8026691 | 8028789 | WBGene00018400 | F43H9.4    | F43H9.4    | -0.694226895778982  | AGIWUR2161  |
| CB4856                                                                 | CT | V | 8029439 | 8031214 | WBGene00003865 | oma-2      | ZC513.6    | 0.0663438228192135  | AGIWUR10685 |
| CB4856                                                                 | CT | V | 8031411 | 8035014 | WBGene00006935 | vars-1     | ZC513.4    | -0.0141566052622601 |             |
| AGIWUR21496;AGIWUR24632;AGIWUR29054;AGIWUR39461                        |    |   |         |         |                |            |            |                     |             |
| CB4856                                                                 | CT | V | 8035111 | 8039506 | WBGene00022629 | ZC513.5    | ZC513.5    | -0.196302370999486  | AGIWUR6084  |
| CB4856                                                                 | CT | V | 8039469 | 8040387 | WBGene00023209 | ZC513.7    | ZC513.7    | 0.521668953838814   |             |
| AGIWUR11496;AGIWUR17404;AGIWUR38696                                    |    |   |         |         |                |            |            |                     |             |
| CB4856                                                                 | CT | V | 8047044 | 8049528 | WBGene00022628 | ZC513.3    | ZC513.3    | 0.0682615199038903  | AGIWUR33455 |
| CB4856                                                                 | CT | V | 8049744 | 8050893 | WBGene00000620 | col-43     | ZC513.8    | -0.801936339553992  | AGIWUR957   |
| CB4856                                                                 | CT | V | 8052137 | 8053730 | WBGene00006060 | sth-1      | ZC513.12   | -0.256296489119348  |             |
| AGIWUR27227                                                            |    |   |         |         |                |            |            |                     |             |
| CB4856                                                                 | CT | V | 8054430 | 8057558 | WBGene00022627 | ZC513.2    | ZC513.2    | -0.131005799037765  |             |
| AGIWUR27743;AGIWUR44063                                                |    |   |         |         |                |            |            |                     |             |
| CB4856                                                                 | CT | V | 8058659 | 8060317 | WBGene00006187 | str-138    | ZC513.11   | -0.0263030320633426 |             |
| AGIWUR36260                                                            |    |   |         |         |                |            |            |                     |             |
| CB4856                                                                 | CT | V | 8060873 | 8062174 | WBGene00006186 | str-139    | ZC513.9    | 0.141488823937509   | AGIWUR8996  |
| CB4856                                                                 | CT | V | 8063247 | 8065079 | WBGene00022630 | fbxa-223   | ZC513.10   | -0.0988677420747175 |             |
| AGIWUR41957                                                            |    |   |         |         |                |            |            |                     |             |
| CB4856                                                                 | CT | V | 8065780 | 8067900 | WBGene00006188 | str-140    | C09H5.3    | -0.471634419541389  | AGIWUR12899 |
| CB4856                                                                 | CT | V | 8068152 | 8069737 | WBGene00006190 | str-143    | C09H5.4    | 0.186467933542859   | AGIWUR22797 |

|                                                 |    |   |         |         |                |          |          |                     |             |
|-------------------------------------------------|----|---|---------|---------|----------------|----------|----------|---------------------|-------------|
| CB4856                                          | CT | V | 8070643 | 8072266 | WBGene00006191 | str-144  | C09H5.5  | 0.288538497036599   | AGIWUR24395 |
| CB4856                                          | CT | V | 8076012 | 8079914 | WBGene00015660 | catp-3   | C09H5.2  | -0.139120239589392  |             |
| AGIWUR20050;AGIWUR41311                         |    |   |         |         |                |          |          |                     |             |
| CB4856                                          | CT | V | 8080367 | 8081678 | WBGene00006180 | str-131  | C09H5.6  | -0.182726754729344  | AGIWUR14503 |
| CB4856                                          | CT | V | 8082367 | 8082767 | WBGene00015659 | C09H5.1  | C09H5.1  | 0.00910549042590247 | AGIWUR15945 |
| CB4856                                          | CT | V | 8084120 | 8085241 | WBGene00015661 | C09H5.7  | C09H5.7  | -0.257924865109672  | AGIWUR19755 |
| CB4856                                          | CT | V | 8085884 | 8087283 | WBGene00006177 | str-128  | C09H5.8  | 0.211271158739882   | AGIWUR39552 |
| CB4856                                          | CT | V | 8089319 | 8090695 | WBGene00006179 | str-130  | C09H5.9  | 0.151304506730344   | AGIWUR20800 |
| CB4856                                          | CT | V | 8090973 | 8092485 | WBGene00006178 | str-129  | F58G4.5  | -0.219227318414632  | AGIWUR24912 |
| CB4856                                          | CT | V | 8093335 | 8095468 | WBGene00006193 | str-146  | F58G4.6  | -0.250255795131184  | AGIWUR34556 |
| CB4856                                          | CT | V | 8096394 | 8098339 | WBGene00006192 | str-145  | F58G4.7  | -0.063022712854349  | AGIWUR31757 |
| CB4856                                          | CT | V | 8099621 | 8100484 | WBGene00019066 | sdz-23   | F58G4.4  | 0.0517888146072449  | AGIWUR33239 |
| CB4856                                          | CT | V | 8102484 | 8106905 | WBGene00006149 | str-90   | F58G4.2  | 0.0576308149454547  | AGIWUR24341 |
| CB4856                                          | CT | V | 8108970 | 8118131 | WBGene00019064 | myo-5    | F58G4.1  | 0.558726886747488   | AGIWUR42109 |
| CB4856                                          | CT | V | 8118264 | 8120351 | WBGene00017020 | D1014.7  | D1014.7  | 0.0795952796580917  | AGIWUR28183 |
| CB4856                                          | CT | V | 8121168 | 8123470 | WBGene00017019 | D1014.6  | D1014.6  | 0.0487880764682878  | AGIWUR10069 |
| CB4856                                          | CT | V | 8123684 | 8126710 | WBGene00017018 | D1014.5  | D1014.5  | 0.70234619803856    | AGIWUR26747 |
| CB4856                                          | CT | V | 8126663 | 8129352 | WBGene00005006 | spr-1    | D1014.8  | -0.224586677845391  |             |
| AGIWUR2032;AGIWUR11463;AGIWUR13038              |    |   |         |         |                |          |          |                     |             |
| CB4856                                          | CT | V | 8130388 | 8133329 | WBGene00017016 | snap-1   | D1014.3  | -0.0191449416928933 | AGIWUR11044 |
| CB4856                                          | CT | V | 8133432 | 8134985 | WBGene00017017 | D1014.4  | D1014.4  | -0.0818225031644841 |             |
| AGIWUR1511;AGIWUR18218;AGIWUR39125;AGIWUR39914  |    |   |         |         |                |          |          |                     |             |
| CB4856                                          | CT | V | 8143761 | 8147782 | WBGene00017015 | D1014.2  | D1014.2  | -0.224107446156822  | AGIWUR18107 |
| CB4856                                          | CT | V | 8157746 | 8159844 | WBGene00006309 | sul-2    | D1014.1  | 0.589862757249946   | AGIWUR14310 |
| CB4856                                          | CT | V | 8159929 | 8161643 | WBGene00017636 | F20D6.6  | F20D6.6  | 0.545674628628938   | AGIWUR12077 |
| CB4856                                          | CT | V | 8177093 | 8177449 | WBGene00017638 | F20D6.9  | F20D6.9  | 0.150968210171959   | AGIWUR25233 |
| CB4856                                          | CT | V | 8179131 | 8183442 | WBGene00005648 | srp-7    | F20D6.4  | -0.053995303038219  |             |
| AGIWUR10926;AGIWUR15736;AGIWUR41757             |    |   |         |         |                |          |          |                     |             |
| CB4856                                          | CT | V | 8183730 | 8185772 | WBGene00005649 | srp-8    | F20D6.3  | 0.0700937769589602  |             |
| AGIWUR14471;AGIWUR14902;AGIWUR23568;AGIWUR43404 |    |   |         |         |                |          |          |                     |             |
| CB4856                                          | CT | V | 8186039 | 8187319 | WBGene00017634 | F20D6.2  | F20D6.2  | 0.278637595043577   | AGIWUR9313  |
| CB4856                                          | CT | V | 8187803 | 8190116 | WBGene00043069 | F20D6.12 | F20D6.12 | 0.0233808234929338  |             |
| AGIWUR12284                                     |    |   |         |         |                |          |          |                     |             |
| CB4856                                          | CT | V | 8190699 | 8192050 | WBGene00017633 | F20D6.1  | F20D6.1  | -0.0783356119992416 | AGIWUR6718  |
| CB4856                                          | CT | V | 8192060 | 8195937 | WBGene00017639 | F20D6.10 | F20D6.10 | 0.374568118264504   |             |
| AGIWUR8103                                      |    |   |         |         |                |          |          |                     |             |
| CB4856                                          | CT | V | 8196774 | 8199094 | WBGene00017640 | F20D6.11 | F20D6.11 | -0.0355198921731024 |             |
| AGIWUR5525                                      |    |   |         |         |                |          |          |                     |             |
| CB4856                                          | CT | V | 8201808 | 8202546 | WBGene00019478 | cri-2    | K07C11.5 | -0.0329370065275629 |             |

|                                                                                                            |    |   |         |         |                |           |           |                     |
|------------------------------------------------------------------------------------------------------------|----|---|---------|---------|----------------|-----------|-----------|---------------------|
| AGIWUR42010                                                                                                |    |   |         |         |                |           |           |                     |
| CB4856                                                                                                     | CT | V | 8203379 | 8205986 | WBGene00019477 | K07C11.4  | K07C11.4  | 0.654963653181055   |
| AGIWUR17869                                                                                                |    |   |         |         |                |           |           |                     |
| CB4856                                                                                                     | CT | V | 8207235 | 8208013 | WBGene00019476 | K07C11.3  | K07C11.3  | -0.0248468115424352 |
| AGIWUR5481                                                                                                 |    |   |         |         |                |           |           |                     |
| CB4856                                                                                                     | CT | V | 8207930 | 8213968 | WBGene00019479 | K07C11.7  | K07C11.7  | -0.126346981181726  |
| AGIWUR1879;AGIWUR11564;AGIWUR41258                                                                         |    |   |         |         |                |           |           |                     |
| CB4856                                                                                                     | CT | V | 8215534 | 8217884 | WBGene00019480 | K07C11.8  | K07C11.8  | -0.164734656387749  |
| AGIWUR703                                                                                                  |    |   |         |         |                |           |           |                     |
| CB4856                                                                                                     | CT | V | 8218279 | 8221316 | WBGene00019481 | cogc-6    | K07C11.9  | 0.00550247081177879 |
| AGIWUR44423                                                                                                |    |   |         |         |                |           |           |                     |
| CB4856                                                                                                     | CT | V | 8221410 | 8223587 | WBGene00000098 | air-1     | K07C11.2  | -0.0685467321574436 |
| AGIWUR1464;AGIWUR10508;AGIWUR24452                                                                         |    |   |         |         |                |           |           |                     |
| CB4856                                                                                                     | CT | V | 8224965 | 8226037 | WBGene00003937 | pax-1     | K07C11.1  | 0.313434010522532   |
| AGIWUR6074                                                                                                 |    |   |         |         |                |           |           |                     |
| CB4856                                                                                                     | CT | V | 8226061 | 8226852 | WBGene00019482 | K07C11.10 | K07C11.10 | 0.295667530684154   |
| AGIWUR23380                                                                                                |    |   |         |         |                |           |           |                     |
| CB4856                                                                                                     | CT | V | 8228300 | 8238409 | WBGene00004395 | rol-3     | C16D9.2   | -0.240409483831695  |
| AGIWUR28970;AGIWUR41147                                                                                    |    |   |         |         |                |           |           |                     |
| CB4856                                                                                                     | CT | V | 8238959 | 8240021 | WBGene00015858 | C16D9.3   | C16D9.3   | -0.0376375018417487 |
| AGIWUR2918;AGIWUR12819;AGIWUR13836;AGIWUR22036;AGIWUR25212;AGIWUR26109;AGIWUR37663;AGIWUR40907;AGIWUR41937 |    |   |         |         |                |           |           |                     |
| CB4856                                                                                                     | CT | V | 8240928 | 8242898 | WBGene00015859 | C16D9.4   | C16D9.4   | 0.176195445690858   |
| CB4856                                                                                                     | CT | V | 8243709 | 8245400 | WBGene00015860 | C16D9.5   | C16D9.5   | -0.144058101376046  |
| AGIWUR7962;AGIWUR25590;AGIWUR41064                                                                         |    |   |         |         |                |           |           |                     |
| CB4856                                                                                                     | CT | V | 8248123 | 8250289 | WBGene00015861 | C16D9.6   | C16D9.6   | -0.306286892566844  |
| CB4856                                                                                                     | CT | V | 8256831 | 8258076 | WBGene00015862 | srt-25    | C16D9.7   | 0.0923975391320857  |
| CB4856                                                                                                     | CT | V | 8259316 | 8261315 | WBGene00015857 | C16D9.1   | C16D9.1   | -0.107297986838262  |
| CB4856                                                                                                     | CT | V | 8261390 | 8263566 | WBGene00015863 | C16D9.8   | C16D9.8   | -0.0907846171565119 |
| CB4856                                                                                                     | CT | V | 8264241 | 8264663 | WBGene00015864 | C16D9.9   | C16D9.9   | 0.583422519378304   |
| CB4856                                                                                                     | CT | V | 8265202 | 8266385 | WBGene00017679 | F21F8.5   | F21F8.5   | -0.0602075254515686 |
| CB4856                                                                                                     | CT | V | 8267511 | 8268937 | WBGene00000219 | asp-6     | F21F8.7   | 0.378197001124676   |
| CB4856                                                                                                     | CT | V | 8269254 | 8272058 | WBGene00017678 | asp-12    | F21F8.4   | 0.227481116432962   |
| CB4856                                                                                                     | CT | V | 8272375 | 8274046 | WBGene00000218 | asp-5     | F21F8.3   | 0.0275924167925048  |
| AGIWUR5560;AGIWUR23001;AGIWUR28611;AGIWUR31817                                                             |    |   |         |         |                |           |           |                     |
| CB4856                                                                                                     | CT | V | 8274353 | 8275757 | WBGene00017677 | asp-11    | F21F8.2   | 1.57830526742697    |
| CB4856                                                                                                     | CT | V | 8275898 | 8277041 | WBGene00006185 | str-137   | F21F8.8   | 0.0988283614083749  |
| AGIWUR20524;AGIWUR37534                                                                                    |    |   |         |         |                |           |           |                     |
| CB4856                                                                                                     | CT | V | 8277516 | 8278930 | WBGene00006184 | str-136   | F21F8.9   | 0.079558551894916   |
| CB4856                                                                                                     | CT | V | 8279375 | 8282167 | WBGene00006183 | str-135   | F21F8.10  | -0.124517487885336  |

|                                                                               |    |   |         |         |                |          |          |                     |             |
|-------------------------------------------------------------------------------|----|---|---------|---------|----------------|----------|----------|---------------------|-------------|
| AGIWUR22082                                                                   |    |   |         |         |                |          |          |                     |             |
| CB4856                                                                        | CT | V | 8282333 | 8284900 | WBGene00017681 | slc-17.5 | F21F8.11 | -0.121835445806388  |             |
| AGIWUR9561                                                                    |    |   |         |         |                |          |          |                     |             |
| CB4856                                                                        | CT | V | 8292064 | 8293516 | WBGene00005190 | srg-33   | F21F8.1  | 0.179819132658851   | AGIWUR38187 |
| CB4856                                                                        | CT | V | 8293809 | 8294900 | WBGene00020939 | W02D7.3  | W02D7.3  | 0.202385963657223   | AGIWUR37768 |
| CB4856                                                                        | CT | V | 8296558 | 8297604 | WBGene00020940 | W02D7.4  | W02D7.4  | -0.040439570492552  | AGIWUR7250  |
| CB4856                                                                        | CT | V | 8297700 | 8299244 | WBGene00020941 | W02D7.5  | W02D7.5  | -0.185481724686733  | AGIWUR41016 |
| CB4856                                                                        | CT | V | 8299753 | 8301507 | WBGene00020942 | W02D7.6  | W02D7.6  | -0.0108776019823225 | AGIWUR2754  |
| CB4856                                                                        | CT | V | 8301490 | 8302580 | WBGene00004766 | sel-9    | W02D7.7  | -0.20218173177949   |             |
| AGIWUR305;AGIWUR3250;AGIWUR5175;AGIWUR6945;AGIWUR8272;AGIWUR17351;AGIWUR19473 |    |   |         |         |                |          |          |                     |             |
| CB4856                                                                        | CT | V | 8302887 | 8304469 | WBGene00020946 | W02D7.11 | W02D7.11 | 1.36858708586813    |             |
| AGIWUR13639                                                                   |    |   |         |         |                |          |          |                     |             |
| CB4856                                                                        | CT | V | 8305120 | 8306460 | WBGene00020943 | W02D7.8  | W02D7.8  | 1.14236886824912    | AGIWUR28197 |
| CB4856                                                                        | CT | V | 8307942 | 8310766 | WBGene00020938 | clcc-218 | W02D7.2  | 0.728738441871312   |             |
| AGIWUR39060;AGIWUR41065                                                       |    |   |         |         |                |          |          |                     |             |
| CB4856                                                                        | CT | V | 8311510 | 8312041 | WBGene00044356 | W02D7.12 | W02D7.12 | 0.118165780466729   |             |
| AGIWUR27526                                                                   |    |   |         |         |                |          |          |                     |             |
| CB4856                                                                        | CT | V | 8318435 | 8322863 | WBGene00020945 | clcc-219 | W02D7.10 | -0.333631495295343  |             |
| AGIWUR25784                                                                   |    |   |         |         |                |          |          |                     |             |
| CB4856                                                                        | CT | V | 8323426 | 8323885 | WBGene00023354 | W02D7.1  | W02D7.1  | 0.0900453892091617  |             |
| AGIWUR5151;AGIWUR11873;AGIWUR23778;AGIWUR28332                                |    |   |         |         |                |          |          |                     |             |
| CB4856                                                                        | CT | V | 8326191 | 8326514 | WBGene00020944 | W02D7.9  | W02D7.9  | 0.0525293524339823  | AGIWUR41935 |
| CB4856                                                                        | CT | V | 8336658 | 8340675 | WBGene00006582 | tmd-2    | C08D8.2  | 0.151367334313045   |             |
| AGIWUR24109;AGIWUR37546                                                       |    |   |         |         |                |          |          |                     |             |
| CB4856                                                                        | CT | V | 8345759 | 8349909 | WBGene00015592 | C08D8.1  | C08D8.1  | 0.59656079070176    | AGIWUR31565 |
| CB4856                                                                        | CT | V | 8351671 | 8353085 | WBGene00018180 | srsx-22  | F38E1.8  | 0.0953735018914372  | AGIWUR42326 |
| CB4856                                                                        | CT | V | 8353793 | 8355008 | WBGene00044126 | srsx-23  | F38E1.12 | 0.00466639091948196 |             |
| AGIWUR32398;AGIWUR33303                                                       |    |   |         |         |                |          |          |                     |             |
| CB4856                                                                        | CT | V | 8355953 | 8358185 | WBGene00003395 | mom-2    | F38E1.7  | -0.0300671188022275 |             |
| AGIWUR9372;AGIWUR18335;AGIWUR22584;AGIWUR36859;AGIWUR40063                    |    |   |         |         |                |          |          |                     |             |
| CB4856                                                                        | CT | V | 8358203 | 8359163 | WBGene00018181 | F38E1.9  | F38E1.9  | -0.281961133864455  |             |
| AGIWUR17431;AGIWUR24194                                                       |    |   |         |         |                |          |          |                     |             |
| CB4856                                                                        | CT | V | 8359818 | 8361394 | WBGene00018179 | F38E1.6  | F38E1.6  | -0.0415005328651192 | AGIWUR11093 |
| CB4856                                                                        | CT | V | 8371014 | 8374027 | WBGene00001664 | gpa-2    | F38E1.5  | 0.0197009219225421  | AGIWUR29092 |
| CB4856                                                                        | CT | V | 8374027 | 8375474 | WBGene00018182 | F38E1.10 | F38E1.10 | -0.187947718602115  |             |
| AGIWUR12738                                                                   |    |   |         |         |                |          |          |                     |             |
| CB4856                                                                        | CT | V | 8376117 | 8377944 | WBGene00018178 | F38E1.3  | F38E1.3  | -0.0891278670389859 | AGIWUR6638  |
| CB4856                                                                        | CT | V | 8378903 | 8379925 | WBGene00018183 | F38E1.11 | F38E1.11 | 0.0160464868744494  |             |
| AGIWUR34757                                                                   |    |   |         |         |                |          |          |                     |             |

|                                                                        |    |   |         |         |                |           |           |                     |             |
|------------------------------------------------------------------------|----|---|---------|---------|----------------|-----------|-----------|---------------------|-------------|
| CB4856                                                                 | CT | V | 8379474 | 8383747 | WBGene00018694 | F52E1.5   | F52E1.5   | 0.84924020758023    |             |
| AGIWUR9540;AGIWUR37783                                                 |    |   |         |         |                |           |           |                     |             |
| CB4856                                                                 | CT | V | 8383922 | 8384867 | WBGene00044696 | F52E1.14  | F52E1.14  | -0.0238473597772648 |             |
| AGIWUR8044;AGIWUR9472;AGIWUR17987;AGIWUR34787;AGIWUR37989;AGIWUR42621  |    |   |         |         |                |           |           |                     |             |
| CB4856                                                                 | CT | V | 8384774 | 8386268 | WBGene00002021 | hsp-17    | F52E1.7   | -0.765839619563154  | AGIWUR43590 |
| CB4856                                                                 | CT | V | 8387356 | 8392324 | WBGene00001534 | gcy-7     | F52E1.4   | 0.0141942390601502  | AGIWUR37358 |
| CB4856                                                                 | CT | V | 8392357 | 8394383 | WBGene00018696 | pho-6     | F52E1.8   | 1.06873093509037    | AGIWUR24061 |
| CB4856                                                                 | CT | V | 8394800 | 8396344 | WBGene00018693 | F52E1.3   | F52E1.3   | 0.265469450050997   | AGIWUR42980 |
| CB4856                                                                 | CT | V | 8398145 | 8402669 | WBGene00018697 | F52E1.9   | F52E1.9   | 0.258769682798165   | AGIWUR32593 |
| CB4856                                                                 | CT | V | 8410595 | 8411831 | WBGene00018692 | F52E1.2   | F52E1.2   | 0.143474947645775   | AGIWUR18541 |
| CB4856                                                                 | CT | V | 8411775 | 8413513 | WBGene00018698 | vha-18    | F52E1.10  | -0.0226496698748591 |             |
| AGIWUR24887                                                            |    |   |         |         |                |           |           |                     |             |
| CB4856                                                                 | CT | V | 8414085 | 8415254 | WBGene00004078 | pos-1     | F52E1.1   | -0.0265100075069888 | AGIWUR7897  |
| CB4856                                                                 | CT | V | 8415687 | 8444773 | WBGene00018700 | lmd-3     | F52E1.13  | 0.191581471049438   |             |
| AGIWUR2888;AGIWUR29288;AGIWUR40480;AGIWUR43671                         |    |   |         |         |                |           |           |                     |             |
| CB4856                                                                 | CT | V | 8446608 | 8448009 | WBGene00020720 | T23B12.5  | T23B12.5  | -0.237228849098894  |             |
| AGIWUR43508                                                            |    |   |         |         |                |           |           |                     |             |
| CB4856                                                                 | CT | V | 8455396 | 8457606 | WBGene00044553 | T23B12.11 | T23B12.11 | -0.171072560518204  |             |
| AGIWUR21695;AGIWUR33424                                                |    |   |         |         |                |           |           |                     |             |
| CB4856                                                                 | CT | V | 8457616 | 8460419 | WBGene00020721 | T23B12.6  | T23B12.6  | -0.0900721423929536 |             |
| AGIWUR33383;AGIWUR39766;AGIWUR45189                                    |    |   |         |         |                |           |           |                     |             |
| CB4856                                                                 | CT | V | 8461096 | 8462116 | WBGene00001040 | dnj-22    | T23B12.7  | -0.213668289231979  |             |
| AGIWUR4124                                                             |    |   |         |         |                |           |           |                     |             |
| CB4856                                                                 | CT | V | 8462327 | 8465569 | WBGene00020719 | natc-1    | T23B12.4  | 0.0866550987823338  |             |
| AGIWUR41325                                                            |    |   |         |         |                |           |           |                     |             |
| CB4856                                                                 | CT | V | 8465617 | 8467159 | WBGene00020718 | mrps-2    | T23B12.3  | -0.114536589574207  |             |
| AGIWUR42622                                                            |    |   |         |         |                |           |           |                     |             |
| CB4856                                                                 | CT | V | 8467265 | 8468943 | WBGene00020717 | mrpl-4    | T23B12.2  | -0.397764961089687  |             |
| AGIWUR1921;AGIWUR3134;AGIWUR8568;AGIWUR26621                           |    |   |         |         |                |           |           |                     |             |
| CB4856                                                                 | CT | V | 8469040 | 8470072 | WBGene00020716 | phf-30    | T23B12.1  | -0.110014741072018  |             |
| AGIWUR4944;AGIWUR7828;AGIWUR43934                                      |    |   |         |         |                |           |           |                     |             |
| CB4856                                                                 | CT | V | 8470013 | 8471244 | WBGene00020722 | T23B12.8  | T23B12.8  | 0.0150457456805047  |             |
| AGIWUR3007;AGIWUR8513                                                  |    |   |         |         |                |           |           |                     |             |
| CB4856                                                                 | CT | V | 8494889 | 8502336 | WBGene00004256 | pxn-1     | ZK994.3   | -0.324829713890459  |             |
| AGIWUR29049;AGIWUR39160                                                |    |   |         |         |                |           |           |                     |             |
| CB4856                                                                 | CT | V | 8502591 | 8504591 | WBGene00022842 | ZK994.6   | ZK994.6   | 0.0401758518116466  | AGIWUR38282 |
| CB4856                                                                 | CT | V | 8510237 | 8512663 | WBGene00022840 | ZK994.1   | ZK994.1   | 0.162985968134017   | AGIWUR26288 |
| CB4856                                                                 | CT | V | 8512689 | 8513463 | WBGene00018481 | F45F2.9   | F45F2.9   | 0.0081808645770316  |             |
| AGIWUR3538;AGIWUR12227;AGIWUR14370;AGIWUR18337;AGIWUR30838;AGIWUR37139 |    |   |         |         |                |           |           |                     |             |



|                                                                                                                      |   |         |         |                |          |          |                     |             |
|----------------------------------------------------------------------------------------------------------------------|---|---------|---------|----------------|----------|----------|---------------------|-------------|
| CB4856 CT                                                                                                            | V | 8513577 | 8518764 | WBGene00018482 | F45F2.10 | F45F2.10 | -0.0359783288200646 |             |
| AGIWUR20897                                                                                                          |   |         |         |                |          |          |                     |             |
| CB4856 CT                                                                                                            | V | 8519346 | 8520896 | WBGene00018483 | F45F2.11 | F45F2.11 | 0.0223702485271176  |             |
| AGIWUR34803                                                                                                          |   |         |         |                |          |          |                     |             |
| CB4856 CT                                                                                                            | V | 8521503 | 8524555 | WBGene00018480 | otpl-7   | F45F2.7  | -0.109580873237041  | AGIWUR1825  |
| CB4856 CT                                                                                                            | V | 8525908 | 8528580 | WBGene00018479 | otpl-6   | F45F2.6  | 0.101874770145683   | AGIWUR1512  |
| CB4856 CT                                                                                                            | V | 8529519 | 8532465 | WBGene00018478 | otpl-5   | F45F2.5  | -0.199732626185039  | AGIWUR999   |
| CB4856 CT                                                                                                            | V | 8537331 | 8539614 | WBGene00018477 | otpl-4   | F45F2.1  | -0.0561434255204603 | AGIWUR5463  |
| CB4856 CT                                                                                                            | V | 8539728 | 8545566 | WBGene00017798 | slc-17.8 | F25G6.7  | -0.0512609680187648 |             |
| AGIWUR40015                                                                                                          |   |         |         |                |          |          |                     |             |
| CB4856 CT                                                                                                            | V | 8546128 | 8548880 | WBGene00003816 | asns-1   | F25G6.6  | -0.532695115571846  | AGIWUR24276 |
| CB4856 CT                                                                                                            | V | 8549289 | 8551165 | WBGene00006435 | stdh-4   | F25G6.5  | -0.337116185114631  | AGIWUR23729 |
| CB4856 CT                                                                                                            | V | 8552695 | 8555388 | WBGene00000054 | acr-15   | F25G6.4  | -0.0536132847084509 | AGIWUR44252 |
| CB4856 CT                                                                                                            | V | 8561216 | 8564345 | WBGene00000055 | acr-16   | F25G6.3  | -0.305724549808294  |             |
| AGIWUR16589;AGIWUR21014;AGIWUR42576                                                                                  |   |         |         |                |          |          |                     |             |
| CB4856 CT                                                                                                            | V | 8564303 | 8565175 | WBGene00017799 | F25G6.8  | F25G6.8  | -0.143303972392554  | AGIWUR39719 |
| CB4856 CT                                                                                                            | V | 8565275 | 8570077 | WBGene00017800 | F25G6.9  | F25G6.9  | 0.320930674800572   | AGIWUR11988 |
| CB4856 CT                                                                                                            | V | 8570311 | 8581397 | WBGene00017797 | symk-1   | F25G6.2  | -0.228023649181177  |             |
| AGIWUR4549;AGIWUR20084                                                                                               |   |         |         |                |          |          |                     |             |
| CB4856 CT                                                                                                            | V | 8581261 | 8583576 | WBGene00015670 | C10B5.1  | C10B5.1  | 0.127060919773617   | AGIWUR36163 |
| CB4856 CT                                                                                                            | V | 8583553 | 8584554 | WBGene00015671 | C10B5.3  | C10B5.3  | 0.195040635881027   | AGIWUR28344 |
| CB4856 CT                                                                                                            | V | 8594914 | 8597500 | WBGene00007055 | tag-196  | F41E6.6  | 0.769191912566377   | AGIWUR30420 |
| CB4856 CT                                                                                                            | V | 8597851 | 8599292 | WBGene00018288 | F41E6.7  | F41E6.7  | -0.271378416145703  | AGIWUR17625 |
| CB4856 CT                                                                                                            | V | 8599584 | 8601412 | WBGene00018289 | F41E6.8  | F41E6.8  | 0.198835742043252   | AGIWUR31859 |
| CB4856 CT                                                                                                            | V | 8602084 | 8602825 | WBGene00044554 | F41E6.15 | F41E6.15 | 0.286266498027905   |             |
| AGIWUR12689;AGIWUR20045;AGIWUR24139;AGIWUR36787;AGIWUR37343                                                          |   |         |         |                |          |          |                     |             |
| CB4856 CT                                                                                                            | V | 8603480 | 8605469 | WBGene00018286 | F41E6.5  | F41E6.5  | 1.59802150966198    | AGIWUR16835 |
| CB4856 CT                                                                                                            | V | 8607800 | 8615841 | WBGene00018285 | smk-1    | F41E6.4  | -0.0812449072294243 |             |
| AGIWUR654;AGIWUR5459;AGIWUR13596;AGIWUR14276;AGIWUR14346;AGIWUR15894;AGIWUR18138;AGIWUR18721;AGIWUR22723;AGIWUR22728 |   |         |         |                |          |          |                     |             |
| CB4856 CT                                                                                                            | V | 8619032 | 8619869 | WBGene00001694 | grd-5    | F41E6.2  | -0.643080456845784  | AGIWUR25134 |
| CB4856 CT                                                                                                            | V | 8619925 | 8621348 | WBGene00018292 | F41E6.11 | F41E6.11 | -0.762208182403098  |             |
| AGIWUR16678                                                                                                          |   |         |         |                |          |          |                     |             |
| CB4856 CT                                                                                                            | V | 8626900 | 8629129 | WBGene00018293 | F41E6.12 | F41E6.12 | -0.730678242885951  |             |
| AGIWUR31874                                                                                                          |   |         |         |                |          |          |                     |             |
| CB4856 CT                                                                                                            | V | 8629223 | 8631325 | WBGene00018294 | atg-18   | F41E6.13 | 0.45225812753149    |             |
| AGIWUR9216;AGIWUR10459;AGIWUR27595                                                                                   |   |         |         |                |          |          |                     |             |
| CB4856 CT                                                                                                            | V | 8631871 | 8635675 | WBGene00018295 | oac-29   | F41E6.14 | 1.54281349173701    |             |
| AGIWUR6170                                                                                                           |   |         |         |                |          |          |                     |             |

|                                     |   |         |         |                |          |          |                     |             |
|-------------------------------------|---|---------|---------|----------------|----------|----------|---------------------|-------------|
| CB4856 CT                           | V | 8635820 | 8637006 | WBGene00001721 | grl-12   | F28A12.2 | -0.348482205271598  |             |
| AGIWUR39621                         |   |         |         |                |          |          |                     |             |
| CB4856 CT                           | V | 8638237 | 8640585 | WBGene00017879 | acd-4    | F28A12.1 | -0.377972476814096  |             |
| AGIWUR23065                         |   |         |         |                |          |          |                     |             |
| CB4856 CT                           | V | 8640596 | 8641344 | WBGene00017880 | F28A12.3 | F28A12.3 | -0.650703836640947  |             |
| AGIWUR39240                         |   |         |         |                |          |          |                     |             |
| CB4856 CT                           | V | 8641491 | 8643225 | WBGene00017881 | asp-13   | F28A12.4 | -0.305732777068977  |             |
| AGIWUR6336                          |   |         |         |                |          |          |                     |             |
| CB4856 CT                           | V | 8666065 | 8671680 | WBGene00022538 | ZC190.4  | ZC190.4  | 0.126352911737318   | AGIWUR3159  |
| CB4856 CT                           | V | 8674602 | 8677293 | WBGene00022540 | ZC190.6  | ZC190.6  | 0.46664543125485    | AGIWUR4434  |
| CB4856 CT                           | V | 8681350 | 8682939 | WBGene00022537 | ZC190.2  | ZC190.2  | -0.236292398448894  | AGIWUR22064 |
| CB4856 CT                           | V | 8682955 | 8686160 | WBGene00000541 | cln-3.3  | ZC190.1  | -0.59509189298532   | AGIWUR40054 |
| CB4856 CT                           | V | 8686071 | 8686864 | WBGene00022541 | ZC190.7  | ZC190.7  | 0.0448980038995179  | AGIWUR30409 |
| CB4856 CT                           | V | 8686958 | 8688435 | WBGene00022542 | ZC190.8  | ZC190.8  | -0.193831313062669  | AGIWUR41198 |
| CB4856 CT                           | V | 8694329 | 8696507 | WBGene00022544 | ZC190.10 | ZC190.10 | -0.0353842988448498 |             |
| AGIWUR30061                         |   |         |         |                |          |          |                     |             |
| CB4856 CT                           | V | 8701432 | 8703060 | WBGene00022535 | ZC178.1  | ZC178.1  | 0.0377377667613557  | AGIWUR35182 |
| CB4856 CT                           | V | 8705437 | 8709880 | WBGene00022536 | ZC178.2  | ZC178.2  | -0.0139244378393322 | AGIWUR19531 |
| CB4856 CT                           | V | 8716495 | 8720893 | WBGene00001616 | glr-5    | ZC196.7  | 0.229655248073819   |             |
| AGIWUR8923;AGIWUR33190              |   |         |         |                |          |          |                     |             |
| CB4856 CT                           | V | 8721198 | 8722260 | WBGene00022551 | ZC196.8  | ZC196.8  | -0.133165716861197  | AGIWUR10032 |
| CB4856 CT                           | V | 8726516 | 8728894 | WBGene00022550 | droe-8   | ZC196.6  | 1.46386604607961    |             |
| AGIWUR16914;AGIWUR36682;AGIWUR37378 |   |         |         |                |          |          |                     |             |
| CB4856 CT                           | V | 8729458 | 8732789 | WBGene00022549 | ZC196.5  | ZC196.5  | -0.207001358169197  | AGIWUR34777 |
| CB4856 CT                           | V | 8733106 | 8735781 | WBGene00022548 | ZC196.4  | ZC196.4  | 0.139804280753262   | AGIWUR8712  |
| CB4856 CT                           | V | 8736674 | 8738437 | WBGene00022547 | ZC196.3  | ZC196.3  | -0.289966362679069  | AGIWUR38070 |
| CB4856 CT                           | V | 8739437 | 8742259 | WBGene00022546 | ZC196.2  | ZC196.2  | -0.132314423011067  | AGIWUR26730 |
| CB4856 CT                           | V | 8742804 | 8745045 | WBGene00022545 | ZC196.1  | ZC196.1  | 0.110127875663737   |             |
| AGIWUR21259;AGIWUR38916;AGIWUR39614 |   |         |         |                |          |          |                     |             |
| CB4856 CT                           | V | 8753695 | 8754873 | WBGene00015222 | B0507.5  | B0507.5  | -0.0111997424680892 | AGIWUR12863 |
| CB4856 CT                           | V | 8754970 | 8755759 | WBGene00015221 | B0507.4  | B0507.4  | 0.173860898341324   | AGIWUR44217 |
| CB4856 CT                           | V | 8755897 | 8757098 | WBGene00235307 | B0507.17 | B0507.17 | 0.18050307170998    |             |
| AGIWUR20645                         |   |         |         |                |          |          |                     |             |
| CB4856 CT                           | V | 8760687 | 8763194 | WBGene00015225 | B0507.8  | B0507.8  | 2.84241513922001    | AGIWUR2410  |
| CB4856 CT                           | V | 8764888 | 8766038 | WBGene00015226 | B0507.9  | B0507.9  | 0.109348277141566   | AGIWUR25026 |
| CB4856 CT                           | V | 8768909 | 8770876 | WBGene00015220 | B0507.3  | B0507.3  | 1.08249740911936    | AGIWUR10104 |
| CB4856 CT                           | V | 8771899 | 8773781 | WBGene00006006 | srx-115  | B0507.11 | -0.21999549652687   |             |
| AGIWUR14341;AGIWUR19285             |   |         |         |                |          |          |                     |             |
| CB4856 CT                           | V | 8774332 | 8776630 | WBGene00015219 | B0507.2  | B0507.2  | 0.287400269314574   | AGIWUR12931 |

|                                                                                    |    |   |         |         |                |           |           |                      |             |
|------------------------------------------------------------------------------------|----|---|---------|---------|----------------|-----------|-----------|----------------------|-------------|
| CB4856                                                                             | CT | V | 8776570 | 8779318 | WBGene00015218 | B0507.1   | B0507.1   | 0.440965918861703    | AGIWUR10922 |
| CB4856                                                                             | CT | V | 8783422 | 8784165 | WBGene00015275 | C01B7.3   | C01B7.3   | 0.103086207420364    | AGIWUR6935  |
| CB4856                                                                             | CT | V | 8786551 | 8792771 | WBGene00006342 | sup-37    | C01B7.1   | 0.0389330607515337   |             |
| AGIWUR12890;AGIWUR24197;AGIWUR33572                                                |    |   |         |         |                |           |           |                      |             |
| CB4856                                                                             | CT | V | 8792696 | 8795567 | WBGene00006467 | magu-2    | C01B7.4   | 0.255663440599118    |             |
| AGIWUR6705;AGIWUR7116;AGIWUR29311                                                  |    |   |         |         |                |           |           |                      |             |
| CB4856                                                                             | CT | V | 8800151 | 8800996 | WBGene00015276 | C01B7.5   | C01B7.5   | -0.135398300604678   | AGIWUR31037 |
| CB4856                                                                             | CT | V | 8805416 | 8819955 | WBGene00004457 | rpm-1     | C01B7.6   | 0.361058776656979    | AGIWUR13055 |
| CB4856                                                                             | CT | V | 8865351 | 8867297 | WBGene00017192 | F07B7.14  | F07B7.14  | -0.142623753333028   |             |
| AGIWUR21155                                                                        |    |   |         |         |                |           |           |                      |             |
| CB4856                                                                             | CT | V | 8876035 | 8877015 | WBGene00017152 | EGAP798.1 | EGAP798.1 | -0.0490501391969778  |             |
| AGIWUR42453                                                                        |    |   |         |         |                |           |           |                      |             |
| CB4856                                                                             | CT | V | 8898195 | 8898645 | WBGene00001892 | his-18    | K06C4.10  | -0.525477848836885   |             |
| AGIWUR14430                                                                        |    |   |         |         |                |           |           |                      |             |
| CB4856                                                                             | CT | V | 8899276 | 8902221 | WBGene00019448 | frpr-13   | K06C4.17  | 0.175599911562744    |             |
| AGIWUR41740                                                                        |    |   |         |         |                |           |           |                      |             |
| CB4856                                                                             | CT | V | 8902339 | 8905364 | WBGene00019445 | frpr-12   | K06C4.9   | -0.00615992162239021 | AGIWUR17925 |
| CB4856                                                                             | CT | V | 8907629 | 8909442 | WBGene00019444 | frpr-11   | K06C4.8   | -0.0768722722625697  | AGIWUR7490  |
| CB4856                                                                             | CT | V | 8909725 | 8914033 | WBGene00003386 | mod-1     | K06C4.6   | -0.0190020656306356  |             |
| AGIWUR19981;AGIWUR24514;AGIWUR44071                                                |    |   |         |         |                |           |           |                      |             |
| CB4856                                                                             | CT | V | 8914915 | 8916795 | WBGene00019443 | K06C4.7   | K06C4.7   | 0.0383605366800133   | AGIWUR14865 |
| CB4856                                                                             | CT | V | 8923088 | 8923936 | WBGene00019203 | ttr-47    | H14N18.3  | -0.309156803389126   |             |
| AGIWUR16282                                                                        |    |   |         |         |                |           |           |                      |             |
| CB4856                                                                             | CT | V | 8923900 | 8928938 | WBGene00019204 | H14N18.4  | H14N18.4  | 0.0915056898554534   |             |
| AGIWUR4412;AGIWUR22862;AGIWUR24807;AGIWUR27204;AGIWUR33845;AGIWUR35410             |    |   |         |         |                |           |           |                      |             |
| CB4856                                                                             | CT | V | 8932618 | 8934265 | WBGene00019202 | H14N18.2  | H14N18.2  |                      |             |
| -0.00202404036137427 AGIWUR19763                                                   |    |   |         |         |                |           |           |                      |             |
| CB4856                                                                             | CT | V | 8936359 | 8939676 | WBGene00006760 | unc-23    | H14N18.1  | -0.172409282605656   |             |
| AGIWUR36885                                                                        |    |   |         |         |                |           |           |                      |             |
| CB4856                                                                             | CT | V | 8939592 | 8944063 | WBGene00020554 | T19A5.3   | T19A5.3   | 0.24399617199978     |             |
| AGIWUR9403;AGIWUR21691;AGIWUR24644;AGIWUR24708;AGIWUR26711;AGIWUR39995;AGIWUR40351 |    |   |         |         |                |           |           |                      |             |
| CB4856                                                                             | CT | V | 8947799 | 8956294 | WBGene00001526 | gck-1     | T19A5.2   | 0.0812249682406465   |             |
| AGIWUR7524;AGIWUR14367;AGIWUR20465;AGIWUR25186;AGIWUR39460;AGIWUR40989             |    |   |         |         |                |           |           |                      |             |
| CB4856                                                                             | CT | V | 8957045 | 8961935 | WBGene00020553 | T19A5.1   | T19A5.1   | 0.0813636975912821   | AGIWUR27563 |
| CB4856                                                                             | CT | V | 8961915 | 8964099 | WBGene00003634 | nhr-44    | T19A5.4   | 0.413090332107636    | AGIWUR18736 |
| CB4856                                                                             | CT | V | 8964711 | 8968406 | WBGene00020555 | nhr-219   | T19A5.5   | 0.345675741304402    | AGIWUR15634 |
| CB4856                                                                             | CT | V | 8968737 | 8969955 | WBGene00019114 | nhr-194   | F59E11.8  | 0.196217289318826    |             |
| AGIWUR42742                                                                        |    |   |         |         |                |           |           |                      |             |
| CB4856                                                                             | CT | V | 8970744 | 8972364 | WBGene00019115 | nhr-195   | F59E11.10 | 0.511639535047685    |             |

|                                                                      |    |   |         |         |                |          |                                         |
|----------------------------------------------------------------------|----|---|---------|---------|----------------|----------|-----------------------------------------|
| AGIWUR42909                                                          |    |   |         |         |                |          |                                         |
| CB4856                                                               | CT | V | 8973182 | 8974943 | WBGene00019116 | nhr-143  | F59E11.11 0.364366985100117             |
| AGIWUR26665                                                          |    |   |         |         |                |          |                                         |
| CB4856                                                               | CT | V | 8975698 | 8977465 | WBGene00019117 | nhr-144  | F59E11.12 0.119905754939321             |
| AGIWUR2070;AGIWUR5823;AGIWUR7596;AGIWUR21861;AGIWUR25053;AGIWUR41239 |    |   |         |         |                |          |                                         |
| CB4856                                                               | CT | V | 8979522 | 8980929 | WBGene00006143 | str-84   | F59E11.13 -0.337468160889019            |
| AGIWUR27796                                                          |    |   |         |         |                |          |                                         |
| CB4856                                                               | CT | V | 8982387 | 8983689 | WBGene00006145 | str-86   | F59E11.14 -0.0963034362431339           |
| AGIWUR12913                                                          |    |   |         |         |                |          |                                         |
| CB4856                                                               | CT | V | 8984525 | 8985840 | WBGene00006144 | str-85   | F59E11.15 -0.345794944288808            |
| AGIWUR44467                                                          |    |   |         |         |                |          |                                         |
| CB4856                                                               | CT | V | 8986694 | 8987965 | WBGene00006146 | str-87   | F59E11.16 -0.140436570036789            |
| AGIWUR3731                                                           |    |   |         |         |                |          |                                         |
| CB4856                                                               | CT | V | 8990244 | 8991664 | WBGene00019113 | F59E11.7 | F59E11.7 0.72602807957768               |
| AGIWUR3934;AGIWUR7034;AGIWUR9590;AGIWUR10453;AGIWUR16102;AGIWUR30847 |    |   |         |         |                |          |                                         |
| CB4856                                                               | CT | V | 8991789 | 8993142 | WBGene00019112 | F59E11.6 | F59E11.6 0.0217396341652858             |
| AGIWUR14515                                                          |    |   |         |         |                |          |                                         |
| CB4856                                                               | CT | V | 8995101 | 8996664 | WBGene00019111 | F59E11.5 | F59E11.5 0.00244294640997467            |
| AGIWUR21952                                                          |    |   |         |         |                |          |                                         |
| CB4856                                                               | CT | V | 8998599 | 9001352 | WBGene00005535 | sri-23   | F59E11.3 0.277139295835013              |
| AGIWUR44649                                                          |    |   |         |         |                |          |                                         |
| CB4856                                                               | CT | V | 9001475 | 9003100 | WBGene00019109 | F59E11.2 | F59E11.2 0.321646374443454              |
| AGIWUR9207;AGIWUR11718;AGIWUR41284                                   |    |   |         |         |                |          |                                         |
| CB4856                                                               | CT | V | 9003709 | 9004967 | WBGene00005892 | srx-1    | F59E11.1 0.0828291799306742             |
| AGIWUR9999                                                           |    |   |         |         |                |          |                                         |
| CB4856                                                               | CT | V | 9005543 | 9006931 | WBGene00005894 | srx-3    | R03H4.3 0.0215208809541085 AGIWUR26052  |
| CB4856                                                               | CT | V | 9009475 | 9010788 | WBGene00005893 | srx-2    | R03H4.2 0.256578258200793 AGIWUR9140    |
| CB4856                                                               | CT | V | 9011244 | 9011565 | WBGene00023327 | R03H4.8  | R03H4.8 0.0422965344173249              |
| AGIWUR7761;AGIWUR13453;AGIWUR19516;AGIWUR25492;AGIWUR37990           |    |   |         |         |                |          |                                         |
| CB4856                                                               | CT | V | 9012199 | 9013865 | WBGene00005412 | srh-201  | R03H4.9 -0.00567259030967637 AGIWUR3855 |
| CB4856                                                               | CT | V | 9014408 | 9015640 | WBGene00019850 | srt-18   | R03H4.4 0.0221935189463096 AGIWUR6053   |
| CB4856                                                               | CT | V | 9016864 | 9019318 | WBGene00019849 | oac-40   | R03H4.1 -0.0393922261434341 AGIWUR14055 |
| CB4856                                                               | CT | V | 9019595 | 9022178 | WBGene00019851 | oac-41   | R03H4.5 0.0528148593365305 AGIWUR13765  |
| CB4856                                                               | CT | V | 9022361 | 9024806 | WBGene00044617 | bus-1    | R03H4.6 -0.0484898285893083             |
| AGIWUR6644;AGIWUR9344                                                |    |   |         |         |                |          |                                         |
| CB4856                                                               | CT | V | 9025513 | 9026540 | WBGene00019853 | srsx-20  | R03H4.7 -0.0191688443614519             |
| AGIWUR2800;AGIWUR18747;AGIWUR30131;AGIWUR35466                       |    |   |         |         |                |          |                                         |
| CB4856                                                               | CT | V | 9030548 | 9032593 | WBGene00016095 | C25E10.5 | C25E10.5 -0.012017350012659             |
| AGIWUR32429                                                          |    |   |         |         |                |          |                                         |

|                                                                       |   |                 |                |           |           |                     |             |
|-----------------------------------------------------------------------|---|-----------------|----------------|-----------|-----------|---------------------|-------------|
| CB4856 CT                                                             | V | 9033567 9035605 | WBGene00016094 | C25E10.4  | C25E10.4  | -0.414255243329942  |             |
| AGIWUR5021                                                            |   |                 |                |           |           |                     |             |
| CB4856 CT                                                             | V | 9036236 9040289 | WBGene00016093 | srsx-34   | C25E10.3  | 0.465908890845911   |             |
| AGIWUR14246;AGIWUR22371;AGIWUR42503;AGIWUR42809                       |   |                 |                |           |           |                     |             |
| CB4856 CT                                                             | V | 9041330 9043677 | WBGene00016092 | cyp-33B1  | C25E10.2  | 0.293591830357933   |             |
| AGIWUR816;AGIWUR6140;AGIWUR39399                                      |   |                 |                |           |           |                     |             |
| CB4856 CT                                                             | V | 9045171 9046967 | WBGene00016091 | nhr-30    | C25E10.1  | 0.262448059851175   |             |
| AGIWUR17500                                                           |   |                 |                |           |           |                     |             |
| CB4856 CT                                                             | V | 9050102 9051191 | WBGene00016096 | C25E10.7  | C25E10.7  | 0.0899174891986023  |             |
| AGIWUR44248                                                           |   |                 |                |           |           |                     |             |
| CB4856 CT                                                             | V | 9053322 9053995 | WBGene00016097 | C25E10.8  | C25E10.8  | -0.0734743508767313 |             |
| AGIWUR386;AGIWUR11321;AGIWUR12719;AGIWUR26576                         |   |                 |                |           |           |                     |             |
| CB4856 CT                                                             | V | 9054268 9054844 | WBGene00023417 | swm-1     | C25E10.9  | 0.0408964206648292  |             |
| AGIWUR435;AGIWUR3111;AGIWUR11880;AGIWUR15292                          |   |                 |                |           |           |                     |             |
| CB4856 CT                                                             | V | 9055326 9056392 | WBGene00016099 | C25E10.10 | C25E10.10 | -0.33006036124511   |             |
| AGIWUR16698                                                           |   |                 |                |           |           |                     |             |
| CB4856 CT                                                             | V | 9057543 9058332 | WBGene00016100 | C25E10.11 | C25E10.11 | 0.151609215767603   |             |
| AGIWUR35724                                                           |   |                 |                |           |           |                     |             |
| CB4856 CT                                                             | V | 9059750 9060481 | WBGene00023431 | C25E10.13 | C25E10.13 | 0.234232305990439   |             |
| AGIWUR10531;AGIWUR28693;AGIWUR31323;AGIWUR40791;AGIWUR41640           |   |                 |                |           |           |                     |             |
| CB4856 CT                                                             | V | 9060494 9062441 | WBGene00016101 | C25E10.12 | C25E10.12 | -0.0473662527652365 |             |
| AGIWUR18021                                                           |   |                 |                |           |           |                     |             |
| CB4856 CT                                                             | V | 9067976 9068390 | WBGene00020862 | fip-2     | T27E4.4   | 0.809401751412789   | AGIWUR28034 |
| CB4856 CT                                                             | V | 9068368 9069694 | WBGene00020863 | T27E4.5   | T27E4.5   | -0.102540435025249  |             |
| AGIWUR1035;AGIWUR8082;AGIWUR15817;AGIWUR22970                         |   |                 |                |           |           |                     |             |
| CB4856 CT                                                             | V | 9069865 9073528 | WBGene00020864 | oac-50    | T27E4.6   | 0.457934062329297   | AGIWUR36336 |
| CB4856 CT                                                             | V | 9074784 9076322 | WBGene00020865 | T27E4.7   | T27E4.7   | 0.566417889110898   |             |
| AGIWUR34270;AGIWUR35657;AGIWUR37836                                   |   |                 |                |           |           |                     |             |
| CB4856 CT                                                             | V | 9092345 9094345 | WBGene00020861 | T27E4.1   | T27E4.1   | 0.274772220126586   |             |
| AGIWUR639;AGIWUR19829;AGIWUR29731                                     |   |                 |                |           |           |                     |             |
| CB4856 CT                                                             | V | 9096007 9097233 | WBGene00017659 | F21C10.10 | F21C10.10 | 2.45847187875335    |             |
| AGIWUR25059                                                           |   |                 |                |           |           |                     |             |
| CB4856 CT                                                             | V | 9097121 9098696 | WBGene00017658 | F21C10.9  | F21C10.9  | 0.299305198904787   |             |
| AGIWUR7021;AGIWUR8613;AGIWUR11231;AGIWUR12515;AGIWUR12623;AGIWUR44908 |   |                 |                |           |           |                     |             |
| CB4856 CT                                                             | V | 9099638 9101133 | WBGene00017661 | frpr-6    | F21C10.12 | 0.0708996344388506  |             |
| AGIWUR11739                                                           |   |                 |                |           |           |                     |             |
| CB4856 CT                                                             | V | 9109584 9111013 | WBGene00004119 | pqn-31    | F21C10.8  | 0.875031722964305   |             |
| AGIWUR10968                                                           |   |                 |                |           |           |                     |             |
| CB4856 CT                                                             | V | 9112767 9122180 | WBGene00017657 | F21C10.7  | F21C10.7  | -0.122716584427666  |             |

|                                                                     |    |   |         |         |                |           |           |                     |
|---------------------------------------------------------------------|----|---|---------|---------|----------------|-----------|-----------|---------------------|
| AGIWUR43657                                                         |    |   |         |         |                |           |           |                     |
| CB4856                                                              | CT | V | 9123489 | 9123809 | WBGene00017660 | F21C10.11 | F21C10.11 | 0.562005745806944   |
| AGIWUR1058;AGIWUR5369;AGIWUR7951;AGIWUR8268;AGIWUR14237;AGIWUR24278 |    |   |         |         |                |           |           |                     |
| CB4856                                                              | CT | V | 9124480 | 9124994 | WBGene00017656 | F21C10.6  | F21C10.6  | 0.0107858891539854  |
| AGIWUR43227                                                         |    |   |         |         |                |           |           |                     |
| CB4856                                                              | CT | V | 9125645 | 9126006 | WBGene00017655 | F21C10.5  | F21C10.5  | 0.212223892637622   |
| AGIWUR34079                                                         |    |   |         |         |                |           |           |                     |
| CB4856                                                              | CT | V | 9126679 | 9127593 | WBGene00017654 | F21C10.4  | F21C10.4  | 0.130892702123601   |
| AGIWUR25641                                                         |    |   |         |         |                |           |           |                     |
| CB4856                                                              | CT | V | 9128710 | 9130943 | WBGene00017653 | F21C10.3  | F21C10.3  | 0.331899922090763   |
| AGIWUR3740                                                          |    |   |         |         |                |           |           |                     |
| CB4856                                                              | CT | V | 9132384 | 9133275 | WBGene00017652 | F21C10.1  | F21C10.1  | 0.263051628297699   |
| AGIWUR35855                                                         |    |   |         |         |                |           |           |                     |
| CB4856                                                              | CT | V | 9134255 | 9135347 | WBGene00015053 | B0222.1   | B0222.1   | 0.116593436314711   |
| CB4856                                                              | CT | V | 9135656 | 9137718 | WBGene00015054 | pitr-2    | B0222.2   | 0.187510387016271   |
| CB4856                                                              | CT | V | 9138946 | 9141397 | WBGene00015055 | pitr-3    | B0222.3   | 0.114433439569228   |
| AGIWUR12154;AGIWUR17374;AGIWUR25525;AGIWUR26220                     |    |   |         |         |                |           |           |                     |
| CB4856                                                              | CT | V | 9144630 | 9146899 | WBGene00006418 | tag-38    | B0222.4   | 0.530367725493367   |
| CB4856                                                              | CT | V | 9152321 | 9154872 | WBGene00015056 | B0222.5   | B0222.5   | -0.407312144180967  |
| CB4856                                                              | CT | V | 9162051 | 9163005 | WBGene00000718 | col-145   | B0222.7   | -0.246022073542658  |
| CB4856                                                              | CT | V | 9164297 | 9165307 | WBGene00000599 | col-10    | B0222.8   | -0.297960027860482  |
| CB4856                                                              | CT | V | 9165820 | 9168041 | WBGene00044582 | B0222.11  | B0222.11  | -0.0991683901553002 |
| AGIWUR15091;AGIWUR20798                                             |    |   |         |         |                |           |           |                     |
| CB4856                                                              | CT | V | 9168393 | 9173024 | WBGene00015057 | gad-3     | B0222.9   | 0.130250362565613   |
| CB4856                                                              | CT | V | 9174089 | 9175250 | WBGene00004107 | pqn-16    | C24B5.5   | 0.545786724049297   |
| CB4856                                                              | CT | V | 9175798 | 9177997 | WBGene00016045 | spas-1    | C24B5.2   | -0.201966151696773  |
| AGIWUR5281;AGIWUR20143                                              |    |   |         |         |                |           |           |                     |
| CB4856                                                              | CT | V | 9177949 | 9181719 | WBGene00004216 | ptr-1     | C24B5.3   | 0.0176566212625904  |
| CB4856                                                              | CT | V | 9191617 | 9195877 | WBGene00016044 | C24B5.1   | C24B5.1   | 0.262470012177811   |
| CB4856                                                              | CT | V | 9195821 | 9197326 | WBGene00016046 | C24B5.4   | C24B5.4   | 0.672320486542134   |
| CB4856                                                              | CT | V | 9197751 | 9198987 | WBGene00006221 | str-177   | T18H9.4   | 0.196264408844026   |
| AGIWUR2394;AGIWUR11610;AGIWUR18614;AGIWUR33614                      |    |   |         |         |                |           |           |                     |
| CB4856                                                              | CT | V | 9199680 | 9204734 | WBGene00000215 | asp-2     | T18H9.2   | -0.264339138903431  |
| CB4856                                                              | CT | V | 9204703 | 9207467 | WBGene00002132 | inx-10    | T18H9.5   | -0.0408735712239547 |
| AGIWUR9782;AGIWUR15209;AGIWUR34590                                  |    |   |         |         |                |           |           |                     |
| CB4856                                                              | CT | V | 9209463 | 9213654 | WBGene00007023 | mdt-27    | T18H9.6   | -0.212609700731941  |
| CB4856                                                              | CT | V | 9213746 | 9217243 | WBGene00044077 | tag-232   | T18H9.7   | 0.0321112657704283  |
| CB4856                                                              | CT | V | 9221866 | 9224354 | WBGene00001695 | grd-6     | T18H9.1   | -0.645928838934299  |
| CB4856                                                              | CT | V | 9226094 | 9227523 | WBGene00017193 | F07C3.2   | F07C3.2   | -0.174356317700832  |

|                                                                                                                        |    |   |         |         |                 |          |           |                            |             |
|------------------------------------------------------------------------------------------------------------------------|----|---|---------|---------|-----------------|----------|-----------|----------------------------|-------------|
| CB4856                                                                                                                 | CT | V | 9227710 | 9232396 | WBGene00017194  | F07C3.3  | F07C3.3   | -0.301238437200208         | AGIWUR2492  |
| CB4856                                                                                                                 | CT | V | 9234610 | 9243221 | WBGene00017195  | glo-4    | F07C3.4   | 0.205330931728416          |             |
| AGIWUR18442;AGIWUR21236;AGIWUR30949;AGIWUR33447;AGIWUR35250;AGIWUR39020                                                |    |   |         |         |                 |          |           |                            |             |
| CB4856                                                                                                                 | CT | V | 9244402 | 9246360 | WBGene000000003 | aat-2    | F07C3.7   | 0.264758526816815          |             |
| AGIWUR8898;AGIWUR30371;AGIWUR33955;AGIWUR43403                                                                         |    |   |         |         |                 |          |           |                            |             |
| CB4856                                                                                                                 | CT | V | 9250275 | 9254223 | WBGene00004211  | ptd-2    | F07C3.1   | 0.06110307991647           | AGIWUR19663 |
| CB4856                                                                                                                 | CT | V | 9254219 | 9254632 | WBGene00017197  | F07C3.9  | F07C3.9   | 0.149936642667399          | AGIWUR36578 |
| CB4856                                                                                                                 | CT | V | 9256864 | 9261124 | WBGene00017198  | nhr-36   | F07C3.10  | -0.00961704367724625       |             |
| AGIWUR5452                                                                                                             |    |   |         |         |                 |          |           |                            |             |
| CB4856                                                                                                                 | CT | V | 9263800 | 9266499 | WBGene00022788  | slc-17.7 |           | ZK682.2 -0.151440949944435 |             |
| AGIWUR27401                                                                                                            |    |   |         |         |                 |          |           |                            |             |
| CB4856                                                                                                                 | CT | V | 9280702 | 9282154 | WBGene00001954  | hlh-10   | ZK682.4   | 0.0599616191966028         | AGIWUR4665  |
| CB4856                                                                                                                 | CT | V | 9284129 | 9287617 | WBGene00022789  | lron-2   | ZK682.5   | -0.35275181346446          | AGIWUR4188  |
| CB4856                                                                                                                 | CT | V | 9290683 | 9292118 | WBGene00022790  | ZK682.7  | ZK682.7   | 0.00860965174920381        | AGIWUR7624  |
| CB4856                                                                                                                 | CT | V | 9297632 | 9302158 | WBGene00018405  | F44A2.5  | F44A2.5   | 0.320857302098405          |             |
| AGIWUR10464;AGIWUR10630;AGIWUR43500                                                                                    |    |   |         |         |                 |          |           |                            |             |
| CB4856                                                                                                                 | CT | V | 9303326 | 9304622 | WBGene00018404  | nhr-39   | F44A2.4   | 0.289744920622692          | AGIWUR25387 |
| CB4856                                                                                                                 | CT | V | 9305416 | 9310926 | WBGene00018403  | F44A2.3  | F44A2.3   | -0.0641897414641655        | AGIWUR5487  |
| CB4856                                                                                                                 | CT | V | 9318311 | 9320995 | WBGene00018402  | kvs-3    | F44A2.2   | 0.168317959235049          | AGIWUR34457 |
| CB4856                                                                                                                 | CT | V | 9321503 | 9322905 | WBGene00018406  | F44A2.7  | F44A2.7   | 0.204372907459965          | AGIWUR39794 |
| CB4856                                                                                                                 | CT | V | 9323085 | 9327209 | WBGene00006499  | tag-153  | F44A2.1   | -0.168815320113491         |             |
| AGIWUR3118;AGIWUR11728;AGIWUR21919;AGIWUR31459;AGIWUR34827;AGIWUR41537                                                 |    |   |         |         |                 |          |           |                            |             |
| CB4856                                                                                                                 | CT | V | 9327145 | 9333062 | WBGene00019465  | ac1-14   | K07B1.5   | -0.126733445805076         |             |
| AGIWUR5902;AGIWUR21744;AGIWUR42125                                                                                     |    |   |         |         |                 |          |           |                            |             |
| CB4856                                                                                                                 | CT | V | 9334773 | 9336668 | WBGene00006729  | ucp-4    | K07B1.3   | -0.0400896875008758        | AGIWUR23287 |
| CB4856                                                                                                                 | CT | V | 9336762 | 9338858 | WBGene00000766  | coq-6    | K07B1.2   | -0.104896643906715         | AGIWUR24967 |
| CB4856                                                                                                                 | CT | V | 9338859 | 9344218 | WBGene00019466  | tos-1    | K07B1.6   | 0.414547195793737          |             |
| AGIWUR7103;AGIWUR19971;AGIWUR23532;AGIWUR25576;AGIWUR27157;AGIWUR29383;AGIWUR30086;AGIWUR30658;AGIWUR33209;AGIWUR36988 |    |   |         |         |                 |          |           |                            |             |
| CB4856                                                                                                                 | CT | V | 9345022 | 9346962 | WBGene00019467  | K07B1.7  | K07B1.7   | 0.0763289235410847         |             |
| AGIWUR11067;AGIWUR29876                                                                                                |    |   |         |         |                 |          |           |                            |             |
| CB4856                                                                                                                 | CT | V | 9345772 | 9348687 | WBGene00006623  | try-5    | K07B1.1   | 0.0954448659133114         | AGIWUR40119 |
| CB4856                                                                                                                 | CT | V | 9349987 | 9351332 | WBGene00005938  | srx-47   | E02C12.3  | -0.0717233201616478        |             |
| AGIWUR30857                                                                                                            |    |   |         |         |                 |          |           |                            |             |
| CB4856                                                                                                                 | CT | V | 9353247 | 9354497 | WBGene00005937  | srx-46   | E02C12.2  | 0.0121385696566998         |             |
| AGIWUR39729                                                                                                            |    |   |         |         |                 |          |           |                            |             |
| CB4856                                                                                                                 | CT | V | 9354512 | 9355471 | WBGene00017091  | ttr-40   | E02C12.4  | -0.632215770541851         |             |
| AGIWUR41676                                                                                                            |    |   |         |         |                 |          |           |                            |             |
| CB4856                                                                                                                 | CT | V | 9355505 | 9356541 | WBGene00023485  | ttr-49   | E02C12.13 | -0.517247230772366         |             |

AGIWUR9606;AGIWUR10008;AGIWUR23715

CB4856 CT V 9356750 9359774 WBGene00001665 gpa-3 E02C12.5 0.20060890213602

AGIWUR30793

CB4856 CT V 9369549 9371086 WBGene00017092 E02C12.6 E02C12.6 0.936954512853641

AGIWUR25049

CB4856 CT V 9371620 9373613 WBGene00017093 E02C12.8 E02C12.8 -0.137237975063385

AGIWUR16233;AGIWUR41103

CB4856 CT V 9373954 9374842 WBGene00017094 E02C12.9 E02C12.9 0.102318957018037

AGIWUR5285

CB4856 CT V 9375099 9378404 WBGene00017095 E02C12.10 E02C12.10 -0.517895238358542

AGIWUR5101

CB4856 CT V 9379435 9379908 WBGene00017096 E02C12.11 E02C12.11 -0.0400797057492177

AGIWUR34551

CB4856 CT V 9386179 9400062 WBGene00002036 hum-2 F36D4.3 0.0657735893706892

AGIWUR15165;AGIWUR16315;AGIWUR25547

CB4856 CT V 9400327 9401855 WBGene00018088 trpp-4 F36D4.2 -0.0657420318778712 AGIWUR33543

CB4856 CT V 9401805 9406360 WBGene00018089 F36D4.4 F36D4.4 -0.106334587413768 AGIWUR1817

CB4856 CT V 9417056 9419298 WBGene00018087 F36D4.1 F36D4.1 0.161908528376309 AGIWUR36788

CB4856 CT V 9419292 9425762 WBGene00018090 F36D4.5 F36D4.5 -0.116748098143706

AGIWUR6465;AGIWUR6807;AGIWUR7542;AGIWUR11462;AGIWUR23487;AGIWUR27935;AGIWUR35955;AGIWUR39168

CB4856 CT V 9426852 9427523 WBGene00018091 F36D4.6 F36D4.6 -0.0427042263051938 AGIWUR18771

CB4856 CT V 9444050 9460639 WBGene00019237 H24G06.1 H24G06.1 0.303311049773363

AGIWUR8707;AGIWUR38127;AGIWUR44261

CB4856 CT V 9460686 9462705 WBGene00008556 F07D3.3 F07D3.3 -0.0499333108204718 AGIWUR9046

CB4856 CT V 9471975 9473796 WBGene00001449 flp-6 F07D3.2 0.266806963219167 AGIWUR27152

CB4856 CT V 9478163 9479601 WBGene00003522 nas-3 K06A4.1 -0.657967037663075

AGIWUR1048;AGIWUR7670;AGIWUR13476;AGIWUR13931;AGIWUR17705;AGIWUR33871

CB4856 CT V 9484206 9489033 WBGene00010592 K06A4.2 K06A4.2 -0.00661482765036858 AGIWUR5894

CB4856 CT V 9490028 9491715 WBGene00010597 K06A4.7 K06A4.7 0.256672883027781 AGIWUR17974

CB4856 CT V 9497042 9499372 WBGene00010593 gsnl-1 K06A4.3 -0.125330028898578 AGIWUR4604

CB4856 CT V 9501401 9504580 WBGene00010594 swt-5 K06A4.4 0.0116751411058242 AGIWUR10451

CB4856 CT V 9505603 9507049 WBGene00010595 haao-1 K06A4.5 -0.497924374452944 AGIWUR4297

CB4856 CT V 9508079 9510476 WBGene00008669 acs-14 F11A3.1 0.0667299676237878 AGIWUR34411

CB4856 CT V 9510406 9510719 WBGene00077496 F11A3.4 F11A3.4 0.159416234718943 AGIWUR18321

CB4856 CT V 9512506 9513466 WBGene00014734 F11A3.3 F11A3.3 0.11706505280149

AGIWUR5652;AGIWUR23491

CB4856 CT V 9513824 9517585 WBGene00008670 eif-2Bdelta F11A3.2 -0.204039326357613

AGIWUR6022

CB4856 CT V 9517519 9518933 WBGene00008233 C50F4.8 C50F4.8 0.815130913048014 AGIWUR9165



|                                                                      |    |   |         |         |                |          |          |                     |             |
|----------------------------------------------------------------------|----|---|---------|---------|----------------|----------|----------|---------------------|-------------|
| CB4856                                                               | CT | V | 9521676 | 9523036 | WBGene00014711 | C50F4.15 | C50F4.15 | -0.0192353663901419 |             |
| AGIWUR4792;AGIWUR8304                                                |    |   |         |         |                |          |          |                     |             |
| CB4856                                                               | CT | V | 9523167 | 9524199 | WBGene00008234 | C50F4.9  | C50F4.9  | 1.51157088463053    | AGIWUR3907  |
| CB4856                                                               | CT | V | 9526698 | 9529259 | WBGene00008229 | C50F4.1  | C50F4.1  | 0.666123776995132   | AGIWUR39754 |
| CB4856                                                               | CT | V | 9529951 | 9531577 | WBGene00008235 | C50F4.10 | C50F4.10 | 0.11561198289106    |             |
| AGIWUR42661                                                          |    |   |         |         |                |          |          |                     |             |
| CB4856                                                               | CT | V | 9531819 | 9534537 | WBGene00008230 | pfk-1.2  | C50F4.2  | 0.0497130715852734  | AGIWUR26495 |
| CB4856                                                               | CT | V | 9534926 | 9536404 | WBGene00008231 | tag-329  | C50F4.3  | -0.324658240794305  |             |
| AGIWUR15122;AGIWUR19502;AGIWUR39574                                  |    |   |         |         |                |          |          |                     |             |
| CB4856                                                               | CT | V | 9536771 | 9537769 | WBGene00008232 | C50F4.4  | C50F4.4  | -0.305032662399956  | AGIWUR16123 |
| CB4856                                                               | CT | V | 9537672 | 9539738 | WBGene00008236 | C50F4.12 | C50F4.12 | 0.0209265467615563  |             |
| AGIWUR24897;AGIWUR34125;AGIWUR34467;AGIWUR37554                      |    |   |         |         |                |          |          |                     |             |
| CB4856                                                               | CT | V | 9539844 | 9541606 | WBGene00008238 | C50F4.16 | C50F4.16 | -0.0572328690314787 |             |
| AGIWUR2870                                                           |    |   |         |         |                |          |          |                     |             |
| CB4856                                                               | CT | V | 9541782 | 9544226 | WBGene00003160 | mdf-1    | C50F4.11 | -0.36777789887592   |             |
| AGIWUR2261                                                           |    |   |         |         |                |          |          |                     |             |
| CB4856                                                               | CT | V | 9544611 | 9545398 | WBGene00001909 | his-35   | C50F4.13 | -0.121412987875287  |             |
| AGIWUR5006;AGIWUR6688;AGIWUR9765;AGIWUR19176;AGIWUR25348;AGIWUR38982 |    |   |         |         |                |          |          |                     |             |
| CB4856                                                               | CT | V | 9546092 | 9546838 | WBGene00001910 | C50F4.6  | C50F4.6  | -0.237336273727664  | AGIWUR818   |
| CB4856                                                               | CT | V | 9547083 | 9547607 | WBGene00001911 | his-37   | C50F4.7  | 0.0878772514485293  |             |
| AGIWUR5363;AGIWUR6028                                                |    |   |         |         |                |          |          |                     |             |
| CB4856                                                               | CT | V | 9547606 | 9549836 | WBGene00008237 | nstp-10  | C50F4.14 | 0.0223642223666065  |             |
| AGIWUR10756;AGIWUR24316;AGIWUR40160                                  |    |   |         |         |                |          |          |                     |             |
| CB4856                                                               | CT | V | 9550644 | 9556064 | WBGene00009098 | ehbp-1   | F25B3.1  | 0.00902386403490496 | AGIWUR7819  |
| CB4856                                                               | CT | V | 9556226 | 9561643 | WBGene00009100 | rgef-1   | F25B3.3  | -0.140553858152323  |             |
| AGIWUR23351;AGIWUR35083;AGIWUR44618                                  |    |   |         |         |                |          |          |                     |             |
| CB4856                                                               | CT | V | 9568749 | 9570295 | WBGene00009102 | F25B3.5  | F25B3.5  | 0.262255988274658   | AGIWUR39474 |
| CB4856                                                               | CT | V | 9577128 | 9579946 | WBGene00009099 | F25B3.2  | F25B3.2  | -0.0461818389430677 | AGIWUR27474 |
| CB4856                                                               | CT | V | 9580041 | 9582644 | WBGene00009103 | rtfo-1   | F25B3.6  | 0.251073545798663   | AGIWUR32432 |
| CB4856                                                               | CT | V | 9583545 | 9590523 | WBGene00010727 | K09G1.1  | K09G1.1  | -0.197431279753715  |             |
| AGIWUR9171;AGIWUR25494;AGIWUR35434                                   |    |   |         |         |                |          |          |                     |             |
| CB4856                                                               | CT | V | 9590617 | 9591255 | WBGene00010728 | K09G1.2  | K09G1.2  | -0.272211918104217  | AGIWUR21454 |
| CB4856                                                               | CT | V | 9597351 | 9597566 | WBGene00010729 | K09G1.3  | K09G1.3  | 0.0667230680595541  | AGIWUR34774 |
| CB4856                                                               | CT | V | 9608562 | 9614942 | WBGene00001053 | dop-2    | K09G1.4  | -0.196650142965542  | AGIWUR40950 |
| CB4856                                                               | CT | V | 9616031 | 9617654 | WBGene00004146 | pqn-63   | T06E4.11 | -0.340570772760944  |             |
| AGIWUR39956                                                          |    |   |         |         |                |          |          |                     |             |
| CB4856                                                               | CT | V | 9618233 | 9619019 | WBGene00011537 | T06E4.10 | T06E4.10 | -0.336094022701566  |             |
| AGIWUR42536                                                          |    |   |         |         |                |          |          |                     |             |
| CB4856                                                               | CT | V | 9620150 | 9621036 | WBGene00011536 | T06E4.9  | T06E4.9  | -0.728753203860752  |             |

AGIWUR17247;AGIWUR19509;AGIWUR27759;AGIWUR36271;AGIWUR41455;AGIWUR43957  
 CB4856 CT V 9622105 9622934 WBGene00011535 T06E4.8 T06E4.8 -0.558952813047537  
 AGIWUR5829;AGIWUR8168;AGIWUR9243;AGIWUR10103;AGIWUR31043  
 CB4856 CT V 9626404 9628143 WBGene00011534 T06E4.7 T06E4.7 0.00537478815589765 AGIWUR9548  
 CB4856 CT V 9628314 9629110 WBGene00044011 T06E4.12 T06E4.12 -0.481894241302239  
 AGIWUR411;AGIWUR3675;AGIWUR14554;AGIWUR26188;AGIWUR31848  
 CB4856 CT V 9629943 9631012 WBGene00000719 col-146 T06E4.6 -0.406584019695188  
 AGIWUR823;AGIWUR3653;AGIWUR6351;AGIWUR15529;AGIWUR28793  
 CB4856 CT V 9632029 9633338 WBGene00000720 col-147 T06E4.4 -0.140909216467318 AGIWUR7879  
 CB4856 CT V 9634861 9645595 WBGene00000226 atl-1 T06E4.3 0.0771650311097538  
 AGIWUR10638;AGIWUR18456;AGIWUR41912  
 CB4856 CT V 9645746 9650297 WBGene00001830 hcp-2 T06E4.1 -0.12218828160076  
 AGIWUR1535;AGIWUR38072  
 CB4856 CT V 9654755 9657975 WBGene00007140 cyp-29A4 B0331.1 -0.712917874328236  
 AGIWUR26929  
 CB4856 CT V 9658931 9661614 WBGene00007141 pitr-4 B0331.2 0.883325197945591 AGIWUR21848  
 CB4856 CT V 9666700 9670050 WBGene00013962 ZK287.1 ZK287.1 0.83010861549208 AGIWUR5092  
 CB4856 CT V 9670028 9673630 WBGene00013963 sulp-8 ZK287.2 -0.149751078256784 AGIWUR23963  
 CB4856 CT V 9678277 9679302 WBGene00013964 ZK287.3 ZK287.3 -0.232217079887153 AGIWUR14407  
 CB4856 CT V 9679357 9680215 WBGene00013968 ZK287.9 ZK287.9 -0.453412057821398  
 AGIWUR3299;AGIWUR3857;AGIWUR4248;AGIWUR19258;AGIWUR24574;AGIWUR26804;AGIWUR27249;AGIWUR30486;AGIWUR31680;AGIWUR37264  
 CB4856 CT V 9680173 9685715 WBGene00013965 ZK287.4 ZK287.4 0.300192713903409 AGIWUR8288  
 CB4856 CT V 9689686 9690615 WBGene00004320 rbx-1 ZK287.5 -0.0945517433373624  
 AGIWUR1130;AGIWUR15983;AGIWUR18688;AGIWUR21768;AGIWUR27088;AGIWUR41715  
 CB4856 CT V 9691039 9692159 WBGene00013966 ztf-9 ZK287.6 -0.274095967313456  
 AGIWUR11148;AGIWUR11795;AGIWUR15603;AGIWUR16629  
 CB4856 CT V 9692899 9694785 WBGene00013967 ZK287.7 ZK287.7 -0.0357111680782847 AGIWUR43503  
 CB4856 CT V 9697129 9701552 WBGene00001842 her-1 ZK287.8 -0.123851922423537  
 AGIWUR2045;AGIWUR11114;AGIWUR12264;AGIWUR22029;AGIWUR33994;AGIWUR34851  
 CB4856 CT V 9711447 9713632 WBGene00009586 F40F9.10 F40F9.10 0.310392044570845  
 AGIWUR3196  
 CB4856 CT V 9715209 9716380 WBGene00009581 F40F9.3 F40F9.3 0.0163220431644415  
 AGIWUR3237;AGIWUR12679;AGIWUR24727;AGIWUR42854  
 CB4856 CT V 9716697 9718051 WBGene00006230 str-188 F40F9.4 0.142086071719478 AGIWUR9381  
 CB4856 CT V 9718462 9719724 WBGene00014754 F40F9.11 F40F9.11 0.207340863563251  
 AGIWUR367;AGIWUR4670;AGIWUR8858;AGIWUR8900;AGIWUR17425;AGIWUR30807;AGIWUR40618  
 CB4856 CT V 9719743 9724118 WBGene00009582 F40F9.5 F40F9.5 0.284791127513021 AGIWUR12858  
 CB4856 CT V 9725972 9729510 WBGene00009583 aagr-3 F40F9.6 0.0106409302914692 AGIWUR8286

|                                                                                                                                                                                                        |    |   |         |         |                |          |          |                       |             |
|--------------------------------------------------------------------------------------------------------------------------------------------------------------------------------------------------------|----|---|---------|---------|----------------|----------|----------|-----------------------|-------------|
| CB4856                                                                                                                                                                                                 | CT | V | 9730110 | 9734022 | WBGene00009584 | drap-1   | F40F9.7  | -0.094913441781646    |             |
| AGIWUR6724;AGIWUR11997;AGIWUR15401;AGIWUR15476;AGIWUR22214;AGIWUR34305                                                                                                                                 |    |   |         |         |                |          |          |                       |             |
| CB4856                                                                                                                                                                                                 | CT | V | 9734103 | 9735316 | WBGene00009585 | cal-7    | F40F9.8  | -0.172489160696692    | AGIWUR40235 |
| CB4856                                                                                                                                                                                                 | CT | V | 9737556 | 9739740 | WBGene00000172 | aqp-4    | F40F9.9  | -0.111236525630837    | AGIWUR18766 |
| CB4856                                                                                                                                                                                                 | CT | V | 9741206 | 9744326 | WBGene00010251 | sta-2    | F58E6.1  | 0.0873414866803204    |             |
| AGIWUR6189;AGIWUR14897;AGIWUR16493;AGIWUR18977;AGIWUR39584;AGIWUR43036                                                                                                                                 |    |   |         |         |                |          |          |                       |             |
| CB4856                                                                                                                                                                                                 | CT | V | 9745240 | 9749228 | WBGene00077697 | F58E6.13 | F58E6.13 | 0.650801072268256     |             |
| AGIWUR2338;AGIWUR12430                                                                                                                                                                                 |    |   |         |         |                |          |          |                       |             |
| CB4856                                                                                                                                                                                                 | CT | V | 9749971 | 9750408 | WBGene00010253 | F58E6.4  | F58E6.4  | 0.159771651738119     | AGIWUR1069  |
| CB4856                                                                                                                                                                                                 | CT | V | 9752076 | 9752861 | WBGene00010255 | F58E6.6  | F58E6.6  | 0.0939761504247496    | AGIWUR24247 |
| CB4856                                                                                                                                                                                                 | CT | V | 9753423 | 9754581 | WBGene00010254 | F58E6.5  | F58E6.5  | -0.313707412632684    | AGIWUR18939 |
| CB4856                                                                                                                                                                                                 | CT | V | 9755076 | 9755808 | WBGene00010257 | F58E6.8  | F58E6.8  | 0.0189054224260676    |             |
| AGIWUR2576;AGIWUR16776;AGIWUR17087;AGIWUR36175                                                                                                                                                         |    |   |         |         |                |          |          |                       |             |
| CB4856                                                                                                                                                                                                 | CT | V | 9756954 | 9757984 | WBGene00010258 | F58E6.11 | F58E6.11 | 0.107578325161867     |             |
| AGIWUR10045                                                                                                                                                                                            |    |   |         |         |                |          |          |                       |             |
| CB4856                                                                                                                                                                                                 | CT | V | 9764645 | 9769361 | WBGene00006778 | unc-42   | F58E6.10 | 1.09950977977002      |             |
| AGIWUR40416                                                                                                                                                                                            |    |   |         |         |                |          |          |                       |             |
| CB4856                                                                                                                                                                                                 | CT | V | 9772430 | 9774881 | WBGene00009768 | F46B6.2  | F46B6.2  | 0.031953261882899     | AGIWUR14437 |
| CB4856                                                                                                                                                                                                 | CT | V | 9774897 | 9775834 | WBGene00009776 | F46B6.12 | F46B6.12 | -0.178636160659758    |             |
| AGIWUR24747;AGIWUR42292                                                                                                                                                                                |    |   |         |         |                |          |          |                       |             |
| CB4856                                                                                                                                                                                                 | CT | V | 9775935 | 9777743 | WBGene00004882 | smg-4    | F46B6.3  | -0.150208138332879    |             |
| AGIWUR15546;AGIWUR24438;AGIWUR29576;AGIWUR35194;AGIWUR44130                                                                                                                                            |    |   |         |         |                |          |          |                       |             |
| CB4856                                                                                                                                                                                                 | CT | V | 9777863 | 9779518 | WBGene00009769 | F46B6.4  | F46B6.4  | -0.205016969875054    | AGIWUR28824 |
| CB4856                                                                                                                                                                                                 | CT | V | 9779550 | 9783062 | WBGene00009770 | F46B6.5  | F46B6.5  | -0.0789967159435321   |             |
| AGIWUR3043;AGIWUR9088;AGIWUR12125;AGIWUR22800;AGIWUR24084;AGIWUR24726;AGIWUR29962;AGIWUR31112;AGIWUR32190                                                                                              |    |   |         |         |                |          |          |                       |             |
| CB4856                                                                                                                                                                                                 | CT | V | 9783167 | 9786868 | WBGene00009771 | F46B6.6  | F46B6.6  | -0.0668297551626349   | AGIWUR17683 |
| CB4856                                                                                                                                                                                                 | CT | V | 9786949 | 9789707 | WBGene00009772 | ztf-7    | F46B6.7  | -0.000663669353409446 |             |
| AGIWUR2863;AGIWUR4966;AGIWUR6956;AGIWUR7130;AGIWUR9529;AGIWUR10038;AGIWUR14760;AGIWUR15597;AGIWUR19058;AGIWUR23791;AGIWUR25977;AGIWUR29172;AGIWUR29972;AGIWUR31314;AGIWUR33929;AGIWUR35152;AGIWUR40593 |    |   |         |         |                |          |          |                       |             |
| CB4856                                                                                                                                                                                                 | CT | V | 9791567 | 9793234 | WBGene00009773 | lip1-2   | F46B6.8  | 1.67260166254873      | AGIWUR21540 |
| CB4856                                                                                                                                                                                                 | CT | V | 9796862 | 9798270 | WBGene00009774 | F46B6.9  | F46B6.9  | 0.136645531772665     |             |
| AGIWUR4462;AGIWUR18178                                                                                                                                                                                 |    |   |         |         |                |          |          |                       |             |
| CB4856                                                                                                                                                                                                 | CT | V | 9798926 | 9799179 | WBGene00044192 | F46B6.13 | F46B6.13 | -0.305462755555036    |             |
| AGIWUR313;AGIWUR12061;AGIWUR17444;AGIWUR18951;AGIWUR39217                                                                                                                                              |    |   |         |         |                |          |          |                       |             |
| CB4856                                                                                                                                                                                                 | CT | V | 9801463 | 9802028 | WBGene00009775 | F46B6.10 | F46B6.10 | 0.137898133911419     |             |
| AGIWUR5952;AGIWUR39386                                                                                                                                                                                 |    |   |         |         |                |          |          |                       |             |
| CB4856                                                                                                                                                                                                 | CT | V | 9803476 | 9804607 | WBGene00005702 | sru-39   | F46B6.11 | -0.266045200182964    |             |
| AGIWUR39929                                                                                                                                                                                            |    |   |         |         |                |          |          |                       |             |
| CB4856                                                                                                                                                                                                 | CT | V | 9805461 | 9806600 | WBGene00005700 | sru-37   | C50C10.1 | -0.0962446789978522   |             |

|                                                                                                                    |   |         |         |                |         |          |                       |             |
|--------------------------------------------------------------------------------------------------------------------|---|---------|---------|----------------|---------|----------|-----------------------|-------------|
|                                                                                                                    |   |         |         |                |         |          |                       |             |
| AGIWUR24732                                                                                                        |   |         |         |                |         |          |                       |             |
| CB4856 CT                                                                                                          | V | 9807635 | 9809432 | WBGene00005696 | sru-33  | C50C10.8 | -0.329718298820683    |             |
| AGIWUR25941                                                                                                        |   |         |         |                |         |          |                       |             |
| CB4856 CT                                                                                                          | V | 9811461 | 9812619 | WBGene00005692 | sru-29  | C50C10.2 | -0.000159881691701003 |             |
| AGIWUR7544                                                                                                         |   |         |         |                |         |          |                       |             |
| CB4856 CT                                                                                                          | V | 9813838 | 9815007 | WBGene00005693 | sru-30  | C50C10.3 | -0.00381439781173132  |             |
| AGIWUR36392                                                                                                        |   |         |         |                |         |          |                       |             |
| CB4856 CT                                                                                                          | V | 9816690 | 9817862 | WBGene00005694 | sru-31  | C50C10.4 | -0.60375765181913     |             |
| AGIWUR12905                                                                                                        |   |         |         |                |         |          |                       |             |
| CB4856 CT                                                                                                          | V | 9819279 | 9820210 | WBGene00005695 | sru-32  | C50C10.5 | 0.057874439271604     |             |
| AGIWUR7644; AGIWUR12393; AGIWUR12687; AGIWUR13938; AGIWUR24740; AGIWUR24921; AGIWUR28299; AGIWUR38405; AGIWUR44059 |   |         |         |                |         |          |                       |             |
| CB4856 CT                                                                                                          | V | 9820554 | 9821824 | WBGene00006232 | str-193 | C50C10.6 | 0.00183052685940766   |             |
| AGIWUR6862                                                                                                         |   |         |         |                |         |          |                       |             |
| CB4856 CT                                                                                                          | V | 9822619 | 9824249 | WBGene00006070 | str-2   | C50C10.7 | 0.0536872060671758    |             |
| AGIWUR28381                                                                                                        |   |         |         |                |         |          |                       |             |
| CB4856 CT                                                                                                          | V | 9827156 | 9828401 | WBGene00005697 | sru-34  | C50C10.9 | 0.00475518566027722   |             |
| AGIWUR1612; AGIWUR26289                                                                                            |   |         |         |                |         |          |                       |             |
| CB4856 CT                                                                                                          | V | 9829068 | 9830444 | WBGene00014817 | R07B5.1 | R07B5.1  | -0.0911928562475599   |             |
| AGIWUR5180; AGIWUR9324                                                                                             |   |         |         |                |         |          |                       |             |
| CB4856 CT                                                                                                          | V | 9830978 | 9831908 | WBGene00014818 | R07B5.2 | R07B5.2  | 0.131394962785221     |             |
| AGIWUR5210; AGIWUR38357                                                                                            |   |         |         |                |         |          |                       |             |
| CB4856 CT                                                                                                          | V | 9832742 | 9834000 | WBGene00005703 | sru-40  | R07B5.3  | 0.56692859194913      | AGIWUR10727 |
| CB4856 CT                                                                                                          | V | 9834463 | 9836088 | WBGene00005701 | sru-38  | R07B5.4  | 0.0536250032082863    | AGIWUR15518 |
| CB4856 CT                                                                                                          | V | 9837979 | 9839588 | WBGene00011084 | srsx-21 | R07B5.5  | 0.116895910583962     | AGIWUR25575 |
| CB4856 CT                                                                                                          | V | 9841676 | 9843179 | WBGene00005699 | sru-36  | R07B5.6  | -0.128812802225264    | AGIWUR8930  |
| CB4856 CT                                                                                                          | V | 9843866 | 9846161 | WBGene00005671 | sru-8   | R07B5.7  | 0.0383888754440225    | AGIWUR21957 |
| CB4856 CT                                                                                                          | V | 9846158 | 9859963 | WBGene00045419 | lsy-12  | R07B5.9  | -0.108733372077812    |             |
| AGIWUR7788; AGIWUR14451; AGIWUR18405; AGIWUR18991; AGIWUR21009; AGIWUR22924; AGIWUR27328; AGIWUR30577              |   |         |         |                |         |          |                       |             |
| CB4856 CT                                                                                                          | V | 9866628 | 9868411 | WBGene00011701 | srab-17 | T11A5.2  | 0.0349673659885967    |             |
| AGIWUR26966; AGIWUR29976; AGIWUR37974                                                                              |   |         |         |                |         |          |                       |             |
| CB4856 CT                                                                                                          | V | 9869887 | 9871439 | WBGene00011702 | srab-18 | T11A5.3  | 0.167047644540826     | AGIWUR44934 |
| CB4856 CT                                                                                                          | V | 9874009 | 9875899 | WBGene00011703 | srab-19 | T11A5.4  | 0.0399041827611804    | AGIWUR44659 |
| CB4856 CT                                                                                                          | V | 9876687 | 9879504 | WBGene00043059 | srab-26 | T11A5.7  | 0.114422064965962     |             |
| AGIWUR12889; AGIWUR32842                                                                                           |   |         |         |                |         |          |                       |             |
| CB4856 CT                                                                                                          | V | 9880114 | 9881181 | WBGene00011704 | sdz-31  | T11A5.5  | -0.122368961623343    | AGIWUR30501 |
| CB4856 CT                                                                                                          | V | 9882034 | 9885960 | WBGene00011705 | T11A5.6 | T11A5.6  | -0.199961056620527    |             |
| AGIWUR4479; AGIWUR12299; AGIWUR17100; AGIWUR20013; AGIWUR22364                                                     |   |         |         |                |         |          |                       |             |
| CB4856 CT                                                                                                          | V | 9889839 | 9894849 | WBGene00008239 | fshr-1  | C50H2.1  | 0.18126640429967      |             |
| AGIWUR15231; AGIWUR21400; AGIWUR23775                                                                              |   |         |         |                |         |          |                       |             |

|                                     |                 |                |           |           |                     |             |
|-------------------------------------|-----------------|----------------|-----------|-----------|---------------------|-------------|
| CB4856 CT V                         | 9899587 9907644 | WBGene00001211 | egl-47    | C50H2.2   | 0.0835266847466078  |             |
| AGIWUR1630;AGIWUR25213              |                 |                |           |           |                     |             |
| CB4856 CT V                         | 9907632 9915103 | WBGene00003173 | mec-9     | C50H2.3   | -0.23778863379377   |             |
| AGIWUR8109;AGIWUR20278              |                 |                |           |           |                     |             |
| CB4856 CT V                         | 9916975 9919167 | WBGene00008240 | C50H2.4   | C50H2.4   | 0.205022733672422   |             |
| AGIWUR6240;AGIWUR13906;AGIWUR34958  |                 |                |           |           |                     |             |
| CB4856 CT V                         | 9918770 9919790 | WBGene00008241 | C50H2.5   | C50H2.5   | 0.0852116342695357  | AGIWUR4106  |
| CB4856 CT V                         | 9921337 9922194 | WBGene00008242 | ceh-75    | C50H2.6   | -0.0335446286161538 | AGIWUR44098 |
| CB4856 CT V                         | 9923285 9923936 | WBGene00008243 | C50H2.7   | C50H2.7   | 0.0698000258550948  | AGIWUR26387 |
| CB4856 CT V                         | 9926544 9927884 | WBGene00008246 | C50H2.13  | C50H2.13  | 0.176431748914233   |             |
| AGIWUR37920                         |                 |                |           |           |                     |             |
| CB4856 CT V                         | 9927782 9930775 | WBGene00011576 | rmh-2     | T07C12.12 | -0.246659644146348  |             |
| AGIWUR26741                         |                 |                |           |           |                     |             |
| CB4856 CT V                         | 9931019 9932368 | WBGene00044204 | suds-3    | T07C12.14 | -0.129479801559462  |             |
| AGIWUR11628;AGIWUR14798;AGIWUR38926 |                 |                |           |           |                     |             |
| CB4856 CT V                         | 9935548 9937535 | WBGene00005618 | srj-33    | T07C12.1  | 0.134759604868243   |             |
| AGIWUR9624                          |                 |                |           |           |                     |             |
| CB4856 CT V                         | 9937804 9940885 | WBGene00014833 | T07C12.4  | T07C12.4  | 0.0182813960970236  |             |
| AGIWUR12419;AGIWUR17109;AGIWUR34432 |                 |                |           |           |                     |             |
| CB4856 CT V                         | 9941691 9942999 | WBGene00005619 | srj-34    | T07C12.5  | 0.0373677572926923  |             |
| AGIWUR30726;AGIWUR40882             |                 |                |           |           |                     |             |
| CB4856 CT V                         | 9944393 9945895 | WBGene00011570 | sre-28    | T07C12.6  | 0.11606269778683    |             |
| AGIWUR27875                         |                 |                |           |           |                     |             |
| CB4856 CT V                         | 9951233 9952182 | WBGene00011571 | ttr-46    | T07C12.7  | -0.379447105755928  |             |
| AGIWUR3342;AGIWUR14268              |                 |                |           |           |                     |             |
| CB4856 CT V                         | 9952699 9956883 | WBGene00011572 | mam-5     | T07C12.8  | 0.438674036994469   |             |
| AGIWUR5217                          |                 |                |           |           |                     |             |
| CB4856 CT V                         | 9956879 9958331 | WBGene00011573 | anmt-3    | T07C12.9  | -0.0663523375342816 |             |
| AGIWUR20955;AGIWUR23694;AGIWUR38361 |                 |                |           |           |                     |             |
| CB4856 CT V                         | 9959997 9960337 | WBGene00011574 | T07C12.10 | T07C12.10 | 0.14913760277463    |             |
| AGIWUR36362                         |                 |                |           |           |                     |             |
| CB4856 CT V                         | 9966404 9976226 | WBGene00006777 | unc-41    | C27H6.1   | 0.111527862307835   |             |
| AGIWUR15466;AGIWUR44126             |                 |                |           |           |                     |             |
| CB4856 CT V                         | 9978791 9980802 | WBGene00007784 | ruvb-1    | C27H6.2   | -0.166310041874701  |             |
| AGIWUR21285;AGIWUR38782             |                 |                |           |           |                     |             |
| CB4856 CT V                         | 9981249 9982766 | WBGene00007785 | tofu-1    | C27H6.3   | -0.0750498172986109 |             |
| AGIWUR8036;AGIWUR34372              |                 |                |           |           |                     |             |
| CB4856 CT V                         | 9982868 9983932 | WBGene00077500 | C27H6.9   | C27H6.9   | 0.0401430584256968  |             |
| AGIWUR8798;AGIWUR30656;AGIWUR37688  |                 |                |           |           |                     |             |

|                                                                               |    |   |          |          |                |           |           |                     |            |
|-------------------------------------------------------------------------------|----|---|----------|----------|----------------|-----------|-----------|---------------------|------------|
| CB4856                                                                        | CT | V | 9983924  | 9986277  | WBGene00007786 | rmd-2     | C27H6.4   | -0.0622743325920148 | AGIWUR2085 |
| CB4856                                                                        | CT | V | 9986330  | 9987788  | WBGene00007787 | C27H6.8   | C27H6.8   | -0.0217002617313917 |            |
| AGIWUR23276;AGIWUR30527;AGIWUR31051;AGIWUR31999;AGIWUR35154;AGIWUR37913       |    |   |          |          |                |           |           |                     |            |
| CB4856                                                                        | CT | V | 9987916  | 9991642  | WBGene00004323 | rde-1     | K08H10.7  | -0.0106417775142376 |            |
| AGIWUR8121                                                                    |    |   |          |          |                |           |           |                     |            |
| CB4856                                                                        | CT | V | 9991812  | 9992792  | WBGene00010699 | trpp-6    | K08H10.9  | -0.166621968187858  |            |
| AGIWUR41394                                                                   |    |   |          |          |                |           |           |                     |            |
| CB4856                                                                        | CT | V | 9993732  | 9995883  | WBGene00010698 | K08H10.6  | K08H10.6  | -0.533965009101015  |            |
| AGIWUR583                                                                     |    |   |          |          |                |           |           |                     |            |
| CB4856                                                                        | CT | V | 9997094  | 9998481  | WBGene00014805 | K08H10.5  | K08H10.5  | -0.152589021406795  |            |
| AGIWUR9000                                                                    |    |   |          |          |                |           |           |                     |            |
| CB4856                                                                        | CT | V | 10001118 | 10002766 | WBGene00077491 | K08H10.10 | K08H10.10 |                     |            |
| 0.00820772722958463 AGIWUR13436;AGIWUR30142;AGIWUR34222                       |    |   |          |          |                |           |           |                     |            |
| CB4856                                                                        | CT | V | 10004755 | 10007482 | WBGene00010697 | uda-1     | K08H10.4  |                     |            |
| -0.0429378645179597 AGIWUR13430;AGIWUR19067;AGIWUR40611                       |    |   |          |          |                |           |           |                     |            |
| CB4856                                                                        | CT | V | 10011871 | 10028158 | WBGene00002263 | lea-1     | K08H10.1  |                     |            |
| 0.218956059076486 AGIWUR11182;AGIWUR11697;AGIWUR17882;AGIWUR38029;AGIWUR39700 |    |   |          |          |                |           |           |                     |            |
| CB4856                                                                        | CT | V | 10028150 | 10031094 | WBGene00011543 | ac1-2     | T06E8.1   | -0.0480675935116661 |            |
| AGIWUR9552;AGIWUR14141;AGIWUR39235                                            |    |   |          |          |                |           |           |                     |            |
| CB4856                                                                        | CT | V | 10035746 | 10036413 | WBGene00011544 | T06E8.2   | T06E8.2   | 0.233687599590533   |            |
| AGIWUR36746                                                                   |    |   |          |          |                |           |           |                     |            |
| CB4856                                                                        | CT | V | 10037340 | 10048726 | WBGene00010177 | F57A8.1   | F57A8.1   | 0.298706775459755   |            |
| AGIWUR9377;AGIWUR19620;AGIWUR26218;AGIWUR41504                                |    |   |          |          |                |           |           |                     |            |
| CB4856                                                                        | CT | V | 10050047 | 10054913 | WBGene00010178 | yif-1     | F57A8.2   | -0.0955260740482506 |            |
| AGIWUR4863;AGIWUR17667                                                        |    |   |          |          |                |           |           |                     |            |
| CB4856                                                                        | CT | V | 10064503 | 10064939 | WBGene00010183 | fipr-13   | F57A8.8   | -0.107238623174506  |            |
| AGIWUR19773                                                                   |    |   |          |          |                |           |           |                     |            |
| CB4856                                                                        | CT | V | 10067087 | 10068818 | WBGene00010179 | F57A8.4   | F57A8.4   | 0.188486945164595   |            |
| AGIWUR12584                                                                   |    |   |          |          |                |           |           |                     |            |
| CB4856                                                                        | CT | V | 10069369 | 10070641 | WBGene00010180 | nhr-192   | F57A8.5   | -0.740223137519438  |            |
| AGIWUR13885                                                                   |    |   |          |          |                |           |           |                     |            |
| CB4856                                                                        | CT | V | 10071945 | 10073893 | WBGene00010181 | F57A8.6   | F57A8.6   | 0.0422665432004266  |            |
| AGIWUR33295;AGIWUR38993;AGIWUR44089                                           |    |   |          |          |                |           |           |                     |            |
| CB4856                                                                        | CT | V | 10075749 | 10077804 | WBGene00010182 | F57A8.7   | F57A8.7   | 0.02911176745204    |            |
| AGIWUR23052                                                                   |    |   |          |          |                |           |           |                     |            |
| CB4856                                                                        | CT | V | 10077905 | 10078344 | WBGene00011001 | R04B5.1   | R04B5.1   | -0.201613580216727  |            |
| AGIWUR39091                                                                   |    |   |          |          |                |           |           |                     |            |
| CB4856                                                                        | CT | V | 10080119 | 10081739 | WBGene00011002 | nhr-205   | R04B5.3   | -0.0583284119267127 |            |
| AGIWUR10466                                                                   |    |   |          |          |                |           |           |                     |            |

|                                                                        |   |                                                           |          |                |          |          |                     |
|------------------------------------------------------------------------|---|-----------------------------------------------------------|----------|----------------|----------|----------|---------------------|
| CB4856 CT                                                              | V | 10082141                                                  | 10084043 | WBGene00003611 | nhr-12   | R04B5.4  | -0.236425076930384  |
| AGIWUR27082                                                            |   |                                                           |          |                |          |          |                     |
| CB4856 CT                                                              | V | 10085281                                                  | 10087313 | WBGene00011004 | R04B5.6  | R04B5.6  | -0.198233133416952  |
| AGIWUR21782                                                            |   |                                                           |          |                |          |          |                     |
| CB4856 CT                                                              | V | 10087480                                                  | 10088998 | WBGene00011003 | R04B5.5  | R04B5.5  | 0.832089524776574   |
| AGIWUR21261                                                            |   |                                                           |          |                |          |          |                     |
| CB4856 CT                                                              | V | 10089157                                                  | 10090561 | WBGene00011005 | R04B5.7  | R04B5.7  | 0.115307849338565   |
| AGIWUR30661                                                            |   |                                                           |          |                |          |          |                     |
| CB4856 CT                                                              | V | 10090688                                                  | 10091252 | WBGene00011008 | R04B5.11 | R04B5.11 |                     |
| -0.202766791322686                                                     |   | AGIWUR5081;AGIWUR6922;AGIWUR16433;AGIWUR19085;AGIWUR42467 |          |                |          |          |                     |
| CB4856 CT                                                              | V | 10094720                                                  | 10096311 | WBGene00005127 | srd-49   | R04B5.8  | 0.185160387202679   |
| AGIWUR15531                                                            |   |                                                           |          |                |          |          |                     |
| CB4856 CT                                                              | V | 10096305                                                  | 10098597 | WBGene00011006 | ugt-47   | R04B5.9  | -0.295475054563015  |
| AGIWUR42833                                                            |   |                                                           |          |                |          |          |                     |
| CB4856 CT                                                              | V | 10098904                                                  | 10099205 | WBGene00011007 | R04B5.10 | R04B5.10 |                     |
| 0.178984148411205                                                      |   | AGIWUR5592                                                |          |                |          |          |                     |
| CB4856 CT                                                              | V | 10100156                                                  | 10102016 | WBGene00044044 | C08B6.14 | C08B6.14 |                     |
| -0.0694014672895662                                                    |   | AGIWUR23984                                               |          |                |          |          |                     |
| CB4856 CT                                                              | V | 10102592                                                  | 10104946 | WBGene00007422 | ugt-17   | C08B6.1  | -0.43749853158986   |
| AGIWUR16806                                                            |   |                                                           |          |                |          |          |                     |
| CB4856 CT                                                              | V | 10107684                                                  | 10109905 | WBGene00007431 | C08B6.11 | C08B6.11 |                     |
| -0.474735351907963                                                     |   | AGIWUR13572                                               |          |                |          |          |                     |
| CB4856 CT                                                              | V | 10109872                                                  | 10112287 | WBGene00007424 | C08B6.3  | C08B6.3  | -0.392516330764963  |
| AGIWUR37592                                                            |   |                                                           |          |                |          |          |                     |
| CB4856 CT                                                              | V | 10117765                                                  | 10119688 | WBGene00007426 | C08B6.5  | C08B6.5  | -0.157065276430482  |
| AGIWUR14625                                                            |   |                                                           |          |                |          |          |                     |
| CB4856 CT                                                              | V | 10119574                                                  | 10120986 | WBGene00007432 | srxa-18  | C08B6.12 |                     |
| 0.156409796859506                                                      |   | AGIWUR36957                                               |          |                |          |          |                     |
| CB4856 CT                                                              | V | 10121134                                                  | 10122770 | WBGene00044012 | srxa-19  | C08B6.13 |                     |
| 0.162152093067126                                                      |   | AGIWUR27566;AGIWUR44831                                   |          |                |          |          |                     |
| CB4856 CT                                                              | V | 10123638                                                  | 10124689 | WBGene00007427 | C08B6.6  | C08B6.6  | 0.110181676972561   |
| AGIWUR8597                                                             |   |                                                           |          |                |          |          |                     |
| CB4856 CT                                                              | V | 10125052                                                  | 10127570 | WBGene00007430 | C08B6.10 | C08B6.10 |                     |
| -0.0665674520607524                                                    |   | AGIWUR6529                                                |          |                |          |          |                     |
| CB4856 CT                                                              | V | 10127492                                                  | 10130295 | WBGene00000142 | aos-1    | C08B6.9  | -0.179344518673443  |
| AGIWUR24404;AGIWUR32403;AGIWUR35539;AGIWUR38336                        |   |                                                           |          |                |          |          |                     |
| CB4856 CT                                                              | V | 10130405                                                  | 10134148 | WBGene00007428 | wdr-20   | C08B6.7  | -0.0132472332534075 |
| AGIWUR4283;AGIWUR10640;AGIWUR12917;AGIWUR19139;AGIWUR20882;AGIWUR24602 |   |                                                           |          |                |          |          |                     |
| CB4856 CT                                                              | V | 10134643                                                  | 10143081 | WBGene00007429 | C08B6.8  | C08B6.8  | -0.168942480536648  |

|                                                                              |    |   |          |          |                |          |                             |
|------------------------------------------------------------------------------|----|---|----------|----------|----------------|----------|-----------------------------|
| AGIWUR20990;AGIWUR33580                                                      |    |   |          |          |                |          |                             |
| CB4856                                                                       | CT | V | 10143936 | 10144192 | WBGene00077449 | C08B6.15 | C08B6.15                    |
| -0.0674289864514304 AGIWUR717;AGIWUR3577;AGIWUR20236;AGIWUR38212;AGIWUR43073 |    |   |          |          |                |          |                             |
| CB4856                                                                       | CT | V | 10144408 | 10145251 | WBGene00008253 | C51E3.8  | C51E3.8 0.403039721477867   |
| AGIWUR30989                                                                  |    |   |          |          |                |          |                             |
| CB4856                                                                       | CT | V | 10145905 | 10148977 | WBGene00008254 | C51E3.9  | C51E3.9 -0.154312300058056  |
| AGIWUR22043                                                                  |    |   |          |          |                |          |                             |
| CB4856                                                                       | CT | V | 10150066 | 10152159 | WBGene00008248 | srsx-27  | C51E3.2 0.378300237364563   |
| AGIWUR23884;AGIWUR25522                                                      |    |   |          |          |                |          |                             |
| CB4856                                                                       | CT | V | 10152583 | 10154756 | WBGene00008249 | srsx-28  | C51E3.3 0.0461176151581082  |
| AGIWUR10539;AGIWUR19267;AGIWUR25349                                          |    |   |          |          |                |          |                             |
| CB4856                                                                       | CT | V | 10154998 | 10156381 | WBGene00008250 | srsx-29  | C51E3.4 -0.200730998965268  |
| AGIWUR5433                                                                   |    |   |          |          |                |          |                             |
| CB4856                                                                       | CT | V | 10158833 | 10160297 | WBGene00008251 | srsx-30  | C51E3.5 -0.141226584067155  |
| AGIWUR13139;AGIWUR18898                                                      |    |   |          |          |                |          |                             |
| CB4856                                                                       | CT | V | 10160439 | 10161161 | WBGene00008255 | C51E3.10 | C51E3.10                    |
| 0.188405672484649 AGIWUR5502                                                 |    |   |          |          |                |          |                             |
| CB4856                                                                       | CT | V | 10164135 | 10166463 | WBGene00008252 | C51E3.6  | C51E3.6 -0.424320961203421  |
| AGIWUR15393;AGIWUR33155;AGIWUR38537                                          |    |   |          |          |                |          |                             |
| CB4856                                                                       | CT | V | 10169197 | 10173753 | WBGene00001172 | egl-3    | C51E3.7 0.534255414903998   |
| AGIWUR1410;AGIWUR10673;AGIWUR10823;AGIWUR32937                               |    |   |          |          |                |          |                             |
| CB4856                                                                       | CT | V | 10179535 | 10183154 | WBGene00000840 | cul-5    | ZK856.1 0.346323566067175   |
| AGIWUR10749                                                                  |    |   |          |          |                |          |                             |
| CB4856                                                                       | CT | V | 10183284 | 10184446 | WBGene00014105 | ZK856.4  | ZK856.4 -0.194331840643152  |
| AGIWUR1992                                                                   |    |   |          |          |                |          |                             |
| CB4856                                                                       | CT | V | 10184689 | 10186007 | WBGene00194912 | ZK856.18 | ZK856.18                    |
| -0.0435450810908549 AGIWUR11214                                              |    |   |          |          |                |          |                             |
| CB4856                                                                       | CT | V | 10198704 | 10199942 | WBGene00014107 | ZK856.6  | ZK856.6 -0.0320100214785874 |
| AGIWUR24559                                                                  |    |   |          |          |                |          |                             |
| CB4856                                                                       | CT | V | 10201856 | 10202610 | WBGene00014108 | ZK856.7  | ZK856.7 -0.265622283756303  |
| AGIWUR4691;AGIWUR21535;AGIWUR29202;AGIWUR31126                               |    |   |          |          |                |          |                             |
| CB4856                                                                       | CT | V | 10202538 | 10203485 | WBGene00014109 | chpf-1   | ZK856.8 0.126795204778063   |
| AGIWUR8017;AGIWUR29777;AGIWUR42156;AGIWUR44854                               |    |   |          |          |                |          |                             |
| CB4856                                                                       | CT | V | 10203772 | 10205587 | WBGene00014112 | ZK856.11 | ZK856.11                    |
| -0.0720413276888134 AGIWUR11220                                              |    |   |          |          |                |          |                             |
| CB4856                                                                       | CT | V | 10205683 | 10206602 | WBGene00014111 | rpc-25   | ZK856.10                    |
| 0.0826581612016568 AGIWUR35370                                               |    |   |          |          |                |          |                             |
| CB4856                                                                       | CT | V | 10206619 | 10210344 | WBGene00014114 | tftc-3   | ZK856.13                    |
| -0.179953094587706 AGIWUR11722                                               |    |   |          |          |                |          |                             |



|                                                                                                                      |                                                                         |          |                |          |          |                    |
|----------------------------------------------------------------------------------------------------------------------|-------------------------------------------------------------------------|----------|----------------|----------|----------|--------------------|
| CB4856 CT V                                                                                                          | 10210444                                                                | 10212127 | WBGene00006489 | zhit-3   | ZK856.9  | -0.105960829758876 |
| AGIWUR41962                                                                                                          |                                                                         |          |                |          |          |                    |
| CB4856 CT V                                                                                                          | 10212929                                                                | 10216305 | WBGene00014113 | hpo-40   | ZK856.12 |                    |
| -0.253471653606715                                                                                                   | AGIWUR20340;AGIWUR26577;AGIWUR37582                                     |          |                |          |          |                    |
| CB4856 CT V                                                                                                          | 10217079                                                                | 10219022 | WBGene00044020 | ZK856.14 |          | ZK856.14           |
| 0.0283968825862377                                                                                                   | AGIWUR1092;AGIWUR14205;AGIWUR31390                                      |          |                |          |          |                    |
| CB4856 CT V                                                                                                          | 10219455                                                                | 10220470 | WBGene00007540 | C12D8.13 |          | C12D8.13           |
| -0.129806064551815                                                                                                   | AGIWUR15994                                                             |          |                |          |          |                    |
| CB4856 CT V                                                                                                          | 10223513                                                                | 10225760 | WBGene00007536 | daf-36   | C12D8.5  | -0.799891529795831 |
| AGIWUR24683                                                                                                          |                                                                         |          |                |          |          |                    |
| CB4856 CT V                                                                                                          | 10226885                                                                | 10227434 | WBGene00007535 | ttr-19   | C12D8.4  | 0.33130113923175   |
| AGIWUR25644                                                                                                          |                                                                         |          |                |          |          |                    |
| CB4856 CT V                                                                                                          | 10228043                                                                | 10228460 | WBGene00007541 | fipr-4   | C12D8.14 |                    |
| -0.152738587412191                                                                                                   | AGIWUR16878                                                             |          |                |          |          |                    |
| CB4856 CT V                                                                                                          | 10228641                                                                | 10229322 | WBGene00007542 | C12D8.15 |          | C12D8.15           |
| -0.0993685602091237                                                                                                  | AGIWUR24231                                                             |          |                |          |          |                    |
| CB4856 CT V                                                                                                          | 10231821                                                                | 10233430 | WBGene00006226 | str-182  | C12D8.12 |                    |
| 0.0039953483197257                                                                                                   | AGIWUR41878                                                             |          |                |          |          |                    |
| CB4856 CT V                                                                                                          | 10236160                                                                | 10238902 | WBGene00007534 | C12D8.1  | C12D8.1  | -0.144217361367398 |
| AGIWUR1056;AGIWUR7083;AGIWUR9511;AGIWUR14024;AGIWUR18462;AGIWUR22716;AGIWUR25429;AGIWUR27421;AGIWUR35675;AGIWUR39350 |                                                                         |          |                |          |          |                    |
| CB4856 CT V                                                                                                          | 10240573                                                                | 10241188 | WBGene00195157 | C12D8.21 |          | C12D8.21           |
| -0.321633270093789                                                                                                   | AGIWUR15826                                                             |          |                |          |          |                    |
| CB4856 CT V                                                                                                          | 10241784                                                                | 10242718 | WBGene00000721 | col-148  | C12D8.8  | -0.11914437560424  |
| AGIWUR13025                                                                                                          |                                                                         |          |                |          |          |                    |
| CB4856 CT V                                                                                                          | 10242787                                                                | 10243205 | WBGene00007538 | C12D8.9  | C12D8.9  | -0.20926919741782  |
| AGIWUR8119                                                                                                           |                                                                         |          |                |          |          |                    |
| CB4856 CT V                                                                                                          | 10248907                                                                | 10252895 | WBGene00000102 | akt-1    | C12D8.10 |                    |
| -0.0449751473516775                                                                                                  | AGIWUR3065;AGIWUR5113;AGIWUR14046;AGIWUR43925                           |          |                |          |          |                    |
| CB4856 CT V                                                                                                          | 10252821                                                                | 10255055 | WBGene00004405 | rop-1    | C12D8.11 |                    |
| -0.111574163254499                                                                                                   | AGIWUR2067;AGIWUR16535;AGIWUR21656                                      |          |                |          |          |                    |
| CB4856 CT V                                                                                                          | 10256360                                                                | 10258654 | WBGene00012494 | nhr-232  | Y22F5A.1 |                    |
| 0.0717290157447952                                                                                                   | AGIWUR2700                                                              |          |                |          |          |                    |
| CB4856 CT V                                                                                                          | 10258661                                                                | 10260554 | WBGene00005530 | sri-18   | Y22F5A.2 |                    |
| 0.0503511488366462                                                                                                   | AGIWUR12538                                                             |          |                |          |          |                    |
| CB4856 CT V                                                                                                          | 10261131                                                                | 10270314 | WBGene00004364 | ric-4    | Y22F5A.3 |                    |
| 0.000340727715031797                                                                                                 | AGIWUR13824;AGIWUR14867;AGIWUR17495;AGIWUR21980                         |          |                |          |          |                    |
| CB4856 CT V                                                                                                          | 10277827                                                                | 10279127 | WBGene00003090 | lys-1    | Y22F5A.4 |                    |
| -0.468959001755572                                                                                                   | AGIWUR13848;AGIWUR17373;AGIWUR20455;AGIWUR29828;AGIWUR30263;AGIWUR33540 |          |                |          |          |                    |

|                                                           |                                                                        |          |                |          |                             |
|-----------------------------------------------------------|------------------------------------------------------------------------|----------|----------------|----------|-----------------------------|
| CB4856 CT V                                               | 10280310                                                               | 10281474 | WBGene00003091 | lys-2    | Y22F5A.5                    |
| -0.723576837887951                                        | AGIWUR37008                                                            |          |                |          |                             |
| CB4856 CT V                                               | 10282204                                                               | 10283544 | WBGene00003092 | lys-3    | Y22F5A.6                    |
| 1.59258933200653                                          | AGIWUR44748                                                            |          |                |          |                             |
| CB4856 CT V                                               | 10287564                                                               | 10289272 | WBGene00007096 | B0024.3  | B0024.3 -0.136900924299784  |
| AGIWUR8921                                                |                                                                        |          |                |          |                             |
| CB4856 CT V                                               | 10289721                                                               | 10291710 | WBGene00007104 | B0024.15 | B0024.15                    |
| -0.23156031800646                                         | AGIWUR36356                                                            |          |                |          |                             |
| CB4856 CT V                                               | 10291697                                                               | 10292869 | WBGene00000722 | col-149  | B0024.1 -0.442025951467125  |
| AGIWUR37769                                               |                                                                        |          |                |          |                             |
| CB4856 CT V                                               | 10293563                                                               | 10294623 | WBGene00000723 | col-150  | B0024.2 -0.156533778184741  |
| AGIWUR37941                                               |                                                                        |          |                |          |                             |
| CB4856 CT V                                               | 10297399                                                               | 10298865 | WBGene00007097 | B0024.4  | B0024.4 0.316061953826995   |
| AGIWUR44276                                               |                                                                        |          |                |          |                             |
| CB4856 CT V                                               | 10299473                                                               | 10307354 | WBGene00000491 | che-12   | B0024.8 0.434678730143936   |
| AGIWUR3900                                                |                                                                        |          |                |          |                             |
| CB4856 CT V                                               | 10308291                                                               | 10314053 | WBGene00001533 | gcy-6    | B0024.6 -0.0228097710642423 |
| AGIWUR18920                                               |                                                                        |          |                |          |                             |
| CB4856 CT V                                               | 10314641                                                               | 10315304 | WBGene00007099 | trx-2    | B0024.9 0.0749813081961648  |
| AGIWUR37553                                               |                                                                        |          |                |          |                             |
| CB4856 CT V                                               | 10315245                                                               | 10317394 | WBGene00007100 | B0024.10 | B0024.10                    |
| -0.137463839234442                                        | AGIWUR4937                                                             |          |                |          |                             |
| CB4856 CT V                                               | 10317490                                                               | 10319534 | WBGene00007101 | B0024.11 | B0024.11                    |
| -0.204732188216742                                        | AGIWUR40598                                                            |          |                |          |                             |
| CB4856 CT V                                               | 10319535                                                               | 10320158 | WBGene00001646 | gna-1    | B0024.12                    |
| -0.0825632407894386                                       | AGIWUR36410                                                            |          |                |          |                             |
| CB4856 CT V                                               | 10320715                                                               | 10322304 | WBGene00007102 | B0024.13 | B0024.13                    |
| 0.0202704905926963                                        | AGIWUR19097;AGIWUR26092;AGIWUR29028;AGIWUR32735                        |          |                |          |                             |
| CB4856 CT V                                               | 10322288                                                               | 10332112 | WBGene00007103 | crm-1    | B0024.14                    |
| 0.24655000430143                                          | AGIWUR4802;AGIWUR12222;AGIWUR14025;AGIWUR21491;AGIWUR22518;AGIWUR40898 |          |                |          |                             |
| CB4856 CT V                                               | 10335443                                                               | 10338355 | WBGene00000200 | arx-2    | K07C5.1 0.0579390732312888  |
| AGIWUR20870                                               |                                                                        |          |                |          |                             |
| CB4856 CT V                                               | 10339500                                                               | 10340971 | WBGene00010625 | K07C5.2  | K07C5.2 0.0329080166269407  |
| AGIWUR5598                                                |                                                                        |          |                |          |                             |
| CB4856 CT V                                               | 10343032                                                               | 10345489 | WBGene00010626 | K07C5.3  | K07C5.3 -0.14644580355899   |
| AGIWUR28656                                               |                                                                        |          |                |          |                             |
| CB4856 CT V                                               | 10346662                                                               | 10350154 | WBGene00010632 | K07C5.9  | K07C5.9 0.0979596806850367  |
| AGIWUR3318;AGIWUR7900;AGIWUR14780;AGIWUR17856;AGIWUR27080 |                                                                        |          |                |          |                             |
| CB4856 CT V                                               | 10350471                                                               | 10352978 | WBGene00010627 | K07C5.4  | K07C5.4 -0.0374575290269625 |

|                                                            |                                                                      |          |                |           |         |                     |  |
|------------------------------------------------------------|----------------------------------------------------------------------|----------|----------------|-----------|---------|---------------------|--|
| AGIWUR11758;AGIWUR13751;AGIWUR31089;AGIWUR36058            |                                                                      |          |                |           |         |                     |  |
| CB4856 CT V                                                | 10353584                                                             | 10355837 | WBGene00010629 | K07C5.6   | K07C5.6 | -0.148406638720729  |  |
| AGIWUR35576                                                |                                                                      |          |                |           |         |                     |  |
| CB4856 CT V                                                | 10356285                                                             | 10357903 | WBGene00010628 | ceeh-2    | K07C5.5 | 0.0276886481774286  |  |
| AGIWUR2367;AGIWUR11689;AGIWUR43744                         |                                                                      |          |                |           |         |                     |  |
| CB4856 CT V                                                | 10358544                                                             | 10361430 | WBGene00010630 | ttl1-15   | K07C5.7 | -0.582348208739878  |  |
| AGIWUR2920                                                 |                                                                      |          |                |           |         |                     |  |
| CB4856 CT V                                                | 10362261                                                             | 10366014 | WBGene00010631 | cash-1    | K07C5.8 | -0.173753313504539  |  |
| AGIWUR7634;AGIWUR18426;AGIWUR20669                         |                                                                      |          |                |           |         |                     |  |
| CB4856 CT V                                                | 10368556                                                             | 10369868 | WBGene00005532 | sri-20    | AC3.1   | 0.300284641664089   |  |
| AGIWUR10661                                                |                                                                      |          |                |           |         |                     |  |
| CB4856 CT V                                                | 10372325                                                             | 10374245 | WBGene00007070 | ugt-49    | AC3.2   | 0.188643315152031   |  |
| AGIWUR29691                                                |                                                                      |          |                |           |         |                     |  |
| CB4856 CT V                                                | 10374851                                                             | 10376884 | WBGene00044022 | AC3.9     | AC3.9   | 0.151187382620139   |  |
| AGIWUR28600                                                |                                                                      |          |                |           |         |                     |  |
| CB4856 CT V                                                | 10376985                                                             | 10377317 | WBGene00077502 | AC3.11    | AC3.11  | 0.00505821220593106 |  |
| AGIWUR6781;AGIWUR26582;AGIWUR29815;AGIWUR32777;AGIWUR40707 |                                                                      |          |                |           |         |                     |  |
| CB4856 CT V                                                | 10378982                                                             | 10379364 | WBGene00077503 | AC3.12    | AC3.12  | -0.203012302694964  |  |
| AGIWUR3223;AGIWUR15051;AGIWUR27034;AGIWUR43064;AGIWUR43093 |                                                                      |          |                |           |         |                     |  |
| CB4856 CT V                                                | 10384157                                                             | 10385711 | WBGene00004964 | spe-10    | AC3.10  | -0.138122070016303  |  |
| AGIWUR21504                                                |                                                                      |          |                |           |         |                     |  |
| CB4856 CT V                                                | 10388402                                                             | 10393504 | WBGene00007071 | AC3.5     | AC3.5   | -0.511339560659948  |  |
| AGIWUR3186;AGIWUR10575;AGIWUR24403;AGIWUR35180             |                                                                      |          |                |           |         |                     |  |
| CB4856 CT V                                                | 10393531                                                             | 10395232 | WBGene00000724 | col-151   | AC3.6   | -0.0175316169061928 |  |
| AGIWUR37545                                                |                                                                      |          |                |           |         |                     |  |
| CB4856 CT V                                                | 10395663                                                             | 10397817 | WBGene00007072 | ugt-1     | AC3.7   | -0.427512909963486  |  |
| AGIWUR6758                                                 |                                                                      |          |                |           |         |                     |  |
| CB4856 CT V                                                | 10398717                                                             | 10401307 | WBGene00007073 | ugt-2     | AC3.8   | -0.140199405175277  |  |
| AGIWUR24429                                                |                                                                      |          |                |           |         |                     |  |
| CB4856 CT V                                                | 10401447                                                             | 10402904 | WBGene00008875 | F15H10.8  |         | F15H10.8            |  |
| -0.234321400246891                                         | AGIWUR3582;AGIWUR4498;AGIWUR5126;AGIWUR15892;AGIWUR20758;AGIWUR39123 |          |                |           |         |                     |  |
| CB4856 CT V                                                | 10403184                                                             | 10406424 | WBGene00008874 | F15H10.7  |         | F15H10.7            |  |
| 0.160010154651447                                          | AGIWUR6174                                                           |          |                |           |         |                     |  |
| CB4856 CT V                                                | 10410240                                                             | 10412149 | WBGene00008873 | F15H10.6  |         | F15H10.6            |  |
| -0.0875988717711387                                        | AGIWUR40937                                                          |          |                |           |         |                     |  |
| CB4856 CT V                                                | 10413332                                                             | 10414692 | WBGene00044013 | F15H10.9  |         | F15H10.9            |  |
| 0.101424032980043                                          | AGIWUR2037                                                           |          |                |           |         |                     |  |
| CB4856 CT V                                                | 10415734                                                             | 10417025 | WBGene00044014 | F15H10.10 |         | F15H10.10           |  |
| 0.370347281919425                                          | AGIWUR29823;AGIWUR44691                                              |          |                |           |         |                     |  |

|                                                                                                             |                                                                         |          |                |          |                            |
|-------------------------------------------------------------------------------------------------------------|-------------------------------------------------------------------------|----------|----------------|----------|----------------------------|
| CB4856 CT V                                                                                                 | 10417617                                                                | 10419053 | WBGene00008872 | F15H10.5 | F15H10.5                   |
| -0.222438970614417                                                                                          | AGIWUR4994;AGIWUR14497                                                  |          |                |          |                            |
| CB4856 CT V                                                                                                 | 10423907                                                                | 10425092 | WBGene00000601 | col-12   | F15H10.1                   |
| -0.621669121964826                                                                                          | AGIWUR4286                                                              |          |                |          |                            |
| CB4856 CT V                                                                                                 | 10425362                                                                | 10426399 | WBGene00000144 | apc-10   | F15H10.3                   |
| 0.012421670188373                                                                                           | AGIWUR26869;AGIWUR44725                                                 |          |                |          |                            |
| CB4856 CT V                                                                                                 | 10426633                                                                | 10428731 | WBGene00008871 | tag-314  | F15H10.4                   |
| -0.08333145749687                                                                                           | AGIWUR40256                                                             |          |                |          |                            |
| CB4856 CT V                                                                                                 | 10428726                                                                | 10433604 | WBGene00012529 | Y32F6A.4 | Y32F6A.4                   |
| -0.0105128302225177                                                                                         | AGIWUR11049;AGIWUR15338;AGIWUR22164;AGIWUR27644;AGIWUR28480;AGIWUR32635 |          |                |          |                            |
| CB4856 CT V                                                                                                 | 10436912                                                                | 10441149 | WBGene00012527 | set-22   | Y32F6A.1                   |
| -0.138937129543192                                                                                          | AGIWUR21850                                                             |          |                |          |                            |
| CB4856 CT V                                                                                                 | 10441979                                                                | 10446459 | WBGene00012528 | pap-1    | Y32F6A.3                   |
| 0.0668499574359958                                                                                          | AGIWUR12613;AGIWUR17884                                                 |          |                |          |                            |
| CB4856 CT V                                                                                                 | 10446534                                                                | 10453781 | WBGene00012530 | Y32F6A.5 | Y32F6A.5                   |
| 0.0393739685072827                                                                                          | AGIWUR31672                                                             |          |                |          |                            |
| CB4856 CT V                                                                                                 | 10453748                                                                | 10457347 | WBGene00009058 | F22E12.1 | F22E12.1                   |
| -0.263092053558942                                                                                          | AGIWUR3370                                                              |          |                |          |                            |
| CB4856 CT V                                                                                                 | 10459188                                                                | 10463364 | WBGene00009060 | F22E12.3 | F22E12.3                   |
| -0.244347278356473                                                                                          | AGIWUR16080                                                             |          |                |          |                            |
| CB4856 CT V                                                                                                 | 10462282                                                                | 10464660 | WBGene00009059 | chw-1    | F22E12.2                   |
| -0.246606741106248                                                                                          | AGIWUR32911                                                             |          |                |          |                            |
| CB4856 CT V                                                                                                 | 10468411                                                                | 10476952 | WBGene00001178 | egl-9    | F22E12.4                   |
| 0.112911036198284                                                                                           |                                                                         |          |                |          |                            |
| AGIWUR8432;AGIWUR12790;AGIWUR13943;AGIWUR16371;AGIWUR18187;AGIWUR21119;AGIWUR21574;AGIWUR31407;AGIWUR33133; |                                                                         |          |                |          |                            |
| AGIWUR36086;AGIWUR36899                                                                                     |                                                                         |          |                |          |                            |
| CB4856 CT V                                                                                                 | 10478566                                                                | 10480963 | WBGene00012532 | crp-1    | Y32F6B.3                   |
| -0.0895876451095692                                                                                         | AGIWUR5221                                                              |          |                |          |                            |
| CB4856 CT V                                                                                                 | 10480949                                                                | 10484740 | WBGene00012531 | Y32F6B.1 | Y32F6B.1                   |
| -0.0864691242207165                                                                                         | AGIWUR41958                                                             |          |                |          |                            |
| CB4856 CT V                                                                                                 | 10486473                                                                | 10490048 | WBGene00003570 | ncx-5    | Y32F6B.2                   |
| 0.172460591594102                                                                                           | AGIWUR33541                                                             |          |                |          |                            |
| CB4856 CT V                                                                                                 | 10491743                                                                | 10493268 | WBGene00000173 | aqp-5    | C35A5.1 0.151756834416688  |
| AGIWUR18028                                                                                                 |                                                                         |          |                |          |                            |
| CB4856 CT V                                                                                                 | 10493406                                                                | 10496477 | WBGene00007946 | ugt-33   | C35A5.2 0.0980581249957186 |
| AGIWUR25829                                                                                                 |                                                                         |          |                |          |                            |
| CB4856 CT V                                                                                                 | 10497059                                                                | 10499324 | WBGene00007948 | C35A5.4  | C35A5.4 -0.352111956210106 |
| AGIWUR30625                                                                                                 |                                                                         |          |                |          |                            |
| CB4856 CT V                                                                                                 | 10499355                                                                | 10501395 | WBGene00007947 | C35A5.3  | C35A5.3 -0.589507470118175 |

|                                                               |    |   |          |          |                |          |                             |
|---------------------------------------------------------------|----|---|----------|----------|----------------|----------|-----------------------------|
| AGIWUR12046;AGIWUR35018;AGIWUR44995                           |    |   |          |          |                |          |                             |
| CB4856                                                        | CT | V | 10502116 | 10503111 | WBGene00044024 | C35A5.11 | C35A5.11                    |
| 1.38183386825585 AGIWUR730;AGIWUR7265;AGIWUR11026;AGIWUR30955 |    |   |          |          |                |          |                             |
| CB4856                                                        | CT | V | 10504193 | 10505401 | WBGene00044016 | C35A5.10 | C35A5.10                    |
| 0.137777518166384 AGIWUR22038;AGIWUR24479                     |    |   |          |          |                |          |                             |
| CB4856                                                        | CT | V | 10505850 | 10507829 | WBGene00007949 | C35A5.5  | C35A5.5 0.386470769850844   |
| AGIWUR30308                                                   |    |   |          |          |                |          |                             |
| CB4856                                                        | CT | V | 10509055 | 10510451 | WBGene00007950 | C35A5.6  | C35A5.6 -0.0367244613987943 |
| AGIWUR13574                                                   |    |   |          |          |                |          |                             |
| CB4856                                                        | CT | V | 10510684 | 10514371 | WBGene00007951 | dmsr-8   | C35A5.7 0.00217450304234656 |
| AGIWUR14579;AGIWUR39136;AGIWUR44611                           |    |   |          |          |                |          |                             |
| CB4856                                                        | CT | V | 10521992 | 10525908 | WBGene00007952 | C35A5.8  | C35A5.8 -0.123283363200533  |
| AGIWUR6377;AGIWUR17776;AGIWUR23357;AGIWUR34779;AGIWUR36167    |    |   |          |          |                |          |                             |
| CB4856                                                        | CT | V | 10526298 | 10528396 | WBGene00007953 | hda-11   | C35A5.9 0.0592007025191137  |
| AGIWUR13484;AGIWUR23917;AGIWUR33306                           |    |   |          |          |                |          |                             |
| CB4856                                                        | CT | V | 10528754 | 10530568 | WBGene00009108 | F25D1.3  | F25D1.3 -0.110915619808519  |
| AGIWUR27819                                                   |    |   |          |          |                |          |                             |
| CB4856                                                        | CT | V | 10530641 | 10532848 | WBGene00009107 | F25D1.2  | F25D1.2 0.265406509761934   |
| AGIWUR14084                                                   |    |   |          |          |                |          |                             |
| CB4856                                                        | CT | V | 10532894 | 10536388 | WBGene00006460 | ppm-1    | F25D1.1 0.0117008746583078  |
| AGIWUR38079                                                   |    |   |          |          |                |          |                             |
| CB4856                                                        | CT | V | 10538493 | 10538788 | WBGene00077506 | F25D1.7  | F25D1.7 -0.0436338172823358 |
| AGIWUR3338;AGIWUR15506;AGIWUR20953;AGIWUR28164;AGIWUR28456    |    |   |          |          |                |          |                             |
| CB4856                                                        | CT | V | 10540324 | 10545742 | WBGene00009109 | degt-1   | F25D1.4 -0.126783048318226  |
| AGIWUR27927                                                   |    |   |          |          |                |          |                             |
| CB4856                                                        | CT | V | 10545741 | 10546799 | WBGene00009110 | F25D1.5  | F25D1.5 0.21580863793015    |
| AGIWUR36901                                                   |    |   |          |          |                |          |                             |
| CB4856                                                        | CT | V | 10547598 | 10549081 | WBGene00005112 | srd-34   | F32G8.1 -0.0787700510906992 |
| AGIWUR11030                                                   |    |   |          |          |                |          |                             |
| CB4856                                                        | CT | V | 10550017 | 10554493 | WBGene00009338 | F32G8.2  | F32G8.2 -0.0632211811213423 |
| AGIWUR24079;AGIWUR31469;AGIWUR33558                           |    |   |          |          |                |          |                             |
| CB4856                                                        | CT | V | 10554616 | 10555238 | WBGene00009339 | F32G8.3  | F32G8.3 0.0599036521733591  |
| AGIWUR21055                                                   |    |   |          |          |                |          |                             |
| CB4856                                                        | CT | V | 10557976 | 10560793 | WBGene00009340 | best-14  | F32G8.4 -0.0963331118777955 |
| AGIWUR10997;AGIWUR24165;AGIWUR30762;AGIWUR38864               |    |   |          |          |                |          |                             |
| CB4856                                                        | CT | V | 10560921 | 10562150 | WBGene00000725 | col-152  | F32G8.5 -0.427244616285702  |
| AGIWUR6215                                                    |    |   |          |          |                |          |                             |
| CB4856                                                        | CT | V | 10564880 | 10566445 | WBGene00000298 | cat-4    | F32G8.6 0.264513030721961   |
| AGIWUR23788                                                   |    |   |          |          |                |          |                             |

|                                                                         |          |          |                |          |          |                     |
|-------------------------------------------------------------------------|----------|----------|----------------|----------|----------|---------------------|
| CB4856 CT V                                                             | 10566365 | 10576419 | WBGene00006934 | vps-54   | T21C9.2  | 0.170991298727754   |
| AGIWUR6454;AGIWUR10348;AGIWUR12955;AGIWUR14416;AGIWUR17131;AGIWUR25888  |          |          |                |          |          |                     |
| CB4856 CT V                                                             | 10576513 | 10578322 | WBGene00011890 | mics-1   | T21C9.1  | 0.198900299789399   |
| AGIWUR12337                                                             |          |          |                |          |          |                     |
| CB4856 CT V                                                             | 10578428 | 10579141 | WBGene00011892 | T21C9.4  | T21C9.4  | 0.0299869555872156  |
| AGIWUR13694                                                             |          |          |                |          |          |                     |
| CB4856 CT V                                                             | 10579309 | 10580693 | WBGene00003065 | lpd-9    | T21C9.5  | -0.07962986450298   |
| AGIWUR30951                                                             |          |          |                |          |          |                     |
| CB4856 CT V                                                             | 10581887 | 10587164 | WBGene00011893 | T21C9.6  | T21C9.6  | 0.439873994818917   |
| AGIWUR12083                                                             |          |          |                |          |          |                     |
| CB4856 CT V                                                             | 10587167 | 10588794 | WBGene00005189 | srg-32   | T21C9.7  | -0.192530808660958  |
| AGIWUR6145                                                              |          |          |                |          |          |                     |
| CB4856 CT V                                                             | 10590548 | 10592653 | WBGene00011895 | T21C9.9  | T21C9.9  | -0.495188695257266  |
| AGIWUR34880                                                             |          |          |                |          |          |                     |
| CB4856 CT V                                                             | 10593936 | 10594906 | WBGene00011896 | T21C9.11 | T21C9.11 |                     |
| -0.212170540978491 AGIWUR32886                                          |          |          |                |          |          |                     |
| CB4856 CT V                                                             | 10597266 | 10598666 | WBGene00011898 | T21C9.13 | T21C9.13 |                     |
| -0.121648275976954 AGIWUR14188                                          |          |          |                |          |          |                     |
| CB4856 CT V                                                             | 10599105 | 10602147 | WBGene00011897 | scpl-4   | T21C9.12 |                     |
| 0.249650757844794 AGIWUR10563                                           |          |          |                |          |          |                     |
| CB4856 CT V                                                             | 10602458 | 10605568 | WBGene00010418 | H27A22.1 | H27A22.1 |                     |
| 0.212939750379299 AGIWUR33284                                           |          |          |                |          |          |                     |
| CB4856 CT V                                                             | 10612926 | 10615511 | WBGene00010375 | H09F14.1 | H09F14.1 |                     |
| -0.0384806247222969 AGIWUR24872                                         |          |          |                |          |          |                     |
| CB4856 CT V                                                             | 10633058 | 10635411 | WBGene00003114 | mab-23   | C32C4.5  | 0.00583739939137473 |
| AGIWUR21001;AGIWUR26989;AGIWUR29956;AGIWUR34519;AGIWUR44313;AGIWUR44808 |          |          |                |          |          |                     |
| CB4856 CT V                                                             | 10636022 | 10645135 | WBGene00007862 | C32C4.1  | C32C4.1  | 0.0954296043933551  |
| AGIWUR36603                                                             |          |          |                |          |          |                     |
| CB4856 CT V                                                             | 10645020 | 10646963 | WBGene00007863 | C32C4.3  | C32C4.3  | 0.0303780087436949  |
| AGIWUR5767;AGIWUR27045                                                  |          |          |                |          |          |                     |
| CB4856 CT V                                                             | 10648446 | 10651952 | WBGene00000174 | aqp-6    | C32C4.2  | -0.0761747103421833 |
| AGIWUR9151                                                              |          |          |                |          |          |                     |
| CB4856 CT V                                                             | 10651995 | 10654265 | WBGene00044286 | ugt-35   | C32C4.7  | 0.0238719714902578  |
| AGIWUR29194                                                             |          |          |                |          |          |                     |
| CB4856 CT V                                                             | 10654417 | 10656976 | WBGene00009255 | ugt-34   | F29F11.2 |                     |
| 0.3615432363371 AGIWUR34667;AGIWUR40200                                 |          |          |                |          |          |                     |
| CB4856 CT V                                                             | 10658194 | 10659658 | WBGene00009256 | tut-2    | F29F11.3 |                     |
| 0.214840136484383 AGIWUR33697                                           |          |          |                |          |          |                     |
| CB4856 CT V                                                             | 10659635 | 10661467 | WBGene00005022 | sqv-4    | F29F11.1 |                     |

|                                                            |                                                                         |
|------------------------------------------------------------|-------------------------------------------------------------------------|
| -0.252575344319419                                         | AGIWUR17812;AGIWUR20431;AGIWUR22370;AGIWUR37842;AGIWUR39068;AGIWUR41179 |
| CB4856 CT V                                                | 10667586 10670860 WBGene00006667 twk-12 F29F11.4                        |
| -0.363120132305191                                         | AGIWUR24447                                                             |
| CB4856 CT V                                                | 10672459 10675644 WBGene00000445 ceh-22 F29F11.5                        |
| 0.492290375788652                                          | AGIWUR12965;AGIWUR20993;AGIWUR30917                                     |
| CB4856 CT V                                                | 10682422 10686537 WBGene00001747 gsp-1 F29F11.6                         |
| -0.153225012532815                                         | AGIWUR17355                                                             |
| CB4856 CT V                                                | 10702549 10704906 WBGene00004083 ppH-1 C05A2.1 0.149589470551357        |
| AGIWUR9032;AGIWUR15633;AGIWUR16147;AGIWUR22418;AGIWUR24808 |                                                                         |
| CB4856 CT V                                                | 10712165 10732507 WBGene00012117 T28B11.1 T28B11.1                      |
| 0.136709793464206                                          | AGIWUR585;AGIWUR14500;AGIWUR41017                                       |
| CB4856 CT V                                                | 10733931 10736892 WBGene00003405 mre-11 ZC302.1 0.109536732165285       |
| AGIWUR33458                                                |                                                                         |
| CB4856 CT V                                                | 10737116 10739350 WBGene00013862 wdr-5.3 ZC302.2 0.0510302376447491     |
| AGIWUR14638                                                |                                                                         |
| CB4856 CT V                                                | 10742466 10743749 WBGene00005610 srj-22 F28H7.1 0.125441839691078       |
| AGIWUR40243                                                |                                                                         |
| CB4856 CT V                                                | 10744642 10746469 WBGene00005609 srj-21 F28H7.11                        |
| -0.551824632011584                                         | AGIWUR12071                                                             |
| CB4856 CT V                                                | 10746548 10747337 WBGene00009238 selt-1.2 F28H7.4                       |
| -0.313543477490797                                         | AGIWUR38788                                                             |
| CB4856 CT V                                                | 10747944 10748938 WBGene00009236 F28H7.2 F28H7.2 0.304645811106679      |
| AGIWUR3011                                                 |                                                                         |
| CB4856 CT V                                                | 10749607 10750788 WBGene00009237 F28H7.3 F28H7.3 -0.249520054288805     |
| AGIWUR35986                                                |                                                                         |
| CB4856 CT V                                                | 10751057 10754147 WBGene00009240 F28H7.7 F28H7.7 -0.34099108634769      |
| AGIWUR2905                                                 |                                                                         |
| CB4856 CT V                                                | 10754469 10756664 WBGene00009239 irld-6 F28H7.6 -0.665676041420156      |
| AGIWUR1059                                                 |                                                                         |
| CB4856 CT V                                                | 10758958 10760663 WBGene00009241 F28H7.8 F28H7.8 -1.11963734572508      |
| AGIWUR9083                                                 |                                                                         |
| CB4856 CT V                                                | 10760658 10762790 WBGene00009242 sre-6 F28H7.9 0.146926091588796        |
| AGIWUR41255;AGIWUR42176                                    |                                                                         |
| CB4856 CT V                                                | 10764366 10768454 WBGene00003838 ocr-1 F28H7.10                         |
| 0.00791444216422388                                        | AGIWUR35218                                                             |
| CB4856 CT V                                                | 10768465 10770217 WBGene00008370 D1054.1 D1054.1 0.0267112531698466     |
| AGIWUR44989                                                |                                                                         |
| CB4856 CT V                                                | 10770321 10771351 WBGene00003923 pas-2 D1054.2 -0.187657283665693       |
| AGIWUR20271;AGIWUR21995;AGIWUR34386;AGIWUR40199            |                                                                         |

|                                                                                                             |    |   |          |          |                |          |         |                     |
|-------------------------------------------------------------------------------------------------------------|----|---|----------|----------|----------------|----------|---------|---------------------|
| CB4856                                                                                                      | CT | V | 10771451 | 10772832 | WBGene00008371 | D1054.3  | D1054.3 | -0.185639463500428  |
| AGIWUR3336;AGIWUR4673;AGIWUR15639;AGIWUR16549                                                               |    |   |          |          |                |          |         |                     |
| CB4856                                                                                                      | CT | V | 10772819 | 10776578 | WBGene00008372 | D1054.5  | D1054.5 | 0.0334373465422715  |
| AGIWUR41456                                                                                                 |    |   |          |          |                |          |         |                     |
| CB4856                                                                                                      | CT | V | 10778475 | 10780019 | WBGene00008373 | D1054.6  | D1054.6 | -0.0575897795617841 |
| AGIWUR39343                                                                                                 |    |   |          |          |                |          |         |                     |
| CB4856                                                                                                      | CT | V | 10781459 | 10783380 | WBGene00008374 | clec-220 |         | D1054.7             |
| -0.290242841697351 AGIWUR32354;AGIWUR38925                                                                  |    |   |          |          |                |          |         |                     |
| CB4856                                                                                                      | CT | V | 10784236 | 10785367 | WBGene00008375 | D1054.8  | D1054.8 | -0.266880079195163  |
| AGIWUR20991                                                                                                 |    |   |          |          |                |          |         |                     |
| CB4856                                                                                                      | CT | V | 10785801 | 10791057 | WBGene00008376 | D1054.9  | D1054.9 | 0.117017229554992   |
| AGIWUR3559;AGIWUR5305;AGIWUR10996;AGIWUR13468;AGIWUR13746;AGIWUR19183;AGIWUR28311;AGIWUR34506               |    |   |          |          |                |          |         |                     |
| CB4856                                                                                                      | CT | V | 10791975 | 10792830 | WBGene00008377 | D1054.10 |         | D1054.10            |
| 0.0628959173327956 AGIWUR31296                                                                              |    |   |          |          |                |          |         |                     |
| CB4856                                                                                                      | CT | V | 10793793 | 10794924 | WBGene00008378 | ule-3    |         | D1054.11            |
| -0.0578961483617775 AGIWUR7075                                                                              |    |   |          |          |                |          |         |                     |
| CB4856                                                                                                      | CT | V | 10796863 | 10798157 | WBGene00005399 | srh-184  |         | D1054.12            |
| 0.107440371734575 AGIWUR26639                                                                               |    |   |          |          |                |          |         |                     |
| CB4856                                                                                                      | CT | V | 10798360 | 10799475 | WBGene00005379 | srh-163  |         | D1054.16            |
| -0.00767492813662951 AGIWUR15060;AGIWUR25635                                                                |    |   |          |          |                |          |         |                     |
| CB4856                                                                                                      | CT | V | 10802336 | 10804474 | WBGene00008379 | secs-1   |         | D1054.13            |
| 0.0783633617008199 AGIWUR31281                                                                              |    |   |          |          |                |          |         |                     |
| CB4856                                                                                                      | CT | V | 10804721 | 10806034 | WBGene00008380 | prp-38   |         | D1054.14            |
| -0.00619107992427104 AGIWUR30839;AGIWUR36917                                                                |    |   |          |          |                |          |         |                     |
| CB4856                                                                                                      | CT | V | 10806131 | 10807973 | WBGene00006481 | plrg-1   |         | D1054.15            |
| -0.056830467659827 AGIWUR34148                                                                              |    |   |          |          |                |          |         |                     |
| CB4856                                                                                                      | CT | V | 10812343 | 10813487 | WBGene00007797 | C29A12.1 |         | C29A12.1            |
| -0.168095366139376 AGIWUR4242                                                                               |    |   |          |          |                |          |         |                     |
| CB4856                                                                                                      | CT | V | 10814113 | 10816718 | WBGene00002985 | lig-1    |         | C29A12.3            |
| -0.239995765319249 AGIWUR1609;AGIWUR22411                                                                   |    |   |          |          |                |          |         |                     |
| CB4856                                                                                                      | CT | V | 10825012 | 10846695 | WBGene00007799 | nrx-1    |         | C29A12.4            |
| -0.0066930219608281                                                                                         |    |   |          |          |                |          |         |                     |
| AGIWUR9816;AGIWUR10025;AGIWUR14320;AGIWUR17861;AGIWUR18536;AGIWUR19055;AGIWUR36206;AGIWUR36484;AGIWUR37045; |    |   |          |          |                |          |         |                     |
| AGIWUR38337;AGIWUR38411;AGIWUR41061;AGIWUR43338                                                             |    |   |          |          |                |          |         |                     |
| CB4856                                                                                                      | CT | V | 10847193 | 10852502 | WBGene00007800 | C29A12.6 |         | C29A12.6            |
| 0.981795582712261 AGIWUR7641                                                                                |    |   |          |          |                |          |         |                     |
| CB4856                                                                                                      | CT | V | 10852519 | 10865792 | WBGene00010012 | saeg-1   |         | F53H10.2            |
| 0.0528527676464456 AGIWUR15318;AGIWUR22336;AGIWUR24998;AGIWUR35859;AGIWUR37415                              |    |   |          |          |                |          |         |                     |
| CB4856                                                                                                      | CT | V | 10880837 | 10883399 | WBGene00009326 | F32D8.1  | F32D8.1 | -0.0167401989615676 |



|                      |   |                                                                        |          |                |           |           |                     |
|----------------------|---|------------------------------------------------------------------------|----------|----------------|-----------|-----------|---------------------|
| AGIWUR7811           |   |                                                                        |          |                |           |           |                     |
| CB4856 CT            | V | 10883778                                                               | 10886102 | WBGene00009327 | F32D8.2   | F32D8.2   | 0.166055864225187   |
| AGIWUR40386          |   |                                                                        |          |                |           |           |                     |
| CB4856 CT            | V | 10886837                                                               | 10887965 | WBGene00009328 | F32D8.3   | F32D8.3   | -0.0627649184746097 |
| AGIWUR42274          |   |                                                                        |          |                |           |           |                     |
| CB4856 CT            | V | 10887873                                                               | 10889004 | WBGene00043302 | F32D8.11  | F32D8.11  |                     |
| -0.15061815902533    |   | AGIWUR2373;AGIWUR10990;AGIWUR29778;AGIWUR42702;AGIWUR45151             |          |                |           |           |                     |
| CB4856 CT            | V | 10888572                                                               | 10891030 | WBGene00009334 | F32D8.12  | F32D8.12  |                     |
| 0.170376289260834    |   | AGIWUR31365;AGIWUR36246                                                |          |                |           |           |                     |
| CB4856 CT            | V | 10891338                                                               | 10893560 | WBGene00009329 | F32D8.4   | F32D8.4   | -0.363439746465691  |
| AGIWUR39233          |   |                                                                        |          |                |           |           |                     |
| CB4856 CT            | V | 10893649                                                               | 10894788 | WBGene00009336 | F32D8.14  | F32D8.14  |                     |
| -0.180636822709733   |   | AGIWUR4301;AGIWUR30461                                                 |          |                |           |           |                     |
| CB4856 CT            | V | 10896658                                                               | 10897143 | WBGene00001303 | emo-1     | F32D8.6   | -0.289142013088114  |
| AGIWUR34849          |   |                                                                        |          |                |           |           |                     |
| CB4856 CT            | V | 10898435                                                               | 10900701 | WBGene00009331 | F32D8.7   | F32D8.7   | -0.0812151312906053 |
| AGIWUR27643          |   |                                                                        |          |                |           |           |                     |
| CB4856 CT            | V | 10900563                                                               | 10901303 | WBGene00005001 | spp-16    | F32D8.9   | -0.194231159684751  |
| AGIWUR36125          |   |                                                                        |          |                |           |           |                     |
| CB4856 CT            | V | 10901480                                                               | 10902782 | WBGene00009332 | F32D8.8   | F32D8.8   | -0.193461704428151  |
| AGIWUR44171          |   |                                                                        |          |                |           |           |                     |
| CB4856 CT            | V | 10904059                                                               | 10906774 | WBGene00009325 | F32D8.15  | F32D8.15  |                     |
| 0.0331657120102413   |   | AGIWUR5514                                                             |          |                |           |           |                     |
| CB4856 CT            | V | 10906755                                                               | 10909171 | WBGene00009333 | F32D8.10  | F32D8.10  |                     |
| -0.209916175449995   |   | AGIWUR1368                                                             |          |                |           |           |                     |
| CB4856 CT            | V | 10917648                                                               | 10918401 | WBGene00010235 | F58B4.2   | F58B4.2   | -0.170626990585837  |
| AGIWUR12490          |   |                                                                        |          |                |           |           |                     |
| CB4856 CT            | V | 10918861                                                               | 10921847 | WBGene00003549 | nas-31    | F58B4.1   |                     |
| -0.00973472320519653 |   | AGIWUR9906;AGIWUR11402;AGIWUR21749;AGIWUR23262;AGIWUR23820;AGIWUR40710 |          |                |           |           |                     |
| CB4856 CT            | V | 10925322                                                               | 10926796 | WBGene00010239 | F58B4.6   | F58B4.6   | 0.332435295136749   |
| AGIWUR8914           |   |                                                                        |          |                |           |           |                     |
| CB4856 CT            | V | 10929811                                                               | 10930774 | WBGene00010236 | F58B4.3   | F58B4.3   | 0.0611033822943128  |
| AGIWUR359            |   |                                                                        |          |                |           |           |                     |
| CB4856 CT            | V | 10930778                                                               | 10931289 | WBGene00010237 | scvp-1    | F58B4.4   | 0.096642844773223   |
| AGIWUR33317          |   |                                                                        |          |                |           |           |                     |
| CB4856 CT            | V | 10932647                                                               | 10934245 | WBGene00010238 | F58B4.5   | F58B4.5   | -0.197990170931154  |
| AGIWUR16464          |   |                                                                        |          |                |           |           |                     |
| CB4856 CT            | V | 10934228                                                               | 10936920 | WBGene00008923 | F17C11.12 | F17C11.12 |                     |
| -0.632852471092328   |   | AGIWUR4805                                                             |          |                |           |           |                     |

|                         |                                                                                   |          |                |           |                             |
|-------------------------|-----------------------------------------------------------------------------------|----------|----------------|-----------|-----------------------------|
| CB4856 CT V             | 10937633                                                                          | 10938849 | WBGene00008922 | F17C11.11 | F17C11.11                   |
| -0.721489114583999      | AGIWUR8176                                                                        |          |                |           |                             |
| CB4856 CT V             | 10939245                                                                          | 10939612 | WBGene00050890 | F17C11.16 | F17C11.16                   |
| -0.0133490586417357     | AGIWUR4887;AGIWUR9224;AGIWUR13452;AGIWUR13645;AGIWUR41559                         |          |                |           |                             |
| CB4856 CT V             | 10941450                                                                          | 10944302 | WBGene00077761 | zip-9     | F17C11.17                   |
| -0.334095495219181      | AGIWUR2242;AGIWUR6734;AGIWUR25942;AGIWUR34136;AGIWUR38340;AGIWUR38704;AGIWUR39056 |          |                |           |                             |
| CB4856 CT V             | 10948212                                                                          | 10949129 | WBGene00008914 | F17C11.2  | F17C11.2                    |
| 0.443789433493874       | AGIWUR20468                                                                       |          |                |           |                             |
| CB4856 CT V             | 10949857                                                                          | 10951821 | WBGene00000726 | col-153   | F17C11.3                    |
| 0.0297619904419619      | AGIWUR22834                                                                       |          |                |           |                             |
| CB4856 CT V             | 10951818                                                                          | 10953472 | WBGene00008915 | F17C11.4  | F17C11.4                    |
| 1.25515765199824        | AGIWUR37270                                                                       |          |                |           |                             |
| CB4856 CT V             | 10953501                                                                          | 10954434 | WBGene00008916 | cllec-221 | F17C11.5                    |
| -0.200924512896488      | AGIWUR11860                                                                       |          |                |           |                             |
| CB4856 CT V             | 10955091                                                                          | 10955952 | WBGene00008917 | F17C11.6  | F17C11.6                    |
| -0.412560821959977      | AGIWUR7977;AGIWUR14608;AGIWUR23095                                                |          |                |           |                             |
| CB4856 CT V             | 10955923                                                                          | 10957020 | WBGene00023503 | F17C11.13 | F17C11.13                   |
| -0.305512364830463      | AGIWUR13427                                                                       |          |                |           |                             |
| CB4856 CT V             | 10956910                                                                          | 10958821 | WBGene00008918 | F17C11.7  | F17C11.7                    |
| 0.000657440417402455    | AGIWUR13347;AGIWUR36662                                                           |          |                |           |                             |
| CB4856 CT V             | 10958928                                                                          | 10960919 | WBGene00008919 | vps-36    | F17C11.8                    |
| 0.0534590187199884      | AGIWUR5553;AGIWUR23059;AGIWUR28557;AGIWUR40486                                    |          |                |           |                             |
| CB4856 CT V             | 10961722                                                                          | 10965562 | WBGene00008921 | F17C11.10 | F17C11.10                   |
| -0.32694902242063       | AGIWUR6666;AGIWUR29011;AGIWUR36798                                                |          |                |           |                             |
| CB4856 CT V             | 10965675                                                                          | 10968070 | WBGene00008920 | eef-1G    | F17C11.9                    |
| 0.0116035246404493      | AGIWUR5607;AGIWUR10732;AGIWUR16495;AGIWUR20982;AGIWUR42601                        |          |                |           |                             |
| CB4856 CT V             | 10970399                                                                          | 10981213 | WBGene00009968 | fig-1     | F53B7.5 0.130863544421429   |
| AGIWUR14199             |                                                                                   |          |                |           |                             |
| CB4856 CT V             | 10992099                                                                          | 10994817 | WBGene00009965 | frpr-9    | F53B7.2                     |
| -0.00542845201884123    | AGIWUR38039                                                                       |          |                |           |                             |
| CB4856 CT V             | 10999102                                                                          | 10999642 | WBGene00009969 | F53B7.7   | F53B7.7 -0.0475428649847203 |
| AGIWUR29607             |                                                                                   |          |                |           |                             |
| CB4856 CT V             | 10999658                                                                          | 11000713 | WBGene00009966 | F53B7.3   | F53B7.3 -0.357486655891282  |
| AGIWUR31116             |                                                                                   |          |                |           |                             |
| CB4856 CT V             | 11000957                                                                          | 11002534 | WBGene00009967 | F53B7.4   | F53B7.4 0.0520785689635983  |
| AGIWUR15378;AGIWUR32446 |                                                                                   |          |                |           |                             |
| CB4856 CT V             | 11011589                                                                          | 11012465 | WBGene00007553 | C13G3.1   | C13G3.1 -0.135335549984074  |
| AGIWUR5612              |                                                                                   |          |                |           |                             |
| CB4856 CT V             | 11021069                                                                          | 11022884 | WBGene00001991 | hot-6     | C13G3.2 0.507969173142307   |

AGIWUR35399

|                                                                                          |    |   |          |          |                |           |          |                    |
|------------------------------------------------------------------------------------------|----|---|----------|----------|----------------|-----------|----------|--------------------|
| CB4856                                                                                   | CT | V | 11027153 | 11030845 | WBGene00007554 | pptr-2    | C13G3.3  | 0.0437431137637905 |
| AGIWUR6753;AGIWUR10456;AGIWUR15563;AGIWUR23456                                           |    |   |          |          |                |           |          |                    |
| CB4856                                                                                   | CT | V | 11036462 | 11039425 | WBGene00006443 | pak-2     | C45B11.1 |                    |
| 0.0482028463925044 AGIWUR4837;AGIWUR12671                                                |    |   |          |          |                |           |          |                    |
| CB4856                                                                                   | CT | V | 11041824 | 11042301 | WBGene00008106 | C45B11.5  |          | C45B11.5           |
| -0.227386743410475 AGIWUR45002                                                           |    |   |          |          |                |           |          |                    |
| CB4856                                                                                   | CT | V | 11042817 | 11043855 | WBGene00008105 | C45B11.2  |          | C45B11.2           |
| -0.0172536127703373 AGIWUR2224;AGIWUR5947                                                |    |   |          |          |                |           |          |                    |
| CB4856                                                                                   | CT | V | 11044067 | 11045734 | WBGene00045379 | C45B11.6  |          | C45B11.6           |
| 0.233815640282246 AGIWUR9924;AGIWUR28606;AGIWUR30898;AGIWUR32180;AGIWUR37183;AGIWUR43770 |    |   |          |          |                |           |          |                    |
| CB4856                                                                                   | CT | V | 11045696 | 11046899 | WBGene00000981 | dhs-18    | C45B11.3 |                    |
| 0.63804380497157 AGIWUR38705                                                             |    |   |          |          |                |           |          |                    |
| CB4856                                                                                   | CT | V | 11047227 | 11048744 | WBGene00005295 | srh-74    | C45B11.4 |                    |
| -8.12920783803683e-05 AGIWUR14311;AGIWUR26356                                            |    |   |          |          |                |           |          |                    |
| CB4856                                                                                   | CT | V | 11052457 | 11053107 | WBGene00271444 | T04C12.33 |          | T04C12.33          |
| -0.792251244956065 AGIWUR36779                                                           |    |   |          |          |                |           |          |                    |
| CB4856                                                                                   | CT | V | 11054127 | 11055142 | WBGene00011429 | T04C12.7  |          | T04C12.7           |
| 0.30135586497528 AGIWUR19762                                                             |    |   |          |          |                |           |          |                    |
| CB4856                                                                                   | CT | V | 11055306 | 11057143 | WBGene00005296 | srh-75    | T04C12.2 |                    |
| 0.174615231392245 AGIWUR13499                                                            |    |   |          |          |                |           |          |                    |
| CB4856                                                                                   | CT | V | 11058649 | 11059264 | WBGene00011427 | T04C12.1  |          | T04C12.1           |
| 1.41299850986512 AGIWUR14776;AGIWUR18085;AGIWUR19163;AGIWUR26042;AGIWUR26550;AGIWUR38351 |    |   |          |          |                |           |          |                    |
| CB4856                                                                                   | CT | V | 11062439 | 11063245 | WBGene00050889 | T04C12.9  |          | T04C12.9           |
| 0.0562175080153704 AGIWUR2246;AGIWUR4116;AGIWUR21052;AGIWUR38044;AGIWUR42482             |    |   |          |          |                |           |          |                    |
| CB4856                                                                                   | CT | V | 11064954 | 11065634 | WBGene00011428 | T04C12.3  |          | T04C12.3           |
| 0.277514849868096 AGIWUR5731;AGIWUR6696;AGIWUR6992;AGIWUR24917;AGIWUR28081;AGIWUR40873   |    |   |          |          |                |           |          |                    |
| CB4856                                                                                   | CT | V | 11068069 | 11069358 | WBGene00011430 | T04C12.8  |          | T04C12.8           |
| 0.539811389389795 AGIWUR42678                                                            |    |   |          |          |                |           |          |                    |
| CB4856                                                                                   | CT | V | 11071690 | 11074498 | WBGene00000065 | act-3     | T04C12.4 |                    |
| 0.056946934484376 AGIWUR13229;AGIWUR23078;AGIWUR29810;AGIWUR42315                        |    |   |          |          |                |           |          |                    |
| CB4856                                                                                   | CT | V | 11076723 | 11078168 | WBGene00000064 | act-2     | T04C12.5 |                    |
| -0.198112784422669 AGIWUR9001                                                            |    |   |          |          |                |           |          |                    |
| CB4856                                                                                   | CT | V | 11079167 | 11082497 | WBGene00000063 | act-1     | T04C12.6 |                    |
| 0.270145436789658 AGIWUR9269                                                             |    |   |          |          |                |           |          |                    |
| CB4856                                                                                   | CT | V | 11088154 | 11097970 | WBGene00012776 | Y42A5A.1  |          | Y42A5A.1           |
| -0.122715365612326 AGIWUR16408                                                           |    |   |          |          |                |           |          |                    |
| CB4856                                                                                   | CT | V | 11098950 | 11107288 | WBGene00012779 | cdk1-1    | Y42A5A.4 |                    |
| 0.1580637633186 AGIWUR22818                                                              |    |   |          |          |                |           |          |                    |

|                                                                         |                         |          |                |          |                             |
|-------------------------------------------------------------------------|-------------------------|----------|----------------|----------|-----------------------------|
| CB4856 CT V                                                             | 11107535                | 11109747 | WBGene00012780 | Y42A5A.5 | Y42A5A.5                    |
| 0.125717598158772                                                       | AGIWUR31100             |          |                |          |                             |
| CB4856 CT V                                                             | 11110063                | 11113103 | WBGene00010405 | erfa-3   | H19N07.1                    |
| -0.219469159272982                                                      | AGIWUR16557             |          |                |          |                             |
| CB4856 CT V                                                             | 11113914                | 11118818 | WBGene00010406 | math-33  | H19N07.2                    |
| 0.183428375475999                                                       | AGIWUR9079;AGIWUR13855  |          |                |          |                             |
| CB4856 CT V                                                             | 11118721                | 11119730 | WBGene00010407 | H19N07.3 | H19N07.3                    |
| 0.711359974773213                                                       | AGIWUR9792              |          |                |          |                             |
| CB4856 CT V                                                             | 11119813                | 11122579 | WBGene00010408 | mboa-2   | H19N07.4                    |
| -0.170560774440677                                                      | AGIWUR25266             |          |                |          |                             |
| CB4856 CT V                                                             | 11122820                | 11123867 | WBGene00007385 | atp-5    | C06H2.1 -0.121817515378353  |
| AGIWUR18502;AGIWUR24548;AGIWUR30030;AGIWUR39039;AGIWUR39317;AGIWUR40026 |                         |          |                |          |                             |
| CB4856 CT V                                                             | 11124303                | 11125053 | WBGene00007390 | lmtr-3   | C06H2.6 -0.0488336667876021 |
| AGIWUR18923;AGIWUR20009                                                 |                         |          |                |          |                             |
| CB4856 CT V                                                             | 11125222                | 11127306 | WBGene00007386 | C06H2.2  | C06H2.2 -0.239294056817155  |
| AGIWUR30603                                                             |                         |          |                |          |                             |
| CB4856 CT V                                                             | 11127497                | 11130085 | WBGene00007387 | jmjd-5   | C06H2.3 -0.122084755504043  |
| AGIWUR9255                                                              |                         |          |                |          |                             |
| CB4856 CT V                                                             | 11134609                | 11140323 | WBGene00007389 | glb-3    | C06H2.5 -0.345003020023274  |
| AGIWUR780                                                               |                         |          |                |          |                             |
| CB4856 CT V                                                             | 11141498                | 11143121 | WBGene00007388 | folt-1   | C06H2.4 -0.314931932916686  |
| AGIWUR43335                                                             |                         |          |                |          |                             |
| CB4856 CT V                                                             | 11143062                | 11144758 | WBGene00007391 | C06H2.7  | C06H2.7 -0.208810073578663  |
| AGIWUR29570                                                             |                         |          |                |          |                             |
| CB4856 CT V                                                             | 11149705                | 11151309 | WBGene00011838 | T19C4.1  | T19C4.1 0.860871525210592   |
| AGIWUR8258                                                              |                         |          |                |          |                             |
| CB4856 CT V                                                             | 11151339                | 11152430 | WBGene00005196 | srg-39   | T19C4.2 0.102329213926879   |
| AGIWUR13750                                                             |                         |          |                |          |                             |
| CB4856 CT V                                                             | 11152575                | 11155653 | WBGene00005195 | srg-38   | T19C4.8 -0.0297662627983835 |
| AGIWUR26785                                                             |                         |          |                |          |                             |
| CB4856 CT V                                                             | 11157090                | 11158706 | WBGene00005199 | srg-42   | T19C4.9 -0.146619153490233  |
| AGIWUR13312                                                             |                         |          |                |          |                             |
| CB4856 CT V                                                             | 11160452                | 11161891 | WBGene00005198 | srg-41   | T19C4.3 -0.0925373619202814 |
| AGIWUR30808                                                             |                         |          |                |          |                             |
| CB4856 CT V                                                             | 11163036                | 11164575 | WBGene00005197 | srg-40   | T19C4.4 -1.09112556460805   |
| AGIWUR38932                                                             |                         |          |                |          |                             |
| CB4856 CT V                                                             | 11165853                | 11167640 | WBGene00014841 | T19C4.10 | T19C4.10                    |
| -0.131786612362298                                                      | AGIWUR28571;AGIWUR44720 |          |                |          |                             |
| CB4856 CT V                                                             | 11172215                | 11174452 | WBGene00011839 | T19C4.5  | T19C4.5 1.05651522388458    |

|                                                             |   |                                                                        |          |                |           |           |                    |
|-------------------------------------------------------------|---|------------------------------------------------------------------------|----------|----------------|-----------|-----------|--------------------|
| AGIWUR44772                                                 |   |                                                                        |          |                |           |           |                    |
| CB4856 CT                                                   | V | 11174567                                                               | 11177559 | WBGene00001663 | gpa-1     | T19C4.6   | 0.0436657557677123 |
| AGIWUR42384                                                 |   |                                                                        |          |                |           |           |                    |
| CB4856 CT                                                   | V | 11183224                                                               | 11183643 | WBGene00012152 | cnc-10    | VK10D6R.1 |                    |
| 0.148692902622512                                           |   | AGIWUR4385                                                             |          |                |           |           |                    |
| CB4856 CT                                                   | V | 11191283                                                               | 11193638 | WBGene00010741 | lgc-49    | K10D6.1   | -0.286751157889107 |
| AGIWUR8747                                                  |   |                                                                        |          |                |           |           |                    |
| CB4856 CT                                                   | V | 11193733                                                               | 11196010 | WBGene00010742 | K10D6.2   | K10D6.2   | 0.66039862572439   |
| AGIWUR9438;AGIWUR26231;AGIWUR43418                          |   |                                                                        |          |                |           |           |                    |
| CB4856 CT                                                   | V | 11200665                                                               | 11201392 | WBGene00010743 | K10D6.3   | K10D6.3   | -0.139580550225819 |
| AGIWUR15976;AGIWUR19250;AGIWUR20801;AGIWUR22472;AGIWUR38353 |   |                                                                        |          |                |           |           |                    |
| CB4856 CT                                                   | V | 11201905                                                               | 11216774 | WBGene00010744 | K10D6.4   | K10D6.4   | 0.471444655856075  |
| AGIWUR23468                                                 |   |                                                                        |          |                |           |           |                    |
| CB4856 CT                                                   | V | 11217583                                                               | 11219902 | WBGene00011830 | cyp-29A2  |           | T19B10.1           |
| 0.404298212598416                                           |   | AGIWUR36091                                                            |          |                |           |           |                    |
| CB4856 CT                                                   | V | 11221302                                                               | 11222834 | WBGene00011831 | T19B10.2  |           | T19B10.2           |
| 0.165997524299861                                           |   | AGIWUR3115;AGIWUR10805;AGIWUR11521;AGIWUR25739;AGIWUR29837;AGIWUR39360 |          |                |           |           |                    |
| CB4856 CT                                                   | V | 11222772                                                               | 11226018 | WBGene00011832 | bga1-1    |           | T19B10.3           |
| -0.099600251759302                                          |   | AGIWUR14003;AGIWUR17301;AGIWUR27843                                    |          |                |           |           |                    |
| CB4856 CT                                                   | V | 11226314                                                               | 11228703 | WBGene00004152 | pqn-70    |           | T19B10.4           |
| -0.0236074436572542                                         |   | AGIWUR3150;AGIWUR23106                                                 |          |                |           |           |                    |
| CB4856 CT                                                   | V | 11234650                                                               | 11237428 | WBGene00011833 | T19B10.5  |           | T19B10.5           |
| -0.0275505522337909                                         |   | AGIWUR22092                                                            |          |                |           |           |                    |
| CB4856 CT                                                   | V | 11237438                                                               | 11239331 | WBGene00011834 | dvc-1     |           | T19B10.6           |
| -0.234562467717323                                          |   | AGIWUR13415;AGIWUR15411;AGIWUR41047                                    |          |                |           |           |                    |
| CB4856 CT                                                   | V | 11239675                                                               | 11241780 | WBGene00002072 | ima-1     |           | T19B10.7           |
| -0.083005211002142                                          |   | AGIWUR5907;AGIWUR8615;AGIWUR15144                                      |          |                |           |           |                    |
| CB4856 CT                                                   | V | 11241879                                                               | 11244726 | WBGene00011835 | T19B10.8  |           | T19B10.8           |
| -0.0890293931341661                                         |   | AGIWUR7678;AGIWUR38740                                                 |          |                |           |           |                    |
| CB4856 CT                                                   | V | 11244839                                                               | 11245927 | WBGene00003509 | mx1-1     |           | T19B10.11          |
| 0.0606472737537693                                          |   | AGIWUR42940                                                            |          |                |           |           |                    |
| CB4856 CT                                                   | V | 11248146                                                               | 11250866 | WBGene00011836 | mam-4     |           | T19B10.9           |
| 0.00726426898634225                                         |   | AGIWUR1265;AGIWUR8663;AGIWUR13972;AGIWUR22475;AGIWUR23365;AGIWUR31468  |          |                |           |           |                    |
| CB4856 CT                                                   | V | 11251035                                                               | 11251211 | WBGene00050898 | T19B10.12 |           | T19B10.12          |
| 0.0657367348874027                                          |   | AGIWUR487;AGIWUR6099;AGIWUR24637;AGIWUR29982;AGIWUR40878               |          |                |           |           |                    |
| CB4856 CT                                                   | V | 11251415                                                               | 11252529 | WBGene00011837 | srsx-33   |           | T19B10.10          |
| -0.172985684598546                                          |   | AGIWUR40610                                                            |          |                |           |           |                    |
| CB4856 CT                                                   | V | 11254013                                                               | 11255080 | WBGene00008552 | srsx-31   | F07B10.6  |                    |
| 0.125516995411207                                           |   | AGIWUR24817;AGIWUR36194                                                |          |                |           |           |                    |

|                         |                                     |          |                |           |                             |
|-------------------------|-------------------------------------|----------|----------------|-----------|-----------------------------|
| CB4856 CT V             | 11256521                            | 11258996 | WBGene00008551 | lgc-36    | F07B10.5                    |
| 0.0472277776039265      | AGIWUR12869                         |          |                |           |                             |
| CB4856 CT V             | 11259312                            | 11260722 | WBGene00077514 | F07B10.7  | F07B10.7                    |
| 0.106660910510812       | AGIWUR17989                         |          |                |           |                             |
| CB4856 CT V             | 11261264                            | 11263116 | WBGene00008550 | F07B10.4  | F07B10.4                    |
| -0.616878961202699      | AGIWUR18448;AGIWUR26396             |          |                |           |                             |
| CB4856 CT V             | 11263523                            | 11265711 | WBGene00000539 | cln-3.1   | F07B10.1                    |
| -0.795902293770567      | AGIWUR23122                         |          |                |           |                             |
| CB4856 CT V             | 11266981                            | 11268323 | WBGene00006167 | str-116   | F07B10.2                    |
| 0.119706465341221       | AGIWUR32627                         |          |                |           |                             |
| CB4856 CT V             | 11269091                            | 11270426 | WBGene00006166 | str-115   | F07B10.3                    |
| 0.000177877264848192    | AGIWUR8426                          |          |                |           |                             |
| CB4856 CT V             | 11271351                            | 11272467 | WBGene00007283 | cllec-222 | C03E10.6                    |
| 0.178481791956987       | AGIWUR34617                         |          |                |           |                             |
| CB4856 CT V             | 11273148                            | 11278161 | WBGene00007282 | cllec-223 | C03E10.5                    |
| 0.536302857106406       | AGIWUR34212                         |          |                |           |                             |
| CB4856 CT V             | 11282572                            | 11286039 | WBGene00001645 | gly-20    | C03E10.4                    |
| 0.0207121903313521      | AGIWUR10498;AGIWUR14558;AGIWUR31763 |          |                |           |                             |
| CB4856 CT V             | 11286602                            | 11288412 | WBGene00007281 | C03E10.3  | C03E10.3                    |
| 0.0027231915630157      | AGIWUR22175;AGIWUR35237;AGIWUR43907 |          |                |           |                             |
| CB4856 CT V             | 11291188                            | 11292569 | WBGene00007279 | C03E10.1  | C03E10.1                    |
| 0.0587833072226198      | AGIWUR31775                         |          |                |           |                             |
| CB4856 CT V             | 11294693                            | 11296562 | WBGene00011403 | T03F7.6   | T03F7.6 0.0981089999936797  |
| AGIWUR30648             |                                     |          |                |           |                             |
| CB4856 CT V             | 11296696                            | 11298732 | WBGene00011402 | T03F7.5   | T03F7.5 0.0207711211870762  |
| AGIWUR25048             |                                     |          |                |           |                             |
| CB4856 CT V             | 11299373                            | 11300639 | WBGene00005270 | srh-47    | T03F7.4 0.163960709231183   |
| AGIWUR8046;AGIWUR39403  |                                     |          |                |           |                             |
| CB4856 CT V             | 11301607                            | 11302886 | WBGene00005269 | srh-46    | T03F7.3 -0.114357265850622  |
| AGIWUR18968             |                                     |          |                |           |                             |
| CB4856 CT V             | 11303651                            | 11304979 | WBGene00005268 | srh-45    | T03F7.2 -0.386580232723504  |
| AGIWUR15350;AGIWUR19467 |                                     |          |                |           |                             |
| CB4856 CT V             | 11305070                            | 11308446 | WBGene00004910 | snf-11    | T03F7.1 0.193061923995268   |
| AGIWUR20858             |                                     |          |                |           |                             |
| CB4856 CT V             | 11311456                            | 11313445 | WBGene00011404 | T03F7.7   | T03F7.7 -0.117815339110079  |
| AGIWUR17896;AGIWUR18547 |                                     |          |                |           |                             |
| CB4856 CT V             | 11313400                            | 11316901 | WBGene00009830 | cut1-18   | F47G9.3 -0.705272278969526  |
| AGIWUR31545             |                                     |          |                |           |                             |
| CB4856 CT V             | 11317214                            | 11321786 | WBGene00009831 | F47G9.4   | F47G9.4 -0.0583324435464139 |

AGIWUR4717;AGIWUR9709;AGIWUR14335;AGIWUR21384;AGIWUR42673  
 CB4856 CT V 11322322 11323820 WBGene00006189 str-141 F47G9.2 0.34126734974997  
 AGIWUR9795  
 CB4856 CT V 11323965 11326964 WBGene00009829 F47G9.1 F47G9.1 -0.0179966866229471  
 AGIWUR8533;AGIWUR11906;AGIWUR24323  
 CB4856 CT V 11329400 11330775 WBGene00009833 F47G9.6 F47G9.6 0.0651948294693412  
 AGIWUR24729  
 CB4856 CT V 11332987 11334293 WBGene00044203 T02E9.6 T02E9.6 0.0617707625538162  
 AGIWUR1151;AGIWUR30893  
 CB4856 CT V 11342233 11344773 WBGene00011383 T02E9.5 T02E9.5 0.470346242726525  
 AGIWUR4132;AGIWUR6704;AGIWUR13819;AGIWUR22708;AGIWUR22756;AGIWUR24772  
 CB4856 CT V 11344831 11347012 WBGene00001716 grl-7 T02E9.2 -0.072319470280676  
 AGIWUR14923;AGIWUR42462  
 CB4856 CT V 11349310 11352993 WBGene00011381 npr-25 T02E9.1 0.255181513309926  
 AGIWUR27897  
 CB4856 CT V 11362453 11366221 WBGene00011382 dop-5 T02E9.3 0.157706820279722  
 AGIWUR6998  
 CB4856 CT V 11375742 11377990 WBGene00000554 cnb-1 F55C10.1  
 0.288631242398427 AGIWUR15966  
 CB4856 CT V 11383105 11384353 WBGene00010109 F55C10.5 F55C10.5  
 -0.0879060339687037 AGIWUR28132  
 CB4856 CT V 11385360 11386529 WBGene00000727 col-154 F55C10.2  
 0.0746546424273795 AGIWUR18601  
 CB4856 CT V 11386698 11388678 WBGene00010108 F55C10.4 F55C10.4  
 -0.464441766206177 AGIWUR44361  
 CB4856 CT V 11390273 11390494 WBGene00010526 K03B8.11 K03B8.11  
 -0.530715216540763 AGIWUR10764  
 CB4856 CT V 11392320 11393508 WBGene00003535 nas-16 K03B8.1 -0.0280294618998012  
 AGIWUR5158;AGIWUR9549  
 CB4856 CT V 11398916 11400528 WBGene00003536 nas-17 K03B8.2 -1.06005210048703  
 AGIWUR16781  
 CB4856 CT V 11401195 11402690 WBGene00003538 nas-19 K03B8.5 -0.473194925879366  
 AGIWUR2377  
 CB4856 CT V 11407523 11409543 WBGene00010524 K03B8.6 K03B8.6 0.0209624646516313  
 AGIWUR9809;AGIWUR37619  
 CB4856 CT V 11409467 11411019 WBGene00010525 K03B8.8 K03B8.8 -0.0195580883091999  
 AGIWUR796;AGIWUR8221;AGIWUR10078;AGIWUR13769;AGIWUR34518;AGIWUR40338;AGIWUR44676  
 CB4856 CT V 11411511 11412769 WBGene00001712 grl-3 K03B8.7 0.00625500513982047  
 AGIWUR3545

|                                                                                              |                                     |          |                |          |          |                     |
|----------------------------------------------------------------------------------------------|-------------------------------------|----------|----------------|----------|----------|---------------------|
| CB4856 CT V                                                                                  | 11412870                            | 11415159 | WBGene00000951 | deg-3    | K03B8.9  | 0.0715988840934134  |
| AGIWUR33003                                                                                  |                                     |          |                |          |          |                     |
| CB4856 CT V                                                                                  | 11415342                            | 11420293 | WBGene00000955 | des-2    | T26H10.1 |                     |
| 0.247735748599125                                                                            | AGIWUR24189                         |          |                |          |          |                     |
| CB4856 CT V                                                                                  | 11438770                            | 11441618 | WBGene00010191 | dmsr-1   | F57B7.1  | 0.17836258314694    |
| AGIWUR10396;AGIWUR16007                                                                      |                                     |          |                |          |          |                     |
| CB4856 CT V                                                                                  | 11441925                            | 11443603 | WBGene00010192 | F57B7.2  | F57B7.2  | -0.0539822465828461 |
| AGIWUR12817                                                                                  |                                     |          |                |          |          |                     |
| CB4856 CT V                                                                                  | 11446633                            | 11449245 | WBGene00003248 | mig-17   | F57B7.4  | -0.400669185981322  |
| AGIWUR40715                                                                                  |                                     |          |                |          |          |                     |
| CB4856 CT V                                                                                  | 11449223                            | 11450357 | WBGene00000729 | col-156  | F57B7.3  | -0.0441637596316165 |
| AGIWUR10540                                                                                  |                                     |          |                |          |          |                     |
| CB4856 CT V                                                                                  | 11462999                            | 11466770 | WBGene00006486 | zipt-21  | T11F9.2  | -0.414534590364129  |
| AGIWUR1480                                                                                   |                                     |          |                |          |          |                     |
| CB4856 CT V                                                                                  | 11466844                            | 11470663 | WBGene00000007 | aat-6    | T11F9.4  | -0.153329168092283  |
| AGIWUR20033                                                                                  |                                     |          |                |          |          |                     |
| CB4856 CT V                                                                                  | 11470868                            | 11472349 | WBGene00003539 | nas-20   | T11F9.3  | -0.570065773946837  |
| AGIWUR1380;AGIWUR5186;AGIWUR11424;AGIWUR18119                                                |                                     |          |                |          |          |                     |
| CB4856 CT V                                                                                  | 11472561                            | 11473973 | WBGene00003540 | nas-21   | T11F9.5  | -0.0156776890701638 |
| AGIWUR4677;AGIWUR5223;AGIWUR9699;AGIWUR11738;AGIWUR12453;AGIWUR17204;AGIWUR18508;AGIWUR43832 |                                     |          |                |          |          |                     |
| CB4856 CT V                                                                                  | 11474699                            | 11477951 | WBGene00003541 | nas-22   | T11F9.6  | -0.228105503989728  |
| AGIWUR3819;AGIWUR8826;AGIWUR9112;AGIWUR26329;AGIWUR36117;AGIWUR37505;AGIWUR42006             |                                     |          |                |          |          |                     |
| CB4856 CT V                                                                                  | 11478413                            | 11479243 | WBGene00005235 | srh-9    | T11F9.17 |                     |
| -0.168751692764623                                                                           | AGIWUR24741;AGIWUR43754;AGIWUR44860 |          |                |          |          |                     |
| CB4856 CT V                                                                                  | 11485858                            | 11487266 | WBGene00005227 | srh-1    | T11F9.18 |                     |
| -0.167749836673618                                                                           | AGIWUR24579                         |          |                |          |          |                     |
| CB4856 CT V                                                                                  | 11487152                            | 11488275 | WBGene00011712 | T11F9.10 |          | T11F9.10            |
| 0.00628131665598453                                                                          | AGIWUR16276                         |          |                |          |          |                     |
| CB4856 CT V                                                                                  | 11489050                            | 11490328 | WBGene00000982 | dhs-19   | T11F9.11 |                     |
| 0.148378454279873                                                                            | AGIWUR39451                         |          |                |          |          |                     |
| CB4856 CT V                                                                                  | 11491829                            | 11492590 | WBGene00011716 | T11F9.19 |          | T11F9.19            |
| 0.34322205994013                                                                             | AGIWUR31163                         |          |                |          |          |                     |
| CB4856 CT V                                                                                  | 11493556                            | 11496379 | WBGene00011713 | T11F9.12 |          | T11F9.12            |
| -0.119737822371263                                                                           | AGIWUR14163                         |          |                |          |          |                     |
| CB4856 CT V                                                                                  | 11501444                            | 11503127 | WBGene00044019 | C55A6.12 |          | C55A6.12            |
| -0.00997655264659958                                                                         | AGIWUR10900                         |          |                |          |          |                     |
| CB4856 CT V                                                                                  | 11503811                            | 11504884 | WBGene00008330 | C55A6.1  | C55A6.1  | -0.223243799210473  |
| AGIWUR2304;AGIWUR41867                                                                       |                                     |          |                |          |          |                     |
| CB4856 CT V                                                                                  | 11505352                            | 11508271 | WBGene00008339 | C55A6.10 |          | C55A6.10            |



|                                                                                    |                                    |          |                |          |          |                     |  |
|------------------------------------------------------------------------------------|------------------------------------|----------|----------------|----------|----------|---------------------|--|
| -0.00126814886873206                                                               | AGIWUR2761                         |          |                |          |          |                     |  |
| CB4856 CT V                                                                        | 11509068                           | 11512318 | WBGene00008331 | ttl1-5   | C55A6.2  | -0.059332043054328  |  |
| AGIWUR31123;AGIWUR43920                                                            |                                    |          |                |          |          |                     |  |
| CB4856 CT V                                                                        | 11512313                           | 11513436 | WBGene00008332 | C55A6.3  | C55A6.3  | 0.0214475672561782  |  |
| AGIWUR30062                                                                        |                                    |          |                |          |          |                     |  |
| CB4856 CT V                                                                        | 11513665                           | 11514737 | WBGene00008335 | C55A6.6  | C55A6.6  | -0.221253241995759  |  |
| AGIWUR7253                                                                         |                                    |          |                |          |          |                     |  |
| CB4856 CT V                                                                        | 11515084                           | 11516191 | WBGene00008334 | sdz-8    | C55A6.5  | -0.332268390681371  |  |
| AGIWUR44215                                                                        |                                    |          |                |          |          |                     |  |
| CB4856 CT V                                                                        | 11516445                           | 11517889 | WBGene00008333 | C55A6.4  | C55A6.4  | -0.426171721272731  |  |
| AGIWUR12044                                                                        |                                    |          |                |          |          |                     |  |
| CB4856 CT V                                                                        | 11518100                           | 11518702 | WBGene00008337 | C55A6.8  | C55A6.8  | 0.0839881144435521  |  |
| AGIWUR3620;AGIWUR12782;AGIWUR19330                                                 |                                    |          |                |          |          |                     |  |
| CB4856 CT V                                                                        | 11519335                           | 11520530 | WBGene00008336 | C55A6.7  | C55A6.7  | -0.0364970161643865 |  |
| AGIWUR4983;AGIWUR10473;AGIWUR12082;AGIWUR43879                                     |                                    |          |                |          |          |                     |  |
| CB4856 CT V                                                                        | 11520515                           | 11521554 | WBGene00008340 | C55A6.11 | C55A6.11 |                     |  |
| -0.0493042019143566                                                                | AGIWUR17876                        |          |                |          |          |                     |  |
| CB4856 CT V                                                                        | 11521653                           | 11523384 | WBGene00008338 | pafo-1   | C55A6.9  | -0.182786522217981  |  |
| AGIWUR4256                                                                         |                                    |          |                |          |          |                     |  |
| CB4856 CT V                                                                        | 11527831                           | 11541219 | WBGene00009532 | ccch-1   | F38B7.1  | 0.14080667784541    |  |
| AGIWUR1888;AGIWUR15184;AGIWUR18653;AGIWUR21592;AGIWUR31708;AGIWUR35392;AGIWUR38363 |                                    |          |                |          |          |                     |  |
| CB4856 CT V                                                                        | 11543857                           | 11545290 | WBGene00009533 | F38B7.2  | F38B7.2  | -0.267052532052172  |  |
| AGIWUR5222;AGIWUR12757;AGIWUR16809;AGIWUR30377;AGIWUR33388                         |                                    |          |                |          |          |                     |  |
| CB4856 CT V                                                                        | 11545536                           | 11546376 | WBGene00077536 | F38B7.10 | F38B7.10 |                     |  |
| 0.158487097149663                                                                  | AGIWUR1421;AGIWUR14756;AGIWUR33638 |          |                |          |          |                     |  |
| CB4856 CT V                                                                        | 11549107                           | 11551560 | WBGene00009534 | F38B7.3  | F38B7.3  | 0.266727757986553   |  |
| AGIWUR33781                                                                        |                                    |          |                |          |          |                     |  |
| CB4856 CT V                                                                        | 11552679                           | 11554222 | WBGene00005976 | srx-85   | F38B7.4  | 0.234902509765698   |  |
| AGIWUR36588                                                                        |                                    |          |                |          |          |                     |  |
| CB4856 CT V                                                                        | 11554635                           | 11558127 | WBGene00001110 | duo-1    | F38B7.5  | -0.169791525442701  |  |
| AGIWUR6255;AGIWUR23547;AGIWUR41872                                                 |                                    |          |                |          |          |                     |  |
| CB4856 CT V                                                                        | 11558319                           | 11559881 | WBGene00005962 | srx-71   | F38B7.6  | 0.235076320436232   |  |
| AGIWUR33725                                                                        |                                    |          |                |          |          |                     |  |
| CB4856 CT V                                                                        | 11560078                           | 11561650 | WBGene00005963 | srx-72   | F38B7.9  | -0.0549687217579407 |  |
| AGIWUR5244;AGIWUR41450                                                             |                                    |          |                |          |          |                     |  |
| CB4856 CT V                                                                        | 11562943                           | 11564508 | WBGene00005977 | srx-86   | F38B7.7  |                     |  |
| -0.00382088903252908                                                               | AGIWUR22026;AGIWUR22798            |          |                |          |          |                     |  |
| CB4856 CT V                                                                        | 11564873                           | 11566771 | WBGene00005978 | srx-87   | F38B7.8  | 0.0785501902029688  |  |
| AGIWUR5096;AGIWUR11440;AGIWUR14755                                                 |                                    |          |                |          |          |                     |  |

|                     |                                                                        |          |                |           |                           |
|---------------------|------------------------------------------------------------------------|----------|----------------|-----------|---------------------------|
| CB4856 CT V         | 11566804                                                               | 11573091 | WBGene00004064 | pms-2     | H12C20.2                  |
| -0.0713534056054064 | AGIWUR22401;AGIWUR36857;AGIWUR38193                                    |          |                |           |                           |
| CB4856 CT V         | 11573440                                                               | 11575709 | WBGene00003658 | nhr-68    | H12C20.3                  |
| -0.380580393723019  | AGIWUR12727                                                            |          |                |           |                           |
| CB4856 CT V         | 11576631                                                               | 11577911 | WBGene00005982 | srx-91    | H12C20.4                  |
| -0.0294821476239528 | AGIWUR1007;AGIWUR11759;AGIWUR22109;AGIWUR31195;AGIWUR31842             |          |                |           |                           |
| CB4856 CT V         | 11581126                                                               | 11582458 | WBGene00005981 | srx-90    | H12C20.5                  |
| 0.19946004259706    | AGIWUR28808                                                            |          |                |           |                           |
| CB4856 CT V         | 11583512                                                               | 11585115 | WBGene00005979 | srx-88    | F43A11.1                  |
| -0.0359885433237652 | AGIWUR12245                                                            |          |                |           |                           |
| CB4856 CT V         | 11586259                                                               | 11588133 | WBGene00005980 | srx-89    | F43A11.3                  |
| -0.0237960607259367 | AGIWUR8733;AGIWUR29031;AGIWUR33331;AGIWUR35615                         |          |                |           |                           |
| CB4856 CT V         | 11589733                                                               | 11592931 | WBGene00005973 | srx-82    | F43A11.6                  |
| 0.0524808446810505  | AGIWUR5392;AGIWUR12579                                                 |          |                |           |                           |
| CB4856 CT V         | 11593727                                                               | 11594971 | WBGene00005971 | srx-80    | F43A11.4                  |
| -0.11496948930613   | AGIWUR26018                                                            |          |                |           |                           |
| CB4856 CT V         | 11595919                                                               | 11597096 | WBGene00005972 | srx-81    | F43A11.5                  |
| 0.00236762170302462 | AGIWUR1854;AGIWUR40726                                                 |          |                |           |                           |
| CB4856 CT V         | 11597346                                                               | 11598897 | WBGene00005974 | srx-83    | F43A11.7                  |
| 0.219272175159436   | AGIWUR31700                                                            |          |                |           |                           |
| CB4856 CT V         | 11599107                                                               | 11600628 | WBGene00005975 | srx-84    | F35B12.1                  |
| -0.0310556502685526 | AGIWUR17845;AGIWUR35416                                                |          |                |           |                           |
| CB4856 CT V         | 11601119                                                               | 11602358 | WBGene00009388 | F35B12.9  | F35B12.9                  |
| 0.0704237473581069  | AGIWUR1481;AGIWUR14629;AGIWUR18779;AGIWUR43752                         |          |                |           |                           |
| CB4856 CT V         | 11602294                                                               | 11604563 | WBGene00000983 | dhs-20    | F35B12.2                  |
| 0.0681411589524075  | AGIWUR1985                                                             |          |                |           |                           |
| CB4856 CT V         | 11609096                                                               | 11610149 | WBGene00009384 | piit-1    | F35B12.4                  |
| -0.0589870887637751 | AGIWUR44326                                                            |          |                |           |                           |
| CB4856 CT V         | 11610708                                                               | 11613054 | WBGene00009385 | sas-5     | F35B12.5                  |
| -0.078752709107321  | AGIWUR12489                                                            |          |                |           |                           |
| CB4856 CT V         | 11613307                                                               | 11614888 | WBGene00009386 | tag-290   | F35B12.6                  |
| -0.238026373789332  | AGIWUR13593                                                            |          |                |           |                           |
| CB4856 CT V         | 11616283                                                               | 11616829 | WBGene00003762 | nlp-24    | F35B12.7                  |
| -0.67979566287746   | AGIWUR2533;AGIWUR13008;AGIWUR22163;AGIWUR24238;AGIWUR32188;AGIWUR39141 |          |                |           |                           |
| CB4856 CT V         | 11616812                                                               | 11618266 | WBGene00009387 | glb-15    | F35B12.8                  |
| 0.344125688514186   | AGIWUR37261                                                            |          |                |           |                           |
| CB4856 CT V         | 11625954                                                               | 11629322 | WBGene00009389 | F35B12.10 | F35B12.10                 |
| 0.138270622099167   | AGIWUR31419                                                            |          |                |           |                           |
| CB4856 CT V         | 11631434                                                               | 11637291 | WBGene00012100 | sipa-1    | T27F2.2 0.174300588656614 |



|                                                                                                                                                                                           |                                                             |          |                |                 |                            |
|-------------------------------------------------------------------------------------------------------------------------------------------------------------------------------------------|-------------------------------------------------------------|----------|----------------|-----------------|----------------------------|
| CB4856 CT V                                                                                                                                                                               | 11760671                                                    | 11761894 | WBGene00077538 | T04F3.5 T04F3.5 | 0.145143970912464          |
| AGIWUR8529                                                                                                                                                                                |                                                             |          |                |                 |                            |
| CB4856 CT V                                                                                                                                                                               | 11761893                                                    | 11763152 | WBGene00011439 | T04F3.4 T04F3.4 | -0.681055561367216         |
| AGIWUR40120                                                                                                                                                                               |                                                             |          |                |                 |                            |
| CB4856 CT V                                                                                                                                                                               | 11763140                                                    | 11764382 | WBGene00010075 | F55A11.1        | F55A11.1                   |
| -0.143817974528687                                                                                                                                                                        | AGIWUR6498                                                  |          |                |                 |                            |
| CB4856 CT V                                                                                                                                                                               | 11764904                                                    | 11767222 | WBGene00006373 | syx-5           | F55A11.2                   |
| 0.0859449032965856                                                                                                                                                                        | AGIWUR44160                                                 |          |                |                 |                            |
| CB4856 CT V                                                                                                                                                                               | 11767328                                                    | 11769899 | WBGene00004768 | sel-11          | F55A11.3                   |
| -0.132235427357877                                                                                                                                                                        | AGIWUR15843                                                 |          |                |                 |                            |
| CB4856 CT V                                                                                                                                                                               | 11770456                                                    | 11773495 | WBGene00010077 | F55A11.4        | F55A11.4                   |
| 0.029034988988629                                                                                                                                                                         | AGIWUR5298;AGIWUR7111;AGIWUR18868                           |          |                |                 |                            |
| CB4856 CT V                                                                                                                                                                               | 11773720                                                    | 11776631 | WBGene00044631 | bus-18          | F55A11.5                   |
| 0.370270865938038                                                                                                                                                                         | AGIWUR15849;AGIWUR24966;AGIWUR28370;AGIWUR28599;AGIWUR31508 |          |                |                 |                            |
| CB4856 CT V                                                                                                                                                                               | 11776838                                                    | 11783422 | WBGene00010079 | F55A11.6        | F55A11.6                   |
| -0.410557869231294                                                                                                                                                                        | AGIWUR34008                                                 |          |                |                 |                            |
| CB4856 CT V                                                                                                                                                                               | 11783340                                                    | 11784616 | WBGene00010082 | F55A11.11       | F55A11.11                  |
| 0.110361635711204                                                                                                                                                                         | AGIWUR13045                                                 |          |                |                 |                            |
| CB4856 CT V                                                                                                                                                                               | 11784573                                                    | 11787443 | WBGene00010080 | F55A11.7        | F55A11.7                   |
| -0.00993194994792646                                                                                                                                                                      | AGIWUR11196                                                 |          |                |                 |                            |
| CB4856 CT V                                                                                                                                                                               | 11788157                                                    | 11789121 | WBGene00010081 | F55A11.8        | F55A11.8                   |
| 0.0780778635854489                                                                                                                                                                        | AGIWUR34175                                                 |          |                |                 |                            |
| CB4856 CT V                                                                                                                                                                               | 11789550                                                    | 11800544 | WBGene00014300 | D2023.1 D2023.1 | 0.00665501372875132        |
| AGIWUR536;AGIWUR3337;AGIWUR6597;AGIWUR7176;AGIWUR7685;AGIWUR12399;AGIWUR14258;AGIWUR20071;AGIWUR22319;AGIWUR22876;AGIWUR27785;AGIWUR29680;AGIWUR30851;AGIWUR30970;AGIWUR37689;AGIWUR41203 |                                                             |          |                |                 |                            |
| CB4856 CT V                                                                                                                                                                               | 11802105                                                    | 11811943 | WBGene00008407 | D2023.3 D2023.3 | -0.1697498839557           |
| AGIWUR13552                                                                                                                                                                               |                                                             |          |                |                 |                            |
| CB4856 CT V                                                                                                                                                                               | 11817783                                                    | 11822529 | WBGene00004258 | pyc-1           | D2023.2 -0.122489443443858 |
| AGIWUR3941;AGIWUR5430;AGIWUR24488;AGIWUR26160;AGIWUR38320;AGIWUR39419                                                                                                                     |                                                             |          |                |                 |                            |
| CB4856 CT V                                                                                                                                                                               | 11825033                                                    | 11825762 | WBGene00008408 | D2023.4 D2023.4 | -0.357397058692717         |
| AGIWUR28004                                                                                                                                                                               |                                                             |          |                |                 |                            |
| CB4856 CT V                                                                                                                                                                               | 11825897                                                    | 11827067 | WBGene00008409 | mpst-1          | D2023.5 -0.151581381052907 |
| AGIWUR2371                                                                                                                                                                                |                                                             |          |                |                 |                            |
| CB4856 CT V                                                                                                                                                                               | 11827306                                                    | 11829370 | WBGene00008410 | D2023.6 D2023.6 | 0.0749379908524723         |
| AGIWUR39106                                                                                                                                                                               |                                                             |          |                |                 |                            |
| CB4856 CT V                                                                                                                                                                               | 11829582                                                    | 11831220 | WBGene00000731 | col-158         | D2023.7 -0.841399059864468 |
| AGIWUR34847                                                                                                                                                                               |                                                             |          |                |                 |                            |
| CB4856 CT V                                                                                                                                                                               | 11831203                                                    | 11843625 | WBGene00011261 | nphp-4          | R13H4.1 0.438685217322846  |
| AGIWUR34994                                                                                                                                                                               |                                                             |          |                |                 |                            |

|                                                                         |          |          |                |          |          |                    |
|-------------------------------------------------------------------------|----------|----------|----------------|----------|----------|--------------------|
| CB4856 CT V                                                             | 11845877 | 11852165 | WBGene00001978 | hmp-1    | R13H4.4  | 0.176137057373454  |
| AGIWUR6777;AGIWUR24555                                                  |          |          |                |          |          |                    |
| CB4856 CT V                                                             | 11860675 | 11862289 | WBGene00011263 | R13H4.5  | R13H4.5  | 0.091440679150729  |
| AGIWUR27117                                                             |          |          |                |          |          |                    |
| CB4856 CT V                                                             | 11863117 | 11864913 | WBGene00011264 | R13H4.6  | R13H4.6  | -0.216902455811146 |
| AGIWUR14613                                                             |          |          |                |          |          |                    |
| CB4856 CT V                                                             | 11866438 | 11868234 | WBGene00011265 | R13H4.7  | R13H4.7  | 0.178688084317526  |
| AGIWUR35907                                                             |          |          |                |          |          |                    |
| CB4856 CT V                                                             | 11875360 | 11879141 | WBGene00010788 | sulp-4   | K12G11.1 |                    |
| 0.053510781191342 AGIWUR43811                                           |          |          |                |          |          |                    |
| CB4856 CT V                                                             | 11880068 | 11883160 | WBGene00010789 | sulp-5   | K12G11.2 |                    |
| -0.127528195886229 AGIWUR10275;AGIWUR28603;AGIWUR33364                  |          |          |                |          |          |                    |
| CB4856 CT V                                                             | 11888236 | 11889634 | WBGene00010790 | sodh-1   | K12G11.3 |                    |
| 5.49635082510986 AGIWUR19293;AGIWUR22729                                |          |          |                |          |          |                    |
| CB4856 CT V                                                             | 11889719 | 11891194 | WBGene00010791 | sodh-2   | K12G11.4 |                    |
| 0.673094119941443 AGIWUR7398                                            |          |          |                |          |          |                    |
| CB4856 CT V                                                             | 11891812 | 11893451 | WBGene00005967 | srx-76   | K12G11.5 |                    |
| -0.014843561054084 AGIWUR22594;AGIWUR37306;AGIWUR41361                  |          |          |                |          |          |                    |
| CB4856 CT V                                                             | 11894331 | 11895808 | WBGene00010792 | K12G11.6 | K12G11.6 |                    |
| 0.252187995593581 AGIWUR7419                                            |          |          |                |          |          |                    |
| CB4856 CT V                                                             | 11899072 | 11916623 | WBGene00004855 | sma-1    | R31.1    | 0.206352839653251  |
| AGIWUR10020;AGIWUR22705;AGIWUR35546;AGIWUR37626;AGIWUR42804;AGIWUR45024 |          |          |                |          |          |                    |
| CB4856 CT V                                                             | 11917564 | 11924654 | WBGene00011270 | R31.2    | R31.2    | 0.188415493089394  |
| AGIWUR240;AGIWUR32724                                                   |          |          |                |          |          |                    |
| CB4856 CT V                                                             | 11924632 | 11927406 | WBGene00003886 | osm-6    | R31.3    | 0.631329532516101  |
| AGIWUR28117                                                             |          |          |                |          |          |                    |
| CB4856 CT V                                                             | 11927661 | 11933246 | WBGene00010284 | aman-2   | F58H1.1  | 0.128222611252081  |
| AGIWUR18036;AGIWUR33704;AGIWUR35490                                     |          |          |                |          |          |                    |
| CB4856 CT V                                                             | 11933881 | 11935052 | WBGene00010286 | F58H1.3  | F58H1.3  | 0.038280487716432  |
| AGIWUR9064;AGIWUR15551;AGIWUR22696;AGIWUR33803                          |          |          |                |          |          |                    |
| CB4856 CT V                                                             | 11935148 | 11936528 | WBGene00138720 | F58H1.8  | F58H1.8  | -0.436666246591333 |
| AGIWUR9603                                                              |          |          |                |          |          |                    |
| CB4856 CT V                                                             | 11936505 | 11937794 | WBGene00001466 | flr-2    | F58H1.4  | 0.0979473750376738 |
| AGIWUR5295;AGIWUR13263;AGIWUR24230;AGIWUR38451                          |          |          |                |          |          |                    |
| CB4856 CT V                                                             | 11942625 | 11944656 | WBGene00010289 | F58H1.6  | F58H1.6  | -0.218704482948151 |
| AGIWUR2655;AGIWUR8435;AGIWUR29734                                       |          |          |                |          |          |                    |
| CB4856 CT V                                                             | 11958393 | 11962699 | WBGene00010288 | F58H1.5  | F58H1.5  | 0.376003153379415  |
| AGIWUR13260;AGIWUR22778;AGIWUR23737                                     |          |          |                |          |          |                    |
| CB4856 CT V                                                             | 11963007 | 11964821 | WBGene00010290 | F58H1.7  | F58H1.7  | 0.32657833865286   |

|                                                                        |    |   |          |          |                |         |         |                     |  |
|------------------------------------------------------------------------|----|---|----------|----------|----------------|---------|---------|---------------------|--|
| AGIWUR2934;AGIWUR9376;AGIWUR13051;AGIWUR13113;AGIWUR19170;AGIWUR20927  |    |   |          |          |                |         |         |                     |  |
| CB4856                                                                 | CT | V | 11975515 | 11976756 | WBGene00000781 | cpr-1   | C52E4.1 | 0.387550890916346   |  |
| AGIWUR38171;AGIWUR44556                                                |    |   |          |          |                |         |         |                     |  |
| CB4856                                                                 | CT | V | 11976777 | 11978459 | WBGene00003235 | mif-2   | C52E4.2 | -0.249941160086669  |  |
| AGIWUR17960                                                            |    |   |          |          |                |         |         |                     |  |
| CB4856                                                                 | CT | V | 11978518 | 11979970 | WBGene00004917 | snr-4   | C52E4.3 | -0.212733986683208  |  |
| AGIWUR9177                                                             |    |   |          |          |                |         |         |                     |  |
| CB4856                                                                 | CT | V | 11980502 | 11982450 | WBGene00004501 | rpt-1   | C52E4.4 | -0.115350896286403  |  |
| AGIWUR64;AGIWUR28575;AGIWUR40117                                       |    |   |          |          |                |         |         |                     |  |
| CB4856                                                                 | CT | V | 11982901 | 11986115 | WBGene00008258 | mans-2  | C52E4.5 | -0.355204798506325  |  |
| AGIWUR8557                                                             |    |   |          |          |                |         |         |                     |  |
| CB4856                                                                 | CT | V | 11991011 | 11993767 | WBGene00000876 | cyl-1   | C52E4.6 | 0.0226359501180537  |  |
| AGIWUR19976;AGIWUR44208                                                |    |   |          |          |                |         |         |                     |  |
| CB4856                                                                 | CT | V | 11994295 | 11995858 | WBGene00008259 | C52E4.7 | C52E4.7 | -0.0855561898353585 |  |
| AGIWUR33143                                                            |    |   |          |          |                |         |         |                     |  |
| CB4856                                                                 | CT | V | 11995868 | 12001965 | WBGene00001553 | gcy-33  | F57F5.2 | 0.204987292087822   |  |
| AGIWUR6682                                                             |    |   |          |          |                |         |         |                     |  |
| CB4856                                                                 | CT | V | 12003028 | 12004600 | WBGene00010204 | F57F5.1 | F57F5.1 | 0.00765632737214617 |  |
| AGIWUR12276;AGIWUR20040;AGIWUR32898                                    |    |   |          |          |                |         |         |                     |  |
| CB4856                                                                 | CT | V | 12004616 | 12006605 | WBGene00010205 | F57F5.3 | F57F5.3 | 0.131398707202065   |  |
| AGIWUR39013                                                            |    |   |          |          |                |         |         |                     |  |
| CB4856                                                                 | CT | V | 12009537 | 12013605 | WBGene00000073 | add-2   | F57F5.4 | -0.0930202796731798 |  |
| AGIWUR9329;AGIWUR31353;AGIWUR39004                                     |    |   |          |          |                |         |         |                     |  |
| CB4856                                                                 | CT | V | 12014385 | 12032131 | WBGene00004032 | pkc-1   | F57F5.5 | -0.0335678318551693 |  |
| AGIWUR8741;AGIWUR15869;AGIWUR21697;AGIWUR35101;AGIWUR39298;AGIWUR41185 |    |   |          |          |                |         |         |                     |  |
| CB4856                                                                 | CT | V | 12032257 | 12040873 | WBGene00002241 | kup-1   | F10C2.2 | -0.0617083476155038 |  |
| AGIWUR7433                                                             |    |   |          |          |                |         |         |                     |  |
| CB4856                                                                 | CT | V | 12041556 | 12045347 | WBGene00008645 | F10C2.4 | F10C2.4 | 0.0526660641833896  |  |
| AGIWUR15408                                                            |    |   |          |          |                |         |         |                     |  |
| CB4856                                                                 | CT | V | 12045432 | 12048631 | WBGene00008646 | F10C2.5 | F10C2.5 | -0.111035703020242  |  |
| AGIWUR42690                                                            |    |   |          |          |                |         |         |                     |  |
| CB4856                                                                 | CT | V | 12048745 | 12052182 | WBGene00001095 | dars-2  | F10C2.6 | -0.175785119289323  |  |
| AGIWUR15266;AGIWUR20285;AGIWUR42451                                    |    |   |          |          |                |         |         |                     |  |
| CB4856                                                                 | CT | V | 12053952 | 12056320 | WBGene00008647 | F10C2.7 | F10C2.7 | 0.553922897639831   |  |
| AGIWUR18774                                                            |    |   |          |          |                |         |         |                     |  |
| CB4856                                                                 | CT | V | 12056575 | 12059747 | WBGene00011087 | R07B7.2 | R07B7.2 | -0.0526323360037182 |  |
| AGIWUR41963                                                            |    |   |          |          |                |         |         |                     |  |
| CB4856                                                                 | CT | V | 12060234 | 12063368 | WBGene00000533 | clh-6   | R07B7.1 | -0.192998683101028  |  |
| AGIWUR25470;AGIWUR40237;AGIWUR43301                                    |    |   |          |          |                |         |         |                     |  |

|                                                 |                                  |          |                |          |          |                     |
|-------------------------------------------------|----------------------------------|----------|----------------|----------|----------|---------------------|
| CB4856 CT V                                     | 12063432                         | 12065391 | WBGene00004138 | pqn-53   | R07B7.3  | 0.181425913919115   |
| AGIWUR27696                                     |                                  |          |                |          |          |                     |
| CB4856 CT V                                     | 12065960                         | 12067957 | WBGene00011088 | kmo-2    | R07B7.4  | -0.0536420375627564 |
| AGIWUR13702;AGIWUR15063;AGIWUR19014             |                                  |          |                |          |          |                     |
| CB4856 CT V                                     | 12068725                         | 12070519 | WBGene00011089 | kmo-1    | R07B7.5  | -0.263912086025147  |
| AGIWUR3864                                      |                                  |          |                |          |          |                     |
| CB4856 CT V                                     | 12072862                         | 12074986 | WBGene00011090 | R07B7.6  | R07B7.6  | 0.28572677809282    |
| AGIWUR10108;AGIWUR27116;AGIWUR33997;AGIWUR35278 |                                  |          |                |          |          |                     |
| CB4856 CT V                                     | 12078044                         | 12080374 | WBGene00011093 | R07B7.9  | R07B7.9  | -0.0833320849764725 |
| AGIWUR14262                                     |                                  |          |                |          |          |                     |
| CB4856 CT V                                     | 12081089                         | 12084316 | WBGene00011092 | R07B7.8  | R07B7.8  | -0.127374494897779  |
| AGIWUR7397                                      |                                  |          |                |          |          |                     |
| CB4856 CT V                                     | 12084186                         | 12086460 | WBGene00011094 | R07B7.10 |          | R07B7.10            |
| -0.377995053064277                              | AGIWUR4600                       |          |                |          |          |                     |
| CB4856 CT V                                     | 12087234                         | 12088931 | WBGene00011095 | gana-1   | R07B7.11 |                     |
| -0.0754561805342338                             | AGIWUR1945                       |          |                |          |          |                     |
| CB4856 CT V                                     | 12089073                         | 12091812 | WBGene00011096 | R07B7.12 |          | R07B7.12            |
| -0.0037492298288635                             | AGIWUR15;AGIWUR15650;AGIWUR17447 |          |                |          |          |                     |
| CB4856 CT V                                     | 12092006                         | 12093862 | WBGene00011097 | nhr-206  | R07B7.13 |                     |
| 1.10438599220885                                | AGIWUR31961                      |          |                |          |          |                     |
| CB4856 CT V                                     | 12094374                         | 12095947 | WBGene00011099 | nhr-208  | R07B7.15 |                     |
| 0.6329968887635                                 | AGIWUR15985                      |          |                |          |          |                     |
| CB4856 CT V                                     | 12096234                         | 12097845 | WBGene00011098 | nhr-207  | R07B7.14 |                     |
| -0.27719296291952                               | AGIWUR6595                       |          |                |          |          |                     |
| CB4856 CT V                                     | 12098149                         | 12100111 | WBGene00011100 | nhr-209  | R07B7.16 |                     |
| 0.13437585164369                                | AGIWUR29309                      |          |                |          |          |                     |
| CB4856 CT V                                     | 12101293                         | 12103286 | WBGene00007547 | nhr-154  | C13C4.2  | -0.195938493243174  |
| AGIWUR8400                                      |                                  |          |                |          |          |                     |
| CB4856 CT V                                     | 12104273                         | 12106507 | WBGene00007546 | nhr-153  | C13C4.1  | -0.223910360218733  |
| AGIWUR39908                                     |                                  |          |                |          |          |                     |
| CB4856 CT V                                     | 12107142                         | 12109201 | WBGene00003726 | nhr-136  | C13C4.3  | 0.185094142006689   |
| AGIWUR39836                                     |                                  |          |                |          |          |                     |
| CB4856 CT V                                     | 12109168                         | 12110978 | WBGene00007548 | C13C4.4  | C13C4.4  | -0.236653056671589  |
| AGIWUR37050                                     |                                  |          |                |          |          |                     |
| CB4856 CT V                                     | 12114993                         | 12117443 | WBGene00007549 | spin-1   | C13C4.5  | -0.130998711127059  |
| AGIWUR16171                                     |                                  |          |                |          |          |                     |
| CB4856 CT V                                     | 12118828                         | 12120814 | WBGene00007551 | C13C4.7  | C13C4.7  | 0.0204381634385715  |
| AGIWUR3454                                      |                                  |          |                |          |          |                     |
| CB4856 CT V                                     | 12121587                         | 12125096 | WBGene00007550 | C13C4.6  | C13C4.6  | 0.35900143277695    |





|                                                            |          |          |                |         |          |                     |
|------------------------------------------------------------|----------|----------|----------------|---------|----------|---------------------|
| CB4856 CT V                                                | 12194457 | 12205494 | WBGene00014098 | ogdh-2  | ZK836.2  | -0.0613349634999079 |
| AGIWUR6700;AGIWUR15933;AGIWUR32427                         |          |          |                |         |          |                     |
| CB4856 CT V                                                | 12213327 | 12225935 | WBGene00006874 | vab-8   | K12F2.2  |                     |
| -0.00976692228858411 AGIWUR29761                           |          |          |                |         |          |                     |
| CB4856 CT V                                                | 12226816 | 12234343 | WBGene00003515 | myo-3   | K12F2.1  | 0.059606032309123   |
| AGIWUR39311                                                |          |          |                |         |          |                     |
| CB4856 CT V                                                | 12236895 | 12238599 | WBGene00011448 | tag-348 | T04H1.1  | 0.61006443444048    |
| AGIWUR7345                                                 |          |          |                |         |          |                     |
| CB4856 CT V                                                | 12238938 | 12240316 | WBGene00005827 | srw-80  | T04H1.10 |                     |
| -1.04048245297612 AGIWUR21658                              |          |          |                |         |          |                     |
| CB4856 CT V                                                | 12241409 | 12241945 | WBGene00011450 | ttr-22  | T04H1.3  | 0.240856645106203   |
| AGIWUR3349;AGIWUR4769;AGIWUR13278;AGIWUR25891              |          |          |                |         |          |                     |
| CB4856 CT V                                                | 12241962 | 12245059 | WBGene00011449 | T04H1.2 | T04H1.2  | 0.172409852924723   |
| AGIWUR2792;AGIWUR12771;AGIWUR16025;AGIWUR31410;AGIWUR38140 |          |          |                |         |          |                     |
| CB4856 CT V                                                | 12245594 | 12251246 | WBGene00004296 | rad-50  | T04H1.4  | -0.310862254439119  |
| AGIWUR21464                                                |          |          |                |         |          |                     |
| CB4856 CT V                                                | 12251341 | 12252407 | WBGene00011451 | T04H1.5 | T04H1.5  | 0.382535145511785   |
| AGIWUR10392                                                |          |          |                |         |          |                     |
| CB4856 CT V                                                | 12252623 | 12255450 | WBGene00003075 | lrx-1   | T04H1.6  | -0.268339793721575  |
| AGIWUR1303                                                 |          |          |                |         |          |                     |
| CB4856 CT V                                                | 12255547 | 12258804 | WBGene00011452 | ugt-55  | T04H1.7  | 0.265436759215654   |
| AGIWUR11839                                                |          |          |                |         |          |                     |
| CB4856 CT V                                                | 12258982 | 12261205 | WBGene00011453 | ugt-56  | T04H1.8  | 0.0456584866999803  |
| AGIWUR34483;AGIWUR37835                                    |          |          |                |         |          |                     |
| CB4856 CT V                                                | 12261804 | 12263368 | WBGene00006539 | tbb-6   | T04H1.9  | -0.706100252833778  |
| AGIWUR44382                                                |          |          |                |         |          |                     |
| CB4856 CT V                                                | 12263369 | 12263896 | WBGene00010091 | ssp-35  | F55C5.1  | 0.286482580314589   |
| AGIWUR39324                                                |          |          |                |         |          |                     |
| CB4856 CT V                                                | 12264002 | 12265492 | WBGene00010092 | F55C5.2 | F55C5.2  | -0.463071132302188  |
| AGIWUR41701                                                |          |          |                |         |          |                     |
| CB4856 CT V                                                | 12265707 | 12269549 | WBGene00006677 | twk-24  | F55C5.3  | -0.176839666529049  |
| AGIWUR23192                                                |          |          |                |         |          |                     |
| CB4856 CT V                                                | 12270271 | 12271551 | WBGene00010094 | tsfm-1  | F55C5.5  | -0.23298052944889   |
| AGIWUR2050;AGIWUR9824;AGIWUR31526                          |          |          |                |         |          |                     |
| CB4856 CT V                                                | 12271873 | 12275676 | WBGene00010093 | capg-2  | F55C5.4  | -0.0206602507156006 |
| AGIWUR40113                                                |          |          |                |         |          |                     |
| CB4856 CT V                                                | 12275625 | 12277046 | WBGene00044791 | bnc-1   | F55C5.11 |                     |
| 0.0754919790670119 AGIWUR24922                             |          |          |                |         |          |                     |
| CB4856 CT V                                                | 12279506 | 12281461 | WBGene00010095 | F55C5.6 | F55C5.6  | -0.0787996171237317 |

|                                                                        |                                                                                     |          |                |           |           |                     |
|------------------------------------------------------------------------|-------------------------------------------------------------------------------------|----------|----------------|-----------|-----------|---------------------|
| AGIWUR36761                                                            |                                                                                     |          |                |           |           |                     |
| CB4856 CT V                                                            | 12283487                                                                            | 12283999 | WBGene00010098 | F55C5.10  | F55C5.10  |                     |
| 0.420089237658337                                                      | AGIWUR24288                                                                         |          |                |           |           |                     |
| CB4856 CT V                                                            | 12284060                                                                            | 12288615 | WBGene00010096 | rskd-1    | F55C5.7   | -0.0151755614926907 |
| AGIWUR20265;AGIWUR20565;AGIWUR36910;AGIWUR40876                        |                                                                                     |          |                |           |           |                     |
| CB4856 CT V                                                            | 12288922                                                                            | 12291658 | WBGene00010097 | srpa-68   | F55C5.8   | -0.168471799521159  |
| AGIWUR4738;AGIWUR11042;AGIWUR28005;AGIWUR30627;AGIWUR33642;AGIWUR44914 |                                                                                     |          |                |           |           |                     |
| CB4856 CT V                                                            | 12292214                                                                            | 12293802 | WBGene00005241 | srh-16    | F55C5.9   |                     |
| -0.00334700549526978                                                   | AGIWUR30040                                                                         |          |                |           |           |                     |
| CB4856 CT V                                                            | 12302484                                                                            | 12306978 | WBGene00001493 | frm-7     | C51F7.1   | 0.233293563244384   |
| AGIWUR18582                                                            |                                                                                     |          |                |           |           |                     |
| CB4856 CT V                                                            | 12307490                                                                            | 12308658 | WBGene00005202 | srg-45    | C51F7.2   | 0.019688603244262   |
| AGIWUR10609                                                            |                                                                                     |          |                |           |           |                     |
| CB4856 CT V                                                            | 12308849                                                                            | 12310342 | WBGene00011014 | hpo-30    | R04F11.1  |                     |
| -0.203057574194737                                                     | AGIWUR27617                                                                         |          |                |           |           |                     |
| CB4856 CT V                                                            | 12314919                                                                            | 12317180 | WBGene00011016 | R04F11.3  | R04F11.3  |                     |
| 0.0981726897469954                                                     | AGIWUR28374                                                                         |          |                |           |           |                     |
| CB4856 CT V                                                            | 12317278                                                                            | 12318019 | WBGene00011017 | R04F11.5  | R04F11.5  |                     |
| -0.424341496286981                                                     | AGIWUR26518                                                                         |          |                |           |           |                     |
| CB4856 CT V                                                            | 12318385                                                                            | 12320229 | WBGene00011015 | R04F11.2  | R04F11.2  |                     |
| -0.0107387546912205                                                    | AGIWUR549;AGIWUR9276;AGIWUR21822;AGIWUR24633;AGIWUR37581;AGIWUR41818                |          |                |           |           |                     |
| CB4856 CT V                                                            | 12320187                                                                            | 12337744 | WBGene00006668 | twk-13    | R04F11.4  |                     |
| -0.05181940599575                                                      | AGIWUR28680;AGIWUR39921;AGIWUR40661                                                 |          |                |           |           |                     |
| CB4856 CT V                                                            | 12342314                                                                            | 12343469 | WBGene00009092 | tomm-20   | F23H12.2  |                     |
| -0.180536289894722                                                     | AGIWUR10782                                                                         |          |                |           |           |                     |
| CB4856 CT V                                                            | 12344188                                                                            | 12345919 | WBGene00004898 | snb-2     | F23H12.1  |                     |
| 0.182636688964534                                                      | AGIWUR13735;AGIWUR22688;AGIWUR24346;AGIWUR26228;AGIWUR32107;AGIWUR39035;AGIWUR41382 |          |                |           |           |                     |
| CB4856 CT V                                                            | 12345935                                                                            | 12350451 | WBGene00009093 | F23H12.3  | F23H12.3  |                     |
| -0.0777336325254971                                                    | AGIWUR18327                                                                         |          |                |           |           |                     |
| CB4856 CT V                                                            | 12352994                                                                            | 12354314 | WBGene00005018 | sqt-3     | F23H12.4  |                     |
| 0.565708485597725                                                      | AGIWUR30261;AGIWUR42458                                                             |          |                |           |           |                     |
| CB4856 CT V                                                            | 12356256                                                                            | 12357309 | WBGene00050938 | F23H12.11 | F23H12.11 |                     |
| -0.0769091636024015                                                    | AGIWUR12590;AGIWUR34990                                                             |          |                |           |           |                     |
| CB4856 CT V                                                            | 12358647                                                                            | 12363691 | WBGene00009094 | F23H12.5  | F23H12.5  |                     |
| 0.246870795839001                                                      | AGIWUR40074                                                                         |          |                |           |           |                     |
| CB4856 CT V                                                            | 12363754                                                                            | 12369537 | WBGene00001539 | gcy-13    | F23H12.6  |                     |
| 0.0100730689724529                                                     | AGIWUR26383                                                                         |          |                |           |           |                     |
| CB4856 CT V                                                            | 12371730                                                                            | 12372870 | WBGene00009095 | F23H12.7  | F23H12.7  |                     |
| -0.0202870451871604                                                    | AGIWUR33584                                                                         |          |                |           |           |                     |

|                     |                                                             |          |                |           |           |
|---------------------|-------------------------------------------------------------|----------|----------------|-----------|-----------|
| CB4856 CT V         | 12377556                                                    | 12378832 | WBGene00010461 | K01D12.1  | K01D12.1  |
| 0.691012470500038   | AGIWUR30600                                                 |          |                |           |           |
| CB4856 CT V         | 12381254                                                    | 12385623 | WBGene00010463 | K01D12.3  | K01D12.3  |
| 0.296559107315832   | AGIWUR38470                                                 |          |                |           |           |
| CB4856 CT V         | 12387041                                                    | 12395706 | WBGene00006669 | twk-14    | K01D12.4  |
| -0.0212529892567028 | AGIWUR11110;AGIWUR24894;AGIWUR31992                         |          |                |           |           |
| CB4856 CT V         | 12397845                                                    | 12398783 | WBGene00010464 | K01D12.5  | K01D12.5  |
| -0.636026431740536  | AGIWUR7580                                                  |          |                |           |           |
| CB4856 CT V         | 12398759                                                    | 12400859 | WBGene00010465 | K01D12.6  | K01D12.6  |
| -0.139517714091189  | AGIWUR951;AGIWUR1257;AGIWUR19449;AGIWUR39885                |          |                |           |           |
| CB4856 CT V         | 12402655                                                    | 12403234 | WBGene00010467 | K01D12.8  | K01D12.8  |
| -0.170842994283633  | AGIWUR5069;AGIWUR9752;AGIWUR18695;AGIWUR44052               |          |                |           |           |
| CB4856 CT V         | 12403942                                                    | 12404651 | WBGene00010468 | K01D12.9  | K01D12.9  |
| -0.588316659459363  | AGIWUR35425                                                 |          |                |           |           |
| CB4856 CT V         | 12406229                                                    | 12407017 | WBGene00010469 | K01D12.10 | K01D12.10 |
| -0.181746704414331  | AGIWUR443                                                   |          |                |           |           |
| CB4856 CT V         | 12407428                                                    | 12408592 | WBGene00010470 | cdr-4     | K01D12.11 |
| -0.79006359228301   | AGIWUR3045                                                  |          |                |           |           |
| CB4856 CT V         | 12409369                                                    | 12410513 | WBGene00010473 | hrg-2     | K01D12.14 |
| 0.0541546495873355  | AGIWUR26565                                                 |          |                |           |           |
| CB4856 CT V         | 12410879                                                    | 12412091 | WBGene00010472 | cdr-7     | K01D12.13 |
| -0.830423326042176  | AGIWUR13221                                                 |          |                |           |           |
| CB4856 CT V         | 12412506                                                    | 12413698 | WBGene00010471 | cdr-6     | K01D12.12 |
| -0.0911176424824554 | AGIWUR43496                                                 |          |                |           |           |
| CB4856 CT V         | 12414640                                                    | 12415709 | WBGene00008296 | cdr-2     | C54D10.1  |
| -0.832647696825028  | AGIWUR22071                                                 |          |                |           |           |
| CB4856 CT V         | 12416358                                                    | 12417377 | WBGene00008297 | cdr-3     | C54D10.2  |
| -0.117856228366703  | AGIWUR40901                                                 |          |                |           |           |
| CB4856 CT V         | 12418592                                                    | 12419428 | WBGene00008298 | C54D10.3  | C54D10.3  |
| 0.841214386724626   | AGIWUR16125;AGIWUR29602;AGIWUR33587;AGIWUR35265;AGIWUR38616 |          |                |           |           |
| CB4856 CT V         | 12419492                                                    | 12420944 | WBGene00008299 | C54D10.4  | C54D10.4  |
| 0.123408526707049   | AGIWUR12106                                                 |          |                |           |           |
| CB4856 CT V         | 12429357                                                    | 12431196 | WBGene00008300 | C54D10.5  | C54D10.5  |
| -0.031644003845984  | AGIWUR5470                                                  |          |                |           |           |
| CB4856 CT V         | 12431368                                                    | 12432289 | WBGene00045400 | C54D10.13 | C54D10.13 |
| 0.629595024788266   | AGIWUR3457                                                  |          |                |           |           |
| CB4856 CT V         | 12432365                                                    | 12433817 | WBGene00005249 | srh-25    | C54D10.6  |
| 0.245322026963217   | AGIWUR17191                                                 |          |                |           |           |
| CB4856 CT V         | 12434361                                                    | 12436952 | WBGene00044787 | pals-36   | C54D10.12 |

|                                                                        |                                                             |          |                |                 |                     |
|------------------------------------------------------------------------|-------------------------------------------------------------|----------|----------------|-----------------|---------------------|
| 0.0232556402823842                                                     | AGIWUR21228                                                 |          |                |                 |                     |
| CB4856 CT V                                                            | 12437499                                                    | 12441266 | WBGene00138721 | pals-37         | C54D10.14           |
| -0.118169384721757                                                     | AGIWUR22417                                                 |          |                |                 |                     |
| CB4856 CT V                                                            | 12445184                                                    | 12446956 | WBGene00008302 | pals-38         | C54D10.8            |
| 1.07341678911439                                                       | AGIWUR44320                                                 |          |                |                 |                     |
| CB4856 CT V                                                            | 12447499                                                    | 12448661 | WBGene00008303 | C54D10.9        | C54D10.9            |
| -0.141291677638881                                                     | AGIWUR2442                                                  |          |                |                 |                     |
| CB4856 CT V                                                            | 12448685                                                    | 12450002 | WBGene00008304 | C54D10.10       | C54D10.10           |
| 0.592342942035579                                                      | AGIWUR21029                                                 |          |                |                 |                     |
| CB4856 CT V                                                            | 12450807                                                    | 12453336 | WBGene00009200 | F28C1.1 F28C1.1 | -0.0576897483030194 |
| AGIWUR34773                                                            |                                                             |          |                |                 |                     |
| CB4856 CT V                                                            | 12453955                                                    | 12463008 | WBGene00001179 | egl-10 F28C1.2  | -0.251824599645179  |
| AGIWUR5517;AGIWUR14567;AGIWUR19931;AGIWUR28668;AGIWUR29452;AGIWUR33579 |                                                             |          |                |                 |                     |
| CB4856 CT V                                                            | 12468683                                                    | 12473533 | WBGene00009201 | F28C1.3 F28C1.3 | 0.0267182513961632  |
| AGIWUR4004;AGIWUR7132;AGIWUR13049;AGIWUR17663;AGIWUR36408              |                                                             |          |                |                 |                     |
| CB4856 CT V                                                            | 12478413                                                    | 12484442 | WBGene00000228 | atn-1 W04D2.1   | 0.014476504501169   |
| AGIWUR26457;AGIWUR30926                                                |                                                             |          |                |                 |                     |
| CB4856 CT V                                                            | 12484885                                                    | 12486068 | WBGene00012242 | srt-39 W04D2.2  | 0.0691368739656664  |
| AGIWUR42463                                                            |                                                             |          |                |                 |                     |
| CB4856 CT V                                                            | 12487266                                                    | 12493264 | WBGene00002133 | inx-11 W04D2.3  | -0.16419102578433   |
| AGIWUR21702                                                            |                                                             |          |                |                 |                     |
| CB4856 CT V                                                            | 12493239                                                    | 12494622 | WBGene00012244 | mrps-11 W04D2.5 | 0.105892932795529   |
| AGIWUR5065;AGIWUR13820;AGIWUR15166                                     |                                                             |          |                |                 |                     |
| CB4856 CT V                                                            | 12494728                                                    | 12497755 | WBGene00012243 | W04D2.4 W04D2.4 | -0.184792460998874  |
| AGIWUR26542                                                            |                                                             |          |                |                 |                     |
| CB4856 CT V                                                            | 12498213                                                    | 12503738 | WBGene00012245 | W04D2.6 W04D2.6 | 0.0629847826854149  |
| AGIWUR19864;AGIWUR37066                                                |                                                             |          |                |                 |                     |
| CB4856 CT V                                                            | 12505244                                                    | 12506260 | WBGene00012145 | nlp-46 T28H10.4 |                     |
| -0.119054309288171                                                     | AGIWUR16141                                                 |          |                |                 |                     |
| CB4856 CT V                                                            | 12510645                                                    | 12512201 | WBGene00012143 | T28H10.2        | T28H10.2            |
| -0.42410210789005                                                      | AGIWUR10112;AGIWUR28923;AGIWUR29056;AGIWUR36962             |          |                |                 |                     |
| CB4856 CT V                                                            | 12512986                                                    | 12514941 | WBGene00012144 | T28H10.3        | T28H10.3            |
| 1.33742749830179                                                       | AGIWUR15495;AGIWUR21042;AGIWUR21714;AGIWUR33773;AGIWUR42383 |          |                |                 |                     |
| CB4856 CT V                                                            | 12514875                                                    | 12517205 | WBGene00000285 | cal-1 C13C12.1  |                     |
| 0.373662547727575                                                      | AGIWUR31413                                                 |          |                |                 |                     |
| CB4856 CT V                                                            | 12523647                                                    | 12525656 | WBGene00007552 | C13C12.2        | C13C12.2            |
| -0.0179814623413144                                                    | AGIWUR2397;AGIWUR13466;AGIWUR39611                          |          |                |                 |                     |
| CB4856 CT V                                                            | 12527058                                                    | 12528023 | WBGene00009721 | F45D3.1 F45D3.1 | -0.266716060157304  |
| AGIWUR12145                                                            |                                                             |          |                |                 |                     |

|                                                                                             |                                                                       |          |                |                                     |
|---------------------------------------------------------------------------------------------|-----------------------------------------------------------------------|----------|----------------|-------------------------------------|
| CB4856 CT V                                                                                 | 12541040                                                              | 12542973 | WBGene00009722 | F45D3.2 F45D3.2 0.189128945431554   |
| AGIWUR13978                                                                                 |                                                                       |          |                |                                     |
| CB4856 CT V                                                                                 | 12549216                                                              | 12550385 | WBGene00009723 | F45D3.3 F45D3.3 0.793351611577968   |
| AGIWUR7531                                                                                  |                                                                       |          |                |                                     |
| CB4856 CT V                                                                                 | 12552211                                                              | 12553301 | WBGene00009724 | F45D3.4 F45D3.4 2.33864281759479    |
| AGIWUR10584;AGIWUR22383                                                                     |                                                                       |          |                |                                     |
| CB4856 CT V                                                                                 | 12560710                                                              | 12563383 | WBGene00004759 | sel-1 F45D3.5 -0.0334078786746312   |
| AGIWUR12278;AGIWUR20293;AGIWUR29900                                                         |                                                                       |          |                |                                     |
| CB4856 CT V                                                                                 | 12563487                                                              | 12565785 | WBGene00008452 | mrps-5 E02A10.1                     |
| 0.163115466458873                                                                           | AGIWUR14293                                                           |          |                |                                     |
| CB4856 CT V                                                                                 | 12566016                                                              | 12567951 | WBGene00008454 | E02A10.4 E02A10.4                   |
| 0.180790285722686                                                                           | AGIWUR21249                                                           |          |                |                                     |
| CB4856 CT V                                                                                 | 12575308                                                              | 12576895 | WBGene00001732 | grl-23 E02A10.2                     |
| -0.0339071000892393                                                                         | AGIWUR35126                                                           |          |                |                                     |
| CB4856 CT V                                                                                 | 12583726                                                              | 12587991 | WBGene00008453 | E02A10.3 E02A10.3                   |
| 0.282658164796917                                                                           | AGIWUR1496;AGIWUR3722;AGIWUR18897                                     |          |                |                                     |
| CB4856 CT V                                                                                 | 12588309                                                              | 12589644 | WBGene00007584 | C14C10.1 C14C10.1                   |
| 0.305010492578933                                                                           | AGIWUR2794                                                            |          |                |                                     |
| CB4856 CT V                                                                                 | 12589633                                                              | 12590717 | WBGene00007590 | ttr-43 C14C10.7                     |
| 0.096252716148058                                                                           | AGIWUR29794                                                           |          |                |                                     |
| CB4856 CT V                                                                                 | 12590979                                                              | 12592477 | WBGene00007585 | C14C10.2 C14C10.2                   |
| -0.112802994576419                                                                          | AGIWUR2163;AGIWUR9585;AGIWUR29812;AGIWUR36093;AGIWUR40434;AGIWUR44127 |          |                |                                     |
| CB4856 CT V                                                                                 | 12592568                                                              | 12596296 | WBGene00007587 | mma-1 C14C10.4                      |
| -0.173030948034899                                                                          | AGIWUR23046                                                           |          |                |                                     |
| CB4856 CT V                                                                                 | 12596393                                                              | 12599151 | WBGene00007586 | ril-2 C14C10.3                      |
| 0.0223932086000529                                                                          | AGIWUR6809;AGIWUR15074;AGIWUR31193;AGIWUR31739                        |          |                |                                     |
| CB4856 CT V                                                                                 | 12600192                                                              | 12607304 | WBGene00007588 | C14C10.5 C14C10.5                   |
| 0.00146158840639199                                                                         | AGIWUR13491;AGIWUR21045;AGIWUR34022;AGIWUR39851                       |          |                |                                     |
| CB4856 CT V                                                                                 | 12607413                                                              | 12608107 | WBGene00007589 | erg-28 C14C10.6                     |
| -0.0763102625689331                                                                         | AGIWUR24094                                                           |          |                |                                     |
| CB4856 CT V                                                                                 | 12609826                                                              | 12610857 | WBGene00013853 | ZC116.1 ZC116.1 0.603078448651946   |
| AGIWUR38261                                                                                 |                                                                       |          |                |                                     |
| CB4856 CT V                                                                                 | 12611329                                                              | 12628738 | WBGene00013855 | ZC116.3 ZC116.3 0.116491795170972   |
| AGIWUR14;AGIWUR5873;AGIWUR10800;AGIWUR12287;AGIWUR13102;AGIWUR21054;AGIWUR30097;AGIWUR30478 |                                                                       |          |                |                                     |
| CB4856 CT V                                                                                 | 12628957                                                              | 12629905 | WBGene00044198 | F56H9.6 F56H9.6 0.187320204463781   |
| AGIWUR33770                                                                                 |                                                                       |          |                |                                     |
| CB4856 CT V                                                                                 | 12630170                                                              | 12632148 | WBGene00006004 | srx-113 F56H9.1 0.0370928034238518  |
| AGIWUR6265;AGIWUR43399                                                                      |                                                                       |          |                |                                     |
| CB4856 CT V                                                                                 | 12632490                                                              | 12633638 | WBGene00050977 | F56H9.7 F56H9.7 -0.0452816791205297 |

|                                                                                                                        |    |   |          |          |                                              |          |          |                     |
|------------------------------------------------------------------------------------------------------------------------|----|---|----------|----------|----------------------------------------------|----------|----------|---------------------|
| AGIWUR8350;AGIWUR11631;AGIWUR21197                                                                                     |    |   |          |          |                                              |          |          |                     |
| CB4856                                                                                                                 | CT | V | 12637663 | 12638237 | WBGene00010174                               | F56H9.2  | F56H9.2  | 0.366595122535298   |
| AGIWUR42483                                                                                                            |    |   |          |          |                                              |          |          |                     |
| CB4856                                                                                                                 | CT | V | 12638852 | 12640470 | WBGene00001670                               | gpa-8    | F56H9.3  | 0.203662766861533   |
| AGIWUR36549                                                                                                            |    |   |          |          |                                              |          |          |                     |
| CB4856                                                                                                                 | CT | V | 12646827 | 12649313 | WBGene00001671                               | gpa-9    | F56H9.4  | 0.854566138612164   |
| AGIWUR41400                                                                                                            |    |   |          |          |                                              |          |          |                     |
| CB4856                                                                                                                 | CT | V | 12649858 | 12658718 | WBGene00003011                               | lin-25   | F56H9.5  | -0.0787970512583112 |
| AGIWUR40170                                                                                                            |    |   |          |          |                                              |          |          |                     |
| CB4856                                                                                                                 | CT | V | 12658668 | 12659687 | WBGene00012277                               | ccch-3   | W05B10.2 |                     |
| -0.200410041270437                                                                                                     |    |   |          |          | AGIWUR913;AGIWUR4527;AGIWUR37880;AGIWUR44491 |          |          |                     |
| CB4856                                                                                                                 | CT | V | 12659704 | 12660330 | WBGene00012276                               | his-74   | W05B10.1 |                     |
| -0.0073690206984125                                                                                                    |    |   |          |          | AGIWUR21591                                  |          |          |                     |
| CB4856                                                                                                                 | CT | V | 12661304 | 12661659 | WBGene00012278                               | W05B10.3 |          | W05B10.3            |
| -0.223376008181894                                                                                                     |    |   |          |          |                                              |          |          |                     |
| AGIWUR5588;AGIWUR11557;AGIWUR17691;AGIWUR29657;AGIWUR30731;AGIWUR31536;AGIWUR32212;AGIWUR34463;AGIWUR43549;AGIWUR44193 |    |   |          |          |                                              |          |          |                     |
| CB4856                                                                                                                 | CT | V | 12668226 | 12669689 | WBGene00012279                               | W05B10.4 |          | W05B10.4            |
| 0.188573961459113                                                                                                      |    |   |          |          | AGIWUR32489                                  |          |          |                     |
| CB4856                                                                                                                 | CT | V | 12670907 | 12672726 | WBGene00006007                               | srx-116  | W05B10.5 |                     |
| 0.258048722511719                                                                                                      |    |   |          |          | AGIWUR42124                                  |          |          |                     |
| CB4856                                                                                                                 | CT | V | 12680107 | 12692364 | WBGene00010735                               | frpr-15  | K10C8.2  | 0.0136884778230706  |
| AGIWUR19256;AGIWUR21031                                                                                                |    |   |          |          |                                              |          |          |                     |
| CB4856                                                                                                                 | CT | V | 12692486 | 12695255 | WBGene00010734                               | parn-1   | K10C8.1  | -0.0782266071702322 |
| AGIWUR5380;AGIWUR29696                                                                                                 |    |   |          |          |                                              |          |          |                     |
| CB4856                                                                                                                 | CT | V | 12696225 | 12696877 | WBGene00010737                               | K10C8.4  | K10C8.4  | 0.0619258342875346  |
| AGIWUR3597                                                                                                             |    |   |          |          |                                              |          |          |                     |
| CB4856                                                                                                                 | CT | V | 12697794 | 12704273 | WBGene00010736                               | istr-1   | K10C8.3  | 0.139528586789115   |
| AGIWUR17103;AGIWUR21085;AGIWUR33300;AGIWUR35232                                                                        |    |   |          |          |                                              |          |          |                     |
| CB4856                                                                                                                 | CT | V | 12704382 | 12707761 | WBGene00011242                               | R11D1.1  | R11D1.1  | 0.140801022651569   |
| AGIWUR39860                                                                                                            |    |   |          |          |                                              |          |          |                     |
| CB4856                                                                                                                 | CT | V | 12708678 | 12710700 | WBGene00011243                               | R11D1.2  | R11D1.2  | -0.102330775386368  |
| AGIWUR7737                                                                                                             |    |   |          |          |                                              |          |          |                     |
| CB4856                                                                                                                 | CT | V | 12711293 | 12712109 | WBGene00011244                               | R11D1.3  | R11D1.3  | 0.244566643640496   |
| AGIWUR19840                                                                                                            |    |   |          |          |                                              |          |          |                     |
| CB4856                                                                                                                 | CT | V | 12713035 | 12714220 | WBGene00011245                               | R11D1.4  | R11D1.4  | -0.0710784692092501 |
| AGIWUR9359                                                                                                             |    |   |          |          |                                              |          |          |                     |
| CB4856                                                                                                                 | CT | V | 12714503 | 12716549 | WBGene00006222                               | str-178  | R11D1.5  | -0.120961974896656  |
| AGIWUR3222                                                                                                             |    |   |          |          |                                              |          |          |                     |

|                                                           |                                                             |          |                |          |          |                     |
|-----------------------------------------------------------|-------------------------------------------------------------|----------|----------------|----------|----------|---------------------|
| CB4856 CT V                                               | 12716616                                                    | 12718722 | WBGene00006225 | str-181  | R11D1.6  | -0.0560862721571134 |
| AGIWUR5561                                                |                                                             |          |                |          |          |                     |
| CB4856 CT V                                               | 12720058                                                    | 12722727 | WBGene00011246 | R11D1.7  | R11D1.7  | 0.085009485879441   |
| AGIWUR24869                                               |                                                             |          |                |          |          |                     |
| CB4856 CT V                                               | 12724562                                                    | 12725993 | WBGene00045336 | R11D1.12 | R11D1.12 |                     |
| 0.0351609780095075                                        | AGIWUR14180;AGIWUR14693;AGIWUR16055;AGIWUR24942;AGIWUR26376 |          |                |          |          |                     |
| CB4856 CT V                                               | 12727171                                                    | 12727621 | WBGene00045517 | R11D1.13 | R11D1.13 |                     |
| 0.00726249284570679                                       | AGIWUR16530;AGIWUR29414;AGIWUR33362;AGIWUR36100             |          |                |          |          |                     |
| CB4856 CT V                                               | 12727593                                                    | 12728112 | WBGene00004442 | rp1-28   | R11D1.8  | -0.0935822788200085 |
| AGIWUR32903;AGIWUR35759                                   |                                                             |          |                |          |          |                     |
| CB4856 CT V                                               | 12728631                                                    | 12729416 | WBGene00011247 | mrp1-49  | R11D1.9  | -0.103015118876167  |
| AGIWUR19366;AGIWUR34528;AGIWUR44439                       |                                                             |          |                |          |          |                     |
| CB4856 CT V                                               | 12729520                                                    | 12731801 | WBGene00011248 | R11D1.10 | R11D1.10 |                     |
| -0.234787216827243                                        | AGIWUR18000                                                 |          |                |          |          |                     |
| CB4856 CT V                                               | 12731772                                                    | 12733645 | WBGene00000984 | dhs-21   | R11D1.11 |                     |
| 0.090538559560553                                         | AGIWUR471;AGIWUR5236;AGIWUR10383                            |          |                |          |          |                     |
| CB4856 CT V                                               | 12734183                                                    | 12736041 | WBGene00007604 | xbx-9    | C15C8.1  | 0.0950445506822213  |
| AGIWUR42554                                               |                                                             |          |                |          |          |                     |
| CB4856 CT V                                               | 12736703                                                    | 12741211 | WBGene00000521 | cky-1    | C15C8.2  | 0.172726972700596   |
| AGIWUR14255;AGIWUR27971;AGIWUR29840                       |                                                             |          |                |          |          |                     |
| CB4856 CT V                                               | 12742041                                                    | 12744207 | WBGene00007605 | asp-10   | C15C8.3  | -0.416444378621296  |
| AGIWUR21210                                               |                                                             |          |                |          |          |                     |
| CB4856 CT V                                               | 12745201                                                    | 12747463 | WBGene00007606 | C15C8.4  | C15C8.4  | -0.33053547208508   |
| AGIWUR16153;AGIWUR25403;AGIWUR26667                       |                                                             |          |                |          |          |                     |
| CB4856 CT V                                               | 12748292                                                    | 12749963 | WBGene00007607 | C15C8.5  | C15C8.5  | -0.0228526656152788 |
| AGIWUR10751                                               |                                                             |          |                |          |          |                     |
| CB4856 CT V                                               | 12750030                                                    | 12751545 | WBGene00007608 | C15C8.6  | C15C8.6  | -0.0954801199567603 |
| AGIWUR26274                                               |                                                             |          |                |          |          |                     |
| CB4856 CT V                                               | 12751603                                                    | 12752507 | WBGene00045460 | C15C8.8  | C15C8.8  | 0.1079419013645     |
| AGIWUR4939;AGIWUR8729;AGIWUR13587;AGIWUR39928;AGIWUR40646 |                                                             |          |                |          |          |                     |
| CB4856 CT V                                               | 12752762                                                    | 12754893 | WBGene00001675 | gpa-13   | F18E2.5  | -0.20764925485279   |
| AGIWUR35469                                               |                                                             |          |                |          |          |                     |
| CB4856 CT V                                               | 12757591                                                    | 12760227 | WBGene00008936 | pap1-1   | F18E2.1  | -0.77890784651602   |
| AGIWUR19152                                               |                                                             |          |                |          |          |                     |
| CB4856 CT V                                               | 12761044                                                    | 12763375 | WBGene00006512 | abcf-1   | F18E2.2  | -0.474195478923341  |
| AGIWUR107;AGIWUR5368;AGIWUR41006;AGIWUR43678              |                                                             |          |                |          |          |                     |
| CB4856 CT V                                               | 12763945                                                    | 12767933 | WBGene00004738 | scc-3    | F18E2.3  |                     |
| -0.00526733751587116                                      | AGIWUR20773                                                 |          |                |          |          |                     |
| CB4856 CT V                                               | 12769268                                                    | 12770845 | WBGene00008937 | srt-43   | F18E2.4  | -0.126593998447898  |

|                                                                                              |    |   |          |          |                |         |          |                     |  |
|----------------------------------------------------------------------------------------------|----|---|----------|----------|----------------|---------|----------|---------------------|--|
| AGIWUR45016                                                                                  |    |   |          |          |                |         |          |                     |  |
| CB4856                                                                                       | CT | V | 12773522 | 12783063 | WBGene00013902 | ZC455.1 | ZC455.1  | 0.0124716468532888  |  |
| AGIWUR5386;AGIWUR43768                                                                       |    |   |          |          |                |         |          |                     |  |
| CB4856                                                                                       | CT | V | 12783222 | 12784864 | WBGene00013907 | sre-20  | ZC455.7  | -0.168610920680518  |  |
| AGIWUR19270                                                                                  |    |   |          |          |                |         |          |                     |  |
| CB4856                                                                                       | CT | V | 12785154 | 12787126 | WBGene00001429 | fkb-4   | ZC455.10 |                     |  |
| 0.254868482940507 AGIWUR2842                                                                 |    |   |          |          |                |         |          |                     |  |
| CB4856                                                                                       | CT | V | 12787269 | 12788551 | WBGene00013909 | srbc-44 | ZC455.9  | -0.331663600905551  |  |
| AGIWUR23977                                                                                  |    |   |          |          |                |         |          |                     |  |
| CB4856                                                                                       | CT | V | 12789197 | 12790518 | WBGene00013908 | srbc-43 | ZC455.8  | -0.369842583537118  |  |
| AGIWUR31402                                                                                  |    |   |          |          |                |         |          |                     |  |
| CB4856                                                                                       | CT | V | 12790698 | 12792965 | WBGene00013906 | ugt-5   | ZC455.6  |                     |  |
| -0.00274905250376722 AGIWUR26588;AGIWUR32844;AGIWUR35067;AGIWUR35571;AGIWUR42083;AGIWUR44576 |    |   |          |          |                |         |          |                     |  |
| CB4856                                                                                       | CT | V | 12793020 | 12795336 | WBGene00013905 | ugt-4   | ZC455.5  | 0.136587415911571   |  |
| AGIWUR17590;AGIWUR32025;AGIWUR37226;AGIWUR44616                                              |    |   |          |          |                |         |          |                     |  |
| CB4856                                                                                       | CT | V | 12795484 | 12798154 | WBGene00013904 | ugt-6   | ZC455.4  | -0.540819109179832  |  |
| AGIWUR2287                                                                                   |    |   |          |          |                |         |          |                     |  |
| CB4856                                                                                       | CT | V | 12798327 | 12800193 | WBGene00013903 | ugt-3   | ZC455.3  | -0.273908283252355  |  |
| AGIWUR23933                                                                                  |    |   |          |          |                |         |          |                     |  |
| CB4856                                                                                       | CT | V | 12803574 | 12804550 | WBGene00013910 | srbc-45 | ZC455.11 |                     |  |
| 0.102575710574634 AGIWUR5861;AGIWUR24206;AGIWUR34533;AGIWUR37594;AGIWUR41557                 |    |   |          |          |                |         |          |                     |  |
| CB4856                                                                                       | CT | V | 12805149 | 12806128 | WBGene00044102 | srbc-46 | ZC455.12 |                     |  |
| 0.0660445131423533 AGIWUR5830                                                                |    |   |          |          |                |         |          |                     |  |
| CB4856                                                                                       | CT | V | 12806490 | 12808277 | WBGene00077562 | ZC443.7 | ZC443.7  | 0.128546435393605   |  |
| AGIWUR3475;AGIWUR31113                                                                       |    |   |          |          |                |         |          |                     |  |
| CB4856                                                                                       | CT | V | 12808422 | 12810080 | WBGene00013896 | ZC443.1 | ZC443.1  | 0.117165112675334   |  |
| AGIWUR20062                                                                                  |    |   |          |          |                |         |          |                     |  |
| CB4856                                                                                       | CT | V | 12812258 | 12814122 | WBGene00013898 | ZC443.3 | ZC443.3  | 2.0462388767918     |  |
| AGIWUR17607                                                                                  |    |   |          |          |                |         |          |                     |  |
| CB4856                                                                                       | CT | V | 12816912 | 12819545 | WBGene00013899 | ZC443.4 | ZC443.4  | 0.84098181859536    |  |
| AGIWUR34599                                                                                  |    |   |          |          |                |         |          |                     |  |
| CB4856                                                                                       | CT | V | 12820265 | 12822758 | WBGene00013900 | ugt-18  | ZC443.5  | 3.68340337150669    |  |
| AGIWUR10265                                                                                  |    |   |          |          |                |         |          |                     |  |
| CB4856                                                                                       | CT | V | 12825024 | 12827432 | WBGene00013901 | ugt-16  | ZC443.6  | -0.0675100311087604 |  |
| AGIWUR4668                                                                                   |    |   |          |          |                |         |          |                     |  |
| CB4856                                                                                       | CT | V | 12827770 | 12830109 | WBGene00008097 | ugt-15  | C44H9.1  | 0.289901493730828   |  |
| AGIWUR39382                                                                                  |    |   |          |          |                |         |          |                     |  |
| CB4856                                                                                       | CT | V | 12830804 | 12834438 | WBGene00008098 | C44H9.2 | C44H9.2  | 0.0998523396873026  |  |
| AGIWUR13206                                                                                  |    |   |          |          |                |         |          |                     |  |



|                                     |                                                                      |          |                |                 |                             |
|-------------------------------------|----------------------------------------------------------------------|----------|----------------|-----------------|-----------------------------|
| CB4856 CT V                         | 12835708                                                             | 12839783 | WBGene00008099 | C44H9.4 C44H9.4 | -0.042356755928342          |
| AGIWUR41365                         |                                                                      |          |                |                 |                             |
| CB4856 CT V                         | 12842494                                                             | 12845330 | WBGene00008101 | C44H9.6 C44H9.6 | 0.160389340935941           |
| AGIWUR44468                         |                                                                      |          |                |                 |                             |
| CB4856 CT V                         | 12846721                                                             | 12849864 | WBGene00008100 | C44H9.5 C44H9.5 | 0.0689460755775775          |
| AGIWUR12662;AGIWUR43467             |                                                                      |          |                |                 |                             |
| CB4856 CT V                         | 12853015                                                             | 12854839 | WBGene00008102 | C44H9.7 C44H9.7 | 0.925090239812281           |
| AGIWUR18702;AGIWUR19111;AGIWUR29062 |                                                                      |          |                |                 |                             |
| CB4856 CT V                         | 12859381                                                             | 12863833 | WBGene00011587 | T07F10.1        | T07F10.1                    |
| 0.201686471636442                   | AGIWUR12497                                                          |          |                |                 |                             |
| CB4856 CT V                         | 12868026                                                             | 12870035 | WBGene00011589 | T07F10.3        | T07F10.3                    |
| -0.0181423889337671                 | AGIWUR5418;AGIWUR8235;AGIWUR9659;AGIWUR10901;AGIWUR13177;AGIWUR33700 |          |                |                 |                             |
| CB4856 CT V                         | 12872053                                                             | 12882108 | WBGene00011590 | bus-19          | T07F10.4                    |
| 0.0396018356019709                  | AGIWUR573;AGIWUR18516;AGIWUR42616                                    |          |                |                 |                             |
| CB4856 CT V                         | 12882078                                                             | 12885960 | WBGene00011287 | glb-24          | R90.5 0.0241777032187862    |
| AGIWUR12824;AGIWUR18804;AGIWUR38495 |                                                                      |          |                |                 |                             |
| CB4856 CT V                         | 12891523                                                             | 12895872 | WBGene00011283 | R90.1           | R90.1 0.180773619775285     |
| AGIWUR14152;AGIWUR38711             |                                                                      |          |                |                 |                             |
| CB4856 CT V                         | 12903551                                                             | 12904160 | WBGene00011284 | ttr-27          | R90.2 -0.330788106268077    |
| AGIWUR18386                         |                                                                      |          |                |                 |                             |
| CB4856 CT V                         | 12904213                                                             | 12905168 | WBGene00011285 | ttr-28          | R90.3 -0.124738651146616    |
| AGIWUR1453                          |                                                                      |          |                |                 |                             |
| CB4856 CT V                         | 12906131                                                             | 12906746 | WBGene00011286 | ttr-29          | R90.4 0.40951404250143      |
| AGIWUR25178                         |                                                                      |          |                |                 |                             |
| CB4856 CT V                         | 12910113                                                             | 12917198 | WBGene00003738 | nid-1           | F54F3.1 -0.149234046496746  |
| AGIWUR44234                         |                                                                      |          |                |                 |                             |
| CB4856 CT V                         | 12917450                                                             | 12918902 | WBGene00014770 | F54F3.2         | F54F3.2 0.926758211262598   |
| AGIWUR20453;AGIWUR24291             |                                                                      |          |                |                 |                             |
| CB4856 CT V                         | 12919952                                                             | 12921692 | WBGene00010062 | lip1-1          | F54F3.3 1.91177584376519    |
| AGIWUR44387                         |                                                                      |          |                |                 |                             |
| CB4856 CT V                         | 12922608                                                             | 12924156 | WBGene00010063 | dhrrs-4         | F54F3.4 0.184505646270573   |
| AGIWUR2741                          |                                                                      |          |                |                 |                             |
| CB4856 CT V                         | 12924441                                                             | 12928173 | WBGene00004150 | pqn-67          | T16G1.1 -0.154523121694684  |
| AGIWUR806;AGIWUR25408;AGIWUR26872   |                                                                      |          |                |                 |                             |
| CB4856 CT V                         | 12929478                                                             | 12932966 | WBGene00011796 | T16G1.2         | T16G1.2 -0.0726628758557339 |
| AGIWUR33                            |                                                                      |          |                |                 |                             |
| CB4856 CT V                         | 12932941                                                             | 12935112 | WBGene00011801 | T16G1.7         | T16G1.7 0.51169742288174    |
| AGIWUR18524                         |                                                                      |          |                |                 |                             |
| CB4856 CT V                         | 12935538                                                             | 12937263 | WBGene00011800 | T16G1.6         | T16G1.6 0.097623283450428   |

|                                                                                                            |    |   |          |          |                |         |          |                     |
|------------------------------------------------------------------------------------------------------------|----|---|----------|----------|----------------|---------|----------|---------------------|
| AGIWUR22206;AGIWUR22875;AGIWUR25143                                                                        |    |   |          |          |                |         |          |                     |
| CB4856                                                                                                     | CT | V | 12937654 | 12939506 | WBGene00011799 | T16G1.5 | T16G1.5  | -0.0926262948213594 |
| AGIWUR22764                                                                                                |    |   |          |          |                |         |          |                     |
| CB4856                                                                                                     | CT | V | 12940038 | 12941847 | WBGene00011798 | T16G1.4 | T16G1.4  | 3.24127025370183    |
| AGIWUR4039;AGIWUR26972;AGIWUR30778                                                                         |    |   |          |          |                |         |          |                     |
| CB4856                                                                                                     | CT | V | 12942365 | 12944329 | WBGene00011797 | T16G1.3 | T16G1.3  |                     |
| -0.00166920277668581 AGIWUR9650                                                                            |    |   |          |          |                |         |          |                     |
| CB4856                                                                                                     | CT | V | 12944861 | 12946853 | WBGene00001711 | grl-2   | T16G1.8  | 0.346755757131124   |
| AGIWUR39625                                                                                                |    |   |          |          |                |         |          |                     |
| CB4856                                                                                                     | CT | V | 12946815 | 12950658 | WBGene00011802 | T16G1.9 | T16G1.9  | -0.0905700683537063 |
| AGIWUR42413                                                                                                |    |   |          |          |                |         |          |                     |
| CB4856                                                                                                     | CT | V | 12952636 | 12953208 | WBGene00004151 | pqn-68  | T16G1.10 |                     |
| -0.379793743427086 AGIWUR24781                                                                             |    |   |          |          |                |         |          |                     |
| CB4856                                                                                                     | CT | V | 12954002 | 12955229 | WBGene00001233 | eif-3.K | T16G1.11 |                     |
| -0.277936019492895 AGIWUR12786;AGIWUR16029;AGIWUR16352                                                     |    |   |          |          |                |         |          |                     |
| CB4856                                                                                                     | CT | V | 12955203 | 12961149 | WBGene00011307 | mpst-7  | R186.6   | -0.326467815587892  |
| AGIWUR36157                                                                                                |    |   |          |          |                |         |          |                     |
| CB4856                                                                                                     | CT | V | 12961474 | 12963336 | WBGene00011305 | R186.1  | R186.1   | 0.158696086475546   |
| AGIWUR27464                                                                                                |    |   |          |          |                |         |          |                     |
| CB4856                                                                                                     | CT | V | 12964376 | 12966022 | WBGene00005113 | srd-35  | R186.2   | 0.183616315339947   |
| AGIWUR7784;AGIWUR33653;AGIWUR35769;AGIWUR44051;AGIWUR45110                                                 |    |   |          |          |                |         |          |                     |
| CB4856                                                                                                     | CT | V | 12966000 | 12967210 | WBGene00011306 | R186.3  | R186.3   | 0.0886511609313843  |
| AGIWUR12413                                                                                                |    |   |          |          |                |         |          |                     |
| CB4856                                                                                                     | CT | V | 12967309 | 12967982 | WBGene00011309 | R186.8  | R186.8   | -0.119839594925099  |
| AGIWUR8865;AGIWUR11438;AGIWUR14545;AGIWUR19202;AGIWUR28961;AGIWUR29160;AGIWUR36476;AGIWUR40001;AGIWUR43571 |    |   |          |          |                |         |          |                     |
| CB4856                                                                                                     | CT | V | 12968855 | 12970730 | WBGene00003031 | lin-46  | R186.4   | -0.128312219130443  |
| AGIWUR25766                                                                                                |    |   |          |          |                |         |          |                     |
| CB4856                                                                                                     | CT | V | 12971110 | 12973282 | WBGene00011308 | R186.7  | R186.7   |                     |
| -0.00157803988034289 AGIWUR34982                                                                           |    |   |          |          |                |         |          |                     |
| CB4856                                                                                                     | CT | V | 12973261 | 12976704 | WBGene00004793 | shw-3   | R186.5   | 0.119377393065163   |
| AGIWUR30708                                                                                                |    |   |          |          |                |         |          |                     |
| CB4856                                                                                                     | CT | V | 12988543 | 12992185 | WBGene00008851 | F15B9.8 | F15B9.8  | 0.23570478483556    |
| AGIWUR9286;AGIWUR19700;AGIWUR20843                                                                         |    |   |          |          |                |         |          |                     |
| CB4856                                                                                                     | CT | V | 12993180 | 12994822 | WBGene00001109 | dsl-7   | F15B9.9  | 0.268382398190755   |
| AGIWUR34207                                                                                                |    |   |          |          |                |         |          |                     |
| CB4856                                                                                                     | CT | V | 12995569 | 12996836 | WBGene00001389 | far-5   | F15B9.3  | -0.277372031463957  |
| AGIWUR5382;AGIWUR7263;AGIWUR41491;AGIWUR45201                                                              |    |   |          |          |                |         |          |                     |
| CB4856                                                                                                     | CT | V | 12996787 | 12997524 | WBGene00001387 | far-3   | F15B9.1  | 0.553284127354939   |
| AGIWUR34379                                                                                                |    |   |          |          |                |         |          |                     |

|                                                                                    |            |          |                |          |          |                     |
|------------------------------------------------------------------------------------|------------|----------|----------------|----------|----------|---------------------|
| CB4856 CT V                                                                        | 12998427   | 12999659 | WBGene00001388 | far-4    | F15B9.2  | -0.202227624486463  |
| AGIWUR39090                                                                        |            |          |                |          |          |                     |
| CB4856 CT V                                                                        | 13002317   | 13006987 | WBGene00008848 | inft-2   | F15B9.4  | 0.149818208836146   |
| AGIWUR36918                                                                        |            |          |                |          |          |                     |
| CB4856 CT V                                                                        | 13006981   | 13008925 | WBGene00045418 | F15B9.10 | F15B9.10 |                     |
| 0.104388338700998                                                                  | AGIWUR7185 |          |                |          |          |                     |
| CB4856 CT V                                                                        | 13014144   | 13016641 | WBGene00008850 | F15B9.6  | F15B9.6  | 0.0131948619887972  |
| AGIWUR13550                                                                        |            |          |                |          |          |                     |
| CB4856 CT V                                                                        | 13019068   | 13033373 | WBGene00001475 | fmi-1    | F15B9.7  | 0.316776695546832   |
| AGIWUR21662;AGIWUR42470;AGIWUR43120                                                |            |          |                |          |          |                     |
| CB4856 CT V                                                                        | 13033529   | 13034164 | WBGene00012335 | W07G4.1  | W07G4.1  | 0.382538037528984   |
| AGIWUR6064;AGIWUR28273                                                             |            |          |                |          |          |                     |
| CB4856 CT V                                                                        | 13034267   | 13034704 | WBGene00077565 | W07G4.7  | W07G4.7  | 0.84612799781834    |
| AGIWUR11268                                                                        |            |          |                |          |          |                     |
| CB4856 CT V                                                                        | 13036996   | 13041879 | WBGene00012337 | W07G4.3  | W07G4.3  | -0.132224258376816  |
| AGIWUR1071;AGIWUR12298;AGIWUR14469;AGIWUR14495;AGIWUR31800;AGIWUR32655;AGIWUR43836 |            |          |                |          |          |                     |
| CB4856 CT V                                                                        | 13043712   | 13046355 | WBGene00002250 | lap-2    | W07G4.4  | -0.335075208120179  |
| AGIWUR38316                                                                        |            |          |                |          |          |                     |
| CB4856 CT V                                                                        | 13047980   | 13049238 | WBGene00012339 | W07G4.5  | W07G4.5  | 0.569375072234067   |
| AGIWUR3319                                                                         |            |          |                |          |          |                     |
| CB4856 CT V                                                                        | 13049730   | 13053910 | WBGene00005652 | srr-1    | W07G4.6  | -0.0200549416360651 |
| AGIWUR30904                                                                        |            |          |                |          |          |                     |
| CB4856 CT V                                                                        | 13065461   | 13065794 | WBGene00009631 | F42E8.2  | F42E8.2  | 0.1280417636358     |
| AGIWUR41554                                                                        |            |          |                |          |          |                     |
| CB4856 CT V                                                                        | 13066640   | 13071152 | WBGene00007908 | C34B4.3  | C34B4.3  | 0.726484032099086   |
| AGIWUR9410;AGIWUR40112                                                             |            |          |                |          |          |                     |
| CB4856 CT V                                                                        | 13083055   | 13090260 | WBGene00007907 | C34B4.2  | C34B4.2  | 0.113320927542716   |
| AGIWUR14470;AGIWUR23901;AGIWUR38007                                                |            |          |                |          |          |                     |
| CB4856 CT V                                                                        | 13089803   | 13092512 | WBGene00007909 | C34B4.4  | C34B4.4  | -0.124147341653158  |
| AGIWUR26382;AGIWUR37670                                                            |            |          |                |          |          |                     |
| CB4856 CT V                                                                        | 13092666   | 13094446 | WBGene00077698 | lurp-4   | C34B4.7  | 0.155442904469639   |
| AGIWUR5631;AGIWUR11097                                                             |            |          |                |          |          |                     |
| CB4856 CT V                                                                        | 13095954   | 13097457 | WBGene00007910 | C34B4.5  | C34B4.5  | 0.252942871201867   |
| AGIWUR38581                                                                        |            |          |                |          |          |                     |
| CB4856 CT V                                                                        | 13098910   | 13110337 | WBGene00003143 | max-1    | C34B4.1  | 0.350272216957874   |
| AGIWUR39031                                                                        |            |          |                |          |          |                     |
| CB4856 CT V                                                                        | 13116488   | 13120167 | WBGene00007150 | acly-2   | B0365.1  | -0.0684989637173441 |
| AGIWUR4217                                                                         |            |          |                |          |          |                     |
| CB4856 CT V                                                                        | 13120676   | 13123421 | WBGene00007151 | B0365.2  | B0365.2  | -0.0299455604460839 |

|                                                                                              |    |   |          |          |                |         |         |                     |  |
|----------------------------------------------------------------------------------------------|----|---|----------|----------|----------------|---------|---------|---------------------|--|
| AGIWUR14820                                                                                  |    |   |          |          |                |         |         |                     |  |
| CB4856                                                                                       | CT | V | 13126414 | 13129995 | WBGene00001137 | eat-6   | B0365.3 | -0.300566817846185  |  |
| AGIWUR190;AGIWUR311;AGIWUR2417;AGIWUR3481;AGIWUR3982;AGIWUR25633;AGIWUR27717;AGIWUR33762     |    |   |          |          |                |         |         |                     |  |
| CB4856                                                                                       | CT | V | 13131873 | 13133565 | WBGene00219208 | B0365.9 | B0365.9 | -0.155439221115898  |  |
| AGIWUR34951                                                                                  |    |   |          |          |                |         |         |                     |  |
| CB4856                                                                                       | CT | V | 13134965 | 13138101 | WBGene00007153 | clcc-41 | B0365.6 | -0.359775337024173  |  |
| AGIWUR3662;AGIWUR18488;AGIWUR26592;AGIWUR36559;AGIWUR44784                                   |    |   |          |          |                |         |         |                     |  |
| CB4856                                                                                       | CT | V | 13138981 | 13152466 | WBGene00007154 | dhc-3   | B0365.7 | -0.0801283386824885 |  |
| AGIWUR24444;AGIWUR29005                                                                      |    |   |          |          |                |         |         |                     |  |
| CB4856                                                                                       | CT | V | 13152894 | 13176111 | WBGene00011647 | noca-1  | T09E8.1 | 0.0540569166308611  |  |
| AGIWUR2137;AGIWUR2843;AGIWUR4645;AGIWUR19230;AGIWUR24927;AGIWUR34375;AGIWUR42573;AGIWUR43631 |    |   |          |          |                |         |         |                     |  |
| CB4856                                                                                       | CT | V | 13176711 | 13180189 | WBGene00001874 | him-17  | T09E8.2 |                     |  |
| -0.00067399705776694 AGIWUR42908                                                             |    |   |          |          |                |         |         |                     |  |
| CB4856                                                                                       | CT | V | 13180330 | 13181534 | WBGene00011648 | cni-1   | T09E8.3 | -0.350846760740976  |  |
| AGIWUR7422;AGIWUR16265;AGIWUR18132;AGIWUR37833                                               |    |   |          |          |                |         |         |                     |  |
| CB4856                                                                                       | CT | V | 13181580 | 13184237 | WBGene00011649 | T09E8.4 | T09E8.4 | -0.0441851413150545 |  |
| AGIWUR146                                                                                    |    |   |          |          |                |         |         |                     |  |
| CB4856                                                                                       | CT | V | 13185684 | 13187428 | WBGene00005518 | sri-6   | T09E8.5 | 0.183725404872147   |  |
| AGIWUR29710                                                                                  |    |   |          |          |                |         |         |                     |  |
| CB4856                                                                                       | CT | V | 13188025 | 13189406 | WBGene00044199 | F57B1.8 | F57B1.8 | 0.00387929495000705 |  |
| AGIWUR1263;AGIWUR10046;AGIWUR29953                                                           |    |   |          |          |                |         |         |                     |  |
| CB4856                                                                                       | CT | V | 13191707 | 13193538 | WBGene00006311 | sun-1   | F57B1.2 | -0.0814358429719118 |  |
| AGIWUR36486                                                                                  |    |   |          |          |                |         |         |                     |  |
| CB4856                                                                                       | CT | V | 13193933 | 13195648 | WBGene00010187 | F57B1.1 | F57B1.1 | -0.198766447668509  |  |
| AGIWUR12797;AGIWUR18184;AGIWUR21634;AGIWUR24778;AGIWUR26707;AGIWUR39169                      |    |   |          |          |                |         |         |                     |  |
| CB4856                                                                                       | CT | V | 13196088 | 13197923 | WBGene00045488 | F57B1.9 | F57B1.9 | -0.304605511641461  |  |
| AGIWUR11389;AGIWUR18594;AGIWUR29360;AGIWUR32520;AGIWUR36306;AGIWUR38732                      |    |   |          |          |                |         |         |                     |  |
| CB4856                                                                                       | CT | V | 13200982 | 13202192 | WBGene00000733 | col-160 | F57B1.4 | -0.153393028490427  |  |
| AGIWUR7499                                                                                   |    |   |          |          |                |         |         |                     |  |
| CB4856                                                                                       | CT | V | 13207763 | 13208762 | WBGene00010188 | F57B1.5 | F57B1.5 | -0.109081189476981  |  |
| AGIWUR35756                                                                                  |    |   |          |          |                |         |         |                     |  |
| CB4856                                                                                       | CT | V | 13209645 | 13213462 | WBGene00010189 | F57B1.6 | F57B1.6 | 0.583478157257977   |  |
| AGIWUR3188                                                                                   |    |   |          |          |                |         |         |                     |  |
| CB4856                                                                                       | CT | V | 13222620 | 13225941 | WBGene00007929 | dmd-10  | C34D1.1 | 0.109087145426656   |  |
| AGIWUR28168;AGIWUR36450                                                                      |    |   |          |          |                |         |         |                     |  |
| CB4856                                                                                       | CT | V | 13236171 | 13236604 | WBGene00007930 | dmd-11  | C34D1.2 | -0.0426467623260258 |  |
| AGIWUR25121                                                                                  |    |   |          |          |                |         |         |                     |  |
| CB4856                                                                                       | CT | V | 13246591 | 13249536 | WBGene00003850 | odr-3   | C34D1.3 | 0.0842050208777998  |  |
| AGIWUR520                                                                                    |    |   |          |          |                |         |         |                     |  |

|                                                                                                |   |                                    |          |                |          |          |                     |
|------------------------------------------------------------------------------------------------|---|------------------------------------|----------|----------------|----------|----------|---------------------|
| CB4856 CT                                                                                      | V | 13257097                           | 13259311 | WBGene00007931 | C34D1.4  | C34D1.4  | 0.0298155036966676  |
| AGIWUR26252                                                                                    |   |                                    |          |                |          |          |                     |
| CB4856 CT                                                                                      | V | 13264546                           | 13269820 | WBGene00007932 | zip-5    | C34D1.5  | 0.218542453305854   |
| AGIWUR12576                                                                                    |   |                                    |          |                |          |          |                     |
| CB4856 CT                                                                                      | V | 13273153                           | 13295978 | WBGene00009337 | uig-1    | F32F2.1  | 0.344361544330635   |
| AGIWUR6427;AGIWUR10081;AGIWUR10403;AGIWUR16513;AGIWUR18628;AGIWUR19651;AGIWUR21862;AGIWUR43746 |   |                                    |          |                |          |          |                     |
| CB4856 CT                                                                                      | V | 13297520                           | 13298050 | WBGene00007747 | C26E1.1  | C26E1.1  | 0.23906330457707    |
| AGIWUR35253                                                                                    |   |                                    |          |                |          |          |                     |
| CB4856 CT                                                                                      | V | 13301652                           | 13304785 | WBGene00007749 | ceh-79   | C26E1.3  | 0.42291020981863    |
| AGIWUR27287                                                                                    |   |                                    |          |                |          |          |                     |
| CB4856 CT                                                                                      | V | 13305138                           | 13307271 | WBGene00007748 | C26E1.2  | C26E1.2  | 1.30792707195846    |
| AGIWUR24177                                                                                    |   |                                    |          |                |          |          |                     |
| CB4856 CT                                                                                      | V | 13308916                           | 13309423 | WBGene00008217 | C50B6.1  | C50B6.1  | 0.0373656202648869  |
| AGIWUR2180;AGIWUR7650;AGIWUR34812;AGIWUR42323                                                  |   |                                    |          |                |          |          |                     |
| CB4856 CT                                                                                      | V | 13310186                           | 13312260 | WBGene00008218 | nasp-2   | C50B6.2  | -0.0852343784927001 |
| AGIWUR1780                                                                                     |   |                                    |          |                |          |          |                     |
| CB4856 CT                                                                                      | V | 13313575                           | 13315812 | WBGene00008219 | C50B6.3  | C50B6.3  | 0.0946601346143936  |
| AGIWUR28232                                                                                    |   |                                    |          |                |          |          |                     |
| CB4856 CT                                                                                      | V | 13318464                           | 13320080 | WBGene00005243 | srh-18   | C50B6.5  |                     |
| -0.00406474693167702                                                                           |   | AGIWUR26672                        |          |                |          |          |                     |
| CB4856 CT                                                                                      | V | 13320984                           | 13322355 | WBGene00005240 | srh-15   | C50B6.6  | 0.0245695553435716  |
| AGIWUR9319                                                                                     |   |                                    |          |                |          |          |                     |
| CB4856 CT                                                                                      | V | 13322369                           | 13324979 | WBGene00008220 | C50B6.7  | C50B6.7  | 0.406301726782699   |
| AGIWUR37223                                                                                    |   |                                    |          |                |          |          |                     |
| CB4856 CT                                                                                      | V | 13326339                           | 13327634 | WBGene00014710 | C50B6.13 | C50B6.13 |                     |
| -0.198492683949027                                                                             |   | AGIWUR9436;AGIWUR21227             |          |                |          |          |                     |
| CB4856 CT                                                                                      | V | 13327763                           | 13328866 | WBGene00006102 | str-37   | C50B6.12 |                     |
| -0.00823926868029368                                                                           |   | AGIWUR41798                        |          |                |          |          |                     |
| CB4856 CT                                                                                      | V | 13329193                           | 13331019 | WBGene00003719 | nhr-129  | C50B6.14 |                     |
| 0.25747983632411                                                                               |   | AGIWUR41684                        |          |                |          |          |                     |
| CB4856 CT                                                                                      | V | 13331117                           | 13333871 | WBGene00008221 | nhr-168  | C50B6.8  | 0.656937933475101   |
| AGIWUR18922                                                                                    |   |                                    |          |                |          |          |                     |
| CB4856 CT                                                                                      | V | 13336369                           | 13337957 | WBGene00008222 | C50B6.9  | C50B6.9  | 0.206582156071519   |
| AGIWUR40384                                                                                    |   |                                    |          |                |          |          |                     |
| CB4856 CT                                                                                      | V | 13337991                           | 13339718 | WBGene00006072 | str-4    | C50B6.10 |                     |
| 0.0111717795531456                                                                             |   | AGIWUR7313;AGIWUR29755;AGIWUR35114 |          |                |          |          |                     |
| CB4856 CT                                                                                      | V | 13340240                           | 13343040 | WBGene00008223 | lgc-48   | C50B6.11 |                     |
| -0.163046178572229                                                                             |   | AGIWUR4680                         |          |                |          |          |                     |
| CB4856 CT                                                                                      | V | 13346278                           | 13356101 | WBGene00006693 | twk-43   | F32H5.7  | -0.0478499022023442 |

|                                                                                                           |            |    |   |          |          |                |         |          |                     |
|-----------------------------------------------------------------------------------------------------------|------------|----|---|----------|----------|----------------|---------|----------|---------------------|
| AGIWUR1564;AGIWUR6551;AGIWUR16179;AGIWUR26578;AGIWUR32931;AGIWUR33454;AGIWUR35141;AGIWUR37747;AGIWUR40696 | CB4856     | CT | V | 13356101 | 13358079 | WBGene00009347 | F32H5.1 | F32H5.1  | 0.183422402239058   |
| AGIWUR3189                                                                                                | CB4856     | CT | V | 13359334 | 13360024 | WBGene00009349 | F32H5.3 | F32H5.3  | -0.1881312444057596 |
| AGIWUR33526;AGIWUR33920                                                                                   | CB4856     | CT | V | 13361203 | 13363357 | WBGene00009350 | F32H5.4 | F32H5.4  | -0.308614942772465  |
| AGIWUR693;AGIWUR24348;AGIWUR36416                                                                         | CB4856     | CT | V | 13363715 | 13364728 | WBGene00005203 | srg-46  | F32H5.5  | 0.088018914754727   |
| AGIWUR23784                                                                                               | CB4856     | CT | V | 13367252 | 13369990 | WBGene00006016 | srx-125 | F32H5.6  | 0.0332354548398026  |
| AGIWUR7412;AGIWUR9295;AGIWUR12807;AGIWUR17136;AGIWUR28275;AGIWUR43239                                     | CB4856     | CT | V | 13370083 | 13380262 | WBGene00010867 | tag-260 | M04G12.1 |                     |
| 0.138629959929983                                                                                         | CB4856     | CT | V | 13381189 | 13383077 | WBGene00000789 | cpz-2   | M04G12.2 |                     |
| 0.165877573606608                                                                                         | CB4856     | CT | V | 13383019 | 13385898 | WBGene00001554 | gcy-34  | M04G12.3 |                     |
| 0.290128351208481                                                                                         | CB4856     | CT | V | 13386065 | 13391393 | WBGene00010868 | somi-1  | M04G12.4 |                     |
| 0.788014769452336                                                                                         | CB4856     | CT | V | 13404031 | 13406014 | WBGene00009979 | cutl-1  | F53F1.1  | -0.183766004887135  |
| AGIWUR27799                                                                                               | CB4856     | CT | V | 13406816 | 13408265 | WBGene00009980 | F53F1.2 | F53F1.2  | -0.533893477854178  |
| AGIWUR5471                                                                                                | CB4856     | CT | V | 13408242 | 13409832 | WBGene00009981 | F53F1.3 | F53F1.3  | -0.171853114035413  |
| AGIWUR392                                                                                                 | CB4856     | CT | V | 13411077 | 13411717 | WBGene00009982 | F53F1.4 | F53F1.4  | -0.455507165347237  |
| AGIWUR6086;AGIWUR23571                                                                                    | CB4856     | CT | V | 13414902 | 13416121 | WBGene00009983 | cut-2   | F53F1.5  | 0.0442805058287039  |
| AGIWUR19257                                                                                               | CB4856     | CT | V | 13416103 | 13417604 | WBGene00009984 | F53F1.6 | F53F1.6  | 0.444451925757956   |
| AGIWUR40851                                                                                               | CB4856     | CT | V | 13419217 | 13420740 | WBGene00005719 | srv-8   | F53F1.7  | -0.36627326247465   |
| AGIWUR23144                                                                                               | CB4856     | CT | V | 13421140 | 13423147 | WBGene00005720 | srv-9   | F53F1.8  | 0.221905533644158   |
| AGIWUR31461                                                                                               | CB4856     | CT | V | 13423908 | 13425266 | WBGene00005721 | srv-10  | F53F1.9  | 0.276969108468879   |
| AGIWUR11420                                                                                               | CB4856     | CT | V | 13425572 | 13426882 | WBGene00005096 | srd-18  | F53F1.10 |                     |
| 0.161706833203905                                                                                         | AGIWUR9433 |    |   |          |          |                |         |          |                     |

|                                                                                                |          |          |                |          |          |                     |
|------------------------------------------------------------------------------------------------|----------|----------|----------------|----------|----------|---------------------|
| CB4856 CT V                                                                                    | 13430651 | 13432714 | WBGene00005095 | srd-17   | Y2H9A.2  | 0.199019743237832   |
| AGIWUR19936;AGIWUR39164                                                                        |          |          |                |          |          |                     |
| CB4856 CT V                                                                                    | 13433050 | 13437545 | WBGene00003222 | mes-4    | Y2H9A.1  | 0.0335868522694334  |
| AGIWUR3310;AGIWUR3946;AGIWUR40132                                                              |          |          |                |          |          |                     |
| CB4856 CT V                                                                                    | 13445745 | 13448815 | WBGene00012381 | Y2H9A.4  | Y2H9A.4  | -0.214612894217177  |
| AGIWUR16927                                                                                    |          |          |                |          |          |                     |
| CB4856 CT V                                                                                    | 13451197 | 13452968 | WBGene00014744 | F25H9.9  | F25H9.9  | -0.11641144461843   |
| AGIWUR18861;AGIWUR19729                                                                        |          |          |                |          |          |                     |
| CB4856 CT V                                                                                    | 13453634 | 13455447 | WBGene00009134 | lurp-2   | F25H9.1  | 0.092608233092669   |
| AGIWUR10925                                                                                    |          |          |                |          |          |                     |
| CB4856 CT V                                                                                    | 13455748 | 13457506 | WBGene00009136 | lurp-3   | F25H9.3  | 0.026405737926833   |
| AGIWUR12404                                                                                    |          |          |                |          |          |                     |
| CB4856 CT V                                                                                    | 13458083 | 13459504 | WBGene00009135 | F25H9.2  | F25H9.2  | -0.12771840151621   |
| AGIWUR44437                                                                                    |          |          |                |          |          |                     |
| CB4856 CT V                                                                                    | 13459525 | 13461803 | WBGene00009137 | bath-39  | F25H9.4  | -0.250360392581092  |
| AGIWUR26645;AGIWUR30359;AGIWUR38033                                                            |          |          |                |          |          |                     |
| CB4856 CT V                                                                                    | 13463128 | 13467131 | WBGene00001496 | frm-10   | F25H9.5  | -0.114831628455006  |
| AGIWUR33216                                                                                    |          |          |                |          |          |                     |
| CB4856 CT V                                                                                    | 13466924 | 13468361 | WBGene00009138 | F25H9.6  | F25H9.6  | 0.250293803090159   |
| AGIWUR32693                                                                                    |          |          |                |          |          |                     |
| CB4856 CT V                                                                                    | 13468376 | 13469087 | WBGene00009139 | F25H9.7  | F25H9.7  | 0.0204174739072727  |
| AGIWUR43654                                                                                    |          |          |                |          |          |                     |
| CB4856 CT V                                                                                    | 13469066 | 13473679 | WBGene00011692 | T10G3.1  | T10G3.1  | 1.0287581427539     |
| AGIWUR7241                                                                                     |          |          |                |          |          |                     |
| CB4856 CT V                                                                                    | 13474228 | 13476382 | WBGene00045340 | T10G3.8  | T10G3.8  | 0.190923756103312   |
| AGIWUR14677;AGIWUR41060                                                                        |          |          |                |          |          |                     |
| CB4856 CT V                                                                                    | 13477384 | 13479858 | WBGene00011693 | T10G3.2  | T10G3.2  | -0.0473435434215026 |
| AGIWUR8086;AGIWUR22954                                                                         |          |          |                |          |          |                     |
| CB4856 CT V                                                                                    | 13482075 | 13484435 | WBGene00011695 | T10G3.4  | T10G3.4  | 0.0863167620257244  |
| AGIWUR35537                                                                                    |          |          |                |          |          |                     |
| CB4856 CT V                                                                                    | 13487026 | 13489626 | WBGene00011694 | T10G3.3  | T10G3.3  | -0.77135050345205   |
| AGIWUR26800                                                                                    |          |          |                |          |          |                     |
| CB4856 CT V                                                                                    | 13491068 | 13497372 | WBGene00011696 | eea-1    | T10G3.5  | -0.147436846072318  |
| AGIWUR8015;AGIWUR12733;AGIWUR12749;AGIWUR19148;AGIWUR20934;AGIWUR24622;AGIWUR29618;AGIWUR33391 |          |          |                |          |          |                     |
| CB4856 CT V                                                                                    | 13497690 | 13498819 | WBGene00001808 | gut-2    | T10G3.6  | -0.259201156848772  |
| AGIWUR7892;AGIWUR22967;AGIWUR32644;AGIWUR40313;AGIWUR43259;AGIWUR44390                         |          |          |                |          |          |                     |
| CB4856 CT V                                                                                    | 13498786 | 13511718 | WBGene00000233 | avr-15   | R11G10.1 |                     |
| -0.0351036227592303 AGIWUR30125;AGIWUR36531;AGIWUR42208                                        |          |          |                |          |          |                     |
| CB4856 CT V                                                                                    | 13511905 | 13515215 | WBGene00011249 | R11G10.2 |          | R11G10.2            |

|                                                 |          |                                   |                |                 |                     |
|-------------------------------------------------|----------|-----------------------------------|----------------|-----------------|---------------------|
| 0.0135019873668192                              |          | AGIWUR5998;AGIWUR9152;AGIWUR37805 |                |                 |                     |
| CB4856 CT V                                     | 13523530 | 13529658                          | WBGene00044045 | R11G10.3        | R11G10.3            |
| 0.146756713589316                               |          | AGIWUR15842;AGIWUR24465           |                |                 |                     |
| CB4856 CT V                                     | 13529562 | 13530744                          | WBGene00008341 | ttr-44 C56A3.2  | 0.133262555420091   |
| AGIWUR16445                                     |          |                                   |                |                 |                     |
| CB4856 CT V                                     | 13531743 | 13536105                          | WBGene00008342 | frpr-5 C56A3.3  | -0.183959692317238  |
| AGIWUR41300                                     |          |                                   |                |                 |                     |
| CB4856 CT V                                     | 13550520 | 13551810                          | WBGene00008343 | C56A3.4 C56A3.4 | -0.066710273989413  |
| AGIWUR30441;AGIWUR34820;AGIWUR37682;AGIWUR38750 |          |                                   |                |                 |                     |
| CB4856 CT V                                     | 13551911 | 13553373                          | WBGene00008344 | C56A3.5 C56A3.5 | -0.139989238557259  |
| AGIWUR15348                                     |          |                                   |                |                 |                     |
| CB4856 CT V                                     | 13553374 | 13556408                          | WBGene00008345 | C56A3.6 C56A3.6 | 0.133608328643401   |
| AGIWUR25755                                     |          |                                   |                |                 |                     |
| CB4856 CT V                                     | 13557104 | 13559922                          | WBGene00000302 | cav-2 C56A3.7   | -0.0709133258503218 |
| AGIWUR36224                                     |          |                                   |                |                 |                     |
| CB4856 CT V                                     | 13560278 | 13561992                          | WBGene00008346 | C56A3.8 C56A3.8 | -0.0191124375893192 |
| AGIWUR2902;AGIWUR12612;AGIWUR22047              |          |                                   |                |                 |                     |
| CB4856 CT V                                     | 13562105 | 13563913                          | WBGene00001726 | gr1-17 C56A3.1  | 0.101636746774773   |
| AGIWUR20018                                     |          |                                   |                |                 |                     |
| CB4856 CT V                                     | 13565863 | 13566968                          | WBGene00008224 | C50B8.1 C50B8.1 | -0.0266753718140169 |
| AGIWUR40609                                     |          |                                   |                |                 |                     |
| CB4856 CT V                                     | 13566931 | 13568657                          | WBGene00008225 | nuaf-1 C50B8.3  | 0.136356183015003   |
| AGIWUR31957                                     |          |                                   |                |                 |                     |
| CB4856 CT V                                     | 13568850 | 13570030                          | WBGene00000250 | bir-2 C50B8.2   | 0.523117829580364   |
| AGIWUR40461                                     |          |                                   |                |                 |                     |
| CB4856 CT V                                     | 13572037 | 13573423                          | WBGene00008226 | C50B8.4 C50B8.4 | 1.05014661869002    |
| AGIWUR13777                                     |          |                                   |                |                 |                     |
| CB4856 CT V                                     | 13578972 | 13580807                          | WBGene00008228 | C50B8.6 C50B8.6 | -0.0708087040054419 |
| AGIWUR10703                                     |          |                                   |                |                 |                     |
| CB4856 CT V                                     | 13580993 | 13584643                          | WBGene00008227 | C50B8.5 C50B8.5 | -0.113978685257948  |
| AGIWUR40816                                     |          |                                   |                |                 |                     |
| CB4856 CT V                                     | 13584903 | 13585369                          | WBGene00009985 | F53F4.1 F53F4.1 | -0.269240826801713  |
| AGIWUR26165                                     |          |                                   |                |                 |                     |
| CB4856 CT V                                     | 13588206 | 13588479                          | WBGene00045195 | F53F4.17        | F53F4.17            |
| 0.141156495103161                               |          | AGIWUR30395                       |                |                 |                     |
| CB4856 CT V                                     | 13588612 | 13589585                          | WBGene00009986 | F53F4.2 F53F4.2 | 0.154863550206281   |
| AGIWUR10582                                     |          |                                   |                |                 |                     |
| CB4856 CT V                                     | 13592124 | 13593183                          | WBGene00009987 | tbcb-1 F53F4.3  | -0.128006318833568  |
| AGIWUR11278;AGIWUR24957;AGIWUR31578;AGIWUR38807 |          |                                   |                |                 |                     |



|                                                                                                          |          |          |                |          |          |                     |
|----------------------------------------------------------------------------------------------------------|----------|----------|----------------|----------|----------|---------------------|
| CB4856 CT V                                                                                              | 13593383 | 13598269 | WBGene00009988 | F53F4.4  | F53F4.4  | 0.076338738106374   |
| AGIWUR5440;AGIWUR29243;AGIWUR30894                                                                       |          |          |                |          |          |                     |
| CB4856 CT V                                                                                              | 13598331 | 13600982 | WBGene00004328 | rdy-2    | F53F4.6  | 0.196487921803099   |
| AGIWUR10827                                                                                              |          |          |                |          |          |                     |
| CB4856 CT V                                                                                              | 13603276 | 13606701 | WBGene00001479 | fmo-4    | F53F4.5  | 0.146097864721188   |
| AGIWUR8267;AGIWUR11593;AGIWUR14457;AGIWUR15870;AGIWUR23166;AGIWUR32253                                   |          |          |                |          |          |                     |
| CB4856 CT V                                                                                              | 13611337 | 13611888 | WBGene00009995 | F53F4.13 | F53F4.13 |                     |
| 0.301659892037273 AGIWUR23892                                                                            |          |          |                |          |          |                     |
| CB4856 CT V                                                                                              | 13612439 | 13613979 | WBGene00009990 | F53F4.7  | F53F4.7  | 0.00914701241476568 |
| AGIWUR7953;AGIWUR24081;AGIWUR27468;AGIWUR28108;AGIWUR31833;AGIWUR33916                                   |          |          |                |          |          |                     |
| CB4856 CT V                                                                                              | 13614236 | 13617723 | WBGene00009991 | F53F4.8  | F53F4.8  | 0.443578629587844   |
| AGIWUR14887                                                                                              |          |          |                |          |          |                     |
| CB4856 CT V                                                                                              | 13617851 | 13619686 | WBGene00005089 | srd-11   | F53F4.9  | 0.0244455191373074  |
| AGIWUR30493                                                                                              |          |          |                |          |          |                     |
| CB4856 CT V                                                                                              | 13620976 | 13621459 | WBGene00009997 | F53F4.15 | F53F4.15 |                     |
| 0.0603916411307548 AGIWUR2105                                                                            |          |          |                |          |          |                     |
| CB4856 CT V                                                                                              | 13621371 | 13621820 | WBGene00023419 | F53F4.16 | F53F4.16 |                     |
| -0.139053581712536 AGIWUR33852;AGIWUR39333                                                               |          |          |                |          |          |                     |
| CB4856 CT V                                                                                              | 13622107 | 13624525 | WBGene00009993 | F53F4.11 | F53F4.11 |                     |
| -0.156575487550406 AGIWUR5780                                                                            |          |          |                |          |          |                     |
| CB4856 CT V                                                                                              | 13626031 | 13627482 | WBGene00009994 | F53F4.12 | F53F4.12 |                     |
| 0.272382295133104 AGIWUR9467                                                                             |          |          |                |          |          |                     |
| CB4856 CT V                                                                                              | 13627573 | 13629831 | WBGene00009996 | F53F4.14 | F53F4.14 |                     |
| 0.424668144207253 AGIWUR9184                                                                             |          |          |                |          |          |                     |
| CB4856 CT V                                                                                              | 13629798 | 13634220 | WBGene00010426 | H37A05.2 | H37A05.2 |                     |
| 0.39493247367361 AGIWUR38170                                                                             |          |          |                |          |          |                     |
| CB4856 CT V                                                                                              | 13646884 | 13648397 | WBGene00044200 | H37A05.4 | H37A05.4 |                     |
| 0.0897041668897911 AGIWUR575;AGIWUR1900;AGIWUR15836;AGIWUR21231;AGIWUR35946;AGIWUR38688;AGIWUR44826      |          |          |                |          |          |                     |
| CB4856 CT V                                                                                              | 13650262 | 13654129 | WBGene00010425 | lpin-1   | H37A05.1 |                     |
| -0.0873928225840501                                                                                      |          |          |                |          |          |                     |
| AGIWUR2643;AGIWUR4507;AGIWUR9267;AGIWUR16504;AGIWUR18966;AGIWUR23328;AGIWUR29667;AGIWUR30580;AGIWUR31663 |          |          |                |          |          |                     |
| CB4856 CT V                                                                                              | 13661261 | 13664233 | WBGene00010279 | letm-1   | F58G11.1 |                     |
| -0.103885785065216 AGIWUR2941                                                                            |          |          |                |          |          |                     |
| CB4856 CT V                                                                                              | 13665397 | 13669292 | WBGene00010280 | rde-12   | F58G11.2 |                     |
| -0.0796947660429339 AGIWUR4244;AGIWUR13280;AGIWUR18784;AGIWUR25411;AGIWUR28193;AGIWUR32694;AGIWUR43200   |          |          |                |          |          |                     |
| CB4856 CT V                                                                                              | 13669353 | 13671958 | WBGene00010281 | F58G11.3 | F58G11.3 |                     |
| -0.202121594383726 AGIWUR7764                                                                            |          |          |                |          |          |                     |
| CB4856 CT V                                                                                              | 13672597 | 13676024 | WBGene00010282 | F58G11.4 | F58G11.4 |                     |
| 0.800720025306305 AGIWUR45194                                                                            |          |          |                |          |          |                     |

|                                                                         |                                     |          |                |           |                             |
|-------------------------------------------------------------------------|-------------------------------------|----------|----------------|-----------|-----------------------------|
| CB4856 CT V                                                             | 13675988                            | 13678598 | WBGene00006442 | tag-65    | F58G11.5                    |
| 0.0469041418097191                                                      | AGIWUR25787;AGIWUR34042;AGIWUR42886 |          |                |           |                             |
| CB4856 CT V                                                             | 13678875                            | 13681539 | WBGene00010283 | ccz-1     | F58G11.6                    |
| -0.0510444914101917                                                     | AGIWUR38090                         |          |                |           |                             |
| CB4856 CT V                                                             | 13689892                            | 13703330 | WBGene00011326 | T01D3.1   | T01D3.1 0.0629052829958461  |
| AGIWUR6558;AGIWUR11831;AGIWUR40023                                      |                                     |          |                |           |                             |
| CB4856 CT V                                                             | 13704929                            | 13711085 | WBGene00011328 | T01D3.3   | T01D3.3 1.01808085717285    |
| AGIWUR15077;AGIWUR42302                                                 |                                     |          |                |           |                             |
| CB4856 CT V                                                             | 13712854                            | 13716624 | WBGene00011329 | zipt-9    | T01D3.5 -0.292285959338869  |
| AGIWUR16842;AGIWUR19607                                                 |                                     |          |                |           |                             |
| CB4856 CT V                                                             | 13716824                            | 13720402 | WBGene00011330 | T01D3.6   | T01D3.6 0.0791576967123993  |
| AGIWUR15921;AGIWUR25854;AGIWUR27027;AGIWUR29108;AGIWUR29892;AGIWUR30923 |                                     |          |                |           |                             |
| CB4856 CT V                                                             | 13721249                            | 13722196 | WBGene00009425 | sc1-16    | F35E12.1                    |
| -0.167521476398926                                                      | AGIWUR6100                          |          |                |           |                             |
| CB4856 CT V                                                             | 13722254                            | 13724881 | WBGene00009426 | F35E12.2  | F35E12.2                    |
| -0.253896058866559                                                      | AGIWUR16340                         |          |                |           |                             |
| CB4856 CT V                                                             | 13725905                            | 13727014 | WBGene00009427 | fbxa-181  | F35E12.3                    |
| -0.224467444248178                                                      | AGIWUR28078                         |          |                |           |                             |
| CB4856 CT V                                                             | 13727763                            | 13730776 | WBGene00009431 | dct-17    | F35E12.7                    |
| -0.689894594044599                                                      | AGIWUR32743                         |          |                |           |                             |
| CB4856 CT V                                                             | 13731506                            | 13733387 | WBGene00009428 | F35E12.4  | F35E12.4                    |
| 0.1741122026546                                                         | AGIWUR23886                         |          |                |           |                             |
| CB4856 CT V                                                             | 13734118                            | 13736247 | WBGene00009430 | F35E12.6  | F35E12.6                    |
| -0.570202069359222                                                      | AGIWUR2036                          |          |                |           |                             |
| CB4856 CT V                                                             | 13737007                            | 13738474 | WBGene00009429 | irg-5     | F35E12.5                    |
| -0.130048552879746                                                      | AGIWUR30275                         |          |                |           |                             |
| CB4856 CT V                                                             | 13741321                            | 13745127 | WBGene00009433 | F35E12.9  | F35E12.9                    |
| -0.580484667230244                                                      | AGIWUR35609;AGIWUR36025             |          |                |           |                             |
| CB4856 CT V                                                             | 13745696                            | 13748758 | WBGene00009434 | F35E12.10 | F35E12.10                   |
| -0.35637065499338                                                       | AGIWUR6787                          |          |                |           |                             |
| CB4856 CT V                                                             | 13749181                            | 13751972 | WBGene00009432 | cld-9     | F35E12.8                    |
| -0.46865810778003                                                       | AGIWUR25822                         |          |                |           |                             |
| CB4856 CT V                                                             | 13755011                            | 13756409 | WBGene00008986 | F20G2.2   | F20G2.2 -0.0634750573436627 |
| AGIWUR38701                                                             |                                     |          |                |           |                             |
| CB4856 CT V                                                             | 13758090                            | 13759945 | WBGene00044920 | F20G2.7   | F20G2.7 -0.2044911404975    |
| AGIWUR6299;AGIWUR17995;AGIWUR22254;AGIWUR33333;AGIWUR37779;AGIWUR44262  |                                     |          |                |           |                             |
| CB4856 CT V                                                             | 13763077                            | 13765980 | WBGene00008989 | F20G2.6   | F20G2.6 0.184885539879824   |
| AGIWUR30925                                                             |                                     |          |                |           |                             |
| CB4856 CT V                                                             | 13765926                            | 13768552 | WBGene00008987 | F20G2.3   | F20G2.3                     |

|                                                                                                                   |                                                                                 |          |                |          |          |                    |
|-------------------------------------------------------------------------------------------------------------------|---------------------------------------------------------------------------------|----------|----------------|----------|----------|--------------------|
| -0.00603700048756295                                                                                              | AGIWUR23110                                                                     |          |                |          |          |                    |
| CB4856 CT V                                                                                                       | 13769669                                                                        | 13771279 | WBGene00003543 | nas-24   | F20G2.4  | -0.163732687017362 |
| AGIWUR9822                                                                                                        |                                                                                 |          |                |          |          |                    |
| CB4856 CT V                                                                                                       | 13771508                                                                        | 13773695 | WBGene00008988 | F20G2.5  | F20G2.5  | 0.218747225998198  |
| AGIWUR967;AGIWUR2052;AGIWUR2758;AGIWUR5251;AGIWUR8818;AGIWUR31389;AGIWUR32219;AGIWUR33248;AGIWUR34200;AGIWUR38036 |                                                                                 |          |                |          |          |                    |
| CB4856 CT V                                                                                                       | 13775751                                                                        | 13777767 | WBGene00009971 | F53C11.1 |          | F53C11.1           |
| -0.403935802004808                                                                                                | AGIWUR41401                                                                     |          |                |          |          |                    |
| CB4856 CT V                                                                                                       | 13778015                                                                        | 13778592 | WBGene00044921 | F53C11.9 |          | F53C11.9           |
| 0.655245383248559                                                                                                 | AGIWUR658;AGIWUR7729;AGIWUR17506                                                |          |                |          |          |                    |
| CB4856 CT V                                                                                                       | 13778633                                                                        | 13781625 | WBGene00009972 | oac-33   | F53C11.2 |                    |
| 0.0280766466886524                                                                                                | AGIWUR43622                                                                     |          |                |          |          |                    |
| CB4856 CT V                                                                                                       | 13782399                                                                        | 13784102 | WBGene00009973 | F53C11.3 |          | F53C11.3           |
| 0.38103226249414                                                                                                  | AGIWUR21156                                                                     |          |                |          |          |                    |
| CB4856 CT V                                                                                                       | 13784095                                                                        | 13787712 | WBGene00009974 | F53C11.4 |          | F53C11.4           |
| 0.0318271334148168                                                                                                | AGIWUR6856;AGIWUR16078;AGIWUR17928                                              |          |                |          |          |                    |
| CB4856 CT V                                                                                                       | 13787536                                                                        | 13796254 | WBGene00009975 | F53C11.5 |          | F53C11.5           |
| 0.110233122257315                                                                                                 | AGIWUR14374                                                                     |          |                |          |          |                    |
| CB4856 CT V                                                                                                       | 13796641                                                                        | 13800577 | WBGene00006684 | twk-32   | F53C11.6 |                    |
| 0.331646490732084                                                                                                 | AGIWUR19031                                                                     |          |                |          |          |                    |
| CB4856 CT V                                                                                                       | 13800976                                                                        | 13804282 | WBGene00009976 | swan-2   | F53C11.7 |                    |
| 0.0181844936241617                                                                                                | AGIWUR2857                                                                      |          |                |          |          |                    |
| CB4856 CT V                                                                                                       | 13804395                                                                        | 13807237 | WBGene00009977 | swan-1   | F53C11.8 |                    |
| 0.00850048772562451                                                                                               | AGIWUR2829;AGIWUR14332;AGIWUR14646;AGIWUR26673;AGIWUR34285;AGIWUR41780          |          |                |          |          |                    |
| CB4856 CT V                                                                                                       | 13813309                                                                        | 13815272 | WBGene00000447 | ceh-24   | F55B12.1 |                    |
| 0.0856192503459576                                                                                                | AGIWUR29993                                                                     |          |                |          |          |                    |
| CB4856 CT V                                                                                                       | 13815374                                                                        | 13816977 | WBGene00010088 | F55B12.2 |          | F55B12.2           |
| 0.0909577659548715                                                                                                | AGIWUR6477                                                                      |          |                |          |          |                    |
| CB4856 CT V                                                                                                       | 13818132                                                                        | 13822980 | WBGene00004767 | sel-10   | F55B12.3 |                    |
| -0.170357044733041                                                                                                | AGIWUR41;AGIWUR9842;AGIWUR13814;AGIWUR27608;AGIWUR34431;AGIWUR37471;AGIWUR39533 |          |                |          |          |                    |
| CB4856 CT V                                                                                                       | 13823052                                                                        | 13825222 | WBGene00010089 | hpo-31   | F55B12.4 |                    |
| -0.0477856279801543                                                                                               | AGIWUR17921;AGIWUR28404;AGIWUR28902;AGIWUR39706                                 |          |                |          |          |                    |
| CB4856 CT V                                                                                                       | 13828208                                                                        | 13831040 | WBGene00003812 | nrf-5    | F55B12.5 |                    |
| -0.193714944003922                                                                                                | AGIWUR14186                                                                     |          |                |          |          |                    |
| CB4856 CT V                                                                                                       | 13831113                                                                        | 13832905 | WBGene00006210 | str-165  | F55B12.6 |                    |
| -0.180029319145044                                                                                                | AGIWUR23102                                                                     |          |                |          |          |                    |
| CB4856 CT V                                                                                                       | 13834251                                                                        | 13836581 | WBGene00006020 | srx-129  | F55B12.9 |                    |
| -0.186953392736729                                                                                                | AGIWUR19811;AGIWUR37331                                                         |          |                |          |          |                    |
| CB4856 CT V                                                                                                       | 13837473                                                                        | 13838682 | WBGene00006019 | srx-128  | F55B12.7 |                    |

|                                                             |                                                             |          |                |           |                             |
|-------------------------------------------------------------|-------------------------------------------------------------|----------|----------------|-----------|-----------------------------|
| -0.0721831775389505                                         | AGIWUR22941                                                 |          |                |           |                             |
| CB4856 CT V                                                 | 13839769                                                    | 13840281 | WBGene00077439 | F55B12.10 | F55B12.10                   |
| 0.510876038495692                                           | AGIWUR14927;AGIWUR31593;AGIWUR32913;AGIWUR36567;AGIWUR37092 |          |                |           |                             |
| CB4856 CT V                                                 | 13840741                                                    | 13842187 | WBGene00005908 | srx-17    | F55B12.8                    |
| 0.00937774582405915                                         | AGIWUR16351                                                 |          |                |           |                             |
| CB4856 CT V                                                 | 13843447                                                    | 13844962 | WBGene00006021 | srx-130   | F09F3.1 0.219712348690078   |
| AGIWUR12608;AGIWUR12670;AGIWUR20875;AGIWUR44651             |                                                             |          |                |           |                             |
| CB4856 CT V                                                 | 13845436                                                    | 13846727 | WBGene00006022 | srx-131   | F09F3.2 0.125207134597719   |
| AGIWUR14507                                                 |                                                             |          |                |           |                             |
| CB4856 CT V                                                 | 13847230                                                    | 13848414 | WBGene00006023 | srx-132   | F09F3.3 0.322466748164315   |
| AGIWUR7957                                                  |                                                             |          |                |           |                             |
| CB4856 CT V                                                 | 13848679                                                    | 13849969 | WBGene00006024 | srx-133   | F09F3.4 -0.0446675736890709 |
| AGIWUR2081                                                  |                                                             |          |                |           |                             |
| CB4856 CT V                                                 | 13850470                                                    | 13853199 | WBGene00008627 | F09F3.5   | F09F3.5 -0.192144545975578  |
| AGIWUR16921                                                 |                                                             |          |                |           |                             |
| CB4856 CT V                                                 | 13853834                                                    | 13855260 | WBGene00008628 | ttr-21    | F09F3.6 0.281759107897848   |
| AGIWUR29376;AGIWUR31698;AGIWUR33752;AGIWUR34397;AGIWUR39923 |                                                             |          |                |           |                             |
| CB4856 CT V                                                 | 13854878                                                    | 13856476 | WBGene00006025 | srx-134   | F09F3.7 -0.150118799037815  |
| AGIWUR3077                                                  |                                                             |          |                |           |                             |
| CB4856 CT V                                                 | 13857448                                                    | 13858942 | WBGene00006027 | srx-136   | F09F3.12                    |
| -0.291395922291025                                          | AGIWUR12174;AGIWUR19548;AGIWUR37830                         |          |                |           |                             |
| CB4856 CT V                                                 | 13859301                                                    | 13861321 | WBGene00006026 | srx-135   | F09F3.11                    |
| -0.11837412487829                                           | AGIWUR21897                                                 |          |                |           |                             |
| CB4856 CT V                                                 | 13862805                                                    | 13864110 | WBGene00006028 | srx-137   | F09F3.13                    |
| 0.134116446913593                                           | AGIWUR21439                                                 |          |                |           |                             |
| CB4856 CT V                                                 | 13866706                                                    | 13868473 | WBGene00008630 | nhr-175   | F09F3.10                    |
| -0.00563468646064447                                        | AGIWUR37589                                                 |          |                |           |                             |
| CB4856 CT V                                                 | 13869888                                                    | 13872529 | WBGene00014732 | F09F3.8   | F09F3.8 0.704372386900764   |
| AGIWUR18228                                                 |                                                             |          |                |           |                             |
| CB4856 CT V                                                 | 13873153                                                    | 13875891 | WBGene00008629 | cpt-5     | F09F3.9 -0.171973437674184  |
| AGIWUR27803                                                 |                                                             |          |                |           |                             |
| CB4856 CT V                                                 | 13876837                                                    | 13877949 | WBGene00011929 | T22G5.1   | T22G5.1 -0.309441440342772  |
| AGIWUR38579                                                 |                                                             |          |                |           |                             |
| CB4856 CT V                                                 | 13879552                                                    | 13880213 | WBGene00002259 | lbp-7     | T22G5.2 0.0791055794693527  |
| AGIWUR5469                                                  |                                                             |          |                |           |                             |
| CB4856 CT V                                                 | 13880908                                                    | 13883937 | WBGene00011930 | T22G5.3   | T22G5.3 -0.126965068846259  |
| AGIWUR10007                                                 |                                                             |          |                |           |                             |
| CB4856 CT V                                                 | 13887658                                                    | 13889458 | WBGene00011931 | srsx-19   | T22G5.4 0.285116531465016   |
| AGIWUR39026                                                 |                                                             |          |                |           |                             |

|                                              |                                     |          |                |          |           |                     |
|----------------------------------------------|-------------------------------------|----------|----------------|----------|-----------|---------------------|
| CB4856 CT V                                  | 13889918                            | 13890295 | WBGene00004997 | spp-12   | T22G5.7   | 0.369546534287495   |
| AGIWUR10860                                  |                                     |          |                |          |           |                     |
| CB4856 CT V                                  | 13890679                            | 13891364 | WBGene00002260 | lbp-8    | T22G5.6   | -0.335750889215528  |
| AGIWUR7757;AGIWUR22889                       |                                     |          |                |          |           |                     |
| CB4856 CT V                                  | 13893325                            | 13896405 | WBGene00011932 | spt1-3   | T22G5.5   | -0.158595848382251  |
| AGIWUR2196;AGIWUR2376;AGIWUR4449;AGIWUR23193 |                                     |          |                |          |           |                     |
| CB4856 CT V                                  | 13896663                            | 13898488 | WBGene00007362 | cyp-35C1 |           | C06B3.3             |
| -0.48879753738446                            | AGIWUR23062                         |          |                |          |           |                     |
| CB4856 CT V                                  | 13899513                            | 13902653 | WBGene00007361 | oac-3    | C06B3.2   | -0.51754846061151   |
| AGIWUR19326;AGIWUR20418;AGIWUR25380          |                                     |          |                |          |           |                     |
| CB4856 CT V                                  | 13902795                            | 13903886 | WBGene00007360 | C06B3.1  | C06B3.1   | 0.259925293845404   |
| AGIWUR38921                                  |                                     |          |                |          |           |                     |
| CB4856 CT V                                  | 13904611                            | 13905996 | WBGene00007364 | stdh-3   | C06B3.5   | 0.112406327296689   |
| AGIWUR33232                                  |                                     |          |                |          |           |                     |
| CB4856 CT V                                  | 13906492                            | 13908135 | WBGene00007363 | stdh-1   | C06B3.4   | -0.171767363925829  |
| AGIWUR6267                                   |                                     |          |                |          |           |                     |
| CB4856 CT V                                  | 13908133                            | 13909513 | WBGene00007365 | C06B3.6  | C06B3.6   | 1.75808677359626    |
| AGIWUR1890                                   |                                     |          |                |          |           |                     |
| CB4856 CT V                                  | 13909686                            | 13911524 | WBGene00007366 | C06B3.7  | C06B3.7   | -0.0255106815190977 |
| AGIWUR10558                                  |                                     |          |                |          |           |                     |
| CB4856 CT V                                  | 13912080                            | 13915436 | WBGene00001552 | gcy-32   | C06B3.8   | 0.00205298843348789 |
| AGIWUR43888                                  |                                     |          |                |          |           |                     |
| CB4856 CT V                                  | 13916496                            | 13918051 | WBGene00006278 | str-252  | C06B3.9   | 0.0263966684211061  |
| AGIWUR25893                                  |                                     |          |                |          |           |                     |
| CB4856 CT V                                  | 13918641                            | 13920032 | WBGene00006277 | str-250  | C06B3.10  |                     |
| -0.439088887119856                           | AGIWUR13257                         |          |                |          |           |                     |
| CB4856 CT V                                  | 13921030                            | 13922404 | WBGene00005933 | srx-42   | C06B3.11  |                     |
| -0.0704668035491856                          | AGIWUR21430;AGIWUR25384             |          |                |          |           |                     |
| CB4856 CT V                                  | 13924151                            | 13925807 | WBGene00044114 | srx-11   | C06B3.12  |                     |
| 0.158936868626265                            | AGIWUR25293;AGIWUR27699             |          |                |          |           |                     |
| CB4856 CT V                                  | 13926698                            | 13929320 | WBGene00044115 | srx-12   | C06B3.13  |                     |
| 0.151489286718301                            | AGIWUR29606;AGIWUR36139;AGIWUR41790 |          |                |          |           |                     |
| CB4856 CT V                                  | 13929803                            | 13931252 | WBGene00044116 | srx-13   | C06B3.14  |                     |
| -0.258725234665897                           | AGIWUR11485;AGIWUR26810             |          |                |          |           |                     |
| CB4856 CT V                                  | 13931525                            | 13932198 | WBGene00189947 | C06B3.16 |           | C06B3.16            |
| -0.26647661296207                            | AGIWUR3507                          |          |                |          |           |                     |
| CB4856 CT V                                  | 13932575                            | 13934645 | WBGene00011185 | R10D12.1 |           | R10D12.1            |
| 0.493847769354623                            | AGIWUR1456                          |          |                |          |           |                     |
| CB4856 CT V                                  | 13937223                            | 13939602 | WBGene00011197 | srw-145  | R10D12.17 |                     |

|                                                                                                 |                                                            |          |                |           |           |                    |
|-------------------------------------------------------------------------------------------------|------------------------------------------------------------|----------|----------------|-----------|-----------|--------------------|
| 0.356890468168371                                                                               | AGIWUR27930                                                |          |                |           |           |                    |
| CB4856 CT V                                                                                     | 13940139                                                   | 13942182 | WBGene00001062 | dpr-1     | R10D12.2  |                    |
| -0.0734654533831947                                                                             | AGIWUR18986                                                |          |                |           |           |                    |
| CB4856 CT V                                                                                     | 13943462                                                   | 13944589 | WBGene00006018 | srx-127   | R10D12.3  |                    |
| 0.00546809895140665                                                                             | AGIWUR28843                                                |          |                |           |           |                    |
| CB4856 CT V                                                                                     | 13945248                                                   | 13946485 | WBGene00005901 | srx-10    | R10D12.4  |                    |
| 0.0128707603054838                                                                              | AGIWUR36137                                                |          |                |           |           |                    |
| CB4856 CT V                                                                                     | 13946969                                                   | 13948799 | WBGene00011186 | clec-226  | R10D12.5  |                    |
| 0.200366420272189                                                                               | AGIWUR14296                                                |          |                |           |           |                    |
| CB4856 CT V                                                                                     | 13949319                                                   | 13949640 | WBGene00011187 | R10D12.6  | R10D12.6  |                    |
| 0.615168525337275                                                                               | AGIWUR31172                                                |          |                |           |           |                    |
| CB4856 CT V                                                                                     | 13950066                                                   | 13950394 | WBGene00011188 | R10D12.7  | R10D12.7  |                    |
| -0.280645246100822                                                                              | AGIWUR23207                                                |          |                |           |           |                    |
| CB4856 CT V                                                                                     | 13950733                                                   | 13953291 | WBGene00011189 | R10D12.8  | R10D12.8  |                    |
| 0.253250441088566                                                                               | AGIWUR6538                                                 |          |                |           |           |                    |
| CB4856 CT V                                                                                     | 13954277                                                   | 13956176 | WBGene00011190 | swt-6     | R10D12.9  |                    |
| -0.129705937757965                                                                              | AGIWUR4056;AGIWUR12190;AGIWUR26090                         |          |                |           |           |                    |
| CB4856 CT V                                                                                     | 13956161                                                   | 13958347 | WBGene00011191 | R10D12.10 | R10D12.10 |                    |
| -0.0433015271660184                                                                             | AGIWUR7758;AGIWUR23659                                     |          |                |           |           |                    |
| CB4856 CT V                                                                                     | 13958746                                                   | 13961016 | WBGene00011192 | srh-24    | R10D12.11 |                    |
| 0.215050525277571                                                                               | AGIWUR2603;AGIWUR4584;AGIWUR9879                           |          |                |           |           |                    |
| CB4856 CT V                                                                                     | 13961265                                                   | 13961977 | WBGene00011193 | algn-13   | R10D12.12 |                    |
| -0.493981098986474                                                                              | AGIWUR1988                                                 |          |                |           |           |                    |
| CB4856 CT V                                                                                     | 13962417                                                   | 13963840 | WBGene00011194 | R10D12.13 | R10D12.13 |                    |
| -0.119158361504037                                                                              | AGIWUR9954;AGIWUR10705;AGIWUR18062;AGIWUR43283             |          |                |           |           |                    |
| CB4856 CT V                                                                                     | 13963734                                                   | 13965797 | WBGene00011195 | sao-1     | R10D12.14 |                    |
| -0.0674255064796592                                                                             | AGIWUR18990;AGIWUR31397;AGIWUR34082;AGIWUR39963            |          |                |           |           |                    |
| CB4856 CT V                                                                                     | 13979571                                                   | 13980907 | WBGene00045401 | eol-1     | T26F2.3   | 2.34036510531347   |
| AGIWUR22948                                                                                     |                                                            |          |                |           |           |                    |
| CB4856 CT V                                                                                     | 13981568                                                   | 13982971 | WBGene00012058 | T26F2.2   | T26F2.2   | -0.434242496158063 |
| AGIWUR15010                                                                                     |                                                            |          |                |           |           |                    |
| CB4856 CT V                                                                                     | 13985137                                                   | 13987072 | WBGene00001310 | end-1     | F58E10.2  |                    |
| 0.336358429248828                                                                               | AGIWUR8175                                                 |          |                |           |           |                    |
| CB4856 CT V                                                                                     | 13987166                                                   | 14006079 | WBGene00010259 | ric-7     | F58E10.1  |                    |
| 0.04536542955156                                                                                |                                                            |          |                |           |           |                    |
| AGIWUR11260;AGIWUR19271;AGIWUR22169;AGIWUR22854;AGIWUR33583;AGIWUR34027;AGIWUR36597;AGIWUR42820 |                                                            |          |                |           |           |                    |
| CB4856 CT V                                                                                     | 14008768                                                   | 14012218 | WBGene00010260 | ddx-17    | F58E10.3  |                    |
| 0.0405708758256758                                                                              | AGIWUR7766;AGIWUR10134;AGIWUR28864;AGIWUR33511;AGIWUR38214 |          |                |           |           |                    |
| CB4856 CT V                                                                                     | 14012333                                                   | 14013644 | WBGene00000097 | aip-1     | F58E10.4  |                    |

|                                                            |                                                            |          |                |          |          |                     |
|------------------------------------------------------------|------------------------------------------------------------|----------|----------------|----------|----------|---------------------|
| -0.0790016798141444                                        | AGIWUR42494                                                |          |                |          |          |                     |
| CB4856 CT V                                                | 14014701                                                   | 14015850 | WBGene00001311 | end-3    | F58E10.5 |                     |
| -0.079492861196826                                         | AGIWUR20810                                                |          |                |          |          |                     |
| CB4856 CT V                                                | 14015978                                                   | 14017576 | WBGene00010261 | srh-308  | F58E10.6 |                     |
| 0.0188348656072073                                         | AGIWUR22290                                                |          |                |          |          |                     |
| CB4856 CT V                                                | 14018270                                                   | 14018673 | WBGene00003474 | mtl-2    | T08G5.10 |                     |
| 0.157465046563102                                          | AGIWUR31900                                                |          |                |          |          |                     |
| CB4856 CT V                                                | 14018766                                                   | 14020332 | WBGene00011622 | T08G5.1  | T08G5.1  | 0.950732348518189   |
| AGIWUR41045                                                |                                                            |          |                |          |          |                     |
| CB4856 CT V                                                | 14020628                                                   | 14021737 | WBGene00077572 | T08G5.14 |          | T08G5.14            |
| -0.0251515462390586                                        | AGIWUR39576                                                |          |                |          |          |                     |
| CB4856 CT V                                                | 14026336                                                   | 14027484 | WBGene00011624 | T08G5.3  | T08G5.3  | -0.0460046954227025 |
| AGIWUR99;AGIWUR1082;AGIWUR19837;AGIWUR20924;AGIWUR35998    |                                                            |          |                |          |          |                     |
| CB4856 CT V                                                | 14030184                                                   | 14032584 | WBGene00014834 | T08G5.4  | T08G5.4  | 0.0191177341703415  |
| AGIWUR9751;AGIWUR42190                                     |                                                            |          |                |          |          |                     |
| CB4856 CT V                                                | 14033950                                                   | 14034393 | WBGene00002093 | ins-10   | T08G5.12 |                     |
| 0.673707242757345                                          | AGIWUR40111                                                |          |                |          |          |                     |
| CB4856 CT V                                                | 14034323                                                   | 14038372 | WBGene00011625 | vps-39   | T08G5.5  | -0.0501399127318134 |
| AGIWUR2812;AGIWUR16018;AGIWUR25794;AGIWUR38233;AGIWUR44385 |                                                            |          |                |          |          |                     |
| CB4856 CT V                                                | 14038896                                                   | 14040234 | WBGene00050930 | T08G5.13 |          | T08G5.13            |
| -0.116095622013814                                         | AGIWUR11059;AGIWUR16384;AGIWUR30398                        |          |                |          |          |                     |
| CB4856 CT V                                                | 14057840                                                   | 14064529 | WBGene00010250 | F58D12.3 |          | F58D12.3            |
| 0.101212986713233                                          | AGIWUR1597;AGIWUR31940;AGIWUR35221;AGIWUR43868             |          |                |          |          |                     |
| CB4856 CT V                                                | 14067819                                                   | 14071215 | WBGene00045355 | D1086.17 |          | D1086.17            |
| 0.12754059647423                                           | AGIWUR12879;AGIWUR16108;AGIWUR34946;AGIWUR35308            |          |                |          |          |                     |
| CB4856 CT V                                                | 14071646                                                   | 14073719 | WBGene00077448 | D1086.20 |          | D1086.20            |
| -0.137944643085718                                         | AGIWUR546;AGIWUR21272                                      |          |                |          |          |                     |
| CB4856 CT V                                                | 14074456                                                   | 14076725 | WBGene00044081 | D1086.11 |          | D1086.11            |
| 0.134005990841773                                          | AGIWUR9110;AGIWUR31787                                     |          |                |          |          |                     |
| CB4856 CT V                                                | 14079801                                                   | 14081766 | WBGene00008393 | D1086.6  | D1086.6  | -0.0864818585023803 |
| AGIWUR6916;AGIWUR27761                                     |                                                            |          |                |          |          |                     |
| CB4856 CT V                                                | 14082753                                                   | 14083584 | WBGene00044080 | D1086.10 |          | D1086.10            |
| -0.216097960026014                                         | AGIWUR5549                                                 |          |                |          |          |                     |
| CB4856 CT V                                                | 14084270                                                   | 14085811 | WBGene00008394 | D1086.7  | D1086.7  | -0.0171151140339099 |
| AGIWUR3028;AGIWUR13342                                     |                                                            |          |                |          |          |                     |
| CB4856 CT V                                                | 14085889                                                   | 14087169 | WBGene00045405 | D1086.18 |          | D1086.18            |
| 0.949891400202389                                          | AGIWUR34218                                                |          |                |          |          |                     |
| CB4856 CT V                                                | 14088351                                                   | 14088704 | WBGene00045406 | D1086.19 |          | D1086.19            |
| -0.0504376118920913                                        | AGIWUR8143;AGIWUR14209;AGIWUR16516;AGIWUR22654;AGIWUR29990 |          |                |          |          |                     |

|                                      |   |                                                                                             |          |                |                                    |
|--------------------------------------|---|---------------------------------------------------------------------------------------------|----------|----------------|------------------------------------|
| CB4856 CT<br>AGIWUR23610             | V | 14088893                                                                                    | 14090359 | WBGene00008392 | D1086.5 D1086.5 0.843558293696379  |
| CB4856 CT<br>AGIWUR44490             | V | 14090719                                                                                    | 14092435 | WBGene00001864 | him-5 D1086.4 0.205920629437895    |
| CB4856 CT<br>AGIWUR14700             | V | 14092792                                                                                    | 14093986 | WBGene00008390 | D1086.3 D1086.3 -0.798093634694986 |
| CB4856 CT<br>AGIWUR12365             | V | 14094105                                                                                    | 14097088 | WBGene00008395 | D1086.8 D1086.8 0.08116751352512   |
| CB4856 CT<br>AGIWUR4031              | V | 14097038                                                                                    | 14098668 | WBGene00008389 | D1086.2 D1086.2 1.38303564650093   |
| CB4856 CT<br>AGIWUR34537             | V | 14098858                                                                                    | 14100390 | WBGene00008388 | D1086.1 D1086.1 0.55903039363484   |
| CB4856 CT<br>0.292710816699447       | V | 14101186<br>AGIWUR36541                                                                     | 14102821 | WBGene00044082 | D1086.12 D1086.12                  |
| CB4856 CT<br>AGIWUR22373;AGIWUR29291 | V | 14104270                                                                                    | 14106416 | WBGene00008396 | D1086.9 D1086.9 0.341575463711736  |
| CB4856 CT<br>0.097390645801152       | V | 14107811<br>AGIWUR7418;AGIWUR8050;AGIWUR9150;AGIWUR9268;AGIWUR17164;AGIWUR29655;AGIWUR40848 | 14110151 | WBGene00044201 | H39E23.3 H39E23.3                  |
| CB4856 CT<br>1.58586639733138        | V | 14110361<br>AGIWUR10876                                                                     | 14112027 | WBGene00010432 | H39E23.2 H39E23.2                  |
| CB4856 CT<br>0.134892631758317       | V | 14112039<br>AGIWUR16278;AGIWUR16410;AGIWUR19436;AGIWUR27928;AGIWUR32541;AGIWUR41271         | 14141119 | WBGene00003916 | par-1 H39E23.1                     |
| CB4856 CT<br>AGIWUR30614             | V | 14144030                                                                                    | 14145411 | WBGene00007084 | AH10.3 AH10.3 0.391783718177586    |
| CB4856 CT<br>AGIWUR12516             | V | 14146499                                                                                    | 14148784 | WBGene00007082 | acs-10 AH10.1 0.299343494276382    |
| CB4856 CT<br>AGIWUR34461             | V | 14156831                                                                                    | 14157622 | WBGene00007083 | AH10.2 AH10.2 0.367682115187171    |
| CB4856 CT<br>AGIWUR26497             | V | 14157663                                                                                    | 14160862 | WBGene00011364 | T02B5.3 T02B5.3 0.402142437238957  |
| CB4856 CT<br>AGIWUR8800              | V | 14161551                                                                                    | 14162841 | WBGene00005104 | srd-26 T02B5.4 -0.19561343740482   |
| CB4856 CT<br>AGIWUR16187             | V | 14163260                                                                                    | 14166730 | WBGene00011362 | T02B5.1 T02B5.1 0.106113902766886  |
| CB4856 CT<br>AGIWUR27567             | V | 14167228                                                                                    | 14167729 | WBGene00011363 | ocam-1 T02B5.2 0.128745713186678   |
| CB4856 CT<br>AGIWUR44554             | V | 14168362                                                                                    | 14171481 | WBGene00013875 | ZC376.3 ZC376.3 0.104182020141284  |
| CB4856 CT                            | V | 14171645                                                                                    | 14175355 | WBGene00013874 | ZC376.2 ZC376.2 -0.549336543537418 |



|                                  |   |                                                |          |                |           |          |                     |  |
|----------------------------------|---|------------------------------------------------|----------|----------------|-----------|----------|---------------------|--|
| AGIWUR25072                      |   |                                                |          |                |           |          |                     |  |
| CB4856 CT                        | V | 14175517                                       | 14182960 | WBGene00013873 | ZC376.1   | ZC376.1  | 0.505649574413299   |  |
| AGIWUR25901                      |   |                                                |          |                |           |          |                     |  |
| CB4856 CT                        | V | 14183124                                       | 14185667 | WBGene00006613 | trm-1     | ZC376.5  | -0.249286647972069  |  |
| AGIWUR20951                      |   |                                                |          |                |           |          |                     |  |
| CB4856 CT                        | V | 14185691                                       | 14192156 | WBGene00013877 | ZC376.6   | ZC376.6  | -0.0991239931831505 |  |
| AGIWUR30098                      |   |                                                |          |                |           |          |                     |  |
| CB4856 CT                        | V | 14193685                                       | 14197695 | WBGene00013878 | atfs-1    | ZC376.7  | -0.0522474528523844 |  |
| AGIWUR14731                      |   |                                                |          |                |           |          |                     |  |
| CB4856 CT                        | V | 14205776                                       | 14209010 | WBGene00011793 | T16A9.3   | T16A9.3  | -0.0831899124708499 |  |
| AGIWUR801;AGIWUR8622;AGIWUR32892 |   |                                                |          |                |           |          |                     |  |
| CB4856 CT                        | V | 14209170                                       | 14210873 | WBGene00006261 | str-230   | T16A9.2  | 0.477130904776358   |  |
| AGIWUR11289                      |   |                                                |          |                |           |          |                     |  |
| CB4856 CT                        | V | 14215343                                       | 14220730 | WBGene00011794 | nep-21    | T16A9.4  | 0.480802901688783   |  |
| AGIWUR27727                      |   |                                                |          |                |           |          |                     |  |
| CB4856 CT                        | V | 14225397                                       | 14226414 | WBGene00050975 | K02E11.11 |          | K02E11.11           |  |
| -0.0507101706051127              |   | AGIWUR642;AGIWUR3294;AGIWUR20831               |          |                |           |          |                     |  |
| CB4856 CT                        | V | 14232281                                       | 14236076 | WBGene00010510 | ent-3     | K02E11.1 |                     |  |
| 0.277729751914432                |   | AGIWUR24207                                    |          |                |           |          |                     |  |
| CB4856 CT                        | V | 14239942                                       | 14241151 | WBGene00044109 | K02E11.10 |          | K02E11.10           |  |
| -0.381307577722101               |   | AGIWUR33374                                    |          |                |           |          |                     |  |
| CB4856 CT                        | V | 14244204                                       | 14246104 | WBGene00010511 | sre-7     | K02E11.2 |                     |  |
| 0.0393980376219263               |   | AGIWUR19699                                    |          |                |           |          |                     |  |
| CB4856 CT                        | V | 14246276                                       | 14246909 | WBGene00010512 | K02E11.3  |          | K02E11.3            |  |
| 0.0554124052030236               |   | AGIWUR42262                                    |          |                |           |          |                     |  |
| CB4856 CT                        | V | 14247476                                       | 14248137 | WBGene00010513 | K02E11.4  |          | K02E11.4            |  |
| 0.0366417765444789               |   | AGIWUR8828;AGIWUR19022;AGIWUR19695;AGIWUR20713 |          |                |           |          |                     |  |
| CB4856 CT                        | V | 14250627                                       | 14251510 | WBGene00010515 | K02E11.6  |          | K02E11.6            |  |
| -0.00016053243281533             |   | AGIWUR8194;AGIWUR14347;AGIWUR17081             |          |                |           |          |                     |  |
| CB4856 CT                        | V | 14253488                                       | 14254321 | WBGene00010516 | K02E11.7  |          | K02E11.7            |  |
| -0.257963489949276               |   | AGIWUR15018                                    |          |                |           |          |                     |  |
| CB4856 CT                        | V | 14257107                                       | 14259231 | WBGene00009596 | sre-8     | F40G12.1 |                     |  |
| 0.110253007704912                |   | AGIWUR44907                                    |          |                |           |          |                     |  |
| CB4856 CT                        | V | 14259544                                       | 14260931 | WBGene00009597 | F40G12.2  |          | F40G12.2            |  |
| -0.597359042227869               |   | AGIWUR20587                                    |          |                |           |          |                     |  |
| CB4856 CT                        | V | 14261990                                       | 14267317 | WBGene00009598 | F40G12.3  |          | F40G12.3            |  |
| 0.129011181923826                |   | AGIWUR8470                                     |          |                |           |          |                     |  |
| CB4856 CT                        | V | 14267761                                       | 14268639 | WBGene00009599 | F40G12.4  |          | F40G12.4            |  |
| 0.0581003622814293               |   | AGIWUR13152                                    |          |                |           |          |                     |  |

|                                   |                                                            |          |                |           |                            |
|-----------------------------------|------------------------------------------------------------|----------|----------------|-----------|----------------------------|
| CB4856 CT V                       | 14269182                                                   | 14270636 | WBGene00009600 | F40G12.5  | F40G12.5                   |
| 0.745740463859522                 | AGIWUR14463                                                |          |                |           |                            |
| CB4856 CT V                       | 14271143                                                   | 14273047 | WBGene00009601 | F40G12.6  | F40G12.6                   |
| 0.101587073146957                 | AGIWUR11143                                                |          |                |           |                            |
| CB4856 CT V                       | 14275669                                                   | 14276343 | WBGene00009602 | F40G12.7  | F40G12.7                   |
| -0.279671112386271                | AGIWUR28116                                                |          |                |           |                            |
| CB4856 CT V                       | 14278312                                                   | 14279877 | WBGene00009603 | srt-33    | F40G12.8                   |
| 0.128826293565915                 | AGIWUR32323                                                |          |                |           |                            |
| CB4856 CT V                       | 14281120                                                   | 14282322 | WBGene00044002 | srt-74    | F40G12.15                  |
| -0.0598943594443506               | AGIWUR10878;AGIWUR27270                                    |          |                |           |                            |
| CB4856 CT V                       | 14282482                                                   | 14282997 | WBGene00009604 | F40G12.9  | F40G12.9                   |
| 0.0228497657845921                | AGIWUR13071                                                |          |                |           |                            |
| CB4856 CT V                       | 14283528                                                   | 14285327 | WBGene00009605 | F40G12.10 | F40G12.10                  |
| 0.17235014752848                  | AGIWUR42439                                                |          |                |           |                            |
| CB4856 CT V                       | 14286171                                                   | 14288056 | WBGene00009606 | F40G12.11 | F40G12.11                  |
| -0.13926650886247                 | AGIWUR11643                                                |          |                |           |                            |
| CB4856 CT V                       | 14288733                                                   | 14289718 | WBGene00008788 | F14D7.1   | F14D7.1 -0.479089182494853 |
| AGIWUR224;AGIWUR11807;AGIWUR17635 |                                                            |          |                |           |                            |
| CB4856 CT V                       | 14291910                                                   | 14293712 | WBGene00008789 | F14D7.2   | F14D7.2 -0.357596784247807 |
| AGIWUR29824                       |                                                            |          |                |           |                            |
| CB4856 CT V                       | 14295828                                                   | 14298132 | WBGene00008791 | F14D7.4   | F14D7.4 0.18023081131037   |
| AGIWUR2077;AGIWUR35633            |                                                            |          |                |           |                            |
| CB4856 CT V                       | 14299180                                                   | 14299642 | WBGene00008792 | F14D7.5   | F14D7.5 -0.199722182260702 |
| AGIWUR1779                        |                                                            |          |                |           |                            |
| CB4856 CT V                       | 14300014                                                   | 14300561 | WBGene00045331 | F14D7.12  | F14D7.12                   |
| -0.304243496661888                | AGIWUR7767;AGIWUR25853;AGIWUR35920;AGIWUR36552;AGIWUR37897 |          |                |           |                            |
| CB4856 CT V                       | 14301413                                                   | 14306444 | WBGene00008793 | F14D7.6   | F14D7.6 -0.4578402383151   |
| AGIWUR15208                       |                                                            |          |                |           |                            |
| CB4856 CT V                       | 14310389                                                   | 14311236 | WBGene00008798 | F14D7.11  | F14D7.11                   |
| 0.0440096856441698                | AGIWUR2201                                                 |          |                |           |                            |
| CB4856 CT V                       | 14311882                                                   | 14312788 | WBGene00008795 | F14D7.8   | F14D7.8 0.0672164911632471 |
| AGIWUR10018                       |                                                            |          |                |           |                            |
| CB4856 CT V                       | 14313759                                                   | 14314333 | WBGene00009802 | F47B8.1   | F47B8.1 0.581099776312568  |
| AGIWUR30750                       |                                                            |          |                |           |                            |
| CB4856 CT V                       | 14315859                                                   | 14316625 | WBGene00009803 | F47B8.2   | F47B8.2 0.817064512749926  |
| AGIWUR41770                       |                                                            |          |                |           |                            |
| CB4856 CT V                       | 14320546                                                   | 14321313 | WBGene00044194 | F47B8.14  | F47B8.14                   |
| 0.153393056829161                 | AGIWUR7504;AGIWUR9913;AGIWUR32975;AGIWUR38665;AGIWUR41324  |          |                |           |                            |
| CB4856 CT V                       | 14329069                                                   | 14330080 | WBGene00009807 | pepm-1    | F47B8.6 0.0574384500250096 |

|                                                                                                                                             |   |                                                                        |          |                |           |                            |
|---------------------------------------------------------------------------------------------------------------------------------------------|---|------------------------------------------------------------------------|----------|----------------|-----------|----------------------------|
| AGIWUR10391                                                                                                                                 |   |                                                                        |          |                |           |                            |
| CB4856 CT                                                                                                                                   | V | 14331674                                                               | 14332667 | WBGene00009809 | F47B8.8   | F47B8.8 0.0223841876479174 |
| AGIWUR38545                                                                                                                                 |   |                                                                        |          |                |           |                            |
| CB4856 CT                                                                                                                                   | V | 14333416                                                               | 14334803 | WBGene00009808 | srm-4     | F47B8.7 0.195066385584584  |
| AGIWUR33260                                                                                                                                 |   |                                                                        |          |                |           |                            |
| CB4856 CT                                                                                                                                   | V | 14337049                                                               | 14338808 | WBGene00009810 | srm-6     | F47B8.9 0.0733710759140713 |
| AGIWUR8149;AGIWUR29529                                                                                                                      |   |                                                                        |          |                |           |                            |
| CB4856 CT                                                                                                                                   | V | 14343068                                                               | 14346964 | WBGene00009811 | F47B8.10  | F47B8.10                   |
| 0.593356974079746                                                                                                                           |   | AGIWUR30997                                                            |          |                |           |                            |
| CB4856 CT                                                                                                                                   | V | 14347731                                                               | 14350776 | WBGene00013024 | cept-2    | Y49A3A.1                   |
| -0.383196467310432                                                                                                                          |   | AGIWUR16913;AGIWUR33405;AGIWUR42443                                    |          |                |           |                            |
| CB4856 CT                                                                                                                                   | V | 14351207                                                               | 14354421 | WBGene00013025 | vha-13    | Y49A3A.2                   |
| -0.14471816050197                                                                                                                           |   |                                                                        |          |                |           |                            |
| AGIWUR2828;AGIWUR4109;AGIWUR6352;AGIWUR7215;AGIWUR12423;AGIWUR12812;AGIWUR18412;AGIWUR19376;AGIWUR33598;AGIWUR33706;AGIWUR38557;AGIWUR44816 |   |                                                                        |          |                |           |                            |
| CB4856 CT                                                                                                                                   | V | 14354410                                                               | 14355754 | WBGene00013026 | Y49A3A.3  | Y49A3A.3                   |
| 0.472327544207042                                                                                                                           |   | AGIWUR9557                                                             |          |                |           |                            |
| CB4856 CT                                                                                                                                   | V | 14356076                                                               | 14356823 | WBGene00000877 | cyn-1     | Y49A3A.5                   |
| -0.459958189218743                                                                                                                          |   | AGIWUR2731;AGIWUR19749;AGIWUR22880;AGIWUR24716;AGIWUR26930;AGIWUR32649 |          |                |           |                            |
| CB4856 CT                                                                                                                                   | V | 14356900                                                               | 14358390 | WBGene00013027 | Y49A3A.4  | Y49A3A.4                   |
| 0.181830447911913                                                                                                                           |   | AGIWUR38068                                                            |          |                |           |                            |
| CB4856 CT                                                                                                                                   | V | 14373389                                                               | 14375799 | WBGene00006775 | unc-39    | F56A12.1                   |
| 0.675586875757191                                                                                                                           |   | AGIWUR35843                                                            |          |                |           |                            |
| CB4856 CT                                                                                                                                   | V | 14376099                                                               | 14379066 | WBGene00010143 | F56A12.2  | F56A12.2                   |
| 0.0259907139749389                                                                                                                          |   | AGIWUR35255                                                            |          |                |           |                            |
| CB4856 CT                                                                                                                                   | V | 14392240                                                               | 14392772 | WBGene00007618 | C15H11.10 | C15H11.10                  |
| 0.133960560740195                                                                                                                           |   | AGIWUR28622                                                            |          |                |           |                            |
| CB4856 CT                                                                                                                                   | V | 14395070                                                               | 14395749 | WBGene00077576 | C15H11.13 | C15H11.13                  |
| -0.604814734864502                                                                                                                          |   | AGIWUR2315                                                             |          |                |           |                            |
| CB4856 CT                                                                                                                                   | V | 14409078                                                               | 14411986 | WBGene00007614 | gnrr-2    | C15H11.2                   |
| -0.0474599253747208                                                                                                                         |   | AGIWUR36691                                                            |          |                |           |                            |
| CB4856 CT                                                                                                                                   | V | 14412400                                                               | 14415792 | WBGene00003834 | nx-f-1    | C15H11.3                   |
| 0.117269494677789                                                                                                                           |   | AGIWUR12693                                                            |          |                |           |                            |
| CB4856 CT                                                                                                                                   | V | 14415814                                                               | 14416176 | WBGene00007619 | C15H11.11 | C15H11.11                  |
| 0.33794771951564                                                                                                                            |   | AGIWUR30610                                                            |          |                |           |                            |
| CB4856 CT                                                                                                                                   | V | 14416067                                                               | 14417835 | WBGene00003835 | nx-f-2    | C15H11.6                   |
| -0.0363136618581326                                                                                                                         |   | AGIWUR19959                                                            |          |                |           |                            |
| CB4856 CT                                                                                                                                   | V | 14417903                                                               | 14420096 | WBGene00007615 | set-31    | C15H11.5                   |
| -0.331959589324129                                                                                                                          |   | AGIWUR27949                                                            |          |                |           |                            |

|                                                                                   |                                                 |          |                |           |                            |
|-----------------------------------------------------------------------------------|-------------------------------------------------|----------|----------------|-----------|----------------------------|
| CB4856 CT V                                                                       | 14420071                                        | 14421450 | WBGene00000985 | dhs-22    | C15H11.4                   |
| 0.0582631798713309                                                                | AGIWUR10213;AGIWUR15538;AGIWUR27388;AGIWUR40728 |          |                |           |                            |
| CB4856 CT V                                                                       | 14421566                                        | 14422618 | WBGene00003922 | pas-1     | C15H11.7                   |
| -0.117631203366207                                                                | AGIWUR30109;AGIWUR43121;AGIWUR44076             |          |                |           |                            |
| CB4856 CT V                                                                       | 14422720                                        | 14423383 | WBGene00007616 | rpoa-12   | C15H11.8                   |
| -0.311040547161959                                                                | AGIWUR9582;AGIWUR11619;AGIWUR13169              |          |                |           |                            |
| CB4856 CT V                                                                       | 14423776                                        | 14425008 | WBGene00007617 | rrbs-1    | C15H11.9                   |
| -0.17345823272966                                                                 | AGIWUR2187;AGIWUR22700;AGIWUR35444;AGIWUR37023  |          |                |           |                            |
| CB4856 CT V                                                                       | 14429165                                        | 14430500 | WBGene00009079 | F23B12.1  | F23B12.1                   |
| -0.233093230235387                                                                | AGIWUR17727                                     |          |                |           |                            |
| CB4856 CT V                                                                       | 14431310                                        | 14432359 | WBGene00001170 | egl-1     | F23B12.9                   |
| 0.0724343488329477                                                                | AGIWUR33982                                     |          |                |           |                            |
| CB4856 CT V                                                                       | 14434563                                        | 14435743 | WBGene00005706 | sru-43    | F23B12.2                   |
| 0.0650262260273222                                                                | AGIWUR30624;AGIWUR42345                         |          |                |           |                            |
| CB4856 CT V                                                                       | 14441057                                        | 14445346 | WBGene00009081 | F23B12.4  | F23B12.4                   |
| 0.0326156043355468                                                                | AGIWUR26802;AGIWUR27323;AGIWUR44559             |          |                |           |                            |
| CB4856 CT V                                                                       | 14445324                                        | 14447608 | WBGene00009082 | dlat-1    | F23B12.5                   |
| 0.223469360830196                                                                 | AGIWUR13860                                     |          |                |           |                            |
| CB4856 CT V                                                                       | 14447629                                        | 14449587 | WBGene00006465 | fntb-1    | F23B12.6                   |
| -0.132956726452077                                                                | AGIWUR6698;AGIWUR21483;AGIWUR30837              |          |                |           |                            |
| CB4856 CT V                                                                       | 14449697                                        | 14452971 | WBGene00009084 | F23B12.7  | F23B12.7                   |
| 0.0112075023375695                                                                | AGIWUR4829;AGIWUR35599                          |          |                |           |                            |
| CB4856 CT V                                                                       | 14453305                                        | 14456998 | WBGene00000257 | bmk-1     | F23B12.8                   |
| -0.142200791746976                                                                | AGIWUR3443;AGIWUR36706                          |          |                |           |                            |
| CB4856 CT V                                                                       | 14460624                                        | 14461132 | WBGene00008590 | F08H9.2   | F08H9.2 0.305611590839373  |
| AGIWUR5738;AGIWUR9504;AGIWUR13305;AGIWUR15895;AGIWUR18011;AGIWUR38364;AGIWUR39285 |                                                 |          |                |           |                            |
| CB4856 CT V                                                                       | 14461943                                        | 14462809 | WBGene00008591 | F08H9.3   | F08H9.3 1.58056528357729   |
| AGIWUR42607                                                                       |                                                 |          |                |           |                            |
| CB4856 CT V                                                                       | 14463588                                        | 14464428 | WBGene00008592 | F08H9.4   | F08H9.4 0.610443358349052  |
| AGIWUR12207                                                                       |                                                 |          |                |           |                            |
| CB4856 CT V                                                                       | 14465095                                        | 14468246 | WBGene00023515 | srz-97    | F08H9.12                   |
| -0.0904431199510816                                                               | AGIWUR16877;AGIWUR39019;AGIWUR43230             |          |                |           |                            |
| CB4856 CT V                                                                       | 14469191                                        | 14472448 | WBGene00008594 | cllec-57  | F08H9.6 -0.891695781785944 |
| AGIWUR25819;AGIWUR26410                                                           |                                                 |          |                |           |                            |
| CB4856 CT V                                                                       | 14472529                                        | 14474374 | WBGene00008593 | cllec-227 | F08H9.5                    |
| 0.242253948252651                                                                 | AGIWUR12601;AGIWUR28943;AGIWUR34139             |          |                |           |                            |
| CB4856 CT V                                                                       | 14474399                                        | 14476794 | WBGene00008595 | cllec-56  | F08H9.7 -0.362574939514403 |
| AGIWUR8691                                                                        |                                                 |          |                |           |                            |
| CB4856 CT V                                                                       | 14476903                                        | 14479003 | WBGene00008596 | cllec-54  | F08H9.8 0.302315231630457  |

|                                                                       |   |                                                                                   |          |                |          |                             |
|-----------------------------------------------------------------------|---|-----------------------------------------------------------------------------------|----------|----------------|----------|-----------------------------|
| AGIWUR43177                                                           |   |                                                                                   |          |                |          |                             |
| CB4856 CT                                                             | V | 14479284                                                                          | 14482195 | WBGene00008597 | clec-55  | F08H9.9 0.65551083202009    |
| AGIWUR30079                                                           |   |                                                                                   |          |                |          |                             |
| CB4856 CT                                                             | V | 14482287                                                                          | 14482836 | WBGene00194788 | R02D5.10 | R02D5.10                    |
| 0.38197905819692                                                      |   | AGIWUR13960;AGIWUR22681;AGIWUR27498;AGIWUR31073;AGIWUR40594                       |          |                |          |                             |
| CB4856 CT                                                             | V | 14483160                                                                          | 14484346 | WBGene00010977 | R02D5.3  | R02D5.3 0.322286774778448   |
| AGIWUR16897                                                           |   |                                                                                   |          |                |          |                             |
| CB4856 CT                                                             | V | 14508249                                                                          | 14509655 | WBGene00010976 | R02D5.1  | R02D5.1 0.437461122349702   |
| AGIWUR12339;AGIWUR42123                                               |   |                                                                                   |          |                |          |                             |
| CB4856 CT                                                             | V | 14509738                                                                          | 14511123 | WBGene00077577 | R02D5.9  | R02D5.9 0.190836090652543   |
| AGIWUR21673                                                           |   |                                                                                   |          |                |          |                             |
| CB4856 CT                                                             | V | 14518351                                                                          | 14519368 | WBGene00050937 | R02D5.8  | R02D5.8 0.0011058027406996  |
| AGIWUR38956                                                           |   |                                                                                   |          |                |          |                             |
| CB4856 CT                                                             | V | 14519371                                                                          | 14521100 | WBGene00194707 | C53A5.17 | C53A5.17                    |
| -0.2184803361062                                                      |   | AGIWUR3775;AGIWUR8040;AGIWUR11708;AGIWUR13521;AGIWUR25149;AGIWUR25297;AGIWUR29485 |          |                |          |                             |
| CB4856 CT                                                             | V | 14523329                                                                          | 14524129 | WBGene00008262 | ril-1    | C53A5.1 -0.0351725774470175 |
| AGIWUR2119;AGIWUR4729;AGIWUR20901;AGIWUR21355;AGIWUR42930;AGIWUR43238 |   |                                                                                   |          |                |          |                             |
| CB4856 CT                                                             | V | 14525389                                                                          | 14527411 | WBGene00001834 | hda-1    | C53A5.3 0.0436947212517698  |
| AGIWUR5903                                                            |   |                                                                                   |          |                |          |                             |
| CB4856 CT                                                             | V | 14531115                                                                          | 14542893 | WBGene00008265 | kcnl-4   | C53A5.5 -0.232382309697382  |
| AGIWUR4093                                                            |   |                                                                                   |          |                |          |                             |
| CB4856 CT                                                             | V | 14543588                                                                          | 14545866 | WBGene00008266 | C53A5.6  | C53A5.6 -0.0512446497171091 |
| AGIWUR12806                                                           |   |                                                                                   |          |                |          |                             |
| CB4856 CT                                                             | V | 14546873                                                                          | 14554546 | WBGene00008270 | C53A5.13 | C53A5.13                    |
| -0.298771035478584                                                    |   | AGIWUR22437                                                                       |          |                |          |                             |
| CB4856 CT                                                             | V | 14554980                                                                          | 14556287 | WBGene00005204 | srg-47   | C53A5.8 -0.0460436265490944 |
| AGIWUR29829                                                           |   |                                                                                   |          |                |          |                             |
| CB4856 CT                                                             | V | 14557038                                                                          | 14558866 | WBGene00008267 | C53A5.9  | C53A5.9 0.340105943734398   |
| AGIWUR3180                                                            |   |                                                                                   |          |                |          |                             |
| CB4856 CT                                                             | V | 14559612                                                                          | 14561293 | WBGene00008268 | srt-32   | C53A5.10                    |
| 0.174160191409659                                                     |   | AGIWUR6672                                                                        |          |                |          |                             |
| CB4856 CT                                                             | V | 14562565                                                                          | 14564639 | WBGene00008269 | C53A5.11 | C53A5.11                    |
| 2.8376321782908                                                       |   | AGIWUR19518                                                                       |          |                |          |                             |
| CB4856 CT                                                             | V | 14564752                                                                          | 14579719 | WBGene00001519 | gar-3    | Y40H4A.1                    |
| 0.0414894576214824                                                    |   | AGIWUR19736;AGIWUR36424;AGIWUR39730                                               |          |                |          |                             |
| CB4856 CT                                                             | V | 14583306                                                                          | 14585451 | WBGene00012741 | Y40H4A.2 | Y40H4A.2                    |
| 0.0562889834251141                                                    |   | AGIWUR37624                                                                       |          |                |          |                             |
| CB4856 CT                                                             | V | 14591474                                                                          | 14593642 | WBGene00014822 | R11H6.6  | R11H6.6 -0.148799955721627  |
| AGIWUR37957                                                           |   |                                                                                   |          |                |          |                             |

|                                                                                                                                                                                |    |   |          |          |                |           |          |                     |
|--------------------------------------------------------------------------------------------------------------------------------------------------------------------------------|----|---|----------|----------|----------------|-----------|----------|---------------------|
| CB4856                                                                                                                                                                         | CT | V | 14595268 | 14597067 | WBGene00003982 | pes-9     | R11H6.1  | -0.389275335333327  |
| AGIWUR912;AGIWUR12621;AGIWUR13853;AGIWUR21199;AGIWUR22229                                                                                                                      |    |   |          |          |                |           |          |                     |
| CB4856                                                                                                                                                                         | CT | V | 14597939 | 14600092 | WBGene00011250 | R11H6.2   | R11H6.2  | 0.00344366986785261 |
| AGIWUR26564                                                                                                                                                                    |    |   |          |          |                |           |          |                     |
| CB4856                                                                                                                                                                         | CT | V | 14600272 | 14606535 | WBGene00011251 | glb-22    | R11H6.3  | 0.032157040605636   |
| AGIWUR38644                                                                                                                                                                    |    |   |          |          |                |           |          |                     |
| CB4856                                                                                                                                                                         | CT | V | 14609943 | 14610705 | WBGene00011252 | R11H6.4   | R11H6.4  | 0.290919450952892   |
| AGIWUR28376                                                                                                                                                                    |    |   |          |          |                |           |          |                     |
| CB4856                                                                                                                                                                         | CT | V | 14610734 | 14612222 | WBGene00011253 | R11H6.5   | R11H6.5  | 0.0373067361127717  |
| AGIWUR40698                                                                                                                                                                    |    |   |          |          |                |           |          |                     |
| CB4856                                                                                                                                                                         | CT | V | 14612432 | 14613706 | WBGene00009650 | ccnk-1    | F43D2.1  | -0.0143875448689705 |
| AGIWUR32184                                                                                                                                                                    |    |   |          |          |                |           |          |                     |
| CB4856                                                                                                                                                                         | CT | V | 14621135 | 14629384 | WBGene00001986 | hot-1     | F43D2.4  | -0.0463773958334066 |
| AGIWUR27200                                                                                                                                                                    |    |   |          |          |                |           |          |                     |
| CB4856                                                                                                                                                                         | CT | V | 14629377 | 14635180 | WBGene00044191 | F43D2.6   | F43D2.6  | -0.211859656106979  |
| AGIWUR23;AGIWUR4702;AGIWUR8799;AGIWUR11684;AGIWUR13617;AGIWUR14871;AGIWUR23346;AGIWUR30060;AGIWUR30678;AGIWUR30858;AGIWUR31003;AGIWUR31315;AGIWUR31350;AGIWUR32612;AGIWUR34854 |    |   |          |          |                |           |          |                     |
| CB4856                                                                                                                                                                         | CT | V | 14635582 | 14637751 | WBGene00009651 | F43D2.2   | F43D2.2  | -0.482709482793352  |
| AGIWUR14791                                                                                                                                                                    |    |   |          |          |                |           |          |                     |
| CB4856                                                                                                                                                                         | CT | V | 14638945 | 14640015 | WBGene00045516 | F43D2.7   | F43D2.7  | 0.0915442712766357  |
| AGIWUR20996;AGIWUR22378;AGIWUR28161;AGIWUR31836;AGIWUR40482                                                                                                                    |    |   |          |          |                |           |          |                     |
| CB4856                                                                                                                                                                         | CT | V | 14641101 | 14641382 | WBGene00008319 | C54G10.1  |          | C54G10.1            |
| -0.00211365488857851 AGIWUR16483                                                                                                                                               |    |   |          |          |                |           |          |                     |
| CB4856                                                                                                                                                                         | CT | V | 14642739 | 14645979 | WBGene00004337 | rfc-1     | C54G10.2 |                     |
| -0.198416397641644 AGIWUR2489;AGIWUR8541;AGIWUR9916;AGIWUR13984;AGIWUR27850;AGIWUR37721                                                                                        |    |   |          |          |                |           |          |                     |
| CB4856                                                                                                                                                                         | CT | V | 14646739 | 14653464 | WBGene00004060 | pmp-3     | C54G10.3 |                     |
| -0.0192408711670815 AGIWUR27604                                                                                                                                                |    |   |          |          |                |           |          |                     |
| CB4856                                                                                                                                                                         | CT | V | 14653491 | 14658174 | WBGene00008320 | slc-25A29 |          | C54G10.4            |
| -0.173325624863207                                                                                                                                                             |    |   |          |          |                |           |          |                     |
| AGIWUR4735;AGIWUR15437;AGIWUR24609;AGIWUR28968;AGIWUR33112;AGIWUR38903;AGIWUR39305;AGIWUR40437;AGIWUR40699                                                                     |    |   |          |          |                |           |          |                     |
| CB4856                                                                                                                                                                         | CT | V | 14661305 | 14662928 | WBGene00005242 | srh-17    | C47E8.2  | 0.22198093069526    |
| AGIWUR38401                                                                                                                                                                    |    |   |          |          |                |           |          |                     |
| CB4856                                                                                                                                                                         | CT | V | 14663306 | 14665927 | WBGene00008146 | C47E8.9   | C47E8.9  | 0.493351278355092   |
| AGIWUR16984;AGIWUR29136;AGIWUR33718                                                                                                                                            |    |   |          |          |                |           |          |                     |
| CB4856                                                                                                                                                                         | CT | V | 14666005 | 14667158 | WBGene00008141 | C47E8.1   | C47E8.1  | -0.0496764981633171 |
| AGIWUR3716;AGIWUR6200;AGIWUR12161;AGIWUR42797                                                                                                                                  |    |   |          |          |                |           |          |                     |
| CB4856                                                                                                                                                                         | CT | V | 14667897 | 14668743 | WBGene00044216 | C47E8.10  |          | C47E8.10            |
| -0.330949197230828 AGIWUR377;AGIWUR3153;AGIWUR17976;AGIWUR22180;AGIWUR31385                                                                                                    |    |   |          |          |                |           |          |                     |
| CB4856                                                                                                                                                                         | CT | V | 14680314 | 14683751 | WBGene00008142 | C47E8.3   | C47E8.3  | -0.138797830207089  |

|                                                                        |    |   |                                                          |          |                |           |           |                     |
|------------------------------------------------------------------------|----|---|----------------------------------------------------------|----------|----------------|-----------|-----------|---------------------|
| AGIWUR16754                                                            |    |   |                                                          |          |                |           |           |                     |
| CB4856                                                                 | CT | V | 14683706                                                 | 14685528 | WBGene00008143 | C47E8.4   | C47E8.4   | -0.0961784159903978 |
| AGIWUR36395                                                            |    |   |                                                          |          |                |           |           |                     |
| CB4856                                                                 | CT | V | 14684918                                                 | 14688543 | WBGene00000915 | daf-21    | C47E8.5   | -0.121301794097392  |
| AGIWUR9991;AGIWUR14975;AGIWUR21712;AGIWUR29884;AGIWUR30998;AGIWUR37657 |    |   |                                                          |          |                |           |           |                     |
| CB4856                                                                 | CT | V | 14688616                                                 | 14688959 | WBGene00044180 | C47E8.11  | C47E8.11  |                     |
| -0.121745863701721                                                     |    |   | AGIWUR297;AGIWUR6077;AGIWUR42319;AGIWUR42457;AGIWUR43490 |          |                |           |           |                     |
| CB4856                                                                 | CT | V | 14689154                                                 | 14691861 | WBGene00008144 | gasr-8    | C47E8.6   | 0.253486921067353   |
| AGIWUR32623                                                            |    |   |                                                          |          |                |           |           |                     |
| CB4856                                                                 | CT | V | 14691854                                                 | 14697107 | WBGene00006836 | unc-112   | C47E8.7   | -0.0575062033737446 |
| AGIWUR188;AGIWUR26949;AGIWUR36523                                      |    |   |                                                          |          |                |           |           |                     |
| CB4856                                                                 | CT | V | 14698957                                                 | 14707601 | WBGene00008145 | set-5     | C47E8.8   | -0.301743609871238  |
| AGIWUR23099                                                            |    |   |                                                          |          |                |           |           |                     |
| CB4856                                                                 | CT | V | 14711949                                                 | 14712296 | WBGene00014819 | R08A2.6   | R08A2.6   | 0.0253269654451138  |
| AGIWUR8279;AGIWUR14356;AGIWUR25788;AGIWUR32369;AGIWUR34440             |    |   |                                                          |          |                |           |           |                     |
| CB4856                                                                 | CT | V | 14712663                                                 | 14714072 | WBGene00011136 | R08A2.5   | R08A2.5   | 0.0279687558090922  |
| AGIWUR32248                                                            |    |   |                                                          |          |                |           |           |                     |
| CB4856                                                                 | CT | V | 14714207                                                 | 14715720 | WBGene00011133 | R08A2.2   | R08A2.2   | -0.0944605559192384 |
| AGIWUR28225;AGIWUR36004                                                |    |   |                                                          |          |                |           |           |                     |
| CB4856                                                                 | CT | V | 14718601                                                 | 14719591 | WBGene00011132 | R08A2.1   | R08A2.1   | 0.0631099096244121  |
| AGIWUR23398                                                            |    |   |                                                          |          |                |           |           |                     |
| CB4856                                                                 | CT | V | 14723324                                                 | 14724766 | WBGene00011137 | R08A2.7   | R08A2.7   | 0.701101373560219   |
| AGIWUR11484                                                            |    |   |                                                          |          |                |           |           |                     |
| CB4856                                                                 | CT | V | 14726907                                                 | 14727328 | WBGene00013046 | Y50E8A.1  | Y50E8A.1  |                     |
| 0.341245366402745                                                      |    |   | AGIWUR10947                                              |          |                |           |           |                     |
| CB4856                                                                 | CT | V | 14728441                                                 | 14728854 | WBGene00013047 | Y50E8A.2  | Y50E8A.2  |                     |
| -0.206407968078995                                                     |    |   | AGIWUR18648                                              |          |                |           |           |                     |
| CB4856                                                                 | CT | V | 14729643                                                 | 14731129 | WBGene00003861 | oig-3     | Y50E8A.3  |                     |
| 0.439390075606596                                                      |    |   | AGIWUR18726                                              |          |                |           |           |                     |
| CB4856                                                                 | CT | V | 14731095                                                 | 14734237 | WBGene00006795 | unc-61    | Y50E8A.4  |                     |
| -0.00204726520459264                                                   |    |   | AGIWUR12148;AGIWUR21715;AGIWUR34974;AGIWUR39479          |          |                |           |           |                     |
| CB4856                                                                 | CT | V | 14734660                                                 | 14736169 | WBGene00013048 | Y50E8A.5  | Y50E8A.5  |                     |
| 0.000118825749085616                                                   |    |   | AGIWUR25169                                              |          |                |           |           |                     |
| CB4856                                                                 | CT | V | 14738542                                                 | 14741326 | WBGene00013049 | Y50E8A.6  | Y50E8A.6  |                     |
| -0.170015096676273                                                     |    |   | AGIWUR24930                                              |          |                |           |           |                     |
| CB4856                                                                 | CT | V | 14745684                                                 | 14748708 | WBGene00013050 | lip1-8    | Y50E8A.7  |                     |
| -0.352151227308975                                                     |    |   | AGIWUR39197                                              |          |                |           |           |                     |
| CB4856                                                                 | CT | V | 14758785                                                 | 14765831 | WBGene00013056 | Y50E8A.14 | Y50E8A.14 |                     |
| 0.227938090812051                                                      |    |   | AGIWUR27161;AGIWUR30646                                  |          |                |           |           |                     |

|                                                                       |                                                                      |          |                |           |           |                    |
|-----------------------------------------------------------------------|----------------------------------------------------------------------|----------|----------------|-----------|-----------|--------------------|
| CB4856 CT V                                                           | 14773258                                                             | 14777697 | WBGene00001817 | haf-7     | Y50E8A.16 |                    |
| -0.187906610888961                                                    | AGIWUR43772                                                          |          |                |           |           |                    |
| CB4856 CT V                                                           | 14778336                                                             | 14779714 | WBGene00013052 | scrm-7    | Y50E8A.9  |                    |
| -0.137622897617117                                                    | AGIWUR24090                                                          |          |                |           |           |                    |
| CB4856 CT V                                                           | 14779996                                                             | 14781078 | WBGene00013053 | Y50E8A.10 | Y50E8A.10 |                    |
| -0.236514561421512                                                    | AGIWUR40189                                                          |          |                |           |           |                    |
| CB4856 CT V                                                           | 14781493                                                             | 14782209 | WBGene00013054 | Y50E8A.11 | Y50E8A.11 |                    |
| -0.086408975295504                                                    | AGIWUR3125;AGIWUR4148;AGIWUR20735;AGIWUR22683                        |          |                |           |           |                    |
| CB4856 CT V                                                           | 14782658                                                             | 14784065 | WBGene00013055 | Y50E8A.12 | Y50E8A.12 |                    |
| 0.0125472570165162                                                    | AGIWUR9036                                                           |          |                |           |           |                    |
| CB4856 CT V                                                           | 14784167                                                             | 14815659 | WBGene00008183 | rin-1     | C48G7.3   | -0.109594552133242 |
| AGIWUR11451;AGIWUR18250;AGIWUR32306                                   |                                                                      |          |                |           |           |                    |
| CB4856 CT V                                                           | 14821853                                                             | 14824453 | WBGene00012291 | W06A7.2   | W06A7.2   | -0.398680066614169 |
| AGIWUR26273                                                           |                                                                      |          |                |           |           |                    |
| CB4856 CT V                                                           | 14824664                                                             | 14829533 | WBGene00012293 | W06A7.4   | W06A7.4   | -0.220942853589499 |
| AGIWUR11198                                                           |                                                                      |          |                |           |           |                    |
| CB4856 CT V                                                           | 14829177                                                             | 14847413 | WBGene00004336 | ret-1     | W06A7.3   | 0.0583611013924039 |
| AGIWUR4614;AGIWUR9051;AGIWUR32940;AGIWUR33542;AGIWUR39865;AGIWUR43561 |                                                                      |          |                |           |           |                    |
| CB4856 CT V                                                           | 14852826                                                             | 14858596 | WBGene00013883 | npr-13    | ZC412.1   | -0.485555491844471 |
| AGIWUR24587                                                           |                                                                      |          |                |           |           |                    |
| CB4856 CT V                                                           | 14863168                                                             | 14867992 | WBGene00001540 | gcy-14    | ZC412.2   | 0.419218437238075  |
| AGIWUR25373                                                           |                                                                      |          |                |           |           |                    |
| CB4856 CT V                                                           | 14868645                                                             | 14871547 | WBGene00013884 | ZC412.3   | ZC412.3   | -0.146840036672689 |
| AGIWUR22737;AGIWUR26775;AGIWUR32462;AGIWUR32846;AGIWUR41774           |                                                                      |          |                |           |           |                    |
| CB4856 CT V                                                           | 14874198                                                             | 14875470 | WBGene00013886 | ZC412.5   | ZC412.5   | 0.21846959191385   |
| AGIWUR9631                                                            |                                                                      |          |                |           |           |                    |
| CB4856 CT V                                                           | 14875945                                                             | 14876824 | WBGene00050943 | ZC412.10  | ZC412.10  |                    |
| 0.176220128877475                                                     | AGIWUR19669;AGIWUR20199;AGIWUR25392;AGIWUR38413;AGIWUR41778          |          |                |           |           |                    |
| CB4856 CT V                                                           | 14884585                                                             | 14884880 | WBGene00044272 | nspa-4    | H12D21.13 |                    |
| 0.368455383957702                                                     | AGIWUR1631;AGIWUR9028;AGIWUR23094;AGIWUR23657;AGIWUR31671            |          |                |           |           |                    |
| CB4856 CT V                                                           | 14891450                                                             | 14893435 | WBGene00010380 | mpst-2    | H12D21.4  |                    |
| 0.662143999066029                                                     | AGIWUR3938                                                           |          |                |           |           |                    |
| CB4856 CT V                                                           | 14894053                                                             | 14894798 | WBGene00010381 | H12D21.5  | H12D21.5  |                    |
| -0.0923529455809291                                                   | AGIWUR18903;AGIWUR37094;AGIWUR42491                                  |          |                |           |           |                    |
| CB4856 CT V                                                           | 14895647                                                             | 14899013 | WBGene00010383 | mpst-3    | H12D21.7  |                    |
| -0.233055453256149                                                    | AGIWUR7967                                                           |          |                |           |           |                    |
| CB4856 CT V                                                           | 14899791                                                             | 14911929 | WBGene00010386 | H12D21.10 | H12D21.10 |                    |
| -0.159806545050525                                                    | AGIWUR4311;AGIWUR6332;AGIWUR9362;AGIWUR10420;AGIWUR32434;AGIWUR38707 |          |                |           |           |                    |
| CB4856 CT V                                                           | 14915906                                                             | 14917682 | WBGene00010387 | H12D21.11 | H12D21.11 |                    |



|                                                             |                                     |          |                |          |          |                    |
|-------------------------------------------------------------|-------------------------------------|----------|----------------|----------|----------|--------------------|
| 0.0998094761414672                                          | AGIWUR28713                         |          |                |          |          |                    |
| CB4856 CT V                                                 | 14917735                            | 14921609 | WBGene00012364 | zmp-4    | W09D12.1 |                    |
| 0.28971148812963                                            | AGIWUR31014                         |          |                |          |          |                    |
| CB4856 CT V                                                 | 14921988                            | 14924204 | WBGene00005211 | srg-54   | W09D12.3 |                    |
| 0.0993896597895443                                          | AGIWUR10044;AGIWUR13039;AGIWUR19865 |          |                |          |          |                    |
| CB4856 CT V                                                 | 14926710                            | 14928342 | WBGene00005212 | srg-55   | W09D12.2 |                    |
| 0.108476714358321                                           | AGIWUR15180                         |          |                |          |          |                    |
| CB4856 CT V                                                 | 14936898                            | 14939367 | WBGene00044176 | C30G7.2  | C30G7.2  | -0.145104990488072 |
| AGIWUR15345;AGIWUR19514;AGIWUR20514;AGIWUR20840;AGIWUR40778 |                                     |          |                |          |          |                    |
| CB4856 CT V                                                 | 14942137                            | 14945704 | WBGene00044177 | C30G7.3  | C30G7.3  | 0.117193588350937  |
| AGIWUR41197                                                 |                                     |          |                |          |          |                    |
| CB4856 CT V                                                 | 14946622                            | 14947229 | WBGene00044178 | C30G7.4  | C30G7.4  | 0.432317765181542  |
| AGIWUR30727;AGIWUR32223;AGIWUR44853                         |                                     |          |                |          |          |                    |
| CB4856 CT V                                                 | 14949777                            | 14952796 | WBGene00001852 | hil-1    | C30G7.1  | 1.70506740376024   |
| AGIWUR6850                                                  |                                     |          |                |          |          |                    |
| CB4856 CT V                                                 | 14953115                            | 14954733 | WBGene00044179 | C30G7.5  | C30G7.5  | 0.141942537825051  |
| AGIWUR13663;AGIWUR24010                                     |                                     |          |                |          |          |                    |
| CB4856 CT V                                                 | 14971436                            | 14972419 | WBGene00008522 | F02D8.5  | F02D8.5  | 0.423969308500297  |
| AGIWUR7448                                                  |                                     |          |                |          |          |                    |
| CB4856 CT V                                                 | 14972907                            | 14978779 | WBGene00008520 | F02D8.1  | F02D8.1  | 0.0570570731188127 |
| AGIWUR14274                                                 |                                     |          |                |          |          |                    |
| CB4856 CT V                                                 | 14978505                            | 14980159 | WBGene00001701 | grd-12   | F02D8.2  | 0.0881304126758149 |
| AGIWUR8753                                                  |                                     |          |                |          |          |                    |
| CB4856 CT V                                                 | 14980354                            | 14982626 | WBGene00006960 | xbx-1    | F02D8.3  | -0.156198017008661 |
| AGIWUR25693                                                 |                                     |          |                |          |          |                    |
| CB4856 CT V                                                 | 14984893                            | 14987571 | WBGene00008521 | F02D8.4  | F02D8.4  | 0.0320682470537257 |
| AGIWUR34606                                                 |                                     |          |                |          |          |                    |
| CB4856 CT V                                                 | 14987556                            | 14991024 | WBGene00011318 | cdt-2    | T01C3.1  | 0.0270355349539528 |
| AGIWUR15169                                                 |                                     |          |                |          |          |                    |
| CB4856 CT V                                                 | 14991168                            | 14991649 | WBGene00011319 | T01C3.2  | T01C3.2  | -0.317306746552397 |
| AGIWUR38466                                                 |                                     |          |                |          |          |                    |
| CB4856 CT V                                                 | 14991707                            | 14992677 | WBGene00011320 | T01C3.3  | T01C3.3  | -0.16652768188991  |
| AGIWUR20486                                                 |                                     |          |                |          |          |                    |
| CB4856 CT V                                                 | 14993838                            | 14995201 | WBGene00011321 | fil-1    | T01C3.4  | 3.38197525776209   |
| AGIWUR31420                                                 |                                     |          |                |          |          |                    |
| CB4856 CT V                                                 | 14996536                            | 14998121 | WBGene00011322 | irld-14  | T01C3.5  | 0.178967119899989  |
| AGIWUR1135                                                  |                                     |          |                |          |          |                    |
| CB4856 CT V                                                 | 14998991                            | 15000029 | WBGene00011325 | T01C3.11 | T01C3.11 |                    |
| 0.274417491470151                                           | AGIWUR35806                         |          |                |          |          |                    |

|                                                                       |          |          |                |          |           |                     |
|-----------------------------------------------------------------------|----------|----------|----------------|----------|-----------|---------------------|
| CB4856 CT V                                                           | 15000011 | 15000594 | WBGene00004485 | rps-16   | T01C3.6   | 0.00861498604758104 |
| AGIWUR8459;AGIWUR18895                                                |          |          |                |          |           |                     |
| CB4856 CT V                                                           | 15000653 | 15002273 | WBGene00001423 | fib-1    | T01C3.7   | -0.022767251915301  |
| AGIWUR20438;AGIWUR21536;AGIWUR25217                                   |          |          |                |          |           |                     |
| CB4856 CT V                                                           | 15002543 | 15005055 | WBGene00011323 | mut-15   | T01C3.8   | -0.109111878175771  |
| AGIWUR16375                                                           |          |          |                |          |           |                     |
| CB4856 CT V                                                           | 15005100 | 15006400 | WBGene00011324 | T01C3.9  | T01C3.9   | 0.00178789346914776 |
| AGIWUR28084                                                           |          |          |                |          |           |                     |
| CB4856 CT V                                                           | 15006412 | 15011660 | WBGene00003775 | nmr-2    | T01C3.10  |                     |
| 0.0734582763663285                                                    |          |          |                |          |           |                     |
| AGIWUR2690;AGIWUR21972                                                |          |          |                |          |           |                     |
| CB4856 CT V                                                           | 15011870 | 15014222 | WBGene00008832 | obr-2    | F14H8.1   | 0.133075125420078   |
| AGIWUR36992                                                           |          |          |                |          |           |                     |
| CB4856 CT V                                                           | 15019224 | 15020325 | WBGene00008833 | F14H8.2  | F14H8.2   | -0.133844961983886  |
| AGIWUR22268                                                           |          |          |                |          |           |                     |
| CB4856 CT V                                                           | 15021032 | 15022049 | WBGene00008835 | F14H8.5  | F14H8.5   | 0.107257815386692   |
| AGIWUR36821                                                           |          |          |                |          |           |                     |
| CB4856 CT V                                                           | 15023844 | 15025150 | WBGene00008834 | F14H8.4  | F14H8.4   | -0.152123790387652  |
| AGIWUR23604                                                           |          |          |                |          |           |                     |
| CB4856 CT V                                                           | 15025740 | 15031473 | WBGene00000562 | cng-1    | F14H8.6   | 0.17888663085437    |
| AGIWUR33769                                                           |          |          |                |          |           |                     |
| CB4856 CT V                                                           | 15039152 | 15048207 | WBGene00004747 | sdc-3    | C25D7.3   | -0.050261300424566  |
| AGIWUR2845                                                            |          |          |                |          |           |                     |
| CB4856 CT V                                                           | 15051011 | 15052530 | WBGene00007716 | fbxa-82  | C25D7.4   | 0.213591821999358   |
| AGIWUR10372                                                           |          |          |                |          |           |                     |
| CB4856 CT V                                                           | 15053765 | 15056280 | WBGene00007717 | C25D7.5  | C25D7.5   | -0.4729321536093    |
| AGIWUR24839                                                           |          |          |                |          |           |                     |
| CB4856 CT V                                                           | 15056289 | 15056744 | WBGene00050940 | C25D7.16 |           | C25D7.16            |
| 0.170630845529652                                                     |          |          |                |          |           |                     |
| AGIWUR9975                                                            |          |          |                |          |           |                     |
| CB4856 CT V                                                           | 15056719 | 15059599 | WBGene00003155 | mcm-3    | C25D7.6   | -0.121785610449339  |
| AGIWUR8062;AGIWUR8850;AGIWUR19068;AGIWUR40939;AGIWUR41661;AGIWUR43165 |          |          |                |          |           |                     |
| CB4856 CT V                                                           | 15060249 | 15061530 | WBGene00007722 | C25D7.15 |           | C25D7.15            |
| 0.0204503991434226                                                    |          |          |                |          |           |                     |
| AGIWUR122;AGIWUR3050;AGIWUR3052;AGIWUR26496;AGIWUR34917               |          |          |                |          |           |                     |
| CB4856 CT V                                                           | 15061488 | 15064087 | WBGene00004308 | rap-2    | C25D7.7   | -0.207840787506079  |
| AGIWUR28629                                                           |          |          |                |          |           |                     |
| CB4856 CT V                                                           | 15066298 | 15067464 | WBGene00007718 | otub-1   | C25D7.8   | -0.143198911749714  |
| AGIWUR22406                                                           |          |          |                |          |           |                     |
| CB4856 CT V                                                           | 15067465 | 15068581 | WBGene00007720 | C25D7.10 |           | C25D7.10            |
| -0.0505986347110845                                                   |          |          |                |          |           |                     |
| AGIWUR30033                                                           |          |          |                |          |           |                     |
| CB4856 CT V                                                           | 15068678 | 15069504 | WBGene00001021 | dnj-3    | C01G10.12 |                     |

|                     |                                                             |          |                |                 |                    |
|---------------------|-------------------------------------------------------------|----------|----------------|-----------------|--------------------|
| -0.203705564279922  | AGIWUR17693                                                 |          |                |                 |                    |
| CB4856 CT V         | 15071748                                                    | 15080152 | WBGene00006808 | unc-76          | C01G10.11          |
| -0.0449442774797726 | AGIWUR3430;AGIWUR13249;AGIWUR13398;AGIWUR42081              |          |                |                 |                    |
| CB4856 CT V         | 15080134                                                    | 15082533 | WBGene00007237 | C01G10.10       | C01G10.10          |
| -0.20598268029495   | AGIWUR17288                                                 |          |                |                 |                    |
| CB4856 CT V         | 15082530                                                    | 15084139 | WBGene00007236 | C01G10.9        | C01G10.9           |
| -0.299578090691766  | AGIWUR42749                                                 |          |                |                 |                    |
| CB4856 CT V         | 15084059                                                    | 15085382 | WBGene00007235 | C01G10.8        | C01G10.8           |
| -0.211355684367346  | AGIWUR24212;AGIWUR27098;AGIWUR27860;AGIWUR40458;AGIWUR43962 |          |                |                 |                    |
| CB4856 CT V         | 15085747                                                    | 15087064 | WBGene00007234 | C01G10.7        | C01G10.7           |
| -0.14534351772029   | AGIWUR22086                                                 |          |                |                 |                    |
| CB4856 CT V         | 15087656                                                    | 15088336 | WBGene00007233 | C01G10.6        | C01G10.6           |
| -0.251641694920249  | AGIWUR21700                                                 |          |                |                 |                    |
| CB4856 CT V         | 15088427                                                    | 15088699 | WBGene00077583 | C01G10.18       | C01G10.18          |
| 0.123012096430199   | AGIWUR32231                                                 |          |                |                 |                    |
| CB4856 CT V         | 15090757                                                    | 15091062 | WBGene00044658 | C01G10.17       | C01G10.17          |
| -0.205211643967157  | AGIWUR31764                                                 |          |                |                 |                    |
| CB4856 CT V         | 15092966                                                    | 15094338 | WBGene00007241 | C01G10.16       | C01G10.16          |
| -0.459811979140916  | AGIWUR38976                                                 |          |                |                 |                    |
| CB4856 CT V         | 15095049                                                    | 15097452 | WBGene00005969 | srx-78          | C01G10.3           |
| 0.0308266914510016  | AGIWUR38301                                                 |          |                |                 |                    |
| CB4856 CT V         | 15097674                                                    | 15099554 | WBGene00005970 | srx-79          | C01G10.2           |
| 0.232744687371048   | AGIWUR43742                                                 |          |                |                 |                    |
| CB4856 CT V         | 15099747                                                    | 15104389 | WBGene00007230 | C01G10.1        | C01G10.1           |
| -0.229196694193673  | AGIWUR43126                                                 |          |                |                 |                    |
| CB4856 CT V         | 15104724                                                    | 15105197 | WBGene00077584 | C01G10.19       | C01G10.19          |
| -0.0899300330420765 | AGIWUR22856                                                 |          |                |                 |                    |
| CB4856 CT V         | 15106094                                                    | 15106473 | WBGene00007238 | C01G10.13       | C01G10.13          |
| -0.101200794726191  | AGIWUR36941                                                 |          |                |                 |                    |
| CB4856 CT V         | 15109577                                                    | 15110345 | WBGene00013566 | Y75B12A.2       | Y75B12A.2          |
| -0.222661792782898  | AGIWUR5674                                                  |          |                |                 |                    |
| CB4856 CT V         | 15111960                                                    | 15113628 | WBGene00011342 | T01G5.7 T01G5.7 | -0.412683161975758 |
| AGIWUR41464         |                                                             |          |                |                 |                    |
| CB4856 CT V         | 15113781                                                    | 15114092 | WBGene00011341 | T01G5.6 T01G5.6 | 0.0772334094825435 |
| AGIWUR38981         |                                                             |          |                |                 |                    |
| CB4856 CT V         | 15116844                                                    | 15119617 | WBGene00011339 | T01G5.1 T01G5.1 | -0.29875705552114  |
| AGIWUR32926         |                                                             |          |                |                 |                    |
| CB4856 CT V         | 15121729                                                    | 15125228 | WBGene00011340 | ugt-30 T01G5.2  | -0.677777119288312 |
| AGIWUR40589         |                                                             |          |                |                 |                    |

|                                                                                                                       |   |          |          |                |          |          |                     |
|-----------------------------------------------------------------------------------------------------------------------|---|----------|----------|----------------|----------|----------|---------------------|
| CB4856 CT<br>AGIWUR27734                                                                                              | V | 15126212 | 15127513 | WBGene00005615 | srj-27   | T01G5.3  | -0.0505101056249924 |
| CB4856 CT<br>AGIWUR30840                                                                                              | V | 15128171 | 15129986 | WBGene00005658 | srr-7    | T01G5.4  | -0.146628119189884  |
| CB4856 CT<br>AGIWUR9632                                                                                               | V | 15130497 | 15132516 | WBGene00006215 | str-171  | T01G5.5  | 0.146562642330331   |
| CB4856 CT<br>AGIWUR12725                                                                                              | V | 15134188 | 15136801 | WBGene00010685 | aip1-1   | K08F9.2  | 0.123484307784983   |
| CB4856 CT<br>AGIWUR31121;AGIWUR34826;AGIWUR37417                                                                      | V | 15137273 | 15139888 | WBGene00010684 | K08F9.1  | K08F9.1  | 0.828094346665537   |
| CB4856 CT<br>AGIWUR44170                                                                                              | V | 15140547 | 15143923 | WBGene00010686 | K08F9.3  | K08F9.3  | 0.826493167694533   |
| CB4856 CT<br>AGIWUR30773                                                                                              | V | 15144019 | 15146435 | WBGene00010687 | K08F9.4  | K08F9.4  | -0.032390143248449  |
| CB4856 CT<br>AGIWUR35738                                                                                              | V | 15149046 | 15150733 | WBGene00011665 | T09F5.1  | T09F5.1  | 0.29136999429762    |
| CB4856 CT<br>AGIWUR18789                                                                                              | V | 15150961 | 15151638 | WBGene00011666 | T09F5.2  | T09F5.2  | -0.228666191946108  |
| CB4856 CT<br>-0.0305723364893442                                                                                      | V | 15151845 | 15153369 | WBGene00005276 | srh-53   | T09F5.15 |                     |
| CB4856 CT<br>AGIWUR37126                                                                                              | V | 15153577 | 15154994 | WBGene00005278 | srh-55   | T09F5.5  | -0.0178734990047458 |
| CB4856 CT<br>AGIWUR1667;AGIWUR34644                                                                                   | V | 15155139 | 15156457 | WBGene00005277 | srh-54   | T09F5.6  | 0.0282546603359171  |
| CB4856 CT<br>AGIWUR6042                                                                                               | V | 15158991 | 15160546 | WBGene00006110 | str-45   | T09F5.3  | 0.0231788923055198  |
| CB4856 CT<br>AGIWUR19205;AGIWUR21794                                                                                  | V | 15161003 | 15162433 | WBGene00014835 | T09F5.4  | T09F5.4  | 0.20424976287015    |
| CB4856 CT<br>-0.0690551863856133                                                                                      | V | 15163082 | 15164518 | WBGene00023506 | srz-11   | T09F5.16 |                     |
| CB4856 CT<br>0.018559701829199                                                                                        | V | 15164743 | 15166318 | WBGene00014836 | T09F5.12 |          | T09F5.12            |
| AGIWUR5187;AGIWUR9932;AGIWUR16230;AGIWUR23997;AGIWUR25680;AGIWUR25747;AGIWUR31915;AGIWUR37507;AGIWUR37916;AGIWUR44722 |   |          |          |                |          |          |                     |
| CB4856 CT<br>AGIWUR30203                                                                                              | V | 15170462 | 15171642 | WBGene00005483 | srh-278  | T09F5.8  | -0.15285652360753   |
| CB4856 CT<br>-0.039765575191943                                                                                       | V | 15173635 | 15174856 | WBGene00014837 | T09F5.13 |          | T09F5.13            |
| CB4856 CT<br>AGIWUR15078                                                                                              | V | 15175673 | 15176324 | WBGene00011668 | cllec-47 | T09F5.9  | -0.301462043297818  |

AGIWUR4783;AGIWUR31179;AGIWUR31331

CB4856 CT V 15176768 15179484

0.00564110095560277 AGIWUR23703;AGIWUR41505

CB4856 CT V 15180057 15181785

-0.268862023670051 AGIWUR27301

CB4856 CT V 15182440 15184125

-0.504400483876402 AGIWUR34280

CB4856 CT V 15184706 15185878

-0.1806040191407 AGIWUR7998;AGIWUR34678

CB4856 CT V 15185891 15186300

-0.0307153118326151 AGIWUR7577;AGIWUR19953;AGIWUR29967;AGIWUR31867;AGIWUR38866;AGIWUR41247

CB4856 CT V 15186582 15187787

-0.0724799895926491 AGIWUR14782;AGIWUR26242

CB4856 CT V 15187989 15189588

-0.0957239054775219 AGIWUR4808

CB4856 CT V 15189927 15190926

-0.0177368055522873 AGIWUR29379;AGIWUR29942

CB4856 CT V 15191296 15191836

0.063449266276951 AGIWUR1882;AGIWUR21973;AGIWUR35511;AGIWUR36041;AGIWUR40308

CB4856 CT V 15192572 15197661

0.16677328384635 AGIWUR37464

CB4856 CT V 15198255 15199396

-0.28560251484564 AGIWUR11483

CB4856 CT V 15205095 15206552

-0.0271533321876607 AGIWUR4002;AGIWUR4181

CB4856 CT V 15212169 15213706

-0.0726585878513859 AGIWUR30590

CB4856 CT V 15215475 15216889

0.285489129758431 AGIWUR34017

CB4856 CT V 15217005 15219320

0.0886962280434105 AGIWUR41083

CB4856 CT V 15219946 15221377

AGIWUR17371

CB4856 CT V 15221682 15223114

AGIWUR10550

CB4856 CT V 15223968 15225359

-0.00516717634022701 AGIWUR35860

CB4856 CT V 15225950 15227472

AGIWUR17235

WBGene00005772 srw-25 T09F5.14

WBGene00011669 T09F5.10 T09F5.10

WBGene00011670 fbxa-84 T09F5.11

WBGene00013567 Y75B12B.1 Y75B12B.1

WBGene00013568 Y75B12B.3 Y75B12B.3

WBGene00000883 cyn-7 Y75B12B.2

WBGene00013569 bath-36 Y75B12B.4

WBGene00000879 cyn-3 Y75B12B.5

WBGene00013573 Y75B12B.11 Y75B12B.11

WBGene00004037 plc-2 Y75B12B.6

WBGene00005748 srw-1 Y75B12B.7

WBGene00077440 Y75B12B.14 Y75B12B.14

WBGene00005536 sri-24 C41G6.11

WBGene00005538 sri-26 C41G6.14

WBGene00005537 sri-25 C41G6.10

WBGene00005381 srh-165 C41G6.9 -0.0944895783098314

WBGene00008057 irld-25 C41G6.6 -0.0102719978406949

WBGene00005771 srw-24 C41G6.7

WBGene00005761 srw-14 C41G6.8 0.30562925521035

|                                     |                         |          |                |          |                             |
|-------------------------------------|-------------------------|----------|----------------|----------|-----------------------------|
| CB4856 CT V                         | 15228092                | 15230075 | WBGene00008055 | cyp-34A3 | C41G6.1                     |
| 0.00752025654662436                 | AGIWUR27581             |          |                |          |                             |
| CB4856 CT V                         | 15230543                | 15231893 | WBGene00005762 | srw-15   | C41G6.3 0.222359018030033   |
| AGIWUR7178                          |                         |          |                |          |                             |
| CB4856 CT V                         | 15232500                | 15233844 | WBGene00005760 | srw-13   | C41G6.15                    |
| 0.183111206173908                   | AGIWUR17125             |          |                |          |                             |
| CB4856 CT V                         | 15233894                | 15235761 | WBGene00008056 | nhr-164  | C41G6.5 0.12558254014847    |
| AGIWUR41753                         |                         |          |                |          |                             |
| CB4856 CT V                         | 15237334                | 15238650 | WBGene00005759 | srw-12   | C41G6.2 -0.0687925866728554 |
| AGIWUR1197                          |                         |          |                |          |                             |
| CB4856 CT V                         | 15239070                | 15240315 | WBGene00005758 | srw-11   | M01B2.11                    |
| -0.08073883146937                   | AGIWUR1583              |          |                |          |                             |
| CB4856 CT V                         | 15241584                | 15243943 | WBGene00010799 | chil-12  | M01B2.6 0.166342573846585   |
| AGIWUR28079                         |                         |          |                |          |                             |
| CB4856 CT V                         | 15244756                | 15247707 | WBGene00002211 | kin-30   | M01B2.1 0.0809693612431435  |
| AGIWUR2872;AGIWUR26412;AGIWUR37435  |                         |          |                |          |                             |
| CB4856 CT V                         | 15252382                | 15253291 | WBGene00010798 | srbc-76  | M01B2.4 0.0191153407840003  |
| AGIWUR28878                         |                         |          |                |          |                             |
| CB4856 CT V                         | 15253829                | 15254805 | WBGene00010797 | srbc-75  | M01B2.3 0.164792641497558   |
| AGIWUR7779                          |                         |          |                |          |                             |
| CB4856 CT V                         | 15257581                | 15259149 | WBGene00010800 | srsx-37  | M01B2.7 0.00512349931960721 |
| AGIWUR25045                         |                         |          |                |          |                             |
| CB4856 CT V                         | 15260238                | 15260786 | WBGene00010801 | M01B2.8  | M01B2.8 0.0310134077502351  |
| AGIWUR34144                         |                         |          |                |          |                             |
| CB4856 CT V                         | 15260890                | 15262244 | WBGene00010803 | M01B2.10 | M01B2.10                    |
| 0.483347736645056                   | AGIWUR12440             |          |                |          |                             |
| CB4856 CT V                         | 15263005                | 15264231 | WBGene00045337 | M01B2.12 | M01B2.12                    |
| 0.249447298045078                   | AGIWUR23366;AGIWUR39919 |          |                |          |                             |
| CB4856 CT V                         | 15264653                | 15265786 | WBGene00045338 | M01B2.13 | M01B2.13                    |
| 1.17064829972167                    | AGIWUR22195;AGIWUR36262 |          |                |          |                             |
| CB4856 CT V                         | 15266436                | 15267505 | WBGene00045339 | T10H4.13 | T10H4.13                    |
| 0.328023388993973                   | AGIWUR15224;AGIWUR29329 |          |                |          |                             |
| CB4856 CT V                         | 15270147                | 15272363 | WBGene00011697 | T10H4.4  | T10H4.4 -0.481898765195133  |
| AGIWUR11665                         |                         |          |                |          |                             |
| CB4856 CT V                         | 15273383                | 15274857 | WBGene00005763 | srw-16   | T10H4.5 -0.0949993727439908 |
| AGIWUR21435;AGIWUR32739;AGIWUR38813 |                         |          |                |          |                             |
| CB4856 CT V                         | 15275443                | 15276900 | WBGene00005764 | srw-17   | T10H4.6 0.382051335348843   |
| AGIWUR36781                         |                         |          |                |          |                             |
| CB4856 CT V                         | 15277612                | 15278972 | WBGene00005765 | srw-18   | T10H4.7 0.0407472147412693  |

|                                                                               |    |   |          |          |                |           |           |                     |
|-------------------------------------------------------------------------------|----|---|----------|----------|----------------|-----------|-----------|---------------------|
| AGIWUR40153;AGIWUR42041                                                       |    |   |          |          |                |           |           |                     |
| CB4856                                                                        | CT | V | 15279782 | 15281395 | WBGene00005766 | srw-19    | T10H4.8   | -0.146263188411389  |
| AGIWUR25938                                                                   |    |   |          |          |                |           |           |                     |
| CB4856                                                                        | CT | V | 15281899 | 15283562 | WBGene00005942 | srx-51    | T10H4.9   | -0.0506398551257008 |
| AGIWUR5846;AGIWUR18176;AGIWUR22189;AGIWUR23255                                |    |   |          |          |                |           |           |                     |
| CB4856                                                                        | CT | V | 15284242 | 15285551 | WBGene00014839 | T10H4.1   | T10H4.1   | 0.0368666949983281  |
| AGIWUR20134;AGIWUR27880                                                       |    |   |          |          |                |           |           |                     |
| CB4856                                                                        | CT | V | 15285605 | 15287925 | WBGene00011698 | cyp-34A1  | T10H4.10  |                     |
| 0.679999347278708 AGIWUR34196;AGIWUR36752                                     |    |   |          |          |                |           |           |                     |
| CB4856                                                                        | CT | V | 15288924 | 15291107 | WBGene00011699 | cyp-34A2  | T10H4.11  |                     |
| 0.427666857207057 AGIWUR9841;AGIWUR12717;AGIWUR25983;AGIWUR37300              |    |   |          |          |                |           |           |                     |
| CB4856                                                                        | CT | V | 15292490 | 15293965 | WBGene00006153 | str-96    | T10H4.2   | 0.102698289317772   |
| AGIWUR28458                                                                   |    |   |          |          |                |           |           |                     |
| CB4856                                                                        | CT | V | 15296853 | 15298700 | WBGene00000783 | cpr-3     | T10H4.12  |                     |
| 0.0674600685472484 AGIWUR17997                                                |    |   |          |          |                |           |           |                     |
| CB4856                                                                        | CT | V | 15299190 | 15301890 | WBGene00005940 | srx-49    | T26H8.3   | 0.026790776068867   |
| AGIWUR10126                                                                   |    |   |          |          |                |           |           |                     |
| CB4856                                                                        | CT | V | 15302371 | 15303725 | WBGene00005939 | srx-48    | T26H8.2   | 0.0386834613523135  |
| AGIWUR31605                                                                   |    |   |          |          |                |           |           |                     |
| CB4856                                                                        | CT | V | 15304607 | 15305602 | WBGene00077588 | T26H8.5   | T26H8.5   | 0.2142635754678     |
| AGIWUR36665                                                                   |    |   |          |          |                |           |           |                     |
| CB4856                                                                        | CT | V | 15307562 | 15309063 | WBGene00014195 | srz-10    | ZK1037.11 |                     |
| -0.133920043185537 AGIWUR35045                                                |    |   |          |          |                |           |           |                     |
| CB4856                                                                        | CT | V | 15310120 | 15310437 | WBGene00045514 | ZK1037.12 | ZK1037.12 |                     |
| 0.00524465897875714 AGIWUR3212;AGIWUR5803;AGIWUR13301;AGIWUR18102;AGIWUR41748 |    |   |          |          |                |           |           |                     |
| CB4856                                                                        | CT | V | 15311080 | 15312536 | WBGene00014190 | irld-62   | ZK1037.1  |                     |
| -0.015576405499421 AGIWUR1413;AGIWUR6378;AGIWUR44594                          |    |   |          |          |                |           |           |                     |
| CB4856                                                                        | CT | V | 15312982 | 15314230 | WBGene00014993 | ZK1037.2  | ZK1037.2  |                     |
| -0.170121487501844 AGIWUR24023;AGIWUR27900                                    |    |   |          |          |                |           |           |                     |
| CB4856                                                                        | CT | V | 15314668 | 15315927 | WBGene00014191 | srt-22    | ZK1037.3  |                     |
| 0.127345704738892 AGIWUR27698                                                 |    |   |          |          |                |           |           |                     |
| CB4856                                                                        | CT | V | 15316497 | 15318425 | WBGene00014192 | nhr-246   | ZK1037.4  |                     |
| 0.359362240019374 AGIWUR12217                                                 |    |   |          |          |                |           |           |                     |
| CB4856                                                                        | CT | V | 15318961 | 15320553 | WBGene00045515 | ZK1037.13 | ZK1037.13 |                     |
| -0.0851852242806546 AGIWUR28286                                               |    |   |          |          |                |           |           |                     |
| CB4856                                                                        | CT | V | 15323853 | 15325351 | WBGene00014193 | nhr-247   | ZK1037.5  |                     |
| 0.324520787366836 AGIWUR3093                                                  |    |   |          |          |                |           |           |                     |
| CB4856                                                                        | CT | V | 15325822 | 15327795 | WBGene00014194 | ZK1037.6  | ZK1037.6  |                     |
| -0.557530306945806 AGIWUR30444                                                |    |   |          |          |                |           |           |                     |

|                    |                                                                       |          |                |           |                             |
|--------------------|-----------------------------------------------------------------------|----------|----------------|-----------|-----------------------------|
| CB4856 CT V        | 15328656                                                              | 15330064 | WBGene00005817 | srw-70    | ZK1037.7                    |
| 0.203710372226134  | AGIWUR1333                                                            |          |                |           |                             |
| CB4856 CT V        | 15330614                                                              | 15332774 | WBGene00005499 | srh-295   | ZK1037.8                    |
| 0.081631377021365  | AGIWUR8748                                                            |          |                |           |                             |
| CB4856 CT V        | 15333151                                                              | 15334571 | WBGene00005860 | srw-113   | ZK1037.9                    |
| 0.248078297248018  | AGIWUR28439                                                           |          |                |           |                             |
| CB4856 CT V        | 15334782                                                              | 15337505 | WBGene00006953 | wrt-7     | ZK1037.10                   |
| 0.304127481254843  | AGIWUR34552                                                           |          |                |           |                             |
| CB4856 CT V        | 15338569                                                              | 15339482 | WBGene00044086 | cllec-228 | H02K04.2                    |
| -0.225519779511705 | AGIWUR23656                                                           |          |                |           |                             |
| CB4856 CT V        | 15340136                                                              | 15341446 | WBGene00010355 | cllec-229 | H02K04.1                    |
| -0.415270249903264 | AGIWUR13041                                                           |          |                |           |                             |
| CB4856 CT V        | 15342056                                                              | 15344572 | WBGene00006954 | wrt-8     | C29F3.2 0.347801256237265   |
| AGIWUR24077        |                                                                       |          |                |           |                             |
| CB4856 CT V        | 15346674                                                              | 15347411 | WBGene00007804 | C29F3.3   | C29F3.3 0.898422566771481   |
| AGIWUR15493        |                                                                       |          |                |           |                             |
| CB4856 CT V        | 15347847                                                              | 15349144 | WBGene00007806 | cllec-230 | C29F3.5                     |
| 0.3146870681461    | AGIWUR153;AGIWUR19005;AGIWUR25227;AGIWUR32717;AGIWUR41233;AGIWUR45193 |          |                |           |                             |
| CB4856 CT V        | 15349449                                                              | 15350662 | WBGene00007805 | cllec-231 | C29F3.4                     |
| 0.103491991415333  | AGIWUR37420                                                           |          |                |           |                             |
| CB4856 CT V        | 15352574                                                              | 15353862 | WBGene00005949 | srx-58    | C29F3.6 -0.0986313531637819 |
| AGIWUR41130        |                                                                       |          |                |           |                             |
| CB4856 CT V        | 15354833                                                              | 15357572 | WBGene00007807 | C29F3.7   | C29F3.7 -0.471851472086811  |
| AGIWUR39682        |                                                                       |          |                |           |                             |
| CB4856 CT V        | 15357696                                                              | 15360738 | WBGene00001150 | ech-1.1   | C29F3.1 0.146520488770618   |
| AGIWUR34719        |                                                                       |          |                |           |                             |
| CB4856 CT V        | 15363604                                                              | 15365013 | WBGene00005325 | srh-106   | R08H2.14                    |
| -0.123520564417183 | AGIWUR529;AGIWUR43325                                                 |          |                |           |                             |
| CB4856 CT V        | 15365298                                                              | 15366825 | WBGene00005326 | srh-107   | R08H2.12                    |
| 0.11384942949112   | AGIWUR8881;AGIWUR12553;AGIWUR26384;AGIWUR26419;AGIWUR33182            |          |                |           |                             |
| CB4856 CT V        | 15367159                                                              | 15368289 | WBGene00005327 | srh-108   | R08H2.11                    |
| 0.110017950012063  | AGIWUR6959;AGIWUR10639;AGIWUR15625                                    |          |                |           |                             |
| CB4856 CT V        | 15368470                                                              | 15370215 | WBGene00011150 | nhr-269   | R08H2.9 -0.17346457876412   |
| AGIWUR22961        |                                                                       |          |                |           |                             |
| CB4856 CT V        | 15370867                                                              | 15372950 | WBGene00011149 | R08H2.8   | R08H2.8 0.136097801738151   |
| AGIWUR35406        |                                                                       |          |                |           |                             |
| CB4856 CT V        | 15373676                                                              | 15374113 | WBGene00011151 | R08H2.10  | R08H2.10                    |
| 0.0984756878790503 | AGIWUR37438                                                           |          |                |           |                             |
| CB4856 CT V        | 15374900                                                              | 15376323 | WBGene00005275 | srh-52    | R08H2.7 0.0645201846307115  |



|                                                                                                 |   |                                                            |          |                |                   |                     |
|-------------------------------------------------------------------------------------------------|---|------------------------------------------------------------|----------|----------------|-------------------|---------------------|
| AGIWUR25436                                                                                     |   |                                                            |          |                |                   |                     |
| CB4856 CT                                                                                       | V | 15376501                                                   | 15378003 | WBGene00005340 | srh-122 R08H2.5   | 0.164804798563678   |
| AGIWUR24573                                                                                     |   |                                                            |          |                |                   |                     |
| CB4856 CT                                                                                       | V | 15378367                                                   | 15379917 | WBGene00005457 | srh-251 R08H2.4   | -0.0162408600571906 |
| AGIWUR18065                                                                                     |   |                                                            |          |                |                   |                     |
| CB4856 CT                                                                                       | V | 15381097                                                   | 15382305 | WBGene00000986 | dhs-23 R08H2.1    | -0.047700239973663  |
| AGIWUR35197                                                                                     |   |                                                            |          |                |                   |                     |
| CB4856 CT                                                                                       | V | 15382439                                                   | 15383839 | WBGene00006147 | str-88 R08H2.2    | 0.287163476774789   |
| AGIWUR2182                                                                                      |   |                                                            |          |                |                   |                     |
| CB4856 CT                                                                                       | V | 15385033                                                   | 15386653 | WBGene00006157 | str-102 R08H2.13  |                     |
| -0.058214948773788                                                                              |   | AGIWUR25002                                                |          |                |                   |                     |
| CB4856 CT                                                                                       | V | 15386923                                                   | 15388870 | WBGene00005386 | srh-170 R08H2.3   | 0.00309661722664689 |
| AGIWUR34041                                                                                     |   |                                                            |          |                |                   |                     |
| CB4856 CT                                                                                       | V | 15393108                                                   | 15394957 | WBGene00011538 | T06E6.1 T06E6.1   | -0.123531830669988  |
| AGIWUR3213                                                                                      |   |                                                            |          |                |                   |                     |
| CB4856 CT                                                                                       | V | 15395696                                                   | 15397348 | WBGene00000868 | cyb-3 T06E6.2     | 0.0347698693554745  |
| AGIWUR10457;AGIWUR11193;AGIWUR18348;AGIWUR18947;AGIWUR19045;AGIWUR22627;AGIWUR36099;AGIWUR44565 |   |                                                            |          |                |                   |                     |
| CB4856 CT                                                                                       | V | 15397385                                                   | 15398828 | WBGene00005931 | fbxa-199 T06E6.3  |                     |
| -0.110645279477794                                                                              |   | AGIWUR8885                                                 |          |                |                   |                     |
| CB4856 CT                                                                                       | V | 15398939                                                   | 15399791 | WBGene00044759 | T06E6.15 T06E6.15 |                     |
| -0.0317087551239377                                                                             |   | AGIWUR14475;AGIWUR43886                                    |          |                |                   |                     |
| CB4856 CT                                                                                       | V | 15400327                                                   | 15401820 | WBGene00005519 | sri-7 T06E6.4     | -0.0510032578748021 |
| AGIWUR28308;AGIWUR32085;AGIWUR44685                                                             |   |                                                            |          |                |                   |                     |
| CB4856 CT                                                                                       | V | 15402277                                                   | 15404385 | WBGene00011539 | fbxa-135 T06E6.5  |                     |
| 0.699937320384627                                                                               |   | AGIWUR9210;AGIWUR29642;AGIWUR36860;AGIWUR41930             |          |                |                   |                     |
| CB4856 CT                                                                                       | V | 15405159                                                   | 15406760 | WBGene00005464 | srh-258 T06E6.7   | 0.0500656845483149  |
| AGIWUR3933                                                                                      |   |                                                            |          |                |                   |                     |
| CB4856 CT                                                                                       | V | 15407228                                                   | 15411380 | WBGene00005463 | srh-257 T06E6.6   | -0.0508119902707698 |
| AGIWUR5150;AGIWUR6121;AGIWUR9002                                                                |   |                                                            |          |                |                   |                     |
| CB4856 CT                                                                                       | V | 15411433                                                   | 15412725 | WBGene00011541 | srbc-63 T06E6.11  |                     |
| -0.11202479647283                                                                               |   | AGIWUR20907                                                |          |                |                   |                     |
| CB4856 CT                                                                                       | V | 15414147                                                   | 15415349 | WBGene00005470 | srh-264 T06E6.8   | 0.0368360063981941  |
| AGIWUR11829                                                                                     |   |                                                            |          |                |                   |                     |
| CB4856 CT                                                                                       | V | 15416251                                                   | 15417616 | WBGene00005471 | srh-265 T06E6.9   | -0.0826446269482988 |
| AGIWUR37761                                                                                     |   |                                                            |          |                |                   |                     |
| CB4856 CT                                                                                       | V | 15418131                                                   | 15419395 | WBGene00011540 | T06E6.10 T06E6.10 |                     |
| 0.100908161707984                                                                               |   | AGIWUR40932                                                |          |                |                   |                     |
| CB4856 CT                                                                                       | V | 15419820                                                   | 15421506 | WBGene00005469 | srh-263 T06E6.12  |                     |
| 0.0173626410114753                                                                              |   | AGIWUR8797;AGIWUR27731;AGIWUR36405;AGIWUR37131;AGIWUR40154 |          |                |                   |                     |

|                                                             |                                                |          |                |                  |                     |
|-------------------------------------------------------------|------------------------------------------------|----------|----------------|------------------|---------------------|
| CB4856 CT V                                                 | 15421673                                       | 15423658 | WBGene00011542 | fbxa-104         | T06E6.13            |
| 0.0029172047497088                                          | AGIWUR21268                                    |          |                |                  |                     |
| CB4856 CT V                                                 | 15423746                                       | 15425498 | WBGene00012533 | fbxa-209         | Y36E3A.1            |
| 0.355299912181756                                           | AGIWUR5589                                     |          |                |                  |                     |
| CB4856 CT V                                                 | 15427305                                       | 15432722 | WBGene00012070 | T26H5.8 T26H5.8  | 1.50104443016374    |
| AGIWUR3269;AGIWUR13122;AGIWUR17414                          |                                                |          |                |                  |                     |
| CB4856 CT V                                                 | 15437132                                       | 15438673 | WBGene00006168 | str-117 T26H5.7  | 0.0219142095843559  |
| AGIWUR24354;AGIWUR35605                                     |                                                |          |                |                  |                     |
| CB4856 CT V                                                 | 15438798                                       | 15440332 | WBGene00014846 | T26H5.6 T26H5.6  | 0.0750109391562601  |
| AGIWUR38172;AGIWUR43959                                     |                                                |          |                |                  |                     |
| CB4856 CT V                                                 | 15441324                                       | 15442979 | WBGene00005460 | srh-254 T26H5.1  | 0.444697387209838   |
| AGIWUR12876;AGIWUR23679;AGIWUR28403;AGIWUR35260;AGIWUR39764 |                                                |          |                |                  |                     |
| CB4856 CT V                                                 | 15443401                                       | 15443808 | WBGene00044783 | T26H5.10         | T26H5.10            |
| -0.249804419401264                                          | AGIWUR7855;AGIWUR21215;AGIWUR29464;AGIWUR32228 |          |                |                  |                     |
| CB4856 CT V                                                 | 15444916                                       | 15445420 | WBGene00044206 | T26H5.9 T26H5.9  | 4.37470566454902    |
| AGIWUR669;AGIWUR10973;AGIWUR15693;AGIWUR34140;AGIWUR43316   |                                                |          |                |                  |                     |
| CB4856 CT V                                                 | 15445853                                       | 15447282 | WBGene00005446 | srh-239 T26H5.3  | 0.314347526287524   |
| AGIWUR29286                                                 |                                                |          |                |                  |                     |
| CB4856 CT V                                                 | 15447640                                       | 15448138 | WBGene00012069 | T26H5.4 T26H5.4  | 3.79675541387187    |
| AGIWUR22733                                                 |                                                |          |                |                  |                     |
| CB4856 CT V                                                 | 15449631                                       | 15451521 | WBGene00005780 | srw-33 T26H5.5   | 0.54781059438264    |
| AGIWUR16165                                                 |                                                |          |                |                  |                     |
| CB4856 CT V                                                 | 15452333                                       | 15455840 | WBGene00005445 | srh-238 T23F1.1  | -0.0558385258493801 |
| AGIWUR7147;AGIWUR42643                                      |                                                |          |                |                  |                     |
| CB4856 CT V                                                 | 15456066                                       | 15457445 | WBGene00011947 | T23F1.3 T23F1.3  | 0.021314635205961   |
| AGIWUR25858                                                 |                                                |          |                |                  |                     |
| CB4856 CT V                                                 | 15457815                                       | 15459188 | WBGene00006133 | str-71 T23F1.4   | 0.258517866932829   |
| AGIWUR32145                                                 |                                                |          |                |                  |                     |
| CB4856 CT V                                                 | 15459413                                       | 15464425 | WBGene00011948 | T23F1.5 T23F1.5  | 1.33905532776645    |
| AGIWUR18005                                                 |                                                |          |                |                  |                     |
| CB4856 CT V                                                 | 15465677                                       | 15467099 | WBGene00004153 | pqn-71 T23F1.6   | -0.165750512887019  |
| AGIWUR41589                                                 |                                                |          |                |                  |                     |
| CB4856 CT V                                                 | 15471335                                       | 15476122 | WBGene00001054 | dpf-1 T23F1.7    | -0.0517170127211219 |
| AGIWUR42365                                                 |                                                |          |                |                  |                     |
| CB4856 CT V                                                 | 15476086                                       | 15478566 | WBGene00007368 | C06B8.2 C06B8.2  | -0.147575080091976  |
| AGIWUR19011;AGIWUR28409                                     |                                                |          |                |                  |                     |
| CB4856 CT V                                                 | 15479398                                       | 15481677 | WBGene00007367 | nhr-150 C06B8.1  | 0.672301500723833   |
| AGIWUR11858                                                 |                                                |          |                |                  |                     |
| CB4856 CT V                                                 | 15482149                                       | 15483665 | WBGene00077594 | nhr-151 C06B8.12 |                     |

|                                                                                                |             |          |                |          |          |                     |
|------------------------------------------------------------------------------------------------|-------------|----------|----------------|----------|----------|---------------------|
| 0.106644337196837                                                                              | AGIWUR37535 |          |                |          |          |                     |
| CB4856 CT V                                                                                    | 15486388    | 15487118 | WBGene00007373 | C06B8.11 | C06B8.11 |                     |
| -0.0826350891837162                                                                            | AGIWUR19586 |          |                |          |          |                     |
| CB4856 CT V                                                                                    | 15488064    | 15489401 | WBGene00005768 | srw-21   | C06B8.9  | 0.115242491292584   |
| AGIWUR22410                                                                                    |             |          |                |          |          |                     |
| CB4856 CT V                                                                                    | 15491003    | 15492770 | WBGene00007370 | str-264  | C06B8.4  | -0.150875391647777  |
| AGIWUR6224                                                                                     |             |          |                |          |          |                     |
| CB4856 CT V                                                                                    | 15493980    | 15495761 | WBGene00005428 | srh-218  | C06B8.10 |                     |
| -0.106338359784586                                                                             | AGIWUR17980 |          |                |          |          |                     |
| CB4856 CT V                                                                                    | 15496269    | 15497567 | WBGene00005429 | srh-219  | C06B8.6  | 0.147251651992667   |
| AGIWUR42051                                                                                    |             |          |                |          |          |                     |
| CB4856 CT V                                                                                    | 15498743    | 15511421 | WBGene00007372 | C06B8.7  | C06B8.7  | 0.452017343508089   |
| AGIWUR30713                                                                                    |             |          |                |          |          |                     |
| CB4856 CT V                                                                                    | 15512166    | 15512780 | WBGene00004452 | rpl-38   | C06B8.8  | -0.0673396978822591 |
| AGIWUR2954;AGIWUR10276;AGIWUR18225;AGIWUR19497;AGIWUR29421;AGIWUR36954;AGIWUR39941             |             |          |                |          |          |                     |
| CB4856 CT V                                                                                    | 15512765    | 15522020 | WBGene00008997 | lgc-31   | F21A3.7  | -0.0241271228493587 |
| AGIWUR2141;AGIWUR5441;AGIWUR11882;AGIWUR22753;AGIWUR25835;AGIWUR32893;AGIWUR35667;AGIWUR43072  |             |          |                |          |          |                     |
| CB4856 CT V                                                                                    | 15529369    | 15530767 | WBGene00005481 | srh-276  | F21A3.1  | 0.313349266748714   |
| AGIWUR14696                                                                                    |             |          |                |          |          |                     |
| CB4856 CT V                                                                                    | 15530783    | 15533251 | WBGene00219316 | F21A3.11 | F21A3.11 |                     |
| 1.35390376021483                                                                               | AGIWUR7750  |          |                |          |          |                     |
| CB4856 CT V                                                                                    | 15536620    | 15537986 | WBGene00008994 | F21A3.4  | F21A3.4  | -0.0721254471553756 |
| AGIWUR18374                                                                                    |             |          |                |          |          |                     |
| CB4856 CT V                                                                                    | 15538244    | 15547020 | WBGene00008995 | prde-1   | F21A3.5  | -0.193982218511472  |
| AGIWUR27874;AGIWUR36842                                                                        |             |          |                |          |          |                     |
| CB4856 CT V                                                                                    | 15551155    | 15559147 | WBGene00000057 | acr-18   | F28F8.1  | -0.257105647953962  |
| AGIWUR12480                                                                                    |             |          |                |          |          |                     |
| CB4856 CT V                                                                                    | 15567394    | 15569889 | WBGene00009221 | acs-2    | F28F8.2  | 5.15016655257618    |
| AGIWUR7908;AGIWUR28624;AGIWUR29438;AGIWUR30410;AGIWUR38477;AGIWUR41007;AGIWUR42897;AGIWUR44518 |             |          |                |          |          |                     |
| CB4856 CT V                                                                                    | 15569935    | 15570742 | WBGene00003079 | lsm-5    | F28F8.3  | 0.153080917610993   |
| AGIWUR4058;AGIWUR18048;AGIWUR26535;AGIWUR35988;AGIWUR37591;AGIWUR38266;AGIWUR42575             |             |          |                |          |          |                     |
| CB4856 CT V                                                                                    | 15571490    | 15574106 | WBGene00009225 | fbxa-94  | F28F8.8  | 0.255363676908317   |
| AGIWUR41240                                                                                    |             |          |                |          |          |                     |
| CB4856 CT V                                                                                    | 15574098    | 15575403 | WBGene00009223 | mdt-28   | F28F8.5  | -0.220424197007947  |
| AGIWUR1213                                                                                     |             |          |                |          |          |                     |
| CB4856 CT V                                                                                    | 15575498    | 15577443 | WBGene00006446 | atx-3    | F28F8.6  | -0.0733803268176842 |
| AGIWUR34792                                                                                    |             |          |                |          |          |                     |
| CB4856 CT V                                                                                    | 15577569    | 15578486 | WBGene00044188 | F28F8.9  | F28F8.9  | -0.121885907557418  |
| AGIWUR6762;AGIWUR33145;AGIWUR41510                                                             |             |          |                |          |          |                     |

|                         |                                     |          |                                                 |                  |                     |
|-------------------------|-------------------------------------|----------|-------------------------------------------------|------------------|---------------------|
| CB4856 CT V             | 15578984                            | 15590617 | WBGene00009224                                  | F28F8.7 F28F8.7  | -0.0876314463691514 |
| AGIWUR39186             |                                     |          |                                                 |                  |                     |
| CB4856 CT V             | 15585067                            | 15593185 | WBGene00007165                                  | B0391.10         | B0391.10            |
| -0.187568432126239      | AGIWUR10516                         |          |                                                 |                  |                     |
| CB4856 CT V             | 15593462                            | 15593799 | WBGene00007164                                  | fbxa-139         | B0391.9             |
| 0.0341129064270804      | AGIWUR119;AGIWUR1454;AGIWUR3371     |          | AGIWUR16116;AGIWUR19563;AGIWUR27242;AGIWUR42247 |                  |                     |
| CB4856 CT V             | 15595055                            | 15596466 | WBGene00014643                                  | B0391.8 B0391.8  | -0.142748197078296  |
| AGIWUR37846             |                                     |          |                                                 |                  |                     |
| CB4856 CT V             | 15600400                            | 15602345 | WBGene00007166                                  | fbxa-152         | B0391.11            |
| 0.205791181400281       | AGIWUR35465                         |          |                                                 |                  |                     |
| CB4856 CT V             | 15605673                            | 15610384 | WBGene00007162                                  | fbxa-153         | B0391.5             |
| -0.273502172108319      | AGIWUR17241;AGIWUR31489;AGIWUR37968 |          |                                                 |                  |                     |
| CB4856 CT V             | 15610890                            | 15612591 | WBGene00006080                                  | str-12 B0391.4   | 0.0137335658572244  |
| AGIWUR35912             |                                     |          |                                                 |                  |                     |
| CB4856 CT V             | 15613186                            | 15614968 | WBGene00006289                                  | str-263 B0391.12 |                     |
| 0.0602794955803461      | AGIWUR28380                         |          |                                                 |                  |                     |
| CB4856 CT V             | 15614937                            | 15617611 | WBGene00007161                                  | B0391.3 B0391.3  | 0.106631479383555   |
| AGIWUR24303             |                                     |          |                                                 |                  |                     |
| CB4856 CT V             | 15618180                            | 15619395 | WBGene00007160                                  | B0391.1 B0391.1  | -0.0580842549282341 |
| AGIWUR23157             |                                     |          |                                                 |                  |                     |
| CB4856 CT V             | 15620022                            | 15621232 | WBGene00014722                                  | C55A1.13         | C55A1.13            |
| 0.124374782394214       | AGIWUR18236;AGIWUR31370             |          |                                                 |                  |                     |
| CB4856 CT V             | 15621818                            | 15623077 | WBGene00008321                                  | C55A1.1 C55A1.1  | 0.027687676376571   |
| AGIWUR8124              |                                     |          |                                                 |                  |                     |
| CB4856 CT V             | 15624355                            | 15625515 | WBGene00005192                                  | srg-35 C55A1.2   | 0.0707935322987661  |
| AGIWUR14553;AGIWUR44396 |                                     |          |                                                 |                  |                     |
| CB4856 CT V             | 15625861                            | 15626223 | WBGene00008326                                  | C55A1.11         | C55A1.11            |
| 0.0683916965865725      | AGIWUR13748                         |          |                                                 |                  |                     |
| CB4856 CT V             | 15626452                            | 15627238 | WBGene00008325                                  | C55A1.9 C55A1.9  | 0.0551617676151466  |
| AGIWUR21342             |                                     |          |                                                 |                  |                     |
| CB4856 CT V             | 15628125                            | 15629643 | WBGene00006275                                  | str-248 C55A1.3  | -0.0733165009458192 |
| AGIWUR32115             |                                     |          |                                                 |                  |                     |
| CB4856 CT V             | 15630204                            | 15631509 | WBGene00014723                                  | srz-49 C55A1.16  |                     |
| 0.154579574131076       | AGIWUR19030;AGIWUR20618             |          |                                                 |                  |                     |
| CB4856 CT V             | 15632718                            | 15635277 | WBGene00008329                                  | C55A1.15         | C55A1.15            |
| 0.0884425963918716      | AGIWUR3100;AGIWUR4333;AGIWUR30124   |          | AGIWUR38191;AGIWUR40753                         |                  |                     |
| CB4856 CT V             | 15635565                            | 15637240 | WBGene00008328                                  | srz-43 C55A1.14  |                     |
| -0.0492859466484719     | AGIWUR7007;AGIWUR13658              |          |                                                 |                  |                     |
| CB4856 CT V             | 15637416                            | 15638953 | WBGene00008327                                  | srz-44 C55A1.12  |                     |

|                                                                                |                        |          |                |          |                             |
|--------------------------------------------------------------------------------|------------------------|----------|----------------|----------|-----------------------------|
| 0.170471981107202                                                              | AGIWUR40530            |          |                |          |                             |
| CB4856 CT V                                                                    | 15639678               | 15642499 | WBGene00005384 | srh-168  | C55A1.10                    |
| -0.0154471234195412                                                            | AGIWUR4275;AGIWUR44912 |          |                |          |                             |
| CB4856 CT V                                                                    | 15644875               | 15646478 | WBGene00006090 | str-23   | C55A1.5 -0.90345015186257   |
| AGIWUR20741                                                                    |                        |          |                |          |                             |
| CB4856 CT V                                                                    | 15648102               | 15648848 | WBGene00008323 | C55A1.6  | C55A1.6 0.228511693245727   |
| AGIWUR2288;AGIWUR7298;AGIWUR18106;AGIWUR26132;AGIWUR32979;AGIWUR38974          |                        |          |                |          |                             |
| CB4856 CT V                                                                    | 15650467               | 15652413 | WBGene00005705 | sru-42   | C55A1.8 -0.125810574527183  |
| AGIWUR38344                                                                    |                        |          |                |          |                             |
| CB4856 CT V                                                                    | 15652438               | 15659079 | WBGene00009978 | F53E4.1  | F53E4.1 -0.0173691927315271 |
| AGIWUR625;AGIWUR1120;AGIWUR7353;AGIWUR9791;AGIWUR17711;AGIWUR31888;AGIWUR32784 |                        |          |                |          |                             |
| CB4856 CT V                                                                    | 15669170               | 15670091 | WBGene00010599 | K06B4.4  | K06B4.4 -0.254834682224237  |
| AGIWUR1472;AGIWUR14005                                                         |                        |          |                |          |                             |
| CB4856 CT V                                                                    | 15670472               | 15671784 | WBGene00077450 | K06B4.15 | K06B4.15                    |
| -0.508489066255029                                                             | AGIWUR31005            |          |                |          |                             |
| CB4856 CT V                                                                    | 15672666               | 15673236 | WBGene00010598 | K06B4.3  | K06B4.3 -0.40441388119793   |
| AGIWUR27844                                                                    |                        |          |                |          |                             |
| CB4856 CT V                                                                    | 15674026               | 15675620 | WBGene00003641 | nhp-51   | K06B4.1 0.0140082945040128  |
| AGIWUR10709;AGIWUR13389                                                        |                        |          |                |          |                             |
| CB4856 CT V                                                                    | 15677582               | 15680074 | WBGene00003642 | nhp-52   | K06B4.2 0.109277459391325   |
| AGIWUR33467                                                                    |                        |          |                |          |                             |
| CB4856 CT V                                                                    | 15686090               | 15687590 | WBGene00010600 | nhp-196  | K06B4.5 -0.0725099200213766 |
| AGIWUR20684                                                                    |                        |          |                |          |                             |
| CB4856 CT V                                                                    | 15687960               | 15689759 | WBGene00010602 | nhp-197  | K06B4.7 0.0155845505476773  |
| AGIWUR18830                                                                    |                        |          |                |          |                             |
| CB4856 CT V                                                                    | 15690204               | 15691606 | WBGene00010601 | nhp-268  | K06B4.6 0.0641321907514323  |
| AGIWUR26445                                                                    |                        |          |                |          |                             |
| CB4856 CT V                                                                    | 15691999               | 15693161 | WBGene00014800 | nhp-200  | K06B4.13                    |
| 0.112587233103264                                                              | AGIWUR15076            |          |                |          |                             |
| CB4856 CT V                                                                    | 15693994               | 15696217 | WBGene00010603 | nhp-198  | K06B4.8 -0.0512965907225666 |
| AGIWUR7936                                                                     |                        |          |                |          |                             |
| CB4856 CT V                                                                    | 15696785               | 15698199 | WBGene00005920 | srx-29   | K06B4.9 0.064125177631233   |
| AGIWUR3617                                                                     |                        |          |                |          |                             |
| CB4856 CT V                                                                    | 15698528               | 15699899 | WBGene00010604 | nhp-199  | K06B4.10                    |
| 0.419598358312001                                                              | AGIWUR6613             |          |                |          |                             |
| CB4856 CT V                                                                    | 15700606               | 15702363 | WBGene00003643 | nhp-53   | K06B4.11                    |
| 0.403886460177963                                                              | AGIWUR42551            |          |                |          |                             |
| CB4856 CT V                                                                    | 15704960               | 15709528 | WBGene00006686 | twk-34   | K06B4.12                    |
| -0.220076906063492                                                             | AGIWUR42155            |          |                |          |                             |

|                                     |                                                             |          |                |                                     |
|-------------------------------------|-------------------------------------------------------------|----------|----------------|-------------------------------------|
| CB4856 CT V                         | 15709578                                                    | 15710501 | WBGene00012397 | Y6E2A.1 Y6E2A.1 0.282382078939526   |
| AGIWUR21730                         |                                                             |          |                |                                     |
| CB4856 CT V                         | 15710787                                                    | 15711998 | WBGene00006156 | str-101 Y6E2A.2                     |
| 0.000444071914398769                | AGIWUR2563                                                  |          |                |                                     |
| CB4856 CT V                         | 15712248                                                    | 15715644 | WBGene00012398 | Y6E2A.4 Y6E2A.4 1.24776854411802    |
| AGIWUR2462                          |                                                             |          |                |                                     |
| CB4856 CT V                         | 15716419                                                    | 15718660 | WBGene00012399 | Y6E2A.5 Y6E2A.5 1.14413112541695    |
| AGIWUR3329;AGIWUR44726;AGIWUR44897  |                                                             |          |                |                                     |
| CB4856 CT V                         | 15719870                                                    | 15721292 | WBGene00012400 | Y6E2A.7 Y6E2A.7 0.612286141493455   |
| AGIWUR23084                         |                                                             |          |                |                                     |
| CB4856 CT V                         | 15722188                                                    | 15723999 | WBGene00005357 | srh-140 Y6E2A.6 -0.243772304618063  |
| AGIWUR44528                         |                                                             |          |                |                                     |
| CB4856 CT V                         | 15724849                                                    | 15726702 | WBGene00012401 | irld-57 Y6E2A.8 0.00128182096643137 |
| AGIWUR40186                         |                                                             |          |                |                                     |
| CB4856 CT V                         | 15726841                                                    | 15728353 | WBGene00012402 | sfxn-1.3 Y6E2A.9                    |
| -0.203769960966989                  | AGIWUR26428;AGIWUR29355;AGIWUR41643                         |          |                |                                     |
| CB4856 CT V                         | 15729238                                                    | 15730532 | WBGene00050915 | Y6E2A.10 Y6E2A.10                   |
| 0.246863069256186                   | AGIWUR40704                                                 |          |                |                                     |
| CB4856 CT V                         | 15730779                                                    | 15732309 | WBGene00006103 | str-38 T23D5.2 0.116781465641358    |
| AGIWUR24345;AGIWUR36279;AGIWUR40640 |                                                             |          |                |                                     |
| CB4856 CT V                         | 15732863                                                    | 15733668 | WBGene00011942 | T23D5.3 T23D5.3 -0.892967873501552  |
| AGIWUR3432                          |                                                             |          |                |                                     |
| CB4856 CT V                         | 15734023                                                    | 15735820 | WBGene00006093 | str-27 T23D5.1 0.0179873921583251   |
| AGIWUR28342                         |                                                             |          |                |                                     |
| CB4856 CT V                         | 15737020                                                    | 15739659 | WBGene00014844 | T23D5.5 T23D5.5 -0.194999529657951  |
| AGIWUR19384                         |                                                             |          |                |                                     |
| CB4856 CT V                         | 15740517                                                    | 15741951 | WBGene00006085 | str-18 T23D5.6 0.0704794071280013   |
| AGIWUR32407                         |                                                             |          |                |                                     |
| CB4856 CT V                         | 15743260                                                    | 15744478 | WBGene00006086 | str-19 T23D5.7 -0.146999322937218   |
| AGIWUR17721;AGIWUR43854             |                                                             |          |                |                                     |
| CB4856 CT V                         | 15745404                                                    | 15745652 | WBGene00077456 | T23D5.14 T23D5.14                   |
| -0.111259511695698                  | AGIWUR24664;AGIWUR26354;AGIWUR26713;AGIWUR29651;AGIWUR44216 |          |                |                                     |
| CB4856 CT V                         | 15750932                                                    | 15752149 | WBGene00006108 | str-43 T23D5.9 -0.0757730193013337  |
| AGIWUR15500                         |                                                             |          |                |                                     |
| CB4856 CT V                         | 15755031                                                    | 15756394 | WBGene00006076 | str-8 T23D5.11                      |
| 0.117927574932757                   | AGIWUR21147                                                 |          |                |                                     |
| CB4856 CT V                         | 15758749                                                    | 15760417 | WBGene00006077 | str-9 F57A10.1                      |
| -0.21642911014988                   | AGIWUR18310                                                 |          |                |                                     |
| CB4856 CT V                         | 15760426                                                    | 15766172 | WBGene00001813 | haf-3 F57A10.3                      |

|                                                                                                                                   |             |          |                |          |                             |
|-----------------------------------------------------------------------------------------------------------------------------------|-------------|----------|----------------|----------|-----------------------------|
| -0.135811971858548                                                                                                                | AGIWUR38570 |          |                |          |                             |
| CB4856 CT V                                                                                                                       | 15766575    | 15767272 | WBGene00010184 | F57A10.2 | F57A10.2                    |
| 0.567944263592208                                                                                                                 | AGIWUR45066 |          |                |          |                             |
| CB4856 CT V                                                                                                                       | 15769438    | 15770371 | WBGene00010185 | F57A10.4 | F57A10.4                    |
| -0.120844714588587                                                                                                                | AGIWUR19566 |          |                |          |                             |
| CB4856 CT V                                                                                                                       | 15770302    | 15773239 | WBGene00003650 | nhr-60   | F57A10.5                    |
| 0.360715450428696                                                                                                                 | AGIWUR31604 |          |                |          |                             |
| CB4856 CT V                                                                                                                       | 15774946    | 15776676 | WBGene00010186 | nhr-283  | F57A10.6                    |
| -0.02002410368247                                                                                                                 | AGIWUR22663 |          |                |          |                             |
| CB4856 CT V                                                                                                                       | 15777718    | 15779247 | WBGene00012056 | nhr-285  | T26E4.16                    |
| 0.0813134512435454                                                                                                                | AGIWUR25482 |          |                |          |                             |
| CB4856 CT V                                                                                                                       | 15779693    | 15781082 | WBGene00012043 | irld-52  | T26E4.1 -0.298450896241102  |
| AGIWUR19642                                                                                                                       |             |          |                |          |                             |
| CB4856 CT V                                                                                                                       | 15781401    | 15782011 | WBGene00012044 | T26E4.2  | T26E4.2 0.324694211831695   |
| AGIWUR39816                                                                                                                       |             |          |                |          |                             |
| CB4856 CT V                                                                                                                       | 15782794    | 15784470 | WBGene00012045 | T26E4.3  | T26E4.3 -0.102840008483323  |
| AGIWUR44007                                                                                                                       |             |          |                |          |                             |
| CB4856 CT V                                                                                                                       | 15784929    | 15786597 | WBGene00012048 | srxa-17  | T26E4.6 0.163147930974024   |
| AGIWUR8380                                                                                                                        |             |          |                |          |                             |
| CB4856 CT V                                                                                                                       | 15790476    | 15792583 | WBGene00012046 | T26E4.4  | T26E4.4 -0.18191788198744   |
| AGIWUR1297;AGIWUR22296                                                                                                            |             |          |                |          |                             |
| CB4856 CT V                                                                                                                       | 15793570    | 15795194 | WBGene00012049 | T26E4.7  | T26E4.7 -0.0517499432008393 |
| AGIWUR39128                                                                                                                       |             |          |                |          |                             |
| CB4856 CT V                                                                                                                       | 15799212    | 15802723 | WBGene00012051 | T26E4.9  | T26E4.9 -0.463249496743286  |
| AGIWUR16925                                                                                                                       |             |          |                |          |                             |
| CB4856 CT V                                                                                                                       | 15804843    | 15805750 | WBGene00012053 | srbc-74  | T26E4.13                    |
| -0.150633821745155                                                                                                                | AGIWUR8264  |          |                |          |                             |
| CB4856 CT V                                                                                                                       | 15808119    | 15810036 | WBGene00012055 | srsx-36  | T26E4.15                    |
| 0.240190663750726                                                                                                                 | AGIWUR23418 |          |                |          |                             |
| CB4856 CT V                                                                                                                       | 15810784    | 15811330 | WBGene00010016 | F54B8.1  | F54B8.1                     |
| -0.00764555464590089                                                                                                              | AGIWUR958   |          |                |          |                             |
| CB4856 CT V                                                                                                                       | 15814237    | 15815659 | WBGene00010018 | fbxa-69  | F54B8.3 0.260320818702013   |
| AGIWUR21915                                                                                                                       |             |          |                |          |                             |
| CB4856 CT V                                                                                                                       | 15816464    | 15817143 | WBGene00010019 | F54B8.4  | F54B8.4 0.480517070493448   |
| AGIWUR1221;AGIWUR1619;AGIWUR11144;AGIWUR22397;AGIWUR31675;AGIWUR33561;AGIWUR33604;AGIWUR35475;AGIWUR38821;AGIWUR40872;AGIWUR44858 |             |          |                |          |                             |
| CB4856 CT V                                                                                                                       | 15817410    | 15817846 | WBGene00000014 | abf-3    | F54B8.5 0.0581581475283137  |
| AGIWUR35529                                                                                                                       |             |          |                |          |                             |
| CB4856 CT V                                                                                                                       | 15818427    | 15819827 | WBGene00044103 | srbc-47  | F54B8.14                    |

|                     |                                                             |          |                |                                     |
|---------------------|-------------------------------------------------------------|----------|----------------|-------------------------------------|
| 0.0177704872815054  | AGIWUR16708;AGIWUR36182                                     |          |                |                                     |
| CB4856 CT V         | 15820283                                                    | 15821383 | WBGene00010020 | srbc-48 F54B8.6 -0.222580536404251  |
| AGIWUR42422         |                                                             |          |                |                                     |
| CB4856 CT V         | 15821698                                                    | 15822884 | WBGene00010021 | srbc-49 F54B8.7 0.125690713099331   |
| AGIWUR20962         |                                                             |          |                |                                     |
| CB4856 CT V         | 15823898                                                    | 15824966 | WBGene00010022 | srbc-50 F54B8.8 -0.0918496599637866 |
| AGIWUR7657          |                                                             |          |                |                                     |
| CB4856 CT V         | 15826410                                                    | 15827429 | WBGene00010023 | srbc-51 F54B8.9 -0.108971477934788  |
| AGIWUR31717         |                                                             |          |                |                                     |
| CB4856 CT V         | 15827823                                                    | 15828882 | WBGene00010024 | srbc-52 F54B8.10                    |
| 0.0538070214784589  | AGIWUR35751                                                 |          |                |                                     |
| CB4856 CT V         | 15829022                                                    | 15830007 | WBGene00044105 | srbc-55 F54B8.16                    |
| 0.137456818347507   | AGIWUR26313                                                 |          |                |                                     |
| CB4856 CT V         | 15830586                                                    | 15831686 | WBGene00010026 | srbc-56 F54B8.12                    |
| 0.147136033324306   | AGIWUR4572;AGIWUR45179                                      |          |                |                                     |
| CB4856 CT V         | 15832436                                                    | 15833722 | WBGene00010025 | srbc-54 F54B8.11                    |
| -0.0474417521021193 | AGIWUR13949                                                 |          |                |                                     |
| CB4856 CT V         | 15834745                                                    | 15837403 | WBGene00044104 | srbc-53 F54B8.15                    |
| 0.0949300905776118  | AGIWUR13012;AGIWUR24832                                     |          |                |                                     |
| CB4856 CT V         | 15837524                                                    | 15839522 | WBGene00003556 | nas-40 F54B8.13                     |
| -0.0351071365558191 | AGIWUR34477;AGIWUR39894                                     |          |                |                                     |
| CB4856 CT V         | 15839967                                                    | 15841195 | WBGene00005365 | srh-149 K08G2.13                    |
| 0.447104036074197   | AGIWUR15882                                                 |          |                |                                     |
| CB4856 CT V         | 15841837                                                    | 15844214 | WBGene00005368 | srh-152 K08G2.3 0.199254344628857   |
| AGIWUR23740         |                                                             |          |                |                                     |
| CB4856 CT V         | 15844453                                                    | 15844768 | WBGene00050949 | K08G2.16 K08G2.16                   |
| -0.0432105426965848 | AGIWUR19175;AGIWUR26507;AGIWUR29082;AGIWUR39015;AGIWUR41335 |          |                |                                     |
| CB4856 CT V         | 15845931                                                    | 15847306 | WBGene00005366 | srh-150 K08G2.2 0.37370244843413    |
| AGIWUR38885         |                                                             |          |                |                                     |
| CB4856 CT V         | 15855012                                                    | 15856148 | WBGene00005369 | srh-153 K08G2.11                    |
| 0.00297138737834324 | AGIWUR27955                                                 |          |                |                                     |
| CB4856 CT V         | 15858838                                                    | 15859227 | WBGene00014803 | K08G2.14 K08G2.14                   |
| -0.084992793727706  | AGIWUR7388;AGIWUR25421                                      |          |                |                                     |
| CB4856 CT V         | 15859960                                                    | 15860985 | WBGene00005367 | srh-151 K08G2.6 -0.626248544997763  |
| AGIWUR24228         |                                                             |          |                |                                     |
| CB4856 CT V         | 15861452                                                    | 15862699 | WBGene00010688 | srz-12 K08G2.7 -0.135356297602129   |
| AGIWUR2579          |                                                             |          |                |                                     |
| CB4856 CT V         | 15863342                                                    | 15864458 | WBGene00005503 | srh-299 K08G2.9 -0.0246504262301137 |
| AGIWUR22771         |                                                             |          |                |                                     |



|                         |                                     |          |                |                  |                             |
|-------------------------|-------------------------------------|----------|----------------|------------------|-----------------------------|
| CB4856 CT V             | 15865088                            | 15865811 | WBGene00005498 | srh-294 K08G2.10 |                             |
| 0.0214258113522128      | AGIWUR5785;AGIWUR24066;AGIWUR27707  |          |                |                  |                             |
| CB4856 CT V             | 15866139                            | 15867333 | WBGene00005497 | srh-293 K08G2.8  | 0.0596510033731095          |
| AGIWUR25448             |                                     |          |                |                  |                             |
| CB4856 CT V             | 15867683                            | 15869051 | WBGene00011513 | fbxa-197         | T06C12.4                    |
| -0.266588534858641      | AGIWUR25587                         |          |                |                  |                             |
| CB4856 CT V             | 15869311                            | 15870636 | WBGene00011514 | fbxa-198         | T06C12.5                    |
| 0.11227654057504        | AGIWUR22215;AGIWUR24784;AGIWUR35646 |          |                |                  |                             |
| CB4856 CT V             | 15871170                            | 15872351 | WBGene00006122 | str-57           | T06C12.2                    |
| 0.00662467273659573     | AGIWUR3263                          |          |                |                  |                             |
| CB4856 CT V             | 15872573                            | 15873770 | WBGene00006121 | str-56           | T06C12.3                    |
| -0.0406963208495954     | AGIWUR4744                          |          |                |                  |                             |
| CB4856 CT V             | 15874093                            | 15876408 | WBGene00003692 | nhr-102          | T06C12.6                    |
| -0.214505677491166      | AGIWUR17090                         |          |                |                  |                             |
| CB4856 CT V             | 15876732                            | 15879619 | WBGene00003674 | nhr-84           | T06C12.7                    |
| -0.101492137391608      | AGIWUR11870                         |          |                |                  |                             |
| CB4856 CT V             | 15885662                            | 15886059 | WBGene00011516 | T06C12.9         | T06C12.9                    |
| 0.000811475267717299    | AGIWUR29957                         |          |                |                  |                             |
| CB4856 CT V             | 15886719                            | 15888851 | WBGene00011517 | cgt-1            | T06C12.10                   |
| 0.721977516356544       | AGIWUR26795                         |          |                |                  |                             |
| CB4856 CT V             | 15892061                            | 15892520 | WBGene00011519 | T06C12.12        | T06C12.12                   |
| -0.3430394963134        | AGIWUR22023                         |          |                |                  |                             |
| CB4856 CT V             | 15892996                            | 15894160 | WBGene00011518 | T06C12.11        | T06C12.11                   |
| -0.210913533838658      | AGIWUR41573                         |          |                |                  |                             |
| CB4856 CT V             | 15894454                            | 15896765 | WBGene00011520 | nhr-213          | T06C12.13                   |
| 0.416570524672114       | AGIWUR5439                          |          |                |                  |                             |
| CB4856 CT V             | 15897996                            | 15899415 | WBGene00006124 | str-60           | T06C12.1                    |
| -0.400563041522573      | AGIWUR44430                         |          |                |                  |                             |
| CB4856 CT V             | 15899996                            | 15900900 | WBGene00011521 | T06C12.14        | T06C12.14                   |
| -0.0806571853248474     | AGIWUR9101                          |          |                |                  |                             |
| CB4856 CT V             | 15901142                            | 15902166 | WBGene00014832 | srab-27          | T06C12.15                   |
| -0.0369081659690145     | AGIWUR14272;AGIWUR26824             |          |                |                  |                             |
| CB4856 CT V             | 15905620                            | 15907032 | WBGene00009418 | F35E8.2          | F35E8.2 0.00240154753122468 |
| AGIWUR12319;AGIWUR42594 |                                     |          |                |                  |                             |
| CB4856 CT V             | 15912148                            | 15913056 | WBGene00009420 | F35E8.6          | F35E8.6 0.169203011760498   |
| AGIWUR6094              |                                     |          |                |                  |                             |
| CB4856 CT V             | 15914014                            | 15915142 | WBGene00009421 | F35E8.7          | F35E8.7 0.00103208622825157 |
| AGIWUR36084             |                                     |          |                |                  |                             |
| CB4856 CT V             | 15915216                            | 15916079 | WBGene00001786 | gst-38           | F35E8.8 -0.638731468710579  |

|                      |                                     |          |                |         |          |                     |  |
|----------------------|-------------------------------------|----------|----------------|---------|----------|---------------------|--|
| AGIWUR4624           |                                     |          |                |         |          |                     |  |
| CB4856 CT V          | 15916334                            | 15917558 | WBGene00009422 | F35E8.9 | F35E8.9  | -0.351403439714176  |  |
| AGIWUR3483           |                                     |          |                |         |          |                     |  |
| CB4856 CT V          | 15921309                            | 15922818 | WBGene00000412 | cdr-1   | F35E8.11 |                     |  |
| 0.211922203012746    | AGIWUR32534                         |          |                |         |          |                     |  |
| CB4856 CT V          | 15922939                            | 15924471 | WBGene00003698 | nhr-108 | F35E8.12 |                     |  |
| -0.114892441942366   | AGIWUR15760                         |          |                |         |          |                     |  |
| CB4856 CT V          | 15926425                            | 15928425 | WBGene00011505 | pzf-1   | T05G11.1 |                     |  |
| -0.16850564489452    | AGIWUR19186                         |          |                |         |          |                     |  |
| CB4856 CT V          | 15930182                            | 15931084 | WBGene00011506 | srbc-77 | T05G11.2 |                     |  |
| 0.0855476447500818   | AGIWUR5982                          |          |                |         |          |                     |  |
| CB4856 CT V          | 15931292                            | 15932490 | WBGene00005773 | srw-26  | T05G11.3 |                     |  |
| -0.00144014961328054 | AGIWUR30587                         |          |                |         |          |                     |  |
| CB4856 CT V          | 15933267                            | 15934976 | WBGene00005774 | srw-27  | T05G11.4 |                     |  |
| -0.202827361212491   | AGIWUR37244                         |          |                |         |          |                     |  |
| CB4856 CT V          | 15935948                            | 15937110 | WBGene00005775 | srw-28  | T05G11.5 |                     |  |
| -0.00977490830315686 | AGIWUR36679;AGIWUR39032             |          |                |         |          |                     |  |
| CB4856 CT V          | 15937194                            | 15938538 | WBGene00005799 | srw-52  | T05G11.8 |                     |  |
| 0.0611639212881947   | AGIWUR4369                          |          |                |         |          |                     |  |
| CB4856 CT V          | 15938776                            | 15940354 | WBGene00005802 | srw-55  | T05G11.6 |                     |  |
| -0.0277463270505711  | AGIWUR4347                          |          |                |         |          |                     |  |
| CB4856 CT V          | 15943425                            | 15944854 | WBGene00005800 | srw-53  | T05G11.7 |                     |  |
| 0.076350319710178    | AGIWUR16562                         |          |                |         |          |                     |  |
| CB4856 CT V          | 15947299                            | 15948461 | WBGene00005805 | srw-58  | H24D24.2 |                     |  |
| 0.106982399791422    | AGIWUR27357                         |          |                |         |          |                     |  |
| CB4856 CT V          | 15949716                            | 15951003 | WBGene00005806 | srw-59  | H24D24.1 |                     |  |
| 0.123930518825667    | AGIWUR21694                         |          |                |         |          |                     |  |
| CB4856 CT V          | 15951432                            | 15952862 | WBGene00005803 | srw-56  | F36G9.16 |                     |  |
| -0.441131692699061   | AGIWUR36809                         |          |                |         |          |                     |  |
| CB4856 CT V          | 15953595                            | 15955032 | WBGene00005804 | srw-57  | F36G9.1  | 0.131070872875948   |  |
| AGIWUR34845          |                                     |          |                |         |          |                     |  |
| CB4856 CT V          | 15955797                            | 15957028 | WBGene00005401 | srh-186 | F36G9.2  | 0.0911212438939106  |  |
| AGIWUR8604           |                                     |          |                |         |          |                     |  |
| CB4856 CT V          | 15957406                            | 15959554 | WBGene00009485 | F36G9.3 | F36G9.3  | -0.535080291922645  |  |
| AGIWUR19685          |                                     |          |                |         |          |                     |  |
| CB4856 CT V          | 15959808                            | 15961915 | WBGene00014751 | F36G9.4 | F36G9.4  | -0.0377562247978735 |  |
| AGIWUR31171          |                                     |          |                |         |          |                     |  |
| CB4856 CT V          | 15962086                            | 15963232 | WBGene00005515 | sri-3   | F36G9.10 |                     |  |
| -0.386250140331118   | AGIWUR15677;AGIWUR17012;AGIWUR28051 |          |                |         |          |                     |  |

|                                    |   |                         |          |                |          |          |                     |
|------------------------------------|---|-------------------------|----------|----------------|----------|----------|---------------------|
| CB4856 CT                          | V | 15963849                | 15965212 | WBGene00005514 | sri-2    | F36G9.9  | -0.314477699791678  |
| AGIWUR1372                         |   |                         |          |                |          |          |                     |
| CB4856 CT                          | V | 15966245                | 15967642 | WBGene00005513 | sri-1    | F36G9.8  | 0.0709447176707965  |
| AGIWUR26153                        |   |                         |          |                |          |          |                     |
| CB4856 CT                          | V | 15968474                | 15969753 | WBGene00009486 | F36G9.7  | F36G9.7  | 0.0761710394326967  |
| AGIWUR35022                        |   |                         |          |                |          |          |                     |
| CB4856 CT                          | V | 15970433                | 15972579 | WBGene00005686 | sru-23   | F36G9.6  | 0.0838900445285544  |
| AGIWUR22156                        |   |                         |          |                |          |          |                     |
| CB4856 CT                          | V | 15972907                | 15974936 | WBGene00005685 | sru-22   | F36G9.5  | -0.0502168036416748 |
| AGIWUR28181                        |   |                         |          |                |          |          |                     |
| CB4856 CT                          | V | 15978714                | 15981666 | WBGene00009488 | oac-20   | F36G9.12 |                     |
| -0.208240294661657                 |   | AGIWUR23069             |          |                |          |          |                     |
| CB4856 CT                          | V | 15981691                | 15982854 | WBGene00009490 | fbxa-99  | F36G9.14 |                     |
| -0.383883476812841                 |   | AGIWUR27467             |          |                |          |          |                     |
| CB4856 CT                          | V | 15983294                | 15986640 | WBGene00009489 | F36G9.13 |          | F36G9.13            |
| -0.0957959897668674                |   | AGIWUR30823             |          |                |          |          |                     |
| CB4856 CT                          | V | 15987494                | 15988174 | WBGene00009491 | F36G9.15 |          | F36G9.15            |
| -0.0641815433085857                |   | AGIWUR25824;AGIWUR39952 |          |                |          |          |                     |
| CB4856 CT                          | V | 15988754                | 15991607 | WBGene00007380 | C06C6.6  | C06C6.6  | -0.338660151984008  |
| AGIWUR5010                         |   |                         |          |                |          |          |                     |
| CB4856 CT                          | V | 15992150                | 15995607 | WBGene00007381 | C06C6.7  | C06C6.7  | -0.514466344013918  |
| AGIWUR11685                        |   |                         |          |                |          |          |                     |
| CB4856 CT                          | V | 15996214                | 15996745 | WBGene00007383 | C06C6.9  | C06C6.9  | -0.291702377515465  |
| AGIWUR44824                        |   |                         |          |                |          |          |                     |
| CB4856 CT                          | V | 15997136                | 15997768 | WBGene00007382 | C06C6.8  | C06C6.8  | -0.683324350631467  |
| AGIWUR6150                         |   |                         |          |                |          |          |                     |
| CB4856 CT                          | V | 15997761                | 16000653 | WBGene00003640 | nhr-50   | C06C6.5  | 0.117868265172141   |
| AGIWUR4454;AGIWUR26657;AGIWUR29520 |   |                         |          |                |          |          |                     |
| CB4856 CT                          | V | 16002588                | 16004728 | WBGene00003653 | nhr-63   | C06C6.4  | 0.0269332308644312  |
| AGIWUR17261                        |   |                         |          |                |          |          |                     |
| CB4856 CT                          | V | 16006304                | 16007605 | WBGene00006262 | str-231  | C06C6.3  | -0.220621116619984  |
| AGIWUR41558                        |   |                         |          |                |          |          |                     |
| CB4856 CT                          | V | 16008332                | 16009664 | WBGene00006264 | str-233  | C06C6.2  | -0.0809508620277928 |
| AGIWUR18585                        |   |                         |          |                |          |          |                     |
| CB4856 CT                          | V | 16010710                | 16012112 | WBGene00007379 | C06C6.1  | C06C6.1  | 0.0628936885121973  |
| AGIWUR45005                        |   |                         |          |                |          |          |                     |
| CB4856 CT                          | V | 16012537                | 16014226 | WBGene00011686 | T10C6.2  | T10C6.2  | 0.069982168895983   |
| AGIWUR29743                        |   |                         |          |                |          |          |                     |
| CB4856 CT                          | V | 16014509                | 16015752 | WBGene00006263 | str-232  | T10C6.1  | -0.0283301028624425 |

|                         |                                    |          |                |          |          |                     |  |
|-------------------------|------------------------------------|----------|----------------|----------|----------|---------------------|--|
| AGIWUR21772             |                                    |          |                |          |          |                     |  |
| CB4856 CT V             | 16017971                           | 16019862 | WBGene00005934 | srx-43   | T10C6.3  | 0.0858276241093305  |  |
| AGIWUR6572;AGIWUR7974   |                                    |          |                |          |          |                     |  |
| CB4856 CT V             | 16020342                           | 16022652 | WBGene00005935 | srx-44   | T10C6.4  |                     |  |
| -0.00428165912144074    | AGIWUR22415                        |          |                |          |          |                     |  |
| CB4856 CT V             | 16023351                           | 16024185 | WBGene00011687 | T10C6.5  | T10C6.5  | -0.0716588733081274 |  |
| AGIWUR13803;AGIWUR29687 |                                    |          |                |          |          |                     |  |
| CB4856 CT V             | 16024326                           | 16027454 | WBGene00011688 | T10C6.6  | T10C6.6  | 0.337387063043026   |  |
| AGIWUR11648;AGIWUR33048 |                                    |          |                |          |          |                     |  |
| CB4856 CT V             | 16027449                           | 16031713 | WBGene00011689 | T10C6.7  | T10C6.7  | -0.223979387544151  |  |
| AGIWUR38717             |                                    |          |                |          |          |                     |  |
| CB4856 CT V             | 16036413                           | 16038293 | WBGene00011691 | T10C6.10 |          | T10C6.10            |  |
| -0.40596941086742       | AGIWUR7120;AGIWUR17168;AGIWUR30370 |          |                |          |          |                     |  |
| CB4856 CT V             | 16041828                           | 16042283 | WBGene00001876 | his-2    | T10C6.13 |                     |  |
| -0.0710912379174644     | AGIWUR18145                        |          |                |          |          |                     |  |
| CB4856 CT V             | 16044296                           | 16045874 | WBGene00050899 | T10C6.15 |          | T10C6.15            |  |
| 1.68514826018148        | AGIWUR44157                        |          |                |          |          |                     |  |
| CB4856 CT V             | 16046873                           | 16047446 | WBGene00013961 | ZK285.2  | ZK285.2  | 0.125077663945321   |  |
| AGIWUR44047             |                                    |          |                |          |          |                     |  |
| CB4856 CT V             | 16047808                           | 16049147 | WBGene00006234 | str-198  | ZK285.1  | 0.105860613971364   |  |
| AGIWUR35495             |                                    |          |                |          |          |                     |  |
| CB4856 CT V             | 16049492                           | 16051554 | WBGene00008821 | best-12  | F14H3.2  | -0.0318105436394926 |  |
| AGIWUR39204             |                                    |          |                |          |          |                     |  |
| CB4856 CT V             | 16051923                           | 16053510 | WBGene00008822 | F14H3.3  | F14H3.3  | -0.0828738953482855 |  |
| AGIWUR44849             |                                    |          |                |          |          |                     |  |
| CB4856 CT V             | 16053900                           | 16055072 | WBGene00008823 | F14H3.4  | F14H3.4  | -0.335490913310558  |  |
| AGIWUR3490              |                                    |          |                |          |          |                     |  |
| CB4856 CT V             | 16055806                           | 16057054 | WBGene00008824 | F14H3.5  | F14H3.5  | -0.377666664400051  |  |
| AGIWUR2701              |                                    |          |                |          |          |                     |  |
| CB4856 CT V             | 16057322                           | 16058892 | WBGene00008825 | F14H3.6  | F14H3.6  | -0.237600538562686  |  |
| AGIWUR24313             |                                    |          |                |          |          |                     |  |
| CB4856 CT V             | 16059781                           | 16060235 | WBGene00219414 | F14H3.15 |          | F14H3.15            |  |
| 0.139508631738368       | AGIWUR36744                        |          |                |          |          |                     |  |
| CB4856 CT V             | 16063551                           | 16064108 | WBGene00014735 | cyp-35D2 |          | F14H3.13            |  |
| -0.287835369010282      | AGIWUR43917                        |          |                |          |          |                     |  |
| CB4856 CT V             | 16064447                           | 16067002 | WBGene00008827 | F14H3.8  | F14H3.8  | 0.00952225139444085 |  |
| AGIWUR4110              |                                    |          |                |          |          |                     |  |
| CB4856 CT V             | 16067949                           | 16068763 | WBGene00008828 | F14H3.9  | F14H3.9  | 0.0804671499181087  |  |
| AGIWUR20501             |                                    |          |                |          |          |                     |  |

|                                                           |                         |          |                |          |                             |
|-----------------------------------------------------------|-------------------------|----------|----------------|----------|-----------------------------|
| CB4856 CT V                                               | 16069238                | 16071301 | WBGene00008829 | cyp-35D1 | F14H3.10                    |
| -0.655923885466141                                        | AGIWUR18064             |          |                |          |                             |
| CB4856 CT V                                               | 16071325                | 16072738 | WBGene00008830 | nhr-176  | F14H3.11                    |
| -0.110773127375459                                        | AGIWUR13486;AGIWUR17452 |          |                |          |                             |
| CB4856 CT V                                               | 16072765                | 16073956 | WBGene00005598 | srj-10   | F14H3.1 0.0704303657733618  |
| AGIWUR29645                                               |                         |          |                |          |                             |
| CB4856 CT V                                               | 16074113                | 16075323 | WBGene00008831 | F14H3.12 | F14H3.12                    |
| -0.425909530821277                                        | AGIWUR2204              |          |                |          |                             |
| CB4856 CT V                                               | 16075659                | 16077308 | WBGene00005616 | srj-29   | F22B8.1 0.020002133285991   |
| AGIWUR36282                                               |                         |          |                |          |                             |
| CB4856 CT V                                               | 16077979                | 16079234 | WBGene00014741 | F22B8.2  | F22B8.2 -0.095378750917738  |
| AGIWUR15244                                               |                         |          |                |          |                             |
| CB4856 CT V                                               | 16086572                | 16088217 | WBGene00009047 | F22B8.4  | F22B8.4 0.139354513641957   |
| AGIWUR44672                                               |                         |          |                |          |                             |
| CB4856 CT V                                               | 16090985                | 16092117 | WBGene00009046 | F22B8.3  | F22B8.3 -0.184968466510949  |
| AGIWUR21008                                               |                         |          |                |          |                             |
| CB4856 CT V                                               | 16094584                | 16097320 | WBGene00009049 | F22B8.7  | F22B8.7 0.104715736197772   |
| AGIWUR15062                                               |                         |          |                |          |                             |
| CB4856 CT V                                               | 16097985                | 16100209 | WBGene00006075 | str-7    | F22B8.5 -0.209732361002583  |
| AGIWUR15383;AGIWUR19926;AGIWUR42258                       |                         |          |                |          |                             |
| CB4856 CT V                                               | 16100627                | 16102750 | WBGene00009048 | cth-1    | F22B8.6 -0.167867186864614  |
| AGIWUR9763;AGIWUR36127;AGIWUR42001                        |                         |          |                |          |                             |
| CB4856 CT V                                               | 16103894                | 16105950 | WBGene00009706 | argk-1   | F44G3.2 -0.0583084029256682 |
| AGIWUR1153;AGIWUR5200;AGIWUR18061;AGIWUR18759;AGIWUR36128 |                         |          |                |          |                             |
| CB4856 CT V                                               | 16112237                | 16112968 | WBGene00014757 | F44G3.4  | F44G3.4 0.104744647373691   |
| AGIWUR14212;AGIWUR36160                                   |                         |          |                |          |                             |
| CB4856 CT V                                               | 16112992                | 16114337 | WBGene00009707 | srxa-16  | F44G3.5 0.194414932700215   |
| AGIWUR36396                                               |                         |          |                |          |                             |
| CB4856 CT V                                               | 16115681                | 16116897 | WBGene00006092 | str-25   | F44G3.11                    |
| -0.0548409845319089                                       | AGIWUR7233              |          |                |          |                             |
| CB4856 CT V                                               | 16117363                | 16118701 | WBGene00006158 | str-103  | F44G3.1 0.0218343434966979  |
| AGIWUR41093                                               |                         |          |                |          |                             |
| CB4856 CT V                                               | 16121824                | 16122648 | WBGene00004809 | skr-3    | F44G3.6 0.126319121943066   |
| AGIWUR29757                                               |                         |          |                |          |                             |
| CB4856 CT V                                               | 16125811                | 16127497 | WBGene00044661 | fbxa-143 | F44G3.14                    |
| 0.263138110006942                                         | AGIWUR21812             |          |                |          |                             |
| CB4856 CT V                                               | 16128131                | 16129089 | WBGene00044660 | fbxa-87  | F44G3.13                    |
| 0.148669968192523                                         | AGIWUR7460;AGIWUR29772  |          |                |          |                             |
| CB4856 CT V                                               | 16129409                | 16130979 | WBGene00044659 | fbxa-142 | F44G3.12                    |

|                                     |                                    |          |                |                  |                     |
|-------------------------------------|------------------------------------|----------|----------------|------------------|---------------------|
| 0.0719152944994725                  | AGIWUR14461                        |          |                |                  |                     |
| CB4856 CT V                         | 16131180                           | 16133283 | WBGene00009709 | fbxa-144         | F44G3.8             |
| -0.1396488397769                    | AGIWUR29526;AGIWUR33518            |          |                |                  |                     |
| CB4856 CT V                         | 16133781                           | 16137143 | WBGene00009708 | F44G3.7 F44G3.7  | 0.0258750018818752  |
| AGIWUR25611                         |                                    |          |                |                  |                     |
| CB4856 CT V                         | 16138846                           | 16139627 | WBGene00009710 | F44G3.10         | F44G3.10            |
| -0.184655651481662                  | AGIWUR7611;AGIWUR37760;AGIWUR40817 |          |                |                  |                     |
| CB4856 CT V                         | 16140314                           | 16141164 | WBGene00008631 | F10A3.1 F10A3.1  | 0.0151249415120933  |
| AGIWUR34865                         |                                    |          |                |                  |                     |
| CB4856 CT V                         | 16142008                           | 16143116 | WBGene00008632 | fbxa-88 F10A3.2  | -0.54884365318226   |
| AGIWUR31979                         |                                    |          |                |                  |                     |
| CB4856 CT V                         | 16143615                           | 16144653 | WBGene00008633 | fbxa-18 F10A3.3  | -0.39897045829419   |
| AGIWUR10313                         |                                    |          |                |                  |                     |
| CB4856 CT V                         | 16144986                           | 16146263 | WBGene00008638 | F10A3.16         | F10A3.16            |
| -0.335704588864786                  | AGIWUR14428                        |          |                |                  |                     |
| CB4856 CT V                         | 16147039                           | 16148327 | WBGene00014733 | F10A3.10         | F10A3.10            |
| 0.0896480711335563                  | AGIWUR582                          |          |                |                  |                     |
| CB4856 CT V                         | 16149125                           | 16151870 | WBGene00008634 | F10A3.4 F10A3.4  | -0.544833499126238  |
| AGIWUR18361                         |                                    |          |                |                  |                     |
| CB4856 CT V                         | 16151978                           | 16153475 | WBGene00006280 | str-254 F10A3.9  | -0.0590080633569792 |
| AGIWUR7211;AGIWUR44010              |                                    |          |                |                  |                     |
| CB4856 CT V                         | 16153855                           | 16155211 | WBGene00006154 | str-97 F10A3.8   | 0.0315035261706971  |
| AGIWUR13410;AGIWUR25754;AGIWUR37364 |                                    |          |                |                  |                     |
| CB4856 CT V                         | 16155451                           | 16156722 | WBGene00008635 | F10A3.7 F10A3.7  | 0.209088785661152   |
| AGIWUR32120                         |                                    |          |                |                  |                     |
| CB4856 CT V                         | 16157335                           | 16158491 | WBGene00006155 | str-99 F10A3.6   | -0.407652198981344  |
| AGIWUR1542                          |                                    |          |                |                  |                     |
| CB4856 CT V                         | 16158679                           | 16159694 | WBGene00045507 | F10A3.17         | F10A3.17            |
| -0.312088472257845                  | AGIWUR32356                        |          |                |                  |                     |
| CB4856 CT V                         | 16160685                           | 16162224 | WBGene00006161 | str-109 F10A3.5  |                     |
| -0.00986277202353403                | AGIWUR3013                         |          |                |                  |                     |
| CB4856 CT V                         | 16162685                           | 16163795 | WBGene00008636 | F10A3.11         | F10A3.11            |
| 0.347404554988625                   | AGIWUR12243                        |          |                |                  |                     |
| CB4856 CT V                         | 16164019                           | 16165473 | WBGene00008637 | F10A3.12         | F10A3.12            |
| -0.00408839083313772                | AGIWUR37426                        |          |                |                  |                     |
| CB4856 CT V                         | 16166236                           | 16167409 | WBGene00006160 | str-108 F10A3.13 |                     |
| -0.0656960809046732                 | AGIWUR15968                        |          |                |                  |                     |
| CB4856 CT V                         | 16167875                           | 16169126 | WBGene00006162 | str-111 F10A3.15 |                     |
| -0.0935247930460115                 | AGIWUR15156                        |          |                |                  |                     |

|        |    |   |                                                                      |          |                |                 |                    |
|--------|----|---|----------------------------------------------------------------------|----------|----------------|-----------------|--------------------|
| CB4856 | CT | V | 16173743                                                             | 16175857 | WBGene00010589 | cyp-33D1        | K05D4.4            |
|        |    |   | -0.24447126608252 AGIWUR15132;AGIWUR26937;AGIWUR28056;AGIWUR32245    |          |                |                 |                    |
| CB4856 | CT | V | 16176287                                                             | 16177491 | WBGene00014799 | K05D4.5 K05D4.5 | -0.130161987163201 |
|        |    |   | AGIWUR19570;AGIWUR25619;AGIWUR36956                                  |          |                |                 |                    |
| CB4856 | CT | V | 16178532                                                             | 16179966 | WBGene00014798 | K05D4.1 K05D4.1 | -0.030495192099413 |
|        |    |   | AGIWUR13418;AGIWUR22857                                              |          |                |                 |                    |
| CB4856 | CT | V | 16180650                                                             | 16181861 | WBGene00006159 | str-106 K05D4.2 | 0.04998779278481   |
|        |    |   | AGIWUR36320                                                          |          |                |                 |                    |
| CB4856 | CT | V | 16182410                                                             | 16183540 | WBGene00010590 | srz-13 K05D4.8  | 0.147094193430815  |
|        |    |   | AGIWUR9886                                                           |          |                |                 |                    |
| CB4856 | CT | V | 16185403                                                             | 16186920 | WBGene00005482 | srh-277 K05D4.6 | 0.0754922461608345 |
|        |    |   | AGIWUR114;AGIWUR2111;AGIWUR2913;AGIWUR7866;AGIWUR39691               |          |                |                 |                    |
| CB4856 | CT | V | 16187728                                                             | 16189129 | WBGene00005485 | srh-280 K05D4.7 | 0.110619813275042  |
|        |    |   | AGIWUR4413;AGIWUR6895;AGIWUR19136;AGIWUR25620                        |          |                |                 |                    |
| CB4856 | CT | V | 16190785                                                             | 16192262 | WBGene00005486 | srh-281 F11A5.1 | -0.418477420646854 |
|        |    |   | AGIWUR15987                                                          |          |                |                 |                    |
| CB4856 | CT | V | 16193356                                                             | 16194581 | WBGene00005484 | srh-279 F11A5.2 | 0.0119869243917963 |
|        |    |   | AGIWUR40342                                                          |          |                |                 |                    |
| CB4856 | CT | V | 16194939                                                             | 16195544 | WBGene00008671 | F11A5.3 F11A5.3 | 0.226740286380644  |
|        |    |   | AGIWUR28861                                                          |          |                |                 |                    |
| CB4856 | CT | V | 16195679                                                             | 16196290 | WBGene00008672 | F11A5.4 F11A5.4 | -0.167263089992947 |
|        |    |   | AGIWUR37086                                                          |          |                |                 |                    |
| CB4856 | CT | V | 16198379                                                             | 16201045 | WBGene00008673 | F11A5.5 F11A5.5 | 0.210437708650495  |
|        |    |   | AGIWUR44997                                                          |          |                |                 |                    |
| CB4856 | CT | V | 16202030                                                             | 16202740 | WBGene00045510 | F11A5.17        | F11A5.17           |
|        |    |   | 0.246595658465358 AGIWUR5781;AGIWUR36739;AGIWUR40497                 |          |                |                 |                    |
| CB4856 | CT | V | 16202809                                                             | 16204862 | WBGene00045511 | F11A5.18        | F11A5.18           |
|        |    |   | -0.0366885887139237 AGIWUR12498;AGIWUR15612;AGIWUR25301;AGIWUR40184  |          |                |                 |                    |
| CB4856 | CT | V | 16205188                                                             | 16206818 | WBGene00008675 | ir1d-26 F11A5.7 | -0.103664594922503 |
|        |    |   | AGIWUR991                                                            |          |                |                 |                    |
| CB4856 | CT | V | 16206943                                                             | 16209916 | WBGene00008676 | oac-15 F11A5.8  | 0.0281294769190854 |
|        |    |   | AGIWUR43379                                                          |          |                |                 |                    |
| CB4856 | CT | V | 16210952                                                             | 16211454 | WBGene00044184 | F11A5.16        | F11A5.16           |
|        |    |   | -0.00301770371700449 AGIWUR13277;AGIWUR19353;AGIWUR36561;AGIWUR43875 |          |                |                 |                    |
| CB4856 | CT | V | 16214890                                                             | 16217706 | WBGene00008677 | F11A5.9 F11A5.9 | 1.1421543065824    |
|        |    |   | AGIWUR17833                                                          |          |                |                 |                    |
| CB4856 | CT | V | 16217701                                                             | 16218605 | WBGene00008680 | F11A5.15        | F11A5.15           |
|        |    |   | 0.282828430397814 AGIWUR37713                                        |          |                |                 |                    |
| CB4856 | CT | V | 16219541                                                             | 16221948 | WBGene00001591 | glc-1 F11A5.10  |                    |

|                         |                                     |          |                |           |          |                    |
|-------------------------|-------------------------------------|----------|----------------|-----------|----------|--------------------|
| 1.95615166790692        | AGIWUR29186                         |          |                |           |          |                    |
| CB4856 CT V             | 16222323                            | 16223415 | WBGene00005547 | sri-35    | F11A5.11 |                    |
| -0.0112266488899433     | AGIWUR6562;AGIWUR31026;AGIWUR32138  |          |                |           |          |                    |
| CB4856 CT V             | 16224327                            | 16225540 | WBGene00008678 | stdh-2    | F11A5.12 |                    |
| 0.004447150126488       | AGIWUR16829                         |          |                |           |          |                    |
| CB4856 CT V             | 16225701                            | 16225887 | WBGene00014322 | F11A5.14  | F11A5.14 |                    |
| -0.0560861071429812     | AGIWUR15158                         |          |                |           |          |                    |
| CB4856 CT V             | 16226013                            | 16226681 | WBGene00008679 | F11A5.13  | F11A5.13 |                    |
| -0.46502983817326       | AGIWUR21002                         |          |                |           |          |                    |
| CB4856 CT V             | 16227127                            | 16229893 | WBGene00009028 | F21H7.2   | F21H7.2  | -0.231183677597097 |
| AGIWUR23420             |                                     |          |                |           |          |                    |
| CB4856 CT V             | 16230203                            | 16231043 | WBGene00009033 | F21H7.12  | F21H7.12 |                    |
| 1.54016137121457        | AGIWUR43397                         |          |                |           |          |                    |
| CB4856 CT V             | 16231032                            | 16232317 | WBGene00001770 | gst-22    | F21H7.1  | -1.03286196319448  |
| AGIWUR20527             |                                     |          |                |           |          |                    |
| CB4856 CT V             | 16232652                            | 16233335 | WBGene00009029 | F21H7.3   | F21H7.3  | -1.09116704409599  |
| AGIWUR18667             |                                     |          |                |           |          |                    |
| CB4856 CT V             | 16233924                            | 16234896 | WBGene00009030 | cllec-233 | F21H7.4  |                    |
| -0.148965313567098      | AGIWUR23753                         |          |                |           |          |                    |
| CB4856 CT V             | 16235171                            | 16235747 | WBGene00005317 | srh-98    | F21H7.14 |                    |
| -0.0456590858411348     | AGIWUR15119                         |          |                |           |          |                    |
| CB4856 CT V             | 16237523                            | 16238824 | WBGene00009031 | F21H7.5   | F21H7.5  | -0.532269112331017 |
| AGIWUR30066             |                                     |          |                |           |          |                    |
| CB4856 CT V             | 16239333                            | 16240447 | WBGene00014740 | F21H7.6   | F21H7.6  | 0.185720808368373  |
| AGIWUR22044;AGIWUR35030 |                                     |          |                |           |          |                    |
| CB4856 CT V             | 16241217                            | 16242445 | WBGene00005322 | srh-103   | F21H7.13 |                    |
| -0.0757709010159964     | AGIWUR7209                          |          |                |           |          |                    |
| CB4856 CT V             | 16242818                            | 16244178 | WBGene00005323 | srh-104   | F21H7.7  | 0.0750144256545564 |
| AGIWUR26850             |                                     |          |                |           |          |                    |
| CB4856 CT V             | 16246879                            | 16248455 | WBGene00005315 | srh-95    | F21H7.11 |                    |
| -0.00987923586550199    | AGIWUR10690;AGIWUR27139;AGIWUR34427 |          |                |           |          |                    |
| CB4856 CT V             | 16248583                            | 16253787 | WBGene00001545 | gcy-20    | F21H7.9  | 0.360674186475987  |
| AGIWUR34558             |                                     |          |                |           |          |                    |
| CB4856 CT V             | 16254301                            | 16256398 | WBGene00009032 | bgnt-1.3  | F21H7.10 |                    |
| 0.360631308151069       | AGIWUR37791                         |          |                |           |          |                    |
| CB4856 CT V             | 16258442                            | 16260686 | WBGene00011750 | nhr-218   | T13F3.2  | 0.0958180605827117 |
| AGIWUR988               |                                     |          |                |           |          |                    |
| CB4856 CT V             | 16261647                            | 16263953 | WBGene00003717 | nhr-127   | T13F3.3  | 0.308161043367638  |
| AGIWUR40703             |                                     |          |                |           |          |                    |



|                                                                        |    |   |          |          |                |          |           |                     |
|------------------------------------------------------------------------|----|---|----------|----------|----------------|----------|-----------|---------------------|
| CB4856                                                                 | CT | V | 16265097 | 16265607 | WBGene00011751 | T13F3.4  | T13F3.4   | -0.0660594192352697 |
| AGIWUR9411;AGIWUR16759;AGIWUR18945;AGIWUR27431;AGIWUR29628;AGIWUR35257 |    |   |          |          |                |          |           |                     |
| CB4856                                                                 | CT | V | 16266765 | 16268150 | WBGene00044653 | T13F3.9  | T13F3.9   | -0.194167581612706  |
| AGIWUR23129;AGIWUR24605;AGIWUR40089                                    |    |   |          |          |                |          |           |                     |
| CB4856                                                                 | CT | V | 16268335 | 16269567 | WBGene00011752 | fbxa-2   | T13F3.5   | 0.0691635485428854  |
| AGIWUR17354;AGIWUR22932;AGIWUR34541                                    |    |   |          |          |                |          |           |                     |
| CB4856                                                                 | CT | V | 16270216 | 16271223 | WBGene00011753 | T13F3.6  | T13F3.6   | -0.804359378652044  |
| AGIWUR20125;AGIWUR21281                                                |    |   |          |          |                |          |           |                     |
| CB4856                                                                 | CT | V | 16271536 | 16272498 | WBGene00044205 | T13F3.8  | T13F3.8   | 0.0300977041911707  |
| AGIWUR12595                                                            |    |   |          |          |                |          |           |                     |
| CB4856                                                                 | CT | V | 16272686 | 16275410 | WBGene00011754 | T13F3.7  | T13F3.7   | 0.197370791713178   |
| AGIWUR11446                                                            |    |   |          |          |                |          |           |                     |
| CB4856                                                                 | CT | V | 16275913 | 16277698 | WBGene00006227 | str-183  | T13F3.1   | 0.0159298325633577  |
| AGIWUR17043                                                            |    |   |          |          |                |          |           |                     |
| CB4856                                                                 | CT | V | 16278191 | 16280612 | WBGene00009226 | cyp-37B1 | F28G4.1   |                     |
| 3.37343113857048 AGIWUR38767                                           |    |   |          |          |                |          |           |                     |
| CB4856                                                                 | CT | V | 16280602 | 16282321 | WBGene00009227 | F28G4.2  | F28G4.2   | 0.06544657160231    |
| AGIWUR29795                                                            |    |   |          |          |                |          |           |                     |
| CB4856                                                                 | CT | V | 16283018 | 16285894 | WBGene00009229 | F28G4.4  | F28G4.4   | -0.108050076469867  |
| AGIWUR15182;AGIWUR16824;AGIWUR27000                                    |    |   |          |          |                |          |           |                     |
| CB4856                                                                 | CT | V | 16286151 | 16287719 | WBGene00009228 | F28G4.3  | F28G4.3   | -0.122455379964199  |
| AGIWUR37528                                                            |    |   |          |          |                |          |           |                     |
| CB4856                                                                 | CT | V | 16288788 | 16292154 | WBGene00009230 | oac-18   | F28G4.5   | -0.136982912205978  |
| AGIWUR32845                                                            |    |   |          |          |                |          |           |                     |
| CB4856                                                                 | CT | V | 16292709 | 16295600 | WBGene00007829 | oac-5    | C31A11.1  |                     |
| 0.211093016684338 AGIWUR27043                                          |    |   |          |          |                |          |           |                     |
| CB4856                                                                 | CT | V | 16297370 | 16298278 | WBGene00007831 | srbc-83  | C31A11.3  |                     |
| -0.164333280672952 AGIWUR11713;AGIWUR17091                             |    |   |          |          |                |          |           |                     |
| CB4856                                                                 | CT | V | 16298969 | 16299862 | WBGene00044106 | srbc-84  | C31A11.10 |                     |
| 0.132701479561113 AGIWUR7876                                           |    |   |          |          |                |          |           |                     |
| CB4856                                                                 | CT | V | 16300576 | 16301478 | WBGene00007832 | srbc-82  | C31A11.4  |                     |
| 0.621891187921904 AGIWUR27488                                          |    |   |          |          |                |          |           |                     |
| CB4856                                                                 | CT | V | 16302717 | 16306156 | WBGene00007833 | oac-6    | C31A11.5  |                     |
| -0.146582701918518 AGIWUR21759                                         |    |   |          |          |                |          |           |                     |
| CB4856                                                                 | CT | V | 16307682 | 16309623 | WBGene00007834 | srxa-7   | C31A11.6  |                     |
| 0.164418200417295 AGIWUR6387                                           |    |   |          |          |                |          |           |                     |
| CB4856                                                                 | CT | V | 16309805 | 16314752 | WBGene00007835 | oac-7    | C31A11.7  |                     |
| -0.0650770075673011 AGIWUR45204                                        |    |   |          |          |                |          |           |                     |
| CB4856                                                                 | CT | V | 16315304 | 16317226 | WBGene00006247 | str-214  | C31A11.9  |                     |

|                                    |                                                                         |          |                |                 |                     |
|------------------------------------|-------------------------------------------------------------------------|----------|----------------|-----------------|---------------------|
| 0.0536495779312984                 | AGIWUR32118                                                             |          |                |                 |                     |
| CB4856 CT V                        | 16317567                                                                | 16318805 | WBGene00005395 | srh-180 F57G8.1 | -0.0594756111488657 |
| AGIWUR7163                         |                                                                         |          |                |                 |                     |
| CB4856 CT V                        | 16320797                                                                | 16327477 | WBGene00005747 | srv-36 F57G8.8  | 0.17075681307135    |
| AGIWUR662;AGIWUR19347;AGIWUR23944  |                                                                         |          |                |                 |                     |
| CB4856 CT V                        | 16329370                                                                | 16330242 | WBGene00010216 | F57G8.7 F57G8.7 | 1.27272927780182    |
| AGIWUR2979                         |                                                                         |          |                |                 |                     |
| CB4856 CT V                        | 16333712                                                                | 16335063 | WBGene00005383 | srh-167 F57G8.3 | -0.165241813454458  |
| AGIWUR21109                        |                                                                         |          |                |                 |                     |
| CB4856 CT V                        | 16336626                                                                | 16338277 | WBGene00005834 | srw-87 F57G8.4  | 0.0560479559601506  |
| AGIWUR11621                        |                                                                         |          |                |                 |                     |
| CB4856 CT V                        | 16339024                                                                | 16341536 | WBGene00010214 | F57G8.5 F57G8.5 | -0.335604038553658  |
| AGIWUR2510;AGIWUR10277;AGIWUR21099 |                                                                         |          |                |                 |                     |
| CB4856 CT V                        | 16342497                                                                | 16344272 | WBGene00010215 | nhr-193 F57G8.6 | 0.826134049834355   |
| AGIWUR30592                        |                                                                         |          |                |                 |                     |
| CB4856 CT V                        | 16344375                                                                | 16346506 | WBGene00012349 | W08G11.5        | W08G11.5            |
| -0.119960923003166                 | AGIWUR40666                                                             |          |                |                 |                     |
| CB4856 CT V                        | 16347060                                                                | 16349833 | WBGene00012346 | W08G11.1        | W08G11.1            |
| 0.27159411759672                   | AGIWUR24072                                                             |          |                |                 |                     |
| CB4856 CT V                        | 16357521                                                                | 16367574 | WBGene00012348 | pptr-1 W08G11.4 |                     |
| 0.0923162131778339                 | AGIWUR15748;AGIWUR23092;AGIWUR23926;AGIWUR30777;AGIWUR42165;AGIWUR43390 |          |                |                 |                     |
| CB4856 CT V                        | 16367681                                                                | 16372097 | WBGene00012347 | W08G11.3        | W08G11.3            |
| -0.180507361809937                 | AGIWUR18074                                                             |          |                |                 |                     |
| CB4856 CT V                        | 16372417                                                                | 16374776 | WBGene00005745 | srv-34 F13A7.3  | 0.159061841439224   |
| AGIWUR3625                         |                                                                         |          |                |                 |                     |
| CB4856 CT V                        | 16376239                                                                | 16377949 | WBGene00008724 | F13A7.1 F13A7.1 | 0.123802762077755   |
| AGIWUR36448                        |                                                                         |          |                |                 |                     |
| CB4856 CT V                        | 16378892                                                                | 16380488 | WBGene00005746 | srv-35 F13A7.4  | -0.0945974722506855 |
| AGIWUR1064;AGIWUR24283             |                                                                         |          |                |                 |                     |
| CB4856 CT V                        | 16382167                                                                | 16383829 | WBGene00008725 | F13A7.7 F13A7.7 | -0.196196112681559  |
| AGIWUR8127                         |                                                                         |          |                |                 |                     |
| CB4856 CT V                        | 16384490                                                                | 16386136 | WBGene00005576 | sri-64 F13A7.6  | -0.0995669007342297 |
| AGIWUR9997;AGIWUR25215;AGIWUR29874 |                                                                         |          |                |                 |                     |
| CB4856 CT V                        | 16386662                                                                | 16388368 | WBGene00005577 | sri-65 F13A7.8  | 0.345110938523272   |
| AGIWUR25201                        |                                                                         |          |                |                 |                     |
| CB4856 CT V                        | 16389241                                                                | 16389865 | WBGene00004817 | skr-11 F13A7.9  | -0.421960638788978  |
| AGIWUR11715                        |                                                                         |          |                |                 |                     |
| CB4856 CT V                        | 16390891                                                                | 16392406 | WBGene00001792 | gst-44 F13A7.10 |                     |
| 0.289001289228644                  | AGIWUR3708                                                              |          |                |                 |                     |

|                                                                                                      |          |          |                |          |          |                     |
|------------------------------------------------------------------------------------------------------|----------|----------|----------------|----------|----------|---------------------|
| CB4856 CT V                                                                                          | 16392482 | 16393828 | WBGene00005140 | srd-63   | F13A7.2  | -0.226306208170358  |
| AGIWUR2129;AGIWUR23449;AGIWUR32161;AGIWUR33690                                                       |          |          |                |          |          |                     |
| CB4856 CT V                                                                                          | 16394015 | 16395075 | WBGene00008726 | F13A7.11 | F13A7.11 |                     |
| 0.0928146943342583 AGIWUR19640                                                                       |          |          |                |          |          |                     |
| CB4856 CT V                                                                                          | 16396359 | 16398502 | WBGene00008727 | F13A7.12 | F13A7.12 |                     |
| -0.15436246924715 AGIWUR39641                                                                        |          |          |                |          |          |                     |
| CB4856 CT V                                                                                          | 16399688 | 16401625 | WBGene00008728 | sre-36   | F13A7.13 |                     |
| 0.0712768330198585 AGIWUR14743                                                                       |          |          |                |          |          |                     |
| CB4856 CT V                                                                                          | 16405751 | 16407699 | WBGene00006375 | syp-1    | F26D2.2  | -0.0775646837665054 |
| AGIWUR3001;AGIWUR12902                                                                               |          |          |                |          |          |                     |
| CB4856 CT V                                                                                          | 16407963 | 16410270 | WBGene00009148 | F26D2.3  | F26D2.3  | -0.165120906608111  |
| AGIWUR1510;AGIWUR11211;AGIWUR21865;AGIWUR24161;AGIWUR27772;AGIWUR40093;AGIWUR44150                   |          |          |                |          |          |                     |
| CB4856 CT V                                                                                          | 16410713 | 16411843 | WBGene00005361 | srh-145  | F26D2.4  | 0.083822497025265   |
| AGIWUR9297                                                                                           |          |          |                |          |          |                     |
| CB4856 CT V                                                                                          | 16412687 | 16413786 | WBGene00005360 | srh-144  | F26D2.5  | -0.0552300306688496 |
| AGIWUR45095                                                                                          |          |          |                |          |          |                     |
| CB4856 CT V                                                                                          | 16414068 | 16415247 | WBGene00014745 | F26D2.8  | F26D2.8  | 0.0732942687951628  |
| AGIWUR44;AGIWUR27522                                                                                 |          |          |                |          |          |                     |
| CB4856 CT V                                                                                          | 16415694 | 16417114 | WBGene00006120 | str-55   | F26D2.7  | -0.163438158801327  |
| AGIWUR2221                                                                                           |          |          |                |          |          |                     |
| CB4856 CT V                                                                                          | 16418433 | 16420425 | WBGene00009154 | F26D2.16 | F26D2.16 |                     |
| -0.452731406988145 AGIWUR32894                                                                       |          |          |                |          |          |                     |
| CB4856 CT V                                                                                          | 16420996 | 16422774 | WBGene00005795 | srw-48   | F26D2.9  | 0.0291409268978873  |
| AGIWUR28331                                                                                          |          |          |                |          |          |                     |
| CB4856 CT V                                                                                          | 16423099 | 16424507 | WBGene00005776 | srw-29   | F26D2.11 |                     |
| -0.128881805500311 AGIWUR31643                                                                       |          |          |                |          |          |                     |
| CB4856 CT V                                                                                          | 16424854 | 16429603 | WBGene00009149 | F26D2.10 | F26D2.10 |                     |
| -0.632016578831943 AGIWUR6760;AGIWUR29245;AGIWUR41595                                                |          |          |                |          |          |                     |
| CB4856 CT V                                                                                          | 16430240 | 16431861 | WBGene00006134 | str-73   | F26D2.1  | -0.18183354588021   |
| AGIWUR22361                                                                                          |          |          |                |          |          |                     |
| CB4856 CT V                                                                                          | 16432009 | 16433572 | WBGene00009150 | clec-234 | F26D2.12 |                     |
| 0.030050198040521 AGIWUR7612;AGIWUR16991;AGIWUR24649;AGIWUR26856;AGIWUR27037;AGIWUR33724;AGIWUR44070 |          |          |                |          |          |                     |
| CB4856 CT V                                                                                          | 16434722 | 16435610 | WBGene00009151 | F26D2.13 | F26D2.13 |                     |
| 0.135887746102124 AGIWUR22570                                                                        |          |          |                |          |          |                     |
| CB4856 CT V                                                                                          | 16435855 | 16436736 | WBGene00009152 | F26D2.14 | F26D2.14 |                     |
| 0.0688413775215122 AGIWUR11473;AGIWUR14643                                                           |          |          |                |          |          |                     |
| CB4856 CT V                                                                                          | 16437846 | 16438934 | WBGene00009153 | F26D2.15 | F26D2.15 |                     |
| -0.129741792968431 AGIWUR15745                                                                       |          |          |                |          |          |                     |
| CB4856 CT V                                                                                          | 16439667 | 16442450 | WBGene00011617 | T08G3.4  | T08G3.4  | 0.0154919710379557  |

|                                    |                                    |          |                |                   |                     |
|------------------------------------|------------------------------------|----------|----------------|-------------------|---------------------|
| AGIWUR1245;AGIWUR13961;AGIWUR18166 |                                    |          |                |                   |                     |
| CB4856 CT V                        | 16443926                           | 16445734 | WBGene00005358 | srh-141 T08G3.5   | 0.0137945023978761  |
| AGIWUR13063                        |                                    |          |                |                   |                     |
| CB4856 CT V                        | 16445976                           | 16447165 | WBGene00011618 | T08G3.6 T08G3.6   | 0.176446637808798   |
| AGIWUR25599                        |                                    |          |                |                   |                     |
| CB4856 CT V                        | 16448035                           | 16449344 | WBGene00011621 | T08G3.13          | T08G3.13            |
| -0.265814855964464                 | AGIWUR15610                        |          |                |                   |                     |
| CB4856 CT V                        | 16457269                           | 16458814 | WBGene00006083 | str-15 T08G3.1    | -0.0445265246656934 |
| AGIWUR34333                        |                                    |          |                |                   |                     |
| CB4856 CT V                        | 16459388                           | 16460965 | WBGene00005359 | srh-142 T08G3.3   | 0.0109042454117603  |
| AGIWUR21874                        |                                    |          |                |                   |                     |
| CB4856 CT V                        | 16462438                           | 16466357 | WBGene00011619 | T08G3.7 T08G3.7   |                     |
| -0.00772148167751752               | AGIWUR15711                        |          |                |                   |                     |
| CB4856 CT V                        | 16466466                           | 16467940 | WBGene00005707 | sru-44 T08G3.8    | 0.0857095796239253  |
| AGIWUR20001                        |                                    |          |                |                   |                     |
| CB4856 CT V                        | 16469367                           | 16471016 | WBGene00005355 | srh-138 T08G3.12  |                     |
| -0.224746962039244                 | AGIWUR37531                        |          |                |                   |                     |
| CB4856 CT V                        | 16471442                           | 16473397 | WBGene00005782 | srw-35 T08G3.10   |                     |
| -0.0874616727125552                | AGIWUR13977                        |          |                |                   |                     |
| CB4856 CT V                        | 16475677                           | 16476825 | WBGene00006017 | srx-126 T08G3.9   | 0.131282615037682   |
| AGIWUR32135                        |                                    |          |                |                   |                     |
| CB4856 CT V                        | 16478698                           | 16479375 | WBGene00011620 | T08G3.11          | T08G3.11            |
| 0.111200757413869                  | AGIWUR43715                        |          |                |                   |                     |
| CB4856 CT V                        | 16481580                           | 16482000 | WBGene00010202 | F57E7.1 F57E7.1   | -0.193691156048162  |
| AGIWUR31789                        |                                    |          |                |                   |                     |
| CB4856 CT V                        | 16482420                           | 16483144 | WBGene00010203 | F57E7.2 F57E7.2   | -0.108922643043813  |
| AGIWUR13259                        |                                    |          |                |                   |                     |
| CB4856 CT V                        | 16483981                           | 16485382 | WBGene00005356 | srh-139 F57E7.3   | -0.970318799521563  |
| AGIWUR15646                        |                                    |          |                |                   |                     |
| CB4856 CT V                        | 16486978                           | 16487574 | WBGene00012520 | Y32B12A.5         | Y32B12A.5           |
| 0.169458037668903                  | AGIWUR3890                         |          |                |                   |                     |
| CB4856 CT V                        | 16488472                           | 16489104 | WBGene00012516 | sqst-4 Y32B12A.1  |                     |
| -0.65363723811713                  | AGIWUR20316                        |          |                |                   |                     |
| CB4856 CT V                        | 16489531                           | 16490520 | WBGene00012517 | srbc-73 Y32B12A.2 |                     |
| 0.0671758909015994                 | AGIWUR22720                        |          |                |                   |                     |
| CB4856 CT V                        | 16490760                           | 16491547 | WBGene00005465 | srh-259 Y32B12A.6 |                     |
| 0.16048740459543                   | AGIWUR4254;AGIWUR15269;AGIWUR20175 |          |                |                   |                     |
| CB4856 CT V                        | 16492170                           | 16493458 | WBGene00005466 | srh-260 Y32B12A.7 |                     |
| -0.203798037421056                 | AGIWUR3405;AGIWUR29973             |          |                |                   |                     |

|                                                 |                                                                                    |          |                |           |                             |
|-------------------------------------------------|------------------------------------------------------------------------------------|----------|----------------|-----------|-----------------------------|
| CB4856 CT V                                     | 16493655                                                                           | 16494449 | WBGene00012518 | comt-2    | Y32B12A.3                   |
| -0.22290485563561                               | AGIWUR3690;AGIWUR15142;AGIWUR25810;AGIWUR27894;AGIWUR28027;AGIWUR28665;AGIWUR35500 |          |                |           |                             |
| CB4856 CT V                                     | 16494730                                                                           | 16495227 | WBGene00012519 | Y32B12A.4 | Y32B12A.4                   |
| -0.245757836521808                              | AGIWUR16079                                                                        |          |                |           |                             |
| CB4856 CT V                                     | 16495994                                                                           | 16497596 | WBGene00005353 | srh-136   | F36D3.6 -0.134117949130207  |
| AGIWUR4040                                      |                                                                                    |          |                |           |                             |
| CB4856 CT V                                     | 16499352                                                                           | 16502879 | WBGene00009469 | F36D3.1   | F36D3.1 -0.231076900848866  |
| AGIWUR15881                                     |                                                                                    |          |                |           |                             |
| CB4856 CT V                                     | 16502947                                                                           | 16503282 | WBGene00044189 | F36D3.14  | F36D3.14                    |
| 0.0720117059597385                              | AGIWUR1797;AGIWUR4391;AGIWUR5212;AGIWUR34875;AGIWUR41228                           |          |                |           |                             |
| CB4856 CT V                                     | 16503947                                                                           | 16505917 | WBGene00003644 | nhr-54    | F36D3.2 0.00883590873582385 |
| AGIWUR18110                                     |                                                                                    |          |                |           |                             |
| CB4856 CT V                                     | 16506897                                                                           | 16508705 | WBGene00005654 | srr-3     | F36D3.3 -0.233550893246957  |
| AGIWUR21200;AGIWUR30737;AGIWUR35699             |                                                                                    |          |                |           |                             |
| CB4856 CT V                                     | 16516472                                                                           | 16517719 | WBGene00009470 | F36D3.4   | F36D3.4 -0.531055594952994  |
| AGIWUR14766                                     |                                                                                    |          |                |           |                             |
| CB4856 CT V                                     | 16518183                                                                           | 16520245 | WBGene00009472 | F36D3.7   | F36D3.7 0.0457677034792585  |
| AGIWUR10953;AGIWUR12499;AGIWUR23247;AGIWUR34317 |                                                                                    |          |                |           |                             |
| CB4856 CT V                                     | 16520600                                                                           | 16522270 | WBGene00005781 | srw-34    | F36D3.13                    |
| -0.104741764442183                              | AGIWUR4748                                                                         |          |                |           |                             |
| CB4856 CT V                                     | 16528935                                                                           | 16530213 | WBGene00219326 | F36D3.16  | F36D3.16                    |
| -0.321991507867436                              | AGIWUR3090                                                                         |          |                |           |                             |
| CB4856 CT V                                     | 16531373                                                                           | 16532690 | WBGene00009474 | clec-235  | F36D3.10                    |
| 0.0697210127426859                              | AGIWUR22246;AGIWUR34028                                                            |          |                |           |                             |
| CB4856 CT V                                     | 16533004                                                                           | 16534110 | WBGene00000782 | cpr-2     | F36D3.9 0.271742099687799   |
| AGIWUR7124                                      |                                                                                    |          |                |           |                             |
| CB4856 CT V                                     | 16537001                                                                           | 16537771 | WBGene00012521 | Y32B12B.1 | Y32B12B.1                   |
| 0.0599382397612622                              | AGIWUR43482                                                                        |          |                |           |                             |
| CB4856 CT V                                     | 16538396                                                                           | 16549854 | WBGene00012522 | Y32B12B.2 | Y32B12B.2                   |
| 0.0335234762584129                              | AGIWUR11254;AGIWUR41877                                                            |          |                |           |                             |
| CB4856 CT V                                     | 16550980                                                                           | 16552282 | WBGene00012523 | srbc-65   | Y32B12B.3                   |
| 0.0151769264178974                              | AGIWUR27274                                                                        |          |                |           |                             |
| CB4856 CT V                                     | 16553327                                                                           | 16563504 | WBGene00012524 | Y32B12B.4 | Y32B12B.4                   |
| -0.0471214460747458                             | AGIWUR28882                                                                        |          |                |           |                             |
| CB4856 CT V                                     | 16565939                                                                           | 16567572 | WBGene00005708 | sru-45    | Y32B12B.7                   |
| -0.333102744570184                              | AGIWUR43428                                                                        |          |                |           |                             |
| CB4856 CT V                                     | 16569387                                                                           | 16571340 | WBGene00006471 | nhr-233   | Y32B12B.6                   |
| 0.0242975001889514                              | AGIWUR8446                                                                         |          |                |           |                             |
| CB4856 CT V                                     | 16573468                                                                           | 16574952 | WBGene00006196 | str-149   | Y32B12B.5                   |

|                                    |                                                            |          |                |           |          |                     |
|------------------------------------|------------------------------------------------------------|----------|----------------|-----------|----------|---------------------|
| 0.141110548940771                  | AGIWUR31136                                                |          |                |           |          |                     |
| CB4856 CT V                        | 16578459                                                   | 16580524 | WBGene00011396 | nhf-271   | T03E6.3  | 0.227363845626389   |
| AGIWUR4028                         |                                                            |          |                |           |          |                     |
| CB4856 CT V                        | 16581037                                                   | 16583175 | WBGene00011395 | T03E6.2   | T03E6.2  | -0.100195417269438  |
| AGIWUR20782                        |                                                            |          |                |           |          |                     |
| CB4856 CT V                        | 16586742                                                   | 16588528 | WBGene00005820 | srw-73    | T03E6.6  | 0.0764755587844572  |
| AGIWUR1802                         |                                                            |          |                |           |          |                     |
| CB4856 CT V                        | 16590101                                                   | 16592042 | WBGene00005475 | srh-269   | T03E6.5  | 0.293495540303904   |
| AGIWUR38015                        |                                                            |          |                |           |          |                     |
| CB4856 CT V                        | 16592572                                                   | 16595346 | WBGene00000776 | cp1-1     | T03E6.7  | -0.240745168420037  |
| AGIWUR4698;AGIWUR43048;AGIWUR43652 |                                                            |          |                |           |          |                     |
| CB4856 CT V                        | 16598989                                                   | 16600723 | WBGene00045356 | T03E6.9   | T03E6.9  | -0.0117473985277217 |
| AGIWUR18668;AGIWUR41414            |                                                            |          |                |           |          |                     |
| CB4856 CT V                        | 16600567                                                   | 16603369 | WBGene00011397 | T03E6.8   | T03E6.8  | 0.80974275154638    |
| AGIWUR22270                        |                                                            |          |                |           |          |                     |
| CB4856 CT V                        | 16603529                                                   | 16610952 | WBGene00194769 | Y32B12C.5 |          | Y32B12C.5           |
| 0.150797352159126                  | AGIWUR1181;AGIWUR25930;AGIWUR32738;AGIWUR38459             |          |                |           |          |                     |
| CB4856 CT V                        | 16612792                                                   | 16614767 | WBGene00012526 | Y32B12C.3 |          | Y32B12C.3           |
| -0.189128203242027                 | AGIWUR23808                                                |          |                |           |          |                     |
| CB4856 CT V                        | 16618341                                                   | 16620908 | WBGene00050904 | Y70C5A.3  |          | Y70C5A.3            |
| -0.000547083160727269              | AGIWUR31825                                                |          |                |           |          |                     |
| CB4856 CT V                        | 16621396                                                   | 16623211 | WBGene00013490 | Y70C5A.2  |          | Y70C5A.2            |
| 0.147852874383043                  | AGIWUR12702;AGIWUR30116                                    |          |                |           |          |                     |
| CB4856 CT V                        | 16624008                                                   | 16627970 | WBGene00012308 | oac-53    | W06G6.1  | 0.182916500626165   |
| AGIWUR25651                        |                                                            |          |                |           |          |                     |
| CB4856 CT V                        | 16629291                                                   | 16629648 | WBGene00012309 | W06G6.2   | W06G6.2  | -0.129145223436407  |
| AGIWUR17424                        |                                                            |          |                |           |          |                     |
| CB4856 CT V                        | 16629900                                                   | 16631155 | WBGene00005099 | srh-21    | W06G6.3  | 0.050592005139384   |
| AGIWUR13478                        |                                                            |          |                |           |          |                     |
| CB4856 CT V                        | 16632737                                                   | 16634085 | WBGene00005102 | srh-24    | W06G6.4  | -0.100133706485398  |
| AGIWUR8474;AGIWUR44750             |                                                            |          |                |           |          |                     |
| CB4856 CT V                        | 16634252                                                   | 16635619 | WBGene00005822 | srw-75    | W06G6.13 |                     |
| -0.696158516161144                 | AGIWUR19212                                                |          |                |           |          |                     |
| CB4856 CT V                        | 16645997                                                   | 16646481 | WBGene00012311 | W06G6.9   | W06G6.9  | 0.242524858082003   |
| AGIWUR42180                        |                                                            |          |                |           |          |                     |
| CB4856 CT V                        | 16646791                                                   | 16647193 | WBGene00012312 | W06G6.10  |          | W06G6.10            |
| 0.145663822876276                  | AGIWUR9521                                                 |          |                |           |          |                     |
| CB4856 CT V                        | 16648027                                                   | 16648480 | WBGene00219308 | W06G6.20  |          | W06G6.20            |
| 0.76380373785903                   | AGIWUR3552;AGIWUR17521;AGIWUR40622;AGIWUR43972;AGIWUR44176 |          |                |           |          |                     |

|                     |                                                             |          |                |          |                             |
|---------------------|-------------------------------------------------------------|----------|----------------|----------|-----------------------------|
| CB4856 CT V         | 16666340                                                    | 16666747 | WBGene00044185 | F14F8.14 | F14F8.14                    |
| -0.405073503570664  | AGIWUR10328;AGIWUR15648;AGIWUR18851;AGIWUR42476;AGIWUR44067 |          |                |          |                             |
| CB4856 CT V         | 16667691                                                    | 16668573 | WBGene00008817 | F14F8.9  | F14F8.9 -0.0760893374562208 |
| AGIWUR22108         |                                                             |          |                |          |                             |
| CB4856 CT V         | 16669339                                                    | 16671290 | WBGene00006125 | str-61   | F14F8.1 -0.0148551867941524 |
| AGIWUR39904         |                                                             |          |                |          |                             |
| CB4856 CT V         | 16671622                                                    | 16672186 | WBGene00008816 | F14F8.8  | F14F8.8 -0.183175725341739  |
| AGIWUR4826          |                                                             |          |                |          |                             |
| CB4856 CT V         | 16673423                                                    | 16674690 | WBGene00008813 | srz-2    | F14F8.2 0.267228104137498   |
| AGIWUR6690          |                                                             |          |                |          |                             |
| CB4856 CT V         | 16675853                                                    | 16677551 | WBGene00008814 | srz-1    | F14F8.3 -0.102731003982233  |
| AGIWUR21849         |                                                             |          |                |          |                             |
| CB4856 CT V         | 16677623                                                    | 16679337 | WBGene00008815 | srz-103  | F14F8.4 0.130772693762587   |
| AGIWUR41520         |                                                             |          |                |          |                             |
| CB4856 CT V         | 16680281                                                    | 16682656 | WBGene00005791 | srw-44   | F14F8.6 0.00619677309264688 |
| AGIWUR104           |                                                             |          |                |          |                             |
| CB4856 CT V         | 16683186                                                    | 16684878 | WBGene00005783 | srw-36   | F14F8.7 0.127969626547905   |
| AGIWUR29070         |                                                             |          |                |          |                             |
| CB4856 CT V         | 16686025                                                    | 16687083 | WBGene00005790 | srw-43   | F14F8.5 -0.152062068518715  |
| AGIWUR29683         |                                                             |          |                |          |                             |
| CB4856 CT V         | 16687527                                                    | 16689866 | WBGene00023505 | srz-102  | F14F8.13                    |
| 0.0551071804010359  | AGIWUR497                                                   |          |                |          |                             |
| CB4856 CT V         | 16692125                                                    | 16693832 | WBGene00005789 | srw-42   | F14F8.11                    |
| 0.0254799833587134  | AGIWUR30032                                                 |          |                |          |                             |
| CB4856 CT V         | 16697478                                                    | 16699773 | WBGene00005788 | srw-41   | F14F8.10                    |
| 0.0420989341816291  | AGIWUR37516                                                 |          |                |          |                             |
| CB4856 CT V         | 16700199                                                    | 16704409 | WBGene00013492 | Y70C5C.1 | Y70C5C.1                    |
| -0.196991768604272  | AGIWUR21778                                                 |          |                |          |                             |
| CB4856 CT V         | 16705082                                                    | 16706647 | WBGene00013493 | clec-9   | Y70C5C.2                    |
| 0.451364468049933   | AGIWUR39973                                                 |          |                |          |                             |
| CB4856 CT V         | 16709977                                                    | 16710778 | WBGene00023516 | srz-98   | Y70C5C.7                    |
| -0.0281183166773493 | AGIWUR22402;AGIWUR26467;AGIWUR31812                         |          |                |          |                             |
| CB4856 CT V         | 16713449                                                    | 16715195 | WBGene00013494 | irld-58  | Y70C5C.3                    |
| 0.123479352341565   | AGIWUR6228                                                  |          |                |          |                             |
| CB4856 CT V         | 16715480                                                    | 16716718 | WBGene00005354 | srh-137  | Y70C5C.4                    |
| 0.155020929502288   | AGIWUR13217                                                 |          |                |          |                             |
| CB4856 CT V         | 16718418                                                    | 16721993 | WBGene00013495 | clec-236 | Y70C5C.5                    |
| -0.0236539219002694 | AGIWUR15366;AGIWUR24547;AGIWUR25863                         |          |                |          |                             |
| CB4856 CT V         | 16722061                                                    | 16723844 | WBGene00003702 | nhr-112  | Y70C5C.6                    |

|                                                                      |                                               |          |                |          |                            |
|----------------------------------------------------------------------|-----------------------------------------------|----------|----------------|----------|----------------------------|
| -0.246642524315358                                                   | AGIWUR4411;AGIWUR17712;AGIWUR18788            |          |                |          |                            |
| CB4856 CT V                                                          | 16728731                                      | 16729960 | WBGene00012027 | fbxa-127 | T25E12.12                  |
| 0.112077296560699                                                    | AGIWUR42116                                   |          |                |          |                            |
| CB4856 CT V                                                          | 16733901                                      | 16735594 | WBGene00012025 | clec-38  | T25E12.10                  |
| 0.150679830047541                                                    | AGIWUR6517                                    |          |                |          |                            |
| CB4856 CT V                                                          | 16735765                                      | 16737404 | WBGene00012023 | clec-34  | T25E12.8                   |
| 0.193172498072189                                                    | AGIWUR1485;AGIWUR8334;AGIWUR32502;AGIWUR34931 |          |                |          |                            |
| CB4856 CT V                                                          | 16737673                                      | 16739200 | WBGene00012024 | clec-29  | T25E12.9                   |
| 0.0913161664780668                                                   | AGIWUR41772                                   |          |                |          |                            |
| CB4856 CT V                                                          | 16739268                                      | 16741588 | WBGene00012022 | clec-39  | T25E12.7                   |
| 0.21011157933606                                                     | AGIWUR32712                                   |          |                |          |                            |
| CB4856 CT V                                                          | 16742423                                      | 16744881 | WBGene00012021 | T25E12.6 | T25E12.6                   |
| 0.162146255430356                                                    | AGIWUR36964                                   |          |                |          |                            |
| CB4856 CT V                                                          | 16745080                                      | 16746258 | WBGene00012020 | gyg-2    | T25E12.5                   |
| 0.0981695974522836                                                   | AGIWUR36841                                   |          |                |          |                            |
| CB4856 CT V                                                          | 16747559                                      | 16788435 | WBGene00012019 | dkf-2    | T25E12.4                   |
| -0.0369883227306786                                                  | AGIWUR6610;AGIWUR31450;AGIWUR31584            |          |                |          |                            |
| CB4856 CT V                                                          | 16789267                                      | 16792771 | WBGene00012315 | immt-2   | W06H3.1 -0.171000738771096 |
| AGIWUR148;AGIWUR3517;AGIWUR15542;AGIWUR21222;AGIWUR38953;AGIWUR41677 |                                               |          |                |          |                            |
| CB4856 CT V                                                          | 16792764                                      | 16795007 | WBGene00004248 | pus-1    | W06H3.2 0.0836166441434116 |
| AGIWUR19463                                                          |                                               |          |                |          |                            |
| CB4856 CT V                                                          | 16794878                                      | 16802004 | WBGene00012316 | ctps-1   | W06H3.3 -0.368465119285206 |
| AGIWUR41343                                                          |                                               |          |                |          |                            |
| CB4856 CT V                                                          | 16802874                                      | 16814563 | WBGene00013606 | cand-1   | Y102A5A.1                  |
| -0.146759059833482                                                   | AGIWUR30164                                   |          |                |          |                            |
| CB4856 CT V                                                          | 16815567                                      | 16820712 | WBGene00011850 | T20B3.1  | T20B3.1 1.36065654529406   |
| AGIWUR33326                                                          |                                               |          |                |          |                            |
| CB4856 CT V                                                          | 16825290                                      | 16827592 | WBGene00005426 | srh-216  | T20B3.5 -0.151330358999194 |
| AGIWUR7258                                                           |                                               |          |                |          |                            |
| CB4856 CT V                                                          | 16828235                                      | 16829755 | WBGene00005424 | srh-214  | T20B3.4 0.0049265981216422 |
| AGIWUR12153                                                          |                                               |          |                |          |                            |
| CB4856 CT V                                                          | 16830557                                      | 16832021 | WBGene00005425 | srh-215  | T20B3.3                    |
| -0.00532836812770743                                                 | AGIWUR25568                                   |          |                |          |                            |
| CB4856 CT V                                                          | 16833316                                      | 16839141 | WBGene00004026 | phy-3    | T20B3.7 -0.375942013941888 |
| AGIWUR19081                                                          |                                               |          |                |          |                            |
| CB4856 CT V                                                          | 16839145                                      | 16841061 | WBGene00011853 | clec-40  | T20B3.13                   |
| 0.84386248930292                                                     | AGIWUR29336                                   |          |                |          |                            |
| CB4856 CT V                                                          | 16841459                                      | 16842863 | WBGene00011851 | clec-23  | T20B3.8 0.932623478406246  |
| AGIWUR14153                                                          |                                               |          |                |          |                            |



|                                    |                                                             |          |                |                   |                     |
|------------------------------------|-------------------------------------------------------------|----------|----------------|-------------------|---------------------|
| CB4856 CT V                        | 16843241                                                    | 16844696 | WBGene00044331 | clec-25 T20B3.15  |                     |
| 0.494306005328712                  | AGIWUR32341                                                 |          |                |                   |                     |
| CB4856 CT V                        | 16846867                                                    | 16848466 | WBGene00044332 | clec-36 T20B3.16  |                     |
| 0.193695880979143                  | AGIWUR9285;AGIWUR17755                                      |          |                |                   |                     |
| CB4856 CT V                        | 16848611                                                    | 16850130 | WBGene00011852 | clec-26 T20B3.12  |                     |
| -0.206090126039916                 | AGIWUR13391                                                 |          |                |                   |                     |
| CB4856 CT V                        | 16850394                                                    | 16852095 | WBGene00013609 | clec-37 Y102A5B.3 |                     |
| 0.0212422100433791                 | AGIWUR37056                                                 |          |                |                   |                     |
| CB4856 CT V                        | 16852291                                                    | 16854053 | WBGene00013608 | clec-35 Y102A5B.2 |                     |
| -0.224354340799225                 | AGIWUR14364;AGIWUR34707                                     |          |                |                   |                     |
| CB4856 CT V                        | 16854646                                                    | 16856152 | WBGene00013607 | clec-27 Y102A5B.1 |                     |
| -0.288048276953582                 | AGIWUR5046                                                  |          |                |                   |                     |
| CB4856 CT V                        | 16856437                                                    | 16858077 | WBGene00009854 | clec-31 F49A5.2   | 0.97195291763553    |
| AGIWUR16982                        |                                                             |          |                |                   |                     |
| CB4856 CT V                        | 16858429                                                    | 16860040 | WBGene00009855 | clec-22 F49A5.3   | -0.27830767497265   |
| AGIWUR1555;AGIWUR6322;AGIWUR16586  |                                                             |          |                |                   |                     |
| CB4856 CT V                        | 16860228                                                    | 16861869 | WBGene00009860 | clec-32 F49A5.9   | 1.38564464573926    |
| AGIWUR25174                        |                                                             |          |                |                   |                     |
| CB4856 CT V                        | 16862012                                                    | 16863890 | WBGene00009856 | clec-24 F49A5.4   | 1.14169018084282    |
| AGIWUR7771;AGIWUR14539;AGIWUR16880 |                                                             |          |                |                   |                     |
| CB4856 CT V                        | 16865704                                                    | 16867226 | WBGene00009857 | clec-28 F49A5.5   | -0.021264486036042  |
| AGIWUR34482                        |                                                             |          |                |                   |                     |
| CB4856 CT V                        | 16867678                                                    | 16869845 | WBGene00009859 | clec-33 F49A5.7   | -0.213437575735032  |
| AGIWUR45121                        |                                                             |          |                |                   |                     |
| CB4856 CT V                        | 16870742                                                    | 16871487 | WBGene00009858 | thn-4 F49A5.6     | -0.147614138062627  |
| AGIWUR2062                         |                                                             |          |                |                   |                     |
| CB4856 CT V                        | 16873942                                                    | 16875455 | WBGene00005770 | srw-23 F49A5.8    | -0.0211982211266797 |
| AGIWUR9227                         |                                                             |          |                |                   |                     |
| CB4856 CT V                        | 16875877                                                    | 16876144 | WBGene00044195 | F49A5.10          | F49A5.10            |
| 0.065588757830632                  | AGIWUR17436;AGIWUR22208;AGIWUR28545;AGIWUR29932;AGIWUR43591 |          |                |                   |                     |
| CB4856 CT V                        | 16878724                                                    | 16880154 | WBGene00008617 | F09C6.3 F09C6.3   | 0.0619660037668286  |
| AGIWUR41965                        |                                                             |          |                |                   |                     |
| CB4856 CT V                        | 16880994                                                    | 16881336 | WBGene00044278 | F09C6.14          | F09C6.14            |
| -0.104835163486134                 | AGIWUR11479;AGIWUR13626;AGIWUR22926;AGIWUR26443;AGIWUR44638 |          |                |                   |                     |
| CB4856 CT V                        | 16881901                                                    | 16882310 | WBGene00044181 | F09C6.11          | F09C6.11            |
| -0.0805967318075655                | AGIWUR19891;AGIWUR21290;AGIWUR38265;AGIWUR43218;AGIWUR43793 |          |                |                   |                     |
| CB4856 CT V                        | 16882878                                                    | 16883142 | WBGene00044182 | F09C6.12          | F09C6.12            |
| 0.000773605905515673               | AGIWUR10485;AGIWUR20232;AGIWUR31606;AGIWUR41910;AGIWUR44596 |          |                |                   |                     |
| CB4856 CT V                        | 16885075                                                    | 16885403 | WBGene00044183 | F09C6.13          | F09C6.13            |

|                                   |                                                                      |
|-----------------------------------|----------------------------------------------------------------------|
| 0.875976806928709                 | AGIWUR5166;AGIWUR14599;AGIWUR14672;AGIWUR24787;AGIWUR27503           |
| CB4856 CT V                       | 16887413 16888479 WBGene00008615 F09C6.1 F09C6.1 -0.0487087563208615 |
| AGIWUR43328                       |                                                                      |
| CB4856 CT V                       | 16889275 16890749 WBGene00008616 fbxa-44 F09C6.2 -0.0531486081259054 |
| AGIWUR3276;AGIWUR8021;AGIWUR37377 |                                                                      |
| CB4856 CT V                       | 16893740 16894107 WBGene00077492 F09C6.15 F09C6.15                   |
| -0.0714652306767536               | AGIWUR1114;AGIWUR25469                                               |
| CB4856 CT V                       | 16894230 16895553 WBGene00005650 srp-9 F09C6.5 -0.146774010469273    |
| AGIWUR21568;AGIWUR41911           |                                                                      |
| CB4856 CT V                       | 16896358 16897728 WBGene00005651 srp-10 F09C6.4 -0.439074682018338   |
| AGIWUR4775                        |                                                                      |
| CB4856 CT V                       | 16898457 16899455 WBGene00008618 fbxa-45 F09C6.6 -0.444197714395539  |
| AGIWUR45116                       |                                                                      |
| CB4856 CT V                       | 16901215 16902826 WBGene00005145 srd-68 F09C6.7 -1.12730300647117    |
| AGIWUR9408                        |                                                                      |
| CB4856 CT V                       | 16907969 16909971 WBGene00077493 F09C6.16 F09C6.16                   |
| -0.123536427060739                | AGIWUR3518;AGIWUR14063                                               |
| CB4856 CT V                       | 16912234 16915350 WBGene00003706 nhr-116 F09C6.9 -0.0226153188537115 |
| AGIWUR10178                       |                                                                      |
| CB4856 CT V                       | 16915373 16916179 WBGene00008620 F09C6.10 F09C6.10                   |
| -0.148039194882441                | AGIWUR4409;AGIWUR11154;AGIWUR21121;AGIWUR38731;AGIWUR40439           |
| CB4856 CT V                       | 16917196 16918478 WBGene00013610 fbxa-206 Y102A5C.1                  |
| -0.187208115145172                | AGIWUR32733                                                          |
| CB4856 CT V                       | 16918782 16919784 WBGene00013611 Y102A5C.2 Y102A5C.2                 |
| -0.385967891555131                | AGIWUR16511;AGIWUR35854;AGIWUR38293;AGIWUR44018                      |
| CB4856 CT V                       | 16919780 16921323 WBGene00013612 fbxa-207 Y102A5C.3                  |
| -0.279752048361161                | AGIWUR4834;AGIWUR21721;AGIWUR23457;AGIWUR42510                       |
| CB4856 CT V                       | 16922252 16924258 WBGene00013613 Y102A5C.4 Y102A5C.4                 |
| 0.413231335909698                 | AGIWUR2578                                                           |
| CB4856 CT V                       | 16924985 16926125 WBGene00044220 Y102A5C.35 Y102A5C.35               |
| -0.182190608446272                | AGIWUR8646                                                           |
| CB4856 CT V                       | 16926920 16927445 WBGene00044213 Y102A5C.36 Y102A5C.36               |
| -0.286023891970368                | AGIWUR1655                                                           |
| CB4856 CT V                       | 16928328 16928999 WBGene00014954 Y102A5C.5 Y102A5C.5                 |
| 0.0455049109000178                | AGIWUR7475;AGIWUR7938;AGIWUR18033                                    |
| CB4856 CT V                       | 16929167 16930063 WBGene00014955 Y102A5C.6 Y102A5C.6                 |
| 0.112233598028944                 | AGIWUR5552;AGIWUR6206;AGIWUR31531                                    |
| CB4856 CT V                       | 16943191 16943836 WBGene00014956 Y102A5C.11 Y102A5C.11               |
| -0.218556629865908                | AGIWUR11429;AGIWUR21276;AGIWUR30634                                  |

|                      |                         |          |                |            |            |
|----------------------|-------------------------|----------|----------------|------------|------------|
| CB4856 CT V          | 16947158                | 16948111 | WBGene00013619 | fbxa-112   | Y102A5C.13 |
| -0.214121400952257   | AGIWUR24401             |          |                |            |            |
| CB4856 CT V          | 16956529                | 16957991 | WBGene00013621 | cllec-239  | Y102A5C.16 |
| 0.1823004528567      | AGIWUR5509              |          |                |            |            |
| CB4856 CT V          | 16958657                | 16965675 | WBGene00001161 | efl-1      | Y102A5C.18 |
| 0.0287974582913026   | AGIWUR31042;AGIWUR35577 |          |                |            |            |
| CB4856 CT V          | 16966814                | 16968586 | WBGene00013623 | fbxa-90    | Y102A5C.19 |
| -0.28545250760812    | AGIWUR14527             |          |                |            |            |
| CB4856 CT V          | 16969039                | 16970965 | WBGene00013624 | srbc-80    | Y102A5C.20 |
| -0.0743857563464072  | AGIWUR36434             |          |                |            |            |
| CB4856 CT V          | 16972434                | 16974088 | WBGene00005338 | srh-119    | Y102A5C.21 |
| -0.00708601480997295 | AGIWUR31546             |          |                |            |            |
| CB4856 CT V          | 16975219                | 16976717 | WBGene00005945 | srx-54     | Y102A5C.22 |
| 0.130015295688773    | AGIWUR19658;AGIWUR21218 |          |                |            |            |
| CB4856 CT V          | 16977191                | 16978408 | WBGene00013625 | srz-53     | Y102A5C.23 |
| 0.269427658218483    | AGIWUR26238             |          |                |            |            |
| CB4856 CT V          | 16979010                | 16980244 | WBGene00005946 | srx-55     | Y102A5C.24 |
| -0.0769660741203939  | AGIWUR36283             |          |                |            |            |
| CB4856 CT V          | 16984044                | 16985395 | WBGene00013627 | srz-52     | Y102A5C.26 |
| 0.0144132636779091   | AGIWUR19574             |          |                |            |            |
| CB4856 CT V          | 16986460                | 16987135 | WBGene00077624 | Y102A5C.40 | Y102A5C.40 |
| 0.167934814576566    | AGIWUR40450             |          |                |            |            |
| CB4856 CT V          | 16990810                | 16991459 | WBGene00001706 | grd-17     | Y102A5C.34 |
| 0.162262407838351    | AGIWUR18992;AGIWUR41502 |          |                |            |            |
| CB4856 CT V          | 16992034                | 16993910 | WBGene00013629 | srz-95     | Y102A5C.33 |
| -0.0532269676686017  | AGIWUR22065             |          |                |            |            |
| CB4856 CT V          | 16998933                | 17000304 | WBGene00006249 | str-217    | Y102A5C.28 |
| -0.0559149652634954  | AGIWUR10775             |          |                |            |            |
| CB4856 CT V          | 17001467                | 17003587 | WBGene00005521 | sri-9      | Y102A5C.29 |
| -0.0758671544606946  | AGIWUR34695             |          |                |            |            |
| CB4856 CT V          | 17003980                | 17005066 | WBGene00014957 | Y102A5C.30 | Y102A5C.30 |
| -0.259937139082892   | AGIWUR3275              |          |                |            |            |
| CB4856 CT V          | 17005489                | 17006753 | WBGene00005348 | srh-131    | Y102A5C.31 |
| -0.325761499121519   | AGIWUR42747             |          |                |            |            |
| CB4856 CT V          | 17007232                | 17008402 | WBGene00005581 | sri-69     | Y102A5C.32 |
| 0.237286510101081    | AGIWUR40373             |          |                |            |            |
| CB4856 CT V          | 17008673                | 17009388 | WBGene00009914 | F49H6.13   | F49H6.13   |
| 0.395562998538981    | AGIWUR35282             |          |                |            |            |
| CB4856 CT V          | 17010062                | 17011849 | WBGene00009905 | cllec-240  | F49H6.1    |

|                                                                                  |                                                                         |          |                |                 |                     |  |
|----------------------------------------------------------------------------------|-------------------------------------------------------------------------|----------|----------------|-----------------|---------------------|--|
| -0.246364892107487                                                               | AGIWUR7659                                                              |          |                |                 |                     |  |
| CB4856 CT V                                                                      | 17012127                                                                | 17013332 | WBGene00009906 | clec-241        | F49H6.2             |  |
| 0.0140380818802139                                                               | AGIWUR41928                                                             |          |                |                 |                     |  |
| CB4856 CT V                                                                      | 17013646                                                                | 17013861 | WBGene00050928 | F49H6.16        | F49H6.16            |  |
| 0.0604132303932801                                                               | AGIWUR11947;AGIWUR12220;AGIWUR29541;AGIWUR36769;AGIWUR39561             |          |                |                 |                     |  |
| CB4856 CT V                                                                      | 17014408                                                                | 17015326 | WBGene00009907 | F49H6.3 F49H6.3 | -0.163116044446636  |  |
| AGIWUR44169                                                                      |                                                                         |          |                |                 |                     |  |
| CB4856 CT V                                                                      | 17016175                                                                | 17016446 | WBGene00045502 | F49H6.14        | F49H6.14            |  |
| 0.0856442808566                                                                  | AGIWUR9144;AGIWUR19042;AGIWUR28769;AGIWUR39378                          |          |                |                 |                     |  |
| CB4856 CT V                                                                      | 17017087                                                                | 17019800 | WBGene00005316 | srh-97 F49H6.4  | -0.162529708909885  |  |
| AGIWUR4678                                                                       |                                                                         |          |                |                 |                     |  |
| CB4856 CT V                                                                      | 17019990                                                                | 17020226 | WBGene00050965 | F49H6.17        | F49H6.17            |  |
| -0.129608989457785                                                               | AGIWUR21780;AGIWUR22613;AGIWUR30372;AGIWUR35838;AGIWUR43274;AGIWUR43610 |          |                |                 |                     |  |
| CB4856 CT V                                                                      | 17020907                                                                | 17021461 | WBGene00009913 | F49H6.12        | F49H6.12            |  |
| -0.327235464145128                                                               | AGIWUR15422;AGIWUR21659;AGIWUR24462;AGIWUR27313;AGIWUR32570             |          |                |                 |                     |  |
| CB4856 CT V                                                                      | 17023473                                                                | 17025347 | WBGene00009908 | F49H6.5 F49H6.5 | 1.04326482461018    |  |
| AGIWUR21039                                                                      |                                                                         |          |                |                 |                     |  |
| CB4856 CT V                                                                      | 17027255                                                                | 17028374 | WBGene00014768 | F49H6.6 F49H6.6 | -0.437307394010433  |  |
| AGIWUR12196;AGIWUR15561                                                          |                                                                         |          |                |                 |                     |  |
| CB4856 CT V                                                                      | 17028884                                                                | 17030448 | WBGene00005784 | srw-37 F49H6.7  | 0.02874668834008    |  |
| AGIWUR28075                                                                      |                                                                         |          |                |                 |                     |  |
| CB4856 CT V                                                                      | 17030738                                                                | 17032772 | WBGene00009910 | srz-92 F49H6.9  | -0.0364111490679795 |  |
| AGIWUR2313;AGIWUR2642;AGIWUR5170;AGIWUR16949;AGIWUR30126;AGIWUR32196;AGIWUR34131 |                                                                         |          |                |                 |                     |  |
| CB4856 CT V                                                                      | 17033218                                                                | 17035950 | WBGene00009912 | srz-94 F49H6.11 |                     |  |
| -0.00153348980255963                                                             | AGIWUR37649                                                             |          |                |                 |                     |  |
| CB4856 CT V                                                                      | 17036410                                                                | 17037862 | WBGene00009911 | srz-93 F49H6.10 |                     |  |
| -0.0284746063217689                                                              | AGIWUR6095                                                              |          |                |                 |                     |  |
| CB4856 CT V                                                                      | 17040739                                                                | 17041961 | WBGene00050976 | F28B1.11        | F28B1.11            |  |
| -0.161711432112154                                                               | AGIWUR3533                                                              |          |                |                 |                     |  |
| CB4856 CT V                                                                      | 17042592                                                                | 17043783 | WBGene00009195 | hpo-33 F28B1.1  |                     |  |
| -0.00785312691267848                                                             | AGIWUR21710                                                             |          |                |                 |                     |  |
| CB4856 CT V                                                                      | 17044786                                                                | 17049822 | WBGene00009196 | F28B1.2 F28B1.2 | -0.520418200066453  |  |
| AGIWUR29073                                                                      |                                                                         |          |                |                 |                     |  |
| CB4856 CT V                                                                      | 17051015                                                                | 17051617 | WBGene00077494 | F28B1.12        | F28B1.12            |  |
| -0.153221834221426                                                               | AGIWUR29490                                                             |          |                |                 |                     |  |
| CB4856 CT V                                                                      | 17052004                                                                | 17055349 | WBGene00009197 | F28B1.3 F28B1.3 | 0.0679489415285266  |  |
| AGIWUR32415                                                                      |                                                                         |          |                |                 |                     |  |
| CB4856 CT V                                                                      | 17055431                                                                | 17057052 | WBGene00009198 | F28B1.4 F28B1.4 | -0.0448539795149028 |  |
| AGIWUR43815                                                                      |                                                                         |          |                |                 |                     |  |

|                         |                                                             |          |                |                                     |
|-------------------------|-------------------------------------------------------------|----------|----------------|-------------------------------------|
| CB4856 CT V             | 17057135                                                    | 17059919 | WBGene00009199 | F28B1.5 F28B1.5                     |
| -0.00221057456280604    | AGIWUR27451                                                 |          |                |                                     |
| CB4856 CT V             | 17060287                                                    | 17061675 | WBGene00005578 | sri-66 F28B1.6 0.179047521122106    |
| AGIWUR5923              |                                                             |          |                |                                     |
| CB4856 CT V             | 17061889                                                    | 17063095 | WBGene00045381 | F28B1.9 F28B1.9 -0.236640465815791  |
| AGIWUR26072;AGIWUR42486 |                                                             |          |                |                                     |
| CB4856 CT V             | 17063417                                                    | 17064823 | WBGene00005462 | srh-256 F28B1.7 -0.0229100677222882 |
| AGIWUR1913;AGIWUR35236  |                                                             |          |                |                                     |
| CB4856 CT V             | 17064976                                                    | 17066471 | WBGene00005461 | srh-255 F28B1.8 0.0592916040358613  |
| AGIWUR23182             |                                                             |          |                |                                     |
| CB4856 CT V             | 17067146                                                    | 17067854 | WBGene00050958 | F28B1.10 F28B1.10                   |
| 0.038379775767349       | AGIWUR36506                                                 |          |                |                                     |
| CB4856 CT V             | 17068627                                                    | 17069533 | WBGene00045382 | T05E12.8 T05E12.8                   |
| -0.105319012154451      | AGIWUR15678                                                 |          |                |                                     |
| CB4856 CT V             | 17070527                                                    | 17071678 | WBGene00011485 | srbc-14 T05E12.2                    |
| 0.0181694617891424      | AGIWUR39008                                                 |          |                |                                     |
| CB4856 CT V             | 17074290                                                    | 17076000 | WBGene00006176 | str-125 T05E12.1                    |
| 0.0305087641384558      | AGIWUR38712                                                 |          |                |                                     |
| CB4856 CT V             | 17076874                                                    | 17077989 | WBGene00011486 | T05E12.3 T05E12.3                   |
| 1.02548991563389        | AGIWUR29382                                                 |          |                |                                     |
| CB4856 CT V             | 17078257                                                    | 17079895 | WBGene00005767 | srw-20 T05E12.4                     |
| 0.0905593263581164      | AGIWUR43453                                                 |          |                |                                     |
| CB4856 CT V             | 17080492                                                    | 17082818 | WBGene00045500 | T05E12.9 T05E12.9                   |
| -0.0587027614218472     | AGIWUR39435;AGIWUR41395                                     |          |                |                                     |
| CB4856 CT V             | 17085002                                                    | 17090023 | WBGene00011487 | T05E12.6 T05E12.6                   |
| -0.846515300060053      | AGIWUR6518;AGIWUR14154;AGIWUR29463;AGIWUR40326;AGIWUR42300  |          |                |                                     |
| CB4856 CT V             | 17090362                                                    | 17091693 | WBGene00005444 | srh-237 T05E12.7                    |
| -0.822615603093119      | AGIWUR6479;AGIWUR19438;AGIWUR36456                          |          |                |                                     |
| CB4856 CT V             | 17092570                                                    | 17093420 | WBGene00013935 | ZK218.1 ZK218.1 -0.755777135950465  |
| AGIWUR24739             |                                                             |          |                |                                     |
| CB4856 CT V             | 17094180                                                    | 17094485 | WBGene00050963 | ZK218.15 ZK218.15                   |
| -0.0934682262514528     | AGIWUR14594;AGIWUR24596;AGIWUR27095;AGIWUR36385;AGIWUR36538 |          |                |                                     |
| CB4856 CT V             | 17097927                                                    | 17098766 | WBGene00013937 | ZK218.3 ZK218.3 -0.28986203277144   |
| AGIWUR6219              |                                                             |          |                |                                     |
| CB4856 CT V             | 17099347                                                    | 17100364 | WBGene00013938 | ZK218.4 ZK218.4 -0.31588183943851   |
| AGIWUR32987             |                                                             |          |                |                                     |
| CB4856 CT V             | 17101132                                                    | 17102017 | WBGene00013939 | ZK218.5 ZK218.5 -0.180188581363846  |
| AGIWUR2008              |                                                             |          |                |                                     |
| CB4856 CT V             | 17103410                                                    | 17104627 | WBGene00013940 | nhr-248 ZK218.6 0.08358271608218    |

|                                                            |   |                                     |          |                |          |          |                     |
|------------------------------------------------------------|---|-------------------------------------|----------|----------------|----------|----------|---------------------|
| AGIWUR1901                                                 |   |                                     |          |                |          |          |                     |
| CB4856 CT                                                  | V | 17105783                            | 17106656 | WBGene00013941 | ZK218.7  | ZK218.7  | 0.171908194535725   |
| AGIWUR24098                                                |   |                                     |          |                |          |          |                     |
| CB4856 CT                                                  | V | 17107530                            | 17108418 | WBGene00013943 | ZK218.11 |          | ZK218.11            |
| -0.0711345188577557                                        |   | AGIWUR2994                          |          |                |          |          |                     |
| CB4856 CT                                                  | V | 17109684                            | 17110448 | WBGene00045492 | ZK218.14 |          | ZK218.14            |
| -0.164147993700716                                         |   | AGIWUR3949;AGIWUR7949;AGIWUR33943   |          |                |          |          |                     |
| CB4856 CT                                                  | V | 17114540                            | 17114887 | WBGene00014981 | ZK218.9  | ZK218.9  | -0.0382491442402113 |
| AGIWUR2424;AGIWUR15452;AGIWUR22073;AGIWUR28343;AGIWUR39661 |   |                                     |          |                |          |          |                     |
| CB4856 CT                                                  | V | 17116026                            | 17117009 | WBGene00013942 | ZK218.8  | ZK218.8  | -0.130102757093251  |
| AGIWUR24794                                                |   |                                     |          |                |          |          |                     |
| CB4856 CT                                                  | V | 17146825                            | 17153266 | WBGene00014753 | F40D4.14 |          | F40D4.14            |
| 0.0256063795801098                                         |   | AGIWUR3920;AGIWUR28464              |          |                |          |          |                     |
| CB4856 CT                                                  | V | 17159874                            | 17162621 | WBGene00009571 | F40D4.12 |          | F40D4.12            |
| -0.0195059173200312                                        |   | AGIWUR14728;AGIWUR30832;AGIWUR31537 |          |                |          |          |                     |
| CB4856 CT                                                  | V | 17162900                            | 17165509 | WBGene00005321 | srh-102  | F40D4.11 |                     |
| 0.289581241049007                                          |   | AGIWUR38142                         |          |                |          |          |                     |
| CB4856 CT                                                  | V | 17166028                            | 17167557 | WBGene00009569 | srz-66   | F40D4.9  | -0.0591711797116492 |
| AGIWUR28911                                                |   |                                     |          |                |          |          |                     |
| CB4856 CT                                                  | V | 17167833                            | 17169279 | WBGene00009570 | srz-65   | F40D4.10 |                     |
| 0.092100056584254                                          |   | AGIWUR21917                         |          |                |          |          |                     |
| CB4856 CT                                                  | V | 17169442                            | 17170922 | WBGene00005798 | srw-51   | F40D4.8  | 0.0239902454993697  |
| AGIWUR10986                                                |   |                                     |          |                |          |          |                     |
| CB4856 CT                                                  | V | 17171851                            | 17173313 | WBGene00009568 | srbc-26  | F40D4.7  | -0.122818823560994  |
| AGIWUR43279                                                |   |                                     |          |                |          |          |                     |
| CB4856 CT                                                  | V | 17174038                            | 17175530 | WBGene00009567 | srbc-25  | F40D4.6  | -0.0318580687144756 |
| AGIWUR151;AGIWUR44899                                      |   |                                     |          |                |          |          |                     |
| CB4856 CT                                                  | V | 17176716                            | 17178067 | WBGene00009566 | srsx-1   | F40D4.5  | -0.0109840238340952 |
| AGIWUR9027                                                 |   |                                     |          |                |          |          |                     |
| CB4856 CT                                                  | V | 17178757                            | 17180002 | WBGene00005390 | srh-174  | F40D4.1  | -0.0660486828771241 |
| AGIWUR20313;AGIWUR44339                                    |   |                                     |          |                |          |          |                     |
| CB4856 CT                                                  | V | 17184396                            | 17186082 | WBGene00005378 | srh-162  | F40D4.4  | 0.0142625206914646  |
| AGIWUR6806;AGIWUR34277                                     |   |                                     |          |                |          |          |                     |
| CB4856 CT                                                  | V | 17186873                            | 17188680 | WBGene00005413 | srh-202  | Y68A4A.1 |                     |
| -0.180630652485241                                         |   | AGIWUR18682                         |          |                |          |          |                     |
| CB4856 CT                                                  | V | 17189186                            | 17190499 | WBGene00006235 | str-199  | Y68A4A.3 |                     |
| 0.327057445160537                                          |   | AGIWUR34565                         |          |                |          |          |                     |
| CB4856 CT                                                  | V | 17193031                            | 17199003 | WBGene00013467 | Y68A4A.5 |          | Y68A4A.5            |
| -0.0614305663571648                                        |   | AGIWUR14113;AGIWUR28008             |          |                |          |          |                     |

|                                                            |                                                            |          |                |           |                             |
|------------------------------------------------------------|------------------------------------------------------------|----------|----------------|-----------|-----------------------------|
| CB4856 CT V                                                | 17199418                                                   | 17201736 | WBGene00013468 | srz-96    | Y68A4A.6                    |
| 0.342117547774885                                          | AGIWUR40306                                                |          |                |           |                             |
| CB4856 CT V                                                | 17205641                                                   | 17207160 | WBGene00005821 | srw-74    | Y68A4A.11                   |
| -0.127613294823529                                         | AGIWUR40920                                                |          |                |           |                             |
| CB4856 CT V                                                | 17209065                                                   | 17209955 | WBGene00014944 | Y68A4A.12 | Y68A4A.12                   |
| 0.253996160784368                                          | AGIWUR43560                                                |          |                |           |                             |
| CB4856 CT V                                                | 17210716                                                   | 17212039 | WBGene00005443 | srh-236   | Y68A4A.9                    |
| -0.181001249698767                                         | AGIWUR6236                                                 |          |                |           |                             |
| CB4856 CT V                                                | 17213043                                                   | 17214212 | WBGene00005332 | srh-113   | Y68A4A.7                    |
| 0.0273069433850592                                         | AGIWUR42610                                                |          |                |           |                             |
| CB4856 CT V                                                | 17215066                                                   | 17216751 | WBGene00014943 | Y68A4A.8  | Y68A4A.8                    |
| -0.148790100147324                                         | AGIWUR5679                                                 |          |                |           |                             |
| CB4856 CT V                                                | 17217990                                                   | 17219004 | WBGene00011840 | srbc-62   | T19C9.1                     |
| 0.000155126276228934                                       | AGIWUR32160                                                |          |                |           |                             |
| CB4856 CT V                                                | 17219253                                                   | 17220445 | WBGene00005328 | srh-109   | T19C9.4 0.120937028994771   |
| AGIWUR39083                                                |                                                            |          |                |           |                             |
| CB4856 CT V                                                | 17222386                                                   | 17223405 | WBGene00005458 | srh-252   | T19C9.3 0.206965822745055   |
| AGIWUR15804                                                |                                                            |          |                |           |                             |
| CB4856 CT V                                                | 17225086                                                   | 17226219 | WBGene00005331 | srh-112   | T19C9.2 -0.115486826345225  |
| AGIWUR41950                                                |                                                            |          |                |           |                             |
| CB4856 CT V                                                | 17229555                                                   | 17229990 | WBGene00011842 | T19C9.6   | T19C9.6 0.0856724143521594  |
| AGIWUR28;AGIWUR1422;AGIWUR14042;AGIWUR17957;AGIWUR25905    |                                                            |          |                |           |                             |
| CB4856 CT V                                                | 17234329                                                   | 17234630 | WBGene00050933 | T19C9.9   | T19C9.9 -0.0726533037855974 |
| AGIWUR4141;AGIWUR19550;AGIWUR26952;AGIWUR34168;AGIWUR36985 |                                                            |          |                |           |                             |
| CB4856 CT V                                                | 17236592                                                   | 17238097 | WBGene00050934 | T19C9.10  | T19C9.10                    |
| -0.0648150051463325                                        | AGIWUR4377;AGIWUR19269;AGIWUR26611;AGIWUR41291;AGIWUR42252 |          |                |           |                             |
| CB4856 CT V                                                | 17239097                                                   | 17240656 | WBGene00011844 | T19C9.8   | T19C9.8 0.0972433038093019  |
| AGIWUR39193                                                |                                                            |          |                |           |                             |
| CB4856 CT V                                                | 17241708                                                   | 17242652 | WBGene00013472 | Y68A4B.3  | Y68A4B.3                    |
| 0.0441116457160251                                         | AGIWUR4089;AGIWUR12735                                     |          |                |           |                             |
| CB4856 CT V                                                | 17243767                                                   | 17245506 | WBGene00013471 | cllec-242 | Y68A4B.2                    |
| -0.433561286024446                                         | AGIWUR41908                                                |          |                |           |                             |
| CB4856 CT V                                                | 17247325                                                   | 17249015 | WBGene00013470 | cllec-243 | Y68A4B.1                    |
| 0.167240893467299                                          | AGIWUR4918                                                 |          |                |           |                             |
| CB4856 CT V                                                | 17251911                                                   | 17252309 | WBGene00219383 | Y61B8A.6  | Y61B8A.6                    |
| 0.11087822914544                                           | AGIWUR9858;AGIWUR38279                                     |          |                |           |                             |
| CB4856 CT V                                                | 17252931                                                   | 17255128 | WBGene00005335 | srh-116   | Y61B8A.1                    |
| 0.148199429122208                                          | AGIWUR22833                                                |          |                |           |                             |
| CB4856 CT V                                                | 17255754                                                   | 17257194 | WBGene00005334 | srh-115   | Y61B8A.2                    |

|                                                                                                                    |                                                |          |                |          |                            |
|--------------------------------------------------------------------------------------------------------------------|------------------------------------------------|----------|----------------|----------|----------------------------|
| -0.357303831244653                                                                                                 | AGIWUR27892                                    |          |                |          |                            |
| CB4856 CT V                                                                                                        | 17259173                                       | 17260534 | WBGene00044654 | fbxa-85  | Y61B8A.4                   |
| -0.14165265018515                                                                                                  | AGIWUR32797                                    |          |                |          |                            |
| CB4856 CT V                                                                                                        | 17260674                                       | 17262325 | WBGene00005794 | srw-47   | K10G4.2 0.173373457921416  |
| AGIWUR42524                                                                                                        |                                                |          |                |          |                            |
| CB4856 CT V                                                                                                        | 17264066                                       | 17264955 | WBGene00010752 | K10G4.3  | K10G4.3 0.0411317486723268 |
| AGIWUR19495                                                                                                        |                                                |          |                |          |                            |
| CB4856 CT V                                                                                                        | 17271730                                       | 17272888 | WBGene00005336 | srh-117  | K10G4.6 0.0666046715096451 |
| AGIWUR10777                                                                                                        |                                                |          |                |          |                            |
| CB4856 CT V                                                                                                        | 17273524                                       | 17275059 | WBGene00044202 | K10G4.10 | K10G4.10                   |
| -0.0817697715339731                                                                                                | AGIWUR17927;AGIWUR27492                        |          |                |          |                            |
| CB4856 CT V                                                                                                        | 17278367                                       | 17285169 | WBGene00010753 | K10G4.4  | K10G4.4 -0.261199307734971 |
| AGIWUR19573                                                                                                        |                                                |          |                |          |                            |
| CB4856 CT V                                                                                                        | 17292214                                       | 17293729 | WBGene00005793 | srw-46   | K10G4.8 0.0645418625366876 |
| AGIWUR874                                                                                                          |                                                |          |                |          |                            |
| CB4856 CT V                                                                                                        | 17294413                                       | 17297359 | WBGene00077629 | K10G4.13 | K10G4.13                   |
| 0.380818522192811                                                                                                  | AGIWUR4790                                     |          |                |          |                            |
| CB4856 CT V                                                                                                        | 17303054                                       | 17304438 | WBGene00005582 | sri-70   | Y61B8B.1                   |
| -0.230277411835003                                                                                                 | AGIWUR10381                                    |          |                |          |                            |
| CB4856 CT V                                                                                                        | 17316351                                       | 17317719 | WBGene00023507 | srz-26   | F31E9.7 0.0178031360340132 |
| AGIWUR29264                                                                                                        |                                                |          |                |          |                            |
| CB4856 CT V                                                                                                        | 17318147                                       | 17319515 | WBGene00009298 | srz-58   | F31E9.5 -0.307270431561196 |
| AGIWUR38599                                                                                                        |                                                |          |                |          |                            |
| CB4856 CT V                                                                                                        | 17319596                                       | 17322444 | WBGene00009295 | fbxa-180 | F31E9.1                    |
| -0.125428713492816                                                                                                 | AGIWUR31899                                    |          |                |          |                            |
| CB4856 CT V                                                                                                        | 17322615                                       | 17324518 | WBGene00009296 | F31E9.3  | F31E9.3 0.233505606350035  |
| AGIWUR2504;AGIWUR3170;AGIWUR4495;AGIWUR7491;AGIWUR7699;AGIWUR16129;AGIWUR18574;AGIWUR30010;AGIWUR39662;AGIWUR44275 |                                                |          |                |          |                            |
| CB4856 CT V                                                                                                        | 17324907                                       | 17326168 | WBGene00045408 | F31E9.8  | F31E9.8 0.127085933440709  |
| AGIWUR388                                                                                                          |                                                |          |                |          |                            |
| CB4856 CT V                                                                                                        | 17326453                                       | 17327967 | WBGene00009297 | sdz-16   | F31E9.4 0.113082614471487  |
| AGIWUR6249;AGIWUR25089                                                                                             |                                                |          |                |          |                            |
| CB4856 CT V                                                                                                        | 17331570                                       | 17335546 | WBGene00009836 | fbxa-185 | F47H4.4                    |
| 0.0537304120431039                                                                                                 | AGIWUR4082;AGIWUR14040;AGIWUR14183;AGIWUR28850 |          |                |          |                            |
| CB4856 CT V                                                                                                        | 17336138                                       | 17338335 | WBGene00009837 | fbxa-186 | F47H4.6                    |
| 0.0743521602844943                                                                                                 | AGIWUR43890                                    |          |                |          |                            |
| CB4856 CT V                                                                                                        | 17339084                                       | 17342780 | WBGene00009838 | fbxa-187 | F47H4.7                    |
| -0.0767003519001745                                                                                                | AGIWUR34510                                    |          |                |          |                            |
| CB4856 CT V                                                                                                        | 17347922                                       | 17348625 | WBGene00004811 | skr-5    | F47H4.10                   |



|                     |  |                                     |            |                |                 |                     |  |  |
|---------------------|--|-------------------------------------|------------|----------------|-----------------|---------------------|--|--|
| -0.27669684201862   |  |                                     | AGIWUR3296 |                |                 |                     |  |  |
| CB4856 CT V         |  | 17348665                            | 17350180   | WBGene00009834 | lsy-27 F47H4.1  | -0.327821544581784  |  |  |
| AGIWUR2966          |  |                                     |            |                |                 |                     |  |  |
| CB4856 CT V         |  | 17350387                            | 17352870   | WBGene00009841 | fbxa-134        | F47H4.11            |  |  |
| 0.353684544353177   |  | AGIWUR726                           |            |                |                 |                     |  |  |
| CB4856 CT V         |  | 17353325                            | 17360212   | WBGene00009835 | F47H4.2 F47H4.2 | -0.248052983073595  |  |  |
| AGIWUR31591         |  |                                     |            |                |                 |                     |  |  |
| CB4856 CT V         |  | 17369715                            | 17371468   | WBGene00014764 | srz-46 F47H4.3  | -0.0881627025773017 |  |  |
| AGIWUR5100          |  |                                     |            |                |                 |                     |  |  |
| CB4856 CT V         |  | 17371544                            | 17376745   | WBGene00012491 | Y20C6A.1        | Y20C6A.1            |  |  |
| 1.24386188404694    |  | AGIWUR12193                         |            |                |                 |                     |  |  |
| CB4856 CT V         |  | 17377406                            | 17379226   | WBGene00012492 | fbxb-7 Y20C6A.2 |                     |  |  |
| -0.459683070142436  |  | AGIWUR14771                         |            |                |                 |                     |  |  |
| CB4856 CT V         |  | 17380232                            | 17381119   | WBGene00077495 | Y20C6A.4        | Y20C6A.4            |  |  |
| 0.258169257843298   |  | AGIWUR4613                          |            |                |                 |                     |  |  |
| CB4856 CT V         |  | 17382090                            | 17383373   | WBGene00012493 | Y20C6A.3        | Y20C6A.3            |  |  |
| 0.0543274845332054  |  | AGIWUR36562                         |            |                |                 |                     |  |  |
| CB4856 CT V         |  | 17395674                            | 17398034   | WBGene00005339 | srh-120 T27C5.1 | 0.144687375019166   |  |  |
| AGIWUR25062         |  |                                     |            |                |                 |                     |  |  |
| CB4856 CT V         |  | 17400123                            | 17401774   | WBGene00005944 | srx-53 T27C5.2  | 0.0494231255937825  |  |  |
| AGIWUR2034          |  |                                     |            |                |                 |                     |  |  |
| CB4856 CT V         |  | 17404611                            | 17405823   | WBGene00023512 | srz-51 T27C5.11 |                     |  |  |
| -0.0811617910527884 |  | AGIWUR11238                         |            |                |                 |                     |  |  |
| CB4856 CT V         |  | 17406306                            | 17407503   | WBGene00012078 | srz-50 T27C5.4  | -0.452467785787357  |  |  |
| AGIWUR42655         |  |                                     |            |                |                 |                     |  |  |
| CB4856 CT V         |  | 17410255                            | 17411705   | WBGene00005349 | srh-132 T27C5.5 | 0.498047273389041   |  |  |
| AGIWUR27579         |  |                                     |            |                |                 |                     |  |  |
| CB4856 CT V         |  | 17412602                            | 17413098   | WBGene00012079 | T27C5.6 T27C5.6 | -0.101084274202542  |  |  |
| AGIWUR37517         |  |                                     |            |                |                 |                     |  |  |
| CB4856 CT V         |  | 17413546                            | 17414749   | WBGene00012080 | clec-244        | T27C5.7             |  |  |
| 0.0945177640967589  |  | AGIWUR27963;AGIWUR29663;AGIWUR32941 |            |                |                 |                     |  |  |
| CB4856 CT V         |  | 17415278                            | 17416743   | WBGene00044059 | T27C5.12        | T27C5.12            |  |  |
| 0.1147610721435     |  | AGIWUR25726                         |            |                |                 |                     |  |  |
| CB4856 CT V         |  | 17417133                            | 17418391   | WBGene00012081 | T27C5.8 T27C5.8 | 0.0975722686777418  |  |  |
| AGIWUR37095         |  |                                     |            |                |                 |                     |  |  |
| CB4856 CT V         |  | 17419156                            | 17420298   | WBGene00044096 | srh-96 T27C5.14 |                     |  |  |
| 0.104016834417084   |  | AGIWUR40955                         |            |                |                 |                     |  |  |
| CB4856 CT V         |  | 17429701                            | 17430166   | WBGene00012083 | T27C5.10        | T27C5.10            |  |  |
| -0.0920978614036461 |  | AGIWUR4231;AGIWUR13140;AGIWUR38544  |            |                |                 |                     |  |  |

|                     |                         |          |                |                                     |
|---------------------|-------------------------|----------|----------------|-------------------------------------|
| CB4856 CT V         | 17431203                | 17432501 | WBGene00044100 | srbc-27 F20E11.15                   |
| -0.0505116205078506 | AGIWUR43044             |          |                |                                     |
| CB4856 CT V         | 17432993                | 17435209 | WBGene00044101 | srbc-28 F20E11.16                   |
| 0.208107573943751   | AGIWUR5255              |          |                |                                     |
| CB4856 CT V         | 17435678                | 17436592 | WBGene00206495 | F20E11.18 F20E11.18                 |
| 0.0671881755059163  | AGIWUR14662             |          |                |                                     |
| CB4856 CT V         | 17436985                | 17438417 | WBGene00008982 | srsx-2 F20E11.2                     |
| -0.665928921643208  | AGIWUR3063              |          |                |                                     |
| CB4856 CT V         | 17442581                | 17445668 | WBGene00005374 | srh-158 F20E11.13                   |
| 0.104810368398025   | AGIWUR14378;AGIWUR40459 |          |                |                                     |
| CB4856 CT V         | 17446348                | 17447636 | WBGene00005376 | srh-160 F20E11.3                    |
| -0.0364155030285076 | AGIWUR21027             |          |                |                                     |
| CB4856 CT V         | 17448332                | 17449590 | WBGene00005373 | srh-157 F20E11.8                    |
| 0.00952412706797512 | AGIWUR8991;AGIWUR31658  |          |                |                                     |
| CB4856 CT V         | 17452676                | 17453805 | WBGene00005377 | srh-161 F20E11.14                   |
| -0.128946527476842  | AGIWUR10052             |          |                |                                     |
| CB4856 CT V         | 17458533                | 17460161 | WBGene00008981 | srz-48 F20E11.1                     |
| 0.0255093538827467  | AGIWUR1569              |          |                |                                     |
| CB4856 CT V         | 17460813                | 17462432 | WBGene00008983 | F20E11.5 F20E11.5                   |
| -0.0193621687406393 | AGIWUR25782             |          |                |                                     |
| CB4856 CT V         | 17464578                | 17466730 | WBGene00008984 | F20E11.7 F20E11.7                   |
| -0.108261794265648  | AGIWUR36820             |          |                |                                     |
| CB4856 CT V         | 17472319                | 17473481 | WBGene00005333 | srh-114 F08E10.8                    |
| -0.0975159807317834 | AGIWUR23613             |          |                |                                     |
| CB4856 CT V         | 17473999                | 17475471 | WBGene00005341 | srh-123 F08E10.3                    |
| 0.127675984156523   | AGIWUR43710             |          |                |                                     |
| CB4856 CT V         | 17476790                | 17478108 | WBGene00008574 | srbc-61 F08E10.2                    |
| 0.078592781627961   | AGIWUR37212             |          |                |                                     |
| CB4856 CT V         | 17478333                | 17479386 | WBGene00005329 | srh-110 F08E10.4                    |
| -0.191235940774312  | AGIWUR5026              |          |                |                                     |
| CB4856 CT V         | 17480851                | 17481855 | WBGene00005459 | srh-253 F08E10.5                    |
| -0.194801727858007  | AGIWUR44105             |          |                |                                     |
| CB4856 CT V         | 17487346                | 17488833 | WBGene00010536 | K03D7.9 K03D7.9 0.148055172140996   |
| AGIWUR27680         |                         |          |                |                                     |
| CB4856 CT V         | 17489502                | 17491609 | WBGene00010535 | K03D7.8 K03D7.8 0.267891713757692   |
| AGIWUR35923         |                         |          |                |                                     |
| CB4856 CT V         | 17492077                | 17493832 | WBGene00010534 | fbxa-102 K03D7.7                    |
| -0.0466043317631879 | AGIWUR25951             |          |                |                                     |
| CB4856 CT V         | 17494306                | 17496171 | WBGene00005337 | srh-118 K03D7.6 -0.0352415053521273 |

|                         |                                                           |          |                |          |          |                     |  |
|-------------------------|-----------------------------------------------------------|----------|----------------|----------|----------|---------------------|--|
| AGIWUR33420             |                                                           |          |                |          |          |                     |  |
| CB4856 CT V             | 17499044                                                  | 17505021 | WBGene00014796 | K03D7.3  | K03D7.3  | 0.0531149961843269  |  |
| AGIWUR22757             |                                                           |          |                |          |          |                     |  |
| CB4856 CT V             | 17508793                                                  | 17510214 | WBGene00005779 | srw-32   | K03D7.11 |                     |  |
| 0.0700927683681547      | AGIWUR28798                                               |          |                |          |          |                     |  |
| CB4856 CT V             | 17511533                                                  | 17519857 | WBGene00005792 | srw-45   | K03D7.10 |                     |  |
| -0.0201143872633587     | AGIWUR3827;AGIWUR5632;AGIWUR10237;AGIWUR11287;AGIWUR42706 |          |                |          |          |                     |  |
| CB4856 CT V             | 17521037                                                  | 17527479 | WBGene00007672 | fbxa-136 |          | C18D4.2             |  |
| 0.695973518722219       | AGIWUR23664;AGIWUR26139                                   |          |                |          |          |                     |  |
| CB4856 CT V             | 17528029                                                  | 17529910 | WBGene00007678 | srz-90   | C18D4.9  | 0.11703209510067    |  |
| AGIWUR27577             |                                                           |          |                |          |          |                     |  |
| CB4856 CT V             | 17530303                                                  | 17530714 | WBGene00219493 | C18D4.12 |          | C18D4.12            |  |
| -0.092690681858274      | AGIWUR10696                                               |          |                |          |          |                     |  |
| CB4856 CT V             | 17530813                                                  | 17531510 | WBGene00007674 | C18D4.4  | C18D4.4  | 0.0573574005102468  |  |
| AGIWUR29903             |                                                           |          |                |          |          |                     |  |
| CB4856 CT V             | 17532353                                                  | 17532786 | WBGene00007673 | C18D4.3  | C18D4.3  | -0.0423487055982879 |  |
| AGIWUR30181             |                                                           |          |                |          |          |                     |  |
| CB4856 CT V             | 17535615                                                  | 17538373 | WBGene00007675 | C18D4.6  | C18D4.6  | -0.0598673229508604 |  |
| AGIWUR10351;AGIWUR42998 |                                                           |          |                |          |          |                     |  |
| CB4856 CT V             | 17540595                                                  | 17542272 | WBGene00014679 | srz-25   | C18D4.5  | 0.529522436664029   |  |
| AGIWUR13682             |                                                           |          |                |          |          |                     |  |
| CB4856 CT V             | 17542719                                                  | 17544108 | WBGene00007676 | srz-57   | C18D4.7  | -0.0901503107445398 |  |
| AGIWUR32653             |                                                           |          |                |          |          |                     |  |
| CB4856 CT V             | 17544175                                                  | 17546974 | WBGene00007677 | C18D4.8  | C18D4.8  | 0.304794650570354   |  |
| AGIWUR41632             |                                                           |          |                |          |          |                     |  |
| CB4856 CT V             | 17547383                                                  | 17549288 | WBGene00045293 | fbxa-175 |          | C38D9.12            |  |
| 0.0269035419006114      | AGIWUR34376                                               |          |                |          |          |                     |  |
| CB4856 CT V             | 17549675                                                  | 17551196 | WBGene00008017 | fbxa-176 |          | C38D9.9             |  |
| 0.14490275621432        | AGIWUR14301                                               |          |                |          |          |                     |  |
| CB4856 CT V             | 17555854                                                  | 17558477 | WBGene00008015 | fbxa-174 |          | C38D9.7             |  |
| -0.0025968803396017     | AGIWUR20461                                               |          |                |          |          |                     |  |
| CB4856 CT V             | 17563171                                                  | 17566003 | WBGene00008009 | fbxa-171 |          | C38D9.1             |  |
| -0.187944642408002      | AGIWUR22354                                               |          |                |          |          |                     |  |
| CB4856 CT V             | 17567513                                                  | 17571603 | WBGene00008010 | C38D9.2  | C38D9.2  | 0.292128919725835   |  |
| AGIWUR10796             |                                                           |          |                |          |          |                     |  |
| CB4856 CT V             | 17584793                                                  | 17585876 | WBGene00008012 | fbxa-133 |          | C38D9.4             |  |
| -0.756778904606649      | AGIWUR24992                                               |          |                |          |          |                     |  |
| CB4856 CT V             | 17592387                                                  | 17594243 | WBGene00012403 | srz-45   | Y6G8.1   | -0.0592245050412519 |  |
| AGIWUR24279             |                                                           |          |                |          |          |                     |  |

|                                                                                                                                              |          |          |                |          |          |                     |
|----------------------------------------------------------------------------------------------------------------------------------------------|----------|----------|----------------|----------|----------|---------------------|
| CB4856 CT V                                                                                                                                  | 17594349 | 17598971 | WBGene00012404 | Y6G8.2   | Y6G8.2   | 0.969668392470167   |
| AGIWUR37650                                                                                                                                  |          |          |                |          |          |                     |
| CB4856 CT V                                                                                                                                  | 17599978 | 17600872 | WBGene00050974 | Y6G8.9   | Y6G8.9   | -0.228934200601832  |
| AGIWUR2079;AGIWUR23739                                                                                                                       |          |          |                |          |          |                     |
| CB4856 CT V                                                                                                                                  | 17601820 | 17602954 | WBGene00012405 | ztf-25   | Y6G8.3   | 0.0224390166186854  |
| AGIWUR37324                                                                                                                                  |          |          |                |          |          |                     |
| CB4856 CT V                                                                                                                                  | 17603185 | 17603945 | WBGene00077459 | Y6G8.10  | Y6G8.10  | -0.0974097200074091 |
| AGIWUR11426                                                                                                                                  |          |          |                |          |          |                     |
| CB4856 CT V                                                                                                                                  | 17607379 | 17607690 | WBGene00077460 | Y6G8.11  | Y6G8.11  | 0.0653451604227575  |
| AGIWUR1681;AGIWUR13086;AGIWUR21320;AGIWUR33835;AGIWUR39121                                                                                   |          |          |                |          |          |                     |
| CB4856 CT V                                                                                                                                  | 17608097 | 17609597 | WBGene00012406 | srz-91   | Y6G8.4   | 0.142827697661105   |
| AGIWUR13792                                                                                                                                  |          |          |                |          |          |                     |
| CB4856 CT V                                                                                                                                  | 17613792 | 17614357 | WBGene00138715 | Y6G8.14  | Y6G8.14  | -0.0569926523623789 |
| AGIWUR18983;AGIWUR32925                                                                                                                      |          |          |                |          |          |                     |
| CB4856 CT V                                                                                                                                  | 17616473 | 17616921 | WBGene00044208 | Y6G8.6   | Y6G8.6   | -0.0846014172359748 |
| AGIWUR4430;AGIWUR5423;AGIWUR16001;AGIWUR40934;AGIWUR41144                                                                                    |          |          |                |          |          |                     |
| CB4856 CT V                                                                                                                                  | 17620194 | 17622750 | WBGene00045501 | Y6G8.8   | Y6G8.8   | 0.92877762787363    |
| AGIWUR7206;AGIWUR18354                                                                                                                       |          |          |                |          |          |                     |
| CB4856 CT V                                                                                                                                  | 17625127 | 17627598 | WBGene00195165 | F57G4.11 |          | F57G4.11            |
| 1.1048404572395 AGIWUR30502                                                                                                                  |          |          |                |          |          |                     |
| CB4856 CT V                                                                                                                                  | 17628866 | 17630215 | WBGene00045506 | F57G4.10 |          | F57G4.10            |
| 0.11623425782751 AGIWUR2368;AGIWUR2435;AGIWUR18799;AGIWUR20217                                                                               |          |          |                |          |          |                     |
| CB4856 CT V                                                                                                                                  | 17637982 | 17640042 | WBGene00010209 | fbxa-191 |          | F57G4.4             |
| -0.253897362153699 AGIWUR34789                                                                                                               |          |          |                |          |          |                     |
| CB4856 CT V                                                                                                                                  | 17640672 | 17650527 | WBGene00010212 | fbxa-192 |          | F57G4.8             |
| -0.050050950160534                                                                                                                           |          |          |                |          |          |                     |
| AGIWUR4316;AGIWUR4368;AGIWUR7320;AGIWUR14928;AGIWUR17320;AGIWUR20534;AGIWUR22976;AGIWUR25735;AGIWUR27646;AGIWUR31741;AGIWUR41603;AGIWUR42867 |          |          |                |          |          |                     |
| CB4856 CT V                                                                                                                                  | 17653482 | 17655281 | WBGene00010295 | fbxa-193 |          | F59A1.9             |
| -0.205171031423905 AGIWUR276                                                                                                                 |          |          |                |          |          |                     |
| CB4856 CT V                                                                                                                                  | 17655581 | 17656654 | WBGene00010294 | fbxa-129 |          | F59A1.8             |
| -0.171865849061008 AGIWUR9387;AGIWUR44072                                                                                                    |          |          |                |          |          |                     |
| CB4856 CT V                                                                                                                                  | 17656892 | 17658198 | WBGene00010293 | fbxa-108 |          | F59A1.7             |
| -0.106659552707502 AGIWUR17141;AGIWUR41177                                                                                                   |          |          |                |          |          |                     |
| CB4856 CT V                                                                                                                                  | 17660303 | 17661810 | WBGene00010296 | dgat-2   | F59A1.10 |                     |
| -0.953848286389935 AGIWUR3725                                                                                                                |          |          |                |          |          |                     |
| CB4856 CT V                                                                                                                                  | 17661802 | 17665475 | WBGene00010297 | F59A1.11 |          | F59A1.11            |
| -0.129383780238144 AGIWUR4003                                                                                                                |          |          |                |          |          |                     |
| CB4856 CT V                                                                                                                                  | 17668882 | 17671330 | WBGene00006148 | str-89   | F59A1.4  | 0.103006298886445   |

|                         |                                                 |          |                |          |          |                    |
|-------------------------|-------------------------------------------------|----------|----------------|----------|----------|--------------------|
| AGIWUR22398             |                                                 |          |                |          |          |                    |
| CB4856 CT V             | 17671700                                        | 17673443 | WBGene00006151 | str-93   | F59A1.14 |                    |
| -0.0037635916435752     | AGIWUR15703                                     |          |                |          |          |                    |
| CB4856 CT V             | 17674946                                        | 17676653 | WBGene00006150 | str-92   | F59A1.3  | 0.0566723295300591 |
| AGIWUR33147             |                                                 |          |                |          |          |                    |
| CB4856 CT V             | 17678358                                        | 17680208 | WBGene00014779 | F59A1.2  | F59A1.2  | 0.0133827974558876 |
| AGIWUR24205;AGIWUR27684 |                                                 |          |                |          |          |                    |
| CB4856 CT V             | 17680661                                        | 17683907 | WBGene00010300 | F59A1.15 |          | F59A1.15           |
| 0.334337405884932       | AGIWUR40297                                     |          |                |          |          |                    |
| CB4856 CT V             | 17684149                                        | 17684968 | WBGene00010301 | F59A1.16 |          | F59A1.16           |
| -0.81006215226695       | AGIWUR20039                                     |          |                |          |          |                    |
| CB4856 CT V             | 17685192                                        | 17686074 | WBGene00010292 | F59A1.6  | F59A1.6  | -0.27621472954424  |
| AGIWUR24435             |                                                 |          |                |          |          |                    |
| CB4856 CT V             | 17687211                                        | 17690994 | WBGene00010299 | F59A1.13 |          | F59A1.13           |
| -0.117833086026812      | AGIWUR39181                                     |          |                |          |          |                    |
| CB4856 CT V             | 17692502                                        | 17695827 | WBGene00012515 | Y26G10.1 |          | Y26G10.1           |
| -1.0718860211798        | AGIWUR5760                                      |          |                |          |          |                    |
| CB4856 CT V             | 17701212                                        | 17703285 | WBGene00005255 | srh-32   | Y26G10.2 |                    |
| -0.14027285043137       | AGIWUR10909                                     |          |                |          |          |                    |
| CB4856 CT V             | 17704362                                        | 17706117 | WBGene00050973 | Y26G10.3 |          | Y26G10.3           |
| 0.0156791440533173      | AGIWUR22451;AGIWUR38578                         |          |                |          |          |                    |
| CB4856 CT V             | 17706114                                        | 17706875 | WBGene00012305 | W06D12.6 |          | W06D12.6           |
| -0.319609595370878      | AGIWUR29688                                     |          |                |          |          |                    |
| CB4856 CT V             | 17707184                                        | 17709823 | WBGene00005254 | srh-31   | W06D12.7 |                    |
| 0.0430433200252418      | AGIWUR7156                                      |          |                |          |          |                    |
| CB4856 CT V             | 17710040                                        | 17714377 | WBGene00006685 | twk-33   | W06D12.5 |                    |
| -0.195712544353153      | AGIWUR23332;AGIWUR39569;AGIWUR43456             |          |                |          |          |                    |
| CB4856 CT V             | 17718947                                        | 17721293 | WBGene00006137 | str-77   | W06D12.4 |                    |
| 0.0811780002324864      | AGIWUR8320                                      |          |                |          |          |                    |
| CB4856 CT V             | 17725004                                        | 17726818 | WBGene00001397 | fat-5    | W06D12.3 |                    |
| 0.645569757893607       | AGIWUR14736;AGIWUR20562;AGIWUR22243;AGIWUR27469 |          |                |          |          |                    |
| CB4856 CT V             | 17726799                                        | 17730381 | WBGene00006692 | twk-42   | W06D12.2 |                    |
| -0.35849001495151       | AGIWUR35124                                     |          |                |          |          |                    |
| CB4856 CT V             | 17733568                                        | 17739899 | WBGene00012304 | cut1-4   | W06D12.1 |                    |
| -0.0813052870771633     | AGIWUR5269;AGIWUR9713;AGIWUR10938               |          |                |          |          |                    |
| CB4856 CT V             | 17743651                                        | 17747059 | WBGene00006688 | twk-36   | R12G8.2  | 0.0673574053145645 |
| AGIWUR29554             |                                                 |          |                |          |          |                    |
| CB4856 CT V             | 17747966                                        | 17749243 | WBGene00011254 | R12G8.1  | R12G8.1  | -0.100073868993075 |
| AGIWUR20029             |                                                 |          |                |          |          |                    |

|                      |                                                            |          |                |           |           |
|----------------------|------------------------------------------------------------|----------|----------------|-----------|-----------|
| CB4856 CT V          | 17755892                                                   | 17764751 | WBGene00004003 | pgp-9     | C47A10.1  |
| 0.0506573511167581   | AGIWUR15356                                                |          |                |           |           |
| CB4856 CT V          | 17767549                                                   | 17769621 | WBGene00005489 | srh-284   | C47A10.3  |
| 0.211009369870842    | AGIWUR13539                                                |          |                |           |           |
| CB4856 CT V          | 17769653                                                   | 17773208 | WBGene00008126 | sre-21    | C47A10.4  |
| 0.140798610935677    | AGIWUR6720;AGIWUR10002;AGIWUR10999                         |          |                |           |           |
| CB4856 CT V          | 17774187                                                   | 17777227 | WBGene00008127 | ddo-1     | C47A10.5  |
| 0.198252380525098    | AGIWUR14884                                                |          |                |           |           |
| CB4856 CT V          | 17777924                                                   | 17779487 | WBGene00008129 | C47A10.12 | C47A10.12 |
| 0.682299072718495    | AGIWUR12728                                                |          |                |           |           |
| CB4856 CT V          | 17780448                                                   | 17783639 | WBGene00008128 | srab-12   | C47A10.6  |
| 0.105900798423761    | AGIWUR29939                                                |          |                |           |           |
| CB4856 CT V          | 17789494                                                   | 17789738 | WBGene00050897 | C47A10.13 | C47A10.13 |
| -0.170924973402038   | AGIWUR8974;AGIWUR10304;AGIWUR21806;AGIWUR28302;AGIWUR42390 |          |                |           |           |
| CB4856 CT V          | 17790491                                                   | 17792470 | WBGene00005494 | srh-290   | C47A10.11 |
| 0.0603228555480975   | AGIWUR19006                                                |          |                |           |           |
| CB4856 CT V          | 17792679                                                   | 17794086 | WBGene00005493 | srh-289   | C47A10.10 |
| 0.100839027491441    | AGIWUR14885                                                |          |                |           |           |
| CB4856 CT V          | 17794909                                                   | 17795755 | WBGene00005492 | srh-288   | C47A10.7  |
| -0.22279710097555    | AGIWUR9355                                                 |          |                |           |           |
| CB4856 CT V          | 17796200                                                   | 17798889 | WBGene00005909 | srx-18    | C47A10.8  |
| 0.158615245124221    | AGIWUR744                                                  |          |                |           |           |
| CB4856 CT V          | 17800838                                                   | 17801906 | WBGene00005491 | srh-287   | C47A10.9  |
| 0.0539983129893411   | AGIWUR32425                                                |          |                |           |           |
| CB4856 CT V          | 17802410                                                   | 17802619 | WBGene00050893 | Y94A7B.11 | Y94A7B.11 |
| -0.0422010460597573  | AGIWUR8422;AGIWUR35883;AGIWUR43835                         |          |                |           |           |
| CB4856 CT V          | 17802769                                                   | 17803923 | WBGene00005496 | srh-292   | Y94A7B.1  |
| 0.225854514395126    | AGIWUR34250                                                |          |                |           |           |
| CB4856 CT V          | 17805486                                                   | 17808611 | WBGene00005495 | srh-291   | Y94A7B.3  |
| -0.00242404211723013 | AGIWUR7471                                                 |          |                |           |           |
| CB4856 CT V          | 17810353                                                   | 17812794 | WBGene00005500 | srh-296   | Y94A7B.4  |
| 0.0163899325648931   | AGIWUR21677                                                |          |                |           |           |
| CB4856 CT V          | 17818867                                                   | 17821003 | WBGene00005502 | srh-298   | Y94A7B.5  |
| -0.198617117767487   | AGIWUR44774                                                |          |                |           |           |
| CB4856 CT V          | 17822105                                                   | 17823889 | WBGene00005504 | srh-300   | Y94A7B.6  |
| -0.0352172173095724  | AGIWUR16526                                                |          |                |           |           |
| CB4856 CT V          | 17824910                                                   | 17827774 | WBGene00005505 | srh-301   | Y94A7B.8  |
| -0.131550272288726   | AGIWUR14106                                                |          |                |           |           |
| CB4856 CT V          | 17828610                                                   | 17829983 | WBGene00005508 | srh-304   | Y94A7B.9  |

|                                                                                                                                              |                                                                                  |          |                |           |                             |
|----------------------------------------------------------------------------------------------------------------------------------------------|----------------------------------------------------------------------------------|----------|----------------|-----------|-----------------------------|
| -0.0691012644987588                                                                                                                          | AGIWUR4451                                                                       |          |                |           |                             |
| CB4856 CT V                                                                                                                                  | 17831650                                                                         | 17833418 | WBGene00005507 | srh-303   | Y94A7B.7                    |
| 0.00518158969885718                                                                                                                          | AGIWUR19659                                                                      |          |                |           |                             |
| CB4856 CT V                                                                                                                                  | 17837360                                                                         | 17838119 | WBGene00013341 | Y59A8A.7  | Y59A8A.7                    |
| 0.0246958855773549                                                                                                                           | AGIWUR19908                                                                      |          |                |           |                             |
| CB4856 CT V                                                                                                                                  | 17838831                                                                         | 17841188 | WBGene00005506 | srh-302   | Y59A8A.5                    |
| -0.0711403209002661                                                                                                                          | AGIWUR38418                                                                      |          |                |           |                             |
| CB4856 CT V                                                                                                                                  | 17841483                                                                         | 17844206 | WBGene00005490 | srh-286   | Y59A8A.4                    |
| 0.213251388752601                                                                                                                            | AGIWUR23633                                                                      |          |                |           |                             |
| CB4856 CT V                                                                                                                                  | 17845739                                                                         | 17855989 | WBGene00013340 | tcc-1     | Y59A8A.3                    |
| -0.139191620323471                                                                                                                           | AGIWUR2535;AGIWUR5566;AGIWUR7194;AGIWUR15447;AGIWUR21458;AGIWUR27254;AGIWUR32170 |          |                |           |                             |
| CB4856 CT V                                                                                                                                  | 17861368                                                                         | 17870651 | WBGene00000813 | csn-1     | Y59A8A.1                    |
| -0.258893613635738                                                                                                                           | AGIWUR10688;AGIWUR14162;AGIWUR37627                                              |          |                |           |                             |
| CB4856 CT V                                                                                                                                  | 17871401                                                                         | 17879913 | WBGene00013339 | phf-14    | Y59A8A.2                    |
| -0.104683847161589                                                                                                                           | AGIWUR31159                                                                      |          |                |           |                             |
| CB4856 CT V                                                                                                                                  | 17879844                                                                         | 17888984 | WBGene00007394 | C06H5.6   | C06H5.6 -0.249607472641274  |
| AGIWUR7896;AGIWUR8502;AGIWUR8823;AGIWUR15190;AGIWUR16651;AGIWUR18629;AGIWUR21138;AGIWUR25545;AGIWUR28925;AGIWUR35720;AGIWUR40621;AGIWUR44512 |                                                                                  |          |                |           |                             |
| CB4856 CT V                                                                                                                                  | 17892426                                                                         | 17892706 | WBGene00045346 | C06H5.9   | C06H5.9 0.00593674562324864 |
| AGIWUR3364;AGIWUR10273;AGIWUR10645;AGIWUR27916;AGIWUR42380                                                                                   |                                                                                  |          |                |           |                             |
| CB4856 CT V                                                                                                                                  | 17895268                                                                         | 17896804 | WBGene00007392 | fbxa-156  | C06H5.1                     |
| -0.359516305506164                                                                                                                           | AGIWUR25046                                                                      |          |                |           |                             |
| CB4856 CT V                                                                                                                                  | 17897546                                                                         | 17897746 | WBGene00219446 | C06H5.13  | C06H5.13                    |
| 0.0106752309156981                                                                                                                           | AGIWUR952;AGIWUR14193;AGIWUR20483;AGIWUR22689;AGIWUR33984                        |          |                |           |                             |
| CB4856 CT V                                                                                                                                  | 17899803                                                                         | 17901913 | WBGene00007393 | fbxa-157  | C06H5.2                     |
| 0.168226801341326                                                                                                                            | AGIWUR32833                                                                      |          |                |           |                             |
| CB4856 CT V                                                                                                                                  | 17910304                                                                         | 17917241 | WBGene00007395 | dcar-1    | C06H5.7 0.330907882225993   |
| AGIWUR4617;AGIWUR10116;AGIWUR43125                                                                                                           |                                                                                  |          |                |           |                             |
| CB4856 CT V                                                                                                                                  | 17921776                                                                         | 17924185 | WBGene00008442 | E01B7.2   | E01B7.2 -0.197115206451352  |
| AGIWUR9023                                                                                                                                   |                                                                                  |          |                |           |                             |
| CB4856 CT V                                                                                                                                  | 17924916                                                                         | 17934225 | WBGene00008441 | usp-50    | E01B7.1 -0.127731617435198  |
| AGIWUR11877;AGIWUR13337                                                                                                                      |                                                                                  |          |                |           |                             |
| CB4856 CT V                                                                                                                                  | 17936332                                                                         | 17949184 | WBGene00001080 | dpy-21    | Y59A8B.1                    |
| 0.319933021583985                                                                                                                            | AGIWUR39389                                                                      |          |                |           |                             |
| CB4856 CT V                                                                                                                                  | 17951348                                                                         | 17952820 | WBGene00013356 | Y59A8B.24 | Y59A8B.24                   |
| 0.0369070432885845                                                                                                                           | AGIWUR42293                                                                      |          |                |           |                             |
| CB4856 CT V                                                                                                                                  | 17954054                                                                         | 17966847 | WBGene00013355 | gck-3     | Y59A8B.23                   |
| -0.0143245708851278                                                                                                                          | AGIWUR29083                                                                      |          |                |           |                             |
| CB4856 CT V                                                                                                                                  | 17968510                                                                         | 17980082 | WBGene00013354 | snx-6     | Y59A8B.22                   |

|                     |                                                                                   |          |                |           |           |
|---------------------|-----------------------------------------------------------------------------------|----------|----------------|-----------|-----------|
| -0.170836175542762  | AGIWUR31388                                                                       |          |                |           |           |
| CB4856 CT V         | 17986260                                                                          | 17994546 | WBGene00013353 | Y59A8B.21 | Y59A8B.21 |
| -0.202116982613489  | AGIWUR40332                                                                       |          |                |           |           |
| CB4856 CT V         | 17995347                                                                          | 18001368 | WBGene00013352 | lon-8     | Y59A8B.20 |
| -0.291316770126851  | AGIWUR8675;AGIWUR9102;AGIWUR15282;AGIWUR17603;AGIWUR19833                         |          |                |           |           |
| CB4856 CT V         | 18007230                                                                          | 18009041 | WBGene00013351 | Y59A8B.19 | Y59A8B.19 |
| -0.0369649903863154 | AGIWUR17315                                                                       |          |                |           |           |
| CB4856 CT V         | 18010017                                                                          | 18010837 | WBGene00045459 | Y59A8B.26 | Y59A8B.26 |
| -0.116957814883401  | AGIWUR12442;AGIWUR21434                                                           |          |                |           |           |
| CB4856 CT V         | 18012413                                                                          | 18014216 | WBGene00005350 | srh-133   | Y59A8B.3  |
| 0.119746077686633   | AGIWUR8992                                                                        |          |                |           |           |
| CB4856 CT V         | 18014641                                                                          | 18017326 | WBGene00005351 | srh-134   | Y59A8B.4  |
| 0.191262122786235   | AGIWUR5306                                                                        |          |                |           |           |
| CB4856 CT V         | 18017904                                                                          | 18020014 | WBGene00005511 | srh-307   | Y59A8B.5  |
| -0.108899936314801  | AGIWUR5710;AGIWUR35581                                                            |          |                |           |           |
| CB4856 CT V         | 18022479                                                                          | 18042353 | WBGene00013343 | prp-6     | Y59A8B.6  |
| -0.116413129070978  | AGIWUR7680                                                                        |          |                |           |           |
| CB4856 CT V         | 18043571                                                                          | 18052323 | WBGene00013344 | ebp-1     | Y59A8B.7  |
| -0.220769628211396  | AGIWUR16212                                                                       |          |                |           |           |
| CB4856 CT V         | 18070021                                                                          | 18081957 | WBGene00013347 | Y59A8B.10 | Y59A8B.10 |
| 0.144279553467552   | AGIWUR38201                                                                       |          |                |           |           |
| CB4856 CT V         | 18082406                                                                          | 18085127 | WBGene00013348 | fbxa-106  | Y59A8B.11 |
| 0.282869007624985   | AGIWUR14652                                                                       |          |                |           |           |
| CB4856 CT V         | 18085630                                                                          | 18086225 | WBGene00013349 | Y59A8B.12 | Y59A8B.12 |
| -0.360702185268694  | AGIWUR24593                                                                       |          |                |           |           |
| CB4856 CT V         | 18087123                                                                          | 18097996 | WBGene00013350 | slr-2     | Y59A8B.13 |
| -0.431516806582531  | AGIWUR5909                                                                        |          |                |           |           |
| CB4856 CT V         | 18098676                                                                          | 18106868 | WBGene00003919 | par-4     | Y59A8B.14 |
| -0.0816620376746018 | AGIWUR43625                                                                       |          |                |           |           |
| CB4856 CT V         | 18108269                                                                          | 18114755 | WBGene00012562 | Y37H2A.1  | Y37H2A.1  |
| -0.107039451027088  | AGIWUR15257                                                                       |          |                |           |           |
| CB4856 CT V         | 18115402                                                                          | 18123594 | WBGene00050935 | Y37H2A.16 | Y37H2A.16 |
| -0.22371939616202   | AGIWUR5789;AGIWUR9443;AGIWUR11169;AGIWUR17775;AGIWUR27302;AGIWUR29776;AGIWUR41474 |          |                |           |           |
| CB4856 CT V         | 18123939                                                                          | 18125245 | WBGene00012564 | fbxa-107  | Y37H2A.4  |
| 0.152414740391663   | AGIWUR43709                                                                       |          |                |           |           |
| CB4856 CT V         | 18125375                                                                          | 18127205 | WBGene00012565 | fbxa-210  | Y37H2A.5  |
| -0.369544481481888  | AGIWUR20368                                                                       |          |                |           |           |
| CB4856 CT V         | 18127519                                                                          | 18128885 | WBGene00012566 | fbxa-211  | Y37H2A.6  |
| -0.0653026199193985 | AGIWUR12070;AGIWUR24650;AGIWUR37600                                               |          |                |           |           |



|                      |                                             |          |                |                 |                   |
|----------------------|---------------------------------------------|----------|----------------|-----------------|-------------------|
| CB4856 CT V          | 18129171                                    | 18131125 | WBGene00044758 | Y37H2A.12       | Y37H2A.12         |
| -0.420794633376824   | AGIWUR39737                                 |          |                |                 |                   |
| CB4856 CT V          | 18131667                                    | 18133232 | WBGene00219210 | Y37H2A.18       | Y37H2A.18         |
| -0.135780308317237   | AGIWUR26503                                 |          |                |                 |                   |
| CB4856 CT V          | 18134722                                    | 18136022 | WBGene00012568 | fbxa-212        | Y37H2A.8          |
| 0.218762969421277    | AGIWUR25803;AGIWUR41974                     |          |                |                 |                   |
| CB4856 CT V          | 18136704                                    | 18137714 | WBGene00012569 | fbxc-46         | Y37H2A.9          |
| -0.00306681182368962 | AGIWUR40984                                 |          |                |                 |                   |
| CB4856 CT V          | 18138995                                    | 18140687 | WBGene00012570 | Y37H2A.10       | Y37H2A.10         |
| -0.126122937664524   | AGIWUR10504                                 |          |                |                 |                   |
| CB4856 CT V          | 18141461                                    | 18142577 | WBGene00012571 | Y37H2A.11       | Y37H2A.11         |
| 0.029865303013846    | AGIWUR28154                                 |          |                |                 |                   |
| CB4856 CT V          | 18142849                                    | 18143543 | WBGene00045417 | Y37H2A.13       | Y37H2A.13         |
| -0.785164138623415   | AGIWUR19;AGIWUR2328;AGIWUR27028;AGIWUR27310 |          |                |                 |                   |
| CB4856 CT V          | 18143716                                    | 18144720 | WBGene00045416 | Y37H2A.14       | Y37H2A.14         |
| -0.175000522559703   | AGIWUR25981                                 |          |                |                 |                   |
| CB4856 CT V          | 18146965                                    | 18154396 | WBGene00206536 | C14A6.16        | C14A6.16          |
| 0.0457496732895724   | AGIWUR26918                                 |          |                |                 |                   |
| CB4856 CT V          | 18159652                                    | 18161339 | WBGene00050956 | C14A6.13        | C14A6.13          |
| 0.00946480686018258  | AGIWUR13918                                 |          |                |                 |                   |
| CB4856 CT V          | 18162034                                    | 18162668 | WBGene00050955 | C14A6.12        | C14A6.12          |
| -0.207250383704841   | AGIWUR3236;AGIWUR21166;AGIWUR21466          |          |                |                 |                   |
| CB4856 CT V          | 18163439                                    | 18164858 | WBGene00007569 | C14A6.5 C14A6.5 | 0.124161611939202 |
| AGIWUR38662          |                                             |          |                |                 |                   |
| CB4856 CT V          | 18165294                                    | 18167261 | WBGene00007570 | C14A6.6 C14A6.6 |                   |
| -0.00901265723201661 | AGIWUR43342                                 |          |                |                 |                   |
| CB4856 CT V          | 18167634                                    | 18168450 | WBGene00007571 | C14A6.7 C14A6.7 | 0.037699701240113 |
| AGIWUR22025          |                                             |          |                |                 |                   |
| CB4856 CT V          | 18169087                                    | 18171618 | WBGene00007572 | C14A6.8 C14A6.8 | 0.114733402826517 |
| AGIWUR30547          |                                             |          |                |                 |                   |
| CB4856 CT V          | 18172484                                    | 18178759 | WBGene00007853 | C31G12.4        | C31G12.4          |
| 0.0922665715104918   | AGIWUR25686;AGIWUR31906                     |          |                |                 |                   |
| CB4856 CT V          | 18179943                                    | 18181373 | WBGene00007850 | C31G12.1        | C31G12.1          |
| -0.316686595875069   | AGIWUR44939                                 |          |                |                 |                   |
| CB4856 CT V          | 18185210                                    | 18185461 | WBGene00007852 | C31G12.3        | C31G12.3          |
| -0.326622961585402   | AGIWUR11940                                 |          |                |                 |                   |
| CB4856 CT V          | 18186111                                    | 18188331 | WBGene00007851 | clec-245        | C31G12.2          |
| -0.664029181641412   | AGIWUR25381                                 |          |                |                 |                   |
| CB4856 CT V          | 18189560                                    | 18191047 | WBGene00008892 | clec-246        | F16H6.2           |

|                                                           |                                                                      |
|-----------------------------------------------------------|----------------------------------------------------------------------|
| -0.566397113089175                                        | AGIWUR2615;AGIWUR21493;AGIWUR36344;AGIWUR38574                       |
| CB4856 CT V                                               | 18191412 18194167 WBGene00008891 clec-42 F16H6.1 -0.0095166301991263 |
| AGIWUR6841                                                |                                                                      |
| CB4856 CT V                                               | 18195306 18197863 WBGene00008893 F16H6.3 F16H6.3 0.198115431145231   |
| AGIWUR7554                                                |                                                                      |
| CB4856 CT V                                               | 18198721 18205815 WBGene00008894 F16H6.4 F16H6.4 -0.0140517648220055 |
| AGIWUR11811;AGIWUR29561                                   |                                                                      |
| CB4856 CT V                                               | 18207064 18209171 WBGene00008897 F16H6.7 F16H6.7 -0.0454331443654787 |
| AGIWUR32034                                               |                                                                      |
| CB4856 CT V                                               | 18217084 18222299 WBGene00008899 F16H6.9 F16H6.9 -0.339931299634475  |
| AGIWUR12021                                               |                                                                      |
| CB4856 CT V                                               | 18222746 18224447 WBGene00008900 F16H6.10 F16H6.10                   |
| -0.291126998719095                                        | AGIWUR29693                                                          |
| CB4856 CT V                                               | 18227037 18231455 WBGene00012572 Y37H2B.1 Y37H2B.1                   |
| -0.0298815775696157                                       | AGIWUR22690                                                          |
| CB4856 CT V                                               | 18231635 18237223 WBGene00014821 R10E8.7 R10E8.7 -0.405343032691423  |
| AGIWUR28066;AGIWUR30825                                   |                                                                      |
| CB4856 CT V                                               | 18238122 18240736 WBGene00011213 R10E8.8 R10E8.8 0.578104196177257   |
| AGIWUR20037                                               |                                                                      |
| CB4856 CT V                                               | 18242339 18252416 WBGene00011207 R10E8.1 R10E8.1 -0.0357988320963587 |
| AGIWUR5910;AGIWUR8723;AGIWUR17037;AGIWUR20949;AGIWUR20966 |                                                                      |
| CB4856 CT V                                               | 18253794 18254403 WBGene00011208 R10E8.2 R10E8.2 0.126041842602447   |
| AGIWUR22380                                               |                                                                      |
| CB4856 CT V                                               | 18254783 18257067 WBGene00011211 R10E8.5 R10E8.5 -0.0652024205565667 |
| AGIWUR30162                                               |                                                                      |
| CB4856 CT V                                               | 18259270 18266370 WBGene00011212 R10E8.6 R10E8.6 0.90613344414666    |
| AGIWUR11589                                               |                                                                      |
| CB4856 CT V                                               | 18267292 18268844 WBGene00012574 fbxa-213 Y37H2C.3                   |
| 0.140360934248438                                         | AGIWUR33649                                                          |
| CB4856 CT V                                               | 18269616 18269985 WBGene00004812 skr-6 Y37H2C.2                      |
| 0.112816156212231                                         | AGIWUR27438                                                          |
| CB4856 CT V                                               | 18270703 18272256 WBGene00012575 Y37H2C.4 Y37H2C.4                   |
| -0.417516940540684                                        | AGIWUR20744                                                          |
| CB4856 CT V                                               | 18272889 18277694 WBGene00012573 Y37H2C.1 Y37H2C.1                   |
| 0.390915745003286                                         | AGIWUR17827                                                          |
| CB4856 CT V                                               | 18282897 18290590 WBGene00013058 clec-247 Y51A2A.1                   |
| -0.104760519479881                                        | AGIWUR43134                                                          |
| CB4856 CT V                                               | 18290942 18291348 WBGene00013060 Y51A2A.4 Y51A2A.4                   |
| 0.108873083369532                                         | AGIWUR16311                                                          |

|                                                                                                |                                                                         |          |                |           |                            |
|------------------------------------------------------------------------------------------------|-------------------------------------------------------------------------|----------|----------------|-----------|----------------------------|
| CB4856 CT V                                                                                    | 18292595                                                                | 18292944 | WBGene00077445 | Y51A2A.12 | Y51A2A.12                  |
| 0.0215777421753023                                                                             | AGIWUR755;AGIWUR23757;AGIWUR31475;AGIWUR41999;AGIWUR42533               |          |                |           |                            |
| CB4856 CT V                                                                                    | 18298806                                                                | 18300713 | WBGene00013061 | Y51A2A.5  | Y51A2A.5                   |
| 0.0255110823509721                                                                             | AGIWUR41693                                                             |          |                |           |                            |
| CB4856 CT V                                                                                    | 18309386                                                                | 18310203 | WBGene00014906 | fbxa-109  | Y51A2A.8                   |
| -0.0165501926359348                                                                            | AGIWUR38308;AGIWUR43586                                                 |          |                |           |                            |
| CB4856 CT V                                                                                    | 18310924                                                                | 18311985 | WBGene00014907 | fbxa-117  | Y51A2A.9                   |
| -0.17169989631326                                                                              | AGIWUR23063                                                             |          |                |           |                            |
| CB4856 CT V                                                                                    | 18318595                                                                | 18319744 | WBGene00007182 | fbxb-119  | B0462.3                    |
| 0.00435118539237367                                                                            |                                                                         |          |                |           |                            |
| AGIWUR6162;AGIWUR11568;AGIWUR13340;AGIWUR14758;AGIWUR16201;AGIWUR17658;AGIWUR29562;AGIWUR40018 |                                                                         |          |                |           |                            |
| CB4856 CT V                                                                                    | 18320110                                                                | 18321527 | WBGene00005580 | sri-68    | B0462.2 -0.224079371463535 |
| AGIWUR30149;AGIWUR39795                                                                        |                                                                         |          |                |           |                            |
| CB4856 CT V                                                                                    | 18325035                                                                | 18328791 | WBGene00007181 | B0462.1   | B0462.1 1.13496691496006   |
| AGIWUR32448                                                                                    |                                                                         |          |                |           |                            |
| CB4856 CT V                                                                                    | 18329112                                                                | 18331179 | WBGene00007183 | B0462.4   | B0462.4 0.282884989612372  |
| AGIWUR14082                                                                                    |                                                                         |          |                |           |                            |
| CB4856 CT V                                                                                    | 18351021                                                                | 18352672 | WBGene00119201 | C08E8.11  | C08E8.11                   |
| 0.0660400475573546                                                                             | AGIWUR33378                                                             |          |                |           |                            |
| CB4856 CT V                                                                                    | 18353510                                                                | 18355842 | WBGene00007438 | C08E8.2   | C08E8.2 -0.210118033796467 |
| AGIWUR19655;AGIWUR23477;AGIWUR40483                                                            |                                                                         |          |                |           |                            |
| CB4856 CT V                                                                                    | 18358035                                                                | 18359555 | WBGene00045496 | C08E8.8   | C08E8.8 0.0853694260523206 |
| AGIWUR1498;AGIWUR11590;AGIWUR13685;AGIWUR14012;AGIWUR37565                                     |                                                                         |          |                |           |                            |
| CB4856 CT V                                                                                    | 18359818                                                                | 18359988 | WBGene00007441 | C08E8.5   | C08E8.5 0.110978447265624  |
| AGIWUR31154                                                                                    |                                                                         |          |                |           |                            |
| CB4856 CT V                                                                                    | 18361051                                                                | 18362543 | WBGene00007437 | C08E8.1   | C08E8.1 0.118074066658965  |
| AGIWUR13037;AGIWUR22262;AGIWUR29468                                                            |                                                                         |          |                |           |                            |
| CB4856 CT V                                                                                    | 18364858                                                                | 18365224 | WBGene00050891 | C08E8.9   | C08E8.9 0.0667338656542249 |
| AGIWUR12572;AGIWUR29261;AGIWUR38952;AGIWUR42879;AGIWUR44736                                    |                                                                         |          |                |           |                            |
| CB4856 CT V                                                                                    | 18368014                                                                | 18368422 | WBGene00007442 | C08E8.6   | C08E8.6 0.0420086906627173 |
| AGIWUR29226                                                                                    |                                                                         |          |                |           |                            |
| CB4856 CT V                                                                                    | 18371846                                                                | 18373528 | WBGene00007440 | C08E8.4   | C08E8.4 0.814030985705063  |
| AGIWUR33396;AGIWUR42447                                                                        |                                                                         |          |                |           |                            |
| CB4856 CT V                                                                                    | 18374494                                                                | 18376755 | WBGene00013066 | Y51A2B.2  | Y51A2B.2                   |
| -0.579621952745072                                                                             | AGIWUR530                                                               |          |                |           |                            |
| CB4856 CT V                                                                                    | 18379119                                                                | 18379289 | WBGene00013071 | Y51A2B.8  | Y51A2B.8                   |
| -0.0978617369517432                                                                            | AGIWUR11261;AGIWUR15571;AGIWUR26511;AGIWUR35990;AGIWUR37522;AGIWUR43960 |          |                |           |                            |
| CB4856 CT V                                                                                    | 18380620                                                                | 18382690 | WBGene00013067 | nhr-288   | Y51A2B.3                   |
| -0.0123982091085999                                                                            | AGIWUR6038                                                              |          |                |           |                            |

|                      |                                                             |          |                |                  |                     |
|----------------------|-------------------------------------------------------------|----------|----------------|------------------|---------------------|
| CB4856 CT V          | 18386252                                                    | 18389146 | WBGene00013068 | Y51A2B.4         | Y51A2B.4            |
| 0.0532791093819522   | AGIWUR28115                                                 |          |                |                  |                     |
| CB4856 CT V          | 18389280                                                    | 18391337 | WBGene00013069 | Y51A2B.5         | Y51A2B.5            |
| -0.240402919776802   | AGIWUR3971                                                  |          |                |                  |                     |
| CB4856 CT V          | 18392007                                                    | 18394303 | WBGene00013070 | Y51A2B.6         | Y51A2B.6            |
| -0.00982626623518357 | AGIWUR20290                                                 |          |                |                  |                     |
| CB4856 CT V          | 18395338                                                    | 18395749 | WBGene00050907 | Y51A2B.9         | Y51A2B.9            |
| 0.0483406230391292   | AGIWUR15787;AGIWUR15989;AGIWUR19344;AGIWUR25724;AGIWUR40333 |          |                |                  |                     |
| CB4856 CT V          | 18398450                                                    | 18400374 | WBGene00005828 | srw-81 Y51A2B.7  |                     |
| -0.0538456069537485  | AGIWUR14210                                                 |          |                |                  |                     |
| CB4856 CT V          | 18406896                                                    | 18408138 | WBGene00014984 | ZK262.12         | ZK262.12            |
| 0.0563991250099374   | AGIWUR29494;AGIWUR39668                                     |          |                |                  |                     |
| CB4856 CT V          | 18409043                                                    | 18410242 | WBGene00005417 | srh-207 ZK262.1  | -0.0687424186231418 |
| AGIWUR24982          |                                                             |          |                |                  |                     |
| CB4856 CT V          | 18410758                                                    | 18412987 | WBGene00013949 | ZK262.2 ZK262.2  | -0.0253853536152722 |
| AGIWUR1816           |                                                             |          |                |                  |                     |
| CB4856 CT V          | 18414351                                                    | 18416861 | WBGene00013950 | ZK262.3 ZK262.3  | 0.522017556123105   |
| AGIWUR39692          |                                                             |          |                |                  |                     |
| CB4856 CT V          | 18417749                                                    | 18419893 | WBGene00005409 | srh-198 ZK262.13 |                     |
| 0.112709150500308    | AGIWUR10509;AGIWUR15365                                     |          |                |                  |                     |
| CB4856 CT V          | 18421097                                                    | 18423477 | WBGene00005614 | srj-26 ZK262.10  |                     |
| 0.0527723423548263   | AGIWUR12493;AGIWUR38321;AGIWUR40538                         |          |                |                  |                     |
| CB4856 CT V          | 18423883                                                    | 18424207 | WBGene00013951 | ZK262.4 ZK262.4  |                     |
| -0.00883522060429875 | AGIWUR19656                                                 |          |                |                  |                     |
| CB4856 CT V          | 18426580                                                    | 18430537 | WBGene00005830 | srw-83 ZK262.6   | 0.0789558437016789  |
| AGIWUR18266          |                                                             |          |                |                  |                     |
| CB4856 CT V          | 18431750                                                    | 18434172 | WBGene00005829 | srw-82 ZK262.7   | 0.191025653017148   |
| AGIWUR4528           |                                                             |          |                |                  |                     |
| CB4856 CT V          | 18440578                                                    | 18441340 | WBGene00013954 | ZK262.9 ZK262.9  | -0.18524060285455   |
| AGIWUR34089          |                                                             |          |                |                  |                     |
| CB4856 CT V          | 18444418                                                    | 18447019 | WBGene00013944 | ZK228.1 ZK228.1  | 0.125789412584298   |
| AGIWUR6424           |                                                             |          |                |                  |                     |
| CB4856 CT V          | 18455355                                                    | 18455934 | WBGene00050900 | ZK228.11         | ZK228.11            |
| -0.0770827783774806  | AGIWUR27728                                                 |          |                |                  |                     |
| CB4856 CT V          | 18458238                                                    | 18461231 | WBGene00013946 | ZK228.3 ZK228.3  | -1.02960710466009   |
| AGIWUR704            |                                                             |          |                |                  |                     |
| CB4856 CT V          | 18462804                                                    | 18465320 | WBGene00013947 | ZK228.4 ZK228.4  | -0.95018677530458   |
| AGIWUR27462          |                                                             |          |                |                  |                     |
| CB4856 CT V          | 18471985                                                    | 18473530 | WBGene00005397 | srh-182 ZK228.5  | -0.19256608347436   |

|                     |   |                                                          |          |                |                  |                    |
|---------------------|---|----------------------------------------------------------|----------|----------------|------------------|--------------------|
| AGIWUR27804         |   |                                                          |          |                |                  |                    |
| CB4856 CT           | V | 18474523                                                 | 18476268 | WBGene00005396 | srh-181 ZK228.6  | 0.0613997274586264 |
| AGIWUR6220          |   |                                                          |          |                |                  |                    |
| CB4856 CT           | V | 18476390                                                 | 18478061 | WBGene00005394 | srh-179 ZK228.7  | -0.269190295194297 |
| AGIWUR29334         |   |                                                          |          |                |                  |                    |
| CB4856 CT           | V | 18478467                                                 | 18480331 | WBGene00005393 | srh-178 ZK228.8  | 0.178827975190013  |
| AGIWUR6209          |   |                                                          |          |                |                  |                    |
| CB4856 CT           | V | 18481131                                                 | 18487258 | WBGene00013083 | Y51A2D.18        | Y51A2D.18          |
| -0.391843097322763  |   | AGIWUR19122                                              |          |                |                  |                    |
| CB4856 CT           | V | 18492265                                                 | 18508201 | WBGene00004830 | slo-1 Y51A2D.19  |                    |
| 0.0143837484794993  |   | AGIWUR35207;AGIWUR43931                                  |          |                |                  |                    |
| CB4856 CT           | V | 18508873                                                 | 18512632 | WBGene00013072 | Y51A2D.1         | Y51A2D.1           |
| -0.142664293523289  |   | AGIWUR24034                                              |          |                |                  |                    |
| CB4856 CT           | V | 18516789                                                 | 18523875 | WBGene00013073 | hmit-1.1         | Y51A2D.4           |
| 1.16181582101607    |   | AGIWUR9464                                               |          |                |                  |                    |
| CB4856 CT           | V | 18524760                                                 | 18529156 | WBGene00013074 | hmit-1.2         | Y51A2D.5           |
| -0.319560103058961  |   | AGIWUR26939                                              |          |                |                  |                    |
| CB4856 CT           | V | 18533924                                                 | 18549129 | WBGene00013075 | Y51A2D.7         | Y51A2D.7           |
| 0.0703967999459767  |   | AGIWUR40539                                              |          |                |                  |                    |
| CB4856 CT           | V | 18550022                                                 | 18553867 | WBGene00013076 | Y51A2D.8         | Y51A2D.8           |
| -0.351010612173567  |   | AGIWUR41015                                              |          |                |                  |                    |
| CB4856 CT           | V | 18555387                                                 | 18556643 | WBGene00013077 | ttr-24 Y51A2D.9  |                    |
| 0.029109320960357   |   | AGIWUR9673                                               |          |                |                  |                    |
| CB4856 CT           | V | 18556714                                                 | 18558099 | WBGene00013078 | ttr-25 Y51A2D.10 |                    |
| 0.127868783263759   |   | AGIWUR27649                                              |          |                |                  |                    |
| CB4856 CT           | V | 18558748                                                 | 18560308 | WBGene00013079 | ttr-26 Y51A2D.11 |                    |
| 0.00633311489393051 |   | AGIWUR38389                                              |          |                |                  |                    |
| CB4856 CT           | V | 18562178                                                 | 18564886 | WBGene00005191 | srg-34 Y51A2D.12 |                    |
| -0.303051258639384  |   | AGIWUR5864;AGIWUR15788;AGIWUR28658                       |          |                |                  |                    |
| CB4856 CT           | V | 18571833                                                 | 18573026 | WBGene00044210 | Y51A2D.21        | Y51A2D.21          |
| -0.0861568740797969 |   | AGIWUR69;AGIWUR12741;AGIWUR19445;AGIWUR23107;AGIWUR31627 |          |                |                  |                    |
| CB4856 CT           | V | 18573056                                                 | 18579784 | WBGene00013080 | Y51A2D.13        | Y51A2D.13          |
| 0.665312885419453   |   | AGIWUR33983                                              |          |                |                  |                    |
| CB4856 CT           | V | 18582658                                                 | 18582963 | WBGene00013081 | Y51A2D.14        | Y51A2D.14          |
| 0.17302726569503    |   | AGIWUR35808                                              |          |                |                  |                    |
| CB4856 CT           | V | 18592754                                                 | 18614101 | WBGene00013082 | grdn-1 Y51A2D.15 |                    |
| 0.341221273108118   |   | AGIWUR699;AGIWUR3278;AGIWUR40624                         |          |                |                  |                    |
| CB4856 CT           | V | 18616599                                                 | 18620043 | WBGene00003660 | nhr-70 Y51A2D.17 |                    |
| -0.137395746056228  |   | AGIWUR6583                                               |          |                |                  |                    |

|                                                                                     |                                                         |          |                |                                    |
|-------------------------------------------------------------------------------------|---------------------------------------------------------|----------|----------------|------------------------------------|
| CB4856 CT V                                                                         | 18620057                                                | 18623093 | WBGene00013479 | Y69H2.1 Y69H2.1 -0.204683569601759 |
| AGIWUR4951                                                                          |                                                         |          |                |                                    |
| CB4856 CT V                                                                         | 18623198                                                | 18626852 | WBGene00050884 | Y69H2.15 Y69H2.15                  |
| -0.201500018861401                                                                  | AGIWUR11539;AGIWUR42398                                 |          |                |                                    |
| CB4856 CT V                                                                         | 18628680                                                | 18636348 | WBGene00013480 | egas-3 Y69H2.2 -0.344666666675896  |
| AGIWUR12373                                                                         |                                                         |          |                |                                    |
| CB4856 CT V                                                                         | 18638484                                                | 18639591 | WBGene00013489 | col-42 Y69H2.14                    |
| -0.226245535831239                                                                  | AGIWUR4525;AGIWUR33265                                  |          |                |                                    |
| CB4856 CT V                                                                         | 18640337                                                | 18648392 | WBGene00013486 | egas-1 Y69H2.11                    |
| 0.0178103879248237                                                                  | AGIWUR27908                                             |          |                |                                    |
| CB4856 CT V                                                                         | 18650343                                                | 18656165 | WBGene00013487 | egas-2 Y69H2.12                    |
| -0.169966207611634                                                                  | AGIWUR11285                                             |          |                |                                    |
| CB4856 CT V                                                                         | 18656094                                                | 18664116 | WBGene00013481 | Y69H2.3 Y69H2.3 -0.386632423506507 |
| AGIWUR14840;AGIWUR15424;AGIWUR24446;AGIWUR25250;AGIWUR30766;AGIWUR39487;AGIWUR40523 |                                                         |          |                |                                    |
| CB4856 CT V                                                                         | 18670315                                                | 18684360 | WBGene00013485 | Y69H2.10 Y69H2.10                  |
| 0.178613235314703                                                                   | AGIWUR10385;AGIWUR23560;AGIWUR34119                     |          |                |                                    |
| CB4856 CT V                                                                         | 18685060                                                | 18686349 | WBGene00077455 | Y69H2.17 Y69H2.17                  |
| -0.0312529756088598                                                                 | AGIWUR9288;AGIWUR16970;AGIWUR45036                      |          |                |                                    |
| CB4856 CT V                                                                         | 18686315                                                | 18689843 | WBGene00006714 | ubc-19 Y69H2.6 -0.0934236313441037 |
| AGIWUR6785                                                                          |                                                         |          |                |                                    |
| CB4856 CT V                                                                         | 18689989                                                | 18696069 | WBGene00013482 | Y69H2.7 Y69H2.7 -0.249578059900609 |
| AGIWUR29711;AGIWUR41114                                                             |                                                         |          |                |                                    |
| CB4856 CT V                                                                         | 18701540                                                | 18706098 | WBGene00013484 | Y69H2.9 Y69H2.9 -0.25467952957478  |
| AGIWUR13319                                                                         |                                                         |          |                |                                    |
| CB4856 CT V                                                                         | 18706031                                                | 18706254 | WBGene00077451 | Y69H2.16 Y69H2.16                  |
| 0.279998602923322                                                                   | AGIWUR12659                                             |          |                |                                    |
| CB4856 CT V                                                                         | 18709810                                                | 18711696 | WBGene00194680 | Y17D7C.6 Y17D7C.6                  |
| -0.0544431052910772                                                                 | AGIWUR37831                                             |          |                |                                    |
| CB4856 CT V                                                                         | 18713728                                                | 18714612 | WBGene00050903 | Y17D7C.4 Y17D7C.4                  |
| -0.0202128265327213                                                                 | AGIWUR689;AGIWUR4289;AGIWUR8035;AGIWUR26888;AGIWUR35127 |          |                |                                    |
| CB4856 CT V                                                                         | 18716075                                                | 18719944 | WBGene00012456 | Y17D7C.2 Y17D7C.2                  |
| -0.0654019438755755                                                                 | AGIWUR12235                                             |          |                |                                    |
| CB4856 CT V                                                                         | 18720589                                                | 18723771 | WBGene00045366 | Y17D7C.3 Y17D7C.3                  |
| -0.0303572625465334                                                                 | AGIWUR22892;AGIWUR44345                                 |          |                |                                    |
| CB4856 CT V                                                                         | 18728703                                                | 18729374 | WBGene00077655 | asp-19 ZK384.6 0.226390956774997   |
| AGIWUR5848                                                                          |                                                         |          |                |                                    |
| CB4856 CT V                                                                         | 18731991                                                | 18732772 | WBGene00013971 | sc1-19 ZK384.1 -0.131847825153445  |
| AGIWUR33613                                                                         |                                                         |          |                |                                    |
| CB4856 CT V                                                                         | 18732802                                                | 18734466 | WBGene00013972 | sc1-20 ZK384.2 0.265156466333092   |

|                     |                                                           |          |                |           |           |
|---------------------|-----------------------------------------------------------|----------|----------------|-----------|-----------|
| AGIWUR29469         |                                                           |          |                |           |           |
| CB4856 CT V         | 18738955                                                  | 18742208 | WBGene00045364 | clec-250  | F11D11.14 |
| 0.0804130736868967  | AGIWUR14561;AGIWUR19691;AGIWUR42947                       |          |                |           |           |
| CB4856 CT V         | 18742427                                                  | 18745266 | WBGene00045363 | F11D11.13 | F11D11.13 |
| -0.17422369100495   | AGIWUR372;AGIWUR17003                                     |          |                |           |           |
| CB4856 CT V         | 18745718                                                  | 18746987 | WBGene00008703 | clec-251  | F11D11.8  |
| 0.0569685993770292  | AGIWUR24107                                               |          |                |           |           |
| CB4856 CT V         | 18747943                                                  | 18748826 | WBGene00008702 | clec-252  | F11D11.7  |
| 0.00566589442536891 | AGIWUR30950                                               |          |                |           |           |
| CB4856 CT V         | 18749579                                                  | 18750199 | WBGene00045362 | F11D11.12 | F11D11.12 |
| 0.0109210390524375  | AGIWUR1476;AGIWUR2080;AGIWUR33437;AGIWUR41696;AGIWUR44609 |          |                |           |           |
| CB4856 CT V         | 18750163                                                  | 18750691 | WBGene00206492 | F11D11.21 | F11D11.21 |
| 0.175721227052083   | AGIWUR1746                                                |          |                |           |           |
| CB4856 CT V         | 18751267                                                  | 18752299 | WBGene00045361 | clec-253  | F11D11.11 |
| 0.00338749394672444 | AGIWUR9867;AGIWUR17636                                    |          |                |           |           |
| CB4856 CT V         | 18752482                                                  | 18753136 | WBGene00008701 | F11D11.6  | F11D11.6  |
| 0.0126659616476319  | AGIWUR6810;AGIWUR14978;AGIWUR29426                        |          |                |           |           |
| CB4856 CT V         | 18753500                                                  | 18754428 | WBGene00008700 | clec-254  | F11D11.5  |
| 0.13829072940373    | AGIWUR11388                                               |          |                |           |           |
| CB4856 CT V         | 18755450                                                  | 18756760 | WBGene00050971 | F11D11.15 | F11D11.15 |
| 0.412563566496992   | AGIWUR7429;AGIWUR24923                                    |          |                |           |           |
| CB4856 CT V         | 18756846                                                  | 18757678 | WBGene00077442 | F11D11.16 | F11D11.16 |
| -0.0530680729641171 | AGIWUR4444;AGIWUR5749;AGIWUR14017;AGIWUR24396;AGIWUR44023 |          |                |           |           |
| CB4856 CT V         | 18757982                                                  | 18760285 | WBGene00008698 | F11D11.3  | F11D11.3  |
| 0.0916077824510975  | AGIWUR30167                                               |          |                |           |           |
| CB4856 CT V         | 18761378                                                  | 18763526 | WBGene00008699 | F11D11.4  | F11D11.4  |
| -0.465383726190309  | AGIWUR35106                                               |          |                |           |           |
| CB4856 CT V         | 18767754                                                  | 18768414 | WBGene00077659 | F11D11.19 | F11D11.19 |
| 0.135278580067718   | AGIWUR24782                                               |          |                |           |           |
| CB4856 CT V         | 18771690                                                  | 18772639 | WBGene00012454 | clec-256  | Y17D7B.6  |
| 0.0680395094174235  | AGIWUR32361;AGIWUR35140                                   |          |                |           |           |
| CB4856 CT V         | 18773061                                                  | 18774024 | WBGene00044892 | clec-257  | Y17D7B.8  |
| -0.380375763455824  | AGIWUR43865                                               |          |                |           |           |
| CB4856 CT V         | 18775226                                                  | 18776195 | WBGene00012453 | Y17D7B.5  | Y17D7B.5  |
| 0.023998078545012   | AGIWUR36694;AGIWUR37221                                   |          |                |           |           |
| CB4856 CT V         | 18776198                                                  | 18780216 | WBGene00012452 | Y17D7B.4  | Y17D7B.4  |
| 0.232522187596206   | AGIWUR2942                                                |          |                |           |           |
| CB4856 CT V         | 18780490                                                  | 18782605 | WBGene00014562 | Y17D7B.7  | Y17D7B.7  |
| -0.447252755850159  |                                                           |          |                |           |           |

AGIWUR13145;AGIWUR14363;AGIWUR22346;AGIWUR24800;AGIWUR34763;AGIWUR36743;AGIWUR37503;AGIWUR41056;AGIWUR44064  
;AGIWUR44944

|                                                                                             |                                    |          |                |          |          |
|---------------------------------------------------------------------------------------------|------------------------------------|----------|----------------|----------|----------|
| CB4856 CT V                                                                                 | 18784954                           | 18786788 | WBGene00012451 | Y17D7B.3 | Y17D7B.3 |
| -0.217631571048287                                                                          | AGIWUR11530                        |          |                |          |          |
| CB4856 CT V                                                                                 | 18787806                           | 18789617 | WBGene00012450 | Y17D7B.2 | Y17D7B.2 |
| 0.153914170419974                                                                           | AGIWUR8884                         |          |                |          |          |
| CB4856 CT V                                                                                 | 18790958                           | 18794781 | WBGene00012449 | nhr-231  | Y17D7B.1 |
| 0.0990985608086543                                                                          | AGIWUR3281;AGIWUR3287              |          |                |          |          |
| CB4856 CT V                                                                                 | 18796106                           | 18800822 | WBGene00008309 | nhr-170  | C54E10.5 |
| 0.144050927974593                                                                           | AGIWUR4988                         |          |                |          |          |
| CB4856 CT V                                                                                 | 18804080                           | 18806509 | WBGene00005522 | sri-10   | C54E10.4 |
| -0.0236288177488966                                                                         | AGIWUR35247                        |          |                |          |          |
| CB4856 CT V                                                                                 | 18808069                           | 18808670 | WBGene00008310 | C54E10.6 | C54E10.6 |
| 0.0415140290669775                                                                          | AGIWUR20520                        |          |                |          |          |
| CB4856 CT V                                                                                 | 18811005                           | 18813481 | WBGene00008308 | C54E10.3 | C54E10.3 |
| 0.188563959786004                                                                           | AGIWUR32525                        |          |                |          |          |
| CB4856 CT V                                                                                 | 18815036                           | 18818593 | WBGene00008306 | C54E10.1 | C54E10.1 |
| -0.185476878905177                                                                          | AGIWUR12625                        |          |                |          |          |
| CB4856 CT V                                                                                 | 18819766                           | 18831422 | WBGene00008307 | ncs-5    | C54E10.2 |
| 0.192536445773113                                                                           | AGIWUR7427                         |          |                |          |          |
| CB4856 CT V                                                                                 | 18832327                           | 18837214 | WBGene00012448 | cyp-33D3 | Y17D7A.4 |
| 0.410611136666114                                                                           | AGIWUR43577                        |          |                |          |          |
| CB4856 CT V                                                                                 | 18839310                           | 18845401 | WBGene00003655 | nhr-65   | Y17D7A.3 |
| -0.318983035605644                                                                          | AGIWUR8708                         |          |                |          |          |
| CB4856 CT V                                                                                 | 18846817                           | 18852729 | WBGene00012446 | nhr-230  | Y17D7A.1 |
| -0.123427161251636                                                                          | AGIWUR23803;AGIWUR40110            |          |                |          |          |
| CB4856 CT V                                                                                 | 18853127                           | 18859221 | WBGene00006945 | wars-1   | Y80D3A.1 |
| -0.330005988616191                                                                          | AGIWUR39065                        |          |                |          |          |
| CB4856 CT V                                                                                 | 18860287                           | 18894974 | WBGene00001258 | emb-4    | Y80D3A.2 |
| -0.281047627474542                                                                          |                                    |          |                |          |          |
| AGIWUR228;AGIWUR4092;AGIWUR9326;AGIWUR10162;AGIWUR34227;AGIWUR35514;AGIWUR38064;AGIWUR42024 |                                    |          |                |          |          |
| CB4856 CT V                                                                                 | 18895317                           | 18900532 | WBGene00013584 | nhr-243  | Y80D3A.4 |
| 0.178569127630052                                                                           | AGIWUR41496                        |          |                |          |          |
| CB4856 CT V                                                                                 | 18912038                           | 18918109 | WBGene00013585 | cyp-42A1 | Y80D3A.5 |
| 0.245286313714649                                                                           | AGIWUR7466;AGIWUR41876;AGIWUR42942 |          |                |          |          |
| CB4856 CT V                                                                                 | 18919296                           | 18931379 | WBGene00004236 | ptr-22   | Y80D3A.7 |
| 0.523320192470988                                                                           | AGIWUR13202                        |          |                |          |          |
| CB4856 CT V                                                                                 | 18940641                           | 18946905 | WBGene00013586 | Y80D3A.8 | Y80D3A.8 |
| -0.0539896291248625                                                                         | AGIWUR41159;AGIWUR44894            |          |                |          |          |



|                     |                                                                                  |          |                |           |           |
|---------------------|----------------------------------------------------------------------------------|----------|----------------|-----------|-----------|
| CB4856 CT V         | 18953118                                                                         | 18957317 | WBGene00013587 | Y80D3A.9  | Y80D3A.9  |
| -0.153040439708427  | AGIWUR42361                                                                      |          |                |           |           |
| CB4856 CT V         | 18958240                                                                         | 18960172 | WBGene00012702 | ztf-20    | Y39B6A.46 |
| 0.0568278299046465  | AGIWUR22117                                                                      |          |                |           |           |
| CB4856 CT V         | 18960969                                                                         | 18967842 | WBGene00012701 | Y39B6A.43 | Y39B6A.43 |
| -0.27567473967915   | AGIWUR14234                                                                      |          |                |           |           |
| CB4856 CT V         | 18968021                                                                         | 18969640 | WBGene00012700 | Y39B6A.42 | Y39B6A.42 |
| -0.0518181494116261 | AGIWUR22324;AGIWUR30146                                                          |          |                |           |           |
| CB4856 CT V         | 18970500                                                                         | 18977976 | WBGene00012699 | Y39B6A.41 | Y39B6A.41 |
| -0.63467486382637   | AGIWUR26695                                                                      |          |                |           |           |
| CB4856 CT V         | 18979336                                                                         | 18981193 | WBGene00012698 | sws-1     | Y39B6A.40 |
| -0.0609946780921025 | AGIWUR12800                                                                      |          |                |           |           |
| CB4856 CT V         | 18981306                                                                         | 18985870 | WBGene00012697 | mrps-35   | Y39B6A.39 |
| -0.173614640345743  | AGIWUR40852                                                                      |          |                |           |           |
| CB4856 CT V         | 18986498                                                                         | 18990421 | WBGene00012696 | reps-1    | Y39B6A.38 |
| -0.202306619103311  | AGIWUR11454;AGIWUR30291;AGIWUR39000                                              |          |                |           |           |
| CB4856 CT V         | 18990850                                                                         | 18993799 | WBGene00012695 | Y39B6A.37 | Y39B6A.37 |
| -0.118120475902268  | AGIWUR27863                                                                      |          |                |           |           |
| CB4856 CT V         | 18993940                                                                         | 18998200 | WBGene00012694 | Y39B6A.36 | Y39B6A.36 |
| -0.203117874773728  | AGIWUR3112                                                                       |          |                |           |           |
| CB4856 CT V         | 18998345                                                                         | 19000918 | WBGene00006567 | tgt-2     | Y39B6A.35 |
| -0.0824444509374409 | AGIWUR30400                                                                      |          |                |           |           |
| CB4856 CT V         | 19001018                                                                         | 19001856 | WBGene00012693 | Y39B6A.34 | Y39B6A.34 |
| -0.0756916911680072 | AGIWUR4047                                                                       |          |                |           |           |
| CB4856 CT V         | 19001956                                                                         | 19006711 | WBGene00012692 | Y39B6A.33 | Y39B6A.33 |
| -0.240989492245784  | AGIWUR11551                                                                      |          |                |           |           |
| CB4856 CT V         | 19008635                                                                         | 19013833 | WBGene00012690 | Y39B6A.31 | Y39B6A.31 |
| 0.239462940504785   | AGIWUR12356                                                                      |          |                |           |           |
| CB4856 CT V         | 19014573                                                                         | 19020001 | WBGene00012689 | Y39B6A.30 | Y39B6A.30 |
| -0.129404972145664  | AGIWUR2723;AGIWUR3868;AGIWUR8560;AGIWUR19395;AGIWUR22745;AGIWUR25998;AGIWUR35972 |          |                |           |           |
| CB4856 CT V         | 19020487                                                                         | 19024765 | WBGene00012688 | Y39B6A.29 | Y39B6A.29 |
| -0.13891912484825   | AGIWUR29897                                                                      |          |                |           |           |
| CB4856 CT V         | 19031742                                                                         | 19035255 | WBGene00012686 | Y39B6A.27 | Y39B6A.27 |
| -0.019624401763144  | AGIWUR12883;AGIWUR21823;AGIWUR22555                                              |          |                |           |           |
| CB4856 CT V         | 19035753                                                                         | 19037320 | WBGene00012683 | asp-17    | Y39B6A.24 |
| -0.960225731229281  | AGIWUR28496                                                                      |          |                |           |           |
| CB4856 CT V         | 19039058                                                                         | 19042605 | WBGene00012682 | asp-16    | Y39B6A.23 |
| -0.142787795843065  | AGIWUR29027                                                                      |          |                |           |           |
| CB4856 CT V         | 19043215                                                                         | 19044853 | WBGene00012681 | asp-15    | Y39B6A.22 |

|                      |                                                                        |          |                |           |           |
|----------------------|------------------------------------------------------------------------|----------|----------------|-----------|-----------|
| -0.0242569685319536  | AGIWUR2429                                                             |          |                |           |           |
| CB4856 CT V          | 19047047                                                               | 19048669 | WBGene00012680 | Y39B6A.21 | Y39B6A.21 |
| -0.674990581495303   | AGIWUR26567                                                            |          |                |           |           |
| CB4856 CT V          | 19049461                                                               | 19050825 | WBGene00000214 | asp-1     | Y39B6A.20 |
| 0.0530125794027647   | AGIWUR25099                                                            |          |                |           |           |
| CB4856 CT V          | 19060180                                                               | 19067034 | WBGene00006696 | twk-46    | Y39B6A.19 |
| 0.121263303925321    | AGIWUR13015;AGIWUR14878;AGIWUR16757                                    |          |                |           |           |
| CB4856 CT V          | 19068621                                                               | 19074237 | WBGene00012679 | Y39B6A.18 | Y39B6A.18 |
| -0.206759908977475   | AGIWUR34309                                                            |          |                |           |           |
| CB4856 CT V          | 19076654                                                               | 19082641 | WBGene00003685 | nhr-95    | Y39B6A.17 |
| -0.0766960155035044  | AGIWUR15473;AGIWUR22074;AGIWUR37574                                    |          |                |           |           |
| CB4856 CT V          | 19087723                                                               | 19092668 | WBGene00012703 | nhr-145   | Y39B6A.47 |
| -0.188691147112543   | AGIWUR17417;AGIWUR35409                                                |          |                |           |           |
| CB4856 CT V          | 19099085                                                               | 19101108 | WBGene00012678 | Y39B6A.16 | Y39B6A.16 |
| -0.185353548607477   | AGIWUR34959                                                            |          |                |           |           |
| CB4856 CT V          | 19101961                                                               | 19118412 | WBGene00012676 | pro-3     | Y39B6A.14 |
| -0.261787225933598   | AGIWUR4302;AGIWUR23872                                                 |          |                |           |           |
| CB4856 CT V          | 19118505                                                               | 19119425 | WBGene00012675 | Y39B6A.13 | Y39B6A.13 |
| -0.21033319141896    | AGIWUR1697;AGIWUR18271;AGIWUR25659;AGIWUR42276                         |          |                |           |           |
| CB4856 CT V          | 19119527                                                               | 19124915 | WBGene00012674 | bed-1     | Y39B6A.12 |
| -0.0906801170587404  | AGIWUR8314                                                             |          |                |           |           |
| CB4856 CT V          | 19127530                                                               | 19130938 | WBGene00012673 | dyf-17    | Y39B6A.11 |
| -0.158701943692526   | AGIWUR31302                                                            |          |                |           |           |
| CB4856 CT V          | 19131531                                                               | 19133603 | WBGene00012672 | Y39B6A.10 | Y39B6A.10 |
| -0.140546113618113   | AGIWUR28432                                                            |          |                |           |           |
| CB4856 CT V          | 19136509                                                               | 19138986 | WBGene00012671 | Y39B6A.9  | Y39B6A.9  |
| 0.00210707659755727  | AGIWUR37848                                                            |          |                |           |           |
| CB4856 CT V          | 19140795                                                               | 19145542 | WBGene00012670 | Y39B6A.8  | Y39B6A.8  |
| -0.0667300755483398  | AGIWUR9446;AGIWUR12441;AGIWUR23017;AGIWUR25985;AGIWUR31414;AGIWUR38533 |          |                |           |           |
| CB4856 CT V          | 19145778                                                               | 19149147 | WBGene00012669 | Y39B6A.7  | Y39B6A.7  |
| 0.18623114937029     | AGIWUR5513;AGIWUR7476                                                  |          |                |           |           |
| CB4856 CT V          | 19154106                                                               | 19157674 | WBGene00006639 | tsp-13    | Y39B6A.6  |
| -0.00339003946753813 | AGIWUR1772                                                             |          |                |           |           |
| CB4856 CT V          | 19157659                                                               | 19158877 | WBGene00012668 | Y39B6A.5  | Y39B6A.5  |
| 0.00749494018918817  | AGIWUR38840                                                            |          |                |           |           |
| CB4856 CT V          | 19174806                                                               | 19187899 | WBGene00001987 | hot-2     | Y39B6A.48 |
| 0.0925721478940567   | AGIWUR11607;AGIWUR30465;AGIWUR44669                                    |          |                |           |           |
| CB4856 CT V          | 19189246                                                               | 19190035 | WBGene00012666 | Y39B6A.3  | Y39B6A.3  |
| -0.0104450744267428  | AGIWUR4119;AGIWUR9133;AGIWUR19452                                      |          |                |           |           |

|                                     |                                                                         |          |                |          |                             |
|-------------------------------------|-------------------------------------------------------------------------|----------|----------------|----------|-----------------------------|
| CB4856 CT V                         | 19190547                                                                | 19199080 | WBGene00012665 | pph-5    | Y39B6A.2                    |
| -0.159420944034239                  | AGIWUR17724;AGIWUR26103;AGIWUR30573;AGIWUR40282                         |          |                |          |                             |
| CB4856 CT V                         | 19201013                                                                | 19203607 | WBGene00012664 | Y39B6A.1 | Y39B6A.1                    |
| -0.199319606311819                  | AGIWUR381;AGIWUR1405;AGIWUR30522                                        |          |                |          |                             |
| CB4856 CT V                         | 19207684                                                                | 19211895 | WBGene00003669 | nhr-79   | T26H2.9 0.0857230144244525  |
| AGIWUR33400                         |                                                                         |          |                |          |                             |
| CB4856 CT V                         | 19213685                                                                | 19217138 | WBGene00005653 | srr-2    | T26H2.8 0.15350288798496    |
| AGIWUR39912                         |                                                                         |          |                |          |                             |
| CB4856 CT V                         | 19217975                                                                | 19222908 | WBGene00012068 | oac-49   | T26H2.7 -0.0543920099634887 |
| AGIWUR12320;AGIWUR34436             |                                                                         |          |                |          |                             |
| CB4856 CT V                         | 19252181                                                                | 19253054 | WBGene00219452 | F21D9.11 | F21D9.11                    |
| 0.377138718579545                   | AGIWUR32988                                                             |          |                |          |                             |
| CB4856 CT V                         | 19253820                                                                | 19256758 | WBGene00009018 | F21D9.4  | F21D9.4 -0.0843234619629349 |
| AGIWUR14486;AGIWUR27967;AGIWUR40913 |                                                                         |          |                |          |                             |
| CB4856 CT V                         | 19257583                                                                | 19257753 | WBGene00009017 | F21D9.3  | F21D9.3 0.0998041955319593  |
| AGIWUR44583                         |                                                                         |          |                |          |                             |
| CB4856 CT V                         | 19258483                                                                | 19262449 | WBGene00009016 | F21D9.2  | F21D9.2 -0.286243282727959  |
| AGIWUR31772                         |                                                                         |          |                |          |                             |
| CB4856 CT V                         | 19264597                                                                | 19269661 | WBGene00009015 | F21D9.1  | F21D9.1 0.550793896935902   |
| AGIWUR11826                         |                                                                         |          |                |          |                             |
| CB4856 CT V                         | 19279218                                                                | 19279988 | WBGene00009021 | F21D9.8  | F21D9.8 0.176610104570992   |
| AGIWUR27067                         |                                                                         |          |                |          |                             |
| CB4856 CT V                         | 19282614                                                                | 19284594 | WBGene00010099 | fbxb-117 | F55C9.1                     |
| 0.241687024387591                   | AGIWUR13275                                                             |          |                |          |                             |
| CB4856 CT V                         | 19287009                                                                | 19288173 | WBGene00010100 | F55C9.3  | F55C9.3 0.446663953574369   |
| AGIWUR494                           |                                                                         |          |                |          |                             |
| CB4856 CT V                         | 19288755                                                                | 19289889 | WBGene00010101 | fbxb-57  | F55C9.4 0.298954915545739   |
| AGIWUR24142                         |                                                                         |          |                |          |                             |
| CB4856 CT V                         | 19290616                                                                | 19291028 | WBGene00010102 | F55C9.5  | F55C9.5 0.295499243144232   |
| AGIWUR19911                         |                                                                         |          |                |          |                             |
| CB4856 CT V                         | 19299562                                                                | 19300461 | WBGene00077663 | F55C9.14 | F55C9.14                    |
| 0.25673603433748                    | AGIWUR6689                                                              |          |                |          |                             |
| CB4856 CT V                         | 19301076                                                                | 19302034 | WBGene00010105 | fbxb-62  | F55C9.8 0.0384787493938141  |
| AGIWUR8848                          |                                                                         |          |                |          |                             |
| CB4856 CT V                         | 19302787                                                                | 19303728 | WBGene00044197 | fbxb-63  | F55C9.13                    |
| 0.248931245266474                   | AGIWUR2799                                                              |          |                |          |                             |
| CB4856 CT V                         | 19307242                                                                | 19307583 | WBGene00010107 | F55C9.11 | F55C9.11                    |
| 0.111034248474127                   | AGIWUR11613;AGIWUR17151;AGIWUR17890;AGIWUR25273;AGIWUR41312;AGIWUR44273 |          |                |          |                             |
| CB4856 CT V                         | 19308707                                                                | 19309687 | WBGene00077441 | C43D7.10 | C43D7.10                    |

|                         |                                                                        |          |                |                 |                     |
|-------------------------|------------------------------------------------------------------------|----------|----------------|-----------------|---------------------|
| 0.106238836466188       | AGIWUR30843;AGIWUR31224                                                |          |                |                 |                     |
| CB4856 CT V             | 19310583                                                               | 19311058 | WBGene00008070 | C43D7.8 C43D7.8 | 0.520145912755627   |
| AGIWUR33714             |                                                                        |          |                |                 |                     |
| CB4856 CT V             | 19313275                                                               | 19316512 | WBGene00008071 | fbxb-64 C43D7.9 | 0.306299396399192   |
| AGIWUR31078             |                                                                        |          |                |                 |                     |
| CB4856 CT V             | 19317362                                                               | 19318500 | WBGene00005418 | srh-208 C43D7.6 | 0.0747983424638381  |
| AGIWUR23104             |                                                                        |          |                |                 |                     |
| CB4856 CT V             | 19319033                                                               | 19319460 | WBGene00008069 | C43D7.7 C43D7.7 | 0.0205360276602269  |
| AGIWUR38919             |                                                                        |          |                |                 |                     |
| CB4856 CT V             | 19320624                                                               | 19321203 | WBGene00008068 | sdz-6 C43D7.5   | -0.347657940562739  |
| AGIWUR42821             |                                                                        |          |                |                 |                     |
| CB4856 CT V             | 19321901                                                               | 19322487 | WBGene00008067 | C43D7.4 C43D7.4 | -0.25759566105069   |
| AGIWUR30874;AGIWUR38230 |                                                                        |          |                |                 |                     |
| CB4856 CT V             | 19324105                                                               | 19325882 | WBGene00014702 | C43D7.3 C43D7.3 | 0.0844900872335126  |
| AGIWUR12126;AGIWUR22143 |                                                                        |          |                |                 |                     |
| CB4856 CT V             | 19329563                                                               | 19330747 | WBGene00008066 | fbxb-65 C43D7.2 | 0.136942364801833   |
| AGIWUR44975             |                                                                        |          |                |                 |                     |
| CB4856 CT V             | 19332425                                                               | 19349495 | WBGene00007583 | C14B4.2 C14B4.2 | -0.0164805617912447 |
| AGIWUR32835;AGIWUR36110 |                                                                        |          |                |                 |                     |
| CB4856 CT V             | 19370602                                                               | 19371331 | WBGene00012808 | Y43F8A.1        | Y43F8A.1            |
| 0.474556445240346       | AGIWUR26806                                                            |          |                |                 |                     |
| CB4856 CT V             | 19371553                                                               | 19376247 | WBGene00012809 | Y43F8A.2        | Y43F8A.2            |
| -0.0451962782893531     | AGIWUR28395                                                            |          |                |                 |                     |
| CB4856 CT V             | 19377444                                                               | 19381031 | WBGene00012810 | nceh-1 Y43F8A.3 |                     |
| 0.296624703079731       | AGIWUR31819                                                            |          |                |                 |                     |
| CB4856 CT V             | 19381268                                                               | 19384760 | WBGene00005831 | srw-84 Y43F8A.4 |                     |
| 0.131108193901079       | AGIWUR43294                                                            |          |                |                 |                     |
| CB4856 CT V             | 19384887                                                               | 19390120 | WBGene00012811 | Y43F8A.5        | Y43F8A.5            |
| 0.0523577081872233      | AGIWUR7721;AGIWUR20141;AGIWUR20247;AGIWUR27153;AGIWUR28536;AGIWUR29250 |          |                |                 |                     |
| CB4856 CT V             | 19395055                                                               | 19396609 | WBGene00007727 | C25F9.8 C25F9.8 | -0.259664088523056  |
| AGIWUR44804             |                                                                        |          |                |                 |                     |
| CB4856 CT V             | 19397828                                                               | 19398982 | WBGene00045413 | C25F9.13        | C25F9.13            |
| 0.0679917601549302      | AGIWUR475                                                              |          |                |                 |                     |
| CB4856 CT V             | 19400142                                                               | 19400715 | WBGene00005833 | srw-86 C25F9.7  | -0.258738332941444  |
| AGIWUR6983              |                                                                        |          |                |                 |                     |
| CB4856 CT V             | 19402296                                                               | 19402955 | WBGene00045412 | C25F9.12        | C25F9.12            |
| -0.225235466897605      | AGIWUR1593;AGIWUR18466;AGIWUR19405;AGIWUR25246;AGIWUR28580             |          |                |                 |                     |
| CB4856 CT V             | 19403530                                                               | 19405326 | WBGene00007726 | C25F9.6 C25F9.6 | -0.394728018692351  |
| AGIWUR21894             |                                                                        |          |                |                 |                     |

|                         |                                                |          |                |                 |                     |
|-------------------------|------------------------------------------------|----------|----------------|-----------------|---------------------|
| CB4856 CT V             | 19405685                                       | 19406394 | WBGene00044291 | C25F9.10        | C25F9.10            |
| -0.450258169266306      | AGIWUR2366;AGIWUR17710;AGIWUR42481             |          |                |                 |                     |
| CB4856 CT V             | 19407739                                       | 19410857 | WBGene00007725 | C25F9.5 C25F9.5 | -0.476708125991438  |
| AGIWUR5091              |                                                |          |                |                 |                     |
| CB4856 CT V             | 19411274                                       | 19413914 | WBGene00007724 | C25F9.4 C25F9.4 | -0.0489971917259382 |
| AGIWUR26318             |                                                |          |                |                 |                     |
| CB4856 CT V             | 19416633                                       | 19418004 | WBGene00007728 | C25F9.9 C25F9.9 | -0.176682415503495  |
| AGIWUR14245;AGIWUR39624 |                                                |          |                |                 |                     |
| CB4856 CT V             | 19418212                                       | 19418911 | WBGene00050967 | C25F9.15        | C25F9.15            |
| -0.123829118190302      | AGIWUR2951;AGIWUR35208;AGIWUR39664             |          |                |                 |                     |
| CB4856 CT V             | 19421471                                       | 19426774 | WBGene00007723 | C25F9.2 C25F9.2 | 0.0760921730494903  |
| AGIWUR34473             |                                                |          |                |                 |                     |
| CB4856 CT V             | 19429440                                       | 19431687 | WBGene00005832 | srw-85 C25F9.1  | -0.352132654026517  |
| AGIWUR1639              |                                                |          |                |                 |                     |
| CB4856 CT V             | 19432441                                       | 19433072 | WBGene00045411 | C25F9.11        | C25F9.11            |
| 0.962961882723931       | AGIWUR27999;AGIWUR36828                        |          |                |                 |                     |
| CB4856 CT V             | 19436484                                       | 19437217 | WBGene00045461 | C25F9.14        | C25F9.14            |
| -0.340137072508077      | AGIWUR9904;AGIWUR27826;AGIWUR29040;AGIWUR42961 |          |                |                 |                     |
| CB4856 CT V             | 19437899                                       | 19445605 | WBGene00010850 | M04C3.1 M04C3.1 | -0.298917135005221  |
| AGIWUR15238;AGIWUR16598 |                                                |          |                |                 |                     |
| CB4856 CT V             | 19445873                                       | 19448901 | WBGene00010851 | M04C3.2 M04C3.2 | -0.171140335086086  |
| AGIWUR3985;AGIWUR21107  |                                                |          |                |                 |                     |
| CB4856 CT V             | 19449738                                       | 19450914 | WBGene00206418 | M04C3.5 M04C3.5 | 0.028611135524276   |
| AGIWUR10907             |                                                |          |                |                 |                     |
| CB4856 CT V             | 19452183                                       | 19455031 | WBGene00012824 | Y43F8B.14       | Y43F8B.14           |
| -0.257150361757787      | AGIWUR7744                                     |          |                |                 |                     |
| CB4856 CT V             | 19460818                                       | 19462102 | WBGene00045415 | Y43F8B.15       | Y43F8B.15           |
| -0.12504945863821       | AGIWUR1838;AGIWUR3164;AGIWUR37500;AGIWUR41629  |          |                |                 |                     |
| CB4856 CT V             | 19462912                                       | 19463759 | WBGene00195177 | Y43F8B.25       | Y43F8B.25           |
| 0.0417357037646759      | AGIWUR45162                                    |          |                |                 |                     |
| CB4856 CT V             | 19468383                                       | 19469554 | WBGene00012822 | Y43F8B.12       | Y43F8B.12           |
| -0.648666869059308      | AGIWUR15046                                    |          |                |                 |                     |
| CB4856 CT V             | 19470694                                       | 19472501 | WBGene00012821 | Y43F8B.11       | Y43F8B.11           |
| 0.0186345386255615      | AGIWUR11074                                    |          |                |                 |                     |
| CB4856 CT V             | 19474464                                       | 19476942 | WBGene00012820 | Y43F8B.10       | Y43F8B.10           |
| -0.110925114150623      | AGIWUR22443                                    |          |                |                 |                     |
| CB4856 CT V             | 19479203                                       | 19480459 | WBGene00012819 | Y43F8B.9        | Y43F8B.9            |
| -0.334663963570359      | AGIWUR2851                                     |          |                |                 |                     |
| CB4856 CT V             | 19483637                                       | 19483895 | WBGene00014888 | Y43F8B.8        | Y43F8B.8            |

|                                                                                                                       |                                                                                   |          |                |           |                            |
|-----------------------------------------------------------------------------------------------------------------------|-----------------------------------------------------------------------------------|----------|----------------|-----------|----------------------------|
| -0.0100913905874904                                                                                                   | AGIWUR11075;AGIWUR22024;AGIWUR28783;AGIWUR29367;AGIWUR33429                       |          |                |           |                            |
| CB4856 CT V                                                                                                           | 19485319                                                                          | 19485873 | WBGene00219302 | Y43F8B.28 | Y43F8B.28                  |
| 0.210316425734661                                                                                                     | AGIWUR27524                                                                       |          |                |           |                            |
| CB4856 CT V                                                                                                           | 19485916                                                                          | 19486746 | WBGene00050911 | Y43F8B.18 | Y43F8B.18                  |
| -0.0569293310786634                                                                                                   | AGIWUR1861;AGIWUR18935                                                            |          |                |           |                            |
| CB4856 CT V                                                                                                           | 19490761                                                                          | 19491231 | WBGene00012818 | Y43F8B.7  | Y43F8B.7                   |
| 0.556454885465171                                                                                                     | AGIWUR13017;AGIWUR18716                                                           |          |                |           |                            |
| CB4856 CT V                                                                                                           | 19493885                                                                          | 19494657 | WBGene00012817 | Y43F8B.6  | Y43F8B.6                   |
| 0.0901845408787585                                                                                                    | AGIWUR42352                                                                       |          |                |           |                            |
| CB4856 CT V                                                                                                           | 19494762                                                                          | 19495687 | WBGene00012816 | sc1-21    | Y43F8B.5                   |
| 0.137188229454266                                                                                                     | AGIWUR20613                                                                       |          |                |           |                            |
| CB4856 CT V                                                                                                           | 19503108                                                                          | 19519950 | WBGene00012814 | Y43F8B.3  | Y43F8B.3                   |
| -0.0556768105897536                                                                                                   | AGIWUR27061;AGIWUR30319;AGIWUR39677                                               |          |                |           |                            |
| CB4856 CT V                                                                                                           | 19519925                                                                          | 19533110 | WBGene00012813 | Y43F8B.2  | Y43F8B.2                   |
| 0.544570160542287                                                                                                     |                                                                                   |          |                |           |                            |
| AGIWUR5140;AGIWUR8653;AGIWUR11230;AGIWUR13882;AGIWUR16244;AGIWUR24976;AGIWUR26509;AGIWUR26843;AGIWUR31243;AGIWUR38299 |                                                                                   |          |                |           |                            |
| CB4856 CT V                                                                                                           | 19534880                                                                          | 19546200 | WBGene00012812 | Y43F8B.1  | Y43F8B.1                   |
| 0.0376007201980233                                                                                                    | AGIWUR4012;AGIWUR9462;AGIWUR20201;AGIWUR20421;AGIWUR20989;AGIWUR35973;AGIWUR40150 |          |                |           |                            |
| CB4856 CT V                                                                                                           | 19548239                                                                          | 19549784 | WBGene00086559 | Y43F8B.20 | Y43F8B.20                  |
| -0.101844073866216                                                                                                    | AGIWUR37706                                                                       |          |                |           |                            |
| CB4856 CT V                                                                                                           | 19551008                                                                          | 19555969 | WBGene00007177 | oac-1     | B0399.2 -0.304304932847504 |
| AGIWUR32001;AGIWUR33010                                                                                               |                                                                                   |          |                |           |                            |
| CB4856 CT V                                                                                                           | 19565386                                                                          | 19606115 | WBGene00007176 | kcn1-1    | B0399.1 0.0425328149960107 |
| AGIWUR25702;AGIWUR29918                                                                                               |                                                                                   |          |                |           |                            |
| CB4856 CT V                                                                                                           | 19607511                                                                          | 19608346 | WBGene00003763 | nlp-25    | Y43F8C.1                   |
| 0.53298131813699                                                                                                      | AGIWUR26743                                                                       |          |                |           |                            |
| CB4856 CT V                                                                                                           | 19609494                                                                          | 19612099 | WBGene00012840 | grsp-1    | Y43F8C.20                  |
| -0.347777979233377                                                                                                    | AGIWUR5647;AGIWUR38806                                                            |          |                |           |                            |
| CB4856 CT V                                                                                                           | 19613461                                                                          | 19614533 | WBGene00003764 | nlp-26    | Y43F8C.2                   |
| -0.0980431857866186                                                                                                   | AGIWUR26915                                                                       |          |                |           |                            |
| CB4856 CT V                                                                                                           | 19614558                                                                          | 19622551 | WBGene00012825 | Y43F8C.3  | Y43F8C.3                   |
| 0.722249762881573                                                                                                     | AGIWUR8607;AGIWUR9609                                                             |          |                |           |                            |
| CB4856 CT V                                                                                                           | 19625062                                                                          | 19630753 | WBGene00012826 | dyf-19    | Y43F8C.4                   |
| 0.399055319985118                                                                                                     | AGIWUR20380                                                                       |          |                |           |                            |
| CB4856 CT V                                                                                                           | 19633062                                                                          | 19640908 | WBGene00012828 | Y43F8C.6  | Y43F8C.6                   |
| 0.0489485815717909                                                                                                    | AGIWUR7964                                                                        |          |                |           |                            |
| CB4856 CT V                                                                                                           | 19641292                                                                          | 19644083 | WBGene00012829 | Y43F8C.7  | Y43F8C.7                   |
| 0.22647507194745                                                                                                      | AGIWUR32615                                                                       |          |                |           |                            |

|                      |                                                                                    |          |                |            |            |
|----------------------|------------------------------------------------------------------------------------|----------|----------------|------------|------------|
| CB4856 CT V          | 19644239                                                                           | 19645758 | WBGene00012830 | mrps-28    | Y43F8C.8   |
| -0.228235662849421   | AGIWUR2235;AGIWUR13361;AGIWUR20245;AGIWUR21105;AGIWUR28455;AGIWUR30763;AGIWUR31409 |          |                |            |            |
| CB4856 CT V          | 19646088                                                                           | 19647338 | WBGene00012831 | Y43F8C.9   | Y43F8C.9   |
| 0.000224558050490486 | AGIWUR11322                                                                        |          |                |            |            |
| CB4856 CT V          | 19650438                                                                           | 19655251 | WBGene00012832 | dmd-3      | Y43F8C.10  |
| 0.00474158373676481  | AGIWUR41418                                                                        |          |                |            |            |
| CB4856 CT V          | 19670259                                                                           | 19671411 | WBGene00012833 | Y43F8C.11  | Y43F8C.11  |
| 0.00769295000437431  | AGIWUR35037                                                                        |          |                |            |            |
| CB4856 CT V          | 19674843                                                                           | 19693043 | WBGene00003413 | mrp-7      | Y43F8C.12  |
| -0.338062181201629   | AGIWUR7172;AGIWUR10445;AGIWUR24658;AGIWUR29604;AGIWUR43123                         |          |                |            |            |
| CB4856 CT V          | 19693896                                                                           | 19697398 | WBGene00012834 | Y43F8C.13  | Y43F8C.13  |
| -0.394780946971586   | AGIWUR15896                                                                        |          |                |            |            |
| CB4856 CT V          | 19697560                                                                           | 19705212 | WBGene00012835 | ani-3      | Y43F8C.14  |
| 0.0653895333158019   | AGIWUR23978                                                                        |          |                |            |            |
| CB4856 CT V          | 19705205                                                                           | 19706379 | WBGene00012839 | Y43F8C.18  | Y43F8C.18  |
| 0.0673759529983653   | AGIWUR6142;AGIWUR28019;AGIWUR32124;AGIWUR32673;AGIWUR34660;AGIWUR44782             |          |                |            |            |
| CB4856 CT V          | 19706890                                                                           | 19708949 | WBGene00005714 | srv-3      | Y43F8C.19  |
| -0.400171065909803   | AGIWUR44295                                                                        |          |                |            |            |
| CB4856 CT V          | 19709775                                                                           | 19710614 | WBGene00012836 | Y43F8C.15  | Y43F8C.15  |
| 0.112164886503987    | AGIWUR32879                                                                        |          |                |            |            |
| CB4856 CT V          | 19714213                                                                           | 19715519 | WBGene00012837 | Y43F8C.16  | Y43F8C.16  |
| -0.0719048855638751  | AGIWUR10556;AGIWUR41075                                                            |          |                |            |            |
| CB4856 CT V          | 19727481                                                                           | 19727964 | WBGene00013819 | Y116F11A.6 | Y116F11A.6 |
| -0.119334528031292   | AGIWUR17758                                                                        |          |                |            |            |
| CB4856 CT V          | 19729038                                                                           | 19729590 | WBGene00013817 | Y116F11A.3 | Y116F11A.3 |
| -0.0595843508370528  | AGIWUR15941                                                                        |          |                |            |            |
| CB4856 CT V          | 19730588                                                                           | 19732165 | WBGene00013816 | Y116F11A.1 | Y116F11A.1 |
| 0.0776648001578359   | AGIWUR20538;AGIWUR42748                                                            |          |                |            |            |
| CB4856 CT V          | 19733411                                                                           | 19735075 | WBGene00014615 | Y116F11A.4 | Y116F11A.4 |
| 0.0795342797195073   | AGIWUR1684;AGIWUR15569;AGIWUR33436;AGIWUR44464                                     |          |                |            |            |
| CB4856 CT V          | 19735077                                                                           | 19737607 | WBGene00012252 | W04E12.7   | W04E12.7   |
| -0.0507907419473508  | AGIWUR28982;AGIWUR29879;AGIWUR35186                                                |          |                |            |            |
| CB4856 CT V          | 19738417                                                                           | 19739393 | WBGene00012246 | fbxa-131   | W04E12.1   |
| -0.273173800358208   | AGIWUR27629                                                                        |          |                |            |            |
| CB4856 CT V          | 19739559                                                                           | 19741117 | WBGene00012247 | W04E12.2   | W04E12.2   |
| -0.509550166896247   | AGIWUR15328                                                                        |          |                |            |            |
| CB4856 CT V          | 19741951                                                                           | 19742312 | WBGene00012248 | W04E12.3   | W04E12.3   |
| -0.807221307761607   | AGIWUR25773                                                                        |          |                |            |            |
| CB4856 CT V          | 19746152                                                                           | 19748540 | WBGene00012250 | W04E12.5   | W04E12.5   |

|                         |                                     |          |                |             |                            |
|-------------------------|-------------------------------------|----------|----------------|-------------|----------------------------|
| -0.585537456283321      | AGIWUR39057                         |          |                |             |                            |
| CB4856 CT V             | 19748987                            | 19751212 | WBGene00012251 | clec-49     | W04E12.6                   |
| -0.522796572722431      | AGIWUR32                            |          |                |             |                            |
| CB4856 CT V             | 19752400                            | 19755368 | WBGene00012253 | clec-50     | W04E12.8                   |
| -0.154897706337781      | AGIWUR44477                         |          |                |             |                            |
| CB4856 CT V             | 19756553                            | 19758552 | WBGene00012254 | W04E12.9    | W04E12.9                   |
| 1.2654030308463         | AGIWUR11345                         |          |                |             |                            |
| CB4856 CT V             | 19768261                            | 19770929 | WBGene00050946 | M162.12     | M162.12 -0.326135273088482 |
| AGIWUR37664             |                                     |          |                |             |                            |
| CB4856 CT V             | 19773401                            | 19774975 | WBGene00014811 | M162.9      | M162.9 -0.375382752655579  |
| AGIWUR28727;AGIWUR29002 |                                     |          |                |             |                            |
| CB4856 CT V             | 19777247                            | 19778708 | WBGene00044655 | fbxa-194    | M162.11                    |
| -0.0411271940761866     | AGIWUR5922;AGIWUR35071              |          |                |             |                            |
| CB4856 CT V             | 19780123                            | 19782314 | WBGene00010930 | srt-46      | M162.4 0.0508116387781037  |
| AGIWUR38377             |                                     |          |                |             |                            |
| CB4856 CT V             | 19784129                            | 19785961 | WBGene00010929 | srt-45      | M162.3 -0.338891832582814  |
| AGIWUR43248             |                                     |          |                |             |                            |
| CB4856 CT V             | 19788704                            | 19789281 | WBGene00010928 | clec-258    | M162.2                     |
| 0.0120230499840872      | AGIWUR1086                          |          |                |             |                            |
| CB4856 CT V             | 19790043                            | 19791248 | WBGene00010927 | clec-259    | M162.1                     |
| -0.500522704997662      | AGIWUR15647                         |          |                |             |                            |
| CB4856 CT V             | 19797999                            | 19801133 | WBGene00013820 | Y116F11B.2  | Y116F11B.2                 |
| 0.544711942581079       | AGIWUR577                           |          |                |             |                            |
| CB4856 CT V             | 19815133                            | 19816451 | WBGene00000920 | daf-28      | Y116F11B.1                 |
| -0.270393810964249      | AGIWUR14505                         |          |                |             |                            |
| CB4856 CT V             | 19822748                            | 19830099 | WBGene00003959 | pcp-4       | Y116F11B.3                 |
| -0.547316541591641      | AGIWUR32657                         |          |                |             |                            |
| CB4856 CT V             | 19836442                            | 19839342 | WBGene00005785 | srw-38      | Y116F11B.5                 |
| 0.203919998003562       | AGIWUR34111                         |          |                |             |                            |
| CB4856 CT V             | 19839403                            | 19841472 | WBGene00013821 | srz-35      | Y116F11B.4                 |
| 0.304452223157095       | AGIWUR11931                         |          |                |             |                            |
| CB4856 CT V             | 19848314                            | 19855250 | WBGene00013823 | Y116F11B.7  | Y116F11B.7                 |
| -0.370383372955787      | AGIWUR26854                         |          |                |             |                            |
| CB4856 CT V             | 19855174                            | 19867983 | WBGene00013825 | Y116F11B.9  | Y116F11B.9                 |
| -0.053920005014028      | AGIWUR15712;AGIWUR38310;AGIWUR39456 |          |                |             |                            |
| CB4856 CT V             | 19870506                            | 19873931 | WBGene00013826 | Y116F11B.10 | Y116F11B.10                |
| -0.0705033410605438     | AGIWUR5727                          |          |                |             |                            |
| CB4856 CT V             | 19881374                            | 19895350 | WBGene00001629 | gly-4       | Y116F11B.12                |
| -0.0551619801563579     | AGIWUR44184                         |          |                |             |                            |



|                     |                                     |          |                |           |           |
|---------------------|-------------------------------------|----------|----------------|-----------|-----------|
| CB4856 CT V         | 19897977                            | 19907434 | WBGene00013361 | fars-2    | Y60A3A.13 |
| -0.187215893187037  | AGIWUR22328;AGIWUR27164;AGIWUR42038 |          |                |           |           |
| CB4856 CT V         | 19908765                            | 19916023 | WBGene00000499 | chk-2     | Y60A3A.12 |
| -0.349110759979391  | AGIWUR5614                          |          |                |           |           |
| CB4856 CT V         | 19916557                            | 19919996 | WBGene00013365 | Y60A3A.19 | Y60A3A.19 |
| -0.0183200860319772 | AGIWUR1610;AGIWUR39964              |          |                |           |           |
| CB4856 CT V         | 19921697                            | 19922600 | WBGene00013364 | Y60A3A.16 | Y60A3A.16 |
| -0.388796663945929  | AGIWUR13571                         |          |                |           |           |
| CB4856 CT V         | 19922931                            | 19924049 | WBGene00014934 | Y60A3A.17 | Y60A3A.17 |
| -0.0363040394374279 | AGIWUR28300                         |          |                |           |           |
| CB4856 CT V         | 19924224                            | 19925033 | WBGene00004810 | skr-4     | Y60A3A.18 |
| -0.113971626157779  | AGIWUR21479;AGIWUR23516;AGIWUR37687 |          |                |           |           |
| CB4856 CT V         | 19927782                            | 19934323 | WBGene00013362 | algn-7    | Y60A3A.14 |
| -0.695823754681923  | AGIWUR37566                         |          |                |           |           |
| CB4856 CT V         | 19934795                            | 19946629 | WBGene00000987 | dhs-24    | Y60A3A.10 |
| -0.194761262742469  | AGIWUR26087;AGIWUR37453             |          |                |           |           |
| CB4856 CT V         | 19946691                            | 19949093 | WBGene00013360 | Y60A3A.9  | Y60A3A.9  |
| -0.185979066724007  | AGIWUR4870                          |          |                |           |           |
| CB4856 CT V         | 19949982                            | 19955122 | WBGene00013359 | Y60A3A.8  | Y60A3A.8  |
| -0.273458373145225  | AGIWUR21853                         |          |                |           |           |
| CB4856 CT V         | 19955453                            | 19958912 | WBGene00013358 | abhd-3.1  | Y60A3A.7  |
| -0.174675649900047  | AGIWUR19672                         |          |                |           |           |
| CB4856 CT V         | 19959044                            | 19960916 | WBGene00005388 | srh-172   | Y60A3A.6  |
| 0.100440115845434   | AGIWUR7190                          |          |                |           |           |
| CB4856 CT V         | 19965700                            | 19972559 | WBGene00005387 | srh-171   | Y60A3A.5  |
| 0.556988945427339   | AGIWUR31131                         |          |                |           |           |
| CB4856 CT V         | 19973284                            | 19975063 | WBGene00005389 | srh-173   | Y60A3A.4  |
| 0.0471557072215472  | AGIWUR9556                          |          |                |           |           |
| CB4856 CT V         | 19975610                            | 19978320 | WBGene00005398 | srh-183   | Y60A3A.3  |
| -0.0584474855751331 | AGIWUR22288                         |          |                |           |           |
| CB4856 CT V         | 19978620                            | 19981882 | WBGene00023519 | Y60A3A.24 | Y60A3A.24 |
| 0.0319000404989582  | AGIWUR10345;AGIWUR29702             |          |                |           |           |
| CB4856 CT V         | 19982994                            | 19986313 | WBGene00013357 | cllec-260 | Y60A3A.2  |
| -0.326515217316657  | AGIWUR17195                         |          |                |           |           |
| CB4856 CT V         | 19987984                            | 19990504 | WBGene00005579 | sri-67    | Y60A3A.22 |
| 0.0855424779490983  | AGIWUR9481                          |          |                |           |           |
| CB4856 CT V         | 19991207                            | 19994189 | WBGene00044211 | Y60A3A.25 | Y60A3A.25 |
| -0.25738878721124   | AGIWUR18341;AGIWUR26967             |          |                |           |           |
| CB4856 CT V         | 19995986                            | 20004485 | WBGene00006786 | unc-51    | Y60A3A.1  |

|                                                                                                |                                                                         |          |                |                 |                     |
|------------------------------------------------------------------------------------------------|-------------------------------------------------------------------------|----------|----------------|-----------------|---------------------|
| -0.2554215534075                                                                               | AGIWUR2393;AGIWUR4960;AGIWUR34898                                       |          |                |                 |                     |
| CB4856 CT V                                                                                    | 20007770                                                                | 20009195 | WBGene00013367 | Y60A3A.23       | Y60A3A.23           |
| -0.0310328574162906                                                                            |                                                                         |          |                |                 |                     |
| AGIWUR2176;AGIWUR14126;AGIWUR19113;AGIWUR24124;AGIWUR28719;AGIWUR29428;AGIWUR33373;AGIWUR41318 |                                                                         |          |                |                 |                     |
| CB4856 CT V                                                                                    | 20011959                                                                | 20015077 | WBGene00013366 | Y60A3A.21       | Y60A3A.21           |
| -0.181718257875607                                                                             | AGIWUR11192;AGIWUR19356;AGIWUR31108;AGIWUR35001;AGIWUR37667;AGIWUR44305 |          |                |                 |                     |
| CB4856 CT V                                                                                    | 20023046                                                                | 20036667 | WBGene00013746 | lgc-55          | Y113G7A.5           |
| 0.249000084631507                                                                              | AGIWUR17669                                                             |          |                |                 |                     |
| CB4856 CT V                                                                                    | 20037587                                                                | 20039419 | WBGene00013753 | Y113G7A.16      | Y113G7A.16          |
| 0.31316971397131                                                                               | AGIWUR35813                                                             |          |                |                 |                     |
| CB4856 CT V                                                                                    | 20040927                                                                | 20047398 | WBGene00013747 | spe-19          | Y113G7A.10          |
| -0.0887794717900103                                                                            | AGIWUR20899                                                             |          |                |                 |                     |
| CB4856 CT V                                                                                    | 20053733                                                                | 20064174 | WBGene00006652 | ttx-1           | Y113G7A.6           |
| 0.145514214304172                                                                              | AGIWUR13073;AGIWUR31199;AGIWUR39096;AGIWUR43427                         |          |                |                 |                     |
| CB4856 CT V                                                                                    | 20075935                                                                | 20087733 | WBGene00001485 | fre-1           | Y113G7A.8           |
| 0.0453566672719994                                                                             | AGIWUR11871                                                             |          |                |                 |                     |
| CB4856 CT V                                                                                    | 20087848                                                                | 20090743 | WBGene00000940 | dcs-1           | Y113G7A.9           |
| -0.0894599531740283                                                                            | AGIWUR19604                                                             |          |                |                 |                     |
| CB4856 CT V                                                                                    | 20091263                                                                | 20105685 | WBGene00004754 | sec-23          | Y113G7A.3           |
| -0.31471032530894                                                                              | AGIWUR20961;AGIWUR27455                                                 |          |                |                 |                     |
| CB4856 CT V                                                                                    | 20105632                                                                | 20120675 | WBGene00003566 | ncx-1           | Y113G7A.4           |
| 0.223060767890436                                                                              | AGIWUR12631                                                             |          |                |                 |                     |
| CB4856 CT V                                                                                    | 20128416                                                                | 20133142 | WBGene00013748 | ssu-1           | Y113G7A.11          |
| -0.00148922310909239                                                                           | AGIWUR9872                                                              |          |                |                 |                     |
| CB4856 CT V                                                                                    | 20135864                                                                | 20138449 | WBGene00013751 | Y113G7A.14      | Y113G7A.14          |
| -0.417749319579806                                                                             | AGIWUR29412                                                             |          |                |                 |                     |
| CB4856 CT V                                                                                    | 20144247                                                                | 20146805 | WBGene00013749 | Y113G7A.12      | Y113G7A.12          |
| 0.113929246662078                                                                              | AGIWUR19626                                                             |          |                |                 |                     |
| CB4856 CT V                                                                                    | 20148195                                                                | 20150357 | WBGene00013750 | Y113G7A.13      | Y113G7A.13          |
| 0.310823735318033                                                                              | AGIWUR30341                                                             |          |                |                 |                     |
| CB4856 CT V                                                                                    | 20151489                                                                | 20155442 | WBGene00008946 | F19B2.7 F19B2.7 | -0.320467501641395  |
| AGIWUR43667                                                                                    |                                                                         |          |                |                 |                     |
| CB4856 CT V                                                                                    | 20158523                                                                | 20161788 | WBGene00008945 | F19B2.6 F19B2.6 | -0.0186731745018642 |
| AGIWUR9773                                                                                     |                                                                         |          |                |                 |                     |
| CB4856 CT V                                                                                    | 20162649                                                                | 20164561 | WBGene00008944 | F19B2.5 F19B2.5 | -0.555282795728921  |
| AGIWUR26790                                                                                    |                                                                         |          |                |                 |                     |
| CB4856 CT V                                                                                    | 20167309                                                                | 20169283 | WBGene00008943 | srz-36 F19B2.4  | -0.267989378611726  |
| AGIWUR19481                                                                                    |                                                                         |          |                |                 |                     |
| CB4856 CT V                                                                                    | 20172821                                                                | 20173999 | WBGene00008942 | srz-34 F19B2.2  | 0.00214301667588135 |

|                                                                                                                     |                                     |          |                |            |            |                    |  |
|---------------------------------------------------------------------------------------------------------------------|-------------------------------------|----------|----------------|------------|------------|--------------------|--|
| AGIWUR29579                                                                                                         |                                     |          |                |            |            |                    |  |
| CB4856 CT V                                                                                                         | 20174988                            | 20182756 | WBGene00008941 | srz-33     | F19B2.1    | 0.0310647447148145 |  |
| AGIWUR3249;AGIWUR12827                                                                                              |                                     |          |                |            |            |                    |  |
| CB4856 CT V                                                                                                         | 20183843                            | 20186679 | WBGene00008947 | srz-16     | F19B2.8    | -0.314404184663457 |  |
| AGIWUR22368                                                                                                         |                                     |          |                |            |            |                    |  |
| CB4856 CT V                                                                                                         | 20187710                            | 20188882 | WBGene00013754 | fbxa-116   |            | Y113G7B.1          |  |
| 0.0542592532204633                                                                                                  | AGIWUR41446                         |          |                |            |            |                    |  |
| CB4856 CT V                                                                                                         | 20190535                            | 20192152 | WBGene00013755 | fbxa-115   |            | Y113G7B.3          |  |
| 0.0233326667181037                                                                                                  | AGIWUR16439;AGIWUR19447;AGIWUR23667 |          |                |            |            |                    |  |
| CB4856 CT V                                                                                                         | 20193463                            | 20195246 | WBGene00005427 | srh-217    | Y113G7B.2  |                    |  |
| -0.147199104675959                                                                                                  | AGIWUR9761                          |          |                |            |            |                    |  |
| CB4856 CT V                                                                                                         | 20196971                            | 20198242 | WBGene00013756 | ftr-1      | Y113G7B.4  |                    |  |
| 0.145279198550639                                                                                                   | AGIWUR13945                         |          |                |            |            |                    |  |
| CB4856 CT V                                                                                                         | 20199262                            | 20200640 | WBGene00001482 | fog-2      | Y113G7B.5  |                    |  |
| -0.0983287780692237                                                                                                 | AGIWUR19874;AGIWUR34434;AGIWUR39227 |          |                |            |            |                    |  |
| CB4856 CT V                                                                                                         | 20201616                            | 20202874 | WBGene00013758 | fbxa-114   |            | Y113G7B.7          |  |
| -0.494755959253084                                                                                                  | AGIWUR968                           |          |                |            |            |                    |  |
| CB4856 CT V                                                                                                         | 20203422                            | 20204503 | WBGene00013757 | fbxa-113   |            | Y113G7B.6          |  |
| -0.0702235896923042                                                                                                 | AGIWUR24213                         |          |                |            |            |                    |  |
| CB4856 CT V                                                                                                         | 20204528                            | 20206180 | WBGene00013759 | fbxb-59    | Y113G7B.8  |                    |  |
| 0.378783566870137                                                                                                   | AGIWUR32951                         |          |                |            |            |                    |  |
| CB4856 CT V                                                                                                         | 20206318                            | 20207907 | WBGene00013760 | srbc-34    | Y113G7B.9  |                    |  |
| -0.20903412711931                                                                                                   | AGIWUR7968;AGIWUR26183              |          |                |            |            |                    |  |
| CB4856 CT V                                                                                                         | 20208685                            | 20212451 | WBGene00013762 | Y113G7B.12 |            | Y113G7B.12         |  |
| -0.0017020755632462                                                                                                 | AGIWUR21855                         |          |                |            |            |                    |  |
| CB4856 CT V                                                                                                         | 20213821                            | 20215297 | WBGene00013761 | Y113G7B.11 |            | Y113G7B.11         |  |
| 0.206617346741114                                                                                                   | AGIWUR23594                         |          |                |            |            |                    |  |
| CB4856 CT V                                                                                                         | 20224856                            | 20225458 | WBGene00013770 | Y113G7B.26 |            | Y113G7B.26         |  |
| -0.0372166065744732                                                                                                 | AGIWUR25398                         |          |                |            |            |                    |  |
| CB4856 CT V                                                                                                         | 20226835                            | 20228829 | WBGene00013763 | Y113G7B.14 |            | Y113G7B.14         |  |
| -0.865656964736255                                                                                                  | AGIWUR17338                         |          |                |            |            |                    |  |
| CB4856 CT V                                                                                                         | 20234807                            | 20237743 | WBGene00013768 | sld-5      | Y113G7B.24 |                    |  |
| -0.152709683770041                                                                                                  | AGIWUR3715                          |          |                |            |            |                    |  |
| CB4856 CT V                                                                                                         | 20239180                            | 20249482 | WBGene00004203 | swsn-1     | Y113G7B.23 |                    |  |
| 0.133768435191126                                                                                                   | AGIWUR18515                         |          |                |            |            |                    |  |
| CB4856 CT V                                                                                                         | 20250881                            | 20267244 | WBGene00007017 | mdt-17     | Y113G7B.18 |                    |  |
| -0.161517654029719                                                                                                  |                                     |          |                |            |            |                    |  |
| AGIWUR2457;AGIWUR2923;AGIWUR6091;AGIWUR7506;AGIWUR11809;AGIWUR15271;AGIWUR20509;AGIWUR33020;AGIWUR33876;AGIWUR41067 |                                     |          |                |            |            |                    |  |

|                                    |                                                                        |          |                |                 |                           |
|------------------------------------|------------------------------------------------------------------------|----------|----------------|-----------------|---------------------------|
| CB4856 CT V                        | 20267377                                                               | 20269711 | WBGene00013766 | prmt-1          | Y113G7B.17                |
| 0.248841244319369                  | AGIWUR18691;AGIWUR32192;AGIWUR35752                                    |          |                |                 |                           |
| CB4856 CT V                        | 20270107                                                               | 20275732 | WBGene00013765 | cdkr-3          | Y113G7B.16                |
| -0.308399608535409                 | AGIWUR3128;AGIWUR11138;AGIWUR23975;AGIWUR24040;AGIWUR28760;AGIWUR35598 |          |                |                 |                           |
| CB4856 CT V                        | 20278160                                                               | 20279861 | WBGene00004173 | pqn-94          | ZC15.8 0.76414591218164   |
| AGIWUR7199                         |                                                                        |          |                |                 |                           |
| CB4856 CT V                        | 20281391                                                               | 20289417 | WBGene00013835 | mlt-4           | ZC15.7 0.0313372323965195 |
| AGIWUR32698                        |                                                                        |          |                |                 |                           |
| CB4856 CT V                        | 20289939                                                               | 20294488 | WBGene00013834 | cllec-261       | ZC15.6                    |
| -0.212399923562197                 | AGIWUR1972                                                             |          |                |                 |                           |
| CB4856 CT V                        | 20303588                                                               | 20304908 | WBGene00013832 | ZC15.3 ZC15.3   | 0.00847300568259257       |
| AGIWUR43150                        |                                                                        |          |                |                 |                           |
| CB4856 CT V                        | 20306103                                                               | 20308919 | WBGene00013830 | ZC15.1 ZC15.1   | 0.101618807804622         |
| AGIWUR7067                         |                                                                        |          |                |                 |                           |
| CB4856 CT V                        | 20310148                                                               | 20311656 | WBGene00045050 | ZC15.10 ZC15.10 | 0.0342139828530819        |
| AGIWUR3810;AGIWUR21680;AGIWUR40158 |                                                                        |          |                |                 |                           |
| CB4856 CT V                        | 20311819                                                               | 20315628 | WBGene00013831 | cllec-262       | ZC15.2                    |
| 0.291848014807735                  | AGIWUR18438                                                            |          |                |                 |                           |
| CB4856 CT V                        | 20317742                                                               | 20324024 | WBGene00013771 | Y113G7C.1       | Y113G7C.1                 |
| 0.0478423155249175                 | AGIWUR11288                                                            |          |                |                 |                           |
| CB4856 CT V                        | 20325728                                                               | 20328056 | WBGene00012612 | Y38H6A.1        | Y38H6A.1                  |
| -0.0658964648144957                | AGIWUR1354                                                             |          |                |                 |                           |
| CB4856 CT V                        | 20329705                                                               | 20335364 | WBGene00077669 | Y38H6A.5        | Y38H6A.5                  |
| 0.0861651089582938                 | AGIWUR9711;AGIWUR32556;AGIWUR33345;AGIWUR34192                         |          |                |                 |                           |
| CB4856 CT V                        | 20345203                                                               | 20348127 | WBGene00012614 | Y38H6A.3        | Y38H6A.3                  |
| -0.116933449642193                 | AGIWUR19521                                                            |          |                |                 |                           |
| CB4856 CT V                        | 20348247                                                               | 20349925 | WBGene00014874 | Y38H6A.4        | Y38H6A.4                  |
| -0.0293890148798557                | AGIWUR26688                                                            |          |                |                 |                           |
| CB4856 CT V                        | 20356802                                                               | 20365718 | WBGene00001700 | grd-11          | K02E2.2 0.254971670593611 |
| AGIWUR28288                        |                                                                        |          |                |                 |                           |
| CB4856 CT V                        | 20365708                                                               | 20366939 | WBGene00010509 | K02E2.8 K02E2.8 | -0.461661813947678        |
| AGIWUR3684                         |                                                                        |          |                |                 |                           |
| CB4856 CT V                        | 20367480                                                               | 20369253 | WBGene00005392 | srh-177         | K02E2.3 0.366833524095313 |
| AGIWUR35201                        |                                                                        |          |                |                 |                           |
| CB4856 CT V                        | 20375536                                                               | 20376301 | WBGene00002118 | ins-35          | K02E2.4 0.376126197484277 |
| AGIWUR3688                         |                                                                        |          |                |                 |                           |
| CB4856 CT V                        | 20377128                                                               | 20379410 | WBGene00014794 | K02E2.5 K02E2.5 | -0.0425475297516664       |
| AGIWUR1067;AGIWUR26609             |                                                                        |          |                |                 |                           |
| CB4856 CT V                        | 20380561                                                               | 20382036 | WBGene00010507 | K02E2.6 K02E2.6 | 0.0450467038640667        |



AGIWUR9853;AGIWUR19303;AGIWUR24521;AGIWUR25903;AGIWUR28169;AGIWUR28994;AGIWUR29363;AGIWUR33453;AGIWUR38174  
 CB4856 CT V 20500812 20503228 WBGene00005812 srw-65 Y38H6C.2  
 0.153791636328514 AGIWUR2254  
 CB4856 CT V 20504875 20505097 WBGene00012617 Y38H6C.4 Y38H6C.4  
 0.195381673742012 AGIWUR9045  
 CB4856 CT V 20514637 20515706 WBGene00012621 Y38H6C.8 Y38H6C.8  
 0.228233681281126 AGIWUR10442  
 CB4856 CT V 20516298 20518036 WBGene00012623 fbxa-149 Y38H6C.10  
 -0.117265651058483 AGIWUR24018  
 CB4856 CT V 20520250 20522270 WBGene00012622 Y38H6C.9 Y38H6C.9  
 -0.0500661924460273 AGIWUR1386  
 CB4856 CT V 20522621 20524512 WBGene00012624 fbxa-150 Y38H6C.11  
 -0.0404962761212619 AGIWUR3580;AGIWUR15698;AGIWUR27527  
 CB4856 CT V 20524700 20525866 WBGene00005382 srh-166 Y38H6C.12  
 0.187041235566943 AGIWUR14164  
 CB4856 CT V 20529953 20534169 WBGene00012626 famh-161 Y38H6C.14  
 -0.20937219964699 AGIWUR2469  
 CB4856 CT V 20534774 20536308 WBGene00012627 Y38H6C.15 Y38H6C.15  
 -0.204179629746958 AGIWUR41427  
 CB4856 CT V 20536430 20538155 WBGene00012628 Y38H6C.16 Y38H6C.16  
 0.158473041573712 AGIWUR15764  
 CB4856 CT V 20540395 20544192 WBGene00012629 slc-36.3 Y38H6C.17  
 1.01187928643662 AGIWUR2656  
 CB4856 CT V 20546626 20547148 WBGene00012630 Y38H6C.18 Y38H6C.18  
 -0.0944687446068739 AGIWUR25153  
 CB4856 CT V 20547261 20551164 WBGene00012632 Y38H6C.20 Y38H6C.20  
 0.091179137017888 AGIWUR34360  
 CB4856 CT V 20552294 20553071 WBGene00012631 Y38H6C.19 Y38H6C.19  
 0.123018988656721 AGIWUR19219  
 CB4856 CT V 20554116 20555267 WBGene00012633 Y38H6C.21 Y38H6C.21  
 -0.504606246026549 AGIWUR29870  
 CB4856 CT V 20555629 20556360 WBGene00012634 Y38H6C.23 Y38H6C.23  
 -0.239566609834324 AGIWUR24290  
 CB4856 CT V 20557945 20558379 WBGene00000015 abf-4 Y38H6C.22  
 -0.0342269857474937 AGIWUR5038  
 CB4856 CT V 20559080 20561895 WBGene00009166 F26F2.1 F26F2.1 -0.162657692208165  
 AGIWUR9644;AGIWUR24078;AGIWUR43885  
 CB4856 CT V 20564383 20564666 WBGene00219309 F26F2.13 F26F2.13  
 -0.231551413885454 AGIWUR33359

|                                                                        |                                                                        |          |                |                                     |
|------------------------------------------------------------------------|------------------------------------------------------------------------|----------|----------------|-------------------------------------|
| CB4856 CT V                                                            | 20565410                                                               | 20566541 | WBGene00009168 | F26F2.3 F26F2.3 -0.968468604036341  |
| AGIWUR19294                                                            |                                                                        |          |                |                                     |
| CB4856 CT V                                                            | 20569295                                                               | 20570191 | WBGene00009169 | F26F2.4 F26F2.4 -0.309798145751217  |
| AGIWUR9279;AGIWUR30803;AGIWUR33977;AGIWUR38558;AGIWUR40546;AGIWUR44909 |                                                                        |          |                |                                     |
| CB4856 CT V                                                            | 20573717                                                               | 20574000 | WBGene00009170 | F26F2.5 F26F2.5 -0.308003222678744  |
| AGIWUR38019                                                            |                                                                        |          |                |                                     |
| CB4856 CT V                                                            | 20574625                                                               | 20577636 | WBGene00009171 | clec-263 F26F2.6                    |
| 0.176416913104539                                                      | AGIWUR15828                                                            |          |                |                                     |
| CB4856 CT V                                                            | 20579546                                                               | 20580678 | WBGene00023504 | F26F2.8 F26F2.8 0.251760307345429   |
| AGIWUR3190;AGIWUR14596;AGIWUR29229;AGIWUR35095                         |                                                                        |          |                |                                     |
| CB4856 CT V                                                            | 20580996                                                               | 20590321 | WBGene00009172 | F26F2.7 F26F2.7 -0.0295429448821913 |
| AGIWUR34182                                                            |                                                                        |          |                |                                     |
| CB4856 CT V                                                            | 20600095                                                               | 20602474 | WBGene00000736 | col-163 F46B3.17                    |
| -0.192133507433346                                                     | AGIWUR17760                                                            |          |                |                                     |
| CB4856 CT V                                                            | 20603366                                                               | 20604378 | WBGene00009758 | ttr-11 F46B3.3                      |
| -0.00246668879039724                                                   | AGIWUR5985;AGIWUR15582;AGIWUR37486                                     |          |                |                                     |
| CB4856 CT V                                                            | 20607804                                                               | 20608559 | WBGene00009759 | ttr-12 F46B3.4 0.0562764254470447   |
| AGIWUR28886;AGIWUR29298                                                |                                                                        |          |                |                                     |
| CB4856 CT V                                                            | 20609794                                                               | 20613929 | WBGene00001691 | grd-2 F46B3.5 -0.226850437594816    |
| AGIWUR11921                                                            |                                                                        |          |                |                                     |
| CB4856 CT V                                                            | 20614382                                                               | 20615054 | WBGene00050932 | F46B3.19 F46B3.19                   |
| 0.0233848017502485                                                     | AGIWUR5624;AGIWUR19280;AGIWUR21487;AGIWUR28143;AGIWUR35096             |          |                |                                     |
| CB4856 CT V                                                            | 20618120                                                               | 20618656 | WBGene00009760 | F46B3.7 F46B3.7 0.260652533702268   |
| AGIWUR21128                                                            |                                                                        |          |                |                                     |
| CB4856 CT V                                                            | 20618910                                                               | 20621966 | WBGene00077434 | F46B3.20 F46B3.20                   |
| 0.236009712412769                                                      | AGIWUR4884                                                             |          |                |                                     |
| CB4856 CT V                                                            | 20622650                                                               | 20623160 | WBGene00009761 | F46B3.8 F46B3.8 0.253761083423177   |
| AGIWUR11360                                                            |                                                                        |          |                |                                     |
| CB4856 CT V                                                            | 20623630                                                               | 20624887 | WBGene00077436 | F46B3.22 F46B3.22                   |
| 0.00914718239362955                                                    | AGIWUR12526;AGIWUR21313;AGIWUR32702;AGIWUR39543;AGIWUR43533            |          |                |                                     |
| CB4856 CT V                                                            | 20625186                                                               | 20626143 | WBGene00009762 | F46B3.9 F46B3.9 -0.303446911641604  |
| AGIWUR40468                                                            |                                                                        |          |                |                                     |
| CB4856 CT V                                                            | 20626711                                                               | 20628206 | WBGene00009763 | srz-18 F46B3.11                     |
| -0.241196592874285                                                     | AGIWUR15575                                                            |          |                |                                     |
| CB4856 CT V                                                            | 20628422                                                               | 20629802 | WBGene00009764 | srz-17 F46B3.12                     |
| 0.126578938169255                                                      | AGIWUR21470                                                            |          |                |                                     |
| CB4856 CT V                                                            | 20630148                                                               | 20631329 | WBGene00009765 | F46B3.14 F46B3.14                   |
| -0.0748480558943871                                                    | AGIWUR7603;AGIWUR12522;AGIWUR13428;AGIWUR24567;AGIWUR36158;AGIWUR43491 |          |                |                                     |
| CB4856 CT V                                                            | 20632985                                                               | 20633689 | WBGene00009766 | F46B3.15 F46B3.15                   |

|                                                                       |                                                            |          |                |          |          |                     |
|-----------------------------------------------------------------------|------------------------------------------------------------|----------|----------------|----------|----------|---------------------|
| -0.0162476316807796                                                   | AGIWUR17891;AGIWUR44745;AGIWUR45040                        |          |                |          |          |                     |
| CB4856 CT V                                                           | 20634462                                                   | 20635313 | WBGene00009767 | F46B3.16 | F46B3.16 |                     |
| -0.0593786487739116                                                   | AGIWUR31887                                                |          |                |          |          |                     |
| CB4856 CT V                                                           | 20635943                                                   | 20636576 | WBGene00012849 | ttr-13   | Y44A6B.4 |                     |
| -0.080122727517514                                                    | AGIWUR4635;AGIWUR32172;AGIWUR34647;AGIWUR34876;AGIWUR35235 |          |                |          |          |                     |
| CB4856 CT V                                                           | 20636864                                                   | 20638444 | WBGene00012848 | Y44A6B.3 | Y44A6B.3 |                     |
| -0.0978239852936866                                                   | AGIWUR39781                                                |          |                |          |          |                     |
| CB4856 CT V                                                           | 20639594                                                   | 20641049 | WBGene00012846 | srxa-14  | Y44A6B.1 |                     |
| -0.124402977274632                                                    | AGIWUR11441;AGIWUR28556;AGIWUR32560                        |          |                |          |          |                     |
| CB4856 CT V                                                           | 20642289                                                   | 20644356 | WBGene00012847 | srxa-15  | Y44A6B.2 |                     |
| -0.00675102012418982                                                  | AGIWUR6148;AGIWUR10441;AGIWUR28261                         |          |                |          |          |                     |
| CB4856 CT V                                                           | 20654652                                                   | 20659742 | WBGene00012184 | mnr-1    | W01F3.1  | -0.062088340978713  |
| AGIWUR27576                                                           |                                                            |          |                |          |          |                     |
| CB4856 CT V                                                           | 20660325                                                   | 20662031 | WBGene00012185 | W01F3.2  | W01F3.2  | 0.0855542924376227  |
| AGIWUR21598                                                           |                                                            |          |                |          |          |                     |
| CB4856 CT V                                                           | 20667209                                                   | 20678513 | WBGene00012186 | mlt-11   | W01F3.3  | 1.3447859215006     |
| AGIWUR34807;AGIWUR41668                                               |                                                            |          |                |          |          |                     |
| CB4856 CT V                                                           | 20681420                                                   | 20683014 | WBGene00009999 | srsx-35  | F53F8.2  | 0.0551247966056985  |
| AGIWUR5741;AGIWUR37284                                                |                                                            |          |                |          |          |                     |
| CB4856 CT V                                                           | 20685683                                                   | 20688770 | WBGene00009998 | k1f-2    | F53F8.1  | 0.738597644684175   |
| AGIWUR30841                                                           |                                                            |          |                |          |          |                     |
| CB4856 CT V                                                           | 20688734                                                   | 20689532 | WBGene00010000 | F53F8.3  | F53F8.3  | -0.534818194880716  |
| AGIWUR22910                                                           |                                                            |          |                |          |          |                     |
| CB4856 CT V                                                           | 20690582                                                   | 20691685 | WBGene00010001 | F53F8.4  | F53F8.4  | 0.163384948586248   |
| AGIWUR27499                                                           |                                                            |          |                |          |          |                     |
| CB4856 CT V                                                           | 20700340                                                   | 20704048 | WBGene00010002 | F53F8.5  | F53F8.5  | -0.262415851984814  |
| AGIWUR19422                                                           |                                                            |          |                |          |          |                     |
| CB4856 CT V                                                           | 20708728                                                   | 20709794 | WBGene00010003 | F53F8.6  | F53F8.6  | -0.0547237431761545 |
| AGIWUR37872                                                           |                                                            |          |                |          |          |                     |
| CB4856 CT V                                                           | 20713920                                                   | 20716872 | WBGene00012850 | Y44A6C.1 | Y44A6C.1 |                     |
| 0.688167963739108                                                     | AGIWUR7317                                                 |          |                |          |          |                     |
| CB4856 CT V                                                           | 20717872                                                   | 20729271 | WBGene00012319 | ipla-3   | W07A8.2  | 0.106389426540916   |
| AGIWUR7440                                                            |                                                            |          |                |          |          |                     |
| CB4856 CT V                                                           | 20729948                                                   | 20744385 | WBGene00001043 | dnj-25   | W07A8.3  | -0.0368469683353752 |
| AGIWUR24301                                                           |                                                            |          |                |          |          |                     |
| CB4856 CT V                                                           | 20752883                                                   | 20760317 | WBGene00004013 | pha-4    | F38A6.1  | 0.723925998779789   |
| AGIWUR4940;AGIWUR7056;AGIWUR10928;AGIWUR11116;AGIWUR33259;AGIWUR39144 |                                                            |          |                |          |          |                     |
| CB4856 CT V                                                           | 20764955                                                   | 20770161 | WBGene00001248 | elp-1    | F38A6.2  | 0.00849726557637709 |
| AGIWUR28578                                                           |                                                            |          |                |          |          |                     |



|                                                                                                |                                                           |          |                |           |          |                     |
|------------------------------------------------------------------------------------------------|-----------------------------------------------------------|----------|----------------|-----------|----------|---------------------|
| CB4856 CT V                                                                                    | 20773743                                                  | 20775369 | WBGene00009528 | F38A6.4   | F38A6.4  | -0.303769861609062  |
| AGIWUR3923                                                                                     |                                                           |          |                |           |          |                     |
| CB4856 CT V                                                                                    | 20780413                                                  | 20785259 | WBGene00001851 | hif-1     | F38A6.3  | 0.276494192606818   |
| AGIWUR4461;AGIWUR8388;AGIWUR13579;AGIWUR16367;AGIWUR17143;AGIWUR40614                          |                                                           |          |                |           |          |                     |
| CB4856 CT V                                                                                    | 20789471                                                  | 20790784 | WBGene00012853 | Y44A6D.2  |          | Y44A6D.2            |
| -0.0878761557355272                                                                            | AGIWUR15098                                               |          |                |           |          |                     |
| CB4856 CT V                                                                                    | 20790768                                                  | 20792413 | WBGene00012854 | Y44A6D.3  |          | Y44A6D.3            |
| 0.203718192841425                                                                              | AGIWUR6196;AGIWUR8125;AGIWUR11022;AGIWUR14203;AGIWUR30558 |          |                |           |          |                     |
| CB4856 CT V                                                                                    | 20798218                                                  | 20801207 | WBGene00004748 | sdf-9     | Y44A6D.4 |                     |
| 0.0352518257322991                                                                             | AGIWUR37586                                               |          |                |           |          |                     |
| CB4856 CT V                                                                                    | 20801184                                                  | 20803006 | WBGene00012855 | Y44A6D.5  |          | Y44A6D.5            |
| 0.150253976568376                                                                              | AGIWUR43513                                               |          |                |           |          |                     |
| CB4856 CT V                                                                                    | 20816142                                                  | 20816553 | WBGene00011394 | T03D8.7   | T03D8.7  | 0.0770099727931264  |
| AGIWUR8909                                                                                     |                                                           |          |                |           |          |                     |
| CB4856 CT V                                                                                    | 20816576                                                  | 20820330 | WBGene00011393 | T03D8.6   | T03D8.6  | -0.0475912862450159 |
| AGIWUR11094                                                                                    |                                                           |          |                |           |          |                     |
| CB4856 CT V                                                                                    | 20820366                                                  | 20825028 | WBGene00001547 | gcy-22    | T03D8.5  | 0.391942734247864   |
| AGIWUR38984                                                                                    |                                                           |          |                |           |          |                     |
| CB4856 CT V                                                                                    | 20825559                                                  | 20827740 | WBGene00001723 | grl-14    | T03D8.4  | -0.117917605200936  |
| AGIWUR2172                                                                                     |                                                           |          |                |           |          |                     |
| CB4856 CT V                                                                                    | 20827715                                                  | 20828939 | WBGene00011392 | sbt-1     | T03D8.3  | 0.261801988233133   |
| AGIWUR26432;AGIWUR35497                                                                        |                                                           |          |                |           |          |                     |
| CB4856 CT V                                                                                    | 20829811                                                  | 20837552 | WBGene00003830 | num-1     | T03D8.1  | -0.186213695098949  |
| AGIWUR3244;AGIWUR15343;AGIWUR24653                                                             |                                                           |          |                |           |          |                     |
| CB4856 CT V                                                                                    | 20838080                                                  | 20838768 | WBGene00011391 | mrps-12   | T03D8.2  | -0.132864861148398  |
| AGIWUR36932                                                                                    |                                                           |          |                |           |          |                     |
| CB4856 CT V                                                                                    | 20838865                                                  | 20841582 | WBGene00009289 | exos-7    | F31D4.1  | -0.148984512051758  |
| AGIWUR6280                                                                                     |                                                           |          |                |           |          |                     |
| CB4856 CT V                                                                                    | 20841573                                                  | 20845546 | WBGene00009290 | F31D4.2   | F31D4.2  | -0.0036385108857413 |
| AGIWUR13395;AGIWUR14102;AGIWUR21065;AGIWUR29128;AGIWUR33661;AGIWUR41259                        |                                                           |          |                |           |          |                     |
| CB4856 CT V                                                                                    | 20846113                                                  | 20847727 | WBGene00001431 | fbk-6     | F31D4.3  | -0.0935473502241635 |
| AGIWUR4919;AGIWUR13185;AGIWUR20145;AGIWUR25639;AGIWUR26171;AGIWUR31644;AGIWUR32800;AGIWUR43487 |                                                           |          |                |           |          |                     |
| CB4856 CT V                                                                                    | 20847702                                                  | 20850666 | WBGene00009291 | cllec-264 |          | F31D4.4             |
| 0.515288459760658                                                                              | AGIWUR35224                                               |          |                |           |          |                     |
| CB4856 CT V                                                                                    | 20850833                                                  | 20851897 | WBGene00009294 | F31D4.9   | F31D4.9  | -0.220471332263349  |
| AGIWUR30890                                                                                    |                                                           |          |                |           |          |                     |
| CB4856 CT V                                                                                    | 20854143                                                  | 20858576 | WBGene00009292 | F31D4.5   | F31D4.5  | 1.03154771902533    |
| AGIWUR42985                                                                                    |                                                           |          |                |           |          |                     |
| CB4856 CT V                                                                                    | 20859344                                                  | 20861153 | WBGene00006622 | try-4     | F31D4.6  | -0.413610684555708  |

[illegible]

|                                                                         |    |   |        |        |                |          |          |                     |             |
|-------------------------------------------------------------------------|----|---|--------|--------|----------------|----------|----------|---------------------|-------------|
| CB4856                                                                  | CT | X | 270408 | 274012 | WBGene00022433 | Y108F1.5 | Y108F1.5 | -0.305426519921667  |             |
| AGIWUR39937                                                             |    |   |        |        |                |          |          |                     |             |
| CB4856                                                                  | CT | X | 297234 | 299287 | WBGene00020083 | R57.2    | R57.2    | -0.0193604595690378 | AGIWUR31539 |
| CB4856                                                                  | CT | X | 301832 | 308298 | WBGene00020082 | gcp-2.1  | R57.1    | -0.370676607227665  |             |
| AGIWUR15035;AGIWUR31471                                                 |    |   |        |        |                |          |          |                     |             |
| CB4856                                                                  | CT | X | 308762 | 311323 | WBGene00019734 | M02E1.2  | M02E1.2  | 0.115479562849794   |             |
| AGIWUR10337;AGIWUR35098;AGIWUR37692                                     |    |   |        |        |                |          |          |                     |             |
| CB4856                                                                  | CT | X | 326113 | 334600 | WBGene00019733 | M02E1.1  | M02E1.1  | 0.22692383721793    |             |
| AGIWUR13020;AGIWUR36891;AGIWUR38182                                     |    |   |        |        |                |          |          |                     |             |
| CB4856                                                                  | CT | X | 334580 | 341232 | WBGene00015431 | C04E7.4  | C04E7.4  | 0.129103478214265   | AGIWUR4709  |
| CB4856                                                                  | CT | X | 344127 | 346289 | WBGene00015430 | C04E7.3  | C04E7.3  | -0.0905998181047538 | AGIWUR11024 |
| CB4856                                                                  | CT | X | 353619 | 357939 | WBGene00015429 | sor-3    | C04E7.2  | -0.17558765165764   | AGIWUR32632 |
| CB4856                                                                  | CT | X | 358092 | 360198 | WBGene00015428 | C04E7.1  | C04E7.1  | -0.344632471684411  | AGIWUR39667 |
| CB4856                                                                  | CT | X | 360779 | 362938 | WBGene00045270 | C04E7.5  | C04E7.5  | -0.412294149550418  |             |
| AGIWUR1304;AGIWUR6863;AGIWUR26142;AGIWUR34587                           |    |   |        |        |                |          |          |                     |             |
| CB4856                                                                  | CT | X | 372235 | 376900 | WBGene00019862 | nrde-3   | R04A9.2  | 0.209957213193794   | AGIWUR34371 |
| CB4856                                                                  | CT | X | 377133 | 380605 | WBGene00019863 | R04A9.3  | R04A9.3  | -0.132232100969082  |             |
| AGIWUR1910;AGIWUR27720;AGIWUR39047                                      |    |   |        |        |                |          |          |                     |             |
| CB4856                                                                  | CT | X | 381338 | 382709 | WBGene00002060 | ife-2    | R04A9.4  | 0.205783139763408   | AGIWUR44493 |
| CB4856                                                                  | CT | X | 384382 | 388797 | WBGene00019864 | ceh-93   | R04A9.5  | -0.240456912057988  | AGIWUR4933  |
| CB4856                                                                  | CT | X | 391360 | 394828 | WBGene00044281 | R04A9.7  | R04A9.7  | 0.112952115504725   |             |
| AGIWUR15403;AGIWUR22517;AGIWUR22851;AGIWUR29510;AGIWUR35082;AGIWUR39575 |    |   |        |        |                |          |          |                     |             |
| CB4856                                                                  | CT | X | 397567 | 400687 | WBGene00019865 | R04A9.6  | R04A9.6  | -0.115400557695486  |             |
| AGIWUR184;AGIWUR3927;AGIWUR6837;AGIWUR17015;AGIWUR38506                 |    |   |        |        |                |          |          |                     |             |
| CB4856                                                                  | CT | X | 404897 | 405357 | WBGene00019861 | R04A9.1  | R04A9.1  | 0.253956904730141   | AGIWUR29396 |
| CB4856                                                                  | CT | X | 406459 | 416633 | WBGene00022858 | ZK1193.2 | ZK1193.2 | -0.341653444640531  |             |
| AGIWUR30557                                                             |    |   |        |        |                |          |          |                     |             |
| CB4856                                                                  | CT | X | 417482 | 420361 | WBGene00022859 | ZK1193.3 | ZK1193.3 | 0.0983439510956279  |             |
| AGIWUR31872                                                             |    |   |        |        |                |          |          |                     |             |
| CB4856                                                                  | CT | X | 421707 | 423033 | WBGene00000608 | col-19   | ZK1193.1 | 0.092189697414355   |             |
| AGIWUR6664;AGIWUR10326                                                  |    |   |        |        |                |          |          |                     |             |
| CB4856                                                                  | CT | X | 422890 | 425631 | WBGene00022860 | ZK1193.4 | ZK1193.4 | -0.366560574406387  |             |
| AGIWUR10253                                                             |    |   |        |        |                |          |          |                     |             |
| CB4856                                                                  | CT | X | 427043 | 433799 | WBGene00022861 | dve-1    | ZK1193.5 | 0.276324700445213   |             |
| AGIWUR26243;AGIWUR30037;AGIWUR42054;AGIWUR44587                         |    |   |        |        |                |          |          |                     |             |
| CB4856                                                                  | CT | X | 446356 | 450212 | WBGene00018683 | F52D1.2  | F52D1.2  | 1.00246876157467    | AGIWUR11405 |
| CB4856                                                                  | CT | X | 450446 | 457648 | WBGene00004127 | abu-12   | F52D1.3  | -0.0965259602908617 | AGIWUR18676 |
| CB4856                                                                  | CT | X | 460651 | 466912 | WBGene00018682 | aagr-4   | F52D1.1  | -0.192027053614972  | AGIWUR38943 |
| CB4856                                                                  | CT | X | 476561 | 478283 | WBGene00044556 | F38G1.3  | F38G1.3  | 0.00271863409316531 |             |

AGIWUR21457;AGIWUR27213;AGIWUR30357

|        |    |   |        |        |                |          |          |                    |             |
|--------|----|---|--------|--------|----------------|----------|----------|--------------------|-------------|
| CB4856 | CT | X | 481378 | 486504 | WBGene00000484 | che-2    | F38G1.1  | 0.228409476523635  | AGIWUR16263 |
| CB4856 | CT | X | 489695 | 492273 | WBGene00001185 | egl-17   | F38G1.2  | -0.29691354690662  | AGIWUR37293 |
| CB4856 | CT | X | 493211 | 497510 | WBGene00015137 | B0310.1  | B0310.1  | 0.0947076336449548 | AGIWUR27738 |
| CB4856 | CT | X | 501965 | 506943 | WBGene00015138 | B0310.2  | B0310.2  | -0.178592014380882 | AGIWUR23228 |
| CB4856 | CT | X | 510818 | 520880 | WBGene00015139 | B0310.3  | B0310.3  | 0.531926364357503  | AGIWUR20693 |
| CB4856 | CT | X | 525929 | 530289 | WBGene00015141 | ugt-46   | B0310.5  | -0.273576191890498 | AGIWUR40037 |
| CB4856 | CT | X | 530551 | 531009 | WBGene00015142 | B0310.6  | B0310.6  | -0.189666793920653 | AGIWUR16990 |
| CB4856 | CT | X | 531841 | 535834 | WBGene00017898 | F28C10.3 | F28C10.3 | -0.125630751386474 |             |

AGIWUR13471

|        |    |   |        |        |                |          |          |                   |  |
|--------|----|---|--------|--------|----------------|----------|----------|-------------------|--|
| CB4856 | CT | X | 537303 | 538910 | WBGene00017899 | F28C10.4 | F28C10.4 | 0.235873304854156 |  |
|--------|----|---|--------|--------|----------------|----------|----------|-------------------|--|

AGIWUR27250

|        |    |   |        |        |                |          |          |                    |  |
|--------|----|---|--------|--------|----------------|----------|----------|--------------------|--|
| CB4856 | CT | X | 543107 | 544256 | WBGene00017896 | F28C10.1 | F28C10.1 | 0.0885498043153357 |  |
|--------|----|---|--------|--------|----------------|----------|----------|--------------------|--|

AGIWUR6343

|        |    |   |        |        |                |        |          |                   |  |
|--------|----|---|--------|--------|----------------|--------|----------|-------------------|--|
| CB4856 | CT | X | 555788 | 557191 | WBGene00001962 | hlh-19 | F57C12.3 | 0.670080556514257 |  |
|--------|----|---|--------|--------|----------------|--------|----------|-------------------|--|

AGIWUR32848

|        |    |   |        |        |                |        |          |                    |  |
|--------|----|---|--------|--------|----------------|--------|----------|--------------------|--|
| CB4856 | CT | X | 558141 | 563657 | WBGene00003554 | nas-38 | F57C12.1 | -0.397685967561786 |  |
|--------|----|---|--------|--------|----------------|--------|----------|--------------------|--|

AGIWUR34589

|        |    |   |        |        |                |       |          |                    |  |
|--------|----|---|--------|--------|----------------|-------|----------|--------------------|--|
| CB4856 | CT | X | 563719 | 572701 | WBGene00003408 | mrp-2 | F57C12.4 | -0.182997737670425 |  |
|--------|----|---|--------|--------|----------------|-------|----------|--------------------|--|

AGIWUR6975;AGIWUR36018;AGIWUR45099

|        |    |   |        |        |                |       |          |                    |  |
|--------|----|---|--------|--------|----------------|-------|----------|--------------------|--|
| CB4856 | CT | X | 576318 | 587483 | WBGene00003407 | mrp-1 | F57C12.5 | 0.0987998878536018 |  |
|--------|----|---|--------|--------|----------------|-------|----------|--------------------|--|

AGIWUR9284;AGIWUR13774;AGIWUR34067

|        |    |   |        |        |                |         |         |                   |  |
|--------|----|---|--------|--------|----------------|---------|---------|-------------------|--|
| CB4856 | CT | X | 593960 | 596289 | WBGene00017423 | F13C5.2 | F13C5.2 | 0.452142843434269 |  |
|--------|----|---|--------|--------|----------------|---------|---------|-------------------|--|

AGIWUR10683;AGIWUR13371;AGIWUR22552;AGIWUR22732;AGIWUR31040;AGIWUR35162

|        |    |   |        |        |                |         |         |                     |  |
|--------|----|---|--------|--------|----------------|---------|---------|---------------------|--|
| CB4856 | CT | X | 596314 | 599553 | WBGene00017424 | F13C5.3 | F13C5.3 | -0.0411291311915027 |  |
|--------|----|---|--------|--------|----------------|---------|---------|---------------------|--|

AGIWUR302;AGIWUR6079;AGIWUR9605;AGIWUR11481;AGIWUR16677;AGIWUR17142;AGIWUR21336;AGIWUR23589;AGIWUR28821;AGIWUR33103;AGIWUR36497;AGIWUR37477;AGIWUR41870;AGIWUR43585

|        |    |   |        |        |                |         |         |                   |             |
|--------|----|---|--------|--------|----------------|---------|---------|-------------------|-------------|
| CB4856 | CT | X | 602172 | 604922 | WBGene00017422 | F13C5.1 | F13C5.1 | 0.300946123213761 | AGIWUR20727 |
|--------|----|---|--------|--------|----------------|---------|---------|-------------------|-------------|

|        |    |   |        |        |                |         |         |                   |             |
|--------|----|---|--------|--------|----------------|---------|---------|-------------------|-------------|
| CB4856 | CT | X | 604872 | 608492 | WBGene00017426 | F13C5.5 | F13C5.5 | 0.329476291588048 | AGIWUR43112 |
|--------|----|---|--------|--------|----------------|---------|---------|-------------------|-------------|

|        |    |   |        |        |                |        |         |                   |             |
|--------|----|---|--------|--------|----------------|--------|---------|-------------------|-------------|
| CB4856 | CT | X | 611120 | 621290 | WBGene00006825 | unc-96 | F13C5.6 | 0.317740806376786 | AGIWUR38876 |
|--------|----|---|--------|--------|----------------|--------|---------|-------------------|-------------|

|        |    |   |        |        |                |      |      |                     |             |
|--------|----|---|--------|--------|----------------|------|------|---------------------|-------------|
| CB4856 | CT | X | 629188 | 632868 | WBGene00019776 | M6.4 | M6.4 | -0.0464231738464731 | AGIWUR22702 |
|--------|----|---|--------|--------|----------------|------|------|---------------------|-------------|

|        |    |   |        |        |                |       |      |                   |  |
|--------|----|---|--------|--------|----------------|-------|------|-------------------|--|
| CB4856 | CT | X | 633703 | 636993 | WBGene00004011 | pha-2 | M6.3 | 0.283078190469326 |  |
|--------|----|---|--------|--------|----------------|-------|------|-------------------|--|

AGIWUR2968;AGIWUR10208;AGIWUR16900;AGIWUR22412;AGIWUR23724;AGIWUR24946;AGIWUR28447;AGIWUR39161;AGIWUR40151

|        |    |   |        |        |                |       |      |                    |  |
|--------|----|---|--------|--------|----------------|-------|------|--------------------|--|
| CB4856 | CT | X | 642156 | 654903 | WBGene00002056 | ifc-2 | M6.1 | -0.263922510609609 |  |
|--------|----|---|--------|--------|----------------|-------|------|--------------------|--|

AGIWUR13526;AGIWUR33635;AGIWUR35773;AGIWUR42995

|        |    |   |        |        |                |       |         |                    |  |
|--------|----|---|--------|--------|----------------|-------|---------|--------------------|--|
| CB4856 | CT | X | 656188 | 658511 | WBGene00020571 | lpr-7 | T19D7.3 | 0.0777547040105508 |  |
|--------|----|---|--------|--------|----------------|-------|---------|--------------------|--|

AGIWUR18294;AGIWUR27906

|        |    |   |        |        |                |        |         |                      |             |
|--------|----|---|--------|--------|----------------|--------|---------|----------------------|-------------|
| CB4856 | CT | X | 658477 | 661777 | WBGene00020572 | rund-1 | T19D7.4 | 0.000182744670741641 | AGIWUR36812 |
|--------|----|---|--------|--------|----------------|--------|---------|----------------------|-------------|

|        |    |   |        |        |                |         |         |                    |           |
|--------|----|---|--------|--------|----------------|---------|---------|--------------------|-----------|
| CB4856 | CT | X | 664714 | 666300 | WBGene00020573 | T19D7.5 | T19D7.5 | -0.213793401579188 | AGIWUR792 |
|--------|----|---|--------|--------|----------------|---------|---------|--------------------|-----------|

|                                                                                                                                  |    |   |        |        |                |          |          |                      |             |
|----------------------------------------------------------------------------------------------------------------------------------|----|---|--------|--------|----------------|----------|----------|----------------------|-------------|
| CB4856                                                                                                                           | CT | X | 669684 | 670800 | WBGene00020574 | T19D7.6  | T19D7.6  | 0.274973398643569    | AGIWUR37273 |
| CB4856                                                                                                                           | CT | X | 673027 | 676484 | WBGene00020569 | lgc-32   | T19D7.1  | -0.38234829482605    | AGIWUR27396 |
| CB4856                                                                                                                           | CT | X | 676435 | 680419 | WBGene00020575 | T19D7.7  | T19D7.7  | 0.313661007210425    | AGIWUR41783 |
| CB4856                                                                                                                           | CT | X | 681129 | 682780 | WBGene00021185 | Y9C12A.1 | Y9C12A.1 | -0.0162131662747278  |             |
| AGIWUR9671                                                                                                                       |    |   |        |        |                |          |          |                      |             |
| CB4856                                                                                                                           | CT | X | 692978 | 703036 | WBGene00017184 | ncam-1   | F02G3.1  | 0.478090232108411    |             |
| AGIWUR5275;AGIWUR5619;AGIWUR11793;AGIWUR40249                                                                                    |    |   |        |        |                |          |          |                      |             |
| CB4856                                                                                                                           | CT | X | 703029 | 714478 | WBGene00002150 | irk-2    | M02A10.2 | -0.273368016743875   |             |
| AGIWUR28735                                                                                                                      |    |   |        |        |                |          |          |                      |             |
| CB4856                                                                                                                           | CT | X | 720330 | 725957 | WBGene00004829 | sli-1    | M02A10.3 | 0.0815611694549059   |             |
| AGIWUR16071                                                                                                                      |    |   |        |        |                |          |          |                      |             |
| CB4856                                                                                                                           | CT | X | 731160 | 735672 | WBGene00015364 | npr-19   | C02H7.2  | -0.061308033976287   | AGIWUR36999 |
| CB4856                                                                                                                           | CT | X | 751211 | 759732 | WBGene00000086 | aex-3    | C02H7.3  | 0.462282937840752    |             |
| AGIWUR9247;AGIWUR24583;AGIWUR31811;AGIWUR33793                                                                                   |    |   |        |        |                |          |          |                      |             |
| CB4856                                                                                                                           | CT | X | 763769 | 766713 | WBGene00001127 | dyf-11   | C02H7.1  | 0.184211766084516    | AGIWUR33461 |
| CB4856                                                                                                                           | CT | X | 767023 | 768069 | WBGene00020216 | trap-2   | T04G9.5  | -0.207866749863684   |             |
| AGIWUR1311;AGIWUR14535;AGIWUR14666;AGIWUR28463;AGIWUR32471;AGIWUR43584                                                           |    |   |        |        |                |          |          |                      |             |
| CB4856                                                                                                                           | CT | X | 768596 | 770776 | WBGene00002071 | ile-2    | T04G9.3  | -0.394306135648847   | AGIWUR20795 |
| CB4856                                                                                                                           | CT | X | 770833 | 771882 | WBGene00020218 | T04G9.7  | T04G9.7  | 0.226377345989735    |             |
| AGIWUR9050;AGIWUR38408;AGIWUR38566;AGIWUR43698                                                                                   |    |   |        |        |                |          |          |                      |             |
| CB4856                                                                                                                           | CT | X | 772353 | 775371 | WBGene00020215 | T04G9.4  | T04G9.4  | -0.00167422843611931 | AGIWUR18022 |
| CB4856                                                                                                                           | CT | X | 777721 | 780514 | WBGene00003534 | nas-15   | T04G9.2  | -0.04996669721106    |             |
| AGIWUR6169;AGIWUR9460                                                                                                            |    |   |        |        |                |          |          |                      |             |
| CB4856                                                                                                                           | CT | X | 780528 | 785624 | WBGene00020217 | T04G9.6  | T04G9.6  | -0.147871515458969   | AGIWUR25013 |
| CB4856                                                                                                                           | CT | X | 788353 | 796142 | WBGene00020214 | attf-5   | T04G9.1  | -0.318712304421556   | AGIWUR24528 |
| CB4856                                                                                                                           | CT | X | 802796 | 804264 | WBGene00017779 | gtr-1    | F25E2.1  | 0.0596900484582239   | AGIWUR19478 |
| CB4856                                                                                                                           | CT | X | 806993 | 810794 | WBGene00017780 | F25E2.2  | F25E2.2  | -0.553943446415893   | AGIWUR29915 |
| CB4856                                                                                                                           | CT | X | 811173 | 813163 | WBGene00017781 | F25E2.3  | F25E2.3  | 1.02214397374834     | AGIWUR9834  |
| CB4856                                                                                                                           | CT | X | 813852 | 815929 | WBGene00002058 | ifd-2    | F25E2.4  | -0.0459279016540588  | AGIWUR17114 |
| CB4856                                                                                                                           | CT | X | 817927 | 825475 | WBGene00000899 | daf-3    | F25E2.5  | -0.0349791699455997  |             |
| AGIWUR2490;AGIWUR2974;AGIWUR8571;AGIWUR16462;AGIWUR19235;AGIWUR20554;AGIWUR23624;AGIWUR25067;AGIWUR29176;AGIWUR30818;AGIWUR40071 |    |   |        |        |                |          |          |                      |             |
| CB4856                                                                                                                           | CT | X | 830258 | 833760 | WBGene00018213 | F39H12.2 | F39H12.2 | 0.464736047134817    |             |
| AGIWUR39216                                                                                                                      |    |   |        |        |                |          |          |                      |             |
| CB4856                                                                                                                           | CT | X | 834778 | 837758 | WBGene00018212 | F39H12.1 | F39H12.1 | -0.283922018904917   |             |
| AGIWUR17434                                                                                                                      |    |   |        |        |                |          |          |                      |             |
| CB4856                                                                                                                           | CT | X | 838144 | 841493 | WBGene00018214 | F39H12.3 | F39H12.3 | 0.137039984698482    |             |
| AGIWUR30604                                                                                                                      |    |   |        |        |                |          |          |                      |             |
| CB4856                                                                                                                           | CT | X | 845731 | 851516 | WBGene00018215 | igcm-1   | F39H12.4 | 1.01862196320711     |             |

|                                                                                     |    |   |        |        |                |          |          |                      |             |
|-------------------------------------------------------------------------------------|----|---|--------|--------|----------------|----------|----------|----------------------|-------------|
| AGIWUR40820                                                                         |    |   |        |        |                |          |          |                      |             |
| CB4856                                                                              | CT | X | 864925 | 871089 | WBGene00018987 | lgl-1    | F56F10.4 | 0.0200223226245466   |             |
| AGIWUR20878                                                                         |    |   |        |        |                |          |          |                      |             |
| CB4856                                                                              | CT | X | 872517 | 875948 | WBGene00018984 | F56F10.1 | F56F10.1 | -1.85326162576535    |             |
| AGIWUR1210;AGIWUR8208;AGIWUR14901;AGIWUR15405;AGIWUR19430;AGIWUR37374               |    |   |        |        |                |          |          |                      |             |
| CB4856                                                                              | CT | X | 877239 | 879881 | WBGene00022502 | ZC13.1   | ZC13.1   | -0.0189543409945294  |             |
| AGIWUR4898;AGIWUR18529;AGIWUR36418                                                  |    |   |        |        |                |          |          |                      |             |
| CB4856                                                                              | CT | X | 880629 | 883049 | WBGene00022503 | ZC13.2   | ZC13.2   | 0.223622369464096    | AGIWUR44486 |
| CB4856                                                                              | CT | X | 882967 | 888394 | WBGene00022504 | mam-1    | ZC13.3   | 0.35420339426569     |             |
| AGIWUR6310;AGIWUR40476                                                              |    |   |        |        |                |          |          |                      |             |
| CB4856                                                                              | CT | X | 892228 | 898117 | WBGene00003104 | mab-7    | ZC13.4   | -0.148985747678448   | AGIWUR18071 |
| CB4856                                                                              | CT | X | 899508 | 902599 | WBGene00044557 | ZC13.10  | ZC13.10  | 0.0739901210129181   |             |
| AGIWUR2564;AGIWUR42796                                                              |    |   |        |        |                |          |          |                      |             |
| CB4856                                                                              | CT | X | 913290 | 914853 | WBGene00018078 | F35H12.6 | F35H12.6 | -0.408724016507669   |             |
| AGIWUR19934                                                                         |    |   |        |        |                |          |          |                      |             |
| CB4856                                                                              | CT | X | 915874 | 918290 | WBGene00004769 | sel-12   | F35H12.3 | -0.00845552602076438 |             |
| AGIWUR8596;AGIWUR15902                                                              |    |   |        |        |                |          |          |                      |             |
| CB4856                                                                              | CT | X | 918353 | 920193 | WBGene00018077 | F35H12.5 | F35H12.5 | -0.281105979452134   |             |
| AGIWUR39745                                                                         |    |   |        |        |                |          |          |                      |             |
| CB4856                                                                              | CT | X | 920200 | 924511 | WBGene00018076 | pifk-1   | F35H12.4 | 0.0658274853639362   |             |
| AGIWUR39475                                                                         |    |   |        |        |                |          |          |                      |             |
| CB4856                                                                              | CT | X | 924964 | 932255 | WBGene00018075 | tbc-11   | F35H12.2 | 0.340985976327225    |             |
| AGIWUR39704                                                                         |    |   |        |        |                |          |          |                      |             |
| CB4856                                                                              | CT | X | 933804 | 934906 | WBGene00018079 | F35H12.7 | F35H12.7 | -0.298676818208678   |             |
| AGIWUR12471                                                                         |    |   |        |        |                |          |          |                      |             |
| CB4856                                                                              | CT | X | 935460 | 937704 | WBGene00018074 | F35H12.1 | F35H12.1 | -0.380353165940778   |             |
| AGIWUR17036                                                                         |    |   |        |        |                |          |          |                      |             |
| CB4856                                                                              | CT | X | 938516 | 942608 | WBGene00018779 | F53H8.3  | F53H8.3  | -0.0258203188025306  | AGIWUR35128 |
| CB4856                                                                              | CT | X | 944826 | 948883 | WBGene00004893 | sms-2    | F53H8.4  | 0.00033294349936952  |             |
| AGIWUR10675;AGIWUR16059;AGIWUR19890;AGIWUR31185;AGIWUR35157;AGIWUR36174;AGIWUR43169 |    |   |        |        |                |          |          |                      |             |
| CB4856                                                                              | CT | X | 950782 | 954233 | WBGene00000195 | arr-1    | F53H8.2  | 0.295352427966373    | AGIWUR32033 |
| CB4856                                                                              | CT | X | 954839 | 957762 | WBGene00000164 | apm-3    | F53H8.1  | 0.132708009571331    |             |
| AGIWUR12166;AGIWUR44192;AGIWUR45022                                                 |    |   |        |        |                |          |          |                      |             |
| CB4856                                                                              | CT | X | 957881 | 960568 | WBGene00016642 | chil-10  | C44C1.2  | 0.0207279581513262   | AGIWUR31190 |
| CB4856                                                                              | CT | X | 960569 | 963202 | WBGene00003563 | ncs-1    | C44C1.3  | -0.15293724946201    | AGIWUR41639 |
| CB4856                                                                              | CT | X | 969074 | 970270 | WBGene00016645 | C44C1.6  | C44C1.6  | 1.1225763528576      | AGIWUR410   |
| CB4856                                                                              | CT | X | 970583 | 974816 | WBGene00016643 | vps-45   | C44C1.4  | -0.202923806683621   |             |
| AGIWUR8956;AGIWUR18258;AGIWUR38973                                                  |    |   |        |        |                |          |          |                      |             |
| CB4856                                                                              | CT | X | 975525 | 978445 | WBGene00016644 | abhd-3.2 | C44C1.5  | -0.352577276382393   |             |

|                                                                                                |    |   |         |         |                |         |          |                      |             |
|------------------------------------------------------------------------------------------------|----|---|---------|---------|----------------|---------|----------|----------------------|-------------|
| AGIWUR12864                                                                                    |    |   |         |         |                |         |          |                      |             |
| CB4856                                                                                         | CT | X | 980776  | 983030  | WBGene00016641 | C44C1.1 | C44C1.1  | -0.131434735117212   | AGIWUR16266 |
| CB4856                                                                                         | CT | X | 984581  | 991456  | WBGene00000958 | dgk-1   | C09E10.2 | 0.145183183765528    |             |
| AGIWUR5498                                                                                     |    |   |         |         |                |         |          |                      |             |
| CB4856                                                                                         | CT | X | 1004337 | 1009412 | WBGene00018861 | cutl-21 | F55A4.10 | 0.594693843790038    |             |
| AGIWUR34441                                                                                    |    |   |         |         |                |         |          |                      |             |
| CB4856                                                                                         | CT | X | 1011501 | 1012347 | WBGene00023069 | rnscs-1 | F55A4.9  | 1.60874017126866     | AGIWUR25420 |
| CB4856                                                                                         | CT | X | 1012731 | 1017567 | WBGene00018854 | nlf-1   | F55A4.2  | -0.0479661089466843  |             |
| AGIWUR3564;AGIWUR4708;AGIWUR21428;AGIWUR23400;AGIWUR32736;AGIWUR41565                          |    |   |         |         |                |         |          |                      |             |
| CB4856                                                                                         | CT | X | 1023477 | 1023780 | WBGene00018855 | F55A4.3 | F55A4.3  | -0.143888431691273   | AGIWUR33841 |
| CB4856                                                                                         | CT | X | 1024646 | 1025838 | WBGene00018856 | F55A4.4 | F55A4.4  | 0.554427766403347    | AGIWUR14930 |
| CB4856                                                                                         | CT | X | 1027673 | 1035286 | WBGene00018857 | stau-1  | F55A4.5  | 0.152987481196379    |             |
| AGIWUR10835;AGIWUR23559                                                                        |    |   |         |         |                |         |          |                      |             |
| CB4856                                                                                         | CT | X | 1035548 | 1037046 | WBGene00018853 | sec-22  | F55A4.1  | -0.382584531664966   | AGIWUR3979  |
| CB4856                                                                                         | CT | X | 1037023 | 1038447 | WBGene00018859 | F55A4.7 | F55A4.7  | 0.171609769490267    |             |
| AGIWUR4952;AGIWUR5421;AGIWUR10067;AGIWUR14857;AGIWUR20097;AGIWUR24312;AGIWUR37548              |    |   |         |         |                |         |          |                      |             |
| CB4856                                                                                         | CT | X | 1038514 | 1046206 | WBGene00018860 | vpat-1  | F55A4.8  | 0.0676274869894513   |             |
| AGIWUR2518;AGIWUR5258;AGIWUR18590;AGIWUR29451                                                  |    |   |         |         |                |         |          |                      |             |
| CB4856                                                                                         | CT | X | 1054081 | 1056843 | WBGene00003565 | ncs-3   | K03E6.3  | -0.00282235830108313 | AGIWUR18624 |
| CB4856                                                                                         | CT | X | 1057487 | 1062447 | WBGene00006741 | unc-1   | K03E6.5  | 0.0731817842943059   |             |
| AGIWUR2302;AGIWUR14006;AGIWUR20781                                                             |    |   |         |         |                |         |          |                      |             |
| CB4856                                                                                         | CT | X | 1066789 | 1069033 | WBGene00019364 | mksr-1  | K03E6.4  | 0.580134297548295    | AGIWUR31174 |
| CB4856                                                                                         | CT | X | 1073908 | 1079451 | WBGene00002988 | lim-6   | K03E6.1  | 0.151162732265491    |             |
| AGIWUR8993;AGIWUR10111;AGIWUR20616;AGIWUR21171;AGIWUR36958;AGIWUR43242                         |    |   |         |         |                |         |          |                      |             |
| CB4856                                                                                         | CT | X | 1079446 | 1080653 | WBGene00003991 | pfn-3   | K03E6.6  | -0.397079044451115   |             |
| AGIWUR14050;AGIWUR16785;AGIWUR17554;AGIWUR22606;AGIWUR34446;AGIWUR35978                        |    |   |         |         |                |         |          |                      |             |
| CB4856                                                                                         | CT | X | 1084214 | 1088148 | WBGene00019365 | rei-2   | K03E6.7  | 0.478907812747069    | AGIWUR9250  |
| CB4856                                                                                         | CT | X | 1095547 | 1097013 | WBGene00018634 | F49E7.2 | F49E7.2  | 0.306521608708       | AGIWUR9891  |
| CB4856                                                                                         | CT | X | 1097152 | 1103320 | WBGene00004377 | rme-6   | F49E7.1  | 0.00544914083702297  |             |
| AGIWUR1339;AGIWUR17283;AGIWUR18352;AGIWUR27630;AGIWUR32031;AGIWUR35210;AGIWUR37190;AGIWUR39437 |    |   |         |         |                |         |          |                      |             |
| CB4856                                                                                         | CT | X | 1104212 | 1106247 | WBGene00002062 | ife-4   | C05D9.5  | -0.0635280902870061  | AGIWUR2875  |
| CB4856                                                                                         | CT | X | 1107969 | 1110110 | WBGene00015473 | C05D9.4 | C05D9.4  | -0.143184094028553   | AGIWUR3752  |
| CB4856                                                                                         | CT | X | 1111903 | 1116794 | WBGene00015472 | C05D9.3 | C05D9.3  | 0.0418084481443657   | AGIWUR42743 |
| CB4856                                                                                         | CT | X | 1117192 | 1119405 | WBGene00015474 | C05D9.7 | C05D9.7  | 0.0446214186987657   | AGIWUR25615 |
| CB4856                                                                                         | CT | X | 1122422 | 1124308 | WBGene00015476 | C05D9.9 | C05D9.9  | 0.878688793902527    |             |
| AGIWUR28491;AGIWUR45071                                                                        |    |   |         |         |                |         |          |                      |             |
| CB4856                                                                                         | CT | X | 1125170 | 1128288 | WBGene00015471 | lmp-2   | C05D9.2  | -0.0082583769082305  | AGIWUR42105 |
| CB4856                                                                                         | CT | X | 1128986 | 1132925 | WBGene00004927 | snx-1   | C05D9.1  | -0.0182510719523883  | AGIWUR40310 |
| CB4856                                                                                         | CT | X | 1132993 | 1148585 | WBGene00020128 | R193.2  | R193.2   | -0.295705574256937   |             |

AGIWUR619;AGIWUR14015;AGIWUR19955;AGIWUR21988;AGIWUR24806;AGIWUR31506;AGIWUR33612;AGIWUR39536;AGIWUR41598  
 CB4856 CT X 1151547 1153545 WBGene00020129 R193.3 R193.3 -0.436797485888723 AGIWUR33696  
 CB4856 CT X 1154948 1155613 WBGene00020127 R193.1 R193.1 -0.039179606631853 AGIWUR37642  
 CB4856 CT X 1163153 1177172 WBGene00020490 tmc-1 T13G4.3 0.179276884128084 AGIWUR5257  
 CB4856 CT X 1180284 1187932 WBGene00020489 hot-8 T13G4.2 0.0989980947836457 AGIWUR17480  
 CB4856 CT X 1188453 1190752 WBGene00020491 T13G4.4 T13G4.4 -0.304539872903186 AGIWUR41536  
 CB4856 CT X 1193148 1193858 WBGene00020488 T13G4.1 T13G4.1 0.124676370315193 AGIWUR44589  
 CB4856 CT X 1195108 1198481 WBGene00020492 T13G4.5 T13G4.5 0.24983049571024 AGIWUR28194  
 CB4856 CT X 1202606 1203763 WBGene00020494 T13G4.7 T13G4.7 0.153213505132827 AGIWUR29871  
 CB4856 CT X 1209411 1210683 WBGene00016724 C46H3.1 C46H3.1 -0.00723199293515364 AGIWUR22802  
 CB4856 CT X 1211760 1230758 WBGene00016725 C46H3.2 C46H3.2 -0.123682342688577  
 AGIWUR35176;AGIWUR42826  
 CB4856 CT X 1245984 1247892 WBGene00006635 tsp-9 C25G6.2 -0.067428094753712 AGIWUR37946  
 CB4856 CT X 1247833 1249838 WBGene00016109 C25G6.4 C25G6.4 0.0259076150229154  
 AGIWUR21889;AGIWUR30220;AGIWUR35983;AGIWUR37039  
 CB4856 CT X 1270898 1272561 WBGene00016107 C25G6.1 C25G6.1 0.0433996115921751 AGIWUR15410  
 CB4856 CT X 1272788 1275416 WBGene00016874 C52B11.5 C52B11.5 0.137207222074796  
 AGIWUR34464  
 CB4856 CT X 1295278 1298823 WBGene00016872 dop-4 C52B11.3 -0.624980521237644  
 AGIWUR7407  
 CB4856 CT X 1300149 1309504 WBGene00016871 inso-1 C52B11.2 0.25014350894207  
 AGIWUR5254;AGIWUR19809;AGIWUR21664;AGIWUR23766;AGIWUR26079;AGIWUR28297;AGIWUR40402  
 CB4856 CT X 1311605 1316634 WBGene00019272 H42K12.3 H42K12.3 0.700710282260559  
 AGIWUR33012  
 CB4856 CT X 1321353 1327985 WBGene00003965 pdk-1 H42K12.1 0.0410781872529888  
 AGIWUR29723  
 CB4856 CT X 1328143 1329947 WBGene00017666 F21E9.2 F21E9.2 0.171310400228236 AGIWUR18182  
 CB4856 CT X 1335363 1336915 WBGene00017667 ttr-37 F21E9.3 0.255939534779191 AGIWUR28934  
 CB4856 CT X 1343837 1344410 WBGene00017668 ins-39 F21E9.4 -0.0250203617649971 AGIWUR19013  
 CB4856 CT X 1355556 1356482 WBGene00017670 F21E9.6 F21E9.6 -0.145171706093239 AGIWUR33293  
 CB4856 CT X 1357771 1358532 WBGene00018940 F56C3.3 F56C3.3 0.155498036538336 AGIWUR20347  
 CB4856 CT X 1359720 1362036 WBGene00018941 F56C3.4 F56C3.4 0.0740122891863528 AGIWUR22669  
 CB4856 CT X 1362816 1363997 WBGene00018942 F56C3.5 F56C3.5 0.15375730619339 AGIWUR12830  
 CB4856 CT X 1365474 1367516 WBGene00018943 dgn-2 F56C3.6 0.0265954343578798  
 AGIWUR15039;AGIWUR33689  
 CB4856 CT X 1370543 1370786 WBGene00018944 F56C3.7 F56C3.7 -0.0908691876438006 AGIWUR3068  
 CB4856 CT X 1372012 1374630 WBGene00018939 fbxa-190 F56C3.2 -0.681593640210519  
 AGIWUR11442  
 CB4856 CT X 1381375 1381665 WBGene00044558 F56C3.10 F56C3.10 -0.0264523083420567



AGIWUR2372;AGIWUR19801;AGIWUR30724;AGIWUR32967;AGIWUR42194  
 CB4856 CT X 1384318 1384638 WBGene00018945 F56C3.8 F56C3.8 -0.167236352503801 AGIWUR18707  
 CB4856 CT X 1386248 1388160 WBGene00018938 F56C3.1 F56C3.1 -0.123482836384705 AGIWUR37168  
 CB4856 CT X 1391800 1393991 WBGene00018946 F56C3.9 F56C3.9 0.0808374664032669 AGIWUR26315  
 CB4856 CT X 1396353 1396551 WBGene00019267 H39E20.1 H39E20.1 -0.0153241758194511  
 AGIWUR10559  
 CB4856 CT X 1398824 1400751 WBGene00022731 ZK402.5 ZK402.5 -0.0887919438882836 AGIWUR27189  
 CB4856 CT X 1404271 1406101 WBGene00022728 ZK402.1 ZK402.1 0.262234385420536 AGIWUR22523  
 CB4856 CT X 1408836 1410652 WBGene00000025 abu-2 F19G12.7 -0.139520096847944  
 AGIWUR19145  
 CB4856 CT X 1413144 1416545 WBGene00005244 srh-19 F19G12.5 -0.000258686536012576  
 AGIWUR14945  
 CB4856 CT X 1417304 1417477 WBGene00017612 F19G12.4 F19G12.4 0.0775195109647653  
 AGIWUR1694;AGIWUR5185;AGIWUR16213  
 CB4856 CT X 1425727 1426164 WBGene00017611 F19G12.3 F19G12.3 0.207468750001641  
 AGIWUR32948  
 CB4856 CT X 1427774 1430871 WBGene00017610 F19G12.2 F19G12.2 0.44054871474159  
 AGIWUR40163  
 CB4856 CT X 1439261 1440261 WBGene00021046 sed1-1 W05H7.3 -0.214076249810581 AGIWUR2320  
 CB4856 CT X 1440366 1446643 WBGene00021047 zfp-3 W05H7.4 0.0669063586329415  
 AGIWUR10664;AGIWUR21164;AGIWUR22713;AGIWUR25733;AGIWUR33192;AGIWUR33399;AGIWUR37599;AGIWUR40048;AGIWUR40099  
 ;AGIWUR40219;AGIWUR42218;AGIWUR42733;AGIWUR43726  
 CB4856 CT X 1450768 1452306 WBGene00021044 W05H7.1 W05H7.1 -0.584439833675255 AGIWUR28997  
 CB4856 CT X 1452695 1454000 WBGene00016997 cebp-1 D1005.3 -0.228136671427296 AGIWUR7092  
 CB4856 CT X 1459047 1462793 WBGene00016996 D1005.2 D1005.2 0.467132669606338 AGIWUR38343  
 CB4856 CT X 1463110 1464799 WBGene00017000 D1005.6 D1005.6 0.188182699618306 AGIWUR21560  
 CB4856 CT X 1470998 1472919 WBGene00016999 D1005.5 D1005.5 -0.130032739222166 AGIWUR25343  
 CB4856 CT X 1479542 1484398 WBGene00016995 acly-1 D1005.1 -0.330913244836777  
 AGIWUR2651;AGIWUR19932;AGIWUR34267;AGIWUR38476  
 CB4856 CT X 1484853 1485818 WBGene00016998 D1005.4 D1005.4 -0.188595905981773  
 AGIWUR6861;AGIWUR20502;AGIWUR36467;AGIWUR37562  
 CB4856 CT X 1486473 1489326 WBGene00000988 dhs-25 F09E10.3 -0.273344563442199  
 AGIWUR6958  
 CB4856 CT X 1489672 1494356 WBGene00017295 F09E10.5 F09E10.5 0.0625558425014301  
 AGIWUR22470  
 CB4856 CT X 1495074 1497681 WBGene00017296 F09E10.6 F09E10.6 0.990141974474393  
 AGIWUR15544  
 CB4856 CT X 1500180 1501852 WBGene00017297 F09E10.7 F09E10.7 -0.323010815812403  
 AGIWUR3344;AGIWUR5999;AGIWUR7563;AGIWUR14284;AGIWUR21040;AGIWUR21617;AGIWUR24684;AGIWUR26365;AGIWUR31714;AG

IWUR33549;AGIWUR36843;AGIWUR43253

|        |    |   |         |         |                |          |          |                    |
|--------|----|---|---------|---------|----------------|----------|----------|--------------------|
| CB4856 | CT | X | 1502860 | 1503278 | WBGene00017294 | F09E10.1 | F09E10.1 | -0.277296221547367 |
|--------|----|---|---------|---------|----------------|----------|----------|--------------------|

AGIWUR40122

|        |    |   |         |         |                |       |           |                  |
|--------|----|---|---------|---------|----------------|-------|-----------|------------------|
| CB4856 | CT | X | 1504131 | 1504841 | WBGene00006650 | tts-1 | F09E10.11 | 2.38066030326954 |
|--------|----|---|---------|---------|----------------|-------|-----------|------------------|

AGIWUR9901;AGIWUR15248;AGIWUR21990;AGIWUR22247;AGIWUR25378;AGIWUR28345

|        |    |   |         |         |                |           |           |                  |
|--------|----|---|---------|---------|----------------|-----------|-----------|------------------|
| CB4856 | CT | X | 1505190 | 1505626 | WBGene00022982 | F09E10.10 | F09E10.10 | 1.02158993581222 |
|--------|----|---|---------|---------|----------------|-----------|-----------|------------------|

AGIWUR1241;AGIWUR1434;AGIWUR10913;AGIWUR26832;AGIWUR36065

|        |    |   |         |         |                |        |          |                   |
|--------|----|---|---------|---------|----------------|--------|----------|-------------------|
| CB4856 | CT | X | 1510480 | 1521487 | WBGene00017298 | toca-1 | F09E10.8 | 0.110364023125817 |
|--------|----|---|---------|---------|----------------|--------|----------|-------------------|

AGIWUR15186

|        |    |   |         |         |                |         |         |                  |            |
|--------|----|---|---------|---------|----------------|---------|---------|------------------|------------|
| CB4856 | CT | X | 1536366 | 1540287 | WBGene00019436 | K06A9.2 | K06A9.2 | 1.26526133116468 | AGIWUR8972 |
|--------|----|---|---------|---------|----------------|---------|---------|------------------|------------|

|        |    |   |         |         |                |         |         |                   |
|--------|----|---|---------|---------|----------------|---------|---------|-------------------|
| CB4856 | CT | X | 1547505 | 1560124 | WBGene00019435 | K06A9.1 | K06A9.1 | 0.363445959935249 |
|--------|----|---|---------|---------|----------------|---------|---------|-------------------|

AGIWUR976;AGIWUR18127

|        |    |   |         |         |                |          |          |                  |
|--------|----|---|---------|---------|----------------|----------|----------|------------------|
| CB4856 | CT | X | 1568678 | 1572854 | WBGene00019146 | H02F09.3 | H02F09.3 | 1.06039054723943 |
|--------|----|---|---------|---------|----------------|----------|----------|------------------|

AGIWUR14894

|        |    |   |         |         |                |          |          |                  |
|--------|----|---|---------|---------|----------------|----------|----------|------------------|
| CB4856 | CT | X | 1573220 | 1574010 | WBGene00019145 | H02F09.2 | H02F09.2 | 0.22304249201774 |
|--------|----|---|---------|---------|----------------|----------|----------|------------------|

AGIWUR30326

|        |    |   |         |         |                |       |         |                     |
|--------|----|---|---------|---------|----------------|-------|---------|---------------------|
| CB4856 | CT | X | 1576637 | 1591296 | WBGene00006955 | wrt-9 | B0344.2 | -0.0401623591545714 |
|--------|----|---|---------|---------|----------------|-------|---------|---------------------|

AGIWUR1818;AGIWUR5585

|        |    |   |         |         |                |          |          |                     |
|--------|----|---|---------|---------|----------------|----------|----------|---------------------|
| CB4856 | CT | X | 1604906 | 1619115 | WBGene00019188 | H11E01.3 | H11E01.3 | -0.0325944926170418 |
|--------|----|---|---------|---------|----------------|----------|----------|---------------------|

AGIWUR2438;AGIWUR14187;AGIWUR17474;AGIWUR31358;AGIWUR41516

|        |    |   |         |         |                |          |          |                   |
|--------|----|---|---------|---------|----------------|----------|----------|-------------------|
| CB4856 | CT | X | 1621481 | 1625247 | WBGene00019187 | H11E01.2 | H11E01.2 | 0.324994712993135 |
|--------|----|---|---------|---------|----------------|----------|----------|-------------------|

AGIWUR17159

|        |    |   |         |         |                |         |          |                    |
|--------|----|---|---------|---------|----------------|---------|----------|--------------------|
| CB4856 | CT | X | 1628137 | 1629454 | WBGene00019186 | fbxb-58 | H11E01.1 | -0.973547601743773 |
|--------|----|---|---------|---------|----------------|---------|----------|--------------------|

AGIWUR41566

|        |    |   |         |         |                |         |         |                     |             |
|--------|----|---|---------|---------|----------------|---------|---------|---------------------|-------------|
| CB4856 | CT | X | 1630615 | 1635727 | WBGene00022723 | ZK380.2 | ZK380.2 | -0.0344184378417554 | AGIWUR11129 |
|--------|----|---|---------|---------|----------------|---------|---------|---------------------|-------------|

|        |    |   |         |         |                |         |         |                   |             |
|--------|----|---|---------|---------|----------------|---------|---------|-------------------|-------------|
| CB4856 | CT | X | 1651419 | 1653897 | WBGene00022724 | ZK380.4 | ZK380.4 | 0.118033102505665 | AGIWUR12753 |
|--------|----|---|---------|---------|----------------|---------|---------|-------------------|-------------|

|        |    |   |         |         |                |        |         |                   |             |
|--------|----|---|---------|---------|----------------|--------|---------|-------------------|-------------|
| CB4856 | CT | X | 1655522 | 1656936 | WBGene00006551 | tbx-32 | ZK380.1 | 0.103633193601357 | AGIWUR10520 |
|--------|----|---|---------|---------|----------------|--------|---------|-------------------|-------------|

|        |    |   |         |         |                |         |         |                     |             |
|--------|----|---|---------|---------|----------------|---------|---------|---------------------|-------------|
| CB4856 | CT | X | 1667019 | 1668848 | WBGene00019991 | R09H3.3 | R09H3.3 | -0.0412755062801233 | AGIWUR16590 |
|--------|----|---|---------|---------|----------------|---------|---------|---------------------|-------------|

|        |    |   |         |         |                |        |         |                    |             |
|--------|----|---|---------|---------|----------------|--------|---------|--------------------|-------------|
| CB4856 | CT | X | 1671148 | 1674165 | WBGene00006550 | tbx-31 | C36C9.2 | -0.135301347952566 | AGIWUR28414 |
|--------|----|---|---------|---------|----------------|--------|---------|--------------------|-------------|

|        |    |   |         |         |                |          |         |                    |
|--------|----|---|---------|---------|----------------|----------|---------|--------------------|
| CB4856 | CT | X | 1676205 | 1678121 | WBGene00016486 | fbxa-170 | C36C9.3 | -0.311203438036751 |
|--------|----|---|---------|---------|----------------|----------|---------|--------------------|

AGIWUR11766;AGIWUR14810;AGIWUR17800

|        |    |   |         |         |                 |          |          |                     |
|--------|----|---|---------|---------|-----------------|----------|----------|---------------------|
| CB4856 | CT | X | 1681752 | 1681886 | WBGene000219849 | C36C9.10 | C36C9.10 | -0.0855058775289521 |
|--------|----|---|---------|---------|-----------------|----------|----------|---------------------|

AGIWUR20054;AGIWUR26371;AGIWUR40994

|        |    |   |         |         |                |       |         |                    |
|--------|----|---|---------|---------|----------------|-------|---------|--------------------|
| CB4856 | CT | X | 1682954 | 1686419 | WBGene00016485 | meg-4 | C36C9.1 | -0.229366517081883 |
|--------|----|---|---------|---------|----------------|-------|---------|--------------------|

AGIWUR5290;AGIWUR14478

|        |    |   |         |         |                |         |         |                     |             |
|--------|----|---|---------|---------|----------------|---------|---------|---------------------|-------------|
| CB4856 | CT | X | 1699788 | 1703938 | WBGene00016488 | C36C9.5 | C36C9.5 | -0.0865753850550961 | AGIWUR25128 |
|--------|----|---|---------|---------|----------------|---------|---------|---------------------|-------------|

|        |    |   |         |         |                |         |         |                   |             |
|--------|----|---|---------|---------|----------------|---------|---------|-------------------|-------------|
| CB4856 | CT | X | 1706370 | 1706638 | WBGene00017224 | F07G6.5 | F07G6.5 | 0.150905967517625 | AGIWUR37961 |
|--------|----|---|---------|---------|----------------|---------|---------|-------------------|-------------|

|        |    |   |         |         |                |         |         |                      |             |
|--------|----|---|---------|---------|----------------|---------|---------|----------------------|-------------|
| CB4856 | CT | X | 1710293 | 1711212 | WBGene00017225 | fbxa-52 | F07G6.6 | -0.00815852092287628 | AGIWUR45205 |
|--------|----|---|---------|---------|----------------|---------|---------|----------------------|-------------|

|        |    |   |         |         |                |         |         |                    |
|--------|----|---|---------|---------|----------------|---------|---------|--------------------|
| CB4856 | CT | X | 1714351 | 1715487 | WBGene00044583 | F07G6.9 | F07G6.9 | -0.126897314659622 |
|--------|----|---|---------|---------|----------------|---------|---------|--------------------|

AGIWUR6243;AGIWUR29401;AGIWUR39325;AGIWUR44809  
 CB4856 CT X 1716442 1718568 WBGene00017226 fbxa-53 F07G6.7 -0.0874595664545721  
 AGIWUR7155;AGIWUR25529;AGIWUR32530  
 CB4856 CT X 1720093 1720428 WBGene00017227 F07G6.8 F07G6.8 -0.554378811061215  
 AGIWUR21530;AGIWUR23105;AGIWUR23920;AGIWUR30816;AGIWUR36057;AGIWUR40612  
 CB4856 CT X 1727356 1729154 WBGene00017222 F07G6.2 F07G6.2 0.226934326529415 AGIWUR44319  
 CB4856 CT X 1729858 1731819 WBGene00017221 dgn-3 F07G6.1 -0.052080944882217 AGIWUR5604  
 CB4856 CT X 1737906 1739229 WBGene00045271 F07G6.10 F07G6.10 -0.392865990083301  
 AGIWUR31342  
 CB4856 CT X 1745096 1746217 WBGene00022292 Y75D11A.3 Y75D11A.3 -0.245011667120709  
 AGIWUR1373;AGIWUR2826;AGIWUR4858;AGIWUR13158;AGIWUR41378  
 CB4856 CT X 1777355 1778146 WBGene00001237 elc-2 W03H1.2 -0.0428894801373776 AGIWUR8069  
 CB4856 CT X 1786907 1788405 WBGene00000185 arg-1 F31A9.3 0.023038040267723  
 AGIWUR12589;AGIWUR18681;AGIWUR19310;AGIWUR34927;AGIWUR44042  
 CB4856 CT X 1794816 1795673 WBGene00017941 F31A9.2 F31A9.2 -0.111005894241842 AGIWUR2252  
 CB4856 CT X 1806833 1807767 WBGene00015771 got-1.3 C14E2.2 0.143395940233068 AGIWUR33854  
 CB4856 CT X 1810686 1811536 WBGene00015772 C14E2.3 C14E2.3 0.140119753736418 AGIWUR15532  
 CB4856 CT X 1816361 1816762 WBGene00044562 C14E2.7 C14E2.7 0.197856058166177  
 AGIWUR1121;AGIWUR9109;AGIWUR24714;AGIWUR42117;AGIWUR44298  
 CB4856 CT X 1823616 1825340 WBGene00015774 C14E2.5 C14E2.5 -0.0769982641359475 AGIWUR7100  
 CB4856 CT X 1826466 1827354 WBGene00015770 C14E2.1 C14E2.1 -0.134840618223209 AGIWUR10204  
 CB4856 CT X 1827738 1828487 WBGene00015775 C14E2.6 C14E2.6 0.000956805833038032 AGIWUR656  
 CB4856 CT X 1834445 1839024 WBGene00020829 T26C11.3 T26C11.3 -0.347191611765055  
 AGIWUR27549  
 CB4856 CT X 1840554 1845565 WBGene00020830 T26C11.4 T26C11.4 -0.207015848855065  
 AGIWUR24882  
 CB4856 CT X 1846608 1848675 WBGene00000462 ceh-41 T26C11.5 -0.0899762307512084  
 AGIWUR30638  
 CB4856 CT X 1848795 1852736 WBGene00000444 ceh-21 T26C11.6 0.0103899737499322  
 AGIWUR20034;AGIWUR42019  
 CB4856 CT X 1853874 1856189 WBGene00000460 ceh-39 T26C11.7 -0.348317734628885  
 AGIWUR17728  
 CB4856 CT X 1860722 1863543 WBGene00044563 T26C11.8 T26C11.8  
 -0.00600875509009535 AGIWUR13940;AGIWUR41424  
 CB4856 CT X 1865246 1866638 WBGene00006560 tbx-41 T26C11.1 -0.0821107386001048  
 AGIWUR10415  
 CB4856 CT X 1892187 1893272 WBGene00015118 B0294.3 B0294.3 0.0926290595119266  
 AGIWUR903;AGIWUR5963;AGIWUR22701;AGIWUR25360;AGIWUR36315  
 CB4856 CT X 1896662 1897343 WBGene00015117 B0294.1 B0294.1 -0.0301205785262795 AGIWUR37631

|                                                                       |    |   |         |         |                |            |            |                     |             |
|-----------------------------------------------------------------------|----|---|---------|---------|----------------|------------|------------|---------------------|-------------|
| CB4856                                                                | CT | X | 1910943 | 1913357 | WBGene00022508 | ZC53.1     | ZC53.1     | -0.382247251597274  | AGIWUR16565 |
| CB4856                                                                | CT | X | 1915258 | 1917162 | WBGene00004352 | rgs-9      | ZC53.7     | -0.382964142319146  | AGIWUR2771  |
| CB4856                                                                | CT | X | 1917437 | 1919755 | WBGene00022512 | dot-1.5    | ZC53.6     | -0.149638371776062  | AGIWUR38437 |
| CB4856                                                                | CT | X | 1923723 | 1924238 | WBGene00022509 | ZC53.2     | ZC53.2     | 0.0731308264835411  | AGIWUR14607 |
| CB4856                                                                | CT | X | 1925750 | 1937689 | WBGene00022511 | ZC53.4     | ZC53.4     | 0.0657139008741376  | AGIWUR2275  |
| CB4856                                                                | CT | X | 1937947 | 1942199 | WBGene00021987 | fbxa-40    | Y59E1A.1   | -0.208557513399313  |             |
| AGIWUR6971                                                            |    |   |         |         |                |            |            |                     |             |
| CB4856                                                                | CT | X | 1955550 | 1956824 | WBGene00018691 | fbxa-17    | F52D2.10   | 0.00898981071729921 |             |
| AGIWUR44400                                                           |    |   |         |         |                |            |            |                     |             |
| CB4856                                                                | CT | X | 1962573 | 1966188 | WBGene00018689 | F52D2.7    | F52D2.7    | -0.306876446959032  | AGIWUR5190  |
| CB4856                                                                | CT | X | 1969875 | 1972657 | WBGene00006139 | str-79     | F52D2.9    | -0.132312707659151  | AGIWUR34890 |
| CB4856                                                                | CT | X | 1973796 | 1974523 | WBGene00018687 | F52D2.5    | F52D2.5    | 0.126997835622628   |             |
| AGIWUR4221;AGIWUR5847;AGIWUR24939;AGIWUR26041;AGIWUR36663;AGIWUR42686 |    |   |         |         |                |            |            |                     |             |
| CB4856                                                                | CT | X | 1978014 | 1980938 | WBGene00219451 | F52D2.12   | F52D2.12   | 0.10221360885456    |             |
| AGIWUR34636                                                           |    |   |         |         |                |            |            |                     |             |
| CB4856                                                                | CT | X | 1983714 | 1984833 | WBGene00018690 | fbxa-46    | F52D2.8    | 0.0615213761292055  |             |
| AGIWUR9476;AGIWUR13269;AGIWUR27954;AGIWUR29303                        |    |   |         |         |                |            |            |                     |             |
| CB4856                                                                | CT | X | 1986429 | 1989607 | WBGene00001569 | meg-3      | F52D2.4    | -0.274817592731129  | AGIWUR30104 |
| CB4856                                                                | CT | X | 1990734 | 1992649 | WBGene00021484 | Y40A1A.2   | Y40A1A.2   | 0.0231230360089754  |             |
| AGIWUR11963;AGIWUR40969;AGIWUR41408                                   |    |   |         |         |                |            |            |                     |             |
| CB4856                                                                | CT | X | 1995731 | 1998112 | WBGene00021485 | Y40A1A.3   | Y40A1A.3   | 0.00571049969689064 |             |
| AGIWUR7356;AGIWUR27578                                                |    |   |         |         |                |            |            |                     |             |
| CB4856                                                                | CT | X | 2001030 | 2002631 | WBGene00021483 | Y40A1A.1   | Y40A1A.1   | -0.113395290081386  |             |
| AGIWUR41690                                                           |    |   |         |         |                |            |            |                     |             |
| CB4856                                                                | CT | X | 2013151 | 2018062 | WBGene00022419 | Y102A11A.9 | Y102A11A.9 | -0.0816695358748518 |             |
| AGIWUR27143                                                           |    |   |         |         |                |            |            |                     |             |
| CB4856                                                                | CT | X | 2019148 | 2025737 | WBGene00022413 | Y102A11A.3 | Y102A11A.3 | 0.308489407423313   |             |
| AGIWUR42775                                                           |    |   |         |         |                |            |            |                     |             |
| CB4856                                                                | CT | X | 2026642 | 2031010 | WBGene00022412 | Y102A11A.2 | Y102A11A.2 | 0.458182915819576   |             |
| AGIWUR41940                                                           |    |   |         |         |                |            |            |                     |             |
| CB4856                                                                | CT | X | 2030959 | 2031588 | WBGene00022415 | Y102A11A.5 | Y102A11A.5 | 0.233076837272632   |             |
| AGIWUR14358;AGIWUR22481;AGIWUR35764;AGIWUR37140;AGIWUR41055           |    |   |         |         |                |            |            |                     |             |
| CB4856                                                                | CT | X | 2031963 | 2035245 | WBGene00022416 | Y102A11A.6 | Y102A11A.6 | 0.414841994601518   |             |
| AGIWUR11400                                                           |    |   |         |         |                |            |            |                     |             |
| CB4856                                                                | CT | X | 2035943 | 2038220 | WBGene00022417 | Y102A11A.7 | Y102A11A.7 | -0.464922405474365  |             |
| AGIWUR24151                                                           |    |   |         |         |                |            |            |                     |             |
| CB4856                                                                | CT | X | 2039397 | 2046360 | WBGene00022418 | igcm-4     | Y102A11A.8 | 0.510535666558125   |             |
| AGIWUR5133;AGIWUR5331;AGIWUR6948;AGIWUR10058;AGIWUR18787;AGIWUR21402  |    |   |         |         |                |            |            |                     |             |
| CB4856                                                                | CT | X | 2051907 | 2054048 | WBGene00022411 | Y102A11A.1 | Y102A11A.1 | -0.266394161654347  |             |

|                                                                                 |    |   |         |         |                |                 |                                |
|---------------------------------------------------------------------------------|----|---|---------|---------|----------------|-----------------|--------------------------------|
| AGIWUR11614                                                                     |    |   |         |         |                |                 |                                |
| CB4856                                                                          | CT | X | 2065038 | 2066567 | WBGene00044753 | F49H12.7        | F49H12.7 0.282194007870265     |
| AGIWUR14793                                                                     |    |   |         |         |                |                 |                                |
| CB4856                                                                          | CT | X | 2066554 | 2070441 | WBGene00018657 | ac1-4 F49H12.6  | 0.0904599765042704             |
| AGIWUR9065;AGIWUR9826;AGIWUR20288                                               |    |   |         |         |                |                 |                                |
| CB4856                                                                          | CT | X | 2074448 | 2075944 | WBGene00018656 | F49H12.5        | F49H12.5 -0.55332839508047     |
| AGIWUR5705                                                                      |    |   |         |         |                |                 |                                |
| CB4856                                                                          | CT | X | 2079836 | 2081487 | WBGene00018655 | F49H12.4        | F49H12.4 -0.435869533033861    |
| AGIWUR5627                                                                      |    |   |         |         |                |                 |                                |
| CB4856                                                                          | CT | X | 2084375 | 2085057 | WBGene00018654 | F49H12.3        | F49H12.3 0.206765173278418     |
| AGIWUR30404                                                                     |    |   |         |         |                |                 |                                |
| CB4856                                                                          | CT | X | 2086057 | 2086730 | WBGene00018653 | F49H12.2        | F49H12.2 0.0857043191846687    |
| AGIWUR43736                                                                     |    |   |         |         |                |                 |                                |
| CB4856                                                                          | CT | X | 2089659 | 2093253 | WBGene00003087 | lsy-2 F49H12.1  | 0.0952692814578313             |
| AGIWUR50;AGIWUR1628;AGIWUR22146;AGIWUR28258;AGIWUR28522;AGIWUR33708;AGIWUR37286 |    |   |         |         |                |                 |                                |
| CB4856                                                                          | CT | X | 2093475 | 2094842 | WBGene00000737 | col-164 T21D9.1 | -0.428099258824339 AGIWUR4292  |
| CB4856                                                                          | CT | X | 2095370 | 2096058 | WBGene00020645 | T21D9.2 T21D9.2 | 0.0582259518682093 AGIWUR16571 |
| CB4856                                                                          | CT | X | 2105629 | 2107170 | WBGene00018736 | F53B1.3 F53B1.3 | -0.0373885551398443            |
| AGIWUR22369;AGIWUR33958                                                         |    |   |         |         |                |                 |                                |
| CB4856                                                                          | CT | X | 2108982 | 2111441 | WBGene00018735 | F53B1.2 F53B1.2 | -0.220702997492189 AGIWUR28367 |
| CB4856                                                                          | CT | X | 2111397 | 2113103 | WBGene00018737 | F53B1.4 F53B1.4 | 0.425524230428827 AGIWUR11271  |
| CB4856                                                                          | CT | X | 2114629 | 2118257 | WBGene00018738 | swip-10 F53B1.6 | 0.367526826659215 AGIWUR20532  |
| CB4856                                                                          | CT | X | 2118894 | 2121061 | WBGene00001667 | gpa-5 F53B1.7   | -0.167296496886615 AGIWUR2116  |
| CB4856                                                                          | CT | X | 2123413 | 2130241 | WBGene00018739 | F53B1.8 F53B1.8 | 0.0522613863462675             |
| AGIWUR11157;AGIWUR24254;AGIWUR26319                                             |    |   |         |         |                |                 |                                |
| CB4856                                                                          | CT | X | 2144605 | 2145647 | WBGene00001065 | dpy-3 EGAP7.1   | -0.512199938707329 AGIWUR27602 |
| CB4856                                                                          | CT | X | 2147614 | 2149252 | WBGene00018591 | npax-2 F48B9.5  | -0.0196765167128898 AGIWUR4555 |
| CB4856                                                                          | CT | X | 2163384 | 2164069 | WBGene00018590 | nlp-37 F48B9.4  | 0.492492773022821 AGIWUR34654  |
| CB4856                                                                          | CT | X | 2165109 | 2173849 | WBGene00018589 | F48B9.3 F48B9.3 | -0.0324684665180071            |
| AGIWUR2612;AGIWUR8870;AGIWUR28980;AGIWUR42374                                   |    |   |         |         |                |                 |                                |
| CB4856                                                                          | CT | X | 2173890 | 2176411 | WBGene00018593 | F48B9.8 F48B9.8 | -0.14576869229775 AGIWUR31971  |
| CB4856                                                                          | CT | X | 2180888 | 2185854 | WBGene00018587 | F48B9.1 F48B9.1 | 0.0823747812313043 AGIWUR27228 |
| CB4856                                                                          | CT | X | 2192504 | 2195348 | WBGene00001515 | gap-1 T24C12.2  | 0.101291672548524              |
| AGIWUR24037                                                                     |    |   |         |         |                |                 |                                |
| CB4856                                                                          | CT | X | 2196525 | 2203961 | WBGene00020765 | T24C12.3        | T24C12.3 -0.0444543173242966   |
| AGIWUR34456                                                                     |    |   |         |         |                |                 |                                |
| CB4856                                                                          | CT | X | 2204050 | 2205063 | WBGene00020766 | T24C12.4        | T24C12.4 -1.04914569630076     |
| AGIWUR31433                                                                     |    |   |         |         |                |                 |                                |
| CB4856                                                                          | CT | X | 2215630 | 2218980 | WBGene00003968 | peb-1 T14F9.4   | 0.628094191283387              |

AGIWUR21146;AGIWUR30492

CB4856 CT X 2221150 2226620 WBGene00020509 hex-1 T14F9.3 0.100605077520617

AGIWUR1715;AGIWUR24945;AGIWUR26864;AGIWUR32391

CB4856 CT X 2229208 2230122 WBGene00003018 lin-32 T14F9.5 0.882570591675527 AGIWUR33532

CB4856 CT X 2234321 2236706 WBGene00020508 T14F9.2 T14F9.2 -0.269679951795972 AGIWUR30683

CB4856 CT X 2237911 2240255 WBGene00020507 vha-15 T14F9.1 -0.254794399508135 AGIWUR23485

CB4856 CT X 2241738 2242618 WBGene00004423 rpl-11.2 F07D10.1 0.0186181490010053

AGIWUR4463;AGIWUR5995;AGIWUR11434;AGIWUR20528;AGIWUR26031;AGIWUR36131;AGIWUR37677;AGIWUR38852

CB4856 CT X 2255852 2258101 WBGene00000797 crn-4 AH9.2 -0.262080941819118 AGIWUR16169

CB4856 CT X 2259150 2260526 WBGene00014999 AH9.3 AH9.3 -0.0339899345481207 AGIWUR8206

CB4856 CT X 2263176 2267472 WBGene00044701 AH9.6 AH9.6 -0.0701368804341178

AGIWUR1909;AGIWUR4754

CB4856 CT X 2271025 2274337 WBGene00015000 AH9.4 AH9.4 -0.0393252426886042 AGIWUR29159

CB4856 CT X 2283998 2287188 WBGene00020427 sav-1 T10H10.3 0.00166942222929833

AGIWUR35953

CB4856 CT X 2294750 2298193 WBGene00020426 T10H10.2 T10H10.2 0.750486379667392

AGIWUR43952

CB4856 CT X 2303082 2314914 WBGene00002039 hum-6 T10H10.1 0.363638294890849

AGIWUR38516

CB4856 CT X 2314896 2319333 WBGene00020135 aakg-4 T01B6.3 0.83305967480009

AGIWUR13944;AGIWUR20760

CB4856 CT X 2335684 2348635 WBGene00020134 T01B6.1 T01B6.1 0.399238646259764

AGIWUR3958;AGIWUR4904;AGIWUR12927;AGIWUR17462;AGIWUR19138;AGIWUR21280;AGIWUR22799;AGIWUR24274;AGIWUR31031;AGIWUR34130;AGIWUR35858;AGIWUR38941;AGIWUR41041;AGIWUR43996

CB4856 CT X 2360097 2364818 WBGene00020767 lgc-40 T24D8.1 -0.290056797638185 AGIWUR21614

CB4856 CT X 2365700 2365942 WBGene00020769 T24D8.6 T24D8.6 0.00723861155875882

AGIWUR7743;AGIWUR26204;AGIWUR32420;AGIWUR34389;AGIWUR36696;AGIWUR44279

CB4856 CT X 2375997 2379060 WBGene00018578 F47G3.3 F47G3.3 0.0368165988416713 AGIWUR44829

CB4856 CT X 2382691 2384764 WBGene00018577 asna-2 F47G3.2 -0.351190676965033 AGIWUR19401

CB4856 CT X 2385765 2392695 WBGene00018576 F47G3.1 F47G3.1 -0.16494939582293 AGIWUR11303

CB4856 CT X 2395505 2398826 WBGene00016619 C43H6.6 C43H6.6 0.327056577718777

AGIWUR2029;AGIWUR18869;AGIWUR19237;AGIWUR31119;AGIWUR35215

CB4856 CT X 2398812 2402057 WBGene00016620 dhhc-9 C43H6.7 -0.0987297654676187

AGIWUR5071;AGIWUR27531;AGIWUR40331

CB4856 CT X 2404024 2407364 WBGene00016617 C43H6.4 C43H6.4 -0.15696919732625 AGIWUR3069

CB4856 CT X 2407467 2409567 WBGene00016616 C43H6.3 C43H6.3 -0.0909327904206454

AGIWUR6923;AGIWUR21325

CB4856 CT X 2409570 2412966 WBGene00016614 trpp-12 C43H6.1 -0.435211262675503

AGIWUR4699;AGIWUR9360;AGIWUR22546;AGIWUR25479;AGIWUR36654

|                                                                        |    |   |         |         |                |          |          |                     |             |
|------------------------------------------------------------------------|----|---|---------|---------|----------------|----------|----------|---------------------|-------------|
| CB4856                                                                 | CT | X | 2412953 | 2413377 | WBGene00001959 | hlh-15   | C43H6.8  | 0.226931460268913   | AGIWUR16405 |
| CB4856                                                                 | CT | X | 2413909 | 2417892 | WBGene00001618 | glr-7    | C43H6.9  | 0.0929899872270541  | AGIWUR17578 |
| CB4856                                                                 | CT | X | 2418425 | 2419877 | WBGene00020303 | T07D1.5  | T07D1.5  | 0.189758123790469   | AGIWUR37199 |
| CB4856                                                                 | CT | X | 2420462 | 2427504 | WBGene00001551 | gcy-31   | T07D1.1  | -0.095140300133477  | AGIWUR2312  |
| CB4856                                                                 | CT | X | 2429862 | 2439158 | WBGene00020301 | T07D1.2  | T07D1.2  | 0.220974625219197   |             |
| AGIWUR7384;AGIWUR28486;AGIWUR34400                                     |    |   |         |         |                |          |          |                     |             |
| CB4856                                                                 | CT | X | 2442970 | 2443404 | WBGene00020302 | T07D1.3  | T07D1.3  | 0.59077064805181    | AGIWUR44069 |
| CB4856                                                                 | CT | X | 2445500 | 2455949 | WBGene00001484 | fox-1    | T07D1.4  | 0.326740040533527   |             |
| AGIWUR3748;AGIWUR30879;AGIWUR33746                                     |    |   |         |         |                |          |          |                     |             |
| CB4856                                                                 | CT | X | 2467347 | 2471308 | WBGene00019866 | R04B3.1  | R04B3.1  | 0.450675267463281   | AGIWUR4954  |
| CB4856                                                                 | CT | X | 2471540 | 2473718 | WBGene00019867 | R04B3.2  | R04B3.2  | -0.195316397292114  | AGIWUR3145  |
| CB4856                                                                 | CT | X | 2473758 | 2476030 | WBGene00019868 | R04B3.3  | R04B3.3  | -0.0766089784778963 | AGIWUR2415  |
| CB4856                                                                 | CT | X | 2477107 | 2478765 | WBGene00019319 | K02E10.5 | K02E10.5 | -0.189353927837879  |             |
| AGIWUR29502                                                            |    |   |         |         |                |          |          |                     |             |
| CB4856                                                                 | CT | X | 2480755 | 2482911 | WBGene00019320 | K02E10.6 | K02E10.6 | -0.0904328103307925 |             |
| AGIWUR36677                                                            |    |   |         |         |                |          |          |                     |             |
| CB4856                                                                 | CT | X | 2483263 | 2488296 | WBGene00019318 | K02E10.4 | K02E10.4 | 0.139280299557055   |             |
| AGIWUR8951;AGIWUR15514;AGIWUR32000;AGIWUR32607                         |    |   |         |         |                |          |          |                     |             |
| CB4856                                                                 | CT | X | 2489044 | 2494339 | WBGene00001844 | hid-1    | K02E10.2 | 0.128608805318168   |             |
| AGIWUR9595;AGIWUR16184;AGIWUR22838;AGIWUR23855;AGIWUR43646;AGIWUR44331 |    |   |         |         |                |          |          |                     |             |
| CB4856                                                                 | CT | X | 2496180 | 2501001 | WBGene00019317 | K02E10.1 | K02E10.1 | 0.29781773696973    |             |
| AGIWUR9485                                                             |    |   |         |         |                |          |          |                     |             |
| CB4856                                                                 | CT | X | 2501003 | 2508549 | WBGene00019321 | K02E10.7 | K02E10.7 | -0.150256659419137  |             |
| AGIWUR45028                                                            |    |   |         |         |                |          |          |                     |             |
| CB4856                                                                 | CT | X | 2509608 | 2515317 | WBGene00006365 | syg-1    | K02E10.8 | 0.202339091379339   |             |
| AGIWUR8570;AGIWUR29333                                                 |    |   |         |         |                |          |          |                     |             |
| CB4856                                                                 | CT | X | 2525191 | 2532457 | WBGene00044061 | tbc-12   | R11B5.1  | 0.0747188862544181  | AGIWUR30102 |
| CB4856                                                                 | CT | X | 2540066 | 2541053 | WBGene00018715 | F52H2.3  | F52H2.3  | 0.49940225159925    | AGIWUR6056  |
| CB4856                                                                 | CT | X | 2543391 | 2548028 | WBGene00018716 | F52H2.4  | F52H2.4  | 0.119612730401789   | AGIWUR26943 |
| CB4856                                                                 | CT | X | 2552436 | 2557726 | WBGene00000004 | aat-3    | F52H2.2  | 0.21330267121153    | AGIWUR21672 |
| CB4856                                                                 | CT | X | 2557976 | 2559638 | WBGene00018717 | F52H2.5  | F52H2.5  | -0.462229607968791  | AGIWUR7255  |
| CB4856                                                                 | CT | X | 2559727 | 2564147 | WBGene00018718 | F52H2.6  | F52H2.6  | 0.0228100703030365  |             |
| AGIWUR1964;AGIWUR9945;AGIWUR11343;AGIWUR35339                          |    |   |         |         |                |          |          |                     |             |
| CB4856                                                                 | CT | X | 2566557 | 2572653 | WBGene00018719 | F52H2.7  | F52H2.7  | 0.225896662432021   | AGIWUR9017  |
| CB4856                                                                 | CT | X | 2572863 | 2576697 | WBGene00018714 | F52H2.1  | F52H2.1  | 0.1453252652877     | AGIWUR23592 |
| CB4856                                                                 | CT | X | 2577742 | 2578262 | WBGene00045268 | ttr-42   | H01M10.3 | -0.398942096570455  |             |
| AGIWUR18181;AGIWUR31853                                                |    |   |         |         |                |          |          |                     |             |
| CB4856                                                                 | CT | X | 2578211 | 2580574 | WBGene00019143 | H01M10.1 | H01M10.1 | -0.0779138644953754 |             |
| AGIWUR29748                                                            |    |   |         |         |                |          |          |                     |             |

|                                                                                                            |    |   |         |         |                |           |           |                     |
|------------------------------------------------------------------------------------------------------------|----|---|---------|---------|----------------|-----------|-----------|---------------------|
| CB4856                                                                                                     | CT | X | 2584539 | 2585739 | WBGene00019144 | H01M10.2  | H01M10.2  | -0.108632359513647  |
| AGIWUR43764                                                                                                |    |   |         |         |                |           |           |                     |
| CB4856                                                                                                     | CT | X | 2594003 | 2606732 | WBGene00003630 | nhr-40    | T03G6.2   | 0.190808790069253   |
| AGIWUR203;AGIWUR11036;AGIWUR21316;AGIWUR45083                                                              |    |   |         |         |                |           |           |                     |
| CB4856                                                                                                     | CT | X | 2608228 | 2609989 | WBGene00020194 | T03G6.1   | T03G6.1   | 1.03965477794919    |
| AGIWUR42652                                                                                                |    |   |         |         |                |           |           |                     |
| CB4856                                                                                                     | CT | X | 2610826 | 2615726 | WBGene00020195 | T03G6.3   | T03G6.3   | 0.2622138496787     |
| AGIWUR39954                                                                                                |    |   |         |         |                |           |           |                     |
| CB4856                                                                                                     | CT | X | 2621274 | 2664373 | WBGene00018837 | F54G2.1   | F54G2.1   | 0.0266565133111509  |
| AGIWUR21188;AGIWUR34450                                                                                    |    |   |         |         |                |           |           |                     |
| CB4856                                                                                                     | CT | X | 2672427 | 2672759 | WBGene00022919 | C09B7.4   | C09B7.4   | 0.0199076745416411  |
| AGIWUR472;AGIWUR11888;AGIWUR14220;AGIWUR26186;AGIWUR35518                                                  |    |   |         |         |                |           |           |                     |
| CB4856                                                                                                     | CT | X | 2673471 | 2682379 | WBGene00004780 | ser-7     | C09B7.1   | -0.143735548469596  |
| AGIWUR21887;AGIWUR40148;AGIWUR40519                                                                        |    |   |         |         |                |           |           |                     |
| CB4856                                                                                                     | CT | X | 2682754 | 2687184 | WBGene00020511 | immt-1    | T14G11.3  | -0.126615675789555  |
| AGIWUR21136                                                                                                |    |   |         |         |                |           |           |                     |
| CB4856                                                                                                     | CT | X | 2688945 | 2692022 | WBGene00020510 | T14G11.1  | T14G11.1  | 0.166264478403122   |
| AGIWUR2431;AGIWUR17996;AGIWUR22135;AGIWUR23764;AGIWUR32517;AGIWUR32564;AGIWUR35471;AGIWUR39291;AGIWUR39542 |    |   |         |         |                |           |           |                     |
| CB4856                                                                                                     | CT | X | 2694908 | 2698273 | WBGene00020158 | T02C5.1   | T02C5.1   | 0.455147744682595   |
| AGIWUR40757;AGIWUR43458                                                                                    |    |   |         |         |                |           |           |                     |
| CB4856                                                                                                     | CT | X | 2698257 | 2705859 | WBGene00020160 | igcm-3    | T02C5.3   | 0.856845854472482   |
| AGIWUR21354;AGIWUR38472;AGIWUR40980                                                                        |    |   |         |         |                |           |           |                     |
| CB4856                                                                                                     | CT | X | 2710918 | 2748114 | WBGene00006742 | unc-2     | T02C5.5   | 0.157997059752793   |
| AGIWUR282;AGIWUR15155                                                                                      |    |   |         |         |                |           |           |                     |
| CB4856                                                                                                     | CT | X | 2769588 | 2770060 | WBGene00018888 | F55F1.2   | F55F1.2   | 0.229310892770317   |
| AGIWUR62                                                                                                   |    |   |         |         |                |           |           |                     |
| CB4856                                                                                                     | CT | X | 2772042 | 2799247 | WBGene00006496 | cgef-1    | C14A11.3  | 0.0840177900394035  |
| AGIWUR17834;AGIWUR33860;AGIWUR34012;AGIWUR36036                                                            |    |   |         |         |                |           |           |                     |
| CB4856                                                                                                     | CT | X | 2803112 | 2804830 | WBGene00015748 | C14A11.2  | C14A11.2  | 0.652595109643073   |
| AGIWUR21605                                                                                                |    |   |         |         |                |           |           |                     |
| CB4856                                                                                                     | CT | X | 2805075 | 2807528 | WBGene00015750 | C14A11.5  | C14A11.5  | 0.172241056951599   |
| AGIWUR28637;AGIWUR29994;AGIWUR33322                                                                        |    |   |         |         |                |           |           |                     |
| CB4856                                                                                                     | CT | X | 2807911 | 2809635 | WBGene00050944 | C14A11.9  | C14A11.9  | -0.0456647820990064 |
| AGIWUR28185                                                                                                |    |   |         |         |                |           |           |                     |
| CB4856                                                                                                     | CT | X | 2810484 | 2814125 | WBGene00015751 | C14A11.6  | C14A11.6  |                     |
| 0.000525036566919379 AGIWUR40572;AGIWUR42224                                                               |    |   |         |         |                |           |           |                     |
| CB4856                                                                                                     | CT | X | 2820431 | 2822433 | WBGene00006632 | tsp-6     | C14A11.1  | 0.210089566761855   |
| AGIWUR4926;AGIWUR10463;AGIWUR16224;AGIWUR16558                                                             |    |   |         |         |                |           |           |                     |
| CB4856                                                                                                     | CT | X | 2823501 | 2826827 | WBGene00006055 | ssr-2     | C14A11.7  | 0.209352501324683   |
| AGIWUR1100                                                                                                 |    |   |         |         |                |           |           |                     |
| CB4856                                                                                                     | CT | X | 2834222 | 2840292 | WBGene00022201 | Y71H10B.1 | Y71H10B.1 | -0.143583590833375  |
| AGIWUR944;AGIWUR5971;AGIWUR7849;AGIWUR9130;AGIWUR17991;AGIWUR18894;AGIWUR19077;AGIWUR38626;AGIWUR43058     |    |   |         |         |                |           |           |                     |



|                                                                      |    |   |         |         |                |           |           |                     |             |
|----------------------------------------------------------------------|----|---|---------|---------|----------------|-----------|-----------|---------------------|-------------|
| CB4856                                                               | CT | X | 2843922 | 2852520 | WBGene00002210 | kin-29    | F58H12.1  | 0.115484997996417   |             |
| AGIWUR5264;AGIWUR14602;AGIWUR16974;AGIWUR23969;AGIWUR32652           |    |   |         |         |                |           |           |                     |             |
| CB4856                                                               | CT | X | 2853678 | 2857603 | WBGene00018740 | tra-4     | F53B3.1   | -0.156953744186931  |             |
| AGIWUR2299;AGIWUR17562                                               |    |   |         |         |                |           |           |                     |             |
| CB4856                                                               | CT | X | 2864211 | 2865683 | WBGene00018744 | F53B3.6   | F53B3.6   | -0.142765872168699  | AGIWUR12334 |
| CB4856                                                               | CT | X | 2865960 | 2871060 | WBGene00018742 | F53B3.3   | F53B3.3   | 0.300192608489468   |             |
| AGIWUR5232;AGIWUR8771;AGIWUR37860                                    |    |   |         |         |                |           |           |                     |             |
| CB4856                                                               | CT | X | 2872739 | 2879619 | WBGene00018743 | F53B3.5   | F53B3.5   | 1.10559579473724    | AGIWUR37342 |
| CB4856                                                               | CT | X | 2885863 | 2890625 | WBGene00015171 | vang-1    | B0410.2   | -0.0434843003220724 | AGIWUR27637 |
| CB4856                                                               | CT | X | 2890612 | 2891491 | WBGene00015172 | B0410.3   | B0410.3   | 0.249124083345539   | AGIWUR35784 |
| CB4856                                                               | CT | X | 2892484 | 2898356 | WBGene00044304 | F52B10.3  | F52B10.3  | 0.12932179352851    |             |
| AGIWUR17121;AGIWUR31609                                              |    |   |         |         |                |           |           |                     |             |
| CB4856                                                               | CT | X | 2909536 | 2918038 | WBGene00003776 | nmy-1     | F52B10.1  | 0.309074658632239   |             |
| AGIWUR2608;AGIWUR3742;AGIWUR6745;AGIWUR33243;AGIWUR39326;AGIWUR44379 |    |   |         |         |                |           |           |                     |             |
| CB4856                                                               | CT | X | 2918730 | 2923984 | WBGene00044303 | hst-3.2   | F52B10.2  | 0.353556762967842   |             |
| AGIWUR3291;AGIWUR40841                                               |    |   |         |         |                |           |           |                     |             |
| CB4856                                                               | CT | X | 2933361 | 2937740 | WBGene00022200 | fard-1    | Y71H10A.2 | 0.0375332371636468  |             |
| AGIWUR7983;AGIWUR12871;AGIWUR22212                                   |    |   |         |         |                |           |           |                     |             |
| CB4856                                                               | CT | X | 2940872 | 2945481 | WBGene00022199 | pfk-1.1   | Y71H10A.1 | 0.124478740445676   |             |
| AGIWUR6779;AGIWUR29236                                               |    |   |         |         |                |           |           |                     |             |
| CB4856                                                               | CT | X | 2945803 | 2946570 | WBGene00044901 | Y41G9A.10 | Y41G9A.10 | 0.232202674989839   |             |
| AGIWUR24427;AGIWUR27514;AGIWUR27676;AGIWUR28212;AGIWUR34418          |    |   |         |         |                |           |           |                     |             |
| CB4856                                                               | CT | X | 2946667 | 2949025 | WBGene00021529 | Y41G9A.5  | Y41G9A.5  | 0.352572001187923   |             |
| AGIWUR26260                                                          |    |   |         |         |                |           |           |                     |             |
| CB4856                                                               | CT | X | 2957934 | 2968167 | WBGene00021528 | gbb-1     | Y41G9A.4  | -0.0162891585159728 |             |
| AGIWUR24071;AGIWUR30929                                              |    |   |         |         |                |           |           |                     |             |
| CB4856                                                               | CT | X | 2976457 | 2981008 | WBGene00021527 | aakg-3    | Y41G9A.3  | -0.248817327376438  |             |
| AGIWUR36721                                                          |    |   |         |         |                |           |           |                     |             |
| CB4856                                                               | CT | X | 2982056 | 2984125 | WBGene00021526 | Y41G9A.2  | Y41G9A.2  | 0.437807167016592   |             |
| AGIWUR14896                                                          |    |   |         |         |                |           |           |                     |             |
| CB4856                                                               | CT | X | 2984278 | 2991375 | WBGene00003885 | osm-5     | Y41G9A.1  | 0.643527204126863   |             |
| AGIWUR29544                                                          |    |   |         |         |                |           |           |                     |             |
| CB4856                                                               | CT | X | 2998303 | 3003803 | WBGene00021530 | Y41G9A.6  | Y41G9A.6  | 0.23038295687671    |             |
| AGIWUR4734                                                           |    |   |         |         |                |           |           |                     |             |
| CB4856                                                               | CT | X | 3009499 | 3010175 | WBGene00021656 | Y48D7A.1  | Y48D7A.1  | 0.00614323033136177 |             |
| AGIWUR39448                                                          |    |   |         |         |                |           |           |                     |             |
| CB4856                                                               | CT | X | 3012190 | 3018555 | WBGene00001461 | f1p-18    | Y48D7A.2  | 0.327287088986422   |             |
| AGIWUR22573                                                          |    |   |         |         |                |           |           |                     |             |
| CB4856                                                               | CT | X | 3025505 | 3026976 | WBGene00000175 | aqp-7     | M02F4.8   | 0.00863890604098216 | AGIWUR18600 |

|                                                                                                          |    |   |         |         |                |          |          |                            |             |
|----------------------------------------------------------------------------------------------------------|----|---|---------|---------|----------------|----------|----------|----------------------------|-------------|
| CB4856                                                                                                   | CT | X | 3027253 | 3030762 | WBGene00019735 | M02F4.1  | M02F4.1  | -0.261313983742312         | AGIWUR11119 |
| CB4856                                                                                                   | CT | X | 3031723 | 3033203 | WBGene00019738 | clec-265 |          | M02F4.7 -0.873086062978018 |             |
| AGIWUR442                                                                                                |    |   |         |         |                |          |          |                            |             |
| CB4856                                                                                                   | CT | X | 3033325 | 3034303 | WBGene00019736 | M02F4.2  | M02F4.2  | 0.11924241325404           | AGIWUR18919 |
| CB4856                                                                                                   | CT | X | 3036427 | 3045806 | WBGene00016343 | cnm-3    | C33D12.2 | -0.0671786962631993        |             |
| AGIWUR2882;AGIWUR5098;AGIWUR5720;AGIWUR7394;AGIWUR24199;AGIWUR24738;AGIWUR31588;AGIWUR39336              |    |   |         |         |                |          |          |                            |             |
| CB4856                                                                                                   | CT | X | 3050365 | 3054585 | WBGene00006679 | twk-26   | C33D12.3 | -0.63813000444604          |             |
| AGIWUR28243                                                                                              |    |   |         |         |                |          |          |                            |             |
| CB4856                                                                                                   | CT | X | 3055257 | 3059385 | WBGene00016344 | rsef-1   | C33D12.6 | 0.067349242813135          |             |
| AGIWUR2392                                                                                               |    |   |         |         |                |          |          |                            |             |
| CB4856                                                                                                   | CT | X | 3063585 | 3065551 | WBGene00000451 | ceh-30   | C33D12.7 | 0.459804959006261          |             |
| AGIWUR20536                                                                                              |    |   |         |         |                |          |          |                            |             |
| CB4856                                                                                                   | CT | X | 3068650 | 3070396 | WBGene00000452 | ceh-31   | C33D12.1 | 0.355772417327776          |             |
| AGIWUR1382                                                                                               |    |   |         |         |                |          |          |                            |             |
| CB4856                                                                                                   | CT | X | 3081125 | 3085336 | WBGene00006670 | twk-16   | F52E4.4  | -0.372870891370983         |             |
| AGIWUR10197;AGIWUR23264;AGIWUR27801;AGIWUR28179                                                          |    |   |         |         |                |          |          |                            |             |
| CB4856                                                                                                   | CT | X | 3085829 | 3087345 | WBGene00018702 | F52E4.5  | F52E4.5  | -0.0332008344273031        | AGIWUR13956 |
| CB4856                                                                                                   | CT | X | 3089496 | 3092457 | WBGene00018701 | pccb-1   | F52E4.1  | 0.113431335596953          |             |
| AGIWUR1837;AGIWUR6654;AGIWUR9003;AGIWUR12787;AGIWUR20116;AGIWUR32561;AGIWUR32604;AGIWUR40672;AGIWUR41415 |    |   |         |         |                |          |          |                            |             |
| CB4856                                                                                                   | CT | X | 3092395 | 3094448 | WBGene00006948 | wrt-2    | F52E4.6  | 0.113409871177848          |             |
| AGIWUR373;AGIWUR722;AGIWUR13619                                                                          |    |   |         |         |                |          |          |                            |             |
| CB4856                                                                                                   | CT | X | 3095434 | 3099837 | WBGene00018703 | sec-3    | F52E4.7  | -0.101294659528076         | AGIWUR41191 |
| CB4856                                                                                                   | CT | X | 3103250 | 3106279 | WBGene00019611 | K10B3.5  | K10B3.5  | 0.102729133218153          |             |
| AGIWUR25536;AGIWUR25538                                                                                  |    |   |         |         |                |          |          |                            |             |
| CB4856                                                                                                   | CT | X | 3106543 | 3110630 | WBGene00019612 | gpcp-1   | K10B3.6  | 0.161351441068748          |             |
| AGIWUR17177;AGIWUR26068;AGIWUR44080                                                                      |    |   |         |         |                |          |          |                            |             |
| CB4856                                                                                                   | CT | X | 3112083 | 3113382 | WBGene00001685 | gpd-3    | K10B3.7  | -0.0489106387500646        |             |
| AGIWUR6643;AGIWUR7153;AGIWUR12023;AGIWUR23960;AGIWUR36409;AGIWUR36989                                    |    |   |         |         |                |          |          |                            |             |
| CB4856                                                                                                   | CT | X | 3113434 | 3114771 | WBGene00001684 | gpd-2    | K10B3.8  | -0.348026643527531         | AGIWUR22539 |
| CB4856                                                                                                   | CT | X | 3114668 | 3116538 | WBGene00003124 | mai-1    | K10B3.9  | -0.073637327291241         | AGIWUR35840 |
| CB4856                                                                                                   | CT | X | 3117439 | 3127073 | WBGene00004951 | spc-1    | K10B3.10 | 0.157796907721003          |             |
| AGIWUR4438;AGIWUR7942;AGIWUR9370;AGIWUR10005;AGIWUR12089;AGIWUR31510;AGIWUR42440                         |    |   |         |         |                |          |          |                            |             |
| CB4856                                                                                                   | CT | X | 3135486 | 3136663 | WBGene00019609 | K10B3.1  | K10B3.1  | -0.179017533257664         |             |
| AGIWUR7520;AGIWUR7583;AGIWUR12761;AGIWUR22048;AGIWUR25116;AGIWUR44994                                    |    |   |         |         |                |          |          |                            |             |
| CB4856                                                                                                   | CT | X | 3146573 | 3147088 | WBGene00015790 | C15C7.4  | C15C7.4  | 0.430830200649204          | AGIWUR34652 |
| CB4856                                                                                                   | CT | X | 3151148 | 3152461 | WBGene00015791 | C15C7.5  | C15C7.5  | -0.101665080716163         |             |
| AGIWUR560;AGIWUR19372;AGIWUR23873;AGIWUR28059;AGIWUR30270;AGIWUR39946                                    |    |   |         |         |                |          |          |                            |             |
| CB4856                                                                                                   | CT | X | 3159940 | 3164424 | WBGene00002220 | gcc-1    | C15C7.2  | -0.154461837798638         |             |
| AGIWUR4551;AGIWUR14889;AGIWUR28773;AGIWUR30268;AGIWUR30613;AGIWUR43739                                   |    |   |         |         |                |          |          |                            |             |

|                                                                                   |    |   |         |         |                |          |          |                      |             |
|-----------------------------------------------------------------------------------|----|---|---------|---------|----------------|----------|----------|----------------------|-------------|
| CB4856                                                                            | CT | X | 3164525 | 3165650 | WBGene00015789 | syx-6    | C15C7.1  | 0.095167653901751    |             |
| AGIWUR1944;AGIWUR3669;AGIWUR41127;AGIWUR45171                                     |    |   |         |         |                |          |          |                      |             |
| CB4856                                                                            | CT | X | 3165796 | 3167579 | WBGene00015793 | C15C7.7  | C15C7.7  | 0.386504720846865    | AGIWUR40953 |
| CB4856                                                                            | CT | X | 3167570 | 3170556 | WBGene00015792 | C15C7.6  | C15C7.6  | 0.0728887588460254   |             |
| AGIWUR6524;AGIWUR10308;AGIWUR33805;AGIWUR40453                                    |    |   |         |         |                |          |          |                      |             |
| CB4856                                                                            | CT | X | 3171424 | 3178695 | WBGene00002217 | k1p-4    | F56E3.3  | 0.0979423511768758   |             |
| AGIWUR3576;AGIWUR7058;AGIWUR15218;AGIWUR26622;AGIWUR30042;AGIWUR32297;AGIWUR33608 |    |   |         |         |                |          |          |                      |             |
| CB4856                                                                            | CT | X | 3206818 | 3209644 | WBGene00017893 | F28B4.4  | F28B4.4  | 0.324147792893111    | AGIWUR22272 |
| CB4856                                                                            | CT | X | 3210470 | 3220367 | WBGene00017891 | rg1-1    | F28B4.2  | 0.097692615977552    |             |
| AGIWUR11313;AGIWUR17316;AGIWUR20300;AGIWUR36614;AGIWUR36742;AGIWUR40752           |    |   |         |         |                |          |          |                      |             |
| CB4856                                                                            | CT | X | 3227489 | 3235408 | WBGene00017892 | F28B4.3  | F28B4.3  | -0.67854706119968    | AGIWUR28431 |
| CB4856                                                                            | CT | X | 3235768 | 3243624 | WBGene00018237 | irg-7    | F40F4.6  | -0.446231151580029   | AGIWUR39079 |
| CB4856                                                                            | CT | X | 3243886 | 3245980 | WBGene00018238 | F40F4.7  | F40F4.7  | -0.0308293355721077  | AGIWUR14512 |
| CB4856                                                                            | CT | X | 3247045 | 3250529 | WBGene00004124 | pqn-37   | F40F4.8  | -0.408402033735976   | AGIWUR35686 |
| CB4856                                                                            | CT | X | 3252963 | 3256265 | WBGene00006535 | tba-9    | F40F4.5  | -0.00809849292758358 | AGIWUR37481 |
| CB4856                                                                            | CT | X | 3257010 | 3258155 | WBGene00002255 | lbp-3    | F40F4.4  | -0.166190617948814   |             |
| AGIWUR4882;AGIWUR22843;AGIWUR31099                                                |    |   |         |         |                |          |          |                      |             |
| CB4856                                                                            | CT | X | 3259087 | 3259855 | WBGene00002253 | lbp-1    | F40F4.3  | 0.829361877189648    | AGIWUR15823 |
| CB4856                                                                            | CT | X | 3260610 | 3261470 | WBGene00002254 | lbp-2    | F40F4.2  | -0.31654995529448    | AGIWUR17137 |
| CB4856                                                                            | CT | X | 3262900 | 3264161 | WBGene00018236 | fbxb-71  | F40F4.1  | 0.227599555627767    | AGIWUR33431 |
| CB4856                                                                            | CT | X | 3267294 | 3270906 | WBGene00006308 | su1-1    | K09C4.8  | 0.0515445329614472   | AGIWUR36553 |
| CB4856                                                                            | CT | X | 3271353 | 3271773 | WBGene00019553 | K09C4.9  | K09C4.9  | 0.029354112887706    | AGIWUR12345 |
| CB4856                                                                            | CT | X | 3272730 | 3273155 | WBGene00019552 | K09C4.7  | K09C4.7  | 0.121617453292561    | AGIWUR7564  |
| CB4856                                                                            | CT | X | 3274757 | 3275768 | WBGene00019551 | K09C4.6  | K09C4.6  | 0.0251912511792289   | AGIWUR37707 |
| CB4856                                                                            | CT | X | 3276020 | 3280230 | WBGene00019554 | K09C4.10 | K09C4.10 | -0.238849802097567   |             |
| AGIWUR18845                                                                       |    |   |         |         |                |          |          |                      |             |
| CB4856                                                                            | CT | X | 3282602 | 3285721 | WBGene00019550 | K09C4.5  | K09C4.5  | -0.0802607202585888  |             |
| AGIWUR1581;AGIWUR33875;AGIWUR44903                                                |    |   |         |         |                |          |          |                      |             |
| CB4856                                                                            | CT | X | 3289485 | 3292412 | WBGene00019549 | K09C4.4  | K09C4.4  | 0.353503690775034    | AGIWUR18440 |
| CB4856                                                                            | CT | X | 3293290 | 3294369 | WBGene00002006 | hsp-2    | K09C4.3  | -0.335209259989711   |             |
| AGIWUR17108;AGIWUR24868;AGIWUR30948;AGIWUR37512                                   |    |   |         |         |                |          |          |                      |             |
| CB4856                                                                            | CT | X | 3296482 | 3297993 | WBGene00019548 | K09C4.2  | K09C4.2  | -0.00526438082903802 | AGIWUR6444  |
| CB4856                                                                            | CT | X | 3298832 | 3301637 | WBGene00019547 | K09C4.1  | K09C4.1  | 1.57097695567954     | AGIWUR35316 |
| CB4856                                                                            | CT | X | 3302070 | 3303927 | WBGene00017382 | F11D5.5  | F11D5.5  | 0.845851098619425    |             |
| AGIWUR19390;AGIWUR29499                                                           |    |   |         |         |                |          |          |                      |             |
| CB4856                                                                            | CT | X | 3304026 | 3306939 | WBGene00043980 | F11D5.7  | F11D5.7  | 0.122196583453595    |             |
| AGIWUR17430;AGIWUR29001;AGIWUR29773                                               |    |   |         |         |                |          |          |                      |             |
| CB4856                                                                            | CT | X | 3315321 | 3324229 | WBGene00017381 | ddr-2    | F11D5.3  | 0.61340082201685     | AGIWUR26574 |
| CB4856                                                                            | CT | X | 3325166 | 3326275 | WBGene00017383 | F11D5.6  | F11D5.6  | 0.0444085480530596   |             |

AGIWUR6111;AGIWUR19770;AGIWUR19885;AGIWUR31566;AGIWUR31777  
 CB4856 CT X 3333130 3347302 WBGene00017380 F11D5.1 F11D5.1 0.314932852335888  
 AGIWUR21170;AGIWUR35228;AGIWUR36050  
 CB4856 CT X 3348121 3348642 WBGene00022826 ZK816.3 ZK816.3 -0.0961030408434977 AGIWUR28879  
 CB4856 CT X 3348878 3350401 WBGene00022827 ZK816.4 ZK816.4 0.618403084675149 AGIWUR5143  
 CB4856 CT X 3359062 3360656 WBGene00022825 ZK816.1 ZK816.1 -0.00381742505810312 AGIWUR7579  
 CB4856 CT X 3360722 3362493 WBGene00000989 dhs-26 ZK816.5 -0.168061883916216  
 AGIWUR30451;AGIWUR35473  
 CB4856 CT X 3368959 3373217 WBGene00022767 ZK563.2 ZK563.2 0.0658117354181034 AGIWUR18934  
 CB4856 CT X 3373247 3374740 WBGene00000524 clc-3 ZK563.4 -0.120628401155706 AGIWUR27033  
 CB4856 CT X 3376874 3379234 WBGene00022769 sorf-1 ZK563.5 -0.0836889767314251  
 AGIWUR5888;AGIWUR12956;AGIWUR13650;AGIWUR25096;AGIWUR33967;AGIWUR43263  
 CB4856 CT X 3380480 3382838 WBGene00044355 ZK563.7 ZK563.7 -0.0409286811145995  
 AGIWUR34423;AGIWUR42244  
 CB4856 CT X 3382868 3385547 WBGene00022770 acp-1 ZK563.6 -0.347222956937062 AGIWUR39590  
 CB4856 CT X 3393864 3397656 WBGene00006865 slcf-2 ZK563.1 0.158135523187869  
 AGIWUR37355;AGIWUR38288  
 CB4856 CT X 3397613 3400017 WBGene00000503 cht-1 C04F6.3 0.547386335177253 AGIWUR35268  
 CB4856 CT X 3408664 3411683 WBGene00006810 unc-78 C04F6.4 -0.0791402781346378  
 AGIWUR1669;AGIWUR16113;AGIWUR17514;AGIWUR25638  
 CB4856 CT X 3412876 3414708 WBGene00000990 dhs-27 C04F6.5 -0.102043630937972 AGIWUR29086  
 CB4856 CT X 3424816 3427337 WBGene00044564 ZK813.6 ZK813.6 1.18544488439134  
 AGIWUR15263;AGIWUR34459  
 CB4856 CT X 3427372 3430120 WBGene00022823 ZK813.4 ZK813.4 -0.0565804040085389 AGIWUR25241  
 CB4856 CT X 3441839 3442458 WBGene00022822 ZK813.3 ZK813.3 -0.0516337170780616  
 AGIWUR10722;AGIWUR12466;AGIWUR20222;AGIWUR20531;AGIWUR38971  
 CB4856 CT X 3443782 3444420 WBGene00022821 ZK813.2 ZK813.2 0.288942357797197 AGIWUR28329  
 CB4856 CT X 3444802 3445283 WBGene00045394 ZK813.7 ZK813.7 0.033431549010853  
 AGIWUR3984;AGIWUR4660;AGIWUR9902;AGIWUR11733;AGIWUR22422;AGIWUR26236;AGIWUR35956;AGIWUR36513;AGIWUR44011  
 CB4856 CT X 3446311 3448253 WBGene00022820 ZK813.1 ZK813.1 0.234204096077157 AGIWUR8539  
 CB4856 CT X 3448744 3451222 WBGene00022824 ZK813.5 ZK813.5 0.412997778971043 AGIWUR14288  
 CB4856 CT X 3451945 3465925 WBGene00004729 sax-3 ZK377.2 0.135586092872358  
 AGIWUR15391;AGIWUR19547;AGIWUR28949;AGIWUR29051;AGIWUR37636;AGIWUR42492  
 CB4856 CT X 3480251 3483649 WBGene00006952 wrt-6 ZK377.1 0.0707509885776414  
 AGIWUR4539;AGIWUR16131;AGIWUR26666;AGIWUR32164;AGIWUR34901  
 CB4856 CT X 3486309 3486838 WBGene00015715 C12D12.4 C12D12.4 0.22777081833399  
 AGIWUR27243  
 CB4856 CT X 3487101 3487996 WBGene00022922 C12D12.7 C12D12.7 -0.029552484683613  
 AGIWUR17188

|                                                                        |    |   |         |         |                |          |          |                     |             |
|------------------------------------------------------------------------|----|---|---------|---------|----------------|----------|----------|---------------------|-------------|
| CB4856                                                                 | CT | X | 3489293 | 3491155 | WBGene00015714 | C12D12.3 | C12D12.3 | 0.0794278150261416  |             |
| AGIWUR20187;AGIWUR27237;AGIWUR28908;AGIWUR33500                        |    |   |         |         |                |          |          |                     |             |
| CB4856                                                                 | CT | X | 3496026 | 3499165 | WBGene00001620 | glt-1    | C12D12.2 | -0.181708850646004  |             |
| AGIWUR20640;AGIWUR30222                                                |    |   |         |         |                |          |          |                     |             |
| CB4856                                                                 | CT | X | 3499253 | 3505251 | WBGene00015713 | C12D12.1 | C12D12.1 | -0.376301953937849  |             |
| AGIWUR17039;AGIWUR19364                                                |    |   |         |         |                |          |          |                     |             |
| CB4856                                                                 | CT | X | 3505286 | 3511529 | WBGene00015716 | sox-4    | C12D12.5 | -0.231030837504486  |             |
| AGIWUR772;AGIWUR8579;AGIWUR38135                                       |    |   |         |         |                |          |          |                     |             |
| CB4856                                                                 | CT | X | 3528812 | 3531826 | WBGene00006864 | npr-16   | F56B6.5  | 0.450357679712075   | AGIWUR9194  |
| CB4856                                                                 | CT | X | 3531841 | 3532811 | WBGene00018937 | F56B6.6  | F56B6.6  | -0.0312787339510265 |             |
| AGIWUR2309;AGIWUR7014;AGIWUR24773;AGIWUR28044;AGIWUR29035;AGIWUR36026  |    |   |         |         |                |          |          |                     |             |
| CB4856                                                                 | CT | X | 3537641 | 3540940 | WBGene00006863 | gyg-1    | F56B6.4  | 0.0293197202148594  |             |
| AGIWUR4402;AGIWUR40739                                                 |    |   |         |         |                |          |          |                     |             |
| CB4856                                                                 | CT | X | 3542558 | 3557599 | WBGene00004350 | rgs-7    | F56B6.2  | 0.183592312819781   |             |
| AGIWUR8199;AGIWUR17813;AGIWUR29479;AGIWUR32324;AGIWUR32993;AGIWUR34005 |    |   |         |         |                |          |          |                     |             |
| CB4856                                                                 | CT | X | 3558839 | 3563974 | WBGene00006928 | vit-4    | F59D8.2  | -0.396713903339302  |             |
| AGIWUR3280;AGIWUR20585                                                 |    |   |         |         |                |          |          |                     |             |
| CB4856                                                                 | CT | X | 3567355 | 3572549 | WBGene00006927 | vit-3    | F59D8.1  | -0.250794723954478  | AGIWUR15620 |
| CB4856                                                                 | CT | X | 3573051 | 3573562 | WBGene00020845 | T27A10.5 | T27A10.5 | -0.434733877405574  |             |
| AGIWUR1640                                                             |    |   |         |         |                |          |          |                     |             |
| CB4856                                                                 | CT | X | 3576608 | 3578830 | WBGene00000515 | ckc-1    | T27A10.3 | -0.706913259430314  |             |
| AGIWUR449;AGIWUR4215;AGIWUR8145                                        |    |   |         |         |                |          |          |                     |             |
| CB4856                                                                 | CT | X | 3588858 | 3596497 | WBGene00020846 | T27A10.6 | T27A10.6 | -0.344190767261829  |             |
| AGIWUR4757;AGIWUR15179;AGIWUR15354                                     |    |   |         |         |                |          |          |                     |             |
| CB4856                                                                 | CT | X | 3597276 | 3600475 | WBGene00020847 | cgr-1    | T27A10.7 | -0.0607285379009816 |             |
| AGIWUR2139                                                             |    |   |         |         |                |          |          |                     |             |
| CB4856                                                                 | CT | X | 3601800 | 3604360 | WBGene00015954 | C18B2.3  | C18B2.3  | -0.0491477969428775 | AGIWUR35650 |
| CB4856                                                                 | CT | X | 3604291 | 3605741 | WBGene00015955 | C18B2.4  | C18B2.4  | -0.0284427549585917 | AGIWUR41181 |
| CB4856                                                                 | CT | X | 3606668 | 3611092 | WBGene00015956 | C18B2.5  | C18B2.5  | -0.23323794554823   |             |
| AGIWUR14917;AGIWUR15676                                                |    |   |         |         |                |          |          |                     |             |
| CB4856                                                                 | CT | X | 3613353 | 3617378 | WBGene00015957 | del-9    | C18B2.6  | 0.48963368792628    | AGIWUR40349 |
| CB4856                                                                 | CT | X | 3623522 | 3628359 | WBGene00015953 | C18B2.2  | C18B2.2  | 0.135252700651585   | AGIWUR37215 |
| CB4856                                                                 | CT | X | 3628316 | 3630884 | WBGene00015952 | C18B2.1  | C18B2.1  | -0.23655132643788   | AGIWUR28851 |
| CB4856                                                                 | CT | X | 3632367 | 3633747 | WBGene00001759 | gst-11   | R11G1.3  | -0.200775727160607  |             |
| AGIWUR1123;AGIWUR11838;AGIWUR17670;AGIWUR34809                         |    |   |         |         |                |          |          |                     |             |
| CB4856                                                                 | CT | X | 3639189 | 3644896 | WBGene00020012 | R11G1.6  | R11G1.6  | 0.0873338902632455  |             |
| AGIWUR18151;AGIWUR22592;AGIWUR35254;AGIWUR36233;AGIWUR36775            |    |   |         |         |                |          |          |                     |             |
| CB4856                                                                 | CT | X | 3646320 | 3650150 | WBGene00004727 | sax-1    | R11G1.4  | 0.246742023116013   |             |
| AGIWUR3701;AGIWUR7535;AGIWUR44764                                      |    |   |         |         |                |          |          |                     |             |

|                                                                                                                             |    |   |         |         |                |          |           |                     |             |
|-----------------------------------------------------------------------------------------------------------------------------|----|---|---------|---------|----------------|----------|-----------|---------------------|-------------|
| CB4856                                                                                                                      | CT | X | 3652017 | 3655419 | WBGene00020011 | R11G1.2  | R11G1.2   | 0.198881061499202   |             |
| AGIWUR18566;AGIWUR29373                                                                                                     |    |   |         |         |                |          |           |                     |             |
| CB4856                                                                                                                      | CT | X | 3656272 | 3657265 | WBGene00044725 | R11G1.7  | R11G1.7   | 0.378062286264417   | AGIWUR18423 |
| CB4856                                                                                                                      | CT | X | 3659492 | 3666879 | WBGene00020010 | R11G1.1  | R11G1.1   | 0.251963192240894   | AGIWUR9479  |
| CB4856                                                                                                                      | CT | X | 3668100 | 3668942 | WBGene00015354 | snet-1   | C02F12.3  | 0.28958585002718    |             |
| AGIWUR3210;AGIWUR35056                                                                                                      |    |   |         |         |                |          |           |                     |             |
| CB4856                                                                                                                      | CT | X | 3670374 | 3672098 | WBGene00015355 | C02F12.5 | C02F12.5  | -0.533414164767297  |             |
| AGIWUR42617                                                                                                                 |    |   |         |         |                |          |           |                     |             |
| CB4856                                                                                                                      | CT | X | 3672378 | 3673918 | WBGene00045215 | ceh-63   | C02F12.10 | 0.166704345593796   |             |
| AGIWUR24651;AGIWUR30317;AGIWUR41987                                                                                         |    |   |         |         |                |          |           |                     |             |
| CB4856                                                                                                                      | CT | X | 3674041 | 3678557 | WBGene00006431 | tag-52   | C02F12.4  | 0.254507232877334   |             |
| AGIWUR35687                                                                                                                 |    |   |         |         |                |          |           |                     |             |
| CB4856                                                                                                                      | CT | X | 3681170 | 3684232 | WBGene00006643 | tsp-17   | C02F12.1  | 0.0304446604266424  |             |
| AGIWUR71;AGIWUR691;AGIWUR2919;AGIWUR7781;AGIWUR9164;AGIWUR10882;AGIWUR25534;AGIWUR25780;AGIWUR29313;AGIWUR44582;AGIWUR45202 |    |   |         |         |                |          |           |                     |             |
| CB4856                                                                                                                      | CT | X | 3684212 | 3689205 | WBGene00015356 | tag-278  | C02F12.7  | 0.291638568457897   |             |
| AGIWUR44429                                                                                                                 |    |   |         |         |                |          |           |                     |             |
| CB4856                                                                                                                      | CT | X | 3690143 | 3693238 | WBGene00015357 | C02F12.8 | C02F12.8  | -0.0827650899335008 |             |
| AGIWUR30932                                                                                                                 |    |   |         |         |                |          |           |                     |             |
| CB4856                                                                                                                      | CT | X | 3696903 | 3700807 | WBGene00015358 | C02F12.9 | C02F12.9  | -0.0225111052517244 |             |
| AGIWUR8648;AGIWUR21142;AGIWUR37573;AGIWUR38180                                                                              |    |   |         |         |                |          |           |                     |             |
| CB4856                                                                                                                      | CT | X | 3706551 | 3713382 | WBGene00015293 | C01C4.3  | C01C4.3   | 0.324788152135142   |             |
| AGIWUR101;AGIWUR13011;AGIWUR31216                                                                                           |    |   |         |         |                |          |           |                     |             |
| CB4856                                                                                                                      | CT | X | 3716314 | 3718566 | WBGene00015292 | C01C4.2  | C01C4.2   | 0.196732172663084   |             |
| AGIWUR380;AGIWUR7965;AGIWUR10650;AGIWUR12661                                                                                |    |   |         |         |                |          |           |                     |             |
| CB4856                                                                                                                      | CT | X | 3727553 | 3728446 | WBGene00003739 | nlp-1    | C01C4.1   | 0.319847339115842   | AGIWUR42191 |
| CB4856                                                                                                                      | CT | X | 3729281 | 3731960 | WBGene00006454 | aex-4    | T14G12.2  | 0.443161613648256   |             |
| AGIWUR5944                                                                                                                  |    |   |         |         |                |          |           |                     |             |
| CB4856                                                                                                                      | CT | X | 3731894 | 3733457 | WBGene00006408 | tag-18   | T14G12.3  | -0.0674503390285892 |             |
| AGIWUR26566                                                                                                                 |    |   |         |         |                |          |           |                     |             |
| CB4856                                                                                                                      | CT | X | 3740208 | 3742323 | WBGene00001434 | fkx-2    | T14G12.4  | 0.180832077143618   |             |
| AGIWUR928;AGIWUR1294;AGIWUR4150;AGIWUR7793;AGIWUR14765;AGIWUR30544                                                          |    |   |         |         |                |          |           |                     |             |
| CB4856                                                                                                                      | CT | X | 3763057 | 3764395 | WBGene00018534 | F47B7.3  | F47B7.3   | 0.0155755163287794  |             |
| AGIWUR32605;AGIWUR39322                                                                                                     |    |   |         |         |                |          |           |                     |             |
| CB4856                                                                                                                      | CT | X | 3765324 | 3766626 | WBGene00018535 | F47B7.4  | F47B7.4   | 0.0824418289982152  | AGIWUR9808  |
| CB4856                                                                                                                      | CT | X | 3767795 | 3768817 | WBGene00018536 | F47B7.5  | F47B7.5   | 0.111323997991948   | AGIWUR13937 |
| CB4856                                                                                                                      | CT | X | 3769731 | 3770643 | WBGene00018537 | F47B7.6  | F47B7.6   | -0.0885888512800239 | AGIWUR41486 |
| CB4856                                                                                                                      | CT | X | 3772763 | 3778080 | WBGene00018533 | F47B7.2  | F47B7.2   | -0.161243868369931  |             |
| AGIWUR213;AGIWUR9801;AGIWUR15390;AGIWUR19993;AGIWUR23514;AGIWUR24158;AGIWUR34104;AGIWUR34713;AGIWUR37042;AG                 |    |   |         |         |                |          |           |                     |             |

|                                                                                                                                                                                             |    |   |         |         |                |         |         |                      |             |
|---------------------------------------------------------------------------------------------------------------------------------------------------------------------------------------------|----|---|---------|---------|----------------|---------|---------|----------------------|-------------|
| IWUR44702                                                                                                                                                                                   |    |   |         |         |                |         |         |                      |             |
| CB4856                                                                                                                                                                                      | CT | X | 3778091 | 3781118 | WBGene00018538 | marg-1  | F47B7.7 | 0.561790623257888    | AGIWUR36494 |
| CB4856                                                                                                                                                                                      | CT | X | 3788026 | 3788532 | WBGene00018532 | F47B7.1 | F47B7.1 | -0.172251368828832   |             |
| AGIWUR5087;AGIWUR6046                                                                                                                                                                       |    |   |         |         |                |         |         |                      |             |
| CB4856                                                                                                                                                                                      | CT | X | 3789757 | 3792815 | WBGene00018026 | F35A5.4 | F35A5.4 | -0.143187079315595   |             |
| AGIWUR3889;AGIWUR9459;AGIWUR9820                                                                                                                                                            |    |   |         |         |                |         |         |                      |             |
| CB4856                                                                                                                                                                                      | CT | X | 3793912 | 3795395 | WBGene00018027 | F35A5.5 | F35A5.5 | 0.0375030518301944   |             |
| AGIWUR230;AGIWUR7864;AGIWUR12138;AGIWUR12675;AGIWUR20530;AGIWUR22072;AGIWUR23940;AGIWUR29917;AGIWUR37314;AGIWUR38248;AGIWUR42205                                                            |    |   |         |         |                |         |         |                      |             |
| CB4856                                                                                                                                                                                      | CT | X | 3798179 | 3799741 | WBGene00000033 | abu-10  | F35A5.3 | -0.272378955464866   | AGIWUR37428 |
| CB4856                                                                                                                                                                                      | CT | X | 3800045 | 3802771 | WBGene00001335 | erp-1   | F35A5.8 | -0.0499538317672057  |             |
| AGIWUR6029;AGIWUR8627;AGIWUR42411;AGIWUR45109                                                                                                                                               |    |   |         |         |                |         |         |                      |             |
| CB4856                                                                                                                                                                                      | CT | X | 3805084 | 3805749 | WBGene00018025 | F35A5.2 | F35A5.2 | 0.566059013666209    | AGIWUR43919 |
| CB4856                                                                                                                                                                                      | CT | X | 3807460 | 3816429 | WBGene00018024 | F35A5.1 | F35A5.1 | -0.128974423822804   |             |
| AGIWUR16665;AGIWUR20440;AGIWUR21793                                                                                                                                                         |    |   |         |         |                |         |         |                      |             |
| CB4856                                                                                                                                                                                      | CT | X | 3816851 | 3826963 | WBGene00001441 | fkh-9   | K03C7.2 | 0.2565813419584      |             |
| AGIWUR1451;AGIWUR3258;AGIWUR6593;AGIWUR15006;AGIWUR16658;AGIWUR20846;AGIWUR21069;AGIWUR26982;AGIWUR27201                                                                                    |    |   |         |         |                |         |         |                      |             |
| CB4856                                                                                                                                                                                      | CT | X | 3827231 | 3829300 | WBGene00019359 | K03C7.3 | K03C7.3 | -0.405162509404145   | AGIWUR5541  |
| CB4856                                                                                                                                                                                      | CT | X | 3840869 | 3842468 | WBGene00022515 | ttr-48  | ZC64.2  | -0.0580739727808153  |             |
| AGIWUR7561;AGIWUR8684;AGIWUR35317;AGIWUR40258                                                                                                                                               |    |   |         |         |                |         |         |                      |             |
| CB4856                                                                                                                                                                                      | CT | X | 3843367 | 3857797 | WBGene00000441 | ceh-18  | ZC64.3  | -0.172849876714704   |             |
| AGIWUR2095;AGIWUR8429;AGIWUR8825;AGIWUR22735;AGIWUR27675;AGIWUR28338;AGIWUR37278                                                                                                            |    |   |         |         |                |         |         |                      |             |
| CB4856                                                                                                                                                                                      | CT | X | 3869753 | 3873295 | WBGene00002987 | lim-4   | ZC64.4  | 0.512303973019158    | AGIWUR27888 |
| CB4856                                                                                                                                                                                      | CT | X | 3879782 | 3893309 | WBGene00018569 | F47F2.1 | F47F2.1 | 0.156792132314051    |             |
| AGIWUR8897;AGIWUR10596;AGIWUR21221;AGIWUR41611                                                                                                                                              |    |   |         |         |                |         |         |                      |             |
| CB4856                                                                                                                                                                                      | CT | X | 3893964 | 3895677 | WBGene00018571 | F47F2.3 | F47F2.3 | 0.160016888449503    | AGIWUR27605 |
| CB4856                                                                                                                                                                                      | CT | X | 3904591 | 3907671 | WBGene00006321 | sup-12  | T22B2.4 | 0.308234270123083    |             |
| AGIWUR4964;AGIWUR13589;AGIWUR35264;AGIWUR37936;AGIWUR39225;AGIWUR40172                                                                                                                      |    |   |         |         |                |         |         |                      |             |
| CB4856                                                                                                                                                                                      | CT | X | 3908144 | 3911380 | WBGene00020669 | T22B2.5 | T22B2.5 | 0.0737715109575801   |             |
| AGIWUR11095;AGIWUR14481;AGIWUR17029;AGIWUR20075;AGIWUR36801;AGIWUR39173;AGIWUR41209;AGIWUR45062                                                                                             |    |   |         |         |                |         |         |                      |             |
| CB4856                                                                                                                                                                                      | CT | X | 3914765 | 3915848 | WBGene00020670 | T22B2.6 | T22B2.6 | -0.399192945452835   |             |
| AGIWUR3107;AGIWUR3588;AGIWUR7204;AGIWUR8957;AGIWUR11412;AGIWUR11915;AGIWUR17333;AGIWUR19664;AGIWUR26137;AGIWUR29664;AGIWUR32235;AGIWUR35489;AGIWUR36229;AGIWUR37239;AGIWUR44863;AGIWUR44904 |    |   |         |         |                |         |         |                      |             |
| CB4856                                                                                                                                                                                      | CT | X | 3917301 | 3919835 | WBGene00020667 | T22B2.3 | T22B2.3 | -0.00935120159783143 | AGIWUR4053  |
| CB4856                                                                                                                                                                                      | CT | X | 3921068 | 3923233 | WBGene00020666 | T22B2.2 | T22B2.2 | 0.211048243151885    | AGIWUR34034 |
| CB4856                                                                                                                                                                                      | CT | X | 3926081 | 3929576 | WBGene00020665 | T22B2.1 | T22B2.1 | -0.147213658947178   | AGIWUR13633 |
| CB4856                                                                                                                                                                                      | CT | X | 3931631 | 3937897 | WBGene00020567 | T19D2.1 | T19D2.1 | -0.105410191356498   | AGIWUR8958  |
| CB4856                                                                                                                                                                                      | CT | X | 3939401 | 3940092 | WBGene00020568 | T19D2.3 | T19D2.3 | -0.255747348504798   | AGIWUR40361 |
| CB4856                                                                                                                                                                                      | CT | X | 3940141 | 3943313 | WBGene00004184 | T19D2.2 | T19D2.2 | 0.0547437531750354   |             |

|                                                                                             |    |   |         |         |                |          |          |                     |                     |
|---------------------------------------------------------------------------------------------|----|---|---------|---------|----------------|----------|----------|---------------------|---------------------|
| AGIWUR288;AGIWUR6348;AGIWUR7010;AGIWUR18174;AGIWUR20877;AGIWUR21653;AGIWUR33189;AGIWUR36185 |    |   |         |         |                |          |          |                     |                     |
| CB4856                                                                                      | CT | X | 3958497 | 3961907 | WBGene00003007 | lin-18   | C16B8.1  | -0.205981906550001  |                     |
| AGIWUR3203;AGIWUR25846;AGIWUR29365                                                          |    |   |         |         |                |          |          |                     |                     |
| CB4856                                                                                      | CT | X | 3961930 | 3966432 | WBGene00015822 | C16B8.2  | C16B8.2  | 0.391803662875883   |                     |
| AGIWUR6092;AGIWUR11035;AGIWUR35161                                                          |    |   |         |         |                |          |          |                     |                     |
| CB4856                                                                                      | CT | X | 3968036 | 3968637 | WBGene00015823 | C16B8.3  | C16B8.3  | -0.127343573506846  |                     |
| AGIWUR4953;AGIWUR18034;AGIWUR24168;AGIWUR35144                                              |    |   |         |         |                |          |          |                     |                     |
| CB4856                                                                                      | CT | X | 3970389 | 3973634 | WBGene00015824 | C16B8.4  | C16B8.4  | 0.135916210676847   | AGIWUR20367         |
| CB4856                                                                                      | CT | X | 3985104 | 3985465 | WBGene00022926 | C16B8.5  | C16B8.5  | 0.0459262479006881  |                     |
| AGIWUR6001;AGIWUR7797;AGIWUR14016;AGIWUR21798;AGIWUR33763                                   |    |   |         |         |                |          |          |                     |                     |
| CB4856                                                                                      | CT | X | 3997340 | 3999341 | WBGene00019829 | R02E12.5 |          | R02E12.5            | -0.243143750950578  |
| AGIWUR26862                                                                                 |    |   |         |         |                |          |          |                     |                     |
| CB4856                                                                                      | CT | X | 4003532 | 4007634 | WBGene00019828 | R02E12.4 |          | R02E12.4            | -0.0277375375022579 |
| AGIWUR39405                                                                                 |    |   |         |         |                |          |          |                     |                     |
| CB4856                                                                                      | CT | X | 4008058 | 4016185 | WBGene00019830 | hrg-1    | R02E12.6 |                     | 0.459994920080398   |
| AGIWUR22265                                                                                 |    |   |         |         |                |          |          |                     |                     |
| CB4856                                                                                      | CT | X | 4012219 | 4021956 | WBGene00019827 | mop-25.1 |          | R02E12.2            | 0.11886518347638    |
| AGIWUR35677                                                                                 |    |   |         |         |                |          |          |                     |                     |
| CB4856                                                                                      | CT | X | 4022273 | 4025584 | WBGene00000049 | acr-10   | R02E12.8 |                     | 0.0618468787891349  |
| AGIWUR13780                                                                                 |    |   |         |         |                |          |          |                     |                     |
| CB4856                                                                                      | CT | X | 4056835 | 4071493 | WBGene00020294 | T06F4.1  | T06F4.1  | 0.0299954525516144  |                     |
| AGIWUR12454;AGIWUR40322                                                                     |    |   |         |         |                |          |          |                     |                     |
| CB4856                                                                                      | CT | X | 4078236 | 4081045 | WBGene00044566 | T06F4.3  | T06F4.3  | 0.15229218052763    |                     |
| AGIWUR9614;AGIWUR19207;AGIWUR22647;AGIWUR33199;AGIWUR34873                                  |    |   |         |         |                |          |          |                     |                     |
| CB4856                                                                                      | CT | X | 4094867 | 4100573 | WBGene00000531 | clh-4    | T06F4.2  | 0.231770933919437   |                     |
| AGIWUR7616;AGIWUR14496;AGIWUR23097;AGIWUR26114                                              |    |   |         |         |                |          |          |                     |                     |
| CB4856                                                                                      | CT | X | 4101687 | 4102125 | WBGene00044724 | R02E4.3  | R02E4.3  | -0.210081714669593  |                     |
| AGIWUR4745;AGIWUR30953;AGIWUR38166                                                          |    |   |         |         |                |          |          |                     |                     |
| CB4856                                                                                      | CT | X | 4103447 | 4104521 | WBGene00019826 | R02E4.1  | R02E4.1  | 0.00181829182226156 |                     |
| AGIWUR13674;AGIWUR27146                                                                     |    |   |         |         |                |          |          |                     |                     |
| CB4856                                                                                      | CT | X | 4107476 | 4110496 | WBGene00044021 | R02E4.2  | R02E4.2  | 0.17562420400122    |                     |
| AGIWUR16898;AGIWUR41313                                                                     |    |   |         |         |                |          |          |                     |                     |
| CB4856                                                                                      | CT | X | 4110442 | 4111474 | WBGene00017307 | F09F9.2  | F09F9.2  | 0.430305673091343   | AGIWUR15733         |
| CB4856                                                                                      | CT | X | 4115330 | 4117027 | WBGene00017306 | F09F9.1  | F09F9.1  | -0.0472039195259164 | AGIWUR2150          |
| CB4856                                                                                      | CT | X | 4117951 | 4119487 | WBGene00045395 | F09F9.5  | F09F9.5  | -0.0275232853586762 |                     |
| AGIWUR15072;AGIWUR17778                                                                     |    |   |         |         |                |          |          |                     |                     |
| CB4856                                                                                      | CT | X | 4119652 | 4121016 | WBGene00017308 | F09F9.3  | F09F9.3  | 0.131285194089499   | AGIWUR7987          |
| CB4856                                                                                      | CT | X | 4121786 | 4128431 | WBGene00017309 | F09F9.4  | F09F9.4  | 0.464156195142401   | AGIWUR3191          |
| CB4856                                                                                      | CT | X | 4135133 | 4147662 | WBGene00022745 | ZK470.2  | ZK470.2  | -0.283055528373485  |                     |



AGIWUR4037;AGIWUR17753;AGIWUR18130

CB4856 CT X 4148648 4153443 WBGene00006410 nck-1 ZK470.5 0.00955875585496635

AGIWUR19892;AGIWUR25883;AGIWUR27962;AGIWUR30810;AGIWUR33783

CB4856 CT X 4167459 4169791 WBGene00219362 ZK470.14 ZK470.14 0.201594491147282

AGIWUR25015

CB4856 CT X 4176065 4177494 WBGene00022747 ZK470.6 ZK470.6 -0.361805512277671

AGIWUR244;AGIWUR9011;AGIWUR18872;AGIWUR21207

CB4856 CT X 4177917 4186756 WBGene00003412 mrp-6 F20B6.3 -0.0644813986945811

AGIWUR11769;AGIWUR13096;AGIWUR28457;AGIWUR31143;AGIWUR32298;AGIWUR35622;AGIWUR38453;AGIWUR40403

CB4856 CT X 4191094 4193144 WBGene00006921 vha-12 F20B6.2 -0.381472265289432

AGIWUR6392;AGIWUR21906;AGIWUR38099

CB4856 CT X 4194019 4194785 WBGene00017628 F20B6.4 F20B6.4 0.288706979383312 AGIWUR38287

CB4856 CT X 4201650 4202214 WBGene00017630 F20B6.6 F20B6.6 -0.0779577753790992 AGIWUR43841

CB4856 CT X 4204602 4206444 WBGene00017632 F20B6.9 F20B6.9 -0.198338532577647

AGIWUR5286;AGIWUR38141

CB4856 CT X 4210573 4217290 WBGene00001994 hpk-1 F20B6.8 0.481306564903817

AGIWUR1171;AGIWUR11680

CB4856 CT X 4218279 4218458 WBGene00020922 W01H2.2 W01H2.2 -0.171516299489641 AGIWUR21224

CB4856 CT X 4227857 4235846 WBGene00004285 rab-37 W01H2.3 0.150610492902018

AGIWUR7026;AGIWUR19855;AGIWUR22772;AGIWUR29998;AGIWUR35671;AGIWUR42634

CB4856 CT X 4246554 4247212 WBGene00018602 F48D6.4 F48D6.4 1.02979551944162

AGIWUR4659;AGIWUR14142;AGIWUR26030;AGIWUR44362

CB4856 CT X 4249249 4250764 WBGene00001957 h1h-13 F48D6.3 0.415203830047816

AGIWUR12271;AGIWUR31055

CB4856 CT X 4252356 4254174 WBGene00005716 srv-5 F48D6.2 -0.00762296092507775 AGIWUR32042

CB4856 CT X 4255154 4256812 WBGene00006393 taf-11.1 F48D6.1 0.204010574273148

AGIWUR12189

CB4856 CT X 4257061 4259094 WBGene00005717 srv-6 C52B9.5 0.0663112668448811 AGIWUR38894

CB4856 CT X 4260652 4264591 WBGene00016867 C52B9.4 C52B9.4 -0.200077296249557 AGIWUR2170

CB4856 CT X 4265851 4270486 WBGene00016866 coe1-1 C52B9.3 1.07651448683547

AGIWUR6040;AGIWUR13947;AGIWUR22554;AGIWUR33368;AGIWUR36165;AGIWUR37755;AGIWUR40505

CB4856 CT X 4271169 4274229 WBGene00003179 mec-18 C52B9.9 -0.0941621109388944 AGIWUR1282

CB4856 CT X 4273914 4274750 WBGene00016869 C52B9.10 C52B9.10 0.111535434221833

AGIWUR5387

CB4856 CT X 4274786 4279344 WBGene00006680 twk-28 C52B9.6 -0.180913091922287

AGIWUR8740;AGIWUR10284;AGIWUR44110

CB4856 CT X 4280980 4284176 WBGene00016865 ets-9 C52B9.2 0.0697409679573191 AGIWUR41782

CB4856 CT X 4284189 4284901 WBGene00016870 ets-10 C52B9.11 0.155820506263623

AGIWUR19859

|                                                                        |    |   |         |         |                |           |           |                     |             |
|------------------------------------------------------------------------|----|---|---------|---------|----------------|-----------|-----------|---------------------|-------------|
| CB4856                                                                 | CT | X | 4286737 | 4291494 | WBGene00000510 | cka-2     | C52B9.1   | 0.0261981647911949  |             |
| AGIWUR4895;AGIWUR24931;AGIWUR37447;AGIWUR37628;AGIWUR39879;AGIWUR42350 |    |   |         |         |                |           |           |                     |             |
| CB4856                                                                 | CT | X | 4291475 | 4297630 | WBGene00003907 | paf-2     | C52B9.7   | -0.0488597768449366 |             |
| AGIWUR1054;AGIWUR26277                                                 |    |   |         |         |                |           |           |                     |             |
| CB4856                                                                 | CT | X | 4297860 | 4304398 | WBGene00016868 | C52B9.8   | C52B9.8   | 0.0708166759068938  | AGIWUR22938 |
| CB4856                                                                 | CT | X | 4328400 | 4328916 | WBGene00016039 | C24A8.5   | C24A8.5   | 0.012830086327245   | AGIWUR16655 |
| CB4856                                                                 | CT | X | 4339634 | 4343702 | WBGene00017472 | cst-1     | F14H12.4  | -0.0314637166571998 |             |
| AGIWUR38627                                                            |    |   |         |         |                |           |           |                     |             |
| CB4856                                                                 | CT | X | 4344215 | 4345644 | WBGene00017471 | F14H12.3  | F14H12.3  | -0.0941232315376723 |             |
| AGIWUR39369                                                            |    |   |         |         |                |           |           |                     |             |
| CB4856                                                                 | CT | X | 4350498 | 4352744 | WBGene00017470 | F14H12.2  | F14H12.2  | -0.27658626111322   |             |
| AGIWUR5219                                                             |    |   |         |         |                |           |           |                     |             |
| CB4856                                                                 | CT | X | 4353618 | 4354820 | WBGene00000738 | col-165   | F14H12.1  | 0.71355781557519    |             |
| AGIWUR4381;AGIWUR38491                                                 |    |   |         |         |                |           |           |                     |             |
| CB4856                                                                 | CT | X | 4357015 | 4357567 | WBGene00017473 | F14H12.6  | F14H12.6  | -0.343655995905635  |             |
| AGIWUR27312                                                            |    |   |         |         |                |           |           |                     |             |
| CB4856                                                                 | CT | X | 4361927 | 4362283 | WBGene00017474 | F14H12.7  | F14H12.7  | 0.550306375227164   |             |
| AGIWUR32261                                                            |    |   |         |         |                |           |           |                     |             |
| CB4856                                                                 | CT | X | 4362936 | 4363315 | WBGene00219368 | F14H12.17 | F14H12.17 | 0.364132986280229   |             |
| AGIWUR40009                                                            |    |   |         |         |                |           |           |                     |             |
| CB4856                                                                 | CT | X | 4365305 | 4366332 | WBGene00020120 | R160.3    | R160.3    | -0.635349619257841  | AGIWUR21678 |
| CB4856                                                                 | CT | X | 4367159 | 4367514 | WBGene00219369 | R160.10   | R160.10   | 2.20326720110247    | AGIWUR35788 |
| CB4856                                                                 | CT | X | 4370014 | 4370856 | WBGene00020122 | R160.5    | R160.5    | 0.17335605286727    | AGIWUR13004 |
| CB4856                                                                 | CT | X | 4371036 | 4373211 | WBGene00020123 | R160.6    | R160.6    | 0.0763976443964349  | AGIWUR26469 |
| CB4856                                                                 | CT | X | 4376595 | 4376850 | WBGene00020119 | R160.2    | R160.2    | 0.243219339785602   | AGIWUR27023 |
| CB4856                                                                 | CT | X | 4378004 | 4383366 | WBGene00003084 | lst-2     | R160.7    | -0.103625711631343  | AGIWUR785   |
| CB4856                                                                 | CT | X | 4389365 | 4393796 | WBGene00001082 | dpy-23    | R160.1    | -0.182435585102102  |             |
| AGIWUR4657;AGIWUR6146;AGIWUR37164                                      |    |   |         |         |                |           |           |                     |             |
| CB4856                                                                 | CT | X | 4403159 | 4407145 | WBGene00017040 | D1079.1   | D1079.1   | 0.378842328531992   | AGIWUR29911 |
| CB4856                                                                 | CT | X | 4408089 | 4409133 | WBGene00017477 | F15A8.4   | F15A8.4   | 0.0365977636001471  | AGIWUR21412 |
| CB4856                                                                 | CT | X | 4411359 | 4416079 | WBGene00001052 | dop-1     | F15A8.5   | 0.0564194133334546  |             |
| AGIWUR5927;AGIWUR12192;AGIWUR20100;AGIWUR22632;AGIWUR30934             |    |   |         |         |                |           |           |                     |             |
| CB4856                                                                 | CT | X | 4430929 | 4437512 | WBGene00017478 | F15A8.6   | F15A8.6   | 0.156404183937884   | AGIWUR33964 |
| CB4856                                                                 | CT | X | 4440941 | 4441726 | WBGene00017476 | F15A8.1   | F15A8.1   | -0.0161790077854729 | AGIWUR39320 |
| CB4856                                                                 | CT | X | 4442152 | 4448383 | WBGene00017794 | mltn-13   | F25F6.1   | -0.0392152725811288 |             |
| AGIWUR20642;AGIWUR27594                                                |    |   |         |         |                |           |           |                     |             |
| CB4856                                                                 | CT | X | 4454120 | 4457304 | WBGene00017177 | F02E8.4   | F02E8.4   | -0.241887678510018  | AGIWUR29684 |
| CB4856                                                                 | CT | X | 4458272 | 4459264 | WBGene00000157 | aps-2     | F02E8.3   | -0.123675602625661  |             |
| AGIWUR18349;AGIWUR23286;AGIWUR24757;AGIWUR31667                        |    |   |         |         |                |           |           |                     |             |

|                                                                                                                        |    |   |         |         |                |          |          |                     |             |
|------------------------------------------------------------------------------------------------------------------------|----|---|---------|---------|----------------|----------|----------|---------------------|-------------|
| CB4856                                                                                                                 | CT | X | 4459603 | 4462609 | WBGene00017178 | atg-16.1 | F02E8.5  | 0.113884518433576   |             |
| AGIWUR40988                                                                                                            |    |   |         |         |                |          |          |                     |             |
| CB4856                                                                                                                 | CT | X | 4466518 | 4469005 | WBGene00017176 | nmur-3   | F02E8.2  | 0.154248325709704   | AGIWUR11312 |
| CB4856                                                                                                                 | CT | X | 4469743 | 4471476 | WBGene00000207 | asb-2    | F02E8.1  | -0.0267904945510633 |             |
| AGIWUR7405;AGIWUR8491;AGIWUR21740;AGIWUR34730;AGIWUR38595;AGIWUR42226                                                  |    |   |         |         |                |          |          |                     |             |
| CB4856                                                                                                                 | CT | X | 4472244 | 4488851 | WBGene00003561 | ncr-1    | F02E8.6  | 0.548074464103534   | AGIWUR16168 |
| CB4856                                                                                                                 | CT | X | 4491651 | 4492208 | WBGene00023460 | F46H6.5  | F46H6.5  | 0.595035654339689   | AGIWUR43882 |
| CB4856                                                                                                                 | CT | X | 4494914 | 4504388 | WBGene00000959 | dgk-2    | F46H6.2  | 0.37693726969707    |             |
| AGIWUR8189;AGIWUR8947;AGIWUR12916;AGIWUR22238;AGIWUR23464;AGIWUR25341;AGIWUR27280;AGIWUR28757;AGIWUR30229;AGIWUR42723  |    |   |         |         |                |          |          |                     |             |
| CB4856                                                                                                                 | CT | X | 4508509 | 4510960 | WBGene00004356 | rhi-1    | F46H6.1  | -0.0110254713298366 |             |
| AGIWUR3599;AGIWUR16396;AGIWUR24273;AGIWUR27364                                                                         |    |   |         |         |                |          |          |                     |             |
| CB4856                                                                                                                 | CT | X | 4514099 | 4516894 | WBGene00005008 | spr-3    | C07A12.5 | -0.196401390302927  |             |
| AGIWUR19165;AGIWUR42543                                                                                                |    |   |         |         |                |          |          |                     |             |
| CB4856                                                                                                                 | CT | X | 4517748 | 4521069 | WBGene00015561 | C07A12.7 | C07A12.7 |                     |             |
| -0.00923728146778835 AGIWUR15126;AGIWUR25240                                                                           |    |   |         |         |                |          |          |                     |             |
| CB4856                                                                                                                 | CT | X | 4524155 | 4526536 | WBGene00003963 | pdi-2    | C07A12.4 | -0.187546211909658  |             |
| AGIWUR3408;AGIWUR14954;AGIWUR15713;AGIWUR20132;AGIWUR21475;AGIWUR25287;AGIWUR28983;AGIWUR29415;AGIWUR43162;AGIWUR43873 |    |   |         |         |                |          |          |                     |             |
| CB4856                                                                                                                 | CT | X | 4532430 | 4537545 | WBGene00003628 | nhr-35   | C07A12.3 | 0.857354955402156   |             |
| AGIWUR12593                                                                                                            |    |   |         |         |                |          |          |                     |             |
| CB4856                                                                                                                 | CT | X | 4544876 | 4545418 | WBGene00015560 | C07A12.2 | C07A12.2 | -0.0312099363590779 |             |
| AGIWUR39936                                                                                                            |    |   |         |         |                |          |          |                     |             |
| CB4856                                                                                                                 | CT | X | 4562163 | 4562880 | WBGene00015495 | C05E11.6 | C05E11.6 | 0.558270328890833   |             |
| AGIWUR10070                                                                                                            |    |   |         |         |                |          |          |                     |             |
| CB4856                                                                                                                 | CT | X | 4565302 | 4569393 | WBGene00000136 | amt-4    | C05E11.5 | -0.55723818458662   |             |
| AGIWUR20267                                                                                                            |    |   |         |         |                |          |          |                     |             |
| CB4856                                                                                                                 | CT | X | 4571448 | 4573914 | WBGene00000133 | amt-1    | C05E11.4 | 1.08427391873773    |             |
| AGIWUR2915                                                                                                             |    |   |         |         |                |          |          |                     |             |
| CB4856                                                                                                                 | CT | X | 4578249 | 4581724 | WBGene00015494 | C05E11.3 | C05E11.3 | 0.187753745550847   |             |
| AGIWUR36785                                                                                                            |    |   |         |         |                |          |          |                     |             |
| CB4856                                                                                                                 | CT | X | 4581586 | 4585679 | WBGene00015496 | C05E11.7 | C05E11.7 | 0.208858634173777   |             |
| AGIWUR21270                                                                                                            |    |   |         |         |                |          |          |                     |             |
| CB4856                                                                                                                 | CT | X | 4586917 | 4587993 | WBGene00015493 | C05E11.2 | C05E11.2 | -0.018539148258955  |             |
| AGIWUR32772                                                                                                            |    |   |         |         |                |          |          |                     |             |
| CB4856                                                                                                                 | CT | X | 4588768 | 4590446 | WBGene00015492 | lnp-1    | C05E11.1 | -0.0296257218951972 |             |
| AGIWUR41193                                                                                                            |    |   |         |         |                |          |          |                     |             |
| CB4856                                                                                                                 | CT | X | 4591281 | 4592404 | WBGene00001455 | flp-12   | C05E11.8 | 0.292518656548438   |             |
| AGIWUR4207;AGIWUR7649;AGIWUR11808;AGIWUR12376;AGIWUR16211;AGIWUR34929;AGIWUR35398;AGIWUR38482;AGIWUR42059;A            |    |   |         |         |                |          |          |                     |             |

GIWUR42237;AGIWUR43382

CB4856 CT X 4596016 4605928 WBGene00020496 spat-3 T13H2.5 0.038325678439306

AGIWUR24159;AGIWUR33442

CB4856 CT X 4610926 4620423 WBGene00004148 pqn-65 T13H2.4 0.0432553437825973

AGIWUR2057;AGIWUR7236;AGIWUR8289;AGIWUR17805;AGIWUR21667;AGIWUR36009;AGIWUR41841

CB4856 CT X 4629039 4631838 WBGene00016706 C46C11.3 C46C11.3

-0.00521736049567068 AGIWUR15591

CB4856 CT X 4632348 4635784 WBGene00016705 C46C11.2 C46C11.2 -0.406908061076269

AGIWUR36196

CB4856 CT X 4637242 4643695 WBGene00016704 hos1-1 C46C11.1 0.0157527908459425

AGIWUR26837

CB4856 CT X 4644404 4647192 WBGene00044567 C46C11.4 C46C11.4 0.815413686484304

AGIWUR25422;AGIWUR33961

CB4856 CT X 4647526 4649197 WBGene00017532 ent-5 F16H11.3 -0.11571754915224

AGIWUR39877

CB4856 CT X 4653434 4654157 WBGene00000428 ceh-1 F16H11.4 -0.0428145876205308

AGIWUR10788;AGIWUR22423;AGIWUR26594

CB4856 CT X 4656433 4660318 WBGene00003635 nhr-45 F16H11.5 0.0046691215830279

AGIWUR1648

CB4856 CT X 4668071 4673234 WBGene00017530 F16H11.1 F16H11.1 -0.124549970588825

AGIWUR30876

CB4856 CT X 4673706 4677283 WBGene00019345 tmem-135 K02G10.3 -0.257506165776482

AGIWUR24352

CB4856 CT X 4677342 4678129 WBGene00001454 flp-11 K02G10.4 0.330758746257978

AGIWUR387;AGIWUR13935;AGIWUR23795;AGIWUR25362;AGIWUR33739;AGIWUR34739;AGIWUR35075;AGIWUR44123

CB4856 CT X 4687763 4691316 WBGene00019346 K02G10.5 K02G10.5 -0.241975323913386

AGIWUR44406

CB4856 CT X 4696952 4699461 WBGene00002044 hyl-2 K02G10.6 -0.32367087659258

AGIWUR24282

CB4856 CT X 4702965 4704970 WBGene00000176 aqp-8 K02G10.7 0.193727912712108

AGIWUR14200

CB4856 CT X 4707188 4709812 WBGene00019344 dhhc-10 K02G10.1 0.0377458408645364

AGIWUR41098

CB4856 CT X 4709772 4711744 WBGene00001032 dnj-14 K02G10.8 0.100235717194284

AGIWUR126;AGIWUR12952;AGIWUR18427;AGIWUR29641;AGIWUR38758;AGIWUR40737

CB4856 CT X 4712279 4715080 WBGene00018878 glit-1 F55D10.3 0.0331817762910962

AGIWUR8019

CB4856 CT X 4715178 4715801 WBGene00004438 rpl-25.1 F55D10.2 -0.154940879931084

AGIWUR3501;AGIWUR18829



|                                                                                                          |    |   |         |         |                |          |          |                      |             |
|----------------------------------------------------------------------------------------------------------|----|---|---------|---------|----------------|----------|----------|----------------------|-------------|
| CB4856                                                                                                   | CT | X | 4907290 | 4912323 | WBGene00019403 | K05B2.2  | K05B2.2  | -0.0224838970599741  | AGIWUR22809 |
| CB4856                                                                                                   | CT | X | 4912308 | 4915979 | WBGene00002052 | ifa-4    | K05B2.3  | -0.00516281053065626 | AGIWUR8151  |
| CB4856                                                                                                   | CT | X | 4919019 | 4920988 | WBGene00019404 | K05B2.4  | K05B2.4  | -0.185845364820274   | AGIWUR3149  |
| CB4856                                                                                                   | CT | X | 4921252 | 4929757 | WBGene00003986 | mct-4    | K05B2.5  | -0.448631306432743   |             |
| AGIWUR1296;AGIWUR2543;AGIWUR5527;AGIWUR10729;AGIWUR18533;AGIWUR21418;AGIWUR25450;AGIWUR28400;AGIWUR39815 |    |   |         |         |                |          |          |                      |             |
| CB4856                                                                                                   | CT | X | 4948049 | 4955331 | WBGene00006475 | tyra-3   | M03F4.3  | 0.166036939112182    | AGIWUR44037 |
| CB4856                                                                                                   | CT | X | 4957329 | 4958067 | WBGene00019758 | M03F4.4  | M03F4.4  | 0.21707711787759     | AGIWUR32869 |
| CB4856                                                                                                   | CT | X | 4960553 | 4964416 | WBGene00000066 | act-4    | M03F4.2  | 0.00599312253520878  |             |
| AGIWUR24973;AGIWUR26902                                                                                  |    |   |         |         |                |          |          |                      |             |
| CB4856                                                                                                   | CT | X | 4964413 | 4969459 | WBGene00019759 | M03F4.6  | M03F4.6  | 0.14708737374621     | AGIWUR37710 |
| CB4856                                                                                                   | CT | X | 4969537 | 4972281 | WBGene00019760 | calu-1   | M03F4.7  | -0.373048746305273   |             |
| AGIWUR8128;AGIWUR11525;AGIWUR13302;AGIWUR24024;AGIWUR25793;AGIWUR31221;AGIWUR40414                       |    |   |         |         |                |          |          |                      |             |
| CB4856                                                                                                   | CT | X | 4972575 | 4997598 | WBGene00022501 | ZC8.6    | ZC8.6    | -0.200538091210554   |             |
| AGIWUR20769;AGIWUR22221;AGIWUR44515                                                                      |    |   |         |         |                |          |          |                      |             |
| CB4856                                                                                                   | CT | X | 4999270 | 5003515 | WBGene00022499 | set-30   | ZC8.3    | 0.421228889331571    | AGIWUR11661 |
| CB4856                                                                                                   | CT | X | 5005269 | 5007024 | WBGene00022498 | hsd-2    | ZC8.1    | -0.247105162354654   | AGIWUR15242 |
| CB4856                                                                                                   | CT | X | 5009300 | 5011222 | WBGene00022616 | hsd-3    | ZC449.6  | -0.18004097936049    |             |
| AGIWUR21264;AGIWUR39014                                                                                  |    |   |         |         |                |          |          |                      |             |
| CB4856                                                                                                   | CT | X | 5014040 | 5015452 | WBGene00045365 | ZC449.7  | ZC449.7  | -0.218939056218127   |             |
| AGIWUR2844;AGIWUR39162                                                                                   |    |   |         |         |                |          |          |                      |             |
| CB4856                                                                                                   | CT | X | 5017924 | 5021064 | WBGene00022613 | sek-3    | ZC449.3  | -0.184662393297701   | AGIWUR32402 |
| CB4856                                                                                                   | CT | X | 5021215 | 5024258 | WBGene00022612 | ZC449.2  | ZC449.2  | 0.868781128815169    | AGIWUR16052 |
| CB4856                                                                                                   | CT | X | 5024420 | 5028165 | WBGene00022611 | ZC449.1  | ZC449.1  | 0.465445446441346    |             |
| AGIWUR17967;AGIWUR31767                                                                                  |    |   |         |         |                |          |          |                      |             |
| CB4856                                                                                                   | CT | X | 5028184 | 5029568 | WBGene00022614 | ZC449.4  | ZC449.4  | 0.172960731527798    | AGIWUR20026 |
| CB4856                                                                                                   | CT | X | 5035030 | 5037773 | WBGene00022615 | ZC449.5  | ZC449.5  | -0.353338355341945   |             |
| AGIWUR9356;AGIWUR13636;AGIWUR22963;AGIWUR25078;AGIWUR32327;AGIWUR36618                                   |    |   |         |         |                |          |          |                      |             |
| CB4856                                                                                                   | CT | X | 5043976 | 5044746 | WBGene00022024 | Y64H9A.2 | Y64H9A.2 | -0.410862424422803   |             |
| AGIWUR11654                                                                                              |    |   |         |         |                |          |          |                      |             |
| CB4856                                                                                                   | CT | X | 5057273 | 5057581 | WBGene00022023 | Y64H9A.1 | Y64H9A.1 | -0.295521297745735   |             |
| AGIWUR12543                                                                                              |    |   |         |         |                |          |          |                      |             |
| CB4856                                                                                                   | CT | X | 5058367 | 5058733 | WBGene00016070 | C24H10.4 | C24H10.4 | -0.37269787161257    |             |
| AGIWUR27501                                                                                              |    |   |         |         |                |          |          |                      |             |
| CB4856                                                                                                   | CT | X | 5061056 | 5062209 | WBGene00016069 | C24H10.3 | C24H10.3 | 0.511892766018535    |             |
| AGIWUR2962;AGIWUR14100                                                                                   |    |   |         |         |                |          |          |                      |             |
| CB4856                                                                                                   | CT | X | 5064602 | 5066663 | WBGene00016068 | C24H10.2 | C24H10.2 | -0.162971302075709   |             |
| AGIWUR9762                                                                                               |    |   |         |         |                |          |          |                      |             |
| CB4856                                                                                                   | CT | X | 5072019 | 5074425 | WBGene00016067 | C24H10.1 | C24H10.1 | -0.133622739115541   |             |
| AGIWUR25124                                                                                              |    |   |         |         |                |          |          |                      |             |

|                                                                                                |    |   |         |         |                |           |           |                     |             |
|------------------------------------------------------------------------------------------------|----|---|---------|---------|----------------|-----------|-----------|---------------------|-------------|
| CB4856                                                                                         | CT | X | 5074399 | 5078120 | WBGene00006861 | cal-5     | C24H10.5  | -0.0642795322734742 |             |
| AGIWUR30530                                                                                    |    |   |         |         |                |           |           |                     |             |
| CB4856                                                                                         | CT | X | 5079773 | 5084489 | WBGene00016600 | ets-5     | C42D8.4   | 0.304969832114931   | AGIWUR35943 |
| CB4856                                                                                         | CT | X | 5087840 | 5092538 | WBGene00006862 | pnk-4     | C42D8.3   | -0.0247655604926464 |             |
| AGIWUR20818;AGIWUR40779;AGIWUR44864                                                            |    |   |         |         |                |           |           |                     |             |
| CB4856                                                                                         | CT | X | 5092458 | 5097067 | WBGene00000039 | acn-1     | C42D8.5   | 0.3168794179551     | AGIWUR38360 |
| CB4856                                                                                         | CT | X | 5101032 | 5106173 | WBGene00006926 | vit-2     | C42D8.2   | -0.0279695118135415 |             |
| AGIWUR7138;AGIWUR13310;AGIWUR30312                                                             |    |   |         |         |                |           |           |                     |             |
| CB4856                                                                                         | CT | X | 5106260 | 5107039 | WBGene00044299 | C42D8.9   | C42D8.9   | -0.162531046687972  |             |
| AGIWUR486;AGIWUR17383;AGIWUR42735                                                              |    |   |         |         |                |           |           |                     |             |
| CB4856                                                                                         | CT | X | 5109504 | 5112452 | WBGene00016599 | C42D8.1   | C42D8.1   | -0.0188843823061511 | AGIWUR34679 |
| CB4856                                                                                         | CT | X | 5112422 | 5116866 | WBGene00000149 | apl-1     | C42D8.8   | 0.175002675143906   |             |
| AGIWUR8657;AGIWUR10776;AGIWUR13543;AGIWUR28682;AGIWUR32921;AGIWUR35954;AGIWUR38873;AGIWUR41528 |    |   |         |         |                |           |           |                     |             |
| CB4856                                                                                         | CT | X | 5138991 | 5146742 | WBGene00016292 | tbc-7     | C31H2.1   | -0.0446603870306603 | AGIWUR23489 |
| CB4856                                                                                         | CT | X | 5148804 | 5150476 | WBGene00001070 | dpy-8     | C31H2.2   | -0.505760202482382  | AGIWUR25466 |
| CB4856                                                                                         | CT | X | 5151547 | 5154399 | WBGene00016293 | C31H2.3   | C31H2.3   | 0.362443028503299   | AGIWUR40194 |
| CB4856                                                                                         | CT | X | 5155093 | 5159667 | WBGene00016294 | C31H2.4   | C31H2.4   | 0.123826019058331   | AGIWUR39874 |
| CB4856                                                                                         | CT | X | 5163055 | 5163439 | WBGene00017150 | EGAP5.1   | EGAP5.1   | 0.1930938936852     | AGIWUR14391 |
| CB4856                                                                                         | CT | X | 5165395 | 5168778 | WBGene00020197 | mans-3    | T03G11.4  | 0.17419913300278    |             |
| AGIWUR10489                                                                                    |    |   |         |         |                |           |           |                     |             |
| CB4856                                                                                         | CT | X | 5168739 | 5171119 | WBGene00044732 | T03G11.10 | T03G11.10 | 0.15802460890083    |             |
| AGIWUR14189;AGIWUR18431                                                                        |    |   |         |         |                |           |           |                     |             |
| CB4856                                                                                         | CT | X | 5174369 | 5177506 | WBGene00020196 | T03G11.3  | T03G11.3  | 0.437850114504085   |             |
| AGIWUR35567                                                                                    |    |   |         |         |                |           |           |                     |             |
| CB4856                                                                                         | CT | X | 5177519 | 5179210 | WBGene00020199 | T03G11.6  | T03G11.6  | -0.0254856618819357 |             |
| AGIWUR2097;AGIWUR6235;AGIWUR26975                                                              |    |   |         |         |                |           |           |                     |             |
| CB4856                                                                                         | CT | X | 5180174 | 5181495 | WBGene00005711 | sru-48    | T03G11.2  | -0.22606179744653   |             |
| AGIWUR37034                                                                                    |    |   |         |         |                |           |           |                     |             |
| CB4856                                                                                         | CT | X | 5183828 | 5186623 | WBGene00044584 | T03G11.9  | T03G11.9  | -0.0884625698878079 |             |
| AGIWUR7733;AGIWUR10680                                                                         |    |   |         |         |                |           |           |                     |             |
| CB4856                                                                                         | CT | X | 5186921 | 5189077 | WBGene00006983 | zig-6     | T03G11.8  | 0.162558276946339   |             |
| AGIWUR17299;AGIWUR28407;AGIWUR44746                                                            |    |   |         |         |                |           |           |                     |             |
| CB4856                                                                                         | CT | X | 5196110 | 5204250 | WBGene00004145 | pqn-62    | T03G11.1  | 0.0133815399952897  |             |
| AGIWUR4007;AGIWUR5125;AGIWUR30497;AGIWUR31491                                                  |    |   |         |         |                |           |           |                     |             |
| CB4856                                                                                         | CT | X | 5205760 | 5216230 | WBGene00019250 | H28G03.2  | H28G03.2  | -0.0389727592288098 |             |
| AGIWUR817;AGIWUR31145;AGIWUR37381;AGIWUR43675                                                  |    |   |         |         |                |           |           |                     |             |
| CB4856                                                                                         | CT | X | 5216363 | 5219095 | WBGene00019249 | H28G03.1  | H28G03.1  | -0.0258124021074515 |             |
| AGIWUR804;AGIWUR5930;AGIWUR9399;AGIWUR20705;AGIWUR21613;AGIWUR37275;AGIWUR44938                |    |   |         |         |                |           |           |                     |             |
| CB4856                                                                                         | CT | X | 5220406 | 5222042 | WBGene00019251 | H28G03.3  | H28G03.3  | 0.123736504918444   |             |

|                                                                                                                                                         |    |   |         |         |                |           |           |                       |
|---------------------------------------------------------------------------------------------------------------------------------------------------------|----|---|---------|---------|----------------|-----------|-----------|-----------------------|
| AGIWUR32465                                                                                                                                             |    |   |         |         |                |           |           |                       |
| CB4856                                                                                                                                                  | CT | X | 5234669 | 5243408 | WBGene00003477 | mtm-5     | H28G03.6  | -0.0561694466660381   |
| AGIWUR17321                                                                                                                                             |    |   |         |         |                |           |           |                       |
| CB4856                                                                                                                                                  | CT | X | 5244317 | 5246927 | WBGene00021323 | Y34B4A.7  | Y34B4A.7  | -0.0531247425384507   |
| AGIWUR2665;AGIWUR15980;AGIWUR25310                                                                                                                      |    |   |         |         |                |           |           |                       |
| CB4856                                                                                                                                                  | CT | X | 5249851 | 5252787 | WBGene00021326 | Y34B4A.10 | Y34B4A.10 | -0.340667637361057    |
| AGIWUR18285                                                                                                                                             |    |   |         |         |                |           |           |                       |
| CB4856                                                                                                                                                  | CT | X | 5253001 | 5255068 | WBGene00021322 | Y34B4A.6  | Y34B4A.6  | -0.394353530612605    |
| AGIWUR10605                                                                                                                                             |    |   |         |         |                |           |           |                       |
| CB4856                                                                                                                                                  | CT | X | 5255194 | 5256855 | WBGene00021325 | Y34B4A.9  | Y34B4A.9  | -0.286235583989471    |
| AGIWUR19937;AGIWUR39655                                                                                                                                 |    |   |         |         |                |           |           |                       |
| CB4856                                                                                                                                                  | CT | X | 5257213 | 5258384 | WBGene00021321 | Y34B4A.5  | Y34B4A.5  | -0.147349304370056    |
| AGIWUR44254                                                                                                                                             |    |   |         |         |                |           |           |                       |
| CB4856                                                                                                                                                  | CT | X | 5264330 | 5271799 | WBGene00021320 | Y34B4A.4  | Y34B4A.4  | -0.0503744423525303   |
| AGIWUR2026;AGIWUR35951                                                                                                                                  |    |   |         |         |                |           |           |                       |
| CB4856                                                                                                                                                  | CT | X | 5271780 | 5275287 | WBGene00021324 | Y34B4A.8  | Y34B4A.8  | 0.12788344389965      |
| AGIWUR30828                                                                                                                                             |    |   |         |         |                |           |           |                       |
| CB4856                                                                                                                                                  | CT | X | 5275567 | 5278813 | WBGene00002031 | hst-6     | Y34B4A.3  | -0.205620518255767    |
| AGIWUR663                                                                                                                                               |    |   |         |         |                |           |           |                       |
| CB4856                                                                                                                                                  | CT | X | 5279497 | 5283719 | WBGene00021319 | Y34B4A.2  | Y34B4A.2  | -0.115317374079897    |
| AGIWUR406;AGIWUR7277;AGIWUR8792;AGIWUR10761;AGIWUR15875;AGIWUR21692;AGIWUR24499;AGIWUR25055;AGIWUR26841;AGIWUR29281;AGIWUR29621;AGIWUR37635;AGIWUR41542 |    |   |         |         |                |           |           |                       |
| CB4856                                                                                                                                                  | CT | X | 5283831 | 5289726 | WBGene00017974 | vps-41    | F32A6.3   | -0.0276682380468056   |
| AGIWUR24978;AGIWUR33755                                                                                                                                 |    |   |         |         |                |           |           |                       |
| CB4856                                                                                                                                                  | CT | X | 5289728 | 5303512 | WBGene00000092 | ags-3     | F32A6.4   | -0.000964841795870086 |
| AGIWUR2762;AGIWUR6181;AGIWUR6713;AGIWUR8007;AGIWUR19964;AGIWUR23829;AGIWUR32302                                                                         |    |   |         |         |                |           |           |                       |
| CB4856                                                                                                                                                  | CT | X | 5298561 | 5306328 | WBGene00017973 | ift-81    | F32A6.2   | 0.10047521860794      |
| AGIWUR4111;AGIWUR6031;AGIWUR6950;AGIWUR10167;AGIWUR11518;AGIWUR17046;AGIWUR17375;AGIWUR22547;AGIWUR23483;AGIWUR35816                                    |    |   |         |         |                |           |           |                       |
| CB4856                                                                                                                                                  | CT | X | 5307489 | 5323385 | WBGene00006064 | sto-2     | F32A6.5   | 0.0765220066660994    |
| AGIWUR30928                                                                                                                                             |    |   |         |         |                |           |           |                       |
| CB4856                                                                                                                                                  | CT | X | 5329455 | 5332339 | WBGene00016134 | C26B9.5   | C26B9.5   | -0.0627267871751336   |
| AGIWUR13099                                                                                                                                             |    |   |         |         |                |           |           |                       |
| CB4856                                                                                                                                                  | CT | X | 5332969 | 5335468 | WBGene00016135 | C26B9.6   | C26B9.6   | 0.433988873196292     |
| AGIWUR9069                                                                                                                                              |    |   |         |         |                |           |           |                       |
| CB4856                                                                                                                                                  | CT | X | 5338273 | 5340182 | WBGene00016133 | C26B9.3   | C26B9.3   | 0.681176059635272     |
| AGIWUR41485                                                                                                                                             |    |   |         |         |                |           |           |                       |
| CB4856                                                                                                                                                  | CT | X | 5340189 | 5342202 | WBGene00016132 | C26B9.2   | C26B9.2   | -0.174853630045963    |
| AGIWUR14514                                                                                                                                             |    |   |         |         |                |           |           |                       |
| CB4856                                                                                                                                                  | CT | X | 5342307 | 5342841 | WBGene00016136 | C26B9.7   | C26B9.7   | 0.0835461637571111    |
| AGIWUR25278;AGIWUR29045;AGIWUR31795;AGIWUR32458;AGIWUR37242;AGIWUR43461                                                                                 |    |   |         |         |                |           |           |                       |
| CB4856                                                                                                                                                  | CT | X | 5344520 | 5348411 | WBGene00016131 | C26B9.1   | C26B9.1   | -0.0253320164198652   |
| AGIWUR34413                                                                                                                                             |    |   |         |         |                |           |           |                       |
| CB4856                                                                                                                                                  | CT | X | 5349098 | 5352423 | WBGene00006371 | syx-3     | F35C8.4   | -0.0298609679808504   |
| AGIWUR7704                                                                                                                                              |    |   |         |         |                |           |           |                       |
| CB4856                                                                                                                                                  | CT | X | 5353033 | 5354144 | WBGene00003990 | pfn-2     | F35C8.6   | 0.247173758275897     |



AGIWUR7182;AGIWUR10564

|        |    |   |         |         |                |         |          |                    |             |
|--------|----|---|---------|---------|----------------|---------|----------|--------------------|-------------|
| CB4856 | CT | X | 5355638 | 5364322 | WBGene00018037 | cht1-1  | F35C8.7  | -0.261121735891537 | AGIWUR15722 |
| CB4856 | CT | X | 5365808 | 5367619 | WBGene00018036 | F35C8.5 | F35C8.5  | 0.323624116324387  | AGIWUR38857 |
| CB4856 | CT | X | 5368468 | 5372059 | WBGene00002177 | jkk-1   | F35C8.3  | 0.0138703051401938 | AGIWUR13137 |
| CB4856 | CT | X | 5372149 | 5374443 | WBGene00018038 | F35C8.8 | F35C8.8  | -0.228598189595154 | AGIWUR41387 |
| CB4856 | CT | X | 5375070 | 5376911 | WBGene00018035 | sek-4   | F35C8.2  | 0.418498904323922  | AGIWUR22777 |
| CB4856 | CT | X | 5377607 | 5379353 | WBGene00018034 | sek-5   | F35C8.1  | 0.170077280101922  | AGIWUR3165  |
| CB4856 | CT | X | 5386248 | 5394330 | WBGene00015387 | kcn1-3  | C03F11.1 | -0.240679280692179 |             |

AGIWUR24146

|        |    |   |         |         |                |          |          |                   |  |
|--------|----|---|---------|---------|----------------|----------|----------|-------------------|--|
| CB4856 | CT | X | 5394508 | 5397400 | WBGene00015388 | C03F11.2 | C03F11.2 | 0.191157503067974 |  |
|--------|----|---|---------|---------|----------------|----------|----------|-------------------|--|

AGIWUR26439

|        |    |   |         |         |                |        |          |                     |  |
|--------|----|---|---------|---------|----------------|--------|----------|---------------------|--|
| CB4856 | CT | X | 5397676 | 5400626 | WBGene00015389 | scav-1 | C03F11.3 | -0.0852184627377994 |  |
|--------|----|---|---------|---------|----------------|--------|----------|---------------------|--|

AGIWUR28074

|        |    |   |         |         |                |          |          |                    |  |
|--------|----|---|---------|---------|----------------|----------|----------|--------------------|--|
| CB4856 | CT | X | 5401437 | 5406443 | WBGene00015390 | C03F11.4 | C03F11.4 | -0.347966637582253 |  |
|--------|----|---|---------|---------|----------------|----------|----------|--------------------|--|

AGIWUR36310

|        |    |   |         |         |                |         |         |                     |  |
|--------|----|---|---------|---------|----------------|---------|---------|---------------------|--|
| CB4856 | CT | X | 5406562 | 5414350 | WBGene00016559 | C41A3.2 | C41A3.2 | -0.0985611985505552 |  |
|--------|----|---|---------|---------|----------------|---------|---------|---------------------|--|

AGIWUR4001;AGIWUR38812

|        |    |   |         |         |                |       |         |                    |  |
|--------|----|---|---------|---------|----------------|-------|---------|--------------------|--|
| CB4856 | CT | X | 5413810 | 5441958 | WBGene00016558 | pks-1 | C41A3.1 | -0.388247072435707 |  |
|--------|----|---|---------|---------|----------------|-------|---------|--------------------|--|

AGIWUR7593;AGIWUR7992

|        |    |   |         |         |                |         |         |                   |  |
|--------|----|---|---------|---------|----------------|---------|---------|-------------------|--|
| CB4856 | CT | X | 5445163 | 5448085 | WBGene00016106 | C25F6.7 | C25F6.7 | 0.380043688332028 |  |
|--------|----|---|---------|---------|----------------|---------|---------|-------------------|--|

AGIWUR7887;AGIWUR15484;AGIWUR15991;AGIWUR27938;AGIWUR33932

|        |    |   |         |         |                |         |         |                     |  |
|--------|----|---|---------|---------|----------------|---------|---------|---------------------|--|
| CB4856 | CT | X | 5448241 | 5450010 | WBGene00044569 | C25F6.8 | C25F6.8 | -0.0577484075793766 |  |
|--------|----|---|---------|---------|----------------|---------|---------|---------------------|--|

AGIWUR13339;AGIWUR22448;AGIWUR37292

|        |    |   |         |         |                |         |         |                   |             |
|--------|----|---|---------|---------|----------------|---------|---------|-------------------|-------------|
| CB4856 | CT | X | 5450262 | 5450823 | WBGene00016105 | C25F6.6 | C25F6.6 | 0.367257267338132 | AGIWUR38872 |
|--------|----|---|---------|---------|----------------|---------|---------|-------------------|-------------|

|        |    |   |         |         |                |       |         |                   |             |
|--------|----|---|---------|---------|----------------|-------|---------|-------------------|-------------|
| CB4856 | CT | X | 5461256 | 5466310 | WBGene00016104 | ddr-1 | C25F6.4 | 0.246511090915416 | AGIWUR44016 |
|--------|----|---|---------|---------|----------------|-------|---------|-------------------|-------------|

|        |    |   |         |         |                |        |         |                    |            |
|--------|----|---|---------|---------|----------------|--------|---------|--------------------|------------|
| CB4856 | CT | X | 5467870 | 5472684 | WBGene00016103 | dpyd-1 | C25F6.3 | -0.253524937086242 | AGIWUR8451 |
|--------|----|---|---------|---------|----------------|--------|---------|--------------------|------------|

|        |    |   |         |         |                |       |         |                   |  |
|--------|----|---|---------|---------|----------------|-------|---------|-------------------|--|
| CB4856 | CT | X | 5479700 | 5484941 | WBGene00001006 | dlg-1 | C25F6.2 | 0.534287857245417 |  |
|--------|----|---|---------|---------|----------------|-------|---------|-------------------|--|

AGIWUR6452;AGIWUR6973;AGIWUR37028

|        |    |   |         |         |                |         |         |                    |             |
|--------|----|---|---------|---------|----------------|---------|---------|--------------------|-------------|
| CB4856 | CT | X | 5486487 | 5488102 | WBGene00016102 | C25F6.1 | C25F6.1 | -0.163882212256867 | AGIWUR28493 |
|--------|----|---|---------|---------|----------------|---------|---------|--------------------|-------------|

|        |    |   |         |         |                |         |         |                   |             |
|--------|----|---|---------|---------|----------------|---------|---------|-------------------|-------------|
| CB4856 | CT | X | 5488777 | 5489111 | WBGene00018876 | F55D1.2 | F55D1.2 | 0.185058750064535 | AGIWUR25880 |
|--------|----|---|---------|---------|----------------|---------|---------|-------------------|-------------|

|        |    |   |         |         |                |         |         |                   |            |
|--------|----|---|---------|---------|----------------|---------|---------|-------------------|------------|
| CB4856 | CT | X | 5489838 | 5490113 | WBGene00018875 | F55D1.1 | F55D1.1 | 0.130027154090667 | AGIWUR2924 |
|--------|----|---|---------|---------|----------------|---------|---------|-------------------|------------|

|        |    |   |         |         |                |       |         |                   |            |
|--------|----|---|---------|---------|----------------|-------|---------|-------------------|------------|
| CB4856 | CT | X | 5492915 | 5496000 | WBGene00044623 | bus-8 | T23F2.1 | 0.410829580704512 | AGIWUR8554 |
|--------|----|---|---------|---------|----------------|-------|---------|-------------------|------------|

|        |    |   |         |         |                |         |         |                     |  |
|--------|----|---|---------|---------|----------------|---------|---------|---------------------|--|
| CB4856 | CT | X | 5496122 | 5505248 | WBGene00020735 | T23F2.2 | T23F2.2 | -0.0539125666072593 |  |
|--------|----|---|---------|---------|----------------|---------|---------|---------------------|--|

AGIWUR3692;AGIWUR12559;AGIWUR23951

|        |    |   |         |         |                |         |         |                   |             |
|--------|----|---|---------|---------|----------------|---------|---------|-------------------|-------------|
| CB4856 | CT | X | 5514798 | 5515080 | WBGene00020737 | T23F2.4 | T23F2.4 | 0.729501568960821 | AGIWUR42924 |
|--------|----|---|---------|---------|----------------|---------|---------|-------------------|-------------|

|        |    |   |         |         |                |         |         |                    |             |
|--------|----|---|---------|---------|----------------|---------|---------|--------------------|-------------|
| CB4856 | CT | X | 5516454 | 5517162 | WBGene00020738 | T23F2.5 | T23F2.5 | -0.283810702903082 | AGIWUR17349 |
|--------|----|---|---------|---------|----------------|---------|---------|--------------------|-------------|

|        |    |   |         |         |                |        |         |                  |            |
|--------|----|---|---------|---------|----------------|--------|---------|------------------|------------|
| CB4856 | CT | X | 5519876 | 5522819 | WBGene00016934 | mboa-3 | C54G7.2 | 0.24316942554913 | AGIWUR4306 |
|--------|----|---|---------|---------|----------------|--------|---------|------------------|------------|

|        |    |   |         |         |                |       |         |                     |  |
|--------|----|---|---------|---------|----------------|-------|---------|---------------------|--|
| CB4856 | CT | X | 5525199 | 5538514 | WBGene00002983 | lgx-1 | C54G7.3 | 0.00668703970347995 |  |
|--------|----|---|---------|---------|----------------|-------|---------|---------------------|--|

AGIWUR2468;AGIWUR35142

|                                                                                                                       |    |   |         |         |                |          |          |                     |             |
|-----------------------------------------------------------------------------------------------------------------------|----|---|---------|---------|----------------|----------|----------|---------------------|-------------|
| CB4856                                                                                                                | CT | X | 5543951 | 5545529 | WBGene00016933 | C54G7.1  | C54G7.1  | -0.335030033521766  | AGIWUR7203  |
| CB4856                                                                                                                | CT | X | 5545684 | 5552756 | WBGene00016935 | ifta-1   | C54G7.4  | 0.124367055101391   | AGIWUR32065 |
| CB4856                                                                                                                | CT | X | 5559021 | 5561330 | WBGene00016518 | C38C5.1  | C38C5.1  | -0.0154228905170104 | AGIWUR21309 |
| CB4856                                                                                                                | CT | X | 5575932 | 5590815 | WBGene00003166 | mec-2    | F14D12.4 | -0.0170235111810713 |             |
| AGIWUR5405;AGIWUR9147;AGIWUR16683;AGIWUR18760;AGIWUR25075;AGIWUR25491;AGIWUR38095;AGIWUR38202;AGIWUR41977;AGIWUR43004 |    |   |         |         |                |          |          |                     |             |
| CB4856                                                                                                                | CT | X | 5593133 | 5594965 | WBGene00006826 | unc-97   | F14D12.2 | -0.0146773992985048 |             |
| AGIWUR3367;AGIWUR8261;AGIWUR9120;AGIWUR12267;AGIWUR12558;AGIWUR39269                                                  |    |   |         |         |                |          |          |                     |             |
| CB4856                                                                                                                | CT | X | 5595778 | 5599330 | WBGene00017464 | sulp-2   | F14D12.5 | -0.0880262783897892 |             |
| AGIWUR12101;AGIWUR24371;AGIWUR32052;AGIWUR42406                                                                       |    |   |         |         |                |          |          |                     |             |
| CB4856                                                                                                                | CT | X | 5603766 | 5609133 | WBGene00017463 | F14D12.1 | F14D12.1 | 0.0888971128209164  |             |
| AGIWUR14060;AGIWUR18971;AGIWUR41801                                                                                   |    |   |         |         |                |          |          |                     |             |
| CB4856                                                                                                                | CT | X | 5609155 | 5611250 | WBGene00006411 | octr-1   | F14D12.6 | -0.0650139957850886 |             |
| AGIWUR27771;AGIWUR34399;AGIWUR35742                                                                                   |    |   |         |         |                |          |          |                     |             |
| CB4856                                                                                                                | CT | X | 5630356 | 5632302 | WBGene00020658 | T21F4.1  | T21F4.1  | -0.213251690928766  | AGIWUR14167 |
| CB4856                                                                                                                | CT | X | 5637887 | 5638075 | WBGene00044570 | T22B7.8  | T22B7.8  | 0.0417538954074477  |             |
| AGIWUR20092;AGIWUR30776;AGIWUR30830;AGIWUR35628;AGIWUR42724                                                           |    |   |         |         |                |          |          |                     |             |
| CB4856                                                                                                                | CT | X | 5638582 | 5641363 | WBGene00020673 | T22B7.4  | T22B7.4  | 0.138846415263487   | AGIWUR17746 |
| CB4856                                                                                                                | CT | X | 5642911 | 5644940 | WBGene00005718 | srv-7    | T22B7.5  | -0.28430413777356   | AGIWUR7545  |
| CB4856                                                                                                                | CT | X | 5647378 | 5650213 | WBGene00020672 | T22B7.3  | T22B7.3  | 1.17609511848424    | AGIWUR1146  |
| CB4856                                                                                                                | CT | X | 5651869 | 5653925 | WBGene00020674 | T22B7.7  | T22B7.7  | -0.958883934083353  | AGIWUR13647 |
| CB4856                                                                                                                | CT | X | 5663837 | 5674060 | WBGene00001182 | egl-13   | T22B7.1  | -0.0232830181380499 |             |
| AGIWUR15053;AGIWUR18785;AGIWUR21583;AGIWUR27020                                                                       |    |   |         |         |                |          |          |                     |             |
| CB4856                                                                                                                | CT | X | 5675246 | 5680225 | WBGene00020919 | set-19   | W01C8.3  | -0.118688976920577  |             |
| AGIWUR3495;AGIWUR5274;AGIWUR14343;AGIWUR34668                                                                         |    |   |         |         |                |          |          |                     |             |
| CB4856                                                                                                                | CT | X | 5680349 | 5684741 | WBGene00020920 | set-20   | W01C8.4  | 0.453556463036449   | AGIWUR11570 |
| CB4856                                                                                                                | CT | X | 5692399 | 5694426 | WBGene00020918 | W01C8.1  | W01C8.1  | 0.772105869458906   | AGIWUR23186 |
| CB4856                                                                                                                | CT | X | 5694475 | 5697308 | WBGene00020921 | W01C8.5  | W01C8.5  | 0.4468385506534     |             |
| AGIWUR3723;AGIWUR7945;AGIWUR43807                                                                                     |    |   |         |         |                |          |          |                     |             |
| CB4856                                                                                                                | CT | X | 5705719 | 5710625 | WBGene00000295 | cat-1    | W01C8.6  | -0.207741375147084  |             |
| AGIWUR4252;AGIWUR19213;AGIWUR23916                                                                                    |    |   |         |         |                |          |          |                     |             |
| CB4856                                                                                                                | CT | X | 5714279 | 5717601 | WBGene00017108 | cyp-43A1 | E03E2.1  | -0.151028019070351  |             |
| AGIWUR6770;AGIWUR8326;AGIWUR17479;AGIWUR18439;AGIWUR42387;AGIWUR44987                                                 |    |   |         |         |                |          |          |                     |             |
| CB4856                                                                                                                | CT | X | 5717538 | 5720268 | WBGene00016568 | C41G11.1 | C41G11.1 | 0.0883043217901078  |             |
| AGIWUR1606;AGIWUR11627;AGIWUR19917;AGIWUR25682;AGIWUR28142;AGIWUR35183                                                |    |   |         |         |                |          |          |                     |             |
| CB4856                                                                                                                | CT | X | 5720438 | 5728656 | WBGene00004349 | rgs-6    | C41G11.3 | 0.0324009339899618  |             |
| AGIWUR25314;AGIWUR29193                                                                                               |    |   |         |         |                |          |          |                     |             |
| CB4856                                                                                                                | CT | X | 5738761 | 5743307 | WBGene00016570 | gnrr-4   | C41G11.4 | -0.0368579084939675 |             |
| AGIWUR39635                                                                                                           |    |   |         |         |                |          |          |                     |             |

|                                                                                                                                   |    |   |         |         |                |          |          |                      |             |
|-----------------------------------------------------------------------------------------------------------------------------------|----|---|---------|---------|----------------|----------|----------|----------------------|-------------|
| CB4856                                                                                                                            | CT | X | 5760281 | 5763392 | WBGene00016937 | tag-294  | C54H2.3  | -0.14604723217653    | AGIWUR6339  |
| CB4856                                                                                                                            | CT | X | 5766482 | 5770793 | WBGene00016938 | C54H2.4  | C54H2.4  | 0.132506498787695    | AGIWUR15372 |
| CB4856                                                                                                                            | CT | X | 5776251 | 5778884 | WBGene00006368 | sym-3    | C54H2.1  | -0.186334493605621   |             |
| AGIWUR2331;AGIWUR18041;AGIWUR20651;AGIWUR23478                                                                                    |    |   |         |         |                |          |          |                      |             |
| CB4856                                                                                                                            | CT | X | 5778875 | 5780758 | WBGene00004788 | sft-4    | C54H2.5  | -0.00880425329790135 |             |
| AGIWUR8477;AGIWUR9575;AGIWUR11346;AGIWUR14701;AGIWUR34782;AGIWUR41146                                                             |    |   |         |         |                |          |          |                      |             |
| CB4856                                                                                                                            | CT | X | 5783405 | 5786406 | WBGene00018516 | tag-257  | F46G11.3 | 0.315075156720415    |             |
| AGIWUR13771                                                                                                                       |    |   |         |         |                |          |          |                      |             |
| CB4856                                                                                                                            | CT | X | 5786493 | 5787353 | WBGene00045269 | F46G11.6 | F46G11.6 | -0.0399256817996143  |             |
| AGIWUR20936                                                                                                                       |    |   |         |         |                |          |          |                      |             |
| CB4856                                                                                                                            | CT | X | 5788096 | 5790345 | WBGene00018515 | F46G11.2 | F46G11.2 | -0.282903332537872   |             |
| AGIWUR4630;AGIWUR41476                                                                                                            |    |   |         |         |                |          |          |                      |             |
| CB4856                                                                                                                            | CT | X | 5791703 | 5797328 | WBGene00018514 | F46G11.1 | F46G11.1 | 0.237400239547118    |             |
| AGIWUR14159;AGIWUR16979                                                                                                           |    |   |         |         |                |          |          |                      |             |
| CB4856                                                                                                                            | CT | X | 5797313 | 5798790 | WBGene00018517 | F46G11.4 | F46G11.4 | -0.196910402824111   |             |
| AGIWUR28013                                                                                                                       |    |   |         |         |                |          |          |                      |             |
| CB4856                                                                                                                            | CT | X | 5804379 | 5805922 | WBGene00017428 | F13D11.3 | F13D11.3 | 0.695646398010668    |             |
| AGIWUR8316;AGIWUR8680;AGIWUR33918;AGIWUR37491;AGIWUR38571                                                                         |    |   |         |         |                |          |          |                      |             |
| CB4856                                                                                                                            | CT | X | 5822277 | 5827755 | WBGene00001824 | hbl-1    | F13D11.2 | 0.549090361472178    |             |
| AGIWUR1043;AGIWUR8461;AGIWUR11581;AGIWUR15453;AGIWUR20933;AGIWUR24101;AGIWUR31648;AGIWUR31830;AGIWUR33022;AGIWUR35804;AGIWUR41028 |    |   |         |         |                |          |          |                      |             |
| CB4856                                                                                                                            | CT | X | 5829376 | 5832027 | WBGene00017427 | acp-5    | F13D11.1 | 0.195015499798696    |             |
| AGIWUR5445;AGIWUR11396;AGIWUR23581                                                                                                |    |   |         |         |                |          |          |                      |             |
| CB4856                                                                                                                            | CT | X | 5831918 | 5834858 | WBGene00017429 | F13D11.4 | F13D11.4 | 0.368815739245171    |             |
| AGIWUR5892                                                                                                                        |    |   |         |         |                |          |          |                      |             |
| CB4856                                                                                                                            | CT | X | 5838039 | 5839778 | WBGene00021060 | dct-11   | W06B11.3 | 0.0588229926142017   |             |
| AGIWUR21625                                                                                                                       |    |   |         |         |                |          |          |                      |             |
| CB4856                                                                                                                            | CT | X | 5841592 | 5845987 | WBGene00004245 | puf-9    | W06B11.2 | -0.0426037965857962  |             |
| AGIWUR6309;AGIWUR16845;AGIWUR30458                                                                                                |    |   |         |         |                |          |          |                      |             |
| CB4856                                                                                                                            | CT | X | 5849104 | 5851971 | WBGene00021059 | atat-2   | W06B11.1 | 0.00556617040308538  |             |
| AGIWUR1959                                                                                                                        |    |   |         |         |                |          |          |                      |             |
| CB4856                                                                                                                            | CT | X | 5851954 | 5854260 | WBGene00001984 | hog-1    | W06B11.4 | -0.0344009730533976  |             |
| AGIWUR9208                                                                                                                        |    |   |         |         |                |          |          |                      |             |
| CB4856                                                                                                                            | CT | X | 5862708 | 5873320 | WBGene00006424 | ctbp-1   | F49E10.5 | 0.258962597034032    |             |
| AGIWUR5330;AGIWUR41828                                                                                                            |    |   |         |         |                |          |          |                      |             |
| CB4856                                                                                                                            | CT | X | 5875898 | 5881716 | WBGene00018641 | F49E10.4 | F49E10.4 | -0.0199886346902876  |             |
| AGIWUR9852;AGIWUR13472;AGIWUR16268;AGIWUR41839                                                                                    |    |   |         |         |                |          |          |                      |             |
| CB4856                                                                                                                            | CT | X | 5885865 | 5886823 | WBGene00001450 | flp-7    | F49E10.3 | 0.0787478544615476   |             |
| AGIWUR358;AGIWUR2865;AGIWUR4562;AGIWUR35967                                                                                       |    |   |         |         |                |          |          |                      |             |

|                                                                                    |   |         |         |                |          |          |                     |             |
|------------------------------------------------------------------------------------|---|---------|---------|----------------|----------|----------|---------------------|-------------|
| CB4856 CT                                                                          | X | 5890380 | 5894757 | WBGene00018640 | F49E10.2 | F49E10.2 | 0.342754297257523   |             |
| AGIWUR32917                                                                        |   |         |         |                |          |          |                     |             |
| CB4856 CT                                                                          | X | 5897342 | 5902152 | WBGene00018639 | tbc-16   | F49E10.1 | -0.109407972821936  |             |
| AGIWUR22634                                                                        |   |         |         |                |          |          |                     |             |
| CB4856 CT                                                                          | X | 5904627 | 5905346 | WBGene00019160 | crf-1    | H05L03.3 | 0.461132539669027   |             |
| AGIWUR36178                                                                        |   |         |         |                |          |          |                     |             |
| CB4856 CT                                                                          | X | 5919656 | 5920494 | WBGene00021268 | capa-1   | Y23B4A.2 | 0.566148502570584   |             |
| AGIWUR13010                                                                        |   |         |         |                |          |          |                     |             |
| CB4856 CT                                                                          | X | 5931122 | 5934532 | WBGene00001175 | egl-6    | C46F4.1  | -0.122947652399782  | AGIWUR10686 |
| CB4856 CT                                                                          | X | 5935780 | 5937549 | WBGene00044571 | C46F4.3  | C46F4.3  | -0.0831498370839574 |             |
| AGIWUR3474;AGIWUR15765;AGIWUR18513;AGIWUR32363                                     |   |         |         |                |          |          |                     |             |
| CB4856 CT                                                                          | X | 5937506 | 5944510 | WBGene00016716 | acs-17   | C46F4.2  | 0.980266306788264   |             |
| AGIWUR6231;AGIWUR17820;AGIWUR20521;AGIWUR20972;AGIWUR22389;AGIWUR29029             |   |         |         |                |          |          |                     |             |
| CB4856 CT                                                                          | X | 5945821 | 5948869 | WBGene00003254 | mig-23   | R07E4.4  | -0.218749728571902  | AGIWUR10959 |
| CB4856 CT                                                                          | X | 5949529 | 5953174 | WBGene00019938 | R07E4.5  | R07E4.5  | -0.108148434821523  | AGIWUR41208 |
| CB4856 CT                                                                          | X | 5953450 | 5953815 | WBGene00019937 | R07E4.3  | R07E4.3  | -0.205256458255883  | AGIWUR17110 |
| CB4856 CT                                                                          | X | 5959115 | 5970158 | WBGene00019935 | R07E4.1  | R07E4.1  | 0.115472468114808   |             |
| AGIWUR11245;AGIWUR31261                                                            |   |         |         |                |          |          |                     |             |
| CB4856 CT                                                                          | X | 5970677 | 5977854 | WBGene00002190 | kin-2    | R07E4.6  | 0.0758850651824243  |             |
| AGIWUR8994;AGIWUR10317;AGIWUR10536;AGIWUR14932;AGIWUR15995;AGIWUR34314;AGIWUR35178 |   |         |         |                |          |          |                     |             |
| CB4856 CT                                                                          | X | 5984975 | 5992103 | WBGene00002224 | k1p-13   | F22F4.3  | 0.435980118785595   | AGIWUR36520 |
| CB4856 CT                                                                          | X | 5992099 | 5992859 | WBGene00017718 | F22F4.5  | F22F4.5  | -0.552412260637194  |             |
| AGIWUR24185;AGIWUR27325;AGIWUR28641                                                |   |         |         |                |          |          |                     |             |
| CB4856 CT                                                                          | X | 5996156 | 5998243 | WBGene00002125 | inx-3    | F22F4.2  | 0.321931745125513   |             |
| AGIWUR11328;AGIWUR26870;AGIWUR41549;AGIWUR42844                                    |   |         |         |                |          |          |                     |             |
| CB4856 CT                                                                          | X | 5998310 | 6001534 | WBGene00017717 | F22F4.4  | F22F4.4  | -0.130858284622535  | AGIWUR30783 |
| CB4856 CT                                                                          | X | 6004482 | 6007071 | WBGene00017716 | F22F4.1  | F22F4.1  | 0.349825179049761   | AGIWUR8904  |
| CB4856 CT                                                                          | X | 6006969 | 6011310 | WBGene00015622 | C09B8.3  | C09B8.3  | 0.358816304509852   | AGIWUR18158 |
| CB4856 CT                                                                          | X | 6015492 | 6017584 | WBGene00015625 | C09B8.8  | C09B8.8  | -0.495972526907135  | AGIWUR25377 |
| CB4856 CT                                                                          | X | 6018442 | 6019936 | WBGene00015623 | C09B8.4  | C09B8.4  | -0.840414922223408  | AGIWUR28618 |
| CB4856 CT                                                                          | X | 6020866 | 6022569 | WBGene00015624 | C09B8.5  | C09B8.5  | -0.442030534466038  | AGIWUR22489 |
| CB4856 CT                                                                          | X | 6031469 | 6034525 | WBGene00002146 | ipp-5    | C09B8.1  | 0.0580883703801476  |             |
| AGIWUR7509;AGIWUR39391;AGIWUR43663                                                 |   |         |         |                |          |          |                     |             |
| CB4856 CT                                                                          | X | 6034463 | 6039496 | WBGene00002023 | hsp-25   | C09B8.6  | 0.128866761973114   |             |
| AGIWUR3529;AGIWUR6104;AGIWUR20413;AGIWUR30435;AGIWUR39439;AGIWUR42269              |   |         |         |                |          |          |                     |             |
| CB4856 CT                                                                          | X | 6044309 | 6048610 | WBGene00003911 | pak-1    | C09B8.7  | 0.0862269543842453  |             |
| AGIWUR25778;AGIWUR39887                                                            |   |         |         |                |          |          |                     |             |
| CB4856 CT                                                                          | X | 6053058 | 6057177 | WBGene00016661 | C45B2.6  | C45B2.6  | -0.0958279497103742 | AGIWUR40366 |
| CB4856 CT                                                                          | X | 6058255 | 6060242 | WBGene00001602 | gln-1    | C45B2.5  | -0.119124729450363  |             |

AGIWUR483;AGIWUR9520;AGIWUR30943

CB4856 CT X 6060754 6065986 WBGene00004219 ptr-4 C45B2.7 1.09221963856162

AGIWUR7044;AGIWUR10815;AGIWUR13775;AGIWUR35960;AGIWUR42720;AGIWUR44398

CB4856 CT X 6070497 6081833 WBGene00001587 ggr-2 C45B2.4 0.160035326849795 AGIWUR16871

CB4856 CT X 6082960 6083333 WBGene00016660 C45B2.3 C45B2.3 -0.0912813244908257 AGIWUR36757

CB4856 CT X 6084739 6085189 WBGene00016659 C45B2.2 C45B2.2 0.00926568724323751

AGIWUR7351;AGIWUR20052;AGIWUR28037;AGIWUR36337;AGIWUR44487

CB4856 CT X 6086124 6086567 WBGene00016658 C45B2.1 C45B2.1 -0.259855721480276 AGIWUR13077

CB4856 CT X 6087985 6088391 WBGene00016662 C45B2.8 C45B2.8 -0.570391275050012 AGIWUR42228

CB4856 CT X 6089033 6092124 WBGene00002007 hsp-3 C15H9.6 -0.224087130132488

AGIWUR794;AGIWUR4634;AGIWUR7413;AGIWUR7841;AGIWUR20115;AGIWUR27420;AGIWUR27912;AGIWUR33491;AGIWUR37727;AGIWUR38048;AGIWUR38338;AGIWUR41750;AGIWUR41826;AGIWUR45001

CB4856 CT X 6093286 6097574 WBGene00015801 C15H9.5 C15H9.5 -0.272710177241043 AGIWUR10532

CB4856 CT X 6101158 6105526 WBGene00015800 C15H9.4 C15H9.4 -0.135977179003302 AGIWUR43548

CB4856 CT X 6106926 6109338 WBGene00015802 kynu-1 C15H9.7 -0.685446248208665 AGIWUR18801

CB4856 CT X 6110754 6113057 WBGene00004193 prx-3 C15H9.8 0.0520025302722473

AGIWUR4666;AGIWUR15011;AGIWUR15322;AGIWUR31300;AGIWUR35692

CB4856 CT X 6115804 6118051 WBGene00015799 C15H9.3 C15H9.3 0.0564054280517867

AGIWUR21830;AGIWUR23000;AGIWUR29763

CB4856 CT X 6118776 6120436 WBGene00015798 C15H9.2 C15H9.2 0.258799632813704 AGIWUR29727

CB4856 CT X 6122315 6127541 WBGene00003778 nnt-1 C15H9.1 1.76242775678261 AGIWUR7268

CB4856 CT X 6127457 6128326 WBGene00015803 C15H9.9 C15H9.9 -0.25337000356366 AGIWUR18082

CB4856 CT X 6129535 6138332 WBGene00022202 Y72A10A.1 Y72A10A.1 -0.228961317161389

AGIWUR13394

CB4856 CT X 6142546 6150545 WBGene00016423 tag-275 C34H3.1 0.158809270128391 AGIWUR24326

CB4856 CT X 6159388 6160523 WBGene00003846 odd-2 C34H3.2 0.393745264582137 AGIWUR34622

CB4856 CT X 6169305 6173748 WBGene00020786 T25B2.2 T25B2.2 0.45850434264478 AGIWUR42133

CB4856 CT X 6176129 6177154 WBGene00077592 T25B2.3 T25B2.3 0.143267823979562 AGIWUR29729

CB4856 CT X 6179241 6180140 WBGene00020484 T13C5.3 T13C5.3 0.0973616780107021 AGIWUR32692

CB4856 CT X 6180650 6181425 WBGene00020487 T13C5.7 T13C5.7 -0.301188523171496 AGIWUR4318

CB4856 CT X 6188148 6189422 WBGene000206360 T13C5.10 T13C5.10 0.137439020833778

AGIWUR3002

CB4856 CT X 6191590 6192948 WBGene00020485 ceh-54 T13C5.4 0.120468733238196 AGIWUR15363

CB4856 CT X 6196927 6200818 WBGene00000905 daf-9 T13C5.1 -0.176229383659749 AGIWUR17268

CB4856 CT X 6201875 6204922 WBGene00000245 bca-1 T13C5.5 0.0570808175176083

AGIWUR7829;AGIWUR10187;AGIWUR11293;AGIWUR21637

CB4856 CT X 6205180 6206475 WBGene00077690 mtp-18 T13C5.8 -0.322213972660064

AGIWUR13852;AGIWUR15465

CB4856 CT X 6206581 6207626 WBGene00020486 T13C5.6 T13C5.6 -0.423635161662069 AGIWUR19108

|                                                                                                                                                                                                                   |   |         |         |                |          |          |                     |             |
|-------------------------------------------------------------------------------------------------------------------------------------------------------------------------------------------------------------------|---|---------|---------|----------------|----------|----------|---------------------|-------------|
| CB4856 CT                                                                                                                                                                                                         | X | 6208161 | 6208563 | WBGene00015782 | C14F11.7 | C14F11.7 | -0.0954714521570335 |             |
| AGIWUR44304                                                                                                                                                                                                       |   |         |         |                |          |          |                     |             |
| CB4856 CT                                                                                                                                                                                                         | X | 6208761 | 6213911 | WBGene00015779 | lrch-1   | C14F11.2 | 0.358767899321677   |             |
| AGIWUR15777                                                                                                                                                                                                       |   |         |         |                |          |          |                     |             |
| CB4856 CT                                                                                                                                                                                                         | X | 6226131 | 6230701 | WBGene00001803 | lite-1   | C14F11.3 | 0.219703675586975   |             |
| AGIWUR41630                                                                                                                                                                                                       |   |         |         |                |          |          |                     |             |
| CB4856 CT                                                                                                                                                                                                         | X | 6230920 | 6233048 | WBGene00015780 | C14F11.4 | C14F11.4 | -0.0296376822806508 |             |
| AGIWUR10334;AGIWUR14376;AGIWUR42427                                                                                                                                                                               |   |         |         |                |          |          |                     |             |
| CB4856 CT                                                                                                                                                                                                         | X | 6233149 | 6235541 | WBGene00002024 | hsp-43   | C14F11.5 | -0.191127759517856  |             |
| AGIWUR803;AGIWUR2757;AGIWUR3346;AGIWUR5545;AGIWUR7080;AGIWUR11542;AGIWUR12158;AGIWUR12947;AGIWUR13833;AGIWUR20327;AGIWUR24200;AGIWUR26078;AGIWUR26161;AGIWUR27483;AGIWUR30002;AGIWUR31377;AGIWUR37840;AGIWUR41660 |   |         |         |                |          |          |                     |             |
| CB4856 CT                                                                                                                                                                                                         | X | 6238021 | 6239115 | WBGene00015781 | C14F11.6 | C14F11.6 | 0.882130421129958   |             |
| AGIWUR1730                                                                                                                                                                                                        |   |         |         |                |          |          |                     |             |
| CB4856 CT                                                                                                                                                                                                         | X | 6240955 | 6242709 | WBGene00015778 | got-2.2  | C14F11.1 | 0.393276286373332   |             |
| AGIWUR9797;AGIWUR14781;AGIWUR26879                                                                                                                                                                                |   |         |         |                |          |          |                     |             |
| CB4856 CT                                                                                                                                                                                                         | X | 6252274 | 6253785 | WBGene00021050 | W05H9.3  | W05H9.3  | 0.0618472507072489  | AGIWUR35259 |
| CB4856 CT                                                                                                                                                                                                         | X | 6263648 | 6266913 | WBGene00021051 | W05H9.4  | W05H9.4  | 0.272820296967552   | AGIWUR44050 |
| CB4856 CT                                                                                                                                                                                                         | X | 6267043 | 6271087 | WBGene00021049 | W05H9.2  | W05H9.2  | -0.0434910988336696 |             |
| AGIWUR8667;AGIWUR12910;AGIWUR13830;AGIWUR39746;AGIWUR44532                                                                                                                                                        |   |         |         |                |          |          |                     |             |
| CB4856 CT                                                                                                                                                                                                         | X | 6272089 | 6273768 | WBGene00021048 | W05H9.1  | W05H9.1  | 0.84136258938325    | AGIWUR30479 |
| CB4856 CT                                                                                                                                                                                                         | X | 6279801 | 6281015 | WBGene00000739 | col-166  | T07H6.3  | -0.0489188873828352 |             |
| AGIWUR37078;AGIWUR44419                                                                                                                                                                                           |   |         |         |                |          |          |                     |             |
| CB4856 CT                                                                                                                                                                                                         | X | 6281847 | 6291732 | WBGene00002976 | lev-9    | T07H6.5  | -0.127693003085821  |             |
| AGIWUR2946;AGIWUR21872;AGIWUR24441;AGIWUR32386                                                                                                                                                                    |   |         |         |                |          |          |                     |             |
| CB4856 CT                                                                                                                                                                                                         | X | 6293124 | 6298195 | WBGene00003394 | mom-1    | T07H6.2  | -0.187869038611616  | AGIWUR4640  |
| CB4856 CT                                                                                                                                                                                                         | X | 6300138 | 6305211 | WBGene00020330 | T07H6.1  | T07H6.1  | 0.138642794923898   | AGIWUR44690 |
| CB4856 CT                                                                                                                                                                                                         | X | 6311715 | 6314588 | WBGene00020420 | T10E10.3 | T10E10.3 | -0.0407793353478487 |             |
| AGIWUR439                                                                                                                                                                                                         |   |         |         |                |          |          |                     |             |
| CB4856 CT                                                                                                                                                                                                         | X | 6314529 | 6322819 | WBGene00020421 | T10E10.4 | T10E10.4 | -0.10914543101008   |             |
| AGIWUR46                                                                                                                                                                                                          |   |         |         |                |          |          |                     |             |
| CB4856 CT                                                                                                                                                                                                         | X | 6323297 | 6324539 | WBGene00000740 | col-167  | T10E10.2 | -0.0708610599130211 |             |
| AGIWUR40205                                                                                                                                                                                                       |   |         |         |                |          |          |                     |             |
| CB4856 CT                                                                                                                                                                                                         | X | 6329160 | 6330127 | WBGene00000742 | col-169  | T10E10.5 | -0.201429716017275  |             |
| AGIWUR18709                                                                                                                                                                                                       |   |         |         |                |          |          |                     |             |
| CB4856 CT                                                                                                                                                                                                         | X | 6331620 | 6332686 | WBGene00000743 | col-170  | T10E10.6 | -0.463606625128667  |             |
| AGIWUR1815                                                                                                                                                                                                        |   |         |         |                |          |          |                     |             |
| CB4856 CT                                                                                                                                                                                                         | X | 6335279 | 6338035 | WBGene00015381 | C03B1.13 | C03B1.13 | -0.532262811062235  |             |
| AGIWUR25465                                                                                                                                                                                                       |   |         |         |                |          |          |                     |             |
| CB4856 CT                                                                                                                                                                                                         | X | 6341835 | 6345842 | WBGene00015378 | C03B1.7  | C03B1.7  | 0.0606526919595023  | AGIWUR27113 |

|                                                                                                            |    |   |         |         |                |          |          |                      |             |
|------------------------------------------------------------------------------------------------------------|----|---|---------|---------|----------------|----------|----------|----------------------|-------------|
| CB4856                                                                                                     | CT | X | 6346359 | 6347113 | WBGene00015379 | C03B1.9  | C03B1.9  | 0.0148857225369978   |             |
| AGIWUR1881;AGIWUR13826;AGIWUR18914;AGIWUR19974;AGIWUR23191;AGIWUR24202;AGIWUR32257;AGIWUR34582;AGIWUR37352 |    |   |         |         |                |          |          |                      |             |
| CB4856                                                                                                     | CT | X | 6350187 | 6351876 | WBGene00015377 | C03B1.6  | C03B1.6  | -0.0478919032761485  |             |
| AGIWUR9258;AGIWUR38721                                                                                     |    |   |         |         |                |          |          |                      |             |
| CB4856                                                                                                     | CT | X | 6355585 | 6357689 | WBGene00015376 | C03B1.5  | C03B1.5  | 0.269416429222995    | AGIWUR14829 |
| CB4856                                                                                                     | CT | X | 6359383 | 6360758 | WBGene00015382 | C03B1.14 | C03B1.14 | 0.122075785469658    |             |
| AGIWUR20078                                                                                                |    |   |         |         |                |          |          |                      |             |
| CB4856                                                                                                     | CT | X | 6364496 | 6365717 | WBGene00015375 | C03B1.4  | C03B1.4  | 0.0963694950620182   | AGIWUR44475 |
| CB4856                                                                                                     | CT | X | 6366013 | 6366831 | WBGene00015374 | C03B1.3  | C03B1.3  | 0.148090621593907    | AGIWUR9747  |
| CB4856                                                                                                     | CT | X | 6367614 | 6373157 | WBGene00015373 | C03B1.2  | C03B1.2  | 0.0739025032236267   | AGIWUR29724 |
| CB4856                                                                                                     | CT | X | 6374751 | 6375592 | WBGene00015372 | C03B1.1  | C03B1.1  | -0.505729118598061   | AGIWUR17004 |
| CB4856                                                                                                     | CT | X | 6376459 | 6377684 | WBGene00003053 | lmp-1    | C03B1.12 | 0.243724197601177    |             |
| AGIWUR27222;AGIWUR33434                                                                                    |    |   |         |         |                |          |          |                      |             |
| CB4856                                                                                                     | CT | X | 6379484 | 6384845 | WBGene00020130 | igcm-2   | SSSD1.1  | 1.05823909813289     | AGIWUR41163 |
| CB4856                                                                                                     | CT | X | 6385280 | 6387863 | WBGene00020691 | igdb-3   | T22E5.3  | 0.486676507617402    | AGIWUR40893 |
| CB4856                                                                                                     | CT | X | 6388255 | 6391591 | WBGene00044572 | T22E5.7  | T22E5.7  | 0.0813618569776358   |             |
| AGIWUR17271;AGIWUR19093;AGIWUR37241;AGIWUR38134;AGIWUR42347                                                |    |   |         |         |                |          |          |                      |             |
| CB4856                                                                                                     | CT | X | 6403424 | 6406981 | WBGene00001622 | glt-4    | T22E5.2  | 0.0320674231988942   | AGIWUR27019 |
| CB4856                                                                                                     | CT | X | 6408470 | 6410359 | WBGene00003495 | mup-2    | T22E5.5  | -0.277919366861735   |             |
| AGIWUR2620;AGIWUR15971;AGIWUR21994;AGIWUR30200;AGIWUR36727;AGIWUR40271;AGIWUR41617                         |    |   |         |         |                |          |          |                      |             |
| CB4856                                                                                                     | CT | X | 6412886 | 6413488 | WBGene00020690 | T22E5.1  | T22E5.1  | -0.453936425367622   |             |
| AGIWUR4696;AGIWUR12616;AGIWUR17543;AGIWUR17768;AGIWUR31630;AGIWUR44181                                     |    |   |         |         |                |          |          |                      |             |
| CB4856                                                                                                     | CT | X | 6414148 | 6416400 | WBGene00020692 | T22E5.6  | T22E5.6  | -0.3582154296335     | AGIWUR27334 |
| CB4856                                                                                                     | CT | X | 6421036 | 6430610 | WBGene00019617 | K10C2.1  | K10C2.1  | -0.603006326341657   | AGIWUR13082 |
| CB4856                                                                                                     | CT | X | 6430695 | 6433788 | WBGene00019618 | K10C2.2  | K10C2.2  | 0.0777514307872753   | AGIWUR31252 |
| CB4856                                                                                                     | CT | X | 6436440 | 6437645 | WBGene00045265 | K10C2.8  | K10C2.8  | -0.435865106811708   |             |
| AGIWUR11725;AGIWUR42028;AGIWUR42307                                                                        |    |   |         |         |                |          |          |                      |             |
| CB4856                                                                                                     | CT | X | 6443055 | 6443473 | WBGene00019622 | K10C2.7  | K10C2.7  | -0.94277305162688    |             |
| AGIWUR2183;AGIWUR16937;AGIWUR22507;AGIWUR36334;AGIWUR39501                                                 |    |   |         |         |                |          |          |                      |             |
| CB4856                                                                                                     | CT | X | 6444189 | 6446664 | WBGene00019619 | asp-14   | K10C2.3  | 0.00195939624459562  | AGIWUR11999 |
| CB4856                                                                                                     | CT | X | 6446649 | 6448999 | WBGene00019620 | fah-1    | K10C2.4  | -0.277018501807563   |             |
| AGIWUR10551;AGIWUR17534;AGIWUR30736;AGIWUR31151                                                            |    |   |         |         |                |          |          |                      |             |
| CB4856                                                                                                     | CT | X | 6449959 | 6450939 | WBGene00001715 | grl-6    | K10C2.5  | 0.32729608276732     | AGIWUR35833 |
| CB4856                                                                                                     | CT | X | 6451363 | 6451859 | WBGene00019621 | K10C2.6  | K10C2.6  | -0.0712598053084399  |             |
| AGIWUR3279;AGIWUR4945;AGIWUR27791;AGIWUR32387;AGIWUR37818                                                  |    |   |         |         |                |          |          |                      |             |
| CB4856                                                                                                     | CT | X | 6451800 | 6455179 | WBGene00003551 | nas-33   | K04E7.3  | -0.101228375861744   |             |
| AGIWUR16368;AGIWUR20434;AGIWUR27178;AGIWUR42590                                                            |    |   |         |         |                |          |          |                      |             |
| CB4856                                                                                                     | CT | X | 6456687 | 6461767 | WBGene00003877 | pept-1   | K04E7.2  | -0.28793487889094    | AGIWUR35390 |
| CB4856                                                                                                     | CT | X | 6462029 | 6463228 | WBGene00019383 | K04E7.1  | K04E7.1  | -0.00462430288692062 | AGIWUR11377 |

|                                                                                                                     |    |   |         |         |                |          |          |                    |             |
|---------------------------------------------------------------------------------------------------------------------|----|---|---------|---------|----------------|----------|----------|--------------------|-------------|
| CB4856                                                                                                              | CT | X | 6463412 | 6465861 | WBGene00015784 | C15B12.2 | C15B12.2 | -0.106643012916278 |             |
| AGIWUR19482;AGIWUR23863;AGIWUR31366                                                                                 |    |   |         |         |                |          |          |                    |             |
| CB4856                                                                                                              | CT | X | 6467284 | 6467562 | WBGene00015785 | C15B12.3 | C15B12.3 | -0.375621260898823 |             |
| AGIWUR35027                                                                                                         |    |   |         |         |                |          |          |                    |             |
| CB4856                                                                                                              | CT | X | 6468799 | 6469803 | WBGene00044573 | C15B12.9 | C15B12.9 | 0.0977045378168544 |             |
| AGIWUR12978;AGIWUR17588;AGIWUR32647                                                                                 |    |   |         |         |                |          |          |                    |             |
| CB4856                                                                                                              | CT | X | 6470366 | 6473748 | WBGene00015786 | C15B12.4 | C15B12.4 | 0.325903426760227  |             |
| AGIWUR18689                                                                                                         |    |   |         |         |                |          |          |                    |             |
| CB4856                                                                                                              | CT | X | 6474274 | 6476645 | WBGene00015788 | C15B12.8 | C15B12.8 | 1.55458580146218   |             |
| AGIWUR9292                                                                                                          |    |   |         |         |                |          |          |                    |             |
| CB4856                                                                                                              | CT | X | 6476738 | 6479086 | WBGene00015783 | C15B12.1 | C15B12.1 | 0.474533884942092  |             |
| AGIWUR15568                                                                                                         |    |   |         |         |                |          |          |                    |             |
| CB4856                                                                                                              | CT | X | 6479447 | 6484810 | WBGene00001517 | gar-1    | C15B12.5 | 0.199182360177459  |             |
| AGIWUR16993;AGIWUR18743;AGIWUR37260                                                                                 |    |   |         |         |                |          |          |                    |             |
| CB4856                                                                                                              | CT | X | 6496823 | 6499836 | WBGene00015787 | C15B12.6 | C15B12.6 | -0.218353856816146 |             |
| AGIWUR17851;AGIWUR20196;AGIWUR43327                                                                                 |    |   |         |         |                |          |          |                    |             |
| CB4856                                                                                                              | CT | X | 6499928 | 6504613 | WBGene00000393 | cdf-1    | C15B12.7 | -0.042388109815672 |             |
| AGIWUR21474;AGIWUR32017;AGIWUR36111;AGIWUR37609                                                                     |    |   |         |         |                |          |          |                    |             |
| CB4856                                                                                                              | CT | X | 6506884 | 6509882 | WBGene00001619 | glr-8    | F22A3.3  | 0.192327062191822  |             |
| AGIWUR3455;AGIWUR18484;AGIWUR21797                                                                                  |    |   |         |         |                |          |          |                    |             |
| CB4856                                                                                                              | CT | X | 6510929 | 6512195 | WBGene00044605 | ttr-36   | F22A3.7  | -0.517917007678735 |             |
| AGIWUR298;AGIWUR5370;AGIWUR19336;AGIWUR19999                                                                        |    |   |         |         |                |          |          |                    |             |
| CB4856                                                                                                              | CT | X | 6512285 | 6512956 | WBGene00017688 | ttr-35   | F22A3.2  | -0.585807778116804 | AGIWUR21619 |
| CB4856                                                                                                              | CT | X | 6518883 | 6522656 | WBGene00017687 | ets-4    | F22A3.1  | 0.287660254797413  |             |
| AGIWUR889;AGIWUR3485;AGIWUR9857;AGIWUR11604;AGIWUR17443;AGIWUR24709;AGIWUR28144;AGIWUR30453;AGIWUR34260;AGIWUR34579 |    |   |         |         |                |          |          |                    |             |
| CB4856                                                                                                              | CT | X | 6522596 | 6530148 | WBGene00017690 | ceh-60   | F22A3.5  | 0.136642011305968  |             |
| AGIWUR4658;AGIWUR39511                                                                                              |    |   |         |         |                |          |          |                    |             |
| CB4856                                                                                                              | CT | X | 6533493 | 6536840 | WBGene00017691 | ilys-5   | F22A3.6  | -0.456210633960093 |             |
| AGIWUR4971;AGIWUR38630                                                                                              |    |   |         |         |                |          |          |                    |             |
| CB4856                                                                                                              | CT | X | 6542992 | 6543983 | WBGene00020505 | T14E8.2  | T14E8.2  | 0.197596865212581  | AGIWUR20726 |
| CB4856                                                                                                              | CT | X | 6553288 | 6564207 | WBGene00020504 | svh-2    | T14E8.1  | 0.214607528669173  |             |
| AGIWUR2337;AGIWUR14132;AGIWUR37556                                                                                  |    |   |         |         |                |          |          |                    |             |
| CB4856                                                                                                              | CT | X | 6564175 | 6569518 | WBGene00020506 | dop-3    | T14E8.3  | 0.0353172975150375 |             |
| AGIWUR10355;AGIWUR12156;AGIWUR26923                                                                                 |    |   |         |         |                |          |          |                    |             |
| CB4856                                                                                                              | CT | X | 6582004 | 6585237 | WBGene00020885 | T28B4.2  | T28B4.2  | 0.0463305672172627 | AGIWUR24266 |
| CB4856                                                                                                              | CT | X | 6587898 | 6596135 | WBGene00020884 | T28B4.1  | T28B4.1  | 0.224954798709703  | AGIWUR24308 |
| CB4856                                                                                                              | CT | X | 6596425 | 6597121 | WBGene00020886 | ttr-6    | T28B4.3  | -0.142097119687827 | AGIWUR24030 |
| CB4856                                                                                                              | CT | X | 6597918 | 6598866 | WBGene00020887 | T28B4.4  | T28B4.4  | 0.200325195425307  | AGIWUR26842 |



|                                                                                              |    |   |         |         |                |          |          |                     |             |
|----------------------------------------------------------------------------------------------|----|---|---------|---------|----------------|----------|----------|---------------------|-------------|
| CB4856                                                                                       | CT | X | 6601558 | 6603212 | WBGene00044574 | F23G4.1  | F23G4.1  | -0.157482246676222  |             |
| AGIWUR10940;AGIWUR25657;AGIWUR37205                                                          |    |   |         |         |                |          |          |                     |             |
| CB4856                                                                                       | CT | X | 6607203 | 6609045 | WBGene00000786 | cpr-6    | C25B8.3  | -0.278207311468115  |             |
| AGIWUR4925;AGIWUR5195;AGIWUR8195;AGIWUR11216;AGIWUR11804;AGIWUR20912;AGIWUR28068;AGIWUR28947 |    |   |         |         |                |          |          |                     |             |
| CB4856                                                                                       | CT | X | 6610054 | 6615343 | WBGene00044297 | C25B8.8  | C25B8.8  | -0.0581707251895818 |             |
| AGIWUR27278;AGIWUR29524                                                                      |    |   |         |         |                |          |          |                     |             |
| CB4856                                                                                       | CT | X | 6617393 | 6622915 | WBGene00016088 | clec-266 | C25B8.4  | 0.855609437226094   |             |
| AGIWUR19062;AGIWUR24639;AGIWUR25897;AGIWUR35797;AGIWUR39462;AGIWUR40914                      |    |   |         |         |                |          |          |                     |             |
| CB4856                                                                                       | CT | X | 6619022 | 6628017 | WBGene00002233 | kqt-1    | C25B8.1  | 0.205269283748228   | AGIWUR20419 |
| CB4856                                                                                       | CT | X | 6628041 | 6631537 | WBGene00016090 | aexr-2   | C25B8.7  | 0.0776060953771829  |             |
| AGIWUR3032;AGIWUR6225;AGIWUR42800                                                            |    |   |         |         |                |          |          |                     |             |
| CB4856                                                                                       | CT | X | 6631927 | 6635035 | WBGene00016089 | aexr-1   | C25B8.5  | 0.112975885440183   |             |
| AGIWUR10697;AGIWUR15587;AGIWUR44665                                                          |    |   |         |         |                |          |          |                     |             |
| CB4856                                                                                       | CT | X | 6636561 | 6640620 | WBGene00003710 | nhr-120  | C25B8.6  | 0.0361200218707509  | AGIWUR24251 |
| CB4856                                                                                       | CT | X | 6645654 | 6651753 | WBGene00016976 | C56E10.3 | C56E10.3 | -0.053460926760156  |             |
| AGIWUR16579                                                                                  |    |   |         |         |                |          |          |                     |             |
| CB4856                                                                                       | CT | X | 6655547 | 6659966 | WBGene00016975 | nhr-173  | C56E10.1 | 0.325959012009468   |             |
| AGIWUR38723                                                                                  |    |   |         |         |                |          |          |                     |             |
| CB4856                                                                                       | CT | X | 6661791 | 6669011 | WBGene00003727 | nhr-137  | C56E10.4 | -0.345999518619008  |             |
| AGIWUR26005                                                                                  |    |   |         |         |                |          |          |                     |             |
| CB4856                                                                                       | CT | X | 6672830 | 6674407 | WBGene00000745 | col-172  | F38B6.5  | -0.224339953909005  |             |
| AGIWUR2848;AGIWUR4663;AGIWUR37133                                                            |    |   |         |         |                |          |          |                     |             |
| CB4856                                                                                       | CT | X | 6674869 | 6679848 | WBGene00018174 | F38B6.4  | F38B6.4  | -0.658651527586681  | AGIWUR5569  |
| CB4856                                                                                       | CT | X | 6680901 | 6682783 | WBGene00044575 | F38B6.8  | F38B6.8  | 0.0444208966252821  |             |
| AGIWUR32608;AGIWUR44990                                                                      |    |   |         |         |                |          |          |                     |             |
| CB4856                                                                                       | CT | X | 6684440 | 6690085 | WBGene00018175 | F38B6.6  | F38B6.6  | 0.0931938521473148  |             |
| AGIWUR25333;AGIWUR42026                                                                      |    |   |         |         |                |          |          |                     |             |
| CB4856                                                                                       | CT | X | 6693735 | 6695662 | WBGene00018173 | F38B6.3  | F38B6.3  | -0.021583492071108  | AGIWUR1165  |
| CB4856                                                                                       | CT | X | 6695820 | 6698337 | WBGene00018176 | F38B6.7  | F38B6.7  | 0.173519929614105   | AGIWUR20268 |
| CB4856                                                                                       | CT | X | 6698533 | 6700826 | WBGene00018172 | F38B6.2  | F38B6.2  | -0.357789816346254  |             |
| AGIWUR8745;AGIWUR28477                                                                       |    |   |         |         |                |          |          |                     |             |
| CB4856                                                                                       | CT | X | 6702463 | 6709142 | WBGene00000042 | acr-2    | K11G12.2 | -0.0197261792646755 |             |
| AGIWUR12651;AGIWUR15050                                                                      |    |   |         |         |                |          |          |                     |             |
| CB4856                                                                                       | CT | X | 6709538 | 6712925 | WBGene00000043 | acr-3    | K11G12.7 | -0.34813712546252   |             |
| AGIWUR1653                                                                                   |    |   |         |         |                |          |          |                     |             |
| CB4856                                                                                       | CT | X | 6713577 | 6716381 | WBGene00003530 | nas-11   | K11G12.1 | -0.170037257383539  |             |
| AGIWUR25194                                                                                  |    |   |         |         |                |          |          |                     |             |
| CB4856                                                                                       | CT | X | 6719666 | 6723066 | WBGene00004876 | smf-1    | K11G12.4 | 0.0448351194768257  |             |
| AGIWUR3059                                                                                   |    |   |         |         |                |          |          |                     |             |

|                                                                                   |    |   |         |         |                |           |          |                     |             |
|-----------------------------------------------------------------------------------|----|---|---------|---------|----------------|-----------|----------|---------------------|-------------|
| CB4856                                                                            | CT | X | 6723500 | 6725668 | WBGene00019656 | slc-25A10 | K11G12.5 | -0.116741262538209  |             |
| AGIWUR19365                                                                       |    |   |         |         |                |           |          |                     |             |
| CB4856                                                                            | CT | X | 6725781 | 6729748 | WBGene00019657 | K11G12.6  | K11G12.6 | 0.272557123939439   |             |
| AGIWUR6530;AGIWUR10261;AGIWUR11629                                                |    |   |         |         |                |           |          |                     |             |
| CB4856                                                                            | CT | X | 6729997 | 6733315 | WBGene00019843 | R03E9.2   | R03E9.2  | 0.197471891300953   | AGIWUR12973 |
| CB4856                                                                            | CT | X | 6742351 | 6743899 | WBGene00003163 | mdl-1     | R03E9.1  | 0.837247073742525   |             |
| AGIWUR4901;AGIWUR16512;AGIWUR26064;AGIWUR45173                                    |    |   |         |         |                |           |          |                     |             |
| CB4856                                                                            | CT | X | 6747296 | 6761738 | WBGene00019844 | abts-4    | R03E9.3  | 0.509666980525849   |             |
| AGIWUR6213;AGIWUR6511;AGIWUR21622;AGIWUR27359;AGIWUR31458;AGIWUR35645             |    |   |         |         |                |           |          |                     |             |
| CB4856                                                                            | CT | X | 6766083 | 6772946 | WBGene00002149 | irk-1     | R03E9.4  | 0.244832367319494   |             |
| AGIWUR5497;AGIWUR11639                                                            |    |   |         |         |                |           |          |                     |             |
| CB4856                                                                            | CT | X | 6783157 | 6784197 | WBGene00019226 | H22K11.3  | H22K11.3 | 0.134011030038407   |             |
| AGIWUR36514                                                                       |    |   |         |         |                |           |          |                     |             |
| CB4856                                                                            | CT | X | 6784411 | 6787296 | WBGene00019225 | bgal-2    | H22K11.2 | 0.00870118156387178 |             |
| AGIWUR40471                                                                       |    |   |         |         |                |           |          |                     |             |
| CB4856                                                                            | CT | X | 6787256 | 6789578 | WBGene00019227 | sgca-1    | H22K11.4 | -0.118416412922516  |             |
| AGIWUR35089                                                                       |    |   |         |         |                |           |          |                     |             |
| CB4856                                                                            | CT | X | 6791064 | 6792715 | WBGene00000216 | asp-3     | H22K11.1 | -0.131360161460902  |             |
| AGIWUR6252;AGIWUR11666;AGIWUR14411;AGIWUR14860;AGIWUR31198;AGIWUR36688            |    |   |         |         |                |           |          |                     |             |
| CB4856                                                                            | CT | X | 6800688 | 6803700 | WBGene00019749 | M03A8.3   | M03A8.3  | -0.0341247316502997 |             |
| AGIWUR7715;AGIWUR32523                                                            |    |   |         |         |                |           |          |                     |             |
| CB4856                                                                            | CT | X | 6809104 | 6817266 | WBGene00019748 | atg-2     | M03A8.2  | 0.505876038046676   | AGIWUR4789  |
| CB4856                                                                            | CT | X | 6818438 | 6820080 | WBGene00000991 | dhs-28    | M03A8.1  | 0.0551840389070364  |             |
| AGIWUR7084;AGIWUR8935;AGIWUR10246;AGIWUR13173;AGIWUR15478;AGIWUR33060;AGIWUR33621 |    |   |         |         |                |           |          |                     |             |
| CB4856                                                                            | CT | X | 6820005 | 6823268 | WBGene00001572 | gei-15    | M03A8.4  | 0                   | AGIWUR6969  |
| CB4856                                                                            | CT | X | 6823890 | 6825862 | WBGene00018257 | F41B4.1   | F41B4.1  | -0.163136208371565  | AGIWUR30496 |
| CB4856                                                                            | CT | X | 6831251 | 6835266 | WBGene00018258 | F41B4.2   | F41B4.2  | -0.0518690028306779 |             |
| AGIWUR6648;AGIWUR31181                                                            |    |   |         |         |                |           |          |                     |             |
| CB4856                                                                            | CT | X | 6835487 | 6836115 | WBGene00018259 | F41B4.3   | F41B4.3  | -0.646051378122939  | AGIWUR26760 |
| CB4856                                                                            | CT | X | 6836386 | 6840615 | WBGene00001617 | glr-6     | F41B4.4  | -0.124547144273857  |             |
| AGIWUR8107;AGIWUR34692                                                            |    |   |         |         |                |           |          |                     |             |
| CB4856                                                                            | CT | X | 6841258 | 6842129 | WBGene00000210 | asg-2     | C53B7.4  | -0.179662615350619  | AGIWUR24638 |
| CB4856                                                                            | CT | X | 6844755 | 6845976 | WBGene00016894 | C53B7.3   | C53B7.3  | 0.859603048040776   |             |
| AGIWUR39143;AGIWUR43670                                                           |    |   |         |         |                |           |          |                     |             |
| CB4856                                                                            | CT | X | 6846233 | 6847547 | WBGene00016893 | C53B7.2   | C53B7.2  | -0.0855976328130628 |             |
| AGIWUR12377;AGIWUR30277                                                           |    |   |         |         |                |           |          |                     |             |
| CB4856                                                                            | CT | X | 6853618 | 6860922 | WBGene00004370 | rig-3     | C53B7.1  | 0.248666207667625   | AGIWUR369   |
| CB4856                                                                            | CT | X | 6860946 | 6863414 | WBGene00016896 | nep-4     | C53B7.7  | 0.103678186050164   |             |
| AGIWUR10965;AGIWUR15889;AGIWUR21335                                               |    |   |         |         |                |           |          |                     |             |

|                                                                                                                       |    |   |         |         |                |           |           |                     |             |
|-----------------------------------------------------------------------------------------------------------------------|----|---|---------|---------|----------------|-----------|-----------|---------------------|-------------|
| CB4856                                                                                                                | CT | X | 6864313 | 6865939 | WBGene00003856 | odr-10    | C53B7.5   | 0.0211174233170883  | AGIWUR17818 |
| CB4856                                                                                                                | CT | X | 6870354 | 6871670 | WBGene00018276 | F41C6.2   | F41C6.2   | -0.181916515483259  | AGIWUR21975 |
| CB4856                                                                                                                | CT | X | 6873359 | 6874823 | WBGene00018278 | F41C6.4   | F41C6.4   | -0.638252028847097  | AGIWUR42965 |
| CB4856                                                                                                                | CT | X | 6875131 | 6877536 | WBGene00000746 | col-173   | F41C6.5   | -0.339038711082898  | AGIWUR44310 |
| CB4856                                                                                                                | CT | X | 6880909 | 6881571 | WBGene00018279 | F41C6.6   | F41C6.6   | 0.0953397023911062  | AGIWUR9981  |
| CB4856                                                                                                                | CT | X | 6882493 | 6885277 | WBGene00018280 | F41C6.7   | F41C6.7   | -0.0237638188373612 | AGIWUR37348 |
| CB4856                                                                                                                | CT | X | 6889689 | 6897147 | WBGene00006746 | unc-6     | F41C6.1   | 0.418503304200795   | AGIWUR36208 |
| CB4856                                                                                                                | CT | X | 6898650 | 6899948 | WBGene00017446 | F14B8.4   | F14B8.4   | -0.494306932870625  | AGIWUR26049 |
| CB4856                                                                                                                | CT | X | 6901378 | 6903985 | WBGene00003987 | pes-23    | F14B8.3   | -0.0776108947791467 |             |
| AGIWUR7012;AGIWUR11006;AGIWUR22618                                                                                    |    |   |         |         |                |           |           |                     |             |
| CB4856                                                                                                                | CT | X | 6904721 | 6905849 | WBGene00017445 | sid-5     | F14B8.2   | 0.136117888820866   | AGIWUR3606  |
| CB4856                                                                                                                | CT | X | 6914254 | 6921126 | WBGene00003732 | nhx-4     | F14B8.1   | 0.182948083810233   | AGIWUR24792 |
| CB4856                                                                                                                | CT | X | 6921646 | 6924764 | WBGene00017449 | otpl-3    | F14B8.7   | -0.291161556533517  | AGIWUR35094 |
| CB4856                                                                                                                | CT | X | 6924804 | 6928704 | WBGene00017447 | F14B8.5   | F14B8.5   | 0.174106261358686   |             |
| AGIWUR2134;AGIWUR7909;AGIWUR15355;AGIWUR16145;AGIWUR16298;AGIWUR18264;AGIWUR28130;AGIWUR34979;AGIWUR40952;AGIWUR41459 |    |   |         |         |                |           |           |                     |             |
| CB4856                                                                                                                | CT | X | 6929262 | 6932359 | WBGene00017448 | F14B8.6   | F14B8.6   | 0.127608025433577   | AGIWUR30709 |
| CB4856                                                                                                                | CT | X | 6935732 | 6939041 | WBGene00015866 | C16E9.2   | C16E9.2   | -0.0215340721225861 |             |
| AGIWUR31984;AGIWUR40570;AGIWUR40974                                                                                   |    |   |         |         |                |           |           |                     |             |
| CB4856                                                                                                                | CT | X | 6940253 | 6943713 | WBGene00015865 | C16E9.1   | C16E9.1   | 0.26801306323458    | AGIWUR38169 |
| CB4856                                                                                                                | CT | X | 6943740 | 6956399 | WBGene00002123 | inx-1     | C16E9.4   | -0.0594957629223707 |             |
| AGIWUR1327;AGIWUR4443;AGIWUR41082                                                                                     |    |   |         |         |                |           |           |                     |             |
| CB4856                                                                                                                | CT | X | 6967369 | 6974864 | WBGene00017156 | F01E11.3  | F01E11.3  | 0.202607598969973   |             |
| AGIWUR8518;AGIWUR17384;AGIWUR32545                                                                                    |    |   |         |         |                |           |           |                     |             |
| CB4856                                                                                                                | CT | X | 6980784 | 6983132 | WBGene00219372 | F01E11.17 | F01E11.17 | 0.109666487683812   |             |
| AGIWUR29020                                                                                                           |    |   |         |         |                |           |           |                     |             |
| CB4856                                                                                                                | CT | X | 6991727 | 6994162 | WBGene00017154 | ugt-57    | F01E11.1  | 0.278415834949356   |             |
| AGIWUR1259;AGIWUR9010;AGIWUR39364                                                                                     |    |   |         |         |                |           |           |                     |             |
| CB4856                                                                                                                | CT | X | 6994784 | 6996620 | WBGene00006642 | tsp-16    | F01E11.4  | 0.181385989298921   |             |
| AGIWUR15782                                                                                                           |    |   |         |         |                |           |           |                     |             |
| CB4856                                                                                                                | CT | X | 6996873 | 7005575 | WBGene00017157 | tyra-2    | F01E11.5  | 0.0152181155819164  |             |
| AGIWUR1834;AGIWUR19308;AGIWUR32958;AGIWUR34968                                                                        |    |   |         |         |                |           |           |                     |             |
| CB4856                                                                                                                | CT | X | 7020033 | 7023950 | WBGene00000283 | cah-5     | R173.1    | -0.0757033974632364 | AGIWUR13092 |
| CB4856                                                                                                                | CT | X | 7029136 | 7029638 | WBGene00020126 | flp-26    | R173.4    | 0.137544413433361   | AGIWUR20847 |
| CB4856                                                                                                                | CT | X | 7030225 | 7036084 | WBGene00020125 | R173.3    | R173.3    | 0.179212622502967   | AGIWUR11682 |
| CB4856                                                                                                                | CT | X | 7050577 | 7055667 | WBGene00006712 | ubc-17    | B0403.2   | -0.0475206708769242 |             |
| AGIWUR6165;AGIWUR7860;AGIWUR8038;AGIWUR9008;AGIWUR14371;AGIWUR37718                                                   |    |   |         |         |                |           |           |                     |             |
| CB4856                                                                                                                | CT | X | 7057731 | 7061190 | WBGene00015169 | B0403.5   | B0403.5   | -0.690189755807879  |             |
| AGIWUR25613;AGIWUR42236                                                                                               |    |   |         |         |                |           |           |                     |             |

|                                                                                               |    |   |         |         |                |          |          |                     |             |
|-----------------------------------------------------------------------------------------------|----|---|---------|---------|----------------|----------|----------|---------------------|-------------|
| CB4856                                                                                        | CT | X | 7061203 | 7063330 | WBGene00015167 | B0403.3  | B0403.3  | -0.125985850071523  | AGIWUR23954 |
| CB4856                                                                                        | CT | X | 7066345 | 7068563 | WBGene00015168 | pdi-6    | B0403.4  | -0.0551609389499892 |             |
| AGIWUR13446;AGIWUR43810                                                                       |    |   |         |         |                |          |          |                     |             |
| CB4856                                                                                        | CT | X | 7071410 | 7075337 | WBGene00043982 | B0403.6  | B0403.6  | 0.459007232254335   |             |
| AGIWUR11703;AGIWUR39969                                                                       |    |   |         |         |                |          |          |                     |             |
| CB4856                                                                                        | CT | X | 7083417 | 7086008 | WBGene00016467 | C36B7.4  | C36B7.4  | -0.0898553521318064 | AGIWUR5620  |
| CB4856                                                                                        | CT | X | 7089228 | 7096449 | WBGene00016468 | C36B7.5  | C36B7.5  | -0.0252760144802329 | AGIWUR10931 |
| CB4856                                                                                        | CT | X | 7097434 | 7100338 | WBGene00016469 | C36B7.6  | C36B7.6  | -0.306233702227852  |             |
| AGIWUR5911;AGIWUR24672;AGIWUR26892;AGIWUR34244;AGIWUR38062                                    |    |   |         |         |                |          |          |                     |             |
| CB4856                                                                                        | CT | X | 7101777 | 7102136 | WBGene00016466 | C36B7.3  | C36B7.3  | -0.130035805611717  | AGIWUR17906 |
| CB4856                                                                                        | CT | X | 7106407 | 7108436 | WBGene00016465 | C36B7.2  | C36B7.2  | 0.193082946025584   | AGIWUR9259  |
| CB4856                                                                                        | CT | X | 7112889 | 7114863 | WBGene00016464 | C36B7.1  | C36B7.1  | 0.12628524753482    |             |
| AGIWUR16046;AGIWUR22687                                                                       |    |   |         |         |                |          |          |                     |             |
| CB4856                                                                                        | CT | X | 7116205 | 7116996 | WBGene00001841 | hen-1    | C36B7.7  | 0.24341390593647    | AGIWUR31932 |
| CB4856                                                                                        | CT | X | 7126648 | 7139646 | WBGene00002163 | ist-1    | C54D1.3  | 0.0919086665060469  |             |
| AGIWUR8309;AGIWUR22991;AGIWUR28042;AGIWUR32682;AGIWUR43007;AGIWUR44474                        |    |   |         |         |                |          |          |                     |             |
| CB4856                                                                                        | CT | X | 7139875 | 7140566 | WBGene00016912 | clec-86  | C54D1.2  | -0.980200282529307  | AGIWUR21885 |
| CB4856                                                                                        | CT | X | 7140504 | 7143641 | WBGene00000116 | alh-10   | C54D1.4  | 0.346148831431531   | AGIWUR9700  |
| CB4856                                                                                        | CT | X | 7143918 | 7151235 | WBGene00016913 | lam-2    | C54D1.5  | -0.29147676411304   |             |
| AGIWUR1996;AGIWUR27256                                                                        |    |   |         |         |                |          |          |                     |             |
| CB4856                                                                                        | CT | X | 7153889 | 7156035 | WBGene00016914 | C54D1.7  | C54D1.7  | 0.139166841939339   | AGIWUR27463 |
| CB4856                                                                                        | CT | X | 7159036 | 7166021 | WBGene00004004 | pgp-10   | C54D1.1  | 0.0663266515615657  | AGIWUR15114 |
| CB4856                                                                                        | CT | X | 7166005 | 7170625 | WBGene00000238 | bar-1    | C54D1.6  | 0.0330679450278453  | AGIWUR1646  |
| CB4856                                                                                        | CT | X | 7177641 | 7178922 | WBGene00044577 | F43E12.1 | F43E12.1 | -0.0892566144969225 |             |
| AGIWUR7496;AGIWUR16469;AGIWUR42022;AGIWUR44522                                                |    |   |         |         |                |          |          |                     |             |
| CB4856                                                                                        | CT | X | 7187355 | 7188482 | WBGene00016940 | C55B6.4  | C55B6.4  | 0.116232712997785   | AGIWUR32410 |
| CB4856                                                                                        | CT | X | 7194564 | 7198291 | WBGene00001025 | dnj-7    | C55B6.2  | -0.29755968207125   |             |
| AGIWUR1962;AGIWUR10779;AGIWUR11340;AGIWUR14618;AGIWUR30335;AGIWUR34569                        |    |   |         |         |                |          |          |                     |             |
| CB4856                                                                                        | CT | X | 7200364 | 7204044 | WBGene00016939 | C55B6.1  | C55B6.1  | -0.31114451960293   | AGIWUR30579 |
| CB4856                                                                                        | CT | X | 7204742 | 7205295 | WBGene00016941 | C55B6.5  | C55B6.5  | 0.0498918052936475  | AGIWUR4101  |
| CB4856                                                                                        | CT | X | 7206719 | 7209985 | WBGene00022829 | ZK867.2  | ZK867.2  | 0.25799553231832    |             |
| AGIWUR27793;AGIWUR39082                                                                       |    |   |         |         |                |          |          |                     |             |
| CB4856                                                                                        | CT | X | 7211705 | 7213956 | WBGene00044283 | spp-22   | ZK867.3  | -0.0410841315974064 | AGIWUR30676 |
| CB4856                                                                                        | CT | X | 7218109 | 7226825 | WBGene00044068 | syd-9    | ZK867.1  | 0.570091829808591   |             |
| AGIWUR366;AGIWUR8810;AGIWUR22384;AGIWUR28559                                                  |    |   |         |         |                |          |          |                     |             |
| CB4856                                                                                        | CT | X | 7230330 | 7238662 | WBGene00018519 | F46H5.3  | F46H5.3  | -0.0536266819705595 |             |
| AGIWUR2881;AGIWUR5451;AGIWUR6990;AGIWUR30972;AGIWUR32854                                      |    |   |         |         |                |          |          |                     |             |
| CB4856                                                                                        | CT | X | 7238666 | 7242983 | WBGene00018522 | F46H5.7  | F46H5.7  | 0.146940638114216   |             |
| AGIWUR9564;AGIWUR9695;AGIWUR14090;AGIWUR18319;AGIWUR19653;AGIWUR23962;AGIWUR26751;AGIWUR36620 |    |   |         |         |                |          |          |                     |             |

|                                                                                                |    |   |         |         |                |          |          |                     |             |
|------------------------------------------------------------------------------------------------|----|---|---------|---------|----------------|----------|----------|---------------------|-------------|
| CB4856                                                                                         | CT | X | 7245057 | 7254792 | WBGene00018520 | F46H5.4  | F46H5.4  | 0.176328169620092   | AGIWUR39855 |
| CB4856                                                                                         | CT | X | 7255927 | 7256978 | WBGene00018521 | F46H5.5  | F46H5.5  | -0.0389286205978374 | AGIWUR29869 |
| CB4856                                                                                         | CT | X | 7258116 | 7260377 | WBGene00018523 | lact-1   | F46H5.8  | -0.579560881509998  |             |
| AGIWUR2426;AGIWUR13200;AGIWUR29644                                                             |    |   |         |         |                |          |          |                     |             |
| CB4856                                                                                         | CT | X | 7265652 | 7267893 | WBGene00018518 | F46H5.2  | F46H5.2  | -0.241474283962955  |             |
| AGIWUR7598;AGIWUR15397;AGIWUR17951;AGIWUR27236;AGIWUR37973                                     |    |   |         |         |                |          |          |                     |             |
| CB4856                                                                                         | CT | X | 7267989 | 7272067 | WBGene00001696 | grd-7    | F46H5.6  | -0.306977945694281  | AGIWUR8059  |
| CB4856                                                                                         | CT | X | 7272334 | 7280322 | WBGene00006750 | unc-10   | T10A3.1  | 0.0698847313350113  |             |
| AGIWUR1087;AGIWUR8869;AGIWUR23174;AGIWUR43203                                                  |    |   |         |         |                |          |          |                     |             |
| CB4856                                                                                         | CT | X | 7292138 | 7296035 | WBGene00019351 | Iron-7   | K03A1.2  | 0.00879734706133384 | AGIWUR24250 |
| CB4856                                                                                         | CT | X | 7296098 | 7298751 | WBGene00019352 | K03A1.4  | K03A1.4  | 0.11201063233713    | AGIWUR14580 |
| CB4856                                                                                         | CT | X | 7301357 | 7305570 | WBGene00006351 | sur-5    | K03A1.5  | -0.254846147494153  |             |
| AGIWUR8047;AGIWUR19938;AGIWUR20779;AGIWUR21098                                                 |    |   |         |         |                |          |          |                     |             |
| CB4856                                                                                         | CT | X | 7312175 | 7313976 | WBGene00020338 | T08A9.6  | T08A9.6  | -0.148068593744619  |             |
| AGIWUR11970;AGIWUR20221;AGIWUR32288                                                            |    |   |         |         |                |          |          |                     |             |
| CB4856                                                                                         | CT | X | 7314969 | 7315353 | WBGene00004988 | spp-3    | T08A9.7  | -0.112553841253799  |             |
| AGIWUR831;AGIWUR28222;AGIWUR42444                                                              |    |   |         |         |                |          |          |                     |             |
| CB4856                                                                                         | CT | X | 7315995 | 7316818 | WBGene00004987 | spp-2    | T08A9.12 | 2.20555007434137    |             |
| AGIWUR2832;AGIWUR4441;AGIWUR7152;AGIWUR41734                                                   |    |   |         |         |                |          |          |                     |             |
| CB4856                                                                                         | CT | X | 7317341 | 7317681 | WBGene00004991 | spp-6    | T08A9.10 | 2.41376078370715    |             |
| AGIWUR3981                                                                                     |    |   |         |         |                |          |          |                     |             |
| CB4856                                                                                         | CT | X | 7318239 | 7318798 | WBGene00004989 | spp-4    | T08A9.8  | -0.398950789853556  | AGIWUR39959 |
| CB4856                                                                                         | CT | X | 7319935 | 7320384 | WBGene00004990 | spp-5    | T08A9.9  | -0.0239771803750877 | AGIWUR16988 |
| CB4856                                                                                         | CT | X | 7321999 | 7322415 | WBGene00044442 | T08A9.13 | T08A9.13 | 0.175205443829238   |             |
| AGIWUR739;AGIWUR14660;AGIWUR17977;AGIWUR19453;AGIWUR23763                                      |    |   |         |         |                |          |          |                     |             |
| CB4856                                                                                         | CT | X | 7327605 | 7329677 | WBGene00004912 | sng-1    | T08A9.3  | -0.0818155190960752 | AGIWUR19181 |
| CB4856                                                                                         | CT | X | 7329818 | 7330669 | WBGene00020339 | ttr-59   | T08A9.11 | -0.0719099962829528 |             |
| AGIWUR43881                                                                                    |    |   |         |         |                |          |          |                     |             |
| CB4856                                                                                         | CT | X | 7331189 | 7331903 | WBGene00020335 | ttr-30   | T08A9.2  | -0.31590375207119   | AGIWUR26782 |
| CB4856                                                                                         | CT | X | 7334714 | 7340224 | WBGene00020334 | epg-7    | T08A9.1  | 0.21694855504909    | AGIWUR13141 |
| CB4856                                                                                         | CT | X | 7341509 | 7342780 | WBGene00015565 | C07D8.6  | C07D8.6  | -0.477413922987679  |             |
| AGIWUR2633;AGIWUR25877                                                                         |    |   |         |         |                |          |          |                     |             |
| CB4856                                                                                         | CT | X | 7344047 | 7344551 | WBGene00015564 | C07D8.5  | C07D8.5  | 0.256594619305286   | AGIWUR16285 |
| CB4856                                                                                         | CT | X | 7362082 | 7363663 | WBGene00015562 | C07D8.2  | C07D8.2  | 0.133538878172117   | AGIWUR2955  |
| CB4856                                                                                         | CT | X | 7365567 | 7366298 | WBGene00016985 | C56G3.2  | C56G3.2  | 0.218612846456583   |             |
| AGIWUR3048;AGIWUR12259;AGIWUR20965;AGIWUR21589;AGIWUR22826;AGIWUR29368;AGIWUR31432;AGIWUR35429 |    |   |         |         |                |          |          |                     |             |
| CB4856                                                                                         | CT | X | 7377302 | 7388400 | WBGene00016984 | npr-8    | C56G3.1  | 0.186476795988263   | AGIWUR30083 |
| CB4856                                                                                         | CT | X | 7390574 | 7392276 | WBGene00015667 | C10A4.6  | C10A4.6  | 0.133369511546171   | AGIWUR8450  |
| CB4856                                                                                         | CT | X | 7393467 | 7395987 | WBGene00015666 | gad-2    | C10A4.5  | -0.112624863742456  | AGIWUR36308 |

|                                                                                                                                                        |    |   |         |         |                |          |          |                     |             |
|--------------------------------------------------------------------------------------------------------------------------------------------------------|----|---|---------|---------|----------------|----------|----------|---------------------|-------------|
| CB4856                                                                                                                                                 | CT | X | 7398884 | 7400858 | WBGene00050957 | C10A4.10 | C10A4.10 | -0.235181589952729  |             |
| AGIWUR23007                                                                                                                                            |    |   |         |         |                |          |          |                     |             |
| CB4856                                                                                                                                                 | CT | X | 7402131 | 7403609 | WBGene00015665 | C10A4.4  | C10A4.4  | -0.208235990220212  | AGIWUR10942 |
| CB4856                                                                                                                                                 | CT | X | 7407456 | 7408703 | WBGene00015664 | C10A4.3  | C10A4.3  | 0.558767953630307   | AGIWUR6197  |
| CB4856                                                                                                                                                 | CT | X | 7410235 | 7412749 | WBGene00015663 | C10A4.2  | C10A4.2  | 0.00652155767710916 | AGIWUR37959 |
| CB4856                                                                                                                                                 | CT | X | 7413611 | 7415520 | WBGene00015668 | C10A4.7  | C10A4.7  | -0.0742917550734363 | AGIWUR1003  |
| CB4856                                                                                                                                                 | CT | X | 7415839 | 7418627 | WBGene00015662 | C10A4.1  | C10A4.1  | -0.21669383860117   | AGIWUR5893  |
| CB4856                                                                                                                                                 | CT | X | 7420871 | 7422628 | WBGene00045456 | C10A4.9  | C10A4.9  | -0.105799926602276  |             |
| AGIWUR3200;AGIWUR10221;AGIWUR10599;AGIWUR13837;AGIWUR15117                                                                                             |    |   |         |         |                |          |          |                     |             |
| CB4856                                                                                                                                                 | CT | X | 7422641 | 7424881 | WBGene00003380 | mmn-2    | C10A4.8  | 0.431456684343932   | AGIWUR7370  |
| CB4856                                                                                                                                                 | CT | X | 7431472 | 7433548 | WBGene00000523 | clc-2    | C01C10.1 | 0.0804268877859498  |             |
| AGIWUR8585;AGIWUR41135                                                                                                                                 |    |   |         |         |                |          |          |                     |             |
| CB4856                                                                                                                                                 | CT | X | 7433632 | 7435733 | WBGene00000526 | clc-5    | C01C10.4 | 0.490122035319086   |             |
| AGIWUR9626                                                                                                                                             |    |   |         |         |                |          |          |                     |             |
| CB4856                                                                                                                                                 | CT | X | 7435602 | 7438000 | WBGene00015294 | C01C10.2 | C01C10.2 | 0.0597186474840541  |             |
| AGIWUR10583;AGIWUR28046;AGIWUR41797                                                                                                                    |    |   |         |         |                |          |          |                     |             |
| CB4856                                                                                                                                                 | CT | X | 7439396 | 7442577 | WBGene00015295 | acl-12   | C01C10.3 | 0.427780252531662   |             |
| AGIWUR24331                                                                                                                                            |    |   |         |         |                |          |          |                     |             |
| CB4856                                                                                                                                                 | CT | X | 7458293 | 7463736 | WBGene00004949 | sox-2    | K08A8.2  | 0.36932667656043    |             |
| AGIWUR580;AGIWUR1927;AGIWUR2157;AGIWUR9025;AGIWUR12690;AGIWUR16873;AGIWUR17998;AGIWUR18918;AGIWUR23196;AGIWUR23402;AGIWUR29307;AGIWUR34708;AGIWUR35922 |    |   |         |         |                |          |          |                     |             |
| CB4856                                                                                                                                                 | CT | X | 7465193 | 7475014 | WBGene00000591 | coh-1    | K08A8.3  | 0.181437314858263   |             |
| AGIWUR8999;AGIWUR9946;AGIWUR16896;AGIWUR24797;AGIWUR25003;AGIWUR30115                                                                                  |    |   |         |         |                |          |          |                     |             |
| CB4856                                                                                                                                                 | CT | X | 7479248 | 7481010 | WBGene00003185 | mek-1    | K08A8.1  | 0.0345203707807169  |             |
| AGIWUR4305;AGIWUR11188;AGIWUR43700                                                                                                                     |    |   |         |         |                |          |          |                     |             |
| CB4856                                                                                                                                                 | CT | X | 7481326 | 7485038 | WBGene00018608 | F48E3.9  | F48E3.9  | 0.256781403191678   |             |
| AGIWUR4018;AGIWUR26749;AGIWUR26772                                                                                                                     |    |   |         |         |                |          |          |                     |             |
| CB4856                                                                                                                                                 | CT | X | 7485864 | 7490707 | WBGene00001637 | gly-12   | F48E3.1  | -0.489980958471158  | AGIWUR21551 |
| CB4856                                                                                                                                                 | CT | X | 7493724 | 7495591 | WBGene00018605 | F48E3.4  | F48E3.4  | -0.140771535306776  | AGIWUR24512 |
| CB4856                                                                                                                                                 | CT | X | 7495684 | 7500982 | WBGene00018604 | uggt-1   | F48E3.3  | -0.242899277670272  | AGIWUR23074 |
| CB4856                                                                                                                                                 | CT | X | 7501236 | 7502674 | WBGene00018606 | F48E3.6  | F48E3.6  | 0.0357067210374495  | AGIWUR16467 |
| CB4856                                                                                                                                                 | CT | X | 7503823 | 7506633 | WBGene00000061 | lgc-11   | F48E3.7  | -0.126963054699333  | AGIWUR43951 |
| CB4856                                                                                                                                                 | CT | X | 7507885 | 7517694 | WBGene00018607 | F48E3.8  | F48E3.8  | 0.463148678025122   |             |
| AGIWUR13250;AGIWUR17401;AGIWUR20280;AGIWUR34154;AGIWUR35820;AGIWUR41858                                                                                |    |   |         |         |                |          |          |                     |             |
| CB4856                                                                                                                                                 | CT | X | 7525571 | 7527433 | WBGene00018485 | F46C8.3  | F46C8.3  | 0.279532968240327   | AGIWUR15002 |
| CB4856                                                                                                                                                 | CT | X | 7528616 | 7532732 | WBGene00000438 | ceh-14   | F46C8.5  | 0.0117515306582057  | AGIWUR29513 |
| CB4856                                                                                                                                                 | CT | X | 7536417 | 7537792 | WBGene00001069 | dpy-7    | F46C8.6  | 0.796790264575051   |             |
| AGIWUR4342;AGIWUR38497                                                                                                                                 |    |   |         |         |                |          |          |                     |             |
| CB4856                                                                                                                                                 | CT | X | 7537844 | 7540129 | WBGene00018486 | glb-16   | F46C8.7  | -0.0665154769096494 | AGIWUR8108  |

|                                                                                                                                                 |    |   |         |         |                |          |          |                     |             |
|-------------------------------------------------------------------------------------------------------------------------------------------------|----|---|---------|---------|----------------|----------|----------|---------------------|-------------|
| CB4856                                                                                                                                          | CT | X | 7546842 | 7548365 | WBGene00000747 | col-174  | F46C8.2  | 0.0451929862416298  | AGIWUR17224 |
| CB4856                                                                                                                                          | CT | X | 7548458 | 7551218 | WBGene00018484 | F46C8.1  | F46C8.1  | -0.0393143557906335 | AGIWUR21652 |
| CB4856                                                                                                                                          | CT | X | 7551204 | 7554426 | WBGene00018487 | F46C8.8  | F46C8.8  | -0.325416294475874  | AGIWUR23957 |
| CB4856                                                                                                                                          | CT | X | 7556788 | 7559085 | WBGene00019803 | PDB1.1   | PDB1.1   | -0.132346434299486  |             |
| AGIWUR8001;AGIWUR9508;AGIWUR11133;AGIWUR16595;AGIWUR20548;AGIWUR26709                                                                           |    |   |         |         |                |          |          |                     |             |
| CB4856                                                                                                                                          | CT | X | 7560024 | 7562093 | WBGene00017243 | F08C6.5  | F08C6.5  | 0.221498485889965   | AGIWUR31069 |
| CB4856                                                                                                                                          | CT | X | 7562831 | 7564805 | WBGene00006063 | sto-1    | F08C6.4  | 0.691679435048256   | AGIWUR31380 |
| CB4856                                                                                                                                          | CT | X | 7565323 | 7568152 | WBGene00007059 | vps-52   | F08C6.3  | -0.105086895204973  | AGIWUR5089  |
| CB4856                                                                                                                                          | CT | X | 7568137 | 7569722 | WBGene00017244 | apy-1    | F08C6.6  | -0.60829000372102   | AGIWUR19261 |
| CB4856                                                                                                                                          | CT | X | 7570374 | 7573751 | WBGene00006827 | unc-98   | F08C6.7  | 0.0369051515118226  | AGIWUR41594 |
| CB4856                                                                                                                                          | CT | X | 7572110 | 7581059 | WBGene00017241 | pcyt-1   | F08C6.2  | -0.170381006404657  |             |
| AGIWUR294;AGIWUR13737                                                                                                                           |    |   |         |         |                |          |          |                     |             |
| CB4856                                                                                                                                          | CT | X | 7585587 | 7595414 | WBGene00000083 | adt-2    | F08C6.1  | -0.0992400981284653 |             |
| AGIWUR10684;AGIWUR11003;AGIWUR15407;AGIWUR18101;AGIWUR19164;AGIWUR21177;AGIWUR26814;AGIWUR40645;AGIWUR40834;AGIWUR41449;AGIWUR42558;AGIWUR43389 |    |   |         |         |                |          |          |                     |             |
| CB4856                                                                                                                                          | CT | X | 7596927 | 7599824 | WBGene00016657 | C44E12.1 | C44E12.1 | 0.347536602788669   |             |
| AGIWUR899;AGIWUR7416;AGIWUR11671;AGIWUR12930;AGIWUR13227;AGIWUR43370                                                                            |    |   |         |         |                |          |          |                     |             |
| CB4856                                                                                                                                          | CT | X | 7599836 | 7608135 | WBGene00006671 | twk-17   | C44E12.3 | -0.0558553121098484 |             |
| AGIWUR3885;AGIWUR20444;AGIWUR20522;AGIWUR24943;AGIWUR29077;AGIWUR33963;AGIWUR39488                                                              |    |   |         |         |                |          |          |                     |             |
| CB4856                                                                                                                                          | CT | X | 7627649 | 7627848 | WBGene00017813 | F26A10.1 | F26A10.1 | 0.113079789650527   |             |
| AGIWUR2562                                                                                                                                      |    |   |         |         |                |          |          |                     |             |
| CB4856                                                                                                                                          | CT | X | 7630905 | 7637172 | WBGene00017814 | F26A10.2 | F26A10.2 | 0.46491487789204    |             |
| AGIWUR12816;AGIWUR43740                                                                                                                         |    |   |         |         |                |          |          |                     |             |
| CB4856                                                                                                                                          | CT | X | 7651132 | 7651548 | WBGene00017862 | F27D9.3  | F27D9.3  | -0.051498876613417  | AGIWUR33666 |
| CB4856                                                                                                                                          | CT | X | 7653135 | 7654425 | WBGene00017863 | F27D9.4  | F27D9.4  | -0.3995798384984    | AGIWUR37245 |
| CB4856                                                                                                                                          | CT | X | 7657538 | 7687738 | WBGene00017864 | pcca-1   | F27D9.5  | -0.0547048714968446 |             |
| AGIWUR2629;AGIWUR33378;AGIWUR6786;AGIWUR14447;AGIWUR31106;AGIWUR38037                                                                           |    |   |         |         |                |          |          |                     |             |
| CB4856                                                                                                                                          | CT | X | 7690590 | 7707086 | WBGene00002242 | kvs-1    | C53C9.3  | -0.106733549765989  |             |
| AGIWUR2769;AGIWUR11806;AGIWUR34819                                                                                                              |    |   |         |         |                |          |          |                     |             |
| CB4856                                                                                                                                          | CT | X | 7710170 | 7710716 | WBGene00019583 | K09F5.4  | K09F5.4  | -0.292153894905461  | AGIWUR25180 |
| CB4856                                                                                                                                          | CT | X | 7719272 | 7725583 | WBGene00044698 | K09F5.6  | K09F5.6  | 0.237073530826109   |             |
| AGIWUR5167;AGIWUR13606;AGIWUR14314;AGIWUR22242;AGIWUR39871                                                                                      |    |   |         |         |                |          |          |                     |             |
| CB4856                                                                                                                                          | CT | X | 7725955 | 7726383 | WBGene00004999 | spp-14   | K09F5.3  | 0.1441541339619     | AGIWUR11497 |
| CB4856                                                                                                                                          | CT | X | 7727889 | 7733168 | WBGene00006925 | vit-1    | K09F5.2  | -0.343938193176765  | AGIWUR31944 |
| CB4856                                                                                                                                          | CT | X | 7733334 | 7736271 | WBGene00019584 | set-12   | K09F5.5  | -0.0281271184320371 | AGIWUR39637 |
| CB4856                                                                                                                                          | CT | X | 7739653 | 7741906 | WBGene00019582 | K09F5.1  | K09F5.1  | 0.198053535272576   | AGIWUR8592  |
| CB4856                                                                                                                                          | CT | X | 7744239 | 7750010 | WBGene00004335 | ref-2    | C47C12.3 | 0.47112314005198    |             |
| AGIWUR12202;AGIWUR17761;AGIWUR31512;AGIWUR35474                                                                                                 |    |   |         |         |                |          |          |                     |             |
| CB4856                                                                                                                                          | CT | X | 7754046 | 7754284 | WBGene00016736 | C47C12.2 | C47C12.2 | 0.361466107156494   |             |

|                                                                                                                               |    |   |         |         |                |           |           |                     |             |
|-------------------------------------------------------------------------------------------------------------------------------|----|---|---------|---------|----------------|-----------|-----------|---------------------|-------------|
| AGIWUR14617                                                                                                                   |    |   |         |         |                |           |           |                     |             |
| CB4856                                                                                                                        | CT | X | 7763187 | 7774915 | WBGene00000950 | deg-1     | C47C12.6  | 0.598615186256332   |             |
| AGIWUR12770                                                                                                                   |    |   |         |         |                |           |           |                     |             |
| CB4856                                                                                                                        | CT | X | 7774859 | 7776689 | WBGene00003171 | mec-7     | ZK154.3   | -0.220715262288661  |             |
| AGIWUR35991;AGIWUR36555                                                                                                       |    |   |         |         |                |           |           |                     |             |
| CB4856                                                                                                                        | CT | X | 7777031 | 7782537 | WBGene00022666 | ZK154.4   | ZK154.4   | 0.0256322979870642  | AGIWUR35005 |
| CB4856                                                                                                                        | CT | X | 7783190 | 7787966 | WBGene00022667 | ZK154.5   | ZK154.5   | -0.117815784823318  | AGIWUR30208 |
| CB4856                                                                                                                        | CT | X | 7790178 | 7793563 | WBGene00022668 | ZK154.6   | ZK154.6   | 0.154116446704903   |             |
| AGIWUR5581;AGIWUR6159;AGIWUR34648                                                                                             |    |   |         |         |                |           |           |                     |             |
| CB4856                                                                                                                        | CT | X | 7795046 | 7798287 | WBGene00000075 | adm-4     | ZK154.7   | -0.335317996095357  | AGIWUR20603 |
| CB4856                                                                                                                        | CT | X | 7798955 | 7799780 | WBGene00019846 | gpx-7     | R03G5.5   | -0.147491070951403  |             |
| AGIWUR17391;AGIWUR26627;AGIWUR31329;AGIWUR34737                                                                               |    |   |         |         |                |           |           |                     |             |
| CB4856                                                                                                                        | CT | X | 7800445 | 7805676 | WBGene00019845 | irld-13   | R03G5.3   | 0.0114687666875222  | AGIWUR27593 |
| CB4856                                                                                                                        | CT | X | 7805629 | 7809134 | WBGene00019847 | R03G5.6   | R03G5.6   | 0.310332136897997   |             |
| AGIWUR39142;AGIWUR41155                                                                                                       |    |   |         |         |                |           |           |                     |             |
| CB4856                                                                                                                        | CT | X | 7816720 | 7821045 | WBGene00004758 | sek-1     | R03G5.2   | 0.0688402043346201  | AGIWUR29353 |
| CB4856                                                                                                                        | CT | X | 7823652 | 7825769 | WBGene00001169 | eef-1A.2  | R03G5.1   | 0.197312032315999   |             |
| AGIWUR8817;AGIWUR13058;AGIWUR15776;AGIWUR20915;AGIWUR23861;AGIWUR35550;AGIWUR38611;AGIWUR39303;AGIWUR41511                    |    |   |         |         |                |           |           |                     |             |
| CB4856                                                                                                                        | CT | X | 7827085 | 7834535 | WBGene00006310 | sul-3     | C54D2.4   | 0.763972865256275   | AGIWUR45187 |
| CB4856                                                                                                                        | CT | X | 7838899 | 7839381 | WBGene00016916 | C54D2.2   | C54D2.2   | 0.260390897136221   | AGIWUR18655 |
| CB4856                                                                                                                        | CT | X | 7842632 | 7845438 | WBGene00016915 | C54D2.1   | C54D2.1   | 0.231195605987452   | AGIWUR37793 |
| CB4856                                                                                                                        | CT | X | 7846190 | 7847460 | WBGene00045210 | C54D2.6   | C54D2.6   | -0.225062398365349  |             |
| AGIWUR8415;AGIWUR15984                                                                                                        |    |   |         |         |                |           |           |                     |             |
| CB4856                                                                                                                        | CT | X | 7847682 | 7875954 | WBGene00000367 | cca-1     | C54D2.5   | -0.0486456514156428 |             |
| AGIWUR13850;AGIWUR17664;AGIWUR22438;AGIWUR36286                                                                               |    |   |         |         |                |           |           |                     |             |
| CB4856                                                                                                                        | CT | X | 7879771 | 7880948 | WBGene00016535 | C39D10.8  | C39D10.8  | -0.428133318908973  |             |
| AGIWUR154;AGIWUR858;AGIWUR1029;AGIWUR1163;AGIWUR17488;AGIWUR25598;AGIWUR25753;AGIWUR30213;AGIWUR39081;AGIWUR39426;AGIWUR44038 |    |   |         |         |                |           |           |                     |             |
| CB4856                                                                                                                        | CT | X | 7884288 | 7887479 | WBGene00016531 | C39D10.3  | C39D10.3  | 0.239410866797989   |             |
| AGIWUR11017                                                                                                                   |    |   |         |         |                |           |           |                     |             |
| CB4856                                                                                                                        | CT | X | 7889215 | 7889765 | WBGene00016530 | C39D10.2  | C39D10.2  | 0.0470215328971175  |             |
| AGIWUR927                                                                                                                     |    |   |         |         |                |           |           |                     |             |
| CB4856                                                                                                                        | CT | X | 7890410 | 7892396 | WBGene00016532 | C39D10.5  | C39D10.5  | 0.176730659088538   |             |
| AGIWUR25921                                                                                                                   |    |   |         |         |                |           |           |                     |             |
| CB4856                                                                                                                        | CT | X | 7896221 | 7897773 | WBGene00016533 | C39D10.6  | C39D10.6  | 0.0282018245561542  |             |
| AGIWUR42464                                                                                                                   |    |   |         |         |                |           |           |                     |             |
| CB4856                                                                                                                        | CT | X | 7901631 | 7901990 | WBGene00016536 | C39D10.9  | C39D10.9  | 0.129420728119541   |             |
| AGIWUR40149                                                                                                                   |    |   |         |         |                |           |           |                     |             |
| CB4856                                                                                                                        | CT | X | 7903280 | 7905466 | WBGene00043983 | C39D10.11 | C39D10.11 | 0.45207823413369    |             |



|                                                                                                                                 |    |   |         |         |                |          |          |                     |             |
|---------------------------------------------------------------------------------------------------------------------------------|----|---|---------|---------|----------------|----------|----------|---------------------|-------------|
| AGIWUR42504;AGIWUR44558                                                                                                         |    |   |         |         |                |          |          |                     |             |
| CB4856                                                                                                                          | CT | X | 7906964 | 7907119 | WBGene00016529 | C39D10.1 | C39D10.1 | 0.0711300249828799  |             |
| AGIWUR8159                                                                                                                      |    |   |         |         |                |          |          |                     |             |
| CB4856                                                                                                                          | CT | X | 7907955 | 7913930 | WBGene00016534 | C39D10.7 | C39D10.7 | -0.0523879232149298 |             |
| AGIWUR28583                                                                                                                     |    |   |         |         |                |          |          |                     |             |
| CB4856                                                                                                                          | CT | X | 7925434 | 7926594 | WBGene00006981 | zig-4    | C09C7.1  | 0.259032362796471   |             |
| AGIWUR17450;AGIWUR19354;AGIWUR30211                                                                                             |    |   |         |         |                |          |          |                     |             |
| CB4856                                                                                                                          | CT | X | 7930738 | 7931808 | WBGene00006980 | zig-3    | C14F5.2  | 0.792515125143577   | AGIWUR2314  |
| CB4856                                                                                                                          | CT | X | 7937635 | 7945048 | WBGene00006588 | tnt-3    | C14F5.3  | -0.0866748505519901 |             |
| AGIWUR26799;AGIWUR31168;AGIWUR36095                                                                                             |    |   |         |         |                |          |          |                     |             |
| CB4856                                                                                                                          | CT | X | 7954355 | 7956211 | WBGene00015776 | dct-1    | C14F5.1  | 0.671007693105416   | AGIWUR26731 |
| CB4856                                                                                                                          | CT | X | 7956196 | 7958303 | WBGene00015777 | sfxn-2   | C14F5.4  | -0.303284311413771  | AGIWUR21473 |
| CB4856                                                                                                                          | CT | X | 7959452 | 7961723 | WBGene00004774 | sem-5    | C14F5.5  | -0.0401269113761913 | AGIWUR1438  |
| CB4856                                                                                                                          | CT | X | 7976700 | 7980657 | WBGene00018466 | F45E1.5  | F45E1.5  | -0.106084711437918  | AGIWUR29946 |
| CB4856                                                                                                                          | CT | X | 7981382 | 7982070 | WBGene00001945 | his-71   | F45E1.6  | 0.317017435715659   | AGIWUR28969 |
| CB4856                                                                                                                          | CT | X | 7985979 | 7988981 | WBGene00018465 | F45E1.4  | F45E1.4  | -0.195630921742054  |             |
| AGIWUR3201;AGIWUR6769                                                                                                           |    |   |         |         |                |          |          |                     |             |
| CB4856                                                                                                                          | CT | X | 7988931 | 7998229 | WBGene00018467 | sdpn-1   | F45E1.7  | 0.273584652129241   | AGIWUR28499 |
| CB4856                                                                                                                          | CT | X | 8003819 | 8009400 | WBGene00018462 | F45E1.1  | F45E1.1  | -0.015117704554088  | AGIWUR39595 |
| CB4856                                                                                                                          | CT | X | 8014983 | 8026858 | WBGene00016407 | C34D10.2 | C34D10.2 | 0.798762011963793   |             |
| AGIWUR1066;AGIWUR8041                                                                                                           |    |   |         |         |                |          |          |                     |             |
| CB4856                                                                                                                          | CT | X | 8029479 | 8031614 | WBGene00016406 | C34D10.1 | C34D10.1 | 0.264458104658825   |             |
| AGIWUR27238                                                                                                                     |    |   |         |         |                |          |          |                     |             |
| CB4856                                                                                                                          | CT | X | 8041327 | 8044409 | WBGene00006962 | xol-1    | C18A11.5 | -0.49226180263214   |             |
| AGIWUR19381;AGIWUR39183                                                                                                         |    |   |         |         |                |          |          |                     |             |
| CB4856                                                                                                                          | CT | X | 8045552 | 8047416 | WBGene00015950 | C18A11.4 | C18A11.4 | -0.392198931706983  |             |
| AGIWUR36837                                                                                                                     |    |   |         |         |                |          |          |                     |             |
| CB4856                                                                                                                          | CT | X | 8050476 | 8058220 | WBGene00001000 | dim-1    | C18A11.7 | -0.148890711965148  |             |
| AGIWUR746;AGIWUR3893;AGIWUR6746;AGIWUR13907;AGIWUR14088;AGIWUR16775;AGIWUR17481;AGIWUR19007;AGIWUR35992;AGIWUR36156;AGIWUR36589 |    |   |         |         |                |          |          |                     |             |
| CB4856                                                                                                                          | CT | X | 8061123 | 8065688 | WBGene00015949 | C18A11.3 | C18A11.3 | -0.436156686390699  |             |
| AGIWUR9153                                                                                                                      |    |   |         |         |                |          |          |                     |             |
| CB4856                                                                                                                          | CT | X | 8067568 | 8068095 | WBGene00015948 | C18A11.2 | C18A11.2 | 0.32149966977328    |             |
| AGIWUR31132                                                                                                                     |    |   |         |         |                |          |          |                     |             |
| CB4856                                                                                                                          | CT | X | 8069328 | 8070289 | WBGene00015947 | C18A11.1 | C18A11.1 | 0.533503106321758   |             |
| AGIWUR22349;AGIWUR27090;AGIWUR37350;AGIWUR38997                                                                                 |    |   |         |         |                |          |          |                     |             |
| CB4856                                                                                                                          | CT | X | 8078063 | 8080256 | WBGene00016714 | C46F2.1  | C46F2.1  | -0.723663999653908  | AGIWUR24718 |
| CB4856                                                                                                                          | CT | X | 8080869 | 8084018 | WBGene00019492 | K07E3.4  | K07E3.4  | 0.56562612317401    | AGIWUR28196 |
| CB4856                                                                                                                          | CT | X | 8084210 | 8086550 | WBGene00000929 | dao-3    | K07E3.3  | -0.0659525437814033 | AGIWUR33499 |

|                                                                                    |    |   |         |         |                |          |          |                      |             |
|------------------------------------------------------------------------------------|----|---|---------|---------|----------------|----------|----------|----------------------|-------------|
| CB4856                                                                             | CT | X | 8087554 | 8089427 | WBGene00006890 | vem-1    | K07E3.8  | 0.00101663190787704  | AGIWUR5567  |
| CB4856                                                                             | CT | X | 8089826 | 8098863 | WBGene00019493 | catp-5   | K07E3.7  | -0.228824805721315   | AGIWUR33219 |
| CB4856                                                                             | CT | X | 8104305 | 8107557 | WBGene00019491 | K07E3.2  | K07E3.2  | -0.00490506241128141 |             |
| AGIWUR4890;AGIWUR34188                                                             |    |   |         |         |                |          |          |                      |             |
| CB4856                                                                             | CT | X | 8110449 | 8114762 | WBGene00019490 | K07E3.1  | K07E3.1  | -0.0902056046316595  | AGIWUR34231 |
| CB4856                                                                             | CT | X | 8116636 | 8120133 | WBGene00001953 | hlh-8    | C02B8.4  | 0.231966553508107    | AGIWUR37979 |
| CB4856                                                                             | CT | X | 8120410 | 8123220 | WBGene00219375 | C02B8.12 | C02B8.12 | 0.0565896316431669   |             |
| AGIWUR39796                                                                        |    |   |         |         |                |          |          |                      |             |
| CB4856                                                                             | CT | X | 8133155 | 8136326 | WBGene00015324 | C02B8.6  | C02B8.6  | -0.0450560354930438  |             |
| AGIWUR5064;AGIWUR14981;AGIWUR16481;AGIWUR17832;AGIWUR30095;AGIWUR30413;AGIWUR42682 |    |   |         |         |                |          |          |                      |             |
| CB4856                                                                             | CT | X | 8137721 | 8137879 | WBGene00015325 | C02B8.7  | C02B8.7  | 0.271003435354151    | AGIWUR31418 |
| CB4856                                                                             | CT | X | 8139446 | 8140243 | WBGene00015322 | C02B8.3  | C02B8.3  | 0.121438469642007    |             |
| AGIWUR2189;AGIWUR25989                                                             |    |   |         |         |                |          |          |                      |             |
| CB4856                                                                             | CT | X | 8147710 | 8148588 | WBGene00015320 | C02B8.1  | C02B8.1  | -0.416254868345487   | AGIWUR14484 |
| CB4856                                                                             | CT | X | 8149563 | 8150716 | WBGene00017714 | F22F1.2  | F22F1.2  | 0.0318213773965645   | AGIWUR41354 |
| CB4856                                                                             | CT | X | 8159153 | 8160084 | WBGene00001854 | hil-3    | F22F1.1  | 0.901851196400777    | AGIWUR7999  |
| CB4856                                                                             | CT | X | 8161839 | 8163073 | WBGene00017715 | F22F1.3  | F22F1.3  | 0.0297165535386501   | AGIWUR24544 |
| CB4856                                                                             | CT | X | 8169930 | 8172913 | WBGene00015922 | C17H11.2 | C17H11.2 | 0.0262807290363529   |             |
| AGIWUR41888                                                                        |    |   |         |         |                |          |          |                      |             |
| CB4856                                                                             | CT | X | 8173910 | 8180865 | WBGene00015921 | C17H11.1 | C17H11.1 | 0.271549402745195    |             |
| AGIWUR43707                                                                        |    |   |         |         |                |          |          |                      |             |
| CB4856                                                                             | CT | X | 8181031 | 8181640 | WBGene00015924 | C17H11.4 | C17H11.4 | 0.339245960458721    |             |
| AGIWUR23254                                                                        |    |   |         |         |                |          |          |                      |             |
| CB4856                                                                             | CT | X | 8183008 | 8185133 | WBGene00015925 | C17H11.5 | C17H11.5 | -0.0521635848281274  |             |
| AGIWUR38063                                                                        |    |   |         |         |                |          |          |                      |             |
| CB4856                                                                             | CT | X | 8185175 | 8203784 | WBGene00015926 | C17H11.6 | C17H11.6 | 0.340573019759965    |             |
| AGIWUR8111;AGIWUR29624;AGIWUR40357                                                 |    |   |         |         |                |          |          |                      |             |
| CB4856                                                                             | CT | X | 8208748 | 8211149 | WBGene00000391 | cdd-1    | C47D2.2  | -0.109749814807991   | AGIWUR13118 |
| CB4856                                                                             | CT | X | 8215050 | 8215668 | WBGene00016738 | C47D2.1  | C47D2.1  | 0.0198998724014814   | AGIWUR12024 |
| CB4856                                                                             | CT | X | 8219728 | 8220064 | WBGene00019292 | K02A6.1  | K02A6.1  | 0.122645960197912    | AGIWUR628   |
| CB4856                                                                             | CT | X | 8224391 | 8224902 | WBGene00019293 | K02A6.2  | K02A6.2  | 0.107913952833961    | AGIWUR21360 |
| CB4856                                                                             | CT | X | 8228068 | 8231934 | WBGene00019294 | K02A6.3  | K02A6.3  | 0.302379881884757    | AGIWUR36272 |
| CB4856                                                                             | CT | X | 8232254 | 8236316 | WBGene00019780 | M60.4    | M60.4    | 1.19637006140176     | AGIWUR8759  |
| CB4856                                                                             | CT | X | 8242056 | 8247869 | WBGene00019779 | endu-2   | M60.2    | 0.8477120787819      | AGIWUR28695 |
| CB4856                                                                             | CT | X | 8248207 | 8252458 | WBGene00019781 | M60.6    | M60.6    | -0.0295892617913527  |             |
| AGIWUR6639;AGIWUR20670;AGIWUR39957                                                 |    |   |         |         |                |          |          |                      |             |
| CB4856                                                                             | CT | X | 8258149 | 8261175 | WBGene00019782 | M60.7    | M60.7    | 0.430281167220615    | AGIWUR16017 |
| CB4856                                                                             | CT | X | 8262421 | 8271021 | WBGene00017421 | cutl-29  | F13B9.6  | 0.572250022210387    | AGIWUR18221 |
| CB4856                                                                             | CT | X | 8275158 | 8283301 | WBGene00002239 | ksr-1    | F13B9.5  | -0.0994371725761489  | AGIWUR15566 |

|                                     |    |   |         |         |                |          |           |                     |                     |
|-------------------------------------|----|---|---------|---------|----------------|----------|-----------|---------------------|---------------------|
| CB4856                              | CT | X | 8283282 | 8285219 | WBGene00001425 | fis-2    | F13B9.8   | -0.110940715273797  | AGIWUR29120         |
| CB4856                              | CT | X | 8285683 | 8286785 | WBGene00017420 | F13B9.2  | F13B9.2   | -0.447081969898861  | AGIWUR31567         |
| CB4856                              | CT | X | 8287261 | 8294514 | WBGene00017419 | F13B9.1  | F13B9.1   | 0.463965049264456   | AGIWUR13018         |
| CB4856                              | CT | X | 8294625 | 8296675 | WBGene00019987 | R09F10.3 |           | R09F10.3            | 0.0575545719903996  |
| AGIWUR23087                         |    |   |         |         |                |          |           |                     |                     |
| CB4856                              | CT | X | 8299119 | 8299654 | WBGene00000427 | ced-13   | R09F10.9  |                     | -0.0689689140405756 |
| AGIWUR36309                         |    |   |         |         |                |          |           |                     |                     |
| CB4856                              | CT | X | 8300030 | 8302395 | WBGene00002127 | inx-5    | R09F10.4  |                     | -0.11738228135646   |
| AGIWUR8644;AGIWUR33230              |    |   |         |         |                |          |           |                     |                     |
| CB4856                              | CT | X | 8306225 | 8307700 | WBGene00019988 | R09F10.5 |           | R09F10.5            | -0.055055556767158  |
| AGIWUR18056                         |    |   |         |         |                |          |           |                     |                     |
| CB4856                              | CT | X | 8313128 | 8314267 | WBGene00005239 | srh-13   | R09F10.10 |                     | 0.278228234821183   |
| AGIWUR6738                          |    |   |         |         |                |          |           |                     |                     |
| CB4856                              | CT | X | 8315524 | 8316278 | WBGene00005238 | srh-12   | R09F10.11 |                     | 0.00343115034820407 |
| AGIWUR16767;AGIWUR22171;AGIWUR31297 |    |   |         |         |                |          |           |                     |                     |
| CB4856                              | CT | X | 8317637 | 8319050 | WBGene00005237 | srh-11   | R09F10.6  |                     | -0.647950994147223  |
| AGIWUR29614                         |    |   |         |         |                |          |           |                     |                     |
| CB4856                              | CT | X | 8323592 | 8325046 | WBGene00019986 | R09F10.1 |           | R09F10.1            | 0.00172590679752282 |
| AGIWUR41725                         |    |   |         |         |                |          |           |                     |                     |
| CB4856                              | CT | X | 8325099 | 8326451 | WBGene00019989 | R09F10.8 |           | R09F10.8            | -0.262631291966672  |
| AGIWUR24471                         |    |   |         |         |                |          |           |                     |                     |
| CB4856                              | CT | X | 8327559 | 8327900 | WBGene00018883 | F55E10.4 |           | F55E10.4            | -0.172059025989156  |
| AGIWUR32061                         |    |   |         |         |                |          |           |                     |                     |
| CB4856                              | CT | X | 8333247 | 8337948 | WBGene00018884 | F55E10.5 |           | F55E10.5            | 0.172412894063658   |
| AGIWUR28678                         |    |   |         |         |                |          |           |                     |                     |
| CB4856                              | CT | X | 8340693 | 8340986 | WBGene00018882 | F55E10.2 |           | F55E10.2            |                     |
| -0.00746895344833209 AGIWUR19603    |    |   |         |         |                |          |           |                     |                     |
| CB4856                              | CT | X | 8341975 | 8342286 | WBGene00018881 | F55E10.1 |           | F55E10.1            | -0.17779718551976   |
| AGIWUR4035                          |    |   |         |         |                |          |           |                     |                     |
| CB4856                              | CT | X | 8344700 | 8346408 | WBGene00018885 | drd-5    | F55E10.6  |                     | -0.847087210927649  |
| AGIWUR1745                          |    |   |         |         |                |          |           |                     |                     |
| CB4856                              | CT | X | 8348537 | 8351059 | WBGene00018886 | npr-28   | F55E10.7  |                     | 0.722602903615226   |
| AGIWUR20796                         |    |   |         |         |                |          |           |                     |                     |
| CB4856                              | CT | X | 8368534 | 8371609 | WBGene00018226 | F40B5.2  | F40B5.2   | -0.209606825795063  | AGIWUR10274         |
| CB4856                              | CT | X | 8372206 | 8374474 | WBGene00018227 | nep-15   | F40B5.3   | -0.328230740732431  | AGIWUR17266         |
| CB4856                              | CT | X | 8375288 | 8377304 | WBGene00018225 | nep-14   | F40B5.1   | 1.46193384442191    | AGIWUR37444         |
| CB4856                              | CT | X | 8378557 | 8382700 | WBGene00018281 | tbc-18   | F41D9.1   | 0.319580694168556   | AGIWUR38939         |
| CB4856                              | CT | X | 8382706 | 8384945 | WBGene00018282 | F41D9.2  | F41D9.2   | -0.109929308351704  | AGIWUR19133         |
| CB4856                              | CT | X | 8387448 | 8392584 | WBGene00006942 | wrk-1    | F41D9.3   | -0.0923474279803287 |                     |

AGIWUR156;AGIWUR6021;AGIWUR13188;AGIWUR13370;AGIWUR19239;AGIWUR28819;AGIWUR37022;AGIWUR41612;AGIWUR41671  
 CB4856 CT X 8403539 8408367 WBGene00018283 sulp-3 F41D9.5 0.205047115916181 AGIWUR24297  
 CB4856 CT X 8411698 8414195 WBGene00017258 F08F1.4 F08F1.4 0.305867646067945  
 AGIWUR4950;AGIWUR6123;AGIWUR12253;AGIWUR14710;AGIWUR15054;AGIWUR17264;AGIWUR18514;AGIWUR30864;AGIWUR43115;A  
 GIWUR45009  
 CB4856 CT X 8417424 8418524 WBGene00004998 spp-13 F08F1.6 0.231356384958305 AGIWUR2104  
 CB4856 CT X 8418646 8422055 WBGene00006472 tag-123 F08F1.7 -0.100342199805822  
 AGIWUR752;AGIWUR6564;AGIWUR12444;AGIWUR28314;AGIWUR34981;AGIWUR40903  
 CB4856 CT X 8422480 8423731 WBGene00006649 tth-1 F08F1.8 0.649076090745355 AGIWUR37804  
 CB4856 CT X 8432663 8437346 WBGene00002195 kin-9 F08F1.1 0.0971053387183893 AGIWUR36818  
 CB4856 CT X 8440192 8450417 WBGene00017513 F16F9.1 F16F9.1 0.28179600148388 AGIWUR30468  
 CB4856 CT X 8450381 8455640 WBGene00001068 dpy-6 F16F9.2 -0.55303876472226 AGIWUR35261  
 CB4856 CT X 8457614 8459734 WBGene00017514 F16F9.3 F16F9.3 -0.264410090046217 AGIWUR14547  
 CB4856 CT X 8459821 8463360 WBGene00017515 F16F9.4 F16F9.4 -0.2546109462125 AGIWUR23854  
 CB4856 CT X 8465832 8470256 WBGene00003174 mec-10 F16F9.5 0.132739491607468 AGIWUR42070  
 CB4856 CT X 8473723 8476176 WBGene00003613 nhr-14 T01B10.4 -0.0130366949064129  
 AGIWUR1892;AGIWUR2548;AGIWUR14751;AGIWUR15964;AGIWUR19124  
 CB4856 CT X 8495322 8498062 WBGene00020137 T01B10.5 T01B10.5 0.825917834222043  
 AGIWUR41525  
 CB4856 CT X 8499664 8501037 WBGene00001703 grd-14 T01B10.2 -0.628034820399314  
 AGIWUR39755  
 CB4856 CT X 8501245 8502289 WBGene00001693 grd-4 T01B10.1 -0.490170963600097  
 AGIWUR5512  
 CB4856 CT X 8507876 8514126 WBGene00019148 H03E18.1 H03E18.1 0.415764563088334  
 AGIWUR37696  
 CB4856 CT X 8514088 8517830 WBGene00019149 H03E18.2 H03E18.2 -0.178648370119168  
 AGIWUR17740  
 CB4856 CT X 8528250 8531033 WBGene00001448 flp-5 C03G5.7 0.272973432278638  
 AGIWUR1829;AGIWUR34234  
 CB4856 CT X 8542867 8546021 WBGene00015391 sdha-1 C03G5.1 -0.333153984552815  
 AGIWUR270;AGIWUR5327;AGIWUR26113;AGIWUR26614;AGIWUR30788  
 CB4856 CT X 8546451 8549056 WBGene00017048 D2021.4 D2021.4 0.060025486626655  
 AGIWUR6248;AGIWUR11716;AGIWUR20806  
 CB4856 CT X 8552261 8556351 WBGene00044071 dhhc-14 D2021.2 -0.0868272182506953  
 AGIWUR2179;AGIWUR13670;AGIWUR28378;AGIWUR41196  
 CB4856 CT X 8557151 8563235 WBGene00017046 utx-1 D2021.1 0.0888569613276573  
 AGIWUR4714;AGIWUR5935;AGIWUR18865;AGIWUR22140;AGIWUR25209;AGIWUR25406;AGIWUR35006  
 CB4856 CT X 8571049 8575451 WBGene00017571 jmj-d-3.1 F18E9.5 0.768880699183722  
 AGIWUR38593

|                                                                                     |    |   |         |         |                |          |          |                      |             |
|-------------------------------------------------------------------------------------|----|---|---------|---------|----------------|----------|----------|----------------------|-------------|
| CB4856                                                                              | CT | X | 8578585 | 8580104 | WBGene00044780 | F18E9.8  | F18E9.8  | 0.0322875567145449   |             |
| AGIWUR1800;AGIWUR4650;AGIWUR9990                                                    |    |   |         |         |                |          |          |                      |             |
| CB4856                                                                              | CT | X | 8580656 | 8583537 | WBGene00017570 | F18E9.4  | F18E9.4  | -0.426143528524897   |             |
| AGIWUR12635;AGIWUR15548;AGIWUR40652                                                 |    |   |         |         |                |          |          |                      |             |
| CB4856                                                                              | CT | X | 8586147 | 8590290 | WBGene00017569 | F18E9.3  | F18E9.3  | 0.337330458584548    | AGIWUR42934 |
| CB4856                                                                              | CT | X | 8593187 | 8593974 | WBGene00003745 | nlp-7    | F18E9.2  | 0.0977821361404274   | AGIWUR44693 |
| CB4856                                                                              | CT | X | 8595152 | 8597747 | WBGene00017573 | F18E9.7  | F18E9.7  | -0.405010818358692   | AGIWUR25588 |
| CB4856                                                                              | CT | X | 8601535 | 8602366 | WBGene00017568 | F18E9.1  | F18E9.1  | 0.599217882592005    | AGIWUR9199  |
| CB4856                                                                              | CT | X | 8607174 | 8607753 | WBGene00019265 | H35N09.1 | H35N09.1 | -0.30105508282024    |             |
| AGIWUR40490                                                                         |    |   |         |         |                |          |          |                      |             |
| CB4856                                                                              | CT | X | 8618418 | 8619756 | WBGene00019286 | K01A12.2 | K01A12.2 | -0.178970960580619   |             |
| AGIWUR2797;AGIWUR18038;AGIWUR23292;AGIWUR32547;AGIWUR36214                          |    |   |         |         |                |          |          |                      |             |
| CB4856                                                                              | CT | X | 8620570 | 8625240 | WBGene00019287 | K01A12.3 | K01A12.3 | 0.0402419980662465   |             |
| AGIWUR16423;AGIWUR36181;AGIWUR38635                                                 |    |   |         |         |                |          |          |                      |             |
| CB4856                                                                              | CT | X | 8639389 | 8643431 | WBGene00017400 | stg-2    | F12D9.1  | 0.000111858000277465 | AGIWUR31307 |
| CB4856                                                                              | CT | X | 8646606 | 8647097 | WBGene00017401 | F12D9.2  | F12D9.2  | -0.0463596753289686  | AGIWUR2405  |
| CB4856                                                                              | CT | X | 8660619 | 8671753 | WBGene00004369 | rig-1    | K09E2.4  | 0.289308677983461    |             |
| AGIWUR23760;AGIWUR27489;AGIWUR32360                                                 |    |   |         |         |                |          |          |                      |             |
| CB4856                                                                              | CT | X | 8673060 | 8681653 | WBGene00019571 | K09E2.2  | K09E2.2  | 0.291532009949059    | AGIWUR36350 |
| CB4856                                                                              | CT | X | 8681910 | 8686146 | WBGene00019570 | K09E2.1  | K09E2.1  | 0.116270687986694    |             |
| AGIWUR13311;AGIWUR34731;AGIWUR43898                                                 |    |   |         |         |                |          |          |                      |             |
| CB4856                                                                              | CT | X | 8697817 | 8702822 | WBGene00018728 | frpr-8   | F53A9.5  | 0.137472209405978    |             |
| AGIWUR1563;AGIWUR37929                                                              |    |   |         |         |                |          |          |                      |             |
| CB4856                                                                              | CT | X | 8704309 | 8707197 | WBGene00018727 | jbts-14  | F53A9.4  | 0.546974377185866    | AGIWUR39170 |
| CB4856                                                                              | CT | X | 8708365 | 8709370 | WBGene00018726 | F53A9.3  | F53A9.3  | 0.0852736175233915   | AGIWUR22905 |
| CB4856                                                                              | CT | X | 8709764 | 8710137 | WBGene00018725 | kreg-1   | F53A9.2  | 0.549825499088299    |             |
| AGIWUR5464;AGIWUR7328;AGIWUR7798;AGIWUR15741;AGIWUR20454;AGIWUR30988                |    |   |         |         |                |          |          |                      |             |
| CB4856                                                                              | CT | X | 8711590 | 8711911 | WBGene00018724 | F53A9.1  | F53A9.1  | 1.06602721022648     |             |
| AGIWUR32378;AGIWUR38157                                                             |    |   |         |         |                |          |          |                      |             |
| CB4856                                                                              | CT | X | 8713461 | 8713952 | WBGene00018729 | F53A9.6  | F53A9.6  | 1.50455049809543     | AGIWUR26199 |
| CB4856                                                                              | CT | X | 8716532 | 8716929 | WBGene00018730 | F53A9.7  | F53A9.7  | 1.40639834595966     | AGIWUR11432 |
| CB4856                                                                              | CT | X | 8718567 | 8718905 | WBGene00018731 | F53A9.8  | F53A9.8  | 3.60319709928601     | AGIWUR35395 |
| CB4856                                                                              | CT | X | 8720226 | 8720758 | WBGene00018732 | F53A9.9  | F53A9.9  | 0.442832413215816    | AGIWUR40805 |
| CB4856                                                                              | CT | X | 8721557 | 8723552 | WBGene00006587 | tnt-2    | F53A9.10 | 0.0169215820100703   |             |
| AGIWUR10214;AGIWUR15235;AGIWUR16730;AGIWUR22902;AGIWUR39188;AGIWUR39856;AGIWUR41250 |    |   |         |         |                |          |          |                      |             |
| CB4856                                                                              | CT | X | 8726798 | 8727406 | WBGene00017149 | EGAP4.1  | EGAP4.1  | -0.343339134383774   | AGIWUR37219 |
| CB4856                                                                              | CT | X | 8731310 | 8731922 | WBGene00019732 | M02D8.6  | M02D8.6  | 0.558391924199881    | AGIWUR42632 |
| CB4856                                                                              | CT | X | 8732958 | 8737015 | WBGene00019729 | M02D8.3  | M02D8.3  | -0.0357623266781442  | AGIWUR43043 |
| CB4856                                                                              | CT | X | 8739048 | 8740171 | WBGene00019728 | M02D8.2  | M02D8.2  | -0.135282873109805   |             |

AGIWUR13616;AGIWUR23732;AGIWUR26248;AGIWUR30537;AGIWUR39903  
 CB4856 CT X 8740789 8743057 WBGene00044313 M02D8.7 M02D8.7 0.259593550891409  
 AGIWUR5408;AGIWUR35449  
 CB4856 CT X 8748434 8750969 WBGene00019730 asns-2 M02D8.4 0.283564053563436  
 AGIWUR19162;AGIWUR20337;AGIWUR21929;AGIWUR23261  
 CB4856 CT X 8754576 8761580 WBGene00019731 M02D8.5 M02D8.5 -0.459770521403245 AGIWUR16000  
 CB4856 CT X 8763907 8766280 WBGene00019727 zig-12 M02D8.1 -0.342863437531907 AGIWUR26789  
 CB4856 CT X 8778847 8784441 WBGene00022811 ZK721.4 ZK721.4 0.0526324787126171 AGIWUR21245  
 CB4856 CT X 8784534 8787072 WBGene00022810 ZK721.3 ZK721.3 -0.123633760506513 AGIWUR959  
 CB4856 CT X 8789456 8790621 WBGene00006764 unc-27 ZK721.2 0.13398685966078  
 AGIWUR8777;AGIWUR17569  
 CB4856 CT X 8792160 8796110 WBGene00006477 chup-1 ZK721.1 -0.165046832836112  
 AGIWUR29227;AGIWUR32479  
 CB4856 CT X 8796545 8797835 WBGene00019870 R04E5.7 R04E5.7 0.115919728870746  
 AGIWUR14421;AGIWUR36332;AGIWUR37318;AGIWUR40252;AGIWUR40895  
 CB4856 CT X 8801624 8806113 WBGene00019871 R04E5.8 R04E5.8 0.0473086843037716  
 AGIWUR27571;AGIWUR40800  
 CB4856 CT X 8806174 8811142 WBGene00019872 R04E5.9 R04E5.9 0.193514619821903  
 AGIWUR7613;AGIWUR8776;AGIWUR11944;AGIWUR16588;AGIWUR24497;AGIWUR37816  
 CB4856 CT X 8812143 8816805 WBGene00019869 cnm-2 R04E5.2 -0.254607714889998 AGIWUR22058  
 CB4856 CT X 8820703 8824448 WBGene00002057 ifd-1 R04E5.10 -0.126106722921137  
 AGIWUR7275;AGIWUR21127  
 CB4856 CT X 8826627 8828540 WBGene00016190 C28G1.5 C28G1.5 -0.335667919645509  
 AGIWUR27051;AGIWUR43751  
 CB4856 CT X 8829920 8831262 WBGene00016191 C28G1.6 C28G1.6 0.397869347807593 AGIWUR24667  
 CB4856 CT X 8831739 8835715 WBGene00016188 sec-15 C28G1.3 -0.0348902984018262  
 AGIWUR2654;AGIWUR4425  
 CB4856 CT X 8836644 8837661 WBGene00016187 C28G1.2 C28G1.2 0.489269117749791  
 AGIWUR6456;AGIWUR30481  
 CB4856 CT X 8847122 8848482 WBGene00219376 C28G1.10 C28G1.10 0.282255174640241  
 AGIWUR42745  
 CB4856 CT X 8849137 8853621 WBGene00016189 C28G1.4 C28G1.4 0.0154366090091571 AGIWUR32459  
 CB4856 CT X 8857056 8857954 WBGene00015529 C06E2.5 C06E2.5 0.0912069964717652 AGIWUR40648  
 CB4856 CT X 8861258 8861650 WBGene00044579 C06E2.9 C06E2.9 -0.181711347111615  
 AGIWUR7776;AGIWUR8306;AGIWUR12019;AGIWUR20105;AGIWUR24625  
 CB4856 CT X 8866238 8866640 WBGene00002092 ins-9 C06E2.8 -0.455841602087396  
 AGIWUR17847;AGIWUR18385;AGIWUR22537;AGIWUR26370;AGIWUR28244  
 CB4856 CT X 8867603 8869153 WBGene00006717 ubc-22 C06E2.7 0.0573833865209012 AGIWUR8878  
 CB4856 CT X 8869625 8871901 WBGene00006716 ubc-21 C06E2.3 -0.0178060683789036

AGIWUR2345;AGIWUR14287;AGIWUR40115

|                                                                        |    |   |         |         |                |         |          |                     |             |
|------------------------------------------------------------------------|----|---|---------|---------|----------------|---------|----------|---------------------|-------------|
| CB4856                                                                 | CT | X | 8872933 | 8874848 | WBGene00015527 | C06E2.1 | C06E2.1  | -0.299124850921764  | AGIWUR42187 |
| CB4856                                                                 | CT | X | 8879649 | 8880406 | WBGene00015528 | C06E2.2 | C06E2.2  | -0.347735573407985  | AGIWUR44949 |
| CB4856                                                                 | CT | X | 8893129 | 8898517 | WBGene00015740 | C13E3.1 | C13E3.1  | -0.0281552144472821 | AGIWUR22911 |
| CB4856                                                                 | CT | X | 8908050 | 8910837 | WBGene00017013 | ensh-1  | D1009.3  | 0.2783494924998     | AGIWUR6361  |
| CB4856                                                                 | CT | X | 8911293 | 8914261 | WBGene00000884 | cyn-8   | D1009.2  | 0.171985760682767   |             |
| AGIWUR7443;AGIWUR10061;AGIWUR35701;AGIWUR36094;AGIWUR39431;AGIWUR39528 |    |   |         |         |                |         |          |                     |             |
| CB4856                                                                 | CT | X | 8917421 | 8919423 | WBGene00003752 | nlp-14  | D1009.4  | 0.302264386815615   | AGIWUR2900  |
| CB4856                                                                 | CT | X | 8931241 | 8939263 | WBGene00017012 | acs-22  | D1009.1  | 0.214292160013919   |             |
| AGIWUR4766;AGIWUR6135;AGIWUR9124;AGIWUR27367;AGIWUR32376               |    |   |         |         |                |         |          |                     |             |
| CB4856                                                                 | CT | X | 8939389 | 8940143 | WBGene00017014 | dylt-2  | D1009.5  | 0.513404667072923   | AGIWUR21964 |
| CB4856                                                                 | CT | X | 8941139 | 8950978 | WBGene00017039 | trk-1   | D1073.1  | 0.234258010929662   |             |
| AGIWUR14010;AGIWUR16072;AGIWUR30714;AGIWUR32171                        |    |   |         |         |                |         |          |                     |             |
| CB4856                                                                 | CT | X | 8957616 | 8961170 | WBGene00016748 | aexr-3  | C48C5.3  | -0.0770672900306453 | AGIWUR21382 |
| CB4856                                                                 | CT | X | 8980976 | 8985063 | WBGene00016747 | nmur-1  | C48C5.1  | 0.0750782683540159  |             |
| AGIWUR14619;AGIWUR16262;AGIWUR27846                                    |    |   |         |         |                |         |          |                     |             |
| CB4856                                                                 | CT | X | 8988137 | 8991972 | WBGene00006672 | twk-18  | C24A3.6  | -0.0288378989153824 | AGIWUR6794  |
| CB4856                                                                 | CT | X | 8992406 | 8994763 | WBGene00016034 | C24A3.4 | C24A3.4  | 0.00721273864296457 |             |
| AGIWUR3347;AGIWUR9135;AGIWUR17732;AGIWUR32265;AGIWUR35548;AGIWUR41716  |    |   |         |         |                |         |          |                     |             |
| CB4856                                                                 | CT | X | 8997479 | 8998909 | WBGene00016033 | C24A3.2 | C24A3.2  | 0.0921927942669178  |             |
| AGIWUR13952;AGIWUR26014;AGIWUR28903                                    |    |   |         |         |                |         |          |                     |             |
| CB4856                                                                 | CT | X | 9001239 | 9006053 | WBGene00016032 | C24A3.1 | C24A3.1  | 0.124915548126749   |             |
| AGIWUR17679;AGIWUR40654                                                |    |   |         |         |                |         |          |                     |             |
| CB4856                                                                 | CT | X | 9009780 | 9010457 | WBGene00044580 | C24A3.9 | C24A3.9  | 0.0387989132189182  |             |
| AGIWUR12458;AGIWUR20948;AGIWUR35053;AGIWUR43393                        |    |   |         |         |                |         |          |                     |             |
| CB4856                                                                 | CT | X | 9015773 | 9016799 | WBGene00020790 | T25B6.4 | T25B6.4  | -0.17513809079466   | AGIWUR26573 |
| CB4856                                                                 | CT | X | 9020588 | 9021755 | WBGene00020791 | T25B6.5 | T25B6.5  | 0.182933191804919   | AGIWUR13577 |
| CB4856                                                                 | CT | X | 9021922 | 9022833 | WBGene00020792 | T25B6.6 | T25B6.6  | -0.124120223100302  | AGIWUR27292 |
| CB4856                                                                 | CT | X | 9027604 | 9028285 | WBGene00020789 | T25B6.3 | T25B6.3  | -0.0974313123020343 | AGIWUR28443 |
| CB4856                                                                 | CT | X | 9029478 | 9033955 | WBGene00004911 | snf-12  | T25B6.7  | 0.530643176372356   | AGIWUR10581 |
| CB4856                                                                 | CT | X | 9034554 | 9038547 | WBGene00020788 | nep-22  | T25B6.2  | -0.275195809511772  |             |
| AGIWUR30322;AGIWUR36231                                                |    |   |         |         |                |         |          |                     |             |
| CB4856                                                                 | CT | X | 9040416 | 9041058 | WBGene00020787 | T25B6.1 | T25B6.1  | 0.183071680935449   | AGIWUR13768 |
| CB4856                                                                 | CT | X | 9046213 | 9054885 | WBGene00018567 | F47E1.3 | F47E1.3  | 0.251810422502217   | AGIWUR11460 |
| CB4856                                                                 | CT | X | 9057652 | 9061860 | WBGene00018566 | F47E1.2 | F47E1.2  | 0.0320535639998631  |             |
| AGIWUR23020;AGIWUR28657;AGIWUR33267;AGIWUR44410                        |    |   |         |         |                |         |          |                     |             |
| CB4856                                                                 | CT | X | 9062834 | 9066591 | WBGene00018568 | F47E1.4 | F47E1.4  | 1.05379627098007    | AGIWUR17318 |
| CB4856                                                                 | CT | X | 9073800 | 9077724 | WBGene00018565 | F47E1.1 | F47E1.1  | 0.492827377759743   | AGIWUR3858  |
| CB4856                                                                 | CT | X | 9078945 | 9113613 | WBGene00000100 | ajm-1   | C25A11.4 | 0.0731332597658625  |             |

AGIWUR1659;AGIWUR2586;AGIWUR3751;AGIWUR5431;AGIWUR5755;AGIWUR10369;AGIWUR18886;AGIWUR19046;AGIWUR28888;AGIWUR42397;AGIWUR43790  
 CB4856 CT X 9114368 9116891 WBGene00016087 C25A11.2 C25A11.2 -0.229235387858697  
 AGIWUR42121  
 CB4856 CT X 9119774 9121687 WBGene00016086 C25A11.1 C25A11.1 -0.190418013376313  
 AGIWUR3468;AGIWUR28257;AGIWUR32811  
 CB4856 CT X 9121884 9123505 WBGene00219374 C25A11.10 C25A11.10  
 -0.00875964731041101 AGIWUR17757;AGIWUR19421;AGIWUR20739;AGIWUR22486  
 CB4856 CT X 9137927 9145656 WBGene00015263 B0563.6 B0563.6 -0.109544115136235  
 AGIWUR6329;AGIWUR10984;AGIWUR13642;AGIWUR15404;AGIWUR20913;AGIWUR21716;AGIWUR24233;AGIWUR38920;AGIWUR40946  
 CB4856 CT X 9146174 9147526 WBGene00015262 B0563.5 B0563.5 0.612440153817102  
 AGIWUR16724;AGIWUR26839;AGIWUR28523;AGIWUR29996;AGIWUR40814  
 CB4856 CT X 9150694 9160646 WBGene00006479 tmbi-4 B0563.4 -0.0102692637605948 AGIWUR35222  
 CB4856 CT X 9163164 9166368 WBGene00006637 tsp-11 B0563.2 0.0846750635806188 AGIWUR39443  
 CB4856 CT X 9168539 9169022 WBGene00044687 B0563.9 B0563.9 0.221438121670039  
 AGIWUR1912;AGIWUR5988;AGIWUR17520;AGIWUR27703;AGIWUR42134  
 CB4856 CT X 9171562 9172204 WBGene00015261 B0563.1 B0563.1 -0.140054425614361 AGIWUR20274  
 CB4856 CT X 9173685 9174490 WBGene00015265 B0563.8 B0563.8 -0.627225938402756 AGIWUR20718  
 CB4856 CT X 9180062 9180923 WBGene00044581 Y81B9A.4 Y81B9A.4 0.0912298421257782  
 AGIWUR2260;AGIWUR26510;AGIWUR39823  
 CB4856 CT X 9182440 9182947 WBGene00022317 Y81B9A.3 Y81B9A.3 -0.0379049163911569  
 AGIWUR13980;AGIWUR14706;AGIWUR18027;AGIWUR19056;AGIWUR43732  
 CB4856 CT X 9184163 9190717 WBGene00022316 Y81B9A.2 Y81B9A.2 -0.0377936352646886  
 AGIWUR4160  
 CB4856 CT X 9192444 9194382 WBGene00022315 Y81B9A.1 Y81B9A.1 0.173901158294277  
 AGIWUR1439  
 CB4856 CT X 9211144 9212321 WBGene00044743 crb-3 C35B8.4 -0.0857152334970817  
 AGIWUR10376;AGIWUR17275;AGIWUR17825;AGIWUR28825;AGIWUR37521  
 CB4856 CT X 9213953 9216856 WBGene00016438 C35B8.3 C35B8.3 0.0930577175012459 AGIWUR18703  
 CB4856 CT X 9216867 9232075 WBGene00006887 vav-1 C35B8.2 0.16689896785757  
 AGIWUR455;AGIWUR11041;AGIWUR31927  
 CB4856 CT X 9233638 9234618 WBGene00000748 col-175 C35B8.1 -0.128831989859744 AGIWUR29914  
 CB4856 CT X 9235103 9242223 WBGene00017580 lgc-4 F18G5.4 -0.293044608316912 AGIWUR4317  
 CB4856 CT X 9247007 9249103 WBGene00001674 gpa-12 F18G5.3 -0.479683125412103 AGIWUR24993  
 CB4856 CT X 9251818 9255717 WBGene00003981 pes-8 F18G5.2 -0.492614743025165 AGIWUR23852  
 CB4856 CT X 9256008 9257456 WBGene00017581 F18G5.5 F18G5.5 -0.171972101965587 AGIWUR27652  
 CB4856 CT X 9259852 9261066 WBGene00017579 F18G5.1 F18G5.1 -0.57912610969709 AGIWUR40631  
 CB4856 CT X 9262027 9264331 WBGene00017582 F18G5.6 F18G5.6 1.35357551988321  
 AGIWUR791;AGIWUR2708;AGIWUR11787;AGIWUR38307



|                                                                                                                                                                                                                    |    |   |         |         |                |          |          |                      |             |
|--------------------------------------------------------------------------------------------------------------------------------------------------------------------------------------------------------------------|----|---|---------|---------|----------------|----------|----------|----------------------|-------------|
| CB4856                                                                                                                                                                                                             | CT | X | 9268626 | 9270855 | WBGene00015181 | B0416.5  | B0416.5  | -0.027197956066856   |             |
| AGIWUR2846;AGIWUR16098;AGIWUR34193;AGIWUR40626                                                                                                                                                                     |    |   |         |         |                |          |          |                      |             |
| CB4856                                                                                                                                                                                                             | CT | X | 9278953 | 9279947 | WBGene00015180 | B0416.4  | B0416.4  | -0.305141493286246   |             |
| AGIWUR25648;AGIWUR36314;AGIWUR39520                                                                                                                                                                                |    |   |         |         |                |          |          |                      |             |
| CB4856                                                                                                                                                                                                             | CT | X | 9291651 | 9293366 | WBGene00015179 | B0416.3  | B0416.3  | -0.10210566307989    | AGIWUR3498  |
| CB4856                                                                                                                                                                                                             | CT | X | 9293664 | 9296622 | WBGene00001638 | gly-13   | B0416.6  | -0.384851861610708   | AGIWUR12912 |
| CB4856                                                                                                                                                                                                             | CT | X | 9296947 | 9297934 | WBGene00015182 | B0416.7  | B0416.7  | -0.0874918859246758  |             |
| AGIWUR5443;AGIWUR7853;AGIWUR15838;AGIWUR18976;AGIWUR19220;AGIWUR22464;AGIWUR31115;AGIWUR31167;AGIWUR35787;AGIWUR44988                                                                                              |    |   |         |         |                |          |          |                      |             |
| CB4856                                                                                                                                                                                                             | CT | X | 9299147 | 9300131 | WBGene00015178 | B0416.2  | B0416.2  | -0.0561006009272864  | AGIWUR43083 |
| CB4856                                                                                                                                                                                                             | CT | X | 9303724 | 9310439 | WBGene00015177 | tmc-2    | B0416.1  | -0.089442457929934   | AGIWUR21090 |
| CB4856                                                                                                                                                                                                             | CT | X | 9310625 | 9311341 | WBGene00045261 | H29C22.1 | H29C22.1 | 0.142066140420129    |             |
| AGIWUR12636;AGIWUR32509                                                                                                                                                                                            |    |   |         |         |                |          |          |                      |             |
| CB4856                                                                                                                                                                                                             | CT | X | 9312648 | 9314488 | WBGene00044788 | ttr-38   | F35G8.2  | -0.771243660259186   |             |
| AGIWUR1546;AGIWUR7857;AGIWUR16234;AGIWUR24607                                                                                                                                                                      |    |   |         |         |                |          |          |                      |             |
| CB4856                                                                                                                                                                                                             | CT | X | 9315436 | 9319180 | WBGene00018067 | npr-7    | F35G8.1  | -0.0148160163849429  | AGIWUR12994 |
| CB4856                                                                                                                                                                                                             | CT | X | 9331133 | 9336632 | WBGene00020595 | T20B5.2  | T20B5.2  | -0.0910303190186355  | AGIWUR5555  |
| CB4856                                                                                                                                                                                                             | CT | X | 9336819 | 9342970 | WBGene00000161 | apa-2    | T20B5.1  | -0.181824138633766   |             |
| AGIWUR7529;AGIWUR19739;AGIWUR28855;AGIWUR36115                                                                                                                                                                     |    |   |         |         |                |          |          |                      |             |
| CB4856                                                                                                                                                                                                             | CT | X | 9343333 | 9347430 | WBGene00020596 | oga-1    | T20B5.3  | 0.148469167388842    |             |
| AGIWUR5115;AGIWUR11833;AGIWUR13581;AGIWUR24006;AGIWUR40314;AGIWUR45209                                                                                                                                             |    |   |         |         |                |          |          |                      |             |
| CB4856                                                                                                                                                                                                             | CT | X | 9349276 | 9349890 | WBGene00001463 | flp-20   | E01H11.3 | 0.128123555861901    |             |
| AGIWUR17940                                                                                                                                                                                                        |    |   |         |         |                |          |          |                      |             |
| CB4856                                                                                                                                                                                                             | CT | X | 9364818 | 9386035 | WBGene00004033 | pkc-2    | E01H11.1 | 0.000178484414626201 |             |
| AGIWUR4394;AGIWUR5483;AGIWUR5665;AGIWUR8696;AGIWUR9373;AGIWUR10115;AGIWUR11392;AGIWUR16641;AGIWUR18117;AGIWUR27326;AGIWUR30526;AGIWUR33176;AGIWUR34297;AGIWUR34365;AGIWUR35659;AGIWUR38093;AGIWUR40292;AGIWUR44936 |    |   |         |         |                |          |          |                      |             |
| CB4856                                                                                                                                                                                                             | CT | X | 9387341 | 9389189 | WBGene00016009 | C23F12.4 | C23F12.4 | -0.0672480102158826  |             |
| AGIWUR5651                                                                                                                                                                                                         |    |   |         |         |                |          |          |                      |             |
| CB4856                                                                                                                                                                                                             | CT | X | 9391645 | 9394702 | WBGene00016008 | C23F12.3 | C23F12.3 | 0.113571016544205    |             |
| AGIWUR22232                                                                                                                                                                                                        |    |   |         |         |                |          |          |                      |             |
| CB4856                                                                                                                                                                                                             | CT | X | 9397701 | 9427246 | WBGene00016006 | fln-2    | C23F12.1 | 0.0768141192360901   |             |
| AGIWUR2768;AGIWUR3524;AGIWUR4234;AGIWUR6327;AGIWUR11527;AGIWUR13067;AGIWUR19340;AGIWUR21140;AGIWUR21986;AGIWUR27693;AGIWUR28234;AGIWUR33002;AGIWUR33525;AGIWUR36069;AGIWUR40435                                    |    |   |         |         |                |          |          |                      |             |
| CB4856                                                                                                                                                                                                             | CT | X | 9428431 | 9430424 | WBGene00007130 | B0272.4  | B0272.4  | 0.141699207045736    | AGIWUR26263 |
| CB4856                                                                                                                                                                                                             | CT | X | 9431432 | 9432745 | WBGene00007129 | B0272.3  | B0272.3  | -0.0602739333882845  | AGIWUR18153 |
| CB4856                                                                                                                                                                                                             | CT | X | 9434452 | 9436893 | WBGene00006538 | tbb-4    | B0272.1  | 0.304278625026956    | AGIWUR39009 |
| CB4856                                                                                                                                                                                                             | CT | X | 9440079 | 9441571 | WBGene00007128 | memb-1   | B0272.2  | -0.319956117787768   | AGIWUR29736 |
| CB4856                                                                                                                                                                                                             | CT | X | 9446664 | 9447612 | WBGene00014140 | ZK899.1  | ZK899.1  | -0.0181370682483148  | AGIWUR2353  |
| CB4856                                                                                                                                                                                                             | CT | X | 9447861 | 9449399 | WBGene00014145 | ZK899.7  | ZK899.7  | -0.0831137003540068  |             |

AGIWUR17130;AGIWUR28669;AGIWUR36863

|        |    |   |         |         |                |         |         |                     |             |
|--------|----|---|---------|---------|----------------|---------|---------|---------------------|-------------|
| CB4856 | CT | X | 9450225 | 9451994 | WBGene00014141 | ZK899.2 | ZK899.2 | -0.133831823946457  | AGIWUR13325 |
| CB4856 | CT | X | 9453959 | 9454660 | WBGene00014142 | ZK899.3 | ZK899.3 | -0.164402245410604  | AGIWUR1908  |
| CB4856 | CT | X | 9455485 | 9458348 | WBGene00006534 | tba-8   | ZK899.4 | -0.0343712952696249 | AGIWUR42441 |
| CB4856 | CT | X | 9459911 | 9460934 | WBGene00014143 | ZK899.5 | ZK899.5 | -0.0158928707996067 | AGIWUR26787 |
| CB4856 | CT | X | 9463356 | 9464725 | WBGene00014144 | ZK899.6 | ZK899.6 | -0.129259063139635  | AGIWUR21764 |
| CB4856 | CT | X | 9472469 | 9516440 | WBGene00001516 | gap-2   | ZK899.8 | 0.0291461059422922  |             |

AGIWUR1390;AGIWUR6256;AGIWUR8578;AGIWUR9282;AGIWUR9686;AGIWUR16619;AGIWUR19702;AGIWUR20064;AGIWUR20762;AGIWUR20894;AGIWUR23198;AGIWUR23501;AGIWUR24911;AGIWUR25718;AGIWUR26474;AGIWUR27862;AGIWUR29312;AGIWUR30264;AGIWUR32349;AGIWUR35911;AGIWUR40375

|        |    |   |         |         |                |         |         |                    |             |
|--------|----|---|---------|---------|----------------|---------|---------|--------------------|-------------|
| CB4856 | CT | X | 9516393 | 9517187 | WBGene00007407 | C07B5.2 | C07B5.2 | -0.367655988705061 | AGIWUR35949 |
| CB4856 | CT | X | 9519022 | 9521486 | WBGene00007410 | C07B5.6 | C07B5.6 | 0.0969840683434793 | AGIWUR16034 |
| CB4856 | CT | X | 9522488 | 9523173 | WBGene00007408 | C07B5.3 | C07B5.3 | 0.451061647637728  | AGIWUR31308 |
| CB4856 | CT | X | 9529533 | 9536631 | WBGene00007409 | C07B5.4 | C07B5.4 | 0.499503125952676  |             |

AGIWUR3621;AGIWUR11381;AGIWUR27991;AGIWUR28114;AGIWUR31629;AGIWUR35020;AGIWUR36150;AGIWUR43450

|        |    |   |         |         |                |       |         |                  |  |
|--------|----|---|---------|---------|----------------|-------|---------|------------------|--|
| CB4856 | CT | X | 9539905 | 9542430 | WBGene00003828 | nuc-1 | C07B5.5 | 0.30925283214761 |  |
|--------|----|---|---------|---------|----------------|-------|---------|------------------|--|

AGIWUR8544;AGIWUR19630;AGIWUR27016

|        |    |   |         |         |                |         |         |                   |  |
|--------|----|---|---------|---------|----------------|---------|---------|-------------------|--|
| CB4856 | CT | X | 9543670 | 9560801 | WBGene00009888 | F49E2.5 | F49E2.5 | 0.193747656846206 |  |
|--------|----|---|---------|---------|----------------|---------|---------|-------------------|--|

AGIWUR1096;AGIWUR1611;AGIWUR2644;AGIWUR2838;AGIWUR7511;AGIWUR8364;AGIWUR10828;AGIWUR14219;AGIWUR16672;AGIWUR19009;AGIWUR21819;AGIWUR23167;AGIWUR25326;AGIWUR29705;AGIWUR30817;AGIWUR35031;AGIWUR35540;AGIWUR35753;AGIWUR35876;AGIWUR42913

|        |    |   |         |         |                |         |         |                    |  |
|--------|----|---|---------|---------|----------------|---------|---------|--------------------|--|
| CB4856 | CT | X | 9561850 | 9565981 | WBGene00009885 | F49E2.1 | F49E2.1 | -0.250732698398178 |  |
|--------|----|---|---------|---------|----------------|---------|---------|--------------------|--|

AGIWUR6116;AGIWUR6559;AGIWUR10854;AGIWUR20850;AGIWUR30883;AGIWUR39455;AGIWUR42055

|        |    |   |         |         |                |         |         |                    |            |
|--------|----|---|---------|---------|----------------|---------|---------|--------------------|------------|
| CB4856 | CT | X | 9567296 | 9573723 | WBGene00009886 | F49E2.2 | F49E2.2 | 0.0907766606252505 | AGIWUR6164 |
|--------|----|---|---------|---------|----------------|---------|---------|--------------------|------------|

|        |    |   |         |         |                |        |         |                    |  |
|--------|----|---|---------|---------|----------------|--------|---------|--------------------|--|
| CB4856 | CT | X | 9573741 | 9575866 | WBGene00009887 | glb-17 | F49E2.4 | -0.115357067138488 |  |
|--------|----|---|---------|---------|----------------|--------|---------|--------------------|--|

AGIWUR11201;AGIWUR15486;AGIWUR23651;AGIWUR27022;AGIWUR34920;AGIWUR45030

|        |    |   |         |         |                |       |         |                    |  |
|--------|----|---|---------|---------|----------------|-------|---------|--------------------|--|
| CB4856 | CT | X | 9584664 | 9586344 | WBGene00007516 | gpx-5 | C11E4.1 | -0.232830537920104 |  |
|--------|----|---|---------|---------|----------------|-------|---------|--------------------|--|

AGIWUR26679;AGIWUR40806

|        |    |   |         |         |                |       |         |                    |  |
|--------|----|---|---------|---------|----------------|-------|---------|--------------------|--|
| CB4856 | CT | X | 9587942 | 9588879 | WBGene00007517 | gpx-3 | C11E4.2 | -0.044468964798817 |  |
|--------|----|---|---------|---------|----------------|-------|---------|--------------------|--|

AGIWUR13307;AGIWUR43368

|        |    |   |         |         |                |       |         |                     |             |
|--------|----|---|---------|---------|----------------|-------|---------|---------------------|-------------|
| CB4856 | CT | X | 9589423 | 9595459 | WBGene00007518 | del-8 | C11E4.3 | -0.0619402078190827 | AGIWUR15310 |
|--------|----|---|---------|---------|----------------|-------|---------|---------------------|-------------|

|        |    |   |         |         |                |          |  |          |  |
|--------|----|---|---------|---------|----------------|----------|--|----------|--|
| CB4856 | CT | X | 9595770 | 9595902 | WBGene00201289 | C11E4.14 |  | C11E4.14 |  |
|--------|----|---|---------|---------|----------------|----------|--|----------|--|

-0.00507801068892988

AGIWUR2498

|        |    |   |         |         |                |         |         |                    |             |
|--------|----|---|---------|---------|----------------|---------|---------|--------------------|-------------|
| CB4856 | CT | X | 9610563 | 9617045 | WBGene00007520 | C11E4.6 | C11E4.6 | 0.0956075983342011 | AGIWUR27647 |
|--------|----|---|---------|---------|----------------|---------|---------|--------------------|-------------|

|        |    |   |         |         |                |         |         |                    |            |
|--------|----|---|---------|---------|----------------|---------|---------|--------------------|------------|
| CB4856 | CT | X | 9617219 | 9619122 | WBGene00007521 | C11E4.7 | C11E4.7 | -0.245365120232306 | AGIWUR9290 |
|--------|----|---|---------|---------|----------------|---------|---------|--------------------|------------|

|        |    |   |         |         |                |         |         |                   |            |
|--------|----|---|---------|---------|----------------|---------|---------|-------------------|------------|
| CB4856 | CT | X | 9623304 | 9624714 | WBGene00007522 | C11E4.8 | C11E4.8 | 0.103986174976495 | AGIWUR4440 |
|--------|----|---|---------|---------|----------------|---------|---------|-------------------|------------|

|        |    |   |         |         |                |          |  |          |                   |
|--------|----|---|---------|---------|----------------|----------|--|----------|-------------------|
| CB4856 | CT | X | 9626135 | 9626849 | WBGene00009378 | F34H10.1 |  | F34H10.1 | 0.362750966981875 |
|--------|----|---|---------|---------|----------------|----------|--|----------|-------------------|

AGIWUR24854

|        |    |   |         |         |                |          |  |          |                   |
|--------|----|---|---------|---------|----------------|----------|--|----------|-------------------|
| CB4856 | CT | X | 9630423 | 9630875 | WBGene00009379 | F34H10.2 |  | F34H10.2 | 0.446964235286561 |
|--------|----|---|---------|---------|----------------|----------|--|----------|-------------------|

|                                                                                                |    |   |         |         |                |                  |                                |
|------------------------------------------------------------------------------------------------|----|---|---------|---------|----------------|------------------|--------------------------------|
| AGIWUR32767                                                                                    |    |   |         |         |                |                  |                                |
| CB4856                                                                                         | CT | X | 9633284 | 9635647 | WBGene00009380 | F34H10.3         | F34H10.3 0.312337872016624     |
| AGIWUR9257                                                                                     |    |   |         |         |                |                  |                                |
| CB4856                                                                                         | CT | X | 9635693 | 9636884 | WBGene00009382 | F34H10.5         | F34H10.5 -0.74926549615791     |
| AGIWUR44097                                                                                    |    |   |         |         |                |                  |                                |
| CB4856                                                                                         | CT | X | 9648532 | 9650928 | WBGene00009381 | F34H10.4         | F34H10.4 -0.0795599354528971   |
| AGIWUR38929                                                                                    |    |   |         |         |                |                  |                                |
| CB4856                                                                                         | CT | X | 9650999 | 9653116 | WBGene00000085 | aex-2 T14B1.2    | 0.0434450336042991 AGIWUR10230 |
| CB4856                                                                                         | CT | X | 9664499 | 9668755 | WBGene00011763 | T14B1.1 T14B1.1  | 0.851430013286885              |
| AGIWUR14041;AGIWUR17060;AGIWUR21205;AGIWUR41237                                                |    |   |         |         |                |                  |                                |
| CB4856                                                                                         | CT | X | 9675844 | 9680169 | WBGene00002067 | ifp-1 C43C3.1    | 0.0113100527699457             |
| AGIWUR39748;AGIWUR42431                                                                        |    |   |         |         |                |                  |                                |
| CB4856                                                                                         | CT | X | 9690745 | 9696718 | WBGene00008065 | npr-18 C43C3.2   | 0.189490753184496 AGIWUR12539  |
| CB4856                                                                                         | CT | X | 9698678 | 9701679 | WBGene00001123 | dyf-7 C43C3.3    | 0.430290163133907              |
| AGIWUR6186;AGIWUR13488;AGIWUR37978;AGIWUR40328                                                 |    |   |         |         |                |                  |                                |
| CB4856                                                                                         | CT | X | 9706926 | 9708563 | WBGene00008865 | F15G9.1 F15G9.1  | 0.209713396452623              |
| AGIWUR2786;AGIWUR18819;AGIWUR20324;AGIWUR23067;AGIWUR27181;AGIWUR28533;AGIWUR42907;AGIWUR43564 |    |   |         |         |                |                  |                                |
| CB4856                                                                                         | CT | X | 9708590 | 9713713 | WBGene00008866 | F15G9.2 F15G9.2  | -0.121357471703923 AGIWUR38649 |
| CB4856                                                                                         | CT | X | 9717589 | 9753764 | WBGene00001863 | him-4 F15G9.4    | -0.243627255599833 AGIWUR31653 |
| CB4856                                                                                         | CT | X | 9757271 | 9759306 | WBGene00011642 | T09B9.1 T09B9.1  | -0.149235123083172             |
| AGIWUR27426;AGIWUR32169                                                                        |    |   |         |         |                |                  |                                |
| CB4856                                                                                         | CT | X | 9759297 | 9761281 | WBGene00011644 | T09B9.3 T09B9.3  | 0.226762938985708 AGIWUR17627  |
| CB4856                                                                                         | CT | X | 9761483 | 9764922 | WBGene00011643 | slc-17.9 T09B9.2 | 0.363235485303223              |
| AGIWUR19015                                                                                    |    |   |         |         |                |                  |                                |
| CB4856                                                                                         | CT | X | 9771697 | 9774352 | WBGene00011645 | T09B9.4 T09B9.4  | -0.178849662472157 AGIWUR6173  |
| CB4856                                                                                         | CT | X | 9777831 | 9780251 | WBGene00011646 | T09B9.5 T09B9.5  | 0.0221906169628125 AGIWUR31885 |
| CB4856                                                                                         | CT | X | 9780375 | 9789275 | WBGene00009482 | F36G3.1 F36G3.1  | -0.154283586751708             |
| AGIWUR802;AGIWUR15540;AGIWUR16093;AGIWUR37210;AGIWUR42245;AGIWUR44981                          |    |   |         |         |                |                  |                                |
| CB4856                                                                                         | CT | X | 9792407 | 9794273 | WBGene00009483 | F36G3.2 F36G3.2  | 0.115285356914159              |
| AGIWUR11079;AGIWUR15033;AGIWUR31455                                                            |    |   |         |         |                |                  |                                |
| CB4856                                                                                         | CT | X | 9798839 | 9801038 | WBGene00009484 | F36G3.3 F36G3.3  | 0.0360513366217337 AGIWUR26906 |
| CB4856                                                                                         | CT | X | 9801091 | 9807662 | WBGene00009799 | lgc-47 F47A4.1   | 0.137428070775723              |
| AGIWUR528;AGIWUR6353;AGIWUR10171;AGIWUR29701                                                   |    |   |         |         |                |                  |                                |
| CB4856                                                                                         | CT | X | 9810202 | 9822273 | WBGene00001081 | dpy-22 F47A4.2   | 0.156689862165504 AGIWUR4384   |
| CB4856                                                                                         | CT | X | 9823752 | 9831249 | WBGene00009800 | rrc-1 F47A4.3    | 0.392610529851771 AGIWUR44440  |
| CB4856                                                                                         | CT | X | 9833352 | 9838039 | WBGene00009801 | ipla-2 F47A4.5   | 0.233462988630404 AGIWUR8383   |
| CB4856                                                                                         | CT | X | 9847275 | 9849518 | WBGene00006881 | vab-15 R07B1.1   | 0.15204584871666 AGIWUR21372   |
| CB4856                                                                                         | CT | X | 9850209 | 9851375 | WBGene00002271 | lec-8 R07B1.10   | 0.0148780500942518             |
| AGIWUR25560                                                                                    |    |   |         |         |                |                  |                                |

|                                                                                                                                                                       |    |   |         |         |                |          |          |                     |             |
|-----------------------------------------------------------------------------------------------------------------------------------------------------------------------|----|---|---------|---------|----------------|----------|----------|---------------------|-------------|
| CB4856                                                                                                                                                                | CT | X | 9852139 | 9852909 | WBGene00002270 | lec-7    | R07B1.2  | 0.442235454466596   |             |
| AGIWUR5220;AGIWUR7200;AGIWUR12362;AGIWUR21935;AGIWUR22868;AGIWUR25023;AGIWUR25252;AGIWUR25319;AGIWUR27786;AGIWUR29709;AGIWUR37997;AGIWUR39507;AGIWUR43141;AGIWUR43727 |    |   |         |         |                |          |          |                     |             |
| CB4856                                                                                                                                                                | CT | X | 9856918 | 9858083 | WBGene00011082 | R07B1.11 | R07B1.11 | 0.0258093016879997  |             |
| AGIWUR37912                                                                                                                                                           |    |   |         |         |                |          |          |                     |             |
| CB4856                                                                                                                                                                | CT | X | 9858339 | 9861735 | WBGene00011076 | scav-5   | R07B1.3  | -0.385876287776727  | AGIWUR27332 |
| CB4856                                                                                                                                                                | CT | X | 9861646 | 9862960 | WBGene00001784 | gst-36   | R07B1.4  | -0.669187911732845  | AGIWUR21795 |
| CB4856                                                                                                                                                                | CT | X | 9864069 | 9866531 | WBGene00011077 | R07B1.5  | R07B1.5  | 0.138011306235247   | AGIWUR7300  |
| CB4856                                                                                                                                                                | CT | X | 9866660 | 9867921 | WBGene00011078 | R07B1.6  | R07B1.6  | 0.197624041025177   | AGIWUR39602 |
| CB4856                                                                                                                                                                | CT | X | 9869836 | 9870792 | WBGene00138711 | R07B1.13 | R07B1.13 | -0.128102175730483  |             |
| AGIWUR34623                                                                                                                                                           |    |   |         |         |                |          |          |                     |             |
| CB4856                                                                                                                                                                | CT | X | 9870804 | 9872654 | WBGene00001608 | R07B1.8  | R07B1.8  | -0.196153200565075  | AGIWUR28705 |
| CB4856                                                                                                                                                                | CT | X | 9872884 | 9882212 | WBGene00011083 | glo-1    | R07B1.12 | -0.092917016722712  |             |
| AGIWUR13929;AGIWUR23649;AGIWUR27945                                                                                                                                   |    |   |         |         |                |          |          |                     |             |
| CB4856                                                                                                                                                                | CT | X | 9884278 | 9889704 | WBGene00003410 | mrp-4    | F21G4.2  | -0.324651034241349  | AGIWUR18807 |
| CB4856                                                                                                                                                                | CT | X | 9889618 | 9892328 | WBGene00009023 | F21G4.1  | F21G4.1  | 0.16953063217367    |             |
| AGIWUR23391;AGIWUR33969                                                                                                                                               |    |   |         |         |                |          |          |                     |             |
| CB4856                                                                                                                                                                | CT | X | 9895144 | 9897057 | WBGene00009024 | F21G4.3  | F21G4.3  | 0.00488261755843844 | AGIWUR28779 |
| CB4856                                                                                                                                                                | CT | X | 9897313 | 9899476 | WBGene00009025 | phf-34   | F21G4.4  | -0.184908320181671  | AGIWUR3666  |
| CB4856                                                                                                                                                                | CT | X | 9906148 | 9908116 | WBGene00009026 | F21G4.5  | F21G4.5  | -0.0336507760450253 | AGIWUR38645 |
| CB4856                                                                                                                                                                | CT | X | 9908794 | 9917448 | WBGene00009027 | F21G4.6  | F21G4.6  | -0.210059973555573  | AGIWUR1469  |
| CB4856                                                                                                                                                                | CT | X | 9919302 | 9920346 | WBGene00007648 | folr-1   | C17G1.1  | -0.574953856611092  | AGIWUR26776 |
| CB4856                                                                                                                                                                | CT | X | 9921557 | 9922843 | WBGene00007649 | C17G1.2  | C17G1.2  | 0.0585133830839535  | AGIWUR25661 |
| CB4856                                                                                                                                                                | CT | X | 9922910 | 9925173 | WBGene00007650 | ugt-23   | C17G1.3  | 0.0579642310169888  | AGIWUR28073 |
| CB4856                                                                                                                                                                | CT | X | 9925728 | 9931460 | WBGene00007651 | nra-3    | C17G1.4  | 0.18790091911265    | AGIWUR9330  |
| CB4856                                                                                                                                                                | CT | X | 9932371 | 9937133 | WBGene00023491 | tsp-21   | C17G1.8  | -0.0506482111254858 | AGIWUR15686 |
| CB4856                                                                                                                                                                | CT | X | 9941630 | 9944838 | WBGene00007652 | C17G1.5  | C17G1.5  | 0.10575916839687    |             |
| AGIWUR28795;AGIWUR36756                                                                                                                                               |    |   |         |         |                |          |          |                     |             |
| CB4856                                                                                                                                                                | CT | X | 9944844 | 9949060 | WBGene00003553 | nas-37   | C17G1.6  | 0.242117748914882   | AGIWUR4277  |
| CB4856                                                                                                                                                                | CT | X | 9952579 | 9954533 | WBGene00007653 | cys1-1   | C17G1.7  | 0.295237088707278   | AGIWUR28040 |
| CB4856                                                                                                                                                                | CT | X | 9958899 | 9964747 | WBGene00013919 | ZC506.1  | ZC506.1  | -0.0218187719006937 |             |
| AGIWUR8213;AGIWUR11908;AGIWUR12251;AGIWUR17485;AGIWUR19519;AGIWUR24133;AGIWUR24710;AGIWUR28753;AGIWUR35520;AGIWUR35766                                                |    |   |         |         |                |          |          |                     |             |
| CB4856                                                                                                                                                                | CT | X | 9965495 | 9968584 | WBGene00013920 | pssy-1   | ZC506.3  | 0.00657811120838048 | AGIWUR5773  |
| CB4856                                                                                                                                                                | CT | X | 9968517 | 9976392 | WBGene00003232 | mg1-1    | ZC506.4  | -0.144295152015356  | AGIWUR6179  |
| CB4856                                                                                                                                                                | CT | X | 9982402 | 9985005 | WBGene00008954 | F19C6.5  | F19C6.5  | -0.343220341151904  | AGIWUR12405 |
| CB4856                                                                                                                                                                | CT | X | 9991255 | 9999178 | WBGene00001708 | grk-1    | F19C6.1  | -0.161264504581878  |             |
| AGIWUR3423;AGIWUR6594;AGIWUR9252;AGIWUR19484;AGIWUR28775;AGIWUR30119;AGIWUR30987;AGIWUR31580;AGIWUR34424;AGIWUR36707                                                  |    |   |         |         |                |          |          |                     |             |

|                                                                         |    |   |                     |                        |                |          |           |                     |
|-------------------------------------------------------------------------|----|---|---------------------|------------------------|----------------|----------|-----------|---------------------|
| CB4856                                                                  | CT | X | 10000935            | 10005408               | WBGene00008951 | F19C6.2  | F19C6.2   | 0.0128985004225628  |
| AGIWUR14774;AGIWUR18317;AGIWUR21208;AGIWUR23874;AGIWUR24789;AGIWUR25351 |    |   |                     |                        |                |          |           |                     |
| CB4856                                                                  | CT | X | 10005733            | 10008755               | WBGene00008952 | F19C6.3  | F19C6.3   | 0.205419212978846   |
| AGIWUR9397                                                              |    |   |                     |                        |                |          |           |                     |
| CB4856                                                                  | CT | X | 10015045            | 10018025               | WBGene00008953 | F19C6.4  | F19C6.4   | -0.369031912544344  |
| AGIWUR11952;AGIWUR20470;AGIWUR31977                                     |    |   |                     |                        |                |          |           |                     |
| CB4856                                                                  | CT | X | 10018046            | 10022304               | WBGene00009645 | F42G10.1 |           | F42G10.1            |
|                                                                         |    |   | -0.348361238079569  | AGIWUR7303             |                |          |           |                     |
| CB4856                                                                  | CT | X | 10027856            | 10030130               | WBGene00003368 | mkk-4    | F42G10.2  |                     |
|                                                                         |    |   | -0.22715923306249   | AGIWUR7431;AGIWUR19589 |                |          |           |                     |
| CB4856                                                                  | CT | X | 10031088            | 10033283               | WBGene00012162 | sek-6    | VZC374L.1 |                     |
|                                                                         |    |   | 0.166822235331509   | AGIWUR30961            |                |          |           |                     |
| CB4856                                                                  | CT | X | 10034836            | 10047417               | WBGene00013872 | ZC374.2  | ZC374.2   | -0.0147033678369386 |
| AGIWUR28487                                                             |    |   |                     |                        |                |          |           |                     |
| CB4856                                                                  | CT | X | 10049460            | 10052481               | WBGene00013871 | gnrr-3   | ZC374.1   | 0.198392445967988   |
| AGIWUR25668                                                             |    |   |                     |                        |                |          |           |                     |
| CB4856                                                                  | CT | X | 10054281            | 10057524               | WBGene00013866 | cbs-1    | ZC373.1   | -0.169810867409234  |
| AGIWUR2325                                                              |    |   |                     |                        |                |          |           |                     |
| CB4856                                                                  | CT | X | 10057925            | 10058437               | WBGene00013867 | ZC373.2  | ZC373.2   | 0.0404580812638429  |
| AGIWUR24519                                                             |    |   |                     |                        |                |          |           |                     |
| CB4856                                                                  | CT | X | 10060525            | 10061681               | WBGene00013868 | ZC373.3  | ZC373.3   | 0.0290154572908499  |
| AGIWUR8982                                                              |    |   |                     |                        |                |          |           |                     |
| CB4856                                                                  | CT | X | 10062451            | 10069783               | WBGene00013869 | mlck-1   | ZC373.4   | -0.145885766968084  |
| AGIWUR28216                                                             |    |   |                     |                        |                |          |           |                     |
| CB4856                                                                  | CT | X | 10072507            | 10074391               | WBGene00013870 | ZC373.5  | ZC373.5   | -0.113132336870399  |
| AGIWUR835;AGIWUR27101;AGIWUR42518;AGIWUR42861                           |    |   |                     |                        |                |          |           |                     |
| CB4856                                                                  | CT | X | 10075288            | 10076357               | WBGene00000930 | dao-4    | ZC373.6   | -0.255464830124819  |
| AGIWUR28509                                                             |    |   |                     |                        |                |          |           |                     |
| CB4856                                                                  | CT | X | 10084627            | 10104252               | WBGene00012326 | W07E11.1 |           | W07E11.1            |
|                                                                         |    |   | 0.49913034567129    | AGIWUR4175;AGIWUR11508 |                |          |           |                     |
| CB4856                                                                  | CT | X | 10104612            | 10125483               | WBGene00006792 | unc-58   | T06H11.1  |                     |
|                                                                         |    |   | -0.138550691717297  | AGIWUR26360            |                |          |           |                     |
| CB4856                                                                  | CT | X | 10129588            | 10130267               | WBGene00011552 | T06H11.2 |           | T06H11.2            |
|                                                                         |    |   | -0.0584306757723168 | AGIWUR38332            |                |          |           |                     |
| CB4856                                                                  | CT | X | 10136129            | 10138620               | WBGene00003384 | moc-1    | T06H11.4  |                     |
|                                                                         |    |   | -0.155541470255859  | AGIWUR25632            |                |          |           |                     |
| CB4856                                                                  | CT | X | 10139374            | 10142013               | WBGene00008602 | oac-14   | F09B9.1   | 0.844065325104823   |
| AGIWUR6547;AGIWUR23375;AGIWUR30796;AGIWUR39301                          |    |   |                     |                        |                |          |           |                     |
| CB4856                                                                  | CT | X | 10146889            | 10153142               | WBGene00006839 | unc-115  | F09B9.2   | -0.0230927534083447 |

AGIWUR531;AGIWUR1683;AGIWUR2406;AGIWUR8737;AGIWUR14699;AGIWUR17750;AGIWUR18007;AGIWUR32621;AGIWUR35554;AGIWUR37555;AGIWUR37856;AGIWUR38833  
 CB4856 CT X 10154821 10156856 WBGene00008604 F09B9.5 F09B9.5 -0.213795032132801  
 AGIWUR13866;AGIWUR15513;AGIWUR24575  
 CB4856 CT X 10156858 10160438 WBGene00001331 erd-2 F09B9.3 0.158780297660098  
 AGIWUR12862  
 CB4856 CT X 10160631 10161809 WBGene00008603 F09B9.4 F09B9.4 0.0389595077164131  
 AGIWUR18927  
 CB4856 CT X 10167096 10171668 WBGene00007396 tiar-3 C07A4.1 -0.499872948470788  
 AGIWUR7064  
 CB4856 CT X 10172326 10174185 WBGene00007397 C07A4.2 C07A4.2 0.312794867719516  
 AGIWUR12417  
 CB4856 CT X 10174985 10175896 WBGene00007398 C07A4.3 C07A4.3 0.916792908399001  
 AGIWUR13464  
 CB4856 CT X 10177237 10180662 WBGene00008998 ncs-4 F21A10.1  
 -0.622375743773618 AGIWUR31188  
 CB4856 CT X 10180953 10194377 WBGene00008999 myrf-2 F21A10.2  
 0.174922380953741 AGIWUR8406;AGIWUR20315;AGIWUR22227;AGIWUR36013;AGIWUR42903;AGIWUR43892  
 CB4856 CT X 10197706 10200407 WBGene00009674 nucb-1 F44A6.1 -0.423869984950114  
 AGIWUR17889;AGIWUR21581  
 CB4856 CT X 10201329 10205433 WBGene00004786 sex-1 F44A6.2 0.252857587560689  
 AGIWUR14694;AGIWUR24896;AGIWUR30249  
 CB4856 CT X 10212771 10214165 WBGene00009675 F44A6.3 F44A6.3 -0.151529209596294  
 AGIWUR25082  
 CB4856 CT X 10214443 10215495 WBGene00009676 F44A6.4 F44A6.4 -0.0309104957231057  
 AGIWUR34767  
 CB4856 CT X 10217310 10218760 WBGene00009677 F44A6.5 F44A6.5 -0.228252812392101  
 AGIWUR29850  
 CB4856 CT X 10220644 10228137 WBGene00007593 C14H10.3 C14H10.3  
 0.224656401809925 AGIWUR41483  
 CB4856 CT X 10233739 10236944 WBGene00007591 zipt-13 C14H10.1  
 -0.349770695348351 AGIWUR24523  
 CB4856 CT X 10239805 10241039 WBGene00006135 str-74 C14H10.4  
 -0.0955649689504456 AGIWUR42696  
 CB4856 CT X 10242325 10252879 WBGene00007592 C14H10.2 C14H10.2  
 -0.13286869649013 AGIWUR33394  
 CB4856 CT X 10258733 10260135 WBGene00007861 C32A9.1 C32A9.1 0.0942862652003109  
 AGIWUR8449;AGIWUR16047;AGIWUR35637  
 CB4856 CT X 10273692 10278261 WBGene00009618 F41E7.2 F41E7.2 0.193737580163551

|                                                                |   |                          |          |                |           |           |                     |  |
|----------------------------------------------------------------|---|--------------------------|----------|----------------|-----------|-----------|---------------------|--|
| AGIWUR12392; AGIWUR25610; AGIWUR37597                          |   |                          |          |                |           |           |                     |  |
| CB4856 CT                                                      | X | 10279599                 | 10282842 | WBGene00009617 | F41E7.1   | F41E7.1   | -0.113934780094459  |  |
| AGIWUR907                                                      |   |                          |          |                |           |           |                     |  |
| CB4856 CT                                                      | X | 10282825                 | 10285734 | WBGene00009619 | npr-6     | F41E7.3   | 0.143442098536021   |  |
| AGIWUR28581                                                    |   |                          |          |                |           |           |                     |  |
| CB4856 CT                                                      | X | 10302622                 | 10303143 | WBGene00009620 | fip-5     | F41E7.4   | -0.0222224337143686 |  |
| AGIWUR13840                                                    |   |                          |          |                |           |           |                     |  |
| CB4856 CT                                                      | X | 10304507                 | 10304947 | WBGene00009621 | fipr-21   | F41E7.5   | -0.154053157264457  |  |
| AGIWUR20588                                                    |   |                          |          |                |           |           |                     |  |
| CB4856 CT                                                      | X | 10306595                 | 10306951 | WBGene00009624 | cnc-8     | F41E7.8   | -0.270512069854128  |  |
| AGIWUR9182; AGIWUR11541; AGIWUR16122; AGIWUR19341; AGIWUR43020 |   |                          |          |                |           |           |                     |  |
| CB4856 CT                                                      | X | 10307137                 | 10310466 | WBGene00009622 | F41E7.6   | F41E7.6   | -0.591798104381374  |  |
| AGIWUR756                                                      |   |                          |          |                |           |           |                     |  |
| CB4856 CT                                                      | X | 10307873                 | 10312182 | WBGene00009623 | F41E7.7   | F41E7.7   | 0.289412909163797   |  |
| AGIWUR28863                                                    |   |                          |          |                |           |           |                     |  |
| CB4856 CT                                                      | X | 10312756                 | 10316005 | WBGene00009625 | F41E7.9   | F41E7.9   | 0.0149767055683521  |  |
| AGIWUR37898                                                    |   |                          |          |                |           |           |                     |  |
| CB4856 CT                                                      | X | 10317722                 | 10321857 | WBGene00011107 | R07E3.6   | R07E3.6   | 0.653940565324083   |  |
| AGIWUR11980                                                    |   |                          |          |                |           |           |                     |  |
| CB4856 CT                                                      | X | 10324183                 | 10327642 | WBGene00011106 | acl-5     | R07E3.5   | 0.135898427927508   |  |
| AGIWUR7281                                                     |   |                          |          |                |           |           |                     |  |
| CB4856 CT                                                      | X | 10330547                 | 10331900 | WBGene00011105 | R07E3.4   | R07E3.4   | -0.358066617412369  |  |
| AGIWUR25740                                                    |   |                          |          |                |           |           |                     |  |
| CB4856 CT                                                      | X | 10333861                 | 10338200 | WBGene00011104 | cut-5     | R07E3.3   | 0.754616683775333   |  |
| AGIWUR41403                                                    |   |                          |          |                |           |           |                     |  |
| CB4856 CT                                                      | X | 10339225                 | 10341161 | WBGene00011102 | R07E3.1   | R07E3.1   | 0.0609230238474936  |  |
| AGIWUR22504; AGIWUR33913; AGIWUR44194                          |   |                          |          |                |           |           |                     |  |
| CB4856 CT                                                      | X | 10341732                 | 10344080 | WBGene00011108 | R07E3.7   | R07E3.7   | -0.0452084694815857 |  |
| AGIWUR39580                                                    |   |                          |          |                |           |           |                     |  |
| CB4856 CT                                                      | X | 10358476                 | 10360550 | WBGene00013028 | efhc-1    | Y49A10A.1 |                     |  |
| 0.281029725405789                                              |   | AGIWUR39558              |          |                |           |           |                     |  |
| CB4856 CT                                                      | X | 10371077                 | 10372664 | WBGene00044949 | Y49A10A.2 | Y49A10A.2 |                     |  |
| 0.293484923487781                                              |   | AGIWUR32528; AGIWUR34902 |          |                |           |           |                     |  |
| CB4856 CT                                                      | X | 10373235                 | 10377832 | WBGene00004375 | rme-4     | F46F6.1   | -0.110302082169653  |  |
| AGIWUR4542; AGIWUR14043; AGIWUR15056                           |   |                          |          |                |           |           |                     |  |
| CB4856 CT                                                      | X | 10379693                 | 10386508 | WBGene00001122 | dyf-6     | F46F6.4   | -0.0138506374518981 |  |
| AGIWUR18040; AGIWUR18179                                       |   |                          |          |                |           |           |                     |  |
| CB4856 CT                                                      | X | 10397243                 | 10402573 | WBGene00009793 | pkn-1     | F46F6.2   | 0.0833505724784196  |  |
| AGIWUR21969                                                    |   |                          |          |                |           |           |                     |  |

|                                                                                    |   |                                    |          |                |          |          |                     |
|------------------------------------------------------------------------------------|---|------------------------------------|----------|----------------|----------|----------|---------------------|
| CB4856 CT                                                                          | X | 10402526                           | 10406303 | WBGene00001804 | gur-3    | ZC504.5  | 0.209423941400481   |
| AGIWUR5039                                                                         |   |                                    |          |                |          |          |                     |
| CB4856 CT                                                                          | X | 10407150                           | 10409774 | WBGene00013916 | ZC504.1  | ZC504.1  | -0.0242413272788928 |
| AGIWUR13279                                                                        |   |                                    |          |                |          |          |                     |
| CB4856 CT                                                                          | X | 10412725                           | 10416630 | WBGene00000047 | acr-8    | ZC504.2  | -0.16508235312687   |
| AGIWUR5108                                                                         |   |                                    |          |                |          |          |                     |
| CB4856 CT                                                                          | X | 10416639                           | 10419764 | WBGene00013917 | cdk-11.2 | ZC504.3  |                     |
| -0.0787906527464628                                                                |   | AGIWUR41614                        |          |                |          |          |                     |
| CB4856 CT                                                                          | X | 10421655                           | 10428650 | WBGene00003247 | mig-15   | ZC504.4  | 0.140029587815633   |
| AGIWUR3064;AGIWUR23047;AGIWUR34681;AGIWUR36617;AGIWUR37004;AGIWUR40485;AGIWUR41703 |   |                                    |          |                |          |          |                     |
| CB4856 CT                                                                          | X | 10444169                           | 10444674 | WBGene00008023 | C39B10.3 | C39B10.3 |                     |
| 0.325019249724955                                                                  |   | AGIWUR10562                        |          |                |          |          |                     |
| CB4856 CT                                                                          | X | 10447351                           | 10447755 | WBGene00008025 | C39B10.5 | C39B10.5 |                     |
| -0.15147968202777                                                                  |   | AGIWUR17118                        |          |                |          |          |                     |
| CB4856 CT                                                                          | X | 10454309                           | 10460341 | WBGene00008022 | lgc-41   | C39B10.2 |                     |
| 0.0535786657164454                                                                 |   | AGIWUR7852;AGIWUR20309;AGIWUR22317 |          |                |          |          |                     |
| CB4856 CT                                                                          | X | 10460546                           | 10463580 | WBGene00008021 | C39B10.1 | C39B10.1 |                     |
| 0.78376029501498                                                                   |   | AGIWUR34897                        |          |                |          |          |                     |
| CB4856 CT                                                                          | X | 10475527                           | 10475959 | WBGene00001252 | elt-4    | C39B10.6 |                     |
| -0.787199864766079                                                                 |   | AGIWUR17014                        |          |                |          |          |                     |
| CB4856 CT                                                                          | X | 10481240                           | 10483446 | WBGene00001250 | elt-2    | C33D3.1  | 0.352634022300409   |
| AGIWUR16561                                                                        |   |                                    |          |                |          |          |                     |
| CB4856 CT                                                                          | X | 10485350                           | 10486757 | WBGene00007894 | C33D3.3  | C33D3.3  | -0.319983343455185  |
| AGIWUR33607                                                                        |   |                                    |          |                |          |          |                     |
| CB4856 CT                                                                          | X | 10489063                           | 10489821 | WBGene00007895 | C33D3.4  | C33D3.4  | -0.274984142766658  |
| AGIWUR29590                                                                        |   |                                    |          |                |          |          |                     |
| CB4856 CT                                                                          | X | 10491344                           | 10497264 | WBGene00007896 | C33D3.5  | C33D3.5  | 0.132710458910671   |
| AGIWUR7459                                                                         |   |                                    |          |                |          |          |                     |
| CB4856 CT                                                                          | X | 10505988                           | 10519563 | WBGene00006870 | vab-3    | F14F3.1  | 0.595875034487722   |
| AGIWUR12076;AGIWUR40464                                                            |   |                                    |          |                |          |          |                     |
| CB4856 CT                                                                          | X | 10520817                           | 10521464 | WBGene00008807 | F14F3.4  | F14F3.4  | -0.0264004400303355 |
| AGIWUR31682                                                                        |   |                                    |          |                |          |          |                     |
| CB4856 CT                                                                          | X | 10521806                           | 10524565 | WBGene00008806 | mboa-7   | F14F3.3  | -0.2308639413853    |
| AGIWUR17910                                                                        |   |                                    |          |                |          |          |                     |
| CB4856 CT                                                                          | X | 10529294                           | 10532677 | WBGene00010340 | slcf-1   | F59F5.1  | -0.455925119025054  |
| AGIWUR21115                                                                        |   |                                    |          |                |          |          |                     |
| CB4856 CT                                                                          | X | 10533699                           | 10537114 | WBGene00010341 | glo-3    | F59F5.2  | 0.0220216534490132  |
| AGIWUR8372;AGIWUR13035                                                             |   |                                    |          |                |          |          |                     |
| CB4856 CT                                                                          | X | 10537141                           | 10542423 | WBGene00010342 | F59F5.3  | F59F5.3  | 0.828947322552583   |





|                                                                                                            |    |   |                                                            |          |                |          |          |                    |
|------------------------------------------------------------------------------------------------------------|----|---|------------------------------------------------------------|----------|----------------|----------|----------|--------------------|
| CB4856                                                                                                     | CT | X | 10719554                                                   | 10722054 | WBGene00011315 | mbr-1    | T01C1.2  | -0.126591398987794 |
| AGIWUR17126;AGIWUR42959                                                                                    |    |   |                                                            |          |                |          |          |                    |
| CB4856                                                                                                     | CT | X | 10734326                                                   | 10744355 | WBGene00001202 | egl-36   | R07A4.1  | 0.317286715686275  |
| AGIWUR14098                                                                                                |    |   |                                                            |          |                |          |          |                    |
| CB4856                                                                                                     | CT | X | 10744356                                                   | 10746488 | WBGene00011073 | R07A4.2  | R07A4.2  | 0.0443073601490838 |
| AGIWUR21532                                                                                                |    |   |                                                            |          |                |          |          |                    |
| CB4856                                                                                                     | CT | X | 10751666                                                   | 10757708 | WBGene00011075 | R07A4.4  | R07A4.4  | -0.813860648004573 |
| AGIWUR16492                                                                                                |    |   |                                                            |          |                |          |          |                    |
| CB4856                                                                                                     | CT | X | 10754917                                                   | 10758140 | WBGene00011074 | R07A4.3  | R07A4.3  | 0.214768504302234  |
| AGIWUR35068                                                                                                |    |   |                                                            |          |                |          |          |                    |
| CB4856                                                                                                     | CT | X | 10769288                                                   | 10782973 | WBGene00004862 | sma-9    | T05A10.1 |                    |
| 0.260540563099122                                                                                          |    |   |                                                            |          |                |          |          |                    |
| AGIWUR7667;AGIWUR8425;AGIWUR17994;AGIWUR18754;AGIWUR19109;AGIWUR26054;AGIWUR34116;AGIWUR34810;AGIWUR44751  |    |   |                                                            |          |                |          |          |                    |
| CB4856                                                                                                     | CT | X | 10782996                                                   | 10783907 | WBGene00000525 | clc-4    | T05A10.2 |                    |
| -0.432778000366388                                                                                         |    |   |                                                            |          |                |          |          |                    |
|                                                                                                            |    |   | AGIWUR26254                                                |          |                |          |          |                    |
| CB4856                                                                                                     | CT | X | 10787503                                                   | 10789700 | WBGene00011460 | ttr-14   | T05A10.3 |                    |
| -0.0861492893259683                                                                                        |    |   |                                                            |          |                |          |          |                    |
| AGIWUR7785;AGIWUR26286;AGIWUR27583;AGIWUR27923;AGIWUR30927;AGIWUR33316;AGIWUR35945;AGIWUR42650;AGIWUR43068 |    |   |                                                            |          |                |          |          |                    |
| CB4856                                                                                                     | CT | X | 10789628                                                   | 10792535 | WBGene00011462 | vap-2    | T05A10.5 |                    |
| 1.22607819206124                                                                                           |    |   |                                                            |          |                |          |          |                    |
|                                                                                                            |    |   | AGIWUR4601;AGIWUR31583                                     |          |                |          |          |                    |
| CB4856                                                                                                     | CT | X | 10792903                                                   | 10794734 | WBGene00011463 | T05A10.6 | T05A10.6 |                    |
| 0.404241015391174                                                                                          |    |   |                                                            |          |                |          |          |                    |
|                                                                                                            |    |   | AGIWUR15837;AGIWUR26641                                    |          |                |          |          |                    |
| CB4856                                                                                                     | CT | X | 10794852                                                   | 10815004 | WBGene00004036 | plc-1    | F31B12.1 |                    |
| 0.158988542047747                                                                                          |    |   |                                                            |          |                |          |          |                    |
|                                                                                                            |    |   | AGIWUR7963;AGIWUR11662;AGIWUR20227;AGIWUR26127;AGIWUR32796 |          |                |          |          |                    |
| CB4856                                                                                                     | CT | X | 10816968                                                   | 10838650 | WBGene00001495 | frm-9    | F31B12.3 |                    |
| 0.0889411121874022                                                                                         |    |   |                                                            |          |                |          |          |                    |
|                                                                                                            |    |   | AGIWUR41268;AGIWUR44578                                    |          |                |          |          |                    |
| CB4856                                                                                                     | CT | X | 10842658                                                   | 10844674 | WBGene00007317 | C05A9.2  | C05A9.2  | 0.616560053123784  |
| AGIWUR7259                                                                                                 |    |   |                                                            |          |                |          |          |                    |
| CB4856                                                                                                     | CT | X | 10854320                                                   | 10859297 | WBGene00003999 | pgp-5    | C05A9.1  | -0.206038547286742 |
| AGIWUR16649;AGIWUR20377;AGIWUR39244                                                                        |    |   |                                                            |          |                |          |          |                    |
| CB4856                                                                                                     | CT | X | 10859351                                                   | 10864422 | WBGene00004002 | pgp-8    | T21E8.3  | -0.629498311467821 |
| AGIWUR37678                                                                                                |    |   |                                                            |          |                |          |          |                    |
| CB4856                                                                                                     | CT | X | 10871181                                                   | 10877465 | WBGene00004000 | pgp-6    | T21E8.1  | -0.458001036953988 |
| AGIWUR27854                                                                                                |    |   |                                                            |          |                |          |          |                    |
| CB4856                                                                                                     | CT | X | 10883567                                                   | 10884508 | WBGene00164972 | T21E8.7  | T21E8.7  | 0.234098711997775  |
| AGIWUR1323                                                                                                 |    |   |                                                            |          |                |          |          |                    |
| CB4856                                                                                                     | CT | X | 10886278                                                   | 10887052 | WBGene00011903 | T21E8.5  | T21E8.5  | 0.407761375816616  |
| AGIWUR38749                                                                                                |    |   |                                                            |          |                |          |          |                    |
| CB4856                                                                                                     | CT | X | 10888506                                                   | 10889028 | WBGene00009817 | F47B10.6 | F47B10.6 |                    |

|                                                                                              |                                                                     |          |                |          |          |                     |
|----------------------------------------------------------------------------------------------|---------------------------------------------------------------------|----------|----------------|----------|----------|---------------------|
| 0.104783337375824                                                                            | AGIWUR35274                                                         |          |                |          |          |                     |
| CB4856 CT X                                                                                  | 10889041                                                            | 10890556 | WBGene00009816 | F47B10.5 | F47B10.5 |                     |
| -0.121248218548442                                                                           | AGIWUR1819;AGIWUR3353;AGIWUR3360;AGIWUR9921;AGIWUR11152;AGIWUR16718 |          |                |          |          |                     |
| CB4856 CT X                                                                                  | 10891295                                                            | 10891707 | WBGene00009815 | F47B10.4 | F47B10.4 |                     |
| -0.0169165173901877                                                                          | AGIWUR4612                                                          |          |                |          |          |                     |
| CB4856 CT X                                                                                  | 10892190                                                            | 10893569 | WBGene00009814 | F47B10.3 | F47B10.3 |                     |
| 0.10237538059799                                                                             | AGIWUR42103                                                         |          |                |          |          |                     |
| CB4856 CT X                                                                                  | 10893567                                                            | 10896598 | WBGene00009813 | haly-1   | F47B10.2 |                     |
| -0.412687793739543                                                                           | AGIWUR18039;AGIWUR18232;AGIWUR21187;AGIWUR30251;AGIWUR42699         |          |                |          |          |                     |
| CB4856 CT X                                                                                  | 10897678                                                            | 10900114 | WBGene00009812 | suca-1   | F47B10.1 |                     |
| -0.0195089059543805                                                                          |                                                                     |          |                |          |          |                     |
| AGIWUR2889;AGIWUR3616;AGIWUR8658;AGIWUR11415;AGIWUR11812;AGIWUR16981;AGIWUR23660;AGIWUR26155 |                                                                     |          |                |          |          |                     |
| CB4856 CT X                                                                                  | 10903278                                                            | 10905107 | WBGene00009818 | acbp-3   | F47B10.7 |                     |
| -0.252597118817743                                                                           | AGIWUR21895                                                         |          |                |          |          |                     |
| CB4856 CT X                                                                                  | 10905181                                                            | 10910768 | WBGene00009819 | F47B10.8 | F47B10.8 |                     |
| 0.147352940538299                                                                            | AGIWUR25552                                                         |          |                |          |          |                     |
| CB4856 CT X                                                                                  | 10912118                                                            | 10914081 | WBGene00009820 | F47B10.9 | F47B10.9 |                     |
| 0.037788254207094                                                                            | AGIWUR3929;AGIWUR11878;AGIWUR12314;AGIWUR32006                      |          |                |          |          |                     |
| CB4856 CT X                                                                                  | 10916765                                                            | 10920013 | WBGene00011882 | nstp-9   | T21B6.5  | -0.0811286057864953 |
| AGIWUR28758                                                                                  |                                                                     |          |                |          |          |                     |
| CB4856 CT X                                                                                  | 10920533                                                            | 10928998 | WBGene00009861 | dgn-1    | T21B6.1  | 0.34999383500204    |
| AGIWUR5992;AGIWUR6010;AGIWUR9266;AGIWUR31210;AGIWUR32355;AGIWUR39633                         |                                                                     |          |                |          |          |                     |
| CB4856 CT X                                                                                  | 10938197                                                            | 10941355 | WBGene00011879 | pho-7    | T21B6.2  | -0.128491755107117  |
| AGIWUR9383                                                                                   |                                                                     |          |                |          |          |                     |
| CB4856 CT X                                                                                  | 10945160                                                            | 10948970 | WBGene00011880 | T21B6.3  | T21B6.3  | 0.246643270663961   |
| AGIWUR12433                                                                                  |                                                                     |          |                |          |          |                     |
| CB4856 CT X                                                                                  | 10950708                                                            | 10951393 | WBGene00010717 | K09C8.7  | K09C8.7  | 0.622138545075778   |
| AGIWUR37457                                                                                  |                                                                     |          |                |          |          |                     |
| CB4856 CT X                                                                                  | 10954134                                                            | 10958236 | WBGene00003943 | pbo-4    | K09C8.1  | -0.105181719305447  |
| AGIWUR5694;AGIWUR21821                                                                       |                                                                     |          |                |          |          |                     |
| CB4856 CT X                                                                                  | 10958761                                                            | 10959178 | WBGene00003757 | nlp-19   | K09C8.6  | 0.00824677976046573 |
| AGIWUR20445                                                                                  |                                                                     |          |                |          |          |                     |
| CB4856 CT X                                                                                  | 10959568                                                            | 10960937 | WBGene00010715 | K09C8.2  | K09C8.2  | -0.261409556611317  |
| AGIWUR14659                                                                                  |                                                                     |          |                |          |          |                     |
| CB4856 CT X                                                                                  | 10960982                                                            | 10964725 | WBGene00003529 | nas-10   | K09C8.3  | 0.202234101291316   |
| AGIWUR21993                                                                                  |                                                                     |          |                |          |          |                     |
| CB4856 CT X                                                                                  | 10966551                                                            | 10969898 | WBGene00010716 | lge-1    | K09C8.4  | 0.117923123101445   |
| AGIWUR23818                                                                                  |                                                                     |          |                |          |          |                     |
| CB4856 CT X                                                                                  | 10970963                                                            | 10972107 | WBGene00010718 | K09C8.8  | K09C8.8  | 0.169493199241819   |

|                                                                                                                                                                                                                      |   |          |          |                |          |          |                    |  |  |
|----------------------------------------------------------------------------------------------------------------------------------------------------------------------------------------------------------------------|---|----------|----------|----------------|----------|----------|--------------------|--|--|
| AGIWUR18755                                                                                                                                                                                                          |   |          |          |                |          |          |                    |  |  |
| CB4856 CT AGIWUR22501                                                                                                                                                                                                | X | 10972172 | 10979265 | WBGene00004257 | pxn-2    | K09C8.5  | 0.106169070874673  |  |  |
| CB4856 CT AGIWUR40866                                                                                                                                                                                                | X | 10982351 | 10987928 | WBGene00006897 | ver-4    | F59F3.5  | 0.601182243059922  |  |  |
| CB4856 CT AGIWUR5042;AGIWUR8537;AGIWUR18078;AGIWUR18120;AGIWUR18428;AGIWUR22182;AGIWUR33911;AGIWUR34669;AGIWUR39163;AGIWUR39571;AGIWUR44850                                                                          | X | 10992483 | 10997846 | WBGene00006896 | ver-3    | F59F3.1  | 0.0101987389635561 |  |  |
| CB4856 CT AGIWUR13384                                                                                                                                                                                                | X | 10998004 | 10999276 | WBGene00010335 | F59F3.6  | F59F3.6  | -0.209629165767873 |  |  |
| CB4856 CT AGIWUR10969                                                                                                                                                                                                | X | 10999742 | 11001850 | WBGene00000750 | col-177  | F59F3.2  | 0.143488628691641  |  |  |
| CB4856 CT AGIWUR36770                                                                                                                                                                                                | X | 11004984 | 11008181 | WBGene00010334 | del-5    | F59F3.4  | 0.174854551225156  |  |  |
| CB4856 CT AGIWUR22294                                                                                                                                                                                                | X | 11008266 | 11009070 | WBGene00010225 | ttr-31   | F58A3.5  | -0.576457923160044 |  |  |
| CB4856 CT AGIWUR33904                                                                                                                                                                                                | X | 11009558 | 11010640 | WBGene00010224 | F58A3.4  | F58A3.4  | -0.141429643881363 |  |  |
| CB4856 CT AGIWUR21004                                                                                                                                                                                                | X | 11012662 | 11014412 | WBGene00010223 | F58A3.3  | F58A3.3  | 0.265175988208189  |  |  |
| CB4856 CT AGIWUR2025;AGIWUR14387;AGIWUR17579;AGIWUR18150;AGIWUR22661;AGIWUR22831;AGIWUR23615;AGIWUR26322;AGIWUR26361;AGIWUR28249;AGIWUR28413;AGIWUR33328;AGIWUR34362;AGIWUR35573;AGIWUR38056;AGIWUR39477;AGIWUR40101 | X | 11016410 | 11023421 | WBGene00001184 | egl-15   | F58A3.2  | 0.325312147247691  |  |  |
| CB4856 CT AGIWUR12215;AGIWUR18780;AGIWUR20417;AGIWUR26587;AGIWUR32684;AGIWUR42410                                                                                                                                    | X | 11028917 | 11040612 | WBGene00002261 | ldb-1    | F58A3.1  | 0.277068059153007  |  |  |
| CB4856 CT 0.158896609339084                                                                                                                                                                                          | X | 11041032 | 11042877 | WBGene00007483 | C09F12.3 |          | C09F12.3           |  |  |
| CB4856 CT 0.0580074137601603                                                                                                                                                                                         | X | 11047446 | 11049271 | WBGene00000522 | clc-1    | C09F12.1 |                    |  |  |
| CB4856 CT -0.00449374960904603                                                                                                                                                                                       | X | 11053915 | 11056970 | WBGene00007482 | C09F12.2 |          | C09F12.2           |  |  |
| CB4856 CT AGIWUR11517                                                                                                                                                                                                | X | 11057401 | 11059794 | WBGene00012261 | lpr-3    | W04G3.8  | 1.50944601234407   |  |  |
| CB4856 CT AGIWUR6825                                                                                                                                                                                                 | X | 11059994 | 11061868 | WBGene00012255 | lpr-6    | W04G3.1  | 1.05811808678045   |  |  |
| CB4856 CT AGIWUR12969;AGIWUR25508                                                                                                                                                                                    | X | 11062132 | 11064539 | WBGene00012256 | lpr-5    | W04G3.2  | 0.567267573675429  |  |  |
| CB4856 CT AGIWUR5276                                                                                                                                                                                                 | X | 11065133 | 11066811 | WBGene00012257 | lpr-4    | W04G3.3  | 0.940172693161728  |  |  |

|                                                                                                                       |   |          |          |                |          |          |                    |
|-----------------------------------------------------------------------------------------------------------------------|---|----------|----------|----------------|----------|----------|--------------------|
| CB4856 CT                                                                                                             | X | 11068527 | 11071925 | WBGene00000166 | apt-9    | W04G3.4  | -0.219772743132002 |
| AGIWUR18454                                                                                                           |   |          |          |                |          |          |                    |
| CB4856 CT                                                                                                             | X | 11076182 | 11076767 | WBGene00044151 | W04G3.12 | W04G3.12 |                    |
| -0.0705881913331967 AGIWUR19796;AGIWUR23344;AGIWUR40941;AGIWUR43619                                                   |   |          |          |                |          |          |                    |
| CB4856 CT                                                                                                             | X | 11077772 | 11078243 | WBGene00044152 | W04G3.10 | W04G3.10 |                    |
| -0.476097703601825 AGIWUR9600;AGIWUR14595;AGIWUR20255;AGIWUR39365                                                     |   |          |          |                |          |          |                    |
| CB4856 CT                                                                                                             | X | 11080678 | 11087474 | WBGene00012259 | sulp-7   | W04G3.6  | -0.066040500145025 |
| AGIWUR14526;AGIWUR17899;AGIWUR25281;AGIWUR25544;AGIWUR43216                                                           |   |          |          |                |          |          |                    |
| CB4856 CT                                                                                                             | X | 11089243 | 11090679 | WBGene00044153 | W04G3.11 | W04G3.11 |                    |
| -0.29516783614174 AGIWUR7780;AGIWUR10269;AGIWUR27223;AGIWUR30755;AGIWUR42818                                          |   |          |          |                |          |          |                    |
| CB4856 CT                                                                                                             | X | 11096158 | 11096935 | WBGene00012218 | W02H3.2  | W02H3.2  | 0.0975854148666455 |
| AGIWUR16182                                                                                                           |   |          |          |                |          |          |                    |
| CB4856 CT                                                                                                             | X | 11102587 | 11105460 | WBGene00012217 | W02H3.1  | W02H3.1  | -0.965645937478579 |
| AGIWUR14835                                                                                                           |   |          |          |                |          |          |                    |
| CB4856 CT                                                                                                             | X | 11107376 | 11109316 | WBGene00011140 | R08B4.4  | R08B4.4  | 0.0426200557091523 |
| AGIWUR1513                                                                                                            |   |          |          |                |          |          |                    |
| CB4856 CT                                                                                                             | X | 11109440 | 11115887 | WBGene00001690 | grd-1    | R08B4.1  | -0.207750128619489 |
| AGIWUR17903                                                                                                           |   |          |          |                |          |          |                    |
| CB4856 CT                                                                                                             | X | 11116107 | 11116823 | WBGene00011141 | R08B4.5  | R08B4.5  | 0.387679627418296  |
| AGIWUR24780;AGIWUR26045;AGIWUR30649;AGIWUR32569                                                                       |   |          |          |                |          |          |                    |
| CB4856 CT                                                                                                             | X | 11118959 | 11121005 | WBGene00011139 | R08B4.3  | R08B4.3  | -0.127880200973526 |
| AGIWUR26481;AGIWUR44332                                                                                               |   |          |          |                |          |          |                    |
| CB4856 CT                                                                                                             | X | 11121916 | 11125615 | WBGene00044330 | alr-1    | R08B4.2  | 0.613695431583654  |
| AGIWUR30021                                                                                                           |   |          |          |                |          |          |                    |
| CB4856 CT                                                                                                             | X | 11142971 | 11152820 | WBGene00007327 | C05C9.3  | C05C9.3  | -0.147509881913031 |
| AGIWUR5280                                                                                                            |   |          |          |                |          |          |                    |
| CB4856 CT                                                                                                             | X | 11153065 | 11157643 | WBGene00007326 | C05C9.2  | C05C9.2  | 0.0636334754131962 |
| AGIWUR6141;AGIWUR40885                                                                                                |   |          |          |                |          |          |                    |
| CB4856 CT                                                                                                             | X | 11160981 | 11164006 | WBGene00007325 | C05C9.1  | C05C9.1  | 0.157301134594761  |
| AGIWUR37380                                                                                                           |   |          |          |                |          |          |                    |
| CB4856 CT                                                                                                             | X | 11163958 | 11189591 | WBGene00008735 | F13D2.1  | F13D2.1  | -0.200026949666718 |
| AGIWUR9368;AGIWUR31805;AGIWUR34326                                                                                    |   |          |          |                |          |          |                    |
| CB4856 CT                                                                                                             | X | 11192485 | 11196841 | WBGene00007938 | C34F6.1  | C34F6.1  | -0.325231001572973 |
| AGIWUR23731                                                                                                           |   |          |          |                |          |          |                    |
| CB4856 CT                                                                                                             | X | 11199455 | 11200464 | WBGene00000751 | col-178  | C34F6.2  | 0.225046707875656  |
| AGIWUR40880                                                                                                           |   |          |          |                |          |          |                    |
| CB4856 CT                                                                                                             | X | 11201465 | 11202488 | WBGene00000752 | col-179  | C34F6.3  | -0.13409502969006  |
| AGIWUR3484;AGIWUR4228;AGIWUR11395;AGIWUR12859;AGIWUR18664;AGIWUR21635;AGIWUR24699;AGIWUR30009;AGIWUR35779;AGIWUR37272 |   |          |          |                |          |          |                    |

|                                                                                                                       |             |          |                |                 |                     |
|-----------------------------------------------------------------------------------------------------------------------|-------------|----------|----------------|-----------------|---------------------|
| CB4856 CT X                                                                                                           | 11202476    | 11203990 | WBGene00007945 | C34F6.11        | C34F6.11            |
| -0.104962006714125                                                                                                    | AGIWUR32368 |          |                |                 |                     |
| CB4856 CT X                                                                                                           | 11204117    | 11207155 | WBGene00002029 | hst-2 C34F6.4   | -0.0725240224821189 |
| AGIWUR28552                                                                                                           |             |          |                |                 |                     |
| CB4856 CT X                                                                                                           | 11207250    | 11208994 | WBGene00007939 | C34F6.5 C34F6.5 | 0.010041034668975   |
| AGIWUR21;AGIWUR994                                                                                                    |             |          |                |                 |                     |
| CB4856 CT X                                                                                                           | 11210107    | 11215470 | WBGene00007941 | C34F6.7 C34F6.7 | -0.162030654301148  |
| AGIWUR6467;AGIWUR32311;AGIWUR32877                                                                                    |             |          |                |                 |                     |
| CB4856 CT X                                                                                                           | 11215696    | 11218305 | WBGene00007942 | idh-2 C34F6.8   | -0.189441773188044  |
| AGIWUR3586                                                                                                            |             |          |                |                 |                     |
| CB4856 CT X                                                                                                           | 11218135    | 11222811 | WBGene00007943 | C34F6.9 C34F6.9 | -0.140217719159374  |
| AGIWUR23073                                                                                                           |             |          |                |                 |                     |
| CB4856 CT X                                                                                                           | 11229213    | 11237383 | WBGene00007944 | C34F6.10        | C34F6.10            |
| 0.400130399108996                                                                                                     | AGIWUR42553 |          |                |                 |                     |
| CB4856 CT X                                                                                                           | 11257361    | 11260225 | WBGene00007266 | C03A3.1 C03A3.1 | 0.530177006222256   |
| AGIWUR11397;AGIWUR29952;AGIWUR39266                                                                                   |             |          |                |                 |                     |
| CB4856 CT X                                                                                                           | 11262848    | 11266324 | WBGene00007267 | C03A3.2 C03A3.2 | 0.076525588016958   |
| AGIWUR4732;AGIWUR8292                                                                                                 |             |          |                |                 |                     |
| CB4856 CT X                                                                                                           | 11267391    | 11269023 | WBGene00007268 | C03A3.3 C03A3.3 | 0.0711200812157458  |
| AGIWUR44225                                                                                                           |             |          |                |                 |                     |
| CB4856 CT X                                                                                                           | 11271184    | 11275482 | WBGene00002050 | ifa-1 F38B2.1   | -0.162451860595649  |
| AGIWUR2245;AGIWUR4997;AGIWUR15389;AGIWUR25371;AGIWUR31125;AGIWUR33213;AGIWUR38221;AGIWUR40353;AGIWUR40580;AGIWUR43826 |             |          |                |                 |                     |
| CB4856 CT X                                                                                                           | 11278401    | 11279376 | WBGene00009529 | F38B2.2 F38B2.2 | 0.0513367569030927  |
| AGIWUR2233;AGIWUR17353;AGIWUR22429;AGIWUR23640;AGIWUR40315;AGIWUR40760                                                |             |          |                |                 |                     |
| CB4856 CT X                                                                                                           | 11281716    | 11286346 | WBGene00009530 | F38B2.3 F38B2.3 |                     |
| -0.00390594037722281                                                                                                  | AGIWUR4915  |          |                |                 |                     |
| CB4856 CT X                                                                                                           | 11286443    | 11287717 | WBGene00009531 | F38B2.4 F38B2.4 | -0.0623896757247042 |
| AGIWUR5307;AGIWUR5637;AGIWUR26506;AGIWUR39548                                                                         |             |          |                |                 |                     |
| CB4856 CT X                                                                                                           | 11294962    | 11296731 | WBGene00002124 | inx-2 F08G12.10 |                     |
| -0.104801093133759                                                                                                    | AGIWUR1732  |          |                |                 |                     |
| CB4856 CT X                                                                                                           | 11298036    | 11299784 | WBGene00008586 | F08G12.2        | F08G12.2            |
| -0.186272922111987                                                                                                    | AGIWUR40930 |          |                |                 |                     |
| CB4856 CT X                                                                                                           | 11300283    | 11302094 | WBGene00008587 | F08G12.3        | F08G12.3            |
| -0.291918644052227                                                                                                    | AGIWUR19748 |          |                |                 |                     |
| CB4856 CT X                                                                                                           | 11302074    | 11305873 | WBGene00008585 | F08G12.1        | F08G12.1            |
| -0.0278285867964705                                                                                                   | AGIWUR19035 |          |                |                 |                     |
| CB4856 CT X                                                                                                           | 11307360    | 11308400 | WBGene00006922 | vh1-1 F08G12.4  |                     |
| -0.349803223338595                                                                                                    | AGIWUR501   |          |                |                 |                     |

|                                                 |                                                                                     |          |                |           |                             |
|-------------------------------------------------|-------------------------------------------------------------------------------------|----------|----------------|-----------|-----------------------------|
| CB4856 CT X                                     | 11308864                                                                            | 11310285 | WBGene00008588 | F08G12.5  | F08G12.5                    |
| 0.030281962218222                               | AGIWUR36011                                                                         |          |                |           |                             |
| CB4856 CT X                                     | 11313385                                                                            | 11315612 | WBGene00044135 | F08G12.11 | F08G12.11                   |
| 0.0469249093780504                              | AGIWUR2107;AGIWUR11925;AGIWUR30415;AGIWUR39046                                      |          |                |           |                             |
| CB4856 CT X                                     | 11317050                                                                            | 11318036 | WBGene00008589 | nlp-57    | F08G12.8                    |
| 0.0993617593596099                              | AGIWUR25391                                                                         |          |                |           |                             |
| CB4856 CT X                                     | 11318278                                                                            | 11321085 | WBGene00013976 | hizr-1    | ZK455.6 -0.0681076596105044 |
| AGIWUR3772                                      |                                                                                     |          |                |           |                             |
| CB4856 CT X                                     | 11321079                                                                            | 11324251 | WBGene00000212 | asm-2     | ZK455.4 0.229600730649413   |
| AGIWUR12179;AGIWUR20805;AGIWUR30554;AGIWUR45075 |                                                                                     |          |                |           |                             |
| CB4856 CT X                                     | 11324517                                                                            | 11326901 | WBGene00013975 | ZK455.5   | ZK455.5 -0.375915669743356  |
| AGIWUR16779                                     |                                                                                     |          |                |           |                             |
| CB4856 CT X                                     | 11328591                                                                            | 11332072 | WBGene00013974 | npr-9     | ZK455.3 0.12435372315725    |
| AGIWUR11847                                     |                                                                                     |          |                |           |                             |
| CB4856 CT X                                     | 11332553                                                                            | 11338301 | WBGene00001536 | gcy-9     | ZK455.2 -0.131895310848611  |
| AGIWUR15202                                     |                                                                                     |          |                |           |                             |
| CB4856 CT X                                     | 11339874                                                                            | 11343568 | WBGene00000040 | aco-1     | ZK455.1 -0.166391260930769  |
| AGIWUR15192;AGIWUR20633;AGIWUR21869;AGIWUR30301 |                                                                                     |          |                |           |                             |
| CB4856 CT X                                     | 11346455                                                                            | 11350244 | WBGene00003843 | oct-2     | ZK455.8 0.0610621293613747  |
| AGIWUR2167;AGIWUR14035                          |                                                                                     |          |                |           |                             |
| CB4856 CT X                                     | 11352136                                                                            | 11357094 | WBGene00003997 | pgp-3     | ZK455.7 -0.0727661265150905 |
| AGIWUR11749;AGIWUR17389;AGIWUR20480;AGIWUR22101 |                                                                                     |          |                |           |                             |
| CB4856 CT X                                     | 11358395                                                                            | 11364049 | WBGene00003998 | pgp-4     | F42E11.1                    |
| -0.399232293216179                              | AGIWUR28989;AGIWUR41306;AGIWUR44841                                                 |          |                |           |                             |
| CB4856 CT X                                     | 11368719                                                                            | 11374358 | WBGene00009632 | ttyh-1    | F42E11.2                    |
| 0.158361379098482                               | AGIWUR10181;AGIWUR19745;AGIWUR21649;AGIWUR22469;AGIWUR28938;AGIWUR38032;AGIWUR44333 |          |                |           |                             |
| CB4856 CT X                                     | 11374599                                                                            | 11375609 | WBGene00009633 | F42E11.3  | F42E11.3                    |
| -0.311628475258919                              | AGIWUR39282                                                                         |          |                |           |                             |
| CB4856 CT X                                     | 11375887                                                                            | 11377470 | WBGene00006584 | tni-1     | F42E11.4                    |
| -0.476751449514964                              | AGIWUR8414                                                                          |          |                |           |                             |
| CB4856 CT X                                     | 11384773                                                                            | 11392779 | WBGene00008571 | prmn-1    | F08B12.1                    |
| 0.278868665388904                               | AGIWUR2776                                                                          |          |                |           |                             |
| CB4856 CT X                                     | 11393293                                                                            | 11394619 | WBGene00004197 | prx-12    | F08B12.2                    |
| 0.19501269329354                                | AGIWUR27319                                                                         |          |                |           |                             |
| CB4856 CT X                                     | 11394605                                                                            | 11405931 | WBGene00004831 | slo-2     | F08B12.3                    |
| -0.0229273600505699                             | AGIWUR1051;AGIWUR7985;AGIWUR23787;AGIWUR24004;AGIWUR26341                           |          |                |           |                             |
| CB4856 CT X                                     | 11407054                                                                            | 11407730 | WBGene00008572 | F08B12.4  | F08B12.4                    |
| 0.87698102911132                                | AGIWUR9647                                                                          |          |                |           |                             |
| CB4856 CT X                                     | 11410181                                                                            | 11414887 | WBGene00003970 | pek-1     | F46C3.1 0.0829499229716362  |

|                                                                                              |    |   |          |          |                |                                    |
|----------------------------------------------------------------------------------------------|----|---|----------|----------|----------------|------------------------------------|
| AGIWUR522;AGIWUR2937;AGIWUR17263                                                             |    |   |          |          |                |                                    |
| CB4856                                                                                       | CT | X | 11416653 | 11418740 | WBGene00009777 | F46C3.2 F46C3.2 -0.241990732032704 |
| AGIWUR20393                                                                                  |    |   |          |          |                |                                    |
| CB4856                                                                                       | CT | X | 11419108 | 11420074 | WBGene00045253 | F46C3.6 F46C3.6 0.559941555478781  |
| AGIWUR6859;AGIWUR19299;AGIWUR25267;AGIWUR33107;AGIWUR35145;AGIWUR36021                       |    |   |          |          |                |                                    |
| CB4856                                                                                       | CT | X | 11420474 | 11433524 | WBGene00002037 | hum-4 F46C3.3 -0.128194049160669   |
| AGIWUR1757;AGIWUR4067;AGIWUR4936;AGIWUR18116;AGIWUR18323;AGIWUR19638;AGIWUR21461;AGIWUR22845 |    |   |          |          |                |                                    |
| CB4856                                                                                       | CT | X | 11434792 | 11435899 | WBGene00044703 | F46C3.5 F46C3.5 0.243229460740487  |
| AGIWUR7105                                                                                   |    |   |          |          |                |                                    |
| CB4856                                                                                       | CT | X | 11436124 | 11437747 | WBGene00044702 | F46C3.4 F46C3.4 0.0104453672101172 |
| AGIWUR7674                                                                                   |    |   |          |          |                |                                    |
| CB4856                                                                                       | CT | X | 11444424 | 11446635 | WBGene00009842 | igeg-2 F48C5.1 0.00336615366356252 |
| AGIWUR24691                                                                                  |    |   |          |          |                |                                    |
| CB4856                                                                                       | CT | X | 11451617 | 11454195 | WBGene00009843 | F48C5.2 F48C5.2 -0.138216878592265 |
| AGIWUR39842                                                                                  |    |   |          |          |                |                                    |
| CB4856                                                                                       | CT | X | 11465557 | 11484368 | WBGene00003003 | lin-14 T25C12.1                    |
| -0.060783016029526 AGIWUR25830                                                               |    |   |          |          |                |                                    |
| CB4856                                                                                       | CT | X | 11491087 | 11499999 | WBGene00012018 | T25C12.3 T25C12.3                  |
| -0.560163328251656 AGIWUR2452                                                                |    |   |          |          |                |                                    |
| CB4856                                                                                       | CT | X | 11502267 | 11509432 | WBGene00009257 | F29G6.1 F29G6.1 -0.091948913645072 |
| AGIWUR18243                                                                                  |    |   |          |          |                |                                    |
| CB4856                                                                                       | CT | X | 11509446 | 11511451 | WBGene00009258 | ccdc-149 F29G6.2                   |
| 0.0827607345358921 AGIWUR15047;AGIWUR17433;AGIWUR35296                                       |    |   |          |          |                |                                    |
| CB4856                                                                                       | CT | X | 11511558 | 11519062 | WBGene00009259 | hpo-34 F29G6.3 -0.207684808253246  |
| AGIWUR844;AGIWUR23574;AGIWUR44644;AGIWUR44749                                                |    |   |          |          |                |                                    |
| CB4856                                                                                       | CT | X | 11522707 | 11533450 | WBGene00004746 | sdC-2 C35C5.1 -0.141305133776516   |
| AGIWUR6463                                                                                   |    |   |          |          |                |                                    |
| CB4856                                                                                       | CT | X | 11534004 | 11536574 | WBGene00007957 | C35C5.8 C35C5.8 2.69603159499795   |
| AGIWUR3917;AGIWUR30581;AGIWUR36963                                                           |    |   |          |          |                |                                    |
| CB4856                                                                                       | CT | X | 11536568 | 11537124 | WBGene00007958 | C35C5.9 C35C5.9 0.970680706721208  |
| AGIWUR9875;AGIWUR17639;AGIWUR34507;AGIWUR35227;AGIWUR43027;AGIWUR44311                       |    |   |          |          |                |                                    |
| CB4856                                                                                       | CT | X | 11537714 | 11541417 | WBGene00007954 | gcp-2.2 C35C5.2 0.109712961975567  |
| AGIWUR19973;AGIWUR28266                                                                      |    |   |          |          |                |                                    |
| CB4856                                                                                       | CT | X | 11542129 | 11545061 | WBGene00044121 | gcp-2.3 C35C5.11                   |
| -0.289641659931663 AGIWUR24227                                                               |    |   |          |          |                |                                    |
| CB4856                                                                                       | CT | X | 11545091 | 11546495 | WBGene00007955 | selt-1.1 C35C5.3                   |
| -0.0989729492383713 AGIWUR22821                                                              |    |   |          |          |                |                                    |
| CB4856                                                                                       | CT | X | 11548608 | 11550740 | WBGene00003239 | mig-2 C35C5.4 -0.130514708534541   |
| AGIWUR1331;AGIWUR5810;AGIWUR8838;AGIWUR17531;AGIWUR43904;AGIWUR44479                         |    |   |          |          |                |                                    |



|                                                                                                                                     |                                                                        |          |                |          |                             |
|-------------------------------------------------------------------------------------------------------------------------------------|------------------------------------------------------------------------|----------|----------------|----------|-----------------------------|
| CB4856 CT X                                                                                                                         | 11554795                                                               | 11559858 | WBGene00007959 | C35C5.10 | C35C5.10                    |
| -0.31029447906352                                                                                                                   | AGIWUR2588                                                             |          |                |          |                             |
| CB4856 CT X                                                                                                                         | 11560915                                                               | 11563697 | WBGene00002975 | lev-8    | C35C5.5 0.264780758124857   |
| AGIWUR35817                                                                                                                         |                                                                        |          |                |          |                             |
| CB4856 CT X                                                                                                                         | 11563923                                                               | 11569531 | WBGene00007956 | trpp-9   | C35C5.6 0.0716480164145015  |
| AGIWUR43921                                                                                                                         |                                                                        |          |                |          |                             |
| CB4856 CT X                                                                                                                         | 11576247                                                               | 11581727 | WBGene00001490 | frm-3    | H05G16.1                    |
| 0.13869130545717                                                                                                                    |                                                                        |          |                |          |                             |
| AGIWUR18461;AGIWUR18670;AGIWUR20783;AGIWUR25861;AGIWUR28199;AGIWUR29720;AGIWUR33619;AGIWUR37114;AGIWUR40164;AGIWUR40423;AGIWUR43229 |                                                                        |          |                |          |                             |
| CB4856 CT X                                                                                                                         | 11581751                                                               | 11584960 | WBGene00009932 | F52D10.6 | F52D10.6                    |
| 0.261365282276816                                                                                                                   | AGIWUR32267                                                            |          |                |          |                             |
| CB4856 CT X                                                                                                                         | 11585675                                                               | 11589757 | WBGene00009929 | abts-2   | F52D10.1                    |
| 0.0609513437491636                                                                                                                  | AGIWUR18270                                                            |          |                |          |                             |
| CB4856 CT X                                                                                                                         | 11589686                                                               | 11591719 | WBGene00009930 | F52D10.2 | F52D10.2                    |
| -0.00847534593719779                                                                                                                | AGIWUR36851                                                            |          |                |          |                             |
| CB4856 CT X                                                                                                                         | 11603709                                                               | 11605451 | WBGene00001502 | ftt-2    | F52D10.3                    |
| -0.0338018609391142                                                                                                                 | AGIWUR5562;AGIWUR16612;AGIWUR30144                                     |          |                |          |                             |
| CB4856 CT X                                                                                                                         | 11617462                                                               | 11619795 | WBGene00009931 | F52D10.4 | F52D10.4                    |
| 0.177057543165888                                                                                                                   | AGIWUR33683                                                            |          |                |          |                             |
| CB4856 CT X                                                                                                                         | 11620047                                                               | 11621996 | WBGene00006065 | sto-3    | F52D10.5                    |
| -0.263813103953817                                                                                                                  | AGIWUR16696                                                            |          |                |          |                             |
| CB4856 CT X                                                                                                                         | 11622967                                                               | 11627113 | WBGene00006694 | twk-44   | Y71H9A.1                    |
| -0.0354041863818377                                                                                                                 | AGIWUR2136;AGIWUR13930;AGIWUR22707;AGIWUR34157;AGIWUR36683;AGIWUR39124 |          |                |          |                             |
| CB4856 CT X                                                                                                                         | 11632407                                                               | 11636508 | WBGene00006068 | sto-6    | Y71H9A.2                    |
| -0.0789660647237191                                                                                                                 | AGIWUR37934                                                            |          |                |          |                             |
| CB4856 CT X                                                                                                                         | 11644143                                                               | 11647425 | WBGene00006066 | sto-4    | Y71H9A.3                    |
| 0.0642978739082842                                                                                                                  | AGIWUR18972;AGIWUR20785;AGIWUR21265                                    |          |                |          |                             |
| CB4856 CT X                                                                                                                         | 11647423                                                               | 11648196 | WBGene00011446 | T04F8.8  | T04F8.8 -0.223865706469397  |
| AGIWUR18677                                                                                                                         |                                                                        |          |                |          |                             |
| CB4856 CT X                                                                                                                         | 11648358                                                               | 11650918 | WBGene00011443 | cutl-11  | T04F8.4 0.129979885025358   |
| AGIWUR19813                                                                                                                         |                                                                        |          |                |          |                             |
| CB4856 CT X                                                                                                                         | 11653570                                                               | 11656569 | WBGene00011441 | T04F8.2  | T04F8.2 -0.175142305477758  |
| AGIWUR2428;AGIWUR19123                                                                                                              |                                                                        |          |                |          |                             |
| CB4856 CT X                                                                                                                         | 11659510                                                               | 11661660 | WBGene00011440 | sfxn-1.5 | T04F8.1                     |
| -0.0983938004887293                                                                                                                 | AGIWUR30329                                                            |          |                |          |                             |
| CB4856 CT X                                                                                                                         | 11667127                                                               | 11672309 | WBGene00011444 | T04F8.6  | T04F8.6 -0.0662197018932429 |
| AGIWUR7225;AGIWUR17517;AGIWUR18050;AGIWUR18678;AGIWUR18752;AGIWUR29417;AGIWUR31500;AGIWUR34985                                      |                                                                        |          |                |          |                             |
| CB4856 CT X                                                                                                                         | 11674416                                                               | 11677090 | WBGene00011447 | T04F8.9  | T04F8.9 0.602480348617203   |

|                                    |   |                                                                        |          |                |           |           |                    |
|------------------------------------|---|------------------------------------------------------------------------|----------|----------------|-----------|-----------|--------------------|
| AGIWUR34736                        |   |                                                                        |          |                |           |           |                    |
| CB4856 CT                          | X | 11677515                                                               | 11680980 | WBGene00011445 | T04F8.7   | T04F8.7   | 0.864709256134404  |
| AGIWUR5669;AGIWUR31052;AGIWUR38300 |   |                                                                        |          |                |           |           |                    |
| CB4856 CT                          | X | 11684661                                                               | 11685778 | WBGene00001981 | hnd-1     | C44C10.8  |                    |
| 0.606315379393365                  |   | AGIWUR25505                                                            |          |                |           |           |                    |
| CB4856 CT                          | X | 11687000                                                               | 11688269 | WBGene00008088 | C44C10.7  | C44C10.7  |                    |
| 0.0961565801725532                 |   | AGIWUR36171                                                            |          |                |           |           |                    |
| CB4856 CT                          | X | 11690314                                                               | 11690789 | WBGene00008090 | C44C10.10 | C44C10.10 |                    |
| 0.244210214806223                  |   | AGIWUR42468                                                            |          |                |           |           |                    |
| CB4856 CT                          | X | 11691109                                                               | 11692456 | WBGene00008086 | C44C10.5  | C44C10.5  |                    |
| -0.203974685197903                 |   | AGIWUR26240                                                            |          |                |           |           |                    |
| CB4856 CT                          | X | 11693464                                                               | 11695750 | WBGene00008085 | C44C10.4  | C44C10.4  |                    |
| -0.209503104869992                 |   | AGIWUR6646                                                             |          |                |           |           |                    |
| CB4856 CT                          | X | 11696996                                                               | 11698065 | WBGene00044133 | C44C10.12 | C44C10.12 |                    |
| -0.0260748947199492                |   | AGIWUR37824;AGIWUR38613;AGIWUR42182                                    |          |                |           |           |                    |
| CB4856 CT                          | X | 11698384                                                               | 11699098 | WBGene00008087 | C44C10.6  | C44C10.6  |                    |
| 0.028090496335027                  |   | AGIWUR36681                                                            |          |                |           |           |                    |
| CB4856 CT                          | X | 11702525                                                               | 11704500 | WBGene00008084 | C44C10.3  | C44C10.3  |                    |
| -0.521122387193525                 |   | AGIWUR21455;AGIWUR29164;AGIWUR41440                                    |          |                |           |           |                    |
| CB4856 CT                          | X | 11704888                                                               | 11707238 | WBGene00008083 | cyp-29A1  | C44C10.2  |                    |
| 0.170960884079235                  |   | AGIWUR6870                                                             |          |                |           |           |                    |
| CB4856 CT                          | X | 11707903                                                               | 11710190 | WBGene00043985 | C44C10.11 | C44C10.11 |                    |
| -0.0119870032805394                |   | AGIWUR5144;AGIWUR21747;AGIWUR26369;AGIWUR35133;AGIWUR35582;AGIWUR40080 |          |                |           |           |                    |
| CB4856 CT                          | X | 11711307                                                               | 11712280 | WBGene00000753 | col-180   | C44C10.1  |                    |
| -0.144104553835028                 |   | AGIWUR19530                                                            |          |                |           |           |                    |
| CB4856 CT                          | X | 11713240                                                               | 11716511 | WBGene00008089 | C44C10.9  | C44C10.9  |                    |
| -0.143724268919185                 |   | AGIWUR1389;AGIWUR14021                                                 |          |                |           |           |                    |
| CB4856 CT                          | X | 11721724                                                               | 11724195 | WBGene00008369 | D1053.4   | D1053.4   | -0.204422744607703 |
| AGIWUR22031                        |   |                                                                        |          |                |           |           |                    |
| CB4856 CT                          | X | 11726271                                                               | 11727936 | WBGene00001790 | gst-42    | D1053.1   | -0.29139206359884  |
| AGIWUR39657                        |   |                                                                        |          |                |           |           |                    |
| CB4856 CT                          | X | 11728151                                                               | 11728891 | WBGene00008367 | D1053.2   | D1053.2   | -0.602570754110013 |
| AGIWUR4100                         |   |                                                                        |          |                |           |           |                    |
| CB4856 CT                          | X | 11729586                                                               | 11733698 | WBGene00008368 | D1053.3   | D1053.3   | 0.201671997419844  |
| AGIWUR22019;AGIWUR42744            |   |                                                                        |          |                |           |           |                    |
| CB4856 CT                          | X | 11746076                                                               | 11747249 | WBGene00008049 | C40H5.7   | C40H5.7   | -0.296376513167226 |
| AGIWUR42587                        |   |                                                                        |          |                |           |           |                    |
| CB4856 CT                          | X | 11754776                                                               | 11756762 | WBGene00008045 | C40H5.2   | C40H5.2   | -0.281549938275131 |
| AGIWUR45000                        |   |                                                                        |          |                |           |           |                    |

|                                                                  |          |          |                |           |          |                     |
|------------------------------------------------------------------|----------|----------|----------------|-----------|----------|---------------------|
| CB4856 CT X                                                      | 11759198 | 11764535 | WBGene00008047 | lact-7    | C40H5.4  | 0.0229876751006262  |
| AGIWUR2323;AGIWUR6946;AGIWUR12305;AGIWUR29315                    |          |          |                |           |          |                     |
| CB4856 CT X                                                      | 11764456 | 11769378 | WBGene00006654 | ttx-3     | C40H5.5  | 0.0502034217217768  |
| AGIWUR3181;AGIWUR40976                                           |          |          |                |           |          |                     |
| CB4856 CT X                                                      | 11775190 | 11775728 | WBGene00008048 | hpo-41    | C40H5.6  | -0.360462396704769  |
| AGIWUR7235                                                       |          |          |                |           |          |                     |
| CB4856 CT X                                                      | 11781463 | 11784330 | WBGene00013631 | Y102F5A.1 |          | Y102F5A.1           |
| 0.0828503188200234 AGIWUR41265                                   |          |          |                |           |          |                     |
| CB4856 CT X                                                      | 11798505 | 11803656 | WBGene00004682 | rsd-3     | C34E11.1 |                     |
| 0.151455819041551 AGIWUR12992                                    |          |          |                |           |          |                     |
| CB4856 CT X                                                      | 11804210 | 11805306 | WBGene00007937 | C34E11.4  |          | C34E11.4            |
| 0.594552492251019 AGIWUR29254                                    |          |          |                |           |          |                     |
| CB4856 CT X                                                      | 11805378 | 11814653 | WBGene00007935 | C34E11.2  |          | C34E11.2            |
| 0.194294893558168 AGIWUR6735;AGIWUR17971;AGIWUR18770;AGIWUR41165 |          |          |                |           |          |                     |
| CB4856 CT X                                                      | 11826093 | 11836162 | WBGene00044079 | tag-241   | C34E11.3 |                     |
| 0.170124476825528 AGIWUR21066                                    |          |          |                |           |          |                     |
| CB4856 CT X                                                      | 11836068 | 11837478 | WBGene00006388 | taf-7.1   | F54F7.1  | -0.0184249859998218 |
| AGIWUR43977                                                      |          |          |                |           |          |                     |
| CB4856 CT X                                                      | 11843663 | 11845337 | WBGene00010064 | F54F7.2   | F54F7.2  | -0.306344382656777  |
| AGIWUR20596                                                      |          |          |                |           |          |                     |
| CB4856 CT X                                                      | 11847856 | 11848695 | WBGene00045251 | F54F7.9   | F54F7.9  | -0.0962121839498273 |
| AGIWUR36255                                                      |          |          |                |           |          |                     |
| CB4856 CT X                                                      | 11849392 | 11850182 | WBGene00010065 | F54F7.3   | F54F7.3  | 0.177835373021106   |
| AGIWUR44650                                                      |          |          |                |           |          |                     |
| CB4856 CT X                                                      | 11852794 | 11853729 | WBGene00006965 | xtr-1     | F54F7.4  | 1.25569983854434    |
| AGIWUR11219                                                      |          |          |                |           |          |                     |
| CB4856 CT X                                                      | 11853818 | 11854996 | WBGene00010068 | F54F7.8   | F54F7.8  | 0.0872250547129845  |
| AGIWUR34989                                                      |          |          |                |           |          |                     |
| CB4856 CT X                                                      | 11857478 | 11862373 | WBGene00003219 | mes-1     | F54F7.5  | -0.354897446778367  |
| AGIWUR34339                                                      |          |          |                |           |          |                     |
| CB4856 CT X                                                      | 11865383 | 11866827 | WBGene00010066 | F54F7.6   | F54F7.6  | -0.240560264643392  |
| AGIWUR14467                                                      |          |          |                |           |          |                     |
| CB4856 CT X                                                      | 11867971 | 11869360 | WBGene00010067 | dot-1.2   | F54F7.7  | -0.238527295590949  |
| AGIWUR12110                                                      |          |          |                |           |          |                     |
| CB4856 CT X                                                      | 11875654 | 11877242 | WBGene00013389 | Y62H9A.1  |          | Y62H9A.1            |
| 0.184455648213214 AGIWUR11046                                    |          |          |                |           |          |                     |
| CB4856 CT X                                                      | 11877418 | 11878196 | WBGene00013390 | Y62H9A.2  |          | Y62H9A.2            |
| 0.157986049467981 AGIWUR43304                                    |          |          |                |           |          |                     |
| CB4856 CT X                                                      | 11879110 | 11879971 | WBGene00013391 | Y62H9A.3  |          | Y62H9A.3            |

|                         |                         |          |                |                                    |           |
|-------------------------|-------------------------|----------|----------------|------------------------------------|-----------|
| -0.0356297860028505     | AGIWUR45025             |          |                |                                    |           |
| CB4856 CT X             | 11880124                | 11881264 | WBGene00013392 | Y62H9A.4                           | Y62H9A.4  |
| -0.183838971064841      | AGIWUR33966             |          |                |                                    |           |
| CB4856 CT X             | 11882144                | 11882917 | WBGene00013393 | Y62H9A.5                           | Y62H9A.5  |
| 0.114768705842128       | AGIWUR33524             |          |                |                                    |           |
| CB4856 CT X             | 11883127                | 11884043 | WBGene00013394 | ule-5 Y62H9A.6                     |           |
| -0.0372973714753755     | AGIWUR14679             |          |                |                                    |           |
| CB4856 CT X             | 11884330                | 11886438 | WBGene00013395 | Y62H9A.7                           | Y62H9A.7  |
| 0.0447795288213619      | AGIWUR35290             |          |                |                                    |           |
| CB4856 CT X             | 11891259                | 11892422 | WBGene00013396 | Y62H9A.8                           | Y62H9A.8  |
| 0.153527268101566       | AGIWUR19602             |          |                |                                    |           |
| CB4856 CT X             | 11895585                | 11898140 | WBGene00013397 | Y62H9A.9                           | Y62H9A.9  |
| -0.31136845825834       | AGIWUR45120             |          |                |                                    |           |
| CB4856 CT X             | 11904924                | 11907022 | WBGene00013399 | Y62H9A.11                          | Y62H9A.11 |
| -0.0738025573102368     | AGIWUR40597             |          |                |                                    |           |
| CB4856 CT X             | 11907267                | 11910145 | WBGene00045252 | Y62H9A.15                          | Y62H9A.15 |
| -0.0956104338288108     | AGIWUR37686;AGIWUR42152 |          |                |                                    |           |
| CB4856 CT X             | 11914124                | 11915558 | WBGene00013400 | Y62H9A.12                          | Y62H9A.12 |
| -0.227486411012496      | AGIWUR36585             |          |                |                                    |           |
| CB4856 CT X             | 11917005                | 11920158 | WBGene00013401 | Y62H9A.13                          | Y62H9A.13 |
| 0.0880698589040207      | AGIWUR26048             |          |                |                                    |           |
| CB4856 CT X             | 11921252                | 11923138 | WBGene00013402 | Y62H9A.14                          | Y62H9A.14 |
| 0.216670435316425       | AGIWUR30338             |          |                |                                    |           |
| CB4856 CT X             | 11924461                | 11927032 | WBGene00010119 | F55G7.1 F55G7.1 -0.277786136971408 |           |
| AGIWUR11372;AGIWUR22511 |                         |          |                |                                    |           |
| CB4856 CT X             | 11928107                | 11929372 | WBGene00045493 | F55G7.4 F55G7.4 -0.199879866602004 |           |
| AGIWUR39073             |                         |          |                |                                    |           |
| CB4856 CT X             | 11929899                | 11931646 | WBGene00010120 | dot-1.4 F55G7.2 0.0225982669613582 |           |
| AGIWUR9664              |                         |          |                |                                    |           |
| CB4856 CT X             | 11940336                | 11942051 | WBGene00010121 | F55G7.3 F55G7.3 0.05134592867919   |           |
| AGIWUR19193             |                         |          |                |                                    |           |
| CB4856 CT X             | 11944313                | 11946834 | WBGene00011614 | nfya-1 T08D10.1                    |           |
| -0.015656942415994      | AGIWUR28467             |          |                |                                    |           |
| CB4856 CT X             | 11948843                | 11951893 | WBGene00011615 | lsd-1 T08D10.2                     |           |
| -0.190303351972647      | AGIWUR18850             |          |                |                                    |           |
| CB4856 CT X             | 11952085                | 11953329 | WBGene00044148 | T08D10.4                           | T08D10.4  |
| 0.188864934459915       | AGIWUR17215;AGIWUR24785 |          |                |                                    |           |
| CB4856 CT X             | 11957563                | 11958395 | WBGene00206466 | T08D10.5                           | T08D10.5  |
| -0.0906838606874665     | AGIWUR1122              |          |                |                                    |           |

|                                                                                                     |   |          |          |                |                   |                    |
|-----------------------------------------------------------------------------------------------------|---|----------|----------|----------------|-------------------|--------------------|
| CB4856 CT                                                                                           | X | 11960145 | 11961509 | WBGene00008212 | C49F5.8 C49F5.8   | -0.468935482713967 |
| AGIWUR44049                                                                                         |   |          |          |                |                   |                    |
| CB4856 CT                                                                                           | X | 11961443 | 11961777 | WBGene00268214 | C49F5.12          | C49F5.12           |
| -0.176937729669345 AGIWUR950;AGIWUR15616;AGIWUR43673                                                |   |          |          |                |                   |                    |
| CB4856 CT                                                                                           | X | 11962413 | 11962646 | WBGene00045316 | C49F5.9 C49F5.9   | -0.438869764543043 |
| AGIWUR18274;AGIWUR34913;AGIWUR35638;AGIWUR35757;AGIWUR44815                                         |   |          |          |                |                   |                    |
| CB4856 CT                                                                                           | X | 11965962 | 11969784 | WBGene00008205 | sams-1 C49F5.1    | -0.386182698897542 |
| AGIWUR1947;AGIWUR7219;AGIWUR10862;AGIWUR24028;AGIWUR26342;AGIWUR32238                               |   |          |          |                |                   |                    |
| CB4856 CT                                                                                           | X | 11968034 | 12021212 | WBGene00012158 | ucr-2.1 VW06B3R.1 |                    |
| 0.0772387690546301 AGIWUR8278;AGIWUR8939;AGIWUR16170;AGIWUR31443                                    |   |          |          |                |                   |                    |
| CB4856 CT                                                                                           | X | 12028711 | 12031498 | WBGene00007115 | B0198.2 B0198.2   | 0.0326178866412121 |
| AGIWUR5120                                                                                          |   |          |          |                |                   |                    |
| CB4856 CT                                                                                           | X | 12031598 | 12034037 | WBGene00006646 | tsp-20 B0198.1    | 0.345067701432112  |
| AGIWUR7276                                                                                          |   |          |          |                |                   |                    |
| CB4856 CT                                                                                           | X | 12042593 | 12057049 | WBGene00007116 | B0198.3 B0198.3   | 0.254735482271366  |
| AGIWUR8482                                                                                          |   |          |          |                |                   |                    |
| CB4856 CT                                                                                           | X | 12065264 | 12067432 | WBGene00007594 | lgc-23 C15A7.1    | 0.104668535931609  |
| AGIWUR16523                                                                                         |   |          |          |                |                   |                    |
| CB4856 CT                                                                                           | X | 12068550 | 12070563 | WBGene00045385 | lgc-24 C15A7.4    | 0.191732882420474  |
| AGIWUR25344                                                                                         |   |          |          |                |                   |                    |
| CB4856 CT                                                                                           | X | 12070743 | 12073863 | WBGene00007595 | C15A7.2 C15A7.2   | 0.220544966779515  |
| AGIWUR26829;AGIWUR37909                                                                             |   |          |          |                |                   |                    |
| CB4856 CT                                                                                           | X | 12076553 | 12093083 | WBGene00012226 | W03G11.4          | W03G11.4           |
| 0.641402359283325 AGIWUR19534;AGIWUR32595                                                           |   |          |          |                |                   |                    |
| CB4856 CT                                                                                           | X | 12100196 | 12103812 | WBGene00012225 | W03G11.3          | W03G11.3           |
| -0.108705797851366 AGIWUR6598;AGIWUR7282;AGIWUR8929;AGIWUR16839;AGIWUR22839;AGIWUR23249;AGIWUR41917 |   |          |          |                |                   |                    |
| CB4856 CT                                                                                           | X | 12104930 | 12106081 | WBGene00000754 | col-181 W03G11.1  |                    |
| 0.0530472924279657 AGIWUR30503                                                                      |   |          |          |                |                   |                    |
| CB4856 CT                                                                                           | X | 12106407 | 12108617 | WBGene00012224 | W03G11.2          | W03G11.2           |
| -0.15456157320067 AGIWUR7267                                                                        |   |          |          |                |                   |                    |
| CB4856 CT                                                                                           | X | 12109135 | 12111185 | WBGene00011354 | lgc-13 T01H10.1   |                    |
| 0.401554899560026 AGIWUR15109                                                                       |   |          |          |                |                   |                    |
| CB4856 CT                                                                                           | X | 12111513 | 12113475 | WBGene00011355 | lgc-14 T01H10.2   |                    |
| 0.257985526665523 AGIWUR6157;AGIWUR14058;AGIWUR33985;AGIWUR40554                                    |   |          |          |                |                   |                    |
| CB4856 CT                                                                                           | X | 12114324 | 12115923 | WBGene00011356 | lgc-15 T01H10.3   |                    |
| 0.263486578467793 AGIWUR16903                                                                       |   |          |          |                |                   |                    |
| CB4856 CT                                                                                           | X | 12116615 | 12117763 | WBGene00011357 | T01H10.4          | T01H10.4           |
| -0.0814441981620666 AGIWUR10006;AGIWUR28978;AGIWUR33766                                             |   |          |          |                |                   |                    |
| CB4856 CT                                                                                           | X | 12118640 | 12120661 | WBGene00011358 | lgc-16 T01H10.5   |                    |

|                                                                                                 |                                                |          |                |          |          |                     |  |
|-------------------------------------------------------------------------------------------------|------------------------------------------------|----------|----------------|----------|----------|---------------------|--|
| 0.0145099844681189                                                                              | AGIWUR10023                                    |          |                |          |          |                     |  |
| CB4856 CT X                                                                                     | 12121585                                       | 12125048 | WBGene00011359 | lgc-17   | T01H10.6 |                     |  |
| 0.172398586570871                                                                               | AGIWUR31474                                    |          |                |          |          |                     |  |
| CB4856 CT X                                                                                     | 12125608                                       | 12128000 | WBGene00011360 | lgc-18   | T01H10.7 |                     |  |
| 1.15226721538086                                                                                | AGIWUR397                                      |          |                |          |          |                     |  |
| CB4856 CT X                                                                                     | 12128144                                       | 12141151 | WBGene00011361 | lyst-1   | T01H10.8 |                     |  |
| 0.309290613168131                                                                               | AGIWUR42346                                    |          |                |          |          |                     |  |
| CB4856 CT X                                                                                     | 12142869                                       | 12143819 | WBGene00010926 | M153.3   | M153.3   | -0.417339108182559  |  |
| AGIWUR36470                                                                                     |                                                |          |                |          |          |                     |  |
| CB4856 CT X                                                                                     | 12144114                                       | 12145940 | WBGene00045481 | M153.5   | M153.5   | 0.407807611635588   |  |
| AGIWUR15412                                                                                     |                                                |          |                |          |          |                     |  |
| CB4856 CT X                                                                                     | 12146832                                       | 12148529 | WBGene00010924 | M153.1   | M153.1   | 0.0338209782498282  |  |
| AGIWUR36000                                                                                     |                                                |          |                |          |          |                     |  |
| CB4856 CT X                                                                                     | 12150080                                       | 12151474 | WBGene00044144 | M153.4   | M153.4   | 0.057194165650472   |  |
| AGIWUR5719;AGIWUR7960;AGIWUR16127;AGIWUR32416;AGIWUR43557                                       |                                                |          |                |          |          |                     |  |
| CB4856 CT X                                                                                     | 12151359                                       | 12154105 | WBGene00010925 | M153.2   | M153.2   | -0.230748415457652  |  |
| AGIWUR13412                                                                                     |                                                |          |                |          |          |                     |  |
| CB4856 CT X                                                                                     | 12156407                                       | 12160039 | WBGene00010222 | F57G12.2 |          | F57G12.2            |  |
| 0.295845480148873                                                                               | AGIWUR6500;AGIWUR11956;AGIWUR12822;AGIWUR28178 |          |                |          |          |                     |  |
| CB4856 CT X                                                                                     | 12169092                                       | 12171681 | WBGene00010221 | F57G12.1 |          | F57G12.1            |  |
| -0.0961486898168573                                                                             | AGIWUR24594;AGIWUR27372                        |          |                |          |          |                     |  |
| CB4856 CT X                                                                                     | 12199655                                       | 12213049 | WBGene00000277 | cab-1    | C23H4.1  | 0.402891529796478   |  |
| AGIWUR10784;AGIWUR10818;AGIWUR15448;AGIWUR17107;AGIWUR18304;AGIWUR36949;AGIWUR39077;AGIWUR41971 |                                                |          |                |          |          |                     |  |
| CB4856 CT X                                                                                     | 12217243                                       | 12219312 | WBGene00044132 | C23H4.8  | C23H4.8  | -0.137052588654472  |  |
| AGIWUR18650;AGIWUR25954                                                                         |                                                |          |                |          |          |                     |  |
| CB4856 CT X                                                                                     | 12219710                                       | 12222745 | WBGene00007691 | C23H4.2  | C23H4.2  | -0.0677109344583435 |  |
| AGIWUR31189;AGIWUR35320;AGIWUR36580                                                             |                                                |          |                |          |          |                     |  |
| CB4856 CT X                                                                                     | 12222869                                       | 12226047 | WBGene00007695 | C23H4.7  | C23H4.7  | -0.64349648638267   |  |
| AGIWUR32273                                                                                     |                                                |          |                |          |          |                     |  |
| CB4856 CT X                                                                                     | 12226203                                       | 12229861 | WBGene00007692 | C23H4.3  | C23H4.3  | -0.368817151112479  |  |
| AGIWUR37430                                                                                     |                                                |          |                |          |          |                     |  |
| CB4856 CT X                                                                                     | 12229951                                       | 12233244 | WBGene00007693 | C23H4.4  | C23H4.4  | -0.621937242332029  |  |
| AGIWUR7406                                                                                      |                                                |          |                |          |          |                     |  |
| CB4856 CT X                                                                                     | 12235621                                       | 12240781 | WBGene00007694 | C23H4.6  | C23H4.6  | 0.264915199158956   |  |
| AGIWUR31706                                                                                     |                                                |          |                |          |          |                     |  |
| CB4856 CT X                                                                                     | 12241627                                       | 12244637 | WBGene00008451 | E01G6.3  | E01G6.3  | 0.33240194955804    |  |
| AGIWUR14402                                                                                     |                                                |          |                |          |          |                     |  |
| CB4856 CT X                                                                                     | 12256644                                       | 12258971 | WBGene00008450 | E01G6.2  | E01G6.2  | 0.272198320435807   |  |
| AGIWUR5313                                                                                      |                                                |          |                |          |          |                     |  |

|                                                           |             |          |                |                                     |
|-----------------------------------------------------------|-------------|----------|----------------|-------------------------------------|
| CB4856 CT X                                               | 12260881    | 12266537 | WBGene00008449 | E01G6.1 E01G6.1 -0.152679703971241  |
| AGIWUR6911                                                |             |          |                |                                     |
| CB4856 CT X                                               | 12266912    | 12270941 | WBGene00010403 | otpl-8 H19J13.1                     |
| -0.216293454834656                                        | AGIWUR20322 |          |                |                                     |
| CB4856 CT X                                               | 12273638    | 12274691 | WBGene00010404 | H19J13.2 H19J13.2                   |
| -0.158863573293821                                        | AGIWUR32478 |          |                |                                     |
| CB4856 CT X                                               | 12275042    | 12275677 | WBGene00007294 | C04B4.6 C04B4.6 0.256085812276723   |
| AGIWUR31570                                               |             |          |                |                                     |
| CB4856 CT X                                               | 12280707    | 12282559 | WBGene00007289 | C04B4.1 C04B4.1 -0.0469914075990054 |
| AGIWUR36736                                               |             |          |                |                                     |
| CB4856 CT X                                               | 12283285    | 12285307 | WBGene00007290 | C04B4.2 C04B4.2 -0.175740655946413  |
| AGIWUR10264                                               |             |          |                |                                     |
| CB4856 CT X                                               | 12285824    | 12287253 | WBGene00007291 | lips-2 C04B4.3 0.165939899614144    |
| AGIWUR12086                                               |             |          |                |                                     |
| CB4856 CT X                                               | 12287659    | 12288354 | WBGene00007293 | C04B4.5 C04B4.5 -0.250903628825245  |
| AGIWUR44214                                               |             |          |                |                                     |
| CB4856 CT X                                               | 12290839    | 12293267 | WBGene00007292 | C04B4.4 C04B4.4 -0.0697133114164261 |
| AGIWUR37988                                               |             |          |                |                                     |
| CB4856 CT X                                               | 12293767    | 12295311 | WBGene00012299 | W06D11.1 W06D11.1                   |
| -0.371573594599761                                        | AGIWUR23674 |          |                |                                     |
| CB4856 CT X                                               | 12296047    | 12296644 | WBGene00012300 | W06D11.2 W06D11.2                   |
| -0.0424880705353292                                       | AGIWUR11296 |          |                |                                     |
| CB4856 CT X                                               | 12298683    | 12300022 | WBGene00012301 | W06D11.3 W06D11.3                   |
| -0.321335385003705                                        | AGIWUR2184  |          |                |                                     |
| CB4856 CT X                                               | 12300134    | 12301282 | WBGene00012303 | W06D11.5 W06D11.5                   |
| -0.383262424458561                                        | AGIWUR42832 |          |                |                                     |
| CB4856 CT X                                               | 12301488    | 12302817 | WBGene00012302 | dot-1.3 W06D11.4                    |
| -0.0900655171697222                                       | AGIWUR8566  |          |                |                                     |
| CB4856 CT X                                               | 12306865    | 12309482 | WBGene00008902 | phf-32 F17A2.3 0.0870013826491434   |
| AGIWUR35016                                               |             |          |                |                                     |
| CB4856 CT X                                               | 12310812    | 12312730 | WBGene00008903 | F17A2.4 F17A2.4 0.0434908638102289  |
| AGIWUR27669                                               |             |          |                |                                     |
| CB4856 CT X                                               | 12315568    | 12317673 | WBGene00006966 | xtr-2 F17A2.1 -0.115858199114722    |
| AGIWUR2512;AGIWUR9538;AGIWUR16671;AGIWUR33859;AGIWUR44395 |             |          |                |                                     |
| CB4856 CT X                                               | 12318240    | 12320777 | WBGene00000461 | ceh-40 F17A2.5 -0.217298625660289   |
| AGIWUR40436                                               |             |          |                |                                     |
| CB4856 CT X                                               | 12321657    | 12322993 | WBGene00008904 | F17A2.13 F17A2.13                   |
| -0.0964333048311907                                       | AGIWUR36689 |          |                |                                     |
| CB4856 CT X                                               | 12323739    | 12325432 | WBGene00005118 | srd-40 F17A2.12                     |

|                         |                                                            |          |                |           |           |                     |
|-------------------------|------------------------------------------------------------|----------|----------------|-----------|-----------|---------------------|
| 0.13383929935109        | AGIWUR31745                                                |          |                |           |           |                     |
| CB4856 CT X             | 12326724                                                   | 12328365 | WBGene00005119 | srd-41    | F17A2.6   | 0.173710732240377   |
| AGIWUR18512             |                                                            |          |                |           |           |                     |
| CB4856 CT X             | 12328976                                                   | 12330526 | WBGene00005123 | srd-45    | F17A2.7   | 0.159523024261038   |
| AGIWUR44137             |                                                            |          |                |           |           |                     |
| CB4856 CT X             | 12332095                                                   | 12333302 | WBGene00005124 | srd-46    | F17A2.10  |                     |
| 0.0961265602764403      | AGIWUR16372                                                |          |                |           |           |                     |
| CB4856 CT X             | 12333642                                                   | 12335290 | WBGene00005125 | srd-47    | F17A2.11  |                     |
| 0.230094735967255       | AGIWUR33221                                                |          |                |           |           |                     |
| CB4856 CT X             | 12336108                                                   | 12337752 | WBGene00005126 | srd-48    | F17A2.9   | 0.131279016049402   |
| AGIWUR11538             |                                                            |          |                |           |           |                     |
| CB4856 CT X             | 12338440                                                   | 12340248 | WBGene00005122 | srd-44    | F17A2.8   | 0.326522550629203   |
| AGIWUR32586             |                                                            |          |                |           |           |                     |
| CB4856 CT X             | 12340378                                                   | 12341438 | WBGene00006979 | zig-2     | F42F12.2  |                     |
| 0.643274525425348       | AGIWUR17101                                                |          |                |           |           |                     |
| CB4856 CT X             | 12342289                                                   | 12342597 | WBGene00044397 | nspc-8    | F42F12.12 |                     |
| -0.117290678055997      | AGIWUR3560;AGIWUR10811;AGIWUR34815;AGIWUR41515             |          |                |           |           |                     |
| CB4856 CT X             | 12343609                                                   | 12344043 | WBGene00009640 | nspc-10   | F42F12.9  |                     |
| 0.238290056091628       | AGIWUR20803;AGIWUR25081                                    |          |                |           |           |                     |
| CB4856 CT X             | 12347029                                                   | 12347899 | WBGene00044140 | F42F12.11 | F42F12.11 |                     |
| 0.127508146417869       | AGIWUR23806;AGIWUR30383;AGIWUR41994                        |          |                |           |           |                     |
| CB4856 CT X             | 12350578                                                   | 12351788 | WBGene00009635 | F42F12.3  | F42F12.3  |                     |
| -0.0538078008160063     | AGIWUR13631                                                |          |                |           |           |                     |
| CB4856 CT X             | 12351978                                                   | 12352949 | WBGene00009636 | F42F12.4  | F42F12.4  |                     |
| -0.0519497860784646     | AGIWUR9513;AGIWUR25004;AGIWUR33036;AGIWUR42098             |          |                |           |           |                     |
| CB4856 CT X             | 12353550                                                   | 12353768 | WBGene00044398 | nspc-11   | F42F12.13 |                     |
| -0.142922312586784      | AGIWUR7590;AGIWUR24310;AGIWUR29559;AGIWUR37495;AGIWUR41829 |          |                |           |           |                     |
| CB4856 CT X             | 12356194                                                   | 12356681 | WBGene00023493 | nspc-12   | F42F12.10 |                     |
| -0.129884928629263      | AGIWUR20494;AGIWUR24317                                    |          |                |           |           |                     |
| CB4856 CT X             | 12362397                                                   | 12363102 | WBGene00008961 | F19H6.6   | F19H6.6   | -0.258313832199503  |
| AGIWUR43762             |                                                            |          |                |           |           |                     |
| CB4856 CT X             | 12363713                                                   | 12364904 | WBGene00008960 | F19H6.5   | F19H6.5   | -0.223108840890809  |
| AGIWUR22825             |                                                            |          |                |           |           |                     |
| CB4856 CT X             | 12365688                                                   | 12367255 | WBGene00008959 | F19H6.4   | F19H6.4   | -0.0675045309591162 |
| AGIWUR8462              |                                                            |          |                |           |           |                     |
| CB4856 CT X             | 12374223                                                   | 12378393 | WBGene00008957 | glb-13    | F19H6.2   | 0.00897834712956591 |
| AGIWUR12885;AGIWUR35693 |                                                            |          |                |           |           |                     |
| CB4856 CT X             | 12389594                                                   | 12391474 | WBGene00008956 | nek1-3    | F19H6.1   | 0.170003716702613   |
| AGIWUR10988             |                                                            |          |                |           |           |                     |



|                                                                                                                       |   |          |          |                |         |          |                     |
|-----------------------------------------------------------------------------------------------------------------------|---|----------|----------|----------------|---------|----------|---------------------|
| CB4856 CT                                                                                                             | X | 12394265 | 12399534 | WBGene00008924 | F17E5.2 | F17E5.2  | -0.263930701008353  |
| AGIWUR1387                                                                                                            |   |          |          |                |         |          |                     |
| CB4856 CT                                                                                                             | X | 12399517 | 12414037 | WBGene00002991 | lin-2   | F17E5.1  | -0.0794675544328332 |
| AGIWUR13913                                                                                                           |   |          |          |                |         |          |                     |
| CB4856 CT                                                                                                             | X | 12425730 | 12426631 | WBGene00023492 | T24D3.2 | T24D3.2  | -0.387121538524439  |
| AGIWUR6201;AGIWUR10096;AGIWUR16437;AGIWUR21018;AGIWUR30257;AGIWUR31249;AGIWUR40680;AGIWUR42163                        |   |          |          |                |         |          |                     |
| CB4856 CT                                                                                                             | X | 12434154 | 12443915 | WBGene00011824 | T18D3.7 | T18D3.7  | 0.715908113572773   |
| AGIWUR6965;AGIWUR18290;AGIWUR21788                                                                                    |   |          |          |                |         |          |                     |
| CB4856 CT                                                                                                             | X | 12449896 | 12451360 | WBGene00011823 | T18D3.6 | T18D3.6  | 0.0465462986557057  |
| AGIWUR27988                                                                                                           |   |          |          |                |         |          |                     |
| CB4856 CT                                                                                                             | X | 12451356 | 12454328 | WBGene00011826 | T18D3.9 | T18D3.9  | -0.447682067975498  |
| AGIWUR23848                                                                                                           |   |          |          |                |         |          |                     |
| CB4856 CT                                                                                                             | X | 12454745 | 12457934 | WBGene00011820 | T18D3.1 | T18D3.1  | -0.100624758226661  |
| AGIWUR4299;AGIWUR13787;AGIWUR22278;AGIWUR22796                                                                        |   |          |          |                |         |          |                     |
| CB4856 CT                                                                                                             | X | 12459069 | 12461639 | WBGene00003854 | odr-7   | T18D3.2  | 0.0409904417930953  |
| AGIWUR22267;AGIWUR41458                                                                                               |   |          |          |                |         |          |                     |
| CB4856 CT                                                                                                             | X | 12463815 | 12464378 | WBGene00011822 | T18D3.5 | T18D3.5  | 0.0258039003524129  |
| AGIWUR17653                                                                                                           |   |          |          |                |         |          |                     |
| CB4856 CT                                                                                                             | X | 12464640 | 12466917 | WBGene00011821 | cdf-2   | T18D3.3  | 0.897782356660606   |
| AGIWUR23602                                                                                                           |   |          |          |                |         |          |                     |
| CB4856 CT                                                                                                             | X | 12468061 | 12475348 | WBGene00003514 | myo-2   | T18D3.4  | 0.287690105806155   |
| AGIWUR3996;AGIWUR9670;AGIWUR14689;AGIWUR15589;AGIWUR19019;AGIWUR21820;AGIWUR26437;AGIWUR30907;AGIWUR33713;AGIWUR36921 |   |          |          |                |         |          |                     |
| CB4856 CT                                                                                                             | X | 12475659 | 12477441 | WBGene00009725 | F45E6.1 | F45E6.1  |                     |
| 0.000731686196287384 AGIWUR32552                                                                                      |   |          |          |                |         |          |                     |
| CB4856 CT                                                                                                             | X | 12480948 | 12484904 | WBGene00000222 | atf-6   | F45E6.2  | 0.103207495756052   |
| AGIWUR6080;AGIWUR36726;AGIWUR42069                                                                                    |   |          |          |                |         |          |                     |
| CB4856 CT                                                                                                             | X | 12485054 | 12491102 | WBGene00009726 | tbc-13  | F45E6.3  | 0.120067939401459   |
| AGIWUR42166                                                                                                           |   |          |          |                |         |          |                     |
| CB4856 CT                                                                                                             | X | 12492865 | 12495862 | WBGene00009727 | lips-1  | F45E6.4  | 0.126980313523498   |
| AGIWUR2685;AGIWUR6093;AGIWUR33965                                                                                     |   |          |          |                |         |          |                     |
| CB4856 CT                                                                                                             | X | 12502802 | 12503338 | WBGene00009728 | sdz-19  | F45E6.6  | 0.0449966688301373  |
| AGIWUR3292                                                                                                            |   |          |          |                |         |          |                     |
| CB4856 CT                                                                                                             | X | 12503885 | 12514048 | WBGene00004739 | scd-1   | H20J18.1 |                     |
| 0.294907808544239 AGIWUR11901;AGIWUR30749;AGIWUR31931;AGIWUR42881                                                     |   |          |          |                |         |          |                     |
| CB4856 CT                                                                                                             | X | 12525344 | 12525783 | WBGene00007634 | C16D6.1 | C16D6.1  | -0.0245959523075996 |
| AGIWUR33758                                                                                                           |   |          |          |                |         |          |                     |
| CB4856 CT                                                                                                             | X | 12526660 | 12527286 | WBGene00007636 | C16D6.3 | C16D6.3  | -0.225376693242097  |
| AGIWUR38101                                                                                                           |   |          |          |                |         |          |                     |

|                                                           |   |          |          |                |          |          |                     |
|-----------------------------------------------------------|---|----------|----------|----------------|----------|----------|---------------------|
| CB4856 CT                                                 | X | 12537014 | 12551677 | WBGene00007635 | npr-4    | C16D6.2  | -0.290544990584185  |
| AGIWUR4513;AGIWUR13566;AGIWUR38713                        |   |          |          |                |          |          |                     |
| CB4856 CT                                                 | X | 12574069 | 12577209 | WBGene00011989 | T24D5.1  | T24D5.1  | -0.0341353225044356 |
| AGIWUR44564                                               |   |          |          |                |          |          |                     |
| CB4856 CT                                                 | X | 12580074 | 12583213 | WBGene00011991 | T24D5.3  | T24D5.3  | -0.0919532065684088 |
| AGIWUR29259                                               |   |          |          |                |          |          |                     |
| CB4856 CT                                                 | X | 12583799 | 12586439 | WBGene00011990 | T24D5.2  | T24D5.2  | -0.307721014293783  |
| AGIWUR2904                                                |   |          |          |                |          |          |                     |
| CB4856 CT                                                 | X | 12597168 | 12597437 | WBGene00011992 | T24D5.4  | T24D5.4  | -0.14060084632527   |
| AGIWUR12113                                               |   |          |          |                |          |          |                     |
| CB4856 CT                                                 | X | 12598031 | 12599297 | WBGene00011993 | T24D5.5  | T24D5.5  | 0.0270378473648014  |
| AGIWUR9730                                                |   |          |          |                |          |          |                     |
| CB4856 CT                                                 | X | 12603622 | 12604708 | WBGene00044149 | T24D5.6  | T24D5.6  | 0.38580587767059    |
| AGIWUR9923                                                |   |          |          |                |          |          |                     |
| CB4856 CT                                                 | X | 12612727 | 12617880 | WBGene00011152 | R09A8.1  | R09A8.1  | 0.0706863619945963  |
| AGIWUR12254                                               |   |          |          |                |          |          |                     |
| CB4856 CT                                                 | X | 12619472 | 12623531 | WBGene00011153 | R09A8.2  | R09A8.2  | -0.305523989556065  |
| AGIWUR3121                                                |   |          |          |                |          |          |                     |
| CB4856 CT                                                 | X | 12624655 | 12634354 | WBGene00006493 | tag-147  | R09A8.3  | -0.310365722231154  |
| AGIWUR18950                                               |   |          |          |                |          |          |                     |
| CB4856 CT                                                 | X | 12636153 | 12637056 | WBGene00000755 | col-182  | R09A8.4  |                     |
| -0.00912366907360607 AGIWUR23947                          |   |          |          |                |          |          |                     |
| CB4856 CT                                                 | X | 12638461 | 12640559 | WBGene00011154 | R09A8.5  | R09A8.5  | 0.250752883274036   |
| AGIWUR17053                                               |   |          |          |                |          |          |                     |
| CB4856 CT                                                 | X | 12647117 | 12651487 | WBGene00010423 | zmp-5    | H36L18.1 |                     |
| 0.888584994300412 AGIWUR29634                             |   |          |          |                |          |          |                     |
| CB4856 CT                                                 | X | 12652591 | 12653520 | WBGene00010424 | H36L18.2 |          | H36L18.2            |
| 0.240168744345161 AGIWUR30293;AGIWUR43830                 |   |          |          |                |          |          |                     |
| CB4856 CT                                                 | X | 12658476 | 12661062 | WBGene00007259 | C02B4.3  | C02B4.3  |                     |
| 0.000347903964070362 AGIWUR16012;AGIWUR23291;AGIWUR23948  |   |          |          |                |          |          |                     |
| CB4856 CT                                                 | X | 12662478 | 12663627 | WBGene00045386 | C02B4.4  | C02B4.4  | 0.382692496239791   |
| AGIWUR3227;AGIWUR7068;AGIWUR16049;AGIWUR39735;AGIWUR42448 |   |          |          |                |          |          |                     |
| CB4856 CT                                                 | X | 12663760 | 12667854 | WBGene00003616 | nhr-17   | C02B4.2  | 0.623894157428117   |
| AGIWUR26583                                               |   |          |          |                |          |          |                     |
| CB4856 CT                                                 | X | 12678832 | 12689279 | WBGene00000082 | adt-1    | C02B4.1  | -0.129485660463943  |
| AGIWUR3895                                                |   |          |          |                |          |          |                     |
| CB4856 CT                                                 | X | 12691573 | 12695652 | WBGene00011564 | ugt-50   | T07C5.1  | -0.201108078241575  |
| AGIWUR20308;AGIWUR44327                                   |   |          |          |                |          |          |                     |
| CB4856 CT                                                 | X | 12695589 | 12699921 | WBGene00011568 | nhr-26   | T07C5.5  | -0.0155890443249316 |



|                                                                                                                                             |   |          |          |                |          |          |                    |
|---------------------------------------------------------------------------------------------------------------------------------------------|---|----------|----------|----------------|----------|----------|--------------------|
| CB4856 CT                                                                                                                                   | X | 12978505 | 12979854 | WBGene00008693 | F11C1.4  | F11C1.4  | -0.249000947494354 |
| AGIWUR4772                                                                                                                                  |   |          |          |                |          |          |                    |
| CB4856 CT                                                                                                                                   | X | 12981775 | 12985852 | WBGene00008692 | scav-4   | F11C1.3  | -0.203035547734464 |
| AGIWUR5437;AGIWUR7703;AGIWUR24766                                                                                                           |   |          |          |                |          |          |                    |
| CB4856 CT                                                                                                                                   | X | 12985790 | 12987219 | WBGene00008691 | mff-1    | F11C1.2  | 0.269405339378228  |
| AGIWUR7567                                                                                                                                  |   |          |          |                |          |          |                    |
| CB4856 CT                                                                                                                                   | X | 12987334 | 12990365 | WBGene00008690 | F11C1.1  | F11C1.1  | -0.261358074932064 |
| AGIWUR38893                                                                                                                                 |   |          |          |                |          |          |                    |
| CB4856 CT                                                                                                                                   | X | 12991447 | 12999638 | WBGene00008694 | F11C1.5  | F11C1.5  | -0.183218136281752 |
| AGIWUR955;AGIWUR6921;AGIWUR7291;AGIWUR14107;AGIWUR25945;AGIWUR27374;AGIWUR28924;AGIWUR31966;AGIWUR38085;AGIWUR39778;AGIWUR43066;AGIWUR44053 |   |          |          |                |          |          |                    |
| CB4856 CT                                                                                                                                   | X | 13008493 | 13013962 | WBGene00003623 | nhr-25   | F11C1.6  | 0.499581348774944  |
| AGIWUR112;AGIWUR11229;AGIWUR18735;AGIWUR26216;AGIWUR33480                                                                                   |   |          |          |                |          |          |                    |
| CB4856 CT                                                                                                                                   | X | 13018848 | 13022023 | WBGene00008278 | npr-10   | C53C7.1  | -0.24218518427776  |
| AGIWUR30677                                                                                                                                 |   |          |          |                |          |          |                    |
| CB4856 CT                                                                                                                                   | X | 13042182 | 13046220 | WBGene00014294 | C53C7.5  | C53C7.5  | 0.316676367323628  |
| AGIWUR1468;AGIWUR8123;AGIWUR9304;AGIWUR26719;AGIWUR29429;AGIWUR43147;AGIWUR43738;AGIWUR43899                                                |   |          |          |                |          |          |                    |
| CB4856 CT                                                                                                                                   | X | 13048558 | 13050885 | WBGene00008279 | C53C7.3  | C53C7.3  |                    |
| -6.03255548785597e-05 AGIWUR43;AGIWUR783;AGIWUR5332;AGIWUR23440                                                                             |   |          |          |                |          |          |                    |
| CB4856 CT                                                                                                                                   | X | 13051796 | 13055395 | WBGene00010519 | K03A11.1 |          | K03A11.1           |
| 0.0880673114142208 AGIWUR3726;AGIWUR10438;AGIWUR18953;AGIWUR28685                                                                           |   |          |          |                |          |          |                    |
| CB4856 CT                                                                                                                                   | X | 13055860 | 13058381 | WBGene00045497 | K03A11.6 |          | K03A11.6           |
| 0.139484191235069 AGIWUR8903                                                                                                                |   |          |          |                |          |          |                    |
| CB4856 CT                                                                                                                                   | X | 13064168 | 13066936 | WBGene00010522 | K03A11.5 |          | K03A11.5           |
| -0.246397841158318 AGIWUR31110                                                                                                              |   |          |          |                |          |          |                    |
| CB4856 CT                                                                                                                                   | X | 13067279 | 13068239 | WBGene00010520 | cpx-2    | K03A11.2 |                    |
| 0.113634723025723 AGIWUR9477                                                                                                                |   |          |          |                |          |          |                    |
| CB4856 CT                                                                                                                                   | X | 13074682 | 13076092 | WBGene00000450 | ceh-28   | K03A11.3 |                    |
| -0.130430169123322 AGIWUR30609                                                                                                              |   |          |          |                |          |          |                    |
| CB4856 CT                                                                                                                                   | X | 13078172 | 13082045 | WBGene00010521 | K03A11.4 |          | K03A11.4           |
| -0.119566082912965 AGIWUR28119;AGIWUR42048                                                                                                  |   |          |          |                |          |          |                    |
| CB4856 CT                                                                                                                                   | X | 13082626 | 13084235 | WBGene00006078 | str-10   | R03G8.5  | 0.0228303261760958 |
| AGIWUR10323                                                                                                                                 |   |          |          |                |          |          |                    |
| CB4856 CT                                                                                                                                   | X | 13084573 | 13087646 | WBGene00010996 | R03G8.1  | R03G8.1  | -0.148447257343706 |
| AGIWUR40244                                                                                                                                 |   |          |          |                |          |          |                    |
| CB4856 CT                                                                                                                                   | X | 13091131 | 13094424 | WBGene00010998 | R03G8.3  | R03G8.3  | -0.140635705643831 |
| AGIWUR44752                                                                                                                                 |   |          |          |                |          |          |                    |
| CB4856 CT                                                                                                                                   | X | 13094558 | 13100445 | WBGene00011000 | R03G8.6  | R03G8.6  | -0.143159528145841 |
| AGIWUR41046                                                                                                                                 |   |          |          |                |          |          |                    |

|                                                                                                                                               |             |          |                |          |          |                     |
|-----------------------------------------------------------------------------------------------------------------------------------------------|-------------|----------|----------------|----------|----------|---------------------|
| CB4856 CT X                                                                                                                                   | 13101306    | 13104205 | WBGene00010999 | R03G8.4  | R03G8.4  | -0.533007016326367  |
| AGIWUR30157                                                                                                                                   |             |          |                |          |          |                     |
| CB4856 CT X                                                                                                                                   | 13105184    | 13108543 | WBGene00008925 | F17H10.1 |          | F17H10.1            |
| 0.0411620315600842                                                                                                                            | AGIWUR29715 |          |                |          |          |                     |
| CB4856 CT X                                                                                                                                   | 13113772    | 13116390 | WBGene00008926 | F17H10.2 |          | F17H10.2            |
| 0.128611092936783                                                                                                                             | AGIWUR44308 |          |                |          |          |                     |
| CB4856 CT X                                                                                                                                   | 13116352    | 13122291 | WBGene00008927 | snx-17   | F17H10.3 |                     |
| 0.149531375100008                                                                                                                             | AGIWUR19757 |          |                |          |          |                     |
| CB4856 CT X                                                                                                                                   | 13125976    | 13126520 | WBGene00008928 | F17H10.4 |          | F17H10.4            |
| -0.0436354361670537                                                                                                                           | AGIWUR6044  |          |                |          |          |                     |
| CB4856 CT X                                                                                                                                   | 13130263    | 13134124 | WBGene00008598 | spin-3   | F09A5.1  | -0.0239846901219147 |
| AGIWUR37383                                                                                                                                   |             |          |                |          |          |                     |
| CB4856 CT X                                                                                                                                   | 13135107    | 13139771 | WBGene00008599 | F09A5.2  | F09A5.2  | -0.0569549691024225 |
| AGIWUR40861                                                                                                                                   |             |          |                |          |          |                     |
| CB4856 CT X                                                                                                                                   | 13139847    | 13140886 | WBGene00045245 | ttr-34   | F09A5.9  | 0.196134953839889   |
| AGIWUR16227;AGIWUR16758;AGIWUR16976;AGIWUR31415;AGIWUR32230                                                                                   |             |          |                |          |          |                     |
| CB4856 CT X                                                                                                                                   | 13141601    | 13152474 | WBGene00008600 | F09A5.3  | F09A5.3  | -0.0480627665257582 |
| AGIWUR19338                                                                                                                                   |             |          |                |          |          |                     |
| CB4856 CT X                                                                                                                                   | 13152821    | 13170113 | WBGene00008601 | F09A5.4  | F09A5.4  | 0.1243665452214     |
| AGIWUR4543;AGIWUR20864;AGIWUR23880;AGIWUR28567;AGIWUR41955                                                                                    |             |          |                |          |          |                     |
| CB4856 CT X                                                                                                                                   | 13177856    | 13178447 | WBGene00003741 | nlp-3    | F48C11.3 |                     |
| 0.342041000320936                                                                                                                             | AGIWUR24480 |          |                |          |          |                     |
| CB4856 CT X                                                                                                                                   | 13182463    | 13189961 | WBGene00009844 | cwp-5    | F48C11.2 |                     |
| -0.113934500706332                                                                                                                            | AGIWUR38605 |          |                |          |          |                     |
| CB4856 CT X                                                                                                                                   | 13191246    | 13193955 | WBGene00001668 | gpa-6    | F48C11.1 |                     |
| -0.126013361208638                                                                                                                            | AGIWUR8673  |          |                |          |          |                     |
| CB4856 CT X                                                                                                                                   | 13212390    | 13216707 | WBGene00006749 | unc-9    | R12H7.1  | -0.253027582648986  |
| AGIWUR37395                                                                                                                                   |             |          |                |          |          |                     |
| CB4856 CT X                                                                                                                                   | 13217101    | 13219019 | WBGene00011255 | R12H7.4  | R12H7.4  | -0.0843039018447591 |
| AGIWUR1046                                                                                                                                    |             |          |                |          |          |                     |
| CB4856 CT X                                                                                                                                   | 13218977    | 13221462 | WBGene00000217 | asp-4    | R12H7.2  | -0.267582646610703  |
| AGIWUR834;AGIWUR4136;AGIWUR14681;AGIWUR36693                                                                                                  |             |          |                |          |          |                     |
| CB4856 CT X                                                                                                                                   | 13222920    | 13223546 | WBGene00004826 | skr-20   | R12H7.5  | 0.211782678313822   |
| AGIWUR8378                                                                                                                                    |             |          |                |          |          |                     |
| CB4856 CT X                                                                                                                                   | 13223644    | 13224712 | WBGene00004825 | skr-19   | R12H7.3  | 0.38653450865936    |
| AGIWUR5557;AGIWUR9972;AGIWUR11033;AGIWUR13815;AGIWUR20375;AGIWUR21446;AGIWUR30438;AGIWUR31990;AGIWUR35512;AGIWUR36622;AGIWUR42278;AGIWUR42725 |             |          |                |          |          |                     |
| CB4856 CT X                                                                                                                                   | 13225818    | 13226678 | WBGene00004827 | skr-21   | K08H2.1  | 0.733325718882682   |
| AGIWUR33637                                                                                                                                   |             |          |                |          |          |                     |

|                                   |                                     |          |                |                 |                     |
|-----------------------------------|-------------------------------------|----------|----------------|-----------------|---------------------|
| CB4856 CT X<br>-0.327221130085031 | 13228669<br>AGIWUR41025             | 13232328 | WBGene00010694 | bgnt-1.5        | K08H2.9             |
| CB4856 CT X<br>AGIWUR39457        | 13234099                            | 13234957 | WBGene00010689 | K08H2.2 K08H2.2 | 0.128849400616283   |
| CB4856 CT X<br>AGIWUR24564        | 13237389                            | 13238476 | WBGene00010690 | K08H2.3 K08H2.3 | -0.333431165471833  |
| CB4856 CT X<br>AGIWUR38828        | 13238651                            | 13240003 | WBGene00010691 | K08H2.4 K08H2.4 | 0.477318436177095   |
| CB4856 CT X<br>AGIWUR37660        | 13241109                            | 13242278 | WBGene00010692 | K08H2.5 K08H2.5 | -0.333989759195163  |
| CB4856 CT X<br>AGIWUR30567        | 13245390                            | 13247044 | WBGene00001995 | hpl-1 K08H2.6   | 0.015425944676295   |
| CB4856 CT X<br>AGIWUR16768        | 13247263                            | 13248426 | WBGene00010693 | K08H2.7 K08H2.7 | -0.0189674236656687 |
| CB4856 CT X<br>AGIWUR38246        | 13251964                            | 13256282 | WBGene00003626 | nhr-32 K08H2.8  | 0.408099118467662   |
| CB4856 CT X<br>-0.291458898570417 | 13262495<br>AGIWUR5726              | 13264589 | WBGene00010704 | K09A11.1        | K09A11.1            |
| CB4856 CT X<br>-0.692538494348643 | 13265041<br>AGIWUR19431             | 13267338 | WBGene00010705 | cyp-14A1        | K09A11.2            |
| CB4856 CT X<br>-0.691528189066602 | 13267562<br>AGIWUR19995             | 13269697 | WBGene00010706 | cyp-14A2        | K09A11.3            |
| CB4856 CT X<br>0.0592621263237785 | 13271877<br>AGIWUR28698             | 13274218 | WBGene00010707 | cyp-14A3        | K09A11.4            |
| CB4856 CT X<br>0.193478545644317  | 13275315<br>AGIWUR28036;AGIWUR30720 | 13278976 | WBGene00010708 | phf-33 K09A11.5 |                     |
| CB4856 CT X<br>-0.264884978026801 | 13282096<br>AGIWUR8120              | 13284204 | WBGene00011009 | cyp-14A4        | R04D3.1             |
| CB4856 CT X<br>AGIWUR41426        | 13285122                            | 13286633 | WBGene00011010 | R04D3.2 R04D3.2 | -0.117840851639448  |
| CB4856 CT X<br>AGIWUR39895        | 13287779                            | 13288815 | WBGene00011012 | R04D3.4 R04D3.4 | -0.214502340283357  |
| CB4856 CT X<br>AGIWUR37441        | 13288917                            | 13290631 | WBGene00011011 | R04D3.3 R04D3.3 | -0.133976760458809  |
| CB4856 CT X<br>0.0544806552300896 | 13291806<br>AGIWUR42329             | 13292984 | WBGene00005116 | srd-38 R04D3.12 |                     |
| CB4856 CT X<br>AGIWUR23630        | 13293415                            | 13294773 | WBGene00005114 | srd-36 R04D3.6  | 0.144729672885622   |
| CB4856 CT X                       | 13295164                            | 13297885 | WBGene00005115 | srd-37 R04D3.11 |                     |

|                                                                                                             |                                              |          |                |          |          |                    |
|-------------------------------------------------------------------------------------------------------------|----------------------------------------------|----------|----------------|----------|----------|--------------------|
| -0.00315495059528592                                                                                        | AGIWUR7041;AGIWUR21547                       |          |                |          |          |                    |
| CB4856 CT X                                                                                                 | 13298994                                     | 13300523 | WBGene00005117 | srd-39   | R04D3.8  | -0.539929642163356 |
| AGIWUR39585                                                                                                 |                                              |          |                |          |          |                    |
| CB4856 CT X                                                                                                 | 13301599                                     | 13303457 | WBGene00005120 | srd-42   | R04D3.7  | -0.30207469347927  |
| AGIWUR25173                                                                                                 |                                              |          |                |          |          |                    |
| CB4856 CT X                                                                                                 | 13303905                                     | 13305844 | WBGene00005121 | srd-43   | R04D3.9  | -0.133294684545302 |
| AGIWUR19251                                                                                                 |                                              |          |                |          |          |                    |
| CB4856 CT X                                                                                                 | 13307282                                     | 13308845 | WBGene00011013 | srxa-8   | R04D3.10 |                    |
| -0.0111962542653448                                                                                         | AGIWUR10861                                  |          |                |          |          |                    |
| CB4856 CT X                                                                                                 | 13310227                                     | 13311830 | WBGene00009796 | F46G10.1 |          | F46G10.1           |
| 0.0402832480677002                                                                                          |                                              |          |                |          |          |                    |
| AGIWUR13809;AGIWUR18540;AGIWUR23251;AGIWUR24687;AGIWUR30484;AGIWUR34867;AGIWUR35204;AGIWUR37443;AGIWUR41431 |                                              |          |                |          |          |                    |
| CB4856 CT X                                                                                                 | 13322963                                     | 13327854 | WBGene00009797 | F46G10.2 |          | F46G10.2           |
| 0.548238871066062                                                                                           | AGIWUR27847                                  |          |                |          |          |                    |
| CB4856 CT X                                                                                                 | 13328252                                     | 13331248 | WBGene00004801 | sir-2.2  | F46G10.7 |                    |
| -0.0283341643664894                                                                                         | AGIWUR11869;AGIWUR16128;AGIWUR41063          |          |                |          |          |                    |
| CB4856 CT X                                                                                                 | 13332014                                     | 13333825 | WBGene00004802 | sir-2.3  | F46G10.3 |                    |
| -0.347485112744723                                                                                          | AGIWUR25984                                  |          |                |          |          |                    |
| CB4856 CT X                                                                                                 | 13334046                                     | 13336784 | WBGene00009798 | F46G10.4 |          | F46G10.4           |
| -0.631625895612265                                                                                          | AGIWUR3389                                   |          |                |          |          |                    |
| CB4856 CT X                                                                                                 | 13338052                                     | 13348118 | WBGene00004238 | ptr-24   | F46G10.5 |                    |
| -0.21791238557296                                                                                           | AGIWUR39309                                  |          |                |          |          |                    |
| CB4856 CT X                                                                                                 | 13349639                                     | 13350804 | WBGene00003511 | mxl-3    | F46G10.6 |                    |
| -0.302441409085912                                                                                          | AGIWUR27752                                  |          |                |          |          |                    |
| CB4856 CT X                                                                                                 | 13361201                                     | 13365294 | WBGene00008213 | C49F8.1  | C49F8.1  | -0.59289698282105  |
| AGIWUR21450                                                                                                 |                                              |          |                |          |          |                    |
| CB4856 CT X                                                                                                 | 13371612                                     | 13376992 | WBGene00008214 | gem-1    | C49F8.2  | 0.195489661945326  |
| AGIWUR7625;AGIWUR28459;AGIWUR33570                                                                          |                                              |          |                |          |          |                    |
| CB4856 CT X                                                                                                 | 13386057                                     | 13387547 | WBGene00008215 | C49F8.3  | C49F8.3  | -0.269053428065734 |
| AGIWUR11465                                                                                                 |                                              |          |                |          |          |                    |
| CB4856 CT X                                                                                                 | 13391949                                     | 13395149 | WBGene00008518 | irld-2   | F02C12.4 |                    |
| 0.00822814146825479                                                                                         | AGIWUR29427                                  |          |                |          |          |                    |
| CB4856 CT X                                                                                                 | 13397323                                     | 13397710 | WBGene00008517 | F02C12.3 |          | F02C12.3           |
| -0.207033517775653                                                                                          | AGIWUR41613                                  |          |                |          |          |                    |
| CB4856 CT X                                                                                                 | 13398198                                     | 13399230 | WBGene00008516 | F02C12.2 |          | F02C12.2           |
| -0.180616125928557                                                                                          | AGIWUR19214                                  |          |                |          |          |                    |
| CB4856 CT X                                                                                                 | 13402083                                     | 13406415 | WBGene00008515 | F02C12.1 |          | F02C12.1           |
| -0.198048799790461                                                                                          | AGIWUR866;AGIWUR5397;AGIWUR16048;AGIWUR28399 |          |                |          |          |                    |
| CB4856 CT X                                                                                                 | 13406674                                     | 13409644 | WBGene00008519 | cyp-13B1 |          | F02C12.5           |

|                                                                                                |   |          |                                                 |                                                                                   |          |                             |
|------------------------------------------------------------------------------------------------|---|----------|-------------------------------------------------|-----------------------------------------------------------------------------------|----------|-----------------------------|
| 0.531639333710389                                                                              |   |          | AGIWUR29779;AGIWUR30525;AGIWUR31387;AGIWUR37308 |                                                                                   |          |                             |
| CB4856 CT                                                                                      | X | 13410720 | 13411285                                        | WBGene00044405                                                                    | C29F7.8  | C29F7.8 -0.0910953306695386 |
| AGIWUR23372;AGIWUR24426;AGIWUR24459;AGIWUR39234                                                |   |          |                                                 |                                                                                   |          |                             |
| CB4856 CT                                                                                      | X | 13412463 | 13414617                                        | WBGene00007810                                                                    | C29F7.1  | C29F7.1 -0.249793271993664  |
| AGIWUR1665                                                                                     |   |          |                                                 |                                                                                   |          |                             |
| CB4856 CT                                                                                      | X | 13416078 | 13418220                                        | WBGene00007811                                                                    | C29F7.2  | C29F7.2 0.745021105130753   |
| AGIWUR15482                                                                                    |   |          |                                                 |                                                                                   |          |                             |
| CB4856 CT                                                                                      | X | 13418841 | 13419934                                        | WBGene00007812                                                                    | C29F7.3  | C29F7.3 -0.342408619585708  |
| AGIWUR27922                                                                                    |   |          |                                                 |                                                                                   |          |                             |
| CB4856 CT                                                                                      | X | 13421824 | 13423427                                        | WBGene00001435                                                                    | fkf-3    | C29F7.4 -0.199506889285802  |
| AGIWUR12036                                                                                    |   |          |                                                 |                                                                                   |          |                             |
| CB4856 CT                                                                                      | X | 13427062 | 13428842                                        | WBGene00001436                                                                    | fkf-4    | C29F7.5 -0.310980709881772  |
| AGIWUR33148                                                                                    |   |          |                                                 |                                                                                   |          |                             |
| CB4856 CT                                                                                      | X | 13436454 | 13441883                                        | WBGene00007813                                                                    | jmjd-3.3 | C29F7.6                     |
| 0.184752071304211                                                                              |   |          |                                                 | AGIWUR14123;AGIWUR19403;AGIWUR21987;AGIWUR37163;AGIWUR41094;AGIWUR41742           |          |                             |
| CB4856 CT                                                                                      | X | 13444980 | 13448230                                        | WBGene00008527                                                                    | set-8    | F02D10.7                    |
| 0.00745443011838098                                                                            |   |          |                                                 | AGIWUR29127                                                                       |          |                             |
| CB4856 CT                                                                                      | X | 13449586 | 13451678                                        | WBGene00008526                                                                    | F02D10.6 | F02D10.6                    |
| -0.141605403917293                                                                             |   |          |                                                 | AGIWUR32178                                                                       |          |                             |
| CB4856 CT                                                                                      | X | 13452667 | 13456658                                        | WBGene00001465                                                                    | flr-1    | F02D10.5                    |
| -0.21886418766662                                                                              |   |          |                                                 | AGIWUR14339                                                                       |          |                             |
| CB4856 CT                                                                                      | X | 13456889 | 13462619                                        | WBGene00008524                                                                    | F02D10.3 | F02D10.3                    |
| -0.0445090255426805                                                                            |   |          |                                                 | AGIWUR2362;AGIWUR5227;AGIWUR11181;AGIWUR31334;AGIWUR31422;AGIWUR33407;AGIWUR35404 |          |                             |
| CB4856 CT                                                                                      | X | 13462668 | 13463893                                        | WBGene00008523                                                                    | F02D10.2 | F02D10.2                    |
| 0.132032504938845                                                                              |   |          |                                                 | AGIWUR28889                                                                       |          |                             |
| CB4856 CT                                                                                      | X | 13466737 | 13467736                                        | WBGene00000756                                                                    | col-183  | F02D10.1                    |
| -0.177914310182543                                                                             |   |          |                                                 | AGIWUR28871                                                                       |          |                             |
| CB4856 CT                                                                                      | X | 13469387 | 13470471                                        | WBGene00000757                                                                    | col-184  | F15A2.1 -0.0852733686575959 |
| AGIWUR23058;AGIWUR31053                                                                        |   |          |                                                 |                                                                                   |          |                             |
| CB4856 CT                                                                                      | X | 13472155 | 13475899                                        | WBGene00006610                                                                    | tre-4    | F15A2.2 -0.279473049949186  |
| AGIWUR43735                                                                                    |   |          |                                                 |                                                                                   |          |                             |
| CB4856 CT                                                                                      | X | 13475964 | 13477456                                        | WBGene00001164                                                                    | efn-3    | F15A2.5 -0.581429052872284  |
| AGIWUR588                                                                                      |   |          |                                                 |                                                                                   |          |                             |
| CB4856 CT                                                                                      | X | 13478621 | 13481804                                        | WBGene00005128                                                                    | srd-50   | F15A2.4 -0.0484892127627869 |
| AGIWUR36687                                                                                    |   |          |                                                 |                                                                                   |          |                             |
| CB4856 CT                                                                                      | X | 13482649 | 13484913                                        | WBGene00005129                                                                    | srd-51   | F15A2.3 0.0726287176562934  |
| AGIWUR37248                                                                                    |   |          |                                                 |                                                                                   |          |                             |
| CB4856 CT                                                                                      | X | 13487555 | 13500662                                        | WBGene00004719                                                                    | sad-1    | F15A2.6 0.0147425100144964  |
| AGIWUR4261;AGIWUR17936;AGIWUR25295;AGIWUR32392;AGIWUR36840;AGIWUR39256;AGIWUR39714;AGIWUR43372 |   |          |                                                 |                                                                                   |          |                             |



|                                                                                  |                        |          |                |           |                             |
|----------------------------------------------------------------------------------|------------------------|----------|----------------|-----------|-----------------------------|
| CB4856 CT X                                                                      | 13507564               | 13510094 | WBGene00010368 | H06A10.1  | H06A10.1                    |
| -0.29128232640354                                                                | AGIWUR2679             |          |                |           |                             |
| CB4856 CT X                                                                      | 13515871               | 13518911 | WBGene00000406 | cdk-4     | F18H3.5 -0.106027696923421  |
| AGIWUR9653;AGIWUR20273;AGIWUR41553                                               |                        |          |                |           |                             |
| CB4856 CT X                                                                      | 13519663               | 13521537 | WBGene00008939 | F18H3.1   | F18H3.1 -0.137087432572755  |
| AGIWUR19712;AGIWUR23248;AGIWUR25409;AGIWUR28478                                  |                        |          |                |           |                             |
| CB4856 CT X                                                                      | 13522264               | 13527483 | WBGene00003903 | pab-2     | F18H3.3 0.135092014504107   |
| AGIWUR4780;AGIWUR26610;AGIWUR29191;AGIWUR43409                                   |                        |          |                |           |                             |
| CB4856 CT X                                                                      | 13529088               | 13532032 | WBGene00008940 | F18H3.4   | F18H3.4 0.0937032915768512  |
| AGIWUR15998                                                                      |                        |          |                |           |                             |
| CB4856 CT X                                                                      | 13532871               | 13536433 | WBGene00000051 | acr-12    | R01E6.4 -0.107633898191168  |
| AGIWUR42149                                                                      |                        |          |                |           |                             |
| CB4856 CT X                                                                      | 13542574               | 13544599 | WBGene00000282 | cah-4     | R01E6.3 -0.0384674194870964 |
| AGIWUR2019;AGIWUR5716;AGIWUR6607;AGIWUR16164;AGIWUR22877;AGIWUR22998;AGIWUR40387 |                        |          |                |           |                             |
| CB4856 CT X                                                                      | 13544822               | 13550824 | WBGene00003848 | odr-1     | R01E6.1 -0.0145207253213053 |
| AGIWUR40730                                                                      |                        |          |                |           |                             |
| CB4856 CT X                                                                      | 13552549               | 13556166 | WBGene00010970 | glb-20    | R01E6.6 0.0564397683027784  |
| AGIWUR23177;AGIWUR32303                                                          |                        |          |                |           |                             |
| CB4856 CT X                                                                      | 13565486               | 13566536 | WBGene00010968 | R01E6.2   | R01E6.2 -0.112088519805589  |
| AGIWUR977;AGIWUR6356;AGIWUR8398;AGIWUR33428;AGIWUR35834                          |                        |          |                |           |                             |
| CB4856 CT X                                                                      | 13567441               | 13569954 | WBGene00010971 | R01E6.7   | R01E6.7 0.309827433307589   |
| AGIWUR15289                                                                      |                        |          |                |           |                             |
| CB4856 CT X                                                                      | 13578783               | 13581728 | WBGene00010034 | F54B11.11 | F54B11.11                   |
| -0.589305977189891                                                               | AGIWUR26327            |          |                |           |                             |
| CB4856 CT X                                                                      | 13582120               | 13582757 | WBGene00010033 | F54B11.10 | F54B11.10                   |
| 0.525201654054519                                                                | AGIWUR11190            |          |                |           |                             |
| CB4856 CT X                                                                      | 13584775               | 13589820 | WBGene00006816 | unc-84    | F54B11.3                    |
| 0.221311138137276                                                                | AGIWUR1516;AGIWUR14318 |          |                |           |                             |
| CB4856 CT X                                                                      | 13590035               | 13591207 | WBGene00000598 | col-9     | F54B11.1                    |
| -0.390352084061216                                                               | AGIWUR20177            |          |                |           |                             |
| CB4856 CT X                                                                      | 13591498               | 13592461 | WBGene00000621 | col-44    | F54B11.2                    |
| -0.0152276729828866                                                              | AGIWUR41919            |          |                |           |                             |
| CB4856 CT X                                                                      | 13592618               | 13593643 | WBGene00010027 | F54B11.4  | F54B11.4                    |
| -0.46879721693231                                                                | AGIWUR34481            |          |                |           |                             |
| CB4856 CT X                                                                      | 13594121               | 13596068 | WBGene00010028 | F54B11.5  | F54B11.5                    |
| 0.0657156334313829                                                               | AGIWUR24045            |          |                |           |                             |
| CB4856 CT X                                                                      | 13598449               | 13599687 | WBGene00000262 | bra-1     | F54B11.6                    |
| -0.0717453887067254                                                              | AGIWUR17923            |          |                |           |                             |
| CB4856 CT X                                                                      | 13600436               | 13601534 | WBGene00010030 | F54B11.7  | F54B11.7                    |

|                                                                                                          |                                     |          |                |          |                             |
|----------------------------------------------------------------------------------------------------------|-------------------------------------|----------|----------------|----------|-----------------------------|
| 0.0174661710196258                                                                                       | AGIWUR7344                          |          |                |          |                             |
| CB4856 CT X                                                                                              | 13602200                            | 13603918 | WBGene00010031 | F54B11.8 | F54B11.8                    |
| -0.29631529237101                                                                                        | AGIWUR12031                         |          |                |          |                             |
| CB4856 CT X                                                                                              | 13605567                            | 13608369 | WBGene00010032 | F54B11.9 | F54B11.9                    |
| 0.323372832832273                                                                                        | AGIWUR14120                         |          |                |          |                             |
| CB4856 CT X                                                                                              | 13618874                            | 13619930 | WBGene00012440 | nlp-53   | Y12A6A.2                    |
| 0.228293842873063                                                                                        | AGIWUR14392;AGIWUR15716;AGIWUR43825 |          |                |          |                             |
| CB4856 CT X                                                                                              | 13619938                            | 13621728 | WBGene00012439 | Y12A6A.1 | Y12A6A.1                    |
| -0.347079217391192                                                                                       | AGIWUR40926                         |          |                |          |                             |
| CB4856 CT X                                                                                              | 13625373                            | 13631166 | WBGene00006412 | nlg-1    | C40C9.5 0.287945368600942   |
| AGIWUR3446;AGIWUR3519;AGIWUR6253;AGIWUR16584;AGIWUR23334;AGIWUR27866;AGIWUR33301;AGIWUR34573;AGIWUR38156 |                                     |          |                |          |                             |
| CB4856 CT X                                                                                              | 13639877                            | 13642256 | WBGene00006673 | twk-20   | C40C9.1 -0.651887168322736  |
| AGIWUR19296                                                                                              |                                     |          |                |          |                             |
| CB4856 CT X                                                                                              | 13642348                            | 13646898 | WBGene00000048 | acr-9    | C40C9.2 -0.0418434902277234 |
| AGIWUR24132                                                                                              |                                     |          |                |          |                             |
| CB4856 CT X                                                                                              | 13647605                            | 13648334 | WBGene00008036 | C40C9.3  | C40C9.3 0.336814304485559   |
| AGIWUR12524                                                                                              |                                     |          |                |          |                             |
| CB4856 CT X                                                                                              | 13651149                            | 13651737 | WBGene00008037 | C40C9.4  | C40C9.4 0.335428623089073   |
| AGIWUR34524                                                                                              |                                     |          |                |          |                             |
| CB4856 CT X                                                                                              | 13660519                            | 13662963 | WBGene00007285 | C04A11.1 | C04A11.1                    |
| -0.0557665747118374                                                                                      | AGIWUR15658                         |          |                |          |                             |
| CB4856 CT X                                                                                              | 13664589                            | 13665352 | WBGene00007288 | C04A11.5 | C04A11.5                    |
| 1.11185304831731                                                                                         | AGIWUR3797                          |          |                |          |                             |
| CB4856 CT X                                                                                              | 13665958                            | 13668830 | WBGene00007286 | C04A11.2 | C04A11.2                    |
| 0.265138338000034                                                                                        | AGIWUR10297                         |          |                |          |                             |
| CB4856 CT X                                                                                              | 13677192                            | 13682340 | WBGene00007287 | gck-4    | C04A11.3                    |
| 0.178350904123445                                                                                        | AGIWUR34555                         |          |                |          |                             |
| CB4856 CT X                                                                                              | 13687973                            | 13695771 | WBGene00000074 | adm-2    | C04A11.4                    |
| 0.274346304612653                                                                                        | AGIWUR12265                         |          |                |          |                             |
| CB4856 CT X                                                                                              | 13706928                            | 13708002 | WBGene00010504 | K02D3.1  | K02D3.1 -0.0787967139326997 |
| AGIWUR309;AGIWUR7863;AGIWUR9204;AGIWUR36261                                                              |                                     |          |                |          |                             |
| CB4856 CT X                                                                                              | 13708619                            | 13711964 | WBGene00010505 | K02D3.2  | K02D3.2 -0.488798887351136  |
| AGIWUR3853                                                                                               |                                     |          |                |          |                             |
| CB4856 CT X                                                                                              | 13714157                            | 13716298 | WBGene00010773 | K11E4.1  | K11E4.1 -0.10559297954317   |
| AGIWUR16769                                                                                              |                                     |          |                |          |                             |
| CB4856 CT X                                                                                              | 13717584                            | 13719217 | WBGene00010774 | K11E4.2  | K11E4.2 0.591499941471486   |
| AGIWUR9551                                                                                               |                                     |          |                |          |                             |
| CB4856 CT X                                                                                              | 13719207                            | 13722917 | WBGene00010775 | pom1-1   | K11E4.3 0.26703539011902    |
| AGIWUR31310                                                                                              |                                     |          |                |          |                             |

|                                                                                             |   |          |          |                |          |          |                     |
|---------------------------------------------------------------------------------------------|---|----------|----------|----------------|----------|----------|---------------------|
| CB4856 CT                                                                                   | X | 13727298 | 13734404 | WBGene00010776 | pix-1    | K11E4.4  | -0.0449477825188307 |
| AGIWUR4920                                                                                  |   |          |          |                |          |          |                     |
| CB4856 CT                                                                                   | X | 13747315 | 13751777 | WBGene00003661 | nhr-71   | K11E4.5  | 0.0825332993699064  |
| AGIWUR2436;AGIWUR7635;AGIWUR15082;AGIWUR15554;AGIWUR15602;AGIWUR37166;AGIWUR40083           |   |          |          |                |          |          |                     |
| CB4856 CT                                                                                   | X | 13755771 | 13759391 | WBGene00010115 | aakb-1   | F55F3.1  | 0.214045846099836   |
| AGIWUR29247;AGIWUR31066;AGIWUR41100                                                         |   |          |          |                |          |          |                     |
| CB4856 CT                                                                                   | X | 13760237 | 13763998 | WBGene00010116 | F55F3.2  | F55F3.2  | -0.0676982749367019 |
| AGIWUR17133;AGIWUR19209;AGIWUR35861;AGIWUR37018                                             |   |          |          |                |          |          |                     |
| CB4856 CT                                                                                   | X | 13765331 | 13770558 | WBGene00010117 | nkb-3    | F55F3.3  | -0.133440218639996  |
| AGIWUR39006;AGIWUR43132                                                                     |   |          |          |                |          |          |                     |
| CB4856 CT                                                                                   | X | 13785479 | 13789238 | WBGene00010118 | F55F3.4  | F55F3.4  | 0.0687674674235801  |
| AGIWUR37949                                                                                 |   |          |          |                |          |          |                     |
| CB4856 CT                                                                                   | X | 13790832 | 13792258 | WBGene00014217 | ZK1086.3 |          | ZK1086.3            |
| 0.155372705877316 AGIWUR35791                                                               |   |          |          |                |          |          |                     |
| CB4856 CT                                                                                   | X | 13792305 | 13793625 | WBGene00014216 | ZK1086.2 |          | ZK1086.2            |
| -0.435721455464753 AGIWUR16136                                                              |   |          |          |                |          |          |                     |
| CB4856 CT                                                                                   | X | 13798222 | 13809857 | WBGene00014215 | obr-3    | ZK1086.1 |                     |
| -0.0794756578182225 AGIWUR15230;AGIWUR16536;AGIWUR20740;AGIWUR27701;AGIWUR35047;AGIWUR40410 |   |          |          |                |          |          |                     |
| CB4856 CT                                                                                   | X | 13817999 | 13823582 | WBGene00006676 | twk-23   | F19D8.1  | 0.113687812431122   |
| AGIWUR3421                                                                                  |   |          |          |                |          |          |                     |
| CB4856 CT                                                                                   | X | 13834427 | 13836522 | WBGene00008955 | F19D8.2  | F19D8.2  | -0.0478014856554445 |
| AGIWUR20537                                                                                 |   |          |          |                |          |          |                     |
| CB4856 CT                                                                                   | X | 13841610 | 13843108 | WBGene00010833 | M03B6.1  | M03B6.1  | -0.576983287902269  |
| AGIWUR14549                                                                                 |   |          |          |                |          |          |                     |
| CB4856 CT                                                                                   | X | 13852906 | 13857324 | WBGene00010834 | mct-3    | M03B6.2  | -0.194250673259639  |
| AGIWUR27898                                                                                 |   |          |          |                |          |          |                     |
| CB4856 CT                                                                                   | X | 13858841 | 13872915 | WBGene00010836 | M03B6.4  | M03B6.4  | -0.346029300727469  |
| AGIWUR15673                                                                                 |   |          |          |                |          |          |                     |
| CB4856 CT                                                                                   | X | 13865038 | 13882693 | WBGene00011904 | h1b-1    | T21H8.1  | 0.208068634382785   |
| AGIWUR41754                                                                                 |   |          |          |                |          |          |                     |
| CB4856 CT                                                                                   | X | 13890993 | 13893334 | WBGene00005063 | sra-37   | T21H8.2  | 0.114197088891277   |
| AGIWUR36347                                                                                 |   |          |          |                |          |          |                     |
| CB4856 CT                                                                                   | X | 13897934 | 13900147 | WBGene00005064 | sra-38   | T21H8.3  | 0.0410365585599859  |
| AGIWUR33908                                                                                 |   |          |          |                |          |          |                     |
| CB4856 CT                                                                                   | X | 13901064 | 13903428 | WBGene00005065 | sra-39   | T21H8.4  | -0.321085771474126  |
| AGIWUR27466                                                                                 |   |          |          |                |          |          |                     |
| CB4856 CT                                                                                   | X | 13908414 | 13909950 | WBGene00012514 | Y26E6A.3 |          | Y26E6A.3            |
| -0.283936589375582 AGIWUR15997                                                              |   |          |          |                |          |          |                     |
| CB4856 CT                                                                                   | X | 13910937 | 13912978 | WBGene00012513 | Y26E6A.2 |          | Y26E6A.2            |

|                                                 |                                                                       |          |                |          |          |                     |
|-------------------------------------------------|-----------------------------------------------------------------------|----------|----------------|----------|----------|---------------------|
| -0.180049231262255                              | AGIWUR32408                                                           |          |                |          |          |                     |
| CB4856 CT X                                     | 13914806                                                              | 13917171 | WBGene00012512 | ekl-5    | Y26E6A.1 |                     |
| -0.153453833819247                              | AGIWUR3073;AGIWUR6875;AGIWUR12665;AGIWUR23214;AGIWUR36035;AGIWUR39348 |          |                |          |          |                     |
| CB4856 CT X                                     | 13922663                                                              | 13926129 | WBGene00010493 | meg-2    | K02B9.2  | -0.013979810112982  |
| AGIWUR13859;AGIWUR26357                         |                                                                       |          |                |          |          |                     |
| CB4856 CT X                                     | 13927036                                                              | 13929634 | WBGene00010492 | meg-1    | K02B9.1  | -0.176451674263849  |
| AGIWUR13817;AGIWUR14669;AGIWUR19975;AGIWUR29958 |                                                                       |          |                |          |          |                     |
| CB4856 CT X                                     | 13930898                                                              | 13932033 | WBGene00010494 | K02B9.3  | K02B9.3  | -0.688116649585625  |
| AGIWUR43343                                     |                                                                       |          |                |          |          |                     |
| CB4856 CT X                                     | 13934883                                                              | 13941247 | WBGene00001251 | elt-3    | K02B9.4  | 0.271072698259951   |
| AGIWUR40564                                     |                                                                       |          |                |          |          |                     |
| CB4856 CT X                                     | 13949114                                                              | 13956261 | WBGene00000105 | alg-1    | F48F7.1  | -0.0953847900520461 |
| AGIWUR8665;AGIWUR12306                          |                                                                       |          |                |          |          |                     |
| CB4856 CT X                                     | 13960064                                                              | 13962830 | WBGene00006372 | syx-2    | F48F7.2  | 0.174671282951779   |
| AGIWUR10497;AGIWUR23467;AGIWUR37424             |                                                                       |          |                |          |          |                     |
| CB4856 CT X                                     | 13963509                                                              | 13965718 | WBGene00009849 | F48F7.3  | F48F7.3  | 0.341309939241667   |
| AGIWUR33231                                     |                                                                       |          |                |          |          |                     |
| CB4856 CT X                                     | 13965676                                                              | 13968672 | WBGene00004126 | pqn-39   | F48F7.4  | -0.102431889267709  |
| AGIWUR28707                                     |                                                                       |          |                |          |          |                     |
| CB4856 CT X                                     | 13975660                                                              | 13976920 | WBGene00009850 | F48F7.5  | F48F7.5  | 0.117022877989378   |
| AGIWUR26316                                     |                                                                       |          |                |          |          |                     |
| CB4856 CT X                                     | 13977829                                                              | 13979031 | WBGene00009851 | F48F7.6  | F48F7.6  | -0.0320185571431821 |
| AGIWUR4649                                      |                                                                       |          |                |          |          |                     |
| CB4856 CT X                                     | 13979240                                                              | 13980515 | WBGene00009852 | arrd-24  | F48F7.7  | 0.236323184818849   |
| AGIWUR27486                                     |                                                                       |          |                |          |          |                     |
| CB4856 CT X                                     | 13980840                                                              | 13981629 | WBGene00009853 | arrd-27  | F48F7.8  | -0.157214759499778  |
| AGIWUR645                                       |                                                                       |          |                |          |          |                     |
| CB4856 CT X                                     | 13984491                                                              | 13985692 | WBGene00007842 | C31E10.1 |          | C31E10.1            |
| 0.109220883278261                               | AGIWUR36680                                                           |          |                |          |          |                     |
| CB4856 CT X                                     | 13986607                                                              | 13989009 | WBGene00007844 | irld-24  | C31E10.3 |                     |
| -0.0149098438980246                             | AGIWUR19946                                                           |          |                |          |          |                     |
| CB4856 CT X                                     | 13989496                                                              | 13990180 | WBGene00007845 | C31E10.4 |          | C31E10.4            |
| 0.401322897040885                               | AGIWUR9160                                                            |          |                |          |          |                     |
| CB4856 CT X                                     | 13991458                                                              | 13995834 | WBGene00007846 | C31E10.5 |          | C31E10.5            |
| -0.145122297380007                              | AGIWUR2218                                                            |          |                |          |          |                     |
| CB4856 CT X                                     | 13996307                                                              | 13999351 | WBGene00007847 | C31E10.6 |          | C31E10.6            |
| 0.0818181544286585                              | AGIWUR19852                                                           |          |                |          |          |                     |
| CB4856 CT X                                     | 14001902                                                              | 14003080 | WBGene00007848 | cytb-5.1 |          | C31E10.7            |
| 0.201858213185488                               | AGIWUR2725                                                            |          |                |          |          |                     |

|                                                             |             |          |                |          |                            |
|-------------------------------------------------------------|-------------|----------|----------------|----------|----------------------------|
| CB4856 CT X                                                 | 14003020    | 14012595 | WBGene00007849 | tbc-19   | C31E10.8                   |
| -0.322289881957364                                          | AGIWUR26465 |          |                |          |                            |
| CB4856 CT X                                                 | 14020590    | 14022409 | WBGene00007295 | C04C11.1 | C04C11.1                   |
| 0.202288498709152                                           | AGIWUR2716  |          |                |          |                            |
| CB4856 CT X                                                 | 14033794    | 14037447 | WBGene00007296 | arrd-25  | C04C11.2                   |
| -0.0005166377096959                                         | AGIWUR25327 |          |                |          |                            |
| CB4856 CT X                                                 | 14049535    | 14063884 | WBGene00001116 | dyc-1    | C33G3.1 0.0435772544803648 |
| AGIWUR42602                                                 |             |          |                |          |                            |
| CB4856 CT X                                                 | 14064313    | 14067984 | WBGene00007903 | lgc-21   | C33G3.3 -0.169838759126814 |
| AGIWUR27168;AGIWUR31618;AGIWUR31972                         |             |          |                |          |                            |
| CB4856 CT X                                                 | 14071162    | 14076295 | WBGene00007904 | C33G3.4  | C33G3.4 0.174996814218545  |
| AGIWUR35084                                                 |             |          |                |          |                            |
| CB4856 CT X                                                 | 14076316    | 14078674 | WBGene00007905 | C33G3.5  | C33G3.5 -0.234381050852337 |
| AGIWUR10367                                                 |             |          |                |          |                            |
| CB4856 CT X                                                 | 14080381    | 14084318 | WBGene00007906 | C33G3.6  | C33G3.6 -0.162608585745371 |
| AGIWUR4232                                                  |             |          |                |          |                            |
| CB4856 CT X                                                 | 14085508    | 14089581 | WBGene00008879 | F16B12.1 | F16B12.1                   |
| 0.120599279070435                                           | AGIWUR33817 |          |                |          |                            |
| CB4856 CT X                                                 | 14090389    | 14095490 | WBGene00001106 | dsl-4    | F16B12.2                   |
| 0.275417395729336                                           | AGIWUR31319 |          |                |          |                            |
| CB4856 CT X                                                 | 14095738    | 14098664 | WBGene00008880 | F16B12.4 | F16B12.4                   |
| -0.0936501994259036                                         | AGIWUR37367 |          |                |          |                            |
| CB4856 CT X                                                 | 14100555    | 14101568 | WBGene00008881 | F16B12.5 | F16B12.5                   |
| 0.00424891782326853                                         | AGIWUR24008 |          |                |          |                            |
| CB4856 CT X                                                 | 14102359    | 14107905 | WBGene00008882 | F16B12.6 | F16B12.6                   |
| -0.113347272118776                                          | AGIWUR3685  |          |                |          |                            |
| CB4856 CT X                                                 | 14108545    | 14109714 | WBGene00008883 | F16B12.7 | F16B12.7                   |
| -0.206511822860139                                          | AGIWUR44349 |          |                |          |                            |
| CB4856 CT X                                                 | 14111263    | 14113447 | WBGene00008884 | nhr-281  | F16B12.8                   |
| 0.00328399873399299                                         | AGIWUR28687 |          |                |          |                            |
| CB4856 CT X                                                 | 14116111    | 14116751 | WBGene00009235 | F28H6.7  | F28H6.7 0.0162038552286132 |
| AGIWUR42982                                                 |             |          |                |          |                            |
| CB4856 CT X                                                 | 14117069    | 14125879 | WBGene00009234 | F28H6.6  | F28H6.6                    |
| -0.00468692653834424                                        | AGIWUR36143 |          |                |          |                            |
| CB4856 CT X                                                 | 14127877    | 14133525 | WBGene00009233 | F28H6.4  | F28H6.4 -0.12905591684472  |
| AGIWUR14483                                                 |             |          |                |          |                            |
| CB4856 CT X                                                 | 14133896    | 14134344 | WBGene00044137 | F28H6.8  | F28H6.8 0.0193638935825042 |
| AGIWUR12025;AGIWUR19471;AGIWUR27893;AGIWUR39148;AGIWUR39947 |             |          |                |          |                            |
| CB4856 CT X                                                 | 14137997    | 14140070 | WBGene00009232 | nkat-1   | F28H6.3 -0.152338027357154 |

|                                                             |    |   |          |          |                |          |         |                     |  |
|-------------------------------------------------------------|----|---|----------|----------|----------------|----------|---------|---------------------|--|
| AGIWUR5953;AGIWUR24988;AGIWUR37065                          |    |   |          |          |                |          |         |                     |  |
| CB4856                                                      | CT | X | 14141946 | 14144889 | WBGene00009231 | ceh-89   | F28H6.2 | -0.0510991417042153 |  |
| AGIWUR17574                                                 |    |   |          |          |                |          |         |                     |  |
| CB4856                                                      | CT | X | 14147700 | 14152070 | WBGene00000103 | akt-2    | F28H6.1 | 0.360841345831705   |  |
| AGIWUR27380;AGIWUR32868                                     |    |   |          |          |                |          |         |                     |  |
| CB4856                                                      | CT | X | 14155115 | 14157013 | WBGene00010995 | ceh-90   | R03E1.4 | 0.16698987757679    |  |
| AGIWUR14794                                                 |    |   |          |          |                |          |         |                     |  |
| CB4856                                                      | CT | X | 14158870 | 14161734 | WBGene00010994 | lgc-25   | R03E1.3 | 0.145134831884299   |  |
| AGIWUR25418;AGIWUR42901                                     |    |   |          |          |                |          |         |                     |  |
| CB4856                                                      | CT | X | 14163099 | 14164506 | WBGene00010993 | vha-20   | R03E1.2 | -0.228110927877774  |  |
| AGIWUR39470                                                 |    |   |          |          |                |          |         |                     |  |
| CB4856                                                      | CT | X | 14164634 | 14169779 | WBGene00006369 | sym-4    | R03E1.1 | -0.151820899918955  |  |
| AGIWUR24140;AGIWUR27190                                     |    |   |          |          |                |          |         |                     |  |
| CB4856                                                      | CT | X | 14170864 | 14174063 | WBGene00007993 | idhb-1   | C37E2.1 | 0.0863044403734037  |  |
| AGIWUR20911;AGIWUR23240;AGIWUR25532;AGIWUR37250;AGIWUR43320 |    |   |          |          |                |          |         |                     |  |
| CB4856                                                      | CT | X | 14176050 | 14178608 | WBGene00007994 | C37E2.2  | C37E2.2 | -0.0919512088316026 |  |
| AGIWUR24144;AGIWUR39279                                     |    |   |          |          |                |          |         |                     |  |
| CB4856                                                      | CT | X | 14178988 | 14181705 | WBGene00007995 | C37E2.3  | C37E2.3 | 0.103806636203658   |  |
| AGIWUR218                                                   |    |   |          |          |                |          |         |                     |  |
| CB4856                                                      | CT | X | 14183449 | 14185597 | WBGene00000457 | ceh-36   | C37E2.4 | 0.62549811875304    |  |
| AGIWUR21190                                                 |    |   |          |          |                |          |         |                     |  |
| CB4856                                                      | CT | X | 14197373 | 14209153 | WBGene00000458 | ceh-37   | C37E2.5 | 0.279415656813592   |  |
| AGIWUR10198;AGIWUR11270                                     |    |   |          |          |                |          |         |                     |  |
| CB4856                                                      | CT | X | 14214939 | 14219089 | WBGene00010605 | K06G5.1  | K06G5.1 | -0.205422504387158  |  |
| AGIWUR42150                                                 |    |   |          |          |                |          |         |                     |  |
| CB4856                                                      | CT | X | 14219568 | 14223256 | WBGene00010607 | K06G5.3  | K06G5.3 | 0.0455065688510459  |  |
| AGIWUR23179                                                 |    |   |          |          |                |          |         |                     |  |
| CB4856                                                      | CT | X | 14225573 | 14228768 | WBGene00010606 | cyp-13B2 |         | K06G5.2             |  |
| -0.50749846678395 AGIWUR19930                               |    |   |          |          |                |          |         |                     |  |
| CB4856                                                      | CT | X | 14229668 | 14230876 | WBGene00005193 | srg-36   | K04C1.6 | -0.0182965006948757 |  |
| AGIWUR2949;AGIWUR2975;AGIWUR10474;AGIWUR34604               |    |   |          |          |                |          |         |                     |  |
| CB4856                                                      | CT | X | 14233944 | 14235285 | WBGene00005194 | srg-37   | K04C1.1 | -0.116336797417929  |  |
| AGIWUR37515                                                 |    |   |          |          |                |          |         |                     |  |
| CB4856                                                      | CT | X | 14238695 | 14241350 | WBGene00010552 | K04C1.2  | K04C1.2 | 0.0131912062693438  |  |
| AGIWUR39418                                                 |    |   |          |          |                |          |         |                     |  |
| CB4856                                                      | CT | X | 14241572 | 14243395 | WBGene00010553 | K04C1.3  | K04C1.3 | -0.120386117587353  |  |
| AGIWUR22409                                                 |    |   |          |          |                |          |         |                     |  |
| CB4856                                                      | CT | X | 14245650 | 14246623 | WBGene00010554 | mlc-6    | K04C1.4 | -0.502723824088669  |  |
| AGIWUR30373                                                 |    |   |          |          |                |          |         |                     |  |

|                                            |                                                    |
|--------------------------------------------|----------------------------------------------------|
| CB4856 CT X 14248053 14249846              | WBGene00010555 K04C1.5 K04C1.5 -0.186585439022696  |
| AGIWUR32533;AGIWUR34151;AGIWUR42780        |                                                    |
| CB4856 CT X 14250512 14252146              | WBGene00008464 E02H4.6 E02H4.6 -0.318082652582646  |
| AGIWUR38164                                |                                                    |
| CB4856 CT X 14254039 14255139              | WBGene00008463 E02H4.5 E02H4.5 0.50053925015633    |
| AGIWUR6899;AGIWUR13133                     |                                                    |
| CB4856 CT X 14262802 14263573              | WBGene00194907 E02H4.8 E02H4.8 0.103741603696349   |
| AGIWUR13007                                |                                                    |
| CB4856 CT X 14271959 14277040              | WBGene00000952 del-1 E02H4.1 -0.110113971569694    |
| AGIWUR8867                                 |                                                    |
| CB4856 CT X 14278459 14281599              | WBGene00008460 E02H4.2 E02H4.2 -0.118366497487862  |
| AGIWUR2058                                 |                                                    |
| CB4856 CT X 14284775 14293993              | WBGene00006517 madd-3 E02H4.3 0.17844059053021     |
| AGIWUR40551;AGIWUR42950                    |                                                    |
| CB4856 CT X 14295794 14296658              | WBGene00007532 C11H1.8 C11H1.8 0.397726500601721   |
| AGIWUR9785                                 |                                                    |
| CB4856 CT X 14298102 14303178              | WBGene00007530 C11H1.5 C11H1.5 -0.193475795172182  |
| AGIWUR36760                                |                                                    |
| CB4856 CT X 14304946 14307767              | WBGene00007528 C11H1.2 C11H1.2 -0.319136953997852  |
| AGIWUR34656                                |                                                    |
| CB4856 CT X 14307863 14311683              | WBGene00007529 C11H1.3 C11H1.3 0.0149918608173216  |
| AGIWUR23360                                |                                                    |
| CB4856 CT X 14313721 14326800              | WBGene00004191 prx-1 C11H1.4 -0.0602448604159136   |
| AGIWUR3526;AGIWUR18665;AGIWUR32379         |                                                    |
| CB4856 CT X 14327409 14330195              | WBGene00007531 C11H1.7 C11H1.7 0.323697197263154   |
| AGIWUR33624                                |                                                    |
| CB4856 CT X 14332770 14340481              | WBGene00004764 sel-7 K04G11.2                      |
| -0.0139051650789805 AGIWUR7618;AGIWUR23720 |                                                    |
| CB4856 CT X 14345338 14347574              | WBGene00010571 K04G11.3 K04G11.3                   |
| -0.43785866234527 AGIWUR5678               |                                                    |
| CB4856 CT X 14350140 14352366              | WBGene00010572 wdr-5.2 K04G11.4                    |
| 0.14509764861109 AGIWUR23939               |                                                    |
| CB4856 CT X 14353309 14370370              | WBGene00002151 irk-3 K04G11.5                      |
| -0.284498705670682 AGIWUR11300             |                                                    |
| CB4856 CT X 14376955 14377330              | WBGene00013371 Y60A9A.1 Y60A9A.1                   |
| -0.173634012968067 AGIWUR24349             |                                                    |
| CB4856 CT X 14381289 14381891              | WBGene00013369 Y60A9.2 Y60A9.2 -0.229537815277359  |
| AGIWUR37910                                |                                                    |
| CB4856 CT X 14383251 14383901              | WBGene00013370 Y60A9.3 Y60A9.3 -0.0768622022270478 |

|                                                           |   |                                                             |          |                |           |           |                     |
|-----------------------------------------------------------|---|-------------------------------------------------------------|----------|----------------|-----------|-----------|---------------------|
| AGIWUR33592                                               |   |                                                             |          |                |           |           |                     |
| CB4856 CT                                                 | X | 14392867                                                    | 14394615 | WBGene00013368 | Y60A9.1   | Y60A9.1   | 0.0233724251441068  |
| AGIWUR26091                                               |   |                                                             |          |                |           |           |                     |
| CB4856 CT                                                 | X | 14406117                                                    | 14411181 | WBGene00011765 | frpr-17   | T14C1.1   | -0.0325123892331014 |
| AGIWUR14528                                               |   |                                                             |          |                |           |           |                     |
| CB4856 CT                                                 | X | 14411418                                                    | 14412855 | WBGene00045292 | fbxa-179  | T14C1.3   |                     |
| -0.0909486717162959                                       |   | AGIWUR28226                                                 |          |                |           |           |                     |
| CB4856 CT                                                 | X | 14413578                                                    | 14415746 | WBGene00045291 | F23D12.10 | F23D12.10 |                     |
| -0.0900468850262945                                       |   | AGIWUR194;AGIWUR17650                                       |          |                |           |           |                     |
| CB4856 CT                                                 | X | 14416121                                                    | 14421579 | WBGene00009086 | F23D12.2  | F23D12.2  |                     |
| -0.322170579100179                                        |   | AGIWUR25607;AGIWUR31917                                     |          |                |           |           |                     |
| CB4856 CT                                                 | X | 14423405                                                    | 14423883 | WBGene00009090 | fipr-3    | F23D12.6  |                     |
| 0.174172573343967                                         |   | AGIWUR10622                                                 |          |                |           |           |                     |
| CB4856 CT                                                 | X | 14423871                                                    | 14424751 | WBGene00194674 | F23D12.11 | F23D12.11 |                     |
| -0.562569999107284                                        |   | AGIWUR21628                                                 |          |                |           |           |                     |
| CB4856 CT                                                 | X | 14434212                                                    | 14435363 | WBGene00044136 | F23D12.8  | F23D12.8  |                     |
| -0.136696158486854                                        |   | AGIWUR11013;AGIWUR44943                                     |          |                |           |           |                     |
| CB4856 CT                                                 | X | 14436751                                                    | 14437656 | WBGene00044217 | F23D12.9  | F23D12.9  |                     |
| -0.226120065172677                                        |   | AGIWUR4688;AGIWUR9629;AGIWUR20087;AGIWUR24983;AGIWUR37527   |          |                |           |           |                     |
| CB4856 CT                                                 | X | 14442621                                                    | 14443446 | WBGene00009087 | F23D12.3  | F23D12.3  |                     |
| -0.459695089662332                                        |   | AGIWUR16391                                                 |          |                |           |           |                     |
| CB4856 CT                                                 | X | 14445001                                                    | 14446165 | WBGene00009088 | F23D12.4  | F23D12.4  |                     |
| -0.0605414412871692                                       |   | AGIWUR15283                                                 |          |                |           |           |                     |
| CB4856 CT                                                 | X | 14448224                                                    | 14453562 | WBGene00009089 | jmjd-3.2  | F23D12.5  |                     |
| 0.476358331715646                                         |   | AGIWUR4166                                                  |          |                |           |           |                     |
| CB4856 CT                                                 | X | 14453557                                                    | 14453835 | WBGene00009091 | F23D12.7  | F23D12.7  |                     |
| 0.30947584747825                                          |   | AGIWUR43008                                                 |          |                |           |           |                     |
| CB4856 CT                                                 | X | 14454689                                                    | 14455519 | WBGene00044156 | Y66C5A.1  | Y66C5A.1  |                     |
| -0.467933956670489                                        |   | AGIWUR11294;AGIWUR16226;AGIWUR28674;AGIWUR35288;AGIWUR38878 |          |                |           |           |                     |
| CB4856 CT                                                 | X | 14460349                                                    | 14462139 | WBGene00044157 | Y66C5A.2  | Y66C5A.2  |                     |
| -0.0349073013140853                                       |   | AGIWUR12487;AGIWUR13381                                     |          |                |           |           |                     |
| CB4856 CT                                                 | X | 14462857                                                    | 14464400 | WBGene00010938 | M163.6    | M163.6    | -0.203284321626572  |
| AGIWUR2660                                                |   |                                                             |          |                |           |           |                     |
| CB4856 CT                                                 | X | 14464809                                                    | 14467615 | WBGene00010939 | M163.7    | M163.7    | 0.131906960991727   |
| AGIWUR35597                                               |   |                                                             |          |                |           |           |                     |
| CB4856 CT                                                 | X | 14469647                                                    | 14470066 | WBGene00044145 | M163.9    | M163.9    | 0.07466051042974    |
| AGIWUR4009;AGIWUR5904;AGIWUR14096;AGIWUR15601;AGIWUR37296 |   |                                                             |          |                |           |           |                     |
| CB4856 CT                                                 | X | 14470987                                                    | 14471772 | WBGene00044146 | M163.10   | M163.10   | 0.139653540836288   |
| AGIWUR3264;AGIWUR8009;AGIWUR20332;AGIWUR23335;AGIWUR40949 |   |                                                             |          |                |           |           |                     |



|                                                                                          |   |          |          |                |          |          |                     |
|------------------------------------------------------------------------------------------|---|----------|----------|----------------|----------|----------|---------------------|
| CB4856 CT                                                                                | X | 14474038 | 14476153 | WBGene00010937 | M163.5   | M163.5   | 0.0738159844538959  |
| AGIWUR14359                                                                              |   |          |          |                |          |          |                     |
| CB4856 CT                                                                                | X | 14479378 | 14480256 | WBGene00044147 | M163.11  | M163.11  | -0.337074121995993  |
| AGIWUR2389;AGIWUR15730                                                                   |   |          |          |                |          |          |                     |
| CB4856 CT                                                                                | X | 14480572 | 14484702 | WBGene00001583 | gfi-3    | M163.4   | -0.172662660510838  |
| AGIWUR16280                                                                              |   |          |          |                |          |          |                     |
| CB4856 CT                                                                                | X | 14485127 | 14485955 | WBGene00010940 | M163.8   | M163.8   | 0.0150395603431228  |
| AGIWUR1287;AGIWUR14317;AGIWUR22925                                                       |   |          |          |                |          |          |                     |
| CB4856 CT                                                                                | X | 14490094 | 14491115 | WBGene00001898 | his-24   | M163.3   | 0.978455356490501   |
| AGIWUR14069;AGIWUR31222;AGIWUR32696;AGIWUR34761;AGIWUR38474;AGIWUR42369                  |   |          |          |                |          |          |                     |
| CB4856 CT                                                                                | X | 14496085 | 14499434 | WBGene00010936 | ztf-14   | M163.2   | 0.295301419856568   |
| AGIWUR43318                                                                              |   |          |          |                |          |          |                     |
| CB4856 CT                                                                                | X | 14502487 | 14503862 | WBGene00010935 | M163.1   | M163.1   | 0.752407132089658   |
| AGIWUR26347                                                                              |   |          |          |                |          |          |                     |
| CB4856 CT                                                                                | X | 14511248 | 14512912 | WBGene00008355 | fbxa-141 |          | D1025.3             |
| -0.58646524612948 AGIWUR19594                                                            |   |          |          |                |          |          |                     |
| CB4856 CT                                                                                | X | 14514136 | 14515073 | WBGene00008354 | gcsh-1   | D1025.2  | -0.567434291254951  |
| AGIWUR34839                                                                              |   |          |          |                |          |          |                     |
| CB4856 CT                                                                                | X | 14516860 | 14519229 | WBGene00044134 | D1025.10 |          | D1025.10            |
| -0.0993111713879822 AGIWUR9627;AGIWUR37647                                               |   |          |          |                |          |          |                     |
| CB4856 CT                                                                                | X | 14520763 | 14522705 | WBGene00008353 | D1025.1  | D1025.1  | -0.0610326974844693 |
| AGIWUR28702                                                                              |   |          |          |                |          |          |                     |
| CB4856 CT                                                                                | X | 14529788 | 14530214 | WBGene00008356 | nspc-20  | D1025.4  | 0.763266149504366   |
| AGIWUR10733                                                                              |   |          |          |                |          |          |                     |
| CB4856 CT                                                                                | X | 14537897 | 14539522 | WBGene00011984 | T24C2.5  | T24C2.5  | 0.726788675038213   |
| AGIWUR13511;AGIWUR22752;AGIWUR23045;AGIWUR27229;AGIWUR29830                              |   |          |          |                |          |          |                     |
| CB4856 CT                                                                                | X | 14540686 | 14542058 | WBGene00011983 | fbxa-81  | T24C2.4  | 0.114374187828089   |
| AGIWUR13255;AGIWUR27010;AGIWUR35307                                                      |   |          |          |                |          |          |                     |
| CB4856 CT                                                                                | X | 14543557 | 14544643 | WBGene00011982 | T24C2.3  | T24C2.3  | 0.2598721108513     |
| AGIWUR4174                                                                               |   |          |          |                |          |          |                     |
| CB4856 CT                                                                                | X | 14545855 | 14546720 | WBGene00011981 | T24C2.2  | T24C2.2  | -0.253198323601257  |
| AGIWUR37499                                                                              |   |          |          |                |          |          |                     |
| CB4856 CT                                                                                | X | 14550138 | 14556297 | WBGene00004301 | ram-5    | T24C2.1  | -0.207012049375106  |
| AGIWUR1673                                                                               |   |          |          |                |          |          |                     |
| CB4856 CT                                                                                | X | 14558504 | 14561425 | WBGene00003602 | nhr-3    | H01A20.1 |                     |
| 0.0835334125172604 AGIWUR7464;AGIWUR8593;AGIWUR12537;AGIWUR17322;AGIWUR28309;AGIWUR36939 |   |          |          |                |          |          |                     |
| CB4856 CT                                                                                | X | 14568854 | 14589101 | WBGene00008094 | C44H4.4  | C44H4.4  | -0.1496403950418    |
| AGIWUR6592                                                                               |   |          |          |                |          |          |                     |
| CB4856 CT                                                                                | X | 14589624 | 14591821 | WBGene00006524 | tap-1    | C44H4.5  | 0.00193276509899576 |

|                                                                                               |   |                                    |          |                |          |          |                     |  |
|-----------------------------------------------------------------------------------------------|---|------------------------------------|----------|----------------|----------|----------|---------------------|--|
| AGIWUR24906                                                                                   |   |                                    |          |                |          |          |                     |  |
| CB4856 CT                                                                                     | X | 14595125                           | 14595944 | WBGene00008096 | C44H4.8  | C44H4.8  | -0.274854716538508  |  |
| AGIWUR29980                                                                                   |   |                                    |          |                |          |          |                     |  |
| CB4856 CT                                                                                     | X | 14596476                           | 14599158 | WBGene00008095 | C44H4.6  | C44H4.6  | 0.00749839211333914 |  |
| AGIWUR42695                                                                                   |   |                                    |          |                |          |          |                     |  |
| CB4856 CT                                                                                     | X | 14603017                           | 14608655 | WBGene00001325 | eor-2    | C44H4.7  | 0.136057500811133   |  |
| AGIWUR23295;AGIWUR35594                                                                       |   |                                    |          |                |          |          |                     |  |
| CB4856 CT                                                                                     | X | 14611380                           | 14624824 | WBGene00004313 | rbc-1    | F54E4.1  | 0.0893215014518489  |  |
| AGIWUR32837                                                                                   |   |                                    |          |                |          |          |                     |  |
| CB4856 CT                                                                                     | X | 14625452                           | 14628916 | WBGene00010058 | F54E4.2  | F54E4.2  | 0.0691625069710167  |  |
| AGIWUR4544                                                                                    |   |                                    |          |                |          |          |                     |  |
| CB4856 CT                                                                                     | X | 14632092                           | 14636472 | WBGene00010059 | F54E4.3  | F54E4.3  | -0.0693898885986357 |  |
| AGIWUR5252;AGIWUR17296;AGIWUR18189;AGIWUR22420;AGIWUR35079                                    |   |                                    |          |                |          |          |                     |  |
| CB4856 CT                                                                                     | X | 14641391                           | 14645486 | WBGene00010060 | F54E4.4  | F54E4.4  | 0.148832528350495   |  |
| AGIWUR13807                                                                                   |   |                                    |          |                |          |          |                     |  |
| CB4856 CT                                                                                     | X | 14654972                           | 14662841 | WBGene00007750 | syg-2    | C26G2.1  | 0.372234121517076   |  |
| AGIWUR31608                                                                                   |   |                                    |          |                |          |          |                     |  |
| CB4856 CT                                                                                     | X | 14664289                           | 14671336 | WBGene00007751 | C26G2.2  | C26G2.2  | 0.0199227785236058  |  |
| AGIWUR16366;AGIWUR33426;AGIWUR34201;AGIWUR40630                                               |   |                                    |          |                |          |          |                     |  |
| CB4856 CT                                                                                     | X | 14674328                           | 14683326 | WBGene00004854 | slt-1    | F40E10.4 |                     |  |
| 0.0948223714149243                                                                            |   | AGIWUR17273                        |          |                |          |          |                     |  |
| CB4856 CT                                                                                     | X | 14684877                           | 14688322 | WBGene00000822 | csq-1    | F40E10.3 |                     |  |
| 0.183750376866053                                                                             |   | AGIWUR5990;AGIWUR26198;AGIWUR34544 |          |                |          |          |                     |  |
| CB4856 CT                                                                                     | X | 14690846                           | 14692999 | WBGene00004950 | sox-3    | F40E10.2 |                     |  |
| 0.22650813316111                                                                              |   | AGIWUR31056                        |          |                |          |          |                     |  |
| CB4856 CT                                                                                     | X | 14696412                           | 14699977 | WBGene00001828 | hch-1    | F40E10.1 |                     |  |
| 1.25204578681262                                                                              |   | AGIWUR35024                        |          |                |          |          |                     |  |
| CB4856 CT                                                                                     | X | 14701790                           | 14703682 | WBGene00009573 | F40E10.5 |          | F40E10.5            |  |
| -0.126397228872133                                                                            |   | AGIWUR38084                        |          |                |          |          |                     |  |
| CB4856 CT                                                                                     | X | 14703715                           | 14706859 | WBGene00009574 | F40E10.6 |          | F40E10.6            |  |
| -0.0113349420628572                                                                           |   |                                    |          |                |          |          |                     |  |
| AGIWUR5715;AGIWUR7899;AGIWUR16909;AGIWUR27026;AGIWUR32719;AGIWUR36500;AGIWUR39306;AGIWUR39932 |   |                                    |          |                |          |          |                     |  |
| CB4856 CT                                                                                     | X | 14710475                           | 14718779 | WBGene00006432 | tag-53   | F33C8.1  | 0.306281017518195   |  |
| AGIWUR8626;AGIWUR8942                                                                         |   |                                    |          |                |          |          |                     |  |
| CB4856 CT                                                                                     | X | 14721398                           | 14723437 | WBGene00009357 | F33C8.2  | F33C8.2  | 0.0625378859958605  |  |
| AGIWUR10908                                                                                   |   |                                    |          |                |          |          |                     |  |
| CB4856 CT                                                                                     | X | 14726626                           | 14729482 | WBGene00006634 | tsp-8    | F33C8.3  | -0.0933307197204982 |  |
| AGIWUR40963                                                                                   |   |                                    |          |                |          |          |                     |  |
| CB4856 CT                                                                                     | X | 14732283                           | 14734457 | WBGene00009358 | F33C8.4  | F33C8.4  | -0.383168841594273  |  |

|                                                             |   |                                                                         |          |                |          |                             |
|-------------------------------------------------------------|---|-------------------------------------------------------------------------|----------|----------------|----------|-----------------------------|
| AGIWUR25047                                                 |   |                                                                         |          |                |          |                             |
| CB4856 CT                                                   | X | 14734443                                                                | 14740088 | WBGene00007347 | C05G5.1  | C05G5.1                     |
| -0.000991349846451328                                       |   | AGIWUR4992                                                              |          |                |          |                             |
| CB4856 CT                                                   | X | 14747320                                                                | 14750390 | WBGene00007348 | C05G5.2  | C05G5.2 -0.0184198466982313 |
| AGIWUR26168                                                 |   |                                                                         |          |                |          |                             |
| CB4856 CT                                                   | X | 14750849                                                                | 14752011 | WBGene00007349 | C05G5.3  | C05G5.3 -0.132338965742552  |
| AGIWUR43661                                                 |   |                                                                         |          |                |          |                             |
| CB4856 CT                                                   | X | 14754026                                                                | 14756459 | WBGene00007350 | suc1-1   | C05G5.4 0.0408843047234573  |
| AGIWUR12280                                                 |   |                                                                         |          |                |          |                             |
| CB4856 CT                                                   | X | 14761966                                                                | 14771885 | WBGene00012445 | Y16B4A.2 | Y16B4A.2                    |
| -0.479923934557995                                          |   | AGIWUR21626                                                             |          |                |          |                             |
| CB4856 CT                                                   | X | 14773538                                                                | 14783564 | WBGene00006743 | unc-3    | Y16B4A.1                    |
| 0.992463968525215                                           |   | AGIWUR11747                                                             |          |                |          |                             |
| CB4856 CT                                                   | X | 14791008                                                                | 14792980 | WBGene00009628 | tatn-1   | F42D1.2 -0.451742659315495  |
| AGIWUR9033;AGIWUR21070;AGIWUR35338;AGIWUR43426              |   |                                                                         |          |                |          |                             |
| CB4856 CT                                                   | X | 14794217                                                                | 14804359 | WBGene00009629 | spr-2    | F42D1.3 -0.479704429318447  |
| AGIWUR11796                                                 |   |                                                                         |          |                |          |                             |
| CB4856 CT                                                   | X | 14807236                                                                | 14807944 | WBGene00044139 | F42D1.4  | F42D1.4 0.027635711821917   |
| AGIWUR12997;AGIWUR16902;AGIWUR28233;AGIWUR41590;AGIWUR44828 |   |                                                                         |          |                |          |                             |
| CB4856 CT                                                   | X | 14808846                                                                | 14810849 | WBGene00000221 | atf-5    | T04C10.4                    |
| -0.259853440169282                                          |   | AGIWUR6034                                                              |          |                |          |                             |
| CB4856 CT                                                   | X | 14812361                                                                | 14814380 | WBGene00011426 | T04C10.3 | T04C10.3                    |
| 0.0147042089802376                                          |   | AGIWUR41380                                                             |          |                |          |                             |
| CB4856 CT                                                   | X | 14815828                                                                | 14818507 | WBGene00001329 | epr-1    | T04C10.2                    |
| 0.0612798172862421                                          |   | AGIWUR14802;AGIWUR28806;AGIWUR30004;AGIWUR40253;AGIWUR42773;AGIWUR45112 |          |                |          |                             |
| CB4856 CT                                                   | X | 14819909                                                                | 14824540 | WBGene00003149 | mbk-1    | T04C10.1                    |
| 0.104929127921842                                           |   | AGIWUR20624                                                             |          |                |          |                             |
| CB4856 CT                                                   | X | 14831824                                                                | 14838241 | WBGene00001055 | dpr-2    | C27C12.7                    |
| 0.0686999610832544                                          |   | AGIWUR6732                                                              |          |                |          |                             |
| CB4856 CT                                                   | X | 14845937                                                                | 14849217 | WBGene00007772 | egrh-1   | C27C12.2                    |
| 0.225924165969305                                           |   | AGIWUR3860;AGIWUR36066                                                  |          |                |          |                             |
| CB4856 CT                                                   | X | 14849275                                                                | 14852619 | WBGene00007775 | acd-3    | C27C12.5                    |
| 0.00128859427674577                                         |   | AGIWUR43410                                                             |          |                |          |                             |
| CB4856 CT                                                   | X | 14852552                                                                | 14853762 | WBGene00007771 | C27C12.1 | C27C12.1                    |
| -0.21006947188509                                           |   | AGIWUR16057                                                             |          |                |          |                             |
| CB4856 CT                                                   | X | 14854131                                                                | 14856518 | WBGene00007774 | C27C12.4 | C27C12.4                    |
| -0.124765905429882                                          |   | AGIWUR24339                                                             |          |                |          |                             |
| CB4856 CT                                                   | X | 14857303                                                                | 14861801 | WBGene00007776 | dmd-4    | C27C12.6                    |
| 0.558441056113478                                           |   | AGIWUR9518                                                              |          |                |          |                             |

|                                                                                                                                             |   |          |          |                |          |                             |
|---------------------------------------------------------------------------------------------------------------------------------------------|---|----------|----------|----------------|----------|-----------------------------|
| CB4856 CT                                                                                                                                   | X | 14863678 | 14865844 | WBGene00007773 | C27C12.3 | C27C12.3                    |
| -0.0398608175336719 AGIWUR1471;AGIWUR20813;AGIWUR29142;AGIWUR41215;AGIWUR43019                                                              |   |          |          |                |          |                             |
| CB4856 CT                                                                                                                                   | X | 14867101 | 14868300 | WBGene00009300 | F31F6.1  | F31F6.1 -0.178146232991677  |
| AGIWUR36444                                                                                                                                 |   |          |          |                |          |                             |
| CB4856 CT                                                                                                                                   | X | 14869606 | 14870675 | WBGene00009301 | F31F6.2  | F31F6.2 -0.0787913795882531 |
| AGIWUR24956                                                                                                                                 |   |          |          |                |          |                             |
| CB4856 CT                                                                                                                                   | X | 14876150 | 14878855 | WBGene00044138 | sssh-1   | F31F6.8 -0.128787364310492  |
| AGIWUR19406;AGIWUR20525;AGIWUR31034                                                                                                         |   |          |          |                |          |                             |
| CB4856 CT                                                                                                                                   | X | 14881419 | 14882300 | WBGene00001451 | flp-8    | F31F6.4 0.133669037794983   |
| AGIWUR4453;AGIWUR7526;AGIWUR9122;AGIWUR9925;AGIWUR14557;AGIWUR15832;AGIWUR15891;AGIWUR25652;AGIWUR25878;AGIWUR34263;AGIWUR37944;AGIWUR44175 |   |          |          |                |          |                             |
| CB4856 CT                                                                                                                                   | X | 14888488 | 14894297 | WBGene00000902 | daf-6    | F31F6.5 -0.321124025213747  |
| AGIWUR20854                                                                                                                                 |   |          |          |                |          |                             |
| CB4856 CT                                                                                                                                   | X | 14895145 | 14898449 | WBGene00003517 | nac-1    | F31F6.6 0.232025436747548   |
| AGIWUR44277                                                                                                                                 |   |          |          |                |          |                             |
| CB4856 CT                                                                                                                                   | X | 14898505 | 14900772 | WBGene00009303 | lips-8   | F31F6.7 0.186600139653994   |
| AGIWUR20024                                                                                                                                 |   |          |          |                |          |                             |
| CB4856 CT                                                                                                                                   | X | 14901881 | 14905261 | WBGene00013497 | hex-5    | Y70D2A.2                    |
| -0.303083718408555 AGIWUR37112                                                                                                              |   |          |          |                |          |                             |
| CB4856 CT                                                                                                                                   | X | 14918836 | 14923942 | WBGene00013496 | Y70D2A.1 | Y70D2A.1                    |
| 0.0416600092576589 AGIWUR20397                                                                                                              |   |          |          |                |          |                             |
| CB4856 CT                                                                                                                                   | X | 14925031 | 14928934 | WBGene00008808 | ntr-2    | F14F4.1 0.0179870828851616  |
| AGIWUR24360                                                                                                                                 |   |          |          |                |          |                             |
| CB4856 CT                                                                                                                                   | X | 14938502 | 14946317 | WBGene00003411 | mrp-5    | F14F4.3 0.20820712443974    |
| AGIWUR40460                                                                                                                                 |   |          |          |                |          |                             |
| CB4856 CT                                                                                                                                   | X | 14951200 | 14954544 | WBGene00003909 | pag-3    | F45B8.4 0.471747496735199   |
| AGIWUR17163                                                                                                                                 |   |          |          |                |          |                             |
| CB4856 CT                                                                                                                                   | X | 14960544 | 14961571 | WBGene00009720 | F45B8.3  | F45B8.3 -0.370031755574983  |
| AGIWUR17468                                                                                                                                 |   |          |          |                |          |                             |
| CB4856 CT                                                                                                                                   | X | 14962922 | 14963995 | WBGene00004353 | rgs-10   | F45B8.2 -0.190097857414131  |
| AGIWUR38642                                                                                                                                 |   |          |          |                |          |                             |
| CB4856 CT                                                                                                                                   | X | 14964553 | 14965976 | WBGene00004354 | rgs-11   | F45B8.1 -0.381470940473434  |
| AGIWUR19167                                                                                                                                 |   |          |          |                |          |                             |
| CB4856 CT                                                                                                                                   | X | 14968900 | 14970271 | WBGene00008973 | F20D1.1  | F20D1.1 0.175597401064188   |
| AGIWUR33104                                                                                                                                 |   |          |          |                |          |                             |
| CB4856 CT                                                                                                                                   | X | 14970751 | 14974779 | WBGene00008974 | tbc-1    | F20D1.2 -0.146928614629662  |
| AGIWUR5402                                                                                                                                  |   |          |          |                |          |                             |
| CB4856 CT                                                                                                                                   | X | 14976117 | 14978714 | WBGene00008975 | F20D1.3  | F20D1.3 -0.114420457151018  |
| AGIWUR25553;AGIWUR44272                                                                                                                     |   |          |          |                |          |                             |

|                                                                                                |                                                                         |          |                |          |          |                    |
|------------------------------------------------------------------------------------------------|-------------------------------------------------------------------------|----------|----------------|----------|----------|--------------------|
| CB4856 CT X                                                                                    | 14979374                                                                | 14980435 | WBGene00008980 | emre-1   | F20D1.10 |                    |
| 0.267690155629981                                                                              | AGIWUR21288;AGIWUR30966;AGIWUR38147;AGIWUR40911;AGIWUR42285;AGIWUR44747 |          |                |          |          |                    |
| CB4856 CT X                                                                                    | 14980954                                                                | 14981675 | WBGene00000191 | arl-7    | F20D1.5  | -0.424830273586684 |
| AGIWUR40958                                                                                    |                                                                         |          |                |          |          |                    |
| CB4856 CT X                                                                                    | 14983533                                                                | 14987365 | WBGene00004317 | rbg-1    | F20D1.6  | 0.537709071394566  |
| AGIWUR12759                                                                                    |                                                                         |          |                |          |          |                    |
| CB4856 CT X                                                                                    | 14987369                                                                | 14991380 | WBGene00008977 | iglr-1   | F20D1.7  | 0.214645892041917  |
| AGIWUR17966                                                                                    |                                                                         |          |                |          |          |                    |
| CB4856 CT X                                                                                    | 14994752                                                                | 14999198 | WBGene00008978 | cutl-3   | F20D1.8  | 0.20500150093217   |
| AGIWUR15768;AGIWUR27261                                                                        |                                                                         |          |                |          |          |                    |
| CB4856 CT X                                                                                    | 15002034                                                                | 15003941 | WBGene00008979 | F20D1.9  | F20D1.9  | -0.112430681847361 |
| AGIWUR33263                                                                                    |                                                                         |          |                |          |          |                    |
| CB4856 CT X                                                                                    | 15004064                                                                | 15007308 | WBGene00007668 | C18B12.6 |          | C18B12.6           |
| -0.241294287848742                                                                             | AGIWUR25292                                                             |          |                |          |          |                    |
| CB4856 CT X                                                                                    | 15012684                                                                | 15012926 | WBGene00007663 | C18B12.1 |          | C18B12.1           |
| -0.376603346166969                                                                             | AGIWUR22784                                                             |          |                |          |          |                    |
| CB4856 CT X                                                                                    | 15026308                                                                | 15031084 | WBGene00007664 | seb-3    | C18B12.2 |                    |
| -0.0182675700263548                                                                            | AGIWUR15522                                                             |          |                |          |          |                    |
| CB4856 CT X                                                                                    | 15031353                                                                | 15034541 | WBGene00001096 | dsc-1    | C18B12.3 |                    |
| 0.279916914584913                                                                              | AGIWUR482;AGIWUR35604;AGIWUR37220                                       |          |                |          |          |                    |
| CB4856 CT X                                                                                    | 15036662                                                                | 15040602 | WBGene00007666 | C18B12.4 |          | C18B12.4           |
| 0.430836137642533                                                                              | AGIWUR41884                                                             |          |                |          |          |                    |
| CB4856 CT X                                                                                    | 15042956                                                                | 15045353 | WBGene00007667 | fbxa-97  | C18B12.5 |                    |
| -0.151165508273548                                                                             | AGIWUR7812                                                              |          |                |          |          |                    |
| CB4856 CT X                                                                                    | 15051688                                                                | 15052870 | WBGene00044141 | H03G16.6 |          | H03G16.6           |
| 0.284138535944412                                                                              | AGIWUR568;AGIWUR19092;AGIWUR31424                                       |          |                |          |          |                    |
| CB4856 CT X                                                                                    | 15053883                                                                | 15054652 | WBGene00010358 | H03G16.1 |          | H03G16.1           |
| -0.0786267318703695                                                                            | AGIWUR16692                                                             |          |                |          |          |                    |
| CB4856 CT X                                                                                    | 15055500                                                                | 15056822 | WBGene00010361 | H03G16.5 |          | H03G16.5           |
| -0.102437750593952                                                                             | AGIWUR32198                                                             |          |                |          |          |                    |
| CB4856 CT X                                                                                    | 15058509                                                                | 15060399 | WBGene00010360 | fbxa-96  | H03G16.4 |                    |
| 0.122056570230793                                                                              | AGIWUR9111;AGIWUR12914;AGIWUR33212                                      |          |                |          |          |                    |
| CB4856 CT X                                                                                    | 15064015                                                                | 15067184 | WBGene00014790 | H03G16.3 |          | H03G16.3           |
| -0.0941437711962445                                                                            |                                                                         |          |                |          |          |                    |
| AGIWUR4038;AGIWUR23558;AGIWUR24798;AGIWUR30039;AGIWUR30542;AGIWUR41463;AGIWUR44210;AGIWUR44463 |                                                                         |          |                |          |          |                    |
| CB4856 CT X                                                                                    | 15067476                                                                | 15069342 | WBGene00010359 | mam-6    | H03G16.2 |                    |
| 0.144617423579742                                                                              | AGIWUR3512                                                              |          |                |          |          |                    |
| CB4856 CT X                                                                                    | 15069743                                                                | 15076480 | WBGene00010434 | H40L08.3 |          | H40L08.3           |
| -0.172726599839143                                                                             | AGIWUR4784;AGIWUR22840;AGIWUR44346                                      |          |                |          |          |                    |

|                                                                                                                                           |    |   |          |          |                |          |                            |
|-------------------------------------------------------------------------------------------------------------------------------------------|----|---|----------|----------|----------------|----------|----------------------------|
| CB4856                                                                                                                                    | CT | X | 15076696 | 15077748 | WBGene00014793 | H40L08.2 | H40L08.2                   |
| 0.42874949430208<br>AGIWUR965;AGIWUR4962;AGIWUR10059;AGIWUR15584;AGIWUR34346;AGIWUR35856;AGIWUR36602;AGIWUR42221;AGIWUR43395              |    |   |          |          |                |          |                            |
| CB4856                                                                                                                                    | CT | X | 15080779 | 15084086 | WBGene00010433 | H40L08.1 | H40L08.1                   |
| -0.0936261476779485<br>AGIWUR31733                                                                                                        |    |   |          |          |                |          |                            |
| CB4856                                                                                                                                    | CT | X | 15084749 | 15088135 | WBGene00008609 | F09B12.5 | F09B12.5                   |
| 0.012150601799056<br>AGIWUR32756                                                                                                          |    |   |          |          |                |          |                            |
| CB4856                                                                                                                                    | CT | X | 15089397 | 15093585 | WBGene00001468 | flr-4    | F09B12.6                   |
| -0.362238059676566<br>AGIWUR41102                                                                                                         |    |   |          |          |                |          |                            |
| CB4856                                                                                                                                    | CT | X | 15095343 | 15097954 | WBGene00008607 | F09B12.3 | F09B12.3                   |
| -0.486610272543384<br>AGIWUR25770;AGIWUR36606                                                                                             |    |   |          |          |                |          |                            |
| CB4856                                                                                                                                    | CT | X | 15098066 | 15100416 | WBGene00008606 | dhhc-1   | F09B12.2                   |
| 0.356160768476656<br>AGIWUR10831                                                                                                          |    |   |          |          |                |          |                            |
| CB4856                                                                                                                                    | CT | X | 15101787 | 15107967 | WBGene00008605 | mlt-9    | F09B12.1                   |
| 0.0562699437560745<br>AGIWUR4062;AGIWUR7385;AGIWUR36793;AGIWUR39663                                                                       |    |   |          |          |                |          |                            |
| CB4856                                                                                                                                    | CT | X | 15109951 | 15116618 | WBGene00011101 | R07D5.2  | R07D5.2 0.117443063144749  |
| AGIWUR37283;AGIWUR44061                                                                                                                   |    |   |          |          |                |          |                            |
| CB4856                                                                                                                                    | CT | X | 15120975 | 15147742 | WBGene00006747 | unc-7    | R07D5.1 -0.118720019465257 |
| AGIWUR3980;AGIWUR16987;AGIWUR30189;AGIWUR31952                                                                                            |    |   |          |          |                |          |                            |
| CB4856                                                                                                                                    | CT | X | 15157359 | 15158749 | WBGene00007525 | C11G10.1 | C11G10.1                   |
| 0.403499672822795<br>AGIWUR32660;AGIWUR37230                                                                                              |    |   |          |          |                |          |                            |
| CB4856                                                                                                                                    | CT | X | 15161283 | 15166222 | WBGene00011684 | T10B10.8 | T10B10.8                   |
| -0.128158066544398<br>AGIWUR1307;AGIWUR8812;AGIWUR19532                                                                                   |    |   |          |          |                |          |                            |
| CB4856                                                                                                                                    | CT | X | 15168722 | 15173621 | WBGene00003840 | ocr-3    | T10B10.7                   |
| 0.131390485144492<br>AGIWUR24640                                                                                                          |    |   |          |          |                |          |                            |
| CB4856                                                                                                                                    | CT | X | 15173904 | 15178145 | WBGene00011679 | ucr-2.2  | T10B10.2                   |
| 0.0539548261859562<br>AGIWUR11998                                                                                                         |    |   |          |          |                |          |                            |
| CB4856                                                                                                                                    | CT | X | 15178096 | 15181501 | WBGene00011680 | T10B10.3 | T10B10.3                   |
| 0.115665421363775<br>AGIWUR1243;AGIWUR7773;AGIWUR9134;AGIWUR10929;AGIWUR14582;AGIWUR18013;AGIWUR19217;AGIWUR23455;AGIWUR26069;AGIWUR36469 |    |   |          |          |                |          |                            |
| CB4856                                                                                                                                    | CT | X | 15190100 | 15193066 | WBGene00011681 | T10B10.4 | T10B10.4                   |
| 0.215771071761505<br>AGIWUR16848;AGIWUR22935;AGIWUR44845                                                                                  |    |   |          |          |                |          |                            |
| CB4856                                                                                                                                    | CT | X | 15193086 | 15194324 | WBGene00011683 | phat-6   | T10B10.6                   |
| 0.204694582250298<br>AGIWUR8369                                                                                                           |    |   |          |          |                |          |                            |
| CB4856                                                                                                                                    | CT | X | 15195922 | 15199136 | WBGene00011682 | snt-7    | T10B10.5                   |
| 0.0243000367732176<br>AGIWUR39833;AGIWUR42120;AGIWUR44905                                                                                 |    |   |          |          |                |          |                            |
| CB4856                                                                                                                                    | CT | X | 15209289 | 15213259 | WBGene00010356 | H03A11.1 | H03A11.1                   |
| -0.169962391530129<br>AGIWUR17022;AGIWUR32933;AGIWUR43737                                                                                 |    |   |          |          |                |          |                            |

|                                                                                                     |   |          |          |                |                 |                     |
|-----------------------------------------------------------------------------------------------------|---|----------|----------|----------------|-----------------|---------------------|
| CB4856 CT                                                                                           | X | 15225869 | 15230645 | WBGene00010357 | H03A11.2        | H03A11.2            |
| -0.306951075985898 AGIWUR34239                                                                      |   |          |          |                |                 |                     |
| CB4856 CT                                                                                           | X | 15234829 | 15246365 | WBGene00009552 | piki-1 F39B1.1  | -0.158017721697673  |
| AGIWUR23824                                                                                         |   |          |          |                |                 |                     |
| CB4856 CT                                                                                           | X | 15250809 | 15253877 | WBGene00009786 | F46F2.1 F46F2.1 | 0.2215121122532     |
| AGIWUR14648                                                                                         |   |          |          |                |                 |                     |
| CB4856 CT                                                                                           | X | 15257597 | 15259048 | WBGene00009788 | F46F2.4 F46F2.4 | -0.153360999232149  |
| AGIWUR36542                                                                                         |   |          |          |                |                 |                     |
| CB4856 CT                                                                                           | X | 15259579 | 15260290 | WBGene00009787 | F46F2.3 F46F2.3 | -0.728040272525323  |
| AGIWUR720;AGIWUR8033;AGIWUR37485                                                                    |   |          |          |                |                 |                     |
| CB4856 CT                                                                                           | X | 15262727 | 15267857 | WBGene00009789 | F46F2.5 F46F2.5 | -0.235198474316691  |
| AGIWUR14029;AGIWUR19544                                                                             |   |          |          |                |                 |                     |
| CB4856 CT                                                                                           | X | 15269074 | 15281110 | WBGene00002203 | kin-20 F46F2.2  | 0.104397425541635   |
| AGIWUR2546;AGIWUR3876;AGIWUR6680;AGIWUR29853                                                        |   |          |          |                |                 |                     |
| CB4856 CT                                                                                           | X | 15284182 | 15286227 | WBGene00007262 | jud-4 C02D4.1   | -0.0332702515502792 |
| AGIWUR1289;AGIWUR4849;AGIWUR9307;AGIWUR20816;AGIWUR37557;AGIWUR44498                                |   |          |          |                |                 |                     |
| CB4856 CT                                                                                           | X | 15286579 | 15302963 | WBGene00004777 | ser-2 C02D4.2   |                     |
| -0.000527104083903218 AGIWUR10251;AGIWUR15917;AGIWUR16808;AGIWUR28601;AGIWUR35275;AGIWUR36199       |   |          |          |                |                 |                     |
| CB4856 CT                                                                                           | X | 15309374 | 15314899 | WBGene00003681 | nhr-91 Y15E3A.1 |                     |
| 0.493636811788688 AGIWUR391;AGIWUR8575;AGIWUR11164;AGIWUR30048;AGIWUR32782;AGIWUR38239;AGIWUR40936  |   |          |          |                |                 |                     |
| CB4856 CT                                                                                           | X | 15314874 | 15317223 | WBGene00012441 | glb-28 Y15E3A.2 |                     |
| -0.159076101602655 AGIWUR2433                                                                       |   |          |          |                |                 |                     |
| CB4856 CT                                                                                           | X | 15322249 | 15325809 | WBGene00012442 | Y15E3A.3        | Y15E3A.3            |
| -0.139412160304231 AGIWUR223                                                                        |   |          |          |                |                 |                     |
| CB4856 CT                                                                                           | X | 15330964 | 15333960 | WBGene00012443 | Y15E3A.4        | Y15E3A.4            |
| -0.253693591866305 AGIWUR986                                                                        |   |          |          |                |                 |                     |
| CB4856 CT                                                                                           | X | 15343154 | 15344146 | WBGene00012444 | Y15E3A.5        | Y15E3A.5            |
| 1.13665153492729 AGIWUR9705                                                                         |   |          |          |                |                 |                     |
| CB4856 CT                                                                                           | X | 15355238 | 15363861 | WBGene00007877 | nfki-1 C33A11.1 |                     |
| 0.00679059907030855 AGIWUR2664;AGIWUR3693;AGIWUR5288;AGIWUR9684;AGIWUR18915;AGIWUR44109;AGIWUR44590 |   |          |          |                |                 |                     |
| CB4856 CT                                                                                           | X | 15365994 | 15369999 | WBGene00007878 | C33A11.2        | C33A11.2            |
| 0.210935542299413 AGIWUR11040                                                                       |   |          |          |                |                 |                     |
| CB4856 CT                                                                                           | X | 15369974 | 15377685 | WBGene00006462 | tag-97 C33A11.4 |                     |
| -0.173857952520952 AGIWUR20474                                                                      |   |          |          |                |                 |                     |
| CB4856 CT                                                                                           | X | 15407931 | 15419290 | WBGene00009560 | psa-3 F39D8.2   | 0.44126073716107    |
| AGIWUR22299                                                                                         |   |          |          |                |                 |                     |
| CB4856 CT                                                                                           | X | 15420979 | 15425114 | WBGene00009561 | F39D8.3 F39D8.3 | -0.0461540844292525 |
| AGIWUR19493;AGIWUR26499;AGIWUR35456                                                                 |   |          |          |                |                 |                     |
| CB4856 CT                                                                                           | X | 15425274 | 15428180 | WBGene00003532 | nas-13 F39D8.4  | -0.0729891375279652 |

AGIWUR20338;AGIWUR23299;AGIWUR24853;AGIWUR25911;AGIWUR28890;AGIWUR32864;AGIWUR35977;AGIWUR42757  
 CB4856 CT X 15429925 15431198 WBGene00010981 blos-8 R03A10.1  
 0.212789204208814 AGIWUR39615  
 CB4856 CT X 15433787 15434972 WBGene00010982 flp-32 R03A10.2  
 -0.337142511194386 AGIWUR41012  
 CB4856 CT X 15435665 15440794 WBGene00010983 mocs-1 R03A10.3  
 -0.295385701978876 AGIWUR38137  
 CB4856 CT X 15441731 15443641 WBGene00010984 nkat-3 R03A10.4  
 -0.320927865903695 AGIWUR9337  
 CB4856 CT X 15446724 15450362 WBGene00010985 R03A10.5 R03A10.5  
 0.135305267697461 AGIWUR6587;AGIWUR27742;AGIWUR43903  
 CB4856 CT X 15461843 15470758 WBGene00010986 sprr-1 R03A10.6  
 0.0827362780281637 AGIWUR15270;AGIWUR41095  
 CB4856 CT X 15470795 15477402 WBGene00008116 C46E1.3 C46E1.3 0.0193771268921115  
 AGIWUR34412  
 CB4856 CT X 15479017 15485700 WBGene00001556 gcy-36 C46E1.2 0.228254249319599  
 AGIWUR6436  
 CB4856 CT X 15488106 15491987 WBGene00010396 H13N06.2 H13N06.2  
 -0.272581490298517 AGIWUR20767  
 CB4856 CT X 15493536 15497504 WBGene00001649 gob-1 H13N06.3  
 0.104058164238914 AGIWUR19792  
 CB4856 CT X 15497555 15500279 WBGene00010397 suox-1 H13N06.4  
 0.0976286017079078  
 AGIWUR8075;AGIWUR8146;AGIWUR13927;AGIWUR21239;AGIWUR21902;AGIWUR25339;AGIWUR31516;AGIWUR38931  
 CB4856 CT X 15500259 15504895 WBGene00006541 tbh-1 H13N06.6  
 -0.0812130889376483 AGIWUR32109  
 CB4856 CT X 15506037 15507880 WBGene00006494 zipt-7.2 H13N06.5  
 -0.127921788521148 AGIWUR4074  
 CB4856 CT X 15516655 15524020 WBGene00001148 eat-20 H30A04.1  
 0.0960147377595395 AGIWUR2763;AGIWUR32677;AGIWUR39473;AGIWUR44821  
 CB4856 CT X 15537662 15546323 WBGene00007260 olrn-1 C02C6.2 0.591521885078045  
 AGIWUR33886  
 CB4856 CT X 15546688 15552233 WBGene00007261 lron-3 C02C6.3 0.0180124328133879  
 AGIWUR11376;AGIWUR19492;AGIWUR26257;AGIWUR26685;AGIWUR42061;AGIWUR42454  
 CB4856 CT X 15568890 15573693 WBGene00001130 dyn-1 C02C6.1 0.0840939560546268  
 AGIWUR28101  
 CB4856 CT X 15577470 15586803 WBGene00010703 K09A9.6 K09A9.6 -0.0925693788495163  
 AGIWUR16950;AGIWUR34178  
 CB4856 CT X 15586812 15590397 WBGene00001520 gas-1 K09A9.5 0.15162855929092



|                                                                                                                                  |    |   |                                     |          |                |          |          |                     |
|----------------------------------------------------------------------------------------------------------------------------------|----|---|-------------------------------------|----------|----------------|----------|----------|---------------------|
| AGIWUR9283                                                                                                                       |    |   |                                     |          |                |          |          |                     |
| CB4856                                                                                                                           | CT | X | 15591368                            | 15595387 | WBGene00010702 | usp-33   | K09A9.4  | -0.168166356670469  |
| AGIWUR41099                                                                                                                      |    |   |                                     |          |                |          |          |                     |
| CB4856                                                                                                                           | CT | X | 15601067                            | 15603763 | WBGene00010701 | ent-2    | K09A9.3  | 0.190600516769164   |
| AGIWUR33953;AGIWUR41849;AGIWUR43615                                                                                              |    |   |                                     |          |                |          |          |                     |
| CB4856                                                                                                                           | CT | X | 15604635                            | 15606635 | WBGene00004276 | rab-14   | K09A9.2  | -0.19079787081272   |
| AGIWUR725;AGIWUR4364;AGIWUR12647;AGIWUR19104;AGIWUR21129;AGIWUR22392;AGIWUR24016;AGIWUR29023;AGIWUR34364;AGIWUR36569;AGIWUR41345 |    |   |                                     |          |                |          |          |                     |
| CB4856                                                                                                                           | CT | X | 15607969                            | 15610631 | WBGene00010700 | nipi-3   | K09A9.1  | -0.0422373786343471 |
| AGIWUR1159;AGIWUR16805;AGIWUR18397;AGIWUR23922;AGIWUR33732                                                                       |    |   |                                     |          |                |          |          |                     |
| CB4856                                                                                                                           | CT | X | 15611824                            | 15613791 | WBGene00010726 | K09E9.3  | K09E9.3  | -0.086740065380182  |
| AGIWUR4427;AGIWUR26149;AGIWUR27156;AGIWUR34050;AGIWUR38990;AGIWUR42599;AGIWUR43032                                               |    |   |                                     |          |                |          |          |                     |
| CB4856                                                                                                                           | CT | X | 15613805                            | 15616519 | WBGene00010725 | erv-46   | K09E9.2  | -0.190070208233848  |
| AGIWUR44606                                                                                                                      |    |   |                                     |          |                |          |          |                     |
| CB4856                                                                                                                           | CT | X | 15620489                            | 15626629 | WBGene00010724 | K09E9.1  | K09E9.1  | 0.0788208908394665  |
| AGIWUR33744                                                                                                                      |    |   |                                     |          |                |          |          |                     |
| CB4856                                                                                                                           | CT | X | 15628606                            | 15630440 | WBGene00044143 | K09E9.4  | K09E9.4  | -0.0707749747521351 |
| AGIWUR15297                                                                                                                      |    |   |                                     |          |                |          |          |                     |
| CB4856                                                                                                                           | CT | X | 15642938                            | 15644336 | WBGene00010372 | H08J19.1 |          | H08J19.1            |
| -0.238246767244524                                                                                                               |    |   | AGIWUR25204                         |          |                |          |          |                     |
| CB4856                                                                                                                           | CT | X | 15646380                            | 15647369 | WBGene00010332 | F59D12.5 |          | F59D12.5            |
| -0.163032439760887                                                                                                               |    |   | AGIWUR28052                         |          |                |          |          |                     |
| CB4856                                                                                                                           | CT | X | 15648263                            | 15650905 | WBGene00010331 | F59D12.3 |          | F59D12.3            |
| -0.12017278002131                                                                                                                |    |   | AGIWUR18081                         |          |                |          |          |                     |
| CB4856                                                                                                                           | CT | X | 15666761                            | 15672363 | WBGene00010329 | F59D12.1 |          | F59D12.1            |
| 0.107215521608557                                                                                                                |    |   | AGIWUR31048                         |          |                |          |          |                     |
| CB4856                                                                                                                           | CT | X | 15672743                            | 15675722 | WBGene00010330 | F59D12.2 |          | F59D12.2            |
| 0.0820013763094041                                                                                                               |    |   | AGIWUR14911;AGIWUR32565;AGIWUR34025 |          |                |          |          |                     |
| CB4856                                                                                                                           | CT | X | 15681693                            | 15687477 | WBGene00001687 | gpn-1    | F59D12.4 |                     |
| -0.309583072661879                                                                                                               |    |   | AGIWUR21149                         |          |                |          |          |                     |
| CB4856                                                                                                                           | CT | X | 15689449                            | 15696423 | WBGene00007284 | C03H12.1 |          | C03H12.1            |
| -0.0364508072769354                                                                                                              |    |   | AGIWUR27399                         |          |                |          |          |                     |
| CB4856                                                                                                                           | CT | X | 15696700                            | 15698062 | WBGene00014039 | ZK662.2  | ZK662.2  | -0.753741555608052  |
| AGIWUR7417                                                                                                                       |    |   |                                     |          |                |          |          |                     |
| CB4856                                                                                                                           | CT | X | 15708195                            | 15716444 | WBGene00003638 | nhr-48   | ZK662.3  | 0.131270039560335   |
| AGIWUR7223;AGIWUR14331                                                                                                           |    |   |                                     |          |                |          |          |                     |
| CB4856                                                                                                                           | CT | X | 15718625                            | 15720415 | WBGene00045494 | ZK662.6  | ZK662.6  | -0.208737522166222  |
| AGIWUR9757;AGIWUR29907;AGIWUR30215                                                                                               |    |   |                                     |          |                |          |          |                     |
| CB4856                                                                                                                           | CT | X | 15721270                            | 15723776 | WBGene00014040 | ZK662.5  | ZK662.5  | -0.269445209064169  |

[illegible]

|                                                                                                |   |          |          |                |           |           |                     |
|------------------------------------------------------------------------------------------------|---|----------|----------|----------------|-----------|-----------|---------------------|
| CB4856 CT                                                                                      | X | 15849885 | 15851771 | WBGene00010339 | ac1-1     | F59F4.4   | -0.0773939871435552 |
| AGIWUR14275                                                                                    |   |          |          |                |           |           |                     |
| CB4856 CT                                                                                      | X | 15852935 | 15860608 | WBGene00010011 | F53H4.6   | F53H4.6   | 0.133193133022276   |
| AGIWUR5968;AGIWUR38837                                                                         |   |          |          |                |           |           |                     |
| CB4856 CT                                                                                      | X | 15861294 | 15865918 | WBGene00000803 | csb-1     | F53H4.1   | 0.0628035697464249  |
| AGIWUR4195;AGIWUR10825;AGIWUR17135;AGIWUR21736;AGIWUR30198;AGIWUR37770;AGIWUR40998             |   |          |          |                |           |           |                     |
| CB4856 CT                                                                                      | X | 15866411 | 15868764 | WBGene00010009 | F53H4.4   | F53H4.4   | 0.0449176844142363  |
| AGIWUR4350;AGIWUR10553;AGIWUR14414;AGIWUR24536;AGIWUR27418;AGIWUR30318;AGIWUR40238;AGIWUR43408 |   |          |          |                |           |           |                     |
| CB4856 CT                                                                                      | X | 15879096 | 15885617 | WBGene00010010 | gmeb-2    | F53H4.5   | -0.0291915548509323 |
| AGIWUR17153                                                                                    |   |          |          |                |           |           |                     |
| CB4856 CT                                                                                      | X | 15885604 | 15887593 | WBGene00010008 | F53H4.3   | F53H4.3   | -0.253058227173927  |
| AGIWUR23300;AGIWUR37269;AGIWUR39299                                                            |   |          |          |                |           |           |                     |
| CB4856 CT                                                                                      | X | 15910638 | 15914159 | WBGene00009278 | npr-33    | F31B9.1   | -0.131605223350363  |
| AGIWUR32643                                                                                    |   |          |          |                |           |           |                     |
| CB4856 CT                                                                                      | X | 15915699 | 15917100 | WBGene00009281 | F31B9.4   | F31B9.4   | -0.301249623777958  |
| AGIWUR20462                                                                                    |   |          |          |                |           |           |                     |
| CB4856 CT                                                                                      | X | 15918137 | 15920423 | WBGene00009279 | F31B9.2   | F31B9.2   | -0.247504250055583  |
| AGIWUR3218                                                                                     |   |          |          |                |           |           |                     |
| CB4856 CT                                                                                      | X | 15923738 | 15925169 | WBGene00009280 | F31B9.3   | F31B9.3   | -0.419940224135694  |
| AGIWUR36631                                                                                    |   |          |          |                |           |           |                     |
| CB4856 CT                                                                                      | X | 15929958 | 15939324 | WBGene00003409 | mrp-3     | E03G2.2   | -0.0727660991069854 |
| AGIWUR9771                                                                                     |   |          |          |                |           |           |                     |
| CB4856 CT                                                                                      | X | 15944009 | 15948951 | WBGene00003169 | mec-5     | E03G2.3   | -0.509420807626213  |
| AGIWUR25286                                                                                    |   |          |          |                |           |           |                     |
| CB4856 CT                                                                                      | X | 15951503 | 15954570 | WBGene00000759 | col-186   | E03G2.4   | 0.0292901802509     |
| AGIWUR20885                                                                                    |   |          |          |                |           |           |                     |
| CB4856 CT                                                                                      | X | 15959100 | 15962344 | WBGene00007487 | C09G1.5   | C09G1.5   | -0.0244247114940199 |
| AGIWUR1392;AGIWUR19086;AGIWUR25667;AGIWUR31963;AGIWUR45188                                     |   |          |          |                |           |           |                     |
| CB4856 CT                                                                                      | X | 15966112 | 15972300 | WBGene00004103 | pqn-11    | C09G1.1   | 0.166596211041857   |
| AGIWUR17453                                                                                    |   |          |          |                |           |           |                     |
| CB4856 CT                                                                                      | X | 15977762 | 15982600 | WBGene00007484 | C09G1.2   | C09G1.2   | 0.191225300893681   |
| AGIWUR5714                                                                                     |   |          |          |                |           |           |                     |
| CB4856 CT                                                                                      | X | 15986163 | 15987594 | WBGene00007485 | C09G1.3   | C09G1.3   | -0.420647960208886  |
| AGIWUR19963                                                                                    |   |          |          |                |           |           |                     |
| CB4856 CT                                                                                      | X | 15987971 | 15996936 | WBGene00007486 | C09G1.4   | C09G1.4   | -0.154796671519425  |
| AGIWUR10955;AGIWUR15110;AGIWUR18823;AGIWUR19674                                                |   |          |          |                |           |           |                     |
| CB4856 CT                                                                                      | X | 16013605 | 16016920 | WBGene00044150 | VB0395L.1 | VB0395L.1 |                     |
| -0.198727777444876 AGIWUR4504;AGIWUR43845                                                      |   |          |          |                |           |           |                     |
| CB4856 CT                                                                                      | X | 16017263 | 16021776 | WBGene00003729 | nhx-1     | B0395.1   | -0.277785437314392  |

|                                                                                                 |   |             |          |                |           |         |                     |  |
|-------------------------------------------------------------------------------------------------|---|-------------|----------|----------------|-----------|---------|---------------------|--|
| AGIWUR28160                                                                                     |   |             |          |                |           |         |                     |  |
| CB4856 CT                                                                                       | X | 16030806    | 16034816 | WBGene00007174 | mboa-1    | B0395.2 | 0.535545993273292   |  |
| AGIWUR19203                                                                                     |   |             |          |                |           |         |                     |  |
| CB4856 CT                                                                                       | X | 16035055    | 16039514 | WBGene00007175 | B0395.3   | B0395.3 | -0.128925079679616  |  |
| AGIWUR3904                                                                                      |   |             |          |                |           |         |                     |  |
| CB4856 CT                                                                                       | X | 16049844    | 16054623 | WBGene00012073 | cpd-2     | T27A8.1 | 0.18568924806933    |  |
| AGIWUR31375                                                                                     |   |             |          |                |           |         |                     |  |
| CB4856 CT                                                                                       | X | 16057719    | 16058934 | WBGene00012074 | T27A8.2   | T27A8.2 | -0.381456819676618  |  |
| AGIWUR20370                                                                                     |   |             |          |                |           |         |                     |  |
| CB4856 CT                                                                                       | X | 16067069    | 16067463 | WBGene00012076 | T27A8.4   | T27A8.4 | 0.0729996417308563  |  |
| AGIWUR150                                                                                       |   |             |          |                |           |         |                     |  |
| CB4856 CT                                                                                       | X | 16072903    | 16074852 | WBGene00000760 | col-187   | C30F2.1 | 0.146955069228287   |  |
| AGIWUR23970                                                                                     |   |             |          |                |           |         |                     |  |
| CB4856 CT                                                                                       | X | 16075061    | 16075668 | WBGene00007818 | C30F2.4   | C30F2.4 | 0.262020843903674   |  |
| AGIWUR33122                                                                                     |   |             |          |                |           |         |                     |  |
| CB4856 CT                                                                                       | X | 16076809    | 16085215 | WBGene00007816 | C30F2.2   | C30F2.2 | 0.0808259396133737  |  |
| AGIWUR27373                                                                                     |   |             |          |                |           |         |                     |  |
| CB4856 CT                                                                                       | X | 16082435    | 16085799 | WBGene00007817 | C30F2.3   | C30F2.3 | -0.0255904278537455 |  |
| AGIWUR22979                                                                                     |   |             |          |                |           |         |                     |  |
| CB4856 CT                                                                                       | X | 16094067    | 16096497 | WBGene00007819 | C30F2.5   | C30F2.5 | -0.0913768542949303 |  |
| AGIWUR16587                                                                                     |   |             |          |                |           |         |                     |  |
| CB4856 CT                                                                                       | X | 16103643    | 16123903 | WBGene00014214 | ZK1073.2  |         | ZK1073.2            |  |
| 0.221226606220336                                                                               |   | AGIWUR10513 |          |                |           |         |                     |  |
| CB4856 CT                                                                                       | X | 16123942    | 16128865 | WBGene00014213 | ZK1073.1  |         | ZK1073.1            |  |
| 0.0411166521457114                                                                              |   |             |          |                |           |         |                     |  |
| AGIWUR12484;AGIWUR13643;AGIWUR17965;AGIWUR20567;AGIWUR22715;AGIWUR27247;AGIWUR37118;AGIWUR42707 |   |             |          |                |           |         |                     |  |
| CB4856 CT                                                                                       | X | 16140507    | 16147022 | WBGene00008622 | F09C8.2   | F09C8.2 | 0.109789704169263   |  |
| AGIWUR3954;AGIWUR39843                                                                          |   |             |          |                |           |         |                     |  |
| CB4856 CT                                                                                       | X | 16159648    | 16163548 | WBGene00008621 | F09C8.1   | F09C8.1 | -0.091264759751331  |  |
| AGIWUR27457                                                                                     |   |             |          |                |           |         |                     |  |
| CB4856 CT                                                                                       | X | 16184370    | 16185419 | WBGene00011227 | R11.2     | R11.2   | -0.0895184479189677 |  |
| AGIWUR38968                                                                                     |   |             |          |                |           |         |                     |  |
| CB4856 CT                                                                                       | X | 16189856    | 16195007 | WBGene00011226 | slc-25A21 |         | R11.1               |  |
| -0.233617764992047                                                                              |   | AGIWUR3436  |          |                |           |         |                     |  |
| CB4856 CT                                                                                       | X | 16196911    | 16199932 | WBGene00011228 | R11.3     | R11.3   | -0.627261127094814  |  |
| AGIWUR13201                                                                                     |   |             |          |                |           |         |                     |  |
| CB4856 CT                                                                                       | X | 16210303    | 16210651 | WBGene00011229 | R11.4     | R11.4   | 0.208348101153201   |  |
| AGIWUR11349;AGIWUR39105                                                                         |   |             |          |                |           |         |                     |  |
| CB4856 CT                                                                                       | X | 16212606    | 16213072 | WBGene00009069 | F23A7.4   | F23A7.4 | -0.513493962286057  |  |

|                                                                                                          |    |   |          |          |                |          |          |                     |  |
|----------------------------------------------------------------------------------------------------------|----|---|----------|----------|----------------|----------|----------|---------------------|--|
| AGIWUR4574;AGIWUR7844;AGIWUR21278;AGIWUR27048;AGIWUR39685                                                |    |   |          |          |                |          |          |                     |  |
| CB4856                                                                                                   | CT | X | 16217392 | 16217666 | WBGene00009067 | F23A7.1  | F23A7.1  | 0.374305442724495   |  |
| AGIWUR12165                                                                                              |    |   |          |          |                |          |          |                     |  |
| CB4856                                                                                                   | CT | X | 16220010 | 16223519 | WBGene00009068 | F23A7.3  | F23A7.3  | -0.0814151302468771 |  |
| AGIWUR44777                                                                                              |    |   |          |          |                |          |          |                     |  |
| CB4856                                                                                                   | CT | X | 16229463 | 16236856 | WBGene00009070 | F23A7.5  | F23A7.5  | 0.198164640853747   |  |
| AGIWUR14137;AGIWUR17393;AGIWUR33960                                                                      |    |   |          |          |                |          |          |                     |  |
| CB4856                                                                                                   | CT | X | 16237273 | 16240702 | WBGene00009071 | F23A7.6  | F23A7.6  | 0.0933081783015526  |  |
| AGIWUR2598;AGIWUR4477;AGIWUR16594;AGIWUR39535;AGIWUR42446                                                |    |   |          |          |                |          |          |                     |  |
| CB4856                                                                                                   | CT | X | 16245194 | 16245559 | WBGene00012378 | W10G6.1  | W10G6.1  | -0.339408334308235  |  |
| AGIWUR30616                                                                                              |    |   |          |          |                |          |          |                     |  |
| CB4856                                                                                                   | CT | X | 16254843 | 16262151 | WBGene00004789 | sgk-1    | W10G6.2  | 0.270401027338451   |  |
| AGIWUR40954                                                                                              |    |   |          |          |                |          |          |                     |  |
| CB4856                                                                                                   | CT | X | 16262295 | 16265686 | WBGene00003485 | mua-6    | W10G6.3  | -0.335834223625786  |  |
| AGIWUR3794;AGIWUR30679                                                                                   |    |   |          |          |                |          |          |                     |  |
| CB4856                                                                                                   | CT | X | 16275769 | 16282436 | WBGene00004745 | sdc-1    | F52E10.1 |                     |  |
| 0.0340375990526525 AGIWUR7891                                                                            |    |   |          |          |                |          |          |                     |  |
| CB4856                                                                                                   | CT | X | 16282806 | 16283203 | WBGene00009933 | F52E10.2 |          | F52E10.2            |  |
| 0.0993707091291443 AGIWUR8938                                                                            |    |   |          |          |                |          |          |                     |  |
| CB4856                                                                                                   | CT | X | 16283803 | 16284069 | WBGene00009934 | F52E10.3 |          | F52E10.3            |  |
| 0.060523819862099 AGIWUR4159                                                                             |    |   |          |          |                |          |          |                     |  |
| CB4856                                                                                                   | CT | X | 16285598 | 16292990 | WBGene00009935 | F52E10.4 |          | F52E10.4            |  |
| 0.0809782337185023 AGIWUR2646;AGIWUR2750;AGIWUR18312;AGIWUR22395;AGIWUR30979;AGIWUR44314                 |    |   |          |          |                |          |          |                     |  |
| CB4856                                                                                                   | CT | X | 16299904 | 16304122 | WBGene00006674 | twk-21   | T01B4.1  | 0.276932183506655   |  |
| AGIWUR9363                                                                                               |    |   |          |          |                |          |          |                     |  |
| CB4856                                                                                                   | CT | X | 16306464 | 16314998 | WBGene00006675 | twk-22   | T01B4.2  | -0.403412659684215  |  |
| AGIWUR18542                                                                                              |    |   |          |          |                |          |          |                     |  |
| CB4856                                                                                                   | CT | X | 16315356 | 16317729 | WBGene00011310 | T01B4.3  | T01B4.3  | 0.0478308667021974  |  |
| AGIWUR34216                                                                                              |    |   |          |          |                |          |          |                     |  |
| CB4856                                                                                                   | CT | X | 16329217 | 16329997 | WBGene00007523 | C11G6.2  | C11G6.2  | -0.0287532729377098 |  |
| AGIWUR40547                                                                                              |    |   |          |          |                |          |          |                     |  |
| CB4856                                                                                                   | CT | X | 16332440 | 16346027 | WBGene00006384 | taf-3    | C11G6.1  | 0.0301161797816709  |  |
| AGIWUR1561;AGIWUR11199;AGIWUR12052;AGIWUR16051;AGIWUR19008;AGIWUR33712;AGIWUR35393;AGIWUR37423           |    |   |          |          |                |          |          |                     |  |
| CB4856                                                                                                   | CT | X | 16354976 | 16359654 | WBGene00003624 | nhr-28   | C11G6.4  | -0.0795099701633708 |  |
| AGIWUR8488;AGIWUR9598;AGIWUR9927;AGIWUR16883;AGIWUR19635;AGIWUR27806;AGIWUR38710;AGIWUR39679;AGIWUR41588 |    |   |          |          |                |          |          |                     |  |
| CB4856                                                                                                   | CT | X | 16367229 | 16373789 | WBGene00000035 | ace-1    | W09B12.1 |                     |  |
| 0.107722878408678 AGIWUR15181;AGIWUR18087;AGIWUR34105;AGIWUR44165                                        |    |   |          |          |                |          |          |                     |  |
| CB4856                                                                                                   | CT | X | 16376595 | 16380047 | WBGene00006353 | sur-7    | F01G12.2 |                     |  |
| -0.0317086112531069 AGIWUR24885                                                                          |    |   |          |          |                |          |          |                     |  |

|                                                                                                |                                                             |          |                |          |                             |
|------------------------------------------------------------------------------------------------|-------------------------------------------------------------|----------|----------------|----------|-----------------------------|
| CB4856 CT X                                                                                    | 16380597                                                    | 16389371 | WBGene00002280 | let-2    | F01G12.5                    |
| 0.283623273448999                                                                              | AGIWUR2727                                                  |          |                |          |                             |
| CB4856 CT X                                                                                    | 16395076                                                    | 16396949 | WBGene00017170 | F01G12.1 | F01G12.1                    |
| 0.105978715985862                                                                              | AGIWUR33324                                                 |          |                |          |                             |
| CB4856 CT X                                                                                    | 16398958                                                    | 16417063 | WBGene00020770 | eat-17   | T24D11.1                    |
| 0.0559757972637724                                                                             | AGIWUR9558;AGIWUR40096                                      |          |                |          |                             |
| CB4856 CT X                                                                                    | 16446197                                                    | 16451336 | WBGene00018187 | F38E9.5  | F38E9.5 0.228241904557912   |
| AGIWUR22680                                                                                    |                                                             |          |                |          |                             |
| CB4856 CT X                                                                                    | 16451942                                                    | 16452559 | WBGene00018186 | F38E9.4  | F38E9.4 0.127572586278109   |
| AGIWUR17619;AGIWUR24265;AGIWUR42297                                                            |                                                             |          |                |          |                             |
| CB4856 CT X                                                                                    | 16471058                                                    | 16474819 | WBGene00018184 | F38E9.1  | F38E9.1 0.998610276465795   |
| AGIWUR22012                                                                                    |                                                             |          |                |          |                             |
| CB4856 CT X                                                                                    | 16487481                                                    | 16489397 | WBGene00000281 | cah-3    | K05G3.3 -0.157572031529874  |
| AGIWUR12628                                                                                    |                                                             |          |                |          |                             |
| CB4856 CT X                                                                                    | 16494930                                                    | 16499875 | WBGene00019423 | K05G3.2  | K05G3.2 -0.0258399719863744 |
| AGIWUR7369                                                                                     |                                                             |          |                |          |                             |
| CB4856 CT X                                                                                    | 16501332                                                    | 16501943 | WBGene00019422 | K05G3.1  | K05G3.1 -0.246257305834958  |
| AGIWUR29717                                                                                    |                                                             |          |                |          |                             |
| CB4856 CT X                                                                                    | 16505248                                                    | 16507411 | WBGene00020795 | T25D1.3  | T25D1.3 -0.165649624304763  |
| AGIWUR19131                                                                                    |                                                             |          |                |          |                             |
| CB4856 CT X                                                                                    | 16518137                                                    | 16522295 | WBGene00020793 | T25D1.1  | T25D1.1 0.0899959281729306  |
| AGIWUR34205                                                                                    |                                                             |          |                |          |                             |
| CB4856 CT X                                                                                    | 16536837                                                    | 16540207 | WBGene00003933 | pat-9    | T27B1.2 0.858202081732962   |
| AGIWUR33944                                                                                    |                                                             |          |                |          |                             |
| CB4856 CT X                                                                                    | 16541330                                                    | 16551211 | WBGene00003883 | osm-1    | T27B1.1 0.125078133967593   |
| AGIWUR26249                                                                                    |                                                             |          |                |          |                             |
| CB4856 CT X                                                                                    | 16551166                                                    | 16553887 | WBGene00019519 | K08B5.2  | K08B5.2 0.488141176761028   |
| AGIWUR30619                                                                                    |                                                             |          |                |          |                             |
| CB4856 CT X                                                                                    | 16558444                                                    | 16562549 | WBGene00019518 | K08B5.1  | K08B5.1                     |
| 0.000884116332541929                                                                           | AGIWUR3014                                                  |          |                |          |                             |
| CB4856 CT X                                                                                    | 16595238                                                    | 16602238 | WBGene00000401 | cdh-9    | F59C12.1                    |
| 0.322212146233845                                                                              | AGIWUR44322                                                 |          |                |          |                             |
| CB4856 CT X                                                                                    | 16602445                                                    | 16602717 | WBGene00045272 | F59C12.4 | F59C12.4                    |
| -0.170170001325957                                                                             | AGIWUR17690;AGIWUR23844;AGIWUR25643;AGIWUR31519;AGIWUR37069 |          |                |          |                             |
| CB4856 CT X                                                                                    | 16603364                                                    | 16609524 | WBGene00019102 | F59C12.3 | F59C12.3                    |
| 0.185999193599161                                                                              | AGIWUR17001                                                 |          |                |          |                             |
| CB4856 CT X                                                                                    | 16613451                                                    | 16617675 | WBGene00015547 | ain-1    | C06G1.4 0.260898703304424   |
| AGIWUR1288;AGIWUR16458;AGIWUR27740;AGIWUR30057;AGIWUR30412;AGIWUR32412;AGIWUR32875;AGIWUR44566 |                                                             |          |                |          |                             |
| CB4856 CT X                                                                                    | 16621807                                                    | 16622739 | WBGene00015546 | C06G1.2  | C06G1.2 -0.222215212762883  |

|                                                 |   |                                                                        |          |                |                  |                     |
|-------------------------------------------------|---|------------------------------------------------------------------------|----------|----------------|------------------|---------------------|
| AGIWUR30202                                     |   |                                                                        |          |                |                  |                     |
| CB4856 CT                                       | X | 16633363                                                               | 16637633 | WBGene00015545 | C06G1.1 C06G1.1  | 0.0658185147011139  |
| AGIWUR18757                                     |   |                                                                        |          |                |                  |                     |
| CB4856 CT                                       | X | 16638226                                                               | 16662823 | WBGene00018373 | F43B10.1         | F43B10.1            |
| -0.145432077134529                              |   | AGIWUR10226;AGIWUR36301                                                |          |                |                  |                     |
| CB4856 CT                                       | X | 16665116                                                               | 16674732 | WBGene00018374 | tag-343 F43B10.2 |                     |
| 0.26549578519295                                |   | AGIWUR39613                                                            |          |                |                  |                     |
| CB4856 CT                                       | X | 16677340                                                               | 16677738 | WBGene00017727 | F22H10.3         | F22H10.3            |
| 0.0866521793910184                              |   | AGIWUR1554;AGIWUR10098;AGIWUR15778;AGIWUR17954;AGIWUR19306;AGIWUR23009 |          |                |                  |                     |
| CB4856 CT                                       | X | 16678488                                                               | 16679823 | WBGene00017726 | F22H10.2         | F22H10.2            |
| -0.591291265814824                              |   | AGIWUR52                                                               |          |                |                  |                     |
| CB4856 CT                                       | X | 16684414                                                               | 16687196 | WBGene00017729 | F22H10.5         | F22H10.5            |
| 0.292312081770434                               |   | AGIWUR34045;AGIWUR34560                                                |          |                |                  |                     |
| CB4856 CT                                       | X | 16689366                                                               | 16690860 | WBGene00017730 | F22H10.6         | F22H10.6            |
| -0.0623612838674656                             |   | AGIWUR18260                                                            |          |                |                  |                     |
| CB4856 CT                                       | X | 16702442                                                               | 16703440 | WBGene00017725 | F22H10.1         | F22H10.1            |
| -0.157588714854298                              |   | AGIWUR35049                                                            |          |                |                  |                     |
| CB4856 CT                                       | X | 16711681                                                               | 16720658 | WBGene00020657 | lgc-53 T21F2.1   | -0.0120008087861923 |
| AGIWUR6827;AGIWUR10514;AGIWUR34398              |   |                                                                        |          |                |                  |                     |
| CB4856 CT                                       | X | 16729559                                                               | 16744698 | WBGene00001837 | hda-4 C10E2.3    | 0.00819013622915321 |
| AGIWUR10698;AGIWUR13477;AGIWUR38203;AGIWUR41406 |   |                                                                        |          |                |                  |                     |
| CB4856 CT                                       | X | 16745753                                                               | 16748208 | WBGene00015673 | C10E2.2 C10E2.2  |                     |
| -0.00292587112489784                            |   | AGIWUR3308                                                             |          |                |                  |                     |
| CB4856 CT                                       | X | 16749755                                                               | 16751110 | WBGene00015674 | C10E2.4 C10E2.4  | -0.199182865389971  |
| AGIWUR16706                                     |   |                                                                        |          |                |                  |                     |
| CB4856 CT                                       | X | 16751864                                                               | 16753673 | WBGene00015675 | C10E2.5 C10E2.5  | 0.049244362902809   |
| AGIWUR2100;AGIWUR3033;AGIWUR11634               |   |                                                                        |          |                |                  |                     |
| CB4856 CT                                       | X | 16763153                                                               | 16766656 | WBGene00015672 | C10E2.1 C10E2.1  | -0.367411612384739  |
| AGIWUR44107                                     |   |                                                                        |          |                |                  |                     |
| CB4856 CT                                       | X | 16767422                                                               | 16770498 | WBGene00015676 | mct-6 C10E2.6    | -0.324686736922978  |
| AGIWUR17867                                     |   |                                                                        |          |                |                  |                     |
| CB4856 CT                                       | X | 16780994                                                               | 16782894 | WBGene00020144 | T01C8.3 T01C8.3  | -0.47761021792207   |
| AGIWUR41175                                     |   |                                                                        |          |                |                  |                     |
| CB4856 CT                                       | X | 16786438                                                               | 16787620 | WBGene00020143 | T01C8.2 T01C8.2  | -0.292316574538923  |
| AGIWUR42620                                     |   |                                                                        |          |                |                  |                     |
| CB4856 CT                                       | X | 16787632                                                               | 16790412 | WBGene00020145 | got-1.1 T01C8.4  | -0.0507840303572022 |
| AGIWUR3969                                      |   |                                                                        |          |                |                  |                     |
| CB4856 CT                                       | X | 16791347                                                               | 16793137 | WBGene00020146 | got-1.2 T01C8.5  | 0.272236482854606   |
| AGIWUR11961;AGIWUR17870;AGIWUR30233             |   |                                                                        |          |                |                  |                     |

|                                                                         |    |   |          |          |                |          |         |                     |
|-------------------------------------------------------------------------|----|---|----------|----------|----------------|----------|---------|---------------------|
| CB4856                                                                  | CT | X | 16796087 | 16803357 | WBGene00020142 | aak-2    | T01C8.1 | -0.0380200842417886 |
| AGIWUR2222;AGIWUR6304;AGIWUR17730;AGIWUR36784;AGIWUR37853;AGIWUR43105   |    |   |          |          |                |          |         |                     |
| CB4856                                                                  | CT | X | 16803368 | 16807125 | WBGene00003168 | mec-4    | T01C8.7 | -0.264329301402565  |
| AGIWUR16250                                                             |    |   |          |          |                |          |         |                     |
| CB4856                                                                  | CT | X | 16807461 | 16813673 | WBGene00000294 | cas-1    | F41G4.2 | 0.188946676131874   |
| AGIWUR13644;AGIWUR15303;AGIWUR21211;AGIWUR24406                         |    |   |          |          |                |          |         |                     |
| CB4856                                                                  | CT | X | 16816260 | 16819268 | WBGene00006067 | sto-5    | F41G4.3 | -0.218611917317617  |
| AGIWUR11224;AGIWUR13982;AGIWUR15700;AGIWUR16568;AGIWUR30756;AGIWUR40541 |    |   |          |          |                |          |         |                     |
| CB4856                                                                  | CT | X | 16829767 | 16830672 | WBGene00018308 | F41G4.4  | F41G4.4 | 0.633695455501016   |
| AGIWUR34367                                                             |    |   |          |          |                |          |         |                     |
| CB4856                                                                  | CT | X | 16833588 | 16836404 | WBGene00018310 | F41G4.7  | F41G4.7 | 0.00113015784178438 |
| AGIWUR8357;AGIWUR33677                                                  |    |   |          |          |                |          |         |                     |
| CB4856                                                                  | CT | X | 16841105 | 16842975 | WBGene00018307 | dyla-1   | F41G4.1 | -0.22058093557907   |
| AGIWUR325                                                               |    |   |          |          |                |          |         |                     |
| CB4856                                                                  | CT | X | 16843355 | 16845024 | WBGene00018311 | F41G4.8  | F41G4.8 | 0.457832868008609   |
| AGIWUR7728                                                              |    |   |          |          |                |          |         |                     |
| CB4856                                                                  | CT | X | 16845374 | 16862005 | WBGene00020632 | T20F7.5  | T20F7.5 | 0.00749854064810629 |
| AGIWUR8382;AGIWUR14936                                                  |    |   |          |          |                |          |         |                     |
| CB4856                                                                  | CT | X | 16866069 | 16869031 | WBGene00020633 | aakg-2   | T20F7.6 | -0.0842515801340191 |
| AGIWUR36879                                                             |    |   |          |          |                |          |         |                     |
| CB4856                                                                  | CT | X | 16872926 | 16878351 | WBGene00020630 | T20F7.1  | T20F7.1 | -0.161501065696338  |
| AGIWUR4889                                                              |    |   |          |          |                |          |         |                     |
| CB4856                                                                  | CT | X | 16878148 | 16880526 | WBGene00020634 | acs-9    | T20F7.7 | 0.0603159641072919  |
| AGIWUR18018;AGIWUR22812                                                 |    |   |          |          |                |          |         |                     |
| CB4856                                                                  | CT | X | 16891991 | 16893148 | WBGene00018203 | F39F10.3 |         | F39F10.3            |
| -0.222310226979717 AGIWUR33743                                          |    |   |          |          |                |          |         |                     |
| CB4856                                                                  | CT | X | 16894884 | 16895916 | WBGene00018202 | F39F10.2 |         | F39F10.2            |
| -0.59787026676371 AGIWUR36126                                           |    |   |          |          |                |          |         |                     |
| CB4856                                                                  | CT | X | 16902391 | 16904332 | WBGene00018204 | F39F10.4 |         | F39F10.4            |
| 0.109394381636527 AGIWUR4716                                            |    |   |          |          |                |          |         |                     |
| CB4856                                                                  | CT | X | 16913906 | 16916800 | WBGene00016255 | C30E1.6  | C30E1.6 | -0.0329646862636914 |
| AGIWUR22467;AGIWUR29826                                                 |    |   |          |          |                |          |         |                     |
| CB4856                                                                  | CT | X | 16916812 | 16919319 | WBGene00016257 | C30E1.8  | C30E1.8 | 0.163056889260565   |
| AGIWUR41597                                                             |    |   |          |          |                |          |         |                     |
| CB4856                                                                  | CT | X | 16921853 | 16922861 | WBGene00016254 | fbxb-114 |         | C30E1.5             |
| 0.603115952203518 AGIWUR31156                                           |    |   |          |          |                |          |         |                     |
| CB4856                                                                  | CT | X | 16923936 | 16925917 | WBGene00016253 | C30E1.4  | C30E1.4 | 0.0110982064234593  |
| AGIWUR42296                                                             |    |   |          |          |                |          |         |                     |
| CB4856                                                                  | CT | X | 16925954 | 16926821 | WBGene00016252 | C30E1.3  | C30E1.3 | 0.108399793214269   |



|                                                                                               |   |                         |          |                |          |          |                     |  |
|-----------------------------------------------------------------------------------------------|---|-------------------------|----------|----------------|----------|----------|---------------------|--|
| AGIWUR41174                                                                                   |   |                         |          |                |          |          |                     |  |
| CB4856 CT                                                                                     | X | 16926964                | 16928023 | WBGene00016251 | C30E1.2  | C30E1.2  | 0.114938190432508   |  |
| AGIWUR28158                                                                                   |   |                         |          |                |          |          |                     |  |
| CB4856 CT                                                                                     | X | 16929914                | 16931619 | WBGene00022951 | C30E1.9  | C30E1.9  | 0.409112331477328   |  |
| AGIWUR1340;AGIWUR1400;AGIWUR9127;AGIWUR14609;AGIWUR33336                                      |   |                         |          |                |          |          |                     |  |
| CB4856 CT                                                                                     | X | 16943323                | 16943517 | WBGene00219964 | F52G3.6  | F52G3.6  | 0.0981858045922177  |  |
| AGIWUR34273                                                                                   |   |                         |          |                |          |          |                     |  |
| CB4856 CT                                                                                     | X | 16944877                | 16948026 | WBGene00018711 | F52G3.3  | F52G3.3  | -0.381259498226356  |  |
| AGIWUR8520                                                                                    |   |                         |          |                |          |          |                     |  |
| CB4856 CT                                                                                     | X | 16948355                | 16952113 | WBGene00018712 | F52G3.4  | F52G3.4  | -0.0156805552602988 |  |
| AGIWUR27777                                                                                   |   |                         |          |                |          |          |                     |  |
| CB4856 CT                                                                                     | X | 16963871                | 16972808 | WBGene00018710 | F52G3.1  | F52G3.1  | 0.0804604032877236  |  |
| AGIWUR3424                                                                                    |   |                         |          |                |          |          |                     |  |
| CB4856 CT                                                                                     | X | 16973227                | 16976130 | WBGene00018713 | F52G3.5  | F52G3.5  | 0.482454301360907   |  |
| AGIWUR17329                                                                                   |   |                         |          |                |          |          |                     |  |
| CB4856 CT                                                                                     | X | 16986629                | 17008462 | WBGene00019347 | mb1-1    | K02H8.1  | -0.131330375102421  |  |
| AGIWUR10094;AGIWUR21006;AGIWUR27337;AGIWUR28511;AGIWUR33493;AGIWUR40744                       |   |                         |          |                |          |          |                     |  |
| CB4856 CT                                                                                     | X | 17013462                | 17014028 | WBGene00018030 | F35B3.3  | F35B3.3  | -0.186773920455424  |  |
| AGIWUR40040                                                                                   |   |                         |          |                |          |          |                     |  |
| CB4856 CT                                                                                     | X | 17015297                | 17017814 | WBGene00018028 | F35B3.1  | F35B3.1  | 0.498434660387305   |  |
| AGIWUR12954                                                                                   |   |                         |          |                |          |          |                     |  |
| CB4856 CT                                                                                     | X | 17019616                | 17020958 | WBGene00018031 | F35B3.4  | F35B3.4  | -0.687894092074473  |  |
| AGIWUR6234                                                                                    |   |                         |          |                |          |          |                     |  |
| CB4856 CT                                                                                     | X | 17021821                | 17030219 | WBGene00004121 | ptrn-1   | F35B3.5  | -0.0199665853824076 |  |
| AGIWUR2363;AGIWUR37820                                                                        |   |                         |          |                |          |          |                     |  |
| CB4856 CT                                                                                     | X | 17035206                | 17042985 | WBGene00018033 | F35B3.7  | F35B3.7  | 0.551547046531784   |  |
| AGIWUR16065                                                                                   |   |                         |          |                |          |          |                     |  |
| CB4856 CT                                                                                     | X | 17044115                | 17045497 | WBGene00016268 | C30G4.2  | C30G4.2  | 0.405819362501584   |  |
| AGIWUR30899                                                                                   |   |                         |          |                |          |          |                     |  |
| CB4856 CT                                                                                     | X | 17046261                | 17055581 | WBGene00001537 | gcy-11   | C30G4.3  | 0.328820572611519   |  |
| AGIWUR42669                                                                                   |   |                         |          |                |          |          |                     |  |
| CB4856 CT                                                                                     | X | 17056925                | 17072188 | WBGene00016269 | C30G4.4  | C30G4.4  | 0.371963809621736   |  |
| AGIWUR709;AGIWUR4881;AGIWUR5058;AGIWUR8872;AGIWUR31858;AGIWUR31945;AGIWUR37580;AGIWUR41091    |   |                         |          |                |          |          |                     |  |
| CB4856 CT                                                                                     | X | 17073810                | 17080685 | WBGene00016271 | ir1d-23  | C30G4.6  | -0.122783354591117  |  |
| AGIWUR155;AGIWUR11710;AGIWUR29104;AGIWUR29756;AGIWUR34987;AGIWUR36342;AGIWUR39395;AGIWUR43306 |   |                         |          |                |          |          |                     |  |
| CB4856 CT                                                                                     | X | 17081128                | 17082042 | WBGene00044773 | C08A9.10 | C08A9.10 |                     |  |
| 0.0255464423482774                                                                            |   | AGIWUR19873;AGIWUR22703 |          |                |          |          |                     |  |
| CB4856 CT                                                                                     | X | 17083162                | 17083742 | WBGene00045273 | C08A9.11 | C08A9.11 |                     |  |
| -0.33170069119787                                                                             |   | AGIWUR28514             |          |                |          |          |                     |  |

|                                                             |    |   |          |          |                |         |         |                     |
|-------------------------------------------------------------|----|---|----------|----------|----------------|---------|---------|---------------------|
| CB4856                                                      | CT | X | 17087882 | 17093299 | WBGene00015583 | C08A9.3 | C08A9.3 | 0.066585760829259   |
| AGIWUR10031;AGIWUR22743;AGIWUR23148;AGIWUR31283;AGIWUR39427 |    |   |          |          |                |         |         |                     |
| CB4856                                                      | CT | X | 17092718 | 17094223 | WBGene00004932 | sod-3   | C08A9.1 | 0.04902906111686    |
| AGIWUR31330                                                 |    |   |          |          |                |         |         |                     |
| CB4856                                                      | CT | X | 17094288 | 17096537 | WBGene00015586 | C08A9.6 | C08A9.6 | -0.0798237509472894 |
| AGIWUR30672                                                 |    |   |          |          |                |         |         |                     |
| CB4856                                                      | CT | X | 17099112 | 17100752 | WBGene00015587 | sdz-2   | C08A9.7 | 0.14300941967388    |
| AGIWUR13578;AGIWUR33350;AGIWUR38756                         |    |   |          |          |                |         |         |                     |
| CB4856                                                      | CT | X | 17102845 | 17104871 | WBGene00015588 | C08A9.8 | C08A9.8 |                     |
| -0.00966569520977867 AGIWUR24190;AGIWUR42370                |    |   |          |          |                |         |         |                     |
| CB4856                                                      | CT | X | 17109282 | 17110655 | WBGene00019576 | K09E3.5 | K09E3.5 | -0.443448908800503  |
| AGIWUR9689                                                  |    |   |          |          |                |         |         |                     |
| CB4856                                                      | CT | X | 17113965 | 17115189 | WBGene00019577 | K09E3.6 | K09E3.6 | 0.0483158350034723  |
| AGIWUR35743                                                 |    |   |          |          |                |         |         |                     |
| CB4856                                                      | CT | X | 17117659 | 17117988 | WBGene00019574 | K09E3.2 | K09E3.2 | -0.205014097338972  |
| AGIWUR2162                                                  |    |   |          |          |                |         |         |                     |
| CB4856                                                      | CT | X | 17119269 | 17120263 | WBGene00019575 | K09E3.4 | K09E3.4 | -0.387867029949181  |
| AGIWUR1080;AGIWUR6845;AGIWUR22791;AGIWUR24492               |    |   |          |          |                |         |         |                     |
| CB4856                                                      | CT | X | 17131348 | 17134527 | WBGene00019578 | K09E3.7 | K09E3.7 | -0.528545506589142  |
| AGIWUR19317                                                 |    |   |          |          |                |         |         |                     |
| CB4856                                                      | CT | X | 17135975 | 17138110 | WBGene00020725 | cnp-3   | T23C6.3 | 0.32051112585919    |
| AGIWUR12081                                                 |    |   |          |          |                |         |         |                     |
| CB4856                                                      | CT | X | 17147531 | 17149927 | WBGene00020726 | T23C6.4 | T23C6.4 | 0.27264959278876    |
| AGIWUR19464                                                 |    |   |          |          |                |         |         |                     |
| CB4856                                                      | CT | X | 17151522 | 17154595 | WBGene00007011 | mdt-1.2 | T23C6.1 | -0.273740470427096  |
| AGIWUR698                                                   |    |   |          |          |                |         |         |                     |
| CB4856                                                      | CT | X | 17155088 | 17157957 | WBGene00020727 | npr-21  | T23C6.5 | -0.217090648047247  |
| AGIWUR19735                                                 |    |   |          |          |                |         |         |                     |
| CB4856                                                      | CT | X | 17176490 | 17176777 | WBGene00015121 | B0302.4 | B0302.4 | 0.0361519547888491  |
| AGIWUR31228                                                 |    |   |          |          |                |         |         |                     |
| CB4856                                                      | CT | X | 17178539 | 17178992 | WBGene00015119 | B0302.2 | B0302.2 | -0.138383690977529  |
| AGIWUR36023                                                 |    |   |          |          |                |         |         |                     |
| CB4856                                                      | CT | X | 17186380 | 17193289 | WBGene00002207 | sid-3   | B0302.1 | 0.321396310538505   |
| AGIWUR9881                                                  |    |   |          |          |                |         |         |                     |
| CB4856                                                      | CT | X | 17193300 | 17195137 | WBGene00015122 | B0302.5 | B0302.5 | 0.204985220642664   |
| AGIWUR15536                                                 |    |   |          |          |                |         |         |                     |
| CB4856                                                      | CT | X | 17205243 | 17209365 | WBGene00020365 | T08G2.2 | T08G2.2 | 0.170081082639294   |
| AGIWUR13064                                                 |    |   |          |          |                |         |         |                     |
| CB4856                                                      | CT | X | 17213144 | 17214929 | WBGene00020366 | acdh-10 | T08G2.3 | 0.345288895475079   |

|                                     |    |   |                                                                        |          |                |                     |
|-------------------------------------|----|---|------------------------------------------------------------------------|----------|----------------|---------------------|
| AGIWUR21557;AGIWUR26581;AGIWUR38674 |    |   |                                                                        |          |                |                     |
| CB4856                              | CT | X | 17215018                                                               | 17217105 | WBGene00020812 | acdH-7 T25G12.5     |
| 0.293943530585434                   |    |   | AGIWUR35641                                                            |          |                |                     |
| CB4856                              | CT | X | 17222475                                                               | 17224464 | WBGene00004270 | rab-6.2 T25G12.4    |
| 0.100870663366932                   |    |   | AGIWUR5495;AGIWUR12185;AGIWUR18195;AGIWUR26907;AGIWUR33675;AGIWUR33764 |          |                |                     |
| CB4856                              | CT | X | 17225197                                                               | 17230208 | WBGene00020813 | T25G12.6 T25G12.6   |
| -0.219601717852964                  |    |   | AGIWUR6172;AGIWUR9894                                                  |          |                |                     |
| CB4856                              | CT | X | 17230719                                                               | 17235838 | WBGene00000993 | dhs-30 T25G12.7     |
| 0.0867051906636327                  |    |   | AGIWUR20085;AGIWUR42792                                                |          |                |                     |
| CB4856                              | CT | X | 17236933                                                               | 17237855 | WBGene00020817 | T25G12.11 T25G12.11 |
| 0.428795363329696                   |    |   | AGIWUR8755                                                             |          |                |                     |
| CB4856                              | CT | X | 17247674                                                               | 17248972 | WBGene00020810 | T25G12.2 T25G12.2   |
| -0.467801017947817                  |    |   | AGIWUR33125                                                            |          |                |                     |
| CB4856                              | CT | X | 17248837                                                               | 17250007 | WBGene00020809 | T25G12.1 T25G12.1   |
| -0.334234725943263                  |    |   | AGIWUR1918                                                             |          |                |                     |
| CB4856                              | CT | X | 17256235                                                               | 17256780 | WBGene00021500 | Y40C7B.4 Y40C7B.4   |
| -0.423276911101522                  |    |   | AGIWUR5826;AGIWUR10870;AGIWUR23992                                     |          |                |                     |
| CB4856                              | CT | X | 17258335                                                               | 17259585 | WBGene00021499 | Y40C7B.3 Y40C7B.3   |
| 0.0830286816245813                  |    |   | AGIWUR34942                                                            |          |                |                     |
| CB4856                              | CT | X | 17259889                                                               | 17263584 | WBGene00021498 | Y40C7B.1 Y40C7B.1   |
| 0.247513322085025                   |    |   | AGIWUR9091;AGIWUR15084                                                 |          |                |                     |
| CB4856                              | CT | X | 17263831                                                               | 17266460 | WBGene00021501 | Y40C7B.5 Y40C7B.5   |
| 0.312648694644479                   |    |   | AGIWUR40180                                                            |          |                |                     |
| CB4856                              | CT | X | 17266695                                                               | 17269960 | WBGene00016348 | C33E10.6 C33E10.6   |
| 0.1734495760908                     |    |   | AGIWUR39517                                                            |          |                |                     |
| CB4856                              | CT | X | 17272934                                                               | 17279532 | WBGene00016347 | C33E10.5 C33E10.5   |
| -0.0375061933999978                 |    |   | AGIWUR31699                                                            |          |                |                     |
| CB4856                              | CT | X | 17280761                                                               | 17283574 | WBGene00023246 | C33E10.4 C33E10.4   |
| -0.35208345327348                   |    |   | AGIWUR11057                                                            |          |                |                     |
| CB4856                              | CT | X | 17284339                                                               | 17285449 | WBGene00023245 | C33E10.3 C33E10.3   |
| 0.177516755498852                   |    |   | AGIWUR20722;AGIWUR33047                                                |          |                |                     |
| CB4856                              | CT | X | 17286274                                                               | 17287564 | WBGene00023247 | C33E10.7 C33E10.7   |
| 0.24488292777078                    |    |   | AGIWUR28214                                                            |          |                |                     |
| CB4856                              | CT | X | 17293094                                                               | 17294828 | WBGene00016349 | C33E10.8 C33E10.8   |
| -0.146264759490386                  |    |   | AGIWUR14047                                                            |          |                |                     |
| CB4856                              | CT | X | 17296644                                                               | 17297231 | WBGene00023248 | C33E10.9 C33E10.9   |
| -0.0985014007771627                 |    |   | AGIWUR4144;AGIWUR19105;AGIWUR19349;AGIWUR39258                         |          |                |                     |
| CB4856                              | CT | X | 17301374                                                               | 17301923 | WBGene00016350 | C33E10.10 C33E10.10 |
| -0.166419655038967                  |    |   | AGIWUR15483;AGIWUR32562                                                |          |                |                     |

|                                                                                    |                                                                        |          |                |                 |                     |
|------------------------------------------------------------------------------------|------------------------------------------------------------------------|----------|----------------|-----------------|---------------------|
| CB4856 CT X                                                                        | 17302719                                                               | 17303994 | WBGene00016346 | fbxa-120        | C33E10.2            |
| -0.0869931573334473                                                                | AGIWUR18344                                                            |          |                |                 |                     |
| CB4856 CT X                                                                        | 17305325                                                               | 17306164 | WBGene00016345 | C33E10.1        | C33E10.1            |
| 0.33462199593372                                                                   | AGIWUR34159                                                            |          |                |                 |                     |
| CB4856 CT X                                                                        | 17318584                                                               | 17326603 | WBGene00004220 | ptr-5           | C53C11.3            |
| 0.28023681444808                                                                   | AGIWUR18738                                                            |          |                |                 |                     |
| CB4856 CT X                                                                        | 17334052                                                               | 17336169 | WBGene00044770 | C53C11.5        | C53C11.5            |
| 0.300468479775298                                                                  | AGIWUR36267;AGIWUR38496                                                |          |                |                 |                     |
| CB4856 CT X                                                                        | 17337279                                                               | 17338632 | WBGene00016900 | C53C11.2        | C53C11.2            |
| 0.0670841152354393                                                                 | AGIWUR1053;AGIWUR10129;AGIWUR13719;AGIWUR15294;AGIWUR20496;AGIWUR31951 |          |                |                 |                     |
| CB4856 CT X                                                                        | 17339907                                                               | 17342220 | WBGene00016899 | C53C11.1        | C53C11.1            |
| 0.0193589120553055                                                                 | AGIWUR10071                                                            |          |                |                 |                     |
| CB4856 CT X                                                                        | 17359770                                                               | 17364764 | WBGene00017338 | F10D7.1 F10D7.1 | 0.348388092096862   |
| AGIWUR43231                                                                        |                                                                        |          |                |                 |                     |
| CB4856 CT X                                                                        | 17364646                                                               | 17368642 | WBGene00017339 | F10D7.2 F10D7.2 | 0.0378762354256974  |
| AGIWUR12776                                                                        |                                                                        |          |                |                 |                     |
| CB4856 CT X                                                                        | 17372318                                                               | 17374877 | WBGene00017340 | F10D7.3 F10D7.3 | 0.895340785694794   |
| AGIWUR41425                                                                        |                                                                        |          |                |                 |                     |
| CB4856 CT X                                                                        | 17378569                                                               | 17381818 | WBGene00017341 | F10D7.4 F10D7.4 | 0.247875770802453   |
| AGIWUR22452                                                                        |                                                                        |          |                |                 |                     |
| CB4856 CT X                                                                        | 17383125                                                               | 17391615 | WBGene00017342 | F10D7.5 F10D7.5 | 0.23401207145973    |
| AGIWUR1506;AGIWUR16573;AGIWUR19528;AGIWUR20197;AGIWUR29819;AGIWUR37849;AGIWUR44662 |                                                                        |          |                |                 |                     |
| CB4856 CT X                                                                        | 17393789                                                               | 17396556 | WBGene00006886 | vap-1 F11C7.3   | 0.143786424687493   |
| AGIWUR25126                                                                        |                                                                        |          |                |                 |                     |
| CB4856 CT X                                                                        | 17396814                                                               | 17397798 | WBGene00017376 | F11C7.2 F11C7.2 | 0.0544997118169519  |
| AGIWUR22548                                                                        |                                                                        |          |                |                 |                     |
| CB4856 CT X                                                                        | 17398593                                                               | 17399357 | WBGene00017379 | F11C7.7 F11C7.7 | -0.51184772437554   |
| AGIWUR29574                                                                        |                                                                        |          |                |                 |                     |
| CB4856 CT X                                                                        | 17401571                                                               | 17402581 | WBGene00017378 | F11C7.6 F11C7.6 | 1.60714418136593    |
| AGIWUR43595                                                                        |                                                                        |          |                |                 |                     |
| CB4856 CT X                                                                        | 17402540                                                               | 17414014 | WBGene00000792 | crb-1 F11C7.4   | 0.531472525394861   |
| AGIWUR8685;AGIWUR17055;AGIWUR28897                                                 |                                                                        |          |                |                 |                     |
| CB4856 CT X                                                                        | 17420211                                                               | 17421582 | WBGene00003891 | osm-11 F11C7.5  | -0.0451474244961183 |
| AGIWUR67;AGIWUR19910;AGIWUR40771                                                   |                                                                        |          |                |                 |                     |
| CB4856 CT X                                                                        | 17429042                                                               | 17433103 | WBGene00017375 | pbo-6 F11C7.1   | 0.0813593067250835  |
| AGIWUR26634                                                                        |                                                                        |          |                |                 |                     |
| CB4856 CT X                                                                        | 17434445                                                               | 17438080 | WBGene00016489 | C36E6.1 C36E6.1 | 0.0734850131562546  |
| AGIWUR10631;AGIWUR13541;AGIWUR41270                                                |                                                                        |          |                |                 |                     |
| CB4856 CT X                                                                        | 17438619                                                               | 17439751 | WBGene00044683 | C36E6.8 C36E6.8 | -0.222731201725136  |

|                                                                         |    |   |          |          |                 |          |          |                    |  |
|-------------------------------------------------------------------------|----|---|----------|----------|-----------------|----------|----------|--------------------|--|
| AGIWUR4420;AGIWUR11987;AGIWUR31569;AGIWUR37832                          |    |   |          |          |                 |          |          |                    |  |
| CB4856                                                                  | CT | X | 17452392 | 17455861 | WBGene00016490  | C36E6.2  | C36E6.2  | 0.0569321946076364 |  |
| AGIWUR29514                                                             |    |   |          |          |                 |          |          |                    |  |
| CB4856                                                                  | CT | X | 17459115 | 17460778 | WBGene00003369  | mlc-1    | C36E6.3  | 0.0940802653331403 |  |
| AGIWUR8479;AGIWUR21106;AGIWUR22126;AGIWUR26754;AGIWUR37052              |    |   |          |          |                 |          |          |                    |  |
| CB4856                                                                  | CT | X | 17460778 | 17464966 | WBGene00022647  | slc-17.1 |          | ZK54.1             |  |
| 0.138408366778211 AGIWUR15167;AGIWUR35072;AGIWUR40379;AGIWUR43365       |    |   |          |          |                 |          |          |                    |  |
| CB4856                                                                  | CT | X | 17467121 | 17474585 | WBGene00006602  | tps-1    | ZK54.2   | 0.5318478305105    |  |
| AGIWUR3579;AGIWUR8084;AGIWUR16998                                       |    |   |          |          |                 |          |          |                    |  |
| CB4856                                                                  | CT | X | 17479842 | 17480309 | WBGene00020085  | R106.1   | R106.1   | 0.0561513605184523 |  |
| AGIWUR7948                                                              |    |   |          |          |                 |          |          |                    |  |
| CB4856                                                                  | CT | X | 17480653 | 17481960 | WBGene000206419 | R106.5   | R106.5   | 0.291958249983034  |  |
| AGIWUR6816;AGIWUR8226;AGIWUR12105;AGIWUR15357;AGIWUR25111;AGIWUR39075   |    |   |          |          |                 |          |          |                    |  |
| CB4856                                                                  | CT | X | 17483012 | 17486831 | WBGene00020086  | npr-24   | R106.2   | -0.323486547882451 |  |
| AGIWUR20558                                                             |    |   |          |          |                 |          |          |                    |  |
| CB4856                                                                  | CT | X | 17518445 | 17528197 | WBGene00003600  | nhr-1    | R09G11.2 |                    |  |
| -0.289166289712641 AGIWUR2950;AGIWUR4048;AGIWUR32468;AGIWUR39789        |    |   |          |          |                 |          |          |                    |  |
| CB4856                                                                  | CT | X | 17528344 | 17531980 | WBGene00006319  | sup-10   | R09G11.1 |                    |  |
| -0.125253861962493 AGIWUR22302;AGIWUR35729;AGIWUR37633                  |    |   |          |          |                 |          |          |                    |  |
| CB4856                                                                  | CT | X | 17532976 | 17534064 | WBGene00017938  | F31A3.3  | F31A3.3  | 0.0726128324599671 |  |
| AGIWUR14131                                                             |    |   |          |          |                 |          |          |                    |  |
| CB4856                                                                  | CT | X | 17553419 | 17554449 | WBGene00000026  | abu-3    | F31A3.1  | -0.437496241122602 |  |
| AGIWUR19465                                                             |    |   |          |          |                 |          |          |                    |  |
| CB4856                                                                  | CT | X | 17554946 | 17561464 | WBGene00017939  | F31A3.5  | F31A3.5  | 0.134957984110739  |  |
| AGIWUR11105;AGIWUR12739;AGIWUR19710;AGIWUR33019;AGIWUR35493;AGIWUR43788 |    |   |          |          |                 |          |          |                    |  |
| CB4856                                                                  | CT | X | 17567643 | 17571923 | WBGene00018191  | frpr-7   | F39B3.2  | 0.0154478610626949 |  |
| AGIWUR17280                                                             |    |   |          |          |                 |          |          |                    |  |
| CB4856                                                                  | CT | X | 17578692 | 17579111 | WBGene00018192  | F39B3.3  | F39B3.3  | -0.219048814676775 |  |
| AGIWUR14256                                                             |    |   |          |          |                 |          |          |                    |  |
| CB4856                                                                  | CT | X | 17600412 | 17601503 | WBGene00002272  | lec-9    | C16H3.2  | -0.422822335408576 |  |
| AGIWUR23352                                                             |    |   |          |          |                 |          |          |                    |  |
| CB4856                                                                  | CT | X | 17601607 | 17610048 | WBGene00015868  | C16H3.3  | C16H3.3  | 0.504655317483913  |  |
| AGIWUR8937;AGIWUR32768                                                  |    |   |          |          |                 |          |          |                    |  |
| CB4856                                                                  | CT | X | 17617827 | 17619458 | WBGene00015867  | ncs-7    | C16H3.1  | 0.148867867267947  |  |
| AGIWUR9806                                                              |    |   |          |          |                 |          |          |                    |  |
| CB4856                                                                  | CT | X | 17622778 | 17640743 | WBGene00019211  | H18N23.2 |          | H18N23.2           |  |
| -0.157297647201759 AGIWUR637;AGIWUR9448;AGIWUR16628                     |    |   |          |          |                 |          |          |                    |  |
| CB4856                                                                  | CT | X | 17650178 | 17651594 | WBGene00044771  | tmem-218 |          | T23E7.5            |  |
| 0.227908140589406 AGIWUR2801;AGIWUR33791                                |    |   |          |          |                 |          |          |                    |  |

|                                                                                                                                                                                 |    |   |          |          |                |            |           |                     |
|---------------------------------------------------------------------------------------------------------------------------------------------------------------------------------|----|---|----------|----------|----------------|------------|-----------|---------------------|
| CB4856                                                                                                                                                                          | CT | X | 17662458 | 17665357 | WBGene00003744 | nlp-6      | T23E7.4   | 0.104303842021318   |
| AGIWUR7630;AGIWUR25902;AGIWUR28626;AGIWUR43164                                                                                                                                  |    |   |          |          |                |            |           |                     |
| CB4856                                                                                                                                                                          | CT | X | 17671029 | 17680793 | WBGene00020732 | T23E7.2    | T23E7.2   | 0.00346379109995532 |
| AGIWUR357;AGIWUR3225;AGIWUR7696;AGIWUR15128;AGIWUR17786;AGIWUR19744;AGIWUR22848;AGIWUR23185;AGIWUR24830;AGIWUR31754;AGIWUR36428;AGIWUR39375;AGIWUR41150;AGIWUR42827;AGIWUR42893 |    |   |          |          |                |            |           |                     |
| CB4856                                                                                                                                                                          | CT | X | 17680873 | 17682294 | WBGene00044772 | T23E7.6    | T23E7.6   | 0.431750345565563   |
| AGIWUR7154;AGIWUR11579;AGIWUR12544;AGIWUR17726;AGIWUR31690;AGIWUR35251;AGIWUR36341;AGIWUR39773;AGIWUR40382;AGIWUR41037                                                          |    |   |          |          |                |            |           |                     |
| CB4856                                                                                                                                                                          | CT | X | 17695232 | 17701744 | WBGene00017625 | cgt-2      | F20B4.6   | -0.0648034135036184 |
| AGIWUR4948;AGIWUR24597                                                                                                                                                          |    |   |          |          |                |            |           |                     |
| CB4856                                                                                                                                                                          | CT | X | 17710286 | 17711674 | WBGene00019189 | H11L12.1   |           | H11L12.1            |
| -0.368230833890074 AGIWUR6383                                                                                                                                                   |    |   |          |          |                |            |           |                     |
| CB4856                                                                                                                                                                          | CT | X | 17714456 | 17714832 | WBGene00007069 | 6R55.2     | 6R55.2    | 0.297793249128711   |
| AGIWUR33343                                                                                                                                                                     |    |   |          |          |                |            |           |                     |
| CB4856                                                                                                                                                                          | CT | X | 17714968 | 17718720 | WBGene00007068 | cTel155X.1 |           | cTel155X.1          |
| 0.143756083965009 AGIWUR19047;AGIWUR34189;AGIWUR43038                                                                                                                           |    |   |          |          |                |            |           |                     |
| CB4856                                                                                                                                                                          | HS | I | 3747     | 3909     | WBGene00023193 | Y74C9A.6   | Y74C9A.6  | -0.0638729388243746 |
| AGIWUR10283                                                                                                                                                                     |    |   |          |          |                |            |           |                     |
| CB4856                                                                                                                                                                          | HS | I | 4116     | 10230    | WBGene00022277 | homt-1     | Y74C9A.3  | 0.170399528920694   |
| AGIWUR36142                                                                                                                                                                     |    |   |          |          |                |            |           |                     |
| CB4856                                                                                                                                                                          | HS | I | 11495    | 16837    | WBGene00022276 | nlp-40     | Y74C9A.2  | 0.202642824704027   |
| AGIWUR15573;AGIWUR25172                                                                                                                                                         |    |   |          |          |                |            |           |                     |
| CB4856                                                                                                                                                                          | HS | I | 17487    | 26781    | WBGene00022278 | rcor-1     | Y74C9A.4  | -0.113960474831748  |
| AGIWUR26476                                                                                                                                                                     |    |   |          |          |                |            |           |                     |
| CB4856                                                                                                                                                                          | HS | I | 27591    | 32544    | WBGene00022279 | sesn-1     | Y74C9A.5  | -0.0147297760134588 |
| AGIWUR22971                                                                                                                                                                     |    |   |          |          |                |            |           |                     |
| CB4856                                                                                                                                                                          | HS | I | 43733    | 44677    | WBGene00022275 | Y74C9A.1   | Y74C9A.1  | 0.0777562103428995  |
| AGIWUR5034                                                                                                                                                                      |    |   |          |          |                |            |           |                     |
| CB4856                                                                                                                                                                          | HS | I | 47467    | 49857    | WBGene00044345 | Y48G1C.12  | Y48G1C.12 | -0.0258824115892047 |
| AGIWUR8212;AGIWUR32887;AGIWUR43575                                                                                                                                              |    |   |          |          |                |            |           |                     |
| CB4856                                                                                                                                                                          | HS | I | 49919    | 54426    | WBGene00021677 | pgs-1      | Y48G1C.4  | 0.206686921371077   |
| AGIWUR6338;AGIWUR29294;AGIWUR41966                                                                                                                                              |    |   |          |          |                |            |           |                     |
| CB4856                                                                                                                                                                          | HS | I | 55293    | 64066    | WBGene00021678 | Y48G1C.5   | Y48G1C.5  | 0.196056689983467   |
| AGIWUR12519                                                                                                                                                                     |    |   |          |          |                |            |           |                     |
| CB4856                                                                                                                                                                          | HS | I | 71425    | 81071    | WBGene00000812 | csk-1      | Y48G1C.2  | -0.0916375415062856 |
| AGIWUR18740;AGIWUR27071;AGIWUR29609;AGIWUR40038                                                                                                                                 |    |   |          |          |                |            |           |                     |
| CB4856                                                                                                                                                                          | HS | I | 81193    | 91020    | WBGene00021683 | Y48G1C.10  | Y48G1C.10 | -0.0211154215768303 |
| AGIWUR1487;AGIWUR6768;AGIWUR17886                                                                                                                                               |    |   |          |          |                |            |           |                     |
| CB4856                                                                                                                                                                          | HS | I | 91380    | 92877    | WBGene00021682 | Y48G1C.9   | Y48G1C.9  | -0.0248408216099927 |

|                                                                                                                                 |    |   |        |        |                |           |           |                     |
|---------------------------------------------------------------------------------------------------------------------------------|----|---|--------|--------|----------------|-----------|-----------|---------------------|
| AGIWUR6641;AGIWUR16497;AGIWUR29495                                                                                              |    |   |        |        |                |           |           |                     |
| CB4856                                                                                                                          | HS | I | 93024  | 94884  | WBGene00021676 | Y48G1C.1  | Y48G1C.1  | -0.251224355083117  |
| AGIWUR20733                                                                                                                     |    |   |        |        |                |           |           |                     |
| CB4856                                                                                                                          | HS | I | 96544  | 108223 | WBGene00021681 | Y48G1C.8  | Y48G1C.8  | 0.00100207776777061 |
| AGIWUR2118;AGIWUR4958;AGIWUR17289;AGIWUR20729;AGIWUR23172;AGIWUR25122;AGIWUR30532;AGIWUR33151;AGIWUR37921                       |    |   |        |        |                |           |           |                     |
| CB4856                                                                                                                          | HS | I | 108670 | 110107 | WBGene00004274 | rab-11.1  | F53G12.1  | -0.121482365779149  |
| AGIWUR7280;AGIWUR18237                                                                                                          |    |   |        |        |                |           |           |                     |
| CB4856                                                                                                                          | HS | I | 111038 | 112417 | WBGene00004418 | rp1-7     | F53G12.10 | -0.2186478264165    |
| AGIWUR2263;AGIWUR3392;AGIWUR5751;AGIWUR6722;AGIWUR12865;AGIWUR17613;AGIWUR21588;AGIWUR25879;AGIWUR34428;AGIWUR39201;AGIWUR39669 |    |   |        |        |                |           |           |                     |
| CB4856                                                                                                                          | HS | I | 112285 | 113721 | WBGene00018774 | F53G12.9  | F53G12.9  | -0.142370033144544  |
| AGIWUR6433;AGIWUR10455;AGIWUR10794;AGIWUR22121;AGIWUR25979;AGIWUR27830;AGIWUR36366;AGIWUR36737                                  |    |   |        |        |                |           |           |                     |
| CB4856                                                                                                                          | HS | I | 113807 | 114704 | WBGene00018773 | F53G12.8  | F53G12.8  | 0.0825537295346388  |
| AGIWUR11234;AGIWUR20914                                                                                                         |    |   |        |        |                |           |           |                     |
| CB4856                                                                                                                          | HS | I | 115739 | 117438 | WBGene00000622 | col-45    | F53G12.7  | -0.355786957818967  |
| AGIWUR14279                                                                                                                     |    |   |        |        |                |           |           |                     |
| CB4856                                                                                                                          | HS | I | 118109 | 120870 | WBGene00004962 | spe-8     | F53G12.6  | -0.059565312643783  |
| AGIWUR621;AGIWUR6081;AGIWUR40104;AGIWUR43527                                                                                    |    |   |        |        |                |           |           |                     |
| CB4856                                                                                                                          | HS | I | 127297 | 134065 | WBGene00003229 | mex-3     | F53G12.5  | -0.018656198852927  |
| AGIWUR13975;AGIWUR29437;AGIWUR44108                                                                                             |    |   |        |        |                |           |           |                     |
| CB4856                                                                                                                          | HS | I | 134337 | 137282 | WBGene00018772 | F53G12.4  | F53G12.4  | 0.0624840084958045  |
| AGIWUR42484                                                                                                                     |    |   |        |        |                |           |           |                     |
| CB4856                                                                                                                          | HS | I | 146486 | 154850 | WBGene00000253 | bli-3     | F56C11.1  | 0.067170012506427   |
| AGIWUR3807                                                                                                                      |    |   |        |        |                |           |           |                     |
| CB4856                                                                                                                          | HS | I | 160172 | 166819 | WBGene00004225 | ptr-11    | F56C11.2  | -0.0257082566502422 |
| AGIWUR42837                                                                                                                     |    |   |        |        |                |           |           |                     |
| CB4856                                                                                                                          | HS | I | 171340 | 175989 | WBGene00018958 | F56C11.6  | F56C11.6  | 0.175014595253923   |
| AGIWUR6883                                                                                                                      |    |   |        |        |                |           |           |                     |
| CB4856                                                                                                                          | HS | I | 178538 | 182161 | WBGene00018957 | F56C11.5  | F56C11.5  | 0.0346959790784709  |
| AGIWUR2702                                                                                                                      |    |   |        |        |                |           |           |                     |
| CB4856                                                                                                                          | HS | I | 182079 | 182772 | WBGene00018955 | F56C11.3  | F56C11.3  | -0.252833600068859  |
| AGIWUR23793                                                                                                                     |    |   |        |        |                |           |           |                     |
| CB4856                                                                                                                          | HS | I | 183364 | 208465 | WBGene00000227 | atm-1     | Y48G1BL.2 | -0.145551962478674  |
| AGIWUR463;AGIWUR33245;AGIWUR38423;AGIWUR39307                                                                                   |    |   |        |        |                |           |           |                     |
| CB4856                                                                                                                          | HS | I | 216028 | 216996 | WBGene00021662 | snpc-3.3  | Y48G1BL.1 | 0.0085835979427209  |
| AGIWUR11670                                                                                                                     |    |   |        |        |                |           |           |                     |
| CB4856                                                                                                                          | HS | I | 219735 | 221575 | WBGene00021664 | Y48G1BL.5 | Y48G1BL.5 | -0.518961524352756  |
| AGIWUR13754                                                                                                                     |    |   |        |        |                |           |           |                     |
| CB4856                                                                                                                          | HS | I | 238616 | 239021 | WBGene00021672 | Y48G1BM.7 | Y48G1BM.7 | 0.331898927649096   |

|                                                                                                                                                           |    |   |        |        |                |           |           |                                  |
|-----------------------------------------------------------------------------------------------------------------------------------------------------------|----|---|--------|--------|----------------|-----------|-----------|----------------------------------|
| AGIWUR38722                                                                                                                                               |    |   |        |        |                |           |           |                                  |
| CB4856                                                                                                                                                    | HS | I | 240491 | 245414 | WBGene00021668 | Y48G1BM.2 | Y48G1BM.2 | 0.0155364952597354               |
| AGIWUR29927                                                                                                                                               |    |   |        |        |                |           |           |                                  |
| CB4856                                                                                                                                                    | HS | I | 248624 | 251580 | WBGene00021673 | Y48G1BM.8 | Y48G1BM.8 | -0.0926296549405574              |
| AGIWUR38995                                                                                                                                               |    |   |        |        |                |           |           |                                  |
| CB4856                                                                                                                                                    | HS | I | 252118 | 254277 | WBGene00021667 | snpc-3.2  | Y48G1BM.1 | -0.1033490817349                 |
| AGIWUR11205                                                                                                                                               |    |   |        |        |                |           |           |                                  |
| CB4856                                                                                                                                                    | HS | I | 254277 | 259157 | WBGene00021675 | Y48G1BR.1 | Y48G1BR.1 | -0.00106599261597662             |
| AGIWUR4179;AGIWUR5959;AGIWUR23967;AGIWUR27432;AGIWUR32377;AGIWUR37148;AGIWUR43002;AGIWUR43138                                                             |    |   |        |        |                |           |           |                                  |
| CB4856                                                                                                                                                    | HS | I | 280120 | 280445 | WBGene00016904 | C53D5.3   | C53D5.3   | 0.017865048408984 AGIWUR33409    |
| CB4856                                                                                                                                                    | HS | I | 283500 | 286115 | WBGene00016903 | marc-4    | C53D5.2   | 0.262366735176013 AGIWUR3252     |
| CB4856                                                                                                                                                    | HS | I | 286088 | 289185 | WBGene00016905 | ztf-3     | C53D5.4   | -0.233211872551177 AGIWUR12744   |
| CB4856                                                                                                                                                    | HS | I | 291215 | 305468 | WBGene00016902 | C53D5.1   | C53D5.1   | 0.0898828946465962 AGIWUR2825    |
| CB4856                                                                                                                                                    | HS | I | 305811 | 311130 | WBGene00016906 | C53D5.5   | C53D5.5   | -0.00763641092232703 AGIWUR41850 |
| CB4856                                                                                                                                                    | HS | I | 310981 | 314989 | WBGene00002077 | imb-3     | C53D5.6   | 0.144237180871436                |
| AGIWUR3906;AGIWUR8209;AGIWUR34608                                                                                                                         |    |   |        |        |                |           |           |                                  |
| CB4856                                                                                                                                                    | HS | I | 318390 | 323352 | WBGene00002079 | xpo-2     | Y48G1A.5  | -0.0606892703874458              |
| AGIWUR26191                                                                                                                                               |    |   |        |        |                |           |           |                                  |
| CB4856                                                                                                                                                    | HS | I | 323855 | 330978 | WBGene00021660 | Y48G1A.4  | Y48G1A.4  | 0.00599141263635872              |
| AGIWUR8979                                                                                                                                                |    |   |        |        |                |           |           |                                  |
| CB4856                                                                                                                                                    | HS | I | 332611 | 337839 | WBGene00000917 | daf-25    | Y48G1A.3  | -0.174191069504914               |
| AGIWUR35344                                                                                                                                               |    |   |        |        |                |           |           |                                  |
| CB4856                                                                                                                                                    | HS | I | 343069 | 348424 | WBGene00021661 | mbtr-1    | Y48G1A.6  | -0.023290811551103               |
| AGIWUR1177                                                                                                                                                |    |   |        |        |                |           |           |                                  |
| CB4856                                                                                                                                                    | HS | I | 348460 | 357193 | WBGene00021657 | Y48G1A.1  | Y48G1A.1  | 0.0718102505281806               |
| AGIWUR10987                                                                                                                                               |    |   |        |        |                |           |           |                                  |
| CB4856                                                                                                                                                    | HS | I | 357240 | 363901 | WBGene00020087 | R119.1    | R119.1    | 0.136771229599988 AGIWUR25426    |
| CB4856                                                                                                                                                    | HS | I | 364510 | 368319 | WBGene00020091 | rnp-8     | R119.7    | -0.20208533621572 AGIWUR25376    |
| CB4856                                                                                                                                                    | HS | I | 368370 | 373445 | WBGene00020088 | R119.2    | R119.2    | -0.0686763073694188 AGIWUR10202  |
| CB4856                                                                                                                                                    | HS | I | 373571 | 379073 | WBGene00020089 | R119.3    | R119.3    | 0.190430985787749                |
| AGIWUR3041;AGIWUR17217;AGIWUR27220;AGIWUR29433;AGIWUR30374;AGIWUR42548                                                                                    |    |   |        |        |                |           |           |                                  |
| CB4856                                                                                                                                                    | HS | I | 379071 | 381902 | WBGene00004143 | pqn-59    | R119.4    | -0.304534325999025               |
| AGIWUR5926;AGIWUR7401;AGIWUR13641;AGIWUR16067;AGIWUR19397;AGIWUR19860;AGIWUR21791;AGIWUR26455;AGIWUR28874;AGIWUR32613;AGIWUR36219;AGIWUR36591;AGIWUR38419 |    |   |        |        |                |           |           |                                  |
| CB4856                                                                                                                                                    | HS | I | 382648 | 388564 | WBGene00006385 | taf-4     | R119.6    | 0.138064871069137 AGIWUR11265    |
| CB4856                                                                                                                                                    | HS | I | 388470 | 394415 | WBGene00020090 | R119.5    | R119.5    | 0.0834229793000816               |
| AGIWUR1299;AGIWUR1860                                                                                                                                     |    |   |        |        |                |           |           |                                  |
| CB4856                                                                                                                                                    | HS | I | 398891 | 412915 | WBGene00021733 | otub-2    | Y50C1A.1  | 0.0173532718419569               |



AGIWUR9308;AGIWUR14492;AGIWUR36666

|        |    |   |        |        |                |          |          |                    |
|--------|----|---|--------|--------|----------------|----------|----------|--------------------|
| CB4856 | HS | I | 412911 | 418660 | WBGene00021734 | Y50C1A.2 | Y50C1A.2 | 0.0476350585129328 |
|--------|----|---|--------|--------|----------------|----------|----------|--------------------|

AGIWUR12911

|        |    |   |        |        |                |          |          |                     |
|--------|----|---|--------|--------|----------------|----------|----------|---------------------|
| CB4856 | HS | I | 420922 | 423713 | WBGene00015570 | C07F11.2 | C07F11.2 | -0.0467666666274074 |
|--------|----|---|--------|--------|----------------|----------|----------|---------------------|

AGIWUR14464

|        |    |   |        |        |                |       |          |                    |
|--------|----|---|--------|--------|----------------|-------|----------|--------------------|
| CB4856 | HS | I | 443999 | 461605 | WBGene00006593 | tol-1 | C07F11.1 | 0.0690484624873591 |
|--------|----|---|--------|--------|----------------|-------|----------|--------------------|

AGIWUR2677;AGIWUR10919;AGIWUR11990;AGIWUR12403;AGIWUR13788;AGIWUR18746;AGIWUR19485;AGIWUR26817;AGIWUR32956;  
AGIWUR39071;AGIWUR41796

|        |    |   |        |        |                |         |         |                      |             |
|--------|----|---|--------|--------|----------------|---------|---------|----------------------|-------------|
| CB4856 | HS | I | 461995 | 462651 | WBGene00021026 | W04C9.4 | W04C9.4 | -0.00320311173495647 | AGIWUR40613 |
|--------|----|---|--------|--------|----------------|---------|---------|----------------------|-------------|

|        |    |   |        |        |                |         |         |                    |             |
|--------|----|---|--------|--------|----------------|---------|---------|--------------------|-------------|
| CB4856 | HS | I | 462657 | 467131 | WBGene00021027 | W04C9.5 | W04C9.5 | 0.0300776821809752 | AGIWUR32438 |
|--------|----|---|--------|--------|----------------|---------|---------|--------------------|-------------|

|        |    |   |        |        |                |         |         |                     |
|--------|----|---|--------|--------|----------------|---------|---------|---------------------|
| CB4856 | HS | I | 477582 | 481954 | WBGene00021025 | cutl-13 | W04C9.3 | -0.0266988573168065 |
|--------|----|---|--------|--------|----------------|---------|---------|---------------------|

AGIWUR7157;AGIWUR17034;AGIWUR44870

|        |    |   |        |        |                |         |         |                     |             |
|--------|----|---|--------|--------|----------------|---------|---------|---------------------|-------------|
| CB4856 | HS | I | 482040 | 483880 | WBGene00235388 | W04C9.9 | W04C9.9 | -0.0459325369913808 | AGIWUR43955 |
|--------|----|---|--------|--------|----------------|---------|---------|---------------------|-------------|

|        |    |   |        |        |                |         |         |                   |            |
|--------|----|---|--------|--------|----------------|---------|---------|-------------------|------------|
| CB4856 | HS | I | 488607 | 489905 | WBGene00021024 | W04C9.2 | W04C9.2 | 0.236234457217456 | AGIWUR6890 |
|--------|----|---|--------|--------|----------------|---------|---------|-------------------|------------|

|        |    |   |        |        |                |       |         |                    |             |
|--------|----|---|--------|--------|----------------|-------|---------|--------------------|-------------|
| CB4856 | HS | I | 489969 | 496150 | WBGene00001814 | haf-4 | W04C9.1 | 0.0227661565541197 | AGIWUR32786 |
|--------|----|---|--------|--------|----------------|-------|---------|--------------------|-------------|

|        |    |   |        |        |                |           |           |                     |
|--------|----|---|--------|--------|----------------|-----------|-----------|---------------------|
| CB4856 | HS | I | 496144 | 502042 | WBGene00022035 | Y65B4BL.3 | Y65B4BL.3 | -0.0535299218661933 |
|--------|----|---|--------|--------|----------------|-----------|-----------|---------------------|

AGIWUR355

|        |    |   |        |        |                |           |           |                    |
|--------|----|---|--------|--------|----------------|-----------|-----------|--------------------|
| CB4856 | HS | I | 502932 | 506250 | WBGene00022036 | Y65B4BL.4 | Y65B4BL.4 | -0.046418647314777 |
|--------|----|---|--------|--------|----------------|-----------|-----------|--------------------|

AGIWUR42967

|        |    |   |        |        |                |        |           |                     |
|--------|----|---|--------|--------|----------------|--------|-----------|---------------------|
| CB4856 | HS | I | 506469 | 509056 | WBGene00022034 | deps-1 | Y65B4BL.2 | -0.0329429828755128 |
|--------|----|---|--------|--------|----------------|--------|-----------|---------------------|

AGIWUR44389

|        |    |   |        |        |                |        |           |                   |
|--------|----|---|--------|--------|----------------|--------|-----------|-------------------|
| CB4856 | HS | I | 511052 | 519800 | WBGene00022037 | acs-13 | Y65B4BL.5 | 0.133734258809252 |
|--------|----|---|--------|--------|----------------|--------|-----------|-------------------|

AGIWUR5213;AGIWUR6411;AGIWUR12098;AGIWUR26016;AGIWUR28762;AGIWUR30485;AGIWUR41922

|        |    |   |        |        |                |           |           |                    |
|--------|----|---|--------|--------|----------------|-----------|-----------|--------------------|
| CB4856 | HS | I | 520109 | 521554 | WBGene00022038 | Y65B4BL.6 | Y65B4BL.6 | -0.147363218824144 |
|--------|----|---|--------|--------|----------------|-----------|-----------|--------------------|

AGIWUR10694;AGIWUR14351;AGIWUR18806;AGIWUR24805;AGIWUR30981;AGIWUR33410;AGIWUR36376;AGIWUR36747;AGIWUR36896  
;AGIWUR42899;AGIWUR44259

|        |    |   |        |        |                |           |           |                    |
|--------|----|---|--------|--------|----------------|-----------|-----------|--------------------|
| CB4856 | HS | I | 530969 | 533084 | WBGene00022033 | Y65B4BL.1 | Y65B4BL.1 | 0.0241428722391746 |
|--------|----|---|--------|--------|----------------|-----------|-----------|--------------------|

AGIWUR40224

|        |    |   |        |        |                |       |           |                   |
|--------|----|---|--------|--------|----------------|-------|-----------|-------------------|
| CB4856 | HS | I | 534455 | 535344 | WBGene00022043 | psf-3 | Y65B4BR.8 | 0.133917757679875 |
|--------|----|---|--------|--------|----------------|-------|-----------|-------------------|

AGIWUR31655

|        |    |   |        |        |                |       |           |                   |
|--------|----|---|--------|--------|----------------|-------|-----------|-------------------|
| CB4856 | HS | I | 535791 | 536670 | WBGene00022042 | icd-2 | Y65B4BR.5 | 0.145497107997686 |
|--------|----|---|--------|--------|----------------|-------|-----------|-------------------|

AGIWUR5033;AGIWUR8895;AGIWUR9943;AGIWUR17402;AGIWUR44103;AGIWUR45197

|        |    |   |        |        |                |       |           |                      |
|--------|----|---|--------|--------|----------------|-------|-----------|----------------------|
| CB4856 | HS | I | 537122 | 542200 | WBGene00007009 | wwp-1 | Y65B4BR.4 | -0.00985585434123593 |
|--------|----|---|--------|--------|----------------|-------|-----------|----------------------|

AGIWUR1688;AGIWUR20352;AGIWUR38522

|        |    |   |        |        |                |        |           |                    |
|--------|----|---|--------|--------|----------------|--------|-----------|--------------------|
| CB4856 | HS | I | 550696 | 556638 | WBGene00004235 | ptr-21 | Y65B4BR.3 | -0.346126176638592 |
|--------|----|---|--------|--------|----------------|--------|-----------|--------------------|

AGIWUR8387

|        |    |   |        |        |                |       |           |                    |
|--------|----|---|--------|--------|----------------|-------|-----------|--------------------|
| CB4856 | HS | I | 557375 | 561671 | WBGene00002393 | lpr-1 | Y65B4BR.2 | 0.0741047651047513 |
|--------|----|---|--------|--------|----------------|-------|-----------|--------------------|

AGIWUR5420

|        |    |   |        |        |                |           |           |                    |
|--------|----|---|--------|--------|----------------|-----------|-----------|--------------------|
| CB4856 | HS | I | 562736 | 565181 | WBGene00022040 | Y65B4BR.1 | Y65B4BR.1 | 0.0565786242292745 |
|--------|----|---|--------|--------|----------------|-----------|-----------|--------------------|

|                                                                        |    |   |        |        |                |           |           |                                |
|------------------------------------------------------------------------|----|---|--------|--------|----------------|-----------|-----------|--------------------------------|
| AGIWUR36108                                                            |    |   |        |        |                |           |           |                                |
| CB4856                                                                 | HS | I | 565436 | 566414 | WBGene00000434 | ceh-9     | Y65B4BR.9 | 0.000810425066123166           |
| AGIWUR20254;AGIWUR37142                                                |    |   |        |        |                |           |           |                                |
| CB4856                                                                 | HS | I | 572177 | 575120 | WBGene00001725 | grl-16    | Y65B4BR.6 | -0.165286017261989             |
| AGIWUR7933;AGIWUR10290;AGIWUR17115                                     |    |   |        |        |                |           |           |                                |
| CB4856                                                                 | HS | I | 582288 | 583748 | WBGene00044427 | F56A6.5   | F56A6.5   | 0.592413451579023              |
| AGIWUR5027;AGIWUR22482;AGIWUR31223                                     |    |   |        |        |                |           |           |                                |
| CB4856                                                                 | HS | I | 585831 | 607601 | WBGene00002040 | hum-7     | F56A6.2   | -0.118966554452991 AGIWUR35233 |
| CB4856                                                                 | HS | I | 614651 | 629444 | WBGene00018923 | eme-1     | F56A6.4   | -0.0564845348264544            |
| AGIWUR9658;AGIWUR17702;AGIWUR40576                                     |    |   |        |        |                |           |           |                                |
| CB4856                                                                 | HS | I | 629492 | 636350 | WBGene00022029 | Y65B4A.6  | Y65B4A.6  | -0.137991494068471             |
| AGIWUR16088                                                            |    |   |        |        |                |           |           |                                |
| CB4856                                                                 | HS | I | 636804 | 637852 | WBGene00022027 | vps-20    | Y65B4A.3  | -0.223423271459492             |
| AGIWUR2007;AGIWUR15178;AGIWUR23419;AGIWUR28868;AGIWUR29377;AGIWUR42530 |    |   |        |        |                |           |           |                                |
| CB4856                                                                 | HS | I | 638129 | 653986 | WBGene00022026 | Y65B4A.2  | Y65B4A.2  | 0.00853518352329097            |
| AGIWUR28421                                                            |    |   |        |        |                |           |           |                                |
| CB4856                                                                 | HS | I | 654090 | 658810 | WBGene00022025 | Y65B4A.1  | Y65B4A.1  | 0.129520806739176              |
| AGIWUR30815                                                            |    |   |        |        |                |           |           |                                |
| CB4856                                                                 | HS | I | 659557 | 663686 | WBGene00022031 | Y65B4A.8  | Y65B4A.8  | -0.402169737030698             |
| AGIWUR33639                                                            |    |   |        |        |                |           |           |                                |
| CB4856                                                                 | HS | I | 667615 | 674413 | WBGene00044461 | Y18H1A.14 | Y18H1A.14 | 0.0796004366289562             |
| AGIWUR26159;AGIWUR30290                                                |    |   |        |        |                |           |           |                                |
| CB4856                                                                 | HS | I | 682876 | 686599 | WBGene00021214 | hasp-2    | Y18H1A.10 | 0.186142265617033              |
| AGIWUR12962                                                            |    |   |        |        |                |           |           |                                |
| CB4856                                                                 | HS | I | 688286 | 691267 | WBGene00021207 | Y18H1A.1  | Y18H1A.1  | -0.0612689818905459            |
| AGIWUR42845                                                            |    |   |        |        |                |           |           |                                |
| CB4856                                                                 | HS | I | 692026 | 694948 | WBGene00021210 | Y18H1A.4  | Y18H1A.4  | 0.0752787470470953             |
| AGIWUR32934;AGIWUR40014                                                |    |   |        |        |                |           |           |                                |
| CB4856                                                                 | HS | I | 694982 | 698322 | WBGene00021208 | Y18H1A.2  | Y18H1A.2  | -0.20956653156645              |
| AGIWUR21289                                                            |    |   |        |        |                |           |           |                                |
| CB4856                                                                 | HS | I | 700274 | 715874 | WBGene00021209 | hgap-1    | Y18H1A.3  | -0.111426637737547             |
| AGIWUR7556;AGIWUR13243;AGIWUR29984;AGIWUR33686;AGIWUR39061;AGIWUR39297 |    |   |        |        |                |           |           |                                |
| CB4856                                                                 | HS | I | 717893 | 719816 | WBGene00004332 | rec-1     | Y18H1A.7  | 0.0503079051091078             |
| AGIWUR12224                                                            |    |   |        |        |                |           |           |                                |
| CB4856                                                                 | HS | I | 719929 | 731078 | WBGene00004028 | pif-1     | Y18H1A.6  | -0.175951143255894             |
| AGIWUR23096                                                            |    |   |        |        |                |           |           |                                |
| CB4856                                                                 | HS | I | 731068 | 736552 | WBGene00044434 | Y18H1A.15 | Y18H1A.15 | 0.0486432392954708             |
| AGIWUR8664                                                             |    |   |        |        |                |           |           |                                |
| CB4856                                                                 | HS | I | 741913 | 745570 | WBGene00000623 | col-46    | Y18H1A.13 | -0.063627378931379             |

|                                                                                                                                                                      |    |   |        |         |                |           |           |                                 |
|----------------------------------------------------------------------------------------------------------------------------------------------------------------------|----|---|--------|---------|----------------|-----------|-----------|---------------------------------|
| AGIWUR13435                                                                                                                                                          |    |   |        |         |                |           |           |                                 |
| CB4856                                                                                                                                                               | HS | I | 748228 | 757010  | WBGene00021213 | Y18H1A.9  | Y18H1A.9  | -0.151631708333202              |
| AGIWUR1232                                                                                                                                                           |    |   |        |         |                |           |           |                                 |
| CB4856                                                                                                                                                               | HS | I | 758756 | 760429  | WBGene00021212 | Y18H1A.8  | Y18H1A.8  | -0.573718305694603              |
| AGIWUR19119                                                                                                                                                          |    |   |        |         |                |           |           |                                 |
| CB4856                                                                                                                                                               | HS | I | 760848 | 761849  | WBGene00020282 | mps-3     | T06A4.2   | 0.0668777006940129 AGIWUR43985  |
| CB4856                                                                                                                                                               | HS | I | 763597 | 770720  | WBGene00020283 | T06A4.3   | T06A4.3   | 0.051519140085345 AGIWUR4393    |
| CB4856                                                                                                                                                               | HS | I | 770892 | 776369  | WBGene00020281 | T06A4.1   | T06A4.1   | 0.0486042903782966 AGIWUR22830  |
| CB4856                                                                                                                                                               | HS | I | 803368 | 835277  | WBGene00022518 | zfh-2     | ZC123.3   | 0.0369552139487004              |
| AGIWUR8335;AGIWUR26889;AGIWUR32482;AGIWUR36028;AGIWUR37303;AGIWUR42904                                                                                               |    |   |        |         |                |           |           |                                 |
| CB4856                                                                                                                                                               | HS | I | 837996 | 841746  | WBGene00022517 | ZC123.1   | ZC123.1   | -0.00178150411630762            |
| AGIWUR1437;AGIWUR5409;AGIWUR11894;AGIWUR21175;AGIWUR35381;AGIWUR36327                                                                                                |    |   |        |         |                |           |           |                                 |
| CB4856                                                                                                                                                               | HS | I | 841742 | 846763  | WBGene00022519 | ZC123.4   | ZC123.4   | -0.134954974945129              |
| AGIWUR20395;AGIWUR21786;AGIWUR27160;AGIWUR33235;AGIWUR38509                                                                                                          |    |   |        |         |                |           |           |                                 |
| CB4856                                                                                                                                                               | HS | I | 853451 | 872103  | WBGene00022388 | Y95B8A.8  | Y95B8A.8  | -0.047109895897572              |
| AGIWUR12290;AGIWUR40942                                                                                                                                              |    |   |        |         |                |           |           |                                 |
| CB4856                                                                                                                                                               | HS | I | 873164 | 882713  | WBGene00022389 | pde-6     | Y95B8A.10 | -0.0465456522310683             |
| AGIWUR2879;AGIWUR8164;AGIWUR17662;AGIWUR23206;AGIWUR27165;AGIWUR27349                                                                                                |    |   |        |         |                |           |           |                                 |
| CB4856                                                                                                                                                               | HS | I | 882918 | 890194  | WBGene00022386 | Y95B8A.6  | Y95B8A.6  | -0.116217105997588              |
| AGIWUR26061;AGIWUR39290;AGIWUR39599                                                                                                                                  |    |   |        |         |                |           |           |                                 |
| CB4856                                                                                                                                                               | HS | I | 897286 | 906077  | WBGene00001678 | gpa-16    | Y95B8A.5  | -0.205298792368232              |
| AGIWUR36673                                                                                                                                                          |    |   |        |         |                |           |           |                                 |
| CB4856                                                                                                                                                               | HS | I | 907448 | 911189  | WBGene00022385 | Y95B8A.4  | Y95B8A.4  | 0.0714571251017215              |
| AGIWUR27919                                                                                                                                                          |    |   |        |         |                |           |           |                                 |
| CB4856                                                                                                                                                               | HS | I | 912415 | 926877  | WBGene00022391 | Y95B8A.12 | Y95B8A.12 | 0.356672516592886               |
| AGIWUR20888;AGIWUR31755                                                                                                                                              |    |   |        |         |                |           |           |                                 |
| CB4856                                                                                                                                                               | HS | I | 938464 | 941773  | WBGene00022383 | Y95B8A.2  | Y95B8A.2  | -0.200304599922975              |
| AGIWUR3724;AGIWUR34637                                                                                                                                               |    |   |        |         |                |           |           |                                 |
| CB4856                                                                                                                                                               | HS | I | 942257 | 947710  | WBGene00003548 | nas-30    | Y95B8A.1  | -0.424114881447744              |
| AGIWUR13336                                                                                                                                                          |    |   |        |         |                |           |           |                                 |
| CB4856                                                                                                                                                               | HS | I | 948569 | 957404  | WBGene00003238 | mig-1     | Y34D9B.1  | 0.180875533281627               |
| AGIWUR19889;AGIWUR24156;AGIWUR39680;AGIWUR41925                                                                                                                      |    |   |        |         |                |           |           |                                 |
| CB4856                                                                                                                                                               | HS | I | 963700 | 969426  | WBGene00018787 | cutl-20   | F54A5.2   | -0.0716584892502805 AGIWUR36883 |
| CB4856                                                                                                                                                               | HS | I | 969089 | 976550  | WBGene00018788 | shc-1     | F54A5.3   | -0.099527241440045              |
| AGIWUR1520;AGIWUR6328;AGIWUR7799;AGIWUR16360;AGIWUR21266;AGIWUR22224;AGIWUR23180;AGIWUR24163;AGIWUR25177;AGIWUR28900;AGIWUR30401;AGIWUR31527;AGIWUR33487;AGIWUR43199 |    |   |        |         |                |           |           |                                 |
| CB4856                                                                                                                                                               | HS | I | 989671 | 992181  | WBGene00018786 | hmbx-1    | F54A5.1   | 0.048947753346257               |
| AGIWUR17420;AGIWUR21529;AGIWUR26430;AGIWUR28932;AGIWUR31846;AGIWUR38211                                                                                              |    |   |        |         |                |           |           |                                 |
| CB4856                                                                                                                                                               | HS | I | 996045 | 1005066 | WBGene00016932 | C54G6.3   | C54G6.3   | -0.0292105693358264             |

AGIWUR22;AGIWUR16210;AGIWUR29308;AGIWUR31907;AGIWUR35462;AGIWUR41023  
 CB4856 HS I 1006102 1010765 WBGene00016931 C54G6.2 C54G6.2 0.0496262389571447 AGIWUR6501  
 CB4856 HS I 1011371 1014455 WBGene00016930 madf-6 C54G6.1 -0.144336270804803  
 AGIWUR5134;AGIWUR11965;AGIWUR20597;AGIWUR20929;AGIWUR32037  
 CB4856 HS I 1016403 1017180 WBGene00005002 spp-17 C54G6.5 -0.0178949118317178 AGIWUR29378  
 CB4856 HS I 1018835 1019229 WBGene00021335 spp-23 Y34D9A.11 0.281071658360508  
 AGIWUR9839;AGIWUR10201;AGIWUR16077;AGIWUR24534;AGIWUR34141;AGIWUR39770  
 CB4856 HS I 1019827 1029910 WBGene00021327 mrp1-38 Y34D9A.1 0.0738029875045676  
 AGIWUR42178  
 CB4856 HS I 1030629 1033436 WBGene00004952 spd-1 Y34D9A.4 0.0124609125303987  
 AGIWUR8339;AGIWUR10414;AGIWUR10601;AGIWUR13233;AGIWUR34053  
 CB4856 HS I 1034443 1040868 WBGene00021329 Y34D9A.3 Y34D9A.3 0.0431519778862697  
 AGIWUR17558;AGIWUR19082;AGIWUR25332;AGIWUR28801;AGIWUR35935;AGIWUR41040;AGIWUR41363  
 CB4856 HS I 1041474 1048329 WBGene00021332 Y34D9A.7 Y34D9A.7 -0.140225681031264  
 AGIWUR3469  
 CB4856 HS I 1049596 1050727 WBGene00021331 glrx-10 Y34D9A.6 -0.122188968829928  
 AGIWUR11461  
 CB4856 HS I 1050921 1053826 WBGene00021333 Y34D9A.8 Y34D9A.8 -0.0485120015529965  
 AGIWUR13006;AGIWUR14778;AGIWUR23259;AGIWUR23416;AGIWUR24085;AGIWUR32213  
 CB4856 HS I 1053894 1066899 WBGene00021334 vps-4 Y34D9A.10 0.00292114802717691  
 AGIWUR2517;AGIWUR33071;AGIWUR33422  
 CB4856 HS I 1068484 1075010 WBGene00001745 gsa-1 R06A10.2 -0.113588148081714  
 AGIWUR7028  
 CB4856 HS I 1084630 1088473 WBGene00019909 R06A10.1 R06A10.1 -0.0677025062420364  
 AGIWUR12833  
 CB4856 HS I 1088514 1089742 WBGene00044895 R06A10.5 R06A10.5 0.119756364889785  
 AGIWUR8078;AGIWUR13536;AGIWUR18834;AGIWUR20617;AGIWUR32661  
 CB4856 HS I 1089666 1095796 WBGene00019911 R06A10.4 R06A10.4 0 AGIWUR18722  
 CB4856 HS I 1112418 1115501 WBGene000236809 ZK993.5 ZK993.5 0.0957752660734963 AGIWUR41688  
 CB4856 HS I 1128324 1131737 WBGene00022837 ceh-45 ZK993.1 -0.382077370654365 AGIWUR30087  
 CB4856 HS I 1136371 1154386 WBGene00021689 Y48G8AL.10 Y48G8AL.10 -0.0722303399400097  
 AGIWUR4185;AGIWUR5373;AGIWUR25625  
 CB4856 HS I 1154511 1156020 WBGene00000165 aps-3 Y48G8AL.14 -0.0398261226006049  
 AGIWUR10923  
 CB4856 HS I 1156579 1157474 WBGene00004429 rpl-17 Y48G8AL.8 0.340011748043729  
 AGIWUR4065;AGIWUR7333;AGIWUR10981;AGIWUR14030;AGIWUR16076;AGIWUR16834;AGIWUR21488;AGIWUR22895;AGIWUR33449;A  
 GIWUR37938;AGIWUR38748;AGIWUR41085;AGIWUR41517  
 CB4856 HS I 1157571 1162939 WBGene00021687 Y48G8AL.7 Y48G8AL.7 -0.0424744818324001  
 AGIWUR25543

|                                                                                     |   |         |         |                |            |            |                      |
|-------------------------------------------------------------------------------------|---|---------|---------|----------------|------------|------------|----------------------|
| CB4856 HS                                                                           | I | 1162880 | 1175868 | WBGene00001816 | haf-6      | Y48G8AL.11 | 0.129085247535169    |
| AGIWUR20067                                                                         |   |         |         |                |            |            |                      |
| CB4856 HS                                                                           | I | 1176471 | 1190829 | WBGene00004880 | smg-2      | Y48G8AL.6  | 0.0236776959572911   |
| AGIWUR59                                                                            |   |         |         |                |            |            |                      |
| CB4856 HS                                                                           | I | 1193158 | 1211434 | WBGene00021686 | Y48G8AL.5  | Y48G8AL.5  | -0.098079418443894   |
| AGIWUR18159;AGIWUR45123                                                             |   |         |         |                |            |            |                      |
| CB4856 HS                                                                           | I | 1211485 | 1254669 | WBGene00021685 | herc-1     | Y48G8AL.1  | -0.154748888744555   |
| AGIWUR13334                                                                         |   |         |         |                |            |            |                      |
| CB4856 HS                                                                           | I | 1254770 | 1258258 | WBGene00021692 | Y48G8AL.15 | Y48G8AL.15 | -0.0634693958043879  |
| AGIWUR13059;AGIWUR26397;AGIWUR27751                                                 |   |         |         |                |            |            |                      |
| CB4856 HS                                                                           | I | 1259374 | 1268155 | WBGene00001707 | grh-1      | Y48G8AR.1  | -0.100915517126134   |
| AGIWUR17365                                                                         |   |         |         |                |            |            |                      |
| CB4856 HS                                                                           | I | 1282101 | 1285435 | WBGene00021693 | Y48G8AR.2  | Y48G8AR.2  | 0.285220212063036    |
| AGIWUR39120                                                                         |   |         |         |                |            |            |                      |
| CB4856 HS                                                                           | I | 1287304 | 1287959 | WBGene00021694 | Y48G8AR.3  | Y48G8AR.3  | -0.0617004151095824  |
| AGIWUR41090                                                                         |   |         |         |                |            |            |                      |
| CB4856 HS                                                                           | I | 1305562 | 1328348 | WBGene00003400 | dapk-1     | K12C11.4   | 0.00835135904397255  |
| AGIWUR11986                                                                         |   |         |         |                |            |            |                      |
| CB4856 HS                                                                           | I | 1332698 | 1334074 | WBGene00044896 | K12C11.5   | K12C11.5   | 0.0957486330305972   |
| AGIWUR7756;AGIWUR20555;AGIWUR32336                                                  |   |         |         |                |            |            |                      |
| CB4856 HS                                                                           | I | 1335321 | 1336867 | WBGene00019674 | K12C11.3   | K12C11.3   | -0.00872502771207451 |
| AGIWUR13813;AGIWUR27282;AGIWUR39984;AGIWUR42143                                     |   |         |         |                |            |            |                      |
| CB4856 HS                                                                           | I | 1337012 | 1338216 | WBGene00045052 | K12C11.6   | K12C11.6   | -0.0489437538279756  |
| AGIWUR12512;AGIWUR16762;AGIWUR45006                                                 |   |         |         |                |            |            |                      |
| CB4856 HS                                                                           | I | 1338749 | 1339773 | WBGene00045053 | K12C11.7   | K12C11.7   | 0.00295450620017945  |
| AGIWUR14477;AGIWUR15520;AGIWUR29050;AGIWUR30108;AGIWUR34743;AGIWUR36565;AGIWUR42371 |   |         |         |                |            |            |                      |
| CB4856 HS                                                                           | I | 1340678 | 1341258 | WBGene00004888 | smo-1      | K12C11.2   | -0.227141652148998   |
| AGIWUR36454;AGIWUR38737                                                             |   |         |         |                |            |            |                      |
| CB4856 HS                                                                           | I | 1341218 | 1344692 | WBGene00019673 | K12C11.1   | K12C11.1   | 0.125195295520645    |
| AGIWUR3302;AGIWUR43117                                                              |   |         |         |                |            |            |                      |
| CB4856 HS                                                                           | I | 1348503 | 1359595 | WBGene00022363 | Y92H12BL.1 | Y92H12BL.1 | -0.110158121866348   |
| AGIWUR15759;AGIWUR28550;AGIWUR44414                                                 |   |         |         |                |            |            |                      |
| CB4856 HS                                                                           | I | 1365309 | 1376409 | WBGene00022366 | Y92H12BL.5 | Y92H12BL.5 | -0.10593894631662    |
| AGIWUR35560                                                                         |   |         |         |                |            |            |                      |
| CB4856 HS                                                                           | I | 1376942 | 1385057 | WBGene00022365 | Y92H12BL.4 | Y92H12BL.4 | -0.0300362483451657  |
| AGIWUR6416;AGIWUR23727                                                              |   |         |         |                |            |            |                      |
| CB4856 HS                                                                           | I | 1385818 | 1392759 | WBGene00022367 | Y92H12BM.1 | Y92H12BM.1 | -0.175698600335751   |
| AGIWUR24013;AGIWUR35109                                                             |   |         |         |                |            |            |                      |
| CB4856 HS                                                                           | I | 1394569 | 1402975 | WBGene00022372 | Y92H12BR.7 | Y92H12BR.7 | -0.0333362012750644  |



|                                                                                                         |    |   |         |         |                |            |            |                     |
|---------------------------------------------------------------------------------------------------------|----|---|---------|---------|----------------|------------|------------|---------------------|
| CB4856                                                                                                  | HS | I | 1621346 | 1628476 | WBGene00000269 | bre-4      | Y73E7A.7   | -0.314896778458092  |
| AGIWUR34680                                                                                             |    |   |         |         |                |            |            |                     |
| CB4856                                                                                                  | HS | I | 1629003 | 1633498 | WBGene00022268 | Y73E7A.1   | Y73E7A.1   | -0.048857484472598  |
| AGIWUR1633;AGIWUR3458;AGIWUR3977;AGIWUR7843;AGIWUR11159;AGIWUR21506;AGIWUR22736;AGIWUR23690;AGIWUR42544 |    |   |         |         |                |            |            |                     |
| CB4856                                                                                                  | HS | I | 1634613 | 1644107 | WBGene00022274 | Y73E7A.8   | Y73E7A.8   | -0.0136568673423056 |
| AGIWUR20107                                                                                             |    |   |         |         |                |            |            |                     |
| CB4856                                                                                                  | HS | I | 1644588 | 1651394 | WBGene00003111 | mab-20     | Y71G12B.20 | -0.146413425077525  |
| AGIWUR27582;AGIWUR40456                                                                                 |    |   |         |         |                |            |            |                     |
| CB4856                                                                                                  | HS | I | 1652901 | 1655399 | WBGene00022156 | Y71G12B.18 | Y71G12B.18 | 0.37685751066466    |
| AGIWUR116                                                                                               |    |   |         |         |                |            |            |                     |
| CB4856                                                                                                  | HS | I | 1655616 | 1656726 | WBGene00004168 | pqn-88     | Y71G12B.21 | 0.146946858103963   |
| AGIWUR26050                                                                                             |    |   |         |         |                |            |            |                     |
| CB4856                                                                                                  | HS | I | 1657513 | 1663331 | WBGene00044358 | Y71G12B.33 | Y71G12B.33 | -0.0355831993913549 |
| AGIWUR2249;AGIWUR8734;AGIWUR20752;AGIWUR30652                                                           |    |   |         |         |                |            |            |                     |
| CB4856                                                                                                  | HS | I | 1667501 | 1669792 | WBGene00022155 | Y71G12B.17 | Y71G12B.17 | 0.0412701926227825  |
| AGIWUR42831                                                                                             |    |   |         |         |                |            |            |                     |
| CB4856                                                                                                  | HS | I | 1670036 | 1672742 | WBGene00022158 | Y71G12B.23 | Y71G12B.23 | 0.0395194201313451  |
| AGIWUR5132;AGIWUR11929;AGIWUR32676                                                                      |    |   |         |         |                |            |            |                     |
| CB4856                                                                                                  | HS | I | 1680450 | 1685063 | WBGene00022154 | drag-1     | Y71G12B.16 | 0.151288883231198   |
| AGIWUR35035                                                                                             |    |   |         |         |                |            |            |                     |
| CB4856                                                                                                  | HS | I | 1686216 | 1693457 | WBGene00044348 | Y71G12B.31 | Y71G12B.31 | -0.0255828671277127 |
| AGIWUR1166;AGIWUR4811;AGIWUR35486                                                                       |    |   |         |         |                |            |            |                     |
| CB4856                                                                                                  | HS | I | 1698094 | 1701128 | WBGene00006702 | ubc-3      | Y71G12B.15 | 0.0822398837731182  |
| AGIWUR4490;AGIWUR30533                                                                                  |    |   |         |         |                |            |            |                     |
| CB4856                                                                                                  | HS | I | 1701361 | 1701808 | WBGene00003080 | lsm-6      | Y71G12B.14 | 0.0740917481062411  |
| AGIWUR4447;AGIWUR11056                                                                                  |    |   |         |         |                |            |            |                     |
| CB4856                                                                                                  | HS | I | 1702105 | 1708008 | WBGene00022153 | Y71G12B.13 | Y71G12B.13 | -0.116226626706201  |
| AGIWUR12172                                                                                             |    |   |         |         |                |            |            |                     |
| CB4856                                                                                                  | HS | I | 1709587 | 1715568 | WBGene00022152 | atg-5      | Y71G12B.12 | -0.116134231531964  |
| AGIWUR7357;AGIWUR29374;AGIWUR37289                                                                      |    |   |         |         |                |            |            |                     |
| CB4856                                                                                                  | HS | I | 1721592 | 1740670 | WBGene00006771 | tln-1      | Y71G12B.11 | -0.0130393428753433 |
| AGIWUR12058;AGIWUR13591;AGIWUR32962;AGIWUR33419;AGIWUR38217;AGIWUR43568                                 |    |   |         |         |                |            |            |                     |
| CB4856                                                                                                  | HS | I | 1740647 | 1751055 | WBGene00022159 | mppa-1     | Y71G12B.24 | -0.14837953751711   |
| AGIWUR24046                                                                                             |    |   |         |         |                |            |            |                     |
| CB4856                                                                                                  | HS | I | 1751481 | 1754410 | WBGene00022150 | Y71G12B.10 | Y71G12B.10 | 0.177605190796125   |
| AGIWUR41998                                                                                             |    |   |         |         |                |            |            |                     |
| CB4856                                                                                                  | HS | I | 1755329 | 1766400 | WBGene00022149 | lin-65     | Y71G12B.9  | 0.10353519826974    |
| AGIWUR776;AGIWUR21654                                                                                   |    |   |         |         |                |            |            |                     |
| CB4856                                                                                                  | HS | I | 1767887 | 1790157 | WBGene00022148 | ddx-27     | Y71G12B.8  | -0.186479062779927  |





|                                                                                                 |    |   |         |         |                |            |           |                     |             |
|-------------------------------------------------------------------------------------------------|----|---|---------|---------|----------------|------------|-----------|---------------------|-------------|
| CB4856                                                                                          | HS | I | 1895161 | 1923088 | WBGene00022138 | trpp-10    | Y71G12A.2 | -0.0813325828372498 |             |
| AGIWUR19988;AGIWUR29483                                                                         |    |   |         |         |                |            |           |                     |             |
| CB4856                                                                                          | HS | I | 1924300 | 1932260 | WBGene00021766 | hex-4      | Y51F10.5  | 0.0694610079954892  |             |
| AGIWUR620                                                                                       |    |   |         |         |                |            |           |                     |             |
| CB4856                                                                                          | HS | I | 1932352 | 1945212 | WBGene00021765 | Y51F10.4   | Y51F10.4  | -0.06848525019352   |             |
| AGIWUR33035                                                                                     |    |   |         |         |                |            |           |                     |             |
| CB4856                                                                                          | HS | I | 1950594 | 1958527 | WBGene00021771 | spe-48     | Y51F10.10 | -0.0991310389651368 |             |
| AGIWUR38998                                                                                     |    |   |         |         |                |            |           |                     |             |
| CB4856                                                                                          | HS | I | 1958707 | 1965267 | WBGene00044438 | Y51F10.11  | Y51F10.11 | -0.0451433164666    |             |
| AGIWUR3528;AGIWUR6982;AGIWUR40531                                                               |    |   |         |         |                |            |           |                     |             |
| CB4856                                                                                          | HS | I | 1967772 | 1973882 | WBGene00021764 | Y51F10.3   | Y51F10.3  | -0.0793688004050246 |             |
| AGIWUR6418                                                                                      |    |   |         |         |                |            |           |                     |             |
| CB4856                                                                                          | HS | I | 1977993 | 1983436 | WBGene00021763 | Y51F10.2   | Y51F10.2  | -0.22062966872944   |             |
| AGIWUR19000                                                                                     |    |   |         |         |                |            |           |                     |             |
| CB4856                                                                                          | HS | I | 1988246 | 2010525 | WBGene00021238 | gap-3      | Y20F4.3   | -0.0891858513900914 |             |
| AGIWUR11087;AGIWUR20405;AGIWUR25539;AGIWUR31637;AGIWUR32847;AGIWUR44046                         |    |   |         |         |                |            |           |                     |             |
| CB4856                                                                                          | HS | I | 2026277 | 2033966 | WBGene00021237 | crtc-1     | Y20F4.2   | -0.142207083785683  | AGIWUR16307 |
| CB4856                                                                                          | HS | I | 2034383 | 2043805 | WBGene00021239 | Y20F4.4    | Y20F4.4   | 0.0845001379566925  | AGIWUR3718  |
| CB4856                                                                                          | HS | I | 2049140 | 2050177 | WBGene00044435 | Y20F4.8    | Y20F4.8   | 0.141984914136401   |             |
| AGIWUR4442;AGIWUR5343;AGIWUR18496                                                               |    |   |         |         |                |            |           |                     |             |
| CB4856                                                                                          | HS | I | 2061667 | 2064077 | WBGene00021346 | Y37E3.1    | Y37E3.1   | -0.193894035358696  | AGIWUR16488 |
| CB4856                                                                                          | HS | I | 2064909 | 2065481 | WBGene00021348 | moag-4     | Y37E3.4   | 0.0528498264175497  | AGIWUR5629  |
| CB4856                                                                                          | HS | I | 2065727 | 2069049 | WBGene00021349 | arl-13     | Y37E3.5   | 1.03430502973335    | AGIWUR20970 |
| CB4856                                                                                          | HS | I | 2069086 | 2069587 | WBGene00004409 | rla-1      | Y37E3.7   | -0.297036379403735  |             |
| AGIWUR3039;AGIWUR4288;AGIWUR14249;AGIWUR27765;AGIWUR37184;AGIWUR40288                           |    |   |         |         |                |            |           |                     |             |
| CB4856                                                                                          | HS | I | 2069681 | 2070607 | WBGene00021350 | Y37E3.8    | Y37E3.8   | 0.00108583487145175 |             |
| AGIWUR13326;AGIWUR16500;AGIWUR18905;AGIWUR33748;AGIWUR34085;AGIWUR35002;AGIWUR38325;AGIWUR39997 |    |   |         |         |                |            |           |                     |             |
| CB4856                                                                                          | HS | I | 2071352 | 2072547 | WBGene00004014 | phb-1      | Y37E3.9   | 0.277187093692497   | AGIWUR8000  |
| CB4856                                                                                          | HS | I | 2072680 | 2076906 | WBGene00021351 | eif-2alpha | Y37E3.10  | -0.0218148987259799 |             |
| AGIWUR6037;AGIWUR23060;AGIWUR26110;AGIWUR41959                                                  |    |   |         |         |                |            |           |                     |             |
| CB4856                                                                                          | HS | I | 2078959 | 2085662 | WBGene00021352 | Y37E3.11   | Y37E3.11  | 0.177262911024004   |             |
| AGIWUR2995                                                                                      |    |   |         |         |                |            |           |                     |             |
| CB4856                                                                                          | HS | I | 2085673 | 2093822 | WBGene00021353 | iglr-3     | Y37E3.13  | 0.0637709920375382  |             |
| AGIWUR15489;AGIWUR30008                                                                         |    |   |         |         |                |            |           |                     |             |
| CB4856                                                                                          | HS | I | 2097346 | 2123443 | WBGene00003799 | npp-13     | Y37E3.15  | -0.141440757022012  |             |
| AGIWUR11120;AGIWUR13240                                                                         |    |   |         |         |                |            |           |                     |             |
| CB4856                                                                                          | HS | I | 2128590 | 2145971 | WBGene00021355 | Y37E3.17   | Y37E3.17  | 0.103615266667338   |             |
| AGIWUR25279                                                                                     |    |   |         |         |                |            |           |                     |             |
| CB4856                                                                                          | HS | I | 2160042 | 2209629 | WBGene00021009 | afd-1      | W03F11.6  | -0.100476525303865  |             |

AGIWUR4041;AGIWUR5559;AGIWUR9161;AGIWUR9303;AGIWUR14028;AGIWUR14832;AGIWUR15541;AGIWUR17457;AGIWUR21460;AGI  
 WUR36718;AGIWUR37855;AGIWUR39179;AGIWUR39762  
 CB4856 HS I 2216100 2219479 WBGene00021008 W03F11.5 W03F11.5 -0.0597271458318822  
 AGIWUR42538  
 CB4856 HS I 2219471 2222313 WBGene00021005 ule-1 W03F11.1 0.0581220065154753  
 AGIWUR3046  
 CB4856 HS I 2223307 2233099 WBGene00001542 gcy-17 W03F11.2 0.0235840028280663  
 AGIWUR33861  
 CB4856 HS I 2233744 2234957 WBGene00021006 dct-9 W03F11.3 0.154860303101897  
 AGIWUR22187  
 CB4856 HS I 2235617 2241210 WBGene00021007 W03F11.4 W03F11.4 0.287570393040646  
 AGIWUR9560  
 CB4856 HS I 2242230 2247223 WBGene00017399 lgc-51 F12B6.3 0.197256292162152 AGIWUR28630  
 CB4856 HS I 2250131 2254901 WBGene00017398 slc-17.6 F12B6.2 -0.0430907286120705  
 AGIWUR20287;AGIWUR25238;AGIWUR39652;AGIWUR42417  
 CB4856 HS I 2255923 2272866 WBGene00000020 abt-2 F12B6.1 -0.135133459042324  
 AGIWUR23301;AGIWUR28644  
 CB4856 HS I 2279835 2281516 WBGene00021458 Y39G10AL.1 Y39G10AL.1 -0.26909469075398  
 AGIWUR36209  
 CB4856 HS I 2281504 2291183 WBGene00000408 cdk-7 Y39G10AL.3 0.0611438812220761  
 AGIWUR39048  
 CB4856 HS I 2293132 2297312 WBGene00021469 Y39G10AR.11 Y39G10AR.11 -0.32139678665275  
 AGIWUR22260  
 CB4856 HS I 2297280 2304393 WBGene00021470 tpxl-1 Y39G10AR.12 -0.172478018721332  
 AGIWUR12614;AGIWUR36527  
 CB4856 HS I 2304512 2306816 WBGene00002047 icp-1 Y39G10AR.13 -0.0990595137827022  
 AGIWUR14808;AGIWUR28043;AGIWUR29130;AGIWUR29237;AGIWUR38297  
 CB4856 HS I 2306985 2308975 WBGene00021467 Y39G10AR.9 Y39G10AR.9 0.138810025475028  
 AGIWUR6667  
 CB4856 HS I 2308976 2312129 WBGene00021476 nsun-4 Y39G10AR.21 -0.121518142151082  
 AGIWUR13426  
 CB4856 HS I 2312496 2313008 WBGene00021475 tbca-1 Y39G10AR.20 0.114163598132825  
 AGIWUR41500  
 CB4856 HS I 2313271 2316003 WBGene00021466 eif-2gamma Y39G10AR.8 -0.274392395839727  
 AGIWUR1012;AGIWUR30510  
 CB4856 HS I 2316307 2318305 WBGene00021465 ekl-7 Y39G10AR.7 -0.261531983239552  
 AGIWUR18593  
 CB4856 HS I 2318291 2321847 WBGene00003156 mcm-4 Y39G10AR.14 0.14200532989117  
 AGIWUR23145

|                                                                         |   |         |         |                |             |             |                      |             |
|-------------------------------------------------------------------------|---|---------|---------|----------------|-------------|-------------|----------------------|-------------|
| CB4856 HS                                                               | I | 2322025 | 2322596 | WBGene00219275 | Y39G10AR.32 | Y39G10AR.32 | -0.0715246310774393  |             |
| AGIWUR27494                                                             |   |         |         |                |             |             |                      |             |
| CB4856 HS                                                               | I | 2327989 | 2330162 | WBGene00021477 | srbc-64     | Y39G10AR.22 | -0.0316658054783847  |             |
| AGIWUR16180                                                             |   |         |         |                |             |             |                      |             |
| CB4856 HS                                                               | I | 2330895 | 2332652 | WBGene00021472 | Y39G10AR.16 | Y39G10AR.16 | -0.0824931863161442  |             |
| AGIWUR4806;AGIWUR12047;AGIWUR19458;AGIWUR24864;AGIWUR39806              |   |         |         |                |             |             |                      |             |
| CB4856 HS                                                               | I | 2333312 | 2338693 | WBGene00021464 | ugt-31      | Y39G10AR.6  | -0.160493358243887   |             |
| AGIWUR16968                                                             |   |         |         |                |             |             |                      |             |
| CB4856 HS                                                               | I | 2342216 | 2350468 | WBGene00021463 | zeel-1      | Y39G10AR.5  | -0.218871313097223   |             |
| AGIWUR22312                                                             |   |         |         |                |             |             |                      |             |
| CB4856 HS                                                               | I | 2357883 | 2372964 | WBGene00021461 | nekl-1      | Y39G10AR.3  | 0.217943206345582    |             |
| AGIWUR3700;AGIWUR12255                                                  |   |         |         |                |             |             |                      |             |
| CB4856 HS                                                               | I | 2377089 | 2381851 | WBGene00021473 | sydn-1      | Y39G10AR.17 | -0.335367008893211   |             |
| AGIWUR29573;AGIWUR29726                                                 |   |         |         |                |             |             |                      |             |
| CB4856 HS                                                               | I | 2382953 | 2401492 | WBGene00021474 | dot-1.1     | Y39G10AR.18 | -0.049742108035586   |             |
| AGIWUR2332;AGIWUR3782;AGIWUR25161;AGIWUR29638                           |   |         |         |                |             |             |                      |             |
| CB4856 HS                                                               | I | 2402232 | 2409987 | WBGene00021460 | zwl-1       | Y39G10AR.2  | -0.00266468900059991 |             |
| AGIWUR39214;AGIWUR43207;AGIWUR45076                                     |   |         |         |                |             |             |                      |             |
| CB4856 HS                                                               | I | 2415133 | 2418521 | WBGene00017741 | F23C8.13    | F23C8.13    | -0.310564593671851   |             |
| AGIWUR805                                                               |   |         |         |                |             |             |                      |             |
| CB4856 HS                                                               | I | 2418450 | 2420801 | WBGene00017734 | F23C8.5     | F23C8.5     | 0.219156598937501    |             |
| AGIWUR9817;AGIWUR12095;AGIWUR12773;AGIWUR21578;AGIWUR22886;AGIWUR43078  |   |         |         |                |             |             |                      |             |
| CB4856 HS                                                               | I | 2420803 | 2421816 | WBGene00017735 | did-2       | F23C8.6     | -0.215406264681675   | AGIWUR36365 |
| CB4856 HS                                                               | I | 2429675 | 2432601 | WBGene00017737 | F23C8.8     | F23C8.8     | -0.0437954641056315  | AGIWUR29692 |
| CB4856 HS                                                               | I | 2432570 | 2433755 | WBGene00017738 | F23C8.9     | F23C8.9     | -0.0295728657085146  |             |
| AGIWUR11516;AGIWUR12714;AGIWUR24496;AGIWUR39273;AGIWUR44822;AGIWUR45164 |   |         |         |                |             |             |                      |             |
| CB4856 HS                                                               | I | 2434004 | 2435708 | WBGene00017733 | ubxn-1      | F23C8.4     | -0.284859393790359   | AGIWUR26378 |
| CB4856 HS                                                               | I | 2438767 | 2442948 | WBGene00017732 | F23C8.3     | F23C8.3     | 0.101149498700607    |             |
| AGIWUR4209;AGIWUR24398;AGIWUR32650;AGIWUR34132                          |   |         |         |                |             |             |                      |             |
| CB4856 HS                                                               | I | 2445420 | 2445983 | WBGene00023273 | F23C8.2     | F23C8.2     | -0.0300538961877006  | AGIWUR10294 |
| CB4856 HS                                                               | I | 2446740 | 2448369 | WBGene00017731 | F23C8.1     | F23C8.1     | -0.0463536991230544  | AGIWUR34435 |
| CB4856 HS                                                               | I | 2449414 | 2451366 | WBGene00017739 | F23C8.11    | F23C8.11    | 0.0550396403758446   |             |
| AGIWUR5077                                                              |   |         |         |                |             |             |                      |             |
| CB4856 HS                                                               | I | 2451908 | 2464637 | WBGene00002141 | inx-19      | T16H5.1     | 0.296696397137376    | AGIWUR2403  |
| CB4856 HS                                                               | I | 2468787 | 2471972 | WBGene00022280 | Y74C10AL.2  | Y74C10AL.2  | 0.0284826780708585   |             |
| AGIWUR21766                                                             |   |         |         |                |             |             |                      |             |
| CB4856 HS                                                               | I | 2472066 | 2485391 | WBGene00022281 | abtm-1      | Y74C10AR.3  | -0.141558167959362   |             |
| AGIWUR5309;AGIWUR8973;AGIWUR10270;AGIWUR25468;AGIWUR30612;AGIWUR33610   |   |         |         |                |             |             |                      |             |
| CB4856 HS                                                               | I | 2485867 | 2489780 | WBGene00001232 | eif-3.I     | Y74C10AR.1  | -0.0622982776899335  |             |

|                                                            |    |   |         |         |                |                 |                                 |
|------------------------------------------------------------|----|---|---------|---------|----------------|-----------------|---------------------------------|
| AGIWUR29413                                                |    |   |         |         |                |                 |                                 |
| CB4856                                                     | HS | I | 2489976 | 2497371 | WBGene00021277 | Y23H5B.6        | Y23H5B.6 0.117629143252756      |
| AGIWUR38087                                                |    |   |         |         |                |                 |                                 |
| CB4856                                                     | HS | I | 2498134 | 2506259 | WBGene00021276 | Y23H5B.5        | Y23H5B.5 -0.0503570391662853    |
| AGIWUR5878;AGIWUR6191;AGIWUR6274;AGIWUR28260               |    |   |         |         |                |                 |                                 |
| CB4856                                                     | HS | I | 2506891 | 2513710 | WBGene00021278 | Y23H5B.7        | Y23H5B.7 -0.147761973713763     |
| AGIWUR29322;AGIWUR30588                                    |    |   |         |         |                |                 |                                 |
| CB4856                                                     | HS | I | 2533268 | 2542114 | WBGene00021275 | dmsr-2 Y23H5B.4 | -0.161275284177997              |
| AGIWUR14185                                                |    |   |         |         |                |                 |                                 |
| CB4856                                                     | HS | I | 2544749 | 2546163 | WBGene00021274 | Y23H5B.3        | Y23H5B.3 0.233005119665171      |
| AGIWUR14576                                                |    |   |         |         |                |                 |                                 |
| CB4856                                                     | HS | I | 2546897 | 2548358 | WBGene00021279 | Y23H5B.8        | Y23H5B.8 0.134553535257269      |
| AGIWUR24104                                                |    |   |         |         |                |                 |                                 |
| CB4856                                                     | HS | I | 2549296 | 2550543 | WBGene00021273 | Y23H5B.2        | Y23H5B.2 0.178024675691054      |
| AGIWUR20479                                                |    |   |         |         |                |                 |                                 |
| CB4856                                                     | HS | I | 2551375 | 2551590 | WBGene00021280 | nspd-8 Y23H5B.9 | -0.0469184024085827             |
| AGIWUR21495                                                |    |   |         |         |                |                 |                                 |
| CB4856                                                     | HS | I | 2556252 | 2557425 | WBGene00194701 | Y23H5B.12       | Y23H5B.12 0.0750543506802179    |
| AGIWUR19243                                                |    |   |         |         |                |                 |                                 |
| CB4856                                                     | HS | I | 2558300 | 2560110 | WBGene00016950 | C55C2.4 C55C2.4 | 0.0375401676050888 AGIWUR14938  |
| CB4856                                                     | HS | I | 2560396 | 2561820 | WBGene00016949 | C55C2.3 C55C2.3 | 0.14298715966981                |
| AGIWUR5924;AGIWUR10632                                     |    |   |         |         |                |                 |                                 |
| CB4856                                                     | HS | I | 2562616 | 2563049 | WBGene00006047 | ssp-19 C55C2.2  | -0.0651333648492702 AGIWUR13085 |
| CB4856                                                     | HS | I | 2568872 | 2570746 | WBGene00016948 | scrt-1 C55C2.1  | -0.0876188175477344 AGIWUR37839 |
| CB4856                                                     | HS | I | 2571782 | 2576020 | WBGene00000006 | aat-5 C55C2.5   | 0.0761830584519316              |
| AGIWUR2506;AGIWUR10049;AGIWUR18292;AGIWUR40198             |    |   |         |         |                |                 |                                 |
| CB4856                                                     | HS | I | 2580935 | 2586126 | WBGene00001404 | fbp-1 K07A3.1   | 0.105234554664147               |
| AGIWUR9040;AGIWUR12995;AGIWUR25728;AGIWUR35028;AGIWUR35818 |    |   |         |         |                |                 |                                 |
| CB4856                                                     | HS | I | 2587527 | 2595294 | WBGene00004226 | ptr-12 K07A3.2  | -0.053648606537684              |
| AGIWUR617;AGIWUR33884;AGIWUR35603                          |    |   |         |         |                |                 |                                 |
| CB4856                                                     | HS | I | 2599979 | 2602627 | WBGene00019461 | K07A3.3 K07A3.3 | -0.108836661046167              |
| AGIWUR13808;AGIWUR24193;AGIWUR42169                        |    |   |         |         |                |                 |                                 |
| CB4856                                                     | HS | I | 2606754 | 2617360 | WBGene00000832 | ctn-1 Y23H5A.5  | 0.0271614110018081              |
| AGIWUR10113;AGIWUR17733;AGIWUR41210;AGIWUR41252            |    |   |         |         |                |                 |                                 |
| CB4856                                                     | HS | I | 2617560 | 2620425 | WBGene00021271 | spe-47 Y23H5A.4 | -0.150024479061484              |
| AGIWUR24731                                                |    |   |         |         |                |                 |                                 |
| CB4856                                                     | HS | I | 2620654 | 2621859 | WBGene00021270 | Y23H5A.3        | Y23H5A.3 -0.0671871567325066    |
| AGIWUR40693                                                |    |   |         |         |                |                 |                                 |
| CB4856                                                     | HS | I | 2621957 | 2623186 | WBGene00021269 | Y23H5A.2        | Y23H5A.2 -0.107133076072497     |

AGIWUR22648  
CB4856 HS I 2623102 2628577 WBGene00000800 cars-1 Y23H5A.7 0.218715669741027  
AGIWUR23131  
CB4856 HS I 2629685 2632320 WBGene00000801 cars-2 Y23H5A.1 -0.253609519402751  
AGIWUR1077;AGIWUR6380;AGIWUR10780;AGIWUR19734;AGIWUR20638  
CB4856 HS I 2632987 2634561 WBGene00023172 Y23H5A.8 Y23H5A.8 0.0110693908532502  
AGIWUR14216  
CB4856 HS I 2638649 2639419 WBGene00018231 F40E3.3 F40E3.3 -0.0757412316762589  
AGIWUR4066;AGIWUR10758;AGIWUR23936;AGIWUR24120;AGIWUR24171;AGIWUR31356;AGIWUR35745;AGIWUR37922;AGIWUR39709;  
AGIWUR43197  
CB4856 HS I 2642724 2643778 WBGene00018230 mage-1 F40E3.2 -0.175645736485812 AGIWUR23200  
CB4856 HS I 2645273 2657241 WBGene00018232 F40E3.5 F40E3.5 0.00301504161613142  
AGIWUR26138;AGIWUR32507  
CB4856 HS I 2668160 2672434 WBGene00017979 F32B5.6 F32B5.6 -0.0138379689421875  
AGIWUR7646;AGIWUR13992;AGIWUR30184  
CB4856 HS I 2672940 2682797 WBGene00017980 F32B5.7 F32B5.7 0.106683731866217  
AGIWUR6695;AGIWUR6824;AGIWUR13525;AGIWUR18240;AGIWUR27541;AGIWUR31729  
CB4856 HS I 2686639 2689493 WBGene00000788 cpz-1 F32B5.8 -0.00177078270233366 AGIWUR41569  
CB4856 HS I 2692074 2692467 WBGene00017978 F32B5.4 F32B5.4 -0.288465817987742  
AGIWUR7463;AGIWUR9486;AGIWUR10833;AGIWUR14697;AGIWUR21940;AGIWUR33121;AGIWUR33897;AGIWUR44678;AGIWUR45085  
CB4856 HS I 2692757 2694084 WBGene00017977 F32B5.3 F32B5.3 -0.0260368794644705 AGIWUR18941  
CB4856 HS I 2697399 2699955 WBGene00017976 F32B5.2 F32B5.2 -0.0746479171482282 AGIWUR23268  
CB4856 HS I 2706883 2717549 WBGene00003006 lin-17 Y71F9B.5 0.095388263006801  
AGIWUR27001;AGIWUR35050  
CB4856 HS I 2718027 2721475 WBGene00001048 dnj-30 Y71F9B.16 0.081101546581495  
AGIWUR40146  
CB4856 HS I 2721879 2726724 WBGene00022128 Y71F9B.6 Y71F9B.6 -0.372463027125811  
AGIWUR19507  
CB4856 HS I 2727014 2727545 WBGene00004920 snr-7 Y71F9B.4 -0.0305786492721332  
AGIWUR7048  
CB4856 HS I 2730004 2731453 WBGene00022127 yop-1 Y71F9B.3 -0.15327000011424  
AGIWUR5660;AGIWUR6385;AGIWUR8144;AGIWUR16646;AGIWUR35160;AGIWUR37496  
CB4856 HS I 2731562 2735371 WBGene00022126 Y71F9B.2 Y71F9B.2 0.0423201797186366  
AGIWUR8231  
CB4856 HS I 2735345 2742508 WBGene00022129 lron-11 Y71F9B.8 0.13509090962881  
AGIWUR4975;AGIWUR8612  
CB4856 HS I 2755540 2758204 WBGene00004043 plk-2 Y71F9B.7 -0.102819298679265  
AGIWUR32009  
CB4856 HS I 2759023 2761044 WBGene00022130 Y71F9B.9 Y71F9B.9 0.0442012490562682

|                                                           |    |   |         |         |                |            |            |                     |             |
|-----------------------------------------------------------|----|---|---------|---------|----------------|------------|------------|---------------------|-------------|
| AGIWUR15089                                               |    |   |         |         |                |            |            |                     |             |
| CB4856                                                    | HS | I | 2761158 | 2776097 | WBGene00004946 | sop-3      | Y71F9B.10  | -0.153862583965044  |             |
| AGIWUR13710;AGIWUR15065;AGIWUR23349                       |    |   |         |         |                |            |            |                     |             |
| CB4856                                                    | HS | I | 2776370 | 2778726 | WBGene00022131 | Y71F9B.13  | Y71F9B.13  | -0.114001594794201  |             |
| AGIWUR18999;AGIWUR21201                                   |    |   |         |         |                |            |            |                     |             |
| CB4856                                                    | HS | I | 2780850 | 2784276 | WBGene00022133 | Y71F9B.15  | Y71F9B.15  | -0.162687826966609  |             |
| AGIWUR16378;AGIWUR33305                                   |    |   |         |         |                |            |            |                     |             |
| CB4856                                                    | HS | I | 2784620 | 2786077 | WBGene00020990 | W03D8.9    | W03D8.9    | 0.21355536796764    | AGIWUR3317  |
| CB4856                                                    | HS | I | 2786332 | 2787514 | WBGene00020991 | W03D8.10   | W03D8.10   | -0.264419239285768  |             |
| AGIWUR21745                                               |    |   |         |         |                |            |            |                     |             |
| CB4856                                                    | HS | I | 2791687 | 2794976 | WBGene00020989 | W03D8.8    | W03D8.8    | -0.0380839132525725 |             |
| AGIWUR22441;AGIWUR29065;AGIWUR38128                       |    |   |         |         |                |            |            |                     |             |
| CB4856                                                    | HS | I | 2796130 | 2797238 | WBGene00020988 | W03D8.7    | W03D8.7    | -0.052663849662653  | AGIWUR11786 |
| CB4856                                                    | HS | I | 2798175 | 2800878 | WBGene00020985 | W03D8.2    | W03D8.2    | 0.181983963498904   | AGIWUR7975  |
| CB4856                                                    | HS | I | 2802822 | 2815786 | WBGene00002174 | itx-1      | W03D8.6    | 0.23531697235963    | AGIWUR14038 |
| CB4856                                                    | HS | I | 2816415 | 2817646 | WBGene00020987 | W03D8.5    | W03D8.5    | 0.132496197414625   |             |
| AGIWUR3546;AGIWUR4156;AGIWUR9484;AGIWUR19425;AGIWUR24118  |    |   |         |         |                |            |            |                     |             |
| CB4856                                                    | HS | I | 2818744 | 2820701 | WBGene00044796 | W03D8.11   | W03D8.11   | -0.028326468910036  |             |
| AGIWUR42963                                               |    |   |         |         |                |            |            |                     |             |
| CB4856                                                    | HS | I | 2820869 | 2822300 | WBGene00020986 | W03D8.3    | W03D8.3    | 0.0877885993854512  | AGIWUR40700 |
| CB4856                                                    | HS | I | 2823254 | 2830311 | WBGene00004077 | pop-1      | W10C8.2    | 0.0157490250264232  | AGIWUR37103 |
| CB4856                                                    | HS | I | 2832872 | 2833253 | WBGene00021126 | W10C8.3    | W10C8.3    | -0.167338260285055  | AGIWUR28937 |
| CB4856                                                    | HS | I | 2845859 | 2849792 | WBGene00021125 | ccb-2      | W10C8.1    | -0.0277792495181988 |             |
| AGIWUR17713;AGIWUR29981;AGIWUR44951                       |    |   |         |         |                |            |            |                     |             |
| CB4856                                                    | HS | I | 2851963 | 2853903 | WBGene00021127 | W10C8.4    | W10C8.4    | 0.0802646556844042  |             |
| AGIWUR2101;AGIWUR26297;AGIWUR28145                        |    |   |         |         |                |            |            |                     |             |
| CB4856                                                    | HS | I | 2858524 | 2859913 | WBGene00044433 | W10C8.6    | W10C8.6    | 0.0646641374207579  |             |
| AGIWUR1574;AGIWUR2177;AGIWUR33520;AGIWUR42210;AGIWUR45158 |    |   |         |         |                |            |            |                     |             |
| CB4856                                                    | HS | I | 2862403 | 2864446 | WBGene00022116 | Y71F9AL.11 | Y71F9AL.11 | -0.149692290191908  |             |
| AGIWUR36633                                               |    |   |         |         |                |            |            |                     |             |
| CB4856                                                    | HS | I | 2866508 | 2870167 | WBGene00022115 | Y71F9AL.10 | Y71F9AL.10 | -0.185322050313827  |             |
| AGIWUR30152                                               |    |   |         |         |                |            |            |                     |             |
| CB4856                                                    | HS | I | 2870608 | 2875289 | WBGene00022117 | Y71F9AL.12 | Y71F9AL.12 | -0.310875772789849  |             |
| AGIWUR29739                                               |    |   |         |         |                |            |            |                     |             |
| CB4856                                                    | HS | I | 2875395 | 2876324 | WBGene00004412 | rp1-1      | Y71F9AL.13 | -0.0350347976301819 |             |
| AGIWUR13419;AGIWUR14964                                   |    |   |         |         |                |            |            |                     |             |
| CB4856                                                    | HS | I | 2876932 | 2878523 | WBGene00022114 | Y71F9AL.9  | Y71F9AL.9  |                     |             |
| -0.00136065330676693 AGIWUR15225;AGIWUR43288              |    |   |         |         |                |            |            |                     |             |
| CB4856                                                    | HS | I | 2878578 | 2880929 | WBGene00022113 | Y71F9AL.8  | Y71F9AL.8  | -0.194557473357314  |             |

|                                                                                 |    |   |         |         |                |            |            |                      |
|---------------------------------------------------------------------------------|----|---|---------|---------|----------------|------------|------------|----------------------|
| AGIWUR29805                                                                     |    |   |         |         |                |            |            |                      |
| CB4856                                                                          | HS | I | 2880919 | 2883454 | WBGene00022118 | dnc-5      | Y71F9AL.14 | -0.113084147444985   |
| AGIWUR1789;AGIWUR5524;AGIWUR13460;AGIWUR25120;AGIWUR26338                       |    |   |         |         |                |            |            |                      |
| CB4856                                                                          | HS | I | 2883546 | 2893718 | WBGene00000199 | arx-1      | Y71F9AL.16 | 0.14941416240166     |
| AGIWUR11177                                                                     |    |   |         |         |                |            |            |                      |
| CB4856                                                                          | HS | I | 2895329 | 2900860 | WBGene00022119 | copa-1     | Y71F9AL.17 | 0.019680278522479    |
| AGIWUR19351                                                                     |    |   |         |         |                |            |            |                      |
| CB4856                                                                          | HS | I | 2901325 | 2903006 | WBGene00001791 | gst-43     | Y71F9AL.5  | -0.0536001777085211  |
| AGIWUR21982                                                                     |    |   |         |         |                |            |            |                      |
| CB4856                                                                          | HS | I | 2903596 | 2907751 | WBGene00022110 | Y71F9AL.4  | Y71F9AL.4  | -0.231194626217111   |
| AGIWUR25316                                                                     |    |   |         |         |                |            |            |                      |
| CB4856                                                                          | HS | I | 2925212 | 2928134 | WBGene00022107 | Y71F9AL.1  | Y71F9AL.1  | -0.0270691722563061  |
| AGIWUR2864                                                                      |    |   |         |         |                |            |            |                      |
| CB4856                                                                          | HS | I | 2928395 | 2929687 | WBGene00022122 | trap-1     | Y71F9AM.6  | -0.0725109307906608  |
| AGIWUR4502;AGIWUR4985;AGIWUR5165;AGIWUR5707;AGIWUR13179;AGIWUR27433;AGIWUR45195 |    |   |         |         |                |            |            |                      |
| CB4856                                                                          | HS | I | 2929736 | 2931361 | WBGene00003836 | nxt-1      | Y71F9AM.5  | -0.00335562720506744 |
| AGIWUR15059                                                                     |    |   |         |         |                |            |            |                      |
| CB4856                                                                          | HS | I | 2931461 | 2947152 | WBGene00022121 | cogc-3     | Y71F9AM.4  | -0.0374618544880607  |
| AGIWUR4108;AGIWUR6047;AGIWUR36855;AGIWUR41452                                   |    |   |         |         |                |            |            |                      |
| CB4856                                                                          | HS | I | 2949600 | 2957910 | WBGene00000237 | bam-2      | Y71F9AR.1  | 0.10065597602766     |
| AGIWUR41421                                                                     |    |   |         |         |                |            |            |                      |
| CB4856                                                                          | HS | I | 2981531 | 2983076 | WBGene00044894 | Y71F9AR.4  | Y71F9AR.4  | -0.13566186439434    |
| AGIWUR18847                                                                     |    |   |         |         |                |            |            |                      |
| CB4856                                                                          | HS | I | 2983213 | 2985167 | WBGene00022123 | Y71F9AR.2  | Y71F9AR.2  | 0.219836648017516    |
| AGIWUR19262                                                                     |    |   |         |         |                |            |            |                      |
| CB4856                                                                          | HS | I | 2986104 | 2995914 | WBGene00022124 | supr-1     | Y71F9AR.3  | 0.265067387969436    |
| AGIWUR10209                                                                     |    |   |         |         |                |            |            |                      |
| CB4856                                                                          | HS | I | 2996401 | 3001382 | WBGene00001046 | dnj-28     | Y54E10BL.4 | -0.0211292979742996  |
| AGIWUR1394                                                                      |    |   |         |         |                |            |            |                      |
| CB4856                                                                          | HS | I | 3001360 | 3002847 | WBGene00021839 | nduf-5     | Y54E10BL.5 | 0.13017474090228     |
| AGIWUR6233                                                                      |    |   |         |         |                |            |            |                      |
| CB4856                                                                          | HS | I | 3015742 | 3021531 | WBGene00021843 | Y54E10BR.4 | Y54E10BR.4 | -0.138054329720731   |
| AGIWUR20452                                                                     |    |   |         |         |                |            |            |                      |
| CB4856                                                                          | HS | I | 3021651 | 3028396 | WBGene00021842 | Y54E10BR.3 | Y54E10BR.3 | -0.0239951096674744  |
| AGIWUR41419                                                                     |    |   |         |         |                |            |            |                      |
| CB4856                                                                          | HS | I | 3028307 | 3031092 | WBGene00021844 | Y54E10BR.5 | Y54E10BR.5 | -0.290897617382581   |
| AGIWUR27706;AGIWUR30378                                                         |    |   |         |         |                |            |            |                      |
| CB4856                                                                          | HS | I | 3031212 | 3032938 | WBGene00021845 | rpb-7      | Y54E10BR.6 | -0.234014838279371   |
| AGIWUR32718                                                                     |    |   |         |         |                |            |            |                      |

|                                                                                                           |    |   |         |         |                |            |            |                     |
|-----------------------------------------------------------------------------------------------------------|----|---|---------|---------|----------------|------------|------------|---------------------|
| CB4856                                                                                                    | HS | I | 3032935 | 3034761 | WBGene00021841 | Y54E10BR.2 | Y54E10BR.2 | -0.141170336954128  |
| AGIWUR2238;AGIWUR18683;AGIWUR24455;AGIWUR43905                                                            |    |   |         |         |                |            |            |                     |
| CB4856                                                                                                    | HS | I | 3035193 | 3047794 | WBGene00003387 | mod-5      | Y54E10BR.7 | -0.243141960776972  |
| AGIWUR24272                                                                                               |    |   |         |         |                |            |            |                     |
| CB4856                                                                                                    | HS | I | 3052018 | 3059185 | WBGene00021846 | ztf-23     | Y54E10BR.8 | -0.229415304012857  |
| AGIWUR33528                                                                                               |    |   |         |         |                |            |            |                     |
| CB4856                                                                                                    | HS | I | 3059151 | 3069393 | WBGene00021840 | Y54E10BR.1 | Y54E10BR.1 | 0.213170913113684   |
| AGIWUR14801                                                                                               |    |   |         |         |                |            |            |                     |
| CB4856                                                                                                    | HS | I | 3069325 | 3070150 | WBGene00000205 | arx-7      | M01B12.3   | 0.0611524839105275  |
| AGIWUR5428                                                                                                |    |   |         |         |                |            |            |                     |
| CB4856                                                                                                    | HS | I | 3070973 | 3084874 | WBGene00019697 | M01B12.4   | M01B12.4   | -0.193713516150433  |
| AGIWUR16943;AGIWUR36776;AGIWUR37540                                                                       |    |   |         |         |                |            |            |                     |
| CB4856                                                                                                    | HS | I | 3085011 | 3096285 | WBGene00019698 | riok-1     | M01B12.5   | -0.057628010440764  |
| AGIWUR5372;AGIWUR5467;AGIWUR12452;AGIWUR27824;AGIWUR28472;AGIWUR30070;AGIWUR34208;AGIWUR36598;AGIWUR41932 |    |   |         |         |                |            |            |                     |
| CB4856                                                                                                    | HS | I | 3094513 | 3109596 | WBGene00003654 | nhr-64     | C45E1.1    | 0.070913793806735   |
| AGIWUR14818                                                                                               |    |   |         |         |                |            |            |                     |
| CB4856                                                                                                    | HS | I | 3115036 | 3117628 | WBGene00016663 | C45E1.4    | C45E1.4    | -0.073407040568032  |
| AGIWUR41381                                                                                               |    |   |         |         |                |            |            |                     |
| CB4856                                                                                                    | HS | I | 3137185 | 3138447 | WBGene00000626 | col-49     | K09H9.3    | -0.503617263055894  |
| AGIWUR23696                                                                                               |    |   |         |         |                |            |            |                     |
| CB4856                                                                                                    | HS | I | 3138541 | 3140601 | WBGene00045387 | K09H9.8    | K09H9.8    | 0.23606906149389    |
| AGIWUR6683;AGIWUR9499;AGIWUR29974                                                                         |    |   |         |         |                |            |            |                     |
| CB4856                                                                                                    | HS | I | 3141704 | 3143197 | WBGene00019597 | K09H9.5    | K09H9.5    | 0.0852819464493635  |
| AGIWUR19387                                                                                               |    |   |         |         |                |            |            |                     |
| CB4856                                                                                                    | HS | I | 3144410 | 3147793 | WBGene00003062 | lpd-6      | K09H9.6    | -0.142367904236536  |
| AGIWUR13406                                                                                               |    |   |         |         |                |            |            |                     |
| CB4856                                                                                                    | HS | I | 3147996 | 3150349 | WBGene00019595 | K09H9.2    | K09H9.2    | 0.0840140528622815  |
| AGIWUR25014                                                                                               |    |   |         |         |                |            |            |                     |
| CB4856                                                                                                    | HS | I | 3150346 | 3162387 | WBGene00006888 | vbh-1      | Y54E10A.9  | -0.103473986526209  |
| AGIWUR36846                                                                                               |    |   |         |         |                |            |            |                     |
| CB4856                                                                                                    | HS | I | 3162803 | 3163649 | WBGene00021829 | mrpl-17    | Y54E10A.7  | 0.126465260413873   |
| AGIWUR1305                                                                                                |    |   |         |         |                |            |            |                     |
| CB4856                                                                                                    | HS | I | 3163688 | 3167925 | WBGene00021828 | Y54E10A.6  | Y54E10A.6  | -0.0976356826631708 |
| AGIWUR24704                                                                                               |    |   |         |         |                |            |            |                     |
| CB4856                                                                                                    | HS | I | 3167908 | 3171230 | WBGene00021827 | dnc-6      | Y54E10A.5  | 0.0979718631264817  |
| AGIWUR5057;AGIWUR9073;AGIWUR40125                                                                         |    |   |         |         |                |            |            |                     |
| CB4856                                                                                                    | HS | I | 3173243 | 3176319 | WBGene00021830 | Y54E10A.10 | Y54E10A.10 | 0.237848674050635   |
| AGIWUR13178                                                                                               |    |   |         |         |                |            |            |                     |
| CB4856                                                                                                    | HS | I | 3176419 | 3192857 | WBGene00021831 | Y54E10A.11 | Y54E10A.11 | -0.100942663470875  |
| AGIWUR2164;AGIWUR16574                                                                                    |    |   |         |         |                |            |            |                     |
| CB4856                                                                                                    | HS | I | 3193528 | 3198838 | WBGene00021832 | Y54E10A.12 | Y54E10A.12 | 0.143567800772065   |
| AGIWUR12213                                                                                               |    |   |         |         |                |            |            |                     |
| CB4856                                                                                                    | HS | I | 3199540 | 3203229 | WBGene00021833 | Y54E10A.13 | Y54E10A.13 | -0.304313279957886  |
| AGIWUR9596                                                                                                |    |   |         |         |                |            |            |                     |
| CB4856                                                                                                    | HS | I | 3206730 | 3209294 | WBGene00021835 | Y54E10A.17 | Y54E10A.17 | 0.112692112974413   |



AGIWUR37690  
 CB4856 HS I 3211046 3217366 WBGene00001481 fog-1 Y54E10A.4 0.0812920426627883  
 AGIWUR13603;AGIWUR15435;AGIWUR35965  
 CB4856 HS I 3217296 3222950 WBGene00004404 rom-5 Y54E10A.14 0.0844222970114767  
 AGIWUR37258  
 CB4856 HS I 3223160 3228104 WBGene00000413 cdt-1 Y54E10A.15 -0.105093452397033  
 AGIWUR7164;AGIWUR8441;AGIWUR9365;AGIWUR10177;AGIWUR14248;AGIWUR14397;AGIWUR28748;AGIWUR40356  
 CB4856 HS I 3229431 3233294 WBGene00021826 txl-1 Y54E10A.3 -0.210018447545743  
 AGIWUR39852  
 CB4856 HS I 3233391 3255678 WBGene00003258 cogc-1 Y54E10A.2 -0.100013451534624  
 AGIWUR30427;AGIWUR32820;AGIWUR39620  
 CB4856 HS I 3259871 3264254 WBGene00021553 tyr-5 Y44E3B.2 -0.0530075407390314  
 AGIWUR23134  
 CB4856 HS I 3264237 3266762 WBGene00021552 zip-4 Y44E3B.1 0.0173827470947714  
 AGIWUR2699;AGIWUR20566;AGIWUR20700;AGIWUR26560;AGIWUR28062;AGIWUR30568;AGIWUR32351  
 CB4856 HS I 3267094 3269116 WBGene00020915 nol-5 W01B11.3 0.148062162125489  
 AGIWUR37743  
 CB4856 HS I 3269406 3280883 WBGene00004154 pqn-72 W01B11.5 -0.165820709001719  
 AGIWUR12149;AGIWUR23263;AGIWUR25848;AGIWUR35656;AGIWUR42564;AGIWUR43889  
 CB4856 HS I 3287336 3293127 WBGene00020914 sulp-6 W01B11.2 -0.00783982109386772  
 AGIWUR2355;AGIWUR10745;AGIWUR30073;AGIWUR36750;AGIWUR37204;AGIWUR39158  
 CB4856 HS I 3293142 3294356 WBGene00020917 W01B11.6 W01B11.6 0.301481315661595  
 AGIWUR11957;AGIWUR23982;AGIWUR24179  
 CB4856 HS I 3299606 3300490 WBGene00020913 W01B11.1 W01B11.1 0.101352415532862  
 AGIWUR1462  
 CB4856 HS I 3302001 3307587 WBGene00000036 ace-2 Y44E3A.2 0.117784595699961  
 AGIWUR33576  
 CB4856 HS I 3317978 3318584 WBGene00021548 trx-4 Y44E3A.3 0.00492712186288813  
 AGIWUR13327  
 CB4856 HS I 3319540 3330673 WBGene00021549 Y44E3A.4 Y44E3A.4 -0.155588777041963  
 AGIWUR4866;AGIWUR12826;AGIWUR21456;AGIWUR37487  
 CB4856 HS I 3338367 3340219 WBGene00021547 Y44E3A.1 Y44E3A.1 -0.0950505896806559  
 AGIWUR6438;AGIWUR21696;AGIWUR28706  
 CB4856 HS I 3340231 3349907 WBGene00021551 Y44E3A.6 Y44E3A.6 -0.198273179148741  
 AGIWUR19599;AGIWUR28799  
 CB4856 HS I 3367640 3368550 WBGene00021035 W05F2.3 W05F2.3 -0.106366585636715  
 AGIWUR11491;AGIWUR17920;AGIWUR23022;AGIWUR38692;AGIWUR40671;AGIWUR42685  
 CB4856 HS I 3368785 3371444 WBGene00021038 W05F2.6 W05F2.6 0.164746497529134 AGIWUR10259  
 CB4856 HS I 3371769 3373834 WBGene00021037 fbxa-203 W05F2.5 -0.0679500899423289

AGIWUR18896  
 CB4856 HS I 3374776 3407189 WBGene00021036 W05F2.4 W05F2.4 -0.0486504691688179  
 AGIWUR1629;AGIWUR8478;AGIWUR12583;AGIWUR15753;AGIWUR22393;AGIWUR23436;AGIWUR32189;AGIWUR34613  
 CB4856 HS I 3408033 3415238 WBGene00019362 cdk-2 K03E5.3 -0.210271581215633 AGIWUR23928  
 CB4856 HS I 3419600 3424211 WBGene00019361 K03E5.2 K03E5.2 0.0999170785333661  
 AGIWUR1571;AGIWUR13604;AGIWUR16735;AGIWUR17165;AGIWUR21604;AGIWUR26478;AGIWUR26766;AGIWUR27970;AGIWUR30728;  
 AGIWUR31092;AGIWUR37714;AGIWUR39861;AGIWUR43156;AGIWUR43908  
 CB4856 HS I 3427177 3433207 WBGene00019360 neto-1 K03E5.1 -0.146326090656619 AGIWUR34916  
 CB4856 HS I 3433157 3438543 WBGene00004775 sep-1 Y47G6A.12 0.131403592099455  
 AGIWUR2398  
 CB4856 HS I 3439108 3449175 WBGene00006440 tag-63 Y47G6A.28 0.0816173328070384  
 AGIWUR25852  
 CB4856 HS I 3449326 3462177 WBGene00003422 msh-6 Y47G6A.11 -0.216015489723471  
 AGIWUR22181  
 CB4856 HS I 3462270 3468187 WBGene00021640 Y47G6A.14 Y47G6A.14  
 -0.00020526780954544 AGIWUR1119  
 CB4856 HS I 3467132 3478515 WBGene00004978 spg-7 Y47G6A.10 -0.14294295930863  
 AGIWUR21359  
 CB4856 HS I 3479329 3481439 WBGene00021638 Y47G6A.9 Y47G6A.9 -0.0590004505886697  
 AGIWUR35431  
 CB4856 HS I 3481987 3484499 WBGene00000794 crn-1 Y47G6A.8 -0.0273587662645696  
 AGIWUR13801;AGIWUR22565  
 CB4856 HS I 3487812 3499706 WBGene00021643 ccep-290 Y47G6A.17 -0.0220483570305459  
 AGIWUR3330;AGIWUR15688  
 CB4856 HS I 3502738 3508421 WBGene00021637 Y47G6A.7 Y47G6A.7 0.179515095557512  
 AGIWUR6082;AGIWUR7088;AGIWUR24590  
 CB4856 HS I 3508397 3512735 WBGene00021644 Y47G6A.18 Y47G6A.18  
 -0.00439659171000883  
 AGIWUR4776;AGIWUR5770;AGIWUR6663;AGIWUR14345;AGIWUR18070;AGIWUR30279;AGIWUR31587;AGIWUR36047;AGIWUR38200;AG  
 IWUR38330;AGIWUR41216  
 CB4856 HS I 3516450 3523387 WBGene00021636 pcaf-1 Y47G6A.6 -0.169418941311996  
 AGIWUR32442  
 CB4856 HS I 3523313 3529956 WBGene00021645 Y47G6A.19 Y47G6A.19 -0.140119703144638  
 AGIWUR31354  
 CB4856 HS I 3533885 3539196 WBGene00021635 Y47G6A.5 Y47G6A.5 0.100637767894137  
 AGIWUR37951  
 CB4856 HS I 3539554 3546904 WBGene00004389 rnp-6 Y47G6A.20 -0.0263153539748968  
 AGIWUR16653;AGIWUR31705;AGIWUR35799;AGIWUR39341  
 CB4856 HS I 3547071 3552005 WBGene00021634 rde-10 Y47G6A.4 -0.174816129812733

|                                                                        |    |   |         |         |                |           |           |                     |
|------------------------------------------------------------------------|----|---|---------|---------|----------------|-----------|-----------|---------------------|
| AGIWUR39093                                                            |    |   |         |         |                |           |           |                     |
| CB4856                                                                 | HS | I | 3551949 | 3559807 | WBGene00021646 | Y47G6A.21 | Y47G6A.21 | 0.0754612960776431  |
| AGIWUR20916;AGIWUR42118                                                |    |   |         |         |                |           |           |                     |
| CB4856                                                                 | HS | I | 3559923 | 3562851 | WBGene00021647 | Y47G6A.22 | Y47G6A.22 | 0.0610737730741704  |
| AGIWUR28433                                                            |    |   |         |         |                |           |           |                     |
| CB4856                                                                 | HS | I | 3564040 | 3565068 | WBGene00045399 | Y47G6A.33 | Y47G6A.33 | 0.0674726030628507  |
| AGIWUR25152;AGIWUR41843                                                |    |   |         |         |                |           |           |                     |
| CB4856                                                                 | HS | I | 3565012 | 3600729 | WBGene00003060 | lpd-3     | Y47G6A.23 | 0.0226265403470221  |
| AGIWUR25264;AGIWUR43063                                                |    |   |         |         |                |           |           |                     |
| CB4856                                                                 | HS | I | 3601291 | 3602908 | WBGene00021633 | Y47G6A.3  | Y47G6A.3  | -0.0613814017795296 |
| AGIWUR21723                                                            |    |   |         |         |                |           |           |                     |
| CB4856                                                                 | HS | I | 3603343 | 3604537 | WBGene00044436 | Y47G6A.31 | Y47G6A.31 | 0.137757952153357   |
| AGIWUR2009;AGIWUR4486;AGIWUR11467;AGIWUR16255                          |    |   |         |         |                |           |           |                     |
| CB4856                                                                 | HS | I | 3604520 | 3605763 | WBGene00021648 | mis-12    | Y47G6A.24 | 0.208138242777746   |
| AGIWUR31284                                                            |    |   |         |         |                |           |           |                     |
| CB4856                                                                 | HS | I | 3606411 | 3608345 | WBGene00021649 | Y47G6A.25 | Y47G6A.25 | -0.060602099350799  |
| AGIWUR16764;AGIWUR17972;AGIWUR30368;AGIWUR34454;AGIWUR38799            |    |   |         |         |                |           |           |                     |
| CB4856                                                                 | HS | I | 3608395 | 3612301 | WBGene00002144 | inx-22    | Y47G6A.2  | 0.0389845963218836  |
| AGIWUR32737                                                            |    |   |         |         |                |           |           |                     |
| CB4856                                                                 | HS | I | 3611909 | 3618317 | WBGene00002143 | inx-21    | Y47G6A.1  | 0.17710280809103    |
| AGIWUR2419                                                             |    |   |         |         |                |           |           |                     |
| CB4856                                                                 | HS | I | 3618889 | 3619697 | WBGene00021650 | Y47G6A.26 | Y47G6A.26 | 0.158802282393589   |
| AGIWUR10804                                                            |    |   |         |         |                |           |           |                     |
| CB4856                                                                 | HS | I | 3620582 | 3625087 | WBGene00044437 | Y47G6A.32 | Y47G6A.32 | -0.172930429799163  |
| AGIWUR28152;AGIWUR35782;AGIWUR39596                                    |    |   |         |         |                |           |           |                     |
| CB4856                                                                 | HS | I | 3629471 | 3631112 | WBGene00000284 | cah-6     | T28F2.3   | -0.173452895984861  |
| CB4856                                                                 | HS | I | 3631086 | 3636485 | WBGene00020902 | jmjc-1    | T28F2.4   | 0.31052081676928    |
| AGIWUR10716;AGIWUR27941                                                |    |   |         |         |                |           |           |                     |
| CB4856                                                                 | HS | I | 3637353 | 3638819 | WBGene00020901 | T28F2.2   | T28F2.2   | -0.154046450066599  |
| AGIWUR3655;AGIWUR17862;AGIWUR19553;AGIWUR28347;AGIWUR30674;AGIWUR35823 |    |   |         |         |                |           |           |                     |
| CB4856                                                                 | HS | I | 3639648 | 3641347 | WBGene00020900 | T28F2.1   | T28F2.1   | 0.213440772384615   |
| CB4856                                                                 | HS | I | 3641668 | 3647009 | WBGene00000368 | ccb-1     | T28F2.5   | -0.0430664673017951 |
| AGIWUR17902;AGIWUR36522                                                |    |   |         |         |                |           |           |                     |
| CB4856                                                                 | HS | I | 3651230 | 3652599 | WBGene00000627 | col-50    | T28F2.6   | -0.0937440036117025 |
| AGIWUR28502;AGIWUR33906                                                |    |   |         |         |                |           |           |                     |
| CB4856                                                                 | HS | I | 3653997 | 3655265 | WBGene00000628 | col-51    | T28F2.8   | -0.467364834108391  |
| CB4856                                                                 | HS | I | 3655413 | 3662183 | WBGene00020903 | acd-5     | T28F2.7   | 0.139869645083373   |
| CB4856                                                                 | HS | I | 3666923 | 3671700 | WBGene00004890 | smf-2     | D1037.2   | -0.0316091130724985 |
| CB4856                                                                 | HS | I | 3680178 | 3680944 | WBGene00001501 | ftn-2     | D1037.3   | 0.0707825298551832  |

AGIWUR8517;AGIWUR21576;AGIWUR30113;AGIWUR39905;AGIWUR40881;AGIWUR45149  
 CB4856 HS I 3682772 3684118 WBGene00004272 rab-8 D1037.4 0.0183699894540013  
 AGIWUR8091;AGIWUR21531;AGIWUR23567;AGIWUR31383;AGIWUR34408;AGIWUR40705;AGIWUR44617  
 CB4856 HS I 3684783 3690192 WBGene00017025 D1037.1 D1037.1 -0.326215564103974 AGIWUR23371  
 CB4856 HS I 3690181 3694021 WBGene00017026 ip1a-4 D1037.5 0.0364425632713541 AGIWUR39546  
 CB4856 HS I 3694296 3697549 WBGene00003418 msh-2 H26D21.2 0.0996998763044488  
 AGIWUR4168  
 CB4856 HS I 3698102 3699300 WBGene00002042 hus-1 H26D21.1 -0.0999951908786869  
 AGIWUR20692  
 CB4856 HS I 3706030 3709435 WBGene00017651 F21A9.2 F21A9.2 0.11256948772974 AGIWUR4947  
 CB4856 HS I 3712133 3713134 WBGene00017650 F21A9.1 F21A9.1 -0.0512810364442498 AGIWUR22805  
 CB4856 HS I 3713142 3721157 WBGene00003040 lin-59 T12F5.4 -0.215404184084411  
 AGIWUR22950;AGIWUR24884;AGIWUR25052  
 CB4856 HS I 3726011 3731265 WBGene00001601 glh-4 T12F5.3 0.184611789134701 AGIWUR15176  
 CB4856 HS I 3732982 3740479 WBGene00004147 larp-5 T12F5.5 -0.0874847648880532  
 AGIWUR11520;AGIWUR29583;AGIWUR33557  
 CB4856 HS I 3741456 3742646 WBGene00020466 sld-2 T12F5.1 0.0925732775081176 AGIWUR14577  
 CB4856 HS I 3748523 3753958 WBGene00002135 inx-13 Y8G1A.2 -0.0753959523809358  
 AGIWUR5735;AGIWUR7745;AGIWUR14145;AGIWUR26568;AGIWUR30702;AGIWUR38532  
 CB4856 HS I 3755457 3759077 WBGene00002134 inx-12 ZK770.3 0.186480391126043  
 AGIWUR5815;AGIWUR12211;AGIWUR19906  
 CB4856 HS I 3769681 3773876 WBGene00022815 asic-1 ZK770.1 0.208657650059902 AGIWUR39041  
 CB4856 HS I 3774706 3777468 WBGene00016324 C32E8.6 C32E8.6 0.0251802819847806  
 AGIWUR13968;AGIWUR42073  
 CB4856 HS I 3778089 3781690 WBGene00004368 ric-19 C32E8.7 0.235678991252476 AGIWUR5505  
 CB4856 HS I 3782118 3783294 WBGene00016323 C32E8.5 C32E8.5 0.353784451212499  
 AGIWUR10554;AGIWUR18167  
 CB4856 HS I 3783835 3784435 WBGene00016322 C32E8.4 C32E8.4 -0.0162298570883666  
 AGIWUR25087;AGIWUR28898;AGIWUR38913  
 CB4856 HS I 3786588 3787494 WBGene00016321 tppp-1 C32E8.3 -0.0497548861140409 AGIWUR830  
 CB4856 HS I 3788036 3788909 WBGene00004425 rpl-13 C32E8.2 -0.22570543946626  
 AGIWUR4831;AGIWUR12028;AGIWUR21601;AGIWUR24937;AGIWUR36210;AGIWUR40534;AGIWUR40558;AGIWUR40887  
 CB4856 HS I 3789309 3792797 WBGene00004217 ptr-2 C32E8.8 -0.269695879354167  
 AGIWUR13785;AGIWUR26858;AGIWUR38652  
 CB4856 HS I 3794556 3798069 WBGene00016325 C32E8.9 C32E8.9 0.118053501266758 AGIWUR631  
 CB4856 HS I 3798566 3805737 WBGene00006751 unc-11 C32E8.10 -0.0930557764987565  
 AGIWUR7869;AGIWUR17953;AGIWUR22953;AGIWUR24588;AGIWUR25836;AGIWUR39231;AGIWUR39504  
 CB4856 HS I 3807458 3816809 WBGene00016326 ubr-1 C32E8.11 -0.0412969887442571  
 AGIWUR21445

|                                                                                                                                                          |    |   |         |         |                 |          |          |                     |                     |             |
|----------------------------------------------------------------------------------------------------------------------------------------------------------|----|---|---------|---------|-----------------|----------|----------|---------------------|---------------------|-------------|
| CB4856                                                                                                                                                   | HS | I | 3817996 | 3821505 | WBGene00003797  | npp-11   | F53F10.5 |                     | -0.0757243584055605 |             |
| AGIWUR20808                                                                                                                                              |    |   |         |         |                 |          |          |                     |                     |             |
| CB4856                                                                                                                                                   | HS | I | 3821656 | 3821990 | WBGene00023066  | F53F10.7 |          | F53F10.7            | -0.126764746460498  |             |
| AGIWUR7872;AGIWUR22404;AGIWUR22849;AGIWUR28979;AGIWUR36927                                                                                               |    |   |         |         |                 |          |          |                     |                     |             |
| CB4856                                                                                                                                                   | HS | I | 3824947 | 3826514 | WBGene00006833  | unc-108  | F53F10.4 |                     | 0.0694968677020862  |             |
| AGIWUR4694;AGIWUR13234;AGIWUR19555;AGIWUR21037;AGIWUR23542;AGIWUR33385;AGIWUR35111;AGIWUR36324;AGIWUR37033;AGIWUR41608                                   |    |   |         |         |                 |          |          |                     |                     |             |
| CB4856                                                                                                                                                   | HS | I | 3827219 | 3828143 | WBGene00018765  | mpc-2    | F53F10.3 |                     | -0.199545390968812  |             |
| AGIWUR21074                                                                                                                                              |    |   |         |         |                 |          |          |                     |                     |             |
| CB4856                                                                                                                                                   | HS | I | 3828239 | 3829308 | WBGene00044423  | F53F10.8 |          | F53F10.8            | 0.0756095737507319  |             |
| AGIWUR6429;AGIWUR15090;AGIWUR36207;AGIWUR43512                                                                                                           |    |   |         |         |                 |          |          |                     |                     |             |
| CB4856                                                                                                                                                   | HS | I | 3830562 | 3834124 | WBGene00018764  | F53F10.2 |          | F53F10.2            | -0.160067323078199  |             |
| AGIWUR2264;AGIWUR6729;AGIWUR9892;AGIWUR13356;AGIWUR14555;AGIWUR19732;AGIWUR23173;AGIWUR25744;AGIWUR26007;AGIWUR27943;AGIWUR29611;AGIWUR36716;AGIWUR42029 |    |   |         |         |                 |          |          |                     |                     |             |
| CB4856                                                                                                                                                   | HS | I | 3834115 | 3837807 | WBGene00018763  | F53F10.1 |          | F53F10.1            | -0.231560884340003  |             |
| AGIWUR22095                                                                                                                                              |    |   |         |         |                 |          |          |                     |                     |             |
| CB4856                                                                                                                                                   | HS | I | 3838237 | 3839899 | WBGene00020187  | gsp-4    | T03F1.5  | 0.176293755644783   |                     | AGIWUR8768  |
| CB4856                                                                                                                                                   | HS | I | 3839809 | 3841558 | WBGene00020188  | T03F1.6  | T03F1.6  | -0.183576386372387  |                     |             |
| AGIWUR6276;AGIWUR15360;AGIWUR19567                                                                                                                       |    |   |         |         |                 |          |          |                     |                     |             |
| CB4856                                                                                                                                                   | HS | I | 3853810 | 3854233 | WBGene00020192  | T03F1.11 |          | T03F1.11            | 0.192075905319395   |             |
| AGIWUR41326                                                                                                                                              |    |   |         |         |                 |          |          |                     |                     |             |
| CB4856                                                                                                                                                   | HS | I | 3854169 | 3859292 | WBGene00020189  | tfbm-1   | T03F1.7  | -0.0794526658177759 |                     | AGIWUR20942 |
| CB4856                                                                                                                                                   | HS | I | 3859376 | 3862729 | WBGene00020190  | guk-1    | T03F1.8  | 0.0060612443356538  |                     |             |
| AGIWUR2473;AGIWUR5012;AGIWUR19709;AGIWUR27356                                                                                                            |    |   |         |         |                 |          |          |                     |                     |             |
| CB4856                                                                                                                                                   | HS | I | 3862775 | 3865938 | WBGene00001832  | hcp-4    | T03F1.9  | -0.0666107918848535 |                     |             |
| AGIWUR6379;AGIWUR7648;AGIWUR29704;AGIWUR37109                                                                                                            |    |   |         |         |                 |          |          |                     |                     |             |
| CB4856                                                                                                                                                   | HS | I | 3867541 | 3869109 | WBGene00020185  | pgk-1    | T03F1.3  | 0.186718287298472   |                     | AGIWUR13438 |
| CB4856                                                                                                                                                   | HS | I | 3869214 | 3870114 | WBGene00000764  | coq-4    | T03F1.2  | 0.177083339651412   |                     |             |
| AGIWUR4077;AGIWUR4428;AGIWUR8265                                                                                                                         |    |   |         |         |                 |          |          |                     |                     |             |
| CB4856                                                                                                                                                   | HS | I | 3870642 | 3871267 | WBGene000219725 | linc-63  | T03F1.13 |                     | 0.544834117306982   |             |
| AGIWUR21463                                                                                                                                              |    |   |         |         |                 |          |          |                     |                     |             |
| CB4856                                                                                                                                                   | HS | I | 3871474 | 3873428 | WBGene00020191  | cllec-53 | T03F1.10 |                     | -0.162080828615949  |             |
| AGIWUR12742                                                                                                                                              |    |   |         |         |                 |          |          |                     |                     |             |
| CB4856                                                                                                                                                   | HS | I | 3874037 | 3875995 | WBGene00020184  | uba-5    | T03F1.1  | -0.0931202803138689 |                     |             |
| AGIWUR13281;AGIWUR14762;AGIWUR40606                                                                                                                      |    |   |         |         |                 |          |          |                     |                     |             |
| CB4856                                                                                                                                                   | HS | I | 3875974 | 3876711 | WBGene00020193  | T03F1.12 |          | T03F1.12            | -0.0104339907128477 |             |
| AGIWUR6414;AGIWUR30180;AGIWUR33159;AGIWUR36650;AGIWUR37016                                                                                               |    |   |         |         |                 |          |          |                     |                     |             |
| CB4856                                                                                                                                                   | HS | I | 3877063 | 3880747 | WBGene00016837  | C50F2.3  | C50F2.3  | 0.189714478932917   |                     | AGIWUR4648  |
| CB4856                                                                                                                                                   | HS | I | 3881816 | 3888313 | WBGene00016836  | C50F2.2  | C50F2.2  | 0.0648783987497037  |                     | AGIWUR20836 |

|                                                                                                                                                                                  |    |   |         |         |                |         |         |                     |             |
|----------------------------------------------------------------------------------------------------------------------------------------------------------------------------------|----|---|---------|---------|----------------|---------|---------|---------------------|-------------|
| CB4856                                                                                                                                                                           | HS | I | 3888331 | 3891598 | WBGene00016838 | C50F2.4 | C50F2.4 | -0.0587136492088689 | AGIWUR21618 |
| CB4856                                                                                                                                                                           | HS | I | 3892332 | 3895271 | WBGene00016835 | C50F2.1 | C50F2.1 | -0.0629171887571971 | AGIWUR30897 |
| CB4856                                                                                                                                                                           | HS | I | 3898046 | 3899840 | WBGene00001430 | fkf-5   | C50F2.6 | -0.0241856892001842 |             |
| AGIWUR566;AGIWUR5699;AGIWUR6375;AGIWUR8997;AGIWUR14812;AGIWUR17905;AGIWUR26306                                                                                                   |    |   |         |         |                |         |         |                     |             |
| CB4856                                                                                                                                                                           | HS | I | 3900407 | 3901437 | WBGene00016840 | C50F2.7 | C50F2.7 | 0.100570779382624   | AGIWUR34430 |
| CB4856                                                                                                                                                                           | HS | I | 3901432 | 3905208 | WBGene00016841 | magu-3  | C50F2.8 | 0.131058350594488   | AGIWUR10248 |
| CB4856                                                                                                                                                                           | HS | I | 3908747 | 3909701 | WBGene00003950 | pbs-4   | T20F5.2 | -0.0356606658204974 |             |
| AGIWUR3637;AGIWUR19846;AGIWUR21083;AGIWUR23708;AGIWUR40592;AGIWUR43430                                                                                                           |    |   |         |         |                |         |         |                     |             |
| CB4856                                                                                                                                                                           | HS | I | 3909629 | 3910544 | WBGene00020625 | mrrf-1  | T20F5.3 | 0.106141259676431   | AGIWUR14724 |
| CB4856                                                                                                                                                                           | HS | I | 3912635 | 3915458 | WBGene00020626 | T20F5.4 | T20F5.4 | 0.177442408266982   | AGIWUR17512 |
| CB4856                                                                                                                                                                           | HS | I | 3916064 | 3916391 | WBGene00023142 | T20F5.1 | T20F5.1 | -0.0432426644518404 | AGIWUR5544  |
| CB4856                                                                                                                                                                           | HS | I | 3917911 | 3920172 | WBGene00020627 | T20F5.5 | T20F5.5 | -0.0704588775094592 | AGIWUR7752  |
| CB4856                                                                                                                                                                           | HS | I | 3920177 | 3925162 | WBGene00020628 | T20F5.6 | T20F5.6 | -0.168203897452837  |             |
| AGIWUR29764;AGIWUR39526;AGIWUR41846                                                                                                                                              |    |   |         |         |                |         |         |                     |             |
| CB4856                                                                                                                                                                           | HS | I | 3925434 | 3927887 | WBGene00020629 | T20F5.7 | T20F5.7 | -0.0526767023119916 |             |
| AGIWUR1843;AGIWUR5114;AGIWUR7038;AGIWUR9628;AGIWUR12435;AGIWUR24370;AGIWUR34443                                                                                                  |    |   |         |         |                |         |         |                     |             |
| CB4856                                                                                                                                                                           | HS | I | 3930830 | 3931552 | WBGene00020653 | T21E3.2 | T21E3.2 | 0.199314600301174   | AGIWUR6826  |
| CB4856                                                                                                                                                                           | HS | I | 3932210 | 3934813 | WBGene00020652 | egg-4   | T21E3.1 | 0.086964082586233   | AGIWUR3682  |
| CB4856                                                                                                                                                                           | HS | I | 3935272 | 3953991 | WBGene00003072 | lrp-2   | T21E3.3 | -0.022834604548311  |             |
| AGIWUR29102;AGIWUR33825                                                                                                                                                          |    |   |         |         |                |         |         |                     |             |
| CB4856                                                                                                                                                                           | HS | I | 3968118 | 3970474 | WBGene00018531 | F47B3.7 | F47B3.7 | -0.0998235037163546 | AGIWUR2971  |
| CB4856                                                                                                                                                                           | HS | I | 3974063 | 3977351 | WBGene00017909 | F28H1.4 | F28H1.4 | 0.357376140255361   | AGIWUR4979  |
| CB4856                                                                                                                                                                           | HS | I | 3978493 | 3979538 | WBGene00017910 | F28H1.5 | F28H1.5 | 0.161434290622509   | AGIWUR27721 |
| CB4856                                                                                                                                                                           | HS | I | 3983171 | 3986915 | WBGene00000197 | aars-2  | F28H1.3 | -0.0417729972598462 |             |
| AGIWUR5656;AGIWUR5960;AGIWUR22497;AGIWUR31140;AGIWUR35129;AGIWUR42993                                                                                                            |    |   |         |         |                |         |         |                     |             |
| CB4856                                                                                                                                                                           | HS | I | 3987842 | 3988699 | WBGene00000779 | cpn-3   | F28H1.2 | 0.163678592826701   | AGIWUR1643  |
| CB4856                                                                                                                                                                           | HS | I | 3995709 | 3996950 | WBGene00017908 | F28H1.1 | F28H1.1 | 0.0688914178503062  |             |
| AGIWUR6699;AGIWUR23035;AGIWUR27226;AGIWUR33403;AGIWUR36968;AGIWUR44156;AGIWUR44775                                                                                               |    |   |         |         |                |         |         |                     |             |
| CB4856                                                                                                                                                                           | HS | I | 3999348 | 4031739 | WBGene00006805 | unc-73  | F55C7.7 | -0.0607077958895053 |             |
| AGIWUR1149;AGIWUR3451;AGIWUR8764;AGIWUR9185;AGIWUR9442;AGIWUR24092;AGIWUR29201;AGIWUR29929;AGIWUR30982;AGIWUR34557;AGIWUR35974;AGIWUR36594;AGIWUR42637                           |    |   |         |         |                |         |         |                     |             |
| CB4856                                                                                                                                                                           | HS | I | 4035702 | 4090884 | WBGene00006820 | unc-89  | C09D1.1 | -0.196624146933912  |             |
| AGIWUR6300;AGIWUR7462;AGIWUR9086;AGIWUR10960;AGIWUR10976;AGIWUR12117;AGIWUR13718;AGIWUR19966;AGIWUR21298;AGIWUR28254;AGIWUR29472;AGIWUR32385;AGIWUR33294;AGIWUR33479;AGIWUR43580 |    |   |         |         |                |         |         |                     |             |
| CB4856                                                                                                                                                                           | HS | I | 4094179 | 4098330 | WBGene00016066 | acd-2   | C24G7.4 | -0.110086637147345  | AGIWUR36711 |
| CB4856                                                                                                                                                                           | HS | I | 4103713 | 4108045 | WBGene00016064 | acd-1   | C24G7.2 | -0.0956703961572489 |             |
| AGIWUR8785;AGIWUR10183                                                                                                                                                           |    |   |         |         |                |         |         |                     |             |
| CB4856                                                                                                                                                                           | HS | I | 4109407 | 4112385 | WBGene00016063 | delm-2  | C24G7.1 | -0.108369472453798  |             |
| AGIWUR10048;AGIWUR20136                                                                                                                                                          |    |   |         |         |                |         |         |                     |             |

|                                                                        |    |   |         |         |                |          |          |                     |                    |             |
|------------------------------------------------------------------------|----|---|---------|---------|----------------|----------|----------|---------------------|--------------------|-------------|
| CB4856                                                                 | HS | I | 4114734 | 4116370 | WBGene00000867 | cyb-2.2  | H31G24.4 |                     | -0.178744747081815 |             |
| AGIWUR32371                                                            |    |   |         |         |                |          |          |                     |                    |             |
| CB4856                                                                 | HS | I | 4123481 | 4124723 | WBGene00019253 | H31G24.1 | H31G24.1 |                     | -0.121098565971876 |             |
| AGIWUR24730                                                            |    |   |         |         |                |          |          |                     |                    |             |
| CB4856                                                                 | HS | I | 4126056 | 4129307 | WBGene00003029 | lin-44   | E01A2.3  | 0.162748422427056   |                    |             |
| AGIWUR3426;AGIWUR26281;AGIWUR28498;AGIWUR29789;AGIWUR34306;AGIWUR44057 |    |   |         |         |                |          |          |                     |                    |             |
| CB4856                                                                 | HS | I | 4129469 | 4132292 | WBGene00002696 | let-504  | E01A2.4  | -0.130391479748273  |                    | AGIWUR28032 |
| CB4856                                                                 | HS | I | 4132500 | 4135239 | WBGene00017085 | E01A2.2  | E01A2.2  | -0.153787919572383  |                    |             |
| AGIWUR606;AGIWUR16300;AGIWUR28446;AGIWUR41107                          |    |   |         |         |                |          |          |                     |                    |             |
| CB4856                                                                 | HS | I | 4135239 | 4137074 | WBGene00017087 | E01A2.5  | E01A2.5  | 0.102956052016783   |                    | AGIWUR9789  |
| CB4856                                                                 | HS | I | 4137134 | 4140634 | WBGene00017088 | akir-1   | E01A2.6  | -0.197509789744519  |                    | AGIWUR15450 |
| CB4856                                                                 | HS | I | 4139514 | 4142367 | WBGene00017084 | E01A2.1  | E01A2.1  | -0.021547941960808  |                    | AGIWUR44336 |
| CB4856                                                                 | HS | I | 4148832 | 4149429 | WBGene00020040 | R12E2.15 | R12E2.15 | -0.236927633414268  |                    |             |
| AGIWUR12434;AGIWUR26472                                                |    |   |         |         |                |          |          |                     |                    |             |
| CB4856                                                                 | HS | I | 4151099 | 4151761 | WBGene00020032 | R12E2.6  | R12E2.6  | -0.167880875399533  |                    | AGIWUR21859 |
| CB4856                                                                 | HS | I | 4153957 | 4154550 | WBGene00020033 | R12E2.7  | R12E2.7  | -0.233274612616045  |                    | AGIWUR14061 |
| CB4856                                                                 | HS | I | 4155542 | 4158733 | WBGene00020034 | R12E2.8  | R12E2.8  | -0.212457936343392  |                    | AGIWUR2190  |
| CB4856                                                                 | HS | I | 4159014 | 4161149 | WBGene00002137 | inx-15   | R12E2.9  | 0.115279608277271   |                    | AGIWUR34283 |
| CB4856                                                                 | HS | I | 4162035 | 4165015 | WBGene00002138 | inx-16   | R12E2.5  | -0.0121793370858825 |                    | AGIWUR26075 |
| CB4856                                                                 | HS | I | 4165135 | 4167229 | WBGene00002139 | inx-17   | R12E2.4  | 0.142488562952519   |                    |             |
| AGIWUR9327;AGIWUR17226;AGIWUR20101;AGIWUR22560                         |    |   |         |         |                |          |          |                     |                    |             |
| CB4856                                                                 | HS | I | 4172433 | 4173739 | WBGene00020036 | R12E2.11 | R12E2.11 | -0.270315845509998  |                    |             |
| AGIWUR10106                                                            |    |   |         |         |                |          |          |                     |                    |             |
| CB4856                                                                 | HS | I | 4173743 | 4174774 | WBGene00020037 | mrps-6   | R12E2.12 | -0.101309805769882  |                    |             |
| AGIWUR38727                                                            |    |   |         |         |                |          |          |                     |                    |             |
| CB4856                                                                 | HS | I | 4175319 | 4177271 | WBGene00004464 | rpn-8    | R12E2.3  | -0.103394405220341  |                    |             |
| AGIWUR18623;AGIWUR22338                                                |    |   |         |         |                |          |          |                     |                    |             |
| CB4856                                                                 | HS | I | 4177305 | 4178447 | WBGene00020038 | R12E2.13 | R12E2.13 | -0.128791398362456  |                    |             |
| AGIWUR3754;AGIWUR18414;AGIWUR22505;AGIWUR41014;AGIWUR42132             |    |   |         |         |                |          |          |                     |                    |             |
| CB4856                                                                 | HS | I | 4178812 | 4182158 | WBGene00020031 | suco-1   | R12E2.2  | 0.099888719502097   |                    | AGIWUR2927  |
| CB4856                                                                 | HS | I | 4182221 | 4184992 | WBGene00020030 | R12E2.1  | R12E2.1  | 0.0837263049371195  |                    | AGIWUR29439 |
| CB4856                                                                 | HS | I | 4190142 | 4193129 | WBGene00015975 | cas-2    | C18E3.6  | -0.187192810189686  |                    | AGIWUR19315 |
| CB4856                                                                 | HS | I | 4193241 | 4203303 | WBGene00015974 | C18E3.5  | C18E3.5  | -0.151544891042187  |                    | AGIWUR18123 |
| CB4856                                                                 | HS | I | 4203458 | 4208537 | WBGene00015972 | C18E3.3  | C18E3.3  | -0.158839032957436  |                    | AGIWUR9106  |
| CB4856                                                                 | HS | I | 4208515 | 4210341 | WBGene00001985 | hop-1    | C18E3.8  | -0.0205801747377592 |                    | AGIWUR15216 |
| CB4856                                                                 | HS | I | 4210979 | 4212667 | WBGene00015971 | swsn-2.2 | C18E3.2  | 0.125013015412749   |                    |             |
| AGIWUR22115                                                            |    |   |         |         |                |          |          |                     |                    |             |
| CB4856                                                                 | HS | I | 4212708 | 4214317 | WBGene00015970 | C18E3.1  | C18E3.1  | 0.193426656331143   |                    |             |
| AGIWUR5693;AGIWUR8501;AGIWUR13498                                      |    |   |         |         |                |          |          |                     |                    |             |

|                                                                                               |    |   |         |         |                |           |           |                     |             |
|-----------------------------------------------------------------------------------------------|----|---|---------|---------|----------------|-----------|-----------|---------------------|-------------|
| CB4856                                                                                        | HS | I | 4214294 | 4215768 | WBGene00015976 | C18E3.9   | C18E3.9   | -0.206277454648699  | AGIWUR20276 |
| CB4856                                                                                        | HS | I | 4229577 | 4236039 | WBGene00003516 | nab-1     | C43E11.6  | -0.0413866654307462 |             |
| AGIWUR2476;AGIWUR3623;AGIWUR14586;AGIWUR14740;AGIWUR15070;AGIWUR28263;AGIWUR34361;AGIWUR39076 |    |   |         |         |                |           |           |                     |             |
| CB4856                                                                                        | HS | I | 4239088 | 4242727 | WBGene00003584 | ndx-7     | C43E11.7  | 0.112597750581465   |             |
| AGIWUR3786                                                                                    |    |   |         |         |                |           |           |                     |             |
| CB4856                                                                                        | HS | I | 4242821 | 4247582 | WBGene00016606 | exoc-7    | C43E11.8  | -0.108519596150067  |             |
| AGIWUR18146                                                                                   |    |   |         |         |                |           |           |                     |             |
| CB4856                                                                                        | HS | I | 4247754 | 4249415 | WBGene00007001 | tufm-2    | C43E11.4  | 0.00377774708606715 |             |
| AGIWUR11352;AGIWUR18532;AGIWUR37882;AGIWUR40266                                               |    |   |         |         |                |           |           |                     |             |
| CB4856                                                                                        | HS | I | 4249482 | 4253170 | WBGene00016608 | cogc-5    | C43E11.11 | -0.199879903198489  |             |
| AGIWUR16563                                                                                   |    |   |         |         |                |           |           |                     |             |
| CB4856                                                                                        | HS | I | 4253242 | 4254139 | WBGene00016609 | C43E11.12 | C43E11.12 | -0.346341926190227  |             |
| AGIWUR19632                                                                                   |    |   |         |         |                |           |           |                     |             |
| CB4856                                                                                        | HS | I | 4254380 | 4264699 | WBGene00016603 | met-1     | C43E11.3  | -0.12043898608777   |             |
| AGIWUR2423;AGIWUR5245;AGIWUR8984;AGIWUR14864;AGIWUR15911;AGIWUR26980;AGIWUR38107              |    |   |         |         |                |           |           |                     |             |
| CB4856                                                                                        | HS | I | 4265109 | 4267238 | WBGene00016602 | mus-81    | C43E11.2  | 0.144178017356854   |             |
| AGIWUR1293                                                                                    |    |   |         |         |                |           |           |                     |             |
| CB4856                                                                                        | HS | I | 4267199 | 4267967 | WBGene00016607 | C43E11.9  | C43E11.9  | 0.0826570620225735  |             |
| AGIWUR3376;AGIWUR11694                                                                        |    |   |         |         |                |           |           |                     |             |
| CB4856                                                                                        | HS | I | 4268070 | 4270287 | WBGene00000382 | cdc-6     | C43E11.10 | -0.199484847393684  |             |
| AGIWUR23938                                                                                   |    |   |         |         |                |           |           |                     |             |
| CB4856                                                                                        | HS | I | 4270697 | 4273332 | WBGene00016601 | acin-1    | C43E11.1  | -0.248462912139505  |             |
| AGIWUR26821                                                                                   |    |   |         |         |                |           |           |                     |             |
| CB4856                                                                                        | HS | I | 4273896 | 4274742 | WBGene00021631 | Y47D9A.4  | Y47D9A.4  | 0.0755715984801419  |             |
| AGIWUR20658                                                                                   |    |   |         |         |                |           |           |                     |             |
| CB4856                                                                                        | HS | I | 4277684 | 4279622 | WBGene00021632 | Y47D9A.5  | Y47D9A.5  | 0.111029771089331   |             |
| AGIWUR13379                                                                                   |    |   |         |         |                |           |           |                     |             |
| CB4856                                                                                        | HS | I | 4298184 | 4302243 | WBGene00021629 | scpl-3    | Y47D9A.2  | -0.0226379821181206 |             |
| AGIWUR34572;AGIWUR41718                                                                       |    |   |         |         |                |           |           |                     |             |
| CB4856                                                                                        | HS | I | 4303930 | 4308244 | WBGene00021628 | Y47D9A.1  | Y47D9A.1  | -0.0312534451914068 |             |
| AGIWUR1935;AGIWUR8700;AGIWUR37027                                                             |    |   |         |         |                |           |           |                     |             |
| CB4856                                                                                        | HS | I | 4321095 | 4359080 | WBGene00000140 | anc-1     | ZK973.6   | -0.137053385993666  |             |
| AGIWUR2453;AGIWUR11299;AGIWUR11875;AGIWUR21024;AGIWUR28673;AGIWUR37202;AGIWUR38158            |    |   |         |         |                |           |           |                     |             |
| CB4856                                                                                        | HS | I | 4359207 | 4362548 | WBGene00000045 | acr-6     | ZK973.5   | -0.145459629476797  | AGIWUR12825 |
| CB4856                                                                                        | HS | I | 4363415 | 4364048 | WBGene00022833 | ZK973.4   | ZK973.4   | 0.0218983823428012  | AGIWUR43472 |
| CB4856                                                                                        | HS | I | 4364906 | 4367049 | WBGene00022834 | ZK973.8   | ZK973.8   | 0.0991434121210801  | AGIWUR38768 |
| CB4856                                                                                        | HS | I | 4368089 | 4370504 | WBGene00022832 | pdp-1     | ZK973.3   | -0.0127988252975761 | AGIWUR38319 |
| CB4856                                                                                        | HS | I | 4370419 | 4372138 | WBGene00022835 | ZK973.9   | ZK973.9   | -0.170851306237465  | AGIWUR26896 |
| CB4856                                                                                        | HS | I | 4372255 | 4373018 | WBGene00003061 | lpd-5     | ZK973.10  | 0.028352072765216   |             |



|                                                                        |    |   |         |         |                |            |           |                    |                     |
|------------------------------------------------------------------------|----|---|---------|---------|----------------|------------|-----------|--------------------|---------------------|
| AGIWUR9768                                                             |    |   |         |         |                |            |           |                    |                     |
| CB4856                                                                 | HS | I | 4373656 | 4379329 | WBGene00022831 | cec-10     | ZK973.2   | -0.131332330550752 | AGIWUR11355         |
| CB4856                                                                 | HS | I | 4379325 | 4381948 | WBGene00022836 | ZK973.11   |           | ZK973.11           | 0.0772243547577229  |
| AGIWUR40438                                                            |    |   |         |         |                |            |           |                    |                     |
| CB4856                                                                 | HS | I | 4382565 | 4385218 | WBGene00022830 | ZK973.1    | ZK973.1   | 0.153713910131884  | AGIWUR15329         |
| CB4856                                                                 | HS | I | 4386785 | 4401980 | WBGene00000962 | dhc-1      | T21E12.4  |                    | -0.0397277990210751 |
| AGIWUR25546;AGIWUR28865                                                |    |   |         |         |                |            |           |                    |                     |
| CB4856                                                                 | HS | I | 4401956 | 4404585 | WBGene00020655 | T21E12.3   |           | T21E12.3           | 0.0641105960749924  |
| AGIWUR37344                                                            |    |   |         |         |                |            |           |                    |                     |
| CB4856                                                                 | HS | I | 4409689 | 4426137 | WBGene00015704 | tiam-1     | C11D9.1   | 0.134179069777507  |                     |
| AGIWUR16;AGIWUR16270                                                   |    |   |         |         |                |            |           |                    |                     |
| CB4856                                                                 | HS | I | 4428467 | 4444342 | WBGene00016562 | C41D11.3   |           | C41D11.3           | -0.0916944099580208 |
| AGIWUR18411;AGIWUR25427;AGIWUR32861;AGIWUR34009                        |    |   |         |         |                |            |           |                    |                     |
| CB4856                                                                 | HS | I | 4444719 | 4446598 | WBGene00001231 | eif-3.H    | C41D11.2  |                    | -0.104187210662342  |
| AGIWUR21203                                                            |    |   |         |         |                |            |           |                    |                     |
| CB4856                                                                 | HS | I | 4446577 | 4448461 | WBGene00000787 | cps-6      | C41D11.8  |                    | 0.184889478816988   |
| AGIWUR1461;AGIWUR12582;AGIWUR32366                                     |    |   |         |         |                |            |           |                    |                     |
| CB4856                                                                 | HS | I | 4448576 | 4449774 | WBGene00016567 | C41D11.9   |           | C41D11.9           | 0.0616173333935599  |
| AGIWUR9473                                                             |    |   |         |         |                |            |           |                    |                     |
| CB4856                                                                 | HS | I | 4449879 | 4450927 | WBGene00016564 | cmt-1      | C41D11.5  |                    | 0.0619164067437552  |
| AGIWUR43287                                                            |    |   |         |         |                |            |           |                    |                     |
| CB4856                                                                 | HS | I | 4451200 | 4456805 | WBGene00016566 | eri-7      | C41D11.7  |                    | -0.106616992053414  |
| AGIWUR27075                                                            |    |   |         |         |                |            |           |                    |                     |
| CB4856                                                                 | HS | I | 4457383 | 4469461 | WBGene00016561 | eri-6      | C41D11.1  |                    | 0.0291188250903627  |
| AGIWUR9474;AGIWUR15095;AGIWUR33241                                     |    |   |         |         |                |            |           |                    |                     |
| CB4856                                                                 | HS | I | 4481203 | 4508930 | WBGene00020131 | gcy-28     | T01A4.1   | 0.002663190556766  |                     |
| AGIWUR8023;AGIWUR9811;AGIWUR10432;AGIWUR11693;AGIWUR25389;AGIWUR29324  |    |   |         |         |                |            |           |                    |                     |
| CB4856                                                                 | HS | I | 4508917 | 4511126 | WBGene00022470 | mrp1-19    | Y119C1B.4 |                    | -0.103658726875505  |
| AGIWUR28354                                                            |    |   |         |         |                |            |           |                    |                     |
| CB4856                                                                 | HS | I | 4511440 | 4516512 | WBGene00022471 | Y119C1B.5  |           | Y119C1B.5          | 0.162700726750174   |
| AGIWUR39560                                                            |    |   |         |         |                |            |           |                    |                     |
| CB4856                                                                 | HS | I | 4517260 | 4518491 | WBGene00022472 | Y119C1B.6  |           | Y119C1B.6          | 0.133301383340173   |
| AGIWUR7587;AGIWUR14994;AGIWUR16399;AGIWUR27205;AGIWUR37427;AGIWUR38985 |    |   |         |         |                |            |           |                    |                     |
| CB4856                                                                 | HS | I | 4520070 | 4522768 | WBGene00044754 | Y119C1B.12 |           | Y119C1B.12         | 0.494976428513496   |
| AGIWUR5460;AGIWUR27225;AGIWUR42488                                     |    |   |         |         |                |            |           |                    |                     |
| CB4856                                                                 | HS | I | 4526232 | 4534798 | WBGene00022473 | bet-1      | Y119C1B.8 |                    | -0.076289082086678  |
| AGIWUR1031;AGIWUR3966;AGIWUR43474                                      |    |   |         |         |                |            |           |                    |                     |
| CB4856                                                                 | HS | I | 4537449 | 4539725 | WBGene00022474 | zig-9      | Y119C1B.9 |                    | -0.0516911596544851 |
| AGIWUR17606                                                            |    |   |         |         |                |            |           |                    |                     |

|                                                                                                                                              |   |         |         |                |            |            |                     |             |
|----------------------------------------------------------------------------------------------------------------------------------------------|---|---------|---------|----------------|------------|------------|---------------------|-------------|
| CB4856 HS                                                                                                                                    | I | 4549695 | 4552758 | WBGene00022469 | Y119C1B.3  | Y119C1B.3  | 0.415219257260178   |             |
| AGIWUR19268                                                                                                                                  |   |         |         |                |            |            |                     |             |
| CB4856 HS                                                                                                                                    | I | 4552851 | 4553121 | WBGene00044441 | Y119C1B.11 | Y119C1B.11 | -0.0624306348701831 |             |
| AGIWUR4602;AGIWUR7834;AGIWUR9928;AGIWUR28645;AGIWUR31236                                                                                     |   |         |         |                |            |            |                     |             |
| CB4856 HS                                                                                                                                    | I | 4554126 | 4555203 | WBGene00022467 | Y119C1B.1  | Y119C1B.1  | -0.115511110457522  |             |
| AGIWUR24218                                                                                                                                  |   |         |         |                |            |            |                     |             |
| CB4856 HS                                                                                                                                    | I | 4555343 | 4556814 | WBGene00022475 | Y119C1B.10 | Y119C1B.10 | 0.18495943739534    |             |
| AGIWUR39830                                                                                                                                  |   |         |         |                |            |            |                     |             |
| CB4856 HS                                                                                                                                    | I | 4557664 | 4563694 | WBGene00017010 | D1007.15   | D1007.15   | 0.0990704072312667  |             |
| AGIWUR9638                                                                                                                                   |   |         |         |                |            |            |                     |             |
| CB4856 HS                                                                                                                                    | I | 4564035 | 4565976 | WBGene00004113 | pqn-24     | D1007.14   | 0.219555515770882   |             |
| AGIWUR5942                                                                                                                                   |   |         |         |                |            |            |                     |             |
| CB4856 HS                                                                                                                                    | I | 4566495 | 4568385 | WBGene00017009 | D1007.13   | D1007.13   | -0.3042035996052    |             |
| AGIWUR36815                                                                                                                                  |   |         |         |                |            |            |                     |             |
| CB4856 HS                                                                                                                                    | I | 4568962 | 4570027 | WBGene00000440 | ceh-17     | D1007.1    | 0.196729494748631   | AGIWUR7465  |
| CB4856 HS                                                                                                                                    | I | 4571214 | 4572787 | WBGene00000629 | col-52     | D1007.2    | -0.106241964881761  | AGIWUR32251 |
| CB4856 HS                                                                                                                                    | I | 4575782 | 4577204 | WBGene00017001 | D1007.3    | D1007.3    | 0.127808872088544   | AGIWUR11775 |
| CB4856 HS                                                                                                                                    | I | 4578695 | 4579740 | WBGene00044421 | D1007.18   | D1007.18   | -0.0135526039315899 |             |
| AGIWUR1057;AGIWUR2948;AGIWUR11364;AGIWUR23273;AGIWUR28118                                                                                    |   |         |         |                |            |            |                     |             |
| CB4856 HS                                                                                                                                    | I | 4579964 | 4580601 | WBGene00017002 | D1007.4    | D1007.4    | 0.123255552742489   | AGIWUR33335 |
| CB4856 HS                                                                                                                                    | I | 4580692 | 4583810 | WBGene00017003 | D1007.5    | D1007.5    | 0.108070761793893   |             |
| AGIWUR6591;AGIWUR13479                                                                                                                       |   |         |         |                |            |            |                     |             |
| CB4856 HS                                                                                                                                    | I | 4583873 | 4584505 | WBGene00004479 | rps-10     | D1007.6    | -0.28143843441621   |             |
| AGIWUR23072;AGIWUR34651                                                                                                                      |   |         |         |                |            |            |                     |             |
| CB4856 HS                                                                                                                                    | I | 4585115 | 4586177 | WBGene00004436 | rp1-24.1   | D1007.12   | -0.300309219438975  |             |
| AGIWUR2234;AGIWUR7117;AGIWUR7732;AGIWUR16379;AGIWUR17943;AGIWUR18712;AGIWUR21241;AGIWUR28846;AGIWUR31144;AGIWUR31405;AGIWUR32422;AGIWUR32535 |   |         |         |                |            |            |                     |             |
| CB4856 HS                                                                                                                                    | I | 4586273 | 4589463 | WBGene00017007 | D1007.10   | D1007.10   | -0.226192049328335  |             |
| AGIWUR22139;AGIWUR22225                                                                                                                      |   |         |         |                |            |            |                     |             |
| CB4856 HS                                                                                                                                    | I | 4589380 | 4589899 | WBGene00045048 | D1007.19   | D1007.19   | 0.0640089979786271  |             |
| AGIWUR9696;AGIWUR15492;AGIWUR15856;AGIWUR24796;AGIWUR32400                                                                                   |   |         |         |                |            |            |                     |             |
| CB4856 HS                                                                                                                                    | I | 4590430 | 4591587 | WBGene00017006 | D1007.9    | D1007.9    | 0.06625145708575    | AGIWUR6994  |
| CB4856 HS                                                                                                                                    | I | 4597914 | 4602666 | WBGene00017004 | nrd-1      | D1007.7    | -0.0955520453541503 |             |
| AGIWUR12783;AGIWUR16196;AGIWUR18660;AGIWUR21356;AGIWUR22525;AGIWUR37310                                                                      |   |         |         |                |            |            |                     |             |
| CB4856 HS                                                                                                                                    | I | 4603217 | 4604196 | WBGene00017011 | eaf-1      | D1007.16   | 0.097164240436669   |             |
| AGIWUR42215                                                                                                                                  |   |         |         |                |            |            |                     |             |
| CB4856 HS                                                                                                                                    | I | 4604175 | 4605385 | WBGene00017005 | D1007.8    | D1007.8    | 0.155134958470807   | AGIWUR31149 |
| CB4856 HS                                                                                                                                    | I | 4605655 | 4610202 | WBGene00016654 | C44E4.5    | C44E4.5    | 0.113274897881314   |             |
| AGIWUR38528;AGIWUR40268                                                                                                                      |   |         |         |                |            |            |                     |             |

|                                                                                                                                             |    |   |         |         |                |           |           |                     |             |
|---------------------------------------------------------------------------------------------------------------------------------------------|----|---|---------|---------|----------------|-----------|-----------|---------------------|-------------|
| CB4856                                                                                                                                      | HS | I | 4610147 | 4633377 | WBGene00016650 | ubr-4     | C44E4.1   | -0.0904086423124291 |             |
| AGIWUR26053;AGIWUR26807;AGIWUR44636                                                                                                         |    |   |         |         |                |           |           |                     |             |
| CB4856                                                                                                                                      | HS | I | 4634103 | 4635620 | WBGene00016653 | C44E4.4   | C44E4.4   | -0.18715870169543   |             |
| AGIWUR10614;AGIWUR20679                                                                                                                     |    |   |         |         |                |           |           |                     |             |
| CB4856                                                                                                                                      | HS | I | 4635722 | 4637328 | WBGene00016655 | acbp-1    | C44E4.6   | 0.220993890696228   | AGIWUR39810 |
| CB4856                                                                                                                                      | HS | I | 4637432 | 4640882 | WBGene00016652 | got-2.1   | C44E4.3   | 0.179247997807009   | AGIWUR9876  |
| CB4856                                                                                                                                      | HS | I | 4641003 | 4644069 | WBGene00022466 | Y119C1A.1 | Y119C1A.1 | -0.0606490272091111 |             |
| AGIWUR36777                                                                                                                                 |    |   |         |         |                |           |           |                     |             |
| CB4856                                                                                                                                      | HS | I | 4644677 | 4645657 | WBGene00015008 | lmd-2     | B0041.3   | -0.0395174378197574 | AGIWUR22463 |
| CB4856                                                                                                                                      | HS | I | 4645641 | 4646963 | WBGene00004415 | rpl-4     | B0041.4   | -0.0945234513987008 |             |
| AGIWUR1725;AGIWUR9422;AGIWUR14581;AGIWUR19810;AGIWUR33413;AGIWUR42912                                                                       |    |   |         |         |                |           |           |                     |             |
| CB4856                                                                                                                                      | HS | I | 4647280 | 4648275 | WBGene00015011 | B0041.8   | B0041.8   | -0.0595461471247249 |             |
| AGIWUR864;AGIWUR12611;AGIWUR13671;AGIWUR30350                                                                                               |    |   |         |         |                |           |           |                     |             |
| CB4856                                                                                                                                      | HS | I | 4648272 | 4650770 | WBGene00015009 | B0041.5   | B0041.5   | 0.121366712497103   | AGIWUR43682 |
| CB4856                                                                                                                                      | HS | I | 4652145 | 4652906 | WBGene00015010 | ptps-1    | B0041.6   | 0.210463902050835   |             |
| AGIWUR1589;AGIWUR18373;AGIWUR27336;AGIWUR28856;AGIWUR39809;AGIWUR42507                                                                      |    |   |         |         |                |           |           |                     |             |
| CB4856                                                                                                                                      | HS | I | 4653471 | 4660151 | WBGene00015007 | ain-2     | B0041.2   | 0.0126147837190311  |             |
| AGIWUR108;AGIWUR2251;AGIWUR8966;AGIWUR12167;AGIWUR12517;AGIWUR13698;AGIWUR29300;AGIWUR30748;AGIWUR30865;AGIWUR32722                         |    |   |         |         |                |           |           |                     |             |
| CB4856                                                                                                                                      | HS | I | 4665744 | 4671738 | WBGene00006961 | xnp-1     | B0041.7   | 0.0667432924781863  |             |
| AGIWUR6803;AGIWUR7645;AGIWUR8360;AGIWUR9104;AGIWUR18059;AGIWUR25526;AGIWUR26185;AGIWUR26197;AGIWUR32396;AGIWUR34797;AGIWUR35523;AGIWUR41946 |    |   |         |         |                |           |           |                     |             |
| CB4856                                                                                                                                      | HS | I | 4675135 | 4679409 | WBGene00006791 | unc-57    | T04D1.3   | -0.167333908825576  |             |
| AGIWUR19596;AGIWUR20386;AGIWUR30589                                                                                                         |    |   |         |         |                |           |           |                     |             |
| CB4856                                                                                                                                      | HS | I | 4679671 | 4682755 | WBGene00020212 | T04D1.2   | T04D1.2   | -0.127603315682341  | AGIWUR20292 |
| CB4856                                                                                                                                      | HS | I | 4685865 | 4698575 | WBGene00007053 | chd-7     | T04D1.4   | 0.0669327580682317  | AGIWUR42196 |
| CB4856                                                                                                                                      | HS | I | 4704598 | 4705881 | WBGene00021112 | W09C3.4   | W09C3.4   | 0.104759801828077   | AGIWUR1005  |
| CB4856                                                                                                                                      | HS | I | 4706682 | 4708762 | WBGene00021111 | W09C3.3   | W09C3.3   | 0.0400262174693466  | AGIWUR16434 |
| CB4856                                                                                                                                      | HS | I | 4709262 | 4710712 | WBGene00021113 | gsp-3     | W09C3.6   | -0.277680240436571  |             |
| AGIWUR17793;AGIWUR31790                                                                                                                     |    |   |         |         |                |           |           |                     |             |
| CB4856                                                                                                                                      | HS | I | 4711414 | 4713572 | WBGene00021110 | W09C3.2   | W09C3.2   | 0.101331962269995   | AGIWUR13150 |
| CB4856                                                                                                                                      | HS | I | 4714320 | 4715485 | WBGene00021114 | W09C3.7   | W09C3.7   | 0.206602924960759   | AGIWUR37490 |
| CB4856                                                                                                                                      | HS | I | 4716059 | 4717441 | WBGene00021115 | W09C3.8   | W09C3.8   | 0.140788755898814   | AGIWUR9668  |
| CB4856                                                                                                                                      | HS | I | 4719789 | 4721098 | WBGene00015696 | C10H11.7  | C10H11.7  | -0.0309313834419171 |             |
| AGIWUR22151                                                                                                                                 |    |   |         |         |                |           |           |                     |             |
| CB4856                                                                                                                                      | HS | I | 4721131 | 4723960 | WBGene00015695 | ugt-26    | C10H11.6  | 0.0532096999255423  |             |
| AGIWUR8772                                                                                                                                  |    |   |         |         |                |           |           |                     |             |
| CB4856                                                                                                                                      | HS | I | 4724065 | 4726779 | WBGene00015694 | ugt-27    | C10H11.5  | -0.0524792486289485 |             |
| AGIWUR3550;AGIWUR34887;AGIWUR35735                                                                                                          |    |   |         |         |                |           |           |                     |             |

|                                                                       |    |   |         |         |                |          |           |                     |             |
|-----------------------------------------------------------------------|----|---|---------|---------|----------------|----------|-----------|---------------------|-------------|
| CB4856                                                                | HS | I | 4727280 | 4730366 | WBGene00015693 | ugt-28   | C10H11.4  | -0.0690383886516504 |             |
| AGIWUR10641;AGIWUR42541                                               |    |   |         |         |                |          |           |                     |             |
| CB4856                                                                | HS | I | 4731603 | 4735276 | WBGene00015692 | ugt-25   | C10H11.3  | -0.0233419905695431 |             |
| AGIWUR33026                                                           |    |   |         |         |                |          |           |                     |             |
| CB4856                                                                | HS | I | 4735471 | 4738100 | WBGene00015697 | mlst-8   | C10H11.8  | -0.107529553379097  |             |
| AGIWUR33168                                                           |    |   |         |         |                |          |           |                     |             |
| CB4856                                                                | HS | I | 4738171 | 4744321 | WBGene00002694 | let-502  | C10H11.9  | 0.20704021143947    |             |
| AGIWUR13661;AGIWUR36987                                               |    |   |         |         |                |          |           |                     |             |
| CB4856                                                                | HS | I | 4747490 | 4759601 | WBGene00015691 | viln-1   | C10H11.1  | -0.0797416861219133 |             |
| AGIWUR26405                                                           |    |   |         |         |                |          |           |                     |             |
| CB4856                                                                | HS | I | 4759820 | 4761321 | WBGene00015698 | kca-1    | C10H11.10 | -0.0440792024527052 |             |
| AGIWUR10472;AGIWUR41596                                               |    |   |         |         |                |          |           |                     |             |
| CB4856                                                                | HS | I | 4769694 | 4771358 | WBGene00019767 | rpa-2    | M04F3.1   | 0.0239234541969253  | AGIWUR40091 |
| CB4856                                                                | HS | I | 4771348 | 4773673 | WBGene00019770 | M04F3.4  | M04F3.4   | -0.0354154019735873 |             |
| AGIWUR6019;AGIWUR14997;AGIWUR27654;AGIWUR28372;AGIWUR32364            |    |   |         |         |                |          |           |                     |             |
| CB4856                                                                | HS | I | 4773818 | 4788358 | WBGene00019771 | M04F3.5  | M04F3.5   | -0.139653794341045  |             |
| AGIWUR32895;AGIWUR36661                                               |    |   |         |         |                |          |           |                     |             |
| CB4856                                                                | HS | I | 4789190 | 4789592 | WBGene00023067 | rp1-41.1 | F54D7.6   | 0.0758539738725759  |             |
| AGIWUR16924                                                           |    |   |         |         |                |          |           |                     |             |
| CB4856                                                                | HS | I | 4790292 | 4790649 | WBGene00023068 | rp1-41.2 | F54D7.7   | 0.173768499403099   |             |
| AGIWUR5284;AGIWUR28223                                                |    |   |         |         |                |          |           |                     |             |
| CB4856                                                                | HS | I | 4790644 | 4792560 | WBGene00006984 | zig-7    | F54D7.4   | 0.238062319083852   | AGIWUR1938  |
| CB4856                                                                | HS | I | 4800043 | 4804268 | WBGene00018798 | gnrr-1   | F54D7.3   | -0.28712127075244   | AGIWUR35863 |
| CB4856                                                                | HS | I | 4805607 | 4809674 | WBGene00018797 | F54D7.2  | F54D7.2   | 0.0433078067835933  |             |
| AGIWUR13252;AGIWUR32663;AGIWUR38228;AGIWUR41575                       |    |   |         |         |                |          |           |                     |             |
| CB4856                                                                | HS | I | 4821933 | 4824811 | WBGene00019012 | F57C9.6  | F57C9.6   | 0.0352923962835057  | AGIWUR8277  |
| CB4856                                                                | HS | I | 4824921 | 4826633 | WBGene00019013 | tofu-4   | F57C9.7   | -0.0319909024669762 |             |
| AGIWUR17499;AGIWUR26308                                               |    |   |         |         |                |          |           |                     |             |
| CB4856                                                                | HS | I | 4827072 | 4829794 | WBGene00002034 | htp-3    | F57C9.5   | 0.192251414854976   | AGIWUR12950 |
| CB4856                                                                | HS | I | 4830135 | 4835619 | WBGene00019011 | F57C9.4  | F57C9.4   | 0.158783784741269   |             |
| AGIWUR3295;AGIWUR5793;AGIWUR12169;AGIWUR24527;AGIWUR27565;AGIWUR37268 |    |   |         |         |                |          |           |                     |             |
| CB4856                                                                | HS | I | 4836187 | 4844966 | WBGene00019010 | glo-2    | F57C9.3   | 0.0326176739424451  | AGIWUR34322 |
| CB4856                                                                | HS | I | 4845013 | 4847336 | WBGene00019009 | clcc-90  | F57C9.2   | -0.0764088758882715 |             |
| AGIWUR3253;AGIWUR3898;AGIWUR4431;AGIWUR28280;AGIWUR28715;AGIWUR32897  |    |   |         |         |                |          |           |                     |             |
| CB4856                                                                | HS | I | 4848425 | 4850717 | WBGene00019008 | pdxk-1   | F57C9.1   | -0.124738368914481  |             |
| AGIWUR4151;AGIWUR8744;AGIWUR38672;AGIWUR42153;AGIWUR43420;AGIWUR43542 |    |   |         |         |                |          |           |                     |             |
| CB4856                                                                | HS | I | 4850682 | 4867825 | WBGene00015303 | rga-6    | C01F4.2   | 0.13569197984502    |             |
| AGIWUR6175;AGIWUR8844                                                 |    |   |         |         |                |          |           |                     |             |
| CB4856                                                                | HS | I | 4884903 | 4895495 | WBGene00017795 | F25F8.1  | F25F8.1   | -0.293486570704376  | AGIWUR32285 |

|                                                                                                |    |   |         |         |                |          |          |                      |             |
|------------------------------------------------------------------------------------------------|----|---|---------|---------|----------------|----------|----------|----------------------|-------------|
| CB4856                                                                                         | HS | I | 4896003 | 4897541 | WBGene00017674 | F21F3.4  | F21F3.4  | -0.0735783479552019  | AGIWUR17618 |
| CB4856                                                                                         | HS | I | 4897620 | 4900977 | WBGene00006774 | unc-38   | F21F3.5  | -0.168268789195785   | AGIWUR19032 |
| CB4856                                                                                         | HS | I | 4901918 | 4903264 | WBGene00017673 | icmt-1   | F21F3.3  | 0.392598007710287    | AGIWUR10653 |
| CB4856                                                                                         | HS | I | 4903437 | 4905138 | WBGene00017672 | F21F3.2  | F21F3.2  | -0.167307311474561   | AGIWUR36704 |
| CB4856                                                                                         | HS | I | 4906786 | 4911829 | WBGene00017671 | pgal-1   | F21F3.1  | -0.00733809868154722 |             |
| AGIWUR10360;AGIWUR11221;AGIWUR39787                                                            |    |   |         |         |                |          |          |                      |             |
| CB4856                                                                                         | HS | I | 4911805 | 4914047 | WBGene00017675 | F21F3.6  | F21F3.6  | -0.174614459001939   |             |
| AGIWUR6443;AGIWUR19391;AGIWUR23423;AGIWUR28728                                                 |    |   |         |         |                |          |          |                      |             |
| CB4856                                                                                         | HS | I | 4918372 | 4920770 | WBGene00017676 | F21F3.7  | F21F3.7  | 0.24258925914793     |             |
| AGIWUR4819;AGIWUR10338;AGIWUR11236;AGIWUR12715;AGIWUR18328;AGIWUR22480;AGIWUR36384;AGIWUR42305 |    |   |         |         |                |          |          |                      |             |
| CB4856                                                                                         | HS | I | 4920707 | 4926233 | WBGene00002075 | imb-1    | F28B3.8  | -0.111719976389638   |             |
| AGIWUR17237;AGIWUR19494;AGIWUR21477;AGIWUR23298;AGIWUR26174;AGIWUR40448                        |    |   |         |         |                |          |          |                      |             |
| CB4856                                                                                         | HS | I | 4926592 | 4928840 | WBGene00017886 | F28B3.5  | F28B3.5  | -0.0796360271056784  |             |
| AGIWUR3834;AGIWUR29211                                                                         |    |   |         |         |                |          |          |                      |             |
| CB4856                                                                                         | HS | I | 4928654 | 4932147 | WBGene00017888 | ac1-11   | F28B3.9  | -0.165472480007104   | AGIWUR26348 |
| CB4856                                                                                         | HS | I | 4934118 | 4949332 | WBGene00017885 | dip-2    | F28B3.4  | -0.143409310137578   |             |
| AGIWUR3431;AGIWUR18607;AGIWUR29662;AGIWUR33088;AGIWUR34513;AGIWUR42148                         |    |   |         |         |                |          |          |                      |             |
| CB4856                                                                                         | HS | I | 4949327 | 4950410 | WBGene00017889 | F28B3.10 | F28B3.10 | -0.0493110451561556  |             |
| AGIWUR37298                                                                                    |    |   |         |         |                |          |          |                      |             |
| CB4856                                                                                         | HS | I | 4950583 | 4951550 | WBGene00017887 | F28B3.6  | F28B3.6  | 0.129302141072072    |             |
| AGIWUR14419;AGIWUR15223;AGIWUR19224;AGIWUR29297;AGIWUR31798;AGIWUR41653                        |    |   |         |         |                |          |          |                      |             |
| CB4856                                                                                         | HS | I | 4951570 | 4957667 | WBGene00001860 | him-1    | F28B3.7  | 0.0905613085219805   | AGIWUR5462  |
| CB4856                                                                                         | HS | I | 4957776 | 4958309 | WBGene00044431 | W03G9.8  | W03G9.8  | -0.0260441843175307  |             |
| AGIWUR521;AGIWUR2774;AGIWUR10077;AGIWUR19733;AGIWUR42359                                       |    |   |         |         |                |          |          |                      |             |
| CB4856                                                                                         | HS | I | 4962451 | 4964745 | WBGene00021014 | W03G9.2  | W03G9.2  | -0.180916190165011   | AGIWUR17245 |
| CB4856                                                                                         | HS | I | 4964667 | 4967089 | WBGene00000155 | app-1    | W03G9.4  | 0.172985446647413    | AGIWUR31837 |
| CB4856                                                                                         | HS | I | 4968007 | 4970245 | WBGene00021016 | W03G9.5  | W03G9.5  | 0.105456972222184    | AGIWUR898   |
| CB4856                                                                                         | HS | I | 4969923 | 4972243 | WBGene00044432 | W03G9.9  | W03G9.9  | 0.14393265242569     |             |
| AGIWUR4097;AGIWUR15675                                                                         |    |   |         |         |                |          |          |                      |             |
| CB4856                                                                                         | HS | I | 4980307 | 4983958 | WBGene00004900 | snf-1    | W03G9.1  | -0.0757446422648922  | AGIWUR37640 |
| CB4856                                                                                         | HS | I | 4984760 | 4986739 | WBGene00003906 | paf-1    | W03G9.6  | 0.0483279683535578   | AGIWUR30136 |
| CB4856                                                                                         | HS | I | 4986954 | 4989454 | WBGene00021017 | cil-7    | W03G9.7  | 0.259039499427368    | AGIWUR41717 |
| CB4856                                                                                         | HS | I | 4989568 | 4994675 | WBGene00001117 | dyf-1    | F54C1.5  | 0.0843804036732942   | AGIWUR4202  |
| CB4856                                                                                         | HS | I | 4996839 | 5003161 | WBGene00003221 | mes-3    | F54C1.3  | 0.0776324497913263   |             |
| AGIWUR28141;AGIWUR30866;AGIWUR40884                                                            |    |   |         |         |                |          |          |                      |             |
| CB4856                                                                                         | HS | I | 5003351 | 5005163 | WBGene00001050 | dom-3    | F54C1.2  | 0.0543743824551264   | AGIWUR4782  |
| CB4856                                                                                         | HS | I | 5004924 | 5006057 | WBGene00018792 | F54C1.8  | F54C1.8  | 0.05638539320059     |             |
| AGIWUR8345;AGIWUR9536;AGIWUR21501;AGIWUR36845                                                  |    |   |         |         |                |          |          |                      |             |
| CB4856                                                                                         | HS | I | 5006706 | 5007991 | WBGene00006058 | sst-20   | F54C1.9  | 0.13860631891912     | AGIWUR11233 |

|                                                                        |    |   |         |         |                |            |            |                     |             |
|------------------------------------------------------------------------|----|---|---------|---------|----------------|------------|------------|---------------------|-------------|
| CB4856                                                                 | HS | I | 5008770 | 5013581 | WBGene00018789 | F54C1.1    | F54C1.1    | -0.105167723475168  | AGIWUR29730 |
| CB4856                                                                 | HS | I | 5014351 | 5016260 | WBGene00018791 | F54C1.6    | F54C1.6    | -0.0942151867952576 | AGIWUR27151 |
| CB4856                                                                 | HS | I | 5018770 | 5020166 | WBGene00003934 | pat-10     | F54C1.7    | 0.500009540813146   |             |
| AGIWUR6495;AGIWUR16624;AGIWUR26202;AGIWUR38199                         |    |   |         |         |                |            |            |                     |             |
| CB4856                                                                 | HS | I | 5020748 | 5023210 | WBGene00016730 | C46H11.6   | C46H11.6   | 0.40490609667083    |             |
| AGIWUR39021                                                            |    |   |         |         |                |            |            |                     |             |
| CB4856                                                                 | HS | I | 5023889 | 5041149 | WBGene00002979 | lfe-2      | C46H11.4   | 0.215036631560041   |             |
| AGIWUR527;AGIWUR15498;AGIWUR15600;AGIWUR22329;AGIWUR39734              |    |   |         |         |                |            |            |                     |             |
| CB4856                                                                 | HS | I | 5041492 | 5042055 | WBGene00016729 | C46H11.3   | C46H11.3   | -0.0123200438948317 |             |
| AGIWUR2153;AGIWUR17010;AGIWUR19831;AGIWUR31265;AGIWUR41786             |    |   |         |         |                |            |            |                     |             |
| CB4856                                                                 | HS | I | 5042102 | 5043453 | WBGene00016731 | C46H11.7   | C46H11.7   | -0.377628955330527  |             |
| AGIWUR10507                                                            |    |   |         |         |                |            |            |                     |             |
| CB4856                                                                 | HS | I | 5044201 | 5045720 | WBGene00016732 | phat-1     | C46H11.8   | 0.182474635528373   |             |
| AGIWUR10717                                                            |    |   |         |         |                |            |            |                     |             |
| CB4856                                                                 | HS | I | 5050040 | 5052523 | WBGene00016728 | C46H11.2   | C46H11.2   | 0.140739613626241   |             |
| AGIWUR43572                                                            |    |   |         |         |                |            |            |                     |             |
| CB4856                                                                 | HS | I | 5052529 | 5054960 | WBGene00016734 | C46H11.10  | C46H11.10  | -0.11356497306735   |             |
| AGIWUR25478                                                            |    |   |         |         |                |            |            |                     |             |
| CB4856                                                                 | HS | I | 5055686 | 5056039 | WBGene00016727 | C46H11.1   | C46H11.1   | -0.0909645289859453 |             |
| AGIWUR1249;AGIWUR10642;AGIWUR11922;AGIWUR15339;AGIWUR28513;AGIWUR41170 |    |   |         |         |                |            |            |                     |             |
| CB4856                                                                 | HS | I | 5058251 | 5068829 | WBGene00016735 | fhod-1     | C46H11.11  | 0.131511619022659   |             |
| AGIWUR2364                                                             |    |   |         |         |                |            |            |                     |             |
| CB4856                                                                 | HS | I | 5079911 | 5082279 | WBGene00016258 | vha-16     | C30F8.2    | 0.178335669413208   |             |
| AGIWUR9041;AGIWUR12777;AGIWUR38333                                     |    |   |         |         |                |            |            |                     |             |
| CB4856                                                                 | HS | I | 5086317 | 5093793 | WBGene00002213 | kin-32     | C30F8.4    | 0.14714934454328    | AGIWUR30640 |
| CB4856                                                                 | HS | I | 5096601 | 5100579 | WBGene00016259 | C30F8.3    | C30F8.3    | 0.126016169415617   | AGIWUR38945 |
| CB4856                                                                 | HS | I | 5100751 | 5101674 | WBGene00022465 | ift-20     | Y110A7A.20 | 0.125458183030391   |             |
| AGIWUR43171                                                            |    |   |         |         |                |            |            |                     |             |
| CB4856                                                                 | HS | I | 5101682 | 5103467 | WBGene00004959 | spe-5      | Y110A7A.12 | 0.0936071243757937  |             |
| AGIWUR45082                                                            |    |   |         |         |                |            |            |                     |             |
| CB4856                                                                 | HS | I | 5103581 | 5104956 | WBGene00000502 | chp-1      | Y110A7A.13 | -0.0069769509861981 |             |
| AGIWUR23337                                                            |    |   |         |         |                |            |            |                     |             |
| CB4856                                                                 | HS | I | 5105110 | 5106204 | WBGene00003924 | pas-3      | Y110A7A.14 | -0.0113090743136279 |             |
| AGIWUR17561;AGIWUR38486;AGIWUR39496;AGIWUR41863                        |    |   |         |         |                |            |            |                     |             |
| CB4856                                                                 | HS | I | 5106204 | 5107625 | WBGene00022460 | use-1      | Y110A7A.11 | 0.0279467474684374  |             |
| AGIWUR8138;AGIWUR10961;AGIWUR39888                                     |    |   |         |         |                |            |            |                     |             |
| CB4856                                                                 | HS | I | 5107833 | 5110183 | WBGene00000001 | aap-1      | Y110A7A.10 | 0.174205160745863   |             |
| AGIWUR5137                                                             |    |   |         |         |                |            |            |                     |             |
| CB4856                                                                 | HS | I | 5110075 | 5111154 | WBGene00045212 | Y110A7A.21 | Y110A7A.21 | 0.375392974043191   |             |



|                                                                                  |    |   |         |         |                |           |           |                      |             |
|----------------------------------------------------------------------------------|----|---|---------|---------|----------------|-----------|-----------|----------------------|-------------|
| CB4856                                                                           | HS | I | 5244283 | 5245402 | WBGene00015092 | mrp1-47   | B0261.4   | 0.0375928958647371   | AGIWUR25197 |
| CB4856                                                                           | HS | I | 5245743 | 5263413 | WBGene00002583 | let-363   | B0261.2   | 0.156453165586417    | AGIWUR44044 |
| CB4856                                                                           | HS | I | 5263694 | 5268380 | WBGene00015091 | B0261.1   | B0261.1   | 0.00715561219583449  | AGIWUR18289 |
| CB4856                                                                           | HS | I | 5269545 | 5270941 | WBGene00015095 | B0261.7   | B0261.7   | 0.106300087638139    | AGIWUR8322  |
| CB4856                                                                           | HS | I | 5271265 | 5272037 | WBGene00015096 | B0261.8   | B0261.8   | 0.203420182474813    | AGIWUR2556  |
| CB4856                                                                           | HS | I | 5272846 | 5274339 | WBGene00015312 | C01G8.1   | C01G8.1   | 0.105104052953619    |             |
| AGIWUR694;AGIWUR16178;AGIWUR34561                                                |    |   |         |         |                |           |           |                      |             |
| CB4856                                                                           | HS | I | 5274693 | 5278708 | WBGene00000540 | c1n-3.2   | C01G8.2   | -0.27524089139447    | AGIWUR30422 |
| CB4856                                                                           | HS | I | 5278803 | 5281526 | WBGene00000965 | dhs-1     | C01G8.3   | -0.139133145391341   | AGIWUR15951 |
| CB4856                                                                           | HS | I | 5282085 | 5283944 | WBGene00001022 | dnj-4     | C01G8.4   | 0.0962037298394804   | AGIWUR42    |
| CB4856                                                                           | HS | I | 5284062 | 5291604 | WBGene00001333 | erm-1     | C01G8.5   | 0.283374574083609    | AGIWUR16002 |
| CB4856                                                                           | HS | I | 5298755 | 5300331 | WBGene00015313 | hpo-32    | C01G8.6   | 0.0781138813890543   | AGIWUR26468 |
| CB4856                                                                           | HS | I | 5300901 | 5317392 | WBGene00002717 | let-526   | C01G8.9   | 0.0961248127094301   |             |
| AGIWUR7817;AGIWUR8550;AGIWUR8678;AGIWUR20851;AGIWUR25435;AGIWUR30166;AGIWUR37870 |    |   |         |         |                |           |           |                      |             |
| CB4856                                                                           | HS | I | 5317491 | 5318124 | WBGene00018598 | F48C1.5   | F48C1.5   | 0.00784020599457946  | AGIWUR33414 |
| CB4856                                                                           | HS | I | 5318225 | 5319301 | WBGene00018599 | F48C1.6   | F48C1.6   | -0.147289224772802   | AGIWUR37907 |
| CB4856                                                                           | HS | I | 5319720 | 5321117 | WBGene00018595 | fbxa-145  | F48C1.2   | 0.204527388082877    |             |
| AGIWUR1383                                                                       |    |   |         |         |                |           |           |                      |             |
| CB4856                                                                           | HS | I | 5324511 | 5330222 | WBGene00018594 | aman-3    | F48C1.1   | -0.119596032114933   |             |
| AGIWUR25737;AGIWUR28725;AGIWUR31540                                              |    |   |         |         |                |           |           |                      |             |
| CB4856                                                                           | HS | I | 5330578 | 5332194 | WBGene00004965 | spe-11    | F48C1.7   | -0.00100722260265584 | AGIWUR39988 |
| CB4856                                                                           | HS | I | 5332249 | 5332780 | WBGene00018601 | F48C1.9   | F48C1.9   | -0.236440996996988   | AGIWUR10340 |
| CB4856                                                                           | HS | I | 5338922 | 5342012 | WBGene00018865 | F55A12.6  | F55A12.6  | -0.0991887374880189  |             |
| AGIWUR15674                                                                      |    |   |         |         |                |           |           |                      |             |
| CB4856                                                                           | HS | I | 5342180 | 5344724 | WBGene00000150 | apm-1     | F55A12.7  | 0.121378882031568    |             |
| AGIWUR9311                                                                       |    |   |         |         |                |           |           |                      |             |
| CB4856                                                                           | HS | I | 5345927 | 5349657 | WBGene00018864 | F55A12.5  | F55A12.5  | 0.0538104281009097   |             |
| AGIWUR43597                                                                      |    |   |         |         |                |           |           |                      |             |
| CB4856                                                                           | HS | I | 5349646 | 5353767 | WBGene00018866 | nath-10   | F55A12.8  | 0.175272736245473    |             |
| AGIWUR6506                                                                       |    |   |         |         |                |           |           |                      |             |
| CB4856                                                                           | HS | I | 5354160 | 5357026 | WBGene00000966 | dhs-2     | F55A12.4  | 0.0111694639005391   |             |
| AGIWUR6834;AGIWUR39323                                                           |    |   |         |         |                |           |           |                      |             |
| CB4856                                                                           | HS | I | 5358522 | 5365170 | WBGene00004087 | ppk-1     | F55A12.3  | 0.146123552394648    |             |
| AGIWUR9665                                                                       |    |   |         |         |                |           |           |                      |             |
| CB4856                                                                           | HS | I | 5365265 | 5366875 | WBGene00018863 | F55A12.2  | F55A12.2  | 0.0655681435744135   |             |
| AGIWUR5975;AGIWUR16690;AGIWUR23746                                               |    |   |         |         |                |           |           |                      |             |
| CB4856                                                                           | HS | I | 5366944 | 5367829 | WBGene00018867 | F55A12.10 | F55A12.10 | 0.103468424699081    |             |
| AGIWUR25431                                                                      |    |   |         |         |                |           |           |                      |             |
| CB4856                                                                           | HS | I | 5368478 | 5372643 | WBGene00018862 | wago-2    | F55A12.1  | 0.0428253812511272   |             |



|                                                                        |    |   |         |         |                |          |          |                     |             |
|------------------------------------------------------------------------|----|---|---------|---------|----------------|----------|----------|---------------------|-------------|
| AGIWUR28246                                                            |    |   |         |         |                |          |          |                     |             |
| CB4856                                                                 | HS | I | 5372854 | 5384508 | WBGene00004131 | pqn-44   | F55A12.9 | -0.0214629726142705 |             |
| AGIWUR896;AGIWUR27262                                                  |    |   |         |         |                |          |          |                     |             |
| CB4856                                                                 | HS | I | 5384639 | 5385737 | WBGene00016042 | C24A11.5 | C24A11.5 | -0.0227648425036096 |             |
| AGIWUR7145                                                             |    |   |         |         |                |          |          |                     |             |
| CB4856                                                                 | HS | I | 5396269 | 5396503 | WBGene00016043 | C24A11.6 | C24A11.6 | 0.0363857774691159  |             |
| AGIWUR14300                                                            |    |   |         |         |                |          |          |                     |             |
| CB4856                                                                 | HS | I | 5401757 | 5402896 | WBGene00016040 | C24A11.1 | C24A11.1 | 0.168370685957571   |             |
| AGIWUR5355                                                             |    |   |         |         |                |          |          |                     |             |
| CB4856                                                                 | HS | I | 5402889 | 5408344 | WBGene00001491 | frm-4    | C24A11.8 | -0.135286961647323  |             |
| AGIWUR981;AGIWUR4212;AGIWUR6365;AGIWUR15596;AGIWUR16887;AGIWUR31981    |    |   |         |         |                |          |          |                     |             |
| CB4856                                                                 | HS | I | 5412841 | 5415629 | WBGene00000761 | coq-1    | C24A11.9 | 0.23183613938499    |             |
| AGIWUR43800                                                            |    |   |         |         |                |          |          |                     |             |
| CB4856                                                                 | HS | I | 5416649 | 5420731 | WBGene00016278 | C30H7.2  | C30H7.2  | -0.129332220242294  | AGIWUR21269 |
| CB4856                                                                 | HS | I | 5421313 | 5428457 | WBGene00017855 | F27C1.6  | F27C1.6  | 0.238556749109001   | AGIWUR3947  |
| CB4856                                                                 | HS | I | 5428469 | 5429908 | WBGene00000230 | atp-3    | F27C1.7  | 0.151311488145312   |             |
| AGIWUR4068;AGIWUR34961                                                 |    |   |         |         |                |          |          |                     |             |
| CB4856                                                                 | HS | I | 5430164 | 5431449 | WBGene00017852 | F27C1.2  | F27C1.2  | -0.106225459940404  |             |
| AGIWUR2440;AGIWUR34813                                                 |    |   |         |         |                |          |          |                     |             |
| CB4856                                                                 | HS | I | 5432158 | 5433054 | WBGene00001067 | dpy-5    | F27C1.8  | -0.0444733849122674 |             |
| AGIWUR27120;AGIWUR44335                                                |    |   |         |         |                |          |          |                     |             |
| CB4856                                                                 | HS | I | 5433907 | 5443026 | WBGene00017858 | F27C1.11 | F27C1.11 | 0.121844015835352   |             |
| AGIWUR5701;AGIWUR9333;AGIWUR22774;AGIWUR27305;AGIWUR27976              |    |   |         |         |                |          |          |                     |             |
| CB4856                                                                 | HS | I | 5443878 | 5446855 | WBGene00017860 | F27C1.13 | F27C1.13 | -0.0611315865471633 |             |
| AGIWUR6830;AGIWUR24304;AGIWUR35087;AGIWUR39993;AGIWUR41117;AGIWUR42850 |    |   |         |         |                |          |          |                     |             |
| CB4856                                                                 | HS | I | 5455730 | 5459550 | WBGene00020262 | fer1-1   | T05E8.1  | 0.155976257122166   | AGIWUR22748 |
| CB4856                                                                 | HS | I | 5463480 | 5469627 | WBGene00001859 | hil-8    | T05E8.2  | 0.0155623379239129  |             |
| AGIWUR8595;AGIWUR8928;AGIWUR15131;AGIWUR28796;AGIWUR36374              |    |   |         |         |                |          |          |                     |             |
| CB4856                                                                 | HS | I | 5472321 | 5479438 | WBGene00020263 | let-355  | T05E8.3  | 0.0208560386383567  | AGIWUR30390 |
| CB4856                                                                 | HS | I | 5479550 | 5484643 | WBGene00015635 | C09D4.4  | C09D4.4  | 0.17567241200469    | AGIWUR10054 |
| CB4856                                                                 | HS | I | 5484779 | 5486354 | WBGene00004431 | rpl-19   | C09D4.5  | -0.436507739960891  | AGIWUR34311 |
| CB4856                                                                 | HS | I | 5486487 | 5487150 | WBGene00015636 | C09D4.6  | C09D4.6  | 0.188861377911506   | AGIWUR45087 |
| CB4856                                                                 | HS | I | 5488309 | 5490626 | WBGene00015634 | C09D4.3  | C09D4.3  | 0.13514040352532    | AGIWUR5653  |
| CB4856                                                                 | HS | I | 5491424 | 5493263 | WBGene00015633 | C09D4.2  | C09D4.2  | 0.0632896220421184  | AGIWUR16931 |
| CB4856                                                                 | HS | I | 5497679 | 5505447 | WBGene00015632 | C09D4.1  | C09D4.1  | -0.055369070989757  | AGIWUR27450 |
| CB4856                                                                 | HS | I | 5505377 | 5507023 | WBGene00019076 | mrpl-24  | F59A3.3  | -0.121453102888553  | AGIWUR34650 |
| CB4856                                                                 | HS | I | 5507123 | 5509288 | WBGene00019077 | zipt-11  | F59A3.4  | -0.0421316993014038 |             |
| AGIWUR5874;AGIWUR13042;AGIWUR14294;AGIWUR18200                         |    |   |         |         |                |          |          |                     |             |
| CB4856                                                                 | HS | I | 5509473 | 5511705 | WBGene00019079 | rpa-4    | F59A3.6  | -0.152725348450492  |             |

AGIWUR22494;AGIWUR27515;AGIWUR32418;AGIWUR38402

|        |    |   |         |         |                 |          |          |                    |            |
|--------|----|---|---------|---------|-----------------|----------|----------|--------------------|------------|
| CB4856 | HS | I | 5512048 | 5514557 | WBGene00019075  | F59A3.2  | F59A3.2  | 0.126602606223354  | AGIWUR6715 |
| CB4856 | HS | I | 5514651 | 5516025 | WBGene000185086 | F59A3.12 | F59A3.12 | 0.0453723739462717 |            |

AGIWUR27384

|        |    |   |         |         |                |       |         |                     |  |
|--------|----|---|---------|---------|----------------|-------|---------|---------------------|--|
| CB4856 | HS | I | 5520389 | 5529763 | WBGene00019074 | cpd-1 | F59A3.1 | -0.0830471998053399 |  |
|--------|----|---|---------|---------|----------------|-------|---------|---------------------|--|

AGIWUR832;AGIWUR9804;AGIWUR16154;AGIWUR23805;AGIWUR36548;AGIWUR40265;AGIWUR40556

|        |    |   |         |         |                |          |          |                    |            |
|--------|----|---|---------|---------|----------------|----------|----------|--------------------|------------|
| CB4856 | HS | I | 5530618 | 5533710 | WBGene00019082 | pup-3    | F59A3.9  | -0.088245571518268 | AGIWUR5052 |
| CB4856 | HS | I | 5542630 | 5543334 | WBGene00019083 | F59A3.10 | F59A3.10 | 0.0143388867757741 |            |

AGIWUR23620

|        |    |   |         |         |                |       |          |                     |  |
|--------|----|---|---------|---------|----------------|-------|----------|---------------------|--|
| CB4856 | HS | I | 5546120 | 5561642 | WBGene00006594 | tom-1 | M01A10.2 | 0.00581498747744291 |  |
|--------|----|---|---------|---------|----------------|-------|----------|---------------------|--|

AGIWUR11147;AGIWUR11431;AGIWUR21101;AGIWUR27403;AGIWUR28716;AGIWUR31664

|        |    |   |         |         |                |          |          |                    |  |
|--------|----|---|---------|---------|----------------|----------|----------|--------------------|--|
| CB4856 | HS | I | 5563827 | 5566265 | WBGene00019692 | M01A10.1 | M01A10.1 | 0.0649497317581922 |  |
|--------|----|---|---------|---------|----------------|----------|----------|--------------------|--|

AGIWUR14718

|        |    |   |         |         |                |        |          |                     |  |
|--------|----|---|---------|---------|----------------|--------|----------|---------------------|--|
| CB4856 | HS | I | 5566343 | 5570081 | WBGene00019713 | pqn-52 | M01E11.4 | 0.00243043509366103 |  |
|--------|----|---|---------|---------|----------------|--------|----------|---------------------|--|

AGIWUR6355;AGIWUR8778;AGIWUR14340;AGIWUR18170;AGIWUR19043;AGIWUR39174

|        |    |   |         |         |                |       |          |                  |  |
|--------|----|---|---------|---------|----------------|-------|----------|------------------|--|
| CB4856 | HS | I | 5571787 | 5573019 | WBGene00000474 | cey-3 | M01E11.5 | 0.10001829349588 |  |
|--------|----|---|---------|---------|----------------|-------|----------|------------------|--|

AGIWUR15351;AGIWUR34621

|        |    |   |         |         |                |       |          |                   |  |
|--------|----|---|---------|---------|----------------|-------|----------|-------------------|--|
| CB4856 | HS | I | 5573214 | 5576749 | WBGene00019712 | rmh-1 | M01E11.3 | 0.118601192370923 |  |
|--------|----|---|---------|---------|----------------|-------|----------|-------------------|--|

AGIWUR30964

|        |    |   |         |         |                |          |          |                  |  |
|--------|----|---|---------|---------|----------------|----------|----------|------------------|--|
| CB4856 | HS | I | 5579666 | 5581979 | WBGene00019711 | M01E11.2 | M01E11.2 | 0.15216942465079 |  |
|--------|----|---|---------|---------|----------------|----------|----------|------------------|--|

AGIWUR34357

|        |    |   |         |         |                |          |          |                     |  |
|--------|----|---|---------|---------|----------------|----------|----------|---------------------|--|
| CB4856 | HS | I | 5582005 | 5583471 | WBGene00019710 | M01E11.1 | M01E11.1 | -0.0747683828750461 |  |
|--------|----|---|---------|---------|----------------|----------|----------|---------------------|--|

AGIWUR18685

|        |    |   |         |         |                |       |          |                    |  |
|--------|----|---|---------|---------|----------------|-------|----------|--------------------|--|
| CB4856 | HS | I | 5583407 | 5607529 | WBGene00006508 | tns-1 | M01E11.7 | 0.0395908469761626 |  |
|--------|----|---|---------|---------|----------------|-------|----------|--------------------|--|

AGIWUR6532;AGIWUR6811;AGIWUR11533;AGIWUR11928;AGIWUR15727;AGIWUR18697;AGIWUR19135;AGIWUR21857;AGIWUR30199;AGIWUR31547;AGIWUR36030;AGIWUR38255

|        |    |   |         |         |                |       |          |                    |  |
|--------|----|---|---------|---------|----------------|-------|----------|--------------------|--|
| CB4856 | HS | I | 5607820 | 5608841 | WBGene00006726 | ubl-5 | F46F11.4 | 0.0834496119259267 |  |
|--------|----|---|---------|---------|----------------|-------|----------|--------------------|--|

AGIWUR38965

|        |    |   |         |         |                |        |          |                    |  |
|--------|----|---|---------|---------|----------------|--------|----------|--------------------|--|
| CB4856 | HS | I | 5609310 | 5610270 | WBGene00006919 | vha-10 | F46F11.5 | 0.0280612331867269 |  |
|--------|----|---|---------|---------|----------------|--------|----------|--------------------|--|

AGIWUR5301;AGIWUR16359

|        |    |   |         |         |                |        |          |                    |  |
|--------|----|---|---------|---------|----------------|--------|----------|--------------------|--|
| CB4856 | HS | I | 5610375 | 5616402 | WBGene00018512 | trpp-8 | F46F11.9 | 0.0521650089151038 |  |
|--------|----|---|---------|---------|----------------|--------|----------|--------------------|--|

AGIWUR28006

|        |    |   |         |         |                |          |          |                    |  |
|--------|----|---|---------|---------|----------------|----------|----------|--------------------|--|
| CB4856 | HS | I | 5616593 | 5618682 | WBGene00018509 | F46F11.6 | F46F11.6 | 0.0461554964407167 |  |
|--------|----|---|---------|---------|----------------|----------|----------|--------------------|--|

AGIWUR31483

|        |    |   |         |         |                |       |          |                    |  |
|--------|----|---|---------|---------|----------------|-------|----------|--------------------|--|
| CB4856 | HS | I | 5619569 | 5620668 | WBGene00000473 | cey-2 | F46F11.2 | 0.0864635524569977 |  |
|--------|----|---|---------|---------|----------------|-------|----------|--------------------|--|

AGIWUR19929;AGIWUR20244;AGIWUR20969;AGIWUR39577;AGIWUR39981;AGIWUR43534

|        |    |   |         |         |                |          |          |                   |  |
|--------|----|---|---------|---------|----------------|----------|----------|-------------------|--|
| CB4856 | HS | I | 5620751 | 5623035 | WBGene00018510 | F46F11.7 | F46F11.7 | 0.416925154396303 |  |
|--------|----|---|---------|---------|----------------|----------|----------|-------------------|--|

AGIWUR6851

|        |    |   |         |         |                |           |           |                    |  |
|--------|----|---|---------|---------|----------------|-----------|-----------|--------------------|--|
| CB4856 | HS | I | 5623019 | 5624475 | WBGene00018513 | F46F11.10 | F46F11.10 | -0.152692275418492 |  |
|--------|----|---|---------|---------|----------------|-----------|-----------|--------------------|--|

|                                                                                                                                                         |    |   |         |         |                |          |          |                      |
|---------------------------------------------------------------------------------------------------------------------------------------------------------|----|---|---------|---------|----------------|----------|----------|----------------------|
| AGIWUR14352;AGIWUR29230                                                                                                                                 |    |   |         |         |                |          |          |                      |
| CB4856                                                                                                                                                  | HS | I | 5624558 | 5626288 | WBGene00018511 | F46F11.8 | F46F11.8 | 0.0512610663121666   |
| AGIWUR13272                                                                                                                                             |    |   |         |         |                |          |          |                      |
| CB4856                                                                                                                                                  | HS | I | 5627819 | 5637622 | WBGene00018508 | F46F11.1 | F46F11.1 | 0.260981379308696    |
| AGIWUR40503                                                                                                                                             |    |   |         |         |                |          |          |                      |
| CB4856                                                                                                                                                  | HS | I | 5643310 | 5644057 | WBGene00044616 | M01A12.4 | M01A12.4 | 0.141706358186314    |
| AGIWUR32316                                                                                                                                             |    |   |         |         |                |          |          |                      |
| CB4856                                                                                                                                                  | HS | I | 5644729 | 5646370 | WBGene00000630 | col-53   | M01A12.1 | -0.0342157969116075  |
| AGIWUR31336;AGIWUR38774                                                                                                                                 |    |   |         |         |                |          |          |                      |
| CB4856                                                                                                                                                  | HS | I | 5646369 | 5649656 | WBGene00018890 | F55F8.2  | F55F8.2  | -0.225741158617401   |
| CB4856                                                                                                                                                  | HS | I | 5649756 | 5653648 | WBGene00018891 | F55F8.3  | F55F8.3  | 0.179910657080061    |
| CB4856                                                                                                                                                  | HS | I | 5653804 | 5655857 | WBGene00018892 | cir-1    | F55F8.4  | -0.214143179011538   |
| AGIWUR18388;AGIWUR44318                                                                                                                                 |    |   |         |         |                |          |          |                      |
| CB4856                                                                                                                                                  | HS | I | 5655950 | 5658118 | WBGene00018893 | wdr-12   | F55F8.5  | 0.0805271966414658   |
| CB4856                                                                                                                                                  | HS | I | 5657980 | 5658723 | WBGene00018894 | mff-2    | F55F8.6  | -0.143818328127182   |
| CB4856                                                                                                                                                  | HS | I | 5662143 | 5667160 | WBGene00004224 | ptr-10   | F55F8.1  | 0.00560481916301026  |
| CB4856                                                                                                                                                  | HS | I | 5667069 | 5668837 | WBGene00018896 | F55F8.8  | F55F8.8  | -0.10773709637475    |
| CB4856                                                                                                                                                  | HS | I | 5669950 | 5673352 | WBGene00018897 | zipt-2.4 | F55F8.9  | -0.25532254737039    |
| AGIWUR33516                                                                                                                                             |    |   |         |         |                |          |          |                      |
| CB4856                                                                                                                                                  | HS | I | 5674304 | 5676609 | WBGene00020558 | T19B4.5  | T19B4.5  | -0.0888799883649547  |
| AGIWUR11276;AGIWUR12993;AGIWUR32131                                                                                                                     |    |   |         |         |                |          |          |                      |
| CB4856                                                                                                                                                  | HS | I | 5676827 | 5677646 | WBGene00001039 | dnj-21   | T19B4.4  | 0.000752930324040335 |
| CB4856                                                                                                                                                  | HS | I | 5678638 | 5679862 | WBGene00020557 | T19B4.3  | T19B4.3  | 0.0585836177803216   |
| AGIWUR27841;AGIWUR39756;AGIWUR40511;AGIWUR44979                                                                                                         |    |   |         |         |                |          |          |                      |
| CB4856                                                                                                                                                  | HS | I | 5679844 | 5691503 | WBGene00006776 | unc-40   | T19B4.7  | 0.177905778100584    |
| CB4856                                                                                                                                                  | HS | I | 5691838 | 5697506 | WBGene00003793 | npp-7    | T19B4.2  | 0.0558501745125017   |
| AGIWUR623;AGIWUR6784;AGIWUR10030;AGIWUR11279;AGIWUR12845;AGIWUR28597;AGIWUR30194;AGIWUR36089;AGIWUR37196                                                |    |   |         |         |                |          |          |                      |
| CB4856                                                                                                                                                  | HS | I | 5702156 | 5706838 | WBGene00020556 | pamn-1   | T19B4.1  | 0.0273747868464609   |
| AGIWUR1427;AGIWUR1919;AGIWUR4740;AGIWUR7671;AGIWUR18929;AGIWUR19185;AGIWUR19546;AGIWUR19808;AGIWUR21670;AGIWUR22000;AGIWUR33507;AGIWUR34825;AGIWUR36338 |    |   |         |         |                |          |          |                      |
| CB4856                                                                                                                                                  | HS | I | 5716574 | 5725772 | WBGene00002989 | lim-7    | C04F1.3  | -0.0852847022800471  |
| CB4856                                                                                                                                                  | HS | I | 5726308 | 5729310 | WBGene00015442 | C04F1.1  | C04F1.1  | 0.0697530201096637   |
| AGIWUR21075;AGIWUR37345                                                                                                                                 |    |   |         |         |                |          |          |                      |
| CB4856                                                                                                                                                  | HS | I | 5729793 | 5735842 | WBGene00018994 | F56H1.3  | F56H1.3  | -0.00251425569888397 |
| CB4856                                                                                                                                                  | HS | I | 5741186 | 5741622 | WBGene00269393 | F56H1.11 | F56H1.11 | -0.129144805734565   |
| AGIWUR11632                                                                                                                                             |    |   |         |         |                |          |          |                      |
| CB4856                                                                                                                                                  | HS | I | 5741868 | 5743571 | WBGene00004505 | rpt-5    | F56H1.4  | 0.0865921435521111   |
| AGIWUR4545;AGIWUR10484;AGIWUR34653;AGIWUR44921                                                                                                          |    |   |         |         |                |          |          |                      |
| CB4856                                                                                                                                                  | HS | I | 5744148 | 5745617 | WBGene00044305 | rad-8    | F56H1.6  | 0.0549783942260493   |

AGIWUR15763;AGIWUR22891

|        |    |   |         |         |                |        |         |                    |             |
|--------|----|---|---------|---------|----------------|--------|---------|--------------------|-------------|
| CB4856 | HS | I | 5746633 | 5754278 | WBGene00000493 | che-14 | F56H1.1 | 0.218870385011783  | AGIWUR27291 |
| CB4856 | HS | I | 5754312 | 5760803 | WBGene00018995 | ccpp-1 | F56H1.5 | -0.170676018268942 |             |

AGIWUR12374;AGIWUR14910;AGIWUR28454

|        |    |   |         |         |                |       |         |                   |  |
|--------|----|---|---------|---------|----------------|-------|---------|-------------------|--|
| CB4856 | HS | I | 5760897 | 5762435 | WBGene00045483 | oxy-5 | F56H1.7 | 0.185381966326613 |  |
|--------|----|---|---------|---------|----------------|-------|---------|-------------------|--|

AGIWUR6195;AGIWUR37147

|        |    |   |         |         |                |         |         |                    |             |
|--------|----|---|---------|---------|----------------|---------|---------|--------------------|-------------|
| CB4856 | HS | I | 5764030 | 5768190 | WBGene00020694 | dhhc-11 | T22E7.2 | 0.154986634505356  | AGIWUR20471 |
| CB4856 | HS | I | 5768919 | 5773627 | WBGene00020693 | lron-8  | T22E7.1 | 0.0592271380122202 |             |

AGIWUR7310;AGIWUR37476

|        |    |   |         |         |                |       |         |                  |  |
|--------|----|---|---------|---------|----------------|-------|---------|------------------|--|
| CB4856 | HS | I | 5774585 | 5775610 | WBGene00001856 | hil-5 | B0414.3 | 0.10126764756917 |  |
|--------|----|---|---------|---------|----------------|-------|---------|------------------|--|

AGIWUR31929;AGIWUR38263

|        |    |   |         |         |                |       |         |                     |             |
|--------|----|---|---------|---------|----------------|-------|---------|---------------------|-------------|
| CB4856 | HS | I | 5776154 | 5788610 | WBGene00004393 | rnt-1 | B0414.2 | 0.334450032768775   | AGIWUR35389 |
| CB4856 | HS | I | 5788634 | 5791752 | WBGene00000772 | cpb-3 | B0414.5 | 0.00261508387437459 | AGIWUR11416 |
| CB4856 | HS | I | 5792324 | 5795114 | WBGene00001600 | glh-3 | B0414.6 | -0.0694541529150676 | AGIWUR26903 |
| CB4856 | HS | I | 5795404 | 5801299 | WBGene00003472 | mtk-1 | B0414.7 | 0.061942018172287   |             |

AGIWUR5791;AGIWUR9780;AGIWUR32266

|        |    |   |         |         |                |        |          |                    |            |
|--------|----|---|---------|---------|----------------|--------|----------|--------------------|------------|
| CB4856 | HS | I | 5801872 | 5803266 | WBGene00015175 | srz-4  | B0414.1  | 0.0691481373893481 | AGIWUR4046 |
| CB4856 | HS | I | 5803959 | 5807291 | WBGene00015176 | vps-51 | B0414.8  | 0.0122833348063409 | AGIWUR1676 |
| CB4856 | HS | I | 5807709 | 5815637 | WBGene00003020 | lin-35 | C32F10.2 | -0.211900232674108 |            |

AGIWUR39684

|        |    |   |         |         |                |       |          |                    |  |
|--------|----|---|---------|---------|----------------|-------|----------|--------------------|--|
| CB4856 | HS | I | 5815609 | 5818132 | WBGene00001973 | hmg-3 | C32F10.5 | -0.277359433589716 |  |
|--------|----|---|---------|---------|----------------|-------|----------|--------------------|--|

AGIWUR20478

|        |    |   |         |         |                |       |          |                      |  |
|--------|----|---|---------|---------|----------------|-------|----------|----------------------|--|
| CB4856 | HS | I | 5818477 | 5821134 | WBGene00003601 | nhr-2 | C32F10.6 | -0.00603657261735613 |  |
|--------|----|---|---------|---------|----------------|-------|----------|----------------------|--|

AGIWUR39715

|        |    |   |         |         |                |          |          |                     |  |
|--------|----|---|---------|---------|----------------|----------|----------|---------------------|--|
| CB4856 | HS | I | 5822841 | 5826148 | WBGene00016333 | C32F10.8 | C32F10.8 | -0.0863116774715014 |  |
|--------|----|---|---------|---------|----------------|----------|----------|---------------------|--|

AGIWUR11408;AGIWUR13429;AGIWUR22672;AGIWUR24518;AGIWUR28667

|        |    |   |         |         |                |       |          |                     |  |
|--------|----|---|---------|---------|----------------|-------|----------|---------------------|--|
| CB4856 | HS | I | 5829072 | 5834640 | WBGene00016331 | obr-4 | C32F10.1 | -0.0480402998668366 |  |
|--------|----|---|---------|---------|----------------|-------|----------|---------------------|--|

AGIWUR16969;AGIWUR31133

|        |    |   |         |         |                |        |          |                    |  |
|--------|----|---|---------|---------|----------------|--------|----------|--------------------|--|
| CB4856 | HS | I | 5834644 | 5837392 | WBGene00018002 | twk-47 | F33D11.5 | -0.226804956455324 |  |
|--------|----|---|---------|---------|----------------|--------|----------|--------------------|--|

AGIWUR6580

|        |    |   |         |         |                |        |          |                    |  |
|--------|----|---|---------|---------|----------------|--------|----------|--------------------|--|
| CB4856 | HS | I | 5840289 | 5841888 | WBGene00000436 | ceh-12 | F33D11.4 | -0.290383572220345 |  |
|--------|----|---|---------|---------|----------------|--------|----------|--------------------|--|

AGIWUR24005

|        |    |   |         |         |                |        |          |                    |  |
|--------|----|---|---------|---------|----------------|--------|----------|--------------------|--|
| CB4856 | HS | I | 5842709 | 5844050 | WBGene00000631 | col-54 | F33D11.3 | -0.064047137751265 |  |
|--------|----|---|---------|---------|----------------|--------|----------|--------------------|--|

AGIWUR26608

|        |    |   |         |         |                |          |          |                   |  |
|--------|----|---|---------|---------|----------------|----------|----------|-------------------|--|
| CB4856 | HS | I | 5844836 | 5846466 | WBGene00018003 | F33D11.6 | F33D11.6 | 0.276763201180103 |  |
|--------|----|---|---------|---------|----------------|----------|----------|-------------------|--|

AGIWUR20606

|        |    |   |         |         |                |          |          |                    |  |
|--------|----|---|---------|---------|----------------|----------|----------|--------------------|--|
| CB4856 | HS | I | 5847477 | 5849391 | WBGene00018001 | F33D11.2 | F33D11.2 | 0.0550619586849077 |  |
|--------|----|---|---------|---------|----------------|----------|----------|--------------------|--|

AGIWUR26643

|        |    |   |         |         |                |          |          |                  |  |
|--------|----|---|---------|---------|----------------|----------|----------|------------------|--|
| CB4856 | HS | I | 5852045 | 5852962 | WBGene00018000 | F33D11.1 | F33D11.1 | 0.15417336774656 |  |
|--------|----|---|---------|---------|----------------|----------|----------|------------------|--|

AGIWUR2935;AGIWUR8296;AGIWUR17179;AGIWUR33917;AGIWUR37035;AGIWUR38448  
 CB4856 HS I 5854261 5855047 WBGene00018005 F33D11.8 F33D11.8 0.0746934869992835  
 AGIWUR1231;AGIWUR12588  
 CB4856 HS I 5857548 5862557 WBGene00018006 hpo-3 F33D11.9 -0.0254791962261933  
 AGIWUR20778;AGIWUR26526;AGIWUR29283  
 CB4856 HS I 5862644 5866431 WBGene00018009 dhhc-3 F33D11.12 0.0800534094548073  
 AGIWUR35887  
 CB4856 HS I 5866514 5868139 WBGene00018007 F33D11.10 F33D11.10 -0.111689763291677  
 AGIWUR11065;AGIWUR33616  
 CB4856 HS I 5868266 5869954 WBGene00018008 vpr-1 F33D11.11 -0.0830313482337175  
 AGIWUR24026  
 CB4856 HS I 5872174 5874343 WBGene00016421 cdc-7 C34G6.5 0.0626238782294202 AGIWUR4240  
 CB4856 HS I 5874422 5878954 WBGene00016422 noah-1 C34G6.6 -0.153667025646676 AGIWUR31175  
 CB4856 HS I 5886613 5895970 WBGene00003996 pgp-2 C34G6.4 -0.164235550751254 AGIWUR25666  
 CB4856 HS I 5898303 5902112 WBGene00016419 tyr-4 C34G6.2 0.16247933098844 AGIWUR39659  
 CB4856 HS I 5902106 5904695 WBGene00004109 stam-1 C34G6.7 -0.0474492224671392  
 AGIWUR1601;AGIWUR1672;AGIWUR38163;AGIWUR39752  
 CB4856 HS I 5906662 5918229 WBGene00016418 hpo-27 C34G6.1 -0.137289602693965  
 AGIWUR1717;AGIWUR13154;AGIWUR14544  
 CB4856 HS I 5919055 5935416 WBGene00015028 B0207.5 B0207.5 -0.101034069029684 AGIWUR5023  
 CB4856 HS I 5935370 5936957 WBGene00015029 B0207.6 B0207.6 -0.144896176563115 AGIWUR21951  
 CB4856 HS I 5937477 5938885 WBGene00000099 air-2 B0207.4 0.0481711753116656  
 AGIWUR8154;AGIWUR34964  
 CB4856 HS I 5942419 5945537 WBGene00001676 gpa-14 B0207.3 0.134029341260044 AGIWUR7895  
 CB4856 HS I 5945581 5947620 WBGene00015030 B0207.7 B0207.7 0.0321939375137283 AGIWUR22759  
 CB4856 HS I 5951136 5951742 WBGene00015031 B0207.8 B0207.8 -0.117196117054782 AGIWUR38503  
 CB4856 HS I 5955031 5956883 WBGene00015027 B0207.2 B0207.2 0.165116950103966  
 AGIWUR25443;AGIWUR37060;AGIWUR41309  
 CB4856 HS I 5957461 5958457 WBGene00015032 B0207.9 B0207.9 -0.010714441271265 AGIWUR15640  
 CB4856 HS I 5959008 5959526 WBGene00015033 B0207.10 B0207.10 0.0611091997300832  
 AGIWUR5455  
 CB4856 HS I 5962953 5964183 WBGene00015034 B0207.11 B0207.11 0.268298496065889  
 AGIWUR25597  
 CB4856 HS I 5965062 5967211 WBGene00015026 B0207.1 B0207.1 -0.196132469952143 AGIWUR35700  
 CB4856 HS I 5967250 5973320 WBGene00000232 avr-14 B0207.12 0.148703600264761  
 AGIWUR636;AGIWUR9364;AGIWUR18879;AGIWUR37041;AGIWUR37132  
 CB4856 HS I 5981778 5985869 WBGene00015504 C06A5.6 C06A5.6 -0.0895017151239053 AGIWUR39294  
 CB4856 HS I 5986443 5990581 WBGene00015501 C06A5.3 C06A5.3 -0.063498219029718 AGIWUR35558  
 CB4856 HS I 5990741 5992658 WBGene00004803 sir-2.4 C06A5.11 0.10429034995564

AGIWUR43540  
 CB4856 HS I 5992661 6003363 WBGene00006823 unc-94 C06A5.7 0.0701638611316611  
 AGIWUR4768;AGIWUR18849;AGIWUR18987;AGIWUR20008;AGIWUR20709;AGIWUR27311;AGIWUR32220;AGIWUR33730;AGIWUR35148;  
 AGIWUR36712;AGIWUR40863  
 CB4856 HS I 6004599 6007595 WBGene00044414 C06A5.12 C06A5.12 -0.187104481972323  
 AGIWUR28163;AGIWUR31238;AGIWUR34035;AGIWUR42647;AGIWUR42784  
 CB4856 HS I 6008105 6009606 WBGene00015505 C06A5.8 C06A5.8 -0.0299212539000955  
 AGIWUR34087;AGIWUR37759  
 CB4856 HS I 6009782 6011586 WBGene00004380 rnf-1 C06A5.9 0.0499458709074037  
 AGIWUR4178;AGIWUR27456  
 CB4856 HS I 6011977 6022516 WBGene00015499 inst-1 C06A5.1 -0.2278894788248 AGIWUR33571  
 CB4856 HS I 6022660 6026874 WBGene00000814 csn-2 B0025.2 0.166165242219 AGIWUR5887  
 CB4856 HS I 6027194 6028370 WBGene00015001 B0025.4 B0025.4 0.212183531615967 AGIWUR11731  
 CB4856 HS I 6028486 6033457 WBGene00006932 vps-34 B0025.1 0.0351956441342516  
 AGIWUR18092;AGIWUR25361;AGIWUR41664;AGIWUR42560  
 CB4856 HS I 6035452 6037745 WBGene00016155 C27A12.4 C27A12.4 0.0974287924627584  
 AGIWUR43310  
 CB4856 HS I 6038406 6041265 WBGene00006492 let-391 C27A12.3 0.164632354264608  
 AGIWUR4733  
 CB4856 HS I 6041672 6046018 WBGene00016154 C27A12.2 C27A12.2 -0.0520897503753908  
 AGIWUR17644  
 CB4856 HS I 6046832 6050462 WBGene00000429 ceh-2 C27A12.5 0.0310484146659862  
 AGIWUR28248  
 CB4856 HS I 6053785 6055821 WBGene00016156 C27A12.6 C27A12.6 0.0884352506568802  
 AGIWUR2214;AGIWUR7904;AGIWUR27980;AGIWUR37666  
 CB4856 HS I 6055947 6058424 WBGene00016157 C27A12.7 C27A12.7 -0.260448850600461  
 AGIWUR7052;AGIWUR18453;AGIWUR30076;AGIWUR32444  
 CB4856 HS I 6058546 6061033 WBGene00016158 ari-1 C27A12.8 0.236448218942151  
 AGIWUR43402  
 CB4856 HS I 6061752 6068040 WBGene00016159 C27A12.9 C27A12.9 -0.100860081983262  
 AGIWUR2352;AGIWUR10114;AGIWUR11058;AGIWUR38416;AGIWUR44563;AGIWUR45035  
 CB4856 HS I 6068526 6070122 WBGene00022749 ZK484.3 ZK484.3 -0.0690150995112528  
 AGIWUR23472;AGIWUR25484;AGIWUR42142  
 CB4856 HS I 6070236 6078895 WBGene00022750 ZK484.4 ZK484.4 -0.247998910242421  
 AGIWUR32976;AGIWUR33451  
 CB4856 HS I 6081782 6085962 WBGene00001819 haf-9 ZK484.2 0.185052965931902  
 AGIWUR2028;AGIWUR12808;AGIWUR25179;AGIWUR39792;AGIWUR43940  
 CB4856 HS I 6087366 6087764 WBGene00022751 ZK484.5 ZK484.5 0.212558932690943 AGIWUR40045  
 CB4856 HS I 6090015 6090919 WBGene00022752 ZK484.6 ZK484.6 0.187712428611899 AGIWUR15679

|                                                                                                                                                                                                                                                                                              |    |   |         |         |                |         |          |                     |             |
|----------------------------------------------------------------------------------------------------------------------------------------------------------------------------------------------------------------------------------------------------------------------------------------------|----|---|---------|---------|----------------|---------|----------|---------------------|-------------|
| CB4856                                                                                                                                                                                                                                                                                       | HS | I | 6093305 | 6094426 | WBGene00022748 | oaz-1   | ZK484.1  | 0.144789733861225   |             |
| AGIWUR5633;AGIWUR6260;AGIWUR9669;AGIWUR10174;AGIWUR10329;AGIWUR11262;AGIWUR14480;AGIWUR16682;AGIWUR17416;AGIWUR18340;AGIWUR18545;AGIWUR22968;AGIWUR23831;AGIWUR23930;AGIWUR25183;AGIWUR25365;AGIWUR26539;AGIWUR26756;AGIWUR30941;AGIWUR34252;AGIWUR34836;AGIWUR40956;AGIWUR41471;AGIWUR45198 |    |   |         |         |                |         |          |                     |             |
| CB4856                                                                                                                                                                                                                                                                                       | HS | I | 6095060 | 6096589 | WBGene00022753 | ZK484.7 | ZK484.7  | -0.206994804728762  | AGIWUR24816 |
| CB4856                                                                                                                                                                                                                                                                                       | HS | I | 6097494 | 6097837 | WBGene00022754 | nspd-1  | ZK484.8  | -0.148000981955363  | AGIWUR17934 |
| CB4856                                                                                                                                                                                                                                                                                       | HS | I | 6098927 | 6099731 | WBGene00020840 | spch-3  | T27A3.4  | -0.121687204191998  | AGIWUR32101 |
| CB4856                                                                                                                                                                                                                                                                                       | HS | I | 6100261 | 6101789 | WBGene00020841 | T27A3.5 | T27A3.5  | -0.0835833773347794 | AGIWUR19455 |
| CB4856                                                                                                                                                                                                                                                                                       | HS | I | 6102032 | 6102463 | WBGene00006044 | ssp-16  | T27A3.3  | -0.198187077829273  |             |
| AGIWUR14575;AGIWUR23833;AGIWUR26401;AGIWUR29267;AGIWUR33358;AGIWUR42127                                                                                                                                                                                                                      |    |   |         |         |                |         |          |                     |             |
| CB4856                                                                                                                                                                                                                                                                                       | HS | I | 6104805 | 6105589 | WBGene00044611 | T27A3.8 | T27A3.8  | 0.238303251429261   | AGIWUR22882 |
| CB4856                                                                                                                                                                                                                                                                                       | HS | I | 6105863 | 6107715 | WBGene00020842 | T27A3.6 | T27A3.6  | -0.108793101567521  |             |
| AGIWUR18567;AGIWUR24268;AGIWUR41070                                                                                                                                                                                                                                                          |    |   |         |         |                |         |          |                     |             |
| CB4856                                                                                                                                                                                                                                                                                       | HS | I | 6107809 | 6109679 | WBGene00020843 | T27A3.7 | T27A3.7  | -0.265783494877267  | AGIWUR37549 |
| CB4856                                                                                                                                                                                                                                                                                       | HS | I | 6110134 | 6114537 | WBGene00020839 | usp-5   | T27A3.2  | -0.420681358885847  | AGIWUR22004 |
| CB4856                                                                                                                                                                                                                                                                                       | HS | I | 6122590 | 6126851 | WBGene00020838 | trak-1  | T27A3.1  | -0.0488679356569826 |             |
| AGIWUR9827;AGIWUR13114;AGIWUR18998;AGIWUR19263;AGIWUR20155;AGIWUR21043;AGIWUR21050;AGIWUR21240;AGIWUR25994;AGIWUR26331;AGIWUR34093                                                                                                                                                           |    |   |         |         |                |         |          |                     |             |
| CB4856                                                                                                                                                                                                                                                                                       | HS | I | 6133245 | 6137978 | WBGene00003878 | pept-3  | F56F4.5  | 0.327730590782252   | AGIWUR25162 |
| CB4856                                                                                                                                                                                                                                                                                       | HS | I | 6137994 | 6138955 | WBGene00018981 | F56F4.4 | F56F4.4  | 0.107108136737934   | AGIWUR7191  |
| CB4856                                                                                                                                                                                                                                                                                       | HS | I | 6139216 | 6140444 | WBGene00018982 | abt-6   | F56F4.6  | 0.14581496612949    |             |
| AGIWUR6130;AGIWUR7439;AGIWUR21554                                                                                                                                                                                                                                                            |    |   |         |         |                |         |          |                     |             |
| CB4856                                                                                                                                                                                                                                                                                       | HS | I | 6141469 | 6144386 | WBGene00018980 | F56F4.3 | F56F4.3  | 0.139512802325152   |             |
| AGIWUR1365;AGIWUR31670                                                                                                                                                                                                                                                                       |    |   |         |         |                |         |          |                     |             |
| CB4856                                                                                                                                                                                                                                                                                       | HS | I | 6145455 | 6146477 | WBGene00018979 | ttr-55  | F56F4.2  | -0.120632627383754  |             |
| AGIWUR9831;AGIWUR12974;AGIWUR17577;AGIWUR23966;AGIWUR27059                                                                                                                                                                                                                                   |    |   |         |         |                |         |          |                     |             |
| CB4856                                                                                                                                                                                                                                                                                       | HS | I | 6146461 | 6147068 | WBGene00050896 | ttr-56  | F56F4.9  | 0.0637477924395267  | AGIWUR33891 |
| CB4856                                                                                                                                                                                                                                                                                       | HS | I | 6149197 | 6150480 | WBGene00045498 | F56F4.8 | F56F4.8  | -0.153042398597779  |             |
| AGIWUR18973;AGIWUR22403;AGIWUR42734                                                                                                                                                                                                                                                          |    |   |         |         |                |         |          |                     |             |
| CB4856                                                                                                                                                                                                                                                                                       | HS | I | 6154075 | 6157438 | WBGene00020379 | T09B4.5 | T09B4.5  | -0.0950234983491365 |             |
| AGIWUR8668;AGIWUR31230                                                                                                                                                                                                                                                                       |    |   |         |         |                |         |          |                     |             |
| CB4856                                                                                                                                                                                                                                                                                       | HS | I | 6157473 | 6159264 | WBGene00020380 | T09B4.6 | T09B4.6  | -0.110074323985687  | AGIWUR26255 |
| CB4856                                                                                                                                                                                                                                                                                       | HS | I | 6164719 | 6166539 | WBGene00020382 | T09B4.8 | T09B4.8  | 0.0927436513977185  | AGIWUR22457 |
| CB4856                                                                                                                                                                                                                                                                                       | HS | I | 6167940 | 6168642 | WBGene00020378 | T09B4.4 | T09B4.4  | 0.161953447190665   | AGIWUR8464  |
| CB4856                                                                                                                                                                                                                                                                                       | HS | I | 6176252 | 6178057 | WBGene00020377 | T09B4.3 | T09B4.3  | -0.0856707367261738 | AGIWUR20677 |
| CB4856                                                                                                                                                                                                                                                                                       | HS | I | 6177983 | 6180840 | WBGene00020383 | tin-44  | T09B4.9  | -0.153398838774415  | AGIWUR33554 |
| CB4856                                                                                                                                                                                                                                                                                       | HS | I | 6181314 | 6183913 | WBGene00000500 | chn-1   | T09B4.10 | 0.0944200981116872  |             |
| AGIWUR3531;AGIWUR14093;AGIWUR30546                                                                                                                                                                                                                                                           |    |   |         |         |                |         |          |                     |             |
| CB4856                                                                                                                                                                                                                                                                                       | HS | I | 6184072 | 6185368 | WBGene00020376 | T09B4.2 | T09B4.2  | 0.544364702689444   | AGIWUR5828  |

|                                                                                                             |    |   |         |         |                |          |          |                    |             |
|-------------------------------------------------------------------------------------------------------------|----|---|---------|---------|----------------|----------|----------|--------------------|-------------|
| CB4856                                                                                                      | HS | I | 6185462 | 6188121 | WBGene00020375 | pigv-1   | T09B4.1  | 0.0690643791284629 | AGIWUR2739  |
| CB4856                                                                                                      | HS | I | 6188157 | 6192632 | WBGene00020259 | T05E7.3  | T05E7.3  | -0.175866785760383 |             |
| AGIWUR8483;AGIWUR13425;AGIWUR16427;AGIWUR36048                                                              |    |   |         |         |                |          |          |                    |             |
| CB4856                                                                                                      | HS | I | 6192552 | 6194897 | WBGene00020260 | T05E7.4  | T05E7.4  | 0.0671028379108662 | AGIWUR3464  |
| CB4856                                                                                                      | HS | I | 6199141 | 6200193 | WBGene00000632 | col-55   | T05E7.2  | 0.0975906160425071 | AGIWUR45093 |
| CB4856                                                                                                      | HS | I | 6200798 | 6202076 | WBGene00020261 | vet-1    | T05E7.5  | -0.220612794874407 | AGIWUR29881 |
| CB4856                                                                                                      | HS | I | 6203897 | 6206927 | WBGene00020258 | T05E7.1  | T05E7.1  | 0.0665612653850403 | AGIWUR11566 |
| CB4856                                                                                                      | HS | I | 6206955 | 6211155 | WBGene00020347 | ech-1.2  | T08B2.7  | -0.123540212181019 |             |
| AGIWUR1878;AGIWUR13286;AGIWUR24847;AGIWUR27700                                                              |    |   |         |         |                |          |          |                    |             |
| CB4856                                                                                                      | HS | I | 6211270 | 6211885 | WBGene00020348 | mrpl-23  | T08B2.8  | 0.107413576184296  | AGIWUR12288 |
| CB4856                                                                                                      | HS | I | 6211986 | 6214645 | WBGene00001497 | fars-1   | T08B2.9  | -0.194914539902594 |             |
| AGIWUR15691;AGIWUR18498;AGIWUR21754;AGIWUR24091;AGIWUR31467;AGIWUR34640;AGIWUR39566                         |    |   |         |         |                |          |          |                    |             |
| CB4856                                                                                                      | HS | I | 6215669 | 6219911 | WBGene00020346 | rbm-5    | T08B2.5  | -0.102746263168179 |             |
| AGIWUR389;AGIWUR3390;AGIWUR17098;AGIWUR17725;AGIWUR21019;AGIWUR24671;AGIWUR42870;AGIWUR45169                |    |   |         |         |                |          |          |                    |             |
| CB4856                                                                                                      | HS | I | 6220090 | 6220766 | WBGene00004486 | rps-17   | T08B2.10 | 0.15719499496272   |             |
| AGIWUR6912;AGIWUR15081;AGIWUR16480;AGIWUR16946;AGIWUR21104;AGIWUR24229;AGIWUR24253;AGIWUR26223;AGIWUR28324; |    |   |         |         |                |          |          |                    |             |
| AGIWUR28853;AGIWUR32494;AGIWUR38938;AGIWUR40673;AGIWUR43660                                                 |    |   |         |         |                |          |          |                    |             |
| CB4856                                                                                                      | HS | I | 6221245 | 6223116 | WBGene00020349 | T08B2.11 | T08B2.11 | 0.0631181990839114 |             |
| AGIWUR41230                                                                                                 |    |   |         |         |                |          |          |                    |             |
| CB4856                                                                                                      | HS | I | 6232777 | 6234280 | WBGene00000633 | col-56   | T08B2.2  | 0.130714360764702  |             |
| AGIWUR18477;AGIWUR21810;AGIWUR23961                                                                         |    |   |         |         |                |          |          |                    |             |
| CB4856                                                                                                      | HS | I | 6249556 | 6250197 | WBGene00005000 | spp-15   | C48E7.10 | 0.167802047181485  |             |
| AGIWUR26334                                                                                                 |    |   |         |         |                |          |          |                    |             |
| CB4856                                                                                                      | HS | I | 6250475 | 6252834 | WBGene00000583 | cof-2    | C48E7.5  | 0.0419209577911799 |             |
| AGIWUR25222;AGIWUR43373                                                                                     |    |   |         |         |                |          |          |                    |             |
| CB4856                                                                                                      | HS | I | 6252986 | 6253584 | WBGene00016754 | cebp-2   | C48E7.11 | 0.0966119300252544 |             |
| AGIWUR4905                                                                                                  |    |   |         |         |                |          |          |                    |             |
| CB4856                                                                                                      | HS | I | 6253701 | 6254947 | WBGene00003059 | lpd-2    | C48E7.3  | -0.208869909565372 | AGIWUR36039 |
| CB4856                                                                                                      | HS | I | 6255035 | 6257791 | WBGene00016750 | let-611  | C48E7.2  | -0.015656545862857 | AGIWUR8583  |
| CB4856                                                                                                      | HS | I | 6260249 | 6264540 | WBGene00016749 | C48E7.1  | C48E7.1  | 0.0245541961275784 | AGIWUR25489 |
| CB4856                                                                                                      | HS | I | 6265691 | 6269073 | WBGene00016753 | oac-9    | C48E7.8  | 0.0742021351425084 | AGIWUR7858  |
| CB4856                                                                                                      | HS | I | 6269561 | 6271541 | WBGene00006689 | twk-37   | C48E7.9  | 0.27791050580435   | AGIWUR32998 |
| CB4856                                                                                                      | HS | I | 6271866 | 6273780 | WBGene00015688 | C10G11.8 | C10G11.8 | -0.118469545870921 |             |
| AGIWUR25031;AGIWUR33880;AGIWUR36459                                                                         |    |   |         |         |                |          |          |                    |             |
| CB4856                                                                                                      | HS | I | 6284973 | 6289340 | WBGene00015687 | chdp-1   | C10G11.7 | 0.127548637789335  |             |
| AGIWUR4250                                                                                                  |    |   |         |         |                |          |          |                    |             |
| CB4856                                                                                                      | HS | I | 6289433 | 6293855 | WBGene00015686 | C10G11.6 | C10G11.6 | -0.121540237286865 |             |
| AGIWUR8034                                                                                                  |    |   |         |         |                |          |          |                    |             |
| CB4856                                                                                                      | HS | I | 6295067 | 6297625 | WBGene00004068 | pnk-1    | C10G11.5 | 0.295754602750239  |             |



AGIWUR13687;AGIWUR29299;AGIWUR36480;AGIWUR43272  
 CB4856 HS I 6297767 6299729 WBGene00005272 srh-49 C10G11.4 0.110888174285519  
 AGIWUR16346  
 CB4856 HS I 6300493 6302298 WBGene00005274 srh-51 C10G11.3 0.164084173681273  
 AGIWUR12171;AGIWUR16140  
 CB4856 HS I 6302474 6304263 WBGene00005273 srh-50 C10G11.2 -0.254120642178369  
 AGIWUR41687  
 CB4856 HS I 6304916 6306363 WBGene00015690 C10G11.10 C10G11.10 -0.0494833773874106  
 AGIWUR33367  
 CB4856 HS I 6309114 6310781 WBGene00017817 F26B1.5 F26B1.5 -0.00986641928221399  
 AGIWUR7184;AGIWUR31624  
 CB4856 HS I 6311229 6312413 WBGene00000634 col-58 F26B1.4 -0.0442176663739122 AGIWUR2202  
 CB4856 HS I 6312750 6314624 WBGene00005171 srg-14 F26B1.6 -0.0830366703137564 AGIWUR3070  
 CB4856 HS I 6315233 6317267 WBGene00002073 ima-2 F26B1.3 -0.0285919456738775  
 AGIWUR10902;AGIWUR14196;AGIWUR25439;AGIWUR31579;AGIWUR37813  
 CB4856 HS I 6317701 6320365 WBGene00017816 hrpk-1 F26B1.2 -0.128999880559577  
 AGIWUR1418;AGIWUR1827;AGIWUR3187;AGIWUR5329;AGIWUR9787;AGIWUR16221;AGIWUR17680;AGIWUR18701;AGIWUR18921;AGIWUR26852;AGIWUR27039;AGIWUR36351;AGIWUR39126;AGIWUR43994  
 CB4856 HS I 6320289 6324018 WBGene00002601 let-381 F26B1.7 -0.167671656521014 AGIWUR36974  
 CB4856 HS I 6342231 6356678 WBGene00000254 bli-4 K04F10.4 -0.109789656270026  
 AGIWUR3978;AGIWUR12697;AGIWUR17473;AGIWUR25337;AGIWUR32461;AGIWUR34393;AGIWUR42192;AGIWUR44317  
 CB4856 HS I 6356614 6358410 WBGene00003499 mut-2 K04F10.6 -0.271622463332861  
 AGIWUR2874;AGIWUR9366;AGIWUR9500;AGIWUR26345;AGIWUR33780;AGIWUR36604;AGIWUR41011;AGIWUR42263  
 CB4856 HS I 6358585 6360457 WBGene00019396 K04F10.3 K04F10.3 0.091857165113657  
 AGIWUR13704  
 CB4856 HS I 6360844 6364172 WBGene00019395 K04F10.2 K04F10.2 -0.0633512810520314  
 AGIWUR4876  
 CB4856 HS I 6364886 6366224 WBGene00019394 K04F10.1 K04F10.1 0.266699599066481  
 AGIWUR3231  
 CB4856 HS I 6366331 6368078 WBGene00019399 K04F10.7 K04F10.7 0.124174199440139  
 AGIWUR6668  
 CB4856 HS I 6368270 6369598 WBGene00022586 ZC308.4 ZC308.4 0.196753267605434 AGIWUR37754  
 CB4856 HS I 6369934 6386183 WBGene00001596 gld-2 ZC308.1 -0.180807065384741  
 AGIWUR1922;AGIWUR5338;AGIWUR9092;AGIWUR24999  
 CB4856 HS I 6386149 6392524 WBGene00022592 klu-2 ZC328.2 0.186441309036208 AGIWUR9565  
 CB4856 HS I 6404587 6405705 WBGene00022591 cuti-1 ZC328.1 0.0401631251791343  
 AGIWUR28749;AGIWUR40109;AGIWUR42212  
 CB4856 HS I 6405882 6406936 WBGene00022594 ZC328.5 ZC328.5 -0.118214903405171 AGIWUR29601  
 CB4856 HS I 6407458 6409212 WBGene00004721 san-1 ZC328.4 -0.0633608886589414

AGIWUR10499;AGIWUR16704;AGIWUR24958;AGIWUR38192;AGIWUR40688  
 CB4856 HS I 6409050 6417010 WBGene00022593 ZC328.3 ZC328.3 0.255744701775836  
 AGIWUR2496;AGIWUR16461;AGIWUR19232  
 CB4856 HS I 6418565 6418809 WBGene00019992 R10A10.1 R10A10.1 -0.0480022395709874  
 AGIWUR38650  
 CB4856 HS I 6420660 6421985 WBGene00019993 rbx-2 R10A10.2 -0.232966907668278  
 AGIWUR20356  
 CB4856 HS I 6421978 6425794 WBGene00018156 ncbp-1 F37E3.1 -0.00821397318540562 AGIWUR26304  
 CB4856 HS I 6425793 6428942 WBGene00018157 lron-6 F37E3.2 -0.119261315430494 AGIWUR1813  
 CB4856 HS I 6429525 6431586 WBGene00018158 comp-1 F37E3.3 0.190915023708277  
 AGIWUR1030;AGIWUR34352  
 CB4856 HS I 6436058 6441192 WBGene00004924 snt-4 T23H2.2 0.215404040508876 AGIWUR23814  
 CB4856 HS I 6441637 6446465 WBGene00020742 T23H2.3 T23H2.3 -0.0069639271977282  
 AGIWUR2836;AGIWUR2981;AGIWUR5671;AGIWUR11513;AGIWUR12657;AGIWUR14273;AGIWUR15264;AGIWUR15865;AGIWUR20917;AG  
 IWUR26561;AGIWUR34382;AGIWUR43457  
 CB4856 HS I 6447304 6453933 WBGene00003798 npp-12 T23H2.1 -0.0221954624969509  
 AGIWUR565;AGIWUR8913;AGIWUR37341;AGIWUR41730  
 CB4856 HS I 6453875 6456984 WBGene00020743 mam-8 T23H2.4 0.0374127815194738 AGIWUR24944  
 CB4856 HS I 6457061 6458479 WBGene00004273 rab-10 T23H2.5 0.115895052874698  
 AGIWUR1929;AGIWUR2575;AGIWUR4282;AGIWUR8097;AGIWUR10011;AGIWUR21666;AGIWUR34705  
 CB4856 HS I 6460433 6464286 WBGene00019432 kn1-2 K06A5.4 0.39917658135677 AGIWUR32152  
 CB4856 HS I 6464197 6466941 WBGene00019433 acdh-3 K06A5.6 0.103185827001971 AGIWUR7557  
 CB4856 HS I 6466752 6467515 WBGene00019431 K06A5.3 K06A5.3 0.120106854830761 AGIWUR8782  
 CB4856 HS I 6468113 6469392 WBGene00019430 K06A5.2 K06A5.2 0.176751632764857 AGIWUR24586  
 CB4856 HS I 6469386 6471995 WBGene00000386 cdc-25.1 K06A5.7 -0.0351413059712549  
 AGIWUR40783  
 CB4856 HS I 6474183 6489030 WBGene00019434 nmtn-1 K06A5.8 0.0489901087901821  
 AGIWUR3470;AGIWUR27663;AGIWUR38621  
 CB4856 HS I 6490716 6492727 WBGene00000937 dbr-1 C55B7.8 0.158702129029681 AGIWUR15559  
 CB4856 HS I 6492722 6494754 WBGene00007018 mdt-18 C55B7.9 -0.204811443673414 AGIWUR24134  
 CB4856 HS I 6494216 6496109 WBGene00016944 uri-1 C55B7.5 0.0334517279187168 AGIWUR23828  
 CB4856 HS I 6497436 6499560 WBGene00016943 acdh-1 C55B7.4 0.124151173928794  
 AGIWUR9071;AGIWUR12896;AGIWUR13562;AGIWUR24409;AGIWUR29961  
 CB4856 HS I 6507894 6511630 WBGene00001627 gly-2 C55B7.2 0.219100922866316 AGIWUR38944  
 CB4856 HS I 6511612 6513843 WBGene00016947 C55B7.11 C55B7.11 0.00117671660060115  
 AGIWUR317;AGIWUR10946;AGIWUR17661;AGIWUR19575;AGIWUR40605  
 CB4856 HS I 6513928 6517507 WBGene00001599 glh-2 C55B7.1 -0.203971632387898 AGIWUR14020  
 CB4856 HS I 6517575 6520879 WBGene00000483 che-1 C55B7.12 -0.0391544174600496  
 AGIWUR40311

|                                                                         |    |   |         |         |                |          |           |                     |             |
|-------------------------------------------------------------------------|----|---|---------|---------|----------------|----------|-----------|---------------------|-------------|
| CB4856                                                                  | HS | I | 6525045 | 6528689 | WBGene00020414 | T10E9.4  | T10E9.4   | 0.323415048000413   | AGIWUR11816 |
| CB4856                                                                  | HS | I | 6529158 | 6530099 | WBGene00020416 | T10E9.6  | T10E9.6   | 0.192027092222268   | AGIWUR1670  |
| CB4856                                                                  | HS | I | 6530131 | 6533031 | WBGene00020417 | nuo-2    | T10E9.7   | 0.0213001732754172  |             |
| AGIWUR3800;AGIWUR20696;AGIWUR23397                                      |    |   |         |         |                |          |           |                     |             |
| CB4856                                                                  | HS | I | 6534072 | 6539193 | WBGene00020413 | T10E9.3  | T10E9.3   | -0.205680611436454  | AGIWUR7632  |
| CB4856                                                                  | HS | I | 6539129 | 6541084 | WBGene00020418 | T10E9.8  | T10E9.8   | 0.084426656899721   |             |
| AGIWUR8524;AGIWUR10486;AGIWUR10560;AGIWUR16490;AGIWUR32642;AGIWUR35271  |    |   |         |         |                |          |           |                     |             |
| CB4856                                                                  | HS | I | 6542090 | 6544966 | WBGene00020412 | T10E9.2  | T10E9.2   | -0.0770453553870816 | AGIWUR39070 |
| CB4856                                                                  | HS | I | 6545110 | 6546593 | WBGene00020411 | T10E9.1  | T10E9.1   | -0.0219891616468875 | AGIWUR29543 |
| CB4856                                                                  | HS | I | 6548644 | 6550447 | WBGene00019005 | F57B10.8 | F57B10.8  | 0.0268894379602269  |             |
| AGIWUR34149                                                             |    |   |         |         |                |          |           |                     |             |
| CB4856                                                                  | HS | I | 6550536 | 6552665 | WBGene00019006 | spg-20   | F57B10.9  | 0.145195460468539   |             |
| AGIWUR2257                                                              |    |   |         |         |                |          |           |                     |             |
| CB4856                                                                  | HS | I | 6552834 | 6553379 | WBGene00019007 | ucr-11   | F57B10.14 | 0.266272542845094   |             |
| AGIWUR26529                                                             |    |   |         |         |                |          |           |                     |             |
| CB4856                                                                  | HS | I | 6553481 | 6554290 | WBGene00000896 | dad-1    | F57B10.10 | 0.0315999540743697  |             |
| AGIWUR15439                                                             |    |   |         |         |                |          |           |                     |             |
| CB4856                                                                  | HS | I | 6554729 | 6558623 | WBGene00006607 | tre-1    | F57B10.7  | 0.115602484895184   |             |
| AGIWUR30347                                                             |    |   |         |         |                |          |           |                     |             |
| CB4856                                                                  | HS | I | 6558696 | 6562346 | WBGene00019004 | xpg-1    | F57B10.6  | 0.0999660829964508  |             |
| AGIWUR13434                                                             |    |   |         |         |                |          |           |                     |             |
| CB4856                                                                  | HS | I | 6562699 | 6563660 | WBGene00019003 | F57B10.5 | F57B10.5  | -0.0262089868270969 |             |
| AGIWUR37962                                                             |    |   |         |         |                |          |           |                     |             |
| CB4856                                                                  | HS | I | 6563629 | 6564451 | WBGene00000236 | bag-1    | F57B10.11 | -0.0981428573709628 |             |
| AGIWUR18247                                                             |    |   |         |         |                |          |           |                     |             |
| CB4856                                                                  | HS | I | 6564749 | 6565868 | WBGene00003184 | mei-2    | F57B10.12 | 0.0371412342079793  |             |
| AGIWUR37281                                                             |    |   |         |         |                |          |           |                     |             |
| CB4856                                                                  | HS | I | 6566173 | 6568905 | WBGene00019002 | F57B10.4 | F57B10.4  | -0.0993643715524133 |             |
| AGIWUR37891                                                             |    |   |         |         |                |          |           |                     |             |
| CB4856                                                                  | HS | I | 6569494 | 6572598 | WBGene00019001 | ipgm-1   | F57B10.3  | 0.0849508077639589  |             |
| AGIWUR7348;AGIWUR17880;AGIWUR19488;AGIWUR23845                          |    |   |         |         |                |          |           |                     |             |
| CB4856                                                                  | HS | I | 6574004 | 6585510 | WBGene00002783 | let-607  | F57B10.1  | -0.147417360643808  |             |
| AGIWUR10303;AGIWUR13630;AGIWUR16293;AGIWUR22955;AGIWUR28124;AGIWUR31341 |    |   |         |         |                |          |           |                     |             |
| CB4856                                                                  | HS | I | 6585039 | 6587882 | WBGene00006624 | try-6    | F48A9.3   | 0.146193345451801   | AGIWUR17630 |
| CB4856                                                                  | HS | I | 6592332 | 6593831 | WBGene00018582 | F48A9.2  | F48A9.2   | -0.0869368016781404 | AGIWUR22685 |
| CB4856                                                                  | HS | I | 6594320 | 6596231 | WBGene00018581 | F48A9.1  | F48A9.1   | -0.119034287070908  | AGIWUR30733 |
| CB4856                                                                  | HS | I | 6596919 | 6598928 | WBGene00017067 | D2092.6  | D2092.6   | -0.0933811745375914 | AGIWUR13165 |
| CB4856                                                                  | HS | I | 6598981 | 6607520 | WBGene00017066 | maco-1   | D2092.5   | -0.0493850853188293 |             |
| AGIWUR6251;AGIWUR33086                                                  |    |   |         |         |                |          |           |                     |             |

|                                                                      |    |   |         |         |                |          |          |                             |             |
|----------------------------------------------------------------------|----|---|---------|---------|----------------|----------|----------|-----------------------------|-------------|
| CB4856                                                               | HS | I | 6612188 | 6615990 | WBGene00017065 | D2092.4  | D2092.4  | 0.237038587001607           | AGIWUR33325 |
| CB4856                                                               | HS | I | 6616304 | 6618560 | WBGene00006645 | tsp-19   | D2092.7  | 0.148552906162859           | AGIWUR38000 |
| CB4856                                                               | HS | I | 6620665 | 6621292 | WBGene00017068 | D2092.8  | D2092.8  | -0.10679950665957           | AGIWUR24576 |
| CB4856                                                               | HS | I | 6621687 | 6624894 | WBGene00000050 | acr-11   | D2092.3  | 0.229257399040367           | AGIWUR4258  |
| CB4856                                                               | HS | I | 6625066 | 6626788 | WBGene00017064 | ppfr-2   | D2092.2  | -0.0474077216215214         | AGIWUR39480 |
| CB4856                                                               | HS | I | 6627045 | 6627914 | WBGene00044610 | D2092.10 |          | D2092.10 0.124577044399178  |             |
| AGIWUR21189;AGIWUR22339;AGIWUR38102;AGIWUR40477                      |    |   |         |         |                |          |          |                             |             |
| CB4856                                                               | HS | I | 6629717 | 6637429 | WBGene00017063 | mctp-1   | D2092.1  | 0.155545094935432           | AGIWUR30994 |
| CB4856                                                               | HS | I | 6640662 | 6642643 | WBGene00006625 | try-7    | ZC581.6  | 0.208293805661048           | AGIWUR4027  |
| CB4856                                                               | HS | I | 6651220 | 6655430 | WBGene00022633 | ZC581.3  | ZC581.3  | 0.201783574085404           | AGIWUR20637 |
| CB4856                                                               | HS | I | 6655608 | 6658371 | WBGene00022632 | ZC581.2  | ZC581.2  | 0.0386095645238473          |             |
| AGIWUR13462;AGIWUR32856;AGIWUR33302                                  |    |   |         |         |                |          |          |                             |             |
| CB4856                                                               | HS | I | 6660436 | 6662315 | WBGene00022634 | ZC581.7  | ZC581.7  | 0.125411103034988           | AGIWUR41254 |
| CB4856                                                               | HS | I | 6663050 | 6665160 | WBGene00022631 | nek1-2   | ZC581.1  | 0.213360944833635           | AGIWUR4970  |
| CB4856                                                               | HS | I | 6665077 | 6673840 | WBGene00022635 | ZC581.9  | ZC581.9  | 0.24959019849037            | AGIWUR14388 |
| CB4856                                                               | HS | I | 6687349 | 6691662 | WBGene00020712 | ckr-1    | T23B3.4  | -0.170575032657785          | AGIWUR27855 |
| CB4856                                                               | HS | I | 6706766 | 6708919 | WBGene00020714 | T23B3.6  | T23B3.6  | -0.146877981155543          | AGIWUR31861 |
| CB4856                                                               | HS | I | 6711512 | 6712327 | WBGene00020711 | rmd-5    | T23B3.3  | -0.0465765241251832         | AGIWUR43249 |
| CB4856                                                               | HS | I | 6715949 | 6717090 | WBGene00020710 | T23B3.2  | T23B3.2  | 0.126836535942305           | AGIWUR4376  |
| CB4856                                                               | HS | I | 6717819 | 6719430 | WBGene00020709 | T23B3.1  | T23B3.1  | 0.00729120056097088         | AGIWUR41299 |
| CB4856                                                               | HS | I | 6719368 | 6723059 | WBGene00020933 | W02D3.4  | W02D3.4  | -0.112450019861949          | AGIWUR22746 |
| CB4856                                                               | HS | I | 6724917 | 6728330 | WBGene00003170 | mec-6    | W02D3.3  | -0.166159949159113          | AGIWUR969   |
| CB4856                                                               | HS | I | 6728290 | 6729376 | WBGene00002258 | lbp-6    | W02D3.5  | 0.307786281363242           | AGIWUR30217 |
| CB4856                                                               | HS | I | 6729996 | 6730959 | WBGene00007057 | ant-1.2  | W02D3.6  | 0.123858572965801           | AGIWUR30633 |
| CB4856                                                               | HS | I | 6731267 | 6732280 | WBGene00002257 | lbp-5    | W02D3.7  | 0.0303924266630373          |             |
| AGIWUR35562;AGIWUR35903                                              |    |   |         |         |                |          |          |                             |             |
| CB4856                                                               | HS | I | 6734029 | 6736161 | WBGene00004883 | smg-5    | W02D3.8  | 0.0907083575478822          | AGIWUR40678 |
| CB4856                                                               | HS | I | 6736680 | 6741175 | WBGene00020932 | dhod-1   | W02D3.2  | -0.154545943572781          | AGIWUR16146 |
| CB4856                                                               | HS | I | 6741274 | 6741877 | WBGene00020931 | cytb-5.2 |          | W02D3.1 0.031133332898567   |             |
| AGIWUR6119;AGIWUR17412                                               |    |   |         |         |                |          |          |                             |             |
| CB4856                                                               | HS | I | 6741984 | 6742358 | WBGene00020937 | W02D3.12 |          | W02D3.12 -0.284064479555891 |             |
| AGIWUR27444                                                          |    |   |         |         |                |          |          |                             |             |
| CB4856                                                               | HS | I | 6742293 | 6745341 | WBGene00006773 | unc-37   | W02D3.9  | 0.162393142151555           |             |
| AGIWUR5383;AGIWUR17092                                               |    |   |         |         |                |          |          |                             |             |
| CB4856                                                               | HS | I | 6745991 | 6753031 | WBGene00020935 | fnci-1   | W02D3.10 | -0.0942060307440711         |             |
| AGIWUR9400;AGIWUR35508                                               |    |   |         |         |                |          |          |                             |             |
| CB4856                                                               | HS | I | 6753219 | 6756348 | WBGene00020936 | hrpf-1   | W02D3.11 | 0.0805942810597502          |             |
| AGIWUR3301;AGIWUR4929;AGIWUR6674;AGIWUR15926;AGIWUR19943;AGIWUR35377 |    |   |         |         |                |          |          |                             |             |
| CB4856                                                               | HS | I | 6757763 | 6758178 | WBGene00001682 | gpc-2    | F08B6.2  | 0.0579959955628739          |             |

AGIWUR8016;AGIWUR25894  
 CB4856 HS I 6758181 6760179 WBGene00017240 calu-2 F08B6.3 0.142485668790684 AGIWUR31  
 CB4856 HS I 6761228 6767797 WBGene00006819 unc-87 F08B6.4 0.150259915773126  
 AGIWUR5112;AGIWUR7202;AGIWUR19433;AGIWUR32709  
 CB4856 HS I 6773976 6780151 WBGene00004111 pqn-21 C37A2.5 -0.157816198099129  
 AGIWUR8188;AGIWUR13214;AGIWUR28740;AGIWUR31351;AGIWUR36292;AGIWUR38150;AGIWUR42687  
 CB4856 HS I 6780806 6784396 WBGene00000871 cye-1 C37A2.4 -0.239279761384379  
 AGIWUR21118;AGIWUR35011  
 CB4856 HS I 6784854 6787139 WBGene00016491 acdh-5 C37A2.3 0.137603708566836  
 AGIWUR16440;AGIWUR35452;AGIWUR44135  
 CB4856 HS I 6788032 6789002 WBGene00016492 C37A2.6 C37A2.6 0.215398233081837  
 AGIWUR6422;AGIWUR37330  
 CB4856 HS I 6789039 6789738 WBGene00016493 C37A2.7 C37A2.7 0.121762571865364  
 AGIWUR6374;AGIWUR44421  
 CB4856 HS I 6791025 6797470 WBGene00004110 pqn-20 C37A2.2 -0.421600611477999 AGIWUR19579  
 CB4856 HS I 6798232 6799674 WBGene00016494 C37A2.8 C37A2.8 -0.0961603258817192  
 AGIWUR28525;AGIWUR44472  
 CB4856 HS I 6800386 6804860 WBGene00017098 E02D9.1 E02D9.1 -0.0189098072394831  
 AGIWUR17002;AGIWUR18835;AGIWUR27530;AGIWUR29337;AGIWUR32622;AGIWUR35400;AGIWUR42665  
 CB4856 HS I 6804788 6810451 WBGene00019324 K02F2.5 K02F2.5 0.0809619136356319  
 AGIWUR7002;AGIWUR14204;AGIWUR16418;AGIWUR24188;AGIWUR38556;AGIWUR42759  
 CB4856 HS I 6812664 6814248 WBGene00006740 ulp-5 K02F2.4 -0.261642260430376 AGIWUR25907  
 CB4856 HS I 6814511 6834687 WBGene00019323 teg-4 K02F2.3 -0.141699856432906 AGIWUR33779  
 CB4856 HS I 6836375 6838140 WBGene00019322 ahcy-1 K02F2.2 -0.0180181917104711  
 AGIWUR287;AGIWUR1378;AGIWUR4956;AGIWUR8493;AGIWUR9338;AGIWUR9562;AGIWUR12159;AGIWUR14900;AGIWUR17808;AGIWUR  
 17829;AGIWUR19142;AGIWUR23216;AGIWUR23428;AGIWUR26001;AGIWUR28582;AGIWUR29154;AGIWUR32426  
 CB4856 HS I 6838354 6843343 WBGene00001056 dpf-3 K02F2.1 0.0461641282065237 AGIWUR15334  
 CB4856 HS I 6843589 6845134 WBGene00001075 dpy-14 H27M09.4 -1.21630488706179  
 AGIWUR26750  
 CB4856 HS I 6845175 6846952 WBGene00019248 H27M09.5 H27M09.5 -0.0617518814360416  
 AGIWUR12565  
 CB4856 HS I 6847511 6849923 WBGene00019247 syp-4 H27M09.3 -0.214863968868137  
 AGIWUR16231  
 CB4856 HS I 6850409 6851356 WBGene00019246 rpb-5 H27M09.2 0.116817009610108  
 AGIWUR41547  
 CB4856 HS I 6851372 6854140 WBGene00019245 sacy-1 H27M09.1 -0.128173596185572  
 AGIWUR16956;AGIWUR24226;AGIWUR38168;AGIWUR39686;AGIWUR41837  
 CB4856 HS I 6862397 6870424 WBGene00044898 let-383 T21G5.6 -0.0649449195007676  
 AGIWUR3358;AGIWUR6039;AGIWUR10814;AGIWUR19853;AGIWUR35561

|                                                                                     |    |   |         |         |                |          |          |                       |             |
|-------------------------------------------------------------------------------------|----|---|---------|---------|----------------|----------|----------|-----------------------|-------------|
| CB4856                                                                              | HS | I | 6870415 | 6871911 | WBGene00020660 | T21G5.2  | T21G5.2  | -0.000330290057427796 |             |
| AGIWUR21753;AGIWUR29068;AGIWUR35710                                                 |    |   |         |         |                |          |          |                       |             |
| CB4856                                                                              | HS | I | 6872597 | 6873755 | WBGene00020661 | smz-2    | T21G5.4  | -0.0140005417237248   | AGIWUR42609 |
| CB4856                                                                              | HS | I | 6874304 | 6876928 | WBGene00020659 | T21G5.1  | T21G5.1  | -0.159404787623417    | AGIWUR26740 |
| CB4856                                                                              | HS | I | 6877080 | 6888217 | WBGene00006423 | asd-2    | T21G5.5  | 0.0202170758182909    |             |
| AGIWUR22524;AGIWUR24899;AGIWUR25729;AGIWUR34706;AGIWUR38832;AGIWUR43537;AGIWUR44294 |    |   |         |         |                |          |          |                       |             |
| CB4856                                                                              | HS | I | 6889254 | 6891501 | WBGene00016742 | C48B6.4  | C48B6.4  | 0.208207333736272     | AGIWUR13786 |
| CB4856                                                                              | HS | I | 6897755 | 6900619 | WBGene00016743 | srb-15   | C48B6.5  | -0.00818776441878288  | AGIWUR12549 |
| CB4856                                                                              | HS | I | 6900947 | 6913579 | WBGene00004879 | smg-1    | C48B6.6  | -0.207401763393033    |             |
| AGIWUR26267;AGIWUR29121;AGIWUR35234                                                 |    |   |         |         |                |          |          |                       |             |
| CB4856                                                                              | HS | I | 6915049 | 6916609 | WBGene00016741 | C48B6.3  | C48B6.3  | -0.195273494284071    |             |
| AGIWUR3569;AGIWUR8775;AGIWUR16126;AGIWUR22913;AGIWUR32725;AGIWUR33646               |    |   |         |         |                |          |          |                       |             |
| CB4856                                                                              | HS | I | 6916766 | 6917560 | WBGene00016740 | C48B6.2  | C48B6.2  | 0.0134486928285327    | AGIWUR3988  |
| CB4856                                                                              | HS | I | 6923076 | 6923688 | WBGene00016746 | C48B6.10 | C48B6.10 | 0.0716094054165932    |             |
| AGIWUR2589;AGIWUR8621;AGIWUR26363;AGIWUR28730;AGIWUR30871;AGIWUR44258               |    |   |         |         |                |          |          |                       |             |
| CB4856                                                                              | HS | I | 6924288 | 6925463 | WBGene00016745 | C48B6.9  | C48B6.9  | -0.210694387141661    | AGIWUR21629 |
| CB4856                                                                              | HS | I | 6926262 | 6929664 | WBGene00020399 | ztf-4    | T10B11.3 | -0.147731197065117    |             |
| AGIWUR20363                                                                         |    |   |         |         |                |          |          |                       |             |
| CB4856                                                                              | HS | I | 6931138 | 6936928 | WBGene00020398 | cerk-1   | T10B11.2 | 0.209644436506576     |             |
| AGIWUR8530                                                                          |    |   |         |         |                |          |          |                       |             |
| CB4856                                                                              | HS | I | 6937504 | 6939618 | WBGene00020400 | T10B11.4 | T10B11.4 | -0.250902136266621    |             |
| AGIWUR31514                                                                         |    |   |         |         |                |          |          |                       |             |
| CB4856                                                                              | HS | I | 6940249 | 6941950 | WBGene00020401 | T10B11.5 | T10B11.5 | 0.0249243469461362    |             |
| AGIWUR43470                                                                         |    |   |         |         |                |          |          |                       |             |
| CB4856                                                                              | HS | I | 6943176 | 6945358 | WBGene00020402 | T10B11.6 | T10B11.6 | 0.0315847097471895    |             |
| AGIWUR14326                                                                         |    |   |         |         |                |          |          |                       |             |
| CB4856                                                                              | HS | I | 6945596 | 6950499 | WBGene00020403 | T10B11.7 | T10B11.7 | -0.005706221173857    |             |
| AGIWUR41683                                                                         |    |   |         |         |                |          |          |                       |             |
| CB4856                                                                              | HS | I | 6951135 | 6951982 | WBGene00020397 | pcbd-1   | T10B11.1 | 0.0133368184934284    |             |
| AGIWUR16908                                                                         |    |   |         |         |                |          |          |                       |             |
| CB4856                                                                              | HS | I | 6951900 | 6954252 | WBGene00020404 | T10B11.8 | T10B11.8 | 0.072326061409381     |             |
| AGIWUR11281                                                                         |    |   |         |         |                |          |          |                       |             |
| CB4856                                                                              | HS | I | 6954414 | 6961139 | WBGene00016260 | rege-1   | C30F12.1 | 0.385677741516394     |             |
| AGIWUR409;AGIWUR6954;AGIWUR24743;AGIWUR28854;AGIWUR31266;AGIWUR32912                |    |   |         |         |                |          |          |                       |             |
| CB4856                                                                              | HS | I | 6967670 | 6970190 | WBGene00016261 | C30F12.2 | C30F12.2 | -0.0158592710369936   |             |
| AGIWUR4610;AGIWUR34084                                                              |    |   |         |         |                |          |          |                       |             |
| CB4856                                                                              | HS | I | 6970367 | 6971879 | WBGene00016262 | C30F12.3 | C30F12.3 | -0.0234753052252934   |             |
| AGIWUR15866                                                                         |    |   |         |         |                |          |          |                       |             |
| CB4856                                                                              | HS | I | 6972157 | 6973789 | WBGene00016263 | C30F12.4 | C30F12.4 | -0.133526327610181    |             |

|                                                                                                                       |    |   |         |         |                |          |          |                      |
|-----------------------------------------------------------------------------------------------------------------------|----|---|---------|---------|----------------|----------|----------|----------------------|
| AGIWUR17475                                                                                                           |    |   |         |         |                |          |          |                      |
| CB4856                                                                                                                | HS | I | 6974558 | 6977100 | WBGene00016266 | idhg-2   | C30F12.7 | 0.176746266955561    |
| AGIWUR38700                                                                                                           |    |   |         |         |                |          |          |                      |
| CB4856                                                                                                                | HS | I | 6989067 | 6992106 | WBGene00016265 | trhr-1   | C30F12.6 | -0.0354888179216406  |
| AGIWUR4257                                                                                                            |    |   |         |         |                |          |          |                      |
| CB4856                                                                                                                | HS | I | 6991951 | 6999706 | WBGene00016264 | C30F12.5 | C30F12.5 | 0.154189931035649    |
| AGIWUR3647;AGIWUR41737                                                                                                |    |   |         |         |                |          |          |                      |
| CB4856                                                                                                                | HS | I | 7002870 | 7003481 | WBGene00010371 | H06001.4 | H06001.4 | 0.291142974147911    |
| AGIWUR24652                                                                                                           |    |   |         |         |                |          |          |                      |
| CB4856                                                                                                                | HS | I | 7005443 | 7009190 | WBGene00010370 | ctg-1    | H06001.3 | 0.206530292702196    |
| AGIWUR39363                                                                                                           |    |   |         |         |                |          |          |                      |
| CB4856                                                                                                                | HS | I | 7009139 | 7015212 | WBGene00010369 | chd-1    | H06001.2 | 0.13314669125851     |
| AGIWUR350                                                                                                             |    |   |         |         |                |          |          |                      |
| CB4856                                                                                                                | HS | I | 7015912 | 7021743 | WBGene00003964 | pdi-3    | H06001.1 | -0.115380856083      |
| AGIWUR20997;AGIWUR22066                                                                                               |    |   |         |         |                |          |          |                      |
| CB4856                                                                                                                | HS | I | 7021946 | 7029076 | WBGene00008852 | ubql-1   | F15C11.2 | -0.134000519708603   |
| AGIWUR2160;AGIWUR4824;AGIWUR10320;AGIWUR10692;AGIWUR12397;AGIWUR13433;AGIWUR13487;AGIWUR23339;AGIWUR37152;AGIWUR44055 |    |   |         |         |                |          |          |                      |
| CB4856                                                                                                                | HS | I | 7038900 | 7048832 | WBGene00004773 | sem-4    | F15C11.1 | 0.128942432755036    |
| AGIWUR17306;AGIWUR32821;AGIWUR36613;AGIWUR38195;AGIWUR39733                                                           |    |   |         |         |                |          |          |                      |
| CB4856                                                                                                                | HS | I | 7050042 | 7051712 | WBGene00044764 | W01A8.7  | W01A8.7  | 1.03840593849141     |
| CB4856                                                                                                                | HS | I | 7057170 | 7059351 | WBGene00007024 | plin-1   | W01A8.1  | -0.0844412195184283  |
| AGIWUR6882;AGIWUR21896;AGIWUR25710;AGIWUR39335;AGIWUR41766                                                            |    |   |         |         |                |          |          |                      |
| CB4856                                                                                                                | HS | I | 7065263 | 7067899 | WBGene00012165 | cutl-6   | W01A8.3  | 0.180753157407574    |
| CB4856                                                                                                                | HS | I | 7068106 | 7069186 | WBGene00012166 | nuo-6    | W01A8.4  | -0.123701956096254   |
| AGIWUR5024;AGIWUR14516;AGIWUR20848                                                                                    |    |   |         |         |                |          |          |                      |
| CB4856                                                                                                                | HS | I | 7069440 | 7070728 | WBGene00012167 | tofu-5   | W01A8.5  | -0.0637371349836364  |
| AGIWUR10884;AGIWUR16983;AGIWUR23898;AGIWUR29769;AGIWUR44504                                                           |    |   |         |         |                |          |          |                      |
| CB4856                                                                                                                | HS | I | 7070649 | 7074733 | WBGene00012168 | W01A8.6  | W01A8.6  | 0.233639463248679    |
| CB4856                                                                                                                | HS | I | 7075918 | 7079566 | WBGene00002198 | kin-14   | F22D6.1  | 0.0261834579646365   |
| CB4856                                                                                                                | HS | I | 7079868 | 7081520 | WBGene00009050 | F22D6.2  | F22D6.2  | 0.073255148275404    |
| AGIWUR7047;AGIWUR7697;AGIWUR28913;AGIWUR33699                                                                         |    |   |         |         |                |          |          |                      |
| CB4856                                                                                                                | HS | I | 7088030 | 7090062 | WBGene00003815 | nars-1   | F22D6.3  | -0.00454009495588714 |
| AGIWUR8353;AGIWUR28891;AGIWUR31912                                                                                    |    |   |         |         |                |          |          |                      |
| CB4856                                                                                                                | HS | I | 7090623 | 7091371 | WBGene00009051 | nduf-6   | F22D6.4  | -0.131297043862549   |
| CB4856                                                                                                                | HS | I | 7091309 | 7094537 | WBGene00004186 | prpf-4   | F22D6.5  | 0.243735205830284    |
| CB4856                                                                                                                | HS | I | 7095486 | 7098406 | WBGene00009052 | ekl-1    | F22D6.6  | 0.0586623226727099   |
| CB4856                                                                                                                | HS | I | 7098981 | 7099497 | WBGene00043279 | F22D6.8  | F22D6.8  | 0.000685197471305798 |
| AGIWUR5007;AGIWUR5895;AGIWUR19127;AGIWUR27377;AGIWUR36296;AGIWUR44085                                                 |    |   |         |         |                |          |          |                      |

|                                                                        |    |   |         |         |                |          |          |                      |             |
|------------------------------------------------------------------------|----|---|---------|---------|----------------|----------|----------|----------------------|-------------|
| CB4856                                                                 | HS | I | 7099810 | 7101775 | WBGene00009054 | F22D6.9  | F22D6.9  | -0.0385645218013764  | AGIWUR19730 |
| CB4856                                                                 | HS | I | 7102216 | 7103392 | WBGene00009056 | F22D6.15 | F22D6.15 | 0.124598195586668    |             |
| AGIWUR11066;AGIWUR24483;AGIWUR44167                                    |    |   |         |         |                |          |          |                      |             |
| CB4856                                                                 | HS | I | 7105302 | 7106926 | WBGene00000636 | col-60   | F22D6.10 | -0.37387823207647    |             |
| AGIWUR14941                                                            |    |   |         |         |                |          |          |                      |             |
| CB4856                                                                 | HS | I | 7110240 | 7112287 | WBGene00001643 | gly-18   | F22D6.11 | 0.162061915233759    |             |
| AGIWUR10272                                                            |    |   |         |         |                |          |          |                      |             |
| CB4856                                                                 | HS | I | 7112903 | 7115001 | WBGene00001644 | gly-19   | F22D6.12 | 0.207234964716151    |             |
| AGIWUR30017;AGIWUR32849                                                |    |   |         |         |                |          |          |                      |             |
| CB4856                                                                 | HS | I | 7116092 | 7116889 | WBGene00010740 | K10D3.6  | K10D3.6  | 0.119943771389474    |             |
| AGIWUR34630;AGIWUR43978                                                |    |   |         |         |                |          |          |                      |             |
| CB4856                                                                 | HS | I | 7117808 | 7121545 | WBGene00001614 | glr-3    | K10D3.1  | 0.475703487001075    |             |
| AGIWUR1117;AGIWUR20863                                                 |    |   |         |         |                |          |          |                      |             |
| CB4856                                                                 | HS | I | 7121657 | 7122194 | WBGene00219281 | K10D3.8  | K10D3.8  | 0.101723854432689    | AGIWUR40179 |
| CB4856                                                                 | HS | I | 7122614 | 7128423 | WBGene00006753 | unc-14   | K10D3.2  | -0.153532628591936   |             |
| AGIWUR5593;AGIWUR16242;AGIWUR16992;AGIWUR17744;AGIWUR22269;AGIWUR37434 |    |   |         |         |                |          |          |                      |             |
| CB4856                                                                 | HS | I | 7132747 | 7134312 | WBGene00006394 | taf-11.2 | K10D3.3  | 0.0585180920096064   |             |
| AGIWUR23016;AGIWUR35624;AGIWUR37192                                    |    |   |         |         |                |          |          |                      |             |
| CB4856                                                                 | HS | I | 7134738 | 7139973 | WBGene00010738 | K10D3.4  | K10D3.4  | -0.00948122385469752 | AGIWUR12834 |
| CB4856                                                                 | HS | I | 7140278 | 7147230 | WBGene00010427 | hpo-11   | H37N21.1 | -0.0982738996940755  |             |
| AGIWUR9880;AGIWUR43725                                                 |    |   |         |         |                |          |          |                      |             |
| CB4856                                                                 | HS | I | 7149937 | 7151887 | WBGene00010645 | fec1-1   | K07G5.6  | 0.195303689258267    | AGIWUR6918  |
| CB4856                                                                 | HS | I | 7152463 | 7156868 | WBGene00010641 | crml-1   | K07G5.1  | 0.011274275029753    |             |
| AGIWUR923;AGIWUR2297;AGIWUR24001;AGIWUR40638                           |    |   |         |         |                |          |          |                      |             |
| CB4856                                                                 | HS | I | 7159714 | 7160917 | WBGene00006963 | xpa-1    | K07G5.2  | 0.140470148216536    | AGIWUR9973  |
| CB4856                                                                 | HS | I | 7161016 | 7166518 | WBGene00010642 | mks-6    | K07G5.3  | -0.0235420593792579  |             |
| AGIWUR17006;AGIWUR35676                                                |    |   |         |         |                |          |          |                      |             |
| CB4856                                                                 | HS | I | 7166932 | 7168783 | WBGene00010643 | K07G5.4  | K07G5.4  | -0.0389902550961132  | AGIWUR19839 |
| CB4856                                                                 | HS | I | 7169997 | 7172189 | WBGene00010644 | K07G5.5  | K07G5.5  | 0.256396660954564    | AGIWUR36732 |
| CB4856                                                                 | HS | I | 7172463 | 7174156 | WBGene00010870 | let-522  | M05B5.2  | 0.117757482411978    | AGIWUR13948 |
| CB4856                                                                 | HS | I | 7177953 | 7179430 | WBGene00010869 | M05B5.1  | M05B5.1  | -0.161576634825458   | AGIWUR15124 |
| CB4856                                                                 | HS | I | 7183053 | 7185709 | WBGene00010873 | trpa-2   | M05B5.6  | 0.22873141224121     | AGIWUR13437 |
| CB4856                                                                 | HS | I | 7185695 | 7188298 | WBGene00010871 | M05B5.3  | M05B5.3  | 0.108927033081809    | AGIWUR6763  |
| CB4856                                                                 | HS | I | 7188465 | 7190581 | WBGene00010872 | M05B5.4  | M05B5.4  | 0.0566318972628848   |             |
| AGIWUR6384;AGIWUR17510                                                 |    |   |         |         |                |          |          |                      |             |
| CB4856                                                                 | HS | I | 7190834 | 7193924 | WBGene00001949 | hlh-2    | M05B5.5  | -0.210221374720234   |             |
| AGIWUR8155;AGIWUR10611;AGIWUR18355                                     |    |   |         |         |                |          |          |                      |             |
| CB4856                                                                 | HS | I | 7202242 | 7203533 | WBGene00000637 | col-61   | C01H6.1  | -0.158220362275092   | AGIWUR17413 |
| CB4856                                                                 | HS | I | 7204541 | 7207717 | WBGene00007252 | mlt-2    | C01H6.2  | 0.221747835489452    | AGIWUR13393 |



|                                                                                                           |    |   |         |         |                |          |          |                       |             |
|-----------------------------------------------------------------------------------------------------------|----|---|---------|---------|----------------|----------|----------|-----------------------|-------------|
| CB4856                                                                                                    | HS | I | 7208028 | 7209866 | WBGene00007253 | C01H6.3  | C01H6.3  | 0.0701529646872325    | AGIWUR12247 |
| CB4856                                                                                                    | HS | I | 7210515 | 7212579 | WBGene00007254 | C01H6.4  | C01H6.4  | 0.106001452468115     |             |
| AGIWUR31742;AGIWUR32511                                                                                   |    |   |         |         |                |          |          |                       |             |
| CB4856                                                                                                    | HS | I | 7214745 | 7221781 | WBGene00003622 | nhr-23   | C01H6.5  | -0.2395975949053      |             |
| AGIWUR5349;AGIWUR8686;AGIWUR11774;AGIWUR22468;AGIWUR27636;AGIWUR31994;AGIWUR33632;AGIWUR34495;AGIWUR36432 |    |   |         |         |                |          |          |                       |             |
| CB4856                                                                                                    | HS | I | 7222296 | 7224381 | WBGene00007255 | cnm-4    | C01H6.6  | -0.000332297924351188 |             |
| AGIWUR485;AGIWUR20649;AGIWUR41720                                                                         |    |   |         |         |                |          |          |                       |             |
| CB4856                                                                                                    | HS | I | 7224656 | 7227767 | WBGene00007256 | swn-9    | C01H6.7  | 0.151284210325301     | AGIWUR16237 |
| CB4856                                                                                                    | HS | I | 7227859 | 7229434 | WBGene00007257 | C01H6.8  | C01H6.8  | 0.014548869175683     |             |
| AGIWUR18870;AGIWUR23323;AGIWUR27055;AGIWUR27094                                                           |    |   |         |         |                |          |          |                       |             |
| CB4856                                                                                                    | HS | I | 7229433 | 7233121 | WBGene00007258 | hasp-1   | C01H6.9  | 0.128262189317996     |             |
| AGIWUR21484;AGIWUR22965                                                                                   |    |   |         |         |                |          |          |                       |             |
| CB4856                                                                                                    | HS | I | 7233645 | 7234501 | WBGene00011062 | R06C7.2  | R06C7.2  | 0.021286281034012     | AGIWUR43578 |
| CB4856                                                                                                    | HS | I | 7235371 | 7238790 | WBGene00011061 | wago-1   | R06C7.1  | -0.260562874920423    |             |
| AGIWUR2605;AGIWUR31860                                                                                    |    |   |         |         |                |          |          |                       |             |
| CB4856                                                                                                    | HS | I | 7238994 | 7243967 | WBGene00000963 | dhp-1    | R06C7.3  | 0.18920494246116      |             |
| AGIWUR11332;AGIWUR32947                                                                                   |    |   |         |         |                |          |          |                       |             |
| CB4856                                                                                                    | HS | I | 7246849 | 7248741 | WBGene00011064 | adsl-1   | R06C7.5  | 0.0356327779521965    |             |
| AGIWUR2006;AGIWUR8376;AGIWUR29052;AGIWUR41518                                                             |    |   |         |         |                |          |          |                       |             |
| CB4856                                                                                                    | HS | I | 7248828 | 7251422 | WBGene00003041 | lin-61   | R06C7.7  | 0.0310393470444161    |             |
| AGIWUR29775;AGIWUR42249                                                                                   |    |   |         |         |                |          |          |                       |             |
| CB4856                                                                                                    | HS | I | 7251941 | 7255223 | WBGene00000275 | bub-1    | R06C7.8  | -0.143777842801249    | AGIWUR20021 |
| CB4856                                                                                                    | HS | I | 7255380 | 7258700 | WBGene00011066 | ztf-15   | R06C7.9  | -0.287716708537664    | AGIWUR32881 |
| CB4856                                                                                                    | HS | I | 7258915 | 7267117 | WBGene00002348 | myo-1    | R06C7.10 | -0.14120102207043     |             |
| AGIWUR24541                                                                                               |    |   |         |         |                |          |          |                       |             |
| CB4856                                                                                                    | HS | I | 7269179 | 7273005 | WBGene00006656 | twk-1    | F21C3.1  | 0.212163252433649     | AGIWUR16353 |
| CB4856                                                                                                    | HS | I | 7274282 | 7278573 | WBGene00009001 | tyr-3    | F21C3.2  | -0.0340046044036972   | AGIWUR19725 |
| CB4856                                                                                                    | HS | I | 7278802 | 7279609 | WBGene00077548 | F21C3.7  | F21C3.7  | 0.0630171512473048    |             |
| AGIWUR21181;AGIWUR29371;AGIWUR42066                                                                       |    |   |         |         |                |          |          |                       |             |
| CB4856                                                                                                    | HS | I | 7279658 | 7280501 | WBGene00009002 | hint-1   | F21C3.3  | 0.00737440671879597   | AGIWUR34525 |
| CB4856                                                                                                    | HS | I | 7280552 | 7282871 | WBGene00004324 | rde-2    | F21C3.4  | 0.0630271765470596    | AGIWUR37884 |
| CB4856                                                                                                    | HS | I | 7282964 | 7283818 | WBGene00009004 | pfd-6    | F21C3.5  | -0.0317482290838367   | AGIWUR14191 |
| CB4856                                                                                                    | HS | I | 7283907 | 7285762 | WBGene00009005 | F21C3.6  | F21C3.6  | 0.136882544164148     | AGIWUR6232  |
| CB4856                                                                                                    | HS | I | 7291272 | 7293331 | WBGene00008762 | ztf-2    | F13G3.1  | 0.172120769929944     | AGIWUR38805 |
| CB4856                                                                                                    | HS | I | 7294038 | 7295687 | WBGene00005131 | srd-53   | F13G3.2  | 0.309571527613341     | AGIWUR18194 |
| CB4856                                                                                                    | HS | I | 7295753 | 7297004 | WBGene00008770 | F13G3.12 | F13G3.12 | 0.0334973887574463    |             |
| AGIWUR44355                                                                                               |    |   |         |         |                |          |          |                       |             |
| CB4856                                                                                                    | HS | I | 7296913 | 7299983 | WBGene00008763 | F13G3.3  | F13G3.3  | 0.105899478456644     | AGIWUR37892 |
| CB4856                                                                                                    | HS | I | 7300062 | 7300913 | WBGene00008764 | dylt-1   | F13G3.4  | -0.194129564338344    |             |

AGIWUR23442;AGIWUR40549  
CB4856 HS I 7301007 7303227 WBGene00008765 ttx-7 F13G3.5 -0.0166983638607743  
AGIWUR26166;AGIWUR32307  
CB4856 HS I 7303300 7304690 WBGene00008766 F13G3.6 F13G3.6 -0.243917464188183 AGIWUR33952  
CB4856 HS I 7304918 7307010 WBGene00008767 F13G3.7 F13G3.7 0.0503056177143009  
AGIWUR7091;AGIWUR24366;AGIWUR27990  
CB4856 HS I 7307117 7308626 WBGene00008769 mrpl-13 F13G3.11 -0.0770801275202273  
AGIWUR7546;AGIWUR8371;AGIWUR24043;AGIWUR27410;AGIWUR37354;AGIWUR37886  
CB4856 HS I 7308603 7311939 WBGene00001136 eat-5 F13G3.8 0.270772368262045 AGIWUR15708  
CB4856 HS I 7312797 7313525 WBGene00003236 mif-3 F13G3.9 0.0206955826206006 AGIWUR6050  
CB4856 HS I 7313585 7314277 WBGene00008768 F13G3.10 F13G3.10 0.315530764642014  
AGIWUR10810  
CB4856 HS I 7317646 7318337 WBGene00009915 F52A8.1 F52A8.1 -0.181557757823065  
AGIWUR17070;AGIWUR32537  
CB4856 HS I 7318290 7321085 WBGene00001680 gpb-2 F52A8.2 -0.0569577041177673  
AGIWUR5017;AGIWUR30919  
CB4856 HS I 7322270 7324415 WBGene00009916 F52A8.3 F52A8.3 -0.136754131267609  
AGIWUR15576;AGIWUR38874;AGIWUR39839  
CB4856 HS I 7339204 7345949 WBGene00009917 glb-18 F52A8.4 -0.187918934898125 AGIWUR25073  
CB4856 HS I 7345932 7347427 WBGene00009918 gcsh-2 F52A8.5 0.147561952328116 AGIWUR45177  
CB4856 HS I 7347222 7350386 WBGene00009919 kbr1-1 F52A8.6 0.0815256731764782  
AGIWUR12791;AGIWUR16926;AGIWUR22612;AGIWUR29694;AGIWUR39394;AGIWUR40419  
CB4856 HS I 7350312 7352235 WBGene00002136 inx-14 F07A5.1 0.0733554116132034  
AGIWUR519;AGIWUR43444  
CB4856 HS I 7352415 7353701 WBGene00008541 F07A5.2 F07A5.2 0.194731471279608 AGIWUR31313  
CB4856 HS I 7354491 7357180 WBGene00008542 scav-6 F07A5.3 0.366834824049112 AGIWUR34532  
CB4856 HS I 7357180 7359100 WBGene00008543 F07A5.4 F07A5.4 -0.0127835784183263  
AGIWUR5394;AGIWUR32250;AGIWUR43624  
CB4856 HS I 7360199 7371534 WBGene00006306 sue-1 F07A5.5 0.0707130299658143  
AGIWUR7614;AGIWUR42629  
CB4856 HS I 7376604 7383197 WBGene00006754 unc-15 F07A5.7 0.129072290356701  
AGIWUR979;AGIWUR5073;AGIWUR7505;AGIWUR11096;AGIWUR28192;AGIWUR34853;AGIWUR44241  
CB4856 HS I 7384398 7388792 WBGene00007597 C15A11.2 C15A11.2 0.224375064394946  
AGIWUR25007  
CB4856 HS I 7389049 7395918 WBGene00004944 sol-1 C15A11.3 0.251506487954997  
AGIWUR36489  
CB4856 HS I 7398824 7401023 WBGene00007598 C15A11.4 C15A11.4 0.288851459646946  
AGIWUR3755  
CB4856 HS I 7404950 7408511 WBGene00007599 C15A11.7 C15A11.7 0.177726826996221

AGIWUR5504;AGIWUR10256;AGIWUR20323

|        |    |   |         |         |                |         |         |                    |             |
|--------|----|---|---------|---------|----------------|---------|---------|--------------------|-------------|
| CB4856 | HS | I | 7422785 | 7454088 | WBGene00006752 | unc-13  | ZK524.2 | 0.264305412238453  | AGIWUR25843 |
| CB4856 | HS | I | 7454660 | 7456953 | WBGene00004958 | spe-4   | ZK524.1 | 0.123590975879136  | AGIWUR9983  |
| CB4856 | HS | I | 7457153 | 7460756 | WBGene00003074 | lars-2  | ZK524.3 | 0.0698815716819698 | AGIWUR37098 |
| CB4856 | HS | I | 7460858 | 7466424 | WBGene00013994 | ZK524.4 | ZK524.4 | 0.112018006554066  |             |

AGIWUR7548;AGIWUR15682;AGIWUR18485;AGIWUR23215;AGIWUR24454;AGIWUR32072;AGIWUR39429;AGIWUR40886

|        |    |   |         |         |                |         |         |                    |             |
|--------|----|---|---------|---------|----------------|---------|---------|--------------------|-------------|
| CB4856 | HS | I | 7472611 | 7476946 | WBGene00012136 | T28F4.1 | T28F4.1 | 0.173860694139503  | AGIWUR23973 |
| CB4856 | HS | I | 7480108 | 7483392 | WBGene00012137 | asic-2  | T28F4.2 | 0.154352606323996  | AGIWUR28627 |
| CB4856 | HS | I | 7484159 | 7486302 | WBGene00012138 | T28F4.3 | T28F4.3 | 0.0989019159292823 |             |

AGIWUR3863;AGIWUR23076;AGIWUR41466

|        |    |   |         |         |                |         |         |                    |             |
|--------|----|---|---------|---------|----------------|---------|---------|--------------------|-------------|
| CB4856 | HS | I | 7486577 | 7490174 | WBGene00012139 | T28F4.4 | T28F4.4 | 0.39332542207204   | AGIWUR26867 |
| CB4856 | HS | I | 7491816 | 7492934 | WBGene00012140 | T28F4.5 | T28F4.5 | -0.206046109474078 |             |

AGIWUR3589;AGIWUR3804;AGIWUR5333;AGIWUR18046;AGIWUR25627;AGIWUR36240

|        |    |   |         |         |                |         |         |                     |             |
|--------|----|---|---------|---------|----------------|---------|---------|---------------------|-------------|
| CB4856 | HS | I | 7492788 | 7494700 | WBGene00012141 | T28F4.6 | T28F4.6 | -0.0707964085556849 | AGIWUR22039 |
| CB4856 | HS | I | 7495437 | 7503577 | WBGene00007042 | pbrm-1  | C26C6.1 | -0.179266111434909  |             |

AGIWUR4581;AGIWUR8361;AGIWUR8965;AGIWUR20774

|        |    |   |         |         |                |         |         |                    |  |
|--------|----|---|---------|---------|----------------|---------|---------|--------------------|--|
| CB4856 | HS | I | 7503576 | 7505580 | WBGene00007742 | C26C6.8 | C26C6.8 | 0.0116516597614398 |  |
|--------|----|---|---------|---------|----------------|---------|---------|--------------------|--|

AGIWUR24774;AGIWUR26471

|        |    |   |         |         |                |          |          |                     |             |
|--------|----|---|---------|---------|----------------|----------|----------|---------------------|-------------|
| CB4856 | HS | I | 7505951 | 7506693 | WBGene00007740 | C26C6.6  | C26C6.6  | 0.303617350149304   | AGIWUR1050  |
| CB4856 | HS | I | 7508721 | 7512593 | WBGene00007741 | glb-8    | C26C6.7  | -0.0595425803515868 | AGIWUR32542 |
| CB4856 | HS | I | 7512918 | 7513726 | WBGene00077553 | C26C6.10 | C26C6.10 | -0.18160379733026   |             |

AGIWUR8783;AGIWUR12734;AGIWUR16803;AGIWUR31486;AGIWUR45154

|        |    |   |         |         |                |         |         |                    |            |
|--------|----|---|---------|---------|----------------|---------|---------|--------------------|------------|
| CB4856 | HS | I | 7514117 | 7515126 | WBGene00007743 | C26C6.9 | C26C6.9 | 0.0768213816179859 | AGIWUR8485 |
| CB4856 | HS | I | 7522116 | 7526703 | WBGene00001648 | goa-1   | C26C6.2 | 0.0442006441289466 |            |

AGIWUR13528;AGIWUR17695;AGIWUR38775;AGIWUR41116

|        |    |   |         |         |                |         |         |                    |             |
|--------|----|---|---------|---------|----------------|---------|---------|--------------------|-------------|
| CB4856 | HS | I | 7527224 | 7531715 | WBGene00003552 | nas-36  | C26C6.3 | -0.290915444624739 | AGIWUR16556 |
| CB4856 | HS | I | 7532315 | 7535997 | WBGene00007739 | C26C6.4 | C26C6.4 | 0.589773682910604  | AGIWUR19863 |
| CB4856 | HS | I | 7536204 | 7542157 | WBGene00000938 | dcp-66  | C26C6.5 | -0.201858677638915 |             |

AGIWUR1334;AGIWUR14944;AGIWUR20106;AGIWUR32961;AGIWUR44832

|        |    |   |         |         |                |         |         |                     |             |
|--------|----|---|---------|---------|----------------|---------|---------|---------------------|-------------|
| CB4856 | HS | I | 7552975 | 7554553 | WBGene00012029 | T25G3.1 | T25G3.1 | -0.0800823818648873 | AGIWUR18597 |
| CB4856 | HS | I | 7554855 | 7559916 | WBGene00000496 | chs-1   | T25G3.2 | 0.127801506931744   | AGIWUR19128 |
| CB4856 | HS | I | 7559839 | 7562349 | WBGene00012030 | T25G3.3 | T25G3.3 | 0.127801193824673   |             |

AGIWUR3427;AGIWUR4620;AGIWUR5004;AGIWUR7005;AGIWUR12640;AGIWUR22358;AGIWUR23711;AGIWUR27358;AGIWUR31286;AGIWUR31532;AGIWUR40279

|        |    |   |         |         |                |         |         |                    |  |
|--------|----|---|---------|---------|----------------|---------|---------|--------------------|--|
| CB4856 | HS | I | 7564584 | 7567719 | WBGene00012031 | T25G3.4 | T25G3.4 | 0.0963304788312138 |  |
|--------|----|---|---------|---------|----------------|---------|---------|--------------------|--|

AGIWUR186;AGIWUR12674;AGIWUR13829;AGIWUR42301

|        |    |   |         |         |                |        |         |                    |  |
|--------|----|---|---------|---------|----------------|--------|---------|--------------------|--|
| CB4856 | HS | I | 7567775 | 7571250 | WBGene00008411 | mans-1 | D2030.1 | -0.114911286061082 |  |
|--------|----|---|---------|---------|----------------|--------|---------|--------------------|--|

AGIWUR1155;AGIWUR3168;AGIWUR4637;AGIWUR12685;AGIWUR20584;AGIWUR26209;AGIWUR26452;AGIWUR30258;AGIWUR38235;AGIWUR41375;AGIWUR42688

|                                                                                     |    |   |         |         |                |          |          |                     |             |
|-------------------------------------------------------------------------------------|----|---|---------|---------|----------------|----------|----------|---------------------|-------------|
| CB4856                                                                              | HS | I | 7574195 | 7578564 | WBGene00008412 | D2030.2  | D2030.2  | 0.162704284280284   |             |
| AGIWUR13197;AGIWUR43842;AGIWUR43976                                                 |    |   |         |         |                |          |          |                     |             |
| CB4856                                                                              | HS | I | 7578512 | 7580833 | WBGene00008413 | D2030.3  | D2030.3  | 0.0232364886842031  |             |
| AGIWUR13349;AGIWUR37279                                                             |    |   |         |         |                |          |          |                     |             |
| CB4856                                                                              | HS | I | 7580944 | 7581628 | WBGene00008414 | D2030.4  | D2030.4  | -0.162795375504981  | AGIWUR31361 |
| CB4856                                                                              | HS | I | 7582106 | 7583349 | WBGene00008415 | mce-1    | D2030.5  | -0.0159695070338675 |             |
| AGIWUR7421;AGIWUR9392;AGIWUR21647;AGIWUR32440;AGIWUR39252;AGIWUR44166               |    |   |         |         |                |          |          |                     |             |
| CB4856                                                                              | HS | I | 7583810 | 7585340 | WBGene00008421 | D2030.12 | D2030.12 | -0.343969254002407  |             |
| AGIWUR34170                                                                         |    |   |         |         |                |          |          |                     |             |
| CB4856                                                                              | HS | I | 7585324 | 7588367 | WBGene00004178 | prg-1    | D2030.6  | 0.0849002680974422  | AGIWUR10305 |
| CB4856                                                                              | HS | I | 7588580 | 7590565 | WBGene00008417 | D2030.7  | D2030.7  | 0.00839490873775262 | AGIWUR29435 |
| CB4856                                                                              | HS | I | 7590543 | 7591204 | WBGene00008420 | D2030.11 | D2030.11 | -0.31573343061466   |             |
| AGIWUR30935                                                                         |    |   |         |         |                |          |          |                     |             |
| CB4856                                                                              | HS | I | 7591288 | 7595198 | WBGene00008418 | D2030.8  | D2030.8  | 0.0162079084581048  | AGIWUR31838 |
| CB4856                                                                              | HS | I | 7596507 | 7602203 | WBGene00008419 | wdr-23   | D2030.9  | 0.0256098337782551  |             |
| AGIWUR1501;AGIWUR4494;AGIWUR8516;AGIWUR23572;AGIWUR25857;AGIWUR41529                |    |   |         |         |                |          |          |                     |             |
| CB4856                                                                              | HS | I | 7602307 | 7608245 | WBGene00000084 | aex-1    | D2030.10 | 0.134047937851737   |             |
| AGIWUR10350;AGIWUR16639;AGIWUR17325;AGIWUR19915;AGIWUR29156;AGIWUR30595;AGIWUR37321 |    |   |         |         |                |          |          |                     |             |
| CB4856                                                                              | HS | I | 7614176 | 7634135 | WBGene00003071 | lrp-1    | F29D11.1 | -0.197394264932855  |             |
| AGIWUR29566                                                                         |    |   |         |         |                |          |          |                     |             |
| CB4856                                                                              | HS | I | 7634494 | 7639780 | WBGene00009254 | capg-1   | F29D11.2 | -0.0619987748819728 |             |
| AGIWUR1032;AGIWUR21417                                                              |    |   |         |         |                |          |          |                     |             |
| CB4856                                                                              | HS | I | 7640338 | 7641767 | WBGene00009140 | F26A3.1  | F26A3.1  | 0.0777080412194708  |             |
| AGIWUR2059;AGIWUR17278;AGIWUR34924                                                  |    |   |         |         |                |          |          |                     |             |
| CB4856                                                                              | HS | I | 7642270 | 7643328 | WBGene00009141 | ncbp-2   | F26A3.2  | 0.0871761787677201  | AGIWUR28835 |
| CB4856                                                                              | HS | I | 7643431 | 7649777 | WBGene00004508 | rrf-1    | F26A3.8  | -0.0640334258207016 |             |
| AGIWUR5335;AGIWUR25229                                                              |    |   |         |         |                |          |          |                     |             |
| CB4856                                                                              | HS | I | 7650418 | 7656336 | WBGene00001214 | ego-1    | F26A3.3  | 0.0461176515569335  | AGIWUR44352 |
| CB4856                                                                              | HS | I | 7656978 | 7658291 | WBGene00009142 | F26A3.4  | F26A3.4  | 0.0364946568658109  |             |
| AGIWUR14432;AGIWUR20058;AGIWUR35343                                                 |    |   |         |         |                |          |          |                     |             |
| CB4856                                                                              | HS | I | 7667729 | 7669900 | WBGene00009143 | F26A3.5  | F26A3.5  | -0.148266368726972  | AGIWUR25193 |
| CB4856                                                                              | HS | I | 7670314 | 7672714 | WBGene00009144 | del-3    | F26A3.6  | -0.231620763048996  | AGIWUR30425 |
| CB4856                                                                              | HS | I | 7674734 | 7676127 | WBGene00009145 | F26A3.7  | F26A3.7  | -0.239299891249242  | AGIWUR23284 |
| CB4856                                                                              | HS | I | 7676668 | 7679061 | WBGene00011975 | T24B1.1  | T24B1.1  | -0.0260573498052459 | AGIWUR18387 |
| CB4856                                                                              | HS | I | 7679454 | 7683041 | WBGene00011972 | T23G11.7 | T23G11.7 | -0.143185584784154  |             |
| AGIWUR25258;AGIWUR36273                                                             |    |   |         |         |                |          |          |                     |             |
| CB4856                                                                              | HS | I | 7683341 | 7694210 | WBGene00011970 | r1bp-1   | T23G11.5 | -0.15952861003858   |             |
| AGIWUR25068                                                                         |    |   |         |         |                |          |          |                     |             |
| CB4856                                                                              | HS | I | 7694325 | 7695233 | WBGene00011969 | T23G11.4 | T23G11.4 | -0.0405912159217809 |             |

AGIWUR38478  
CB4856 HS I 7695661 7698227 WBGene00001595 gld-1 T23G11.3 -0.137856936410655  
AGIWUR3931;AGIWUR7691;AGIWUR8949;AGIWUR9950;AGIWUR13665;AGIWUR16668;AGIWUR17200;AGIWUR25690;AGIWUR30259;AGIWUR35080;AGIWUR37229;AGIWUR42811  
CB4856 HS I 7698301 7699037 WBGene00011973 T23G11.10 T23G11.10 0.217397079782549  
AGIWUR28833  
CB4856 HS I 7699543 7700958 WBGene00001647 gna-2 T23G11.2 0.140310741091426  
AGIWUR38355  
CB4856 HS I 7701365 7702053 WBGene00011968 T23G11.1 T23G11.1 0.252939286226914  
AGIWUR4190  
CB4856 HS I 7702429 7704584 WBGene00009187 F27D4.1 F27D4.1 -0.151454810474231 AGIWUR30511  
CB4856 HS I 7704565 7707049 WBGene00009188 lsy-22 F27D4.2 0.0363335600664554  
AGIWUR3195;AGIWUR10700;AGIWUR10886;AGIWUR11509;AGIWUR13652;AGIWUR16965;AGIWUR18957;AGIWUR21690;AGIWUR23469;AGIWUR26882;AGIWUR38016;AGIWUR41279  
CB4856 HS I 7723754 7724656 WBGene00009191 F27D4.7 F27D4.7 0.0522955945088199 AGIWUR32828  
CB4856 HS I 7725019 7727112 WBGene00009189 F27D4.4 F27D4.4 0.0591746374886384 AGIWUR45003  
CB4856 HS I 7727267 7729092 WBGene00006518 bckd-1B F27D4.5 0.0217474834503388  
AGIWUR6557;AGIWUR28991;AGIWUR29478  
CB4856 HS I 7729184 7729878 WBGene00077543 F27D4.8 F27D4.8 0.0666587070955558  
AGIWUR8217;AGIWUR12100;AGIWUR27032;AGIWUR32572;AGIWUR43980  
CB4856 HS I 7731121 7737995 WBGene00009190 F27D4.6 F27D4.6 0.0429059266212963  
AGIWUR9006;AGIWUR33873;AGIWUR45113  
CB4856 HS I 7755778 7756353 WBGene00010291 F58H10.1 F58H10.1 0.112332847335871  
AGIWUR742;AGIWUR9492;AGIWUR18367;AGIWUR22334;AGIWUR37012;AGIWUR40797;AGIWUR44521  
CB4856 HS I 7766532 7772231 WBGene00003818 nsf-1 H15N14.2 0.202867173048599  
AGIWUR5898;AGIWUR23021;AGIWUR40675  
CB4856 HS I 7773180 7777652 WBGene00000079 adr-1 H15N14.1 -0.209922947762273  
AGIWUR36832;AGIWUR41920  
CB4856 HS I 7786205 7793539 WBGene00008401 D2005.6 D2005.6 -0.469993326395262 AGIWUR22650  
CB4856 HS I 7800458 7801822 WBGene00003746 nlp-8 D2005.2 -0.108777236081782 AGIWUR14278  
CB4856 HS I 7813761 7815042 WBGene00008398 D2005.3 D2005.3 -0.175657263670832 AGIWUR39084  
CB4856 HS I 7819579 7820489 WBGene000086551 D2005.7 D2005.7 0.00437373582252043 AGIWUR22887  
CB4856 HS I 7820831 7826433 WBGene00008400 drh-3 D2005.5 0.228457175020669 AGIWUR6818  
CB4856 HS I 7826442 7831629 WBGene00009271 glna-3 F30F8.2 0.0359773189174319 AGIWUR18761  
CB4856 HS I 7832692 7835453 WBGene00009270 F30F8.1 F30F8.1 0.066114960962123 AGIWUR20487  
CB4856 HS I 7835814 7836967 WBGene00009272 gras-1 F30F8.3 0.017957724510465 AGIWUR42039  
CB4856 HS I 7837063 7840022 WBGene00009276 F30F8.9 F30F8.9 0.102008463864317  
AGIWUR12971;AGIWUR13463  
CB4856 HS I 7840442 7846923 WBGene00009277 F30F8.10 F30F8.10 -0.170515226541781

AGIWUR8230;AGIWUR31083;AGIWUR35509;AGIWUR43910

|        |    |   |         |         |                |         |         |                     |             |
|--------|----|---|---------|---------|----------------|---------|---------|---------------------|-------------|
| CB4856 | HS | I | 7847246 | 7848920 | WBGene00009274 | F30F8.5 | F30F8.5 | -0.0764174864133835 | AGIWUR42023 |
| CB4856 | HS | I | 7848975 | 7853631 | WBGene00006386 | taf-5   | F30F8.8 | 0.102713002618463   | AGIWUR13028 |
| CB4856 | HS | I | 7853750 | 7857850 | WBGene00000163 | apb-3   | R11A5.1 | 0.177735811295971   | AGIWUR978   |
| CB4856 | HS | I | 7857823 | 7859417 | WBGene00011230 | nud-2   | R11A5.2 | 0.0320795933369702  | AGIWUR24764 |
| CB4856 | HS | I | 7862736 | 7863553 | WBGene00011231 | R11A5.3 | R11A5.3 | -0.179608581149745  | AGIWUR16938 |
| CB4856 | HS | I | 7866136 | 7872080 | WBGene00011232 | pck-2   | R11A5.4 | 0.524038812180754   | AGIWUR14830 |
| CB4856 | HS | I | 7872057 | 7875554 | WBGene00011235 | suro-1  | R11A5.7 | -0.191525451589055  |             |

AGIWUR1591;AGIWUR9643;AGIWUR18550;AGIWUR25192;AGIWUR29119

|        |    |   |         |         |                |          |  |          |                    |
|--------|----|---|---------|---------|----------------|----------|--|----------|--------------------|
| CB4856 | HS | I | 7884319 | 7885769 | WBGene00010110 | F55D12.1 |  | F55D12.1 | -0.101409692380928 |
|--------|----|---|---------|---------|----------------|----------|--|----------|--------------------|

AGIWUR28202

|        |    |   |         |         |                |          |  |          |                   |
|--------|----|---|---------|---------|----------------|----------|--|----------|-------------------|
| CB4856 | HS | I | 7889310 | 7894864 | WBGene00010111 | F55D12.2 |  | F55D12.2 | 0.253088906955899 |
|--------|----|---|---------|---------|----------------|----------|--|----------|-------------------|

AGIWUR30725

|        |    |   |         |         |                |         |          |  |                     |
|--------|----|---|---------|---------|----------------|---------|----------|--|---------------------|
| CB4856 | HS | I | 7896125 | 7897725 | WBGene00010112 | nhr-191 | F55D12.3 |  | -0.0845494332050132 |
|--------|----|---|---------|---------|----------------|---------|----------|--|---------------------|

AGIWUR40247

|        |    |   |         |         |                |        |          |  |                   |
|--------|----|---|---------|---------|----------------|--------|----------|--|-------------------|
| CB4856 | HS | I | 7899037 | 7903334 | WBGene00006790 | unc-55 | F55D12.4 |  | 0.215941191822738 |
|--------|----|---|---------|---------|----------------|--------|----------|--|-------------------|

AGIWUR29846

|        |    |   |         |         |                |          |  |          |                    |
|--------|----|---|---------|---------|----------------|----------|--|----------|--------------------|
| CB4856 | HS | I | 7906826 | 7914269 | WBGene00010113 | F55D12.5 |  | F55D12.5 | 0.0607034584671062 |
|--------|----|---|---------|---------|----------------|----------|--|----------|--------------------|

AGIWUR6230

|        |    |   |         |         |                |         |         |                    |  |
|--------|----|---|---------|---------|----------------|---------|---------|--------------------|--|
| CB4856 | HS | I | 7913937 | 7918341 | WBGene00008991 | F20G4.2 | F20G4.2 | -0.113729547425471 |  |
|--------|----|---|---------|---------|----------------|---------|---------|--------------------|--|

AGIWUR833;AGIWUR9193;AGIWUR38969

|        |    |   |         |         |                |        |         |                    |             |
|--------|----|---|---------|---------|----------------|--------|---------|--------------------|-------------|
| CB4856 | HS | I | 7918443 | 7926338 | WBGene00008990 | smg1-1 | F20G4.1 | -0.134047304516121 | AGIWUR24802 |
|--------|----|---|---------|---------|----------------|--------|---------|--------------------|-------------|

|        |    |   |         |         |                |       |         |                    |  |
|--------|----|---|---------|---------|----------------|-------|---------|--------------------|--|
| CB4856 | HS | I | 7926623 | 7934577 | WBGene00003777 | nmy-2 | F20G4.3 | -0.084072796759294 |  |
|--------|----|---|---------|---------|----------------|-------|---------|--------------------|--|

AGIWUR1539;AGIWUR3678;AGIWUR4118;AGIWUR15521;AGIWUR21394;AGIWUR21683;AGIWUR26098;AGIWUR31723;AGIWUR36619;AGIWUR38685;AGIWUR42013;AGIWUR45084

|        |    |   |         |         |                |         |         |                    |             |
|--------|----|---|---------|---------|----------------|---------|---------|--------------------|-------------|
| CB4856 | HS | I | 7936223 | 7938328 | WBGene00011912 | T22C1.1 | T22C1.1 | -0.205502823453539 | AGIWUR12142 |
|--------|----|---|---------|---------|----------------|---------|---------|--------------------|-------------|

|        |    |   |         |         |                |         |         |                     |             |
|--------|----|---|---------|---------|----------------|---------|---------|---------------------|-------------|
| CB4856 | HS | I | 7938560 | 7940388 | WBGene00011914 | T22C1.3 | T22C1.3 | -0.0663557295168147 | AGIWUR24799 |
|--------|----|---|---------|---------|----------------|---------|---------|---------------------|-------------|

|        |    |   |         |         |                |         |         |                    |  |
|--------|----|---|---------|---------|----------------|---------|---------|--------------------|--|
| CB4856 | HS | I | 7940893 | 7941994 | WBGene00011916 | T22C1.5 | T22C1.5 | 0.0189079713271956 |  |
|--------|----|---|---------|---------|----------------|---------|---------|--------------------|--|

AGIWUR618;AGIWUR3363;AGIWUR8190;AGIWUR8908;AGIWUR9720;AGIWUR28946

|        |    |   |         |         |                |         |         |                    |             |
|--------|----|---|---------|---------|----------------|---------|---------|--------------------|-------------|
| CB4856 | HS | I | 7942719 | 7945588 | WBGene00011917 | T22C1.6 | T22C1.6 | -0.174747666645164 | AGIWUR19335 |
|--------|----|---|---------|---------|----------------|---------|---------|--------------------|-------------|

|        |    |   |         |         |                |       |         |                   |  |
|--------|----|---|---------|---------|----------------|-------|---------|-------------------|--|
| CB4856 | HS | I | 7946186 | 7951593 | WBGene00002179 | jph-1 | T22C1.7 | 0.014464603765731 |  |
|--------|----|---|---------|---------|----------------|-------|---------|-------------------|--|

AGIWUR3743;AGIWUR13804;AGIWUR18557;AGIWUR18715;AGIWUR22762;AGIWUR37124

|        |    |   |         |         |                |         |         |                    |             |
|--------|----|---|---------|---------|----------------|---------|---------|--------------------|-------------|
| CB4856 | HS | I | 7955977 | 7958505 | WBGene00011918 | T22C1.8 | T22C1.8 | -0.159872764428904 | AGIWUR19143 |
|--------|----|---|---------|---------|----------------|---------|---------|--------------------|-------------|

|        |    |   |         |         |                |         |         |                    |  |
|--------|----|---|---------|---------|----------------|---------|---------|--------------------|--|
| CB4856 | HS | I | 7958647 | 7960158 | WBGene00011919 | T22C1.9 | T22C1.9 | 0.0471896792875288 |  |
|--------|----|---|---------|---------|----------------|---------|---------|--------------------|--|

AGIWUR14647;AGIWUR17388;AGIWUR33828;AGIWUR40991

|        |    |   |         |         |                |          |  |          |                    |
|--------|----|---|---------|---------|----------------|----------|--|----------|--------------------|
| CB4856 | HS | I | 7960388 | 7961460 | WBGene00011921 | T22C1.12 |  | T22C1.12 | -0.207083546303698 |
|--------|----|---|---------|---------|----------------|----------|--|----------|--------------------|

AGIWUR39086

|        |    |   |         |         |                |       |          |  |                    |
|--------|----|---|---------|---------|----------------|-------|----------|--|--------------------|
| CB4856 | HS | I | 7962052 | 7972443 | WBGene00004318 | rbg-2 | T22C1.10 |  | -0.110494467777222 |
|--------|----|---|---------|---------|----------------|-------|----------|--|--------------------|

AGIWUR34380

|                                                                                               |    |   |         |         |                |           |          |                     |             |
|-----------------------------------------------------------------------------------------------|----|---|---------|---------|----------------|-----------|----------|---------------------|-------------|
| CB4856                                                                                        | HS | I | 7972473 | 7977078 | WBGene00010366 | H05L14.1  | H05L14.1 | 0.241729557727286   |             |
| AGIWUR3563                                                                                    |    |   |         |         |                |           |          |                     |             |
| CB4856                                                                                        | HS | I | 7980237 | 7993159 | WBGene00010367 | H05L14.2  | H05L14.2 | 0.127133792056171   |             |
| AGIWUR24280                                                                                   |    |   |         |         |                |           |          |                     |             |
| CB4856                                                                                        | HS | I | 7995738 | 7996669 | WBGene00008315 | C54G4.5   | C54G4.5  | 0.211655844044486   | AGIWUR19383 |
| CB4856                                                                                        | HS | I | 7996728 | 8003179 | WBGene00008314 | C54G4.4   | C54G4.4  | 0.0260531591064641  | AGIWUR2268  |
| CB4856                                                                                        | HS | I | 8005127 | 8006448 | WBGene00008313 | C54G4.3   | C54G4.3  | 0.0960774968570117  |             |
| AGIWUR11601;AGIWUR24007;AGIWUR43355                                                           |    |   |         |         |                |           |          |                     |             |
| CB4856                                                                                        | HS | I | 8006650 | 8009118 | WBGene00008312 | C54G4.2   | C54G4.2  | -0.136413002754988  | AGIWUR25325 |
| CB4856                                                                                        | HS | I | 8014412 | 8019572 | WBGene00008311 | rskn-2    | C54G4.1  | 0.00835865866348584 |             |
| AGIWUR7952;AGIWUR17948;AGIWUR28022                                                            |    |   |         |         |                |           |          |                     |             |
| CB4856                                                                                        | HS | I | 8019501 | 8022730 | WBGene00008317 | C54G4.7   | C54G4.7  | 0.0940021085747542  |             |
| AGIWUR32071;AGIWUR34039;AGIWUR43802                                                           |    |   |         |         |                |           |          |                     |             |
| CB4856                                                                                        | HS | I | 8022674 | 8024422 | WBGene00000869 | cyc-1     | C54G4.8  | -0.0132825409785156 |             |
| AGIWUR8905;AGIWUR9205;AGIWUR12984;AGIWUR23480;AGIWUR28992;AGIWUR36574                         |    |   |         |         |                |           |          |                     |             |
| CB4856                                                                                        | HS | I | 8024880 | 8026525 | WBGene00008318 | C54G4.9   | C54G4.9  | 0.0510229609246462  | AGIWUR42787 |
| CB4856                                                                                        | HS | I | 8026606 | 8028752 | WBGene00010560 | eif-2beta | K04G2.1  | -0.223932760220285  |             |
| AGIWUR9491;AGIWUR22485;AGIWUR24936;AGIWUR35928;AGIWUR40176                                    |    |   |         |         |                |           |          |                     |             |
| CB4856                                                                                        | HS | I | 8030959 | 8032886 | WBGene00045192 | aho-3     | K04G2.2  | -0.131327687737869  | AGIWUR36029 |
| CB4856                                                                                        | HS | I | 8032863 | 8035696 | WBGene00010562 | cdc-48.3  | K04G2.3  | -0.0496151553886541 |             |
| AGIWUR8959                                                                                    |    |   |         |         |                |           |          |                     |             |
| CB4856                                                                                        | HS | I | 8036944 | 8039752 | WBGene00010564 | ath-1     | K04G2.5  | -0.0975741101269083 |             |
| AGIWUR7565;AGIWUR22477;AGIWUR35481                                                            |    |   |         |         |                |           |          |                     |             |
| CB4856                                                                                        | HS | I | 8039879 | 8040526 | WBGene00010569 | scbp-2    | K04G2.11 | 0.0160414538302618  |             |
| AGIWUR10517                                                                                   |    |   |         |         |                |           |          |                     |             |
| CB4856                                                                                        | HS | I | 8040799 | 8043277 | WBGene00010565 | vac1-14   | K04G2.6  | 0.05782494134227    | AGIWUR459   |
| CB4856                                                                                        | HS | I | 8047345 | 8049351 | WBGene00010566 | K04G2.7   | K04G2.7  | 0.461877149181201   | AGIWUR13374 |
| CB4856                                                                                        | HS | I | 8050043 | 8055489 | WBGene00000156 | apr-1     | K04G2.8  | -0.158621627160472  |             |
| AGIWUR2386;AGIWUR8642;AGIWUR15749;AGIWUR23225;AGIWUR24248;AGIWUR24940;AGIWUR33692;AGIWUR41192 |    |   |         |         |                |           |          |                     |             |
| CB4856                                                                                        | HS | I | 8055459 | 8057029 | WBGene00010567 | K04G2.9   | K04G2.9  | 0.198016852117476   | AGIWUR13708 |
| CB4856                                                                                        | HS | I | 8057762 | 8060557 | WBGene00010568 | K04G2.10  | K04G2.10 | -0.387545876519175  |             |
| AGIWUR31263                                                                                   |    |   |         |         |                |           |          |                     |             |
| CB4856                                                                                        | HS | I | 8060791 | 8061793 | WBGene00008935 | F18C12.4  | F18C12.4 | -0.157551515153473  |             |
| AGIWUR11272                                                                                   |    |   |         |         |                |           |          |                     |             |
| CB4856                                                                                        | HS | I | 8062059 | 8081671 | WBGene00000485 | che-3     | F18C12.1 | 0.10461832185034    |             |
| AGIWUR19754;AGIWUR31660;AGIWUR42151                                                           |    |   |         |         |                |           |          |                     |             |
| CB4856                                                                                        | HS | I | 8083583 | 8095574 | WBGene00004378 | rme-8     | F18C12.2 | 0.0269620909597208  |             |
| AGIWUR1718;AGIWUR4249                                                                         |    |   |         |         |                |           |          |                     |             |
| CB4856                                                                                        | HS | I | 8095740 | 8098444 | WBGene00008934 | F18C12.3  | F18C12.3 | -0.0588453481346125 |             |

AGIWUR23155

|                                                                         |    |   |         |         |                |          |          |                      |             |
|-------------------------------------------------------------------------|----|---|---------|---------|----------------|----------|----------|----------------------|-------------|
| CB4856                                                                  | HS | I | 8103601 | 8109227 | WBGene00005009 | spr-4    | C09H6.1  | 0.184644294656531    | AGIWUR22535 |
| CB4856                                                                  | HS | I | 8109746 | 8119314 | WBGene00002999 | lin-10   | C09H6.2  | -0.0389700920637708  | AGIWUR34214 |
| CB4856                                                                  | HS | I | 8125801 | 8130091 | WBGene00003136 | mau-2    | C09H6.3  | 0.0877491940270971   | AGIWUR29187 |
| CB4856                                                                  | HS | I | 8133891 | 8135051 | WBGene00012113 | T28B8.1  | T28B8.1  | -0.0816833874455778  |             |
| AGIWUR234;AGIWUR7128;AGIWUR13741;AGIWUR18450;AGIWUR31586;AGIWUR35869    |    |   |         |         |                |          |          |                      |             |
| CB4856                                                                  | HS | I | 8139468 | 8142537 | WBGene00012116 | del-4    | T28B8.5  | 0.156590532849351    | AGIWUR41269 |
| CB4856                                                                  | HS | I | 8147400 | 8149723 | WBGene00002101 | ins-18   | T28B8.2  | 0.0266494989821133   | AGIWUR37506 |
| CB4856                                                                  | HS | I | 8150331 | 8151368 | WBGene00044122 | T28B8.6  | T28B8.6  | 0.177009545576603    |             |
| AGIWUR3015;AGIWUR12297;AGIWUR24914                                      |    |   |         |         |                |          |          |                      |             |
| CB4856                                                                  | HS | I | 8151985 | 8159732 | WBGene00012114 | T28B8.3  | T28B8.3  | 0.0111313945658154   | AGIWUR24289 |
| CB4856                                                                  | HS | I | 8160512 | 8168643 | WBGene00012115 | T28B8.4  | T28B8.4  | -0.0945997286874007  |             |
| AGIWUR7458;AGIWUR11534;AGIWUR12150;AGIWUR29517;AGIWUR36686              |    |   |         |         |                |          |          |                      |             |
| CB4856                                                                  | HS | I | 8172721 | 8173489 | WBGene00023413 | H31B20.2 | H31B20.2 | -0.153835929483097   |             |
| AGIWUR3366;AGIWUR40756                                                  |    |   |         |         |                |          |          |                      |             |
| CB4856                                                                  | HS | I | 8174888 | 8208740 | WBGene00008570 | kcn1-2   | F08A10.1 | 0.0569473099523972   |             |
| AGIWUR11841;AGIWUR13112;AGIWUR15015;AGIWUR27508;AGIWUR31988;AGIWUR43818 |    |   |         |         |                |          |          |                      |             |
| CB4856                                                                  | HS | I | 8208712 | 8210703 | WBGene00011379 | T02E1.7  | T02E1.7  | 0.119163939473875    | AGIWUR28236 |
| CB4856                                                                  | HS | I | 8210931 | 8212411 | WBGene00011378 | T02E1.6  | T02E1.6  | -0.148580503959483   | AGIWUR11385 |
| CB4856                                                                  | HS | I | 8212362 | 8218361 | WBGene00000967 | dhs-3    | T02E1.5  | -0.0490583714680994  |             |
| AGIWUR11837;AGIWUR21469                                                 |    |   |         |         |                |          |          |                      |             |
| CB4856                                                                  | HS | I | 8219998 | 8223009 | WBGene00011375 | T02E1.2  | T02E1.2  | -0.0223682625464185  | AGIWUR13580 |
| CB4856                                                                  | HS | I | 8224539 | 8226297 | WBGene00004966 | spe-12   | T02E1.1  | -0.0204212288624284  | AGIWUR35507 |
| CB4856                                                                  | HS | I | 8226509 | 8240637 | WBGene00013955 | kri-1    | ZK265.1  | -0.0449874857333183  |             |
| AGIWUR16436;AGIWUR37773;AGIWUR41475                                     |    |   |         |         |                |          |          |                      |             |
| CB4856                                                                  | HS | I | 8242104 | 8243572 | WBGene00013956 | ZK265.3  | ZK265.3  | -0.151298412002538   |             |
| AGIWUR13680;AGIWUR16508;AGIWUR18985                                     |    |   |         |         |                |          |          |                      |             |
| CB4856                                                                  | HS | I | 8243695 | 8244963 | WBGene00000639 | col-63   | ZK265.2  | -0.344696320677834   | AGIWUR22009 |
| CB4856                                                                  | HS | I | 8245722 | 8250896 | WBGene00000433 | ceh-8    | ZK265.4  | -0.0361808124906613  | AGIWUR32521 |
| CB4856                                                                  | HS | I | 8253452 | 8254961 | WBGene00044094 | fitm-2   | ZK265.9  | 0.0408395783131201   | AGIWUR37013 |
| CB4856                                                                  | HS | I | 8255348 | 8256312 | WBGene00013958 | ZK265.6  | ZK265.6  | 0.15078731318453     |             |
| AGIWUR7197;AGIWUR34833;AGIWUR42498                                      |    |   |         |         |                |          |          |                      |             |
| CB4856                                                                  | HS | I | 8256360 | 8258939 | WBGene00013957 | sre-23   | ZK265.5  | 0.123394110670893    |             |
| AGIWUR18546;AGIWUR38634                                                 |    |   |         |         |                |          |          |                      |             |
| CB4856                                                                  | HS | I | 8262039 | 8268990 | WBGene00013959 | ZK265.7  | ZK265.7  | 0.0745934803489252   | AGIWUR1840  |
| CB4856                                                                  | HS | I | 8270304 | 8275701 | WBGene00013960 | cut1-8   | ZK265.8  | -0.00525133493203489 |             |
| AGIWUR23965;AGIWUR30635                                                 |    |   |         |         |                |          |          |                      |             |
| CB4856                                                                  | HS | I | 8275611 | 8288124 | WBGene00011344 | T01G9.2  | T01G9.2  | -0.0307032884957561  |             |
| AGIWUR22898;AGIWUR27052                                                 |    |   |         |         |                |          |          |                      |             |



|                                                                         |    |   |         |         |                |          |         |                             |             |
|-------------------------------------------------------------------------|----|---|---------|---------|----------------|----------|---------|-----------------------------|-------------|
| CB4856                                                                  | HS | I | 8288959 | 8291077 | WBGene00002196 | kin-10   | T01G9.6 | -0.267873438812416          |             |
| AGIWUR14009;AGIWUR14529                                                 |    |   |         |         |                |          |         |                             |             |
| CB4856                                                                  | HS | I | 8291289 | 8293640 | WBGene00003788 | npp-2    | T01G9.4 | -0.203805139944169          | AGIWUR31441 |
| CB4856                                                                  | HS | I | 8294881 | 8296940 | WBGene00003183 | mei-1    | T01G9.5 | -0.210252541923206          |             |
| AGIWUR22653;AGIWUR25821;AGIWUR25892;AGIWUR43030                         |    |   |         |         |                |          |         |                             |             |
| CB4856                                                                  | HS | I | 8296917 | 8307566 | WBGene00009920 | abts-1   | F52B5.1 | 0.265861735824819           | AGIWUR30789 |
| CB4856                                                                  | HS | I | 8313228 | 8315432 | WBGene00009923 | F52B5.7  | F52B5.7 | -0.0182134110569176         | AGIWUR36330 |
| CB4856                                                                  | HS | I | 8315898 | 8318250 | WBGene00009921 | F52B5.2  | F52B5.2 | 0.136845594329426           |             |
| AGIWUR12506;AGIWUR37654;AGIWUR39112                                     |    |   |         |         |                |          |         |                             |             |
| CB4856                                                                  | HS | I | 8318347 | 8323987 | WBGene00009922 | F52B5.3  | F52B5.3 | -0.144942075045694          | AGIWUR15537 |
| CB4856                                                                  | HS | I | 8324120 | 8328853 | WBGene00000467 | cep-1    | F52B5.5 | -0.237737041873604          | AGIWUR34163 |
| CB4856                                                                  | HS | I | 8329062 | 8329684 | WBGene00004439 | rp1-25.2 |         | F52B5.6 -0.0863485817022749 |             |
| AGIWUR14531;AGIWUR21549;AGIWUR23326;AGIWUR37715;AGIWUR38978;AGIWUR41115 |    |   |         |         |                |          |         |                             |             |
| CB4856                                                                  | HS | I | 8330552 | 8332783 | WBGene00007911 | C34B7.1  | C34B7.1 | -0.0199354676515018         |             |
| AGIWUR2961;AGIWUR20830;AGIWUR24915                                      |    |   |         |         |                |          |         |                             |             |
| CB4856                                                                  | HS | I | 8333082 | 8336144 | WBGene00007914 | mys-4    | C34B7.4 | -0.343209883687855          | AGIWUR30760 |
| CB4856                                                                  | HS | I | 8336966 | 8341826 | WBGene00007912 | C34B7.2  | C34B7.2 | 0.0249136526619846          |             |
| AGIWUR3075;AGIWUR7142;AGIWUR24662;AGIWUR29512                           |    |   |         |         |                |          |         |                             |             |
| CB4856                                                                  | HS | I | 8341709 | 8346023 | WBGene00007913 | cyp-36A1 |         | C34B7.3 -0.040673638234324  |             |
| AGIWUR26344                                                             |    |   |         |         |                |          |         |                             |             |
| CB4856                                                                  | HS | I | 8353410 | 8357828 | WBGene00006531 | tba-5    | F16D3.1 | 0.221396648927362           |             |
| AGIWUR20180;AGIWUR43630                                                 |    |   |         |         |                |          |         |                             |             |
| CB4856                                                                  | HS | I | 8358254 | 8363858 | WBGene00004684 | rsd-6    | F16D3.2 | 0.00204838736767599         | AGIWUR25032 |
| CB4856                                                                  | HS | I | 8363954 | 8369917 | WBGene00008887 | tbcd-1   | F16D3.4 | 0.0705929457804544          | AGIWUR15687 |
| CB4856                                                                  | HS | I | 8377601 | 8392768 | WBGene00011827 | T19A6.1  | T19A6.1 | -0.0134060013711155         |             |
| AGIWUR416;AGIWUR7327;AGIWUR31170;AGIWUR37062                            |    |   |         |         |                |          |         |                             |             |
| CB4856                                                                  | HS | I | 8394728 | 8398626 | WBGene00003596 | ngp-1    | T19A6.2 | 0.0553158523990405          |             |
| AGIWUR14013;AGIWUR17089;AGIWUR36590                                     |    |   |         |         |                |          |         |                             |             |
| CB4856                                                                  | HS | I | 8398918 | 8400472 | WBGene00011828 | nepr-1   | T19A6.3 | -0.145895340793883          | AGIWUR20226 |
| CB4856                                                                  | HS | I | 8401389 | 8403939 | WBGene00011829 | T19A6.4  | T19A6.4 | 0.135487010549088           |             |
| AGIWUR3638;AGIWUR42337;AGIWUR43968                                      |    |   |         |         |                |          |         |                             |             |
| CB4856                                                                  | HS | I | 8404547 | 8405955 | WBGene00008529 | F02E9.3  | F02E9.3 | -0.084331986506843          |             |
| AGIWUR27790;AGIWUR41404                                                 |    |   |         |         |                |          |         |                             |             |
| CB4856                                                                  | HS | I | 8406828 | 8407645 | WBGene00008528 | F02E9.1  | F02E9.1 | 0.048473122829499           | AGIWUR14333 |
| CB4856                                                                  | HS | I | 8407802 | 8410804 | WBGene00003014 | lin-28   | F02E9.2 | 0.0197993616640701          |             |
| AGIWUR28453;AGIWUR32342                                                 |    |   |         |         |                |          |         |                             |             |
| CB4856                                                                  | HS | I | 8413253 | 8416195 | WBGene00008531 | F02E9.7  | F02E9.7 | -0.125701046174958          | AGIWUR27934 |
| CB4856                                                                  | HS | I | 8435958 | 8438638 | WBGene00008648 | F10D11.2 |         | F10D11.2 -0.085056184912693 |             |
| AGIWUR38994                                                             |    |   |         |         |                |          |         |                             |             |

|                                                                                    |   |         |         |                |          |          |                     |             |
|------------------------------------------------------------------------------------|---|---------|---------|----------------|----------|----------|---------------------|-------------|
| CB4856 HS                                                                          | I | 8439756 | 8440470 | WBGene00008649 | F10D11.3 | F10D11.3 | 0.083628183493925   |             |
| AGIWUR20074                                                                        |   |         |         |                |          |          |                     |             |
| CB4856 HS                                                                          | I | 8441543 | 8442452 | WBGene00008650 | F10D11.4 | F10D11.4 | -0.0853453659666314 |             |
| AGIWUR38060                                                                        |   |         |         |                |          |          |                     |             |
| CB4856 HS                                                                          | I | 8442695 | 8444934 | WBGene00008651 | F10D11.5 | F10D11.5 |                     |             |
| -0.00772413252311033 AGIWUR6906                                                    |   |         |         |                |          |          |                     |             |
| CB4856 HS                                                                          | I | 8445351 | 8451023 | WBGene00008652 | F10D11.6 | F10D11.6 | -0.0202464850830264 |             |
| AGIWUR25958                                                                        |   |         |         |                |          |          |                     |             |
| CB4856 HS                                                                          | I | 8460225 | 8463015 | WBGene00006844 | unc-120  | D1081.2  | 0.0454500500046233  | AGIWUR32798 |
| CB4856 HS                                                                          | I | 8463356 | 8469309 | WBGene00008381 | D1081.3  | D1081.3  | 0.129883064246402   | AGIWUR4534  |
| CB4856 HS                                                                          | I | 8469922 | 8471852 | WBGene00045508 | D1081.10 | D1081.10 |                     |             |
| -0.00901666021578196 AGIWUR32516;AGIWUR38018                                       |   |         |         |                |          |          |                     |             |
| CB4856 HS                                                                          | I | 8472556 | 8473481 | WBGene00050879 | D1081.11 | D1081.11 | 0.228303823910901   |             |
| AGIWUR24143                                                                        |   |         |         |                |          |          |                     |             |
| CB4856 HS                                                                          | I | 8474061 | 8474767 | WBGene00086554 | D1081.12 | D1081.12 | 0.00529442922080658 |             |
| AGIWUR6030;AGIWUR32272                                                             |   |         |         |                |          |          |                     |             |
| CB4856 HS                                                                          | I | 8481152 | 8482538 | WBGene00008383 | D1081.5  | D1081.5  | -0.17866632415506   | AGIWUR28444 |
| CB4856 HS                                                                          | I | 8482759 | 8485694 | WBGene00008384 | D1081.6  | D1081.6  | -0.0485973229563363 |             |
| AGIWUR9889;AGIWUR12027;AGIWUR23754;AGIWUR31661;AGIWUR41169                         |   |         |         |                |          |          |                     |             |
| CB4856 HS                                                                          | I | 8485876 | 8487043 | WBGene00008387 | D1081.9  | D1081.9  | -0.0328938496612068 | AGIWUR17852 |
| CB4856 HS                                                                          | I | 8487618 | 8490938 | WBGene00008385 | D1081.7  | D1081.7  | 0.218566638478332   | AGIWUR13110 |
| CB4856 HS                                                                          | I | 8491291 | 8495855 | WBGene00008386 | cdc-5L   | D1081.8  | 0.156834112274954   | AGIWUR1233  |
| CB4856 HS                                                                          | I | 8498114 | 8502412 | WBGene00000431 | ceh-6    | K02B12.1 | 0.0983814123081199  |             |
| AGIWUR39847                                                                        |   |         |         |                |          |          |                     |             |
| CB4856 HS                                                                          | I | 8509041 | 8511412 | WBGene00010496 | sec-12   | K02B12.3 | -0.348674143248161  |             |
| AGIWUR33956                                                                        |   |         |         |                |          |          |                     |             |
| CB4856 HS                                                                          | I | 8511600 | 8512505 | WBGene00010495 | K02B12.2 | K02B12.2 | 0.118851386796177   |             |
| AGIWUR10637                                                                        |   |         |         |                |          |          |                     |             |
| CB4856 HS                                                                          | I | 8513919 | 8517535 | WBGene00010497 | axl-1    | K02B12.4 | 0.0869150061562101  |             |
| AGIWUR10856;AGIWUR17622                                                            |   |         |         |                |          |          |                     |             |
| CB4856 HS                                                                          | I | 8517481 | 8526621 | WBGene00010498 | K02B12.5 | K02B12.5 | 0.0241976521826643  |             |
| AGIWUR18930                                                                        |   |         |         |                |          |          |                     |             |
| CB4856 HS                                                                          | I | 8529380 | 8531338 | WBGene00006976 | zhp-3    | K02B12.8 | 0.092777109534957   |             |
| AGIWUR5845                                                                         |   |         |         |                |          |          |                     |             |
| CB4856 HS                                                                          | I | 8531760 | 8534527 | WBGene00001677 | gpa-15   | M04C7.1  | 0.865794186007577   | AGIWUR18844 |
| CB4856 HS                                                                          | I | 8540025 | 8544415 | WBGene00010855 | M04C7.4  | M04C7.4  | 0.0546157023119891  | AGIWUR8927  |
| CB4856 HS                                                                          | I | 8546063 | 8546725 | WBGene00010854 | M04C7.3  | M04C7.3  | -0.372454171935024  | AGIWUR33468 |
| CB4856 HS                                                                          | I | 8549513 | 8570998 | WBGene00001651 | gon-2    | T01H8.5  | 0.00316943725231766 |             |
| AGIWUR3928;AGIWUR20657;AGIWUR27009;AGIWUR28841;AGIWUR29968;AGIWUR31752;AGIWUR33924 |   |         |         |                |          |          |                     |             |

|                                                                                                           |    |   |         |         |                |           |           |                      |             |
|-----------------------------------------------------------------------------------------------------------|----|---|---------|---------|----------------|-----------|-----------|----------------------|-------------|
| CB4856                                                                                                    | HS | I | 8571557 | 8573749 | WBGene00011353 | T01H8.2   | T01H8.2   | 0.244378500644324    | AGIWUR21519 |
| CB4856                                                                                                    | HS | I | 8573855 | 8580157 | WBGene00011352 | rskn-1    | T01H8.1   | 0.00458759503405659  |             |
| AGIWUR2751;AGIWUR11425;AGIWUR16452;AGIWUR19665;AGIWUR25198                                                |    |   |         |         |                |           |           |                      |             |
| CB4856                                                                                                    | HS | I | 8584081 | 8587505 | WBGene00000904 | daf-8     | R05D11.1  | -0.111517484065625   |             |
| AGIWUR2662;AGIWUR6435;AGIWUR14094                                                                         |    |   |         |         |                |           |           |                      |             |
| CB4856                                                                                                    | HS | I | 8591215 | 8591978 | WBGene00004305 | ran-4     | R05D11.3  | 0.00456972707514058  |             |
| AGIWUR243;AGIWUR4908                                                                                      |    |   |         |         |                |           |           |                      |             |
| CB4856                                                                                                    | HS | I | 8592092 | 8592926 | WBGene00011033 | R05D11.5  | R05D11.5  | 0.152746136643328    |             |
| AGIWUR32579                                                                                               |    |   |         |         |                |           |           |                      |             |
| CB4856                                                                                                    | HS | I | 8593027 | 8596225 | WBGene00011037 | R05D11.9  | R05D11.9  | 0.0420294989322194   |             |
| AGIWUR22806                                                                                               |    |   |         |         |                |           |           |                      |             |
| CB4856                                                                                                    | HS | I | 8596333 | 8598552 | WBGene00011034 | paxt-1    | R05D11.6  | 0.143552790668927    |             |
| AGIWUR40684                                                                                               |    |   |         |         |                |           |           |                      |             |
| CB4856                                                                                                    | HS | I | 8598658 | 8600923 | WBGene00011032 | R05D11.4  | R05D11.4  | -0.0979360443575614  |             |
| AGIWUR137;AGIWUR4605;AGIWUR11633;AGIWUR20068;AGIWUR30339;AGIWUR31404                                      |    |   |         |         |                |           |           |                      |             |
| CB4856                                                                                                    | HS | I | 8601339 | 8602034 | WBGene00011035 | snrp-27   | R05D11.7  | -0.119784186531124   |             |
| AGIWUR38331                                                                                               |    |   |         |         |                |           |           |                      |             |
| CB4856                                                                                                    | HS | I | 8602125 | 8605165 | WBGene00011036 | edc-3     | R05D11.8  | -0.110342612433893   |             |
| AGIWUR28087                                                                                               |    |   |         |         |                |           |           |                      |             |
| CB4856                                                                                                    | HS | I | 8606404 | 8608631 | WBGene00009664 | idha-1    | F43G9.1   | -0.108126326015988   |             |
| AGIWUR1214;AGIWUR8312;AGIWUR18719;AGIWUR29935;AGIWUR31785;AGIWUR34086;AGIWUR35501;AGIWUR37048;AGIWUR43639 |    |   |         |         |                |           |           |                      |             |
| CB4856                                                                                                    | HS | I | 8609925 | 8611066 | WBGene00009665 | lmd-1     | F43G9.2   | -0.0726947191578784  |             |
| AGIWUR9510;AGIWUR16545;AGIWUR21608;AGIWUR26157                                                            |    |   |         |         |                |           |           |                      |             |
| CB4856                                                                                                    | HS | I | 8612728 | 8615175 | WBGene00009666 | slc-25A42 | F43G9.3   | 0.00137405550437464  |             |
| AGIWUR38648                                                                                               |    |   |         |         |                |           |           |                      |             |
| CB4856                                                                                                    | HS | I | 8615388 | 8616420 | WBGene00009668 | cfim-1    | F43G9.5   | 0.108069591119246    | AGIWUR2016  |
| CB4856                                                                                                    | HS | I | 8617400 | 8618889 | WBGene00009670 | F43G9.8   | F43G9.8   | -0.0498106505020637  | AGIWUR17255 |
| CB4856                                                                                                    | HS | I | 8623017 | 8631184 | WBGene00001414 | fer-1     | F43G9.6   | -0.135718619596465   | AGIWUR32229 |
| CB4856                                                                                                    | HS | I | 8633925 | 8636044 | WBGene00000468 | ces-1     | F43G9.11  | -0.343227069343074   |             |
| AGIWUR40030                                                                                               |    |   |         |         |                |           |           |                      |             |
| CB4856                                                                                                    | HS | I | 8636123 | 8637971 | WBGene00000777 | cpn-1     | F43G9.9   | 0.430568219357816    | AGIWUR7568  |
| CB4856                                                                                                    | HS | I | 8638514 | 8640236 | WBGene00009671 | mfap-1    | F43G9.10  | -0.00160179857141252 |             |
| AGIWUR36870                                                                                               |    |   |         |         |                |           |           |                      |             |
| CB4856                                                                                                    | HS | I | 8640508 | 8644399 | WBGene00009672 | F43G9.12  | F43G9.12  | -0.0908404622627814  |             |
| AGIWUR3156;AGIWUR6132;AGIWUR7150;AGIWUR13796                                                              |    |   |         |         |                |           |           |                      |             |
| CB4856                                                                                                    | HS | I | 8644460 | 8646304 | WBGene00012150 | syx-17    | VF39H2L.1 | 0.100507030427778    |             |
| AGIWUR33011                                                                                               |    |   |         |         |                |           |           |                      |             |
| CB4856                                                                                                    | HS | I | 8646451 | 8651777 | WBGene00000890 | sig-7     | F39H2.2   | -0.0964298787058882  |             |
| AGIWUR6319;AGIWUR9396;AGIWUR10898;AGIWUR19443;AGIWUR40323;AGIWUR41019                                     |    |   |         |         |                |           |           |                      |             |

|                                                                         |    |   |         |         |                |          |          |                       |             |
|-------------------------------------------------------------------------|----|---|---------|---------|----------------|----------|----------|-----------------------|-------------|
| CB4856                                                                  | HS | I | 8658874 | 8659967 | WBGene00009562 | flp-22   | F39H2.1  | -0.0329327602783387   | AGIWUR19806 |
| CB4856                                                                  | HS | I | 8660820 | 8663127 | WBGene00045237 | mrt-1    | F39H2.5  | -0.205683559352796    | AGIWUR15553 |
| CB4856                                                                  | HS | I | 8663048 | 8664143 | WBGene00006377 | syp-3    | F39H2.4  | -0.0765975075723073   | AGIWUR18940 |
| CB4856                                                                  | HS | I | 8664925 | 8666499 | WBGene00009563 | F39H2.3  | F39H2.3  | 0.281168174889135     | AGIWUR1893  |
| CB4856                                                                  | HS | I | 8666595 | 8669792 | WBGene00010620 | K07A12.1 | K07A12.1 | 0.0942851869960748    |             |
| AGIWUR4177                                                              |    |   |         |         |                |          |          |                       |             |
| CB4856                                                                  | HS | I | 8676666 | 8681325 | WBGene00010621 | egg-6    | K07A12.2 | 0.155074176361246     |             |
| AGIWUR2537;AGIWUR6447;AGIWUR13392;AGIWUR18818;AGIWUR31594;AGIWUR44231   |    |   |         |         |                |          |          |                       |             |
| CB4856                                                                  | HS | I | 8683220 | 8687217 | WBGene00001990 | hot-5    | K07A12.6 | 0.00610343493712406   |             |
| AGIWUR18893                                                             |    |   |         |         |                |          |          |                       |             |
| CB4856                                                                  | HS | I | 8687634 | 8690937 | WBGene00010622 | K07A12.4 | K07A12.4 | -0.199318465632688    |             |
| AGIWUR12861;AGIWUR13225;AGIWUR40426                                     |    |   |         |         |                |          |          |                       |             |
| CB4856                                                                  | HS | I | 8691039 | 8692622 | WBGene00010624 | mrps-15  | K07A12.7 | 0.216481637563426     |             |
| AGIWUR271                                                               |    |   |         |         |                |          |          |                       |             |
| CB4856                                                                  | HS | I | 8692946 | 8693468 | WBGene00000209 | asg-1    | K07A12.3 | -0.218156349632292    |             |
| AGIWUR21398                                                             |    |   |         |         |                |          |          |                       |             |
| CB4856                                                                  | HS | I | 8693451 | 8695159 | WBGene00010623 | K07A12.5 | K07A12.5 | 0.0387498720543054    |             |
| AGIWUR40                                                                |    |   |         |         |                |          |          |                       |             |
| CB4856                                                                  | HS | I | 8695205 | 8696376 | WBGene00003953 | pbs-7    | F39H11.5 | -0.0611305669768685   |             |
| AGIWUR15172;AGIWUR32863;AGIWUR39094;AGIWUR40619                         |    |   |         |         |                |          |          |                       |             |
| CB4856                                                                  | HS | I | 8696603 | 8697596 | WBGene00009565 | F39H11.1 | F39H11.1 | -0.116892180300496    |             |
| AGIWUR20511                                                             |    |   |         |         |                |          |          |                       |             |
| CB4856                                                                  | HS | I | 8697923 | 8701971 | WBGene00006577 | tlf-1    | F39H11.2 | -0.000709687000815862 |             |
| AGIWUR18615;AGIWUR19525;AGIWUR27512;AGIWUR44922                         |    |   |         |         |                |          |          |                       |             |
| CB4856                                                                  | HS | I | 8702478 | 8705825 | WBGene00000409 | cdk-8    | F39H11.3 | -0.0788529405941603   |             |
| AGIWUR21102                                                             |    |   |         |         |                |          |          |                       |             |
| CB4856                                                                  | HS | I | 8705670 | 8724279 | WBGene00000527 | cle-1    | C36B1.1  | -0.0229196963114582   |             |
| AGIWUR3067;AGIWUR23941;AGIWUR27821;AGIWUR32409;AGIWUR40629;AGIWUR41723  |    |   |         |         |                |          |          |                       |             |
| CB4856                                                                  | HS | I | 8727214 | 8728497 | WBGene00003925 | pas-4    | C36B1.4  | 0.0259176630873199    |             |
| AGIWUR1803;AGIWUR20887;AGIWUR43761                                      |    |   |         |         |                |          |          |                       |             |
| CB4856                                                                  | HS | I | 8728687 | 8730054 | WBGene00007971 | rpb-3    | C36B1.3  | 0.0840853274360587    | AGIWUR39563 |
| CB4856                                                                  | HS | I | 8730156 | 8730922 | WBGene00044614 | C36B1.14 | C36B1.14 | 0.0396113511320877    |             |
| AGIWUR5597                                                              |    |   |         |         |                |          |          |                       |             |
| CB4856                                                                  | HS | I | 8730905 | 8732125 | WBGene00044120 | C36B1.13 | C36B1.13 | -0.0546870565818676   |             |
| AGIWUR3219;AGIWUR15030;AGIWUR36543                                      |    |   |         |         |                |          |          |                       |             |
| CB4856                                                                  | HS | I | 8732219 | 8733436 | WBGene00007973 | C36B1.6  | C36B1.6  | -0.0314320308078475   |             |
| AGIWUR10616;AGIWUR14532;AGIWUR16176;AGIWUR16962;AGIWUR17067;AGIWUR30963 |    |   |         |         |                |          |          |                       |             |
| CB4856                                                                  | HS | I | 8733413 | 8735717 | WBGene00007972 | prp-4    | C36B1.5  | 0.210784735094222     | AGIWUR6599  |
| CB4856                                                                  | HS | I | 8736213 | 8737038 | WBGene00007974 | dhfr-1   | C36B1.7  | 0.162102838557065     |             |

AGIWUR4679;AGIWUR12507;AGIWUR26096  
 CB4856 HS I 8737072 8742548 WBGene00007975 gls-1 C36B1.8 -0.0420290739609124  
 AGIWUR14858;AGIWUR18949  
 CB4856 HS I 8743849 8746925 WBGene00007976 C36B1.9 C36B1.9 -0.075800055682425 AGIWUR42991  
 CB4856 HS I 8749616 8751397 WBGene00007977 gska-3 C36B1.10 -0.133605134463007  
 AGIWUR27792  
 CB4856 HS I 8752236 8755678 WBGene00007979 imp-1 C36B1.12 0.0459514523940001  
 AGIWUR17031  
 CB4856 HS I 8755846 8757603 WBGene00007978 C36B1.11 C36B1.11 0.152693528463352  
 AGIWUR2671  
 CB4856 HS I 8758156 8759032 WBGene00008440 DY3.8 DY3.8 -0.127193890815263  
 AGIWUR28207;AGIWUR35048  
 CB4856 HS I 8759204 8759788 WBGene00006574 tin-13 DY3.1 -0.132223474342529  
 AGIWUR18692;AGIWUR32809  
 CB4856 HS I 8762986 8765633 WBGene00003052 lmn-1 DY3.2 0.0738614921211678  
 AGIWUR31393;AGIWUR32136;AGIWUR45124  
 CB4856 HS I 8768325 8771248 WBGene00006618 trt-1 DY3.4 -0.190239499958107 AGIWUR33053  
 CB4856 HS I 8771275 8777514 WBGene00004115 pqn-26 DY3.5 0.0998669930585052 AGIWUR42740  
 CB4856 HS I 8779731 8785415 WBGene00008439 mfb-1 DY3.6 -0.0518304593205361  
 AGIWUR12938;AGIWUR30025  
 CB4856 HS I 8792965 8797293 WBGene00006324 sup-17 DY3.7 -0.0439593831018268 AGIWUR24707  
 CB4856 HS I 8798785 8801694 WBGene00009453 F36A2.3 F36A2.3 0.288934844718629 AGIWUR5208  
 CB4856 HS I 8801612 8804697 WBGene00009452 F36A2.2 F36A2.2 0.0541538436256097 AGIWUR32436  
 CB4856 HS I 8804799 8808081 WBGene00009451 cids-2 F36A2.1 0.143792488912856 AGIWUR13864  
 CB4856 HS I 8808775 8813298 WBGene00009455 phip-1 F36A2.8 0.0180653491165543  
 AGIWUR9233;AGIWUR16121;AGIWUR31991;AGIWUR34048;AGIWUR40925  
 CB4856 HS I 8813761 8814979 WBGene00009454 F36A2.7 F36A2.7 -0.24346898089296  
 AGIWUR18419;AGIWUR27255  
 CB4856 HS I 8815554 8816193 WBGene00004484 rps-15 F36A2.6 0.13500448993663  
 AGIWUR10589;AGIWUR16337;AGIWUR20215;AGIWUR23222;AGIWUR31135;AGIWUR34061  
 CB4856 HS I 8816978 8821359 WBGene00009456 F36A2.9 F36A2.9 -0.216562226524655 AGIWUR32707  
 CB4856 HS I 8822188 8823637 WBGene00009458 F36A2.11 F36A2.11 0.123987609738336  
 AGIWUR14729  
 CB4856 HS I 8824401 8825628 WBGene00023490 F36A2.14 F36A2.14 0.124780970501819  
 AGIWUR38352  
 CB4856 HS I 8826167 8826670 WBGene00009459 F36A2.12 F36A2.12 0.00223369194202139  
 AGIWUR3383;AGIWUR3491;AGIWUR20812;AGIWUR24892  
 CB4856 HS I 8828048 8838719 WBGene00009460 ubr-5 F36A2.13 -0.0551431099844506  
 AGIWUR2272;AGIWUR9912;AGIWUR27719;AGIWUR32971;AGIWUR34063;AGIWUR44432

|                                                                        |   |         |         |                |          |          |                     |             |
|------------------------------------------------------------------------|---|---------|---------|----------------|----------|----------|---------------------|-------------|
| CB4856 HS                                                              | I | 8840634 | 8841163 | WBGene00009250 | F29D10.1 | F29D10.1 | 0.216484797738184   |             |
| AGIWUR6675                                                             |   |         |         |                |          |          |                     |             |
| CB4856 HS                                                              | I | 8841770 | 8842323 | WBGene00009251 | F29D10.2 | F29D10.2 | -0.360151438073315  |             |
| AGIWUR35680                                                            |   |         |         |                |          |          |                     |             |
| CB4856 HS                                                              | I | 8842552 | 8845595 | WBGene00009252 | F29D10.3 | F29D10.3 |                     |             |
| -0.00665630400297168 AGIWUR40719                                       |   |         |         |                |          |          |                     |             |
| CB4856 HS                                                              | I | 8845809 | 8851116 | WBGene00002035 | hum-1    | F29D10.4 | 0.0700459862672975  |             |
| AGIWUR26300                                                            |   |         |         |                |          |          |                     |             |
| CB4856 HS                                                              | I | 8853686 | 8861274 | WBGene00010137 | ztf-26   | F55H12.6 | -0.0457012736552427 |             |
| AGIWUR10402;AGIWUR26678;AGIWUR32959;AGIWUR43440                        |   |         |         |                |          |          |                     |             |
| CB4856 HS                                                              | I | 8863996 | 8865475 | WBGene00219283 | F55H12.7 | F55H12.7 | 0.0353266169897299  |             |
| AGIWUR10168;AGIWUR13074;AGIWUR22738;AGIWUR23038;AGIWUR37370            |   |         |         |                |          |          |                     |             |
| CB4856 HS                                                              | I | 8866907 | 8868293 | WBGene00010133 | F55H12.2 | F55H12.2 | -0.144655985008514  |             |
| AGIWUR12233                                                            |   |         |         |                |          |          |                     |             |
| CB4856 HS                                                              | I | 8869709 | 8871698 | WBGene00010136 | F55H12.5 | F55H12.5 | 0.101880174782231   |             |
| AGIWUR5794                                                             |   |         |         |                |          |          |                     |             |
| CB4856 HS                                                              | I | 8871791 | 8875253 | WBGene00004901 | snf-2    | F55H12.1 | 0.0166003890577153  |             |
| AGIWUR9487;AGIWUR19311                                                 |   |         |         |                |          |          |                     |             |
| CB4856 HS                                                              | I | 8876319 | 8893051 | WBGene00010134 | F55H12.3 | F55H12.3 | 0.0228349728547812  |             |
| AGIWUR9070                                                             |   |         |         |                |          |          |                     |             |
| CB4856 HS                                                              | I | 8893308 | 8894137 | WBGene00010135 | F55H12.4 | F55H12.4 | 0.159277378307619   |             |
| AGIWUR3304;AGIWUR5417;AGIWUR36249                                      |   |         |         |                |          |          |                     |             |
| CB4856 HS                                                              | I | 8897613 | 8901435 | WBGene00006765 | unc-29   | T08G11.5 | 0.0435131586604696  |             |
| AGIWUR16459                                                            |   |         |         |                |          |          |                     |             |
| CB4856 HS                                                              | I | 8902747 | 8905534 | WBGene00011631 | T08G11.4 | T08G11.4 | 0.0378781431232085  |             |
| AGIWUR14591                                                            |   |         |         |                |          |          |                     |             |
| CB4856 HS                                                              | I | 8905644 | 8916805 | WBGene00011629 | T08G11.1 | T08G11.1 | -0.180163042719239  |             |
| AGIWUR1995;AGIWUR15550;AGIWUR25916                                     |   |         |         |                |          |          |                     |             |
| CB4856 HS                                                              | I | 8919329 | 8920516 | WBGene00044684 | T08G11.2 | T08G11.2 | -0.0371479273514979 |             |
| AGIWUR9790;AGIWUR15705                                                 |   |         |         |                |          |          |                     |             |
| CB4856 HS                                                              | I | 8921190 | 8925327 | WBGene00011630 | T08G11.3 | T08G11.3 | -0.147538195191956  |             |
| AGIWUR19825                                                            |   |         |         |                |          |          |                     |             |
| CB4856 HS                                                              | I | 8928748 | 8931089 | WBGene00006641 | tsp-15   | F53B6.1  | 0.252948922383681   | AGIWUR2572  |
| CB4856 HS                                                              | I | 8931035 | 8942287 | WBGene00009958 | madd-4   | F53B6.2  | -0.177032501910748  |             |
| AGIWUR22167;AGIWUR26682;AGIWUR29905;AGIWUR37895;AGIWUR41106            |   |         |         |                |          |          |                     |             |
| CB4856 HS                                                              | I | 8945533 | 8946205 | WBGene00009964 | fip-6    | F53B6.9  | -0.0373595114781398 |             |
| AGIWUR7478;AGIWUR11131;AGIWUR11435;AGIWUR20023;AGIWUR25202;AGIWUR43705 |   |         |         |                |          |          |                     |             |
| CB4856 HS                                                              | I | 8946686 | 8947201 | WBGene00009963 | fipr-26  | F53B6.8  | 0.072331920895266   | AGIWUR33720 |
| CB4856 HS                                                              | I | 8947304 | 8948711 | WBGene00009959 | F53B6.4  | F53B6.4  | -0.150406230424215  |             |

AGIWUR31357;AGIWUR34697

|        |    |   |         |         |                |          |          |                     |             |
|--------|----|---|---------|---------|----------------|----------|----------|---------------------|-------------|
| CB4856 | HS | I | 8948778 | 8954394 | WBGene00009962 | F53B6.7  | F53B6.7  | 0.143942098157904   | AGIWUR3335  |
| CB4856 | HS | I | 8954559 | 8957482 | WBGene00009961 | cutl-7   | F53B6.6  | -0.0127736482739245 | AGIWUR18610 |
| CB4856 | HS | I | 8958061 | 8960889 | WBGene00043049 | F32H2.11 | F32H2.11 | -0.0391083631941544 |             |

AGIWUR30582

|        |    |   |         |         |                |          |          |                      |             |
|--------|----|---|---------|---------|----------------|----------|----------|----------------------|-------------|
| CB4856 | HS | I | 8962322 | 8966129 | WBGene00001568 | snpc-4   | F32H2.1  | -0.00257671398397008 | AGIWUR16674 |
| CB4856 | HS | I | 8966130 | 8967004 | WBGene00007026 | mdt-31   | F32H2.2  | -0.241850273744141   | AGIWUR34254 |
| CB4856 | HS | I | 8966985 | 8970158 | WBGene00004953 | spd-2    | F32H2.3  | -0.0836675105748768  | AGIWUR12491 |
| CB4856 | HS | I | 8970293 | 8971031 | WBGene00009346 | F32H2.10 | F32H2.10 | -0.330325860425798   |             |

AGIWUR31683

|        |    |   |         |         |                |          |          |                   |             |
|--------|----|---|---------|---------|----------------|----------|----------|-------------------|-------------|
| CB4856 | HS | I | 8971139 | 8973063 | WBGene00009341 | thoc-3   | F32H2.4  | -0.17909587543217 | AGIWUR33313 |
| CB4856 | HS | I | 8973066 | 8974575 | WBGene00050880 | F32H2.12 | F32H2.12 | 0.115085748388146 |             |

AGIWUR1994;AGIWUR33278

|        |    |   |         |         |                |        |         |                     |  |
|--------|----|---|---------|---------|----------------|--------|---------|---------------------|--|
| CB4856 | HS | I | 8975384 | 8986534 | WBGene00009342 | fasn-1 | F32H2.5 | 0.00304586663981787 |  |
|--------|----|---|---------|---------|----------------|--------|---------|---------------------|--|

AGIWUR11210;AGIWUR43314

|        |    |   |         |         |                |         |         |                    |             |
|--------|----|---|---------|---------|----------------|---------|---------|--------------------|-------------|
| CB4856 | HS | I | 8989938 | 8993461 | WBGene00009345 | F32H2.8 | F32H2.8 | 0.032018692330011  | AGIWUR40399 |
| CB4856 | HS | I | 8994002 | 8998593 | WBGene00006532 | tba-6   | F32H2.9 | 0.0270608327097435 |             |

AGIWUR6102;AGIWUR8788;AGIWUR19549

|        |    |   |         |         |                |         |         |                     |             |
|--------|----|---|---------|---------|----------------|---------|---------|---------------------|-------------|
| CB4856 | HS | I | 8998532 | 8999564 | WBGene00009343 | F32H2.6 | F32H2.6 | -0.169755866793718  | AGIWUR6481  |
| CB4856 | HS | I | 9000097 | 9001721 | WBGene00009480 | F36F2.7 | F36F2.7 | -0.196548266441895  | AGIWUR19884 |
| CB4856 | HS | I | 9001913 | 9003963 | WBGene00009478 | syx-7   | F36F2.4 | 0.199360294306562   | AGIWUR4349  |
| CB4856 | HS | I | 9004513 | 9008708 | WBGene00009479 | fcp-1   | F36F2.6 | -0.0784230622312863 |             |

AGIWUR1634;AGIWUR1989;AGIWUR12067;AGIWUR12943;AGIWUR19990;AGIWUR23535;AGIWUR23931;AGIWUR33444;AGIWUR33850;AGIWUR35249;AGIWUR37967;AGIWUR38798

|        |    |   |         |         |                |        |         |                    |  |
|--------|----|---|---------|---------|----------------|--------|---------|--------------------|--|
| CB4856 | HS | I | 9009260 | 9013885 | WBGene00009477 | rbpl-1 | F36F2.3 | -0.013587597887204 |  |
|--------|----|---|---------|---------|----------------|--------|---------|--------------------|--|

AGIWUR8448;AGIWUR9874;AGIWUR11081;AGIWUR20523;AGIWUR42216;AGIWUR44180

|        |    |   |         |         |                |         |         |                     |             |
|--------|----|---|---------|---------|----------------|---------|---------|---------------------|-------------|
| CB4856 | HS | I | 9015357 | 9015711 | WBGene00009481 | F36F2.8 | F36F2.8 | -0.0212308076081662 | AGIWUR18272 |
| CB4856 | HS | I | 9016755 | 9017994 | WBGene00009476 | F36F2.2 | F36F2.2 | 0.323037001136761   | AGIWUR2277  |
| CB4856 | HS | I | 9018623 | 9020304 | WBGene00009475 | F36F2.1 | F36F2.1 | -0.0665195521345936 | AGIWUR26314 |
| CB4856 | HS | I | 9020945 | 9025553 | WBGene00006525 | tax-2   | F36F2.5 | 0.0144237696667968  | AGIWUR29674 |
| CB4856 | HS | I | 9025779 | 9031232 | WBGene00007854 | C31H5.1 | C31H5.1 | 0.1412894618388     | AGIWUR2925  |
| CB4856 | HS | I | 9031274 | 9036695 | WBGene00000058 | acr-19  | C31H5.3 | 0.145944668690123   | AGIWUR7763  |
| CB4856 | HS | I | 9041374 | 9041988 | WBGene00007858 | C31H5.7 | C31H5.7 | 0.162081658531159   | AGIWUR33167 |
| CB4856 | HS | I | 9042270 | 9042599 | WBGene00007855 | C31H5.4 | C31H5.4 | -0.026257764305381  | AGIWUR26962 |
| CB4856 | HS | I | 9043315 | 9046889 | WBGene00007857 | C31H5.6 | C31H5.6 | 0.345412254632517   | AGIWUR44224 |
| CB4856 | HS | I | 9048188 | 9049427 | WBGene00007856 | C31H5.5 | C31H5.5 | -0.181409758435567  | AGIWUR15377 |
| CB4856 | HS | I | 9049460 | 9055457 | WBGene00001843 | hgo-1   | W06D4.1 | 0.112357181186056   | AGIWUR36152 |
| CB4856 | HS | I | 9056293 | 9057822 | WBGene00012296 | spe-46  | W06D4.2 | -0.157866229720424  |             |

AGIWUR906;AGIWUR18763;AGIWUR24886

|                                                                                                                                                                                                                                |    |   |         |         |                |          |          |                      |             |
|--------------------------------------------------------------------------------------------------------------------------------------------------------------------------------------------------------------------------------|----|---|---------|---------|----------------|----------|----------|----------------------|-------------|
| CB4856                                                                                                                                                                                                                         | HS | I | 9058852 | 9060473 | WBGene00012297 | W06D4.3  | W06D4.3  | 0.102194882067911    |             |
| AGIWUR9186;AGIWUR28315;AGIWUR40836                                                                                                                                                                                             |    |   |         |         |                |          |          |                      |             |
| CB4856                                                                                                                                                                                                                         | HS | I | 9060493 | 9063160 | WBGene00012298 | prmt-7   | W06D4.4  | 0.160983904895852    | AGIWUR3456  |
| CB4856                                                                                                                                                                                                                         | HS | I | 9063588 | 9064403 | WBGene00006503 | snx-3    | W06D4.5  | -0.0625268460347392  | AGIWUR28774 |
| CB4856                                                                                                                                                                                                                         | HS | I | 9065087 | 9070264 | WBGene00004298 | rad-54   | W06D4.6  | 0.00369192523032424  |             |
| AGIWUR159;AGIWUR21282;AGIWUR26162                                                                                                                                                                                              |    |   |         |         |                |          |          |                      |             |
| CB4856                                                                                                                                                                                                                         | HS | I | 9070247 | 9075077 | WBGene00011531 | rsbp-1   | T06D10.1 | 0.0369892857661416   |             |
| AGIWUR241;AGIWUR1536;AGIWUR4469;AGIWUR5365;AGIWUR12649;AGIWUR14014;AGIWUR18637;AGIWUR23781;AGIWUR24397;AGIWUR26444;AGIWUR26777;AGIWUR40003;AGIWUR43991                                                                         |    |   |         |         |                |          |          |                      |             |
| CB4856                                                                                                                                                                                                                         | HS | I | 9077565 | 9080024 | WBGene00011532 | chaf-1   | T06D10.2 | -0.0576271078308572  |             |
| AGIWUR26057                                                                                                                                                                                                                    |    |   |         |         |                |          |          |                      |             |
| CB4856                                                                                                                                                                                                                         | HS | I | 9095957 | 9100862 | WBGene00003182 | mef-2    | W10D5.1  | -0.00570258998066198 |             |
| AGIWUR1934;AGIWUR2035;AGIWUR36060;AGIWUR40628                                                                                                                                                                                  |    |   |         |         |                |          |          |                      |             |
| CB4856                                                                                                                                                                                                                         | HS | I | 9100846 | 9107939 | WBGene00001574 | gei-17   | W10D5.3  | -0.0394577050250584  |             |
| AGIWUR1675;AGIWUR2117;AGIWUR7167;AGIWUR7510;AGIWUR9339;AGIWUR11898;AGIWUR12040;AGIWUR15245;AGIWUR21852;AGIWUR23780;AGIWUR23859;AGIWUR28852;AGIWUR32519;AGIWUR36685;AGIWUR37731;AGIWUR37792;AGIWUR37857;AGIWUR39942;AGIWUR42717 |    |   |         |         |                |          |          |                      |             |
| CB4856                                                                                                                                                                                                                         | HS | I | 9108173 | 9110918 | WBGene00012376 | nduf-7   | W10D5.2  | 0.21559014376963     |             |
| AGIWUR9870;AGIWUR19362;AGIWUR25841;AGIWUR39958;AGIWUR42432                                                                                                                                                                     |    |   |         |         |                |          |          |                      |             |
| CB4856                                                                                                                                                                                                                         | HS | I | 9118115 | 9122398 | WBGene00014115 | gld-4    | ZK858.1  | 0.0536919945619267   |             |
| AGIWUR8183;AGIWUR20297;AGIWUR27306                                                                                                                                                                                             |    |   |         |         |                |          |          |                      |             |
| CB4856                                                                                                                                                                                                                         | HS | I | 9123182 | 9124509 | WBGene00014116 | ZK858.2  | ZK858.2  | -0.0737351632528451  | AGIWUR39603 |
| CB4856                                                                                                                                                                                                                         | HS | I | 9124664 | 9126155 | WBGene00014121 | ZK858.8  | ZK858.8  | -0.167246285263612   | AGIWUR34245 |
| CB4856                                                                                                                                                                                                                         | HS | I | 9126140 | 9127101 | WBGene00014117 | clcc-91  | ZK858.3  | 0.209299879605229    | AGIWUR32994 |
| CB4856                                                                                                                                                                                                                         | HS | I | 9132538 | 9135753 | WBGene00003209 | mel-26   | ZK858.4  | -0.180661043810062   | AGIWUR17332 |
| CB4856                                                                                                                                                                                                                         | HS | I | 9135764 | 9138361 | WBGene00014118 | ZK858.5  | ZK858.5  | -0.191138027491396   | AGIWUR21277 |
| CB4856                                                                                                                                                                                                                         | HS | I | 9138267 | 9145632 | WBGene00014119 | ZK858.6  | ZK858.6  | 0.0411742551374523   | AGIWUR1164  |
| CB4856                                                                                                                                                                                                                         | HS | I | 9149474 | 9153252 | WBGene00010421 | slc-36.4 | H32K16.1 | 0.161219024741381    |             |
| AGIWUR12001;AGIWUR14839;AGIWUR39085                                                                                                                                                                                            |    |   |         |         |                |          |          |                      |             |
| CB4856                                                                                                                                                                                                                         | HS | I | 9154228 | 9154789 | WBGene00010422 | H32K16.2 | H32K16.2 | 0.1901738219638      |             |
| AGIWUR19106                                                                                                                                                                                                                    |    |   |         |         |                |          |          |                      |             |
| CB4856                                                                                                                                                                                                                         | HS | I | 9155513 | 9157411 | WBGene00009129 | F25H5.7  | F25H5.7  | -0.089929246250378   | AGIWUR22773 |
| CB4856                                                                                                                                                                                                                         | HS | I | 9159015 | 9159757 | WBGene00009128 | mrpl-54  | F25H5.6  | 0.0823828621171323   | AGIWUR41190 |
| CB4856                                                                                                                                                                                                                         | HS | I | 9159938 | 9163261 | WBGene00009127 | clsp-1   | F25H5.5  | 0.0883996486522332   | AGIWUR34600 |
| CB4856                                                                                                                                                                                                                         | HS | I | 9163531 | 9166952 | WBGene00001167 | eef-2    | F25H5.4  | -0.232187878480181   |             |
| AGIWUR2082;AGIWUR2145;AGIWUR3539;AGIWUR3615;AGIWUR6960;AGIWUR18490;AGIWUR19460;AGIWUR20868;AGIWUR29742;AGIWUR34740;AGIWUR37900;AGIWUR42189;AGIWUR44830                                                                         |    |   |         |         |                |          |          |                      |             |
| CB4856                                                                                                                                                                                                                         | HS | I | 9168432 | 9177488 | WBGene00009126 | pyk-1    | F25H5.3  | -0.130485105489243   |             |
| AGIWUR13861;AGIWUR19221;AGIWUR20544;AGIWUR20814                                                                                                                                                                                |    |   |         |         |                |          |          |                      |             |



|                                                                                                                                  |    |   |         |         |                |         |           |                      |             |
|----------------------------------------------------------------------------------------------------------------------------------|----|---|---------|---------|----------------|---------|-----------|----------------------|-------------|
| CB4856                                                                                                                           | HS | I | 9177664 | 9178703 | WBGene00009130 | F25H5.8 | F25H5.8   | 0.00606169957696068  | AGIWUR17782 |
| CB4856                                                                                                                           | HS | I | 9179941 | 9181119 | WBGene00009125 | F25H5.2 | F25H5.2   | 0.236630802246175    | AGIWUR3832  |
| CB4856                                                                                                                           | HS | I | 9181819 | 9220766 | WBGene00006407 | lim-9   | F25H5.1   | 0.161954082780075    |             |
| AGIWUR4251;AGIWUR5434;AGIWUR8051;AGIWUR12308;AGIWUR12581;AGIWUR14843;AGIWUR27883;AGIWUR28401;AGIWUR34213;AGIWUR37608;AGIWUR40066 |    |   |         |         |                |         |           |                      |             |
| CB4856                                                                                                                           | HS | I | 9221834 | 9226390 | WBGene00008107 | aspm-1  | C45G3.1   | 0.0401459409059304   |             |
| AGIWUR10033;AGIWUR19229;AGIWUR22943;AGIWUR26742;AGIWUR35966;AGIWUR38022                                                          |    |   |         |         |                |         |           |                      |             |
| CB4856                                                                                                                           | HS | I | 9226905 | 9228184 | WBGene00001590 | C45G3.3 | C45G3.3   | 0.144784741613577    |             |
| AGIWUR3937;AGIWUR4120;AGIWUR8367;AGIWUR41921                                                                                     |    |   |         |         |                |         |           |                      |             |
| CB4856                                                                                                                           | HS | I | 9228163 | 9232097 | WBGene00044008 | gip-2   | C45G3.5   | 0.106341578927676    | AGIWUR39028 |
| CB4856                                                                                                                           | HS | I | 9232071 | 9233560 | WBGene00000147 | aph-1   | VF36H2L.1 | -0.173179020929798   |             |
| AGIWUR20506                                                                                                                      |    |   |         |         |                |         |           |                      |             |
| CB4856                                                                                                                           | HS | I | 9234174 | 9245924 | WBGene00009498 | tat-5   | F36H2.1   | -0.130551626366948   | AGIWUR33349 |
| CB4856                                                                                                                           | HS | I | 9246028 | 9249383 | WBGene00009499 | ent-6   | F36H2.2   | 0.224955423390218    | AGIWUR33843 |
| CB4856                                                                                                                           | HS | I | 9249542 | 9250488 | WBGene00044247 | F36H2.4 | F36H2.4   | 0.0511737856765428   |             |
| AGIWUR1039;AGIWUR13806;AGIWUR14703;AGIWUR14903                                                                                   |    |   |         |         |                |         |           |                      |             |
| CB4856                                                                                                                           | HS | I | 9251838 | 9261657 | WBGene00009500 | F36H2.3 | F36H2.3   | -0.00268368533507157 |             |
| AGIWUR5375;AGIWUR18730                                                                                                           |    |   |         |         |                |         |           |                      |             |
| CB4856                                                                                                                           | HS | I | 9265951 | 9270919 | WBGene00008779 | F14B4.1 | F14B4.1   | -0.169089378373689   | AGIWUR35273 |
| CB4856                                                                                                                           | HS | I | 9271443 | 9278689 | WBGene00008780 | hxx-1   | F14B4.2   | -0.0710094666185519  |             |
| AGIWUR9996;AGIWUR14587;AGIWUR24932                                                                                               |    |   |         |         |                |         |           |                      |             |
| CB4856                                                                                                                           | HS | I | 9280963 | 9286577 | WBGene00008781 | rpoa-2  | F14B4.3   | -0.120429095189099   | AGIWUR24437 |
| CB4856                                                                                                                           | HS | I | 9287437 | 9289770 | WBGene00009173 | prom-1  | F26H9.1   | -0.193180114573391   | AGIWUR21546 |
| CB4856                                                                                                                           | HS | I | 9289753 | 9294035 | WBGene00009174 | F26H9.2 | F26H9.2   | -0.227494356501724   |             |
| AGIWUR18009;AGIWUR21415;AGIWUR26246                                                                                              |    |   |         |         |                |         |           |                      |             |
| CB4856                                                                                                                           | HS | I | 9305751 | 9306844 | WBGene00009176 | nmat-2  | F26H9.4   | 0.0396611934340427   | AGIWUR38957 |
| CB4856                                                                                                                           | HS | I | 9308442 | 9310221 | WBGene00004268 | rab-5   | F26H9.6   | 0.0389174858128456   |             |
| AGIWUR6586;AGIWUR20214;AGIWUR26895;AGIWUR43354                                                                                   |    |   |         |         |                |         |           |                      |             |
| CB4856                                                                                                                           | HS | I | 9310329 | 9312641 | WBGene00006732 | uev-3   | F26H9.7   | -0.0913519616951639  | AGIWUR29491 |
| CB4856                                                                                                                           | HS | I | 9312635 | 9314488 | WBGene00009177 | F26H9.5 | F26H9.5   | 0.1309969424583      | AGIWUR38121 |
| CB4856                                                                                                                           | HS | I | 9317736 | 9327279 | WBGene00009178 | uggt-2  | F26H9.8   | 0.0313297325842994   | AGIWUR43492 |
| CB4856                                                                                                                           | HS | I | 9327857 | 9330928 | WBGene00007533 | cbl-1   | C12C8.2   | 0.0375905586271488   |             |
| AGIWUR4013;AGIWUR4482;AGIWUR30682;AGIWUR40616                                                                                    |    |   |         |         |                |         |           |                      |             |
| CB4856                                                                                                                           | HS | I | 9334812 | 9342496 | WBGene00003026 | lin-41  | C12C8.3   | -0.106727579717482   |             |
| AGIWUR30548;AGIWUR38608                                                                                                          |    |   |         |         |                |         |           |                      |             |
| CB4856                                                                                                                           | HS | I | 9344724 | 9349558 | WBGene00010857 | M04C9.2 | M04C9.2   | -0.185890417860334   |             |
| AGIWUR9274;AGIWUR27747;AGIWUR37255                                                                                               |    |   |         |         |                |         |           |                      |             |
| CB4856                                                                                                                           | HS | I | 9350274 | 9352700 | WBGene00010856 | M04C9.1 | M04C9.1   | 0.0489441428686739   |             |
| AGIWUR13465;AGIWUR15038;AGIWUR30895;AGIWUR32551;AGIWUR38207                                                                      |    |   |         |         |                |         |           |                      |             |

|                                                                         |    |   |         |         |                |           |           |                     |             |
|-------------------------------------------------------------------------|----|---|---------|---------|----------------|-----------|-----------|---------------------|-------------|
| CB4856                                                                  | HS | I | 9352882 | 9354541 | WBGene00010858 | M04C9.3   | M04C9.3   | 0.0733909986743733  |             |
| AGIWUR17011;AGIWUR34564;AGIWUR40124                                     |    |   |         |         |                |           |           |                     |             |
| CB4856                                                                  | HS | I | 9355072 | 9357079 | WBGene00010859 | M04C9.4   | M04C9.4   | 0.471849485035843   | AGIWUR12795 |
| CB4856                                                                  | HS | I | 9359075 | 9364180 | WBGene00001121 | dyf-5     | M04C9.5   | 0.0488160328101168  | AGIWUR3172  |
| CB4856                                                                  | HS | I | 9364099 | 9389982 | WBGene00008878 | ppfr-1    | F16A11.3  | 0.0974394698090855  |             |
| AGIWUR6600;AGIWUR24113;AGIWUR33603                                      |    |   |         |         |                |           |           |                     |             |
| CB4856                                                                  | HS | I | 9390829 | 9393095 | WBGene00008877 | rtcb-1    | F16A11.2  | 0.052618293876165   |             |
| AGIWUR39556                                                             |    |   |         |         |                |           |           |                     |             |
| CB4856                                                                  | HS | I | 9393948 | 9404024 | WBGene00008876 | F16A11.1  | F16A11.1  | 0.11384709949974    |             |
| AGIWUR4470                                                              |    |   |         |         |                |           |           |                     |             |
| CB4856                                                                  | HS | I | 9408356 | 9410094 | WBGene00007641 | C17E4.1   | C17E4.1   | 0.233694055260042   | AGIWUR21934 |
| CB4856                                                                  | HS | I | 9414456 | 9416703 | WBGene00219313 | C17E4.20  | C17E4.20  | -0.429078606151375  |             |
| AGIWUR33741                                                             |    |   |         |         |                |           |           |                     |             |
| CB4856                                                                  | HS | I | 9416704 | 9418884 | WBGene00007643 | marc-3    | C17E4.3   | 0.0564537191918815  |             |
| AGIWUR7149;AGIWUR44386                                                  |    |   |         |         |                |           |           |                     |             |
| CB4856                                                                  | HS | I | 9419368 | 9419998 | WBGene00007644 | C17E4.4   | C17E4.4   | 0.0940921264635399  | AGIWUR38083 |
| CB4856                                                                  | HS | I | 9419973 | 9420813 | WBGene00044236 | C17E4.11  | C17E4.11  | -0.225218560734564  |             |
| AGIWUR27536;AGIWUR36882                                                 |    |   |         |         |                |           |           |                     |             |
| CB4856                                                                  | HS | I | 9420907 | 9421992 | WBGene00003904 | pabp-2    | C17E4.5   | -0.114447390729727  |             |
| AGIWUR3676;AGIWUR21561;AGIWUR38882;AGIWUR41249                          |    |   |         |         |                |           |           |                     |             |
| CB4856                                                                  | HS | I | 9422556 | 9431120 | WBGene00007645 | C17E4.6   | C17E4.6   | -0.121411689150277  |             |
| AGIWUR13805;AGIWUR17385;AGIWUR29208                                     |    |   |         |         |                |           |           |                     |             |
| CB4856                                                                  | HS | I | 9431098 | 9433828 | WBGene00007646 | nkb-1     | C17E4.9   | -0.150557673522431  |             |
| AGIWUR8987;AGIWUR12137;AGIWUR17620;AGIWUR22816;AGIWUR23728;AGIWUR43795  |    |   |         |         |                |           |           |                     |             |
| CB4856                                                                  | HS | I | 9435377 | 9441029 | WBGene00007647 | C17E4.10  | C17E4.10  | -0.143203455267301  |             |
| AGIWUR23779;AGIWUR25582;AGIWUR42996                                     |    |   |         |         |                |           |           |                     |             |
| CB4856                                                                  | HS | I | 9441010 | 9450731 | WBGene00003172 | mec-8     | F46A9.6   | -0.0615400924186904 |             |
| AGIWUR10739;AGIWUR11464;AGIWUR28789;AGIWUR38678;AGIWUR43431;AGIWUR44090 |    |   |         |         |                |           |           |                     |             |
| CB4856                                                                  | HS | I | 9457456 | 9458842 | WBGene00009754 | F46A9.1   | F46A9.1   | 0.00262460152420196 | AGIWUR34224 |
| CB4856                                                                  | HS | I | 9459287 | 9460550 | WBGene00009755 | F46A9.2   | F46A9.2   | -0.151199653652968  | AGIWUR16726 |
| CB4856                                                                  | HS | I | 9463760 | 9468917 | WBGene00006681 | twk-29    | F46A9.3   | 0.184404159810304   | AGIWUR11445 |
| CB4856                                                                  | HS | I | 9469704 | 9470633 | WBGene00004808 | skr-2     | F46A9.4   | 0.0824427234705283  | AGIWUR3845  |
| CB4856                                                                  | HS | I | 9471341 | 9472642 | WBGene00004807 | skr-1     | F46A9.5   | -0.207367298783202  |             |
| AGIWUR10859;AGIWUR17688;AGIWUR21590;AGIWUR24111;AGIWUR37526             |    |   |         |         |                |           |           |                     |             |
| CB4856                                                                  | HS | I | 9472642 | 9474794 | WBGene00009260 | calm-1    | F30A10.1  | 0.365567364761947   |             |
| AGIWUR3316                                                              |    |   |         |         |                |           |           |                     |             |
| CB4856                                                                  | HS | I | 9476597 | 9477181 | WBGene00045473 | F30A10.14 | F30A10.14 | 0.398849107121478   |             |
| AGIWUR13773                                                             |    |   |         |         |                |           |           |                     |             |
| CB4856                                                                  | HS | I | 9477478 | 9478098 | WBGene00009268 | F30A10.11 | F30A10.11 | -0.044845998907995  |             |

|                                                           |    |   |         |         |                |                  |                                 |
|-----------------------------------------------------------|----|---|---------|---------|----------------|------------------|---------------------------------|
| AGIWUR10060                                               |    |   |         |         |                |                  |                                 |
| CB4856                                                    | HS | I | 9478470 | 9479091 | WBGene00044680 | F30A10.13        | F30A10.13 0.267249811005376     |
| AGIWUR16460;AGIWUR40269                                   |    |   |         |         |                |                  |                                 |
| CB4856                                                    | HS | I | 9479101 | 9480774 | WBGene00009261 | F30A10.2         | F30A10.2 -0.0771861851059503    |
| AGIWUR14176;AGIWUR14360;AGIWUR22666                       |    |   |         |         |                |                  |                                 |
| CB4856                                                    | HS | I | 9481629 | 9482275 | WBGene00009269 | F30A10.12        | F30A10.12 0.186017986416765     |
| AGIWUR5625;AGIWUR19501                                    |    |   |         |         |                |                  |                                 |
| CB4856                                                    | HS | I | 9483810 | 9486540 | WBGene00009263 | F30A10.4         | F30A10.4 0.0848064336021839     |
| AGIWUR16094                                               |    |   |         |         |                |                  |                                 |
| CB4856                                                    | HS | I | 9486642 | 9488229 | WBGene00006061 | stl-1 F30A10.5   | 0.214884563030017               |
| AGIWUR12020                                               |    |   |         |         |                |                  |                                 |
| CB4856                                                    | HS | I | 9488488 | 9492620 | WBGene00009264 | sac-1 F30A10.6   | -0.104480930657113              |
| AGIWUR8404;AGIWUR15613;AGIWUR21401                        |    |   |         |         |                |                  |                                 |
| CB4856                                                    | HS | I | 9492615 | 9494589 | WBGene00009262 | F30A10.3         | F30A10.3 0.0609723427982232     |
| AGIWUR7533;AGIWUR30325;AGIWUR31913                        |    |   |         |         |                |                  |                                 |
| CB4856                                                    | HS | I | 9501268 | 9505173 | WBGene00006062 | stn-1 F30A10.8   | 0.0429151916919297              |
| AGIWUR11443;AGIWUR37826                                   |    |   |         |         |                |                  |                                 |
| CB4856                                                    | HS | I | 9506553 | 9511184 | WBGene00009267 | usp-48 F30A10.10 | 0.072000875498162               |
| AGIWUR41266                                               |    |   |         |         |                |                  |                                 |
| CB4856                                                    | HS | I | 9511181 | 9512236 | WBGene00004887 | smn-1 C41G7.1    | 0.112077856679843 AGIWUR40754   |
| CB4856                                                    | HS | I | 9512428 | 9514755 | WBGene00002226 | k1p-16 C41G7.2   | -0.0337710375650335 AGIWUR16204 |
| CB4856                                                    | HS | I | 9515002 | 9516776 | WBGene00077771 | C41G7.9 C41G7.9  | -0.0872396533689086             |
| AGIWUR9965;AGIWUR12718;AGIWUR34772                        |    |   |         |         |                |                  |                                 |
| CB4856                                                    | HS | I | 9519244 | 9521275 | WBGene00008062 | set-32 C41G7.4   | -0.0267793873917626             |
| AGIWUR11730;AGIWUR16788;AGIWUR18476                       |    |   |         |         |                |                  |                                 |
| CB4856                                                    | HS | I | 9530816 | 9532831 | WBGene00077525 | C41G7.8 C41G7.8  | 0.0999367941925113              |
| AGIWUR15227;AGIWUR15913;AGIWUR20146;AGIWUR21311           |    |   |         |         |                |                  |                                 |
| CB4856                                                    | HS | I | 9533580 | 9536271 | WBGene00008064 | C41G7.7 C41G7.7  | -0.256781367740491 AGIWUR40452  |
| CB4856                                                    | HS | I | 9536465 | 9540966 | WBGene00007984 | irx-1 C36F7.1    | 0.24771491882412                |
| AGIWUR3595;AGIWUR4726;AGIWUR12384;AGIWUR15187;AGIWUR40383 |    |   |         |         |                |                  |                                 |
| CB4856                                                    | HS | I | 9544733 | 9558096 | WBGene00007985 | swah-1 C36F7.2   | -0.0300148296502272             |
| AGIWUR4941;AGIWUR23912;AGIWUR33178                        |    |   |         |         |                |                  |                                 |
| CB4856                                                    | HS | I | 9565394 | 9574377 | WBGene00004372 | rig-5 C36F7.4    | 0.193287310782514               |
| AGIWUR610;AGIWUR8403;AGIWUR17086;AGIWUR19523;AGIWUR44163  |    |   |         |         |                |                  |                                 |
| CB4856                                                    | HS | I | 9574762 | 9576141 | WBGene00007986 | C36F7.5 C36F7.5  | -0.0460690131559645 AGIWUR26301 |
| CB4856                                                    | HS | I | 9578526 | 9581267 | WBGene00002276 | lem-3 F42H11.2   | 0.137269556111242               |
| AGIWUR4832                                                |    |   |         |         |                |                  |                                 |
| CB4856                                                    | HS | I | 9581786 | 9582583 | WBGene00044987 | K07A1.17         | K07A1.17 -0.0740746917002948    |
| AGIWUR11068                                               |    |   |         |         |                |                  |                                 |

|                                                                                                                                             |    |   |         |         |                |          |          |                     |             |
|---------------------------------------------------------------------------------------------------------------------------------------------|----|---|---------|---------|----------------|----------|----------|---------------------|-------------|
| CB4856                                                                                                                                      | HS | I | 9582682 | 9583533 | WBGene00010608 | K07A1.1  | K07A1.1  | 0.130704548307438   |             |
| AGIWUR3309;AGIWUR7293;AGIWUR13669;AGIWUR14108;AGIWUR25109;AGIWUR29244;AGIWUR34922;AGIWUR40044                                               |    |   |         |         |                |          |          |                     |             |
| CB4856                                                                                                                                      | HS | I | 9583869 | 9584817 | WBGene00010617 | K07A1.13 | K07A1.13 | -0.182903787805808  |             |
| AGIWUR31686                                                                                                                                 |    |   |         |         |                |          |          |                     |             |
| CB4856                                                                                                                                      | HS | I | 9585317 | 9587206 | WBGene00010609 | dut-1    | K07A1.2  | -0.311960469907106  |             |
| AGIWUR17209;AGIWUR24219;AGIWUR34406                                                                                                         |    |   |         |         |                |          |          |                     |             |
| CB4856                                                                                                                                      | HS | I | 9587169 | 9588132 | WBGene00010610 | K07A1.3  | K07A1.3  | 0.164664845080555   |             |
| AGIWUR10401;AGIWUR13401;AGIWUR21452                                                                                                         |    |   |         |         |                |          |          |                     |             |
| CB4856                                                                                                                                      | HS | I | 9588710 | 9589931 | WBGene00010611 | K07A1.4  | K07A1.4  | 0.00355111884688597 | AGIWUR21507 |
| CB4856                                                                                                                                      | HS | I | 9591939 | 9593103 | WBGene00010613 | K07A1.6  | K07A1.6  | 0.0146548956593122  |             |
| AGIWUR12219;AGIWUR17738;AGIWUR20345;AGIWUR27107;AGIWUR29821                                                                                 |    |   |         |         |                |          |          |                     |             |
| CB4856                                                                                                                                      | HS | I | 9595276 | 9598363 | WBGene00010614 | cri-1    | K07A1.7  | -0.0727045901422541 |             |
| AGIWUR6642;AGIWUR9009;AGIWUR42113                                                                                                           |    |   |         |         |                |          |          |                     |             |
| CB4856                                                                                                                                      | HS | I | 9605896 | 9609025 | WBGene00000177 | aqp-9    | K07A1.16 | 0.22318400724112    |             |
| AGIWUR14146;AGIWUR43748                                                                                                                     |    |   |         |         |                |          |          |                     |             |
| CB4856                                                                                                                                      | HS | I | 9608926 | 9609705 | WBGene00010619 | K07A1.15 | K07A1.15 |                     |             |
| -0.00987533505919558 AGIWUR34358                                                                                                            |    |   |         |         |                |          |          |                     |             |
| CB4856                                                                                                                                      | HS | I | 9609501 | 9611620 | WBGene00002070 | ile-1    | K07A1.8  | -0.0906143838125528 |             |
| AGIWUR11387;AGIWUR26158;AGIWUR44299;AGIWUR45019                                                                                             |    |   |         |         |                |          |          |                     |             |
| CB4856                                                                                                                                      | HS | I | 9611815 | 9615082 | WBGene00010615 | ate-1    | K07A1.9  | 0.00935361431813497 |             |
| AGIWUR5578;AGIWUR19246                                                                                                                      |    |   |         |         |                |          |          |                     |             |
| CB4856                                                                                                                                      | HS | I | 9615195 | 9616474 | WBGene00010616 | K07A1.10 | K07A1.10 | 0.109067765456381   |             |
| AGIWUR8008;AGIWUR36377;AGIWUR40995;AGIWUR43062                                                                                              |    |   |         |         |                |          |          |                     |             |
| CB4856                                                                                                                                      | HS | I | 9616508 | 9618107 | WBGene00004312 | rba-1    | K07A1.11 | -0.0647520126860925 |             |
| AGIWUR21971                                                                                                                                 |    |   |         |         |                |          |          |                     |             |
| CB4856                                                                                                                                      | HS | I | 9618207 | 9619760 | WBGene00003036 | lin-53   | K07A1.12 | -0.0485018121573573 |             |
| AGIWUR784;AGIWUR14734;AGIWUR15058;AGIWUR17077;AGIWUR22021;AGIWUR28468                                                                       |    |   |         |         |                |          |          |                     |             |
| CB4856                                                                                                                                      | HS | I | 9621160 | 9625796 | WBGene00004488 | rps-19   | T05F1.3  | -0.11088067919483   |             |
| AGIWUR1014;AGIWUR3605;AGIWUR6371;AGIWUR9406;AGIWUR15578;AGIWUR17883;AGIWUR19787;AGIWUR21395;AGIWUR23441;AGIWUR32203;AGIWUR35058;AGIWUR41713 |    |   |         |         |                |          |          |                     |             |
| CB4856                                                                                                                                      | HS | I | 9626241 | 9630848 | WBGene00002027 | hsr-9    | T05F1.6  | -0.105330849466942  | AGIWUR37000 |
| CB4856                                                                                                                                      | HS | I | 9631388 | 9632402 | WBGene00011490 | T05F1.4  | T05F1.4  | 0.0706344628747235  | AGIWUR14722 |
| CB4856                                                                                                                                      | HS | I | 9633183 | 9635945 | WBGene00011491 | T05F1.5  | T05F1.5  | 0.159946352117815   | AGIWUR9793  |
| CB4856                                                                                                                                      | HS | I | 9638886 | 9641736 | WBGene00011492 | T05F1.7  | T05F1.7  | -0.0385566210310078 | AGIWUR266   |
| CB4856                                                                                                                                      | HS | I | 9642344 | 9643804 | WBGene00011493 | T05F1.8  | T05F1.8  | 0.170964795455443   | AGIWUR38596 |
| CB4856                                                                                                                                      | HS | I | 9645699 | 9647676 | WBGene00011494 | T05F1.9  | T05F1.9  | -0.0240510551051987 | AGIWUR9312  |
| CB4856                                                                                                                                      | HS | I | 9647603 | 9649238 | WBGene00000968 | dhs-4    | T05F1.10 | -0.168780107127168  |             |
| AGIWUR27482                                                                                                                                 |    |   |         |         |                |          |          |                     |             |
| CB4856                                                                                                                                      | HS | I | 9650499 | 9652946 | WBGene00011497 | T05F1.13 | T05F1.13 | 0.0786014960306414  |             |

|                                                                       |    |   |         |         |                |                  |                                 |
|-----------------------------------------------------------------------|----|---|---------|---------|----------------|------------------|---------------------------------|
| AGIWUR14401                                                           |    |   |         |         |                |                  |                                 |
| CB4856                                                                | HS | I | 9653021 | 9657040 | WBGene00011495 | T05F1.11         | T05F1.11 0.402164195522179      |
| AGIWUR25086                                                           |    |   |         |         |                |                  |                                 |
| CB4856                                                                | HS | I | 9657012 | 9657871 | WBGene00007278 | lab-1 C03D6.6    | 0.166790233187825 AGIWUR9702    |
| CB4856                                                                | HS | I | 9658274 | 9660080 | WBGene00007277 | asf1-1 C03D6.5   | 0.0649778454669292 AGIWUR14465  |
| CB4856                                                                | HS | I | 9660174 | 9664915 | WBGene00003800 | npp-14 C03D6.4   | -0.142570313358007 AGIWUR18409  |
| CB4856                                                                | HS | I | 9665194 | 9668664 | WBGene00000466 | cel-1 C03D6.3    | 0.180638205642733               |
| AGIWUR2773;AGIWUR8832;AGIWUR16240;AGIWUR35365                         |    |   |         |         |                |                  |                                 |
| CB4856                                                                | HS | I | 9668628 | 9670726 | WBGene00007275 | C03D6.1 C03D6.1  | 0.116558078031794 AGIWUR13138   |
| CB4856                                                                | HS | I | 9673668 | 9678553 | WBGene00007297 | C04F12.1         | C04F12.1 0.0181510289846649     |
| AGIWUR33114                                                           |    |   |         |         |                |                  |                                 |
| CB4856                                                                | HS | I | 9685398 | 9688653 | WBGene00002069 | ikb-1 C04F12.3   | -0.0321036868569351             |
| AGIWUR2266                                                            |    |   |         |         |                |                  |                                 |
| CB4856                                                                | HS | I | 9689185 | 9690084 | WBGene00004426 | rp1-14 C04F12.4  | 0.277488799493476               |
| AGIWUR38081                                                           |    |   |         |         |                |                  |                                 |
| CB4856                                                                | HS | I | 9690079 | 9690557 | WBGene00007299 | C04F12.5         | C04F12.5 -0.174804315852235     |
| AGIWUR2681;AGIWUR6569;AGIWUR15195;AGIWUR17394;AGIWUR19832;AGIWUR21206 |    |   |         |         |                |                  |                                 |
| CB4856                                                                | HS | I | 9692701 | 9693781 | WBGene00007300 | C04F12.6         | C04F12.6                        |
| -0.00832134700212173 AGIWUR7919                                       |    |   |         |         |                |                  |                                 |
| CB4856                                                                | HS | I | 9695707 | 9696762 | WBGene00007301 | C04F12.7         | C04F12.7 -0.090197310144454     |
| AGIWUR8242                                                            |    |   |         |         |                |                  |                                 |
| CB4856                                                                | HS | I | 9697237 | 9699561 | WBGene00007302 | C04F12.8         | C04F12.8 0.0719193220920502     |
| AGIWUR19847                                                           |    |   |         |         |                |                  |                                 |
| CB4856                                                                | HS | I | 9710093 | 9710767 | WBGene00007303 | rnh-1.3 C04F12.9 | 0.0364319416591457              |
| AGIWUR2458                                                            |    |   |         |         |                |                  |                                 |
| CB4856                                                                | HS | I | 9711064 | 9712719 | WBGene00001405 | fce-1 C04F12.10  | 0.268962552069748               |
| AGIWUR36986                                                           |    |   |         |         |                |                  |                                 |
| CB4856                                                                | HS | I | 9712825 | 9715230 | WBGene00007621 | C16C2.4 C16C2.4  | 0.169401951088235 AGIWUR25185   |
| CB4856                                                                | HS | I | 9715321 | 9728108 | WBGene00007620 | ocr1-1 C16C2.3   | -0.0583502865872738 AGIWUR34995 |
| CB4856                                                                | HS | I | 9737823 | 9744190 | WBGene00001582 | gfi-2 K02A11.1   | -0.121041036485341              |
| AGIWUR27008;AGIWUR33816                                               |    |   |         |         |                |                  |                                 |
| CB4856                                                                | HS | I | 9744242 | 9745990 | WBGene00010487 | K02A11.2         | K02A11.2 -0.123197659493392     |
| AGIWUR32384                                                           |    |   |         |         |                |                  |                                 |
| CB4856                                                                | HS | I | 9745967 | 9747923 | WBGene00010488 | endu-1 K02A11.3  | -0.0307538100084006             |
| AGIWUR26684                                                           |    |   |         |         |                |                  |                                 |
| CB4856                                                                | HS | I | 9748517 | 9749953 | WBGene00044607 | K02A11.4         | K02A11.4 0.2513581873491        |
| AGIWUR1620;AGIWUR25104;AGIWUR38391;AGIWUR44265;AGIWUR45015            |    |   |         |         |                |                  |                                 |
| CB4856                                                                | HS | I | 9754122 | 9757898 | WBGene00006352 | sur-6 F26E4.1    | 0.267688631255685               |
| AGIWUR2096;AGIWUR2215;AGIWUR9115;AGIWUR12953;AGIWUR13411;AGIWUR24929  |    |   |         |         |                |                  |                                 |

|                                                                                   |    |   |         |         |                |          |          |                     |             |
|-----------------------------------------------------------------------------------|----|---|---------|---------|----------------|----------|----------|---------------------|-------------|
| CB4856                                                                            | HS | I | 9757854 | 9760787 | WBGene00009157 | F26E4.2  | F26E4.2  | 0.27067527978814    | AGIWUR8064  |
| CB4856                                                                            | HS | I | 9762403 | 9767873 | WBGene00009158 | F26E4.3  | F26E4.3  | 0.132102021557243   |             |
| AGIWUR4512;AGIWUR27007                                                            |    |   |         |         |                |          |          |                     |             |
| CB4856                                                                            | HS | I | 9768836 | 9771068 | WBGene00009160 | F26E4.5  | F26E4.5  | 0.0742898092725834  | AGIWUR23988 |
| CB4856                                                                            | HS | I | 9771061 | 9772565 | WBGene00009159 | F26E4.4  | F26E4.4  | -0.0683049103783873 | AGIWUR27196 |
| CB4856                                                                            | HS | I | 9773172 | 9774012 | WBGene00009161 | F26E4.6  | F26E4.6  | 0.153900486845149   | AGIWUR5123  |
| CB4856                                                                            | HS | I | 9774165 | 9779541 | WBGene00009162 | F26E4.7  | F26E4.7  | -0.127860263741855  | AGIWUR18395 |
| CB4856                                                                            | HS | I | 9780287 | 9781418 | WBGene00009165 | gpx-1    | F26E4.12 | -0.0444423082053316 |             |
| AGIWUR41088                                                                       |    |   |         |         |                |          |          |                     |             |
| CB4856                                                                            | HS | I | 9781338 | 9785722 | WBGene00009163 | drsh-1   | F26E4.10 | -0.0180106754377745 |             |
| AGIWUR9346;AGIWUR17525                                                            |    |   |         |         |                |          |          |                     |             |
| CB4856                                                                            | HS | I | 9785778 | 9787624 | WBGene00006528 | tba-1    | F26E4.8  | -0.0197564335031988 |             |
| AGIWUR26699;AGIWUR27386;AGIWUR38577                                               |    |   |         |         |                |          |          |                     |             |
| CB4856                                                                            | HS | I | 9788749 | 9790050 | WBGene00000371 | cco-1    | F26E4.9  | 0.0864630665133959  |             |
| AGIWUR2388;AGIWUR7324;AGIWUR10896;AGIWUR25457;AGIWUR26663;AGIWUR29113;AGIWUR38370 |    |   |         |         |                |          |          |                     |             |
| CB4856                                                                            | HS | I | 9793756 | 9796675 | WBGene00009164 | hrd1-1   | F26E4.11 | 0.0330791399017478  |             |
| AGIWUR477;AGIWUR5508;AGIWUR9022                                                   |    |   |         |         |                |          |          |                     |             |
| CB4856                                                                            | HS | I | 9808904 | 9813075 | WBGene00003569 | ncx-4    | F35C12.2 | 0.0695850151480046  |             |
| AGIWUR18843;AGIWUR26111;AGIWUR27942;AGIWUR30673                                   |    |   |         |         |                |          |          |                     |             |
| CB4856                                                                            | HS | I | 9813034 | 9823448 | WBGene00009408 | F35C12.3 | F35C12.3 | 0.194112978723197   |             |
| AGIWUR41111                                                                       |    |   |         |         |                |          |          |                     |             |
| CB4856                                                                            | HS | I | 9829827 | 9830599 | WBGene00013449 | Y67A6A.1 | Y67A6A.1 | 0.0849462544554296  |             |
| AGIWUR44360                                                                       |    |   |         |         |                |          |          |                     |             |
| CB4856                                                                            | HS | I | 9839598 | 9844809 | WBGene00003652 | nhr-62   | Y67A6A.2 | -0.0704622597873037 |             |
| AGIWUR2485                                                                        |    |   |         |         |                |          |          |                     |             |
| CB4856                                                                            | HS | I | 9847406 | 9850082 | WBGene00006978 | zig-1    | K10C3.3  | 0.0850892555896738  |             |
| AGIWUR21169;AGIWUR39109;AGIWUR39381                                               |    |   |         |         |                |          |          |                     |             |
| CB4856                                                                            | HS | I | 9850020 | 9851791 | WBGene00010730 | ensa-1   | K10C3.2  | -0.0201539318644519 |             |
| AGIWUR18495;AGIWUR30294;AGIWUR30891;AGIWUR35413;AGIWUR35421;AGIWUR41141           |    |   |         |         |                |          |          |                     |             |
| CB4856                                                                            | HS | I | 9853658 | 9863492 | WBGene00010731 | K10C3.4  | K10C3.4  | -0.246665706154682  |             |
| AGIWUR1891;AGIWUR30585                                                            |    |   |         |         |                |          |          |                     |             |
| CB4856                                                                            | HS | I | 9863588 | 9869055 | WBGene00010732 | K10C3.5  | K10C3.5  | 0.138623569177575   | AGIWUR42407 |
| CB4856                                                                            | HS | I | 9869632 | 9874676 | WBGene00003639 | nhr-49   | K10C3.6  | -0.0838607139721397 |             |
| AGIWUR7928;AGIWUR12085;AGIWUR13755;AGIWUR22758                                    |    |   |         |         |                |          |          |                     |             |
| CB4856                                                                            | HS | I | 9874698 | 9879119 | WBGene00002142 | inx-20   | T23H4.1  | 0.0242882312076409  | AGIWUR21242 |
| CB4856                                                                            | HS | I | 9879183 | 9881504 | WBGene00003659 | nhr-69   | T23H4.2  | 0.146065533759728   |             |
| AGIWUR5029;AGIWUR19276;AGIWUR24449                                                |    |   |         |         |                |          |          |                     |             |
| CB4856                                                                            | HS | I | 9886200 | 9888154 | WBGene00003524 | nas-5    | T23H4.3  | -0.0245565146862141 | AGIWUR21924 |
| CB4856                                                                            | HS | I | 9888356 | 9892223 | WBGene00003842 | oct-1    | F52F12.1 | -0.0835669910282419 |             |

AGIWUR6287;AGIWUR17666;AGIWUR21319  
 CB4856 HS I 9893698 9895596 WBGene00000640 col-64 F52F12.2 -0.227663001586104  
 AGIWUR24554  
 CB4856 HS I 9895693 9900817 WBGene00003396 mom-4 F52F12.3 0.0645154009979256  
 AGIWUR385;AGIWUR4265;AGIWUR14861;AGIWUR22928;AGIWUR26295;AGIWUR27202;AGIWUR30831;AGIWUR34120  
 CB4856 HS I 9901255 9902929 WBGene00009937 ls1-1 F52F12.4 0.107795115834685  
 AGIWUR13054  
 CB4856 HS I 9902943 9910545 WBGene00009939 ztf-11 F52F12.6 -0.131832890080331  
 AGIWUR22662;AGIWUR22912  
 CB4856 HS I 9921211 9921961 WBGene00009938 F52F12.5 F52F12.5 -0.0414866148993678  
 AGIWUR14086  
 CB4856 HS I 9923610 9924280 WBGene00009941 F52F12.8 F52F12.8 0.079945010461925  
 AGIWUR14551  
 CB4856 HS I 9925978 9929032 WBGene00009942 F52F12.9 F52F12.9 -0.0377522969842472  
 AGIWUR9358;AGIWUR35586  
 CB4856 HS I 9928946 9930885 WBGene00009940 str1-1 F52F12.7 -0.2274350495133  
 AGIWUR24560  
 CB4856 HS I 9930972 9931882 WBGene00013696 Y106G6A.4 Y106G6A.4 0.174781523827068  
 AGIWUR2031  
 CB4856 HS I 9931870 9934290 WBGene00013695 epg-8 Y106G6A.2 0.0077036880571093  
 AGIWUR2744;AGIWUR18245;AGIWUR18984;AGIWUR28290;AGIWUR31270;AGIWUR32991;AGIWUR41204;AGIWUR43220;AGIWUR43432  
 CB4856 HS I 9934639 9936022 WBGene00013697 dsbn-1 Y106G6A.5 -0.10725801849463  
 AGIWUR37460  
 CB4856 HS I 9936125 9938378 WBGene00013694 Y106G6A.1 Y106G6A.1 0.0987356083358222  
 AGIWUR3372;AGIWUR9642;AGIWUR28741  
 CB4856 HS I 9947805 9953387 WBGene00005023 sqv-5 T24D1.1 0.022195518114196  
 AGIWUR9388;AGIWUR42746  
 CB4856 HS I 9953409 9955873 WBGene00011985 T24D1.2 T24D1.2 -0.206112198525112  
 AGIWUR6789;AGIWUR19798;AGIWUR22341  
 CB4856 HS I 9956150 9958357 WBGene00011988 har-2 T24D1.5 0.0203668803769084 AGIWUR42509  
 CB4856 HS I 9958782 9960155 WBGene00011986 T24D1.3 T24D1.3 0.0967784131418199 AGIWUR3679  
 CB4856 HS I 9960370 9961973 WBGene00007043 tag-179 T24D1.4 0.171626033470249  
 AGIWUR14556;AGIWUR29087  
 CB4856 HS I 9965580 9970037 WBGene00003397 mom-5 T23D8.1 -0.0261000396225688  
 AGIWUR7889;AGIWUR22460  
 CB4856 HS I 9970037 9973177 WBGene00006633 tsp-7 T23D8.2 0.24044635654203 AGIWUR25168  
 CB4856 HS I 9973377 9976315 WBGene00011944 T23D8.3 T23D8.3 -0.232475216817368 AGIWUR31007  
 CB4856 HS I 9976393 9979662 WBGene00001226 eif-3.C T23D8.4 0.0448097832486463  
 AGIWUR3943;AGIWUR14459

|                                                                                   |    |   |          |          |                |           |          |                     |             |
|-----------------------------------------------------------------------------------|----|---|----------|----------|----------------|-----------|----------|---------------------|-------------|
| CB4856                                                                            | HS | I | 9980064  | 9984848  | WBGene00006379 | sys-1     | T23D8.9  | 0.084697865408085   |             |
| AGIWUR584;AGIWUR11881;AGIWUR12778;AGIWUR27780;AGIWUR30185;AGIWUR34013;AGIWUR43769 |    |   |          |          |                |           |          |                     |             |
| CB4856                                                                            | HS | I | 9988341  | 9988826  | WBGene00001941 | his-67    | T23D8.5  | -0.385071198851064  | AGIWUR20059 |
| CB4856                                                                            | HS | I | 9989061  | 9989617  | WBGene00001942 | his-68    | T23D8.6  | -0.353696846076495  |             |
| AGIWUR9020;AGIWUR10398;AGIWUR19130;AGIWUR38394;AGIWUR41721                        |    |   |          |          |                |           |          |                     |             |
| CB4856                                                                            | HS | I | 9989802  | 9993975  | WBGene00011945 | hpo-24    | T23D8.7  | 0.0895825538336119  |             |
| AGIWUR8843;AGIWUR15233;AGIWUR36871                                                |    |   |          |          |                |           |          |                     |             |
| CB4856                                                                            | HS | I | 9994731  | 9999928  | WBGene00000476 | cfi-1     | T23D8.8  | -0.158460726946306  |             |
| AGIWUR4844;AGIWUR34287;AGIWUR44917                                                |    |   |          |          |                |           |          |                     |             |
| CB4856                                                                            | HS | I | 10014547 | 10015495 | WBGene00007274 | C03C11.1  |          | C03C11.1            |             |
| -0.209726366453177 AGIWUR25138                                                    |    |   |          |          |                |           |          |                     |             |
| CB4856                                                                            | HS | I | 10016778 | 10018114 | WBGene00001483 | fog-3     | C03C11.2 |                     |             |
| 0.160011716612109 AGIWUR2227                                                      |    |   |          |          |                |           |          |                     |             |
| CB4856                                                                            | HS | I | 10023810 | 10025831 | WBGene00008663 | eak-6     | F10G8.4  | 0.702452562315072   |             |
| AGIWUR19346                                                                       |    |   |          |          |                |           |          |                     |             |
| CB4856                                                                            | HS | I | 10026188 | 10030058 | WBGene00003803 | rae-1     | F10G8.3  |                     |             |
| -0.00517577943650593 AGIWUR14990                                                  |    |   |          |          |                |           |          |                     |             |
| CB4856                                                                            | HS | I | 10030174 | 10046760 | WBGene00008665 | ercc-1    | F10G8.7  | 0.0917671601178309  |             |
| AGIWUR7402;AGIWUR8445;AGIWUR8743;AGIWUR10512                                      |    |   |          |          |                |           |          |                     |             |
| CB4856                                                                            | HS | I | 10046442 | 10048028 | WBGene00008664 | nubp-1    | F10G8.6  | 0.0994002828374407  |             |
| AGIWUR7984;AGIWUR8402;AGIWUR9547;AGIWUR44930                                      |    |   |          |          |                |           |          |                     |             |
| CB4856                                                                            | HS | I | 10048087 | 10050770 | WBGene00008667 | F10G8.9   | F10G8.9  | 0.0850281640906552  |             |
| AGIWUR18885;AGIWUR29836;AGIWUR32672                                               |    |   |          |          |                |           |          |                     |             |
| CB4856                                                                            | HS | I | 10050691 | 10062026 | WBGene00008666 | F10G8.8   | F10G8.8  | -0.0220075678821763 |             |
| AGIWUR15028;AGIWUR31677                                                           |    |   |          |          |                |           |          |                     |             |
| CB4856                                                                            | HS | I | 10072578 | 10074399 | WBGene00007159 | B0379.7   | B0379.7  | -0.1832136424601    |             |
| AGIWUR21196                                                                       |    |   |          |          |                |           |          |                     |             |
| CB4856                                                                            | HS | I | 10074952 | 10077749 | WBGene00007155 | B0379.1   | B0379.1  | 0.109359798925176   |             |
| AGIWUR38309;AGIWUR41296;AGIWUR44354                                               |    |   |          |          |                |           |          |                     |             |
| CB4856                                                                            | HS | I | 10080159 | 10085777 | WBGene00003508 | mut-16    | B0379.3  | -0.140008880391129  |             |
| AGIWUR788;AGIWUR33569                                                             |    |   |          |          |                |           |          |                     |             |
| CB4856                                                                            | HS | I | 10085713 | 10102012 | WBGene00007054 | scpl-1    | B0379.4  | -0.371749607268324  |             |
| AGIWUR35678                                                                       |    |   |          |          |                |           |          |                     |             |
| CB4856                                                                            | HS | I | 10107393 | 10109000 | WBGene00013698 | Y106G6D.1 |          | Y106G6D.1           |             |
| -0.259464131846394 AGIWUR15930                                                    |    |   |          |          |                |           |          |                     |             |
| CB4856                                                                            | HS | I | 10110982 | 10111916 | WBGene00013699 | Y106G6D.2 |          | Y106G6D.2           |             |
| -0.242148533046709 AGIWUR24239                                                    |    |   |          |          |                |           |          |                     |             |
| CB4856                                                                            | HS | I | 10112088 | 10114256 | WBGene00013700 | Y106G6D.3 |          | Y106G6D.3           |             |
| 0.205793568386021 AGIWUR43241                                                     |    |   |          |          |                |           |          |                     |             |



|                                                                                                            |                                                          |          |                |                  |                     |
|------------------------------------------------------------------------------------------------------------|----------------------------------------------------------|----------|----------------|------------------|---------------------|
| CB4856 HS I                                                                                                | 10114759                                                 | 10116583 | WBGene00013701 | Y106G6D.4        | Y106G6D.4           |
| 0.0940159043107034                                                                                         | AGIWUR7232;AGIWUR36951                                   |          |                |                  |                     |
| CB4856 HS I                                                                                                | 10117061                                                 | 10118134 | WBGene00013704 | Y106G6D.8        | Y106G6D.8           |
| 0.181939481418029                                                                                          | AGIWUR6334;AGIWUR8836;AGIWUR9264;AGIWUR27542;AGIWUR35825 |          |                |                  |                     |
| CB4856 HS I                                                                                                | 10119209                                                 | 10122171 | WBGene00014965 | Y106G6D.5        | Y106G6D.5           |
| -0.0222844394180521                                                                                        | AGIWUR20599;AGIWUR43526                                  |          |                |                  |                     |
| CB4856 HS I                                                                                                | 10122459                                                 | 10130215 | WBGene00013703 | Y106G6D.7        | Y106G6D.7           |
| -0.000991499618002489                                                                                      | AGIWUR14206;AGIWUR26940                                  |          |                |                  |                     |
| CB4856 HS I                                                                                                | 10147325                                                 | 10149888 | WBGene00008885 | F16C3.1 F16C3.1  | 0.134401542580026   |
| AGIWUR6363                                                                                                 |                                                          |          |                |                  |                     |
| CB4856 HS I                                                                                                | 10150280                                                 | 10155131 | WBGene00008886 | F16C3.2 F16C3.2  | 0.170092054559356   |
| AGIWUR7129                                                                                                 |                                                          |          |                |                  |                     |
| CB4856 HS I                                                                                                | 10155161                                                 | 10158558 | WBGene00023415 | F16C3.3 F16C3.3  | 0.0404785095555122  |
| AGIWUR25814;AGIWUR41744                                                                                    |                                                          |          |                |                  |                     |
| CB4856 HS I                                                                                                | 10158951                                                 | 10160034 | WBGene00044243 | F16C3.4 F16C3.4  | 0.243668296276439   |
| AGIWUR37530;AGIWUR41968;AGIWUR44496                                                                        |                                                          |          |                |                  |                     |
| CB4856 HS I                                                                                                | 10159982                                                 | 10161883 | WBGene00006447 | tag-72 C25A1.3   | 0.0486415449156805  |
| AGIWUR27730                                                                                                |                                                          |          |                |                  |                     |
| CB4856 HS I                                                                                                | 10162379                                                 | 10163578 | WBGene00007705 | C25A1.1 C25A1.1  | -0.0934809721077752 |
| AGIWUR38730                                                                                                |                                                          |          |                |                  |                     |
| CB4856 HS I                                                                                                | 10163475                                                 | 10165135 | WBGene00001442 | fkh-10 C25A1.2   |                     |
| -0.00184811652385797                                                                                       | AGIWUR5426                                               |          |                |                  |                     |
| CB4856 HS I                                                                                                | 10169639                                                 | 10172645 | WBGene00007706 | C25A1.4 C25A1.4  | -0.0198375928589867 |
| AGIWUR7340;AGIWUR20206;AGIWUR39825                                                                         |                                                          |          |                |                  |                     |
| CB4856 HS I                                                                                                | 10177181                                                 | 10178921 | WBGene00007707 | C25A1.5 C25A1.5  | 0.0804106730046001  |
| AGIWUR9829                                                                                                 |                                                          |          |                |                  |                     |
| CB4856 HS I                                                                                                | 10179832                                                 | 10184075 | WBGene00002153 | iars-2 C25A1.7   | 0.0653291277384591  |
| AGIWUR4515;AGIWUR17911;AGIWUR22885;AGIWUR24106;AGIWUR27797;AGIWUR32150                                     |                                                          |          |                |                  |                     |
| CB4856 HS I                                                                                                | 10184478                                                 | 10185470 | WBGene00007709 | cllec-87 C25A1.8 | -0.17576154469076   |
| AGIWUR10786;AGIWUR12722;AGIWUR14448;AGIWUR17486;AGIWUR31726;AGIWUR32435                                    |                                                          |          |                |                  |                     |
| CB4856 HS I                                                                                                | 10185780                                                 | 10187550 | WBGene00007710 | rsa-1 C25A1.9    | 0.0611045839296747  |
| AGIWUR24491                                                                                                |                                                          |          |                |                  |                     |
| CB4856 HS I                                                                                                | 10187515                                                 | 10190896 | WBGene00000931 | dao-5 C25A1.10   |                     |
| 0.0450443157898945                                                                                         | AGIWUR2193;AGIWUR14692;AGIWUR38010;AGIWUR41462           |          |                |                  |                     |
| CB4856 HS I                                                                                                | 10191273                                                 | 10192894 | WBGene00007711 | lid-1 C25A1.12   |                     |
| -0.0757913811299957                                                                                        |                                                          |          |                |                  |                     |
| AGIWUR7759;AGIWUR12214;AGIWUR12894;AGIWUR18762;AGIWUR24648;AGIWUR30354;AGIWUR37784;AGIWUR42516;AGIWUR43176 |                                                          |          |                |                  |                     |
| CB4856 HS I                                                                                                | 10193242                                                 | 10193999 | WBGene00007712 | mrpl-34 C25A1.13 |                     |
| 0.153933098360877                                                                                          | AGIWUR6533                                               |          |                |                  |                     |

|                                                            |                                                                      |          |                |           |           |                     |
|------------------------------------------------------------|----------------------------------------------------------------------|----------|----------------|-----------|-----------|---------------------|
| CB4856 HS I                                                | 10193925                                                             | 10197000 | WBGene00000095 | aha-1     | C25A1.11  |                     |
| 0.282654549838272                                          | AGIWUR44293                                                          |          |                |           |           |                     |
| CB4856 HS I                                                | 10197321                                                             | 10197596 | WBGene00007713 | C25A1.15  | C25A1.15  |                     |
| 0.0965807000302554                                         | AGIWUR19876                                                          |          |                |           |           |                     |
| CB4856 HS I                                                | 10198286                                                             | 10200440 | WBGene00013705 | Y106G6E.1 | Y106G6E.1 |                     |
| 0.0594987556078035                                         | AGIWUR11466                                                          |          |                |           |           |                     |
| CB4856 HS I                                                | 10221635                                                             | 10222778 | WBGene00013708 | Y106G6E.4 | Y106G6E.4 |                     |
| 0.205995712827499                                          | AGIWUR36816;AGIWUR38525                                              |          |                |           |           |                     |
| CB4856 HS I                                                | 10222881                                                             | 10227009 | WBGene00000426 | ced-12    | Y106G6E.5 |                     |
| 0.174658160689479                                          | AGIWUR6640;AGIWUR10649;AGIWUR39379                                   |          |                |           |           |                     |
| CB4856 HS I                                                | 10227210                                                             | 10231214 | WBGene00013709 | csnk-1    | Y106G6E.6 |                     |
| -0.00197883299098578                                       | AGIWUR6259;AGIWUR41120                                               |          |                |           |           |                     |
| CB4856 HS I                                                | 10248256                                                             | 10255327 | WBGene00003000 | lin-11    | ZC247.3   | -0.0524312277428098 |
| AGIWUR5317;AGIWUR13003;AGIWUR24260;AGIWUR25289;AGIWUR33061 |                                                                      |          |                |           |           |                     |
| CB4856 HS I                                                | 10255632                                                             | 10262250 | WBGene00013860 | ZC247.2   | ZC247.2   | 0.352121164797964   |
| AGIWUR1179                                                 |                                                                      |          |                |           |           |                     |
| CB4856 HS I                                                | 10264314                                                             | 10279234 | WBGene00013859 | ZC247.1   | ZC247.1   | -0.0804844853672648 |
| AGIWUR19141                                                |                                                                      |          |                |           |           |                     |
| CB4856 HS I                                                | 10291870                                                             | 10297927 | WBGene00007047 | wts-1     | T20F10.1  |                     |
| -0.00753690115192285                                       | AGIWUR24166                                                          |          |                |           |           |                     |
| CB4856 HS I                                                | 10298140                                                             | 10300598 | WBGene00011864 | T20F10.2  | T20F10.2  |                     |
| -0.0660390379009339                                        | AGIWUR17094;AGIWUR17549;AGIWUR23612;AGIWUR43299                      |          |                |           |           |                     |
| CB4856 HS I                                                | 10300573                                                             | 10302945 | WBGene00011866 | T20F10.5  | T20F10.5  |                     |
| -0.0625041400310091                                        | AGIWUR5199;AGIWUR5957;AGIWUR9005;AGIWUR20137;AGIWUR28724;AGIWUR36038 |          |                |           |           |                     |
| CB4856 HS I                                                | 10309757                                                             | 10311591 | WBGene00045057 | Y106G6G.7 | Y106G6G.7 |                     |
| 1.42233641644288                                           | AGIWUR20883                                                          |          |                |           |           |                     |
| CB4856 HS I                                                | 10319669                                                             | 10321493 | WBGene00013715 | Y106G6G.6 | Y106G6G.6 |                     |
| -0.100953282204189                                         | AGIWUR13079;AGIWUR28186                                              |          |                |           |           |                     |
| CB4856 HS I                                                | 10321711                                                             | 10323398 | WBGene00013713 | Y106G6G.4 | Y106G6G.4 |                     |
| 0.128615846872773                                          | AGIWUR1645                                                           |          |                |           |           |                     |
| CB4856 HS I                                                | 10323511                                                             | 10324145 | WBGene00013712 | dlc-6     | Y106G6G.3 |                     |
| -0.150932100204338                                         | AGIWUR14226                                                          |          |                |           |           |                     |
| CB4856 HS I                                                | 10328984                                                             | 10330370 | WBGene00013710 | Y106G6G.1 | Y106G6G.1 |                     |
| 0.16608897850595                                           | AGIWUR3549                                                           |          |                |           |           |                     |
| CB4856 HS I                                                | 10330879                                                             | 10331808 | WBGene00004476 | rps-7     | ZC434.2   | 0.379720900427966   |
| AGIWUR1411;AGIWUR7247;AGIWUR25024                          |                                                                      |          |                |           |           |                     |
| CB4856 HS I                                                | 10331945                                                             | 10333082 | WBGene00013892 | ZC434.4   | ZC434.4   | -0.0433513607724496 |
| AGIWUR35993                                                |                                                                      |          |                |           |           |                     |
| CB4856 HS I                                                | 10333471                                                             | 10334590 | WBGene00220261 | ZC434.10  | ZC434.10  |                     |

|                                                                                                                                   |             |          |                |           |           |                     |  |
|-----------------------------------------------------------------------------------------------------------------------------------|-------------|----------|----------------|-----------|-----------|---------------------|--|
| -0.0341268698090369                                                                                                               | AGIWUR43270 |          |                |           |           |                     |  |
| CB4856 HS I                                                                                                                       | 10334661    | 10335739 | WBGene00013891 | ZC434.3   | ZC434.3   | -0.0287713259679583 |  |
| AGIWUR2990;AGIWUR17062;AGIWUR22980;AGIWUR26531                                                                                    |             |          |                |           |           |                     |  |
| CB4856 HS I                                                                                                                       | 10336395    | 10341178 | WBGene00001337 | ears-1    | ZC434.5   | -0.0377128402703484 |  |
| AGIWUR436;AGIWUR496;AGIWUR43053                                                                                                   |             |          |                |           |           |                     |  |
| CB4856 HS I                                                                                                                       | 10340997    | 10345648 | WBGene00000148 | aph-2     | ZC434.6   | 0.0117548361342124  |  |
| AGIWUR28276                                                                                                                       |             |          |                |           |           |                     |  |
| CB4856 HS I                                                                                                                       | 10345736    | 10348061 | WBGene00013893 | ZC434.7   | ZC434.7   | 0.131082847346999   |  |
| AGIWUR7669;AGIWUR26724;AGIWUR33950;AGIWUR39834;AGIWUR42693;AGIWUR43556                                                            |             |          |                |           |           |                     |  |
| CB4856 HS I                                                                                                                       | 10348055    | 10349379 | WBGene00013894 | ZC434.8   | ZC434.8   | -0.16006602163595   |  |
| AGIWUR17368;AGIWUR26084                                                                                                           |             |          |                |           |           |                     |  |
| CB4856 HS I                                                                                                                       | 10356251    | 10360890 | WBGene00013895 | ZC434.9   | ZC434.9   | 0.443333729303976   |  |
| AGIWUR44177                                                                                                                       |             |          |                |           |           |                     |  |
| CB4856 HS I                                                                                                                       | 10366621    | 10371699 | WBGene00009743 | sptf-1    | F45H11.1  |                     |  |
| 0.109969795089015 AGIWUR2830;AGIWUR23379;AGIWUR41497                                                                              |             |          |                |           |           |                     |  |
| CB4856 HS I                                                                                                                       | 10373368    | 10373862 | WBGene00003587 | ned-8     | F45H11.2  |                     |  |
| -0.150915453842629 AGIWUR23345                                                                                                    |             |          |                |           |           |                     |  |
| CB4856 HS I                                                                                                                       | 10374809    | 10379631 | WBGene00009744 | hpo-35    | F45H11.3  |                     |  |
| -0.204695520552438 AGIWUR4287;AGIWUR33299;AGIWUR33740;AGIWUR42031                                                                 |             |          |                |           |           |                     |  |
| CB4856 HS I                                                                                                                       | 10381082    | 10382040 | WBGene00009745 | F45H11.5  |           | F45H11.5            |  |
| 0.0298277521157537 AGIWUR3840;AGIWUR9168;AGIWUR22568;AGIWUR39623                                                                  |             |          |                |           |           |                     |  |
| CB4856 HS I                                                                                                                       | 10382746    | 10384222 | WBGene00077521 | maf-1     | F45H11.6  |                     |  |
| 0.0831215170234003                                                                                                                |             |          |                |           |           |                     |  |
| AGIWUR1078;AGIWUR6836;AGIWUR12363;AGIWUR12557;AGIWUR12681;AGIWUR25932;AGIWUR34710;AGIWUR39209;AGIWUR40992;AGIWUR43296;AGIWUR43530 |             |          |                |           |           |                     |  |
| CB4856 HS I                                                                                                                       | 10384219    | 10391388 | WBGene00003233 | mg1-2     | F45H11.4  |                     |  |
| 0.326603623486381 AGIWUR4879;AGIWUR20282                                                                                          |             |          |                |           |           |                     |  |
| CB4856 HS I                                                                                                                       | 10398944    | 10400195 | WBGene00000843 | cup-2     | F25D7.1   | -0.0260518779411028 |  |
| AGIWUR4401;AGIWUR20500                                                                                                            |             |          |                |           |           |                     |  |
| CB4856 HS I                                                                                                                       | 10401065    | 10402774 | WBGene00009112 | tag-353   | F25D7.2   | 0.0148078704912376  |  |
| AGIWUR6582                                                                                                                        |             |          |                |           |           |                     |  |
| CB4856 HS I                                                                                                                       | 10409302    | 10414707 | WBGene00003847 | blmp-1    | F25D7.3   | 0.127053844212773   |  |
| AGIWUR1162;AGIWUR2993;AGIWUR8630;AGIWUR9914;AGIWUR13060;AGIWUR35588;AGIWUR36795;AGIWUR37572                                       |             |          |                |           |           |                     |  |
| CB4856 HS I                                                                                                                       | 10422958    | 10429026 | WBGene00009114 | F25D7.5   | F25D7.5   | 0.0412787307672247  |  |
| AGIWUR14538;AGIWUR16277;AGIWUR26686                                                                                               |             |          |                |           |           |                     |  |
| CB4856 HS I                                                                                                                       | 10429629    | 10432336 | WBGene00013716 | Y106G6H.1 |           | Y106G6H.1           |  |
| 0.30004519001435 AGIWUR3844                                                                                                       |             |          |                |           |           |                     |  |
| CB4856 HS I                                                                                                                       | 10432815    | 10435882 | WBGene00003902 | pab-1     | Y106G6H.2 |                     |  |
| -0.180885924112434                                                                                                                |             |          |                |           |           |                     |  |

AGIWUR551;AGIWUR1625;AGIWUR4054;AGIWUR8505;AGIWUR14804;AGIWUR15583;AGIWUR16120;AGIWUR24249;AGIWUR29890;AGIWUR36402

|        |    |   |                                                                         |                                                |                |            |            |                     |
|--------|----|---|-------------------------------------------------------------------------|------------------------------------------------|----------------|------------|------------|---------------------|
| CB4856 | HS | I | 10436254                                                                | 10436884                                       | WBGene00004444 | rp1-30     | Y106G6H.3  |                     |
|        |    |   | -0.542890015439745                                                      | AGIWUR24641                                    |                |            |            |                     |
| CB4856 | HS | I | 10436895                                                                | 10437708                                       | WBGene00013717 | madf-10    | Y106G6H.4  |                     |
|        |    |   | 0.024582350363044                                                       | AGIWUR8428                                     |                |            |            |                     |
| CB4856 | HS | I | 10438075                                                                | 10443563                                       | WBGene00013718 | pdpr-1     | Y106G6H.5  |                     |
|        |    |   | -0.137513231231125                                                      | AGIWUR3494;AGIWUR4149;AGIWUR31485;AGIWUR40774  |                |            |            |                     |
| CB4856 | HS | I | 10443668                                                                | 10446133                                       | WBGene00013719 | Y106G6H.6  | Y106G6H.6  |                     |
|        |    |   | -0.00930593308405392                                                    | AGIWUR7986                                     |                |            |            |                     |
| CB4856 | HS | I | 10446661                                                                | 10452071                                       | WBGene00004753 | sec-8      | Y106G6H.7  |                     |
|        |    |   | -0.214383968825635                                                      | AGIWUR20305                                    |                |            |            |                     |
| CB4856 | HS | I | 10452178                                                                | 10452895                                       | WBGene00013720 | Y106G6H.8  | Y106G6H.8  |                     |
|        |    |   | -0.0466874172688545                                                     | AGIWUR6889;AGIWUR24705;AGIWUR26727;AGIWUR31225 |                |            |            |                     |
| CB4856 | HS | I | 10464328                                                                | 10471056                                       | WBGene00001112 | duo-3      | Y106G6H.12 |                     |
|        |    |   | 0.10230287048795                                                        | AGIWUR27835                                    |                |            |            |                     |
| CB4856 | HS | I | 10472196                                                                | 10473389                                       | WBGene00013724 | Y106G6H.14 | Y106G6H.14 |                     |
|        |    |   | 0.0190680967631103                                                      | AGIWUR4557;AGIWUR19187;AGIWUR19475             |                |            |            |                     |
| CB4856 | HS | I | 10473513                                                                | 10474449                                       | WBGene00013725 | ska-1      | Y106G6H.15 |                     |
|        |    |   | -0.0696159739448756                                                     | AGIWUR32773                                    |                |            |            |                     |
| CB4856 | HS | I | 10474835                                                                | 10475525                                       | WBGene00013726 | Y106G6H.16 | Y106G6H.16 |                     |
|        |    |   | -0.152885833893343                                                      | AGIWUR31191                                    |                |            |            |                     |
| CB4856 | HS | I | 10475522                                                                | 10478129                                       | WBGene00009508 | row-1      | F37D6.2    | 0.262269464205431   |
|        |    |   | AGIWUR11222                                                             |                                                |                |            |            |                     |
| CB4856 | HS | I | 10479283                                                                | 10484969                                       | WBGene00009507 | mus-101    | F37D6.1    | -0.0572021381473045 |
|        |    |   | AGIWUR201;AGIWUR29531;AGIWUR41907                                       |                                                |                |            |            |                     |
| CB4856 | HS | I | 10486714                                                                | 10487322                                       | WBGene00009509 | F37D6.3    | F37D6.3    | -0.0178587291044519 |
|        |    |   | AGIWUR26244                                                             |                                                |                |            |            |                     |
| CB4856 | HS | I | 10488648                                                                | 10489569                                       | WBGene00009510 | F37D6.4    | F37D6.4    | -0.0682440574811829 |
|        |    |   | AGIWUR11781;AGIWUR16130;AGIWUR23068;AGIWUR24394;AGIWUR24669;AGIWUR39352 |                                                |                |            |            |                     |
| CB4856 | HS | I | 10501585                                                                | 10505949                                       | WBGene00006445 | tag-68     | F37D6.6    | 0.0907695983741705  |
|        |    |   | AGIWUR2748;AGIWUR11690;AGIWUR14931;AGIWUR27423;AGIWUR41788;AGIWUR43215  |                                                |                |            |            |                     |
| CB4856 | HS | I | 10507000                                                                | 10515506                                       | WBGene00000492 | che-13     | F59C6.7    | 0.116288984521303   |
|        |    |   | AGIWUR10651                                                             |                                                |                |            |            |                     |
| CB4856 | HS | I | 10516036                                                                | 10516432                                       | WBGene00206464 | F59C6.18   | F59C6.18   |                     |
|        |    |   | 0.294241384474278                                                       | AGIWUR38691                                    |                |            |            |                     |
| CB4856 | HS | I | 10518379                                                                | 10519263                                       | WBGene00010325 | exos-3     | F59C6.4    |                     |
|        |    |   | -0.00217978460283064                                                    | AGIWUR35660                                    |                |            |            |                     |
| CB4856 | HS | I | 10519360                                                                | 10520761                                       | WBGene00010326 | F59C6.5    | F59C6.5    | 0.231557826823931   |

|                                                                                                                                                                                                                                             |    |   |                                                                                  |          |                |                                     |
|---------------------------------------------------------------------------------------------------------------------------------------------------------------------------------------------------------------------------------------------|----|---|----------------------------------------------------------------------------------|----------|----------------|-------------------------------------|
| AGIWUR2505                                                                                                                                                                                                                                  |    |   |                                                                                  |          |                |                                     |
| CB4856                                                                                                                                                                                                                                      | HS | I | 10520863                                                                         | 10521986 | WBGene00044251 | F59C6.12 F59C6.12                   |
| -0.136979899434994                                                                                                                                                                                                                          |    |   | AGIWUR25235;AGIWUR38986                                                          |          |                |                                     |
| CB4856                                                                                                                                                                                                                                      | HS | I | 10522091                                                                         | 10523996 | WBGene00010323 | dhhc-12 F59C6.2 0.0383935502293777  |
| AGIWUR23798                                                                                                                                                                                                                                 |    |   |                                                                                  |          |                |                                     |
| CB4856                                                                                                                                                                                                                                      | HS | I | 10524424                                                                         | 10525509 | WBGene00010324 | F59C6.3 F59C6.3 0.2450989790774     |
| AGIWUR7210;AGIWUR25869                                                                                                                                                                                                                      |    |   |                                                                                  |          |                |                                     |
| CB4856                                                                                                                                                                                                                                      | HS | I | 10526533                                                                         | 10530095 | WBGene00044792 | F59C6.14 F59C6.14                   |
| 0.249569550848307                                                                                                                                                                                                                           |    |   |                                                                                  |          |                |                                     |
| AGIWUR2011;AGIWUR7131;AGIWUR11982;AGIWUR22037;AGIWUR24402;AGIWUR24720;AGIWUR25617;AGIWUR28187;AGIWUR28827;AGIWUR36554;AGIWUR38820;AGIWUR39490;AGIWUR43929                                                                                   |    |   |                                                                                  |          |                |                                     |
| CB4856                                                                                                                                                                                                                                      | HS | I | 10530339                                                                         | 10531547 | WBGene00014789 | F59C6.10 F59C6.10                   |
| -0.106060885808991                                                                                                                                                                                                                          |    |   | AGIWUR29319                                                                      |          |                |                                     |
| CB4856                                                                                                                                                                                                                                      | HS | I | 10532667                                                                         | 10534484 | WBGene00010328 | F59C6.11 F59C6.11                   |
| 0.154404585762247                                                                                                                                                                                                                           |    |   | AGIWUR14721                                                                      |          |                |                                     |
| CB4856                                                                                                                                                                                                                                      | HS | I | 10543024                                                                         | 10546435 | WBGene00009116 | snx-27 F25H2.2 -0.204710331414873   |
| AGIWUR29978                                                                                                                                                                                                                                 |    |   |                                                                                  |          |                |                                     |
| CB4856                                                                                                                                                                                                                                      | HS | I | 10547721                                                                         | 10549876 | WBGene00009117 | F25H2.3 F25H2.3 -0.122530144115728  |
| AGIWUR40211                                                                                                                                                                                                                                 |    |   |                                                                                  |          |                |                                     |
| CB4856                                                                                                                                                                                                                                      | HS | I | 10551972                                                                         | 10553035 | WBGene00009118 | F25H2.4 F25H2.4 -0.0259637381646023 |
| AGIWUR22807                                                                                                                                                                                                                                 |    |   |                                                                                  |          |                |                                     |
| CB4856                                                                                                                                                                                                                                      | HS | I | 10553116                                                                         | 10553913 | WBGene00009119 | ndk-1 F25H2.5 -0.0500191085813224   |
| AGIWUR1428;AGIWUR4491;AGIWUR7177;AGIWUR8978;AGIWUR10087;AGIWUR11437;AGIWUR13155;AGIWUR13297;AGIWUR14349;AGIWUR23883;AGIWUR25992;AGIWUR32023;AGIWUR32499;AGIWUR33225;AGIWUR36407;AGIWUR39612;AGIWUR41122;AGIWUR42164;AGIWUR44511;AGIWUR45155 |    |   |                                                                                  |          |                |                                     |
| CB4856                                                                                                                                                                                                                                      | HS | I | 10554366                                                                         | 10557838 | WBGene00009120 | F25H2.6 F25H2.6 0.0321695910389579  |
| AGIWUR32606                                                                                                                                                                                                                                 |    |   |                                                                                  |          |                |                                     |
| CB4856                                                                                                                                                                                                                                      | HS | I | 10558323                                                                         | 10560006 | WBGene00009121 | F25H2.7 F25H2.7 -0.20609692824301   |
| AGIWUR30852                                                                                                                                                                                                                                 |    |   |                                                                                  |          |                |                                     |
| CB4856                                                                                                                                                                                                                                      | HS | I | 10562968                                                                         | 10564914 | WBGene00006720 | ubc-25 F25H2.8 -0.182675868049053   |
| AGIWUR14963;AGIWUR16386;AGIWUR38751                                                                                                                                                                                                         |    |   |                                                                                  |          |                |                                     |
| CB4856                                                                                                                                                                                                                                      | HS | I | 10566350                                                                         | 10567300 | WBGene00003926 | pas-5 F25H2.9 -0.0744817875488408   |
| AGIWUR16852                                                                                                                                                                                                                                 |    |   |                                                                                  |          |                |                                     |
| CB4856                                                                                                                                                                                                                                      | HS | I | 10567894                                                                         | 10569019 | WBGene00004408 | r1a-0 F25H2.10                      |
| -0.349520021697293                                                                                                                                                                                                                          |    |   | AGIWUR3634;AGIWUR4230;AGIWUR5948;AGIWUR12550;AGIWUR14129;AGIWUR17615;AGIWUR31740 |          |                |                                     |
| CB4856                                                                                                                                                                                                                                      | HS | I | 10569112                                                                         | 10570030 | WBGene00009122 | tct-1 F25H2.11                      |
| 0.209658051600762                                                                                                                                                                                                                           |    |   | AGIWUR34683                                                                      |          |                |                                     |
| CB4856                                                                                                                                                                                                                                      | HS | I | 10570079                                                                         | 10571916 | WBGene00009123 | F25H2.12 F25H2.12                   |
| 0.0996550461259371                                                                                                                                                                                                                          |    |   | AGIWUR42316                                                                      |          |                |                                     |

|                                                                        |             |          |                |          |                             |
|------------------------------------------------------------------------|-------------|----------|----------------|----------|-----------------------------|
| CB4856 HS I                                                            | 10571954    | 10577135 | WBGene00009124 | rtel-1   | F25H2.13                    |
| 0.0909230163001489                                                     | AGIWUR14329 |          |                |          |                             |
| CB4856 HS I                                                            | 10579413    | 10580890 | WBGene00009243 | F29C6.1  | F29C6.1 -0.090038864554975  |
| AGIWUR1176;AGIWUR28962                                                 |             |          |                |          |                             |
| CB4856 HS I                                                            | 10581538    | 10582609 | WBGene00011906 | hsp-12.1 | T22A3.2                     |
| 0.0272832321600838                                                     | AGIWUR22241 |          |                |          |                             |
| CB4856 HS I                                                            | 10588177    | 10590464 | WBGene00003083 | lst-1    | T22A3.3 -0.0553318055291818 |
| AGIWUR4603                                                             |             |          |                |          |                             |
| CB4856 HS I                                                            | 10590678    | 10593972 | WBGene00044070 | set-18   | T22A3.4 0.0799925424775463  |
| AGIWUR474                                                              |             |          |                |          |                             |
| CB4856 HS I                                                            | 10595545    | 10598490 | WBGene00011909 | T22A3.6  | T22A3.6 0.17156130891631    |
| AGIWUR40214                                                            |             |          |                |          |                             |
| CB4856 HS I                                                            | 10598673    | 10606620 | WBGene00011908 | pash-1   | T22A3.5 -0.039575114412866  |
| AGIWUR31209                                                            |             |          |                |          |                             |
| CB4856 HS I                                                            | 10608466    | 10621433 | WBGene00002248 | lam-3    | T22A3.8 0.0311834191950768  |
| AGIWUR5500;AGIWUR37672                                                 |             |          |                |          |                             |
| CB4856 HS I                                                            | 10622952    | 10624361 | WBGene00016622 | mafr-1   | C43H8.2 0.0214162554139854  |
| AGIWUR45017                                                            |             |          |                |          |                             |
| CB4856 HS I                                                            | 10624464    | 10625387 | WBGene00016621 | arch-1   | C43H8.1 0.074149907341619   |
| AGIWUR41519                                                            |             |          |                |          |                             |
| CB4856 HS I                                                            | 10625388    | 10628387 | WBGene00015232 | B0511.6  | B0511.6 0.0245505844117808  |
| AGIWUR3687;AGIWUR4208;AGIWUR4272;AGIWUR4753;AGIWUR45010                |             |          |                |          |                             |
| CB4856 HS I                                                            | 10628712    | 10631674 | WBGene00015231 | cutl-14  | B0511.5 0.165198264521534   |
| AGIWUR12758                                                            |             |          |                |          |                             |
| CB4856 HS I                                                            | 10631665    | 10633150 | WBGene00015233 | B0511.7  | B0511.7 -0.233917595094429  |
| AGIWUR29044                                                            |             |          |                |          |                             |
| CB4856 HS I                                                            | 10633279    | 10634078 | WBGene00255714 | B0511.19 | B0511.19                    |
| 0.110913094615                                                         | AGIWUR2149  |          |                |          |                             |
| CB4856 HS I                                                            | 10636692    | 10638977 | WBGene00044321 | mrps-30  | B0511.8 0.206895132229812   |
| AGIWUR24656                                                            |             |          |                |          |                             |
| CB4856 HS I                                                            | 10639079    | 10640230 | WBGene00015235 | cdc-26   | B0511.9 -0.0510187312295907 |
| AGIWUR4793;AGIWUR28476;AGIWUR31998;AGIWUR37074;AGIWUR37096;AGIWUR40826 |             |          |                |          |                             |
| CB4856 HS I                                                            | 10640465    | 10642281 | WBGene00001228 | eif-3.E  | B0511.10                    |
| 0.028477534525237                                                      | AGIWUR37070 |          |                |          |                             |
| CB4856 HS I                                                            | 10644245    | 10645617 | WBGene00015230 | tag-344  | B0511.4 -0.0653876957869777 |
| AGIWUR24553                                                            |             |          |                |          |                             |
| CB4856 HS I                                                            | 10646762    | 10647777 | WBGene00015229 | fbxa-125 | B0511.3                     |
| -0.0135710608543214                                                    | AGIWUR14685 |          |                |          |                             |
| CB4856 HS I                                                            | 10648606    | 10654179 | WBGene00015236 | B0511.11 | B0511.11                    |

|                                                                       |                                                             |             |                |          |          |                     |
|-----------------------------------------------------------------------|-------------------------------------------------------------|-------------|----------------|----------|----------|---------------------|
| 0.0539526614993484                                                    |                                                             | AGIWUR44598 |                |          |          |                     |
| CB4856 HS I                                                           | 10654298                                                    | 10666933    | WBGene00015237 | B0511.12 | B0511.12 |                     |
| 0.11779226263587                                                      | AGIWUR11649;AGIWUR13533;AGIWUR15421                         |             |                |          |          |                     |
| CB4856 HS I                                                           | 10667808                                                    | 10671301    | WBGene00001432 | fkf-7    | B0511.1  | -0.0440479388761936 |
| AGIWUR39506                                                           |                                                             |             |                |          |          |                     |
| CB4856 HS I                                                           | 10671460                                                    | 10672589    | WBGene00016389 | C34B2.4  | C34B2.4  | 0.0626326935323682  |
| AGIWUR41157                                                           |                                                             |             |                |          |          |                     |
| CB4856 HS I                                                           | 10675167                                                    | 10676811    | WBGene00016390 | C34B2.5  | C34B2.5  | -0.433179824639874  |
| AGIWUR7716;AGIWUR29153                                                |                                                             |             |                |          |          |                     |
| CB4856 HS I                                                           | 10676922                                                    | 10682374    | WBGene00016391 | lonp-1   | C34B2.6  | 0.0166421133663288  |
| AGIWUR943;AGIWUR2718;AGIWUR5681                                       |                                                             |             |                |          |          |                     |
| CB4856 HS I                                                           | 10682472                                                    | 10683155    | WBGene00016395 | C34B2.10 | C34B2.10 |                     |
| 0.00143030563100055                                                   | AGIWUR14716;AGIWUR15847                                     |             |                |          |          |                     |
| CB4856 HS I                                                           | 10683270                                                    | 10685664    | WBGene00016392 | sdha-2   | C34B2.7  | 0.047548106024184   |
| AGIWUR38680                                                           |                                                             |             |                |          |          |                     |
| CB4856 HS I                                                           | 10685825                                                    | 10687058    | WBGene00016393 | C34B2.8  | C34B2.8  | 0.204294594588919   |
| AGIWUR1458;AGIWUR3758;AGIWUR26926;AGIWUR36412;AGIWUR43567;AGIWUR44915 |                                                             |             |                |          |          |                     |
| CB4856 HS I                                                           | 10687363                                                    | 10688068    | WBGene00016387 | kbp-5    | C34B2.2  | -0.167183097663742  |
| AGIWUR11015                                                           |                                                             |             |                |          |          |                     |
| CB4856 HS I                                                           | 10688332                                                    | 10690790    | WBGene00016386 | tag-272  | C34B2.1  | -0.0813681188419544 |
| AGIWUR21234                                                           |                                                             |             |                |          |          |                     |
| CB4856 HS I                                                           | 10691345                                                    | 10696783    | WBGene00016396 | C34B2.11 | C34B2.11 |                     |
| 0.111893584516846                                                     | AGIWUR2570;AGIWUR10840;AGIWUR43723                          |             |                |          |          |                     |
| CB4856 HS I                                                           | 10699562                                                    | 10703801    | WBGene00016394 | C34B2.9  | C34B2.9  |                     |
| -0.00567994233093216                                                  | AGIWUR34791                                                 |             |                |          |          |                     |
| CB4856 HS I                                                           | 10708363                                                    | 10710376    | WBGene00015024 | B0205.10 | B0205.10 |                     |
| -0.367599422484393                                                    | AGIWUR13757                                                 |             |                |          |          |                     |
| CB4856 HS I                                                           | 10713505                                                    | 10718201    | WBGene00015017 | B0205.1  | B0205.1  | 0.204488707635777   |
| AGIWUR28744                                                           |                                                             |             |                |          |          |                     |
| CB4856 HS I                                                           | 10720813                                                    | 10723496    | WBGene00015023 | B0205.9  | B0205.9  | 0.0221390416926486  |
| AGIWUR7558                                                            |                                                             |             |                |          |          |                     |
| CB4856 HS I                                                           | 10724161                                                    | 10726136    | WBGene00015018 | srz-85   | B0205.2  | 0.0566291729702373  |
| AGIWUR40535                                                           |                                                             |             |                |          |          |                     |
| CB4856 HS I                                                           | 10726903                                                    | 10727364    | WBGene00044646 | B0205.14 | B0205.14 |                     |
| -0.0887182698658551                                                   | AGIWUR19150;AGIWUR26793;AGIWUR29668;AGIWUR31946;AGIWUR42563 |             |                |          |          |                     |
| CB4856 HS I                                                           | 10727755                                                    | 10728808    | WBGene00044644 | B0205.13 | B0205.13 |                     |
| -0.138499026872886                                                    | AGIWUR18822;AGIWUR35516;AGIWUR42241                         |             |                |          |          |                     |
| CB4856 HS I                                                           | 10728959                                                    | 10730287    | WBGene00015022 | B0205.8  | B0205.8  | 0.107492626711867   |
| AGIWUR1980                                                            |                                                             |             |                |          |          |                     |

|                                                                                 |    |   |          |          |                |          |                             |
|---------------------------------------------------------------------------------|----|---|----------|----------|----------------|----------|-----------------------------|
| CB4856                                                                          | HS | I | 10730467 | 10730743 | WBGene00044413 | B0205.12 | B0205.12                    |
| 0.0783936095904245 AGIWUR32246;AGIWUR34973;AGIWUR40595;AGIWUR42095;AGIWUR44666  |    |   |          |          |                |          |                             |
| CB4856                                                                          | HS | I | 10730712 | 10732448 | WBGene00004466 | rpn-10   | B0205.3 -0.118673889676424  |
| AGIWUR1283;AGIWUR18646;AGIWUR19121;AGIWUR19902;AGIWUR37875                      |    |   |          |          |                |          |                             |
| CB4856                                                                          | HS | I | 10732543 | 10733686 | WBGene00015025 | mrp1-9   | B0205.11                    |
| -0.089741382941753 AGIWUR17494                                                  |    |   |          |          |                |          |                             |
| CB4856                                                                          | HS | I | 10734022 | 10736615 | WBGene00002191 | kin-3    | B0205.7 0.192332899476459   |
| AGIWUR6814;AGIWUR14979;AGIWUR16721;AGIWUR31425;AGIWUR35891;AGIWUR36826          |    |   |          |          |                |          |                             |
| CB4856                                                                          | HS | I | 10736697 | 10739911 | WBGene00015021 | B0205.6  | B0205.6 0.0492186420804721  |
| AGIWUR33097                                                                     |    |   |          |          |                |          |                             |
| CB4856                                                                          | HS | I | 10740218 | 10740590 | WBGene00015020 | B0205.5  | B0205.5                     |
| -0.00136939021216609 AGIWUR43771                                                |    |   |          |          |                |          |                             |
| CB4856                                                                          | HS | I | 10741368 | 10744445 | WBGene00015019 | B0205.4  | B0205.4 0.135725127460213   |
| AGIWUR6510;AGIWUR34542                                                          |    |   |          |          |                |          |                             |
| CB4856                                                                          | HS | I | 10750343 | 10776700 | WBGene00000912 | daf-16   | R13H8.1 -0.246243106353859  |
| AGIWUR15683;AGIWUR17069;AGIWUR19627;AGIWUR26737;AGIWUR27096                     |    |   |          |          |                |          |                             |
| CB4856                                                                          | HS | I | 10781442 | 10782890 | WBGene00018850 | gpx-8    | F55A3.5 -0.0131072583630045 |
| AGIWUR1381                                                                      |    |   |          |          |                |          |                             |
| CB4856                                                                          | HS | I | 10785128 | 10787863 | WBGene00018852 | F55A3.7  | F55A3.7 -0.431246320146001  |
| AGIWUR35755                                                                     |    |   |          |          |                |          |                             |
| CB4856                                                                          | HS | I | 10789130 | 10793152 | WBGene00018849 | F55A3.3  | F55A3.3 -0.0875744960933553 |
| AGIWUR21198;AGIWUR26112;AGIWUR28742;AGIWUR36072;AGIWUR43803;AGIWUR44363         |    |   |          |          |                |          |                             |
| CB4856                                                                          | HS | I | 10793161 | 10798059 | WBGene00018848 | F55A3.2  | F55A3.2 0.0920406908094353  |
| AGIWUR32325                                                                     |    |   |          |          |                |          |                             |
| CB4856                                                                          | HS | I | 10799623 | 10806901 | WBGene00018847 | marc-6   | F55A3.1 -0.149890083589021  |
| AGIWUR19410                                                                     |    |   |          |          |                |          |                             |
| CB4856                                                                          | HS | I | 10806922 | 10808238 | WBGene00016461 | C35E7.9  | C35E7.9 -0.0915179152953085 |
| AGIWUR15468;AGIWUR34153                                                         |    |   |          |          |                |          |                             |
| CB4856                                                                          | HS | I | 10808590 | 10810497 | WBGene00016460 | C35E7.8  | C35E7.8 0.242527206922684   |
| AGIWUR12957                                                                     |    |   |          |          |                |          |                             |
| CB4856                                                                          | HS | I | 10810648 | 10812923 | WBGene00016462 | C35E7.10 | C35E7.10                    |
| 0.0720698536928346 AGIWUR1500                                                   |    |   |          |          |                |          |                             |
| CB4856                                                                          | HS | I | 10813815 | 10814904 | WBGene00016459 | C35E7.7  | C35E7.7 -0.144372799584173  |
| AGIWUR27260                                                                     |    |   |          |          |                |          |                             |
| CB4856                                                                          | HS | I | 10817352 | 10819963 | WBGene00016458 | C35E7.6  | C35E7.6 -0.173103987946854  |
| AGIWUR19288                                                                     |    |   |          |          |                |          |                             |
| CB4856                                                                          | HS | I | 10823363 | 10828454 | WBGene00016457 | C35E7.5  | C35E7.5 -0.199017580430473  |
| AGIWUR221;AGIWUR3071;AGIWUR7500;AGIWUR13387;AGIWUR13605;AGIWUR15219;AGIWUR35549 |    |   |          |          |                |          |                             |
| CB4856                                                                          | HS | I | 10831881 | 10834812 | WBGene00016456 | C35E7.4  | C35E7.4 0.192261322716829   |



|                       |   |                                                                     |          |                |          |          |                     |
|-----------------------|---|---------------------------------------------------------------------|----------|----------------|----------|----------|---------------------|
| AGIWUR26878           |   |                                                                     |          |                |          |          |                     |
| CB4856 HS             | I | 10836985                                                            | 10838877 | WBGene00016455 | C35E7.3  | C35E7.3  | -0.254691552493497  |
| AGIWUR38197           |   |                                                                     |          |                |          |          |                     |
| CB4856 HS             | I | 10841114                                                            | 10844647 | WBGene00016454 | C35E7.2  | C35E7.2  | -0.0649939215191822 |
| AGIWUR9766            |   |                                                                     |          |                |          |          |                     |
| CB4856 HS             | I | 10844772                                                            | 10845922 | WBGene00016463 | C35E7.11 | C35E7.11 |                     |
| 0.0466657130037831    |   | AGIWUR28616                                                         |          |                |          |          |                     |
| CB4856 HS             | I | 10846777                                                            | 10850103 | WBGene00016453 | vet-2    | C35E7.1  | 0.0039670039791293  |
| AGIWUR10906           |   |                                                                     |          |                |          |          |                     |
| CB4856 HS             | I | 10855935                                                            | 10857620 | WBGene00021383 | Y37F4.2  | Y37F4.2  | -0.0327658548388676 |
| AGIWUR3056            |   |                                                                     |          |                |          |          |                     |
| CB4856 HS             | I | 10859534                                                            | 10860769 | WBGene00021382 | Y37F4.1  | Y37F4.1  | 0.258559608302788   |
| AGIWUR7087            |   |                                                                     |          |                |          |          |                     |
| CB4856 HS             | I | 10861215                                                            | 10863453 | WBGene00021386 | Y37F4.5  | Y37F4.5  | 0.173323297872447   |
| AGIWUR44323           |   |                                                                     |          |                |          |          |                     |
| CB4856 HS             | I | 10863880                                                            | 10866495 | WBGene00021388 | Y37F4.7  | Y37F4.7  | 0.201174030589409   |
| AGIWUR1404;AGIWUR3734 |   |                                                                     |          |                |          |          |                     |
| CB4856 HS             | I | 10867554                                                            | 10868530 | WBGene00044289 | Y37F4.8  | Y37F4.8  | 0.248127012493947   |
| AGIWUR36705           |   |                                                                     |          |                |          |          |                     |
| CB4856 HS             | I | 10870023                                                            | 10875046 | WBGene00021387 | Y37F4.6  | Y37F4.6  | 0.0963086590523332  |
| AGIWUR44270           |   |                                                                     |          |                |          |          |                     |
| CB4856 HS             | I | 10878047                                                            | 10878378 | WBGene00020860 | nspd-10  | T27C10.7 |                     |
| 0.0407851507949033    |   | AGIWUR23135                                                         |          |                |          |          |                     |
| CB4856 HS             | I | 10879138                                                            | 10879572 | WBGene00269435 | T27C10.9 | T27C10.9 |                     |
| -0.328240844428109    |   | AGIWUR40191                                                         |          |                |          |          |                     |
| CB4856 HS             | I | 10879769                                                            | 10894239 | WBGene00003068 | lrk-1    | T27C10.6 |                     |
| 0.180603455878469     |   | AGIWUR10723                                                         |          |                |          |          |                     |
| CB4856 HS             | I | 10899110                                                            | 10902024 | WBGene00020857 | srt-62   | T27C10.2 |                     |
| -0.0652970798522077   |   | AGIWUR18376;AGIWUR33397                                             |          |                |          |          |                     |
| CB4856 HS             | I | 10906812                                                            | 10912203 | WBGene00018630 | F49D11.6 | F49D11.6 |                     |
| 0.00151363940707849   |   | AGIWUR9641                                                          |          |                |          |          |                     |
| CB4856 HS             | I | 10912913                                                            | 10915796 | WBGene00018628 | F49D11.4 | F49D11.4 |                     |
| 0.101491183428866     |   | AGIWUR33044                                                         |          |                |          |          |                     |
| CB4856 HS             | I | 10917064                                                            | 10919095 | WBGene00018627 | F49D11.3 | F49D11.3 |                     |
| 0.145826791462836     |   | AGIWUR7428                                                          |          |                |          |          |                     |
| CB4856 HS             | I | 10921416                                                            | 10923484 | WBGene00018626 | F49D11.2 | F49D11.2 |                     |
| 0.0545728175555098    |   | AGIWUR4503;AGIWUR16229;AGIWUR16872                                  |          |                |          |          |                     |
| CB4856 HS             | I | 10923574                                                            | 10923944 | WBGene00018631 | F49D11.7 | F49D11.7 |                     |
| -0.0301450497102218   |   | AGIWUR2557;AGIWUR8303;AGIWUR9080;AGIWUR9566;AGIWUR38563;AGIWUR40010 |          |                |          |          |                     |

|                      |                                                                        |          |                |            |                           |
|----------------------|------------------------------------------------------------------------|----------|----------------|------------|---------------------------|
| CB4856 HS I          | 10924240                                                               | 10925753 | WBGene00000780 | cpn-4      | F49D11.8                  |
| 0.184546165621597    | AGIWUR2714;AGIWUR20006;AGIWUR29506                                     |          |                |            |                           |
| CB4856 HS I          | 10926883                                                               | 10933705 | WBGene00045433 | F49D11.10  | F49D11.10                 |
| 0.0997433047387233   | AGIWUR42404                                                            |          |                |            |                           |
| CB4856 HS I          | 10933810                                                               | 10935712 | WBGene00018632 | tag-296    | F49D11.9                  |
| 0.151018463098325    | AGIWUR11932                                                            |          |                |            |                           |
| CB4856 HS I          | 10936819                                                               | 10940521 | WBGene00018625 | prp-17     | F49D11.1                  |
| 0.0296711359702293   | AGIWUR16544                                                            |          |                |            |                           |
| CB4856 HS I          | 10940685                                                               | 10943922 | WBGene00045434 | Y95D11A.3  | Y95D11A.3                 |
| 0.0711904378709196   | AGIWUR10746;AGIWUR23575                                                |          |                |            |                           |
| CB4856 HS I          | 10944210                                                               | 10945690 | WBGene00013605 | Y95D11A.1  | Y95D11A.1                 |
| 0.0729238399306276   | AGIWUR11591                                                            |          |                |            |                           |
| CB4856 HS I          | 10958297                                                               | 10959906 | WBGene00044262 | Y95D11A.2  | Y95D11A.2                 |
| 0.101415403100875    | AGIWUR38881                                                            |          |                |            |                           |
| CB4856 HS I          | 10964473                                                               | 10966348 | WBGene00013121 | spe-38     | Y52B11A.1                 |
| 0.0839516177226347   | AGIWUR10936;AGIWUR13151;AGIWUR29137                                    |          |                |            |                           |
| CB4856 HS I          | 10966394                                                               | 10970166 | WBGene00013122 | impt-1     | Y52B11A.2                 |
| -0.105017409500236   | AGIWUR5756;AGIWUR11019;AGIWUR12958;AGIWUR13000;AGIWUR18911;AGIWUR29124 |          |                |            |                           |
| CB4856 HS I          | 10970493                                                               | 10980111 | WBGene00013123 | Y52B11A.3  | Y52B11A.3                 |
| -0.0849338396196364  | AGIWUR948;AGIWUR8774;AGIWUR10299;AGIWUR30518;AGIWUR35426;AGIWUR35479   |          |                |            |                           |
| CB4856 HS I          | 11011435                                                               | 11014274 | WBGene00219422 | Y52B11A.20 | Y52B11A.20                |
| 0.0298520418440189   | AGIWUR3523;AGIWUR43245                                                 |          |                |            |                           |
| CB4856 HS I          | 11012959                                                               | 11014739 | WBGene00077539 | Y52B11A.12 | Y52B11A.12                |
| 0.0408813485321078   | AGIWUR8711;AGIWUR18783                                                 |          |                |            |                           |
| CB4856 HS I          | 11015486                                                               | 11017497 | WBGene00013125 | cllec-92   | Y52B11A.5                 |
| -0.458036149098113   | AGIWUR15108                                                            |          |                |            |                           |
| CB4856 HS I          | 11018571                                                               | 11025653 | WBGene00013126 | mltn-2     | Y52B11A.7                 |
| 0.437028029552534    | AGIWUR13171;AGIWUR21642                                                |          |                |            |                           |
| CB4856 HS I          | 11032339                                                               | 11034055 | WBGene00013127 | Y52B11A.8  | Y52B11A.8                 |
| -0.217400135803667   | AGIWUR32358                                                            |          |                |            |                           |
| CB4856 HS I          | 11034057                                                               | 11038857 | WBGene00013128 | dxbp-1     | Y52B11A.9                 |
| 0.0697711043960965   | AGIWUR22113                                                            |          |                |            |                           |
| CB4856 HS I          | 11039056                                                               | 11052494 | WBGene00013129 | Y52B11A.10 | Y52B11A.10                |
| 0.0064840105310946   | AGIWUR18772;AGIWUR35839;AGIWUR36487                                    |          |                |            |                           |
| CB4856 HS I          | 11067699                                                               | 11069996 | WBGene00014914 | Y52B11A.11 | Y52B11A.11                |
| -0.0124394686200731  | AGIWUR356;AGIWUR941;AGIWUR13335;AGIWUR18309;AGIWUR23163                |          |                |            |                           |
| CB4856 HS I          | 11075758                                                               | 11134667 | WBGene00001980 | hmr-1      | W02B9.1                   |
| -0.00849157185515814 | AGIWUR2464;AGIWUR4079;AGIWUR7642;AGIWUR14037;AGIWUR25685;AGIWUR25807   |          |                |            |                           |
| CB4856 HS I          | 11142113                                                               | 11144090 | WBGene00013929 | cllec-93   | ZK39.4 -0.158087380742066 |

|                                                                                        |   |          |          |                |           |          |                     |  |
|----------------------------------------------------------------------------------------|---|----------|----------|----------------|-----------|----------|---------------------|--|
| AGIWUR16569                                                                            |   |          |          |                |           |          |                     |  |
| CB4856 HS                                                                              | I | 11144652 | 11145696 | WBGene00044266 | ZK39.9    | ZK39.9   | -0.0785672215276554 |  |
| AGIWUR3953;AGIWUR18942;AGIWUR31124;AGIWUR35697;AGIWUR38465                             |   |          |          |                |           |          |                     |  |
| CB4856 HS                                                                              | I | 11146448 | 11148309 | WBGene00013928 | clec-94   | ZK39.3   | -0.304336447693631  |  |
| AGIWUR7109                                                                             |   |          |          |                |           |          |                     |  |
| CB4856 HS                                                                              | I | 11148973 | 11150295 | WBGene00013927 | clec-95   | ZK39.2   | -0.273977508004236  |  |
| AGIWUR14880                                                                            |   |          |          |                |           |          |                     |  |
| CB4856 HS                                                                              | I | 11151241 | 11151972 | WBGene00013930 | clec-96   | ZK39.5   | -0.375245382880305  |  |
| AGIWUR38744                                                                            |   |          |          |                |           |          |                     |  |
| CB4856 HS                                                                              | I | 11152704 | 11154329 | WBGene00013931 | clec-97   | ZK39.6   | 0.121884764581276   |  |
| AGIWUR3379;AGIWUR10205                                                                 |   |          |          |                |           |          |                     |  |
| CB4856 HS                                                                              | I | 11156745 | 11158831 | WBGene00013933 | clec-99   | ZK39.8   | -0.218974636929751  |  |
| AGIWUR13126                                                                            |   |          |          |                |           |          |                     |  |
| CB4856 HS                                                                              | I | 11160034 | 11162602 | WBGene00050881 | ZK39.10   | ZK39.10  | -0.0374175018479992 |  |
| AGIWUR15295;AGIWUR25506                                                                |   |          |          |                |           |          |                     |  |
| CB4856 HS                                                                              | I | 11163811 | 11168736 | WBGene00013131 | Y52B11C.1 |          | Y52B11C.1           |  |
| -0.136350480741392 AGIWUR30055                                                         |   |          |          |                |           |          |                     |  |
| CB4856 HS                                                                              | I | 11177805 | 11182115 | WBGene00004706 | rsr-1     | F28D9.1  | -0.367108931761575  |  |
| AGIWUR25663                                                                            |   |          |          |                |           |          |                     |  |
| CB4856 HS                                                                              | I | 11182817 | 11186137 | WBGene00005517 | sri-5     | F28D9.2  | 0.948534195406807   |  |
| AGIWUR20194                                                                            |   |          |          |                |           |          |                     |  |
| CB4856 HS                                                                              | I | 11206922 | 11211842 | WBGene00012317 | ztf-6     | W06H12.1 |                     |  |
| 0.093371095345046 AGIWUR4883;AGIWUR5680;AGIWUR8022;AGIWUR21252;AGIWUR28412;AGIWUR42642 |   |          |          |                |           |          |                     |  |
| CB4856 HS                                                                              | I | 11212426 | 11215091 | WBGene00002119 | ins-36    | Y53H1A.4 |                     |  |
| -0.039751360882911 AGIWUR17879;AGIWUR21406;AGIWUR34002;AGIWUR36162;AGIWUR38489         |   |          |          |                |           |          |                     |  |
| CB4856 HS                                                                              | I | 11216118 | 11221995 | WBGene00013177 | rsy-1     | Y53H1A.1 |                     |  |
| -0.112563824277121 AGIWUR974;AGIWUR14921                                               |   |          |          |                |           |          |                     |  |
| CB4856 HS                                                                              | I | 11222326 | 11224400 | WBGene00013178 | Y53H1A.2  |          | Y53H1A.2            |  |
| -0.153805831269494 AGIWUR14334;AGIWUR20569;AGIWUR21366                                 |   |          |          |                |           |          |                     |  |
| CB4856 HS                                                                              | I | 11224836 | 11233334 | WBGene00043056 | nfya-2    | Y53H1A.5 |                     |  |
| 0.187372780025104 AGIWUR33672                                                          |   |          |          |                |           |          |                     |  |
| CB4856 HS                                                                              | I | 11234302 | 11235176 | WBGene00013179 | clec-100  |          | Y53H1A.3            |  |
| -0.164576415151386 AGIWUR16219                                                         |   |          |          |                |           |          |                     |  |
| CB4856 HS                                                                              | I | 11235385 | 11235594 | WBGene00044781 | Y53H1A.6  |          | Y53H1A.6            |  |
| 0.286488924416604 AGIWUR13135                                                          |   |          |          |                |           |          |                     |  |
| CB4856 HS                                                                              | I | 11243836 | 11245003 | WBGene00009749 | F46A8.6   | F46A8.6  | -0.120952660576814  |  |
| AGIWUR32965                                                                            |   |          |          |                |           |          |                     |  |
| CB4856 HS                                                                              | I | 11245823 | 11246765 | WBGene00014760 | F46A8.2   | F46A8.2  | 0.089657336975792   |  |
| AGIWUR32278;AGIWUR33361                                                                |   |          |          |                |           |          |                     |  |

|                                                                                |                         |          |                |          |                             |
|--------------------------------------------------------------------------------|-------------------------|----------|----------------|----------|-----------------------------|
| CB4856 HS I                                                                    | 11248270                | 11249952 | WBGene00014761 | F46A8.11 | F46A8.11                    |
| 0.0157905512789411                                                             | AGIWUR14328;AGIWUR40171 |          |                |          |                             |
| CB4856 HS I                                                                    | 11250139                | 11251602 | WBGene00014759 | F46A8.1  | F46A8.1 0.534492717068551   |
| AGIWUR15744;AGIWUR23653;AGIWUR27635                                            |                         |          |                |          |                             |
| CB4856 HS I                                                                    | 11252238                | 11252981 | WBGene00009752 | F46A8.9  | F46A8.9 0.236816287924968   |
| AGIWUR9494                                                                     |                         |          |                |          |                             |
| CB4856 HS I                                                                    | 11253256                | 11256022 | WBGene00009753 | scrm-6   | F46A8.10                    |
| 0.0938850302275611 AGIWUR31148                                                 |                         |          |                |          |                             |
| CB4856 HS I                                                                    | 11256550                | 11259225 | WBGene00009467 | F36D1.8  | F36D1.8 0.184680095955516   |
| AGIWUR29021                                                                    |                         |          |                |          |                             |
| CB4856 HS I                                                                    | 11263066                | 11263661 | WBGene00009466 | F36D1.7  | F36D1.7 0.189988878901454   |
| AGIWUR2766;AGIWUR3959;AGIWUR7252;AGIWUR15487;AGIWUR32950;AGIWUR45156           |                         |          |                |          |                             |
| CB4856 HS I                                                                    | 11265523                | 11265714 | WBGene00077524 | F36D1.11 | F36D1.11                    |
| -0.0896747765092427 AGIWUR3397;AGIWUR28134                                     |                         |          |                |          |                             |
| CB4856 HS I                                                                    | 11266070                | 11266474 | WBGene00009464 | F36D1.5  | F36D1.5 -0.0357161344528425 |
| AGIWUR19361                                                                    |                         |          |                |          |                             |
| CB4856 HS I                                                                    | 11268030                | 11268409 | WBGene00044246 | F36D1.10 | F36D1.10                    |
| 0.0208784909379238 AGIWUR2407;AGIWUR4902;AGIWUR6043;AGIWUR20336;AGIWUR24359    |                         |          |                |          |                             |
| CB4856 HS I                                                                    | 11269946                | 11271226 | WBGene00009465 | F36D1.6  | F36D1.6 -0.065483692638983  |
| AGIWUR5059;AGIWUR16986;AGIWUR23497                                             |                         |          |                |          |                             |
| CB4856 HS I                                                                    | 11271708                | 11272346 | WBGene00009463 | F36D1.4  | F36D1.4 0.0158333778774846  |
| AGIWUR27994                                                                    |                         |          |                |          |                             |
| CB4856 HS I                                                                    | 11274899                | 11276346 | WBGene00009468 | F36D1.9  | F36D1.9 -0.309868297572423  |
| AGIWUR28466;AGIWUR30243;AGIWUR30436                                            |                         |          |                |          |                             |
| CB4856 HS I                                                                    | 11276451                | 11280018 | WBGene00009461 | madf-2   | F36D1.1 -0.01130850726401   |
| AGIWUR18025                                                                    |                         |          |                |          |                             |
| CB4856 HS I                                                                    | 11282473                | 11286290 | WBGene00009462 | sre-22   | F36D1.2 -0.0222081265227581 |
| AGIWUR8829;AGIWUR32183                                                         |                         |          |                |          |                             |
| CB4856 HS I                                                                    | 11289044                | 11291868 | WBGene00005710 | sru-47   | F36D1.3 0.223374703179845   |
| AGIWUR34147                                                                    |                         |          |                |          |                             |
| CB4856 HS I                                                                    | 11292662                | 11294197 | WBGene00013181 | Y53H1B.2 | Y53H1B.2                    |
| 0.152547163634271 AGIWUR1839                                                   |                         |          |                |          |                             |
| CB4856 HS I                                                                    | 11294593                | 11297206 | WBGene00013180 | cutl-10  | Y53H1B.1                    |
| 0.160596513730233 AGIWUR9275                                                   |                         |          |                |          |                             |
| CB4856 HS I                                                                    | 11300743                | 11301662 | WBGene00013182 | Y53H1B.4 | Y53H1B.4                    |
| 0.0231897954299107 AGIWUR40711                                                 |                         |          |                |          |                             |
| CB4856 HS I                                                                    | 11305882                | 11307450 | WBGene00219319 | H25P06.5 | H25P06.5                    |
| -0.101734604811186 AGIWUR14863;AGIWUR22874;AGIWUR29330;AGIWUR31715;AGIWUR39430 |                         |          |                |          |                             |
| CB4856 HS I                                                                    | 11311516                | 11323110 | WBGene00010416 | hvk-2    | H25P06.1                    |

|                                                          |                                                                      |          |                |          |          |                     |
|----------------------------------------------------------|----------------------------------------------------------------------|----------|----------------|----------|----------|---------------------|
| -0.17647389667837                                        | AGIWUR19499                                                          |          |                |          |          |                     |
| CB4856 HS I                                              | 11323527                                                             | 11333152 | WBGene00000410 | cdk-9    | H25P06.2 |                     |
| -0.230804575096032                                       | AGIWUR2599;AGIWUR5704;AGIWUR16319;AGIWUR18803;AGIWUR22679            |          |                |          |          |                     |
| CB4856 HS I                                              | 11334223                                                             | 11337431 | WBGene00014807 | M04D5.1  | M04D5.1  | -0.0584853679228017 |
| AGIWUR1348;AGIWUR28722                                   |                                                                      |          |                |          |          |                     |
| CB4856 HS I                                              | 11339787                                                             | 11341521 | WBGene00077770 | M04D5.3  | M04D5.3  | -0.147672550687314  |
| AGIWUR20198                                              |                                                                      |          |                |          |          |                     |
| CB4856 HS I                                              | 11361090                                                             | 11362900 | WBGene00044250 | F56G4.7  | F56G4.7  | -0.0885588203725352 |
| AGIWUR219;AGIWUR6931;AGIWUR14752;AGIWUR17788;AGIWUR20636 |                                                                      |          |                |          |          |                     |
| CB4856 HS I                                              | 11364321                                                             | 11374334 | WBGene00010161 | F56G4.6  | F56G4.6  | 0.114198093734634   |
| AGIWUR42088                                              |                                                                      |          |                |          |          |                     |
| CB4856 HS I                                              | 11374620                                                             | 11380127 | WBGene00010159 | F56G4.4  | F56G4.4  | 0.0127621800527145  |
| AGIWUR21621                                              |                                                                      |          |                |          |          |                     |
| CB4856 HS I                                              | 11380231                                                             | 11388751 | WBGene00010160 | png-1    | F56G4.5  | -0.0822711958616615 |
| AGIWUR20127                                              |                                                                      |          |                |          |          |                     |
| CB4856 HS I                                              | 11388689                                                             | 11396660 | WBGene00000010 | aat-9    | Y53H1C.1 |                     |
| -0.162638375524386                                       | AGIWUR16336;AGIWUR17335;AGIWUR18837                                  |          |                |          |          |                     |
| CB4856 HS I                                              | 11400612                                                             | 11416427 | WBGene00001215 | ego-2    | Y53H1C.2 |                     |
| -0.112685660800397                                       | AGIWUR2467;AGIWUR2804;AGIWUR4341;AGIWUR10016;AGIWUR25366;AGIWUR45207 |          |                |          |          |                     |
| CB4856 HS I                                              | 11417844                                                             | 11421236 | WBGene00013186 | Y53H1C.3 | Y53H1C.3 |                     |
| -0.0112978186392194                                      | AGIWUR20556                                                          |          |                |          |          |                     |
| CB4856 HS I                                              | 11422190                                                             | 11423600 | WBGene00007769 | C27C7.7  | C27C7.7  | -0.190297232547101  |
| AGIWUR13993                                              |                                                                      |          |                |          |          |                     |
| CB4856 HS I                                              | 11423993                                                             | 11426054 | WBGene00007768 | C27C7.5  | C27C7.5  | -0.356278552599089  |
| AGIWUR1894                                               |                                                                      |          |                |          |          |                     |
| CB4856 HS I                                              | 11429029                                                             | 11432145 | WBGene00003664 | nhr-74   | C27C7.3  | 0.0286996805967004  |
| AGIWUR43950                                              |                                                                      |          |                |          |          |                     |
| CB4856 HS I                                              | 11443452                                                             | 11446644 | WBGene00014992 | ZK1025.1 | ZK1025.1 |                     |
| 0.0378075623363827                                       | AGIWUR9385                                                           |          |                |          |          |                     |
| CB4856 HS I                                              | 11460780                                                             | 11463074 | WBGene00014183 | ZK1025.3 | ZK1025.3 |                     |
| -0.132588349064376                                       | AGIWUR9770                                                           |          |                |          |          |                     |
| CB4856 HS I                                              | 11473218                                                             | 11475677 | WBGene00003703 | nhr-113  | ZK1025.9 |                     |
| 0.0312486924631674                                       | AGIWUR19572                                                          |          |                |          |          |                     |
| CB4856 HS I                                              | 11483392                                                             | 11484571 | WBGene00010652 | K08C9.5  | K08C9.5  | -0.0163436767921681 |
| AGIWUR40298                                              |                                                                      |          |                |          |          |                     |
| CB4856 HS I                                              | 11484778                                                             | 11486598 | WBGene00010650 | K08C9.1  | K08C9.1  | -0.0275676096022295 |
| AGIWUR24763                                              |                                                                      |          |                |          |          |                     |
| CB4856 HS I                                              | 11486895                                                             | 11488471 | WBGene00010651 | K08C9.2  | K08C9.2  | -0.167061970293728  |
| AGIWUR16644                                              |                                                                      |          |                |          |          |                     |

|                                                             |          |          |                |           |          |                     |
|-------------------------------------------------------------|----------|----------|----------------|-----------|----------|---------------------|
| CB4856 HS I                                                 | 11489158 | 11490630 | WBGene00000641 | col-65    | K08C9.4  | -0.573240412521814  |
| AGIWUR17873                                                 |          |          |                |           |          |                     |
| CB4856 HS I                                                 | 11493036 | 11495080 | WBGene00045218 | K08C9.8   | K08C9.8  | 0.0437518624668183  |
| AGIWUR14097;AGIWUR39873                                     |          |          |                |           |          |                     |
| CB4856 HS I                                                 | 11498914 | 11499655 | WBGene00010653 | K08C9.6   | K08C9.6  | 0.148494269327895   |
| AGIWUR354;AGIWUR5663;AGIWUR10669;AGIWUR15581;AGIWUR43275    |          |          |                |           |          |                     |
| CB4856 HS I                                                 | 11501625 | 11507129 | WBGene00009318 | F32B4.8   | F32B4.8  | -0.140709718174714  |
| AGIWUR31965                                                 |          |          |                |           |          |                     |
| CB4856 HS I                                                 | 11510066 | 11512769 | WBGene00009312 | F32B4.1   | F32B4.1  | 0.0438667560115054  |
| AGIWUR10881;AGIWUR12015;AGIWUR29788                         |          |          |                |           |          |                     |
| CB4856 HS I                                                 | 11512840 | 11513853 | WBGene00009313 | F32B4.2   | F32B4.2  | 0.107226689879948   |
| AGIWUR23120;AGIWUR37167;AGIWUR44941                         |          |          |                |           |          |                     |
| CB4856 HS I                                                 | 11515127 | 11517108 | WBGene00009316 | abhd-11.1 | F32B4.6  |                     |
| 0.0367255851099575 AGIWUR39042                              |          |          |                |           |          |                     |
| CB4856 HS I                                                 | 11517558 | 11526962 | WBGene00009314 | F32B4.4   | F32B4.4  | 0.00052590907590222 |
| AGIWUR25980;AGIWUR30552                                     |          |          |                |           |          |                     |
| CB4856 HS I                                                 | 11526918 | 11557851 | WBGene00001131 | dys-1     | F15D3.1  | 0.0368624073819461  |
| AGIWUR12141;AGIWUR22309;AGIWUR24862;AGIWUR34445;AGIWUR40088 |          |          |                |           |          |                     |
| CB4856 HS I                                                 | 11557986 | 11558671 | WBGene00077557 | F15D3.9   | F15D3.9  | 0.0527443475592744  |
| AGIWUR2903;AGIWUR3479;AGIWUR5850;AGIWUR17559;AGIWUR22084    |          |          |                |           |          |                     |
| CB4856 HS I                                                 | 11560637 | 11564387 | WBGene00008853 | cllec-101 | F15D3.2  |                     |
| -0.0402735258254836 AGIWUR11727;AGIWUR34026                 |          |          |                |           |          |                     |
| CB4856 HS I                                                 | 11565238 | 11570803 | WBGene00008854 | F15D3.4   | F15D3.4  | 0.0728750570298917  |
| AGIWUR1550                                                  |          |          |                |           |          |                     |
| CB4856 HS I                                                 | 11570886 | 11571178 | WBGene00008855 | F15D3.5   | F15D3.5  | -0.204639053918876  |
| AGIWUR38955                                                 |          |          |                |           |          |                     |
| CB4856 HS I                                                 | 11572121 | 11577488 | WBGene00008856 | F15D3.6   | F15D3.6  | -0.328301357445139  |
| AGIWUR36119;AGIWUR37869                                     |          |          |                |           |          |                     |
| CB4856 HS I                                                 | 11578641 | 11579612 | WBGene00008857 | timmm-23  | F15D3.7  | 0.0626483412760859  |
| AGIWUR37010                                                 |          |          |                |           |          |                     |
| CB4856 HS I                                                 | 11579861 | 11581986 | WBGene00008858 | pals-1    | F15D3.8  | 0.447249109008176   |
| AGIWUR20103                                                 |          |          |                |           |          |                     |
| CB4856 HS I                                                 | 11582743 | 11586069 | WBGene00004963 | spe-9     | C17D12.6 |                     |
| 0.150938720134366 AGIWUR2003                                |          |          |                |           |          |                     |
| CB4856 HS I                                                 | 11585922 | 11587294 | WBGene00007639 | C17D12.5  | C17D12.5 |                     |
| -0.225051660841791 AGIWUR29807                              |          |          |                |           |          |                     |
| CB4856 HS I                                                 | 11592302 | 11602095 | WBGene00006807 | unc-75    | C17D12.2 |                     |
| 0.0622669641313673 AGIWUR17392;AGIWUR20095                  |          |          |                |           |          |                     |
| CB4856 HS I                                                 | 11604027 | 11611314 | WBGene00007640 | C17D12.7  | C17D12.7 |                     |

|                                                                                    |                                     |          |                |          |          |                     |
|------------------------------------------------------------------------------------|-------------------------------------|----------|----------------|----------|----------|---------------------|
| -0.315708602237635                                                                 | AGIWUR32357                         |          |                |          |          |                     |
| CB4856 HS I                                                                        | 11611672                            | 11616244 | WBGene00007637 | dhhc-7   | C17D12.1 |                     |
| 0.011240797982488                                                                  | AGIWUR38592                         |          |                |          |          |                     |
| CB4856 HS I                                                                        | 11616816                            | 11620263 | WBGene00007638 | C17D12.3 | C17D12.3 |                     |
| -0.162562073526656                                                                 | AGIWUR9660                          |          |                |          |          |                     |
| CB4856 HS I                                                                        | 11630064                            | 11632879 | WBGene00012265 | W04G5.4  | W04G5.4  | -0.13348334014742   |
| AGIWUR32019;AGIWUR32119;AGIWUR43756                                                |                                     |          |                |          |          |                     |
| CB4856 HS I                                                                        | 11633002                            | 11638491 | WBGene00004275 | rab-11.2 | W04G5.2  |                     |
| -0.257264008622219                                                                 | AGIWUR6515;AGIWUR17616;AGIWUR24210  |          |                |          |          |                     |
| CB4856 HS I                                                                        | 11638482                            | 11640414 | WBGene00012270 | W04G5.10 | W04G5.10 |                     |
| 0.115685118848063                                                                  | AGIWUR4128;AGIWUR31161;AGIWUR34859  |          |                |          |          |                     |
| CB4856 HS I                                                                        | 11640687                            | 11642206 | WBGene00002205 | kin-23   | W04G5.6  | -0.172772819580114  |
| AGIWUR14720                                                                        |                                     |          |                |          |          |                     |
| CB4856 HS I                                                                        | 11642625                            | 11645420 | WBGene00012269 | W04G5.9  | W04G5.9  | 0.175125805925488   |
| AGIWUR26630                                                                        |                                     |          |                |          |          |                     |
| CB4856 HS I                                                                        | 11646525                            | 11647020 | WBGene00045075 | W04G5.12 | W04G5.12 |                     |
| 0.0698161364451018                                                                 | AGIWUR863;AGIWUR7332;AGIWUR13915    |          |                |          |          |                     |
| CB4856 HS I                                                                        | 11647753                            | 11648428 | WBGene00045076 | W04G5.13 | W04G5.13 |                     |
| -0.126231851326535                                                                 | AGIWUR11630;AGIWUR42286;AGIWUR42442 |          |                |          |          |                     |
| CB4856 HS I                                                                        | 11649982                            | 11651912 | WBGene00012268 | W04G5.8  | W04G5.8  | -0.0167035716506847 |
| AGIWUR29292                                                                        |                                     |          |                |          |          |                     |
| CB4856 HS I                                                                        | 11652789                            | 11654254 | WBGene00012267 | W04G5.7  | W04G5.7  | -0.0877080911105868 |
| AGIWUR227;AGIWUR4758;AGIWUR23631                                                   |                                     |          |                |          |          |                     |
| CB4856 HS I                                                                        | 11675850                            | 11680975 | WBGene00002232 | kpc-1    | F11A6.1  | 0.133324670429754   |
| AGIWUR6129;AGIWUR35941;AGIWUR40036;AGIWUR40532;AGIWUR41868;AGIWUR43223;AGIWUR44060 |                                     |          |                |          |          |                     |
| CB4856 HS I                                                                        | 11680913                            | 11682441 | WBGene00008681 | scrm-4   | F11A6.2  | 0.28402354814221    |
| AGIWUR12708;AGIWUR15152;AGIWUR37914                                                |                                     |          |                |          |          |                     |
| CB4856 HS I                                                                        | 11687811                            | 11688522 | WBGene00077549 | F11A6.3  | F11A6.3  | -0.0100628340583349 |
| AGIWUR5970                                                                         |                                     |          |                |          |          |                     |
| CB4856 HS I                                                                        | 11688680                            | 11690830 | WBGene00011935 | scrm-1   | T22H2.5  | -0.160877370719933  |
| AGIWUR22686;AGIWUR42928                                                            |                                     |          |                |          |          |                     |
| CB4856 HS I                                                                        | 11694722                            | 11694997 | WBGene00011934 | T22H2.4  | T22H2.4  | -0.120425636106082  |
| AGIWUR33144                                                                        |                                     |          |                |          |          |                     |
| CB4856 HS I                                                                        | 11695339                            | 11697943 | WBGene00005523 | sri-11   | T22H2.3  | -0.0130523806750169 |
| AGIWUR24552                                                                        |                                     |          |                |          |          |                     |
| CB4856 HS I                                                                        | 11699169                            | 11701178 | WBGene00005524 | sri-12   | T22H2.1  | -0.154189341888138  |
| AGIWUR26364                                                                        |                                     |          |                |          |          |                     |
| CB4856 HS I                                                                        | 11701631                            | 11703698 | WBGene00011936 | pgrn-1   | T22H2.6  | 0.107327134955624   |
| AGIWUR27058;AGIWUR43309                                                            |                                     |          |                |          |          |                     |

|                                                                                                           |   |          |          |                |          |          |                     |
|-----------------------------------------------------------------------------------------------------------|---|----------|----------|----------------|----------|----------|---------------------|
| CB4856 HS                                                                                                 | I | 11703718 | 11706612 | WBGene00011933 | oac-47   | T22H2.2  | 0.320317097696127   |
| AGIWUR23499                                                                                               |   |          |          |                |          |          |                     |
| CB4856 HS                                                                                                 | I | 11707818 | 11712197 | WBGene00009413 | oac-19   | F35E2.6  | -0.151461347677604  |
| AGIWUR25636                                                                                               |   |          |          |                |          |          |                     |
| CB4856 HS                                                                                                 | I | 11714956 | 11717616 | WBGene00009414 | F35E2.7  | F35E2.7  | 0.126818569242793   |
| AGIWUR21665                                                                                               |   |          |          |                |          |          |                     |
| CB4856 HS                                                                                                 | I | 11718864 | 11719790 | WBGene00009415 | F35E2.8  | F35E2.8  | 0.0176016220833883  |
| AGIWUR4814                                                                                                |   |          |          |                |          |          |                     |
| CB4856 HS                                                                                                 | I | 11719902 | 11722936 | WBGene00044270 | F35E2.10 |          | F35E2.10            |
| -0.0731677169591793 AGIWUR4911;AGIWUR28015;AGIWUR32014;AGIWUR44280                                        |   |          |          |                |          |          |                     |
| CB4856 HS                                                                                                 | I | 11723427 | 11726326 | WBGene00009416 | F35E2.9  | F35E2.9  | 0.0907159010282736  |
| AGIWUR15496                                                                                               |   |          |          |                |          |          |                     |
| CB4856 HS                                                                                                 | I | 11733940 | 11735964 | WBGene00009411 | F35E2.3  | F35E2.3  | 0.0136701234230765  |
| AGIWUR643;AGIWUR24810;AGIWUR32708;AGIWUR40664;AGIWUR43891                                                 |   |          |          |                |          |          |                     |
| CB4856 HS                                                                                                 | I | 11736637 | 11737699 | WBGene00009410 | F35E2.2  | F35E2.2  | -0.150974837677146  |
| AGIWUR38091                                                                                               |   |          |          |                |          |          |                     |
| CB4856 HS                                                                                                 | I | 11741603 | 11743951 | WBGene00009412 | F35E2.5  | F35E2.5  | -0.0508714736399183 |
| AGIWUR19040;AGIWUR31412                                                                                   |   |          |          |                |          |          |                     |
| CB4856 HS                                                                                                 | I | 11744172 | 11747451 | WBGene00012946 | Y47H9B.2 |          | Y47H9B.2            |
| -0.0413080527024556 AGIWUR3183;AGIWUR27320;AGIWUR39374;AGIWUR42978                                        |   |          |          |                |          |          |                     |
| CB4856 HS                                                                                                 | I | 11747428 | 11792118 | WBGene00006876 | vab-10   | ZK1151.1 |                     |
| 0.0510324196329908                                                                                        |   |          |          |                |          |          |                     |
| AGIWUR5594;AGIWUR6483;AGIWUR14405;AGIWUR15572;AGIWUR17308;AGIWUR19666;AGIWUR20230;AGIWUR25708;AGIWUR38637 |   |          |          |                |          |          |                     |
| CB4856 HS                                                                                                 | I | 11797032 | 11797947 | WBGene00011384 | T02G6.1  | T02G6.1  | -0.308791290903896  |
| AGIWUR30583                                                                                               |   |          |          |                |          |          |                     |
| CB4856 HS                                                                                                 | I | 11800433 | 11804991 | WBGene00011385 | T02G6.2  | T02G6.2  | -0.283521076807209  |
| AGIWUR1183;AGIWUR9681;AGIWUR13350;AGIWUR33790;AGIWUR38283;AGIWUR38543                                     |   |          |          |                |          |          |                     |
| CB4856 HS                                                                                                 | I | 11809132 | 11811266 | WBGene00011387 | T02G6.4  | T02G6.4  | -0.108853549151975  |
| AGIWUR25717                                                                                               |   |          |          |                |          |          |                     |
| CB4856 HS                                                                                                 | I | 11813779 | 11814451 | WBGene00011386 | T02G6.3  | T02G6.3  | -0.536071899290123  |
| AGIWUR33810                                                                                               |   |          |          |                |          |          |                     |
| CB4856 HS                                                                                                 | I | 11815910 | 11819277 | WBGene00011388 | T02G6.5  | T02G6.5  | 0.0174280748289686  |
| AGIWUR1129                                                                                                |   |          |          |                |          |          |                     |
| CB4856 HS                                                                                                 | I | 11820688 | 11823459 | WBGene00086562 | T02G6.11 |          | T02G6.11            |
| -0.0481049301882308 AGIWUR4176;AGIWUR10405;AGIWUR11978;AGIWUR13971;AGIWUR40335;AGIWUR44344                |   |          |          |                |          |          |                     |
| CB4856 HS                                                                                                 | I | 11827549 | 11828619 | WBGene00011390 | T02G6.7  | T02G6.7  | -0.112605883801371  |
| AGIWUR6776                                                                                                |   |          |          |                |          |          |                     |
| CB4856 HS                                                                                                 | I | 11830985 | 11833166 | WBGene00012947 | Y47H9C.1 |          | Y47H9C.1            |
| 0.315209032407264 AGIWUR41747                                                                             |   |          |          |                |          |          |                     |



|                                                                                                                      |                                                 |          |                |                 |                            |
|----------------------------------------------------------------------------------------------------------------------|-------------------------------------------------|----------|----------------|-----------------|----------------------------|
| CB4856 HS I                                                                                                          | 11836460                                        | 11849251 | WBGene00012948 | dhhc-2          | Y47H9C.2                   |
| 0.0817190146284261                                                                                                   | AGIWUR13146                                     |          |                |                 |                            |
| CB4856 HS I                                                                                                          | 11851566                                        | 11868105 | WBGene00000415 | ced-1           | Y47H9C.4                   |
| -0.0158309396206118                                                                                                  | AGIWUR17222;AGIWUR19662;AGIWUR22787;AGIWUR40343 |          |                |                 |                            |
| CB4856 HS I                                                                                                          | 11888501                                        | 11890558 | WBGene00000821 | csp-3           | Y47H9C.6                   |
| 0.0072398838545098                                                                                                   | AGIWUR42697                                     |          |                |                 |                            |
| CB4856 HS I                                                                                                          | 11891549                                        | 11893727 | WBGene00012950 | eif-2Bbeta      | Y47H9C.7                   |
| -0.00876449637424592                                                                                                 | AGIWUR36725                                     |          |                |                 |                            |
| CB4856 HS I                                                                                                          | 11893881                                        | 11896284 | WBGene00012951 | Y47H9C.8        | Y47H9C.8                   |
| 0.130664748417077                                                                                                    | AGIWUR13628                                     |          |                |                 |                            |
| CB4856 HS I                                                                                                          | 11898789                                        | 11901476 | WBGene00012952 | Y47H9C.9        | Y47H9C.9                   |
| 0.112989746292866                                                                                                    | AGIWUR19718                                     |          |                |                 |                            |
| CB4856 HS I                                                                                                          | 11901608                                        | 11903305 | WBGene00012953 | fbxa-216        | Y47H9C.10                  |
| -0.0695369808488273                                                                                                  | AGIWUR18820                                     |          |                |                 |                            |
| CB4856 HS I                                                                                                          | 11903734                                        | 11905148 | WBGene00012954 | fbxa-217        | Y47H9C.11                  |
| -0.0500803532965612                                                                                                  | AGIWUR28607                                     |          |                |                 |                            |
| CB4856 HS I                                                                                                          | 11905957                                        | 11907484 | WBGene00014820 | R09B3.6 R09B3.6 | 0.0450911678836685         |
| AGIWUR33163;AGIWUR44264                                                                                              |                                                 |          |                |                 |                            |
| CB4856 HS I                                                                                                          | 11907571                                        | 11909280 | WBGene00001372 | exo-3           | R09B3.1                    |
| -0.00272294771850667                                                                                                 | AGIWUR18555                                     |          |                |                 |                            |
| CB4856 HS I                                                                                                          | 11909366                                        | 11910104 | WBGene00011155 | R09B3.2 R09B3.2 | 0.16995236757516           |
| AGIWUR1991;AGIWUR2354;AGIWUR5088;AGIWUR17198;AGIWUR19184;AGIWUR19657;AGIWUR32430;AGIWUR32996;AGIWUR36348;AGIWUR38502 |                                                 |          |                |                 |                            |
| CB4856 HS I                                                                                                          | 11910328                                        | 11911021 | WBGene00011156 | R09B3.3 R09B3.3 | -0.425813178259906         |
| AGIWUR19760                                                                                                          |                                                 |          |                |                 |                            |
| CB4856 HS I                                                                                                          | 11911324                                        | 11912052 | WBGene00006707 | ubc-12          | R09B3.4                    |
| -0.00530673255275005                                                                                                 | AGIWUR27816                                     |          |                |                 |                            |
| CB4856 HS I                                                                                                          | 11912791                                        | 11917719 | WBGene00001836 | hda-3           | R06C1.1 0.0651449288111863 |
| AGIWUR26718                                                                                                          |                                                 |          |                |                 |                            |
| CB4856 HS I                                                                                                          | 11917834                                        | 11923915 | WBGene00011058 | fdps-1          | R06C1.2 0.189544763639903  |
| AGIWUR5488                                                                                                           |                                                 |          |                |                 |                            |
| CB4856 HS I                                                                                                          | 11924785                                        | 11929511 | WBGene00006958 | wve-1           | R06C1.3 0.0940329971391254 |
| AGIWUR2816;AGIWUR28617;AGIWUR38538                                                                                   |                                                 |          |                |                 |                            |
| CB4856 HS I                                                                                                          | 11930704                                        | 11931757 | WBGene00011059 | R06C1.4 R06C1.4 | -0.25087657716583          |
| AGIWUR13265;AGIWUR15867;AGIWUR18035;AGIWUR19895;AGIWUR36452;AGIWUR40223                                              |                                                 |          |                |                 |                            |
| CB4856 HS I                                                                                                          | 11947001                                        | 11953126 | WBGene00011060 | R06C1.6 R06C1.6 | 0.0930072410581939         |
| AGIWUR16528                                                                                                          |                                                 |          |                |                 |                            |
| CB4856 HS I                                                                                                          | 11953512                                        | 11961984 | WBGene00002004 | hsf-1           | Y53C10A.12                 |
| 0.12203949151403                                                                                                     | AGIWUR5003                                      |          |                |                 |                            |

|                                                          |                                                                                   |          |                |            |                             |
|----------------------------------------------------------|-----------------------------------------------------------------------------------|----------|----------------|------------|-----------------------------|
| CB4856 HS I                                              | 11966271                                                                          | 11967591 | WBGene00014915 | Y53C10A.1  | Y53C10A.1                   |
| -0.0101681523765675                                      | AGIWUR3407;AGIWUR13951;AGIWUR27588;AGIWUR39138;AGIWUR40433                        |          |                |            |                             |
| CB4856 HS I                                              | 11968022                                                                          | 11969847 | WBGene00013134 | hsf-2      | Y53C10A.3                   |
| -0.178110509170489                                       | AGIWUR14077;AGIWUR30255                                                           |          |                |            |                             |
| CB4856 HS I                                              | 11971179                                                                          | 11971797 | WBGene00044805 | Y53C10A.15 | Y53C10A.15                  |
| 0.11982081681794                                         | AGIWUR5972;AGIWUR10075;AGIWUR17097;AGIWUR25230;AGIWUR41924                        |          |                |            |                             |
| CB4856 HS I                                              | 11979401                                                                          | 11985612 | WBGene00013135 | rga-2      | Y53C10A.4                   |
| 0.118649080213347                                        | AGIWUR7868                                                                        |          |                |            |                             |
| CB4856 HS I                                              | 11998781                                                                          | 12002643 | WBGene00013136 | Y53C10A.5  | Y53C10A.5                   |
| -0.0698352369639412                                      | AGIWUR35184                                                                       |          |                |            |                             |
| CB4856 HS I                                              | 12002552                                                                          | 12004997 | WBGene00013137 | Y53C10A.6  | Y53C10A.6                   |
| 0.0885597335000483                                       | AGIWUR28508                                                                       |          |                |            |                             |
| CB4856 HS I                                              | 12005177                                                                          | 12006296 | WBGene00014916 | fbxa-124   | Y53C10A.7                   |
| -0.254449079658766                                       | AGIWUR32469                                                                       |          |                |            |                             |
| CB4856 HS I                                              | 12006911                                                                          | 12008040 | WBGene00014917 | fbxa-122   | Y53C10A.13                  |
| -0.00275883045894698                                     | AGIWUR4146;AGIWUR13689;AGIWUR26279;AGIWUR27755;AGIWUR38162                        |          |                |            |                             |
| CB4856 HS I                                              | 12008625                                                                          | 12009625 | WBGene00014918 | fbxa-123   | Y53C10A.14                  |
| 0.0867666618125593                                       | AGIWUR4517                                                                        |          |                |            |                             |
| CB4856 HS I                                              | 12011195                                                                          | 12018668 | WBGene00000023 | abt-5      | Y53C10A.9                   |
| 0.0953691513337613                                       | AGIWUR9468                                                                        |          |                |            |                             |
| CB4856 HS I                                              | 12020756                                                                          | 12028313 | WBGene00013138 | Y53C10A.10 | Y53C10A.10                  |
| 0.111108903089207                                        | AGIWUR3846;AGIWUR7803;AGIWUR19726;AGIWUR30908;AGIWUR33643;AGIWUR37169;AGIWUR42595 |          |                |            |                             |
| CB4856 HS I                                              | 12029927                                                                          | 12031762 | WBGene00010247 | F58D5.8    | F58D5.8 -0.0643597781875656 |
| AGIWUR33736                                              |                                                                                   |          |                |            |                             |
| CB4856 HS I                                              | 12032289                                                                          | 12033706 | WBGene00010246 | F58D5.7    | F58D5.7 -0.190432652151362  |
| AGIWUR18434                                              |                                                                                   |          |                |            |                             |
| CB4856 HS I                                              | 12034072                                                                          | 12037230 | WBGene00010245 | F58D5.6    | F58D5.6 0.0351300266537855  |
| AGIWUR31967                                              |                                                                                   |          |                |            |                             |
| CB4856 HS I                                              | 12041035                                                                          | 12045200 | WBGene00010244 | F58D5.5    | F58D5.5 -0.16790182433293   |
| AGIWUR541;AGIWUR6183;AGIWUR18314;AGIWUR21111;AGIWUR28012 |                                                                                   |          |                |            |                             |
| CB4856 HS I                                              | 12045201                                                                          | 12046617 | WBGene00010248 | F58D5.9    | F58D5.9 -0.238332908967708  |
| AGIWUR21103                                              |                                                                                   |          |                |            |                             |
| CB4856 HS I                                              | 12047469                                                                          | 12059798 | WBGene00002240 | ksr-2      | F58D5.4 0.189934000214532   |
| AGIWUR8113                                               |                                                                                   |          |                |            |                             |
| CB4856 HS I                                              | 12060271                                                                          | 12064897 | WBGene00002000 | hrp-2      | F58D5.1 0.0740600436289469  |
| AGIWUR10039                                              |                                                                                   |          |                |            |                             |
| CB4856 HS I                                              | 12066010                                                                          | 12068668 | WBGene00010242 | F58D5.2    | F58D5.2 0.164824519239648   |
| AGIWUR41355                                              |                                                                                   |          |                |            |                             |
| CB4856 HS I                                              | 12069806                                                                          | 12072878 | WBGene00010243 | F58D5.3    | F58D5.3 0.128576940263661   |

|                                     |                                     |          |                |           |           |                     |
|-------------------------------------|-------------------------------------|----------|----------------|-----------|-----------|---------------------|
| AGIWUR42289                         |                                     |          |                |           |           |                     |
| CB4856 HS I                         | 12084721                            | 12087830 | WBGene00012958 | Y47H10A.2 | Y47H10A.2 |                     |
| -0.033106224099873                  | AGIWUR9810;AGIWUR11617;AGIWUR34817  |          |                |           |           |                     |
| CB4856 HS I                         | 12088120                            | 12089969 | WBGene00012959 | Y47H10A.3 | Y47H10A.3 |                     |
| 0.427401497642447                   | AGIWUR19345                         |          |                |           |           |                     |
| CB4856 HS I                         | 12091571                            | 12094740 | WBGene00012960 | Y47H10A.4 | Y47H10A.4 |                     |
| 0.147182244857891                   | AGIWUR7903                          |          |                |           |           |                     |
| CB4856 HS I                         | 12095777                            | 12097987 | WBGene00012961 | Y47H10A.5 | Y47H10A.5 |                     |
| 1.06005810625233                    | AGIWUR33342                         |          |                |           |           |                     |
| CB4856 HS I                         | 12098671                            | 12106112 | WBGene00004509 | rrf-2     | M01G12.12 |                     |
| 0.171524493894154                   | AGIWUR44168                         |          |                |           |           |                     |
| CB4856 HS I                         | 12106912                            | 12108503 | WBGene00010825 | M01G12.14 | M01G12.14 |                     |
| 0.124370221619789                   | AGIWUR13895;AGIWUR22435             |          |                |           |           |                     |
| CB4856 HS I                         | 12109096                            | 12112505 | WBGene00010822 | M01G12.9  | M01G12.9  |                     |
| 0.016184360285159                   | AGIWUR10130;AGIWUR16412;AGIWUR27321 |          |                |           |           |                     |
| CB4856 HS I                         | 12114064                            | 12116304 | WBGene00010821 | M01G12.7  | M01G12.7  |                     |
| 1.02801340689346                    | AGIWUR27585                         |          |                |           |           |                     |
| CB4856 HS I                         | 12117997                            | 12122282 | WBGene00010820 | M01G12.6  | M01G12.6  |                     |
| 0.253505908399689                   | AGIWUR15151                         |          |                |           |           |                     |
| CB4856 HS I                         | 12122811                            | 12125586 | WBGene00005858 | srw-111   | M01G12.4  |                     |
| 0.739133485300092                   | AGIWUR20447                         |          |                |           |           |                     |
| CB4856 HS I                         | 12126455                            | 12128965 | WBGene00010818 | srt-21    | M01G12.3  |                     |
| -0.00873918432124654                | AGIWUR8394                          |          |                |           |           |                     |
| CB4856 HS I                         | 12144007                            | 12146977 | WBGene00005529 | sri-17    | F15H9.3   | -0.0880625458506756 |
| AGIWUR6764;AGIWUR41347              |                                     |          |                |           |           |                     |
| CB4856 HS I                         | 12148080                            | 12150741 | WBGene00005528 | sri-16    | F15H9.4   | 0.0661655216596273  |
| AGIWUR44834                         |                                     |          |                |           |           |                     |
| CB4856 HS I                         | 12151021                            | 12154333 | WBGene00005527 | sri-15    | F15H9.2   | -0.0847735316322122 |
| AGIWUR8549                          |                                     |          |                |           |           |                     |
| CB4856 HS I                         | 12157151                            | 12158712 | WBGene00008870 | F15H9.1   | F15H9.1   | 0.0633756594282739  |
| AGIWUR434;AGIWUR33445               |                                     |          |                |           |           |                     |
| CB4856 HS I                         | 12160100                            | 12162091 | WBGene00077535 | F15H9.7   | F15H9.7   | -0.0278782927555112 |
| AGIWUR16743;AGIWUR44656             |                                     |          |                |           |           |                     |
| CB4856 HS I                         | 12162399                            | 12163703 | WBGene00011026 | R05D7.1   | R05D7.1   | -0.263163199521681  |
| AGIWUR27624                         |                                     |          |                |           |           |                     |
| CB4856 HS I                         | 12165729                            | 12168022 | WBGene00011027 | R05D7.2   | R05D7.2   | -0.0329838818414583 |
| AGIWUR10353;AGIWUR10361;AGIWUR19900 |                                     |          |                |           |           |                     |
| CB4856 HS I                         | 12168238                            | 12177782 | WBGene00011028 | R05D7.3   | R05D7.3   | 0.311036497647485   |
| AGIWUR20284                         |                                     |          |                |           |           |                     |

|                                                             |                        |          |                |                 |                     |
|-------------------------------------------------------------|------------------------|----------|----------------|-----------------|---------------------|
| CB4856 HS I                                                 | 12181046               | 12183297 | WBGene00011029 | abhd-11.2       | R05D7.4             |
| 0.196376521206599                                           | AGIWUR12358            |          |                |                 |                     |
| CB4856 HS I                                                 | 12183688               | 12189007 | WBGene00011030 | R05D7.5 R05D7.5 | 0.0881239348612333  |
| AGIWUR7362                                                  |                        |          |                |                 |                     |
| CB4856 HS I                                                 | 12189521               | 12190218 | WBGene00077559 | R05D7.7 R05D7.7 | -0.110643447218793  |
| AGIWUR3082;AGIWUR11879;AGIWUR19486;AGIWUR35942;AGIWUR38583  |                        |          |                |                 |                     |
| CB4856 HS I                                                 | 12202232               | 12203717 | WBGene00007600 | C15C6.1 C15C6.1 | -0.172930901042946  |
| AGIWUR33988                                                 |                        |          |                |                 |                     |
| CB4856 HS I                                                 | 12203800               | 12205809 | WBGene00007601 | C15C6.2 C15C6.2 |                     |
| -0.00114359973473643                                        | AGIWUR7410;AGIWUR19117 |          |                |                 |                     |
| CB4856 HS I                                                 | 12207097               | 12212206 | WBGene00007602 | C15C6.3 C15C6.3 | -0.400811664254949  |
| AGIWUR13087                                                 |                        |          |                |                 |                     |
| CB4856 HS I                                                 | 12213109               | 12215184 | WBGene00007603 | C15C6.4 C15C6.4 | 0.0468831735426072  |
| AGIWUR2360                                                  |                        |          |                |                 |                     |
| CB4856 HS I                                                 | 12218433               | 12222298 | WBGene00008783 | F14B6.2 F14B6.2 | 0.166824516848028   |
| AGIWUR18283                                                 |                        |          |                |                 |                     |
| CB4856 HS I                                                 | 12230418               | 12232303 | WBGene00008784 | F14B6.3 F14B6.3 | -0.192263970111068  |
| AGIWUR26961                                                 |                        |          |                |                 |                     |
| CB4856 HS I                                                 | 12232689               | 12235193 | WBGene00008787 | F14B6.6 F14B6.6 | -0.145470689522737  |
| AGIWUR15381                                                 |                        |          |                |                 |                     |
| CB4856 HS I                                                 | 12236018               | 12238252 | WBGene00008785 | F14B6.4 F14B6.4 |                     |
| -0.00837541272631093                                        | AGIWUR38387            |          |                |                 |                     |
| CB4856 HS I                                                 | 12239160               | 12241808 | WBGene00008786 | oac-16 F14B6.5  | 0.180092043944873   |
| AGIWUR42049                                                 |                        |          |                |                 |                     |
| CB4856 HS I                                                 | 12245456               | 12246751 | WBGene00003672 | nhr-82 F41D3.1  | -0.0149691487646511 |
| AGIWUR30564                                                 |                        |          |                |                 |                     |
| CB4856 HS I                                                 | 12247771               | 12250210 | WBGene00009607 | oac-26 F41D3.2  | -0.0538795248829818 |
| AGIWUR21424                                                 |                        |          |                |                 |                     |
| CB4856 HS I                                                 | 12251906               | 12253554 | WBGene00009608 | nhr-265 F41D3.3 | 0.230521590590069   |
| AGIWUR20066                                                 |                        |          |                |                 |                     |
| CB4856 HS I                                                 | 12254506               | 12257180 | WBGene00009609 | oac-27 F41D3.4  | 0.0914594693040485  |
| AGIWUR10798;AGIWUR12390;AGIWUR20094;AGIWUR38069;AGIWUR43226 |                        |          |                |                 |                     |
| CB4856 HS I                                                 | 12264521               | 12266267 | WBGene00009611 | F41D3.6 F41D3.6 |                     |
| -0.00289617180831758                                        | AGIWUR37864            |          |                |                 |                     |
| CB4856 HS I                                                 | 12267045               | 12267491 | WBGene00009612 | F41D3.7 F41D3.7 | -0.0250790533383904 |
| AGIWUR35359                                                 |                        |          |                |                 |                     |
| CB4856 HS I                                                 | 12267499               | 12268128 | WBGene00009613 | F41D3.8 F41D3.8 | -0.186121495191783  |
| AGIWUR42139                                                 |                        |          |                |                 |                     |
| CB4856 HS I                                                 | 12272981               | 12274636 | WBGene00009614 | F41D3.9 F41D3.9 | 0.150199219737826   |

|                                     |                                     |          |                |                 |                     |  |
|-------------------------------------|-------------------------------------|----------|----------------|-----------------|---------------------|--|
| AGIWUR39869                         |                                     |          |                |                 |                     |  |
| CB4856 HS I                         | 12276893                            | 12278775 | WBGene00009616 | F41D3.11        | F41D3.11            |  |
| 0.0305714988242869                  | AGIWUR44485                         |          |                |                 |                     |  |
| CB4856 HS I                         | 12281221                            | 12282615 | WBGene00010162 | F56H6.1 F56H6.1 | -0.0830073885323452 |  |
| AGIWUR18565                         |                                     |          |                |                 |                     |  |
| CB4856 HS I                         | 12283270                            | 12285384 | WBGene00010173 | F56H6.13        | F56H6.13            |  |
| 0.199598833183298                   | AGIWUR13846                         |          |                |                 |                     |  |
| CB4856 HS I                         | 12287199                            | 12289307 | WBGene00010163 | F56H6.2 F56H6.2 | 0.279264470203822   |  |
| AGIWUR39362                         |                                     |          |                |                 |                     |  |
| CB4856 HS I                         | 12289552                            | 12290191 | WBGene00010164 | F56H6.3 F56H6.3 | 0.0578839889781362  |  |
| AGIWUR16604                         |                                     |          |                |                 |                     |  |
| CB4856 HS I                         | 12290449                            | 12292212 | WBGene00010165 | F56H6.4 F56H6.4 | 1.30771051639273    |  |
| AGIWUR18750                         |                                     |          |                |                 |                     |  |
| CB4856 HS I                         | 12292269                            | 12293936 | WBGene00010166 | gmd-2 F56H6.5   | 0.259100575407682   |  |
| AGIWUR7165                          |                                     |          |                |                 |                     |  |
| CB4856 HS I                         | 12294380                            | 12296263 | WBGene00010167 | bgnt-1.6        | F56H6.6             |  |
| 0.109356979317131                   | AGIWUR963                           |          |                |                 |                     |  |
| CB4856 HS I                         | 12297734                            | 12300817 | WBGene00010168 | F56H6.7 F56H6.7 | 0.0803617372365526  |  |
| AGIWUR17051                         |                                     |          |                |                 |                     |  |
| CB4856 HS I                         | 12301424                            | 12303157 | WBGene00010169 | clcc-18 F56H6.8 | 0.28374557659782    |  |
| AGIWUR41003                         |                                     |          |                |                 |                     |  |
| CB4856 HS I                         | 12303599                            | 12306820 | WBGene00010170 | F56H6.9 F56H6.9 | 0.055361864223594   |  |
| AGIWUR1010;AGIWUR14730              |                                     |          |                |                 |                     |  |
| CB4856 HS I                         | 12307731                            | 12310406 | WBGene00010171 | oac-35 F56H6.11 |                     |  |
| -0.168670552608683                  | AGIWUR41513                         |          |                |                 |                     |  |
| CB4856 HS I                         | 12312335                            | 12314895 | WBGene00010172 | oac-36 F56H6.12 |                     |  |
| -0.00346527156912124                | AGIWUR24225;AGIWUR26226;AGIWUR40420 |          |                |                 |                     |  |
| CB4856 HS I                         | 12315193                            | 12316688 | WBGene00008159 | C47F8.3 C47F8.3 | -0.0254516250856485 |  |
| AGIWUR13904                         |                                     |          |                |                 |                     |  |
| CB4856 HS I                         | 12317321                            | 12318735 | WBGene00008160 | glct-4 C47F8.4  | 0.0883442800915581  |  |
| AGIWUR15638                         |                                     |          |                |                 |                     |  |
| CB4856 HS I                         | 12319350                            | 12320854 | WBGene00008162 | C47F8.6 C47F8.6 | 0.0862193492348506  |  |
| AGIWUR31086                         |                                     |          |                |                 |                     |  |
| CB4856 HS I                         | 12321937                            | 12324062 | WBGene00008161 | C47F8.5 C47F8.5 | 0.00150841681376512 |  |
| AGIWUR37700                         |                                     |          |                |                 |                     |  |
| CB4856 HS I                         | 12326441                            | 12327030 | WBGene00008163 | C47F8.7 C47F8.7 | 0.149348092852934   |  |
| AGIWUR4906                          |                                     |          |                |                 |                     |  |
| CB4856 HS I                         | 12328100                            | 12329508 | WBGene00003671 | nhr-81 C47F8.8  | 0.254760160035502   |  |
| AGIWUR10579;AGIWUR25388;AGIWUR39749 |                                     |          |                |                 |                     |  |

|                     |                                    |          |                |                                    |
|---------------------|------------------------------------|----------|----------------|------------------------------------|
| CB4856 HS I         | 12331085                           | 12333413 | WBGene00008158 | nhr-165 C47F8.2 -0.126119859526928 |
| AGIWUR37607         |                                    |          |                |                                    |
| CB4856 HS I         | 12335035                           | 12336605 | WBGene00008157 | C47F8.1 C47F8.1 0.066580741015926  |
| AGIWUR45            |                                    |          |                |                                    |
| CB4856 HS I         | 12337968                           | 12339239 | WBGene00011650 | glct-1 T09E11.1                    |
| -0.274031274614068  | AGIWUR41546                        |          |                |                                    |
| CB4856 HS I         | 12341145                           | 12342826 | WBGene00011651 | nhr-217 T09E11.2                   |
| -0.221639773532648  | AGIWUR38513                        |          |                |                                    |
| CB4856 HS I         | 12344167                           | 12345702 | WBGene00011660 | T09E11.11 T09E11.11                |
| 0.386215189496481   | AGIWUR9231                         |          |                |                                    |
| CB4856 HS I         | 12345819                           | 12347265 | WBGene00011659 | T09E11.10 T09E11.10                |
| 0.0908275210389817  | AGIWUR9137;AGIWUR26055;AGIWUR36895 |          |                |                                    |
| CB4856 HS I         | 12347700                           | 12349819 | WBGene00011658 | T09E11.9 T09E11.9                  |
| 0.257099616447359   | AGIWUR36326                        |          |                |                                    |
| CB4856 HS I         | 12350692                           | 12352724 | WBGene00011657 | T09E11.8 T09E11.8                  |
| 0.0523982461995329  | AGIWUR32745                        |          |                |                                    |
| CB4856 HS I         | 12353506                           | 12356337 | WBGene00011656 | oac-45 T09E11.7                    |
| -0.135676636373136  | AGIWUR34978                        |          |                |                                    |
| CB4856 HS I         | 12356942                           | 12359341 | WBGene00011654 | oac-44 T09E11.5                    |
| -0.0203587632748432 | AGIWUR16338;AGIWUR30786            |          |                |                                    |
| CB4856 HS I         | 12359942                           | 12363416 | WBGene00011653 | oac-43 T09E11.4                    |
| 0.0113341536251763  | AGIWUR1706                         |          |                |                                    |
| CB4856 HS I         | 12364718                           | 12365948 | WBGene00045103 | T09E11.12 T09E11.12                |
| -0.183172355468614  | AGIWUR13986;AGIWUR27610            |          |                |                                    |
| CB4856 HS I         | 12366335                           | 12368619 | WBGene00011655 | T09E11.6 T09E11.6                  |
| 0.0427825465982821  | AGIWUR2283;AGIWUR21346;AGIWUR43303 |          |                |                                    |
| CB4856 HS I         | 12374205                           | 12376649 | WBGene00011779 | bgnt-1.7 T15D6.4                   |
| -0.0425516756673439 | AGIWUR15806;AGIWUR17941            |          |                |                                    |
| CB4856 HS I         | 12376904                           | 12378674 | WBGene00001642 | gly-17 T15D6.3 0.00950287676400663 |
| AGIWUR4623          |                                    |          |                |                                    |
| CB4856 HS I         | 12379335                           | 12381032 | WBGene00001641 | gly-16 T15D6.2 -0.0537452080985377 |
| AGIWUR19223         |                                    |          |                |                                    |
| CB4856 HS I         | 12381808                           | 12383259 | WBGene00011780 | T15D6.5 T15D6.5 -0.11039959369206  |
| AGIWUR15742         |                                    |          |                |                                    |
| CB4856 HS I         | 12384277                           | 12385731 | WBGene00003667 | nhr-77 T15D6.6 0.267995932881581   |
| AGIWUR37750         |                                    |          |                |                                    |
| CB4856 HS I         | 12385766                           | 12388791 | WBGene00011781 | glct-3 T15D6.7 0.039028565120617   |
| AGIWUR2441          |                                    |          |                |                                    |
| CB4856 HS I         | 12392009                           | 12393585 | WBGene00011783 | T15D6.9 T15D6.9 -0.186913699974005 |

|                        |             |          |                |                  |                     |  |
|------------------------|-------------|----------|----------------|------------------|---------------------|--|
| AGIWUR21864            |             |          |                |                  |                     |  |
| CB4856 HS I            | 12394120    | 12396322 | WBGene00011784 | T15D6.10         | T15D6.10            |  |
| -0.242907186887238     | AGIWUR795   |          |                |                  |                     |  |
| CB4856 HS I            | 12396644    | 12398267 | WBGene00011785 | T15D6.11         | T15D6.11            |  |
| 0.174509292184464      | AGIWUR40226 |          |                |                  |                     |  |
| CB4856 HS I            | 12399323    | 12401206 | WBGene00011786 | T15D6.12         | T15D6.12            |  |
| -0.0557196065816852    | AGIWUR7270  |          |                |                  |                     |  |
| CB4856 HS I            | 12403110    | 12404489 | WBGene00008470 | E03H4.2 E03H4.2  | -0.280021471787407  |  |
| AGIWUR40136            |             |          |                |                  |                     |  |
| CB4856 HS I            | 12405525    | 12406946 | WBGene00008471 | E03H4.3 E03H4.3  | -0.0409293923657383 |  |
| AGIWUR39310            |             |          |                |                  |                     |  |
| CB4856 HS I            | 12407564    | 12411435 | WBGene00008472 | E03H4.4 E03H4.4  | 0.199998897377984   |  |
| AGIWUR38190            |             |          |                |                  |                     |  |
| CB4856 HS I            | 12413809    | 12415745 | WBGene00008473 | E03H4.5 E03H4.5  | -0.259759279198272  |  |
| AGIWUR5938             |             |          |                |                  |                     |  |
| CB4856 HS I            | 12417386    | 12418800 | WBGene00008474 | nhr-174 E03H4.6  | -0.192021601128828  |  |
| AGIWUR19291            |             |          |                |                  |                     |  |
| CB4856 HS I            | 12421239    | 12424411 | WBGene00008475 | oac-13 E03H4.7   | 0.0481801282731684  |  |
| AGIWUR4799             |             |          |                |                  |                     |  |
| CB4856 HS I            | 12424555    | 12426850 | WBGene00008476 | E03H4.8 E03H4.8  | 0.268554902278478   |  |
| AGIWUR40478            |             |          |                |                  |                     |  |
| CB4856 HS I            | 12427388    | 12429094 | WBGene00014729 | E03H4.9 E03H4.9  | -0.246731258177888  |  |
| AGIWUR6347;AGIWUR40147 |             |          |                |                  |                     |  |
| CB4856 HS I            | 12430028    | 12431500 | WBGene00008477 | clcc-17 E03H4.10 |                     |  |
| 0.332087545265606      | AGIWUR22801 |          |                |                  |                     |  |
| CB4856 HS I            | 12433061    | 12434886 | WBGene00008478 | E03H4.11         | E03H4.11            |  |
| -0.0121243958123642    | AGIWUR5267  |          |                |                  |                     |  |
| CB4856 HS I            | 12435726    | 12437285 | WBGene00008479 | glct-2 E03H4.12  |                     |  |
| -0.230182481882796     | AGIWUR34058 |          |                |                  |                     |  |
| CB4856 HS I            | 12439936    | 12441253 | WBGene00003679 | nhr-89 E03H4.13  |                     |  |
| -0.130318613731824     | AGIWUR39890 |          |                |                  |                     |  |
| CB4856 HS I            | 12442299    | 12443728 | WBGene00008289 | nhr-169 C54C8.1  | 0.0248460607055598  |  |
| AGIWUR43082            |             |          |                |                  |                     |  |
| CB4856 HS I            | 12444587    | 12446502 | WBGene00008290 | bgnt-1.8         | C54C8.2             |  |
| 0.221946364676096      | AGIWUR19147 |          |                |                  |                     |  |
| CB4856 HS I            | 12447167    | 12448421 | WBGene00008291 | C54C8.3 C54C8.3  | -0.0772484689804456 |  |
| AGIWUR7375             |             |          |                |                  |                     |  |
| CB4856 HS I            | 12449977    | 12452027 | WBGene00008292 | C54C8.4 C54C8.4  | 0.0636145563226149  |  |
| AGIWUR35933            |             |          |                |                  |                     |  |

|                                                                                                                                                         |   |                                                             |          |                |          |          |                     |
|---------------------------------------------------------------------------------------------------------------------------------------------------------|---|-------------------------------------------------------------|----------|----------------|----------|----------|---------------------|
| CB4856 HS                                                                                                                                               | I | 12453389                                                    | 12454764 | WBGene00008293 | glct-5   | C54C8.5  | 0.0377017973283662  |
| AGIWUR25504                                                                                                                                             |   |                                                             |          |                |          |          |                     |
| CB4856 HS                                                                                                                                               | I | 12454853                                                    | 12455826 | WBGene00003098 | lys-9    | C54C8.6  | 0.119280505089308   |
| AGIWUR2072                                                                                                                                              |   |                                                             |          |                |          |          |                     |
| CB4856 HS                                                                                                                                               | I | 12456918                                                    | 12457209 | WBGene00044242 | C54C8.12 | C54C8.12 |                     |
| -0.115486543516707                                                                                                                                      |   | AGIWUR19622;AGIWUR21351;AGIWUR24934;AGIWUR29563;AGIWUR35527 |          |                |          |          |                     |
| CB4856 HS                                                                                                                                               | I | 12458028                                                    | 12458996 | WBGene00014714 | C54C8.8  | C54C8.8  | -0.102794527712336  |
| AGIWUR2522                                                                                                                                              |   |                                                             |          |                |          |          |                     |
| CB4856 HS                                                                                                                                               | I | 12459499                                                    | 12460903 | WBGene00008294 | cllec-11 | C54C8.7  | -0.121376269695821  |
| AGIWUR6618;AGIWUR36802                                                                                                                                  |   |                                                             |          |                |          |          |                     |
| CB4856 HS                                                                                                                                               | I | 12461645                                                    | 12461925 | WBGene00008295 | nlp-39   | C54C8.9  | -0.0230397657469705 |
| AGIWUR2285                                                                                                                                              |   |                                                             |          |                |          |          |                     |
| CB4856 HS                                                                                                                                               | I | 12462176                                                    | 12465831 | WBGene00001640 | gly-15   | C54C8.11 |                     |
| -0.0353185580215225                                                                                                                                     |   | AGIWUR4226;AGIWUR19199;AGIWUR41172                          |          |                |          |          |                     |
| CB4856 HS                                                                                                                                               | I | 12470620                                                    | 12473404 | WBGene00012102 | T27F6.1  | T27F6.1  | 0.105233566177484   |
| AGIWUR6133                                                                                                                                              |   |                                                             |          |                |          |          |                     |
| CB4856 HS                                                                                                                                               | I | 12474620                                                    | 12475934 | WBGene00077508 | T27F6.10 | T27F6.10 |                     |
| -0.0749523156127143                                                                                                                                     |   | AGIWUR40057                                                 |          |                |          |          |                     |
| CB4856 HS                                                                                                                                               | I | 12476685                                                    | 12478588 | WBGene00012103 | cllec-12 | T27F6.2  | 0.100128431421126   |
| AGIWUR32740                                                                                                                                             |   |                                                             |          |                |          |          |                     |
| CB4856 HS                                                                                                                                               | I | 12483809                                                    | 12486235 | WBGene00012104 | sygl-1   | T27F6.4  | -0.459434438544173  |
| AGIWUR43852                                                                                                                                             |   |                                                             |          |                |          |          |                     |
| CB4856 HS                                                                                                                                               | I | 12486872                                                    | 12490931 | WBGene00004190 | pars-2   | T27F6.5  | 0.144530521383587   |
| AGIWUR1856;AGIWUR2356;AGIWUR8002;AGIWUR8434;AGIWUR11790;AGIWUR11802;AGIWUR15588;AGIWUR16087;AGIWUR28139;AGIWUR29090;AGIWUR41244;AGIWUR43781;AGIWUR45063 |   |                                                             |          |                |          |          |                     |
| CB4856 HS                                                                                                                                               | I | 12490976                                                    | 12494530 | WBGene00012105 | T27F6.6  | T27F6.6  | 0.129857453824608   |
| AGIWUR3497                                                                                                                                              |   |                                                             |          |                |          |          |                     |
| CB4856 HS                                                                                                                                               | I | 12494826                                                    | 12497354 | WBGene00012106 | T27F6.7  | T27F6.7  | -0.255804565581808  |
| AGIWUR36447                                                                                                                                             |   |                                                             |          |                |          |          |                     |
| CB4856 HS                                                                                                                                               | I | 12497467                                                    | 12505010 | WBGene00010768 | K11D2.1  | K11D2.1  | -0.23011783154895   |
| AGIWUR17267;AGIWUR40837                                                                                                                                 |   |                                                             |          |                |          |          |                     |
| CB4856 HS                                                                                                                                               | I | 12505028                                                    | 12508064 | WBGene00010769 | asah-1   | K11D2.2  | -0.118429093768583  |
| AGIWUR37730                                                                                                                                             |   |                                                             |          |                |          |          |                     |
| CB4856 HS                                                                                                                                               | I | 12508299                                                    | 12513419 | WBGene00006829 | unc-101  | K11D2.3  | -0.0829425571509823 |
| AGIWUR417;AGIWUR2271;AGIWUR7234;AGIWUR18404;AGIWUR20120;AGIWUR22240;AGIWUR26389;AGIWUR38381;AGIWUR40794                                                 |   |                                                             |          |                |          |          |                     |
| CB4856 HS                                                                                                                                               | I | 12513516                                                    | 12518694 | WBGene00010771 | K11D2.5  | K11D2.5  | 0.095910373864287   |
| AGIWUR11668                                                                                                                                             |   |                                                             |          |                |          |          |                     |
| CB4856 HS                                                                                                                                               | I | 12518787                                                    | 12527906 | WBGene00010770 | K11D2.4  | K11D2.4  | -0.148036629072585  |
| AGIWUR1842                                                                                                                                              |   |                                                             |          |                |          |          |                     |



|                                                             |             |          |                |          |          |                     |
|-------------------------------------------------------------|-------------|----------|----------------|----------|----------|---------------------|
| CB4856 HS I                                                 | 12528312    | 12532182 | WBGene00004181 | pri-2    | W02D9.1  | 0.0613914694496707  |
| AGIWUR3305                                                  |             |          |                |          |          |                     |
| CB4856 HS I                                                 | 12532669    | 12534400 | WBGene00012208 | W02D9.2  | W02D9.2  | 0.0324727332547994  |
| AGIWUR32177                                                 |             |          |                |          |          |                     |
| CB4856 HS I                                                 | 12535312    | 12537671 | WBGene00012209 | hmg-20   | W02D9.3  | -0.0320770724517807 |
| AGIWUR2684;AGIWUR36464                                      |             |          |                |          |          |                     |
| CB4856 HS I                                                 | 12551537    | 12552375 | WBGene00012216 | W02D9.10 | W02D9.10 |                     |
| 0.0464777148642526                                          | AGIWUR8060  |          |                |          |          |                     |
| CB4856 HS I                                                 | 12557164    | 12557563 | WBGene00012215 | W02D9.9  | W02D9.9  | -0.0918573087668779 |
| AGIWUR19044                                                 |             |          |                |          |          |                     |
| CB4856 HS I                                                 | 12558547    | 12558944 | WBGene00012214 | W02D9.8  | W02D9.8  | 0.0514481390237593  |
| AGIWUR38870                                                 |             |          |                |          |          |                     |
| CB4856 HS I                                                 | 12559245    | 12559674 | WBGene00012213 | W02D9.7  | W02D9.7  | -0.101788000559896  |
| AGIWUR19286                                                 |             |          |                |          |          |                     |
| CB4856 HS I                                                 | 12560292    | 12560714 | WBGene00012212 | W02D9.6  | W02D9.6  | 0.381541522621784   |
| AGIWUR5048                                                  |             |          |                |          |          |                     |
| CB4856 HS I                                                 | 12561040    | 12561560 | WBGene00012211 | ssp-37   | W02D9.5  | 0.176139112883945   |
| AGIWUR14307                                                 |             |          |                |          |          |                     |
| CB4856 HS I                                                 | 12562756    | 12564210 | WBGene00045474 | C49G9.2  | C49G9.2  | -0.119444686610255  |
| AGIWUR20355;AGIWUR23937;AGIWUR31109;AGIWUR35803;AGIWUR35835 |             |          |                |          |          |                     |
| CB4856 HS I                                                 | 12564356    | 12565893 | WBGene00008216 | mec-19   | C49G9.1  | 0.152452430713804   |
| AGIWUR41066                                                 |             |          |                |          |          |                     |
| CB4856 HS I                                                 | 12565804    | 12572801 | WBGene00001008 | dlk-1    | F33E2.2  | -0.131859772757259  |
| AGIWUR40022;AGIWUR42874                                     |             |          |                |          |          |                     |
| CB4856 HS I                                                 | 12578108    | 12579205 | WBGene00077769 | F33E2.10 | F33E2.10 |                     |
| 0.0862778320153259                                          | AGIWUR5546  |          |                |          |          |                     |
| CB4856 HS I                                                 | 12582074    | 12584711 | WBGene00009360 | F33E2.4  | F33E2.4  | -0.210413308481904  |
| AGIWUR43140                                                 |             |          |                |          |          |                     |
| CB4856 HS I                                                 | 12583786    | 12585119 | WBGene00045254 | F33E2.8  | F33E2.8  | 0.296251789540071   |
| AGIWUR28003;AGIWUR30710                                     |             |          |                |          |          |                     |
| CB4856 HS I                                                 | 12585382    | 12585971 | WBGene00009363 | F33E2.7  | F33E2.7  | -0.40626918997472   |
| AGIWUR16591                                                 |             |          |                |          |          |                     |
| CB4856 HS I                                                 | 12587242    | 12591091 | WBGene00009362 | F33E2.6  | F33E2.6  | -0.267609539452407  |
| AGIWUR22599                                                 |             |          |                |          |          |                     |
| CB4856 HS I                                                 | 12591116    | 12597442 | WBGene00009361 | F33E2.5  | F33E2.5  | -0.0462395763802164 |
| AGIWUR2198;AGIWUR32087;AGIWUR32401                          |             |          |                |          |          |                     |
| CB4856 HS I                                                 | 12603772    | 12606248 | WBGene00011581 | T07D10.1 | T07D10.1 |                     |
| -0.197295877649865                                          | AGIWUR33134 |          |                |          |          |                     |
| CB4856 HS I                                                 | 12621171    | 12623084 | WBGene00011582 | ntr-1    | T07D10.2 |                     |

|                                                                                                                                                                                                                      |             |          |                |           |          |                     |
|----------------------------------------------------------------------------------------------------------------------------------------------------------------------------------------------------------------------|-------------|----------|----------------|-----------|----------|---------------------|
| -0.156746226639609                                                                                                                                                                                                   | AGIWUR20900 |          |                |           |          |                     |
| CB4856 HS I                                                                                                                                                                                                          | 12624235    | 12625238 | WBGene00011586 | flp-33    | T07D10.6 |                     |
| -0.0692818884384643                                                                                                                                                                                                  | AGIWUR26500 |          |                |           |          |                     |
| CB4856 HS I                                                                                                                                                                                                          | 12626742    | 12628997 | WBGene00011583 | T07D10.3  | T07D10.3 |                     |
| 0.253058511811922                                                                                                                                                                                                    | AGIWUR36305 |          |                |           |          |                     |
| CB4856 HS I                                                                                                                                                                                                          | 12640720    | 12641501 | WBGene00195255 | H16D19.7  | H16D19.7 |                     |
| 0.188665790089091                                                                                                                                                                                                    | AGIWUR43884 |          |                |           |          |                     |
| CB4856 HS I                                                                                                                                                                                                          | 12647376    | 12652087 | WBGene00010420 | mcrs-1    | H28016.2 |                     |
| -0.0442104090015896                                                                                                                                                                                                  | AGIWUR40821 |          |                |           |          |                     |
| CB4856 HS I                                                                                                                                                                                                          | 12652277    | 12654646 | WBGene00010419 | H28016.1  | H28016.1 |                     |
| -0.0209826992285622                                                                                                                                                                                                  |             |          |                |           |          |                     |
| AGIWUR1002;AGIWUR6017;AGIWUR9225;AGIWUR15093;AGIWUR18400;AGIWUR19137;AGIWUR20909;AGIWUR21162;AGIWUR22474;AGIWUR25477;AGIWUR30636;AGIWUR30684;AGIWUR33565;AGIWUR37320;AGIWUR37771;AGIWUR38251;AGIWUR40047;AGIWUR42542 |             |          |                |           |          |                     |
| CB4856 HS I                                                                                                                                                                                                          | 12655449    | 12655970 | WBGene00012040 | T26E3.7   | T26E3.7  | -0.0345567432751421 |
| AGIWUR36996                                                                                                                                                                                                          |             |          |                |           |          |                     |
| CB4856 HS I                                                                                                                                                                                                          | 12657762    | 12659446 | WBGene00012041 | T26E3.8   | T26E3.8  | -0.151500875113355  |
| AGIWUR37661                                                                                                                                                                                                          |             |          |                |           |          |                     |
| CB4856 HS I                                                                                                                                                                                                          | 12659729    | 12660647 | WBGene00044905 | T26E3.11  | T26E3.11 |                     |
| -0.0352393249828609                                                                                                                                                                                                  | AGIWUR41658 |          |                |           |          |                     |
| CB4856 HS I                                                                                                                                                                                                          | 12661254    | 12661729 | WBGene00012039 | T26E3.6   | T26E3.6  | -0.154629134606921  |
| AGIWUR36512                                                                                                                                                                                                          |             |          |                |           |          |                     |
| CB4856 HS I                                                                                                                                                                                                          | 12662938    | 12663833 | WBGene00012038 | T26E3.5   | T26E3.5  | -0.293532138591877  |
| AGIWUR1201                                                                                                                                                                                                           |             |          |                |           |          |                     |
| CB4856 HS I                                                                                                                                                                                                          | 12665067    | 12668893 | WBGene00012037 | T26E3.4   | T26E3.4  | 0.106104333436095   |
| AGIWUR2560;AGIWUR11531;AGIWUR28485;AGIWUR30882;AGIWUR32370;AGIWUR41162                                                                                                                                               |             |          |                |           |          |                     |
| CB4856 HS I                                                                                                                                                                                                          | 12669380    | 12674447 | WBGene00003921 | par-6     | T26E3.3  | -0.203146993001926  |
| AGIWUR4153;AGIWUR21135;AGIWUR24877                                                                                                                                                                                   |             |          |                |           |          |                     |
| CB4856 HS I                                                                                                                                                                                                          | 12679207    | 12681816 | WBGene00003578 | ndx-1     | T26E3.2  | -0.039119351652058  |
| AGIWUR36323                                                                                                                                                                                                          |             |          |                |           |          |                     |
| CB4856 HS I                                                                                                                                                                                                          | 12681883    | 12682681 | WBGene00012042 | T26E3.10  | T26E3.10 |                     |
| 0.0998156787143767                                                                                                                                                                                                   | AGIWUR2023  |          |                |           |          |                     |
| CB4856 HS I                                                                                                                                                                                                          | 12683238    | 12684359 | WBGene00012036 | cllec-103 | T26E3.1  |                     |
| -0.227374426886849                                                                                                                                                                                                   | AGIWUR36031 |          |                |           |          |                     |
| CB4856 HS I                                                                                                                                                                                                          | 12686116    | 12688206 | WBGene00005051 | sra-25    | T26E3.9  | 1.26798638365046    |
| AGIWUR23081                                                                                                                                                                                                          |             |          |                |           |          |                     |
| CB4856 HS I                                                                                                                                                                                                          | 12688727    | 12690572 | WBGene00005043 | sra-17    | F28C12.1 |                     |
| -0.0480775713643213                                                                                                                                                                                                  | AGIWUR103   |          |                |           |          |                     |
| CB4856 HS I                                                                                                                                                                                                          | 12692169    | 12693724 | WBGene00005044 | sra-18    | F28C12.2 |                     |
| -0.167224701017666                                                                                                                                                                                                   | AGIWUR40855 |          |                |           |          |                     |

|                                                                      |                                                                                   |          |                |          |          |                     |
|----------------------------------------------------------------------|-----------------------------------------------------------------------------------|----------|----------------|----------|----------|---------------------|
| CB4856 HS I                                                          | 12694406                                                                          | 12695934 | WBGene00005045 | sra-19   | F28C12.3 |                     |
| 0.029412809511828                                                    | AGIWUR2298;AGIWUR5976;AGIWUR10097;AGIWUR12389;AGIWUR26934;AGIWUR30505;AGIWUR39618 |          |                |          |          |                     |
| CB4856 HS I                                                          | 12696558                                                                          | 12698214 | WBGene00005046 | sra-20   | F28C12.4 |                     |
| 0.349540011158513                                                    | AGIWUR24117                                                                       |          |                |          |          |                     |
| CB4856 HS I                                                          | 12698904                                                                          | 12699200 | WBGene00077555 | F28C12.8 | F28C12.8 |                     |
| -0.0359412388943303                                                  | AGIWUR4271;AGIWUR9750;AGIWUR13760;AGIWUR22255;AGIWUR25005                         |          |                |          |          |                     |
| CB4856 HS I                                                          | 12699430                                                                          | 12701093 | WBGene00005047 | sra-21   | F28C12.5 |                     |
| -0.125172990777165                                                   | AGIWUR44687                                                                       |          |                |          |          |                     |
| CB4856 HS I                                                          | 12701439                                                                          | 12702886 | WBGene00005048 | sra-22   | F28C12.7 |                     |
| -0.113846488989793                                                   | AGIWUR34243                                                                       |          |                |          |          |                     |
| CB4856 HS I                                                          | 12703435                                                                          | 12704727 | WBGene00005049 | sra-23   | T06G6.1  | 0.0382134679862078  |
| AGIWUR6499                                                           |                                                                                   |          |                |          |          |                     |
| CB4856 HS I                                                          | 12705097                                                                          | 12706983 | WBGene00005050 | sra-24   | T06G6.2  | 0.0689874447531569  |
| AGIWUR44570                                                          |                                                                                   |          |                |          |          |                     |
| CB4856 HS I                                                          | 12707513                                                                          | 12708691 | WBGene00011550 | T06G6.11 | T06G6.11 |                     |
| -0.00875046973537508                                                 | AGIWUR6450                                                                        |          |                |          |          |                     |
| CB4856 HS I                                                          | 12708863                                                                          | 12711596 | WBGene00011545 | T06G6.3  | T06G6.3  | -0.219606746683287  |
| AGIWUR36658                                                          |                                                                                   |          |                |          |          |                     |
| CB4856 HS I                                                          | 12712158                                                                          | 12714722 | WBGene00011546 | T06G6.4  | T06G6.4  | -0.11667225058188   |
| AGIWUR7160                                                           |                                                                                   |          |                |          |          |                     |
| CB4856 HS I                                                          | 12715648                                                                          | 12716583 | WBGene00011547 | T06G6.5  | T06G6.5  | -0.0765128679674767 |
| AGIWUR30650                                                          |                                                                                   |          |                |          |          |                     |
| CB4856 HS I                                                          | 12718296                                                                          | 12719795 | WBGene00011548 | T06G6.6  | T06G6.6  | 0.0945664133742063  |
| AGIWUR17689                                                          |                                                                                   |          |                |          |          |                     |
| CB4856 HS I                                                          | 12720205                                                                          | 12722036 | WBGene00005835 | srw-88   | T06G6.7  | -0.102786721695258  |
| AGIWUR1507                                                           |                                                                                   |          |                |          |          |                     |
| CB4856 HS I                                                          | 12722045                                                                          | 12722883 | WBGene00011551 | T06G6.12 | T06G6.12 |                     |
| -0.268578373191687                                                   | AGIWUR32980                                                                       |          |                |          |          |                     |
| CB4856 HS I                                                          | 12724751                                                                          | 12726206 | WBGene00011549 | T06G6.8  | T06G6.8  | -0.0164834751501202 |
| AGIWUR34628                                                          |                                                                                   |          |                |          |          |                     |
| CB4856 HS I                                                          | 12728137                                                                          | 12729870 | WBGene00006889 | pfd-3    | T06G6.9  | 0.0548277261866463  |
| AGIWUR1885;AGIWUR2341;AGIWUR7063;AGIWUR17219;AGIWUR19489;AGIWUR31484 |                                                                                   |          |                |          |          |                     |
| CB4856 HS I                                                          | 12730011                                                                          | 12732753 | WBGene00012192 | W02A11.1 | W02A11.1 |                     |
| 0.151586876086489                                                    | AGIWUR8401                                                                        |          |                |          |          |                     |
| CB4856 HS I                                                          | 12733287                                                                          | 12741275 | WBGene00012193 | vps-25   | W02A11.2 |                     |
| 0.105635800706654                                                    | AGIWUR17203                                                                       |          |                |          |          |                     |
| CB4856 HS I                                                          | 12741588                                                                          | 12749318 | WBGene00006700 | uba-2    | W02A11.4 |                     |
| -0.539503284878219                                                   | AGIWUR31511                                                                       |          |                |          |          |                     |
| CB4856 HS I                                                          | 12749890                                                                          | 12752087 | WBGene00012195 | bath-34  | W02A11.5 |                     |

|                        |                                                |          |                |                                     |
|------------------------|------------------------------------------------|----------|----------------|-------------------------------------|
| -0.0260226063073512    | AGIWUR9884;AGIWUR28264                         |          |                |                                     |
| CB4856 HS I            | 12758433                                       | 12759572 | WBGene00012196 | bath-35 W02A11.8                    |
| 0.137283704097091      | AGIWUR37753                                    |          |                |                                     |
| CB4856 HS I            | 12759545                                       | 12764960 | WBGene00000138 | amx-2 B0019.1 -0.182831142042895    |
| AGIWUR19037            |                                                |          |                |                                     |
| CB4856 HS I            | 12773659                                       | 12782282 | WBGene00007094 | B0019.2 B0019.2 -0.0943932432297738 |
| AGIWUR9959;AGIWUR22906 |                                                |          |                |                                     |
| CB4856 HS I            | 12783358                                       | 12784978 | WBGene00023459 | Y18D10A.26 Y18D10A.26               |
| 0.156845315162062      | AGIWUR24786;AGIWUR33759                        |          |                |                                     |
| CB4856 HS I            | 12787944                                       | 12806581 | WBGene00012474 | attf-6 Y18D10A.1                    |
| 0.114282015641876      | AGIWUR42137                                    |          |                |                                     |
| CB4856 HS I            | 12807586                                       | 12809682 | WBGene00012475 | Y18D10A.2 Y18D10A.2                 |
| -0.0323993771603739    | AGIWUR13443                                    |          |                |                                     |
| CB4856 HS I            | 12809999                                       | 12815641 | WBGene00012476 | Y18D10A.3 Y18D10A.3                 |
| -0.225020562067627     | AGIWUR36104                                    |          |                |                                     |
| CB4856 HS I            | 12815904                                       | 12816428 | WBGene00012477 | Y18D10A.4 Y18D10A.4                 |
| -0.371559105718967     | AGIWUR2617                                     |          |                |                                     |
| CB4856 HS I            | 12819216                                       | 12825562 | WBGene00001746 | gsk-3 Y18D10A.5                     |
| -0.132012184711684     | AGIWUR44507                                    |          |                |                                     |
| CB4856 HS I            | 12825664                                       | 12834143 | WBGene00003735 | nhx-8 Y18D10A.6                     |
| -0.129484773436593     | AGIWUR10024;AGIWUR18724;AGIWUR35964            |          |                |                                     |
| CB4856 HS I            | 12834665                                       | 12843233 | WBGene00004231 | ptr-17 Y18D10A.7                    |
| 0.01750493862263       | AGIWUR2500;AGIWUR17127;AGIWUR35830;AGIWUR38073 |          |                |                                     |
| CB4856 HS I            | 12844269                                       | 12853105 | WBGene00012478 | mxt-1 Y18D10A.8                     |
| 0.173495147289284      | AGIWUR4070                                     |          |                |                                     |
| CB4856 HS I            | 12853088                                       | 12858272 | WBGene00012479 | Y18D10A.9 Y18D10A.9                 |
| 0.0686926220912589     | AGIWUR18598                                    |          |                |                                     |
| CB4856 HS I            | 12859499                                       | 12861197 | WBGene00012480 | cllec-104 Y18D10A.10                |
| -0.146836208545121     | AGIWUR26490                                    |          |                |                                     |
| CB4856 HS I            | 12861951                                       | 12863544 | WBGene00012481 | Y18D10A.11 Y18D10A.11               |
| -0.130255461713563     | AGIWUR18588                                    |          |                |                                     |
| CB4856 HS I            | 12864230                                       | 12865568 | WBGene00012488 | cllec-105 Y18D10A.24                |
| -0.13157372850892      | AGIWUR22133                                    |          |                |                                     |
| CB4856 HS I            | 12866120                                       | 12866896 | WBGene00012482 | cllec-106 Y18D10A.12                |
| -0.0744173914666746    | AGIWUR40586                                    |          |                |                                     |
| CB4856 HS I            | 12866991                                       | 12869556 | WBGene00012487 | Y18D10A.23 Y18D10A.23               |
| 0.0152955311358678     | AGIWUR21563                                    |          |                |                                     |
| CB4856 HS I            | 12878595                                       | 12902806 | WBGene00003905 | pad-1 Y18D10A.13                    |
| 0.0780140971527494     | AGIWUR16264                                    |          |                |                                     |

|                                               |                                                                        |          |                |            |                            |
|-----------------------------------------------|------------------------------------------------------------------------|----------|----------------|------------|----------------------------|
| CB4856 HS I                                   | 12903059                                                               | 12904072 | WBGene00012483 | Y18D10A.16 | Y18D10A.16                 |
| 0.0278984299868767                            | AGIWUR10347;AGIWUR19850;AGIWUR33702                                    |          |                |            |                            |
| CB4856 HS I                                   | 12904470                                                               | 12906212 | WBGene00012484 | car-1      | Y18D10A.17                 |
| -0.0692089824524862                           | AGIWUR9634;AGIWUR11573;AGIWUR13065;AGIWUR30240;AGIWUR35163;AGIWUR41272 |          |                |            |                            |
| CB4856 HS I                                   | 12906462                                                               | 12907754 | WBGene00012485 | fbxa-121   | Y18D10A.18                 |
| -0.202701116720036                            | AGIWUR33138                                                            |          |                |            |                            |
| CB4856 HS I                                   | 12908304                                                               | 12909436 | WBGene00077556 | Y18D10A.27 | Y18D10A.27                 |
| 0.0003825872499581                            | AGIWUR5790;AGIWUR7354;AGIWUR9630                                       |          |                |            |                            |
| CB4856 HS I                                   | 12916441                                                               | 12918108 | WBGene00001433 | fbk-8      | Y18D10A.25                 |
| 0.0762929915471973                            | AGIWUR3419;AGIWUR11778                                                 |          |                |            |                            |
| CB4856 HS I                                   | 12918722                                                               | 12919278 | WBGene00001427 | fbk-2      | Y18D10A.19                 |
| 0.196807711979091                             | AGIWUR1517;AGIWUR18093;AGIWUR43780                                     |          |                |            |                            |
| CB4856 HS I                                   | 12922004                                                               | 12923548 | WBGene00003989 | pfn-1      | Y18D10A.20                 |
| 0.0110544446325074                            | AGIWUR749;AGIWUR10648;AGIWUR13965;AGIWUR14413;AGIWUR19323;AGIWUR22987  |          |                |            |                            |
| CB4856 HS I                                   | 12929372                                                               | 12931069 | WBGene00012486 | Y18D10A.21 | Y18D10A.21                 |
| 0.157053955539428                             | AGIWUR15932                                                            |          |                |            |                            |
| CB4856 HS I                                   | 12932037                                                               | 12933751 | WBGene00014864 | Y18D10A.22 | Y18D10A.22                 |
| 0.148952979228721                             | AGIWUR28353                                                            |          |                |            |                            |
| CB4856 HS I                                   | 12934767                                                               | 12937252 | WBGene00006484 | tag-138    | F08A8.6 0.330618601416685  |
| AGIWUR2434                                    |                                                                        |          |                |            |                            |
| CB4856 HS I                                   | 12938555                                                               | 12942224 | WBGene00008564 | acox-1.1   | F08A8.1                    |
| 0.0061633286370899                            | AGIWUR34581                                                            |          |                |            |                            |
| CB4856 HS I                                   | 12942280                                                               | 12946562 | WBGene00008565 | acox-1.2   | F08A8.2                    |
| -0.193297103143305                            | AGIWUR825                                                              |          |                |            |                            |
| CB4856 HS I                                   | 12951025                                                               | 12954015 | WBGene00008567 | acox-1.4   | F08A8.4                    |
| -0.103291879355232                            | AGIWUR1174;AGIWUR16821                                                 |          |                |            |                            |
| CB4856 HS I                                   | 12953969                                                               | 12955322 | WBGene00045468 | F08A8.8    | F08A8.8 0.147973916657183  |
| AGIWUR441                                     |                                                                        |          |                |            |                            |
| CB4856 HS I                                   | 12955328                                                               | 12957902 | WBGene00008568 | F08A8.5    | F08A8.5 0.148718765119819  |
| AGIWUR26122                                   |                                                                        |          |                |            |                            |
| CB4856 HS I                                   | 12958639                                                               | 12959955 | WBGene00008569 | fbxa-101   | F08A8.7                    |
| -0.0864314004371263                           | AGIWUR11695                                                            |          |                |            |                            |
| CB4856 HS I                                   | 12960313                                                               | 12961606 | WBGene00008130 | fbxa-140   | C47B2.1                    |
| 0.11359802437623                              | AGIWUR4596                                                             |          |                |            |                            |
| CB4856 HS I                                   | 12962042                                                               | 12964579 | WBGene00008131 | C47B2.2    | C47B2.2 -0.146452499530662 |
| AGIWUR30169                                   |                                                                        |          |                |            |                            |
| CB4856 HS I                                   | 12964674                                                               | 12966876 | WBGene00006529 | tba-2      | C47B2.3 0.0442213711425903 |
| AGIWUR4560;AGIWUR7861;AGIWUR17254;AGIWUR33286 |                                                                        |          |                |            |                            |
| CB4856 HS I                                   | 12967216                                                               | 12968280 | WBGene00003948 | pbs-2      | C47B2.4 0.0248683940115768 |

|                                                                       |    |   |          |          |                |           |          |                    |  |
|-----------------------------------------------------------------------|----|---|----------|----------|----------------|-----------|----------|--------------------|--|
| AGIWUR41108                                                           |    |   |          |          |                |           |          |                    |  |
| CB4856                                                                | HS | I | 12968921 | 12970238 | WBGene00001234 | eif-6     | C47B2.5  | 0.0541481058787525 |  |
| AGIWUR1942;AGIWUR2030;AGIWUR4142;AGIWUR21916;AGIWUR24490              |    |   |          |          |                |           |          |                    |  |
| CB4856                                                                | HS | I | 12971120 | 12972347 | WBGene00004196 | prx-11    | C47B2.8  | 0.202245536640952  |  |
| AGIWUR1599                                                            |    |   |          |          |                |           |          |                    |  |
| CB4856                                                                | HS | I | 12975183 | 12978749 | WBGene00008132 | gale-1    | C47B2.6  | -0.060292163996909 |  |
| AGIWUR10738;AGIWUR34894                                               |    |   |          |          |                |           |          |                    |  |
| CB4856                                                                | HS | I | 12978839 | 12982452 | WBGene00008133 | efsc-1    | C47B2.7  | -0.120033222174158 |  |
| AGIWUR34915                                                           |    |   |          |          |                |           |          |                    |  |
| CB4856                                                                | HS | I | 12983004 | 12983974 | WBGene00008134 | C47B2.9   | C47B2.9  | 0.0136772931695699 |  |
| AGIWUR36090                                                           |    |   |          |          |                |           |          |                    |  |
| CB4856                                                                | HS | I | 12988223 | 12995475 | WBGene00003753 | nlp-15    | CC4.2    | 0.196038379316827  |  |
| AGIWUR1711                                                            |    |   |          |          |                |           |          |                    |  |
| CB4856                                                                | HS | I | 12995803 | 13012859 | WBGene00004895 | smu-1     | CC4.3    | 0.0642728012374487 |  |
| AGIWUR14067                                                           |    |   |          |          |                |           |          |                    |  |
| CB4856                                                                | HS | I | 13004437 | 13023625 | WBGene00004063 | pmr-1     | ZK256.1  | 0.0132995633135895 |  |
| AGIWUR12760;AGIWUR19470;AGIWUR21490;AGIWUR37538                       |    |   |          |          |                |           |          |                    |  |
| CB4856                                                                | HS | I | 13033483 | 13045555 | WBGene00012274 | W05B5.1   | W05B5.1  | -0.134906488702251 |  |
| AGIWUR130;AGIWUR13029;AGIWUR16053;AGIWUR21284;AGIWUR34592;AGIWUR42290 |    |   |          |          |                |           |          |                    |  |
| CB4856                                                                | HS | I | 13050445 | 13057435 | WBGene00012275 | npr-14    | W05B5.2  | 0.0394846592459146 |  |
| AGIWUR22861                                                           |    |   |          |          |                |           |          |                    |  |
| CB4856                                                                | HS | I | 13066924 | 13069038 | WBGene00012500 | hpo-2     | Y26D4A.2 |                    |  |
| -0.286993256807934 AGIWUR24458                                        |    |   |          |          |                |           |          |                    |  |
| CB4856                                                                | HS | I | 13069529 | 13071190 | WBGene00012502 | cllec-107 |          | Y26D4A.4           |  |
| -0.192772611800507 AGIWUR8324                                         |    |   |          |          |                |           |          |                    |  |
| CB4856                                                                | HS | I | 13073837 | 13075124 | WBGene00044706 | Y26D4A.15 |          | Y26D4A.15          |  |
| 0.026956640680655 AGIWUR1641;AGIWUR27615                              |    |   |          |          |                |           |          |                    |  |
| CB4856                                                                | HS | I | 13075122 | 13075381 | WBGene00044710 | Y26D4A.16 |          | Y26D4A.16          |  |
| -0.125701834880939 AGIWUR73                                           |    |   |          |          |                |           |          |                    |  |
| CB4856                                                                | HS | I | 13077994 | 13078880 | WBGene00045235 | Y26D4A.18 |          | Y26D4A.18          |  |
| -0.330462962024083 AGIWUR39678                                        |    |   |          |          |                |           |          |                    |  |
| CB4856                                                                | HS | I | 13079742 | 13080633 | WBGene00045236 | Y26D4A.19 |          | Y26D4A.19          |  |
| 0.0751806891325888 AGIWUR40017                                        |    |   |          |          |                |           |          |                    |  |
| CB4856                                                                | HS | I | 13081448 | 13082166 | WBGene00012504 | cllec-108 |          | Y26D4A.6           |  |
| 0.176703672827102 AGIWUR7770                                          |    |   |          |          |                |           |          |                    |  |
| CB4856                                                                | HS | I | 13082681 | 13082966 | WBGene00012509 | Y26D4A.12 |          | Y26D4A.12          |  |
| 0.188435703960797 AGIWUR41342                                         |    |   |          |          |                |           |          |                    |  |
| CB4856                                                                | HS | I | 13083321 | 13085505 | WBGene00012505 | pals-13   | Y26D4A.8 |                    |  |
| 0.171808734148432 AGIWUR17033                                         |    |   |          |          |                |           |          |                    |  |

|                                                                             |    |   |          |          |                |          |          |                   |
|-----------------------------------------------------------------------------|----|---|----------|----------|----------------|----------|----------|-------------------|
| CB4856                                                                      | HS | I | 13085106 | 13103119 | WBGene00007655 | C17H1.2  | C17H1.2  | 0.103161014372144 |
| AGIWUR9507;AGIWUR23034;AGIWUR29977;AGIWUR37866;AGIWUR42970                  |    |   |          |          |                |          |          |                   |
| CB4856                                                                      | HS | I | 13104253 | 13106298 | WBGene00007656 | pals-2   | C17H1.3  | 1.85595424847868  |
| AGIWUR5622;AGIWUR17946;AGIWUR35948                                          |    |   |          |          |                |          |          |                   |
| CB4856                                                                      | HS | I | 13107140 | 13107457 | WBGene00044711 | pals-10  | C17H1.11 |                   |
| 1.55296345240798 AGIWUR9138;AGIWUR27537;AGIWUR32329;AGIWUR37188;AGIWUR42291 |    |   |          |          |                |          |          |                   |
| CB4856                                                                      | HS | I | 13107492 | 13112443 | WBGene00007657 | pals-3   | C17H1.4  | 0.977277135036715 |
| AGIWUR37391                                                                 |    |   |          |          |                |          |          |                   |
| CB4856                                                                      | HS | I | 13113487 | 13116434 | WBGene00007658 | pals-4   | C17H1.5  | 1.36884628955269  |
| AGIWUR37559                                                                 |    |   |          |          |                |          |          |                   |
| CB4856                                                                      | HS | I | 13117629 | 13120324 | WBGene00007654 | C17H1.1  | C17H1.1  | 0.988227112433911 |
| AGIWUR17604;AGIWUR25487;AGIWUR28593                                         |    |   |          |          |                |          |          |                   |
| CB4856                                                                      | HS | I | 13121092 | 13123513 | WBGene00007662 | pals-8   | C17H1.9  | 1.66784918421743  |
| AGIWUR32197                                                                 |    |   |          |          |                |          |          |                   |
| CB4856                                                                      | HS | I | 13124081 | 13126650 | WBGene00044708 | pals-11  | C17H1.13 |                   |
| 1.72437216937051 AGIWUR17715                                                |    |   |          |          |                |          |          |                   |
| CB4856                                                                      | HS | I | 13127152 | 13127876 | WBGene00044722 | C17H1.12 | C17H1.12 |                   |
| -0.00386852375914248 AGIWUR6757;AGIWUR7071;AGIWUR11735;AGIWUR13554          |    |   |          |          |                |          |          |                   |
| CB4856                                                                      | HS | I | 13128470 | 13130409 | WBGene00007661 | pals-7   | C17H1.8  | 0.830641794589401 |
| AGIWUR41771                                                                 |    |   |          |          |                |          |          |                   |
| CB4856                                                                      | HS | I | 13130808 | 13132464 | WBGene00007659 | pals-5   | C17H1.6  | 0.797495846567122 |
| AGIWUR7049                                                                  |    |   |          |          |                |          |          |                   |
| CB4856                                                                      | HS | I | 13133638 | 13136156 | WBGene00044237 | pals-9   | C17H1.10 |                   |
| 2.02990691638322 AGIWUR18891                                                |    |   |          |          |                |          |          |                   |
| CB4856                                                                      | HS | I | 13136467 | 13138521 | WBGene00007660 | pals-6   | C17H1.7  | 1.90696195274706  |
| AGIWUR2479                                                                  |    |   |          |          |                |          |          |                   |
| CB4856                                                                      | HS | I | 13139132 | 13141789 | WBGene00009061 | pals-14  | F22G12.1 |                   |
| 1.88343072628797 AGIWUR8641;AGIWUR17238                                     |    |   |          |          |                |          |          |                   |
| CB4856                                                                      | HS | I | 13144912 | 13146453 | WBGene00044712 | pals-15  | F22G12.8 |                   |
| 0.209158751506984 AGIWUR2413;AGIWUR10665;AGIWUR28917                        |    |   |          |          |                |          |          |                   |
| CB4856                                                                      | HS | I | 13152575 | 13153706 | WBGene00009063 | F22G12.3 | F22G12.3 |                   |
| -0.109927708908127 AGIWUR38346                                              |    |   |          |          |                |          |          |                   |
| CB4856                                                                      | HS | I | 13155239 | 13161508 | WBGene00009064 | F22G12.4 | F22G12.4 |                   |
| -0.0859876484888442 AGIWUR15762;AGIWUR18080;AGIWUR18882                     |    |   |          |          |                |          |          |                   |
| CB4856                                                                      | HS | I | 13162492 | 13182725 | WBGene00009065 | F22G12.5 | F22G12.5 |                   |
| -0.0278437301701615 AGIWUR21603                                             |    |   |          |          |                |          |          |                   |
| CB4856                                                                      | HS | I | 13184852 | 13188234 | WBGene00008905 | F17B5.1  | F17B5.1  | 0.204376241004525 |
| AGIWUR11554                                                                 |    |   |          |          |                |          |          |                   |
| CB4856                                                                      | HS | I | 13189792 | 13190583 | WBGene00138716 | F17B5.10 | F17B5.10 |                   |

|                                                                                           |            |          |                |                 |                     |
|-------------------------------------------------------------------------------------------|------------|----------|----------------|-----------------|---------------------|
| -0.0877143869119452                                                                       | AGIWUR9777 |          |                |                 |                     |
| CB4856 HS I                                                                               | 13190578   | 13191921 | WBGene00045458 | F17B5.8 F17B5.8 | 0.0137486488873355  |
| AGIWUR1859;AGIWUR10263;AGIWUR21965;AGIWUR23242;AGIWUR29567                                |            |          |                |                 |                     |
| CB4856 HS I                                                                               | 13197179   | 13198374 | WBGene00008907 | clec-109        | F17B5.3             |
| -0.0800648098588503 AGIWUR6963;AGIWUR18308;AGIWUR20621;AGIWUR21937;AGIWUR41207            |            |          |                |                 |                     |
| CB4856 HS I                                                                               | 13199359   | 13200980 | WBGene00008908 | F17B5.4 F17B5.4 | 0.0753147818338729  |
| AGIWUR11419;AGIWUR39916                                                                   |            |          |                |                 |                     |
| CB4856 HS I                                                                               | 13201710   | 13204293 | WBGene00044058 | F17B5.6 F17B5.6 | -0.0543445577052344 |
| AGIWUR5127                                                                                |            |          |                |                 |                     |
| CB4856 HS I                                                                               | 13204497   | 13205403 | WBGene00008909 | clec-110        | F17B5.5             |
| -0.302834904237886 AGIWUR4687;AGIWUR17223;AGIWUR17887;AGIWUR29019                         |            |          |                |                 |                     |
| CB4856 HS I                                                                               | 13205664   | 13207759 | WBGene00014235 | ZK1225.1        | ZK1225.1            |
| -0.0658125959201765 AGIWUR129                                                             |            |          |                |                 |                     |
| CB4856 HS I                                                                               | 13208441   | 13210462 | WBGene00014236 | ZK1225.2        | ZK1225.2            |
| -0.0959746252311895 AGIWUR9579;AGIWUR13739;AGIWUR37030                                    |            |          |                |                 |                     |
| CB4856 HS I                                                                               | 13210585   | 13211352 | WBGene00044713 | ZK1225.9        | ZK1225.9            |
| 0.0138408453245731 AGIWUR719;AGIWUR16159;AGIWUR31446                                      |            |          |                |                 |                     |
| CB4856 HS I                                                                               | 13211826   | 13213806 | WBGene00044714 | ZK1225.10       | ZK1225.10           |
| -0.192645445516597 AGIWUR37508;AGIWUR38006;AGIWUR42906                                    |            |          |                |                 |                     |
| CB4856 HS I                                                                               | 13214095   | 13216230 | WBGene00014238 | ZK1225.4        | ZK1225.4            |
| 0.157163119451159 AGIWUR23716                                                             |            |          |                |                 |                     |
| CB4856 HS I                                                                               | 13216605   | 13218867 | WBGene00014239 | ZK1225.5        | ZK1225.5            |
| 0.213395201320637 AGIWUR1722                                                              |            |          |                |                 |                     |
| CB4856 HS I                                                                               | 13219056   | 13219545 | WBGene00006048 | ssp-31          | ZK1225.6            |
| -0.106477834926289 AGIWUR4043;AGIWUR11256;AGIWUR18577;AGIWUR20890;AGIWUR21770;AGIWUR43896 |            |          |                |                 |                     |
| CB4856 HS I                                                                               | 13227995   | 13229751 | WBGene00014196 | ZK1053.1        | ZK1053.1            |
| 0.280296716835196 AGIWUR8882                                                              |            |          |                |                 |                     |
| CB4856 HS I                                                                               | 13232121   | 13234686 | WBGene00014197 | ZK1053.2        | ZK1053.2            |
| 0.202203925349725 AGIWUR12680                                                             |            |          |                |                 |                     |
| CB4856 HS I                                                                               | 13235367   | 13236662 | WBGene00014200 | scrm-2          | ZK1053.5            |
| 0.00768362440747783 AGIWUR23919                                                           |            |          |                |                 |                     |
| CB4856 HS I                                                                               | 13237054   | 13238302 | WBGene00044786 | ZK1053.7        | ZK1053.7            |
| -0.0245245787045945 AGIWUR29991;AGIWUR34385                                               |            |          |                |                 |                     |
| CB4856 HS I                                                                               | 13238540   | 13240726 | WBGene00014201 | ZK1053.6        | ZK1053.6            |
| -0.0652342196862783 AGIWUR20160                                                           |            |          |                |                 |                     |
| CB4856 HS I                                                                               | 13241645   | 13244797 | WBGene00014199 | ZK1053.4        | ZK1053.4            |
| -0.264241850970564 AGIWUR9930                                                             |            |          |                |                 |                     |
| CB4856 HS I                                                                               | 13246853   | 13249789 | WBGene00014198 | ZK1053.3        | ZK1053.3            |
| -0.394009817461525 AGIWUR10322                                                            |            |          |                |                 |                     |



|                                                                                                           |    |   |          |          |                |         |         |                     |
|-----------------------------------------------------------------------------------------------------------|----|---|----------|----------|----------------|---------|---------|---------------------|
| CB4856                                                                                                    | HS | I | 13250519 | 13252902 | WBGene00009693 | F44F1.1 | F44F1.1 | -0.0400894031411241 |
| AGIWUR11569;AGIWUR12707;AGIWUR35981                                                                       |    |   |          |          |                |         |         |                     |
| CB4856                                                                                                    | HS | I | 13254141 | 13257729 | WBGene00009695 | F44F1.3 | F44F1.3 | 0.130710108945017   |
| AGIWUR36983                                                                                               |    |   |          |          |                |         |         |                     |
| CB4856                                                                                                    | HS | I | 13258381 | 13260217 | WBGene00009697 | F44F1.5 | F44F1.5 | 0.013495450723962   |
| AGIWUR24484                                                                                               |    |   |          |          |                |         |         |                     |
| CB4856                                                                                                    | HS | I | 13260933 | 13262727 | WBGene00009698 | F44F1.6 | F44F1.6 | -0.0897438593677213 |
| AGIWUR2878;AGIWUR9405;AGIWUR14989;AGIWUR18297;AGIWUR19140;AGIWUR22641;AGIWUR25795;AGIWUR33450;AGIWUR43720 |    |   |          |          |                |         |         |                     |
| CB4856                                                                                                    | HS | I | 13263803 | 13265570 | WBGene00009696 | F44F1.4 | F44F1.4 | -0.228036132786554  |
| AGIWUR33801                                                                                               |    |   |          |          |                |         |         |                     |
| CB4856                                                                                                    | HS | I | 13269984 | 13272784 | WBGene00006902 | vet-6   | F44F1.7 | -0.542769301666786  |
| AGIWUR16532                                                                                               |    |   |          |          |                |         |         |                     |
| CB4856                                                                                                    | HS | I | 13274111 | 13276462 | WBGene00010804 | M01E5.1 | M01E5.1 | -0.0240262889331753 |
| AGIWUR23175;AGIWUR33900;AGIWUR42322                                                                       |    |   |          |          |                |         |         |                     |
| CB4856                                                                                                    | HS | I | 13277061 | 13280175 | WBGene00010805 | M01E5.2 | M01E5.2 | -0.117815784823318  |
| AGIWUR39432                                                                                               |    |   |          |          |                |         |         |                     |
| CB4856                                                                                                    | HS | I | 13280892 | 13286497 | WBGene00010806 | M01E5.3 | M01E5.3 | -0.177314754208545  |
| AGIWUR24647;AGIWUR27603;AGIWUR30431;AGIWUR31429                                                           |    |   |          |          |                |         |         |                     |
| CB4856                                                                                                    | HS | I | 13287551 | 13289542 | WBGene00010807 | M01E5.4 | M01E5.4 | -0.0882278433819592 |
| AGIWUR20792;AGIWUR38781                                                                                   |    |   |          |          |                |         |         |                     |
| CB4856                                                                                                    | HS | I | 13292506 | 13297555 | WBGene00006595 | top-1   | M01E5.5 | 0.0707995455558521  |
| AGIWUR1777;AGIWUR15898;AGIWUR16737;AGIWUR17593;AGIWUR26904;AGIWUR32658;AGIWUR39976                        |    |   |          |          |                |         |         |                     |
| CB4856                                                                                                    | HS | I | 13298209 | 13300716 | WBGene00010808 | sepa-1  | M01E5.6 | 0.194309714175973   |
| AGIWUR6207                                                                                                |    |   |          |          |                |         |         |                     |
| CB4856                                                                                                    | HS | I | 13302759 | 13304311 | WBGene00011431 | T04D3.1 | T04D3.1 | 0.165966339712087   |
| AGIWUR30784                                                                                               |    |   |          |          |                |         |         |                     |
| CB4856                                                                                                    | HS | I | 13307031 | 13308787 | WBGene00011432 | sdz-30  | T04D3.2 | -0.558842597951301  |
| AGIWUR10330;AGIWUR32859;AGIWUR44585                                                                       |    |   |          |          |                |         |         |                     |
| CB4856                                                                                                    | HS | I | 13309994 | 13310715 | WBGene00011435 | T04D3.8 | T04D3.8 | -0.0350316060560569 |
| AGIWUR31158                                                                                               |    |   |          |          |                |         |         |                     |
| CB4856                                                                                                    | HS | I | 13310915 | 13318704 | WBGene00011433 | pde-1   | T04D3.3 | 0.0567647679595904  |
| AGIWUR2048                                                                                                |    |   |          |          |                |         |         |                     |
| CB4856                                                                                                    | HS | I | 13325230 | 13333508 | WBGene00001555 | gcy-35  | T04D3.4 | -0.213134584759636  |
| AGIWUR30654                                                                                               |    |   |          |          |                |         |         |                     |
| CB4856                                                                                                    | HS | I | 13333380 | 13336146 | WBGene00012343 | W08E3.2 | W08E3.2 | -0.175704270938491  |
| AGIWUR23946                                                                                               |    |   |          |          |                |         |         |                     |
| CB4856                                                                                                    | HS | I | 13337460 | 13338921 | WBGene00012345 | W08E3.4 | W08E3.4 | 0.159204153759186   |
| AGIWUR15170                                                                                               |    |   |          |          |                |         |         |                     |
| CB4856                                                                                                    | HS | I | 13339397 | 13340224 | WBGene00004915 | snr-2   | W08E3.1 | 0.0268135482905212  |

|                                                                                            |    |   |          |          |                |           |                             |
|--------------------------------------------------------------------------------------------|----|---|----------|----------|----------------|-----------|-----------------------------|
| AGIWUR2020;AGIWUR17872;AGIWUR37716                                                         |    |   |          |          |                |           |                             |
| CB4856                                                                                     | HS | I | 13340327 | 13343940 | WBGene00012344 | ola-1     | W08E3.3 0.104203606702367   |
| AGIWUR20746                                                                                |    |   |          |          |                |           |                             |
| CB4856                                                                                     | HS | I | 13344044 | 13346966 | WBGene00012732 | Y40B1A.1  | Y40B1A.1                    |
| -0.0986146364343359 AGIWUR8122;AGIWUR14845;AGIWUR22783;AGIWUR24127;AGIWUR30754;AGIWUR33337 |    |   |          |          |                |           |                             |
| CB4856                                                                                     | HS | I | 13347068 | 13349259 | WBGene00012733 | Y40B1A.2  | Y40B1A.2                    |
| 0.102810474169341 AGIWUR39339                                                              |    |   |          |          |                |           |                             |
| CB4856                                                                                     | HS | I | 13349410 | 13358674 | WBGene00012734 | Y40B1A.3  | Y40B1A.3                    |
| -0.188784308839067 AGIWUR7751;AGIWUR14091                                                  |    |   |          |          |                |           |                             |
| CB4856                                                                                     | HS | I | 13360401 | 13366888 | WBGene00012735 | sptf-3    | Y40B1A.4                    |
| 0.0719656780595894 AGIWUR4406                                                              |    |   |          |          |                |           |                             |
| CB4856                                                                                     | HS | I | 13379917 | 13384371 | WBGene00007218 | C01A2.6   | C01A2.6 0.165034241054867   |
| AGIWUR11252                                                                                |    |   |          |          |                |           |                             |
| CB4856                                                                                     | HS | I | 13384752 | 13387084 | WBGene00007217 | tads-1    | C01A2.5 -0.0413453806467956 |
| AGIWUR15887                                                                                |    |   |          |          |                |           |                             |
| CB4856                                                                                     | HS | I | 13387819 | 13391450 | WBGene00007215 | oxa-1     | C01A2.3 -0.168839798033038  |
| AGIWUR15608;AGIWUR16802;AGIWUR22209;AGIWUR26992;AGIWUR29372;AGIWUR30785                    |    |   |          |          |                |           |                             |
| CB4856                                                                                     | HS | I | 13392118 | 13394001 | WBGene00007216 | C01A2.4   | C01A2.4 0.0624068324920781  |
| AGIWUR11598                                                                                |    |   |          |          |                |           |                             |
| CB4856                                                                                     | HS | I | 13397270 | 13398529 | WBGene00007214 | C01A2.2   | C01A2.2 0.175658190548523   |
| AGIWUR43823                                                                                |    |   |          |          |                |           |                             |
| CB4856                                                                                     | HS | I | 13402447 | 13404106 | WBGene00007219 | nlp-38    | C01A2.7 0.0594452140957547  |
| AGIWUR11225;AGIWUR16600;AGIWUR17922;AGIWUR36114                                            |    |   |          |          |                |           |                             |
| CB4856                                                                                     | HS | I | 13414273 | 13414465 | WBGene00077561 | W05H12.3  | W05H12.3                    |
| -0.0617287228578398 AGIWUR9577;AGIWUR17249;AGIWUR24012;AGIWUR29770;AGIWUR38825             |    |   |          |          |                |           |                             |
| CB4856                                                                                     | HS | I | 13418458 | 13423379 | WBGene00012289 | W05H12.1  | W05H12.1                    |
| 0.243505455748949 AGIWUR2538;AGIWUR7093;AGIWUR42065                                        |    |   |          |          |                |           |                             |
| CB4856                                                                                     | HS | I | 13423994 | 13425148 | WBGene00044066 | fbxb-66   | Y40B1B.3                    |
| -0.337491450078431 AGIWUR5934                                                              |    |   |          |          |                |           |                             |
| CB4856                                                                                     | HS | I | 13426454 | 13428471 | WBGene00012739 | Y40B1B.7  | Y40B1B.7                    |
| -0.107980448235125 AGIWUR19958                                                             |    |   |          |          |                |           |                             |
| CB4856                                                                                     | HS | I | 13428913 | 13434717 | WBGene00012740 | slc-25A46 | Y40B1B.8                    |
| 0.0613908064839115 AGIWUR4532;AGIWUR25826;AGIWUR38819;AGIWUR40634                          |    |   |          |          |                |           |                             |
| CB4856                                                                                     | HS | I | 13435489 | 13437965 | WBGene00012738 | EIF-3.J   | Y40B1B.5                    |
| 0.117562033520841 AGIWUR5279                                                               |    |   |          |          |                |           |                             |
| CB4856                                                                                     | HS | I | 13438058 | 13450216 | WBGene00005010 | spr-5     | Y40B1B.6                    |
| -0.113092200813888 AGIWUR25838;AGIWUR27172;AGIWUR43055                                     |    |   |          |          |                |           |                             |
| CB4856                                                                                     | HS | I | 13451463 | 13452841 | WBGene00013023 | Y48G10A.6 | Y48G10A.6                   |
| 0.104199622998185 AGIWUR1449;AGIWUR19843;AGIWUR21746;AGIWUR24663;AGIWUR26086;AGIWUR30523   |    |   |          |          |                |           |                             |

|                     |                                                                        |          |                |           |           |
|---------------------|------------------------------------------------------------------------|----------|----------------|-----------|-----------|
| CB4856 HS I         | 13455356                                                               | 13470439 | WBGene00013021 | Y48G10A.4 | Y48G10A.4 |
| 0.0282805453230237  | AGIWUR4727;AGIWUR25796;AGIWUR35731;AGIWUR39194;AGIWUR41307;AGIWUR44612 |          |                |           |           |
| CB4856 HS I         | 13471683                                                               | 13474185 | WBGene00013020 | Y48G10A.3 | Y48G10A.3 |
| 0.0632764572920337  | AGIWUR36511                                                            |          |                |           |           |
| CB4856 HS I         | 13477214                                                               | 13487404 | WBGene00013019 | Y48G10A.2 | Y48G10A.2 |
| 0.0109414985982781  | AGIWUR14937                                                            |          |                |           |           |
| CB4856 HS I         | 13489552                                                               | 13491226 | WBGene00013018 | Y48G10A.1 | Y48G10A.1 |
| 0.151911724810706   | AGIWUR2483                                                             |          |                |           |           |
| CB4856 HS I         | 13491425                                                               | 13493317 | WBGene00013603 | soem-1    | Y87G2A.17 |
| -0.27106265810552   | AGIWUR34580                                                            |          |                |           |           |
| CB4856 HS I         | 13503045                                                               | 13507064 | WBGene00003585 | ndx-8     | Y87G2A.14 |
| -0.0898989388213352 | AGIWUR42138                                                            |          |                |           |           |
| CB4856 HS I         | 13508785                                                               | 13512026 | WBGene00044260 | Y87G2A.19 | Y87G2A.19 |
| 0.165185978002384   | AGIWUR38809                                                            |          |                |           |           |
| CB4856 HS I         | 13512313                                                               | 13514320 | WBGene00013604 | Y87G2A.18 | Y87G2A.18 |
| -0.0383738940181395 | AGIWUR37837                                                            |          |                |           |           |
| CB4856 HS I         | 13514550                                                               | 13526254 | WBGene00013593 | Y87G2A.1  | Y87G2A.1  |
| -0.261399267257509  | AGIWUR10029                                                            |          |                |           |           |
| CB4856 HS I         | 13528706                                                               | 13531444 | WBGene00044261 | Y87G2A.20 | Y87G2A.20 |
| -0.0597825916486912 | AGIWUR10888;AGIWUR20595;AGIWUR33352;AGIWUR35074;AGIWUR44230            |          |                |           |           |
| CB4856 HS I         | 13534718                                                               | 13537014 | WBGene00013594 | Y87G2A.2  | Y87G2A.2  |
| 0.363722486117709   | AGIWUR11310                                                            |          |                |           |           |
| CB4856 HS I         | 13536892                                                               | 13542703 | WBGene00013595 | atg-4.1   | Y87G2A.3  |
| -0.103637122017767  | AGIWUR21404                                                            |          |                |           |           |
| CB4856 HS I         | 13543079                                                               | 13545188 | WBGene00000089 | aex-6     | Y87G2A.4  |
| 0.0831904696888266  | AGIWUR6216;AGIWUR10423;AGIWUR15952;AGIWUR20591;AGIWUR26131;AGIWUR43384 |          |                |           |           |
| CB4856 HS I         | 13547898                                                               | 13559361 | WBGene00006936 | glp-4     | Y87G2A.5  |
| 0.0691139336532007  | AGIWUR33323                                                            |          |                |           |           |
| CB4856 HS I         | 13560447                                                               | 13563465 | WBGene00013602 | Y87G2A.16 | Y87G2A.16 |
| -0.131892109754636  | AGIWUR9625                                                             |          |                |           |           |
| CB4856 HS I         | 13564567                                                               | 13566362 | WBGene00001704 | grd-15    | Y87G2A.15 |
| -0.0466896806059989 | AGIWUR1040                                                             |          |                |           |           |
| CB4856 HS I         | 13566258                                                               | 13572063 | WBGene00000891 | cyn-15    | Y87G2A.6  |
| 0.26288372761708    | AGIWUR11314                                                            |          |                |           |           |
| CB4856 HS I         | 13572379                                                               | 13575805 | WBGene00013596 | nyn-2     | Y87G2A.7  |
| -0.0169521669335335 | AGIWUR32583;AGIWUR42958                                                |          |                |           |           |
| CB4856 HS I         | 13576148                                                               | 13581585 | WBGene00013597 | gpi-1     | Y87G2A.8  |
| 0.222623845424541   | AGIWUR4888;AGIWUR42506                                                 |          |                |           |           |
| CB4856 HS I         | 13581698                                                               | 13585295 | WBGene00006709 | ubc-14    | Y87G2A.9  |

|                                                                                                                                             |                                                                                   |          |                |           |           |                     |  |  |
|---------------------------------------------------------------------------------------------------------------------------------------------|-----------------------------------------------------------------------------------|----------|----------------|-----------|-----------|---------------------|--|--|
| 0.253239288497888                                                                                                                           | AGIWUR13481                                                                       |          |                |           |           |                     |  |  |
| CB4856 HS I                                                                                                                                 | 13586037                                                                          | 13588831 | WBGene00013598 | vps-28    | Y87G2A.10 |                     |  |  |
| -0.0313902682033564                                                                                                                         | AGIWUR4233;AGIWUR7451;AGIWUR18989;AGIWUR19541;AGIWUR22158;AGIWUR22997;AGIWUR26235 |          |                |           |           |                     |  |  |
| CB4856 HS I                                                                                                                                 | 13589099                                                                          | 13598505 | WBGene00013599 | eipr-1    | Y87G2A.11 |                     |  |  |
| -0.112306579205644                                                                                                                          | AGIWUR26147                                                                       |          |                |           |           |                     |  |  |
| CB4856 HS I                                                                                                                                 | 13598618                                                                          | 13603393 | WBGene00013601 | Y87G2A.13 | Y87G2A.13 |                     |  |  |
| -0.299445439279609                                                                                                                          | AGIWUR15125                                                                       |          |                |           |           |                     |  |  |
| CB4856 HS I                                                                                                                                 | 13603885                                                                          | 13626225 | WBGene00012386 | agef-1    | Y6B3A.1   | -0.0831570442220109 |  |  |
| AGIWUR25300;AGIWUR33210                                                                                                                     |                                                                                   |          |                |           |           |                     |  |  |
| CB4856 HS I                                                                                                                                 | 13626522                                                                          | 13628447 | WBGene00012351 | W09C5.1   | W09C5.1   | -0.0600375915245852 |  |  |
| AGIWUR17955;AGIWUR23847;AGIWUR32726                                                                                                         |                                                                                   |          |                |           |           |                     |  |  |
| CB4856 HS I                                                                                                                                 | 13629227                                                                          | 13633494 | WBGene00006793 | unc-59    | W09C5.2   | -0.0058554273168081 |  |  |
| AGIWUR44683                                                                                                                                 |                                                                                   |          |                |           |           |                     |  |  |
| CB4856 HS I                                                                                                                                 | 13635042                                                                          | 13635958 | WBGene00014858 | W09C5.3   | W09C5.3   | 0.0512472010092084  |  |  |
| AGIWUR3493;AGIWUR4777                                                                                                                       |                                                                                   |          |                |           |           |                     |  |  |
| CB4856 HS I                                                                                                                                 | 13637845                                                                          | 13639311 | WBGene00002116 | ins-33    | W09C5.4   | 0.502223730404975   |  |  |
| AGIWUR10812                                                                                                                                 |                                                                                   |          |                |           |           |                     |  |  |
| CB4856 HS I                                                                                                                                 | 13640297                                                                          | 13648405 | WBGene00012352 | dkf-1     | W09C5.5   |                     |  |  |
| -0.00919815169620719                                                                                                                        | AGIWUR22471                                                                       |          |                |           |           |                     |  |  |
| CB4856 HS I                                                                                                                                 | 13652939                                                                          | 13653704 | WBGene00004445 | rp1-31    | W09C5.6   | 0.330122510835308   |  |  |
| AGIWUR3290;AGIWUR3645;AGIWUR5928;AGIWUR8527;AGIWUR12729;AGIWUR14128;AGIWUR19084;AGIWUR22677;AGIWUR26990;AGIWUR30940;AGIWUR31232;AGIWUR42891 |                                                                                   |          |                |           |           |                     |  |  |
| CB4856 HS I                                                                                                                                 | 13654009                                                                          | 13658167 | WBGene00012353 | W09C5.7   | W09C5.7   | -0.0968218735660891 |  |  |
| AGIWUR16306                                                                                                                                 |                                                                                   |          |                |           |           |                     |  |  |
| CB4856 HS I                                                                                                                                 | 13658171                                                                          | 13659128 | WBGene00012354 | W09C5.8   | W09C5.8   | 0.0752035964349211  |  |  |
| AGIWUR1781;AGIWUR3960;AGIWUR9938;AGIWUR16533;AGIWUR18251;AGIWUR25895                                                                        |                                                                                   |          |                |           |           |                     |  |  |
| CB4856 HS I                                                                                                                                 | 13663462                                                                          | 13674997 | WBGene00012234 | W04A4.5   | W04A4.5   | 0.122205658235544   |  |  |
| AGIWUR2477                                                                                                                                  |                                                                                   |          |                |           |           |                     |  |  |
| CB4856 HS I                                                                                                                                 | 13676255                                                                          | 13677792 | WBGene00012233 | W04A4.4   | W04A4.4   | 0.0950187538558449  |  |  |
| AGIWUR39892                                                                                                                                 |                                                                                   |          |                |           |           |                     |  |  |
| CB4856 HS I                                                                                                                                 | 13680415                                                                          | 13681366 | WBGene00012232 | W04A4.3   | W04A4.3   | 0.0625418262807802  |  |  |
| AGIWUR12765                                                                                                                                 |                                                                                   |          |                |           |           |                     |  |  |
| CB4856 HS I                                                                                                                                 | 13682137                                                                          | 13684417 | WBGene00012231 | W04A4.2   | W04A4.2   | 0.17240471235411    |  |  |
| AGIWUR12922;AGIWUR28553;AGIWUR29183                                                                                                         |                                                                                   |          |                |           |           |                     |  |  |
| CB4856 HS I                                                                                                                                 | 13685303                                                                          | 13687582 | WBGene00012235 | W04A4.6   | W04A4.6   | 0.0821350435222175  |  |  |
| AGIWUR30052;AGIWUR32598                                                                                                                     |                                                                                   |          |                |           |           |                     |  |  |
| CB4856 HS I                                                                                                                                 | 13692929                                                                          | 13702954 | WBGene00012387 | Y6B3B.1   | Y6B3B.1   | 0.0898562379445371  |  |  |
| AGIWUR2983                                                                                                                                  |                                                                                   |          |                |           |           |                     |  |  |
| CB4856 HS I                                                                                                                                 | 13709779                                                                          | 13719528 | WBGene00012388 | Y6B3B.3   | Y6B3B.3   | 0.0180762294049686  |  |  |

|                                                                         |             |          |                |          |          |                     |  |
|-------------------------------------------------------------------------|-------------|----------|----------------|----------|----------|---------------------|--|
| AGIWUR35375                                                             |             |          |                |          |          |                     |  |
| CB4856 HS I                                                             | 13720125    | 13724453 | WBGene00012394 | hsd-1    | Y6B3B.11 |                     |  |
| -0.00421660815751679                                                    | AGIWUR42334 |          |                |          |          |                     |  |
| CB4856 HS I                                                             | 13724577    | 13732046 | WBGene00006505 | lagr-1   | Y6B3B.10 |                     |  |
| 0.0657064240608731                                                      | AGIWUR14852 |          |                |          |          |                     |  |
| CB4856 HS I                                                             | 13734958    | 13751124 | WBGene00012393 | Y6B3B.9  | Y6B3B.9  | 0.109795895155136   |  |
| AGIWUR2653                                                              |             |          |                |          |          |                     |  |
| CB4856 HS I                                                             | 13751234    | 13756354 | WBGene00012390 | gpap-1   | Y6B3B.5  | 0.0828194535493374  |  |
| AGIWUR18956                                                             |             |          |                |          |          |                     |  |
| CB4856 HS I                                                             | 13756730    | 13771773 | WBGene00012389 | Y6B3B.4  | Y6B3B.4  | -0.119213826885776  |  |
| AGIWUR1970;AGIWUR5684;AGIWUR19132;AGIWUR32826                           |             |          |                |          |          |                     |  |
| CB4856 HS I                                                             | 13773067    | 13778782 | WBGene00012576 | Y37H9A.1 |          | Y37H9A.1            |  |
| -0.106912662030215                                                      | AGIWUR36695 |          |                |          |          |                     |  |
| CB4856 HS I                                                             | 13778899    | 13792165 | WBGene00012578 | Y37H9A.3 |          | Y37H9A.3            |  |
| 0.177926815016715                                                       | AGIWUR7845  |          |                |          |          |                     |  |
| CB4856 HS I                                                             | 13792645    | 13794152 | WBGene00003581 | ndx-4    | Y37H9A.6 |                     |  |
| -0.022163707114693                                                      | AGIWUR33795 |          |                |          |          |                     |  |
| CB4856 HS I                                                             | 13795277    | 13795867 | WBGene00014870 | Y37H9A.4 |          | Y37H9A.4            |  |
| -0.358047499701517                                                      | AGIWUR24358 |          |                |          |          |                     |  |
| CB4856 HS I                                                             | 13802390    | 13806801 | WBGene00044065 | tag-229  | W09G3.3  | -0.224337159905803  |  |
| AGIWUR9860                                                              |             |          |                |          |          |                     |  |
| CB4856 HS I                                                             | 13806917    | 13812268 | WBGene00012366 | maea-1   | W09G3.2  | -0.0757111808455697 |  |
| AGIWUR20326;AGIWUR24050;AGIWUR35534                                     |             |          |                |          |          |                     |  |
| CB4856 HS I                                                             | 13814756    | 13827988 | WBGene00012369 | W09G3.6  | W09G3.6  | -0.0330223889133272 |  |
| AGIWUR9505                                                              |             |          |                |          |          |                     |  |
| CB4856 HS I                                                             | 13828102    | 13832146 | WBGene00012365 | W09G3.1  | W09G3.1  | -0.192721630459411  |  |
| AGIWUR21708;AGIWUR21737;AGIWUR23876;AGIWUR31807;AGIWUR34127;AGIWUR37740 |             |          |                |          |          |                     |  |
| CB4856 HS I                                                             | 13835292    | 13840047 | WBGene00012236 | W04A8.1  | W04A8.1  | 0.0896338013771363  |  |
| AGIWUR8302                                                              |             |          |                |          |          |                     |  |
| CB4856 HS I                                                             | 13840706    | 13841846 | WBGene00012237 | W04A8.2  | W04A8.2  | -0.094861260175553  |  |
| AGIWUR13981;AGIWUR15281;AGIWUR17643;AGIWUR36920;AGIWUR42788;AGIWUR44916 |             |          |                |          |          |                     |  |
| CB4856 HS I                                                             | 13841895    | 13843480 | WBGene00012239 | W04A8.4  | W04A8.4  | -0.0905942294117814 |  |
| AGIWUR3994;AGIWUR38834;AGIWUR41125;AGIWUR42044                          |             |          |                |          |          |                     |  |
| CB4856 HS I                                                             | 13844729    | 13846957 | WBGene00012238 | W04A8.3  | W04A8.3  | 0.0820875846793712  |  |
| AGIWUR41862                                                             |             |          |                |          |          |                     |  |
| CB4856 HS I                                                             | 13849599    | 13850893 | WBGene00012240 | W04A8.5  | W04A8.5  | -0.269398171222289  |  |
| AGIWUR25404                                                             |             |          |                |          |          |                     |  |
| CB4856 HS I                                                             | 13854632    | 13859699 | WBGene00012241 | W04A8.6  | W04A8.6  | -0.125965757222151  |  |
| AGIWUR43163                                                             |             |          |                |          |          |                     |  |

|                                                          |                                                            |          |                |            |            |                    |
|----------------------------------------------------------|------------------------------------------------------------|----------|----------------|------------|------------|--------------------|
| CB4856 HS I                                              | 13861472                                                   | 13887468 | WBGene00006382 | taf-1      | W04A8.7    | 0.0103432608013012 |
| AGIWUR29095                                              |                                                            |          |                |            |            |                    |
| CB4856 HS I                                              | 13899085                                                   | 13913854 | WBGene00006616 | trp-4      | Y71A12B.4  |                    |
| -0.243097494006406                                       | AGIWUR41758                                                |          |                |            |            |                    |
| CB4856 HS I                                              | 13915664                                                   | 13917809 | WBGene00013502 | cllec-111  | Y71A12B.5  |                    |
| -0.123475096977792                                       | AGIWUR36981                                                |          |                |            |            |                    |
| CB4856 HS I                                              | 13919375                                                   | 13922122 | WBGene00013503 | cllec-112  | Y71A12B.6  |                    |
| 0.139472669752423                                        | AGIWUR23899                                                |          |                |            |            |                    |
| CB4856 HS I                                              | 13938185                                                   | 13942016 | WBGene00013505 | Y71A12B.8  | Y71A12B.8  |                    |
| 0.0426644060122445                                       | AGIWUR3434                                                 |          |                |            |            |                    |
| CB4856 HS I                                              | 13943079                                                   | 13951628 | WBGene00013506 | usp-3      | Y71A12B.9  |                    |
| -0.154355978248947                                       | AGIWUR41370                                                |          |                |            |            |                    |
| CB4856 HS I                                              | 13952159                                                   | 13953194 | WBGene00004475 | rps-6      | Y71A12B.1  |                    |
| -0.0633079346089112                                      | AGIWUR4211;AGIWUR15277;AGIWUR23183;AGIWUR37410;AGIWUR42537 |          |                |            |            |                    |
| CB4856 HS I                                              | 13957199                                                   | 13960440 | WBGene00013507 | Y71A12B.10 | Y71A12B.10 |                    |
| 0.0868439466065158                                       | AGIWUR3766                                                 |          |                |            |            |                    |
| CB4856 HS I                                              | 13978430                                                   | 13980144 | WBGene00013508 | Y71A12B.11 | Y71A12B.11 |                    |
| -0.788700278526241                                       | AGIWUR15619                                                |          |                |            |            |                    |
| CB4856 HS I                                              | 13984308                                                   | 13989588 | WBGene00045058 | gadr-5     | Y71A12B.17 |                    |
| -0.300840239900038                                       | AGIWUR11183;AGIWUR29400                                    |          |                |            |            |                    |
| CB4856 HS I                                              | 13992582                                                   | 13996221 | WBGene00013511 | Y71A12B.15 | Y71A12B.15 |                    |
| -0.0106430915180571                                      | AGIWUR23417;AGIWUR23555                                    |          |                |            |            |                    |
| CB4856 HS I                                              | 13997363                                                   | 14007078 | WBGene00045077 | Y71A12B.18 | Y71A12B.18 |                    |
| -0.0968285572075374                                      | AGIWUR33089                                                |          |                |            |            |                    |
| CB4856 HS I                                              | 14004412                                                   | 14008484 | WBGene00013509 | Y71A12B.12 | Y71A12B.12 |                    |
| -0.178338859805371                                       | AGIWUR15382;AGIWUR42964                                    |          |                |            |            |                    |
| CB4856 HS I                                              | 14009871                                                   | 14011521 | WBGene00013865 | ZC334.7    | ZC334.7    | 0.0149168593500359 |
| AGIWUR38733                                              |                                                            |          |                |            |            |                    |
| CB4856 HS I                                              | 14012369                                                   | 14013629 | WBGene00002111 | ins-28     | ZC334.9    | -0.240771136844558 |
| AGIWUR19714                                              |                                                            |          |                |            |            |                    |
| CB4856 HS I                                              | 14018785                                                   | 14019759 | WBGene00002112 | ins-29     | ZC334.10   |                    |
| 0.297419054522589                                        | AGIWUR5899;AGIWUR9154;AGIWUR12469;AGIWUR28025;AGIWUR32013  |          |                |            |            |                    |
| CB4856 HS I                                              | 14020364                                                   | 14021155 | WBGene00002108 | ins-25     | ZC334.8    | -0.029954586739656 |
| AGIWUR2131;AGIWUR3614;AGIWUR5931;AGIWUR17706;AGIWUR32860 |                                                            |          |                |            |            |                    |
| CB4856 HS I                                              | 14027236                                                   | 14027588 | WBGene00002110 | ins-27     | ZC334.11   |                    |
| -0.132186378613179                                       | AGIWUR1125;AGIWUR12173;AGIWUR16115;AGIWUR19429;AGIWUR27925 |          |                |            |            |                    |
| CB4856 HS I                                              | 14028997                                                   | 14029212 | WBGene00045396 | ZC334.12   | ZC334.12   |                    |
| 0.0135943223088173                                       | AGIWUR3784;AGIWUR6250;AGIWUR31903;AGIWUR38530;AGIWUR42619  |          |                |            |            |                    |
| CB4856 HS I                                              | 14031147                                                   | 14031667 | WBGene00002107 | ins-24     | ZC334.3    | 0.0874738291242849 |

|                                                                                                                                                                                                             |   |          |          |                |           |           |                     |  |  |
|-------------------------------------------------------------------------------------------------------------------------------------------------------------------------------------------------------------|---|----------|----------|----------------|-----------|-----------|---------------------|--|--|
| AGIWUR3689                                                                                                                                                                                                  |   |          |          |                |           |           |                     |  |  |
| CB4856 HS                                                                                                                                                                                                   | I | 14035096 | 14036057 | WBGene00002113 | ins-30    | ZC334.2   | 0.0569792431556486  |  |  |
| AGIWUR40182                                                                                                                                                                                                 |   |          |          |                |           |           |                     |  |  |
| CB4856 HS                                                                                                                                                                                                   | I | 14037151 | 14037803 | WBGene00002109 | ins-26    | ZC334.1   | 0.131558805270835   |  |  |
| AGIWUR2102                                                                                                                                                                                                  |   |          |          |                |           |           |                     |  |  |
| CB4856 HS                                                                                                                                                                                                   | I | 14041627 | 14043478 | WBGene00013512 | nhr-276   | Y71A12C.1 |                     |  |  |
| 0.264445787275835 AGIWUR30870                                                                                                                                                                               |   |          |          |                |           |           |                     |  |  |
| CB4856 HS                                                                                                                                                                                                   | I | 14043531 | 14045694 | WBGene00050878 | Y71A12C.3 | Y71A12C.3 |                     |  |  |
| 0.940051164303839 AGIWUR19098                                                                                                                                                                               |   |          |          |                |           |           |                     |  |  |
| CB4856 HS                                                                                                                                                                                                   | I | 14046234 | 14048017 | WBGene00013513 | Y71A12C.2 | Y71A12C.2 |                     |  |  |
| 0.0485028124992377 AGIWUR9179;AGIWUR15094                                                                                                                                                                   |   |          |          |                |           |           |                     |  |  |
| CB4856 HS                                                                                                                                                                                                   | I | 14048085 | 14051003 | WBGene00004875 | smd-1     | F47G4.7   | -0.0679530060186657 |  |  |
| AGIWUR33737                                                                                                                                                                                                 |   |          |          |                |           |           |                     |  |  |
| CB4856 HS                                                                                                                                                                                                   | I | 14052136 | 14054154 | WBGene00009828 | F47G4.8   | F47G4.8   | -0.0709386905540441 |  |  |
| AGIWUR4404                                                                                                                                                                                                  |   |          |          |                |           |           |                     |  |  |
| CB4856 HS                                                                                                                                                                                                   | I | 14054593 | 14056894 | WBGene00009822 | clec-113  | F47G4.1   |                     |  |  |
| 0.0912309219953347 AGIWUR33408                                                                                                                                                                              |   |          |          |                |           |           |                     |  |  |
| CB4856 HS                                                                                                                                                                                                   | I | 14059411 | 14060829 | WBGene00009827 | hmg-6     | F47G4.6   | 0.112896507276613   |  |  |
| AGIWUR8349                                                                                                                                                                                                  |   |          |          |                |           |           |                     |  |  |
| CB4856 HS                                                                                                                                                                                                   | I | 14060876 | 14062137 | WBGene00009826 | F47G4.5   | F47G4.5   | -0.134777185628829  |  |  |
| AGIWUR13877                                                                                                                                                                                                 |   |          |          |                |           |           |                     |  |  |
| CB4856 HS                                                                                                                                                                                                   | I | 14062749 | 14068803 | WBGene00009825 | F47G4.4   | F47G4.4   | -0.0732149770044019 |  |  |
| AGIWUR5650;AGIWUR9090;AGIWUR19297;AGIWUR26208;AGIWUR33296;AGIWUR39500                                                                                                                                       |   |          |          |                |           |           |                     |  |  |
| CB4856 HS                                                                                                                                                                                                   | I | 14075836 | 14078211 | WBGene00009824 | gpdh-1    | F47G4.3   | -0.142030831290889  |  |  |
| AGIWUR20253                                                                                                                                                                                                 |   |          |          |                |           |           |                     |  |  |
| CB4856 HS                                                                                                                                                                                                   | I | 14078193 | 14082643 | WBGene00009823 | gad-6     | F47G4.2   | -0.0989545002256609 |  |  |
| AGIWUR14336;AGIWUR14614                                                                                                                                                                                     |   |          |          |                |           |           |                     |  |  |
| CB4856 HS                                                                                                                                                                                                   | I | 14088094 | 14089858 | WBGene00013404 | fxbx-101  | Y63D3A.3  |                     |  |  |
| 0.0493203611427599 AGIWUR20759                                                                                                                                                                              |   |          |          |                |           |           |                     |  |  |
| CB4856 HS                                                                                                                                                                                                   | I | 14090738 | 14096346 | WBGene00013403 | fxbx-100  | Y63D3A.2  |                     |  |  |
| 0.0845686218984056 AGIWUR42011                                                                                                                                                                              |   |          |          |                |           |           |                     |  |  |
| CB4856 HS                                                                                                                                                                                                   | I | 14097492 | 14101090 | WBGene00013405 | tdpt-1    | Y63D3A.4  |                     |  |  |
| 0.265820372856163 AGIWUR8766                                                                                                                                                                                |   |          |          |                |           |           |                     |  |  |
| CB4856 HS                                                                                                                                                                                                   | I | 14101236 | 14104475 | WBGene00006565 | tfg-1     | Y63D3A.5  |                     |  |  |
| -0.175700266401535 AGIWUR3031                                                                                                                                                                               |   |          |          |                |           |           |                     |  |  |
| CB4856 HS                                                                                                                                                                                                   | I | 14104429 | 14113179 | WBGene00001047 | dnj-29    | Y63D3A.6  |                     |  |  |
| -0.0415857637628836                                                                                                                                                                                         |   |          |          |                |           |           |                     |  |  |
| AGIWUR2497;AGIWUR2707;AGIWUR8430;AGIWUR9345;AGIWUR14768;AGIWUR14847;AGIWUR15853;AGIWUR20958;AGIWUR23646;AGI<br>WUR25975;AGIWUR26974;AGIWUR26995;AGIWUR28054;AGIWUR28176;AGIWUR32588;AGIWUR35335;AGIWUR35775 |   |          |          |                |           |           |                     |  |  |

|                                                                         |                                                                                                                        |          |                |          |                             |
|-------------------------------------------------------------------------|------------------------------------------------------------------------------------------------------------------------|----------|----------------|----------|-----------------------------|
| CB4856 HS I                                                             | 14113636                                                                                                               | 14114085 | WBGene00013406 | Y63D3A.7 | Y63D3A.7                    |
| 0.0756164743144048                                                      | AGIWUR7230;AGIWUR16354;AGIWUR21021;AGIWUR25749;AGIWUR29079;AGIWUR34860;AGIWUR35530;AGIWUR35904;AGIWUR43091;AGIWUR44857 |          |                |          |                             |
| CB4856 HS I                                                             | 14114194                                                                                                               | 14118650 | WBGene00013407 | Y63D3A.8 | Y63D3A.8                    |
| -0.125380674522813                                                      | AGIWUR5018;AGIWUR21326;AGIWUR39732                                                                                     |          |                |          |                             |
| CB4856 HS I                                                             | 14118753                                                                                                               | 14127199 | WBGene00010537 | mys-2    | K03D10.3                    |
| -0.306112380753453                                                      | AGIWUR15721;AGIWUR29820                                                                                                |          |                |          |                             |
| CB4856 HS I                                                             | 14128594                                                                                                               | 14142207 | WBGene00002181 | kal-1    | K03D10.1                    |
| -0.0426126354999337                                                     | AGIWUR36370                                                                                                            |          |                |          |                             |
| CB4856 HS I                                                             | 14150731                                                                                                               | 14151041 | WBGene00014700 | C37A5.6  | C37A5.6 0.0783399578061559  |
| AGIWUR31033                                                             |                                                                                                                        |          |                |          |                             |
| CB4856 HS I                                                             | 14154769                                                                                                               | 14155249 | WBGene00014698 | C37A5.3  | C37A5.3                     |
| -0.000531530221378418                                                   | AGIWUR138;AGIWUR9321;AGIWUR10493;AGIWUR12985;AGIWUR39666                                                               |          |                |          |                             |
| CB4856 HS I                                                             | 14157611                                                                                                               | 14158076 | WBGene00007992 | fipr-24  | C37A5.8 0.174805422828857   |
| AGIWUR23130                                                             |                                                                                                                        |          |                |          |                             |
| CB4856 HS I                                                             | 14158506                                                                                                               | 14161718 | WBGene00007988 | best-8   | C37A5.1 0.189544964165851   |
| AGIWUR7467                                                              |                                                                                                                        |          |                |          |                             |
| CB4856 HS I                                                             | 14163447                                                                                                               | 14168309 | WBGene00007991 | C37A5.7  | C37A5.7 -0.13067852505897   |
| AGIWUR43696                                                             |                                                                                                                        |          |                |          |                             |
| CB4856 HS I                                                             | 14171864                                                                                                               | 14172786 | WBGene00077520 | C37A5.11 | C37A5.11                    |
| 0.0419505511465497                                                      | AGIWUR202;AGIWUR14942;AGIWUR22282;AGIWUR26996;AGIWUR33327                                                              |          |                |          |                             |
| CB4856 HS I                                                             | 14172840                                                                                                               | 14179360 | WBGene00004202 | pry-1    | C37A5.9 -0.222254213312175  |
| AGIWUR33395                                                             |                                                                                                                        |          |                |          |                             |
| CB4856 HS I                                                             | 14182787                                                                                                               | 14185717 | WBGene00014100 | ZK849.1  | ZK849.1 0.0939939094552287  |
| AGIWUR13863                                                             |                                                                                                                        |          |                |          |                             |
| CB4856 HS I                                                             | 14185647                                                                                                               | 14196295 | WBGene00014101 | gopc-1   | ZK849.2 -0.111175625590288  |
| AGIWUR26761;AGIWUR33441;AGIWUR34814;AGIWUR41624;AGIWUR42335;AGIWUR42882 |                                                                                                                        |          |                |          |                             |
| CB4856 HS I                                                             | 14198612                                                                                                               | 14199099 | WBGene00014104 | ZK849.6  | ZK849.6 -0.14983892760505   |
| AGIWUR16143                                                             |                                                                                                                        |          |                |          |                             |
| CB4856 HS I                                                             | 14200020                                                                                                               | 14204687 | WBGene00014103 | best-26  | ZK849.5 0.156846512137999   |
| AGIWUR7283;AGIWUR24096;AGIWUR30353                                      |                                                                                                                        |          |                |          |                             |
| CB4856 HS I                                                             | 14205717                                                                                                               | 14208581 | WBGene00014102 | best-25  | ZK849.4 -0.0630352708006079 |
| AGIWUR15418                                                             |                                                                                                                        |          |                |          |                             |
| CB4856 HS I                                                             | 14209215                                                                                                               | 14212501 | WBGene00008185 | best-10  | C49A1.2 -0.235487238474571  |
| AGIWUR31693                                                             |                                                                                                                        |          |                |          |                             |
| CB4856 HS I                                                             | 14213681                                                                                                               | 14215790 | WBGene00008184 | C49A1.1  | C49A1.1 -0.0619331985035672 |
| AGIWUR10091                                                             |                                                                                                                        |          |                |          |                             |
| CB4856 HS I                                                             | 14216756                                                                                                               | 14220624 | WBGene00008186 | best-11  | C49A1.3 -0.0706814400292455 |



|                                     |   |             |          |                 |           |           |                    |  |
|-------------------------------------|---|-------------|----------|-----------------|-----------|-----------|--------------------|--|
| AGIWUR23910                         |   |             |          |                 |           |           |                    |  |
| CB4856 HS                           | I | 14220783    | 14231360 | WBGene00001377  | eya-1     | C49A1.4   | 0.172471362460629  |  |
| AGIWUR4852                          |   |             |          |                 |           |           |                    |  |
| CB4856 HS                           | I | 14237359    | 14241188 | WBGene00008187  | C49A1.5   | C49A1.5   | 0.0952234272062027 |  |
| AGIWUR33564;AGIWUR41607             |   |             |          |                 |           |           |                    |  |
| CB4856 HS                           | I | 14241898    | 14244452 | WBGene00008191  | C49A1.10  | C49A1.10  |                    |  |
| 0.171954854776299                   |   | AGIWUR23897 |          |                 |           |           |                    |  |
| CB4856 HS                           | I | 14246228    | 14247314 | WBGene00008188  | cllec-115 | C49A1.6   |                    |  |
| -0.086903738721027                  |   | AGIWUR35266 |          |                 |           |           |                    |  |
| CB4856 HS                           | I | 14251061    | 14252362 | WBGene00010576  | cllec-116 | K04H8.1   |                    |  |
| 0.187489230989934                   |   | AGIWUR39037 |          |                 |           |           |                    |  |
| CB4856 HS                           | I | 14252957    | 14255510 | WBGene00010577  | K04H8.2   | K04H8.2   | 0.0554360530756748 |  |
| AGIWUR7769                          |   |             |          |                 |           |           |                    |  |
| CB4856 HS                           | I | 14255684    | 14256970 | WBGene00010578  | K04H8.3   | K04H8.3   | -0.443741718406198 |  |
| AGIWUR23282                         |   |             |          |                 |           |           |                    |  |
| CB4856 HS                           | I | 14263301    | 14271321 | WBGene00003980  | pes-7     | F09C3.1   | -0.207703243705732 |  |
| AGIWUR25123                         |   |             |          |                 |           |           |                    |  |
| CB4856 HS                           | I | 14271893    | 14274213 | WBGene00008610  | F09C3.2   | F09C3.2   | 0.184365519490026  |  |
| AGIWUR42136                         |   |             |          |                 |           |           |                    |  |
| CB4856 HS                           | I | 14283464    | 14285319 | WBGene00008613  | fbxb-69   | F09C3.5   | -0.160100499868836 |  |
| AGIWUR25537                         |   |             |          |                 |           |           |                    |  |
| CB4856 HS                           | I | 14287872    | 14295898 | WBGene00008612  | fbxa-103  | F09C3.4   |                    |  |
| -0.168207926079689                  |   | AGIWUR3613  |          |                 |           |           |                    |  |
| CB4856 HS                           | I | 14297287    | 14298265 | WBGene00009862  | fbxb-67   | F49B2.2   | -0.114449853231143 |  |
| AGIWUR34725                         |   |             |          |                 |           |           |                    |  |
| CB4856 HS                           | I | 14305070    | 14307134 | WBGene000086555 | F49B2.7   | F49B2.7   | 0.250831544683615  |  |
| AGIWUR6124                          |   |             |          |                 |           |           |                    |  |
| CB4856 HS                           | I | 14311009    | 14312871 | WBGene00009863  | F49B2.3   | F49B2.3   | -0.151010162873815 |  |
| AGIWUR21423                         |   |             |          |                 |           |           |                    |  |
| CB4856 HS                           | I | 14319114    | 14319913 | WBGene00268216  | F49B2.9   | F49B2.9   | -0.131690474930682 |  |
| AGIWUR17709;AGIWUR21668;AGIWUR35873 |   |             |          |                 |           |           |                    |  |
| CB4856 HS                           | I | 14322237    | 14328965 | WBGene00005078  | src-2     | F49B2.5   | -0.05001475499229  |  |
| AGIWUR33270                         |   |             |          |                 |           |           |                    |  |
| CB4856 HS                           | I | 14331085    | 14339831 | WBGene00009865  | F49B2.6   | F49B2.6   | 0.0206080810870155 |  |
| AGIWUR8730;AGIWUR31462;AGIWUR36353  |   |             |          |                 |           |           |                    |  |
| CB4856 HS                           | I | 14341571    | 14343815 | WBGene00013666  | Y105E8A.1 | Y105E8A.1 |                    |  |
| -0.200194572873118                  |   | AGIWUR26600 |          |                 |           |           |                    |  |
| CB4856 HS                           | I | 14347514    | 14358326 | WBGene00013667  | Y105E8A.2 | Y105E8A.2 |                    |  |
| 0.0379616574522252                  |   | AGIWUR28921 |          |                 |           |           |                    |  |

|                                                                                              |                                     |          |                |            |            |
|----------------------------------------------------------------------------------------------|-------------------------------------|----------|----------------|------------|------------|
| CB4856 HS I                                                                                  | 14358502                            | 14367594 | WBGene00013668 | Y105E8A.3  | Y105E8A.3  |
| -0.0785720516725696                                                                          | AGIWUR38906                         |          |                |            |            |
| CB4856 HS I                                                                                  | 14367608                            | 14369773 | WBGene00001156 | ech-7      | Y105E8A.4  |
| 0.288762045125861                                                                            | AGIWUR4586                          |          |                |            |            |
| CB4856 HS I                                                                                  | 14371142                            | 14376025 | WBGene00000241 | bbs-1      | Y105E8A.5  |
| -0.19449994571359                                                                            | AGIWUR133                           |          |                |            |            |
| CB4856 HS I                                                                                  | 14378386                            | 14379425 | WBGene00044264 | Y105E8A.32 | Y105E8A.32 |
| 0.00194839871269359                                                                          | AGIWUR17134                         |          |                |            |            |
| CB4856 HS I                                                                                  | 14381344                            | 14384737 | WBGene00006824 | unc-95     | Y105E8A.6  |
| -0.126103865128105                                                                           | AGIWUR23275                         |          |                |            |            |
| CB4856 HS I                                                                                  | 14390333                            | 14400222 | WBGene00002977 | lev-10     | Y105E8A.7  |
| -0.181442489027656                                                                           | AGIWUR23424;AGIWUR35694;AGIWUR38498 |          |                |            |            |
| CB4856 HS I                                                                                  | 14400679                            | 14405649 | WBGene00013669 | Y105E8A.8  | Y105E8A.8  |
| -0.138223566396643                                                                           | AGIWUR12986                         |          |                |            |            |
| CB4856 HS I                                                                                  | 14406028                            | 14417942 | WBGene00000158 | apg-1      | Y105E8A.9  |
| -0.0956296172458                                                                             | AGIWUR1586;AGIWUR14637              |          |                |            |            |
| CB4856 HS I                                                                                  | 14418197                            | 14431806 | WBGene00013670 | hpo-13     | Y105E8A.10 |
| 0.237966246433778                                                                            | AGIWUR42701                         |          |                |            |            |
| CB4856 HS I                                                                                  | 14432793                            | 14433841 | WBGene00013671 | Y105E8A.11 | Y105E8A.11 |
| 0.0795820901584428                                                                           | AGIWUR15864                         |          |                |            |            |
| CB4856 HS I                                                                                  | 14436810                            | 14451880 | WBGene00013672 | catp-1     | Y105E8A.12 |
| 0.117501648499859                                                                            | AGIWUR4487                          |          |                |            |            |
| CB4856 HS I                                                                                  | 14465380                            | 14468214 | WBGene00013674 | Y105E8A.14 | Y105E8A.14 |
| -0.00280516019827459                                                                         |                                     |          |                |            |            |
| AGIWUR918;AGIWUR7311;AGIWUR12133;AGIWUR12400;AGIWUR29395;AGIWUR31736;AGIWUR37639;AGIWUR43745 |                                     |          |                |            |            |
| CB4856 HS I                                                                                  | 14468321                            | 14469354 | WBGene00004489 | rps-20     | Y105E8A.16 |
| -0.246855710028493                                                                           | AGIWUR26559                         |          |                |            |            |
| CB4856 HS I                                                                                  | 14469506                            | 14476790 | WBGene00013676 | ekl-4      | Y105E8A.17 |
| 0.06838152142904                                                                             | AGIWUR43665;AGIWUR43829             |          |                |            |            |
| CB4856 HS I                                                                                  | 14476674                            | 14486767 | WBGene00013677 | yars-1     | Y105E8A.19 |
| -0.214177038468102                                                                           | AGIWUR18952;AGIWUR25570             |          |                |            |            |
| CB4856 HS I                                                                                  | 14486878                            | 14496560 | WBGene00013678 | Y105E8A.20 | Y105E8A.20 |
| 0.251635245816148                                                                            | AGIWUR11146                         |          |                |            |            |
| CB4856 HS I                                                                                  | 14496909                            | 14498291 | WBGene00013685 | Y105E8A.28 | Y105E8A.28 |
| 0.0844295350188009                                                                           | AGIWUR6382                          |          |                |            |            |
| CB4856 HS I                                                                                  | 14499727                            | 14510552 | WBGene00013679 | Y105E8A.21 | Y105E8A.21 |
| 0.223356585026373                                                                            | AGIWUR3433                          |          |                |            |            |
| CB4856 HS I                                                                                  | 14511431                            | 14518719 | WBGene00001365 | exc-4      | Y105E8A.22 |
| -0.329970979533669                                                                           | AGIWUR16297;AGIWUR28292             |          |                |            |            |

|                     |                                                                                 |          |                |            |            |
|---------------------|---------------------------------------------------------------------------------|----------|----------------|------------|------------|
| CB4856 HS I         | 14529531                                                                        | 14546634 | WBGene00013683 | zoo-1      | Y105E8A.26 |
| -0.0142955572894135 | AGIWUR38954                                                                     |          |                |            |            |
| CB4856 HS I         | 14552030                                                                        | 14565853 | WBGene00013680 | rpom-1     | Y105E8A.23 |
| 0.0507104421337097  | AGIWUR36449                                                                     |          |                |            |            |
| CB4856 HS I         | 14567169                                                                        | 14616524 | WBGene00013682 | Y105E8A.25 | Y105E8A.25 |
| 0.0216694251088896  | AGIWUR1343;AGIWUR2683;AGIWUR4821;AGIWUR7929;AGIWUR18859;AGIWUR19624;AGIWUR36825 |          |                |            |            |
| CB4856 HS I         | 14620388                                                                        | 14620632 | WBGene00044265 | Y105E8B.11 | Y105E8B.11 |
| 0.0487885514854245  | AGIWUR949;AGIWUR4198;AGIWUR10506;AGIWUR29150;AGIWUR40348                        |          |                |            |            |
| CB4856 HS I         | 14621173                                                                        | 14631254 | WBGene00002978 | lev-11     | Y105E8B.1  |
| 0.334103844935321   | AGIWUR10189;AGIWUR13276;AGIWUR26792;AGIWUR32066                                 |          |                |            |            |
| CB4856 HS I         | 14634456                                                                        | 14642653 | WBGene00013687 | exoc-8     | Y105E8B.2  |
| 0.0420936731788619  | AGIWUR34821;AGIWUR40365;AGIWUR40499;AGIWUR43251                                 |          |                |            |            |
| CB4856 HS I         | 14642714                                                                        | 14646600 | WBGene00013692 | Y105E8B.7  | Y105E8B.7  |
| 0.161399032483462   | AGIWUR3209                                                                      |          |                |            |            |
| CB4856 HS I         | 14647782                                                                        | 14651456 | WBGene00013689 | bath-40    | Y105E8B.4  |
| -0.383594495715617  | AGIWUR35669                                                                     |          |                |            |            |
| CB4856 HS I         | 14652116                                                                        | 14657275 | WBGene00013688 | riok-2     | Y105E8B.3  |
| -0.110865390417466  | AGIWUR17763;AGIWUR26680;AGIWUR41638                                             |          |                |            |            |
| CB4856 HS I         | 14657355                                                                        | 14661414 | WBGene00013690 | hprt-1     | Y105E8B.5  |
| 0.0131953037391508  | AGIWUR26599                                                                     |          |                |            |            |
| CB4856 HS I         | 14662524                                                                        | 14662873 | WBGene00013691 | Y105E8B.6  | Y105E8B.6  |
| -0.10488118630068   | AGIWUR6708;AGIWUR11489;AGIWUR23025;AGIWUR33975;AGIWUR37197;AGIWUR39910          |          |                |            |            |
| CB4856 HS I         | 14663209                                                                        | 14674822 | WBGene00001334 | ero-1      | Y105E8B.8  |
| -0.0719893600607637 | AGIWUR15790;AGIWUR38676                                                         |          |                |            |            |
| CB4856 HS I         | 14675600                                                                        | 14682566 | WBGene00013693 | Y105E8B.9  | Y105E8B.9  |
| 0.0256494291421281  | AGIWUR1425;AGIWUR6556;AGIWUR10139;AGIWUR24148                                   |          |                |            |            |
| CB4856 HS I         | 14688639                                                                        | 14691736 | WBGene00013197 | ttm-5      | Y54E5A.1   |
| 0.219840687681707   | AGIWUR43809                                                                     |          |                |            |            |
| CB4856 HS I         | 14694154                                                                        | 14700392 | WBGene00013198 | Y54E5A.2   | Y54E5A.2   |
| -0.165620972441709  | AGIWUR12835;AGIWUR39872                                                         |          |                |            |            |
| CB4856 HS I         | 14701122                                                                        | 14706522 | WBGene00003790 | npp-4      | Y54E5A.4   |
| -0.154274026757069  | AGIWUR665;AGIWUR10793;AGIWUR11371;AGIWUR15099;AGIWUR25502;AGIWUR33722           |          |                |            |            |
| CB4856 HS I         | 14707059                                                                        | 14707875 | WBGene00013200 | Y54E5A.5   | Y54E5A.5   |
| -0.0111113579187752 | AGIWUR39609                                                                     |          |                |            |            |
| CB4856 HS I         | 14708195                                                                        | 14710961 | WBGene00013201 | dus-2      | Y54E5A.6   |
| 0.0247421061063253  | AGIWUR32804                                                                     |          |                |            |            |
| CB4856 HS I         | 14711081                                                                        | 14715030 | WBGene00013202 | Y54E5A.7   | Y54E5A.7   |
| 0.13940030531869    | AGIWUR27553                                                                     |          |                |            |            |
| CB4856 HS I         | 14716528                                                                        | 14719027 | WBGene00013203 | Y54E5A.8   | Y54E5A.8   |

|                                                                                                |                                                                         |          |                |          |          |                     |  |
|------------------------------------------------------------------------------------------------|-------------------------------------------------------------------------|----------|----------------|----------|----------|---------------------|--|
| -0.0782049443641961                                                                            | AGIWUR31127;AGIWUR33181                                                 |          |                |          |          |                     |  |
| CB4856 HS I                                                                                    | 14719167                                                                | 14720477 | WBGene00003951 | pbs-5    | K05C4.1  | 0.0234659328375999  |  |
| AGIWUR4323;AGIWUR6843                                                                          |                                                                         |          |                |          |          |                     |  |
| CB4856 HS I                                                                                    | 14720588                                                                | 14721979 | WBGene00010579 | K05C4.2  | K05C4.2  | 0.0628256938741103  |  |
| AGIWUR97;AGIWUR12763;AGIWUR19503;AGIWUR28718;AGIWUR37026;AGIWUR39116;AGIWUR39497               |                                                                         |          |                |          |          |                     |  |
| CB4856 HS I                                                                                    | 14725296                                                                | 14726131 | WBGene00010586 | K05C4.10 | K05C4.10 |                     |  |
| -0.00329514751794413                                                                           | AGIWUR6961;AGIWUR7840;AGIWUR25950                                       |          |                |          |          |                     |  |
| CB4856 HS I                                                                                    | 14726804                                                                | 14730719 | WBGene00010585 | K05C4.9  | K05C4.9  | -0.123940470160482  |  |
| AGIWUR29746                                                                                    |                                                                         |          |                |          |          |                     |  |
| CB4856 HS I                                                                                    | 14732426                                                                | 14733549 | WBGene00010584 | K05C4.8  | K05C4.8  | -0.180709271199979  |  |
| AGIWUR39087                                                                                    |                                                                         |          |                |          |          |                     |  |
| CB4856 HS I                                                                                    | 14735236                                                                | 14736945 | WBGene00010581 | K05C4.4  | K05C4.4  | 0.00949585502802108 |  |
| AGIWUR43308                                                                                    |                                                                         |          |                |          |          |                     |  |
| CB4856 HS I                                                                                    | 14737702                                                                | 14738796 | WBGene00010583 | K05C4.7  | K05C4.7  | -0.212389273136562  |  |
| AGIWUR26735                                                                                    |                                                                         |          |                |          |          |                     |  |
| CB4856 HS I                                                                                    | 14738882                                                                | 14742657 | WBGene00001979 | hmp-2    | K05C4.6  | 0.0173721705245864  |  |
| AGIWUR5348                                                                                     |                                                                         |          |                |          |          |                     |  |
| CB4856 HS I                                                                                    | 14742765                                                                | 14747789 | WBGene00010582 | K05C4.5  | K05C4.5  | 0.295777720025953   |  |
| AGIWUR38011                                                                                    |                                                                         |          |                |          |          |                     |  |
| CB4856 HS I                                                                                    | 14755154                                                                | 14756432 | WBGene00009559 | mtx-1    | F39B2.11 |                     |  |
| -0.051958750812493                                                                             | AGIWUR191;AGIWUR5779;AGIWUR11203;AGIWUR43974                            |          |                |          |          |                     |  |
| CB4856 HS I                                                                                    | 14756858                                                                | 14759354 | WBGene00001030 | dnj-12   | F39B2.10 |                     |  |
| -0.147955970269978                                                                             | AGIWUR13540;AGIWUR15860;AGIWUR19114;AGIWUR25936;AGIWUR32563;AGIWUR40305 |          |                |          |          |                     |  |
| CB4856 HS I                                                                                    | 14759918                                                                | 14760654 | WBGene00004495 | rps-26   | F39B2.6  | -0.411568633574201  |  |
| AGIWUR5600;AGIWUR11547;AGIWUR15702;AGIWUR16030;AGIWUR26227;AGIWUR35000;AGIWUR36505;AGIWUR42692 |                                                                         |          |                |          |          |                     |  |
| CB4856 HS I                                                                                    | 14760644                                                                | 14768980 | WBGene00009558 | F39B2.8  | F39B2.8  | 0.265417545448717   |  |
| AGIWUR40829                                                                                    |                                                                         |          |                |          |          |                     |  |
| CB4856 HS I                                                                                    | 14770689                                                                | 14775007 | WBGene00009557 | mtcu-1   | F39B2.7  | 0.0756217582918719  |  |
| AGIWUR33237                                                                                    |                                                                         |          |                |          |          |                     |  |
| CB4856 HS I                                                                                    | 14775184                                                                | 14776663 | WBGene00009556 | F39B2.5  | F39B2.5  | 0.14347469392062    |  |
| AGIWUR3717                                                                                     |                                                                         |          |                |          |          |                     |  |
| CB4856 HS I                                                                                    | 14777139                                                                | 14787804 | WBGene00006349 | sur-2    | F39B2.4  | 0.196881590151524   |  |
| AGIWUR2835                                                                                     |                                                                         |          |                |          |          |                     |  |
| CB4856 HS I                                                                                    | 14788125                                                                | 14789517 | WBGene00009554 | F39B2.3  | F39B2.3  | 0.0479734141440611  |  |
| AGIWUR9553;AGIWUR10012;AGIWUR18635;AGIWUR19118;AGIWUR28859;AGIWUR38962                         |                                                                         |          |                |          |          |                     |  |
| CB4856 HS I                                                                                    | 14790244                                                                | 14790934 | WBGene00006730 | uev-1    | F39B2.2  | -0.0566246992804444 |  |
| AGIWUR32262                                                                                    |                                                                         |          |                |          |          |                     |  |
| CB4856 HS I                                                                                    | 14791040                                                                | 14794371 | WBGene00009553 | hinf-1   | F39B2.1  | -0.0351123661211563 |  |
| AGIWUR523;AGIWUR1351;AGIWUR6152;AGIWUR7485;AGIWUR15969;AGIWUR17279;AGIWUR21722;AGIWUR25305     |                                                                         |          |                |          |          |                     |  |

|                                                                        |                                                            |          |                |                                     |
|------------------------------------------------------------------------|------------------------------------------------------------|----------|----------------|-------------------------------------|
| CB4856 HS I                                                            | 14794899                                                   | 14797166 | WBGene00010766 | K11B4.1 K11B4.1 0.161113041127344   |
| AGIWUR14744                                                            |                                                            |          |                |                                     |
| CB4856 HS I                                                            | 14797660                                                   | 14798705 | WBGene00010767 | blos-9 K11B4.2                      |
| -0.000213026445313957                                                  | AGIWUR7970                                                 |          |                |                                     |
| CB4856 HS I                                                            | 14807467                                                   | 14815725 | WBGene00004889 | smp-1 Y54E5B.1                      |
| -0.0339749723532661                                                    | AGIWUR30467;AGIWUR30814                                    |          |                |                                     |
| CB4856 HS I                                                            | 14815706                                                   | 14820222 | WBGene00013204 | Y54E5B.2 Y54E5B.2                   |
| 0.139135035174391                                                      | AGIWUR11700;AGIWUR39232                                    |          |                |                                     |
| CB4856 HS I                                                            | 14820381                                                   | 14821651 | WBGene00002324 | let-49 Y54E5B.3                     |
| -0.327739489418724                                                     | AGIWUR23956                                                |          |                |                                     |
| CB4856 HS I                                                            | 14822050                                                   | 14823996 | WBGene00006711 | ubc-16 Y54E5B.4                     |
| -0.134640580895216                                                     | AGIWUR12386;AGIWUR26881;AGIWUR26984;AGIWUR40178            |          |                |                                     |
| CB4856 HS I                                                            | 14824493                                                   | 14825952 | WBGene00014921 | Y54E5B.5 Y54E5B.5                   |
| 0.0796506334462155                                                     | AGIWUR12811;AGIWUR14671                                    |          |                |                                     |
| CB4856 HS I                                                            | 14826558                                                   | 14827779 | WBGene00005839 | srw-92 F32A7.1 -0.0732647066579508  |
| AGIWUR1679;AGIWUR23528;AGIWUR25181;AGIWUR30153;AGIWUR41623;AGIWUR41896 |                                                            |          |                |                                     |
| CB4856 HS I                                                            | 14828200                                                   | 14829594 | WBGene00005840 | srw-93 F32A7.2 0.141775208490745    |
| AGIWUR1982;AGIWUR19601;AGIWUR32483;AGIWUR33418                         |                                                            |          |                |                                     |
| CB4856 HS I                                                            | 14829667                                                   | 14834839 | WBGene00009304 | eva-1 F32A7.3                       |
| 0.000306422361662229                                                   | AGIWUR1324;AGIWUR10089;AGIWUR20986;AGIWUR37717;AGIWUR43383 |          |                |                                     |
| CB4856 HS I                                                            | 14838917                                                   | 14839138 | WBGene00044245 | F32A7.8 F32A7.8 -0.0421063304824996 |
| AGIWUR10354;AGIWUR11237;AGIWUR18460;AGIWUR40339;AGIWUR41657            |                                                            |          |                |                                     |
| CB4856 HS I                                                            | 14839856                                                   | 14843128 | WBGene00009305 | F32A7.4 F32A7.4 -0.0261259331108246 |
| AGIWUR13160                                                            |                                                            |          |                |                                     |
| CB4856 HS I                                                            | 14846476                                                   | 14850137 | WBGene00009306 | mapH-1.1 F32A7.5                    |
| -0.0310043140461929                                                    | AGIWUR5224;AGIWUR15454;AGIWUR20881;AGIWUR24422;AGIWUR29527 |          |                |                                     |
| CB4856 HS I                                                            | 14850054                                                   | 14855827 | WBGene00000088 | aex-5 F32A7.6 0.118315257178548     |
| AGIWUR36674                                                            |                                                            |          |                |                                     |
| CB4856 HS I                                                            | 14855901                                                   | 14863573 | WBGene00006789 | unc-54 F11C3.3 -0.142577068533608   |
| AGIWUR25719;AGIWUR36183;AGIWUR43581                                    |                                                            |          |                |                                     |
| CB4856 HS I                                                            | 14867924                                                   | 14871467 | WBGene00008695 | F11C3.1 F11C3.1 0.029149336864446   |
| AGIWUR21606                                                            |                                                            |          |                |                                     |
| CB4856 HS I                                                            | 14872112                                                   | 14875378 | WBGene00006845 | unc-122 F11C3.2 0.275422610927651   |
| AGIWUR5296                                                             |                                                            |          |                |                                     |
| CB4856 HS I                                                            | 14875784                                                   | 14900213 | WBGene00001488 | frm-1 ZK270.2 0.0634366071053947    |
| AGIWUR29071;AGIWUR39050;AGIWUR42633                                    |                                                            |          |                |                                     |
| CB4856 HS I                                                            | 14909240                                                   | 14913083 | WBGene00004237 | ptr-23 ZK270.1 -0.0661401566543898  |
| AGIWUR19053                                                            |                                                            |          |                |                                     |
| CB4856 HS I                                                            | 14913623                                                   | 14915571 | WBGene00009022 | F21F12.1 F21F12.1                   |

|                                                                                                                                                                                 |            |          |                |         |         |                     |  |  |
|---------------------------------------------------------------------------------------------------------------------------------------------------------------------------------|------------|----------|----------------|---------|---------|---------------------|--|--|
| -0.137102229047328                                                                                                                                                              | AGIWUR3298 |          |                |         |         |                     |  |  |
| CB4856 HS I                                                                                                                                                                     | 14919533   | 14951924 | WBGene00002189 | kin-1   | ZK909.2 | -0.0451173787811712 |  |  |
| AGIWUR2274;AGIWUR5154;AGIWUR8830;AGIWUR9986;AGIWUR11088;AGIWUR14732;AGIWUR18535;AGIWUR27166;AGIWUR34274;AGIWUR35252;AGIWUR38388;AGIWUR40098;AGIWUR41578;AGIWUR42171;AGIWUR43175 |            |          |                |         |         |                     |  |  |
| CB4856 HS I                                                                                                                                                                     | 14953490   | 14955492 | WBGene00014148 | ZK909.3 | ZK909.3 | -0.198261994509776  |  |  |
| AGIWUR12225;AGIWUR23203;AGIWUR29149;AGIWUR39359;AGIWUR39889                                                                                                                     |            |          |                |         |         |                     |  |  |
| CB4856 HS I                                                                                                                                                                     | 14955647   | 14957097 | WBGene00014149 | fbxb-70 | ZK909.5 | 0.101055045691584   |  |  |
| AGIWUR10119;AGIWUR38208;AGIWUR44401                                                                                                                                             |            |          |                |         |         |                     |  |  |
| CB4856 HS I                                                                                                                                                                     | 14961501   | 14965361 | WBGene00000469 | ces-2   | ZK909.4 | 0.0307928810904645  |  |  |
| AGIWUR13093                                                                                                                                                                     |            |          |                |         |         |                     |  |  |
| CB4856 HS I                                                                                                                                                                     | 14967301   | 14968540 | WBGene00014150 | ZK909.6 | ZK909.6 | -0.0395137247318331 |  |  |
| AGIWUR20349                                                                                                                                                                     |            |          |                |         |         |                     |  |  |
| CB4856 HS I                                                                                                                                                                     | 14975419   | 14980586 | WBGene00013970 | klu-1   | ZK337.2 | 0.0530425155682082  |  |  |
| AGIWUR38347                                                                                                                                                                     |            |          |                |         |         |                     |  |  |
| CB4856 HS I                                                                                                                                                                     | 14984178   | 14987658 | WBGene00006399 | tag-4   | ZK337.4 | -0.0973181455175425 |  |  |
| AGIWUR16061                                                                                                                                                                     |            |          |                |         |         |                     |  |  |
| CB4856 HS I                                                                                                                                                                     | 14993821   | 15001682 | WBGene00013969 | tep-1   | ZK337.1 | 0.0269336232513027  |  |  |
| AGIWUR25691                                                                                                                                                                     |            |          |                |         |         |                     |  |  |
| CB4856 HS I                                                                                                                                                                     | 15001854   | 15005608 | WBGene00003471 | mtd-1   | ZK337.5 | -0.213493630003438  |  |  |
| AGIWUR33354                                                                                                                                                                     |            |          |                |         |         |                     |  |  |
| CB4856 HS I                                                                                                                                                                     | 15005603   | 15013904 | WBGene00009368 | pole-1  | F33H2.5 | 0.0406070549174302  |  |  |
| AGIWUR7795                                                                                                                                                                      |            |          |                |         |         |                     |  |  |
| CB4856 HS I                                                                                                                                                                     | 15014851   | 15016595 | WBGene00009369 | F33H2.6 | F33H2.6 | -0.0603312843599593 |  |  |
| AGIWUR26108;AGIWUR28125;AGIWUR29986;AGIWUR34837;AGIWUR37775;AGIWUR38817                                                                                                         |            |          |                |         |         |                     |  |  |
| CB4856 HS I                                                                                                                                                                     | 15017283   | 15023017 | WBGene00001049 | dog-1   | F33H2.1 | 0.134603027832362   |  |  |
| AGIWUR16013                                                                                                                                                                     |            |          |                |         |         |                     |  |  |
| CB4856 HS I                                                                                                                                                                     | 15023092   | 15027761 | WBGene00009366 | F33H2.2 | F33H2.2 | 0.0767605170923744  |  |  |
| AGIWUR41707                                                                                                                                                                     |            |          |                |         |         |                     |  |  |
| CB4856 HS I                                                                                                                                                                     | 15027717   | 15030666 | WBGene00009370 | set-10  | F33H2.7 | -0.0107622753263872 |  |  |
| AGIWUR21015;AGIWUR27125                                                                                                                                                         |            |          |                |         |         |                     |  |  |
| CB4856 HS I                                                                                                                                                                     | 15031145   | 15033039 | WBGene00009371 | F33H2.8 | F33H2.8 | 0.0402830981483309  |  |  |
| AGIWUR34249                                                                                                                                                                     |            |          |                |         |         |                     |  |  |
| CB4856 HS I                                                                                                                                                                     | 15034517   | 15035467 | WBGene00009367 | F33H2.3 | F33H2.3 | 0.114883166317053   |  |  |
| AGIWUR26011                                                                                                                                                                     |            |          |                |         |         |                     |  |  |
| CB4856 HS I                                                                                                                                                                     | 15036373   | 15040487 | WBGene00009284 | F31C3.2 | F31C3.2 | 0.0619775935595506  |  |  |
| AGIWUR3373                                                                                                                                                                      |            |          |                |         |         |                     |  |  |
| CB4856 HS I                                                                                                                                                                     | 15040427   | 15041274 | WBGene00000881 | cyn-5   | F31C3.1 | 0.0578559906093492  |  |  |
| AGIWUR8073;AGIWUR36731                                                                                                                                                          |            |          |                |         |         |                     |  |  |
| CB4856 HS I                                                                                                                                                                     | 15041433   | 15050700 | WBGene00009285 | F31C3.3 | F31C3.3 | -0.0110170110274819 |  |  |

|                                                                                                                                                          |    |    |          |          |                |          |          |                      |             |
|----------------------------------------------------------------------------------------------------------------------------------------------------------|----|----|----------|----------|----------------|----------|----------|----------------------|-------------|
| AGIWUR40656                                                                                                                                              |    |    |          |          |                |          |          |                      |             |
| CB4856                                                                                                                                                   | HS | I  | 15050797 | 15052420 | WBGene00009286 | zipt-1   | F31C3.4  | -0.166801113519149   |             |
| AGIWUR32215;AGIWUR36866;AGIWUR41938                                                                                                                      |    |    |          |          |                |          |          |                      |             |
| CB4856                                                                                                                                                   | HS | I  | 15053025 | 15053670 | WBGene00009287 | psf-2    | F31C3.5  | 0.0434892674113687   |             |
| AGIWUR7586                                                                                                                                               |    |    |          |          |                |          |          |                      |             |
| CB4856                                                                                                                                                   | HS | I  | 15053617 | 15059003 | WBGene00009288 | F31C3.6  | F31C3.6  | -0.0500203889274129  |             |
| AGIWUR4435;AGIWUR6596;AGIWUR10855;AGIWUR23668;AGIWUR30942;AGIWUR43814                                                                                    |    |    |          |          |                |          |          |                      |             |
| CB4856                                                                                                                                                   | HS | I  | 15064301 | 15064453 | WBGene00004567 | rrn-2.1  | F31C3.11 |                      |             |
| 0.236232460107111 AGIWUR3226;AGIWUR10771;AGIWUR23918;AGIWUR33092;AGIWUR34754                                                                             |    |    |          |          |                |          |          |                      |             |
| CB4856                                                                                                                                                   | HS | I  | 15064838 | 15068346 | WBGene00004622 | rrn-3.1  | F31C3.9  | -0.543879273265436   |             |
| AGIWUR1682;AGIWUR9181;AGIWUR9854;AGIWUR13031;AGIWUR16753;AGIWUR20764;AGIWUR24344;AGIWUR25995;AGIWUR26866;AGIWUR28966;AGIWUR31062;AGIWUR40604;AGIWUR42613 |    |    |          |          |                |          |          |                      |             |
| CB4856                                                                                                                                                   | HS | II | 1848     | 4717     | WBGene00007063 | 2L52.1   | 2L52.1   | 0.311622619530104    | AGIWUR7229  |
| CB4856                                                                                                                                                   | HS | II | 5129     | 5483     | WBGene00022904 | C01B12.9 | C01B12.9 | -0.0176553730944269  |             |
| AGIWUR3983;AGIWUR13294;AGIWUR20192;AGIWUR35059;AGIWUR42377                                                                                               |    |    |          |          |                |          |          |                      |             |
| CB4856                                                                                                                                                   | HS | II | 6664     | 9486     | WBGene00015287 | osta-1   | C01B12.4 | 0.174222295662753    |             |
| AGIWUR4697;AGIWUR29006;AGIWUR40725                                                                                                                       |    |    |          |          |                |          |          |                      |             |
| CB4856                                                                                                                                                   | HS | II | 9485     | 11846    | WBGene00015288 | best-4   | C01B12.5 | 0.0148487388721525   |             |
| AGIWUR7492;AGIWUR13932;AGIWUR42239                                                                                                                       |    |    |          |          |                |          |          |                      |             |
| CB4856                                                                                                                                                   | HS | II | 12985    | 16001    | WBGene00015286 | best-3   | C01B12.3 | 0.0677513710979394   |             |
| AGIWUR14530                                                                                                                                              |    |    |          |          |                |          |          |                      |             |
| CB4856                                                                                                                                                   | HS | II | 19538    | 22169    | WBGene00015285 | gmeh-1   | C01B12.2 | 0.00672990987681965  |             |
| AGIWUR30642;AGIWUR31147;AGIWUR31577;AGIWUR43552                                                                                                          |    |    |          |          |                |          |          |                      |             |
| CB4856                                                                                                                                                   | HS | II | 23328    | 24458    | WBGene00005017 | sqt-2    | C01B12.1 | -0.00479343247289421 |             |
| AGIWUR13749;AGIWUR14151;AGIWUR38043                                                                                                                      |    |    |          |          |                |          |          |                      |             |
| CB4856                                                                                                                                                   | HS | II | 24666    | 25446    | WBGene00015291 | C01B12.8 | C01B12.8 | 0.135755769529544    |             |
| AGIWUR4616                                                                                                                                               |    |    |          |          |                |          |          |                      |             |
| CB4856                                                                                                                                                   | HS | II | 25382    | 28423    | WBGene00017745 | F23F1.4  | F23F1.4  | -0.0333452114208876  |             |
| AGIWUR29868;AGIWUR33772                                                                                                                                  |    |    |          |          |                |          |          |                      |             |
| CB4856                                                                                                                                                   | HS | II | 30061    | 31584    | WBGene00017746 | F23F1.5  | F23F1.5  | 0.0686392845936759   | AGIWUR40336 |
| CB4856                                                                                                                                                   | HS | II | 31768    | 33610    | WBGene00017744 | fbxc-54  | F23F1.3  | -0.114683078407712   | AGIWUR18725 |
| CB4856                                                                                                                                                   | HS | II | 34204    | 35262    | WBGene00017743 | F23F1.2  | F23F1.2  | -0.31795633246573    | AGIWUR15988 |
| CB4856                                                                                                                                                   | HS | II | 35202    | 37313    | WBGene00017747 | F23F1.6  | F23F1.6  | 0.277882567583465    | AGIWUR34202 |
| CB4856                                                                                                                                                   | HS | II | 38558    | 39537    | WBGene00017748 | F23F1.7  | F23F1.7  | 0.211113569614135    | AGIWUR1202  |
| CB4856                                                                                                                                                   | HS | II | 41471    | 41982    | WBGene00017750 | F23F1.10 | F23F1.10 | 0.0123206891590186   |             |
| AGIWUR3668;AGIWUR12855;AGIWUR14753;AGIWUR19238;AGIWUR28736                                                                                               |    |    |          |          |                |          |          |                      |             |
| CB4856                                                                                                                                                   | HS | II | 42181    | 46216    | WBGene00004504 | rpt-4    | F23F1.8  | -0.330942529086339   |             |
| AGIWUR4840;AGIWUR5595;AGIWUR18020;AGIWUR20985;AGIWUR35442                                                                                                |    |    |          |          |                |          |          |                      |             |
| CB4856                                                                                                                                                   | HS | II | 45040    | 47479    | WBGene00017749 | rpoa-49  | F23F1.9  | 0.00605360755161044  | AGIWUR41889 |

|                                                                                                                       |    |    |        |        |                |          |          |                     |             |
|-----------------------------------------------------------------------------------------------------------------------|----|----|--------|--------|----------------|----------|----------|---------------------|-------------|
| CB4856                                                                                                                | HS | II | 47580  | 50303  | WBGene00016021 | C23H3.5  | C23H3.5  | -0.0499775937132547 | AGIWUR14601 |
| CB4856                                                                                                                | HS | II | 51072  | 57576  | WBGene00016020 | spt1-1   | C23H3.4  | -0.0506475217436915 |             |
| AGIWUR15255;AGIWUR28293;AGIWUR41602                                                                                   |    |    |        |        |                |          |          |                     |             |
| CB4856                                                                                                                | HS | II | 57670  | 60040  | WBGene00016019 | C23H3.3  | C23H3.3  | -0.210859659420549  |             |
| AGIWUR17330;AGIWUR18749;AGIWUR41138                                                                                   |    |    |        |        |                |          |          |                     |             |
| CB4856                                                                                                                | HS | II | 61302  | 64340  | WBGene00016018 | C23H3.2  | C23H3.2  | 0.149527894030933   |             |
| AGIWUR1906;AGIWUR13184;AGIWUR26164;AGIWUR32918                                                                        |    |    |        |        |                |          |          |                     |             |
| CB4856                                                                                                                | HS | II | 69654  | 71279  | WBGene00001193 | egl-26   | C23H3.1  | -0.279909727748352  | AGIWUR31601 |
| CB4856                                                                                                                | HS | II | 71672  | 79266  | WBGene00016022 | C23H3.9  | C23H3.9  | 0.0872785012168347  |             |
| AGIWUR6544;AGIWUR37497;AGIWUR38816                                                                                    |    |    |        |        |                |          |          |                     |             |
| CB4856                                                                                                                | HS | II | 84434  | 87823  | WBGene00016809 | C50D2.6  | C50D2.6  | 0.159212368246369   | AGIWUR28282 |
| CB4856                                                                                                                | HS | II | 88221  | 91519  | WBGene00016812 | C50D2.9  | C50D2.9  | 0.110705583320128   | AGIWUR14627 |
| CB4856                                                                                                                | HS | II | 92169  | 95277  | WBGene00016810 | C50D2.7  | C50D2.7  | 0.039282247757594   | AGIWUR26625 |
| CB4856                                                                                                                | HS | II | 96127  | 98027  | WBGene00016811 | C50D2.8  | C50D2.8  | -0.260866523710394  | AGIWUR13595 |
| CB4856                                                                                                                | HS | II | 98404  | 98961  | WBGene00016808 | C50D2.5  | C50D2.5  | -0.361314873580805  |             |
| AGIWUR3897;AGIWUR20416;AGIWUR21779;AGIWUR31226                                                                        |    |    |        |        |                |          |          |                     |             |
| CB4856                                                                                                                | HS | II | 99647  | 101061 | WBGene00044420 | C50D2.10 | C50D2.10 | -0.0180271390688045 |             |
| AGIWUR3739;AGIWUR5801;AGIWUR7174;AGIWUR29349;AGIWUR42173                                                              |    |    |        |        |                |          |          |                     |             |
| CB4856                                                                                                                | HS | II | 104534 | 105833 | WBGene00000644 | col-68   | C50D2.4  | -0.357545851998605  | AGIWUR5687  |
| CB4856                                                                                                                | HS | II | 106189 | 107521 | WBGene00016807 | C50D2.3  | C50D2.3  | 0.069728154086091   | AGIWUR39774 |
| CB4856                                                                                                                | HS | II | 109165 | 111429 | WBGene00016806 | C50D2.2  | C50D2.2  | -0.0137698244423152 |             |
| AGIWUR1716;AGIWUR23387;AGIWUR40635                                                                                    |    |    |        |        |                |          |          |                     |             |
| CB4856                                                                                                                | HS | II | 111621 | 114454 | WBGene00016805 | C50D2.1  | C50D2.1  | -0.116986267392594  | AGIWUR33829 |
| CB4856                                                                                                                | HS | II | 114429 | 121222 | WBGene00019615 | K10B4.3  | K10B4.3  | 0.0936451540787111  | AGIWUR40135 |
| CB4856                                                                                                                | HS | II | 123270 | 125004 | WBGene00019616 | nmur-2   | K10B4.4  | 0.179648823175507   | AGIWUR4619  |
| CB4856                                                                                                                | HS | II | 126938 | 128706 | WBGene00005081 | srd-3    | K10B4.5  | 0.0384656324865995  | AGIWUR20269 |
| CB4856                                                                                                                | HS | II | 130983 | 133598 | WBGene00000857 | cwn-1    | K10B4.6  | -0.107189880492477  | AGIWUR16463 |
| CB4856                                                                                                                | HS | II | 135466 | 139999 | WBGene00019613 | K10B4.1  | K10B4.1  | -0.0642284222865754 | AGIWUR11600 |
| CB4856                                                                                                                | HS | II | 147241 | 152825 | WBGene00020798 | T25D3.4  | T25D3.4  | -0.127439063381834  | AGIWUR37414 |
| CB4856                                                                                                                | HS | II | 152525 | 154936 | WBGene00020797 | T25D3.3  | T25D3.3  | 0.289255154992507   | AGIWUR40922 |
| CB4856                                                                                                                | HS | II | 154875 | 156043 | WBGene00020796 | mrp1-28  | T25D3.2  | 0.0350184985154609  |             |
| AGIWUR5393;AGIWUR23054;AGIWUR24701;AGIWUR35171;AGIWUR35915;AGIWUR40250;AGIWUR43080                                    |    |    |        |        |                |          |          |                     |             |
| CB4856                                                                                                                | HS | II | 162374 | 170628 | WBGene00001340 | etr-1    | T01D1.2  | 0.154302592422787   |             |
| AGIWUR4015;AGIWUR8140;AGIWUR15274;AGIWUR21571;AGIWUR31029;AGIWUR31047;AGIWUR31656;AGIWUR32715;AGIWUR36529;AGIWUR42342 |    |    |        |        |                |          |          |                     |             |
| CB4856                                                                                                                | HS | II | 171386 | 173779 | WBGene00044428 | T01D1.7  | T01D1.7  | -0.0451180905932866 |             |
| AGIWUR33551;AGIWUR37702                                                                                               |    |    |        |        |                |          |          |                     |             |
| CB4856                                                                                                                | HS | II | 174401 | 175642 | WBGene00020148 | T01D1.3  | T01D1.3  | 0.098437133102113   | AGIWUR6933  |
| CB4856                                                                                                                | HS | II | 176997 | 179093 | WBGene00020149 | T01D1.4  | T01D1.4  | -0.198762377746036  | AGIWUR11472 |



|                                                                                                          |    |    |        |        |                |            |            |                      |             |
|----------------------------------------------------------------------------------------------------------|----|----|--------|--------|----------------|------------|------------|----------------------|-------------|
| CB4856                                                                                                   | HS | II | 179261 | 192078 | WBGene00044641 | T01D1.8    | T01D1.8    | -0.00729431736492847 |             |
| AGIWUR3097;AGIWUR10524;AGIWUR10527;AGIWUR16181;AGIWUR19838;AGIWUR28896                                   |    |    |        |        |                |            |            |                      |             |
| CB4856                                                                                                   | HS | II | 192531 | 194558 | WBGene00000034 | abu-11     | T01D1.6    | -0.223238869390078   | AGIWUR5572  |
| CB4856                                                                                                   | HS | II | 196985 | 211941 | WBGene00000497 | chs-2      | F48A11.1   | 0.129133202884275    |             |
| AGIWUR6866;AGIWUR9413;AGIWUR12416;AGIWUR12580;AGIWUR13068;AGIWUR28174;AGIWUR32227;AGIWUR38725            |    |    |        |        |                |            |            |                      |             |
| CB4856                                                                                                   | HS | II | 213169 | 216621 | WBGene00018585 | F48A11.4   | F48A11.4   | 0.123972344325299    |             |
| AGIWUR38865                                                                                              |    |    |        |        |                |            |            |                      |             |
| CB4856                                                                                                   | HS | II | 217049 | 220667 | WBGene00018586 | ubxn-3     | F48A11.5   | -0.0723284067621872  |             |
| AGIWUR38277                                                                                              |    |    |        |        |                |            |            |                      |             |
| CB4856                                                                                                   | HS | II | 222700 | 232739 | WBGene00021545 | Y43H11AL.1 | Y43H11AL.1 | 0.0251802205949616   |             |
| AGIWUR31822                                                                                              |    |    |        |        |                |            |            |                      |             |
| CB4856                                                                                                   | HS | II | 232852 | 237821 | WBGene00021546 | laat-1     | Y43H11AL.2 | -0.3573128260717     |             |
| AGIWUR382;AGIWUR607;AGIWUR4019;AGIWUR31192;AGIWUR32769;AGIWUR41132                                       |    |    |        |        |                |            |            |                      |             |
| CB4856                                                                                                   | HS | II | 240722 | 255182 | WBGene00004166 | pqn-85     | Y43H11AL.3 | 0.367860588601205    |             |
| AGIWUR10541                                                                                              |    |    |        |        |                |            |            |                      |             |
| CB4856                                                                                                   | HS | II | 257819 | 261063 | WBGene00000296 | cat-2      | B0432.5    | 0.126897542397129    |             |
| AGIWUR7552;AGIWUR31219                                                                                   |    |    |        |        |                |            |            |                      |             |
| CB4856                                                                                                   | HS | II | 264353 | 266077 | WBGene00044640 | B0432.14   | B0432.14   | -0.0555417936456131  |             |
| AGIWUR7508;AGIWUR7619;AGIWUR9732;AGIWUR17555;AGIWUR23611;AGIWUR35504;AGIWUR36059;AGIWUR38673;AGIWUR40321 |    |    |        |        |                |            |            |                      |             |
| CB4856                                                                                                   | HS | II | 266301 | 273966 | WBGene00015188 | B0432.7    | B0432.7    | -0.113486050032718   |             |
| AGIWUR4743;AGIWUR10714                                                                                   |    |    |        |        |                |            |            |                      |             |
| CB4856                                                                                                   | HS | II | 276212 | 278736 | WBGene00015189 | B0432.8    | B0432.8    | -0.253765207175707   | AGIWUR8831  |
| CB4856                                                                                                   | HS | II | 278621 | 282576 | WBGene00015194 | B0432.13   | B0432.13   | 0.13087849986773     |             |
| AGIWUR20880                                                                                              |    |    |        |        |                |            |            |                      |             |
| CB4856                                                                                                   | HS | II | 282576 | 283694 | WBGene00015190 | B0432.9    | B0432.9    | -0.175786705737984   | AGIWUR23197 |
| CB4856                                                                                                   | HS | II | 283887 | 286275 | WBGene00015191 | B0432.10   | B0432.10   | -0.277767278511297   |             |
| AGIWUR20057                                                                                              |    |    |        |        |                |            |            |                      |             |
| CB4856                                                                                                   | HS | II | 286625 | 288850 | WBGene00015186 | misc-1     | B0432.4    | 0.0260246795677332   | AGIWUR20234 |
| CB4856                                                                                                   | HS | II | 288939 | 290391 | WBGene00015185 | mrp1-41    | B0432.3    | 0.197343360905293    | AGIWUR1350  |
| CB4856                                                                                                   | HS | II | 290582 | 291861 | WBGene00015184 | djr-1.1    | B0432.2    | 0.0825531803153865   | AGIWUR11594 |
| CB4856                                                                                                   | HS | II | 293864 | 294706 | WBGene00015192 | B0432.11   | B0432.11   | 0.0999093162624778   |             |
| AGIWUR35985                                                                                              |    |    |        |        |                |            |            |                      |             |
| CB4856                                                                                                   | HS | II | 296291 | 297010 | WBGene00015193 | clcc-117   | B0432.12   | -0.121696051158695   |             |
| AGIWUR35170                                                                                              |    |    |        |        |                |            |            |                      |             |
| CB4856                                                                                                   | HS | II | 297399 | 299735 | WBGene00015183 | B0432.1    | B0432.1    | -0.218209113180704   | AGIWUR9466  |
| CB4856                                                                                                   | HS | II | 302405 | 303659 | WBGene00019280 | K01A2.5    | K01A2.5    | -0.039296889694814   | AGIWUR41704 |
| CB4856                                                                                                   | HS | II | 303924 | 305530 | WBGene00000645 | col-69     | K01A2.7    | 0.208476400989206    | AGIWUR24367 |
| CB4856                                                                                                   | HS | II | 307545 | 313969 | WBGene00019279 | K01A2.4    | K01A2.4    | 0.0371859732536901   |             |
| AGIWUR1000;AGIWUR1739                                                                                    |    |    |        |        |                |            |            |                      |             |

|                                                                                  |    |    |        |        |                |           |           |                      |             |
|----------------------------------------------------------------------------------|----|----|--------|--------|----------------|-----------|-----------|----------------------|-------------|
| CB4856                                                                           | HS | II | 319785 | 321445 | WBGene00001391 | far-7     | K01A2.2   | -0.0977955740205161  |             |
| AGIWUR24256;AGIWUR29060;AGIWUR40355                                              |    |    |        |        |                |           |           |                      |             |
| CB4856                                                                           | HS | II | 321442 | 323098 | WBGene00019284 | K01A2.10  | K01A2.10  | 0.146610925500801    |             |
| AGIWUR2318                                                                       |    |    |        |        |                |           |           |                      |             |
| CB4856                                                                           | HS | II | 326262 | 328224 | WBGene00019277 | sgcb-1    | K01A2.1   | 0.134736222039161    |             |
| AGIWUR7196;AGIWUR43662                                                           |    |    |        |        |                |           |           |                      |             |
| CB4856                                                                           | HS | II | 328564 | 332513 | WBGene00019285 | cbn-1     | K01A2.11  | -0.00715763483977039 |             |
| AGIWUR15086;AGIWUR18315;AGIWUR42119                                              |    |    |        |        |                |           |           |                      |             |
| CB4856                                                                           | HS | II | 337339 | 339248 | WBGene00000778 | cpn-2     | D1069.2   | -0.125059571807572   | AGIWUR32382 |
| CB4856                                                                           | HS | II | 341982 | 347891 | WBGene00017037 | D1069.3   | D1069.3   | 0.0799720538474915   |             |
| AGIWUR2482;AGIWUR11734;AGIWUR22668;AGIWUR31920                                   |    |    |        |        |                |           |           |                      |             |
| CB4856                                                                           | HS | II | 348266 | 357024 | WBGene00017038 | dmsr-4    | D1069.4   | -0.223781345271288   |             |
| AGIWUR1416;AGIWUR19580                                                           |    |    |        |        |                |           |           |                      |             |
| CB4856                                                                           | HS | II | 362495 | 367555 | WBGene00004218 | ptr-3     | C41D7.2   | -0.016088716471323   | AGIWUR13713 |
| CB4856                                                                           | HS | II | 375250 | 375835 | WBGene00015406 | C03H5.4   | C03H5.4   | 0.0164861529118827   |             |
| AGIWUR16004;AGIWUR28127;AGIWUR29633                                              |    |    |        |        |                |           |           |                      |             |
| CB4856                                                                           | HS | II | 380573 | 382257 | WBGene00015409 | C03H5.7   | C03H5.7   | 0.0983220110533827   |             |
| AGIWUR1131;AGIWUR3098;AGIWUR42721                                                |    |    |        |        |                |           |           |                      |             |
| CB4856                                                                           | HS | II | 382309 | 385358 | WBGene00015407 | C03H5.5   | C03H5.5   | 0.294338362308761    | AGIWUR9543  |
| CB4856                                                                           | HS | II | 386134 | 387949 | WBGene00015405 | C03H5.3   | C03H5.3   | -0.208741096898109   | AGIWUR35781 |
| CB4856                                                                           | HS | II | 388833 | 392732 | WBGene00015404 | nstp-4    | C03H5.2   | 0.112074645351475    | AGIWUR10131 |
| CB4856                                                                           | HS | II | 402580 | 404235 | WBGene00015403 | clcc-10   | C03H5.1   | -0.478448373173983   | AGIWUR17547 |
| CB4856                                                                           | HS | II | 406141 | 410961 | WBGene00016074 | C24H12.5  | C24H12.5  | 0.0356417913803657   |             |
| AGIWUR38684                                                                      |    |    |        |        |                |           |           |                      |             |
| CB4856                                                                           | HS | II | 411222 | 416620 | WBGene00016073 | C24H12.4  | C24H12.4  | -0.0614296165416022  |             |
| AGIWUR8344;AGIWUR26796;AGIWUR27112;AGIWUR35447;AGIWUR44221                       |    |    |        |        |                |           |           |                      |             |
| CB4856                                                                           | HS | II | 417349 | 418882 | WBGene00016075 | C24H12.6  | C24H12.6  | 0.173973902486399    |             |
| AGIWUR12274                                                                      |    |    |        |        |                |           |           |                      |             |
| CB4856                                                                           | HS | II | 419178 | 420568 | WBGene00016076 | C24H12.7  | C24H12.7  | -0.0526324961519036  |             |
| AGIWUR2158                                                                       |    |    |        |        |                |           |           |                      |             |
| CB4856                                                                           | HS | II | 422319 | 423142 | WBGene00016077 | C24H12.8  | C24H12.8  | -0.137201793541655   |             |
| AGIWUR66                                                                         |    |    |        |        |                |           |           |                      |             |
| CB4856                                                                           | HS | II | 423624 | 427019 | WBGene00016078 | C24H12.9  | C24H12.9  | 0.0311071997121255   |             |
| AGIWUR781;AGIWUR7070;AGIWUR11382;AGIWUR12130;AGIWUR15508;AGIWUR37267;AGIWUR45078 |    |    |        |        |                |           |           |                      |             |
| CB4856                                                                           | HS | II | 427603 | 429152 | WBGene00016080 | C24H12.11 | C24H12.11 | -0.300929377803558   |             |
| AGIWUR31524                                                                      |    |    |        |        |                |           |           |                      |             |
| CB4856                                                                           | HS | II | 436867 | 438748 | WBGene00016072 | C24H12.2  | C24H12.2  | 0.0631022066628901   |             |
| AGIWUR8039                                                                       |    |    |        |        |                |           |           |                      |             |
| CB4856                                                                           | HS | II | 444132 | 446928 | WBGene00235338 | C24H12.19 | C24H12.19 | -0.0460381790410143  |             |

|                                                                        |    |    |        |        |                |          |         |                             |             |
|------------------------------------------------------------------------|----|----|--------|--------|----------------|----------|---------|-----------------------------|-------------|
| CB4856                                                                 | HS | II | 448346 | 453156 | WBGene00021130 | W10D9.2  | W10D9.2 | -0.0133272477986379         | AGIWUR34864 |
| CB4856                                                                 | HS | II | 456113 | 457886 | WBGene00185079 | W10D9.6  | W10D9.6 | 0.126817749111883           | AGIWUR5554  |
| CB4856                                                                 | HS | II | 461667 | 467365 | WBGene00021132 | nfyb-1   | W10D9.4 | 0.106361584529386           | AGIWUR25019 |
| CB4856                                                                 | HS | II | 468374 | 470475 | WBGene00021133 | tomm-22  | W10D9.5 | 0.124443237661701           | AGIWUR7361  |
| CB4856                                                                 | HS | II | 471247 | 475940 | WBGene00021073 | nol-1    | W07E6.1 | -0.0559146639343755         |             |
| AGIWUR4767;AGIWUR18751;AGIWUR29814;AGIWUR30790;AGIWUR35336;AGIWUR42846 |    |    |        |        |                |          |         |                             |             |
| CB4856                                                                 | HS | II | 476222 | 478063 | WBGene00021076 | W07E6.5  | W07E6.5 | -0.0186873275001638         |             |
| AGIWUR697;AGIWUR10017;AGIWUR17438;AGIWUR35291;AGIWUR42424              |    |    |        |        |                |          |         |                             |             |
| CB4856                                                                 | HS | II | 480722 | 484386 | WBGene00021074 | W07E6.2  | W07E6.2 | 0.230813914779871           | AGIWUR43424 |
| CB4856                                                                 | HS | II | 484866 | 490403 | WBGene00004188 | prp-21   | W07E6.4 | -0.171920527792116          | AGIWUR25405 |
| CB4856                                                                 | HS | II | 495424 | 498659 | WBGene00021075 | W07E6.3  | W07E6.3 | -0.386315221906085          | AGIWUR28387 |
| CB4856                                                                 | HS | II | 503229 | 506014 | WBGene00005324 | T27A1.1  | T27A1.1 | 0.699480873765066           |             |
| AGIWUR10735;AGIWUR24620                                                |    |    |        |        |                |          |         |                             |             |
| CB4856                                                                 | HS | II | 508245 | 509326 | WBGene00005512 | srh-105  | T27A1.7 | -0.283243597061601          | AGIWUR40738 |
| CB4856                                                                 | HS | II | 516014 | 521605 | WBGene00003106 | mab-9    | T27A1.6 | -0.0708712721917566         |             |
| AGIWUR7631;AGIWUR14622;AGIWUR24220                                     |    |    |        |        |                |          |         |                             |             |
| CB4856                                                                 | HS | II | 522594 | 525983 | WBGene00020837 | slc-36.2 |         | T27A1.5 0.283159879510546   |             |
| AGIWUR8375                                                             |    |    |        |        |                |          |         |                             |             |
| CB4856                                                                 | HS | II | 526574 | 530374 | WBGene00020836 | lgc-34   | T27A1.4 | 0.242439231877754           | AGIWUR23718 |
| CB4856                                                                 | HS | II | 535578 | 546944 | WBGene00020835 | T27A1.3  | T27A1.3 | -0.0925051659991185         | AGIWUR41722 |
| CB4856                                                                 | HS | II | 546705 | 552031 | WBGene00015646 | mlt-10   | C09E8.3 | 0.104817963944649           |             |
| AGIWUR13193;AGIWUR31746                                                |    |    |        |        |                |          |         |                             |             |
| CB4856                                                                 | HS | II | 553086 | 554789 | WBGene00015645 | lips-7   | C09E8.2 | -0.0782078645921978         |             |
| AGIWUR27124;AGIWUR27958;AGIWUR30248                                    |    |    |        |        |                |          |         |                             |             |
| CB4856                                                                 | HS | II | 556485 | 564215 | WBGene00015644 | C09E8.1  | C09E8.1 | 0.0177813014634749          |             |
| AGIWUR16148;AGIWUR22381;AGIWUR24838;AGIWUR43911                        |    |    |        |        |                |          |         |                             |             |
| CB4856                                                                 | HS | II | 569236 | 572110 | WBGene00021095 | mlt-8    | W08F4.6 | 0.185262305758524           | AGIWUR39199 |
| CB4856                                                                 | HS | II | 574872 | 577732 | WBGene00021096 | W08F4.7  | W08F4.7 | 0.0219882853492805          |             |
| AGIWUR15585;AGIWUR17009;AGIWUR42523                                    |    |    |        |        |                |          |         |                             |             |
| CB4856                                                                 | HS | II | 577839 | 580593 | WBGene00021097 | cdc-37   | W08F4.8 | -0.0473206949484828         |             |
| AGIWUR41954;AGIWUR45168                                                |    |    |        |        |                |          |         |                             |             |
| CB4856                                                                 | HS | II | 580602 | 582014 | WBGene00021093 | W08F4.3  | W08F4.3 | -0.037863963888487          | AGIWUR6026  |
| CB4856                                                                 | HS | II | 584798 | 586241 | WBGene00044733 | W08F4.13 |         | W08F4.13 0.0144451715626523 |             |
| AGIWUR8104                                                             |    |    |        |        |                |          |         |                             |             |
| CB4856                                                                 | HS | II | 589161 | 589993 | WBGene00268207 | W08F4.20 |         | W08F4.20 0.299435574447285  |             |
| AGIWUR27767                                                            |    |    |        |        |                |          |         |                             |             |
| CB4856                                                                 | HS | II | 590578 | 591210 | WBGene00021099 | W08F4.10 |         | W08F4.10 0.157762904411122  |             |
| AGIWUR29;AGIWUR12451;AGIWUR19061;AGIWUR26023;AGIWUR36121               |    |    |        |        |                |          |         |                             |             |

|                                                                         |    |    |        |        |                |           |           |                      |             |
|-------------------------------------------------------------------------|----|----|--------|--------|----------------|-----------|-----------|----------------------|-------------|
| CB4856                                                                  | HS | II | 595207 | 602120 | WBGene00003599 | nhl-3     | W04H10.3  | 0.144562216673727    |             |
| AGIWUR39114                                                             |    |    |        |        |                |           |           |                      |             |
| CB4856                                                                  | HS | II | 606350 | 606735 | WBGene00206416 | W04H10.5  | W04H10.5  | -0.0577739816503291  |             |
| AGIWUR34751                                                             |    |    |        |        |                |           |           |                      |             |
| CB4856                                                                  | HS | II | 614767 | 624543 | WBGene00020207 | T04B8.5   | T04B8.5   | 0.122374868875447    |             |
| AGIWUR9756;AGIWUR21808;AGIWUR36894;AGIWUR41802;AGIWUR41815              |    |    |        |        |                |           |           |                      |             |
| CB4856                                                                  | HS | II | 627506 | 628662 | WBGene00020205 | arrd-1    | T04B8.3   | -0.310150417155708   | AGIWUR21856 |
| CB4856                                                                  | HS | II | 630075 | 631980 | WBGene00020204 | T04B8.2   | T04B8.2   | -0.351900783844514   | AGIWUR16818 |
| CB4856                                                                  | HS | II | 637346 | 639488 | WBGene00019497 | K07E8.6   | K07E8.6   | 0.0417402649071579   |             |
| AGIWUR26831;AGIWUR32972                                                 |    |    |        |        |                |           |           |                      |             |
| CB4856                                                                  | HS | II | 641010 | 650367 | WBGene00019498 | K07E8.7   | K07E8.7   | 0.053288301520162    | AGIWUR8822  |
| CB4856                                                                  | HS | II | 650964 | 654062 | WBGene00019496 | frpr-14   | K07E8.5   | -0.0307748924681901  | AGIWUR41435 |
| CB4856                                                                  | HS | II | 658669 | 659867 | WBGene00019495 | sdz-24    | K07E8.3   | -0.452997613105484   | AGIWUR38836 |
| CB4856                                                                  | HS | II | 660091 | 661796 | WBGene00005557 | sri-45    | K07E8.9   | -0.221594493535711   | AGIWUR3487  |
| CB4856                                                                  | HS | II | 667755 | 668444 | WBGene00019494 | K07E8.1   | K07E8.1   | 0.0344730880082977   | AGIWUR39454 |
| CB4856                                                                  | HS | II | 669506 | 671125 | WBGene00005558 | sri-46    | K07E8.11  | -0.138595473245261   |             |
| AGIWUR22123                                                             |    |    |        |        |                |           |           |                      |             |
| CB4856                                                                  | HS | II | 671542 | 673844 | WBGene00005556 | sri-44    | K07E8.12  | -0.237474984944319   |             |
| AGIWUR6105;AGIWUR19807                                                  |    |    |        |        |                |           |           |                      |             |
| CB4856                                                                  | HS | II | 675603 | 678347 | WBGene00021457 | Y39F10C.1 | Y39F10C.1 | 0.0591331620201059   |             |
| AGIWUR14888                                                             |    |    |        |        |                |           |           |                      |             |
| CB4856                                                                  | HS | II | 679025 | 679714 | WBGene00020179 | T02H6.9   | T02H6.9   | -0.31090209991347    | AGIWUR35739 |
| CB4856                                                                  | HS | II | 679777 | 680712 | WBGene00020180 | T02H6.10  | T02H6.10  | -0.121633372401384   |             |
| AGIWUR41544                                                             |    |    |        |        |                |           |           |                      |             |
| CB4856                                                                  | HS | II | 680832 | 681516 | WBGene00020178 | T02H6.8   | T02H6.8   | 0.102564525185324    | AGIWUR11615 |
| CB4856                                                                  | HS | II | 682626 | 683320 | WBGene00020177 | T02H6.7   | T02H6.7   | -0.00429639725976028 |             |
| AGIWUR2807;AGIWUR31704                                                  |    |    |        |        |                |           |           |                      |             |
| CB4856                                                                  | HS | II | 683767 | 684116 | WBGene00020176 | T02H6.6   | T02H6.6   | -0.0252848797493801  | AGIWUR30315 |
| CB4856                                                                  | HS | II | 685234 | 689014 | WBGene00020175 | T02H6.5   | T02H6.5   | -0.0353299954455029  | AGIWUR10088 |
| CB4856                                                                  | HS | II | 690049 | 691084 | WBGene00020174 | T02H6.4   | T02H6.4   | -0.0300525612946476  | AGIWUR35824 |
| CB4856                                                                  | HS | II | 691881 | 693456 | WBGene00020173 | T02H6.3   | T02H6.3   | -0.0212493430486784  |             |
| AGIWUR16045;AGIWUR20376;AGIWUR25904;AGIWUR30689;AGIWUR39982             |    |    |        |        |                |           |           |                      |             |
| CB4856                                                                  | HS | II | 700482 | 701125 | WBGene00020181 | T02H6.11  | T02H6.11  | -0.130642578191916   |             |
| AGIWUR22052;AGIWUR36290                                                 |    |    |        |        |                |           |           |                      |             |
| CB4856                                                                  | HS | II | 702107 | 708608 | WBGene00020172 | thoc-1    | T02H6.2   | -0.140898592571119   |             |
| AGIWUR13124;AGIWUR24834;AGIWUR29393;AGIWUR34043;AGIWUR39938;AGIWUR39989 |    |    |        |        |                |           |           |                      |             |
| CB4856                                                                  | HS | II | 709381 | 723699 | WBGene00020171 | T02H6.1   | T02H6.1   | -0.00578347189399775 |             |
| AGIWUR1925;AGIWUR31002                                                  |    |    |        |        |                |           |           |                      |             |
| CB4856                                                                  | HS | II | 723788 | 732513 | WBGene00021456 | Y39F10B.1 | Y39F10B.1 |                      |             |

|                                                                                                                                                                                                                                |    |                      |           |        |                 |           |           |                                 |
|--------------------------------------------------------------------------------------------------------------------------------------------------------------------------------------------------------------------------------|----|----------------------|-----------|--------|-----------------|-----------|-----------|---------------------------------|
|                                                                                                                                                                                                                                |    | -0.00179636077655765 | AGIWUR578 |        |                 |           |           |                                 |
| CB4856                                                                                                                                                                                                                         | HS | II                   | 734607    | 738666 | WBGene00015614  | C08G5.1   | C08G5.1   | 0.166807639552093               |
| AGIWUR7483;AGIWUR22598;AGIWUR26950                                                                                                                                                                                             |    |                      |           |        |                 |           |           |                                 |
| CB4856                                                                                                                                                                                                                         | HS | II                   | 739598    | 740852 | WBGene00015615  | fbxc-48   | C08G5.2   | -0.319367194737543 AGIWUR33530  |
| CB4856                                                                                                                                                                                                                         | HS | II                   | 741595    | 745128 | WBGene00015616  | C08G5.3   | C08G5.3   | -0.215957739998245 AGIWUR34991  |
| CB4856                                                                                                                                                                                                                         | HS | II                   | 745418    | 750164 | WBGene00004926  | snt-6     | C08G5.4   | -0.0278701479887324 AGIWUR20804 |
| CB4856                                                                                                                                                                                                                         | HS | II                   | 756195    | 765317 | WBGene00044418  | C08G5.7   | C08G5.7   | 0.0256602984204672              |
| AGIWUR1376;AGIWUR2926;AGIWUR3173;AGIWUR7059;AGIWUR8584;AGIWUR11962;AGIWUR14089;AGIWUR15395;AGIWUR16770;AGIWUR16869;AGIWUR17068;AGIWUR17422;AGIWUR31479;AGIWUR32296;AGIWUR33655;AGIWUR35357;AGIWUR38066;AGIWUR38457;AGIWUR40764 |    |                      |           |        |                 |           |           |                                 |
| CB4856                                                                                                                                                                                                                         | HS | II                   | 770553    | 772117 | WBGene00015618  | C08G5.6   | C08G5.6   | -0.0459893343800291             |
| AGIWUR31084;AGIWUR39491                                                                                                                                                                                                        |    |                      |           |        |                 |           |           |                                 |
| CB4856                                                                                                                                                                                                                         | HS | II                   | 775333    | 776780 | WBGene00021452  | Y39F10A.1 | Y39F10A.1 | 0.40040851818361                |
| AGIWUR13624                                                                                                                                                                                                                    |    |                      |           |        |                 |           |           |                                 |
| CB4856                                                                                                                                                                                                                         | HS | II                   | 779380    | 779882 | WBGene000269331 | Y39F10A.5 | Y39F10A.5 | -0.378967672229894              |
| AGIWUR43684                                                                                                                                                                                                                    |    |                      |           |        |                 |           |           |                                 |
| CB4856                                                                                                                                                                                                                         | HS | II                   | 781884    | 783001 | WBGene00021454  | Y39F10A.3 | Y39F10A.3 | 0.216243452028587               |
| AGIWUR5346;AGIWUR32953;AGIWUR43193                                                                                                                                                                                             |    |                      |           |        |                 |           |           |                                 |
| CB4856                                                                                                                                                                                                                         | HS | II                   | 787312    | 787994 | WBGene00018507  | F46F5.16  | F46F5.16  | 0.228530166739697               |
| AGIWUR29948                                                                                                                                                                                                                    |    |                      |           |        |                 |           |           |                                 |
| CB4856                                                                                                                                                                                                                         | HS | II                   | 788378    | 789175 | WBGene00018506  | F46F5.15  | F46F5.15  | -0.178779502596183              |
| AGIWUR11301                                                                                                                                                                                                                    |    |                      |           |        |                 |           |           |                                 |
| CB4856                                                                                                                                                                                                                         | HS | II                   | 8e+05     | 801454 | WBGene00018505  | F46F5.14  | F46F5.14  | 0.182997359009047               |
| AGIWUR12850                                                                                                                                                                                                                    |    |                      |           |        |                 |           |           |                                 |
| CB4856                                                                                                                                                                                                                         | HS | II                   | 801728    | 802693 | WBGene00023287  | F46F5.3   | F46F5.3   | -0.107889790763839              |
| AGIWUR4664;AGIWUR27371                                                                                                                                                                                                         |    |                      |           |        |                 |           |           |                                 |
| CB4856                                                                                                                                                                                                                         | HS | II                   | 803309    | 803717 | WBGene00018504  | F46F5.13  | F46F5.13  | -0.0490403228724503             |
| AGIWUR26178                                                                                                                                                                                                                    |    |                      |           |        |                 |           |           |                                 |
| CB4856                                                                                                                                                                                                                         | HS | II                   | 805028    | 806438 | WBGene00018495  | F46F5.4   | F46F5.4   | -0.0441583859720591 AGIWUR10079 |
| CB4856                                                                                                                                                                                                                         | HS | II                   | 807372    | 808070 | WBGene00018503  | F46F5.12  | F46F5.12  | -0.117547303740782              |
| AGIWUR5055                                                                                                                                                                                                                     |    |                      |           |        |                 |           |           |                                 |
| CB4856                                                                                                                                                                                                                         | HS | II                   | 808757    | 811887 | WBGene00018502  | F46F5.11  | F46F5.11  | 0.0724705423981522              |
| AGIWUR38924                                                                                                                                                                                                                    |    |                      |           |        |                 |           |           |                                 |
| CB4856                                                                                                                                                                                                                         | HS | II                   | 812141    | 813708 | WBGene00018496  | F46F5.5   | F46F5.5   | 0.0454108115638157 AGIWUR5636   |
| CB4856                                                                                                                                                                                                                         | HS | II                   | 814452    | 814866 | WBGene00018497  | F46F5.6   | F46F5.6   | -0.111358338769209 AGIWUR40706  |
| CB4856                                                                                                                                                                                                                         | HS | II                   | 818578    | 820683 | WBGene00018498  | F46F5.7   | F46F5.7   | 0.237716424439101               |
| AGIWUR4943;AGIWUR18449                                                                                                                                                                                                         |    |                      |           |        |                 |           |           |                                 |
| CB4856                                                                                                                                                                                                                         | HS | II                   | 821408    | 821614 | WBGene00018499  | F46F5.8   | F46F5.8   | -0.166486912879972 AGIWUR38844  |
| CB4856                                                                                                                                                                                                                         | HS | II                   | 823829    | 825245 | WBGene00018501  | F46F5.10  | F46F5.10  | 0.275880542098639               |

|                                     |    |        |        |                |           |           |                     |             |
|-------------------------------------|----|--------|--------|----------------|-----------|-----------|---------------------|-------------|
| AGIWUR22274                         |    |        |        |                |           |           |                     |             |
| CB4856 HS                           | II | 825848 | 827500 | WBGene00017869 | F28A10.1  | F28A10.1  | 0.216816553281804   |             |
| AGIWUR9597                          |    |        |        |                |           |           |                     |             |
| CB4856 HS                           | II | 827891 | 830267 | WBGene00017870 | F28A10.2  | F28A10.2  | 0.219252516391544   |             |
| AGIWUR44947                         |    |        |        |                |           |           |                     |             |
| CB4856 HS                           | II | 831069 | 831871 | WBGene00017878 | F28A10.10 | F28A10.10 | -0.0630962822405063 |             |
| AGIWUR22041                         |    |        |        |                |           |           |                     |             |
| CB4856 HS                           | II | 833607 | 835270 | WBGene00017877 | F28A10.9  | F28A10.9  | 0.172846020182021   |             |
| AGIWUR6656;AGIWUR38454              |    |        |        |                |           |           |                     |             |
| CB4856 HS                           | II | 837719 | 838470 | WBGene00017876 | F28A10.8  | F28A10.8  | 0.299345278603965   |             |
| AGIWUR7741                          |    |        |        |                |           |           |                     |             |
| CB4856 HS                           | II | 840567 | 841113 | WBGene00017871 | F28A10.3  | F28A10.3  | 0.165154507330652   |             |
| AGIWUR37007                         |    |        |        |                |           |           |                     |             |
| CB4856 HS                           | II | 844274 | 845085 | WBGene00017872 | F28A10.4  | F28A10.4  | -0.12617220351944   |             |
| AGIWUR21076                         |    |        |        |                |           |           |                     |             |
| CB4856 HS                           | II | 845288 | 845686 | WBGene00017875 | F28A10.7  | F28A10.7  | -0.195761053097836  |             |
| AGIWUR26593                         |    |        |        |                |           |           |                     |             |
| CB4856 HS                           | II | 846864 | 848603 | WBGene00017874 | acdH-9    | F28A10.6  | -0.0102488020039662 |             |
| AGIWUR29074                         |    |        |        |                |           |           |                     |             |
| CB4856 HS                           | II | 849678 | 850654 | WBGene00017873 | F28A10.5  | F28A10.5  | -0.0332387394283806 |             |
| AGIWUR39524                         |    |        |        |                |           |           |                     |             |
| CB4856 HS                           | II | 862927 | 866901 | WBGene00021578 | Y46B2A.3  | Y46B2A.3  | -0.146649587264195  |             |
| AGIWUR35944                         |    |        |        |                |           |           |                     |             |
| CB4856 HS                           | II | 868814 | 871699 | WBGene00021576 | fbxc-51   | Y46B2A.1  | -0.56995646605476   |             |
| AGIWUR29811                         |    |        |        |                |           |           |                     |             |
| CB4856 HS                           | II | 873176 | 879001 | WBGene00000106 | alg-2     | T07D3.7   | 0.0992765384202494  |             |
| AGIWUR35217;AGIWUR37697;AGIWUR40213 |    |        |        |                |           |           |                     |             |
| CB4856 HS                           | II | 881576 | 890710 | WBGene00020307 | T07D3.4   | T07D3.4   | -0.111444947072272  |             |
| AGIWUR7775;AGIWUR43697              |    |        |        |                |           |           |                     |             |
| CB4856 HS                           | II | 893863 | 897379 | WBGene00020306 | T07D3.3   | T07D3.3   | 0.809606274211473   | AGIWUR20372 |
| CB4856 HS                           | II | 898043 | 901164 | WBGene00020311 | T07D3.9   | T07D3.9   | 0.0152530215060924  |             |
| AGIWUR4965;AGIWUR39971              |    |        |        |                |           |           |                     |             |
| CB4856 HS                           | II | 904425 | 906039 | WBGene00020304 | fbxa-200  | T07D3.1   | 0.13011831037662    |             |
| AGIWUR27126                         |    |        |        |                |           |           |                     |             |
| CB4856 HS                           | II | 907535 | 909631 | WBGene00019927 | fbxc-24   | R07C3.11  | -0.0216989472280398 |             |
| AGIWUR15211;AGIWUR21913;AGIWUR26453 |    |        |        |                |           |           |                     |             |
| CB4856 HS                           | II | 909884 | 911592 | WBGene00019926 | fbxc-27   | R07C3.10  | -0.196341263580057  |             |
| AGIWUR10868                         |    |        |        |                |           |           |                     |             |
| CB4856 HS                           | II | 912003 | 913030 | WBGene00019925 | fbxc-31   | R07C3.9   | 0.150182799030358   | AGIWUR14658 |

|                                               |    |    |        |        |                |          |          |                     |             |
|-----------------------------------------------|----|----|--------|--------|----------------|----------|----------|---------------------|-------------|
| CB4856                                        | HS | II | 913680 | 915219 | WBGene00019924 | fbxc-33  | R07C3.8  | 0.142545305273149   | AGIWUR1761  |
| CB4856                                        | HS | II | 916051 | 917464 | WBGene00019923 | fbxc-29  | R07C3.7  | -0.0582220065938781 |             |
| AGIWUR5918;AGIWUR10571                        |    |    |        |        |                |          |          |                     |             |
| CB4856                                        | HS | II | 917624 | 919417 | WBGene00045302 | fbxc-30  | R07C3.15 | -0.367722481340661  |             |
| AGIWUR27335                                   |    |    |        |        |                |          |          |                     |             |
| CB4856                                        | HS | II | 919575 | 920407 | WBGene00269338 | R07C3.16 | R07C3.16 | -0.0220965582325476 |             |
| AGIWUR17863                                   |    |    |        |        |                |          |          |                     |             |
| CB4856                                        | HS | II | 923821 | 925192 | WBGene00019922 | fbxc-28  | R07C3.6  | -0.257192006900475  |             |
| AGIWUR564;AGIWUR11358;AGIWUR20652             |    |    |        |        |                |          |          |                     |             |
| CB4856                                        | HS | II | 926496 | 927431 | WBGene00019929 | R07C3.13 | R07C3.13 | 0.348314589236455   |             |
| AGIWUR7319                                    |    |    |        |        |                |          |          |                     |             |
| CB4856                                        | HS | II | 931171 | 932327 | WBGene00019921 | fbxc-34  | R07C3.5  | -0.171740496435165  | AGIWUR16572 |
| CB4856                                        | HS | II | 933018 | 936989 | WBGene00019920 | acs-15   | R07C3.4  | 0.187822305666069   | AGIWUR7727  |
| CB4856                                        | HS | II | 938849 | 940683 | WBGene00019919 | R07C3.3  | R07C3.3  | 0.0368014014160041  | AGIWUR9697  |
| CB4856                                        | HS | II | 940983 | 943162 | WBGene00019918 | fbxc-36  | R07C3.2  | 0.224870792621696   | AGIWUR14198 |
| CB4856                                        | HS | II | 944066 | 946157 | WBGene00019917 | clec-43  | R07C3.1  | -0.235329226392515  | AGIWUR36973 |
| CB4856                                        | HS | II | 946485 | 948191 | WBGene00016303 | fbxc-32  | C32B5.10 | 0.00781266712695938 |             |
| AGIWUR7472                                    |    |    |        |        |                |          |          |                     |             |
| CB4856                                        | HS | II | 948432 | 950507 | WBGene00016304 | fbxc-41  | C32B5.11 | -0.120047774242353  |             |
| AGIWUR28739                                   |    |    |        |        |                |          |          |                     |             |
| CB4856                                        | HS | II | 950842 | 952843 | WBGene00016305 | fbxc-57  | C32B5.12 | 0.00154425980210959 |             |
| AGIWUR2248;AGIWUR3184;AGIWUR30209;AGIWUR31810 |    |    |        |        |                |          |          |                     |             |
| CB4856                                        | HS | II | 954953 | 956337 | WBGene00016302 | fbxc-7   | C32B5.9  | -0.0441688545100973 | AGIWUR10362 |
| CB4856                                        | HS | II | 956674 | 957961 | WBGene00016301 | fbxc-6   | C32B5.8  | -0.176177223732628  | AGIWUR33819 |
| CB4856                                        | HS | II | 958918 | 960179 | WBGene00016309 | sdz-4    | C32B5.16 | 0.4759518909247     | AGIWUR17898 |
| CB4856                                        | HS | II | 960528 | 964260 | WBGene00016300 | C32B5.7  | C32B5.7  | 0.242692301441881   |             |
| AGIWUR15819;AGIWUR28262;AGIWUR37767           |    |    |        |        |                |          |          |                     |             |
| CB4856                                        | HS | II | 965576 | 967062 | WBGene00016307 | fbxc-18  | C32B5.14 | -0.419610624808529  |             |
| AGIWUR34121                                   |    |    |        |        |                |          |          |                     |             |
| CB4856                                        | HS | II | 968406 | 970523 | WBGene00016299 | C32B5.6  | C32B5.6  | -0.0126781807787308 | AGIWUR6752  |
| CB4856                                        | HS | II | 970645 | 972950 | WBGene00016308 | C32B5.15 | C32B5.15 | -0.20538102615664   |             |
| AGIWUR41227                                   |    |    |        |        |                |          |          |                     |             |
| CB4856                                        | HS | II | 974290 | 975511 | WBGene00016298 | fbxc-14  | C32B5.5  | -0.0513414022047769 | AGIWUR22506 |
| CB4856                                        | HS | II | 976208 | 978951 | WBGene00044419 | fbxc-17  | C32B5.17 | -0.0177384701503103 |             |
| AGIWUR25275;AGIWUR40429                       |    |    |        |        |                |          |          |                     |             |
| CB4856                                        | HS | II | 979423 | 980825 | WBGene00016297 | fbxc-15  | C32B5.4  | -0.0218363367463725 | AGIWUR41541 |
| CB4856                                        | HS | II | 981282 | 982435 | WBGene00016296 | fbxc-16  | C32B5.3  | -0.0354924286062932 |             |
| AGIWUR13034;AGIWUR18974;AGIWUR22521           |    |    |        |        |                |          |          |                     |             |
| CB4856                                        | HS | II | 986003 | 988666 | WBGene00016295 | fbxc-40  | C32B5.1  | -0.237814130136925  |             |

AGIWUR33276;AGIWUR33872;AGIWUR41781  
CB4856 HS II 988737 991074 WBGene00018456 fbxc-39 F45D11.10 -0.139067430485428  
AGIWUR14227  
CB4856 HS II 991600 993638 WBGene00018455 fbxc-42 F45D11.9 -0.0298406726258502  
AGIWUR39826  
CB4856 HS II 993293 994189 WBGene00018454 fbxb-28 F45D11.8 0.175601887643431  
AGIWUR11045;AGIWUR15570  
CB4856 HS II 1000437 1001449 WBGene00018458 fbxb-30 F45D11.13 -0.272862117125879  
AGIWUR44765  
CB4856 HS II 1001703 1002437 WBGene00018452 F45D11.5 F45D11.5 -0.156729891962466  
AGIWUR28527  
CB4856 HS II 1021505 1023528 WBGene00018448 F45D11.1 F45D11.1 -0.31861527059808  
AGIWUR11280;AGIWUR21120  
CB4856 HS II 1023693 1024784 WBGene00019700 btb-11 M01D1.3 -0.473916711128562 AGIWUR26307  
CB4856 HS II 1028987 1033664 WBGene00019699 math-34 M01D1.2 0.633485411478677 AGIWUR42003  
CB4856 HS II 1039697 1040564 WBGene00019702 fbxb-39 M01D1.7 0.151921940648247 AGIWUR12176  
CB4856 HS II 1041321 1042327 WBGene00019703 fbxb-41 M01D1.8 -0.268521038197401 AGIWUR34886  
CB4856 HS II 1042969 1044025 WBGene00019705 fbxb-45 M01D1.10 -0.320233307418428  
AGIWUR40701  
CB4856 HS II 1046505 1048276 WBGene00006195 str-148 M01D1.1 -0.138686321752624 AGIWUR17949  
CB4856 HS II 1048863 1049949 WBGene00019704 fbxb-40 M01D1.9 0.364648432110834  
AGIWUR9353;AGIWUR20714  
CB4856 HS II 1057212 1059280 WBGene00019311 K02E7.6 K02E7.6 -0.0863088210408689  
AGIWUR13530;AGIWUR14487  
CB4856 HS II 1059664 1060802 WBGene00019313 btb-10 K02E7.9 -0.425277000294004 AGIWUR2350  
CB4856 HS II 1065566 1066998 WBGene00019314 K02E7.10 K02E7.10 0.0273078118884342  
AGIWUR12881  
CB4856 HS II 1070640 1071490 WBGene00019316 K02E7.12 K02E7.12 -0.237833117868432  
AGIWUR28681  
CB4856 HS II 1074751 1075505 WBGene00019315 K02E7.11 K02E7.11 0.223108372999663  
AGIWUR7722  
CB4856 HS II 1083159 1083929 WBGene00019306 K02E7.1 K02E7.1 -0.284004803146548  
AGIWUR12424;AGIWUR33478;AGIWUR36865  
CB4856 HS II 1092006 1097899 WBGene00004902 snf-3 T13B5.1 -0.0543548596028671 AGIWUR19715  
CB4856 HS II 1097926 1100819 WBGene00020471 pho-14 T13B5.3 0.19951677570616  
AGIWUR10194;AGIWUR28391  
CB4856 HS II 1101371 1104509 WBGene00020476 T13B5.9 T13B5.9 0.197629018335043 AGIWUR26618  
CB4856 HS II 1104945 1106925 WBGene00000617 col-40 T13B5.4 -0.0188902280123804 AGIWUR17459  
CB4856 HS II 1108841 1110992 WBGene00020472 lips-11 T13B5.5 -0.195010248440331 AGIWUR21783



|                                                                                     |    |    |         |         |                |           |           |                      |             |
|-------------------------------------------------------------------------------------|----|----|---------|---------|----------------|-----------|-----------|----------------------|-------------|
| CB4856                                                                              | HS | II | 1112189 | 1114226 | WBGene00020473 | lips-12   | T13B5.6   | -0.300985651428065   | AGIWUR1562  |
| CB4856                                                                              | HS | II | 1115641 | 1118033 | WBGene00020474 | lips-13   | T13B5.7   | 0.0675551483338577   | AGIWUR32051 |
| CB4856                                                                              | HS | II | 1121018 | 1123259 | WBGene00020475 | sut-1     | T13B5.8   | -0.0904981160985088  | AGIWUR17492 |
| CB4856                                                                              | HS | II | 1123534 | 1127791 | WBGene00021103 | eri-3     | W09B6.3   | 0.135050368991454    | AGIWUR1524  |
| CB4856                                                                              | HS | II | 1127976 | 1132352 | WBGene00006387 | taf-6.1   | W09B6.2   | -0.187326868948393   | AGIWUR14620 |
| CB4856                                                                              | HS | II | 1132302 | 1134240 | WBGene00021104 | W09B6.4   | W09B6.4   | -0.0661993937445757  |             |
| AGIWUR11511;AGIWUR20518;AGIWUR21674;AGIWUR23256;AGIWUR28565;AGIWUR34057;AGIWUR36897 |    |    |         |         |                |           |           |                      |             |
| CB4856                                                                              | HS | II | 1136781 | 1152701 | WBGene00004076 | pod-2     | W09B6.1   | 0.204153924745674    |             |
| AGIWUR4199;AGIWUR14789                                                              |    |    |         |         |                |           |           |                      |             |
| CB4856                                                                              | HS | II | 1163575 | 1165488 | WBGene00020740 | T23F4.2   | T23F4.2   | 0.274671979856647    | AGIWUR1509  |
| CB4856                                                                              | HS | II | 1166490 | 1169168 | WBGene00020739 | T23F4.1   | T23F4.1   | 0.169967876580906    | AGIWUR11835 |
| CB4856                                                                              | HS | II | 1169546 | 1172130 | WBGene00020741 | dlhd-1    | T23F4.3   | 0.0747966458542413   | AGIWUR44663 |
| CB4856                                                                              | HS | II | 1175976 | 1179323 | WBGene00003545 | nas-27    | T23F4.4   | -0.203270227103699   | AGIWUR14074 |
| CB4856                                                                              | HS | II | 1197374 | 1230782 | WBGene00018734 | F53A10.2  | F53A10.2  | -0.0324239162237241  |             |
| AGIWUR30798;AGIWUR41285;AGIWUR43186                                                 |    |    |         |         |                |           |           |                      |             |
| CB4856                                                                              | HS | II | 1233236 | 1252359 | WBGene00018572 | lin-42    | F47F6.1   | -0.00451763175367326 |             |
| AGIWUR15290;AGIWUR36002                                                             |    |    |         |         |                |           |           |                      |             |
| CB4856                                                                              | HS | II | 1255937 | 1258353 | WBGene00018575 | cllec-119 | F47F6.5   | -0.113160269809165   |             |
| AGIWUR24296;AGIWUR41961                                                             |    |    |         |         |                |           |           |                      |             |
| CB4856                                                                              | HS | II | 1259365 | 1262998 | WBGene00023410 | F47F6.9   | F47F6.9   | 0.141011846757142    |             |
| AGIWUR32467;AGIWUR38054                                                             |    |    |         |         |                |           |           |                      |             |
| CB4856                                                                              | HS | II | 1262987 | 1266890 | WBGene00018573 | oac-30    | F47F6.3   | -0.0709079635739265  |             |
| AGIWUR11993;AGIWUR35046                                                             |    |    |         |         |                |           |           |                      |             |
| CB4856                                                                              | HS | II | 1269540 | 1271914 | WBGene00005813 | srw-66    | Y57G7A.4  | 0.0587224979700562   |             |
| AGIWUR7731;AGIWUR8027                                                               |    |    |         |         |                |           |           |                      |             |
| CB4856                                                                              | HS | II | 1273169 | 1275539 | WBGene00021968 | Y57G7A.5  | Y57G7A.5  | 0.0104462774720915   |             |
| AGIWUR11546                                                                         |    |    |         |         |                |           |           |                      |             |
| CB4856                                                                              | HS | II | 1275752 | 1276872 | WBGene00021974 | Y57G7A.11 | Y57G7A.11 | -0.0908629917996677  |             |
| AGIWUR17548                                                                         |    |    |         |         |                |           |           |                      |             |
| CB4856                                                                              | HS | II | 1278650 | 1281039 | WBGene00023499 | srz-63    | Y57G7A.12 | -0.0436280973817578  |             |
| AGIWUR2017;AGIWUR41865;AGIWUR43322                                                  |    |    |         |         |                |           |           |                      |             |
| CB4856                                                                              | HS | II | 1281974 | 1285614 | WBGene00021969 | Y57G7A.6  | Y57G7A.6  | -0.0983591770285805  |             |
| AGIWUR17694                                                                         |    |    |         |         |                |           |           |                      |             |
| CB4856                                                                              | HS | II | 1285797 | 1286371 | WBGene00021967 | Y57G7A.3  | Y57G7A.3  | -0.0298951475441838  |             |
| AGIWUR9015;AGIWUR19309;AGIWUR20491;AGIWUR25151;AGIWUR25756;AGIWUR39388              |    |    |         |         |                |           |           |                      |             |
| CB4856                                                                              | HS | II | 1288735 | 1293257 | WBGene00021970 | srz-64    | Y57G7A.7  | 0.0468557632701874   |             |
| AGIWUR34238                                                                         |    |    |         |         |                |           |           |                      |             |
| CB4856                                                                              | HS | II | 1296078 | 1296746 | WBGene00021966 | Y57G7A.2  | Y57G7A.2  | -0.329714206156133   |             |
| AGIWUR8814                                                                          |    |    |         |         |                |           |           |                      |             |

|                                                                                                             |    |                 |                |           |           |                     |
|-------------------------------------------------------------------------------------------------------------|----|-----------------|----------------|-----------|-----------|---------------------|
| CB4856 HS<br>AGIWUR20526                                                                                    | II | 1298469 1299716 | WBGene00021965 | Y57G7A.1  | Y57G7A.1  | -0.154126324174753  |
| CB4856 HS<br>AGIWUR8263                                                                                     | II | 1300064 1301641 | WBGene00021972 | glb-31    | Y57G7A.9  | 0.135854494252271   |
| CB4856 HS<br>AGIWUR4278                                                                                     | II | 1302497 1306136 | WBGene00021973 | emc-2     | Y57G7A.10 | 0.181726875082322   |
| CB4856 HS<br>AGIWUR21026;AGIWUR21258;AGIWUR24232;AGIWUR28867;AGIWUR34752;AGIWUR36615;AGIWUR43212            | II | 1306240 1310133 | WBGene00000112 | alh-6     | F56D12.1  | 0.0224757338340424  |
| CB4856 HS<br>AGIWUR3322;AGIWUR10578                                                                         | II | 1310518 1320437 | WBGene00018974 | fcho-1    | F56D12.6  | 0.14708893379612    |
| CB4856 HS<br>AGIWUR2756;AGIWUR18673;AGIWUR22674;AGIWUR30958;AGIWUR33919;AGIWUR35778;AGIWUR35851;AGIWUR41568 | II | 1321037 1323170 | WBGene00006924 | vig-1     | F56D12.5  | -0.193228216243161  |
| CB4856 HS<br>AGIWUR11259                                                                                    | II | 1326995 1350136 | WBGene00002176 | jip-1     | F56D12.4  | 0.210134721554532   |
| CB4856 HS<br>AGIWUR42053                                                                                    | II | 1350720 1355641 | WBGene00015728 | C13A10.1  | C13A10.1  | 0.151983918487663   |
| CB4856 HS<br>AGIWUR20549                                                                                    | II | 1357177 1358005 | WBGene00015729 | C13A10.2  | C13A10.2  | -0.019773271298531  |
| CB4856 HS<br>AGIWUR42436;AGIWUR43632                                                                        | II | 1368103 1374988 | WBGene00018819 | rog-1     | F54D12.6  | -0.156242113894394  |
| CB4856 HS<br>AGIWUR38508                                                                                    | II | 1377628 1378359 | WBGene00044424 | F54D12.10 | F54D12.10 | 0.063786445779388   |
| CB4856 HS<br>AGIWUR30305                                                                                    | II | 1380944 1381713 | WBGene00018822 | F54D12.9  | F54D12.9  | -0.259210179924732  |
| CB4856 HS<br>AGIWUR17467                                                                                    | II | 1381807 1385380 | WBGene00018820 | F54D12.7  | F54D12.7  | 0.148131951398931   |
| CB4856 HS<br>AGIWUR12832                                                                                    | II | 1386888 1391567 | WBGene00000008 | aat-7     | F54D12.3  | -0.0546654573950498 |
| CB4856 HS<br>AGIWUR1470;AGIWUR23949;AGIWUR28151;AGIWUR37605;AGIWUR41989                                     | II | 1393488 1394105 | WBGene00044425 | F54D12.11 | F54D12.11 | 0.0171352188560068  |
| CB4856 HS<br>AGIWUR36291                                                                                    | II | 1395004 1398038 | WBGene00018821 | F54D12.8  | F54D12.8  | -0.0976778676075138 |
| CB4856 HS<br>AGIWUR41051                                                                                    | II | 1398761 1400030 | WBGene00018816 | F54D12.2  | F54D12.2  | -0.147351161494774  |
| CB4856 HS<br>AGIWUR2284                                                                                     | II | 1400405 1401371 | WBGene00018815 | F54D12.1  | F54D12.1  | -0.0556128717925137 |
| CB4856 HS<br>AGIWUR23325                                                                                    | II | 1401774 1402134 | WBGene00021786 | Y51H7C.8  | Y51H7C.8  | 0.0122290458302423  |
| CB4856 HS                                                                                                   | II | 1402569 1403215 | WBGene00021785 | Y51H7C.7  | Y51H7C.7  |                     |

|                                                                                                            |                 |                |           |           |                     |                   |  |
|------------------------------------------------------------------------------------------------------------|-----------------|----------------|-----------|-----------|---------------------|-------------------|--|
| -0.00534666606290912                                                                                       | AGIWUR3019      |                |           |           |                     |                   |  |
| CB4856 HS II                                                                                               | 1403321 1409118 | WBGene00021784 | cogc-4    | Y51H7C.6  |                     | -0.12394888597014 |  |
| AGIWUR9683;AGIWUR21974;AGIWUR26256;AGIWUR35503;AGIWUR35651;AGIWUR37749;AGIWUR41187                         |                 |                |           |           |                     |                   |  |
| CB4856 HS II                                                                                               | 1409184 1411472 | WBGene00021787 | Y51H7C.9  | Y51H7C.9  | 0                   | AGIWUR30133       |  |
| CB4856 HS II                                                                                               | 1412409 1420150 | WBGene00021783 | Y51H7C.5  | Y51H7C.5  | -0.100238543727176  |                   |  |
| AGIWUR13720;AGIWUR20788;AGIWUR28870                                                                        |                 |                |           |           |                     |                   |  |
| CB4856 HS II                                                                                               | 1420422 1423668 | WBGene00021788 | Y51H7C.10 | Y51H7C.10 | -0.0326830428380323 |                   |  |
| AGIWUR18507;AGIWUR32455;AGIWUR33386;AGIWUR37153;AGIWUR38549                                                |                 |                |           |           |                     |                   |  |
| CB4856 HS II                                                                                               | 1425758 1437499 | WBGene00021789 | no1-6     | Y51H7C.11 | 0.0339322592184592  |                   |  |
| AGIWUR11653;AGIWUR20656                                                                                    |                 |                |           |           |                     |                   |  |
| CB4856 HS II                                                                                               | 1438490 1439697 | WBGene00021781 | Y51H7C.3  | Y51H7C.3  | -0.138370903964584  |                   |  |
| AGIWUR8694;AGIWUR17307;AGIWUR19226;AGIWUR22706;AGIWUR27660;AGIWUR42418                                     |                 |                |           |           |                     |                   |  |
| CB4856 HS II                                                                                               | 1440066 1446746 | WBGene00021790 | Y51H7C.12 | Y51H7C.12 | 0.0983208343036033  |                   |  |
| AGIWUR27053                                                                                                |                 |                |           |           |                     |                   |  |
| CB4856 HS II                                                                                               | 1459140 1461307 | WBGene00044439 | Y51H7C.15 | Y51H7C.15 | -0.100188403818391  |                   |  |
| AGIWUR793;AGIWUR1636;AGIWUR35924;AGIWUR36322;AGIWUR41340                                                   |                 |                |           |           |                     |                   |  |
| CB4856 HS II                                                                                               | 1463268 1466546 | WBGene00021791 | Y51H7C.13 | Y51H7C.13 | -0.222479725115575  |                   |  |
| AGIWUR16739                                                                                                |                 |                |           |           |                     |                   |  |
| CB4856 HS II                                                                                               | 1467727 1469604 | WBGene00021779 | Y51H7C.1  | Y51H7C.1  | 0.0592379576936732  |                   |  |
| AGIWUR40157                                                                                                |                 |                |           |           |                     |                   |  |
| CB4856 HS II                                                                                               | 1472625 1473581 | WBGene00044643 | H17B01.5  | H17B01.5  | 0.0152438227235923  |                   |  |
| AGIWUR42937                                                                                                |                 |                |           |           |                     |                   |  |
| CB4856 HS II                                                                                               | 1484094 1485764 | WBGene00019208 | lips-14   | H17B01.3  | -0.176363978615541  |                   |  |
| AGIWUR28063                                                                                                |                 |                |           |           |                     |                   |  |
| CB4856 HS II                                                                                               | 1489930 1500330 | WBGene00019209 | emc-1     | H17B01.4  | -0.237243706945203  |                   |  |
| AGIWUR5311;AGIWUR12574;AGIWUR14027                                                                         |                 |                |           |           |                     |                   |  |
| CB4856 HS II                                                                                               | 1504566 1509831 | WBGene00019207 | fgt-1     | H17B01.1  | 0.0333795435695468  |                   |  |
| AGIWUR3961;AGIWUR9439;AGIWUR14822;AGIWUR17175;AGIWUR35685;AGIWUR37584                                      |                 |                |           |           |                     |                   |  |
| CB4856 HS II                                                                                               | 1510288 1517454 | WBGene00021772 | math-45   | Y51H7BM.1 | 0.422410298344681   |                   |  |
| AGIWUR22347                                                                                                |                 |                |           |           |                     |                   |  |
| CB4856 HS II                                                                                               | 1519222 1520328 | WBGene00044645 | Y51H7BR.8 | Y51H7BR.8 | 0.0634804535586877  |                   |  |
| AGIWUR13474;AGIWUR17530;AGIWUR23980;AGIWUR31130;AGIWUR37906                                                |                 |                |           |           |                     |                   |  |
| CB4856 HS II                                                                                               | 1520384 1521842 | WBGene00005704 | sru-41    | Y51H7BR.6 | 0.10372105401461    |                   |  |
| AGIWUR12775;AGIWUR36218                                                                                    |                 |                |           |           |                     |                   |  |
| CB4856 HS II                                                                                               | 1523565 1525598 | WBGene00021778 | Y51H7BR.7 | Y51H7BR.7 | 0.134395029413489   |                   |  |
| AGIWUR41969                                                                                                |                 |                |           |           |                     |                   |  |
| CB4856 HS II                                                                                               | 1529359 1535208 | WBGene00021776 | Y51H7BR.4 | Y51H7BR.4 | 0.0761898069255444  |                   |  |
| AGIWUR5447;AGIWUR16636;AGIWUR18616;AGIWUR23149;AGIWUR24516;AGIWUR25783;AGIWUR31085;AGIWUR38742;AGIWUR39425 |                 |                |           |           |                     |                   |  |
| CB4856 HS II                                                                                               | 1536231 1537275 | WBGene00021774 | fbxb-43   | Y51H7BR.2 | -0.417162278574613  |                   |  |

|                                                                        |    |    |         |         |                |          |           |                     |             |
|------------------------------------------------------------------------|----|----|---------|---------|----------------|----------|-----------|---------------------|-------------|
| AGIWUR17877                                                            |    |    |         |         |                |          |           |                     |             |
| CB4856                                                                 | HS | II | 1537621 | 1538666 | WBGene00021773 | fbxb-42  | Y51H7BR.1 | -0.0244927090233382 |             |
| AGIWUR31502                                                            |    |    |         |         |                |          |           |                     |             |
| CB4856                                                                 | HS | II | 1538891 | 1539901 | WBGene00019416 | fbxb-44  | K05F6.5   | -0.0884231951716723 |             |
| AGIWUR4279;AGIWUR17677                                                 |    |    |         |         |                |          |           |                     |             |
| CB4856                                                                 | HS | II | 1543482 | 1545415 | WBGene00019415 | K05F6.4  | K05F6.4   | 0.0934273933643084  | AGIWUR24379 |
| CB4856                                                                 | HS | II | 1545925 | 1546991 | WBGene00045486 | K05F6.12 | K05F6.12  | 0.125408789819092   |             |
| AGIWUR28538                                                            |    |    |         |         |                |          |           |                     |             |
| CB4856                                                                 | HS | II | 1547060 | 1548182 | WBGene00269420 | K05F6.16 | K05F6.16  | 0.109473966165607   |             |
| AGIWUR7272                                                             |    |    |         |         |                |          |           |                     |             |
| CB4856                                                                 | HS | II | 1555257 | 1556335 | WBGene00019418 | fbxb-54  | K05F6.7   | -0.0236277960984292 | AGIWUR5734  |
| CB4856                                                                 | HS | II | 1567324 | 1567746 | WBGene00019419 | K05F6.8  | K05F6.8   | 0.0627438535136156  |             |
| AGIWUR4026;AGIWUR22442;AGIWUR26126;AGIWUR30746;AGIWUR36813;AGIWUR44179 |    |    |         |         |                |          |           |                     |             |
| CB4856                                                                 | HS | II | 1570065 | 1571134 | WBGene00019420 | fbxb-46  | K05F6.9   | -0.144284424772938  | AGIWUR5730  |
| CB4856                                                                 | HS | II | 1572522 | 1573300 | WBGene00269419 | K05F6.15 | K05F6.15  | -0.161566280229694  |             |
| AGIWUR20317                                                            |    |    |         |         |                |          |           |                     |             |
| CB4856                                                                 | HS | II | 1574557 | 1576115 | WBGene00019421 | K05F6.10 | K05F6.10  | 0.218320988237546   |             |
| AGIWUR3384;AGIWUR5668;AGIWUR9394;AGIWUR24867                           |    |    |         |         |                |          |           |                     |             |
| CB4856                                                                 | HS | II | 1577471 | 1579986 | WBGene00020326 | math-38  | T07H3.3   | 0.84328178616618    | AGIWUR28995 |
| CB4856                                                                 | HS | II | 1582876 | 1584240 | WBGene00020327 | cllec-21 | T07H3.4   | 0.106759860320635   |             |
| AGIWUR7239;AGIWUR35909                                                 |    |    |         |         |                |          |           |                     |             |
| CB4856                                                                 | HS | II | 1588542 | 1589945 | WBGene00044429 | T07H3.7  | T07H3.7   | 0.072909895471291   |             |
| AGIWUR11204;AGIWUR19451;AGIWUR40079                                    |    |    |         |         |                |          |           |                     |             |
| CB4856                                                                 | HS | II | 1593480 | 1595237 | WBGene00020328 | cllec-20 | T07H3.5   | -0.0827056543839735 | AGIWUR37368 |
| CB4856                                                                 | HS | II | 1598029 | 1599488 | WBGene00020325 | bath-46  | T07H3.2   | 0.11779565167882    | AGIWUR648   |
| CB4856                                                                 | HS | II | 1599471 | 1600714 | WBGene00020329 | bath-26  | T07H3.6   | 0.298765462788801   | AGIWUR27574 |
| CB4856                                                                 | HS | II | 1601789 | 1604618 | WBGene00006464 | bath-47  | T07H3.1   | 0.312784488307315   | AGIWUR1261  |
| CB4856                                                                 | HS | II | 1604666 | 1606143 | WBGene00015595 | bath-33  | C08E3.3   | -0.172904966136684  | AGIWUR35175 |
| CB4856                                                                 | HS | II | 1606595 | 1607603 | WBGene00015596 | fbxa-161 | C08E3.4   | 0.0610256382566394  |             |
| AGIWUR37564                                                            |    |    |         |         |                |          |           |                     |             |
| CB4856                                                                 | HS | II | 1607869 | 1609014 | WBGene00015597 | fbxa-162 | C08E3.5   | 0.168466604428747   |             |
| AGIWUR13440                                                            |    |    |         |         |                |          |           |                     |             |
| CB4856                                                                 | HS | II | 1609256 | 1610715 | WBGene00015598 | fbxa-163 | C08E3.6   | 0.298933700171331   |             |
| AGIWUR10816;AGIWUR28346;AGIWUR37259                                    |    |    |         |         |                |          |           |                     |             |
| CB4856                                                                 | HS | II | 1611331 | 1612510 | WBGene00015594 | btb-15   | C08E3.2   | 0.719801072465147   | AGIWUR30529 |
| CB4856                                                                 | HS | II | 1612788 | 1614059 | WBGene00015599 | fbxa-164 | C08E3.7   | 0.200379234403251   |             |
| AGIWUR28121;AGIWUR30670;AGIWUR34271                                    |    |    |         |         |                |          |           |                     |             |
| CB4856                                                                 | HS | II | 1614793 | 1616463 | WBGene00015600 | fbxa-165 | C08E3.8   | 0.204840016382409   |             |
| AGIWUR14879                                                            |    |    |         |         |                |          |           |                     |             |

|                                                 |    |         |         |                |          |          |                       |             |
|-------------------------------------------------|----|---------|---------|----------------|----------|----------|-----------------------|-------------|
| CB4856 HS                                       | II | 1616912 | 1619004 | WBGene00015601 | fbxa-166 | C08E3.9  | -0.100655901075532    |             |
| AGIWUR21789                                     |    |         |         |                |          |          |                       |             |
| CB4856 HS                                       | II | 1619894 | 1621261 | WBGene00015602 | fbxa-158 | C08E3.10 | -0.0813469450118669   |             |
| AGIWUR1075;AGIWUR11977;AGIWUR27950              |    |         |         |                |          |          |                       |             |
| CB4856 HS                                       | II | 1623907 | 1624672 | WBGene00015604 | fbxa-160 | C08E3.12 | -0.151224698222572    |             |
| AGIWUR26010                                     |    |         |         |                |          |          |                       |             |
| CB4856 HS                                       | II | 1625966 | 1626883 | WBGene00044415 | C08E3.14 | C08E3.14 | -0.117332979145587    |             |
| AGIWUR16413;AGIWUR35631                         |    |         |         |                |          |          |                       |             |
| CB4856 HS                                       | II | 1627479 | 1627883 | WBGene00044416 | C08E3.15 | C08E3.15 | 2.28443969575586      |             |
| AGIWUR12234;AGIWUR14033;AGIWUR20688             |    |         |         |                |          |          |                       |             |
| CB4856 HS                                       | II | 1639213 | 1640596 | WBGene00005293 | srh-72   | ZC204.5  | 0.0763715123031634    | AGIWUR31572 |
| CB4856 HS                                       | II | 1644249 | 1644814 | WBGene00022556 | ZC204.6  | ZC204.6  | -0.000516810298742953 | AGIWUR18821 |
| CB4856 HS                                       | II | 1645410 | 1646299 | WBGene00194714 | ZC204.17 | ZC204.17 | -0.172928186248935    |             |
| AGIWUR23907                                     |    |         |         |                |          |          |                       |             |
| CB4856 HS                                       | II | 1646597 | 1647568 | WBGene00044695 | fbxb-27  | ZC204.16 | 0.142080615732444     |             |
| AGIWUR5799;AGIWUR21143                          |    |         |         |                |          |          |                       |             |
| CB4856 HS                                       | II | 1647908 | 1648865 | WBGene00022558 | fbxb-21  | ZC204.8  | -0.11023556076134     |             |
| AGIWUR3003;AGIWUR17859                          |    |         |         |                |          |          |                       |             |
| CB4856 HS                                       | II | 1649138 | 1650197 | WBGene00022559 | fbxb-20  | ZC204.9  | -0.0663312163590675   | AGIWUR31394 |
| CB4856 HS                                       | II | 1650819 | 1651580 | WBGene00022560 | fbxb-16  | ZC204.10 | -0.34649574628075     |             |
| AGIWUR12940                                     |    |         |         |                |          |          |                       |             |
| CB4856 HS                                       | II | 1652510 | 1653497 | WBGene00022557 | fbxb-15  | ZC204.7  | -0.232454083956647    | AGIWUR27611 |
| CB4856 HS                                       | II | 1653775 | 1654732 | WBGene00022561 | btb-13   | ZC204.11 | -0.143415042616729    |             |
| AGIWUR16801                                     |    |         |         |                |          |          |                       |             |
| CB4856 HS                                       | II | 1655217 | 1656148 | WBGene00022555 | btb-12   | ZC204.3  | -0.172343138870408    | AGIWUR30043 |
| CB4856 HS                                       | II | 1656263 | 1657302 | WBGene00022562 | ZC204.12 | ZC204.12 | -0.13569594107494     |             |
| AGIWUR4325;AGIWUR23512;AGIWUR25253;AGIWUR38231  |    |         |         |                |          |          |                       |             |
| CB4856 HS                                       | II | 1663699 | 1665764 | WBGene00022554 | dux1-1   | ZC204.2  | -0.177118235813305    |             |
| AGIWUR8677;AGIWUR19314                          |    |         |         |                |          |          |                       |             |
| CB4856 HS                                       | II | 1666325 | 1667482 | WBGene00022553 | ZC204.1  | ZC204.1  | 0.0418326210347355    |             |
| AGIWUR14813;AGIWUR30212;AGIWUR36411;AGIWUR42000 |    |         |         |                |          |          |                       |             |
| CB4856 HS                                       | II | 1667522 | 1669013 | WBGene00005844 | srw-97   | ZC204.15 | -0.150488403903516    |             |
| AGIWUR4173                                      |    |         |         |                |          |          |                       |             |
| CB4856 HS                                       | II | 1670833 | 1674337 | WBGene00003734 | nhx-6    | F58E1.6  | 0.246176788306643     | AGIWUR15556 |
| CB4856 HS                                       | II | 1676388 | 1677439 | WBGene00019037 | fbxb-17  | F58E1.5  | -0.35052887468333     | AGIWUR9617  |
| CB4856 HS                                       | II | 1677449 | 1679252 | WBGene00019038 | ir1d-37  | F58E1.7  | 0.21248331297533      | AGIWUR21516 |
| CB4856 HS                                       | II | 1679381 | 1682134 | WBGene00019036 | ir1d-36  | F58E1.4  | 0.00718490221489709   | AGIWUR38369 |
| CB4856 HS                                       | II | 1682518 | 1683655 | WBGene00019035 | fbxb-26  | F58E1.3  | -0.110075307514089    | AGIWUR8917  |
| CB4856 HS                                       | II | 1684048 | 1685091 | WBGene00019034 | fbxb-25  | F58E1.2  | -0.0372963176824719   | AGIWUR21302 |

|                                                             |    |         |         |                |           |           |                      |
|-------------------------------------------------------------|----|---------|---------|----------------|-----------|-----------|----------------------|
| CB4856 HS                                                   | II | 1688235 | 1689172 | WBGene00019040 | fbxb-19   | F58E1.9   | -0.119164667000287   |
| AGIWUR2980;AGIWUR24623;AGIWUR33051                          |    |         |         |                |           |           |                      |
| CB4856 HS                                                   | II | 1689696 | 1691077 | WBGene00019041 | fbxc-22   | F58E1.10  | -0.0827340601500035  |
| AGIWUR38601                                                 |    |         |         |                |           |           |                      |
| CB4856 HS                                                   | II | 1691557 | 1692907 | WBGene00019042 | fbxc-21   | F58E1.11  | -0.12210202938337    |
| AGIWUR28792                                                 |    |         |         |                |           |           |                      |
| CB4856 HS                                                   | II | 1693296 | 1694615 | WBGene00019043 | fbxc-26   | F58E1.12  | -0.0975605302490496  |
| AGIWUR27871                                                 |    |         |         |                |           |           |                      |
| CB4856 HS                                                   | II | 1694815 | 1695827 | WBGene00019044 | F58E1.13  | F58E1.13  | 0.0284008852284554   |
| AGIWUR42519                                                 |    |         |         |                |           |           |                      |
| CB4856 HS                                                   | II | 1702384 | 1703463 | WBGene00019045 | fbxb-47   | F58E1.14  | -0.152685394766749   |
| AGIWUR1950                                                  |    |         |         |                |           |           |                      |
| CB4856 HS                                                   | II | 1704904 | 1706476 | WBGene00018442 | sdz-18    | F45C12.11 | -0.00717796893499667 |
| AGIWUR31803                                                 |    |         |         |                |           |           |                      |
| CB4856 HS                                                   | II | 1706709 | 1707720 | WBGene00018441 | math-29   | F45C12.10 | -0.0285613931509054  |
| AGIWUR29511;AGIWUR39167                                     |    |         |         |                |           |           |                      |
| CB4856 HS                                                   | II | 1708432 | 1709696 | WBGene00018440 | F45C12.9  | F45C12.9  | -0.0404904833217161  |
| AGIWUR37829                                                 |    |         |         |                |           |           |                      |
| CB4856 HS                                                   | II | 1710259 | 1711417 | WBGene00018439 | fbxa-184  | F45C12.8  | 0.0536623195235411   |
| AGIWUR11427;AGIWUR15075;AGIWUR21331;AGIWUR23042;AGIWUR42225 |    |         |         |                |           |           |                      |
| CB4856 HS                                                   | II | 1713238 | 1714397 | WBGene00018443 | btb-7     | F45C12.12 | -0.482199554613278   |
| AGIWUR35441                                                 |    |         |         |                |           |           |                      |
| CB4856 HS                                                   | II | 1715162 | 1716497 | WBGene00018438 | btb-6     | F45C12.7  | -0.11007245220355    |
| AGIWUR9254                                                  |    |         |         |                |           |           |                      |
| CB4856 HS                                                   | II | 1718175 | 1719253 | WBGene00018444 | fbxb-48   | F45C12.13 | -0.0169395365876319  |
| AGIWUR32498                                                 |    |         |         |                |           |           |                      |
| CB4856 HS                                                   | II | 1721323 | 1722423 | WBGene00018445 | fbxb-5    | F45C12.14 | -0.135318764136892   |
| AGIWUR6059;AGIWUR14552;AGIWUR42708                          |    |         |         |                |           |           |                      |
| CB4856 HS                                                   | II | 1722770 | 1724186 | WBGene00018437 | btb-8     | F45C12.6  | -0.266942443207878   |
| AGIWUR19396                                                 |    |         |         |                |           |           |                      |
| CB4856 HS                                                   | II | 1726141 | 1727106 | WBGene00269388 | F45C12.17 | F45C12.17 | -0.204273429403309   |
| AGIWUR7469;AGIWUR23367                                      |    |         |         |                |           |           |                      |
| CB4856 HS                                                   | II | 1728506 | 1730065 | WBGene00018435 | btb-9     | F45C12.4  | -0.068166677566559   |
| AGIWUR20385;AGIWUR29933;AGIWUR32157                         |    |         |         |                |           |           |                      |
| CB4856 HS                                                   | II | 1730403 | 1732046 | WBGene00018434 | ceh-81    | F45C12.3  | 0.0358157696973009   |
| AGIWUR25864                                                 |    |         |         |                |           |           |                      |
| CB4856 HS                                                   | II | 1732276 | 1733291 | WBGene00018433 | ceh-82    | F45C12.2  | -0.170178182150927   |
| AGIWUR16980                                                 |    |         |         |                |           |           |                      |
| CB4856 HS                                                   | II | 1733718 | 1736533 | WBGene00018446 | ceh-83    | F45C12.15 | -0.0756999316335154  |

|                                                                                                            |    |    |         |         |                |                   |                                 |
|------------------------------------------------------------------------------------------------------------|----|----|---------|---------|----------------|-------------------|---------------------------------|
| AGIWUR43133                                                                                                |    |    |         |         |                |                   |                                 |
| CB4856                                                                                                     | HS | II | 1736866 | 1738944 | WBGene00018447 | irld-9 F45C12.16  | -0.281019074133283              |
| AGIWUR1756                                                                                                 |    |    |         |         |                |                   |                                 |
| CB4856                                                                                                     | HS | II | 1739076 | 1741013 | WBGene00018432 | irld-33 F45C12.1  | 0.000793066263673481            |
| AGIWUR35733                                                                                                |    |    |         |         |                |                   |                                 |
| CB4856                                                                                                     | HS | II | 1744483 | 1745859 | WBGene00018105 | clcc-19 F36H5.6   | 0.0250124979186577 AGIWUR34948  |
| CB4856                                                                                                     | HS | II | 1746189 | 1747582 | WBGene00006223 | str-179 F36H5.7   | -0.0821263251476152             |
| AGIWUR6697;AGIWUR7711;AGIWUR18141;AGIWUR18259;AGIWUR19978;AGIWUR25714;AGIWUR34971;AGIWUR42875;AGIWUR43866  |    |    |         |         |                |                   |                                 |
| CB4856                                                                                                     | HS | II | 1748378 | 1749943 | WBGene00206519 | F36H5.13 F36H5.13 | -0.194322455271347              |
| AGIWUR24315                                                                                                |    |    |         |         |                |                   |                                 |
| CB4856                                                                                                     | HS | II | 1752749 | 1753090 | WBGene00018107 | F36H5.9 F36H5.9   | -0.073330131061998 AGIWUR28515  |
| CB4856                                                                                                     | HS | II | 1753526 | 1754439 | WBGene00018109 | fbxb-12 F36H5.11  | 0.593450323901189               |
| AGIWUR21376                                                                                                |    |    |         |         |                |                   |                                 |
| CB4856                                                                                                     | HS | II | 1756820 | 1757761 | WBGene00018108 | F36H5.10 F36H5.10 | -0.14823597791878               |
| AGIWUR4473;AGIWUR14070;AGIWUR15873;AGIWUR17539;AGIWUR21671;AGIWUR22520;AGIWUR33979;AGIWUR38675;AGIWUR39220 |    |    |         |         |                |                   |                                 |
| CB4856                                                                                                     | HS | II | 1758326 | 1760667 | WBGene00018104 | fbxb-53 F36H5.5   | -0.013283235270853 AGIWUR9607   |
| CB4856                                                                                                     | HS | II | 1761839 | 1762906 | WBGene00018103 | F36H5.4 F36H5.4   | -0.0713837401997814             |
| AGIWUR19793;AGIWUR21756;AGIWUR22590;AGIWUR25767;AGIWUR34490                                                |    |    |         |         |                |                   |                                 |
| CB4856                                                                                                     | HS | II | 1763372 | 1766555 | WBGene00018102 | math-28 F36H5.3   | 0.00482834660802034             |
| AGIWUR2347;AGIWUR15007;AGIWUR27128                                                                         |    |    |         |         |                |                   |                                 |
| CB4856                                                                                                     | HS | II | 1767802 | 1777394 | WBGene00018101 | math-27 F36H5.2   | 0.0333526236310258              |
| AGIWUR11186;AGIWUR32824                                                                                    |    |    |         |         |                |                   |                                 |
| CB4856                                                                                                     | HS | II | 1772085 | 1778526 | WBGene00015608 | math-3 C08F1.4    | -0.0914737841382047             |
| AGIWUR32321;AGIWUR38372                                                                                    |    |    |         |         |                |                   |                                 |
| CB4856                                                                                                     | HS | II | 1778772 | 1782409 | WBGene00015609 | math-4 C08F1.5    | -0.0556016325317845 AGIWUR13924 |
| CB4856                                                                                                     | HS | II | 1783451 | 1784481 | WBGene00044417 | C08F1.11 C08F1.11 | -0.361553573066612              |
| AGIWUR27089                                                                                                |    |    |         |         |                |                   |                                 |
| CB4856                                                                                                     | HS | II | 1785270 | 1786309 | WBGene00015613 | C08F1.10 C08F1.10 | 0.00908333535396455             |
| AGIWUR3444;AGIWUR13602;AGIWUR23231;AGIWUR23253;AGIWUR27163;AGIWUR40491                                     |    |    |         |         |                |                   |                                 |
| CB4856                                                                                                     | HS | II | 1787222 | 1788187 | WBGene00015610 | C08F1.6 C08F1.6   | -0.481165016168932 AGIWUR11918  |
| CB4856                                                                                                     | HS | II | 1789181 | 1790217 | WBGene00015607 | fbxb-13 C08F1.3   | -0.182345576627964 AGIWUR38059  |
| CB4856                                                                                                     | HS | II | 1791981 | 1792962 | WBGene00006088 | str-21 C08F1.2    | 0.184183624527511 AGIWUR15309   |
| CB4856                                                                                                     | HS | II | 1797852 | 1801377 | WBGene00015606 | math-2 C08F1.1    | 0.0972899978344399 AGIWUR37774  |
| CB4856                                                                                                     | HS | II | 1802107 | 1803302 | WBGene00006089 | str-22 C08F1.7    | 0.633562324597551               |
| AGIWUR10773;AGIWUR24537                                                                                    |    |    |         |         |                |                   |                                 |
| CB4856                                                                                                     | HS | II | 1817281 | 1818400 | WBGene00020362 | fbxb-10 T08E11.6  | -0.176482247917907              |
| AGIWUR7747                                                                                                 |    |    |         |         |                |                   |                                 |
| CB4856                                                                                                     | HS | II | 1818889 | 1820094 | WBGene00020363 | fbxa-3 T08E11.7   | -0.105854229212666              |
| AGIWUR29418                                                                                                |    |    |         |         |                |                   |                                 |

|                                                                         |    |         |         |                |          |          |                     |             |
|-------------------------------------------------------------------------|----|---------|---------|----------------|----------|----------|---------------------|-------------|
| CB4856 HS                                                               | II | 1821026 | 1823034 | WBGene00020361 | fbxc-19  | T08E11.5 | 0.0326478172823936  |             |
| AGIWUR22962;AGIWUR26801;AGIWUR29434;AGIWUR38598;AGIWUR39671;AGIWUR42018 |    |         |         |                |          |          |                     |             |
| CB4856 HS                                                               | II | 1824629 | 1830195 | WBGene00020360 | math-41  | T08E11.4 | -0.288214106057312  |             |
| AGIWUR14454                                                             |    |         |         |                |          |          |                     |             |
| CB4856 HS                                                               | II | 1830632 | 1831789 | WBGene00020359 | math-40  | T08E11.3 | -0.142222236725418  |             |
| AGIWUR21133                                                             |    |         |         |                |          |          |                     |             |
| CB4856 HS                                                               | II | 1832343 | 1833518 | WBGene00020358 | math-39  | T08E11.2 | -0.0505494253961132 |             |
| AGIWUR14134                                                             |    |         |         |                |          |          |                     |             |
| CB4856 HS                                                               | II | 1833627 | 1835783 | WBGene00020364 | T08E11.8 | T08E11.8 | 0.274088789774916   |             |
| AGIWUR7322                                                              |    |         |         |                |          |          |                     |             |
| CB4856 HS                                                               | II | 1840975 | 1842942 | WBGene00016884 | C52E2.5  | C52E2.5  | -0.0376897182625067 | AGIWUR28213 |
| CB4856 HS                                                               | II | 1843165 | 1846234 | WBGene00016883 | C52E2.4  | C52E2.4  | -0.0316355267334014 | AGIWUR9343  |
| CB4856 HS                                                               | II | 1846990 | 1848154 | WBGene00016885 | fbxb-97  | C52E2.6  | -0.0218956232231076 | AGIWUR4720  |
| CB4856 HS                                                               | II | 1849430 | 1850403 | WBGene00016886 | fbxb-96  | C52E2.7  | -0.175163941697219  | AGIWUR33334 |
| CB4856 HS                                                               | II | 1852803 | 1853092 | WBGene00016881 | C52E2.2  | C52E2.2  | 0.106941283676134   | AGIWUR33694 |
| CB4856 HS                                                               | II | 1854394 | 1855360 | WBGene00016880 | fbxb-95  | C52E2.1  | -0.115899859039755  |             |
| AGIWUR16918;AGIWUR31962;AGIWUR36994                                     |    |         |         |                |          |          |                     |             |
| CB4856 HS                                                               | II | 1862634 | 1863782 | WBGene00015830 | fbxb-98  | C16C4.6  | -0.137638326258907  | AGIWUR26970 |
| CB4856 HS                                                               | II | 1864578 | 1864884 | WBGene00044359 | C16C4.17 | C16C4.17 | -0.167245946031116  |             |
| AGIWUR5683;AGIWUR26687;AGIWUR28800;AGIWUR32417;AGIWUR33559              |    |         |         |                |          |          |                     |             |
| CB4856 HS                                                               | II | 1866386 | 1867894 | WBGene00015829 | math-15  | C16C4.5  | 0.171577834504435   | AGIWUR14519 |
| CB4856 HS                                                               | II | 1869410 | 1870803 | WBGene00015828 | math-14  | C16C4.4  | 1.00609411621925    | AGIWUR20950 |
| CB4856 HS                                                               | II | 1873480 | 1875106 | WBGene00015840 | math-11  | C16C4.16 | 0.0527861347894234  |             |
| AGIWUR33822                                                             |    |         |         |                |          |          |                     |             |
| CB4856 HS                                                               | II | 1875958 | 1877237 | WBGene00015827 | math-13  | C16C4.3  | -0.176154842438099  | AGIWUR291   |
| CB4856 HS                                                               | II | 1877579 | 1878763 | WBGene00015832 | math-16  | C16C4.8  | 0.453709804356395   | AGIWUR13056 |
| CB4856 HS                                                               | II | 1879590 | 1880708 | WBGene00015833 | math-17  | C16C4.9  | -0.197298433119215  | AGIWUR27825 |
| CB4856 HS                                                               | II | 1881611 | 1882805 | WBGene00015834 | math-5   | C16C4.10 | 0.0656582566113846  |             |
| AGIWUR44984                                                             |    |         |         |                |          |          |                     |             |
| CB4856 HS                                                               | II | 1883596 | 1884735 | WBGene00015835 | math-6   | C16C4.11 | 0.255046906943813   |             |
| AGIWUR35980                                                             |    |         |         |                |          |          |                     |             |
| CB4856 HS                                                               | II | 1885439 | 1886479 | WBGene00015836 | math-7   | C16C4.12 | -0.0523359324813839 |             |
| AGIWUR25687                                                             |    |         |         |                |          |          |                     |             |
| CB4856 HS                                                               | II | 1887209 | 1889171 | WBGene00015837 | math-8   | C16C4.13 | -0.35729896632058   |             |
| AGIWUR20908                                                             |    |         |         |                |          |          |                     |             |
| CB4856 HS                                                               | II | 1889909 | 1890782 | WBGene00015838 | math-9   | C16C4.14 | 0.0280028724456329  |             |
| AGIWUR34335                                                             |    |         |         |                |          |          |                     |             |
| CB4856 HS                                                               | II | 1890851 | 1891699 | WBGene00015826 | math-12  | C16C4.2  | -0.196420645905587  | AGIWUR17591 |
| CB4856 HS                                                               | II | 1900238 | 1901921 | WBGene00016719 | math-24  | C46F9.3  | 0.413974538070633   | AGIWUR32651 |



|                                                            |    |    |         |         |                |          |           |                      |             |
|------------------------------------------------------------|----|----|---------|---------|----------------|----------|-----------|----------------------|-------------|
| CB4856                                                     | HS | II | 1902281 | 1904446 | WBGene00016718 | math-23  | C46F9.2   | -0.0998717307033363  | AGIWUR5837  |
| CB4856                                                     | HS | II | 1905429 | 1907775 | WBGene00016717 | math-22  | C46F9.1   | -0.0325483668834794  |             |
| AGIWUR15993;AGIWUR33102                                    |    |    |         |         |                |          |           |                      |             |
| CB4856                                                     | HS | II | 1908161 | 1909735 | WBGene00018662 | math-30  | F52C6.5   | -0.00795149843131426 | AGIWUR14125 |
| CB4856                                                     | HS | II | 1912450 | 1912841 | WBGene00018663 | math-31  | F52C6.6   | -0.188212918812439   | AGIWUR328   |
| CB4856                                                     | HS | II | 1913605 | 1916376 | WBGene00018664 | bath-11  | F52C6.7   | 0.133782988246343    | AGIWUR41813 |
| CB4856                                                     | HS | II | 1916713 | 1917958 | WBGene00018665 | bath-4   | F52C6.8   | 0.346274891321288    | AGIWUR32571 |
| CB4856                                                     | HS | II | 1918319 | 1919439 | WBGene00018666 | bath-6   | F52C6.9   | -0.116439428601163   |             |
| AGIWUR1207;AGIWUR16786;AGIWUR29145;AGIWUR41161             |    |    |         |         |                |          |           |                      |             |
| CB4856                                                     | HS | II | 1919926 | 1921111 | WBGene00018667 | bath-7   | F52C6.10  | -0.308490919327848   |             |
| AGIWUR5473                                                 |    |    |         |         |                |          |           |                      |             |
| CB4856                                                     | HS | II | 1921452 | 1922744 | WBGene00018668 | bath-2   | F52C6.11  | -0.0113820106545539  |             |
| AGIWUR14381                                                |    |    |         |         |                |          |           |                      |             |
| CB4856                                                     | HS | II | 1923140 | 1923827 | WBGene00018661 | F52C6.4  | F52C6.4   | -0.105117051318888   |             |
| AGIWUR2439;AGIWUR6117;AGIWUR13431;AGIWUR24905;AGIWUR32132  |    |    |         |         |                |          |           |                      |             |
| CB4856                                                     | HS | II | 1924759 | 1925752 | WBGene00018660 | F52C6.3  | F52C6.3   | -0.203498953358882   |             |
| AGIWUR10072;AGIWUR19332                                    |    |    |         |         |                |          |           |                      |             |
| CB4856                                                     | HS | II | 1926462 | 1927347 | WBGene00018659 | F52C6.2  | F52C6.2   | -0.0818257284606858  | AGIWUR29257 |
| CB4856                                                     | HS | II | 1927879 | 1928734 | WBGene00018658 | bath-22  | F52C6.1   | -0.130888043442489   |             |
| AGIWUR7050;AGIWUR16188;AGIWUR18552;AGIWUR42126             |    |    |         |         |                |          |           |                      |             |
| CB4856                                                     | HS | II | 1929149 | 1930086 | WBGene00018669 | F52C6.12 | F52C6.12  | -0.160201520163158   |             |
| AGIWUR9215;AGIWUR11588;AGIWUR21193;AGIWUR26570;AGIWUR42282 |    |    |         |         |                |          |           |                      |             |
| CB4856                                                     | HS | II | 1930190 | 1930747 | WBGene00018670 | F52C6.13 | F52C6.13  | 0.140467065259539    |             |
| AGIWUR2092                                                 |    |    |         |         |                |          |           |                      |             |
| CB4856                                                     | HS | II | 1930991 | 1934507 | WBGene00018671 | F52C6.14 | F52C6.14  | -0.12228391089447    |             |
| AGIWUR11418                                                |    |    |         |         |                |          |           |                      |             |
| CB4856                                                     | HS | II | 1937063 | 1940147 | WBGene00235352 | ZK250.13 | ZK250.13  | 0.153973413684248    |             |
| AGIWUR42114                                                |    |    |         |         |                |          |           |                      |             |
| CB4856                                                     | HS | II | 1944058 | 1945168 | WBGene00235354 | ZK250.14 | ZK250.14  | 0.198052775761848    |             |
| AGIWUR9209;AGIWUR37083                                     |    |    |         |         |                |          |           |                      |             |
| CB4856                                                     | HS | II | 1953680 | 1955668 | WBGene00022690 | math-49  | ZK250.7   | -0.213056655971998   | AGIWUR24489 |
| CB4856                                                     | HS | II | 1956050 | 1958255 | WBGene00022691 | math-50  | ZK250.8   | -0.281220629870031   | AGIWUR41755 |
| CB4856                                                     | HS | II | 1987285 | 1990667 | WBGene00021193 | math-44  | Y16E11A.1 | 0.147897307329465    |             |
| AGIWUR42798                                                |    |    |         |         |                |          |           |                      |             |
| CB4856                                                     | HS | II | 1994047 | 1995701 | WBGene00016556 | math-21  | C40D2.3   | -0.0908225205856055  |             |
| AGIWUR9190;AGIWUR26554                                     |    |    |         |         |                |          |           |                      |             |
| CB4856                                                     | HS | II | 1996537 | 1998531 | WBGene00016555 | math-20  | C40D2.2   | -0.0111183263143122  | AGIWUR12840 |
| CB4856                                                     | HS | II | 1999743 | 2000820 | WBGene00016557 | ceh-84   | C40D2.4   | -0.265751152816419   | AGIWUR25294 |
| CB4856                                                     | HS | II | 2011485 | 2012838 | WBGene00019137 | ceh-85   | F59H6.6   | -0.323439983544486   | AGIWUR34788 |

|                                                           |    |         |         |                |          |          |                       |             |
|-----------------------------------------------------------|----|---------|---------|----------------|----------|----------|-----------------------|-------------|
| CB4856 HS                                                 | II | 2012998 | 2013386 | WBGene00269394 | F59H6.15 | F59H6.15 | 0.129601527280511     |             |
| AGIWUR9029                                                |    |         |         |                |          |          |                       |             |
| CB4856 HS                                                 | II | 2019654 | 2022441 | WBGene00019133 | F59H6.2  | F59H6.2  | 0.238850360112828     | AGIWUR29740 |
| CB4856 HS                                                 | II | 2025642 | 2026610 | WBGene00019138 | bath-21  | F59H6.8  | -0.127713247936309    | AGIWUR24725 |
| CB4856 HS                                                 | II | 2027612 | 2028812 | WBGene00019139 | bath-1   | F59H6.9  | -0.214564231857107    | AGIWUR35302 |
| CB4856 HS                                                 | II | 2029232 | 2030467 | WBGene00019140 | bath-3   | F59H6.10 | 0.0878852857388619    |             |
| AGIWUR1254                                                |    |         |         |                |          |          |                       |             |
| CB4856 HS                                                 | II | 2030750 | 2031952 | WBGene00019141 | bath-5   | F59H6.11 | 0.134644637521442     |             |
| AGIWUR2269                                                |    |         |         |                |          |          |                       |             |
| CB4856 HS                                                 | II | 2032569 | 2033243 | WBGene00019142 | btb-4    | F59H6.12 | -0.127697222489195    |             |
| AGIWUR41441;AGIWUR44999                                   |    |         |         |                |          |          |                       |             |
| CB4856 HS                                                 | II | 2033586 | 2034812 | WBGene00206415 | F59H6.14 | F59H6.14 | 0.260764621181462     |             |
| AGIWUR1220                                                |    |         |         |                |          |          |                       |             |
| CB4856 HS                                                 | II | 2035702 | 2039388 | WBGene00019132 | bath-19  | F59H6.1  | -0.245900670317095    | AGIWUR32883 |
| CB4856 HS                                                 | II | 2040368 | 2041629 | WBGene00015012 | bath-20  | B0047.1  | -0.23897590016611     |             |
| AGIWUR19234;AGIWUR42677;AGIWUR44896                       |    |         |         |                |          |          |                       |             |
| CB4856 HS                                                 | II | 2043089 | 2044087 | WBGene00015013 | btb-3    | B0047.2  | -0.194229348052833    | AGIWUR36170 |
| CB4856 HS                                                 | II | 2044619 | 2045601 | WBGene00015014 | bath-24  | B0047.3  | -0.126123905492149    | AGIWUR9357  |
| CB4856 HS                                                 | II | 2048061 | 2049175 | WBGene00015016 | bath-14  | B0047.5  | -0.273395203061416    |             |
| AGIWUR22179;AGIWUR23543                                   |    |         |         |                |          |          |                       |             |
| CB4856 HS                                                 | II | 2050023 | 2051679 | WBGene00017209 | F07E5.4  | F07E5.4  | 0.198412036607174     | AGIWUR13648 |
| CB4856 HS                                                 | II | 2053919 | 2059072 | WBGene00017210 | F07E5.5  | F07E5.5  | 0.0475186420164651    | AGIWUR43260 |
| CB4856 HS                                                 | II | 2059869 | 2064018 | WBGene00017211 | fbxb-36  | F07E5.6  | 0.0911427835678982    | AGIWUR21594 |
| CB4856 HS                                                 | II | 2068354 | 2068971 | WBGene00219315 | F07E5.12 | F07E5.12 | -0.0841099387453585   |             |
| AGIWUR2322                                                |    |         |         |                |          |          |                       |             |
| CB4856 HS                                                 | II | 2070593 | 2071516 | WBGene00017212 | F07E5.7  | F07E5.7  | -0.0369329523109245   |             |
| AGIWUR2175;AGIWUR23158;AGIWUR36248                        |    |         |         |                |          |          |                       |             |
| CB4856 HS                                                 | II | 2072221 | 2075830 | WBGene00017213 | F07E5.8  | F07E5.8  | -0.000136548970782968 | AGIWUR11692 |
| CB4856 HS                                                 | II | 2076291 | 2080526 | WBGene00017214 | F07E5.9  | F07E5.9  | 1.15519187475228      | AGIWUR21892 |
| CB4856 HS                                                 | II | 2081557 | 2082016 | WBGene00020535 | T16A1.4  | T16A1.4  | -0.00217123084371629  | AGIWUR35506 |
| CB4856 HS                                                 | II | 2083595 | 2083826 | WBGene00020536 | T16A1.5  | T16A1.5  | -0.0185497111964903   | AGIWUR15560 |
| CB4856 HS                                                 | II | 2084129 | 2084891 | WBGene00020534 | fbxc-49  | T16A1.3  | 0.0616717742799242    | AGIWUR3770  |
| CB4856 HS                                                 | II | 2091772 | 2092111 | WBGene00269431 | T16A1.10 | T16A1.10 | -0.0743763177238197   |             |
| AGIWUR5174                                                |    |         |         |                |          |          |                       |             |
| CB4856 HS                                                 | II | 2095304 | 2098671 | WBGene00020533 | T16A1.2  | T16A1.2  | -0.0639919572664933   | AGIWUR25813 |
| CB4856 HS                                                 | II | 2098871 | 2104149 | WBGene00020532 | math-42  | T16A1.1  | 0.378409522898608     |             |
| AGIWUR4912;AGIWUR5197;AGIWUR24871;AGIWUR27173;AGIWUR31259 |    |         |         |                |          |          |                       |             |
| CB4856 HS                                                 | II | 2104524 | 2106866 | WBGene00020075 | math-35  | R52.3    | 0.0180741341807105    | AGIWUR19446 |
| CB4856 HS                                                 | II | 2107197 | 2108395 | WBGene00020076 | R52.4    | R52.4    | 0.165588586884112     | AGIWUR29766 |

|                                                                                 |    |    |         |         |                |           |          |                     |                     |
|---------------------------------------------------------------------------------|----|----|---------|---------|----------------|-----------|----------|---------------------|---------------------|
| CB4856                                                                          | HS | II | 2108787 | 2110043 | WBGene00020077 | R52.5     | R52.5    | -0.0376024187934316 | AGIWUR35621         |
| CB4856                                                                          | HS | II | 2111227 | 2113048 | WBGene00020078 | R52.6     | R52.6    | 0.113687156773672   | AGIWUR17386         |
| CB4856                                                                          | HS | II | 2114554 | 2116894 | WBGene00005408 | srh-195   | R52.7    | 0.073863505902362   |                     |
| AGIWUR25884;AGIWUR27171;AGIWUR30449                                             |    |    |         |         |                |           |          |                     |                     |
| CB4856                                                                          | HS | II | 2117276 | 2122181 | WBGene00020080 | math-37   | R52.9    | 0.488532777963739   |                     |
| AGIWUR22322;AGIWUR38481                                                         |    |    |         |         |                |           |          |                     |                     |
| CB4856                                                                          | HS | II | 2123687 | 2129281 | WBGene00020081 | sdz-29    | R52.10   | -0.107039307207838  |                     |
| AGIWUR997;AGIWUR7585;AGIWUR9725;AGIWUR17929;AGIWUR24130;AGIWUR36877;AGIWUR39906 |    |    |         |         |                |           |          |                     |                     |
| CB4856                                                                          | HS | II | 2131070 | 2132475 | WBGene00020073 | sdz-28    | R52.1    | 0.103950567384489   | AGIWUR26196         |
| CB4856                                                                          | HS | II | 2133666 | 2135704 | WBGene00016548 | hpo-7     | C40A11.5 | -0.0427251473592438 |                     |
| AGIWUR40590                                                                     |    |    |         |         |                |           |          |                     |                     |
| CB4856                                                                          | HS | II | 2136822 | 2136909 | WBGene00016553 | C40A11.10 |          | C40A11.10           | -0.134568557505953  |
| AGIWUR29844                                                                     |    |    |         |         |                |           |          |                     |                     |
| CB4856                                                                          | HS | II | 2137422 | 2138951 | WBGene00016547 | C40A11.4  |          | C40A11.4            | 0.625666236728645   |
| AGIWUR17400                                                                     |    |    |         |         |                |           |          |                     |                     |
| CB4856                                                                          | HS | II | 2144292 | 2145666 | WBGene00016549 | C40A11.6  |          | C40A11.6            | 0.103506034244543   |
| AGIWUR8253;AGIWUR18636;AGIWUR31194;AGIWUR37868;AGIWUR39471;AGIWUR42954          |    |    |         |         |                |           |          |                     |                     |
| CB4856                                                                          | HS | II | 2146950 | 2148775 | WBGene00016545 | C40A11.2  |          | C40A11.2            | 0.546161563739623   |
| AGIWUR19003                                                                     |    |    |         |         |                |           |          |                     |                     |
| CB4856                                                                          | HS | II | 2148732 | 2150363 | WBGene00016550 | C40A11.7  |          | C40A11.7            | 0.194661637325927   |
| AGIWUR18171                                                                     |    |    |         |         |                |           |          |                     |                     |
| CB4856                                                                          | HS | II | 2150552 | 2151290 | WBGene00016551 | C40A11.8  |          | C40A11.8            | 0.211861075916027   |
| AGIWUR23141;AGIWUR29012;AGIWUR41581                                             |    |    |         |         |                |           |          |                     |                     |
| CB4856                                                                          | HS | II | 2154008 | 2155220 | WBGene00016544 | math-18   | C40A11.1 | -0.0537629940650461 |                     |
| AGIWUR19325                                                                     |    |    |         |         |                |           |          |                     |                     |
| CB4856                                                                          | HS | II | 2163341 | 2163832 | WBGene00044360 | C33C12.11 |          | C33C12.11           | -0.0633959121706056 |
| AGIWUR26375                                                                     |    |    |         |         |                |           |          |                     |                     |
| CB4856                                                                          | HS | II | 2165440 | 2166498 | WBGene00016336 | C33C12.4  |          | C33C12.4            | 0.139509471953414   |
| AGIWUR11200                                                                     |    |    |         |         |                |           |          |                     |                     |
| CB4856                                                                          | HS | II | 2170325 | 2173219 | WBGene00016338 | srb-14    | C33C12.6 | 0.0549617424529942  |                     |
| AGIWUR212;AGIWUR2539;AGIWUR6574;AGIWUR16245;AGIWUR18339;AGIWUR37823             |    |    |         |         |                |           |          |                     |                     |
| CB4856                                                                          | HS | II | 2174586 | 2175289 | WBGene00016339 | C33C12.7  |          | C33C12.7            | -0.113231960476492  |
| AGIWUR41219                                                                     |    |    |         |         |                |           |          |                     |                     |
| CB4856                                                                          | HS | II | 2176741 | 2181990 | WBGene00016335 | gba-1     | C33C12.3 | 0.14204632040749    |                     |
| AGIWUR19527                                                                     |    |    |         |         |                |           |          |                     |                     |
| CB4856                                                                          | HS | II | 2182503 | 2186434 | WBGene00016340 | gba-2     | C33C12.8 | 0.183255872878401   |                     |
| AGIWUR32624                                                                     |    |    |         |         |                |           |          |                     |                     |
| CB4856                                                                          | HS | II | 2187149 | 2189457 | WBGene00016341 | mtq-2     | C33C12.9 | 0.106421503009928   |                     |
| AGIWUR36138                                                                     |    |    |         |         |                |           |          |                     |                     |

|                                                           |    |         |         |                |           |           |                     |             |
|-----------------------------------------------------------|----|---------|---------|----------------|-----------|-----------|---------------------|-------------|
| CB4856 HS<br>AGIWUR44353                                  | II | 2192339 | 2194114 | WBGene00016342 | C33C12.10 | C33C12.10 | -0.01715999599665   |             |
| CB4856 HS<br>AGIWUR20259                                  | II | 2197846 | 2198675 | WBGene00016334 | C33C12.1  | C33C12.1  | 0.64093763104317    |             |
| CB4856 HS<br>AGIWUR13216                                  | II | 2199143 | 2204139 | WBGene00021985 | Y59C2A.2  | Y59C2A.2  | -0.0685004811998278 |             |
| CB4856 HS<br>AGIWUR9506                                   | II | 2208112 | 2212863 | WBGene00021984 | Y59C2A.1  | Y59C2A.1  | 0.0916565835921652  |             |
| CB4856 HS<br>AGIWUR15526                                  | II | 2215476 | 2219921 | WBGene00021986 | Y59C2A.3  | Y59C2A.3  | 0.0178129798053916  |             |
| CB4856 HS                                                 | II | 2224359 | 2225708 | WBGene00018784 | F54A3.5   | F54A3.5   | -0.34697345125649   | AGIWUR36961 |
| CB4856 HS                                                 | II | 2225817 | 2232470 | WBGene00018785 | F54A3.6   | F54A3.6   | -0.115417033351761  | AGIWUR44438 |
| CB4856 HS                                                 | II | 2233540 | 2243539 | WBGene00018782 | cct-3     | F54A3.3   | -0.507673410860153  |             |
| AGIWUR2521;AGIWUR9717;AGIWUR20960;AGIWUR24186;AGIWUR32791 |    |         |         |                |           |           |                     |             |
| CB4856 HS                                                 | II | 2255172 | 2261101 | WBGene00019586 | K09F6.3   | K09F6.3   | -0.13327437361453   |             |
| AGIWUR31678;AGIWUR37475                                   |    |         |         |                |           |           |                     |             |
| CB4856 HS                                                 | II | 2262128 | 2265768 | WBGene00019587 | K09F6.4   | K09F6.4   | -0.324066027828149  | AGIWUR10760 |
| CB4856 HS                                                 | II | 2274876 | 2279146 | WBGene00019589 | K09F6.6   | K09F6.6   | -0.104089189584224  | AGIWUR31027 |
| CB4856 HS                                                 | II | 2280139 | 2280580 | WBGene00044361 | K09F6.11  | K09F6.11  | -0.0680796607723879 |             |
| AGIWUR660;AGIWUR7865;AGIWUR12531;AGIWUR38262              |    |         |         |                |           |           |                     |             |
| CB4856 HS                                                 | II | 2287030 | 2290226 | WBGene00019593 | K09F6.10  | K09F6.10  | 0.0966679655677183  |             |
| AGIWUR39646                                               |    |         |         |                |           |           |                     |             |
| CB4856 HS                                                 | II | 2290896 | 2292184 | WBGene00019590 | K09F6.7   | K09F6.7   | 0.00552174947894279 | AGIWUR35281 |
| CB4856 HS                                                 | II | 2294693 | 2296265 | WBGene00019591 | fbxc-25   | K09F6.8   | -0.137474961386849  |             |
| AGIWUR7503;AGIWUR25600                                    |    |         |         |                |           |           |                     |             |
| CB4856 HS                                                 | II | 2297847 | 2298793 | WBGene00015111 | B0281.4   | B0281.4   | -0.224645904751672  | AGIWUR32252 |
| CB4856 HS                                                 | II | 2299854 | 2300946 | WBGene00015112 | B0281.5   | B0281.5   | -0.204501157125598  | AGIWUR17596 |
| CB4856 HS                                                 | II | 2301308 | 2302229 | WBGene00015113 | B0281.6   | B0281.6   | 0.100125511581227   | AGIWUR30003 |
| CB4856 HS                                                 | II | 2307041 | 2308361 | WBGene00015110 | B0281.3   | B0281.3   | -0.123612894976977  |             |
| AGIWUR10890;AGIWUR22129;AGIWUR38792                       |    |         |         |                |           |           |                     |             |
| CB4856 HS                                                 | II | 2310071 | 2311074 | WBGene00023225 | B0281.7   | B0281.7   | -0.0032810737403679 | AGIWUR19027 |
| CB4856 HS                                                 | II | 2313067 | 2314927 | WBGene00015108 | B0281.1   | B0281.1   | 0.0367340415769606  | AGIWUR29422 |
| CB4856 HS                                                 | II | 2315084 | 2315622 | WBGene00022869 | ZK1240.4  | ZK1240.4  | 0.0916063187787826  |             |
| AGIWUR40750                                               |    |         |         |                |           |           |                     |             |
| CB4856 HS                                                 | II | 2316163 | 2317877 | WBGene00022870 | ZK1240.5  | ZK1240.5  | 0.779014163610217   |             |
| AGIWUR35040                                               |    |         |         |                |           |           |                     |             |
| CB4856 HS                                                 | II | 2318189 | 2320134 | WBGene00022873 | ZK1240.9  | ZK1240.9  | 0.282585864003725   |             |
| AGIWUR6381;AGIWUR34515;AGIWUR37334                        |    |         |         |                |           |           |                     |             |
| CB4856 HS                                                 | II | 2320153 | 2321951 | WBGene00022868 | ZK1240.3  | ZK1240.3  | -0.308559843754638  |             |

|                                   |    |         |         |                         |                 |           |                    |
|-----------------------------------|----|---------|---------|-------------------------|-----------------|-----------|--------------------|
| AGIWUR2960                        |    |         |         |                         |                 |           |                    |
| CB4856 HS                         | II | 2322367 | 2322907 | WBGene00022871          | ZK1240.6        | ZK1240.6  | -0.058121625662344 |
| AGIWUR5666                        |    |         |         |                         |                 |           |                    |
| CB4856 HS                         | II | 2323376 | 2325215 | WBGene00022867          | ZK1240.2        | ZK1240.2  | -0.339156146630723 |
| AGIWUR14511                       |    |         |         |                         |                 |           |                    |
| CB4856 HS                         | II | 2326995 | 2329053 | WBGene00022872          | ZK1240.8        | ZK1240.8  | 0.103931741155309  |
| AGIWUR42400                       |    |         |         |                         |                 |           |                    |
| CB4856 HS                         | II | 2329355 | 2331792 | WBGene00022866          | ZK1240.1        | ZK1240.1  | 0.248289801547464  |
| AGIWUR11319                       |    |         |         |                         |                 |           |                    |
| CB4856 HS                         | II | 2332520 | 2334338 | WBGene00018385          | F43C11.8        | F43C11.8  | 0.156969634335679  |
| AGIWUR12050                       |    |         |         |                         |                 |           |                    |
| CB4856 HS                         | II | 2335933 | 2337696 | WBGene00018384          | F43C11.7        | F43C11.7  | 0.153136939801136  |
| AGIWUR27872                       |    |         |         |                         |                 |           |                    |
| CB4856 HS                         | II | 2337897 | 2340746 | WBGene00018386          | F43C11.9        | F43C11.9  | -0.186630925127121 |
| AGIWUR20373                       |    |         |         |                         |                 |           |                    |
| CB4856 HS                         | II | 2342433 | 2343925 | WBGene00018383          | F43C11.6        | F43C11.6  | -0.169384134624657 |
| AGIWUR25498                       |    |         |         |                         |                 |           |                    |
| CB4856 HS                         | II | 2345118 | 2346028 | WBGene00018382          | F43C11.5        | F43C11.5  | 0.0609025399362046 |
| AGIWUR45203                       |    |         |         |                         |                 |           |                    |
| CB4856 HS                         | II | 2347015 | 2350030 | WBGene00018381          | F43C11.4        | F43C11.4  | 0.152074183810637  |
| AGIWUR19877                       |    |         |         |                         |                 |           |                    |
| CB4856 HS                         | II | 2350216 | 2351657 | WBGene00018387          | F43C11.10       | F43C11.10 | -0.191433223908859 |
| AGIWUR2098;AGIWUR5664;AGIWUR17935 |    |         |         |                         |                 |           |                    |
| CB4856 HS                         | II | 2354776 | 2355972 | WBGene00018379          | F43C11.2        | F43C11.2  | -0.38050602488826  |
| AGIWUR27877                       |    |         |         |                         |                 |           |                    |
| CB4856 HS                         | II | 2357095 | 2358278 | WBGene00018378          | F43C11.1        | F43C11.1  |                    |
| -0.00808947197730925              |    |         |         | AGIWUR35747;AGIWUR36438 |                 |           |                    |
| CB4856 HS                         | II | 2358801 | 2363773 | WBGene00018388          | F43C11.11       | F43C11.11 | -0.085110352297713 |
| AGIWUR6497                        |    |         |         |                         |                 |           |                    |
| CB4856 HS                         | II | 2365573 | 2366720 | WBGene00018389          | F43C11.12       | F43C11.12 | 0.148419215141791  |
| AGIWUR28662                       |    |         |         |                         |                 |           |                    |
| CB4856 HS                         | II | 2367528 | 2368708 | WBGene00017520          | F16G10.5        | F16G10.5  | -0.36340685902702  |
| AGIWUR7640                        |    |         |         |                         |                 |           |                    |
| CB4856 HS                         | II | 2369256 | 2370089 | WBGene00017519          | hpo-25 F16G10.4 |           | 0.0205982017780473 |
| AGIWUR33028                       |    |         |         |                         |                 |           |                    |
| CB4856 HS                         | II | 2372390 | 2374340 | WBGene00017518          | F16G10.3        | F16G10.3  | 0.026267212410918  |
| AGIWUR8438                        |    |         |         |                         |                 |           |                    |
| CB4856 HS                         | II | 2375273 | 2376411 | WBGene00017517          | F16G10.2        | F16G10.2  | -0.490264486676264 |
| AGIWUR3215                        |    |         |         |                         |                 |           |                    |

|                                     |    |         |         |                |           |           |                     |             |
|-------------------------------------|----|---------|---------|----------------|-----------|-----------|---------------------|-------------|
| CB4856 HS                           | II | 2377199 | 2377851 | WBGene00017521 | F16G10.6  | F16G10.6  | -0.222771847132821  |             |
| AGIWUR12468                         |    |         |         |                |           |           |                     |             |
| CB4856 HS                           | II | 2379579 | 2380274 | WBGene00017522 | F16G10.7  | F16G10.7  | 0.0494472680133491  |             |
| AGIWUR29225                         |    |         |         |                |           |           |                     |             |
| CB4856 HS                           | II | 2381949 | 2383434 | WBGene00017523 | F16G10.8  | F16G10.8  | 0.143337615527026   |             |
| AGIWUR20430                         |    |         |         |                |           |           |                     |             |
| CB4856 HS                           | II | 2384186 | 2385595 | WBGene00017524 | F16G10.9  | F16G10.9  | -0.0526640195579162 |             |
| AGIWUR11291;AGIWUR33652;AGIWUR45181 |    |         |         |                |           |           |                     |             |
| CB4856 HS                           | II | 2394916 | 2395964 | WBGene00017527 | F16G10.13 | F16G10.13 |                     |             |
| -0.00870960319553138 AGIWUR12983    |    |         |         |                |           |           |                     |             |
| CB4856 HS                           | II | 2404284 | 2404659 | WBGene00017516 | F16G10.1  | F16G10.1  | -0.059365490020002  |             |
| AGIWUR30351                         |    |         |         |                |           |           |                     |             |
| CB4856 HS                           | II | 2409643 | 2412741 | WBGene00018353 | fbxa-182  | F42G2.4   | -0.0781134370941543 |             |
| AGIWUR13568;AGIWUR39835             |    |         |         |                |           |           |                     |             |
| CB4856 HS                           | II | 2414119 | 2415531 | WBGene00044672 | fbxa-4    | F42G2.8   | 0.285541194121983   |             |
| AGIWUR27382;AGIWUR33844             |    |         |         |                |           |           |                     |             |
| CB4856 HS                           | II | 2416101 | 2417971 | WBGene00018354 | F42G2.5   | F42G2.5   | -0.240123777018313  |             |
| AGIWUR9576;AGIWUR25080;AGIWUR33778  |    |         |         |                |           |           |                     |             |
| CB4856 HS                           | II | 2418448 | 2419025 | WBGene00044362 | F42G2.7   | F42G2.7   | -0.1265419473874    | AGIWUR35918 |
| CB4856 HS                           | II | 2419472 | 2420794 | WBGene00018352 | fbxc-20   | F42G2.3   | 0.447161925901822   | AGIWUR7061  |
| CB4856 HS                           | II | 2426372 | 2429944 | WBGene00018355 | ceh-86    | F42G2.6   | -0.16705079546675   | AGIWUR1758  |
| CB4856 HS                           | II | 2443279 | 2451130 | WBGene00006882 | vab-19    | T22D2.1   | -0.0108748278123305 |             |
| AGIWUR22528;AGIWUR42638             |    |         |         |                |           |           |                     |             |
| CB4856 HS                           | II | 2452970 | 2458981 | WBGene00004129 | pqn-42    | F53G2.4   | 0.116204514964035   |             |
| AGIWUR2755;AGIWUR27831              |    |         |         |                |           |           |                     |             |
| CB4856 HS                           | II | 2460866 | 2472862 | WBGene00006647 | tsr-1     | F53G2.6   | 0.147907825839834   | AGIWUR16260 |
| CB4856 HS                           | II | 2480399 | 2481312 | WBGene00018768 | F53G2.3   | F53G2.3   | 0.161782129593638   | AGIWUR11911 |
| CB4856 HS                           | II | 2481921 | 2485922 | WBGene00018767 | F53G2.2   | F53G2.2   | 0.142982358027041   | AGIWUR37648 |
| CB4856 HS                           | II | 2488754 | 2496641 | WBGene00018766 | F53G2.1   | F53G2.1   | -0.0584294664362837 | AGIWUR38040 |
| CB4856 HS                           | II | 2504878 | 2514846 | WBGene00019130 | gbas-1    | F59H5.1   | -0.122206418149169  | AGIWUR23587 |
| CB4856 HS                           | II | 2514977 | 2516097 | WBGene00019131 | bath-12   | F59H5.3   | 0.138772415633266   |             |
| AGIWUR865;AGIWUR4761;AGIWUR18764    |    |         |         |                |           |           |                     |             |
| CB4856 HS                           | II | 2520965 | 2522044 | WBGene00018223 | bath-13   | F40B1.1   | 0.0973458980472319  | AGIWUR15079 |
| CB4856 HS                           | II | 2522628 | 2524475 | WBGene00018224 | bath-18   | F40B1.2   | -0.161378823624641  | AGIWUR28245 |
| CB4856 HS                           | II | 2525220 | 2529255 | WBGene00019341 | K02F6.7   | K02F6.7   | -0.0343348723823524 | AGIWUR38714 |
| CB4856 HS                           | II | 2530817 | 2531476 | WBGene00019340 | K02F6.6   | K02F6.6   | 0.558446526621964   | AGIWUR20611 |
| CB4856 HS                           | II | 2546225 | 2553572 | WBGene00019337 | K02F6.3   | K02F6.3   | -0.0706081226028363 |             |
| AGIWUR13728;AGIWUR21707;AGIWUR42219 |    |         |         |                |           |           |                     |             |
| CB4856 HS                           | II | 2553962 | 2556313 | WBGene00019335 | K02F6.1   | K02F6.1   | 0.178757877436974   | AGIWUR16350 |

|                                                                         |    |    |         |         |                |          |          |                    |             |
|-------------------------------------------------------------------------|----|----|---------|---------|----------------|----------|----------|--------------------|-------------|
| CB4856                                                                  | HS | II | 2557781 | 2563677 | WBGene00019343 | nep-18   | K02F6.9  | -0.095100013035994 |             |
| AGIWUR27404;AGIWUR31183;AGIWUR32099                                     |    |    |         |         |                |          |          |                    |             |
| CB4856                                                                  | HS | II | 2565275 | 2575930 | WBGene00017280 | usp-39   | F09D1.1  | -0.215844885257363 | AGIWUR22184 |
| CB4856                                                                  | HS | II | 2578536 | 2579595 | WBGene00005587 | sri-75   | F33H12.3 | -0.017448894681924 |             |
| AGIWUR5883                                                              |    |    |         |         |                |          |          |                    |             |
| CB4856                                                                  | HS | II | 2580901 | 2583346 | WBGene00005586 | sri-74   | F33H12.4 | 0.133645661411093  |             |
| AGIWUR38546                                                             |    |    |         |         |                |          |          |                    |             |
| CB4856                                                                  | HS | II | 2583782 | 2585593 | WBGene00005548 | sri-36   | F33H12.5 | 0.321304076272373  |             |
| AGIWUR29515                                                             |    |    |         |         |                |          |          |                    |             |
| CB4856                                                                  | HS | II | 2586078 | 2586911 | WBGene00045457 | F33H12.7 | F33H12.7 | 1.12008559310116   |             |
| AGIWUR10211;AGIWUR11014;AGIWUR14494;AGIWUR20112;AGIWUR21173;AGIWUR27869 |    |    |         |         |                |          |          |                    |             |
| CB4856                                                                  | HS | II | 2587504 | 2589754 | WBGene00005551 | sri-39   | F33H12.2 | 0.0153819701288369 |             |
| AGIWUR2569;AGIWUR9926                                                   |    |    |         |         |                |          |          |                    |             |
| CB4856                                                                  | HS | II | 2600553 | 2601779 | WBGene00018019 | F33H12.1 | F33H12.1 | -0.150042076889222 |             |
| AGIWUR33272                                                             |    |    |         |         |                |          |          |                    |             |
| CB4856                                                                  | HS | II | 2603208 | 2605419 | WBGene00005589 | sri-77   | D2062.9  | -0.281119558369234 | AGIWUR10343 |
| CB4856                                                                  | HS | II | 2610862 | 2612359 | WBGene00005550 | sri-38   | D2062.8  | 0.81524827196222   |             |
| AGIWUR18254;AGIWUR39361                                                 |    |    |         |         |                |          |          |                    |             |
| CB4856                                                                  | HS | II | 2616905 | 2617374 | WBGene00017059 | D2062.7  | D2062.7  | -0.104181621395586 | AGIWUR30414 |
| CB4856                                                                  | HS | II | 2619419 | 2619789 | WBGene00017058 | D2062.6  | D2062.6  | 0.0880056958198701 |             |
| AGIWUR152;AGIWUR6988;AGIWUR17021;AGIWUR28623;AGIWUR37201;AGIWUR42200    |    |    |         |         |                |          |          |                    |             |
| CB4856                                                                  | HS | II | 2623402 | 2624530 | WBGene00017056 | D2062.4  | D2062.4  | 0.0772037268005406 |             |
| AGIWUR11959;AGIWUR21825;AGIWUR31235;AGIWUR43927                         |    |    |         |         |                |          |          |                    |             |
| CB4856                                                                  | HS | II | 2625092 | 2627070 | WBGene00044301 | lgc-28   | D2062.12 | 0.172890322458824  |             |
| AGIWUR30690;AGIWUR43966                                                 |    |    |         |         |                |          |          |                    |             |
| CB4856                                                                  | HS | II | 2627749 | 2629196 | WBGene00005583 | sri-71   | D2062.3  | -0.230316085237355 | AGIWUR35298 |
| CB4856                                                                  | HS | II | 2629570 | 2631231 | WBGene00005549 | sri-37   | D2062.2  | -0.132383616933119 | AGIWUR17145 |
| CB4856                                                                  | HS | II | 2631473 | 2633054 | WBGene00017055 | D2062.1  | D2062.1  | 0.0221952781248778 | AGIWUR15096 |
| CB4856                                                                  | HS | II | 2634210 | 2635321 | WBGene00005553 | sri-41   | F22E5.10 | -0.12748842693505  |             |
| AGIWUR35927;AGIWUR43074                                                 |    |    |         |         |                |          |          |                    |             |
| CB4856                                                                  | HS | II | 2635360 | 2637608 | WBGene00044363 | F22E5.21 | F22E5.21 | 0.344285871791883  |             |
| AGIWUR6996;AGIWUR13791                                                  |    |    |         |         |                |          |          |                    |             |
| CB4856                                                                  | HS | II | 2638392 | 2639353 | WBGene00017708 | F22E5.9  | F22E5.9  | 0.0631334395707519 | AGIWUR8605  |
| CB4856                                                                  | HS | II | 2640081 | 2641897 | WBGene00017707 | F22E5.8  | F22E5.8  | 0.0439378193024274 | AGIWUR29034 |
| CB4856                                                                  | HS | II | 2642090 | 2642884 | WBGene00017706 | F22E5.7  | F22E5.7  | 0.150083189654581  | AGIWUR2135  |
| CB4856                                                                  | HS | II | 2643685 | 2645703 | WBGene00017709 | F22E5.11 | F22E5.11 | 0.187770083273387  |             |
| AGIWUR16622                                                             |    |    |         |         |                |          |          |                    |             |
| CB4856                                                                  | HS | II | 2647637 | 2649639 | WBGene00017711 | F22E5.13 | F22E5.13 | 0.0135587218911795 |             |
| AGIWUR15725;AGIWUR33628                                                 |    |    |         |         |                |          |          |                    |             |

|                                                                                                         |    |    |         |         |                |          |          |                      |             |
|---------------------------------------------------------------------------------------------------------|----|----|---------|---------|----------------|----------|----------|----------------------|-------------|
| CB4856                                                                                                  | HS | II | 2649870 | 2650715 | WBGene00017705 | F22E5.6  | F22E5.6  | 0.00851040236228862  | AGIWUR39051 |
| CB4856                                                                                                  | HS | II | 2652841 | 2654464 | WBGene00005561 | sri-49   | F22E5.14 | 0.0288978093295107   |             |
| AGIWUR283;AGIWUR4661;AGIWUR8245;AGIWUR13251;AGIWUR28279;AGIWUR32069;AGIWUR33970;AGIWUR35353;AGIWUR37519 |    |    |         |         |                |          |          |                      |             |
| CB4856                                                                                                  | HS | II | 2659670 | 2665022 | WBGene00001546 | gcy-21   | F22E5.3  | -0.329415219414308   | AGIWUR44744 |
| CB4856                                                                                                  | HS | II | 2666283 | 2668162 | WBGene00005567 | sri-55   | F22E5.15 | -0.00456005013976002 |             |
| AGIWUR3285;AGIWUR11082                                                                                  |    |    |         |         |                |          |          |                      |             |
| CB4856                                                                                                  | HS | II | 2672632 | 2673634 | WBGene00017713 | F22E5.20 | F22E5.20 | -0.0494366863641886  |             |
| AGIWUR8172                                                                                              |    |    |         |         |                |          |          |                      |             |
| CB4856                                                                                                  | HS | II | 2673908 | 2677588 | WBGene00017703 | F22E5.1  | F22E5.1  | -0.188406644627671   | AGIWUR18331 |
| CB4856                                                                                                  | HS | II | 2678041 | 2679162 | WBGene00017712 | F22E5.17 | F22E5.17 | -0.128318955126804   |             |
| AGIWUR11407                                                                                             |    |    |         |         |                |          |          |                      |             |
| CB4856                                                                                                  | HS | II | 2679163 | 2681218 | WBGene00018021 | F34D6.1  | F34D6.1  | 0.101833262374041    | AGIWUR32910 |
| CB4856                                                                                                  | HS | II | 2683329 | 2684308 | WBGene00018022 | ceh-87   | F34D6.2  | -0.154243678407724   | AGIWUR1083  |
| CB4856                                                                                                  | HS | II | 2684669 | 2686977 | WBGene00006318 | sup-9    | F34D6.3  | -0.183418322730864   | AGIWUR35930 |
| CB4856                                                                                                  | HS | II | 2688916 | 2689179 | WBGene00044365 | F34D6.8  | F34D6.8  | -0.329010669411021   |             |
| AGIWUR3570;AGIWUR14833;AGIWUR16546;AGIWUR25095;AGIWUR30598                                              |    |    |         |         |                |          |          |                      |             |
| CB4856                                                                                                  | HS | II | 2690472 | 2694311 | WBGene00018023 | set-11   | F34D6.4  | -0.207312527921774   | AGIWUR35159 |
| CB4856                                                                                                  | HS | II | 2696939 | 2698478 | WBGene00005574 | sri-62   | F34D6.5  | 0.00548245226063493  | AGIWUR37243 |
| CB4856                                                                                                  | HS | II | 2698865 | 2700329 | WBGene00005573 | sri-61   | F34D6.6  | -0.261426876210519   | AGIWUR26167 |
| CB4856                                                                                                  | HS | II | 2701389 | 2702857 | WBGene00005572 | sri-60   | Y47G7B.3 | 0.179291725684067    |             |
| AGIWUR4730                                                                                              |    |    |         |         |                |          |          |                      |             |
| CB4856                                                                                                  | HS | II | 2703371 | 2705316 | WBGene00005345 | srh-128  | Y47G7B.1 | -0.196059602776113   |             |
| AGIWUR42635                                                                                             |    |    |         |         |                |          |          |                      |             |
| CB4856                                                                                                  | HS | II | 2705996 | 2707982 | WBGene00021654 | Y47G7B.2 | Y47G7B.2 | 0.125496860382709    |             |
| AGIWUR5884                                                                                              |    |    |         |         |                |          |          |                      |             |
| CB4856                                                                                                  | HS | II | 2708438 | 2710096 | WBGene00020227 | T05A8.1  | T05A8.1  | 1.08134921885665     | AGIWUR29682 |
| CB4856                                                                                                  | HS | II | 2709942 | 2711019 | WBGene00020228 | T05A8.2  | T05A8.2  | 0.816831366054647    | AGIWUR23765 |
| CB4856                                                                                                  | HS | II | 2714647 | 2717435 | WBGene00020229 | T05A8.3  | T05A8.3  | -0.0458044985275863  |             |
| AGIWUR2639;AGIWUR12034                                                                                  |    |    |         |         |                |          |          |                      |             |
| CB4856                                                                                                  | HS | II | 2717522 | 2725541 | WBGene00020230 | nep-2    | T05A8.4  | 0.134548384412604    | AGIWUR4193  |
| CB4856                                                                                                  | HS | II | 2731319 | 2735250 | WBGene00020231 | T05A8.5  | T05A8.5  | -0.230878590794863   | AGIWUR33951 |
| CB4856                                                                                                  | HS | II | 2736678 | 2737556 | WBGene00044367 | T05A8.8  | T05A8.8  | -0.0187689433077391  |             |
| AGIWUR6273;AGIWUR21950;AGIWUR29441;AGIWUR34602;AGIWUR42076                                              |    |    |         |         |                |          |          |                      |             |
| CB4856                                                                                                  | HS | II | 2738523 | 2739642 | WBGene00020232 | T05A8.6  | T05A8.6  | 0.0346020050768576   | AGIWUR36070 |
| CB4856                                                                                                  | HS | II | 2740403 | 2742341 | WBGene00020233 | T05A8.7  | T05A8.7  | 0.110360237575325    | AGIWUR12867 |
| CB4856                                                                                                  | HS | II | 2747393 | 2747728 | WBGene00017915 | F29A7.5  | F29A7.5  | -0.0790834387391746  | AGIWUR5403  |
| CB4856                                                                                                  | HS | II | 2748588 | 2751573 | WBGene00017914 | F29A7.4  | F29A7.4  | 0.0351326300494019   | AGIWUR35213 |
| CB4856                                                                                                  | HS | II | 2751741 | 2752611 | WBGene00017916 | F29A7.6  | F29A7.6  | 0.0868402543255726   |             |
| AGIWUR1148;AGIWUR13132                                                                                  |    |    |         |         |                |          |          |                      |             |



|                                                             |    |    |         |         |                |           |           |                     |                     |
|-------------------------------------------------------------|----|----|---------|---------|----------------|-----------|-----------|---------------------|---------------------|
| CB4856                                                      | HS | II | 2753299 | 2754379 | WBGene00017913 | F29A7.3   | F29A7.3   | 0.123912712112815   |                     |
| AGIWUR10580;AGIWUR15672;AGIWUR31599;AGIWUR38911;AGIWUR39414 |    |    |         |         |                |           |           |                     |                     |
| CB4856                                                      | HS | II | 2756021 | 2757018 | WBGene00017917 | cllec-120 |           | F29A7.7             | 0.158331310637926   |
| AGIWUR37125                                                 |    |    |         |         |                |           |           |                     |                     |
| CB4856                                                      | HS | II | 2757147 | 2758054 | WBGene00017918 | F29A7.8   | F29A7.8   | 0.103986192028103   | AGIWUR26911         |
| CB4856                                                      | HS | II | 2758625 | 2761856 | WBGene00017912 | fbxb-107  |           | F29A7.2             | 0.31942725670649    |
| AGIWUR35880                                                 |    |    |         |         |                |           |           |                     |                     |
| CB4856                                                      | HS | II | 2764964 | 2767230 | WBGene00017249 | fbxb-108  |           | F08D12.6            | 0.0766282883773188  |
| AGIWUR27513                                                 |    |    |         |         |                |           |           |                     |                     |
| CB4856                                                      | HS | II | 2767250 | 2769121 | WBGene00017250 | F08D12.7  |           | F08D12.7            | 0.158197041614915   |
| AGIWUR13638                                                 |    |    |         |         |                |           |           |                     |                     |
| CB4856                                                      | HS | II | 2769670 | 2770888 | WBGene00017251 | fbxb-105  |           | F08D12.8            | -0.0556354537473229 |
| AGIWUR32943                                                 |    |    |         |         |                |           |           |                     |                     |
| CB4856                                                      | HS | II | 2771082 | 2772266 | WBGene00017252 | sdz-10    | F08D12.9  |                     | 0.205361403777697   |
| AGIWUR22665                                                 |    |    |         |         |                |           |           |                     |                     |
| CB4856                                                      | HS | II | 2772389 | 2773634 | WBGene00017253 | sdz-9     | F08D12.10 |                     | -0.242461033949894  |
| AGIWUR14124                                                 |    |    |         |         |                |           |           |                     |                     |
| CB4856                                                      | HS | II | 2773954 | 2775042 | WBGene00017254 | fbxb-111  |           | F08D12.11           | 0.560819300079173   |
| AGIWUR23089                                                 |    |    |         |         |                |           |           |                     |                     |
| CB4856                                                      | HS | II | 2778146 | 2779282 | WBGene00017248 | F08D12.4  |           | F08D12.4            | -0.145976567138213  |
| AGIWUR34662                                                 |    |    |         |         |                |           |           |                     |                     |
| CB4856                                                      | HS | II | 2779544 | 2780838 | WBGene00017247 | F08D12.3  |           | F08D12.3            | 0.0989024420236699  |
| AGIWUR11622;AGIWUR14891;AGIWUR21016                         |    |    |         |         |                |           |           |                     |                     |
| CB4856                                                      | HS | II | 2781628 | 2783083 | WBGene00017246 | F08D12.2  |           | F08D12.2            | 0.103340814794251   |
| AGIWUR20210                                                 |    |    |         |         |                |           |           |                     |                     |
| CB4856                                                      | HS | II | 2783102 | 2787089 | WBGene00017255 | F08D12.12 |           | F08D12.12           | 0.0709478300822441  |
| AGIWUR24811                                                 |    |    |         |         |                |           |           |                     |                     |
| CB4856                                                      | HS | II | 2787481 | 2793471 | WBGene00017245 | srpa-72   | F08D12.1  |                     | 0.0529411158476165  |
| AGIWUR36556                                                 |    |    |         |         |                |           |           |                     |                     |
| CB4856                                                      | HS | II | 2794974 | 2800600 | WBGene00003709 | nhr-119   | K12H6.1   |                     | -0.138395852107582  |
| AGIWUR24562;AGIWUR32874                                     |    |    |         |         |                |           |           |                     |                     |
| CB4856                                                      | HS | II | 2808167 | 2812860 | WBGene00019691 | K12H6.12  |           | K12H6.12            | 0.0391637041324593  |
| AGIWUR21824                                                 |    |    |         |         |                |           |           |                     |                     |
| CB4856                                                      | HS | II | 2812872 | 2815544 | WBGene00019683 | K12H6.2   | K12H6.2   | -0.0358049473286108 | AGIWUR31778         |
| CB4856                                                      | HS | II | 2816976 | 2819123 | WBGene00019690 | set-13    | K12H6.11  |                     | -0.209771494943108  |
| AGIWUR6625                                                  |    |    |         |         |                |           |           |                     |                     |
| CB4856                                                      | HS | II | 2819435 | 2822490 | WBGene00001507 | fut-4     | K12H6.3   | 0.306085359115914   | AGIWUR42179         |
| CB4856                                                      | HS | II | 2823707 | 2824269 | WBGene00019684 | K12H6.4   | K12H6.4   | -0.146566043902592  | AGIWUR42778         |
| CB4856                                                      | HS | II | 2825662 | 2826598 | WBGene00019685 | K12H6.5   | K12H6.5   | -0.280546298441475  | AGIWUR12317         |

|                                                                        |    |    |         |         |                |             |             |                     |             |
|------------------------------------------------------------------------|----|----|---------|---------|----------------|-------------|-------------|---------------------|-------------|
| CB4856                                                                 | HS | II | 2827897 | 2828603 | WBGene00019688 | K12H6.8     | K12H6.8     | -0.438033565062298  | AGIWUR35848 |
| CB4856                                                                 | HS | II | 2828594 | 2831233 | WBGene00019686 | K12H6.6     | K12H6.6     | -0.0418052486256322 |             |
| AGIWUR10125;AGIWUR17611                                                |    |    |         |         |                |             |             |                     |             |
| CB4856                                                                 | HS | II | 2834953 | 2836780 | WBGene00019687 | K12H6.7     | K12H6.7     | -0.12423414592705   | AGIWUR41986 |
| CB4856                                                                 | HS | II | 2839304 | 2840386 | WBGene00022441 | Y110A2AL.4  | Y110A2AL.4  | 0.0253248728241275  |             |
| AGIWUR2788;AGIWUR19080;AGIWUR19398;AGIWUR38238                         |    |    |         |         |                |             |             |                     |             |
| CB4856                                                                 | HS | II | 2841010 | 2841629 | WBGene00022443 | Y110A2AL.6  | Y110A2AL.6  | 0.532642492080592   |             |
| AGIWUR18505                                                            |    |    |         |         |                |             |             |                     |             |
| CB4856                                                                 | HS | II | 2842608 | 2843188 | WBGene00022444 | Y110A2AL.7  | Y110A2AL.7  | -0.0888915984024941 |             |
| AGIWUR361                                                              |    |    |         |         |                |             |             |                     |             |
| CB4856                                                                 | HS | II | 2845384 | 2852593 | WBGene00004210 | ptc-3       | Y110A2AL.8  | 0.1364558041736     |             |
| AGIWUR20873;AGIWUR36226;AGIWUR36414;AGIWUR44866                        |    |    |         |         |                |             |             |                     |             |
| CB4856                                                                 | HS | II | 2864529 | 2865363 | WBGene00022442 | Y110A2AL.5  | Y110A2AL.5  | 0.0169594096115038  |             |
| AGIWUR26948                                                            |    |    |         |         |                |             |             |                     |             |
| CB4856                                                                 | HS | II | 2865971 | 2866655 | WBGene00022445 | Y110A2AL.9  | Y110A2AL.9  | -0.0745370618055521 |             |
| AGIWUR3686;AGIWUR15915;AGIWUR18333;AGIWUR20884;AGIWUR37977;AGIWUR39130 |    |    |         |         |                |             |             |                     |             |
| CB4856                                                                 | HS | II | 2867074 | 2867779 | WBGene00022440 | Y110A2AL.3  | Y110A2AL.3  | 0.0515549479877997  |             |
| AGIWUR8722                                                             |    |    |         |         |                |             |             |                     |             |
| CB4856                                                                 | HS | II | 2867993 | 2870758 | WBGene00022439 | Y110A2AL.2  | Y110A2AL.2  | -0.0394236473436944 |             |
| AGIWUR5974;AGIWUR13320;AGIWUR16794;AGIWUR16833;AGIWUR30884             |    |    |         |         |                |             |             |                     |             |
| CB4856                                                                 | HS | II | 2871377 | 2871914 | WBGene00022446 | Y110A2AL.10 | Y110A2AL.10 | 0.0441626964198463  |             |
| AGIWUR28531                                                            |    |    |         |         |                |             |             |                     |             |
| CB4856                                                                 | HS | II | 2875101 | 2876618 | WBGene00022438 | Y110A2AL.1  | Y110A2AL.1  | -0.334585895131051  |             |
| AGIWUR6925                                                             |    |    |         |         |                |             |             |                     |             |
| CB4856                                                                 | HS | II | 2878729 | 2884910 | WBGene00022447 | hpo-20      | Y110A2AL.12 | -0.102774657610664  |             |
| AGIWUR1875;AGIWUR11336;AGIWUR14290;AGIWUR30668;AGIWUR40005;AGIWUR44573 |    |    |         |         |                |             |             |                     |             |
| CB4856                                                                 | HS | II | 2886317 | 2889016 | WBGene00022448 | pinn-1      | Y110A2AL.13 | 0.0625020753710412  |             |
| AGIWUR13612                                                            |    |    |         |         |                |             |             |                     |             |
| CB4856                                                                 | HS | II | 2889104 | 2894395 | WBGene00005020 | sqv-2       | Y110A2AL.14 | 0.088543807584891   |             |
| AGIWUR42414                                                            |    |    |         |         |                |             |             |                     |             |
| CB4856                                                                 | HS | II | 2896737 | 2900348 | WBGene00022450 | ubc-26      | Y110A2AM.3  | 0.0867458278875217  |             |
| AGIWUR5889;AGIWUR23227;AGIWUR30571;AGIWUR38183;AGIWUR42075             |    |    |         |         |                |             |             |                     |             |
| CB4856                                                                 | HS | II | 2902962 | 2904001 | WBGene00022449 | Y110A2AM.1  | Y110A2AM.1  | 0.0583883864989119  |             |
| AGIWUR17641                                                            |    |    |         |         |                |             |             |                     |             |
| CB4856                                                                 | HS | II | 2913705 | 2919314 | WBGene00022453 | Y110A2AR.3  | Y110A2AR.3  | -0.0481069183015563 |             |
| AGIWUR20065;AGIWUR38218;AGIWUR40062                                    |    |    |         |         |                |             |             |                     |             |
| CB4856                                                                 | HS | II | 2919710 | 2920904 | WBGene00022452 | Y110A2AR.1  | Y110A2AR.1  | -0.068229313738545  |             |
| AGIWUR30954                                                            |    |    |         |         |                |             |             |                     |             |
| CB4856                                                                 | HS | II | 2923899 | 2926533 | WBGene00022712 | ZK355.2     | ZK355.2     | -0.0701843855433486 |             |

AGIWUR36579;AGIWUR38145

|        |    |    |         |         |                |         |         |                     |             |
|--------|----|----|---------|---------|----------------|---------|---------|---------------------|-------------|
| CB4856 | HS | II | 2927017 | 2927633 | WBGene00022713 | ZK355.3 | ZK355.3 | 0.575677946550986   | AGIWUR16281 |
| CB4856 | HS | II | 2928221 | 2930599 | WBGene00022714 | irld-64 | ZK355.4 | 0.223251946020889   | AGIWUR25390 |
| CB4856 | HS | II | 2930728 | 2933463 | WBGene00022711 | irld-63 | ZK355.1 | 0.0318650884891092  | AGIWUR574   |
| CB4856 | HS | II | 2933521 | 2934454 | WBGene00044369 | irld-67 | ZK355.7 | -0.0774219886186671 |             |

AGIWUR7665;AGIWUR17850;AGIWUR29654

|        |    |    |         |         |                |         |         |                     |             |
|--------|----|----|---------|---------|----------------|---------|---------|---------------------|-------------|
| CB4856 | HS | II | 2934805 | 2937952 | WBGene00022715 | irld-65 | ZK355.5 | -0.0756593013665308 | AGIWUR18946 |
| CB4856 | HS | II | 2938143 | 2940847 | WBGene00022716 | irld-66 | ZK355.6 | -0.0857918404703311 | AGIWUR36728 |
| CB4856 | HS | II | 2940996 | 2944077 | WBGene00020431 | irld-50 | T11F1.7 | 0.177685475482225   | AGIWUR1396  |
| CB4856 | HS | II | 2944176 | 2946533 | WBGene00020430 | irld-49 | T11F1.6 | 0.11624269001189    | AGIWUR11744 |
| CB4856 | HS | II | 2946738 | 2948434 | WBGene00005826 | srw-79  | T11F1.5 | -0.0312881149234676 |             |

AGIWUR11043;AGIWUR16519;AGIWUR19279;AGIWUR29750

|        |    |    |         |         |                |         |         |                     |             |
|--------|----|----|---------|---------|----------------|---------|---------|---------------------|-------------|
| CB4856 | HS | II | 2948929 | 2952729 | WBGene00077759 | irld-51 | T11F1.9 | -0.1099342264393    | AGIWUR3293  |
| CB4856 | HS | II | 2956065 | 2958191 | WBGene00020428 | irld-48 | T11F1.2 | -0.147313406107668  | AGIWUR5921  |
| CB4856 | HS | II | 2958608 | 2961883 | WBGene00005807 | srw-60  | T11F1.1 | -0.162236862773641  | AGIWUR20994 |
| CB4856 | HS | II | 2976639 | 2987023 | WBGene00003678 | nhr-88  | K08A2.5 | -0.0973729376467141 |             |

AGIWUR9908;AGIWUR25658;AGIWUR25973;AGIWUR31000;AGIWUR33208

|        |    |    |         |         |                |         |         |                    |             |
|--------|----|----|---------|---------|----------------|---------|---------|--------------------|-------------|
| CB4856 | HS | II | 2988307 | 2991238 | WBGene00019513 | K08A2.4 | K08A2.4 | -0.188657583175459 | AGIWUR23537 |
| CB4856 | HS | II | 2991613 | 2994313 | WBGene00019512 | K08A2.2 | K08A2.2 | 0.0347388697815099 | AGIWUR16689 |
| CB4856 | HS | II | 2997021 | 3000653 | WBGene00019511 | K08A2.1 | K08A2.1 | 0.124459732760563  | AGIWUR37176 |
| CB4856 | HS | II | 3000768 | 3002411 | WBGene00016576 | C41H7.6 | C41H7.6 | -0.126650450050787 | AGIWUR20719 |
| CB4856 | HS | II | 3002513 | 3003827 | WBGene00016575 | C41H7.5 | C41H7.5 | -0.874084586768223 | AGIWUR269   |
| CB4856 | HS | II | 3003969 | 3005573 | WBGene00016574 | C41H7.4 | C41H7.4 | 0.100610960586643  | AGIWUR2896  |
| CB4856 | HS | II | 3005799 | 3007506 | WBGene00016573 | C41H7.3 | C41H7.3 | 0.0761115591371055 | AGIWUR27129 |
| CB4856 | HS | II | 3014835 | 3015961 | WBGene00016572 | C41H7.2 | C41H7.2 | 0.220614464290956  | AGIWUR19017 |
| CB4856 | HS | II | 3016068 | 3017471 | WBGene00016571 | C41H7.1 | C41H7.1 | 0.401721702771802  | AGIWUR18416 |
| CB4856 | HS | II | 3017482 | 3019907 | WBGene00016577 | clec-3  | C41H7.7 | 0.330311948650461  | AGIWUR41295 |
| CB4856 | HS | II | 3032780 | 3036122 | WBGene00015197 | B0454.6 | B0454.6 | -0.233880435343105 | AGIWUR13089 |
| CB4856 | HS | II | 3038859 | 3040822 | WBGene00015196 | B0454.5 | B0454.5 | 0.0963087392663597 |             |

AGIWUR14221;AGIWUR34522

|        |    |    |         |         |                |         |         |                    |  |
|--------|----|----|---------|---------|----------------|---------|---------|--------------------|--|
| CB4856 | HS | II | 3040943 | 3043406 | WBGene00015199 | B0454.8 | B0454.8 | 0.0357789230219963 |  |
|--------|----|----|---------|---------|----------------|---------|---------|--------------------|--|

AGIWUR43750;AGIWUR44012;AGIWUR44391

|        |    |    |         |         |                |        |          |                   |            |
|--------|----|----|---------|---------|----------------|--------|----------|-------------------|------------|
| CB4856 | HS | II | 3044323 | 3046115 | WBGene00005541 | sri-29 | B0454.4  | 0.200693152022223 | AGIWUR2475 |
| CB4856 | HS | II | 3046219 | 3048154 | WBGene00005542 | sri-30 | B0454.10 | 0.176638975567613 |            |

AGIWUR8463

|        |    |    |         |         |                |         |         |                    |             |
|--------|----|----|---------|---------|----------------|---------|---------|--------------------|-------------|
| CB4856 | HS | II | 3048678 | 3050435 | WBGene00005540 | sri-28  | B0454.3 | -0.11552492550838  | AGIWUR12561 |
| CB4856 | HS | II | 3051003 | 3052322 | WBGene00005543 | sri-31  | B0454.2 | -0.100187777021847 | AGIWUR14825 |
| CB4856 | HS | II | 3052597 | 3054348 | WBGene00015200 | B0454.9 | B0454.9 | -0.01268715317428  | AGIWUR25688 |
| CB4856 | HS | II | 3056822 | 3060207 | WBGene00002997 | lin-8   | B0454.1 | 0.233640825449418  | AGIWUR39951 |

|                                                                                                                                               |    |         |         |                |           |           |                      |
|-----------------------------------------------------------------------------------------------------------------------------------------------|----|---------|---------|----------------|-----------|-----------|----------------------|
| CB4856 HS                                                                                                                                     | II | 3061082 | 3062112 | WBGene00021293 | Y25C1A.6  | Y25C1A.6  | -0.397909702810974   |
| AGIWUR19149                                                                                                                                   |    |         |         |                |           |           |                      |
| CB4856 HS                                                                                                                                     | II | 3062542 | 3071381 | WBGene00021294 | Y25C1A.7  | Y25C1A.7  | -0.00285150397317491 |
| AGIWUR3099;AGIWUR9962;AGIWUR12918;AGIWUR14161;AGIWUR14668;AGIWUR18126;AGIWUR23317;AGIWUR23438;AGIWUR36817;AGIWUR38161;AGIWUR42714;AGIWUR43276 |    |         |         |                |           |           |                      |
| CB4856 HS                                                                                                                                     | II | 3071164 | 3076953 | WBGene00021295 | Y25C1A.8  | Y25C1A.8  | -0.163828634101463   |
| AGIWUR29733                                                                                                                                   |    |         |         |                |           |           |                      |
| CB4856 HS                                                                                                                                     | II | 3078796 | 3087682 | WBGene00021292 | copb-1    | Y25C1A.5  | -0.0474187656887874  |
| AGIWUR44602                                                                                                                                   |    |         |         |                |           |           |                      |
| CB4856 HS                                                                                                                                     | II | 3088474 | 3091296 | WBGene00005178 | srg-21    | Y25C1A.9  | -0.303357454838553   |
| AGIWUR38380                                                                                                                                   |    |         |         |                |           |           |                      |
| CB4856 HS                                                                                                                                     | II | 3091503 | 3093452 | WBGene00005179 | srg-22    | Y25C1A.10 | -0.124304410982435   |
| AGIWUR15037                                                                                                                                   |    |         |         |                |           |           |                      |
| CB4856 HS                                                                                                                                     | II | 3093902 | 3096160 | WBGene00005180 | srg-23    | Y25C1A.11 | 0.0221191553949307   |
| AGIWUR11917                                                                                                                                   |    |         |         |                |           |           |                      |
| CB4856 HS                                                                                                                                     | II | 3098403 | 3100646 | WBGene00005181 | srg-24    | Y25C1A.12 | 0.0333166477811915   |
| AGIWUR14814                                                                                                                                   |    |         |         |                |           |           |                      |
| CB4856 HS                                                                                                                                     | II | 3102318 | 3104736 | WBGene00021291 | cllec-121 | Y25C1A.4  | 0.0729264286635125   |
| AGIWUR11656                                                                                                                                   |    |         |         |                |           |           |                      |
| CB4856 HS                                                                                                                                     | II | 3106065 | 3108032 | WBGene00021290 | cllec-122 | Y25C1A.3  | 0.0707007809301663   |
| AGIWUR39278                                                                                                                                   |    |         |         |                |           |           |                      |
| CB4856 HS                                                                                                                                     | II | 3109368 | 3111247 | WBGene00021296 | Y25C1A.13 | Y25C1A.13 | -0.276821357449439   |
| AGIWUR14960;AGIWUR25497                                                                                                                       |    |         |         |                |           |           |                      |
| CB4856 HS                                                                                                                                     | II | 3112613 | 3113337 | WBGene00021289 | Y25C1A.2  | Y25C1A.2  | -0.392601546287752   |
| AGIWUR33174                                                                                                                                   |    |         |         |                |           |           |                      |
| CB4856 HS                                                                                                                                     | II | 3114234 | 3116758 | WBGene00021288 | cllec-123 | Y25C1A.1  | 0.201582661690374    |
| AGIWUR10375                                                                                                                                   |    |         |         |                |           |           |                      |
| CB4856 HS                                                                                                                                     | II | 3117771 | 3118451 | WBGene00020409 | T10D4.7   | T10D4.7   | 0.0999972817288173   |
| AGIWUR8077                                                                                                                                    |    |         |         |                |           |           |                      |
| CB4856 HS                                                                                                                                     | II | 3119332 | 3123192 | WBGene00020408 | T10D4.6   | T10D4.6   | 0.0819310006677583   |
| AGIWUR6156                                                                                                                                    |    |         |         |                |           |           |                      |
| CB4856 HS                                                                                                                                     | II | 3123506 | 3124899 | WBGene00005292 | srh-71    | T10D4.5   | 0.0712282497604679   |
| AGIWUR36043                                                                                                                                   |    |         |         |                |           |           |                      |
| CB4856 HS                                                                                                                                     | II | 3126037 | 3126441 | WBGene00002102 | ins-19    | T10D4.13  | 0.0599380965065874   |
| AGIWUR11814;AGIWUR14823;AGIWUR29537;AGIWUR31712;AGIWUR36904                                                                                   |    |         |         |                |           |           |                      |
| CB4856 HS                                                                                                                                     | II | 3127041 | 3127790 | WBGene00002114 | ins-31    | T10D4.4   | -0.0606918797792799  |
| AGIWUR11011;AGIWUR28105;AGIWUR30924;AGIWUR31563;AGIWUR40948                                                                                   |    |         |         |                |           |           |                      |
| CB4856 HS                                                                                                                                     | II | 3129179 | 3131288 | WBGene00020407 | chil-24   | T10D4.3   | -0.156863627881169   |
| AGIWUR34237                                                                                                                                   |    |         |         |                |           |           |                      |
| CB4856 HS                                                                                                                                     | II | 3134099 | 3135283 | WBGene00005568 | sri-56    | T10D4.2   | 0.0677460333755793   |
| AGIWUR16953;AGIWUR32344                                                                                                                       |    |         |         |                |           |           |                      |
| CB4856 HS                                                                                                                                     | II | 3135581 | 3137904 | WBGene00005566 | sri-54    | T10D4.8   | -0.075962053555358   |
| AGIWUR3261                                                                                                                                    |    |         |         |                |           |           |                      |

|                                                                                  |    |    |         |         |                |           |           |                     |             |
|----------------------------------------------------------------------------------|----|----|---------|---------|----------------|-----------|-----------|---------------------|-------------|
| CB4856                                                                           | HS | II | 3140918 | 3142955 | WBGene00005554 | sri-42    | T10D4.9   | 0.132670825060218   | AGIWUR31287 |
| CB4856                                                                           | HS | II | 3143394 | 3144652 | WBGene00005555 | sri-43    | T10D4.10  | -0.106832266707613  |             |
| AGIWUR8985                                                                       |    |    |         |         |                |           |           |                     |             |
| CB4856                                                                           | HS | II | 3146142 | 3146992 | WBGene00077522 | T10D4.15  | T10D4.15  | -0.116270231036454  |             |
| AGIWUR19568;AGIWUR37353                                                          |    |    |         |         |                |           |           |                     |             |
| CB4856                                                                           | HS | II | 3148504 | 3149621 | WBGene00020410 | T10D4.11  | T10D4.11  | -0.155976309509057  |             |
| AGIWUR41738                                                                      |    |    |         |         |                |           |           |                     |             |
| CB4856                                                                           | HS | II | 3150140 | 3152575 | WBGene00020406 | T10D4.1   | T10D4.1   | -0.312744828460811  | AGIWUR10791 |
| CB4856                                                                           | HS | II | 3153050 | 3154483 | WBGene00005544 | sri-32    | T10D4.12  | 0.177038917407372   |             |
| AGIWUR39838                                                                      |    |    |         |         |                |           |           |                     |             |
| CB4856                                                                           | HS | II | 3155167 | 3156849 | WBGene00005545 | sri-33    | Y27F2A.4  | 0.091689084556168   |             |
| AGIWUR38115                                                                      |    |    |         |         |                |           |           |                     |             |
| CB4856                                                                           | HS | II | 3157491 | 3159085 | WBGene00005546 | sri-34    | Y27F2A.7  | 0.1447336264286     | AGIWUR36938 |
| CB4856                                                                           | HS | II | 3168767 | 3170189 | WBGene00021297 | fbxc-55   | Y27F2A.5  | 0.135760994992856   |             |
| AGIWUR9674                                                                       |    |    |         |         |                |           |           |                     |             |
| CB4856                                                                           | HS | II | 3171468 | 3172276 | WBGene00045303 | Y27F2A.10 | Y27F2A.10 | 0.0171504222555816  |             |
| AGIWUR17309;AGIWUR17803                                                          |    |    |         |         |                |           |           |                     |             |
| CB4856                                                                           | HS | II | 3177963 | 3180476 | WBGene00005552 | sri-40    | Y27F2A.3  | -0.143828057993199  |             |
| AGIWUR21152;AGIWUR38695                                                          |    |    |         |         |                |           |           |                     |             |
| CB4856                                                                           | HS | II | 3180479 | 3182676 | WBGene00021298 | Y27F2A.6  | Y27F2A.6  | 0.0866124908031765  |             |
| AGIWUR12463                                                                      |    |    |         |         |                |           |           |                     |             |
| CB4856                                                                           | HS | II | 3185158 | 3186790 | WBGene00005590 | sri-78    | Y27F2A.2  | 0.0374923903415905  |             |
| AGIWUR16945                                                                      |    |    |         |         |                |           |           |                     |             |
| CB4856                                                                           | HS | II | 3197613 | 3199098 | WBGene00005563 | sri-51    | ZC239.8   | 0.00644938698887998 | AGIWUR36077 |
| CB4856                                                                           | HS | II | 3206020 | 3206541 | WBGene00044371 | ZC239.20  | ZC239.20  | -0.194601516896102  |             |
| AGIWUR6160;AGIWUR8135;AGIWUR9712;AGIWUR18739;AGIWUR26353;AGIWUR35448;AGIWUR39029 |    |    |         |         |                |           |           |                     |             |
| CB4856                                                                           | HS | II | 3206939 | 3207388 | WBGene00044372 | ZC239.21  | ZC239.21  | -0.129298143017787  |             |
| AGIWUR7815;AGIWUR14066;AGIWUR22921                                               |    |    |         |         |                |           |           |                     |             |
| CB4856                                                                           | HS | II | 3207683 | 3208751 | WBGene00022570 | sdz-35    | ZC239.12  | 0.0522901342918178  |             |
| AGIWUR30050                                                                      |    |    |         |         |                |           |           |                     |             |
| CB4856                                                                           | HS | II | 3209478 | 3211181 | WBGene00022569 | ZC239.6   | ZC239.6   | -0.113841884594496  | AGIWUR1572  |
| CB4856                                                                           | HS | II | 3212371 | 3213208 | WBGene00022568 | ZC239.5   | ZC239.5   | 0.127009076067445   | AGIWUR27087 |
| CB4856                                                                           | HS | II | 3214452 | 3215565 | WBGene00022567 | ZC239.4   | ZC239.4   | -0.116150939443839  |             |
| AGIWUR1430;AGIWUR11052;AGIWUR38797                                               |    |    |         |         |                |           |           |                     |             |
| CB4856                                                                           | HS | II | 3216081 | 3216600 | WBGene00022566 | ZC239.3   | ZC239.3   | 0.284868285829043   | AGIWUR30364 |
| CB4856                                                                           | HS | II | 3217907 | 3218990 | WBGene00022565 | ZC239.2   | ZC239.2   | 0.131001845628283   | AGIWUR11486 |
| CB4856                                                                           | HS | II | 3221126 | 3222010 | WBGene00022572 | ZC239.14  | ZC239.14  | 0.0334169909468685  |             |
| AGIWUR28231                                                                      |    |    |         |         |                |           |           |                     |             |
| CB4856                                                                           | HS | II | 3222406 | 3222827 | WBGene00022571 | ZC239.13  | ZC239.13  | 0.0351276433883143  |             |

|                                                                       |    |    |         |         |                |                 |                                 |
|-----------------------------------------------------------------------|----|----|---------|---------|----------------|-----------------|---------------------------------|
| AGIWUR7714                                                            |    |    |         |         |                |                 |                                 |
| CB4856                                                                | HS | II | 3224770 | 3225285 | WBGene00022574 | ZC239.16        | ZC239.16 0.342461130968845      |
| AGIWUR28996                                                           |    |    |         |         |                |                 |                                 |
| CB4856                                                                | HS | II | 3225348 | 3225968 | WBGene00022575 | ZC239.17        | ZC239.17                        |
| -0.00838412909102093 AGIWUR8136                                       |    |    |         |         |                |                 |                                 |
| CB4856                                                                | HS | II | 3228885 | 3230522 | WBGene00005501 | srh-297 C17F4.4 | -0.00649635713372154            |
| AGIWUR26598;AGIWUR31997                                               |    |    |         |         |                |                 |                                 |
| CB4856                                                                | HS | II | 3230817 | 3234813 | WBGene00015914 | C17F4.8 C17F4.8 | -0.134562793244127 AGIWUR3081   |
| CB4856                                                                | HS | II | 3235956 | 3237138 | WBGene00023479 | srz-67 C17F4.10 | -0.0631734878221204             |
| AGIWUR21449;AGIWUR34302;AGIWUR41495                                   |    |    |         |         |                |                 |                                 |
| CB4856                                                                | HS | II | 3237471 | 3238179 | WBGene00044373 | C17F4.11        | C17F4.11 -0.0133454400886306    |
| AGIWUR8847;AGIWUR26875;AGIWUR29109                                    |    |    |         |         |                |                 |                                 |
| CB4856                                                                | HS | II | 3238169 | 3240043 | WBGene00023480 | srz-68 C17F4.9  | -0.276362368109 AGIWUR40543     |
| CB4856                                                                | HS | II | 3240545 | 3241726 | WBGene00015911 | C17F4.3 C17F4.3 | -0.0584894852508908 AGIWUR13213 |
| CB4856                                                                | HS | II | 3243676 | 3244162 | WBGene00044374 | C17F4.12        | C17F4.12 -0.0784362278037669    |
| AGIWUR946;AGIWUR4095;AGIWUR14240;AGIWUR31293;AGIWUR35584              |    |    |         |         |                |                 |                                 |
| CB4856                                                                | HS | II | 3245087 | 3246015 | WBGene00015913 | C17F4.7 C17F4.7 | 0.247741286597275 AGIWUR43953   |
| CB4856                                                                | HS | II | 3246316 | 3248174 | WBGene00015912 | fbxc-50 C17F4.5 | -0.0143655672429031 AGIWUR5090  |
| CB4856                                                                | HS | II | 3248623 | 3249386 | WBGene00015910 | C17F4.2 C17F4.2 | -0.321551176632108 AGIWUR23272  |
| CB4856                                                                | HS | II | 3250313 | 3250856 | WBGene00015909 | clcc-124        | C17F4.1 -0.256023353127823      |
| AGIWUR1933                                                            |    |    |         |         |                |                 |                                 |
| CB4856                                                                | HS | II | 3250985 | 3259354 | WBGene00001544 | gcy-19 C17F4.6  | -0.249243349423864 AGIWUR2396   |
| CB4856                                                                | HS | II | 3267663 | 3271505 | WBGene00195073 | F02E11.7        | F02E11.7 0.31623641640542       |
| AGIWUR11844                                                           |    |    |         |         |                |                 |                                 |
| CB4856                                                                | HS | II | 3272349 | 3275023 | WBGene00017181 | F02E11.3        | F02E11.3 0.0825880828355317     |
| AGIWUR41749                                                           |    |    |         |         |                |                 |                                 |
| CB4856                                                                | HS | II | 3276256 | 3277305 | WBGene00017182 | F02E11.4        | F02E11.4 -0.0959668773458588    |
| AGIWUR37077                                                           |    |    |         |         |                |                 |                                 |
| CB4856                                                                | HS | II | 3278987 | 3281686 | WBGene00017179 | wht-4 F02E11.1  | -0.0868543557283052             |
| AGIWUR987;AGIWUR15251;AGIWUR17304;AGIWUR24953;AGIWUR30539;AGIWUR35672 |    |    |         |         |                |                 |                                 |
| CB4856                                                                | HS | II | 3282653 | 3287158 | WBGene00018196 | nep-13 F39E9.4  | 0.0427149912081575 AGIWUR35454  |
| CB4856                                                                | HS | II | 3287373 | 3289031 | WBGene00005575 | sri-63 F39E9.3  | 0.223258715640596 AGIWUR37501   |
| CB4856                                                                | HS | II | 3290486 | 3290644 | WBGene00044375 | F39E9.14        | F39E9.14 -0.0320349465024377    |
| AGIWUR1826                                                            |    |    |         |         |                |                 |                                 |
| CB4856                                                                | HS | II | 3292264 | 3293472 | WBGene00023281 | F39E9.8 F39E9.8 | -0.1503948985055 AGIWUR33135    |
| CB4856                                                                | HS | II | 3294021 | 3295068 | WBGene00023282 | F39E9.9 F39E9.9 | -0.25928175138999 AGIWUR28424   |
| CB4856                                                                | HS | II | 3295414 | 3296582 | WBGene00018200 | btb-17 F39E9.11 | -0.0364085854005332             |
| AGIWUR14277;AGIWUR18377                                               |    |    |         |         |                |                 |                                 |
| CB4856                                                                | HS | II | 3296908 | 3298027 | WBGene00018195 | btb-16 F39E9.2  | 0.104150720878964 AGIWUR26250   |

|                                                             |    |         |         |                                    |          |           |                     |                     |
|-------------------------------------------------------------|----|---------|---------|------------------------------------|----------|-----------|---------------------|---------------------|
| CB4856 HS                                                   | II | 3299825 | 3300676 | WBGene00269387                     | btb-22   | F39E9.27  |                     | -0.0838532841135144 |
| AGIWUR3343                                                  |    |         |         |                                    |          |           |                     |                     |
| CB4856 HS                                                   | II | 3302761 | 3303750 | WBGene00023036                     | F39E9.10 | F39E9.10  |                     | -0.0740198556410574 |
| AGIWUR23026;AGIWUR23331;AGIWUR23832;AGIWUR27066;AGIWUR32012 |    |         |         |                                    |          |           |                     |                     |
| CB4856 HS                                                   | II | 3324021 | 3326431 | WBGene00021589                     | Y46D2A.1 | Y46D2A.1  |                     | -0.0686201144103791 |
| AGIWUR28811                                                 |    |         |         |                                    |          |           |                     |                     |
| CB4856 HS                                                   | II | 3326492 | 3327197 | WBGene00021591                     | Y46D2A.3 | Y46D2A.3  |                     | -0.176130260147698  |
| AGIWUR26527                                                 |    |         |         |                                    |          |           |                     |                     |
| CB4856 HS                                                   | II | 3331889 | 3334205 | WBGene00077751                     | ir1d-27  | F14D2.17  |                     | -0.147240581468707  |
| AGIWUR2293                                                  |    |         |         |                                    |          |           |                     |                     |
| CB4856 HS                                                   | II | 3335422 | 3337139 | WBGene00206522                     | F14D2.19 | F14D2.19  |                     | -0.265108244868225  |
| AGIWUR31445                                                 |    |         |         |                                    |          |           |                     |                     |
| CB4856 HS                                                   | II | 3340556 | 3341260 | WBGene00017453                     | F14D2.5  | F14D2.5   | -0.218296070226447  | AGIWUR12906         |
| CB4856 HS                                                   | II | 3341268 | 3342104 | WBGene00017459                     | F14D2.11 | F14D2.11  |                     | -0.21786011406377   |
| AGIWUR40910                                                 |    |         |         |                                    |          |           |                     |                     |
| CB4856 HS                                                   | II | 3343710 | 3344967 | WBGene00017461                     | bath-28  | F14D2.13  |                     | -0.242984586959636  |
| AGIWUR23578;AGIWUR35439;AGIWUR38267;AGIWUR40583             |    |         |         |                                    |          |           |                     |                     |
| CB4856 HS                                                   | II | 3345218 | 3346378 | WBGene00017460                     | bath-30  | F14D2.12  |                     | -0.0446076273945106 |
| AGIWUR37539                                                 |    |         |         |                                    |          |           |                     |                     |
| CB4856 HS                                                   | II | 3346745 | 3347519 | WBGene00017462                     | F14D2.14 | F14D2.14  |                     | -0.0271049419777452 |
| AGIWUR23383;AGIWUR28782;AGIWUR38077                         |    |         |         |                                    |          |           |                     |                     |
| CB4856 HS                                                   | II | 3347574 | 3349870 | WBGene00017456                     | F14D2.8  | F14D2.8   | -0.252207313496196  |                     |
| AGIWUR8496;AGIWUR16471;AGIWUR17696;AGIWUR37394;AGIWUR38928  |    |         |         |                                    |          |           |                     |                     |
| CB4856 HS                                                   | II | 3350252 | 3358981 | WBGene00017452                     | bath-29  | F14D2.4   | 0.00168792846293186 |                     |
| AGIWUR8805;AGIWUR22859;AGIWUR23701;AGIWUR25164;AGIWUR32290  |    |         |         |                                    |          |           |                     |                     |
| CB4856 HS                                                   | II | 3359139 | 3360255 | WBGene00017451                     | F14D2.2  | F14D2.2   | -0.12399737373125   | AGIWUR24777         |
| CB4856 HS                                                   | II | 3361899 | 3365961 | WBGene00021728                     | Y49F6C.6 | Y49F6C.6  |                     | 0.133765348754793   |
| AGIWUR8396                                                  |    |         |         |                                    |          |           |                     |                     |
| CB4856 HS                                                   | II | 3367258 | 3368197 | WBGene00021729                     | Y49F6C.7 | Y49F6C.7  |                     |                     |
| -0.00945991673209701                                        |    |         |         | AGIWUR17291                        |          |           |                     |                     |
| CB4856 HS                                                   | II | 3369175 | 3370111 | WBGene00021730                     | Y49F6C.8 | Y49F6C.8  |                     |                     |
| -0.00107012580664545                                        |    |         |         | AGIWUR7299;AGIWUR13872;AGIWUR34677 |          |           |                     |                     |
| CB4856 HS                                                   | II | 3371310 | 3372145 | WBGene00021727                     | bath-23  | Y49F6C.5  |                     | 0.182650461661158   |
| AGIWUR11832                                                 |    |         |         |                                    |          |           |                     |                     |
| CB4856 HS                                                   | II | 3373169 | 3374185 | WBGene00219758                     | linc-11  | Y49F6C.11 |                     | 0.0739290733262203  |
| AGIWUR23245;AGIWUR36507                                     |    |         |         |                                    |          |           |                     |                     |
| CB4856 HS                                                   | II | 3375079 | 3376714 | WBGene00021726                     | bath-10  | Y49F6C.4  |                     | 0.0268957253583686  |
| AGIWUR38786                                                 |    |         |         |                                    |          |           |                     |                     |
| CB4856 HS                                                   | II | 3377111 | 3378726 | WBGene00021725                     | bath-9   | Y49F6C.3  |                     | 0.362416757953092   |

|                                               |    |         |         |                |          |          |                    |                     |                     |  |  |  |
|-----------------------------------------------|----|---------|---------|----------------|----------|----------|--------------------|---------------------|---------------------|--|--|--|
| AGIWUR26956                                   |    |         |         |                |          |          |                    |                     |                     |  |  |  |
| CB4856 HS AGIWUR42499                         | II | 3378575 | 3379551 | WBGene00021724 | Y49F6C.2 |          | Y49F6C.2           |                     | -0.131533036990115  |  |  |  |
| CB4856 HS AGIWUR16875;AGIWUR21492;AGIWUR35386 | II | 3380288 | 3381403 | WBGene00021723 | bath-8   | Y49F6C.1 |                    | -0.0575329744909325 |                     |  |  |  |
| CB4856 HS                                     | II | 3381836 | 3384017 | WBGene00020290 | T06D4.1  | T06D4.1  | 0.163268351398324  |                     | AGIWUR42268         |  |  |  |
| CB4856 HS                                     | II | 3388280 | 3391586 | WBGene00020292 | nep-19   | T06D4.3  | 0.145970935985644  |                     | AGIWUR35625         |  |  |  |
| CB4856 HS                                     | II | 3392036 | 3395533 | WBGene00020293 | nep-20   | T06D4.4  | 0.010655064693843  |                     | AGIWUR13318         |  |  |  |
| CB4856 HS AGIWUR32423;AGIWUR41571;AGIWUR43562 | II | 3395821 | 3399303 | WBGene00017554 | nep-9    | F18A12.5 |                    | 0.132371336532785   |                     |  |  |  |
| CB4856 HS AGIWUR28365                         | II | 3399754 | 3402925 | WBGene00017555 | nep-10   | F18A12.6 |                    | 0.0192110748932057  |                     |  |  |  |
| CB4856 HS AGIWUR7990                          | II | 3403835 | 3406838 | WBGene00017553 | nep-8    | F18A12.4 |                    | -0.353927992583817  |                     |  |  |  |
| CB4856 HS AGIWUR5802;AGIWUR20138              | II | 3406951 | 3409774 | WBGene00017552 | nep-7    | F18A12.3 |                    | 0.087676742316011   |                     |  |  |  |
| CB4856 HS AGIWUR10742                         | II | 3411425 | 3414469 | WBGene00017556 | F18A12.7 |          | F18A12.7           |                     | -0.0203743666379186 |  |  |  |
| CB4856 HS AGIWUR39979                         | II | 3415005 | 3416250 | WBGene00017551 | F18A12.2 |          | F18A12.2           |                     | 0.148139459377216   |  |  |  |
| CB4856 HS AGIWUR29679;AGIWUR39896             | II | 3416838 | 3420671 | WBGene00017550 | nep-6    | F18A12.1 |                    | 0.240697934244269   |                     |  |  |  |
| CB4856 HS AGIWUR10985;AGIWUR21992             | II | 3420653 | 3425533 | WBGene00017557 | nep-11   | F18A12.8 |                    | 0.154243911155008   |                     |  |  |  |
| CB4856 HS AGIWUR10454                         | II | 3429406 | 3431303 | WBGene00015855 | C16C8.18 |          | C16C8.18           |                     | -0.36483940283664   |  |  |  |
| CB4856 HS                                     | II | 3431286 | 3436512 | WBGene00015841 | skpo-2   | C16C8.2  | 0.165508745737342  |                     | AGIWUR13637         |  |  |  |
| CB4856 HS AGIWUR17336                         | II | 3440827 | 3442445 | WBGene00015854 | C16C8.17 |          | C16C8.17           |                     | -0.117155839756043  |  |  |  |
| CB4856 HS                                     | II | 3443488 | 3444380 | WBGene00015842 | C16C8.4  | C16C8.4  | 0.0616616454600756 |                     | AGIWUR11008         |  |  |  |
| CB4856 HS                                     | II | 3444689 | 3445381 | WBGene00015843 | C16C8.5  | C16C8.5  | 0.148371823200296  |                     | AGIWUR10128         |  |  |  |
| CB4856 HS AGIWUR6579                          | II | 3448206 | 3448759 | WBGene00195071 | C16C8.21 |          | C16C8.21           |                     | 0.0230263484536986  |  |  |  |
| CB4856 HS AGIWUR21154                         | II | 3449562 | 3450994 | WBGene00015852 | C16C8.14 |          | C16C8.14           |                     | -0.236904885866402  |  |  |  |
| CB4856 HS AGIWUR31623                         | II | 3452721 | 3453602 | WBGene00015850 | C16C8.12 |          | C16C8.12           |                     | 0.0304702710242886  |  |  |  |
| CB4856 HS AGIWUR34563                         | II | 3453708 | 3454688 | WBGene00015849 | C16C8.11 |          | C16C8.11           |                     | -0.252181807541845  |  |  |  |





|                                                             |    |                 |                |           |           |                      |
|-------------------------------------------------------------|----|-----------------|----------------|-----------|-----------|----------------------|
| CB4856 HS<br>AGIWUR26693                                    | II | 3520703 3524180 | WBGene00000648 | col-72    | W09G10.1  | 0.216823952940319    |
| CB4856 HS<br>AGIWUR29131                                    | II | 3525172 3528516 | WBGene00021116 | ncs-6     | W09G10.3  | -0.124093148928559   |
| CB4856 HS<br>AGIWUR18273                                    | II | 3532527 3546431 | WBGene00000162 | apd-3     | W09G10.4  | -0.200349838642612   |
| CB4856 HS<br>AGIWUR32549                                    | II | 3550651 3553437 | WBGene00021148 | W10G11.19 | W10G11.19 | -0.176968988303678   |
| CB4856 HS<br>AGIWUR15212                                    | II | 3553724 3554618 | WBGene00021149 | dnc-3     | W10G11.20 | -0.113717752382414   |
| CB4856 HS<br>AGIWUR3670;AGIWUR23297;AGIWUR31206;AGIWUR38708 | II | 3557474 3567490 | WBGene00021146 | lgc-45    | W10G11.16 | 0.0673607482424878   |
| CB4856 HS<br>AGIWUR29457                                    | II | 3568117 3569218 | WBGene00021138 | clcc-127  | W10G11.5  | 0.0945595424152508   |
| CB4856 HS<br>AGIWUR17823                                    | II | 3569430 3571027 | WBGene00021139 | clcc-128  | W10G11.6  | 0.474699786015562    |
| CB4856 HS<br>AGIWUR20030                                    | II | 3571491 3572883 | WBGene00021145 | clcc-129  | W10G11.15 | -0.297310766140529   |
| CB4856 HS<br>AGIWUR4511;AGIWUR10186;AGIWUR26533;AGIWUR28817 | II | 3573556 3574652 | WBGene00021144 | clcc-130  | W10G11.14 | -0.0880023535605816  |
| CB4856 HS<br>AGIWUR21113                                    | II | 3574699 3576201 | WBGene00021140 | clcc-131  | W10G11.7  | 0.0401168628249771   |
| CB4856 HS<br>AGIWUR29293                                    | II | 3577045 3578110 | WBGene00021143 | clcc-132  | W10G11.13 | 0.0744733156525417   |
| CB4856 HS<br>AGIWUR40246                                    | II | 3578421 3579031 | WBGene00021142 | clcc-133  | W10G11.12 | -0.101655231762182   |
| CB4856 HS<br>AGIWUR34394                                    | II | 3580083 3581433 | WBGene00021141 | clcc-134  | W10G11.11 | -0.131628834636433   |
| CB4856 HS<br>AGIWUR25922                                    | II | 3582052 3583505 | WBGene00005281 | srh-59    | W10G11.10 | -0.00850058042034796 |
| CB4856 HS<br>AGIWUR8096                                     | II | 3583987 3586063 | WBGene00005282 | srh-60    | W10G11.9  | -0.101064647737438   |
| CB4856 HS<br>AGIWUR4569;AGIWUR22972;AGIWUR38323             | II | 3603387 3607384 | WBGene00021711 | wago-11   | Y49F6A.1  | -0.0845113859361231  |
| CB4856 HS<br>AGIWUR38967                                    | II | 3607937 3609862 | WBGene00021713 | Y49F6A.5  | Y49F6A.5  | -0.168982366847032   |
| CB4856 HS<br>AGIWUR15978                                    | II | 3610409 3615352 | WBGene00018235 | F40E12.2  | F40E12.2  | -0.171315500775195   |
| CB4856 HS                                                   | II | 3617812 3618621 | WBGene00018234 | F40E12.1  | F40E12.1  | 0.0239831930825325   |

|                                                                        |    |    |         |         |                |           |           |                              |             |
|------------------------------------------------------------------------|----|----|---------|---------|----------------|-----------|-----------|------------------------------|-------------|
| AGIWUR20499                                                            |    |    |         |         |                |           |           |                              |             |
| CB4856                                                                 | HS | II | 3624198 | 3626950 | WBGene00019796 | M151.4    | M151.4    | -0.243005174097307           | AGIWUR7391  |
| CB4856                                                                 | HS | II | 3629295 | 3630860 | WBGene00219238 | M151.9    | M151.9    | 0.460767360623799            | AGIWUR19947 |
| CB4856                                                                 | HS | II | 3631444 | 3633875 | WBGene00019794 | M151.2    | M151.2    | -0.386261802348998           | AGIWUR40444 |
| CB4856                                                                 | HS | II | 3637811 | 3639338 | WBGene00019797 | fbxb-31   | M151.5    | 1.19215133315899             | AGIWUR21468 |
| CB4856                                                                 | HS | II | 3641500 | 3644082 | WBGene00019793 | M151.1    | M151.1    | -0.217923534467408           | AGIWUR37972 |
| CB4856                                                                 | HS | II | 3645427 | 3646982 | WBGene00019798 | fbxb-32   | M151.6    | -0.0453095939078931          | AGIWUR21526 |
| CB4856                                                                 | HS | II | 3647411 | 3648599 | WBGene00044314 | fbxb-33   | M151.8    | 0.0890558959329795           | AGIWUR37742 |
| CB4856                                                                 | HS | II | 3651256 | 3654276 | WBGene00017590 | F19B10.11 |           | F19B10.11 -0.101134811839113 |             |
| AGIWUR19558                                                            |    |    |         |         |                |           |           |                              |             |
| CB4856                                                                 | HS | II | 3655678 | 3657732 | WBGene00017587 | F19B10.5  |           | F19B10.5 -0.25554944024814   |             |
| AGIWUR136                                                              |    |    |         |         |                |           |           |                              |             |
| CB4856                                                                 | HS | II | 3662204 | 3662618 | WBGene00194713 | F19B10.13 |           | F19B10.13 0.740725329862481  |             |
| AGIWUR21305                                                            |    |    |         |         |                |           |           |                              |             |
| CB4856                                                                 | HS | II | 3663509 | 3663896 | WBGene00017588 | F19B10.6  |           | F19B10.6 0.0728140667839128  |             |
| AGIWUR32405                                                            |    |    |         |         |                |           |           |                              |             |
| CB4856                                                                 | HS | II | 3664404 | 3665120 | WBGene00017585 | F19B10.3  |           | F19B10.3 -0.066929579801581  |             |
| AGIWUR9260                                                             |    |    |         |         |                |           |           |                              |             |
| CB4856                                                                 | HS | II | 3667179 | 3668664 | WBGene00005988 | srx-97    | F19B10.7  | -0.21711366679623            |             |
| AGIWUR11010                                                            |    |    |         |         |                |           |           |                              |             |
| CB4856                                                                 | HS | II | 3669321 | 3671056 | WBGene00005989 | srx-98    | F19B10.8  | 0.0446959000714298           |             |
| AGIWUR27383                                                            |    |    |         |         |                |           |           |                              |             |
| CB4856                                                                 | HS | II | 3671908 | 3673593 | WBGene00004750 | sea-1     | F19B10.9  | -0.0308068080165462          |             |
| AGIWUR13545                                                            |    |    |         |         |                |           |           |                              |             |
| CB4856                                                                 | HS | II | 3675624 | 3676733 | WBGene00017584 | F19B10.2  |           | F19B10.2 -0.0938368901230597 |             |
| AGIWUR1693;AGIWUR12007;AGIWUR13921;AGIWUR30059;AGIWUR30085;AGIWUR31919 |    |    |         |         |                |           |           |                              |             |
| CB4856                                                                 | HS | II | 3677535 | 3681415 | WBGene00017589 | F19B10.10 |           | F19B10.10 -0.273764743665099 |             |
| AGIWUR2171                                                             |    |    |         |         |                |           |           |                              |             |
| CB4856                                                                 | HS | II | 3683177 | 3684996 | WBGene00017583 | F19B10.1  |           | F19B10.1 -0.0762966194733918 |             |
| AGIWUR4480;AGIWUR5713;AGIWUR20096                                      |    |    |         |         |                |           |           |                              |             |
| CB4856                                                                 | HS | II | 3685952 | 3687133 | WBGene00005990 | srx-99    | F19B10.12 | 0.000754917296895918         |             |
| AGIWUR110;AGIWUR17748                                                  |    |    |         |         |                |           |           |                              |             |
| CB4856                                                                 | HS | II | 3687791 | 3688691 | WBGene00044379 | F40H7.12  |           | F40H7.12 0.14310184908091    |             |
| AGIWUR26635                                                            |    |    |         |         |                |           |           |                              |             |
| CB4856                                                                 | HS | II | 3689467 | 3690746 | WBGene00005992 | srx-101   | F40H7.4   | 0.0889725799959691           |             |
| AGIWUR24580;AGIWUR30666                                                |    |    |         |         |                |           |           |                              |             |
| CB4856                                                                 | HS | II | 3691784 | 3693231 | WBGene00005991 | srx-100   | F40H7.3   | 0.190891618810429            | AGIWUR33715 |
| CB4856                                                                 | HS | II | 3693401 | 3694764 | WBGene00005993 | srx-102   | F40H7.5   | -0.0931684772508117          | AGIWUR22545 |
| CB4856                                                                 | HS | II | 3695383 | 3698162 | WBGene00005994 | srx-103   | F40H7.11  | -0.0033421613011777          |             |

|                                                                     |    |    |         |         |                |                   |                                 |
|---------------------------------------------------------------------|----|----|---------|---------|----------------|-------------------|---------------------------------|
| AGIWUR8577                                                          |    |    |         |         |                |                   |                                 |
| CB4856                                                              | HS | II | 3698599 | 3699691 | WBGene00005995 | srx-104 F40H7.7   | 0.112192492082141               |
| AGIWUR19918;AGIWUR37276                                             |    |    |         |         |                |                   |                                 |
| CB4856                                                              | HS | II | 3699834 | 3701405 | WBGene00005996 | srx-105 F40H7.8   | -0.0620790820387285 AGIWUR30107 |
| CB4856                                                              | HS | II | 3701708 | 3703250 | WBGene00005997 | srx-106 F40H7.9   | -0.0746272854534613 AGIWUR13997 |
| CB4856                                                              | HS | II | 3703721 | 3704945 | WBGene00005998 | srx-107 F40H7.10  | 0.0870467800318133              |
| AGIWUR31004                                                         |    |    |         |         |                |                   |                                 |
| CB4856                                                              | HS | II | 3705620 | 3707065 | WBGene00005999 | srx-108 F40H7.2   | 0.227501154164801 AGIWUR15821   |
| CB4856                                                              | HS | II | 3707610 | 3709221 | WBGene00006000 | srx-109 F40H7.1   | 0.00937028311077137             |
| AGIWUR710;AGIWUR29482                                               |    |    |         |         |                |                   |                                 |
| CB4856                                                              | HS | II | 3709555 | 3710952 | WBGene00006001 | srx-110 C46E10.6  | -0.248522718904408              |
| AGIWUR33826                                                         |    |    |         |         |                |                   |                                 |
| CB4856                                                              | HS | II | 3711293 | 3713048 | WBGene00016711 | fbxc-53 C46E10.5  | -0.201937492074803              |
| AGIWUR35329                                                         |    |    |         |         |                |                   |                                 |
| CB4856                                                              | HS | II | 3713188 | 3714695 | WBGene00005319 | srh-100 C46E10.10 | -0.0795980513608026             |
| AGIWUR15850                                                         |    |    |         |         |                |                   |                                 |
| CB4856                                                              | HS | II | 3715000 | 3716555 | WBGene00005318 | srh-99 C46E10.7   | -0.10547041011246               |
| AGIWUR7220                                                          |    |    |         |         |                |                   |                                 |
| CB4856                                                              | HS | II | 3717138 | 3719768 | WBGene00016710 | fbxc-52 C46E10.4  | 0.0797350183323515              |
| AGIWUR29686;AGIWUR42598                                             |    |    |         |         |                |                   |                                 |
| CB4856                                                              | HS | II | 3721316 | 3723084 | WBGene00016709 | C46E10.3          | C46E10.3 -0.314695893209265     |
| AGIWUR4335                                                          |    |    |         |         |                |                   |                                 |
| CB4856                                                              | HS | II | 3723378 | 3723896 | WBGene00016708 | C46E10.2          | C46E10.2 -0.101504085022484     |
| AGIWUR1714                                                          |    |    |         |         |                |                   |                                 |
| CB4856                                                              | HS | II | 3724225 | 3725909 | WBGene00016707 | C46E10.1          | C46E10.1 0.0513313148274577     |
| AGIWUR15609                                                         |    |    |         |         |                |                   |                                 |
| CB4856                                                              | HS | II | 3725906 | 3727479 | WBGene00016712 | C46E10.8          | C46E10.8 -0.132221478537223     |
| AGIWUR300;AGIWUR7910;AGIWUR9883;AGIWUR13329;AGIWUR14299;AGIWUR34806 |    |    |         |         |                |                   |                                 |
| CB4856                                                              | HS | II | 3727690 | 3729707 | WBGene00016713 | C46E10.9          | C46E10.9 -0.0204878769144674    |
| AGIWUR9856                                                          |    |    |         |         |                |                   |                                 |
| CB4856                                                              | HS | II | 3730152 | 3731548 | WBGene00017406 | sdz-12 F12E12.5   | -0.128839619958578              |
| AGIWUR42036                                                         |    |    |         |         |                |                   |                                 |
| CB4856                                                              | HS | II | 3731973 | 3733203 | WBGene00017405 | bath-31 F12E12.4  | -0.0577141151963989             |
| AGIWUR7461;AGIWUR23673;AGIWUR27896                                  |    |    |         |         |                |                   |                                 |
| CB4856                                                              | HS | II | 3735929 | 3736943 | WBGene00017407 | F12E12.6          | F12E12.6 0.0006259437802143     |
| AGIWUR2208                                                          |    |    |         |         |                |                   |                                 |
| CB4856                                                              | HS | II | 3737334 | 3738282 | WBGene00017404 | F12E12.3          | F12E12.3 0.127256408792862      |
| AGIWUR1974                                                          |    |    |         |         |                |                   |                                 |
| CB4856                                                              | HS | II | 3739947 | 3740837 | WBGene00017403 | F12E12.2          | F12E12.2 0.302567150007294      |



|                                                                         |    |    |         |         |                |          |           |                     |                     |
|-------------------------------------------------------------------------|----|----|---------|---------|----------------|----------|-----------|---------------------|---------------------|
| CB4856                                                                  | HS | II | 3802959 | 3803324 | WBGene00002115 | ins-32   | Y8A9A.6   | 0.0198340135618187  | AGIWUR20661         |
| CB4856                                                                  | HS | II | 3805493 | 3807053 | WBGene00018805 | F54D10.4 |           | F54D10.4            | -0.101924400575146  |
| AGIWUR4615;AGIWUR13344;AGIWUR27279;AGIWUR40304                          |    |    |         |         |                |          |           |                     |                     |
| CB4856                                                                  | HS | II | 3807096 | 3808223 | WBGene00018806 | F54D10.5 |           | F54D10.5            | 0.0304803564750991  |
| AGIWUR8260                                                              |    |    |         |         |                |          |           |                     |                     |
| CB4856                                                                  | HS | II | 3812284 | 3813426 | WBGene00018804 | F54D10.3 |           | F54D10.3            | -0.246952153238002  |
| AGIWUR4759                                                              |    |    |         |         |                |          |           |                     |                     |
| CB4856                                                                  | HS | II | 3814376 | 3815458 | WBGene00018807 | fbxa-146 |           | F54D10.6            | 0.0671597044833785  |
| AGIWUR5537;AGIWUR8359;AGIWUR25939                                       |    |    |         |         |                |          |           |                     |                     |
| CB4856                                                                  | HS | II | 3816686 | 3818238 | WBGene00018803 | fbxa-24  | F54D10.2  |                     | -0.103229692539603  |
| AGIWUR14133                                                             |    |    |         |         |                |          |           |                     |                     |
| CB4856                                                                  | HS | II | 3820152 | 3821312 | WBGene00018808 | F54D10.7 |           | F54D10.7            | 0.146748315095836   |
| AGIWUR22587                                                             |    |    |         |         |                |          |           |                     |                     |
| CB4856                                                                  | HS | II | 3824148 | 3825614 | WBGene00004821 | skr-15   | F54D10.1  |                     | -0.180622692353043  |
| AGIWUR10492;AGIWUR17038;AGIWUR17734;AGIWUR27405;AGIWUR28048;AGIWUR29669 |    |    |         |         |                |          |           |                     |                     |
| CB4856                                                                  | HS | II | 3825661 | 3827879 | WBGene00018809 | F54D10.8 |           | F54D10.8            | -0.0699580214946938 |
| AGIWUR13369                                                             |    |    |         |         |                |          |           |                     |                     |
| CB4856                                                                  | HS | II | 3829584 | 3831914 | WBGene00018810 | F54D10.9 |           | F54D10.9            | 0.180819379988903   |
| AGIWUR17912                                                             |    |    |         |         |                |          |           |                     |                     |
| CB4856                                                                  | HS | II | 3833250 | 3836015 | WBGene00015873 | oac-4    | C17A2.5   | -0.379203119490636  | AGIWUR26649         |
| CB4856                                                                  | HS | II | 3837338 | 3838948 | WBGene00015874 | C17A2.6  | C17A2.6   | -0.106798146998116  | AGIWUR38752         |
| CB4856                                                                  | HS | II | 3839862 | 3841272 | WBGene00015872 | C17A2.4  | C17A2.4   | 0.0112356693492233  | AGIWUR34717         |
| CB4856                                                                  | HS | II | 3841914 | 3843405 | WBGene00015875 | C17A2.7  | C17A2.7   | -0.0179918708026463 | AGIWUR18139         |
| CB4856                                                                  | HS | II | 3843609 | 3845509 | WBGene00015871 | C17A2.3  | C17A2.3   | 0.0927761611345002  | AGIWUR3940          |
| CB4856                                                                  | HS | II | 3846328 | 3848143 | WBGene00015870 | C17A2.2  | C17A2.2   | -0.0390236425450947 | AGIWUR43109         |
| CB4856                                                                  | HS | II | 3849053 | 3850725 | WBGene00003662 | nhr-72   | C17A2.8   | -0.257831921849727  | AGIWUR32794         |
| CB4856                                                                  | HS | II | 3852954 | 3854615 | WBGene00015869 | nhr-257  | C17A2.1   | -0.18604433089388   | AGIWUR8067          |
| CB4856                                                                  | HS | II | 3855921 | 3856588 | WBGene00016775 | C49D10.7 |           | C49D10.7            | -0.062669032035215  |
| AGIWUR8239                                                              |    |    |         |         |                |          |           |                     |                     |
| CB4856                                                                  | HS | II | 3858142 | 3860926 | WBGene00016776 | oac-11   | C49D10.8  |                     | 0.0573761185636021  |
| AGIWUR15000                                                             |    |    |         |         |                |          |           |                     |                     |
| CB4856                                                                  | HS | II | 3863084 | 3864752 | WBGene00016777 | nhr-261  | C49D10.9  |                     | 0.341049870120877   |
| AGIWUR1635                                                              |    |    |         |         |                |          |           |                     |                     |
| CB4856                                                                  | HS | II | 3866798 | 3868243 | WBGene00003665 | nhr-75   | C49D10.6  |                     | 0.07444446920146808 |
| AGIWUR6203                                                              |    |    |         |         |                |          |           |                     |                     |
| CB4856                                                                  | HS | II | 3869901 | 3873010 | WBGene00016773 | oac-10   | C49D10.4  |                     | 0.0946532813806935  |
| AGIWUR323;AGIWUR3711;AGIWUR5110;AGIWUR38159                             |    |    |         |         |                |          |           |                     |                     |
| CB4856                                                                  | HS | II | 3873541 | 3877227 | WBGene00016778 | nep-3    | C49D10.10 |                     | 0.10650327658888    |
| AGIWUR25432;AGIWUR28939;AGIWUR31245                                     |    |    |         |         |                |          |           |                     |                     |

|                                                                                                                                                          |    |    |         |         |                |           |           |                     |             |
|----------------------------------------------------------------------------------------------------------------------------------------------------------|----|----|---------|---------|----------------|-----------|-----------|---------------------|-------------|
| CB4856                                                                                                                                                   | HS | II | 3877249 | 3877974 | WBGene00016779 | sdz-7     | C49D10.11 | -0.0317853984497116 |             |
| AGIWUR11675                                                                                                                                              |    |    |         |         |                |           |           |                     |             |
| CB4856                                                                                                                                                   | HS | II | 3878630 | 3879891 | WBGene00005456 | srh-250   | C49D10.3  | 0.136380666085254   |             |
| AGIWUR11362                                                                                                                                              |    |    |         |         |                |           |           |                     |             |
| CB4856                                                                                                                                                   | HS | II | 3880245 | 3882182 | WBGene00016772 | nhr-166   | C49D10.2  | -0.0871186107744801 |             |
| AGIWUR42489                                                                                                                                              |    |    |         |         |                |           |           |                     |             |
| CB4856                                                                                                                                                   | HS | II | 3885032 | 3887995 | WBGene00005311 | srh-90    | F53C3.10  | 0.0987304031725902  |             |
| AGIWUR14811;AGIWUR30096;AGIWUR37788                                                                                                                      |    |    |         |         |                |           |           |                     |             |
| CB4856                                                                                                                                                   | HS | II | 3891424 | 3893574 | WBGene00018752 | F53C3.8   | F53C3.8   | 0.322730164697418   | AGIWUR22070 |
| CB4856                                                                                                                                                   | HS | II | 3894841 | 3896239 | WBGene00018751 | F53C3.7   | F53C3.7   | 0.511421862936459   | AGIWUR24285 |
| CB4856                                                                                                                                                   | HS | II | 3898142 | 3899663 | WBGene00018750 | F53C3.6   | F53C3.6   | -0.0819409742892376 |             |
| AGIWUR1696;AGIWUR34501                                                                                                                                   |    |    |         |         |                |           |           |                     |             |
| CB4856                                                                                                                                                   | HS | II | 3899851 | 3900783 | WBGene00018749 | F53C3.5   | F53C3.5   | -0.272403152607304  | AGIWUR22853 |
| CB4856                                                                                                                                                   | HS | II | 3900788 | 3902773 | WBGene00018748 | F53C3.4   | F53C3.4   | -0.0570650589187549 |             |
| AGIWUR7950;AGIWUR9230;AGIWUR14856;AGIWUR22223;AGIWUR35451;AGIWUR35695                                                                                    |    |    |         |         |                |           |           |                     |             |
| CB4856                                                                                                                                                   | HS | II | 3902860 | 3904794 | WBGene00018747 | F53C3.3   | F53C3.3   | -0.200360007207895  | AGIWUR37908 |
| CB4856                                                                                                                                                   | HS | II | 3904816 | 3906620 | WBGene00018754 | F53C3.11  | F53C3.11  | -0.159750565504984  |             |
| AGIWUR18190                                                                                                                                              |    |    |         |         |                |           |           |                     |             |
| CB4856                                                                                                                                                   | HS | II | 3907140 | 3908478 | WBGene00018746 | fbxb-103  | F53C3.2   | -0.0660098680737153 |             |
| AGIWUR2972                                                                                                                                               |    |    |         |         |                |           |           |                     |             |
| CB4856                                                                                                                                                   | HS | II | 3908491 | 3910837 | WBGene00018755 | bcmo-2    | F53C3.12  | 0.218638679322257   |             |
| AGIWUR28605                                                                                                                                              |    |    |         |         |                |           |           |                     |             |
| CB4856                                                                                                                                                   | HS | II | 3912003 | 3913385 | WBGene00018745 | F53C3.1   | F53C3.1   | -0.161740012397971  | AGIWUR32457 |
| CB4856                                                                                                                                                   | HS | II | 3919794 | 3927982 | WBGene00018756 | F53C3.13  | F53C3.13  | -0.117342477622532  |             |
| AGIWUR8437;AGIWUR8647;AGIWUR8821;AGIWUR10822;AGIWUR13228;AGIWUR16084;AGIWUR17645;AGIWUR19318;AGIWUR24545;AGIWUR27913;AGIWUR30509;AGIWUR33161;AGIWUR39802 |    |    |         |         |                |           |           |                     |             |
| CB4856                                                                                                                                                   | HS | II | 3932178 | 3933740 | WBGene00021192 | Y14H12B.2 | Y14H12B.2 | 0.118541546608874   |             |
| AGIWUR14725                                                                                                                                              |    |    |         |         |                |           |           |                     |             |
| CB4856                                                                                                                                                   | HS | II | 3934451 | 3936008 | WBGene00021191 | Y14H12B.1 | Y14H12B.1 | 0.13242595142926    |             |
| AGIWUR6516;AGIWUR9325                                                                                                                                    |    |    |         |         |                |           |           |                     |             |
| CB4856                                                                                                                                                   | HS | II | 3950145 | 3972137 | WBGene00004751 | sea-2     | K10G6.3   | -0.122341848533666  |             |
| AGIWUR6369;AGIWUR29408                                                                                                                                   |    |    |         |         |                |           |           |                     |             |
| CB4856                                                                                                                                                   | HS | II | 3972820 | 3974968 | WBGene00019641 | K10G6.4   | K10G6.4   | -0.151802715994954  | AGIWUR42914 |
| CB4856                                                                                                                                                   | HS | II | 3976246 | 3977969 | WBGene00019640 | dos-2     | K10G6.2   | 0.058589116866246   | AGIWUR16014 |
| CB4856                                                                                                                                                   | HS | II | 3982549 | 3986944 | WBGene00003017 | lin-31    | K10G6.1   | 0.153895501755283   |             |
| AGIWUR37327;AGIWUR44727                                                                                                                                  |    |    |         |         |                |           |           |                     |             |
| CB4856                                                                                                                                                   | HS | II | 3987281 | 3988185 | WBGene00044381 | K10G6.5   | K10G6.5   | 0.231897277339955   |             |
| AGIWUR15812;AGIWUR23686;AGIWUR40325                                                                                                                      |    |    |         |         |                |           |           |                     |             |
| CB4856                                                                                                                                                   | HS | II | 3988700 | 3989677 | WBGene00044382 | Y14H12A.2 | Y14H12A.2 | 0.0395887329878759  |             |

AGIWUR5795;AGIWUR13726;AGIWUR24093;AGIWUR28723;AGIWUR29110;AGIWUR34219;AGIWUR36017;AGIWUR38335;AGIWUR43600;  
AGIWUR45160  
CB4856 HS II 3993210 3993887 WBGene00021190 Y14H12A.1 Y14H12A.1 0.127445657897439  
AGIWUR37602  
CB4856 HS II 4004885 4016072 WBGene00019487 ephx-1 K07D4.7 0.00155793914445645 AGIWUR1973  
CB4856 HS II 4016827 4018701 WBGene00019486 K07D4.6 K07D4.6 -0.172940072327558 AGIWUR37055  
CB4856 HS II 4020482 4025562 WBGene00019485 K07D4.5 K07D4.5 -0.000325523592727528  
AGIWUR4273;AGIWUR23840;AGIWUR27598;AGIWUR27867;AGIWUR39078  
CB4856 HS II 4028577 4029985 WBGene00019488 K07D4.9 K07D4.9 0.200492087005115 AGIWUR12587  
CB4856 HS II 4031214 4032387 WBGene00019484 K07D4.4 K07D4.4 -0.175713719625594 AGIWUR27836  
CB4856 HS II 4038868 4043070 WBGene00004135 pqn-48 K07D4.8 0.096608738493229 AGIWUR44569  
CB4856 HS II 4043059 4044330 WBGene00004467 rp11 K07D4.3 -0.179013033082623  
AGIWUR2574;AGIWUR13756;AGIWUR14661;AGIWUR25654;AGIWUR35845;AGIWUR37390  
CB4856 HS II 4044771 4047247 WBGene00019483 K07D4.2 K07D4.2 0.380872036670052 AGIWUR20974  
CB4856 HS II 4048525 4049129 WBGene00023318 K07D4.1 K07D4.1 -0.26895366154938 AGIWUR22099  
CB4856 HS II 4055939 4057707 WBGene00021055 W06A11.4 W06A11.4 0.0563795403110605  
AGIWUR4127;AGIWUR22591;AGIWUR24503;AGIWUR43789  
CB4856 HS II 4063008 4064057 WBGene00021054 fbx-118 W06A11.3 -0.0827238153736971  
AGIWUR5599;AGIWUR16342;AGIWUR21363;AGIWUR28791  
CB4856 HS II 4067558 4069771 WBGene00021052 W06A11.1 W06A11.1 -0.0470610641997586  
AGIWUR2631;AGIWUR13752;AGIWUR14821  
CB4856 HS II 4070009 4072920 WBGene00020009 R11F4.3 R11F4.3 -0.0686789952989697  
AGIWUR29471;AGIWUR29931  
CB4856 HS II 4083065 4086226 WBGene00020008 R11F4.2 R11F4.2 -0.0734215949354802  
AGIWUR4756;AGIWUR10772;AGIWUR13044;AGIWUR25629;AGIWUR33062;AGIWUR35536  
CB4856 HS II 4091837 4094349 WBGene00020007 R11F4.1 R11F4.1 0.100094699964902  
AGIWUR5157;AGIWUR18910;AGIWUR23303;AGIWUR32277  
CB4856 HS II 4100788 4127849 WBGene00006476 rhgf-2 T08H4.1 0.0421789912233406  
AGIWUR5268;AGIWUR12668;AGIWUR13047;AGIWUR20456;AGIWUR23101;AGIWUR31904;AGIWUR40324  
CB4856 HS II 4127848 4134867 WBGene00020368 ast-1 T08H4.3 0.212737306738653  
AGIWUR8003;AGIWUR11487  
CB4856 HS II 4140901 4141105 WBGene00021822 Y54C5A.1 Y54C5A.1 0.00811354943640552  
AGIWUR32585  
CB4856 HS II 4142816 4149678 WBGene00018969 F56D3.1 F56D3.1 0.153216220898143 AGIWUR37694  
CB4856 HS II 4155773 4167368 WBGene00019855 R03H10.2 R03H10.2 0.0105820263391632  
AGIWUR7979  
CB4856 HS II 4167555 4168500 WBGene00019856 R03H10.4 R03H10.4 -0.133085865480038  
AGIWUR36427  
CB4856 HS II 4169723 4170608 WBGene00019857 R03H10.5 R03H10.5 0.105387955959578





|                                                            |    |         |         |                |          |          |                       |             |
|------------------------------------------------------------|----|---------|---------|----------------|----------|----------|-----------------------|-------------|
| CB4856 HS                                                  | II | 4320836 | 4321654 | WBGene00021795 | Y52E8A.2 | Y52E8A.2 | 0.198895098419616     |             |
| AGIWUR13205                                                |    |         |         |                |          |          |                       |             |
| CB4856 HS                                                  | II | 4321663 | 4322616 | WBGene00021794 | Y52E8A.1 | Y52E8A.1 | -0.0052935896698223   |             |
| AGIWUR2488                                                 |    |         |         |                |          |          |                       |             |
| CB4856 HS                                                  | II | 4323256 | 4324187 | WBGene00019221 | H20J04.6 | H20J04.6 | -0.0847579433405805   |             |
| AGIWUR29158                                                |    |         |         |                |          |          |                       |             |
| CB4856 HS                                                  | II | 4324361 | 4326089 | WBGene00003390 | mog-2    | H20J04.8 | 0.106269436504715     |             |
| AGIWUR24324;AGIWUR26270                                    |    |         |         |                |          |          |                       |             |
| CB4856 HS                                                  | II | 4326720 | 4328284 | WBGene00019220 | pfd-2    | H20J04.5 | 0.11214350331641      |             |
| AGIWUR28829                                                |    |         |         |                |          |          |                       |             |
| CB4856 HS                                                  | II | 4329023 | 4334484 | WBGene00019219 | H20J04.4 | H20J04.4 | -0.200367259659361    |             |
| AGIWUR12223;AGIWUR19295;AGIWUR19960                        |    |         |         |                |          |          |                       |             |
| CB4856 HS                                                  | II | 4335707 | 4338424 | WBGene00019218 | madf-3   | H20J04.3 | -0.0298486705082981   |             |
| AGIWUR41477                                                |    |         |         |                |          |          |                       |             |
| CB4856 HS                                                  | II | 4340151 | 4350984 | WBGene00019217 | athp-2   | H20J04.2 | -0.0233694949707175   |             |
| AGIWUR13157                                                |    |         |         |                |          |          |                       |             |
| CB4856 HS                                                  | II | 4351188 | 4353159 | WBGene00044310 | H20J04.9 | H20J04.9 | 0.016854244223131     |             |
| AGIWUR27110;AGIWUR39688                                    |    |         |         |                |          |          |                       |             |
| CB4856 HS                                                  | II | 4353221 | 4355317 | WBGene00019222 | H20J04.7 | H20J04.7 | 0.00200311426321598   |             |
| AGIWUR32453                                                |    |         |         |                |          |          |                       |             |
| CB4856 HS                                                  | II | 4355633 | 4358844 | WBGene00019216 | H20J04.1 | H20J04.1 | 0.209857106062448     |             |
| AGIWUR42306                                                |    |         |         |                |          |          |                       |             |
| CB4856 HS                                                  | II | 4359082 | 4368332 | WBGene00002252 | lat-2    | B0286.2  | -0.36928798542605     | AGIWUR17581 |
| CB4856 HS                                                  | II | 4368490 | 4369692 | WBGene00023425 | try-9    | B0286.6  | -0.233400952670399    | AGIWUR47    |
| CB4856 HS                                                  | II | 4369625 | 4372597 | WBGene00015116 | pacs-1   | B0286.3  | 0.229532468459608     | AGIWUR37001 |
| CB4856 HS                                                  | II | 4372740 | 4376742 | WBGene00003825 | ntl-2    | B0286.4  | -0.000350699870054427 |             |
| AGIWUR9456;AGIWUR25085;AGIWUR30605;AGIWUR31866;AGIWUR32151 |    |         |         |                |          |          |                       |             |
| CB4856 HS                                                  | II | 4375504 | 4386343 | WBGene00015115 | B0286.1  | B0286.1  | -0.185624810437609    | AGIWUR29486 |
| CB4856 HS                                                  | II | 4392800 | 4404850 | WBGene00022743 | mlt-7    | ZK430.8  | -0.0553627179735603   | AGIWUR39940 |
| CB4856 HS                                                  | II | 4405864 | 4416553 | WBGene00022741 | ZK430.5  | ZK430.5  | -0.338094075810127    | AGIWUR214   |
| CB4856 HS                                                  | II | 4417683 | 4419131 | WBGene00007036 | sod-5    | ZK430.3  | -0.0262110996351108   | AGIWUR15490 |
| CB4856 HS                                                  | II | 4420255 | 4422319 | WBGene00044063 | bpnt-1   | ZK430.2  | 0.114962599438726     | AGIWUR8553  |
| CB4856 HS                                                  | II | 4422463 | 4424902 | WBGene00022742 | ZK430.7  | ZK430.7  | -0.136092612457468    | AGIWUR22253 |
| CB4856 HS                                                  | II | 4425167 | 4432613 | WBGene00022739 | toe-1    | ZK430.1  | 0.215229637611266     | AGIWUR7011  |
| CB4856 HS                                                  | II | 4433332 | 4435169 | WBGene00003699 | nhr-109  | T12C9.5  | -0.0463079110818008   |             |
| AGIWUR376;AGIWUR15168;AGIWUR17704;AGIWUR19399;AGIWUR35164  |    |         |         |                |          |          |                       |             |
| CB4856 HS                                                  | II | 4435300 | 4436995 | WBGene00020460 | nhr-273  | T12C9.1  | 0.0759446633461982    | AGIWUR25363 |
| CB4856 HS                                                  | II | 4438867 | 4440867 | WBGene00003615 | nhr-16   | T12C9.6  | 0.178576398319139     | AGIWUR908   |
| CB4856 HS                                                  | II | 4441265 | 4453151 | WBGene00006657 | twk-2    | T12C9.3  | -0.110665825801302    |             |

AGIWUR27308;AGIWUR39529  
CB4856 HS II 4458263 4460404 WBGene00020461 T12C9.7 T12C9.7 -0.118575910867822  
AGIWUR2066;AGIWUR5575;AGIWUR24733  
CB4856 HS II 4461130 4467895 WBGene00021058 vps-18 W06B4.3 0.302131741056176 AGIWUR2565  
CB4856 HS II 4468169 4471038 WBGene00021057 W06B4.2 W06B4.2 0.243105407270974 AGIWUR716  
CB4856 HS II 4471401 4473553 WBGene00021056 W06B4.1 W06B4.1 0.0327743933221214 AGIWUR16691  
CB4856 HS II 4478613 4480948 WBGene00020248 T05C1.1 T05C1.1 0.0520286380922315 AGIWUR5570  
CB4856 HS II 4481025 4483722 WBGene00020249 T05C1.2 T05C1.2 0.0706986820101507 AGIWUR6661  
CB4856 HS II 4487694 4489388 WBGene00020250 T05C1.3 T05C1.3 0.088843541831972 AGIWUR7186  
CB4856 HS II 4490408 4490865 WBGene00020252 T05C1.5 T05C1.5 -0.0695653069043267 AGIWUR15261  
CB4856 HS II 4491152 4505147 WBGene00020251 camt-1 T05C1.4 0.103437074159749  
AGIWUR5533;AGIWUR37397;AGIWUR42799  
CB4856 HS II 4512211 4516115 WBGene00015135 cyp-23A1 B0304.3 0.108856843496492  
AGIWUR14628  
CB4856 HS II 4518560 4522523 WBGene00001948 h1h-1 B0304.1 0.0711126009011727  
AGIWUR17528;AGIWUR23856  
CB4856 HS II 4522465 4523222 WBGene00015136 B0304.4 B0304.4 -0.0605199456639856  
AGIWUR1375;AGIWUR6577;AGIWUR19962;AGIWUR37814  
CB4856 HS II 4523622 4524589 WBGene00015134 B0304.2 B0304.2 -0.0547092299252512 AGIWUR28156  
CB4856 HS II 4524634 4527900 WBGene00005061 sra-35 B0304.8 -0.0649565304749498  
AGIWUR7786;AGIWUR36780;AGIWUR38769  
CB4856 HS II 4529636 4531964 WBGene00005058 sra-32 B0304.5 0.0904334975795882 AGIWUR14583  
CB4856 HS II 4534742 4537241 WBGene00005059 sra-33 B0304.6 0.0509966506318058 AGIWUR42367  
CB4856 HS II 4538988 4540731 WBGene00005062 sra-36 B0304.9 0.299990217281471 AGIWUR37011  
CB4856 HS II 4541865 4543668 WBGene00005060 sra-34 B0304.7 -0.0186461858457285 AGIWUR11853  
CB4856 HS II 4550894 4552177 WBGene00019489 K07E1.1 K07E1.1 -0.0380329912067765  
AGIWUR7894;AGIWUR11475;AGIWUR11642;AGIWUR17958;AGIWUR35065;AGIWUR35352;AGIWUR38739  
CB4856 HS II 4557787 4559573 WBGene00019746 M03A1.3 M03A1.3 0.122525028546654  
AGIWUR16157;AGIWUR20492  
CB4856 HS II 4560397 4562618 WBGene00077490 M03A1.8 M03A1.8 -0.296781420440226 AGIWUR33318  
CB4856 HS II 4562853 4563546 WBGene00000928 dao-2 M03A1.7 -0.161064149980104 AGIWUR19408  
CB4856 HS II 4572000 4590970 WBGene00006868 vab-1 M03A1.1 -0.0319995991222544  
AGIWUR14824;AGIWUR44039  
CB4856 HS II 4590952 4601354 WBGene00019747 ip1a-1 M03A1.6 0.053615060029351  
AGIWUR4878;AGIWUR35821  
CB4856 HS II 4601355 4602633 WBGene00018046 F35D11.5 F35D11.5 0.0729307091739599  
AGIWUR22207  
CB4856 HS II 4603406 4604161 WBGene00018045 F35D11.4 F35D11.4 0.132794092423882  
AGIWUR14130

|                                                                                   |    |         |         |                |          |           |                      |             |
|-----------------------------------------------------------------------------------|----|---------|---------|----------------|----------|-----------|----------------------|-------------|
| CB4856 HS                                                                         | II | 4608372 | 4612082 | WBGene00018044 | F35D11.3 | F35D11.3  | 0.102378828099837    |             |
| AGIWUR43345                                                                       |    |         |         |                |          |           |                      |             |
| CB4856 HS                                                                         | II | 4612989 | 4626107 | WBGene00004122 | pqn-35   | F35D11.2  | -0.148937616580556   |             |
| AGIWUR28360                                                                       |    |         |         |                |          |           |                      |             |
| CB4856 HS                                                                         | II | 4626906 | 4627805 | WBGene00018043 | F35D11.1 | F35D11.1  | 0.00652686949157832  |             |
| AGIWUR1128                                                                        |    |         |         |                |          |           |                      |             |
| CB4856 HS                                                                         | II | 4627811 | 4638384 | WBGene00018051 | che-10   | F35D11.11 | -0.0768152137188869  |             |
| AGIWUR23841;AGIWUR35432                                                           |    |         |         |                |          |           |                      |             |
| CB4856 HS                                                                         | II | 4649085 | 4653280 | WBGene00022283 | lgc-27   | Y74E4A.1  | 0.0109800089683594   |             |
| AGIWUR12849;AGIWUR33651                                                           |    |         |         |                |          |           |                      |             |
| CB4856 HS                                                                         | II | 4653189 | 4655934 | WBGene00020222 | fut-6    | T05A7.5   | -0.00556908809631018 |             |
| AGIWUR17270;AGIWUR39398                                                           |    |         |         |                |          |           |                      |             |
| CB4856 HS                                                                         | II | 4665893 | 4667588 | WBGene00043986 | fut-5    | T05A7.10  | -0.108608487210564   |             |
| AGIWUR9107;AGIWUR32803                                                            |    |         |         |                |          |           |                      |             |
| CB4856 HS                                                                         | II | 4668644 | 4671774 | WBGene00020223 | T05A7.6  | T05A7.6   | -0.0187438845406209  | AGIWUR15019 |
| CB4856 HS                                                                         | II | 4672798 | 4673746 | WBGene00001976 | hmg-11   | T05A7.4   | 0.0804394066146301   |             |
| AGIWUR31120;AGIWUR38858                                                           |    |         |         |                |          |           |                      |             |
| CB4856 HS                                                                         | II | 4674420 | 4675729 | WBGene00020220 | clcc-140 | T05A7.2   | 0.995400142740594    |             |
| AGIWUR14366                                                                       |    |         |         |                |          |           |                      |             |
| CB4856 HS                                                                         | II | 4675779 | 4676250 | WBGene00020221 | T05A7.3  | T05A7.3   | 1.53955911555277     | AGIWUR18858 |
| CB4856 HS                                                                         | II | 4678026 | 4679638 | WBGene00020219 | T05A7.1  | T05A7.1   | 0.0103946897720419   | AGIWUR40718 |
| CB4856 HS                                                                         | II | 4679667 | 4681324 | WBGene00020224 | T05A7.7  | T05A7.7   | -0.15709337642928    | AGIWUR18383 |
| CB4856 HS                                                                         | II | 4681764 | 4683728 | WBGene00020225 | sre-40   | T05A7.8   | 0.254348230528544    | AGIWUR18657 |
| CB4856 HS                                                                         | II | 4687241 | 4689392 | WBGene00017371 | sre-39   | F10G7.7   | 0.202880833815229    |             |
| AGIWUR4968;AGIWUR29347                                                            |    |         |         |                |          |           |                      |             |
| CB4856 HS                                                                         | II | 4689777 | 4690484 | WBGene00044744 | F10G7.12 | F10G7.12  | 0.0290710012271038   |             |
| AGIWUR12475                                                                       |    |         |         |                |          |           |                      |             |
| CB4856 HS                                                                         | II | 4691227 | 4693075 | WBGene00017370 | F10G7.6  | F10G7.6   | -0.0653686711535597  | AGIWUR6909  |
| CB4856 HS                                                                         | II | 4693414 | 4696408 | WBGene00017369 | F10G7.5  | F10G7.5   | 0.106745124538028    | AGIWUR25609 |
| CB4856 HS                                                                         | II | 4696419 | 4698427 | WBGene00004461 | rpn-5    | F10G7.8   | -0.0763825638612179  | AGIWUR22904 |
| CB4856 HS                                                                         | II | 4698721 | 4700994 | WBGene00004737 | scc-1    | F10G7.4   | 0.0283258849429018   | AGIWUR4631  |
| CB4856 HS                                                                         | II | 4702069 | 4703219 | WBGene00006817 | unc-85   | F10G7.3   | 0.0374642417637467   | AGIWUR32576 |
| CB4856 HS                                                                         | II | 4703254 | 4706498 | WBGene00017372 | F10G7.9  | F10G7.9   | -0.0748393063515262  | AGIWUR38407 |
| CB4856 HS                                                                         | II | 4706821 | 4710052 | WBGene00006626 | tsn-1    | F10G7.2   | -0.154466930701217   | AGIWUR860   |
| CB4856 HS                                                                         | II | 4710277 | 4713690 | WBGene00006497 | tag-151  | F10G7.1   | -0.132685149134019   |             |
| AGIWUR3622;AGIWUR3894;AGIWUR14759;AGIWUR19454;AGIWUR25721;AGIWUR34601;AGIWUR41035 |    |         |         |                |          |           |                      |             |
| CB4856 HS                                                                         | II | 4713674 | 4726264 | WBGene00017373 | F10G7.10 | F10G7.10  | -0.0183039875771058  |             |
| AGIWUR1239;AGIWUR33197                                                            |    |         |         |                |          |           |                      |             |
| CB4856 HS                                                                         | II | 4727326 | 4727869 | WBGene00017374 | ttr-41   | F10G7.11  | 0.210920523774361    |             |

|                                                                        |    |    |         |         |                |           |           |                                 |
|------------------------------------------------------------------------|----|----|---------|---------|----------------|-----------|-----------|---------------------------------|
| AGIWUR30715                                                            |    |    |         |         |                |           |           |                                 |
| CB4856                                                                 | HS | II | 4731178 | 4733949 | WBGene00018275 | F41C3.11  | F41C3.11  | 0.191081652194224               |
| AGIWUR43633                                                            |    |    |         |         |                |           |           |                                 |
| CB4856                                                                 | HS | II | 4735113 | 4736850 | WBGene00018272 | F41C3.6   | F41C3.6   | 0.173112452637592 AGIWUR15758   |
| CB4856                                                                 | HS | II | 4737617 | 4739906 | WBGene00018271 | F41C3.5   | F41C3.5   | -0.0962828369537867 AGIWUR38501 |
| CB4856                                                                 | HS | II | 4740412 | 4741616 | WBGene00018270 | F41C3.4   | F41C3.4   | 0.012450631983107 AGIWUR32312   |
| CB4856                                                                 | HS | II | 4742128 | 4745280 | WBGene00018269 | acs-11    | F41C3.3   | -0.173082951120993 AGIWUR34073  |
| CB4856                                                                 | HS | II | 4749968 | 4751822 | WBGene00018268 | F41C3.2   | F41C3.2   | 0.017058548728162               |
| AGIWUR23211;AGIWUR35292;AGIWUR38772                                    |    |    |         |         |                |           |           |                                 |
| CB4856                                                                 | HS | II | 4752388 | 4752942 | WBGene00018267 | F41C3.1   | F41C3.1   | 0.304007483496318 AGIWUR4862    |
| CB4856                                                                 | HS | II | 4753413 | 4755595 | WBGene00016163 | C27D9.1   | C27D9.1   | -0.0527856567716327 AGIWUR8054  |
| CB4856                                                                 | HS | II | 4755589 | 4756851 | WBGene00016164 | C27D9.2   | C27D9.2   | -0.327892369770058              |
| AGIWUR26144;AGIWUR26845                                                |    |    |         |         |                |           |           |                                 |
| CB4856                                                                 | HS | II | 4758762 | 4759289 | WBGene00017839 | F26G1.3   | F26G1.3   | 0.0786222468907214 AGIWUR40801  |
| CB4856                                                                 | HS | II | 4763081 | 4764174 | WBGene00017838 | F26G1.2   | F26G1.2   | 0.137056201898982               |
| AGIWUR7212;AGIWUR31440;AGIWUR34452                                     |    |    |         |         |                |           |           |                                 |
| CB4856                                                                 | HS | II | 4764159 | 4766384 | WBGene00017840 | ttm-2     | F26G1.4   | 0.23234950655694 AGIWUR36669    |
| CB4856                                                                 | HS | II | 4770534 | 4771382 | WBGene00017841 | F26G1.5   | F26G1.5   | 0.00400368722435829 AGIWUR2996  |
| CB4856                                                                 | HS | II | 4772835 | 4773991 | WBGene00044662 | F26G1.9   | F26G1.9   | 0.0677426927771867              |
| AGIWUR6370;AGIWUR16681;AGIWUR26642;AGIWUR37047;AGIWUR37704;AGIWUR41281 |    |    |         |         |                |           |           |                                 |
| CB4856                                                                 | HS | II | 4774382 | 4774883 | WBGene00044663 | F26G1.10  | F26G1.10  | 0.168879760553076               |
| AGIWUR6035;AGIWUR18054;AGIWUR22730;AGIWUR24550                         |    |    |         |         |                |           |           |                                 |
| CB4856                                                                 | HS | II | 4775295 | 4781347 | WBGene00017842 | nep-12    | F26G1.6   | -0.0428719313953119 AGIWUR16205 |
| CB4856                                                                 | HS | II | 4785861 | 4786316 | WBGene00003424 | msp-3     | F26G1.7   | 0.264457743497292 AGIWUR39844   |
| CB4856                                                                 | HS | II | 4791620 | 4795643 | WBGene00017837 | F26G1.1   | F26G1.1   | -0.0573869784483345             |
| AGIWUR6838;AGIWUR8224;AGIWUR11071;AGIWUR12821;AGIWUR17678;AGIWUR38146  |    |    |         |         |                |           |           |                                 |
| CB4856                                                                 | HS | II | 4795761 | 4797216 | WBGene00016353 | C33F10.4  | C33F10.4  | -0.0428269375029915             |
| AGIWUR2568;AGIWUR20383;AGIWUR20844;AGIWUR21310                         |    |    |         |         |                |           |           |                                 |
| CB4856                                                                 | HS | II | 4797371 | 4798176 | WBGene00050941 | C33F10.14 | C33F10.14 | 0.051491887370787               |
| AGIWUR4432                                                             |    |    |         |         |                |           |           |                                 |
| CB4856                                                                 | HS | II | 4798154 | 4812136 | WBGene00016354 | rig-6     | C33F10.5  | -0.0914562966417516             |
| AGIWUR8328;AGIWUR10082;AGIWUR34741;AGIWUR37698;AGIWUR37741;AGIWUR40358 |    |    |         |         |                |           |           |                                 |
| CB4856                                                                 | HS | II | 4818662 | 4821564 | WBGene00016355 | lact-5    | C33F10.7  | -0.102106875072955              |
| AGIWUR440;AGIWUR17904;AGIWUR32830                                      |    |    |         |         |                |           |           |                                 |
| CB4856                                                                 | HS | II | 4823381 | 4825196 | WBGene00016356 | C33F10.8  | C33F10.8  | 0.204626059753696               |
| AGIWUR3888                                                             |    |    |         |         |                |           |           |                                 |
| CB4856                                                                 | HS | II | 4826507 | 4827884 | WBGene00016359 | fbxb-88   | C33F10.13 | -0.009187112638954              |
| AGIWUR8862                                                             |    |    |         |         |                |           |           |                                 |
| CB4856                                                                 | HS | II | 4828560 | 4832469 | WBGene00016352 | tbck-1    | C33F10.2  | 0.109881488413034               |

|                                                                                                                                              |    |         |         |                |           |           |                     |             |
|----------------------------------------------------------------------------------------------------------------------------------------------|----|---------|---------|----------------|-----------|-----------|---------------------|-------------|
| AGIWUR11843                                                                                                                                  |    |         |         |                |           |           |                     |             |
| CB4856 HS                                                                                                                                    | II | 4836304 | 4837759 | WBGene00016358 | C33F10.12 | C33F10.12 | -0.143481186500292  |             |
| AGIWUR20730                                                                                                                                  |    |         |         |                |           |           |                     |             |
| CB4856 HS                                                                                                                                    | II | 4850185 | 4851441 | WBGene00044767 | T23B7.3   | T23B7.3   | -0.104896517188566  |             |
| AGIWUR18343;AGIWUR37964;AGIWUR43618                                                                                                          |    |         |         |                |           |           |                     |             |
| CB4856 HS                                                                                                                                    | II | 4852056 | 4857880 | WBGene00001027 | dnj-9     | F11G11.7  | 0.0649993812104057  |             |
| AGIWUR1344;AGIWUR27861                                                                                                                       |    |         |         |                |           |           |                     |             |
| CB4856 HS                                                                                                                                    | II | 4857923 | 4859185 | WBGene00017385 | F11G11.5  | F11G11.5  | 0.0109192114787486  |             |
| AGIWUR30732                                                                                                                                  |    |         |         |                |           |           |                     |             |
| CB4856 HS                                                                                                                                    | II | 4860064 | 4860411 | WBGene00017386 | nspd-5    | F11G11.8  | 0.269893356347435   |             |
| AGIWUR6006                                                                                                                                   |    |         |         |                |           |           |                     |             |
| CB4856 HS                                                                                                                                    | II | 4860594 | 4861696 | WBGene00017384 | F11G11.4  | F11G11.4  | 0.137164736812643   |             |
| AGIWUR9900                                                                                                                                   |    |         |         |                |           |           |                     |             |
| CB4856 HS                                                                                                                                    | II | 4862318 | 4863457 | WBGene00017387 | mpst-4    | F11G11.9  | 0.13721693469062    |             |
| AGIWUR35205                                                                                                                                  |    |         |         |                |           |           |                     |             |
| CB4856 HS                                                                                                                                    | II | 4866436 | 4867576 | WBGene00000606 | col-17    | F11G11.10 | -0.16894674405653   |             |
| AGIWUR20968                                                                                                                                  |    |         |         |                |           |           |                     |             |
| CB4856 HS                                                                                                                                    | II | 4872098 | 4873127 | WBGene00000649 | col-73    | F11G11.12 | 0.30550515563133    |             |
| AGIWUR5980                                                                                                                                   |    |         |         |                |           |           |                     |             |
| CB4856 HS                                                                                                                                    | II | 4875280 | 4875666 | WBGene00017388 | F11G11.13 | F11G11.13 | 0.00760827888765458 |             |
| AGIWUR13442;AGIWUR18299;AGIWUR24022;AGIWUR39742;AGIWUR43786;AGIWUR44698                                                                      |    |         |         |                |           |           |                     |             |
| CB4856 HS                                                                                                                                    | II | 4879885 | 4881105 | WBGene00001754 | gst-6     | F11G11.3  | 0.201048100344678   |             |
| AGIWUR24152                                                                                                                                  |    |         |         |                |           |           |                     |             |
| CB4856 HS                                                                                                                                    | II | 4882062 | 4883358 | WBGene00001755 | gst-7     | F11G11.2  | 0.128833415944083   |             |
| AGIWUR29841                                                                                                                                  |    |         |         |                |           |           |                     |             |
| CB4856 HS                                                                                                                                    | II | 4883749 | 4884602 | WBGene00001756 | gst-8     | F11G11.1  | -0.0594387022379692 |             |
| AGIWUR30738                                                                                                                                  |    |         |         |                |           |           |                     |             |
| CB4856 HS                                                                                                                                    | II | 4886276 | 4888211 | WBGene00019891 | R05F9.7   | R05F9.7   | 0.0128237859568614  | AGIWUR42366 |
| CB4856 HS                                                                                                                                    | II | 4889437 | 4891427 | WBGene00019890 | R05F9.6   | R05F9.6   | -0.21136745629702   |             |
| AGIWUR15697;AGIWUR19070;AGIWUR25990;AGIWUR32241                                                                                              |    |         |         |                |           |           |                     |             |
| CB4856 HS                                                                                                                                    | II | 4891573 | 4893573 | WBGene00001757 | gst-9     | R05F9.5   | -0.237897962009866  | AGIWUR26662 |
| CB4856 HS                                                                                                                                    | II | 4899859 | 4902100 | WBGene00019892 | R05F9.9   | R05F9.9   | -0.198180519493304  |             |
| AGIWUR32806;AGIWUR38871                                                                                                                      |    |         |         |                |           |           |                     |             |
| CB4856 HS                                                                                                                                    | II | 4902288 | 4903796 | WBGene00019893 | sgt-1     | R05F9.10  | 0.140121739355795   |             |
| AGIWUR8466                                                                                                                                   |    |         |         |                |           |           |                     |             |
| CB4856 HS                                                                                                                                    | II | 4905008 | 4911835 | WBGene00019888 | btbd-10   | R05F9.1   | -0.0735744049358793 |             |
| AGIWUR2401;AGIWUR8282;AGIWUR8547;AGIWUR11478;AGIWUR12754;AGIWUR16406;AGIWUR28362;AGIWUR33870;AGIWUR35150;AGIWUR36112;AGIWUR38514;AGIWUR44911 |    |         |         |                |           |           |                     |             |
| CB4856 HS                                                                                                                                    | II | 4911765 | 4914218 | WBGene00019894 | R05F9.11  | R05F9.11  | 0.359911053809471   |             |

AGIWUR11820  
CB4856 HS II 4914494 4925248 WBGene00019895 aagr-2 R05F9.12 0.228899111750621  
AGIWUR6585;AGIWUR22779;AGIWUR27231  
CB4856 HS II 4930873 4932114 WBGene00022763 ZK546.7 ZK546.7 -0.379181256691709 AGIWUR33470  
CB4856 HS II 4932991 4933450 WBGene00003470 msp-152 ZK546.6 0.512568473806915 AGIWUR34259  
CB4856 HS II 4933883 4935038 WBGene00001778 gst-30 ZK546.11 0.0541525271592693  
AGIWUR12388  
CB4856 HS II 4935563 4937956 WBGene00022762 ZK546.5 ZK546.5 0.307529678551994 AGIWUR12473  
CB4856 HS II 4938004 4938602 WBGene00022761 ZK546.4 ZK546.4 -0.160453180610293 AGIWUR18441  
CB4856 HS II 4938599 4941150 WBGene00022766 cblc-1 ZK546.17 0.0856681179351195  
AGIWUR34186;AGIWUR38869  
CB4856 HS II 4944042 4945838 WBGene00022765 ZK546.14 ZK546.14 -0.0155707633022879  
AGIWUR6967;AGIWUR30274  
CB4856 HS II 4946025 4948070 WBGene00022759 ZK546.2 ZK546.2 -0.165980749745287 AGIWUR28619  
CB4856 HS II 4948154 4949527 WBGene00006619 try-1 ZK546.15 0.0797305756928797  
AGIWUR1091  
CB4856 HS II 4949902 4953488 WBGene00006997 zyg-12 ZK546.1 -0.0123218745203317  
AGIWUR32075;AGIWUR42593  
CB4856 HS II 4953589 4954503 WBGene00003580 ndx-3 Y38A8.1 0.205925382161624 AGIWUR15903  
CB4856 HS II 4954480 4955427 WBGene00003949 pbs-3 Y38A8.2 0.138586389381722  
AGIWUR4506;AGIWUR7923  
CB4856 HS II 4955646 4959876 WBGene00006737 ulp-2 Y38A8.3 0.153566039004875 AGIWUR9197  
CB4856 HS II 4969186 4988934 WBGene00020867 shc-2 T27F7.2 -0.0445581242972342  
AGIWUR4201;AGIWUR16312;AGIWUR17522;AGIWUR25678  
CB4856 HS II 4990831 4993580 WBGene00020868 eif-1 T27F7.3 0.0714298874188275  
AGIWUR8012;AGIWUR8543;AGIWUR26232;AGIWUR26466  
CB4856 HS II 4994002 4995607 WBGene00020866 vps-24 T27F7.1 0.0853331805637865  
AGIWUR197;AGIWUR18963;AGIWUR28840  
CB4856 HS II 4995551 4998035 WBGene00004382 rnh-1.0 F59A6.6 0.137225013710495  
AGIWUR10797;AGIWUR42154  
CB4856 HS II 4998007 4998757 WBGene00044664 F59A6.11 F59A6.11 0.046177710626762  
AGIWUR3207;AGIWUR22750;AGIWUR28950;AGIWUR37911;AGIWUR43828  
CB4856 HS II 4999520 5003806 WBGene00019087 F59A6.5 F59A6.5 0.242385361666653 AGIWUR27627  
CB4856 HS II 5003960 5004849 WBGene00044385 F59A6.10 F59A6.10 -0.0368854503787812  
AGIWUR1690;AGIWUR3674;AGIWUR12293;AGIWUR17634;AGIWUR18276;AGIWUR24820;AGIWUR29279;AGIWUR29498;AGIWUR31744;AGIWUR32928;AGIWUR42515  
CB4856 HS II 5005081 5008068 WBGene00019086 F59A6.4 F59A6.4 0.0910214988682725 AGIWUR44174  
CB4856 HS II 5008341 5011179 WBGene00019085 F59A6.3 F59A6.3 -0.225806187212606  
AGIWUR14498;AGIWUR29885;AGIWUR44263

|                                                                                                                       |    |    |         |         |                |          |          |                     |             |
|-----------------------------------------------------------------------------------------------------------------------|----|----|---------|---------|----------------|----------|----------|---------------------|-------------|
| CB4856                                                                                                                | HS | II | 5011523 | 5012078 | WBGene00044665 | F59A6.12 | F59A6.12 | 0.323964926130229   |             |
| AGIWUR6143;AGIWUR21365                                                                                                |    |    |         |         |                |          |          |                     |             |
| CB4856                                                                                                                | HS | II | 5014699 | 5015324 | WBGene00019084 | F59A6.2  | F59A6.2  | -0.231800848698107  | AGIWUR27186 |
| CB4856                                                                                                                | HS | II | 5022764 | 5029982 | WBGene00003822 | nsy-1    | F59A6.1  | -0.0142602200071824 | AGIWUR7127  |
| CB4856                                                                                                                | HS | II | 5029942 | 5031712 | WBGene00018014 | F33G12.2 | F33G12.2 | -0.0391643553112129 |             |
| AGIWUR1431;AGIWUR6223;AGIWUR12852;AGIWUR14295;AGIWUR14922;AGIWUR15737;AGIWUR24470;AGIWUR34893;AGIWUR41448;AGIWUR44513 |    |    |         |         |                |          |          |                     |             |
| CB4856                                                                                                                | HS | II | 5031757 | 5034035 | WBGene00018015 | F33G12.3 | F33G12.3 | -0.0403243751906199 |             |
| AGIWUR559;AGIWUR909;AGIWUR6263;AGIWUR23996;AGIWUR37724                                                                |    |    |         |         |                |          |          |                     |             |
| CB4856                                                                                                                | HS | II | 5034142 | 5036439 | WBGene00018016 | lrr-1    | F33G12.4 | -0.0837211878297879 |             |
| AGIWUR20211                                                                                                           |    |    |         |         |                |          |          |                     |             |
| CB4856                                                                                                                | HS | II | 5036561 | 5040196 | WBGene00018017 | golg-2   | F33G12.5 | 0.0432698139990801  |             |
| AGIWUR38302                                                                                                           |    |    |         |         |                |          |          |                     |             |
| CB4856                                                                                                                | HS | II | 5040208 | 5040681 | WBGene00044666 | F33G12.7 | F33G12.7 | -0.141339497749799  |             |
| AGIWUR11782;AGIWUR22608                                                                                               |    |    |         |         |                |          |          |                     |             |
| CB4856                                                                                                                | HS | II | 5049915 | 5053966 | WBGene00018018 | F33G12.6 | F33G12.6 | 0.143383501537405   |             |
| AGIWUR7871;AGIWUR12854;AGIWUR35039;AGIWUR35780                                                                        |    |    |         |         |                |          |          |                     |             |
| CB4856                                                                                                                | HS | II | 5054084 | 5055338 | WBGene00002068 | ify-1    | C27A2.3  | -0.301710895529283  | AGIWUR37903 |
| CB4856                                                                                                                | HS | II | 5055616 | 5056214 | WBGene00004434 | rpl-22   | C27A2.2  | 0.447748999060686   |             |
| AGIWUR8338;AGIWUR19216;AGIWUR25761;AGIWUR35665;AGIWUR36144;AGIWUR39113;AGIWUR39990;AGIWUR40550                        |    |    |         |         |                |          |          |                     |             |
| CB4856                                                                                                                | HS | II | 5056211 | 5058113 | WBGene00206373 | C27A2.12 | C27A2.12 | 0.0263173936152814  |             |
| AGIWUR25367                                                                                                           |    |    |         |         |                |          |          |                     |             |
| CB4856                                                                                                                | HS | II | 5062129 | 5067116 | WBGene00016151 | smc-5    | C27A2.1  | 0.0887350752305824  |             |
| AGIWUR13886;AGIWUR34831;AGIWUR36227                                                                                   |    |    |         |         |                |          |          |                     |             |
| CB4856                                                                                                                | HS | II | 5067088 | 5067980 | WBGene00044387 | C27A2.8  | C27A2.8  | -0.146135338293993  |             |
| AGIWUR9687;AGIWUR23394;AGIWUR34194;AGIWUR44428                                                                        |    |    |         |         |                |          |          |                     |             |
| CB4856                                                                                                                | HS | II | 5068648 | 5069625 | WBGene00016153 | C27A2.5  | C27A2.5  | -0.398619276325737  | AGIWUR20299 |
| CB4856                                                                                                                | HS | II | 5069764 | 5071365 | WBGene00044386 | C27A2.7  | C27A2.7  | 0.106891573578768   |             |
| AGIWUR320;AGIWUR7549;AGIWUR32727                                                                                      |    |    |         |         |                |          |          |                     |             |
| CB4856                                                                                                                | HS | II | 5078235 | 5081161 | WBGene00001102 | dsh-2    | C27A2.6  | -0.133895674964101  | AGIWUR6526  |
| CB4856                                                                                                                | HS | II | 5081490 | 5083441 | WBGene00015454 | C04G6.4  | C04G6.4  | 0.0985366103076188  | AGIWUR13458 |
| CB4856                                                                                                                | HS | II | 5083848 | 5091690 | WBGene00004040 | p1d-1    | C04G6.3  | 0.0406847566784574  |             |
| AGIWUR8787;AGIWUR15467                                                                                                |    |    |         |         |                |          |          |                     |             |
| CB4856                                                                                                                | HS | II | 5093214 | 5094263 | WBGene00015453 | C04G6.2  | C04G6.2  | -0.050579254021792  |             |
| AGIWUR3836;AGIWUR20839                                                                                                |    |    |         |         |                |          |          |                     |             |
| CB4856                                                                                                                | HS | II | 5094245 | 5095370 | WBGene00077489 | C04G6.13 | C04G6.13 | 0.195242719364314   |             |
| AGIWUR41830                                                                                                           |    |    |         |         |                |          |          |                     |             |
| CB4856                                                                                                                | HS | II | 5098770 | 5100242 | WBGene00015456 | C04G6.6  | C04G6.6  | -0.0398848038265367 | AGIWUR35921 |
| CB4856                                                                                                                | HS | II | 5100412 | 5101801 | WBGene00015457 | C04G6.7  | C04G6.7  | -0.159722277380953  | AGIWUR1649  |



|                                                                       |    |         |         |                |          |          |                     |             |
|-----------------------------------------------------------------------|----|---------|---------|----------------|----------|----------|---------------------|-------------|
| CB4856 HS                                                             | II | 5103341 | 5103834 | WBGene00015459 | C04G6.11 | C04G6.11 | -0.0387136367752436 |             |
| AGIWUR4781                                                            |    |         |         |                |          |          |                     |             |
| CB4856 HS                                                             | II | 5104118 | 5108901 | WBGene00003402 | mpk-2    | C04G6.1  | 0.0135975677674516  |             |
| AGIWUR2806;AGIWUR28220                                                |    |         |         |                |          |          |                     |             |
| CB4856 HS                                                             | II | 5110029 | 5112232 | WBGene00017277 | F09C12.2 | F09C12.2 | 0.168768385554605   |             |
| AGIWUR15962                                                           |    |         |         |                |          |          |                     |             |
| CB4856 HS                                                             | II | 5112382 | 5114153 | WBGene00017279 | F09C12.8 | F09C12.8 | 0.134401565523046   |             |
| AGIWUR10339                                                           |    |         |         |                |          |          |                     |             |
| CB4856 HS                                                             | II | 5116033 | 5118276 | WBGene00017278 | F09C12.6 | F09C12.6 | 0.170466871618867   |             |
| AGIWUR25931                                                           |    |         |         |                |          |          |                     |             |
| CB4856 HS                                                             | II | 5130384 | 5133215 | WBGene00001588 | ggr-3    | F09C12.1 | 0.0791721508653351  |             |
| AGIWUR28057                                                           |    |         |         |                |          |          |                     |             |
| CB4856 HS                                                             | II | 5136717 | 5138568 | WBGene00019023 | F58A6.2  | F58A6.2  | -0.0198596131401274 |             |
| AGIWUR11752;AGIWUR14733;AGIWUR23481;AGIWUR27769;AGIWUR37991           |    |         |         |                |          |          |                     |             |
| CB4856 HS                                                             | II | 5138648 | 5142036 | WBGene00003547 | nas-29   | F58A6.4  | 0.0369150841120582  |             |
| AGIWUR2730;AGIWUR7599;AGIWUR17429;AGIWUR25274;AGIWUR27316;AGIWUR34128 |    |         |         |                |          |          |                     |             |
| CB4856 HS                                                             | II | 5142343 | 5144021 | WBGene00019022 | F58A6.1  | F58A6.1  | -0.0365857376615519 | AGIWUR19021 |
| CB4856 HS                                                             | II | 5146967 | 5148465 | WBGene00019024 | F58A6.5  | F58A6.5  | -0.0820954589611667 |             |
| AGIWUR18647;AGIWUR28907;AGIWUR29036                                   |    |         |         |                |          |          |                     |             |
| CB4856 HS                                                             | II | 5148530 | 5150853 | WBGene00019025 | srb-16   | F58A6.6  | 0.102745784474091   | AGIWUR31347 |
| CB4856 HS                                                             | II | 5153119 | 5154638 | WBGene00019027 | srb-12   | F58A6.10 | 0.176245964102725   |             |
| AGIWUR35711                                                           |    |         |         |                |          |          |                     |             |
| CB4856 HS                                                             | II | 5155436 | 5157625 | WBGene00019028 | srb-13   | F58A6.11 | 0.0774779083150605  |             |
| AGIWUR31294                                                           |    |         |         |                |          |          |                     |             |
| CB4856 HS                                                             | II | 5158566 | 5158988 | WBGene00019026 | F58A6.9  | F58A6.9  | 0.0721826487840111  | AGIWUR42574 |
| CB4856 HS                                                             | II | 5159717 | 5161130 | WBGene00044388 | C27D6.11 | C27D6.11 | 0.00198031284983458 |             |
| AGIWUR40723                                                           |    |         |         |                |          |          |                     |             |
| CB4856 HS                                                             | II | 5161995 | 5163383 | WBGene00005070 | srb-5    | C27D6.6  | -0.262538487997838  | AGIWUR40918 |
| CB4856 HS                                                             | II | 5163868 | 5165020 | WBGene00005069 | srb-4    | C27D6.7  | 0.0175280468256878  | AGIWUR34426 |
| CB4856 HS                                                             | II | 5165315 | 5166838 | WBGene00005068 | srb-3    | C27D6.8  | 0.00423990401217189 | AGIWUR21541 |
| CB4856 HS                                                             | II | 5168110 | 5169324 | WBGene00005067 | srb-2    | C27D6.9  | 0.527976159863073   | AGIWUR22739 |
| CB4856 HS                                                             | II | 5169726 | 5171032 | WBGene00005066 | srb-1    | C27D6.10 | 0.00419495295879813 |             |
| AGIWUR9291                                                            |    |         |         |                |          |          |                     |             |
| CB4856 HS                                                             | II | 5171910 | 5177440 | WBGene00016160 | C27D6.1  | C27D6.1  | -0.195166809546958  | AGIWUR9081  |
| CB4856 HS                                                             | II | 5179034 | 5187569 | WBGene00016162 | crh-2    | C27D6.4  | -0.0487236380161669 |             |
| AGIWUR6531;AGIWUR9803;AGIWUR31953                                     |    |         |         |                |          |          |                     |             |
| CB4856 HS                                                             | II | 5195804 | 5199257 | WBGene00016416 | C34F11.5 | C34F11.5 | 0.130161285317911   |             |
| AGIWUR10404                                                           |    |         |         |                |          |          |                     |             |
| CB4856 HS                                                             | II | 5199763 | 5200223 | WBGene00003443 | msp-50   | C34F11.4 | 0.00851100097847279 |             |

AGIWUR44471  
 CB4856 HS II 5203322 5209799 WBGene00016415 ampd-1 C34F11.3 0.145039003594732  
 AGIWUR3205;AGIWUR3377;AGIWUR8618;AGIWUR26632;AGIWUR28743;AGIWUR29238;AGIWUR30148  
 CB4856 HS II 5209780 5210978 WBGene00016417 C34F11.8 C34F11.8 0.147717720652908  
 AGIWUR22884  
 CB4856 HS II 5212270 5212789 WBGene00016414 C34F11.2 C34F11.2 0.115138682623282  
 AGIWUR12844  
 CB4856 HS II 5212932 5213932 WBGene00016413 C34F11.1 C34F11.1 -0.114622186107926  
 AGIWUR34064  
 CB4856 HS II 5214441 5225377 WBGene00001101 dsh-1 C34F11.9 -0.0484112334753828  
 AGIWUR2992;AGIWUR5381;AGIWUR18371;AGIWUR19496;AGIWUR37180;AGIWUR42341;AGIWUR43485;AGIWUR43880  
 CB4856 HS II 5230081 5230501 WBGene00017148 EGAP2.2 EGAP2.2 -0.116891035284819 AGIWUR38655  
 CB4856 HS II 5231424 5233273 WBGene00017147 EGAP2.1 EGAP2.1 0.0782566933006308 AGIWUR19126  
 CB4856 HS II 5233154 5235926 WBGene00004020 pho-1 EGAP2.3 0.167788152487608 AGIWUR29936  
 CB4856 HS II 5236258 5238514 WBGene00004023 pho-4 T16D1.2 0.132635777664097  
 AGIWUR3712;AGIWUR12698;AGIWUR37571;AGIWUR39791  
 CB4856 HS II 5241233 5241660 WBGene00020539 T16D1.1 T16D1.1 -0.0672742587138737 AGIWUR41030  
 CB4856 HS II 5242452 5246837 WBGene00004221 ptr-6 C54A12.1 -0.0911394130177414  
 AGIWUR4575;AGIWUR29782;AGIWUR33750;AGIWUR35269;AGIWUR36517;AGIWUR42135  
 CB4856 HS II 5251121 5255529 WBGene00016909 frpr-4 C54A12.2 0.113732943115881  
 AGIWUR34619  
 CB4856 HS II 5270406 5271845 WBGene00016911 drn-1 C54A12.4 0.196228764333046  
 AGIWUR19420  
 CB4856 HS II 5278137 5282525 WBGene00022781 pmt-1 ZK622.3 0.219947430602909  
 AGIWUR3942;AGIWUR11991;AGIWUR15724  
 CB4856 HS II 5285329 5288908 WBGene00001806 gur-5 ZK622.2 0.268386866826713 AGIWUR8811  
 CB4856 HS II 5289442 5290326 WBGene00044667 ZK622.5 ZK622.5 0.0776336659763519  
 AGIWUR12678;AGIWUR42990  
 CB4856 HS II 5292683 5293306 WBGene00022782 ZK622.4 ZK622.4 -0.0394262777721122  
 AGIWUR12395;AGIWUR36745;AGIWUR38572;AGIWUR41852  
 CB4856 HS II 5293800 5295612 WBGene00022780 ZK622.1 ZK622.1 0.176998487211701 AGIWUR44091  
 CB4856 HS II 5312046 5319234 WBGene00001538 gcy-12 F08B1.2 0.0868093284431923  
 AGIWUR12960;AGIWUR42287  
 CB4856 HS II 5323005 5340826 WBGene00006923 vhp-1 F08B1.1 0.0301708696961143  
 AGIWUR5649;AGIWUR6552;AGIWUR7813;AGIWUR10624;AGIWUR11567;AGIWUR13821;AGIWUR15922;AGIWUR18468;AGIWUR20242;AGIWUR21499;AGIWUR26859;AGIWUR29335;AGIWUR29995;AGIWUR38653;AGIWUR41812;AGIWUR42052;AGIWUR44227  
 CB4856 HS II 5342663 5344875 WBGene00017291 F09E5.14 F09E5.14 0.0146833215165927  
 AGIWUR32159  
 CB4856 HS II 5350669 5351993 WBGene00017286 F09E5.8 F09E5.8 0.171239462101251 AGIWUR5675

|                                                 |    |    |         |         |                |           |          |                     |             |
|-------------------------------------------------|----|----|---------|---------|----------------|-----------|----------|---------------------|-------------|
| CB4856                                          | HS | II | 5352087 | 5353759 | WBGene00017285 | F09E5.7   | F09E5.7  | -0.221756422173762  | AGIWUR39499 |
| CB4856                                          | HS | II | 5355712 | 5357341 | WBGene00005226 | srg-69    | F09E5.4  | 0.0632749920547599  | AGIWUR24261 |
| CB4856                                          | HS | II | 5357308 | 5358187 | WBGene00017289 | F09E5.11  | F09E5.11 | 0.0990332307582165  |             |
| AGIWUR3030                                      |    |    |         |         |                |           |          |                     |             |
| CB4856                                          | HS | II | 5358695 | 5359469 | WBGene00017293 | bmy-1     | F09E5.17 | 0.094416363391943   |             |
| AGIWUR7837                                      |    |    |         |         |                |           |          |                     |             |
| CB4856                                          | HS | II | 5359552 | 5372122 | WBGene00017284 | sec-6     | F09E5.5  | 0.250581699685895   | AGIWUR1999  |
| CB4856                                          | HS | II | 5371980 | 5373433 | WBGene00000094 | agt-2     | F09E5.13 | 0.277218215836154   |             |
| AGIWUR5697                                      |    |    |         |         |                |           |          |                     |             |
| CB4856                                          | HS | II | 5373997 | 5375177 | WBGene00017283 | F09E5.3   | F09E5.3  | 0.206691606507741   | AGIWUR233   |
| CB4856                                          | HS | II | 5375267 | 5377111 | WBGene00017282 | algn-2    | F09E5.2  | -0.0218438663888492 |             |
| AGIWUR12610;AGIWUR34310                         |    |    |         |         |                |           |          |                     |             |
| CB4856                                          | HS | II | 5378068 | 5379632 | WBGene00006434 | prdx-2    | F09E5.15 | 0.229739206480986   |             |
| AGIWUR2121                                      |    |    |         |         |                |           |          |                     |             |
| CB4856                                          | HS | II | 5380027 | 5384169 | WBGene00004034 | pkc-3     | F09E5.1  | 0.128586671207184   | AGIWUR11029 |
| CB4856                                          | HS | II | 5384137 | 5387317 | WBGene00017136 | ccpp-6    | EEED8.6  | 0.249778251444583   | AGIWUR7326  |
| CB4856                                          | HS | II | 5387411 | 5388830 | WBGene00004701 | rsp-4     | EEED8.7  | -0.195822277926521  |             |
| AGIWUR14445;AGIWUR27407;AGIWUR28507             |    |    |         |         |                |           |          |                     |             |
| CB4856                                          | HS | II | 5388829 | 5390104 | WBGene00003583 | ndx-6     | EEED8.8  | 0.0233001897751102  |             |
| AGIWUR13822;AGIWUR15361;AGIWUR34198;AGIWUR39738 |    |    |         |         |                |           |          |                     |             |
| CB4856                                          | HS | II | 5390233 | 5393190 | WBGene00017144 | brap-2    | EEED8.16 | -0.103446955316873  |             |
| AGIWUR33548                                     |    |    |         |         |                |           |          |                     |             |
| CB4856                                          | HS | II | 5393293 | 5395694 | WBGene00017137 | pink-1    | EEED8.9  | 0.0961353578634601  | AGIWUR43636 |
| CB4856                                          | HS | II | 5395889 | 5398902 | WBGene00017138 | EEED8.10  | EEED8.10 | 0.0975690578168518  |             |
| AGIWUR13646;AGIWUR29548;AGIWUR32140             |    |    |         |         |                |           |          |                     |             |
| CB4856                                          | HS | II | 5399538 | 5405810 | WBGene00003393 | mog-5     | EEED8.5  | -0.0450198949928016 | AGIWUR17482 |
| CB4856                                          | HS | II | 5405819 | 5407634 | WBGene00017139 | cllec-141 | EEED8.11 | -0.249404449809715  |             |
| AGIWUR19066                                     |    |    |         |         |                |           |          |                     |             |
| CB4856                                          | HS | II | 5408260 | 5409024 | WBGene00017140 | EEED8.12  | EEED8.12 | 0.0960265904087194  |             |
| AGIWUR11005                                     |    |    |         |         |                |           |          |                     |             |
| CB4856                                          | HS | II | 5410467 | 5411235 | WBGene00017135 | EEED8.4   | EEED8.4  | 0.197269742836919   | AGIWUR16324 |
| CB4856                                          | HS | II | 5411542 | 5412174 | WBGene00017141 | EEED8.13  | EEED8.13 | -0.0291164640457406 |             |
| AGIWUR306                                       |    |    |         |         |                |           |          |                     |             |
| CB4856                                          | HS | II | 5412196 | 5412610 | WBGene00194696 | EEED8.18  | EEED8.18 | -0.138143238451699  |             |
| AGIWUR43040                                     |    |    |         |         |                |           |          |                     |             |
| CB4856                                          | HS | II | 5414207 | 5415580 | WBGene00017134 | EEED8.3   | EEED8.3  | -0.0093943457680421 | AGIWUR17225 |
| CB4856                                          | HS | II | 5416714 | 5418377 | WBGene00017133 | EEED8.2   | EEED8.2  | 0.0485769767748563  | AGIWUR40222 |
| CB4856                                          | HS | II | 5419233 | 5421093 | WBGene00017143 | EEED8.15  | EEED8.15 | -0.101706502235746  |             |
| AGIWUR2513                                      |    |    |         |         |                |           |          |                     |             |

|                                                                       |    |    |         |         |                |          |          |                      |             |
|-----------------------------------------------------------------------|----|----|---------|---------|----------------|----------|----------|----------------------|-------------|
| CB4856                                                                | HS | II | 5421248 | 5422737 | WBGene00017132 | tofu-6   | EEED8.1  | -0.144121833941572   | AGIWUR23738 |
| CB4856                                                                | HS | II | 5422735 | 5423858 | WBGene00017219 | F07F6.7  | F07F6.7  | -0.00777093170835741 | AGIWUR20957 |
| CB4856                                                                | HS | II | 5424141 | 5425733 | WBGene00017220 | F07F6.8  | F07F6.8  | -0.0730665518191493  | AGIWUR16885 |
| CB4856                                                                | HS | II | 5425750 | 5429572 | WBGene00017217 | F07F6.4  | F07F6.4  | -0.028371587999243   |             |
| AGIWUR4465;AGIWUR5507;AGIWUR9414;AGIWUR22035;AGIWUR28235;AGIWUR34889  |    |    |         |         |                |          |          |                      |             |
| CB4856                                                                | HS | II | 5430392 | 5431422 | WBGene00017216 | F07F6.2  | F07F6.2  | -0.0499592088965946  |             |
| AGIWUR3809;AGIWUR9682;AGIWUR16521;AGIWUR28895;AGIWUR36864;AGIWUR42556 |    |    |         |         |                |          |          |                      |             |
| CB4856                                                                | HS | II | 5431476 | 5433048 | WBGene00006005 | srx-114  | F07F6.9  | -0.142991395002512   | AGIWUR27966 |
| CB4856                                                                | HS | II | 5435724 | 5436933 | WBGene00017218 | dct-5    | F07F6.5  | -0.0539442057525843  |             |
| AGIWUR15543;AGIWUR21500;AGIWUR27471                                   |    |    |         |         |                |          |          |                      |             |
| CB4856                                                                | HS | II | 5437891 | 5440256 | WBGene00017215 | F07F6.1  | F07F6.1  | 0.098590208302042    | AGIWUR12415 |
| CB4856                                                                | HS | II | 5440243 | 5446705 | WBGene00003774 | nmr-1    | F07F6.6  | -0.0409945643518093  | AGIWUR35436 |
| CB4856                                                                | HS | II | 5447681 | 5448634 | WBGene00023407 | cex-1    | F56D1.6  | 0.138358301347171    | AGIWUR41097 |
| CB4856                                                                | HS | II | 5453847 | 5455977 | WBGene00000969 | dhs-5    | F56D1.5  | 0.204455090339604    | AGIWUR3066  |
| CB4856                                                                | HS | II | 5456305 | 5458609 | WBGene00000935 | daz-1    | F56D1.7  | 0.224088274561396    | AGIWUR29003 |
| CB4856                                                                | HS | II | 5466363 | 5473812 | WBGene00000548 | clr-1    | F56D1.4  | -0.00502694996473707 |             |
| AGIWUR15780;AGIWUR32701;AGIWUR40029                                   |    |    |         |         |                |          |          |                      |             |
| CB4856                                                                | HS | II | 5474373 | 5475475 | WBGene00018961 | mrps-16  | F56D1.3  | -0.189200756423478   |             |
| AGIWUR20329;AGIWUR22842;AGIWUR30295                                   |    |    |         |         |                |          |          |                      |             |
| CB4856                                                                | HS | II | 5475409 | 5478524 | WBGene00018960 | ilcr-2   | F56D1.2  | 0.147687051858039    | AGIWUR3916  |
| CB4856                                                                | HS | II | 5478578 | 5480490 | WBGene00018959 | F56D1.1  | F56D1.1  | 0.111016496400627    |             |
| AGIWUR12541;AGIWUR32062;AGIWUR39277                                   |    |    |         |         |                |          |          |                      |             |
| CB4856                                                                | HS | II | 5480591 | 5482041 | WBGene00017394 | cal-8    | F12A10.5 | -0.0291560562122957  |             |
| AGIWUR35593                                                           |    |    |         |         |                |          |          |                      |             |
| CB4856                                                                | HS | II | 5488151 | 5490606 | WBGene00017393 | nep-5    | F12A10.4 | -0.0571256397226589  |             |
| AGIWUR35809                                                           |    |    |         |         |                |          |          |                      |             |
| CB4856                                                                | HS | II | 5491111 | 5493192 | WBGene00017392 | basl-2   | F12A10.3 | 0.192640860511817    |             |
| AGIWUR23641                                                           |    |    |         |         |                |          |          |                      |             |
| CB4856                                                                | HS | II | 5494085 | 5494505 | WBGene00017395 | F12A10.6 | F12A10.6 | 0.196679891780631    |             |
| AGIWUR41057                                                           |    |    |         |         |                |          |          |                      |             |
| CB4856                                                                | HS | II | 5497285 | 5498256 | WBGene00017396 | F12A10.7 | F12A10.7 | -0.0663627336327357  |             |
| AGIWUR25210                                                           |    |    |         |         |                |          |          |                      |             |
| CB4856                                                                | HS | II | 5498851 | 5501409 | WBGene00017397 | F12A10.8 | F12A10.8 | -0.174248495987259   |             |
| AGIWUR33792                                                           |    |    |         |         |                |          |          |                      |             |
| CB4856                                                                | HS | II | 5501633 | 5503908 | WBGene00001511 | fzy-1    | ZK177.6  | -0.0163729827912089  | AGIWUR9934  |
| CB4856                                                                | HS | II | 5503966 | 5506115 | WBGene00000375 | cyp-44A1 | ZK177.5  | -0.0882852567352375  |             |
| AGIWUR8962;AGIWUR13879;AGIWUR35034;AGIWUR38693;AGIWUR43217            |    |    |         |         |                |          |          |                      |             |
| CB4856                                                                | HS | II | 5505870 | 5509056 | WBGene00022672 | ZK177.4  | ZK177.4  | 0.043163101718072    |             |
| AGIWUR12615;AGIWUR36298                                               |    |    |         |         |                |          |          |                      |             |

|                                                                                                                                          |    |    |         |         |                |           |           |                     |             |
|------------------------------------------------------------------------------------------------------------------------------------------|----|----|---------|---------|----------------|-----------|-----------|---------------------|-------------|
| CB4856                                                                                                                                   | HS | II | 5509028 | 5513775 | WBGene00022673 | ZK177.8   | ZK177.8   | -0.0650486429932409 |             |
| AGIWUR15416;AGIWUR18492;AGIWUR22202;AGIWUR33128                                                                                          |    |    |         |         |                |           |           |                     |             |
| CB4856                                                                                                                                   | HS | II | 5515861 | 5517133 | WBGene00022671 | ZK177.3   | ZK177.3   | 1.29779095700981    | AGIWUR21731 |
| CB4856                                                                                                                                   | HS | II | 5517157 | 5517743 | WBGene00022674 | ZK177.9   | ZK177.9   | 1.08664213036864    | AGIWUR36184 |
| CB4856                                                                                                                                   | HS | II | 5522937 | 5523488 | WBGene00044390 | ZK177.11  | ZK177.11  | 0.0457633969023608  |             |
| AGIWUR11132;AGIWUR14057;AGIWUR25550;AGIWUR38479;AGIWUR44677                                                                              |    |    |         |         |                |           |           |                     |             |
| CB4856                                                                                                                                   | HS | II | 5524200 | 5525379 | WBGene00006554 | tbx-35    | ZK177.10  | -0.0897546461011407 |             |
| AGIWUR8139;AGIWUR44660                                                                                                                   |    |    |         |         |                |           |           |                     |             |
| CB4856                                                                                                                                   | HS | II | 5528141 | 5529637 | WBGene00022669 | ZK177.1   | ZK177.1   | 0.0710197986837819  | AGIWUR3590  |
| CB4856                                                                                                                                   | HS | II | 5530501 | 5530928 | WBGene00002121 | ins-38    | C17C3.20  | -0.104866251655743  |             |
| AGIWUR10095;AGIWUR17770;AGIWUR24592;AGIWUR26179;AGIWUR31150                                                                              |    |    |         |         |                |           |           |                     |             |
| CB4856                                                                                                                                   | HS | II | 5531313 | 5532259 | WBGene00015892 | C17C3.9   | C17C3.9   | -0.011897884252865  | AGIWUR3551  |
| CB4856                                                                                                                                   | HS | II | 5532857 | 5533738 | WBGene00001965 | hlh-26    | C17C3.8   | -0.088192988581425  | AGIWUR33494 |
| CB4856                                                                                                                                   | HS | II | 5537835 | 5539004 | WBGene00015893 | C17C3.11  | C17C3.11  | 0.072596325949938   |             |
| AGIWUR2886                                                                                                                               |    |    |         |         |                |           |           |                     |             |
| CB4856                                                                                                                                   | HS | II | 5544585 | 5544851 | WBGene00002096 | ins-13    | C17C3.18  | -0.03867037894558   |             |
| AGIWUR11025;AGIWUR15472                                                                                                                  |    |    |         |         |                |           |           |                     |             |
| CB4856                                                                                                                                   | HS | II | 5544781 | 5547492 | WBGene00015894 | acd-2     | C17C3.12  | 0.128776501665462   |             |
| AGIWUR10216;AGIWUR11158;AGIWUR11868;AGIWUR39769;AGIWUR44925                                                                              |    |    |         |         |                |           |           |                     |             |
| CB4856                                                                                                                                   | HS | II | 5551833 | 5552335 | WBGene00015890 | C17C3.5   | C17C3.5   | 0.0730258510235231  | AGIWUR20466 |
| CB4856                                                                                                                                   | HS | II | 5554617 | 5555306 | WBGene00002095 | ins-12    | C17C3.19  | -0.0278030647347949 |             |
| AGIWUR1112;AGIWUR11658;AGIWUR22944;AGIWUR26429;AGIWUR44694                                                                               |    |    |         |         |                |           |           |                     |             |
| CB4856                                                                                                                                   | HS | II | 5556761 | 5557088 | WBGene00002094 | ins-11    | C17C3.4   | 0.0653471680414022  | AGIWUR24660 |
| CB4856                                                                                                                                   | HS | II | 5561763 | 5563523 | WBGene00015889 | C17C3.3   | C17C3.3   | -0.221560449970206  | AGIWUR13473 |
| CB4856                                                                                                                                   | HS | II | 5570572 | 5574943 | WBGene00015887 | C17C3.1   | C17C3.1   | 0.348230097122725   |             |
| AGIWUR655;AGIWUR1027;AGIWUR2276;AGIWUR3952;AGIWUR5419;AGIWUR9121;AGIWUR18932;AGIWUR33510;AGIWUR36819;AGIWUR37926;AGIWUR38475;AGIWUR42256 |    |    |         |         |                |           |           |                     |             |
| CB4856                                                                                                                                   | HS | II | 5578318 | 5579965 | WBGene00020803 | T25E4.1   | T25E4.1   | -0.116207924532415  |             |
| AGIWUR17629;AGIWUR39775                                                                                                                  |    |    |         |         |                |           |           |                     |             |
| CB4856                                                                                                                                   | HS | II | 5580125 | 5582409 | WBGene00020804 | T25E4.2   | T25E4.2   | -0.146854787725984  | AGIWUR34051 |
| CB4856                                                                                                                                   | HS | II | 5586165 | 5587651 | WBGene00003097 | lys-8     | C17G10.5  | 0.360485432902092   |             |
| AGIWUR8095                                                                                                                               |    |    |         |         |                |           |           |                     |             |
| CB4856                                                                                                                                   | HS | II | 5587614 | 5589755 | WBGene00270322 | C17G10.13 | C17G10.13 | 0.0606743309445719  |             |
| AGIWUR40743                                                                                                                              |    |    |         |         |                |           |           |                     |             |
| CB4856                                                                                                                                   | HS | II | 5589186 | 5593628 | WBGene00000383 | cdc-14    | C17G10.4  | -0.047535433337174  |             |
| AGIWUR4060;AGIWUR6178;AGIWUR9427;AGIWUR23768;AGIWUR27886;AGIWUR37473;AGIWUR44066                                                         |    |    |         |         |                |           |           |                     |             |
| CB4856                                                                                                                                   | HS | II | 5594714 | 5596463 | WBGene00015916 | C17G10.2  | C17G10.2  | 0.101746413968833   |             |
| AGIWUR5214                                                                                                                               |    |    |         |         |                |           |           |                     |             |
| CB4856                                                                                                                                   | HS | II | 5596547 | 5598449 | WBGene00015915 | C17G10.1  | C17G10.1  | 0.0910976001057566  |             |

AGIWUR10468;AGIWUR25020;AGIWUR29338  
 CB4856 HS II 5599930 5603294 WBGene00015918 C17G10.6 C17G10.6 0.0318945974674847  
 AGIWUR4653;AGIWUR5160;AGIWUR9532;AGIWUR11414;AGIWUR33077;AGIWUR39820  
 CB4856 HS II 5606542 5607856 WBGene00015919 C17G10.7 C17G10.7 0.0325504182364202  
 AGIWUR34206  
 CB4856 HS II 5617122 5619319 WBGene00000970 dhs-6 C17G10.8 0.122085438580216  
 AGIWUR41943  
 CB4856 HS II 5619590 5622483 WBGene00015920 eif-3.L C17G10.9 0.128168509649539  
 AGIWUR6407  
 CB4856 HS II 5626316 5627263 WBGene00235269 F59E12.15 F59E12.15 -0.0901175559761045  
 AGIWUR35828  
 CB4856 HS II 5634528 5636926 WBGene00019123 F59E12.8 F59E12.8 0.175796528681962  
 AGIWUR11995  
 CB4856 HS II 5638381 5639752 WBGene00019119 F59E12.3 F59E12.3 0.12781290291421  
 AGIWUR18907;AGIWUR24208;AGIWUR40233;AGIWUR42077  
 CB4856 HS II 5640063 5647042 WBGene00019124 F59E12.9 F59E12.9 -0.0879124688533643  
 AGIWUR6420  
 CB4856 HS II 5647154 5647884 WBGene00019125 ddl-1 F59E12.10 0.107849159955572  
 AGIWUR42386  
 CB4856 HS II 5647986 5649472 WBGene00019126 sam-4 F59E12.11 0.0944625783203659  
 AGIWUR3369  
 CB4856 HS II 5649737 5654422 WBGene00006988 zyg-1 F59E12.2 -0.05429061524584  
 AGIWUR21062  
 CB4856 HS II 5654515 5657371 WBGene00019118 F59E12.1 F59E12.1 -0.249376701267563  
 AGIWUR27965  
 CB4856 HS II 5657710 5659854 WBGene00006402 fut-3 F59E12.13 -0.00685820987799879  
 AGIWUR857  
 CB4856 HS II 5659937 5660786 WBGene00016121 C25H3.12 C25H3.12 0.0338664665527726  
 AGIWUR7009;AGIWUR11907;AGIWUR20481;AGIWUR34018  
 CB4856 HS II 5661167 5665243 WBGene00016115 mdt-26 C25H3.6 -0.163587214967665  
 AGIWUR1167;AGIWUR3321;AGIWUR12078;AGIWUR15580;AGIWUR22399;AGIWUR26846;AGIWUR31427;AGIWUR38315;AGIWUR40073;A  
 GIWUR41078;AGIWUR41188;AGIWUR42279;AGIWUR44075  
 CB4856 HS II 5665408 5666278 WBGene00044391 C25H3.15 C25H3.15 -0.061053529827404  
 AGIWUR31701;AGIWUR41371  
 CB4856 HS II 5666291 5666850 WBGene00044392 C25H3.16 C25H3.16 0.177973146027389  
 AGIWUR1916;AGIWUR4138  
 CB4856 HS II 5666756 5668930 WBGene00016116 C25H3.7 C25H3.7 -0.177168302303295 AGIWUR35607  
 CB4856 HS II 5669788 5679276 WBGene00016117 C25H3.8 C25H3.8 0.180255409365657  
 AGIWUR9610;AGIWUR19861;AGIWUR23395;AGIWUR35785;AGIWUR44190;AGIWUR44837

|                                                                                                                                                          |    |    |         |         |                |          |          |                      |             |
|----------------------------------------------------------------------------------------------------------------------------------------------------------|----|----|---------|---------|----------------|----------|----------|----------------------|-------------|
| CB4856                                                                                                                                                   | HS | II | 5680980 | 5682667 | WBGene00016114 | flp-27   | C25H3.5  | 0.269328510892135    | AGIWUR40585 |
| CB4856                                                                                                                                                   | HS | II | 5684479 | 5689030 | WBGene00016120 | C25H3.11 | C25H3.11 | -0.19484133597304    |             |
| AGIWUR29501                                                                                                                                              |    |    |         |         |                |          |          |                      |             |
| CB4856                                                                                                                                                   | HS | II | 5690137 | 5691355 | WBGene00016118 | C25H3.9  | C25H3.9  | 0.233800296599869    |             |
| AGIWUR1206;AGIWUR40397                                                                                                                                   |    |    |         |         |                |          |          |                      |             |
| CB4856                                                                                                                                                   | HS | II | 5691662 | 5693939 | WBGene00016113 | eif-2D   | C25H3.4  | 0.0578614700154638   | AGIWUR25622 |
| CB4856                                                                                                                                                   | HS | II | 5694195 | 5695237 | WBGene00016112 | C25H3.3  | C25H3.3  | 0.000511883899733334 | AGIWUR18537 |
| CB4856                                                                                                                                                   | HS | II | 5695383 | 5696358 | WBGene00016123 | C25H3.14 | C25H3.14 | 0.00920462048501136  |             |
| AGIWUR41054                                                                                                                                              |    |    |         |         |                |          |          |                      |             |
| CB4856                                                                                                                                                   | HS | II | 5696585 | 5698969 | WBGene00016119 | C25H3.10 | C25H3.10 | 0.303361607638525    |             |
| AGIWUR16686                                                                                                                                              |    |    |         |         |                |          |          |                      |             |
| CB4856                                                                                                                                                   | HS | II | 5700170 | 5701408 | WBGene00016111 | C25H3.1  | C25H3.1  | 0.00761286002494455  |             |
| AGIWUR34742;AGIWUR36546                                                                                                                                  |    |    |         |         |                |          |          |                      |             |
| CB4856                                                                                                                                                   | HS | II | 5707691 | 5712351 | WBGene00015942 | osta-2   | C18A3.4  | 0.0104291136533794   |             |
| AGIWUR3856;AGIWUR8859;AGIWUR9550;AGIWUR16022;AGIWUR17152;AGIWUR18066;AGIWUR25677;AGIWUR26532                                                             |    |    |         |         |                |          |          |                      |             |
| CB4856                                                                                                                                                   | HS | II | 5712351 | 5714823 | WBGene00015943 | tiar-1   | C18A3.5  | -0.0985056086320526  |             |
| AGIWUR9718;AGIWUR16952;AGIWUR31759;AGIWUR34523;AGIWUR37236                                                                                               |    |    |         |         |                |          |          |                      |             |
| CB4856                                                                                                                                                   | HS | II | 5714924 | 5716250 | WBGene00015945 | C18A3.9  | C18A3.9  | -0.123837427217101   | AGIWUR43356 |
| CB4856                                                                                                                                                   | HS | II | 5716307 | 5718038 | WBGene00015941 | C18A3.3  | C18A3.3  | 0.239300849840753    | AGIWUR23308 |
| CB4856                                                                                                                                                   | HS | II | 5718129 | 5720052 | WBGene00015940 | zipt-3   | C18A3.2  | 0.15118494290933     | AGIWUR30196 |
| CB4856                                                                                                                                                   | HS | II | 5720148 | 5721791 | WBGene00015939 | C18A3.1  | C18A3.1  | 0.0265744840493323   |             |
| AGIWUR17352;AGIWUR27379;AGIWUR35544                                                                                                                      |    |    |         |         |                |          |          |                      |             |
| CB4856                                                                                                                                                   | HS | II | 5721791 | 5727651 | WBGene00004267 | rab-3    | C18A3.6  | 0.129358896162035    |             |
| AGIWUR6991;AGIWUR23755;AGIWUR42885                                                                                                                       |    |    |         |         |                |          |          |                      |             |
| CB4856                                                                                                                                                   | HS | II | 5729597 | 5730443 | WBGene00015944 | C18A3.7  | C18A3.7  | 0.0784348304345617   | AGIWUR39731 |
| CB4856                                                                                                                                                   | HS | II | 5731033 | 5731741 | WBGene00044668 | C18A3.11 | C18A3.11 | -0.113472671748021   |             |
| AGIWUR3854;AGIWUR14342                                                                                                                                   |    |    |         |         |                |          |          |                      |             |
| CB4856                                                                                                                                                   | HS | II | 5737790 | 5738888 | WBGene00001958 | hlh-14   | C18A3.8  | -0.309718785840319   | AGIWUR37206 |
| CB4856                                                                                                                                                   | HS | II | 5742971 | 5745284 | WBGene00044296 | F10C1.9  | F10C1.9  | 0.311106403194165    |             |
| AGIWUR25000;AGIWUR40035                                                                                                                                  |    |    |         |         |                |          |          |                      |             |
| CB4856                                                                                                                                                   | HS | II | 5750190 | 5754140 | WBGene00002054 | ifb-2    | F10C1.7  | 0.18965281534444     |             |
| AGIWUR2064;AGIWUR4264;AGIWUR9690;AGIWUR16751;AGIWUR17005;AGIWUR20723;AGIWUR23981;AGIWUR25070;AGIWUR25591;AGIWUR32916;AGIWUR36312;AGIWUR36639;AGIWUR39866 |    |    |         |         |                |          |          |                      |             |
| CB4856                                                                                                                                                   | HS | II | 5754468 | 5756684 | WBGene00017327 | F10C1.8  | F10C1.8  | 0.290542086134852    |             |
| AGIWUR11828;AGIWUR20400;AGIWUR23510                                                                                                                      |    |    |         |         |                |          |          |                      |             |
| CB4856                                                                                                                                                   | HS | II | 5756891 | 5758421 | WBGene00017325 | F10C1.3  | F10C1.3  | -0.0203958402740536  | AGIWUR28265 |
| CB4856                                                                                                                                                   | HS | II | 5765618 | 5772084 | WBGene00002053 | ifb-1    | F10C1.2  | -0.15275084683302    |             |
| AGIWUR3359;AGIWUR9541;AGIWUR22649;AGIWUR27085;AGIWUR32186;AGIWUR35412                                                                                    |    |    |         |         |                |          |          |                      |             |
| CB4856                                                                                                                                                   | HS | II | 5772065 | 5774220 | WBGene00017326 | dmd-5    | F10C1.5  | -0.174989700783973   | AGIWUR29796 |

|                                                                                                                      |    |    |         |         |                |           |           |                     |             |
|----------------------------------------------------------------------------------------------------------------------|----|----|---------|---------|----------------|-----------|-----------|---------------------|-------------|
| CB4856                                                                                                               | HS | II | 5774229 | 5774420 | WBGene00017324 | F10C1.1   | F10C1.1   | -0.479789717844884  | AGIWUR41388 |
| CB4856                                                                                                               | HS | II | 5782524 | 5787658 | WBGene00019408 | K05F1.6   | K05F1.6   | 0.00261124935044066 | AGIWUR25660 |
| CB4856                                                                                                               | HS | II | 5790726 | 5794402 | WBGene00019407 | lect-2    | K05F1.5   | 0.148088780509539   | AGIWUR42763 |
| CB4856                                                                                                               | HS | II | 5794495 | 5796185 | WBGene00019406 | acdH-8    | K05F1.3   | 0.150750782642692   | AGIWUR44040 |
| CB4856                                                                                                               | HS | II | 5797893 | 5798341 | WBGene00003469 | msp-142   | K05F1.2   | -0.268649069941739  | AGIWUR20776 |
| CB4856                                                                                                               | HS | II | 5799321 | 5799642 | WBGene00019409 | K05F1.8   | K05F1.8   | -0.0341311212452666 | AGIWUR38573 |
| CB4856                                                                                                               | HS | II | 5800067 | 5801175 | WBGene00019410 | K05F1.9   | K05F1.9   | -0.262211842744794  | AGIWUR22440 |
| CB4856                                                                                                               | HS | II | 5801382 | 5803680 | WBGene00019405 | K05F1.1   | K05F1.1   | -0.129758642549181  | AGIWUR16912 |
| CB4856                                                                                                               | HS | II | 5804717 | 5805475 | WBGene00019411 | K05F1.10  | K05F1.10  | -0.150158753786666  |             |
| AGIWUR32783                                                                                                          |    |    |         |         |                |           |           |                     |             |
| CB4856                                                                                                               | HS | II | 5810514 | 5811749 | WBGene00022876 | ZK1248.5  | ZK1248.5  | 0.0621834406293935  |             |
| AGIWUR38632                                                                                                          |    |    |         |         |                |           |           |                     |             |
| CB4856                                                                                                               | HS | II | 5812375 | 5815482 | WBGene00022877 | wago-5    | ZK1248.7  | 0.231158112179502   |             |
| AGIWUR11337;AGIWUR33360;AGIWUR40670                                                                                  |    |    |         |         |                |           |           |                     |             |
| CB4856                                                                                                               | HS | II | 5816573 | 5817306 | WBGene00044393 | ZK1248.20 | ZK1248.20 | 0.0832524728082014  |             |
| AGIWUR2122;AGIWUR2856;AGIWUR13420;AGIWUR13878;AGIWUR19625                                                            |    |    |         |         |                |           |           |                     |             |
| CB4856                                                                                                               | HS | II | 5820712 | 5823919 | WBGene00001224 | ehs-1     | ZK1248.3  | 0.00383217127683277 |             |
| AGIWUR724;AGIWUR6312;AGIWUR10853;AGIWUR12575;AGIWUR17892;AGIWUR33127;AGIWUR37745;AGIWUR37955;AGIWUR41914;AGIWUR42738 |    |    |         |         |                |           |           |                     |             |
| CB4856                                                                                                               | HS | II | 5827587 | 5828586 | WBGene00022881 | ZK1248.11 | ZK1248.11 | 0.0736062758688241  |             |
| AGIWUR34944;AGIWUR43813                                                                                              |    |    |         |         |                |           |           |                     |             |
| CB4856                                                                                                               | HS | II | 5828683 | 5833232 | WBGene00022882 | ZK1248.13 | ZK1248.13 | 0.153467582702469   |             |
| AGIWUR29446                                                                                                          |    |    |         |         |                |           |           |                     |             |
| CB4856                                                                                                               | HS | II | 5833328 | 5836203 | WBGene00001509 | fzo-1     | ZK1248.14 | -0.096134560567477  |             |
| AGIWUR6222;AGIWUR26024;AGIWUR34210                                                                                   |    |    |         |         |                |           |           |                     |             |
| CB4856                                                                                                               | HS | II | 5836777 | 5838553 | WBGene00022883 | ZK1248.15 | ZK1248.15 | 0.260877115452622   |             |
| AGIWUR3262                                                                                                           |    |    |         |         |                |           |           |                     |             |
| CB4856                                                                                                               | HS | II | 5838663 | 5839414 | WBGene00022885 | ZK1248.19 | ZK1248.19 | 0.151889585456289   |             |
| AGIWUR11421;AGIWUR22217;AGIWUR44302                                                                                  |    |    |         |         |                |           |           |                     |             |
| CB4856                                                                                                               | HS | II | 5839639 | 5841134 | WBGene00002268 | lec-5     | ZK1248.16 | 0.0962365306246511  |             |
| AGIWUR24252                                                                                                          |    |    |         |         |                |           |           |                     |             |
| CB4856                                                                                                               | HS | II | 5842243 | 5844575 | WBGene00022874 | nep-25    | ZK1248.1  | 0.0105314381516237  |             |
| AGIWUR2152                                                                                                           |    |    |         |         |                |           |           |                     |             |
| CB4856                                                                                                               | HS | II | 5845254 | 5845541 | WBGene00022884 | ZK1248.17 | ZK1248.17 | -0.519950556134074  |             |
| AGIWUR39346                                                                                                          |    |    |         |         |                |           |           |                     |             |
| CB4856                                                                                                               | HS | II | 5845777 | 5850308 | WBGene00019270 | H41C03.3  | H41C03.3  | 0.123566717760987   |             |
| AGIWUR11954                                                                                                          |    |    |         |         |                |           |           |                     |             |
| CB4856                                                                                                               | HS | II | 5850362 | 5852038 | WBGene00019269 | H41C03.2  | H41C03.2  | -0.152592114428487  |             |
| AGIWUR25991                                                                                                          |    |    |         |         |                |           |           |                     |             |



|                                                                                                            |    |    |         |         |                |          |          |                      |             |
|------------------------------------------------------------------------------------------------------------|----|----|---------|---------|----------------|----------|----------|----------------------|-------------|
| CB4856                                                                                                     | HS | II | 5854422 | 5857172 | WBGene00019268 | H41C03.1 | H41C03.1 | -0.0154873479249282  |             |
| AGIWUR44238                                                                                                |    |    |         |         |                |          |          |                      |             |
| CB4856                                                                                                     | HS | II | 5857080 | 5858422 | WBGene00018871 | F55C12.4 | F55C12.4 | 0.237061156582298    |             |
| AGIWUR14984                                                                                                |    |    |         |         |                |          |          |                      |             |
| CB4856                                                                                                     | HS | II | 5864182 | 5867041 | WBGene00018874 | tag-234  | F55C12.7 | -0.0791226452427689  |             |
| AGIWUR1948;AGIWUR3530;AGIWUR13556;AGIWUR25750;AGIWUR29295;AGIWUR32862;AGIWUR33273;AGIWUR35149              |    |    |         |         |                |          |          |                      |             |
| CB4856                                                                                                     | HS | II | 5867268 | 5873614 | WBGene00018872 | F55C12.5 | F55C12.5 | -0.144134762077255   |             |
| AGIWUR8048;AGIWUR12256;AGIWUR13416;AGIWUR22582;AGIWUR25368;AGIWUR29569;AGIWUR29585;AGIWUR32447;AGIWUR37960 |    |    |         |         |                |          |          |                      |             |
| CB4856                                                                                                     | HS | II | 5874507 | 5876101 | WBGene00018873 | F55C12.6 | F55C12.6 | 0.128860938846152    |             |
| AGIWUR10598                                                                                                |    |    |         |         |                |          |          |                      |             |
| CB4856                                                                                                     | HS | II | 5884552 | 5892664 | WBGene00018869 | rfig-1   | F55C12.1 | 0.162315985043725    |             |
| AGIWUR14819;AGIWUR33856                                                                                    |    |    |         |         |                |          |          |                      |             |
| CB4856                                                                                                     | HS | II | 5896170 | 5904588 | WBGene00019128 | F59G1.4  | F59G1.4  | -0.0691472319915976  |             |
| AGIWUR4397;AGIWUR8473;AGIWUR22602;AGIWUR24898;AGIWUR27600;AGIWUR29800;AGIWUR33108;AGIWUR36179              |    |    |         |         |                |          |          |                      |             |
| CB4856                                                                                                     | HS | II | 5904552 | 5906308 | WBGene00006644 | tsp-18   | F59G1.2  | 0.0938837295529318   | AGIWUR36316 |
| CB4856                                                                                                     | HS | II | 5906545 | 5907613 | WBGene00019129 | F59G1.8  | F59G1.8  | 0.0395198486915831   | AGIWUR13867 |
| CB4856                                                                                                     | HS | II | 5907794 | 5911222 | WBGene00006933 | vps-35   | F59G1.3  | 0.0245139443066522   |             |
| AGIWUR7216;AGIWUR8177;AGIWUR32419;AGIWUR39608                                                              |    |    |         |         |                |          |          |                      |             |
| CB4856                                                                                                     | HS | II | 5911324 | 5916910 | WBGene00019127 | cgt-3    | F59G1.1  | 0.0670181864888639   |             |
| AGIWUR12481;AGIWUR21844;AGIWUR24749;AGIWUR30188;AGIWUR36709;AGIWUR43677                                    |    |    |         |         |                |          |          |                      |             |
| CB4856                                                                                                     | HS | II | 5917422 | 5918564 | WBGene00001486 | frh-1    | F59G1.7  | -0.245509006339907   | AGIWUR21616 |
| CB4856                                                                                                     | HS | II | 5918626 | 5921617 | WBGene00004214 | ptp-2    | F59G1.5  | 0.0353672238377536   |             |
| AGIWUR4553;AGIWUR27592                                                                                     |    |    |         |         |                |          |          |                      |             |
| CB4856                                                                                                     | HS | II | 5921967 | 5924838 | WBGene00017895 | vrk-1    | F28B12.3 | -0.0549308244351607  |             |
| AGIWUR36435                                                                                                |    |    |         |         |                |          |          |                      |             |
| CB4856                                                                                                     | HS | II | 5933493 | 5940815 | WBGene00001208 | egl-44   | F28B12.2 | 0.0732408213108506   |             |
| AGIWUR7961;AGIWUR17363;AGIWUR42207                                                                         |    |    |         |         |                |          |          |                      |             |
| CB4856                                                                                                     | HS | II | 5942927 | 5943990 | WBGene00017894 | F28B12.1 | F28B12.1 |                      |             |
| -0.00904776551393383 AGIWUR3006                                                                            |    |    |         |         |                |          |          |                      |             |
| CB4856                                                                                                     | HS | II | 5945418 | 5956683 | WBGene00000403 | casy-1   | B0034.3  | -0.0299031164309378  |             |
| AGIWUR3914;AGIWUR14297;AGIWUR18652;AGIWUR18713;AGIWUR34228;AGIWUR37542;AGIWUR44343                         |    |    |         |         |                |          |          |                      |             |
| CB4856                                                                                                     | HS | II | 5961677 | 5962024 | WBGene00044394 | B0034.7  | B0034.7  | -0.00109527825368794 |             |
| AGIWUR5321;AGIWUR14988;AGIWUR15791;AGIWUR20321;AGIWUR43460                                                 |    |    |         |         |                |          |          |                      |             |
| CB4856                                                                                                     | HS | II | 5968079 | 5969058 | WBGene00015004 | B0034.4  | B0034.4  | 0.0953035441999681   | AGIWUR14408 |
| CB4856                                                                                                     | HS | II | 5970105 | 5972658 | WBGene00015002 | B0034.1  | B0034.1  | -0.0349601268971718  | AGIWUR972   |
| CB4856                                                                                                     | HS | II | 5988526 | 5989394 | WBGene00002085 | ins-2    | ZK75.2   | -0.324288944474329   | AGIWUR17557 |
| CB4856                                                                                                     | HS | II | 5990103 | 5990818 | WBGene00002086 | ins-3    | ZK75.3   | 0.0438548619840358   |             |
| AGIWUR17233;AGIWUR19321;AGIWUR27154;AGIWUR37216                                                            |    |    |         |         |                |          |          |                      |             |
| CB4856                                                                                                     | HS | II | 5996370 | 5997007 | WBGene00002087 | ins-4    | ZK75.1   | -0.19194270780338    | AGIWUR27264 |

|                                                                                                             |    |    |         |         |                 |           |           |                     |             |
|-------------------------------------------------------------------------------------------------------------|----|----|---------|---------|-----------------|-----------|-----------|---------------------|-------------|
| CB4856                                                                                                      | HS | II | 5997803 | 5999019 | WBGene00002088  | ins-5     | ZK84.3    | -0.0542552031901984 |             |
| AGIWUR3314;AGIWUR4383;AGIWUR12709;AGIWUR18430;AGIWUR32680;AGIWUR37567;AGIWUR41810                           |    |    |         |         |                 |           |           |                     |             |
| CB4856                                                                                                      | HS | II | 6000421 | 6001009 | WBGene00002089  | ins-6     | ZK84.6    | 0.1010432555773     | AGIWUR2430  |
| CB4856                                                                                                      | HS | II | 6010844 | 6011321 | WBGene00002103  | ins-20    | ZK84.7    | -0.20935270432955   |             |
| AGIWUR16068;AGIWUR20676;AGIWUR23288;AGIWUR27852;AGIWUR27895;AGIWUR32162;AGIWUR38494;AGIWUR41736;AGIWUR44906 |    |    |         |         |                 |           |           |                     |             |
| CB4856                                                                                                      | HS | II | 6014357 | 6015891 | WBGene00022650  | ZK84.2    | ZK84.2    | -0.135050370558059  | AGIWUR25039 |
| CB4856                                                                                                      | HS | II | 6016229 | 6016561 | WBGene00022652  | ZK84.5    | ZK84.5    | 0.081059075181404   | AGIWUR12563 |
| CB4856                                                                                                      | HS | II | 6020653 | 6023349 | WBGene00022649  | ZK84.1    | ZK84.1    | -0.303448717098137  | AGIWUR20753 |
| CB4856                                                                                                      | HS | II | 6023323 | 6025035 | WBGene00020029  | R12C12.9  | R12C12.9  | 0.202604866336738   |             |
| AGIWUR15643                                                                                                 |    |    |         |         |                 |           |           |                     |             |
| CB4856                                                                                                      | HS | II | 6029514 | 6031206 | WBGene00020023  | frpr-16   | R12C12.3  | -0.0498447599945298 |             |
| AGIWUR26305                                                                                                 |    |    |         |         |                 |           |           |                     |             |
| CB4856                                                                                                      | HS | II | 6039344 | 6039650 | WBGene00020024  | R12C12.4  | R12C12.4  | -0.0289680558416929 |             |
| AGIWUR16314                                                                                                 |    |    |         |         |                 |           |           |                     |             |
| CB4856                                                                                                      | HS | II | 6042797 | 6043266 | WBGene00044395  | R12C12.10 | R12C12.10 | 0.0512657782881139  |             |
| AGIWUR4656;AGIWUR11468;AGIWUR14971;AGIWUR28761;AGIWUR34529                                                  |    |    |         |         |                 |           |           |                     |             |
| CB4856                                                                                                      | HS | II | 6044145 | 6045218 | WBGene00020025  | R12C12.5  | R12C12.5  | 0.0753503418770798  |             |
| AGIWUR4312                                                                                                  |    |    |         |         |                 |           |           |                     |             |
| CB4856                                                                                                      | HS | II | 6046286 | 6047867 | WBGene00020026  | R12C12.6  | R12C12.6  |                     |             |
| 0.000803367423214851 AGIWUR2250;AGIWUR7065;AGIWUR32439;AGIWUR39270                                          |    |    |         |         |                 |           |           |                     |             |
| CB4856                                                                                                      | HS | II | 6048109 | 6049686 | WBGene00004306  | ran-5     | R12C12.2  | -0.254103034676595  |             |
| AGIWUR19265;AGIWUR21585;AGIWUR31081                                                                         |    |    |         |         |                 |           |           |                     |             |
| CB4856                                                                                                      | HS | II | 6050332 | 6054307 | WBGene00020022  | gldc-1    | R12C12.1  | 0.081208379771232   |             |
| AGIWUR2327;AGIWUR4982;AGIWUR19292;AGIWUR33072                                                               |    |    |         |         |                 |           |           |                     |             |
| CB4856                                                                                                      | HS | II | 6055039 | 6056388 | WBGene00020027  | R12C12.7  | R12C12.7  | 0.201561531842069   |             |
| AGIWUR16099                                                                                                 |    |    |         |         |                 |           |           |                     |             |
| CB4856                                                                                                      | HS | II | 6057379 | 6061520 | WBGene00020028  | R12C12.8  | R12C12.8  | 0.0160613351779029  |             |
| AGIWUR4081;AGIWUR13422;AGIWUR28711;AGIWUR30011;AGIWUR31749;AGIWUR44325                                      |    |    |         |         |                 |           |           |                     |             |
| CB4856                                                                                                      | HS | II | 6061977 | 6067166 | WBGene00019190  | H12I13.1  | H12I13.1  |                     |             |
| -0.00840296833901411 AGIWUR31215;AGIWUR31279                                                                |    |    |         |         |                 |           |           |                     |             |
| CB4856                                                                                                      | HS | II | 6071386 | 6073251 | WBGene00019192  | H12I13.3  | H12I13.3  | 0.199306573173297   |             |
| AGIWUR33937                                                                                                 |    |    |         |         |                 |           |           |                     |             |
| CB4856                                                                                                      | HS | II | 6077700 | 6078230 | WBGene00019193  | H12I13.5  | H12I13.5  | -0.0139408616207302 |             |
| AGIWUR4388;AGIWUR15709;AGIWUR23079;AGIWUR35963;AGIWUR38074                                                  |    |    |         |         |                 |           |           |                     |             |
| CB4856                                                                                                      | HS | II | 6077904 | 6078235 | WBGene00019194  | H12I13.6  | H12I13.6  | 0.103849738824421   |             |
| AGIWUR13378                                                                                                 |    |    |         |         |                 |           |           |                     |             |
| CB4856                                                                                                      | HS | II | 6078265 | 6080843 | WBGene00001401  | fbf-1     | H12I13.4  | 0.201431220640774   |             |
| AGIWUR10379                                                                                                 |    |    |         |         |                 |           |           |                     |             |
| CB4856                                                                                                      | HS | II | 6083060 | 6083232 | WBGene000201452 | F21H12.9  | F21H12.9  | -0.283694753413961  |             |

|                                                                                                |    |    |         |         |                |                 |                                 |
|------------------------------------------------------------------------------------------------|----|----|---------|---------|----------------|-----------------|---------------------------------|
| AGIWUR20248                                                                                    |    |    |         |         |                |                 |                                 |
| CB4856                                                                                         | HS | II | 6088008 | 6088202 | WBGene00017684 | F21H12.2        | F21H12.2 0.112147888360031      |
| AGIWUR3403                                                                                     |    |    |         |         |                |                 |                                 |
| CB4856                                                                                         | HS | II | 6088866 | 6091480 | WBGene00001402 | fbf-2 F21H12.5  | 0.110138221921519               |
| AGIWUR38480                                                                                    |    |    |         |         |                |                 |                                 |
| CB4856                                                                                         | HS | II | 6091820 | 6092789 | WBGene00044287 | F21H12.7        | F21H12.7 0.0514343674537203     |
| AGIWUR13232;AGIWUR24259                                                                        |    |    |         |         |                |                 |                                 |
| CB4856                                                                                         | HS | II | 6092766 | 6097597 | WBGene00017686 | tpp-2 F21H12.6  | 0.0614912383295776              |
| AGIWUR1355;AGIWUR10802;AGIWUR13569;AGIWUR39948                                                 |    |    |         |         |                |                 |                                 |
| CB4856                                                                                         | HS | II | 6100060 | 6110122 | WBGene00004346 | rgs-3 C29H12.3  | 0.0770641969485024              |
| AGIWUR13208;AGIWUR30201;AGIWUR31773;AGIWUR42877                                                |    |    |         |         |                |                 |                                 |
| CB4856                                                                                         | HS | II | 6110452 | 6113194 | WBGene00016236 | cec-9 C29H12.5  | 0.0453222317956516              |
| AGIWUR31509                                                                                    |    |    |         |         |                |                 |                                 |
| CB4856                                                                                         | HS | II | 6114423 | 6118263 | WBGene00016237 | C29H12.6        | C29H12.6 -0.0826912703304288    |
| AGIWUR19780                                                                                    |    |    |         |         |                |                 |                                 |
| CB4856                                                                                         | HS | II | 6123809 | 6125438 | WBGene00016235 | C29H12.2        | C29H12.2 0.0107617705576617     |
| AGIWUR7944;AGIWUR11819;AGIWUR29712;AGIWUR41243                                                 |    |    |         |         |                |                 |                                 |
| CB4856                                                                                         | HS | II | 6125559 | 6127942 | WBGene00004680 | rars-2 C29H12.1 | 0.110373481561703               |
| AGIWUR265                                                                                      |    |    |         |         |                |                 |                                 |
| CB4856                                                                                         | HS | II | 6136094 | 6157176 | WBGene00019018 | abts-3 F57F10.1 | 0.0356928364669837              |
| AGIWUR36284                                                                                    |    |    |         |         |                |                 |                                 |
| CB4856                                                                                         | HS | II | 6157167 | 6161094 | WBGene00001373 | exp-1 H35N03.1  | -0.0766586578567203             |
| AGIWUR28654                                                                                    |    |    |         |         |                |                 |                                 |
| CB4856                                                                                         | HS | II | 6165721 | 6169231 | WBGene00002030 | hst-3.1 F40H3.5 | 0.0400191121923257              |
| AGIWUR1423;AGIWUR14920;AGIWUR33288;AGIWUR34425;AGIWUR35649;AGIWUR36354;AGIWUR38927;AGIWUR43602 |    |    |         |         |                |                 |                                 |
| CB4856                                                                                         | HS | II | 6171507 | 6173159 | WBGene00018251 | F40H3.3 F40H3.3 | -0.242948763583891 AGIWUR15632  |
| CB4856                                                                                         | HS | II | 6173568 | 6174863 | WBGene00018250 | F40H3.2 F40H3.2 | 0.121021909570135 AGIWUR22105   |
| CB4856                                                                                         | HS | II | 6179867 | 6184684 | WBGene00018249 | F40H3.1 F40H3.1 | -0.00773440674417891            |
| AGIWUR2525;AGIWUR3859;AGIWUR26674                                                              |    |    |         |         |                |                 |                                 |
| CB4856                                                                                         | HS | II | 6187010 | 6187722 | WBGene00018252 | F40H3.6 F40H3.6 | -0.195091863893046 AGIWUR7675   |
| CB4856                                                                                         | HS | II | 6189580 | 6191402 | WBGene00001440 | fkx-8 F40H3.4   | -0.171842176522657 AGIWUR19154  |
| CB4856                                                                                         | HS | II | 6192784 | 6195170 | WBGene00000771 | cpb-2 C30B5.3   | 0.0258715717634104              |
| AGIWUR9692;AGIWUR28077;AGIWUR33384                                                             |    |    |         |         |                |                 |                                 |
| CB4856                                                                                         | HS | II | 6195813 | 6196959 | WBGene00016245 | C30B5.4 C30B5.4 | -0.0222136403736748 AGIWUR20508 |
| CB4856                                                                                         | HS | II | 6197180 | 6198308 | WBGene00016244 | C30B5.2 C30B5.2 | 0.0893127809501806              |
| AGIWUR1981;AGIWUR4452;AGIWUR6505;AGIWUR36902;AGIWUR41508;AGIWUR42485;AGIWUR43717               |    |    |         |         |                |                 |                                 |
| CB4856                                                                                         | HS | II | 6198696 | 6201628 | WBGene00077732 | szy-4 C30B5.1   | -0.0218976404131404 AGIWUR38892 |
| CB4856                                                                                         | HS | II | 6219526 | 6222658 | WBGene00016247 | C30B5.6 C30B5.6 | -0.0803596871780199             |
| AGIWUR8793;AGIWUR34758;AGIWUR36628;AGIWUR38666                                                 |    |    |         |         |                |                 |                                 |

|                                                                        |    |    |         |         |                |          |          |                      |             |
|------------------------------------------------------------------------|----|----|---------|---------|----------------|----------|----------|----------------------|-------------|
| CB4856                                                                 | HS | II | 6224892 | 6227095 | WBGene00016248 | C30B5.7  | C30B5.7  | 0.22910988093364     | AGIWUR14114 |
| CB4856                                                                 | HS | II | 6234483 | 6244287 | WBGene00020784 | tat-4    | T24H7.5  | 0.088051598822112    |             |
| AGIWUR10956;AGIWUR15388;AGIWUR17815;AGIWUR27470;AGIWUR28746            |    |    |         |         |                |          |          |                      |             |
| CB4856                                                                 | HS | II | 6245748 | 6246257 | WBGene00020783 | blos-4   | T24H7.4  | 0.000501170123785144 | AGIWUR43685 |
| CB4856                                                                 | HS | II | 6246354 | 6247334 | WBGene00020782 | T24H7.3  | T24H7.3  | -0.158193559024163   |             |
| AGIWUR2657;AGIWUR5181;AGIWUR13345;AGIWUR28033;AGIWUR30272              |    |    |         |         |                |          |          |                      |             |
| CB4856                                                                 | HS | II | 6247311 | 6250841 | WBGene00020781 | T24H7.2  | T24H7.2  | 0.110670760596728    |             |
| AGIWUR14735;AGIWUR28910;AGIWUR33691                                    |    |    |         |         |                |          |          |                      |             |
| CB4856                                                                 | HS | II | 6251411 | 6252797 | WBGene00004015 | phb-2    | T24H7.1  | 0.144913632562169    | AGIWUR1862  |
| CB4856                                                                 | HS | II | 6252774 | 6256124 | WBGene00017438 | F13H8.5  | F13H8.5  | -0.169667142113553   | AGIWUR39790 |
| CB4856                                                                 | HS | II | 6257628 | 6260021 | WBGene00017443 | F13H8.11 | F13H8.11 | 0.290334223206383    |             |
| AGIWUR32496                                                            |    |    |         |         |                |          |          |                      |             |
| CB4856                                                                 | HS | II | 6260857 | 6262524 | WBGene00017437 | nmgp-1   | F13H8.4  | -0.0970662022584516  | AGIWUR27005 |
| CB4856                                                                 | HS | II | 6262522 | 6263325 | WBGene00017444 | F13H8.12 | F13H8.12 | -0.0735184839914549  |             |
| AGIWUR31676                                                            |    |    |         |         |                |          |          |                      |             |
| CB4856                                                                 | HS | II | 6264050 | 6265502 | WBGene00017436 | F13H8.3  | F13H8.3  | 0.0859679843713295   | AGIWUR33928 |
| CB4856                                                                 | HS | II | 6265612 | 6268083 | WBGene00017441 | F13H8.8  | F13H8.8  | 0.135785376886935    |             |
| AGIWUR9280;AGIWUR18592;AGIWUR29470;AGIWUR42923                         |    |    |         |         |                |          |          |                      |             |
| CB4856                                                                 | HS | II | 6270370 | 6274005 | WBGene00017435 | F13H8.2  | F13H8.2  | -0.0422415179726592  |             |
| AGIWUR6887;AGIWUR11903;AGIWUR22150;AGIWUR23635                         |    |    |         |         |                |          |          |                      |             |
| CB4856                                                                 | HS | II | 6274115 | 6279699 | WBGene00000259 | bp1-1    | F13H8.10 | 0.101040436986642    |             |
| AGIWUR5304;AGIWUR14955;AGIWUR24067;AGIWUR41077;AGIWUR44743             |    |    |         |         |                |          |          |                      |             |
| CB4856                                                                 | HS | II | 6279676 | 6281102 | WBGene00017442 | F13H8.9  | F13H8.9  | 0.0953925510369125   | AGIWUR41405 |
| CB4856                                                                 | HS | II | 6283386 | 6284724 | WBGene00017434 | F13H8.1  | F13H8.1  | 0.241954481289171    | AGIWUR4875  |
| CB4856                                                                 | HS | II | 6284817 | 6286869 | WBGene00017439 | F13H8.6  | F13H8.6  | 0.0323144588879885   | AGIWUR37478 |
| CB4856                                                                 | HS | II | 6288413 | 6290097 | WBGene00017440 | upb-1    | F13H8.7  | 0.0719315384663286   |             |
| AGIWUR9195;AGIWUR17843;AGIWUR21426;AGIWUR32208;AGIWUR41349;AGIWUR41634 |    |    |         |         |                |          |          |                      |             |
| CB4856                                                                 | HS | II | 6290652 | 6292524 | WBGene00016212 | C29F5.3  | C29F5.3  | 0.0917500375711064   | AGIWUR44222 |
| CB4856                                                                 | HS | II | 6292652 | 6294356 | WBGene00003403 | mps-1    | C29F5.4  | 0.0138103645846757   | AGIWUR17874 |
| CB4856                                                                 | HS | II | 6297243 | 6298675 | WBGene00016213 | C29F5.5  | C29F5.5  | -0.15766674008825    | AGIWUR11702 |
| CB4856                                                                 | HS | II | 6299502 | 6301398 | WBGene00016211 | sdz-3    | C29F5.2  | 0.189662154995216    | AGIWUR5265  |
| CB4856                                                                 | HS | II | 6303424 | 6306283 | WBGene00016210 | C29F5.1  | C29F5.1  | 0.129229920312802    | AGIWUR39617 |
| CB4856                                                                 | HS | II | 6306429 | 6308073 | WBGene00044589 | C29F5.8  | C29F5.8  | -0.0745607781930824  |             |
| AGIWUR12713;AGIWUR30405                                                |    |    |         |         |                |          |          |                      |             |
| CB4856                                                                 | HS | II | 6308114 | 6309298 | WBGene00016215 | glb-10   | C29F5.7  | 0.00644534644547523  | AGIWUR22465 |
| CB4856                                                                 | HS | II | 6318087 | 6321159 | WBGene00016311 | C32D5.3  | C32D5.3  | 0.111874738125088    |             |
| AGIWUR24680;AGIWUR44562                                                |    |    |         |         |                |          |          |                      |             |
| CB4856                                                                 | HS | II | 6321340 | 6323079 | WBGene00016312 | C32D5.4  | C32D5.4  | -0.00522035033801416 | AGIWUR36431 |
| CB4856                                                                 | HS | II | 6324484 | 6327355 | WBGene00004860 | sma-6    | C32D5.2  | 0.022115880407231    |             |

AGIWUR49;AGIWUR39534

|        |    |    |         |         |                |          |          |                     |             |
|--------|----|----|---------|---------|----------------|----------|----------|---------------------|-------------|
| CB4856 | HS | II | 6329850 | 6331341 | WBGene00016313 | set-4    | C32D5.5  | -0.0575378110213833 | AGIWUR32781 |
| CB4856 | HS | II | 6331899 | 6333987 | WBGene00016314 | C32D5.6  | C32D5.6  | 0.365963516468669   | AGIWUR23810 |
| CB4856 | HS | II | 6335478 | 6336334 | WBGene00044755 | C32D5.14 | C32D5.14 | -0.0242242295402262 |             |

AGIWUR1397;AGIWUR12037;AGIWUR13449;AGIWUR17048;AGIWUR39841

|        |    |    |         |         |                |         |         |                    |             |
|--------|----|----|---------|---------|----------------|---------|---------|--------------------|-------------|
| CB4856 | HS | II | 6336345 | 6339557 | WBGene00016315 | C32D5.7 | C32D5.7 | -0.307276034420525 | AGIWUR24724 |
| CB4856 | HS | II | 6343058 | 6345925 | WBGene00016316 | C32D5.8 | C32D5.8 | -0.121011194927516 |             |

AGIWUR20118;AGIWUR36064;AGIWUR41359;AGIWUR41461

|        |    |    |         |         |                |       |         |                   |  |
|--------|----|----|---------|---------|----------------|-------|---------|-------------------|--|
| CB4856 | HS | II | 6346960 | 6347719 | WBGene00002980 | lgg-1 | C32D5.9 | 0.129056732555991 |  |
|--------|----|----|---------|---------|----------------|-------|---------|-------------------|--|

AGIWUR21157;AGIWUR39449;AGIWUR39870

|        |    |    |         |         |                |          |          |                    |  |
|--------|----|----|---------|---------|----------------|----------|----------|--------------------|--|
| CB4856 | HS | II | 6349207 | 6351987 | WBGene00016317 | C32D5.10 | C32D5.10 | 0.0316688597055119 |  |
|--------|----|----|---------|---------|----------------|----------|----------|--------------------|--|

AGIWUR18554

|        |    |    |         |         |                |          |          |                     |  |
|--------|----|----|---------|---------|----------------|----------|----------|---------------------|--|
| CB4856 | HS | II | 6352542 | 6355911 | WBGene00016318 | C32D5.11 | C32D5.11 | -0.0684862726987081 |  |
|--------|----|----|---------|---------|----------------|----------|----------|---------------------|--|

AGIWUR20770;AGIWUR26037;AGIWUR28595;AGIWUR31352;AGIWUR38108;AGIWUR38590

|        |    |    |         |         |                |          |          |                   |  |
|--------|----|----|---------|---------|----------------|----------|----------|-------------------|--|
| CB4856 | HS | II | 6356416 | 6359005 | WBGene00016319 | C32D5.12 | C32D5.12 | 0.141533865093619 |  |
|--------|----|----|---------|---------|----------------|----------|----------|-------------------|--|

AGIWUR30696

|        |    |    |         |         |                |         |         |                      |             |
|--------|----|----|---------|---------|----------------|---------|---------|----------------------|-------------|
| CB4856 | HS | II | 6360331 | 6360959 | WBGene00019607 | K10B2.4 | K10B2.4 | -0.00884992353062586 | AGIWUR3646  |
| CB4856 | HS | II | 6361159 | 6365367 | WBGene00019608 | ani-2   | K10B2.5 | -0.088611649964939   | AGIWUR26224 |
| CB4856 | HS | II | 6365722 | 6367002 | WBGene00019606 | clec-88 | K10B2.3 | 0.0334422539176336   |             |

AGIWUR692;AGIWUR9567;AGIWUR33254;AGIWUR42994

|        |    |    |         |         |                |        |         |                     |  |
|--------|----|----|---------|---------|----------------|--------|---------|---------------------|--|
| CB4856 | HS | II | 6366990 | 6369210 | WBGene00019605 | ctsa-1 | K10B2.2 | -0.0806847739241121 |  |
|--------|----|----|---------|---------|----------------|--------|---------|---------------------|--|

AGIWUR12427;AGIWUR18699;AGIWUR19182;AGIWUR31523;AGIWUR41372

|        |    |    |         |         |                |        |         |                    |             |
|--------|----|----|---------|---------|----------------|--------|---------|--------------------|-------------|
| CB4856 | HS | II | 6371295 | 6374544 | WBGene00003009 | lin-23 | K10B2.1 | -0.215555413235583 | AGIWUR16062 |
|--------|----|----|---------|---------|----------------|--------|---------|--------------------|-------------|

|        |    |    |         |         |                |          |          |                   |  |
|--------|----|----|---------|---------|----------------|----------|----------|-------------------|--|
| CB4856 | HS | II | 6383645 | 6384692 | WBGene00019061 | F58F12.1 | F58F12.1 | -0.15001906165613 |  |
|--------|----|----|---------|---------|----------------|----------|----------|-------------------|--|

AGIWUR9471;AGIWUR23871

|        |    |    |         |         |                |          |          |  |  |
|--------|----|----|---------|---------|----------------|----------|----------|--|--|
| CB4856 | HS | II | 6386767 | 6387568 | WBGene00044756 | F58F12.4 | F58F12.4 |  |  |
|--------|----|----|---------|---------|----------------|----------|----------|--|--|

-0.00635757581294527 AGIWUR4742;AGIWUR26851;AGIWUR28350

|        |    |    |         |         |                |          |          |                    |  |
|--------|----|----|---------|---------|----------------|----------|----------|--------------------|--|
| CB4856 | HS | II | 6387525 | 6388242 | WBGene00019062 | F58F12.2 | F58F12.2 | -0.212895678470487 |  |
|--------|----|----|---------|---------|----------------|----------|----------|--------------------|--|

AGIWUR32553

|        |    |    |         |         |                |          |          |                    |  |
|--------|----|----|---------|---------|----------------|----------|----------|--------------------|--|
| CB4856 | HS | II | 6389275 | 6391295 | WBGene00019063 | F58F12.3 | F58F12.3 | 0.0796265963995024 |  |
|--------|----|----|---------|---------|----------------|----------|----------|--------------------|--|

AGIWUR1198;AGIWUR7481;AGIWUR10443;AGIWUR30768;AGIWUR37971;AGIWUR43033

|        |    |    |         |         |                |        |          |                    |  |
|--------|----|----|---------|---------|----------------|--------|----------|--------------------|--|
| CB4856 | HS | II | 6398706 | 6400940 | WBGene00020800 | zig-10 | T25D10.2 | -0.161194325854781 |  |
|--------|----|----|---------|---------|----------------|--------|----------|--------------------|--|

AGIWUR4485;AGIWUR9846;AGIWUR26601;AGIWUR27441;AGIWUR36937

|        |    |    |         |         |                |       |          |                     |  |
|--------|----|----|---------|---------|----------------|-------|----------|---------------------|--|
| CB4856 | HS | II | 6401949 | 6403102 | WBGene00020802 | btd-2 | T25D10.5 | -0.0861327656012936 |  |
|--------|----|----|---------|---------|----------------|-------|----------|---------------------|--|

AGIWUR34805

|        |    |    |         |         |                |          |          |                    |  |
|--------|----|----|---------|---------|----------------|----------|----------|--------------------|--|
| CB4856 | HS | II | 6403401 | 6405040 | WBGene00020799 | T25D10.1 | T25D10.1 | 0.0192589728207793 |  |
|--------|----|----|---------|---------|----------------|----------|----------|--------------------|--|

AGIWUR43640

|        |    |    |         |         |                |        |          |                   |  |
|--------|----|----|---------|---------|----------------|--------|----------|-------------------|--|
| CB4856 | HS | II | 6405391 | 6407346 | WBGene00004996 | spp-11 | T25D10.3 | 0.113076883996449 |  |
|--------|----|----|---------|---------|----------------|--------|----------|-------------------|--|

AGIWUR32974

|                                                                                               |    |    |         |         |                |          |          |                                 |
|-----------------------------------------------------------------------------------------------|----|----|---------|---------|----------------|----------|----------|---------------------------------|
| CB4856                                                                                        | HS | II | 6407537 | 6410281 | WBGene00020801 | T25D10.4 | T25D10.4 |                                 |
| -0.00469152227714709 AGIWUR42618                                                              |    |    |         |         |                |          |          |                                 |
| CB4856                                                                                        | HS | II | 6423112 | 6424925 | WBGene00019372 | K03H9.3  | K03H9.3  | 0.111259218507397 AGIWUR5579    |
| CB4856                                                                                        | HS | II | 6426293 | 6427513 | WBGene00000651 | col-75   | K03H9.2  | 0.262953685540786 AGIWUR25302   |
| CB4856                                                                                        | HS | II | 6431261 | 6431875 | WBGene00019371 | K03H9.1  | K03H9.1  | -0.0268577613441057 AGIWUR43614 |
| CB4856                                                                                        | HS | II | 6441428 | 6443921 | WBGene00019426 | cutl-16  | K06A1.3  | 0.0164101063395643 AGIWUR25549  |
| CB4856                                                                                        | HS | II | 6444010 | 6446134 | WBGene00019425 | K06A1.2  | K06A1.2  | -0.0159284426994901 AGIWUR15893 |
| CB4856                                                                                        | HS | II | 6446079 | 6449819 | WBGene00003621 | nhr-22   | K06A1.4  | 0.223865274609512 AGIWUR30016   |
| CB4856                                                                                        | HS | II | 6450889 | 6453391 | WBGene00019427 | atg-16.2 | K06A1.5  | -0.139945144586636              |
| AGIWUR13723;AGIWUR19569;AGIWUR29959;AGIWUR42434                                               |    |    |         |         |                |          |          |                                 |
| CB4856                                                                                        | HS | II | 6454974 | 6456440 | WBGene00019424 | aptf-1   | K06A1.1  | -0.0629794594721567 AGIWUR35064 |
| CB4856                                                                                        | HS | II | 6456522 | 6467642 | WBGene00019428 | dgk-5    | K06A1.6  | 0.198510549457181 AGIWUR36916   |
| CB4856                                                                                        | HS | II | 6470095 | 6470506 | WBGene00044669 | T28D9.12 | T28D9.12 | 0.0119621888707426              |
| AGIWUR1436;AGIWUR13032;AGIWUR16320;AGIWUR20238;AGIWUR35214                                    |    |    |         |         |                |          |          |                                 |
| CB4856                                                                                        | HS | II | 6474338 | 6482125 | WBGene00020897 | del-10   | T28D9.7  | -0.141603496337567 AGIWUR19065  |
| CB4856                                                                                        | HS | II | 6483953 | 6484967 | WBGene00020898 | T28D9.9  | T28D9.9  | 0.171605281172009 AGIWUR13709   |
| CB4856                                                                                        | HS | II | 6485677 | 6488861 | WBGene00020895 | T28D9.3  | T28D9.3  | 0.171347763588614               |
| AGIWUR31909;AGIWUR38236;AGIWUR43877                                                           |    |    |         |         |                |          |          |                                 |
| CB4856                                                                                        | HS | II | 6488830 | 6489761 | WBGene00004916 | snr-3    | T28D9.10 | -0.0124907280450319             |
| AGIWUR4000;AGIWUR15440;AGIWUR22068;AGIWUR22293;AGIWUR29265;AGIWUR37787;AGIWUR42229            |    |    |         |         |                |          |          |                                 |
| CB4856                                                                                        | HS | II | 6490158 | 6491340 | WBGene00004702 | rsp-5    | T28D9.2  | 0.101533291493239               |
| AGIWUR5146;AGIWUR5155;AGIWUR10143;AGIWUR12090;AGIWUR17860;AGIWUR27025;AGIWUR28242;AGIWUR40736 |    |    |         |         |                |          |          |                                 |
| CB4856                                                                                        | HS | II | 6491469 | 6491993 | WBGene00020899 | T28D9.11 | T28D9.11 | 0.353162687447125               |
| AGIWUR21047;AGIWUR34760                                                                       |    |    |         |         |                |          |          |                                 |
| CB4856                                                                                        | HS | II | 6492402 | 6493778 | WBGene00020894 | T28D9.1  | T28D9.1  | 0.0523253157693127 AGIWUR5642   |
| CB4856                                                                                        | HS | II | 6493720 | 6498633 | WBGene00019904 | twk-49   | R05G9.2  | 0.064066410522349 AGIWUR26459   |
| CB4856                                                                                        | HS | II | 6500397 | 6501520 | WBGene00019905 | R05G9.3  | R05G9.3  | 0.0623724044847442 AGIWUR11317  |
| CB4856                                                                                        | HS | II | 6503360 | 6526333 | WBGene00016970 | C56E6.2  | C56E6.2  | 0.0382683391359686              |
| AGIWUR8020;AGIWUR8720;AGIWUR8781;AGIWUR28926                                                  |    |    |         |         |                |          |          |                                 |
| CB4856                                                                                        | HS | II | 6526372 | 6528801 | WBGene00016972 | C56E6.4  | C56E6.4  | 0.0368272097799824              |
| AGIWUR11683;AGIWUR17423;AGIWUR23906                                                           |    |    |         |         |                |          |          |                                 |
| CB4856                                                                                        | HS | II | 6528933 | 6531610 | WBGene00016973 | abch-1   | C56E6.5  | 0.450123179145516 AGIWUR23341   |
| CB4856                                                                                        | HS | II | 6536380 | 6554846 | WBGene00007050 | utp-20   | F18C5.3  | 0.114380784339173               |
| AGIWUR10754;AGIWUR11524;AGIWUR42658;AGIWUR43051                                               |    |    |         |         |                |          |          |                                 |
| CB4856                                                                                        | HS | II | 6554977 | 6559267 | WBGene00006944 | wrn-1    | F18C5.2  | 0.147188335400111 AGIWUR29106   |
| CB4856                                                                                        | HS | II | 6559258 | 6561583 | WBGene00017563 | F18C5.10 | F18C5.10 | -0.0423501157861348             |
| AGIWUR207;AGIWUR5082;AGIWUR13583;AGIWUR14924;AGIWUR17027;AGIWUR27722;AGIWUR36568;AGIWUR37877  |    |    |         |         |                |          |          |                                 |
| CB4856                                                                                        | HS | II | 6563796 | 6565154 | WBGene00017559 | mpz-3    | F18C5.4  | -0.272524946868042 AGIWUR16305  |
| CB4856                                                                                        | HS | II | 6567134 | 6567870 | WBGene00017562 | F18C5.9  | F18C5.9  | 0.0816379188561633 AGIWUR27361  |

|                                                                         |    |    |         |         |                |           |           |                     |             |
|-------------------------------------------------------------------------|----|----|---------|---------|----------------|-----------|-----------|---------------------|-------------|
| CB4856                                                                  | HS | II | 6569014 | 6570434 | WBGene00005053 | sra-27    | F18C5.1   | 0.0114772777198304  | AGIWUR39606 |
| CB4856                                                                  | HS | II | 6570547 | 6573777 | WBGene00005054 | sra-28    | F18C5.6   | -0.0819834621994397 | AGIWUR37994 |
| CB4856                                                                  | HS | II | 6574378 | 6575747 | WBGene00005055 | sra-29    | F18C5.8   | 0.0484941681893716  | AGIWUR25113 |
| CB4856                                                                  | HS | II | 6576974 | 6578478 | WBGene00005057 | sra-31    | C56C10.5  | -0.0351188332322447 |             |
| AGIWUR32720                                                             |    |    |         |         |                |           |           |                     |             |
| CB4856                                                                  | HS | II | 6583039 | 6584514 | WBGene00016962 | C56C10.4  | C56C10.4  | -0.395142325699354  |             |
| AGIWUR12231                                                             |    |    |         |         |                |           |           |                     |             |
| CB4856                                                                  | HS | II | 6584409 | 6587569 | WBGene00016964 | C56C10.7  | C56C10.7  | 0.0115846896367096  |             |
| AGIWUR10789;AGIWUR13070;AGIWUR19595;AGIWUR43494;AGIWUR44239             |    |    |         |         |                |           |           |                     |             |
| CB4856                                                                  | HS | II | 6587577 | 6588679 | WBGene00002045 | icd-1     | C56C10.8  | 0.412099961550821   |             |
| AGIWUR11449;AGIWUR16844;AGIWUR16923;AGIWUR19543;AGIWUR37015;AGIWUR43221 |    |    |         |         |                |           |           |                     |             |
| CB4856                                                                  | HS | II | 6589290 | 6591081 | WBGene00016961 | vps-32.1  | C56C10.3  | 0.0233292701259682  |             |
| AGIWUR32474                                                             |    |    |         |         |                |           |           |                     |             |
| CB4856                                                                  | HS | II | 6591048 | 6592351 | WBGene00016965 | C56C10.9  | C56C10.9  | -0.289157967940884  |             |
| AGIWUR19535                                                             |    |    |         |         |                |           |           |                     |             |
| CB4856                                                                  | HS | II | 6592440 | 6594251 | WBGene00016966 | aipr-1    | C56C10.10 | 0.118553223806153   |             |
| AGIWUR35463                                                             |    |    |         |         |                |           |           |                     |             |
| CB4856                                                                  | HS | II | 6594382 | 6598080 | WBGene00001026 | dnj-8     | C56C10.13 | 0.0200271705982455  |             |
| AGIWUR18501                                                             |    |    |         |         |                |           |           |                     |             |
| CB4856                                                                  | HS | II | 6598349 | 6601119 | WBGene00016967 | C56C10.11 | C56C10.11 | 0.0720282757520607  |             |
| AGIWUR37942                                                             |    |    |         |         |                |           |           |                     |             |
| CB4856                                                                  | HS | II | 6601216 | 6603449 | WBGene00016960 | vps-33.2  | C56C10.1  | 0.0168152510552098  |             |
| AGIWUR11698                                                             |    |    |         |         |                |           |           |                     |             |
| CB4856                                                                  | HS | II | 6603441 | 6609356 | WBGene00016968 | epg-5     | C56C10.12 | -0.138695204452768  |             |
| AGIWUR42321                                                             |    |    |         |         |                |           |           |                     |             |
| CB4856                                                                  | HS | II | 6618218 | 6622168 | WBGene00003480 | k1f-3     | F54H5.4   | -0.110464627000809  | AGIWUR40709 |
| CB4856                                                                  | HS | II | 6622189 | 6623500 | WBGene00018840 | F54H5.3   | F54H5.3   | -0.168756958510812  | AGIWUR32792 |
| CB4856                                                                  | HS | II | 6623423 | 6625389 | WBGene00255600 | F54H5.14  | F54H5.14  | -0.0501001458148735 |             |
| AGIWUR17284                                                             |    |    |         |         |                |           |           |                     |             |
| CB4856                                                                  | HS | II | 6631105 | 6637099 | WBGene00020579 | T19D12.4  | T19D12.4  | 0.320984248512215   |             |
| AGIWUR31097;AGIWUR40733                                                 |    |    |         |         |                |           |           |                     |             |
| CB4856                                                                  | HS | II | 6637093 | 6643117 | WBGene00020581 | T19D12.6  | T19D12.6  | 0.119844847067283   |             |
| AGIWUR5677;AGIWUR11762;AGIWUR34722;AGIWUR35376                          |    |    |         |         |                |           |           |                     |             |
| CB4856                                                                  | HS | II | 6647166 | 6649126 | WBGene00020582 | oig-8     | T19D12.7  | 0.108362721301402   |             |
| AGIWUR13576                                                             |    |    |         |         |                |           |           |                     |             |
| CB4856                                                                  | HS | II | 6649789 | 6651819 | WBGene00005052 | sra-26    | T19D12.8  | -0.0839593089468575 |             |
| AGIWUR43747                                                             |    |    |         |         |                |           |           |                     |             |
| CB4856                                                                  | HS | II | 6652339 | 6654384 | WBGene00020583 | T19D12.9  | T19D12.9  | -0.0625554236985266 |             |
| AGIWUR13667                                                             |    |    |         |         |                |           |           |                     |             |

|                                                                                   |    |         |         |                |           |           |                      |             |
|-----------------------------------------------------------------------------------|----|---------|---------|----------------|-----------|-----------|----------------------|-------------|
| CB4856 HS                                                                         | II | 6655096 | 6658866 | WBGene00020584 | T19D12.10 | T19D12.10 | -0.0662114492451753  |             |
| AGIWUR11924                                                                       |    |         |         |                |           |           |                      |             |
| CB4856 HS                                                                         | II | 6660274 | 6660994 | WBGene00020578 | T19D12.3  | T19D12.3  | 0.185111976574995    |             |
| AGIWUR14410                                                                       |    |         |         |                |           |           |                      |             |
| CB4856 HS                                                                         | II | 6661335 | 6665206 | WBGene00020577 | T19D12.2  | T19D12.2  | 0.103846575241168    |             |
| AGIWUR3051;AGIWUR10166;AGIWUR16961;AGIWUR29672                                    |    |         |         |                |           |           |                      |             |
| CB4856 HS                                                                         | II | 6666898 | 6673752 | WBGene00020576 | T19D12.1  | T19D12.1  | 0.394462602432601    |             |
| AGIWUR44211                                                                       |    |         |         |                |           |           |                      |             |
| CB4856 HS                                                                         | II | 6674268 | 6679363 | WBGene00019273 | H43E16.1  | H43E16.1  | 0.180517980888842    |             |
| AGIWUR6136;AGIWUR30081                                                            |    |         |         |                |           |           |                      |             |
| CB4856 HS                                                                         | II | 6679545 | 6682971 | WBGene00016005 | ift-74    | C18H9.8   | 0.0308329618118588   | AGIWUR238   |
| CB4856 HS                                                                         | II | 6684236 | 6691841 | WBGene00016002 | C18H9.3   | C18H9.3   | -0.145562756617039   |             |
| AGIWUR206;AGIWUR13368;AGIWUR18047;AGIWUR23125;AGIWUR37969;AGIWUR38975;AGIWUR41873 |    |         |         |                |           |           |                      |             |
| CB4856 HS                                                                         | II | 6692748 | 6695566 | WBGene00016003 | C18H9.5   | C18H9.5   | 0.0296299065081929   |             |
| AGIWUR4158;AGIWUR8718;AGIWUR38275                                                 |    |         |         |                |           |           |                      |             |
| CB4856 HS                                                                         | II | 6699084 | 6700482 | WBGene00016000 | C18H9.1   | C18H9.1   | 0.0132533599664111   | AGIWUR2090  |
| CB4856 HS                                                                         | II | 6700660 | 6701625 | WBGene00016004 | C18H9.6   | C18H9.6   | -0.0786932100632569  | AGIWUR41807 |
| CB4856 HS                                                                         | II | 6702233 | 6705643 | WBGene00004507 | rpy-1     | C18H9.7   | 0.246144909446937    | AGIWUR37590 |
| CB4856 HS                                                                         | II | 6710156 | 6712931 | WBGene00001072 | dpy-10    | T14B4.7   | 0.0332938634221591   |             |
| AGIWUR5189;AGIWUR7679;AGIWUR8899;AGIWUR9246                                       |    |         |         |                |           |           |                      |             |
| CB4856 HS                                                                         | II | 6714292 | 6715971 | WBGene00001064 | dpy-2     | T14B4.6   | -0.068332371432124   | AGIWUR7774  |
| CB4856 HS                                                                         | II | 6716863 | 6717868 | WBGene00020501 | T14B4.5   | T14B4.5   | -0.00842707485194083 | AGIWUR38846 |
| CB4856 HS                                                                         | II | 6718532 | 6720294 | WBGene00006636 | tsp-10    | T14B4.4   | 0.327240717168941    | AGIWUR4910  |
| CB4856 HS                                                                         | II | 6720177 | 6729302 | WBGene00020502 | T14B4.8   | T14B4.8   | -0.0999484429502333  | AGIWUR25786 |
| CB4856 HS                                                                         | II | 6730207 | 6733795 | WBGene00020503 | T14B4.9   | T14B4.9   | 0.0202808356201718   |             |
| AGIWUR6731;AGIWUR12919;AGIWUR20426                                                |    |         |         |                |           |           |                      |             |
| CB4856 HS                                                                         | II | 6734907 | 6736110 | WBGene00020500 | T14B4.3   | T14B4.3   | -0.114128656428575   | AGIWUR16797 |
| CB4856 HS                                                                         | II | 6736203 | 6736793 | WBGene00020499 | T14B4.2   | T14B4.2   | -0.0733454488210654  | AGIWUR20086 |
| CB4856 HS                                                                         | II | 6736904 | 6741482 | WBGene00020498 | T14B4.1   | T14B4.1   | 0.00385723290396633  |             |
| AGIWUR1770;AGIWUR25503;AGIWUR37363;AGIWUR39875                                    |    |         |         |                |           |           |                      |             |
| CB4856 HS                                                                         | II | 6741663 | 6742819 | WBGene00018305 | exos-8    | F41G3.14  | 0.107491437574087    |             |
| AGIWUR34684                                                                       |    |         |         |                |           |           |                      |             |
| CB4856 HS                                                                         | II | 6742914 | 6744267 | WBGene00018302 | F41G3.6   | F41G3.6   | -0.0986608501269597  | AGIWUR4505  |
| CB4856 HS                                                                         | II | 6744339 | 6744735 | WBGene00002098 | ins-15    | F41G3.17  | 0.126201850562107    |             |
| AGIWUR6727;AGIWUR34476;AGIWUR39415                                                |    |         |         |                |           |           |                      |             |
| CB4856 HS                                                                         | II | 6745435 | 6745960 | WBGene00002097 | ins-14    | F41G3.16  | 0.154511807976758    |             |
| AGIWUR3224;AGIWUR9228;AGIWUR29224;AGIWUR40668;AGIWUR40844                         |    |         |         |                |           |           |                      |             |
| CB4856 HS                                                                         | II | 6746704 | 6748586 | WBGene00018301 | F41G3.5   | F41G3.5   | 0.071223579037671    | AGIWUR8791  |
| CB4856 HS                                                                         | II | 6748632 | 6749522 | WBGene00018303 | F41G3.10  | F41G3.10  | -0.0748647694717022  |             |



|                                                                                     |    |    |         |         |                |          |          |                      |             |
|-------------------------------------------------------------------------------------|----|----|---------|---------|----------------|----------|----------|----------------------|-------------|
| AGIWUR22145                                                                         |    |    |         |         |                |          |          |                      |             |
| CB4856                                                                              | HS | II | 6749793 | 6751029 | WBGene00044315 | F41G3.20 | F41G3.20 | 0.155096462978624    |             |
| AGIWUR22149;AGIWUR35617                                                             |    |    |         |         |                |          |          |                      |             |
| CB4856                                                                              | HS | II | 6751624 | 6752127 | WBGene00044317 | F41G3.19 | F41G3.19 | 0.117995935052549    |             |
| AGIWUR18381;AGIWUR41751                                                             |    |    |         |         |                |          |          |                      |             |
| CB4856                                                                              | HS | II | 6752352 | 6752950 | WBGene00044316 | F41G3.21 | F41G3.21 | 0.102239655038282    |             |
| AGIWUR6402;AGIWUR13731;AGIWUR34977                                                  |    |    |         |         |                |          |          |                      |             |
| CB4856                                                                              | HS | II | 6753126 | 6754774 | WBGene00005986 | srx-95   | F41G3.11 | 0.0087002457355112   |             |
| AGIWUR36254                                                                         |    |    |         |         |                |          |          |                      |             |
| CB4856                                                                              | HS | II | 6755136 | 6755965 | WBGene00001424 | fis-1    | F41G3.4  | 0.0537671916610183   | AGIWUR36073 |
| CB4856                                                                              | HS | II | 6756476 | 6758934 | WBGene00018300 | F41G3.3  | F41G3.3  | -0.240017437509682   | AGIWUR26073 |
| CB4856                                                                              | HS | II | 6758885 | 6760385 | WBGene00018299 | F41G3.2  | F41G3.2  | -0.103091138474173   | AGIWUR26874 |
| CB4856                                                                              | HS | II | 6760684 | 6775176 | WBGene00018304 | agr-1    | F41G3.12 | 0.0976910373713422   |             |
| AGIWUR11141;AGIWUR41695                                                             |    |    |         |         |                |          |          |                      |             |
| CB4856                                                                              | HS | II | 6777076 | 6777889 | WBGene00020480 | ssup-72  | T13C2.4  | -0.027753881709879   | AGIWUR39899 |
| CB4856                                                                              | HS | II | 6779464 | 6781686 | WBGene00020482 | T13C2.7  | T13C2.7  | -0.271785166116525   | AGIWUR34416 |
| CB4856                                                                              | HS | II | 6783427 | 6788255 | WBGene00020481 | T13C2.6  | T13C2.6  | -0.324016627237841   | AGIWUR25670 |
| CB4856                                                                              | HS | II | 6789248 | 6791782 | WBGene00020479 | T13C2.3  | T13C2.3  | -0.122529127647057   | AGIWUR27932 |
| CB4856                                                                              | HS | II | 6799114 | 6800154 | WBGene00017954 | F31E8.4  | F31E8.4  | 0.0735349995291124   | AGIWUR13901 |
| CB4856                                                                              | HS | II | 6803758 | 6804863 | WBGene00006380 | tab-1    | F31E8.3  | 0.444172448457476    |             |
| AGIWUR2387;AGIWUR23684                                                              |    |    |         |         |                |          |          |                      |             |
| CB4856                                                                              | HS | II | 6805022 | 6807262 | WBGene00017955 | F31E8.5  | F31E8.5  | 0.0941439179795225   | AGIWUR41168 |
| CB4856                                                                              | HS | II | 6810963 | 6816443 | WBGene00004921 | snt-1    | F31E8.2  | 0.185242513734115    |             |
| AGIWUR14122;AGIWUR14322;AGIWUR16861;AGIWUR34583;AGIWUR41369                         |    |    |         |         |                |          |          |                      |             |
| CB4856                                                                              | HS | II | 6817750 | 6819328 | WBGene00017956 | F31E8.6  | F31E8.6  | 0.0655074427038085   |             |
| AGIWUR2540;AGIWUR4379;AGIWUR9978;AGIWUR12041;AGIWUR20457;AGIWUR24482                |    |    |         |         |                |          |          |                      |             |
| CB4856                                                                              | HS | II | 6828119 | 6830456 | WBGene00017953 | F31E8.1  | F31E8.1  | -0.336408565910387   | AGIWUR8839  |
| CB4856                                                                              | HS | II | 6835021 | 6847906 | WBGene00001194 | egl-27   | C04A2.3  | -0.161483222662277   |             |
| AGIWUR11721;AGIWUR12570;AGIWUR20852;AGIWUR21383;AGIWUR35051;AGIWUR36106;AGIWUR43838 |    |    |         |         |                |          |          |                      |             |
| CB4856                                                                              | HS | II | 6848060 | 6851531 | WBGene00015410 | tbc-6    | C04A2.1  | 0.044581689857262    |             |
| AGIWUR21486;AGIWUR36834                                                             |    |    |         |         |                |          |          |                      |             |
| CB4856                                                                              | HS | II | 6853464 | 6858298 | WBGene00001023 | dnj-5    | C04A2.7  | -0.00803947009277728 |             |
| AGIWUR4098;AGIWUR14610;AGIWUR24347;AGIWUR32490;AGIWUR43650                          |    |    |         |         |                |          |          |                      |             |
| CB4856                                                                              | HS | II | 6860582 | 6863752 | WBGene00016625 | aff-1    | C44B7.3  | 0.0329134906292534   | AGIWUR33412 |
| CB4856                                                                              | HS | II | 6868946 | 6871039 | WBGene00016626 | clhm-1   | C44B7.4  | 0.130515876581213    | AGIWUR13362 |
| CB4856                                                                              | HS | II | 6871376 | 6872593 | WBGene00016627 | C44B7.5  | C44B7.5  | -0.214119366764791   | AGIWUR26083 |
| CB4856                                                                              | HS | II | 6872829 | 6877089 | WBGene00016628 | slc-36.5 | C44B7.6  | 0.179296544805442    |             |
| AGIWUR8784;AGIWUR36690                                                              |    |    |         |         |                |          |          |                      |             |
| CB4856                                                                              | HS | II | 6879185 | 6880180 | WBGene00016629 | C44B7.7  | C44B7.7  | -0.158255844577441   | AGIWUR28103 |

|                                                                                                                                 |    |    |         |         |                |             |          |                     |             |
|---------------------------------------------------------------------------------------------------------------------------------|----|----|---------|---------|----------------|-------------|----------|---------------------|-------------|
| CB4856                                                                                                                          | HS | II | 6880701 | 6883754 | WBGene00004058 | pmp-1       | C44B7.8  | -0.135931786191776  | AGIWUR27618 |
| CB4856                                                                                                                          | HS | II | 6884049 | 6887805 | WBGene00004059 | pmp-2       | C44B7.9  | -0.0379457503705316 |             |
| AGIWUR16453;AGIWUR17155;AGIWUR31533;AGIWUR41323                                                                                 |    |    |         |         |                |             |          |                     |             |
| CB4856                                                                                                                          | HS | II | 6888553 | 6890418 | WBGene00016630 | acer-1      | C44B7.10 | -0.0647549058471757 |             |
| AGIWUR7035;AGIWUR9317;AGIWUR30334;AGIWUR34052;AGIWUR44700                                                                       |    |    |         |         |                |             |          |                     |             |
| CB4856                                                                                                                          | HS | II | 6891709 | 6893639 | WBGene00016632 | C44B7.12    | C44B7.12 | -0.113139556867552  |             |
| AGIWUR40790                                                                                                                     |    |    |         |         |                |             |          |                     |             |
| CB4856                                                                                                                          | HS | II | 6894179 | 6897540 | WBGene00016631 | C44B7.11    | C44B7.11 | 0.0488826349522311  |             |
| AGIWUR3641;AGIWUR13332                                                                                                          |    |    |         |         |                |             |          |                     |             |
| CB4856                                                                                                                          | HS | II | 6898736 | 6901792 | WBGene00016624 | C44B7.2     | C44B7.2  | 0.00272524016916442 |             |
| AGIWUR11113;AGIWUR17944;AGIWUR27708                                                                                             |    |    |         |         |                |             |          |                     |             |
| CB4856                                                                                                                          | HS | II | 6902095 | 6902937 | WBGene00016623 | psmd-9      | C44B7.1  | 0.140176256711772   | AGIWUR30804 |
| CB4856                                                                                                                          | HS | II | 6902853 | 6907757 | WBGene00015088 | B0252.3     | B0252.3  | 0.0226851249189814  |             |
| AGIWUR18014;AGIWUR18631;AGIWUR31815;AGIWUR42012                                                                                 |    |    |         |         |                |             |          |                     |             |
| CB4856                                                                                                                          | HS | II | 6910031 | 6912697 | WBGene00000211 | asm-1       | B0252.2  | -0.0714342671576844 | AGIWUR20342 |
| CB4856                                                                                                                          | HS | II | 6912543 | 6913365 | WBGene00000886 | cyn-10      | B0252.4  | 0.106473853401109   | AGIWUR2938  |
| CB4856                                                                                                                          | HS | II | 6916110 | 6916963 | WBGene00044615 | B0252.8     | B0252.8  | -0.0294083754245236 |             |
| AGIWUR6502;AGIWUR23113;AGIWUR26771;AGIWUR28445;AGIWUR32697                                                                      |    |    |         |         |                |             |          |                     |             |
| CB4856                                                                                                                          | HS | II | 6917032 | 6918922 | WBGene00015089 | B0252.5     | B0252.5  | 0.12915279284168    | AGIWUR35704 |
| CB4856                                                                                                                          | HS | II | 6919680 | 6923665 | WBGene00015087 | B0252.1     | B0252.1  | 0.433061755713871   | AGIWUR6212  |
| CB4856                                                                                                                          | HS | II | 6924115 | 6925951 | WBGene00017700 | F22D3.4     | F22D3.4  | 0.157907581818678   |             |
| AGIWUR14957;AGIWUR25809;AGIWUR26039;AGIWUR30794                                                                                 |    |    |         |         |                |             |          |                     |             |
| CB4856                                                                                                                          | HS | II | 6928770 | 6947899 | WBGene00017699 | flcn-1      | F22D3.2  | -0.146662265059503  |             |
| AGIWUR26716;AGIWUR31344;AGIWUR32445;AGIWUR42782                                                                                 |    |    |         |         |                |             |          |                     |             |
| CB4856                                                                                                                          | HS | II | 6947855 | 6951300 | WBGene00017702 | F22D3.6     | F22D3.6  | 0.0692624890944256  |             |
| AGIWUR15369;AGIWUR32339;AGIWUR36734;AGIWUR42314                                                                                 |    |    |         |         |                |             |          |                     |             |
| CB4856                                                                                                                          | HS | II | 6951640 | 6955381 | WBGene00000459 | ceh-38      | F22D3.1  | -0.269187012048171  | AGIWUR24803 |
| CB4856                                                                                                                          | HS | II | 6955402 | 6965687 | WBGene00006605 | tra-2       | C15F1.3  | -0.1538726826127    |             |
| AGIWUR13352;AGIWUR31857                                                                                                         |    |    |         |         |                |             |          |                     |             |
| CB4856                                                                                                                          | HS | II | 6965800 | 6967648 | WBGene00004090 | eif-2Bgamma | C15F1.4  | -0.0951832605838945 |             |
| AGIWUR19676                                                                                                                     |    |    |         |         |                |             |          |                     |             |
| CB4856                                                                                                                          | HS | II | 6967900 | 6970615 | WBGene00015796 | C15F1.5     | C15F1.5  | -0.15295963568455   | AGIWUR28615 |
| CB4856                                                                                                                          | HS | II | 6970668 | 6972235 | WBGene00000198 | art-1       | C15F1.6  | 0.0435152490017106  |             |
| AGIWUR4636;AGIWUR10000;AGIWUR14253;AGIWUR15413;AGIWUR17324;AGIWUR25159;AGIWUR31374;AGIWUR45180                                  |    |    |         |         |                |             |          |                     |             |
| CB4856                                                                                                                          | HS | II | 6972712 | 6973892 | WBGene00004930 | sod-1       | C15F1.7  | -0.317539983289038  |             |
| AGIWUR2953;AGIWUR3132;AGIWUR7934;AGIWUR9931;AGIWUR10748;AGIWUR12065;AGIWUR14775;AGIWUR21755;AGIWUR23619;AGIWUR42900;AGIWUR44763 |    |    |         |         |                |             |          |                     |             |
| CB4856                                                                                                                          | HS | II | 6976031 | 6977790 | WBGene00015797 | C15F1.8     | C15F1.8  | 0.0567612019144272  | AGIWUR9736  |
| CB4856                                                                                                                          | HS | II | 6979953 | 6988629 | WBGene00015795 | C15F1.2     | C15F1.2  | 0.0483293591772753  | AGIWUR8419  |

|                                                                                                                                                                                 |    |    |         |         |                |          |           |                     |             |
|---------------------------------------------------------------------------------------------------------------------------------------------------------------------------------|----|----|---------|---------|----------------|----------|-----------|---------------------|-------------|
| CB4856                                                                                                                                                                          | HS | II | 6988778 | 6991797 | WBGene00015794 | C15F1.1  | C15F1.1   | 0.0109282715429693  | AGIWUR39010 |
| CB4856                                                                                                                                                                          | HS | II | 6994987 | 7010624 | WBGene00006831 | unc-104  | C52E12.2  | 0.214210518655232   |             |
| AGIWUR5540;AGIWUR13662;AGIWUR16843                                                                                                                                              |    |    |         |         |                |          |           |                     |             |
| CB4856                                                                                                                                                                          | HS | II | 7010798 | 7012690 | WBGene00005025 | sqv-7    | C52E12.3  | 0.0120256409251702  |             |
| AGIWUR39600                                                                                                                                                                     |    |    |         |         |                |          |           |                     |             |
| CB4856                                                                                                                                                                          | HS | II | 7012787 | 7022509 | WBGene00016889 | lst-6    | C52E12.4  | 0.116614475102864   |             |
| AGIWUR35200                                                                                                                                                                     |    |    |         |         |                |          |           |                     |             |
| CB4856                                                                                                                                                                          | HS | II | 7022913 | 7024930 | WBGene00016890 | lst-5    | C52E12.6  | -0.0781226135280093 |             |
| AGIWUR36634                                                                                                                                                                     |    |    |         |         |                |          |           |                     |             |
| CB4856                                                                                                                                                                          | HS | II | 7025802 | 7030152 | WBGene00016888 | C52E12.1 | C52E12.1  | -0.0023523328153523 |             |
| AGIWUR28857                                                                                                                                                                     |    |    |         |         |                |          |           |                     |             |
| CB4856                                                                                                                                                                          | HS | II | 7038292 | 7041685 | WBGene00022854 | cin-4    | ZK1127.7  | -0.0868652436817499 |             |
| AGIWUR8703                                                                                                                                                                      |    |    |         |         |                |          |           |                     |             |
| CB4856                                                                                                                                                                          | HS | II | 7046041 | 7050071 | WBGene00022855 | tcer-1   | ZK1127.9  | 0.190486050515208   |             |
| AGIWUR38935                                                                                                                                                                     |    |    |         |         |                |          |           |                     |             |
| CB4856                                                                                                                                                                          | HS | II | 7050672 | 7052001 | WBGene00022852 | ZK1127.5 | ZK1127.5  | 0.135714225389476   |             |
| AGIWUR12643                                                                                                                                                                     |    |    |         |         |                |          |           |                     |             |
| CB4856                                                                                                                                                                          | HS | II | 7053949 | 7055208 | WBGene00022851 | ZK1127.4 | ZK1127.4  | -0.0728708034944887 |             |
| AGIWUR22920                                                                                                                                                                     |    |    |         |         |                |          |           |                     |             |
| CB4856                                                                                                                                                                          | HS | II | 7055287 | 7056185 | WBGene00022850 | ZK1127.3 | ZK1127.3  | -0.184516908295903  |             |
| AGIWUR20341                                                                                                                                                                     |    |    |         |         |                |          |           |                     |             |
| CB4856                                                                                                                                                                          | HS | II | 7056173 | 7058014 | WBGene00022856 | cth-2    | ZK1127.10 | 0.133738015619539   |             |
| AGIWUR40731                                                                                                                                                                     |    |    |         |         |                |          |           |                     |             |
| CB4856                                                                                                                                                                          | HS | II | 7061999 | 7064777 | WBGene00022849 | acs-6    | ZK1127.2  | 0.0468219314097786  |             |
| AGIWUR7902;AGIWUR26493;AGIWUR32029;AGIWUR35905                                                                                                                                  |    |    |         |         |                |          |           |                     |             |
| CB4856                                                                                                                                                                          | HS | II | 7065020 | 7069966 | WBGene00001872 | him-14   | ZK1127.11 | 0.0593602964551891  |             |
| AGIWUR32896                                                                                                                                                                     |    |    |         |         |                |          |           |                     |             |
| CB4856                                                                                                                                                                          | HS | II | 7070183 | 7072415 | WBGene00002238 | kars-1   | T02G5.9   | -0.132303094500029  |             |
| AGIWUR8558;AGIWUR8762;AGIWUR9241;AGIWUR9623;AGIWUR14316;AGIWUR16111;AGIWUR16580;AGIWUR16967;AGIWUR17504;AGIWUR19670;AGIWUR19785;AGIWUR20560;AGIWUR24332;AGIWUR25804;AGIWUR29473 |    |    |         |         |                |          |           |                     |             |
| CB4856                                                                                                                                                                          | HS | II | 7073796 | 7075551 | WBGene00002183 | kat-1    | T02G5.8   | -0.340599983608369  | AGIWUR30245 |
| CB4856                                                                                                                                                                          | HS | II | 7075614 | 7077188 | WBGene00020166 | T02G5.7  | T02G5.7   | -0.27967779628268   | AGIWUR17844 |
| CB4856                                                                                                                                                                          | HS | II | 7089674 | 7093102 | WBGene00020170 | T02G5.14 | T02G5.14  | 0.965191471973121   |             |
| AGIWUR23431                                                                                                                                                                     |    |    |         |         |                |          |           |                     |             |
| CB4856                                                                                                                                                                          | HS | II | 7094159 | 7099348 | WBGene00020163 | T02G5.3  | T02G5.3   | -0.0971117479766548 |             |
| AGIWUR16849;AGIWUR21511;AGIWUR23413                                                                                                                                             |    |    |         |         |                |          |           |                     |             |
| CB4856                                                                                                                                                                          | HS | II | 7099587 | 7101163 | WBGene00020169 | mmaa-1   | T02G5.13  | 0.164469463183789   |             |
| AGIWUR11168;AGIWUR18345;AGIWUR31200                                                                                                                                             |    |    |         |         |                |          |           |                     |             |
| CB4856                                                                                                                                                                          | HS | II | 7101218 | 7105030 | WBGene00017349 | far1-11  | F10E7.8   | -0.018098126293375  |             |

AGIWUR11964;AGIWUR23533;AGIWUR42834  
 CB4856 HS II 7105556 7106462 WBGene00004447 rpl-33 F10E7.7 -0.111055412411536  
 AGIWUR11876;AGIWUR26736  
 CB4856 HS II 7106412 7110056 WBGene00017350 F10E7.9 F10E7.9 -0.0988216577852894  
 AGIWUR16688;AGIWUR32795;AGIWUR33226  
 CB4856 HS II 7111978 7112982 WBGene00017347 F10E7.5 F10E7.5 -0.0129666970318496  
 AGIWUR4400;AGIWUR7502;AGIWUR24469;AGIWUR42014  
 CB4856 HS II 7113080 7113732 WBGene00017348 F10E7.6 F10E7.6 0.0645432247303397  
 AGIWUR1488;AGIWUR7762;AGIWUR13851;AGIWUR26019;AGIWUR37859  
 CB4856 HS II 7113683 7115906 WBGene00017351 cutl-5 F10E7.10 -0.0871980662155956  
 AGIWUR13722;AGIWUR22484  
 CB4856 HS II 7116557 7120558 WBGene00006893 spon-1 F10E7.4 -0.079476414827683 AGIWUR20876  
 CB4856 HS II 7122242 7124386 WBGene00017344 F10E7.2 F10E7.2 -0.76734797993115 AGIWUR15200  
 CB4856 HS II 7126757 7129015 WBGene00017343 F10E7.1 F10E7.1 0.0368661230017526 AGIWUR10452  
 CB4856 HS II 7132643 7137522 WBGene00001597 gld-3 T07F8.3 -0.0605356870401543  
 AGIWUR22578;AGIWUR44550  
 CB4856 HS II 7144607 7147253 WBGene00020319 npr-31 T07F8.2 0.0364003042441885  
 AGIWUR9277;AGIWUR13635  
 CB4856 HS II 7149248 7151760 WBGene00020318 T07F8.1 T07F8.1 0.0114844923593704 AGIWUR36349  
 CB4856 HS II 7152566 7155474 WBGene00016173 fust-1 C27H5.3 0.070100733502902  
 AGIWUR14809;AGIWUR16435;AGIWUR22532;AGIWUR27041;AGIWUR27422;AGIWUR32056  
 CB4856 HS II 7155581 7160950 WBGene00016172 C27H5.2 C27H5.2 0.138750158523614  
 AGIWUR2348;AGIWUR28082;AGIWUR37493  
 CB4856 HS II 7167513 7168662 WBGene00000613 col-36 C27H5.5 0.195204562494169 AGIWUR24577  
 CB4856 HS II 7168817 7171355 WBGene00001129 dyf-13 C27H5.7 0.298157818940577 AGIWUR24706  
 CB4856 HS II 7172204 7174936 WBGene00001594 glc-4 C27H5.8 0.320995819235337 AGIWUR4113  
 CB4856 HS II 7183806 7185192 WBGene00003966 pdl-1 C27H5.1 0.00982808246225453 AGIWUR41484  
 CB4856 HS II 7185277 7187210 WBGene00016175 C27H5.6 C27H5.6 -0.0276631178972977 AGIWUR5202  
 CB4856 HS II 7189420 7192507 WBGene00017124 E04F6.4 E04F6.4 -0.210520255016563 AGIWUR27694  
 CB4856 HS II 7192436 7194815 WBGene00017125 acdh-12 E04F6.5 0.0343233609444304  
 AGIWUR7890;AGIWUR8115  
 CB4856 HS II 7196276 7197495 WBGene00017123 maoc-1 E04F6.3 0.186820512238015 AGIWUR36730  
 CB4856 HS II 7197415 7199565 WBGene00017126 E04F6.6 E04F6.6 0.211067074803167  
 AGIWUR3875;AGIWUR9971  
 CB4856 HS II 7200233 7200418 WBGene00045095 mrpr-1 E04F6.16 0.164904727886497  
 AGIWUR7702;AGIWUR18469;AGIWUR20475;AGIWUR43358;AGIWUR43666  
 CB4856 HS II 7200611 7201880 WBGene00017122 pcrg-1 E04F6.2 0.0649772140868707 AGIWUR38515  
 CB4856 HS II 7202016 7203210 WBGene00005134 srd-56 E04F6.14 0.0666401298830097  
 AGIWUR7886

|                                                                         |    |    |         |         |                |          |          |                      |             |
|-------------------------------------------------------------------------|----|----|---------|---------|----------------|----------|----------|----------------------|-------------|
| CB4856                                                                  | HS | II | 7203911 | 7205051 | WBGene00005135 | srd-58   | E04F6.13 | -0.00509726561488577 |             |
| AGIWUR34211                                                             |    |    |         |         |                |          |          |                      |             |
| CB4856                                                                  | HS | II | 7205688 | 7206892 | WBGene00005136 | srd-59   | E04F6.1  | -0.202604794704939   | AGIWUR2527  |
| CB4856                                                                  | HS | II | 7206990 | 7208460 | WBGene00000971 | dhs-7    | E04F6.7  | -0.0269170532544223  | AGIWUR40494 |
| CB4856                                                                  | HS | II | 7208773 | 7210287 | WBGene00017131 | E04F6.15 | E04F6.15 | 0.162677769511841    |             |
| AGIWUR13348                                                             |    |    |         |         |                |          |          |                      |             |
| CB4856                                                                  | HS | II | 7210731 | 7211380 | WBGene00017127 | E04F6.8  | E04F6.8  | 0.184982415106623    |             |
| AGIWUR14338;AGIWUR16369;AGIWUR26017;AGIWUR26803;AGIWUR27394;AGIWUR44297 |    |    |         |         |                |          |          |                      |             |
| CB4856                                                                  | HS | II | 7211625 | 7212159 | WBGene00017128 | E04F6.9  | E04F6.9  | 0.100196148120114    |             |
| AGIWUR19581;AGIWUR30555;AGIWUR35295                                     |    |    |         |         |                |          |          |                      |             |
| CB4856                                                                  | HS | II | 7214055 | 7216957 | WBGene00017129 | E04F6.10 | E04F6.10 | -0.0550624942206475  |             |
| AGIWUR3141;AGIWUR7507;AGIWUR15684;AGIWUR26762                           |    |    |         |         |                |          |          |                      |             |
| CB4856                                                                  | HS | II | 7217076 | 7217478 | WBGene00017130 | E04F6.12 | E04F6.12 | 0.0687204991670258   |             |
| AGIWUR22286                                                             |    |    |         |         |                |          |          |                      |             |
| CB4856                                                                  | HS | II | 7217955 | 7225648 | WBGene00000530 | clh-3    | E04F6.11 | 0.0367301123156669   |             |
| AGIWUR15731;AGIWUR24176;AGIWUR25909;AGIWUR41732                         |    |    |         |         |                |          |          |                      |             |
| CB4856                                                                  | HS | II | 7228784 | 7230616 | WBGene00017970 | F32A5.4  | F32A5.4  | 0.149603456910949    |             |
| AGIWUR1286;AGIWUR8256;AGIWUR16085;AGIWUR39884                           |    |    |         |         |                |          |          |                      |             |
| CB4856                                                                  | HS | II | 7232853 | 7235920 | WBGene00017969 | F32A5.3  | F32A5.3  | 0.142835284504395    |             |
| AGIWUR12121;AGIWUR13016;AGIWUR27135;AGIWUR36318                         |    |    |         |         |                |          |          |                      |             |
| CB4856                                                                  | HS | II | 7235834 | 7238349 | WBGene00000169 | aqp-1    | F32A5.5  | 0.0825202774520228   |             |
| AGIWUR4628;AGIWUR5582                                                   |    |    |         |         |                |          |          |                      |             |
| CB4856                                                                  | HS | II | 7245876 | 7250181 | WBGene00017968 | skpo-3   | F32A5.2  | 0.0179118209632207   |             |
| AGIWUR884;AGIWUR9594;AGIWUR11173;AGIWUR29384;AGIWUR34437;AGIWUR41351    |    |    |         |         |                |          |          |                      |             |
| CB4856                                                                  | HS | II | 7250151 | 7252010 | WBGene00004198 | prx-13   | F32A5.6  | 0.196102038582891    | AGIWUR18591 |
| CB4856                                                                  | HS | II | 7252259 | 7255735 | WBGene00017967 | ada-2    | F32A5.1  | -0.125340432138117   | AGIWUR15959 |
| CB4856                                                                  | HS | II | 7256112 | 7258112 | WBGene00017971 | F32A5.8  | F32A5.8  | -0.177062001837901   |             |
| AGIWUR24468;AGIWUR31093                                                 |    |    |         |         |                |          |          |                      |             |
| CB4856                                                                  | HS | II | 7258389 | 7258829 | WBGene00023021 | F32A5.9  | F32A5.9  | 0.219607844193945    |             |
| AGIWUR9798;AGIWUR18140;AGIWUR30385                                      |    |    |         |         |                |          |          |                      |             |
| CB4856                                                                  | HS | II | 7261648 | 7263654 | WBGene00016276 | C30G12.4 | C30G12.4 | 0.243577610100481    |             |
| AGIWUR13871;AGIWUR19260;AGIWUR31662;AGIWUR32334                         |    |    |         |         |                |          |          |                      |             |
| CB4856                                                                  | HS | II | 7274732 | 7277223 | WBGene00016275 | C30G12.3 | C30G12.3 | 0.0374471772630738   |             |
| AGIWUR23627                                                             |    |    |         |         |                |          |          |                      |             |
| CB4856                                                                  | HS | II | 7290373 | 7291882 | WBGene00016274 | C30G12.2 | C30G12.2 | -0.0829925601689414  |             |
| AGIWUR32700                                                             |    |    |         |         |                |          |          |                      |             |
| CB4856                                                                  | HS | II | 7292192 | 7296015 | WBGene00016277 | C30G12.6 | C30G12.6 | 0.141997563736396    |             |
| AGIWUR13314                                                             |    |    |         |         |                |          |          |                      |             |
| CB4856                                                                  | HS | II | 7296110 | 7298247 | WBGene00004244 | puf-8    | C30G12.7 | -0.131890018911773   |             |

AGIWUR29920;AGIWUR31561;AGIWUR36265  
 CB4856 HS II 7299514 7301632 WBGene00016273 C30G12.1 C30G12.1 0.122548817927861  
 AGIWUR26118  
 CB4856 HS II 7302101 7305760 WBGene00000839 cul-4 F45E12.3 0.0456477116416352  
 AGIWUR495;AGIWUR13180;AGIWUR36169  
 CB4856 HS II 7305861 7308738 WBGene00000271 brf-1 F45E12.2 -0.158822335416634  
 AGIWUR18584  
 CB4856 HS II 7308702 7310115 WBGene00018475 mrpl-14 F45E12.5 -0.118047802908285  
 AGIWUR11390;AGIWUR37904  
 CB4856 HS II 7310348 7313787 WBGene00018474 cnep-1 F45E12.1 -0.0229851992390913  
 AGIWUR35826  
 CB4856 HS II 7313774 7314181 WBGene00018476 F45E12.6 F45E12.6 0.113961752561156  
 AGIWUR27968  
 CB4856 HS II 7318684 7319153 WBGene00017662 F21D12.2 F21D12.2 -0.176447419305195  
 AGIWUR25324  
 CB4856 HS II 7319910 7323200 WBGene00017663 F21D12.3 F21D12.3 -0.0275565663779425  
 AGIWUR34329  
 CB4856 HS II 7328736 7331324 WBGene00017664 npax-1 F21D12.5 -0.110206212464279  
 AGIWUR29093  
 CB4856 HS II 7339229 7349124 WBGene00003620 nhr-21 F21D12.1 0.0978697281914425  
 AGIWUR32353;AGIWUR34044;AGIWUR38422  
 CB4856 HS II 7350121 7352636 WBGene00002008 hsp-4 F43E2.8 -0.129204531578264 AGIWUR16929  
 CB4856 HS II 7353576 7356426 WBGene00001812 haf-2 F43E2.4 -0.170906587833315 AGIWUR37462  
 CB4856 HS II 7358913 7359504 WBGene00018396 F43E2.9 F43E2.9 -0.0924264182277614 AGIWUR10546  
 CB4856 HS II 7359961 7363247 WBGene00018392 insc-1 F43E2.3 0.148764075833345 AGIWUR35459  
 CB4856 HS II 7363216 7364107 WBGene00018393 msra-1 F43E2.5 0.416538225499099 AGIWUR8710  
 CB4856 HS II 7366591 7369049 WBGene00018394 F43E2.6 F43E2.6 -0.0599732369247086  
 AGIWUR14479;AGIWUR28754;AGIWUR30906;AGIWUR36753;AGIWUR37020  
 CB4856 HS II 7369992 7371275 WBGene00018397 F43E2.11 F43E2.11 -0.153255639542826  
 AGIWUR28564  
 CB4856 HS II 7372594 7374172 WBGene00018395 mtch-1 F43E2.7 0.0486228990749842  
 AGIWUR157;AGIWUR28677  
 CB4856 HS II 7374501 7375237 WBGene00018391 rpb-4 F43E2.2 0.148020469437839 AGIWUR21679  
 CB4856 HS II 7379177 7379612 WBGene00044673 C07D10.6 C07D10.6 0.0413693095630032  
 AGIWUR13270;AGIWUR14746;AGIWUR30620;AGIWUR31090;AGIWUR44996  
 CB4856 HS II 7381561 7383499 WBGene00015569 C07D10.5 C07D10.5  
 -0.00884683400511221 AGIWUR44000  
 CB4856 HS II 7387162 7389142 WBGene00015568 sre-3 C07D10.3 -0.0403703254814696  
 AGIWUR45007

|                                                                                              |    |    |         |         |                |           |           |                     |                    |             |
|----------------------------------------------------------------------------------------------|----|----|---------|---------|----------------|-----------|-----------|---------------------|--------------------|-------------|
| CB4856                                                                                       | HS | II | 7394765 | 7397351 | WBGene00015567 | bath-44   | C07D10.2  |                     | -0.181772124328823 |             |
| AGIWUR36096                                                                                  |    |    |         |         |                |           |           |                     |                    |             |
| CB4856                                                                                       | HS | II | 7399012 | 7400540 | WBGene00015566 | C07D10.1  | C07D10.1  |                     | 0.116851598726068  |             |
| AGIWUR18473                                                                                  |    |    |         |         |                |           |           |                     |                    |             |
| CB4856                                                                                       | HS | II | 7400544 | 7402724 | WBGene00003526 | nas-7     | C07D10.4  |                     | -0.102640384014323 |             |
| AGIWUR3626;AGIWUR16232;AGIWUR39221                                                           |    |    |         |         |                |           |           |                     |                    |             |
| CB4856                                                                                       | HS | II | 7408492 | 7410747 | WBGene00005133 | srd-55    | K02A2.2   | 0.0248297956600547  |                    | AGIWUR21751 |
| CB4856                                                                                       | HS | II | 7411075 | 7412030 | WBGene00019290 | K02A2.5   | K02A2.5   | 0.00028120971197243 |                    |             |
| AGIWUR3083;AGIWUR17628;AGIWUR20926                                                           |    |    |         |         |                |           |           |                     |                    |             |
| CB4856                                                                                       | HS | II | 7425935 | 7431390 | WBGene00019289 | kcc-3     | K02A2.3   | 0.41074004825256    |                    | AGIWUR7656  |
| CB4856                                                                                       | HS | II | 7432696 | 7434216 | WBGene00005132 | srd-54    | K02A2.7   | 0.0681541579930793  |                    |             |
| AGIWUR9242;AGIWUR28397                                                                       |    |    |         |         |                |           |           |                     |                    |             |
| CB4856                                                                                       | HS | II | 7435852 | 7436999 | WBGene00005130 | srd-52    | K02A2.4   | 0.112521066383704   |                    |             |
| AGIWUR5866;AGIWUR13963;AGIWUR24611;AGIWUR39878                                               |    |    |         |         |                |           |           |                     |                    |             |
| CB4856                                                                                       | HS | II | 7456242 | 7457380 | WBGene00017023 | D1022.4   | D1022.4   | -0.17831916052139   |                    | AGIWUR19967 |
| CB4856                                                                                       | HS | II | 7457667 | 7458806 | WBGene00017024 | D1022.5   | D1022.5   | -0.145161999864218  |                    |             |
| AGIWUR30740;AGIWUR45185                                                                      |    |    |         |         |                |           |           |                     |                    |             |
| CB4856                                                                                       | HS | II | 7459531 | 7460076 | WBGene00017021 | D1022.2   | D1022.2   | -0.068340536856196  |                    | AGIWUR8681  |
| CB4856                                                                                       | HS | II | 7460110 | 7463614 | WBGene00005641 | sro-1     | D1022.6   | 0.146314200945229   |                    | AGIWUR15307 |
| CB4856                                                                                       | HS | II | 7472729 | 7478959 | WBGene00000101 | aka-1     | D1022.7   | -0.131900679191874  |                    |             |
| AGIWUR3114;AGIWUR3158;AGIWUR6829;AGIWUR12669;AGIWUR17212;AGIWUR18049;AGIWUR24183;AGIWUR40155 |    |    |         |         |                |           |           |                     |                    |             |
| CB4856                                                                                       | HS | II | 7479064 | 7480713 | WBGene00006703 | ubc-6     | D1022.1   | 0.0737825061484472  |                    | AGIWUR40011 |
| CB4856                                                                                       | HS | II | 7480751 | 7483109 | WBGene00000280 | cah-2     | D1022.8   | 0.0455836690546718  |                    | AGIWUR1356  |
| CB4856                                                                                       | HS | II | 7488242 | 7489661 | WBGene00044300 | D1022.9   | D1022.9   | -0.0435088828506096 |                    |             |
| AGIWUR33482;AGIWUR42517                                                                      |    |    |         |         |                |           |           |                     |                    |             |
| CB4856                                                                                       | HS | II | 7491399 | 7493699 | WBGene00003542 | nas-23    | R10H1.5   | -0.152692950112602  |                    |             |
| AGIWUR4989;AGIWUR8815;AGIWUR12650;AGIWUR18219;AGIWUR22957;AGIWUR30287                        |    |    |         |         |                |           |           |                     |                    |             |
| CB4856                                                                                       | HS | II | 7494460 | 7496174 | WBGene00019998 | R10H1.1   | R10H1.1   | 0.227148903545764   |                    | AGIWUR6877  |
| CB4856                                                                                       | HS | II | 7496247 | 7497369 | WBGene00023416 | spi-1     | R10H1.4   | 0.00584967721310115 |                    |             |
| AGIWUR2722;AGIWUR5494;AGIWUR8413;AGIWUR33980;AGIWUR34800;AGIWUR41809                         |    |    |         |         |                |           |           |                     |                    |             |
| CB4856                                                                                       | HS | II | 7497286 | 7499475 | WBGene00019999 | srab-14   | R10H1.2   | 0.105151627070502   |                    |             |
| AGIWUR20225;AGIWUR41600                                                                      |    |    |         |         |                |           |           |                     |                    |             |
| CB4856                                                                                       | HS | II | 7505351 | 7506595 | WBGene00016183 | C28F5.1   | C28F5.1   | -0.0793582233969072 |                    | AGIWUR23368 |
| CB4856                                                                                       | HS | II | 7507319 | 7513975 | WBGene00016184 | glb-9     | C28F5.2   | -0.142777170996114  |                    |             |
| AGIWUR3730;AGIWUR40072                                                                       |    |    |         |         |                |           |           |                     |                    |             |
| CB4856                                                                                       | HS | II | 7519860 | 7523368 | WBGene00016185 | C28F5.4   | C28F5.4   | 0.0233682692734121  |                    | AGIWUR19483 |
| CB4856                                                                                       | HS | II | 7523581 | 7524421 | WBGene00044775 | ZK1290.15 | ZK1290.15 | -0.235445253971817  |                    |             |
| AGIWUR634;AGIWUR9068;AGIWUR12802;AGIWUR26783;AGIWUR31840                                     |    |    |         |         |                |           |           |                     |                    |             |
| CB4856                                                                                       | HS | II | 7524467 | 7525558 | WBGene00022889 | ZK1290.7  | ZK1290.7  | 0.0913683808602634  |                    |             |

|                                                                        |    |         |         |                |           |           |                     |                      |             |
|------------------------------------------------------------------------|----|---------|---------|----------------|-----------|-----------|---------------------|----------------------|-------------|
| AGIWUR43100                                                            |    |         |         |                |           |           |                     |                      |             |
| CB4856 HS                                                              | II | 7525738 | 7528241 | WBGene00022888 | rnh-1.1   | ZK1290.6  |                     | -0.0586563713781842  |             |
| AGIWUR18436                                                            |    |         |         |                |           |           |                     |                      |             |
| CB4856 HS                                                              | II | 7529643 | 7530991 | WBGene00022887 | ZK1290.5  |           | ZK1290.5            | -0.0483271805286449  |             |
| AGIWUR13403                                                            |    |         |         |                |           |           |                     |                      |             |
| CB4856 HS                                                              | II | 7531145 | 7533246 | WBGene00006947 | wrt-1     | ZK1290.12 |                     | -0.00883015072313675 |             |
| AGIWUR18642                                                            |    |         |         |                |           |           |                     |                      |             |
| CB4856 HS                                                              | II | 7533300 | 7534563 | WBGene00006956 | wrt-10    | ZK1290.8  |                     | -0.0667302107042271  |             |
| AGIWUR42222                                                            |    |         |         |                |           |           |                     |                      |             |
| CB4856 HS                                                              | II | 7535006 | 7536989 | WBGene00022893 | ZK1290.13 |           | ZK1290.13           | -0.129257735644459   |             |
| AGIWUR16643                                                            |    |         |         |                |           |           |                     |                      |             |
| CB4856 HS                                                              | II | 7538187 | 7543000 | WBGene00003592 | nfi-1     | ZK1290.4  |                     | -0.133402726004856   |             |
| AGIWUR3009;AGIWUR17692;AGIWUR20277;AGIWUR43039                         |    |         |         |                |           |           |                     |                      |             |
| CB4856 HS                                                              | II | 7544069 | 7545335 | WBGene00004398 | rol-8     | ZK1290.3  |                     | 0.144634445346624    |             |
| AGIWUR40755;AGIWUR41897                                                |    |         |         |                |           |           |                     |                      |             |
| CB4856 HS                                                              | II | 7546807 | 7548129 | WBGene00022890 | fbxa-224  |           | ZK1290.9            | 0.112823630589176    |             |
| AGIWUR8162;AGIWUR22574;AGIWUR33222                                     |    |         |         |                |           |           |                     |                      |             |
| CB4856 HS                                                              | II | 7549335 | 7551977 | WBGene00006600 | tph-1     | ZK1290.2  |                     | 0.149125843064076    |             |
| AGIWUR15624;AGIWUR34300;AGIWUR45200                                    |    |         |         |                |           |           |                     |                      |             |
| CB4856 HS                                                              | II | 7551951 | 7553906 | WBGene00022891 | ZK1290.10 |           | ZK1290.10           | 0.0317063973606331   |             |
| AGIWUR20209                                                            |    |         |         |                |           |           |                     |                      |             |
| CB4856 HS                                                              | II | 7554092 | 7554844 | WBGene00044396 | ZK1290.14 |           | ZK1290.14           | 0.184158946560352    |             |
| AGIWUR31327                                                            |    |         |         |                |           |           |                     |                      |             |
| CB4856 HS                                                              | II | 7560925 | 7561594 | WBGene00022892 | ZK1290.11 |           | ZK1290.11           | -0.365026685083341   |             |
| AGIWUR11550                                                            |    |         |         |                |           |           |                     |                      |             |
| CB4856 HS                                                              | II | 7561753 | 7562701 | WBGene00022886 | ZK1290.1  |           | ZK1290.1            | -0.0746759182052408  |             |
| AGIWUR14827                                                            |    |         |         |                |           |           |                     |                      |             |
| CB4856 HS                                                              | II | 7570605 | 7572444 | WBGene00018041 | F35D2.3   | F35D2.3   | -0.182930518171014  |                      | AGIWUR25303 |
| CB4856 HS                                                              | II | 7574431 | 7575830 | WBGene00018040 | F35D2.2   | F35D2.2   | -0.0713492231510227 |                      | AGIWUR28100 |
| CB4856 HS                                                              | II | 7577723 | 7580244 | WBGene00194916 | F35D2.6   | F35D2.6   | 0.0865007926016377  |                      | AGIWUR5613  |
| CB4856 HS                                                              | II | 7580270 | 7583557 | WBGene00018042 | mks-3     | F35D2.4   | -0.0517921533529249 |                      |             |
| AGIWUR1760;AGIWUR12494;AGIWUR15947                                     |    |         |         |                |           |           |                     |                      |             |
| CB4856 HS                                                              | II | 7585731 | 7594912 | WBGene00006363 | syd-1     | F35D2.5   | 0.130355721419241   |                      |             |
| AGIWUR5413;AGIWUR13745;AGIWUR15444;AGIWUR20159;AGIWUR24267;AGIWUR33701 |    |         |         |                |           |           |                     |                      |             |
| CB4856 HS                                                              | II | 7597545 | 7598752 | WBGene00019941 | pgam-5    | R07G3.5   | -0.101997154775008  |                      |             |
| AGIWUR8443;AGIWUR16940;AGIWUR37105;AGIWUR38237                         |    |         |         |                |           |           |                     |                      |             |
| CB4856 HS                                                              | II | 7599657 | 7608014 | WBGene00019940 | npp-21    | R07G3.3   | 0.0593921892449778  |                      |             |
| AGIWUR8835;AGIWUR16750;AGIWUR44811                                     |    |         |         |                |           |           |                     |                      |             |
| CB4856 HS                                                              | II | 7608253 | 7610986 | WBGene00019939 | lips-17   | R07G3.2   | 0.0829065698559113  |                      | AGIWUR37450 |



|                                                                                                             |    |    |         |         |                |          |          |                             |             |
|-------------------------------------------------------------------------------------------------------------|----|----|---------|---------|----------------|----------|----------|-----------------------------|-------------|
| CB4856                                                                                                      | HS | II | 7610986 | 7613730 | WBGene00019943 | R07G3.7  | R07G3.7  | 0.0697996767336768          | AGIWUR29343 |
| CB4856                                                                                                      | HS | II | 7613541 | 7614434 | WBGene00043050 | oig-4    | R07G3.9  | 0.246024846614026           |             |
| AGIWUR43422;AGIWUR44530                                                                                     |    |    |         |         |                |          |          |                             |             |
| CB4856                                                                                                      | HS | II | 7616452 | 7618245 | WBGene00000390 | cdc-42   | R07G3.1  | -0.218324637012438          |             |
| AGIWUR19545;AGIWUR38027                                                                                     |    |    |         |         |                |          |          |                             |             |
| CB4856                                                                                                      | HS | II | 7618238 | 7620513 | WBGene00019944 | R07G3.8  | R07G3.8  | 0.202779244909315           |             |
| AGIWUR9490;AGIWUR14987;AGIWUR16684;AGIWUR38424                                                              |    |    |         |         |                |          |          |                             |             |
| CB4856                                                                                                      | HS | II | 7627250 | 7651295 | WBGene00020114 | pde-4    | R153.1   | -0.05232070365025           |             |
| AGIWUR19305;AGIWUR24964;AGIWUR29067;AGIWUR34488;AGIWUR36443;AGIWUR36503;AGIWUR36847;AGIWUR39101;AGIWUR40129 |    |    |         |         |                |          |          |                             |             |
| ;AGIWUR40871;AGIWUR41328                                                                                    |    |    |         |         |                |          |          |                             |             |
| CB4856                                                                                                      | HS | II | 7658324 | 7662522 | WBGene00017547 | alfa-1   | F18A1.6  | 0.0842113749853137          | AGIWUR39387 |
| CB4856                                                                                                      | HS | II | 7662706 | 7663754 | WBGene00017548 | F18A1.7  | F18A1.7  | 0.00874338540219455         |             |
| AGIWUR4578;AGIWUR9651;AGIWUR31096                                                                           |    |    |         |         |                |          |          |                             |             |
| CB4856                                                                                                      | HS | II | 7664582 | 7667110 | WBGene00017546 | rpa-1    | F18A1.5  | 0.0810517876458015          | AGIWUR6934  |
| CB4856                                                                                                      | HS | II | 7667993 | 7671905 | WBGene00003045 | lir-2    | F18A1.4  | 0.103583757975057           | AGIWUR26034 |
| CB4856                                                                                                      | HS | II | 7672010 | 7682359 | WBGene00003044 | lir-1    | F18A1.3  | -0.287627431727335          |             |
| AGIWUR17589;AGIWUR35849;AGIWUR42838                                                                         |    |    |         |         |                |          |          |                             |             |
| CB4856                                                                                                      | HS | II | 7682198 | 7684760 | WBGene00003012 | lin-26   | F18A1.2  | -0.164590306915206          |             |
| AGIWUR3543;AGIWUR19668;AGIWUR28083;AGIWUR31105;AGIWUR32625                                                  |    |    |         |         |                |          |          |                             |             |
| CB4856                                                                                                      | HS | II | 7684889 | 7689689 | WBGene00017545 | F18A1.1  | F18A1.1  | 0.153753308203795           |             |
| AGIWUR23601;AGIWUR25978;AGIWUR40021                                                                         |    |    |         |         |                |          |          |                             |             |
| CB4856                                                                                                      | HS | II | 7689710 | 7690572 | WBGene00017549 | pid-1    | F18A1.8  | -0.185392217798753          | AGIWUR21471 |
| CB4856                                                                                                      | HS | II | 7690711 | 7693957 | WBGene00003730 | nhx-2    | B0495.4  | 0.368258802516955           | AGIWUR12604 |
| CB4856                                                                                                      | HS | II | 7695935 | 7698506 | WBGene00015204 | B0495.5  | B0495.5  | -0.21355135838467           | AGIWUR31611 |
| CB4856                                                                                                      | HS | II | 7698613 | 7699046 | WBGene00015205 | moa-2    | B0495.6  | -0.209765860148842          | AGIWUR24473 |
| CB4856                                                                                                      | HS | II | 7699254 | 7702012 | WBGene00015203 | cdk-11.1 |          | B0495.2 -0.0796234130413946 |             |
| AGIWUR6112;AGIWUR35553;AGIWUR42351                                                                          |    |    |         |         |                |          |          |                             |             |
| CB4856                                                                                                      | HS | II | 7701948 | 7705276 | WBGene00015206 | B0495.7  | B0495.7  | -0.00690381024564601        |             |
| AGIWUR15900;AGIWUR33473                                                                                     |    |    |         |         |                |          |          |                             |             |
| CB4856                                                                                                      | HS | II | 7705536 | 7707483 | WBGene00015207 | B0495.8  | B0495.8  | 0.0151975141195417          |             |
| AGIWUR1814;AGIWUR6376;AGIWUR14232;AGIWUR18839;AGIWUR31518;AGIWUR45176                                       |    |    |         |         |                |          |          |                             |             |
| CB4856                                                                                                      | HS | II | 7707586 | 7708725 | WBGene00015208 | B0495.9  | B0495.9  | -0.0794937461624023         | AGIWUR13090 |
| CB4856                                                                                                      | HS | II | 7709789 | 7711444 | WBGene00005149 | sre-1    | B0495.1  | -0.1376521522803            | AGIWUR10241 |
| CB4856                                                                                                      | HS | II | 7711871 | 7718591 | WBGene00007044 | cpna-5   | B0495.10 | 0.0793155229221707          |             |
| AGIWUR11799;AGIWUR15380;AGIWUR25684                                                                         |    |    |         |         |                |          |          |                             |             |
| CB4856                                                                                                      | HS | II | 7724903 | 7752715 | WBGene00015061 | cpna-2   | B0228.4  | -0.0215802003459373         |             |
| AGIWUR6619;AGIWUR9887;AGIWUR16731;AGIWUR25986;AGIWUR31582;AGIWUR34570;AGIWUR38002                           |    |    |         |         |                |          |          |                             |             |
| CB4856                                                                                                      | HS | II | 7752637 | 7753607 | WBGene00015062 | trx-1    | B0228.5  | -0.0895431164283114         |             |
| AGIWUR23893;AGIWUR30447;AGIWUR42639                                                                         |    |    |         |         |                |          |          |                             |             |

|                                                |    |    |         |         |                |          |          |                      |             |
|------------------------------------------------|----|----|---------|---------|----------------|----------|----------|----------------------|-------------|
| CB4856                                         | HS | II | 7754147 | 7755156 | WBGene00015063 | B0228.6  | B0228.6  | 0.0144853985125319   | AGIWUR23399 |
| CB4856                                         | HS | II | 7755997 | 7756907 | WBGene00015059 | B0228.1  | B0228.1  | 0.0641634786409782   |             |
| AGIWUR36033;AGIWUR39436;AGIWUR45163            |    |    |         |         |                |          |          |                      |             |
| CB4856                                         | HS | II | 7757190 | 7758922 | WBGene00015064 | B0228.7  | B0228.7  | 0.121964909776768    | AGIWUR30631 |
| CB4856                                         | HS | II | 7759710 | 7761540 | WBGene00015065 | B0228.8  | B0228.8  | 0.0759408681350431   | AGIWUR32882 |
| CB4856                                         | HS | II | 7762062 | 7763669 | WBGene00015066 | B0228.9  | B0228.9  | -0.100569176864413   |             |
| AGIWUR2478;AGIWUR10101                         |    |    |         |         |                |          |          |                      |             |
| CB4856                                         | HS | II | 7763937 | 7765516 | WBGene00005262 | srh-39   | C06A8.7  | 0.000963598877795846 |             |
| AGIWUR17170;AGIWUR21579;AGIWUR36225            |    |    |         |         |                |          |          |                      |             |
| CB4856                                         | HS | II | 7765545 | 7772017 | WBGene00015517 | C06A8.8  | C06A8.8  | 0.160591217870082    |             |
| AGIWUR13385;AGIWUR31560                        |    |    |         |         |                |          |          |                      |             |
| CB4856                                         | HS | II | 7772499 | 7773914 | WBGene00015516 | C06A8.6  | C06A8.6  | 0.112762524925648    | AGIWUR378   |
| CB4856                                         | HS | II | 7773880 | 7777827 | WBGene00015512 | mthf-1   | C06A8.1  | 0.0522575490187798   | AGIWUR23482 |
| CB4856                                         | HS | II | 7779297 | 7781301 | WBGene00015513 | snpc-1.1 | C06A8.2  | 0.126653069446675    |             |
| AGIWUR28830                                    |    |    |         |         |                |          |          |                      |             |
| CB4856                                         | HS | II | 7781566 | 7783354 | WBGene00015515 | spd1-1   | C06A8.5  | 0.127666785056768    | AGIWUR5128  |
| CB4856                                         | HS | II | 7783829 | 7784654 | WBGene00004823 | skr-17   | C06A8.4  | 0.0951237726083196   | AGIWUR37247 |
| CB4856                                         | HS | II | 7785100 | 7794319 | WBGene00001615 | glr-4    | C06A8.9  | -0.106025536808705   |             |
| AGIWUR6451;AGIWUR19537;AGIWUR21410             |    |    |         |         |                |          |          |                      |             |
| CB4856                                         | HS | II | 7811240 | 7812105 | WBGene00000516 | cki-1    | T05A6.1  | 0.0513483201276692   | AGIWUR39862 |
| CB4856                                         | HS | II | 7816509 | 7820301 | WBGene00000517 | cki-2    | T05A6.2  | -0.0910759890881216  |             |
| AGIWUR15835;AGIWUR32206                        |    |    |         |         |                |          |          |                      |             |
| CB4856                                         | HS | II | 7820333 | 7822554 | WBGene00011458 | irld-47  | T05A6.4  | -0.220232009945833   | AGIWUR4446  |
| CB4856                                         | HS | II | 7822749 | 7825196 | WBGene00011459 | T05A6.5  | T05A6.5  | 0.157593636486927    | AGIWUR10914 |
| CB4856                                         | HS | II | 7825407 | 7826694 | WBGene00005809 | srw-62   | T05A6.6  | -0.187951056359327   |             |
| AGIWUR14075;AGIWUR40775                        |    |    |         |         |                |          |          |                      |             |
| CB4856                                         | HS | II | 7832391 | 7832668 | WBGene00011640 | T09A5.14 | T09A5.14 | -0.0902603988375459  |             |
| AGIWUR35                                       |    |    |         |         |                |          |          |                      |             |
| CB4856                                         | HS | II | 7832844 | 7835414 | WBGene00023408 | cex-2    | T09A5.1  | -0.0284996385828045  | AGIWUR34455 |
| CB4856                                         | HS | II | 7842353 | 7845653 | WBGene00002216 | k1p-3    | T09A5.2  | -0.0813656393973572  |             |
| AGIWUR4382;AGIWUR20513;AGIWUR29273;AGIWUR36971 |    |    |         |         |                |          |          |                      |             |
| CB4856                                         | HS | II | 7845662 | 7849797 | WBGene00000046 | acr-7    | T09A5.3  | 0.154442772506636    | AGIWUR3882  |
| CB4856                                         | HS | II | 7852821 | 7853779 | WBGene00011634 | T09A5.5  | T09A5.5  | -0.0534745645146018  | AGIWUR19073 |
| CB4856                                         | HS | II | 7853880 | 7855042 | WBGene00007014 | mdt-10   | T09A5.6  | 0.141148136995437    | AGIWUR41745 |
| CB4856                                         | HS | II | 7855135 | 7855719 | WBGene00011635 | T09A5.7  | T09A5.7  | 0.105907937245744    | AGIWUR7525  |
| CB4856                                         | HS | II | 7855814 | 7857600 | WBGene00011636 | cec-3    | T09A5.8  | -0.213445770494252   | AGIWUR33974 |
| CB4856                                         | HS | II | 7857811 | 7858334 | WBGene00011641 | T09A5.15 | T09A5.15 | -0.229535919061457   |             |
| AGIWUR23369                                    |    |    |         |         |                |          |          |                      |             |
| CB4856                                         | HS | II | 7858401 | 7859781 | WBGene00011637 | sds-22   | T09A5.9  | -0.00516134351205721 |             |

AGIWUR24015;AGIWUR38639;AGIWUR40986  
CB4856 HS II 7860574 7863563 WBGene00002994 lin-5 T09A5.10 -0.0204251964957614  
AGIWUR1605;AGIWUR16198;AGIWUR34726  
CB4856 HS II 7864074 7866256 WBGene00011638 ostb-1 T09A5.11 -0.19434923997964  
AGIWUR20189;AGIWUR29057;AGIWUR41636  
CB4856 HS II 7866256 7870162 WBGene00011639 ztf-17 T09A5.12 0.18305825664913  
AGIWUR4682;AGIWUR13291;AGIWUR19500;AGIWUR22289  
CB4856 HS II 7870881 7873893 WBGene00011349 T01H3.3 T01H3.3 -0.217199459465117 AGIWUR23452  
CB4856 HS II 7874242 7878097 WBGene00011348 T01H3.2 T01H3.2 -0.131093117464459 AGIWUR24353  
CB4856 HS II 7878083 7879406 WBGene00006913 vha-4 T01H3.1 0.00858359745441106  
AGIWUR1184;AGIWUR10620;AGIWUR20756;AGIWUR24307  
CB4856 HS II 7879720 7880464 WBGene00011351 T01H3.5 T01H3.5 0.130802253551117 AGIWUR24996  
CB4856 HS II 7880812 7882767 WBGene00011350 perm-1 T01H3.4 0.152574992879039 AGIWUR7835  
CB4856 HS II 7893229 7900510 WBGene00004208 ptc-1 ZK675.1 0.0947724547987532  
AGIWUR3463;AGIWUR7183;AGIWUR24141;AGIWUR37844;AGIWUR40130;AGIWUR41556  
CB4856 HS II 7900647 7904636 WBGene00014066 rev-1 ZK675.2 0.0329647254648311 AGIWUR37852  
CB4856 HS II 7904639 7907589 WBGene00014989 best-23 ZK675.3 -0.0667013424612808  
AGIWUR3527;AGIWUR8672;AGIWUR13711;AGIWUR14386;AGIWUR17626;AGIWUR32827;AGIWUR39001  
CB4856 HS II 7911323 7912113 WBGene00014067 ZK675.4 ZK675.4 0.107066972718819 AGIWUR20932  
CB4856 HS II 7912093 7928694 WBGene00014051 spv-1 ZK669.1 -0.0953210516817951  
AGIWUR26977;AGIWUR30516;AGIWUR36509  
CB4856 HS II 7936592 7938583 WBGene00014052 ZK669.2 ZK669.2 0.0155914367531302 AGIWUR4723  
CB4856 HS II 7942463 7945206 WBGene00014054 dbt-1 ZK669.4 0.161687620563972 AGIWUR37925  
CB4856 HS II 7945501 7946894 WBGene00014055 ZK669.5 ZK669.5 -0.101606862299313  
AGIWUR4467;AGIWUR5732;AGIWUR27011;AGIWUR33319;AGIWUR33597  
CB4856 HS II 7958844 7960237 WBGene00007311 C04H4.1 C04H4.1 0.188640005638199 AGIWUR17895  
CB4856 HS II 7976614 7994206 WBGene00008438 DH11.5 DH11.5 0.0603395585447624  
AGIWUR8512;AGIWUR15852;AGIWUR17295;AGIWUR34568  
CB4856 HS II 7995587 8003152 WBGene00004005 pgp-11 DH11.3 0.191694386507091 AGIWUR43425  
CB4856 HS II 8008619 8011633 WBGene00008435 glna-2 DH11.1 0.152109817538937 AGIWUR29345  
CB4856 HS II 8012816 8015264 WBGene00008436 DH11.2 DH11.2 0.0984370050282415 AGIWUR42760  
CB4856 HS II 8017669 8020785 WBGene00006996 zyg-11 C08B11.1 -0.265023465586371  
AGIWUR3394;AGIWUR3850;AGIWUR10462;AGIWUR19652  
CB4856 HS II 8020780 8022561 WBGene00001835 hda-2 C08B11.2 -0.154188255629759  
AGIWUR26485  
CB4856 HS II 8022649 8027756 WBGene00007433 swsn-7 C08B11.3 -0.0507074371946938  
AGIWUR43476  
CB4856 HS II 8028953 8032742 WBGene00003813 nrf-6 C08B11.4 0.159868618813203  
AGIWUR7101

|                                                                                            |    |    |         |         |                |          |          |                     |             |
|--------------------------------------------------------------------------------------------|----|----|---------|---------|----------------|----------|----------|---------------------|-------------|
| CB4856                                                                                     | HS | II | 8034250 | 8035767 | WBGene00004723 | sap-49   | C08B11.5 | -0.10061207708047   |             |
| AGIWUR2998;AGIWUR3824;AGIWUR4991;AGIWUR5242;AGIWUR6636;AGIWUR32094;AGIWUR42094;AGIWUR43153 |    |    |         |         |                |          |          |                     |             |
| CB4856                                                                                     | HS | II | 8035869 | 8037346 | WBGene00007434 | arp-6    | C08B11.6 | 0.0302974520223405  |             |
| AGIWUR5868;AGIWUR37186;AGIWUR38567;AGIWUR42177                                             |    |    |         |         |                |          |          |                     |             |
| CB4856                                                                                     | HS | II | 8037316 | 8038167 | WBGene00007436 | C08B11.9 | C08B11.9 | 0.0253513937463445  |             |
| AGIWUR14890                                                                                |    |    |         |         |                |          |          |                     |             |
| CB4856                                                                                     | HS | II | 8038271 | 8039597 | WBGene00006724 | ubh-4    | C08B11.7 | -0.0834572486978242 |             |
| AGIWUR8971;AGIWUR33365;AGIWUR43766                                                         |    |    |         |         |                |          |          |                     |             |
| CB4856                                                                                     | HS | II | 8040006 | 8041732 | WBGene00007435 | C08B11.8 | C08B11.8 | 0.14098021300663    |             |
| AGIWUR31312                                                                                |    |    |         |         |                |          |          |                     |             |
| CB4856                                                                                     | HS | II | 8042589 | 8047452 | WBGene00011507 | T05H10.1 | T05H10.1 | -0.0354219404968035 |             |
| AGIWUR7238;AGIWUR35900;AGIWUR42683                                                         |    |    |         |         |                |          |          |                     |             |
| CB4856                                                                                     | HS | II | 8047564 | 8049105 | WBGene00000151 | apn-1    | T05H10.2 | -0.0275960411260314 |             |
| AGIWUR5389;AGIWUR33387;AGIWUR40600                                                         |    |    |         |         |                |          |          |                     |             |
| CB4856                                                                                     | HS | II | 8049049 | 8050564 | WBGene00011508 | T05H10.3 | T05H10.3 | -0.359429655349196  |             |
| AGIWUR35674                                                                                |    |    |         |         |                |          |          |                     |             |
| CB4856                                                                                     | HS | II | 8053137 | 8054965 | WBGene00011509 | T05H10.4 | T05H10.4 | -0.132034057350463  |             |
| AGIWUR18325                                                                                |    |    |         |         |                |          |          |                     |             |
| CB4856                                                                                     | HS | II | 8059069 | 8061464 | WBGene00011512 | T05H10.8 | T05H10.8 | 0.253760533028316   |             |
| AGIWUR2912                                                                                 |    |    |         |         |                |          |          |                     |             |
| CB4856                                                                                     | HS | II | 8062741 | 8066193 | WBGene00006734 | ufd-2    | T05H10.5 | 0.0475326305976687  |             |
| AGIWUR6799                                                                                 |    |    |         |         |                |          |          |                     |             |
| CB4856                                                                                     | HS | II | 8066111 | 8068184 | WBGene00011510 | pdha-1   | T05H10.6 | -0.207530913281445  |             |
| AGIWUR31011                                                                                |    |    |         |         |                |          |          |                     |             |
| CB4856                                                                                     | HS | II | 8067990 | 8073372 | WBGene00011511 | gpcp-2   | T05H10.7 | 0.0409931749516592  |             |
| AGIWUR983;AGIWUR13509;AGIWUR13688;AGIWUR15497                                              |    |    |         |         |                |          |          |                     |             |
| CB4856                                                                                     | HS | II | 8075760 | 8076836 | WBGene00010501 | K02C4.2  | K02C4.2  | 0.047945513783584   |             |
| AGIWUR7423;AGIWUR23396;AGIWUR28188                                                         |    |    |         |         |                |          |          |                     |             |
| CB4856                                                                                     | HS | II | 8078457 | 8080847 | WBGene00010503 | K02C4.5  | K02C4.5  | 0.185531246386859   | AGIWUR17113 |
| CB4856                                                                                     | HS | II | 8080789 | 8086849 | WBGene00010502 | K02C4.3  | K02C4.3  | 0.11460481722553    |             |
| AGIWUR5833;AGIWUR12426;AGIWUR31499                                                         |    |    |         |         |                |          |          |                     |             |
| CB4856                                                                                     | HS | II | 8088427 | 8092754 | WBGene00003089 | ltd-1    | K02C4.4  | -0.0519530890442699 | AGIWUR7221  |
| CB4856                                                                                     | HS | II | 8100375 | 8102141 | WBGene00005150 | sre-2    | C41C4.2  | -0.127297421342885  | AGIWUR22986 |
| CB4856                                                                                     | HS | II | 8102108 | 8105052 | WBGene00044049 | sfxn-5   | C41C4.10 | 0.163202395481576   |             |
| AGIWUR5877;AGIWUR16602;AGIWUR26988                                                         |    |    |         |         |                |          |          |                     |             |
| CB4856                                                                                     | HS | II | 8105614 | 8106967 | WBGene00008050 | chst-1   | C41C4.1  | -0.124081687496346  | AGIWUR7477  |
| CB4856                                                                                     | HS | II | 8107645 | 8108954 | WBGene00008054 | C41C4.9  | C41C4.9  | 0.263149331920831   | AGIWUR16390 |
| CB4856                                                                                     | HS | II | 8108941 | 8112163 | WBGene00008051 | lron-4   | C41C4.3  | 0.221040197733458   | AGIWUR2733  |
| CB4856                                                                                     | HS | II | 8112262 | 8124910 | WBGene00002147 | ire-1    | C41C4.4  | 0.089889195154754   | AGIWUR29507 |

|                                                                                     |    |    |         |         |                |           |           |                     |             |
|-------------------------------------------------------------------------------------|----|----|---------|---------|----------------|-----------|-----------|---------------------|-------------|
| CB4856                                                                              | HS | II | 8129960 | 8134742 | WBGene00006739 | ulp-4     | C41C4.6   | 0.0398190449164515  |             |
| AGIWUR2044;AGIWUR6926                                                               |    |    |         |         |                |           |           |                     |             |
| CB4856                                                                              | HS | II | 8134765 | 8136916 | WBGene00008052 | ctns-1    | C41C4.7   | 0.0753331480252282  |             |
| AGIWUR22871;AGIWUR30307;AGIWUR39329                                                 |    |    |         |         |                |           |           |                     |             |
| CB4856                                                                              | HS | II | 8137880 | 8141276 | WBGene00008053 | cdc-48.2  | C41C4.8   | -0.481652350249971  |             |
| AGIWUR22177;AGIWUR23786                                                             |    |    |         |         |                |           |           |                     |             |
| CB4856                                                                              | HS | II | 8141213 | 8143478 | WBGene00008642 | F10B5.8   | F10B5.8   | 0.12701708212014    | AGIWUR42674 |
| CB4856                                                                              | HS | II | 8143863 | 8144671 | WBGene00004421 | rpl-10    | F10B5.1   | 0.144596273883462   |             |
| AGIWUR15626;AGIWUR19210;AGIWUR25935;AGIWUR27480;AGIWUR38463;AGIWUR42597;AGIWUR44548 |    |    |         |         |                |           |           |                     |             |
| CB4856                                                                              | HS | II | 8144762 | 8147236 | WBGene00008639 | F10B5.2   | F10B5.2   | 0.0331482633324534  | AGIWUR23843 |
| CB4856                                                                              | HS | II | 8147190 | 8150030 | WBGene00008640 | F10B5.3   | F10B5.3   | -0.0162389590508454 | AGIWUR14621 |
| CB4856                                                                              | HS | II | 8154096 | 8156937 | WBGene00006655 | tub-1     | F10B5.4   | -0.151378641450274  | AGIWUR23466 |
| CB4856                                                                              | HS | II | 8157362 | 8158045 | WBGene00008643 | tmem-138  | F10B5.9   | -0.0396855351001255 |             |
| AGIWUR3504                                                                          |    |    |         |         |                |           |           |                     |             |
| CB4856                                                                              | HS | II | 8158349 | 8159925 | WBGene00008641 | pch-2     | F10B5.5   | 0.0897931795567253  | AGIWUR2022  |
| CB4856                                                                              | HS | II | 8159865 | 8162170 | WBGene00001281 | emb-27    | F10B5.6   | -0.129832286043666  | AGIWUR21615 |
| CB4856                                                                              | HS | II | 8162465 | 8168644 | WBGene00004510 | rrf-3     | F10B5.7   | 0.157913378704031   | AGIWUR12684 |
| CB4856                                                                              | HS | II | 8168682 | 8170358 | WBGene00011473 | T05C12.11 | T05C12.11 | 0.194935635669031   |             |
| AGIWUR37097                                                                         |    |    |         |         |                |           |           |                     |             |
| CB4856                                                                              | HS | II | 8172229 | 8173562 | WBGene00011467 | decr-1.3  | T05C12.3  | 0.152309502125021   |             |
| AGIWUR7309                                                                          |    |    |         |         |                |           |           |                     |             |
| CB4856                                                                              | HS | II | 8173680 | 8174866 | WBGene00011466 | T05C12.1  | T05C12.1  | 0.0959847186082996  |             |
| AGIWUR8960;AGIWUR11009;AGIWUR38979                                                  |    |    |         |         |                |           |           |                     |             |
| CB4856                                                                              | HS | II | 8174845 | 8177195 | WBGene00000053 | acr-14    | T05C12.2  | 0.019176224168735   |             |
| AGIWUR222;AGIWUR34520;AGIWUR36830                                                   |    |    |         |         |                |           |           |                     |             |
| CB4856                                                                              | HS | II | 8177578 | 8180381 | WBGene00011468 | T05C12.4  | T05C12.4  | 0.181859085551289   |             |
| AGIWUR8536                                                                          |    |    |         |         |                |           |           |                     |             |
| CB4856                                                                              | HS | II | 8181737 | 8182309 | WBGene00011469 | dylt-3    | T05C12.5  | -0.0673430147345222 |             |
| AGIWUR19498                                                                         |    |    |         |         |                |           |           |                     |             |
| CB4856                                                                              | HS | II | 8182323 | 8185023 | WBGene00003241 | mig-5     | T05C12.6  | 0.0417986474099656  |             |
| AGIWUR41036                                                                         |    |    |         |         |                |           |           |                     |             |
| CB4856                                                                              | HS | II | 8185443 | 8187601 | WBGene00000377 | cct-1     | T05C12.7  | -0.154900380174681  |             |
| AGIWUR2764;AGIWUR11724;AGIWUR14998;AGIWUR15680;AGIWUR20879;AGIWUR28442;AGIWUR29277  |    |    |         |         |                |           |           |                     |             |
| CB4856                                                                              | HS | II | 8187607 | 8190528 | WBGene00011471 | T05C12.8  | T05C12.8  | -0.0904367835144182 |             |
| AGIWUR13267                                                                         |    |    |         |         |                |           |           |                     |             |
| CB4856                                                                              | HS | II | 8191773 | 8193329 | WBGene00011472 | T05C12.9  | T05C12.9  | -0.0256078113557621 |             |
| AGIWUR22375                                                                         |    |    |         |         |                |           |           |                     |             |
| CB4856                                                                              | HS | II | 8198803 | 8204001 | WBGene00004264 | qua-1     | T05C12.10 | 0.169517539185057   |             |
| AGIWUR18808                                                                         |    |    |         |         |                |           |           |                     |             |

|                                                            |    |    |         |         |                |           |          |                     |             |
|------------------------------------------------------------|----|----|---------|---------|----------------|-----------|----------|---------------------|-------------|
| CB4856                                                     | HS | II | 8204341 | 8207491 | WBGene00000652 | col-76    | M110.1   | -0.120781726764527  | AGIWUR5673  |
| CB4856                                                     | HS | II | 8208000 | 8209444 | WBGene00010916 | M110.8    | M110.8   | 0.661662846651943   | AGIWUR18001 |
| CB4856                                                     | HS | II | 8210662 | 8212751 | WBGene00006658 | twk-3     | M110.2   | 0.0933207690016102  | AGIWUR10521 |
| CB4856                                                     | HS | II | 8214575 | 8216616 | WBGene00010913 | M110.3    | M110.3   | -0.14496528204953   | AGIWUR23590 |
| CB4856                                                     | HS | II | 8217231 | 8222395 | WBGene00002066 | ifg-1     | M110.4   | 0.0763126099653384  |             |
| AGIWUR3842;AGIWUR23909;AGIWUR24055                         |    |    |         |         |                |           |          |                     |             |
| CB4856                                                     | HS | II | 8226132 | 8229122 | WBGene00000894 | dab-1     | M110.5   | -0.0874492436214696 |             |
| AGIWUR2336;AGIWUR6350;AGIWUR30204;AGIWUR38810              |    |    |         |         |                |           |          |                     |             |
| CB4856                                                     | HS | II | 8231239 | 8232769 | WBGene00010917 | M110.9    | M110.9   | -0.128072766882157  | AGIWUR35202 |
| CB4856                                                     | HS | II | 8232789 | 8237202 | WBGene00010915 | M110.7    | M110.7   | -0.0866062814110862 | AGIWUR27439 |
| CB4856                                                     | HS | II | 8238455 | 8243747 | WBGene00003743 | nlp-5     | F35C11.1 | -0.204794727913162  |             |
| AGIWUR18693                                                |    |    |         |         |                |           |          |                     |             |
| CB4856                                                     | HS | II | 8246776 | 8248263 | WBGene00009402 | F35C11.3  | F35C11.3 | -0.194046462782953  |             |
| AGIWUR20539                                                |    |    |         |         |                |           |          |                     |             |
| CB4856                                                     | HS | II | 8249879 | 8251980 | WBGene00009403 | F35C11.4  | F35C11.4 | -0.0147460822747059 |             |
| AGIWUR37143                                                |    |    |         |         |                |           |          |                     |             |
| CB4856                                                     | HS | II | 8253740 | 8255319 | WBGene00009404 | F35C11.5  | F35C11.5 | 0.00352613819881498 |             |
| AGIWUR44340                                                |    |    |         |         |                |           |          |                     |             |
| CB4856                                                     | HS | II | 8256313 | 8257605 | WBGene00009406 | F35C11.7  | F35C11.7 | 0.36700909995899    |             |
| AGIWUR7569                                                 |    |    |         |         |                |           |          |                     |             |
| CB4856                                                     | HS | II | 8258074 | 8259210 | WBGene00009405 | F35C11.6  | F35C11.6 | 0.126256917234707   |             |
| AGIWUR32766                                                |    |    |         |         |                |           |          |                     |             |
| CB4856                                                     | HS | II | 8264661 | 8267360 | WBGene00010456 | K01C8.1   | K01C8.1  | -0.0842344053101165 | AGIWUR25064 |
| CB4856                                                     | HS | II | 8267253 | 8269914 | WBGene00010457 | K01C8.2   | K01C8.2  | -0.0777465300784188 |             |
| AGIWUR195;AGIWUR41552                                      |    |    |         |         |                |           |          |                     |             |
| CB4856                                                     | HS | II | 8270567 | 8273611 | WBGene00006562 | tdc-1     | K01C8.3  | 0.0632422619503386  |             |
| AGIWUR2061;AGIWUR34794                                     |    |    |         |         |                |           |          |                     |             |
| CB4856                                                     | HS | II | 8273543 | 8276231 | WBGene00001571 | gei-14    | K01C8.5  | 0.0869381137045266  | AGIWUR1841  |
| CB4856                                                     | HS | II | 8276298 | 8277611 | WBGene00010459 | slc-25A32 | K01C8.7  | 0.166207722235573   |             |
| AGIWUR8565;AGIWUR13542;AGIWUR37798;AGIWUR41814;AGIWUR44670 |    |    |         |         |                |           |          |                     |             |
| CB4856                                                     | HS | II | 8277531 | 8278515 | WBGene00010458 | mrpl-10   | K01C8.6  | 0.140395191009929   | AGIWUR38766 |
| CB4856                                                     | HS | II | 8278686 | 8281035 | WBGene00010460 | clcc-142  | K01C8.8  | -0.169528894750215  |             |
| AGIWUR9226;AGIWUR13203;AGIWUR43626                         |    |    |         |         |                |           |          |                     |             |
| CB4856                                                     | HS | II | 8280855 | 8283208 | WBGene00003821 | nst-1     | K01C8.9  | 0.168758659858767   | AGIWUR40653 |
| CB4856                                                     | HS | II | 8283667 | 8285711 | WBGene00000379 | cct-4     | K01C8.10 | 0.0336113900174961  |             |
| AGIWUR13181;AGIWUR32010                                    |    |    |         |         |                |           |          |                     |             |
| CB4856                                                     | HS | II | 8294829 | 8295396 | WBGene00008820 | nlp-55    | F14F11.2 | 0.116554601224898   |             |
| AGIWUR1677                                                 |    |    |         |         |                |           |          |                     |             |
| CB4856                                                     | HS | II | 8305745 | 8321471 | WBGene00008819 | shw-1     | F14F11.1 | 0.00827106125006161 |             |

AGIWUR4986;AGIWUR9350;AGIWUR21060;AGIWUR29497;AGIWUR34911;AGIWUR42810;AGIWUR45012  
 CB4856 HS II 8322612 8325052 WBGene00004304 ran-3 C26D10.1 0.13590527443221  
 AGIWUR40833  
 CB4856 HS II 8325386 8329658 WBGene00007744 C26D10.3 C26D10.3 -0.119435871587234  
 AGIWUR19644  
 CB4856 HS II 8329758 8333481 WBGene00007745 C26D10.4 C26D10.4 -0.0593480036694523  
 AGIWUR16715;AGIWUR19903;AGIWUR40329;AGIWUR43871  
 CB4856 HS II 8334094 8336503 WBGene00023420 C26D10.7 C26D10.7 0.128130261212595  
 AGIWUR16828  
 CB4856 HS II 8346690 8350557 WBGene00001159 eff-1 C26D10.5 0.00545414730795102  
 AGIWUR22682;AGIWUR29270  
 CB4856 HS II 8350535 8354700 WBGene00007746 C26D10.6 C26D10.6 -0.273235170343353  
 AGIWUR25563  
 CB4856 HS II 8358228 8359381 WBGene00000653 col-77 M195.1 -0.477704630880083 AGIWUR23505  
 CB4856 HS II 8359712 8363196 WBGene00010948 M195.2 M195.2 -0.146247460316058 AGIWUR30560  
 CB4856 HS II 8363196 8369159 WBGene00000135 amt-3 M195.3 -0.0221471191538907 AGIWUR26721  
 CB4856 HS II 8376611 8377357 WBGene00010949 M195.4 M195.4 -0.068197733426679 AGIWUR139  
 CB4856 HS II 8381497 8383905 WBGene00009904 F49E12.12 F49E12.12 -0.0518194232870064  
 AGIWUR41004  
 CB4856 HS II 8388051 8389891 WBGene00009902 drd-1 F49E12.9 -0.0517774736612138  
 AGIWUR3152;AGIWUR16685;AGIWUR28016;AGIWUR44394  
 CB4856 HS II 8391088 8392281 WBGene00009903 F49E12.10 F49E12.10 0.294603060945986  
 AGIWUR8922  
 CB4856 HS II 8392571 8394202 WBGene00009901 F49E12.8 F49E12.8 0.130176639780299  
 AGIWUR7589  
 CB4856 HS II 8395276 8396141 WBGene00009900 F49E12.7 F49E12.7 -0.147039975535895  
 AGIWUR21880  
 CB4856 HS II 8398161 8399160 WBGene00009898 dod-23 F49E12.2 0.397735375553179  
 AGIWUR23090  
 CB4856 HS II 8400299 8404848 WBGene00009897 skpo-1 F49E12.1 0.120517115707736  
 AGIWUR22459  
 CB4856 HS II 8405603 8406924 WBGene00006719 ubc-24 F49E12.4 0.16757307223579  
 AGIWUR30944  
 CB4856 HS II 8407685 8409237 WBGene00005039 sra-13 F49E12.5 0.0952324264441966  
 AGIWUR5312;AGIWUR21380;AGIWUR38003  
 CB4856 HS II 8412671 8416857 WBGene00009899 ef1-3 F49E12.6 0.0569498422926  
 AGIWUR13219;AGIWUR15145;AGIWUR32279;AGIWUR38296;AGIWUR43804;AGIWUR44927  
 CB4856 HS II 8417618 8419758 WBGene00008799 F14E5.1 F14E5.1 0.00453842494843926 AGIWUR18246  
 CB4856 HS II 8423951 8428855 WBGene00008800 F14E5.2 F14E5.2 0.0434284651022487

AGIWUR3167;AGIWUR17171;AGIWUR35433

|        |    |    |         |         |                |         |         |                      |             |
|--------|----|----|---------|---------|----------------|---------|---------|----------------------|-------------|
| CB4856 | HS | II | 8429959 | 8432054 | WBGene00008802 | acp-2   | F14E5.4 | 0.154322680033177    | AGIWUR23377 |
| CB4856 | HS | II | 8432773 | 8435105 | WBGene00008804 | acp-4   | F14E5.6 | -0.00860570209920386 | AGIWUR21718 |
| CB4856 | HS | II | 8435347 | 8437135 | WBGene00008801 | acp-3   | F14E5.3 | -0.0117271856391046  | AGIWUR26233 |
| CB4856 | HS | II | 8439118 | 8442151 | WBGene00008803 | lips-10 | F14E5.5 | 0.113745973128093    | AGIWUR4094  |
| CB4856 | HS | II | 8442765 | 8444239 | WBGene00001230 | eif-3.G | F22B5.2 | -0.217888701072344   |             |

AGIWUR9270;AGIWUR19095;AGIWUR24859;AGIWUR29721;AGIWUR29987;AGIWUR38375

|        |    |    |         |         |                |          |          |                     |             |
|--------|----|----|---------|---------|----------------|----------|----------|---------------------|-------------|
| CB4856 | HS | II | 8444307 | 8445177 | WBGene00001358 | evl-20   | F22B5.1  | -0.0017741098075561 | AGIWUR34115 |
| CB4856 | HS | II | 8445168 | 8446831 | WBGene00009041 | cut-3    | F22B5.3  | -0.0346860435952827 | AGIWUR30519 |
| CB4856 | HS | II | 8449701 | 8452739 | WBGene00009042 | F22B5.4  | F22B5.4  | -0.0991828732585951 | AGIWUR24088 |
| CB4856 | HS | II | 8453254 | 8454613 | WBGene00009043 | F22B5.5  | F22B5.5  | 0.0391180244563127  | AGIWUR2516  |
| CB4856 | HS | II | 8454612 | 8456194 | WBGene00009044 | F22B5.6  | F22B5.6  | 0.198694433826248   | AGIWUR11320 |
| CB4856 | HS | II | 8457818 | 8464517 | WBGene00006994 | zyg-9    | F22B5.7  | -0.110224224703295  | AGIWUR36027 |
| CB4856 | HS | II | 8464848 | 8467072 | WBGene00001498 | fars-3   | F22B5.9  | 0.0888229713276036  | AGIWUR34112 |
| CB4856 | HS | II | 8467174 | 8468010 | WBGene00009045 | F22B5.10 | F22B5.10 | 0.0113399814001398  |             |

AGIWUR6122;AGIWUR11334;AGIWUR27711;AGIWUR28547

|        |    |    |         |         |                |          |          |                    |             |
|--------|----|----|---------|---------|----------------|----------|----------|--------------------|-------------|
| CB4856 | HS | II | 8468109 | 8470162 | WBGene00010875 | M05D6.2  | M05D6.2  | 0.0705788512439014 | AGIWUR31827 |
| CB4856 | HS | II | 8470079 | 8471217 | WBGene00010880 | M05D6.8  | M05D6.8  | 0.136591409548111  | AGIWUR15604 |
| CB4856 | HS | II | 8471880 | 8473522 | WBGene00044168 | M05D6.10 | M05D6.10 | 0.0122283522251894 |             |

AGIWUR11206;AGIWUR35547

|        |    |    |         |         |                |         |         |                   |             |
|--------|----|----|---------|---------|----------------|---------|---------|-------------------|-------------|
| CB4856 | HS | II | 8473819 | 8475568 | WBGene00010874 | M05D6.1 | M05D6.1 | 0.144523408169071 | AGIWUR35206 |
| CB4856 | HS | II | 8478010 | 8480478 | WBGene00010877 | lact-4  | M05D6.4 | 0.114252131008485 |             |

AGIWUR13800;AGIWUR34952

|        |    |    |         |         |                |         |         |                     |  |
|--------|----|----|---------|---------|----------------|---------|---------|---------------------|--|
| CB4856 | HS | II | 8480457 | 8482216 | WBGene00010878 | M05D6.5 | M05D6.5 | -0.0350826609103807 |  |
|--------|----|----|---------|---------|----------------|---------|---------|---------------------|--|

AGIWUR3221;AGIWUR10469;AGIWUR10734;AGIWUR41286

|        |    |    |         |         |                |         |         |                     |             |
|--------|----|----|---------|---------|----------------|---------|---------|---------------------|-------------|
| CB4856 | HS | II | 8482376 | 8483872 | WBGene00010879 | M05D6.6 | M05D6.6 | -0.117005685735673  | AGIWUR33291 |
| CB4856 | HS | II | 8485879 | 8487571 | WBGene00001523 | gbh-2   | M05D6.7 | 0.00685778763762368 |             |

AGIWUR2809;AGIWUR14517;AGIWUR29356;AGIWUR29456;AGIWUR39469;AGIWUR39551

|        |    |    |         |         |                |         |         |                    |  |
|--------|----|----|---------|---------|----------------|---------|---------|--------------------|--|
| CB4856 | HS | II | 8487571 | 8509055 | WBGene00011755 | T13H5.1 | T13H5.1 | 0.0264471645057327 |  |
|--------|----|----|---------|---------|----------------|---------|---------|--------------------|--|

AGIWUR6797;AGIWUR8690;AGIWUR15118;AGIWUR15740;AGIWUR16271;AGIWUR21225;AGIWUR27017;AGIWUR30143;AGIWUR33771

|        |    |    |         |         |                |       |         |                    |  |
|--------|----|----|---------|---------|----------------|-------|---------|--------------------|--|
| CB4856 | HS | II | 8514118 | 8516891 | WBGene00011756 | ctg-2 | T13H5.2 | -0.167264312964438 |  |
|--------|----|----|---------|---------|----------------|-------|---------|--------------------|--|

AGIWUR9249;AGIWUR11176;AGIWUR25165;AGIWUR25634;AGIWUR26294;AGIWUR32840

|        |    |    |         |         |                |         |         |                    |             |
|--------|----|----|---------|---------|----------------|---------|---------|--------------------|-------------|
| CB4856 | HS | II | 8517150 | 8518412 | WBGene00004383 | rnh-2   | T13H5.7 | 0.0619882196271639 | AGIWUR12815 |
| CB4856 | HS | II | 8518510 | 8520700 | WBGene00011761 | T13H5.8 | T13H5.8 | 0.18519641090594   | AGIWUR1284  |
| CB4856 | HS | II | 8520905 | 8523490 | WBGene00011757 | cht-2   | T13H5.3 | 0.0983939930306219 | AGIWUR8100  |
| CB4856 | HS | II | 8523494 | 8525396 | WBGene00011758 | T13H5.4 | T13H5.4 | -0.117894892358087 |             |

AGIWUR4164;AGIWUR25257;AGIWUR28277;AGIWUR39003

|        |    |    |         |         |                |          |         |                   |  |
|--------|----|----|---------|---------|----------------|----------|---------|-------------------|--|
| CB4856 | HS | II | 8525685 | 8526804 | WBGene00011759 | mrps-18B | T13H5.5 | 0.107241344443281 |  |
|--------|----|----|---------|---------|----------------|----------|---------|-------------------|--|

AGIWUR26447



|                                                                                    |    |    |         |         |                |          |          |                      |             |
|------------------------------------------------------------------------------------|----|----|---------|---------|----------------|----------|----------|----------------------|-------------|
| CB4856                                                                             | HS | II | 8526799 | 8531222 | WBGene00011760 | T13H5.6  | T13H5.6  | 0.0831963004005694   | AGIWUR15371 |
| CB4856                                                                             | HS | II | 8533095 | 8534363 | WBGene00012175 | W01C9.1  | W01C9.1  | 0.0170694617015021   | AGIWUR17469 |
| CB4856                                                                             | HS | II | 8536133 | 8538603 | WBGene00012176 | W01C9.2  | W01C9.2  | -0.0534280143414696  | AGIWUR13147 |
| CB4856                                                                             | HS | II | 8540720 | 8545452 | WBGene00004155 | pqn-73   | W01C9.3  | -0.210757884962716   | AGIWUR70    |
| CB4856                                                                             | HS | II | 8545652 | 8546854 | WBGene00012177 | decr-1.2 | W01C9.4  | -0.155511848954362   |             |
| AGIWUR35156                                                                        |    |    |         |         |                |          |          |                      |             |
| CB4856                                                                             | HS | II | 8547339 | 8556258 | WBGene00012178 | glb-27   | W01C9.5  | -0.245579523061549   | AGIWUR20195 |
| CB4856                                                                             | HS | II | 8559394 | 8561352 | WBGene00002065 | iff-2    | F54C9.1  | -0.216163513789457   |             |
| AGIWUR1041;AGIWUR13119;AGIWUR18172;AGIWUR31956;AGIWUR34294;AGIWUR35827;AGIWUR38745 |    |    |         |         |                |          |          |                      |             |
| CB4856                                                                             | HS | II | 8563714 | 8566139 | WBGene00006059 | stc-1    | F54C9.2  | -0.0472038395379748  | AGIWUR27084 |
| CB4856                                                                             | HS | II | 8566508 | 8566857 | WBGene00010041 | F54C9.3  | F54C9.3  | -0.177137763873155   | AGIWUR35414 |
| CB4856                                                                             | HS | II | 8568035 | 8569089 | WBGene00000615 | col-38   | F54C9.4  | -0.211682045579309   | AGIWUR17395 |
| CB4856                                                                             | HS | II | 8569927 | 8571100 | WBGene00004416 | rpl-5    | F54C9.5  | 0.00582900514490525  |             |
| AGIWUR9145;AGIWUR16011;AGIWUR23458                                                 |    |    |         |         |                |          |          |                      |             |
| CB4856                                                                             | HS | II | 8571085 | 8572904 | WBGene00010042 | bcs-1    | F54C9.6  | 0.126777659245873    |             |
| AGIWUR6986;AGIWUR16748;AGIWUR26834;AGIWUR38862                                     |    |    |         |         |                |          |          |                      |             |
| CB4856                                                                             | HS | II | 8573355 | 8575045 | WBGene00010043 | F54C9.7  | F54C9.7  | 0.0162289332407468   |             |
| AGIWUR42579;AGIWUR43932                                                            |    |    |         |         |                |          |          |                      |             |
| CB4856                                                                             | HS | II | 8575541 | 8577732 | WBGene00004241 | puf-5    | F54C9.8  | -0.420853498608491   | AGIWUR17244 |
| CB4856                                                                             | HS | II | 8578049 | 8581513 | WBGene00010044 | F54C9.9  | F54C9.9  | 0.188773742418089    |             |
| AGIWUR1419;AGIWUR4848;AGIWUR15723                                                  |    |    |         |         |                |          |          |                      |             |
| CB4856                                                                             | HS | II | 8581945 | 8583080 | WBGene00000187 | arl-1    | F54C9.10 | 0.0444280060080473   |             |
| AGIWUR21476                                                                        |    |    |         |         |                |          |          |                      |             |
| CB4856                                                                             | HS | II | 8583034 | 8585086 | WBGene00010045 | F54C9.11 | F54C9.11 | -0.0665969273824754  |             |
| AGIWUR34137                                                                        |    |    |         |         |                |          |          |                      |             |
| CB4856                                                                             | HS | II | 8590984 | 8593010 | WBGene00009202 | aptf-4   | F28C6.1  | -0.169298306999769   |             |
| AGIWUR10388;AGIWUR16446;AGIWUR39555                                                |    |    |         |         |                |          |          |                      |             |
| CB4856                                                                             | HS | II | 8594190 | 8596294 | WBGene00009203 | aptf-3   | F28C6.2  | -0.10105580010875    |             |
| AGIWUR12578;AGIWUR32441;AGIWUR42969                                                |    |    |         |         |                |          |          |                      |             |
| CB4856                                                                             | HS | II | 8596286 | 8600265 | WBGene00009204 | F28C6.4  | F28C6.4  | 0.0899513043459628   |             |
| AGIWUR10920;AGIWUR17476;AGIWUR38808                                                |    |    |         |         |                |          |          |                      |             |
| CB4856                                                                             | HS | II | 8599508 | 8600506 | WBGene00009205 | F28C6.5  | F28C6.5  | -0.0171402125634827  | AGIWUR22408 |
| CB4856                                                                             | HS | II | 8600435 | 8602479 | WBGene00000773 | cpf-1    | F28C6.3  | 0.0842102993044165   | AGIWUR30019 |
| CB4856                                                                             | HS | II | 8602787 | 8603581 | WBGene00004440 | rpl-26   | F28C6.7  | -0.00997928174446372 |             |
| AGIWUR22308;AGIWUR42774                                                            |    |    |         |         |                |          |          |                      |             |
| CB4856                                                                             | HS | II | 8603846 | 8606744 | WBGene00006307 | suf-1    | F28C6.6  | 0.165058158033665    |             |
| AGIWUR15406;AGIWUR42122;AGIWUR43954                                                |    |    |         |         |                |          |          |                      |             |
| CB4856                                                                             | HS | II | 8606849 | 8607749 | WBGene00009207 | F28C6.8  | F28C6.8  | -0.211961948934299   | AGIWUR35865 |
| CB4856                                                                             | HS | II | 8607889 | 8608865 | WBGene00009209 | F28C6.10 | F28C6.10 | 0.0462681855056957   |             |

|                                                           |    |    |         |         |                |               |         |                     |             |
|-----------------------------------------------------------|----|----|---------|---------|----------------|---------------|---------|---------------------|-------------|
| AGIWUR30551                                               |    |    |         |         |                |               |         |                     |             |
| CB4856                                                    | HS | II | 8608876 | 8610110 | WBGene00009208 | F28C6.9       | F28C6.9 | 0.185963466808237   | AGIWUR41437 |
| CB4856                                                    | HS | II | 8612770 | 8614426 | WBGene00011922 | T22C8.1       | T22C8.1 | 0.0366785078122689  | AGIWUR25354 |
| CB4856                                                    | HS | II | 8614546 | 8617603 | WBGene00011923 | chhy-1        | T22C8.2 | 0.765788105693535   | AGIWUR21816 |
| CB4856                                                    | HS | II | 8620397 | 8621978 | WBGene00011924 | T22C8.3       | T22C8.3 | 0.0777094786507595  | AGIWUR1762  |
| CB4856                                                    | HS | II | 8622447 | 8624254 | WBGene00011925 | T22C8.4       | T22C8.4 | 0.0233736078089866  |             |
| AGIWUR1196;AGIWUR12798;AGIWUR30886                        |    |    |         |         |                |               |         |                     |             |
| CB4856                                                    | HS | II | 8625728 | 8627620 | WBGene00011926 | sptf-2        | T22C8.5 | 0.326139353889258   | AGIWUR21226 |
| CB4856                                                    | HS | II | 8627573 | 8630239 | WBGene00011927 | T22C8.6       | T22C8.6 | 0.13079565979047    | AGIWUR8779  |
| CB4856                                                    | HS | II | 8630710 | 8634464 | WBGene00011928 | cutl-12       | T22C8.7 | 0.047511185319125   |             |
| AGIWUR11556;AGIWUR39206                                   |    |    |         |         |                |               |         |                     |             |
| CB4856                                                    | HS | II | 8636233 | 8637711 | WBGene00006875 | vab-9         | T22C8.8 | 0.0734305674183702  | AGIWUR25044 |
| CB4856                                                    | HS | II | 8641381 | 8648227 | WBGene00008432 | D2085.7       | D2085.7 | 0.0305777844892923  | AGIWUR40175 |
| CB4856                                                    | HS | II | 8651109 | 8658808 | WBGene00004259 | pyr-1         | D2085.1 | -0.0902116969424847 |             |
| AGIWUR22823;AGIWUR41113                                   |    |    |         |         |                |               |         |                     |             |
| CB4856                                                    | HS | II | 8659135 | 8659800 | WBGene00008427 | atg-10        | D2085.2 | 0.139586791484025   | AGIWUR42128 |
| CB4856                                                    | HS | II | 8659782 | 8661712 | WBGene00008431 | piga-1        | D2085.6 | -0.0674401775904716 | AGIWUR5013  |
| CB4856                                                    | HS | II | 8661869 | 8664721 | WBGene00008428 | eif-2Bepsilon | D2085.3 | 0.25084404632736    |             |
| AGIWUR41224                                               |    |    |         |         |                |               |         |                     |             |
| CB4856                                                    | HS | II | 8664833 | 8669154 | WBGene00008429 | D2085.4       | D2085.4 | 0.0613264478572653  | AGIWUR36593 |
| CB4856                                                    | HS | II | 8669133 | 8684897 | WBGene00008430 | hgap-2        | D2085.5 | -0.168616181600328  |             |
| AGIWUR23447;AGIWUR45090                                   |    |    |         |         |                |               |         |                     |             |
| CB4856                                                    | HS | II | 8691789 | 8694180 | WBGene00007916 | C34C6.3       | C34C6.3 | -0.0397040019520922 | AGIWUR9910  |
| CB4856                                                    | HS | II | 8696591 | 8698928 | WBGene00007917 | C34C6.4       | C34C6.4 | 0.0878641354832563  | AGIWUR465   |
| CB4856                                                    | HS | II | 8699045 | 8702193 | WBGene00007918 | sphk-1        | C34C6.5 | 0.133889862179629   |             |
| AGIWUR4466;AGIWUR18165;AGIWUR24595;AGIWUR30041            |    |    |         |         |                |               |         |                     |             |
| CB4856                                                    | HS | II | 8703368 | 8703829 | WBGene00000432 | ceh-7         | C34C6.8 | 0.0585758764547286  | AGIWUR28771 |
| CB4856                                                    | HS | II | 8704824 | 8706768 | WBGene00004194 | prx-5         | C34C6.6 | 0.0962821115026467  |             |
| AGIWUR1248;AGIWUR5786;AGIWUR10847;AGIWUR40056             |    |    |         |         |                |               |         |                     |             |
| CB4856                                                    | HS | II | 8707155 | 8708860 | WBGene00007919 | C34C6.7       | C34C6.7 | 0.384628399381469   | AGIWUR29170 |
| CB4856                                                    | HS | II | 8709069 | 8710413 | WBGene00005172 | srg-15        | C34C6.1 | 0.14190265441847    | AGIWUR33606 |
| CB4856                                                    | HS | II | 8711589 | 8712035 | WBGene00014827 | T01B7.1       | T01B7.1 | 0.016928084396076   |             |
| AGIWUR3554;AGIWUR8918;AGIWUR20861;AGIWUR27845;AGIWUR35574 |    |    |         |         |                |               |         |                     |             |
| CB4856                                                    | HS | II | 8712068 | 8713412 | WBGene00005175 | srg-18        | T01B7.2 | -0.124592974527282  | AGIWUR21000 |
| CB4856                                                    | HS | II | 8713992 | 8715013 | WBGene00004279 | rab-21        | T01B7.3 | -0.024279936165744  | AGIWUR4900  |
| CB4856                                                    | HS | II | 8715132 | 8716281 | WBGene00000887 | cyn-11        | T01B7.4 | -0.325049124014335  | AGIWUR26435 |
| CB4856                                                    | HS | II | 8716834 | 8721691 | WBGene00011311 | T01B7.5       | T01B7.5 | 0.0164239931650769  |             |
| AGIWUR20070;AGIWUR27309;AGIWUR31333;AGIWUR43034           |    |    |         |         |                |               |         |                     |             |
| CB4856                                                    | HS | II | 8722474 | 8725522 | WBGene00011312 | trcs-2        | T01B7.6 | -0.102107335033782  | AGIWUR22900 |

|                                                                                                                                                                                                            |    |    |         |         |                |          |          |                     |             |
|------------------------------------------------------------------------------------------------------------------------------------------------------------------------------------------------------------|----|----|---------|---------|----------------|----------|----------|---------------------|-------------|
| CB4856                                                                                                                                                                                                     | HS | II | 8725533 | 8729777 | WBGene00011314 | T01B7.9  | T01B7.9  | 0.324842317120456   | AGIWUR6767  |
| CB4856                                                                                                                                                                                                     | HS | II | 8733050 | 8734314 | WBGene00004397 | rol-6    | T01B7.7  | 0.0510624062273468  | AGIWUR25131 |
| CB4856                                                                                                                                                                                                     | HS | II | 8736726 | 8737556 | WBGene00011313 | T01B7.8  | T01B7.8  | 0.0517418319186422  | AGIWUR14303 |
| CB4856                                                                                                                                                                                                     | HS | II | 8743725 | 8747234 | WBGene00010681 | mak-1    | K08F8.1  | 0.0202766137443469  |             |
| AGIWUR4577;AGIWUR13470;AGIWUR14854;AGIWUR18734;AGIWUR19560;AGIWUR20333;AGIWUR20930;AGIWUR21944;AGIWUR22982;AGIWUR25100;AGIWUR30687;AGIWUR31970;AGIWUR32850;AGIWUR34735;AGIWUR37918;AGIWUR40571;AGIWUR42916 |    |    |         |         |                |          |          |                     |             |
| CB4856                                                                                                                                                                                                     | HS | II | 8751986 | 8753939 | WBGene00000220 | atf-2    | K08F8.2  | -0.0473578110819037 | AGIWUR24767 |
| CB4856                                                                                                                                                                                                     | HS | II | 8754113 | 8755248 | WBGene00010683 | K08F8.7  | K08F8.7  | 0.171509471699651   | AGIWUR32053 |
| CB4856                                                                                                                                                                                                     | HS | II | 8756291 | 8758723 | WBGene00001505 | fut-1    | K08F8.3  | 0.198838790473213   | AGIWUR29855 |
| CB4856                                                                                                                                                                                                     | HS | II | 8762668 | 8766922 | WBGene00000240 | pah-1    | K08F8.4  | 0.0614753697158612  |             |
| AGIWUR3575;AGIWUR4523;AGIWUR22284;AGIWUR29197;AGIWUR45094                                                                                                                                                  |    |    |         |         |                |          |          |                     |             |
| CB4856                                                                                                                                                                                                     | HS | II | 8767185 | 8769307 | WBGene00010682 | K08F8.5  | K08F8.5  | 0.112698845855803   | AGIWUR39492 |
| CB4856                                                                                                                                                                                                     | HS | II | 8770975 | 8782020 | WBGene00002295 | let-19   | K08F8.6  | 0.0661209748332712  |             |
| AGIWUR4540;AGIWUR10212;AGIWUR18372;AGIWUR25471;AGIWUR28734;AGIWUR42522                                                                                                                                     |    |    |         |         |                |          |          |                     |             |
| CB4856                                                                                                                                                                                                     | HS | II | 8782029 | 8783670 | WBGene00004790 | sgn-1    | F07H5.2  | 0.112008817849322   | AGIWUR29530 |
| CB4856                                                                                                                                                                                                     | HS | II | 8784535 | 8785513 | WBGene00014307 | F07H5.3  | F07H5.3  | 0.127671083248611   | AGIWUR41665 |
| CB4856                                                                                                                                                                                                     | HS | II | 8786457 | 8787119 | WBGene00014308 | F07H5.4  | F07H5.4  | 0.0315475002566572  | AGIWUR18538 |
| CB4856                                                                                                                                                                                                     | HS | II | 8787770 | 8789716 | WBGene00014309 | F07H5.5  | F07H5.5  | 0.0669559284014927  |             |
| AGIWUR17372;AGIWUR24243;AGIWUR28524;AGIWUR32492;AGIWUR39338;AGIWUR44699                                                                                                                                    |    |    |         |         |                |          |          |                     |             |
| CB4856                                                                                                                                                                                                     | HS | II | 8790558 | 8791318 | WBGene00008563 | F07H5.13 | F07H5.13 | 0.0126854863564363  |             |
| AGIWUR7414;AGIWUR39817                                                                                                                                                                                     |    |    |         |         |                |          |          |                     |             |
| CB4856                                                                                                                                                                                                     | HS | II | 8791927 | 8792740 | WBGene00008557 | F07H5.6  | F07H5.6  | 0.0308804020650033  |             |
| AGIWUR4059;AGIWUR10978;AGIWUR39366                                                                                                                                                                         |    |    |         |         |                |          |          |                     |             |
| CB4856                                                                                                                                                                                                     | HS | II | 8792912 | 8794162 | WBGene00008558 | F07H5.7  | F07H5.7  | -0.245224704929326  | AGIWUR34161 |
| CB4856                                                                                                                                                                                                     | HS | II | 8801130 | 8804889 | WBGene00008559 | F07H5.8  | F07H5.8  | -0.250616608197531  |             |
| AGIWUR9599;AGIWUR12195;AGIWUR14389;AGIWUR26173;AGIWUR29115                                                                                                                                                 |    |    |         |         |                |          |          |                     |             |
| CB4856                                                                                                                                                                                                     | HS | II | 8804835 | 8807021 | WBGene00008560 | pho-13   | F07H5.9  | 0.128442456047816   | AGIWUR21693 |
| CB4856                                                                                                                                                                                                     | HS | II | 8807133 | 8808582 | WBGene00008561 | F07H5.10 | F07H5.10 | -0.270863909760104  |             |
| AGIWUR28131                                                                                                                                                                                                |    |    |         |         |                |          |          |                     |             |
| CB4856                                                                                                                                                                                                     | HS | II | 8808636 | 8810729 | WBGene00009784 | F46C5.9  | F46C5.9  | 0.113726119197956   | AGIWUR9698  |
| CB4856                                                                                                                                                                                                     | HS | II | 8811353 | 8812633 | WBGene00009783 | rer-1    | F46C5.8  | 0.125914680462333   |             |
| AGIWUR2840;AGIWUR4345;AGIWUR39178                                                                                                                                                                          |    |    |         |         |                |          |          |                     |             |
| CB4856                                                                                                                                                                                                     | HS | II | 8817593 | 8818426 | WBGene00009785 | F46C5.10 | F46C5.10 | 0.276252700408687   |             |
| AGIWUR30007                                                                                                                                                                                                |    |    |         |         |                |          |          |                     |             |
| CB4856                                                                                                                                                                                                     | HS | II | 8820149 | 8821248 | WBGene00009778 | F46C5.1  | F46C5.1  | -0.237621898572051  | AGIWUR19741 |
| CB4856                                                                                                                                                                                                     | HS | II | 8826069 | 8828215 | WBGene00003544 | nas-25   | F46C5.3  | 0.0380236505884444  |             |
| AGIWUR2053;AGIWUR14007;AGIWUR15314;AGIWUR18326;AGIWUR22006;AGIWUR25476                                                                                                                                     |    |    |         |         |                |          |          |                     |             |
| CB4856                                                                                                                                                                                                     | HS | II | 8828196 | 8829287 | WBGene00009779 | F46C5.2  | F46C5.2  | -0.0235635769677458 | AGIWUR36211 |
| CB4856                                                                                                                                                                                                     | HS | II | 8836175 | 8839313 | WBGene00009780 | F46C5.4  | F46C5.4  | 0.178815233199821   | AGIWUR4321  |

|                                                                                                                                                                                  |    |    |         |         |                |          |          |                     |             |
|----------------------------------------------------------------------------------------------------------------------------------------------------------------------------------|----|----|---------|---------|----------------|----------|----------|---------------------|-------------|
| CB4856                                                                                                                                                                           | HS | II | 8839325 | 8840243 | WBGene00009782 | F46C5.7  | F46C5.7  | -0.148250628608222  | AGIWUR12915 |
| CB4856                                                                                                                                                                           | HS | II | 8840200 | 8844515 | WBGene00009781 | F46C5.6  | F46C5.6  | -0.100000154053308  | AGIWUR15946 |
| CB4856                                                                                                                                                                           | HS | II | 8845598 | 8848902 | WBGene00011767 | agxt-1   | T14D7.1  | -0.0493584069846511 |             |
| AGIWUR23608;AGIWUR43545                                                                                                                                                          |    |    |         |         |                |          |          |                     |             |
| CB4856                                                                                                                                                                           | HS | II | 8848843 | 8852096 | WBGene00011768 | oac-46   | T14D7.2  | 0.119458665350735   |             |
| AGIWUR22936;AGIWUR29185;AGIWUR31496;AGIWUR34912;AGIWUR35792;AGIWUR37935                                                                                                          |    |    |         |         |                |          |          |                     |             |
| CB4856                                                                                                                                                                           | HS | II | 8859074 | 8859696 | WBGene00044062 | snb-6    | T14D7.3  | 0.194880782211856   | AGIWUR10821 |
| CB4856                                                                                                                                                                           | HS | II | 8860913 | 8865173 | WBGene00011578 | npr-20   | T07D4.1  | -0.140131542285737  | AGIWUR14786 |
| CB4856                                                                                                                                                                           | HS | II | 8869549 | 8874020 | WBGene00011579 | T07D4.2  | T07D4.2  | 0.0582322603513497  | AGIWUR34616 |
| CB4856                                                                                                                                                                           | HS | II | 8878496 | 8883659 | WBGene00004355 | rha-1    | T07D4.3  | -0.0859555581970319 | AGIWUR8834  |
| CB4856                                                                                                                                                                           | HS | II | 8883763 | 8884418 | WBGene00045407 | T07D4.5  | T07D4.5  | 0.0637006575581998  |             |
| AGIWUR2542;AGIWUR42808                                                                                                                                                           |    |    |         |         |                |          |          |                     |             |
| CB4856                                                                                                                                                                           | HS | II | 8884901 | 8889673 | WBGene00011580 | ddx-19   | T07D4.4  | 0.102057842989922   |             |
| AGIWUR1657;AGIWUR3284;AGIWUR7547                                                                                                                                                 |    |    |         |         |                |          |          |                     |             |
| CB4856                                                                                                                                                                           | HS | II | 8896841 | 8908666 | WBGene00002251 | lat-1    | B0457.1  | -0.140798990817852  |             |
| AGIWUR4436;AGIWUR10719;AGIWUR13483;AGIWUR16585;AGIWUR16626;AGIWUR21725;AGIWUR23036;AGIWUR29098;AGIWUR29801;                                                                      |    |    |         |         |                |          |          |                     |             |
| AGIWUR36610;AGIWUR38597;AGIWUR44924                                                                                                                                              |    |    |         |         |                |          |          |                     |             |
| CB4856                                                                                                                                                                           | HS | II | 8909008 | 8909994 | WBGene00014660 | B0457.3  | B0457.3  | 0.0207857706552224  |             |
| AGIWUR20307;AGIWUR37158                                                                                                                                                          |    |    |         |         |                |          |          |                     |             |
| CB4856                                                                                                                                                                           | HS | II | 8910913 | 8912029 | WBGene00007179 | B0457.4  | B0457.4  | 0.375239738657703   | AGIWUR5875  |
| CB4856                                                                                                                                                                           | HS | II | 8922423 | 8924373 | WBGene00007180 | B0457.6  | B0457.6  | -0.0591178563047521 | AGIWUR30915 |
| CB4856                                                                                                                                                                           | HS | II | 8924572 | 8926678 | WBGene00007178 | B0457.2  | B0457.2  | -0.0044128288510894 | AGIWUR32452 |
| CB4856                                                                                                                                                                           | HS | II | 8927741 | 8929820 | WBGene00000378 | cct-2    | T21B10.7 | -0.209350544292375  |             |
| AGIWUR1976;AGIWUR8551;AGIWUR9167;AGIWUR14051;AGIWUR22008;AGIWUR22119;AGIWUR23132;AGIWUR25480;AGIWUR29685;AGIWUR30090;AGIWUR34863;AGIWUR35363;AGIWUR40687;AGIWUR42308;AGIWUR42836 |    |    |         |         |                |          |          |                     |             |
| CB4856                                                                                                                                                                           | HS | II | 8929841 | 8930937 | WBGene00011883 | mrpl-50  | T21B10.1 | 0.0429229293753615  |             |
| AGIWUR14079                                                                                                                                                                      |    |    |         |         |                |          |          |                     |             |
| CB4856                                                                                                                                                                           | HS | II | 8930985 | 8933833 | WBGene00011884 | enol-1   | T21B10.2 | 0.176482498283089   |             |
| AGIWUR5548;AGIWUR7435;AGIWUR9458;AGIWUR12492;AGIWUR12639;AGIWUR30121;AGIWUR31823                                                                                                 |    |    |         |         |                |          |          |                     |             |
| CB4856                                                                                                                                                                           | HS | II | 8934382 | 8939033 | WBGene00011885 | T21B10.3 | T21B10.3 | -0.124211326002051  |             |
| AGIWUR25642                                                                                                                                                                      |    |    |         |         |                |          |          |                     |             |
| CB4856                                                                                                                                                                           | HS | II | 8939204 | 8940488 | WBGene00011887 | set-17   | T21B10.5 | 0.0462064738390726  |             |
| AGIWUR5839                                                                                                                                                                       |    |    |         |         |                |          |          |                     |             |
| CB4856                                                                                                                                                                           | HS | II | 8940894 | 8942718 | WBGene00011886 | T21B10.4 | T21B10.4 | 0.034800472585232   |             |
| AGIWUR40409                                                                                                                                                                      |    |    |         |         |                |          |          |                     |             |
| CB4856                                                                                                                                                                           | HS | II | 8942674 | 8947688 | WBGene00011888 | cutl-15  | T21B10.6 | 0.0841936531511149  |             |
| AGIWUR8379;AGIWUR37786                                                                                                                                                           |    |    |         |         |                |          |          |                     |             |
| CB4856                                                                                                                                                                           | HS | II | 8955240 | 8964149 | WBGene00007690 | sftd-3   | C18E9.10 | -0.0352531832473577 |             |
| AGIWUR39676                                                                                                                                                                      |    |    |         |         |                |          |          |                     |             |

|                                                                                                 |    |    |         |         |                |          |          |                      |             |
|-------------------------------------------------------------------------------------------------|----|----|---------|---------|----------------|----------|----------|----------------------|-------------|
| CB4856                                                                                          | HS | II | 8964238 | 8964901 | WBGene00007684 | C18E9.4  | C18E9.4  | 0.134948278647254    | AGIWUR2027  |
| CB4856                                                                                          | HS | II | 8965006 | 8966919 | WBGene00007683 | C18E9.2  | C18E9.2  | -0.253128988158551   | AGIWUR19427 |
| CB4856                                                                                          | HS | II | 8966921 | 8969473 | WBGene00004105 | szy-20   | C18E9.3  | -0.0969497904235119  | AGIWUR232   |
| CB4856                                                                                          | HS | II | 8969980 | 8971967 | WBGene00007685 | C18E9.5  | C18E9.5  | -0.0148598579481671  | AGIWUR9657  |
| CB4856                                                                                          | HS | II | 8971965 | 8973566 | WBGene00007686 | tomm-40  | C18E9.6  | -0.179337560716505   | AGIWUR15552 |
| CB4856                                                                                          | HS | II | 8978475 | 8982678 | WBGene00007687 | C18E9.7  | C18E9.7  | -0.037636401811719   | AGIWUR29598 |
| CB4856                                                                                          | HS | II | 8985900 | 8988062 | WBGene00007688 | C18E9.8  | C18E9.8  | -0.244752702501444   | AGIWUR27516 |
| CB4856                                                                                          | HS | II | 8988359 | 8989544 | WBGene00007689 | C18E9.9  | C18E9.9  | -0.105849007553049   | AGIWUR34240 |
| CB4856                                                                                          | HS | II | 8993169 | 8994533 | WBGene00003870 | ooc-5    | C18E9.11 | -0.147974370712069   |             |
| AGIWUR34657                                                                                     |    |    |         |         |                |          |          |                      |             |
| CB4856                                                                                          | HS | II | 8994636 | 8996269 | WBGene00009711 | F44G4.1  | F44G4.1  | 0.0288290419632933   | AGIWUR36515 |
| CB4856                                                                                          | HS | II | 8996364 | 8997037 | WBGene00009712 | F44G4.2  | F44G4.2  | -0.103867906682565   |             |
| AGIWUR26656;AGIWUR29476;AGIWUR37899                                                             |    |    |         |         |                |          |          |                      |             |
| CB4856                                                                                          | HS | II | 8997027 | 8997662 | WBGene00009713 | F44G4.3  | F44G4.3  | -0.105422202627601   | AGIWUR39850 |
| CB4856                                                                                          | HS | II | 8997827 | 8999722 | WBGene00006514 | tdp-1    | F44G4.4  | 0.0286862068548785   |             |
| AGIWUR6241;AGIWUR23305;AGIWUR31169;AGIWUR40138;AGIWUR43127;AGIWUR43210                          |    |    |         |         |                |          |          |                      |             |
| CB4856                                                                                          | HS | II | 8999727 | 9000431 | WBGene00009714 | F44G4.5  | F44G4.5  | 0.249402931217663    | AGIWUR28065 |
| CB4856                                                                                          | HS | II | 9000872 | 9001793 | WBGene00009715 | F44G4.6  | F44G4.6  | 0.230929169171127    | AGIWUR23769 |
| CB4856                                                                                          | HS | II | 9002527 | 9005167 | WBGene00009716 | F44G4.7  | F44G4.7  | 0.0753073067933254   | AGIWUR41942 |
| CB4856                                                                                          | HS | II | 9005796 | 9019775 | WBGene00009717 | dep-1    | F44G4.8  | 0.202373468317427    |             |
| AGIWUR4980;AGIWUR14304;AGIWUR27995                                                              |    |    |         |         |                |          |          |                      |             |
| CB4856                                                                                          | HS | II | 9026968 | 9029263 | WBGene00009504 | F37B12.1 | F37B12.1 | -0.0982778554997434  |             |
| AGIWUR28129                                                                                     |    |    |         |         |                |          |          |                      |             |
| CB4856                                                                                          | HS | II | 9035562 | 9038301 | WBGene00001527 | gcs-1    | F37B12.2 | -0.0667061513349476  |             |
| AGIWUR36032;AGIWUR39622                                                                         |    |    |         |         |                |          |          |                      |             |
| CB4856                                                                                          | HS | II | 9039820 | 9041406 | WBGene00009505 | F37B12.3 | F37B12.3 | 0.159771584660609    |             |
| AGIWUR6571                                                                                      |    |    |         |         |                |          |          |                      |             |
| CB4856                                                                                          | HS | II | 9042180 | 9053824 | WBGene00011980 | T24B8.7  | T24B8.7  | -0.00486977859977245 |             |
| AGIWUR3801;AGIWUR7738;AGIWUR38682                                                               |    |    |         |         |                |          |          |                      |             |
| CB4856                                                                                          | HS | II | 9054972 | 9056504 | WBGene00011976 | T24B8.2  | T24B8.2  | 0.113288276313174    | AGIWUR38510 |
| CB4856                                                                                          | HS | II | 9056499 | 9057111 | WBGene00004446 | rp1-32   | T24B8.1  | -0.642092579473316   |             |
| AGIWUR17408;AGIWUR18356;AGIWUR19434;AGIWUR19524;AGIWUR26213;AGIWUR26733;AGIWUR34869;AGIWUR36838 |    |    |         |         |                |          |          |                      |             |
| CB4856                                                                                          | HS | II | 9059389 | 9061138 | WBGene00011977 | T24B8.3  | T24B8.3  | -0.0163144032104854  |             |
| AGIWUR8853;AGIWUR15171;AGIWUR15912;AGIWUR22651;AGIWUR28452;AGIWUR38847                          |    |    |         |         |                |          |          |                      |             |
| CB4856                                                                                          | HS | II | 9063687 | 9070904 | WBGene00011978 | T24B8.4  | T24B8.4  | -0.00543232650842862 |             |
| AGIWUR11315;AGIWUR11955;AGIWUR12228;AGIWUR35707                                                 |    |    |         |         |                |          |          |                      |             |
| CB4856                                                                                          | HS | II | 9082626 | 9083146 | WBGene00011979 | T24B8.5  | T24B8.5  | -0.308383593758522   |             |
| AGIWUR4785;AGIWUR5986;AGIWUR16640;AGIWUR24375;AGIWUR34447;AGIWUR40012                           |    |    |         |         |                |          |          |                      |             |
| CB4856                                                                                          | HS | II | 9086608 | 9087917 | WBGene00001950 | hlh-3    | T24B8.6  | 0.0768468500894652   | AGIWUR14966 |

|                                                                        |    |    |         |         |                |          |          |                     |             |
|------------------------------------------------------------------------|----|----|---------|---------|----------------|----------|----------|---------------------|-------------|
| CB4856                                                                 | HS | II | 9091109 | 9093696 | WBGene00007421 | C07H4.1  | C07H4.1  | -0.042904967237547  | AGIWUR20829 |
| CB4856                                                                 | HS | II | 9094710 | 9098605 | WBGene00000532 | c1h-5    | C07H4.2  | 0.0422196153517085  | AGIWUR9749  |
| CB4856                                                                 | HS | II | 9099371 | 9100639 | WBGene00012000 | T24H10.1 | T24H10.1 | -0.542801864310169  |             |
| AGIWUR27507                                                            |    |    |         |         |                |          |          |                     |             |
| CB4856                                                                 | HS | II | 9101098 | 9105451 | WBGene00012003 | T24H10.5 | T24H10.5 | 0.32282319100237    |             |
| AGIWUR7016                                                             |    |    |         |         |                |          |          |                     |             |
| CB4856                                                                 | HS | II | 9106515 | 9107145 | WBGene00012004 | dyrb-1   | T24H10.6 | 0.0430309906873791  |             |
| AGIWUR14292                                                            |    |    |         |         |                |          |          |                     |             |
| CB4856                                                                 | HS | II | 9107382 | 9108600 | WBGene00001041 | dnj-23   | T24H10.3 | -0.0215804715797887 |             |
| AGIWUR28826                                                            |    |    |         |         |                |          |          |                     |             |
| CB4856                                                                 | HS | II | 9109534 | 9111240 | WBGene00012002 | T24H10.4 | T24H10.4 | 0.0336249548667062  |             |
| AGIWUR39308                                                            |    |    |         |         |                |          |          |                     |             |
| CB4856                                                                 | HS | II | 9113219 | 9132213 | WBGene00012005 | jun-1    | T24H10.7 | 0.0648209500049521  |             |
| AGIWUR15041;AGIWUR15175;AGIWUR39207;AGIWUR43228                        |    |    |         |         |                |          |          |                     |             |
| CB4856                                                                 | HS | II | 9131663 | 9134543 | WBGene00007633 | C16D2.1  | C16D2.1  | 0.124665248425898   |             |
| AGIWUR3556;AGIWUR11436;AGIWUR25167;AGIWUR25792;AGIWUR35378;AGIWUR43292 |    |    |         |         |                |          |          |                     |             |
| CB4856                                                                 | HS | II | 9139651 | 9145352 | WBGene00012421 | Y9C2UA.1 | Y9C2UA.1 | 0.109991634448176   |             |
| AGIWUR28136;AGIWUR44101                                                |    |    |         |         |                |          |          |                     |             |
| CB4856                                                                 | HS | II | 9146261 | 9146641 | WBGene00012422 | Y9C2UA.2 | Y9C2UA.2 | -0.427660537493593  |             |
| AGIWUR34874                                                            |    |    |         |         |                |          |          |                     |             |
| CB4856                                                                 | HS | II | 9148356 | 9152311 | WBGene00012322 | W07A12.4 | W07A12.4 | -0.0100239425380346 |             |
| AGIWUR14184                                                            |    |    |         |         |                |          |          |                     |             |
| CB4856                                                                 | HS | II | 9152531 | 9154310 | WBGene00000654 | col-78   | W07A12.5 | -0.298012259918401  |             |
| AGIWUR17535                                                            |    |    |         |         |                |          |          |                     |             |
| CB4856                                                                 | HS | II | 9158108 | 9159874 | WBGene00012323 | oac-54   | W07A12.6 | 0.171872997166933   |             |
| AGIWUR12447                                                            |    |    |         |         |                |          |          |                     |             |
| CB4856                                                                 | HS | II | 9161379 | 9163448 | WBGene00012324 | rhy-1    | W07A12.7 | 0.197419426184931   |             |
| AGIWUR26959                                                            |    |    |         |         |                |          |          |                     |             |
| CB4856                                                                 | HS | II | 9163368 | 9165800 | WBGene00012325 | W07A12.8 | W07A12.8 | 0.302425763649435   |             |
| AGIWUR12569                                                            |    |    |         |         |                |          |          |                     |             |
| CB4856                                                                 | HS | II | 9165929 | 9167830 | WBGene00011966 | T23G7.3  | T23G7.3  | -0.210552424135315  | AGIWUR30241 |
| CB4856                                                                 | HS | II | 9167933 | 9172991 | WBGene00011965 | T23G7.2  | T23G7.2  | 0.17307828718732    | AGIWUR12448 |
| CB4856                                                                 | HS | II | 9173175 | 9177152 | WBGene00004752 | sec-5    | T23G7.4  | 0.0974716201421177  | AGIWUR6458  |
| CB4856                                                                 | HS | II | 9177300 | 9178585 | WBGene00011967 | pir-1    | T23G7.5  | 0.0190200162036831  |             |
| AGIWUR12789;AGIWUR28676;AGIWUR35975                                    |    |    |         |         |                |          |          |                     |             |
| CB4856                                                                 | HS | II | 9178514 | 9188480 | WBGene00006367 | sym-2    | ZK1067.6 | 0.172593325020706   |             |
| AGIWUR16239                                                            |    |    |         |         |                |          |          |                     |             |
| CB4856                                                                 | HS | II | 9197518 | 9207210 | WBGene00002299 | let-23   | ZK1067.1 | 0.12828957143063    |             |
| AGIWUR38958                                                            |    |    |         |         |                |          |          |                     |             |

|                                                                                    |    |    |         |         |                |          |          |                     |             |
|------------------------------------------------------------------------------------|----|----|---------|---------|----------------|----------|----------|---------------------|-------------|
| CB4856                                                                             | HS | II | 9210376 | 9213100 | WBGene00014210 | ZK1067.4 | ZK1067.4 | -0.0210497223946682 |             |
| AGIWUR18196                                                                        |    |    |         |         |                |          |          |                     |             |
| CB4856                                                                             | HS | II | 9213658 | 9222798 | WBGene00014208 | ZK1067.2 | ZK1067.2 | -0.102692545262767  |             |
| AGIWUR280;AGIWUR30742;AGIWUR36429;AGIWUR38565                                      |    |    |         |         |                |          |          |                     |             |
| CB4856                                                                             | HS | II | 9223269 | 9225176 | WBGene00014209 | ZK1067.3 | ZK1067.3 | 0.0634872175281043  |             |
| AGIWUR11545                                                                        |    |    |         |         |                |          |          |                     |             |
| CB4856                                                                             | HS | II | 9225186 | 9227261 | WBGene00004174 | abu-14   | ZK1067.7 | -0.204775271028478  |             |
| AGIWUR14252;AGIWUR36345;AGIWUR43716                                                |    |    |         |         |                |          |          |                     |             |
| CB4856                                                                             | HS | II | 9231457 | 9232340 | WBGene00001761 | gst-13   | T26C5.1  | 0.098479322697381   | AGIWUR6051  |
| CB4856                                                                             | HS | II | 9233223 | 9236202 | WBGene00012032 | T26C5.2  | T26C5.2  | -0.180859019139359  |             |
| AGIWUR22340;AGIWUR30572;AGIWUR39818                                                |    |    |         |         |                |          |          |                     |             |
| CB4856                                                                             | HS | II | 9236583 | 9249123 | WBGene00012033 | T26C5.3  | T26C5.3  | 0.0897497492634969  | AGIWUR43937 |
| CB4856                                                                             | HS | II | 9249048 | 9250522 | WBGene00012034 | T26C5.4  | T26C5.4  | 0.176381366482651   | AGIWUR5499  |
| CB4856                                                                             | HS | II | 9251788 | 9254312 | WBGene00044006 | H32K21.1 | H32K21.1 | 0.115886211973619   |             |
| AGIWUR9374;AGIWUR14634;AGIWUR29552;AGIWUR32187;AGIWUR33749                         |    |    |         |         |                |          |          |                     |             |
| CB4856                                                                             | HS | II | 9258913 | 9261994 | WBGene00000170 | aqp-2    | C01G6.1  | 0.152571661313409   |             |
| AGIWUR6503;AGIWUR16119;AGIWUR16505;AGIWUR16669;AGIWUR38863;AGIWUR42186;AGIWUR43505 |    |    |         |         |                |          |          |                     |             |
| CB4856                                                                             | HS | II | 9267336 | 9268303 | WBGene00007224 | C01G6.2  | C01G6.2  | 0.219095306683318   | AGIWUR904   |
| CB4856                                                                             | HS | II | 9269888 | 9271267 | WBGene00007225 | C01G6.3  | C01G6.3  | 0.0780253496472803  | AGIWUR10148 |
| CB4856                                                                             | HS | II | 9271265 | 9273042 | WBGene00007226 | C01G6.4  | C01G6.4  | 0.0107313591580667  | AGIWUR4309  |
| CB4856                                                                             | HS | II | 9275024 | 9280098 | WBGene00007227 | C01G6.5  | C01G6.5  | -0.0275988526318738 |             |
| AGIWUR7512;AGIWUR15656;AGIWUR20663;AGIWUR34921                                     |    |    |         |         |                |          |          |                     |             |
| CB4856                                                                             | HS | II | 9285932 | 9289136 | WBGene00006510 | mtrr-1   | C01G6.6  | 0.116274690714249   |             |
| AGIWUR4599;AGIWUR5472;AGIWUR6166;AGIWUR8083;AGIWUR10918;AGIWUR36993                |    |    |         |         |                |          |          |                     |             |
| CB4856                                                                             | HS | II | 9289506 | 9291539 | WBGene00014663 | C01G6.10 | C01G6.10 | -0.228574087950045  |             |
| AGIWUR10768;AGIWUR33227                                                            |    |    |         |         |                |          |          |                     |             |
| CB4856                                                                             | HS | II | 9292017 | 9294050 | WBGene00007228 | acs-7    | C01G6.7  | 0.160599165603611   |             |
| AGIWUR16134;AGIWUR20204;AGIWUR41951                                                |    |    |         |         |                |          |          |                     |             |
| CB4856                                                                             | HS | II | 9294029 | 9295753 | WBGene00007229 | C01G6.9  | C01G6.9  | 0.0731139786428869  | AGIWUR9968  |
| CB4856                                                                             | HS | II | 9295918 | 9310304 | WBGene00000289 | cam-1    | C01G6.8  | 0.130978331294054   | AGIWUR22200 |
| CB4856                                                                             | HS | II | 9317551 | 9319627 | WBGene00008403 | csa-1    | D2013.3  | -0.0570888947473627 | AGIWUR20055 |
| CB4856                                                                             | HS | II | 9319865 | 9321888 | WBGene00008402 | wdfy-2   | D2013.2  | 0.0889195182734426  | AGIWUR11794 |
| CB4856                                                                             | HS | II | 9321858 | 9322916 | WBGene00004286 | rab-39   | D2013.1  | -0.0517258736360162 | AGIWUR37896 |
| CB4856                                                                             | HS | II | 9323955 | 9324873 | WBGene00006520 | tag-175  | D2013.10 | 0.157371654386104   |             |
| AGIWUR7498;AGIWUR13845;AGIWUR37776                                                 |    |    |         |         |                |          |          |                     |             |
| CB4856                                                                             | HS | II | 9324874 | 9329665 | WBGene00001134 | eat-3    | D2013.5  | -0.0256496665632291 |             |
| AGIWUR5032;AGIWUR9059;AGIWUR14969                                                  |    |    |         |         |                |          |          |                     |             |
| CB4856                                                                             | HS | II | 9329757 | 9331510 | WBGene00008404 | D2013.6  | D2013.6  | -0.148221965565281  | AGIWUR9103  |
| CB4856                                                                             | HS | II | 9331643 | 9333925 | WBGene00001229 | eif-3.F  | D2013.7  | 0.0333805464921682  | AGIWUR26638 |

|                                                                                                                                  |    |    |         |         |                |          |          |                     |             |
|----------------------------------------------------------------------------------------------------------------------------------|----|----|---------|---------|----------------|----------|----------|---------------------|-------------|
| CB4856                                                                                                                           | HS | II | 9334014 | 9338896 | WBGene00004744 | scp-1    | D2013.8  | 0.165800587712621   | AGIWUR31494 |
| CB4856                                                                                                                           | HS | II | 9338890 | 9341394 | WBGene00008405 | ttl1-12  | D2013.9  | -0.0681476662572011 |             |
| AGIWUR4157;AGIWUR10715;AGIWUR42764                                                                                               |    |    |         |         |                |          |          |                     |             |
| CB4856                                                                                                                           | HS | II | 9341397 | 9346590 | WBGene00009626 | F42A8.1  | F42A8.1  | 0.35912703010478    | AGIWUR629   |
| CB4856                                                                                                                           | HS | II | 9350648 | 9352801 | WBGene00006433 | sdhb-1   | F42A8.2  | -0.123275423413664  |             |
| AGIWUR10676;AGIWUR41853                                                                                                          |    |    |         |         |                |          |          |                     |             |
| CB4856                                                                                                                           | HS | II | 9353000 | 9354327 | WBGene00009627 | F42A8.3  | F42A8.3  | 0.114340624876437   | AGIWUR6749  |
| CB4856                                                                                                                           | HS | II | 9358531 | 9369098 | WBGene00003196 | mel-11   | C06C3.1  | -0.125552032176596  |             |
| AGIWUR488;AGIWUR8877;AGIWUR12482;AGIWUR18840;AGIWUR22152;AGIWUR27473;AGIWUR28945;AGIWUR31426;AGIWUR32983;AGIWUR35345;AGIWUR41789 |    |    |         |         |                |          |          |                     |             |
| CB4856                                                                                                                           | HS | II | 9369178 | 9372485 | WBGene00007374 | C06C3.3  | C06C3.3  | 0.00598264644014002 | AGIWUR42015 |
| CB4856                                                                                                                           | HS | II | 9375845 | 9377258 | WBGene00044169 | C06C3.10 | C06C3.10 | 0.0964060372754467  |             |
| AGIWUR7373;AGIWUR19914;AGIWUR21399;AGIWUR24535;AGIWUR35394;AGIWUR42353;AGIWUR44149                                               |    |    |         |         |                |          |          |                     |             |
| CB4856                                                                                                                           | HS | II | 9378557 | 9379596 | WBGene00045404 | C06C3.11 | C06C3.11 | -0.0552896945751504 |             |
| AGIWUR14892;AGIWUR22768                                                                                                          |    |    |         |         |                |          |          |                     |             |
| CB4856                                                                                                                           | HS | II | 9380106 | 9381355 | WBGene00007376 | C06C3.5  | C06C3.5  | 0.0704341985581287  |             |
| AGIWUR7789;AGIWUR43989                                                                                                           |    |    |         |         |                |          |          |                     |             |
| CB4856                                                                                                                           | HS | II | 9380822 | 9384995 | WBGene00005271 | srh-48   | C06C3.6  | 0.0954720250333629  |             |
| AGIWUR777;AGIWUR30993;AGIWUR41635                                                                                                |    |    |         |         |                |          |          |                     |             |
| CB4856                                                                                                                           | HS | II | 9385541 | 9386537 | WBGene00007377 | C06C3.7  | C06C3.7  | -0.097128489915133  | AGIWUR9039  |
| CB4856                                                                                                                           | HS | II | 9386584 | 9390900 | WBGene00007378 | C06C3.8  | C06C3.8  | 0.265259031217049   | AGIWUR24997 |
| CB4856                                                                                                                           | HS | II | 9395493 | 9397596 | WBGene00013091 | Y51B9A.9 | Y51B9A.9 | 0.141069315285891   |             |
| AGIWUR15463                                                                                                                      |    |    |         |         |                |          |          |                     |             |
| CB4856                                                                                                                           | HS | II | 9398866 | 9399828 | WBGene00013090 | Y51B9A.8 | Y51B9A.8 | -0.155969822104924  |             |
| AGIWUR38154                                                                                                                      |    |    |         |         |                |          |          |                     |             |
| CB4856                                                                                                                           | HS | II | 9400053 | 9400567 | WBGene00013089 | Y51B9A.7 | Y51B9A.7 | -0.127438597320962  |             |
| AGIWUR18686                                                                                                                      |    |    |         |         |                |          |          |                     |             |
| CB4856                                                                                                                           | HS | II | 9400717 | 9403187 | WBGene00013088 | Y51B9A.6 | Y51B9A.6 | 0.0376785150023853  |             |
| AGIWUR41585                                                                                                                      |    |    |         |         |                |          |          |                     |             |
| CB4856                                                                                                                           | HS | II | 9404146 | 9404779 | WBGene00013087 | Y51B9A.5 | Y51B9A.5 | 0.0991052938538655  |             |
| AGIWUR8521                                                                                                                       |    |    |         |         |                |          |          |                     |             |
| CB4856                                                                                                                           | HS | II | 9405539 | 9407114 | WBGene00013085 | mpz-6    | Y51B9A.3 | 0.149629030623494   |             |
| AGIWUR30524                                                                                                                      |    |    |         |         |                |          |          |                     |             |
| CB4856                                                                                                                           | HS | II | 9407270 | 9407547 | WBGene00014909 | Y51B9A.2 | Y51B9A.2 | -0.0645635591750846 |             |
| AGIWUR27725                                                                                                                      |    |    |         |         |                |          |          |                     |             |
| CB4856                                                                                                                           | HS | II | 9407769 | 9409017 | WBGene00013086 | arrd-2   | Y51B9A.4 | -0.250905541239496  |             |
| AGIWUR1161;AGIWUR16056;AGIWUR19379                                                                                               |    |    |         |         |                |          |          |                     |             |
| CB4856                                                                                                                           | HS | II | 9409341 | 9411597 | WBGene00014813 | M176.9   | M176.9   | -0.0808116928173428 |             |
| AGIWUR5800;AGIWUR17079;AGIWUR29430;AGIWUR30418;AGIWUR33537;AGIWUR38628;AGIWUR42401                                               |    |    |         |         |                |          |          |                     |             |



|                                                                                                                      |    |    |         |         |                |          |          |                             |                     |
|----------------------------------------------------------------------------------------------------------------------|----|----|---------|---------|----------------|----------|----------|-----------------------------|---------------------|
| CB4856                                                                                                               | HS | II | 9412565 | 9414144 | WBGene00006429 | arrd-3   | M176.1   | 0.358164512553282           | AGIWUR39634         |
| CB4856                                                                                                               | HS | II | 9414559 | 9416431 | WBGene00010941 | gss-1    | M176.2   | -0.126514459044549          |                     |
| AGIWUR3744;AGIWUR7901;AGIWUR17536;AGIWUR39771                                                                        |    |    |         |         |                |          |          |                             |                     |
| CB4856                                                                                                               | HS | II | 9417013 | 9418316 | WBGene00010942 | chch-3   | M176.3   | 0.00550207991257912         |                     |
| AGIWUR14876;AGIWUR32165                                                                                              |    |    |         |         |                |          |          |                             |                     |
| CB4856                                                                                                               | HS | II | 9420178 | 9422196 | WBGene00010943 | M176.4   | M176.4   | 0.230902974076407           | AGIWUR16670         |
| CB4856                                                                                                               | HS | II | 9422269 | 9423296 | WBGene00010947 | M176.11  | M176.11  | 0.207260021112452           | AGIWUR6138          |
| CB4856                                                                                                               | HS | II | 9423331 | 9426173 | WBGene00010946 | M176.10  | M176.10  | -0.0877631190394954         | AGIWUR8173          |
| CB4856                                                                                                               | HS | II | 9426229 | 9427744 | WBGene00010944 | M176.5   | M176.5   | 0.155774982071286           | AGIWUR437           |
| CB4856                                                                                                               | HS | II | 9431383 | 9433709 | WBGene00002199 | kin-15   | M176.6   | 0.28399886915828            | AGIWUR9251          |
| CB4856                                                                                                               | HS | II | 9434021 | 9436120 | WBGene00002200 | kin-16   | M176.7   | 0.160998645597056           | AGIWUR37351         |
| CB4856                                                                                                               | HS | II | 9436649 | 9438327 | WBGene00010945 | chil-13  | M176.8   | 0.0377389986837215          |                     |
| AGIWUR14242;AGIWUR18118;AGIWUR20828;AGIWUR22939;AGIWUR39368                                                          |    |    |         |         |                |          |          |                             |                     |
| CB4856                                                                                                               | HS | II | 9438609 | 9440160 | WBGene00011159 | chil-17  | R09D1.3  | -0.177027095312642          | AGIWUR9661          |
| CB4856                                                                                                               | HS | II | 9440441 | 9441959 | WBGene00011158 | chil-16  | R09D1.2  | -0.0904613528684575         | AGIWUR12002         |
| CB4856                                                                                                               | HS | II | 9442168 | 9443629 | WBGene00011157 | chil-15  | R09D1.1  | -0.119705300236492          | AGIWUR22130         |
| CB4856                                                                                                               | HS | II | 9443827 | 9445468 | WBGene00011169 | R09D1.13 |          | R09D1.13 -0.286819167607892 |                     |
| AGIWUR9592                                                                                                           |    |    |         |         |                |          |          |                             |                     |
| CB4856                                                                                                               | HS | II | 9446090 | 9447705 | WBGene00011160 | R09D1.4  | R09D1.4  | -0.149913668630044          | AGIWUR21760         |
| CB4856                                                                                                               | HS | II | 9448273 | 9449726 | WBGene00011161 | chil-18  | R09D1.5  | 0.485047792385214           | AGIWUR17840         |
| CB4856                                                                                                               | HS | II | 9450028 | 9452263 | WBGene00011168 | R09D1.12 |          | R09D1.12 0.0737444438953916 |                     |
| AGIWUR2982;AGIWUR9608;AGIWUR10424;AGIWUR16494                                                                        |    |    |         |         |                |          |          |                             |                     |
| CB4856                                                                                                               | HS | II | 9455417 | 9456617 | WBGene00011163 | chil-20  | R09D1.7  | 0.251584052203982           | AGIWUR41221         |
| CB4856                                                                                                               | HS | II | 9462537 | 9464093 | WBGene00011165 | R09D1.9  | R09D1.9  | 0.197920606052445           |                     |
| AGIWUR13346;AGIWUR21482;AGIWUR21719;AGIWUR24513                                                                      |    |    |         |         |                |          |          |                             |                     |
| CB4856                                                                                                               | HS | II | 9464470 | 9466195 | WBGene00011166 | chil-22  | R09D1.10 |                             | 0.00408678510565608 |
| AGIWUR31774                                                                                                          |    |    |         |         |                |          |          |                             |                     |
| CB4856                                                                                                               | HS | II | 9466960 | 9468477 | WBGene00011167 | chil-23  | R09D1.11 |                             | 0.175062697840151   |
| AGIWUR22536                                                                                                          |    |    |         |         |                |          |          |                             |                     |
| CB4856                                                                                                               | HS | II | 9469119 | 9470082 | WBGene00044807 | T19H5.6  | T19H5.6  | -0.00428555459401103        | AGIWUR34993         |
| CB4856                                                                                                               | HS | II | 9470521 | 9471924 | WBGene00044806 | T19H5.5  | T19H5.5  | 0.0491894573019831          | AGIWUR44827         |
| CB4856                                                                                                               | HS | II | 9472691 | 9474467 | WBGene00011846 | chil-25  | T19H5.1  | 0.165482510045062           |                     |
| AGIWUR41436;AGIWUR41503                                                                                              |    |    |         |         |                |          |          |                             |                     |
| CB4856                                                                                                               | HS | II | 9475055 | 9476375 | WBGene00011847 | chil-26  | T19H5.2  | -0.0268558841435187         | AGIWUR15275         |
| CB4856                                                                                                               | HS | II | 9477867 | 9479536 | WBGene00011848 | chil-27  | T19H5.3  | -0.117263420646875          | AGIWUR1801          |
| CB4856                                                                                                               | HS | II | 9479641 | 9480106 | WBGene00045414 | T19H5.7  | T19H5.7  | 0.0828960643202237          |                     |
| AGIWUR267;AGIWUR4245;AGIWUR12414;AGIWUR16867;AGIWUR18186;AGIWUR18396;AGIWUR19091;AGIWUR23500;AGIWUR26261;AGIWUR36288 |    |    |         |         |                |          |          |                             |                     |
| CB4856                                                                                                               | HS | II | 9486377 | 9488260 | WBGene00011849 | T19H5.4  | T19H5.4  | -0.0332218517806755         | AGIWUR33194         |

|                                                                                                 |    |    |         |         |                |          |         |                     |             |
|-------------------------------------------------------------------------------------------------|----|----|---------|---------|----------------|----------|---------|---------------------|-------------|
| CB4856                                                                                          | HS | II | 9502757 | 9507281 | WBGene00001530 | gcy-3    | R134.1  | 0.0585324579233744  | AGIWUR20905 |
| CB4856                                                                                          | HS | II | 9507604 | 9512095 | WBGene00001529 | gcy-2    | R134.2  | -0.0994673535827193 | AGIWUR21956 |
| CB4856                                                                                          | HS | II | 9512490 | 9516936 | WBGene00001528 | gcy-1    | AH6.1   | -0.131253266203957  | AGIWUR34842 |
| CB4856                                                                                          | HS | II | 9517567 | 9518876 | WBGene00007080 | sfxn-1.1 | AH6.2   | 0.0391518390027841  |             |
| AGIWUR30366                                                                                     |    |    |         |         |                |          |         |                     |             |
| CB4856                                                                                          | HS | II | 9519055 | 9520205 | WBGene00007081 | AH6.3    | AH6.3   | 0.162057287473505   | AGIWUR10180 |
| CB4856                                                                                          | HS | II | 9520200 | 9521670 | WBGene00005027 | sra-1    | AH6.4   | -0.271918246003396  | AGIWUR40761 |
| CB4856                                                                                          | HS | II | 9524174 | 9526390 | WBGene00003231 | mex-6    | AH6.5   | -0.217972965234877  | AGIWUR26335 |
| CB4856                                                                                          | HS | II | 9527031 | 9528253 | WBGene00005041 | sra-15   | AH6.16  | 0.08024452542411    |             |
| AGIWUR9384;AGIWUR33043;AGIWUR38123                                                              |    |    |         |         |                |          |         |                     |             |
| CB4856                                                                                          | HS | II | 9528780 | 9529862 | WBGene00005028 | sra-2    | AH6.6   | 0.0670181886773928  | AGIWUR45064 |
| CB4856                                                                                          | HS | II | 9530517 | 9531253 | WBGene00005042 | sra-16   | AH6.13  | 0.121280836545077   |             |
| AGIWUR12292;AGIWUR13397;AGIWUR19197;AGIWUR27224;AGIWUR30160;AGIWUR39965;AGIWUR43396;AGIWUR44805 |    |    |         |         |                |          |         |                     |             |
| CB4856                                                                                          | HS | II | 9532299 | 9533974 | WBGene00005035 | sra-9    | AH6.14  | -0.0813053833819177 | AGIWUR20488 |
| CB4856                                                                                          | HS | II | 9537729 | 9539085 | WBGene00005034 | sra-8    | AH6.12  | -0.0923492123073402 | AGIWUR26993 |
| CB4856                                                                                          | HS | II | 9539274 | 9540823 | WBGene00005029 | sra-3    | AH6.7   | 0.250700156263354   | AGIWUR22844 |
| CB4856                                                                                          | HS | II | 9541601 | 9542885 | WBGene00005030 | sra-4    | AH6.8   | 0.475629635375199   | AGIWUR22321 |
| CB4856                                                                                          | HS | II | 9544686 | 9546208 | WBGene00005033 | sra-7    | AH6.11  | 0.322541840581113   | AGIWUR39696 |
| CB4856                                                                                          | HS | II | 9546438 | 9547647 | WBGene00005031 | sra-5    | AH6.9   | 0.10817292948327    |             |
| AGIWUR15593;AGIWUR21584                                                                         |    |    |         |         |                |          |         |                     |             |
| CB4856                                                                                          | HS | II | 9548405 | 9549698 | WBGene00005032 | sra-6    | AH6.10  | -0.076953382326141  | AGIWUR7915  |
| CB4856                                                                                          | HS | II | 9552631 | 9553279 | WBGene00009446 | F35H8.1  | F35H8.1 | 0.0720092303020543  |             |
| AGIWUR10695;AGIWUR11849;AGIWUR16382                                                             |    |    |         |         |                |          |         |                     |             |
| CB4856                                                                                          | HS | II | 9555503 | 9557532 | WBGene00009447 | F35H8.2  | F35H8.2 | 0.0946932375662968  | AGIWUR43323 |
| CB4856                                                                                          | HS | II | 9557646 | 9559516 | WBGene00009448 | zfp-2    | F35H8.3 | 0.00617866041265813 | AGIWUR44357 |
| CB4856                                                                                          | HS | II | 9559497 | 9560029 | WBGene00009449 | F35H8.4  | F35H8.4 | 0.143191482905381   | AGIWUR31921 |
| CB4856                                                                                          | HS | II | 9575971 | 9581490 | WBGene00001368 | exc-7    | F35H8.5 | 0.181972654599067   |             |
| AGIWUR723;AGIWUR8197;AGIWUR12981;AGIWUR13353;AGIWUR20665;AGIWUR38098                            |    |    |         |         |                |          |         |                     |             |
| CB4856                                                                                          | HS | II | 9581756 | 9583548 | WBGene00006938 | wee-1.1  | F35H8.7 | -0.148510697293395  |             |
| AGIWUR8384;AGIWUR24870;AGIWUR25452                                                              |    |    |         |         |                |          |         |                     |             |
| CB4856                                                                                          | HS | II | 9584384 | 9586815 | WBGene00009450 | ugt-58   | F35H8.6 | 0.209569926347545   | AGIWUR29447 |
| CB4856                                                                                          | HS | II | 9588212 | 9589767 | WBGene00008456 | E02H1.2  | E02H1.2 | 0.178818106369365   | AGIWUR5067  |
| CB4856                                                                                          | HS | II | 9589865 | 9591221 | WBGene00008455 | E02H1.1  | E02H1.1 | 0.0801053841413584  |             |
| AGIWUR4770;AGIWUR6968;AGIWUR20250                                                               |    |    |         |         |                |          |         |                     |             |
| CB4856                                                                                          | HS | II | 9591292 | 9592936 | WBGene00006473 | tag-124  | E02H1.3 | 0.180147113015501   | AGIWUR30273 |
| CB4856                                                                                          | HS | II | 9593037 | 9595128 | WBGene00004050 | parp-2   | E02H1.4 | 0.0413633615080693  |             |
| AGIWUR16193;AGIWUR17717;AGIWUR35231;AGIWUR43516                                                 |    |    |         |         |                |          |         |                     |             |
| CB4856                                                                                          | HS | II | 9595224 | 9596598 | WBGene00008457 | E02H1.5  | E02H1.5 | 0.111565160901044   | AGIWUR4642  |
| CB4856                                                                                          | HS | II | 9596701 | 9597528 | WBGene00008458 | E02H1.6  | E02H1.6 | 0.127597641532889   | AGIWUR24417 |

|                                                                                 |    |    |         |         |                |           |           |                     |                     |
|---------------------------------------------------------------------------------|----|----|---------|---------|----------------|-----------|-----------|---------------------|---------------------|
| CB4856                                                                          | HS | II | 9597622 | 9598201 | WBGene00008459 | mrpl-53   | E02H1.8   | 0.157096476347235   | AGIWUR10408         |
| CB4856                                                                          | HS | II | 9598197 | 9605526 | WBGene00003618 | nhr-19    | E02H1.7   | 0.108071714432516   | AGIWUR17743         |
| CB4856                                                                          | HS | II | 9607533 | 9609396 | WBGene00011791 | T15H9.6   | T15H9.6   | -0.207007040348619  | AGIWUR2463          |
| CB4856                                                                          | HS | II | 9610678 | 9611372 | WBGene00011790 | T15H9.5   | T15H9.5   | -0.0995417260883098 | AGIWUR29738         |
| CB4856                                                                          | HS | II | 9611873 | 9613403 | WBGene00011789 | T15H9.4   | T15H9.4   | 0.209063191412313   |                     |
| AGIWUR14684;AGIWUR16096;AGIWUR22993                                             |    |    |         |         |                |           |           |                     |                     |
| CB4856                                                                          | HS | II | 9613463 | 9614812 | WBGene00001952 | hlh-6     | T15H9.3   | 0.146072260529188   | AGIWUR7175          |
| CB4856                                                                          | HS | II | 9615800 | 9617125 | WBGene00011788 | T15H9.2   | T15H9.2   | 0.0642131341834542  | AGIWUR40983         |
| CB4856                                                                          | HS | II | 9617426 | 9624176 | WBGene00001038 | dnj-20    | T15H9.7   | 0.0206541696133828  |                     |
| AGIWUR32249;AGIWUR37878;AGIWUR41905;AGIWUR44083                                 |    |    |         |         |                |           |           |                     |                     |
| CB4856                                                                          | HS | II | 9624590 | 9626641 | WBGene00014249 | ZK1307.8  |           | ZK1307.8            | 0.0977799659340342  |
| AGIWUR2824                                                                      |    |    |         |         |                |           |           |                     |                     |
| CB4856                                                                          | HS | II | 9636628 | 9640170 | WBGene00014248 | ZK1307.7  |           | ZK1307.7            | -0.0468103908404238 |
| AGIWUR17502;AGIWUR21999;AGIWUR22593                                             |    |    |         |         |                |           |           |                     |                     |
| CB4856                                                                          | HS | II | 9640167 | 9644466 | WBGene00001510 | fzr-1     | ZK1307.6  |                     | 0.0699654145780819  |
| AGIWUR711;AGIWUR5820;AGIWUR6478;AGIWUR13776;AGIWUR16291;AGIWUR25244;AGIWUR44524 |    |    |         |         |                |           |           |                     |                     |
| CB4856                                                                          | HS | II | 9647887 | 9649367 | WBGene00005026 | sqv-8     | ZK1307.5  |                     | -0.142270622252315  |
| AGIWUR27876                                                                     |    |    |         |         |                |           |           |                     |                     |
| CB4856                                                                          | HS | II | 9649491 | 9650959 | WBGene00014250 | ZK1307.9  |           | ZK1307.9            | 0.0661794154556059  |
| AGIWUR32506                                                                     |    |    |         |         |                |           |           |                     |                     |
| CB4856                                                                          | HS | II | 9652308 | 9653019 | WBGene00014246 | ZK1307.3  |           | ZK1307.3            | 0.146395608995903   |
| AGIWUR3583                                                                      |    |    |         |         |                |           |           |                     |                     |
| CB4856                                                                          | HS | II | 9653109 | 9653952 | WBGene00014245 | ZK1307.2  |           | ZK1307.2            | -0.0203923341220644 |
| AGIWUR13506;AGIWUR21858;AGIWUR23126;AGIWUR32393;AGIWUR33914                     |    |    |         |         |                |           |           |                     |                     |
| CB4856                                                                          | HS | II | 9654345 | 9655616 | WBGene00014244 | ZK1307.1  |           | ZK1307.1            | 0.0909821311062604  |
| AGIWUR3698;AGIWUR8636;AGIWUR32380                                               |    |    |         |         |                |           |           |                     |                     |
| CB4856                                                                          | HS | II | 9656689 | 9657719 | WBGene00014251 | gstk-1    | ZK1320.1  |                     | -0.158856382757606  |
| AGIWUR2086;AGIWUR2871;AGIWUR24119;AGIWUR28278;AGIWUR28822;AGIWUR32853           |    |    |         |         |                |           |           |                     |                     |
| CB4856                                                                          | HS | II | 9657876 | 9659002 | WBGene00014252 | ZK1320.2  |           | ZK1320.2            | 0.0719395053208096  |
| AGIWUR25137                                                                     |    |    |         |         |                |           |           |                     |                     |
| CB4856                                                                          | HS | II | 9659246 | 9660442 | WBGene00014253 | ZK1320.3  |           | ZK1320.3            | -0.0471334328035056 |
| AGIWUR6554;AGIWUR24271;AGIWUR40507                                              |    |    |         |         |                |           |           |                     |                     |
| CB4856                                                                          | HS | II | 9660839 | 9663007 | WBGene00014254 | cyp-13A10 |           | ZK1320.4            | 0.100549653371694   |
| AGIWUR16893                                                                     |    |    |         |         |                |           |           |                     |                     |
| CB4856                                                                          | HS | II | 9663616 | 9665664 | WBGene00014255 | ZK1320.5  |           | ZK1320.5            | 0.161795666779323   |
| AGIWUR36576                                                                     |    |    |         |         |                |           |           |                     |                     |
| CB4856                                                                          | HS | II | 9667624 | 9668555 | WBGene00014259 | ZK1320.11 |           | ZK1320.11           | 0.117609521208056   |
| AGIWUR41760                                                                     |    |    |         |         |                |           |           |                     |                     |
| CB4856                                                                          | HS | II | 9669324 | 9671499 | WBGene00006390 | taf-8     | ZK1320.12 |                     | 0.160123745793356   |

|                                                                                                                                             |    |         |         |                |            |            |                     |
|---------------------------------------------------------------------------------------------------------------------------------------------|----|---------|---------|----------------|------------|------------|---------------------|
| AGIWUR7931                                                                                                                                  |    |         |         |                |            |            |                     |
| CB4856 HS                                                                                                                                   | II | 9671608 | 9673263 | WBGene00014256 | ZK1320.7   | ZK1320.7   | 0.0866228493809338  |
| AGIWUR28766                                                                                                                                 |    |         |         |                |            |            |                     |
| CB4856 HS                                                                                                                                   | II | 9674978 | 9677210 | WBGene00000180 | arc-1      | ZK1320.6   | 0.13196390673351    |
| AGIWUR30528                                                                                                                                 |    |         |         |                |            |            |                     |
| CB4856 HS                                                                                                                                   | II | 9680798 | 9683089 | WBGene00044007 | ZK1320.13  | ZK1320.13  | 0.314459563359495   |
| AGIWUR2819;AGIWUR11856;AGIWUR29269;AGIWUR29780;AGIWUR42776                                                                                  |    |         |         |                |            |            |                     |
| CB4856 HS                                                                                                                                   | II | 9684088 | 9686713 | WBGene00014258 | ZK1320.9   | ZK1320.9   | -0.103368869737988  |
| AGIWUR8317;AGIWUR20469;AGIWUR20978;AGIWUR24292;AGIWUR33498                                                                                  |    |         |         |                |            |            |                     |
| CB4856 HS                                                                                                                                   | II | 9689664 | 9691939 | WBGene00003749 | nlp-11     | ZK1320.10  | 0.10946633467433    |
| AGIWUR11616                                                                                                                                 |    |         |         |                |            |            |                     |
| CB4856 HS                                                                                                                                   | II | 9698281 | 9700463 | WBGene00044158 | Y53C12A.8  | Y53C12A.8  | 0.0758513553961464  |
| AGIWUR32060;AGIWUR36415                                                                                                                     |    |         |         |                |            |            |                     |
| CB4856 HS                                                                                                                                   | II | 9700543 | 9701839 | WBGene00013142 | Y53C12A.7  | Y53C12A.7  | 0.138342822435982   |
| AGIWUR2909                                                                                                                                  |    |         |         |                |            |            |                     |
| CB4856 HS                                                                                                                                   | II | 9701402 | 9703732 | WBGene00013140 | mop-25.2   | Y53C12A.4  | -0.235903584834258  |
| AGIWUR20398                                                                                                                                 |    |         |         |                |            |            |                     |
| CB4856 HS                                                                                                                                   | II | 9703812 | 9704789 | WBGene00175030 | Y53C12A.10 | Y53C12A.10 | 0.151671376330086   |
| AGIWUR40049                                                                                                                                 |    |         |         |                |            |            |                     |
| CB4856 HS                                                                                                                                   | II | 9706483 | 9708885 | WBGene00001623 | glt-5      | Y53C12A.2  | 0.205928447983039   |
| AGIWUR40808                                                                                                                                 |    |         |         |                |            |            |                     |
| CB4856 HS                                                                                                                                   | II | 9713737 | 9716467 | WBGene00006940 | wee-1.3    | Y53C12A.1  | 0.157383769773965   |
| AGIWUR7842;AGIWUR12273;AGIWUR14315;AGIWUR16110;AGIWUR25779;AGIWUR30829;AGIWUR39441                                                          |    |         |         |                |            |            |                     |
| CB4856 HS                                                                                                                                   | II | 9717478 | 9717775 | WBGene00013141 | Y53C12A.6  | Y53C12A.6  | -0.0960163654016419 |
| AGIWUR20674                                                                                                                                 |    |         |         |                |            |            |                     |
| CB4856 HS                                                                                                                                   | II | 9721828 | 9724526 | WBGene00013145 | cutl-2     | Y53C12B.6  | -0.391059258827358  |
| AGIWUR17058                                                                                                                                 |    |         |         |                |            |            |                     |
| CB4856 HS                                                                                                                                   | II | 9732137 | 9738035 | WBGene00003100 | mab-3      | Y53C12B.5  | -0.0890346159773685 |
| AGIWUR19751;AGIWUR21247;AGIWUR42412                                                                                                         |    |         |         |                |            |            |                     |
| CB4856 HS                                                                                                                                   | II | 9738982 | 9742884 | WBGene00013144 | Y53C12B.2  | Y53C12B.2  | 0.00523188979356703 |
| AGIWUR29533                                                                                                                                 |    |         |         |                |            |            |                     |
| CB4856 HS                                                                                                                                   | II | 9742982 | 9746074 | WBGene00013143 | Y53C12B.1  | Y53C12B.1  | -0.0860452593427752 |
| AGIWUR19337                                                                                                                                 |    |         |         |                |            |            |                     |
| CB4856 HS                                                                                                                                   | II | 9746316 | 9750454 | WBGene00003785 | nos-3      | Y53C12B.3  | -0.0688354601508641 |
| AGIWUR1727;AGIWUR1776;AGIWUR3921;AGIWUR9435;AGIWUR15558;AGIWUR20432;AGIWUR20708;AGIWUR27214;AGIWUR31897;AGIWUR31923;AGIWUR37671;AGIWUR39396 |    |         |         |                |            |            |                     |
| CB4856 HS                                                                                                                                   | II | 9750442 | 9752317 | WBGene00013146 | Y53C12B.7  | Y53C12B.7  | 0.22906557381943    |
| AGIWUR35367                                                                                                                                 |    |         |         |                |            |            |                     |
| CB4856 HS                                                                                                                                   | II | 9754030 | 9754967 | WBGene00014260 | ZK1321.1   | ZK1321.1   | -0.0235561752460827 |

AGIWUR35488  
 CB4856 HS II 9758234 9768265 WBGene00014261 shk-1 ZK1321.2 -0.0597610560799477  
 AGIWUR5056;AGIWUR8325;AGIWUR11748;AGIWUR15319;AGIWUR22352;AGIWUR25944;AGIWUR35532;AGIWUR37189;AGIWUR38830  
 CB4856 HS II 9768357 9769847 WBGene00000178 aqp-10 ZK1321.3 -0.0491800849229693  
 AGIWUR6508;AGIWUR9418;AGIWUR15485;AGIWUR21502;AGIWUR23911;AGIWUR30029;AGIWUR33320;AGIWUR44993  
 CB4856 HS II 9770759 9774292 WBGene00014262 ZK1321.4 ZK1321.4 -0.131193627098947  
 AGIWUR28204  
 CB4856 HS II 9775146 9775883 WBGene00011678 T10B9.9 T10B9.9 0.256866747594303 AGIWUR43510  
 CB4856 HS II 9779182 9781950 WBGene00011677 cyp-13A1 T10B9.8 0.329981352755933  
 AGIWUR10407  
 CB4856 HS II 9783403 9787419 WBGene00011676 cyp-13A2 T10B9.7 0.0225541552977688  
 AGIWUR9781;AGIWUR17049;AGIWUR32347  
 CB4856 HS II 9788801 9793284 WBGene00011675 cyp-13A3 T10B9.5 0.0442543674899776  
 AGIWUR19245;AGIWUR23212;AGIWUR33620  
 CB4856 HS II 9793754 9795541 WBGene00014838 cyp-13A9 T10B9.6 -0.181461753682592  
 AGIWUR6915;AGIWUR29141  
 CB4856 HS II 9795848 9797740 WBGene00011671 cyp-13A4 T10B9.1 0.271259358539921  
 AGIWUR2689;AGIWUR6539  
 CB4856 HS II 9798277 9800363 WBGene00011672 cyp-13A5 T10B9.2 0.277002694306429  
 AGIWUR2802;AGIWUR22628;AGIWUR37154  
 CB4856 HS II 9800761 9802721 WBGene00011673 cyp-13A6 T10B9.3 -0.135061019970157  
 AGIWUR22808  
 CB4856 HS II 9803620 9805510 WBGene00000372 cyp-13A7 T10B9.10 0.156320109697135  
 AGIWUR29039  
 CB4856 HS II 9805627 9807532 WBGene00011674 cyp-13A8 T10B9.4 0.105494071377441  
 AGIWUR14110  
 CB4856 HS II 9826513 9827926 WBGene00013147 eyg-1 Y53C12C.1 0.184247460348805  
 AGIWUR28836  
 CB4856 HS II 9829408 9830753 WBGene00014158 ZK938.1 ZK938.1 0.119786448770649 AGIWUR42641  
 CB4856 HS II 9831648 9834364 WBGene00014160 ZK938.3 ZK938.3 0.130120681230618 AGIWUR21525  
 CB4856 HS II 9835221 9836925 WBGene00014161 arrd-5 ZK938.4 0.0185676606445835  
 AGIWUR12573;AGIWUR33602;AGIWUR41879  
 CB4856 HS II 9837089 9838305 WBGene00014159 arrd-4 ZK938.2 -0.0549802503969712 AGIWUR18357  
 CB4856 HS II 9839191 9840288 WBGene00270290 ZK938.11 ZK938.11 -0.161661928147339  
 AGIWUR4886  
 CB4856 HS II 9843380 9847006 WBGene00014162 chil-9 ZK938.6 -0.218400006172325 AGIWUR32304  
 CB4856 HS II 9847483 9849597 WBGene00003863 old-2 ZK938.5 -0.0228089458836589 AGIWUR2536  
 CB4856 HS II 9851471 9853394 WBGene00007468 C08H9.8 C08H9.8 0.0522224710526453 AGIWUR35968  
 CB4856 HS II 9855936 9857857 WBGene00007471 chil-6 C08H9.12 -0.257663348700036



|                                                                                                                              |    |    |          |          |                |         |          |                     |             |
|------------------------------------------------------------------------------------------------------------------------------|----|----|----------|----------|----------------|---------|----------|---------------------|-------------|
| CB4856                                                                                                                       | HS | II | 9940758  | 9944006  | WBGene00007333 | ufd-3   | C05C10.6 | -0.0317294775724655 |             |
| AGIWUR3612;AGIWUR5667;AGIWUR10944;AGIWUR24102;AGIWUR24734;AGIWUR35125;AGIWUR39205;AGIWUR41062;AGIWUR42078;AGIWUR42640        |    |    |          |          |                |         |          |                     |             |
| CB4856                                                                                                                       | HS | II | 9944026  | 9947121  | WBGene00011271 | flad-1  | R53.1    | 0.0614119654674417  |             |
| AGIWUR12784;AGIWUR21392;AGIWUR30921;AGIWUR33515                                                                              |    |    |          |          |                |         |          |                     |             |
| CB4856                                                                                                                       | HS | II | 9955185  | 9962344  | WBGene00001207 | egl-43  | R53.3    | -0.0627692390807049 | AGIWUR28128 |
| CB4856                                                                                                                       | HS | II | 9962966  | 9967132  | WBGene00011272 | dtmk-1  | R53.2    | 0.109795877954348   |             |
| AGIWUR14400;AGIWUR44983                                                                                                      |    |    |          |          |                |         |          |                     |             |
| CB4856                                                                                                                       | HS | II | 9967277  | 9968049  | WBGene00011273 | R53.4   | R53.4    | -0.207814548091527  |             |
| AGIWUR274;AGIWUR839;AGIWUR1651;AGIWUR2205;AGIWUR2273;AGIWUR19713;AGIWUR21938;AGIWUR30159;AGIWUR30299;AGIWUR30811;AGIWUR33954 |    |    |          |          |                |         |          |                     |             |
| CB4856                                                                                                                       | HS | II | 9968659  | 9969631  | WBGene00011275 | psf-1   | R53.6    | -0.408602374283063  |             |
| AGIWUR651;AGIWUR4183;AGIWUR19144;AGIWUR19922                                                                                 |    |    |          |          |                |         |          |                     |             |
| CB4856                                                                                                                       | HS | II | 9969620  | 9970515  | WBGene00011274 | R53.5   | R53.5    | 0.0642784183811695  | AGIWUR39788 |
| CB4856                                                                                                                       | HS | II | 9971035  | 9975125  | WBGene00011276 | aakg-5  | R53.7    | -0.125194839398205  | AGIWUR19477 |
| CB4856                                                                                                                       | HS | II | 9976705  | 9977877  | WBGene00011277 | R53.8   | R53.8    | -0.138731516997247  | AGIWUR38025 |
| CB4856                                                                                                                       | HS | II | 9978765  | 9980076  | WBGene00014130 | ZK892.6 | ZK892.6  | 0.0707358573678851  | AGIWUR41533 |
| CB4856                                                                                                                       | HS | II | 9980886  | 9981752  | WBGene00014131 | sdz-38  | ZK892.7  | 0.181168067582135   | AGIWUR12129 |
| CB4856                                                                                                                       | HS | II | 9991160  | 10000350 | WBGene00002266 | lec-3   | ZK892.1  | -0.038215343449032  |             |
| AGIWUR8893;AGIWUR9049;AGIWUR11331;AGIWUR11760;AGIWUR36080                                                                    |    |    |          |          |                |         |          |                     |             |
| CB4856                                                                                                                       | HS | II | 10000335 | 10001198 | WBGene00003773 | nlt-1   | ZK892.2  | -0.235539478583694  |             |
| AGIWUR9175;AGIWUR15509;AGIWUR22828;AGIWUR25447;AGIWUR39257;AGIWUR39674;AGIWUR42147                                           |    |    |          |          |                |         |          |                     |             |
| CB4856                                                                                                                       | HS | II | 10001846 | 10003987 | WBGene00014127 | ZK892.3 | ZK892.3  | 0.236540201127452   |             |
| AGIWUR26549                                                                                                                  |    |    |          |          |                |         |          |                     |             |
| CB4856                                                                                                                       | HS | II | 10006111 | 10006535 | WBGene00044037 | ZK892.8 | ZK892.8  | 0.0496015489217996  |             |
| AGIWUR23204                                                                                                                  |    |    |          |          |                |         |          |                     |             |
| CB4856                                                                                                                       | HS | II | 10006642 | 10008089 | WBGene00014128 | ZK892.4 | ZK892.4  | 0.049530826166559   |             |
| AGIWUR41562                                                                                                                  |    |    |          |          |                |         |          |                     |             |
| CB4856                                                                                                                       | HS | II | 10008217 | 10009401 | WBGene00014129 | ZK892.5 | ZK892.5  | 0.162540868811334   |             |
| AGIWUR7848;AGIWUR20371;AGIWUR34857                                                                                           |    |    |          |          |                |         |          |                     |             |
| CB4856                                                                                                                       | HS | II | 10009608 | 10016183 | WBGene00002265 | lec-2   | F52H3.7  | 0.143089679207672   |             |
| AGIWUR7658;AGIWUR10730;AGIWUR27476;AGIWUR34199                                                                               |    |    |          |          |                |         |          |                     |             |
| CB4856                                                                                                                       | HS | II | 10030195 | 10030970 | WBGene00009947 | F52H3.5 | F52H3.5  | -0.0339884367784133 |             |
| AGIWUR26508                                                                                                                  |    |    |          |          |                |         |          |                     |             |
| CB4856                                                                                                                       | HS | II | 10030895 | 10033213 | WBGene00009944 | mtcu-2  | F52H3.2  | 0.183799563187764   |             |
| AGIWUR8504                                                                                                                   |    |    |          |          |                |         |          |                     |             |
| CB4856                                                                                                                       | HS | II | 10033309 | 10039980 | WBGene00002497 | let-268 | F52H3.1  | 0.10966234224642    |             |
| AGIWUR26464                                                                                                                  |    |    |          |          |                |         |          |                     |             |
| CB4856                                                                                                                       | HS | II | 10041134 | 10042515 | WBGene00009946 | F52H3.4 | F52H3.4  | 0.20641524804066    |             |

[illegible]



|                                                                         |    |    |          |          |                |          |         |                     |
|-------------------------------------------------------------------------|----|----|----------|----------|----------------|----------|---------|---------------------|
| CB4856                                                                  | HS | II | 10155413 | 10156220 | WBGene00044028 | F33H1.6  | F33H1.6 | -0.0636103690666037 |
| AGIWUR5814;AGIWUR10380;AGIWUR29406;AGIWUR40440;AGIWUR44519              |    |    |          |          |                |          |         |                     |
| CB4856                                                                  | HS | II | 10157537 | 10169346 | WBGene00000914 | daf-19   | F33H1.1 | 0.0581731111519801  |
| AGIWUR10712;AGIWUR11493;AGIWUR14380                                     |    |    |          |          |                |          |         |                     |
| CB4856                                                                  | HS | II | 10172923 | 10174346 | WBGene00009364 | F33H1.3  | F33H1.3 | -0.118203561760431  |
| AGIWUR16485                                                             |    |    |          |          |                |          |         |                     |
| CB4856                                                                  | HS | II | 10174572 | 10180183 | WBGene00009365 | F33H1.4  | F33H1.4 | -0.230765040220013  |
| AGIWUR21472;AGIWUR27653;AGIWUR34930                                     |    |    |          |          |                |          |         |                     |
| CB4856                                                                  | HS | II | 10180199 | 10182734 | WBGene00005079 | srd-1    | F33H1.5 | -0.213372975283396  |
| AGIWUR18723                                                             |    |    |          |          |                |          |         |                     |
| CB4856                                                                  | HS | II | 10185789 | 10187908 | WBGene00005080 | srd-2    | R05H5.1 | 0.220716075829346   |
| AGIWUR14572                                                             |    |    |          |          |                |          |         |                     |
| CB4856                                                                  | HS | II | 10188263 | 10189469 | WBGene00000389 | cdc-25.4 | R05H5.2 |                     |
| 0.00612148805227442 AGIWUR15999                                         |    |    |          |          |                |          |         |                     |
| CB4856                                                                  | HS | II | 10192529 | 10193451 | WBGene00011041 | R05H5.7  | R05H5.7 | -0.0337796106692605 |
| AGIWUR6013;AGIWUR11895;AGIWUR21955;AGIWUR26462                          |    |    |          |          |                |          |         |                     |
| CB4856                                                                  | HS | II | 10194905 | 10196835 | WBGene00005071 | srb-6    | R05H5.6 | -0.135699814397789  |
| AGIWUR32602                                                             |    |    |          |          |                |          |         |                     |
| CB4856                                                                  | HS | II | 10197625 | 10198324 | WBGene00011038 | R05H5.3  | R05H5.3 | 0.041215868283329   |
| AGIWUR6581;AGIWUR9461;AGIWUR24214;AGIWUR29342;AGIWUR31178;AGIWUR37075   |    |    |          |          |                |          |         |                     |
| CB4856                                                                  | HS | II | 10198309 | 10199768 | WBGene00011039 | R05H5.4  | R05H5.4 | 0.139842875205636   |
| AGIWUR10312                                                             |    |    |          |          |                |          |         |                     |
| CB4856                                                                  | HS | II | 10199810 | 10200819 | WBGene00011040 | R05H5.5  | R05H5.5 | 0.139272618237634   |
| AGIWUR12341                                                             |    |    |          |          |                |          |         |                     |
| CB4856                                                                  | HS | II | 10201125 | 10202230 | WBGene00006651 | tts-2    | R05H5.8 | -0.374372827622121  |
| AGIWUR23370                                                             |    |    |          |          |                |          |         |                     |
| CB4856                                                                  | HS | II | 10206715 | 10209391 | WBGene00011331 | T01E8.1  | T01E8.1 | 0.229560626128329   |
| AGIWUR29024                                                             |    |    |          |          |                |          |         |                     |
| CB4856                                                                  | HS | II | 10218471 | 10220025 | WBGene00004334 | ref-1    | T01E8.2 | 0.022728395443286   |
| AGIWUR8907                                                              |    |    |          |          |                |          |         |                     |
| CB4856                                                                  | HS | II | 10222877 | 10229440 | WBGene00004038 | plc-3    | T01E8.3 | 0.136717925882266   |
| AGIWUR14929;AGIWUR18912;AGIWUR22081;AGIWUR24082;AGIWUR28683;AGIWUR42469 |    |    |          |          |                |          |         |                     |
| CB4856                                                                  | HS | II | 10231272 | 10236014 | WBGene00011335 | T01E8.8  | T01E8.8 | -0.164619661484846  |
| AGIWUR33309                                                             |    |    |          |          |                |          |         |                     |
| CB4856                                                                  | HS | II | 10236936 | 10239695 | WBGene00003177 | mec-15   | T01E8.4 | -0.0752863748264616 |
| AGIWUR1407;AGIWUR9774;AGIWUR10357;AGIWUR34006                           |    |    |          |          |                |          |         |                     |
| CB4856                                                                  | HS | II | 10240277 | 10242490 | WBGene00011334 | mrps-14  | T01E8.6 | -0.244195663184481  |
| AGIWUR1632;AGIWUR18563;AGIWUR25105                                      |    |    |          |          |                |          |         |                     |
| CB4856                                                                  | HS | II | 10242595 | 10247638 | WBGene00011333 | nrde-2   | T01E8.5 | -0.183723102124997  |

|                                              |    |    |          |          |                                                   |
|----------------------------------------------|----|----|----------|----------|---------------------------------------------------|
| AGIWUR1484;AGIWUR28560                       |    |    |          |          |                                                   |
| CB4856                                       | HS | II | 10248991 | 10251165 | WBGene00010015 atad-3 F54B3.3 -0.190312496585127  |
| AGIWUR20261;AGIWUR36134;AGIWUR44377          |    |    |          |          |                                                   |
| CB4856                                       | HS | II | 10251266 | 10268168 | WBGene00010013 F54B3.1 F54B3.1 -0.111393449409666 |
| AGIWUR11170;AGIWUR12967;AGIWUR28208          |    |    |          |          |                                                   |
| CB4856                                       | HS | II | 10268143 | 10270152 | WBGene00010014 F54B3.2 F54B3.2 -0.239738432771258 |
| AGIWUR39268                                  |    |    |          |          |                                                   |
| CB4856                                       | HS | II | 10278732 | 10280459 | WBGene00014175 ZK971.1 ZK971.1                    |
| -0.00945104582823131 AGIWUR39627;AGIWUR39902 |    |    |          |          |                                                   |
| CB4856                                       | HS | II | 10283466 | 10300132 | WBGene00014171 nep-26 ZK970.1 0.12885564968503    |
| AGIWUR41540                                  |    |    |          |          |                                                   |
| CB4856                                       | HS | II | 10300789 | 10302859 | WBGene00014172 clpp-1 ZK970.2 0.0350446841005247  |
| AGIWUR39591                                  |    |    |          |          |                                                   |
| CB4856                                       | HS | II | 10303007 | 10303713 | WBGene00006918 vha-9 ZK970.4 0.0575377289622132   |
| AGIWUR29615                                  |    |    |          |          |                                                   |
| CB4856                                       | HS | II | 10304139 | 10308826 | WBGene00001531 gcy-4 ZK970.5 -0.190812479338992   |
| AGIWUR24821                                  |    |    |          |          |                                                   |
| CB4856                                       | HS | II | 10309418 | 10310068 | WBGene00014174 ZK970.8 ZK970.8 0.203981152246257  |
| AGIWUR15415                                  |    |    |          |          |                                                   |
| CB4856                                       | HS | II | 10310400 | 10316219 | WBGene00001532 gcy-5 ZK970.6 -0.228558257260677   |
| AGIWUR35870                                  |    |    |          |          |                                                   |
| CB4856                                       | HS | II | 10318228 | 10319970 | WBGene00010832 M02G9.3 M02G9.3 -0.106286129499445 |
| AGIWUR754                                    |    |    |          |          |                                                   |
| CB4856                                       | HS | II | 10321460 | 10324850 | WBGene00010831 M02G9.2 M02G9.2 -0.163075448208485 |
| AGIWUR29671                                  |    |    |          |          |                                                   |
| CB4856                                       | HS | II | 10326041 | 10335807 | WBGene00010830 M02G9.1 M02G9.1 0.0546243993941298 |
| AGIWUR21007                                  |    |    |          |          |                                                   |
| CB4856                                       | HS | II | 10339692 | 10345112 | WBGene00007413 pro-2 C07E3.2 -0.0745316189282406  |
| AGIWUR25738                                  |    |    |          |          |                                                   |
| CB4856                                       | HS | II | 10346375 | 10347001 | WBGene00007420 C07E3.10 C07E3.10                  |
| 0.152027347205886 AGIWUR7074                 |    |    |          |          |                                                   |
| CB4856                                       | HS | II | 10346981 | 10350007 | WBGene00007412 stip-1 C07E3.1 -0.304053907842166  |
| AGIWUR16235;AGIWUR18632;AGIWUR37575          |    |    |          |          |                                                   |
| CB4856                                       | HS | II | 10350760 | 10351613 | WBGene00007419 C07E3.9 C07E3.9 0.088283336811152  |
| AGIWUR41793                                  |    |    |          |          |                                                   |
| CB4856                                       | HS | II | 10353584 | 10357518 | WBGene00007414 C07E3.3 C07E3.3 0.259203934846077  |
| AGIWUR42376                                  |    |    |          |          |                                                   |
| CB4856                                       | HS | II | 10363584 | 10365709 | WBGene00007416 ceh-57 C07E3.5 -0.0428897884238806 |
| AGIWUR12801                                  |    |    |          |          |                                                   |

|                                                                                   |    |          |          |                |          |          |                     |
|-----------------------------------------------------------------------------------|----|----------|----------|----------------|----------|----------|---------------------|
| CB4856 HS                                                                         | II | 10367741 | 10369597 | WBGene00007417 | ceh-58   | C07E3.6  | -0.12149409160614   |
| AGIWUR5364;AGIWUR14869                                                            |    |          |          |                |          |          |                     |
| CB4856 HS                                                                         | II | 10385333 | 10388133 | WBGene00011661 | ztf-27   | T09F3.1  | 0.246224013252972   |
| AGIWUR9306                                                                        |    |          |          |                |          |          |                     |
| CB4856 HS                                                                         | II | 10391154 | 10393614 | WBGene00011662 | T09F3.2  | T09F3.2  | -0.140743559010827  |
| AGIWUR3756;AGIWUR5121;AGIWUR16551;AGIWUR28159;AGIWUR35682;AGIWUR38281;AGIWUR39478 |    |          |          |                |          |          |                     |
| CB4856 HS                                                                         | II | 10394114 | 10395349 | WBGene00001683 | gpd-1    | T09F3.3  | 0.0871277949248448  |
| AGIWUR11243                                                                       |    |          |          |                |          |          |                     |
| CB4856 HS                                                                         | II | 10395707 | 10396756 | WBGene00011663 | T09F3.4  | T09F3.4  | 0.143935799992851   |
| AGIWUR881;AGIWUR42449                                                             |    |          |          |                |          |          |                     |
| CB4856 HS                                                                         | II | 10396878 | 10399320 | WBGene00011664 | T09F3.5  | T09F3.5  |                     |
| -0.00278622738919942 AGIWUR17018                                                  |    |          |          |                |          |          |                     |
| CB4856 HS                                                                         | II | 10411289 | 10412670 | WBGene00008484 | E04D5.5  | E04D5.5  | 0.129980013265953   |
| AGIWUR2989                                                                        |    |          |          |                |          |          |                     |
| CB4856 HS                                                                         | II | 10416786 | 10419237 | WBGene00008480 | eif-2A   | E04D5.1  | -0.164329907378725  |
| AGIWUR21663;AGIWUR24337;AGIWUR42583                                               |    |          |          |                |          |          |                     |
| CB4856 HS                                                                         | II | 10419230 | 10422026 | WBGene00008481 | E04D5.2  | E04D5.2  | 0.103120641639329   |
| AGIWUR1199                                                                        |    |          |          |                |          |          |                     |
| CB4856 HS                                                                         | II | 10440286 | 10442515 | WBGene00008483 | E04D5.4  | E04D5.4  | 0.125847353467027   |
| AGIWUR3398;AGIWUR37195;AGIWUR39288                                                |    |          |          |                |          |          |                     |
| CB4856 HS                                                                         | II | 10443327 | 10445233 | WBGene00014057 | ZK673.1  | ZK673.1  | 0.264607699279289   |
| AGIWUR43812                                                                       |    |          |          |                |          |          |                     |
| CB4856 HS                                                                         | II | 10448266 | 10450222 | WBGene00014058 | ZK673.2  | ZK673.2  | 0.0935258338703546  |
| AGIWUR4328;AGIWUR10658;AGIWUR17853;AGIWUR37680                                    |    |          |          |                |          |          |                     |
| CB4856 HS                                                                         | II | 10450607 | 10452004 | WBGene00003038 | lin-56   | ZK673.3  | 0.181617880027776   |
| AGIWUR25094                                                                       |    |          |          |                |          |          |                     |
| CB4856 HS                                                                         | II | 10452920 | 10455200 | WBGene00014060 | ZK673.4  | ZK673.4  | -0.0972847924293987 |
| AGIWUR34906                                                                       |    |          |          |                |          |          |                     |
| CB4856 HS                                                                         | II | 10457786 | 10462672 | WBGene00014065 | ZK673.11 |          | ZK673.11            |
| -0.0639240556690899 AGIWUR1953                                                    |    |          |          |                |          |          |                     |
| CB4856 HS                                                                         | II | 10462870 | 10464330 | WBGene00014062 | ZK673.6  | ZK673.6  | 0.194744107430981   |
| AGIWUR41397                                                                       |    |          |          |                |          |          |                     |
| CB4856 HS                                                                         | II | 10464870 | 10465298 | WBGene00014064 | sdz-37   | ZK673.10 |                     |
| -0.490734003297236 AGIWUR36805                                                    |    |          |          |                |          |          |                     |
| CB4856 HS                                                                         | II | 10466852 | 10468344 | WBGene00006583 | tnc-2    | ZK673.7  | 0.406463256046186   |
| AGIWUR23392                                                                       |    |          |          |                |          |          |                     |
| CB4856 HS                                                                         | II | 10468351 | 10470297 | WBGene00014063 | clec-143 |          | ZK673.9             |
| 0.103025139668986 AGIWUR27744                                                     |    |          |          |                |          |          |                     |
| CB4856 HS                                                                         | II | 10470934 | 10471347 | WBGene00014041 | ZK666.1  | ZK666.1  | -0.146269898660832  |



|                                                                                                       |    |          |          |                |          |          |                     |
|-------------------------------------------------------------------------------------------------------|----|----------|----------|----------------|----------|----------|---------------------|
| CB4856 HS                                                                                             | II | 10542428 | 10555044 | WBGene00011304 | mnk-1    | R166.5   | -0.121344765450189  |
| AGIWUR34539                                                                                           |    |          |          |                |          |          |                     |
| CB4856 HS                                                                                             | II | 10560018 | 10563407 | WBGene00007352 | cdc-48.1 | C06A1.1  |                     |
| -0.200887288325042 AGIWUR11455;AGIWUR13116;AGIWUR21063;AGIWUR26985;AGIWUR43969                        |    |          |          |                |          |          |                     |
| CB4856 HS                                                                                             | II | 10570602 | 10572530 | WBGene00007353 | C06A1.2  | C06A1.2  | 0.0258979668113675  |
| AGIWUR9060                                                                                            |    |          |          |                |          |          |                     |
| CB4856 HS                                                                                             | II | 10572247 | 10574067 | WBGene00007354 | C06A1.3  | C06A1.3  | 0.209539511806014   |
| AGIWUR6893                                                                                            |    |          |          |                |          |          |                     |
| CB4856 HS                                                                                             | II | 10574842 | 10578193 | WBGene00014667 | C06A1.4  | C06A1.4  | -0.404086063303573  |
| AGIWUR25976;AGIWUR30602                                                                               |    |          |          |                |          |          |                     |
| CB4856 HS                                                                                             | II | 10579366 | 10579955 | WBGene00007355 | rpb-6    | C06A1.5  | 0.0768869298617112  |
| AGIWUR5821                                                                                            |    |          |          |                |          |          |                     |
| CB4856 HS                                                                                             | II | 10579955 | 10581045 | WBGene00007555 | dohh-1   | C14A4.1  | 0.113968697184955   |
| AGIWUR2970;AGIWUR7187;AGIWUR19048                                                                     |    |          |          |                |          |          |                     |
| CB4856 HS                                                                                             | II | 10581133 | 10582519 | WBGene00000933 | dap-3    | C14A4.2  | -0.104342718726921  |
| AGIWUR24770;AGIWUR27331;AGIWUR27823;AGIWUR32317                                                       |    |          |          |                |          |          |                     |
| CB4856 HS                                                                                             | II | 10582618 | 10584236 | WBGene00007564 | mrps-22  | C14A4.14 |                     |
| -0.13607223308639 AGIWUR11916;AGIWUR14585;AGIWUR17314;AGIWUR19277;AGIWUR22350;AGIWUR33834;AGIWUR36123 |    |          |          |                |          |          |                     |
| CB4856 HS                                                                                             | II | 10584336 | 10587928 | WBGene00007556 | C14A4.3  | C14A4.3  | 0.0998643907153944  |
| AGIWUR41411                                                                                           |    |          |          |                |          |          |                     |
| CB4856 HS                                                                                             | II | 10588042 | 10592652 | WBGene00000796 | crn-3    | C14A4.4  | 0.166461793893537   |
| AGIWUR23554;AGIWUR44213                                                                               |    |          |          |                |          |          |                     |
| CB4856 HS                                                                                             | II | 10592752 | 10593591 | WBGene00000798 | crn-5    | C14A4.5  | -0.0413526568194076 |
| AGIWUR22345;AGIWUR34177;AGIWUR35482                                                                   |    |          |          |                |          |          |                     |
| CB4856 HS                                                                                             | II | 10593529 | 10594776 | WBGene00007557 | C14A4.6  | C14A4.6  | -0.0587079030149305 |
| AGIWUR4051;AGIWUR21431;AGIWUR24456                                                                    |    |          |          |                |          |          |                     |
| CB4856 HS                                                                                             | II | 10595266 | 10596562 | WBGene00007558 | C14A4.7  | C14A4.7  | 0.0044661660426506  |
| AGIWUR15049;AGIWUR25017;AGIWUR26477;AGIWUR39292                                                       |    |          |          |                |          |          |                     |
| CB4856 HS                                                                                             | II | 10597174 | 10598100 | WBGene00007559 | C14A4.8  | C14A4.8  | 0.070919634876379   |
| AGIWUR22102                                                                                           |    |          |          |                |          |          |                     |
| CB4856 HS                                                                                             | II | 10599337 | 10600529 | WBGene00007560 | C14A4.9  | C14A4.9  | 0.00749645756456552 |
| AGIWUR25127                                                                                           |    |          |          |                |          |          |                     |
| CB4856 HS                                                                                             | II | 10600599 | 10602276 | WBGene00005713 | srv-2    | C14A4.15 |                     |
| 0.136152114446077 AGIWUR22923                                                                         |    |          |          |                |          |          |                     |
| CB4856 HS                                                                                             | II | 10605030 | 10605612 | WBGene00006397 | taf-13   | C14A4.10 |                     |
| -0.253862954068662 AGIWUR24634                                                                        |    |          |          |                |          |          |                     |
| CB4856 HS                                                                                             | II | 10605717 | 10607275 | WBGene00007561 | ccm-3    | C14A4.11 |                     |
| -0.0151185746446583 AGIWUR27434                                                                       |    |          |          |                |          |          |                     |
| CB4856 HS                                                                                             | II | 10613020 | 10618332 | WBGene00007562 | C14A4.12 | C14A4.12 |                     |

|                                                                                                            |             |             |                |          |          |                     |  |
|------------------------------------------------------------------------------------------------------------|-------------|-------------|----------------|----------|----------|---------------------|--|
| 0.0849287770391562                                                                                         |             | AGIWUR29508 |                |          |          |                     |  |
| CB4856 HS II                                                                                               | 10618471    | 10620503    | WBGene00007563 | C14A4.13 | C14A4.13 |                     |  |
| -0.0900468590005872                                                                                        | AGIWUR32603 |             |                |          |          |                     |  |
| CB4856 HS II                                                                                               | 10622265    | 10625943    | WBGene00010893 | cut1-9   | M28.1    | -0.0315355347738908 |  |
| AGIWUR4593;AGIWUR17552;AGIWUR21126;AGIWUR23189;AGIWUR36371;AGIWUR36670;AGIWUR40197                         |             |             |                |          |          |                     |  |
| CB4856 HS II                                                                                               | 10628263    | 10633216    | WBGene00010899 | M28.8    | M28.8    | 0.0339160644030407  |  |
| AGIWUR44648                                                                                                |             |             |                |          |          |                     |  |
| CB4856 HS II                                                                                               | 10633476    | 10639112    | WBGene00010894 | M28.2    | M28.2    | -0.0106135690102338 |  |
| AGIWUR2316;AGIWUR15524;AGIWUR29354                                                                         |             |             |                |          |          |                     |  |
| CB4856 HS II                                                                                               | 10639410    | 10643536    | WBGene00010900 | M28.9    | M28.9    | -0.0452141245310855 |  |
| AGIWUR4478                                                                                                 |             |             |                |          |          |                     |  |
| CB4856 HS II                                                                                               | 10643703    | 10646978    | WBGene00010895 | M28.4    | M28.4    | 0.0394603979552599  |  |
| AGIWUR26377                                                                                                |             |             |                |          |          |                     |  |
| CB4856 HS II                                                                                               | 10647480    | 10648676    | WBGene00010901 | M28.10   | M28.10   | -0.053213010139034  |  |
| AGIWUR21717                                                                                                |             |             |                |          |          |                     |  |
| CB4856 HS II                                                                                               | 10648938    | 10652256    | WBGene00010898 | nphp-1   | M28.7    | -0.0305494211202024 |  |
| AGIWUR6755                                                                                                 |             |             |                |          |          |                     |  |
| CB4856 HS II                                                                                               | 10652353    | 10657841    | WBGene00010897 | lact-3   | M28.6    | -0.178175358276784  |  |
| AGIWUR25318                                                                                                |             |             |                |          |          |                     |  |
| CB4856 HS II                                                                                               | 10658027    | 10658626    | WBGene00010896 | M28.5    | M28.5    | 0.103044191238843   |  |
| AGIWUR25451;AGIWUR33760                                                                                    |             |             |                |          |          |                     |  |
| CB4856 HS II                                                                                               | 10659206    | 10662317    | WBGene00004704 | rsp-7    | D2089.1  | -0.0639561266208233 |  |
| AGIWUR4646;AGIWUR11930;AGIWUR13996;AGIWUR17240;AGIWUR21144;AGIWUR29901;AGIWUR38441;AGIWUR40407;AGIWUR43998 |             |             |                |          |          |                     |  |
| CB4856 HS II                                                                                               | 10662256    | 10665131    | WBGene00008434 | D2089.3  | D2089.3  | 0.0361784085326691  |  |
| AGIWUR26579;AGIWUR27148;AGIWUR28093;AGIWUR33867                                                            |             |             |                |          |          |                     |  |
| CB4856 HS II                                                                                               | 10675602    | 10690271    | WBGene00004207 | ptb-1    | D2089.4  | 0.133382576073874   |  |
| AGIWUR6285;AGIWUR12901;AGIWUR21246                                                                         |             |             |                |          |          |                     |  |
| CB4856 HS II                                                                                               | 10690452    | 10693863    | WBGene00001522 | gbh-1    | D2089.5  | -0.0445422732643994 |  |
| AGIWUR19935                                                                                                |             |             |                |          |          |                     |  |
| CB4856 HS II                                                                                               | 10695013    | 10702524    | WBGene00001586 | ggr-1    | C09G5.1  | -0.0344338125046901 |  |
| AGIWUR2899;AGIWUR11942                                                                                     |             |             |                |          |          |                     |  |
| CB4856 HS II                                                                                               | 10702509    | 10714297    | WBGene00007488 | dph-2    | C09G5.2  | -0.153264903069587  |  |
| AGIWUR23621                                                                                                |             |             |                |          |          |                     |  |
| CB4856 HS II                                                                                               | 10714886    | 10716416    | WBGene00007489 | C09G5.7  | C09G5.7  | -0.157721824123696  |  |
| AGIWUR23618                                                                                                |             |             |                |          |          |                     |  |
| CB4856 HS II                                                                                               | 10720231    | 10729252    | WBGene00007490 | mks-5    | C09G5.8  | -0.150825313260884  |  |
| AGIWUR34107                                                                                                |             |             |                |          |          |                     |  |
| CB4856 HS II                                                                                               | 10729804    | 10731627    | WBGene00008256 | glb-12   | C52A11.2 |                     |  |
| -0.180090416406657                                                                                         | AGIWUR27689 |             |                |          |          |                     |  |

|                                                                                                                                                                       |    |    |          |          |                |          |                             |
|-----------------------------------------------------------------------------------------------------------------------------------------------------------------------|----|----|----------|----------|----------------|----------|-----------------------------|
| CB4856                                                                                                                                                                | HS | II | 10737402 | 10738628 | WBGene00008257 | C52A11.3 | C52A11.3                    |
| 0.0950139468352162 AGIWUR42803                                                                                                                                        |    |    |          |          |                |          |                             |
| CB4856                                                                                                                                                                | HS | II | 10738635 | 10775061 | WBGene00003404 | mpz-1    | C52A11.4                    |
| 0.0710226613077465                                                                                                                                                    |    |    |          |          |                |          |                             |
| AGIWUR6677;AGIWUR9212;AGIWUR16617;AGIWUR19487;AGIWUR20489;AGIWUR20775;AGIWUR25775;AGIWUR27445;AGIWUR28484;AGIWUR30306;AGIWUR32704;AGIWUR32857;AGIWUR39509;AGIWUR40262 |    |    |          |          |                |          |                             |
| CB4856                                                                                                                                                                | HS | II | 10778389 | 10783962 | WBGene00002297 | ect-2    | T19E10.1                    |
| -0.0947548220650729 AGIWUR1328;AGIWUR5981;AGIWUR9727;AGIWUR21337;AGIWUR24688;AGIWUR44022                                                                              |    |    |          |          |                |          |                             |
| CB4856                                                                                                                                                                | HS | II | 10785452 | 10787272 | WBGene00000411 | cdl-1    | R06F6.1 0.0873381441974725  |
| AGIWUR1579;AGIWUR4225                                                                                                                                                 |    |    |          |          |                |          |                             |
| CB4856                                                                                                                                                                | HS | II | 10787312 | 10787914 | WBGene00011072 | tag-209  | R06F6.11                    |
| 0.317670107486133 AGIWUR5104                                                                                                                                          |    |    |          |          |                |          |                             |
| CB4856                                                                                                                                                                | HS | II | 10788106 | 10793493 | WBGene00011067 | vps-11   | R06F6.2 -0.0966398896315539 |
| AGIWUR9444                                                                                                                                                            |    |    |          |          |                |          |                             |
| CB4856                                                                                                                                                                | HS | II | 10793575 | 10796294 | WBGene00011068 | set-14   | R06F6.4 0.0272193664913161  |
| AGIWUR9082                                                                                                                                                            |    |    |          |          |                |          |                             |
| CB4856                                                                                                                                                                | HS | II | 10796646 | 10798479 | WBGene00003805 | npp-19   | R06F6.5 0.0650306160951653  |
| AGIWUR27834;AGIWUR30360                                                                                                                                               |    |    |          |          |                |          |                             |
| CB4856                                                                                                                                                                | HS | II | 10809279 | 10809847 | WBGene00269421 | R06F6.14 | R06F6.14                    |
| 0.00884035151855578 AGIWUR20089                                                                                                                                       |    |    |          |          |                |          |                             |
| CB4856                                                                                                                                                                | HS | II | 10811016 | 10812188 | WBGene00011070 | R06F6.7  | R06F6.7 0.0271783503691037  |
| AGIWUR37319                                                                                                                                                           |    |    |          |          |                |          |                             |
| CB4856                                                                                                                                                                | HS | II | 10812949 | 10819978 | WBGene00011071 | R06F6.8  | R06F6.8                     |
| -0.00149128814706501 AGIWUR13413                                                                                                                                      |    |    |          |          |                |          |                             |
| CB4856                                                                                                                                                                | HS | II | 10821015 | 10822443 | WBGene00001153 | ech-4    | R06F6.9 0.134982365241097   |
| AGIWUR32397                                                                                                                                                           |    |    |          |          |                |          |                             |
| CB4856                                                                                                                                                                | HS | II | 10822328 | 10824081 | WBGene00023418 | R06F6.12 | R06F6.12                    |
| 0.0188840584499879 AGIWUR23823                                                                                                                                        |    |    |          |          |                |          |                             |
| CB4856                                                                                                                                                                | HS | II | 10824294 | 10841424 | WBGene00003367 | mix-1    | M106.1 -0.0211798557293585  |
| AGIWUR7474;AGIWUR7521;AGIWUR30139;AGIWUR39827                                                                                                                         |    |    |          |          |                |          |                             |
| CB4856                                                                                                                                                                | HS | II | 10855642 | 10857177 | WBGene00044924 | M106.7   | M106.7 -0.0180892385502567  |
| AGIWUR22794                                                                                                                                                           |    |    |          |          |                |          |                             |
| CB4856                                                                                                                                                                | HS | II | 10857473 | 10860909 | WBGene00010911 | M106.3   | M106.3 0.250321334328217    |
| AGIWUR25515;AGIWUR38047                                                                                                                                               |    |    |          |          |                |          |                             |
| CB4856                                                                                                                                                                | HS | II | 10863682 | 10868714 | WBGene00010912 | gmps-1   | M106.4 -0.163383931829632   |
| AGIWUR4592;AGIWUR25800;AGIWUR26865;AGIWUR30939;AGIWUR33439                                                                                                            |    |    |          |          |                |          |                             |
| CB4856                                                                                                                                                                | HS | II | 10869196 | 10870827 | WBGene00000293 | cap-2    | M106.5                      |
| -0.00483298694734113 AGIWUR17286;AGIWUR17665;AGIWUR38899;AGIWUR40831                                                                                                  |    |    |          |          |                |          |                             |
| CB4856                                                                                                                                                                | HS | II | 10870779 | 10872611 | WBGene00000880 | cyn-4    | F59E10.2                    |

|                                   |                                     |          |                |          |          |                     |
|-----------------------------------|-------------------------------------|----------|----------------|----------|----------|---------------------|
| -0.0909802880014663               | AGIWUR17570;AGIWUR29891;AGIWUR33211 |          |                |          |          |                     |
| CB4856 HS II                      | 10872879                            | 10873796 | WBGene00010333 | copz-1   | F59E10.3 |                     |
| -0.0569181197074702               | AGIWUR33271                         |          |                |          |          |                     |
| CB4856 HS II                      | 10873931                            | 10877934 | WBGene00003882 | orc-2    | F59E10.1 |                     |
| -0.0506867041415608               | AGIWUR32871;AGIWUR40159             |          |                |          |          |                     |
| CB4856 HS II                      | 10880925                            | 10882427 | WBGene00009700 | lurp-1   | F44F4.1  | 0.210451431355109   |
| AGIWUR27458                       |                                     |          |                |          |          |                     |
| CB4856 HS II                      | 10882408                            | 10884462 | WBGene00009701 | egg-3    | F44F4.2  | -0.166471143480642  |
| AGIWUR20772                       |                                     |          |                |          |          |                     |
| CB4856 HS II                      | 10884705                            | 10885878 | WBGene00009702 | F44F4.3  | F44F4.3  | -0.158175528734532  |
| AGIWUR21067                       |                                     |          |                |          |          |                     |
| CB4856 HS II                      | 10889279                            | 10893288 | WBGene00004222 | ptr-8    | F44F4.4  | 0.0382788280721265  |
| AGIWUR37161                       |                                     |          |                |          |          |                     |
| CB4856 HS II                      | 10893275                            | 10895088 | WBGene00005036 | sra-10   | F44F4.5  | 0.258870313020276   |
| AGIWUR12637                       |                                     |          |                |          |          |                     |
| CB4856 HS II                      | 10900042                            | 10902204 | WBGene00001626 | gly-1    | F44F4.6  | 0.269409976317881   |
| AGIWUR1846                        |                                     |          |                |          |          |                     |
| CB4856 HS II                      | 10902756                            | 10904479 | WBGene00005038 | sra-12   | F44F4.7  | -0.0524266943397897 |
| AGIWUR16841;AGIWUR26876           |                                     |          |                |          |          |                     |
| CB4856 HS II                      | 10908808                            | 10910319 | WBGene00005037 | sra-11   | F44F4.13 |                     |
| -0.028945157907537                | AGIWUR9493;AGIWUR17231;AGIWUR40553  |          |                |          |          |                     |
| CB4856 HS II                      | 10915901                            | 10917274 | WBGene00009705 | F44F4.10 |          | F44F4.10            |
| 0.203774559097406                 | AGIWUR15150                         |          |                |          |          |                     |
| CB4856 HS II                      | 10918706                            | 10920202 | WBGene00006530 | tba-4    | F44F4.11 |                     |
| -0.0489111163249962               | AGIWUR1211;AGIWUR23556              |          |                |          |          |                     |
| CB4856 HS II                      | 10922672                            | 10922974 | WBGene00012489 | Y19D2B.1 |          | Y19D2B.1            |
| -0.0512462097589506               | AGIWUR43206                         |          |                |          |          |                     |
| CB4856 HS II                      | 10923716                            | 10924595 | WBGene00012490 | Y19D2B.2 |          | Y19D2B.2            |
| -0.00442718147957954              | AGIWUR25225                         |          |                |          |          |                     |
| CB4856 HS II                      | 10926561                            | 10931075 | WBGene00010988 | metr-1   | R03D7.1  | 0.121497758754359   |
| AGIWUR5757;AGIWUR6884;AGIWUR43211 |                                     |          |                |          |          |                     |
| CB4856 HS II                      | 10935726                            | 10942198 | WBGene00014814 | R03D7.3  | R03D7.3  | -0.218041566750675  |
| AGIWUR4633;AGIWUR35952            |                                     |          |                |          |          |                     |
| CB4856 HS II                      | 10943390                            | 10945660 | WBGene00010990 | R03D7.4  | R03D7.4  | 0.10779683292664    |
| AGIWUR31576                       |                                     |          |                |          |          |                     |
| CB4856 HS II                      | 10947610                            | 10949184 | WBGene00010991 | R03D7.5  | R03D7.5  | 0.0581205905331501  |
| AGIWUR30739                       |                                     |          |                |          |          |                     |
| CB4856 HS II                      | 10950350                            | 10951604 | WBGene00001753 | gst-5    | R03D7.6  | -0.109335168582584  |
| AGIWUR32044                       |                                     |          |                |          |          |                     |



|                                                                       |    |          |          |                |           |          |                     |
|-----------------------------------------------------------------------|----|----------|----------|----------------|-----------|----------|---------------------|
| CB4856 HS                                                             | II | 10951879 | 10953165 | WBGene00003783 | nos-1     | R03D7.7  | -0.240785396521812  |
| AGIWUR19424                                                           |    |          |          |                |           |          |                     |
| CB4856 HS                                                             | II | 10953594 | 10956878 | WBGene00010992 | R03D7.8   | R03D7.8  | 0.0972024009180199  |
| AGIWUR44506                                                           |    |          |          |                |           |          |                     |
| CB4856 HS                                                             | II | 10968386 | 11012247 | WBGene00004215 | ptp-3     | C09D8.1  | -0.0262303902517655 |
| AGIWUR3429;AGIWUR6662;AGIWUR13959;AGIWUR34474;AGIWUR35314;AGIWUR37980 |    |          |          |                |           |          |                     |
| CB4856 HS                                                             | II | 11012397 | 11013820 | WBGene00000657 | col-81    | F38A3.1  | 0.274801256523912   |
| AGIWUR3425                                                            |    |          |          |                |           |          |                     |
| CB4856 HS                                                             | II | 11015588 | 11016881 | WBGene00004300 | ram-2     | F38A3.2  | 0.253557163398046   |
| AGIWUR4854;AGIWUR6326;AGIWUR11647                                     |    |          |          |                |           |          |                     |
| CB4856 HS                                                             | II | 11022370 | 11027909 | WBGene00002957 | let-858   | F33A8.1  | 0.109568807410874   |
| AGIWUR12874;AGIWUR29582                                               |    |          |          |                |           |          |                     |
| CB4856 HS                                                             | II | 11027962 | 11030404 | WBGene00003756 | nlp-18    | F33A8.2  | -0.058330582588467  |
| AGIWUR5506;AGIWUR38400                                                |    |          |          |                |           |          |                     |
| CB4856 HS                                                             | II | 11036074 | 11039471 | WBGene00009356 | F33A8.10  |          | F33A8.10            |
| -0.0379965738627126 AGIWUR20869                                       |    |          |          |                |           |          |                     |
| CB4856 HS                                                             | II | 11039348 | 11041206 | WBGene00000472 | cey-1     | F33A8.3  | 0.177565451808674   |
| AGIWUR534;AGIWUR9013;AGIWUR15336;AGIWUR29341;AGIWUR30653              |    |          |          |                |           |          |                     |
| CB4856 HS                                                             | II | 11044135 | 11045968 | WBGene00000658 | col-83    | F33A8.9  | -0.107616455096952  |
| AGIWUR40812                                                           |    |          |          |                |           |          |                     |
| CB4856 HS                                                             | II | 11045786 | 11049030 | WBGene00009352 | F33A8.4   | F33A8.4  | -0.282089960411458  |
| AGIWUR17337                                                           |    |          |          |                |           |          |                     |
| CB4856 HS                                                             | II | 11049144 | 11049913 | WBGene00009353 | sdhd-1    | F33A8.5  | 0.154794209867898   |
| AGIWUR2216                                                            |    |          |          |                |           |          |                     |
| CB4856 HS                                                             | II | 11058096 | 11089456 | WBGene00006788 | unc-53    | F45E10.1 |                     |
| 0.00896906322732072 AGIWUR14085                                       |    |          |          |                |           |          |                     |
| CB4856 HS                                                             | II | 11092713 | 11093871 | WBGene00004455 | rpl-42    | C09H10.1 |                     |
| -0.244349456576039 AGIWUR24645                                        |    |          |          |                |           |          |                     |
| CB4856 HS                                                             | II | 11095048 | 11096475 | WBGene00007504 | C09H10.10 |          | C09H10.10           |
| 0.0623699027045213 AGIWUR31480                                        |    |          |          |                |           |          |                     |
| CB4856 HS                                                             | II | 11096542 | 11097204 | WBGene00004454 | rpl-36.A  |          | C09H10.2            |
| -1.09732076266562 AGIWUR20646                                         |    |          |          |                |           |          |                     |
| CB4856 HS                                                             | II | 11097841 | 11100146 | WBGene00003831 | nuo-1     | C09H10.3 |                     |
| 0.0132962454681422 AGIWUR11037;AGIWUR44982                            |    |          |          |                |           |          |                     |
| CB4856 HS                                                             | II | 11100141 | 11100462 | WBGene00043120 | C09H10.4  |          | C09H10.4            |
| -0.0533111254027894 AGIWUR35898                                       |    |          |          |                |           |          |                     |
| CB4856 HS                                                             | II | 11100479 | 11103779 | WBGene00007499 | C09H10.5  |          | C09H10.5            |
| -0.236580760145261 AGIWUR19231                                        |    |          |          |                |           |          |                     |
| CB4856 HS                                                             | II | 11104462 | 11106046 | WBGene00007503 | C09H10.9  |          | C09H10.9            |

[illegible]

|                                                            |                |                   |                     |
|------------------------------------------------------------|----------------|-------------------|---------------------|
| CB4856 HS II 11186028 11188080                             | WBGene00009513 | sfxn-1.2          | F37H8.4             |
| -0.0905040478722583 AGIWUR24608                            |                |                   |                     |
| CB4856 HS II 11188206 11189437                             | WBGene00009514 | F37H8.5 F37H8.5   | 0.138219977725985   |
| AGIWUR7339                                                 |                |                   |                     |
| CB4856 HS II 11203221 11220642                             | WBGene00011522 | srp-1 T06D8.1     | 0.00636070624648255 |
| AGIWUR17063;AGIWUR23459;AGIWUR36933                        |                |                   |                     |
| CB4856 HS II 11222305 11226548                             | WBGene00011524 | T06D8.3 T06D8.3   | -0.025354746548782  |
| AGIWUR21094                                                |                |                   |                     |
| CB4856 HS II 11226679 11232835                             | WBGene00011523 | T06D8.2 T06D8.2   | 0.0890992865856548  |
| AGIWUR9844;AGIWUR12839;AGIWUR36573                         |                |                   |                     |
| CB4856 HS II 11232756 11234952                             | WBGene00011526 | cox-15 T06D8.5    | 0.026773722234001   |
| AGIWUR17356                                                |                |                   |                     |
| CB4856 HS II 11235053 11236450                             | WBGene00011527 | cchl-1 T06D8.6    | -0.278082182885308  |
| AGIWUR20738;AGIWUR29488                                    |                |                   |                     |
| CB4856 HS II 11236624 11237323                             | WBGene00011528 | T06D8.7 T06D8.7   | 0.0427794224332168  |
| AGIWUR41769                                                |                |                   |                     |
| CB4856 HS II 11237447 11239092                             | WBGene00004465 | rpn-9 T06D8.8     | 0.1541288127234     |
| AGIWUR3086;AGIWUR16274                                     |                |                   |                     |
| CB4856 HS II 11239407 11240988                             | WBGene00011529 | T06D8.9 T06D8.9   | -0.0569434666978355 |
| AGIWUR7515;AGIWUR38105                                     |                |                   |                     |
| CB4856 HS II 11240932 11247514                             | WBGene00011530 | T06D8.10 T06D8.10 |                     |
| -0.165970125034232 AGIWUR28942                             |                |                   |                     |
| CB4856 HS II 11257081 11258506                             | WBGene00011465 | T05B9.2 T05B9.2   | 0.112459033217376   |
| AGIWUR1889;AGIWUR27281;AGIWUR29593;AGIWUR34102;AGIWUR38410 |                |                   |                     |
| CB4856 HS II 11260087 11261256                             | WBGene00011464 | T05B9.1 T05B9.1   | -0.0196476297422254 |
| AGIWUR5135                                                 |                |                   |                     |
| CB4856 HS II 11269124 11271599                             | WBGene00000851 | cut-1 C47G2.1     | 0.14650720322918    |
| AGIWUR10983                                                |                |                   |                     |
| CB4856 HS II 11281986 11283953                             | WBGene00006853 | unc-130 C47G2.2   | -0.100924522251761  |
| AGIWUR15293                                                |                |                   |                     |
| CB4856 HS II 11288690 11290159                             | WBGene00008164 | C47G2.3 C47G2.3   | 0.138281960931714   |
| AGIWUR4536;AGIWUR5872                                      |                |                   |                     |
| CB4856 HS II 11290843 11293606                             | WBGene00008165 | C47G2.4 C47G2.4   | -0.0288852250304181 |
| AGIWUR17801                                                |                |                   |                     |
| CB4856 HS II 11293997 11294579                             | WBGene00044038 | C47G2.6 C47G2.6   | 0.0662916104302411  |
| AGIWUR25886                                                |                |                   |                     |
| CB4856 HS II 11295563 11296019                             | WBGene00044039 | C47G2.7 C47G2.7   | 0.00441911098797654 |
| AGIWUR23223                                                |                |                   |                     |
| CB4856 HS II 11297700 11301254                             | WBGene00008166 | saps-1 C47G2.5    | -0.144738267579426  |



|                      |                                                            |          |                |            |            |
|----------------------|------------------------------------------------------------|----------|----------------|------------|------------|
| CB4856 HS II         | 11410091                                                   | 11412280 | WBGene00044029 | C05D12.7   | C05D12.7   |
| 0.0408271798913891   | AGIWUR1320;AGIWUR20111;AGIWUR26683;AGIWUR26954;AGIWUR33534 |          |                |            |            |
| CB4856 HS II         | 11412232                                                   | 11415820 | WBGene00007339 | C05D12.1   | C05D12.1   |
| 0.0414337371433433   | AGIWUR12511                                                |          |                |            |            |
| CB4856 HS II         | 11418314                                                   | 11423393 | WBGene00007340 | C05D12.2   | C05D12.2   |
| -0.0384964960654663  | AGIWUR10538                                                |          |                |            |            |
| CB4856 HS II         | 11424830                                                   | 11430607 | WBGene00014666 | C05D12.3   | C05D12.3   |
| -0.258339766905046   | AGIWUR21963;AGIWUR23327                                    |          |                |            |            |
| CB4856 HS II         | 11431709                                                   | 11432766 | WBGene00007341 | C05D12.4   | C05D12.4   |
| 0.273457748903933    | AGIWUR6395                                                 |          |                |            |            |
| CB4856 HS II         | 11434221                                                   | 11434958 | WBGene00007342 | C05D12.5   | C05D12.5   |
| -0.0435308565096948  | AGIWUR19686;AGIWUR25321;AGIWUR39345                        |          |                |            |            |
| CB4856 HS II         | 11435212                                                   | 11438464 | WBGene00006915 | vha-6      | VW02B12L.1 |
| -0.0907163061114922  | AGIWUR891;AGIWUR8238;AGIWUR15957                           |          |                |            |            |
| CB4856 HS II         | 11439177                                                   | 11439762 | WBGene00012155 | VW02B12L.2 | VW02B12L.2 |
| 0.0334967673317061   | AGIWUR3395                                                 |          |                |            |            |
| CB4856 HS II         | 11442693                                                   | 11444009 | WBGene00012156 | ebp-2      | VW02B12L.3 |
| -0.109513544254308   | AGIWUR7374;AGIWUR30744                                     |          |                |            |            |
| CB4856 HS II         | 11444162                                                   | 11445255 | WBGene00012157 | adbp-1     | VW02B12L.4 |
| 0.0935202318268384   | AGIWUR1736                                                 |          |                |            |            |
| CB4856 HS II         | 11445289                                                   | 11448895 | WBGene00043534 | W02B12.13  | W02B12.13  |
| -0.00932097010509203 | AGIWUR23311;AGIWUR26362;AGIWUR40669                        |          |                |            |            |
| CB4856 HS II         | 11448965                                                   | 11451445 | WBGene00012201 | W02B12.1   | W02B12.1   |
| 0.168597413211204    | AGIWUR3778                                                 |          |                |            |            |
| CB4856 HS II         | 11451444                                                   | 11452955 | WBGene00004699 | rsp-2      | W02B12.2   |
| -0.079268050226954   | AGIWUR7342;AGIWUR16886;AGIWUR19469;AGIWUR24287;AGIWUR28283 |          |                |            |            |
| CB4856 HS II         | 11453362                                                   | 11455864 | WBGene00004698 | rsp-1      | W02B12.3   |
| 0.063076186027498    | AGIWUR8808;AGIWUR19633;AGIWUR44613                         |          |                |            |            |
| CB4856 HS II         | 11455759                                                   | 11459356 | WBGene00012202 | W02B12.4   | W02B12.4   |
| 0.0538554608278741   | AGIWUR9639;AGIWUR25066;AGIWUR32512                         |          |                |            |            |
| CB4856 HS II         | 11460215                                                   | 11464129 | WBGene00000196 | aars-1     | W02B12.6   |
| 0.0656519882144551   | AGIWUR42057                                                |          |                |            |            |
| CB4856 HS II         | 11464892                                                   | 11468653 | WBGene00012203 | rga-1      | W02B12.8   |
| 0.0344308117019549   | AGIWUR9836;AGIWUR17737;AGIWUR20910;AGIWUR37766             |          |                |            |            |
| CB4856 HS II         | 11468552                                                   | 11469624 | WBGene00044026 | cisd-1     | W02B12.15  |
| 0.032730963135668    | AGIWUR9645;AGIWUR11244;AGIWUR30877;AGIWUR36766;AGIWUR43387 |          |                |            |            |
| CB4856 HS II         | 11470010                                                   | 11472033 | WBGene00012204 | mfn-1      | W02B12.9   |
| 0.116875761349163    | AGIWUR7193;AGIWUR40221                                     |          |                |            |            |
| CB4856 HS II         | 11472135                                                   | 11473571 | WBGene00012205 | W02B12.10  | W02B12.10  |

|                                    |                                                             |          |                |                 |                     |
|------------------------------------|-------------------------------------------------------------|----------|----------------|-----------------|---------------------|
| -0.061559914209445                 | AGIWUR25960                                                 |          |                |                 |                     |
| CB4856 HS II                       | 11473861                                                    | 11476019 | WBGene00012206 | W02B12.11       | W02B12.11           |
| -0.0270481802983973                | AGIWUR16635;AGIWUR22977;AGIWUR44267                         |          |                |                 |                     |
| CB4856 HS II                       | 11476757                                                    | 11479176 | WBGene00012207 | W02B12.12       | W02B12.12           |
| -0.106176252514137                 | AGIWUR13834;AGIWUR34835;AGIWUR35852                         |          |                |                 |                     |
| CB4856 HS II                       | 11480432                                                    | 11482385 | WBGene00007147 | B0334.9 B0334.9 | 0.00703358199432991 |
| AGIWUR3847                         |                                                             |          |                |                 |                     |
| CB4856 HS II                       | 11483201                                                    | 11485359 | WBGene00006660 | twk-5 B0334.2   | 0.193370717812527   |
| AGIWUR24833                        |                                                             |          |                |                 |                     |
| CB4856 HS II                       | 11485510                                                    | 11486774 | WBGene00007142 | ttr-18 B0334.1  | 0.19963275144586    |
| AGIWUR35879                        |                                                             |          |                |                 |                     |
| CB4856 HS II                       | 11488302                                                    | 11489619 | WBGene00007149 | B0334.13        | B0334.13            |
| -0.0517883994713131                | AGIWUR2411                                                  |          |                |                 |                     |
| CB4856 HS II                       | 11489605                                                    | 11493039 | WBGene00007143 | B0334.3 B0334.3 | 0.202726413107982   |
| AGIWUR8770                         |                                                             |          |                |                 |                     |
| CB4856 HS II                       | 11493231                                                    | 11495321 | WBGene00003868 | ooc-3 B0334.11  |                     |
| 0.159874470180842                  | AGIWUR41973                                                 |          |                |                 |                     |
| CB4856 HS II                       | 11495692                                                    | 11496663 | WBGene00007144 | B0334.4 B0334.4 | -0.0727042569113898 |
| AGIWUR44324                        |                                                             |          |                |                 |                     |
| CB4856 HS II                       | 11497665                                                    | 11499620 | WBGene00007145 | B0334.5 B0334.5 | 0.152844870339134   |
| AGIWUR1708                         |                                                             |          |                |                 |                     |
| CB4856 HS II                       | 11510673                                                    | 11513890 | WBGene00007146 | B0334.6 B0334.6 | 0.105047723254637   |
| AGIWUR18391                        |                                                             |          |                |                 |                     |
| CB4856 HS II                       | 11515075                                                    | 11518154 | WBGene00005267 | srh-44 B0334.7  | -0.170560450313017  |
| AGIWUR18781                        |                                                             |          |                |                 |                     |
| CB4856 HS II                       | 11519323                                                    | 11527062 | WBGene00000090 | age-1 B0334.8   | 0.0415956275002785  |
| AGIWUR6065;AGIWUR20151;AGIWUR40421 |                                                             |          |                |                 |                     |
| CB4856 HS II                       | 11527172                                                    | 11533814 | WBGene00007013 | mdt-8 Y62F5A.1  |                     |
| 0.0226647289797919                 | AGIWUR10085;AGIWUR18350                                     |          |                |                 |                     |
| CB4856 HS II                       | 11533925                                                    | 11534479 | WBGene00077453 | Y62F5A.12       | Y62F5A.12           |
| -0.113615985495382                 | AGIWUR15635;AGIWUR22508;AGIWUR29852;AGIWUR30561;AGIWUR32531 |          |                |                 |                     |
| CB4856 HS II                       | 11535165                                                    | 11538841 | WBGene00013387 | Y62F5A.9        | Y62F5A.9            |
| 0.138886172762628                  | AGIWUR2621                                                  |          |                |                 |                     |
| CB4856 HS II                       | 11538904                                                    | 11540630 | WBGene00010055 | F54D5.12        | F54D5.12            |
| -0.0937274498086289                | AGIWUR4071;AGIWUR32091;AGIWUR43219                          |          |                |                 |                     |
| CB4856 HS II                       | 11540772                                                    | 11542579 | WBGene00010054 | F54D5.11        | F54D5.11            |
| 0.104436555603531                  | AGIWUR23057                                                 |          |                |                 |                     |
| CB4856 HS II                       | 11542636                                                    | 11544875 | WBGene00010053 | F54D5.9 F54D5.9 | -0.188572921363393  |
| AGIWUR20809                        |                                                             |          |                |                 |                     |

|                                                                                                                       |    |          |          |                |          |          |                     |
|-----------------------------------------------------------------------------------------------------------------------|----|----------|----------|----------------|----------|----------|---------------------|
| CB4856 HS                                                                                                             | II | 11545563 | 11547366 | WBGene00001031 | dnj-13   | F54D5.8  | -0.17655864026354   |
| AGIWUR32433                                                                                                           |    |          |          |                |          |          |                     |
| CB4856 HS                                                                                                             | II | 11547481 | 11549313 | WBGene00010052 | F54D5.7  | F54D5.7  | 0.0958433773275882  |
| AGIWUR16917;AGIWUR18203                                                                                               |    |          |          |                |          |          |                     |
| CB4856 HS                                                                                                             | II | 11558715 | 11564227 | WBGene00010057 | F54D5.15 | F54D5.15 |                     |
| 0.0173196241829405 AGIWUR23389                                                                                        |    |          |          |                |          |          |                     |
| CB4856 HS                                                                                                             | II | 11564385 | 11567020 | WBGene00010051 | F54D5.5  | F54D5.5  | 0.115896447544261   |
| AGIWUR4180;AGIWUR8631                                                                                                 |    |          |          |                |          |          |                     |
| CB4856 HS                                                                                                             | II | 11569818 | 11571002 | WBGene00010050 | F54D5.4  | F54D5.4  | -0.109635062816021  |
| AGIWUR25511;AGIWUR35726;AGIWUR43286                                                                                   |    |          |          |                |          |          |                     |
| CB4856 HS                                                                                                             | II | 11571805 | 11573025 | WBGene00010049 | F54D5.3  | F54D5.3  | 0.268347960886471   |
| AGIWUR31038                                                                                                           |    |          |          |                |          |          |                     |
| CB4856 HS                                                                                                             | II | 11573180 | 11575000 | WBGene00010048 | F54D5.2  | F54D5.2  | -0.0208171137259026 |
| AGIWUR14382                                                                                                           |    |          |          |                |          |          |                     |
| CB4856 HS                                                                                                             | II | 11574940 | 11577258 | WBGene00003960 | pcs-1    | F54D5.1  | 0.0517880565002606  |
| AGIWUR12093;AGIWUR26991;AGIWUR27917                                                                                   |    |          |          |                |          |          |                     |
| CB4856 HS                                                                                                             | II | 11578716 | 11582758 | WBGene00010056 | smc-6    | F54D5.14 |                     |
| 0.095139260756449 AGIWUR9293;AGIWUR28985;AGIWUR42540                                                                  |    |          |          |                |          |          |                     |
| CB4856 HS                                                                                                             | II | 11582849 | 11588536 | WBGene00008361 | D1043.1  | D1043.1  | -0.214483732045483  |
| AGIWUR31695                                                                                                           |    |          |          |                |          |          |                     |
| CB4856 HS                                                                                                             | II | 11588464 | 11592060 | WBGene00008545 | F07A11.1 | F07A11.1 |                     |
| 0.231653296352299 AGIWUR540                                                                                           |    |          |          |                |          |          |                     |
| CB4856 HS                                                                                                             | II | 11592392 | 11596590 | WBGene00008546 | gfat-1   | F07A11.2 |                     |
| 0.0130018496485 AGIWUR7924                                                                                            |    |          |          |                |          |          |                     |
| CB4856 HS                                                                                                             | II | 11596767 | 11599809 | WBGene00003791 | npp-5    | F07A11.3 |                     |
| -0.0850317664838833 AGIWUR15789                                                                                       |    |          |          |                |          |          |                     |
| CB4856 HS                                                                                                             | II | 11603956 | 11611532 | WBGene00008547 | F07A11.4 | F07A11.4 |                     |
| 0.0181847686896859 AGIWUR16553                                                                                        |    |          |          |                |          |          |                     |
| CB4856 HS                                                                                                             | II | 11612257 | 11614391 | WBGene00008548 | F07A11.5 | F07A11.5 |                     |
| -0.113030971783465 AGIWUR34591                                                                                        |    |          |          |                |          |          |                     |
| CB4856 HS                                                                                                             | II | 11614636 | 11633609 | WBGene00008549 | din-1    | F07A11.6 |                     |
| -0.0536079745663178                                                                                                   |    |          |          |                |          |          |                     |
| AGIWUR2384;AGIWUR5574;AGIWUR20351;AGIWUR26081;AGIWUR29000;AGIWUR30375;AGIWUR35211;AGIWUR35355;AGIWUR40727;AGIWUR42354 |    |          |          |                |          |          |                     |
| CB4856 HS                                                                                                             | II | 11640454 | 11641778 | WBGene00002194 | kin-6    | ZK20.2   | -0.0420766857129617 |
| AGIWUR20410                                                                                                           |    |          |          |                |          |          |                     |
| CB4856 HS                                                                                                             | II | 11646747 | 11649139 | WBGene00013923 | ghi-1    | ZK20.1   | 0.00799832914643872 |
| AGIWUR21946                                                                                                           |    |          |          |                |          |          |                     |
| CB4856 HS                                                                                                             | II | 11649096 | 11651213 | WBGene00013925 | ZK20.4   | ZK20.4   | 0.298375123729654   |

|                                                                                                                                                                                                                                                           |    |    |          |          |                |            |                            |
|-----------------------------------------------------------------------------------------------------------------------------------------------------------------------------------------------------------------------------------------------------------|----|----|----------|----------|----------------|------------|----------------------------|
| AGIWUR28663                                                                                                                                                                                                                                               |    |    |          |          |                |            |                            |
| CB4856                                                                                                                                                                                                                                                    | HS | II | 11651261 | 11652906 | WBGene00013924 | rad-23     | ZK20.3 0.122642231284704   |
| AGIWUR7698;AGIWUR12477;AGIWUR32141;AGIWUR39417                                                                                                                                                                                                            |    |    |          |          |                |            |                            |
| CB4856                                                                                                                                                                                                                                                    | HS | II | 11653096 | 11654194 | WBGene00004468 | rpn-12     | ZK20.5 -0.184540263590595  |
| AGIWUR27674                                                                                                                                                                                                                                               |    |    |          |          |                |            |                            |
| CB4856                                                                                                                                                                                                                                                    | HS | II | 11654214 | 11657172 | WBGene00013926 | nep-1      | ZK20.6 -0.0376360194732506 |
| AGIWUR2710                                                                                                                                                                                                                                                |    |    |          |          |                |            |                            |
| CB4856                                                                                                                                                                                                                                                    | HS | II | 11661583 | 11675927 | WBGene00007028 | trr-1      | C47D12.1                   |
| -0.048768102462347 AGIWUR5325;AGIWUR12751;AGIWUR31535                                                                                                                                                                                                     |    |    |          |          |                |            |                            |
| CB4856                                                                                                                                                                                                                                                    | HS | II | 11676306 | 11679197 | WBGene00008136 | C47D12.2   | C47D12.2                   |
| 0.28849721165909 AGIWUR5784                                                                                                                                                                                                                               |    |    |          |          |                |            |                            |
| CB4856                                                                                                                                                                                                                                                    | HS | II | 11679091 | 11681068 | WBGene00008137 | sfxn-1.4   | C47D12.3                   |
| -0.261837465656633 AGIWUR19634                                                                                                                                                                                                                            |    |    |          |          |                |            |                            |
| CB4856                                                                                                                                                                                                                                                    | HS | II | 11681825 | 11682881 | WBGene00008138 | C47D12.4   | C47D12.4                   |
| 0.315739118446624 AGIWUR23593                                                                                                                                                                                                                             |    |    |          |          |                |            |                            |
| CB4856                                                                                                                                                                                                                                                    | HS | II | 11683479 | 11685289 | WBGene00008139 | C47D12.5   | C47D12.5                   |
| 0.23747032932315 AGIWUR40843                                                                                                                                                                                                                              |    |    |          |          |                |            |                            |
| CB4856                                                                                                                                                                                                                                                    | HS | II | 11696171 | 11705371 | WBGene00008140 | xpf-1      | C47D12.8                   |
| 0.118730319508662 AGIWUR41402                                                                                                                                                                                                                             |    |    |          |          |                |            |                            |
| CB4856                                                                                                                                                                                                                                                    | HS | II | 11705989 | 11713610 | WBGene00012149 | VF13D12L.3 | VF13D12L.3                 |
| 0.238313978463943 AGIWUR3208                                                                                                                                                                                                                              |    |    |          |          |                |            |                            |
| CB4856                                                                                                                                                                                                                                                    | HS | II | 11713721 | 11716785 | WBGene00008744 | F13D12.10  | F13D12.10                  |
| 0.0722207895718956 AGIWUR10883                                                                                                                                                                                                                            |    |    |          |          |                |            |                            |
| CB4856                                                                                                                                                                                                                                                    | HS | II | 11720444 | 11722308 | WBGene00008739 | F13D12.3   | F13D12.3                   |
| -0.0586556615314713 AGIWUR43065                                                                                                                                                                                                                           |    |    |          |          |                |            |                            |
| CB4856                                                                                                                                                                                                                                                    | HS | II | 11724204 | 11726533 | WBGene00002262 | ldh-1      | F13D12.2                   |
| 0.252860752795065 AGIWUR13529                                                                                                                                                                                                                             |    |    |          |          |                |            |                            |
| CB4856                                                                                                                                                                                                                                                    | HS | II | 11726814 | 11728541 | WBGene00008740 | F13D12.5   | F13D12.5                   |
| 0.0355448754029712 AGIWUR26392                                                                                                                                                                                                                            |    |    |          |          |                |            |                            |
| CB4856                                                                                                                                                                                                                                                    | HS | II | 11728949 | 11731226 | WBGene00000114 | alh-8      | F13D12.4                   |
| -0.0500840620482812                                                                                                                                                                                                                                       |    |    |          |          |                |            |                            |
| AGIWUR1224;AGIWUR5891;AGIWUR12029;AGIWUR14165;AGIWUR15757;AGIWUR16773;AGIWUR17567;AGIWUR18235;AGIWUR20123;AGIWUR20401;AGIWUR22020;AGIWUR24172;AGIWUR24755;AGIWUR29296;AGIWUR34759;AGIWUR38206;AGIWUR41118;AGIWUR41506;AGIWUR42887;AGIWUR43612;AGIWUR44212 |    |    |          |          |                |            |                            |
| CB4856                                                                                                                                                                                                                                                    | HS | II | 11731165 | 11732594 | WBGene00008742 | F13D12.8   | F13D12.8                   |
| 0.066793418959973 AGIWUR8447                                                                                                                                                                                                                              |    |    |          |          |                |            |                            |
| CB4856                                                                                                                                                                                                                                                    | HS | II | 11739456 | 11742876 | WBGene00008741 | F13D12.6   | F13D12.6                   |
| 0.331119470597333 AGIWUR13795                                                                                                                                                                                                                             |    |    |          |          |                |            |                            |
| CB4856                                                                                                                                                                                                                                                    | HS | II | 11742814 | 11748611 | WBGene00001679 | gpb-1      | F13D12.7                   |



-0.0195117914252969

AGIWUR1044;AGIWUR6942;AGIWUR12617;AGIWUR16349;AGIWUR22503;AGIWUR22766;AGIWUR27763;AGIWUR37448;AGIWUR38234;AGIWUR39837

CB4856 HS II 11762166 11765662 WBGene00009690 F44E5.3 F44E5.3 0.229999881677587

AGIWUR39880

CB4856 HS II 11771978 11774039 WBGene00206377 F44E5.15 F44E5.15

0.0188680295007391 AGIWUR4924

CB4856 HS II 11774144 11774559 WBGene00009688 F44E5.1 F44E5.1 0.151371540403993

AGIWUR4219;AGIWUR6573;AGIWUR8599;AGIWUR12421;AGIWUR14398;AGIWUR25459;AGIWUR41823

CB4856 HS II 11774669 11777943 WBGene00009661 patr-1 F43G6.9 0.0623767509636135

AGIWUR8301;AGIWUR9463;AGIWUR35105

CB4856 HS II 11778435 11782231 WBGene00001016 dna-2 F43G6.1 0.0474443500752013

AGIWUR42987

CB4856 HS II 11782987 11784086 WBGene00009656 F43G6.3 F43G6.3 -0.0227559516113729

AGIWUR7939;AGIWUR9994;AGIWUR39798

CB4856 HS II 11790759 11797322 WBGene00009657 F43G6.4 F43G6.4 0.103247513781214

AGIWUR3169;AGIWUR32275

CB4856 HS II 11806567 11808805 WBGene00005013 jmjD-1.1 F43G6.6

-0.217299217151936 AGIWUR21925

CB4856 HS II 11812294 11814113 WBGene00009660 F43G6.8 F43G6.8 0.0859638992715865

AGIWUR840

CB4856 HS II 11814839 11816706 WBGene00009658 F43G6.5 F43G6.5 -0.563153912017553

AGIWUR34108

CB4856 HS II 11818248 11819924 WBGene00012396 Y6D1A.2 Y6D1A.2 0.210872397451075

AGIWUR3568

CB4856 HS II 11827933 11830020 WBGene00003979 pes-5 T27D12.4

0.053878073565869 AGIWUR42789

CB4856 HS II 11831062 11832575 WBGene00012086 clec-144 T27D12.3

-0.259108874690794 AGIWUR3999

CB4856 HS II 11842617 11846026 WBGene00012085 T27D12.1 T27D12.1

-0.0570596565742107 AGIWUR43883

CB4856 HS II 11846508 11854743 WBGene00000528 clh-1 T27D12.2

0.0756365802190935 AGIWUR11100;AGIWUR27732;AGIWUR44823

CB4856 HS II 11861029 11863420 WBGene00010787 K12D12.5 K12D12.5

-0.193632867024414 AGIWUR27714

CB4856 HS II 11863525 11865506 WBGene00010786 K12D12.4 K12D12.4

-0.149161296313039 AGIWUR32968

CB4856 HS II 11865523 11874702 WBGene00003789 npp-3 K12D12.2

-0.0532833172106422 AGIWUR28569

|                                                                                              |                                                                                    |          |                |           |                            |
|----------------------------------------------------------------------------------------------|------------------------------------------------------------------------------------|----------|----------------|-----------|----------------------------|
| CB4856 HS II                                                                                 | 11875145                                                                           | 11880588 | WBGene00010785 | top-2     | K12D12.1                   |
| -0.0128548903400025                                                                          | AGIWUR7051;AGIWUR16104;AGIWUR21962;AGIWUR37958;AGIWUR39538;AGIWUR40938;AGIWUR41350 |          |                |           |                            |
| CB4856 HS II                                                                                 | 11882614                                                                           | 11883685 | WBGene00014155 | ZK930.5   | ZK930.5 0.0996015802719032 |
| AGIWUR19690                                                                                  |                                                                                    |          |                |           |                            |
| CB4856 HS II                                                                                 | 11885588                                                                           | 11886601 | WBGene00014156 | ZK930.6   | ZK930.6 0.0329381746913295 |
| AGIWUR43651                                                                                  |                                                                                    |          |                |           |                            |
| CB4856 HS II                                                                                 | 11890992                                                                           | 11893423 | WBGene00014152 | ZK930.2   | ZK930.2 0.170696757085553  |
| AGIWUR42824                                                                                  |                                                                                    |          |                |           |                            |
| CB4856 HS II                                                                                 | 11897365                                                                           | 11901210 | WBGene00014153 | vab-23    | ZK930.3 0.0958617416461376 |
| AGIWUR3989;AGIWUR8215;AGIWUR15786                                                            |                                                                                    |          |                |           |                            |
| CB4856 HS II                                                                                 | 11906517                                                                           | 11908601 | WBGene00014154 | ZK930.4   | ZK930.4                    |
| -0.00834484015665637                                                                         | AGIWUR34030                                                                        |          |                |           |                            |
| CB4856 HS II                                                                                 | 11908714                                                                           | 11915852 | WBGene00014151 | vps-15    | ZK930.1 0.0667296825826149 |
| AGIWUR6792                                                                                   |                                                                                    |          |                |           |                            |
| CB4856 HS II                                                                                 | 11916513                                                                           | 11917643 | WBGene00001977 | hmg-12    | Y17G7A.1                   |
| -0.130757841122391                                                                           | AGIWUR3120;AGIWUR4269;AGIWUR7020;AGIWUR18198;AGIWUR21727;AGIWUR26983               |          |                |           |                            |
| CB4856 HS II                                                                                 | 11917642                                                                           | 11935343 | WBGene00003015 | lin-29    | W03C9.4 0.0320884591785333 |
| AGIWUR21089;AGIWUR27180                                                                      |                                                                                    |          |                |           |                            |
| CB4856 HS II                                                                                 | 11948727                                                                           | 11949474 | WBGene00012223 | W03C9.8   | W03C9.8 0.0423371798649548 |
| AGIWUR29013                                                                                  |                                                                                    |          |                |           |                            |
| CB4856 HS II                                                                                 | 11953239                                                                           | 11960743 | WBGene00012222 | W03C9.6   | W03C9.6 0.0966224482276044 |
| AGIWUR32907                                                                                  |                                                                                    |          |                |           |                            |
| CB4856 HS II                                                                                 | 11960989                                                                           | 11962128 | WBGene00012219 | W03C9.1   | W03C9.1 0.0443783695800875 |
| AGIWUR38306                                                                                  |                                                                                    |          |                |           |                            |
| CB4856 HS II                                                                                 | 11962111                                                                           | 11965258 | WBGene00012220 | W03C9.2   | W03C9.2 0.175892805413529  |
| AGIWUR29253                                                                                  |                                                                                    |          |                |           |                            |
| CB4856 HS II                                                                                 | 11965339                                                                           | 11966931 | WBGene00004271 | rab-7     | W03C9.3 -0.241696208239039 |
| AGIWUR4192;AGIWUR4526;AGIWUR8098;AGIWUR17129;AGIWUR22447;AGIWUR23927;AGIWUR25730;AGIWUR33425 |                                                                                    |          |                |           |                            |
| CB4856 HS II                                                                                 | 11967048                                                                           | 11967533 | WBGene00012221 | W03C9.5   | W03C9.5 -0.142236330173553 |
| AGIWUR2780;AGIWUR8954;AGIWUR14848;AGIWUR18824;AGIWUR24306;AGIWUR42497                        |                                                                                    |          |                |           |                            |
| CB4856 HS II                                                                                 | 11968637                                                                           | 11972334 | WBGene00003228 | mex-1     | W03C9.7 -0.176703881014625 |
| AGIWUR43188                                                                                  |                                                                                    |          |                |           |                            |
| CB4856 HS II                                                                                 | 11972310                                                                           | 11973732 | WBGene00012457 | acbp-6    | Y17G7B.1                   |
| -0.00918728139560177                                                                         | AGIWUR920;AGIWUR15194;AGIWUR16203;AGIWUR37119;AGIWUR38415;AGIWUR39380              |          |                |           |                            |
| CB4856 HS II                                                                                 | 11975190                                                                           | 11977659 | WBGene00012472 | Y17G7B.21 | Y17G7B.21                  |
| -0.162867457999726                                                                           | AGIWUR31694                                                                        |          |                |           |                            |
| CB4856 HS II                                                                                 | 11977784                                                                           | 11979859 | WBGene00012471 | Y17G7B.20 | Y17G7B.20                  |
| -0.0450861627401657                                                                          | AGIWUR10903                                                                        |          |                |           |                            |
| CB4856 HS II                                                                                 | 11979838                                                                           | 11989017 | WBGene00012458 | ash-2     | Y17G7B.2                   |

|                                                                                                |                                                                         |          |                |                     |
|------------------------------------------------------------------------------------------------|-------------------------------------------------------------------------|----------|----------------|---------------------|
| -0.0633941571226622                                                                            | AGIWUR10526;AGIWUR16389;AGIWUR28205;AGIWUR36922;AGIWUR39383             |          |                |                     |
| CB4856 HS II                                                                                   | 11989024                                                                | 11992823 | WBGene00012459 | Y17G7B.3 Y17G7B.3   |
| 0.170854505106064                                                                              | AGIWUR1664                                                              |          |                |                     |
| CB4856 HS II                                                                                   | 11993001                                                                | 11998009 | WBGene00012460 | dhps-1 Y17G7B.4     |
| 0.160719713873723                                                                              | AGIWUR8348                                                              |          |                |                     |
| CB4856 HS II                                                                                   | 11999260                                                                | 12001422 | WBGene00044030 | Y17G7B.23 Y17G7B.23 |
| -0.160977795985813                                                                             | AGIWUR22822                                                             |          |                |                     |
| CB4856 HS II                                                                                   | 12001510                                                                | 12006625 | WBGene00003154 | mcm-2 Y17G7B.5      |
| -0.00599061399089873                                                                           |                                                                         |          |                |                     |
| AGIWUR6431;AGIWUR14362;AGIWUR22034;AGIWUR22863;AGIWUR24320;AGIWUR27510;AGIWUR31581;AGIWUR43987 |                                                                         |          |                |                     |
| CB4856 HS II                                                                                   | 12009077                                                                | 12023825 | WBGene00012461 | glb-29 Y17G7B.6     |
| -0.0262554142225637                                                                            | AGIWUR14390;AGIWUR23983;AGIWUR25092;AGIWUR26552;AGIWUR34236;AGIWUR39129 |          |                |                     |
| CB4856 HS II                                                                                   | 12023861                                                                | 12025932 | WBGene00012465 | Y17G7B.12 Y17G7B.12 |
| -0.0375503670819981                                                                            | AGIWUR29467                                                             |          |                |                     |
| CB4856 HS II                                                                                   | 12028763                                                                | 12036742 | WBGene00000892 | cyn-16 Y17G7B.9     |
| -0.164828450694373                                                                             | AGIWUR4024;AGIWUR23109                                                  |          |                |                     |
| CB4856 HS II                                                                                   | 12036842                                                                | 12039139 | WBGene00006601 | tpi-1 Y17G7B.7      |
| 0.320087573582405                                                                              | AGIWUR1217;AGIWUR2688;AGIWUR4294;AGIWUR7287;AGIWUR8391;AGIWUR11326      |          |                |                     |
| CB4856 HS II                                                                                   | 12042910                                                                | 12049260 | WBGene00012466 | ippk-1 Y17G7B.13    |
| -0.241107708895401                                                                             | AGIWUR17013;AGIWUR20129;AGIWUR22244;AGIWUR29786;AGIWUR35371;AGIWUR35857 |          |                |                     |
| CB4856 HS II                                                                                   | 12049583                                                                | 12059866 | WBGene00012463 | Y17G7B.10 Y17G7B.10 |
| -0.0255038875625155                                                                            | AGIWUR3151;AGIWUR18392;AGIWUR21813;AGIWUR22929;AGIWUR30218;AGIWUR30266  |          |                |                     |
| CB4856 HS II                                                                                   | 12060228                                                                | 12062621 | WBGene00012464 | arrd-7 Y17G7B.11    |
| 0.136374156324797                                                                              | AGIWUR8573                                                              |          |                |                     |
| CB4856 HS II                                                                                   | 12065085                                                                | 12067568 | WBGene00012467 | arrd-8 Y17G7B.14    |
| 0.169998839588986                                                                              | AGIWUR8442                                                              |          |                |                     |
| CB4856 HS II                                                                                   | 12068099                                                                | 12070675 | WBGene00012473 | Y17G7B.22 Y17G7B.22 |
| 0.117868406361981                                                                              | AGIWUR5117;AGIWUR30056;AGIWUR39044                                      |          |                |                     |
| CB4856 HS II                                                                                   | 12072082                                                                | 12088868 | WBGene00000565 | cnt-1 Y17G7B.15     |
| -0.486414201283107                                                                             | AGIWUR32973                                                             |          |                |                     |
| CB4856 HS II                                                                                   | 12092422                                                                | 12099989 | WBGene00012468 | Y17G7B.17 Y17G7B.17 |
| -0.218272599890563                                                                             | AGIWUR39390                                                             |          |                |                     |
| CB4856 HS II                                                                                   | 12103331                                                                | 12107857 | WBGene00012469 | Y17G7B.18 Y17G7B.18 |
| 0.00653544719079058                                                                            | AGIWUR21167;AGIWUR32919                                                 |          |                |                     |
| CB4856 HS II                                                                                   | 12108273                                                                | 12112552 | WBGene00012470 | Y17G7B.19 Y17G7B.19 |
| 0.0236700333373854                                                                             | AGIWUR15320                                                             |          |                |                     |
| CB4856 HS II                                                                                   | 12114971                                                                | 12130968 | WBGene00012845 | set-24 Y43F11A.5    |
| -0.0515520413005746                                                                            | AGIWUR1402;AGIWUR10026;AGIWUR26909;AGIWUR33032;AGIWUR43098              |          |                |                     |
| CB4856 HS II                                                                                   | 12131530                                                                | 12132894 | WBGene00014576 | Y43F11A.6 Y43F11A.6 |

|                     |                                                             |          |                |                   |            |
|---------------------|-------------------------------------------------------------|----------|----------------|-------------------|------------|
| -0.0898896712088306 | AGIWUR3471;AGIWUR10296                                      |          |                |                   |            |
| CB4856 HS II        | 12133535                                                    | 12147134 | WBGene00013246 | Y57A10A.1         | Y57A10A.1  |
| 0.180460646760409   | AGIWUR4370                                                  |          |                |                   |            |
| CB4856 HS II        | 12147633                                                    | 12150216 | WBGene00013247 | Y57A10A.2         | Y57A10A.2  |
| -0.173677038723168  | AGIWUR26512                                                 |          |                |                   |            |
| CB4856 HS II        | 12154486                                                    | 12156812 | WBGene00013250 | Y57A10A.5         | Y57A10A.5  |
| -0.124835547433387  | AGIWUR27774                                                 |          |                |                   |            |
| CB4856 HS II        | 12156940                                                    | 12159252 | WBGene00013251 | Y57A10A.6         | Y57A10A.6  |
| -0.19765599983144   | AGIWUR7730                                                  |          |                |                   |            |
| CB4856 HS II        | 12159472                                                    | 12162671 | WBGene00013252 | Y57A10A.7         | Y57A10A.7  |
| 0.158263097725543   | AGIWUR6939                                                  |          |                |                   |            |
| CB4856 HS II        | 12164839                                                    | 12170762 | WBGene00013253 | Y57A10A.8         | Y57A10A.8  |
| 0.134074552862472   | AGIWUR22872                                                 |          |                |                   |            |
| CB4856 HS II        | 12172571                                                    | 12176069 | WBGene00004394 | rol-1 Y57A10A.11  |            |
| 0.446160140574257   | AGIWUR34088                                                 |          |                |                   |            |
| CB4856 HS II        | 12176880                                                    | 12184875 | WBGene00013256 | Y57A10A.13        | Y57A10A.13 |
| 0.217477018874677   | AGIWUR5797                                                  |          |                |                   |            |
| CB4856 HS II        | 12186007                                                    | 12189265 | WBGene00013257 | Y57A10A.14        | Y57A10A.14 |
| -0.111967495352832  | AGIWUR43593                                                 |          |                |                   |            |
| CB4856 HS II        | 12189795                                                    | 12199959 | WBGene00013258 | polg-1 Y57A10A.15 |            |
| 0.0296749669516636  | AGIWUR23407                                                 |          |                |                   |            |
| CB4856 HS II        | 12200607                                                    | 12202381 | WBGene00013259 | trpp-5 Y57A10A.16 |            |
| 0.126919173045906   | AGIWUR40094                                                 |          |                |                   |            |
| CB4856 HS II        | 12203309                                                    | 12209160 | WBGene00013272 | aqp-12 Y57A10A.35 |            |
| -0.128934806873072  | AGIWUR11399                                                 |          |                |                   |            |
| CB4856 HS II        | 12209228                                                    | 12225086 | WBGene00004167 | pqn-87 Y57A10A.18 |            |
| -0.110237906502705  | AGIWUR40602                                                 |          |                |                   |            |
| CB4856 HS II        | 12225356                                                    | 12227265 | WBGene00013260 | rsr-2 Y57A10A.19  |            |
| 0.0579535859469136  | AGIWUR30536                                                 |          |                |                   |            |
| CB4856 HS II        | 12228305                                                    | 12237051 | WBGene00013261 | sinh-1 Y57A10A.20 |            |
| -0.100717468360438  | AGIWUR11106;AGIWUR29352;AGIWUR30256;AGIWUR35620;AGIWUR42257 |          |                |                   |            |
| CB4856 HS II        | 12240388                                                    | 12242567 | WBGene00013263 | Y57A10A.23        | Y57A10A.23 |
| -0.308695306819843  | AGIWUR11981                                                 |          |                |                   |            |
| CB4856 HS II        | 12242946                                                    | 12247611 | WBGene00013264 | Y57A10A.24        | Y57A10A.24 |
| -0.328963826200021  | AGIWUR40090                                                 |          |                |                   |            |
| CB4856 HS II        | 12248125                                                    | 12249135 | WBGene00013254 | tag-276 Y57A10A.9 |            |
| -0.496897581395634  | AGIWUR11305                                                 |          |                |                   |            |
| CB4856 HS II        | 12251667                                                    | 12256628 | WBGene00013265 | parn-2 Y57A10A.25 |            |
| -0.0727338695917314 | AGIWUR36791                                                 |          |                |                   |            |

|                      |                         |          |                |                  |            |
|----------------------|-------------------------|----------|----------------|------------------|------------|
| CB4856 HS II         | 12256950                | 12269706 | WBGene00013255 | Y57A10A.10       | Y57A10A.10 |
| -0.0153366892111233  | AGIWUR16522             |          |                |                  |            |
| CB4856 HS II         | 12269815                | 12275044 | WBGene00013267 | Y57A10A.27       | Y57A10A.27 |
| 0.247644661462989    | AGIWUR37762             |          |                |                  |            |
| CB4856 HS II         | 12275936                | 12279383 | WBGene00013268 | Y57A10A.28       | Y57A10A.28 |
| -0.15382194698123    | AGIWUR8915              |          |                |                  |            |
| CB4856 HS II         | 12279561                | 12280595 | WBGene00013269 | Y57A10A.29       | Y57A10A.29 |
| -0.0722189761731382  | AGIWUR12646             |          |                |                  |            |
| CB4856 HS II         | 12280662                | 12284133 | WBGene00002063 | ife-5 Y57A10A.30 |            |
| 0.0759591839036844   | AGIWUR30348             |          |                |                  |            |
| CB4856 HS II         | 12289385                | 12300573 | WBGene00013270 | Y57A10A.31       | Y57A10A.31 |
| -0.00037136452339448 | AGIWUR15857;AGIWUR44592 |          |                |                  |            |
| CB4856 HS II         | 12301077                | 12302429 | WBGene00016825 | C50E10.1         | C50E10.1   |
| 0.168561990594259    | AGIWUR13445             |          |                |                  |            |
| CB4856 HS II         | 12303525                | 12305132 | WBGene00016834 | sre-50 C50E10.11 |            |
| 0.084760079149965    | AGIWUR26514             |          |                |                  |            |
| CB4856 HS II         | 12311860                | 12313660 | WBGene00016833 | sre-51 C50E10.10 |            |
| 0.207784615759691    | AGIWUR26368             |          |                |                  |            |
| CB4856 HS II         | 12318841                | 12321070 | WBGene00016832 | sre-49 C50E10.9  |            |
| -0.145745682011578   | AGIWUR24431             |          |                |                  |            |
| CB4856 HS II         | 12321193                | 12323405 | WBGene00016827 | sre-53 C50E10.3  |            |
| 0.163387450760812    | AGIWUR15154             |          |                |                  |            |
| CB4856 HS II         | 12325544                | 12327514 | WBGene00016831 | sre-56 C50E10.8  |            |
| -0.317749697561027   | AGIWUR15130             |          |                |                  |            |
| CB4856 HS II         | 12329294                | 12331122 | WBGene00016830 | sre-55 C50E10.7  |            |
| 0.0815282611082973   | AGIWUR35147             |          |                |                  |            |
| CB4856 HS II         | 12332924                | 12335044 | WBGene00016829 | sre-54 C50E10.6  |            |
| 0.156677567228256    | AGIWUR21803             |          |                |                  |            |
| CB4856 HS II         | 12335730                | 12338093 | WBGene00016828 | sre-52 C50E10.5  |            |
| -0.0947509033203549  | AGIWUR10613             |          |                |                  |            |
| CB4856 HS II         | 12339944                | 12344795 | WBGene00004945 | sop-2 C50E10.4   |            |
| 0.0721399619166814   | AGIWUR34187             |          |                |                  |            |
| CB4856 HS II         | 12345285                | 12352243 | WBGene00004310 | ras-1 C44C11.1   |            |
| 0.126889548586413    | AGIWUR23461;AGIWUR41923 |          |                |                  |            |
| CB4856 HS II         | 12358756                | 12367023 | WBGene00013273 | marc-5 Y57A10B.1 |            |
| -0.0750617918555179  | AGIWUR22652             |          |                |                  |            |
| CB4856 HS II         | 12373522                | 12379511 | WBGene00013274 | Y57A10B.2        | Y57A10B.2  |
| 0.199209664452166    | AGIWUR19618             |          |                |                  |            |
| CB4856 HS II         | 12383463                | 12384692 | WBGene00013275 | btd-14 Y57A10B.3 |            |

|                                    |                                                            |          |                |            |            |                     |
|------------------------------------|------------------------------------------------------------|----------|----------------|------------|------------|---------------------|
| 0.206494761168477                  | AGIWUR16330;AGIWUR18091;AGIWUR33933                        |          |                |            |            |                     |
| CB4856 HS II                       | 12384593                                                   | 12386881 | WBGene00013276 | sre-42     | Y57A10B.4  |                     |
| -0.136748551491868                 | AGIWUR5074                                                 |          |                |            |            |                     |
| CB4856 HS II                       | 12388293                                                   | 12389839 | WBGene00013277 | sre-41     | Y57A10B.5  |                     |
| -0.0606578648732858                | AGIWUR11779                                                |          |                |            |            |                     |
| CB4856 HS II                       | 12390083                                                   | 12392662 | WBGene00013278 | Y57A10B.6  | Y57A10B.6  |                     |
| -0.137315097067155                 | AGIWUR7958                                                 |          |                |            |            |                     |
| CB4856 HS II                       | 12392701                                                   | 12393743 | WBGene00013279 | Y57A10B.7  | Y57A10B.7  |                     |
| 0.0937878652682471                 | AGIWUR36071                                                |          |                |            |            |                     |
| CB4856 HS II                       | 12394856                                                   | 12397756 | WBGene00044048 | F57G9.7    | F57G9.7    | -0.0295036545729075 |
| AGIWUR25016;AGIWUR42871            |                                                            |          |                |            |            |                     |
| CB4856 HS II                       | 12399399                                                   | 12401891 | WBGene00010220 | sre-29     | F57G9.4    | -0.0874786503907945 |
| AGIWUR10397                        |                                                            |          |                |            |            |                     |
| CB4856 HS II                       | 12402434                                                   | 12404887 | WBGene00044041 | F57G9.6    | F57G9.6    | 0.163126167874115   |
| AGIWUR4855;AGIWUR19927;AGIWUR33180 |                                                            |          |                |            |            |                     |
| CB4856 HS II                       | 12404951                                                   | 12406494 | WBGene00010218 | sre-30     | F57G9.2    | 0.254111421284439   |
| AGIWUR12686                        |                                                            |          |                |            |            |                     |
| CB4856 HS II                       | 12406822                                                   | 12408817 | WBGene00010217 | sre-31     | F57G9.1    | 0.0785396254730513  |
| AGIWUR19812                        |                                                            |          |                |            |            |                     |
| CB4856 HS II                       | 12409320                                                   | 12410207 | WBGene00010219 | F57G9.3    | F57G9.3    | -0.532057198035034  |
| AGIWUR30827                        |                                                            |          |                |            |            |                     |
| CB4856 HS II                       | 12411622                                                   | 12412517 | WBGene00013280 | Y57A10C.1  | Y57A10C.1  |                     |
| 0.455280947702839                  | AGIWUR20533                                                |          |                |            |            |                     |
| CB4856 HS II                       | 12412723                                                   | 12412957 | WBGene00044052 | Y57A10C.12 | Y57A10C.12 |                     |
| -0.133234291453451                 | AGIWUR4626;AGIWUR12188;AGIWUR26299;AGIWUR31376;AGIWUR36187 |          |                |            |            |                     |
| CB4856 HS II                       | 12414036                                                   | 12414905 | WBGene00044047 | Y57A10C.11 | Y57A10C.11 |                     |
| 0.145842360123138                  | AGIWUR3841;AGIWUR14115                                     |          |                |            |            |                     |
| CB4856 HS II                       | 12415527                                                   | 12417527 | WBGene00013281 | sre-27     | Y57A10C.3  |                     |
| -0.107725390134865                 | AGIWUR5752                                                 |          |                |            |            |                     |
| CB4856 HS II                       | 12419133                                                   | 12420586 | WBGene00013282 | sre-26     | Y57A10C.4  |                     |
| 0.0909767760147515                 | AGIWUR220                                                  |          |                |            |            |                     |
| CB4856 HS II                       | 12421204                                                   | 12422623 | WBGene00013283 | sre-25     | Y57A10C.5  |                     |
| -0.192967615401482                 | AGIWUR38853                                                |          |                |            |            |                     |
| CB4856 HS II                       | 12423514                                                   | 12425694 | WBGene00013284 | daf-22     | Y57A10C.6  |                     |
| 0.228304769158401                  | AGIWUR5216                                                 |          |                |            |            |                     |
| CB4856 HS II                       | 12427986                                                   | 12429946 | WBGene00013286 | Y57A10C.8  | Y57A10C.8  |                     |
| -0.0723897497362751                | AGIWUR24902                                                |          |                |            |            |                     |
| CB4856 HS II                       | 12430788                                                   | 12432311 | WBGene00013285 | dct-12     | Y57A10C.7  |                     |
| 0.0534480679081177                 | AGIWUR17519                                                |          |                |            |            |                     |

|                                     |                                                |          |                |           |                             |
|-------------------------------------|------------------------------------------------|----------|----------------|-----------|-----------------------------|
| CB4856 HS II                        | 12433608                                       | 12435846 | WBGene00013287 | Y57A10C.9 | Y57A10C.9                   |
| 0.265328076511177                   | AGIWUR21893                                    |          |                |           |                             |
| CB4856 HS II                        | 12442142                                       | 12442367 | WBGene00012284 | W05H5.2   | W05H5.2 0.549004365017081   |
| AGIWUR19090                         |                                                |          |                |           |                             |
| CB4856 HS II                        | 12443119                                       | 12444779 | WBGene00012283 | W05H5.1   | W05H5.1 0.00126201535730353 |
| AGIWUR12242                         |                                                |          |                |           |                             |
| CB4856 HS II                        | 12445332                                       | 12447769 | WBGene00012285 | pit-6     | W05H5.3 0.0954954338888596  |
| AGIWUR13105;AGIWUR15362;AGIWUR30498 |                                                |          |                |           |                             |
| CB4856 HS II                        | 12448541                                       | 12449887 | WBGene00005250 | srh-27    | W05H5.4 0.0517510707564552  |
| AGIWUR3233                          |                                                |          |                |           |                             |
| CB4856 HS II                        | 12450149                                       | 12451407 | WBGene00043058 | sre-34    | W05H5.8                     |
| -4.73686391151418e-05               | AGIWUR10523                                    |          |                |           |                             |
| CB4856 HS II                        | 12453302                                       | 12454693 | WBGene00012287 | sre-33    | W05H5.6 -0.170213796374149  |
| AGIWUR3814                          |                                                |          |                |           |                             |
| CB4856 HS II                        | 12454954                                       | 12456733 | WBGene00012288 | sre-32    | W05H5.7 -0.0389090363201996 |
| AGIWUR4582                          |                                                |          |                |           |                             |
| CB4856 HS II                        | 12457575                                       | 12459510 | WBGene00008837 | sre-38    | F15A4.1 0.222327882719624   |
| AGIWUR35287                         |                                                |          |                |           |                             |
| CB4856 HS II                        | 12459772                                       | 12460551 | WBGene00044323 | tag-281   | F15A4.11                    |
| -0.104771555843808                  | AGIWUR7257;AGIWUR25748;AGIWUR28954;AGIWUR31949 |          |                |           |                             |
| CB4856 HS II                        | 12460641                                       | 12461471 | WBGene00044322 | tag-280   | F15A4.12                    |
| 0.0997904465867752                  | AGIWUR18364                                    |          |                |           |                             |
| CB4856 HS II                        | 12462418                                       | 12464078 | WBGene00008838 | F15A4.2   | F15A4.2 -0.360973317764083  |
| AGIWUR36102                         |                                                |          |                |           |                             |
| CB4856 HS II                        | 12465872                                       | 12467519 | WBGene00008839 | sre-37    | F15A4.3 0.199880151207417   |
| AGIWUR20272                         |                                                |          |                |           |                             |
| CB4856 HS II                        | 12467732                                       | 12469369 | WBGene00005173 | srg-16    | F15A4.4 0.0709554718828791  |
| AGIWUR3092                          |                                                |          |                |           |                             |
| CB4856 HS II                        | 12469374                                       | 12471211 | WBGene00008840 | F15A4.5   | F15A4.5 -0.0669992463621938 |
| AGIWUR32638                         |                                                |          |                |           |                             |
| CB4856 HS II                        | 12471805                                       | 12473084 | WBGene00008841 | F15A4.6   | F15A4.6 0.104665052288698   |
| AGIWUR44991                         |                                                |          |                |           |                             |
| CB4856 HS II                        | 12473706                                       | 12475234 | WBGene00005174 | srg-17    | F15A4.7 0.00129020623672016 |
| AGIWUR23534                         |                                                |          |                |           |                             |
| CB4856 HS II                        | 12475514                                       | 12478917 | WBGene00008842 | chil-28   | F15A4.8 0.146187209351118   |
| AGIWUR2093;AGIWUR3251;AGIWUR33896   |                                                |          |                |           |                             |
| CB4856 HS II                        | 12479590                                       | 12480910 | WBGene00008843 | arrd-9    | F15A4.9 0.0662179036640733  |
| AGIWUR34011                         |                                                |          |                |           |                             |
| CB4856 HS II                        | 12482931                                       | 12484279 | WBGene00008847 | fbxb-102  | F15A4.13                    |

|                                                |                                     |          |                |          |          |                     |
|------------------------------------------------|-------------------------------------|----------|----------------|----------|----------|---------------------|
| -0.0286831867389497                            | AGIWUR8569                          |          |                |          |          |                     |
| CB4856 HS II                                   | 12484544                            | 12485160 | WBGene00008844 | F15A4.10 | F15A4.10 |                     |
| 0.0916029690093438                             | AGIWUR7846                          |          |                |          |          |                     |
| CB4856 HS II                                   | 12490214                            | 12491815 | WBGene00043054 | T21B4.15 | T21B4.15 |                     |
| -0.0671924140999067                            | AGIWUR19166;AGIWUR22620;AGIWUR28953 |          |                |          |          |                     |
| CB4856 HS II                                   | 12492398                            | 12493623 | WBGene00011876 | srz-6    | T21B4.1  | -0.08588419345765   |
| AGIWUR12887                                    |                                     |          |                |          |          |                     |
| CB4856 HS II                                   | 12493800                            | 12495106 | WBGene00000660 | col-85   | T21B4.2  | 0.0728163296088837  |
| AGIWUR28426                                    |                                     |          |                |          |          |                     |
| CB4856 HS II                                   | 12495487                            | 12496387 | WBGene00011877 | T21B4.3  | T21B4.3  | 0.185663344148155   |
| AGIWUR379                                      |                                     |          |                |          |          |                     |
| CB4856 HS II                                   | 12497217                            | 12502878 | WBGene00011878 | ador-1   | T21B4.4  | 0.3438246465216     |
| AGIWUR925;AGIWUR19024                          |                                     |          |                |          |          |                     |
| CB4856 HS II                                   | 12507338                            | 12508452 | WBGene00005289 | srh-68   | T21B4.5  | 0.233513052792024   |
| AGIWUR27004                                    |                                     |          |                |          |          |                     |
| CB4856 HS II                                   | 12508950                            | 12510135 | WBGene00005288 | srh-67   | T21B4.6  | 0.108269262535188   |
| AGIWUR19619                                    |                                     |          |                |          |          |                     |
| CB4856 HS II                                   | 12510682                            | 12511814 | WBGene00005287 | srh-66   | T21B4.10 |                     |
| -0.0441551967176306                            | AGIWUR21685                         |          |                |          |          |                     |
| CB4856 HS II                                   | 12512166                            | 12513316 | WBGene00005294 | srh-73   | T21B4.14 |                     |
| -0.090582930462725                             | AGIWUR29018                         |          |                |          |          |                     |
| CB4856 HS II                                   | 12513618                            | 12514715 | WBGene00005290 | srh-69   | T21B4.7  | 0.0646018092255574  |
| AGIWUR18370                                    |                                     |          |                |          |          |                     |
| CB4856 HS II                                   | 12514972                            | 12516413 | WBGene00005283 | srh-61   | T21B4.8  | 0.0698045730763441  |
| AGIWUR32493                                    |                                     |          |                |          |          |                     |
| CB4856 HS II                                   | 12516753                            | 12517858 | WBGene00005291 | srh-70   | T21B4.9  | 0.222466485315712   |
| AGIWUR1997                                     |                                     |          |                |          |          |                     |
| CB4856 HS II                                   | 12520004                            | 12524478 | WBGene00044032 | ceh-99   | T21B4.17 |                     |
| -0.340375314550522                             | AGIWUR22947                         |          |                |          |          |                     |
| CB4856 HS II                                   | 12525828                            | 12527868 | WBGene00006009 | srx-118  | T21B4.12 |                     |
| -0.00482370521937803                           | AGIWUR15515                         |          |                |          |          |                     |
| CB4856 HS II                                   | 12528247                            | 12529746 | WBGene00006010 | srx-119  | F49C5.1  | 0.0680962226482693  |
| AGIWUR7947                                     |                                     |          |                |          |          |                     |
| CB4856 HS II                                   | 12531258                            | 12532977 | WBGene00006011 | srx-120  | F49C5.2  | 0.0258264809767788  |
| AGIWUR44058                                    |                                     |          |                |          |          |                     |
| CB4856 HS II                                   | 12535760                            | 12542569 | WBGene00009867 | F49C5.4  | F49C5.4  | -0.0794129414521998 |
| AGIWUR1250;AGIWUR15649;AGIWUR16749;AGIWUR42084 |                                     |          |                |          |          |                     |
| CB4856 HS II                                   | 12542754                            | 12544633 | WBGene00044031 | F49C5.9  | F49C5.9  | 0.150117291133693   |
| AGIWUR19466;AGIWUR27810                        |                                     |          |                |          |          |                     |



|                                                                                                                                                                   |                                                                         |          |                |           |            |                    |
|-------------------------------------------------------------------------------------------------------------------------------------------------------------------|-------------------------------------------------------------------------|----------|----------------|-----------|------------|--------------------|
| CB4856 HS II                                                                                                                                                      | 12546030                                                                | 12546513 | WBGene00009868 | F49C5.5   | F49C5.5    | -0.77847977396115  |
| AGIWUR5768                                                                                                                                                        |                                                                         |          |                |           |            |                    |
| CB4856 HS II                                                                                                                                                      | 12546761                                                                | 12548249 | WBGene00044162 | F49C5.10  |            | F49C5.10           |
| 0.103655230049415                                                                                                                                                 | AGIWUR8807;AGIWUR9074                                                   |          |                |           |            |                    |
| CB4856 HS II                                                                                                                                                      | 12555884                                                                | 12557129 | WBGene00044163 | F49C5.11  |            | F49C5.11           |
| 0.0318290322194086                                                                                                                                                |                                                                         |          |                |           |            |                    |
| AGIWUR1347;AGIWUR3489;AGIWUR3872;AGIWUR3883;AGIWUR6795;AGIWUR7306;AGIWUR11761;AGIWUR12963;AGIWUR20946;AGIWUR22899;AGIWUR26088;AGIWUR31262;AGIWUR39486;AGIWUR44001 |                                                                         |          |                |           |            |                    |
| CB4856 HS II                                                                                                                                                      | 12564185                                                                | 12565943 | WBGene00006254 | str-223   | F49C5.6    | 0.0359268874112004 |
| AGIWUR36858                                                                                                                                                       |                                                                         |          |                |           |            |                    |
| CB4856 HS II                                                                                                                                                      | 12566165                                                                | 12568297 | WBGene00009869 | F49C5.7   | F49C5.7    | 0.374097254870235  |
| AGIWUR10009                                                                                                                                                       |                                                                         |          |                |           |            |                    |
| CB4856 HS II                                                                                                                                                      | 12570198                                                                | 12570623 | WBGene00012579 | Y38E10A.1 |            | Y38E10A.1          |
| -0.0958971637982255                                                                                                                                               | AGIWUR18619                                                             |          |                |           |            |                    |
| CB4856 HS II                                                                                                                                                      | 12571572                                                                | 12573529 | WBGene00012580 | Y38E10A.2 |            | Y38E10A.2          |
| 0.028653229874231                                                                                                                                                 | AGIWUR4355                                                              |          |                |           |            |                    |
| CB4856 HS II                                                                                                                                                      | 12573940                                                                | 12574768 | WBGene00012581 | Y38E10A.3 |            | Y38E10A.3          |
| -0.380912782321053                                                                                                                                                | AGIWUR18800                                                             |          |                |           |            |                    |
| CB4856 HS II                                                                                                                                                      | 12575691                                                                | 12577748 | WBGene00012582 | cllec-8   | Y38E10A.4  |                    |
| 0.140356661932208                                                                                                                                                 | AGIWUR5171;AGIWUR8397;AGIWUR26584;AGIWUR28388;AGIWUR36068;AGIWUR41478   |          |                |           |            |                    |
| CB4856 HS II                                                                                                                                                      | 12578356                                                                | 12581098 | WBGene00012583 | cllec-4   | Y38E10A.5  |                    |
| 0.112359060419886                                                                                                                                                 | AGIWUR23230                                                             |          |                |           |            |                    |
| CB4856 HS II                                                                                                                                                      | 12582179                                                                | 12603680 | WBGene00012584 | ceh-100   | Y38E10A.6  |                    |
| 0.0218504590202784                                                                                                                                                | AGIWUR17963                                                             |          |                |           |            |                    |
| CB4856 HS II                                                                                                                                                      | 12605968                                                                | 12607027 | WBGene00012585 | lips-15   | Y38E10A.7  |                    |
| -0.129054446162647                                                                                                                                                | AGIWUR14642;AGIWUR19800                                                 |          |                |           |            |                    |
| CB4856 HS II                                                                                                                                                      | 12607200                                                                | 12608788 | WBGene00012586 | Y38E10A.8 |            | Y38E10A.8          |
| -0.287765844882041                                                                                                                                                | AGIWUR40371                                                             |          |                |           |            |                    |
| CB4856 HS II                                                                                                                                                      | 12608953                                                                | 12609630 | WBGene00012587 | Y38E10A.9 |            | Y38E10A.9          |
| -0.253916545199825                                                                                                                                                | AGIWUR17764                                                             |          |                |           |            |                    |
| CB4856 HS II                                                                                                                                                      | 12610313                                                                | 12612357 | WBGene00012588 | lips-16   | Y38E10A.10 |                    |
| 0.0802937809312496                                                                                                                                                | AGIWUR39472                                                             |          |                |           |            |                    |
| CB4856 HS II                                                                                                                                                      | 12613564                                                                | 12613939 | WBGene00012589 | nspe-4    | Y38E10A.11 |                    |
| -0.169114930326439                                                                                                                                                | AGIWUR11054;AGIWUR13607;AGIWUR20167;AGIWUR22819;AGIWUR26536;AGIWUR41154 |          |                |           |            |                    |
| CB4856 HS II                                                                                                                                                      | 12615897                                                                | 12616166 | WBGene00012603 | nspe-6    | Y38E10A.25 |                    |
| -0.291069057134402                                                                                                                                                | AGIWUR27393                                                             |          |                |           |            |                    |
| CB4856 HS II                                                                                                                                                      | 12617886                                                                | 12618209 | WBGene00012590 | nspe-3    | Y38E10A.12 |                    |
| -0.791311506375424                                                                                                                                                | AGIWUR8742                                                              |          |                |           |            |                    |
| CB4856 HS II                                                                                                                                                      | 12620548                                                                | 12620888 | WBGene00012591 | nspe-1    | Y38E10A.13 |                    |

|                      |                                     |          |                |            |            |
|----------------------|-------------------------------------|----------|----------------|------------|------------|
| 0.0860164935024228   | AGIWUR7082                          |          |                |            |            |
| CB4856 HS II         | 12623215                            | 12624506 | WBGene00012592 | Y38E10A.14 | Y38E10A.14 |
| -0.345975376746162   | AGIWUR14522;AGIWUR18602;AGIWUR33881 |          |                |            |            |
| CB4856 HS II         | 12627187                            | 12627570 | WBGene00012593 | nspe-7     | Y38E10A.15 |
| -0.78614170370691    | AGIWUR13856                         |          |                |            |            |
| CB4856 HS II         | 12628936                            | 12629380 | WBGene00012594 | nspe-5     | Y38E10A.16 |
| -0.337530038063536   | AGIWUR8167                          |          |                |            |            |
| CB4856 HS II         | 12629687                            | 12631995 | WBGene00044034 | Y38E10A.28 | Y38E10A.28 |
| 0.217614049338889    | AGIWUR22063                         |          |                |            |            |
| CB4856 HS II         | 12632593                            | 12634799 | WBGene00012595 | Y38E10A.17 | Y38E10A.17 |
| 0.116125013049682    | AGIWUR10282                         |          |                |            |            |
| CB4856 HS II         | 12636699                            | 12638448 | WBGene00012596 | nhp-234    | Y38E10A.18 |
| -0.0111160719364252  | AGIWUR6486;AGIWUR13527;AGIWUR40928  |          |                |            |            |
| CB4856 HS II         | 12640670                            | 12642740 | WBGene00012597 | nhp-235    | Y38E10A.19 |
| -0.237970631416822   | AGIWUR37120                         |          |                |            |            |
| CB4856 HS II         | 12662759                            | 12671920 | WBGene00004347 | rgs-4      | Y38E10A.21 |
| -0.138088287035551   | AGIWUR13627                         |          |                |            |            |
| CB4856 HS II         | 12673166                            | 12677803 | WBGene00012600 | Y38E10A.22 | Y38E10A.22 |
| -0.117683867857779   | AGIWUR14395;AGIWUR15734             |          |                |            |            |
| CB4856 HS II         | 12679035                            | 12679413 | WBGene00012602 | Y38E10A.24 | Y38E10A.24 |
| -0.153203909267811   | AGIWUR20712                         |          |                |            |            |
| CB4856 HS II         | 12679954                            | 12686713 | WBGene00012895 | cox-10     | Y46G5A.2   |
| 0.126166454628967    | AGIWUR34531                         |          |                |            |            |
| CB4856 HS II         | 12694412                            | 12725483 | WBGene00012894 | tbc-17     | Y46G5A.1   |
| 0.105500494756981    | AGIWUR733;AGIWUR2958;AGIWUR13448    |          |                |            |            |
| CB4856 HS II         | 12726963                            | 12736910 | WBGene00012896 | snrp-200   | Y46G5A.4   |
| 0.0534934732454815   | AGIWUR35032                         |          |                |            |            |
| CB4856 HS II         | 12737032                            | 12738334 | WBGene00012897 | pis-1      | Y46G5A.5   |
| -0.288191697110515   | AGIWUR12144                         |          |                |            |            |
| CB4856 HS II         | 12742546                            | 12744256 | WBGene00077636 | Y46G5A.43  | Y46G5A.43  |
| 0.0207474127776823   | AGIWUR35875                         |          |                |            |            |
| CB4856 HS II         | 12752854                            | 12753813 | WBGene00044164 | Y46G5A.39  | Y46G5A.39  |
| -0.0833766975961274  | AGIWUR7494;AGIWUR40442              |          |                |            |            |
| CB4856 HS II         | 12754610                            | 12754877 | WBGene00077634 | Y46G5A.41  | Y46G5A.41  |
| -0.00618482373973173 | AGIWUR17785                         |          |                |            |            |
| CB4856 HS II         | 12756353                            | 12757677 | WBGene00012900 | Y46G5A.8   | Y46G5A.8   |
| -0.177427489539486   | AGIWUR8892                          |          |                |            |            |
| CB4856 HS II         | 12760797                            | 12767232 | WBGene00012901 | cnp-2      | Y46G5A.10  |
| -0.165192961437009   | AGIWUR11892;AGIWUR14337             |          |                |            |            |

|                     |                                                                        |          |                |           |           |
|---------------------|------------------------------------------------------------------------|----------|----------------|-----------|-----------|
| CB4856 HS II        | 12767221                                                               | 12768217 | WBGene00012903 | vps-2     | Y46G5A.12 |
| 0.152536672946706   | AGIWUR25006                                                            |          |                |           |           |
| CB4856 HS II        | 12768686                                                               | 12773903 | WBGene00012904 | tiar-2    | Y46G5A.13 |
| -0.0643275041698246 | AGIWUR40126                                                            |          |                |           |           |
| CB4856 HS II        | 12774646                                                               | 12781705 | WBGene00012919 | Y46G5A.34 | Y46G5A.34 |
| -0.10547147794877   | AGIWUR34502                                                            |          |                |           |           |
| CB4856 HS II        | 12782751                                                               | 12785412 | WBGene00012906 | Y46G5A.15 | Y46G5A.15 |
| -0.151511113004545  | AGIWUR19252                                                            |          |                |           |           |
| CB4856 HS II        | 12786322                                                               | 12788153 | WBGene00012920 | Y46G5A.35 | Y46G5A.35 |
| 0.110209929494227   | AGIWUR1477                                                             |          |                |           |           |
| CB4856 HS II        | 12788252                                                               | 12796452 | WBGene00012907 | cpt-1     | Y46G5A.17 |
| 0.108699090250757   | AGIWUR9426;AGIWUR17814;AGIWUR24235;AGIWUR34373                         |          |                |           |           |
| CB4856 HS II        | 12800449                                                               | 12805383 | WBGene00012908 | Y46G5A.18 | Y46G5A.18 |
| 0.109481556497204   | AGIWUR2765;AGIWUR7180;AGIWUR7666;AGIWUR13153;AGIWUR35086;AGIWUR44753   |          |                |           |           |
| CB4856 HS II        | 12804862                                                               | 12810872 | WBGene00012909 | spds-1    | Y46G5A.19 |
| 0.110990042758925   | AGIWUR24011                                                            |          |                |           |           |
| CB4856 HS II        | 12811009                                                               | 12811934 | WBGene00012910 | Y46G5A.20 | Y46G5A.20 |
| 0.59999886428395    | AGIWUR1526;AGIWUR11175;AGIWUR20331;AGIWUR20731;AGIWUR23358;AGIWUR29839 |          |                |           |           |
| CB4856 HS II        | 12811802                                                               | 12816462 | WBGene00012911 | ac1-7     | Y46G5A.21 |
| 0.301911106857265   | AGIWUR8222                                                             |          |                |           |           |
| CB4856 HS II        | 12816820                                                               | 12818588 | WBGene00012912 | Y46G5A.22 | Y46G5A.22 |
| -0.0232143226895314 | AGIWUR29260;AGIWUR39522                                                |          |                |           |           |
| CB4856 HS II        | 12823649                                                               | 12824177 | WBGene00012921 | Y46G5A.36 | Y46G5A.36 |
| -0.264468393154305  | AGIWUR40412                                                            |          |                |           |           |
| CB4856 HS II        | 12825546                                                               | 12825833 | WBGene00044042 | Y46G5A.37 | Y46G5A.37 |
| -0.0115414471343342 | AGIWUR4500;AGIWUR9007;AGIWUR9678;AGIWUR17026;AGIWUR33153               |          |                |           |           |
| CB4856 HS II        | 12827032                                                               | 12827519 | WBGene00044043 | Y46G5A.38 | Y46G5A.38 |
| -0.18732032513562   | AGIWUR15102;AGIWUR25500;AGIWUR37081;AGIWUR40350;AGIWUR44577            |          |                |           |           |
| CB4856 HS II        | 12830707                                                               | 12832720 | WBGene00012914 | bcmo-1    | Y46G5A.24 |
| 0.136174281019182   | AGIWUR15666                                                            |          |                |           |           |
| CB4856 HS II        | 12832915                                                               | 12835824 | WBGene00004903 | snf-4     | Y46G5A.25 |
| 0.0536080783401669  | AGIWUR35822                                                            |          |                |           |           |
| CB4856 HS II        | 12836548                                                               | 12840157 | WBGene00012915 | lgc-35    | Y46G5A.26 |
| -0.0890421449007288 | AGIWUR22436;AGIWUR38636                                                |          |                |           |           |
| CB4856 HS II        | 12846203                                                               | 12847836 | WBGene00003983 | pes-10    | Y46G5A.27 |
| -0.214975729903356  | AGIWUR14951                                                            |          |                |           |           |
| CB4856 HS II        | 12856200                                                               | 12862058 | WBGene00012917 | Y46G5A.29 | Y46G5A.29 |
| -0.0798796315846673 | AGIWUR21330                                                            |          |                |           |           |
| CB4856 HS II        | 12861963                                                               | 12865883 | WBGene00004904 | snf-5     | Y46G5A.30 |

|                                                                                                          |                                                 |          |                |          |           |                     |
|----------------------------------------------------------------------------------------------------------|-------------------------------------------------|----------|----------------|----------|-----------|---------------------|
| 0.126205801312191                                                                                        | AGIWUR7331                                      |          |                |          |           |                     |
| CB4856 HS II                                                                                             | 12866448                                        | 12878116 | WBGene00001793 | gsy-1    | Y46G5A.31 |                     |
| -0.25977449242869                                                                                        | AGIWUR37228                                     |          |                |          |           |                     |
| CB4856 HS II                                                                                             | 12880815                                        | 12881968 | WBGene00009390 | F35C5.1  | F35C5.1   | 0.0474372511637746  |
| AGIWUR36217                                                                                              |                                                 |          |                |          |           |                     |
| CB4856 HS II                                                                                             | 12885276                                        | 12888606 | WBGene00005040 | sra-14   | F35C5.2   |                     |
| -0.00263559539250835                                                                                     | AGIWUR40027                                     |          |                |          |           |                     |
| CB4856 HS II                                                                                             | 12888762                                        | 12890460 | WBGene00009391 | F35C5.3  | F35C5.3   | 0.00796462225397487 |
| AGIWUR32174                                                                                              |                                                 |          |                |          |           |                     |
| CB4856 HS II                                                                                             | 12890630                                        | 12892024 | WBGene00009392 | F35C5.4  | F35C5.4   | -0.0839448787815629 |
| AGIWUR25875                                                                                              |                                                 |          |                |          |           |                     |
| CB4856 HS II                                                                                             | 12893065                                        | 12895098 | WBGene00009393 | cllec-62 | F35C5.5   | 0.292620109671834   |
| AGIWUR31973                                                                                              |                                                 |          |                |          |           |                     |
| CB4856 HS II                                                                                             | 12895638                                        | 12897462 | WBGene00009394 | cllec-63 | F35C5.6   | 0.218625136928921   |
| AGIWUR2709;AGIWUR9580;AGIWUR9637;AGIWUR12263;AGIWUR24969;AGIWUR26563;AGIWUR27914;AGIWUR39707;AGIWUR40319 |                                                 |          |                |          |           |                     |
| CB4856 HS II                                                                                             | 12898242                                        | 12900435 | WBGene00009395 | cllec-64 | F35C5.7   | -0.153867312962291  |
| AGIWUR25751                                                                                              |                                                 |          |                |          |           |                     |
| CB4856 HS II                                                                                             | 12901264                                        | 12903336 | WBGene00009396 | cllec-65 | F35C5.8   | -0.0593458773166162 |
| AGIWUR13763                                                                                              |                                                 |          |                |          |           |                     |
| CB4856 HS II                                                                                             | 12904398                                        | 12906686 | WBGene00009397 | cllec-66 | F35C5.9   | -0.071009315820604  |
| AGIWUR15704;AGIWUR25952                                                                                  |                                                 |          |                |          |           |                     |
| CB4856 HS II                                                                                             | 12907370                                        | 12907783 | WBGene00009398 | nspb-11  | F35C5.10  |                     |
| -0.20478461046064                                                                                        | AGIWUR40518                                     |          |                |          |           |                     |
| CB4856 HS II                                                                                             | 12909079                                        | 12910334 | WBGene00009399 | F35C5.11 | F35C5.11  |                     |
| 0.121736795588838                                                                                        | AGIWUR13730;AGIWUR21453;AGIWUR45080             |          |                |          |           |                     |
| CB4856 HS II                                                                                             | 12910229                                        | 12914603 | WBGene00009400 | F35C5.12 | F35C5.12  |                     |
| 0.126484600566048                                                                                        | AGIWUR17427;AGIWUR23921;AGIWUR31371;AGIWUR33008 |          |                |          |           |                     |
| CB4856 HS II                                                                                             | 12915417                                        | 12919018 | WBGene00010264 | F58G1.2  | F58G1.2   | 0.0202347696620713  |
| AGIWUR4611                                                                                               |                                                 |          |                |          |           |                     |
| CB4856 HS II                                                                                             | 12919551                                        | 12923377 | WBGene00010263 | wago-4   | F58G1.1   | 0.113419908269298   |
| AGIWUR13287;AGIWUR32641                                                                                  |                                                 |          |                |          |           |                     |
| CB4856 HS II                                                                                             | 12924026                                        | 12925241 | WBGene00010271 | F58G1.9  | F58G1.9   | 0.154150029896769   |
| AGIWUR28772                                                                                              |                                                 |          |                |          |           |                     |
| CB4856 HS II                                                                                             | 12925304                                        | 12925602 | WBGene00010270 | F58G1.8  | F58G1.8   |                     |
| -0.00205349306735414                                                                                     | AGIWUR43158                                     |          |                |          |           |                     |
| CB4856 HS II                                                                                             | 12925981                                        | 12928341 | WBGene00010265 | F58G1.3  | F58G1.3   | -0.165633842455161  |
| AGIWUR22297                                                                                              |                                                 |          |                |          |           |                     |
| CB4856 HS II                                                                                             | 12931873                                        | 12933515 | WBGene00010266 | dct-18   | F58G1.4   | 0.149014908662865   |
| AGIWUR44081                                                                                              |                                                 |          |                |          |           |                     |

|                                                                                                   |    |          |          |                |          |           |                     |
|---------------------------------------------------------------------------------------------------|----|----------|----------|----------------|----------|-----------|---------------------|
| CB4856 HS                                                                                         | II | 12933854 | 12935362 | WBGene00010267 | lips-9   | F58G1.5   | -0.0320266964837437 |
| AGIWUR25581                                                                                       |    |          |          |                |          |           |                     |
| CB4856 HS                                                                                         | II | 12938869 | 12943867 | WBGene00010268 | arrd-10  | F58G1.6   | 0.179229351126667   |
| AGIWUR3865                                                                                        |    |          |          |                |          |           |                     |
| CB4856 HS                                                                                         | II | 12943862 | 12948143 | WBGene00010269 | F58G1.7  | F58G1.7   | -0.0109330658186959 |
| AGIWUR3737                                                                                        |    |          |          |                |          |           |                     |
| CB4856 HS                                                                                         | II | 12952490 | 12954832 | WBGene00012605 | Y38F1A.1 |           | Y38F1A.1            |
| -0.0969245051806773 AGIWUR25647                                                                   |    |          |          |                |          |           |                     |
| CB4856 HS                                                                                         | II | 12954962 | 12958018 | WBGene00012606 | Y38F1A.2 |           | Y38F1A.2            |
| -0.218903246126496 AGIWUR36625                                                                    |    |          |          |                |          |           |                     |
| CB4856 HS                                                                                         | II | 12965546 | 12978168 | WBGene00004232 | ptr-18   | Y38F1A.3  |                     |
| -0.00436630312116293 AGIWUR718                                                                    |    |          |          |                |          |           |                     |
| CB4856 HS                                                                                         | II | 12980591 | 12993118 | WBGene00000870 | cyd-1    | Y38F1A.5  |                     |
| 0.102707250941933 AGIWUR2519;AGIWUR4218;AGIWUR4651;AGIWUR8981;AGIWUR24138;AGIWUR33027;AGIWUR42526 |    |          |          |                |          |           |                     |
| CB4856 HS                                                                                         | II | 12994358 | 12996571 | WBGene00012608 | hphd-1   | Y38F1A.6  |                     |
| 0.176460090545717 AGIWUR17199;AGIWUR23064;AGIWUR41550                                             |    |          |          |                |          |           |                     |
| CB4856 HS                                                                                         | II | 12996921 | 12997804 | WBGene00012609 | Y38F1A.7 |           | Y38F1A.7            |
| 0.116846436345213 AGIWUR12368                                                                     |    |          |          |                |          |           |                     |
| CB4856 HS                                                                                         | II | 12997986 | 13000853 | WBGene00012610 | Y38F1A.8 |           | Y38F1A.8            |
| -0.240877231947771 AGIWUR15880                                                                    |    |          |          |                |          |           |                     |
| CB4856 HS                                                                                         | II | 13006610 | 13008164 | WBGene00003860 | oig-2    | Y38F1A.9  |                     |
| 0.0800138407731446 AGIWUR43827                                                                    |    |          |          |                |          |           |                     |
| CB4856 HS                                                                                         | II | 13014331 | 13025838 | WBGene00003144 | max-2    | Y38F1A.10 |                     |
| -0.112435565948768 AGIWUR11822;AGIWUR27909;AGIWUR29030;AGIWUR41651;AGIWUR42104                    |    |          |          |                |          |           |                     |
| CB4856 HS                                                                                         | II | 13032778 | 13036505 | WBGene00008929 | F18A11.2 |           | F18A11.2            |
| -0.0170869347048841 AGIWUR33087                                                                   |    |          |          |                |          |           |                     |
| CB4856 HS                                                                                         | II | 13047941 | 13050807 | WBGene00009641 | F42G4.2  | F42G4.2   | -0.462014837578138  |
| AGIWUR32122                                                                                       |    |          |          |                |          |           |                     |
| CB4856 HS                                                                                         | II | 13056814 | 13071530 | WBGene00006999 | zyx-1    | F42G4.3   | 0.0503992195190448  |
| AGIWUR13740;AGIWUR22966;AGIWUR35979;AGIWUR44121                                                   |    |          |          |                |          |           |                     |
| CB4856 HS                                                                                         | II | 13073493 | 13076223 | WBGene00009642 | F42G4.5  | F42G4.5   | 0.152643003181826   |
| AGIWUR61;AGIWUR9936;AGIWUR27632                                                                   |    |          |          |                |          |           |                     |
| CB4856 HS                                                                                         | II | 13081776 | 13082322 | WBGene00195150 | Y81G3A.6 |           | Y81G3A.6            |
| -0.0700090295631668 AGIWUR7372                                                                    |    |          |          |                |          |           |                     |
| CB4856 HS                                                                                         | II | 13083989 | 13091483 | WBGene00013591 | gcn-2    | Y81G3A.3  |                     |
| 0.0346310428448877 AGIWUR1733;AGIWUR23403;AGIWUR36942                                             |    |          |          |                |          |           |                     |
| CB4856 HS                                                                                         | II | 13091587 | 13094241 | WBGene00013592 | Y81G3A.4 |           | Y81G3A.4            |
| -0.0379049473554947 AGIWUR27760                                                                   |    |          |          |                |          |           |                     |
| CB4856 HS                                                                                         | II | 13096009 | 13098275 | WBGene00000661 | col-86   | Y81G3A.5  |                     |

|                                                |                                                                         |          |                |          |          |                     |
|------------------------------------------------|-------------------------------------------------------------------------|----------|----------------|----------|----------|---------------------|
| -0.139033190313567                             | AGIWUR17449                                                             |          |                |          |          |                     |
| CB4856 HS II                                   | 13098249                                                                | 13116806 | WBGene00009245 | rict-1   | F29C12.3 |                     |
| -0.058792092591462                             | AGIWUR30701;AGIWUR40860                                                 |          |                |          |          |                     |
| CB4856 HS II                                   | 13117483                                                                | 13122085 | WBGene00009246 | gfm-1    | F29C12.4 |                     |
| 0.355453358005304                              | AGIWUR22803                                                             |          |                |          |          |                     |
| CB4856 HS II                                   | 13123038                                                                | 13124789 | WBGene00009247 | bath-45  | F29C12.5 |                     |
| -0.0476511817700978                            | AGIWUR30834                                                             |          |                |          |          |                     |
| CB4856 HS II                                   | 13129902                                                                | 13130189 | WBGene00009248 | F29C12.6 | F29C12.6 |                     |
| -0.0978916556334397                            | AGIWUR16796                                                             |          |                |          |          |                     |
| CB4856 HS II                                   | 13131009                                                                | 13134212 | WBGene00009310 | F32A11.5 | F32A11.5 |                     |
| -0.25448108263122                              | AGIWUR15642;AGIWUR20935;AGIWUR21948;AGIWUR22348;AGIWUR36357;AGIWUR36804 |          |                |          |          |                     |
| CB4856 HS II                                   | 13139465                                                                | 13145225 | WBGene00009311 | mltn-1   | F32A11.7 |                     |
| 0.0674429454279961                             | AGIWUR6903                                                              |          |                |          |          |                     |
| CB4856 HS II                                   | 13151459                                                                | 13153399 | WBGene00009308 | F32A11.3 | F32A11.3 |                     |
| 0.274860502527527                              | AGIWUR807                                                               |          |                |          |          |                     |
| CB4856 HS II                                   | 13153461                                                                | 13157093 | WBGene00001998 | hpr-17   | F32A11.2 |                     |
| 0.0500797621708546                             | AGIWUR7794                                                              |          |                |          |          |                     |
| CB4856 HS II                                   | 13157333                                                                | 13160462 | WBGene00009307 | F32A11.1 | F32A11.1 |                     |
| -0.198125121831152                             | AGIWUR31770                                                             |          |                |          |          |                     |
| CB4856 HS II                                   | 13160545                                                                | 13165733 | WBGene00003388 | moe-3    | F32A11.6 |                     |
| 0.343052665080545                              | AGIWUR6208                                                              |          |                |          |          |                     |
| CB4856 HS II                                   | 13175857                                                                | 13181561 | WBGene00012372 | W09H1.1  | W09H1.1  | 0.0212863721790137  |
| AGIWUR5978                                     |                                                                         |          |                |          |          |                     |
| CB4856 HS II                                   | 13183450                                                                | 13183845 | WBGene00001947 | his-73   | W09H1.2  | 0.00897482669634542 |
| AGIWUR31054                                    |                                                                         |          |                |          |          |                     |
| CB4856 HS II                                   | 13184429                                                                | 13185023 | WBGene00012373 | W09H1.3  | W09H1.3  | -0.135766017474541  |
| AGIWUR24666                                    |                                                                         |          |                |          |          |                     |
| CB4856 HS II                                   | 13185092                                                                | 13185914 | WBGene00012374 | W09H1.4  | W09H1.4  | 0.674783396419226   |
| AGIWUR21145                                    |                                                                         |          |                |          |          |                     |
| CB4856 HS II                                   | 13185987                                                                | 13187351 | WBGene00012375 | mecr-1   | W09H1.5  | 0.0721258497141708  |
| AGIWUR34282                                    |                                                                         |          |                |          |          |                     |
| CB4856 HS II                                   | 13195549                                                                | 13199603 | WBGene00002264 | lec-1    | W09H1.6  | -0.169864912411063  |
| AGIWUR18206;AGIWUR41352;AGIWUR41572            |                                                                         |          |                |          |          |                     |
| CB4856 HS II                                   | 13200165                                                                | 13215701 | WBGene00000274 | btf-1    | F15D4.1  | -0.0603555323267875 |
| AGIWUR12208;AGIWUR39267                        |                                                                         |          |                |          |          |                     |
| CB4856 HS II                                   | 13216092                                                                | 13216764 | WBGene00008859 | F15D4.2  | F15D4.2  | 0.0299766302505997  |
| AGIWUR8652;AGIWUR29706;AGIWUR37514             |                                                                         |          |                |          |          |                     |
| CB4856 HS II                                   | 13235306                                                                | 13237417 | WBGene00001459 | flp-16   | F15D4.8  | -0.157038760284449  |
| AGIWUR3652;AGIWUR16501;AGIWUR36244;AGIWUR39440 |                                                                         |          |                |          |          |                     |

|                                                                                                      |          |          |                |                 |                            |
|------------------------------------------------------------------------------------------------------|----------|----------|----------------|-----------------|----------------------------|
| CB4856 HS II                                                                                         | 13239249 | 13243121 | WBGene00008861 | F15D4.4 F15D4.4 | -0.049824108821098         |
| AGIWUR28570;AGIWUR37736                                                                              |          |          |                |                 |                            |
| CB4856 HS II                                                                                         | 13245348 | 13247774 | WBGene00008862 | F15D4.5 F15D4.5 | 0.124778396069072          |
| AGIWUR1585                                                                                           |          |          |                |                 |                            |
| CB4856 HS II                                                                                         | 13249189 | 13249895 | WBGene00008863 | F15D4.6 F15D4.6 | -0.0998929197339899        |
| AGIWUR859;AGIWUR4033;AGIWUR13762;AGIWUR13873;AGIWUR18842;AGIWUR26669;AGIWUR33094;AGIWUR43311         |          |          |                |                 |                            |
| CB4856 HS II                                                                                         | 13260495 | 13261201 | WBGene00012985 | Y48C3A.1        | Y48C3A.1                   |
| -0.227779259370013 AGIWUR22693                                                                       |          |          |                |                 |                            |
| CB4856 HS II                                                                                         | 13272634 | 13304229 | WBGene00012989 | Y48C3A.5        | Y48C3A.5                   |
| 0.245218713666869 AGIWUR11657                                                                        |          |          |                |                 |                            |
| CB4856 HS II                                                                                         | 13309290 | 13311488 | WBGene00012987 | Y48C3A.3        | Y48C3A.3                   |
| 0.00317450596293334 AGIWUR12236;AGIWUR12626;AGIWUR21275                                              |          |          |                |                 |                            |
| CB4856 HS II                                                                                         | 13311459 | 13320911 | WBGene00003119 | mac-1           | Y48C3A.7                   |
| -0.035913338260511 AGIWUR9960;AGIWUR9979;AGIWUR21632;AGIWUR43284                                     |          |          |                |                 |                            |
| CB4856 HS II                                                                                         | 13321954 | 13330825 | WBGene00012990 | sam-10          | Y48C3A.8                   |
| 0.0694557858218907 AGIWUR19200                                                                       |          |          |                |                 |                            |
| CB4856 HS II                                                                                         | 13338281 | 13339961 | WBGene00012992 | mrp1-20         | Y48C3A.10                  |
| -0.0598974116639823 AGIWUR16972                                                                      |          |          |                |                 |                            |
| CB4856 HS II                                                                                         | 13340644 | 13347884 | WBGene00012993 | dmsr-3          | Y48C3A.11                  |
| 0.149013981631637 AGIWUR8773                                                                         |          |          |                |                 |                            |
| CB4856 HS II                                                                                         | 13369607 | 13375290 | WBGene00012998 | Y48C3A.20       | Y48C3A.20                  |
| -0.0346574918054667 AGIWUR6602;AGIWUR34545                                                           |          |          |                |                 |                            |
| CB4856 HS II                                                                                         | 13376412 | 13388879 | WBGene00012994 | Y48C3A.12       | Y48C3A.12                  |
| -0.275760511883177 AGIWUR4627;AGIWUR21344                                                            |          |          |                |                 |                            |
| CB4856 HS II                                                                                         | 13389761 | 13401992 | WBGene00012995 | Y48C3A.14       | Y48C3A.14                  |
| 0.0958427023324901 AGIWUR13908                                                                       |          |          |                |                 |                            |
| CB4856 HS II                                                                                         | 13402980 | 13404629 | WBGene00012996 | pinn-4          | Y48C3A.16                  |
| -0.0666131771989207 AGIWUR26311                                                                      |          |          |                |                 |                            |
| CB4856 HS II                                                                                         | 13406160 | 13411483 | WBGene00001162 | efl-2           | Y48C3A.17                  |
| -0.0845907201225646 AGIWUR25742;AGIWUR26124;AGIWUR26605                                              |          |          |                |                 |                            |
| CB4856 HS II                                                                                         | 13412635 | 13414906 | WBGene00012997 | Y48C3A.18       | Y48C3A.18                  |
| 0.192379847916633 AGIWUR8883;AGIWUR13097;AGIWUR13111;AGIWUR16520;AGIWUR24033;AGIWUR25801             |          |          |                |                 |                            |
| CB4856 HS II                                                                                         | 13415024 | 13424446 | WBGene00013014 | Y48E1C.1        | Y48E1C.1                   |
| 0.0149521389948095 AGIWUR2649;AGIWUR5616;AGIWUR12338;AGIWUR16989;AGIWUR19071;AGIWUR32260;AGIWUR41231 |          |          |                |                 |                            |
| CB4856 HS II                                                                                         | 13424506 | 13428970 | WBGene00013015 | Y48E1C.2        | Y48E1C.2                   |
| 0.0228254174516067 AGIWUR13917                                                                       |          |          |                |                 |                            |
| CB4856 HS II                                                                                         | 13433880 | 13436825 | WBGene00013017 | Y48E1C.4        | Y48E1C.4                   |
| 0.276116907284235 AGIWUR10395                                                                        |          |          |                |                 |                            |
| CB4856 HS II                                                                                         | 13437579 | 13447593 | WBGene00008444 | tbc-14          | E01G4.1 -0.123067940953568 |

AGIWUR5556;AGIWUR44407  
 CB4856 HS II 13448835 13460642 WBGene00004116 pqn-27 E01G4.4 -0.0281726700588436  
 AGIWUR25;AGIWUR10877;AGIWUR44806  
 CB4856 HS II 13460991 13469602 WBGene00008446 E01G4.3 E01G4.3 0.0373997878298695  
 AGIWUR10416;AGIWUR28784;AGIWUR33582;AGIWUR41256;AGIWUR44661  
 CB4856 HS II 13472401 13473995 WBGene00008447 E01G4.5 E01G4.5 0.0388689791888273  
 AGIWUR4017;AGIWUR39799  
 CB4856 HS II 13477471 13478929 WBGene00045410 E01G4.7 E01G4.7  
 -0.00376213608043274 AGIWUR4005;AGIWUR8184;AGIWUR21131;AGIWUR27985;AGIWUR29964;AGIWUR39135  
 CB4856 HS II 13482405 13485780 WBGene00008448 E01G4.6 E01G4.6 0.121495803397051  
 AGIWUR7121  
 CB4856 HS II 13485792 13491786 WBGene00000113 alh-7 F45H10.1  
 -0.0573770264819125 AGIWUR37785  
 CB4856 HS II 13491803 13493050 WBGene00009739 F45H10.2 F45H10.2  
 -0.169034060801412 AGIWUR16910  
 CB4856 HS II 13493181 13494600 WBGene00009740 F45H10.3 F45H10.3  
 -0.152869932380122 AGIWUR19029;AGIWUR22747  
 CB4856 HS II 13495050 13495900 WBGene00009741 drr-1 F45H10.4  
 0.118512744338597 AGIWUR8290  
 CB4856 HS II 13501877 13503822 WBGene00009742 F45H10.5 F45H10.5  
 0.113599538916879  
 AGIWUR5292;AGIWUR9571;AGIWUR12387;AGIWUR12768;AGIWUR21572;AGIWUR25012;AGIWUR29346;AGIWUR34331;AGIWUR35280;A  
 GIWUR39653;AGIWUR40900  
 CB4856 HS II 13504082 13506905 WBGene00010069 F54F11.1 F54F11.1  
 0.187684571476306 AGIWUR34937  
 CB4856 HS II 13507806 13516479 WBGene00010070 nep-17 F54F11.2  
 -0.0739504211351552 AGIWUR31258  
 CB4856 HS II 13517912 13522925 WBGene00010071 sre-45 F54F11.3  
 -0.121427369141248 AGIWUR27402  
 CB4856 HS II 13522919 13531218 WBGene00013011 snx-14 Y48E1B.14  
 -0.0832759801880432 AGIWUR11452;AGIWUR18223;AGIWUR20153;AGIWUR36079;AGIWUR41053  
 CB4856 HS II 13533486 13541084 WBGene00013001 Y48E1B.2 Y48E1B.2  
 0.270853944524996 AGIWUR24617;AGIWUR29266  
 CB4856 HS II 13542007 13547645 WBGene00013000 ddl-2 Y48E1B.1  
 -0.207860343138845 AGIWUR8887;AGIWUR16973  
 CB4856 HS II 13547739 13567999 WBGene00013002 Y48E1B.3 Y48E1B.3  
 -0.446703460584243  
 AGIWUR15123;AGIWUR19802;AGIWUR31063;AGIWUR31692;AGIWUR33404;AGIWUR34595;AGIWUR44162;AGIWUR44251  
 CB4856 HS II 13568077 13575068 WBGene00013004 mrp1-37 Y48E1B.5



|                                                                                                 |                                    |            |                |           |                             |  |
|-------------------------------------------------------------------------------------------------|------------------------------------|------------|----------------|-----------|-----------------------------|--|
| 0.206627459960851                                                                               |                                    | AGIWUR2143 |                |           |                             |  |
| CB4856 HS II                                                                                    | 13575925                           | 13584732   | WBGene00013006 | lin-38    | Y48E1B.7                    |  |
| -0.186641043510693                                                                              | AGIWUR2850;AGIWUR25413             |            |                |           |                             |  |
| CB4856 HS II                                                                                    | 13585705                           | 13589033   | WBGene00013007 | Y48E1B.8  | Y48E1B.8                    |  |
| 0.262625302920764                                                                               | AGIWUR15064                        |            |                |           |                             |  |
| CB4856 HS II                                                                                    | 13589036                           | 13590552   | WBGene00013013 | cllec-145 | Y48E1B.16                   |  |
| 0.126444751848                                                                                  | AGIWUR7883                         |            |                |           |                             |  |
| CB4856 HS II                                                                                    | 13590640                           | 13593797   | WBGene00013008 | cllec-146 | Y48E1B.9                    |  |
| 0.0804103657292607                                                                              | AGIWUR7912;AGIWUR21835;AGIWUR41929 |            |                |           |                             |  |
| CB4856 HS II                                                                                    | 13595006                           | 13596551   | WBGene00013009 | fbxc-23   | Y48E1B.11                   |  |
| 0.265389616463517                                                                               |                                    |            |                |           |                             |  |
| AGIWUR11623;AGIWUR14076;AGIWUR30753;AGIWUR33903;AGIWUR35723;AGIWUR38420;AGIWUR39312;AGIWUR42220 |                                    |            |                |           |                             |  |
| CB4856 HS II                                                                                    | 13596955                           | 13598068   | WBGene00000804 | csc-1     | Y48E1B.12                   |  |
| -0.0931969591951161                                                                             | AGIWUR7181;AGIWUR27268             |            |                |           |                             |  |
| CB4856 HS II                                                                                    | 13601204                           | 13605057   | WBGene00000819 | csp-1     | Y48E1B.13                   |  |
| 0.164971774379378                                                                               | AGIWUR13033                        |            |                |           |                             |  |
| CB4856 HS II                                                                                    | 13608154                           | 13609824   | WBGene00001768 | gst-20    | Y48E1B.10                   |  |
| -0.259664869866288                                                                              | AGIWUR21650                        |            |                |           |                             |  |
| CB4856 HS II                                                                                    | 13610443                           | 13611349   | WBGene00001772 | gst-24    | F37B1.1 0.253751408744719   |  |
| AGIWUR15934                                                                                     |                                    |            |                |           |                             |  |
| CB4856 HS II                                                                                    | 13611771                           | 13613196   | WBGene00001763 | gst-15    | F37B1.4 0.20056952860017    |  |
| AGIWUR43213                                                                                     |                                    |            |                |           |                             |  |
| CB4856 HS II                                                                                    | 13614788                           | 13616100   | WBGene00001762 | gst-14    | F37B1.3 0.103942758517016   |  |
| AGIWUR27122                                                                                     |                                    |            |                |           |                             |  |
| CB4856 HS II                                                                                    | 13616685                           | 13618061   | WBGene00001760 | gst-12    | F37B1.2 0.0565192307537856  |  |
| AGIWUR11751                                                                                     |                                    |            |                |           |                             |  |
| CB4856 HS II                                                                                    | 13622967                           | 13624502   | WBGene00001764 | gst-16    | F37B1.5 -0.239686789071353  |  |
| AGIWUR31264                                                                                     |                                    |            |                |           |                             |  |
| CB4856 HS II                                                                                    | 13625544                           | 13627141   | WBGene00001767 | gst-19    | F37B1.8 0.224833091313173   |  |
| AGIWUR3777;AGIWUR36800                                                                          |                                    |            |                |           |                             |  |
| CB4856 HS II                                                                                    | 13628017                           | 13628774   | WBGene00001765 | gst-17    | F37B1.6 0.0475107101604229  |  |
| AGIWUR36475                                                                                     |                                    |            |                |           |                             |  |
| CB4856 HS II                                                                                    | 13629799                           | 13630887   | WBGene00001766 | gst-18    | F37B1.7 0.0199043519684805  |  |
| AGIWUR12330;AGIWUR24948;AGIWUR32902;AGIWUR38232;AGIWUR44742                                     |                                    |            |                |           |                             |  |
| CB4856 HS II                                                                                    | 13632655                           | 13636986   | WBGene00006404 | tag-10    | C31C9.1 -0.0217569550946326 |  |
| AGIWUR37940                                                                                     |                                    |            |                |           |                             |  |
| CB4856 HS II                                                                                    | 13636929                           | 13638480   | WBGene00007836 | C31C9.2   | C31C9.2 0.19613705903002    |  |
| AGIWUR3095;AGIWUR8721;AGIWUR10783;AGIWUR21035;AGIWUR28229;AGIWUR36644                           |                                    |            |                |           |                             |  |
| CB4856 HS II                                                                                    | 13641495                           | 13643821   | WBGene00007837 | fbxa-167  | C31C9.3                     |  |

|                                                            |                         |          |                |                 |                             |
|------------------------------------------------------------|-------------------------|----------|----------------|-----------------|-----------------------------|
| 0.151035227605368                                          | AGIWUR44122             |          |                |                 |                             |
| CB4856 HS II                                               | 13645781                | 13648850 | WBGene00007838 | fbxa-168        | C31C9.4                     |
| 0.148589574885033                                          | AGIWUR1946              |          |                |                 |                             |
| CB4856 HS II                                               | 13648530                | 13655347 | WBGene00045289 | fbxa-169        | C31C9.8                     |
| -0.222000153817572                                         | AGIWUR7582              |          |                |                 |                             |
| CB4856 HS II                                               | 13669104                | 13669713 | WBGene00007841 | C31C9.7 C31C9.7 | 0.0235572717374239          |
| AGIWUR36149                                                |                         |          |                |                 |                             |
| CB4856 HS II                                               | 13670633                | 13694787 | WBGene00012999 | rpoa-1          | Y48E1A.1                    |
| 0.168515419179977                                          | AGIWUR5492;AGIWUR11083  |          |                |                 |                             |
| CB4856 HS II                                               | 13703877                | 13712911 | WBGene00002235 | kqt-3           | Y54G9A.3                    |
| -0.147502523162268                                         | AGIWUR17672;AGIWUR41149 |          |                |                 |                             |
| CB4856 HS II                                               | 13712921                | 13715893 | WBGene00013207 | zipt-2.3        | Y54G9A.4                    |
| 0.122811538891909                                          | AGIWUR31247             |          |                |                 |                             |
| CB4856 HS II                                               | 13718185                | 13721318 | WBGene00044084 | sre-46          | Y54G9A.10                   |
| -0.0511719542190945                                        | AGIWUR9584;AGIWUR39918  |          |                |                 |                             |
| CB4856 HS II                                               | 13722964                | 13725037 | WBGene00013208 | Y54G9A.5        | Y54G9A.5                    |
| 0.023687066223065                                          | AGIWUR38181             |          |                |                 |                             |
| CB4856 HS II                                               | 13724978                | 13725805 | WBGene00013210 | Y54G9A.7        | Y54G9A.7                    |
| 0.23877737863917                                           | AGIWUR8650              |          |                |                 |                             |
| CB4856 HS II                                               | 13726062                | 13729610 | WBGene00013209 | bub-3           | Y54G9A.6                    |
| 0.0685300014105579                                         | AGIWUR27299             |          |                |                 |                             |
| CB4856 HS II                                               | 13729716                | 13731543 | WBGene00013211 | Y54G9A.9        | Y54G9A.9                    |
| 0.0598517795549363                                         | AGIWUR6367              |          |                |                 |                             |
| CB4856 HS II                                               | 13736349                | 13736933 | WBGene00011056 | R06B9.5 R06B9.5 | -0.283726576132366          |
| AGIWUR29910                                                |                         |          |                |                 |                             |
| CB4856 HS II                                               | 13741742                | 13749983 | WBGene00003246 | mig-14          | R06B9.6 0.0395976742708992  |
| AGIWUR3974                                                 |                         |          |                |                 |                             |
| CB4856 HS II                                               | 13752316                | 13756267 | WBGene00011055 | arrd-14         | R06B9.4 0.237056871645665   |
| AGIWUR11577                                                |                         |          |                |                 |                             |
| CB4856 HS II                                               | 13758408                | 13761233 | WBGene00011054 | arrd-13         | R06B9.3 -0.239108063130875  |
| AGIWUR21367                                                |                         |          |                |                 |                             |
| CB4856 HS II                                               | 13792229                | 13817398 | WBGene00013934 | ZK131.11        | ZK131.11                    |
| 0.131178515503933                                          | AGIWUR2862;AGIWUR10799  |          |                |                 |                             |
| CB4856 HS II                                               | 13821778                | 13822333 | WBGene00001885 | his-11          | ZK131.5 -0.215164026007356  |
| AGIWUR9952;AGIWUR15972;AGIWUR16772;AGIWUR23210;AGIWUR36528 |                         |          |                |                 |                             |
| CB4856 HS II                                               | 13828287                | 13828697 | WBGene00001916 | his-42          | F08G2.3 -0.0191842061964564 |
| AGIWUR34096                                                |                         |          |                |                 |                             |
| CB4856 HS II                                               | 13830592                | 13831213 | WBGene00008576 | F08G2.4 F08G2.4 | -0.201904014051349          |
| AGIWUR31364                                                |                         |          |                |                 |                             |

|                                                                                                        |    |          |          |                |          |          |                     |
|--------------------------------------------------------------------------------------------------------|----|----------|----------|----------------|----------|----------|---------------------|
| CB4856 HS                                                                                              | II | 13832870 | 13833653 | WBGene00008577 | F08G2.5  | F08G2.5  | -0.0161916091741148 |
| AGIWUR43189                                                                                            |    |          |          |                |          |          |                     |
| CB4856 HS                                                                                              | II | 13835103 | 13835709 | WBGene00002120 | ins-37   | F08G2.6  | 0.191824681588274   |
| AGIWUR44380                                                                                            |    |          |          |                |          |          |                     |
| CB4856 HS                                                                                              | II | 13836241 | 13841139 | WBGene00008578 | F08G2.7  | F08G2.7  | 0.0953463437208981  |
| AGIWUR28240                                                                                            |    |          |          |                |          |          |                     |
| CB4856 HS                                                                                              | II | 13852311 | 13855290 | WBGene00008579 | F08G2.8  | F08G2.8  | 0.226625743577532   |
| AGIWUR5634                                                                                             |    |          |          |                |          |          |                     |
| CB4856 HS                                                                                              | II | 13855788 | 13872315 | WBGene00013093 | Y51H1A.2 | Y51H1A.2 |                     |
| -0.11219338693915 AGIWUR10118;AGIWUR12948;AGIWUR15961;AGIWUR23741;AGIWUR29105;AGIWUR32778;AGIWUR41195  |    |          |          |                |          |          |                     |
| CB4856 HS                                                                                              | II | 13872869 | 13875423 | WBGene00013094 | Y51H1A.3 | Y51H1A.3 |                     |
| 0.0632657509088101 AGIWUR11740;AGIWUR14779;AGIWUR19083;AGIWUR23307;AGIWUR31503;AGIWUR38345;AGIWUR41980 |    |          |          |                |          |          |                     |
| CB4856 HS                                                                                              | II | 13876034 | 13882585 | WBGene00013095 | ing-3    | Y51H1A.4 |                     |
| 0.13691739487423 AGIWUR539                                                                             |    |          |          |                |          |          |                     |
| CB4856 HS                                                                                              | II | 13882705 | 13888031 | WBGene00001838 | hda-10   | Y51H1A.5 |                     |
| -0.0184935477389523 AGIWUR33508                                                                        |    |          |          |                |          |          |                     |
| CB4856 HS                                                                                              | II | 13888583 | 13898394 | WBGene00013096 | mcd-1    | Y51H1A.6 |                     |
| -0.0312775744402538 AGIWUR8763;AGIWUR38762                                                             |    |          |          |                |          |          |                     |
| CB4856 HS                                                                                              | II | 13898366 | 13902114 | WBGene00012197 | W02B8.1  | W02B8.1  | -0.25009048062755   |
| AGIWUR36040                                                                                            |    |          |          |                |          |          |                     |
| CB4856 HS                                                                                              | II | 13908921 | 13915254 | WBGene00012198 | W02B8.2  | W02B8.2  | -0.0821419252201476 |
| AGIWUR13508                                                                                            |    |          |          |                |          |          |                     |
| CB4856 HS                                                                                              | II | 13916340 | 13919838 | WBGene00012199 | mltn-3   | W02B8.3  |                     |
| 0.000262559746293078 AGIWUR4662;AGIWUR18634;AGIWUR35203                                                |    |          |          |                |          |          |                     |
| CB4856 HS                                                                                              | II | 13920555 | 13924724 | WBGene00012200 | mltn-4   | W02B8.4  | -0.10644270791658   |
| AGIWUR36510;AGIWUR40714                                                                                |    |          |          |                |          |          |                     |
| CB4856 HS                                                                                              | II | 13925268 | 13930516 | WBGene00044074 | mltn-5   | W02B8.6  | 0.168279026890726   |
| AGIWUR39189                                                                                            |    |          |          |                |          |          |                     |
| CB4856 HS                                                                                              | II | 13930648 | 13931997 | WBGene00001988 | hot-3    | W02B8.5  | 0.14737702088898    |
| AGIWUR31128;AGIWUR40137                                                                                |    |          |          |                |          |          |                     |
| CB4856 HS                                                                                              | II | 13937995 | 13939631 | WBGene00012328 | W07G1.1  | W07G1.1  | -0.112758397894281  |
| AGIWUR33574                                                                                            |    |          |          |                |          |          |                     |
| CB4856 HS                                                                                              | II | 13949590 | 13951869 | WBGene00012329 | sre-44   | W07G1.2  | -0.216316169401986  |
| AGIWUR23234;AGIWUR24414;AGIWUR34747                                                                    |    |          |          |                |          |          |                     |
| CB4856 HS                                                                                              | II | 13951906 | 13957543 | WBGene00012330 | zip-3    | W07G1.3  | 0.0944042208308966  |
| AGIWUR18520;AGIWUR40639                                                                                |    |          |          |                |          |          |                     |
| CB4856 HS                                                                                              | II | 13959239 | 13962417 | WBGene00012332 | rpi-1    | W07G1.5  | -0.179169641150985  |
| AGIWUR29081;AGIWUR34293;AGIWUR44572                                                                    |    |          |          |                |          |          |                     |
| CB4856 HS                                                                                              | II | 13964891 | 13966333 | WBGene00012334 | W07G1.7  | W07G1.7  | -0.0502201105544771 |

|                      |                                                                        |          |                |           |          |                     |
|----------------------|------------------------------------------------------------------------|----------|----------------|-----------|----------|---------------------|
| AGIWUR15265          |                                                                        |          |                |           |          |                     |
| CB4856 HS II         | 13966534                                                               | 13969079 | WBGene00012333 | sre-43    | W07G1.6  | -0.178318311364658  |
| AGIWUR27997          |                                                                        |          |                |           |          |                     |
| CB4856 HS II         | 13970584                                                               | 13972970 | WBGene00012722 | Y39G8B.1  |          | Y39G8B.1            |
| -0.0272237997111517  | AGIWUR15112;AGIWUR16525                                                |          |                |           |          |                     |
| CB4856 HS II         | 13973690                                                               | 13976221 | WBGene00012723 | Y39G8B.2  |          | Y39G8B.2            |
| -0.0302900309656646  | AGIWUR6405                                                             |          |                |           |          |                     |
| CB4856 HS II         | 13977164                                                               | 13979883 | WBGene00012724 | sre-48    | Y39G8B.3 |                     |
| 1.30922104450924     | AGIWUR23507                                                            |          |                |           |          |                     |
| CB4856 HS II         | 13981330                                                               | 13981785 | WBGene00012728 | Y39G8B.9  |          | Y39G8B.9            |
| -0.0104217032148073  | AGIWUR1280;AGIWUR18970;AGIWUR25187;AGIWUR37328;AGIWUR41482;AGIWUR44093 |          |                |           |          |                     |
| CB4856 HS II         | 13982048                                                               | 13983115 | WBGene00012729 | Y39G8B.10 |          | Y39G8B.10           |
| 0.167775167484081    | AGIWUR44923                                                            |          |                |           |          |                     |
| CB4856 HS II         | 13983397                                                               | 13984651 | WBGene00012725 | sre-47    | Y39G8B.4 |                     |
| -0.0237022548373229  | AGIWUR14222                                                            |          |                |           |          |                     |
| CB4856 HS II         | 13987616                                                               | 13991838 | WBGene00012726 | Y39G8B.5  |          | Y39G8B.5            |
| 1.08093012392457     | AGIWUR5997;AGIWUR29173                                                 |          |                |           |          |                     |
| CB4856 HS II         | 13993009                                                               | 13993527 | WBGene00014885 | Y39G8B.8  |          | Y39G8B.8            |
| -0.122273282166268   | AGIWUR4346;AGIWUR37185;AGIWUR43820                                     |          |                |           |          |                     |
| CB4856 HS II         | 13994411                                                               | 13995045 | WBGene00012727 | Y39G8B.7  |          | Y39G8B.7            |
| -0.200079197060676   | AGIWUR25154                                                            |          |                |           |          |                     |
| CB4856 HS II         | 13995401                                                               | 13995876 | WBGene00008501 | fbxa-177  |          | F01D5.11            |
| -0.035794155253841   | AGIWUR13019                                                            |          |                |           |          |                     |
| CB4856 HS II         | 13996958                                                               | 13997606 | WBGene00008492 | F01D5.1   | F01D5.1  | -0.269130334759048  |
| AGIWUR10090          |                                                                        |          |                |           |          |                     |
| CB4856 HS II         | 13998497                                                               | 13999064 | WBGene00008493 | F01D5.2   | F01D5.2  | -0.0721697101267118 |
| AGIWUR45174          |                                                                        |          |                |           |          |                     |
| CB4856 HS II         | 13999059                                                               | 14000144 | WBGene00008494 | F01D5.3   | F01D5.3  |                     |
| -0.00368026318738401 | AGIWUR16727                                                            |          |                |           |          |                     |
| CB4856 HS II         | 14001686                                                               | 14002306 | WBGene00008495 | F01D5.5   | F01D5.5  | 0.0379101794767696  |
| AGIWUR8659           |                                                                        |          |                |           |          |                     |
| CB4856 HS II         | 14006511                                                               | 14008514 | WBGene00008496 | F01D5.6   | F01D5.6  | 0.0159690719088772  |
| AGIWUR18402          |                                                                        |          |                |           |          |                     |
| CB4856 HS II         | 14008666                                                               | 14010583 | WBGene00008497 | F01D5.7   | F01D5.7  | -0.113038085756786  |
| AGIWUR41689          |                                                                        |          |                |           |          |                     |
| CB4856 HS II         | 14010706                                                               | 14013826 | WBGene00008498 | F01D5.8   | F01D5.8  | -0.249727656026423  |
| AGIWUR10871          |                                                                        |          |                |           |          |                     |
| CB4856 HS II         | 14013825                                                               | 14016965 | WBGene00008499 | cyp-37A1  |          | F01D5.9             |
| -0.269558099169057   | AGIWUR11139;AGIWUR13421;AGIWUR31528;AGIWUR34500                        |          |                |           |          |                     |

|                                                                                                                                                                       |    |    |          |          |                |          |                             |
|-----------------------------------------------------------------------------------------------------------------------------------------------------------------------|----|----|----------|----------|----------------|----------|-----------------------------|
| CB4856                                                                                                                                                                | HS | II | 14017839 | 14021330 | WBGene00008500 | F01D5.10 | F01D5.10                    |
| -0.0300024368727314 AGIWUR9014                                                                                                                                        |    |    |          |          |                |          |                             |
| CB4856                                                                                                                                                                | HS | II | 14031402 | 14032644 | WBGene00014851 | W01G7.2  | W01G7.2 -0.201603803527222  |
| AGIWUR33995                                                                                                                                                           |    |    |          |          |                |          |                             |
| CB4856                                                                                                                                                                | HS | II | 14033233 | 14037721 | WBGene00000901 | daf-5    | W01G7.1 -0.0871786496371434 |
| AGIWUR2777;AGIWUR3143;AGIWUR4552;AGIWUR23271;AGIWUR42691;AGIWUR43981                                                                                                  |    |    |          |          |                |          |                             |
| CB4856                                                                                                                                                                | HS | II | 14060061 | 14060624 | WBGene00012187 | rpb-11   | W01G7.3 0.0858975784847615  |
| AGIWUR1799                                                                                                                                                            |    |    |          |          |                |          |                             |
| CB4856                                                                                                                                                                | HS | II | 14060739 | 14062960 | WBGene00012188 | W01G7.4  | W01G7.4 0.0498645246374121  |
| AGIWUR6293;AGIWUR13407;AGIWUR25133;AGIWUR39814;AGIWUR41628;AGIWUR42037                                                                                                |    |    |          |          |                |          |                             |
| CB4856                                                                                                                                                                | HS | II | 14063450 | 14066170 | WBGene00002275 | lem-2    | W01G7.5 -0.308725728173915  |
| AGIWUR36856                                                                                                                                                           |    |    |          |          |                |          |                             |
| CB4856                                                                                                                                                                | HS | II | 14068907 | 14089119 | WBGene00012730 | xrn-1    | Y39G8C.1                    |
| -0.0555771856241263 AGIWUR3029;AGIWUR27428                                                                                                                            |    |    |          |          |                |          |                             |
| CB4856                                                                                                                                                                | HS | II | 14090075 | 14094690 | WBGene00000662 | col-87   | Y39G8C.4                    |
| -0.152718194123365 AGIWUR21941                                                                                                                                        |    |    |          |          |                |          |                             |
| CB4856                                                                                                                                                                | HS | II | 14095447 | 14097390 | WBGene00012731 | Y39G8C.2 | Y39G8C.2                    |
| -0.264710165812016 AGIWUR18523                                                                                                                                        |    |    |          |          |                |          |                             |
| CB4856                                                                                                                                                                | HS | II | 14101263 | 14102961 | WBGene00014569 | bkip-1   | Y39G8C.3                    |
| 0.0471478177465041                                                                                                                                                    |    |    |          |          |                |          |                             |
| AGIWUR2676;AGIWUR3891;AGIWUR12056;AGIWUR14174;AGIWUR15841;AGIWUR15877;AGIWUR16335;AGIWUR23672;AGIWUR35130;AGIWUR37737;AGIWUR38371;AGIWUR40259;AGIWUR41719;AGIWUR43332 |    |    |          |          |                |          |                             |
| CB4856                                                                                                                                                                | HS | II | 14104773 | 14108072 | WBGene00001805 | gur-4    | K09E4.5 0.268494960414405   |
| AGIWUR819                                                                                                                                                             |    |    |          |          |                |          |                             |
| CB4856                                                                                                                                                                | HS | II | 14108016 | 14109635 | WBGene00010723 | cpg-7    | K09E4.6 -0.111009489529263  |
| AGIWUR861                                                                                                                                                             |    |    |          |          |                |          |                             |
| CB4856                                                                                                                                                                | HS | II | 14114213 | 14122165 | WBGene00010722 | K09E4.4  | K09E4.4 0.0351558257520246  |
| AGIWUR36499                                                                                                                                                           |    |    |          |          |                |          |                             |
| CB4856                                                                                                                                                                | HS | II | 14123945 | 14126941 | WBGene00010721 | K09E4.3  | K09E4.3 0.163024888023578   |
| AGIWUR12853                                                                                                                                                           |    |    |          |          |                |          |                             |
| CB4856                                                                                                                                                                | HS | II | 14127687 | 14132833 | WBGene00010720 | K09E4.2  | K09E4.2 0.349129549978056   |
| AGIWUR6171                                                                                                                                                            |    |    |          |          |                |          |                             |
| CB4856                                                                                                                                                                | HS | II | 14133397 | 14142289 | WBGene00012230 | cacn-1   | W03H9.4 -0.0804469561233461 |
| AGIWUR27840                                                                                                                                                           |    |    |          |          |                |          |                             |
| CB4856                                                                                                                                                                | HS | II | 14142949 | 14143874 | WBGene00012228 | W03H9.2  | W03H9.2 -0.0893274456357269 |
| AGIWUR7297;AGIWUR20495                                                                                                                                                |    |    |          |          |                |          |                             |
| CB4856                                                                                                                                                                | HS | II | 14151040 | 14154373 | WBGene00012978 | Y48B6A.1 | Y48B6A.1                    |
| -0.0352089944580518 AGIWUR7453;AGIWUR18959                                                                                                                            |    |    |          |          |                |          |                             |
| CB4856                                                                                                                                                                | HS | II | 14155280 | 14155660 | WBGene00004456 | rpl-43   | Y48B6A.2                    |

-0.279493858964766

AGIWUR3534;AGIWUR4568;AGIWUR11626;AGIWUR13510;AGIWUR21750;AGIWUR21886;AGIWUR26463;AGIWUR33415;AGIWUR36339;AGIWUR38880

|                                                                                                         |    |    |          |          |                |            |            |  |
|---------------------------------------------------------------------------------------------------------|----|----|----------|----------|----------------|------------|------------|--|
| CB4856                                                                                                  | HS | II | 14155768 | 14166018 | WBGene00006964 | xrn-2      | Y48B6A.3   |  |
| -0.013084838171233 AGIWUR40875                                                                          |    |    |          |          |                |            |            |  |
| CB4856                                                                                                  | HS | II | 14172833 | 14175174 | WBGene00012979 | Y48B6A.5   | Y48B6A.5   |  |
| 0.0786821604062471 AGIWUR8342                                                                           |    |    |          |          |                |            |            |  |
| CB4856                                                                                                  | HS | II | 14178814 | 14189917 | WBGene00012980 | efhd-1     | Y48B6A.6   |  |
| -0.0571500429930665 AGIWUR14476;AGIWUR16862;AGIWUR19411;AGIWUR21777                                     |    |    |          |          |                |            |            |  |
| CB4856                                                                                                  | HS | II | 14205633 | 14210214 | WBGene00000037 | ace-3      | Y48B6A.8   |  |
| 0.0587488057002403 AGIWUR33827                                                                          |    |    |          |          |                |            |            |  |
| CB4856                                                                                                  | HS | II | 14211439 | 14213123 | WBGene00001992 | hot-7      | Y48B6A.9   |  |
| 0.037162305382934 AGIWUR20114;AGIWUR22691                                                               |    |    |          |          |                |            |            |  |
| CB4856                                                                                                  | HS | II | 14214409 | 14217139 | WBGene00012981 | Y48B6A.10  | Y48B6A.10  |  |
| 1.33117314670837 AGIWUR21643                                                                            |    |    |          |          |                |            |            |  |
| CB4856                                                                                                  | HS | II | 14217107 | 14218064 | WBGene00050948 | Y48B6A.16  | Y48B6A.16  |  |
| -0.0215576398068773 AGIWUR4514;AGIWUR21323;AGIWUR24184;AGIWUR35402;AGIWUR42266                          |    |    |          |          |                |            |            |  |
| CB4856                                                                                                  | HS | II | 14220938 | 14226287 | WBGene00012984 | Y48B6A.13  | Y48B6A.13  |  |
| 0.121446564502246 AGIWUR31036                                                                           |    |    |          |          |                |            |            |  |
| CB4856                                                                                                  | HS | II | 14226377 | 14234120 | WBGene00012983 | men-1      | Y48B6A.12  |  |
| -0.142955216420678 AGIWUR33695                                                                          |    |    |          |          |                |            |            |  |
| CB4856                                                                                                  | HS | II | 14234972 | 14243603 | WBGene00012982 | jmjd-2     | Y48B6A.11  |  |
| -0.112026669606603                                                                                      |    |    |          |          |                |            |            |  |
| AGIWUR484;AGIWUR4107;AGIWUR9451;AGIWUR12375;AGIWUR17242;AGIWUR26629;AGIWUR28009;AGIWUR35789;AGIWUR40210 |    |    |          |          |                |            |            |  |
| CB4856                                                                                                  | HS | II | 14250683 | 14251448 | WBGene00001971 | hmg-1.1    | Y48B6A.14  |  |
| 0.0489863982864218 AGIWUR2307;AGIWUR6488;AGIWUR12701;AGIWUR18413;AGIWUR19350;AGIWUR40655                |    |    |          |          |                |            |            |  |
| CB4856                                                                                                  | HS | II | 14252357 | 14255705 | WBGene00013213 | Y54G11A.2  | Y54G11A.2  |  |
| 0.186177475600207 AGIWUR11933                                                                           |    |    |          |          |                |            |            |  |
| CB4856                                                                                                  | HS | II | 14256610 | 14256987 | WBGene00235256 | Y54G11A.19 | Y54G11A.19 |  |
| -0.0371166754572432 AGIWUR5247                                                                          |    |    |          |          |                |            |            |  |
| CB4856                                                                                                  | HS | II | 14276621 | 14283973 | WBGene00013214 | Y54G11A.3  | Y54G11A.3  |  |
| 0.113609786114145 AGIWUR26523                                                                           |    |    |          |          |                |            |            |  |
| CB4856                                                                                                  | HS | II | 14285780 | 14287377 | WBGene00005264 | srh-41     | Y54G11A.12 |  |
| 0.449745966363379 AGIWUR23858                                                                           |    |    |          |          |                |            |            |  |
| CB4856                                                                                                  | HS | II | 14287632 | 14289068 | WBGene00005265 | srh-42     | Y54G11A.15 |  |
| -0.195307145863235 AGIWUR36608                                                                          |    |    |          |          |                |            |            |  |
| CB4856                                                                                                  | HS | II | 14289696 | 14290875 | WBGene00005266 | srh-43     | Y54G11A.16 |  |
| -0.0817549710371637 AGIWUR8458                                                                          |    |    |          |          |                |            |            |  |
| CB4856                                                                                                  | HS | II | 14292824 | 14296055 | WBGene00013215 | Y54G11A.4  | Y54G11A.4  |  |

|                                                                                                                                                                      |                                                |          |                |            |            |                     |
|----------------------------------------------------------------------------------------------------------------------------------------------------------------------|------------------------------------------------|----------|----------------|------------|------------|---------------------|
| 0.000826278534044711                                                                                                                                                 | AGIWUR27775                                    |          |                |            |            |                     |
| CB4856 HS II                                                                                                                                                         | 14297305                                       | 14299633 | WBGene00013216 | Y54G11A.7  | Y54G11A.7  |                     |
| 0.287954378061785                                                                                                                                                    | AGIWUR2686                                     |          |                |            |            |                     |
| CB4856 HS II                                                                                                                                                         | 14299553                                       | 14302083 | WBGene00000831 | ctl-2      | Y54G11A.5  |                     |
| 0.0876965872164206                                                                                                                                                   | AGIWUR8751                                     |          |                |            |            |                     |
| CB4856 HS II                                                                                                                                                         | 14318158                                       | 14320917 | WBGene00013221 | Y54G11A.14 | Y54G11A.14 |                     |
| 0.139970697355                                                                                                                                                       | AGIWUR43300                                    |          |                |            |            |                     |
| CB4856 HS II                                                                                                                                                         | 14340068                                       | 14344454 | WBGene00013217 | ddl-3      | Y54G11A.8  |                     |
| -0.0664279396192953                                                                                                                                                  | AGIWUR17300;AGIWUR32646                        |          |                |            |            |                     |
| CB4856 HS II                                                                                                                                                         | 14346877                                       | 14348792 | WBGene00002996 | lin-7      | Y54G11A.10 |                     |
| 0.0267799224009124                                                                                                                                                   | AGIWUR14816                                    |          |                |            |            |                     |
| CB4856 HS II                                                                                                                                                         | 14349783                                       | 14350795 | WBGene00013219 | Y54G11A.11 | Y54G11A.11 |                     |
| -0.295676080104977                                                                                                                                                   | AGIWUR20166;AGIWUR32611                        |          |                |            |            |                     |
| CB4856 HS II                                                                                                                                                         | 14350719                                       | 14358113 | WBGene00011050 | agl-1      | R06A4.8    | -0.071161133362045  |
| AGIWUR23864                                                                                                                                                          |                                                |          |                |            |            |                     |
| CB4856 HS II                                                                                                                                                         | 14358366                                       | 14361701 | WBGene00011051 | pfs-2      | R06A4.9    | 0.0206785197184978  |
| AGIWUR11966                                                                                                                                                          |                                                |          |                |            |            |                     |
| CB4856 HS II                                                                                                                                                         | 14362019                                       | 14365177 | WBGene00011047 | R06A4.2    | R06A4.2    | 0.0675831561715636  |
| AGIWUR31139                                                                                                                                                          |                                                |          |                |            |            |                     |
| CB4856 HS II                                                                                                                                                         | 14365705                                       | 14373899 | WBGene00002076 | imb-2      | R06A4.4    | -0.0392576847731814 |
| AGIWUR3727;AGIWUR8967;AGIWUR15087;AGIWUR16722;AGIWUR22315                                                                                                            |                                                |          |                |            |            |                     |
| CB4856 HS II                                                                                                                                                         | 14373831                                       | 14377890 | WBGene00000059 | acr-20     | R06A4.10   |                     |
| 0.0704411236500935                                                                                                                                                   | AGIWUR3520                                     |          |                |            |            |                     |
| CB4856 HS II                                                                                                                                                         | 14381772                                       | 14383376 | WBGene00011049 | sdz-26     | R06A4.6    | -0.190342616319091  |
| AGIWUR11439                                                                                                                                                          |                                                |          |                |            |            |                     |
| CB4856 HS II                                                                                                                                                         | 14383973                                       | 14388454 | WBGene00003220 | mes-2      | R06A4.7    | 0.120956788672835   |
| AGIWUR7454                                                                                                                                                           |                                                |          |                |            |            |                     |
| CB4856 HS II                                                                                                                                                         | 14389236                                       | 14390116 | WBGene00009179 | kbp-3      | F26H11.1   |                     |
| 0.0522222452449164                                                                                                                                                   | AGIWUR37325                                    |          |                |            |            |                     |
| CB4856 HS II                                                                                                                                                         | 14390718                                       | 14407905 | WBGene00009180 | nurf-1     | F26H11.2   |                     |
| -0.0653090850455209                                                                                                                                                  |                                                |          |                |            |            |                     |
| AGIWUR1055;AGIWUR3235;AGIWUR7486;AGIWUR10576;AGIWUR22291;AGIWUR22413;AGIWUR23878;AGIWUR26556;AGIWUR26933;AGIWUR27114;AGIWUR29545;AGIWUR33257;AGIWUR38259;AGIWUR40676 |                                                |          |                |            |            |                     |
| CB4856 HS II                                                                                                                                                         | 14411095                                       | 14412218 | WBGene00194892 | dsb-2      | F26H11.6   |                     |
| -0.147644075994684                                                                                                                                                   | AGIWUR17446                                    |          |                |            |            |                     |
| CB4856 HS II                                                                                                                                                         | 14412201                                       | 14413516 | WBGene00001371 | exl-1      | F26H11.5   |                     |
| 0.0318154950261818                                                                                                                                                   | AGIWUR41988                                    |          |                |            |            |                     |
| CB4856 HS II                                                                                                                                                         | 14417889                                       | 14424891 | WBGene00004048 | plx-2      | K04B12.1   |                     |
| -0.0467264399723479                                                                                                                                                  | AGIWUR4508;AGIWUR33866;AGIWUR38759;AGIWUR44043 |          |                |            |            |                     |

|                                                                                                                     |             |          |                |           |                             |
|---------------------------------------------------------------------------------------------------------------------|-------------|----------|----------------|-----------|-----------------------------|
| CB4856 HS II                                                                                                        | 14434419    | 14438977 | WBGene00010550 | K04B12.2  | K04B12.2                    |
| 0.0783378492989826                                                                                                  | AGIWUR8514  |          |                |           |                             |
| CB4856 HS II                                                                                                        | 14441409    | 14447219 | WBGene00010551 | smg-8     | K04B12.3                    |
| -0.343015349741302                                                                                                  | AGIWUR21796 |          |                |           |                             |
| CB4856 HS II                                                                                                        | 14455632    | 14464911 | WBGene00013222 | dmsr-6    | Y54G11B.1                   |
| 0.0987213755844003                                                                                                  | AGIWUR16816 |          |                |           |                             |
| CB4856 HS II                                                                                                        | 14470371    | 14479627 | WBGene00007545 | C13B4.1   | C13B4.1 0.0783518701390449  |
| AGIWUR7062                                                                                                          |             |          |                |           |                             |
| CB4856 HS II                                                                                                        | 14485624    | 14488688 | WBGene00006856 | usp-14    | C13B4.2 -0.145171922529521  |
| AGIWUR9141;AGIWUR11923;AGIWUR27616;AGIWUR28554;AGIWUR34325;AGIWUR36729;AGIWUR43933                                  |             |          |                |           |                             |
| CB4856 HS II                                                                                                        | 14489802    | 14492901 | WBGene00010758 | vnut-1    | K10H10.1                    |
| 0.104970275041712                                                                                                   | AGIWUR5410  |          |                |           |                             |
| CB4856 HS II                                                                                                        | 14492826    | 14494514 | WBGene00010759 | cysl-2    | K10H10.2                    |
| 0.0180332112654753                                                                                                  | AGIWUR25107 |          |                |           |                             |
| CB4856 HS II                                                                                                        | 14498026    | 14499755 | WBGene00000972 | dhs-8     | K10H10.3                    |
| 0.570646584631812                                                                                                   | AGIWUR22194 |          |                |           |                             |
| CB4856 HS II                                                                                                        | 14500422    | 14501663 | WBGene00010760 | K10H10.4  | K10H10.4                    |
| -0.155697151803679                                                                                                  | AGIWUR44601 |          |                |           |                             |
| CB4856 HS II                                                                                                        | 14501747    | 14502543 | WBGene00010761 | K10H10.5  | K10H10.5                    |
| -0.171757680399091                                                                                                  | AGIWUR33435 |          |                |           |                             |
| CB4856 HS II                                                                                                        | 14505015    | 14506409 | WBGene00045403 | K10H10.12 | K10H10.12                   |
| 0.20839557354751                                                                                                    |             |          |                |           |                             |
| AGIWUR871;AGIWUR3702;AGIWUR4293;AGIWUR13405;AGIWUR18072;AGIWUR18318;AGIWUR20971;AGIWUR23433;AGIWUR28318;AGIWUR29134 |             |          |                |           |                             |
| CB4856 HS II                                                                                                        | 14507092    | 14507663 | WBGene00010763 | K10H10.7  | K10H10.7                    |
| -0.136650098801304                                                                                                  | AGIWUR17523 |          |                |           |                             |
| CB4856 HS II                                                                                                        | 14508068    | 14510162 | WBGene00010765 | K10H10.10 | K10H10.10                   |
| 0.0314592067211592                                                                                                  | AGIWUR37841 |          |                |           |                             |
| CB4856 HS II                                                                                                        | 14513191    | 14515117 | WBGene00010764 | K10H10.9  | K10H10.9                    |
| 0.0881388336122173                                                                                                  | AGIWUR826   |          |                |           |                             |
| CB4856 HS II                                                                                                        | 14524173    | 14525112 | WBGene00010195 | pot-2     | F57C2.3 -0.0545427623862196 |
| AGIWUR14166                                                                                                         |             |          |                |           |                             |
| CB4856 HS II                                                                                                        | 14525312    | 14526031 | WBGene00010196 | F57C2.4   | F57C2.4 0.330947833228011   |
| AGIWUR38942                                                                                                         |             |          |                |           |                             |
| CB4856 HS II                                                                                                        | 14526213    | 14528296 | WBGene00010197 | F57C2.5   | F57C2.5 -0.146251989977037  |
| AGIWUR20898                                                                                                         |             |          |                |           |                             |
| CB4856 HS II                                                                                                        | 14528754    | 14534173 | WBGene00010198 | spat-1    | F57C2.6 -0.147245599589896  |
| AGIWUR21485                                                                                                         |             |          |                |           |                             |
| CB4856 HS II                                                                                                        | 14534300    | 14535365 | WBGene00007312 | C04H5.1   | C04H5.1 0.0421069412171065  |



|                                                                     |                                    |          |                |                  |                     |  |
|---------------------------------------------------------------------|------------------------------------|----------|----------------|------------------|---------------------|--|
| AGIWUR6314                                                          |                                    |          |                |                  |                     |  |
| CB4856 HS II                                                        | 14535923                           | 14537579 | WBGene00007313 | clec-147         | C04H5.2             |  |
| 0.149338767300971                                                   | AGIWUR37021                        |          |                |                  |                     |  |
| CB4856 HS II                                                        | 14537946                           | 14539162 | WBGene00007315 | C04H5.7 C04H5.7  | 0.306377299288385   |  |
| AGIWUR11910;AGIWUR32330;AGIWUR41692;AGIWUR42941                     |                                    |          |                |                  |                     |  |
| CB4856 HS II                                                        | 14540895                           | 14548791 | WBGene00007314 | gcy-29 C04H5.3   | -0.043487069144204  |  |
| AGIWUR12134                                                         |                                    |          |                |                  |                     |  |
| CB4856 HS II                                                        | 14550913                           | 14552476 | WBGene00007316 | nlp-41 C04H5.8   | -0.0204084490804286 |  |
| AGIWUR1866;AGIWUR5601;AGIWUR7581;AGIWUR9920;AGIWUR14170;AGIWUR37811 |                                    |          |                |                  |                     |  |
| CB4856 HS II                                                        | 14552501                           | 14561599 | WBGene00003392 | mog-4 C04H5.6    | -0.0609828921869955 |  |
| AGIWUR18263                                                         |                                    |          |                |                  |                     |  |
| CB4856 HS II                                                        | 14573615                           | 14576558 | WBGene00007242 | madf-5 C01G12.1  |                     |  |
| 0.124426041095941                                                   | AGIWUR44209                        |          |                |                  |                     |  |
| CB4856 HS II                                                        | 14576957                           | 14578075 | WBGene00044333 | C01G12.13        | C01G12.13           |  |
| 0.0813090360166004                                                  | AGIWUR14353;AGIWUR44551            |          |                |                  |                     |  |
| CB4856 HS II                                                        | 14579016                           | 14580124 | WBGene00007249 | C01G12.9         | C01G12.9            |  |
| 0.251220069900629                                                   | AGIWUR34770                        |          |                |                  |                     |  |
| CB4856 HS II                                                        | 14580254                           | 14581043 | WBGene00007250 | nspb-8 C01G12.10 |                     |  |
| -0.308839826158794                                                  | AGIWUR8498;AGIWUR34778;AGIWUR36101 |          |                |                  |                     |  |
| CB4856 HS II                                                        | 14581377                           | 14582361 | WBGene00007244 | C01G12.3         | C01G12.3            |  |
| 0.0898450917711493                                                  | AGIWUR28563                        |          |                |                  |                     |  |
| CB4856 HS II                                                        | 14583706                           | 14585733 | WBGene00006939 | wee-1.2 C01G12.4 |                     |  |
| -0.0530265175289952                                                 | AGIWUR12799;AGIWUR41845            |          |                |                  |                     |  |
| CB4856 HS II                                                        | 14586527                           | 14587507 | WBGene00007245 | C01G12.5         | C01G12.5            |  |
| -0.0962335137210362                                                 | AGIWUR21158                        |          |                |                  |                     |  |
| CB4856 HS II                                                        | 14587957                           | 14588241 | WBGene00007246 | nspb-10 C01G12.6 |                     |  |
| -0.263267032548278                                                  | AGIWUR22159                        |          |                |                  |                     |  |
| CB4856 HS II                                                        | 14588621                           | 14591893 | WBGene00007247 | C01G12.7         | C01G12.7            |  |
| 0.1998212777287                                                     | AGIWUR6995                         |          |                |                  |                     |  |
| CB4856 HS II                                                        | 14593581                           | 14597657 | WBGene00007248 | catp-4 C01G12.8  |                     |  |
| -0.115810035326778                                                  | AGIWUR22850;AGIWUR29822            |          |                |                  |                     |  |
| CB4856 HS II                                                        | 14600902                           | 14610554 | WBGene00006603 | tps-2 F19H8.1    | 0.147090621387068   |  |
| AGIWUR35888                                                         |                                    |          |                |                  |                     |  |
| CB4856 HS II                                                        | 14616068                           | 14622612 | WBGene00008964 | mltn-9 F19H8.4   | 0.0991895137935073  |  |
| AGIWUR22280                                                         |                                    |          |                |                  |                     |  |
| CB4856 HS II                                                        | 14627630                           | 14630121 | WBGene00007999 | tag-297 C38C6.6  | -0.0685798757910909 |  |
| AGIWUR1156                                                          |                                    |          |                |                  |                     |  |
| CB4856 HS II                                                        | 14630553                           | 14632636 | WBGene00007998 | C38C6.5 C38C6.5  |                     |  |
| -0.00399655251546749                                                | AGIWUR2409;AGIWUR16695             |          |                |                  |                     |  |

|                                                                               |    |          |          |                |           |           |                     |
|-------------------------------------------------------------------------------|----|----------|----------|----------------|-----------|-----------|---------------------|
| CB4856 HS                                                                     | II | 14633123 | 14634657 | WBGene00007996 | C38C6.3   | C38C6.3   | 0.298393982680567   |
| AGIWUR29542                                                                   |    |          |          |                |           |           |                     |
| CB4856 HS                                                                     | II | 14634656 | 14636837 | WBGene00007997 | sre-13    | C38C6.4   | -0.221028998340271  |
| AGIWUR30223                                                                   |    |          |          |                |           |           |                     |
| CB4856 HS                                                                     | II | 14640096 | 14644083 | WBGene00000225 | atgp-2    | C38C6.2   | 0.179889447596386   |
| AGIWUR3765;AGIWUR21389;AGIWUR21804;AGIWUR28905                                |    |          |          |                |           |           |                     |
| CB4856 HS                                                                     | II | 14647325 | 14666943 | WBGene00006787 | unc-52    | ZC101.2   | 0.0641431327227941  |
| AGIWUR18169;AGIWUR31295;AGIWUR36135                                           |    |          |          |                |           |           |                     |
| CB4856 HS                                                                     | II | 14675263 | 14684296 | WBGene00013851 | ZC101.1   | ZC101.1   | -0.0529443311751203 |
| AGIWUR35897                                                                   |    |          |          |                |           |           |                     |
| CB4856 HS                                                                     | II | 14694192 | 14695299 | WBGene00010491 | K02B7.3   | K02B7.3   | 0.21226496880893    |
| AGIWUR13831;AGIWUR17035;AGIWUR22360;AGIWUR27365;AGIWUR31050;AGIWUR37046       |    |          |          |                |           |           |                     |
| CB4856 HS                                                                     | II | 14698701 | 14699362 | WBGene00007478 | C09F9.1   | C09F9.1   | 0.109285033029902   |
| AGIWUR371                                                                     |    |          |          |                |           |           |                     |
| CB4856 HS                                                                     | II | 14705512 | 14712800 | WBGene00007479 | C09F9.2   | C09F9.2   | -0.129704429552254  |
| AGIWUR3438                                                                    |    |          |          |                |           |           |                     |
| CB4856 HS                                                                     | II | 14713340 | 14718225 | WBGene00045322 | C09F9.7   | C09F9.7   |                     |
| 0.000723862958396992 AGIWUR30576                                              |    |          |          |                |           |           |                     |
| CB4856 HS                                                                     | II | 14734410 | 14739243 | WBGene00013187 | npr-34    | Y54E2A.1  |                     |
| -0.0517504099815387 AGIWUR27662                                               |    |          |          |                |           |           |                     |
| CB4856 HS                                                                     | II | 14746890 | 14752489 | WBGene00013188 | smg-9     | Y54E2A.2  |                     |
| -0.034474405236157 AGIWUR8749;AGIWUR25196;AGIWUR38912                         |    |          |          |                |           |           |                     |
| CB4856 HS                                                                     | II | 14752891 | 14753907 | WBGene00006381 | tac-1     | Y54E2A.3  |                     |
| -0.323753190524268 AGIWUR18103                                                |    |          |          |                |           |           |                     |
| CB4856 HS                                                                     | II | 14754622 | 14778149 | WBGene00013189 | Y54E2A.4  | Y54E2A.4  |                     |
| -0.0075521321745069 AGIWUR9156;AGIWUR23342                                    |    |          |          |                |           |           |                     |
| CB4856 HS                                                                     | II | 14778345 | 14782723 | WBGene00013193 | Y54E2A.8  | Y54E2A.8  |                     |
| 0.08446784991912 AGIWUR8170                                                   |    |          |          |                |           |           |                     |
| CB4856 HS                                                                     | II | 14785184 | 14785995 | WBGene00013194 | Y54E2A.9  | Y54E2A.9  |                     |
| 0.205053710400811 AGIWUR1495                                                  |    |          |          |                |           |           |                     |
| CB4856 HS                                                                     | II | 14786198 | 14786512 | WBGene00044171 | Y54E2A.13 | Y54E2A.13 |                     |
| -0.169128658175143 AGIWUR8457;AGIWUR19675;AGIWUR30747;AGIWUR37073;AGIWUR43089 |    |          |          |                |           |           |                     |
| CB4856 HS                                                                     | II | 14791101 | 14792554 | WBGene00013195 | Y54E2A.10 | Y54E2A.10 |                     |
| -0.157624122957813 AGIWUR30769                                                |    |          |          |                |           |           |                     |
| CB4856 HS                                                                     | II | 14795404 | 14798224 | WBGene00001225 | eif-3.B   | Y54E2A.11 |                     |
| -0.201904549716524 AGIWUR3619;AGIWUR7825;AGIWUR11053;AGIWUR11745;AGIWUR15942  |    |          |          |                |           |           |                     |
| CB4856 HS                                                                     | II | 14798472 | 14800971 | WBGene00013196 | tbc-20    | Y54E2A.12 |                     |
| -0.269628839058615 AGIWUR13816;AGIWUR17503;AGIWUR33262                        |    |          |          |                |           |           |                     |
| CB4856 HS                                                                     | II | 14800918 | 14804309 | WBGene00012180 | W01D2.3   | W01D2.3   | 0.00566977273831348 |

|                                                                                                                                 |    |                         |          |                |          |          |                     |
|---------------------------------------------------------------------------------------------------------------------------------|----|-------------------------|----------|----------------|----------|----------|---------------------|
| AGIWUR5729                                                                                                                      |    |                         |          |                |          |          |                     |
| CB4856 HS                                                                                                                       | II | 14805986                | 14808087 | WBGene00012181 | srt-11   | W01D2.4  | 0.0451117348926475  |
| AGIWUR13564                                                                                                                     |    |                         |          |                |          |          |                     |
| CB4856 HS                                                                                                                       | II | 14808922                | 14809204 | WBGene00012183 | W01D2.6  | W01D2.6  | 0.0219204535699928  |
| AGIWUR19703                                                                                                                     |    |                         |          |                |          |          |                     |
| CB4856 HS                                                                                                                       | II | 14812182                | 14814889 | WBGene00012182 | osta-3   | W01D2.5  | -0.0192730919069    |
| AGIWUR28930                                                                                                                     |    |                         |          |                |          |          |                     |
| CB4856 HS                                                                                                                       | II | 14816136                | 14840005 | WBGene00003651 | nhr-61   | W01D2.2  | -0.0723966005370698 |
| AGIWUR20157;AGIWUR25353;AGIWUR29518;AGIWUR30187                                                                                 |    |                         |          |                |          |          |                     |
| CB4856 HS                                                                                                                       | II | 14843177                | 14850905 | WBGene00000399 | cdh-7    | R05H10.6 |                     |
| 0.0850299581588407                                                                                                              |    | AGIWUR6629              |          |                |          |          |                     |
| CB4856 HS                                                                                                                       | II | 14852430                | 14853594 | WBGene00011042 | R05H10.1 |          | R05H10.1            |
| 0.068753778685938                                                                                                               |    | AGIWUR42783             |          |                |          |          |                     |
| CB4856 HS                                                                                                                       | II | 14855529                | 14857010 | WBGene00011046 | R05H10.7 |          | R05H10.7            |
| -0.301222704221258                                                                                                              |    | AGIWUR24851             |          |                |          |          |                     |
| CB4856 HS                                                                                                                       | II | 14857259                | 14866636 | WBGene00011043 | rbm-28   | R05H10.2 |                     |
| 0.177348111223727                                                                                                               |    | AGIWUR4595              |          |                |          |          |                     |
| CB4856 HS                                                                                                                       | II | 14866716                | 14869577 | WBGene00011045 | gpx-2    | R05H10.5 |                     |
| 0.0737641968688649                                                                                                              |    | AGIWUR24659             |          |                |          |          |                     |
| CB4856 HS                                                                                                                       | II | 14869944                | 14883054 | WBGene00011044 | R05H10.3 |          | R05H10.3            |
| -0.112049857781633                                                                                                              |    | AGIWUR38905             |          |                |          |          |                     |
| CB4856 HS                                                                                                                       | II | 14902493                | 14907533 | WBGene00000584 | cog-1    | R03C1.3  | 0.138392279397041   |
| AGIWUR6298;AGIWUR13164;AGIWUR13360;AGIWUR13897;AGIWUR23597;AGIWUR32475                                                          |    |                         |          |                |          |          |                     |
| CB4856 HS                                                                                                                       | II | 14907508                | 14910405 | WBGene00010987 | R03C1.1  | R03C1.1  | -0.418280116246168  |
| AGIWUR36717;AGIWUR40106                                                                                                         |    |                         |          |                |          |          |                     |
| CB4856 HS                                                                                                                       | II | 14919705                | 14953312 | WBGene00008443 | pde-3    | E01F3.1  | -0.171604188592395  |
| AGIWUR2735;AGIWUR5932;AGIWUR6278;AGIWUR7192;AGIWUR10161;AGIWUR10894;AGIWUR16006;AGIWUR25584;AGIWUR29713;AGIWUR40204;AGIWUR41494 |    |                         |          |                |          |          |                     |
| CB4856 HS                                                                                                                       | II | 14954278                | 14958189 | WBGene00013149 | Y53F4B.1 |          | Y53F4B.1            |
| -0.0913246630168025                                                                                                             |    | AGIWUR36946             |          |                |          |          |                     |
| CB4856 HS                                                                                                                       | II | 14959675                | 14964108 | WBGene00001247 | elo-9    | Y53F4B.2 |                     |
| 0.170765509027311                                                                                                               |    | AGIWUR40927             |          |                |          |          |                     |
| CB4856 HS                                                                                                                       | II | 14968633                | 14969354 | WBGene00013150 | Y53F4B.3 |          | Y53F4B.3            |
| 0.0779540732473691                                                                                                              |    | AGIWUR40915             |          |                |          |          |                     |
| CB4856 HS                                                                                                                       | II | 14969617                | 14977005 | WBGene00013151 | nsun-5   | Y53F4B.4 |                     |
| 0.0460655893297686                                                                                                              |    | AGIWUR13954;AGIWUR28834 |          |                |          |          |                     |
| CB4856 HS                                                                                                                       | II | 14982592                | 14984009 | WBGene00013152 | Y53F4B.5 |          | Y53F4B.5            |
| -0.27940082849104                                                                                                               |    | AGIWUR25839             |          |                |          |          |                     |
| CB4856 HS                                                                                                                       | II | 14985806                | 14987225 | WBGene00013153 | Y53F4B.6 |          | Y53F4B.6            |

|                     |                                                            |          |                |                 |           |
|---------------------|------------------------------------------------------------|----------|----------------|-----------------|-----------|
| -0.0230632120811958 | AGIWUR3788;AGIWUR23842;AGIWUR26105;AGIWUR36212;AGIWUR36748 |          |                |                 |           |
| CB4856 HS II        | 14988471                                                   | 14992667 | WBGene00044726 | Y53F4B.43       | Y53F4B.43 |
| -0.116137850530514  | AGIWUR13396;AGIWUR22421;AGIWUR27105                        |          |                |                 |           |
| CB4856 HS II        | 14994197                                                   | 14997444 | WBGene00013155 | Y53F4B.8        | Y53F4B.8  |
| -0.0364025739848284 | AGIWUR38021                                                |          |                |                 |           |
| CB4856 HS II        | 15001896                                                   | 15003510 | WBGene00013157 | Y53F4B.10       | Y53F4B.10 |
| -0.0891756812499285 | AGIWUR34468                                                |          |                |                 |           |
| CB4856 HS II        | 15004869                                                   | 15010416 | WBGene00013156 | Y53F4B.9        | Y53F4B.9  |
| 0.0795826746221842  | AGIWUR36328                                                |          |                |                 |           |
| CB4856 HS II        | 15010748                                                   | 15013408 | WBGene00013158 | Y53F4B.11       | Y53F4B.11 |
| 0.111399042407644   | AGIWUR2609                                                 |          |                |                 |           |
| CB4856 HS II        | 15019223                                                   | 15025768 | WBGene00013159 | Y53F4B.12       | Y53F4B.12 |
| -0.0861878179933147 | AGIWUR38902                                                |          |                |                 |           |
| CB4856 HS II        | 15026137                                                   | 15037807 | WBGene00013160 | Y53F4B.13       | Y53F4B.13 |
| -0.030642214302123  | AGIWUR26575                                                |          |                |                 |           |
| CB4856 HS II        | 15037991                                                   | 15039297 | WBGene00013161 | Y53F4B.14       | Y53F4B.14 |
| -0.145025873828636  | AGIWUR12472;AGIWUR18353                                    |          |                |                 |           |
| CB4856 HS II        | 15039404                                                   | 15048904 | WBGene00000208 | asc-1 Y53F4B.15 |           |
| 0.0100936498735535  | AGIWUR15313;AGIWUR41331;AGIWUR44728                        |          |                |                 |           |
| CB4856 HS II        | 15052085                                                   | 15055718 | WBGene00013162 | Y53F4B.16       | Y53F4B.16 |
| -0.0588287457409695 | AGIWUR16810                                                |          |                |                 |           |
| CB4856 HS II        | 15064267                                                   | 15071671 | WBGene00013164 | Y53F4B.18       | Y53F4B.18 |
| -0.0327028289405042 | AGIWUR33080                                                |          |                |                 |           |
| CB4856 HS II        | 15077218                                                   | 15079475 | WBGene00013165 | Y53F4B.19       | Y53F4B.19 |
| 0.241584105655038   | AGIWUR8305;AGIWUR20252;AGIWUR43799                         |          |                |                 |           |
| CB4856 HS II        | 15084476                                                   | 15089626 | WBGene00013166 | Y53F4B.20       | Y53F4B.20 |
| -0.0637866181210969 | AGIWUR10663                                                |          |                |                 |           |
| CB4856 HS II        | 15090172                                                   | 15109042 | WBGene00013167 | Y53F4B.21       | Y53F4B.21 |
| -0.0121377839250334 | AGIWUR3656;AGIWUR23425;AGIWUR24369;AGIWUR38305;AGIWUR42729 |          |                |                 |           |
| CB4856 HS II        | 15110144                                                   | 15116306 | WBGene00013176 | Y53F4B.39       | Y53F4B.39 |
| 0.114558497940065   | AGIWUR38178                                                |          |                |                 |           |
| CB4856 HS II        | 15117686                                                   | 15117963 | WBGene00044729 | Y53F4B.46       | Y53F4B.46 |
| 0.00831304113950004 | AGIWUR5825;AGIWUR8271;AGIWUR12857;AGIWUR33283;AGIWUR37234  |          |                |                 |           |
| CB4856 HS II        | 15118282                                                   | 15118951 | WBGene00014920 | Y53F4B.38       | Y53F4B.38 |
| -0.0656112341955946 | AGIWUR17970;AGIWUR35908                                    |          |                |                 |           |
| CB4856 HS II        | 15120301                                                   | 15123345 | WBGene00013168 | arp-1 Y53F4B.22 |           |
| 0.0867574336605585  | AGIWUR3603                                                 |          |                |                 |           |
| CB4856 HS II        | 15124504                                                   | 15126365 | WBGene00013169 | Y53F4B.23       | Y53F4B.23 |
| 0.154324895039286   | AGIWUR31793;AGIWUR32003                                    |          |                |                 |           |

|                                   |                        |                |                |            |                             |
|-----------------------------------|------------------------|----------------|----------------|------------|-----------------------------|
| CB4856 HS II                      | 15136186               | 15145370       | WBGene00013171 | Y53F4B.25  | Y53F4B.25                   |
| 0.306084674259772                 | AGIWUR5360             |                |                |            |                             |
| CB4856 HS II                      | 15145894               | 15151934       | WBGene00013173 | Y53F4B.27  | Y53F4B.27                   |
| -0.0093123593317479               | AGIWUR27560            |                |                |            |                             |
| CB4856 HS II                      | 15158180               | 15163614       | WBGene00004234 | ptr-20     | Y53F4B.28                   |
| -0.182060374814483                | AGIWUR24814            |                |                |            |                             |
| CB4856 HS II                      | 15163808               | 15164646       | WBGene00001774 | gst-26     | Y53F4B.29                   |
| 0.120473253563791                 | AGIWUR6018             |                |                |            |                             |
| CB4856 HS II                      | 15164890               | 15165731       | WBGene00001775 | gst-27     | Y53F4B.30                   |
| 0.0336806787092918                | AGIWUR31989            |                |                |            |                             |
| CB4856 HS II                      | 15166194               | 15167406       | WBGene00001776 | gst-28     | Y53F4B.31                   |
| 0.127420018067598                 | AGIWUR1127             |                |                |            |                             |
| CB4856 HS II                      | 15168538               | 15169860       | WBGene00001777 | gst-29     | Y53F4B.32                   |
| -0.157346185921636                | AGIWUR31465            |                |                |            |                             |
| CB4856 HS II                      | 15171163               | 15171912       | WBGene00001787 | gst-39     | Y53F4B.33                   |
| 0.0375137789534019                | AGIWUR6423             |                |                |            |                             |
| CB4856 HS II                      | 15174271               | 15174965       | WBGene00001779 | gst-31     | Y53F4B.35                   |
| 0.0137445204108708                | AGIWUR37191            |                |                |            |                             |
| CB4856 HS II                      | 15175943               | 15177271       | WBGene00013175 | Y53F4B.36  | Y53F4B.36                   |
| 0.127891679565297                 | AGIWUR4348;AGIWUR23408 |                |                |            |                             |
| CB4856 HS II                      | 15177372               | 15178594       | WBGene00001780 | gst-32     | Y53F4B.37                   |
| -0.12112617131819                 | AGIWUR32214            |                |                |            |                             |
| CB4856 HS II                      | 15179971               | 15183232       | WBGene00001782 | gst-34     | Y1H11.1 -0.0845479524624144 |
| AGIWUR779;AGIWUR18828;AGIWUR37638 |                        |                |                |            |                             |
| CB4856 HS II                      | 15183801               | 15185385       | WBGene00001783 | gst-35     | Y1H11.2 0.331102875561111   |
| AGIWUR2855                        |                        |                |                |            |                             |
| CB4856 HS II                      | 15196214               | 15198075       | WBGene00021598 | Y46E12BR.1 | Y46E12BR.1                  |
| 0.0897695357558543                | AGIWUR26873            |                |                |            |                             |
| CB4856 HS II                      | 15207443               | 15229725       | WBGene00021597 | spsb-1     | Y46E12BL.4                  |
| 0.00311678213935807               | AGIWUR15839            |                |                |            |                             |
| CB4856 HS II                      | 15230343               | 15232803       | WBGene00021596 | spsb-2     | Y46E12BL.3                  |
| -0.0337737507501643               | AGIWUR17487            |                |                |            |                             |
| CB4856 HS II                      | 15233153               | 15244931       | WBGene00021595 | Y46E12BL.2 | Y46E12BL.2                  |
| 0.220591816736249                 | AGIWUR12187            |                |                |            |                             |
| CB4856 HS II                      | 15268212               | 15275689       | WBGene00007064 | 2RSSE.1    | 2RSSE.1 -0.0623361096737756 |
| AGIWUR40832;AGIWUR43546           |                        |                |                |            |                             |
| CB4856 HS III                     | 1271 3092              | WBGene00008352 | fbxa-6         | cTel54X.1  | -0.325034837423063          |
| AGIWUR922;AGIWUR23412;AGIWUR38130 |                        |                |                |            |                             |
| CB4856 HS III                     | 3321 11940             | WBGene00019183 | npr-30         | H10E21.2   | 0.0550087232910066          |

|                                                                                                             |     |        |        |                |          |          |                      |             |
|-------------------------------------------------------------------------------------------------------------|-----|--------|--------|----------------|----------|----------|----------------------|-------------|
| AGIWUR33824                                                                                                 |     |        |        |                |          |          |                      |             |
| CB4856 HS                                                                                                   | III | 12170  | 14869  | WBGene00003670 | nhr-80   | H10E21.3 | 0.263722988890704    |             |
| AGIWUR301                                                                                                   |     |        |        |                |          |          |                      |             |
| CB4856 HS                                                                                                   | III | 15720  | 17332  | WBGene00019182 | H10E21.1 | H10E21.1 | 0.220718463816912    |             |
| AGIWUR6087;AGIWUR27387                                                                                      |     |        |        |                |          |          |                      |             |
| CB4856 HS                                                                                                   | III | 17316  | 19675  | WBGene00019184 | H10E21.4 | H10E21.4 | -0.108028054533866   |             |
| AGIWUR9512                                                                                                  |     |        |        |                |          |          |                      |             |
| CB4856 HS                                                                                                   | III | 20531  | 23962  | WBGene00019185 | H10E21.5 | H10E21.5 | 0.30322359430599     |             |
| AGIWUR42375                                                                                                 |     |        |        |                |          |          |                      |             |
| CB4856 HS                                                                                                   | III | 35454  | 39462  | WBGene00021041 | W05G11.4 | W05G11.4 | 0.453594921081054    |             |
| AGIWUR21738                                                                                                 |     |        |        |                |          |          |                      |             |
| CB4856 HS                                                                                                   | III | 41061  | 42021  | WBGene00000663 | col-88   | W05G11.3 | -0.161395719655555   |             |
| AGIWUR40441                                                                                                 |     |        |        |                |          |          |                      |             |
| CB4856 HS                                                                                                   | III | 57702  | 58682  | WBGene00021040 | W05G11.2 | W05G11.2 | 0.223445438214485    |             |
| AGIWUR3886                                                                                                  |     |        |        |                |          |          |                      |             |
| CB4856 HS                                                                                                   | III | 62888  | 66261  | WBGene00021043 | pck-1    | W05G11.6 | -0.0142043574247346  |             |
| AGIWUR11857;AGIWUR14639;AGIWUR19103;AGIWUR23802;AGIWUR24065;AGIWUR25842;AGIWUR34655;AGIWUR38529;AGIWUR41918 |     |        |        |                |          |          |                      |             |
| CB4856 HS                                                                                                   | III | 69073  | 69817  | WBGene00005014 | spt-4    | F54C4.2  | 0.107912555777062    | AGIWUR11937 |
| CB4856 HS                                                                                                   | III | 70442  | 86384  | WBGene00018794 | attf-3   | F54C4.3  | 0.119418917026817    | AGIWUR6291  |
| CB4856 HS                                                                                                   | III | 86677  | 87381  | WBGene00018795 | F54C4.4  | F54C4.4  | 0.236780914291346    | AGIWUR11681 |
| CB4856 HS                                                                                                   | III | 87559  | 89243  | WBGene00018793 | mrpl-40  | F54C4.1  | 0.0815740619920753   | AGIWUR18193 |
| CB4856 HS                                                                                                   | III | 89453  | 94809  | WBGene00003931 | pat-4    | C29F9.7  | -0.0969184981587929  | AGIWUR26748 |
| CB4856 HS                                                                                                   | III | 95394  | 97726  | WBGene00016222 | C29F9.8  | C29F9.8  | -0.0730794881898262  | AGIWUR17287 |
| CB4856 HS                                                                                                   | III | 106824 | 107899 | WBGene00016224 | fbxa-57  | C29F9.10 | 0.0839342680433202   |             |
| AGIWUR32662                                                                                                 |     |        |        |                |          |          |                      |             |
| CB4856 HS                                                                                                   | III | 109322 | 110185 | WBGene00016225 | fbxa-58  | C29F9.11 | 0.425533284105999    |             |
| AGIWUR32908                                                                                                 |     |        |        |                |          |          |                      |             |
| CB4856 HS                                                                                                   | III | 114903 | 116619 | WBGene00016221 | C29F9.6  | C29F9.6  | -0.0204952727707273  | AGIWUR41447 |
| CB4856 HS                                                                                                   | III | 117707 | 118767 | WBGene00016220 | C29F9.5  | C29F9.5  | -0.381562307215461   | AGIWUR24053 |
| CB4856 HS                                                                                                   | III | 120492 | 124641 | WBGene00016219 | pals-24  | C29F9.4  | -0.474982622898206   |             |
| AGIWUR14875;AGIWUR40400                                                                                     |     |        |        |                |          |          |                      |             |
| CB4856 HS                                                                                                   | III | 124778 | 126527 | WBGene00016218 | pals-23  | C29F9.3  | -0.21803660506454    |             |
| AGIWUR245;AGIWUR5444;AGIWUR26093;AGIWUR30406;AGIWUR30704;AGIWUR34729;AGIWUR34764                            |     |        |        |                |          |          |                      |             |
| CB4856 HS                                                                                                   | III | 130180 | 130750 | WBGene00016227 | nhr-280  | C29F9.13 | 0.0519306117910681   |             |
| AGIWUR8933;AGIWUR19189;AGIWUR27290;AGIWUR38196;AGIWUR39253                                                  |     |        |        |                |          |          |                      |             |
| CB4856 HS                                                                                                   | III | 130947 | 131751 | WBGene00016217 | C29F9.2  | C29F9.2  | -0.210367836117834   | AGIWUR9509  |
| CB4856 HS                                                                                                   | III | 132418 | 134401 | WBGene00016216 | pals-22  | C29F9.1  | -0.05823917821699    | AGIWUR40864 |
| CB4856 HS                                                                                                   | III | 134494 | 137975 | WBGene00020540 | pals-25  | T17A3.2  | -0.00396053394929652 | AGIWUR36367 |
| CB4856 HS                                                                                                   | III | 142121 | 143217 | WBGene00020542 | fbxb-82  | T17A3.4  | -0.139710505016957   | AGIWUR11919 |

|                                                            |    |     |        |        |                |          |          |                     |                     |
|------------------------------------------------------------|----|-----|--------|--------|----------------|----------|----------|---------------------|---------------------|
| CB4856                                                     | HS | III | 143631 | 144792 | WBGene00020543 | fbxb-83  | T17A3.6  | 0.0265972840517259  | AGIWUR12633         |
| CB4856                                                     | HS | III | 144994 | 145299 | WBGene00020548 | T17A3.12 |          | T17A3.12            | -0.0516360651440664 |
| AGIWUR35103                                                |    |     |        |        |                |          |          |                     |                     |
| CB4856                                                     | HS | III | 145360 | 146491 | WBGene00020544 | fbxb-84  | T17A3.7  | -0.357850838095804  | AGIWUR4909          |
| CB4856                                                     | HS | III | 146917 | 147607 | WBGene00269434 | sqst-5   | T17A3.13 |                     | 0.110343376882067   |
| AGIWUR8165;AGIWUR15973;AGIWUR24457                         |    |     |        |        |                |          |          |                     |                     |
| CB4856                                                     | HS | III | 150481 | 151805 | WBGene00020547 | srz-7    | T17A3.11 |                     | -0.0619081754532376 |
| AGIWUR1435                                                 |    |     |        |        |                |          |          |                     |                     |
| CB4856                                                     | HS | III | 152572 | 153418 | WBGene00020545 | adbp-2   | T17A3.9  | 0.0375613406520507  | AGIWUR16101         |
| CB4856                                                     | HS | III | 154475 | 156674 | WBGene00020546 | T17A3.10 |          | T17A3.10            | 2.00223414697856    |
| AGIWUR19180                                                |    |     |        |        |                |          |          |                     |                     |
| CB4856                                                     | HS | III | 156824 | 163542 | WBGene00006894 | ver-1    | T17A3.1  | -0.179331738809525  | AGIWUR29063         |
| CB4856                                                     | HS | III | 163598 | 164875 | WBGene00018244 | F40G9.8  | F40G9.8  | 0.18278372493182    | AGIWUR31936         |
| CB4856                                                     | HS | III | 165690 | 166285 | WBGene00018243 | F40G9.7  | F40G9.7  | -0.301445187017994  | AGIWUR25649         |
| CB4856                                                     | HS | III | 167385 | 169556 | WBGene00189954 | F40G9.18 |          | F40G9.18            | 0.121177572259924   |
| AGIWUR35541                                                |    |     |        |        |                |          |          |                     |                     |
| CB4856                                                     | HS | III | 173797 | 174558 | WBGene00189955 | F40G9.19 |          | F40G9.19            | -0.215301576272479  |
| AGIWUR17083                                                |    |     |        |        |                |          |          |                     |                     |
| CB4856                                                     | HS | III | 174609 | 175833 | WBGene00018246 | clcc-148 |          | F40G9.10            | -0.185638153457813  |
| AGIWUR4961                                                 |    |     |        |        |                |          |          |                     |                     |
| CB4856                                                     | HS | III | 176111 | 177815 | WBGene00018248 | F40G9.14 |          | F40G9.14            | 0.126779608378145   |
| AGIWUR9016                                                 |    |     |        |        |                |          |          |                     |                     |
| CB4856                                                     | HS | III | 179542 | 180140 | WBGene00018242 | F40G9.6  | F40G9.6  | 0.079610347068142   | AGIWUR33631         |
| CB4856                                                     | HS | III | 181561 | 182981 | WBGene00077531 | F40G9.15 |          | F40G9.15            | -0.24139057899774   |
| AGIWUR32497;AGIWUR36577;AGIWUR39549                        |    |     |        |        |                |          |          |                     |                     |
| CB4856                                                     | HS | III | 183231 | 184915 | WBGene00018241 | F40G9.5  | F40G9.5  | 0.0526425536210979  | AGIWUR37387         |
| CB4856                                                     | HS | III | 185652 | 186922 | WBGene00001963 | btb-1    | F40G9.4  | -0.0922737927104205 | AGIWUR9514          |
| CB4856                                                     | HS | III | 186951 | 188131 | WBGene00003510 | mxl-2    | F40G9.11 |                     | -0.0448208466291113 |
| AGIWUR14877                                                |    |     |        |        |                |          |          |                     |                     |
| CB4856                                                     | HS | III | 188838 | 190974 | WBGene00006715 | ubc-20   | F40G9.3  | 0.0284081552025377  |                     |
| AGIWUR5501;AGIWUR11356;AGIWUR36186;AGIWUR37947;AGIWUR38131 |    |     |        |        |                |          |          |                     |                     |
| CB4856                                                     | HS | III | 190986 | 191981 | WBGene00018240 | cox-17   | F40G9.2  | 0.165326163840067   | AGIWUR31562         |
| CB4856                                                     | HS | III | 194460 | 210063 | WBGene00185078 | F40G9.17 |          | F40G9.17            | -0.558437371593209  |
| AGIWUR33957                                                |    |     |        |        |                |          |          |                     |                     |
| CB4856                                                     | HS | III | 209992 | 230450 | WBGene00002230 | k1p-20   | Y50D7A.6 |                     | 0.0467093686119782  |
| AGIWUR17698                                                |    |     |        |        |                |          |          |                     |                     |
| CB4856                                                     | HS | III | 230429 | 235121 | WBGene00021755 | hpo-38   | Y50D7A.5 |                     | -0.0465043380962324 |
| AGIWUR10164                                                |    |     |        |        |                |          |          |                     |                     |
| CB4856                                                     | HS | III | 235844 | 254067 | WBGene00021754 | hpo-29   | Y50D7A.4 |                     | -0.0233905418669771 |

|                                                                                           |    |     |        |        |                |           |           |                     |
|-------------------------------------------------------------------------------------------|----|-----|--------|--------|----------------|-----------|-----------|---------------------|
| AGIWUR23049                                                                               |    |     |        |        |                |           |           |                     |
| CB4856                                                                                    | HS | III | 254535 | 264636 | WBGene00021753 | Y50D7A.3  | Y50D7A.3  | -0.0332488217154747 |
| AGIWUR3020;AGIWUR32669;AGIWUR45172                                                        |    |     |        |        |                |           |           |                     |
| CB4856                                                                                    | HS | III | 265090 | 266593 | WBGene00021759 | Y50D7A.11 | Y50D7A.11 | -0.0183331018945827 |
| AGIWUR17396                                                                               |    |     |        |        |                |           |           |                     |
| CB4856                                                                                    | HS | III | 268458 | 283009 | WBGene00021752 | xpd-1     | Y50D7A.2  | -0.312722650435575  |
| AGIWUR16560                                                                               |    |     |        |        |                |           |           |                     |
| CB4856                                                                                    | HS | III | 284117 | 289444 | WBGene00021757 | taco-1    | Y50D7A.9  | 0.193689805015742   |
| AGIWUR6437                                                                                |    |     |        |        |                |           |           |                     |
| CB4856                                                                                    | HS | III | 292640 | 314266 | WBGene00021751 | Y50D7A.1  | Y50D7A.1  | -0.171758904861294  |
| AGIWUR30024                                                                               |    |     |        |        |                |           |           |                     |
| CB4856                                                                                    | HS | III | 315460 | 321721 | WBGene00021758 | Y50D7A.10 | Y50D7A.10 | 0.0435774363829182  |
| AGIWUR2997;AGIWUR9957;AGIWUR40637                                                         |    |     |        |        |                |           |           |                     |
| CB4856                                                                                    | HS | III | 335956 | 343241 | WBGene00021756 | Y50D7A.8  | Y50D7A.8  | -0.0562564155091998 |
| AGIWUR15243                                                                               |    |     |        |        |                |           |           |                     |
| CB4856                                                                                    | HS | III | 344307 | 378250 | WBGene00001561 | gei-4     | W07B3.2   | -0.0577696426372114 |
| AGIWUR34;AGIWUR2203;AGIWUR4322;AGIWUR9947;AGIWUR12564;AGIWUR37982;AGIWUR38490;AGIWUR43785 |    |     |        |        |                |           |           |                     |
| CB4856                                                                                    | HS | III | 378004 | 381298 | WBGene00019636 | gsto-3    | K10F12.4  | -0.295771646258297  |
| AGIWUR38396                                                                               |    |     |        |        |                |           |           |                     |
| CB4856                                                                                    | HS | III | 381900 | 382570 | WBGene00019639 | K10F12.7  | K10F12.7  | -0.23192170600023   |
| AGIWUR31688                                                                               |    |     |        |        |                |           |           |                     |
| CB4856                                                                                    | HS | III | 383771 | 384827 | WBGene00023104 | K10F12.8  | K10F12.8  | -0.0557491362310403 |
| AGIWUR25628;AGIWUR32699;AGIWUR33484;AGIWUR37265;AGIWUR42159                               |    |     |        |        |                |           |           |                     |
| CB4856                                                                                    | HS | III | 398730 | 399392 | WBGene00019638 | K10F12.6  | K10F12.6  | -0.273576710360931  |
| AGIWUR36075                                                                               |    |     |        |        |                |           |           |                     |
| CB4856                                                                                    | HS | III | 402384 | 405589 | WBGene00021909 | Y55B1BL.1 | Y55B1BL.1 | 0.194458856936675   |
| AGIWUR8894;AGIWUR10666;AGIWUR13026;AGIWUR20424                                            |    |     |        |        |                |           |           |                     |
| CB4856                                                                                    | HS | III | 408094 | 418738 | WBGene00021910 | stim-1    | Y55B1BM.1 | -0.028904054680627  |
| AGIWUR37725                                                                               |    |     |        |        |                |           |           |                     |
| CB4856                                                                                    | HS | III | 429300 | 431750 | WBGene00021913 | cec-8     | Y55B1BR.3 | -0.331279015641156  |
| AGIWUR21073                                                                               |    |     |        |        |                |           |           |                     |
| CB4856                                                                                    | HS | III | 434891 | 440142 | WBGene00021912 | Y55B1BR.2 | Y55B1BR.2 | -0.275620422997223  |
| AGIWUR10365                                                                               |    |     |        |        |                |           |           |                     |
| CB4856                                                                                    | HS | III | 453785 | 463811 | WBGene00044401 | Y55B1BR.6 | Y55B1BR.6 | 0.0744781277245821  |
| AGIWUR16016;AGIWUR19782;AGIWUR25028;AGIWUR28804;AGIWUR32799                               |    |     |        |        |                |           |           |                     |
| CB4856                                                                                    | HS | III | 464715 | 471702 | WBGene00021914 | magu-1    | Y55B1BR.4 | -0.133096222829845  |
| AGIWUR9636;AGIWUR33177;AGIWUR35853                                                        |    |     |        |        |                |           |           |                     |
| CB4856                                                                                    | HS | III | 472301 | 475349 | WBGene00017328 | F10C5.2   | F10C5.2   | 0.0367611078937937  |
| CB4856                                                                                    | HS | III | 475454 | 482322 | WBGene00003134 | mat-3     | F10C5.1   | -0.191971441771578  |
|                                                                                           |    |     |        |        |                |           |           | AGIWUR41874         |
|                                                                                           |    |     |        |        |                |           |           | AGIWUR30332         |



|                                                                        |    |     |        |        |                |           |           |                     |             |
|------------------------------------------------------------------------|----|-----|--------|--------|----------------|-----------|-----------|---------------------|-------------|
| CB4856                                                                 | HS | III | 486123 | 486547 | WBGene00003770 | nlp-32    | F30H5.2   | -0.0743700061962125 | AGIWUR5416  |
| CB4856                                                                 | HS | III | 488764 | 489452 | WBGene00044288 | F30H5.5   | F30H5.5   | -0.0855043186770215 |             |
| AGIWUR1090;AGIWUR12017;AGIWUR13475;AGIWUR25827                         |    |     |        |        |                |           |           |                     |             |
| CB4856                                                                 | HS | III | 491547 | 502625 | WBGene00006781 | unc-45    | F30H5.1   | -0.270122878712259  | AGIWUR15042 |
| CB4856                                                                 | HS | III | 505241 | 512217 | WBGene00017937 | F30H5.3   | F30H5.3   | -0.0619564773838173 | AGIWUR28952 |
| CB4856                                                                 | HS | III | 513720 | 516614 | WBGene00020704 | T22F7.5   | T22F7.5   | 0.0330940596269054  | AGIWUR18109 |
| CB4856                                                                 | HS | III | 518356 | 524044 | WBGene00020702 | T22F7.3   | T22F7.3   | -0.264199922103577  | AGIWUR35438 |
| CB4856                                                                 | HS | III | 525234 | 526924 | WBGene00020703 | T22F7.4   | T22F7.4   | -0.148648248573519  | AGIWUR20184 |
| CB4856                                                                 | HS | III | 542066 | 546537 | WBGene00020701 | T22F7.1   | T22F7.1   | 0.145897285238849   | AGIWUR2200  |
| CB4856                                                                 | HS | III | 557518 | 572137 | WBGene00015155 | B0353.1   | B0353.1   | -0.0797775613172673 |             |
| AGIWUR21682;AGIWUR27532;AGIWUR33521                                    |    |     |        |        |                |           |           |                     |             |
| CB4856                                                                 | HS | III | 573984 | 576447 | WBGene00021903 | Y55B1AL.1 | Y55B1AL.1 | 0.223223300026806   |             |
| AGIWUR5302                                                             |    |     |        |        |                |           |           |                     |             |
| CB4856                                                                 | HS | III | 576956 | 577567 | WBGene00021904 | Y55B1AL.2 | Y55B1AL.2 | 0.00841451321121767 |             |
| AGIWUR5763;AGIWUR12164;AGIWUR16417;AGIWUR23626;AGIWUR25079;AGIWUR43817 |    |     |        |        |                |           |           |                     |             |
| CB4856                                                                 | HS | III | 577684 | 587105 | WBGene00021905 | helq-1    | Y55B1AL.3 | -0.151409591279844  |             |
| AGIWUR20903                                                            |    |     |        |        |                |           |           |                     |             |
| CB4856                                                                 | HS | III | 587244 | 598117 | WBGene00021906 | Y55B1AR.2 | Y55B1AR.2 | -0.103728219803189  |             |
| AGIWUR1743;AGIWUR21403;AGIWUR32389                                     |    |     |        |        |                |           |           |                     |             |
| CB4856                                                                 | HS | III | 599509 | 600366 | WBGene00002269 | lec-6     | Y55B1AR.1 | 0.196906831863659   |             |
| AGIWUR670;AGIWUR6324;AGIWUR18866;AGIWUR21263;AGIWUR33575;AGIWUR43375   |    |     |        |        |                |           |           |                     |             |
| CB4856                                                                 | HS | III | 602708 | 603822 | WBGene00021907 | Y55B1AR.3 | Y55B1AR.3 | 0.297534323606063   |             |
| AGIWUR22782                                                            |    |     |        |        |                |           |           |                     |             |
| CB4856                                                                 | HS | III | 604003 | 605515 | WBGene00021908 | Y55B1AR.4 | Y55B1AR.4 | 0.0342957462901499  |             |
| AGIWUR6153                                                             |    |     |        |        |                |           |           |                     |             |
| CB4856                                                                 | HS | III | 606004 | 606994 | WBGene00020566 | ttr-7     | T19C3.9   | 0.253530835152205   | AGIWUR12291 |
| CB4856                                                                 | HS | III | 607045 | 609973 | WBGene00020559 | best-17   | T19C3.1   | 0.227896857381566   | AGIWUR246   |
| CB4856                                                                 | HS | III | 610881 | 614547 | WBGene00020561 | T19C3.3   | T19C3.3   | 0.102057014360067   | AGIWUR28405 |
| CB4856                                                                 | HS | III | 614707 | 617447 | WBGene00020560 | T19C3.2   | T19C3.2   | 0.0783721718768358  |             |
| AGIWUR27733;AGIWUR37800                                                |    |     |        |        |                |           |           |                     |             |
| CB4856                                                                 | HS | III | 618246 | 620254 | WBGene00020562 | T19C3.4   | T19C3.4   | -0.0112099162788724 | AGIWUR19194 |
| CB4856                                                                 | HS | III | 624607 | 627938 | WBGene00020563 | T19C3.5   | T19C3.5   | 0.259285422125239   | AGIWUR17749 |
| CB4856                                                                 | HS | III | 628175 | 630987 | WBGene00020564 | T19C3.6   | T19C3.6   | -0.301266859605921  | AGIWUR11209 |
| CB4856                                                                 | HS | III | 631938 | 634645 | WBGene00001412 | fem-2     | T19C3.8   | 0.0753390214862222  | AGIWUR12509 |
| CB4856                                                                 | HS | III | 634893 | 636167 | WBGene00020565 | T19C3.7   | T19C3.7   | 0.0477323408295911  | AGIWUR7024  |
| CB4856                                                                 | HS | III | 636479 | 638419 | WBGene00021063 | slds-1    | W06E11.4  | -0.0816268268602052 |             |
| AGIWUR37227                                                            |    |     |        |        |                |           |           |                     |             |
| CB4856                                                                 | HS | III | 638531 | 640226 | WBGene00044319 | tag-266   | W06E11.5  | -0.28485127716107   |             |
| AGIWUR19835;AGIWUR27606                                                |    |     |        |        |                |           |           |                     |             |

|                                                                                    |    |     |        |        |                |          |          |                     |             |
|------------------------------------------------------------------------------------|----|-----|--------|--------|----------------|----------|----------|---------------------|-------------|
| CB4856                                                                             | HS | III | 640790 | 641625 | WBGene00044318 | tag-267  | W06E11.2 | -0.200253324416565  |             |
| AGIWUR22516                                                                        |    |     |        |        |                |          |          |                     |             |
| CB4856                                                                             | HS | III | 642059 | 645613 | WBGene00021061 | W06E11.1 | W06E11.1 | -0.240546435413031  |             |
| AGIWUR14099;AGIWUR36340                                                            |    |     |        |        |                |          |          |                     |             |
| CB4856                                                                             | HS | III | 646754 | 654463 | WBGene00015648 | orai-1   | C09F5.2  | -0.0957823644745108 |             |
| AGIWUR14468;AGIWUR23243                                                            |    |     |        |        |                |          |          |                     |             |
| CB4856                                                                             | HS | III | 658709 | 662732 | WBGene00015647 | C09F5.1  | C09F5.1  | 0.119800098533521   | AGIWUR8004  |
| CB4856                                                                             | HS | III | 662847 | 666265 | WBGene00015649 | C09F5.3  | C09F5.3  | -0.1444246197098    | AGIWUR9052  |
| CB4856                                                                             | HS | III | 668098 | 668433 | WBGene00020923 | W02B3.3  | W02B3.3  | -0.0187182554244085 | AGIWUR26697 |
| CB4856                                                                             | HS | III | 676122 | 680253 | WBGene00001709 | grk-2    | W02B3.2  | -0.0383965218422242 |             |
| AGIWUR2530;AGIWUR28189                                                             |    |     |        |        |                |          |          |                     |             |
| CB4856                                                                             | HS | III | 680634 | 683418 | WBGene00020924 | W02B3.4  | W02B3.4  | 0.0987116880861816  | AGIWUR42698 |
| CB4856                                                                             | HS | III | 686237 | 692033 | WBGene00020927 | W02B3.7  | W02B3.7  | 0.00715709507251105 | AGIWUR7724  |
| CB4856                                                                             | HS | III | 688739 | 715823 | WBGene00016029 | elf-1    | C24A1.2  | 0.220779345939381   | AGIWUR13322 |
| CB4856                                                                             | HS | III | 725022 | 726155 | WBGene00016028 | flp-24   | C24A1.1  | -0.0655227827547504 |             |
| AGIWUR8330;AGIWUR16177                                                             |    |     |        |        |                |          |          |                     |             |
| CB4856                                                                             | HS | III | 727211 | 752426 | WBGene00003936 | pat-12   | T17H7.4  | 0.0179417091259619  |             |
| AGIWUR17747;AGIWUR24713;AGIWUR43935                                                |    |     |        |        |                |          |          |                     |             |
| CB4856                                                                             | HS | III | 755298 | 758080 | WBGene00020551 | T17H7.7  | T17H7.7  | -0.319844881763775  | AGIWUR17028 |
| CB4856                                                                             | HS | III | 761779 | 762392 | WBGene00018363 | nlp-52   | F42G9.4  | 0.0972203669614906  | AGIWUR13691 |
| CB4856                                                                             | HS | III | 763810 | 771366 | WBGene00004212 | ptl-1    | F42G9.9  | 0.0622470563296669  |             |
| AGIWUR17260;AGIWUR23112;AGIWUR30034;AGIWUR30114;AGIWUR31642;AGIWUR43414            |    |     |        |        |                |          |          |                     |             |
| CB4856                                                                             | HS | III | 771577 | 772819 | WBGene00018365 | tpst-2   | F42G9.8  | 0.149526873986852   | AGIWUR18955 |
| CB4856                                                                             | HS | III | 773403 | 774159 | WBGene00000882 | cyn-6    | F42G9.2  | -0.0918818488446638 |             |
| AGIWUR2632;AGIWUR7089;AGIWUR13686;AGIWUR21840;AGIWUR23853;AGIWUR42813              |    |     |        |        |                |          |          |                     |             |
| CB4856                                                                             | HS | III | 774321 | 778871 | WBGene00000117 | alh-11   | F42G9.5  | -0.14288408943815   |             |
| AGIWUR25312;AGIWUR36861                                                            |    |     |        |        |                |          |          |                     |             |
| CB4856                                                                             | HS | III | 783714 | 786092 | WBGene00018362 | F42G9.1  | F42G9.1  | -0.0427229019474815 |             |
| AGIWUR2021;AGIWUR26590;AGIWUR41729                                                 |    |     |        |        |                |          |          |                     |             |
| CB4856                                                                             | HS | III | 786532 | 793733 | WBGene00004922 | snt-2    | F42G9.7  | -0.032409718160737  |             |
| AGIWUR6947;AGIWUR14223;AGIWUR27057;AGIWUR28596;AGIWUR35258;AGIWUR42534             |    |     |        |        |                |          |          |                     |             |
| CB4856                                                                             | HS | III | 794300 | 795120 | WBGene00004498 | rps-29   | B0412.4  | 0.471845904484326   |             |
| AGIWUR4823;AGIWUR17511;AGIWUR19190;AGIWUR30443;AGIWUR33838;AGIWUR34596;AGIWUR44337 |    |     |        |        |                |          |          |                     |             |
| CB4856                                                                             | HS | III | 795136 | 809439 | WBGene00015173 | trpp-11  | B0412.3  | -0.302393654989556  | AGIWUR28634 |
| CB4856                                                                             | HS | III | 811828 | 813773 | WBGene00000903 | daf-7    | B0412.2  | -0.158916571697794  | AGIWUR34983 |
| CB4856                                                                             | HS | III | 816145 | 821730 | WBGene00000895 | dac-1    | B0412.1  | -0.0763858238772279 | AGIWUR21958 |
| CB4856                                                                             | HS | III | 823222 | 826408 | WBGene00019328 | clcc-149 | K02F3.5  | 0.17033633972907    |             |
| AGIWUR8225;AGIWUR30863                                                             |    |     |        |        |                |          |          |                     |             |
| CB4856                                                                             | HS | III | 828590 | 832277 | WBGene00019329 | ceeh-1   | K02F3.6  | 0.176276441122859   |             |

AGIWUR5535;AGIWUR20354;AGIWUR29930;AGIWUR42060

|        |    |     |        |        |                |       |         |                    |             |
|--------|----|-----|--------|--------|----------------|-------|---------|--------------------|-------------|
| CB4856 | HS | III | 833858 | 835808 | WBGene00019327 | zip-2 | K02F3.4 | -0.153226058076619 | AGIWUR37051 |
|--------|----|-----|--------|--------|----------------|-------|---------|--------------------|-------------|

|        |    |     |        |        |                |       |         |                  |  |
|--------|----|-----|--------|--------|----------------|-------|---------|------------------|--|
| CB4856 | HS | III | 835815 | 839591 | WBGene00019331 | dos-3 | K02F3.8 | 0.14562485993614 |  |
|--------|----|-----|--------|--------|----------------|-------|---------|------------------|--|

AGIWUR14933;AGIWUR21593

|        |    |     |        |        |                |         |         |                   |             |
|--------|----|-----|--------|--------|----------------|---------|---------|-------------------|-------------|
| CB4856 | HS | III | 840460 | 841366 | WBGene00019332 | K02F3.9 | K02F3.9 | 0.201512219241589 | AGIWUR30193 |
|--------|----|-----|--------|--------|----------------|---------|---------|-------------------|-------------|

|        |    |     |        |        |                |       |         |                   |             |
|--------|----|-----|--------|--------|----------------|-------|---------|-------------------|-------------|
| CB4856 | HS | III | 842935 | 843802 | WBGene00001392 | far-8 | K02F3.3 | 0.227514090143437 | AGIWUR16155 |
|--------|----|-----|--------|--------|----------------|-------|---------|-------------------|-------------|

|        |    |     |        |        |                |         |         |                     |            |
|--------|----|-----|--------|--------|----------------|---------|---------|---------------------|------------|
| CB4856 | HS | III | 845842 | 850586 | WBGene00019326 | K02F3.2 | K02F3.2 | -0.0362894359949948 | AGIWUR6966 |
|--------|----|-----|--------|--------|----------------|---------|---------|---------------------|------------|

|        |    |     |        |        |                |        |          |                    |  |
|--------|----|-----|--------|--------|----------------|--------|----------|--------------------|--|
| CB4856 | HS | III | 851328 | 852396 | WBGene00019333 | moma-1 | K02F3.10 | 0.0917081827086932 |  |
|--------|----|-----|--------|--------|----------------|--------|----------|--------------------|--|

AGIWUR42016

|        |    |     |        |        |                |       |          |                    |  |
|--------|----|-----|--------|--------|----------------|-------|----------|--------------------|--|
| CB4856 | HS | III | 852801 | 853909 | WBGene00004388 | rnp-5 | K02F3.11 | -0.228102265968925 |  |
|--------|----|-----|--------|--------|----------------|-------|----------|--------------------|--|

AGIWUR17078

|        |    |     |        |        |                |        |         |                     |  |
|--------|----|-----|--------|--------|----------------|--------|---------|---------------------|--|
| CB4856 | HS | III | 854219 | 856535 | WBGene00006430 | tag-51 | K02F3.1 | -0.0932739202365536 |  |
|--------|----|-----|--------|--------|----------------|--------|---------|---------------------|--|

AGIWUR1565;AGIWUR16267;AGIWUR32843

|        |    |     |        |        |                |          |          |                     |  |
|--------|----|-----|--------|--------|----------------|----------|----------|---------------------|--|
| CB4856 | HS | III | 856560 | 860090 | WBGene00019334 | K02F3.12 | K02F3.12 | -0.0200746476315956 |  |
|--------|----|-----|--------|--------|----------------|----------|----------|---------------------|--|

AGIWUR15344;AGIWUR19706;AGIWUR40168

|        |    |     |        |        |                |          |          |                    |  |
|--------|----|-----|--------|--------|----------------|----------|----------|--------------------|--|
| CB4856 | HS | III | 860198 | 861324 | WBGene00000202 | exos-4.2 | Y6D11A.1 | -0.210856965778291 |  |
|--------|----|-----|--------|--------|----------------|----------|----------|--------------------|--|

AGIWUR23712;AGIWUR35800

|        |    |     |        |        |                |       |          |                   |  |
|--------|----|-----|--------|--------|----------------|-------|----------|-------------------|--|
| CB4856 | HS | III | 862306 | 865399 | WBGene00021170 | arx-4 | Y6D11A.2 | 0.104489096996563 |  |
|--------|----|-----|--------|--------|----------------|-------|----------|-------------------|--|

AGIWUR30094

|        |    |     |        |        |                |         |         |                   |  |
|--------|----|-----|--------|--------|----------------|---------|---------|-------------------|--|
| CB4856 | HS | III | 867512 | 869987 | WBGene00020758 | T24C4.2 | T24C4.2 | -0.24361764321597 |  |
|--------|----|-----|--------|--------|----------------|---------|---------|-------------------|--|

AGIWUR25065;AGIWUR38112;AGIWUR42624

|        |    |     |        |        |                |         |         |                     |  |
|--------|----|-----|--------|--------|----------------|---------|---------|---------------------|--|
| CB4856 | HS | III | 871783 | 872385 | WBGene00020759 | T24C4.3 | T24C4.3 | -0.0101319849066348 |  |
|--------|----|-----|--------|--------|----------------|---------|---------|---------------------|--|

AGIWUR14423;AGIWUR16344;AGIWUR41032;AGIWUR42660

|        |    |     |        |        |                |         |         |                      |  |
|--------|----|-----|--------|--------|----------------|---------|---------|----------------------|--|
| CB4856 | HS | III | 872622 | 873531 | WBGene00020760 | T24C4.4 | T24C4.4 | -0.00108684314511143 |  |
|--------|----|-----|--------|--------|----------------|---------|---------|----------------------|--|

AGIWUR2930;AGIWUR34970;AGIWUR38120;AGIWUR39190

|        |    |     |        |        |                |         |         |                   |  |
|--------|----|-----|--------|--------|----------------|---------|---------|-------------------|--|
| CB4856 | HS | III | 874310 | 875325 | WBGene00044681 | T24C4.8 | T24C4.8 | 0.223703718250452 |  |
|--------|----|-----|--------|--------|----------------|---------|---------|-------------------|--|

AGIWUR2329;AGIWUR6257;AGIWUR26491

|        |    |     |        |        |                |         |         |                   |            |
|--------|----|-----|--------|--------|----------------|---------|---------|-------------------|------------|
| CB4856 | HS | III | 877435 | 879734 | WBGene00020761 | T24C4.5 | T24C4.5 | 0.150496289585016 | AGIWUR2668 |
|--------|----|-----|--------|--------|----------------|---------|---------|-------------------|------------|

|        |    |     |        |        |                |         |         |                   |             |
|--------|----|-----|--------|--------|----------------|---------|---------|-------------------|-------------|
| CB4856 | HS | III | 879860 | 881506 | WBGene00020757 | ucr-2.3 | T24C4.1 | 0.140401414513166 | AGIWUR35884 |
|--------|----|-----|--------|--------|----------------|---------|---------|-------------------|-------------|

|        |    |     |        |        |                |       |         |                    |  |
|--------|----|-----|--------|--------|----------------|-------|---------|--------------------|--|
| CB4856 | HS | III | 881443 | 886789 | WBGene00020762 | zer-1 | T24C4.6 | 0.0156641563306161 |  |
|--------|----|-----|--------|--------|----------------|-------|---------|--------------------|--|

AGIWUR39357;AGIWUR44580

|        |    |     |        |        |                |        |         |                    |  |
|--------|----|-----|--------|--------|----------------|--------|---------|--------------------|--|
| CB4856 | HS | III | 889955 | 895634 | WBGene00020763 | ztf-18 | T24C4.7 | 0.0897846928375898 |  |
|--------|----|-----|--------|--------|----------------|--------|---------|--------------------|--|

AGIWUR8590;AGIWUR22251;AGIWUR24829;AGIWUR30563;AGIWUR41360;AGIWUR43319

|        |    |     |        |        |                |          |          |                    |  |
|--------|----|-----|--------|--------|----------------|----------|----------|--------------------|--|
| CB4856 | HS | III | 895786 | 900158 | WBGene00017758 | F23H11.2 | F23H11.2 | -0.110999540788113 |  |
|--------|----|-----|--------|--------|----------------|----------|----------|--------------------|--|

AGIWUR11974

|        |    |     |        |        |                |        |          |                     |  |
|--------|----|-----|--------|--------|----------------|--------|----------|---------------------|--|
| CB4856 | HS | III | 900138 | 901444 | WBGene00017759 | suc1-2 | F23H11.3 | -0.0965526800957512 |  |
|--------|----|-----|--------|--------|----------------|--------|----------|---------------------|--|

AGIWUR17484

|        |    |     |        |        |                |          |          |                    |  |
|--------|----|-----|--------|--------|----------------|----------|----------|--------------------|--|
| CB4856 | HS | III | 902151 | 907539 | WBGene00017760 | F23H11.4 | F23H11.4 | 0.0407703761488785 |  |
|--------|----|-----|--------|--------|----------------|----------|----------|--------------------|--|

AGIWUR6869;AGIWUR39276

|                                                                       |     |         |         |                |          |          |                     |             |
|-----------------------------------------------------------------------|-----|---------|---------|----------------|----------|----------|---------------------|-------------|
| CB4856 HS                                                             | III | 908328  | 909902  | WBGene00017763 | cr1s-1   | F23H11.9 | 0.110522146544813   |             |
| AGIWUR8468                                                            |     |         |         |                |          |          |                     |             |
| CB4856 HS                                                             | III | 909957  | 910589  | WBGene00000263 | F23H11.5 | F23H11.5 | 0.0917303166351235  |             |
| AGIWUR6932;AGIWUR8088;AGIWUR33553;AGIWUR37413;AGIWUR37756;AGIWUR41694 |     |         |         |                |          |          |                     |             |
| CB4856 HS                                                             | III | 911261  | 912243  | WBGene00017757 | bra-2    | F23H11.1 | 0.0127152320118178  |             |
| AGIWUR1147                                                            |     |         |         |                |          |          |                     |             |
| CB4856 HS                                                             | III | 913248  | 916997  | WBGene00017761 | F23H11.6 | F23H11.6 | 0.125589074845076   |             |
| AGIWUR33605                                                           |     |         |         |                |          |          |                     |             |
| CB4856 HS                                                             | III | 917088  | 919422  | WBGene00017762 | F23H11.7 | F23H11.7 | -0.0641944332690354 |             |
| AGIWUR13839                                                           |     |         |         |                |          |          |                     |             |
| CB4856 HS                                                             | III | 919528  | 926314  | WBGene00003969 | pef-1    | F23H11.8 | 0.16927290566775    |             |
| AGIWUR10891;AGIWUR36664                                               |     |         |         |                |          |          |                     |             |
| CB4856 HS                                                             | III | 933585  | 936067  | WBGene00020453 | fbxa-55  | T12B5.6  | -0.0254421119245096 | AGIWUR1047  |
| CB4856 HS                                                             | III | 937302  | 938061  | WBGene00020454 | fbxa-56  | T12B5.7  | 0.0305770408976214  | AGIWUR34001 |
| CB4856 HS                                                             | III | 938869  | 939437  | WBGene00020452 | fbxa-22  | T12B5.5  | 0.0838952715675241  | AGIWUR25671 |
| CB4856 HS                                                             | III | 940879  | 943469  | WBGene00020455 | fbxa-59  | T12B5.8  | 0.315360034638427   | AGIWUR41567 |
| CB4856 HS                                                             | III | 944795  | 946298  | WBGene00020456 | fbxa-60  | T12B5.10 | -0.123941561411455  |             |
| AGIWUR20061                                                           |     |         |         |                |          |          |                     |             |
| CB4856 HS                                                             | III | 947848  | 949092  | WBGene00020459 | fbxa-23  | T12B5.13 | 0.00282730080671811 |             |
| AGIWUR31728                                                           |     |         |         |                |          |          |                     |             |
| CB4856 HS                                                             | III | 950869  | 952264  | WBGene00020451 | fbxa-11  | T12B5.4  | 0.0061258281133636  | AGIWUR23723 |
| CB4856 HS                                                             | III | 952419  | 953803  | WBGene00020450 | fbxa-10  | T12B5.3  | -0.0828558011679146 | AGIWUR38989 |
| CB4856 HS                                                             | III | 954291  | 954653  | WBGene00050914 | T12B5.15 | T12B5.15 | -0.154357878245567  |             |
| AGIWUR1132;AGIWUR1851;AGIWUR22450;AGIWUR38458;AGIWUR39446             |     |         |         |                |          |          |                     |             |
| CB4856 HS                                                             | III | 954873  | 955295  | WBGene00050913 | T12B5.14 | T12B5.14 | -0.33767487689132   |             |
| AGIWUR18737;AGIWUR28984;AGIWUR31470;AGIWUR32166;AGIWUR41902           |     |         |         |                |          |          |                     |             |
| CB4856 HS                                                             | III | 956334  | 957947  | WBGene00020449 | fbxa-54  | T12B5.2  | 0.192121960675959   | AGIWUR27557 |
| CB4856 HS                                                             | III | 960268  | 961347  | WBGene00020458 | fbxa-70  | T12B5.12 | 1.02785057097284    |             |
| AGIWUR18579                                                           |     |         |         |                |          |          |                     |             |
| CB4856 HS                                                             | III | 962304  | 963679  | WBGene00020448 | fbxa-51  | T12B5.1  | 0.235601779835615   | AGIWUR21655 |
| CB4856 HS                                                             | III | 966654  | 972269  | WBGene00019912 | R06B10.1 | R06B10.1 | -0.0657233401530926 |             |
| AGIWUR22141                                                           |     |         |         |                |          |          |                     |             |
| CB4856 HS                                                             | III | 973311  | 980451  | WBGene00019913 | R06B10.2 | R06B10.2 | -0.0949703012033432 |             |
| AGIWUR38698                                                           |     |         |         |                |          |          |                     |             |
| CB4856 HS                                                             | III | 977386  | 988446  | WBGene00019915 | tbx-10   | R06B10.5 | -0.26150741582811   |             |
| AGIWUR23747;AGIWUR27330;AGIWUR30813                                   |     |         |         |                |          |          |                     |             |
| CB4856 HS                                                             | III | 991881  | 1001907 | WBGene00006615 | trp-2    | R06B10.4 | -0.0540821034102494 |             |
| AGIWUR18580;AGIWUR36258                                               |     |         |         |                |          |          |                     |             |
| CB4856 HS                                                             | III | 1002707 | 1006298 | WBGene00019914 | clcc-150 | R06B10.3 | 0.118618148588919   |             |

|                                                                         |    |     |         |         |                |             |             |                      |             |
|-------------------------------------------------------------------------|----|-----|---------|---------|----------------|-------------|-------------|----------------------|-------------|
| AGIWUR43057                                                             |    |     |         |         |                |             |             |                      |             |
| CB4856                                                                  | HS | III | 1010535 | 1011385 | WBGene00021337 | Y34F4.2     | Y34F4.2     | 0.585471894883145    | AGIWUR37101 |
| CB4856                                                                  | HS | III | 1015680 | 1016136 | WBGene00021338 | Y34F4.3     | Y34F4.3     | -0.327969166241451   | AGIWUR27784 |
| CB4856                                                                  | HS | III | 1020954 | 1021876 | WBGene00021336 | Y34F4.1     | Y34F4.1     | 0.294180998617199    |             |
| AGIWUR24935;AGIWUR25182                                                 |    |     |         |         |                |             |             |                      |             |
| CB4856                                                                  | HS | III | 1023221 | 1024561 | WBGene00021339 | Y34F4.4     | Y34F4.4     | 0.25046743538954     | AGIWUR4205  |
| CB4856                                                                  | HS | III | 1026916 | 1031065 | WBGene00021340 | Y34F4.5     | Y34F4.5     | 0.0108360650079451   | AGIWUR17466 |
| CB4856                                                                  | HS | III | 1031324 | 1037212 | WBGene00015267 | chin-1      | BE0003N10.2 | 0.0487612290353354   |             |
| AGIWUR40526                                                             |    |     |         |         |                |             |             |                      |             |
| CB4856                                                                  | HS | III | 1037492 | 1046261 | WBGene00015266 | BE0003N10.1 | BE0003N10.1 | -0.21767165319611    |             |
| AGIWUR20325;AGIWUR32995                                                 |    |     |         |         |                |             |             |                      |             |
| CB4856                                                                  | HS | III | 1045809 | 1053246 | WBGene00015268 | BE0003N10.3 | BE0003N10.3 | -0.101628433735363   |             |
| AGIWUR996                                                               |    |     |         |         |                |             |             |                      |             |
| CB4856                                                                  | HS | III | 1062793 | 1076555 | WBGene00006697 | uaf-1       | Y92C3B.2    | -0.132069495503263   |             |
| AGIWUR8964;AGIWUR25966                                                  |    |     |         |         |                |             |             |                      |             |
| CB4856                                                                  | HS | III | 1078150 | 1080775 | WBGene00004277 | rab-18      | Y92C3B.3    | -0.270371969672921   |             |
| AGIWUR11765;AGIWUR17720;AGIWUR21390;AGIWUR30018;AGIWUR33466;AGIWUR38575 |    |     |         |         |                |             |             |                      |             |
| CB4856                                                                  | HS | III | 1080901 | 1081300 | WBGene00022357 | kbp-4       | Y92C3B.1    | -0.00448070598115891 |             |
| AGIWUR33018                                                             |    |     |         |         |                |             |             |                      |             |
| CB4856                                                                  | HS | III | 1081402 | 1095073 | WBGene00003917 | par-2       | F58B6.3     | -0.00641732992238264 |             |
| AGIWUR17088;AGIWUR25963                                                 |    |     |         |         |                |             |             |                      |             |
| CB4856                                                                  | HS | III | 1103224 | 1111923 | WBGene00019030 | exc-6       | F58B6.2     | 0.0473709590638229   | AGIWUR41199 |
| CB4856                                                                  | HS | III | 1112279 | 1116374 | WBGene00019029 | F58B6.1     | F58B6.1     | -0.171871941623381   |             |
| AGIWUR6761;AGIWUR17185;AGIWUR25640;AGIWUR33066;AGIWUR42074              |    |     |         |         |                |             |             |                      |             |
| CB4856                                                                  | HS | III | 1116424 | 1142927 | WBGene00022104 | acsd-1      | Y71D11A.3   | 0.0747730645937441   |             |
| AGIWUR10744                                                             |    |     |         |         |                |             |             |                      |             |
| CB4856                                                                  | HS | III | 1143172 | 1145211 | WBGene00004891 | smr-1       | Y71D11A.2   | 0.110302973881022    |             |
| AGIWUR35021;AGIWUR39134                                                 |    |     |         |         |                |             |             |                      |             |
| CB4856                                                                  | HS | III | 1152044 | 1181137 | WBGene00022103 | cdh-12      | Y71D11A.1   | 0.278892206728386    |             |
| AGIWUR9139;AGIWUR11394;AGIWUR17116;AGIWUR32780;AGIWUR32922              |    |     |         |         |                |             |             |                      |             |
| CB4856                                                                  | HS | III | 1181990 | 1184942 | WBGene00022490 | Y119D3B.13  | Y119D3B.13  | 0.0719455011543602   |             |
| AGIWUR31799                                                             |    |     |         |         |                |             |             |                      |             |
| CB4856                                                                  | HS | III | 1185248 | 1193812 | WBGene00022491 | Y119D3B.14  | Y119D3B.14  | 0.106224364684813    |             |
| AGIWUR26380                                                             |    |     |         |         |                |             |             |                      |             |
| CB4856                                                                  | HS | III | 1194367 | 1196292 | WBGene00022492 | dss-1       | Y119D3B.15  | 0.0612895493510681   |             |
| AGIWUR8941                                                              |    |     |         |         |                |             |             |                      |             |
| CB4856                                                                  | HS | III | 1196560 | 1202008 | WBGene00022493 | mrp1-45     | Y119D3B.16  | -0.244913600636423   |             |
| AGIWUR3926                                                              |    |     |         |         |                |             |             |                      |             |
| CB4856                                                                  | HS | III | 1202548 | 1207346 | WBGene00022489 | Y119D3B.12  | Y119D3B.12  | 0.00152526663678643  |             |

AGIWUR3387;AGIWUR12866;AGIWUR16578;AGIWUR21705;AGIWUR27552;AGIWUR35374;AGIWUR36012  
 CB4856 HS III 1208104 1213650 WBGene00022488 orc-3 Y119D3B.11 0.063680211368931  
 AGIWUR15068  
 CB4856 HS III 1214951 1215293 WBGene00022497 Y119D3B.21 Y119D3B.21 -0.0355656552122969  
 AGIWUR32793  
 CB4856 HS III 1216116 1222072 WBGene00003978 pes-4 Y119D3B.17 0.102666455492443  
 AGIWUR25541  
 CB4856 HS III 1225459 1226065 WBGene00023205 Y119D3B.10 Y119D3B.10 0.144977007367405  
 AGIWUR12248  
 CB4856 HS III 1236015 1237142 WBGene00022487 fbxa-21 Y119D3B.9 0.0386708799433571  
 AGIWUR39017  
 CB4856 HS III 1239260 1242780 WBGene00022486 fbxa-61 Y119D3B.8 0.0263623551392405  
 AGIWUR8976;AGIWUR34220;AGIWUR38464  
 CB4856 HS III 1243513 1245283 WBGene00022485 fbxa-63 Y119D3B.7 -0.0650700773548092  
 AGIWUR29215  
 CB4856 HS III 1247618 1249153 WBGene00044675 fbxa-76 Y119D3B.22 -0.0784780148057784  
 AGIWUR7976;AGIWUR28206  
 CB4856 HS III 1249493 1251838 WBGene00022484 fbxa-77 Y119D3B.6 -0.144245685076315  
 AGIWUR5949  
 CB4856 HS III 1253384 1254401 WBGene00022494 fbxa-91 Y119D3B.18 -0.211343692463572  
 AGIWUR20168  
 CB4856 HS III 1267338 1269256 WBGene00013839 fbxa-32 ZC47.6 0.243915451945348 AGIWUR6737  
 CB4856 HS III 1269558 1271451 WBGene00013838 fbxa-31 ZC47.5 -0.0449543458594865 AGIWUR2303  
 CB4856 HS III 1272474 1273676 WBGene00013836 fbxa-29 ZC47.3 0.255853341895465 AGIWUR25699  
 CB4856 HS III 1276249 1277360 WBGene00014979 ZC47.11 ZC47.11 0.108040077324073 AGIWUR3704  
 CB4856 HS III 1277960 1278991 WBGene00014978 ZC47.8 ZC47.8 0.263377516883924 AGIWUR7537  
 CB4856 HS III 1279627 1281725 WBGene00013841 fbxa-33 ZC47.9 0.0295903348807913 AGIWUR29339  
 CB4856 HS III 1282401 1284144 WBGene00013842 fbxa-34 ZC47.10 -0.1304297097744 AGIWUR33731  
 CB4856 HS III 1285016 1287119 WBGene00013845 fbxa-37 ZC47.14 0.100412658731775 AGIWUR16699  
 CB4856 HS III 1287299 1288523 WBGene00013844 fbxa-50 ZC47.13 -0.170597107946587 AGIWUR40231  
 CB4856 HS III 1289747 1290938 WBGene00013843 fbxa-49 ZC47.12 -0.214871420032456 AGIWUR28291  
 CB4856 HS III 1292051 1293215 WBGene00022479 fbxa-36 Y119D3A.4 0.136156243985315  
 AGIWUR23896  
 CB4856 HS III 1297904 1299484 WBGene00022477 fbxa-28 Y119D3A.2 0.17516128604386  
 AGIWUR43481  
 CB4856 HS III 1303714 1305461 WBGene00022476 fbxa-75 Y119D3A.1 0.128335985258634  
 AGIWUR17956  
 CB4856 HS III 1305716 1308294 WBGene00022329 fbxa-79 Y82E9BL.13 -0.0273535557215023  
 AGIWUR43569

|                                    |     |                 |                |            |            |                      |
|------------------------------------|-----|-----------------|----------------|------------|------------|----------------------|
| CB4856 HS<br>AGIWUR33175           | III | 1309187 1311226 | WBGene00022328 | Y82E9BL.12 | Y82E9BL.12 | 0.271033498396569    |
| CB4856 HS<br>AGIWUR37149           | III | 1311228 1313148 | WBGene00022332 | fbxa-20    | Y82E9BL.16 | -0.0564765333854043  |
| CB4856 HS<br>AGIWUR6535            | III | 1313297 1315229 | WBGene00022330 | fbxa-80    | Y82E9BL.14 | -0.396087467131053   |
| CB4856 HS<br>AGIWUR35810           | III | 1315264 1316665 | WBGene00022331 | fbxa-19    | Y82E9BL.15 | 0.420469487381839    |
| CB4856 HS<br>AGIWUR44682           | III | 1319016 1321671 | WBGene00022327 | fbxa-15    | Y82E9BL.11 | 0.185081944736149    |
| CB4856 HS<br>AGIWUR6137            | III | 1322133 1324633 | WBGene00022326 | fbxa-14    | Y82E9BL.10 | 0.256825991395498    |
| CB4856 HS<br>AGIWUR2791;AGIWUR6751 | III | 1332016 1333708 | WBGene00194735 | Y82E9BL.19 | Y82E9BL.19 | 0.253969896245684    |
| CB4856 HS<br>AGIWUR32587           | III | 1333921 1335467 | WBGene00023395 | Y82E9BL.9  | Y82E9BL.9  | 0.0133404245821183   |
| CB4856 HS<br>AGIWUR16200           | III | 1336707 1340333 | WBGene00022325 | fbxa-5     | Y82E9BL.8  | 0.17877358437777     |
| CB4856 HS<br>AGIWUR41167           | III | 1340597 1342494 | WBGene00022324 | fbxa-26    | Y82E9BL.7  | 0.194192210340475    |
| CB4856 HS<br>AGIWUR35505           | III | 1342975 1344692 | WBGene00022333 | fbxa-27    | Y82E9BL.17 | 0.000320048352303814 |
| CB4856 HS<br>AGIWUR17019           | III | 1344874 1345794 | WBGene00022323 | Y82E9BL.6  | Y82E9BL.6  | -0.271926608933442   |
| CB4856 HS<br>AGIWUR43463           | III | 1346315 1347128 | WBGene00022322 | Y82E9BL.5  | Y82E9BL.5  | 0.157858806083004    |
| CB4856 HS<br>AGIWUR40811           | III | 1347787 1349400 | WBGene00022321 | fbxa-25    | Y82E9BL.4  | 0.0711161661704587   |
| CB4856 HS<br>AGIWUR12446           | III | 1349752 1350836 | WBGene00022320 | Y82E9BL.3  | Y82E9BL.3  | -0.0472536450093513  |
| CB4856 HS<br>AGIWUR708             | III | 1351216 1353371 | WBGene00022319 | Y82E9BL.2  | Y82E9BL.2  | -0.183786984293266   |
| CB4856 HS<br>AGIWUR13081           | III | 1354997 1355420 | WBGene00022318 | Y82E9BL.1  | Y82E9BL.1  | -0.258313686708844   |
| CB4856 HS<br>AGIWUR34134           | III | 1357080 1359135 | WBGene00022341 | Y82E9BR.8  | Y82E9BR.8  | -0.0981247791495576  |
| CB4856 HS<br>AGIWUR2133            | III | 1359254 1359769 | WBGene00022342 | Y82E9BR.9  | Y82E9BR.9  | -0.127101783842212   |
| CB4856 HS                          | III | 1360507 1362676 | WBGene00022340 | Y82E9BR.7  | Y82E9BR.7  | 0.270695341515106    |

|                                                                                    |     |         |         |                |            |            |                      |             |
|------------------------------------------------------------------------------------|-----|---------|---------|----------------|------------|------------|----------------------|-------------|
| AGIWUR31551                                                                        |     |         |         |                |            |            |                      |             |
| CB4856 HS                                                                          | III | 1374152 | 1376542 | WBGene00022352 | Y82E9BR.20 | Y82E9BR.20 | -0.129222140644043   |             |
| AGIWUR2628;AGIWUR9977                                                              |     |         |         |                |            |            |                      |             |
| CB4856 HS                                                                          | III | 1376945 | 1378003 | WBGene00022344 | Y82E9BR.11 | Y82E9BR.11 | 1.58151427668066     |             |
| AGIWUR18767                                                                        |     |         |         |                |            |            |                      |             |
| CB4856 HS                                                                          | III | 1379140 | 1380663 | WBGene00255597 | pals-21    | Y82E9BR.32 | 0.0607040301378072   |             |
| AGIWUR43451                                                                        |     |         |         |                |            |            |                      |             |
| CB4856 HS                                                                          | III | 1390450 | 1391852 | WBGene00022346 | pals-17    | Y82E9BR.13 | 0.162578752144023    |             |
| AGIWUR19418                                                                        |     |         |         |                |            |            |                      |             |
| CB4856 HS                                                                          | III | 1399972 | 1401305 | WBGene00022337 | pals-16    | Y82E9BR.4  | 0.0151368091930539   |             |
| AGIWUR19480;AGIWUR25923                                                            |     |         |         |                |            |            |                      |             |
| CB4856 HS                                                                          | III | 1401946 | 1403460 | WBGene00044761 | pals-19    | Y82E9BR.23 | -0.254343099353504   |             |
| AGIWUR1993                                                                         |     |         |         |                |            |            |                      |             |
| CB4856 HS                                                                          | III | 1404792 | 1406230 | WBGene00022353 | pals-18    | Y82E9BR.21 | -0.194070727875738   |             |
| AGIWUR7285                                                                         |     |         |         |                |            |            |                      |             |
| CB4856 HS                                                                          | III | 1406463 | 1409239 | WBGene00022354 | Y82E9BR.22 | Y82E9BR.22 | 0.0084135665761611   |             |
| AGIWUR4189;AGIWUR14797;AGIWUR32752;AGIWUR42719;AGIWUR45183                         |     |         |         |                |            |            |                      |             |
| CB4856 HS                                                                          | III | 1409243 | 1414116 | WBGene00022347 | Y82E9BR.14 | Y82E9BR.14 | 0.0133614930483921   |             |
| AGIWUR7123;AGIWUR10710;AGIWUR14676;AGIWUR29289                                     |     |         |         |                |            |            |                      |             |
| CB4856 HS                                                                          | III | 1415152 | 1417188 | WBGene00001236 | elc-1      | Y82E9BR.15 | -0.199913747858036   |             |
| AGIWUR1874                                                                         |     |         |         |                |            |            |                      |             |
| CB4856 HS                                                                          | III | 1419196 | 1419914 | WBGene00022336 | Y82E9BR.3  | Y82E9BR.3  | 0.0882266878761939   |             |
| AGIWUR2471;AGIWUR6917;AGIWUR26470;AGIWUR28885;AGIWUR32675;AGIWUR33117;AGIWUR38718  |     |         |         |                |            |            |                      |             |
| CB4856 HS                                                                          | III | 1419863 | 1427228 | WBGene00022348 | Y82E9BR.16 | Y82E9BR.16 | 0.0175839231205117   |             |
| AGIWUR3732;AGIWUR21213;AGIWUR28839;AGIWUR29791;AGIWUR32813;AGIWUR36733;AGIWUR40929 |     |         |         |                |            |            |                      |             |
| CB4856 HS                                                                          | III | 1438832 | 1443190 | WBGene00022335 | Y82E9BR.2  | Y82E9BR.2  | 0.0452212038918427   |             |
| AGIWUR14741                                                                        |     |         |         |                |            |            |                      |             |
| CB4856 HS                                                                          | III | 1447495 | 1455770 | WBGene00022349 | Y82E9BR.17 | Y82E9BR.17 | -0.510343641570778   |             |
| AGIWUR27623                                                                        |     |         |         |                |            |            |                      |             |
| CB4856 HS                                                                          | III | 1458536 | 1466732 | WBGene00022334 | Y82E9BR.1  | Y82E9BR.1  | -0.342647614651509   |             |
| AGIWUR31260                                                                        |     |         |         |                |            |            |                      |             |
| CB4856 HS                                                                          | III | 1467876 | 1483507 | WBGene00022350 | Y82E9BR.18 | Y82E9BR.18 | 0.137825516548226    |             |
| AGIWUR44514                                                                        |     |         |         |                |            |            |                      |             |
| CB4856 HS                                                                          | III | 1468643 | 1517993 | WBGene00019716 | M01G5.3    | M01G5.3    | 0.0705817113712364   | AGIWUR43524 |
| CB4856 HS                                                                          | III | 1520224 | 1532768 | WBGene00004905 | snf-6      | M01G5.5    | 0.039094801975891    |             |
| AGIWUR10711;AGIWUR30660                                                            |     |         |         |                |            |            |                      |             |
| CB4856 HS                                                                          | III | 1533774 | 1538198 | WBGene00022054 | Y67D2.4    | Y67D2.4    | 0.000838371264979543 |             |
| AGIWUR16840;AGIWUR18256;AGIWUR19412;AGIWUR33162;AGIWUR38801;AGIWUR39025            |     |         |         |                |            |            |                      |             |
| CB4856 HS                                                                          | III | 1538472 | 1540244 | WBGene00022055 | Y67D2.5    | Y67D2.5    | 0.00104256453327167  |             |



AGIWUR4238;AGIWUR4934;AGIWUR24164;AGIWUR41948

|        |    |     |         |         |                |         |         |                    |             |
|--------|----|-----|---------|---------|----------------|---------|---------|--------------------|-------------|
| CB4856 | HS | III | 1555395 | 1558529 | WBGene00022057 | Y67D2.7 | Y67D2.7 | 0.0484418367813149 | AGIWUR7019  |
| CB4856 | HS | III | 1558800 | 1570129 | WBGene00022052 | Y67D2.2 | Y67D2.2 | 0.202587252655167  | AGIWUR42933 |
| CB4856 | HS | III | 1570306 | 1576638 | WBGene00022051 | rep-1   | Y67D2.1 | -0.18688070676918  |             |

AGIWUR13469;AGIWUR21879

|        |    |     |         |         |                |           |           |                   |
|--------|----|-----|---------|---------|----------------|-----------|-----------|-------------------|
| CB4856 | HS | III | 1576751 | 1580857 | WBGene00021246 | Y22D7AL.7 | Y22D7AL.7 | 0.192985102974015 |
|--------|----|-----|---------|---------|----------------|-----------|-----------|-------------------|

AGIWUR30553

|        |    |     |         |         |                |       |           |                   |
|--------|----|-----|---------|---------|----------------|-------|-----------|-------------------|
| CB4856 | HS | III | 1583155 | 1601140 | WBGene00004894 | sms-3 | Y22D7AL.8 | 0.204914234537213 |
|--------|----|-----|---------|---------|----------------|-------|-----------|-------------------|

AGIWUR22781

|        |    |     |         |         |                |           |           |                   |
|--------|----|-----|---------|---------|----------------|-----------|-----------|-------------------|
| CB4856 | HS | III | 1604955 | 1606850 | WBGene00021245 | Y22D7AL.6 | Y22D7AL.6 | -0.04917425483342 |
|--------|----|-----|---------|---------|----------------|-----------|-----------|-------------------|

AGIWUR11587;AGIWUR13083

|        |    |     |         |         |                |           |           |                    |
|--------|----|-----|---------|---------|----------------|-----------|-----------|--------------------|
| CB4856 | HS | III | 1606829 | 1614033 | WBGene00021247 | Y22D7AL.9 | Y22D7AL.9 | -0.030079645473831 |
|--------|----|-----|---------|---------|----------------|-----------|-----------|--------------------|

AGIWUR10604;AGIWUR11815;AGIWUR13461;AGIWUR20754

|        |    |     |         |         |                |            |            |                   |
|--------|----|-----|---------|---------|----------------|------------|------------|-------------------|
| CB4856 | HS | III | 1617151 | 1618954 | WBGene00021248 | Y22D7AL.10 | Y22D7AL.10 | 0.169544738505313 |
|--------|----|-----|---------|---------|----------------|------------|------------|-------------------|

AGIWUR3499;AGIWUR30303

|        |    |     |         |         |                |        |           |                    |
|--------|----|-----|---------|---------|----------------|--------|-----------|--------------------|
| CB4856 | HS | III | 1619742 | 1625797 | WBGene00002025 | hsp-60 | Y22D7AL.5 | -0.126734090811329 |
|--------|----|-----|---------|---------|----------------|--------|-----------|--------------------|

AGIWUR10628;AGIWUR19794;AGIWUR20849;AGIWUR20967;AGIWUR21651;AGIWUR26390;AGIWUR33280;AGIWUR34824;AGIWUR42555;  
;AGIWUR43856

|        |    |     |         |         |                |           |           |                    |
|--------|----|-----|---------|---------|----------------|-----------|-----------|--------------------|
| CB4856 | HS | III | 1626632 | 1637561 | WBGene00021244 | Y22D7AL.4 | Y22D7AL.4 | 0.0724542296276285 |
|--------|----|-----|---------|---------|----------------|-----------|-----------|--------------------|

AGIWUR9679;AGIWUR24031

|        |    |     |         |         |                |           |           |                    |
|--------|----|-----|---------|---------|----------------|-----------|-----------|--------------------|
| CB4856 | HS | III | 1641463 | 1641735 | WBGene00021243 | Y22D7AL.3 | Y22D7AL.3 | -0.111596047690279 |
|--------|----|-----|---------|---------|----------------|-----------|-----------|--------------------|

AGIWUR6951

|        |    |     |         |         |                |            |            |                   |
|--------|----|-----|---------|---------|----------------|------------|------------|-------------------|
| CB4856 | HS | III | 1642649 | 1644563 | WBGene00021250 | Y22D7AL.12 | Y22D7AL.12 | -0.15326499753186 |
|--------|----|-----|---------|---------|----------------|------------|------------|-------------------|

AGIWUR44260

|        |    |     |         |         |                |            |            |                     |
|--------|----|-----|---------|---------|----------------|------------|------------|---------------------|
| CB4856 | HS | III | 1648621 | 1648806 | WBGene00021251 | Y22D7AL.13 | Y22D7AL.13 | -0.0958492863240075 |
|--------|----|-----|---------|---------|----------------|------------|------------|---------------------|

AGIWUR43504

|        |    |     |         |         |                |           |           |                   |
|--------|----|-----|---------|---------|----------------|-----------|-----------|-------------------|
| CB4856 | HS | III | 1650302 | 1652669 | WBGene00021241 | Y22D7AL.1 | Y22D7AL.1 | -0.13766920021722 |
|--------|----|-----|---------|---------|----------------|-----------|-----------|-------------------|

AGIWUR26222

|        |    |     |         |         |                |       |            |                    |
|--------|----|-----|---------|---------|----------------|-------|------------|--------------------|
| CB4856 | HS | III | 1653731 | 1657480 | WBGene00021252 | cht-4 | Y22D7AL.14 | 0.0457538914251465 |
|--------|----|-----|---------|---------|----------------|-------|------------|--------------------|

AGIWUR39024

|        |    |     |         |         |                |            |            |                   |
|--------|----|-----|---------|---------|----------------|------------|------------|-------------------|
| CB4856 | HS | III | 1658207 | 1659863 | WBGene00021253 | Y22D7AL.15 | Y22D7AL.15 | 0.113564699803231 |
|--------|----|-----|---------|---------|----------------|------------|------------|-------------------|

AGIWUR28095

|        |    |     |         |         |                |            |            |                    |
|--------|----|-----|---------|---------|----------------|------------|------------|--------------------|
| CB4856 | HS | III | 1662104 | 1665152 | WBGene00021254 | Y22D7AL.16 | Y22D7AL.16 | 0.0504745046848085 |
|--------|----|-----|---------|---------|----------------|------------|------------|--------------------|

AGIWUR14048;AGIWUR28872;AGIWUR29282;AGIWUR35626;AGIWUR42920;AGIWUR43018

|        |    |     |         |         |                |           |           |                   |
|--------|----|-----|---------|---------|----------------|-----------|-----------|-------------------|
| CB4856 | HS | III | 1665493 | 1665793 | WBGene00021257 | Y22D7AR.3 | Y22D7AR.3 | 0.213788205748235 |
|--------|----|-----|---------|---------|----------------|-----------|-----------|-------------------|

AGIWUR37407

|        |    |     |         |         |                |        |           |                  |
|--------|----|-----|---------|---------|----------------|--------|-----------|------------------|
| CB4856 | HS | III | 1665913 | 1668634 | WBGene00021259 | g1b-30 | Y22D7AR.5 | 0.10176660516542 |
|--------|----|-----|---------|---------|----------------|--------|-----------|------------------|

AGIWUR3197;AGIWUR7436;AGIWUR12048;AGIWUR14806;AGIWUR16613;AGIWUR17397;AGIWUR19490;AGIWUR21379;AGIWUR26038;AGIWUR36213;AGIWUR38898;AGIWUR40232;AGIWUR41393

|                                     |     |         |         |                |                    |            |                     |
|-------------------------------------|-----|---------|---------|----------------|--------------------|------------|---------------------|
| CB4856 HS                           | III | 1672517 | 1676721 | WBGene00021260 | Y22D7AR.6          | Y22D7AR.6  | 0.173353119691755   |
| AGIWUR542;AGIWUR6397                |     |         |         |                |                    |            |                     |
| CB4856 HS                           | III | 1683630 | 1688099 | WBGene00021261 | Y22D7AR.7          | Y22D7AR.7  | 0.217654663291382   |
| AGIWUR43214                         |     |         |         |                |                    |            |                     |
| CB4856 HS                           | III | 1688144 | 1691770 | WBGene00021266 | Y22D7AR.14         | Y22D7AR.14 | 0.00903770293918527 |
| AGIWUR43757                         |     |         |         |                |                    |            |                     |
| CB4856 HS                           | III | 1692081 | 1695106 | WBGene00005141 | srd-64 Y22D7AR.8   |            | 0.103356228056233   |
| AGIWUR1225                          |     |         |         |                |                    |            |                     |
| CB4856 HS                           | III | 1697221 | 1698986 | WBGene00021262 | fbxa-74 Y22D7AR.9  |            | -0.0105974784566421 |
| AGIWUR2493                          |     |         |         |                |                    |            |                     |
| CB4856 HS                           | III | 1701714 | 1702437 | WBGene00021263 | Y22D7AR.10         | Y22D7AR.10 | 0.316262959875271   |
| AGIWUR35366                         |     |         |         |                |                    |            |                     |
| CB4856 HS                           | III | 1703500 | 1705899 | WBGene00021264 | fbxa-13 Y22D7AR.11 |            | 0.178449838813073   |
| AGIWUR33164                         |     |         |         |                |                    |            |                     |
| CB4856 HS                           | III | 1705946 | 1713729 | WBGene00021256 | Y22D7AR.2          | Y22D7AR.2  | -0.100748483361628  |
| AGIWUR21273                         |     |         |         |                |                    |            |                     |
| CB4856 HS                           | III | 1716527 | 1722605 | WBGene00021265 | Y22D7AR.12         | Y22D7AR.12 | 0.103750179572224   |
| AGIWUR30137                         |     |         |         |                |                    |            |                     |
| CB4856 HS                           | III | 1723194 | 1733101 | WBGene00004779 | ser-4 Y22D7AR.13   |            | 0.0695207038469263  |
| AGIWUR29875;AGIWUR39631;AGIWUR41915 |     |         |         |                |                    |            |                     |
| CB4856 HS                           | III | 1752183 | 1754942 | WBGene00021593 | Y46E12A.3          | Y46E12A.3  | 0.0761164497310709  |
| AGIWUR10721                         |     |         |         |                |                    |            |                     |
| CB4856 HS                           | III | 1758721 | 1759783 | WBGene00021592 | Y46E12A.2          | Y46E12A.2  | -0.207492145706134  |
| AGIWUR26043                         |     |         |         |                |                    |            |                     |
| CB4856 HS                           | III | 1763524 | 1764836 | WBGene00000560 | cnc-6 Y46E12A.1    |            | -0.187240767044257  |
| AGIWUR12088                         |     |         |         |                |                    |            |                     |
| CB4856 HS                           | III | 1765458 | 1770091 | WBGene00044798 | tbx-43 Y46E12A.4   |            | -0.234399154713549  |
| AGIWUR9296;AGIWUR9677               |     |         |         |                |                    |            |                     |
| CB4856 HS                           | III | 1772531 | 1778069 | WBGene00021442 | Y39A3CL.4          | Y39A3CL.4  | 0.0306474138624182  |
| AGIWUR34744                         |     |         |         |                |                    |            |                     |
| CB4856 HS                           | III | 1777802 | 1778309 | WBGene00021441 | Y39A3CL.3          | Y39A3CL.3  | 0.0676101065146124  |
| AGIWUR43170                         |     |         |         |                |                    |            |                     |
| CB4856 HS                           | III | 1789084 | 1806859 | WBGene00006513 | rimb-1 Y39A3CL.2   |            | -0.0405740867217919 |
| AGIWUR16195                         |     |         |         |                |                    |            |                     |
| CB4856 HS                           | III | 1807740 | 1818323 | WBGene00000545 | clp-4 Y39A3CL.5    |            | 0.0879053019628468  |
| AGIWUR8475;AGIWUR36088              |     |         |         |                |                    |            |                     |
| CB4856 HS                           | III | 1821150 | 1824180 | WBGene00004249 | pvf-1 Y39A3CL.6    |            | 0.145975633935125   |
| AGIWUR2416                          |     |         |         |                |                    |            |                     |
| CB4856 HS                           | III | 1824919 | 1834347 | WBGene00021443 | Y39A3CL.7          | Y39A3CL.7  | -0.157655560254449  |

|                                                                                                                                                                    |    |     |         |         |                |           |           |                     |             |
|--------------------------------------------------------------------------------------------------------------------------------------------------------------------|----|-----|---------|---------|----------------|-----------|-----------|---------------------|-------------|
| AGIWUR20246;AGIWUR32428                                                                                                                                            |    |     |         |         |                |           |           |                     |             |
| CB4856                                                                                                                                                             | HS | III | 1834513 | 1846758 | WBGene00021440 | Y39A3CL.1 | Y39A3CL.1 | 0.0468903907237657  |             |
| AGIWUR36420                                                                                                                                                        |    |     |         |         |                |           |           |                     |             |
| CB4856                                                                                                                                                             | HS | III | 1849047 | 1852902 | WBGene00004163 | pqn-82    | Y39A3CR.7 | -0.340253064894853  |             |
| AGIWUR18098                                                                                                                                                        |    |     |         |         |                |           |           |                     |             |
| CB4856                                                                                                                                                             | HS | III | 1855390 | 1858884 | WBGene00021446 | hlh-33    | Y39A3CR.6 | -0.158243605073102  |             |
| AGIWUR4579                                                                                                                                                         |    |     |         |         |                |           |           |                     |             |
| CB4856                                                                                                                                                             | HS | III | 1858913 | 1859569 | WBGene00021445 | Y39A3CR.5 | Y39A3CR.5 | 0.100426439623664   |             |
| AGIWUR25527                                                                                                                                                        |    |     |         |         |                |           |           |                     |             |
| CB4856                                                                                                                                                             | HS | III | 1859888 | 1860381 | WBGene00000941 | ddp-1     | Y39A3CR.4 | 0.0433354583874568  |             |
| AGIWUR11023;AGIWUR17766                                                                                                                                            |    |     |         |         |                |           |           |                     |             |
| CB4856                                                                                                                                                             | HS | III | 1860429 | 1877514 | WBGene00021444 | ttc-7     | Y39A3CR.3 | 0.0865561670085544  |             |
| AGIWUR13456                                                                                                                                                        |    |     |         |         |                |           |           |                     |             |
| CB4856                                                                                                                                                             | HS | III | 1878365 | 1880866 | WBGene00004886 | smi-1     | Y39A3CR.1 | -0.0338790956132025 |             |
| AGIWUR12074;AGIWUR28726                                                                                                                                            |    |     |         |         |                |           |           |                     |             |
| CB4856                                                                                                                                                             | HS | III | 1881158 | 1883017 | WBGene00021447 | Y39A3CR.8 | Y39A3CR.8 | 0.0876367969334879  |             |
| AGIWUR17516                                                                                                                                                        |    |     |         |         |                |           |           |                     |             |
| CB4856                                                                                                                                                             | HS | III | 1883607 | 1886218 | WBGene00015243 | B0524.4   | B0524.4   | 0.187855402548836   | AGIWUR13914 |
| CB4856                                                                                                                                                             | HS | III | 1887558 | 1889691 | WBGene00015242 | B0524.3   | B0524.3   | -0.219168745201479  | AGIWUR39402 |
| CB4856                                                                                                                                                             | HS | III | 1891383 | 1893842 | WBGene00015244 | B0524.5   | B0524.5   | 0.165689265301223   | AGIWUR13306 |
| CB4856                                                                                                                                                             | HS | III | 1894057 | 1899856 | WBGene00015241 | B0524.2   | B0524.2   | -0.0681635542061798 | AGIWUR35356 |
| CB4856                                                                                                                                                             | HS | III | 1902193 | 1905640 | WBGene00015245 | B0524.6   | B0524.6   | -0.151140924889585  | AGIWUR23257 |
| CB4856                                                                                                                                                             | HS | III | 1905962 | 1939568 | WBGene00004128 | pqn-41    | F53A3.4   | -0.185007621724903  |             |
| AGIWUR1642;AGIWUR6490;AGIWUR7208;AGIWUR8911;AGIWUR9570;AGIWUR11776;AGIWUR13585;AGIWUR18268;AGIWUR19636;AGIWUR19977;AGIWUR22432;AGIWUR27099;AGIWUR34458;AGIWUR40424 |    |     |         |         |                |           |           |                     |             |
| CB4856                                                                                                                                                             | HS | III | 1939546 | 1943653 | WBGene00018720 | F53A3.1   | F53A3.1   | -0.0158220748548423 | AGIWUR44653 |
| CB4856                                                                                                                                                             | HS | III | 1945058 | 1950270 | WBGene00018721 | polh-1    | F53A3.2   | 0.101327060648659   | AGIWUR34536 |
| CB4856                                                                                                                                                             | HS | III | 1950492 | 1951426 | WBGene00004491 | rps-22    | F53A3.3   | -0.308428895119633  |             |
| AGIWUR12230;AGIWUR28690;AGIWUR34975;AGIWUR38589;AGIWUR39036;AGIWUR41473;AGIWUR43706                                                                                |    |     |         |         |                |           |           |                     |             |
| CB4856                                                                                                                                                             | HS | III | 1951526 | 1952032 | WBGene00018723 | F53A3.7   | F53A3.7   | 0.166577572584355   | AGIWUR7627  |
| CB4856                                                                                                                                                             | HS | III | 1952014 | 1961945 | WBGene00020115 | mboa-6    | R155.1    | -0.224521656479714  | AGIWUR26427 |
| CB4856                                                                                                                                                             | HS | III | 1963566 | 1969902 | WBGene00020116 | moa-1     | R155.2    | 0.103070897595662   | AGIWUR40050 |
| CB4856                                                                                                                                                             | HS | III | 1971182 | 1975709 | WBGene00020117 | R155.3    | R155.3    | -0.0684435183920957 | AGIWUR28349 |
| CB4856                                                                                                                                                             | HS | III | 1977315 | 1980462 | WBGene00020118 | R155.4    | R155.4    | 0.11092889829235    | AGIWUR10910 |
| CB4856                                                                                                                                                             | HS | III | 1980823 | 1982647 | WBGene00005143 | srd-66    | Y39A3B.4  | 0.480206553717146   |             |
| AGIWUR24540                                                                                                                                                        |    |     |         |         |                |           |           |                     |             |
| CB4856                                                                                                                                                             | HS | III | 1985109 | 1987466 | WBGene00021438 | Y39A3B.3  | Y39A3B.3  | -0.0910679826397534 |             |
| AGIWUR29085                                                                                                                                                        |    |     |         |         |                |           |           |                     |             |
| CB4856                                                                                                                                                             | HS | III | 1997841 | 2002438 | WBGene00021437 | lgc-42    | Y39A3B.2  | 0.0823129602483856  |             |

|                                                             |     |         |         |                |           |           |                     |             |
|-------------------------------------------------------------|-----|---------|---------|----------------|-----------|-----------|---------------------|-------------|
| AGIWUR39318                                                 |     |         |         |                |           |           |                     |             |
| CB4856 HS                                                   | III | 2006029 | 2009196 | WBGene00021436 | Y39A3B.1  | Y39A3B.1  | -0.0417833366002558 |             |
| AGIWUR42754                                                 |     |         |         |                |           |           |                     |             |
| CB4856 HS                                                   | III | 2009302 | 2021589 | WBGene00021439 | ckr-2     | Y39A3B.5  | -0.0155804834410462 |             |
| AGIWUR1930;AGIWUR17361;AGIWUR30236;AGIWUR38253;AGIWUR44531  |     |         |         |                |           |           |                     |             |
| CB4856 HS                                                   | III | 2035036 | 2048007 | WBGene00001063 | dpy-1     | M01E10.2  | 0.748695117568828   |             |
| AGIWUR23010                                                 |     |         |         |                |           |           |                     |             |
| CB4856 HS                                                   | III | 2053872 | 2054449 | WBGene00019709 | M01E10.3  | M01E10.3  | 0.0324426428949387  |             |
| AGIWUR23384                                                 |     |         |         |                |           |           |                     |             |
| CB4856 HS                                                   | III | 2056730 | 2057670 | WBGene00021433 | Y39A3A.2  | Y39A3A.2  | 1.34767243873121    |             |
| AGIWUR20632                                                 |     |         |         |                |           |           |                     |             |
| CB4856 HS                                                   | III | 2060673 | 2060957 | WBGene00002099 | ins-16    | Y39A3A.5  | -0.0828397826265741 |             |
| AGIWUR14112;AGIWUR31180;AGIWUR32785;AGIWUR34303;AGIWUR38456 |     |         |         |                |           |           |                     |             |
| CB4856 HS                                                   | III | 2063442 | 2065855 | WBGene00023471 | srz-86    | Y39A3A.7  | -0.120073689935912  |             |
| AGIWUR3884;AGIWUR32374                                      |     |         |         |                |           |           |                     |             |
| CB4856 HS                                                   | III | 2066640 | 2068350 | WBGene00021434 | Y39A3A.3  | Y39A3A.3  | -0.253973072503517  |             |
| AGIWUR13923                                                 |     |         |         |                |           |           |                     |             |
| CB4856 HS                                                   | III | 2071513 | 2072347 | WBGene00023470 | srz-87    | Y39A3A.6  | 0.357855256034511   |             |
| AGIWUR7389;AGIWUR23252                                      |     |         |         |                |           |           |                     |             |
| CB4856 HS                                                   | III | 2073009 | 2076520 | WBGene00021435 | Y39A3A.4  | Y39A3A.4  | -0.215059445140314  |             |
| AGIWUR36719                                                 |     |         |         |                |           |           |                     |             |
| CB4856 HS                                                   | III | 2082819 | 2088248 | WBGene00021703 | cpt-3     | Y48G9A.10 | -0.248161087205801  |             |
| AGIWUR30430                                                 |     |         |         |                |           |           |                     |             |
| CB4856 HS                                                   | III | 2092709 | 2099881 | WBGene00021702 | Y48G9A.9  | Y48G9A.9  | 0.227505644579541   |             |
| AGIWUR713                                                   |     |         |         |                |           |           |                     |             |
| CB4856 HS                                                   | III | 2102295 | 2107497 | WBGene00004088 | ppk-2     | Y48G9A.8  | -0.0824501122272316 |             |
| AGIWUR28088                                                 |     |         |         |                |           |           |                     |             |
| CB4856 HS                                                   | III | 2111802 | 2112427 | WBGene00021701 | Y48G9A.7  | Y48G9A.7  | -0.0555993950106934 |             |
| AGIWUR5690                                                  |     |         |         |                |           |           |                     |             |
| CB4856 HS                                                   | III | 2112416 | 2116897 | WBGene00021704 | Y48G9A.11 | Y48G9A.11 | 0.174103634476024   |             |
| AGIWUR39784                                                 |     |         |         |                |           |           |                     |             |
| CB4856 HS                                                   | III | 2117842 | 2119091 | WBGene00021700 | Y48G9A.6  | Y48G9A.6  |                     |             |
| -0.00141516804946917                                        |     |         |         | AGIWUR31978    |           |           |                     |             |
| CB4856 HS                                                   | III | 2124137 | 2151550 | WBGene00021698 | frl-1     | Y48G9A.4  | -0.0449147661218916 |             |
| AGIWUR33287                                                 |     |         |         |                |           |           |                     |             |
| CB4856 HS                                                   | III | 2151968 | 2197908 | WBGene00021697 | gcn-1     | Y48G9A.3  | -0.148913020794833  |             |
| AGIWUR2499;AGIWUR24890;AGIWUR39089                          |     |         |         |                |           |           |                     |             |
| CB4856 HS                                                   | III | 2198006 | 2206882 | WBGene00016524 | C39B5.6   | C39B5.6   | -0.182113787037197  | AGIWUR32372 |
| CB4856 HS                                                   | III | 2211420 | 2217095 | WBGene00189950 | C39B5.14  | C39B5.14  | 0.0578295519491903  |             |

AGIWUR9309;AGIWUR17915;AGIWUR33312

|        |    |     |         |         |                |         |          |                    |             |
|--------|----|-----|---------|---------|----------------|---------|----------|--------------------|-------------|
| CB4856 | HS | III | 2217173 | 2219494 | WBGene00016526 | fbxa-8  | C39B5.8  | 0.141732730570783  | AGIWUR33756 |
| CB4856 | HS | III | 2219797 | 2222365 | WBGene00016525 | fbxa-12 | C39B5.7  | 0.249514810345142  | AGIWUR19075 |
| CB4856 | HS | III | 2222438 | 2224000 | WBGene00005142 | srd-65  | C39B5.12 | 0.0186413741786682 |             |

AGIWUR31417

|        |    |     |         |         |                |          |          |                    |             |
|--------|----|-----|---------|---------|----------------|----------|----------|--------------------|-------------|
| CB4856 | HS | III | 2224672 | 2227198 | WBGene00016522 | fbxa-38  | C39B5.4  | 0.0568014757049067 | AGIWUR24971 |
| CB4856 | HS | III | 2227707 | 2229228 | WBGene00016521 | fbxa-62  | C39B5.3  | 0.123354533222646  | AGIWUR15201 |
| CB4856 | HS | III | 2229992 | 2232460 | WBGene00016527 | fbxa-47  | C39B5.9  | 0.0225300444423553 | AGIWUR41580 |
| CB4856 | HS | III | 2233888 | 2236987 | WBGene00016520 | C39B5.2  | C39B5.2  | -0.129573924415707 | AGIWUR33275 |
| CB4856 | HS | III | 2238967 | 2240172 | WBGene00016528 | C39B5.10 | C39B5.10 | 0.094947298637468  |             |

AGIWUR18177

|        |    |     |         |         |                |        |          |                    |             |
|--------|----|-----|---------|---------|----------------|--------|----------|--------------------|-------------|
| CB4856 | HS | III | 2240771 | 2243843 | WBGene00016519 | srz-56 | C39B5.1  | -0.129504536300811 | AGIWUR37544 |
| CB4856 | HS | III | 2244165 | 2245827 | WBGene00005144 | srd-67 | C39B5.11 | 0.254367398409647  |             |

AGIWUR34479

|        |    |     |         |         |                |         |         |                     |             |
|--------|----|-----|---------|---------|----------------|---------|---------|---------------------|-------------|
| CB4856 | HS | III | 2246016 | 2249404 | WBGene00020642 | T20H9.6 | T20H9.6 | -0.0467366053999951 | AGIWUR25745 |
| CB4856 | HS | III | 2249932 | 2251448 | WBGene00020637 | fbxa-7  | T20H9.1 | 0.434749208021908   | AGIWUR37127 |
| CB4856 | HS | III | 2251957 | 2252989 | WBGene00020641 | fbxa-68 | T20H9.5 | 0.342555475294961   | AGIWUR3648  |
| CB4856 | HS | III | 2253449 | 2254783 | WBGene00020640 | fbxa-73 | T20H9.4 | -0.291261731198945  | AGIWUR32193 |
| CB4856 | HS | III | 2257554 | 2258941 | WBGene00020638 | fbxa-43 | T20H9.2 | 0.0428063711110784  |             |

AGIWUR4357;AGIWUR25103;AGIWUR25937;AGIWUR41236;AGIWUR44639

|        |    |     |         |         |                |         |            |                    |  |
|--------|----|-----|---------|---------|----------------|---------|------------|--------------------|--|
| CB4856 | HS | III | 2260004 | 2261445 | WBGene00044676 | fbxa-42 | Y54F10BL.1 | -0.001983447099831 |  |
|--------|----|-----|---------|---------|----------------|---------|------------|--------------------|--|

AGIWUR13364

|        |    |     |         |         |                |         |            |                   |  |
|--------|----|-----|---------|---------|----------------|---------|------------|-------------------|--|
| CB4856 | HS | III | 2266980 | 2272175 | WBGene00021862 | fbxa-48 | Y54F10BM.7 | 0.102308003394739 |  |
|--------|----|-----|---------|---------|----------------|---------|------------|-------------------|--|

AGIWUR4973

|        |    |     |         |         |                |         |            |                   |  |
|--------|----|-----|---------|---------|----------------|---------|------------|-------------------|--|
| CB4856 | HS | III | 2272453 | 2276965 | WBGene00021859 | fbxa-39 | Y54F10BM.4 | 0.164495615487045 |  |
|--------|----|-----|---------|---------|----------------|---------|------------|-------------------|--|

AGIWUR40392

|        |    |     |         |         |                |            |            |                    |  |
|--------|----|-----|---------|---------|----------------|------------|------------|--------------------|--|
| CB4856 | HS | III | 2277279 | 2289967 | WBGene00021858 | Y54F10BM.3 | Y54F10BM.3 | 0.0803474274425469 |  |
|--------|----|-----|---------|---------|----------------|------------|------------|--------------------|--|

AGIWUR2267

|        |    |     |         |         |                |          |             |                    |  |
|--------|----|-----|---------|---------|----------------|----------|-------------|--------------------|--|
| CB4856 | HS | III | 2291419 | 2294124 | WBGene00044403 | fbxa-219 | Y54F10BM.15 | 0.0199485400347807 |  |
|--------|----|-----|---------|---------|----------------|----------|-------------|--------------------|--|

AGIWUR28098

|        |    |     |         |         |                |            |            |                    |  |
|--------|----|-----|---------|---------|----------------|------------|------------|--------------------|--|
| CB4856 | HS | III | 2295344 | 2304920 | WBGene00021863 | Y54F10BM.9 | Y54F10BM.9 | -0.332642737722276 |  |
|--------|----|-----|---------|---------|----------------|------------|------------|--------------------|--|

AGIWUR29475

|        |    |     |         |         |                |        |             |                   |  |
|--------|----|-----|---------|---------|----------------|--------|-------------|-------------------|--|
| CB4856 | HS | III | 2305942 | 2308008 | WBGene00021864 | fbxa-1 | Y54F10BM.10 | 0.132976764334822 |  |
|--------|----|-----|---------|---------|----------------|--------|-------------|-------------------|--|

AGIWUR24508

|        |    |     |         |         |                 |             |             |                    |  |
|--------|----|-----|---------|---------|-----------------|-------------|-------------|--------------------|--|
| CB4856 | HS | III | 2308256 | 2309744 | WBGene000206486 | Y54F10BM.20 | Y54F10BM.20 | 0.0795283495202872 |  |
|--------|----|-----|---------|---------|-----------------|-------------|-------------|--------------------|--|

AGIWUR32548

|        |    |     |         |         |                |         |             |                     |  |
|--------|----|-----|---------|---------|----------------|---------|-------------|---------------------|--|
| CB4856 | HS | III | 2309924 | 2314073 | WBGene00021865 | fbxa-66 | Y54F10BM.11 | -0.0121982237469105 |  |
|--------|----|-----|---------|---------|----------------|---------|-------------|---------------------|--|

AGIWUR7609

|        |    |     |         |         |                |        |            |                    |  |
|--------|----|-----|---------|---------|----------------|--------|------------|--------------------|--|
| CB4856 | HS | III | 2314436 | 2326901 | WBGene00021857 | iffb-1 | Y54F10BM.2 | 0.0627133611911574 |  |
|--------|----|-----|---------|---------|----------------|--------|------------|--------------------|--|

AGIWUR5626;AGIWUR10411;AGIWUR23707

|        |    |     |         |         |                |             |             |                     |
|--------|----|-----|---------|---------|----------------|-------------|-------------|---------------------|
| CB4856 | HS | III | 2326921 | 2329644 | WBGene00021866 | Y54F10BM.12 | Y54F10BM.12 | -0.0757862361314743 |
|--------|----|-----|---------|---------|----------------|-------------|-------------|---------------------|

AGIWUR29344

|        |    |     |         |         |                |             |             |                    |
|--------|----|-----|---------|---------|----------------|-------------|-------------|--------------------|
| CB4856 | HS | III | 2329577 | 2331183 | WBGene00021867 | Y54F10BM.13 | Y54F10BM.13 | -0.193523926224516 |
|--------|----|-----|---------|---------|----------------|-------------|-------------|--------------------|

AGIWUR19905;AGIWUR36281

|        |    |     |         |         |                |            |            |                    |
|--------|----|-----|---------|---------|----------------|------------|------------|--------------------|
| CB4856 | HS | III | 2331572 | 2342184 | WBGene00021856 | Y54F10BM.1 | Y54F10BM.1 | -0.189720083936866 |
|--------|----|-----|---------|---------|----------------|------------|------------|--------------------|

AGIWUR20766

|        |    |     |         |         |                |       |             |                    |
|--------|----|-----|---------|---------|----------------|-------|-------------|--------------------|
| CB4856 | HS | III | 2343573 | 2347329 | WBGene00004016 | phf-5 | Y54F10BM.14 | 0.0252607429787837 |
|--------|----|-----|---------|---------|----------------|-------|-------------|--------------------|

AGIWUR869;AGIWUR3182;AGIWUR4589;AGIWUR5858;AGIWUR6693;AGIWUR10165;AGIWUR12970;AGIWUR22995;AGIWUR41822

|        |    |     |         |         |                |       |          |                    |
|--------|----|-----|---------|---------|----------------|-------|----------|--------------------|
| CB4856 | HS | III | 2347591 | 2362056 | WBGene00001589 | gip-1 | H04J21.3 | -0.110560926652762 |
|--------|----|-----|---------|---------|----------------|-------|----------|--------------------|

AGIWUR2869;AGIWUR12151;AGIWUR21514

|        |    |     |         |         |                |        |          |                     |
|--------|----|-----|---------|---------|----------------|--------|----------|---------------------|
| CB4856 | HS | III | 2362948 | 2366278 | WBGene00005146 | srd-69 | H04J21.2 | -0.0673951838370037 |
|--------|----|-----|---------|---------|----------------|--------|----------|---------------------|

AGIWUR37224

|        |    |     |         |         |                |          |          |                    |
|--------|----|-----|---------|---------|----------------|----------|----------|--------------------|
| CB4856 | HS | III | 2366884 | 2372655 | WBGene00019150 | H04J21.1 | H04J21.1 | -0.108530344441261 |
|--------|----|-----|---------|---------|----------------|----------|----------|--------------------|

AGIWUR14406

|        |    |     |         |         |                |          |          |                   |
|--------|----|-----|---------|---------|----------------|----------|----------|-------------------|
| CB4856 | HS | III | 2376193 | 2384840 | WBGene00019199 | H14E04.2 | H14E04.2 | 0.116797935621554 |
|--------|----|-----|---------|---------|----------------|----------|----------|-------------------|

AGIWUR2073;AGIWUR27203

|        |    |     |         |         |                |          |          |                   |
|--------|----|-----|---------|---------|----------------|----------|----------|-------------------|
| CB4856 | HS | III | 2384892 | 2386579 | WBGene00019200 | H14E04.3 | H14E04.3 | 0.269904117205177 |
|--------|----|-----|---------|---------|----------------|----------|----------|-------------------|

AGIWUR20025

|        |    |     |         |         |                |          |          |                    |
|--------|----|-----|---------|---------|----------------|----------|----------|--------------------|
| CB4856 | HS | III | 2390203 | 2392116 | WBGene00019201 | H14E04.4 | H14E04.4 | 0.0824294620427306 |
|--------|----|-----|---------|---------|----------------|----------|----------|--------------------|

AGIWUR24047

|        |    |     |         |         |                |       |          |                    |
|--------|----|-----|---------|---------|----------------|-------|----------|--------------------|
| CB4856 | HS | III | 2394325 | 2401308 | WBGene00000506 | cic-1 | H14E04.5 | 0.0946367893039657 |
|--------|----|-----|---------|---------|----------------|-------|----------|--------------------|

AGIWUR12520

|        |    |     |         |         |                |        |          |                   |
|--------|----|-----|---------|---------|----------------|--------|----------|-------------------|
| CB4856 | HS | III | 2402070 | 2406332 | WBGene00019198 | strm-1 | H14E04.1 | 0.101336662663885 |
|--------|----|-----|---------|---------|----------------|--------|----------|-------------------|

AGIWUR40650

|        |    |     |         |         |                |         |         |                   |             |
|--------|----|-----|---------|---------|----------------|---------|---------|-------------------|-------------|
| CB4856 | HS | III | 2406308 | 2410985 | WBGene00021021 | mrpl-30 | W04B5.4 | 0.154447088492974 | AGIWUR43598 |
|--------|----|-----|---------|---------|----------------|---------|---------|-------------------|-------------|

|        |    |     |         |         |                |         |         |                   |            |
|--------|----|-----|---------|---------|----------------|---------|---------|-------------------|------------|
| CB4856 | HS | III | 2411090 | 2418205 | WBGene00021022 | W04B5.5 | W04B5.5 | 0.152862758736156 | AGIWUR8262 |
|--------|----|-----|---------|---------|----------------|---------|---------|-------------------|------------|

|        |    |     |         |         |                |         |         |                    |  |
|--------|----|-----|---------|---------|----------------|---------|---------|--------------------|--|
| CB4856 | HS | III | 2418345 | 2423912 | WBGene00021020 | W04B5.3 | W04B5.3 | 0.0713565454490119 |  |
|--------|----|-----|---------|---------|----------------|---------|---------|--------------------|--|

AGIWUR42343;AGIWUR43483

|        |    |     |         |         |                |         |         |                    |             |
|--------|----|-----|---------|---------|----------------|---------|---------|--------------------|-------------|
| CB4856 | HS | III | 2424355 | 2427738 | WBGene00021019 | W04B5.2 | W04B5.2 | -0.102077638669718 | AGIWUR18604 |
|--------|----|-----|---------|---------|----------------|---------|---------|--------------------|-------------|

|        |    |     |         |         |                |         |         |                    |             |
|--------|----|-----|---------|---------|----------------|---------|---------|--------------------|-------------|
| CB4856 | HS | III | 2436105 | 2442328 | WBGene00017104 | E02H9.6 | E02H9.6 | -0.147252053349312 | AGIWUR23811 |
|--------|----|-----|---------|---------|----------------|---------|---------|--------------------|-------------|

|        |    |     |         |         |                |         |         |                    |  |
|--------|----|-----|---------|---------|----------------|---------|---------|--------------------|--|
| CB4856 | HS | III | 2445228 | 2446142 | WBGene00017105 | E02H9.7 | E02H9.7 | 0.0490270402700368 |  |
|--------|----|-----|---------|---------|----------------|---------|---------|--------------------|--|

AGIWUR25516;AGIWUR35139;AGIWUR40542

|        |    |     |         |         |                |       |         |                   |  |
|--------|----|-----|---------|---------|----------------|-------|---------|-------------------|--|
| CB4856 | HS | III | 2446223 | 2448696 | WBGene00017103 | klo-2 | E02H9.5 | 0.224697500464982 |  |
|--------|----|-----|---------|---------|----------------|-------|---------|-------------------|--|

AGIWUR3705;AGIWUR22017;AGIWUR43846

|        |    |     |         |         |                |         |         |                   |             |
|--------|----|-----|---------|---------|----------------|---------|---------|-------------------|-------------|
| CB4856 | HS | III | 2449382 | 2454949 | WBGene00003711 | nhr-121 | E02H9.8 | 0.243991438474289 | AGIWUR34209 |
|--------|----|-----|---------|---------|----------------|---------|---------|-------------------|-------------|

|        |    |     |         |         |                |         |         |                    |             |
|--------|----|-----|---------|---------|----------------|---------|---------|--------------------|-------------|
| CB4856 | HS | III | 2461911 | 2465079 | WBGene00017101 | E02H9.3 | E02H9.3 | -0.214922494428073 | AGIWUR12571 |
|--------|----|-----|---------|---------|----------------|---------|---------|--------------------|-------------|

|        |    |     |         |         |                |         |         |                     |             |
|--------|----|-----|---------|---------|----------------|---------|---------|---------------------|-------------|
| CB4856 | HS | III | 2465474 | 2466800 | WBGene00017100 | E02H9.2 | E02H9.2 | -0.0695773334011758 | AGIWUR12410 |
|--------|----|-----|---------|---------|----------------|---------|---------|---------------------|-------------|

|        |    |     |         |         |                |         |         |                   |            |
|--------|----|-----|---------|---------|----------------|---------|---------|-------------------|------------|
| CB4856 | HS | III | 2467347 | 2468302 | WBGene00017106 | E02H9.9 | E02H9.9 | -0.29126118376118 | AGIWUR3644 |
|--------|----|-----|---------|---------|----------------|---------|---------|-------------------|------------|

|                                                                                     |    |     |         |         |                |            |             |                     |
|-------------------------------------------------------------------------------------|----|-----|---------|---------|----------------|------------|-------------|---------------------|
| CB4856                                                                              | HS | III | 2468486 | 2469443 | WBGene00017099 | E02H9.1    | E02H9.1     | -0.045143812349016  |
| AGIWUR672;AGIWUR6778;AGIWUR8337;AGIWUR36905                                         |    |     |         |         |                |            |             |                     |
| CB4856                                                                              | HS | III | 2473868 | 2486620 | WBGene00004884 | smg-6      | Y54F10AL.2  | -0.220165358670105  |
| AGIWUR11295;AGIWUR20339;AGIWUR22367;AGIWUR22837;AGIWUR26612;AGIWUR28035;AGIWUR28767 |    |     |         |         |                |            |             |                     |
| CB4856                                                                              | HS | III | 2487769 | 2494340 | WBGene00021847 | Y54F10AL.1 | Y54F10AL.1  | 0.113878775857851   |
| AGIWUR905;AGIWUR13399;AGIWUR33083;AGIWUR33626;AGIWUR33848;AGIWUR42816               |    |     |         |         |                |            |             |                     |
| CB4856                                                                              | HS | III | 2503448 | 2507972 | WBGene00021852 | Y54F10AM.8 | Y54F10AM.8  | 0.117861445618612   |
| AGIWUR2335;AGIWUR25672;AGIWUR32210;AGIWUR35648;AGIWUR36425                          |    |     |         |         |                |            |             |                     |
| CB4856                                                                              | HS | III | 2508848 | 2511802 | WBGene00021850 | Y54F10AM.6 | Y54F10AM.6  | 0.0909919482045494  |
| AGIWUR27666;AGIWUR38314                                                             |    |     |         |         |                |            |             |                     |
| CB4856                                                                              | HS | III | 2512283 | 2528628 | WBGene00004314 | rbc-2      | Y54F10AM.10 | -0.0793387103328644 |
| AGIWUR29963;AGIWUR39097                                                             |    |     |         |         |                |            |             |                     |
| CB4856                                                                              | HS | III | 2529063 | 2530502 | WBGene00021849 | Y54F10AM.5 | Y54F10AM.5  | -0.0387182906417749 |
| AGIWUR19611                                                                         |    |     |         |         |                |            |             |                     |
| CB4856                                                                              | HS | III | 2530615 | 2546420 | WBGene00000464 | ceh-44     | Y54F10AM.4  | 0.0555453874000236  |
| AGIWUR4705;AGIWUR16518;AGIWUR24433                                                  |    |     |         |         |                |            |             |                     |
| CB4856                                                                              | HS | III | 2549927 | 2560684 | WBGene00001410 | feh-1      | Y54F10AM.2  | 0.165036386324539   |
| AGIWUR4773                                                                          |    |     |         |         |                |            |             |                     |
| CB4856                                                                              | HS | III | 2561710 | 2566589 | WBGene00021848 | nhr-239    | Y54F10AM.1  | 0.0656343605493843  |
| AGIWUR14239;AGIWUR19746;AGIWUR25060;AGIWUR30065                                     |    |     |         |         |                |            |             |                     |
| CB4856                                                                              | HS | III | 2567404 | 2571547 | WBGene00021855 | Y54F10AR.2 | Y54F10AR.2  | 0.0068371999536474  |
| AGIWUR40408                                                                         |    |     |         |         |                |            |             |                     |
| CB4856                                                                              | HS | III | 2572031 | 2575723 | WBGene00021854 | Y54F10AR.1 | Y54F10AR.1  | -0.241702714455208  |
| AGIWUR16208                                                                         |    |     |         |         |                |            |             |                     |
| CB4856                                                                              | HS | III | 2579314 | 2580664 | WBGene00022197 | Y71H2B.8   | Y71H2B.8    | -0.0631750687032904 |
| AGIWUR12764                                                                         |    |     |         |         |                |            |             |                     |
| CB4856                                                                              | HS | III | 2583953 | 2597034 | WBGene00000160 | apb-1      | Y71H2B.10   | -0.0854273049203682 |
| AGIWUR28860;AGIWUR38318                                                             |    |     |         |         |                |            |             |                     |
| CB4856                                                                              | HS | III | 2598057 | 2603299 | WBGene00007019 | mdt-19     | Y71H2B.6    | -0.102637554697857  |
| AGIWUR9849                                                                          |    |     |         |         |                |            |             |                     |
| CB4856                                                                              | HS | III | 2604236 | 2606541 | WBGene00022198 | Y71H2B.11  | Y71H2B.11   | 0.115335036254795   |
| AGIWUR3768;AGIWUR39503                                                              |    |     |         |         |                |            |             |                     |
| CB4856                                                                              | HS | III | 2608017 | 2618856 | WBGene00022195 | Y71H2B.5   | Y71H2B.5    | -0.153515546604526  |
| AGIWUR16225                                                                         |    |     |         |         |                |            |             |                     |
| CB4856                                                                              | HS | III | 2618963 | 2619375 | WBGene00022194 | Y71H2B.4   | Y71H2B.4    | 0.120917250509294   |
| AGIWUR6650                                                                          |    |     |         |         |                |            |             |                     |
| CB4856                                                                              | HS | III | 2619936 | 2622709 | WBGene00022193 | ppfr-4     | Y71H2B.3    | 0.193869415785029   |
| AGIWUR44844                                                                         |    |     |         |         |                |            |             |                     |
| CB4856                                                                              | HS | III | 2623170 | 2627771 | WBGene00022192 | Y71H2B.2   | Y71H2B.2    | -0.0288041920064366 |

|                                                                                                                                                |     |         |         |                |            |            |                     |
|------------------------------------------------------------------------------------------------------------------------------------------------|-----|---------|---------|----------------|------------|------------|---------------------|
| AGIWUR42251                                                                                                                                    |     |         |         |                |            |            |                     |
| CB4856 HS                                                                                                                                      | III | 2629013 | 2631439 | WBGene00022191 | Y71H2B.1   | Y71H2B.1   | -0.281226909839035  |
| AGIWUR20164;AGIWUR34065;AGIWUR41211                                                                                                            |     |         |         |                |            |            |                     |
| CB4856 HS                                                                                                                                      | III | 2636405 | 2642848 | WBGene00019212 | zmp-2      | H19M22.3   | -0.0764163243384601 |
| AGIWUR10196;AGIWUR17797;AGIWUR22540;AGIWUR22981;AGIWUR30381;AGIWUR30911;AGIWUR35936;AGIWUR39133;AGIWUR42071                                    |     |         |         |                |            |            |                     |
| CB4856 HS                                                                                                                                      | III | 2650851 | 2651565 | WBGene00023084 | H19M22.4   | H19M22.4   | 0.0812155874584715  |
| AGIWUR7023;AGIWUR25650;AGIWUR36609;AGIWUR42415;AGIWUR43101                                                                                     |     |         |         |                |            |            |                     |
| CB4856 HS                                                                                                                                      | III | 2658083 | 2681112 | WBGene00002915 | let-805    | H19M22.2   | 0.0375477633128201  |
| AGIWUR2534;AGIWUR15885;AGIWUR16395;AGIWUR16752;AGIWUR18969;AGIWUR21421;AGIWUR25034;AGIWUR30471;AGIWUR34160;AGIWUR35690;AGIWUR40260;AGIWUR42896 |     |         |         |                |            |            |                     |
| CB4856 HS                                                                                                                                      | III | 2681451 | 2686463 | WBGene00003941 | pbo-1      | Y71H2AL.1  | 0.239425982774797   |
| AGIWUR16024                                                                                                                                    |     |         |         |                |            |            |                     |
| CB4856 HS                                                                                                                                      | III | 2686791 | 2688997 | WBGene00022165 | Y71H2AL.2  | Y71H2AL.2  | 0.139485239057946   |
| AGIWUR36616                                                                                                                                    |     |         |         |                |            |            |                     |
| CB4856 HS                                                                                                                                      | III | 2690160 | 2698817 | WBGene00022174 | Y71H2AM.9  | Y71H2AM.9  | -0.206131055462578  |
| AGIWUR44591                                                                                                                                    |     |         |         |                |            |            |                     |
| CB4856 HS                                                                                                                                      | III | 2700937 | 2707818 | WBGene00022173 | set-27     | Y71H2AM.8  | 0.0691185878450522  |
| AGIWUR19608                                                                                                                                    |     |         |         |                |            |            |                     |
| CB4856 HS                                                                                                                                      | III | 2707737 | 2716447 | WBGene00022175 | Y71H2AM.10 | Y71H2AM.10 | -0.180097641292893  |
| AGIWUR31620                                                                                                                                    |     |         |         |                |            |            |                     |
| CB4856 HS                                                                                                                                      | III | 2718158 | 2725092 | WBGene00022176 | Y71H2AM.11 | Y71H2AM.11 | 0.324251788019987   |
| AGIWUR34264                                                                                                                                    |     |         |         |                |            |            |                     |
| CB4856 HS                                                                                                                                      | III | 2734080 | 2739531 | WBGene00022178 | Y71H2AM.13 | Y71H2AM.13 | 0.0325499797412476  |
| AGIWUR29754                                                                                                                                    |     |         |         |                |            |            |                     |
| CB4856 HS                                                                                                                                      | III | 2743719 | 2746653 | WBGene00022179 | Y71H2AM.14 | Y71H2AM.14 | 0.0587956163204231  |
| AGIWUR1759                                                                                                                                     |     |         |         |                |            |            |                     |
| CB4856 HS                                                                                                                                      | III | 2747130 | 2756512 | WBGene00022180 | Y71H2AM.15 | Y71H2AM.15 | 0.0928197549134744  |
| AGIWUR14045                                                                                                                                    |     |         |         |                |            |            |                     |
| CB4856 HS                                                                                                                                      | III | 2757087 | 2760816 | WBGene00022181 | pho-9      | Y71H2AM.16 | -0.0173580151609105 |
| AGIWUR1582;AGIWUR7980;AGIWUR12398;AGIWUR14707;AGIWUR22714                                                                                      |     |         |         |                |            |            |                     |
| CB4856 HS                                                                                                                                      | III | 2764037 | 2768675 | WBGene00022182 | swsn-3     | Y71H2AM.17 | -0.255968292260428  |
| AGIWUR22386;AGIWUR25232                                                                                                                        |     |         |         |                |            |            |                     |
| CB4856 HS                                                                                                                                      | III | 2769358 | 2779053 | WBGene00002244 | laf-1      | Y71H2AM.19 | -0.128826528082543  |
| AGIWUR3116;AGIWUR3798;AGIWUR9004;AGIWUR23603;AGIWUR24974;AGIWUR25228;AGIWUR30455                                                               |     |         |         |                |            |            |                     |
| CB4856 HS                                                                                                                                      | III | 2781039 | 2782817 | WBGene00022171 | Y71H2AM.6  | Y71H2AM.6  | -0.235284811717939  |
| AGIWUR24357                                                                                                                                    |     |         |         |                |            |            |                     |
| CB4856 HS                                                                                                                                      | III | 2782733 | 2785993 | WBGene00022185 | Y71H2AM.20 | Y71H2AM.20 | -0.106892318147043  |
| AGIWUR33509;AGIWUR38426                                                                                                                        |     |         |         |                |            |            |                     |
| CB4856 HS                                                                                                                                      | III | 2786117 | 2786859 | WBGene00022170 | Y71H2AM.5  | Y71H2AM.5  | 0.0632352041059985  |



|                                                                                   |    |     |         |         |                |            |            |                     |             |
|-----------------------------------------------------------------------------------|----|-----|---------|---------|----------------|------------|------------|---------------------|-------------|
| AGIWUR2693;AGIWUR6440;AGIWUR17716;AGIWUR32055;AGIWUR36884;AGIWUR38719;AGIWUR41121 |    |     |         |         |                |            |            |                     |             |
| CB4856                                                                            | HS | III | 2786854 | 2788028 | WBGene00022169 | Y71H2AM.4  | Y71H2AM.4  | 0.0626395886238509  |             |
| AGIWUR36947;AGIWUR43443                                                           |    |     |         |         |                |            |            |                     |             |
| CB4856                                                                            | HS | III | 2788441 | 2792973 | WBGene00044609 | tbcc-1     | Y71H2AM.24 | -0.0631427046251289 |             |
| AGIWUR23229;AGIWUR33566                                                           |    |     |         |         |                |            |            |                     |             |
| CB4856                                                                            | HS | III | 2793323 | 2801900 | WBGene00006695 | twk-45     | Y71H2AM.22 | -0.0141867500976729 |             |
| AGIWUR3799;AGIWUR4712;AGIWUR14874;AGIWUR21233;AGIWUR27245;AGIWUR35937             |    |     |         |         |                |            |            |                     |             |
| CB4856                                                                            | HS | III | 2802450 | 2803681 | WBGene00044760 | Y71H2AM.25 | Y71H2AM.25 | 0.0055046239532448  |             |
| AGIWUR36266                                                                       |    |     |         |         |                |            |            |                     |             |
| CB4856                                                                            | HS | III | 2805430 | 2811096 | WBGene00022168 | Y71H2AM.3  | Y71H2AM.3  | -0.0688252653239196 |             |
| AGIWUR192                                                                         |    |     |         |         |                |            |            |                     |             |
| CB4856                                                                            | HS | III | 2811870 | 2814969 | WBGene00007000 | tufm-1     | Y71H2AM.23 | 0.147859506114624   |             |
| AGIWUR44719                                                                       |    |     |         |         |                |            |            |                     |             |
| CB4856                                                                            | HS | III | 2819280 | 2826153 | WBGene00022167 | Y71H2AM.2  | Y71H2AM.2  | -0.142528875982848  |             |
| AGIWUR9342                                                                        |    |     |         |         |                |            |            |                     |             |
| CB4856                                                                            | HS | III | 2827070 | 2833824 | WBGene00022166 | Y71H2AM.1  | Y71H2AM.1  | 0.233485155485178   |             |
| AGIWUR25268;AGIWUR25695                                                           |    |     |         |         |                |            |            |                     |             |
| CB4856                                                                            | HS | III | 2834663 | 2836261 | WBGene00022188 | Y71H2AR.1  | Y71H2AR.1  | 0.190718444663061   |             |
| AGIWUR8952                                                                        |    |     |         |         |                |            |            |                     |             |
| CB4856                                                                            | HS | III | 2836639 | 2838453 | WBGene00022190 | josp-1     | Y71H2AR.3  | -0.0894150085597065 |             |
| AGIWUR10191;AGIWUR14524;AGIWUR20442;AGIWUR42988                                   |    |     |         |         |                |            |            |                     |             |
| CB4856                                                                            | HS | III | 2838763 | 2840927 | WBGene00022189 | Y71H2AR.2  | Y71H2AR.2  | 0.0223099422865536  |             |
| AGIWUR36642                                                                       |    |     |         |         |                |            |            |                     |             |
| CB4856                                                                            | HS | III | 2842044 | 2845197 | WBGene00019261 | H34I24.2   | H34I24.2   | 0.149981441555529   |             |
| AGIWUR22219                                                                       |    |     |         |         |                |            |            |                     |             |
| CB4856                                                                            | HS | III | 2847016 | 2848582 | WBGene00019260 | H34I24.1   | H34I24.1   | -0.029660414990877  |             |
| AGIWUR16301                                                                       |    |     |         |         |                |            |            |                     |             |
| CB4856                                                                            | HS | III | 2849066 | 2855419 | WBGene00018992 | trp1-1     | F56F11.5   | 0.105199936944807   |             |
| AGIWUR13328;AGIWUR37474;AGIWUR40427                                               |    |     |         |         |                |            |            |                     |             |
| CB4856                                                                            | HS | III | 2855554 | 2865497 | WBGene00018991 | F56F11.4   | F56F11.4   | 0.112519491763202   |             |
| AGIWUR5816                                                                        |    |     |         |         |                |            |            |                     |             |
| CB4856                                                                            | HS | III | 2874818 | 2880705 | WBGene00018990 | klf-1      | F56F11.3   | -0.158162928065223  |             |
| AGIWUR37613                                                                       |    |     |         |         |                |            |            |                     |             |
| CB4856                                                                            | HS | III | 2882304 | 2884967 | WBGene00018989 | F56F11.2   | F56F11.2   | 0.00874029063932014 |             |
| AGIWUR6833;AGIWUR13653;AGIWUR40840                                                |    |     |         |         |                |            |            |                     |             |
| CB4856                                                                            | HS | III | 2891762 | 2892613 | WBGene00018988 | F56F11.1   | F56F11.1   | 0.175662543124436   |             |
| AGIWUR13941                                                                       |    |     |         |         |                |            |            |                     |             |
| CB4856                                                                            | HS | III | 2893433 | 2897183 | WBGene00020598 | T20B6.2    | T20B6.2    | 0.0111766087117751  | AGIWUR17017 |
| CB4856                                                                            | HS | III | 2897711 | 2898802 | WBGene00020597 | T20B6.1    | T20B6.1    | 0.141549124859635   | AGIWUR19617 |

|                                                                                                |    |     |         |         |                |          |          |                      |             |
|------------------------------------------------------------------------------------------------|----|-----|---------|---------|----------------|----------|----------|----------------------|-------------|
| CB4856                                                                                         | HS | III | 2899441 | 2900402 | WBGene00020599 | T20B6.3  | T20B6.3  | -0.00393263314296632 | AGIWUR28148 |
| CB4856                                                                                         | HS | III | 2910910 | 2935740 | WBGene00019994 | cdh-1    | R10F2.1  | 0.181669617101774    | AGIWUR5450  |
| CB4856                                                                                         | HS | III | 2937103 | 2944044 | WBGene00019997 | R10F2.6  | R10F2.6  | 0.201354668736447    | AGIWUR7457  |
| CB4856                                                                                         | HS | III | 2947091 | 2960574 | WBGene00019157 | H05C05.1 | H05C05.1 | -0.209819059809059   |             |
| AGIWUR1750;AGIWUR25924                                                                         |    |     |         |         |                |          |          |                      |             |
| CB4856                                                                                         | HS | III | 2962170 | 2965634 | WBGene00019158 | H05C05.2 | H05C05.2 | -0.0716119894400293  |             |
| AGIWUR33855;AGIWUR33898                                                                        |    |     |         |         |                |          |          |                      |             |
| CB4856                                                                                         | HS | III | 2970677 | 2975785 | WBGene00021917 | Y55D5A.3 | Y55D5A.3 | 0.0421320622241819   |             |
| AGIWUR1723                                                                                     |    |     |         |         |                |          |          |                      |             |
| CB4856                                                                                         | HS | III | 2982414 | 2988150 | WBGene00021915 | Y55D5A.1 | Y55D5A.1 | -0.0263798393640098  |             |
| AGIWUR10708;AGIWUR39069                                                                        |    |     |         |         |                |          |          |                      |             |
| CB4856                                                                                         | HS | III | 2988081 | 2990057 | WBGene00021918 | Y55D5A.4 | Y55D5A.4 | 0.0514861239172708   |             |
| AGIWUR22699;AGIWUR34129                                                                        |    |     |         |         |                |          |          |                      |             |
| CB4856                                                                                         | HS | III | 2995487 | 3040860 | WBGene00000898 | daf-2    | Y55D5A.5 | -0.251560252578077   |             |
| AGIWUR7133;AGIWUR13223;AGIWUR19374;AGIWUR30665;AGIWUR30985;AGIWUR34221;AGIWUR38552             |    |     |         |         |                |          |          |                      |             |
| CB4856                                                                                         | HS | III | 3042726 | 3047125 | WBGene00021919 | cut1-25  | Y55D5A.6 | -0.0164985110996438  |             |
| AGIWUR4266                                                                                     |    |     |         |         |                |          |          |                      |             |
| CB4856                                                                                         | HS | III | 3052916 | 3057550 | WBGene00019169 | H06I04.5 | H06I04.5 | 0.270657042699904    |             |
| AGIWUR17811                                                                                    |    |     |         |         |                |          |          |                      |             |
| CB4856                                                                                         | HS | III | 3059598 | 3059943 | WBGene00019171 | fipr-29  | H06I04.7 | 0.272758132875618    |             |
| AGIWUR3286                                                                                     |    |     |         |         |                |          |          |                      |             |
| CB4856                                                                                         | HS | III | 3061192 | 3064328 | WBGene00019170 | H06I04.6 | H06I04.6 | 0.030613067338181    |             |
| AGIWUR17697;AGIWUR28831                                                                        |    |     |         |         |                |          |          |                      |             |
| CB4856                                                                                         | HS | III | 3068306 | 3069210 | WBGene00006725 | ubl-1    | H06I04.4 | 0.206343165342066    |             |
| AGIWUR40097                                                                                    |    |     |         |         |                |          |          |                      |             |
| CB4856                                                                                         | HS | III | 3070523 | 3085268 | WBGene00019168 | H06I04.3 | H06I04.3 | -0.01078146196528    |             |
| AGIWUR19571;AGIWUR26916;AGIWUR43041;AGIWUR43553                                                |    |     |         |         |                |          |          |                      |             |
| CB4856                                                                                         | HS | III | 3086693 | 3091738 | WBGene00004787 | sft-1    | H06I04.2 | -0.122938766444442   |             |
| AGIWUR34593                                                                                    |    |     |         |         |                |          |          |                      |             |
| CB4856                                                                                         | HS | III | 3091850 | 3100468 | WBGene00019167 | H06I04.1 | H06I04.1 | -0.0888933886515249  |             |
| AGIWUR8697;AGIWUR11825;AGIWUR19377;AGIWUR24950;AGIWUR25370;AGIWUR27115;AGIWUR30206;AGIWUR37893 |    |     |         |         |                |          |          |                      |             |
| CB4856                                                                                         | HS | III | 3101267 | 3103955 | WBGene00021818 | Y53G8B.2 | Y53G8B.2 | -0.0789313339195736  |             |
| AGIWUR23098                                                                                    |    |     |         |         |                |          |          |                      |             |
| CB4856                                                                                         | HS | III | 3105668 | 3111828 | WBGene00021819 | Y53G8B.3 | Y53G8B.3 | 0.105700669198779    |             |
| AGIWUR20240;AGIWUR39483                                                                        |    |     |         |         |                |          |          |                      |             |
| CB4856                                                                                         | HS | III | 3112428 | 3127124 | WBGene00021820 | nipa-1   | Y53G8B.4 | -0.213595930684897   |             |
| AGIWUR13380;AGIWUR15191;AGIWUR20673;AGIWUR22382;AGIWUR27257;AGIWUR28555                        |    |     |         |         |                |          |          |                      |             |
| CB4856                                                                                         | HS | III | 3129277 | 3131399 | WBGene00021817 | Y53G8B.1 | Y53G8B.1 | -0.0256103960833656  |             |
| AGIWUR8460                                                                                     |    |     |         |         |                |          |          |                      |             |

|                                                                                                                     |     |                 |                |           |           |                     |             |
|---------------------------------------------------------------------------------------------------------------------|-----|-----------------|----------------|-----------|-----------|---------------------|-------------|
| CB4856 HS<br>AGIWUR9745                                                                                             | III | 3131574 3139234 | WBGene00003175 | mec-12    | C44B11.3  | 0.121089369752553   |             |
| CB4856 HS<br>AGIWUR35263                                                                                            | III | 3142198 3143757 | WBGene00016634 | C44B11.4  | C44B11.4  | -0.252261977688221  |             |
| CB4856 HS<br>AGIWUR35468                                                                                            | III | 3152722 3153471 | WBGene00016635 | C44B11.6  | C44B11.6  | 0.108100374720477   |             |
| CB4856 HS<br>AGIWUR38618                                                                                            | III | 3155268 3158393 | WBGene00016633 | C44B11.1  | C44B11.1  | -0.206595207995069  |             |
| CB4856 HS<br>AGIWUR3695;AGIWUR8574;AGIWUR10518;AGIWUR10971;AGIWUR23515;AGIWUR35283;AGIWUR40568                      | III | 3166285 3171198 | WBGene00020104 | R148.5    | R148.5    | 0.127334392570225   |             |
| CB4856 HS<br>AGIWUR2853;AGIWUR12459;AGIWUR13273;AGIWUR20228;AGIWUR20610;AGIWUR30751;AGIWUR38883                     | III | 3171592 3174845 | WBGene00020103 | R148.4    | R148.4    | 0.0341066415351818  |             |
| CB4856 HS<br>AGIWUR12884;AGIWUR22527                                                                                | III | 3175339 3183498 | WBGene00020102 | R148.3    | R148.3    | 0.0275579671696731  |             |
| CB4856 HS<br>AGIWUR96;AGIWUR32957                                                                                   | III | 3183677 3185237 | WBGene00020101 | lmtr-5    | R148.2    | -0.0219231158906945 |             |
| CB4856 HS<br>AGIWUR15590;AGIWUR23354                                                                                | III | 3186700 3192206 | WBGene00020100 | mks-1     | R148.1    | 0.237219551705101   |             |
| CB4856 HS                                                                                                           | III | 3195561 3198407 | WBGene00020105 | R148.7    | R148.7    | 0.116238226786452   | AGIWUR42091 |
| CB4856 HS                                                                                                           | III | 3198477 3199516 | WBGene00006452 | heh-1     | R148.6    | -0.1717661931132    | AGIWUR16994 |
| CB4856 HS<br>AGIWUR6857                                                                                             | III | 3200795 3219150 | WBGene00001494 | frm-8     | H09G03.2  | 0.108057481851302   |             |
| CB4856 HS<br>AGIWUR20902;AGIWUR38539                                                                                | III | 3226352 3230652 | WBGene00019174 | H09G03.1  | H09G03.1  | 0.0134661112624612  |             |
| CB4856 HS<br>-0.00862450271931348                                                                                   | III | 3233102 3241263 | WBGene00021799 | Y53G8AL.1 | Y53G8AL.1 |                     |             |
| CB4856 HS<br>AGIWUR11969                                                                                            | III | 3241717 3248575 | WBGene00021800 | Y53G8AL.2 | Y53G8AL.2 | 0.0873525464893063  |             |
| CB4856 HS<br>AGIWUR98;AGIWUR2795;AGIWUR8581;AGIWUR11247;AGIWUR12880;AGIWUR27907;AGIWUR29640;AGIWUR31983;AGIWUR32616 | III | 3249346 3250538 | WBGene00050917 | Y53G8AL.4 | Y53G8AL.4 | 0.0126919086496358  |             |
| CB4856 HS<br>AGIWUR3567                                                                                             | III | 3251461 3253143 | WBGene00021801 | Y53G8AL.3 | Y53G8AL.3 | -0.0940775210484528 |             |
| CB4856 HS<br>AGIWUR11618;AGIWUR14433;AGIWUR15534                                                                    | III | 3253969 3255619 | WBGene00021804 | Y53G8AM.4 | Y53G8AM.4 | -0.216486382876321  |             |
| CB4856 HS<br>AGIWUR6953                                                                                             | III | 3256730 3258395 | WBGene00021805 | Y53G8AM.5 | Y53G8AM.5 | -0.070203239245604  |             |
| CB4856 HS<br>AGIWUR37373                                                                                            | III | 3259331 3260882 | WBGene00021806 | Y53G8AM.6 | Y53G8AM.6 | -0.0831293955255799 |             |
| CB4856 HS                                                                                                           | III | 3263682 3266608 | WBGene00021807 | Y53G8AM.7 | Y53G8AM.7 | -0.139521581277013  |             |

|                                                                                    |    |     |         |         |                |                  |                                  |
|------------------------------------------------------------------------------------|----|-----|---------|---------|----------------|------------------|----------------------------------|
| AGIWUR31082                                                                        |    |     |         |         |                |                  |                                  |
| CB4856                                                                             | HS | III | 3267178 | 3278710 | WBGene00021808 | Y53G8AM.8        | Y53G8AM.8 -0.242367933065275     |
| AGIWUR2613;AGIWUR10843                                                             |    |     |         |         |                |                  |                                  |
| CB4856                                                                             | HS | III | 3282308 | 3290215 | WBGene00021814 | Y53G8AR.7        | Y53G8AR.7 0.140502779311749      |
| AGIWUR17390;AGIWUR29595;AGIWUR30914                                                |    |     |         |         |                |                  |                                  |
| CB4856                                                                             | HS | III | 3290117 | 3294330 | WBGene00021815 | Y53G8AR.8        | Y53G8AR.8 -0.0271329361952759    |
| AGIWUR37995                                                                        |    |     |         |         |                |                  |                                  |
| CB4856                                                                             | HS | III | 3294743 | 3297115 | WBGene00021813 | Y53G8AR.6        | Y53G8AR.6 -0.10932208597802      |
| AGIWUR4561;AGIWUR24284;AGIWUR24788;AGIWUR38114                                     |    |     |         |         |                |                  |                                  |
| CB4856                                                                             | HS | III | 3297454 | 3302151 | WBGene00021812 | Y53G8AR.5        | Y53G8AR.5 0.0742802787877945     |
| AGIWUR41086                                                                        |    |     |         |         |                |                  |                                  |
| CB4856                                                                             | HS | III | 3311423 | 3317713 | WBGene00021811 | ral-1 Y53G8AR.3  | 0.0281453817594901               |
| AGIWUR39100                                                                        |    |     |         |         |                |                  |                                  |
| CB4856                                                                             | HS | III | 3317737 | 3321245 | WBGene00021816 | Y53G8AR.9        | Y53G8AR.9 -0.159099284552415     |
| AGIWUR331                                                                          |    |     |         |         |                |                  |                                  |
| CB4856                                                                             | HS | III | 3322962 | 3331727 | WBGene00021810 | phf-15 Y53G8AR.2 | 0.0137868893578599               |
| AGIWUR35836                                                                        |    |     |         |         |                |                  |                                  |
| CB4856                                                                             | HS | III | 3333036 | 3333957 | WBGene00021809 | Y53G8AR.1        | Y53G8AR.1 0.0401909859582403     |
| AGIWUR12431;AGIWUR18982;AGIWUR22098                                                |    |     |         |         |                |                  |                                  |
| CB4856                                                                             | HS | III | 3344875 | 3363409 | WBGene00001559 | gei-1 F45H7.2    | 0.0710830303295036               |
| AGIWUR6128;AGIWUR42668                                                             |    |     |         |         |                |                  |                                  |
| CB4856                                                                             | HS | III | 3363668 | 3370209 | WBGene00004183 | prk-2 F45H7.4    | 0.145761006178603 AGIWUR39213    |
| CB4856                                                                             | HS | III | 3377408 | 3389970 | WBGene00009738 | hecw-1 F45H7.6   | -0.00859107044369178             |
| AGIWUR2775;AGIWUR13999                                                             |    |     |         |         |                |                  |                                  |
| CB4856                                                                             | HS | III | 3389894 | 3392525 | WBGene00008348 | C56G7.3 C56G7.3  | -0.00665912828590898 AGIWUR39672 |
| CB4856                                                                             | HS | III | 3392514 | 3393787 | WBGene00003372 | mlc-4 C56G7.1    | 0.153590310926234                |
| AGIWUR30999;AGIWUR42250;AGIWUR42527                                                |    |     |         |         |                |                  |                                  |
| CB4856                                                                             | HS | III | 3396585 | 3397675 | WBGene00010303 | cri-3 F59A2.3    | 0.177035322337074                |
| AGIWUR13117;AGIWUR25564;AGIWUR26708;AGIWUR37141;AGIWUR43589                        |    |     |         |         |                |                  |                                  |
| CB4856                                                                             | HS | III | 3397743 | 3400644 | WBGene00010304 | clpf-1 F59A2.4   | -0.0502628389924666 AGIWUR17293  |
| CB4856                                                                             | HS | III | 3400644 | 3404479 | WBGene00003795 | npp-9 F59A2.1    | -0.186163388690209               |
| AGIWUR8688;AGIWUR12216;AGIWUR18359;AGIWUR29274;AGIWUR32884;AGIWUR34620;AGIWUR35151 |    |     |         |         |                |                  |                                  |
| CB4856                                                                             | HS | III | 3404863 | 3405469 | WBGene00010305 | F59A2.5 F59A2.5  | -0.110497306414302 AGIWUR18938   |
| CB4856                                                                             | HS | III | 3405576 | 3411624 | WBGene00010302 | F59A2.2 F59A2.2  | -0.0247269793023372 AGIWUR22160  |
| CB4856                                                                             | HS | III | 3415552 | 3425447 | WBGene00010306 | golg-4 F59A2.6   | -0.127151698217354 AGIWUR43196   |
| CB4856                                                                             | HS | III | 3425736 | 3428094 | WBGene00010450 | K01A11.2         | K01A11.2 0.0599011803993736      |
| AGIWUR41248                                                                        |    |     |         |         |                |                  |                                  |
| CB4856                                                                             | HS | III | 3428080 | 3431366 | WBGene00010449 | K01A11.1         | K01A11.1 -0.059411344480333      |
| AGIWUR37728                                                                        |    |     |         |         |                |                  |                                  |

|                                                                                                                    |     |         |         |                |          |          |                     |             |
|--------------------------------------------------------------------------------------------------------------------|-----|---------|---------|----------------|----------|----------|---------------------|-------------|
| CB4856 HS<br>AGIWUR42753                                                                                           | III | 3439023 | 3444207 | WBGene00004976 | spe-41   | K01A11.4 | -0.031771941230943  |             |
| CB4856 HS<br>AGIWUR12199                                                                                           | III | 3447140 | 3452613 | WBGene00010451 | K01A11.3 | K01A11.3 | 0.0114149782316524  |             |
| CB4856 HS<br>AGIWUR8950                                                                                            | III | 3454345 | 3455850 | WBGene00007920 | C34C12.1 | C34C12.1 | 0.275693471622138   |             |
| CB4856 HS<br>AGIWUR33347                                                                                           | III | 3456435 | 3460106 | WBGene00007921 | C34C12.2 | C34C12.2 | 0.0605189941847382  |             |
| CB4856 HS<br>AGIWUR23839                                                                                           | III | 3460406 | 3461590 | WBGene00007927 | C34C12.8 | C34C12.8 | -0.0348051958474027 |             |
| CB4856 HS<br>AGIWUR15982                                                                                           | III | 3461703 | 3467687 | WBGene00007922 | pph-6    | C34C12.3 | 0.0166691423283503  |             |
| CB4856 HS<br>AGIWUR4591;AGIWUR11505;AGIWUR14624;AGIWUR27106;AGIWUR34870                                            | III | 3467664 | 3469827 | WBGene00007923 | C34C12.4 | C34C12.4 | -0.0615623341044582 |             |
| CB4856 HS<br>AGIWUR68;AGIWUR4021;AGIWUR7201;AGIWUR8236;AGIWUR24702;AGIWUR27827;AGIWUR32997;AGIWUR37412;AGIWUR44729 | III | 3472003 | 3473718 | WBGene00007924 | rsu-1    | C34C12.5 | -0.180658206918453  |             |
| CB4856 HS<br>AGIWUR12359                                                                                           | III | 3474019 | 3475450 | WBGene00007928 | C34C12.9 | C34C12.9 | 0.208720915830955   |             |
| CB4856 HS<br>AGIWUR31348                                                                                           | III | 3482591 | 3484843 | WBGene00007925 | C34C12.6 | C34C12.6 | -0.373056655670895  |             |
| CB4856 HS<br>AGIWUR32822                                                                                           | III | 3484813 | 3488341 | WBGene00007926 | C34C12.7 | C34C12.7 | 0.418929913471707   |             |
| CB4856 HS                                                                                                          | III | 3490363 | 3493234 | WBGene00001639 | gly-14   | M01F1.1  | 0.172037644753654   | AGIWUR22529 |
| CB4856 HS<br>AGIWUR15859;AGIWUR37865;AGIWUR43079                                                                   | III | 3493811 | 3499057 | WBGene00010815 | M01F1.9  | M01F1.9  | 0.0930661655322815  |             |
| CB4856 HS                                                                                                          | III | 3499375 | 3502547 | WBGene00010814 | M01F1.8  | M01F1.8  | 0.00891043655358104 | AGIWUR4692  |
| CB4856 HS<br>AGIWUR5475;AGIWUR9044;AGIWUR10626;AGIWUR28475;AGIWUR28655;AGIWUR34090                                 | III | 3502841 | 3503724 | WBGene00004428 | rpl-16   | M01F1.2  | -0.56286634615527   |             |
| CB4856 HS                                                                                                          | III | 3503710 | 3505355 | WBGene00010809 | M01F1.3  | M01F1.3  | 0.0871845146374852  | AGIWUR14202 |
| CB4856 HS                                                                                                          | III | 3505649 | 3510033 | WBGene00010810 | M01F1.4  | M01F1.4  | 0.13534483634316    | AGIWUR40566 |
| CB4856 HS                                                                                                          | III | 3510237 | 3511011 | WBGene00010812 | mrpl-35  | M01F1.6  | 0.118890168674001   | AGIWUR6204  |
| CB4856 HS<br>AGIWUR26004                                                                                           | III | 3510964 | 3519607 | WBGene00010811 | hmit-1.3 | M01F1.5  | -0.335609833356598  |             |
| CB4856 HS                                                                                                          | III | 3521133 | 3529838 | WBGene00010813 | pitp-1   | M01F1.7  | 0.0891388650943448  | AGIWUR42568 |
| CB4856 HS                                                                                                          | III | 3534660 | 3537496 | WBGene00008288 | C54C6.6  | C54C6.6  | 0.200076155248381   | AGIWUR25423 |
| CB4856 HS                                                                                                          | III | 3537688 | 3541628 | WBGene00000248 | ben-1    | C54C6.2  | -0.0426117420724861 | AGIWUR19529 |
| CB4856 HS                                                                                                          | III | 3545740 | 3546419 | WBGene00044166 | C54C6.7  | C54C6.7  | 0.667449169295995   | AGIWUR16866 |
| CB4856 HS<br>AGIWUR3248;AGIWUR7930;AGIWUR11537;AGIWUR12523;AGIWUR12823;AGIWUR23202                                 | III | 3549410 | 3549850 | WBGene00008287 | C54C6.5  | C54C6.5  | -0.0458986823027452 |             |

|                                                                                   |    |     |         |         |                |          |          |                     |             |
|-----------------------------------------------------------------------------------|----|-----|---------|---------|----------------|----------|----------|---------------------|-------------|
| CB4856                                                                            | HS | III | 3553649 | 3556627 | WBGene00008286 | C54C6.4  | C54C6.4  | 0.0219009161240882  |             |
| AGIWUR2455;AGIWUR20439;AGIWUR35219                                                |    |     |         |         |                |          |          |                     |             |
| CB4856                                                                            | HS | III | 3573585 | 3578771 | WBGene00003605 | nhr-6    | C48D5.1  | -0.187806793598581  | AGIWUR30336 |
| CB4856                                                                            | HS | III | 3578716 | 3581736 | WBGene00008180 | C48D5.3  | C48D5.3  | 0.0321040970649209  | AGIWUR23414 |
| CB4856                                                                            | HS | III | 3590734 | 3611993 | WBGene00004213 | ptp-1    | C48D5.2  | -0.225155600434314  |             |
| AGIWUR6891;AGIWUR25035;AGIWUR35090                                                |    |     |         |         |                |          |          |                     |             |
| CB4856                                                                            | HS | III | 3612951 | 3627142 | WBGene00004765 | sel-8    | C32A3.1  | -0.114521588305399  | AGIWUR25533 |
| CB4856                                                                            | HS | III | 3627986 | 3630368 | WBGene00007859 | mrps-31  | C32A3.2  | -0.0589599268449881 | AGIWUR2977  |
| CB4856                                                                            | HS | III | 3635876 | 3643670 | WBGene00007860 | rilp-1   | C32A3.3  | -0.340798219190448  | AGIWUR12909 |
| CB4856                                                                            | HS | III | 3644375 | 3648822 | WBGene00006822 | unc-93   | C46F11.1 | -0.186229976148972  |             |
| AGIWUR19227                                                                       |    |     |         |         |                |          |          |                     |             |
| CB4856                                                                            | HS | III | 3648792 | 3650832 | WBGene00008118 | madf-8   | C46F11.3 | 0.0796458203872046  |             |
| AGIWUR4896                                                                        |    |     |         |         |                |          |          |                     |             |
| CB4856                                                                            | HS | III | 3650905 | 3652973 | WBGene00008117 | gsr-1    | C46F11.2 | -0.16547248745378   |             |
| AGIWUR3922;AGIWUR4457;AGIWUR11413;AGIWUR16538;AGIWUR21036;AGIWUR25473;AGIWUR30459 |    |     |         |         |                |          |          |                     |             |
| CB4856                                                                            | HS | III | 3652866 | 3657602 | WBGene00008120 | C46F11.5 | C46F11.5 | -0.0346554832380086 |             |
| AGIWUR2103;AGIWUR17982;AGIWUR19818                                                |    |     |         |         |                |          |          |                     |             |
| CB4856                                                                            | HS | III | 3657716 | 3664494 | WBGene00008119 | C46F11.4 | C46F11.4 | 0.0995415758640021  |             |
| AGIWUR9635                                                                        |    |     |         |         |                |          |          |                     |             |
| CB4856                                                                            | HS | III | 3667022 | 3670436 | WBGene00008121 | C46F11.6 | C46F11.6 | 0.211505004678191   |             |
| AGIWUR5194                                                                        |    |     |         |         |                |          |          |                     |             |
| CB4856                                                                            | HS | III | 3683253 | 3685808 | WBGene00012084 | npr-15   | T27D1.3  | -0.0737079456993781 | AGIWUR45091 |
| CB4856                                                                            | HS | III | 3697821 | 3699640 | WBGene00000885 | cyn-9    | T27D1.1  | 0.154560819261013   |             |
| AGIWUR5691;AGIWUR22866                                                            |    |     |         |         |                |          |          |                     |             |
| CB4856                                                                            | HS | III | 3699740 | 3701476 | WBGene00003962 | pdi-1    | C14B1.1  | 0.158586496717817   | AGIWUR26524 |
| CB4856                                                                            | HS | III | 3702260 | 3703172 | WBGene00007573 | C14B1.2  | C14B1.2  | 0.0390248881844553  | AGIWUR35229 |
| CB4856                                                                            | HS | III | 3703564 | 3705046 | WBGene00007574 | C14B1.3  | C14B1.3  | -0.175848159165202  | AGIWUR36098 |
| CB4856                                                                            | HS | III | 3705265 | 3706784 | WBGene00006474 | wdr-5.1  | C14B1.4  | 0.0233788488093261  | AGIWUR43195 |
| CB4856                                                                            | HS | III | 3706886 | 3709225 | WBGene00007576 | dph-1    | C14B1.5  | 0.147984049626876   | AGIWUR42170 |
| CB4856                                                                            | HS | III | 3709330 | 3713282 | WBGene00007581 | alkb-8   | C14B1.10 | -0.0124273924574538 |             |
| AGIWUR43295                                                                       |    |     |         |         |                |          |          |                     |             |
| CB4856                                                                            | HS | III | 3713463 | 3718745 | WBGene00007577 | nrde-1   | C14B1.6  | 0.115526826037421   | AGIWUR30630 |
| CB4856                                                                            | HS | III | 3718655 | 3719722 | WBGene00007579 | C14B1.8  | C14B1.8  | -0.0997951968813915 |             |
| AGIWUR1479;AGIWUR19965;AGIWUR23671;AGIWUR36535                                    |    |     |         |         |                |          |          |                     |             |
| CB4856                                                                            | HS | III | 3719904 | 3723597 | WBGene00007578 | C14B1.7  | C14B1.7  | 0.151219282193242   |             |
| AGIWUR3899;AGIWUR7683;AGIWUR11406;AGIWUR14763;AGIWUR18063;AGIWUR23634;AGIWUR27561 |    |     |         |         |                |          |          |                     |             |
| CB4856                                                                            | HS | III | 3724222 | 3724980 | WBGene00184990 | C14B1.12 | C14B1.12 | 0.0701203730907363  |             |
| AGIWUR40467                                                                       |    |     |         |         |                |          |          |                     |             |
| CB4856                                                                            | HS | III | 3726683 | 3729570 | WBGene00045484 | F34D10.9 | F34D10.9 | -0.108099440634918  |             |

|                                                                                    |    |     |         |         |                |          |          |                     |                     |
|------------------------------------------------------------------------------------|----|-----|---------|---------|----------------|----------|----------|---------------------|---------------------|
| AGIWUR26415                                                                        |    |     |         |         |                |          |          |                     |                     |
| CB4856                                                                             | HS | III | 3729493 | 3735039 | WBGene00009372 | evl-18   | F34D10.2 |                     | -0.0620151710418035 |
| AGIWUR31255;AGIWUR41733                                                            |    |     |         |         |                |          |          |                     |                     |
| CB4856                                                                             | HS | III | 3736602 | 3739765 | WBGene00009374 | F34D10.4 | F34D10.4 |                     | 0.118384507653882   |
| AGIWUR6706                                                                         |    |     |         |         |                |          |          |                     |                     |
| CB4856                                                                             | HS | III | 3745461 | 3747451 | WBGene00003033 | lin-48   | F34D10.5 |                     | 0.0006912109709587  |
| AGIWUR8297;AGIWUR33973                                                             |    |     |         |         |                |          |          |                     |                     |
| CB4856                                                                             | HS | III | 3747560 | 3759412 | WBGene00009375 | F34D10.6 | F34D10.6 |                     | 0.0539772614694281  |
| AGIWUR24321;AGIWUR27132                                                            |    |     |         |         |                |          |          |                     |                     |
| CB4856                                                                             | HS | III | 3760378 | 3765556 | WBGene00008091 | C44F1.1  | C44F1.1  | 0.301748133832616   | AGIWUR34530         |
| CB4856                                                                             | HS | III | 3768500 | 3770321 | WBGene00008092 | gmeb-3   | C44F1.2  | -0.0861151593518716 |                     |
| AGIWUR17407;AGIWUR28024;AGIWUR36161                                                |    |     |         |         |                |          |          |                     |                     |
| CB4856                                                                             | HS | III | 3771425 | 3773394 | WBGene00002267 | lec-4    | C44F1.3  | 0.147919219600308   | AGIWUR34709         |
| CB4856                                                                             | HS | III | 3774896 | 3786640 | WBGene00000070 | acy-3    | C44F1.5  | -0.122830172859288  | AGIWUR26920         |
| CB4856                                                                             | HS | III | 3789982 | 3800547 | WBGene00003476 | mtm-3    | T24A11.1 | -0.0443645653064308 |                     |
| AGIWUR9591;AGIWUR13492                                                             |    |     |         |         |                |          |          |                     |                     |
| CB4856                                                                             | HS | III | 3802452 | 3804438 | WBGene00011974 | xbx-5    | T24A11.2 | -0.138193506614575  |                     |
| AGIWUR16614;AGIWUR30028                                                            |    |     |         |         |                |          |          |                     |                     |
| CB4856                                                                             | HS | III | 3804772 | 3809030 | WBGene00006591 | toh-1    | T24A11.3 | -0.0352995394616258 |                     |
| AGIWUR2545;AGIWUR10073;AGIWUR17610;AGIWUR19116;AGIWUR29103;AGIWUR29370;AGIWUR36519 |    |     |         |         |                |          |          |                     |                     |
| CB4856                                                                             | HS | III | 3813519 | 3819679 | WBGene00001086 | dpy-27   | R13G10.1 | 0.196506204581244   |                     |
| AGIWUR14664                                                                        |    |     |         |         |                |          |          |                     |                     |
| CB4856                                                                             | HS | III | 3822403 | 3826261 | WBGene00000137 | amx-1    | R13G10.2 | -0.359407139761437  |                     |
| AGIWUR18369                                                                        |    |     |         |         |                |          |          |                     |                     |
| CB4856                                                                             | HS | III | 3826378 | 3829205 | WBGene00011260 | cnm-5    | R13G10.4 | -0.0601098729877503 |                     |
| AGIWUR24264                                                                        |    |     |         |         |                |          |          |                     |                     |
| CB4856                                                                             | HS | III | 3832591 | 3834522 | WBGene00007963 | cyp-25A1 | C36A4.1  | 0.114474517448738   |                     |
| AGIWUR27481;AGIWUR44867                                                            |    |     |         |         |                |          |          |                     |                     |
| CB4856                                                                             | HS | III | 3835221 | 3837211 | WBGene00007964 | cyp-25A2 | C36A4.2  | 0.0464053384828418  |                     |
| AGIWUR18068                                                                        |    |     |         |         |                |          |          |                     |                     |
| CB4856                                                                             | HS | III | 3837551 | 3839477 | WBGene00014697 | cyp-25A3 | C36A4.3  | -0.0789082447550697 |                     |
| AGIWUR33808                                                                        |    |     |         |         |                |          |          |                     |                     |
| CB4856                                                                             | HS | III | 3841262 | 3843614 | WBGene00007965 | C36A4.4  | C36A4.4  | 0.091504037124146   | AGIWUR21773         |
| CB4856                                                                             | HS | III | 3853026 | 3862958 | WBGene00000264 | brc-1    | C36A4.8  | 0.00154012384554747 | AGIWUR18213         |
| CB4856                                                                             | HS | III | 3864036 | 3867098 | WBGene00007969 | acs-19   | C36A4.9  | 0.211990786629547   |                     |
| AGIWUR5743;AGIWUR8131;AGIWUR18162;AGIWUR24888;AGIWUR42768                          |    |     |         |         |                |          |          |                     |                     |
| CB4856                                                                             | HS | III | 3867852 | 3869587 | WBGene00004414 | rp1-3    | F13B10.2 | -0.223972452147917  |                     |
| AGIWUR4750;AGIWUR29310                                                             |    |     |         |         |                |          |          |                     |                     |
| CB4856                                                                             | HS | III | 3869591 | 3901466 | WBGene00006575 | tir-1    | F13B10.1 | 0.0637107202177232  |                     |

AGIWUR2597;AGIWUR3084;AGIWUR3265;AGIWUR5178;AGIWUR9784;AGIWUR15222;AGIWUR19101;AGIWUR21064;AGIWUR30859;AGIWUR30875;AGIWUR34308;AGIWUR38888;AGIWUR39275;AGIWUR40787  
 CB4856 HS III 3903114 3907687 WBGene00014202 mmcm-1 ZK1058.1 -0.269754593684164  
 AGIWUR1795;AGIWUR2675;AGIWUR8381;AGIWUR12443;AGIWUR14231;AGIWUR16597;AGIWUR17881;AGIWUR33357;AGIWUR39146;AGIWUR41856  
 CB4856 HS III 3908929 3914149 WBGene00003930 pat-3 ZK1058.2 0.100196392170599  
 AGIWUR35961  
 CB4856 HS III 3916933 3918809 WBGene00014204 ccdc-47 ZK1058.4 0.0750049081358029  
 AGIWUR44755  
 CB4856 HS III 3918871 3920700 WBGene00014203 ZK1058.3 ZK1058.3 0.108084838160197  
 AGIWUR18587  
 CB4856 HS III 3920626 3921711 WBGene00014205 ZK1058.5 ZK1058.5 0.0702877909997  
 AGIWUR39458  
 CB4856 HS III 3922207 3923869 WBGene00014206 nit-1 ZK1058.6 0.390696050554702  
 AGIWUR42259  
 CB4856 HS III 3923792 3926238 WBGene00014207 ZK1058.9 ZK1058.9 -0.226121752303522  
 AGIWUR27933  
 CB4856 HS III 3929530 3931523 WBGene00009502 F37A8.2 F37A8.2 -0.0090418013436846 AGIWUR14427  
 CB4856 HS III 3933577 3935908 WBGene00003748 nlp-10 F37A8.4 0.210189310876146 AGIWUR40346  
 CB4856 HS III 3956624 3958161 WBGene00009503 F37A8.5 F37A8.5 -0.0301054915345098 AGIWUR6158  
 CB4856 HS III 3960258 3961825 WBGene00011215 R10E9.3 R10E9.3 0.197886473253503 AGIWUR21427  
 CB4856 HS III 3962731 3964158 WBGene00011214 R10E9.2 R10E9.2 -0.138398820163598 AGIWUR23439  
 CB4856 HS III 3964663 3976391 WBGene00003423 msi-1 R10E9.1 0.0537689874465368  
 AGIWUR32590;AGIWUR33464  
 CB4856 HS III 3984367 3984670 WBGene00012380 Y1A5A.2 Y1A5A.2 -0.160785670417927 AGIWUR12504  
 CB4856 HS III 3985565 3986809 WBGene00012379 Y1A5A.1 Y1A5A.1 -0.000980439030521474  
 AGIWUR35450;AGIWUR37937  
 CB4856 HS III 3988059 3988575 WBGene00044230 C36E8.6 C36E8.6 -0.108139467538425 AGIWUR30001  
 CB4856 HS III 3989298 3992174 WBGene00007981 glb-11 C36E8.2 0.0130453357519755 AGIWUR33067  
 CB4856 HS III 3999286 4004143 WBGene00007980 C36E8.1 C36E8.1 0.100328455802471  
 AGIWUR1345;AGIWUR21250;AGIWUR23164  
 CB4856 HS III 4006142 4009960 WBGene00007982 pxd-1 C36E8.3 -0.239219627904951 AGIWUR29639  
 CB4856 HS III 4012336 4015763 WBGene00007983 C36E8.4 C36E8.4 0.0562061302329582 AGIWUR41273  
 CB4856 HS III 4015769 4017643 WBGene00006537 tbb-2 C36E8.5 0.149399797724043  
 AGIWUR668;AGIWUR1222;AGIWUR16069;AGIWUR18887;AGIWUR19179;AGIWUR42288  
 CB4856 HS III 4020037 4021867 WBGene00011367 snpc-3.4 T02C12.2 0.146213370981794  
 AGIWUR24584  
 CB4856 HS III 4022166 4025658 WBGene00011368 tftc-5 T02C12.3 -0.116715798447352  
 AGIWUR29547



|                                                                                                                                                                      |     |         |         |                |          |           |                     |             |
|----------------------------------------------------------------------------------------------------------------------------------------------------------------------|-----|---------|---------|----------------|----------|-----------|---------------------|-------------|
| CB4856 HS                                                                                                                                                            | III | 4029115 | 4036840 | WBGene00002038 | hum-5    | T02C12.1  | 0.186190917065625   |             |
| AGIWUR9502                                                                                                                                                           |     |         |         |                |          |           |                     |             |
| CB4856 HS                                                                                                                                                            | III | 4052807 | 4057976 | WBGene00004322 | rcq-5    | E03A3.2   | -0.0576297823967806 |             |
| AGIWUR3697;AGIWUR26154;AGIWUR31769                                                                                                                                   |     |         |         |                |          |           |                     |             |
| CB4856 HS                                                                                                                                                            | III | 4058272 | 4058743 | WBGene00001943 | his-69   | E03A3.3   | -0.436005699326177  | AGIWUR40118 |
| CB4856 HS                                                                                                                                                            | III | 4059647 | 4060172 | WBGene00001944 | his-70   | E03A3.4   | -0.268365983496388  | AGIWUR14280 |
| CB4856 HS                                                                                                                                                            | III | 4060591 | 4062822 | WBGene00008465 | E03A3.5  | E03A3.5   | 0.135615410750238   | AGIWUR14656 |
| CB4856 HS                                                                                                                                                            | III | 4066717 | 4082794 | WBGene00006811 | unc-79   | E03A3.6   | -0.0472811571759237 |             |
| AGIWUR4423;AGIWUR5142;AGIWUR15798;AGIWUR15963;AGIWUR18293;AGIWUR20493;AGIWUR28967;AGIWUR39605;AGIWUR41832                                                            |     |         |         |                |          |           |                     |             |
| CB4856 HS                                                                                                                                                            | III | 4084003 | 4086636 | WBGene00002202 | kin-19   | C03C10.1  | -0.175581923032003  |             |
| AGIWUR1828;AGIWUR5712;AGIWUR8099;AGIWUR15304;AGIWUR16042;AGIWUR21790;AGIWUR22763;AGIWUR30118;AGIWUR32074;AGIWUR33100;AGIWUR34225;AGIWUR34996;AGIWUR37313;AGIWUR37347 |     |         |         |                |          |           |                     |             |
| CB4856 HS                                                                                                                                                            | III | 4090291 | 4092120 | WBGene00007271 | C03C10.5 | C03C10.5  | 0.0366642031649862  |             |
| AGIWUR25475                                                                                                                                                          |     |         |         |                |          |           |                     |             |
| CB4856 HS                                                                                                                                                            | III | 4091126 | 4093311 | WBGene00007269 | C03C10.2 | C03C10.2  | 0.179289060990969   |             |
| AGIWUR111                                                                                                                                                            |     |         |         |                |          |           |                     |             |
| CB4856 HS                                                                                                                                                            | III | 4093306 | 4094921 | WBGene00004392 | rnr-2    | C03C10.3  | -0.104902208970328  |             |
| AGIWUR10602;AGIWUR20109;AGIWUR25130;AGIWUR33669;AGIWUR38097;AGIWUR44770                                                                                              |     |         |         |                |          |           |                     |             |
| CB4856 HS                                                                                                                                                            | III | 4096045 | 4096915 | WBGene00007273 | C03C10.7 | C03C10.7  | 0.0059082476175929  |             |
| AGIWUR44164                                                                                                                                                          |     |         |         |                |          |           |                     |             |
| CB4856 HS                                                                                                                                                            | III | 4096896 | 4098190 | WBGene00007270 | rei-1    | C03C10.4  | -0.30879611871792   |             |
| AGIWUR20043                                                                                                                                                          |     |         |         |                |          |           |                     |             |
| CB4856 HS                                                                                                                                                            | III | 4115226 | 4147255 | WBGene00006830 | unc-103  | C30D11.1  | 0.0214741960233003  |             |
| AGIWUR8148;AGIWUR9828;AGIWUR16874;AGIWUR24520;AGIWUR31702;AGIWUR35136;AGIWUR35765;AGIWUR38831;AGIWUR41941                                                            |     |         |         |                |          |           |                     |             |
| CB4856 HS                                                                                                                                                            | III | 4147425 | 4151598 | WBGene00007631 | wht-3    | C16C10.12 | -0.044671126674336  |             |
| AGIWUR39934                                                                                                                                                          |     |         |         |                |          |           |                     |             |
| CB4856 HS                                                                                                                                                            | III | 4152054 | 4152915 | WBGene00007630 | har-1    | C16C10.11 | -0.0780836252092225 |             |
| AGIWUR2630;AGIWUR3696;AGIWUR4247;AGIWUR8756;AGIWUR24873;AGIWUR36702                                                                                                  |     |         |         |                |          |           |                     |             |
| CB4856 HS                                                                                                                                                            | III | 4153599 | 4154650 | WBGene00006448 | glod-4   | C16C10.10 | -0.14479966322383   |             |
| AGIWUR16289                                                                                                                                                          |     |         |         |                |          |           |                     |             |
| CB4856 HS                                                                                                                                                            | III | 4155388 | 4157394 | WBGene00007629 | C16C10.9 | C16C10.9  | 0.127061998040618   |             |
| AGIWUR38186                                                                                                                                                          |     |         |         |                |          |           |                     |             |
| CB4856 HS                                                                                                                                                            | III | 4161951 | 4164171 | WBGene00007628 | C16C10.8 | C16C10.8  | 0.160458729253929   |             |
| AGIWUR15159                                                                                                                                                          |     |         |         |                |          |           |                     |             |
| CB4856 HS                                                                                                                                                            | III | 4164275 | 4166845 | WBGene00004381 | rnf-5    | C16C10.7  | 0.217230382291358   |             |
| AGIWUR10393                                                                                                                                                          |     |         |         |                |          |           |                     |             |
| CB4856 HS                                                                                                                                                            | III | 4166944 | 4168765 | WBGene00007627 | ccdc-55  | C16C10.6  | 0.0884424351584521  |             |
| AGIWUR21267                                                                                                                                                          |     |         |         |                |          |           |                     |             |
| CB4856 HS                                                                                                                                                            | III | 4168797 | 4170949 | WBGene00007626 | rnf-121  | C16C10.5  | 0.15596777050318    |             |

|                                                                       |     |         |         |                |           |          |                      |  |                    |
|-----------------------------------------------------------------------|-----|---------|---------|----------------|-----------|----------|----------------------|--|--------------------|
| AGIWUR2199                                                            |     |         |         |                |           |          |                      |  |                    |
| CB4856 HS                                                             | III | 4171336 | 4172223 | WBGene00007625 | C16C10.4  |          | C16C10.4             |  | -0.2762568016889   |
| AGIWUR17931                                                           |     |         |         |                |           |          |                      |  |                    |
| CB4856 HS                                                             | III | 4172337 | 4176159 | WBGene00007624 | hrde-1    | C16C10.3 |                      |  | -0.295523256417738 |
| AGIWUR20823                                                           |     |         |         |                |           |          |                      |  |                    |
| CB4856 HS                                                             | III | 4176678 | 4177578 | WBGene00007632 | C16C10.13 |          | C16C10.13            |  | 0.0779629029648454 |
| AGIWUR1567                                                            |     |         |         |                |           |          |                      |  |                    |
| CB4856 HS                                                             | III | 4177532 | 4178664 | WBGene00007623 | C16C10.2  |          | C16C10.2             |  | 0.18228132149649   |
| AGIWUR10585;AGIWUR12996;AGIWUR21393;AGIWUR27638;AGIWUR30103           |     |         |         |                |           |          |                      |  |                    |
| CB4856 HS                                                             | III | 4178783 | 4181438 | WBGene00007622 | C16C10.1  |          | C16C10.1             |  | 0.210011794745325  |
| AGIWUR31291                                                           |     |         |         |                |           |          |                      |  |                    |
| CB4856 HS                                                             | III | 4181543 | 4186825 | WBGene00003073 | lars-1    | R74.1    | 0.198667937197467    |  | AGIWUR30809        |
| CB4856 HS                                                             | III | 4188160 | 4189285 | WBGene00011278 | R74.2     | R74.2    | 0.233823365653079    |  |                    |
| AGIWUR27575;AGIWUR27987;AGIWUR31182;AGIWUR31227;AGIWUR43478           |     |         |         |                |           |          |                      |  |                    |
| CB4856 HS                                                             | III | 4189380 | 4190341 | WBGene00206525 | R74.10    | R74.10   | -0.00177911723642499 |  | AGIWUR44068        |
| CB4856 HS                                                             | III | 4191141 | 4193427 | WBGene00001034 | dnj-16    | R74.4    | -0.0278960041652168  |  |                    |
| AGIWUR19228;AGIWUR30349                                               |     |         |         |                |           |          |                      |  |                    |
| CB4856 HS                                                             | III | 4193809 | 4195358 | WBGene00006959 | xbp-1     | R74.3    | -0.108903996386722   |  |                    |
| AGIWUR16166;AGIWUR22379;AGIWUR37406                                   |     |         |         |                |           |          |                      |  |                    |
| CB4856 HS                                                             | III | 4197285 | 4202289 | WBGene00011279 | asd-1     | R74.5    | -0.147423847602816   |  |                    |
| AGIWUR33402;AGIWUR35999                                               |     |         |         |                |           |          |                      |  |                    |
| CB4856 HS                                                             | III | 4202253 | 4204269 | WBGene00011280 | R74.6     | R74.6    | 0.0747361618992048   |  |                    |
| AGIWUR1687;AGIWUR16800;AGIWUR35134                                    |     |         |         |                |           |          |                      |  |                    |
| CB4856 HS                                                             | III | 4204429 | 4205814 | WBGene00011281 | R74.7     | R74.7    | -0.0526017830851018  |  | AGIWUR28021        |
| CB4856 HS                                                             | III | 4206253 | 4208265 | WBGene00011282 | R74.8     | R74.8    | -0.159706584087195   |  |                    |
| AGIWUR5769;AGIWUR22059                                                |     |         |         |                |           |          |                      |  |                    |
| CB4856 HS                                                             | III | 4210562 | 4216724 | WBGene00009647 | F43C1.1   | F43C1.1  | 0.0627291339125735   |  | AGIWUR35794        |
| CB4856 HS                                                             | III | 4216764 | 4228108 | WBGene00003401 | mpk-1     | F43C1.2  | -0.0481752882361812  |  |                    |
| AGIWUR1958;AGIWUR9733;AGIWUR14898;AGIWUR14905;AGIWUR17406;AGIWUR40763 |     |         |         |                |           |          |                      |  |                    |
| CB4856 HS                                                             | III | 4229141 | 4230427 | WBGene00009649 | F43C1.5   | F43C1.5  | 0.134235211333356    |  | AGIWUR1306         |
| CB4856 HS                                                             | III | 4230436 | 4233219 | WBGene00003619 | nhr-20    | F43C1.4  | 0.00328622106813725  |  | AGIWUR42423        |
| CB4856 HS                                                             | III | 4241477 | 4242593 | WBGene00023423 | F43C1.7   | F43C1.7  | -0.125575965966615   |  |                    |
| AGIWUR8452;AGIWUR19266;AGIWUR33069                                    |     |         |         |                |           |          |                      |  |                    |
| CB4856 HS                                                             | III | 4242672 | 4243561 | WBGene00023422 | mrpl-21   | F43C1.6  | 0.159811236666105    |  | AGIWUR5851         |
| CB4856 HS                                                             | III | 4243674 | 4244385 | WBGene00009648 | zhit-2    | F43C1.3  | -0.0416262700967422  |  |                    |
| AGIWUR3825;AGIWUR22128;AGIWUR36936;AGIWUR44159                        |     |         |         |                |           |          |                      |  |                    |
| CB4856 HS                                                             | III | 4244858 | 4247671 | WBGene00012858 | Y44F5A.1  |          | Y44F5A.1             |  | 0.170710741892689  |
| AGIWUR13909                                                           |     |         |         |                |           |          |                      |  |                    |
| CB4856 HS                                                             | III | 4248155 | 4263048 | WBGene00011604 | T08A11.1  |          | T08A11.1             |  |                    |

|                                                                        |    |     |                                                                        |                |          |          |                      |
|------------------------------------------------------------------------|----|-----|------------------------------------------------------------------------|----------------|----------|----------|----------------------|
| -0.00516692380257888                                                   |    |     | AGIWUR8299;AGIWUR14489;AGIWUR20691;AGIWUR32732;AGIWUR33366;AGIWUR37156 |                |          |          |                      |
| CB4856                                                                 | HS | III | 4263785 4269270                                                        | WBGene00011605 | sftb-1   | T08A11.2 | -0.213054303926061   |
| AGIWUR1553;AGIWUR11891;AGIWUR19820;AGIWUR25548                         |    |     |                                                                        |                |          |          |                      |
| CB4856                                                                 | HS | III | 4269743 4272506                                                        | WBGene00011198 | R10E4.1  | R10E4.1  | 0.080693541924262    |
| AGIWUR7076;AGIWUR9157;AGIWUR18471                                      |    |     |                                                                        |                |          |          |                      |
| CB4856                                                                 | HS | III | 4276266 4280217                                                        | WBGene00006331 | sup-26   | R10E4.2  | -0.153152589912871   |
| AGIWUR6823;AGIWUR16442;AGIWUR16959;AGIWUR20757;AGIWUR24961;AGIWUR41251 |    |     |                                                                        |                |          |          |                      |
| CB4856                                                                 | HS | III | 4285861 4287472                                                        | WBGene00011200 | R10E4.3  | R10E4.3  | 0.0886839952882283   |
| CB4856                                                                 | HS | III | 4288264 4291283                                                        | WBGene00003157 | mcm-5    | R10E4.4  | -0.0560089276106108  |
| AGIWUR11433;AGIWUR14883;AGIWUR23176;AGIWUR25320;AGIWUR33448            |    |     |                                                                        |                |          |          |                      |
| CB4856                                                                 | HS | III | 4291543 4293413                                                        | WBGene00011201 | nth-1    | R10E4.5  | -0.138654734100164   |
| CB4856                                                                 | HS | III | 4293408 4295142                                                        | WBGene00011202 | R10E4.6  | R10E4.6  | 0.149241651667958    |
| CB4856                                                                 | HS | III | 4295224 4296599                                                        | WBGene00011203 | R10E4.7  | R10E4.7  | -0.182774674548261   |
| CB4856                                                                 | HS | III | 4297239 4301039                                                        | WBGene00011206 | R10E4.11 | R10E4.11 | -0.0231620367328205  |
| AGIWUR3790                                                             |    |     |                                                                        |                |          |          |                      |
| CB4856                                                                 | HS | III | 4301620 4302393                                                        | WBGene00011205 | R10E4.9  | R10E4.9  | -0.0816055196915002  |
| CB4856                                                                 | HS | III | 4303096 4313128                                                        | WBGene00001352 | evl-14   | H38K22.1 | -0.185929239864436   |
| AGIWUR33989                                                            |    |     |                                                                        |                |          |          |                      |
| CB4856                                                                 | HS | III | 4313927 4317608                                                        | WBGene00010428 | dcn-1    | H38K22.2 | -0.370908679692107   |
| AGIWUR30845                                                            |    |     |                                                                        |                |          |          |                      |
| CB4856                                                                 | HS | III | 4317702 4320341                                                        | WBGene00006478 | tag-131  | H38K22.3 | -0.138762143767126   |
| AGIWUR20634                                                            |    |     |                                                                        |                |          |          |                      |
| CB4856                                                                 | HS | III | 4320389 4321348                                                        | WBGene00044911 | H38K22.6 | H38K22.6 | 0.0229525646174942   |
| AGIWUR13317;AGIWUR17809;AGIWUR26894;AGIWUR40933;AGIWUR41799            |    |     |                                                                        |                |          |          |                      |
| CB4856                                                                 | HS | III | 4321748 4322867                                                        | WBGene00044912 | H38K22.7 | H38K22.7 | -0.0279308391713364  |
| AGIWUR917;AGIWUR9416;AGIWUR19948;AGIWUR20893;AGIWUR30626               |    |     |                                                                        |                |          |          |                      |
| CB4856                                                                 | HS | III | 4324280 4331227                                                        | WBGene00001631 | gly-6    | H38K22.5 | 0.000477775358239896 |
| AGIWUR11179;AGIWUR26035;AGIWUR27415;AGIWUR29155;AGIWUR39994            |    |     |                                                                        |                |          |          |                      |
| CB4856                                                                 | HS | III | 4332996 4340464                                                        | WBGene00007135 | cdk-12   | B0285.1  | -0.0784673314413773  |
| CB4856                                                                 | HS | III | 4341983 4343336                                                        | WBGene00007136 | B0285.3  | B0285.3  | -0.0108252104587514  |
| CB4856                                                                 | HS | III | 4343446 4345366                                                        | WBGene00007137 | B0285.4  | B0285.4  | 0.139902619578709    |
| CB4856                                                                 | HS | III | 4345339 4350079                                                        | WBGene00002003 | hse-5    | B0285.5  | 0.18099770147181     |
| CB4856                                                                 | HS | III | 4352246 4355888                                                        | WBGene00007138 | B0285.6  | B0285.6  | 0.637415434553935    |
| CB4856                                                                 | HS | III | 4356539 4364974                                                        | WBGene00007139 | mnp-1    | B0285.7  | 0.0215976630518924   |
| CB4856                                                                 | HS | III | 4365285 4367469                                                        | WBGene00000511 | ckb-1    | B0285.8  | -0.185547681547993   |
| CB4856                                                                 | HS | III | 4367832 4370160                                                        | WBGene00000512 | ckb-2    | B0285.9  | -0.337935846314165   |
| CB4856                                                                 | HS | III | 4370885 4372820                                                        | WBGene00000513 | ckb-3    | B0285.10 | -0.126833366621129   |
| AGIWUR12272                                                            |    |     |                                                                        |                |          |          |                      |
| CB4856                                                                 | HS | III | 4373179 4375323                                                        | WBGene00045188 | B0284.5  | B0284.5  | -0.179189299390564   |

AGIWUR6647;AGIWUR44597  
CB4856 HS III 4376503 4379200 WBGene00007131 pals-26 B0284.1 1.00859741751617  
AGIWUR659;AGIWUR34401  
CB4856 HS III 4379368 4381041 WBGene00007133 B0284.3 B0284.3 -0.226074762855141 AGIWUR22476  
CB4856 HS III 4381739 4384141 WBGene00007132 pals-27 B0284.2 1.38187947163423 AGIWUR2667  
CB4856 HS III 4384787 4387757 WBGene00007134 pals-28 B0284.4 1.21899501527825 AGIWUR31960  
CB4856 HS III 4394796 4396617 WBGene00011112 R07E5.4 R07E5.4 -0.366924162234513 AGIWUR14612  
CB4856 HS III 4397415 4398576 WBGene00011113 R07E5.5 R07E5.5 -0.0285025495124707 AGIWUR38210  
CB4856 HS III 4398763 4400942 WBGene00011114 R07E5.6 R07E5.6 -0.0666512716447976 AGIWUR35081  
CB4856 HS III 4401442 4402505 WBGene00011120 R07E5.15 R07E5.15 -0.346390762765903  
AGIWUR37803  
CB4856 HS III 4402595 4404436 WBGene00011121 R07E5.17 R07E5.17 -0.142321199153993  
AGIWUR2552;AGIWUR38683  
CB4856 HS III 4404786 4406285 WBGene00011111 snfc-5 R07E5.3 -0.0737540804457684  
AGIWUR11492;AGIWUR14649;AGIWUR22515;AGIWUR25831;AGIWUR28126;AGIWUR28837;AGIWUR29804;AGIWUR32754;AGIWUR35093  
CB4856 HS III 4406286 4407326 WBGene00004387 rnp-4 R07E5.14 -0.0993720418395512  
AGIWUR11861;AGIWUR14460;AGIWUR19160;AGIWUR24049;AGIWUR25412;AGIWUR25790;AGIWUR27926  
CB4856 HS III 4407444 4408437 WBGene00011110 prdx-3 R07E5.2 0.0477778144869321  
AGIWUR25524;AGIWUR35814;AGIWUR37579;AGIWUR41024  
CB4856 HS III 4408551 4412149 WBGene00011109 R07E5.1 R07E5.1 0.246648528425391 AGIWUR8228  
CB4856 HS III 4413457 4414748 WBGene00011119 mpc-1 R07E5.13 0.0944570757132244  
AGIWUR5754;AGIWUR9776;AGIWUR19771;AGIWUR33099;AGIWUR40240  
CB4856 HS III 4414732 4415235 WBGene00011117 R07E5.11 R07E5.11 -0.297392632388707  
AGIWUR32637  
CB4856 HS III 4415520 4418058 WBGene00011116 pdcd-2 R07E5.10 -0.0100604953774077  
AGIWUR4236;AGIWUR6736;AGIWUR6974;AGIWUR15557;AGIWUR19842;AGIWUR20601;AGIWUR20807;AGIWUR36005;AGIWUR38031;AGIWUR38783  
CB4856 HS III 4418343 4419167 WBGene00011115 R07E5.7 R07E5.7 -0.00979742047513099  
AGIWUR1971;AGIWUR7078;AGIWUR8963;AGIWUR28166;AGIWUR32271  
CB4856 HS III 4419848 4423368 WBGene00000520 cku-80 R07E5.8 -0.188087220315222 AGIWUR29231  
CB4856 HS III 4423711 4429499 WBGene00007791 C28A5.6 C28A5.6 -0.0962540552299025 AGIWUR37808  
CB4856 HS III 4442081 4444237 WBGene00003590 nex-3 C28A5.3 0.370215017916923 AGIWUR30120  
CB4856 HS III 4446637 4449943 WBGene00000463 ceh-43 C28A5.4 -0.567307482785115 AGIWUR11902  
CB4856 HS III 4462833 4467377 WBGene00003577 ndg-4 F56F3.2 0.0387735516757779  
AGIWUR18135;AGIWUR26646  
CB4856 HS III 4468878 4470808 WBGene00010155 F56F3.4 F56F3.4 -0.206513265126713 AGIWUR33529  
CB4856 HS III 4471407 4475150 WBGene00004132 ifet-1 F56F3.1 -0.118023399843976  
AGIWUR13827;AGIWUR40868;AGIWUR42975  
CB4856 HS III 4475918 4476887 WBGene00004470 rps-1 F56F3.5 0.119084194456248

AGIWUR7578;AGIWUR16537;AGIWUR18534;AGIWUR24392;AGIWUR34321;AGIWUR36331  
 CB4856 HS III 4476888 4477583 WBGene00002100 ins-17 F56F3.6 0.0272527682915307  
 AGIWUR7314;AGIWUR9236;AGIWUR11108;AGIWUR13900;AGIWUR16963;AGIWUR24675  
 CB4856 HS III 4489359 4491392 WBGene00000465 cpg-1 C07G2.1 0.35537895465567  
 AGIWUR3126;AGIWUR4450;AGIWUR6962;AGIWUR9701;AGIWUR25056;AGIWUR28301;AGIWUR33939  
 CB4856 HS III 4491627 4499043 WBGene00000223 atf-7 C07G2.2 -0.0546434287145043  
 AGIWUR4927;AGIWUR5314;AGIWUR14974;AGIWUR20820;AGIWUR24837;AGIWUR29854;AGIWUR31507;AGIWUR34947;AGIWUR35619;AGIWUR37894;AGIWUR42736  
 CB4856 HS III 4499191 4508114 WBGene00000380 cct-5 C07G2.3 0.0454151758196737  
 AGIWUR3833;AGIWUR4408;AGIWUR31324;AGIWUR40854  
 CB4856 HS III 4508855 4512162 WBGene00009115 F25F2.1 F25F2.1 0.262029237813785 AGIWUR307  
 CB4856 HS III 4520363 4536991 WBGene00000396 cdh-4 F25F2.2 -0.173469780264686 AGIWUR20794  
 CB4856 HS III 4537277 4540644 WBGene00010904 ugt-62 M88.1 0.355791811440227 AGIWUR13910  
 CB4856 HS III 4541326 4542452 WBGene00010905 mrps-34 M88.2 -0.140147340563766 AGIWUR38242  
 CB4856 HS III 4542881 4546025 WBGene00010909 cisd-3.1 M88.7 -0.275119246731011  
 AGIWUR21078  
 CB4856 HS III 4549063 4551567 WBGene00010907 M88.4 M88.4 0.10040069158317 AGIWUR44096  
 CB4856 HS III 4553618 4560350 WBGene00010908 zbp-1 M88.5 0.38167954365575  
 AGIWUR6561;AGIWUR6686;AGIWUR36835  
 CB4856 HS III 4562738 4566276 WBGene00003915 pan-1 M88.6 -0.13936651481569 AGIWUR26141  
 CB4856 HS III 4566279 4568144 WBGene00009439 mlcd-1 F35G12.1 0.0271715889760742  
 AGIWUR2770;AGIWUR2817;AGIWUR13489;AGIWUR27496;AGIWUR33025;AGIWUR39632  
 CB4856 HS III 4567325 4571835 WBGene00009440 idhg-1 F35G12.2 0.148915744563688  
 AGIWUR3341;AGIWUR9882;AGIWUR23281  
 CB4856 HS III 4571753 4578437 WBGene00004762 sel-5 F35G12.3 -0.0797754211800221  
 AGIWUR4191;AGIWUR10977;AGIWUR11373;AGIWUR15605;AGIWUR17298;AGIWUR22658;AGIWUR30054;AGIWUR38843  
 CB4856 HS III 4578855 4581696 WBGene00009441 wdr-48 F35G12.4 0.0234348023066175  
 AGIWUR16083;AGIWUR31303;AGIWUR33315  
 CB4856 HS III 4581795 4583893 WBGene00009445 F35G12.12 F35G12.12 -0.135997907972081  
 AGIWUR19409  
 CB4856 HS III 4584583 4586753 WBGene00009442 F35G12.5 F35G12.5 0.0683020588675198  
 AGIWUR40495  
 CB4856 HS III 4586628 4587330 WBGene00009443 F35G12.7 F35G12.7 0.00769837730195988  
 AGIWUR3544  
 CB4856 HS III 4587415 4593124 WBGene00004874 smc-4 F35G12.8 0.0411986920116885  
 AGIWUR39484  
 CB4856 HS III 4593176 4593832 WBGene00009444 F35G12.11 F35G12.11 -0.0829371898875593  
 AGIWUR25108  
 CB4856 HS III 4593769 4594426 WBGene00000145 apc-11 F35G12.9 -0.0471724808130283

AGIWUR11099  
CB4856 HS III 4594543 4595944 WBGene00000206 asb-1 F35G12.10 -0.0176181470066492  
AGIWUR14757;AGIWUR15446;AGIWUR18553  
CB4856 HS III 4596134 4612384 WBGene00004760 sel-2 F10F2.1 0.0951459390674287 AGIWUR7358  
CB4856 HS III 4616479 4618893 WBGene00008655 lips-3 F10F2.3 -0.0776721667760008  
AGIWUR2515;AGIWUR12349;AGIWUR13166;AGIWUR21826;AGIWUR35962;AGIWUR38897  
CB4856 HS III 4618853 4643305 WBGene00008654 F10F2.2 F10F2.2 -0.000257547155220195 AGIWUR33800  
CB4856 HS III 4643999 4646346 WBGene00004118 pqn-29 F10F2.9 -0.43527668664108 AGIWUR32867  
CB4856 HS III 4646507 4647854 WBGene00011957 T23F11.6 T23F11.6 0.0565463062441047  
AGIWUR29047  
CB4856 HS III 4648591 4653929 WBGene00011953 ppm-2 T23F11.1 -0.00809574917394329  
AGIWUR2592;AGIWUR7677;AGIWUR16510;AGIWUR23088;AGIWUR31765  
CB4856 HS III 4658739 4662697 WBGene00011955 cdka-1 T23F11.3 0.0102576840158544  
AGIWUR5542;AGIWUR14846;AGIWUR38432;AGIWUR39512  
CB4856 HS III 4663185 4665368 WBGene00011956 T23F11.4 T23F11.4 -0.1040540511162  
AGIWUR1001  
CB4856 HS III 4672249 4674207 WBGene00005170 srg-13 T23F11.5 0.0155538714016954  
AGIWUR40917  
CB4856 HS III 4677766 4679663 WBGene00005168 srg-10 T04A8.1 0.16983630818987 AGIWUR27750  
CB4856 HS III 4680013 4681562 WBGene00005169 srg-11 T04A8.2 -0.0509833899815231 AGIWUR13241  
CB4856 HS III 4682774 4685533 WBGene00011405 clec-155 T04A8.3 0.160658515879714  
AGIWUR11086  
CB4856 HS III 4686088 4688210 WBGene00044078 tag-243 T04A8.4 0.120498628944644  
AGIWUR18509;AGIWUR24487  
CB4856 HS III 4689280 4692166 WBGene00011407 ppat-1 T04A8.5 0.338103018910509 AGIWUR40473  
CB4856 HS III 4692098 4693303 WBGene00011408 T04A8.6 T04A8.6 -0.2681782309011 AGIWUR18609  
CB4856 HS III 4694003 4695270 WBGene00011410 T04A8.8 T04A8.8 0.0844422589128015 AGIWUR12099  
CB4856 HS III 4695361 4698010 WBGene00011409 T04A8.7 T04A8.7 -0.247279387820557  
AGIWUR21833;AGIWUR25655;AGIWUR27695;AGIWUR37122  
CB4856 HS III 4697987 4699453 WBGene00001036 dnj-18 T04A8.9 0.0701370241970487  
AGIWUR2611;AGIWUR38656;AGIWUR41916  
CB4856 HS III 4699407 4700224 WBGene00011411 sel-13 T04A8.10 0.183545265745892  
AGIWUR32048  
CB4856 HS III 4700325 4704054 WBGene00000543 clp-2 T04A8.16 -0.195180512738879  
AGIWUR21921  
CB4856 HS III 4704404 4705404 WBGene00011412 mrpl-16 T04A8.11 0.00695748642846006  
AGIWUR8495;AGIWUR22631;AGIWUR34099  
CB4856 HS III 4705413 4706949 WBGene00007045 tag-189 T04A8.12 0.125011911446741  
AGIWUR964;AGIWUR10737;AGIWUR33930

|                                                                                                             |    |     |         |         |                 |          |          |                     |             |
|-------------------------------------------------------------------------------------------------------------|----|-----|---------|---------|-----------------|----------|----------|---------------------|-------------|
| CB4856                                                                                                      | HS | III | 4709248 | 4712547 | WBGene000119203 | T04A8.18 | T04A8.18 | 0.0302910424771632  |             |
| AGIWUR29768                                                                                                 |    |     |         |         |                 |          |          |                     |             |
| CB4856                                                                                                      | HS | III | 4712572 | 4715188 | WBGene00011415  | him-18   | T04A8.15 | 0.15067046281872    |             |
| AGIWUR14976                                                                                                 |    |     |         |         |                 |          |          |                     |             |
| CB4856                                                                                                      | HS | III | 4715293 | 4720670 | WBGene00001259  | emb-5    | T04A8.14 | -0.0899676909796803 |             |
| AGIWUR10332;AGIWUR10446;AGIWUR22030;AGIWUR23199;AGIWUR23677;AGIWUR30711;AGIWUR33433;AGIWUR34113;AGIWUR36496 |    |     |         |         |                 |          |          |                     |             |
| CB4856                                                                                                      | HS | III | 4722126 | 4730919 | WBGene00000068  | acy-1    | F17C8.1  | 0.148565396985017   | AGIWUR11552 |
| CB4856                                                                                                      | HS | III | 4734356 | 4736065 | WBGene00185014  | F17C8.9  | F17C8.9  | 0.168151093309585   |             |
| AGIWUR14597;AGIWUR41893                                                                                     |    |     |         |         |                 |          |          |                     |             |
| CB4856                                                                                                      | HS | III | 4736050 | 4737258 | WBGene00008912  | F17C8.7  | F17C8.7  | -0.236509958143872  | AGIWUR19939 |
| CB4856                                                                                                      | HS | III | 4737589 | 4740075 | WBGene00004311  | ras-2    | F17C8.4  | 0.0719562870306394  |             |
| AGIWUR2834;AGIWUR17837;AGIWUR26706;AGIWUR32802                                                              |    |     |         |         |                 |          |          |                     |             |
| CB4856                                                                                                      | HS | III | 4748127 | 4749164 | WBGene00000664  | col-89   | F17C8.2  | -0.333107210391002  | AGIWUR18994 |
| CB4856                                                                                                      | HS | III | 4752998 | 4754083 | WBGene00004469  | rps-0    | B0393.1  | 0.218917318263564   |             |
| AGIWUR193;AGIWUR6226;AGIWUR6783                                                                             |    |     |         |         |                 |          |          |                     |             |
| CB4856                                                                                                      | HS | III | 4754432 | 4757017 | WBGene00007167  | rbg-3    | B0393.2  | 0.0799724493455507  | AGIWUR3240  |
| CB4856                                                                                                      | HS | III | 4757201 | 4759728 | WBGene00007168  | B0393.3  | B0393.3  | 0.0453738950814042  | AGIWUR43498 |
| CB4856                                                                                                      | HS | III | 4759744 | 4763609 | WBGene00007169  | B0393.4  | B0393.4  | 0.149457192262573   | AGIWUR6601  |
| CB4856                                                                                                      | HS | III | 4765833 | 4776342 | WBGene00007170  | B0393.5  | B0393.5  | 0.00442137894555827 | AGIWUR34080 |
| CB4856                                                                                                      | HS | III | 4776264 | 4778065 | WBGene00007172  | B0393.7  | B0393.7  | 0.100065136934653   | AGIWUR36678 |
| CB4856                                                                                                      | HS | III | 4778390 | 4780157 | WBGene00044636  | B0393.9  | B0393.9  | 0.182140365769053   |             |
| AGIWUR1374;AGIWUR3283;AGIWUR40762                                                                           |    |     |         |         |                 |          |          |                     |             |
| CB4856                                                                                                      | HS | III | 4780130 | 4781987 | WBGene00007171  | B0393.6  | B0393.6  | 0.0231887359236556  | AGIWUR45184 |
| CB4856                                                                                                      | HS | III | 4786080 | 4792391 | WBGene00003210  | mel-28   | C38D4.3  | -0.121740076953024  | AGIWUR40516 |
| CB4856                                                                                                      | HS | III | 4793086 | 4795423 | WBGene00008005  | C38D4.4  | C38D4.4  | 0.140180670451208   | AGIWUR5766  |
| CB4856                                                                                                      | HS | III | 4796839 | 4802907 | WBGene00008006  | tag-325  | C38D4.5  | -0.0182031328768435 | AGIWUR17735 |
| CB4856                                                                                                      | HS | III | 4803007 | 4804753 | WBGene00008008  | C38D4.9  | C38D4.9  | 0.0322347282987181  |             |
| AGIWUR4922;AGIWUR26328;AGIWUR39586                                                                          |    |     |         |         |                 |          |          |                     |             |
| CB4856                                                                                                      | HS | III | 4804708 | 4809489 | WBGene00003912  | pal-1    | C38D4.6  | -0.102865975561953  |             |
| AGIWUR3503;AGIWUR8986;AGIWUR17483;AGIWUR25142;AGIWUR26070;AGIWUR26964;AGIWUR29813;AGIWUR34020               |    |     |         |         |                 |          |          |                     |             |
| CB4856                                                                                                      | HS | III | 4810031 | 4811162 | WBGene00008007  | C38D4.7  | C38D4.7  | 0.0832602667529967  | AGIWUR275   |
| CB4856                                                                                                      | HS | III | 4813309 | 4814814 | WBGene00000193  | arl-6    | C38D4.8  | 0.0926217666486888  | AGIWUR6297  |
| CB4856                                                                                                      | HS | III | 4816040 | 4817078 | WBGene00017804  | F26A1.6  | F26A1.6  | -0.152153010206035  | AGIWUR20049 |
| CB4856                                                                                                      | HS | III | 4818042 | 4819073 | WBGene00017803  | F26A1.4  | F26A1.4  | -0.090835193402051  | AGIWUR21527 |
| CB4856                                                                                                      | HS | III | 4819328 | 4819943 | WBGene00017805  | F26A1.7  | F26A1.7  | -0.052600240779161  | AGIWUR34354 |
| CB4856                                                                                                      | HS | III | 4820670 | 4822226 | WBGene00017806  | F26A1.8  | F26A1.8  | -0.112659104320365  | AGIWUR25170 |
| CB4856                                                                                                      | HS | III | 4825345 | 4829509 | WBGene00017807  | F26A1.9  | F26A1.9  | -0.0789922624751966 | AGIWUR16711 |
| CB4856                                                                                                      | HS | III | 4830010 | 4830349 | WBGene00017808  | nspd-9   | F26A1.10 | 0.168014411984922   |             |
| AGIWUR5361                                                                                                  |    |     |         |         |                 |          |          |                     |             |

|                                                 |     |         |         |                |           |           |                     |
|-------------------------------------------------|-----|---------|---------|----------------|-----------|-----------|---------------------|
| CB4856 HS                                       | III | 4837731 | 4839931 | WBGene00270319 | F26A1.19  | F26A1.19  | -0.256791376611991  |
| AGIWUR745                                       |     |         |         |                |           |           |                     |
| CB4856 HS                                       | III | 4840187 | 4841024 | WBGene00044603 | acbp-7    | F26A1.15  | 0.0199981807371374  |
| AGIWUR8465;AGIWUR28608                          |     |         |         |                |           |           |                     |
| CB4856 HS                                       | III | 4841039 | 4842273 | WBGene00017809 | cllec-156 | F26A1.11  | 0.0521335610347853  |
| AGIWUR40380                                     |     |         |         |                |           |           |                     |
| CB4856 HS                                       | III | 4843493 | 4844410 | WBGene00017810 | cllec-157 | F26A1.12  | -0.228368828264764  |
| AGIWUR41337                                     |     |         |         |                |           |           |                     |
| CB4856 HS                                       | III | 4844662 | 4846546 | WBGene00001437 | fkh-5     | F26A1.2   | 0.123566435377189   |
| AGIWUR10841;AGIWUR35894;AGIWUR40674             |     |         |         |                |           |           |                     |
| CB4856 HS                                       | III | 4847072 | 4848967 | WBGene00017811 | F26A1.13  | F26A1.13  | -0.0385426288545441 |
| AGIWUR9823;AGIWUR14986;AGIWUR25874              |     |         |         |                |           |           |                     |
| CB4856 HS                                       | III | 4849266 | 4849850 | WBGene00017812 | F26A1.14  | F26A1.14  | 0.0543060815116956  |
| AGIWUR21644;AGIWUR25758;AGIWUR38856             |     |         |         |                |           |           |                     |
| CB4856 HS                                       | III | 4850507 | 4851910 | WBGene00017801 | F26A1.1   | F26A1.1   | 0.118879161880349   |
| CB4856 HS                                       | III | 4852313 | 4855177 | WBGene00000418 | ced-4     | C35D10.9  | 0.173016412380388   |
| AGIWUR5354;AGIWUR5654;AGIWUR41670               |     |         |         |                |           |           |                     |
| CB4856 HS                                       | III | 4855250 | 4856101 | WBGene00016445 | C35D10.8  | C35D10.8  | 0.0514477082115103  |
| AGIWUR5688                                      |     |         |         |                |           |           |                     |
| CB4856 HS                                       | III | 4856193 | 4859240 | WBGene00016444 | C35D10.7  | C35D10.7  |                     |
| -0.000312410880223268 AGIWUR24486;AGIWUR38743   |     |         |         |                |           |           |                     |
| CB4856 HS                                       | III | 4859339 | 4860772 | WBGene00016443 | C35D10.6  | C35D10.6  | 0.320604394989521   |
| AGIWUR6719                                      |     |         |         |                |           |           |                     |
| CB4856 HS                                       | III | 4860669 | 4861794 | WBGene00016446 | C35D10.10 | C35D10.10 | 0.0889382637159759  |
| AGIWUR44106                                     |     |         |         |                |           |           |                     |
| CB4856 HS                                       | III | 4862351 | 4863426 | WBGene00016442 | C35D10.5  | C35D10.5  | -0.0421315072143598 |
| AGIWUR10145;AGIWUR15024;AGIWUR19643;AGIWUR27288 |     |         |         |                |           |           |                     |
| CB4856 HS                                       | III | 4863427 | 4866949 | WBGene00000767 | coq-8     | C35D10.4  | 0.199043279054244   |
| AGIWUR31304;AGIWUR41201;AGIWUR43913             |     |         |         |                |           |           |                     |
| CB4856 HS                                       | III | 4867062 | 4867469 | WBGene00016452 | C35D10.17 | C35D10.17 | -0.0896701630742633 |
| AGIWUR26941                                     |     |         |         |                |           |           |                     |
| CB4856 HS                                       | III | 4868333 | 4868769 | WBGene00016447 | msd-4     | C35D10.11 | 0.0958460621920505  |
| AGIWUR19153                                     |     |         |         |                |           |           |                     |
| CB4856 HS                                       | III | 4868921 | 4870106 | WBGene00016441 | C35D10.3  | C35D10.3  | 0.206001888632009   |
| AGIWUR25259                                     |     |         |         |                |           |           |                     |
| CB4856 HS                                       | III | 4870762 | 4872046 | WBGene00016440 | gipc-1    | C35D10.2  | -0.0309963722663991 |
| AGIWUR18831;AGIWUR36466                         |     |         |         |                |           |           |                     |
| CB4856 HS                                       | III | 4872501 | 4874751 | WBGene00016448 | C35D10.12 | C35D10.12 | -0.0858497138801457 |
| AGIWUR21860                                     |     |         |         |                |           |           |                     |



|                                                                                                        |     |         |         |                |           |           |                     |             |
|--------------------------------------------------------------------------------------------------------|-----|---------|---------|----------------|-----------|-----------|---------------------|-------------|
| CB4856 HS                                                                                              | III | 4877526 | 4878311 | WBGene00016449 | C35D10.13 | C35D10.13 | -0.310630669658371  |             |
| AGIWUR28892                                                                                            |     |         |         |                |           |           |                     |             |
| CB4856 HS                                                                                              | III | 4878658 | 4879643 | WBGene00000204 | arx-6     | C35D10.16 | 0.126060521255891   |             |
| AGIWUR41105                                                                                            |     |         |         |                |           |           |                     |             |
| CB4856 HS                                                                                              | III | 4879745 | 4881497 | WBGene00016439 | C35D10.1  | C35D10.1  | 0.0503584417199643  |             |
| AGIWUR11893;AGIWUR14564                                                                                |     |         |         |                |           |           |                     |             |
| CB4856 HS                                                                                              | III | 4881909 | 4883606 | WBGene00016450 | clec-5    | C35D10.14 | 0.35946603334547    |             |
| AGIWUR14533                                                                                            |     |         |         |                |           |           |                     |             |
| CB4856 HS                                                                                              | III | 4885697 | 4887442 | WBGene00016451 | clec-6    | C35D10.15 | 0.27736643271664    |             |
| AGIWUR7022                                                                                             |     |         |         |                |           |           |                     |             |
| CB4856 HS                                                                                              | III | 4887921 | 4891252 | WBGene00017827 | F26F4.5   | F26F4.5   | -0.219741149168643  | AGIWUR19753 |
| CB4856 HS                                                                                              | III | 4891609 | 4893409 | WBGene00017828 | F26F4.6   | F26F4.6   | 0.143207115424246   |             |
| AGIWUR3837;AGIWUR40615                                                                                 |     |         |         |                |           |           |                     |             |
| CB4856 HS                                                                                              | III | 4894647 | 4899085 | WBGene00003598 | nhl-2     | F26F4.7   | 0.175457414137998   | AGIWUR5479  |
| CB4856 HS                                                                                              | III | 4900073 | 4903143 | WBGene00017826 | tag-340   | F26F4.4   | 0.103160398942329   | AGIWUR3465  |
| CB4856 HS                                                                                              | III | 4903177 | 4903884 | WBGene00017832 | kbp-2     | F26F4.13  | -0.231373231604838  |             |
| AGIWUR33560                                                                                            |     |         |         |                |           |           |                     |             |
| CB4856 HS                                                                                              | III | 4903997 | 4905473 | WBGene00005011 | F26F4.8   | F26F4.8   | -0.185391698600116  | AGIWUR28628 |
| CB4856 HS                                                                                              | III | 4907217 | 4908968 | WBGene00004400 | rom-1     | F26F4.3   | 0.208596300377971   | AGIWUR39550 |
| CB4856 HS                                                                                              | III | 4908960 | 4910038 | WBGene00017831 | F26F4.12  | F26F4.12  | -0.214036340982267  |             |
| AGIWUR21349;AGIWUR24383;AGIWUR27298;AGIWUR33398                                                        |     |         |         |                |           |           |                     |             |
| CB4856 HS                                                                                              | III | 4910475 | 4912521 | WBGene00017829 | F26F4.9   | F26F4.9   | 0.0162083169526896  |             |
| AGIWUR42549;AGIWUR44256                                                                                |     |         |         |                |           |           |                     |             |
| CB4856 HS                                                                                              | III | 4912207 | 4914133 | WBGene00017825 | cee-1     | F26F4.1   | -0.0113515182774631 |             |
| AGIWUR2541;AGIWUR6238;AGIWUR9786;AGIWUR15199;AGIWUR42030                                               |     |         |         |                |           |           |                     |             |
| CB4856 HS                                                                                              | III | 4914096 | 4917129 | WBGene00004679 | rars-1    | F26F4.10  | -0.0944535246798015 |             |
| AGIWUR12;AGIWUR6520;AGIWUR9621;AGIWUR21567;AGIWUR22168;AGIWUR24027;AGIWUR30044;AGIWUR36014;AGIWUR36740 |     |         |         |                |           |           |                     |             |
| CB4856 HS                                                                                              | III | 4917104 | 4918008 | WBGene00017830 | rpb-8     | F26F4.11  | -0.312783527280577  |             |
| AGIWUR18230;AGIWUR19441;AGIWUR25054;AGIWUR29048                                                        |     |         |         |                |           |           |                     |             |
| CB4856 HS                                                                                              | III | 4918277 | 4920319 | WBGene00006735 | ula-1     | C26E6.8   | 0.0622710310275556  |             |
| AGIWUR12372;AGIWUR16420;AGIWUR26326                                                                    |     |         |         |                |           |           |                     |             |
| CB4856 HS                                                                                              | III | 4920442 | 4921747 | WBGene00016144 | mmab-1    | C26E6.11  | 0.148373637290735   |             |
| AGIWUR11339                                                                                            |     |         |         |                |           |           |                     |             |
| CB4856 HS                                                                                              | III | 4922446 | 4930204 | WBGene00004782 | set-2     | C26E6.9   | 0.080797342219781   |             |
| AGIWUR1720;AGIWUR9964;AGIWUR18640;AGIWUR33687;AGIWUR35092;AGIWUR36053                                  |     |         |         |                |           |           |                     |             |
| CB4856 HS                                                                                              | III | 4930602 | 4932253 | WBGene00016145 | C26E6.12  | C26E6.12  | 0.152114235249428   |             |
| AGIWUR1262                                                                                             |     |         |         |                |           |           |                     |             |
| CB4856 HS                                                                                              | III | 4932450 | 4934945 | WBGene00016143 | eri-9     | C26E6.7   | -0.191561814463943  | AGIWUR36611 |
| CB4856 HS                                                                                              | III | 4935578 | 4937223 | WBGene00016142 | mrps-18C  | C26E6.6   | -0.106232323193948  |             |

AGIWUR8152;AGIWUR10057;AGIWUR17312;AGIWUR26927;AGIWUR38877;AGIWUR40105  
 CB4856 HS III 4937322 4939453 WBGene00001499 fsn-1 C26E6.5 -0.084302705062866 AGIWUR21648  
 CB4856 HS III 4939567 4944404 WBGene000016140 rpb-2 C26E6.4 -0.0463964441262963  
 AGIWUR1292;AGIWUR7484;AGIWUR13354;AGIWUR26461;AGIWUR26734;AGIWUR28828;AGIWUR31075;AGIWUR31332;AGIWUR34633;A  
 GIWUR36394;AGIWUR38499  
 CB4856 HS III 4944513 4947317 WBGene000016139 ntl-9 C26E6.3 0.00199087312056712  
 AGIWUR4765;AGIWUR6733;AGIWUR29362  
 CB4856 HS III 4952124 4955171 WBGene000016138 flh-2 C26E6.2 -0.150920407138091  
 AGIWUR7622;AGIWUR8591;AGIWUR17173;AGIWUR26133;AGIWUR26422;AGIWUR33680  
 CB4856 HS III 4956891 4957539 WBGene000016137 C26E6.1 C26E6.1 0.091856830207055 AGIWUR6750  
 CB4856 HS III 4958329 4960305 WBGene000016166 C27F2.4 C27F2.4 0.154014698958267 AGIWUR5822  
 CB4856 HS III 4960390 4961715 WBGene000016167 vps-22 C27F2.5 -0.165087790751549  
 AGIWUR27289;AGIWUR30151;AGIWUR37552  
 CB4856 HS III 4961817 4963092 WBGene000043156 C27F2.9 C27F2.9 -0.00239382147257583  
 AGIWUR5606;AGIWUR22616;AGIWUR34511;AGIWUR35346;AGIWUR35703;AGIWUR36189  
 CB4856 HS III 4965571 4979729 WBGene00003558 nca-2 C27F2.2 0.123090671285496 AGIWUR38222  
 CB4856 HS III 4979796 4980418 WBGene000016168 C27F2.6 C27F2.6 0.0693282305638618 AGIWUR5107  
 CB4856 HS III 4980644 4984474 WBGene000016169 C27F2.7 C27F2.7 -0.0117752395199027  
 AGIWUR3709;AGIWUR13500;AGIWUR26613;AGIWUR44036  
 CB4856 HS III 4985019 4986931 WBGene000016171 C27F2.10 C27F2.10 0.0257691873183816  
 AGIWUR8510  
 CB4856 HS III 4987209 4991450 WBGene000016165 C27F2.1 C27F2.1 0.0595685154143526 AGIWUR8370  
 CB4856 HS III 4991439 4998161 WBGene000016170 C27F2.8 C27F2.8 -0.142278653884478  
 AGIWUR7004;AGIWUR15438;AGIWUR21077;AGIWUR22621;AGIWUR35360  
 CB4856 HS III 4999379 5001336 WBGene000020095 R144.5 R144.5 0.137597881494383 AGIWUR12094  
 CB4856 HS III 5001297 5002331 WBGene000020098 R144.10 R144.10 0.0864191831586076 AGIWUR808  
 CB4856 HS III 5003197 5004721 WBGene000020096 R144.6 R144.6 -0.163648021538204 AGIWUR16813  
 CB4856 HS III 5004820 5006981 WBGene000043060 R144.12 R144.12 0.283617744876505 AGIWUR1049  
 CB4856 HS III 5007100 5008830 WBGene000020099 R144.11 R144.11 0.24252023938384 AGIWUR11854  
 CB4856 HS III 5008933 5017860 WBGene000020097 larp-1 R144.7 0.0188694993461311  
 AGIWUR5277;AGIWUR8701;AGIWUR34641  
 CB4856 HS III 5018645 5021118 WBGene000020094 wip-1 R144.4 -0.324520744180756  
 AGIWUR10954;AGIWUR22155;AGIWUR23908  
 CB4856 HS III 5021224 5021910 WBGene00007015 mdt-11 R144.9 0.0849917307175243 AGIWUR43452  
 CB4856 HS III 5022047 5023200 WBGene000020093 R144.3 R144.3 0.0325050426363545  
 AGIWUR20707;AGIWUR39793  
 CB4856 HS III 5023264 5024064 WBGene000044648 R144.13 R144.13 0.179228265436015 AGIWUR7341  
 CB4856 HS III 5024966 5029540 WBGene000020092 pcf-11 R144.2 -0.131225682143853  
 AGIWUR6885;AGIWUR28587;AGIWUR41768

|                                                                                          |    |     |         |         |                |          |          |                     |             |
|------------------------------------------------------------------------------------------|----|-----|---------|---------|----------------|----------|----------|---------------------|-------------|
| CB4856                                                                                   | HS | III | 5030929 | 5036548 | WBGene00002218 | k1p-6    | R144.1   | -0.0692274890657636 |             |
| AGIWUR6002;AGIWUR10422;AGIWUR27584;AGIWUR31010                                           |    |     |         |         |                |          |          |                     |             |
| CB4856                                                                                   | HS | III | 5036381 | 5040413 | WBGene00016677 | C45G9.6  | C45G9.6  | 0.0738547823860847  |             |
| AGIWUR2247;AGIWUR31234                                                                   |    |     |         |         |                |          |          |                     |             |
| CB4856                                                                                   | HS | III | 5042412 | 5044672 | WBGene00016684 | n1p-43   | C45G9.13 | 0.162159187024471   |             |
| AGIWUR41739                                                                              |    |     |         |         |                |          |          |                     |             |
| CB4856                                                                                   | HS | III | 5045009 | 5045667 | WBGene00044409 | C45G9.14 | C45G9.14 | 0.0598419025890315  |             |
| AGIWUR6835;AGIWUR12672;AGIWUR13383;AGIWUR37679                                           |    |     |         |         |                |          |          |                     |             |
| CB4856                                                                                   | HS | III | 5046170 | 5047161 | WBGene00016678 | C45G9.7  | C45G9.7  | 0.073747524233573   | AGIWUR3268  |
| CB4856                                                                                   | HS | III | 5048117 | 5050158 | WBGene00016676 | C45G9.5  | C45G9.5  | 0.060051899174665   | AGIWUR13838 |
| CB4856                                                                                   | HS | III | 5050107 | 5052068 | WBGene00050919 | C45G9.15 | C45G9.15 | 0.182531420518812   |             |
| AGIWUR35385                                                                              |    |     |         |         |                |          |          |                     |             |
| CB4856                                                                                   | HS | III | 5052529 | 5053341 | WBGene00016679 | C45G9.8  | C45G9.8  | -0.0556093617459954 |             |
| AGIWUR5777;AGIWUR13001;AGIWUR13513;AGIWUR30470;AGIWUR36583                               |    |     |         |         |                |          |          |                     |             |
| CB4856                                                                                   | HS | III | 5056847 | 5061888 | WBGene00016681 | C45G9.10 | C45G9.10 | -0.265209317908111  |             |
| AGIWUR12766                                                                              |    |     |         |         |                |          |          |                     |             |
| CB4856                                                                                   | HS | III | 5063993 | 5068725 | WBGene00016682 | C45G9.11 | C45G9.11 | 0.158753024975676   |             |
| AGIWUR36530                                                                              |    |     |         |         |                |          |          |                     |             |
| CB4856                                                                                   | HS | III | 5069001 | 5070418 | WBGene00016674 | C45G9.2  | C45G9.2  | -0.0436133195500732 |             |
| AGIWUR38185;AGIWUR39760                                                                  |    |     |         |         |                |          |          |                     |             |
| CB4856                                                                                   | HS | III | 5070431 | 5071597 | WBGene00016683 | C45G9.12 | C45G9.12 | 0.400617888194645   |             |
| AGIWUR39034                                                                              |    |     |         |         |                |          |          |                     |             |
| CB4856                                                                                   | HS | III | 5074698 | 5075968 | WBGene00016673 | C45G9.1  | C45G9.1  | -0.344681971853652  | AGIWUR22776 |
| CB4856                                                                                   | HS | III | 5077765 | 5080665 | WBGene00000107 | alh-1    | F54D8.3  | -0.109242034820018  |             |
| AGIWUR22754;AGIWUR36700                                                                  |    |     |         |         |                |          |          |                     |             |
| CB4856                                                                                   | HS | III | 5081726 | 5082995 | WBGene00006519 | tag-174  | F54D8.2  | 0.111967418131923   |             |
| AGIWUR58;AGIWUR4165;AGIWUR4356;AGIWUR6331;AGIWUR6584;AGIWUR26746;AGIWUR28653;AGIWUR34083 |    |     |         |         |                |          |          |                     |             |
| CB4856                                                                                   | HS | III | 5083206 | 5085289 | WBGene00000279 | cah-1    | F54D8.4  | -0.0402323321989844 | AGIWUR22257 |
| CB4856                                                                                   | HS | III | 5102991 | 5106955 | WBGene00018802 | F54D8.6  | F54D8.6  | 0.0447791387006387  |             |
| AGIWUR15008;AGIWUR28987                                                                  |    |     |         |         |                |          |          |                     |             |
| CB4856                                                                                   | HS | III | 5107330 | 5108497 | WBGene00001076 | dpy-17   | F54D8.1  | -0.218597304265794  |             |
| AGIWUR26534;AGIWUR31818                                                                  |    |     |         |         |                |          |          |                     |             |
| CB4856                                                                                   | HS | III | 5109701 | 5130673 | WBGene00004728 | sax-2    | F21H11.2 | -0.0111241092124175 |             |
| AGIWUR6192;AGIWUR7162;AGIWUR12049;AGIWUR17202;AGIWUR32090                                |    |     |         |         |                |          |          |                     |             |
| CB4856                                                                                   | HS | III | 5130923 | 5136319 | WBGene00006543 | tbx-2    | F21H11.3 | -0.0264430533969939 |             |
| AGIWUR14269                                                                              |    |     |         |         |                |          |          |                     |             |
| CB4856                                                                                   | HS | III | 5137252 | 5149578 | WBGene00021900 | Y54H5A.2 | Y54H5A.2 | 0.137642142584109   |             |
| AGIWUR5297;AGIWUR36403;AGIWUR39420                                                       |    |     |         |         |                |          |          |                     |             |
| CB4856                                                                                   | HS | III | 5151907 | 5153229 | WBGene00021901 | tag-262  | Y54H5A.3 | 0.109684715220371   |             |

|                                                                                  |    |     |         |         |                |           |           |                      |             |
|----------------------------------------------------------------------------------|----|-----|---------|---------|----------------|-----------|-----------|----------------------|-------------|
| AGIWUR36811                                                                      |    |     |         |         |                |           |           |                      |             |
| CB4856                                                                           | HS | III | 5153406 | 5155465 | WBGene00021899 | Y54H5A.1  | Y54H5A.1  | -0.212089835741601   |             |
| AGIWUR27003                                                                      |    |     |         |         |                |           |           |                      |             |
| CB4856                                                                           | HS | III | 5155472 | 5158774 | WBGene00021902 | oxy-4     | Y54H5A.4  | -0.00367924867044422 |             |
| AGIWUR33031                                                                      |    |     |         |         |                |           |           |                      |             |
| CB4856                                                                           | HS | III | 5158873 | 5159605 | WBGene00044604 | T10F2.5   | T10F2.5   | 0.0472354226288765   |             |
| AGIWUR16189;AGIWUR34183;AGIWUR37130                                              |    |     |         |         |                |           |           |                      |             |
| CB4856                                                                           | HS | III | 5159729 | 5163627 | WBGene00001744 | gars-1    | T10F2.1   | -0.0748058374938934  |             |
| AGIWUR8674;AGIWUR17893                                                           |    |     |         |         |                |           |           |                      |             |
| CB4856                                                                           | HS | III | 5163766 | 5165311 | WBGene00020422 | T10F2.2   | T10F2.2   | 0.129736878527151    | AGIWUR5009  |
| CB4856                                                                           | HS | III | 5165659 | 5169799 | WBGene00006736 | ulp-1     | T10F2.3   | -0.0912718244450978  |             |
| AGIWUR17583;AGIWUR39466;AGIWUR39693                                              |    |     |         |         |                |           |           |                      |             |
| CB4856                                                                           | HS | III | 5169933 | 5172045 | WBGene00020423 | prp-19    | T10F2.4   | 0.190690974842711    |             |
| AGIWUR8511;AGIWUR11498;AGIWUR12677;AGIWUR16041;AGIWUR16667;AGIWUR42332           |    |     |         |         |                |           |           |                      |             |
| CB4856                                                                           | HS | III | 5172720 | 5173338 | WBGene00019631 | K10D2.5   | K10D2.5   | 0.0650691158664936   |             |
| AGIWUR12667;AGIWUR13199;AGIWUR17632;AGIWUR36997                                  |    |     |         |         |                |           |           |                      |             |
| CB4856                                                                           | HS | III | 5173439 | 5173809 | WBGene00019630 | emb-1     | K10D2.4   | 0.0788993401533062   | AGIWUR2253  |
| CB4856                                                                           | HS | III | 5173922 | 5180507 | WBGene00019629 | cid-1     | K10D2.3   | 0.0739026271733518   | AGIWUR29111 |
| CB4856                                                                           | HS | III | 5185920 | 5188646 | WBGene00019628 | pup-2     | K10D2.2   | -0.0502048791928331  |             |
| AGIWUR6106;AGIWUR24493;AGIWUR28776;AGIWUR33868;AGIWUR45004;AGIWUR45089           |    |     |         |         |                |           |           |                      |             |
| CB4856                                                                           | HS | III | 5191131 | 5196028 | WBGene00019627 | K10D2.1   | K10D2.1   | -0.00841083435803647 |             |
| AGIWUR535;AGIWUR40874                                                            |    |     |         |         |                |           |           |                      |             |
| CB4856                                                                           | HS | III | 5196027 | 5196709 | WBGene00019633 | K10D2.7   | K10D2.7   | 0.132557019247042    |             |
| AGIWUR525;AGIWUR7607;AGIWUR14899                                                 |    |     |         |         |                |           |           |                      |             |
| CB4856                                                                           | HS | III | 5196678 | 5199688 | WBGene00001262 | emb-8     | K10D2.6   | -0.0901768796860392  |             |
| AGIWUR318;AGIWUR7707;AGIWUR14019;AGIWUR19026;AGIWUR23518;AGIWUR30421;AGIWUR38124 |    |     |         |         |                |           |           |                      |             |
| CB4856                                                                           | HS | III | 5203713 | 5206911 | WBGene00022531 | morc-1    | ZC155.3   | 0.107808532890873    | AGIWUR31982 |
| CB4856                                                                           | HS | III | 5207567 | 5209557 | WBGene00022534 | syx-16    | ZC155.7   | 0.0241437287177      |             |
| AGIWUR5863;AGIWUR22835;AGIWUR32681                                               |    |     |         |         |                |           |           |                      |             |
| CB4856                                                                           | HS | III | 5211781 | 5215512 | WBGene00022532 | ZC155.4   | ZC155.4   | 0.0669362145835741   | AGIWUR17968 |
| CB4856                                                                           | HS | III | 5215949 | 5217604 | WBGene00022533 | cutl-19   | ZC155.5   | -0.0109706641533931  | AGIWUR43291 |
| CB4856                                                                           | HS | III | 5219280 | 5220093 | WBGene00022530 | ZC155.2   | ZC155.2   | 0.188743660528324    | AGIWUR24241 |
| CB4856                                                                           | HS | III | 5225621 | 5226801 | WBGene00003588 | nex-1     | ZC155.1   | -0.203656302300806   |             |
| AGIWUR20142;AGIWUR20359                                                          |    |     |         |         |                |           |           |                      |             |
| CB4856                                                                           | HS | III | 5226818 | 5227884 | WBGene00016411 | C34E10.10 | C34E10.10 | 0.106072229033559    |             |
| AGIWUR29112                                                                      |    |     |         |         |                |           |           |                      |             |
| CB4856                                                                           | HS | III | 5228417 | 5230536 | WBGene00000229 | atp-2     | C34E10.6  | -0.14879329863296    |             |
| AGIWUR5070;AGIWUR12032;AGIWUR19582;AGIWUR21091;AGIWUR26182;AGIWUR37558           |    |     |         |         |                |           |           |                      |             |
| CB4856                                                                           | HS | III | 5230555 | 5234530 | WBGene00016408 | prmt-5    | C34E10.5  | -0.144542318319625   |             |

|                                                                                    |    |     |         |         |                |          |           |                      |             |
|------------------------------------------------------------------------------------|----|-----|---------|---------|----------------|----------|-----------|----------------------|-------------|
| AGIWUR31212;AGIWUR33990                                                            |    |     |         |         |                |          |           |                      |             |
| CB4856                                                                             | HS | III | 5234617 | 5236364 | WBGene00016412 | mrps-26  | C34E10.11 | 0.168482399178988    |             |
| AGIWUR42475                                                                        |    |     |         |         |                |          |           |                      |             |
| CB4856                                                                             | HS | III | 5236410 | 5240055 | WBGene00006946 | prx-10   | C34E10.4  | 0.266947375328243    |             |
| AGIWUR4880                                                                         |    |     |         |         |                |          |           |                      |             |
| CB4856                                                                             | HS | III | 5240593 | 5242108 | WBGene00000561 | cnd-1    | C34E10.7  | -0.0606054930597129  |             |
| AGIWUR4625                                                                         |    |     |         |         |                |          |           |                      |             |
| CB4856                                                                             | HS | III | 5249075 | 5254187 | WBGene00016409 | sumv-1   | C34E10.8  | 0.12125390858635     |             |
| AGIWUR6645                                                                         |    |     |         |         |                |          |           |                      |             |
| CB4856                                                                             | HS | III | 5254438 | 5258922 | WBGene00001660 | gop-1    | C34E10.3  | -0.145230746554539   |             |
| AGIWUR33981                                                                        |    |     |         |         |                |          |           |                      |             |
| CB4856                                                                             | HS | III | 5259023 | 5260512 | WBGene00001661 | gop-2    | C34E10.2  | 0.0164431276919319   |             |
| AGIWUR3830;AGIWUR7839;AGIWUR12289;AGIWUR26150                                      |    |     |         |         |                |          |           |                      |             |
| CB4856                                                                             | HS | III | 5260693 | 5263837 | WBGene00001662 | gop-3    | C34E10.1  | 0.119459182674422    |             |
| AGIWUR3380;AGIWUR23142;AGIWUR26880                                                 |    |     |         |         |                |          |           |                      |             |
| CB4856                                                                             | HS | III | 5263943 | 5264996 | WBGene00001823 | hap-1    | ZC395.7   | -0.0603976169469327  | AGIWUR27062 |
| CB4856                                                                             | HS | III | 5265113 | 5267204 | WBGene00001740 | gro-1    | ZC395.6   | 0.245589756196754    | AGIWUR27294 |
| CB4856                                                                             | HS | III | 5267809 | 5268581 | WBGene00022597 | ZC395.5  | ZC395.5   | 0.181607656166721    | AGIWUR28768 |
| CB4856                                                                             | HS | III | 5268682 | 5273471 | WBGene00022598 | ztf-8    | ZC395.8   | 0.0866424791141664   | AGIWUR13066 |
| CB4856                                                                             | HS | III | 5273800 | 5274787 | WBGene00022599 | ZC395.10 | ZC395.10  | -0.128018490267208   |             |
| AGIWUR16003;AGIWUR22790                                                            |    |     |         |         |                |          |           |                      |             |
| CB4856                                                                             | HS | III | 5275225 | 5277797 | WBGene00006590 | toc-1    | ZC395.3   | -0.15752906748137    | AGIWUR21186 |
| CB4856                                                                             | HS | III | 5277894 | 5279344 | WBGene00000536 | clk-1    | ZC395.2   | -0.00756407937960013 | AGIWUR12724 |
| CB4856                                                                             | HS | III | 5286086 | 5286305 | WBGene00022600 | ZC395.11 | ZC395.11  |                      |             |
| -0.00197382403857205 AGIWUR24858                                                   |    |     |         |         |                |          |           |                      |             |
| CB4856                                                                             | HS | III | 5288180 | 5298361 | WBGene00020530 | T15B12.1 | T15B12.1  | 0.129402603503075    |             |
| AGIWUR295;AGIWUR35679                                                              |    |     |         |         |                |          |           |                      |             |
| CB4856                                                                             | HS | III | 5300008 | 5301886 | WBGene00020531 | T15B12.2 | T15B12.2  | -0.221186749853077   |             |
| AGIWUR13248                                                                        |    |     |         |         |                |          |           |                      |             |
| CB4856                                                                             | HS | III | 5302218 | 5306324 | WBGene00018675 | F52C9.5  | F52C9.5   | 0.26794744186378     | AGIWUR11007 |
| CB4856                                                                             | HS | III | 5308600 | 5311140 | WBGene00003391 | mog-3    | F52C9.7   | 0.0778297069608342   | AGIWUR40263 |
| CB4856                                                                             | HS | III | 5311246 | 5321732 | WBGene00004095 | pqe-1    | F52C9.8   | -0.125558870664487   |             |
| AGIWUR2071;AGIWUR19151;AGIWUR21084;AGIWUR30521;AGIWUR39453;AGIWUR40792;AGIWUR40889 |    |     |         |         |                |          |           |                      |             |
| CB4856                                                                             | HS | III | 5321885 | 5326345 | WBGene00018674 | F52C9.3  | F52C9.3   | -0.130056410799105   | AGIWUR18125 |
| CB4856                                                                             | HS | III | 5326623 | 5333620 | WBGene00018672 | sorf-2   | F52C9.1   | -0.13067924376837    |             |
| AGIWUR14541;AGIWUR27235;AGIWUR30565                                                |    |     |         |         |                |          |           |                      |             |
| CB4856                                                                             | HS | III | 5341682 | 5344273 | WBGene00022664 | ZK121.2  | ZK121.2   | -0.0347785188216259  |             |
| AGIWUR10875;AGIWUR28689;AGIWUR36103                                                |    |     |         |         |                |          |           |                      |             |
| CB4856                                                                             | HS | III | 5345252 | 5346117 | WBGene00022663 | glrx-21  | ZK121.1   | 0.06710174436214     |             |

|                                                                                   |    |     |         |         |                |           |           |                     |             |
|-----------------------------------------------------------------------------------|----|-----|---------|---------|----------------|-----------|-----------|---------------------|-------------|
| AGIWUR4869;AGIWUR43468                                                            |    |     |         |         |                |           |           |                     |             |
| CB4856                                                                            | HS | III | 5345982 | 5349401 | WBGene00021311 | Y32H12A.2 | Y32H12A.2 | 0.01697142762068    |             |
| AGIWUR28001                                                                       |    |     |         |         |                |           |           |                     |             |
| CB4856                                                                            | HS | III | 5362209 | 5364372 | WBGene00021310 | Y32H12A.1 | Y32H12A.1 | 0.307206792228658   |             |
| AGIWUR5008                                                                        |    |     |         |         |                |           |           |                     |             |
| CB4856                                                                            | HS | III | 5364512 | 5368045 | WBGene00000973 | dhs-9     | Y32H12A.3 | 0.114237500884014   |             |
| AGIWUR9949;AGIWUR33255                                                            |    |     |         |         |                |           |           |                     |             |
| CB4856                                                                            | HS | III | 5368967 | 5371274 | WBGene00021312 | szy-2     | Y32H12A.4 | 0.0378827323483497  |             |
| AGIWUR12268;AGIWUR40185                                                           |    |     |         |         |                |           |           |                     |             |
| CB4856                                                                            | HS | III | 5375698 | 5379929 | WBGene00021313 | paqr-2    | Y32H12A.5 | -0.0785660297297746 |             |
| AGIWUR28786                                                                       |    |     |         |         |                |           |           |                     |             |
| CB4856                                                                            | HS | III | 5380906 | 5382173 | WBGene00021314 | Y32H12A.6 | Y32H12A.6 | -0.034263006313715  |             |
| AGIWUR12120                                                                       |    |     |         |         |                |           |           |                     |             |
| CB4856                                                                            | HS | III | 5382288 | 5385415 | WBGene00021315 | Y32H12A.7 | Y32H12A.7 | 0.100434461479562   |             |
| AGIWUR41756                                                                       |    |     |         |         |                |           |           |                     |             |
| CB4856                                                                            | HS | III | 5385617 | 5406037 | WBGene00021316 | Y32H12A.8 | Y32H12A.8 | 0.163779555882769   |             |
| AGIWUR44435                                                                       |    |     |         |         |                |           |           |                     |             |
| CB4856                                                                            | HS | III | 5406102 | 5407968 | WBGene00020967 | W03A5.2   | W03A5.2   | 0.0753706404643388  | AGIWUR4501  |
| CB4856                                                                            | HS | III | 5407888 | 5413177 | WBGene00020966 | W03A5.1   | W03A5.1   | 0.0553237592389575  | AGIWUR1467  |
| CB4856                                                                            | HS | III | 5413137 | 5413993 | WBGene00001731 | gr1-22    | W03A5.3   | -0.13938493131085   | AGIWUR36919 |
| CB4856                                                                            | HS | III | 5415556 | 5419565 | WBGene00001042 | dnj-24    | W03A5.7   | -0.159560020095978  |             |
| AGIWUR24399;AGIWUR33765                                                           |    |     |         |         |                |           |           |                     |             |
| CB4856                                                                            | HS | III | 5431407 | 5434467 | WBGene00020968 | W03A5.4   | W03A5.4   | 0.0285404230567003  | AGIWUR14281 |
| CB4856                                                                            | HS | III | 5438826 | 5440632 | WBGene00020970 | W03A5.6   | W03A5.6   | -0.0931744712947919 |             |
| AGIWUR6394;AGIWUR38349                                                            |    |     |         |         |                |           |           |                     |             |
| CB4856                                                                            | HS | III | 5440862 | 5442761 | WBGene00020779 | T24G10.2  | T24G10.2  | 0.0544853308844324  |             |
| AGIWUR29411                                                                       |    |     |         |         |                |           |           |                     |             |
| CB4856                                                                            | HS | III | 5443167 | 5446506 | WBGene00018612 | dis1-2    | F48E8.6   | -0.152459594366416  |             |
| AGIWUR13480;AGIWUR16272;AGIWUR25335;AGIWUR32043                                   |    |     |         |         |                |           |           |                     |             |
| CB4856                                                                            | HS | III | 5446510 | 5448419 | WBGene00018613 | skpt-1    | F48E8.7   | 0.116605390312419   | AGIWUR12645 |
| CB4856                                                                            | HS | III | 5448838 | 5449868 | WBGene00044410 | F48E8.8   | F48E8.8   | 0.0611966100032371  |             |
| AGIWUR7055;AGIWUR24195;AGIWUR37290;AGIWUR42009                                    |    |     |         |         |                |           |           |                     |             |
| CB4856                                                                            | HS | III | 5450106 | 5453137 | WBGene00003901 | paa-1     | F48E8.5   | 0.0914492076482762  |             |
| AGIWUR21505;AGIWUR27982;AGIWUR29246                                               |    |     |         |         |                |           |           |                     |             |
| CB4856                                                                            | HS | III | 5453590 | 5459516 | WBGene00018611 | F48E8.4   | F48E8.4   | -0.0514786931858175 |             |
| AGIWUR12928;AGIWUR13899;AGIWUR38555                                               |    |     |         |         |                |           |           |                     |             |
| CB4856                                                                            | HS | III | 5461379 | 5464382 | WBGene00018610 | F48E8.3   | F48E8.3   | 0.104650662369835   |             |
| AGIWUR5788;AGIWUR6747;AGIWUR21003;AGIWUR34646;AGIWUR36155;AGIWUR36413;AGIWUR40162 |    |     |         |         |                |           |           |                     |             |
| CB4856                                                                            | HS | III | 5464381 | 5467992 | WBGene00018609 | F48E8.2   | F48E8.2   | -0.271804286408103  |             |

|                                                                                               |    |     |         |         |                |         |         |                      |             |
|-----------------------------------------------------------------------------------------------|----|-----|---------|---------|----------------|---------|---------|----------------------|-------------|
| AGIWUR16941;AGIWUR22846                                                                       |    |     |         |         |                |         |         |                      |             |
| CB4856                                                                                        | HS | III | 5474478 | 5478005 | WBGene00003055 | lon-1   | F48E8.1 | 0.0876851207900753   | AGIWUR36140 |
| CB4856                                                                                        | HS | III | 5478682 | 5478924 | WBGene00019835 | R02F2.6 | R02F2.6 | -0.162736451539619   |             |
| AGIWUR13517;AGIWUR30140                                                                       |    |     |         |         |                |         |         |                      |             |
| CB4856                                                                                        | HS | III | 5479318 | 5480278 | WBGene00019834 | R02F2.5 | R02F2.5 | 0.0485210813159718   | AGIWUR23390 |
| CB4856                                                                                        | HS | III | 5480262 | 5483784 | WBGene00019836 | R02F2.7 | R02F2.7 | -0.257708247779568   |             |
| AGIWUR16860;AGIWUR18493;AGIWUR20223;AGIWUR37735                                               |    |     |         |         |                |         |         |                      |             |
| CB4856                                                                                        | HS | III | 5484200 | 5486005 | WBGene00019833 | R02F2.4 | R02F2.4 | 0.12112655924485     | AGIWUR13548 |
| CB4856                                                                                        | HS | III | 5487642 | 5498943 | WBGene00019832 | osg-1   | R02F2.2 | -0.00997923905018538 | AGIWUR4638  |
| CB4856                                                                                        | HS | III | 5499190 | 5499976 | WBGene00019838 | R02F2.9 | R02F2.9 | -0.034252590836612   | AGIWUR37966 |
| CB4856                                                                                        | HS | III | 5501861 | 5506392 | WBGene00019831 | R02F2.1 | R02F2.1 | -0.089663105168956   |             |
| AGIWUR11309;AGIWUR20593;AGIWUR33029;AGIWUR36550;AGIWUR37726;AGIWUR40000;AGIWUR40694           |    |     |         |         |                |         |         |                      |             |
| CB4856                                                                                        | HS | III | 5507050 | 5508738 | WBGene00017032 | D1044.7 | D1044.7 | -0.0164679892357942  | AGIWUR24507 |
| CB4856                                                                                        | HS | III | 5512927 | 5517523 | WBGene00017033 | nek1-4  | D1044.8 | 0.0472733082765711   | AGIWUR2553  |
| CB4856                                                                                        | HS | III | 5524181 | 5524439 | WBGene00017030 | D1044.5 | D1044.5 | 0.155185565491479    | AGIWUR8736  |
| CB4856                                                                                        | HS | III | 5526071 | 5535481 | WBGene00017028 | dex-1   | D1044.2 | -0.10729446850631    |             |
| AGIWUR21827;AGIWUR23018;AGIWUR23267                                                           |    |     |         |         |                |         |         |                      |             |
| CB4856                                                                                        | HS | III | 5535660 | 5543218 | WBGene00017031 | D1044.6 | D1044.6 | 0.178769872463009    | AGIWUR15083 |
| CB4856                                                                                        | HS | III | 5544304 | 5546287 | WBGene00017027 | D1044.1 | D1044.1 | 0.0552825256178266   | AGIWUR40892 |
| CB4856                                                                                        | HS | III | 5546987 | 5551231 | WBGene00017302 | F09F7.5 | F09F7.5 | 0.101570457254767    |             |
| AGIWUR4529;AGIWUR6227;AGIWUR12534;AGIWUR18161;AGIWUR23373;AGIWUR25157;AGIWUR35306;AGIWUR40309 |    |     |         |         |                |         |         |                      |             |
| CB4856                                                                                        | HS | III | 5551232 | 5552131 | WBGene00017303 | F09F7.6 | F09F7.6 | -0.0208095168914078  | AGIWUR225   |
| CB4856                                                                                        | HS | III | 5553489 | 5554934 | WBGene00017304 | F09F7.7 | F09F7.7 | 0.0341665957691566   |             |
| AGIWUR5737;AGIWUR9245;AGIWUR35372;AGIWUR35725                                                 |    |     |         |         |                |         |         |                      |             |
| CB4856                                                                                        | HS | III | 5555404 | 5557318 | WBGene00017301 | hach-1  | F09F7.4 | 0.114436414518111    |             |
| AGIWUR605;AGIWUR4972;AGIWUR14052;AGIWUR26931                                                  |    |     |         |         |                |         |         |                      |             |
| CB4856                                                                                        | HS | III | 5557344 | 5564837 | WBGene00017300 | rpc-2   | F09F7.3 | 0.200681643682296    |             |
| AGIWUR897;AGIWUR31854;AGIWUR34704;AGIWUR43566                                                 |    |     |         |         |                |         |         |                      |             |
| CB4856                                                                                        | HS | III | 5565025 | 5567382 | WBGene00003371 | mlc-3   | F09F7.2 | 0.284408117366649    |             |
| AGIWUR3571;AGIWUR7969;AGIWUR9563;AGIWUR9855;AGIWUR23139;AGIWUR26212;AGIWUR31710               |    |     |         |         |                |         |         |                      |             |
| CB4856                                                                                        | HS | III | 5568213 | 5568779 | WBGene00017305 | nspb-12 | F09F7.8 | -0.349814661336048   | AGIWUR36124 |
| CB4856                                                                                        | HS | III | 5573994 | 5576684 | WBGene00017299 | mol-1   | F09F7.1 | 0.0777262836371992   | AGIWUR5547  |
| CB4856                                                                                        | HS | III | 5578435 | 5581343 | WBGene00018966 | F56D2.5 | F56D2.5 | 0.117963392552488    | AGIWUR36564 |
| CB4856                                                                                        | HS | III | 5581582 | 5582411 | WBGene00018968 | F56D2.8 | F56D2.8 | -0.230800348200324   | AGIWUR43983 |
| CB4856                                                                                        | HS | III | 5583135 | 5584213 | WBGene00006731 | uev-2   | F56D2.4 | 0.0552238192437047   | AGIWUR10384 |
| CB4856                                                                                        | HS | III | 5584687 | 5587110 | WBGene00018965 | F56D2.3 | F56D2.3 | 0.0369484142148959   | AGIWUR32222 |
| CB4856                                                                                        | HS | III | 5587263 | 5589095 | WBGene00018964 | F56D2.2 | F56D2.2 | -0.0342663820486173  |             |
| AGIWUR12096;AGIWUR16038;AGIWUR18564                                                           |    |     |         |         |                |         |         |                      |             |
| CB4856                                                                                        | HS | III | 5589036 | 5591718 | WBGene00018967 | ddx-15  | F56D2.6 | 0.032777027083549    |             |

AGIWUR1234;AGIWUR6210;AGIWUR11625;AGIWUR28848;AGIWUR44724  
CB4856 HS III 5592135 5594785 WBGene00018963 ucr-1 F56D2.1 -0.0730545711458546  
AGIWUR396;AGIWUR17595;AGIWUR18618;AGIWUR33070;AGIWUR33417;AGIWUR39900  
CB4856 HS III 5595771 5598066 WBGene00000420 ced-6 F56D2.7 -0.0815796791347605  
AGIWUR21338;AGIWUR38804  
CB4856 HS III 5597947 5600058 WBGene00015470 C05D2.10 C05D2.10 -0.313045650332496  
AGIWUR30330  
CB4856 HS III 5600393 5603656 WBGene00015468 madf-11 C05D2.6 0.0408492247721881 AGIWUR20578  
CB4856 HS III 5604460 5607549 WBGene00001514 xnd-1 C05D2.5 -0.0495032670923159 AGIWUR12205  
CB4856 HS III 5607509 5610346 WBGene00015469 C05D2.8 C05D2.8 0.120539366796811 AGIWUR22365  
CB4856 HS III 5612274 5614700 WBGene00000239 bas-1 C05D2.4 -0.151757186131938  
AGIWUR11865;AGIWUR22234;AGIWUR25155  
CB4856 HS III 5614972 5617257 WBGene00015467 basl-1 C05D2.3 0.0126721822446436  
AGIWUR5686;AGIWUR25855;AGIWUR41332;AGIWUR44004  
CB4856 HS III 5625014 5632322 WBGene00000900 daf-4 C05D2.1 0.0163197854575259  
AGIWUR741;AGIWUR4499;AGIWUR13629;AGIWUR26026;AGIWUR28955  
CB4856 HS III 5635479 5654558 WBGene00000518 ckk-1 C05H8.1 -0.0471662113162021  
AGIWUR35270;AGIWUR44158  
CB4856 HS III 5654984 5656994 WBGene00018828 sdz-21 F54E7.5 -0.196605487784282 AGIWUR8561  
CB4856 HS III 5659889 5661085 WBGene00018829 F54E7.6 F54E7.6 0.0758684179944247 AGIWUR2470  
CB4856 HS III 5664234 5676732 WBGene00003918 par-3 F54E7.3 -0.00856346350216164  
AGIWUR5765;AGIWUR39210  
CB4856 HS III 5676612 5677890 WBGene00018831 F54E7.9 F54E7.9 0.0318747133258679  
AGIWUR7591;AGIWUR27414;AGIWUR31239;AGIWUR42631  
CB4856 HS III 5677953 5679038 WBGene00018830 ska-3 F54E7.8 -0.0501220904673509 AGIWUR242  
CB4856 HS III 5679298 5680187 WBGene00004481 rps-12 F54E7.2 -1.12643653381387 AGIWUR34405  
CB4856 HS III 5680433 5682326 WBGene00018827 pst-2 F54E7.1 0.0939103662621505 AGIWUR2823  
CB4856 HS III 5682310 5684098 WBGene00004321 rcan-1 F54E7.7 0.129502071922199  
AGIWUR2604;AGIWUR22461  
CB4856 HS III 5690107 5692740 WBGene00015146 abi-1 B0336.6 -0.195741587559851 AGIWUR34075  
CB4856 HS III 5692896 5693938 WBGene00015145 B0336.5 B0336.5 -0.00183407529172186 AGIWUR40695  
CB4856 HS III 5694036 5694784 WBGene00015150 B0336.13 B0336.13 -0.052252994714296  
AGIWUR6621  
CB4856 HS III 5694735 5697366 WBGene00015147 B0336.7 B0336.7 0.127288315481457  
AGIWUR24198;AGIWUR34686  
CB4856 HS III 5697477 5698013 WBGene00002982 lgg-3 B0336.8 0.0334410805135583 AGIWUR43374  
CB4856 HS III 5698430 5702304 WBGene00004348 rgs-5 B0336.4 0.244132116818705  
AGIWUR7851;AGIWUR7993;AGIWUR20937  
CB4856 HS III 5702248 5705464 WBGene00006359 swp-1 B0336.9 -0.142991511517833



AGIWUR12277;AGIWUR15861;AGIWUR22510;AGIWUR29765;AGIWUR33611;AGIWUR35913;AGIWUR40245  
 CB4856 HS III 5705521 5706129 WBGene00004435 rpl-23 B0336.10 0.353428392715239  
 AGIWUR5646;AGIWUR25265  
 CB4856 HS III 5706718 5709329 WBGene00015148 hpo-28 B0336.11 0.0328230655172961  
 AGIWUR204;AGIWUR5819;AGIWUR30382;AGIWUR44654  
 CB4856 HS III 5710062 5710509 WBGene00015149 B0336.12 B0336.12 -0.0691288658870679  
 AGIWUR43192  
 CB4856 HS III 5711548 5714846 WBGene00015143 B0336.3 B0336.3 0.0537247315971481 AGIWUR38024  
 CB4856 HS III 5714861 5717585 WBGene00000182 arf-1.2 B0336.2 -0.144232606174397  
 AGIWUR6417;AGIWUR10593;AGIWUR23258;AGIWUR26259  
 CB4856 HS III 5722824 5727115 WBGene00006943 wrm-1 B0336.1 -0.0408490385324463 AGIWUR16540  
 CB4856 HS III 5728180 5730159 WBGene00015083 egg-1 B0244.8 -0.148715665476939  
 AGIWUR973;AGIWUR2213;AGIWUR8633;AGIWUR12270;AGIWUR15368;AGIWUR28877;AGIWUR30186;AGIWUR35008;AGIWUR44144  
 CB4856 HS III 5730118 5731030 WBGene00015084 B0244.9 B0244.9 -0.236808297609112 AGIWUR29575  
 CB4856 HS III 5731501 5732854 WBGene00015082 B0244.7 B0244.7 -0.342930575911756 AGIWUR27688  
 CB4856 HS III 5733997 5737481 WBGene00015085 B0244.10 B0244.10 0.0816746484660653  
 AGIWUR3640;AGIWUR11691;AGIWUR22636  
 CB4856 HS III 5742556 5744820 WBGene00206513 B0244.15 B0244.15 0.109227652626473  
 AGIWUR27006  
 CB4856 HS III 5744870 5747195 WBGene00015080 B0244.5 B0244.5 0.173646685861523 AGIWUR35844  
 CB4856 HS III 5747485 5751637 WBGene00015079 B0244.4 B0244.4 -0.0475470243909051 AGIWUR28304  
 CB4856 HS III 5755496 5765815 WBGene00002048 ida-1 B0244.2 0.0241356773506887 AGIWUR14657  
 CB4856 HS III 5767882 5768665 WBGene00015086 B0244.11 B0244.11 0.146010902808374  
 AGIWUR6678  
 CB4856 HS III 5770185 5774703 WBGene00021343 cutl-23 Y37B11A.1 0.0826458605497624  
 AGIWUR41663  
 CB4856 HS III 5774679 5790707 WBGene00021344 Y37B11A.2 Y37B11A.2 0.210272834354427  
 AGIWUR10288  
 CB4856 HS III 5791171 5803042 WBGene00020964 polq-1 W03A3.2 -0.106163066918994  
 AGIWUR5084;AGIWUR19096  
 CB4856 HS III 5803260 5805112 WBGene00001869 him-10 R12B2.4 -0.0853280507492418 AGIWUR38298  
 CB4856 HS III 5805563 5806975 WBGene00020019 R12B2.3 R12B2.3 0.0437265219529905 AGIWUR18560  
 CB4856 HS III 5807052 5809206 WBGene00020018 R12B2.2 R12B2.2 0.105116129109607 AGIWUR31538  
 CB4856 HS III 5815045 5815513 WBGene00020021 R12B2.7 R12B2.7 0.011248106621494 AGIWUR42938  
 CB4856 HS III 5816203 5820200 WBGene00004858 sma-4 R12B2.1 0.338841100576415  
 AGIWUR15423;AGIWUR34046;AGIWUR34858;AGIWUR38559  
 CB4856 HS III 5823957 5828651 WBGene00044411 R12B2.8 R12B2.8 -0.00146877237794563  
 AGIWUR7783;AGIWUR23563;AGIWUR28200;AGIWUR28780;AGIWUR28810  
 CB4856 HS III 5828603 5833745 WBGene00007016 mdt-15 R12B2.5 0.0511870792807869 AGIWUR4471

|                                                                                                                                               |    |     |         |         |                |          |          |                     |             |
|-----------------------------------------------------------------------------------------------------------------------------------------------|----|-----|---------|---------|----------------|----------|----------|---------------------|-------------|
| CB4856                                                                                                                                        | HS | III | 5834022 | 5835756 | WBGene00020020 | R12B2.6  | R12B2.6  | 0.0237532052663516  | AGIWUR33024 |
| CB4856                                                                                                                                        | HS | III | 5836926 | 5837183 | WBGene00021029 | W04D12.1 | W04D12.1 | -0.0740754328510498 |             |
| AGIWUR33001                                                                                                                                   |    |     |         |         |                |          |          |                     |             |
| CB4856                                                                                                                                        | HS | III | 5848838 | 5853269 | WBGene00017162 | ddx-23   | F01F1.7  | -0.0365072988080843 | AGIWUR17455 |
| CB4856                                                                                                                                        | HS | III | 5853532 | 5855687 | WBGene00000381 | cct-6    | F01F1.8  | -0.150588574544491  |             |
| AGIWUR6023;AGIWUR22509;AGIWUR24670;AGIWUR31718;AGIWUR33596;AGIWUR43085                                                                        |    |     |         |         |                |          |          |                     |             |
| CB4856                                                                                                                                        | HS | III | 5856018 | 5859186 | WBGene00000115 | alh-9    | F01F1.6  | 0.0174285215583705  |             |
| AGIWUR7791;AGIWUR17410;AGIWUR18827;AGIWUR41022;AGIWUR44087                                                                                    |    |     |         |         |                |          |          |                     |             |
| CB4856                                                                                                                                        | HS | III | 5859308 | 5861907 | WBGene00001057 | dpf-4    | F01F1.5  | -0.139741290764451  |             |
| AGIWUR11864;AGIWUR27021;AGIWUR45153                                                                                                           |    |     |         |         |                |          |          |                     |             |
| CB4856                                                                                                                                        | HS | III | 5861855 | 5863546 | WBGene00017163 | dnpp-1   | F01F1.9  | -0.315710895699775  |             |
| AGIWUR4140;AGIWUR30765;AGIWUR43330                                                                                                            |    |     |         |         |                |          |          |                     |             |
| CB4856                                                                                                                                        | HS | III | 5864500 | 5866541 | WBGene00017161 | rabn-5   | F01F1.4  | 0.341466367267447   | AGIWUR7226  |
| CB4856                                                                                                                                        | HS | III | 5866495 | 5868501 | WBGene00017164 | eng-1    | F01F1.10 | 0.155376747230539   |             |
| AGIWUR8283                                                                                                                                    |    |     |         |         |                |          |          |                     |             |
| CB4856                                                                                                                                        | HS | III | 5868587 | 5869620 | WBGene00017169 | F01F1.15 | F01F1.15 | -0.0945213717474704 |             |
| AGIWUR26321;AGIWUR33269                                                                                                                       |    |     |         |         |                |          |          |                     |             |
| CB4856                                                                                                                                        | HS | III | 5869685 | 5872396 | WBGene00017165 | F01F1.11 | F01F1.11 | -0.0643696134590463 |             |
| AGIWUR12560                                                                                                                                   |    |     |         |         |                |          |          |                     |             |
| CB4856                                                                                                                                        | HS | III | 5873025 | 5874680 | WBGene00017160 | F01F1.3  | F01F1.3  | 0.188814904027232   | AGIWUR13608 |
| CB4856                                                                                                                                        | HS | III | 5874672 | 5876625 | WBGene00017166 | aldo-2   | F01F1.12 | -0.0846838750144157 |             |
| AGIWUR12260;AGIWUR18058;AGIWUR25115;AGIWUR25603;AGIWUR31691;AGIWUR40498                                                                       |    |     |         |         |                |          |          |                     |             |
| CB4856                                                                                                                                        | HS | III | 5877020 | 5878419 | WBGene00003252 | mig-21   | F01F1.13 | -0.0578508384620591 |             |
| AGIWUR44500                                                                                                                                   |    |     |         |         |                |          |          |                     |             |
| CB4856                                                                                                                                        | HS | III | 5878521 | 5879415 | WBGene00017159 | F01F1.2  | F01F1.2  | 0.0169488242032632  |             |
| AGIWUR400;AGIWUR17259;AGIWUR18227;AGIWUR28252;AGIWUR33591;AGIWUR38436                                                                         |    |     |         |         |                |          |          |                     |             |
| CB4856                                                                                                                                        | HS | III | 5879489 | 5882428 | WBGene00017158 | hpo-10   | F01F1.1  | -0.0451102802802374 |             |
| AGIWUR1028;AGIWUR18342;AGIWUR23790                                                                                                            |    |     |         |         |                |          |          |                     |             |
| CB4856                                                                                                                                        | HS | III | 5882319 | 5882923 | WBGene00017168 | F01F1.14 | F01F1.14 | 0.19719985164433    |             |
| AGIWUR11771                                                                                                                                   |    |     |         |         |                |          |          |                     |             |
| CB4856                                                                                                                                        | HS | III | 5884307 | 5885848 | WBGene00016196 | C28H8.5  | C28H8.5  | -0.483521886974161  | AGIWUR19907 |
| CB4856                                                                                                                                        | HS | III | 5885847 | 5886956 | WBGene00016198 | C28H8.7  | C28H8.7  | 0.202430535205521   | AGIWUR7242  |
| CB4856                                                                                                                                        | HS | III | 5887104 | 5888775 | WBGene00016199 | C28H8.8  | C28H8.8  | 0.779235569710321   | AGIWUR21123 |
| CB4856                                                                                                                                        | HS | III | 5889721 | 5896013 | WBGene00016197 | pxl-1    | C28H8.6  | 0.0292119445297327  |             |
| AGIWUR2647;AGIWUR6131;AGIWUR10300;AGIWUR12567;AGIWUR13793;AGIWUR15805;AGIWUR18173;AGIWUR21049;AGIWUR24758;AGIWUR30067;AGIWUR33589;AGIWUR42592 |    |     |         |         |                |          |          |                     |             |
| CB4856                                                                                                                                        | HS | III | 5903576 | 5906122 | WBGene00016200 | dpff-1   | C28H8.9  | 0.167051687156986   |             |
| AGIWUR5400;AGIWUR12108;AGIWUR23801                                                                                                            |    |     |         |         |                |          |          |                     |             |
| CB4856                                                                                                                                        | HS | III | 5907044 | 5908457 | WBGene00016195 | C28H8.4  | C28H8.4  | -0.0888242681875475 |             |

AGIWUR5053;AGIWUR10268;AGIWUR28529  
CB4856 HS III 5908700 5914734 WBGene00016194 C28H8.3 C28H8.3 -0.18177185766343  
AGIWUR4907;AGIWUR5521;AGIWUR5753;AGIWUR8116;AGIWUR15977;AGIWUR18776;AGIWUR38328;AGIWUR38602;AGIWUR41317;AGIWUR44843  
CB4856 HS III 5917628 5920086 WBGene00016201 tdo-2 C28H8.11 0.0918655072610406  
AGIWUR189;AGIWUR9055;AGIWUR37615;AGIWUR44015  
CB4856 HS III 5923187 5924431 WBGene00016193 C28H8.2 C28H8.2 -0.33321504932713 AGIWUR33140  
CB4856 HS III 5924394 5925754 WBGene00001018 dnc-2 C28H8.12 -0.214528207164481  
AGIWUR7289;AGIWUR28714;AGIWUR32259  
CB4856 HS III 5926086 5926987 WBGene00016192 bcl-7 C28H8.1 -0.00233988969516474 AGIWUR14967  
CB4856 HS III 5926898 5932953 WBGene00006987 zmp-1 EGAP1.3 0.206536124797337  
AGIWUR7925;AGIWUR17769  
CB4856 HS III 5935749 5937220 WBGene00017146 EGAP1.1 EGAP1.1 0.220963905146148 AGIWUR25306  
CB4856 HS III 5940244 5943835 WBGene00006727 ubq-1 F25B5.4 0.0472923700966241  
AGIWUR8687;AGIWUR12178;AGIWUR21911;AGIWUR22522;AGIWUR22721;AGIWUR23032;AGIWUR27981;AGIWUR32258;AGIWUR40838  
CB4856 HS III 5943833 5946124 WBGene00017776 F25B5.5 F25B5.5 -0.343429152171677 AGIWUR17556  
CB4856 HS III 5946217 5948711 WBGene00017777 F25B5.6 F25B5.6 0.0172912109272794  
AGIWUR4867;AGIWUR36391;AGIWUR42299  
CB4856 HS III 5948890 5953534 WBGene00017775 F25B5.3 F25B5.3 -0.0806401925939717  
AGIWUR1552;AGIWUR4298;AGIWUR15197;AGIWUR41985  
CB4856 HS III 5953526 5958246 WBGene00017778 nono-1 F25B5.7 -0.0948338370763704  
AGIWUR5396;AGIWUR8117;AGIWUR13268;AGIWUR16611;AGIWUR18055;AGIWUR20561;AGIWUR37674;AGIWUR38427  
CB4856 HS III 5958722 5962322 WBGene00017774 nop-1 F25B5.2 0.0906151650389475 AGIWUR31282  
CB4856 HS III 5966413 5971510 WBGene00017773 dct-6 F25B5.1 0.0810898731709884 AGIWUR14598  
CB4856 HS III 5971530 5973664 WBGene00003375 mlp-1 T04C9.4 0.00141781868044211  
AGIWUR33014;AGIWUR37421  
CB4856 HS III 5976781 5982126 WBGene00001489 frm-2 T04C9.6 0.255435932026387 AGIWUR3828  
CB4856 HS III 5985640 5985858 WBGene00020211 T04C9.3 T04C9.3 -0.382226719456697 AGIWUR38664  
CB4856 HS III 5991880 5992230 WBGene00020210 T04C9.2 T04C9.2 -0.0976492674636971 AGIWUR36256  
CB4856 HS III 5993219 6006360 WBGene00020209 T04C9.1 T04C9.1 -0.181723448764881  
AGIWUR11458;AGIWUR16358;AGIWUR30105;AGIWUR35380;AGIWUR39302;AGIWUR42067  
CB4856 HS III 6006344 6009084 WBGene00022694 gcna-1 ZK328.4 -0.115350541691537 AGIWUR18288  
CB4856 HS III 6009550 6012839 WBGene00001166 eftu-2 ZK328.2 -0.0300946597259255  
AGIWUR1543;AGIWUR1621;AGIWUR23124;AGIWUR33224;AGIWUR33784;AGIWUR39115;AGIWUR42275  
CB4856 HS III 6013536 6019562 WBGene00003796 npp-10 ZK328.5 -0.110657330883901  
AGIWUR17451;AGIWUR18497;AGIWUR19359;AGIWUR19986;AGIWUR31346;AGIWUR35634;AGIWUR38716  
CB4856 HS III 6020165 6024659 WBGene00000874 cyk-3 ZK328.1 0.160469119074814  
AGIWUR587;AGIWUR7409  
CB4856 HS III 6025090 6028532 WBGene00006544 tbx-7 ZK328.8 0.0013232306249904 AGIWUR35350

|                                                                                 |    |     |         |         |                |          |          |                     |             |
|---------------------------------------------------------------------------------|----|-----|---------|---------|----------------|----------|----------|---------------------|-------------|
| CB4856                                                                          | HS | III | 6028790 | 6030583 | WBGene00022695 | ZK328.6  | ZK328.6  | -0.0242155314226906 | AGIWUR13455 |
| CB4856                                                                          | HS | III | 6032696 | 6039475 | WBGene00022696 | ZK328.7  | ZK328.7  | 0.0959368211763989  |             |
| AGIWUR21256;AGIWUR23219                                                         |    |     |         |         |                |          |          |                     |             |
| CB4856                                                                          | HS | III | 6040334 | 6045125 | WBGene00018254 | F40H6.2  | F40H6.2  | -0.202750409519891  | AGIWUR42043 |
| CB4856                                                                          | HS | III | 6045771 | 6046981 | WBGene00006547 | tbx-11   | F40H6.4  | -0.395307185786668  |             |
| AGIWUR31993;AGIWUR39421                                                         |    |     |         |         |                |          |          |                     |             |
| CB4856                                                                          | HS | III | 6049316 | 6055448 | WBGene00018255 | F40H6.5  | F40H6.5  | 0.00958772333202385 |             |
| AGIWUR16778;AGIWUR34353                                                         |    |     |         |         |                |          |          |                     |             |
| CB4856                                                                          | HS | III | 6057055 | 6058444 | WBGene00018253 | F40H6.1  | F40H6.1  | -0.124974587480333  | AGIWUR16150 |
| CB4856                                                                          | HS | III | 6065139 | 6066217 | WBGene00044412 | F40H6.6  | F40H6.6  | 0.182307392754673   | AGIWUR6163  |
| CB4856                                                                          | HS | III | 6067857 | 6072076 | WBGene00015478 | C05D10.2 | C05D10.2 | 0.0252991279570214  |             |
| AGIWUR106;AGIWUR11939;AGIWUR23889;AGIWUR29361;AGIWUR43021                       |    |     |         |         |                |          |          |                     |             |
| CB4856                                                                          | HS | III | 6080563 | 6084748 | WBGene00015477 | attf-4   | C05D10.1 | -0.0297440722849309 |             |
| AGIWUR35938                                                                     |    |     |         |         |                |          |          |                     |             |
| CB4856                                                                          | HS | III | 6084665 | 6087721 | WBGene00015479 | wht-1    | C05D10.3 | -0.324244133024999  |             |
| AGIWUR18060                                                                     |    |     |         |         |                |          |          |                     |             |
| CB4856                                                                          | HS | III | 6088684 | 6102862 | WBGene00015480 | C05D10.4 | C05D10.4 | 0.0855291517113566  |             |
| AGIWUR2123;AGIWUR4314;AGIWUR4703;AGIWUR8809;AGIWUR10254;AGIWUR27781;AGIWUR42360 |    |     |         |         |                |          |          |                     |             |
| CB4856                                                                          | HS | III | 6114482 | 6116331 | WBGene00020549 | nmt-1    | T17E9.2  | 0.0517461288076007  |             |
| AGIWUR27138;AGIWUR31541;AGIWUR41341                                             |    |     |         |         |                |          |          |                     |             |
| CB4856                                                                          | HS | III | 6118627 | 6124055 | WBGene00002201 | kin-18   | T17E9.1  | 0.0760192960327606  |             |
| AGIWUR1170;AGIWUR5256                                                           |    |     |         |         |                |          |          |                     |             |
| CB4856                                                                          | HS | III | 6124184 | 6136276 | WBGene00021534 | mvk-1    | Y42G9A.4 | 0.0287103829136335  |             |
| AGIWUR12699;AGIWUR40028                                                         |    |     |         |         |                |          |          |                     |             |
| CB4856                                                                          | HS | III | 6142123 | 6149590 | WBGene00021535 | wht-7    | Y42G9A.6 | 0.165344313385098   |             |
| AGIWUR12629                                                                     |    |     |         |         |                |          |          |                     |             |
| CB4856                                                                          | HS | III | 6149961 | 6154933 | WBGene00021531 | Y42G9A.1 | Y42G9A.1 | -0.0521340473927179 |             |
| AGIWUR36020                                                                     |    |     |         |         |                |          |          |                     |             |
| CB4856                                                                          | HS | III | 6154844 | 6157758 | WBGene00018340 | anmt-2   | F42A10.3 | -0.170235401150007  |             |
| AGIWUR34997                                                                     |    |     |         |         |                |          |          |                     |             |
| CB4856                                                                          | HS | III | 6159842 | 6164588 | WBGene00003593 | nfm-1    | F42A10.2 | 0.0276589648203176  |             |
| AGIWUR1316;AGIWUR1497;AGIWUR7359;AGIWUR41587                                    |    |     |         |         |                |          |          |                     |             |
| CB4856                                                                          | HS | III | 6164645 | 6171165 | WBGene00023489 | F42A10.9 | F42A10.9 | -0.0267767234151046 |             |
| AGIWUR19772;AGIWUR40858                                                         |    |     |         |         |                |          |          |                     |             |
| CB4856                                                                          | HS | III | 6171147 | 6172800 | WBGene00018341 | F42A10.5 | F42A10.5 | -0.0284275014814268 |             |
| AGIWUR24355;AGIWUR30556                                                         |    |     |         |         |                |          |          |                     |             |
| CB4856                                                                          | HS | III | 6173305 | 6176171 | WBGene00018339 | abcf-3   | F42A10.1 | 0.124143611738287   |             |
| AGIWUR32812                                                                     |    |     |         |         |                |          |          |                     |             |
| CB4856                                                                          | HS | III | 6176148 | 6176861 | WBGene00018342 | F42A10.6 | F42A10.6 | 0.316083953953067   |             |

|                                                                                                             |    |     |         |         |                |                 |                                 |
|-------------------------------------------------------------------------------------------------------------|----|-----|---------|---------|----------------|-----------------|---------------------------------|
| AGIWUR14546                                                                                                 |    |     |         |         |                |                 |                                 |
| CB4856                                                                                                      | HS | III | 6177916 | 6178686 | WBGene00018343 | F42A10.7        | F42A10.7 0.205175950093214      |
| AGIWUR20743;AGIWUR44549                                                                                     |    |     |         |         |                |                 |                                 |
| CB4856                                                                                                      | HS | III | 6181078 | 6183218 | WBGene00003546 | nas-28 F42A10.8 | 0.0940402451084177              |
| AGIWUR10042;AGIWUR38272                                                                                     |    |     |         |         |                |                 |                                 |
| CB4856                                                                                                      | HS | III | 6191110 | 6192081 | WBGene00016012 | C23G10.5        | C23G10.5 0.137148238975524      |
| AGIWUR42032                                                                                                 |    |     |         |         |                |                 |                                 |
| CB4856                                                                                                      | HS | III | 6192116 | 6194580 | WBGene00016013 | C23G10.6        | C23G10.6 -0.0216626693090198    |
| AGIWUR42473                                                                                                 |    |     |         |         |                |                 |                                 |
| CB4856                                                                                                      | HS | III | 6195984 | 6198414 | WBGene00016014 | C23G10.7        | C23G10.7 -0.139714760224307     |
| AGIWUR1598;AGIWUR10377;AGIWUR17777;AGIWUR19282                                                              |    |     |         |         |                |                 |                                 |
| CB4856                                                                                                      | HS | III | 6198902 | 6202594 | WBGene00004459 | rpn-2 C23G10.4  | -0.294089797057602              |
| AGIWUR2174;AGIWUR13729;AGIWUR23688;AGIWUR24196;AGIWUR24746;AGIWUR38535;AGIWUR43344                          |    |     |         |         |                |                 |                                 |
| CB4856                                                                                                      | HS | III | 6202619 | 6206211 | WBGene00016015 | C23G10.8        | C23G10.8 0.135848359932567      |
| AGIWUR39422                                                                                                 |    |     |         |         |                |                 |                                 |
| CB4856                                                                                                      | HS | III | 6206803 | 6207971 | WBGene00004472 | rps-3 C23G10.3  | 0.132443900193357               |
| AGIWUR7661;AGIWUR40667                                                                                      |    |     |         |         |                |                 |                                 |
| CB4856                                                                                                      | HS | III | 6208064 | 6209140 | WBGene00016011 | C23G10.2        | C23G10.2 0.259362937374524      |
| AGIWUR31032                                                                                                 |    |     |         |         |                |                 |                                 |
| CB4856                                                                                                      | HS | III | 6209284 | 6212904 | WBGene00016010 | C23G10.1        | C23G10.1 0.180118043979421      |
| AGIWUR19899                                                                                                 |    |     |         |         |                |                 |                                 |
| CB4856                                                                                                      | HS | III | 6213112 | 6213923 | WBGene00016016 | C23G10.10       | C23G10.10 -0.0183436043596128   |
| AGIWUR15153                                                                                                 |    |     |         |         |                |                 |                                 |
| CB4856                                                                                                      | HS | III | 6215164 | 6215576 | WBGene00016017 | C23G10.11       | C23G10.11 -0.396876230503905    |
| AGIWUR44734                                                                                                 |    |     |         |         |                |                 |                                 |
| CB4856                                                                                                      | HS | III | 6220537 | 6224451 | WBGene00001989 | hot-4 T12A2.16  | 0.0564912435921574              |
| AGIWUR4554;AGIWUR11038;AGIWUR14225;AGIWUR34548;AGIWUR41379                                                  |    |     |         |         |                |                 |                                 |
| CB4856                                                                                                      | HS | III | 6224491 | 6229403 | WBGene00020443 | esyt-2 T12A2.15 | 0.050220127865872               |
| AGIWUR11091;AGIWUR17234;AGIWUR18813;AGIWUR22069;AGIWUR27544                                                 |    |     |         |         |                |                 |                                 |
| CB4856                                                                                                      | HS | III | 6233718 | 6239336 | WBGene00020439 | T12A2.5 T12A2.5 | -0.0960423625180606 AGIWUR41851 |
| CB4856                                                                                                      | HS | III | 6240775 | 6241581 | WBGene00020438 | T12A2.3 T12A2.3 | -0.306800291457408              |
| AGIWUR17752;AGIWUR29138;AGIWUR37203;AGIWUR43278                                                             |    |     |         |         |                |                 |                                 |
| CB4856                                                                                                      | HS | III | 6241850 | 6244383 | WBGene00020440 | T12A2.6 T12A2.6 | -0.169000513188733              |
| AGIWUR10318;AGIWUR21837;AGIWUR24481                                                                         |    |     |         |         |                |                 |                                 |
| CB4856                                                                                                      | HS | III | 6244672 | 6246039 | WBGene00020441 | T12A2.7 T12A2.7 | -0.190112001428437 AGIWUR27093  |
| CB4856                                                                                                      | HS | III | 6245932 | 6248234 | WBGene00020442 | gen-1 T12A2.8   | 0.101228245529425               |
| AGIWUR5759;AGIWUR14650;AGIWUR23445                                                                          |    |     |         |         |                |                 |                                 |
| CB4856                                                                                                      | HS | III | 6248317 | 6251607 | WBGene00020437 | stt-3 T12A2.2   | -0.0135525243898558             |
| AGIWUR3513;AGIWUR9746;AGIWUR13447;AGIWUR19992;AGIWUR22561;AGIWUR28326;AGIWUR35902;AGIWUR38028;AGIWUR39066;A |    |     |         |         |                |                 |                                 |

|                                                                                                                                                |    |     |         |         |                |          |          |                     |                     |
|------------------------------------------------------------------------------------------------------------------------------------------------|----|-----|---------|---------|----------------|----------|----------|---------------------|---------------------|
| GIWUR41574                                                                                                                                     |    |     |         |         |                |          |          |                     |                     |
| CB4856                                                                                                                                         | HS | III | 6251811 | 6271282 | WBGene00020436 | T12A2.1  | T12A2.1  | 0.00448241476761169 | AGIWUR4320          |
| CB4856                                                                                                                                         | HS | III | 6271561 | 6272959 | WBGene00015979 | C18F10.9 |          | C18F10.9            | 0.0167615978060827  |
| AGIWUR9386                                                                                                                                     |    |     |         |         |                |          |          |                     |                     |
| CB4856                                                                                                                                         | HS | III | 6273160 | 6276016 | WBGene00015977 | C18F10.2 |          | C18F10.2            | -0.022100362908275  |
| AGIWUR41470                                                                                                                                    |    |     |         |         |                |          |          |                     |                     |
| CB4856                                                                                                                                         | HS | III | 6276048 | 6278351 | WBGene00015978 | C18F10.7 |          | C18F10.7            | -0.0885500814363684 |
| AGIWUR5641;AGIWUR11223;AGIWUR19375;AGIWUR26373;AGIWUR27221;AGIWUR27295;AGIWUR29666;AGIWUR29857;AGIWUR30170;AGIWUR32153;AGIWUR36457;AGIWUR40713 |    |     |         |         |                |          |          |                     |                     |
| CB4856                                                                                                                                         | HS | III | 6280380 | 6282411 | WBGene00001972 | hmg-1.2  | F47D12.4 |                     | -0.0561743388934905 |
| AGIWUR26400;AGIWUR26979                                                                                                                        |    |     |         |         |                |          |          |                     |                     |
| CB4856                                                                                                                                         | HS | III | 6282444 | 6286231 | WBGene00018561 | gadr-3   | F47D12.5 |                     | -0.0680777301407831 |
| AGIWUR26317                                                                                                                                    |    |     |         |         |                |          |          |                     |                     |
| CB4856                                                                                                                                         | HS | III | 6286629 | 6287293 | WBGene00018562 | F47D12.6 |          | F47D12.6            | 0.137752380031081   |
| AGIWUR17571                                                                                                                                    |    |     |         |         |                |          |          |                     |                     |
| CB4856                                                                                                                                         | HS | III | 6293247 | 6296022 | WBGene00018563 | F47D12.7 |          | F47D12.7            | -0.154496214317046  |
| AGIWUR28697                                                                                                                                    |    |     |         |         |                |          |          |                     |                     |
| CB4856                                                                                                                                         | HS | III | 6298461 | 6299338 | WBGene00018560 | F47D12.3 |          | F47D12.3            | -0.0366531702441861 |
| AGIWUR29555                                                                                                                                    |    |     |         |         |                |          |          |                     |                     |
| CB4856                                                                                                                                         | HS | III | 6299331 | 6303217 | WBGene00018564 | F47D12.9 |          | F47D12.9            | -0.196994992828575  |
| AGIWUR6888;AGIWUR10228;AGIWUR20703;AGIWUR25146;AGIWUR30129;AGIWUR30161                                                                         |    |     |         |         |                |          |          |                     |                     |
| CB4856                                                                                                                                         | HS | III | 6309378 | 6320872 | WBGene00001518 | gar-2    | F47D12.1 |                     | 0.139911249888252   |
| AGIWUR3654;AGIWUR4396;AGIWUR18671;AGIWUR18967;AGIWUR29649;AGIWUR38247;AGIWUR38822                                                              |    |     |         |         |                |          |          |                     |                     |
| CB4856                                                                                                                                         | HS | III | 6321176 | 6324239 | WBGene00016980 | C56G2.5  | C56G2.5  | -0.0181849183703138 |                     |
| AGIWUR2514;AGIWUR14213;AGIWUR15494;AGIWUR37144;AGIWUR40562;AGIWUR43714                                                                         |    |     |         |         |                |          |          |                     |                     |
| CB4856                                                                                                                                         | HS | III | 6331732 | 6335829 | WBGene00016979 | C56G2.4  | C56G2.4  | 0.130635071828811   | AGIWUR28406         |
| CB4856                                                                                                                                         | HS | III | 6338508 | 6340228 | WBGene00002891 | let-767  | C56G2.6  | 0.324794927793823   |                     |
| AGIWUR23719;AGIWUR39408                                                                                                                        |    |     |         |         |                |          |          |                     |                     |
| CB4856                                                                                                                                         | HS | III | 6342481 | 6343287 | WBGene00016982 | C56G2.9  | C56G2.9  | 0.0875189260205449  | AGIWUR27081         |
| CB4856                                                                                                                                         | HS | III | 6346285 | 6348121 | WBGene00016978 | C56G2.3  | C56G2.3  | -0.104541303261872  | AGIWUR7248          |
| CB4856                                                                                                                                         | HS | III | 6353384 | 6366660 | WBGene00016977 | akap-1   | C56G2.1  | -0.110523261114654  |                     |
| AGIWUR630;AGIWUR2907;AGIWUR8486;AGIWUR8983;AGIWUR15005;AGIWUR20081;AGIWUR29898;AGIWUR38741                                                     |    |     |         |         |                |          |          |                     |                     |
| CB4856                                                                                                                                         | HS | III | 6366582 | 6367899 | WBGene00016983 | C56G2.15 |          | C56G2.15            | 0.0727575714942734  |
| AGIWUR37593                                                                                                                                    |    |     |         |         |                |          |          |                     |                     |
| CB4856                                                                                                                                         | HS | III | 6368042 | 6373904 | WBGene00015813 | thoc-2   | C16A3.8  | 0.0529535833357269  | AGIWUR35223         |
| CB4856                                                                                                                                         | HS | III | 6374048 | 6374997 | WBGene00004482 | rps-13   | C16A3.9  | -0.097657223674112  |                     |
| AGIWUR19240;AGIWUR42951                                                                                                                        |    |     |         |         |                |          |          |                     |                     |
| CB4856                                                                                                                                         | HS | III | 6375379 | 6379190 | WBGene00007048 | nfx-1    | C16A3.7  | -0.0437532440611843 | AGIWUR32264         |
| CB4856                                                                                                                                         | HS | III | 6379449 | 6380671 | WBGene00015811 | C16A3.6  | C16A3.6  | 0.0470950427731864  |                     |

AGIWUR10740;AGIWUR41642

|        |    |     |         |         |                |         |         |                    |             |
|--------|----|-----|---------|---------|----------------|---------|---------|--------------------|-------------|
| CB4856 | HS | III | 6380695 | 6381517 | WBGene00015810 | C16A3.5 | C16A3.5 | 0.0813806411067493 | AGIWUR18873 |
| CB4856 | HS | III | 6381634 | 6383024 | WBGene00015809 | C16A3.4 | C16A3.4 | 0.0320727657021642 | AGIWUR8037  |
| CB4856 | HS | III | 6383552 | 6389401 | WBGene00002850 | let-716 | C16A3.3 | 0.227445918160862  | AGIWUR5062  |
| CB4856 | HS | III | 6389833 | 6390841 | WBGene00015807 | C16A3.2 | C16A3.2 | 0.0509527591990349 | AGIWUR37881 |
| CB4856 | HS | III | 6390946 | 6393843 | WBGene00015806 | smrc-1  | C16A3.1 | 0.153961952807951  |             |

AGIWUR10053;AGIWUR20541;AGIWUR34378

|        |    |     |         |         |                |        |          |                    |  |
|--------|----|-----|---------|---------|----------------|--------|----------|--------------------|--|
| CB4856 | HS | III | 6394223 | 6396182 | WBGene00015814 | oatr-1 | C16A3.10 | 0.0197306094979197 |  |
|--------|----|-----|---------|---------|----------------|--------|----------|--------------------|--|

AGIWUR29129;AGIWUR41871;AGIWUR42636

|        |    |     |         |         |                |         |          |                     |  |
|--------|----|-----|---------|---------|----------------|---------|----------|---------------------|--|
| CB4856 | HS | III | 6407129 | 6410018 | WBGene00002881 | let-756 | C05D11.4 | -0.0380449725543652 |  |
|--------|----|-----|---------|---------|----------------|---------|----------|---------------------|--|

AGIWUR36676;AGIWUR40092;AGIWUR44667

|        |    |     |         |         |                |          |          |                   |  |
|--------|----|-----|---------|---------|----------------|----------|----------|-------------------|--|
| CB4856 | HS | III | 6410033 | 6412014 | WBGene00015483 | C05D11.5 | C05D11.5 | 0.232798243660312 |  |
|--------|----|-----|---------|---------|----------------|----------|----------|-------------------|--|

AGIWUR25683;AGIWUR32018;AGIWUR33469;AGIWUR36116

|        |    |     |         |         |                |       |          |                    |  |
|--------|----|-----|---------|---------|----------------|-------|----------|--------------------|--|
| CB4856 | HS | III | 6411816 | 6414993 | WBGene00003523 | nas-4 | C05D11.6 | -0.150818489837091 |  |
|--------|----|-----|---------|---------|----------------|-------|----------|--------------------|--|

AGIWUR26546;AGIWUR27915;AGIWUR35771

|        |    |     |         |         |                |        |          |                    |  |
|--------|----|-----|---------|---------|----------------|--------|----------|--------------------|--|
| CB4856 | HS | III | 6415774 | 6421885 | WBGene00015484 | atgl-1 | C05D11.7 | -0.161775259410874 |  |
|--------|----|-----|---------|---------|----------------|--------|----------|--------------------|--|

AGIWUR16740;AGIWUR21361;AGIWUR28752

|        |    |     |         |         |                |          |          |                     |  |
|--------|----|-----|---------|---------|----------------|----------|----------|---------------------|--|
| CB4856 | HS | III | 6422459 | 6427305 | WBGene00015485 | C05D11.8 | C05D11.8 | -0.0863212337312751 |  |
|--------|----|-----|---------|---------|----------------|----------|----------|---------------------|--|

AGIWUR13966

|        |    |     |         |         |                |          |          |                   |  |
|--------|----|-----|---------|---------|----------------|----------|----------|-------------------|--|
| CB4856 | HS | III | 6427529 | 6430934 | WBGene00015486 | C05D11.9 | C05D11.9 | 0.218857912230593 |  |
|--------|----|-----|---------|---------|----------------|----------|----------|-------------------|--|

AGIWUR7701

|        |    |     |         |         |                |         |           |                     |  |
|--------|----|-----|---------|---------|----------------|---------|-----------|---------------------|--|
| CB4856 | HS | III | 6431153 | 6431792 | WBGene00015487 | mrps-17 | C05D11.10 | -0.0216172804629196 |  |
|--------|----|-----|---------|---------|----------------|---------|-----------|---------------------|--|

AGIWUR30900

|        |    |     |         |         |                |        |          |                    |  |
|--------|----|-----|---------|---------|----------------|--------|----------|--------------------|--|
| CB4856 | HS | III | 6432178 | 6433145 | WBGene00006515 | txdc-9 | C05D11.3 | 0.0720449391233053 |  |
|--------|----|-----|---------|---------|----------------|--------|----------|--------------------|--|

AGIWUR13727

|        |    |     |         |         |                |        |          |                   |  |
|--------|----|-----|---------|---------|----------------|--------|----------|-------------------|--|
| CB4856 | HS | III | 6433239 | 6436502 | WBGene00006516 | vps-16 | C05D11.2 | 0.106182976048458 |  |
|--------|----|-----|---------|---------|----------------|--------|----------|-------------------|--|

AGIWUR12562

|        |    |     |         |         |                |          |          |                     |  |
|--------|----|-----|---------|---------|----------------|----------|----------|---------------------|--|
| CB4856 | HS | III | 6436608 | 6439959 | WBGene00015481 | C05D11.1 | C05D11.1 | -0.0851665532633801 |  |
|--------|----|-----|---------|---------|----------------|----------|----------|---------------------|--|

AGIWUR20542;AGIWUR28535

|        |    |     |         |         |                |        |           |                     |  |
|--------|----|-----|---------|---------|----------------|--------|-----------|---------------------|--|
| CB4856 | HS | III | 6440145 | 6443000 | WBGene00003214 | mel-32 | C05D11.11 | -0.0563936194943073 |  |
|--------|----|-----|---------|---------|----------------|--------|-----------|---------------------|--|

AGIWUR4122;AGIWUR20891;AGIWUR29394;AGIWUR41655

|        |    |     |         |         |                |           |           |                   |  |
|--------|----|-----|---------|---------|----------------|-----------|-----------|-------------------|--|
| CB4856 | HS | III | 6443044 | 6444079 | WBGene00015488 | C05D11.13 | C05D11.13 | 0.112868410997244 |  |
|--------|----|-----|---------|---------|----------------|-----------|-----------|-------------------|--|

AGIWUR6024

|        |    |     |         |         |                |         |           |                    |  |
|--------|----|-----|---------|---------|----------------|---------|-----------|--------------------|--|
| CB4856 | HS | III | 6444693 | 6446943 | WBGene00002855 | let-721 | C05D11.12 | 0.0377504595646876 |  |
|--------|----|-----|---------|---------|----------------|---------|-----------|--------------------|--|

AGIWUR6107;AGIWUR19355;AGIWUR41545

|        |    |     |         |         |                |         |         |                    |             |
|--------|----|-----|---------|---------|----------------|---------|---------|--------------------|-------------|
| CB4856 | HS | III | 6448075 | 6450696 | WBGene00020822 | T26A5.6 | T26A5.6 | -0.348437111587568 | AGIWUR16995 |
|--------|----|-----|---------|---------|----------------|---------|---------|--------------------|-------------|

|        |    |     |         |         |                |        |         |                     |  |
|--------|----|-----|---------|---------|----------------|--------|---------|---------------------|--|
| CB4856 | HS | III | 6454483 | 6460014 | WBGene00020821 | jhdm-1 | T26A5.5 | -0.0725265605932872 |  |
|--------|----|-----|---------|---------|----------------|--------|---------|---------------------|--|

AGIWUR22295;AGIWUR37371

|        |    |     |         |         |                |        |         |                   |             |
|--------|----|-----|---------|---------|----------------|--------|---------|-------------------|-------------|
| CB4856 | HS | III | 6460120 | 6462222 | WBGene00020820 | algn-1 | T26A5.4 | 0.113872571315792 | AGIWUR10349 |
|--------|----|-----|---------|---------|----------------|--------|---------|-------------------|-------------|

|                                                 |    |     |         |         |                |           |           |                      |             |
|-------------------------------------------------|----|-----|---------|---------|----------------|-----------|-----------|----------------------|-------------|
| CB4856                                          | HS | III | 6462216 | 6462856 | WBGene00020823 | T26A5.8   | T26A5.8   | -0.343726137649686   | AGIWUR29912 |
| CB4856                                          | HS | III | 6462907 | 6463801 | WBGene00001005 | d1c-1     | T26A5.9   | 0.0625476976691157   |             |
| AGIWUR2065;AGIWUR7456;AGIWUR14904;AGIWUR27849   |    |     |         |         |                |           |           |                      |             |
| CB4856                                          | HS | III | 6465157 | 6467208 | WBGene00006463 | nduf-2.2  | T26A5.3   | -0.239515402824804   |             |
| AGIWUR33657                                     |    |     |         |         |                |           |           |                      |             |
| CB4856                                          | HS | III | 6467382 | 6471510 | WBGene00020819 | T26A5.2   | T26A5.2   | 0.106957936317034    | AGIWUR11165 |
| CB4856                                          | HS | III | 6471720 | 6475246 | WBGene00007060 | wht-6     | T26A5.1   | 0.0145426728756703   | AGIWUR31046 |
| CB4856                                          | HS | III | 6478961 | 6481226 | WBGene00017755 | zip-8     | F23F12.9  | -0.570271853256067   |             |
| AGIWUR18229;AGIWUR25746                         |    |     |         |         |                |           |           |                      |             |
| CB4856                                          | HS | III | 6483218 | 6488875 | WBGene00017754 | F23F12.8  | F23F12.8  | -0.0378936858138514  |             |
| AGIWUR7260;AGIWUR7807;AGIWUR20366               |    |     |         |         |                |           |           |                      |             |
| CB4856                                          | HS | III | 6489793 | 6491282 | WBGene00004503 | rpt-3     | F23F12.6  | -0.00875420325412435 |             |
| AGIWUR5122;AGIWUR30499;AGIWUR41391              |    |     |         |         |                |           |           |                      |             |
| CB4856                                          | HS | III | 6491368 | 6492907 | WBGene00005076 | srb-11    | F23F12.10 | 0.0617067661264024   |             |
| AGIWUR30246                                     |    |     |         |         |                |           |           |                      |             |
| CB4856                                          | HS | III | 6493553 | 6494781 | WBGene00005075 | srb-10    | F23F12.11 | 0.0956459142730717   |             |
| AGIWUR24014                                     |    |     |         |         |                |           |           |                      |             |
| CB4856                                          | HS | III | 6495677 | 6498198 | WBGene00044455 | F23F12.13 | F23F12.13 |                      |             |
| -0.00674942416627333 AGIWUR33864;AGIWUR45117    |    |     |         |         |                |           |           |                      |             |
| CB4856                                          | HS | III | 6498476 | 6500023 | WBGene00017752 | sdz-15    | F23F12.4  | -0.186738746372962   |             |
| AGIWUR867;AGIWUR22937;AGIWUR25799               |    |     |         |         |                |           |           |                      |             |
| CB4856                                          | HS | III | 6500514 | 6507717 | WBGene00017751 | F23F12.3  | F23F12.3  | -0.0333511849522514  |             |
| AGIWUR12746;AGIWUR22390;AGIWUR33264;AGIWUR43307 |    |     |         |         |                |           |           |                      |             |
| CB4856                                          | HS | III | 6508132 | 6509499 | WBGene00017756 | F23F12.12 | F23F12.12 | 0.167617730029097    |             |
| AGIWUR24827                                     |    |     |         |         |                |           |           |                      |             |
| CB4856                                          | HS | III | 6509699 | 6514768 | WBGene00000044 | acr-5     | K03F8.2   | 0.0264764555165531   |             |
| AGIWUR945;AGIWUR2385;AGIWUR14698;AGIWUR31814    |    |     |         |         |                |           |           |                      |             |
| CB4856                                          | HS | III | 6518714 | 6520049 | WBGene00044295 | C09E7.10  | C09E7.10  | 0.0365703394205097   |             |
| AGIWUR9196;AGIWUR10502;AGIWUR25243              |    |     |         |         |                |           |           |                      |             |
| CB4856                                          | HS | III | 6524051 | 6525660 | WBGene00003859 | oig-1     | C09E7.3   | 0.127614811709542    | AGIWUR44575 |
| CB4856                                          | HS | III | 6528202 | 6532088 | WBGene00004102 | pqn-10    | C09E7.2   | -0.229876220994852   | AGIWUR41366 |
| CB4856                                          | HS | III | 6532560 | 6533819 | WBGene00015637 | srxa-5    | C09E7.1   | 0.00397390041897872  | AGIWUR26008 |
| CB4856                                          | HS | III | 6534467 | 6536995 | WBGene00015638 | C09E7.4   | C09E7.4   | -0.229265650486886   | AGIWUR8849  |
| CB4856                                          | HS | III | 6538101 | 6541312 | WBGene00015639 | C09E7.5   | C09E7.5   | 0.21948395925202     | AGIWUR9379  |
| CB4856                                          | HS | III | 6541550 | 6546425 | WBGene00015640 | C09E7.6   | C09E7.6   | -0.218569934736978   |             |
| AGIWUR1061;AGIWUR30995                          |    |     |         |         |                |           |           |                      |             |
| CB4856                                          | HS | III | 6553575 | 6558575 | WBGene00015642 | C09E7.8   | C09E7.8   | 0.110940273391549    | AGIWUR2078  |
| CB4856                                          | HS | III | 6559097 | 6563666 | WBGene00017849 | F27B3.7   | F27B3.7   | 0.0705838476624034   | AGIWUR40502 |
| CB4856                                          | HS | III | 6577827 | 6578584 | WBGene00017848 | F27B3.6   | F27B3.6   | -0.247642940212808   | AGIWUR29969 |



|                                                                       |    |     |         |         |                |           |           |                     |             |
|-----------------------------------------------------------------------|----|-----|---------|---------|----------------|-----------|-----------|---------------------|-------------|
| CB4856                                                                | HS | III | 6579698 | 6579877 | WBGene00044454 | F27B3.8   | F27B3.8   | -0.17580502853306   | AGIWUR13094 |
| CB4856                                                                | HS | III | 6583461 | 6585617 | WBGene00000060 | acr-21    | F27B3.2   | -0.120349606079259  | AGIWUR28720 |
| CB4856                                                                | HS | III | 6587864 | 6589398 | WBGene00017648 | ddo-3     | F20H11.5  | 0.064849902514986   |             |
| AGIWUR24363;AGIWUR41686                                               |    |     |         |         |                |           |           |                     |             |
| CB4856                                                                | HS | III | 6589377 | 6592175 | WBGene00017646 | F20H11.1  | F20H11.1  | 0.226835362934125   |             |
| AGIWUR29171                                                           |    |     |         |         |                |           |           |                     |             |
| CB4856                                                                | HS | III | 6592567 | 6601171 | WBGene00002889 | let-765   | F20H11.2  | -0.392905156980477  |             |
| AGIWUR17640;AGIWUR25140;AGIWUR27253;AGIWUR43209                       |    |     |         |         |                |           |           |                     |             |
| CB4856                                                                | HS | III | 6606247 | 6608106 | WBGene00003162 | mdh-2     | F20H11.3  | 0.0940425721730769  |             |
| AGIWUR5742;AGIWUR9105;AGIWUR11499;AGIWUR32191;AGIWUR32225;AGIWUR43317 |    |     |         |         |                |           |           |                     |             |
| CB4856                                                                | HS | III | 6608622 | 6610455 | WBGene00017647 | F20H11.4  | F20H11.4  | 0.0376925211846206  |             |
| AGIWUR25769                                                           |    |     |         |         |                |           |           |                     |             |
| CB4856                                                                | HS | III | 6610822 | 6612263 | WBGene00005263 | srh-40    | Y40D12A.3 | -0.0236889598752779 |             |
| AGIWUR28492                                                           |    |     |         |         |                |           |           |                     |             |
| CB4856                                                                | HS | III | 6612516 | 6615134 | WBGene00021503 | ctsa-2    | Y40D12A.2 | 0.384123948623623   |             |
| AGIWUR11341                                                           |    |     |         |         |                |           |           |                     |             |
| CB4856                                                                | HS | III | 6615414 | 6620051 | WBGene00021502 | Y40D12A.1 | Y40D12A.1 | -0.0963777918234534 |             |
| AGIWUR14140;AGIWUR35368;AGIWUR38777                                   |    |     |         |         |                |           |           |                     |             |
| CB4856                                                                | HS | III | 6620254 | 6622265 | WBGene00015733 | C13B9.2   | C13B9.2   | 0.115141339695402   | AGIWUR32233 |
| CB4856                                                                | HS | III | 6622676 | 6624972 | WBGene00015734 | copd-1    | C13B9.3   | -0.0704407998147261 | AGIWUR24038 |
| CB4856                                                                | HS | III | 6632841 | 6652083 | WBGene00015735 | pdf-1     | C13B9.4   | 0.179568729072845   |             |
| AGIWUR2877;AGIWUR3657;AGIWUR9278;AGIWUR12756;AGIWUR39212              |    |     |         |         |                |           |           |                     |             |
| CB4856                                                                | HS | III | 6664960 | 6665374 | WBGene00019714 | M01G4.1   | M01G4.1   | -0.0950914302742838 | AGIWUR17124 |
| CB4856                                                                | HS | III | 6675801 | 6703974 | WBGene00004316 | rbf-1     | F37A4.7   | 0.293908911834823   |             |
| AGIWUR809;AGIWUR10220;AGIWUR21533;AGIWUR33340;AGIWUR35132             |    |     |         |         |                |           |           |                     |             |
| CB4856                                                                | HS | III | 6703993 | 6710084 | WBGene00002169 | isw-1     | F37A4.8   | -0.107900711973869  |             |
| AGIWUR21624;AGIWUR25898;AGIWUR35837;AGIWUR38143                       |    |     |         |         |                |           |           |                     |             |
| CB4856                                                                | HS | III | 6711869 | 6713191 | WBGene00018135 | F37A4.5   | F37A4.5   | -0.225525304273114  | AGIWUR10785 |
| CB4856                                                                | HS | III | 6713583 | 6718022 | WBGene00018134 | F37A4.4   | F37A4.4   | 0.0386867073509691  | AGIWUR38765 |
| CB4856                                                                | HS | III | 6718570 | 6720487 | WBGene00018133 | F37A4.3   | F37A4.3   | 0.135662730106683   | AGIWUR28310 |
| CB4856                                                                | HS | III | 6720415 | 6722258 | WBGene00018137 | bath-41   | F37A4.9   | -0.0215685433377413 | AGIWUR38646 |
| CB4856                                                                | HS | III | 6722454 | 6723284 | WBGene00018132 | F37A4.2   | F37A4.2   | 0.101959767032261   | AGIWUR15914 |
| CB4856                                                                | HS | III | 6723389 | 6725711 | WBGene00018131 | F37A4.1   | F37A4.1   | -0.0281838042143185 | AGIWUR31813 |
| CB4856                                                                | HS | III | 6725789 | 6728058 | WBGene00022420 | wdr-4     | Y102E9.2  | -0.266828345141054  |             |
| AGIWUR29143                                                           |    |     |         |         |                |           |           |                     |             |
| CB4856                                                                | HS | III | 6728155 | 6730170 | WBGene00044452 | Y102E9.5  | Y102E9.5  | 0.156631395818353   |             |
| AGIWUR3681;AGIWUR14452                                                |    |     |         |         |                |           |           |                     |             |
| CB4856                                                                | HS | III | 6730781 | 6733935 | WBGene00003851 | odr-4     | Y102E9.1  | 0.00304279498874394 |             |
| AGIWUR7032;AGIWUR24539;AGIWUR26097;AGIWUR33738                        |    |     |         |         |                |           |           |                     |             |

|                                                                                                             |     |         |         |                |          |          |                     |             |
|-------------------------------------------------------------------------------------------------------------|-----|---------|---------|----------------|----------|----------|---------------------|-------------|
| CB4856 HS                                                                                                   | III | 6733992 | 6734520 | WBGene00022421 | Y102E9.3 | Y102E9.3 | -0.294938297047839  |             |
| AGIWUR36461                                                                                                 |     |         |         |                |          |          |                     |             |
| CB4856 HS                                                                                                   | III | 6735968 | 6736642 | WBGene00044453 | Y102E9.6 | Y102E9.6 | -0.181183336237117  |             |
| AGIWUR2619;AGIWUR10795;AGIWUR16286;AGIWUR21903;AGIWUR28604                                                  |     |         |         |                |          |          |                     |             |
| CB4856 HS                                                                                                   | III | 6737271 | 6737783 | WBGene00019501 | K07E12.2 | K07E12.2 | 0.0299202694468637  |             |
| AGIWUR36836                                                                                                 |     |         |         |                |          |          |                     |             |
| CB4856 HS                                                                                                   | III | 6746308 | 6794764 | WBGene00000998 | dig-1    | K07E12.1 | -0.0727243309198791 |             |
| AGIWUR27360                                                                                                 |     |         |         |                |          |          |                     |             |
| CB4856 HS                                                                                                   | III | 6795626 | 6797774 | WBGene00019907 | R05H11.1 | R05H11.1 | -0.0206894219777092 |             |
| AGIWUR12904;AGIWUR43298                                                                                     |     |         |         |                |          |          |                     |             |
| CB4856 HS                                                                                                   | III | 6798299 | 6800489 | WBGene00019908 | R05H11.2 | R05H11.2 | -0.180848077737895  |             |
| AGIWUR9915                                                                                                  |     |         |         |                |          |          |                     |             |
| CB4856 HS                                                                                                   | III | 6802788 | 6816132 | WBGene00017904 | lim-8    | F28F5.3  | -0.0495451557174897 |             |
| AGIWUR16870;AGIWUR44041                                                                                     |     |         |         |                |          |          |                     |             |
| CB4856 HS                                                                                                   | III | 6816643 | 6816880 | WBGene00043297 | F28F5.4  | F28F5.4  | -0.0867931941979765 |             |
| AGIWUR16112;AGIWUR20630;AGIWUR25870;AGIWUR27417;AGIWUR29321;AGIWUR35286                                     |     |         |         |                |          |          |                     |             |
| CB4856 HS                                                                                                   | III | 6817316 | 6819372 | WBGene00017905 | F28F5.6  | F28F5.6  | 0.10851556829526    | AGIWUR24831 |
| CB4856 HS                                                                                                   | III | 6820935 | 6847283 | WBGene00006498 | ten-1    | R13F6.4  | -0.0771913455929365 |             |
| AGIWUR35629;AGIWUR38757;AGIWUR41531                                                                         |     |         |         |                |          |          |                     |             |
| CB4856 HS                                                                                                   | III | 6847390 | 6849055 | WBGene00020066 | dhhc-5   | R13F6.5  | 0.255772639708296   | AGIWUR6886  |
| CB4856 HS                                                                                                   | III | 6851254 | 6853130 | WBGene00005712 | srv-1    | R13F6.3  | -0.108643927263913  | AGIWUR24472 |
| CB4856 HS                                                                                                   | III | 6853113 | 6856804 | WBGene00006971 | zak-1    | R13F6.6  | -0.145954384664446  | AGIWUR29484 |
| CB4856 HS                                                                                                   | III | 6858793 | 6859571 | WBGene00020067 | clcc-158 | R13F6.8  | -0.213258360092472  |             |
| AGIWUR19949;AGIWUR39355                                                                                     |     |         |         |                |          |          |                     |             |
| CB4856 HS                                                                                                   | III | 6859863 | 6860786 | WBGene00020065 | clcc-159 | R13F6.2  | -0.0725490294454056 |             |
| AGIWUR5341                                                                                                  |     |         |         |                |          |          |                     |             |
| CB4856 HS                                                                                                   | III | 6860939 | 6863968 | WBGene00004857 | sma-3    | R13F6.9  | 0.176410055983226   | AGIWUR29198 |
| CB4856 HS                                                                                                   | III | 6865207 | 6869460 | WBGene00020068 | cra-1    | R13F6.10 | 0.13319130387835    |             |
| AGIWUR6115                                                                                                  |     |         |         |                |          |          |                     |             |
| CB4856 HS                                                                                                   | III | 6869634 | 6870298 | WBGene00020064 | kbp-1    | R13F6.1  | -0.173594730527807  | AGIWUR9178  |
| CB4856 HS                                                                                                   | III | 6870296 | 6871171 | WBGene00044312 | K04C2.8  | K04C2.8  | 0.054379718967434   |             |
| AGIWUR8796;AGIWUR11686;AGIWUR12275;AGIWUR21315;AGIWUR28990;AGIWUR41699;AGIWUR44588                          |     |         |         |                |          |          |                     |             |
| CB4856 HS                                                                                                   | III | 6873048 | 6873729 | WBGene00019381 | K04C2.3  | K04C2.3  | 0.0218502597165475  |             |
| AGIWUR13400;AGIWUR14947;AGIWUR25514;AGIWUR26287;AGIWUR31355;AGIWUR34016;AGIWUR34276;AGIWUR34672;AGIWUR40758 |     |         |         |                |          |          |                     |             |
| CB4856 HS                                                                                                   | III | 6880947 | 6883853 | WBGene00044311 | K04C2.7  | K04C2.7  | -0.0262860679830235 |             |
| AGIWUR7543;AGIWUR16799;AGIWUR39321                                                                          |     |         |         |                |          |          |                     |             |
| CB4856 HS                                                                                                   | III | 6885204 | 6889523 | WBGene00000265 | brd-1    | K04C2.4  | 0.154126944070722   | AGIWUR29695 |
| CB4856 HS                                                                                                   | III | 6889749 | 6895089 | WBGene00019380 | K04C2.2  | K04C2.2  | 0.200967121257943   | AGIWUR9457  |
| CB4856 HS                                                                                                   | III | 6898016 | 6900605 | WBGene00020315 | T07E3.4  | T07E3.4  | -0.252582889785986  | AGIWUR17150 |

|                                                                                                           |    |     |         |         |                |          |          |                      |             |
|-----------------------------------------------------------------------------------------------------------|----|-----|---------|---------|----------------|----------|----------|----------------------|-------------|
| CB4856                                                                                                    | HS | III | 6900568 | 6903106 | WBGene00020316 | brc-2    | T07E3.5  | -0.166255812999935   | AGIWUR23409 |
| CB4856                                                                                                    | HS | III | 6903895 | 6905170 | WBGene00020314 | T07E3.3  | T07E3.3  | 0.136256401653502    |             |
| AGIWUR6606;AGIWUR7386                                                                                     |    |     |         |         |                |          |          |                      |             |
| CB4856                                                                                                    | HS | III | 6907441 | 6908012 | WBGene00020313 | T07E3.2  | T07E3.2  | 0.0390940371167829   | AGIWUR40870 |
| CB4856                                                                                                    | HS | III | 6909438 | 6912481 | WBGene00020317 | pdf-1    | T07E3.6  | -0.133228046709828   | AGIWUR21194 |
| CB4856                                                                                                    | HS | III | 6924097 | 6928817 | WBGene00018998 | flap-1   | F57B9.7  | 0.148863579127973    | AGIWUR38961 |
| CB4856                                                                                                    | HS | III | 6930039 | 6931953 | WBGene00002083 | inf-1    | F57B9.6  | -0.213311997790228   | AGIWUR32955 |
| CB4856                                                                                                    | HS | III | 6932001 | 6935862 | WBGene00000276 | byn-1    | F57B9.5  | 0.0404606946756196   |             |
| AGIWUR2887;AGIWUR9859;AGIWUR13290                                                                         |    |     |         |         |                |          |          |                      |             |
| CB4856                                                                                                    | HS | III | 6935967 | 6939443 | WBGene00000762 | coq-2    | F57B9.4  | 0.0499698093483509   |             |
| AGIWUR7144;AGIWUR9523;AGIWUR12892;AGIWUR31473;AGIWUR38173;AGIWUR43114                                     |    |     |         |         |                |          |          |                      |             |
| CB4856                                                                                                    | HS | III | 6939888 | 6941736 | WBGene00018997 | F57B9.3  | F57B9.3  | 0.00420894610742462  |             |
| AGIWUR23882;AGIWUR25698;AGIWUR38042                                                                       |    |     |         |         |                |          |          |                      |             |
| CB4856                                                                                                    | HS | III | 6941889 | 6945895 | WBGene00004133 | abu-13   | F57B9.9  | 0.101345947907504    | AGIWUR40209 |
| CB4856                                                                                                    | HS | III | 6946718 | 6958882 | WBGene00002845 | let-711  | F57B9.2  | -0.117061619867268   | AGIWUR10152 |
| CB4856                                                                                                    | HS | III | 6959110 | 6962027 | WBGene00004462 | rpn-6.1  | F57B9.10 | 0.0129127703428509   |             |
| AGIWUR2602;AGIWUR16836;AGIWUR22959                                                                        |    |     |         |         |                |          |          |                      |             |
| CB4856                                                                                                    | HS | III | 6962090 | 6963319 | WBGene00018996 | F57B9.1  | F57B9.1  | 0.0532665302549429   | AGIWUR37456 |
| CB4856                                                                                                    | HS | III | 6963620 | 6968130 | WBGene00017951 | panl-2   | F31E3.4  | 0.064064511688759    | AGIWUR3878  |
| CB4856                                                                                                    | HS | III | 6970026 | 6972003 | WBGene00001168 | eef-1A.1 | F31E3.5  | -0.039173749323659   |             |
| AGIWUR14568;AGIWUR18769;AGIWUR22122;AGIWUR25445;AGIWUR25772;AGIWUR41301;AGIWUR42112                       |    |     |         |         |                |          |          |                      |             |
| CB4856                                                                                                    | HS | III | 6972210 | 6973717 | WBGene00004340 | rfc-4    | F31E3.3  | -0.0752340567963401  | AGIWUR37637 |
| CB4856                                                                                                    | HS | III | 6974338 | 6978025 | WBGene00017950 | F31E3.2  | F31E3.2  | 0.0193865142293248   |             |
| AGIWUR6472;AGIWUR9830;AGIWUR20256;AGIWUR21734;AGIWUR27342;AGIWUR35926;AGIWUR37116;AGIWUR37915;AGIWUR39344 |    |     |         |         |                |          |          |                      |             |
| CB4856                                                                                                    | HS | III | 6979884 | 6981785 | WBGene00000443 | ceh-20   | F31E3.1  | 0.201715782396981    | AGIWUR8244  |
| CB4856                                                                                                    | HS | III | 6990168 | 7002310 | WBGene00004182 | prk-1    | C06E8.3  | -0.085513757013076   |             |
| AGIWUR1009;AGIWUR20404;AGIWUR20919;AGIWUR43839                                                            |    |     |         |         |                |          |          |                      |             |
| CB4856                                                                                                    | HS | III | 7002301 | 7005450 | WBGene00015544 | C06E8.5  | C06E8.5  | -0.161461113526236   | AGIWUR44652 |
| CB4856                                                                                                    | HS | III | 7009136 | 7019574 | WBGene00017389 | lgc-38   | F11H8.2  | -0.00796329106422933 |             |
| AGIWUR127;AGIWUR44935                                                                                     |    |     |         |         |                |          |          |                      |             |
| CB4856                                                                                                    | HS | III | 7019583 | 7020600 | WBGene00000597 | col-8    | F11H8.3  | 0.472162357409346    | AGIWUR25771 |
| CB4856                                                                                                    | HS | III | 7021167 | 7023652 | WBGene00004341 | rfl-1    | F11H8.1  | -0.170843095503109   | AGIWUR25920 |
| CB4856                                                                                                    | HS | III | 7023642 | 7029203 | WBGene00000872 | cyk-1    | F11H8.4  | 0.0266227417975538   |             |
| AGIWUR2929;AGIWUR7188;AGIWUR9447;AGIWUR31305;AGIWUR34755;AGIWUR36247                                      |    |     |         |         |                |          |          |                      |             |
| CB4856                                                                                                    | HS | III | 7035432 | 7045724 | WBGene00023414 | R01H2.7  | R01H2.7  | 0.141733686967745    |             |
| AGIWUR10603;AGIWUR22901;AGIWUR23233;AGIWUR41509                                                           |    |     |         |         |                |          |          |                      |             |
| CB4856                                                                                                    | HS | III | 7056541 | 7058526 | WBGene00019810 | R01H2.2  | R01H2.2  | -0.125901173452814   |             |
| AGIWUR6400;AGIWUR27609;AGIWUR33698                                                                        |    |     |         |         |                |          |          |                      |             |
| CB4856                                                                                                    | HS | III | 7058516 | 7060597 | WBGene00019811 | egg-2    | R01H2.3  | 0.0599013415126937   | AGIWUR39983 |

|                                                            |    |     |         |         |                |          |          |                      |             |
|------------------------------------------------------------|----|-----|---------|---------|----------------|----------|----------|----------------------|-------------|
| CB4856                                                     | HS | III | 7061111 | 7064275 | WBGene00019812 | R01H2.4  | R01H2.4  | -0.0155696076559853  | AGIWUR17584 |
| CB4856                                                     | HS | III | 7065439 | 7067477 | WBGene00019813 | ger-1    | R01H2.5  | -0.186884374584668   |             |
| AGIWUR8609;AGIWUR22100;AGIWUR34387                         |    |     |         |         |                |          |          |                      |             |
| CB4856                                                     | HS | III | 7067686 | 7068570 | WBGene00006713 | ubc-18   | R01H2.6  | -0.149123232439242   |             |
| AGIWUR20704;AGIWUR29116;AGIWUR36145;AGIWUR38951            |    |     |         |         |                |          |          |                      |             |
| CB4856                                                     | HS | III | 7069103 | 7069580 | WBGene00045190 | R01H2.8  | R01H2.8  | 0.000953012965295486 |             |
| AGIWUR613;AGIWUR4684;AGIWUR11900;AGIWUR31809;AGIWUR39639   |    |     |         |         |                |          |          |                      |             |
| CB4856                                                     | HS | III | 7070800 | 7072552 | WBGene00003022 | lin-37   | ZK418.4  | 0.066460983982914    | AGIWUR4353  |
| CB4856                                                     | HS | III | 7072613 | 7073851 | WBGene00022734 | ZK418.5  | ZK418.5  | 0.151555434895753    | AGIWUR5961  |
| CB4856                                                     | HS | III | 7074250 | 7076349 | WBGene00220259 | ZK418.13 | ZK418.13 | 0.105170084404159    |             |
| AGIWUR31633;AGIWUR36398;AGIWUR37087                        |    |     |         |         |                |          |          |                      |             |
| CB4856                                                     | HS | III | 7079077 | 7080789 | WBGene00022736 | ZK418.7  | ZK418.7  | 0.15364757693937     |             |
| AGIWUR15775;AGIWUR28330;AGIWUR32337                        |    |     |         |         |                |          |          |                      |             |
| CB4856                                                     | HS | III | 7083684 | 7085088 | WBGene00022737 | tofu-7   | ZK418.8  | 0.0695658399046231   | AGIWUR1384  |
| CB4856                                                     | HS | III | 7085197 | 7087741 | WBGene00022738 | ZK418.9  | ZK418.9  | -0.109618849193847   |             |
| AGIWUR5350;AGIWUR11967;AGIWUR12779;AGIWUR22635;AGIWUR44900 |    |     |         |         |                |          |          |                      |             |
| CB4856                                                     | HS | III | 7088644 | 7090132 | WBGene00044353 | ZK418.10 | ZK418.10 | 0.186872691381038    |             |
| AGIWUR33945                                                |    |     |         |         |                |          |          |                      |             |
| CB4856                                                     | HS | III | 7091330 | 7093408 | WBGene00022732 | ZK418.2  | ZK418.2  | 0.0593182757146398   |             |
| AGIWUR26774;AGIWUR38970;AGIWUR43419                        |    |     |         |         |                |          |          |                      |             |
| CB4856                                                     | HS | III | 7095553 | 7097079 | WBGene00003608 | nhr-9    | ZK418.1  | 0.0222411126903221   | AGIWUR40203 |
| CB4856                                                     | HS | III | 7100482 | 7102033 | WBGene00044354 | ZK418.11 | ZK418.11 | 0.0759631187673633   |             |
| AGIWUR12692;AGIWUR40894                                    |    |     |         |         |                |          |          |                      |             |
| CB4856                                                     | HS | III | 7102086 | 7103990 | WBGene00015102 | cpg-2    | B0280.5  | -0.0485797105293404  |             |
| AGIWUR14788;AGIWUR26818                                    |    |     |         |         |                |          |          |                      |             |
| CB4856                                                     | HS | III | 7108322 | 7109741 | WBGene00003845 | odd-1    | B0280.4  | 0.363193588864965    | AGIWUR21681 |
| CB4856                                                     | HS | III | 7110302 | 7111893 | WBGene00015103 | B0280.7  | B0280.7  | 0.267515607832614    | AGIWUR8179  |
| CB4856                                                     | HS | III | 7112300 | 7115438 | WBGene00003609 | nhr-10   | B0280.8  | 0.155164779352143    | AGIWUR15057 |
| CB4856                                                     | HS | III | 7120905 | 7122895 | WBGene00015104 | B0280.9  | B0280.9  | -0.103764291899489   | AGIWUR38406 |
| CB4856                                                     | HS | III | 7123128 | 7124329 | WBGene00015101 | rpia-1   | B0280.3  | 0.00838506623628454  |             |
| AGIWUR24377;AGIWUR29690;AGIWUR34957;AGIWUR43357            |    |     |         |         |                |          |          |                      |             |
| CB4856                                                     | HS | III | 7132038 | 7133674 | WBGene00015105 | pot-1    | B0280.10 | -0.0887468293663591  |             |
| AGIWUR17608                                                |    |     |         |         |                |          |          |                      |             |
| CB4856                                                     | HS | III | 7133766 | 7136460 | WBGene00015099 | ggtb-1   | B0280.1  | 0.07247012881784     |             |
| AGIWUR26;AGIWUR16425;AGIWUR21558;AGIWUR29845               |    |     |         |         |                |          |          |                      |             |
| CB4856                                                     | HS | III | 7136510 | 7138278 | WBGene00015106 | B0280.11 | B0280.11 | -0.0857185969044023  |             |
| AGIWUR27947;AGIWUR34409                                    |    |     |         |         |                |          |          |                      |             |
| CB4856                                                     | HS | III | 7138683 | 7144832 | WBGene00001613 | glr-2    | B0280.12 | -0.146608351260309   |             |
| AGIWUR21369                                                |    |     |         |         |                |          |          |                      |             |

|                                                                                               |    |     |         |         |                |           |           |                     |             |
|-----------------------------------------------------------------------------------------------|----|-----|---------|---------|----------------|-----------|-----------|---------------------|-------------|
| CB4856                                                                                        | HS | III | 7145816 | 7153795 | WBGene00003858 | ogt-1     | K04G7.3   | 0.0366199088209802  |             |
| AGIWUR5550;AGIWUR36960                                                                        |    |     |         |         |                |           |           |                     |             |
| CB4856                                                                                        | HS | III | 7156032 | 7158809 | WBGene00019401 | nuo-4     | K04G7.4   | 0.0394759747941689  |             |
| AGIWUR1349;AGIWUR3103;AGIWUR11949;AGIWUR15549;AGIWUR17066;AGIWUR21918;AGIWUR42710;AGIWUR44306 |    |     |         |         |                |           |           |                     |             |
| CB4856                                                                                        | HS | III | 7158912 | 7161157 | WBGene00004390 | rnp-7     | K04G7.10  | 0.0605057559815947  |             |
| AGIWUR27127                                                                                   |    |     |         |         |                |           |           |                     |             |
| CB4856                                                                                        | HS | III | 7161157 | 7162115 | WBGene00019402 | K04G7.11  | K04G7.11  | 0.00759070602120815 |             |
| AGIWUR41126                                                                                   |    |     |         |         |                |           |           |                     |             |
| CB4856                                                                                        | HS | III | 7162694 | 7165261 | WBGene00019400 | K04G7.1   | K04G7.1   | 0.0915065849244563  | AGIWUR11536 |
| CB4856                                                                                        | HS | III | 7167838 | 7170990 | WBGene00018152 | acs-4     | F37C12.7  | -0.0572514683595973 |             |
| AGIWUR33729;AGIWUR35716                                                                       |    |     |         |         |                |           |           |                     |             |
| CB4856                                                                                        | HS | III | 7177530 | 7178853 | WBGene00005072 | srb-7     | F37C12.17 | 0.0195671097012511  |             |
| AGIWUR8880                                                                                    |    |     |         |         |                |           |           |                     |             |
| CB4856                                                                                        | HS | III | 7178984 | 7179606 | WBGene00004483 | rps-14    | F37C12.9  | -0.429923357445626  |             |
| AGIWUR2374;AGIWUR32041                                                                        |    |     |         |         |                |           |           |                     |             |
| CB4856                                                                                        | HS | III | 7180249 | 7180677 | WBGene00004450 | rp1-36    | F37C12.4  | 0.349713274722987   |             |
| AGIWUR3760;AGIWUR5590;AGIWUR25437                                                             |    |     |         |         |                |           |           |                     |             |
| CB4856                                                                                        | HS | III | 7180730 | 7181925 | WBGene00018151 | F37C12.3  | F37C12.3  | 0.0433386269022669  |             |
| AGIWUR5900;AGIWUR21081                                                                        |    |     |         |         |                |           |           |                     |             |
| CB4856                                                                                        | HS | III | 7181970 | 7184049 | WBGene00018150 | epg-4     | F37C12.2  | 0.0492575605081988  |             |
| AGIWUR42197                                                                                   |    |     |         |         |                |           |           |                     |             |
| CB4856                                                                                        | HS | III | 7184348 | 7187868 | WBGene00018149 | F37C12.1  | F37C12.1  | 0.112201618127269   |             |
| AGIWUR4488                                                                                    |    |     |         |         |                |           |           |                     |             |
| CB4856                                                                                        | HS | III | 7187841 | 7188430 | WBGene00018153 | F37C12.10 | F37C12.10 | 0.0481037115759158  |             |
| AGIWUR22078                                                                                   |    |     |         |         |                |           |           |                     |             |
| CB4856                                                                                        | HS | III | 7189142 | 7189631 | WBGene00004490 | rps-21    | F37C12.11 | 0.168016454860735   |             |
| AGIWUR12006;AGIWUR31276;AGIWUR34444                                                           |    |     |         |         |                |           |           |                     |             |
| CB4856                                                                                        | HS | III | 7190207 | 7192992 | WBGene00003176 | mec-14    | F37C12.12 | 0.0613998488306873  |             |
| AGIWUR9445;AGIWUR17804;AGIWUR28649;AGIWUR39147                                                |    |     |         |         |                |           |           |                     |             |
| CB4856                                                                                        | HS | III | 7194094 | 7195425 | WBGene00044005 | F37C12.18 | F37C12.18 | -0.0387555404407394 |             |
| AGIWUR11612                                                                                   |    |     |         |         |                |           |           |                     |             |
| CB4856                                                                                        | HS | III | 7196225 | 7232172 | WBGene00018154 | exos-9    | F37C12.13 | -0.0777670096615495 |             |
| AGIWUR7392;AGIWUR7814;AGIWUR20734;AGIWUR21953;AGIWUR33274                                     |    |     |         |         |                |           |           |                     |             |
| CB4856                                                                                        | HS | III | 7232926 | 7234202 | WBGene00020636 | T20H4.5   | T20H4.5   | 0.0763267100535749  |             |
| AGIWUR19610;AGIWUR21920;AGIWUR24242;AGIWUR33423                                               |    |     |         |         |                |           |           |                     |             |
| CB4856                                                                                        | HS | III | 7238607 | 7241284 | WBGene00004189 | pars-1    | T20H4.3   | -0.0760167415299495 |             |
| AGIWUR4343;AGIWUR9909;AGIWUR36586                                                             |    |     |         |         |                |           |           |                     |             |
| CB4856                                                                                        | HS | III | 7241365 | 7242950 | WBGene00020635 | T20H4.2   | T20H4.2   | 0.126509022748113   | AGIWUR15565 |
| CB4856                                                                                        | HS | III | 7243305 | 7245743 | WBGene00003890 | osm-10    | T20H4.1   | 0.147374527928013   | AGIWUR39413 |

|                                                                                                          |     |         |         |                |          |          |                      |             |
|----------------------------------------------------------------------------------------------------------|-----|---------|---------|----------------|----------|----------|----------------------|-------------|
| CB4856 HS                                                                                                | III | 7245703 | 7247937 | WBGene00020646 | zmp-6    | T21D11.1 | -0.0953588264199645  |             |
| AGIWUR9527                                                                                               |     |         |         |                |          |          |                      |             |
| CB4856 HS                                                                                                | III | 7268414 | 7275396 | WBGene00015159 | psd-1    | B0361.5  | 0.120679324382236    |             |
| AGIWUR9371;AGIWUR25166                                                                                   |     |         |         |                |          |          |                      |             |
| CB4856 HS                                                                                                | III | 7275502 | 7277274 | WBGene00015160 | B0361.6  | B0361.6  | 0.00123517314344035  | AGIWUR42062 |
| CB4856 HS                                                                                                | III | 7277604 | 7281217 | WBGene00015165 | B0361.11 | B0361.11 | -0.0200765508549168  |             |
| AGIWUR44378                                                                                              |     |         |         |                |          |          |                      |             |
| CB4856 HS                                                                                                | III | 7281377 | 7283959 | WBGene00015157 | B0361.3  | B0361.3  | -0.0506277636727148  | AGIWUR22638 |
| CB4856 HS                                                                                                | III | 7283915 | 7285883 | WBGene00015161 | pho-5    | B0361.7  | 0.00254834944545212  |             |
| AGIWUR4284;AGIWUR4841;AGIWUR6453;AGIWUR19407;AGIWUR27150;AGIWUR32167                                     |     |         |         |                |          |          |                      |             |
| CB4856 HS                                                                                                | III | 7285983 | 7287603 | WBGene00015164 | ykt-6    | B0361.10 | 0.0984212661419885   |             |
| AGIWUR22374                                                                                              |     |         |         |                |          |          |                      |             |
| CB4856 HS                                                                                                | III | 7287848 | 7290562 | WBGene00015162 | algn-11  | B0361.8  | -0.0693778622230852  | AGIWUR25298 |
| CB4856 HS                                                                                                | III | 7293632 | 7308364 | WBGene00015156 | B0361.2  | B0361.2  | 0.113572518909233    | AGIWUR464   |
| CB4856 HS                                                                                                | III | 7308354 | 7308975 | WBGene00018949 | acbp-4   | F56C9.5  | 0.0691370889901695   | AGIWUR42872 |
| CB4856 HS                                                                                                | III | 7308998 | 7310773 | WBGene00018950 | F56C9.6  | F56C9.6  | 0.0555472830305277   | AGIWUR36977 |
| CB4856 HS                                                                                                | III | 7311290 | 7313195 | WBGene00018948 | F56C9.3  | F56C9.3  | 0.0347562847861411   | AGIWUR2658  |
| CB4856 HS                                                                                                | III | 7313149 | 7314977 | WBGene00018951 | F56C9.7  | F56C9.7  | -0.152574183684781   | AGIWUR21582 |
| CB4856 HS                                                                                                | III | 7315903 | 7319595 | WBGene00018952 | F56C9.8  | F56C9.8  | -0.136524077062515   | AGIWUR35334 |
| CB4856 HS                                                                                                | III | 7324940 | 7329649 | WBGene00018954 | F56C9.11 | F56C9.11 | 0.053319858658142    |             |
| AGIWUR145                                                                                                |     |         |         |                |          |          |                      |             |
| CB4856 HS                                                                                                | III | 7329714 | 7335316 | WBGene00018953 | F56C9.10 | F56C9.10 | 0.0420196304942122   |             |
| AGIWUR4974;AGIWUR6930;AGIWUR7997;AGIWUR15213;AGIWUR25399;AGIWUR25573;AGIWUR40411;AGIWUR43493;AGIWUR43851 |     |         |         |                |          |          |                      |             |
| CB4856 HS                                                                                                | III | 7336587 | 7338765 | WBGene00001748 | gsp-2    | F56C9.1  | 0.0860814408077424   | AGIWUR26543 |
| CB4856 HS                                                                                                | III | 7339001 | 7343626 | WBGene00002182 | kap-1    | F08F8.3  | 0.174578206700958    |             |
| AGIWUR23181;AGIWUR29263                                                                                  |     |         |         |                |          |          |                      |             |
| CB4856 HS                                                                                                | III | 7343675 | 7345855 | WBGene00017271 | F08F8.6  | F08F8.6  | 0.216187824370731    | AGIWUR6914  |
| CB4856 HS                                                                                                | III | 7345861 | 7347149 | WBGene00017272 | F08F8.7  | F08F8.7  | 0.0370720910703337   |             |
| AGIWUR3256;AGIWUR12445;AGIWUR15029;AGIWUR17210;AGIWUR17376;AGIWUR43081                                   |     |         |         |                |          |          |                      |             |
| CB4856 HS                                                                                                | III | 7347237 | 7349175 | WBGene00017273 | gos-28   | F08F8.8  | -0.13411326662731    | AGIWUR19819 |
| CB4856 HS                                                                                                | III | 7349291 | 7354090 | WBGene00017274 | F08F8.9  | F08F8.9  | 0.101353987575269    |             |
| AGIWUR6831;AGIWUR31117;AGIWUR42085                                                                       |     |         |         |                |          |          |                      |             |
| CB4856 HS                                                                                                | III | 7354159 | 7357395 | WBGene00017275 | F08F8.10 | F08F8.10 | -0.0236381512799149  |             |
| AGIWUR3820                                                                                               |     |         |         |                |          |          |                      |             |
| CB4856 HS                                                                                                | III | 7357663 | 7359183 | WBGene00017269 | F08F8.4  | F08F8.4  | 0.130614960795084    | AGIWUR6271  |
| CB4856 HS                                                                                                | III | 7359498 | 7362132 | WBGene00017268 | hmgr-1   | F08F8.2  | 0.000720666943157866 |             |
| AGIWUR15001;AGIWUR25419;AGIWUR25776                                                                      |     |         |         |                |          |          |                      |             |
| CB4856 HS                                                                                                | III | 7365902 | 7366448 | WBGene00269381 | F08F8.11 | F08F8.11 | -0.196307145415393   |             |
| AGIWUR5929                                                                                               |     |         |         |                |          |          |                      |             |

|                                                                                                                               |     |         |         |                |           |           |                     |
|-------------------------------------------------------------------------------------------------------------------------------|-----|---------|---------|----------------|-----------|-----------|---------------------|
| CB4856 HS                                                                                                                     | III | 7366717 | 7367112 | WBGene00020603 | T20B12.5  | T20B12.5  | 0.0854082223954018  |
| AGIWUR45073                                                                                                                   |     |         |         |                |           |           |                     |
| CB4856 HS                                                                                                                     | III | 7367710 | 7369538 | WBGene00020602 | T20B12.4  | T20B12.4  | 0.00761079759852734 |
| AGIWUR29818                                                                                                                   |     |         |         |                |           |           |                     |
| CB4856 HS                                                                                                                     | III | 7370131 | 7374731 | WBGene00003378 | mm1-1     | T20B12.6  | -0.0837841043023317 |
| AGIWUR277;AGIWUR27528;AGIWUR27964                                                                                             |     |         |         |                |           |           |                     |
| CB4856 HS                                                                                                                     | III | 7377854 | 7379045 | WBGene00020604 | T20B12.7  | T20B12.7  | -0.222783305676502  |
| AGIWUR17909;AGIWUR18286;AGIWUR31122;AGIWUR35623;AGIWUR36772;AGIWUR43617                                                       |     |         |         |                |           |           |                     |
| CB4856 HS                                                                                                                     | III | 7379143 | 7381609 | WBGene00001974 | hmg-4     | T20B12.8  | -0.175114917517773  |
| AGIWUR13021;AGIWUR13254;AGIWUR15814;AGIWUR16997;AGIWUR37862                                                                   |     |         |         |                |           |           |                     |
| CB4856 HS                                                                                                                     | III | 7382115 | 7383906 | WBGene00020601 | T20B12.3  | T20B12.3  | -0.123682089036201  |
| AGIWUR22514                                                                                                                   |     |         |         |                |           |           |                     |
| CB4856 HS                                                                                                                     | III | 7384033 | 7386132 | WBGene00006542 | tbp-1     | T20B12.2  | 0.0192353306082413  |
| AGIWUR1258;AGIWUR1790;AGIWUR12732;AGIWUR19590;AGIWUR40034                                                                     |     |         |         |                |           |           |                     |
| CB4856 HS                                                                                                                     | III | 7386229 | 7391135 | WBGene00020600 | trd-1     | T20B12.1  | 0.0357680007513652  |
| AGIWUR24657;AGIWUR32413;AGIWUR36042                                                                                           |     |         |         |                |           |           |                     |
| CB4856 HS                                                                                                                     | III | 7391482 | 7395454 | WBGene00020605 | lgc-50    | T20B12.9  | 0.0582995270410933  |
| AGIWUR5207                                                                                                                    |     |         |         |                |           |           |                     |
| CB4856 HS                                                                                                                     | III | 7454012 | 7455980 | WBGene00000118 | alh-12    | Y69F12A.2 | -0.0738484080771746 |
| AGIWUR29059;AGIWUR34442                                                                                                       |     |         |         |                |           |           |                     |
| CB4856 HS                                                                                                                     | III | 7456734 | 7458544 | WBGene00022102 | Y69F12A.1 | Y69F12A.1 | 0.0932499872111894  |
| AGIWUR11528;AGIWUR13958;AGIWUR44146                                                                                           |     |         |         |                |           |           |                     |
| CB4856 HS                                                                                                                     | III | 7460341 | 7461931 | WBGene00003376 | mls-1     | H14A12.4  | -0.080793905759367  |
| AGIWUR13598                                                                                                                   |     |         |         |                |           |           |                     |
| CB4856 HS                                                                                                                     | III | 7463797 | 7465238 | WBGene00019196 | H14A12.3  | H14A12.3  | 0.0667226522024542  |
| AGIWUR2821                                                                                                                    |     |         |         |                |           |           |                     |
| CB4856 HS                                                                                                                     | III | 7465605 | 7467633 | WBGene00001503 | fum-1     | H14A12.2  | -0.111491778939413  |
| AGIWUR21960;AGIWUR44920                                                                                                       |     |         |         |                |           |           |                     |
| CB4856 HS                                                                                                                     | III | 7467574 | 7468676 | WBGene00019197 | H14A12.5  | H14A12.5  | -0.0929098158860349 |
| AGIWUR34074                                                                                                                   |     |         |         |                |           |           |                     |
| CB4856 HS                                                                                                                     | III | 7479680 | 7489075 | WBGene00003497 | mup-4     | K07D8.1   | 0.16338695563444    |
| CB4856 HS                                                                                                                     | III | 7495320 | 7497832 | WBGene00000479 | cgh-1     | C07H6.5   | -0.105613577920709  |
| AGIWUR3774;AGIWUR4099;AGIWUR15533;AGIWUR16780;AGIWUR28635;AGIWUR38324;AGIWUR42561                                             |     |         |         |                |           |           |                     |
| CB4856 HS                                                                                                                     | III | 7498819 | 7499447 | WBGene00015582 | C07H6.9   | C07H6.9   | 0.113936809013204   |
| CB4856 HS                                                                                                                     | III | 7499677 | 7503241 | WBGene00015581 | C07H6.4   | C07H6.4   | 0.09846984552488    |
| AGIWUR706;AGIWUR875;AGIWUR5973;AGIWUR7898;AGIWUR15254;AGIWUR15464;AGIWUR21636;AGIWUR23127;AGIWUR33052;AGIWUR33165;AGIWUR38055 |     |         |         |                |           |           |                     |
| CB4856 HS                                                                                                                     | III | 7508178 | 7515285 | WBGene00015580 | cls-1     | C07H6.3   | -0.0374199249658931 |
| AGIWUR6187;AGIWUR26175;AGIWUR28060;AGIWUR38483                                                                                |     |         |         |                |           |           |                     |

|                                                                                   |    |     |         |         |                |          |          |                      |             |
|-----------------------------------------------------------------------------------|----|-----|---------|---------|----------------|----------|----------|----------------------|-------------|
| CB4856                                                                            | HS | III | 7515223 | 7518524 | WBGene00000537 | clk-2    | C07H6.6  | 0.0335435919863594   |             |
| AGIWUR5586;AGIWUR7836                                                             |    |     |         |         |                |          |          |                      |             |
| CB4856                                                                            | HS | III | 7518628 | 7520845 | WBGene00000854 | cux-7    | C07H6.8  | 0.117434227583475    |             |
| AGIWUR12788;AGIWUR23553;AGIWUR39468;AGIWUR43244                                   |    |     |         |         |                |          |          |                      |             |
| CB4856                                                                            | HS | III | 7521004 | 7524836 | WBGene00002986 | lig-4    | C07H6.1  | 0.1619792409269      | AGIWUR12502 |
| CB4856                                                                            | HS | III | 7528641 | 7536632 | WBGene00003024 | lin-39   | C07H6.7  | 0.253234352869306    | AGIWUR2784  |
| CB4856                                                                            | HS | III | 7555617 | 7558208 | WBGene00000437 | ceh-13   | R13A5.5  | 0.244974679671714    | AGIWUR6653  |
| CB4856                                                                            | HS | III | 7562172 | 7564529 | WBGene00020048 | lgc-12   | R13A5.4  | 0.306118809586282    | AGIWUR22283 |
| CB4856                                                                            | HS | III | 7564500 | 7565347 | WBGene00020049 | ttr-8    | R13A5.6  | 0.274603049492841    | AGIWUR10718 |
| CB4856                                                                            | HS | III | 7566411 | 7567486 | WBGene00020047 | ttr-32   | R13A5.3  | 0.269424699578451    | AGIWUR44767 |
| CB4856                                                                            | HS | III | 7567475 | 7570133 | WBGene00020050 | R13A5.7  | R13A5.7  | 0.0991799451373154   | AGIWUR8137  |
| CB4856                                                                            | HS | III | 7572105 | 7572831 | WBGene00004420 | rpl-9    | R13A5.8  | 0.166223742984798    | AGIWUR14686 |
| CB4856                                                                            | HS | III | 7573350 | 7575263 | WBGene00003063 | lpd-7    | R13A5.12 | 0.108001878224895    |             |
| AGIWUR3802;AGIWUR36129;AGIWUR45192                                                |    |     |         |         |                |          |          |                      |             |
| CB4856                                                                            | HS | III | 7575274 | 7579411 | WBGene00020051 | R13A5.9  | R13A5.9  | 0.00903200576818364  | AGIWUR25499 |
| CB4856                                                                            | HS | III | 7582033 | 7582999 | WBGene00020052 | R13A5.10 | R13A5.10 | 0.358107215310229    |             |
| AGIWUR14155                                                                       |    |     |         |         |                |          |          |                      |             |
| CB4856                                                                            | HS | III | 7584181 | 7591570 | WBGene00000846 | cup-5    | R13A5.1  | 0.102289827759503    |             |
| AGIWUR8333;AGIWUR37240                                                            |    |     |         |         |                |          |          |                      |             |
| CB4856                                                                            | HS | III | 7605949 | 7608290 | WBGene00020202 | T04A6.3  | T04A6.3  | -0.0157128680161964  | AGIWUR19994 |
| CB4856                                                                            | HS | III | 7614862 | 7615699 | WBGene00020201 | T04A6.2  | T04A6.2  | -0.0727116605122786  |             |
| AGIWUR4917;AGIWUR9169;AGIWUR22596;AGIWUR28490                                     |    |     |         |         |                |          |          |                      |             |
| CB4856                                                                            | HS | III | 7616528 | 7617590 | WBGene00020200 | T04A6.1  | T04A6.1  | -0.169931375284562   |             |
| AGIWUR22210;AGIWUR23187;AGIWUR23913;AGIWUR27973                                   |    |     |         |         |                |          |          |                      |             |
| CB4856                                                                            | HS | III | 7625376 | 7641053 | WBGene00022816 | fbn-1    | ZK783.1  | -0.112375468818743   |             |
| AGIWUR3202;AGIWUR4339;AGIWUR28751;AGIWUR30718;AGIWUR36180;AGIWUR43017             |    |     |         |         |                |          |          |                      |             |
| CB4856                                                                            | HS | III | 7641034 | 7643101 | WBGene00022817 | upp-1    | ZK783.2  | 0.0250043053920823   |             |
| AGIWUR33056;AGIWUR36827;AGIWUR44756;AGIWUR44950                                   |    |     |         |         |                |          |          |                      |             |
| CB4856                                                                            | HS | III | 7648788 | 7650005 | WBGene00044448 | ZK783.6  | ZK783.6  | 0.188472921433561    | AGIWUR41156 |
| CB4856                                                                            | HS | III | 7650549 | 7656032 | WBGene00001470 | baz-2    | ZK783.4  | -0.166296867893985   | AGIWUR33055 |
| CB4856                                                                            | HS | III | 7662428 | 7672153 | WBGene00015988 | C18H2.1  | C18H2.1  | -0.00517336527768641 | AGIWUR27375 |
| CB4856                                                                            | HS | III | 7684357 | 7688917 | WBGene00015990 | C18H2.3  | C18H2.3  | 0.164278159449982    | AGIWUR18472 |
| CB4856                                                                            | HS | III | 7689356 | 7694398 | WBGene00015992 | C18H2.5  | C18H2.5  | 0.0451743763411727   | AGIWUR36085 |
| CB4856                                                                            | HS | III | 7694554 | 7700381 | WBGene00015991 | C18H2.4  | C18H2.4  | -0.131763860723884   | AGIWUR28887 |
| CB4856                                                                            | HS | III | 7700338 | 7709491 | WBGene00003002 | lin-13   | C03B8.4  | 0.155800243858035    |             |
| AGIWUR1136;AGIWUR13351;AGIWUR42089                                                |    |     |         |         |                |          |          |                      |             |
| CB4856                                                                            | HS | III | 7712309 | 7717314 | WBGene00015386 | C03B8.3  | C03B8.3  | 0.0101725204092311   |             |
| AGIWUR4334;AGIWUR7654;AGIWUR10933;AGIWUR12045;AGIWUR13588;AGIWUR22325;AGIWUR26403 |    |     |         |         |                |          |          |                      |             |
| CB4856                                                                            | HS | III | 7719791 | 7738105 | WBGene00003559 | nc1-1    | ZK112.2  | -0.132987168061778   |             |



AGIWUR29632;AGIWUR30707;AGIWUR44134

|        |    |     |         |         |                |         |         |                    |             |
|--------|----|-----|---------|---------|----------------|---------|---------|--------------------|-------------|
| CB4856 | HS | III | 7738085 | 7739656 | WBGene00022661 | ZK112.5 | ZK112.5 | 0.080463238623568  | AGIWUR8890  |
| CB4856 | HS | III | 7739855 | 7740541 | WBGene00022662 | ZK112.6 | ZK112.6 | -0.175417985528927 | AGIWUR34004 |
| CB4856 | HS | III | 7741326 | 7754448 | WBGene00000395 | cdh-3   | ZK112.7 | -0.236817595963963 | AGIWUR26163 |
| CB4856 | HS | III | 7758730 | 7761273 | WBGene00003956 | pcp-1   | ZK112.1 | 0.204793736007652  | AGIWUR32149 |
| CB4856 | HS | III | 7761977 | 7763603 | WBGene00022516 | mtx-2   | ZC97.1  | -0.163609440376035 | AGIWUR33978 |
| CB4856 | HS | III | 7763698 | 7766052 | WBGene00022792 | ZK686.2 | ZK686.2 | 0.111687905151445  | AGIWUR29287 |
| CB4856 | HS | III | 7766389 | 7767515 | WBGene00022795 | ZK686.5 | ZK686.5 | 0.165548974030752  | AGIWUR15013 |
| CB4856 | HS | III | 7767571 | 7769063 | WBGene00022793 | ZK686.3 | ZK686.3 | 0.0353508210555766 |             |

AGIWUR1330;AGIWUR17964

|        |    |     |         |         |                |        |         |                    |  |
|--------|----|-----|---------|---------|----------------|--------|---------|--------------------|--|
| CB4856 | HS | III | 7769165 | 7770149 | WBGene00022794 | snu-23 | ZK686.4 | 0.0213291649841647 |  |
|--------|----|-----|---------|---------|----------------|--------|---------|--------------------|--|

AGIWUR31585;AGIWUR44773

|        |    |     |         |         |                |         |         |                     |  |
|--------|----|-----|---------|---------|----------------|---------|---------|---------------------|--|
| CB4856 | HS | III | 7771591 | 7772559 | WBGene00044799 | ZK686.6 | ZK686.6 | -0.0877792472643097 |  |
|--------|----|-----|---------|---------|----------------|---------|---------|---------------------|--|

AGIWUR10543;AGIWUR38278

|        |    |     |         |         |                |         |         |                    |  |
|--------|----|-----|---------|---------|----------------|---------|---------|--------------------|--|
| CB4856 | HS | III | 7773134 | 7773849 | WBGene00022791 | ZK686.1 | ZK686.1 | -0.171026778264193 |  |
|--------|----|-----|---------|---------|----------------|---------|---------|--------------------|--|

AGIWUR3542;AGIWUR27040;AGIWUR33797

|        |    |     |         |         |                |         |         |                     |             |
|--------|----|-----|---------|---------|----------------|---------|---------|---------------------|-------------|
| CB4856 | HS | III | 7774778 | 7776039 | WBGene00015590 | bath-15 | C08C3.2 | -0.166266192877019  | AGIWUR30918 |
| CB4856 | HS | III | 7776835 | 7783454 | WBGene00003102 | mab-5   | C08C3.3 | 0.301922138064762   | AGIWUR524   |
| CB4856 | HS | III | 7793446 | 7795409 | WBGene00015591 | cyk-7   | C08C3.4 | -0.032240119637871  | AGIWUR39828 |
| CB4856 | HS | III | 7814380 | 7817127 | WBGene00001174 | egl-5   | C08C3.1 | -0.0995749052896771 |             |

AGIWUR9619;AGIWUR10136;AGIWUR23410;AGIWUR31673;AGIWUR34828;AGIWUR41220

|        |    |     |         |         |                |        |          |                   |  |
|--------|----|-----|---------|---------|----------------|--------|----------|-------------------|--|
| CB4856 | HS | III | 7824377 | 7828626 | WBGene00001209 | egl-45 | C27D11.1 | 0.210004325638312 |  |
|--------|----|-----|---------|---------|----------------|--------|----------|-------------------|--|

AGIWUR16837

|        |    |     |         |         |                |         |         |                   |  |
|--------|----|-----|---------|---------|----------------|---------|---------|-------------------|--|
| CB4856 | HS | III | 7829411 | 7832503 | WBGene00022785 | ZK652.6 | ZK652.6 | 0.183088131714548 |  |
|--------|----|-----|---------|---------|----------------|---------|---------|-------------------|--|

AGIWUR22114;AGIWUR26296;AGIWUR34734

|        |    |     |         |         |                |         |         |                    |             |
|--------|----|-----|---------|---------|----------------|---------|---------|--------------------|-------------|
| CB4856 | HS | III | 7839594 | 7841491 | WBGene00000446 | ceh-23  | ZK652.5 | -0.104168725691448 | AGIWUR4590  |
| CB4856 | HS | III | 7842381 | 7843636 | WBGene00022786 | ZK652.8 | ZK652.8 | 0.210216958161463  | AGIWUR21230 |
| CB4856 | HS | III | 7855118 | 7855680 | WBGene00004449 | rpl-35  | ZK652.4 | -0.598241443224321 |             |

AGIWUR1318;AGIWUR7271;AGIWUR13592;AGIWUR15530;AGIWUR19789;AGIWUR21396;AGIWUR22629;AGIWUR23860;AGIWUR27111;AGIWUR36006;AGIWUR41499

|        |    |     |         |         |                |         |          |                   |  |
|--------|----|-----|---------|---------|----------------|---------|----------|-------------------|--|
| CB4856 | HS | III | 7855840 | 7857242 | WBGene00022787 | tag-307 | ZK652.10 | 0.104600430733774 |  |
|--------|----|-----|---------|---------|----------------|---------|----------|-------------------|--|

AGIWUR7350

|        |    |     |         |         |                |       |         |                     |             |
|--------|----|-----|---------|---------|----------------|-------|---------|---------------------|-------------|
| CB4856 | HS | III | 7857315 | 7858457 | WBGene00000765 | coq-5 | ZK652.9 | -0.0121473803139303 | AGIWUR16679 |
| CB4856 | HS | III | 7858979 | 7859512 | WBGene00044324 | ufm-1 | ZK652.3 | -0.0104073963078744 |             |

AGIWUR7099;AGIWUR15272

|        |    |     |         |         |                |        |         |                   |  |
|--------|----|-----|---------|---------|----------------|--------|---------|-------------------|--|
| CB4856 | HS | III | 7859613 | 7860159 | WBGene00022783 | tomm-7 | ZK652.2 | 0.126472921864453 |  |
|--------|----|-----|---------|---------|----------------|--------|---------|-------------------|--|

AGIWUR10295;AGIWUR25626;AGIWUR26385;AGIWUR36387;AGIWUR38431;AGIWUR41648

|        |    |     |         |         |                |       |          |                    |  |
|--------|----|-----|---------|---------|----------------|-------|----------|--------------------|--|
| CB4856 | HS | III | 7860466 | 7861004 | WBGene00000835 | cuc-1 | ZK652.11 | -0.158558479630848 |  |
|--------|----|-----|---------|---------|----------------|-------|----------|--------------------|--|

AGIWUR21223

|                                                                                                             |    |     |         |         |                |          |          |                     |             |
|-------------------------------------------------------------------------------------------------------------|----|-----|---------|---------|----------------|----------|----------|---------------------|-------------|
| CB4856                                                                                                      | HS | III | 7862070 | 7862577 | WBGene00004918 | snr-5    | ZK652.1  | 0.0984041776893108  |             |
| AGIWUR7207;AGIWUR8160;AGIWUR18084;AGIWUR22192;AGIWUR27998;AGIWUR30639                                       |    |     |         |         |                |          |          |                     |             |
| CB4856                                                                                                      | HS | III | 7862583 | 7865306 | WBGene00015333 | slc-17.3 | C02C2.4  | 0.120121060243562   |             |
| AGIWUR31202                                                                                                 |    |     |         |         |                |          |          |                     |             |
| CB4856                                                                                                      | HS | III | 7866509 | 7868732 | WBGene00000845 | cup-4    | C02C2.3  | -0.0441282284835012 | AGIWUR37722 |
| CB4856                                                                                                      | HS | III | 7873781 | 7877194 | WBGene00015332 | tyr-1    | C02C2.1  | 0.0794643542228997  | AGIWUR41080 |
| CB4856                                                                                                      | HS | III | 7877176 | 7878839 | WBGene00015334 | sup-18   | C02C2.5  | 0.297392050314972   | AGIWUR39722 |
| CB4856                                                                                                      | HS | III | 7881113 | 7883003 | WBGene00022803 | ZK688.9  | ZK688.9  | 0.0957876231250729  | AGIWUR43699 |
| CB4856                                                                                                      | HS | III | 7883574 | 7884963 | WBGene00044762 | ZK688.11 | ZK688.11 | -0.257563861912205  |             |
| AGIWUR19621;AGIWUR27683                                                                                     |    |     |         |         |                |          |          |                     |             |
| CB4856                                                                                                      | HS | III | 7885088 | 7891615 | WBGene00022800 | ZK688.5  | ZK688.5  | 0.0683633768316119  |             |
| AGIWUR14059;AGIWUR42115                                                                                     |    |     |         |         |                |          |          |                     |             |
| CB4856                                                                                                      | HS | III | 7892256 | 7894625 | WBGene00022798 | fahd-1   | ZK688.3  | 0.0637380225690478  | AGIWUR9390  |
| CB4856                                                                                                      | HS | III | 7895024 | 7895270 | WBGene00022799 | ZK688.4  | ZK688.4  | 0.0741233287159657  |             |
| AGIWUR13823;AGIWUR16019;AGIWUR16901;AGIWUR19883;AGIWUR19970;AGIWUR22563;AGIWUR28504;AGIWUR37484;AGIWUR37746 |    |     |         |         |                |          |          |                     |             |
| ;AGIWUR38268;AGIWUR40686                                                                                    |    |     |         |         |                |          |          |                     |             |
| CB4856                                                                                                      | HS | III | 7895752 | 7897025 | WBGene00044447 | ZK688.10 | ZK688.10 | 0.114877298935236   |             |
| AGIWUR2695;AGIWUR9783                                                                                       |    |     |         |         |                |          |          |                     |             |
| CB4856                                                                                                      | HS | III | 7901033 | 7904473 | WBGene00022797 | best-24  | ZK688.2  | 0.0875145794848065  |             |
| AGIWUR3194;AGIWUR10548;AGIWUR22051                                                                          |    |     |         |         |                |          |          |                     |             |
| CB4856                                                                                                      | HS | III | 7904945 | 7907843 | WBGene00022801 | pcp-5    | ZK688.6  | 0.0339834842594797  | AGIWUR20771 |
| CB4856                                                                                                      | HS | III | 7909563 | 7910758 | WBGene00022796 | ZK688.1  | ZK688.1  | 0.0790998533192688  | AGIWUR6214  |
| CB4856                                                                                                      | HS | III | 7910798 | 7911630 | WBGene00022802 | ZK688.7  | ZK688.7  | 0.148065729158491   | AGIWUR42017 |
| CB4856                                                                                                      | HS | III | 7912698 | 7913600 | WBGene00044763 | ZK688.12 | ZK688.12 | 0.0712879488371865  |             |
| AGIWUR36930;AGIWUR43391;AGIWUR44954                                                                         |    |     |         |         |                |          |          |                     |             |
| CB4856                                                                                                      | HS | III | 7914314 | 7917767 | WBGene00001628 | gly-3    | ZK688.8  | 0.093021871389146   |             |
| AGIWUR13062;AGIWUR36778;AGIWUR36892                                                                         |    |     |         |         |                |          |          |                     |             |
| CB4856                                                                                                      | HS | III | 7917987 | 7924917 | WBGene00016203 | tag-250  | C29E4.5  | 0.122588754012144   |             |
| AGIWUR16151;AGIWUR24388;AGIWUR44595;AGIWUR44893                                                             |    |     |         |         |                |          |          |                     |             |
| CB4856                                                                                                      | HS | III | 7926999 | 7928734 | WBGene00043051 | C29E4.13 | C29E4.13 | 0.127514139862948   |             |
| AGIWUR727;AGIWUR15228                                                                                       |    |     |         |         |                |          |          |                     |             |
| CB4856                                                                                                      | HS | III | 7929013 | 7932993 | WBGene00003801 | npp-15   | C29E4.4  | 0.195296858975809   | AGIWUR31543 |
| CB4856                                                                                                      | HS | III | 7933535 | 7937708 | WBGene00004303 | ran-2    | C29E4.3  | -0.195321353452393  | AGIWUR24556 |
| CB4856                                                                                                      | HS | III | 7937827 | 7940931 | WBGene00016207 | C29E4.10 | C29E4.10 |                     |             |
| -0.000348007875233591 AGIWUR39117                                                                           |    |     |         |         |                |          |          |                     |             |
| CB4856                                                                                                      | HS | III | 7941057 | 7941614 | WBGene00016209 | C29E4.12 | C29E4.12 | 0.103420887135027   |             |
| AGIWUR10229                                                                                                 |    |     |         |         |                |          |          |                     |             |
| CB4856                                                                                                      | HS | III | 7941717 | 7945593 | WBGene00016202 | kle-2    | C29E4.2  | 0.197887425090062   | AGIWUR24070 |
| CB4856                                                                                                      | HS | III | 7945544 | 7947018 | WBGene00016204 | gsto-1   | C29E4.7  | 0.433608233532325   | AGIWUR31884 |

|                                                                                                           |    |     |         |         |                |          |          |                      |             |
|-----------------------------------------------------------------------------------------------------------|----|-----|---------|---------|----------------|----------|----------|----------------------|-------------|
| CB4856                                                                                                    | HS | III | 7948838 | 7950068 | WBGene00000665 | col-90   | C29E4.1  | 0.0244340878250728   |             |
| AGIWUR12003;AGIWUR43808                                                                                   |    |     |         |         |                |          |          |                      |             |
| CB4856                                                                                                    | HS | III | 7949975 | 7951915 | WBGene00002879 | let-754  | C29E4.8  | 0.0734129509459711   |             |
| AGIWUR3078;AGIWUR6977;AGIWUR16207;AGIWUR24532                                                             |    |     |         |         |                |          |          |                      |             |
| CB4856                                                                                                    | HS | III | 7952623 | 7955816 | WBGene00045246 | C29E4.15 | C29E4.15 |                      |             |
| -0.00486135256523568 AGIWUR7251;AGIWUR10062;AGIWUR39986                                                   |    |     |         |         |                |          |          |                      |             |
| CB4856                                                                                                    | HS | III | 7955828 | 7958105 | WBGene00016206 | C29E4.9  | C29E4.9  | 0.0353722151278664   |             |
| AGIWUR3333;AGIWUR5912;AGIWUR14429;AGIWUR23987;AGIWUR24372;AGIWUR27083;AGIWUR27187;AGIWUR37254;AGIWUR40677 |    |     |         |         |                |          |          |                      |             |
| CB4856                                                                                                    | HS | III | 7961596 | 7962741 | WBGene00018844 | F54H12.4 | F54H12.4 | 0.0479566234540467   |             |
| AGIWUR22335                                                                                               |    |     |         |         |                |          |          |                      |             |
| CB4856                                                                                                    | HS | III | 7966601 | 7969221 | WBGene00045247 | F54H12.8 | F54H12.8 | 0.119727218878641    |             |
| AGIWUR229                                                                                                 |    |     |         |         |                |          |          |                      |             |
| CB4856                                                                                                    | HS | III | 7969319 | 7970283 | WBGene00044633 | F54H12.7 | F54H12.7 | -0.0316726106232181  |             |
| AGIWUR4710;AGIWUR17387;AGIWUR38904                                                                        |    |     |         |         |                |          |          |                      |             |
| CB4856                                                                                                    | HS | III | 7970263 | 7972161 | WBGene00018845 | F54H12.5 | F54H12.5 | 0.283355228401856    |             |
| AGIWUR34607                                                                                               |    |     |         |         |                |          |          |                      |             |
| CB4856                                                                                                    | HS | III | 7972382 | 7973386 | WBGene00018846 | eef-1B.1 | F54H12.6 | -0.437775872994303   |             |
| AGIWUR27194;AGIWUR33538                                                                                   |    |     |         |         |                |          |          |                      |             |
| CB4856                                                                                                    | HS | III | 7973717 | 7977355 | WBGene00000041 | aco-2    | F54H12.1 | 0.025544354411398    |             |
| AGIWUR550;AGIWUR666;AGIWUR7264;AGIWUR7765;AGIWUR11526;AGIWUR32513;AGIWUR33054;AGIWUR39786                 |    |     |         |         |                |          |          |                      |             |
| CB4856                                                                                                    | HS | III | 7977216 | 7977803 | WBGene00015558 | C06G4.4  | C06G4.4  | 0.0360872477147636   |             |
| AGIWUR12183;AGIWUR18220;AGIWUR45108                                                                       |    |     |         |         |                |          |          |                      |             |
| CB4856                                                                                                    | HS | III | 7980913 | 7986327 | WBGene00000542 | clp-1    | C06G4.2  | -0.127082810481522   |             |
| AGIWUR2782;AGIWUR10623;AGIWUR24515                                                                        |    |     |         |         |                |          |          |                      |             |
| CB4856                                                                                                    | HS | III | 7987121 | 7990613 | WBGene00015557 | C06G4.1  | C06G4.1  | -0.106135044782238   | AGIWUR11719 |
| CB4856                                                                                                    | HS | III | 7990789 | 7996438 | WBGene00015559 | npr-17   | C06G4.5  | 0.216100811895338    | AGIWUR34939 |
| CB4856                                                                                                    | HS | III | 8004397 | 8005887 | WBGene00044446 | C06G4.6  | C06G4.6  | -0.00183404685990585 | AGIWUR299   |
| CB4856                                                                                                    | HS | III | 8005935 | 8009821 | WBGene00000507 | cit-1.1  | F44B9.4  | -0.184532807058538   |             |
| AGIWUR4816;AGIWUR18943;AGIWUR28638                                                                        |    |     |         |         |                |          |          |                      |             |
| CB4856                                                                                                    | HS | III | 8010778 | 8013774 | WBGene00000508 | cit-1.2  | F44B9.3  | -0.147458547203081   |             |
| AGIWUR8542;AGIWUR15822;AGIWUR17269                                                                        |    |     |         |         |                |          |          |                      |             |
| CB4856                                                                                                    | HS | III | 8013753 | 8016538 | WBGene00018408 | F44B9.5  | F44B9.5  | -0.120992229434691   | AGIWUR17897 |
| CB4856                                                                                                    | HS | III | 8016648 | 8020873 | WBGene00003021 | lin-36   | F44B9.6  | 0.0126327531485178   |             |
| AGIWUR12990;AGIWUR14761;AGIWUR20035;AGIWUR29449;AGIWUR36188;AGIWUR44489;AGIWUR45031                       |    |     |         |         |                |          |          |                      |             |
| CB4856                                                                                                    | HS | III | 8022463 | 8025195 | WBGene00018407 | F44B9.2  | F44B9.2  | 0.188909855579768    | AGIWUR33109 |
| CB4856                                                                                                    | HS | III | 8025210 | 8028042 | WBGene00004125 | mdt-30   | F44B9.7  | -0.254791074270575   | AGIWUR34503 |
| CB4856                                                                                                    | HS | III | 8028133 | 8029649 | WBGene00018409 | F44B9.8  | F44B9.8  | 0.0387635669822899   |             |
| AGIWUR1353;AGIWUR8841;AGIWUR14148;AGIWUR15772                                                             |    |     |         |         |                |          |          |                      |             |
| CB4856                                                                                                    | HS | III | 8029858 | 8031063 | WBGene00018410 | F44B9.9  | F44B9.9  | -0.17784773656522    | AGIWUR21414 |

|                                                                        |    |     |         |         |                |          |          |                      |             |
|------------------------------------------------------------------------|----|-----|---------|---------|----------------|----------|----------|----------------------|-------------|
| CB4856                                                                 | HS | III | 8031413 | 8033727 | WBGene00018411 | F44B9.10 | F44B9.10 | 0.182539803054047    |             |
| AGIWUR27975                                                            |    |     |         |         |                |          |          |                      |             |
| CB4856                                                                 | HS | III | 8038241 | 8041374 | WBGene00001059 | dpf-6    | F44B9.1  | 0.162806248135736    |             |
| AGIWUR786;AGIWUR7937;AGIWUR10600;AGIWUR12968;AGIWUR15899;AGIWUR39780   |    |     |         |         |                |          |          |                      |             |
| CB4856                                                                 | HS | III | 8042577 | 8042875 | WBGene00019681 | K12H4.6  | K12H4.6  | -0.201572909558534   | AGIWUR27362 |
| CB4856                                                                 | HS | III | 8044481 | 8044916 | WBGene00019680 | K12H4.5  | K12H4.5  | -0.15371815708915    | AGIWUR19414 |
| CB4856                                                                 | HS | III | 8045017 | 8045931 | WBGene00019679 | K12H4.4  | K12H4.4  | 0.0148721102904901   | AGIWUR20073 |
| CB4856                                                                 | HS | III | 8046034 | 8047612 | WBGene00019678 | K12H4.3  | K12H4.3  | 0.136062844852656    | AGIWUR25530 |
| CB4856                                                                 | HS | III | 8047712 | 8048461 | WBGene00019677 | K12H4.2  | K12H4.2  | 0.049943679053186    | AGIWUR20148 |
| CB4856                                                                 | HS | III | 8048424 | 8051155 | WBGene00019682 | K12H4.7  | K12H4.7  | 0.175931818490497    |             |
| AGIWUR10819;AGIWUR15259;AGIWUR34223                                    |    |     |         |         |                |          |          |                      |             |
| CB4856                                                                 | HS | III | 8067289 | 8071455 | WBGene00000448 | pros-1   | K12H4.1  | 0.0499138515089133   | AGIWUR34802 |
| CB4856                                                                 | HS | III | 8071916 | 8080281 | WBGene00000939 | dcr-1    | K12H4.8  | 0.121315419317822    | AGIWUR15164 |
| CB4856                                                                 | HS | III | 8080570 | 8083701 | WBGene00000143 | apc-2    | K06H7.6  | 0.177824839323417    | AGIWUR44183 |
| CB4856                                                                 | HS | III | 8083692 | 8085538 | WBGene00019458 | K06H7.7  | K06H7.7  | 0.19645202545928     | AGIWUR13531 |
| CB4856                                                                 | HS | III | 8085705 | 8088449 | WBGene00001743 | grp-1    | K06H7.4  | 0.0502956527112985   |             |
| AGIWUR12843;AGIWUR21602;AGIWUR32200                                    |    |     |         |         |                |          |          |                      |             |
| CB4856                                                                 | HS | III | 8088482 | 8091730 | WBGene00019457 | vms-1    | K06H7.3  | -0.171543492146691   | AGIWUR34576 |
| CB4856                                                                 | HS | III | 8091708 | 8093042 | WBGene00019460 | idi-1    | K06H7.9  | 0.094041451274089    | AGIWUR11791 |
| CB4856                                                                 | HS | III | 8093570 | 8096311 | WBGene00019456 | K06H7.2  | K06H7.2  | 0.00143948790119275  | AGIWUR11874 |
| CB4856                                                                 | HS | III | 8096736 | 8098216 | WBGene00019459 | K06H7.8  | K06H7.8  | 0.226350164394866    | AGIWUR25434 |
| CB4856                                                                 | HS | III | 8099327 | 8100638 | WBGene00019455 | K06H7.1  | K06H7.1  | 0.0132956250490839   | AGIWUR23564 |
| CB4856                                                                 | HS | III | 8101348 | 8104076 | WBGene00004042 | plk-1    | C14B9.4  | 0.140744232370859    |             |
| AGIWUR7884;AGIWUR22550                                                 |    |     |         |         |                |          |          |                      |             |
| CB4856                                                                 | HS | III | 8108703 | 8111245 | WBGene00015753 | C14B9.3  | C14B9.3  | -0.00989499118478632 |             |
| AGIWUR5914;AGIWUR11983;AGIWUR39945;AGIWUR43369;AGIWUR44024;AGIWUR44415 |    |     |         |         |                |          |          |                      |             |
| CB4856                                                                 | HS | III | 8111166 | 8126222 | WBGene00001565 | gei-8    | C14B9.6  | -0.14401129606853    |             |
| AGIWUR22239;AGIWUR29182;AGIWUR35088                                    |    |     |         |         |                |          |          |                      |             |
| CB4856                                                                 | HS | III | 8129551 | 8130227 | WBGene00004433 | rp1-21   | C14B9.7  | 0.123189075482998    | AGIWUR13555 |
| CB4856                                                                 | HS | III | 8130852 | 8132436 | WBGene00015755 | C14B9.10 | C14B9.10 | 0.109334532558742    |             |
| AGIWUR9726;AGIWUR20003;AGIWUR24913;AGIWUR25956;AGIWUR27149;AGIWUR34179 |    |     |         |         |                |          |          |                      |             |
| CB4856                                                                 | HS | III | 8133665 | 8136649 | WBGene00015752 | C14B9.2  | C14B9.2  | -0.0114444863576679  |             |
| AGIWUR8508;AGIWUR11821;AGIWUR19513;AGIWUR30168;AGIWUR41633             |    |     |         |         |                |          |          |                      |             |
| CB4856                                                                 | HS | III | 8138090 | 8139645 | WBGene00002011 | hsp-12.2 | C14B9.1  | -0.0434680951531812  |             |
| AGIWUR13046;AGIWUR29749                                                |    |     |         |         |                |          |          |                      |             |
| CB4856                                                                 | HS | III | 8139610 | 8144629 | WBGene00015754 | C14B9.8  | C14B9.8  | 0.251018966630491    | AGIWUR1876  |
| CB4856                                                                 | HS | III | 8145015 | 8145974 | WBGene00017044 | mrp1-18  | D2007.4  | -0.276034891620348   |             |
| AGIWUR3327;AGIWUR16310;AGIWUR26805                                     |    |     |         |         |                |          |          |                      |             |
| CB4856                                                                 | HS | III | 8148967 | 8154619 | WBGene00017042 | D2007.2  | D2007.2  | -0.0123307392731506  |             |

AGIWUR24883;AGIWUR30242

|                                                                       |    |     |         |         |                |          |          |                     |             |
|-----------------------------------------------------------------------|----|-----|---------|---------|----------------|----------|----------|---------------------|-------------|
| CB4856                                                                | HS | III | 8155470 | 8155989 | WBGene00017041 | D2007.1  | D2007.1  | -0.249079506688965  | AGIWUR34639 |
| CB4856                                                                | HS | III | 8155928 | 8158245 | WBGene00017045 | atg-13   | D2007.5  | 0.10665025506599    | AGIWUR4063  |
| CB4856                                                                | HS | III | 8159155 | 8161338 | WBGene00086546 | cil-1    | C50C3.7  | -0.0801966540268069 | AGIWUR24538 |
| CB4856                                                                | HS | III | 8161449 | 8163383 | WBGene00016803 | bath-42  | C50C3.8  | -0.126388801455187  |             |
| AGIWUR3146;AGIWUR20862;AGIWUR21544;AGIWUR34384                        |    |     |         |         |                |          |          |                     |             |
| CB4856                                                                | HS | III | 8164373 | 8172702 | WBGene00004187 | prp-8    | C50C3.6  | 0.116793130170752   |             |
| AGIWUR12014;AGIWUR25090;AGIWUR31758                                   |    |     |         |         |                |          |          |                     |             |
| CB4856                                                                | HS | III | 8176484 | 8177243 | WBGene00016804 | C50C3.12 | C50C3.12 | -0.180870174615824  |             |
| AGIWUR1160;AGIWUR13818;AGIWUR27621                                    |    |     |         |         |                |          |          |                     |             |
| CB4856                                                                | HS | III | 8179224 | 8180549 | WBGene00016801 | C50C3.5  | C50C3.5  | 0.129129063326703   |             |
| AGIWUR2594;AGIWUR18155;AGIWUR27487                                    |    |     |         |         |                |          |          |                     |             |
| CB4856                                                                | HS | III | 8181881 | 8189372 | WBGene00016800 | C50C3.2  | C50C3.2  | 0.230970688157184   | AGIWUR16251 |
| CB4856                                                                | HS | III | 8191817 | 8193847 | WBGene00016799 | C50C3.1  | C50C3.1  | 0.083000441654093   | AGIWUR10522 |
| CB4856                                                                | HS | III | 8193844 | 8201206 | WBGene00006772 | unc-36   | C50C3.9  | -0.0409083745855394 |             |
| AGIWUR10266;AGIWUR11145;AGIWUR18480                                   |    |     |         |         |                |          |          |                     |             |
| CB4856                                                                | HS | III | 8205124 | 8209945 | WBGene00016242 | C30A5.10 | C30A5.10 | -0.0302219242083641 |             |
| AGIWUR5775;AGIWUR37751;AGIWUR40981                                    |    |     |         |         |                |          |          |                     |             |
| CB4856                                                                | HS | III | 8212750 | 8216336 | WBGene00006818 | unc-86   | C30A5.7  | 0.159712482296017   | AGIWUR37956 |
| CB4856                                                                | HS | III | 8225097 | 8226386 | WBGene00016238 | C30A5.3  | C30A5.3  | 0.0301432562105779  |             |
| AGIWUR1588;AGIWUR5145;AGIWUR13733;AGIWUR20984;AGIWUR34110;AGIWUR39012 |    |     |         |         |                |          |          |                     |             |
| CB4856                                                                | HS | III | 8226478 | 8227650 | WBGene00004342 | rfs-1    | C30A5.2  | -0.0792645832493442 | AGIWUR40272 |
| CB4856                                                                | HS | III | 8227362 | 8232660 | WBGene00015350 | fbx1-1   | C02F5.7  | 0.0735436928214472  |             |
| AGIWUR32117;AGIWUR40156;AGIWUR40691;AGIWUR41092                       |    |     |         |         |                |          |          |                     |             |
| CB4856                                                                | HS | III | 8232651 | 8234591 | WBGene00015349 | henn-1   | C02F5.6  | -0.174347363084213  |             |
| AGIWUR13862;AGIWUR17509;AGIWUR20220;AGIWUR33609;AGIWUR35010           |    |     |         |         |                |          |          |                     |             |
| CB4856                                                                | HS | III | 8234526 | 8235543 | WBGene00044445 | C02F5.14 | C02F5.14 | 0.100569209897832   |             |
| AGIWUR3399;AGIWUR8250;AGIWUR16249;AGIWUR19857;AGIWUR33544;AGIWUR37801 |    |     |         |         |                |          |          |                     |             |
| CB4856                                                                | HS | III | 8236126 | 8236908 | WBGene00015348 | C02F5.5  | C02F5.5  | -0.215867877308163  | AGIWUR24696 |
| CB4856                                                                | HS | III | 8236984 | 8237881 | WBGene00006628 | tsp-2    | C02F5.11 | 0.304523232011518   |             |
| AGIWUR37744;AGIWUR39045                                               |    |     |         |         |                |          |          |                     |             |
| CB4856                                                                | HS | III | 8237995 | 8239423 | WBGene00006627 | tsp-1    | C02F5.8  | 0.539606358581542   | AGIWUR1230  |
| CB4856                                                                | HS | III | 8240872 | 8243029 | WBGene00015352 | C02F5.12 | C02F5.12 | -0.0230400396801738 |             |
| AGIWUR8531                                                            |    |     |         |         |                |          |          |                     |             |
| CB4856                                                                | HS | III | 8243122 | 8244092 | WBGene00003952 | pbs-6    | C02F5.9  | -0.104521831735777  |             |
| AGIWUR1154;AGIWUR35929                                                |    |     |         |         |                |          |          |                     |             |
| CB4856                                                                | HS | III | 8244445 | 8245794 | WBGene00015347 | cids-1   | C02F5.4  | 0.147776370382523   | AGIWUR42649 |
| CB4856                                                                | HS | III | 8245891 | 8247258 | WBGene00015346 | C02F5.3  | C02F5.3  | 0.0882947265007488  | AGIWUR2618  |
| CB4856                                                                | HS | III | 8247351 | 8248814 | WBGene00015353 | C02F5.13 | C02F5.13 | 0.0158179385255277  |             |

|                                                                        |    |     |         |         |                |           |          |                       |             |
|------------------------------------------------------------------------|----|-----|---------|---------|----------------|-----------|----------|-----------------------|-------------|
| AGIWUR12182                                                            |    |     |         |         |                |           |          |                       |             |
| CB4856                                                                 | HS | III | 8248685 | 8249512 | WBGene00015351 | C02F5.10  | C02F5.10 | -0.190852801061439    |             |
| AGIWUR11304                                                            |    |     |         |         |                |           |          |                       |             |
| CB4856                                                                 | HS | III | 8249619 | 8250193 | WBGene00015345 | C02F5.2   | C02F5.2  | 0.0264914602252961    |             |
| AGIWUR134;AGIWUR4847;AGIWUR16620;AGIWUR19511;AGIWUR28543;AGIWUR31316   |    |     |         |         |                |           |          |                       |             |
| CB4856                                                                 | HS | III | 8250636 | 8254286 | WBGene00002231 | kn1-1     | C02F5.1  | -0.12826890607379     | AGIWUR21785 |
| CB4856                                                                 | HS | III | 8254975 | 8257638 | WBGene00017320 | F09G8.5   | F09G8.5  | 0.0755693184867035    | AGIWUR1808  |
| CB4856                                                                 | HS | III | 8258345 | 8265805 | WBGene00003562 | ncr-2     | F09G8.4  | -0.183612454902956    | AGIWUR10674 |
| CB4856                                                                 | HS | III | 8266062 | 8267841 | WBGene00017319 | mrps-9    | F09G8.3  | -0.00188119380383966  | AGIWUR33013 |
| CB4856                                                                 | HS | III | 8267921 | 8268355 | WBGene00017321 | F09G8.7   | F09G8.7  | -0.302038625152613    |             |
| AGIWUR5913;AGIWUR16944;AGIWUR22226;AGIWUR22263;AGIWUR22551;AGIWUR34486 |    |     |         |         |                |           |          |                       |             |
| CB4856                                                                 | HS | III | 8268609 | 8270680 | WBGene00007056 | crn-7     | F09G8.2  | -1.77635683940025e-15 | AGIWUR29025 |
| CB4856                                                                 | HS | III | 8272960 | 8275971 | WBGene00017322 | cllec-160 | F09G8.8  | -0.0616366711514367   |             |
| AGIWUR31776                                                            |    |     |         |         |                |           |          |                       |             |
| CB4856                                                                 | HS | III | 8279108 | 8305832 | WBGene00003243 | mig-10    | F10E9.6  | 0.181139729573442     |             |
| AGIWUR9097;AGIWUR10503;AGIWUR26773                                     |    |     |         |         |                |           |          |                       |             |
| CB4856                                                                 | HS | III | 8305733 | 8326818 | WBGene00017358 | F10E9.7   | F10E9.7  | 0.137496726647189     | AGIWUR4437  |
| CB4856                                                                 | HS | III | 8326516 | 8330947 | WBGene00022580 | iglr-2    | ZC262.3  | 0.084240634870687     |             |
| AGIWUR8953;AGIWUR24237;AGIWUR26998                                     |    |     |         |         |                |           |          |                       |             |
| CB4856                                                                 | HS | III | 8331047 | 8331919 | WBGene00022583 | mrps-18A  | ZC262.8  | 0.0922688008460657    |             |
| AGIWUR27397                                                            |    |     |         |         |                |           |          |                       |             |
| CB4856                                                                 | HS | III | 8332223 | 8333572 | WBGene00022579 | ZC262.2   | ZC262.2  | 0.0616741039181496    |             |
| AGIWUR6868;AGIWUR9361;AGIWUR12810;AGIWUR18704;AGIWUR34135;AGIWUR42356  |    |     |         |         |                |           |          |                       |             |
| CB4856                                                                 | HS | III | 8333663 | 8334233 | WBGene00022581 | ZC262.4   | ZC262.4  | -0.24737720494554     | AGIWUR15636 |
| CB4856                                                                 | HS | III | 8351249 | 8355174 | WBGene00006840 | unc-116   | R05D3.7  | -0.157826674176191    |             |
| AGIWUR1060;AGIWUR21329                                                 |    |     |         |         |                |           |          |                       |             |
| CB4856                                                                 | HS | III | 8356887 | 8358844 | WBGene00019881 | R05D3.8   | R05D3.8  | 0.0217516381227787    |             |
| AGIWUR1460;AGIWUR10567                                                 |    |     |         |         |                |           |          |                       |             |
| CB4856                                                                 | HS | III | 8358625 | 8362496 | WBGene00007008 | rfp-1     | R05D3.4  | -0.00699480219708271  | AGIWUR37669 |
| CB4856                                                                 | HS | III | 8362408 | 8368848 | WBGene00019882 | R05D3.9   | R05D3.9  | -0.00974290355877594  |             |
| AGIWUR23033;AGIWUR30286                                                |    |     |         |         |                |           |          |                       |             |
| CB4856                                                                 | HS | III | 8372255 | 8375175 | WBGene00019877 | R05D3.2   | R05D3.2  | 0.0474984031013346    |             |
| AGIWUR4020;AGIWUR13106;AGIWUR43656                                     |    |     |         |         |                |           |          |                       |             |
| CB4856                                                                 | HS | III | 8375300 | 8380833 | WBGene00019883 | met-2     | R05D3.11 | 0.0344331433675116    |             |
| AGIWUR27065                                                            |    |     |         |         |                |           |          |                       |             |
| CB4856                                                                 | HS | III | 8380943 | 8387529 | WBGene00019884 | R05D3.12  | R05D3.12 | -0.0367170879168484   |             |
| AGIWUR9424;AGIWUR40415                                                 |    |     |         |         |                |           |          |                       |             |
| CB4856                                                                 | HS | III | 8388466 | 8389639 | WBGene00022700 | ZK353.4   | ZK353.4  | 0.194475456251393     | AGIWUR10980 |
| CB4856                                                                 | HS | III | 8389882 | 8394424 | WBGene00044677 | ZK353.10  | ZK353.10 | 0.0322828985944312    |             |

AGIWUR43758  
CB4856 HS III 8395985 8396727 WBGene00022699 ZK353.3 ZK353.3 0.037002492153853  
AGIWUR7042;AGIWUR10899;AGIWUR11298;AGIWUR16527;AGIWUR22949  
CB4856 HS III 8398711 8399240 WBGene00022698 ZK353.2 ZK353.2 0.174275205675356 AGIWUR43243  
CB4856 HS III 8399190 8401928 WBGene00002249 lap-1 ZK353.6 -0.0966392154078228  
AGIWUR19824;AGIWUR21981;AGIWUR31549  
CB4856 HS III 8402049 8403607 WBGene00022702 cutc-1 ZK353.7 -0.0860049399329865  
AGIWUR11611;AGIWUR15249;AGIWUR19716;AGIWUR22359;AGIWUR28520;AGIWUR30902;AGIWUR34334;AGIWUR35842;AGIWUR37404  
CB4856 HS III 8403715 8405562 WBGene00022703 ubxn-4 ZK353.8 -0.181963472393887 AGIWUR17659  
CB4856 HS III 8405874 8409406 WBGene00022697 cyy-1 ZK353.1 -0.083414552008735  
AGIWUR158;AGIWUR1847;AGIWUR4594;AGIWUR6679;AGIWUR26066;AGIWUR33796  
CB4856 HS III 8409496 8412017 WBGene00022704 ZK353.9 ZK353.9 0.159245890341813 AGIWUR9955  
CB4856 HS III 8416227 8422650 WBGene00023405 sor-1 ZK1236.3 0.214075947544666  
AGIWUR14064  
CB4856 HS III 8426334 8428583 WBGene00000414 cec-1 ZK1236.2 -0.110360553913274  
AGIWUR35155  
CB4856 HS III 8429307 8431586 WBGene00022862 ZK1236.1 ZK1236.1 0.161338436361099  
AGIWUR10904  
CB4856 HS III 8431552 8432214 WBGene00022864 ZK1236.5 ZK1236.5 0.0773869370124292  
AGIWUR44607  
CB4856 HS III 8432469 8435174 WBGene00044588 ZK1236.9 ZK1236.9 0.138231510796302  
AGIWUR16787;AGIWUR29697  
CB4856 HS III 8436700 8437811 WBGene00023223 ZK1236.8 ZK1236.8 -0.0260706799670736  
AGIWUR5337;AGIWUR11160;AGIWUR24137;AGIWUR26002;AGIWUR37523  
CB4856 HS III 8438061 8439412 WBGene00004175 pqn-96 ZK1236.6 0.000583332547108739  
AGIWUR25763  
CB4856 HS III 8439468 8443607 WBGene00022865 ufbp-1 ZK1236.7 0.01349339999999447  
AGIWUR21809;AGIWUR40300;AGIWUR43834  
CB4856 HS III 8443917 8446920 WBGene00016250 hsp-110 C30C11.4 -0.0463431968561832  
AGIWUR13298;AGIWUR24695;AGIWUR24876  
CB4856 HS III 8447353 8449346 WBGene00004460 rpn-3 C30C11.2 0.188730242453078  
AGIWUR40229  
CB4856 HS III 8449757 8450519 WBGene00016249 mrpl-32 C30C11.1 0.031215252114027  
AGIWUR42312  
CB4856 HS III 8467035 8478377 WBGene00018369 mig-39 F42H10.5 -0.13515868251555  
AGIWUR20369  
CB4856 HS III 8478382 8480455 WBGene00018370 F42H10.6 F42H10.6 0.106925285196823  
AGIWUR13388  
CB4856 HS III 8484153 8488365 WBGene00018367 F42H10.3 F42H10.3 0.0756070778990781

AGIWUR11127;AGIWUR40428  
CB4856 HS III 8488344 8490347 WBGene00018371 ess-2 F42H10.7 -0.266411514189944  
AGIWUR20825  
CB4856 HS III 8490624 8491097 WBGene00018366 F42H10.2 F42H10.2 -0.0504335592552412  
AGIWUR6373  
CB4856 HS III 8493878 8518879 WBGene00015418 pac-1 C04D8.1 -0.123486547231669  
AGIWUR8499;AGIWUR21807  
CB4856 HS III 8518904 8519945 WBGene00022507 ZC21.8 ZC21.8 -0.252475599766381 AGIWUR36373  
CB4856 HS III 8525073 8528650 WBGene00022505 ZC21.3 ZC21.3 -0.0286383536773602  
AGIWUR6744;AGIWUR18379;AGIWUR21048;AGIWUR26702;AGIWUR33777;AGIWUR41319  
CB4856 HS III 8530077 8531123 WBGene00044443 ZC21.10 ZC21.10 -0.141053791413922  
AGIWUR25900;AGIWUR30228;AGIWUR41931  
CB4856 HS III 8535131 8542748 WBGene00006614 trp-1 ZC21.2 0.0247006325601689 AGIWUR12908  
CB4856 HS III 8542952 8545608 WBGene00022506 ZC21.6 ZC21.6 0.220029653466428 AGIWUR43550  
CB4856 HS III 8552555 8553839 WBGene00043097 C02D5.4 C02D5.4 0.0682813543583283  
AGIWUR11444;AGIWUR40140;AGIWUR42459  
CB4856 HS III 8554772 8555821 WBGene00015337 gsto-2 C02D5.3 0.0761469959957406  
AGIWUR16755;AGIWUR36587;AGIWUR38455  
CB4856 HS III 8557335 8559194 WBGene00015336 C02D5.2 C02D5.2 -0.194438897233447 AGIWUR27961  
CB4856 HS III 8561136 8563026 WBGene00015335 acdh-6 C02D5.1 0.168164038110412 AGIWUR2682  
CB4856 HS III 8581102 8583928 WBGene00015519 doxa-1 C06E1.3 0.167034071425331 AGIWUR20889  
CB4856 HS III 8584186 8588642 WBGene00001612 glr-1 C06E1.4 0.33309934370445 AGIWUR5066  
CB4856 HS III 8589336 8589488 WBGene00015520 fip-3 C06E1.5 -0.103144679395392 AGIWUR5323  
CB4856 HS III 8590833 8590982 WBGene00015521 fipr-16 C06E1.6 -0.186868463253521  
AGIWUR15253;AGIWUR15387;AGIWUR16496;AGIWUR18026;AGIWUR21580;AGIWUR34124  
CB4856 HS III 8591239 8593720 WBGene00015522 C06E1.7 C06E1.7 -0.148470024827457 AGIWUR10879  
CB4856 HS III 8595339 8597870 WBGene00015523 ztf-30 C06E1.8 0.16227040952372 AGIWUR16028  
CB4856 HS III 8605832 8606622 WBGene00015518 C06E1.1 C06E1.1 -0.0104161977150428  
AGIWUR2461;AGIWUR14714;AGIWUR20169;AGIWUR35713  
CB4856 HS III 8609882 8614569 WBGene00015525 rha-2 C06E1.10 -0.0663243937005991  
AGIWUR2692;AGIWUR15564;AGIWUR31321  
CB4856 HS III 8614762 8616381 WBGene00015526 C06E1.11 C06E1.11 0.459574996581174  
AGIWUR14844  
CB4856 HS III 8616781 8626917 WBGene00015747 C13G5.2 C13G5.2 -0.42734684497315 AGIWUR17169  
CB4856 HS III 8626291 8628571 WBGene00017696 polk-1 F22B7.6 -0.183500920512813  
AGIWUR4510;AGIWUR37658;AGIWUR39072  
CB4856 HS III 8631165 8633549 WBGene00001028 dnj-10 F22B7.5 -0.0214741106687839  
AGIWUR815;AGIWUR6507;AGIWUR26820;AGIWUR28613  
CB4856 HS III 8634078 8643739 WBGene00006662 twk-7 F22B7.7 -0.0263052531091414



AGIWUR395;AGIWUR39525  
CB4856 HS III 8648889 8649477 WBGene00017694 F22B7.3 F22B7.3 -0.0379231069421415 AGIWUR43782  
CB4856 HS III 8650764 8652190 WBGene00017693 flp-23 F22B7.2 -0.279291352693217  
AGIWUR4182;AGIWUR16416;AGIWUR16449;AGIWUR17359;AGIWUR25271;AGIWUR29653;AGIWUR30956;AGIWUR37005;AGIWUR42211;  
AGIWUR43285  
CB4856 HS III 8652578 8653925 WBGene00017698 F22B7.9 F22B7.9 0.106630089970418  
AGIWUR3277;AGIWUR19821;AGIWUR23277;AGIWUR25110;AGIWUR27887;AGIWUR28497  
CB4856 HS III 8659872 8667482 WBGene00001078 dpy-19 F22B7.10 -0.235109026873774  
AGIWUR34986  
CB4856 HS III 8670543 8675051 WBGene00003993 pgl-2 B0523.3 -0.0171008724886175 AGIWUR18234  
CB4856 HS III 8675297 8683732 WBGene00001443 fli-1 B0523.5 0.14291906515313  
AGIWUR4414;AGIWUR25594;AGIWUR32485  
CB4856 HS III 8686118 8688457 WBGene00015125 B0303.3 B0303.3 -0.165287349678586  
AGIWUR2262;AGIWUR10093;AGIWUR21243;AGIWUR36276  
CB4856 HS III 8689850 8693473 WBGene00015126 B0303.4 B0303.4 -0.0430396221667202 AGIWUR16137  
CB4856 HS III 8693638 8699497 WBGene00015128 B0303.7 B0303.7 0.0710343941600797 AGIWUR39808  
CB4856 HS III 8699481 8700333 WBGene00015129 sdz-1 B0303.8 -0.0610773564399896 AGIWUR26442  
CB4856 HS III 8700927 8703341 WBGene00015130 vps-33.1 B0303.9 -0.256641117145751  
AGIWUR13675  
CB4856 HS III 8703300 8710410 WBGene00015131 B0303.11 B0303.11 0.0815242459566399  
AGIWUR39482  
CB4856 HS III 8713993 8716184 WBGene00015132 B0303.14 B0303.14 -0.223977802587545  
AGIWUR29492  
CB4856 HS III 8717644 8718567 WBGene00015133 mrpl-11 B0303.15 -0.022786871658468  
AGIWUR38117;AGIWUR41229  
CB4856 HS III 8720201 8725334 WBGene00022717 hipr-1 ZK370.3 0.124075952980771 AGIWUR1623  
CB4856 HS III 8725323 8731373 WBGene00022718 ZK370.4 ZK370.4 -0.00613920461966444  
AGIWUR393;AGIWUR13330;AGIWUR23503;AGIWUR25689;AGIWUR29681;AGIWUR34771;AGIWUR35829  
CB4856 HS III 8737686 8741412 WBGene00022719 pdhk-2 ZK370.5 0.043527382646591 AGIWUR9815  
CB4856 HS III 8742007 8743842 WBGene00022720 ZK370.6 ZK370.6 0.0159433826895805 AGIWUR11574  
CB4856 HS III 8746216 8748701 WBGene00022721 ugtp-1 ZK370.7 -0.0777609446633623 AGIWUR25896  
CB4856 HS III 8749763 8757069 WBGene00004856 sma-2 ZK370.2 0.242189660037878 AGIWUR33081  
CB4856 HS III 8756995 8761101 WBGene00019801 aak-1 PAR2.3 0.0802688201877313  
AGIWUR5774;AGIWUR7517;AGIWUR34094  
CB4856 HS III 8763291 8767342 WBGene00003253 mig-22 PAR2.4 0.0619750564376886  
AGIWUR7118;AGIWUR40525  
CB4856 HS III 8768311 8769252 WBGene00019800 mtss-1 PAR2.1 0.137807079134678 AGIWUR33250  
CB4856 HS III 8769502 8776141 WBGene00019301 K02D10.1 K02D10.1 -0.0832841387503445  
AGIWUR3144;AGIWUR5099;AGIWUR7470;AGIWUR11325;AGIWUR18329;AGIWUR25715;AGIWUR39553;AGIWUR42939

|                                                                         |    |     |         |         |                |          |          |                     |             |
|-------------------------------------------------------------------------|----|-----|---------|---------|----------------|----------|----------|---------------------|-------------|
| CB4856                                                                  | HS | III | 8776183 | 8777895 | WBGene00019305 | snap-29  | K02D10.5 | 0.146078903868455   |             |
| AGIWUR2012                                                              |    |     |         |         |                |          |          |                     |             |
| CB4856                                                                  | HS | III | 8777890 | 8780012 | WBGene00019304 | K02D10.4 | K02D10.4 | 0.0186909465028862  |             |
| AGIWUR11635;AGIWUR12464;AGIWUR16357                                     |    |     |         |         |                |          |          |                     |             |
| CB4856                                                                  | HS | III | 8787092 | 8792346 | WBGene00018833 | ztf-1    | F54F2.5  | 0.0693980310168136  |             |
| AGIWUR12987;AGIWUR35878                                                 |    |     |         |         |                |          |          |                     |             |
| CB4856                                                                  | HS | III | 8792847 | 8806305 | WBGene00006975 | zfp-1    | F54F2.2  | 0.0623755913464343  |             |
| AGIWUR16269;AGIWUR28175                                                 |    |     |         |         |                |          |          |                     |             |
| CB4856                                                                  | HS | III | 8806231 | 8807346 | WBGene00018835 | F54F2.7  | F54F2.7  | 0.18134924390451    | AGIWUR45086 |
| CB4856                                                                  | HS | III | 8807482 | 8809329 | WBGene00004201 | prx-19   | F54F2.8  | -0.0515393291575243 | AGIWUR28794 |
| CB4856                                                                  | HS | III | 8818899 | 8825270 | WBGene00003929 | pat-2    | F54F2.1  | 0.205139438820199   | AGIWUR44985 |
| CB4856                                                                  | HS | III | 8825243 | 8827228 | WBGene00018836 | F54F2.9  | F54F2.9  | -0.171009601083117  | AGIWUR21876 |
| CB4856                                                                  | HS | III | 8827358 | 8829305 | WBGene00018417 | F44E2.3  | F44E2.3  | -0.0262036171303146 |             |
| AGIWUR13313;AGIWUR22083                                                 |    |     |         |         |                |          |          |                     |             |
| CB4856                                                                  | HS | III | 8829493 | 8831109 | WBGene00018423 | F44E2.10 | F44E2.10 | 0.158910758598568   |             |
| AGIWUR14243                                                             |    |     |         |         |                |          |          |                     |             |
| CB4856                                                                  | HS | III | 8832479 | 8838424 | WBGene00018418 | F44E2.4  | F44E2.4  | -0.296474265001848  | AGIWUR21160 |
| CB4856                                                                  | HS | III | 8844494 | 8845214 | WBGene00018419 | F44E2.6  | F44E2.6  | 0.096435096213674   |             |
| AGIWUR15400;AGIWUR16092;AGIWUR16254;AGIWUR16985;AGIWUR34165;AGIWUR38620 |    |     |         |         |                |          |          |                     |             |
| CB4856                                                                  | HS | III | 8845856 | 8848486 | WBGene00018420 | F44E2.7  | F44E2.7  | -0.121509093539526  |             |
| AGIWUR16197;AGIWUR37883;AGIWUR40627                                     |    |     |         |         |                |          |          |                     |             |
| CB4856                                                                  | HS | III | 8848582 | 8849877 | WBGene00018421 | F44E2.8  | F44E2.8  | 0.0554492566165266  | AGIWUR26871 |
| CB4856                                                                  | HS | III | 8849994 | 8850532 | WBGene00018422 | F44E2.9  | F44E2.9  | 0.14754574311198    | AGIWUR30697 |
| CB4856                                                                  | HS | III | 8852264 | 8864451 | WBGene00004041 | plg-1    | F44E2.11 | -0.434409573962841  |             |
| AGIWUR5095;AGIWUR10027;AGIWUR20923;AGIWUR36446                          |    |     |         |         |                |          |          |                     |             |
| CB4856                                                                  | HS | III | 8870099 | 8877128 | WBGene00010475 | K01F9.2  | K01F9.2  | 0.100160579569579   | AGIWUR30346 |
| CB4856                                                                  | HS | III | 8882707 | 8885482 | WBGene00014021 | svop-1   | ZK637.1  | 0.145452038674598   | AGIWUR11249 |
| CB4856                                                                  | HS | III | 8887751 | 8890143 | WBGene00014022 | ZK637.2  | ZK637.2  | 0.0841275397950998  | AGIWUR45186 |
| CB4856                                                                  | HS | III | 8890231 | 8894208 | WBGene00014023 | lnkn-1   | ZK637.3  | 0.126823262928664   | AGIWUR10243 |
| CB4856                                                                  | HS | III | 8894209 | 8894691 | WBGene00014024 | ZK637.4  | ZK637.4  | 0.113455057329945   | AGIWUR37235 |
| CB4856                                                                  | HS | III | 8895082 | 8896654 | WBGene00014025 | asna-1   | ZK637.5  | 0.0301511938021619  | AGIWUR17798 |
| CB4856                                                                  | HS | III | 8898622 | 8899530 | WBGene00014987 | ZK637.6  | ZK637.6  | 0.0145066618912804  |             |
| AGIWUR11772;AGIWUR16118                                                 |    |     |         |         |                |          |          |                     |             |
| CB4856                                                                  | HS | III | 8900237 | 8904160 | WBGene00002998 | lin-9    | ZK637.7  | 0.122672931402757   |             |
| AGIWUR7682;AGIWUR11606;AGIWUR14623                                      |    |     |         |         |                |          |          |                     |             |
| CB4856                                                                  | HS | III | 8905615 | 8911749 | WBGene00006768 | unc-32   | ZK637.8  | 0.0125325024661933  |             |
| AGIWUR30237;AGIWUR33688;AGIWUR37194                                     |    |     |         |         |                |          |          |                     |             |
| CB4856                                                                  | HS | III | 8912144 | 8913632 | WBGene00014027 | tpk-1    | ZK637.9  | -0.0544846754750417 |             |
| AGIWUR23783;AGIWUR40284;AGIWUR42847                                     |    |     |         |         |                |          |          |                     |             |

|                                                                                    |     |         |         |                |          |          |                     |             |
|------------------------------------------------------------------------------------|-----|---------|---------|----------------|----------|----------|---------------------|-------------|
| CB4856 HS<br>AGIWUR2437                                                            | III | 8913769 | 8916450 | WBGene00014028 | trxr-2   | ZK637.10 | 0.0938182268501002  |             |
| CB4856 HS<br>AGIWUR1926                                                            | III | 8916351 | 8917929 | WBGene00000388 | cdc-25.3 | ZK637.11 | 0.0151869366330821  |             |
| CB4856 HS<br>AGIWUR11063                                                           | III | 8922292 | 8925302 | WBGene00014029 | ZK637.12 | ZK637.12 | -0.192121385510799  |             |
| CB4856 HS                                                                          | III | 8925607 | 8926529 | WBGene00014038 | ZK643.7  | ZK643.7  | -0.245221993131274  | AGIWUR30593 |
| CB4856 HS                                                                          | III | 8930036 | 8936682 | WBGene00014033 | arrd-15  | ZK643.1  | 0.0395733071124393  | AGIWUR3131  |
| CB4856 HS<br>AGIWUR21977;AGIWUR41246;AGIWUR42198                                   | III | 8944686 | 8952953 | WBGene00014035 | seb-2    | ZK643.3  | -0.0954410583795369 |             |
| CB4856 HS                                                                          | III | 8952886 | 8956216 | WBGene00014036 | ZK643.5  | ZK643.5  | 0.0527401228805555  | AGIWUR1264  |
| CB4856 HS                                                                          | III | 8956459 | 8957731 | WBGene00014034 | ZK643.2  | ZK643.2  | 0.198832837992661   | AGIWUR7832  |
| CB4856 HS                                                                          | III | 8957704 | 8960693 | WBGene00014037 | ZK643.6  | ZK643.6  | 0.776650482986313   | AGIWUR15236 |
| CB4856 HS                                                                          | III | 8962295 | 8965638 | WBGene00001734 | grl-25   | ZK643.8  | -0.124881090769257  | AGIWUR45029 |
| CB4856 HS                                                                          | III | 8966022 | 8967727 | WBGene00011142 | R08D7.1  | R08D7.1  | 0.162181578908745   | AGIWUR42741 |
| CB4856 HS                                                                          | III | 8967917 | 8969658 | WBGene00011143 | R08D7.2  | R08D7.2  | 0.116961524175707   | AGIWUR1150  |
| CB4856 HS<br>AGIWUR1208;AGIWUR4378;AGIWUR22575;AGIWUR33307;AGIWUR34559;AGIWUR43455 | III | 8969638 | 8971578 | WBGene00001227 | eif-3.D  | R08D7.3  | -0.253915937575186  |             |
| CB4856 HS<br>AGIWUR13868;AGIWUR41913                                               | III | 8971892 | 8973672 | WBGene00011144 | R08D7.4  | R08D7.4  | 0.0986879677726851  |             |
| CB4856 HS                                                                          | III | 8974126 | 8975061 | WBGene00011145 | R08D7.5  | R08D7.5  | 0.00139857589346803 | AGIWUR41124 |
| CB4856 HS<br>AGIWUR20156;AGIWUR22060;AGIWUR24440;AGIWUR33393                       | III | 8975070 | 8981897 | WBGene00011146 | pde-2    | R08D7.6  | 0.0407491161585893  |             |
| CB4856 HS                                                                          | III | 8992205 | 8994827 | WBGene00011147 | R08D7.7  | R08D7.7  | 0.131430252879001   | AGIWUR24736 |
| CB4856 HS<br>AGIWUR2749;AGIWUR3789;AGIWUR8329;AGIWUR22566;AGIWUR25535;AGIWUR35192  | III | 8996418 | 8999785 | WBGene00010308 | F59B2.3  | F59B2.3  | 0.0338943551031896  |             |
| CB4856 HS                                                                          | III | 8999828 | 9001973 | WBGene00010309 | rpn-6.2  | F59B2.5  | 0.112786363364688   | AGIWUR44151 |
| CB4856 HS                                                                          | III | 9002779 | 9004839 | WBGene00006977 | zif-1    | F59B2.6  | -0.0558829769640496 | AGIWUR43029 |
| CB4856 HS<br>AGIWUR5493;AGIWUR6537;AGIWUR18805;AGIWUR36400;AGIWUR44152             | III | 9004821 | 9005955 | WBGene00004269 | rab-6.1  | F59B2.7  | 0.0138577923286523  |             |
| CB4856 HS                                                                          | III | 9007974 | 9010121 | WBGene00010310 | F59B2.8  | F59B2.8  | -0.0051561865118348 | AGIWUR43386 |
| CB4856 HS<br>AGIWUR8241;AGIWUR25616;AGIWUR28441                                    | III | 9010676 | 9012409 | WBGene00010311 | F59B2.9  | F59B2.9  | -0.0382895259078708 |             |
| CB4856 HS<br>AGIWUR5273;AGIWUR14502;AGIWUR15535                                    | III | 9013003 | 9016961 | WBGene00010313 | F59B2.11 | F59B2.11 | -0.0105257275903412 |             |
| CB4856 HS<br>AGIWUR35085                                                           | III | 9017607 | 9020960 | WBGene00010314 | F59B2.12 | F59B2.12 | -0.445551095156258  |             |
| CB4856 HS<br>AGIWUR25458;AGIWUR30439;AGIWUR39247                                   | III | 9021370 | 9022635 | WBGene00050931 | F59B2.14 | F59B2.14 | 0.0131911417891555  |             |

|                                                                                            |    |     |         |         |                |          |          |                     |             |
|--------------------------------------------------------------------------------------------|----|-----|---------|---------|----------------|----------|----------|---------------------|-------------|
| CB4856                                                                                     | HS | III | 9023964 | 9027044 | WBGene00010315 | F59B2.13 | F59B2.13 | 0.0755338419164744  |             |
| AGIWUR39438                                                                                |    |     |         |         |                |          |          |                     |             |
| CB4856                                                                                     | HS | III | 9038779 | 9043300 | WBGene00003518 | nac-2    | R107.1   | -0.179086137879622  | AGIWUR17074 |
| CB4856                                                                                     | HS | III | 9043886 | 9045938 | WBGene00011298 | R107.2   | R107.2   | 0.136057836748108   | AGIWUR29941 |
| CB4856                                                                                     | HS | III | 9046055 | 9050693 | WBGene00011299 | ikke-1   | R107.4   | 0.0682499237652667  |             |
| AGIWUR24852;AGIWUR26951                                                                    |    |     |         |         |                |          |          |                     |             |
| CB4856                                                                                     | HS | III | 9051592 | 9053793 | WBGene00011300 | R107.5   | R107.5   | -0.293604418657852  |             |
| AGIWUR19646;AGIWUR26520                                                                    |    |     |         |         |                |          |          |                     |             |
| CB4856                                                                                     | HS | III | 9055052 | 9058882 | WBGene00000549 | cls-2    | R107.6   | 0.00855922071245274 | AGIWUR39897 |
| CB4856                                                                                     | HS | III | 9059314 | 9060181 | WBGene00001749 | gst-1    | R107.7   | 0.0363835421019054  | AGIWUR24754 |
| CB4856                                                                                     | HS | III | 9060096 | 9071760 | WBGene00003001 | lin-12   | R107.8   | 0.0866307687288845  | AGIWUR31911 |
| CB4856                                                                                     | HS | III | 9074872 | 9075639 | WBGene00044406 | F02A9.7  | F02A9.7  | -0.240709509922908  | AGIWUR800   |
| CB4856                                                                                     | HS | III | 9075726 | 9077804 | WBGene00008513 | F02A9.1  | F02A9.1  | 0.0403566187977802  |             |
| AGIWUR6275;AGIWUR14081;AGIWUR19721;AGIWUR31244;AGIWUR37134                                 |    |     |         |         |                |          |          |                     |             |
| CB4856                                                                                     | HS | III | 9080371 | 9081179 | WBGene00001385 | far-1    | F02A9.2  | 0.619828843599709   |             |
| AGIWUR9075;AGIWUR11257;AGIWUR19678;AGIWUR20921;AGIWUR23169;AGIWUR26703;AGIWUR42791         |    |     |         |         |                |          |          |                     |             |
| CB4856                                                                                     | HS | III | 9081679 | 9082511 | WBGene00001386 | far-2    | F02A9.3  | 0.220189131745482   |             |
| AGIWUR6957;AGIWUR13264;AGIWUR15268;AGIWUR31229                                             |    |     |         |         |                |          |          |                     |             |
| CB4856                                                                                     | HS | III | 9084306 | 9089386 | WBGene00008514 | F02A9.4  | F02A9.4  | -0.0372293037555504 |             |
| AGIWUR2606;AGIWUR4621;AGIWUR4931;AGIWUR5859;AGIWUR8562;AGIWUR27392;AGIWUR31943;AGIWUR43479 |    |     |         |         |                |          |          |                     |             |
| CB4856                                                                                     | HS | III | 9092241 | 9099698 | WBGene00001609 | glp-1    | F02A9.6  | 0.0474198995328976  | AGIWUR41673 |
| CB4856                                                                                     | HS | III | 9101367 | 9103095 | WBGene00013979 | ZK507.3  | ZK507.3  | 0.189103750916061   | AGIWUR8624  |
| CB4856                                                                                     | HS | III | 9103943 | 9106805 | WBGene00013980 | dos-1    | ZK507.4  | 0.131386792301726   |             |
| AGIWUR121;AGIWUR22323;AGIWUR25063                                                          |    |     |         |         |                |          |          |                     |             |
| CB4856                                                                                     | HS | III | 9106702 | 9109272 | WBGene00000863 | cya-1    | ZK507.6  | -0.262961161223444  | AGIWUR31862 |
| CB4856                                                                                     | HS | III | 9115082 | 9117270 | WBGene00013982 | ZK512.1  | ZK512.1  | 0.178859330454282   | AGIWUR11510 |
| CB4856                                                                                     | HS | III | 9117349 | 9118364 | WBGene00001720 | grl-11   | ZK512.9  | 0.0640760089728918  | AGIWUR20150 |
| CB4856                                                                                     | HS | III | 9119559 | 9125153 | WBGene00000425 | ced-11   | ZK512.3  | 0.0488977838948408  | AGIWUR9162  |
| CB4856                                                                                     | HS | III | 9125641 | 9130807 | WBGene00013985 | sec-16   | ZK512.5  | 0.0448733589683816  |             |
| AGIWUR8065;AGIWUR12160;AGIWUR25926;AGIWUR42645                                             |    |     |         |         |                |          |          |                     |             |
| CB4856                                                                                     | HS | III | 9130844 | 9131360 | WBGene00013988 | ZK512.10 | ZK512.10 | -0.0406660332674456 |             |
| AGIWUR14773                                                                                |    |     |         |         |                |          |          |                     |             |
| CB4856                                                                                     | HS | III | 9136916 | 9141822 | WBGene00001135 | eat-4    | ZK512.6  | 0.0749450293777993  | AGIWUR15306 |
| CB4856                                                                                     | HS | III | 9141789 | 9144794 | WBGene00013983 | ZK512.2  | ZK512.2  | 0.0478010912274112  |             |
| AGIWUR2192;AGIWUR3650;AGIWUR7066                                                           |    |     |         |         |                |          |          |                     |             |
| CB4856                                                                                     | HS | III | 9145325 | 9145976 | WBGene00013984 | ZK512.4  | ZK512.4  | 0.186778905756313   | AGIWUR25270 |
| CB4856                                                                                     | HS | III | 9146031 | 9147411 | WBGene00013987 | ZK512.8  | ZK512.8  | -0.0336410050543794 | AGIWUR44998 |
| CB4856                                                                                     | HS | III | 9147395 | 9153909 | WBGene00003597 | nhl-1    | F54G8.4  | 0.371615341260423   | AGIWUR7367  |
| CB4856                                                                                     | HS | III | 9155116 | 9157165 | WBGene00010074 | irld-34  | F54G8.1  | 0.290082095421992   | AGIWUR18148 |

|                                                                         |    |     |         |         |                |         |         |                      |             |
|-------------------------------------------------------------------------|----|-----|---------|---------|----------------|---------|---------|----------------------|-------------|
| CB4856                                                                  | HS | III | 9157243 | 9161653 | WBGene00004223 | ptr-9   | F54G8.5 | 0.109018537669842    | AGIWUR15185 |
| CB4856                                                                  | HS | III | 9163077 | 9168027 | WBGene00000960 | dgk-3   | F54G8.2 | 0.0790645938769128   | AGIWUR30352 |
| CB4856                                                                  | HS | III | 9168040 | 9172802 | WBGene00002081 | ina-1   | F54G8.3 | 0.0243799985030684   | AGIWUR3362  |
| CB4856                                                                  | HS | III | 9181550 | 9185649 | WBGene00006526 | tax-4   | ZC84.2  | 0.207922386758145    | AGIWUR15160 |
| CB4856                                                                  | HS | III | 9186077 | 9192951 | WBGene00013850 | ZC84.7  | ZC84.7  | -0.123174212782034   | AGIWUR31325 |
| CB4856                                                                  | HS | III | 9192983 | 9199507 | WBGene00013849 | ZC84.6  | ZC84.6  | 0.00668853237575284  | AGIWUR6565  |
| CB4856                                                                  | HS | III | 9199450 | 9206285 | WBGene00013846 | ZC84.1  | ZC84.1  | 0.117111127612965    |             |
| AGIWUR1559;AGIWUR10301;AGIWUR12527;AGIWUR22077                          |    |     |         |         |                |         |         |                      |             |
| CB4856                                                                  | HS | III | 9206966 | 9207854 | WBGene00014980 | ZC84.5  | ZC84.5  | 0.227941929590908    | AGIWUR15239 |
| CB4856                                                                  | HS | III | 9208288 | 9215440 | WBGene00013848 | npr-29  | ZC84.4  | 0.0711694302545496   | AGIWUR25356 |
| CB4856                                                                  | HS | III | 9225374 | 9228786 | WBGene00004391 | rnr-1   | T23G5.1 | -0.00751293917681295 |             |
| AGIWUR21235;AGIWUR28652;AGIWUR34624                                     |    |     |         |         |                |         |         |                      |             |
| CB4856                                                                  | HS | III | 9229235 | 9231210 | WBGene00011963 | T23G5.3 | T23G5.3 | 0.121457316315526    | AGIWUR12934 |
| CB4856                                                                  | HS | III | 9231421 | 9236322 | WBGene00011962 | T23G5.2 | T23G5.2 | -0.00697270123287552 |             |
| AGIWUR21176;AGIWUR33460;AGIWUR36304                                     |    |     |         |         |                |         |         |                      |             |
| CB4856                                                                  | HS | III | 9240337 | 9242514 | WBGene00011964 | saeg-2  | T23G5.6 | 0.131572564223069    |             |
| AGIWUR6898;AGIWUR13321;AGIWUR38443                                      |    |     |         |         |                |         |         |                      |             |
| CB4856                                                                  | HS | III | 9242914 | 9246802 | WBGene00000934 | dat-1   | T23G5.5 | -0.028921145044114   | AGIWUR22310 |
| CB4856                                                                  | HS | III | 9247422 | 9248618 | WBGene00011365 | T02C1.1 | T02C1.1 | -0.0861152874663844  | AGIWUR26963 |
| CB4856                                                                  | HS | III | 9251029 | 9253126 | WBGene00011366 | T02C1.2 | T02C1.2 | -0.00378352717945063 | AGIWUR13854 |
| CB4856                                                                  | HS | III | 9257259 | 9260222 | WBGene00010795 | M01A8.1 | M01A8.1 | -0.0175438613685843  |             |
| AGIWUR13143;AGIWUR15928;AGIWUR16043;AGIWUR38473;AGIWUR38524;AGIWUR45013 |    |     |         |         |                |         |         |                      |             |
| CB4856                                                                  | HS | III | 9260191 | 9269062 | WBGene00010796 | clip-1  | M01A8.2 | -0.139736078004362   |             |
| AGIWUR9838;AGIWUR11840;AGIWUR19871                                      |    |     |         |         |                |         |         |                      |             |
| CB4856                                                                  | HS | III | 9281785 | 9296668 | WBGene00010453 | fozi-1  | K01B6.1 | 0.121587196284027    | AGIWUR1508  |
| CB4856                                                                  | HS | III | 9296627 | 9297394 | WBGene00010455 | K01B6.4 | K01B6.4 | 0.079830769161461    | AGIWUR5362  |
| CB4856                                                                  | HS | III | 9300219 | 9303928 | WBGene00010454 | K01B6.3 | K01B6.3 | -0.167315524257798   | AGIWUR27244 |
| CB4856                                                                  | HS | III | 9304034 | 9306696 | WBGene00005936 | srx-45  | K01B6.2 | 0.0776534633306003   |             |
| AGIWUR8476;AGIWUR18281;AGIWUR39530                                      |    |     |         |         |                |         |         |                      |             |
| CB4856                                                                  | HS | III | 9314714 | 9317365 | WBGene00008043 | C40H1.8 | C40H1.8 | -0.152782734499157   | AGIWUR23496 |
| CB4856                                                                  | HS | III | 9318044 | 9319271 | WBGene00008038 | C40H1.2 | C40H1.2 | 0.141526154838996    | AGIWUR40443 |
| CB4856                                                                  | HS | III | 9320040 | 9321663 | WBGene00008044 | C40H1.9 | C40H1.9 | -0.0716725662334383  | AGIWUR14266 |
| CB4856                                                                  | HS | III | 9322316 | 9324733 | WBGene00000770 | cpb-1   | C40H1.1 | 0.120405197352962    | AGIWUR13573 |
| CB4856                                                                  | HS | III | 9325048 | 9327031 | WBGene00008042 | C40H1.7 | C40H1.7 | 0.124601676008613    | AGIWUR16820 |
| CB4856                                                                  | HS | III | 9327307 | 9329366 | WBGene00008039 | C40H1.3 | C40H1.3 | -0.139635730104115   | AGIWUR27686 |
| CB4856                                                                  | HS | III | 9330316 | 9330928 | WBGene00008040 | ttr-5   | C40H1.5 | 0.114306122649269    | AGIWUR40524 |
| CB4856                                                                  | HS | III | 9331514 | 9332284 | WBGene00008041 | ufc-1   | C40H1.6 | 0.152567835650284    | AGIWUR41584 |
| CB4856                                                                  | HS | III | 9332269 | 9334274 | WBGene00001242 | elo-4   | C40H1.4 | 0.168512923125057    | AGIWUR23388 |
| CB4856                                                                  | HS | III | 9336881 | 9344447 | WBGene00001263 | emb-9   | K04H4.1 | 0.211481646557736    |             |

AGIWUR9539;AGIWUR9984  
 CB4856 HS III 9347714 9355480 WBGene00010573 K04H4.2 K04H4.2 0.0284026580945653  
 AGIWUR7753;AGIWUR12418;AGIWUR14842;AGIWUR21373;AGIWUR22356;AGIWUR23321;AGIWUR25593;AGIWUR36790;AGIWUR39493;  
 AGIWUR40643;AGIWUR41480;AGIWUR42869;AGIWUR43596  
 CB4856 HS III 9360269 9361333 WBGene00010574 K04H4.5 K04H4.5 0.0495993848038072 AGIWUR28137  
 CB4856 HS III 9361528 9365380 WBGene00010575 flp-25 K04H4.7 0.0397386190159379  
 AGIWUR2661;AGIWUR28217;AGIWUR28904;AGIWUR38699  
 CB4856 HS III 9367238 9370385 WBGene00000799 crn-6 K04H4.6 0.292657090708524  
 AGIWUR3728;AGIWUR24581  
 CB4856 HS III 9383796 9387605 WBGene00006576 tkr-1 C38C10.1 0.267952223182609  
 AGIWUR1367  
 CB4856 HS III 9387601 9390107 WBGene00008000 slc-17.2 C38C10.2 -0.146895471175443  
 AGIWUR8053;AGIWUR12304;AGIWUR18680;AGIWUR21362;AGIWUR22003;AGIWUR28566  
 CB4856 HS III 9393981 9404532 WBGene00004343 rgr-1 C38C10.5 -0.140863624118019  
 AGIWUR31939  
 CB4856 HS III 9404484 9406641 WBGene00012059 T26G10.1 T26G10.1 0.100324978846647  
 AGIWUR39909  
 CB4856 HS III 9412854 9413440 WBGene00012060 T26G10.3 T26G10.3 0.0300384259461506  
 AGIWUR18817  
 CB4856 HS III 9420531 9421574 WBGene00012061 T26G10.4 T26G10.4 -0.0914932918274216  
 AGIWUR40905  
 CB4856 HS III 9425536 9426674 WBGene00012062 T26G10.5 T26G10.5 -0.119754531502853  
 AGIWUR17340  
 CB4856 HS III 9434057 9435100 WBGene00010036 cpar-1 F54C8.2 -0.100370201221468 AGIWUR14509  
 CB4856 HS III 9435083 9441539 WBGene00001284 emb-30 F54C8.3 0.125569257848206  
 AGIWUR12925;AGIWUR43849  
 CB4856 HS III 9441557 9443634 WBGene00010037 F54C8.4 F54C8.4 0.0332354970819013  
 AGIWUR12673;AGIWUR18539;AGIWUR19722;AGIWUR26404  
 CB4856 HS III 9444360 9449931 WBGene00010039 F54C8.6 F54C8.6 0.00368102834625805 AGIWUR35169  
 CB4856 HS III 9451595 9454062 WBGene00010040 F54C8.7 F54C8.7 0.154808912239297 AGIWUR30464  
 CB4856 HS III 9454163 9456030 WBGene00010038 rheb-1 F54C8.5 -0.267779554762564 AGIWUR34422  
 CB4856 HS III 9456563 9463004 WBGene00004980 spk-1 B0464.5 -0.00621648545064701  
 AGIWUR2559;AGIWUR3910;AGIWUR29612  
 CB4856 HS III 9462989 9465965 WBGene00007186 B0464.6 B0464.6 0.0991759452557881  
 AGIWUR956;AGIWUR34359  
 CB4856 HS III 9465767 9467177 WBGene00007188 B0464.9 B0464.9 0.0800547878590336 AGIWUR10494  
 CB4856 HS III 9467464 9468058 WBGene00000235 baf-1 B0464.7 0.0652200437993447  
 AGIWUR652;AGIWUR2228;AGIWUR3386;AGIWUR20361;AGIWUR21114;AGIWUR22416;AGIWUR27119;AGIWUR28155;AGIWUR29069;AGI  
 WUR31986;AGIWUR33673

|                                                                                     |    |     |         |         |                |             |           |                     |             |
|-------------------------------------------------------------------------------------|----|-----|---------|---------|----------------|-------------|-----------|---------------------|-------------|
| CB4856                                                                              | HS | III | 9468157 | 9469899 | WBGene00007187 | tag-342     | B0464.8   | 0.16942541491565    |             |
| AGIWUR1236;AGIWUR26705                                                              |    |     |         |         |                |             |           |                     |             |
| CB4856                                                                              | HS | III | 9469920 | 9485451 | WBGene00000268 | bre-3       | B0464.4   | 0.204290333095569   | AGIWUR9948  |
| CB4856                                                                              | HS | III | 9488731 | 9489188 | WBGene00007185 | nlp-36      | B0464.3   | -0.230360224994381  | AGIWUR14705 |
| CB4856                                                                              | HS | III | 9489176 | 9491236 | WBGene00001094 | dars-1      | B0464.1   | -0.0380229585441914 |             |
| AGIWUR10366;AGIWUR28818;AGIWUR37587                                                 |    |     |         |         |                |             |           |                     |             |
| CB4856                                                                              | HS | III | 9491640 | 9497044 | WBGene00007184 | ctr-9       | B0464.2   | -0.0826284957606167 |             |
| AGIWUR4327;AGIWUR4818;AGIWUR5388;AGIWUR16073;AGIWUR26585;AGIWUR26624                |    |     |         |         |                |             |           |                     |             |
| CB4856                                                                              | HS | III | 9497019 | 9500202 | WBGene00004933 | sod-4       | F55H2.1   | 0.118779194151891   |             |
| AGIWUR16498;AGIWUR25425;AGIWUR32411;AGIWUR40264;AGIWUR40842                         |    |     |         |         |                |             |           |                     |             |
| CB4856                                                                              | HS | III | 9504764 | 9507081 | WBGene00003067 | lrg-1       | F55H2.4   | -0.186789681898349  |             |
| AGIWUR20208;AGIWUR34899                                                             |    |     |         |         |                |             |           |                     |             |
| CB4856                                                                              | HS | III | 9508074 | 9509806 | WBGene00010130 | vha-14      | F55H2.2   | 0.105063394776778   |             |
| AGIWUR3972;AGIWUR25785;AGIWUR39739                                                  |    |     |         |         |                |             |           |                     |             |
| CB4856                                                                              | HS | III | 9511470 | 9513375 | WBGene00010131 | F55H2.5     | F55H2.5   | -0.299023612012952  |             |
| AGIWUR15384;AGIWUR16468;AGIWUR17057;AGIWUR18183;AGIWUR21757;AGIWUR32281;AGIWUR39797 |    |     |         |         |                |             |           |                     |             |
| CB4856                                                                              | HS | III | 9513348 | 9516248 | WBGene00010132 | F55H2.7     | F55H2.7   | -0.144816989290247  | AGIWUR21357 |
| CB4856                                                                              | HS | III | 9516631 | 9521460 | WBGene00000550 | clu-1       | F55H2.6   | 0.0840985017290636  |             |
| AGIWUR6012;AGIWUR12781;AGIWUR24985;AGIWUR25703                                      |    |     |         |         |                |             |           |                     |             |
| CB4856                                                                              | HS | III | 9522075 | 9525437 | WBGene00014218 | ZK1098.1    | ZK1098.1  | 0.0654786898299538  |             |
| AGIWUR40242                                                                         |    |     |         |         |                |             |           |                     |             |
| CB4856                                                                              | HS | III | 9525552 | 9527068 | WBGene00014222 | trpp-3      | ZK1098.5  | -0.236374422153911  |             |
| AGIWUR27234;AGIWUR28384;AGIWUR35407;AGIWUR36975                                     |    |     |         |         |                |             |           |                     |             |
| CB4856                                                                              | HS | III | 9527151 | 9528689 | WBGene00014223 | ZK1098.6    | ZK1098.6  | -0.066295821462746  |             |
| AGIWUR23405                                                                         |    |     |         |         |                |             |           |                     |             |
| CB4856                                                                              | HS | III | 9529166 | 9531888 | WBGene00014219 | ZK1098.2    | ZK1098.2  | -0.0426992729083118 |             |
| AGIWUR25200                                                                         |    |     |         |         |                |             |           |                     |             |
| CB4856                                                                              | HS | III | 9532427 | 9538700 | WBGene00014220 | ZK1098.3    | ZK1098.3  | -0.0563549681235997 |             |
| AGIWUR7676;AGIWUR9497;AGIWUR42452                                                   |    |     |         |         |                |             |           |                     |             |
| CB4856                                                                              | HS | III | 9539031 | 9542380 | WBGene00003504 | mut-7       | ZK1098.8  | 0.00404154027538439 |             |
| AGIWUR25701                                                                         |    |     |         |         |                |             |           |                     |             |
| CB4856                                                                              | HS | III | 9543069 | 9544404 | WBGene00014221 | eif-2Balpha | ZK1098.4  | -0.0848832975113343 |             |
| AGIWUR18997                                                                         |    |     |         |         |                |             |           |                     |             |
| CB4856                                                                              | HS | III | 9545120 | 9545897 | WBGene00194691 | ZK1098.12   | ZK1098.12 | 0.251973832147121   |             |
| AGIWUR12008                                                                         |    |     |         |         |                |             |           |                     |             |
| CB4856                                                                              | HS | III | 9546258 | 9556514 | WBGene00006755 | unc-16      | ZK1098.10 | 0.139865105331769   |             |
| AGIWUR5621;AGIWUR33196;AGIWUR42349                                                  |    |     |         |         |                |             |           |                     |             |
| CB4856                                                                              | HS | III | 9556507 | 9557454 | WBGene00014226 | ZK1098.11   | ZK1098.11 | 0.0788288079071435  |             |
| AGIWUR25774                                                                         |    |     |         |         |                |             |           |                     |             |

|                                                                                                          |    |     |         |         |                |           |          |                     |             |
|----------------------------------------------------------------------------------------------------------|----|-----|---------|---------|----------------|-----------|----------|---------------------|-------------|
| CB4856                                                                                                   | HS | III | 9557448 | 9558563 | WBGene00008169 | C48B4.6   | C48B4.6  | -0.0736590075734522 | AGIWUR1145  |
| CB4856                                                                                                   | HS | III | 9558669 | 9559427 | WBGene00008170 | C48B4.7   | C48B4.7  | 0.031091876431999   | AGIWUR8640  |
| CB4856                                                                                                   | HS | III | 9559831 | 9561258 | WBGene00008171 | C48B4.8   | C48B4.8  | 0.125456414641299   | AGIWUR29752 |
| CB4856                                                                                                   | HS | III | 9562336 | 9563335 | WBGene00008172 | C48B4.9   | C48B4.9  | 0.0716659162779774  | AGIWUR12846 |
| CB4856                                                                                                   | HS | III | 9563437 | 9564510 | WBGene00008173 | C48B4.10  | C48B4.10 | 0.0797040984251236  |             |
| AGIWUR29101                                                                                              |    |     |         |         |                |           |          |                     |             |
| CB4856                                                                                                   | HS | III | 9564605 | 9566115 | WBGene00008174 | C48B4.11  | C48B4.11 | -0.12599999008857   |             |
| AGIWUR9676                                                                                               |    |     |         |         |                |           |          |                     |             |
| CB4856                                                                                                   | HS | III | 9568751 | 9570460 | WBGene00008176 | C48B4.13  | C48B4.13 | 0.0385198765426287  |             |
| AGIWUR5852                                                                                               |    |     |         |         |                |           |          |                     |             |
| CB4856                                                                                                   | HS | III | 9570394 | 9580081 | WBGene00000421 | ced-7     | C48B4.4  | 0.138412358157128   |             |
| AGIWUR15134;AGIWUR15652;AGIWUR41526                                                                      |    |     |         |         |                |           |          |                     |             |
| CB4856                                                                                                   | HS | III | 9581220 | 9582361 | WBGene00008168 | C48B4.3   | C48B4.3  | -0.0846023200455299 | AGIWUR39224 |
| CB4856                                                                                                   | HS | III | 9586617 | 9592192 | WBGene00008167 | acox-1.5  | C48B4.1  | 0.495889034686307   |             |
| AGIWUR40965                                                                                              |    |     |         |         |                |           |          |                     |             |
| CB4856                                                                                                   | HS | III | 9592282 | 9595667 | WBGene00004401 | rom-2     | C48B4.2  | -0.222205456718806  | AGIWUR30006 |
| CB4856                                                                                                   | HS | III | 9597359 | 9598361 | WBGene00008175 | C48B4.12  | C48B4.12 | -0.593227184739828  |             |
| AGIWUR33971                                                                                              |    |     |         |         |                |           |          |                     |             |
| CB4856                                                                                                   | HS | III | 9598475 | 9600049 | WBGene00010226 | F58A4.1   | F58A4.1  | -0.0784718009740573 | AGIWUR44129 |
| CB4856                                                                                                   | HS | III | 9600038 | 9600745 | WBGene00010227 | F58A4.2   | F58A4.2  | -0.0157503745066734 | AGIWUR17790 |
| CB4856                                                                                                   | HS | III | 9603030 | 9608688 | WBGene00010228 | cllec-161 | F58A4.5  | -0.194761086977916  |             |
| AGIWUR38854                                                                                              |    |     |         |         |                |           |          |                     |             |
| CB4856                                                                                                   | HS | III | 9609568 | 9612191 | WBGene00043992 | bbs-4     | F58A4.14 | 0.108462148841058   |             |
| AGIWUR13700;AGIWUR30878                                                                                  |    |     |         |         |                |           |          |                     |             |
| CB4856                                                                                                   | HS | III | 9614425 | 9615332 | WBGene00010229 | F58A4.6   | F58A4.6  | 0.0782360111999338  | AGIWUR11369 |
| CB4856                                                                                                   | HS | III | 9615306 | 9616470 | WBGene00001831 | hcp-3     | F58A4.3  | -0.0285813593008832 | AGIWUR41202 |
| CB4856                                                                                                   | HS | III | 9619711 | 9626537 | WBGene00001955 | hlh-11    | F58A4.7  | 0.0321088259629327  |             |
| AGIWUR1204;AGIWUR18661;AGIWUR29302                                                                       |    |     |         |         |                |           |          |                     |             |
| CB4856                                                                                                   | HS | III | 9626532 | 9629154 | WBGene00006540 | tbg-1     | F58A4.8  | -0.102244312206698  |             |
| AGIWUR5583;AGIWUR6671;AGIWUR8319;AGIWUR23541;AGIWUR24863;AGIWUR27460;AGIWUR31856;AGIWUR39229;AGIWUR39539 |    |     |         |         |                |           |          |                     |             |
| CB4856                                                                                                   | HS | III | 9629246 | 9629917 | WBGene00010230 | rpac-19   | F58A4.9  | -0.0694366617169262 |             |
| AGIWUR15916;AGIWUR37629                                                                                  |    |     |         |         |                |           |          |                     |             |
| CB4856                                                                                                   | HS | III | 9630085 | 9631167 | WBGene00006704 | ubc-7     | F58A4.10 | 0.0304333905872429  |             |
| AGIWUR18406;AGIWUR20044;AGIWUR40951;AGIWUR43784                                                          |    |     |         |         |                |           |          |                     |             |
| CB4856                                                                                                   | HS | III | 9631994 | 9637116 | WBGene00001570 | gei-13    | F58A4.11 | 0.166782494137758   |             |
| AGIWUR30688                                                                                              |    |     |         |         |                |           |          |                     |             |
| CB4856                                                                                                   | HS | III | 9650422 | 9651971 | WBGene00007610 | C15H7.3   | C15H7.3  | 0.25968539918313    | AGIWUR41659 |
| CB4856                                                                                                   | HS | III | 9652313 | 9653641 | WBGene00014678 | C15H7.2   | C15H7.2  | 0.0598446024073969  | AGIWUR3998  |
| CB4856                                                                                                   | HS | III | 9654409 | 9655859 | WBGene00007611 | C15H7.4   | C15H7.4  | 0.0144784942952185  | AGIWUR12873 |



|                                                            |    |     |         |         |                |          |          |                     |             |
|------------------------------------------------------------|----|-----|---------|---------|----------------|----------|----------|---------------------|-------------|
| CB4856                                                     | HS | III | 9663290 | 9667640 | WBGene00007405 | C07A9.9  | C07A9.9  | -0.120531614514903  |             |
| AGIWUR2793;AGIWUR21425;AGIWUR40053;AGIWUR40663             |    |     |         |         |                |          |          |                     |             |
| CB4856                                                     | HS | III | 9676320 | 9679051 | WBGene00007402 | ugt-60   | C07A9.6  | 0.127314219455005   | AGIWUR2544  |
| CB4856                                                     | HS | III | 9679698 | 9681269 | WBGene00044227 | C07A9.13 | C07A9.13 | 0.285998732565663   |             |
| AGIWUR9129                                                 |    |     |         |         |                |          |          |                     |             |
| CB4856                                                     | HS | III | 9681524 | 9682829 | WBGene00007401 | C07A9.5  | C07A9.5  | 0.131006741951387   |             |
| AGIWUR35061;AGIWUR41297                                    |    |     |         |         |                |          |          |                     |             |
| CB4856                                                     | HS | III | 9686990 | 9690253 | WBGene00007404 | best-5   | C07A9.8  | -0.0478731101497178 | AGIWUR16656 |
| CB4856                                                     | HS | III | 9691030 | 9694572 | WBGene00007403 | set-3    | C07A9.7  | 0.0259646898982231  |             |
| AGIWUR6874;AGIWUR16066                                     |    |     |         |         |                |          |          |                     |             |
| CB4856                                                     | HS | III | 9694668 | 9696517 | WBGene00007400 | C07A9.2  | C07A9.2  | 0.062565869175458   |             |
| AGIWUR2106;AGIWUR8528;AGIWUR23710;AGIWUR30448;AGIWUR44233  |    |     |         |         |                |          |          |                     |             |
| CB4856                                                     | HS | III | 9699876 | 9710268 | WBGene00006579 | tlk-1    | C07A9.3  | -0.214549527052714  |             |
| AGIWUR28026;AGIWUR28045;AGIWUR37049                        |    |     |         |         |                |          |          |                     |             |
| CB4856                                                     | HS | III | 9710312 | 9713928 | WBGene00003571 | ncx-6    | C07A9.4  | -0.123062776379179  | AGIWUR5692  |
| CB4856                                                     | HS | III | 9715883 | 9720291 | WBGene00003572 | ncx-7    | C07A9.11 | 0.271067347505365   |             |
| AGIWUR41131                                                |    |     |         |         |                |          |          |                     |             |
| CB4856                                                     | HS | III | 9723282 | 9725214 | WBGene00007399 | clcc-162 | C07A9.1  | -0.131442564875562  |             |
| AGIWUR18;AGIWUR21283;AGIWUR43658                           |    |     |         |         |                |          |          |                     |             |
| CB4856                                                     | HS | III | 9725285 | 9727539 | WBGene00043994 | C07A9.12 | C07A9.12 | 0.058444318926147   |             |
| AGIWUR23015;AGIWUR42131                                    |    |     |         |         |                |          |          |                     |             |
| CB4856                                                     | HS | III | 9735265 | 9736057 | WBGene00000932 | dao-6    | T05G5.12 | -0.0660652045587025 |             |
| AGIWUR8538;AGIWUR16163;AGIWUR36321                         |    |     |         |         |                |          |          |                     |             |
| CB4856                                                     | HS | III | 9736030 | 9736869 | WBGene00004097 | pqm-96   | T05G5.11 | -0.106223635766952  |             |
| AGIWUR4087;AGIWUR11001;AGIWUR19161;AGIWUR25569;AGIWUR34670 |    |     |         |         |                |          |          |                     |             |
| CB4856                                                     | HS | III | 9737469 | 9738839 | WBGene00001951 | hlh-4    | T05G5.2  | -0.117313599326542  | AGIWUR41294 |
| CB4856                                                     | HS | III | 9745864 | 9747193 | WBGene00002064 | iff-1    | T05G5.10 | 0.210788693684371   |             |
| AGIWUR21180                                                |    |     |         |         |                |          |          |                     |             |
| CB4856                                                     | HS | III | 9747432 | 9748852 | WBGene00000405 | cdk-1    | T05G5.3  | -0.040333790810017  |             |
| AGIWUR18204;AGIWUR25840;AGIWUR26140                        |    |     |         |         |                |          |          |                     |             |
| CB4856                                                     | HS | III | 9748863 | 9749673 | WBGene00011499 | T05G5.4  | T05G5.4  | 0.0737180950320617  | AGIWUR44760 |
| CB4856                                                     | HS | III | 9751440 | 9752922 | WBGene00001155 | ech-6    | T05G5.6  | 0.0714088598639897  |             |
| AGIWUR4728;AGIWUR22276;AGIWUR32179;AGIWUR36972;AGIWUR39062 |    |     |         |         |                |          |          |                     |             |
| CB4856                                                     | HS | III | 9753672 | 9757514 | WBGene00011502 | vps-53   | T05G5.8  | 0.0576763709946331  | AGIWUR12730 |
| CB4856                                                     | HS | III | 9757616 | 9762143 | WBGene00011503 | gcc-2    | T05G5.9  | 0.0384542491789954  | AGIWUR26271 |
| CB4856                                                     | HS | III | 9766516 | 9774825 | WBGene00000366 | cbp-1    | R10E11.1 | -0.0177192314857999 |             |
| AGIWUR3680;AGIWUR20510;AGIWUR23302;AGIWUR36765             |    |     |         |         |                |          |          |                     |             |
| CB4856                                                     | HS | III | 9776532 | 9778850 | WBGene00011216 | usp-46   | R10E11.3 | 0.0361549776359666  |             |
| AGIWUR828;AGIWUR9155;AGIWUR27956;AGIWUR35299               |    |     |         |         |                |          |          |                     |             |

|                                                                         |     |         |         |                 |          |          |                      |             |
|-------------------------------------------------------------------------|-----|---------|---------|-----------------|----------|----------|----------------------|-------------|
| CB4856 HS                                                               | III | 9778782 | 9780350 | WBGene00005021  | sqv-3    | R10E11.4 | 0.162580353649506    |             |
| AGIWUR4791                                                              |     |         |         |                 |          |          |                      |             |
| CB4856 HS                                                               | III | 9781243 | 9782057 | WBGene00006910  | vha-1    | R10E11.8 | -0.182876349305462   |             |
| AGIWUR12283;AGIWUR14952;AGIWUR20193;AGIWUR21407;AGIWUR26765;AGIWUR32083 |     |         |         |                 |          |          |                      |             |
| CB4856 HS                                                               | III | 9782164 | 9783212 | WBGene00006911  | vha-2    | R10E11.2 | -0.157572045640517   |             |
| AGIWUR28465                                                             |     |         |         |                 |          |          |                      |             |
| CB4856 HS                                                               | III | 9783325 | 9786038 | WBGene00011218  | R10E11.6 | R10E11.6 | 0.179350367120533    |             |
| AGIWUR4535;AGIWUR8860                                                   |     |         |         |                 |          |          |                      |             |
| CB4856 HS                                                               | III | 9785957 | 9789657 | WBGene00011217  | R10E11.5 | R10E11.5 | 0.103057429743398    |             |
| AGIWUR32181;AGIWUR38562;AGIWUR42235                                     |     |         |         |                 |          |          |                      |             |
| CB4856 HS                                                               | III | 9792548 | 9793642 | WBGene00011220  | R10E11.9 | R10E11.9 | -0.0597749125680975  |             |
| AGIWUR44902                                                             |     |         |         |                 |          |          |                      |             |
| CB4856 HS                                                               | III | 9794367 | 9798643 | WBGene00003158  | mcm-6    | ZK632.1  | -0.118744222700309   |             |
| AGIWUR3400;AGIWUR44759                                                  |     |         |         |                 |          |          |                      |             |
| CB4856 HS                                                               | III | 9799107 | 9802333 | WBGene00014011  | ZK632.2  | ZK632.2  | 0.0734655885355462   | AGIWUR31557 |
| CB4856 HS                                                               | III | 9802354 | 9805093 | WBGene00014012  | riok-3   | ZK632.3  | -0.0812018959897536  | AGIWUR17835 |
| CB4856 HS                                                               | III | 9805515 | 9807454 | WBGene00014013  | ZK632.4  | ZK632.4  | 0.171132465699092    | AGIWUR36478 |
| CB4856 HS                                                               | III | 9808544 | 9812639 | WBGene00014014  | ZK632.5  | ZK632.5  | 0.126444610994984    | AGIWUR40919 |
| CB4856 HS                                                               | III | 9813446 | 9814424 | WBGene00014020  | ZK632.14 | ZK632.14 | -0.107080817962174   |             |
| AGIWUR10501;AGIWUR29646;AGIWUR30662;AGIWUR44427                         |     |         |         |                 |          |          |                      |             |
| CB4856 HS                                                               | III | 9814364 | 9817137 | WBGene00000567  | cnx-1    | ZK632.6  | 0.201475238915142    | AGIWUR9035  |
| CB4856 HS                                                               | III | 9819294 | 9823120 | WBGene00014015  | panl-3   | ZK632.7  | -0.231583199467934   | AGIWUR30337 |
| CB4856 HS                                                               | III | 9823242 | 9824132 | WBGene00000189  | arl-5    | ZK632.8  | -0.355155374537492   | AGIWUR25912 |
| CB4856 HS                                                               | III | 9824877 | 9825445 | WBGene00014016  | ZK632.9  | ZK632.9  | -0.079843331130137   |             |
| AGIWUR16999;AGIWUR17140;AGIWUR17442;AGIWUR20289;AGIWUR29675;AGIWUR30283 |     |         |         |                 |          |          |                      |             |
| CB4856 HS                                                               | III | 9826130 | 9827178 | WBGene00014017  | ZK632.10 | ZK632.10 | -0.221433594815837   |             |
| AGIWUR30752                                                             |     |         |         |                 |          |          |                      |             |
| CB4856 HS                                                               | III | 9827915 | 9829719 | WBGene00014018  | ZK632.11 | ZK632.11 | 0.199416836905193    |             |
| AGIWUR24674                                                             |     |         |         |                 |          |          |                      |             |
| CB4856 HS                                                               | III | 9830792 | 9832430 | WBGene00014019  | ZK632.12 | ZK632.12 | 0.0722717563888011   |             |
| AGIWUR42050                                                             |     |         |         |                 |          |          |                      |             |
| CB4856 HS                                                               | III | 9835192 | 9838311 | WBGene000185002 | K11H3.8  | K11H3.8  | 0.0691900697528052   | AGIWUR26726 |
| CB4856 HS                                                               | III | 9843782 | 9845733 | WBGene00010782  | K11H3.5  | K11H3.5  | 0.0741253005602989   | AGIWUR35882 |
| CB4856 HS                                                               | III | 9846393 | 9847521 | WBGene00010779  | K11H3.2  | K11H3.2  | -0.0571167474793643  | AGIWUR4923  |
| CB4856 HS                                                               | III | 9847626 | 9848116 | WBGene00010783  | mrp1-36  | K11H3.6  | -0.00285214153166535 | AGIWUR40294 |
| CB4856 HS                                                               | III | 9851854 | 9854102 | WBGene00010780  | K11H3.3  | K11H3.3  | 0.250377489649267    | AGIWUR32929 |
| CB4856 HS                                                               | III | 9854077 | 9859183 | WBGene00010778  | gpdh-2   | K11H3.1  | -0.0824817974989012  |             |
| AGIWUR18384;AGIWUR23070                                                 |     |         |         |                 |          |          |                      |             |
| CB4856 HS                                                               | III | 9860730 | 9863302 | WBGene00010784  | twk-48   | K11H3.7  | 0.0541181750904922   |             |

AGIWUR9189;AGIWUR22564;AGIWUR37335

CB4856 HS III 9863251 9867786 WBGene00014075 dhhc-4 ZK757.4 -0.0316628854442254

AGIWUR2140;AGIWUR3995;AGIWUR20382;AGIWUR33633

CB4856 HS III 9868594 9871124 WBGene00014073 ZK757.1 ZK757.1 0.160558963569884 AGIWUR24918

CB4856 HS III 9874142 9877476 WBGene00014074 ZK757.2 ZK757.2 0.083441422369086 AGIWUR40144

CB4856 HS III 9887210 9891458 WBGene00006449 alg-4 ZK757.3 -0.37061242469858

AGIWUR21301;AGIWUR22137

CB4856 HS III 9893155 9898426 WBGene00009593 mam-7 F40F12.4 0.123195713813674

AGIWUR30722

CB4856 HS III 9898602 9910658 WBGene00009594 cyld-1 F40F12.5 -0.089350900445583

AGIWUR11679;AGIWUR20472

CB4856 HS III 9913021 9914075 WBGene00043995 F40F12.9 F40F12.9 0.123419957984019

AGIWUR3535;AGIWUR7077;AGIWUR10893;AGIWUR13925;AGIWUR16426;AGIWUR21462;AGIWUR23195;AGIWUR30134;AGIWUR31059;AGIWUR34499

CB4856 HS III 9918645 9920864 WBGene00009592 F40F12.3 F40F12.3 0.189814259419819

AGIWUR20178

CB4856 HS III 9921200 9921892 WBGene00014755 F40F12.8 F40F12.8 -0.313485343629033

AGIWUR19378

CB4856 HS III 9923174 9925443 WBGene00010545 cbp-2 K03H1.10 0.33674292657658

AGIWUR37099

CB4856 HS III 9927732 9929004 WBGene00010539 ttr-2 K03H1.4 0.272421284254797 AGIWUR29522

CB4856 HS III 9929058 9930413 WBGene00010541 ttr-1 K03H1.6 0.129637923139763

AGIWUR9772;AGIWUR14636;AGIWUR19049;AGIWUR34888

CB4856 HS III 9932398 9939712 WBGene00010540 K03H1.5 K03H1.5 -0.343660989928523 AGIWUR34316

CB4856 HS III 9940771 9941464 WBGene00010544 K03H1.9 K03H1.9 0.0964147269831024 AGIWUR31829

CB4856 HS III 9941624 9942345 WBGene00010547 K03H1.12 K03H1.12 0.159659904389962

AGIWUR11705

CB4856 HS III 9943243 9944823 WBGene00001603 gln-2 K03H1.1 0.0516721042016677 AGIWUR42968

CB4856 HS III 9945395 9946663 WBGene00010543 K03H1.8 K03H1.8 0.169218475109687 AGIWUR23294

CB4856 HS III 9950381 9951964 WBGene00010546 K03H1.11 K03H1.11 -0.0252223203946524

AGIWUR27779;AGIWUR29848;AGIWUR39811

CB4856 HS III 9952056 9956271 WBGene00003389 mog-1 K03H1.2 -0.137761868599398 AGIWUR16381

CB4856 HS III 9957357 9963171 WBGene00007010 alx-1 R10E12.1 -0.0677769208243557

AGIWUR17080;AGIWUR21528;AGIWUR23807;AGIWUR38367;AGIWUR41652;AGIWUR44473

CB4856 HS III 9963121 9973865 WBGene00011221 R10E12.2 R10E12.2 0.0540374116825983

AGIWUR40690

CB4856 HS III 9987367 9987728 WBGene00194886 C05B5.12 C05B5.12 -0.108384615723859

AGIWUR29906

CB4856 HS III 9993885 9996235 WBGene00007321 C05B5.4 C05B5.4 -0.00175079425328395 AGIWUR11599

|                                                |     |                                     |          |                |           |           |                     |             |
|------------------------------------------------|-----|-------------------------------------|----------|----------------|-----------|-----------|---------------------|-------------|
| CB4856 HS                                      | III | 9996205                             | 9997955  | WBGene00004100 | pqn-8     | C05B5.3   | 0.13080452833518    | AGIWUR38225 |
| CB4856 HS                                      | III | 9998542                             | 9999335  | WBGene00219314 | C05B5.17  | C05B5.17  | 0.201355995995182   |             |
| AGIWUR44836                                    |     |                                     |          |                |           |           |                     |             |
| CB4856 HS                                      | III | 9999819                             | 10000528 | WBGene00007320 | C05B5.2   | C05B5.2   | -0.0494006781446341 |             |
| AGIWUR23685                                    |     |                                     |          |                |           |           |                     |             |
| CB4856 HS                                      | III | 10001400                            | 10003856 | WBGene00007322 | C05B5.5   | C05B5.5   | 0.00214900556206743 |             |
| AGIWUR28548                                    |     |                                     |          |                |           |           |                     |             |
| CB4856 HS                                      | III | 10005459                            | 10006784 | WBGene00007324 | C05B5.8   | C05B5.8   | -0.066048747847649  |             |
| AGIWUR10471;AGIWUR21687;AGIWUR31806            |     |                                     |          |                |           |           |                     |             |
| CB4856 HS                                      | III | 10007966                            | 10010177 | WBGene00007323 | fbxa-155  | C05B5.6   |                     |             |
| -0.0802225344781089                            |     | AGIWUR33096                         |          |                |           |           |                     |             |
| CB4856 HS                                      | III | 10010843                            | 10011065 | WBGene00044130 | C05B5.10  | C05B5.10  |                     |             |
| 0.166684003935037                              |     | AGIWUR30379                         |          |                |           |           |                     |             |
| CB4856 HS                                      | III | 10014188                            | 10016558 | WBGene00004344 | rgs-1     | C05B5.7   | -0.0310447184906639 |             |
| AGIWUR23156                                    |     |                                     |          |                |           |           |                     |             |
| CB4856 HS                                      | III | 10023804                            | 10024120 | WBGene00002104 | ins-21    | M04D8.1   | -0.126067331317529  |             |
| AGIWUR44786                                    |     |                                     |          |                |           |           |                     |             |
| CB4856 HS                                      | III | 10026289                            | 10026673 | WBGene00002105 | ins-22    | M04D8.2   | -0.0146869033821204 |             |
| AGIWUR4200                                     |     |                                     |          |                |           |           |                     |             |
| CB4856 HS                                      | III | 10028247                            | 10028600 | WBGene00002106 | ins-23    | M04D8.3   | -0.100649151150672  |             |
| AGIWUR37017                                    |     |                                     |          |                |           |           |                     |             |
| CB4856 HS                                      | III | 10029991                            | 10030600 | WBGene00010862 | M04D8.4   | M04D8.4   | 0.122391577027816   |             |
| AGIWUR2895                                     |     |                                     |          |                |           |           |                     |             |
| CB4856 HS                                      | III | 10032344                            | 10033313 | WBGene00010863 | M04D8.5   | M04D8.5   | 0.0941669746095046  |             |
| AGIWUR3713;AGIWUR20119;AGIWUR22864;AGIWUR36190 |     |                                     |          |                |           |           |                     |             |
| CB4856 HS                                      | III | 10034181                            | 10035102 | WBGene00010866 | M04D8.8   | M04D8.8   | 0.179913467127331   |             |
| AGIWUR36738                                    |     |                                     |          |                |           |           |                     |             |
| CB4856 HS                                      | III | 10036004                            | 10036796 | WBGene00010864 | xbx-3     | M04D8.6   | 0.12782980834586    |             |
| AGIWUR28393                                    |     |                                     |          |                |           |           |                     |             |
| CB4856 HS                                      | III | 10037450                            | 10038247 | WBGene00010865 | M04D8.7   | M04D8.7   | 0.110354066878411   |             |
| AGIWUR9287                                     |     |                                     |          |                |           |           |                     |             |
| CB4856 HS                                      | III | 10038458                            | 10040113 | WBGene00011808 | T16G12.7  | T16G12.7  |                     |             |
| -0.13119922458584                              |     | AGIWUR12066;AGIWUR16783;AGIWUR24474 |          |                |           |           |                     |             |
| CB4856 HS                                      | III | 10040191                            | 10049857 | WBGene00011803 | T16G12.1  | T16G12.1  |                     |             |
| -0.176650919389161                             |     | AGIWUR9573;AGIWUR22085;AGIWUR24630  |          |                |           |           |                     |             |
| CB4856 HS                                      | III | 10055604                            | 10056133 | WBGene00044222 | T16G12.10 | T16G12.10 |                     |             |
| -0.213977877979909                             |     | AGIWUR15645;AGIWUR32508             |          |                |           |           |                     |             |
| CB4856 HS                                      | III | 10057822                            | 10058684 | WBGene00011805 | T16G12.4  | T16G12.4  |                     |             |
| -0.0398551416972772                            |     | AGIWUR43984                         |          |                |           |           |                     |             |

|                      |                                     |          |                |                  |           |
|----------------------|-------------------------------------|----------|----------------|------------------|-----------|
| CB4856 HS III        | 10059302                            | 10061982 | WBGene00011809 | T16G12.8         | T16G12.8  |
| -0.236026296952591   | AGIWUR26835                         |          |                |                  |           |
| CB4856 HS III        | 10064337                            | 10069201 | WBGene00011806 | ekl-6 T16G12.5   |           |
| -0.00267919537202488 | AGIWUR57                            |          |                |                  |           |
| CB4856 HS III        | 10069564                            | 10075995 | WBGene00011807 | T16G12.6         | T16G12.6  |
| -0.0853336906190698  | AGIWUR23002                         |          |                |                  |           |
| CB4856 HS III        | 10076387                            | 10078707 | WBGene00011810 | T16G12.9         | T16G12.9  |
| -0.166408194515872   | AGIWUR25375                         |          |                |                  |           |
| CB4856 HS III        | 10081443                            | 10083286 | WBGene00011813 | T16H12.3         | T16H12.3  |
| -0.0490533072143204  | AGIWUR17981                         |          |                |                  |           |
| CB4856 HS III        | 10085403                            | 10086064 | WBGene00194725 | T16H12.13        | T16H12.13 |
| -0.370709150574992   | AGIWUR21108                         |          |                |                  |           |
| CB4856 HS III        | 10086303                            | 10087171 | WBGene00011812 | T16H12.2         | T16H12.2  |
| -0.0322220193812583  | AGIWUR2932                          |          |                |                  |           |
| CB4856 HS III        | 10087223                            | 10088673 | WBGene00011819 | hal-2 T16H12.11  |           |
| 0.0161683568195414   | AGIWUR1595;AGIWUR7708;AGIWUR15104   |          |                |                  |           |
| CB4856 HS III        | 10088757                            | 10090800 | WBGene00011814 | T16H12.4         | T16H12.4  |
| -0.0651703508248307  | AGIWUR28361;AGIWUR38433             |          |                |                  |           |
| CB4856 HS III        | 10090862                            | 10098081 | WBGene00011815 | bath-43 T16H12.5 |           |
| -0.153253046316804   | AGIWUR20784                         |          |                |                  |           |
| CB4856 HS III        | 10098469                            | 10101608 | WBGene00002186 | kel-10 T16H12.6  |           |
| 0.0170798517577406   | AGIWUR6246;AGIWUR10107;AGIWUR40683  |          |                |                  |           |
| CB4856 HS III        | 10104841                            | 10106490 | WBGene00011816 | srt-55 T16H12.8  |           |
| -0.169880835680827   | AGIWUR16209                         |          |                |                  |           |
| CB4856 HS III        | 10109423                            | 10112108 | WBGene00011817 | T16H12.9         | T16H12.9  |
| 0.131366989804375    | AGIWUR24769;AGIWUR33645;AGIWUR40685 |          |                |                  |           |
| CB4856 HS III        | 10112100                            | 10113046 | WBGene00014234 | vps-29 ZK1128.8  |           |
| -0.20895993667643    | AGIWUR6205;AGIWUR11659              |          |                |                  |           |
| CB4856 HS III        | 10113146                            | 10114826 | WBGene00014227 | ZK1128.1         | ZK1128.1  |
| -0.0172080187708676  | AGIWUR23994;AGIWUR27881;AGIWUR29799 |          |                |                  |           |
| CB4856 HS III        | 10115042                            | 10116760 | WBGene00014228 | mett-10 ZK1128.2 |           |
| 0.124832349621368    | AGIWUR25608                         |          |                |                  |           |
| CB4856 HS III        | 10116967                            | 10118918 | WBGene00014229 | ZK1128.3         | ZK1128.3  |
| 0.0472021645494856   | AGIWUR10949;AGIWUR26661;AGIWUR29008 |          |                |                  |           |
| CB4856 HS III        | 10118961                            | 10120148 | WBGene00014230 | ZK1128.4         | ZK1128.4  |
| 0.238123238641384    | AGIWUR26863                         |          |                |                  |           |
| CB4856 HS III        | 10120781                            | 10122928 | WBGene00044072 | ham-3 ZK1128.5   |           |
| -0.0721248080562411  | AGIWUR31504                         |          |                |                  |           |
| CB4856 HS III        | 10124183                            | 10132411 | WBGene00014232 | ttl1-4 ZK1128.6  |           |

|                                                                                    |                                                             |          |                |           |           |                     |
|------------------------------------------------------------------------------------|-------------------------------------------------------------|----------|----------------|-----------|-----------|---------------------|
| -0.0738389180043324                                                                | AGIWUR8363;AGIWUR19920;AGIWUR35531                          |          |                |           |           |                     |
| CB4856 HS III                                                                      | 10136982                                                    | 10139241 | WBGene00014233 | ZK1128.7  | ZK1128.7  |                     |
| 0.134558688355217                                                                  | AGIWUR2705;AGIWUR17993;AGIWUR31730                          |          |                |           |           |                     |
| CB4856 HS III                                                                      | 10141573                                                    | 10146801 | WBGene00014801 | K08E5.1   | K08E5.1   | 0.138444493890169   |
| AGIWUR5036                                                                         |                                                             |          |                |           |           |                     |
| CB4856 HS III                                                                      | 10152795                                                    | 10157923 | WBGene00003519 | nac-3     | K08E5.2   | 0.158461460363665   |
| AGIWUR13516;AGIWUR34351                                                            |                                                             |          |                |           |           |                     |
| CB4856 HS III                                                                      | 10159027                                                    | 10160482 | WBGene00077703 | K08E5.5   | K08E5.5   | 0.00651846582937843 |
| AGIWUR38527;AGIWUR38946;AGIWUR39699                                                |                                                             |          |                |           |           |                     |
| CB4856 HS III                                                                      | 10160697                                                    | 10183529 | WBGene00003482 | mua-3     | K08E5.3   | 0.12131134368453    |
| AGIWUR10672                                                                        |                                                             |          |                |           |           |                     |
| CB4856 HS III                                                                      | 10183794                                                    | 10186390 | WBGene00006783 | unc-47    | T20G5.6   | 0.12466081965578    |
| AGIWUR12361                                                                        |                                                             |          |                |           |           |                     |
| CB4856 HS III                                                                      | 10189218                                                    | 10195399 | WBGene00004255 | epac-1    | T20G5.5   | 0.0589164895311054  |
| AGIWUR25467                                                                        |                                                             |          |                |           |           |                     |
| CB4856 HS III                                                                      | 10197716                                                    | 10198352 | WBGene00011869 | dod-6     | T20G5.7   | 0.198959131681729   |
| AGIWUR14195;AGIWUR22878;AGIWUR26343;AGIWUR29516                                    |                                                             |          |                |           |           |                     |
| CB4856 HS III                                                                      | 10199337                                                    | 10199859 | WBGene00011870 | T20G5.8   | T20G5.8   | -0.271593985435902  |
| AGIWUR6691;AGIWUR18399;AGIWUR22022;AGIWUR40445                                     |                                                             |          |                |           |           |                     |
| CB4856 HS III                                                                      | 10199894                                                    | 10201326 | WBGene00011874 | T20G5.13  | T20G5.13  |                     |
| 0.0214938672729361                                                                 | AGIWUR48;AGIWUR21088                                        |          |                |           |           |                     |
| CB4856 HS III                                                                      | 10201623                                                    | 10202528 | WBGene00011873 | T20G5.12  | T20G5.12  |                     |
| -0.125169743942956                                                                 | AGIWUR37044                                                 |          |                |           |           |                     |
| CB4856 HS III                                                                      | 10203821                                                    | 10209704 | WBGene00011867 | chc-1     | T20G5.1   | -0.170528183291971  |
| AGIWUR23019;AGIWUR39562;AGIWUR40241                                                |                                                             |          |                |           |           |                     |
| CB4856 HS III                                                                      | 10209840                                                    | 10211093 | WBGene00011871 | T20G5.9   | T20G5.9   | 0.0579943944303327  |
| AGIWUR1557                                                                         |                                                             |          |                |           |           |                     |
| CB4856 HS III                                                                      | 10211041                                                    | 10211946 | WBGene00011872 | blos-1    | T20G5.10  |                     |
| -0.321225129193213                                                                 | AGIWUR28631                                                 |          |                |           |           |                     |
| CB4856 HS III                                                                      | 10212396                                                    | 10214825 | WBGene00011868 | best-18   | T20G5.4   | -0.172823819485056  |
| AGIWUR1668;AGIWUR12462;AGIWUR19724;AGIWUR27812;AGIWUR32888;AGIWUR33217;AGIWUR41702 |                                                             |          |                |           |           |                     |
| CB4856 HS III                                                                      | 10214814                                                    | 10216635 | WBGene00000833 | cts-1     | T20G5.2   | -0.0406122891966643 |
| AGIWUR6067;AGIWUR20186;AGIWUR25038;AGIWUR27140;AGIWUR44892                         |                                                             |          |                |           |           |                     |
| CB4856 HS III                                                                      | 10217302                                                    | 10218646 | WBGene00004326 | rde-4     | T20G5.11  |                     |
| 0.0704999100639405                                                                 | AGIWUR1070                                                  |          |                |           |           |                     |
| CB4856 HS III                                                                      | 10218943                                                    | 10222935 | WBGene00011875 | T20G5.14  | T20G5.14  |                     |
| -0.256857087143516                                                                 | AGIWUR13544;AGIWUR16763;AGIWUR17186;AGIWUR21489;AGIWUR33131 |          |                |           |           |                     |
| CB4856 HS III                                                                      | 10223524                                                    | 10224162 | WBGene00014946 | Y70G10A.1 | Y70G10A.1 |                     |
| -0.410141302032777                                                                 | AGIWUR14372                                                 |          |                |           |           |                     |

|                                                                       |                                                                       |          |                |           |                             |
|-----------------------------------------------------------------------|-----------------------------------------------------------------------|----------|----------------|-----------|-----------------------------|
| CB4856 HS III                                                         | 10228164                                                              | 10234079 | WBGene00013498 | Y70G10A.2 | Y70G10A.2                   |
| -0.0878303764359174                                                   | AGIWUR17841;AGIWUR20918;AGIWUR22136;AGIWUR38703;AGIWUR41816           |          |                |           |                             |
| CB4856 HS III                                                         | 10238672                                                              | 10244810 | WBGene00013499 | Y70G10A.3 | Y70G10A.3                   |
| 0.0316755417154315                                                    | AGIWUR42684                                                           |          |                |           |                             |
| CB4856 HS III                                                         | 10245056                                                              | 10248905 | WBGene00001002 | div-1     | R01H10.1                    |
| -0.156206380304125                                                    | AGIWUR32960                                                           |          |                |           |                             |
| CB4856 HS III                                                         | 10249111                                                              | 10254709 | WBGene00000768 | cor-1     | R01H10.3                    |
| 0.138659147146583                                                     | AGIWUR4531;AGIWUR25414;AGIWUR37845;AGIWUR40559                        |          |                |           |                             |
| CB4856 HS III                                                         | 10254800                                                              | 10257221 | WBGene00010972 | R01H10.4  | R01H10.4                    |
| 0.10887351590803                                                      | AGIWUR39750                                                           |          |                |           |                             |
| CB4856 HS III                                                         | 10257181                                                              | 10258736 | WBGene00010973 | rip-1     | R01H10.5                    |
| 0.0211191592089994                                                    | AGIWUR2959;AGIWUR5367;AGIWUR14748;AGIWUR29061;AGIWUR36636;AGIWUR38963 |          |                |           |                             |
| CB4856 HS III                                                         | 10258856                                                              | 10261679 | WBGene00010974 | bbs-5     | R01H10.6                    |
| 0.0293501331866972                                                    | AGIWUR28666;AGIWUR30482                                               |          |                |           |                             |
| CB4856 HS III                                                         | 10261799                                                              | 10267381 | WBGene00010975 | R01H10.7  | R01H10.7                    |
| -0.0944669451324351                                                   | AGIWUR23476                                                           |          |                |           |                             |
| CB4856 HS III                                                         | 10271257                                                              | 10278579 | WBGene00000564 | cnk-1     | R01H10.8                    |
| -0.30112941613775                                                     | AGIWUR31863                                                           |          |                |           |                             |
| CB4856 HS III                                                         | 10279127                                                              | 10281476 | WBGene00010757 | pad-2     | K10G9.3 -0.0439980585522708 |
| AGIWUR15507                                                           |                                                                       |          |                |           |                             |
| CB4856 HS III                                                         | 10285923                                                              | 10288621 | WBGene00010756 | K10G9.2   | K10G9.2 -0.207275802168262  |
| AGIWUR11899                                                           |                                                                       |          |                |           |                             |
| CB4856 HS III                                                         | 10295137                                                              | 10298687 | WBGene00010755 | vglu-2    | K10G9.1 -0.0244396054296896 |
| AGIWUR9593                                                            |                                                                       |          |                |           |                             |
| CB4856 HS III                                                         | 10299164                                                              | 10299949 | WBGene00011557 | ostf-4    | T07A5.4 -0.141633805458438  |
| AGIWUR24598                                                           |                                                                       |          |                |           |                             |
| CB4856 HS III                                                         | 10300293                                                              | 10303423 | WBGene00011556 | vglu-3    | T07A5.3 -0.326991033186523  |
| AGIWUR19587                                                           |                                                                       |          |                |           |                             |
| CB4856 HS III                                                         | 10303368                                                              | 10306188 | WBGene00011554 | T07A5.1   | T07A5.1 0.179944571048685   |
| AGIWUR10153                                                           |                                                                       |          |                |           |                             |
| CB4856 HS III                                                         | 10306756                                                              | 10311100 | WBGene00045475 | T07A5.7   | T07A5.7 0.0838198060493878  |
| AGIWUR11178;AGIWUR39351;AGIWUR42277;AGIWUR43222                       |                                                                       |          |                |           |                             |
| CB4856 HS III                                                         | 10314490                                                              | 10318162 | WBGene00006785 | unc-50    | T07A5.2 -0.0118414426403    |
| AGIWUR8024;AGIWUR9434;AGIWUR11973;AGIWUR25507;AGIWUR29014;AGIWUR32340 |                                                                       |          |                |           |                             |
| CB4856 HS III                                                         | 10318939                                                              | 10320021 | WBGene00006802 | unc-69    | T07A5.6 -0.0712034521593674 |
| AGIWUR30280;AGIWUR32788;AGIWUR33203;AGIWUR41320                       |                                                                       |          |                |           |                             |
| CB4856 HS III                                                         | 10321019                                                              | 10325675 | WBGene00011562 | T07C4.10  | T07C4.10                    |
| 0.123815555969397                                                     | AGIWUR29783                                                           |          |                |           |                             |
| CB4856 HS III                                                         | 10325613                                                              | 10330422 | WBGene00003589 | nex-2     | T07C4.9 0.106424637722005   |

|                                                                        |    |     |          |          |                |          |                             |
|------------------------------------------------------------------------|----|-----|----------|----------|----------------|----------|-----------------------------|
| AGIWUR2964;AGIWUR5102;AGIWUR5328;AGIWUR10659;AGIWUR41869;AGIWUR42232   |    |     |          |          |                |          |                             |
| CB4856                                                                 | HS | III | 10331551 | 10332480 | WBGene00044891 | T07C4.12 | T07C4.12                    |
| -0.0154353630748041 AGIWUR11953                                        |    |     |          |          |                |          |                             |
| CB4856                                                                 | HS | III | 10334267 | 10335171 | WBGene00003225 | mev-1    | T07C4.7 -0.143138138082791  |
| AGIWUR10210;AGIWUR33889                                                |    |     |          |          |                |          |                             |
| CB4856                                                                 | HS | III | 10335172 | 10337536 | WBGene00000423 | ced-9    | T07C4.8 -0.218077208033304  |
| AGIWUR286;AGIWUR6854;AGIWUR9572;AGIWUR16216;AGIWUR23511;AGIWUR33329    |    |     |          |          |                |          |                             |
| CB4856                                                                 | HS | III | 10337840 | 10339440 | WBGene00011561 | ttr-15   | T07C4.5 0.0519074480492048  |
| AGIWUR12663                                                            |    |     |          |          |                |          |                             |
| CB4856                                                                 | HS | III | 10339984 | 10341858 | WBGene00006546 | tbx-9    | T07C4.6 -0.113493965201224  |
| AGIWUR5722                                                             |    |     |          |          |                |          |                             |
| CB4856                                                                 | HS | III | 10347575 | 10349740 | WBGene00006545 | tbx-8    | T07C4.2 -0.192966222872441  |
| AGIWUR29064                                                            |    |     |          |          |                |          |                             |
| CB4856                                                                 | HS | III | 10352157 | 10355117 | WBGene00011560 | T07C4.3  | T07C4.3 0.0175332727693638  |
| AGIWUR20793;AGIWUR29934;AGIWUR31453;AGIWUR31839                        |    |     |          |          |                |          |                             |
| CB4856                                                                 | HS | III | 10355122 | 10355982 | WBGene00004986 | spp-1    | T07C4.4 0.0685291832556807  |
| AGIWUR237;AGIWUR7718;AGIWUR8291;AGIWUR10149;AGIWUR21291;AGIWUR35483    |    |     |          |          |                |          |                             |
| CB4856                                                                 | HS | III | 10355799 | 10357761 | WBGene00011559 | umps-1   | T07C4.1 -0.0986195862701886 |
| AGIWUR7994;AGIWUR33842                                                 |    |     |          |          |                |          |                             |
| CB4856                                                                 | HS | III | 10364951 | 10373231 | WBGene00008018 | tbx-8    | C38H2.1 0.112227262105309   |
| AGIWUR4274;AGIWUR22656;AGIWUR25009;AGIWUR35189;AGIWUR38326;AGIWUR43448 |    |     |          |          |                |          |                             |
| CB4856                                                                 | HS | III | 10381740 | 10385335 | WBGene00008019 | C38H2.2  | C38H2.2 0.0831028404723151  |
| AGIWUR1650;AGIWUR12814;AGIWUR18659;AGIWUR32985;AGIWUR34960;AGIWUR36869 |    |     |          |          |                |          |                             |
| CB4856                                                                 | HS | III | 10385313 | 10386572 | WBGene00008020 | C38H2.3  | C38H2.3 -0.252736215029083  |
| AGIWUR33304                                                            |    |     |          |          |                |          |                             |
| CB4856                                                                 | HS | III | 10393389 | 10396081 | WBGene00010838 | M03C11.1 | M03C11.1                    |
| -0.0432543563028815 AGIWUR36458                                        |    |     |          |          |                |          |                             |
| CB4856                                                                 | HS | III | 10399174 | 10405240 | WBGene00010839 | chl-1    | M03C11.2                    |
| -0.0768438563567706 AGIWUR44839                                        |    |     |          |          |                |          |                             |
| CB4856                                                                 | HS | III | 10405070 | 10415150 | WBGene00010840 | M03C11.3 | M03C11.3                    |
| -0.00438463831145341 AGIWUR3706                                        |    |     |          |          |                |          |                             |
| CB4856                                                                 | HS | III | 10416069 | 10421785 | WBGene00010842 | ymel-1   | M03C11.5                    |
| 0.119342345303763 AGIWUR16409;AGIWUR23999                              |    |     |          |          |                |          |                             |
| CB4856                                                                 | HS | III | 10421781 | 10424006 | WBGene00010843 | M03C11.6 | M03C11.6                    |
| -0.189549940931968 AGIWUR23661                                         |    |     |          |          |                |          |                             |
| CB4856                                                                 | HS | III | 10424112 | 10427982 | WBGene00010844 | prp-3    | M03C11.7                    |
| 0.186717547573045 AGIWUR586;AGIWUR12218                                |    |     |          |          |                |          |                             |
| CB4856                                                                 | HS | III | 10428334 | 10435988 | WBGene00010845 | M03C11.8 | M03C11.8                    |
| 0.0199483892569372 AGIWUR27739                                         |    |     |          |          |                |          |                             |



|                                                                                                                                                                                            |     |          |          |                |          |                             |
|--------------------------------------------------------------------------------------------------------------------------------------------------------------------------------------------|-----|----------|----------|----------------|----------|-----------------------------|
| CB4856 HS                                                                                                                                                                                  | III | 10445805 | 10451112 | WBGene00010365 | H04D03.4 | H04D03.4                    |
| -0.112236954989507 AGIWUR7036                                                                                                                                                              |     |          |          |                |          |                             |
| CB4856 HS                                                                                                                                                                                  | III | 10461389 | 10468051 | WBGene00000231 | atx-2    | D2045.1 -0.108602913181579  |
| AGIWUR11012;AGIWUR23942;AGIWUR24350;AGIWUR38378;AGIWUR40827;AGIWUR43539                                                                                                                    |     |          |          |                |          |                             |
| CB4856 HS                                                                                                                                                                                  | III | 10471237 | 10475245 | WBGene00000836 | cul-1    | D2045.6 0.126199147434392   |
| AGIWUR42378                                                                                                                                                                                |     |          |          |                |          |                             |
| CB4856 HS                                                                                                                                                                                  | III | 10475245 | 10479758 | WBGene00008426 | D2045.9  | D2045.9 -0.0943285513402836 |
| AGIWUR4407;AGIWUR25018;AGIWUR30597;AGIWUR35709;AGIWUR36584;AGIWUR39005                                                                                                                     |     |          |          |                |          |                             |
| CB4856 HS                                                                                                                                                                                  | III | 10479807 | 10482285 | WBGene00008424 | D2045.7  | D2045.7 -0.113344439433906  |
| AGIWUR14104                                                                                                                                                                                |     |          |          |                |          |                             |
| CB4856 HS                                                                                                                                                                                  | III | 10482288 | 10483926 | WBGene00008425 | D2045.8  | D2045.8 -0.0276080633549771 |
| AGIWUR39626                                                                                                                                                                                |     |          |          |                |          |                             |
| CB4856 HS                                                                                                                                                                                  | III | 10488128 | 10500267 | WBGene00009653 | F43D9.1  | F43D9.1 0.00872925877158259 |
| AGIWUR22640                                                                                                                                                                                |     |          |          |                |          |                             |
| CB4856 HS                                                                                                                                                                                  | III | 10500284 | 10503853 | WBGene00004283 | rab-33   | F43D9.2                     |
| -0.00636001102433159 AGIWUR9622;AGIWUR24413;AGIWUR29010;AGIWUR31447;AGIWUR32558;AGIWUR42267                                                                                                |     |          |          |                |          |                             |
| CB4856 HS                                                                                                                                                                                  | III | 10503965 | 10505250 | WBGene00006395 | taf-11.3 | F43D9.5                     |
| 0.0121700778909783 AGIWUR20041                                                                                                                                                             |     |          |          |                |          |                             |
| CB4856 HS                                                                                                                                                                                  | III | 10506106 | 10506801 | WBGene00004798 | sip-1    | F43D9.4 0.117333746863522   |
| AGIWUR7686;AGIWUR13613;AGIWUR38909                                                                                                                                                         |     |          |          |                |          |                             |
| CB4856 HS                                                                                                                                                                                  | III | 10507058 | 10518391 | WBGene00009654 | sly-1    | F43D9.3 0.0112380320221965  |
| AGIWUR8732;AGIWUR19708;AGIWUR29661;AGIWUR35705                                                                                                                                             |     |          |          |                |          |                             |
| CB4856 HS                                                                                                                                                                                  | III | 10520676 | 10532705 | WBGene00006784 | unc-49   | T21C12.1                    |
| 0.0931098592935831                                                                                                                                                                         |     |          |          |                |          |                             |
| AGIWUR1626;AGIWUR2943;AGIWUR6217;AGIWUR7139;AGIWUR8761;AGIWUR13176;AGIWUR14305;AGIWUR15017;AGIWUR15943;AGIWUR16705;AGIWUR21882;AGIWUR26074;AGIWUR26395;AGIWUR29204;AGIWUR33200;AGIWUR36268 |     |          |          |                |          |                             |
| CB4856 HS                                                                                                                                                                                  | III | 10535526 | 10537682 | WBGene00001993 | hpd-1    | T21C12.2                    |
| 0.165681018678592 AGIWUR15910;AGIWUR42722;AGIWUR43555                                                                                                                                      |     |          |          |                |          |                             |
| CB4856 HS                                                                                                                                                                                  | III | 10538081 | 10539163 | WBGene00011899 | T21C12.3 | T21C12.3                    |
| -0.243692439538661 AGIWUR24461;AGIWUR33959;AGIWUR35118;AGIWUR39927                                                                                                                         |     |          |          |                |          |                             |
| CB4856 HS                                                                                                                                                                                  | III | 10551102 | 10552955 | WBGene00043998 | T21C12.8 | T21C12.8                    |
| 0.0699588873138959                                                                                                                                                                         |     |          |          |                |          |                             |
| AGIWUR4565;AGIWUR7449;AGIWUR8399;AGIWUR15232;AGIWUR17836;AGIWUR21442;AGIWUR42310;AGIWUR43489;AGIWUR44757                                                                                   |     |          |          |                |          |                             |
| CB4856 HS                                                                                                                                                                                  | III | 10553005 | 10558009 | WBGene00011900 | T21C12.4 | T21C12.4                    |
| 0.082154509944699 AGIWUR7867;AGIWUR22646;AGIWUR32575                                                                                                                                       |     |          |          |                |          |                             |
| CB4856 HS                                                                                                                                                                                  | III | 10558189 | 10561948 | WBGene00012859 | Y45F3A.1 | Y45F3A.1                    |
| 0.0729919336262306 AGIWUR32679                                                                                                                                                             |     |          |          |                |          |                             |
| CB4856 HS                                                                                                                                                                                  | III | 10563026 | 10565603 | WBGene00004282 | rab-30   | Y45F3A.2                    |
| 0.043129618440426 AGIWUR1388;AGIWUR2446;AGIWUR25760;AGIWUR28411;AGIWUR29148;AGIWUR37905                                                                                                    |     |          |          |                |          |                             |

|                     |                                                |          |                |           |           |           |
|---------------------|------------------------------------------------|----------|----------------|-----------|-----------|-----------|
| CB4856 HS III       | 10566181                                       | 10571606 | WBGene00012860 | acdH-11   | Y45F3A.3  |           |
| -0.259991666166538  | AGIWUR23517                                    |          |                |           |           |           |
| CB4856 HS III       | 10572475                                       | 10575420 | WBGene00012861 | Y45F3A.4  |           | Y45F3A.4  |
| 0.0373027308333027  | AGIWUR20000;AGIWUR21324;AGIWUR36197            |          |                |           |           |           |
| CB4856 HS III       | 10585848                                       | 10586343 | WBGene00012862 | Y45F3A.5  |           | Y45F3A.5  |
| 0.155821567385882   | AGIWUR39377                                    |          |                |           |           |           |
| CB4856 HS III       | 10586407                                       | 10587706 | WBGene00014898 | Y45F3A.6  |           | Y45F3A.6  |
| -0.103813317707889  | AGIWUR12638                                    |          |                |           |           |           |
| CB4856 HS III       | 10589865                                       | 10592801 | WBGene00012863 | Y45F3A.8  |           | Y45F3A.8  |
| 0.183884460324408   | AGIWUR28002                                    |          |                |           |           |           |
| CB4856 HS III       | 10592754                                       | 10595166 | WBGene00012864 | Y45F3A.9  |           | Y45F3A.9  |
| 0.0410754508332651  | AGIWUR12357                                    |          |                |           |           |           |
| CB4856 HS III       | 10595258                                       | 10596487 | WBGene00012643 | Y39A1A.3  |           | Y39A1A.3  |
| -0.0486705536396084 | AGIWUR113                                      |          |                |           |           |           |
| CB4856 HS III       | 10596615                                       | 10600184 | WBGene00012641 | epg-6     | Y39A1A.1  |           |
| -0.0192660509606348 | AGIWUR29369                                    |          |                |           |           |           |
| CB4856 HS III       | 10601905                                       | 10603566 | WBGene00012642 | Y39A1A.2  |           | Y39A1A.2  |
| 0.126311360226768   | AGIWUR308;AGIWUR29627;AGIWUR38468;AGIWUR41990  |          |                |           |           |           |
| CB4856 HS III       | 10605349                                       | 10613294 | WBGene00012644 | rabx-5    | Y39A1A.5  |           |
| -0.167861303589971  | AGIWUR5300                                     |          |                |           |           |           |
| CB4856 HS III       | 10613567                                       | 10614931 | WBGene00012660 | Y39A1A.24 |           | Y39A1A.24 |
| 0.11976885168659    | AGIWUR9172                                     |          |                |           |           |           |
| CB4856 HS III       | 10615466                                       | 10617862 | WBGene00012645 | mrp1-22   | Y39A1A.6  |           |
| 0.229205105554639   | AGIWUR27121                                    |          |                |           |           |           |
| CB4856 HS III       | 10617863                                       | 10621369 | WBGene00012646 | Iron-10   | Y39A1A.7  |           |
| -0.024943101598315  | AGIWUR6665;AGIWUR11602;AGIWUR35533;AGIWUR39777 |          |                |           |           |           |
| CB4856 HS III       | 10630070                                       | 10633501 | WBGene00012648 | Y39A1A.9  |           | Y39A1A.9  |
| 0.158115047423104   | AGIWUR11161                                    |          |                |           |           |           |
| CB4856 HS III       | 10640828                                       | 10642872 | WBGene00000974 | dhs-11    | Y39A1A.11 |           |
| 0.109305040664475   | AGIWUR10943                                    |          |                |           |           |           |
| CB4856 HS III       | 10643002                                       | 10646107 | WBGene00012650 | orc-1     | Y39A1A.12 |           |
| 0.361049083346716   | AGIWUR7399                                     |          |                |           |           |           |
| CB4856 HS III       | 10646170                                       | 10648861 | WBGene00012651 | orc-4     | Y39A1A.13 |           |
| 0.0862087279781276  | AGIWUR18023;AGIWUR45072                        |          |                |           |           |           |
| CB4856 HS III       | 10649519                                       | 10650908 | WBGene00012652 | Y39A1A.14 |           | Y39A1A.14 |
| 0.183884780539632   | AGIWUR5717                                     |          |                |           |           |           |
| CB4856 HS III       | 10655018                                       | 10677521 | WBGene00000566 | cnt-2     | Y39A1A.15 |           |
| -0.0398458251955613 | AGIWUR9480;AGIWUR11595;AGIWUR17227;AGIWUR22673 |          |                |           |           |           |
| CB4856 HS III       | 10679474                                       | 10682212 | WBGene00012654 | Y39A1A.16 |           | Y39A1A.16 |

|                                                                                   |                                     |          |                |           |                             |
|-----------------------------------------------------------------------------------|-------------------------------------|----------|----------------|-----------|-----------------------------|
| 0.0391714352851578                                                                | AGIWUR3345                          |          |                |           |                             |
| CB4856 HS III                                                                     | 10687127                            | 10691101 | WBGene00012655 | Y39A1A.17 | Y39A1A.17                   |
| -0.0424109476182908                                                               | AGIWUR3054                          |          |                |           |                             |
| CB4856 HS III                                                                     | 10692221                            | 10694391 | WBGene00012656 | Y39A1A.18 | Y39A1A.18                   |
| 0.151594274602367                                                                 | AGIWUR6126                          |          |                |           |                             |
| CB4856 HS III                                                                     | 10694590                            | 10698861 | WBGene00001478 | fmo-3     | Y39A1A.19                   |
| 0.250504197812578                                                                 | AGIWUR32081                         |          |                |           |                             |
| CB4856 HS III                                                                     | 10699216                            | 10700560 | WBGene00012657 | Y39A1A.20 | Y39A1A.20                   |
| 0.149252653186384                                                                 | AGIWUR2587                          |          |                |           |                             |
| CB4856 HS III                                                                     | 10700652                            | 10707024 | WBGene00012658 | Y39A1A.21 | Y39A1A.21                   |
| 0.0919837643649366                                                                | AGIWUR23804;AGIWUR30508;AGIWUR38450 |          |                |           |                             |
| CB4856 HS III                                                                     | 10707761                            | 10708518 | WBGene00012361 | mrp1-12   | W09D10.3                    |
| 0.113203348574508                                                                 | AGIWUR11263;AGIWUR27960;AGIWUR37422 |          |                |           |                             |
| CB4856 HS III                                                                     | 10708484                            | 10711527 | WBGene00012363 | W09D10.5  | W09D10.5                    |
| -0.0372227089529495                                                               | AGIWUR24376                         |          |                |           |                             |
| CB4856 HS III                                                                     | 10711724                            | 10716191 | WBGene00012362 | W09D10.4  | W09D10.4                    |
| -0.111859024312956                                                                | AGIWUR23890                         |          |                |           |                             |
| CB4856 HS III                                                                     | 10722148                            | 10730705 | WBGene00012360 | tat-3     | W09D10.2                    |
| 0.137763155384613                                                                 | AGIWUR23128                         |          |                |           |                             |
| CB4856 HS III                                                                     | 10736893                            | 10739824 | WBGene00012359 | W09D10.1  | W09D10.1                    |
| 0.119683640120362                                                                 | AGIWUR9099                          |          |                |           |                             |
| CB4856 HS III                                                                     | 10740280                            | 10740772 | WBGene00010479 | K01G5.8   | K01G5.8 0.0623365482955833  |
| AGIWUR1395;AGIWUR8920;AGIWUR21836;AGIWUR27800;AGIWUR30550;AGIWUR36735;AGIWUR42856 |                                     |          |                |           |                             |
| CB4856 HS III                                                                     | 10740868                            | 10742461 | WBGene00006536 | tbb-1     | K01G5.7 0.00488593832381579 |
| AGIWUR12340;AGIWUR24533                                                           |                                     |          |                |           |                             |
| CB4856 HS III                                                                     | 10742777                            | 10746675 | WBGene00004361 | rib-2     | K01G5.6 -0.0979893148820317 |
| AGIWUR18008                                                                       |                                     |          |                |           |                             |
| CB4856 HS III                                                                     | 10746581                            | 10747728 | WBGene00004302 | ran-1     | K01G5.4 -0.0375704086586364 |
| AGIWUR4222;AGIWUR5342;AGIWUR31873;AGIWUR37645;AGIWUR37954;AGIWUR44185             |                                     |          |                |           |                             |
| CB4856 HS III                                                                     | 10748429                            | 10750080 | WBGene00010478 | K01G5.5   | K01G5.5 0.180786700150474   |
| AGIWUR2813                                                                        |                                     |          |                |           |                             |
| CB4856 HS III                                                                     | 10752254                            | 10755523 | WBGene00001996 | hpl-2     | K01G5.2 0.0598953826410398  |
| AGIWUR26193                                                                       |                                     |          |                |           |                             |
| CB4856 HS III                                                                     | 10755624                            | 10757640 | WBGene00010476 | rnf-113   | K01G5.1 -0.041428110650795  |
| AGIWUR5623;AGIWUR16936;AGIWUR23877;AGIWUR30190;AGIWUR33377                        |                                     |          |                |           |                             |
| CB4856 HS III                                                                     | 10757641                            | 10758522 | WBGene00010481 | K01G5.10  | K01G5.10                    |
| -0.0224558179040564                                                               | AGIWUR42363                         |          |                |           |                             |
| CB4856 HS III                                                                     | 10759290                            | 10763006 | WBGene00010480 | K01G5.9   | K01G5.9 0.105378395435656   |
| AGIWUR2342;AGIWUR26214;AGIWUR43246                                                |                                     |          |                |           |                             |

|                                                                                                         |     |          |          |                |           |          |                     |
|---------------------------------------------------------------------------------------------------------|-----|----------|----------|----------------|-----------|----------|---------------------|
| CB4856 HS                                                                                               | III | 10763131 | 10777343 | WBGene00001087 | dpy-28    | Y39A1B.3 |                     |
| -0.0870747825116549 AGIWUR19814;AGIWUR31824;AGIWUR37311;AGIWUR39594;AGIWUR42588;AGIWUR44785;AGIWUR44913 |     |          |          |                |           |          |                     |
| CB4856 HS                                                                                               | III | 10781853 | 10791252 | WBGene00004233 | ptr-19    | Y39A1B.2 |                     |
| -0.0769845290444522 AGIWUR2310                                                                          |     |          |          |                |           |          |                     |
| CB4856 HS                                                                                               | III | 10794349 | 10796369 | WBGene00012661 | cllec-163 | Y39A1B.1 |                     |
| 0.0345492439864579 AGIWUR4091;AGIWUR16942;AGIWUR30849                                                   |     |          |          |                |           |          |                     |
| CB4856 HS                                                                                               | III | 10796711 | 10802212 | WBGene00010772 | K11D9.3   | K11D9.3  | 0.282837677640934   |
| AGIWUR43139                                                                                             |     |          |          |                |           |          |                     |
| CB4856 HS                                                                                               | III | 10805930 | 10810999 | WBGene00002219 | klp-7     | K11D9.1  | -0.0918223910542473 |
| AGIWUR11370;AGIWUR12933;AGIWUR13168;AGIWUR23162;AGIWUR34095;AGIWUR34776;AGIWUR35301                     |     |          |          |                |           |          |                     |
| CB4856 HS                                                                                               | III | 10811906 | 10816844 | WBGene00004736 | sca-1     | K11D9.2  | 0.134497816109226   |
| AGIWUR12804;AGIWUR13224;AGIWUR18711;AGIWUR22264;AGIWUR22479;AGIWUR26781;AGIWUR32116;AGIWUR40601         |     |          |          |                |           |          |                     |
| CB4856 HS                                                                                               | III | 10832936 | 10839451 | WBGene00011269 | R17.3     | R17.3    | -0.0718059273740774 |
| AGIWUR22883                                                                                             |     |          |          |                |           |          |                     |
| CB4856 HS                                                                                               | III | 10840023 | 10845020 | WBGene00011268 | pde-12    | R17.2    | 0.160243064944169   |
| AGIWUR23043                                                                                             |     |          |          |                |           |          |                     |
| CB4856 HS                                                                                               | III | 10847619 | 10848670 | WBGene00011267 | fbxb-85   | R17.1    | -0.192900931165575  |
| AGIWUR2734                                                                                              |     |          |          |                |           |          |                     |
| CB4856 HS                                                                                               | III | 10849222 | 10854561 | WBGene00012663 | hex-3     | Y39A1C.4 |                     |
| -0.27622234763294 AGIWUR15260;AGIWUR27664;AGIWUR37209                                                   |     |          |          |                |           |          |                     |
| CB4856 HS                                                                                               | III | 10856776 | 10858186 | WBGene00012662 | Y39A1C.1  | Y39A1C.1 |                     |
| -0.207864680178915 AGIWUR27789                                                                          |     |          |          |                |           |          |                     |
| CB4856 HS                                                                                               | III | 10858284 | 10866994 | WBGene00003898 | oxi-1     | Y39A1C.2 |                     |
| 0.165324260019492 AGIWUR24661                                                                           |     |          |          |                |           |          |                     |
| CB4856 HS                                                                                               | III | 10866870 | 10868727 | WBGene00000475 | cey-4     | Y39A1C.3 |                     |
| 0.00652870440200903 AGIWUR12140;AGIWUR16283;AGIWUR18401;AGIWUR22576;AGIWUR38439;AGIWUR42063             |     |          |          |                |           |          |                     |
| CB4856 HS                                                                                               | III | 10869193 | 10874528 | WBGene00008078 | vps-50    | C44B9.1  | 0.010365599288396   |
| AGIWUR35718                                                                                             |     |          |          |                |           |          |                     |
| CB4856 HS                                                                                               | III | 10875459 | 10878061 | WBGene00008079 | C44B9.2   | C44B9.2  | -0.493294739875486  |
| AGIWUR32805                                                                                             |     |          |          |                |           |          |                     |
| CB4856 HS                                                                                               | III | 10878191 | 10880183 | WBGene00008080 | C44B9.3   | C44B9.3  | 0.120542401890837   |
| AGIWUR18192                                                                                             |     |          |          |                |           |          |                     |
| CB4856 HS                                                                                               | III | 10882345 | 10893672 | WBGene00008081 | athp-1    | C44B9.4  | -0.256694618922634  |
| AGIWUR37057                                                                                             |     |          |          |                |           |          |                     |
| CB4856 HS                                                                                               | III | 10894520 | 10895732 | WBGene00043996 | fbxb-87   | C44B9.6  | 0.164630210401965   |
| AGIWUR31035;AGIWUR40977                                                                                 |     |          |          |                |           |          |                     |
| CB4856 HS                                                                                               | III | 10896363 | 10901836 | WBGene00008082 | com-1     | C44B9.5  | -0.214118040032741  |
| AGIWUR17334;AGIWUR29610;AGIWUR37809                                                                     |     |          |          |                |           |          |                     |
| CB4856 HS                                                                                               | III | 10902648 | 10908927 | WBGene00006843 | unc-119   | M142.1   | 0.1668051876955     |

|                                                                                                          |     |                                                            |          |                |          |          |                     |  |
|----------------------------------------------------------------------------------------------------------|-----|------------------------------------------------------------|----------|----------------|----------|----------|---------------------|--|
| AGIWUR42584                                                                                              |     |                                                            |          |                |          |          |                     |  |
| CB4856 HS                                                                                                | III | 10911460                                                   | 10916567 | WBGene00000853 | cut-6    | M142.2   | -0.0549642307824483 |  |
| AGIWUR20219;AGIWUR21209;AGIWUR27188;AGIWUR37502                                                          |     |                                                            |          |                |          |          |                     |  |
| CB4856 HS                                                                                                | III | 10920336                                                   | 10926041 | WBGene00006873 | vab-7    | M142.4   | -0.0572376988959391 |  |
| AGIWUR44250                                                                                              |     |                                                            |          |                |          |          |                     |  |
| CB4856 HS                                                                                                | III | 10927093                                                   | 10928909 | WBGene00014809 | M142.3   | M142.3   | 0.0847688170307901  |  |
| AGIWUR38763                                                                                              |     |                                                            |          |                |          |          |                     |  |
| CB4856 HS                                                                                                | III | 10931208                                                   | 10932226 | WBGene00010922 | M142.5   | M142.5   | -0.0838940316082901 |  |
| AGIWUR29358                                                                                              |     |                                                            |          |                |          |          |                     |  |
| CB4856 HS                                                                                                | III | 10933631                                                   | 10936129 | WBGene00043057 | M142.8   | M142.8   | 0.0261201366551749  |  |
| AGIWUR36829                                                                                              |     |                                                            |          |                |          |          |                     |  |
| CB4856 HS                                                                                                | III | 10936246                                                   | 10946834 | WBGene00010923 | rle-1    | M142.6   | -0.0218376764474826 |  |
| AGIWUR4139                                                                                               |     |                                                            |          |                |          |          |                     |  |
| CB4856 HS                                                                                                | III | 10947446                                                   | 10951169 | WBGene00013132 | strd-1   | Y52D3.1  | 0.123868779866182   |  |
| AGIWUR11800;AGIWUR26861;AGIWUR34611                                                                      |     |                                                            |          |                |          |          |                     |  |
| CB4856 HS                                                                                                | III | 10951225                                                   | 10953505 | WBGene00006982 | zig-5    | Y48A6A.1 |                     |  |
| 0.119582061643051                                                                                        |     | AGIWUR7315;AGIWUR13367;AGIWUR16414;AGIWUR26225;AGIWUR43305 |          |                |          |          |                     |  |
| CB4856 HS                                                                                                | III | 10960243                                                   | 10966996 | WBGene00012271 | W05B2.2  | W05B2.2  | -0.0620103451232255 |  |
| AGIWUR10851;AGIWUR17598                                                                                  |     |                                                            |          |                |          |          |                     |  |
| CB4856 HS                                                                                                | III | 10967779                                                   | 10969472 | WBGene00014854 | W05B2.3  | W05B2.3  | -0.227708332111424  |  |
| AGIWUR18948                                                                                              |     |                                                            |          |                |          |          |                     |  |
| CB4856 HS                                                                                                | III | 10969944                                                   | 10981848 | WBGene00012272 | dhc-4    | W05B2.4  | 0.00162588957604815 |  |
| AGIWUR14770                                                                                              |     |                                                            |          |                |          |          |                     |  |
| CB4856 HS                                                                                                | III | 10982166                                                   | 10983253 | WBGene00000667 | col-92   | W05B2.6  | 0.227787086953352   |  |
| AGIWUR6521                                                                                               |     |                                                            |          |                |          |          |                     |  |
| CB4856 HS                                                                                                | III | 10988133                                                   | 10991912 | WBGene00012273 | W05B2.7  | W05B2.7  | -0.12735705898435   |  |
| AGIWUR7734;AGIWUR9067;AGIWUR9729;AGIWUR17657;AGIWUR26332;AGIWUR29538;AGIWUR33745;AGIWUR37673;AGIWUR38793 |     |                                                            |          |                |          |          |                     |  |
| CB4856 HS                                                                                                | III | 10992129                                                   | 10995237 | WBGene00012962 | dmsr-5   | Y48A6B.1 |                     |  |
| -0.146280223009992                                                                                       |     | AGIWUR32538;AGIWUR40488;AGIWUR43570                        |          |                |          |          |                     |  |
| CB4856 HS                                                                                                | III | 11007415                                                   | 11007620 | WBGene00012965 | fipr-17  | Y48A6B.4 |                     |  |
| -0.26184284512377                                                                                        |     | AGIWUR446;AGIWUR13076;AGIWUR15516;AGIWUR36422;AGIWUR41315  |          |                |          |          |                     |  |
| CB4856 HS                                                                                                | III | 11008222                                                   | 11008934 | WBGene00012964 | Y48A6B.3 |          | Y48A6B.3            |  |
| 0.0703266959090554                                                                                       |     | AGIWUR29078;AGIWUR40689                                    |          |                |          |          |                     |  |
| CB4856 HS                                                                                                | III | 11009043                                                   | 11010595 | WBGene00012966 | exos-1   | Y48A6B.5 |                     |  |
| 0.209787634081813                                                                                        |     | AGIWUR7404                                                 |          |                |          |          |                     |  |
| CB4856 HS                                                                                                | III | 11012566                                                   | 11025292 | WBGene00012967 | kvs-4    | Y48A6B.6 |                     |  |
| 0.442023128113095                                                                                        |     | AGIWUR4045                                                 |          |                |          |          |                     |  |
| CB4856 HS                                                                                                | III | 11033172                                                   | 11036080 | WBGene00012970 | Y48A6B.9 |          | Y48A6B.9            |  |
| 0.251766453721254                                                                                        |     | AGIWUR8842                                                 |          |                |          |          |                     |  |

|                                                                                               |     |          |          |                |           |                            |
|-----------------------------------------------------------------------------------------------|-----|----------|----------|----------------|-----------|----------------------------|
| CB4856 HS                                                                                     | III | 11036943 | 11063027 | WBGene00012973 | spat-2    | Y48A6B.13                  |
| -0.0935277315823475 AGIWUR11863;AGIWUR15358;AGIWUR26237;AGIWUR29100                           |     |          |          |                |           |                            |
| CB4856 HS                                                                                     | III | 11063479 | 11068753 | WBGene00012972 | rsa-2     | Y48A6B.11                  |
| -0.00445328623902874 AGIWUR29460                                                              |     |          |          |                |           |                            |
| CB4856 HS                                                                                     | III | 11068858 | 11072981 | WBGene00012356 | W09D6.1   | W09D6.1 -0.198232925580114 |
| AGIWUR7033                                                                                    |     |          |          |                |           |                            |
| CB4856 HS                                                                                     | III | 11074536 | 11077494 | WBGene00006287 | str-261   | W09D6.2 0.16263016058412   |
| AGIWUR26409                                                                                   |     |          |          |                |           |                            |
| CB4856 HS                                                                                     | III | 11077704 | 11079446 | WBGene00006273 | str-246   | W09D6.3 0.0180601670180245 |
| AGIWUR13621                                                                                   |     |          |          |                |           |                            |
| CB4856 HS                                                                                     | III | 11079745 | 11080413 | WBGene00012357 | W09D6.4   | W09D6.4 0.122957084990935  |
| AGIWUR2936                                                                                    |     |          |          |                |           |                            |
| CB4856 HS                                                                                     | III | 11088487 | 11091616 | WBGene00012358 | W09D6.5   | W09D6.5 -0.158330941418138 |
| AGIWUR27195                                                                                   |     |          |          |                |           |                            |
| CB4856 HS                                                                                     | III | 11091548 | 11099964 | WBGene00001815 | hmt-1     | W09D6.6 0.128142599376542  |
| AGIWUR10993;AGIWUR34799;AGIWUR37401                                                           |     |          |          |                |           |                            |
| CB4856 HS                                                                                     | III | 11101268 | 11107206 | WBGene00012974 | Y48A6C.1  | Y48A6C.1                   |
| -0.409979431189079 AGIWUR35097                                                                |     |          |          |                |           |                            |
| CB4856 HS                                                                                     | III | 11116994 | 11119222 | WBGene00012976 | sup-35    | Y48A6C.3                   |
| -0.0741583399398884 AGIWUR22107                                                               |     |          |          |                |           |                            |
| CB4856 HS                                                                                     | III | 11131775 | 11136380 | WBGene00004010 | pha-1     | Y48A6C.5                   |
| -0.307190233282284 AGIWUR37170                                                                |     |          |          |                |           |                            |
| CB4856 HS                                                                                     | III | 11136802 | 11138905 | WBGene00012923 | fbxa-128  | Y47D3A.2                   |
| -0.00631887946566856 AGIWUR43741                                                              |     |          |          |                |           |                            |
| CB4856 HS                                                                                     | III | 11139241 | 11141825 | WBGene00012922 | Y47D3A.1  | Y47D3A.1                   |
| -0.0254867163114003 AGIWUR18483                                                               |     |          |          |                |           |                            |
| CB4856 HS                                                                                     | III | 11142448 | 11154287 | WBGene00012936 | Y47D3A.29 | Y47D3A.29                  |
| 0.0677158683412191 AGIWUR2112                                                                 |     |          |          |                |           |                            |
| CB4856 HS                                                                                     | III | 11154827 | 11168820 | WBGene00000519 | cku-70    | Y47D3A.4                   |
| -0.195743114867795 AGIWUR31521                                                                |     |          |          |                |           |                            |
| CB4856 HS                                                                                     | III | 11168923 | 11170865 | WBGene00012924 | Y47D3A.5  | Y47D3A.5                   |
| 0.079078561540463 AGIWUR42591                                                                 |     |          |          |                |           |                            |
| CB4856 HS                                                                                     | III | 11170889 | 11195207 | WBGene00006604 | tra-1     | Y47D3A.6                   |
| -0.139584729059134                                                                            |     |          |          |                |           |                            |
| AGIWUR1689;AGIWUR2672;AGIWUR17668;AGIWUR22313;AGIWUR25374;AGIWUR29878;AGIWUR35190;AGIWUR38829 |     |          |          |                |           |                            |
| CB4856 HS                                                                                     | III | 11216398 | 11218260 | WBGene00006553 | tbx-34    | Y47D3A.10                  |
| 0.0357467862325151 AGIWUR45039                                                                |     |          |          |                |           |                            |
| CB4856 HS                                                                                     | III | 11218797 | 11222666 | WBGene00012925 | wht-8     | Y47D3A.11                  |
| 0.191130399183059 AGIWUR5856;AGIWUR6471;AGIWUR18518                                           |     |          |          |                |           |                            |

|                                                                       |                                                                       |          |                |           |                             |
|-----------------------------------------------------------------------|-----------------------------------------------------------------------|----------|----------------|-----------|-----------------------------|
| CB4856 HS III                                                         | 11223439                                                              | 11224106 | WBGene00012926 | Y47D3A.13 | Y47D3A.13                   |
| -0.0395340416256058                                                   | AGIWUR20032;AGIWUR22061                                               |          |                |           |                             |
| CB4856 HS III                                                         | 11224800                                                              | 11227125 | WBGene00006556 | tbx-37    | Y47D3A.12                   |
| -0.254359818249489                                                    | AGIWUR19564                                                           |          |                |           |                             |
| CB4856 HS III                                                         | 11235581                                                              | 11236868 | WBGene00012927 | Y47D3A.14 | Y47D3A.14                   |
| -0.185008598124776                                                    | AGIWUR18209;AGIWUR21353                                               |          |                |           |                             |
| CB4856 HS III                                                         | 11237149                                                              | 11238252 | WBGene00012928 | aakb-2    | Y47D3A.15                   |
| 0.0326349089285394                                                    | AGIWUR26897                                                           |          |                |           |                             |
| CB4856 HS III                                                         | 11245120                                                              | 11252281 | WBGene00012929 | rsks-1    | Y47D3A.16                   |
| -0.280174322109953                                                    | AGIWUR17817;AGIWUR19720                                               |          |                |           |                             |
| CB4856 HS III                                                         | 11252391                                                              | 11256646 | WBGene00012938 | Y47D3A.32 | Y47D3A.32                   |
| 0.141102930368643                                                     | AGIWUR9222                                                            |          |                |           |                             |
| CB4856 HS III                                                         | 11257307                                                              | 11270875 | WBGene00012930 | obr-1     | Y47D3A.17                   |
| 0.192454623898151                                                     | AGIWUR4034                                                            |          |                |           |                             |
| CB4856 HS III                                                         | 11274901                                                              | 11276032 | WBGene00012931 | Y47D3A.20 | Y47D3A.20                   |
| -0.138190753666736                                                    | AGIWUR17656                                                           |          |                |           |                             |
| CB4856 HS III                                                         | 11276292                                                              | 11278917 | WBGene00012932 | Y47D3A.21 | Y47D3A.21                   |
| 0.0177117552815265                                                    | AGIWUR43113                                                           |          |                |           |                             |
| CB4856 HS III                                                         | 11279021                                                              | 11290580 | WBGene00012934 | gly-9     | Y47D3A.23                   |
| 0.0215767942185927                                                    | AGIWUR10346                                                           |          |                |           |                             |
| CB4856 HS III                                                         | 11290911                                                              | 11306145 | WBGene00004873 | smc-3     | Y47D3A.26                   |
| -0.298666990017276                                                    | AGIWUR11729                                                           |          |                |           |                             |
| CB4856 HS III                                                         | 11306560                                                              | 11311566 | WBGene00004284 | rab-35    | Y47D3A.25                   |
| -0.123784308281137                                                    | AGIWUR2957;AGIWUR6937;AGIWUR24812;AGIWUR25485;AGIWUR28738;AGIWUR36629 |          |                |           |                             |
| CB4856 HS III                                                         | 11312251                                                              | 11317055 | WBGene00006563 | teg-1     | Y47D3A.27                   |
| 0.222825337907196                                                     | AGIWUR30380                                                           |          |                |           |                             |
| CB4856 HS III                                                         | 11317570                                                              | 11326664 | WBGene00012935 | mcm-10    | Y47D3A.28                   |
| 0.0327586262218702                                                    | AGIWUR37595                                                           |          |                |           |                             |
| CB4856 HS III                                                         | 11326654                                                              | 11343108 | WBGene00012126 | T28D6.6   | T28D6.6 0.252823563850495   |
| AGIWUR8625                                                            |                                                                       |          |                |           |                             |
| CB4856 HS III                                                         | 11343272                                                              | 11344147 | WBGene00003975 | pen-2     | T28D6.9 -0.0545712137316983 |
| AGIWUR8411                                                            |                                                                       |          |                |           |                             |
| CB4856 HS III                                                         | 11344255                                                              | 11346789 | WBGene00012127 | T28D6.7   | T28D6.7 0.26741960233962    |
| AGIWUR10769                                                           |                                                                       |          |                |           |                             |
| CB4856 HS III                                                         | 11360456                                                              | 11366214 | WBGene00012124 | T28D6.4   | T28D6.4 0.0949095298601463  |
| AGIWUR36605                                                           |                                                                       |          |                |           |                             |
| CB4856 HS III                                                         | 11366618                                                              | 11368435 | WBGene00012123 | T28D6.3   | T28D6.3 -0.228193269818685  |
| AGIWUR3710;AGIWUR7468;AGIWUR14018;AGIWUR35762;AGIWUR40316;AGIWUR41376 |                                                                       |          |                |           |                             |
| CB4856 HS III                                                         | 11368415                                                              | 11371775 | WBGene00006533 | tba-7     | T28D6.2 0.0453526894542993  |

AGIWUR715;AGIWUR5371;AGIWUR29133;AGIWUR32168;AGIWUR42111  
 CB4856 HS III 11372886 11377980 WBGene00001077 dpy-18 Y47D3B.10  
 -0.00449391871665838 AGIWUR12436;AGIWUR13772  
 CB4856 HS III 11382222 11388669 WBGene00012939 Y47D3B.1 Y47D3B.1  
 0.0435373382264395 AGIWUR1218;AGIWUR5068;AGIWUR16542  
 CB4856 HS III 11388606 11393261 WBGene00003759 nlp-21 Y47D3B.2  
 -0.0384413773467678 AGIWUR821;AGIWUR1951;AGIWUR3467;AGIWUR16106;AGIWUR18641;AGIWUR34936;AGIWUR40877  
 CB4856 HS III 11403017 11404197 WBGene00185055 Y47D3B.12 Y47D3B.12  
 0.00260105117956932 AGIWUR10572;AGIWUR15106;AGIWUR27216  
 CB4856 HS III 11405361 11409425 WBGene00012941 Y47D3B.4 Y47D3B.4  
 0.00696518977146532 AGIWUR6626;AGIWUR12982;AGIWUR13920;AGIWUR22355;AGIWUR36034  
 CB4856 HS III 11410712 11424655 WBGene00006683 twk-31 Y47D3B.5  
 -0.208513167275777 AGIWUR26655  
 CB4856 HS III 11427135 11428414 WBGene00012942 Y47D3B.6 Y47D3B.6  
 -0.251356305573399 AGIWUR2691;AGIWUR6711;AGIWUR8090;AGIWUR16063;AGIWUR19274;AGIWUR21033;AGIWUR42739  
 CB4856 HS III 11428367 11442566 WBGene00004735 sbp-1 Y47D3B.7  
 0.155769675541897 AGIWUR35305  
 CB4856 HS III 11456877 11462897 WBGene00023404 plr-1 Y47D3B.11  
 0.125066235310872 AGIWUR38850  
 CB4856 HS III 11463665 11470805 WBGene00012943 bed-2 Y47D3B.9  
 -0.0680517362909931 AGIWUR34421  
 CB4856 HS III 11482603 11484244 WBGene00013421 fbxa-220 Y66A7A.1  
 -0.0416757388669771 AGIWUR9425  
 CB4856 HS III 11485474 11487345 WBGene00013422 Y66A7A.2 Y66A7A.2  
 0.297810846561116 AGIWUR6555  
 CB4856 HS III 11488355 11500747 WBGene00013447 nars-2 Y66D12A.23  
 0.128413531851145 AGIWUR8032;AGIWUR18572;AGIWUR36913  
 CB4856 HS III 11500867 11502852 WBGene00006573 tin-10 Y66D12A.22  
 -0.0636172385699307 AGIWUR23071  
 CB4856 HS III 11502963 11505291 WBGene00013446 Y66D12A.21 Y66D12A.21  
 -0.0423278481724925 AGIWUR236;AGIWUR33308  
 CB4856 HS III 11505535 11508919 WBGene00004960 spe-6 Y66D12A.20  
 -0.0237262159998632 AGIWUR19592  
 CB4856 HS III 11509081 11511467 WBGene00013445 Y66D12A.19 Y66D12A.19  
 -0.117865004982148 AGIWUR6432;AGIWUR11711  
 CB4856 HS III 11512860 11523759 WBGene00013443 such-1 Y66D12A.17  
 0.0351252037709706 AGIWUR42355  
 CB4856 HS III 11524322 11526564 WBGene00013442 Y66D12A.16 Y66D12A.16  
 -0.269403145796701 AGIWUR24201



|                     |                                                             |          |                |            |            |
|---------------------|-------------------------------------------------------------|----------|----------------|------------|------------|
| CB4856 HS III       | 11526372                                                    | 11534595 | WBGene00013441 | xpb-1      | Y66D12A.15 |
| 0.0958538585993249  | AGIWUR3323                                                  |          |                |            |            |
| CB4856 HS III       | 11534674                                                    | 11546669 | WBGene00013440 | nrps-1     | Y66D12A.14 |
| -0.125237619349114  | AGIWUR32086                                                 |          |                |            |            |
| CB4856 HS III       | 11548377                                                    | 11552398 | WBGene00013439 | Y66D12A.13 | Y66D12A.13 |
| 0.0385575244706757  | AGIWUR43703                                                 |          |                |            |            |
| CB4856 HS III       | 11561152                                                    | 11562655 | WBGene00013438 | ztf-29     | Y66D12A.12 |
| -0.0466791567413249 | AGIWUR30629                                                 |          |                |            |            |
| CB4856 HS III       | 11563467                                                    | 11565536 | WBGene00013437 | Y66D12A.11 | Y66D12A.11 |
| 0.0675612391969871  | AGIWUR7037;AGIWUR9963;AGIWUR19649                           |          |                |            |            |
| CB4856 HS III       | 11565833                                                    | 11568007 | WBGene00013436 | Y66D12A.10 | Y66D12A.10 |
| 0.0411772746382706  | AGIWUR19129                                                 |          |                |            |            |
| CB4856 HS III       | 11568137                                                    | 11573343 | WBGene00013435 | Y66D12A.9  | Y66D12A.9  |
| 0.131403813031104   | AGIWUR11078                                                 |          |                |            |            |
| CB4856 HS III       | 11574221                                                    | 11578752 | WBGene00013434 | Y66D12A.8  | Y66D12A.8  |
| -0.318275446467652  | AGIWUR27440;AGIWUR44945                                     |          |                |            |            |
| CB4856 HS III       | 11579265                                                    | 11580478 | WBGene00013433 | Y66D12A.7  | Y66D12A.7  |
| 0.01677956568588    | AGIWUR7522                                                  |          |                |            |            |
| CB4856 HS III       | 11580694                                                    | 11581402 | WBGene00013432 | Y66D12A.6  | Y66D12A.6  |
| 0.0677011970650216  | AGIWUR18421                                                 |          |                |            |            |
| CB4856 HS III       | 11581600                                                    | 11589133 | WBGene00013431 | ceh-92     | Y66D12A.5  |
| -0.11667825297309   | AGIWUR8014;AGIWUR41570                                      |          |                |            |            |
| CB4856 HS III       | 11589211                                                    | 11592837 | WBGene00013429 | Y66D12A.3  | Y66D12A.3  |
| 0.0936468291093604  | AGIWUR32063                                                 |          |                |            |            |
| CB4856 HS III       | 11608170                                                    | 11609082 | WBGene00013427 | Y66D12A.1  | Y66D12A.1  |
| -0.170851451108534  | AGIWUR31529                                                 |          |                |            |            |
| CB4856 HS III       | 11612607                                                    | 11615707 | WBGene00013424 | Y66A7A.4   | Y66A7A.4   |
| 0.14714398799026    | AGIWUR22804                                                 |          |                |            |            |
| CB4856 HS III       | 11616758                                                    | 11623991 | WBGene00013425 | ceh-91     | Y66A7A.5   |
| 0.118625625022485   | AGIWUR26537                                                 |          |                |            |            |
| CB4856 HS III       | 11624991                                                    | 11628238 | WBGene00001633 | gly-8      | Y66A7A.6   |
| -0.179232107040786  | AGIWUR39593                                                 |          |                |            |            |
| CB4856 HS III       | 11628386                                                    | 11631014 | WBGene00013426 | Y66A7A.7   | Y66A7A.7   |
| -0.132352691278831  | AGIWUR39184                                                 |          |                |            |            |
| CB4856 HS III       | 11633216                                                    | 11636840 | WBGene00006552 | tbx-33     | Y66A7A.8   |
| 0.0816360691647837  | AGIWUR1180                                                  |          |                |            |            |
| CB4856 HS III       | 11641461                                                    | 11641861 | WBGene00012760 | Y41C4A.17  | Y41C4A.17  |
| -0.140657040679701  | AGIWUR15250;AGIWUR16680;AGIWUR23606;AGIWUR24686;AGIWUR39423 |          |                |            |            |
| CB4856 HS III       | 11647769                                                    | 11649893 | WBGene00012749 | Y41C4A.1   | Y41C4A.1   |

|                                                                                                                                                                                 |                                                                      |          |                |           |           |
|---------------------------------------------------------------------------------------------------------------------------------------------------------------------------------|----------------------------------------------------------------------|----------|----------------|-----------|-----------|
| 0.140671809598414                                                                                                                                                               | AGIWUR15681                                                          |          |                |           |           |
| CB4856 HS III                                                                                                                                                                   | 11650471                                                             | 11656185 | WBGene00012750 | faah-6    | Y41C4A.2  |
| -0.183911073140004                                                                                                                                                              | AGIWUR17139                                                          |          |                |           |           |
| CB4856 HS III                                                                                                                                                                   | 11657738                                                             | 11693837 | WBGene00000793 | crh-1     | Y41C4A.4  |
| -0.0402562644219078                                                                                                                                                             |                                                                      |          |                |           |           |
| AGIWUR743;AGIWUR3806;AGIWUR4913;AGIWUR12286;AGIWUR22855;AGIWUR24059;AGIWUR26704;AGIWUR27210;AGIWUR28416;AGIWUR33693;AGIWUR35499;AGIWUR40809;AGIWUR41451;AGIWUR42718;AGIWUR43847 |                                                                      |          |                |           |           |
| CB4856 HS III                                                                                                                                                                   | 11696599                                                             | 11698306 | WBGene00012753 | Y41C4A.6  | Y41C4A.6  |
| -0.0755801115628314                                                                                                                                                             | AGIWUR279;AGIWUR8193;AGIWUR16575;AGIWUR27230;AGIWUR37467;AGIWUR44508 |          |                |           |           |
| CB4856 HS III                                                                                                                                                                   | 11698869                                                             | 11700087 | WBGene00012754 | Y41C4A.7  | Y41C4A.7  |
| -0.202125198444797                                                                                                                                                              | AGIWUR34332                                                          |          |                |           |           |
| CB4856 HS III                                                                                                                                                                   | 11700285                                                             | 11702856 | WBGene00004165 | pqn-84    | Y41C4A.5  |
| -0.366731391475206                                                                                                                                                              | AGIWUR28537                                                          |          |                |           |           |
| CB4856 HS III                                                                                                                                                                   | 11703885                                                             | 11705091 | WBGene00000670 | col-95    | Y41C4A.16 |
| -0.155567926960892                                                                                                                                                              | AGIWUR43392                                                          |          |                |           |           |
| CB4856 HS III                                                                                                                                                                   | 11705713                                                             | 11706644 | WBGene00000671 | col-96    | Y41C4A.19 |
| -0.423778393008723                                                                                                                                                              | AGIWUR15044                                                          |          |                |           |           |
| CB4856 HS III                                                                                                                                                                   | 11706969                                                             | 11708820 | WBGene00012755 | Y41C4A.8  | Y41C4A.8  |
| 0.011217179124877                                                                                                                                                               | AGIWUR314                                                            |          |                |           |           |
| CB4856 HS III                                                                                                                                                                   | 11710827                                                             | 11718741 | WBGene00012756 | Y41C4A.9  | Y41C4A.9  |
| 0.281536275169916                                                                                                                                                               | AGIWUR36806                                                          |          |                |           |           |
| CB4856 HS III                                                                                                                                                                   | 11718834                                                             | 11719450 | WBGene00001235 | elb-1     | Y41C4A.10 |
| 0.00047407306481162                                                                                                                                                             | AGIWUR44409                                                          |          |                |           |           |
| CB4856 HS III                                                                                                                                                                   | 11721706                                                             | 11723602 | WBGene00270321 | Y41C4A.32 | Y41C4A.32 |
| -0.286923883356224                                                                                                                                                              | AGIWUR18044                                                          |          |                |           |           |
| CB4856 HS III                                                                                                                                                                   | 11724038                                                             | 11726690 | WBGene00012758 | Y41C4A.12 | Y41C4A.12 |
| 0.0906870477225601                                                                                                                                                              | AGIWUR11342;AGIWUR37933                                              |          |                |           |           |
| CB4856 HS III                                                                                                                                                                   | 11730612                                                             | 11731305 | WBGene00012761 | Y41C4A.18 | Y41C4A.18 |
| 0.0637776084570341                                                                                                                                                              | AGIWUR22498                                                          |          |                |           |           |
| CB4856 HS III                                                                                                                                                                   | 11733346                                                             | 11737627 | WBGene00012759 | sup-1     | Y41C4A.13 |
| 0.159339635540423                                                                                                                                                               | AGIWUR24400                                                          |          |                |           |           |
| CB4856 HS III                                                                                                                                                                   | 11747042                                                             | 11750160 | WBGene00003417 | mrt-2     | Y41C4A.14 |
| 0.152923769313258                                                                                                                                                               | AGIWUR6066                                                           |          |                |           |           |
| CB4856 HS III                                                                                                                                                                   | 11751320                                                             | 11773681 | WBGene00007703 | gbf-1     | C24H11.7  |
| -0.0228312940765285                                                                                                                                                             | AGIWUR21724                                                          |          |                |           |           |
| CB4856 HS III                                                                                                                                                                   | 11774950                                                             | 11776675 | WBGene00007021 | immp-1    | C24H11.6  |
| 0.246117640639191                                                                                                                                                               | AGIWUR14285;AGIWUR14709;AGIWUR24365;AGIWUR28971;AGIWUR37179          |          |                |           |           |
| CB4856 HS III                                                                                                                                                                   | 11777625                                                             | 11779629 | WBGene00007704 | mdt-21    | C24H11.9  |
| -0.00457457142440987                                                                                                                                                            | AGIWUR15738                                                          |          |                |           |           |

|                     |                                                                        |          |                |          |           |
|---------------------|------------------------------------------------------------------------|----------|----------------|----------|-----------|
| CB4856 HS III       | 11780235                                                               | 11781035 | WBGene00007702 | C24H11.5 | C24H11.5  |
| 0.0438733849531694  | AGIWUR9878;AGIWUR11324;AGIWUR14573;AGIWUR14995;AGIWUR23570;AGIWUR25385 |          |                |          |           |
| CB4856 HS III       | 11782112                                                               | 11784074 | WBGene00007701 | srd-74   | C24H11.4  |
| -0.280190939061881  | AGIWUR22266                                                            |          |                |          |           |
| CB4856 HS III       | 11784147                                                               | 11786052 | WBGene00006557 | tbx-38   | C24H11.3  |
| -0.230928294802032  | AGIWUR8227                                                             |          |                |          |           |
| CB4856 HS III       | 11795748                                                               | 11803243 | WBGene00006690 | twk-39   | C24H11.8  |
| -0.0980744968539558 | AGIWUR3472;AGIWUR15834                                                 |          |                |          |           |
| CB4856 HS III       | 11804547                                                               | 11806795 | WBGene00044232 | C18D11.7 | C18D11.7  |
| 0.160035618748472   | AGIWUR6793;AGIWUR14078                                                 |          |                |          |           |
| CB4856 HS III       | 11809118                                                               | 11809561 | WBGene00045211 | C18D11.9 | C18D11.9  |
| 0.0566619950315577  | AGIWUR1937;AGIWUR17901;AGIWUR26015;AGIWUR27348                         |          |                |          |           |
| CB4856 HS III       | 11810556                                                               | 11811046 | WBGene00007682 | C18D11.6 | C18D11.6  |
| -0.289609241965058  | AGIWUR24374;AGIWUR28866                                                |          |                |          |           |
| CB4856 HS III       | 11816569                                                               | 11819806 | WBGene00007679 | C18D11.1 | C18D11.1  |
| 0.13853079862049    | AGIWUR30952                                                            |          |                |          |           |
| CB4856 HS III       | 11819745                                                               | 11822526 | WBGene00007680 | maa-1    | C18D11.2  |
| -0.0919738724869532 | AGIWUR10358;AGIWUR12232;AGIWUR27929                                    |          |                |          |           |
| CB4856 HS III       | 11823327                                                               | 11824975 | WBGene00007681 | C18D11.3 | C18D11.3  |
| 0.101179734940466   | AGIWUR37930                                                            |          |                |          |           |
| CB4856 HS III       | 11826215                                                               | 11830996 | WBGene00004705 | rsp-8    | C18D11.4  |
| 0.0321539369807162  | AGIWUR491;AGIWUR962                                                    |          |                |          |           |
| CB4856 HS III       | 11831008                                                               | 11846465 | WBGene00003826 | ntl-3    | Y56A3A.1  |
| -0.110874198709046  | AGIWUR15901;AGIWUR41835                                                |          |                |          |           |
| CB4856 HS III       | 11848152                                                               | 11849522 | WBGene00003234 | mif-1    | Y56A3A.3  |
| 0.0174048608351178  | AGIWUR51                                                               |          |                |          |           |
| CB4856 HS III       | 11849951                                                               | 11862249 | WBGene00013225 | Y56A3A.2 | Y56A3A.2  |
| 0.0777360102149638  | AGIWUR6842;AGIWUR31751                                                 |          |                |          |           |
| CB4856 HS III       | 11862393                                                               | 11869281 | WBGene00006396 | taf-12   | Y56A3A.4  |
| 0.148450512188476   | AGIWUR32671;AGIWUR32932                                                |          |                |          |           |
| CB4856 HS III       | 11871252                                                               | 11878889 | WBGene00013227 | Y56A3A.6 | Y56A3A.6  |
| 0.162876558044097   | AGIWUR9530                                                             |          |                |          |           |
| CB4856 HS III       | 11886485                                                               | 11891435 | WBGene00013226 | faah-5   | Y56A3A.5  |
| 0.57623689122965    | AGIWUR23762                                                            |          |                |          |           |
| CB4856 HS III       | 11894784                                                               | 11898269 | WBGene00013231 | tsen-2   | Y56A3A.11 |
| 0.00936890347744068 | AGIWUR30976;AGIWUR31534;AGIWUR41043                                    |          |                |          |           |
| CB4856 HS III       | 11899337                                                               | 11907387 | WBGene00013232 | faah-4   | Y56A3A.12 |
| -0.125509304248716  | AGIWUR22557                                                            |          |                |          |           |
| CB4856 HS III       | 11907477                                                               | 11908474 | WBGene00013233 | sdz-33   | Y56A3A.14 |

|                                                                                                                                              |                                                                       |          |                |           |           |
|----------------------------------------------------------------------------------------------------------------------------------------------|-----------------------------------------------------------------------|----------|----------------|-----------|-----------|
| 0.00508975033763015                                                                                                                          | AGIWUR5241                                                            |          |                |           |           |
| CB4856 HS III                                                                                                                                | 11915151                                                              | 11915712 | WBGene00013237 | Y56A3A.19 | Y56A3A.19 |
| 0.122131025076708                                                                                                                            | AGIWUR10004;AGIWUR20598;AGIWUR30622                                   |          |                |           |           |
| CB4856 HS III                                                                                                                                | 11915891                                                              | 11917876 | WBGene00003802 | npp-16    | Y56A3A.17 |
| -0.0368331224421512                                                                                                                          |                                                                       |          |                |           |           |
| AGIWUR6396;AGIWUR6847;AGIWUR9066;AGIWUR15726;AGIWUR16215;AGIWUR18214;AGIWUR27133;AGIWUR28029;AGIWUR29924;AGIWUR30267;AGIWUR33353;AGIWUR41005 |                                                                       |          |                |           |           |
| CB4856 HS III                                                                                                                                | 11918828                                                              | 11920237 | WBGene00000369 | ccf-1     | Y56A3A.20 |
| 0.0883804046122831                                                                                                                           |                                                                       |          |                |           |           |
| AGIWUR3851;AGIWUR4029;AGIWUR6652;AGIWUR15305;AGIWUR22050;AGIWUR33330;AGIWUR35362;AGIWUR41944                                                 |                                                                       |          |                |           |           |
| CB4856 HS III                                                                                                                                | 11920716                                                              | 11921590 | WBGene00013238 | trap-4    | Y56A3A.21 |
| 0.170291537675705                                                                                                                            | AGIWUR42080                                                           |          |                |           |           |
| CB4856 HS III                                                                                                                                | 11921692                                                              | 11923825 | WBGene00013239 | Y56A3A.22 | Y56A3A.22 |
| -0.268946086065448                                                                                                                           | AGIWUR24269                                                           |          |                |           |           |
| CB4856 HS III                                                                                                                                | 11923886                                                              | 11929376 | WBGene00003594 | nft-1     | Y56A3A.13 |
| -0.116562746244426                                                                                                                           | AGIWUR21699                                                           |          |                |           |           |
| CB4856 HS III                                                                                                                                | 11929889                                                              | 11933639 | WBGene00044233 | Y56A3A.36 | Y56A3A.36 |
| -0.0897990334622172                                                                                                                          | AGIWUR5818;AGIWUR35337;AGIWUR37064                                    |          |                |           |           |
| CB4856 HS III                                                                                                                                | 11934002                                                              | 11947017 | WBGene00013228 | Y56A3A.7  | Y56A3A.7  |
| 0.041058835798875                                                                                                                            | AGIWUR6563;AGIWUR12033                                                |          |                |           |           |
| CB4856 HS III                                                                                                                                | 11949918                                                              | 11960180 | WBGene00006596 | top-3     | Y56A3A.27 |
| 0.190558307117353                                                                                                                            | AGIWUR2678                                                            |          |                |           |           |
| CB4856 HS III                                                                                                                                | 11961470                                                              | 11971367 | WBGene00013240 | Y56A3A.28 | Y56A3A.28 |
| -0.100499788908162                                                                                                                           | AGIWUR1138;AGIWUR8487                                                 |          |                |           |           |
| CB4856 HS III                                                                                                                                | 11971461                                                              | 11974092 | WBGene00013241 | ung-1     | Y56A3A.29 |
| 0.0886905534779352                                                                                                                           | AGIWUR5152;AGIWUR6264;AGIWUR7720                                      |          |                |           |           |
| CB4856 HS III                                                                                                                                | 11974077                                                              | 11979065 | WBGene00013242 | Y56A3A.30 | Y56A3A.30 |
| 0.251319511299734                                                                                                                            | AGIWUR1081                                                            |          |                |           |           |
| CB4856 HS III                                                                                                                                | 11974477                                                              | 11989885 | WBGene00013243 | Y56A3A.31 | Y56A3A.31 |
| 0.0492156246798796                                                                                                                           | AGIWUR3812                                                            |          |                |           |           |
| CB4856 HS III                                                                                                                                | 11990167                                                              | 11999552 | WBGene00006937 | wah-1     | Y56A3A.32 |
| 0.00475697850716461                                                                                                                          | AGIWUR2501;AGIWUR3631;AGIWUR34419;AGIWUR35517;AGIWUR35901;AGIWUR45018 |          |                |           |           |
| CB4856 HS III                                                                                                                                | 11999497                                                              | 12002950 | WBGene00013244 | Y56A3A.33 | Y56A3A.33 |
| 0.221883273062112                                                                                                                            | AGIWUR10400;AGIWUR17573;AGIWUR27018                                   |          |                |           |           |
| CB4856 HS III                                                                                                                                | 12020552                                                              | 12025325 | WBGene00000273 | brp-1     | Y79H2A.1  |
| -0.168581299458765                                                                                                                           | AGIWUR20615                                                           |          |                |           |           |
| CB4856 HS III                                                                                                                                | 12025559                                                              | 12028811 | WBGene00043997 | Y79H2A.12 | Y79H2A.12 |
| -0.101329863859513                                                                                                                           | AGIWUR31274;AGIWUR37681                                               |          |                |           |           |
| CB4856 HS III                                                                                                                                | 12028969                                                              | 12030769 | WBGene00013579 | Y79H2A.2  | Y79H2A.2  |

|                     |                                                                                 |                |           |           |
|---------------------|---------------------------------------------------------------------------------|----------------|-----------|-----------|
| 0.0381447170166318  | AGIWUR21385;AGIWUR43928                                                         |                |           |           |
| CB4856 HS III       | 12031516 12052303                                                               | WBGene00013580 | Y79H2A.3  | Y79H2A.3  |
| -0.0397639973386097 | AGIWUR3496;AGIWUR4375;AGIWUR5043;AGIWUR7222;AGIWUR15628;AGIWUR20046;AGIWUR38151 |                |           |           |
| CB4856 HS III       | 12052424 12058458                                                               | WBGene00000201 | arx-3     | Y79H2A.6  |
| -0.0737936369522689 | AGIWUR26668                                                                     |                |           |           |
| CB4856 HS III       | 12058844 12072293                                                               | WBGene00006993 | zyg-8     | Y79H2A.11 |
| -0.155054221516654  | AGIWUR36623;AGIWUR44842                                                         |                |           |           |
| CB4856 HS III       | 12074290 12077556                                                               | WBGene00004024 | php-3     | Y75B8A.1  |
| -0.0850555759445815 | AGIWUR9119                                                                      |                |           |           |
| CB4856 HS III       | 12077788 12084320                                                               | WBGene00003779 | nob-1     | Y75B8A.2  |
| 0.096629639604231   | AGIWUR2669;AGIWUR13194                                                          |                |           |           |
| CB4856 HS III       | 12101810 12106597                                                               | WBGene00013540 | Y75B8A.3  | Y75B8A.3  |
| 0.0340249287032357  | AGIWUR41000                                                                     |                |           |           |
| CB4856 HS III       | 12107774 12113471                                                               | WBGene00013541 | lonp-2    | Y75B8A.4  |
| 0.0444231474309014  | AGIWUR44655                                                                     |                |           |           |
| CB4856 HS III       | 12114577 12118470                                                               | WBGene00013542 | lron-12   | Y75B8A.5  |
| -0.0536482298291912 | AGIWUR24439                                                                     |                |           |           |
| CB4856 HS III       | 12123881 12130352                                                               | WBGene00013543 | Y75B8A.6  | Y75B8A.6  |
| 0.0851327971003215  | AGIWUR12891                                                                     |                |           |           |
| CB4856 HS III       | 12152899 12160100                                                               | WBGene00013544 | Y75B8A.7  | Y75B8A.7  |
| -0.295834076711689  | AGIWUR40081                                                                     |                |           |           |
| CB4856 HS III       | 12160758 12171356                                                               | WBGene00013545 | Y75B8A.8  | Y75B8A.8  |
| 0.0256293228075819  | AGIWUR8629                                                                      |                |           |           |
| CB4856 HS III       | 12171353 12177245                                                               | WBGene00001636 | gly-11    | Y75B8A.9  |
| 0.0231904525514555  | AGIWUR185;AGIWUR4639;AGIWUR34343;AGIWUR43642                                    |                |           |           |
| CB4856 HS III       | 12180960 12183013                                                               | WBGene00013547 | Y75B8A.10 | Y75B8A.10 |
| -0.147121551317773  | AGIWUR41582                                                                     |                |           |           |
| CB4856 HS III       | 12186411 12190116                                                               | WBGene00013548 | Y75B8A.11 | Y75B8A.11 |
| -0.0366739452440283 | AGIWUR9380                                                                      |                |           |           |
| CB4856 HS III       | 12191056 12202450                                                               | WBGene00003892 | osm-12    | Y75B8A.12 |
| -0.0104810449666015 | AGIWUR1812;AGIWUR18881;AGIWUR24126                                              |                |           |           |
| CB4856 HS III       | 12203822 12215686                                                               | WBGene00013549 | Y75B8A.13 | Y75B8A.13 |
| -0.247301522214967  | AGIWUR19945;AGIWUR20922;AGIWUR30232;AGIWUR36978                                 |                |           |           |
| CB4856 HS III       | 12216779 12218634                                                               | WBGene00013550 | Y75B8A.14 | Y75B8A.14 |
| 0.100197061597747   | AGIWUR9294                                                                      |                |           |           |
| CB4856 HS III       | 12218990 12223934                                                               | WBGene00013551 | Y75B8A.16 | Y75B8A.16 |
| 0.00722250307280525 | AGIWUR33754                                                                     |                |           |           |
| CB4856 HS III       | 12224487 12225331                                                               | WBGene00013552 | gmn-1     | Y75B8A.17 |
| -0.0178834960906618 | AGIWUR1240;AGIWUR23735;AGIWUR30289;AGIWUR30706;AGIWUR31045;AGIWUR33207          |                |           |           |

|                     |                                                |          |                |           |           |
|---------------------|------------------------------------------------|----------|----------------|-----------|-----------|
| CB4856 HS III       | 12225638                                       | 12226267 | WBGene00013553 | Y75B8A.18 | Y75B8A.18 |
| -0.323718672575346  | AGIWUR31363                                    |          |                |           |           |
| CB4856 HS III       | 12226632                                       | 12232241 | WBGene00013554 | Y75B8A.19 | Y75B8A.19 |
| -0.0441756351875178 | AGIWUR15908;AGIWUR16398;AGIWUR29200            |          |                |           |           |
| CB4856 HS III       | 12232632                                       | 12235711 | WBGene00001724 | grl-15    | Y75B8A.20 |
| 0.0541114758594965  | AGIWUR20943                                    |          |                |           |           |
| CB4856 HS III       | 12240367                                       | 12250164 | WBGene00006571 | tim-1     | Y75B8A.22 |
| 0.154667274850276   | AGIWUR1647;AGIWUR6048;AGIWUR11763              |          |                |           |           |
| CB4856 HS III       | 12250602                                       | 12251009 | WBGene00013556 | Y75B8A.23 | Y75B8A.23 |
| 0.162165353275135   | AGIWUR30023                                    |          |                |           |           |
| CB4856 HS III       | 12251492                                       | 12273692 | WBGene00013557 | Y75B8A.24 | Y75B8A.24 |
| -0.0199823119395575 | AGIWUR17796                                    |          |                |           |           |
| CB4856 HS III       | 12274040                                       | 12282221 | WBGene00013558 | Y75B8A.25 | Y75B8A.25 |
| -0.174376577646076  | AGIWUR29151                                    |          |                |           |           |
| CB4856 HS III       | 12283208                                       | 12303216 | WBGene00003414 | mrp-8     | Y75B8A.26 |
| -0.0119164518102708 | AGIWUR6025;AGIWUR14868;AGIWUR30937;AGIWUR39033 |          |                |           |           |
| CB4856 HS III       | 12307771                                       | 12311924 | WBGene00004172 | pqn-92    | Y75B8A.27 |
| 0.266070874573142   | AGIWUR41336                                    |          |                |           |           |
| CB4856 HS III       | 12313287                                       | 12314403 | WBGene00023483 | Y75B8A.39 | Y75B8A.39 |
| 1.42965458318478    | AGIWUR2361                                     |          |                |           |           |
| CB4856 HS III       | 12315479                                       | 12315857 | WBGene00013565 | Y75B8A.37 | Y75B8A.37 |
| 0.00560848498513877 | AGIWUR38393                                    |          |                |           |           |
| CB4856 HS III       | 12319108                                       | 12323771 | WBGene00013559 | Y75B8A.28 | Y75B8A.28 |
| -0.250010359779887  | AGIWUR24263                                    |          |                |           |           |
| CB4856 HS III       | 12327667                                       | 12332274 | WBGene00013560 | zip-12    | Y75B8A.29 |
| -0.273496855138038  | AGIWUR20625                                    |          |                |           |           |
| CB4856 HS III       | 12333745                                       | 12345347 | WBGene00006986 | zip-1     | Y75B8A.35 |
| 0.253508609316436   | AGIWUR10170                                    |          |                |           |           |
| CB4856 HS III       | 12345323                                       | 12351336 | WBGene00004085 | pph-4.1   | Y75B8A.30 |
| 0.0831115353121845  | AGIWUR12115                                    |          |                |           |           |
| CB4856 HS III       | 12351642                                       | 12354925 | WBGene00013561 | Y75B8A.31 | Y75B8A.31 |
| 0.139659461415947   | AGIWUR12456                                    |          |                |           |           |
| CB4856 HS III       | 12354944                                       | 12358561 | WBGene00013562 | Y75B8A.32 | Y75B8A.32 |
| 0.00586910469338342 | AGIWUR36648                                    |          |                |           |           |
| CB4856 HS III       | 12359565                                       | 12361248 | WBGene00013564 | Y75B8A.34 | Y75B8A.34 |
| 0.0926512113221589  | AGIWUR19352;AGIWUR29568;AGIWUR38384            |          |                |           |           |
| CB4856 HS III       | 12361859                                       | 12367373 | WBGene00013563 | Y75B8A.33 | Y75B8A.33 |
| -0.0382878421158255 | AGIWUR20947;AGIWUR37137;AGIWUR37178            |          |                |           |           |
| CB4856 HS III       | 12367474                                       | 12369050 | WBGene00001946 | his-72    | Y49E10.6  |

|                                                                                               |                                                                         |
|-----------------------------------------------------------------------------------------------|-------------------------------------------------------------------------|
| -0.0581864416251534                                                                           | AGIWUR13672;AGIWUR22973;AGIWUR24494;AGIWUR28018;AGIWUR42852             |
| CB4856 HS III 12370456                                                                        | 12372625 WBGene00004506 rpt-6 Y49E10.1                                  |
| 0.0341737234356891                                                                            | AGIWUR41530                                                             |
| CB4856 HS III 12372583                                                                        | 12373857 WBGene00013029 glrx-5 Y49E10.2                                 |
| 1.77635683940025e-15                                                                          | AGIWUR36243                                                             |
| CB4856 HS III 12374126                                                                        | 12377248 WBGene00004086 pph-4.2 Y49E10.3                                |
| 0.0221930778511767                                                                            |                                                                         |
| AGIWUR6473;AGIWUR7787;AGIWUR15115;AGIWUR24606;AGIWUR27782;AGIWUR33390;AGIWUR42004;AGIWUR43090 |                                                                         |
| CB4856 HS III 12377731                                                                        | 12378829 WBGene00013031 Y49E10.7 Y49E10.7                               |
| -0.329347803126378                                                                            | AGIWUR33767                                                             |
| CB4856 HS III 12378724                                                                        | 12380647 WBGene00013030 Y49E10.4 Y49E10.4                               |
| -0.264474341158857                                                                            | AGIWUR12131;AGIWUR22301;AGIWUR32211;AGIWUR38930                         |
| CB4856 HS III 12387891                                                                        | 12388985 WBGene00014904 Y49E10.26 Y49E10.26                             |
| 0.0129725678459742                                                                            | AGIWUR30780                                                             |
| CB4856 HS III 12389885                                                                        | 12390556 WBGene00014903 Y49E10.8 Y49E10.8                               |
| 0.069474982818539                                                                             | AGIWUR24628                                                             |
| CB4856 HS III 12398901                                                                        | 12421570 WBGene00013034 tat-1 Y49E10.11                                 |
| -0.343498511882721                                                                            | AGIWUR15617;AGIWUR18057;AGIWUR27355;AGIWUR34118                         |
| CB4856 HS III 12426862                                                                        | 12429195 WBGene00004027 pie-1 Y49E10.14                                 |
| 0.0661915425832786                                                                            | AGIWUR4842;AGIWUR43801                                                  |
| CB4856 HS III 12429172                                                                        | 12429630 WBGene00004919 snr-6 Y49E10.15                                 |
| 0.0922349468735302                                                                            | AGIWUR43554                                                             |
| CB4856 HS III 12430430                                                                        | 12433892 WBGene00013035 Y49E10.16 Y49E10.16                             |
| 0.270601445927593                                                                             | AGIWUR15845;AGIWUR27141;AGIWUR43362                                     |
| CB4856 HS III 12436552                                                                        | 12441056 WBGene00013036 fbxa-218 Y49E10.17                              |
| 0.00144115435646697                                                                           | AGIWUR23422                                                             |
| CB4856 HS III 12442630                                                                        | 12446145 WBGene00013037 Y49E10.18 Y49E10.18                             |
| 0.214481461470198                                                                             | AGIWUR10529;AGIWUR24845;AGIWUR26960;AGIWUR29787;AGIWUR32268;AGIWUR34014 |
| CB4856 HS III 12446353                                                                        | 12453202 WBGene00013038 ani-1 Y49E10.19                                 |
| -0.0129946475116682                                                                           | AGIWUR4746                                                              |
| CB4856 HS III 12453588                                                                        | 12456850 WBGene00013039 scav-3 Y49E10.20                                |
| 0.124311107536979                                                                             | AGIWUR22103;AGIWUR31816;AGIWUR37790;AGIWUR43918                         |
| CB4856 HS III 12457599                                                                        | 12465821 WBGene00013040 Y49E10.21 Y49E10.21                             |
| -0.00426913941347173                                                                          | AGIWUR105;AGIWUR15140;AGIWUR38802                                       |
| CB4856 HS III 12466610                                                                        | 12468277 WBGene00013041 pstk-1 Y49E10.22                                |
| 0.0333372068627042                                                                            | AGIWUR13994                                                             |
| CB4856 HS III 12469169                                                                        | 12472541 WBGene00045239 Y49E10.29 Y49E10.29                             |
| -0.141386065659696                                                                            | AGIWUR11208;AGIWUR22942;AGIWUR28929;AGIWUR33709;AGIWUR34350;AGIWUR38560 |
| CB4856 HS III 12472868                                                                        | 12484651 WBGene00013042 cccp-1 Y49E10.23                                |

|                      |                                                                        |          |                |            |            |
|----------------------|------------------------------------------------------------------------|----------|----------------|------------|------------|
| 0.145241691191053    | AGIWUR13894                                                            |          |                |            |            |
| CB4856 HS III        | 12484732                                                               | 12488339 | WBGene00013043 | arrd-16    | Y49E10.24  |
| 0.104700826696101    | AGIWUR7495;AGIWUR21391;AGIWUR42175                                     |          |                |            |            |
| CB4856 HS III        | 12488679                                                               | 12492084 | WBGene00013044 | Y49E10.25  | Y49E10.25  |
| -0.221543435194049   | AGIWUR10386                                                            |          |                |            |            |
| CB4856 HS III        | 12492793                                                               | 12495640 | WBGene00013727 | Y111B2A.1  | Y111B2A.1  |
| 0.0946292245604923   | AGIWUR15820                                                            |          |                |            |            |
| CB4856 HS III        | 12496538                                                               | 12499352 | WBGene00013729 | Y111B2A.3  | Y111B2A.3  |
| -0.112398718158044   | AGIWUR8789                                                             |          |                |            |            |
| CB4856 HS III        | 12499557                                                               | 12527924 | WBGene00013730 | sql-1      | Y111B2A.4  |
| -0.0216711685404682  | AGIWUR4403;AGIWUR5215;AGIWUR17830;AGIWUR26217;AGIWUR27811              |          |                |            |            |
| CB4856 HS III        | 12528287                                                               | 12536848 | WBGene00014613 | Y111B2A.25 | Y111B2A.25 |
| -0.126316272954023   | AGIWUR5020;AGIWUR7629;AGIWUR17399;AGIWUR32936;AGIWUR37551              |          |                |            |            |
| CB4856 HS III        | 12538664                                                               | 12575401 | WBGene00013732 | aakg-1     | Y111B2A.8  |
| -0.163889025826101   | AGIWUR17518;AGIWUR19289;AGIWUR39040;AGIWUR41104;AGIWUR42689            |          |                |            |            |
| CB4856 HS III        | 12595994                                                               | 12598604 | WBGene00013734 | Y111B2A.10 | Y111B2A.10 |
| -0.137774400164079   | AGIWUR31114;AGIWUR32437                                                |          |                |            |            |
| CB4856 HS III        | 12599304                                                               | 12608604 | WBGene00007030 | epc-1      | Y111B2A.11 |
| -0.233068535006545   | AGIWUR24947                                                            |          |                |            |            |
| CB4856 HS III        | 12609289                                                               | 12623740 | WBGene00013735 | Y111B2A.12 | Y111B2A.12 |
| 0.0403467348847411   | AGIWUR1326;AGIWUR15735;AGIWUR23494;AGIWUR25188;AGIWUR27817;AGIWUR29975 |          |                |            |            |
| CB4856 HS III        | 12624766                                                               | 12625890 | WBGene00013736 | Y111B2A.13 | Y111B2A.13 |
| -0.00139095048451043 | AGIWUR7917;AGIWUR20589;AGIWUR21701;AGIWUR22852;AGIWUR24926             |          |                |            |            |
| CB4856 HS III        | 12626568                                                               | 12651757 | WBGene00004161 | pqn-80     | Y111B2A.14 |
| -0.0669126879853197  | AGIWUR3950;AGIWUR19275;AGIWUR36462;AGIWUR45159                         |          |                |            |            |
| CB4856 HS III        | 12652344                                                               | 12662286 | WBGene00013737 | tpst-1     | Y111B2A.15 |
| -0.225492502185858   | AGIWUR30331                                                            |          |                |            |            |
| CB4856 HS III        | 12671307                                                               | 12673421 | WBGene00006389 | taf-7.2    | Y111B2A.16 |
| -0.251691779405753   | AGIWUR31423                                                            |          |                |            |            |
| CB4856 HS III        | 12673633                                                               | 12686230 | WBGene00013738 | elpc-2     | Y111B2A.17 |
| 0.0920076046266658   | AGIWUR37084                                                            |          |                |            |            |
| CB4856 HS III        | 12686243                                                               | 12687916 | WBGene00004700 | rsp-3      | Y111B2A.18 |
| 0.0868604507206108   | AGIWUR5188;AGIWUR13561;AGIWUR19588                                     |          |                |            |            |
| CB4856 HS III        | 12699494                                                               | 12710888 | WBGene00013742 | sas-1      | Y111B2A.24 |
| -0.169821788025235   | AGIWUR24021                                                            |          |                |            |            |
| CB4856 HS III        | 12711506                                                               | 12713874 | WBGene00013740 | hut-1      | Y111B2A.20 |
| 0.126306706944835    | AGIWUR14912                                                            |          |                |            |            |
| CB4856 HS III        | 12714566                                                               | 12743929 | WBGene00007027 | ssl-1      | Y111B2A.22 |
| -0.262145919114793   | AGIWUR15732;AGIWUR31590;AGIWUR43765                                    |          |                |            |            |



|                                                           |     |                                                |          |                |                 |                     |
|-----------------------------------------------------------|-----|------------------------------------------------|----------|----------------|-----------------|---------------------|
| CB4856 HS                                                 | III | 12746450                                       | 12747621 | WBGene00013741 | Y111B2A.21      | Y111B2A.21          |
| 0.255453416686629                                         |     | AGIWUR15341                                    |          |                |                 |                     |
| CB4856 HS                                                 | III | 12747899                                       | 12750927 | WBGene00013911 | irld-60 ZC482.2 | -0.144201805954757  |
| AGIWUR8989                                                |     |                                                |          |                |                 |                     |
| CB4856 HS                                                 | III | 12751109                                       | 12753634 | WBGene00013915 | irld-20 ZC482.7 | -0.0703260901323306 |
| AGIWUR6282                                                |     |                                                |          |                |                 |                     |
| CB4856 HS                                                 | III | 12755348                                       | 12756613 | WBGene00005757 | srw-10 ZC482.6  | 0.174573464481949   |
| AGIWUR3866;AGIWUR16156;AGIWUR34190                        |     |                                                |          |                |                 |                     |
| CB4856 HS                                                 | III | 12757667                                       | 12759619 | WBGene00005756 | srw-9 ZC482.8   | -0.410598134541203  |
| AGIWUR4324                                                |     |                                                |          |                |                 |                     |
| CB4856 HS                                                 | III | 12760684                                       | 12764341 | WBGene00013912 | irld-19 ZC482.3 | 0.266881839534607   |
| AGIWUR17913                                               |     |                                                |          |                |                 |                     |
| CB4856 HS                                                 | III | 12764553                                       | 12769048 | WBGene00013913 | irld-61 ZC482.4 | -0.0367607259531697 |
| AGIWUR489;AGIWUR22473;AGIWUR34972                         |     |                                                |          |                |                 |                     |
| CB4856 HS                                                 | III | 12769564                                       | 12771594 | WBGene00005752 | srw-5 ZC482.9   | -0.196236324573603  |
| AGIWUR1998;AGIWUR30084                                    |     |                                                |          |                |                 |                     |
| CB4856 HS                                                 | III | 12771878                                       | 12779726 | WBGene00001512 | gab-1 ZC482.1   | 0.107663778390997   |
| AGIWUR28927;AGIWUR31006;AGIWUR38849                       |     |                                                |          |                |                 |                     |
| CB4856 HS                                                 | III | 12785154                                       | 12793128 | WBGene00013914 | lgc-37 ZC482.5  | 0.0261745820562802  |
| AGIWUR454;AGIWUR11920;AGIWUR37953;AGIWUR45122             |     |                                                |          |                |                 |                     |
| CB4856 HS                                                 | III | 12793386                                       | 12798157 | WBGene00007210 | agmo-1 BE10.2   | -0.0161854757397784 |
| AGIWUR5835;AGIWUR38227                                    |     |                                                |          |                |                 |                     |
| CB4856 HS                                                 | III | 12804599                                       | 12804761 | WBGene00044128 | BE10.6 BE10.6   | 0.135630464591127   |
| AGIWUR12532                                               |     |                                                |          |                |                 |                     |
| CB4856 HS                                                 | III | 12806175                                       | 12806855 | WBGene00044127 | BE10.5 BE10.5   | 0.0483565301457745  |
| AGIWUR6016;AGIWUR6428;AGIWUR33191;AGIWUR37207;AGIWUR42255 |     |                                                |          |                |                 |                     |
| CB4856 HS                                                 | III | 12813541                                       | 12816798 | WBGene00007212 | BE10.4 BE10.4   | 0.0481734298404679  |
| AGIWUR5283;AGIWUR14355;AGIWUR17624;AGIWUR23051            |     |                                                |          |                |                 |                     |
| CB4856 HS                                                 | III | 12816789                                       | 12818100 | WBGene00000203 | arx-5 Y37D8A.1  |                     |
| -0.0747550936615387                                       |     | AGIWUR8540;AGIWUR16491;AGIWUR26323;AGIWUR42562 |          |                |                 |                     |
| CB4856 HS                                                 | III | 12818658                                       | 12820252 | WBGene00012560 | Y37D8A.25       | Y37D8A.25           |
| 0.0165428088498594                                        |     | AGIWUR1537                                     |          |                |                 |                     |
| CB4856 HS                                                 | III | 12820141                                       | 12825651 | WBGene00012544 | Y37D8A.2        | Y37D8A.2            |
| 0.0862416167432727                                        |     | AGIWUR281                                      |          |                |                 |                     |
| CB4856 HS                                                 | III | 12829368                                       | 12837274 | WBGene00012545 | Y37D8A.3        | Y37D8A.3            |
| 0.412099224314193                                         |     | AGIWUR42989                                    |          |                |                 |                     |
| CB4856 HS                                                 | III | 12837189                                       | 12838959 | WBGene00012546 | Y37D8A.4        | Y37D8A.4            |
| -0.0146993666214748                                       |     | AGIWUR26272                                    |          |                |                 |                     |
| CB4856 HS                                                 | III | 12854051                                       | 12855315 | WBGene00012547 | Y37D8A.5        | Y37D8A.5            |

|                                                                                              |                                                 |          |                |           |           |  |
|----------------------------------------------------------------------------------------------|-------------------------------------------------|----------|----------------|-----------|-----------|--|
| -0.0325570643139663                                                                          | AGIWUR12221                                     |          |                |           |           |  |
| CB4856 HS III                                                                                | 12855844                                        | 12856728 | WBGene00012561 | Y37D8A.26 | Y37D8A.26 |  |
| 0.00641310110078486                                                                          | AGIWUR29792                                     |          |                |           |           |  |
| CB4856 HS III                                                                                | 12856833                                        | 12857911 | WBGene00012548 | Y37D8A.6  | Y37D8A.6  |  |
| 0.0281230173590519                                                                           | AGIWUR19054                                     |          |                |           |           |  |
| CB4856 HS III                                                                                | 12864948                                        | 12867591 | WBGene00012549 | Y37D8A.8  | Y37D8A.8  |  |
| 0.122556047883231                                                                            | AGIWUR42474                                     |          |                |           |           |  |
| CB4856 HS III                                                                                | 12871195                                        | 12874654 | WBGene00003406 | mrg-1     | Y37D8A.9  |  |
| -1.77635683940025e-15                                                                        | AGIWUR13050;AGIWUR24765;AGIWUR32619             |          |                |           |           |  |
| CB4856 HS III                                                                                | 12875007                                        | 12875831 | WBGene00012550 | hpo-21    | Y37D8A.10 |  |
| -0.0596921408264244                                                                          | AGIWUR36621                                     |          |                |           |           |  |
| CB4856 HS III                                                                                | 12875771                                        | 12877577 | WBGene00012551 | cec-7     | Y37D8A.11 |  |
| -0.100438828931303                                                                           | AGIWUR21609                                     |          |                |           |           |  |
| CB4856 HS III                                                                                | 12881037                                        | 12891738 | WBGene00006804 | unc-71    | Y37D8A.13 |  |
| -0.156220268845145                                                                           | AGIWUR35864                                     |          |                |           |           |  |
| CB4856 HS III                                                                                | 12905491                                        | 12906619 | WBGene00012553 | cco-2     | Y37D8A.14 |  |
| 0.112533486188251                                                                            |                                                 |          |                |           |           |  |
| AGIWUR611;AGIWUR5718;AGIWUR11609;AGIWUR18775;AGIWUR29351;AGIWUR29790;AGIWUR39376;AGIWUR42144 |                                                 |          |                |           |           |  |
| CB4856 HS III                                                                                | 12910510                                        | 12914930 | WBGene00001457 | flp-14    | Y37D8A.15 |  |
| 0.16663339763223                                                                             | AGIWUR36571                                     |          |                |           |           |  |
| CB4856 HS III                                                                                | 12915118                                        | 12918675 | WBGene00012554 | Y37D8A.16 | Y37D8A.16 |  |
| 0.203386532738224                                                                            | AGIWUR1963;AGIWUR9465;AGIWUR12505;AGIWUR19886   |          |                |           |           |  |
| CB4856 HS III                                                                                | 12921282                                        | 12925997 | WBGene00012555 | Y37D8A.17 | Y37D8A.17 |  |
| -0.276785451081256                                                                           | AGIWUR34460                                     |          |                |           |           |  |
| CB4856 HS III                                                                                | 12926557                                        | 12927886 | WBGene00012556 | mrps-10   | Y37D8A.18 |  |
| 0.129663691392143                                                                            | AGIWUR32331                                     |          |                |           |           |  |
| CB4856 HS III                                                                                | 12928370                                        | 12931867 | WBGene00012558 | Y37D8A.21 | Y37D8A.21 |  |
| 0.0685236193671663                                                                           | AGIWUR8071                                      |          |                |           |           |  |
| CB4856 HS III                                                                                | 12934717                                        | 12941069 | WBGene00012559 | epg-3     | Y37D8A.22 |  |
| -0.194661797472914                                                                           | AGIWUR15032                                     |          |                |           |           |  |
| CB4856 HS III                                                                                | 12942617                                        | 12949899 | WBGene00006762 | unc-25    | Y37D8A.23 |  |
| 0.142383319776545                                                                            | AGIWUR1644;AGIWUR15904;AGIWUR33380              |          |                |           |           |  |
| CB4856 HS III                                                                                | 12951429                                        | 12952342 | WBGene00012711 | Y39E4A.1  | Y39E4A.1  |  |
| -0.0107632649789497                                                                          | AGIWUR25309                                     |          |                |           |           |  |
| CB4856 HS III                                                                                | 12952969                                        | 12966995 | WBGene00012712 | ttm-1     | Y39E4A.2  |  |
| -0.167719341942078                                                                           | AGIWUR32890                                     |          |                |           |           |  |
| CB4856 HS III                                                                                | 12967898                                        | 12972498 | WBGene00012713 | bckd-1A   | Y39E4A.3  |  |
| 0.0163134322276246                                                                           | AGIWUR27070;AGIWUR27757;AGIWUR28392;AGIWUR44309 |          |                |           |           |  |
| CB4856 HS III                                                                                | 12975068                                        | 12977862 | WBGene00014176 | ZK1010.2  | ZK1010.2  |  |

|                                                                                            |                                                                      |          |                |           |                             |
|--------------------------------------------------------------------------------------------|----------------------------------------------------------------------|----------|----------------|-----------|-----------------------------|
| 0.137982451078919                                                                          | AGIWUR29594                                                          |          |                |           |                             |
| CB4856 HS III                                                                              | 12977910                                                             | 12978523 | WBGene00006728 | ubq-2     | ZK1010.1                    |
| -0.506497942083604                                                                         | AGIWUR20435;AGIWUR37225                                              |          |                |           |                             |
| CB4856 HS III                                                                              | 12979162                                                             | 12980163 | WBGene00014177 | frg-1     | ZK1010.3                    |
| -0.0314187160509682                                                                        | AGIWUR3936;AGIWUR5758;AGIWUR6372;AGIWUR13721;AGIWUR15815;AGIWUR41903 |          |                |           |                             |
| CB4856 HS III                                                                              | 12981070                                                             | 12984423 | WBGene00014178 | ZK1010.4  | ZK1010.4                    |
| 0.11159245049144                                                                           | AGIWUR27206                                                          |          |                |           |                             |
| CB4856 HS III                                                                              | 12984493                                                             | 12987542 | WBGene00014179 | ZK1010.5  | ZK1010.5                    |
| 0.0293271514743019                                                                         | AGIWUR17826                                                          |          |                |           |                             |
| CB4856 HS III                                                                              | 12987672                                                             | 12992492 | WBGene00014180 | ZK1010.6  | ZK1010.6                    |
| -0.296806871422628                                                                         | AGIWUR37174                                                          |          |                |           |                             |
| CB4856 HS III                                                                              | 12992405                                                             | 12993707 | WBGene00000672 | col-97    | ZK1010.7                    |
| 0.0224029765630593                                                                         | AGIWUR142;AGIWUR14870;AGIWUR16747;AGIWUR17138;AGIWUR42663            |          |                |           |                             |
| CB4856 HS III                                                                              | 12995738                                                             | 13000670 | WBGene00014181 | ZK1010.8  | ZK1010.8                    |
| -0.136058309929442                                                                         | AGIWUR29793                                                          |          |                |           |                             |
| CB4856 HS III                                                                              | 13005461                                                             | 13011130 | WBGene00004906 | snf-7     | ZK1010.9                    |
| -0.119989082508699                                                                         | AGIWUR16387                                                          |          |                |           |                             |
| CB4856 HS III                                                                              | 13018935                                                             | 13020226 | WBGene00000673 | col-98    | F14F7.1 0.643170415389612   |
| AGIWUR16447                                                                                |                                                                      |          |                |           |                             |
| CB4856 HS III                                                                              | 13021009                                                             | 13023949 | WBGene00008809 | cyp-13A11 | F14F7.2                     |
| 0.0413172260974823                                                                         | AGIWUR22639                                                          |          |                |           |                             |
| CB4856 HS III                                                                              | 13024547                                                             | 13028012 | WBGene00008810 | cyp-13A12 | F14F7.3                     |
| 0.126915600180434                                                                          | AGIWUR44517                                                          |          |                |           |                             |
| CB4856 HS III                                                                              | 13028393                                                             | 13029708 | WBGene00008811 | F14F7.4   | F14F7.4 0.0504216201527719  |
| AGIWUR6007                                                                                 |                                                                      |          |                |           |                             |
| CB4856 HS III                                                                              | 13032001                                                             | 13036344 | WBGene00008812 | F14F7.5   | F14F7.5 -0.0766003996060984 |
| AGIWUR42336                                                                                |                                                                      |          |                |           |                             |
| CB4856 HS III                                                                              | 13040100                                                             | 13049434 | WBGene00010073 | F54F12.2  | F54F12.2                    |
| -0.014364681973503                                                                         | AGIWUR36521                                                          |          |                |           |                             |
| CB4856 HS III                                                                              | 13049588                                                             | 13055485 | WBGene00010072 | F54F12.1  | F54F12.1                    |
| 0.28485201946749                                                                           | AGIWUR38600                                                          |          |                |           |                             |
| CB4856 HS III                                                                              | 13070756                                                             | 13074697 | WBGene00012717 | Y39E4B.6  | Y39E4B.6                    |
| -0.0608001498169726                                                                        |                                                                      |          |                |           |                             |
| AGIWUR1705;AGIWUR3123;AGIWUR5764;AGIWUR6739;AGIWUR9897;AGIWUR11950;AGIWUR14953;AGIWUR16922 |                                                                      |          |                |           |                             |
| CB4856 HS III                                                                              | 13087479                                                             | 13099455 | WBGene00004164 | pqn-83    | Y39E4B.3                    |
| -0.0748110936679689                                                                        | AGIWUR3211;AGIWUR22318                                               |          |                |           |                             |
| CB4856 HS III                                                                              | 13107607                                                             | 13119042 | WBGene00012718 | dhhc-8    | Y39E4B.7                    |
| -0.238335668622934                                                                         | AGIWUR17580;AGIWUR37080;AGIWUR41866                                  |          |                |           |                             |
| CB4856 HS III                                                                              | 13119820                                                             | 13133938 | WBGene00006985 | zig-8     | Y39E4B.8                    |

|                                                                                                             |                                                                                   |             |                |           |           |                     |
|-------------------------------------------------------------------------------------------------------------|-----------------------------------------------------------------------------------|-------------|----------------|-----------|-----------|---------------------|
| 0.206997047914358                                                                                           |                                                                                   | AGIWUR17456 |                |           |           |                     |
| CB4856 HS III                                                                                               | 13134014                                                                          | 13139614    | WBGene00000267 | bre-2     | Y39E4B.9  |                     |
| 0.0150632573403993                                                                                          | AGIWUR38640                                                                       |             |                |           |           |                     |
| CB4856 HS III                                                                                               | 13143373                                                                          | 13152858    | WBGene00012719 | Y39E4B.10 | Y39E4B.10 |                     |
| -0.35370488456739                                                                                           | AGIWUR33059                                                                       |             |                |           |           |                     |
| CB4856 HS III                                                                                               | 13153817                                                                          | 13160284    | WBGene00012714 | abce-1    | Y39E4B.1  |                     |
| 0.12143437298603                                                                                            | AGIWUR6306                                                                        |             |                |           |           |                     |
| CB4856 HS III                                                                                               | 13162475                                                                          | 13164864    | WBGene00014884 | Y39E4B.14 | Y39E4B.14 |                     |
| 0.119060124569799                                                                                           | AGIWUR12326;AGIWUR36130;AGIWUR36504                                               |             |                |           |           |                     |
| CB4856 HS III                                                                                               | 13165659                                                                          | 13169520    | WBGene00012715 | snpc-1.2  | Y39E4B.2  |                     |
| 0.111753028745913                                                                                           | AGIWUR31060                                                                       |             |                |           |           |                     |
| CB4856 HS III                                                                                               | 13169916                                                                          | 13173106    | WBGene00012716 | Y39E4B.5  | Y39E4B.5  |                     |
| -0.0120874606776908                                                                                         | AGIWUR43541                                                                       |             |                |           |           |                     |
| CB4856 HS III                                                                                               | 13187392                                                                          | 13204897    | WBGene00001630 | gly-5     | Y39E4B.12 |                     |
| 0.010755469036865                                                                                           | AGIWUR9158;AGIWUR10483;AGIWUR11255;AGIWUR15746;AGIWUR16404;AGIWUR18625            |             |                |           |           |                     |
| CB4856 HS III                                                                                               | 13204982                                                                          | 13207393    | WBGene00012720 | Y39E4B.11 | Y39E4B.11 |                     |
| 0.0632885747047975                                                                                          | AGIWUR445;AGIWUR13620;AGIWUR31679                                                 |             |                |           |           |                     |
| CB4856 HS III                                                                                               | 13212666                                                                          | 13214371    | WBGene00006629 | tsp-3     | Y39E4B.4  |                     |
| -0.0512388538625075                                                                                         | AGIWUR20275;AGIWUR27390;AGIWUR42535                                               |             |                |           |           |                     |
| CB4856 HS III                                                                                               | 13223072                                                                          | 13229465    | WBGene00012796 | Y43F4A.1  | Y43F4A.1  |                     |
| -0.00919795286226144                                                                                        | AGIWUR3573;AGIWUR8389;AGIWUR13912;AGIWUR15547;AGIWUR19301;AGIWUR23348;AGIWUR38773 |             |                |           |           |                     |
| CB4856 HS III                                                                                               | 13254675                                                                          | 13256456    | WBGene00185001 | F56A8.9   | F56A8.9   | 0.0982723391144615  |
| AGIWUR12170                                                                                                 |                                                                                   |             |                |           |           |                     |
| CB4856 HS III                                                                                               | 13256878                                                                          | 13262905    | WBGene00010139 | F56A8.3   | F56A8.3   | -0.280594684779894  |
| AGIWUR10753;AGIWUR11459;AGIWUR13812;AGIWUR14851;AGIWUR20482;AGIWUR33389;AGIWUR34133;AGIWUR35104;AGIWUR37135 |                                                                                   |             |                |           |           |                     |
| ;AGIWUR37646                                                                                                |                                                                                   |             |                |           |           |                     |
| CB4856 HS III                                                                                               | 13263268                                                                          | 13265038    | WBGene00010140 | F56A8.4   | F56A8.4   | 0.00438532507029876 |
| AGIWUR38160                                                                                                 |                                                                                   |             |                |           |           |                     |
| CB4856 HS III                                                                                               | 13265866                                                                          | 13266932    | WBGene00010141 | F56A8.5   | F56A8.5   | 0.157669658030207   |
| AGIWUR4737                                                                                                  |                                                                                   |             |                |           |           |                     |
| CB4856 HS III                                                                                               | 13266874                                                                          | 13268897    | WBGene00000774 | cpf-2     | F56A8.6   | 0.0143614894925221  |
| AGIWUR820;AGIWUR36539;AGIWUR44328                                                                           |                                                                                   |             |                |           |           |                     |
| CB4856 HS III                                                                                               | 13277261                                                                          | 13283883    | WBGene00006798 | unc-64    | F56A8.7   | 0.0434830080779882  |
| AGIWUR4899;AGIWUR14105;AGIWUR27209;AGIWUR27682;AGIWUR28092;AGIWUR28579;AGIWUR30962;AGIWUR34538;AGIWUR37059  |                                                                                   |             |                |           |           |                     |
| CB4856 HS III                                                                                               | 13283892                                                                          | 13293088    | WBGene00012802 | set-25    | Y43F4B.3  |                     |
| -0.0936056721676697                                                                                         |                                                                                   |             |                |           |           |                     |
| AGIWUR6872;AGIWUR10552;AGIWUR11103;AGIWUR20458;AGIWUR33492;AGIWUR35107;AGIWUR37662;AGIWUR39018              |                                                                                   |             |                |           |           |                     |
| CB4856 HS III                                                                                               | 13296853                                                                          | 13299122    | WBGene00003804 | npp-18    | Y43F4B.4  |                     |
| -0.0822819487203716                                                                                         | AGIWUR1607;AGIWUR7364                                                             |             |                |           |           |                     |

|                                                                        |                                                                         |          |                |           |                             |
|------------------------------------------------------------------------|-------------------------------------------------------------------------|----------|----------------|-----------|-----------------------------|
| CB4856 HS III                                                          | 13299378                                                                | 13302760 | WBGene00012803 | Y43F4B.5  | Y43F4B.5                    |
| 0.175695392905934                                                      | AGIWUR12941;AGIWUR17119;AGIWUR18458;AGIWUR30210                         |          |                |           |                             |
| CB4856 HS III                                                          | 13302743                                                                | 13307259 | WBGene00002229 | k1p-19    | Y43F4B.6                    |
| -0.00668464993825424                                                   | AGIWUR17050;AGIWUR26586;AGIWUR31738;AGIWUR38118;AGIWUR39195;AGIWUR39404 |          |                |           |                             |
| CB4856 HS III                                                          | 13307502                                                                | 13313389 | WBGene00012804 | Y43F4B.7  | Y43F4B.7                    |
| 0.0931651926082999                                                     | AGIWUR45165                                                             |          |                |           |                             |
| CB4856 HS III                                                          | 13314011                                                                | 13314721 | WBGene00012807 | Y43F4B.10 | Y43F4B.10                   |
| 0.0307001236611129                                                     | AGIWUR3272                                                              |          |                |           |                             |
| CB4856 HS III                                                          | 13315088                                                                | 13318597 | WBGene00012806 | Y43F4B.9  | Y43F4B.9                    |
| 0.110754312978444                                                      | AGIWUR2346;AGIWUR5832;AGIWUR10132;AGIWUR20720;AGIWUR31478;AGIWUR32629   |          |                |           |                             |
| CB4856 HS III                                                          | 13319265                                                                | 13321892 | WBGene00194870 | F53A2.11  | F53A2.11                    |
| 0.11514790768814                                                       | AGIWUR27265                                                             |          |                |           |                             |
| CB4856 HS III                                                          | 13334600                                                                | 13336422 | WBGene00009950 | sdz-20    | F53A2.2 0.00376908145513788 |
| AGIWUR36368                                                            |                                                                         |          |                |           |                             |
| CB4856 HS III                                                          | 13336940                                                                | 13339768 | WBGene00009951 | F53A2.3   | F53A2.3 0.0304343575416155  |
| AGIWUR1393                                                             |                                                                         |          |                |           |                             |
| CB4856 HS III                                                          | 13341527                                                                | 13342607 | WBGene00003829 | nud-1     | F53A2.4 -0.0894736796809195 |
| AGIWUR7935;AGIWUR15431;AGIWUR29058;AGIWUR34024;AGIWUR35551;AGIWUR45037 |                                                                         |          |                |           |                             |
| CB4856 HS III                                                          | 13342684                                                                | 13343337 | WBGene00001092 | dro-1     | F53A2.5 -0.230286139795245  |
| AGIWUR18467                                                            |                                                                         |          |                |           |                             |
| CB4856 HS III                                                          | 13343574                                                                | 13344616 | WBGene00002059 | ife-1     | F53A2.6 -0.348274316222458  |
| AGIWUR10155;AGIWUR12605;AGIWUR23772;AGIWUR29803;AGIWUR38165            |                                                                         |          |                |           |                             |
| CB4856 HS III                                                          | 13344917                                                                | 13346866 | WBGene00009952 | acaa-2    | F53A2.7 -0.0564203301489581 |
| AGIWUR17228;AGIWUR29233;AGIWUR44741                                    |                                                                         |          |                |           |                             |
| CB4856 HS III                                                          | 13347085                                                                | 13355683 | WBGene00003478 | mtm-6     | F53A2.8 -0.124895649822889  |
| AGIWUR13022;AGIWUR20098;AGIWUR41009;AGIWUR43895                        |                                                                         |          |                |           |                             |
| CB4856 HS III                                                          | 13356610                                                                | 13359354 | WBGene00009953 | F53A2.9   | F53A2.9 0.100421360501263   |
| AGIWUR15428                                                            |                                                                         |          |                |           |                             |
| CB4856 HS III                                                          | 13361299                                                                | 13364765 | WBGene00044229 | T03F6.8   | T03F6.8 0.160179609786586   |
| AGIWUR5376;AGIWUR39849                                                 |                                                                         |          |                |           |                             |
| CB4856 HS III                                                          | 13365425                                                                | 13367747 | WBGene00044228 | T03F6.7   | T03F6.7 -0.127618407723112  |
| AGIWUR7179;AGIWUR21758                                                 |                                                                         |          |                |           |                             |
| CB4856 HS III                                                          | 13368087                                                                | 13371072 | WBGene00045482 | T03F6.9   | T03F6.9 0.0914604416884739  |
| AGIWUR31129;AGIWUR33220;AGIWUR43152                                    |                                                                         |          |                |           |                             |
| CB4856 HS III                                                          | 13371175                                                                | 13376710 | WBGene00003047 | lis-1     | T03F6.5 -0.140326160134919  |
| AGIWUR9723                                                             |                                                                         |          |                |           |                             |
| CB4856 HS III                                                          | 13377830                                                                | 13378342 | WBGene00185005 | T03F6.10  | T03F6.10                    |
| -0.00529206441208085                                                   | AGIWUR20586                                                             |          |                |           |                             |
| CB4856 HS III                                                          | 13386150                                                                | 13388353 | WBGene00011400 | T03F6.4   | T03F6.4 -0.0254979743661963 |

|                                                                                               |    |     |          |          |                |          |          |                     |  |
|-----------------------------------------------------------------------------------------------|----|-----|----------|----------|----------------|----------|----------|---------------------|--|
| AGIWUR11909;AGIWUR29629                                                                       |    |     |          |          |                |          |          |                     |  |
| CB4856                                                                                        | HS | III | 13389399 | 13390857 | WBGene00011399 | T03F6.3  | T03F6.3  | -0.153409155526251  |  |
| AGIWUR5191;AGIWUR9832;AGIWUR24981;AGIWUR25586;AGIWUR32831;AGIWUR41743                         |    |     |          |          |                |          |          |                     |  |
| CB4856                                                                                        | HS | III | 13390850 | 13393339 | WBGene00001035 | dnj-17   | T03F6.2  | 0.110355425507791   |  |
| AGIWUR42653                                                                                   |    |     |          |          |                |          |          |                     |  |
| CB4856                                                                                        | HS | III | 13393910 | 13394979 | WBGene00011398 | qdpr-1   | T03F6.1  | 0.151421685795123   |  |
| AGIWUR43190                                                                                   |    |     |          |          |                |          |          |                     |  |
| CB4856                                                                                        | HS | III | 13395633 | 13400563 | WBGene00008714 | F11F1.1  | F11F1.1  | 0.0390248785781999  |  |
| AGIWUR36166                                                                                   |    |     |          |          |                |          |          |                     |  |
| CB4856                                                                                        | HS | III | 13400962 | 13401773 | WBGene00008716 | F11F1.4  | F11F1.4  | -0.136704524185506  |  |
| AGIWUR45038                                                                                   |    |     |          |          |                |          |          |                     |  |
| CB4856                                                                                        | HS | III | 13403234 | 13404514 | WBGene00003249 | mig-18   | F11F1.6  | 0.216390820115482   |  |
| AGIWUR34265                                                                                   |    |     |          |          |                |          |          |                     |  |
| CB4856                                                                                        | HS | III | 13404737 | 13405645 | WBGene00008719 | ttr-52   | F11F1.7  | -0.0911660693209311 |  |
| AGIWUR4329;AGIWUR6840;AGIWUR26823;AGIWUR27520;AGIWUR33186;AGIWUR34462;AGIWUR38554;AGIWUR45068 |    |     |          |          |                |          |          |                     |  |
| CB4856                                                                                        | HS | III | 13405965 | 13409292 | WBGene00003520 | nas-1    | F45G2.1  | -0.103302720847173  |  |
| AGIWUR7337                                                                                    |    |     |          |          |                |          |          |                     |  |
| CB4856                                                                                        | HS | III | 13409895 | 13423537 | WBGene00009730 | myo-6    | F45G2.2  | 0.22614689355985    |  |
| AGIWUR9322                                                                                    |    |     |          |          |                |          |          |                     |  |
| CB4856                                                                                        | HS | III | 13423514 | 13426204 | WBGene00009731 | exo-1    | F45G2.3  | -0.148048395006859  |  |
| AGIWUR34496                                                                                   |    |     |          |          |                |          |          |                     |  |
| CB4856                                                                                        | HS | III | 13426100 | 13427715 | WBGene00009732 | cope-1   | F45G2.4  | -0.0896590100516086 |  |
| AGIWUR20389                                                                                   |    |     |          |          |                |          |          |                     |  |
| CB4856                                                                                        | HS | III | 13427642 | 13429713 | WBGene00000255 | bli-5    | F45G2.5  | -0.144979539552342  |  |
| AGIWUR30064                                                                                   |    |     |          |          |                |          |          |                     |  |
| CB4856                                                                                        | HS | III | 13430462 | 13433394 | WBGene00006612 | trf-1    | F45G2.6  | -0.310062331487591  |  |
| AGIWUR18199                                                                                   |    |     |          |          |                |          |          |                     |  |
| CB4856                                                                                        | HS | III | 13433447 | 13434504 | WBGene00009733 | F45G2.7  | F45G2.7  | -0.0353192171719137 |  |
| AGIWUR31301                                                                                   |    |     |          |          |                |          |          |                     |  |
| CB4856                                                                                        | HS | III | 13434861 | 13435670 | WBGene00009734 | F45G2.8  | F45G2.8  | 0.0941232441252993  |  |
| AGIWUR8725                                                                                    |    |     |          |          |                |          |          |                     |  |
| CB4856                                                                                        | HS | III | 13435771 | 13436943 | WBGene00009735 | F45G2.9  | F45G2.9  | 0.083962320778328   |  |
| AGIWUR15689;AGIWUR32039;AGIWUR40076                                                           |    |     |          |          |                |          |          |                     |  |
| CB4856                                                                                        | HS | III | 13437054 | 13439586 | WBGene00009736 | F45G2.10 | F45G2.10 | 0                   |  |
| AGIWUR41087                                                                                   |    |     |          |          |                |          |          |                     |  |
| CB4856                                                                                        | HS | III | 13439730 | 13455307 | WBGene00000834 | cua-1    | Y76A2A.2 |                     |  |
| 0.104802651934548 AGIWUR21350                                                                 |    |     |          |          |                |          |          |                     |  |
| CB4856                                                                                        | HS | III | 13457687 | 13462238 | WBGene00012097 | abcf-2   | T27E9.7  | 0.0255431141389781  |  |
| AGIWUR9395;AGIWUR15925;AGIWUR26658;AGIWUR29496;AGIWUR39154                                    |    |     |          |          |                |          |          |                     |  |

|                                                                                                                                                                 |     |          |          |                |          |          |                     |
|-----------------------------------------------------------------------------------------------------------------------------------------------------------------|-----|----------|----------|----------------|----------|----------|---------------------|
| CB4856 HS<br>AGIWUR44257                                                                                                                                        | III | 13462239 | 13462594 | WBGene00012094 | T27E9.2  | T27E9.2  | 0.0406158323817145  |
| CB4856 HS<br>AGIWUR9898;AGIWUR15073;AGIWUR22154;AGIWUR23463;AGIWUR23557;AGIWUR24064;AGIWUR24262;AGIWUR24722;AGIWUR25282;<br>AGIWUR26293;AGIWUR27044;AGIWUR30394 | III | 13463163 | 13464657 | WBGene00006439 | ant-1.1  | T27E9.1  | 0.265080680979542   |
| CB4856 HS<br>AGIWUR39681                                                                                                                                        | III | 13464829 | 13471348 | WBGene00002185 | kel-3    | T27E9.4  | -0.090163515435087  |
| CB4856 HS<br>AGIWUR30488                                                                                                                                        | III | 13471708 | 13475385 | WBGene00012095 | pssy-2   | T27E9.5  | -0.227675114467631  |
| CB4856 HS<br>AGIWUR32016                                                                                                                                        | III | 13475406 | 13476107 | WBGene00012096 | T27E9.6  | T27E9.6  | -0.554387258576302  |
| CB4856 HS<br>AGIWUR728                                                                                                                                          | III | 13478561 | 13479629 | WBGene00012098 | fbxb-86  | T27E9.8  | 0.00861574827789013 |
| CB4856 HS<br>AGIWUR43609                                                                                                                                        | III | 13480665 | 13484155 | WBGene00012099 | acc-4    | T27E9.9  | 0.157965846447841   |
| CB4856 HS<br>AGIWUR11101;AGIWUR18718;AGIWUR21352                                                                                                                | III | 13486643 | 13492430 | WBGene00006691 | twk-40   | T28A8.1  | -0.0226312461107181 |
| CB4856 HS<br>AGIWUR17099                                                                                                                                        | III | 13493892 | 13495671 | WBGene00012108 | T28A8.2  | T28A8.2  | -0.0175925906264327 |
| CB4856 HS<br>AGIWUR4827;AGIWUR27619;AGIWUR28503                                                                                                                 | III | 13499199 | 13501510 | WBGene00012112 | T28A8.6  | T28A8.6  | -0.0354892538133189 |
| CB4856 HS<br>AGIWUR5587                                                                                                                                         | III | 13502813 | 13503578 | WBGene00194852 | T28A8.8  | T28A8.8  | 0.140488846278654   |
| CB4856 HS<br>AGIWUR32059                                                                                                                                        | III | 13503679 | 13505536 | WBGene00012110 | T28A8.4  | T28A8.4  | 0.056346939359468   |
| CB4856 HS<br>AGIWUR27068                                                                                                                                        | III | 13506018 | 13508650 | WBGene00012109 | T28A8.3  | T28A8.3  | -0.0193092621507169 |
| CB4856 HS<br>-0.00973075758043862                                                                                                                               | III | 13509301 | 13514570 | WBGene00003373 | mlh-1    | T28A8.7  |                     |
| CB4856 HS<br>-0.0288721674569441                                                                                                                                | III | 13514945 | 13524110 | WBGene00004075 | pod-1    | Y76A2B.1 |                     |
| CB4856 HS<br>-0.162139854784115                                                                                                                                 | III | 13527438 | 13539971 | WBGene00013574 | Iron-13  | Y76A2B.2 |                     |
| CB4856 HS<br>0.0241945307045341                                                                                                                                 | III | 13540139 | 13543534 | WBGene00013575 | acs-5    | Y76A2B.3 |                     |
| CB4856 HS<br>-0.0695132030459078                                                                                                                                | III | 13545245 | 13546777 | WBGene00013576 | Y76A2B.4 | Y76A2B.4 |                     |
| CB4856 HS<br>0.0954912129947658                                                                                                                                 | III | 13546889 | 13549020 | WBGene00013577 | Y76A2B.5 | Y76A2B.5 |                     |

|                                                                         |     |          |          |                |          |                             |
|-------------------------------------------------------------------------|-----|----------|----------|----------------|----------|-----------------------------|
| CB4856 HS                                                               | III | 13550699 | 13555334 | WBGene00013578 | scav-2   | Y76A2B.6                    |
| -0.0029436506260474 AGIWUR3260                                          |     |          |          |                |          |                             |
| CB4856 HS                                                               | III | 13561729 | 13563082 | WBGene00011475 | T05D4.2  | T05D4.2 -0.157861044083289  |
| AGIWUR7893                                                              |     |          |          |                |          |                             |
| CB4856 HS                                                               | III | 13563346 | 13564990 | WBGene00011474 | aldo-1   | T05D4.1 0.147748614527952   |
| AGIWUR4857;AGIWUR14566                                                  |     |          |          |                |          |                             |
| CB4856 HS                                                               | III | 13566874 | 13570447 | WBGene00011476 | T05D4.3  | T05D4.3 -0.04785968032032   |
| AGIWUR23312                                                             |     |          |          |                |          |                             |
| CB4856 HS                                                               | III | 13576188 | 13580662 | WBGene00003887 | osm-7    | T05D4.4 -0.117823951866905  |
| AGIWUR27770                                                             |     |          |          |                |          |                             |
| CB4856 HS                                                               | III | 13580850 | 13583589 | WBGene00011478 | T05D4.5  | T05D4.5 0.115273827009801   |
| AGIWUR33116                                                             |     |          |          |                |          |                             |
| CB4856 HS                                                               | III | 13601760 | 13603156 | WBGene00001605 | gln-4    | T25C8.3 0.0934564263215041  |
| AGIWUR11582                                                             |     |          |          |                |          |                             |
| CB4856 HS                                                               | III | 13604339 | 13606067 | WBGene00000067 | act-5    | T25C8.2 0.115799613807738   |
| AGIWUR17983;AGIWUR31487;AGIWUR45107                                     |     |          |          |                |          |                             |
| CB4856 HS                                                               | III | 13608072 | 13614704 | WBGene00012017 | T25C8.1  | T25C8.1 -0.0918682930577859 |
| AGIWUR34341                                                             |     |          |          |                |          |                             |
| CB4856 HS                                                               | III | 13614699 | 13622489 | WBGene00011735 | hip-1    | T12D8.8 -0.136444991896183  |
| AGIWUR3805;AGIWUR19795;AGIWUR30111;AGIWUR38096                          |     |          |          |                |          |                             |
| CB4856 HS                                                               | III | 13623279 | 13624172 | WBGene00011734 | mlc-5    | T12D8.6 -0.221387712114472  |
| AGIWUR11723                                                             |     |          |          |                |          |                             |
| CB4856 HS                                                               | III | 13624195 | 13626007 | WBGene00006391 | taf-9    | T12D8.7 -0.185420853164949  |
| AGIWUR19328                                                             |     |          |          |                |          |                             |
| CB4856 HS                                                               | III | 13625968 | 13626750 | WBGene00011733 | T12D8.5  | T12D8.5 0.122705568859722   |
| AGIWUR44006                                                             |     |          |          |                |          |                             |
| CB4856 HS                                                               | III | 13626994 | 13630808 | WBGene00011732 | arrd-17  | T12D8.4 0.21121425272439    |
| AGIWUR9273;AGIWUR23751;AGIWUR25808;AGIWUR30362                          |     |          |          |                |          |                             |
| CB4856 HS                                                               | III | 13639893 | 13641688 | WBGene00011731 | acbp-5   | T12D8.3 -0.0574420964162226 |
| AGIWUR15630;AGIWUR23888;AGIWUR25272;AGIWUR27449;AGIWUR38615;AGIWUR39949 |     |          |          |                |          |                             |
| CB4856 HS                                                               | III | 13641795 | 13642327 | WBGene00023450 | T12D8.10 | T12D8.10                    |
| 0.0899233084464832 AGIWUR44933                                          |     |          |          |                |          |                             |
| CB4856 HS                                                               | III | 13642420 | 13643570 | WBGene00011730 | drr-2    | T12D8.2 -0.0666909309242536 |
| AGIWUR27572;AGIWUR36635                                                 |     |          |          |                |          |                             |
| CB4856 HS                                                               | III | 13643916 | 13656637 | WBGene00011729 | set-16   | T12D8.1 0.228025369483367   |
| AGIWUR27385;AGIWUR40824                                                 |     |          |          |                |          |                             |
| CB4856 HS                                                               | III | 13663400 | 13667839 | WBGene00001458 | flp-15   | ZK525.1 0.0878276177520441  |
| AGIWUR11195                                                             |     |          |          |                |          |                             |
| CB4856 HS                                                               | III | 13673280 | 13674746 | WBGene00000179 | aqp-11   | ZK525.2 0.0713312849763739  |



|                                                                                                                    |     |          |          |                                                |          |           |                     |             |
|--------------------------------------------------------------------------------------------------------------------|-----|----------|----------|------------------------------------------------|----------|-----------|---------------------|-------------|
| AGIWUR16789                                                                                                        |     |          |          |                                                |          |           |                     |             |
| CB4856 HS                                                                                                          | III | 13674917 | 13686445 | WBGene00001118                                 | dyf-2    | ZK520.3   | 0.177891581511795   |             |
| AGIWUR11571                                                                                                        |     |          |          |                                                |          |           |                     |             |
| CB4856 HS                                                                                                          | III | 13687199 | 13692683 | WBGene00000837                                 | cul-2    | ZK520.4   | -0.0446252344108631 |             |
| AGIWUR20;AGIWUR1441;AGIWUR1540;AGIWUR13518;AGIWUR13995;AGIWUR14723;AGIWUR23792;AGIWUR28327;AGIWUR41222;AGIWUR42608 |     |          |          |                                                |          |           |                     |             |
| CB4856 HS                                                                                                          | III | 13692668 | 13693811 | WBGene00000878                                 | cyn-2    | ZK520.5   | 0.0245736136976209  |             |
| AGIWUR39498                                                                                                        |     |          |          |                                                |          |           |                     |             |
| CB4856 HS                                                                                                          | III | 13701993 | 13724401 | WBGene00003048                                 | lit-1    | W06F12.1  |                     |             |
| 0.0073676819282209                                                                                                 |     |          |          | AGIWUR6941;AGIWUR12354;AGIWUR32350             |          |           |                     |             |
| CB4856 HS                                                                                                          | III | 13726641 | 13731679 | WBGene00012306                                 | W06F12.2 |           | W06F12.2            |             |
| 0.0944475001578393                                                                                                 |     |          |          | AGIWUR33882;AGIWUR37683;AGIWUR40574            |          |           |                     |             |
| CB4856 HS                                                                                                          | III | 13735071 | 13736541 | WBGene00012307                                 | W06F12.3 |           | W06F12.3            |             |
| -0.0449994456466456                                                                                                |     |          |          | AGIWUR25203                                    |          |           |                     |             |
| CB4856 HS                                                                                                          | III | 13744222 | 13747287 | WBGene00010661                                 | tyr-2    | K08E3.1   | -0.224067046504837  |             |
| AGIWUR5503                                                                                                         |     |          |          |                                                |          |           |                     |             |
| CB4856 HS                                                                                                          | III | 13747472 | 13748686 | WBGene00010662                                 | K08E3.2  | K08E3.2   | 0.0225947054827031  |             |
| AGIWUR9724                                                                                                         |     |          |          |                                                |          |           |                     |             |
| CB4856 HS                                                                                                          | III | 13752406 | 13755861 | WBGene00023451                                 | mlc-7    | K08E3.10  |                     |             |
| 0.25740264957745                                                                                                   |     |          |          | AGIWUR4778;AGIWUR24245;AGIWUR35195;AGIWUR44855 |          |           |                     |             |
| CB4856 HS                                                                                                          | III | 13755896 | 13759434 | WBGene00010663                                 | toca-2   | K08E3.3   | -0.0447831592538854 |             |
| AGIWUR13679;AGIWUR25876;AGIWUR25927;AGIWUR33111                                                                    |     |          |          |                                                |          |           |                     |             |
| CB4856 HS                                                                                                          | III | 13759444 | 13762069 | WBGene00010664                                 | dbn-1    | K08E3.4   | -0.17250549571561   |             |
| AGIWUR34377                                                                                                        |     |          |          |                                                |          |           |                     |             |
| CB4856 HS                                                                                                          | III | 13764030 | 13768092 | WBGene00010665                                 | K08E3.5  | K08E3.5   | -0.176834116049458  |             |
| AGIWUR9559;AGIWUR16248;AGIWUR17000;AGIWUR18925;AGIWUR25456;AGIWUR26080;AGIWUR27983;AGIWUR30514                     |     |          |          |                                                |          |           |                     |             |
| CB4856 HS                                                                                                          | III | 13768541 | 13771242 | WBGene00000875                                 | cyk-4    | K08E3.6   | -0.436250977326261  |             |
| AGIWUR11676;AGIWUR19991;AGIWUR24305;AGIWUR25234                                                                    |     |          |          |                                                |          |           |                     |             |
| CB4856 HS                                                                                                          | III | 13771448 | 13773348 | WBGene00003967                                 | pdr-1    | K08E3.7   | -0.245925235750937  |             |
| AGIWUR30328                                                                                                        |     |          |          |                                                |          |           |                     |             |
| CB4856 HS                                                                                                          | III | 13773456 | 13778896 | WBGene00007025                                 | mdt-29   | K08E3.8   | -0.101409862520197  |             |
| AGIWUR9180;AGIWUR10608                                                                                             |     |          |          |                                                |          |           |                     |             |
| CB4856 HS                                                                                                          | III | 13780220 | 13781133 | WBGene00007065                                 | pot-3    | 3R5.1     | 0.0610179337320176  |             |
| AGIWUR9200                                                                                                         |     |          |          |                                                |          |           |                     |             |
| CB4856 HS                                                                                                          | IV  | 32481    | 48880    | WBGene00001492                                 | frm-5.1  | Y38C1AB.8 | -0.0543222794332849 |             |
| AGIWUR11307;AGIWUR23830                                                                                            |     |          |          |                                                |          |           |                     |             |
| CB4856 HS                                                                                                          | IV  | 86890    | 90082    | WBGene00015246                                 | sc1-23   | B0545.3   | -0.0772422467544533 | AGIWUR11368 |
| CB4856 HS                                                                                                          | IV  | 112408   | 118629   | WBGene00001111                                 | duo-2    | F29C4.5   | -0.108851256231237  | AGIWUR31597 |
| CB4856 HS                                                                                                          | IV  | 119272   | 121707   | WBGene00017928                                 | tut-1    | F29C4.6   | 0.0144520653079079  |             |

AGIWUR33251;AGIWUR36931  
 CB4856 HS IV 121797 126225 WBGene00017929 gr1d-1 F29C4.7 -0.26683260645907  
 AGIWUR23201;AGIWUR26391  
 CB4856 HS IV 126731 127640 WBGene00017926 F29C4.2 F29C4.2 0.0126128856882346  
 AGIWUR6362;AGIWUR10252;AGIWUR12097;AGIWUR12529;AGIWUR16172;AGIWUR23544;AGIWUR27558;AGIWUR31184;AGIWUR37211;  
 AGIWUR37885;AGIWUR40280  
 CB4856 HS IV 132416 138076 WBGene00000897 daf-1 F29C4.1 -0.046232814663 AGIWUR34627  
 CB4856 HS IV 138346 147919 WBGene00000674 col-99 F29C4.8 -0.0914355130764193  
 AGIWUR2432;AGIWUR9402  
 CB4856 HS IV 156071 157901 WBGene00021400 Y38C1AA.9 Y38C1AA.9 0.137431834292308  
 AGIWUR3829  
 CB4856 HS IV 158962 159836 WBGene00021398 Y38C1AA.7 Y38C1AA.7 -0.434857804719496  
 AGIWUR10389;AGIWUR17218;AGIWUR26513;AGIWUR30309;AGIWUR31337;AGIWUR38359  
 CB4856 HS IV 162830 164814 WBGene00021397 Y38C1AA.6 Y38C1AA.6  
 -0.00142598748456457 AGIWUR38082  
 CB4856 HS IV 165077 169980 WBGene00021396 cut1-24 Y38C1AA.5 0.099213905876665  
 AGIWUR7334;AGIWUR11652;AGIWUR32978  
 CB4856 HS IV 179008 183261 WBGene00006561 tcl-2 Y38C1AA.4 0.167584577733093  
 AGIWUR34449  
 CB4856 HS IV 184554 192151 WBGene00021395 pnc-1 Y38C1AA.3 0.204867228460001  
 AGIWUR1594;AGIWUR5204  
 CB4856 HS IV 192256 194745 WBGene00021402 Y38C1AA.12 Y38C1AA.12 -0.176060218242613  
 AGIWUR6999;AGIWUR31095  
 CB4856 HS IV 194745 202586 WBGene00000815 csn-3 Y38C1AA.2 0.0827335722779665  
 AGIWUR42984  
 CB4856 HS IV 205239 208049 WBGene00195063 Y38C1AA.14 Y38C1AA.14 0.223095122293456  
 AGIWUR12592;AGIWUR34861  
 CB4856 HS IV 208189 217390 WBGene00021394 Y38C1AA.1 Y38C1AA.1 0.0650963140484837  
 AGIWUR10055;AGIWUR19059;AGIWUR22478;AGIWUR30888;AGIWUR35437;AGIWUR44502  
 CB4856 HS IV 218551 220854 WBGene00021401 prdx-6 Y38C1AA.11 0.0713204460703771  
 AGIWUR8871;AGIWUR23470;AGIWUR26757  
 CB4856 HS IV 225439 231773 WBGene00019821 R02D3.3 R02D3.3 0.145269860043236 AGIWUR3185  
 CB4856 HS IV 232473 237450 WBGene00019822 R02D3.4 R02D3.4 -0.0723934625279838 AGIWUR39185  
 CB4856 HS IV 237591 240307 WBGene00019823 fnta-1 R02D3.5 -0.113275564309434  
 AGIWUR5534;AGIWUR12653;AGIWUR22990;AGIWUR24412;AGIWUR29214;AGIWUR29389  
 CB4856 HS IV 240451 244129 WBGene00019820 cogc-8 R02D3.2 0.205984140443347 AGIWUR1137  
 CB4856 HS IV 245114 251925 WBGene00019819 R02D3.1 R02D3.1 0.0780879195402768  
 AGIWUR3486;AGIWUR11047;AGIWUR27639;AGIWUR30392;AGIWUR39481  
 CB4856 HS IV 251970 252554 WBGene00001728 gr1-19 R02D3.6 -0.0318000370212128

AGIWUR9545;AGIWUR9685;AGIWUR13103;AGIWUR30596;AGIWUR32729;AGIWUR41213  
 CB4856 HS IV 253571 255429 WBGene00019824 R02D3.7 R02D3.7 -0.13875432877345 AGIWUR39002  
 CB4856 HS IV 255966 257199 WBGene00019825 R02D3.8 R02D3.8 -0.282042175948529 AGIWUR22427  
 CB4856 HS IV 257384 259204 WBGene00001071 dpy-9 T21D12.2 -0.154507746824358  
 AGIWUR18790;AGIWUR27258  
 CB4856 HS IV 261886 264232 WBGene00003932 pat-6 T21D12.4 0.0904781869657914  
 AGIWUR43224  
 CB4856 HS IV 266448 268322 WBGene00020651 T21D12.12 T21D12.12 0.0707798917659641  
 AGIWUR14769;AGIWUR43154;AGIWUR43734  
 CB4856 HS IV 269407 272099 WBGene00020650 T21D12.11 T21D12.11 -0.177673094169918  
 AGIWUR37598  
 CB4856 HS IV 272315 273263 WBGene00005487 srh-282 T21D12.5 -0.127736778641017  
 AGIWUR7137  
 CB4856 HS IV 274570 279940 WBGene00020649 sma-10 T21D12.9 -0.0409833163905788  
 AGIWUR15332;AGIWUR23401;AGIWUR28389;AGIWUR36460  
 CB4856 HS IV 283647 287212 WBGene00020648 best-19 T21D12.15 -0.0740139443303587  
 AGIWUR28322  
 CB4856 HS IV 287305 288127 WBGene00045177 T21D12.14 T21D12.14 0.109709919713167  
 AGIWUR14474  
 CB4856 HS IV 288803 291456 WBGene00020648 T21D12.7 T21D12.7 -0.0923421040798651  
 AGIWUR8323;AGIWUR24804  
 CB4856 HS IV 292429 298280 WBGene00019298 K02D7.1 K02D7.1 0.0244008094018646 AGIWUR22001  
 CB4856 HS IV 307505 311232 WBGene00019300 swt-1 K02D7.5 0.053674090686715 AGIWUR44079  
 CB4856 HS IV 311512 313697 WBGene00019299 snai-1 K02D7.2 0.201216679799128 AGIWUR5231  
 CB4856 HS IV 315056 320605 WBGene00001099 dsc-4 K02D7.4 -0.0948712608163991 AGIWUR35592  
 CB4856 HS IV 321571 323022 WBGene00001735 grl-26 K02D7.6 0.120537352990061 AGIWUR36277  
 CB4856 HS IV 325063 330631 WBGene00017578 drl-1 F18F11.5 0.265142722947665  
 AGIWUR15146  
 CB4856 HS IV 330823 334385 WBGene00017577 F18F11.4 F18F11.4 -0.0705842618323378  
 AGIWUR18816;AGIWUR18855;AGIWUR32242;AGIWUR34618  
 CB4856 HS IV 334809 337178 WBGene00017574 F18F11.1 F18F11.1 0.279304252727146  
 AGIWUR39978  
 CB4856 HS IV 339629 358976 WBGene00017576 cdh-8 F18F11.3 -0.157827466611613  
 AGIWUR3867;AGIWUR7444;AGIWUR27378  
 CB4856 HS IV 359204 376062 WBGene00022048 fln-1 Y66H1B.2 0.0322919888067688  
 AGIWUR6229;AGIWUR12057;AGIWUR34969  
 CB4856 HS IV 379898 383185 WBGene00004981 spl-1 Y66H1B.4 0.217569791697647  
 AGIWUR14485  
 CB4856 HS IV 385894 386607 WBGene00004493 rps-24 T07A9.11 -0.0631245652269676

|                                                                                                                                                           |    |    |        |        |                |          |          |                     |                     |
|-----------------------------------------------------------------------------------------------------------------------------------------------------------|----|----|--------|--------|----------------|----------|----------|---------------------|---------------------|
| AGIWUR18988                                                                                                                                               |    |    |        |        |                |          |          |                     |                     |
| CB4856                                                                                                                                                    | HS | IV | 386699 | 387949 | WBGene00044789 | T07A9.14 |          | T07A9.14            | -0.190480868953763  |
| AGIWUR18205                                                                                                                                               |    |    |        |        |                |          |          |                     |                     |
| CB4856                                                                                                                                                    | HS | IV | 388084 | 388733 | WBGene00020300 | tag-261  | T07A9.13 |                     | 0.0873741818053908  |
| AGIWUR1038                                                                                                                                                |    |    |        |        |                |          |          |                     |                     |
| CB4856                                                                                                                                                    | HS | IV | 388686 | 390468 | WBGene00001338 | ears-2   | T07A9.2  | 0.0589326957342049  | AGIWUR4672          |
| CB4856                                                                                                                                                    | HS | IV | 390512 | 393158 | WBGene00020298 | T07A9.10 |          | T07A9.10            | 0.0721217044295841  |
| AGIWUR8392;AGIWUR29528;AGIWUR35867                                                                                                                        |    |    |        |        |                |          |          |                     |                     |
| CB4856                                                                                                                                                    | HS | IV | 393156 | 393546 | WBGene00045249 | T07A9.15 |          | T07A9.15            | -0.0910662944884866 |
| AGIWUR8754;AGIWUR11842;AGIWUR20015;AGIWUR22125;AGIWUR24642;AGIWUR30586;AGIWUR31937;AGIWUR33298;AGIWUR34076                                                |    |    |        |        |                |          |          |                     |                     |
| CB4856                                                                                                                                                    | HS | IV | 393880 | 396554 | WBGene00020297 | nog-1    | T07A9.9  | -0.206235972527308  |                     |
| AGIWUR8931;AGIWUR9531;AGIWUR16928;AGIWUR20629;AGIWUR28111;AGIWUR30284;AGIWUR32858;AGIWUR34292;AGIWUR35408;AGIWUR39296;AGIWUR40218;AGIWUR41675;AGIWUR44447 |    |    |        |        |                |          |          |                     |                     |
| CB4856                                                                                                                                                    | HS | IV | 396545 | 399095 | WBGene00020296 | T07A9.8  | T07A9.8  | 0.0965159966920943  | AGIWUR13100         |
| CB4856                                                                                                                                                    | HS | IV | 401695 | 405346 | WBGene00001666 | gpa-4    | T07A9.7  | 0.0128924387158333  |                     |
| AGIWUR11240;AGIWUR23437;AGIWUR40058                                                                                                                       |    |    |        |        |                |          |          |                     |                     |
| CB4856                                                                                                                                                    | HS | IV | 405621 | 410033 | WBGene00002187 | kgb-1    | T07A9.3  | 0.403539469885365   | AGIWUR7146          |
| CB4856                                                                                                                                                    | HS | IV | 410831 | 415615 | WBGene00020299 | T07A9.12 |          | T07A9.12            | 0.0793924292529429  |
| AGIWUR10654;AGIWUR20490;AGIWUR28756;AGIWUR37082                                                                                                           |    |    |        |        |                |          |          |                     |                     |
| CB4856                                                                                                                                                    | HS | IV | 415635 | 419958 | WBGene00001332 | eri-1    | T07A9.5  | -0.0402450327428205 |                     |
| AGIWUR3022;AGIWUR3334;AGIWUR17888;AGIWUR20131;AGIWUR41811                                                                                                 |    |    |        |        |                |          |          |                     |                     |
| CB4856                                                                                                                                                    | HS | IV | 419938 | 425181 | WBGene00000913 | daf-18   | T07A9.6  | 0.0461047547596127  |                     |
| AGIWUR2814;AGIWUR14949;AGIWUR15080;AGIWUR23347;AGIWUR28679;AGIWUR32747;AGIWUR39915                                                                        |    |    |        |        |                |          |          |                     |                     |
| CB4856                                                                                                                                                    | HS | IV | 425972 | 427204 | WBGene00022046 | Y66H1A.4 |          | Y66H1A.4            | 0.0800236084344697  |
| AGIWUR14850                                                                                                                                               |    |    |        |        |                |          |          |                     |                     |
| CB4856                                                                                                                                                    | HS | IV | 428070 | 429133 | WBGene00022047 | Y66H1A.5 |          | Y66H1A.5            | -0.10488738643927   |
| AGIWUR29648                                                                                                                                               |    |    |        |        |                |          |          |                     |                     |
| CB4856                                                                                                                                                    | HS | IV | 429214 | 440554 | WBGene00002041 | hum-8    | Y66H1A.6 |                     | -0.0598592133953453 |
| AGIWUR34330                                                                                                                                               |    |    |        |        |                |          |          |                     |                     |
| CB4856                                                                                                                                                    | HS | IV | 443985 | 444783 | WBGene00022045 | mrp1-55  | Y66H1A.3 |                     | 0.0238056571291416  |
| AGIWUR35396                                                                                                                                               |    |    |        |        |                |          |          |                     |                     |
| CB4856                                                                                                                                                    | HS | IV | 445677 | 448439 | WBGene00022044 | dpm-1    | Y66H1A.2 |                     | 0.0962550493752374  |
| AGIWUR39955                                                                                                                                               |    |    |        |        |                |          |          |                     |                     |
| CB4856                                                                                                                                                    | HS | IV | 455726 | 457099 | WBGene00019772 | M04G7.1  | M04G7.1  | 0.0235563016012232  | AGIWUR737           |
| CB4856                                                                                                                                                    | HS | IV | 458032 | 461029 | WBGene00019773 | M04G7.2  | M04G7.2  | 0.0436845057547508  | AGIWUR13061         |
| CB4856                                                                                                                                                    | HS | IV | 461292 | 481167 | WBGene00019774 | M04G7.3  | M04G7.3  | -0.0336752031066005 | AGIWUR16593         |
| CB4856                                                                                                                                                    | HS | IV | 505069 | 506600 | WBGene00021011 | W03G1.5  | W03G1.5  | -0.252783535888852  | AGIWUR7800          |
| CB4856                                                                                                                                                    | HS | IV | 506737 | 519457 | WBGene00021012 | pig-1    | W03G1.6  | 0.0415467048838032  |                     |
| AGIWUR1369;AGIWUR2867;AGIWUR7710;AGIWUR12794;AGIWUR15026;AGIWUR38661;AGIWUR43168                                                                          |    |    |        |        |                |          |          |                     |                     |

|                                                 |    |    |        |        |                |          |          |                      |             |
|-------------------------------------------------|----|----|--------|--------|----------------|----------|----------|----------------------|-------------|
| CB4856                                          | HS | IV | 520214 | 523809 | WBGene00000213 | asm-3    | W03G1.7  | 0.00703104631671359  |             |
| AGIWUR17779;AGIWUR43469                         |    |    |        |        |                |          |          |                      |             |
| CB4856                                          | HS | IV | 524652 | 526479 | WBGene00021010 | W03G1.2  | W03G1.2  | 0.0324893140762086   | AGIWUR7043  |
| CB4856                                          | HS | IV | 527379 | 528583 | WBGene00021013 | W03G1.8  | W03G1.8  | -0.211786561026943   | AGIWUR8211  |
| CB4856                                          | HS | IV | 532135 | 535703 | WBGene00001625 | glt-7    | W03G1.1  | 0.0583576923653757   | AGIWUR40008 |
| CB4856                                          | HS | IV | 543231 | 544086 | WBGene00017276 | F09C11.1 | F09C11.1 | -0.087830371893503   |             |
| AGIWUR1852                                      |    |    |        |        |                |          |          |                      |             |
| CB4856                                          | HS | IV | 548302 | 553231 | WBGene00018924 | F56A11.4 | F56A11.4 | -0.0706171001127887  |             |
| AGIWUR5465                                      |    |    |        |        |                |          |          |                      |             |
| CB4856                                          | HS | IV | 559234 | 568076 | WBGene00001165 | efn-4    | F56A11.3 | -0.396522998449276   |             |
| AGIWUR31786                                     |    |    |        |        |                |          |          |                      |             |
| CB4856                                          | HS | IV | 568372 | 570875 | WBGene00018925 | F56A11.5 | F56A11.5 | -0.179098084751242   |             |
| AGIWUR35066                                     |    |    |        |        |                |          |          |                      |             |
| CB4856                                          | HS | IV | 572723 | 583577 | WBGene00001579 | gex-2    | F56A11.1 | -0.00711158609026441 |             |
| AGIWUR20233                                     |    |    |        |        |                |          |          |                      |             |
| CB4856                                          | HS | IV | 583813 | 587829 | WBGene00189987 | C18H7.12 | C18H7.12 | -0.0310836934087995  |             |
| AGIWUR4609                                      |    |    |        |        |                |          |          |                      |             |
| CB4856                                          | HS | IV | 589030 | 592485 | WBGene00015996 | C18H7.6  | C18H7.6  | -0.107890920345605   | AGIWUR16736 |
| CB4856                                          | HS | IV | 593329 | 595233 | WBGene00015994 | C18H7.4  | C18H7.4  | -0.0449342301027968  | AGIWUR16422 |
| CB4856                                          | HS | IV | 595722 | 596419 | WBGene00015997 | C18H7.7  | C18H7.7  | -0.0191955569256219  |             |
| AGIWUR12555;AGIWUR23432;AGIWUR33157;AGIWUR40236 |    |    |        |        |                |          |          |                      |             |
| CB4856                                          | HS | IV | 596864 | 598771 | WBGene00044457 | C18H7.11 | C18H7.11 | -0.0517715552230769  |             |
| AGIWUR26978                                     |    |    |        |        |                |          |          |                      |             |
| CB4856                                          | HS | IV | 599449 | 601695 | WBGene00015998 | srt-59   | C18H7.8  | -0.0027123695689486  | AGIWUR38612 |
| CB4856                                          | HS | IV | 602991 | 603643 | WBGene00015999 | prmt-4   | C18H7.9  | 0.471466306849325    | AGIWUR21044 |
| CB4856                                          | HS | IV | 604444 | 605876 | WBGene00000676 | col-102  | C18H7.3  | -0.410880537877738   | AGIWUR16403 |
| CB4856                                          | HS | IV | 606355 | 614021 | WBGene00002140 | inx-18   | C18H7.2  | -0.105884500012473   | AGIWUR28351 |
| CB4856                                          | HS | IV | 615544 | 620925 | WBGene00015993 | C18H7.1  | C18H7.1  | -0.0773093994011553  | AGIWUR4760  |
| CB4856                                          | HS | IV | 627537 | 633954 | WBGene00015497 | nhr-76   | C05G6.1  | 0.00279609427653504  |             |
| AGIWUR2051;AGIWUR7810                           |    |    |        |        |                |          |          |                      |             |
| CB4856                                          | HS | IV | 649665 | 651994 | WBGene00019665 | K11H12.9 | K11H12.9 | 0.277262558209582    |             |
| AGIWUR23645                                     |    |    |        |        |                |          |          |                      |             |
| CB4856                                          | HS | IV | 652130 | 653421 | WBGene00019658 | K11H12.1 | K11H12.1 | 0.127779233197687    |             |
| AGIWUR13212                                     |    |    |        |        |                |          |          |                      |             |
| CB4856                                          | HS | IV | 653436 | 654576 | WBGene00004427 | rpl-15   | K11H12.2 | -0.55819018180535    |             |
| AGIWUR18481;AGIWUR24381                         |    |    |        |        |                |          |          |                      |             |
| CB4856                                          | HS | IV | 655353 | 658604 | WBGene00019664 | K11H12.8 | K11H12.8 | -0.140661542667937   |             |
| AGIWUR33789;AGIWUR35461                         |    |    |        |        |                |          |          |                      |             |
| CB4856                                          | HS | IV | 665525 | 666917 | WBGene00019663 | K11H12.7 | K11H12.7 | -0.0870511157126908  |             |

|                                                                                     |    |    |        |        |                |                  |                    |                     |
|-------------------------------------------------------------------------------------|----|----|--------|--------|----------------|------------------|--------------------|---------------------|
| AGIWUR16784;AGIWUR20600;AGIWUR28935;AGIWUR34976;AGIWUR35464                         |    |    |        |        |                |                  |                    |                     |
| CB4856                                                                              | HS | IV | 667291 | 668556 | WBGene00019662 | K11H12.6         | K11H12.6           | -0.126630533253557  |
| AGIWUR21661                                                                         |    |    |        |        |                |                  |                    |                     |
| CB4856                                                                              | HS | IV | 668962 | 670555 | WBGene00044723 | K11H12.11        | K11H12.11          | -0.0607392374751718 |
| AGIWUR4530;AGIWUR41020                                                              |    |    |        |        |                |                  |                    |                     |
| CB4856                                                                              | HS | IV | 674036 | 675883 | WBGene00019660 | K11H12.4         | K11H12.4           | 0.406305848041194   |
| AGIWUR12851                                                                         |    |    |        |        |                |                  |                    |                     |
| CB4856                                                                              | HS | IV | 676075 | 676687 | WBGene00044458 | K11H12.10        | K11H12.10          | -0.0741114369420526 |
| AGIWUR22675                                                                         |    |    |        |        |                |                  |                    |                     |
| CB4856                                                                              | HS | IV | 677616 | 679171 | WBGene00019661 | K11H12.5         | K11H12.5           | -0.12089648166287   |
| AGIWUR26759                                                                         |    |    |        |        |                |                  |                    |                     |
| CB4856                                                                              | HS | IV | 684497 | 688336 | WBGene00018256 | cut1-28 F41A4.1  | 0.321542441000496  | AGIWUR7323          |
| CB4856                                                                              | HS | IV | 698761 | 707719 | WBGene00021950 | cut1-26 Y55F3C.7 | 0.306447930129764  |                     |
| AGIWUR3838                                                                          |    |    |        |        |                |                  |                    |                     |
| CB4856                                                                              | HS | IV | 717925 | 719451 | WBGene00044460 | Y55F3C.10        | Y55F3C.10          | -0.0593783696064056 |
| AGIWUR29659                                                                         |    |    |        |        |                |                  |                    |                     |
| CB4856                                                                              | HS | IV | 719766 | 727481 | WBGene00044459 | Y55F3C.9         | Y55F3C.9           | 0.106329144547833   |
| AGIWUR3147;AGIWUR17197                                                              |    |    |        |        |                |                  |                    |                     |
| CB4856                                                                              | HS | IV | 728500 | 731037 | WBGene00021951 | srt-24 Y55F3C.8  |                    | -0.0290105875276612 |
| AGIWUR31555;AGIWUR35044                                                             |    |    |        |        |                |                  |                    |                     |
| CB4856                                                                              | HS | IV | 736675 | 753316 | WBGene00021948 | kvs-5 Y55F3C.3   |                    | -0.0515826532449575 |
| AGIWUR4683;AGIWUR4981;AGIWUR12075;AGIWUR25624                                       |    |    |        |        |                |                  |                    |                     |
| CB4856                                                                              | HS | IV | 756721 | 759084 | WBGene00021947 | srt-23 Y55F3C.2  |                    | -0.0574872170633629 |
| AGIWUR19631;AGIWUR28671                                                             |    |    |        |        |                |                  |                    |                     |
| CB4856                                                                              | HS | IV | 760610 | 762342 | WBGene00001788 | gst-40 F56B3.10  |                    | -0.029516360285788  |
| AGIWUR6114                                                                          |    |    |        |        |                |                  |                    |                     |
| CB4856                                                                              | HS | IV | 762416 | 763680 | WBGene00000677 | col-103 F56B3.1  | 0.101385508148898  |                     |
| AGIWUR8934;AGIWUR12460                                                              |    |    |        |        |                |                  |                    |                     |
| CB4856                                                                              | HS | IV | 764078 | 768584 | WBGene00018928 | F56B3.2 F56B3.2  | -0.209111663042608 | AGIWUR34465         |
| CB4856                                                                              | HS | IV | 773228 | 776655 | WBGene00018932 | mrp1-2 F56B3.8   | 0.190071479699593  | AGIWUR13207         |
| CB4856                                                                              | HS | IV | 778784 | 784182 | WBGene00018931 | ugt-52 F56B3.7   | -0.199558929217681 | AGIWUR43381         |
| CB4856                                                                              | HS | IV | 786234 | 794326 | WBGene00004824 | F56B3.4 F56B3.4  | 0.355531639361997  | AGIWUR4977          |
| CB4856                                                                              | HS | IV | 794632 | 795689 | WBGene00018935 | skr-18 F56B3.12  |                    | -0.38258301345385   |
| AGIWUR20815                                                                         |    |    |        |        |                |                  |                    |                     |
| CB4856                                                                              | HS | IV | 795755 | 796567 | WBGene00018934 | F56B3.11         | F56B3.11           | -0.225800622492859  |
| AGIWUR10110;AGIWUR20027;AGIWUR22185;AGIWUR26451;AGIWUR30559;AGIWUR37301;AGIWUR43312 |    |    |        |        |                |                  |                    |                     |
| CB4856                                                                              | HS | IV | 797023 | 799922 | WBGene00001154 | ech-5 F56B3.5    | -0.178001018301103 | AGIWUR22304         |
| CB4856                                                                              | HS | IV | 805102 | 806236 | WBGene00185088 | Y55F3BL.4        | Y55F3BL.4          | -0.209995058018336  |
| AGIWUR21165                                                                         |    |    |        |        |                |                  |                    |                     |

|                                                                                     |    |    |         |         |                |            |            |                    |                     |
|-------------------------------------------------------------------------------------|----|----|---------|---------|----------------|------------|------------|--------------------|---------------------|
| CB4856                                                                              | HS | IV | 807439  | 824954  | WBGene00021936 | zipt-20    | Y55F3BL.2  |                    | -0.191641725929513  |
| AGIWUR5347;AGIWUR13156;AGIWUR14357                                                  |    |    |         |         |                |            |            |                    |                     |
| CB4856                                                                              | HS | IV | 830359  | 831896  | WBGene00021942 | madf-1     | Y55F3BR.5  |                    | -0.171309104411916  |
| AGIWUR35663                                                                         |    |    |         |         |                |            |            |                    |                     |
| CB4856                                                                              | HS | IV | 832362  | 833329  | WBGene00044742 | Y55F3BR.10 | Y55F3BR.10 |                    | -0.101706768221332  |
| AGIWUR13482;AGIWUR20780;AGIWUR28506;AGIWUR42338                                     |    |    |         |         |                |            |            |                    |                     |
| CB4856                                                                              | HS | IV | 835033  | 842126  | WBGene00021943 | Y55F3BR.6  | Y55F3BR.6  |                    | -0.166458539318212  |
| AGIWUR15121;AGIWUR42889                                                             |    |    |         |         |                |            |            |                    |                     |
| CB4856                                                                              | HS | IV | 845881  | 848850  | WBGene00021941 | lgc-33     | Y55F3BR.4  |                    | 0.281178246284613   |
| AGIWUR12929                                                                         |    |    |         |         |                |            |            |                    |                     |
| CB4856                                                                              | HS | IV | 849269  | 854780  | WBGene00021945 | lem-4      | Y55F3BR.8  |                    | 0.10971714950232    |
| AGIWUR6239                                                                          |    |    |         |         |                |            |            |                    |                     |
| CB4856                                                                              | HS | IV | 857327  | 874724  | WBGene00021939 | Y55F3BR.2  | Y55F3BR.2  |                    | -0.0110561716908979 |
| AGIWUR2219;AGIWUR14690;AGIWUR43144                                                  |    |    |         |         |                |            |            |                    |                     |
| CB4856                                                                              | HS | IV | 874791  | 881910  | WBGene00021938 | Y55F3BR.1  | Y55F3BR.1  |                    | 0.117389177309857   |
| AGIWUR8321                                                                          |    |    |         |         |                |            |            |                    |                     |
| CB4856                                                                              | HS | IV | 885346  | 890200  | WBGene00007007 | mak-2      | C44C8.6    | 0.0528659266981477 |                     |
| AGIWUR5736;AGIWUR10731;AGIWUR10982;AGIWUR40813                                      |    |    |         |         |                |            |            |                    |                     |
| CB4856                                                                              | HS | IV | 919990  | 920808  | WBGene00019070 | F58H7.5    | F58H7.5    | -0.316663238257552 | AGIWUR34903         |
| CB4856                                                                              | HS | IV | 924936  | 939667  | WBGene00019069 | lgc-30     | F58H7.3    | 0.132343793233227  | AGIWUR10043         |
| CB4856                                                                              | HS | IV | 940017  | 945653  | WBGene00019068 | faah-3     | F58H7.2    | 0.216545148031681  | AGIWUR10182         |
| CB4856                                                                              | HS | IV | 959452  | 984392  | WBGene00004047 | plx-1      | Y55F3AL.1  | -0.354255292228165 |                     |
| AGIWUR24475                                                                         |    |    |         |         |                |            |            |                    |                     |
| CB4856                                                                              | HS | IV | 984405  | 990521  | WBGene00043705 | egrh-2     | Y55F3AM.7  |                    | 0.0756736849769784  |
| AGIWUR6981                                                                          |    |    |         |         |                |            |            |                    |                     |
| CB4856                                                                              | HS | IV | 992240  | 998348  | WBGene00021924 | Y55F3AM.6  | Y55F3AM.6  |                    | -0.052004820931046  |
| AGIWUR12792;AGIWUR15312;AGIWUR16365;AGIWUR19661                                     |    |    |         |         |                |            |            |                    |                     |
| CB4856                                                                              | HS | IV | 999214  | 1003639 | WBGene00021923 | Y55F3AM.5  | Y55F3AM.5  |                    | 0.172567917403125   |
| AGIWUR1547;AGIWUR20689;AGIWUR44614                                                  |    |    |         |         |                |            |            |                    |                     |
| CB4856                                                                              | HS | IV | 1003600 | 1005864 | WBGene00021925 | immp-2     | Y55F3AM.8  |                    | 0.0365324000869194  |
| AGIWUR9588                                                                          |    |    |         |         |                |            |            |                    |                     |
| CB4856                                                                              | HS | IV | 1006083 | 1009734 | WBGene00021926 | Y55F3AM.9  | Y55F3AM.9  |                    | 0.167167572518213   |
| AGIWUR35970                                                                         |    |    |         |         |                |            |            |                    |                     |
| CB4856                                                                              | HS | IV | 1010054 | 1012502 | WBGene00021922 | atg-3      | Y55F3AM.4  |                    | 0.00490970445731875 |
| AGIWUR44533                                                                         |    |    |         |         |                |            |            |                    |                     |
| CB4856                                                                              | HS | IV | 1012624 | 1019558 | WBGene00021921 | Y55F3AM.3  | Y55F3AM.3  |                    | 0.00585224430989939 |
| AGIWUR19334;AGIWUR19775;AGIWUR20515;AGIWUR20761;AGIWUR24236;AGIWUR37138;AGIWUR42157 |    |    |         |         |                |            |            |                    |                     |
| CB4856                                                                              | HS | IV | 1027787 | 1030024 | WBGene00021927 | abhd-14    | Y55F3AM.10 |                    | 0.213431589692689   |
| AGIWUR26712                                                                         |    |    |         |         |                |            |            |                    |                     |

|                                                                                      |    |                 |                |            |            |                      |             |
|--------------------------------------------------------------------------------------|----|-----------------|----------------|------------|------------|----------------------|-------------|
| CB4856 HS<br>AGIWUR19979                                                             | IV | 1038671 1041008 | WBGene00021928 | Y55F3AM.11 | Y55F3AM.11 | 0.130916305969121    |             |
| CB4856 HS<br>AGIWUR42547                                                             | IV | 1045983 1049506 | WBGene00005903 | srx-12     | Y55F3AM.2  | 0.102349011564168    |             |
| CB4856 HS<br>AGIWUR13844;AGIWUR14536;AGIWUR15020;AGIWUR20920;AGIWUR35100;AGIWUR36637 | IV | 1052524 1054794 | WBGene00021929 | dcap-1     | Y55F3AM.12 | -0.00429148915086053 |             |
| CB4856 HS<br>AGIWUR31309                                                             | IV | 1056890 1057620 | WBGene00021920 | mrps-25    | Y55F3AM.1  | 0.102717390634098    |             |
| CB4856 HS<br>AGIWUR14109                                                             | IV | 1058695 1067525 | WBGene00021931 | Y55F3AM.14 | Y55F3AM.14 | -0.192963428885545   |             |
| CB4856 HS<br>AGIWUR14506;AGIWUR35063;AGIWUR36445;AGIWUR38851                         | IV | 1077463 1087013 | WBGene00000816 | csn-4      | Y55F3AM.15 | -0.0887025505062642  |             |
| CB4856 HS<br>AGIWUR7621                                                              | IV | 1087095 1093920 | WBGene00021934 | cct-8      | Y55F3AR.3  | -0.182270384473798   |             |
| CB4856 HS<br>AGIWUR7254                                                              | IV | 1094545 1096723 | WBGene00021933 | Y55F3AR.2  | Y55F3AR.2  | -0.0148422025568848  |             |
| CB4856 HS<br>AGIWUR2526                                                              | IV | 1097453 1102980 | WBGene00021932 | Y55F3AR.1  | Y55F3AR.1  | 0.215367592805553    |             |
| CB4856 HS<br>AGIWUR13870;AGIWUR22722;AGIWUR29440;AGIWUR34768;AGIWUR38469             | IV | 1103541 1104609 | WBGene00044462 | C44B12.9   | C44B12.9   | -0.0866364430787732  |             |
| CB4856 HS<br>AGIWUR35036;AGIWUR44237                                                 | IV | 1107396 1110856 | WBGene00003893 | ost-1      | C44B12.2   | 0.187251087353724    |             |
| CB4856 HS<br>AGIWUR3271                                                              | IV | 1111462 1114820 | WBGene00005905 | srx-14     | C44B12.8   | 0.0166469456950029   |             |
| CB4856 HS<br>AGIWUR26071                                                             | IV | 1114969 1118666 | WBGene00005904 | srx-13     | C44B12.4   | 0.0581635158319926   |             |
| CB4856 HS<br>AGIWUR36087                                                             | IV | 1121457 1125107 | WBGene00016638 | perm-4     | C44B12.5   | -0.262586811836574   |             |
| CB4856 HS<br>AGIWUR12455;AGIWUR35647                                                 | IV | 1126790 1128848 | WBGene00016636 | perm-2     | C44B12.1   | 0.0738291923237568   |             |
| CB4856 HS<br>AGIWUR17771                                                             | IV | 1128964 1136947 | WBGene00016639 | C44B12.6   | C44B12.6   | 0.0221546023208212   |             |
| CB4856 HS                                                                            | IV | 1145681 1158028 | WBGene00016797 | C50A2.3    | C50A2.3    | 0.135794598234149    | AGIWUR22624 |
| CB4856 HS                                                                            | IV | 1159637 1160484 | WBGene00016798 | ets-8      | C50A2.4    | -0.0738297870586528  | AGIWUR6703  |
| CB4856 HS                                                                            | IV | 1170672 1177776 | WBGene00016796 | cec-2      | C50A2.2    | 0.0701693399366619   | AGIWUR29859 |
| CB4856 HS<br>AGIWUR25304                                                             | IV | 1178022 1182837 | WBGene00022426 | Y104H12D.2 | Y104H12D.2 | -0.133042462516839   |             |
| CB4856 HS<br>AGIWUR14593                                                             | IV | 1182592 1186604 | WBGene00022428 | Y104H12D.4 | Y104H12D.4 | -0.0514212898438835  |             |



|                                                                         |    |                 |                |           |            |                      |                     |
|-------------------------------------------------------------------------|----|-----------------|----------------|-----------|------------|----------------------|---------------------|
| CB4856 HS<br>AGIWUR13101                                                | IV | 1187799 1192977 | WBGene00007020 | mdt-20    | Y104H12D.1 | 0.260617002043553    |                     |
| CB4856 HS<br>AGIWUR34307                                                | IV | 1193065 1201846 | WBGene00022427 |           | Y104H12D.3 | Y104H12D.3           | -0.477911535991575  |
| CB4856 HS<br>AGIWUR13919                                                | IV | 1202651 1204970 | WBGene00001104 | ds1-2     | W09G12.1   |                      | -0.453463976642881  |
| CB4856 HS<br>AGIWUR8237;AGIWUR25731;AGIWUR35019;AGIWUR42511             | IV | 1205868 1206377 | WBGene00023163 | W09G12.3  | W09G12.3   |                      | -0.145494113539323  |
| CB4856 HS<br>AGIWUR14118                                                | IV | 1207255 1208102 | WBGene00001103 | ds1-1     | W09G12.4   |                      | -0.32787735468292   |
| CB4856 HS<br>AGIWUR34992                                                | IV | 1216590 1218527 | WBGene00021123 | W09G12.9  | W09G12.9   |                      | -0.302130241192803  |
| CB4856 HS<br>AGIWUR6676;AGIWUR24423;AGIWUR28632;AGIWUR31254;AGIWUR40883 | IV | 1219333 1221287 | WBGene00044463 | W09G12.10 | W09G12.10  |                      | 0.00663933981774179 |
| CB4856 HS<br>-0.00836775649669441                                       | IV | 1226182 1227668 | WBGene00021122 | W09G12.8  | W09G12.8   |                      |                     |
| CB4856 HS<br>AGIWUR26633                                                | IV | 1229080 1230789 | WBGene00021121 | W09G12.7  | W09G12.7   |                      | 0.217659102553469   |
| CB4856 HS<br>AGIWUR44787                                                | IV | 1231897 1232812 | WBGene00021120 | W09G12.6  | W09G12.6   |                      | -0.300660916871781  |
| CB4856 HS<br>AGIWUR1399;AGIWUR42823                                     | IV | 1232872 1239852 | WBGene00009521 | F38A1.8   | F38A1.8    |                      | -0.107876077488777  |
| CB4856 HS<br>-0.00622117829430557                                       | IV | 1241332 1243402 | WBGene00044908 | F38A1.15  | F38A1.15   |                      |                     |
| CB4856 HS                                                               | IV | 1244247 1245344 | WBGene00009522 | F38A1.9   | F38A1.9    | 0.446099164579772    | AGIWUR39998         |
| CB4856 HS<br>AGIWUR18756                                                | IV | 1245399 1246886 | WBGene00009523 | clec-165  | F38A1.10   | 0.175124630378278    |                     |
| CB4856 HS<br>AGIWUR15217                                                | IV | 1247386 1249025 | WBGene00009524 | F38A1.11  | F38A1.11   |                      | -0.440376558906004  |
| CB4856 HS<br>AGIWUR3404                                                 | IV | 1249018 1251366 | WBGene00009518 | clec-166  | F38A1.5    | 0.475047713425592    |                     |
| CB4856 HS                                                               | IV | 1251861 1252470 | WBGene00009519 | F38A1.6   | F38A1.6    | -0.00626517031969964 | AGIWUR39698         |
| CB4856 HS<br>AGIWUR32291                                                | IV | 1253137 1255732 | WBGene00009517 | clec-167  | F38A1.4    | -0.0536904831653153  |                     |
| CB4856 HS<br>AGIWUR22643                                                | IV | 1256956 1259344 | WBGene00009520 | clec-168  | F38A1.7    | -0.291164067798261   |                     |
| CB4856 HS<br>AGIWUR1769                                                 | IV | 1261272 1264622 | WBGene00009526 | clec-169  | F38A1.14   | 0.119249311558042    |                     |
| CB4856 HS                                                               | IV | 1265228 1265848 | WBGene00009525 | F38A1.13  | F38A1.13   | 0.140825241752491    |                     |

AGIWUR34868  
CB4856 HS IV 1266866 1274425 WBGene00009515 clec-170 F38A1.1 0.129490112096551  
AGIWUR120;AGIWUR3055;AGIWUR12336;AGIWUR18316;AGIWUR25656;AGIWUR28250;AGIWUR29831;AGIWUR31041;AGIWUR35445;AGIWUR35831  
CB4856 HS IV 1275865 1277091 WBGene00007476 C09E9.1 C09E9.1 0.0477591071420234  
AGIWUR1226;AGIWUR23153;AGIWUR24526;AGIWUR25781;AGIWUR28437;AGIWUR38895  
CB4856 HS IV 1289627 1296897 WBGene00022425 plst-1 Y104H12BR.1 -0.169915154122573  
AGIWUR6341;AGIWUR8186;AGIWUR19456;AGIWUR20224;AGIWUR30101;AGIWUR30260;AGIWUR33915;AGIWUR35453;AGIWUR36595;AGIWUR41949  
CB4856 HS IV 1297222 1309652 WBGene00018776 F53H1.1 F53H1.1 0.204763065038435 AGIWUR7687  
CB4856 HS IV 1310166 1328241 WBGene00018778 F53H1.4 F53H1.4 -0.0609840013405822  
AGIWUR7608;AGIWUR20200;AGIWUR20748;AGIWUR22712  
CB4856 HS IV 1329162 1339376 WBGene00018777 F53H1.3 F53H1.3 0.119627392047459 AGIWUR16858  
CB4856 HS IV 1347316 1352977 WBGene00004338 rfc-2 F58F6.4 -0.1776877461861 AGIWUR19510  
CB4856 HS IV 1353636 1355305 WBGene00000678 col-104 F58F6.1 -0.0248683940115768 AGIWUR9061  
CB4856 HS IV 1357816 1359225 WBGene00000679 col-105 F58F6.2 0.168782516608129 AGIWUR12554  
CB4856 HS IV 1375369 1376563 WBGene00019052 F58F6.3 F58F6.3 0.131894988723406 AGIWUR5879  
CB4856 HS IV 1386045 1399538 WBGene00022423 nhr-41 Y104H12A.1 0.0132016811692899  
AGIWUR7746;AGIWUR10431;AGIWUR12457;AGIWUR30123  
CB4856 HS IV 1406542 1408131 WBGene00022314 Y77E11A.14 Y77E11A.14 0.035248820906185  
AGIWUR40359  
CB4856 HS IV 1408582 1410041 WBGene00022309 rpc-11 Y77E11A.6 -0.256339779923739  
AGIWUR12229  
CB4856 HS IV 1410786 1419847 WBGene00022310 Y77E11A.7 Y77E11A.7 -0.105900374469215  
AGIWUR268;AGIWUR9813;AGIWUR11788;AGIWUR15813;AGIWUR17418;AGIWUR22112;AGIWUR22493;AGIWUR34355  
CB4856 HS IV 1420929 1421770 WBGene00002180 jtr-1 Y77E11A.4 -0.284519109549532  
AGIWUR20279  
CB4856 HS IV 1425482 1426887 WBGene00022312 clec-171 Y77E11A.9 -0.241579861992158  
AGIWUR15284;AGIWUR26848;AGIWUR35309  
CB4856 HS IV 1429041 1430367 WBGene000235267 Y77E11A.23 Y77E11A.23 0.156785091965995  
AGIWUR20360  
CB4856 HS IV 1435465 1446182 WBGene00000547 clp-7 Y77E11A.11 0.0773483315616019  
AGIWUR14913  
CB4856 HS IV 1447594 1448316 WBGene00022308 Y77E11A.3 Y77E11A.3 -0.0878087995364814  
AGIWUR17454  
CB4856 HS IV 1457075 1459521 WBGene00022307 Y77E11A.2 Y77E11A.2 -0.126472358504842  
AGIWUR20302  
CB4856 HS IV 1459866 1460786 WBGene00000680 col-106 Y77E11A.15 -0.869757475710045  
AGIWUR30247

|                                                                                                                                                          |    |         |         |                |            |            |                     |
|----------------------------------------------------------------------------------------------------------------------------------------------------------|----|---------|---------|----------------|------------|------------|---------------------|
| CB4856 HS                                                                                                                                                | IV | 1461899 | 1475109 | WBGene00022313 | Y77E11A.12 | Y77E11A.12 | -0.117910062724075  |
| AGIWUR10496                                                                                                                                              |    |         |         |                |            |            |                     |
| CB4856 HS                                                                                                                                                | IV | 1485286 | 1489762 | WBGene00044464 | Y77E11A.16 | Y77E11A.16 | -0.0105405829441407 |
| AGIWUR7338                                                                                                                                               |    |         |         |                |            |            |                     |
| CB4856 HS                                                                                                                                                | IV | 1490653 | 1496022 | WBGene00003806 | npp-20     | Y77E11A.13 | -0.0349120886168954 |
| AGIWUR4990;AGIWUR24613;AGIWUR40679                                                                                                                       |    |         |         |                |            |            |                     |
| CB4856 HS                                                                                                                                                | IV | 1497630 | 1509965 | WBGene00022306 | hxx-3      | Y77E11A.1  | 0.154485446085783   |
| AGIWUR29596                                                                                                                                              |    |         |         |                |            |            |                     |
| CB4856 HS                                                                                                                                                | IV | 1510546 | 1515251 | WBGene00019368 | K03H6.2    | K03H6.2    | -0.164442149450366  |
| CB4856 HS                                                                                                                                                | IV | 1515510 | 1516627 | WBGene00044719 | clcc-172   | K03H6.7    | 0.210584980197732   |
| AGIWUR18366                                                                                                                                              |    |         |         |                |            |            |                     |
| CB4856 HS                                                                                                                                                | IV | 1517969 | 1521324 | WBGene00019369 | K03H6.4    | K03H6.4    | 0.159504434981359   |
| AGIWUR24843;AGIWUR40141                                                                                                                                  |    |         |         |                |            |            |                     |
| CB4856 HS                                                                                                                                                | IV | 1523718 | 1526599 | WBGene00019367 | K03H6.1    | K03H6.1    | -0.0717096197462368 |
| CB4856 HS                                                                                                                                                | IV | 1527221 | 1536398 | WBGene00019370 | K03H6.5    | K03H6.5    | -0.0344667881511258 |
| AGIWUR25528;AGIWUR39670                                                                                                                                  |    |         |         |                |            |            |                     |
| CB4856 HS                                                                                                                                                | IV | 1545296 | 1566192 | WBGene00016427 | C34H4.5    | C34H4.5    | -0.0488993270678844 |
| AGIWUR13;AGIWUR480;AGIWUR7571;AGIWUR10154;AGIWUR15441;AGIWUR21312;AGIWUR36966;AGIWUR38213;AGIWUR44132                                                    |    |         |         |                |            |            |                     |
| CB4856 HS                                                                                                                                                | IV | 1567921 | 1595824 | WBGene00003794 | npp-8      | Y41D4B.19  | -0.0118465740089508 |
| AGIWUR451;AGIWUR7749;AGIWUR13128;AGIWUR14605;AGIWUR16223;AGIWUR17183;AGIWUR19609;AGIWUR27086;AGIWUR33432;AGIWUR35153;AGIWUR37403;AGIWUR38651;AGIWUR42141 |    |         |         |                |            |            |                     |
| CB4856 HS                                                                                                                                                | IV | 1597316 | 1601620 | WBGene00000416 | ced-2      | Y41D4B.13  | -0.267200251898274  |
| AGIWUR16139                                                                                                                                              |    |         |         |                |            |            |                     |
| CB4856 HS                                                                                                                                                | IV | 1602985 | 1605609 | WBGene00021515 | set-23     | Y41D4B.12  | 0.00942246127105584 |
| AGIWUR12103                                                                                                                                              |    |         |         |                |            |            |                     |
| CB4856 HS                                                                                                                                                | IV | 1605712 | 1608901 | WBGene00021514 | Y41D4B.11  | Y41D4B.11  | 0.103105273100272   |
| AGIWUR41173                                                                                                                                              |    |         |         |                |            |            |                     |
| CB4856 HS                                                                                                                                                | IV | 1610236 | 1612915 | WBGene00001105 | ds1-3      | Y41D4B.10  | -0.516532807405562  |
| AGIWUR20853                                                                                                                                              |    |         |         |                |            |            |                     |
| CB4856 HS                                                                                                                                                | IV | 1613897 | 1616766 | WBGene00003712 | nhr-122    | Y41D4B.9   | 0.121339482284117   |
| AGIWUR37999                                                                                                                                              |    |         |         |                |            |            |                     |
| CB4856 HS                                                                                                                                                | IV | 1626973 | 1630756 | WBGene00045255 | nhr-146    | Y41D4B.27  | 0.0212545761323089  |
| AGIWUR21898;AGIWUR30984;AGIWUR32578;AGIWUR38940;AGIWUR43528                                                                                              |    |         |         |                |            |            |                     |
| CB4856 HS                                                                                                                                                | IV | 1631951 | 1633257 | WBGene00021525 | Y41D4B.26  | Y41D4B.26  | -0.330669059910846  |
| AGIWUR36375                                                                                                                                              |    |         |         |                |            |            |                     |
| CB4856 HS                                                                                                                                                | IV | 1633772 | 1637367 | WBGene00021513 | Y41D4B.6   | Y41D4B.6   | -0.0248024756524634 |
| AGIWUR39537                                                                                                                                              |    |         |         |                |            |            |                     |
| CB4856 HS                                                                                                                                                | IV | 1659691 | 1660011 | WBGene00004497 | rps-28     | Y41D4B.5   | 0.325325987953093   |
| AGIWUR42056                                                                                                                                              |    |         |         |                |            |            |                     |

|                                                                                                                                                                                              |    |                 |                |                  |           |                      |
|----------------------------------------------------------------------------------------------------------------------------------------------------------------------------------------------|----|-----------------|----------------|------------------|-----------|----------------------|
| CB4856 HS<br>AGIWUR30269                                                                                                                                                                     | IV | 1660112 1669707 | WBGene00021512 | Y41D4B.4         | Y41D4B.4  | 0.0629389419913018   |
| CB4856 HS<br>AGIWUR2885                                                                                                                                                                      | IV | 1672706 1676209 | WBGene00021511 | Y41D4B.1         | Y41D4B.1  | 0.128265045798777    |
| CB4856 HS<br>AGIWUR572;AGIWUR2148;AGIWUR10477;AGIWUR11515;AGIWUR12627;AGIWUR16482;AGIWUR19697;AGIWUR25338;AGIWUR29364;AGIWUR30172;AGIWUR38879                                                | IV | 1676720 1682159 | WBGene00021524 | Y41D4B.24        | Y41D4B.24 | 0.0947321945705912   |
| CB4856 HS<br>AGIWUR6907                                                                                                                                                                      | IV | 1699899 1702820 | WBGene00044618 | bus-2 K08D12.5   |           | 0.000546999539336568 |
| CB4856 HS<br>AGIWUR41649                                                                                                                                                                     | IV | 1707296 1708691 | WBGene00019538 | K08D12.4         | K08D12.4  | -0.205162507728274   |
| CB4856 HS<br>AGIWUR526                                                                                                                                                                       | IV | 1708804 1709745 | WBGene00003947 | pbs-1 K08D12.1   |           | -0.0620727762235944  |
| CB4856 HS<br>AGIWUR1281;AGIWUR4072;AGIWUR7432;AGIWUR7623;AGIWUR10035;AGIWUR15285;AGIWUR19577;AGIWUR24436;AGIWUR25955;AGIWUR29099;AGIWUR32333;AGIWUR32915;AGIWUR33849;AGIWUR36200;AGIWUR42283 | IV | 1710265 1711127 | WBGene00019537 | K08D12.3         | K08D12.3  | 0.00444202452436748  |
| CB4856 HS<br>AGIWUR9019                                                                                                                                                                      | IV | 1711279 1714179 | WBGene00019536 | rpi-2 K08D12.2   |           | -0.00237097035259204 |
| CB4856 HS<br>AGIWUR1415;AGIWUR2340;AGIWUR41859;AGIWUR42751                                                                                                                                   | IV | 1720790 1723067 | WBGene00019540 | K08D12.6         | K08D12.6  | -0.0357799851136704  |
| CB4856 HS<br>AGIWUR27413                                                                                                                                                                     | IV | 1723199 1724143 | WBGene00044293 | K08D12.7         | K08D12.7  | -0.0330584194088885  |
| CB4856 HS<br>-0.00717696402286094                                                                                                                                                            | IV | 1727438 1737884 | WBGene00021507 | Y41D4A.5         | Y41D4A.5  |                      |
| CB4856 HS<br>AGIWUR11580                                                                                                                                                                     | IV | 1740921 1745587 | WBGene00021508 | Y41D4A.6         | Y41D4A.6  | 0.0575730622280695   |
| CB4856 HS<br>AGIWUR9031;AGIWUR10979;AGIWUR20429                                                                                                                                              | IV | 1745875 1751633 | WBGene00021506 | Y41D4A.4         | Y41D4A.4  | -0.0398720252143079  |
| CB4856 HS<br>AGIWUR14956                                                                                                                                                                     | IV | 1752270 1761647 | WBGene00021509 | Y41D4A.7         | Y41D4A.7  | 0.153893065486905    |
| CB4856 HS<br>AGIWUR23691                                                                                                                                                                     | IV | 1768621 1769667 | WBGene00000682 | col-108 Y41D4A.2 |           | -0.0111082224452375  |
| CB4856 HS<br>AGIWUR38771                                                                                                                                                                     | IV | 1772144 1774695 | WBGene00021504 | Y41D4A.1         | Y41D4A.1  | -0.0805351509589958  |
| CB4856 HS<br>AGIWUR8492                                                                                                                                                                      | IV | 1775277 1781562 | WBGene00021510 | frpr-19 Y41D4A.8 |           | 0.00741748308648482  |
| CB4856 HS<br>AGIWUR12252                                                                                                                                                                     | IV | 1802026 1803982 | WBGene00021410 | Y38C1BA.1        | Y38C1BA.1 | 0.0045088287527868   |
| CB4856 HS                                                                                                                                                                                    | IV | 1805037 1815099 | WBGene00004913 | snn-1 Y38C1BA.2  |           | 0.112293323820467    |

|                                                                                                                                                                                  |    |    |         |         |                |           |           |                     |
|----------------------------------------------------------------------------------------------------------------------------------------------------------------------------------|----|----|---------|---------|----------------|-----------|-----------|---------------------|
| AGIWUR9737                                                                                                                                                                       |    |    |         |         |                |           |           |                     |
| CB4856                                                                                                                                                                           | HS | IV | 1817311 | 1820253 | WBGene00000683 | col-109   | Y38C1BA.3 | -0.16648963269591   |
| AGIWUR41439                                                                                                                                                                      |    |    |         |         |                |           |           |                     |
| CB4856                                                                                                                                                                           | HS | IV | 1824481 | 1834029 | WBGene00000553 | cmk-1     | K07A9.2   | -0.164862547235133  |
| AGIWUR6980;AGIWUR44640                                                                                                                                                           |    |    |         |         |                |           |           |                     |
| CB4856                                                                                                                                                                           | HS | IV | 1834628 | 1847336 | WBGene00019462 | K07A9.3   | K07A9.3   | -0.0360114771214857 |
| AGIWUR8587;AGIWUR9835;AGIWUR41314                                                                                                                                                |    |    |         |         |                |           |           |                     |
| CB4856                                                                                                                                                                           | HS | IV | 1847968 | 1880587 | WBGene00001173 | egl-4     | F55A8.2   | 0.0580611818016621  |
| AGIWUR6005;AGIWUR7284;AGIWUR8769;AGIWUR10842;AGIWUR11592;AGIWUR11699;AGIWUR19320;AGIWUR20152;AGIWUR29949;AGIWUR30504;AGIWUR34266;AGIWUR36671;AGIWUR37765;AGIWUR44393;AGIWUR44568 |    |    |         |         |                |           |           |                     |
| CB4856                                                                                                                                                                           | HS | IV | 1902323 | 1917841 | WBGene00001186 | egl-18    | F55A8.1   | -0.0850263544785053 |
| AGIWUR5983;AGIWUR11851;AGIWUR22220;AGIWUR24154;AGIWUR26660;AGIWUR35388                                                                                                           |    |    |         |         |                |           |           |                     |
| CB4856                                                                                                                                                                           | HS | IV | 1917854 | 1921644 | WBGene00001253 | elt-6     | F52C12.5  | -0.22117808419308   |
| AGIWUR35073                                                                                                                                                                      |    |    |         |         |                |           |           |                     |
| CB4856                                                                                                                                                                           | HS | IV | 1923939 | 1948040 | WBGene00018681 | denn-4    | F52C12.4  | -0.540385091775738  |
| AGIWUR27710                                                                                                                                                                      |    |    |         |         |                |           |           |                     |
| CB4856                                                                                                                                                                           | HS | IV | 1948191 | 1953322 | WBGene00018680 | tsen-54   | F52C12.3  | -0.127468674464748  |
| AGIWUR15719                                                                                                                                                                      |    |    |         |         |                |           |           |                     |
| CB4856                                                                                                                                                                           | HS | IV | 1953579 | 1956704 | WBGene00018679 | F52C12.2  | F52C12.2  | 0.0623789095342353  |
| AGIWUR30822;AGIWUR41330                                                                                                                                                          |    |    |         |         |                |           |           |                     |
| CB4856                                                                                                                                                                           | HS | IV | 1956711 | 1959749 | WBGene00138717 | F52C12.6  | F52C12.6  | -0.0309648013495032 |
| AGIWUR10670;AGIWUR13703;AGIWUR23756;AGIWUR30117;AGIWUR37019                                                                                                                      |    |    |         |         |                |           |           |                     |
| CB4856                                                                                                                                                                           | HS | IV | 1959854 | 1963240 | WBGene00018678 | F52C12.1  | F52C12.1  | -0.166705350845323  |
| AGIWUR20817                                                                                                                                                                      |    |    |         |         |                |           |           |                     |
| CB4856                                                                                                                                                                           | HS | IV | 1963191 | 1964724 | WBGene00006738 | ulp-3     | Y48A5A.2  | -0.145151744622874  |
| AGIWUR12318                                                                                                                                                                      |    |    |         |         |                |           |           |                     |
| CB4856                                                                                                                                                                           | HS | IV | 1965481 | 1969650 | WBGene00021655 | Y48A5A.1  | Y48A5A.1  | -0.125245634714307  |
| AGIWUR7982;AGIWUR29240                                                                                                                                                           |    |    |         |         |                |           |           |                     |
| CB4856                                                                                                                                                                           | HS | IV | 1969737 | 1970280 | WBGene00044466 | Y48A5A.3  | Y48A5A.3  | 0.0315428609881785  |
| AGIWUR18424;AGIWUR25118;AGIWUR36764;AGIWUR37110;AGIWUR39187                                                                                                                      |    |    |         |         |                |           |           |                     |
| CB4856                                                                                                                                                                           | HS | IV | 1970734 | 1972977 | WBGene00022298 | Y76B12C.4 | Y76B12C.4 | -0.133301347122515  |
| AGIWUR11644                                                                                                                                                                      |    |    |         |         |                |           |           |                     |
| CB4856                                                                                                                                                                           | HS | IV | 1973702 | 1975677 | WBGene00022297 | Y76B12C.3 | Y76B12C.3 | 0.0725331964647395  |
| AGIWUR39977                                                                                                                                                                      |    |    |         |         |                |           |           |                     |
| CB4856                                                                                                                                                                           | HS | IV | 1979988 | 1980363 | WBGene00022302 | Y76B12C.8 | Y76B12C.8 | 0.132215968250009   |
| AGIWUR19264                                                                                                                                                                      |    |    |         |         |                |           |           |                     |
| CB4856                                                                                                                                                                           | HS | IV | 1981406 | 1992966 | WBGene00022300 | Y76B12C.6 | Y76B12C.6 | 0.227151564284109   |
| AGIWUR11393;AGIWUR23683;AGIWUR35565                                                                                                                                              |    |    |         |         |                |           |           |                     |
| CB4856                                                                                                                                                                           | HS | IV | 1993089 | 2008993 | WBGene00022296 | xpc-1     | Y76B12C.2 | 0.238081665598319   |



|                                                                                                                       |    |    |         |         |                |            |            |                     |             |
|-----------------------------------------------------------------------------------------------------------------------|----|----|---------|---------|----------------|------------|------------|---------------------|-------------|
| CB4856                                                                                                                | HS | IV | 2222828 | 2235795 | WBGene00020208 | T04C4.1    | T04C4.1    | -0.0509113128610323 |             |
| AGIWUR5060;AGIWUR9922;AGIWUR18558;AGIWUR18666;AGIWUR22407;AGIWUR24849;AGIWUR26201;AGIWUR34832;AGIWUR35575;AGIWUR38382 |    |    |         |         |                |            |            |                     |             |
| CB4856                                                                                                                | HS | IV | 2237663 | 2242449 | WBGene00019785 | M70.3      | M70.3      | 0.0183999382666009  | AGIWUR21308 |
| CB4856                                                                                                                | HS | IV | 2243060 | 2243699 | WBGene00019784 | M70.2      | M70.2      | -0.0353171507213794 | AGIWUR43594 |
| CB4856                                                                                                                | HS | IV | 2245874 | 2252370 | WBGene00019783 | M70.1      | M70.1      | 0.022583240945659   | AGIWUR44404 |
| CB4856                                                                                                                | HS | IV | 2253004 | 2263704 | WBGene00019786 | M70.4      | M70.4      | 0.213658361698934   | AGIWUR8671  |
| CB4856                                                                                                                | HS | IV | 2264309 | 2275622 | WBGene00019787 | M70.5      | M70.5      | -0.0588744132782573 | AGIWUR41044 |
| CB4856                                                                                                                | HS | IV | 2275864 | 2300351 | WBGene00002990 | lin-1      | C37F5.1    | 0.177204588703784   |             |
| AGIWUR2520;AGIWUR11089;AGIWUR14119;AGIWUR19872;AGIWUR40161;AGIWUR43471                                                |    |    |         |         |                |            |            |                     |             |
| CB4856                                                                                                                | HS | IV | 2304446 | 2306540 | WBGene00021416 | mksr-2     | Y38F2AL.2  | -0.138347003211716  |             |
| AGIWUR19462                                                                                                           |    |    |         |         |                |            |            |                     |             |
| CB4856                                                                                                                | HS | IV | 2307819 | 2314567 | WBGene00006920 | vha-11     | Y38F2AL.3  | 0.13321804589874    |             |
| AGIWUR5573;AGIWUR21184;AGIWUR35616;AGIWUR38366                                                                        |    |    |         |         |                |            |            |                     |             |
| CB4856                                                                                                                | HS | IV | 2314589 | 2315990 | WBGene00006912 | vha-3      | Y38F2AL.4  | 0.337589607622677   |             |
| AGIWUR8240                                                                                                            |    |    |         |         |                |            |            |                     |             |
| CB4856                                                                                                                | HS | IV | 2324058 | 2326739 | WBGene00021415 | nsy-4      | Y38F2AL.1  | -0.179517586283247  |             |
| AGIWUR35241                                                                                                           |    |    |         |         |                |            |            |                     |             |
| CB4856                                                                                                                | HS | IV | 2327126 | 2329640 | WBGene00021417 | nhr-236    | Y38F2AL.5  | -0.0291635095007363 |             |
| AGIWUR33118                                                                                                           |    |    |         |         |                |            |            |                     |             |
| CB4856                                                                                                                | HS | IV | 2330193 | 2331009 | WBGene00021418 | Y38F2AL.6  | Y38F2AL.6  | 0.0897161613194557  |             |
| AGIWUR12369;AGIWUR40782                                                                                               |    |    |         |         |                |            |            |                     |             |
| CB4856                                                                                                                | HS | IV | 2333837 | 2348912 | WBGene00021425 | ppgn-1     | Y38F2AR.7  | -0.142542533543892  |             |
| AGIWUR27269;AGIWUR34081                                                                                               |    |    |         |         |                |            |            |                     |             |
| CB4856                                                                                                                | HS | IV | 2349271 | 2382171 | WBGene00021423 | tftc-1     | Y38F2AR.5  | -0.145020121070687  |             |
| AGIWUR2694;AGIWUR40174                                                                                                |    |    |         |         |                |            |            |                     |             |
| CB4856                                                                                                                | HS | IV | 2384013 | 2388089 | WBGene00021421 | Y38F2AR.3  | Y38F2AR.3  | 0.117744780622296   |             |
| AGIWUR26768;AGIWUR29181;AGIWUR34184                                                                                   |    |    |         |         |                |            |            |                     |             |
| CB4856                                                                                                                | HS | IV | 2388195 | 2388675 | WBGene00021427 | Y38F2AR.9  | Y38F2AR.9  | 0.102119060338066   |             |
| AGIWUR23976;AGIWUR42445                                                                                               |    |    |         |         |                |            |            |                     |             |
| CB4856                                                                                                                | HS | IV | 2389445 | 2390386 | WBGene00021420 | trap-3     | Y38F2AR.2  | -0.118986639258665  |             |
| AGIWUR18279                                                                                                           |    |    |         |         |                |            |            |                     |             |
| CB4856                                                                                                                | HS | IV | 2390821 | 2396263 | WBGene00021419 | eri-5      | Y38F2AR.1  | -0.210691484136721  |             |
| AGIWUR30757                                                                                                           |    |    |         |         |                |            |            |                     |             |
| CB4856                                                                                                                | HS | IV | 2396257 | 2399420 | WBGene00021428 | Y38F2AR.10 | Y38F2AR.10 | -0.012238156268225  |             |
| AGIWUR17742                                                                                                           |    |    |         |         |                |            |            |                     |             |
| CB4856                                                                                                                | HS | IV | 2399515 | 2412410 | WBGene00021430 | Y38F2AR.12 | Y38F2AR.12 | 0.0291666015233525  |             |
| AGIWUR8407;AGIWUR30068                                                                                                |    |    |         |         |                |            |            |                     |             |
| CB4856                                                                                                                | HS | IV | 2432993 | 2436472 | WBGene00016671 | C45G7.4    | C45G7.4    | -0.263339093285293  | AGIWUR18077 |

|                                                                                                |    |    |         |         |                 |            |            |                     |             |
|------------------------------------------------------------------------------------------------|----|----|---------|---------|-----------------|------------|------------|---------------------|-------------|
| CB4856                                                                                         | HS | IV | 2436505 | 2463405 | WBGene00000402  | cdh-10     | C45G7.5    | -0.252625169593556  |             |
| AGIWUR32982;AGIWUR37797                                                                        |    |    |         |         |                 |            |            |                     |             |
| CB4856                                                                                         | HS | IV | 2464456 | 2465401 | WBGene00016670  | ilys-3     | C45G7.3    | 0.421667454792026   | AGIWUR18202 |
| CB4856                                                                                         | HS | IV | 2467681 | 2468810 | WBGene00016669  | ilys-2     | C45G7.2    | 0.409482060847033   | AGIWUR12281 |
| CB4856                                                                                         | HS | IV | 2470414 | 2471449 | WBGene00016668  | ilys-1     | C45G7.1    | 0.151600785146089   | AGIWUR12322 |
| CB4856                                                                                         | HS | IV | 2476700 | 2480218 | WBGene00001705  | grd-16     | Y69A2AL.1  | -0.204883499514562  |             |
| AGIWUR28070                                                                                    |    |    |         |         |                 |            |            |                     |             |
| CB4856                                                                                         | HS | IV | 2482255 | 2484218 | WBGene00044468  | Y69A2AL.2  | Y69A2AL.2  | 0.336417895628569   |             |
| AGIWUR4846;AGIWUR10333;AGIWUR22619                                                             |    |    |         |         |                 |            |            |                     |             |
| CB4856                                                                                         | HS | IV | 2488820 | 2494135 | WBGene00022090  | Y69A2AR.19 | Y69A2AR.19 | 0.101809139416659   |             |
| AGIWUR32158                                                                                    |    |    |         |         |                 |            |            |                     |             |
| CB4856                                                                                         | HS | IV | 2494513 | 2495174 | WBGene00022092  | Y69A2AR.21 | Y69A2AR.21 | -0.0253641964071374 |             |
| AGIWUR3459;AGIWUR6118;AGIWUR16638;AGIWUR29487;AGIWUR29613                                      |    |    |         |         |                 |            |            |                     |             |
| CB4856                                                                                         | HS | IV | 2495735 | 2497683 | WBGene00022089  | Y69A2AR.18 | Y69A2AR.18 | -0.0615923673419232 |             |
| AGIWUR4576;AGIWUR29217;AGIWUR34804                                                             |    |    |         |         |                 |            |            |                     |             |
| CB4856                                                                                         | HS | IV | 2497801 | 2530296 | WBGene00022087  | Y69A2AR.16 | Y69A2AR.16 | -0.140849021000156  |             |
| AGIWUR8327;AGIWUR23283;AGIWUR27495;AGIWUR40391                                                 |    |    |         |         |                 |            |            |                     |             |
| CB4856                                                                                         | HS | IV | 2542326 | 2548719 | WBGene00022086  | spr-3      | Y69A2AR.15 | -0.314251213127647  |             |
| AGIWUR36441                                                                                    |    |    |         |         |                 |            |            |                     |             |
| CB4856                                                                                         | HS | IV | 2549926 | 2551697 | WBGene00022094  | Y69A2AR.23 | Y69A2AR.23 | -0.190527500078986  |             |
| AGIWUR21548                                                                                    |    |    |         |         |                 |            |            |                     |             |
| CB4856                                                                                         | HS | IV | 2551872 | 2557106 | WBGene00022085  | Y69A2AR.14 | Y69A2AR.14 | -0.217032474332301  |             |
| AGIWUR24129                                                                                    |    |    |         |         |                 |            |            |                     |             |
| CB4856                                                                                         | HS | IV | 2563778 | 2564069 | WBGene00022095  | Y69A2AR.24 | Y69A2AR.24 | -0.190389611999739  |             |
| AGIWUR38735                                                                                    |    |    |         |         |                 |            |            |                     |             |
| CB4856                                                                                         | HS | IV | 2565820 | 2568367 | WBGene00022096  | Y69A2AR.25 | Y69A2AR.25 | -0.346003080749457  |             |
| AGIWUR31094                                                                                    |    |    |         |         |                 |            |            |                     |             |
| CB4856                                                                                         | HS | IV | 2568614 | 2572056 | WBGene00022083  | Y69A2AR.12 | Y69A2AR.12 | 0.0432137920230975  |             |
| AGIWUR43136                                                                                    |    |    |         |         |                 |            |            |                     |             |
| CB4856                                                                                         | HS | IV | 2592395 | 2596786 | WBGene00022079  | Y69A2AR.8  | Y69A2AR.8  | 0.0262096035847534  |             |
| AGIWUR43208;AGIWUR44094                                                                        |    |    |         |         |                 |            |            |                     |             |
| CB4856                                                                                         | HS | IV | 2597574 | 2597970 | WBGene000235294 | Y69A2AR.47 | Y69A2AR.47 | -0.136636910708665  |             |
| AGIWUR35460                                                                                    |    |    |         |         |                 |            |            |                     |             |
| CB4856                                                                                         | HS | IV | 2601141 | 2607571 | WBGene00022078  | epg-9      | Y69A2AR.7  | -0.0575479073973835 |             |
| AGIWUR7888;AGIWUR11032;AGIWUR12009;AGIWUR21991;AGIWUR24627;AGIWUR31250;AGIWUR33586;AGIWUR44851 |    |    |         |         |                 |            |            |                     |             |
| CB4856                                                                                         | HS | IV | 2608051 | 2610200 | WBGene00022077  | vamp-7     | Y69A2AR.6  | 0.124545532144987   |             |
| AGIWUR41890                                                                                    |    |    |         |         |                 |            |            |                     |             |
| CB4856                                                                                         | HS | IV | 2610408 | 2612435 | WBGene00022101  | Y69A2AR.32 | Y69A2AR.32 | -0.135522588603967  |             |
| AGIWUR1713;AGIWUR9524;AGIWUR20374;AGIWUR24017;AGIWUR36001;AGIWUR38697                          |    |    |         |         |                 |            |            |                     |             |



|                                                                         |    |    |         |         |                |            |            |                     |
|-------------------------------------------------------------------------|----|----|---------|---------|----------------|------------|------------|---------------------|
| CB4856                                                                  | HS | IV | 2614200 | 2617135 | WBGene00022076 | daao-1     | Y69A2AR.5  | -0.0312762078381912 |
| AGIWUR1766;AGIWUR3255;AGIWUR8311;AGIWUR25091;AGIWUR35754;AGIWUR36807    |    |    |         |         |                |            |            |                     |
| CB4856                                                                  | HS | IV | 2619875 | 2625438 | WBGene00004878 | smf-3      | Y69A2AR.4  | 0.352162074310678   |
| AGIWUR7804                                                              |    |    |         |         |                |            |            |                     |
| CB4856                                                                  | HS | IV | 2626132 | 2628271 | WBGene00003595 | ngn-1      | Y69A2AR.29 | 0.128435370636994   |
| AGIWUR28661                                                             |    |    |         |         |                |            |            |                     |
| CB4856                                                                  | HS | IV | 2636228 | 2641117 | WBGene00003161 | mdf-2      | Y69A2AR.30 | -0.121015409355985  |
| AGIWUR3452;AGIWUR25205;AGIWUR38116;AGIWUR39583                          |    |    |         |         |                |            |            |                     |
| CB4856                                                                  | HS | IV | 2641310 | 2642113 | WBGene00022075 | Y69A2AR.3  | Y69A2AR.3  | 0.0350098179365972  |
| AGIWUR24450                                                             |    |    |         |         |                |            |            |                     |
| CB4856                                                                  | HS | IV | 2642979 | 2650104 | WBGene00004367 | ric-8      | Y69A2AR.2  | -0.050961107625271  |
| AGIWUR22951;AGIWUR44852                                                 |    |    |         |         |                |            |            |                     |
| CB4856                                                                  | HS | IV | 2650384 | 2664003 | WBGene00022100 | Y69A2AR.31 | Y69A2AR.31 | 0.180414308200758   |
| AGIWUR15525                                                             |    |    |         |         |                |            |            |                     |
| CB4856                                                                  | HS | IV | 2667050 | 2672202 | WBGene00022074 | Y69A2AR.1  | Y69A2AR.1  | -0.257220211409543  |
| AGIWUR16654;AGIWUR29046;AGIWUR35364                                     |    |    |         |         |                |            |            |                     |
| CB4856                                                                  | HS | IV | 2673098 | 2675015 | WBGene00022377 | gpx-4      | Y94H6A.4   | -0.0292493235327917 |
| AGIWUR32332                                                             |    |    |         |         |                |            |            |                     |
| CB4856                                                                  | HS | IV | 2676512 | 2678162 | WBGene00022376 | Y94H6A.3   | Y94H6A.3   | 0.084830280609026   |
| AGIWUR1371                                                              |    |    |         |         |                |            |            |                     |
| CB4856                                                                  | HS | IV | 2680098 | 2688808 | WBGene00044651 | egrh-3     | Y94H6A.11  | -0.269221965819707  |
| AGIWUR18045;AGIWUR18215                                                 |    |    |         |         |                |            |            |                     |
| CB4856                                                                  | HS | IV | 2688947 | 2703977 | WBGene00022378 | Y94H6A.5   | Y94H6A.5   | 0.158060989665071   |
| AGIWUR39570                                                             |    |    |         |         |                |            |            |                     |
| CB4856                                                                  | HS | IV | 2704693 | 2707231 | WBGene00006705 | ubc-8      | Y94H6A.6   | -0.277061600642885  |
| AGIWUR17647                                                             |    |    |         |         |                |            |            |                     |
| CB4856                                                                  | HS | IV | 2709942 | 2711374 | WBGene00022382 | Y94H6A.10  | Y94H6A.10  | -0.262451655811635  |
| AGIWUR41705                                                             |    |    |         |         |                |            |            |                     |
| CB4856                                                                  | HS | IV | 2711939 | 2713035 | WBGene00050885 | Y94H6A.12  | Y94H6A.12  | 0.200379974001475   |
| AGIWUR4052                                                              |    |    |         |         |                |            |            |                     |
| CB4856                                                                  | HS | IV | 2713907 | 2716574 | WBGene00022379 | Y94H6A.7   | Y94H6A.7   | 0.0003611778762318  |
| AGIWUR2447;AGIWUR5357;AGIWUR6386;AGIWUR7246                             |    |    |         |         |                |            |            |                     |
| CB4856                                                                  | HS | IV | 2716661 | 2719834 | WBGene00022380 | Y94H6A.8   | Y94H6A.8   | 0.0331633084915151  |
| AGIWUR29445                                                             |    |    |         |         |                |            |            |                     |
| CB4856                                                                  | HS | IV | 2720323 | 2725858 | WBGene00022381 | ubxn-2     | Y94H6A.9   | -0.0572619475623184 |
| AGIWUR14157;AGIWUR22376;AGIWUR23767;AGIWUR25071;AGIWUR28469;AGIWUR30699 |    |    |         |         |                |            |            |                     |
| CB4856                                                                  | HS | IV | 2730252 | 2732404 | WBGene00022375 | Y94H6A.2   | Y94H6A.2   | 1.16763808908748    |
| AGIWUR29436                                                             |    |    |         |         |                |            |            |                     |
| CB4856                                                                  | HS | IV | 2743007 | 2747476 | WBGene00022374 | nhr-277    | Y94H6A.1   | 0.158675899287589   |

|                                                                                                                       |    |    |         |         |                |                    |                               |
|-----------------------------------------------------------------------------------------------------------------------|----|----|---------|---------|----------------|--------------------|-------------------------------|
| AGIWUR28763                                                                                                           |    |    |         |         |                |                    |                               |
| CB4856                                                                                                                | HS | IV | 2751868 | 2753461 | WBGene00044485 | Y54G2A.41          | Y54G2A.41 0.239700004762348   |
| AGIWUR14592;AGIWUR15871;AGIWUR18786;AGIWUR23658;AGIWUR44244                                                           |    |    |         |         |                |                    |                               |
| CB4856                                                                                                                | HS | IV | 2762680 | 2765612 | WBGene00235350 | Y54G2A.77          | Y54G2A.77 -0.116430327263827  |
| AGIWUR18732                                                                                                           |    |    |         |         |                |                    |                               |
| CB4856                                                                                                                | HS | IV | 2765719 | 2771790 | WBGene00021876 | Y54G2A.11          | Y54G2A.11 -0.0397973912236109 |
| AGIWUR7881;AGIWUR8693;AGIWUR10151;AGIWUR12762;AGIWUR13973;AGIWUR16616                                                 |    |    |         |         |                |                    |                               |
| CB4856                                                                                                                | HS | IV | 2777232 | 2782843 | WBGene00021877 | Y54G2A.12          | Y54G2A.12 -0.101119492362701  |
| AGIWUR4693;AGIWUR23522                                                                                                |    |    |         |         |                |                    |                               |
| CB4856                                                                                                                | HS | IV | 2788692 | 2796805 | WBGene00021868 | atln-1 Y54G2A.2    | -0.256038032444049            |
| AGIWUR33912                                                                                                           |    |    |         |         |                |                    |                               |
| CB4856                                                                                                                | HS | IV | 2797061 | 2798573 | WBGene00045397 | Y54G2A.52          | Y54G2A.52 0.0380833690865745  |
| AGIWUR10865;AGIWUR18487;AGIWUR25860;AGIWUR31076;AGIWUR40561;AGIWUR45067                                               |    |    |         |         |                |                    |                               |
| CB4856                                                                                                                | HS | IV | 2799689 | 2801039 | WBGene00021875 | Y54G2A.10          | Y54G2A.10 -0.0924948348377823 |
| AGIWUR7140;AGIWUR12331;AGIWUR26440                                                                                    |    |    |         |         |                |                    |                               |
| CB4856                                                                                                                | HS | IV | 2801902 | 2803240 | WBGene00044487 | Y54G2A.44          | Y54G2A.44 -0.120074275872028  |
| AGIWUR24750;AGIWUR34109                                                                                               |    |    |         |         |                |                    |                               |
| CB4856                                                                                                                | HS | IV | 2803589 | 2804916 | WBGene00021894 | Y54G2A.32          | Y54G2A.32 0.134528736498291   |
| AGIWUR13210                                                                                                           |    |    |         |         |                |                    |                               |
| CB4856                                                                                                                | HS | IV | 2805839 | 2809504 | WBGene00044488 | Y54G2A.45          | Y54G2A.45 0.13387665098235    |
| AGIWUR7243;AGIWUR20787                                                                                                |    |    |         |         |                |                    |                               |
| CB4856                                                                                                                | HS | IV | 2814568 | 2819733 | WBGene00021878 | Y54G2A.13          | Y54G2A.13 -0.0546361877237445 |
| AGIWUR42785                                                                                                           |    |    |         |         |                |                    |                               |
| CB4856                                                                                                                | HS | IV | 2823746 | 2828069 | WBGene00043062 | cllec-80 Y54G2A.39 | 0.174282348941066             |
| AGIWUR35552                                                                                                           |    |    |         |         |                |                    |                               |
| CB4856                                                                                                                | HS | IV | 2831477 | 2832687 | WBGene00044491 | Y54G2A.48          | Y54G2A.48 0.148789162874664   |
| AGIWUR2292;AGIWUR8308;AGIWUR23599;AGIWUR35331;AGIWUR36640                                                             |    |    |         |         |                |                    |                               |
| CB4856                                                                                                                | HS | IV | 2832877 | 2833480 | WBGene00044489 | pudl-1 Y54G2A.46   | 0.148514872734359             |
| AGIWUR15460;AGIWUR22792                                                                                               |    |    |         |         |                |                    |                               |
| CB4856                                                                                                                | HS | IV | 2834816 | 2835357 | WBGene00044490 | pudl-2 Y54G2A.47   | 0.00302276366934517           |
| AGIWUR3206;AGIWUR12409;AGIWUR21422                                                                                    |    |    |         |         |                |                    |                               |
| CB4856                                                                                                                | HS | IV | 2835664 | 2838583 | WBGene00021873 | cllec-82 Y54G2A.8  | 0.507955952098838             |
| AGIWUR28251                                                                                                           |    |    |         |         |                |                    |                               |
| CB4856                                                                                                                | HS | IV | 2838608 | 2839422 | WBGene00043702 | Y54G2A.7           | Y54G2A.7 0.21904090273859     |
| AGIWUR6401;AGIWUR8166;AGIWUR14841;AGIWUR23759;AGIWUR31835;AGIWUR32286;AGIWUR34675;AGIWUR36900;AGIWUR37090;AGIWUR40142 |    |    |         |         |                |                    |                               |
| CB4856                                                                                                                | HS | IV | 2839375 | 2841434 | WBGene00021879 | cllec-83 Y54G2A.14 | 0.0971078371554981            |
| AGIWUR41939                                                                                                           |    |    |         |         |                |                    |                               |
| CB4856                                                                                                                | HS | IV | 2842474 | 2845604 | WBGene00021895 | cllec-84 Y54G2A.33 | -0.287587282591293            |

|                                                             |    |    |         |         |                |                   |                               |
|-------------------------------------------------------------|----|----|---------|---------|----------------|-------------------|-------------------------------|
| AGIWUR29146                                                 |    |    |         |         |                |                   |                               |
| CB4856                                                      | HS | IV | 2846476 | 2851282 | WBGene00044495 | Y54G2A.40         | Y54G2A.40 0.0341752293944482  |
| AGIWUR3193;AGIWUR17597                                      |    |    |         |         |                |                   |                               |
| CB4856                                                      | HS | IV | 2851691 | 2854293 | WBGene00044492 | Y54G2A.49         | Y54G2A.49 -0.0441687160824316 |
| AGIWUR13172;AGIWUR17819;AGIWUR31750;AGIWUR41764;AGIWUR42281 |    |    |         |         |                |                   |                               |
| CB4856                                                      | HS | IV | 2854339 | 2855456 | WBGene00021872 | clec-85 Y54G2A.6  | -0.448976851989819            |
| AGIWUR3905                                                  |    |    |         |         |                |                   |                               |
| CB4856                                                      | HS | IV | 2855607 | 2864843 | WBGene00021881 | Y54G2A.16         | Y54G2A.16 -0.366677434378673  |
| AGIWUR29314                                                 |    |    |         |         |                |                   |                               |
| CB4856                                                      | HS | IV | 2872050 | 2890449 | WBGene00021882 | nprrt-1 Y54G2A.17 | -0.180652154364237            |
| AGIWUR2046;AGIWUR6560;AGIWUR18981;AGIWUR41129               |    |    |         |         |                |                   |                               |
| CB4856                                                      | HS | IV | 2890888 | 2891636 | WBGene00235102 | Y54G2A.75         | Y54G2A.75 -0.0862458521608573 |
| AGIWUR32909                                                 |    |    |         |         |                |                   |                               |
| CB4856                                                      | HS | IV | 2891560 | 2892495 | WBGene00021883 | Y54G2A.18         | Y54G2A.18 -0.1050942886501    |
| AGIWUR14241;AGIWUR28071                                     |    |    |         |         |                |                   |                               |
| CB4856                                                      | HS | IV | 2893819 | 2894730 | WBGene00021884 | Y54G2A.19         | Y54G2A.19 0.163336370958664   |
| AGIWUR2785                                                  |    |    |         |         |                |                   |                               |
| CB4856                                                      | HS | IV | 2896968 | 2900638 | WBGene00021885 | Y54G2A.20         | Y54G2A.20 0.236127265083296   |
| AGIWUR17990                                                 |    |    |         |         |                |                   |                               |
| CB4856                                                      | HS | IV | 2902436 | 2914816 | WBGene00021886 | Y54G2A.21         | Y54G2A.21 0.00109180168383904 |
| AGIWUR473;AGIWUR4090;AGIWUR6409;AGIWUR28153                 |    |    |         |         |                |                   |                               |
| CB4856                                                      | HS | IV | 2918441 | 2919780 | WBGene00044493 | Y54G2A.50         | Y54G2A.50 -0.103229489707767  |
| AGIWUR14616;AGIWUR16703                                     |    |    |         |         |                |                   |                               |
| CB4856                                                      | HS | IV | 2919826 | 2922251 | WBGene00021887 | fbxc-45 Y54G2A.22 | 0.018444058239476             |
| AGIWUR4439                                                  |    |    |         |         |                |                   |                               |
| CB4856                                                      | HS | IV | 2922591 | 2925691 | WBGene00006708 | ubc-13 Y54G2A.31  | 0.135133897247069             |
| AGIWUR3658                                                  |    |    |         |         |                |                   |                               |
| CB4856                                                      | HS | IV | 2927515 | 2928421 | WBGene00021888 | Y54G2A.23         | Y54G2A.23 -0.191729370373618  |
| AGIWUR8295                                                  |    |    |         |         |                |                   |                               |
| CB4856                                                      | HS | IV | 2931403 | 2936843 | WBGene00021870 | samt-1 Y54G2A.4   | -0.18886837481636             |
| AGIWUR10505                                                 |    |    |         |         |                |                   |                               |
| CB4856                                                      | HS | IV | 2937990 | 2939862 | WBGene00021889 | Y54G2A.24         | Y54G2A.24 -0.270873314935981  |
| AGIWUR20311                                                 |    |    |         |         |                |                   |                               |
| CB4856                                                      | HS | IV | 2960123 | 2964395 | WBGene00021897 | ser-6 Y54G2A.35   | 0.223462546420144             |
| AGIWUR7278                                                  |    |    |         |         |                |                   |                               |
| CB4856                                                      | HS | IV | 2964365 | 2978461 | WBGene00002243 | lad-2 Y54G2A.25   | -0.0545422308481172           |
| AGIWUR29465;AGIWUR35601;AGIWUR41610                         |    |    |         |         |                |                   |                               |
| CB4856                                                      | HS | IV | 2986104 | 2995573 | WBGene00021890 | Y54G2A.26         | Y54G2A.26 -0.120658296805004  |
| AGIWUR29419;AGIWUR31009;AGIWUR39038                         |    |    |         |         |                |                   |                               |

|                                                                                                                                              |    |    |         |         |                 |           |           |                     |
|----------------------------------------------------------------------------------------------------------------------------------------------|----|----|---------|---------|-----------------|-----------|-----------|---------------------|
| CB4856                                                                                                                                       | HS | IV | 2998877 | 2999485 | WBGene00021891  | Y54G2A.27 | Y54G2A.27 | 0.136511246937594   |
| AGIWUR32480                                                                                                                                  |    |    |         |         |                 |           |           |                     |
| CB4856                                                                                                                                       | HS | IV | 3000541 | 3008892 | WBGene000219425 | Y54G2A.73 | Y54G2A.73 | -0.130683692879862  |
| AGIWUR14853;AGIWUR19329;AGIWUR28296;AGIWUR28643;AGIWUR37339                                                                                  |    |    |         |         |                 |           |           |                     |
| CB4856                                                                                                                                       | HS | IV | 3012587 | 3014440 | WBGene00021869  | vrp-1     | Y54G2A.3  | 0.178351083563971   |
| AGIWUR26458                                                                                                                                  |    |    |         |         |                 |           |           |                     |
| CB4856                                                                                                                                       | HS | IV | 3019738 | 3022315 | WBGene00003008  | lin-22    | Y54G2A.1  | -0.0842406742580604 |
| AGIWUR15555;AGIWUR17357;AGIWUR23870                                                                                                          |    |    |         |         |                 |           |           |                     |
| CB4856                                                                                                                                       | HS | IV | 3023403 | 3028942 | WBGene00021893  | ndnf-1    | Y54G2A.29 | -0.210939998063988  |
| AGIWUR24891                                                                                                                                  |    |    |         |         |                 |           |           |                     |
| CB4856                                                                                                                                       | HS | IV | 3032578 | 3050102 | WBGene00022069  | eel-1     | Y67D8C.5  | 0.0853426740675856  |
| AGIWUR9265;AGIWUR12793;AGIWUR16370;AGIWUR19875;AGIWUR25410;AGIWUR32832;AGIWUR34877;AGIWUR36944                                               |    |    |         |         |                 |           |           |                     |
| CB4856                                                                                                                                       | HS | IV | 3053730 | 3062053 | WBGene00022067  | Y67D8C.3  | Y67D8C.3  | -0.123751199953161  |
| AGIWUR20090;AGIWUR34714                                                                                                                      |    |    |         |         |                 |           |           |                     |
| CB4856                                                                                                                                       | HS | IV | 3062524 | 3063366 | WBGene00022070  | Y67D8C.6  | Y67D8C.6  | -0.146185980903557  |
| AGIWUR18899                                                                                                                                  |    |    |         |         |                 |           |           |                     |
| CB4856                                                                                                                                       | HS | IV | 3065568 | 3066934 | WBGene00022071  | Y67D8C.7  | Y67D8C.7  | -0.119053972631578  |
| AGIWUR3480;AGIWUR14950;AGIWUR36360                                                                                                           |    |    |         |         |                 |           |           |                     |
| CB4856                                                                                                                                       | HS | IV | 3067848 | 3069876 | WBGene00022072  | cpg-9     | Y67D8C.8  | 0.0344442851832918  |
| AGIWUR798;AGIWUR6063;AGIWUR12656;AGIWUR20171;AGIWUR23004;AGIWUR23055;AGIWUR23636;AGIWUR24578;AGIWUR25102;AGIWUR33268;AGIWUR38111;AGIWUR39434 |    |    |         |         |                 |           |           |                     |
| CB4856                                                                                                                                       | HS | IV | 3070134 | 3076307 | WBGene000235279 | Y67D8C.22 | Y67D8C.22 | 0.19139995046339    |
| AGIWUR11754                                                                                                                                  |    |    |         |         |                 |           |           |                     |
| CB4856                                                                                                                                       | HS | IV | 3077466 | 3086923 | WBGene00022073  | Y67D8C.9  | Y67D8C.9  | -0.0381013927350526 |
| AGIWUR128;AGIWUR18909;AGIWUR22466;AGIWUR23929;AGIWUR24530;AGIWUR24619;AGIWUR26816;AGIWUR34605;AGIWUR35226;AGIWUR38622;AGIWUR39640            |    |    |         |         |                 |           |           |                     |
| CB4856                                                                                                                                       | HS | IV | 3103157 | 3133147 | WBGene00003153  | mca-3     | Y67D8C.10 | -0.112670093437583  |
| AGIWUR13343;AGIWUR25220                                                                                                                      |    |    |         |         |                 |           |           |                     |
| CB4856                                                                                                                                       | HS | IV | 3139833 | 3146723 | WBGene00020729  | T23E1.2   | T23E1.2   | 0.208852007267374   |
| AGIWUR8351;AGIWUR39712                                                                                                                       |    |    |         |         |                 |           |           |                     |
| CB4856                                                                                                                                       | HS | IV | 3146894 | 3148882 | WBGene00020730  | T23E1.3   | T23E1.3   | 0.190222551249274   |
| AGIWUR38188                                                                                                                                  |    |    |         |         |                 |           |           |                     |
| CB4856                                                                                                                                       | HS | IV | 3151361 | 3155987 | WBGene00020728  | T23E1.1   | T23E1.1   | -0.0166814035610265 |
| AGIWUR1768;AGIWUR6637;AGIWUR10515;AGIWUR12603;AGIWUR17243;AGIWUR18643;AGIWUR19244;AGIWUR27038;AGIWUR33531;AGIWUR33996;AGIWUR38671            |    |    |         |         |                 |           |           |                     |
| CB4856                                                                                                                                       | HS | IV | 3169946 | 3172610 | WBGene00022061  | Y67D8B.1  | Y67D8B.1  | 0.159138685230811   |
| AGIWUR30463                                                                                                                                  |    |    |         |         |                 |           |           |                     |
| CB4856                                                                                                                                       | HS | IV | 3173550 | 3176115 | WBGene00022063  | Y67D8B.4  | Y67D8B.4  | -0.0533164779736524 |
| AGIWUR12437;AGIWUR15848;AGIWUR18862;AGIWUR23118;AGIWUR31340;AGIWUR32394;AGIWUR33681;AGIWUR36083;AGIWUR39191                                  |    |    |         |         |                 |           |           |                     |
| CB4856                                                                                                                                       | HS | IV | 3186080 | 3191562 | WBGene00022062  | Y67D8B.2  | Y67D8B.2  | 0.0479077823986018  |

|                                                                                                             |    |    |         |         |                |          |          |                     |             |
|-------------------------------------------------------------------------------------------------------------|----|----|---------|---------|----------------|----------|----------|---------------------|-------------|
| AGIWUR9123;AGIWUR35608                                                                                      |    |    |         |         |                |          |          |                     |             |
| CB4856                                                                                                      | HS | IV | 3202333 | 3203861 | WBGene00022064 | Y67D8B.5 | Y67D8B.5 | 0.121552859354534   |             |
| AGIWUR29258                                                                                                 |    |    |         |         |                |          |          |                     |             |
| CB4856                                                                                                      | HS | IV | 3204559 | 3210582 | WBGene00004240 | puf-4    | M4.2     | 0.255068902259655   | AGIWUR19536 |
| CB4856                                                                                                      | HS | IV | 3213764 | 3219825 | WBGene00019766 | M4.1     | M4.1     | -0.029973079192132  | AGIWUR39578 |
| CB4856                                                                                                      | HS | IV | 3222440 | 3252601 | WBGene00022059 | Y67D8A.2 | Y67D8A.2 | -0.338437236000409  |             |
| AGIWUR4774;AGIWUR19074;AGIWUR21542;AGIWUR25290                                                              |    |    |         |         |                |          |          |                     |             |
| CB4856                                                                                                      | HS | IV | 3253263 | 3254543 | WBGene00022060 | dmd-9    | Y67D8A.3 | -0.387276462981763  |             |
| AGIWUR7989                                                                                                  |    |    |         |         |                |          |          |                     |             |
| CB4856                                                                                                      | HS | IV | 3258910 | 3263489 | WBGene00020831 | T26C12.1 | T26C12.1 | 0.123510971474499   |             |
| AGIWUR7690;AGIWUR10912;AGIWUR32472                                                                          |    |    |         |         |                |          |          |                     |             |
| CB4856                                                                                                      | HS | IV | 3263851 | 3265372 | WBGene00020832 | T26C12.2 | T26C12.2 | 0.0705732348079948  |             |
| AGIWUR6073                                                                                                  |    |    |         |         |                |          |          |                     |             |
| CB4856                                                                                                      | HS | IV | 3266404 | 3267677 | WBGene00044469 | clcc-173 | T26C12.6 | -0.289370250227979  |             |
| AGIWUR20423                                                                                                 |    |    |         |         |                |          |          |                     |             |
| CB4856                                                                                                      | HS | IV | 3269527 | 3273397 | WBGene00020833 | T26C12.3 | T26C12.3 | -0.233670220846207  |             |
| AGIWUR1492;AGIWUR16675;AGIWUR27212;AGIWUR38075                                                              |    |    |         |         |                |          |          |                     |             |
| CB4856                                                                                                      | HS | IV | 3282885 | 3289337 | WBGene00001548 | gcy-23   | T26C12.4 | 0.146214086791915   |             |
| AGIWUR42079                                                                                                 |    |    |         |         |                |          |          |                     |             |
| CB4856                                                                                                      | HS | IV | 3292120 | 3294633 | WBGene00021089 | W08E12.8 | W08E12.8 | -0.353256249919625  |             |
| AGIWUR25114                                                                                                 |    |    |         |         |                |          |          |                     |             |
| CB4856                                                                                                      | HS | IV | 3295135 | 3297225 | WBGene00021088 | W08E12.7 | W08E12.7 | 0.112512550619169   |             |
| AGIWUR209;AGIWUR14640                                                                                       |    |    |         |         |                |          |          |                     |             |
| CB4856                                                                                                      | HS | IV | 3298629 | 3299687 | WBGene00021087 | W08E12.6 | W08E12.6 | -0.138516091492808  |             |
| AGIWUR36833                                                                                                 |    |    |         |         |                |          |          |                     |             |
| CB4856                                                                                                      | HS | IV | 3305898 | 3306541 | WBGene00021083 | W08E12.2 | W08E12.2 | 0.0871966353985805  |             |
| AGIWUR27318                                                                                                 |    |    |         |         |                |          |          |                     |             |
| CB4856                                                                                                      | HS | IV | 3306664 | 3307563 | WBGene00021090 | W08E12.9 | W08E12.9 | -0.217861490670421  |             |
| AGIWUR887                                                                                                   |    |    |         |         |                |          |          |                     |             |
| CB4856                                                                                                      | HS | IV | 3311276 | 3313180 | WBGene00021082 | zip-11   | W08E12.1 | -0.151329036858684  |             |
| AGIWUR24069                                                                                                 |    |    |         |         |                |          |          |                     |             |
| CB4856                                                                                                      | HS | IV | 3320013 | 3324950 | WBGene00018325 | F42A6.3  | F42A6.3  | 0.00511002728308085 | AGIWUR41089 |
| CB4856                                                                                                      | HS | IV | 3334042 | 3336868 | WBGene00018328 | F42A6.6  | F42A6.6  | -0.251237058619289  | AGIWUR33815 |
| CB4856                                                                                                      | HS | IV | 3336927 | 3338867 | WBGene00001999 | hrp-1    | F42A6.7  | -0.198557273134984  |             |
| AGIWUR11495;AGIWUR13108;AGIWUR16261;AGIWUR18729;AGIWUR24759;AGIWUR30889;AGIWUR35196;AGIWUR42971;AGIWUR43704 |    |    |         |         |                |          |          |                     |             |
| CB4856                                                                                                      | HS | IV | 3339792 | 3340953 | WBGene00018329 | fbxa-130 | F42A6.8  | -0.0509229466047501 |             |
| AGIWUR41895                                                                                                 |    |    |         |         |                |          |          |                     |             |
| CB4856                                                                                                      | HS | IV | 3341470 | 3341939 | WBGene00018324 | F42A6.2  | F42A6.2  | -0.288150653131979  | AGIWUR28289 |
| CB4856                                                                                                      | HS | IV | 3342519 | 3350027 | WBGene00018330 | elks-1   | F42A6.9  | 0.269920968838748   | AGIWUR3955  |

|                                     |    |    |         |         |                 |           |           |                     |             |
|-------------------------------------|----|----|---------|---------|-----------------|-----------|-----------|---------------------|-------------|
| CB4856                              | HS | IV | 3363553 | 3366079 | WBGene00021953  | Y55H10A.2 | Y55H10A.2 | -0.0590113448811724 |             |
| AGIWUR44245                         |    |    |         |         |                 |           |           |                     |             |
| CB4856                              | HS | IV | 3369197 | 3373467 | WBGene00021952  | vha-19    | Y55H10A.1 | 0.223668530070352   |             |
| AGIWUR27642                         |    |    |         |         |                 |           |           |                     |             |
| CB4856                              | HS | IV | 3373387 | 3378130 | WBGene00015249  | otub-4    | B0546.2   | -0.113654899274114  |             |
| AGIWUR36668;AGIWUR40143             |    |    |         |         |                 |           |           |                     |             |
| CB4856                              | HS | IV | 3382949 | 3384147 | WBGene00015251  | B0546.4   | B0546.4   | -0.0609512012202309 | AGIWUR8456  |
| CB4856                              | HS | IV | 3385903 | 3386904 | WBGene00015248  | mai-2     | B0546.1   | -0.0926829978303996 | AGIWUR23582 |
| CB4856                              | HS | IV | 3396581 | 3399123 | WBGene00001119  | dyf-3     | C04C3.5   | -0.0930507138845229 | AGIWUR32839 |
| CB4856                              | HS | IV | 3399672 | 3403904 | WBGene00015413  | pdhb-1    | C04C3.3   | 0.0409358108444007  |             |
| AGIWUR9048;AGIWUR21733              |    |    |         |         |                 |           |           |                     |             |
| CB4856                              | HS | IV | 3415683 | 3419234 | WBGene00015412  | lgc-9     | C04C3.2   | 0.0756468994455801  | AGIWUR16793 |
| CB4856                              | HS | IV | 3419813 | 3422607 | WBGene00015416  | C04C3.6   | C04C3.6   | 0.296898146443032   |             |
| AGIWUR7655;AGIWUR10839;AGIWUR23041  |    |    |         |         |                 |           |           |                     |             |
| CB4856                              | HS | IV | 3428900 | 3430327 | WBGene00015411  | srz-60    | C04C3.1   | -0.244206834148779  | AGIWUR41151 |
| CB4856                              | HS | IV | 3430310 | 3432470 | WBGene000219646 | linc-89   | C04C3.15  | -0.151365847672346  |             |
| AGIWUR39779                         |    |    |         |         |                 |           |           |                     |             |
| CB4856                              | HS | IV | 3436319 | 3437878 | WBGene00021033  | srz-32    | W05E7.2   | 0.0305372410794877  |             |
| AGIWUR8896;AGIWUR37518;AGIWUR39643  |    |    |         |         |                 |           |           |                     |             |
| CB4856                              | HS | IV | 3438312 | 3439503 | WBGene00001702  | grd-13    | W05E7.3   | 0.0270440173024724  | AGIWUR1917  |
| CB4856                              | HS | IV | 3439655 | 3440453 | WBGene00001692  | grd-3     | W05E7.1   | -0.361644611342545  |             |
| AGIWUR6630;AGIWUR31335              |    |    |         |         |                 |           |           |                     |             |
| CB4856                              | HS | IV | 3441055 | 3441770 | WBGene00001699  | grd-10    | F09D12.1  | 0.0282126248157049  |             |
| AGIWUR27659                         |    |    |         |         |                 |           |           |                     |             |
| CB4856                              | HS | IV | 3442303 | 3444201 | WBGene00017281  | F09D12.2  | F09D12.2  | 0.0633457630991305  |             |
| AGIWUR38734                         |    |    |         |         |                 |           |           |                     |             |
| CB4856                              | HS | IV | 3444914 | 3446528 | WBGene00019049  | F58E2.5   | F58E2.5   | -0.145357056232113  | AGIWUR34019 |
| CB4856                              | HS | IV | 3447216 | 3448708 | WBGene00023302  | F58E2.6   | F58E2.6   | 0.204842436444556   | AGIWUR18347 |
| CB4856                              | HS | IV | 3453608 | 3454788 | WBGene00019051  | srz-23    | F58E2.9   | 0.0305882851455266  | AGIWUR34738 |
| CB4856                              | HS | IV | 3455893 | 3457113 | WBGene00019050  | srz-88    | F58E2.7   | -0.0327012760135945 |             |
| AGIWUR19533;AGIWUR37029             |    |    |         |         |                 |           |           |                     |             |
| CB4856                              | HS | IV | 3458600 | 3460440 | WBGene00023481  | srz-22    | F58E2.10  | 0.156631289208559   |             |
| AGIWUR42395                         |    |    |         |         |                 |           |           |                     |             |
| CB4856                              | HS | IV | 3462027 | 3462929 | WBGene00023303  | F58E2.8   | F58E2.8   | 0.103351413331518   | AGIWUR12004 |
| CB4856                              | HS | IV | 3463567 | 3466276 | WBGene00019048  | F58E2.4   | F58E2.4   | 0.0544763220045574  |             |
| AGIWUR16957;AGIWUR18621;AGIWUR27185 |    |    |         |         |                 |           |           |                     |             |
| CB4856                              | HS | IV | 3467430 | 3469828 | WBGene00019047  | F58E2.3   | F58E2.3   | 0.0679966765246194  | AGIWUR6323  |
| CB4856                              | HS | IV | 3470042 | 3470711 | WBGene00019046  | F58E2.2   | F58E2.2   | 0.167182673991484   | AGIWUR15414 |
| CB4856                              | HS | IV | 3471563 | 3473584 | WBGene00023301  | F58E2.1   | F58E2.1   | -0.162257191380306  |             |

|                                                           |    |    |         |         |                |           |           |                     |                     |
|-----------------------------------------------------------|----|----|---------|---------|----------------|-----------|-----------|---------------------|---------------------|
| AGIWUR9201;AGIWUR12704                                    |    |    |         |         |                |           |           |                     |                     |
| CB4856                                                    | HS | IV | 3477392 | 3479011 | WBGene00015656 | srz-70    | C09G12.6  |                     | -0.313246077097181  |
| AGIWUR23116                                               |    |    |         |         |                |           |           |                     |                     |
| CB4856                                                    | HS | IV | 3479335 | 3479730 | WBGene00015655 | C09G12.5  | C09G12.5  |                     | -0.332959470530831  |
| AGIWUR37214                                               |    |    |         |         |                |           |           |                     |                     |
| CB4856                                                    | HS | IV | 3480011 | 3481860 | WBGene00023474 | srz-37    | C09G12.16 |                     | 0.203509432785367   |
| AGIWUR18826;AGIWUR38245                                   |    |    |         |         |                |           |           |                     |                     |
| CB4856                                                    | HS | IV | 3482112 | 3482565 | WBGene00023476 | srz-55    | C09G12.14 |                     | -0.0390294049593236 |
| AGIWUR278;AGIWUR16470;AGIWUR33376;AGIWUR34469             |    |    |         |         |                |           |           |                     |                     |
| CB4856                                                    | HS | IV | 3482895 | 3484706 | WBGene00023463 | srz-82    | C09G12.11 |                     | -0.28245009373172   |
| AGIWUR5025;AGIWUR33887                                    |    |    |         |         |                |           |           |                     |                     |
| CB4856                                                    | HS | IV | 3485316 | 3487105 | WBGene00023465 | srz-81    | C09G12.13 |                     | -0.0927299625409761 |
| AGIWUR5334;AGIWUR17762                                    |    |    |         |         |                |           |           |                     |                     |
| CB4856                                                    | HS | IV | 3487524 | 3489089 | WBGene00015654 | srz-77    | C09G12.4  |                     | 0.226960596296031   |
| AGIWUR30868                                               |    |    |         |         |                |           |           |                     |                     |
| CB4856                                                    | HS | IV | 3489858 | 3491519 | WBGene00023464 | srz-80    | C09G12.12 |                     | -0.207665252887505  |
| AGIWUR1603                                                |    |    |         |         |                |           |           |                     |                     |
| CB4856                                                    | HS | IV | 3491777 | 3493216 | WBGene00015653 | srz-78    | C09G12.3  |                     | -0.0744337718254897 |
| AGIWUR40657                                               |    |    |         |         |                |           |           |                     |                     |
| CB4856                                                    | HS | IV | 3493610 | 3495179 | WBGene00015652 | srz-79    | C09G12.2  |                     | -0.239521125088942  |
| AGIWUR2191                                                |    |    |         |         |                |           |           |                     |                     |
| CB4856                                                    | HS | IV | 3495296 | 3496440 | WBGene00044470 | C09G12.17 | C09G12.17 |                     | -0.0297385064170177 |
| AGIWUR671;AGIWUR27248;AGIWUR36976;AGIWUR39683;AGIWUR40123 |    |    |         |         |                |           |           |                     |                     |
| CB4856                                                    | HS | IV | 3498218 | 3503912 | WBGene00015651 | ceh-53    | C09G12.1  |                     | 0.0392201801077992  |
| AGIWUR21847                                               |    |    |         |         |                |           |           |                     |                     |
| CB4856                                                    | HS | IV | 3504444 | 3506115 | WBGene00023462 | srz-83    | C09G12.10 |                     | -0.151039103575237  |
| AGIWUR26431;AGIWUR37625                                   |    |    |         |         |                |           |           |                     |                     |
| CB4856                                                    | HS | IV | 3506328 | 3509527 | WBGene00000424 | ced-10    | C09G12.8  |                     | -0.193363132846001  |
| AGIWUR21339;AGIWUR26580;AGIWUR27559                       |    |    |         |         |                |           |           |                     |                     |
| CB4856                                                    | HS | IV | 3510046 | 3514572 | WBGene00015658 | tsg-101   | C09G12.9  |                     | -0.0483694185663719 |
| AGIWUR3762;AGIWUR5733;AGIWUR14214                         |    |    |         |         |                |           |           |                     |                     |
| CB4856                                                    | HS | IV | 3516819 | 3526602 | WBGene00006769 | unc-33    | Y37E11C.1 |                     | -0.186120776475784  |
| AGIWUR33833                                               |    |    |         |         |                |           |           |                     |                     |
| CB4856                                                    | HS | IV | 3527354 | 3532521 | WBGene00019778 | M57.2     | M57.2     | -0.0288767366123057 | AGIWUR38368         |
| CB4856                                                    | HS | IV | 3543628 | 3547600 | WBGene00015038 | nstp-6    | B0212.4   | 0.240346536919574   | AGIWUR32216         |
| CB4856                                                    | HS | IV | 3551090 | 3557431 | WBGene00003889 | osm-9     | B0212.5   | -0.0708563281632424 | AGIWUR16919         |
| CB4856                                                    | HS | IV | 3565201 | 3567814 | WBGene00015036 | sre-5     | B0212.2   | -0.0721666820386613 | AGIWUR39523         |
| CB4856                                                    | HS | IV | 3568979 | 3577630 | WBGene00015035 | otpl-1    | B0212.1   | 0.0231983741273689  |                     |
| AGIWUR6709;AGIWUR25191                                    |    |    |         |         |                |           |           |                     |                     |

|                                                                       |    |         |         |                |            |            |                     |             |
|-----------------------------------------------------------------------|----|---------|---------|----------------|------------|------------|---------------------|-------------|
| CB4856 HS                                                             | IV | 3578937 | 3581020 | WBGene00021374 | Y37E11B.1  | Y37E11B.1  | -0.022626634829372  |             |
| AGIWUR42712                                                           |    |         |         |                |            |            |                     |             |
| CB4856 HS                                                             | IV | 3580970 | 3582909 | WBGene00021376 | blos-7     | Y37E11B.3  | -0.280766097956842  |             |
| AGIWUR24972                                                           |    |         |         |                |            |            |                     |             |
| CB4856 HS                                                             | IV | 3584314 | 3593615 | WBGene00006383 | taf-2      | Y37E11B.4  | -0.135742656432527  |             |
| AGIWUR40540                                                           |    |         |         |                |            |            |                     |             |
| CB4856 HS                                                             | IV | 3593960 | 3598552 | WBGene00021377 | Y37E11B.5  | Y37E11B.5  | 0.0849046277123855  |             |
| AGIWUR27479;AGIWUR36703                                               |    |         |         |                |            |            |                     |             |
| CB4856 HS                                                             | IV | 3598656 | 3599299 | WBGene00021378 | Y37E11B.6  | Y37E11B.6  | -0.0979164429064134 |             |
| AGIWUR32299                                                           |    |         |         |                |            |            |                     |             |
| CB4856 HS                                                             | IV | 3599497 | 3600164 | WBGene00021379 | Y37E11B.7  | Y37E11B.7  | 0.21919778760878    |             |
| AGIWUR1502;AGIWUR9722;AGIWUR10223;AGIWUR10260;AGIWUR10569;AGIWUR32668 |    |         |         |                |            |            |                     |             |
| CB4856 HS                                                             | IV | 3601735 | 3603401 | WBGene00021380 | Y37E11B.9  | Y37E11B.9  | -0.100717326611425  |             |
| AGIWUR23524                                                           |    |         |         |                |            |            |                     |             |
| CB4856 HS                                                             | IV | 3603550 | 3606466 | WBGene00021381 | Y37E11B.10 | Y37E11B.10 |                     |             |
| -0.00970863333864003 AGIWUR4295;AGIWUR39675                           |    |         |         |                |            |            |                     |             |
| CB4856 HS                                                             | IV | 3606784 | 3609229 | WBGene00002188 | kgb-2      | ZC416.4    | -0.101351102225291  | AGIWUR24635 |
| CB4856 HS                                                             | IV | 3609218 | 3613072 | WBGene00022610 | ZC416.6    | ZC416.6    | 0.269594069420895   | AGIWUR9980  |
| CB4856 HS                                                             | IV | 3613934 | 3624697 | WBGene00000481 | cha-1      | ZC416.8    | -0.241708500408288  | AGIWUR11212 |
| CB4856 HS                                                             | IV | 3633619 | 3635472 | WBGene00022609 | ZC416.2    | ZC416.2    | 0.0238312512240357  | AGIWUR44932 |
| CB4856 HS                                                             | IV | 3637079 | 3640265 | WBGene00022608 | madf-9     | ZC416.1    | -0.0467625049864973 |             |
| AGIWUR25395;AGIWUR25919                                               |    |         |         |                |            |            |                     |             |
| CB4856 HS                                                             | IV | 3645166 | 3648684 | WBGene00016987 | CC8.2      | CC8.2      | -0.101996872157482  | AGIWUR24618 |
| CB4856 HS                                                             | IV | 3658877 | 3668703 | WBGene00021362 | Y37E11AL.6 | Y37E11AL.6 | -0.0718183781566184 |             |
| AGIWUR14654;AGIWUR28359                                               |    |         |         |                |            |            |                     |             |
| CB4856 HS                                                             | IV | 3683537 | 3686865 | WBGene00003129 | map-1      | Y37E11AL.7 | 0.138161918061435   |             |
| AGIWUR16605                                                           |    |         |         |                |            |            |                     |             |
| CB4856 HS                                                             | IV | 3687565 | 3694837 | WBGene00021363 | taf-6.2    | Y37E11AL.8 | -0.135297970198323  |             |
| AGIWUR18124                                                           |    |         |         |                |            |            |                     |             |
| CB4856 HS                                                             | IV | 3694905 | 3698436 | WBGene00021359 | Y37E11AL.3 | Y37E11AL.3 | 0.0229903104638698  |             |
| AGIWUR8174;AGIWUR10767;AGIWUR17784                                    |    |         |         |                |            |            |                     |             |
| CB4856 HS                                                             | IV | 3698501 | 3699722 | WBGene00021358 | Y37E11AL.2 | Y37E11AL.2 | 0.031472358466111   |             |
| AGIWUR187                                                             |    |         |         |                |            |            |                     |             |
| CB4856 HS                                                             | IV | 3699804 | 3700654 | WBGene00021364 | Y37E11AL.9 | Y37E11AL.9 | -0.0617780089631177 |             |
| AGIWUR38046                                                           |    |         |         |                |            |            |                     |             |
| CB4856 HS                                                             | IV | 3709515 | 3715381 | WBGene00021357 | Y37E11AL.1 | Y37E11AL.1 | -0.0219038952964015 |             |
| AGIWUR20687                                                           |    |         |         |                |            |            |                     |             |
| CB4856 HS                                                             | IV | 3715782 | 3722790 | WBGene00021367 | Y37E11AM.3 | Y37E11AM.3 | -0.201453458748101  |             |
| AGIWUR3608;AGIWUR8546;AGIWUR9320;AGIWUR16402                          |    |         |         |                |            |            |                     |             |



|                                                                                   |                 |                |            |            |                     |
|-----------------------------------------------------------------------------------|-----------------|----------------|------------|------------|---------------------|
| CB4856 HS IV                                                                      | 3722886 3725461 | WBGene00021366 | Y37E11AM.2 | Y37E11AM.2 |                     |
| -0.000354637805322966                                                             | AGIWUR29009     |                |            |            |                     |
| CB4856 HS IV                                                                      | 3726112 3735495 | WBGene00021365 | smg1-2     | Y37E11AM.1 | 0.142117855704742   |
| AGIWUR41488                                                                       |                 |                |            |            |                     |
| CB4856 HS IV                                                                      | 3735845 3738917 | WBGene00021370 | nape-2     | Y37E11AR.3 | 0.175438949908223   |
| AGIWUR1805;AGIWUR6459                                                             |                 |                |            |            |                     |
| CB4856 HS IV                                                                      | 3739524 3740876 | WBGene00021371 | nape-1     | Y37E11AR.4 | -0.129055656000334  |
| AGIWUR1499;AGIWUR10188                                                            |                 |                |            |            |                     |
| CB4856 HS IV                                                                      | 3744048 3747655 | WBGene00021369 | siah-1     | Y37E11AR.2 | -0.521170528631991  |
| AGIWUR32287                                                                       |                 |                |            |            |                     |
| CB4856 HS IV                                                                      | 3748210 3751101 | WBGene00021372 | ugt-45     | Y37E11AR.5 | 0.0592014130689975  |
| AGIWUR35655                                                                       |                 |                |            |            |                     |
| CB4856 HS IV                                                                      | 3752612 3755419 | WBGene00021373 | Y37E11AR.7 | Y37E11AR.7 |                     |
| -0.00816059776915523                                                              | AGIWUR15651     |                |            |            |                     |
| CB4856 HS IV                                                                      | 3756242 3759910 | WBGene00021368 | best-20    | Y37E11AR.1 | -0.139519194646585  |
| AGIWUR14000                                                                       |                 |                |            |            |                     |
| CB4856 HS IV                                                                      | 3761192 3766826 | WBGene00006869 | vab-2      | Y37E11AR.6 | -0.118437270782641  |
| AGIWUR5528                                                                        |                 |                |            |            |                     |
| CB4856 HS IV                                                                      | 3784358 3794044 | WBGene00019546 | glct-6     | W07G9.2    | -0.0250368211356671 |
| AGIWUR20512;AGIWUR38088                                                           |                 |                |            |            |                     |
| CB4856 HS IV                                                                      | 3794767 3796267 | WBGene00019545 | K09B3.1    | K09B3.1    | -0.0730488710964456 |
| AGIWUR2928;AGIWUR10590;AGIWUR15949;AGIWUR18365;AGIWUR32674;AGIWUR43271            |                 |                |            |            |                     |
| CB4856 HS IV                                                                      | 3796306 3800461 | WBGene00003884 | osm-3      | M02B7.3    | -0.157097010753821  |
|                                                                                   |                 |                |            |            | AGIWUR1662          |
| CB4856 HS IV                                                                      | 3801864 3803426 | WBGene00019725 | algn-14    | M02B7.4    | -0.0554807890111491 |
|                                                                                   |                 |                |            |            | AGIWUR4303          |
| CB4856 HS IV                                                                      | 3803581 3804949 | WBGene00019724 | M02B7.2    | M02B7.2    | -0.0480870432454834 |
| AGIWUR13365;AGIWUR36768                                                           |                 |                |            |            |                     |
| CB4856 HS IV                                                                      | 3806703 3807190 | WBGene00044690 | M02B7.7    | M02B7.7    | -0.142038626333616  |
|                                                                                   |                 |                |            |            | AGIWUR2282          |
| CB4856 HS IV                                                                      | 3807870 3819328 | WBGene00019726 | bris-1     | M02B7.5    | -0.153098067658512  |
| AGIWUR3769;AGIWUR15598;AGIWUR33890                                                |                 |                |            |            |                     |
| CB4856 HS IV                                                                      | 3839720 3841628 | WBGene00017906 | F28F9.2    | F28F9.2    | -0.221768244489013  |
|                                                                                   |                 |                |            |            | AGIWUR21998         |
| CB4856 HS IV                                                                      | 3855843 3861552 | WBGene00006970 | zag-1      | F28F9.1    | -0.0863488572901492 |
|                                                                                   |                 |                |            |            | AGIWUR16716         |
| CB4856 HS IV                                                                      | 3862129 3865042 | WBGene00000009 | aat-8      | F28F9.4    | 0.122186066315825   |
|                                                                                   |                 |                |            |            | AGIWUR6881          |
| CB4856 HS IV                                                                      | 3867147 3871842 | WBGene00018144 | F37C4.4    | F37C4.4    | 0.0519377717690084  |
| AGIWUR1949;AGIWUR44847                                                            |                 |                |            |            |                     |
| CB4856 HS IV                                                                      | 3871829 3874416 | WBGene00018145 | F37C4.5    | F37C4.5    | 0.0640754555855736  |
| AGIWUR4389;AGIWUR8043;AGIWUR22760;AGIWUR31925;AGIWUR35017;AGIWUR38139;AGIWUR42284 |                 |                |            |            |                     |
| CB4856 HS IV                                                                      | 3875410 3878372 | WBGene00018146 | F37C4.6    | F37C4.6    | -0.365649833433096  |
|                                                                                   |                 |                |            |            | AGIWUR24044         |
| CB4856 HS IV                                                                      | 3878547 3881187 | WBGene00018148 | F37C4.8    | F37C4.8    | -0.0593773376167759 |
| AGIWUR10242;AGIWUR16117                                                           |                 |                |            |            |                     |

|                                                             |    |    |         |         |                |           |           |                      |             |
|-------------------------------------------------------------|----|----|---------|---------|----------------|-----------|-----------|----------------------|-------------|
| CB4856                                                      | HS | IV | 3881852 | 3884683 | WBGene00018143 | oac-23    | F37C4.3   | 0.0265615493263267   | AGIWUR37307 |
| CB4856                                                      | HS | IV | 3885665 | 3888836 | WBGene00018142 | oac-22    | F37C4.2   | 0.20736364274278     | AGIWUR8307  |
| CB4856                                                      | HS | IV | 3889263 | 3892563 | WBGene00018141 | oac-21    | F37C4.1   | -0.464430677227476   | AGIWUR40823 |
| CB4856                                                      | HS | IV | 3892998 | 3893283 | WBGene00044471 | F56D6.9   | F56D6.9   | -0.344582849581458   | AGIWUR9848  |
| CB4856                                                      | HS | IV | 3894058 | 3894430 | WBGene00044292 | F56D6.8   | F56D6.8   | 0.0141202017753361   | AGIWUR20004 |
| CB4856                                                      | HS | IV | 3895070 | 3895506 | WBGene00044472 | dct-8     | F56D6.10  | 0.243003164160831    |             |
| AGIWUR2226                                                  |    |    |         |         |                |           |           |                      |             |
| CB4856                                                      | HS | IV | 3895963 | 3897997 | WBGene00219307 | F56D6.17  | F56D6.17  | 0.0671956961183096   |             |
| AGIWUR26987;AGIWUR37616                                     |    |    |         |         |                |           |           |                      |             |
| CB4856                                                      | HS | IV | 3898478 | 3899806 | WBGene00219304 | F56D6.16  | F56D6.16  | -0.162273579099869   |             |
| AGIWUR30419                                                 |    |    |         |         |                |           |           |                      |             |
| CB4856                                                      | HS | IV | 3900571 | 3902326 | WBGene00023478 | srz-62    | F56D6.7   | -0.039326263085568   |             |
| AGIWUR2650;AGIWUR24689                                      |    |    |         |         |                |           |           |                      |             |
| CB4856                                                      | HS | IV | 3906113 | 3906493 | WBGene00044473 | F56D6.11  | F56D6.11  | 0.0904995983455672   |             |
| AGIWUR10325;AGIWUR14565;AGIWUR22261;AGIWUR29588             |    |    |         |         |                |           |           |                      |             |
| CB4856                                                      | HS | IV | 3908107 | 3908509 | WBGene00044474 | F56D6.12  | F56D6.12  | 0.071100151356152    |             |
| AGIWUR39239                                                 |    |    |         |         |                |           |           |                      |             |
| CB4856                                                      | HS | IV | 3909381 | 3909799 | WBGene00044475 | F56D6.13  | F56D6.13  | 0.104018805415322    |             |
| AGIWUR35300                                                 |    |    |         |         |                |           |           |                      |             |
| CB4856                                                      | HS | IV | 3915610 | 3916901 | WBGene00018973 | srz-20    | F56D6.5   | 0.015046336567794    | AGIWUR43400 |
| CB4856                                                      | HS | IV | 3917679 | 3918056 | WBGene00044476 | F56D6.14  | F56D6.14  | 0.179967488452313    |             |
| AGIWUR7218;AGIWUR7742;AGIWUR31197;AGIWUR39159;AGIWUR42565   |    |    |         |         |                |           |           |                      |             |
| CB4856                                                      | HS | IV | 3919806 | 3921613 | WBGene00018972 | srz-19    | F56D6.4   | -0.196015025313145   | AGIWUR5228  |
| CB4856                                                      | HS | IV | 3926417 | 3929024 | WBGene00018970 | cllec-68  | F56D6.1   | -0.00693115038472403 |             |
| AGIWUR28660;AGIWUR41001                                     |    |    |         |         |                |           |           |                      |             |
| CB4856                                                      | HS | IV | 3932733 | 3936238 | WBGene00021581 | cllec-70  | Y46C8AL.3 | -0.0656225909389807  |             |
| AGIWUR30235                                                 |    |    |         |         |                |           |           |                      |             |
| CB4856                                                      | HS | IV | 3937464 | 3939924 | WBGene00021582 | cllec-71  | Y46C8AL.4 | -0.312508888111658   |             |
| AGIWUR21185                                                 |    |    |         |         |                |           |           |                      |             |
| CB4856                                                      | HS | IV | 3940259 | 3941702 | WBGene00021580 | cllec-174 | Y46C8AL.2 | -0.607915483439696   |             |
| AGIWUR33517                                                 |    |    |         |         |                |           |           |                      |             |
| CB4856                                                      | HS | IV | 3944816 | 3947364 | WBGene00021583 | cllec-72  | Y46C8AL.5 | -0.484278494697922   |             |
| AGIWUR25323                                                 |    |    |         |         |                |           |           |                      |             |
| CB4856                                                      | HS | IV | 3953935 | 3956210 | WBGene00021579 | cllec-73  | Y46C8AL.1 | 0.340504486908866    |             |
| AGIWUR38603                                                 |    |    |         |         |                |           |           |                      |             |
| CB4856                                                      | HS | IV | 3957005 | 3960139 | WBGene00021585 | cllec-74  | Y46C8AL.8 | -0.125216229736607   |             |
| AGIWUR2330;AGIWUR6622;AGIWUR11329                           |    |    |         |         |                |           |           |                      |             |
| CB4856                                                      | HS | IV | 3960734 | 3964657 | WBGene00021586 | cllec-75  | Y46C8AL.9 | -0.0594508364140705  |             |
| AGIWUR14291;AGIWUR22989;AGIWUR29616;AGIWUR30729;AGIWUR31166 |    |    |         |         |                |           |           |                      |             |

|                                                                         |    |         |         |                |          |           |                      |             |
|-------------------------------------------------------------------------|----|---------|---------|----------------|----------|-----------|----------------------|-------------|
| CB4856 HS                                                               | IV | 3965246 | 3969025 | WBGene00021587 | clec-76  | Y46C8AR.1 | 0.44744398516417     |             |
| AGIWUR23862                                                             |    |         |         |                |          |           |                      |             |
| CB4856 HS                                                               | IV | 3969931 | 3972616 | WBGene00044343 | clec-77  | Y46C8AR.3 | 0.216984684127947    |             |
| AGIWUR31568                                                             |    |         |         |                |          |           |                      |             |
| CB4856 HS                                                               | IV | 3973349 | 3975721 | WBGene00018548 | clec-79  | F47C12.4  | -0.0237645512999745  |             |
| AGIWUR4310;AGIWUR7539;AGIWUR26372                                       |    |         |         |                |          |           |                      |             |
| CB4856 HS                                                               | IV | 3976429 | 3978015 | WBGene00005430 | srh-220  | F47C12.5  | 0.738522377798948    |             |
| AGIWUR20619                                                             |    |         |         |                |          |           |                      |             |
| CB4856 HS                                                               | IV | 3979825 | 3981205 | WBGene00005432 | srh-222  | F47C12.10 | 0.0500258706908001   |             |
| AGIWUR24878;AGIWUR41002;AGIWUR42461                                     |    |         |         |                |          |           |                      |             |
| CB4856 HS                                                               | IV | 3981901 | 3983609 | WBGene00005433 | srh-223  | F47C12.3  | 0.0872545783388414   |             |
| AGIWUR17687                                                             |    |         |         |                |          |           |                      |             |
| CB4856 HS                                                               | IV | 3989102 | 4014195 | WBGene00018547 | clec-78  | F47C12.2  | -0.277228079969116   |             |
| AGIWUR12467;AGIWUR29123;AGIWUR35382                                     |    |         |         |                |          |           |                      |             |
| CB4856 HS                                                               | IV | 4014799 | 4028127 | WBGene00020930 | hlh-30   | W02C12.3  | -0.14267415219396    |             |
| AGIWUR12568;AGIWUR14682;AGIWUR22585                                     |    |         |         |                |          |           |                      |             |
| CB4856 HS                                                               | IV | 4040308 | 4041532 | WBGene00018065 | F35F11.2 | F35F11.2  | -0.0886776153205897  |             |
| AGIWUR4078;AGIWUR9316;AGIWUR38890                                       |    |         |         |                |          |           |                      |             |
| CB4856 HS                                                               | IV | 4042575 | 4047786 | WBGene00018064 | cdc-73   | F35F11.1  | -0.00577171361933537 |             |
| AGIWUR4520;AGIWUR41674                                                  |    |         |         |                |          |           |                      |             |
| CB4856 HS                                                               | IV | 4047937 | 4049448 | WBGene00003955 | pcn-1    | W03D2.4   | 0.0732155363800029   |             |
| AGIWUR1229;AGIWUR1452;AGIWUR10565;AGIWUR13258;AGIWUR27822;AGIWUR40277   |    |         |         |                |          |           |                      |             |
| CB4856 HS                                                               | IV | 4050049 | 4051639 | WBGene00006951 | wrt-5    | W03D2.5   | -0.21746777250118    | AGIWUR29565 |
| CB4856 HS                                                               | IV | 4056586 | 4058243 | WBGene00020981 | W03D2.6  | W03D2.6   | 0.289664586562274    | AGIWUR34941 |
| CB4856 HS                                                               | IV | 4062567 | 4063673 | WBGene00020982 | ilys-6   | W03D2.7   | 0.410873306107783    | AGIWUR15927 |
| CB4856 HS                                                               | IV | 4065905 | 4068412 | WBGene00006173 | str-122  | W03D2.10  | 0.0576099736924611   |             |
| AGIWUR12209                                                             |    |         |         |                |          |           |                      |             |
| CB4856 HS                                                               | IV | 4068780 | 4069548 | WBGene00020979 | fbxb-55  | W03D2.2   | 0.0332963797543773   | AGIWUR30957 |
| CB4856 HS                                                               | IV | 4072327 | 4077644 | WBGene00004157 | pqn-75   | W03D2.1   | 0.069664365057406    | AGIWUR43269 |
| CB4856 HS                                                               | IV | 4077671 | 4078953 | WBGene00016437 | C35B1.8  | C35B1.8   | 0.019228511423651    |             |
| AGIWUR13784;AGIWUR23914;AGIWUR29188;AGIWUR29380;AGIWUR30138;AGIWUR44411 |    |         |         |                |          |           |                      |             |
| CB4856 HS                                                               | IV | 4079804 | 4080207 | WBGene00016434 | C35B1.4  | C35B1.4   | 0.158465584110051    | AGIWUR17839 |
| CB4856 HS                                                               | IV | 4081136 | 4081348 | WBGene00016433 | C35B1.3  | C35B1.3   | -0.0936026449172456  |             |
| AGIWUR12609;AGIWUR19585;AGIWUR39717                                     |    |         |         |                |          |           |                      |             |
| CB4856 HS                                                               | IV | 4083603 | 4084209 | WBGene00016435 | C35B1.5  | C35B1.5   | 0.31292102811371     | AGIWUR696   |
| CB4856 HS                                                               | IV | 4086212 | 4102907 | WBGene00016432 | C35B1.2  | C35B1.2   | 0.180652409375353    |             |
| AGIWUR34404;AGIWUR40227                                                 |    |         |         |                |          |           |                      |             |
| CB4856 HS                                                               | IV | 4103020 | 4106220 | WBGene00006701 | ubc-1    | C35B1.1   | -0.18127603633854    |             |
| AGIWUR11827;AGIWUR34071                                                 |    |         |         |                |          |           |                      |             |

|                                                 |    |    |         |         |                |           |           |                     |             |
|-------------------------------------------------|----|----|---------|---------|----------------|-----------|-----------|---------------------|-------------|
| CB4856                                          | HS | IV | 4109067 | 4110471 | WBGene00016436 | C35B1.7   | C35B1.7   | -0.236513700373431  | AGIWUR19562 |
| CB4856                                          | HS | IV | 4110544 | 4112487 | WBGene00044477 | F49F1.14  | F49F1.14  | -0.0912744982474587 |             |
| AGIWUR17789;AGIWUR24698;AGIWUR25509;AGIWUR28648 |    |    |         |         |                |           |           |                     |             |
| CB4856                                          | HS | IV | 4117732 | 4119179 | WBGene00018643 | drd-50    | F49F1.1   | -0.544155482127003  | AGIWUR14882 |
| CB4856                                          | HS | IV | 4119460 | 4120399 | WBGene00018645 | F49F1.5   | F49F1.5   | 0.0470473970701981  | AGIWUR27910 |
| CB4856                                          | HS | IV | 4121342 | 4123166 | WBGene00018646 | mul-1     | F49F1.6   | -0.35782203197725   |             |
| AGIWUR37789;AGIWUR40067                         |    |    |         |         |                |           |           |                     |             |
| CB4856                                          | HS | IV | 4123525 | 4125757 | WBGene00018647 | F49F1.7   | F49F1.7   | -0.124141997900303  | AGIWUR4538  |
| CB4856                                          | HS | IV | 4130503 | 4134631 | WBGene00018648 | F49F1.8   | F49F1.8   | -0.151040287557123  |             |
| AGIWUR23704;AGIWUR29660                         |    |    |         |         |                |           |           |                     |             |
| CB4856                                          | HS | IV | 4138408 | 4139122 | WBGene00018650 | F49F1.10  | F49F1.10  | -0.0747116890751514 |             |
| AGIWUR29551                                     |    |    |         |         |                |           |           |                     |             |
| CB4856                                          | HS | IV | 4139685 | 4140363 | WBGene00235368 | F49F1.18  | F49F1.18  | -0.0879317066230421 |             |
| AGIWUR21703                                     |    |    |         |         |                |           |           |                     |             |
| CB4856                                          | HS | IV | 4141734 | 4143019 | WBGene00018652 | F49F1.12  | F49F1.12  | -0.0353783637947203 |             |
| AGIWUR15653;AGIWUR25495                         |    |    |         |         |                |           |           |                     |             |
| CB4856                                          | HS | IV | 4145084 | 4147064 | WBGene00019933 | R07C12.3  | R07C12.3  | 0.0918661593436632  |             |
| AGIWUR35115                                     |    |    |         |         |                |           |           |                     |             |
| CB4856                                          | HS | IV | 4148141 | 4150055 | WBGene00019932 | R07C12.2  | R07C12.2  | -0.465901753717629  |             |
| AGIWUR2270                                      |    |    |         |         |                |           |           |                     |             |
| CB4856                                          | HS | IV | 4152547 | 4154029 | WBGene00019931 | R07C12.1  | R07C12.1  | -0.20190485211386   |             |
| AGIWUR36113                                     |    |    |         |         |                |           |           |                     |             |
| CB4856                                          | HS | IV | 4155273 | 4157185 | WBGene00219216 | K08D10.14 | K08D10.14 | -0.626068011518486  |             |
| AGIWUR27539                                     |    |    |         |         |                |           |           |                     |             |
| CB4856                                          | HS | IV | 4157634 | 4161789 | WBGene00019532 | K08D10.9  | K08D10.9  | 0.0163009675964432  |             |
| AGIWUR39171                                     |    |    |         |         |                |           |           |                     |             |
| CB4856                                          | HS | IV | 4162517 | 4164481 | WBGene00019531 | scrm-5    | K08D10.8  | -0.0540002031813405 |             |
| AGIWUR3106                                      |    |    |         |         |                |           |           |                     |             |
| CB4856                                          | HS | IV | 4164692 | 4166230 | WBGene00019530 | scrm-8    | K08D10.7  | 0.220870577726153   |             |
| AGIWUR9450                                      |    |    |         |         |                |           |           |                     |             |
| CB4856                                          | HS | IV | 4166541 | 4168120 | WBGene00235369 | K08D10.18 | K08D10.18 | 0.0911064582373902  |             |
| AGIWUR35321                                     |    |    |         |         |                |           |           |                     |             |
| CB4856                                          | HS | IV | 4168038 | 4169891 | WBGene00019529 | K08D10.5  | K08D10.5  | 0.160483077667648   |             |
| AGIWUR13883                                     |    |    |         |         |                |           |           |                     |             |
| CB4856                                          | HS | IV | 4172076 | 4173988 | WBGene00004385 | rnp-2     | K08D10.4  | 0.00687350952898669 |             |
| AGIWUR23011                                     |    |    |         |         |                |           |           |                     |             |
| CB4856                                          | HS | IV | 4174089 | 4176279 | WBGene00004386 | rnp-3     | K08D10.3  | -0.0053516659197701 |             |
| AGIWUR32748                                     |    |    |         |         |                |           |           |                     |             |
| CB4856                                          | HS | IV | 4176388 | 4178364 | WBGene00001033 | dnj-15    | K08D10.2  | 0.0533913564892536  |             |

AGIWUR41604  
CB4856 HS IV 4178463 4179531 WBGene00019535 tsen-34 K08D10.12 -0.116784540587082  
AGIWUR8924;AGIWUR19233;AGIWUR22445  
CB4856 HS IV 4196173 4196695 WBGene00044478 K06B9.6 K06B9.6 0.119649736199294  
AGIWUR1235;AGIWUR5457;AGIWUR15755;AGIWUR17854;AGIWUR29162  
CB4856 HS IV 4199501 4204375 WBGene00003938 pax-2 K06B9.5 -0.524904095956802 AGIWUR38588  
CB4856 HS IV 4205975 4218259 WBGene00017934 F30B5.4 F30B5.4 0.0232106402509658 AGIWUR34612  
CB4856 HS IV 4219271 4220083 WBGene00235371 F30B5.11 F30B5.11 -0.151579137615144  
AGIWUR18478  
CB4856 HS IV 4222183 4223140 WBGene00044093 srbc-72 F30B5.9 0.0346600841605031  
AGIWUR5787;AGIWUR27677;AGIWUR41288  
CB4856 HS IV 4223857 4225946 WBGene00044092 srbc-71 F30B5.8 0.0111899181275628  
AGIWUR25867;AGIWUR30376  
CB4856 HS IV 4226858 4228017 WBGene00017935 srbc-70 F30B5.6 0.270357981596937 AGIWUR22342  
CB4856 HS IV 4229195 4231861 WBGene00017936 zipt-2.2 F30B5.7 0.159083860043395  
AGIWUR42862  
CB4856 HS IV 4235614 4236710 WBGene00001074 dpy-13 F30B5.1 -0.0236082281541465  
AGIWUR16246;AGIWUR43234  
CB4856 HS IV 4239853 4240855 WBGene00023279 F36A4.9 F36A4.9 0.188084180369747  
AGIWUR6068;AGIWUR29161  
CB4856 HS IV 4243548 4244610 WBGene00000611 col-34 F36A4.10 -0.117946027203116  
AGIWUR6058  
CB4856 HS IV 4244956 4245620 WBGene00018086 F36A4.11 F36A4.11 0.357898589321475  
AGIWUR22161  
CB4856 HS IV 4246760 4247486 WBGene00018085 ttr-20 F36A4.8 0.262123308905885 AGIWUR31794  
CB4856 HS IV 4248020 4258173 WBGene00000123 ama-1 F36A4.7 0.0636748928132689  
AGIWUR3117;AGIWUR13557;AGIWUR21122;AGIWUR27884;AGIWUR30437;AGIWUR40528  
CB4856 HS IV 4263293 4265202 WBGene00000610 col-33 F36A4.6 0.108013088804206 AGIWUR7365  
CB4856 HS IV 4265524 4266598 WBGene00018084 F36A4.5 F36A4.5 0.427590165492909 AGIWUR32046  
CB4856 HS IV 4267582 4268236 WBGene00018083 F36A4.4 F36A4.4 0.0956783394149028 AGIWUR41627  
CB4856 HS IV 4269608 4270186 WBGene00018082 F36A4.3 F36A4.3 0.0846435870464948 AGIWUR2033  
CB4856 HS IV 4271215 4271820 WBGene00018081 F36A4.2 F36A4.2 -0.135713058753947  
AGIWUR6627;AGIWUR15954;AGIWUR37357  
CB4856 HS IV 4272473 4272899 WBGene00018080 F36A4.1 F36A4.1 -0.0144573023284984 AGIWUR37819  
CB4856 HS IV 4274341 4277875 WBGene00003668 nhr-78 F36A4.14 -0.259411801945475  
AGIWUR11194  
CB4856 HS IV 4278825 4284120 WBGene00017487 F15E6.6 F15E6.6 0.0151028409163239 AGIWUR27430  
CB4856 HS IV 4285403 4288432 WBGene00005715 srv-4 F15E6.7 -0.165619628063976  
AGIWUR4587;AGIWUR9840;AGIWUR33733

|                                                                                                        |    |    |         |         |                |          |          |                      |             |
|--------------------------------------------------------------------------------------------------------|----|----|---------|---------|----------------|----------|----------|----------------------|-------------|
| CB4856                                                                                                 | HS | IV | 4289567 | 4290061 | WBGene00017486 | F15E6.5  | F15E6.5  | 0.0944105620581768   | AGIWUR24506 |
| CB4856                                                                                                 | HS | IV | 4290189 | 4290703 | WBGene00017488 | dct-7    | F15E6.8  | 0.26642008099863     | AGIWUR18791 |
| CB4856                                                                                                 | HS | IV | 4291467 | 4291872 | WBGene00017485 | F15E6.4  | F15E6.4  | -0.304941507167237   |             |
| AGIWUR10390;AGIWUR18519;AGIWUR29557;AGIWUR30230;AGIWUR37617;AGIWUR43915                                |    |    |         |         |                |          |          |                      |             |
| CB4856                                                                                                 | HS | IV | 4292869 | 4293611 | WBGene00044479 | F15E6.10 | F15E6.10 | 0.00222333217952375  |             |
| AGIWUR14420;AGIWUR18856;AGIWUR23310;AGIWUR31892;AGIWUR36814                                            |    |    |         |         |                |          |          |                      |             |
| CB4856                                                                                                 | HS | IV | 4293620 | 4299083 | WBGene00017489 | F15E6.9  | F15E6.9  | 0.146112368062131    | AGIWUR4362  |
| CB4856                                                                                                 | HS | IV | 4301308 | 4304437 | WBGene00017483 | lgc-22   | F15E6.2  | 0.08497092596469     | AGIWUR23008 |
| CB4856                                                                                                 | HS | IV | 4326656 | 4332018 | WBGene00020972 | trp1-2   | W03B1.2  | -0.216172733652702   | AGIWUR25968 |
| CB4856                                                                                                 | HS | IV | 4332692 | 4335372 | WBGene00020973 | W03B1.3  | W03B1.3  | -0.0897039140181377  | AGIWUR32449 |
| CB4856                                                                                                 | HS | IV | 4336834 | 4341304 | WBGene00020976 | oac-51   | W03B1.7  | 0.0363355628179156   |             |
| AGIWUR63;AGIWUR4276                                                                                    |    |    |         |         |                |          |          |                      |             |
| CB4856                                                                                                 | HS | IV | 4342357 | 4346558 | WBGene00020977 | oac-52   | W03B1.8  | -0.00441046222218766 | AGIWUR14080 |
| CB4856                                                                                                 | HS | IV | 4357631 | 4359936 | WBGene00005662 | sars-2   | W03B1.4  | 0.149549817834655    |             |
| AGIWUR1886;AGIWUR40320;AGIWUR44856                                                                     |    |    |         |         |                |          |          |                      |             |
| CB4856                                                                                                 | HS | IV | 4359953 | 4360657 | WBGene00050916 | F55F10.3 | F55F10.3 | 0.0452943631268212   |             |
| AGIWUR16657;AGIWUR29416;AGIWUR41260                                                                    |    |    |         |         |                |          |          |                      |             |
| CB4856                                                                                                 | HS | IV | 4360837 | 4386533 | WBGene00018898 | F55F10.1 | F55F10.1 | 0.137739714295794    |             |
| AGIWUR28847                                                                                            |    |    |         |         |                |          |          |                      |             |
| CB4856                                                                                                 | HS | IV | 4386630 | 4388878 | WBGene00021286 | talD-1   | Y24D9A.8 | -0.0662283833963775  |             |
| AGIWUR1068;AGIWUR23705                                                                                 |    |    |         |         |                |          |          |                      |             |
| CB4856                                                                                                 | HS | IV | 4389135 | 4390649 | WBGene00004419 | rp1-7A   | Y24D9A.4 | 0.532639308050914    |             |
| AGIWUR8205                                                                                             |    |    |         |         |                |          |          |                      |             |
| CB4856                                                                                                 | HS | IV | 4390848 | 4393403 | WBGene00021282 | set-21   | Y24D9A.2 | -0.1391921318844     |             |
| AGIWUR34746                                                                                            |    |    |         |         |                |          |          |                      |             |
| CB4856                                                                                                 | HS | IV | 4394410 | 4415622 | WBGene00021281 | ell-1    | Y24D9A.1 | -0.00125607775981518 |             |
| AGIWUR632;AGIWUR12116                                                                                  |    |    |         |         |                |          |          |                      |             |
| CB4856                                                                                                 | HS | IV | 4422339 | 4426566 | WBGene00019950 | clcc-175 | R08C7.6  | 0.0670469191511565   |             |
| AGIWUR5192;AGIWUR14417;AGIWUR21071                                                                     |    |    |         |         |                |          |          |                      |             |
| CB4856                                                                                                 | HS | IV | 4427713 | 4429782 | WBGene00006228 | str-185  | R08C7.7  | -0.16408644768058    | AGIWUR27    |
| CB4856                                                                                                 | HS | IV | 4433049 | 4434541 | WBGene00019951 | R08C7.8  | R08C7.8  | -0.318768735106488   | AGIWUR24643 |
| CB4856                                                                                                 | HS | IV | 4435127 | 4437318 | WBGene00019948 | R08C7.4  | R08C7.4  | -0.213468837586602   | AGIWUR1608  |
| CB4856                                                                                                 | HS | IV | 4437786 | 4439290 | WBGene00019952 | fbxb-74  | R08C7.9  | -0.0925649363351777  |             |
| AGIWUR6404;AGIWUR13245;AGIWUR18904;AGIWUR24042;AGIWUR27521;AGIWUR30324                                 |    |    |         |         |                |          |          |                      |             |
| CB4856                                                                                                 | HS | IV | 4442399 | 4445876 | WBGene00019953 | wap1-1   | R08C7.10 | -0.0284050210066198  |             |
| AGIWUR3049;AGIWUR3502;AGIWUR5857;AGIWUR6345;AGIWUR8110;AGIWUR14201;AGIWUR16332;AGIWUR20448;AGIWUR45027 |    |    |         |         |                |          |          |                      |             |
| CB4856                                                                                                 | HS | IV | 4445990 | 4446997 | WBGene00019947 | htz-1    | R08C7.3  | 0.120587273999981    |             |
| AGIWUR35276;AGIWUR40345                                                                                |    |    |         |         |                |          |          |                      |             |
| CB4856                                                                                                 | HS | IV | 4447299 | 4449897 | WBGene00019946 | chat-1   | R08C7.2  | -0.184213559382524   |             |

AGIWUR23617;AGIWUR24421  
 CB4856 HS IV 4450000 4460027 WBGene00019955 R08C7.12 R08C7.12 0.160003447734638  
 AGIWUR26172;AGIWUR28842;AGIWUR31454;AGIWUR40599;AGIWUR43621  
 CB4856 HS IV 4460179 4462061 WBGene00019718 M01H9.2 M01H9.2 0.087549113586892 AGIWUR8857  
 CB4856 HS IV 4465484 4468509 WBGene00019721 M01H9.5 M01H9.5 -0.339770635916253 AGIWUR11586  
 CB4856 HS IV 4468505 4477059 WBGene00019719 M01H9.3 M01H9.3 0.0254100819175687  
 AGIWUR3461;AGIWUR16506;AGIWUR18811;AGIWUR37123;AGIWUR42973  
 CB4856 HS IV 4479693 4482764 WBGene00019720 M01H9.4 M01H9.4 0.169225656113535  
 AGIWUR1939;AGIWUR17950;AGIWUR22449;AGIWUR29216;AGIWUR30278;AGIWUR36545  
 CB4856 HS IV 4487028 4489000 WBGene00019717 trx-3 M01H9.1 -0.181973286894111 AGIWUR33279  
 CB4856 HS IV 4489012 4506708 WBGene00022675 gbb-2 ZK180.1 -0.0751590729023377  
 AGIWUR3783;AGIWUR5291;AGIWUR12774;AGIWUR13601;AGIWUR20036;AGIWUR29856;AGIWUR31024;AGIWUR31657;AGIWUR32763;A  
 GIWUR33247;AGIWUR33381;AGIWUR33807;AGIWUR35502;AGIWUR41532;AGIWUR42433  
 CB4856 HS IV 4508499 4511320 WBGene00022677 ZK180.3 ZK180.3 0.108678495517319  
 AGIWUR25175;AGIWUR32103  
 CB4856 HS IV 4511896 4513319 WBGene00022678 sar-1 ZK180.4 -0.194888805603069 AGIWUR17236  
 CB4856 HS IV 4515044 4517169 WBGene00022679 ZK180.5 ZK180.5 -0.420641299245401  
 AGIWUR13104;AGIWUR17731;AGIWUR25887;AGIWUR38271  
 CB4856 HS IV 4520181 4525043 WBGene00022680 ZK180.6 ZK180.6 -0.0279910163869204 AGIWUR1519  
 CB4856 HS IV 4528730 4530382 WBGene00022683 ZK185.3 ZK185.3 0.183089755748252 AGIWUR18708  
 CB4856 HS IV 4531222 4533121 WBGene00044480 ZK185.4 ZK185.4 -0.0067772878960195  
 AGIWUR32050;AGIWUR33234  
 CB4856 HS IV 4536553 4541771 WBGene00022682 ZK185.2 ZK185.2 0.228178020139692 AGIWUR38270  
 CB4856 HS IV 4541769 4545918 WBGene00044481 ZK185.5 ZK185.5 0.0145148463772147  
 AGIWUR5901;AGIWUR10425  
 CB4856 HS IV 4548553 4552742 WBGene00022681 ZK185.1 ZK185.1 0.0181855881629511 AGIWUR11021  
 CB4856 HS IV 4562654 4565674 WBGene00017901 igeg-1 F28E10.2 0.243644551357821  
 AGIWUR35893  
 CB4856 HS IV 4566018 4567443 WBGene00017902 F28E10.4 F28E10.4 0.0125600719623904  
 AGIWUR500;AGIWUR10120;AGIWUR31071;AGIWUR32695;AGIWUR32757;AGIWUR32829  
 CB4856 HS IV 4568841 4590297 WBGene00017900 F28E10.1 F28E10.1 -0.0101748169239562  
 AGIWUR450;AGIWUR3642;AGIWUR15545;AGIWUR26942;AGIWUR33923;AGIWUR35572;AGIWUR36232;AGIWUR41759  
 CB4856 HS IV 4595052 4595530 WBGene00017596 F19C7.6 F19C7.6 0.0986785892688236 AGIWUR35427  
 CB4856 HS IV 4595958 4596732 WBGene00017595 F19C7.5 F19C7.5 0.0279720429337829 AGIWUR33005  
 CB4856 HS IV 4605786 4608216 WBGene00017591 F19C7.1 F19C7.1 0.198741633579534 AGIWUR43965  
 CB4856 HS IV 4608201 4609679 WBGene00000684 col-110 F19C7.7 0.308379670239404  
 AGIWUR14499;AGIWUR24835  
 CB4856 HS IV 4610576 4638095 WBGene00017597 F19C7.8 F19C7.8 -0.0635418646371146  
 AGIWUR16659;AGIWUR19393;AGIWUR23800;AGIWUR28813;AGIWUR29521

|                                                                                                            |    |    |         |         |                |             |          |                      |             |
|------------------------------------------------------------------------------------------------------------|----|----|---------|---------|----------------|-------------|----------|----------------------|-------------|
| CB4856                                                                                                     | HS | IV | 4647202 | 4649743 | WBGene00017923 | F29B9.8     | F29B9.8  | -0.156441689450508   | AGIWUR11048 |
| CB4856                                                                                                     | HS | IV | 4649744 | 4650654 | WBGene00017922 | F29B9.7     | F29B9.7  | -0.181116649969228   | AGIWUR18836 |
| CB4856                                                                                                     | HS | IV | 4651044 | 4652468 | WBGene00006706 | ubc-9       | F29B9.6  | -0.13133103796951    |             |
| AGIWUR18958;AGIWUR43174                                                                                    |    |    |         |         |                |             |          |                      |             |
| CB4856                                                                                                     | HS | IV | 4652459 | 4653159 | WBGene00017921 | F29B9.5     | F29B9.5  | 0.0243010172660529   | AGIWUR26617 |
| CB4856                                                                                                     | HS | IV | 4653293 | 4655848 | WBGene00004205 | psr-1       | F29B9.4  | -0.195418177380184   | AGIWUR21294 |
| CB4856                                                                                                     | HS | IV | 4655776 | 4657783 | WBGene00000685 | col-111     | F29B9.9  | -0.0964387915638714  |             |
| AGIWUR4023;AGIWUR27103;AGIWUR31068;AGIWUR31841;AGIWUR33074;AGIWUR37890;AGIWUR38286;AGIWUR39857;AGIWUR41390 |    |    |         |         |                |             |          |                      |             |
| CB4856                                                                                                     | HS | IV | 4659049 | 4659517 | WBGene00017924 | mrps-21     | F29B9.10 | 0.0514893603190139   |             |
| AGIWUR3956                                                                                                 |    |    |         |         |                |             |          |                      |             |
| CB4856                                                                                                     | HS | IV | 4659521 | 4660203 | WBGene00017925 | F29B9.11    | F29B9.11 | -0.0629675688961759  |             |
| AGIWUR3042;AGIWUR27108;AGIWUR33457;AGIWUR35521;AGIWUR41724;AGIWUR43364                                     |    |    |         |         |                |             |          |                      |             |
| CB4856                                                                                                     | HS | IV | 4660991 | 4665204 | WBGene00017920 | jmjd-1.2    | F29B9.2  | -0.0579672448404711  |             |
| AGIWUR352;AGIWUR20412;AGIWUR21912                                                                          |    |    |         |         |                |             |          |                      |             |
| CB4856                                                                                                     | HS | IV | 4665251 | 4667293 | WBGene00017919 | F29B9.1     | F29B9.1  | -0.701840097838916   | AGIWUR28303 |
| CB4856                                                                                                     | HS | IV | 4669529 | 4671992 | WBGene00044482 | F29B9.12    | F29B9.12 | -0.080781344392781   |             |
| AGIWUR10537                                                                                                |    |    |         |         |                |             |          |                      |             |
| CB4856                                                                                                     | HS | IV | 4679018 | 4685168 | WBGene00020678 | T22B11.4    | T22B11.4 | 0.160849043214434    |             |
| AGIWUR181;AGIWUR5515;AGIWUR9417;AGIWUR13970;AGIWUR23451;AGIWUR32601;AGIWUR33091                            |    |    |         |         |                |             |          |                      |             |
| CB4856                                                                                                     | HS | IV | 4688269 | 4691936 | WBGene00044620 | bus-4       | T22B11.2 | -0.254958732123467   |             |
| AGIWUR34594                                                                                                |    |    |         |         |                |             |          |                      |             |
| CB4856                                                                                                     | HS | IV | 4692793 | 4696826 | WBGene00020675 | T22B11.1    | T22B11.1 | 0.158940948790016    |             |
| AGIWUR44942                                                                                                |    |    |         |         |                |             |          |                      |             |
| CB4856                                                                                                     | HS | IV | 4696982 | 4704011 | WBGene00020679 | ogdh-1      | T22B11.5 | -0.0828773859926111  |             |
| AGIWUR20048;AGIWUR28410                                                                                    |    |    |         |         |                |             |          |                      |             |
| CB4856                                                                                                     | HS | IV | 4706777 | 4710755 | WBGene00019543 | cif-1       | K08F11.3 | 0.127434997192553    |             |
| AGIWUR36907;AGIWUR44735                                                                                    |    |    |         |         |                |             |          |                      |             |
| CB4856                                                                                                     | HS | IV | 4710861 | 4712624 | WBGene00006968 | yars-2      | K08F11.4 | -0.00633493375807426 |             |
| AGIWUR1336;AGIWUR23561;AGIWUR33150                                                                         |    |    |         |         |                |             |          |                      |             |
| CB4856                                                                                                     | HS | IV | 4712825 | 4715807 | WBGene00019544 | miro-1      | K08F11.5 | 0.0142929214639      |             |
| AGIWUR13942;AGIWUR43333                                                                                    |    |    |         |         |                |             |          |                      |             |
| CB4856                                                                                                     | HS | IV | 4724862 | 4725332 | WBGene00019541 | K08F11.1    | K08F11.1 | -0.0635721115773276  |             |
| AGIWUR16904                                                                                                |    |    |         |         |                |             |          |                      |             |
| CB4856                                                                                                     | HS | IV | 4730636 | 4732750 | WBGene00017118 | E04A4.3     | E04A4.3  | 0.120805507272808    | AGIWUR23548 |
| CB4856                                                                                                     | HS | IV | 4734305 | 4735876 | WBGene00017117 | fbxb-80     | E04A4.2  | -0.086547118981505   | AGIWUR35293 |
| CB4856                                                                                                     | HS | IV | 4737558 | 4738734 | WBGene00017116 | fbxb-78     | E04A4.1  | 0.175073346391913    | AGIWUR23218 |
| CB4856                                                                                                     | HS | IV | 4739490 | 4744269 | WBGene00001983 | hoe-1       | E04A4.4  | 0.00197465539371322  | AGIWUR18753 |
| CB4856                                                                                                     | HS | IV | 4744377 | 4745492 | WBGene00017119 | timmm-17B.1 | E04A4.5  | 0.159824340945313    |             |
| AGIWUR16514                                                                                                |    |    |         |         |                |             |          |                      |             |



|                                                                                                                                   |    |    |         |         |                 |           |          |                     |                     |
|-----------------------------------------------------------------------------------------------------------------------------------|----|----|---------|---------|-----------------|-----------|----------|---------------------|---------------------|
| CB4856                                                                                                                            | HS | IV | 4745825 | 4747832 | WBGene00017120  | tctn-1    | E04A4.6  | 0.258879103774007   | AGIWUR11344         |
| CB4856                                                                                                                            | HS | IV | 4747901 | 4749113 | WBGene00017121  | cyc-2.1   | E04A4.7  | 0.188751619816401   |                     |
| AGIWUR322;AGIWUR10063;AGIWUR11494;AGIWUR16074;AGIWUR24498;AGIWUR26130;AGIWUR28305;AGIWUR30014;AGIWUR36824;AGIWUR38385;AGIWUR43982 |    |    |         |         |                 |           |          |                     |                     |
| CB4856                                                                                                                            | HS | IV | 4749012 | 4749778 | WBGene00004432  | rp1-20    | E04A4.8  | -0.395189579727196  |                     |
| AGIWUR2616;AGIWUR4332;AGIWUR15631;AGIWUR18334;AGIWUR27175;AGIWUR37198                                                             |    |    |         |         |                 |           |          |                     |                     |
| CB4856                                                                                                                            | HS | IV | 4750240 | 4751491 | WBGene00021202  | Y17G9B.5  |          | Y17G9B.5            |                     |
| -0.00866462230988319 AGIWUR26981                                                                                                  |    |    |         |         |                 |           |          |                     |                     |
| CB4856                                                                                                                            | HS | IV | 4752119 | 4753163 | WBGene00021201  | Y17G9B.4  |          | Y17G9B.4            | -0.0773023061902691 |
| AGIWUR20135                                                                                                                       |    |    |         |         |                 |           |          |                     |                     |
| CB4856                                                                                                                            | HS | IV | 4754199 | 4756157 | WBGene00021204  | fbxb-77   | Y17G9B.7 |                     | 0.1580057453363     |
| AGIWUR5085;AGIWUR28574                                                                                                            |    |    |         |         |                 |           |          |                     |                     |
| CB4856                                                                                                                            | HS | IV | 4757179 | 4758840 | WBGene00021205  | Y17G9B.8  |          | Y17G9B.8            |                     |
| -0.00754432163633467 AGIWUR17568                                                                                                  |    |    |         |         |                 |           |          |                     |                     |
| CB4856                                                                                                                            | HS | IV | 4758982 | 4760428 | WBGene00003216  | memi-1    | Y17G9B.9 |                     | -0.419397174317469  |
| AGIWUR30173                                                                                                                       |    |    |         |         |                 |           |          |                     |                     |
| CB4856                                                                                                                            | HS | IV | 4761049 | 4762856 | WBGene00021200  | cyp-31A3  |          | Y17G9B.3            | -0.0273946991256189 |
| AGIWUR18877                                                                                                                       |    |    |         |         |                 |           |          |                     |                     |
| CB4856                                                                                                                            | HS | IV | 4764182 | 4764602 | WBGene00021199  | Y17G9B.2  |          | Y17G9B.2            | -0.10726302815419   |
| AGIWUR35670                                                                                                                       |    |    |         |         |                 |           |          |                     |                     |
| CB4856                                                                                                                            | HS | IV | 4764748 | 4767839 | WBGene00021198  | Y17G9B.1  |          | Y17G9B.1            | 0.0426317501497824  |
| AGIWUR6283;AGIWUR20407;AGIWUR41861                                                                                                |    |    |         |         |                 |           |          |                     |                     |
| CB4856                                                                                                                            | HS | IV | 4772092 | 4775133 | WBGene00020004  | R11E3.2   | R11E3.2  | 0.378119813162472   | AGIWUR10352         |
| CB4856                                                                                                                            | HS | IV | 4775242 | 4776096 | WBGene000235374 | R11E3.19  |          | R11E3.19            | -0.136880024022119  |
| AGIWUR17262                                                                                                                       |    |    |         |         |                 |           |          |                     |                     |
| CB4856                                                                                                                            | HS | IV | 4784233 | 4788692 | WBGene00003694  | nhr-104   | R11E3.5  | -0.17002438241553   |                     |
| AGIWUR26636;AGIWUR33735                                                                                                           |    |    |         |         |                 |           |          |                     |                     |
| CB4856                                                                                                                            | HS | IV | 4789503 | 4791983 | WBGene00020003  | R11E3.1   | R11E3.1  | -0.0215737055613001 |                     |
| AGIWUR18867;AGIWUR23382                                                                                                           |    |    |         |         |                 |           |          |                     |                     |
| CB4856                                                                                                                            | HS | IV | 4793202 | 4799378 | WBGene00001324  | eor-1     | R11E3.6  | -0.0562845526393936 |                     |
| AGIWUR23443;AGIWUR36822                                                                                                           |    |    |         |         |                 |           |          |                     |                     |
| CB4856                                                                                                                            | HS | IV | 4799388 | 4802592 | WBGene00001060  | dpf-7     | R11E3.7  | -0.176901670988475  |                     |
| AGIWUR20072;AGIWUR31018                                                                                                           |    |    |         |         |                 |           |          |                     |                     |
| CB4856                                                                                                                            | HS | IV | 4802702 | 4806586 | WBGene00001058  | dpf-5     | R11E3.8  | -0.104834605294787  |                     |
| AGIWUR4930;AGIWUR6015;AGIWUR20859;AGIWUR21375                                                                                     |    |    |         |         |                 |           |          |                     |                     |
| CB4856                                                                                                                            | HS | IV | 4806697 | 4807319 | WBGene00044483  | H06H21.11 |          | H06H21.11           | -0.199183467306668  |
| AGIWUR21364                                                                                                                       |    |    |         |         |                 |           |          |                     |                     |
| CB4856                                                                                                                            | HS | IV | 4807426 | 4809976 | WBGene00019163  | ubxn-6    | H06H21.6 |                     | -0.0722444918776093 |
| AGIWUR12053;AGIWUR32125;AGIWUR41983;AGIWUR43407                                                                                   |    |    |         |         |                 |           |          |                     |                     |

|                                     |    |         |         |                |           |           |                     |             |
|-------------------------------------|----|---------|---------|----------------|-----------|-----------|---------------------|-------------|
| CB4856 HS                           | IV | 4810934 | 4811983 | WBGene00019162 | EIF-1.A   | H06H21.3  | -0.167619537481878  |             |
| AGIWUR17674                         |    |         |         |                |           |           |                     |             |
| CB4856 HS                           | IV | 4812075 | 4814029 | WBGene00005842 | SRW-95    | H06H21.2  | -0.249075519469382  |             |
| AGIWUR17290                         |    |         |         |                |           |           |                     |             |
| CB4856 HS                           | IV | 4817388 | 4821131 | WBGene00019164 | H06H21.8  | H06H21.8  | 0.0816645528154742  |             |
| AGIWUR3945;AGIWUR19556              |    |         |         |                |           |           |                     |             |
| CB4856 HS                           | IV | 4825488 | 4827281 | WBGene00019165 | MPZ-4     | H06H21.9  | -0.0717325728815013 |             |
| AGIWUR14973                         |    |         |         |                |           |           |                     |             |
| CB4856 HS                           | IV | 4827853 | 4846893 | WBGene00019166 | TAT-2     | H06H21.10 | 0.120903246423746   |             |
| AGIWUR3450                          |    |         |         |                |           |           |                     |             |
| CB4856 HS                           | IV | 4854394 | 4856287 | WBGene00021195 | Y17G9A.2  | Y17G9A.2  | 0.248675796399544   |             |
| AGIWUR6330;AGIWUR26489;AGIWUR39776  |    |         |         |                |           |           |                     |             |
| CB4856 HS                           | IV | 4859255 | 4860255 | WBGene00235375 | Y17G9A.91 | Y17G9A.91 | 0.0531478396321612  |             |
| AGIWUR30819                         |    |         |         |                |           |           |                     |             |
| CB4856 HS                           | IV | 4862185 | 4864141 | WBGene00006217 | STR-173   | Y17G9A.1  | 0.128179611883247   |             |
| AGIWUR43543                         |    |         |         |                |           |           |                     |             |
| CB4856 HS                           | IV | 4864978 | 4867659 | WBGene00006216 | STR-172   | Y17G9A.5  | -0.0551122817748908 |             |
| AGIWUR33017                         |    |         |         |                |           |           |                     |             |
| CB4856 HS                           | IV | 4872267 | 4874703 | WBGene00006218 | STR-174   | Y17G9A.7  | 0.0849597963380138  |             |
| AGIWUR26745                         |    |         |         |                |           |           |                     |             |
| CB4856 HS                           | IV | 4877402 | 4880315 | WBGene00006214 | STR-170   | T08B6.7   | 0.128607378813211   | AGIWUR41481 |
| CB4856 HS                           | IV | 4884296 | 4886897 | WBGene00006211 | STR-166   | T08B6.6   | -0.100900537000815  | AGIWUR31779 |
| CB4856 HS                           | IV | 4886885 | 4887358 | WBGene00020351 | T08B6.1   | T08B6.1   | -0.0503840673908043 | AGIWUR34344 |
| CB4856 HS                           | IV | 4889918 | 4890672 | WBGene00020354 | T08B6.5   | T08B6.5   | -0.210496041758848  | AGIWUR30916 |
| CB4856 HS                           | IV | 4890843 | 4894085 | WBGene00020356 | T08B6.9   | T08B6.9   | 0.327526685592485   | AGIWUR3587  |
| CB4856 HS                           | IV | 4894370 | 4897043 | WBGene00020352 | T08B6.2   | T08B6.2   | 0.171911181498455   | AGIWUR36141 |
| CB4856 HS                           | IV | 4902422 | 4904061 | WBGene00006206 | STR-161   | T08B6.3   | 0.0966977153798627  | AGIWUR22867 |
| CB4856 HS                           | IV | 4905658 | 4908498 | WBGene00020353 | T08B6.4   | T08B6.4   | 0.0739020051471329  | AGIWUR25964 |
| CB4856 HS                           | IV | 4909339 | 4910962 | WBGene00006204 | STR-159   | Y9C9A.18  | 0.0421501238788271  |             |
| AGIWUR10470;AGIWUR14777             |    |         |         |                |           |           |                     |             |
| CB4856 HS                           | IV | 4911320 | 4912780 | WBGene00021184 | Y9C9A.17  | Y9C9A.17  | 0.00476671304511278 |             |
| AGIWUR25700                         |    |         |         |                |           |           |                     |             |
| CB4856 HS                           | IV | 4915989 | 4917553 | WBGene00006201 | STR-155   | Y9C9A.10  | -0.208182907956202  |             |
| AGIWUR21959                         |    |         |         |                |           |           |                     |             |
| CB4856 HS                           | IV | 4918074 | 4919632 | WBGene00006203 | STR-158   | Y9C9A.9   | -0.0105161712407407 |             |
| AGIWUR11250;AGIWUR15567;AGIWUR22659 |    |         |         |                |           |           |                     |             |
| CB4856 HS                           | IV | 4930365 | 4932217 | WBGene00021178 | Y9C9A.8   | Y9C9A.8   | 0.132726134173026   | AGIWUR14229 |
| CB4856 HS                           | IV | 4934414 | 4936643 | WBGene00006199 | STR-153   | Y9C9A.7   | 0.30419543033196    | AGIWUR15918 |
| CB4856 HS                           | IV | 4936655 | 4938011 | WBGene00021179 | FBXA-86   | Y9C9A.12  | 0.395820457219706   |             |

|                                                             |    |    |         |         |                |          |                                         |
|-------------------------------------------------------------|----|----|---------|---------|----------------|----------|-----------------------------------------|
| AGIWUR44600                                                 |    |    |         |         |                |          |                                         |
| CB4856                                                      | HS | IV | 4939315 | 4941506 | WBGene00006212 | str-168  | Y9C9A.6 0.162567395650003               |
| AGIWUR1074;AGIWUR27267;AGIWUR41906                          |    |    |         |         |                |          |                                         |
| CB4856                                                      | HS | IV | 4941981 | 4944588 | WBGene00021177 | Y9C9A.5  | Y9C9A.5 0.0260193152098829 AGIWUR25885  |
| CB4856                                                      | HS | IV | 4946105 | 4948518 | WBGene00006213 | str-169  | Y9C9A.4 0.174664343513693               |
| AGIWUR13121;AGIWUR15955                                     |    |    |         |         |                |          |                                         |
| CB4856                                                      | HS | IV | 4954187 | 4958206 | WBGene00006208 | str-163  | Y9C9A.3 0.0172719942042558              |
| AGIWUR3410;AGIWUR26106;AGIWUR29004                          |    |    |         |         |                |          |                                         |
| CB4856                                                      | HS | IV | 4960735 | 4963147 | WBGene00006209 | str-164  | Y9C9A.2 -0.0811332319596776 AGIWUR26339 |
| CB4856                                                      | HS | IV | 4963883 | 4965369 | WBGene00021176 | Y9C9A.1  | Y9C9A.1 0.137505676649063 AGIWUR19033   |
| CB4856                                                      | HS | IV | 4966097 | 4969540 | WBGene00021180 | Y9C9A.13 | Y9C9A.13 -0.152115951530529             |
| AGIWUR32536                                                 |    |    |         |         |                |          |                                         |
| CB4856                                                      | HS | IV | 4969840 | 4971145 | WBGene00021181 | srz-27   | Y9C9A.14 2.78206755076908               |
| AGIWUR18744                                                 |    |    |         |         |                |          |                                         |
| CB4856                                                      | HS | IV | 4971671 | 4973203 | WBGene00021182 | srz-28   | Y9C9A.15 0.139303337388244              |
| AGIWUR11092                                                 |    |    |         |         |                |          |                                         |
| CB4856                                                      | HS | IV | 4973622 | 4976089 | WBGene00021183 | Y9C9A.16 | Y9C9A.16 0.146905064842137              |
| AGIWUR10233;AGIWUR14926;AGIWUR24909                         |    |    |         |         |                |          |                                         |
| CB4856                                                      | HS | IV | 4977201 | 4978084 | WBGene00017112 | E03H12.5 | E03H12.5 0.0672336907513937             |
| AGIWUR2197;AGIWUR17016;AGIWUR28451;AGIWUR35167;AGIWUR38500  |    |    |         |         |                |          |                                         |
| CB4856                                                      | HS | IV | 4979789 | 4981127 | WBGene00017113 | srz-24   | E03H12.6 -0.018888628986196             |
| AGIWUR17310;AGIWUR19064;AGIWUR20580                         |    |    |         |         |                |          |                                         |
| CB4856                                                      | HS | IV | 4982596 | 4983892 | WBGene00017111 | E03H12.4 | E03H12.4 0.0550530051138862             |
| AGIWUR11663                                                 |    |    |         |         |                |          |                                         |
| CB4856                                                      | HS | IV | 4984046 | 4985375 | WBGene00017110 | clec-176 | E03H12.3 0.0498108292343638             |
| AGIWUR27091                                                 |    |    |         |         |                |          |                                         |
| CB4856                                                      | HS | IV | 4986546 | 4987725 | WBGene00017109 | clec-177 | E03H12.2 -0.0721573525922814            |
| AGIWUR12062                                                 |    |    |         |         |                |          |                                         |
| CB4856                                                      | HS | IV | 4987702 | 4988642 | WBGene00017114 | E03H12.7 | E03H12.7 -0.0309530551192232            |
| AGIWUR45032                                                 |    |    |         |         |                |          |                                         |
| CB4856                                                      | HS | IV | 4989065 | 4989717 | WBGene00023265 | E03H12.8 | E03H12.8 0.0121882144312515             |
| AGIWUR18233;AGIWUR28268;AGIWUR31646;AGIWUR32544;AGIWUR39099 |    |    |         |         |                |          |                                         |
| CB4856                                                      | HS | IV | 4990255 | 4991433 | WBGene00017115 | E03H12.9 | E03H12.9 -0.101928533245426             |
| AGIWUR469                                                   |    |    |         |         |                |          |                                         |
| CB4856                                                      | HS | IV | 4992389 | 4993857 | WBGene00006207 | str-162  | E03H12.1 0.126421048912064              |
| AGIWUR15331                                                 |    |    |         |         |                |          |                                         |
| CB4856                                                      | HS | IV | 4996142 | 4997559 | WBGene00006051 | ssq-2    | T28H11.5 0.195510568535493              |
| AGIWUR44466                                                 |    |    |         |         |                |          |                                         |
| CB4856                                                      | HS | IV | 4999434 | 4999853 | WBGene00006040 | ssp-11   | T28H11.6 0.211592194103117              |

|                                                                                                |    |         |         |                |          |          |                     |                     |             |
|------------------------------------------------------------------------------------------------|----|---------|---------|----------------|----------|----------|---------------------|---------------------|-------------|
| AGIWUR6740                                                                                     |    |         |         |                |          |          |                     |                     |             |
| CB4856 HS                                                                                      | IV | 5002752 | 5005418 | WBGene00003976 | pes-1    | T28H11.4 |                     | -0.0696300462255497 |             |
| AGIWUR30072                                                                                    |    |         |         |                |          |          |                     |                     |             |
| CB4856 HS                                                                                      | IV | 5008678 | 5010789 | WBGene00005639 | srm-2    | T28H11.3 |                     | 0.407544630816879   |             |
| AGIWUR22655                                                                                    |    |         |         |                |          |          |                     |                     |             |
| CB4856 HS                                                                                      | IV | 5012549 | 5014604 | WBGene00005638 | srm-1    | T28H11.2 |                     | 0.164494291265671   |             |
| AGIWUR3163                                                                                     |    |         |         |                |          |          |                     |                     |             |
| CB4856 HS                                                                                      | IV | 5017989 | 5020654 | WBGene00020906 | T28H11.8 | T28H11.8 |                     | -0.0788844808102933 |             |
| AGIWUR17781                                                                                    |    |         |         |                |          |          |                     |                     |             |
| CB4856 HS                                                                                      | IV | 5021188 | 5025746 | WBGene00220250 | C09B9.85 | C09B9.85 |                     | -0.0965492372110086 |             |
| AGIWUR21248;AGIWUR39960                                                                        |    |         |         |                |          |          |                     |                     |             |
| CB4856 HS                                                                                      | IV | 5029250 | 5031046 | WBGene00015627 | C09B9.2  | C09B9.2  | -0.184408994666141  |                     | AGIWUR33878 |
| CB4856 HS                                                                                      | IV | 5031596 | 5033395 | WBGene00015629 | C09B9.4  | C09B9.4  | 0.117938563632011   |                     | AGIWUR41775 |
| CB4856 HS                                                                                      | IV | 5037815 | 5040495 | WBGene00015626 | C09B9.1  | C09B9.1  | 0.0831886444588958  |                     |             |
| AGIWUR7046;AGIWUR28974;AGIWUR34100                                                             |    |         |         |                |          |          |                     |                     |             |
| CB4856 HS                                                                                      | IV | 5040859 | 5045485 | WBGene00044484 | hot-9    | C09B9.8  | 0.0723166807458844  |                     |             |
| AGIWUR33253;AGIWUR38760                                                                        |    |         |         |                |          |          |                     |                     |             |
| CB4856 HS                                                                                      | IV | 5056973 | 5061012 | WBGene00015630 | C09B9.7  | C09B9.7  | 0.0639919572664933  |                     | AGIWUR22172 |
| CB4856 HS                                                                                      | IV | 5083303 | 5086887 | WBGene00015330 | C02B10.5 | C02B10.5 | -0.224763811437824  |                     |             |
| AGIWUR12136;AGIWUR16791;AGIWUR30192                                                            |    |         |         |                |          |          |                     |                     |             |
| CB4856 HS                                                                                      | IV | 5086839 | 5088883 | WBGene00015326 | ivd-1    | C02B10.1 | -0.165269545788589  |                     |             |
| AGIWUR9354;AGIWUR17617;AGIWUR18265;AGIWUR20484;AGIWUR26324;AGIWUR27425;AGIWUR35957;AGIWUR42479 |    |         |         |                |          |          |                     |                     |             |
| CB4856 HS                                                                                      | IV | 5090243 | 5091043 | WBGene00015327 | snpn-1   | C02B10.2 | 0.0956512428540854  |                     |             |
| AGIWUR16347                                                                                    |    |         |         |                |          |          |                     |                     |             |
| CB4856 HS                                                                                      | IV | 5091586 | 5092807 | WBGene00015329 | C02B10.4 | C02B10.4 |                     |                     |             |
| -0.00828167633422083                                                                           |    |         |         |                |          |          |                     |                     |             |
| AGIWUR7850;AGIWUR23239;AGIWUR33462                                                             |    |         |         |                |          |          |                     |                     |             |
| CB4856 HS                                                                                      | IV | 5092823 | 5103279 | WBGene00015328 | C02B10.3 | C02B10.3 | -0.139556378897685  |                     |             |
| AGIWUR17458;AGIWUR21441;AGIWUR22579;AGIWUR29397;AGIWUR32557;AGIWUR37173                        |    |         |         |                |          |          |                     |                     |             |
| CB4856 HS                                                                                      | IV | 5111839 | 5112917 | WBGene00014997 | AC7.3    | AC7.3    | 0.244724519608781   |                     | AGIWUR5318  |
| CB4856 HS                                                                                      | IV | 5112929 | 5122019 | WBGene00006428 | tkr-3    | AC7.1    | 0.152964918543599   |                     | AGIWUR3307  |
| CB4856 HS                                                                                      | IV | 5127006 | 5152485 | WBGene00004929 | soc-2    | AC7.2    | -0.0422113395909172 |                     |             |
| AGIWUR7562;AGIWUR17527;AGIWUR17969;AGIWUR20865;AGIWUR22829;AGIWUR24095;AGIWUR29132             |    |         |         |                |          |          |                     |                     |             |
| CB4856 HS                                                                                      | IV | 5159427 | 5160248 | WBGene00016057 | C24D10.6 | C24D10.6 | 0.213618366221427   |                     |             |
| AGIWUR2577                                                                                     |    |         |         |                |          |          |                     |                     |             |
| CB4856 HS                                                                                      | IV | 5160522 | 5161388 | WBGene00016055 | C24D10.4 | C24D10.4 | 0.147042690985506   |                     |             |
| AGIWUR2286                                                                                     |    |         |         |                |          |          |                     |                     |             |
| CB4856 HS                                                                                      | IV | 5162223 | 5162712 | WBGene00023243 | C24D10.3 | C24D10.3 | -0.237926482968411  |                     |             |
| AGIWUR38800                                                                                    |    |         |         |                |          |          |                     |                     |             |
| CB4856 HS                                                                                      | IV | 5162743 | 5163074 | WBGene00016058 | nspd-3   | C24D10.7 | 0.247451692857933   |                     |             |

AGIWUR5468  
CB4856 HS IV 5163293 5164351 WBGene00016054 C24D10.2 C24D10.2 0.117755632233735  
AGIWUR653;AGIWUR1095;AGIWUR1370;AGIWUR2640;AGIWUR5782;AGIWUR12706;AGIWUR23865;AGIWUR26333;AGIWUR30473;AGIWUR31756;AGIWUR34688  
CB4856 HS IV 5166330 5168427 WBGene00016053 C24D10.1 C24D10.1 0.173750959951128  
AGIWUR4016  
CB4856 HS IV 5173280 5183708 WBGene00002247 lam-1 W03F8.5 -0.0433893607169544  
AGIWUR8912;AGIWUR20019;AGIWUR22298;AGIWUR26640;AGIWUR31449;AGIWUR36076;AGIWUR42853;AGIWUR43042  
CB4856 HS IV 5184123 5185240 WBGene00020994 W03F8.4 W03F8.4 0.0339690023058132 AGIWUR5806  
CB4856 HS IV 5185333 5189096 WBGene00020993 W03F8.3 W03F8.3 0.178119664618524 AGIWUR31727  
CB4856 HS IV 5189042 5195627 WBGene00020997 gpa-18 W03F8.9 -0.0261409456785655  
AGIWUR32817;AGIWUR45125  
CB4856 HS IV 5204591 5207138 WBGene00006586 tni-4 W03F8.1 -0.0578477696332471  
AGIWUR13736;AGIWUR40275  
CB4856 HS IV 5207109 5209481 WBGene00195093 Y59E9AL.36 Y59E9AL.36 0.0332593000829515  
AGIWUR6575;AGIWUR10992  
CB4856 HS IV 5209501 5210690 WBGene00043064 nbet-1 Y59E9AL.7 0.132322405851795  
AGIWUR26374  
CB4856 HS IV 5221284 5222133 WBGene00021995 Y59E9AL.5 Y59E9AL.5  
-0.00149545094828341 AGIWUR35112  
CB4856 HS IV 5223237 5224172 WBGene00044346 Y59E9AL.8 Y59E9AL.8 0.0245287314767739  
AGIWUR20183;AGIWUR32714  
CB4856 HS IV 5224899 5225772 WBGene00021996 Y59E9AL.6 Y59E9AL.6 0.181516133827227  
AGIWUR7006;AGIWUR23221  
CB4856 HS IV 5228919 5230083 WBGene00021992 thn-6 Y59E9AL.1 -0.0702490324555143  
AGIWUR7330  
CB4856 HS IV 5230830 5232479 WBGene00021999 thn-5 Y59E9AR.4 -0.138502660479553  
AGIWUR38274  
CB4856 HS IV 5241364 5241794 WBGene00022002 Y59E9AR.7 Y59E9AR.7 0.314280767981195  
AGIWUR31205  
CB4856 HS IV 5262786 5264433 WBGene00018127 F36H12.14 F36H12.14 0.0977578406370432  
AGIWUR3951;AGIWUR14943;AGIWUR16218;AGIWUR19616;AGIWUR23777;AGIWUR30541;AGIWUR36641;AGIWUR44470  
CB4856 HS IV 5268049 5278070 WBGene00018130 F36H12.17 F36H12.17 -0.0571437836267696  
AGIWUR29954;AGIWUR36873;AGIWUR44131  
CB4856 HS IV 5290847 5293689 WBGene00018117 nlp-47 F36H12.1 -0.0202364678993447  
AGIWUR9348  
CB4856 HS IV 5295931 5297487 WBGene00022707 ZK354.6 ZK354.6 0.126500096728828 AGIWUR43447  
CB4856 HS IV 5302141 5303078 WBGene00022708 ZK354.7 ZK354.7 0.130543757047551 AGIWUR14632  
CB4856 HS IV 5304021 5306140 WBGene00022709 ZK354.8 ZK354.8 -0.175453622867291 AGIWUR16814

|                                                                        |    |    |         |         |                |           |           |                      |             |
|------------------------------------------------------------------------|----|----|---------|---------|----------------|-----------|-----------|----------------------|-------------|
| CB4856                                                                 | HS | IV | 5310042 | 5311445 | WBGene00022706 | ZK354.3   | ZK354.3   | 0.111651261568413    | AGIWUR4701  |
| CB4856                                                                 | HS | IV | 5313405 | 5315525 | WBGene00022705 | ZK354.2   | ZK354.2   | 0.0361857105795362   |             |
| AGIWUR1753;AGIWUR19004                                                 |    |    |         |         |                |           |           |                      |             |
| CB4856                                                                 | HS | IV | 5319253 | 5325033 | WBGene00021159 | Y4C6B.5   | Y4C6B.5   | 0.250164659539871    | AGIWUR27808 |
| CB4856                                                                 | HS | IV | 5326444 | 5329640 | WBGene00021158 | Y4C6B.4   | Y4C6B.4   | 0.000849073574384462 |             |
| AGIWUR21358;AGIWUR34632                                                |    |    |         |         |                |           |           |                      |             |
| CB4856                                                                 | HS | IV | 5332478 | 5336827 | WBGene00021157 | Y4C6B.3   | Y4C6B.3   | 0.121095442866152    | AGIWUR25646 |
| CB4856                                                                 | HS | IV | 5340890 | 5344204 | WBGene00021156 | Y4C6B.2   | Y4C6B.2   | 0.206097650994565    | AGIWUR21116 |
| CB4856                                                                 | HS | IV | 5344592 | 5350947 | WBGene00021160 | gba-4     | Y4C6B.6   | -0.143717338042247   |             |
| AGIWUR20362;AGIWUR23005;AGIWUR28435;AGIWUR39463                        |    |    |         |         |                |           |           |                      |             |
| CB4856                                                                 | HS | IV | 5351420 | 5353464 | WBGene00021161 | Y4C6B.7   | Y4C6B.7   | 0.0484579020255387   |             |
| AGIWUR1244;AGIWUR12051;AGIWUR17871;AGIWUR26058;AGIWUR41428;AGIWUR41479 |    |    |         |         |                |           |           |                      |             |
| CB4856                                                                 | HS | IV | 5354488 | 5356539 | WBGene00021155 | Y4C6B.1   | Y4C6B.1   | 0.119957540282126    | AGIWUR23550 |
| CB4856                                                                 | HS | IV | 5356538 | 5364306 | WBGene00018319 | hda-6     | F41H10.6  | 0.0849945510105954   |             |
| AGIWUR3721;AGIWUR16258;AGIWUR17382;AGIWUR27562                         |    |    |         |         |                |           |           |                      |             |
| CB4856                                                                 | HS | IV | 5364559 | 5366751 | WBGene00018317 | F41H10.4  | F41H10.4  | -0.0347811994329081  |             |
| AGIWUR8752                                                             |    |    |         |         |                |           |           |                      |             |
| CB4856                                                                 | HS | IV | 5366867 | 5368866 | WBGene00018321 | sand-1    | F41H10.11 | -0.0390582924562652  |             |
| AGIWUR18778;AGIWUR36540;AGIWUR44444                                    |    |    |         |         |                |           |           |                      |             |
| CB4856                                                                 | HS | IV | 5369797 | 5374673 | WBGene00018316 | F41H10.3  | F41H10.3  |                      |             |
| -0.00504406882295516 AGIWUR28505;AGIWUR32473;AGIWUR39991;AGIWUR42589   |    |    |         |         |                |           |           |                      |             |
| CB4856                                                                 | HS | IV | 5374598 | 5377275 | WBGene00001243 | elo-5     | F41H10.7  | 0.171049105040471    |             |
| AGIWUR38049                                                            |    |    |         |         |                |           |           |                      |             |
| CB4856                                                                 | HS | IV | 5381634 | 5382470 | WBGene00018315 | F41H10.2  | F41H10.2  | -0.209793064807577   |             |
| AGIWUR10409                                                            |    |    |         |         |                |           |           |                      |             |
| CB4856                                                                 | HS | IV | 5385320 | 5386080 | WBGene00018322 | F41H10.12 | F41H10.12 | 0.096539305182664    |             |
| AGIWUR27702                                                            |    |    |         |         |                |           |           |                      |             |
| CB4856                                                                 | HS | IV | 5386629 | 5388559 | WBGene00001244 | elo-6     | F41H10.8  | 0.0831359590550287   |             |
| AGIWUR12198;AGIWUR38050                                                |    |    |         |         |                |           |           |                      |             |
| CB4856                                                                 | HS | IV | 5390184 | 5391557 | WBGene00002032 | htp-1     | F41H10.10 | 0.0588846662444347   |             |
| AGIWUR17040                                                            |    |    |         |         |                |           |           |                      |             |
| CB4856                                                                 | HS | IV | 5391912 | 5393572 | WBGene00022775 | ZK616.5   | ZK616.5   | -0.00645294522782791 | AGIWUR17545 |
| CB4856                                                                 | HS | IV | 5393843 | 5394849 | WBGene00022776 | perm-3    | ZK616.6   | -0.122398647004339   |             |
| AGIWUR3289;AGIWUR10280;AGIWUR14230;AGIWUR37025;AGIWUR37266;AGIWUR42327 |    |    |         |         |                |           |           |                      |             |
| CB4856                                                                 | HS | IV | 5394962 | 5396966 | WBGene00022774 | swsn-6    | ZK616.4   | -0.152915813701718   | AGIWUR19887 |
| CB4856                                                                 | HS | IV | 5397069 | 5397694 | WBGene00022773 | ZK616.3   | ZK616.3   | 0.0893605989178408   | AGIWUR16868 |
| CB4856                                                                 | HS | IV | 5397839 | 5398591 | WBGene00022772 | ZK616.2   | ZK616.2   | 0.0262118216681628   | AGIWUR16916 |
| CB4856                                                                 | HS | IV | 5405645 | 5407375 | WBGene00194816 | ZK616.61  | ZK616.61  | 0.208669154819528    |             |
| AGIWUR8298                                                             |    |    |         |         |                |           |           |                      |             |

|                                                                                     |    |    |         |         |                |          |          |                     |             |
|-------------------------------------------------------------------------------------|----|----|---------|---------|----------------|----------|----------|---------------------|-------------|
| CB4856                                                                              | HS | IV | 5408426 | 5411166 | WBGene00235383 | ZK616.65 | ZK616.65 | 0.138704721103185   |             |
| AGIWUR31061                                                                         |    |    |         |         |                |          |          |                     |             |
| CB4856                                                                              | HS | IV | 5412827 | 5415771 | WBGene00004992 | spp-7    | ZK616.9  | 0.240981489368536   | AGIWUR2110  |
| CB4856                                                                              | HS | IV | 5416906 | 5419195 | WBGene00001223 | ehn-3    | ZK616.10 | 0.206160429325671   |             |
| AGIWUR26234                                                                         |    |    |         |         |                |          |          |                     |             |
| CB4856                                                                              | HS | IV | 5423576 | 5450802 | WBGene00021152 | mg1-3    | Y4C6A.2  | 0.0327267139961029  |             |
| AGIWUR24178;AGIWUR32618                                                             |    |    |         |         |                |          |          |                     |             |
| CB4856                                                                              | HS | IV | 5450993 | 5452455 | WBGene00021153 | Y4C6A.3  | Y4C6A.3  | 0.0487079843212754  | AGIWUR10331 |
| CB4856                                                                              | HS | IV | 5452967 | 5453640 | WBGene00021154 | Y4C6A.4  | Y4C6A.4  | 0.340945127276123   | AGIWUR8178  |
| CB4856                                                                              | HS | IV | 5458767 | 5460735 | WBGene00021151 | Y4C6A.1  | Y4C6A.1  | 0.188532908716964   |             |
| AGIWUR37588;AGIWUR42972                                                             |    |    |         |         |                |          |          |                     |             |
| CB4856                                                                              | HS | IV | 5462501 | 5464448 | WBGene00021793 | Y52D5A.2 | Y52D5A.2 | 0.310191778821274   |             |
| AGIWUR31886                                                                         |    |    |         |         |                |          |          |                     |             |
| CB4856                                                                              | HS | IV | 5467393 | 5469134 | WBGene00021792 | Y52D5A.1 | Y52D5A.1 | -0.124844524592625  |             |
| AGIWUR17822                                                                         |    |    |         |         |                |          |          |                     |             |
| CB4856                                                                              | HS | IV | 5469961 | 5473174 | WBGene00004374 | rme-2    | T11F8.3  | 0.0805404294168355  | AGIWUR29033 |
| CB4856                                                                              | HS | IV | 5474162 | 5476568 | WBGene00020435 | T11F8.4  | T11F8.4  | 0.120679401924301   | AGIWUR40747 |
| CB4856                                                                              | HS | IV | 5477214 | 5478708 | WBGene00020434 | T11F8.2  | T11F8.2  | 0.0406532743198427  |             |
| AGIWUR8500;AGIWUR20411;AGIWUR27745;AGIWUR38023                                      |    |    |         |         |                |          |          |                     |             |
| CB4856                                                                              | HS | IV | 5479589 | 5480644 | WBGene00020433 | T11F8.1  | T11F8.1  | 0.10016265184192    | AGIWUR14895 |
| CB4856                                                                              | HS | IV | 5493992 | 5495252 | WBGene00015097 | B0273.1  | B0273.1  | -0.0456979194814942 | AGIWUR31928 |
| CB4856                                                                              | HS | IV | 5495666 | 5528338 | WBGene00006745 | unc-5    | B0273.4  | 0.164043429402549   | AGIWUR31044 |
| CB4856                                                                              | HS | IV | 5533142 | 5537992 | WBGene00001411 | fem-1    | F35D6.1  | -0.139696912388144  |             |
| AGIWUR3074;AGIWUR5563;AGIWUR31665;AGIWUR31934;AGIWUR33987;AGIWUR37509;AGIWUR44674   |    |    |         |         |                |          |          |                     |             |
| CB4856                                                                              | HS | IV | 5537981 | 5541365 | WBGene00001093 | drp-1    | T12E12.4 | 0.00303593573074368 |             |
| AGIWUR7638;AGIWUR8632;AGIWUR21497;AGIWUR26100;AGIWUR26830;AGIWUR27798               |    |    |         |         |                |          |          |                     |             |
| CB4856                                                                              | HS | IV | 5541607 | 5544765 | WBGene00020464 | T12E12.3 | T12E12.3 | 0.0931662984510542  |             |
| AGIWUR16529                                                                         |    |    |         |         |                |          |          |                     |             |
| CB4856                                                                              | HS | IV | 5544860 | 5548459 | WBGene00020463 | cec-6    | T12E12.2 | 0.146953419074899   |             |
| AGIWUR35802                                                                         |    |    |         |         |                |          |          |                     |             |
| CB4856                                                                              | HS | IV | 5551134 | 5558820 | WBGene00020462 | T12E12.1 | T12E12.1 | -0.0877577006649535 |             |
| AGIWUR4873;AGIWUR8315;AGIWUR18358;AGIWUR20163;AGIWUR28072;AGIWUR31360               |    |    |         |         |                |          |          |                     |             |
| CB4856                                                                              | HS | IV | 5567020 | 5574133 | WBGene00020465 | T12E12.6 | T12E12.6 | -0.125335353999116  |             |
| AGIWUR22199;AGIWUR35240;AGIWUR35383                                                 |    |    |         |         |                |          |          |                     |             |
| CB4856                                                                              | HS | IV | 5584661 | 5610368 | WBGene00001439 | fkh-7    | F26D12.1 | -0.0189157108018705 |             |
| AGIWUR21093;AGIWUR25106;AGIWUR27035;AGIWUR32201;AGIWUR38013;AGIWUR38887;AGIWUR42087 |    |    |         |         |                |          |          |                     |             |
| CB4856                                                                              | HS | IV | 5611950 | 5614608 | WBGene00016542 | C39H7.4  | C39H7.4  | 0.0346384977453909  | AGIWUR23749 |
| CB4856                                                                              | HS | IV | 5615522 | 5619685 | WBGene00044125 | srsx-16  | C39H7.9  | 0.148986857276765   |             |
| AGIWUR32633;AGIWUR34370                                                             |    |    |         |         |                |          |          |                     |             |

|                                                                                   |    |    |         |         |                |          |          |                      |             |
|-----------------------------------------------------------------------------------|----|----|---------|---------|----------------|----------|----------|----------------------|-------------|
| CB4856                                                                            | HS | IV | 5622063 | 5623818 | WBGene00044124 | srsx-15  | C39H7.8  | -0.0076883044658782  |             |
| AGIWUR25141;AGIWUR35563;AGIWUR45008                                               |    |    |         |         |                |          |          |                      |             |
| CB4856                                                                            | HS | IV | 5624855 | 5627156 | WBGene00016543 | srsx-14  | C39H7.5  | 0.124340679145737    | AGIWUR22984 |
| CB4856                                                                            | HS | IV | 5628792 | 5630239 | WBGene00005090 | srd-12   | C39H7.6  | 0.0406465261108133   | AGIWUR14655 |
| CB4856                                                                            | HS | IV | 5633818 | 5635651 | WBGene00005091 | srd-13   | C39H7.7  | -0.0597960181479955  | AGIWUR33901 |
| CB4856                                                                            | HS | IV | 5637835 | 5640190 | WBGene00005092 | srd-14   | B0547.3  | 0.0555248390398426   |             |
| AGIWUR37068;AGIWUR42849                                                           |    |    |         |         |                |          |          |                      |             |
| CB4856                                                                            | HS | IV | 5643252 | 5645614 | WBGene00005086 | srd-8    | B0547.4  | -0.151090007736348   | AGIWUR13315 |
| CB4856                                                                            | HS | IV | 5645831 | 5646233 | WBGene00015253 | B0547.2  | B0547.2  | 0.00436663701280438  | AGIWUR4167  |
| CB4856                                                                            | HS | IV | 5647432 | 5648910 | WBGene00005084 | srd-6    | B0547.5  | 0.0417813791152488   |             |
| AGIWUR15071;AGIWUR24916                                                           |    |    |         |         |                |          |          |                      |             |
| CB4856                                                                            | HS | IV | 5649533 | 5651079 | WBGene00000817 | csn-5    | B0547.1  | -0.0145602267764628  |             |
| AGIWUR15023;AGIWUR26838;AGIWUR30038;AGIWUR44781                                   |    |    |         |         |                |          |          |                      |             |
| CB4856                                                                            | HS | IV | 5651087 | 5660523 | WBGene00004804 | skn-1    | T19E7.2  | -0.162373686211515   |             |
| AGIWUR1037;AGIWUR1729;AGIWUR7018;AGIWUR30483                                      |    |    |         |         |                |          |          |                      |             |
| CB4856                                                                            | HS | IV | 5661141 | 5664425 | WBGene00000247 | bec-1    | T19E7.3  | 0.303833835681274    | AGIWUR28646 |
| CB4856                                                                            | HS | IV | 5667525 | 5669583 | WBGene00044500 | T19E7.6  | T19E7.6  | 0.310756697264727    |             |
| AGIWUR1961;AGIWUR7360;AGIWUR13107;AGIWUR18108;AGIWUR28425;AGIWUR31204;AGIWUR37038 |    |    |         |         |                |          |          |                      |             |
| CB4856                                                                            | HS | IV | 5672633 | 5674542 | WBGene00005083 | srd-5    | T19E7.5  | 0.0843604817354482   |             |
| AGIWUR18363;AGIWUR21112;AGIWUR40940                                               |    |    |         |         |                |          |          |                      |             |
| CB4856                                                                            | HS | IV | 5676212 | 5678144 | WBGene00016954 | C55C3.4  | C55C3.4  | -0.322336377294903   | AGIWUR31025 |
| CB4856                                                                            | HS | IV | 5678847 | 5682639 | WBGene00043065 | C55C3.7  | C55C3.7  | -0.119941564906346   |             |
| AGIWUR20678;AGIWUR31895;AGIWUR44145                                               |    |    |         |         |                |          |          |                      |             |
| CB4856                                                                            | HS | IV | 5683184 | 5684672 | WBGene00016956 | C55C3.6  | C55C3.6  | 0.17270439031713     |             |
| AGIWUR3247;AGIWUR44402                                                            |    |    |         |         |                |          |          |                      |             |
| CB4856                                                                            | HS | IV | 5685287 | 5688273 | WBGene00016953 | C55C3.3  | C55C3.3  | 0.0612974149319072   | AGIWUR31711 |
| CB4856                                                                            | HS | IV | 5691030 | 5694646 | WBGene00044501 | C55C3.8  | C55C3.8  | -0.00203240969603069 |             |
| AGIWUR11565;AGIWUR14365;AGIWUR41535                                               |    |    |         |         |                |          |          |                      |             |
| CB4856                                                                            | HS | IV | 5695777 | 5703468 | WBGene00016955 | perm-5   | C55C3.5  | 0.147436903867861    |             |
| AGIWUR2558;AGIWUR12926;AGIWUR13869                                                |    |    |         |         |                |          |          |                      |             |
| CB4856                                                                            | HS | IV | 5709096 | 5714336 | WBGene00016951 | C55C3.1  | C55C3.1  | 0.0394232807676458   | AGIWUR33858 |
| CB4856                                                                            | HS | IV | 5725600 | 5729727 | WBGene00019263 | H35B03.1 | H35B03.1 | 0.196044679746425    |             |
| AGIWUR12168;AGIWUR15462;AGIWUR16089;AGIWUR21515;AGIWUR42466                       |    |    |         |         |                |          |          |                      |             |
| CB4856                                                                            | HS | IV | 5729658 | 5732636 | WBGene00019264 | H35B03.2 | H35B03.2 | 0.120581340950266    |             |
| AGIWUR20162;AGIWUR24408;AGIWUR43047;AGIWUR44813                                   |    |    |         |         |                |          |          |                      |             |
| CB4856                                                                            | HS | IV | 5735019 | 5737106 | WBGene00016667 | C45E5.4  | C45E5.4  | 0.0415333679769461   | AGIWUR28686 |
| CB4856                                                                            | HS | IV | 5744336 | 5747110 | WBGene00016664 | C45E5.1  | C45E5.1  | 0.167022885791202    |             |
| AGIWUR3135;AGIWUR7956;AGIWUR37449                                                 |    |    |         |         |                |          |          |                      |             |
| CB4856                                                                            | HS | IV | 5747376 | 5757862 | WBGene00003636 | nhr-46   | C45E5.6  | -0.0830814615524638  |             |



AGIWUR3975;AGIWUR15663;AGIWUR18429;AGIWUR27946;AGIWUR29904  
 CB4856 HS IV 5791296 5793457 WBGene00016287 C31H1.2 C31H1.2 0.119810962973252  
 AGIWUR7772;AGIWUR9298;AGIWUR24041  
 CB4856 HS IV 5794932 5796825 WBGene00016288 C31H1.5 C31H1.5 -0.162428455241265 AGIWUR15801  
 CB4856 HS IV 5797453 5800233 WBGene00016286 C31H1.1 C31H1.1 0.132788153041407 AGIWUR44740  
 CB4856 HS IV 5800336 5807093 WBGene00016289 lnt1-1 C31H1.6 0.0265769067592609  
 AGIWUR1036;AGIWUR26901  
 CB4856 HS IV 5811583 5814142 WBGene00016291 C31H1.8 C31H1.8 0.236888890642 AGIWUR28224  
 CB4856 HS IV 5820370 5830199 WBGene00015680 egal-1 C10G6.1 0.0675688651456436  
 AGIWUR11282;AGIWUR38980  
 CB4856 HS IV 5839387 5844004 WBGene00015539 C06E7.2 C06E7.2 0.0750014275168827 AGIWUR16132  
 CB4856 HS IV 5843890 5846398 WBGene00015540 sams-4 C06E7.3 0.0801364561970885 AGIWUR33922  
 CB4856 HS IV 5848657 5850845 WBGene00015538 sams-3 C06E7.1 -0.0381630912981947 AGIWUR8961  
 CB4856 HS IV 5850826 5859976 WBGene00015541 C06E7.4 C06E7.4 0.0907140750599602 AGIWUR4608  
 CB4856 HS IV 5864529 5865918 WBGene00004973 spe-27 C06E7.6 0.147210597820184 AGIWUR7261  
 CB4856 HS IV 5867689 5870172 WBGene00005728 srv-17 C06E7.7 0.0520330880561861 AGIWUR11136  
 CB4856 HS IV 5871143 5871737 WBGene00005729 srv-18 H04M03.5 -0.0754439785553149  
 AGIWUR72;AGIWUR9244;AGIWUR19701;AGIWUR19952;AGIWUR27219  
 CB4856 HS IV 5871976 5874081 WBGene00005730 srv-19 H04M03.6 -0.00624712918693149  
 AGIWUR30456  
 CB4856 HS IV 5874559 5875659 WBGene00005731 srv-20 H04M03.7 0.149328543464498  
 AGIWUR1978;AGIWUR4326;AGIWUR7692;AGIWUR11512;AGIWUR32527  
 CB4856 HS IV 5876092 5877346 WBGene00005732 srv-21 H04M03.8 0.0875111482425215  
 AGIWUR15833  
 CB4856 HS IV 5878470 5879953 WBGene00005733 srv-22 H04M03.9 -0.161327306876032  
 AGIWUR31893  
 CB4856 HS IV 5882707 5884529 WBGene00019155 H04M03.11 H04M03.11 0.102663853586646  
 AGIWUR17441  
 CB4856 HS IV 5885835 5889821 WBGene00019154 glf-1 H04M03.4 0.216106698031698  
 AGIWUR44615  
 CB4856 HS IV 5891565 5893329 WBGene00019153 H04M03.3 H04M03.3 0.134677121799589  
 AGIWUR27890  
 CB4856 HS IV 5895490 5895888 WBGene00019152 nspb-6 H04M03.2 0.0797281095875046  
 AGIWUR11992  
 CB4856 HS IV 5896623 5899112 WBGene00019151 pck-3 H04M03.1 0.219174856044404  
 AGIWUR8619  
 CB4856 HS IV 5899586 5903355 WBGene00019156 H04M03.12 H04M03.12 -0.0423164167901273  
 AGIWUR14194  
 CB4856 HS IV 5917326 5921446 WBGene00019257 dhhc-13 H32C10.3 -0.159342553970072

|                                                                                                                                                                                                                                           |    |    |         |         |                |          |          |                      |             |
|-------------------------------------------------------------------------------------------------------------------------------------------------------------------------------------------------------------------------------------------|----|----|---------|---------|----------------|----------|----------|----------------------|-------------|
| AGIWUR33658                                                                                                                                                                                                                               |    |    |         |         |                |          |          |                      |             |
| CB4856                                                                                                                                                                                                                                    | HS | IV | 5930645 | 5933326 | WBGene00003019 | lin-33   | H32C10.2 | -0.14438799784476    |             |
| AGIWUR31530                                                                                                                                                                                                                               |    |    |         |         |                |          |          |                      |             |
| CB4856                                                                                                                                                                                                                                    | HS | IV | 5934346 | 5937497 | WBGene00019255 | H32C10.1 | H32C10.1 | -0.160379281480422   |             |
| AGIWUR5965;AGIWUR20503;AGIWUR32526                                                                                                                                                                                                        |    |    |         |         |                |          |          |                      |             |
| CB4856                                                                                                                                                                                                                                    | HS | IV | 5937445 | 5939230 | WBGene00019296 | mcu-1    | K02B2.3  | -0.161602902505084   |             |
| AGIWUR5511;AGIWUR16477;AGIWUR17572                                                                                                                                                                                                        |    |    |         |         |                |          |          |                      |             |
| CB4856                                                                                                                                                                                                                                    | HS | IV | 5941926 | 5943998 | WBGene00019295 | pfkb-1.2 | K02B2.1  | -0.0601496161439568  |             |
| AGIWUR3026;AGIWUR7954                                                                                                                                                                                                                     |    |    |         |         |                |          |          |                      |             |
| CB4856                                                                                                                                                                                                                                    | HS | IV | 5943981 | 5946754 | WBGene00002129 | inx-7    | K02B2.4  | -0.00940754335955951 | AGIWUR7168  |
| CB4856                                                                                                                                                                                                                                    | HS | IV | 5947036 | 5947607 | WBGene00004494 | rps-25   | K02B2.5  | -0.336900311359168   |             |
| AGIWUR37136;AGIWUR39980                                                                                                                                                                                                                   |    |    |         |         |                |          |          |                      |             |
| CB4856                                                                                                                                                                                                                                    | HS | IV | 5961690 | 5962132 | WBGene00019297 | K02B2.6  | K02B2.6  | -0.200040639627607   | AGIWUR24823 |
| CB4856                                                                                                                                                                                                                                    | HS | IV | 5966656 | 6004857 | WBGene00006780 | unc-44   | B0350.2  | -0.0293286551999206  |             |
| AGIWUR7735;AGIWUR8509;AGIWUR10238;AGIWUR12013;AGIWUR12342;AGIWUR14441;AGIWUR17621;AGIWUR19110;AGIWUR25248;AGIWUR27550;AGIWUR27667;AGIWUR29096;AGIWUR32226;AGIWUR35643;AGIWUR38125;AGIWUR39293;AGIWUR44581                                 |    |    |         |         |                |          |          |                      |             |
| CB4856                                                                                                                                                                                                                                    | HS | IV | 6010352 | 6011645 | WBGene00044502 | C46G7.5  | C46G7.5  | -0.124333127859421   | AGIWUR17759 |
| CB4856                                                                                                                                                                                                                                    | HS | IV | 6015195 | 6017803 | WBGene00016722 | C46G7.2  | C46G7.2  | 0.191553775444772    | AGIWUR4371  |
| CB4856                                                                                                                                                                                                                                    | HS | IV | 6018003 | 6019713 | WBGene00016721 | C46G7.1  | C46G7.1  | 0.201250436721001    | AGIWUR8440  |
| CB4856                                                                                                                                                                                                                                    | HS | IV | 6019705 | 6033639 | WBGene00004112 | pqn-22   | C46G7.4  | 0.0400926022246839   | AGIWUR19188 |
| CB4856                                                                                                                                                                                                                                    | HS | IV | 6040976 | 6074507 | WBGene00019205 | kcc-2    | H16014.1 | -0.0528271538524994  |             |
| AGIWUR1911;AGIWUR2231;AGIWUR5271;AGIWUR6446;AGIWUR7025;AGIWUR8507;AGIWUR13439;AGIWUR13842;AGIWUR14139;AGIWUR15302;AGIWUR17542;AGIWUR19667;AGIWUR21985;AGIWUR26651;AGIWUR27097;AGIWUR28020;AGIWUR29762;AGIWUR34185;AGIWUR42611;AGIWUR42648 |    |    |         |         |                |          |          |                      |             |
| CB4856                                                                                                                                                                                                                                    | HS | IV | 6075301 | 6076157 | WBGene00019514 | K08B4.2  | K08B4.2  | -0.412869386303196   | AGIWUR42732 |
| CB4856                                                                                                                                                                                                                                    | HS | IV | 6076692 | 6079945 | WBGene00019515 | ugt-19   | K08B4.3  | 0.133807403175862    | AGIWUR11886 |
| CB4856                                                                                                                                                                                                                                    | HS | IV | 6080907 | 6083592 | WBGene00019516 | ugt-20   | K08B4.4  | -0.0774536970556596  | AGIWUR914   |
| CB4856                                                                                                                                                                                                                                    | HS | IV | 6086350 | 6089404 | WBGene00019517 | K08B4.5  | K08B4.5  | 0.197753806528366    | AGIWUR15458 |
| CB4856                                                                                                                                                                                                                                    | HS | IV | 6091536 | 6092413 | WBGene00023486 | K08B4.7  | K08B4.7  | 0.2533470586906      |             |
| AGIWUR5558;AGIWUR16663;AGIWUR19385                                                                                                                                                                                                        |    |    |         |         |                |          |          |                      |             |
| CB4856                                                                                                                                                                                                                                    | HS | IV | 6095411 | 6110639 | WBGene00002245 | lag-1    | K08B4.1  | 0.0824499242518186   |             |
| AGIWUR1113;AGIWUR12391;AGIWUR34040                                                                                                                                                                                                        |    |    |         |         |                |          |          |                      |             |
| CB4856                                                                                                                                                                                                                                    | HS | IV | 6110651 | 6112391 | WBGene00019750 | M03D4.3  | M03D4.3  | -0.056420146989856   | AGIWUR34204 |
| CB4856                                                                                                                                                                                                                                    | HS | IV | 6118219 | 6121775 | WBGene00006974 | zen-4    | M03D4.1  | -0.00207511746314282 |             |
| AGIWUR6721;AGIWUR7368;AGIWUR10759;AGIWUR19300;AGIWUR31924                                                                                                                                                                                 |    |    |         |         |                |          |          |                      |             |
| CB4856                                                                                                                                                                                                                                    | HS | IV | 6143183 | 6149923 | WBGene00019176 | H10D12.2 | H10D12.2 | 0.0423876304932667   |             |
| AGIWUR2783;AGIWUR6943;AGIWUR11080;AGIWUR17501;AGIWUR23031;AGIWUR44002                                                                                                                                                                     |    |    |         |         |                |          |          |                      |             |
| CB4856                                                                                                                                                                                                                                    | HS | IV | 6152437 | 6154623 | WBGene00015701 | C11D2.3  | C11D2.3  | -0.0202509283452335  | AGIWUR2737  |
| CB4856                                                                                                                                                                                                                                    | HS | IV | 6154558 | 6155396 | WBGene00015703 | C11D2.7  | C11D2.7  | -0.214418887610771   | AGIWUR26177 |

|                                                 |    |    |         |         |                |          |           |                     |             |
|-------------------------------------------------|----|----|---------|---------|----------------|----------|-----------|---------------------|-------------|
| CB4856                                          | HS | IV | 6155492 | 6156960 | WBGene00015702 | C11D2.4  | C11D2.4   | -0.153251802963184  |             |
| AGIWUR9202;AGIWUR10951;AGIWUR18099;AGIWUR20572  |    |    |         |         |                |          |           |                     |             |
| CB4856                                          | HS | IV | 6157310 | 6183857 | WBGene00006809 | unc-77   | C11D2.6   | 0.0193486178731281  |             |
| AGIWUR18031;AGIWUR29623;AGIWUR40642;AGIWUR43664 |    |    |         |         |                |          |           |                     |             |
| CB4856                                          | HS | IV | 6185888 | 6189205 | WBGene00015700 | asp-9    | C11D2.2   | -0.0314640944952669 |             |
| AGIWUR3747;AGIWUR12177                          |    |    |         |         |                |          |           |                     |             |
| CB4856                                          | HS | IV | 6202080 | 6205703 | WBGene00016761 | tkr-2    | C49A9.7   | 0.169154981511324   | AGIWUR14708 |
| CB4856                                          | HS | IV | 6205793 | 6206344 | WBGene00016764 | C49A9.10 | C49A9.10  | -0.0925858294424273 |             |
| AGIWUR23758                                     |    |    |         |         |                |          |           |                     |             |
| CB4856                                          | HS | IV | 6206843 | 6209527 | WBGene00016762 | ugt-24   | C49A9.8   | 0.0451813860624242  | AGIWUR14772 |
| CB4856                                          | HS | IV | 6210936 | 6213181 | WBGene00016760 | C49A9.6  | C49A9.6   | -0.113183218035852  | AGIWUR38078 |
| CB4856                                          | HS | IV | 6213822 | 6216371 | WBGene00016759 | C49A9.5  | C49A9.5   | 0.131838828144415   | AGIWUR8070  |
| CB4856                                          | HS | IV | 6217349 | 6219449 | WBGene00016763 | C49A9.9  | C49A9.9   | 0.0850095051984532  |             |
| AGIWUR1773;AGIWUR15196                          |    |    |         |         |                |          |           |                     |             |
| CB4856                                          | HS | IV | 6219604 | 6222346 | WBGene00016758 | C49A9.4  | C49A9.4   | 0.492587258225697   | AGIWUR12726 |
| CB4856                                          | HS | IV | 6222089 | 6225009 | WBGene00016757 | C49A9.3  | C49A9.3   | 0.210056411349772   | AGIWUR37712 |
| CB4856                                          | HS | IV | 6225443 | 6228046 | WBGene00016756 | C49A9.2  | C49A9.2   | -0.0993688434109998 | AGIWUR23748 |
| CB4856                                          | HS | IV | 6228203 | 6230025 | WBGene00016755 | C49A9.1  | C49A9.1   | -0.100290748423504  | AGIWUR3139  |
| CB4856                                          | HS | IV | 6231023 | 6232607 | WBGene00019058 | F58F9.4  | F58F9.4   | 0.271346937298992   | AGIWUR41348 |
| CB4856                                          | HS | IV | 6233246 | 6235666 | WBGene00019057 | F58F9.3  | F58F9.3   | 0.0485649934692463  |             |
| AGIWUR7538;AGIWUR20237                          |    |    |         |         |                |          |           |                     |             |
| CB4856                                          | HS | IV | 6235977 | 6237543 | WBGene00019059 | F58F9.6  | F58F9.6   | 0.305662667307001   | AGIWUR19018 |
| CB4856                                          | HS | IV | 6238192 | 6239437 | WBGene00044306 | F58F9.8  | F58F9.8   | -0.0719805610538047 |             |
| AGIWUR9116;AGIWUR24570                          |    |    |         |         |                |          |           |                     |             |
| CB4856                                          | HS | IV | 6240306 | 6241389 | WBGene00044307 | F58F9.9  | F58F9.9   | 0.834271006121729   |             |
| AGIWUR18241;AGIWUR29280                         |    |    |         |         |                |          |           |                     |             |
| CB4856                                          | HS | IV | 6241855 | 6242795 | WBGene00044308 | F58F9.10 | F58F9.10  | 0.0715541854439552  |             |
| AGIWUR26484;AGIWUR38991                         |    |    |         |         |                |          |           |                     |             |
| CB4856                                          | HS | IV | 6243382 | 6244374 | WBGene00044309 | F58F9.11 | F58F9.11  | 0.137888271570628   |             |
| AGIWUR17345                                     |    |    |         |         |                |          |           |                     |             |
| CB4856                                          | HS | IV | 6245341 | 6248492 | WBGene00019060 | acox-3   | F58F9.7   | 0.00948747351833035 | AGIWUR24700 |
| CB4856                                          | HS | IV | 6249874 | 6253083 | WBGene00019055 | F58F9.1  | F58F9.1   | 0.0768510528054467  | AGIWUR12407 |
| CB4856                                          | HS | IV | 6255071 | 6259858 | WBGene00003754 | nlp-16   | T13A10.5  | -0.0502048672822495 |             |
| AGIWUR21097;AGIWUR24636                         |    |    |         |         |                |          |           |                     |             |
| CB4856                                          | HS | IV | 6261058 | 6263344 | WBGene00005739 | srv-28   | T13A10.14 | 0.0511047379693421  |             |
| AGIWUR7801                                      |    |    |         |         |                |          |           |                     |             |
| CB4856                                          | HS | IV | 6267457 | 6269446 | WBGene00005741 | srv-30   | T13A10.7  | -0.119693901063121  |             |
| AGIWUR37058                                     |    |    |         |         |                |          |           |                     |             |
| CB4856                                          | HS | IV | 6269773 | 6272023 | WBGene00005742 | srv-31   | T13A10.9  | 0.0112176358246296  |             |



|                                                                                      |    |                 |                |            |            |                             |
|--------------------------------------------------------------------------------------|----|-----------------|----------------|------------|------------|-----------------------------|
| CB4856 HS<br>AGIWUR43023                                                             | IV | 6377065 6378195 | WBGene00000256 | bli-6      | Y73B6BL.34 | 0.0598432015407919          |
| CB4856 HS<br>AGIWUR18216                                                             | IV | 6378594 6384070 | WBGene00022240 | shl-1      | Y73B6BL.19 | -0.064745048495638          |
| CB4856 HS<br>AGIWUR5050                                                              | IV | 6396582 6402458 | WBGene00022242 | sfrp-1     | Y73B6BL.21 | 0.224372953546187           |
| CB4856 HS<br>AGIWUR3601                                                              | IV | 6405176 6408236 | WBGene00005724 | srv-13     | Y73B6BL.39 | -0.124717622812499          |
| CB4856 HS<br>AGIWUR21204;AGIWUR23050;AGIWUR23340;AGIWUR26890;AGIWUR29462;AGIWUR40052 | IV | 6409557 6413566 | WBGene00022254 | Y73B6BL.35 | Y73B6BL.35 | 0.0579192511781699          |
| CB4856 HS                                                                            | IV | 6415478 6417457 | WBGene00022232 | exos-2     | Y73B6BL.3  | 0.1345277800883 AGIWUR10655 |
| CB4856 HS<br>AGIWUR3816;AGIWUR6155;AGIWUR11951;AGIWUR28586;AGIWUR40745               | IV | 6417696 6419078 | WBGene00022244 | Y73B6BL.23 | Y73B6BL.23 | 0.148749678373246           |
| CB4856 HS<br>AGIWUR10934                                                             | IV | 6419500 6420898 | WBGene00002033 | htp-2      | Y73B6BL.2  | -0.0788320372702458         |
| CB4856 HS<br>AGIWUR9734                                                              | IV | 6421036 6421200 | WBGene00044752 | Y73B6BL.45 | Y73B6BL.45 | 0.0629849526774793          |
| CB4856 HS<br>AGIWUR28069                                                             | IV | 6421589 6423489 | WBGene00022257 | puf-11     | Y73B6BL.38 | 0.0459172531383292          |
| CB4856 HS<br>AGIWUR5531;AGIWUR20296;AGIWUR22193                                      | IV | 6424600 6426139 | WBGene00022245 | acp-6      | Y73B6BL.24 | 0.119382646789262           |
| CB4856 HS<br>AGIWUR31201                                                             | IV | 6428305 6431707 | WBGene00022246 | acp-7      | Y73B6BL.25 | 0.20562779220708            |
| CB4856 HS<br>AGIWUR5344;AGIWUR7316;AGIWUR16502;AGIWUR29630                           | IV | 6438223 6440032 | WBGene00043067 | d1c-5      | Y73B6BL.43 | -0.00543062745642686        |
| CB4856 HS<br>AGIWUR10068;AGIWUR14224;AGIWUR30990                                     | IV | 6442229 6446532 | WBGene00022252 | Y73B6BL.31 | Y73B6BL.31 | 0.381789731794687           |
| CB4856 HS<br>AGIWUR18076                                                             | IV | 6446573 6457543 | WBGene00022247 | lgc-10     | Y73B6BL.26 | -0.0932632781487515         |
| CB4856 HS<br>AGIWUR38243                                                             | IV | 6464352 6468327 | WBGene00043066 | acr-25     | Y73B6BL.42 | 0.331571884629808           |
| CB4856 HS<br>AGIWUR11423;AGIWUR14886                                                 | IV | 6469955 6471384 | WBGene00022255 | Y73B6BL.36 | Y73B6BL.36 | 0.122563695821782           |
| CB4856 HS<br>AGIWUR42102                                                             | IV | 6472155 6473235 | WBGene00022248 | Y73B6BL.27 | Y73B6BL.27 | 0.00562324215617682         |
| CB4856 HS<br>AGIWUR1895                                                              | IV | 6480521 6486971 | WBGene00022231 | tyr-6      | Y73B6BL.1  | 0.228447912606693           |
| CB4856 HS<br>AGIWUR12748                                                             | IV | 6487347 6489090 | WBGene00022256 | Y73B6BL.37 | Y73B6BL.37 | 0.0872502098266095          |

|                                                                                   |    |    |         |         |                |            |            |                      |             |
|-----------------------------------------------------------------------------------|----|----|---------|---------|----------------|------------|------------|----------------------|-------------|
| CB4856                                                                            | HS | IV | 6493599 | 6497378 | WBGene00044350 | Y73B6BL.44 | Y73B6BL.44 | 0.110895944420632    |             |
| AGIWUR1321;AGIWUR8689                                                             |    |    |         |         |                |            |            |                      |             |
| CB4856                                                                            | HS | IV | 6506726 | 6511042 | WBGene00004169 | pgn-89     | Y73B6BR.1  | -0.0208631513699551  |             |
| AGIWUR2166;AGIWUR18201;AGIWUR33782;AGIWUR35889;AGIWUR41226                        |    |    |         |         |                |            |            |                      |             |
| CB4856                                                                            | HS | IV | 6518174 | 6519502 | WBGene00015309 | C01G5.7    | C01G5.7    | -0.0641609237305873  | AGIWUR30933 |
| CB4856                                                                            | HS | IV | 6519926 | 6522242 | WBGene00015311 | C01G5.9    | C01G5.9    | 0.0827049779543438   | AGIWUR16070 |
| CB4856                                                                            | HS | IV | 6522874 | 6524568 | WBGene00015308 | ddi-1      | C01G5.6    | 0.0245282000180289   | AGIWUR695   |
| CB4856                                                                            | HS | IV | 6524610 | 6526524 | WBGene00015307 | C01G5.5    | C01G5.5    | -0.0261749732916918  | AGIWUR13057 |
| CB4856                                                                            | HS | IV | 6526729 | 6529802 | WBGene00004179 | prg-2      | C01G5.2    | -0.146308322584762   |             |
| AGIWUR19766;AGIWUR25037;AGIWUR35662                                               |    |    |         |         |                |            |            |                      |             |
| CB4856                                                                            | HS | IV | 6531750 | 6535677 | WBGene00015306 | C01G5.4    | C01G5.4    | 0.214589949311893    | AGIWUR12939 |
| CB4856                                                                            | HS | IV | 6548818 | 6552511 | WBGene00015310 | fan-1      | C01G5.8    | -0.112473809719372   | AGIWUR30930 |
| CB4856                                                                            | HS | IV | 6552479 | 6555920 | WBGene00016610 | paqr-1     | C43G2.1    | -0.0568921960785111  |             |
| AGIWUR6337;AGIWUR20140;AGIWUR39059                                                |    |    |         |         |                |            |            |                      |             |
| CB4856                                                                            | HS | IV | 6557171 | 6560881 | WBGene00006621 | try-3      | C43G2.5    | -0.0621790118965722  | AGIWUR22974 |
| CB4856                                                                            | HS | IV | 6560736 | 6565261 | WBGene00016613 | best-9     | C43G2.4    | -0.102400110264808   | AGIWUR27424 |
| CB4856                                                                            | HS | IV | 6565384 | 6572338 | WBGene00016611 | bicd-1     | C43G2.2    | -0.0757816079503355  | AGIWUR13162 |
| CB4856                                                                            | HS | IV | 6578197 | 6579402 | WBGene00016612 | C43G2.3    | C43G2.3    | -0.217309869109755   | AGIWUR21928 |
| CB4856                                                                            | HS | IV | 6579840 | 6582676 | WBGene00018160 | odr-8      | F38A5.1    | -0.156342176682642   |             |
| AGIWUR2601;AGIWUR3004;AGIWUR4843;AGIWUR31954;AGIWUR33472;AGIWUR34492;AGIWUR44384  |    |    |         |         |                |            |            |                      |             |
| CB4856                                                                            | HS | IV | 6582703 | 6585571 | WBGene00018161 | F38A5.2    | F38A5.2    | 0.0760820212706719   |             |
| AGIWUR1637;AGIWUR1880;AGIWUR26971;AGIWUR31257;AGIWUR33703;AGIWUR41277;AGIWUR42545 |    |    |         |         |                |            |            |                      |             |
| CB4856                                                                            | HS | IV | 6585871 | 6588186 | WBGene00001029 | dnj-11     | F38A5.13   | -0.00607790240721151 |             |
| AGIWUR26044;AGIWUR32851;AGIWUR33015;AGIWUR41606                                   |    |    |         |         |                |            |            |                      |             |
| CB4856                                                                            | HS | IV | 6588184 | 6590307 | WBGene00002274 | lec-11     | F38A5.3    | 0.1636008915948      |             |
| AGIWUR6492;AGIWUR16105;AGIWUR16475;AGIWUR27350                                    |    |    |         |         |                |            |            |                      |             |
| CB4856                                                                            | HS | IV | 6592666 | 6594529 | WBGene00018168 | irld-7     | F38A5.11   | 0.338044098868437    |             |
| AGIWUR3776                                                                        |    |    |         |         |                |            |            |                      |             |
| CB4856                                                                            | HS | IV | 6596108 | 6597398 | WBGene00018163 | F38A5.6    | F38A5.6    | 0.246078920851012    | AGIWUR30197 |
| CB4856                                                                            | HS | IV | 6599882 | 6600491 | WBGene00018165 | F38A5.8    | F38A5.8    | 0.0726388171763652   | AGIWUR19468 |
| CB4856                                                                            | HS | IV | 6601678 | 6602443 | WBGene00018164 | sup-36     | F38A5.7    | -0.0185618912828964  | AGIWUR35277 |
| CB4856                                                                            | HS | IV | 6602680 | 6603966 | WBGene00017481 | F15B10.3   | F15B10.3   | -0.260090281263157   |             |
| AGIWUR29802                                                                       |    |    |         |         |                |            |            |                      |             |
| CB4856                                                                            | HS | IV | 6604001 | 6606188 | WBGene00017480 | nstp-2     | F15B10.1   | 0.0393396956913534   |             |
| AGIWUR9501                                                                        |    |    |         |         |                |            |            |                      |             |
| CB4856                                                                            | HS | IV | 6607376 | 6613353 | WBGene00001090 | drh-1      | F15B10.2   | 0.160122842685876    |             |
| AGIWUR1034;AGIWUR9440;AGIWUR42915                                                 |    |    |         |         |                |            |            |                      |             |
| CB4856                                                                            | HS | IV | 6613918 | 6618498 | WBGene00001091 | drh-2      | C01B10.1   | -0.0569702131496985  |             |
| AGIWUR7926;AGIWUR18407                                                            |    |    |         |         |                |            |            |                      |             |

|                                                                                                                        |    |         |         |                |           |           |                     |
|------------------------------------------------------------------------------------------------------------------------|----|---------|---------|----------------|-----------|-----------|---------------------|
| CB4856 HS                                                                                                              | IV | 6619468 | 6621352 | WBGene00015278 | C01B10.3  | C01B10.3  | 0.165147600310105   |
| AGIWUR34609                                                                                                            |    |         |         |                |           |           |                     |
| CB4856 HS                                                                                                              | IV | 6624528 | 6627992 | WBGene00015284 | C01B10.10 | C01B10.10 | -0.117693876489061  |
| AGIWUR10607;AGIWUR34060                                                                                                |    |         |         |                |           |           |                     |
| CB4856 HS                                                                                                              | IV | 6628366 | 6631745 | WBGene00015279 | C01B10.4  | C01B10.4  | -0.0607562939132826 |
| AGIWUR31155                                                                                                            |    |         |         |                |           |           |                     |
| CB4856 HS                                                                                                              | IV | 6632222 | 6634986 | WBGene00015283 | C01B10.9  | C01B10.9  | 0.0416547999095975  |
| AGIWUR27315                                                                                                            |    |         |         |                |           |           |                     |
| CB4856 HS                                                                                                              | IV | 6635039 | 6638155 | WBGene00015282 | C01B10.8  | C01B10.8  | 0.130391742058777   |
| AGIWUR40431                                                                                                            |    |         |         |                |           |           |                     |
| CB4856 HS                                                                                                              | IV | 6638556 | 6639271 | WBGene00015281 | C01B10.7  | C01B10.7  | 0.195307239419975   |
| AGIWUR44495                                                                                                            |    |         |         |                |           |           |                     |
| CB4856 HS                                                                                                              | IV | 6640161 | 6645352 | WBGene00015280 | C01B10.6  | C01B10.6  | 0.0323029417615128  |
| AGIWUR35272;AGIWUR40404;AGIWUR42883                                                                                    |    |         |         |                |           |           |                     |
| CB4856 HS                                                                                                              | IV | 6646034 | 6646936 | WBGene00001858 | hil-7     | C01B10.5  | -0.277156245682512  |
| AGIWUR1319;AGIWUR11770;AGIWUR16609;AGIWUR22740;AGIWUR24965;AGIWUR25043;AGIWUR29174;AGIWUR31187;AGIWUR40020;AGIWUR42223 |    |         |         |                |           |           |                     |
| CB4856 HS                                                                                                              | IV | 6657981 | 6660434 | WBGene00044294 | C01B10.11 | C01B10.11 | -0.204783466758363  |
| AGIWUR27716                                                                                                            |    |         |         |                |           |           |                     |
| CB4856 HS                                                                                                              | IV | 6661234 | 6668054 | WBGene00022228 | Y73B6A.1  | Y73B6A.1  | 0.0196467266704179  |
| AGIWUR26914                                                                                                            |    |         |         |                |           |           |                     |
| CB4856 HS                                                                                                              | IV | 6704925 | 6707052 | WBGene00044503 | Y73B6A.6  | Y73B6A.6  | -0.0649084154420194 |
| AGIWUR2811;AGIWUR15743;AGIWUR23600                                                                                     |    |         |         |                |           |           |                     |
| CB4856 HS                                                                                                              | IV | 6732980 | 6736110 | WBGene00022229 | Y73B6A.2  | Y73B6A.2  | 0.0184949661591292  |
| AGIWUR33883                                                                                                            |    |         |         |                |           |           |                     |
| CB4856 HS                                                                                                              | IV | 6738727 | 6740374 | WBGene00022230 | Y73B6A.3  | Y73B6A.3  | 0.129115601943557   |
| AGIWUR7831                                                                                                             |    |         |         |                |           |           |                     |
| CB4856 HS                                                                                                              | IV | 6740496 | 6742443 | WBGene00004885 | smg-7     | Y73B6A.4  | 0.138016450024875   |
| AGIWUR5239                                                                                                             |    |         |         |                |           |           |                     |
| CB4856 HS                                                                                                              | IV | 6742538 | 6748424 | WBGene00003030 | lin-45    | Y73B6A.5  | -0.20073396381196   |
| AGIWUR561;AGIWUR3602;AGIWUR11674;AGIWUR12654;AGIWUR18197;AGIWUR21509;AGIWUR22879;AGIWUR32207                           |    |         |         |                |           |           |                     |
| CB4856 HS                                                                                                              | IV | 6757311 | 6762609 | WBGene00019259 | H34C03.2  | H34C03.2  | -0.152152597193046  |
| AGIWUR4690;AGIWUR5240;AGIWUR6955;AGIWUR32986;AGIWUR33475                                                               |    |         |         |                |           |           |                     |
| CB4856 HS                                                                                                              | IV | 6762716 | 6765200 | WBGene00004954 | spd-3     | H34C03.1  | 0.0821346327188746  |
| AGIWUR42614                                                                                                            |    |         |         |                |           |           |                     |
| CB4856 HS                                                                                                              | IV | 6770810 | 6779859 | WBGene00015938 | anat-1    | C17H12.13 | 0.0201744275666371  |
| AGIWUR5446;AGIWUR28862;AGIWUR30020;AGIWUR40363                                                                         |    |         |         |                |           |           |                     |
| CB4856 HS                                                                                                              | IV | 6779848 | 6784340 | WBGene00015927 | dyci-1    | C17H12.1  | -0.0601034795686566 |
| AGIWUR20301                                                                                                            |    |         |         |                |           |           |                     |

|                                                                          |    |                 |                |                 |                    |                     |
|--------------------------------------------------------------------------|----|-----------------|----------------|-----------------|--------------------|---------------------|
| CB4856 HS<br>AGIWUR4069                                                  | IV | 6786858 6789644 | WBGene00015928 | C17H12.2        | C17H12.2           | 0.00545597613314186 |
| CB4856 HS<br>AGIWUR10144;AGIWUR10801;AGIWUR12310;AGIWUR12618;AGIWUR34885 | IV | 6791074 6792629 | WBGene00006917 | vha-8 C17H12.14 |                    | 0.118652442843192   |
| CB4856 HS<br>AGIWUR18330                                                 | IV | 6793912 6795629 | WBGene00015929 | C17H12.3        | C17H12.3           | -0.102050672619626  |
| CB4856 HS<br>AGIWUR20007                                                 | IV | 6795913 6798789 | WBGene00015937 | C17H12.12       | C17H12.12          | -0.0327623741361229 |
| CB4856 HS<br>AGIWUR24155;AGIWUR26596                                     | IV | 6798921 6802337 | WBGene00015930 | C17H12.4        | C17H12.4           | -0.0741758881856533 |
| CB4856 HS<br>AGIWUR25400                                                 | IV | 6805115 6805908 | WBGene00236786 | C17H12.37       | C17H12.37          | -0.400855062837881  |
| CB4856 HS<br>AGIWUR32645                                                 | IV | 6806810 6809630 | WBGene00015935 | C17H12.10       | C17H12.10          | 0.0592777996398262  |
| CB4856 HS<br>AGIWUR28941                                                 | IV | 6812108 6815607 | WBGene00015934 | ceh-48 C17H12.9 |                    | 0.0376286873179472  |
| CB4856 HS<br>AGIWUR15237;AGIWUR24685;AGIWUR36468                         | IV | 6815912 6817654 | WBGene00015931 | C17H12.5        | C17H12.5           | 0.135573941299619   |
| CB4856 HS<br>AGIWUR24325                                                 | IV | 6818606 6820643 | WBGene00015933 | C17H12.8        | C17H12.8           | 0.443303458390085   |
| CB4856 HS<br>AGIWUR28820                                                 | IV | 6821077 6822506 | WBGene00015932 | C17H12.6        | C17H12.6           | 0.0512560089697498  |
| CB4856 HS<br>AGIWUR43547                                                 | IV | 6824894 6826763 | WBGene00019215 | H20E11.3        | H20E11.3           | 0.0708352061575432  |
| CB4856 HS<br>AGIWUR41422                                                 | IV | 6827777 6829490 | WBGene00019214 | H20E11.2        | H20E11.2           | 0.207382201297367   |
| CB4856 HS<br>AGIWUR1515;AGIWUR24083;AGIWUR24257;AGIWUR26117;AGIWUR34547  | IV | 6830145 6833464 | WBGene00019213 | H20E11.1        | H20E11.1           | 0.055607259353911   |
| CB4856 HS<br>AGIWUR14375;AGIWUR36755                                     | IV | 6839064 6839199 | WBGene00202332 | C05B10.21       | C05B10.21          | 0.194561763702473   |
| CB4856 HS<br>AGIWUR28691                                                 | IV | 6841485 6841609 | WBGene00202097 | C05B10.20       | C05B10.20          | 0.00255587838877958 |
| CB4856 HS<br>AGIWUR28238                                                 | IV | 6842964 6845805 | WBGene00003043 | lip-1 C05B10.1  |                    | -0.0271349651636914 |
| CB4856 HS<br>AGIWUR6354;AGIWUR17959;AGIWUR26946                          | IV | 6846129 6859370 | WBGene00020069 | R13H7.2 R13H7.2 |                    | -0.092374217867615  |
| CB4856 HS                                                                | IV | 6868091 6869137 | WBGene00005911 | srx-20 R13H7.1  | 0.0552299059008208 | AGIWUR15324         |
| CB4856 HS<br>AGIWUR25873;AGIWUR26519                                     | IV | 6873258 6874774 | WBGene00005910 | srx-19 T05A12.1 |                    | 0.0677852683416247  |



|                                                            |    |    |         |         |                |          |          |                      |             |
|------------------------------------------------------------|----|----|---------|---------|----------------|----------|----------|----------------------|-------------|
| CB4856                                                     | HS | IV | 6876737 | 6883461 | WBGene00006608 | tre-2    | T05A12.2 | 0.20565041819596     |             |
| AGIWUR3771;AGIWUR16934;AGIWUR34702;AGIWUR35029;AGIWUR37513 |    |    |         |         |                |          |          |                      |             |
| CB4856                                                     | HS | IV | 6883576 | 6887662 | WBGene00020234 | T05A12.3 | T05A12.3 | 0.109285493670395    |             |
| AGIWUR16023                                                |    |    |         |         |                |          |          |                      |             |
| CB4856                                                     | HS | IV | 6887948 | 6897777 | WBGene00020235 | T05A12.4 | T05A12.4 | -0.243146891549822   |             |
| AGIWUR17582;AGIWUR23680;AGIWUR36204                        |    |    |         |         |                |          |          |                      |             |
| CB4856                                                     | HS | IV | 6899519 | 6900056 | WBGene00020685 | T22D1.6  | T22D1.6  | 0.57575601553926     | AGIWUR24019 |
| CB4856                                                     | HS | IV | 6900326 | 6903624 | WBGene00020686 | T22D1.8  | T22D1.8  | 0.126644176338115    |             |
| AGIWUR7978;AGIWUR22377;AGIWUR36253                         |    |    |         |         |                |          |          |                      |             |
| CB4856                                                     | HS | IV | 6903950 | 6905546 | WBGene00020684 | T22D1.5  | T22D1.5  | 0.0904528442585821   | AGIWUR28419 |
| CB4856                                                     | HS | IV | 6906415 | 6909913 | WBGene00004458 | rpn-1    | T22D1.9  | 0.0218526922865152   | AGIWUR2624  |
| CB4856                                                     | HS | IV | 6910683 | 6912865 | WBGene00020683 | ribo-1   | T22D1.4  | 0.167212258737308    | AGIWUR17258 |
| CB4856                                                     | HS | IV | 6913536 | 6917110 | WBGene00020682 | T22D1.3  | T22D1.3  | 0.0652529625239282   |             |
| AGIWUR30821;AGIWUR45070                                    |    |    |         |         |                |          |          |                      |             |
| CB4856                                                     | HS | IV | 6917111 | 6919454 | WBGene00020687 | ruvb-2   | T22D1.10 | -0.212486765139769   |             |
| AGIWUR21494                                                |    |    |         |         |                |          |          |                      |             |
| CB4856                                                     | HS | IV | 6921855 | 6922852 | WBGene00020681 | T22D1.2  | T22D1.2  | -0.253489990233801   | AGIWUR30873 |
| CB4856                                                     | HS | IV | 6926140 | 6928517 | WBGene00020688 | T22D1.11 | T22D1.11 | -0.201805318846333   |             |
| AGIWUR32365                                                |    |    |         |         |                |          |          |                      |             |
| CB4856                                                     | HS | IV | 6928942 | 6937713 | WBGene00020689 | npr-12   | T22D1.12 | -0.128665221498712   |             |
| AGIWUR16564                                                |    |    |         |         |                |          |          |                      |             |
| CB4856                                                     | HS | IV | 6957641 | 6963716 | WBGene00002178 | jnk-1    | B0478.1  | -0.00257122045175162 |             |
| AGIWUR5169;AGIWUR22314                                     |    |    |         |         |                |          |          |                      |             |
| CB4856                                                     | HS | IV | 6963716 | 6964654 | WBGene00015202 | B0478.3  | B0478.3  | -0.0145201328115263  | AGIWUR3282  |
| CB4856                                                     | HS | IV | 6965492 | 6967806 | WBGene00022725 | ZK381.2  | ZK381.2  | 0.0396483279735471   |             |
| AGIWUR31292;AGIWUR35750                                    |    |    |         |         |                |          |          |                      |             |
| CB4856                                                     | HS | IV | 6968209 | 6970280 | WBGene00044352 | ZK381.8  | ZK381.8  | 0.583882144130793    |             |
| AGIWUR21041;AGIWUR21905                                    |    |    |         |         |                |          |          |                      |             |
| CB4856                                                     | HS | IV | 6971898 | 6972527 | WBGene00022726 | nhr-249  | ZK381.3  | -0.0208660339193969  | AGIWUR41593 |
| CB4856                                                     | HS | IV | 6974401 | 6977318 | WBGene00003992 | pgl-1    | ZK381.4  | -0.0273992990196152  | AGIWUR9053  |
| CB4856                                                     | HS | IV | 6977517 | 6978943 | WBGene00001862 | him-3    | ZK381.1  | 0.111759909913591    | AGIWUR7115  |
| CB4856                                                     | HS | IV | 6978775 | 6986935 | WBGene00022727 | prkl-1   | ZK381.5  | 0.0733164466009582   |             |
| AGIWUR33041;AGIWUR40133                                    |    |    |         |         |                |          |          |                      |             |
| CB4856                                                     | HS | IV | 6999557 | 7001493 | WBGene00016085 | C25A8.5  | C25A8.5  | 0.150255112820904    | AGIWUR40307 |
| CB4856                                                     | HS | IV | 7003623 | 7009268 | WBGene00016084 | cht-3    | C25A8.4  | 0.20469165022697     | AGIWUR32990 |
| CB4856                                                     | HS | IV | 7009841 | 7010744 | WBGene00016083 | C25A8.2  | C25A8.2  | 0.0660863089252066   |             |
| AGIWUR4076;AGIWUR20082                                     |    |    |         |         |                |          |          |                      |             |
| CB4856                                                     | HS | IV | 7011960 | 7016542 | WBGene00015553 | trxr-1   | C06G3.7  | 0.0180216019245059   | AGIWUR31747 |
| CB4856                                                     | HS | IV | 7017626 | 7020210 | WBGene00015552 | C06G3.6  | C06G3.6  | 0.0234966792600408   |             |

AGIWUR7736;AGIWUR28620;AGIWUR44593  
 CB4856 HS IV 7024211 7028144 WBGene00015551 C06G3.5 C06G3.5 0.119268414732018  
 AGIWUR30316;AGIWUR36250;AGIWUR38569  
 CB4856 HS IV 7028173 7030967 WBGene00015550 C06G3.4 C06G3.4 0.00978272169705985 AGIWUR44247  
 CB4856 HS IV 7031298 7032559 WBGene00015554 C06G3.8 C06G3.8 -0.0905450669974019 AGIWUR5950  
 CB4856 HS IV 7032716 7036982 WBGene00015555 ufl-1 C06G3.9 -0.1577898468435 AGIWUR13922  
 CB4856 HS IV 7036960 7039580 WBGene00000585 cogc-2 C06G3.10 -0.155048207946272  
 AGIWUR23147  
 CB4856 HS IV 7040211 7043694 WBGene00002228 klp-18 C06G3.2 0.0198195059387416  
 AGIWUR14117;AGIWUR15370;AGIWUR19879;AGIWUR28610;AGIWUR31615;AGIWUR38249  
 CB4856 HS IV 7043935 7044604 WBGene00006572 tin-9.1 C06G3.11 -0.186647859874823  
 AGIWUR17497;AGIWUR24565;AGIWUR36287;AGIWUR41579  
 CB4856 HS IV 7049954 7053450 WBGene00003695 nhr-105 C06G3.1 -0.169968609474047  
 AGIWUR8408;AGIWUR25401;AGIWUR27613;AGIWUR38972;AGIWUR39864  
 CB4856 HS IV 7057977 7059911 WBGene00005941 srx-50 Y43B11AL.2 0.20982346503764  
 AGIWUR10633  
 CB4856 HS IV 7060192 7061778 WBGene00005811 srw-64 Y43B11AL.3 -0.00216348678059708  
 AGIWUR25631;AGIWUR29248;AGIWUR34284;AGIWUR38179  
 CB4856 HS IV 7065322 7068035 WBGene00021542 Y43B11AL.1 Y43B11AL.1 -0.0356494266539675  
 AGIWUR28733  
 CB4856 HS IV 7070858 7071736 WBGene00005206 srg-49 Y43B11AR.6 -0.0161186111003566  
 AGIWUR28710  
 CB4856 HS IV 7072410 7073625 WBGene00005205 srg-48 Y43B11AR.5 0.0531022564432533  
 AGIWUR9062  
 CB4856 HS IV 7074030 7075163 WBGene00005207 srg-50 Y43B11AR.2 0.361743151542799  
 AGIWUR25216  
 CB4856 HS IV 7081514 7082266 WBGene00021543 Y43B11AR.1 Y43B11AR.1 0.220000555097187  
 AGIWUR4163  
 CB4856 HS IV 7082220 7083716 WBGene00021544 Y43B11AR.3 Y43B11AR.3 0.153010156377974  
 AGIWUR16252  
 CB4856 HS IV 7083694 7084682 WBGene00004473 rps-4 Y43B11AR.4 0.12384867731255  
 AGIWUR360;AGIWUR10099  
 CB4856 HS IV 7085216 7094364 WBGene00000942 deb-1 ZC477.9 0.18042200269737  
 AGIWUR22512;AGIWUR25757;AGIWUR32217;AGIWUR32771  
 CB4856 HS IV 7101375 7103261 WBGene00022620 rde-8 ZC477.5 -0.0254977017611679 AGIWUR23519  
 CB4856 HS IV 7103492 7105096 WBGene00022618 ZC477.3 ZC477.3 0.10392503295613  
 AGIWUR6342;AGIWUR8916;AGIWUR23991;AGIWUR24712  
 CB4856 HS IV 7105169 7107733 WBGene00022622 ZC477.10 ZC477.10 0.103537056702232  
 AGIWUR38280

|        |    |    |         |         |                |          |          |                      |                                     |
|--------|----|----|---------|---------|----------------|----------|----------|----------------------|-------------------------------------|
| CB4856 | HS | IV | 7108221 | 7109912 | WBGene00022617 | ZC477.2  | ZC477.2  | -0.100686150811706   | AGIWUR23545                         |
| CB4856 | HS | IV | 7114899 | 7119926 | WBGene00003527 | nas-8    | C34D4.9  | -0.166718426808632   | AGIWUR2427                          |
| CB4856 | HS | IV | 7119918 | 7121413 | WBGene00016402 | C34D4.10 | C34D4.10 | -0.0122955382243326  | AGIWUR17282                         |
| CB4856 | HS | IV | 7122194 | 7123947 | WBGene00006113 | str-48   | C34D4.8  | -0.0743152526264286  | AGIWUR19828;AGIWUR35417;AGIWUR42209 |
| CB4856 | HS | IV | 7124481 | 7125516 | WBGene00006114 | str-49   | C34D4.7  | -0.0190317465790883  | AGIWUR31208                         |
| CB4856 | HS | IV | 7127683 | 7130462 | WBGene00006115 | str-50   | C34D4.16 | 0.0612626928948732   | AGIWUR42325                         |
| CB4856 | HS | IV | 7130701 | 7131928 | WBGene00016403 | grsp-3   | C34D4.11 | 0.0363962421048569   | AGIWUR9753                          |
| CB4856 | HS | IV | 7132132 | 7133217 | WBGene00000888 | cyn-12   | C34D4.12 | 0.159604101542762    | AGIWUR701                           |
| CB4856 | HS | IV | 7133448 | 7134083 | WBGene00016404 | mutd-1   | C34D4.13 | 0.156205855091322    | AGIWUR16341                         |
| CB4856 | HS | IV | 7134347 | 7144898 | WBGene00016405 | hecd-1   | C34D4.14 | -0.41006833254589    | AGIWUR20390                         |
| CB4856 | HS | IV | 7149361 | 7150692 | WBGene00016400 | C34D4.4  | C34D4.4  | -0.0537810514686754  | AGIWUR3381                          |
| CB4856 | HS | IV | 7150663 | 7152501 | WBGene00000687 | col-113  | C34D4.15 | -0.0718833422001985  | AGIWUR33931                         |
| CB4856 | HS | IV | 7153623 | 7154193 | WBGene00016399 | C34D4.3  | C34D4.3  | 0.216583020417144    | AGIWUR8606                          |
| CB4856 | HS | IV | 7154656 | 7156010 | WBGene00016398 | C34D4.2  | C34D4.2  | -0.136225229488804   | AGIWUR28894                         |
| CB4856 | HS | IV | 7156900 | 7160109 | WBGene00016397 | maph-9   | C34D4.1  | -0.178464560045314   | AGIWUR21448                         |
| CB4856 | HS | IV | 7160135 | 7165748 | WBGene00004411 | rpc-1    | C42D4.8  | 0.150547030897137    | AGIWUR40633                         |
| CB4856 | HS | IV | 7168710 | 7169346 | WBGene00004822 | skr-16   | C42D4.6  | -0.115999920920753   | AGIWUR44191                         |
| CB4856 | HS | IV | 7169931 | 7171322 | WBGene00006251 | str-220  | C42D4.9  | 0.0142815239273881   | AGIWUR13622                         |
| CB4856 | HS | IV | 7171489 | 7172691 | WBGene00006250 | str-219  | C42D4.10 | -0.111681501836608   | AGIWUR984;AGIWUR38838               |
| CB4856 | HS | IV | 7173789 | 7175008 | WBGene00006069 | str-1    | C42D4.5  | -0.00664952349033321 | AGIWUR28880                         |
| CB4856 | HS | IV | 7177187 | 7178423 | WBGene00006109 | str-44   | C42D4.4  | 0.0362239630599541   | AGIWUR8855                          |
| CB4856 | HS | IV | 7179239 | 7180484 | WBGene00016596 | C42D4.3  | C42D4.3  | -0.114721074949342   | AGIWUR3239                          |
| CB4856 | HS | IV | 7180535 | 7182993 | WBGene00016595 | C42D4.2  | C42D4.2  | 0.114485952819578    | AGIWUR26269                         |
| CB4856 | HS | IV | 7183412 | 7184697 | WBGene00016597 | clec-179 | C42D4.11 | -0.211157279254893   | AGIWUR42822                         |
| CB4856 | HS | IV | 7185283 | 7186856 | WBGene00006276 | str-249  | C42D4.12 | 0.106686239824751    | AGIWUR22230;AGIWUR41333             |
| CB4856 | HS | IV | 7187189 | 7188130 | WBGene00016598 | C42D4.13 | C42D4.13 | 0.0401984158057758   | AGIWUR12548                         |
| CB4856 | HS | IV | 7189191 | 7190331 | WBGene00016594 | C42D4.1  | C42D4.1  | 0.114519373635716    | AGIWUR18620                         |

|                                                                                                |    |    |         |         |                |          |          |                     |             |
|------------------------------------------------------------------------------------------------|----|----|---------|---------|----------------|----------|----------|---------------------|-------------|
| CB4856                                                                                         | HS | IV | 7191076 | 7191841 | WBGene00020043 | R13A1.5  | R13A1.5  | -0.151167540201444  | AGIWUR28017 |
| CB4856                                                                                         | HS | IV | 7193520 | 7195834 | WBGene00020046 | best-16  | R13A1.9  | 0.0716699754849657  | AGIWUR33813 |
| CB4856                                                                                         | HS | IV | 7197153 | 7203643 | WBGene00006748 | unc-8    | R13A1.4  | 0.0573765192096989  | AGIWUR37063 |
| CB4856                                                                                         | HS | IV | 7206246 | 7218000 | WBGene00006504 | kcc-1    | R13A1.2  | 0.0425222259382112  |             |
| AGIWUR8066;AGIWUR11215;AGIWUR19432;AGIWUR21562;AGIWUR24569;AGIWUR25696;AGIWUR27820;AGIWUR29249 |    |    |         |         |                |          |          |                     |             |
| CB4856                                                                                         | HS | IV | 7218049 | 7219485 | WBGene00020045 | glb-23   | R13A1.8  | 0.0262346240773272  | AGIWUR17701 |
| CB4856                                                                                         | HS | IV | 7220104 | 7220607 | WBGene00020041 | R13A1.1  | R13A1.1  | 0.00598378128020016 | AGIWUR17265 |
| CB4856                                                                                         | HS | IV | 7225416 | 7227172 | WBGene00044504 | R13A1.10 | R13A1.10 | -0.0523653419312993 |             |
| AGIWUR11055;AGIWUR15267                                                                        |    |    |         |         |                |          |          |                     |             |
| CB4856                                                                                         | HS | IV | 7227274 | 7228306 | WBGene00017053 | D2024.5  | D2024.5  | -0.116944154281809  |             |
| AGIWUR23426;AGIWUR37950                                                                        |    |    |         |         |                |          |          |                     |             |
| CB4856                                                                                         | HS | IV | 7228403 | 7230223 | WBGene00000292 | cap-1    | D2024.6  | 0.199166888061791   | AGIWUR37009 |
| CB4856                                                                                         | HS | IV | 7231235 | 7232822 | WBGene00017052 | D2024.4  | D2024.4  | 0.0200780033987398  |             |
| AGIWUR13170;AGIWUR14444;AGIWUR40395                                                            |    |    |         |         |                |          |          |                     |             |
| CB4856                                                                                         | HS | IV | 7237722 | 7239976 | WBGene00001241 | elo-3    | D2024.3  | -0.187054533948388  | AGIWUR10615 |
| CB4856                                                                                         | HS | IV | 7240445 | 7242270 | WBGene00017054 | gstk-2   | D2024.7  | -0.211841051499196  | AGIWUR35947 |
| CB4856                                                                                         | HS | IV | 7244208 | 7245502 | WBGene00017051 | afmd-1   | D2024.2  | 0.125091399613374   |             |
| AGIWUR4942;AGIWUR16746                                                                         |    |    |         |         |                |          |          |                     |             |
| CB4856                                                                                         | HS | IV | 7247543 | 7249437 | WBGene00017050 | D2024.1  | D2024.1  | 0.252635094878367   | AGIWUR40720 |
| CB4856                                                                                         | HS | IV | 7254990 | 7255909 | WBGene00015534 | C06E4.5  | C06E4.5  | 0.272211531420261   | AGIWUR6487  |
| CB4856                                                                                         | HS | IV | 7257217 | 7258248 | WBGene00015535 | C06E4.6  | C06E4.6  | 0.124343210101939   | AGIWUR40975 |
| CB4856                                                                                         | HS | IV | 7258653 | 7259622 | WBGene00015533 | C06E4.4  | C06E4.4  | 0.180306717116475   | AGIWUR32146 |
| CB4856                                                                                         | HS | IV | 7260875 | 7262132 | WBGene00015532 | C06E4.3  | C06E4.3  | -0.0358767114759289 | AGIWUR15367 |
| CB4856                                                                                         | HS | IV | 7262237 | 7263237 | WBGene00015536 | glb-2    | C06E4.7  | -0.326537464019305  | AGIWUR22556 |
| CB4856                                                                                         | HS | IV | 7276961 | 7283086 | WBGene00015531 | C06E4.2  | C06E4.2  | 0.155915329612205   | AGIWUR4170  |
| CB4856                                                                                         | HS | IV | 7283257 | 7283871 | WBGene00015530 | C06E4.1  | C06E4.1  | -0.1627388305292    | AGIWUR38303 |
| CB4856                                                                                         | HS | IV | 7284219 | 7285873 | WBGene00015537 | C06E4.8  | C06E4.8  | 1.10452002731137    | AGIWUR19169 |
| CB4856                                                                                         | HS | IV | 7286182 | 7287526 | WBGene00018345 | F42C5.3  | F42C5.3  | 2.08392940631163    | AGIWUR36799 |
| CB4856                                                                                         | HS | IV | 7288074 | 7292127 | WBGene00018346 | F42C5.4  | F42C5.4  | 0.104676597599819   | AGIWUR22927 |
| CB4856                                                                                         | HS | IV | 7292536 | 7294221 | WBGene00018347 | F42C5.5  | F42C5.5  | -0.0205555986247692 | AGIWUR27276 |
| CB4856                                                                                         | HS | IV | 7305628 | 7308350 | WBGene00018344 | npr-27   | F42C5.2  | 0.106738600619144   | AGIWUR10249 |
| CB4856                                                                                         | HS | IV | 7308486 | 7309057 | WBGene00018348 | F42C5.6  | F42C5.6  | -0.0228605473106462 | AGIWUR32176 |
| CB4856                                                                                         | HS | IV | 7309838 | 7310760 | WBGene00001713 | grl-4    | F42C5.7  | -0.258771124887691  | AGIWUR17540 |
| CB4856                                                                                         | HS | IV | 7312981 | 7313864 | WBGene00004477 | rps-8    | F42C5.8  | -0.380094493636999  |             |
| AGIWUR14443;AGIWUR25098;AGIWUR29580;AGIWUR41164;AGIWUR41234;AGIWUR43049                        |    |    |         |         |                |          |          |                     |             |
| CB4856                                                                                         | HS | IV | 7314371 | 7317163 | WBGene00018349 | F42C5.9  | F42C5.9  | 0.179647389787235   |             |
| AGIWUR6426;AGIWUR34872                                                                         |    |    |         |         |                |          |          |                     |             |
| CB4856                                                                                         | HS | IV | 7320734 | 7326663 | WBGene00018350 | ifo-1    | F42C5.10 | 0.168386470979836   |             |
| AGIWUR19909                                                                                    |    |    |         |         |                |          |          |                     |             |

|                                                                                 |    |    |         |         |                |          |          |                     |             |
|---------------------------------------------------------------------------------|----|----|---------|---------|----------------|----------|----------|---------------------|-------------|
| CB4856                                                                          | HS | IV | 7327110 | 7329108 | WBGene00021495 | sqst-2   | Y40C5A.1 | 0.171886222200602   |             |
| AGIWUR16543                                                                     |    |    |         |         |                |          |          |                     |             |
| CB4856                                                                          | HS | IV | 7329620 | 7332811 | WBGene00003841 | ocr-4    | Y40C5A.2 | 0.453475640624752   |             |
| AGIWUR23250                                                                     |    |    |         |         |                |          |          |                     |             |
| CB4856                                                                          | HS | IV | 7349283 | 7365111 | WBGene00021497 | Y40C5A.4 | Y40C5A.4 | 0.130626233355402   |             |
| AGIWUR41795;AGIWUR44488                                                         |    |    |         |         |                |          |          |                     |             |
| CB4856                                                                          | HS | IV | 7375147 | 7376635 | WBGene00020446 | T12B3.3  | T12B3.3  | 0.176365734029591   | AGIWUR11785 |
| CB4856                                                                          | HS | IV | 7376811 | 7378906 | WBGene00020445 | T12B3.2  | T12B3.2  | 0.310725276730327   | AGIWUR26548 |
| CB4856                                                                          | HS | IV | 7382415 | 7384752 | WBGene00020444 | T12B3.1  | T12B3.1  | 0.104097684355175   |             |
| AGIWUR11306;AGIWUR19404;AGIWUR43250                                             |    |    |         |         |                |          |          |                     |             |
| CB4856                                                                          | HS | IV | 7384756 | 7388943 | WBGene00020447 | T12B3.4  | T12B3.4  | 0.0903582343786447  | AGIWUR28778 |
| CB4856                                                                          | HS | IV | 7393221 | 7397555 | WBGene00016739 | pittr-1  | C48A7.2  | 0.199601390605899   | AGIWUR21517 |
| CB4856                                                                          | HS | IV | 7405460 | 7418733 | WBGene00001187 | egl-19   | C48A7.1  | 0.0821145247399686  |             |
| AGIWUR364;AGIWUR4859;AGIWUR5340;AGIWUR16650;AGIWUR17147;AGIWUR31639;AGIWUR43178 |    |    |         |         |                |          |          |                     |             |
| CB4856                                                                          | HS | IV | 7419118 | 7419971 | WBGene00015215 | B0496.6  | B0496.6  | 0.152742810606614   | AGIWUR8028  |
| CB4856                                                                          | HS | IV | 7420958 | 7422671 | WBGene00015214 | srtx-1   | B0496.5  | -0.104509084809095  |             |
| AGIWUR6765;AGIWUR18892;AGIWUR42651                                              |    |    |         |         |                |          |          |                     |             |
| CB4856                                                                          | HS | IV | 7424498 | 7444660 | WBGene00006814 | unc-82   | B0496.3  | -0.137881762985683  |             |
| AGIWUR29816;AGIWUR33821                                                         |    |    |         |         |                |          |          |                     |             |
| CB4856                                                                          | HS | IV | 7444639 | 7445432 | WBGene00015216 | valv-1   | B0496.7  | 0.505502950306838   | AGIWUR490   |
| CB4856                                                                          | HS | IV | 7446390 | 7447466 | WBGene00015210 | B0496.1  | B0496.1  | 0.235205575056478   | AGIWUR23905 |
| CB4856                                                                          | HS | IV | 7447856 | 7449169 | WBGene00015211 | B0496.2  | B0496.2  | 0.260807936749185   |             |
| AGIWUR6296;AGIWUR8092;AGIWUR26012                                               |    |    |         |         |                |          |          |                     |             |
| CB4856                                                                          | HS | IV | 7449067 | 7451445 | WBGene00015217 | tes-1    | B0496.8  | 0.178136872261941   | AGIWUR15116 |
| CB4856                                                                          | HS | IV | 7456525 | 7458214 | WBGene00017416 | F13B6.1  | F13B6.1  | 0.636140386283951   |             |
| AGIWUR11830;AGIWUR14383;AGIWUR42047                                             |    |    |         |         |                |          |          |                     |             |
| CB4856                                                                          | HS | IV | 7458836 | 7460424 | WBGene00017417 | F13B6.2  | F13B6.2  | 0.0486769507104032  | AGIWUR26063 |
| CB4856                                                                          | HS | IV | 7461966 | 7465957 | WBGene00017418 | F13B6.3  | F13B6.3  | -0.486397651378798  | AGIWUR17248 |
| CB4856                                                                          | HS | IV | 7466702 | 7469832 | WBGene00018903 | F55G1.7  | F55G1.7  | 0.250424270285111   | AGIWUR216   |
| CB4856                                                                          | HS | IV | 7470860 | 7473340 | WBGene00004044 | plk-3    | F55G1.8  | 0.0272404935952846  |             |
| AGIWUR16334;AGIWUR37685                                                         |    |    |         |         |                |          |          |                     |             |
| CB4856                                                                          | HS | IV | 7473476 | 7474957 | WBGene00018902 | F55G1.6  | F55G1.6  | -0.231120138493528  | AGIWUR23448 |
| CB4856                                                                          | HS | IV | 7475041 | 7476215 | WBGene00018901 | F55G1.5  | F55G1.5  | -0.184092121654523  | AGIWUR31696 |
| CB4856                                                                          | HS | IV | 7476171 | 7477344 | WBGene00018904 | F55G1.9  | F55G1.9  | 0.0240450452211682  | AGIWUR9261  |
| CB4856                                                                          | HS | IV | 7478171 | 7485523 | WBGene00018900 | rod-1    | F55G1.4  | 0.257588750298979   | AGIWUR3348  |
| CB4856                                                                          | HS | IV | 7486519 | 7486962 | WBGene00001936 | his-62   | F55G1.3  | -0.175531578442669  | AGIWUR11523 |
| CB4856                                                                          | HS | IV | 7487560 | 7488025 | WBGene00001934 | his-60   | F55G1.11 | -0.0209375612722269 |             |
| AGIWUR12606;AGIWUR26290                                                         |    |    |         |         |                |          |          |                     |             |
| CB4856                                                                          | HS | IV | 7488216 | 7488956 | WBGene00001933 | his-59   | F55G1.2  | -0.060690387103687  | AGIWUR33079 |

|                                                                                                                                               |    |    |         |         |                |          |          |                      |             |
|-----------------------------------------------------------------------------------------------------------------------------------------------|----|----|---------|---------|----------------|----------|----------|----------------------|-------------|
| CB4856                                                                                                                                        | HS | IV | 7491771 | 7493764 | WBGene00018899 | F55G1.1  | F55G1.1  | 0.105020177649382    | AGIWUR18883 |
| CB4856                                                                                                                                        | HS | IV | 7493843 | 7497850 | WBGene00018906 | egas-4   | F55G1.13 | 0.0805253648415176   |             |
| AGIWUR4429;AGIWUR13990                                                                                                                        |    |    |         |         |                |          |          |                      |             |
| CB4856                                                                                                                                        | HS | IV | 7498129 | 7501437 | WBGene00018907 | F55G1.15 | F55G1.15 | 0.0242879629291775   |             |
| AGIWUR15014                                                                                                                                   |    |    |         |         |                |          |          |                      |             |
| CB4856                                                                                                                                        | HS | IV | 7503622 | 7506447 | WBGene00001624 | glt-6    | R05G6.6  | -0.00318659485880346 | AGIWUR44783 |
| CB4856                                                                                                                                        | HS | IV | 7506425 | 7507891 | WBGene00019900 | vdac-1   | R05G6.7  | 0.279986460717313    |             |
| AGIWUR7516;AGIWUR13358;AGIWUR26690;AGIWUR34696                                                                                                |    |    |         |         |                |          |          |                      |             |
| CB4856                                                                                                                                        | HS | IV | 7508514 | 7509475 | WBGene00019899 | R05G6.5  | R05G6.5  | 0.328840937648305    | AGIWUR24234 |
| CB4856                                                                                                                                        | HS | IV | 7509479 | 7512667 | WBGene00004039 | plc-4    | R05G6.8  | 0.00662432375179467  |             |
| AGIWUR15511;AGIWUR15657;AGIWUR38392                                                                                                           |    |    |         |         |                |          |          |                      |             |
| CB4856                                                                                                                                        | HS | IV | 7513233 | 7514459 | WBGene00019898 | R05G6.4  | R05G6.4  | 0.16182377196558     | AGIWUR24319 |
| CB4856                                                                                                                                        | HS | IV | 7514366 | 7516267 | WBGene00019901 | R05G6.9  | R05G6.9  | 0.28647507438071     | AGIWUR43722 |
| CB4856                                                                                                                                        | HS | IV | 7516585 | 7517035 | WBGene00043466 | R05G6.3  | R05G6.3  | -0.226216965160871   | AGIWUR30281 |
| CB4856                                                                                                                                        | HS | IV | 7517445 | 7542535 | WBGene00019902 | R05G6.10 | R05G6.10 | -0.0290425138395003  |             |
| AGIWUR4083;AGIWUR9586;AGIWUR17594;AGIWUR19402;AGIWUR21095;AGIWUR22162;AGIWUR23598;AGIWUR30608;AGIWUR35767;AGIWUR37498;AGIWUR39891;AGIWUR44953 |    |    |         |         |                |          |          |                      |             |
| CB4856                                                                                                                                        | HS | IV | 7543984 | 7550812 | WBGene00003914 | pam-1    | F49E8.3  | -0.270188749671654   |             |
| AGIWUR2787;AGIWUR8214;AGIWUR17602;AGIWUR18876;AGIWUR23932                                                                                     |    |    |         |         |                |          |          |                      |             |
| CB4856                                                                                                                                        | HS | IV | 7548417 | 7551511 | WBGene00018636 | F49E8.2  | F49E8.2  | 0.0657391467583626   | AGIWUR43872 |
| CB4856                                                                                                                                        | HS | IV | 7551550 | 7553008 | WBGene00000996 | dif-1    | F49E8.5  | 0.125481054921516    |             |
| AGIWUR12711;AGIWUR41882                                                                                                                       |    |    |         |         |                |          |          |                      |             |
| CB4856                                                                                                                                        | HS | IV | 7553532 | 7554488 | WBGene00018637 | F49E8.6  | F49E8.6  | 0.00237426219199044  | AGIWUR10807 |
| CB4856                                                                                                                                        | HS | IV | 7554489 | 7556447 | WBGene00018638 | F49E8.7  | F49E8.7  | -1.18414574183926    | AGIWUR26569 |
| CB4856                                                                                                                                        | HS | IV | 7556637 | 7558759 | WBGene00018635 | nprl-2   | F49E8.1  | -0.101708231753104   |             |
| AGIWUR6442;AGIWUR23027;AGIWUR37510                                                                                                            |    |    |         |         |                |          |          |                      |             |
| CB4856                                                                                                                                        | HS | IV | 7558726 | 7561664 | WBGene00002074 | ima-3    | F32E10.4 | 0.12441476775979     |             |
| AGIWUR4573;AGIWUR43964                                                                                                                        |    |    |         |         |                |          |          |                      |             |
| CB4856                                                                                                                                        | HS | IV | 7562220 | 7563724 | WBGene00043068 | F32E10.9 | F32E10.9 | -0.0666060415472902  |             |
| AGIWUR22062                                                                                                                                   |    |    |         |         |                |          |          |                      |             |
| CB4856                                                                                                                                        | HS | IV | 7567607 | 7568507 | WBGene00017995 | F32E10.8 | F32E10.8 | 0.0103884242728762   |             |
| AGIWUR42705                                                                                                                                   |    |    |         |         |                |          |          |                      |             |
| CB4856                                                                                                                                        | HS | IV | 7568893 | 7573761 | WBGene00017991 | clcc-180 | F32E10.3 | 0.164879067507043    |             |
| AGIWUR7560                                                                                                                                    |    |    |         |         |                |          |          |                      |             |
| CB4856                                                                                                                                        | HS | IV | 7574355 | 7578381 | WBGene00017992 | F32E10.5 | F32E10.5 | 0.0736829691366889   |             |
| AGIWUR30292                                                                                                                                   |    |    |         |         |                |          |          |                      |             |
| CB4856                                                                                                                                        | HS | IV | 7578501 | 7580269 | WBGene00017993 | cec-5    | F32E10.6 | -0.140753493728701   |             |
| AGIWUR26501;AGIWUR38094                                                                                                                       |    |    |         |         |                |          |          |                      |             |
| CB4856                                                                                                                                        | HS | IV | 7580597 | 7583726 | WBGene00017989 | noi-10   | F32E10.1 | 0.0650630015963536   |             |

AGIWUR40007  
CB4856 HS IV 7588931 7628234 WBGene00018468 tag-80 F45E4.3 -0.0340674518207824  
AGIWUR2833;AGIWUR3482;AGIWUR15919;AGIWUR21429;AGIWUR30093;AGIWUR30681;AGIWUR33742;AGIWUR34251  
CB4856 HS IV 7628206 7629042 WBGene00018470 F45E4.5 F45E4.5 0.108263720878304  
AGIWUR1969;AGIWUR7378;AGIWUR9519;AGIWUR11474;AGIWUR13230;AGIWUR18375;AGIWUR19195;AGIWUR20605;AGIWUR22249;AGIWUR35994;AGIWUR42005  
CB4856 HS IV 7633360 7634657 WBGene00004046 plp-1 F45E4.2 -0.0385961585531041  
AGIWUR13584;AGIWUR15669  
CB4856 HS IV 7634786 7635710 WBGene00000190 arf-1.1 F45E4.1 0.000852006663492944  
AGIWUR9982;AGIWUR29192  
CB4856 HS IV 7635655 7641925 WBGene00018472 nep-16 F45E4.7 0.0713424945814292  
AGIWUR10429;AGIWUR19799;AGIWUR25987;AGIWUR37128;AGIWUR37568;AGIWUR39304  
CB4856 HS IV 7642052 7643096 WBGene00003758 nlp-20 F45E4.8 0.0880371044123773 AGIWUR31298  
CB4856 HS IV 7644895 7646219 WBGene00001975 hmg-5 F45E4.9 -0.176784127139825 AGIWUR23274  
CB4856 HS IV 7646200 7654230 WBGene00001584 nrde-4 F45E4.10 0.247177499550029  
AGIWUR36051  
CB4856 HS IV 7658734 7664166 WBGene00015619 C08G9.1 C08G9.1 0.174718753015723  
AGIWUR8284;AGIWUR21343;AGIWUR34698  
CB4856 HS IV 7664157 7672972 WBGene00015620 C08G9.2 C08G9.2 -0.143434047648367  
AGIWUR12102;AGIWUR35330;AGIWUR39246;AGIWUR40267;AGIWUR44579  
CB4856 HS IV 7675174 7696923 WBGene00002173 itr-1 F33D4.2 0.0369865758994612  
AGIWUR1811;AGIWUR9866;AGIWUR11333;AGIWUR16479;AGIWUR20010;AGIWUR24951;AGIWUR24980;AGIWUR25962;AGIWUR27452;AGIWUR27554;AGIWUR31844;AGIWUR40796  
CB4856 HS IV 7696932 7698420 WBGene00001456 flp-13 F33D4.3 0.0835574171521571 AGIWUR40385  
CB4856 HS IV 7703873 7706905 WBGene00017996 F33D4.4 F33D4.4 0.0468473904436664 AGIWUR40904  
CB4856 HS IV 7707575 7709084 WBGene00017997 mrp1-1 F33D4.5 0.156610407412042  
AGIWUR23551;AGIWUR40906;AGIWUR40985  
CB4856 HS IV 7709192 7709736 WBGene00017999 emc-6 F33D4.7 -0.00190247878252592 AGIWUR3453  
CB4856 HS IV 7710045 7710826 WBGene00023487 mrps-24 F33D4.8 -0.351952315617298  
AGIWUR1782;AGIWUR18029;AGIWUR24110;AGIWUR41310  
CB4856 HS IV 7710975 7714198 WBGene00003607 nhr-8 F33D4.1 -0.126923327024402  
AGIWUR9043;AGIWUR11051;AGIWUR20855;AGIWUR37299  
CB4856 HS IV 7714164 7718009 WBGene00017998 F33D4.6 F33D4.6 0.033939693339339  
AGIWUR2259;AGIWUR4489;AGIWUR4741;AGIWUR6491;AGIWUR20721;AGIWUR21072;AGIWUR30717;AGIWUR34578;AGIWUR41364  
CB4856 HS IV 7720566 7723199 WBGene00016846 C50F7.6 C50F7.6 0.218966881327232 AGIWUR29864  
CB4856 HS IV 7726718 7727951 WBGene00016845 C50F7.5 C50F7.5 -0.0673474483040692  
AGIWUR5278;AGIWUR18042;AGIWUR42280  
CB4856 HS IV 7728913 7730645 WBGene00016844 sucg-1 C50F7.4 0.0876124031471406 AGIWUR31058  
CB4856 HS IV 7730669 7732060 WBGene00016847 C50F7.9 C50F7.9 0.0649711833815303 AGIWUR29923

|                                                                                               |    |    |         |         |                |          |          |                      |             |
|-----------------------------------------------------------------------------------------------|----|----|---------|---------|----------------|----------|----------|----------------------|-------------|
| CB4856                                                                                        | HS | IV | 7732329 | 7734210 | WBGene00016843 | C50F7.3  | C50F7.3  | 0.241700525567218    | AGIWUR22357 |
| CB4856                                                                                        | HS | IV | 7734647 | 7736409 | WBGene00000551 | clx-1    | C50F7.2  | -0.267085425974898   | AGIWUR36592 |
| CB4856                                                                                        | HS | IV | 7743906 | 7746074 | WBGene00016842 | npr-35   | C50F7.1  | -0.017480443772012   |             |
| AGIWUR5063;AGIWUR17132;AGIWUR28609                                                            |    |    |         |         |                |          |          |                      |             |
| CB4856                                                                                        | HS | IV | 7745979 | 7748225 | WBGene00016848 | klo-1    | C50F7.10 | 0.296262686558169    |             |
| AGIWUR5356                                                                                    |    |    |         |         |                |          |          |                      |             |
| CB4856                                                                                        | HS | IV | 7748157 | 7757358 | WBGene00016700 | C46A5.4  | C46A5.4  | -0.105902819821296   | AGIWUR5385  |
| CB4856                                                                                        | HS | IV | 7757513 | 7759627 | WBGene00016701 | C46A5.5  | C46A5.5  | -0.0152701988610371  | AGIWUR36380 |
| CB4856                                                                                        | HS | IV | 7760000 | 7763848 | WBGene00016702 | C46A5.6  | C46A5.6  | 0.169245594139674    | AGIWUR4718  |
| CB4856                                                                                        | HS | IV | 7763931 | 7767094 | WBGene00016698 | C46A5.1  | C46A5.1  | -0.248448491572239   | AGIWUR10952 |
| CB4856                                                                                        | HS | IV | 7768395 | 7770025 | WBGene00016703 | rdl-1    | C46A5.8  | -0.00671361046837582 | AGIWUR19222 |
| CB4856                                                                                        | HS | IV | 7770770 | 7774275 | WBGene00001827 | hcf-1    | C46A5.9  | 0.0864400981396507   |             |
| AGIWUR14670;AGIWUR29125;AGIWUR34534                                                           |    |    |         |         |                |          |          |                      |             |
| CB4856                                                                                        | HS | IV | 7774411 | 7775956 | WBGene00016374 | swd-2.2  | C33H5.7  | 0.0778090780782996   | AGIWUR13567 |
| CB4856                                                                                        | HS | IV | 7776025 | 7778022 | WBGene00016373 | swd-2.1  | C33H5.6  | 0.0747076769392496   | AGIWUR4839  |
| CB4856                                                                                        | HS | IV | 7779379 | 7782499 | WBGene00016376 | sec-10   | C33H5.9  | -0.356836662411819   |             |
| AGIWUR24432;AGIWUR29650;AGIWUR29677;AGIWUR35758;AGIWUR37825                                   |    |    |         |         |                |          |          |                      |             |
| CB4856                                                                                        | HS | IV | 7782599 | 7783851 | WBGene00044325 | tag-321  | C33H5.19 | 0.151773664417117    |             |
| AGIWUR8294                                                                                    |    |    |         |         |                |          |          |                      |             |
| CB4856                                                                                        | HS | IV | 7783970 | 7785556 | WBGene00044326 | tag-322  | C33H5.10 | -0.00638715743167495 |             |
| AGIWUR5860                                                                                    |    |    |         |         |                |          |          |                      |             |
| CB4856                                                                                        | HS | IV | 7786000 | 7789613 | WBGene00016378 | imp-3    | C33H5.11 | 0.0806588878309711   |             |
| AGIWUR351;AGIWUR4509;AGIWUR18679;AGIWUR19177;AGIWUR28518                                      |    |    |         |         |                |          |          |                      |             |
| CB4856                                                                                        | HS | IV | 7789847 | 7791229 | WBGene00004703 | rsp-6    | C33H5.12 | -0.0887784865860999  |             |
| AGIWUR2502;AGIWUR3624;AGIWUR21741;AGIWUR27504;AGIWUR32559;AGIWUR34162;AGIWUR37983;AGIWUR38089 |    |    |         |         |                |          |          |                      |             |
| CB4856                                                                                        | HS | IV | 7791704 | 7792263 | WBGene00016379 | C33H5.13 | C33H5.13 | 0.153432399057422    |             |
| AGIWUR285;AGIWUR2593;AGIWUR16455;AGIWUR20732;AGIWUR31399;AGIWUR41305                          |    |    |         |         |                |          |          |                      |             |
| CB4856                                                                                        | HS | IV | 7792349 | 7794809 | WBGene00016380 | ntp-1    | C33H5.14 | 0.00811001734261119  |             |
| AGIWUR738;AGIWUR12371;AGIWUR31554                                                             |    |    |         |         |                |          |          |                      |             |
| CB4856                                                                                        | HS | IV | 7794871 | 7796376 | WBGene00016381 | sgo-1    | C33H5.15 | 0.115483993419073    |             |
| AGIWUR36220                                                                                   |    |    |         |         |                |          |          |                      |             |
| CB4856                                                                                        | HS | IV | 7797192 | 7800252 | WBGene00002221 | k1p-10   | C33H5.4  | -0.0172021680082484  |             |
| AGIWUR403;AGIWUR20408;AGIWUR24076;AGIWUR44025                                                 |    |    |         |         |                |          |          |                      |             |
| CB4856                                                                                        | HS | IV | 7801916 | 7803350 | WBGene00016382 | C33H5.16 | C33H5.16 | -0.0455506720070513  |             |
| AGIWUR39505                                                                                   |    |    |         |         |                |          |          |                      |             |
| CB4856                                                                                        | HS | IV | 7805040 | 7807948 | WBGene00016371 | C33H5.2  | C33H5.2  | 0.469854119011648    | AGIWUR22667 |
| CB4856                                                                                        | HS | IV | 7808912 | 7810681 | WBGene00016370 | C33H5.1  | C33H5.1  | -0.192973095289828   | AGIWUR4459  |
| CB4856                                                                                        | HS | IV | 7811157 | 7812809 | WBGene00016383 | zgpa-1   | C33H5.17 | 0.101065070544264    |             |
| AGIWUR8182                                                                                    |    |    |         |         |                |          |          |                      |             |



|                                                                                                                                                                         |    |    |         |         |                |          |          |                     |             |
|-------------------------------------------------------------------------------------------------------------------------------------------------------------------------|----|----|---------|---------|----------------|----------|----------|---------------------|-------------|
| CB4856                                                                                                                                                                  | HS | IV | 7812770 | 7815733 | WBGene00016384 | cdgs-1   | C33H5.18 | 0.0228302886958076  |             |
| AGIWUR10278;AGIWUR14325;AGIWUR20433;AGIWUR20750;AGIWUR21303;AGIWUR21397;AGIWUR25679;AGIWUR28313;AGIWUR28334;AGIWUR29500;AGIWUR30310;AGIWUR36176;AGIWUR39157;AGIWUR44187 |    |    |         |         |                |          |          |                     |             |
| CB4856                                                                                                                                                                  | HS | IV | 7818251 | 7821195 | WBGene00004363 | ric-3    | T14A8.1  | 0.238284108185667   | AGIWUR12936 |
| CB4856                                                                                                                                                                  | HS | IV | 7821673 | 7822700 | WBGene00020497 | T14A8.2  | T14A8.2  | 0.0110352468334227  | AGIWUR21984 |
| CB4856                                                                                                                                                                  | HS | IV | 7826334 | 7829301 | WBGene00015509 | C06A6.4  | C06A6.4  | -0.0543977000017364 | AGIWUR17848 |
| CB4856                                                                                                                                                                  | HS | IV | 7830525 | 7832401 | WBGene00015508 | mvb-12   | C06A6.3  | -0.115627065983887  | AGIWUR28526 |
| CB4856                                                                                                                                                                  | HS | IV | 7832344 | 7834675 | WBGene00015510 | C06A6.5  | C06A6.5  | 0.0211108010831076  | AGIWUR44246 |
| CB4856                                                                                                                                                                  | HS | IV | 7837350 | 7838548 | WBGene00015511 | C06A6.7  | C06A6.7  | 0.177594823271704   |             |
| AGIWUR1094;AGIWUR1440;AGIWUR43137                                                                                                                                       |    |    |         |         |                |          |          |                     |             |
| CB4856                                                                                                                                                                  | HS | IV | 7846630 | 7854224 | WBGene00015507 | C06A6.2  | C06A6.2  | 0.0724747395576051  | AGIWUR3948  |
| CB4856                                                                                                                                                                  | HS | IV | 7868907 | 7870100 | WBGene00001453 | flp-10   | T06C10.4 | -0.0399966104100677 |             |
| AGIWUR12836;AGIWUR17073;AGIWUR17722;AGIWUR20675;AGIWUR29234                                                                                                             |    |    |         |         |                |          |          |                     |             |
| CB4856                                                                                                                                                                  | HS | IV | 7870865 | 7873034 | WBGene00020289 | T06C10.3 | T06C10.3 | 0.215184582385744   |             |
| AGIWUR11575                                                                                                                                                             |    |    |         |         |                |          |          |                     |             |
| CB4856                                                                                                                                                                  | HS | IV | 7875727 | 7877881 | WBGene00002208 | kin-26   | T06C10.6 | 0.142087315517749   |             |
| AGIWUR12261                                                                                                                                                             |    |    |         |         |                |          |          |                     |             |
| CB4856                                                                                                                                                                  | HS | IV | 7879317 | 7881034 | WBGene00020288 | srt-73   | T06C10.2 | -0.0177490636356534 |             |
| AGIWUR1450                                                                                                                                                              |    |    |         |         |                |          |          |                     |             |
| CB4856                                                                                                                                                                  | HS | IV | 7882028 | 7900247 | WBGene00016957 | atic-1   | C55F2.1  | 0.190447644266532   |             |
| AGIWUR11020;AGIWUR15539;AGIWUR31631;AGIWUR40721                                                                                                                         |    |    |         |         |                |          |          |                     |             |
| CB4856                                                                                                                                                                  | HS | IV | 7900200 | 7902271 | WBGene00016793 | arp-11   | C49H3.8  | 0.00193935955874291 |             |
| AGIWUR22789;AGIWUR27681;AGIWUR41817                                                                                                                                     |    |    |         |         |                |          |          |                     |             |
| CB4856                                                                                                                                                                  | HS | IV | 7903740 | 7907083 | WBGene00016792 | C49H3.6  | C49H3.6  | 0.109085876983334   | AGIWUR35959 |
| CB4856                                                                                                                                                                  | HS | IV | 7907093 | 7909474 | WBGene00016794 | C49H3.9  | C49H3.9  | -0.0274786902107298 |             |
| AGIWUR7966;AGIWUR10533;AGIWUR33949                                                                                                                                      |    |    |         |         |                |          |          |                     |             |
| CB4856                                                                                                                                                                  | HS | IV | 7910575 | 7915184 | WBGene00003827 | ntl-4    | C49H3.5  | 0.204564695926718   |             |
| AGIWUR1118;AGIWUR2358;AGIWUR7312;AGIWUR8161;AGIWUR8439;AGIWUR19950;AGIWUR23304                                                                                          |    |    |         |         |                |          |          |                     |             |
| CB4856                                                                                                                                                                  | HS | IV | 7915291 | 7916711 | WBGene00016791 | C49H3.4  | C49H3.4  | -0.0383783551874073 |             |
| AGIWUR3522;AGIWUR10447;AGIWUR11519;AGIWUR14805                                                                                                                          |    |    |         |         |                |          |          |                     |             |
| CB4856                                                                                                                                                                  | HS | IV | 7916699 | 7924129 | WBGene00002080 | xpo-3    | C49H3.10 | -0.140219124827864  |             |
| AGIWUR39598                                                                                                                                                             |    |    |         |         |                |          |          |                     |             |
| CB4856                                                                                                                                                                  | HS | IV | 7924350 | 7924968 | WBGene00016790 | C49H3.3  | C49H3.3  | 0.089543689542916   | AGIWUR2622  |
| CB4856                                                                                                                                                                  | HS | IV | 7925298 | 7926391 | WBGene00004471 | rps-2    | C49H3.11 | 0.21618065322486    |             |
| AGIWUR7606;AGIWUR9077                                                                                                                                                   |    |    |         |         |                |          |          |                     |             |
| CB4856                                                                                                                                                                  | HS | IV | 7926748 | 7927315 | WBGene00016795 | C49H3.12 | C49H3.12 | 0.078991608977951   |             |
| AGIWUR44761                                                                                                                                                             |    |    |         |         |                |          |          |                     |             |
| CB4856                                                                                                                                                                  | HS | IV | 7928159 | 7933775 | WBGene00001535 | gcy-8    | C49H3.1  | 0.203956204404214   | AGIWUR30693 |
| CB4856                                                                                                                                                                  | HS | IV | 7934097 | 7937746 | WBGene00000242 | bbs-2    | F20D12.3 | -0.0648489651758499 |             |

|                                                 |    |         |         |                |          |          |                     |             |
|-------------------------------------------------|----|---------|---------|----------------|----------|----------|---------------------|-------------|
| AGIWUR5162                                      |    |         |         |                |          |          |                     |             |
| CB4856 HS                                       | IV | 7937959 | 7938934 | WBGene00017645 | F20D12.7 | F20D12.7 | -0.024421670271833  |             |
| AGIWUR12975                                     |    |         |         |                |          |          |                     |             |
| CB4856 HS                                       | IV | 7939812 | 7941064 | WBGene00017644 | exc-9    | F20D12.5 | -0.0516110839414523 |             |
| AGIWUR36421                                     |    |         |         |                |          |          |                     |             |
| CB4856 HS                                       | IV | 7943617 | 7946819 | WBGene00017643 | czw-1    | F20D12.4 | -0.0803195156440513 |             |
| AGIWUR16838;AGIWUR18511;AGIWUR27746;AGIWUR30226 |    |         |         |                |          |          |                     |             |
| CB4856 HS                                       | IV | 7948643 | 7953548 | WBGene00017642 | F20D12.2 | F20D12.2 | 0.186047874213351   |             |
| AGIWUR4597                                      |    |         |         |                |          |          |                     |             |
| CB4856 HS                                       | IV | 7953509 | 7955898 | WBGene00000442 | ceh-19   | F20D12.6 | 0.118103231193323   |             |
| AGIWUR15960;AGIWUR38313                         |    |         |         |                |          |          |                     |             |
| CB4856 HS                                       | IV | 7957580 | 7962129 | WBGene00017641 | csr-1    | F20D12.1 | 0.00983430303443633 |             |
| AGIWUR32004                                     |    |         |         |                |          |          |                     |             |
| CB4856 HS                                       | IV | 7967363 | 7969600 | WBGene00019020 | F57H12.5 | F57H12.5 | 0.0429328152052388  |             |
| AGIWUR37274                                     |    |         |         |                |          |          |                     |             |
| CB4856 HS                                       | IV | 7970525 | 7973363 | WBGene00019019 | frpr-10  | F57H12.4 | 0.0486486805804596  |             |
| AGIWUR12162                                     |    |         |         |                |          |          |                     |             |
| CB4856 HS                                       | IV | 7975430 | 7976406 | WBGene00019021 | F57H12.6 | F57H12.6 | 0.0865311790403496  |             |
| AGIWUR23322                                     |    |         |         |                |          |          |                     |             |
| CB4856 HS                                       | IV | 7977836 | 7979014 | WBGene00003879 | ora-1    | F57H12.3 | -0.225443280305317  |             |
| AGIWUR273                                       |    |         |         |                |          |          |                     |             |
| CB4856 HS                                       | IV | 7979823 | 7982005 | WBGene00006761 | unc-24   | F57H12.2 | -0.0302187409562142 |             |
| AGIWUR28958                                     |    |         |         |                |          |          |                     |             |
| CB4856 HS                                       | IV | 7982526 | 7983919 | WBGene00000183 | arf-3    | F57H12.1 | 0.0644340851833789  |             |
| AGIWUR17772                                     |    |         |         |                |          |          |                     |             |
| CB4856 HS                                       | IV | 7983854 | 7987183 | WBGene00003178 | mec-17   | F57H12.7 | 0.209345113373656   |             |
| AGIWUR6494                                      |    |         |         |                |          |          |                     |             |
| CB4856 HS                                       | IV | 7988685 | 7991425 | WBGene00000689 | col-115  | Y42H9B.1 | -0.505038204474239  |             |
| AGIWUR29817                                     |    |         |         |                |          |          |                     |             |
| CB4856 HS                                       | IV | 7991410 | 8004136 | WBGene00004371 | rig-4    | Y42H9B.2 | 0.150937134706471   |             |
| AGIWUR2109                                      |    |         |         |                |          |          |                     |             |
| CB4856 HS                                       | IV | 8011031 | 8012430 | WBGene00021541 | Y42H9B.3 | Y42H9B.3 | 0.165686809656084   |             |
| AGIWUR16920                                     |    |         |         |                |          |          |                     |             |
| CB4856 HS                                       | IV | 8014149 | 8015722 | WBGene00016130 | C26B2.8  | C26B2.8  | -0.205799944017067  |             |
| AGIWUR8660;AGIWUR13048;AGIWUR25460              |    |         |         |                |          |          |                     |             |
| CB4856 HS                                       | IV | 8016153 | 8016882 | WBGene00016129 | C26B2.7  | C26B2.7  | 0.0676993275499163  |             |
| AGIWUR10974;AGIWUR14635;AGIWUR23376;AGIWUR29971 |    |         |         |                |          |          |                     |             |
| CB4856 HS                                       | IV | 8016994 | 8018221 | WBGene00016128 | elpc-4   | C26B2.6  | -0.252225796363588  | AGIWUR32454 |
| CB4856 HS                                       | IV | 8018130 | 8019808 | WBGene00016124 | dnc-4    | C26B2.1  | -0.0567753034568206 |             |

AGIWUR7415;AGIWUR34884;AGIWUR41679;AGIWUR42082;AGIWUR42711  
 CB4856 HS IV 8021146 8022122 WBGene00016125 C26B2.2 C26B2.2 -0.125276758205439 AGIWUR33968  
 CB4856 HS IV 8022656 8029513 WBGene00003625 nhr-31 C26B2.3 -0.127111484783912  
 AGIWUR5390;AGIWUR12112;AGIWUR24589;AGIWUR24612;AGIWUR28272;AGIWUR38754  
 CB4856 HS IV 8045045 8047363 WBGene00016126 nhr-258 C26B2.4 -0.00376679624487686 AGIWUR15286  
 CB4856 HS IV 8062669 8084087 WBGene00004732 sax-7 C18F3.2 -0.113619328089813  
 AGIWUR1466;AGIWUR9755;AGIWUR15045;AGIWUR23315;AGIWUR30426;AGIWUR32779;AGIWUR34494  
 CB4856 HS IV 8099918 8101424 WBGene00021537 Y42H9AR.2 Y42H9AR.2 -0.0067318081562  
 AGIWUR33662  
 CB4856 HS IV 8102501 8104323 WBGene00021540 Y42H9AR.5 Y42H9AR.5 0.186762397804252  
 AGIWUR18854;AGIWUR21863;AGIWUR44955  
 CB4856 HS IV 8104287 8107600 WBGene00021538 rabs-5 Y42H9AR.3 -0.0779456548646102  
 AGIWUR18906  
 CB4856 HS IV 8107766 8112241 WBGene00021539 Y42H9AR.4 Y42H9AR.4 -0.0547635341476616  
 AGIWUR1965;AGIWUR5037;AGIWUR6631;AGIWUR23066;AGIWUR30445;AGIWUR33465  
 CB4856 HS IV 8113384 8115670 WBGene00021536 Y42H9AR.1 Y42H9AR.1 -0.221411723947103  
 AGIWUR31877  
 CB4856 HS IV 8115762 8118445 WBGene00018360 irld-8 F42G8.9 0.0265903694825553 AGIWUR18758  
 CB4856 HS IV 8121908 8122240 WBGene00249816 F42G8.18 F42G8.18 0.296247237259113  
 AGIWUR20867  
 CB4856 HS IV 8127734 8128909 WBGene00249817 F42G8.19 F42G8.19 0.316197248262989  
 AGIWUR34512  
 CB4856 HS IV 8128940 8130256 WBGene00018361 F42G8.10 F42G8.10 0.146452743362598  
 AGIWUR2781;AGIWUR14396;AGIWUR19987;AGIWUR20573;AGIWUR25865;AGIWUR33090;AGIWUR34700  
 CB4856 HS IV 8130561 8132213 WBGene00018357 moc-3 F42G8.6 0.113286078240655 AGIWUR33514  
 CB4856 HS IV 8132175 8133692 WBGene00004979 sph-1 F42G8.11 -0.221117821106246  
 AGIWUR35585  
 CB4856 HS IV 8133789 8136055 WBGene00002162 isp-1 F42G8.12 0.170657150502382  
 AGIWUR2986;AGIWUR42505  
 CB4856 HS IV 8136325 8139087 WBGene00018356 islo-1 F42G8.5 0.0556357323411452  
 AGIWUR16021;AGIWUR21631;AGIWUR44443;AGIWUR44737  
 CB4856 HS IV 8139219 8143151 WBGene00004057 pmk-3 F42G8.4 -0.089093002553934 AGIWUR35419  
 CB4856 HS IV 8143500 8148647 WBGene00004056 pmk-2 F42G8.3 0.193096934731344  
 AGIWUR24;AGIWUR6567;AGIWUR11118;AGIWUR28986;AGIWUR30474;AGIWUR41777;AGIWUR42922  
 CB4856 HS IV 8148794 8151156 WBGene00004055 pmk-1 B0218.3 -0.0370303079607126  
 AGIWUR2001;AGIWUR5179;AGIWUR10399;AGIWUR20441;AGIWUR23734;AGIWUR34850;AGIWUR36924  
 CB4856 HS IV 8152445 8154857 WBGene00015048 faah-2 B0218.2 0.123633031033798 AGIWUR16601  
 CB4856 HS IV 8155211 8156587 WBGene00015049 B0218.5 B0218.5 0.175454155239015 AGIWUR3420  
 CB4856 HS IV 8159358 8162042 WBGene00015047 faah-1 B0218.1 -0.0360535934279014 AGIWUR22394

|                                                                                    |    |    |         |         |                |          |          |                     |             |
|------------------------------------------------------------------------------------|----|----|---------|---------|----------------|----------|----------|---------------------|-------------|
| CB4856                                                                             | HS | IV | 8161967 | 8163795 | WBGene00015050 | clcc-51  | B0218.6  | 0.062975861335695   |             |
| AGIWUR5196;AGIWUR44442                                                             |    |    |         |         |                |          |          |                     |             |
| CB4856                                                                             | HS | IV | 8164590 | 8166050 | WBGene00015051 | B0218.7  | B0218.7  | 0.145673863805643   | AGIWUR5993  |
| CB4856                                                                             | HS | IV | 8167164 | 8168813 | WBGene00015052 | clcc-52  | B0218.8  | 0.233728822169624   | AGIWUR921   |
| CB4856                                                                             | HS | IV | 8176479 | 8188879 | WBGene00003961 | pct-1    | C07G1.3  | 0.113934436283968   |             |
| AGIWUR35135;AGIWUR38001                                                            |    |    |         |         |                |          |          |                     |             |
| CB4856                                                                             | HS | IV | 8188904 | 8198951 | WBGene00006957 | wsp-1    | C07G1.4  | 0.00533899082342071 |             |
| AGIWUR1941;AGIWUR4372;AGIWUR9072;AGIWUR9845;AGIWUR15505;AGIWUR19474;AGIWUR41409    |    |    |         |         |                |          |          |                     |             |
| CB4856                                                                             | HS | IV | 8200604 | 8201233 | WBGene00044608 | glrx-22  | C07G1.8  | 0.0742362140939754  |             |
| AGIWUR2696;AGIWUR10561;AGIWUR19689;AGIWUR27723;AGIWUR33581                         |    |    |         |         |                |          |          |                     |             |
| CB4856                                                                             | HS | IV | 8201378 | 8206048 | WBGene00004101 | hgrs-1   | C07G1.5  | 0.257121955478244   | AGIWUR13098 |
| CB4856                                                                             | HS | IV | 8206614 | 8213723 | WBGene00006620 | svh-1    | C07G1.1  | -0.0799516531060287 |             |
| AGIWUR22767;AGIWUR25262                                                            |    |    |         |         |                |          |          |                     |             |
| CB4856                                                                             | HS | IV | 8213826 | 8220036 | WBGene00003839 | ocr-2    | T09A12.3 | 0.283146743743444   |             |
| AGIWUR7008                                                                         |    |    |         |         |                |          |          |                     |             |
| CB4856                                                                             | HS | IV | 8222202 | 8223459 | WBGene00020373 | gpx-6    | T09A12.2 | 0.107363346359582   |             |
| AGIWUR5259;AGIWUR30035                                                             |    |    |         |         |                |          |          |                     |             |
| CB4856                                                                             | HS | IV | 8225674 | 8226366 | WBGene00020374 | T09A12.5 | T09A12.5 | -0.310405650501417  |             |
| AGIWUR19944                                                                        |    |    |         |         |                |          |          |                     |             |
| CB4856                                                                             | HS | IV | 8226337 | 8236602 | WBGene00003656 | nhr-66   | T09A12.4 | -0.198060345183819  |             |
| AGIWUR5339;AGIWUR18857;AGIWUR19208;AGIWUR25358;AGIWUR26631;AGIWUR30253;AGIWUR43015 |    |    |         |         |                |          |          |                     |             |
| CB4856                                                                             | HS | IV | 8259248 | 8259979 | WBGene00019507 | K07H8.7  | K07H8.7  | 0.364272289885854   |             |
| AGIWUR3973;AGIWUR19600                                                             |    |    |         |         |                |          |          |                     |             |
| CB4856                                                                             | HS | IV | 8261134 | 8266462 | WBGene00006930 | vit-6    | K07H8.6  | 0.0640486221794045  |             |
| AGIWUR8837;AGIWUR35220                                                             |    |    |         |         |                |          |          |                     |             |
| CB4856                                                                             | HS | IV | 8266752 | 8268435 | WBGene00019508 | K07H8.8  | K07H8.8  | 0.515345838141084   | AGIWUR19784 |
| CB4856                                                                             | HS | IV | 8273226 | 8275332 | WBGene00044510 | K07H8.11 | K07H8.11 | 0.282663606196734   |             |
| AGIWUR24203;AGIWUR36263                                                            |    |    |         |         |                |          |          |                     |             |
| CB4856                                                                             | HS | IV | 8275621 | 8276709 | WBGene00044509 | K07H8.12 | K07H8.12 | 0.0358783122126525  |             |
| AGIWUR17978;AGIWUR27697;AGIWUR31520;AGIWUR37850;AGIWUR38264                        |    |    |         |         |                |          |          |                     |             |
| CB4856                                                                             | HS | IV | 8285175 | 8286566 | WBGene00019509 | K07H8.9  | K07H8.9  | 0.0239894558384819  | AGIWUR36215 |
| CB4856                                                                             | HS | IV | 8286587 | 8289531 | WBGene00019510 | K07H8.10 | K07H8.10 | 0.019486200923339   |             |
| AGIWUR657;AGIWUR2486;AGIWUR8519;AGIWUR15273;AGIWUR22002;AGIWUR26379;AGIWUR28977    |    |    |         |         |                |          |          |                     |             |
| CB4856                                                                             | HS | IV | 8290273 | 8291496 | WBGene00000923 | daf-31   | K07H8.3  | -0.15518909926743   | AGIWUR20212 |
| CB4856                                                                             | HS | IV | 8291515 | 8294596 | WBGene00019504 | K07H8.2  | K07H8.2  | 0.166736549238778   |             |
| AGIWUR2279;AGIWUR6071;AGIWUR17654;AGIWUR26947                                      |    |    |         |         |                |          |          |                     |             |
| CB4856                                                                             | HS | IV | 8294690 | 8297283 | WBGene00019503 | tbce-1   | K07H8.1  | 0.133872723504549   | AGIWUR15141 |
| CB4856                                                                             | HS | IV | 8297197 | 8299843 | WBGene00018072 | npr1-3   | F35H10.7 | 0.067915661093104   |             |
| AGIWUR4422;AGIWUR42532                                                             |    |    |         |         |                |          |          |                     |             |

|                                                            |    |         |         |                |           |           |                    |             |
|------------------------------------------------------------|----|---------|---------|----------------|-----------|-----------|--------------------|-------------|
| CB4856 HS                                                  | IV | 8299936 | 8300647 | WBGene00018071 | F35H10.6  | F35H10.6  | 0.0111406218394023 |             |
| AGIWUR17331                                                |    |         |         |                |           |           |                    |             |
| CB4856 HS                                                  | IV | 8300755 | 8301165 | WBGene00018070 | F35H10.5  | F35H10.5  | 0.023934512344578  |             |
| AGIWUR44449                                                |    |         |         |                |           |           |                    |             |
| CB4856 HS                                                  | IV | 8303968 | 8307369 | WBGene00006914 | vha-5     | F35H10.4  | 0.136537368533503  |             |
| AGIWUR21901;AGIWUR30912;AGIWUR35131                        |    |         |         |                |           |           |                    |             |
| CB4856 HS                                                  | IV | 8307294 | 8312946 | WBGene00018073 | F35H10.10 | F35H10.10 | -0.143682803304488 |             |
| AGIWUR17187                                                |    |         |         |                |           |           |                    |             |
| CB4856 HS                                                  | IV | 8325967 | 8327062 | WBGene00018069 | F35H10.3  | F35H10.3  | 0.094201891460612  |             |
| AGIWUR9334                                                 |    |         |         |                |           |           |                    |             |
| CB4856 HS                                                  | IV | 8329205 | 8329956 | WBGene00018068 | F35H10.2  | F35H10.2  | 0.0674613658148715 |             |
| AGIWUR36343                                                |    |         |         |                |           |           |                    |             |
| CB4856 HS                                                  | IV | 8332826 | 8333559 | WBGene00003099 | lys-10    | F17E9.11  | 0.514518424020491  |             |
| AGIWUR42956                                                |    |         |         |                |           |           |                    |             |
| CB4856 HS                                                  | IV | 8333557 | 8334021 | WBGene00001905 | his-31    | F17E9.12  | -0.37728419008408  |             |
| AGIWUR22692                                                |    |         |         |                |           |           |                    |             |
| CB4856 HS                                                  | IV | 8334298 | 8334862 | WBGene00001906 | his-32    | F17E9.10  | -0.123898933915598 |             |
| AGIWUR5672;AGIWUR14633;AGIWUR15754;AGIWUR21832;AGIWUR32746 |    |         |         |                |           |           |                    |             |
| CB4856 HS                                                  | IV | 8336807 | 8338172 | WBGene00023270 | F17E9.14  | F17E9.14  | 0.133601078842266  |             |
| AGIWUR44242                                                |    |         |         |                |           |           |                    |             |
| CB4856 HS                                                  | IV | 8342685 | 8344485 | WBGene00017543 | lgc-5     | F17E9.7   | 0.0450906549844534 | AGIWUR8436  |
| CB4856 HS                                                  | IV | 8345818 | 8346546 | WBGene00017542 | F17E9.5   | F17E9.5   | -0.135377458926065 | AGIWUR38365 |
| CB4856 HS                                                  | IV | 8348373 | 8349169 | WBGene00017541 | F17E9.4   | F17E9.4   | 0.339720674339599  | AGIWUR2460  |
| CB4856 HS                                                  | IV | 8354874 | 8355433 | WBGene00017540 | F17E9.3   | F17E9.3   | -0.156897041539382 | AGIWUR9498  |
| CB4856 HS                                                  | IV | 8355892 | 8356503 | WBGene00017539 | F17E9.2   | F17E9.2   | 0.0508640516749299 | AGIWUR27596 |
| CB4856 HS                                                  | IV | 8356776 | 8357854 | WBGene00000690 | col-116   | F17E9.1   | 0.161262976706851  | AGIWUR39272 |
| CB4856 HS                                                  | IV | 8357938 | 8358592 | WBGene00044953 | D2096.13  | D2096.13  | 0.07169703832218   |             |
| AGIWUR4484;AGIWUR9578;AGIWUR10373;AGIWUR22490              |    |         |         |                |           |           |                    |             |
| CB4856 HS                                                  | IV | 8359165 | 8359716 | WBGene00017072 | D2096.5   | D2096.5   | 0.0318899046997796 | AGIWUR14138 |
| CB4856 HS                                                  | IV | 8361089 | 8363370 | WBGene00005019 | sqv-1     | D2096.4   | 0.0198008451121936 |             |
| AGIWUR5412;AGIWUR24328;AGIWUR41399                         |    |         |         |                |           |           |                    |             |
| CB4856 HS                                                  | IV | 8363463 | 8366376 | WBGene00017079 | D2096.12  | D2096.12  | 0.0527543176281231 |             |
| AGIWUR8270                                                 |    |         |         |                |           |           |                    |             |
| CB4856 HS                                                  | IV | 8366539 | 8375371 | WBGene00017071 | aagr-1    | D2096.3   | 0.148719558704625  | AGIWUR12328 |
| CB4856 HS                                                  | IV | 8375720 | 8377698 | WBGene00017074 | D2096.7   | D2096.7   | 0.102827655888011  |             |
| AGIWUR3581;AGIWUR8824;AGIWUR12898;AGIWUR41238              |    |         |         |                |           |           |                    |             |
| CB4856 HS                                                  | IV | 8377703 | 8379319 | WBGene00017075 | nap-1     | D2096.8   | -0.182709747526268 | AGIWUR22992 |
| CB4856 HS                                                  | IV | 8379984 | 8381925 | WBGene00017070 | praf-3    | D2096.2   | -0.242377110931025 |             |
| AGIWUR9038;AGIWUR18527;AGIWUR31847;AGIWUR40100             |    |         |         |                |           |           |                    |             |

|                                                                                              |    |    |         |         |                |           |           |                     |                     |
|----------------------------------------------------------------------------------------------|----|----|---------|---------|----------------|-----------|-----------|---------------------|---------------------|
| CB4856                                                                                       | HS | IV | 8381922 | 8382814 | WBGene00017076 | D2096.9   | D2096.9   | 0.13243518650022    | AGIWUR3892          |
| CB4856                                                                                       | HS | IV | 8387626 | 8389239 | WBGene00017077 | D2096.10  |           | D2096.10            | -0.202074883500607  |
| AGIWUR19057                                                                                  |    |    |         |         |                |           |           |                     |                     |
| CB4856                                                                                       | HS | IV | 8398923 | 8399762 | WBGene00019789 | M116.2    | M116.2    | -0.0269928577064427 | AGIWUR34103         |
| CB4856                                                                                       | HS | IV | 8414293 | 8421061 | WBGene00019792 | M116.5    | M116.5    | 0.0655490653910533  | AGIWUR4969          |
| CB4856                                                                                       | HS | IV | 8422053 | 8424146 | WBGene00023488 | srz-84    | T26A8.5   | 0.0530114732344811  |                     |
| AGIWUR7668;AGIWUR26211;AGIWUR32005;AGIWUR37031;AGIWUR38715;AGIWUR44688                       |    |    |         |         |                |           |           |                     |                     |
| CB4856                                                                                       | HS | IV | 8424278 | 8428512 | WBGene00020825 | tmem-231  |           | T26A8.2             | 0.048927736647375   |
| AGIWUR2333                                                                                   |    |    |         |         |                |           |           |                     |                     |
| CB4856                                                                                       | HS | IV | 8428961 | 8431493 | WBGene00020827 | T26A8.4   | T26A8.4   | 0.11025893415537    | AGIWUR31550         |
| CB4856                                                                                       | HS | IV | 8433038 | 8438004 | WBGene00020824 | T26A8.1   | T26A8.1   | -0.0440826351093477 | AGIWUR25557         |
| CB4856                                                                                       | HS | IV | 8447204 | 8449048 | WBGene00020138 | T01B11.1  |           | T01B11.1            | -0.103061456668313  |
| AGIWUR23119                                                                                  |    |    |         |         |                |           |           |                     |                     |
| CB4856                                                                                       | HS | IV | 8449353 | 8451771 | WBGene00020139 | T01B11.2  |           | T01B11.2            | 0.0443394826881658  |
| AGIWUR1975;AGIWUR23355;AGIWUR24343;AGIWUR27969;AGIWUR37585                                   |    |    |         |         |                |           |           |                     |                     |
| CB4856                                                                                       | HS | IV | 8457280 | 8458933 | WBGene00006374 | syx-4     | T01B11.3  |                     | -0.0946475901119008 |
| AGIWUR12060                                                                                  |    |    |         |         |                |           |           |                     |                     |
| CB4856                                                                                       | HS | IV | 8459178 | 8460327 | WBGene00020140 | ant-1.4   | T01B11.4  |                     | -0.0451205085719013 |
| AGIWUR8471;AGIWUR23208                                                                       |    |    |         |         |                |           |           |                     |                     |
| CB4856                                                                                       | HS | IV | 8460999 | 8463816 | WBGene00006220 | str-176   | T01B11.5  |                     | -0.0701445601163266 |
| AGIWUR2743;AGIWUR7347;AGIWUR17297;AGIWUR25379;AGIWUR28348                                    |    |    |         |         |                |           |           |                     |                     |
| CB4856                                                                                       | HS | IV | 8464752 | 8472605 | WBGene00003837 | oat-1     | T01B11.7  |                     | 0.0304552105551785  |
| AGIWUR1624;AGIWUR6649;AGIWUR13136                                                            |    |    |         |         |                |           |           |                     |                     |
| CB4856                                                                                       | HS | IV | 8474056 | 8475278 | WBGene00016181 | C28C12.11 |           | C28C12.11           | 0.191668220106543   |
| AGIWUR8444                                                                                   |    |    |         |         |                |           |           |                     |                     |
| CB4856                                                                                       | HS | IV | 8477182 | 8480656 | WBGene00004995 | spp-10    | C28C12.7  |                     | 0.149823656966158   |
| AGIWUR10234;AGIWUR13523;AGIWUR23082;AGIWUR44161                                              |    |    |         |         |                |           |           |                     |                     |
| CB4856                                                                                       | HS | IV | 8481664 | 8483710 | WBGene00004993 | spp-8     | C28C12.5  |                     | -0.110082872622426  |
| AGIWUR19253                                                                                  |    |    |         |         |                |           |           |                     |                     |
| CB4856                                                                                       | HS | IV | 8487497 | 8488481 | WBGene00016180 | C28C12.4  |           | C28C12.4            | -0.307305922612164  |
| AGIWUR31231                                                                                  |    |    |         |         |                |           |           |                     |                     |
| CB4856                                                                                       | HS | IV | 8490221 | 8490857 | WBGene00016179 | C28C12.3  |           | C28C12.3            | -0.403954090612991  |
| AGIWUR40139                                                                                  |    |    |         |         |                |           |           |                     |                     |
| CB4856                                                                                       | HS | IV | 8492542 | 8494487 | WBGene00005670 | sru-7     | C28C12.13 |                     | -0.177654514200809  |
| AGIWUR1844                                                                                   |    |    |         |         |                |           |           |                     |                     |
| CB4856                                                                                       | HS | IV | 8494550 | 8496363 | WBGene00016182 | C28C12.12 |           | C28C12.12           | 0.0101858223296873  |
| AGIWUR5702;AGIWUR6603;AGIWUR6924;AGIWUR25765;AGIWUR26275;AGIWUR26545;AGIWUR29922;AGIWUR41298 |    |    |         |         |                |           |           |                     |                     |
| CB4856                                                                                       | HS | IV | 8496486 | 8498871 | WBGene00001566 | acdH-13   | C28C12.9  |                     | 0.0600322922808765  |
| AGIWUR33202                                                                                  |    |    |         |         |                |           |           |                     |                     |

|                                                                                             |    |    |         |         |                |            |            |                     |             |
|---------------------------------------------------------------------------------------------|----|----|---------|---------|----------------|------------|------------|---------------------|-------------|
| CB4856                                                                                      | HS | IV | 8499310 | 8500076 | WBGene00016178 | mesp-1     | C28C12.2   | -0.302926910576865  |             |
| AGIWUR28639                                                                                 |    |    |         |         |                |            |            |                     |             |
| CB4856                                                                                      | HS | IV | 8501479 | 8502983 | WBGene00016177 | C28C12.1   | C28C12.1   |                     |             |
| -0.00227914731375378 AGIWUR1654;AGIWUR16632;AGIWUR31146;AGIWUR32280;AGIWUR34091;AGIWUR39245 |    |    |         |         |                |            |            |                     |             |
| CB4856                                                                                      | HS | IV | 8503493 | 8510559 | WBGene00006450 | tag-77     | C28C12.10  | 0.00418334063652992 |             |
| AGIWUR11253;AGIWUR18212;AGIWUR32240;AGIWUR36697                                             |    |    |         |         |                |            |            |                     |             |
| CB4856                                                                                      | HS | IV | 8513205 | 8513916 | WBGene00044001 | C09G4.4    | C09G4.4    | 0.082817101266107   |             |
| AGIWUR28241;AGIWUR42704                                                                     |    |    |         |         |                |            |            |                     |             |
| CB4856                                                                                      | HS | IV | 8513919 | 8514725 | WBGene00001051 | cks-1      | C09G4.3    | -0.0954776053218112 | AGIWUR43376 |
| CB4856                                                                                      | HS | IV | 8520894 | 8538182 | WBGene00015650 | pkg-2      | C09G4.2    | 0.0227464812009419  |             |
| AGIWUR4010;AGIWUR11603;AGIWUR13590;AGIWUR16392;AGIWUR23473;AGIWUR31328;AGIWUR39930          |    |    |         |         |                |            |            |                     |             |
| CB4856                                                                                      | HS | IV | 8539123 | 8544403 | WBGene00002043 | hyl-1      | C09G4.1    | -0.0635650266914389 |             |
| AGIWUR19450;AGIWUR23662;AGIWUR38311                                                         |    |    |         |         |                |            |            |                     |             |
| CB4856                                                                                      | HS | IV | 8559434 | 8563159 | WBGene00022004 | npr-22     | Y59H11AL.1 | -0.05191500273187   |             |
| AGIWUR20346;AGIWUR29725                                                                     |    |    |         |         |                |            |            |                     |             |
| CB4856                                                                                      | HS | IV | 8569144 | 8570353 | WBGene00022008 | Y59H11AM.4 | Y59H11AM.4 |                     |             |
| 0.000229441395443786 AGIWUR21150                                                            |    |    |         |         |                |            |            |                     |             |
| CB4856                                                                                      | HS | IV | 8571438 | 8571821 | WBGene00022005 | Y59H11AM.1 | Y59H11AM.1 | -0.603173710638103  |             |
| AGIWUR27952                                                                                 |    |    |         |         |                |            |            |                     |             |
| CB4856                                                                                      | HS | IV | 8585516 | 8594613 | WBGene00022010 | catp-7     | Y59H11AR.2 | 0.263813397173964   |             |
| AGIWUR26104                                                                                 |    |    |         |         |                |            |            |                     |             |
| CB4856                                                                                      | HS | IV | 8594871 | 8595417 | WBGene00022011 | Y59H11AR.3 | Y59H11AR.3 | 0.00846019796200448 |             |
| AGIWUR27882                                                                                 |    |    |         |         |                |            |            |                     |             |
| CB4856                                                                                      | HS | IV | 8596067 | 8596943 | WBGene00044511 | cllec-181  | Y59H11AR.5 | -0.196496995028583  |             |
| AGIWUR10135;AGIWUR12743;AGIWUR39931                                                         |    |    |         |         |                |            |            |                     |             |
| CB4856                                                                                      | HS | IV | 8597762 | 8598727 | WBGene00077437 | Y59H11AR.6 | Y59H11AR.6 | -0.073841321301602  |             |
| AGIWUR1141;AGIWUR20626;AGIWUR26591;AGIWUR30910;AGIWUR39286;AGIWUR45101                      |    |    |         |         |                |            |            |                     |             |
| CB4856                                                                                      | HS | IV | 8598739 | 8600742 | WBGene00022012 | Y59H11AR.4 | Y59H11AR.4 | 0.0261158370769947  |             |
| AGIWUR9861;AGIWUR14711                                                                      |    |    |         |         |                |            |            |                     |             |
| CB4856                                                                                      | HS | IV | 8609239 | 8611595 | WBGene00018335 | F42A9.6    | F42A9.6    | 0.105544844699404   | AGIWUR15055 |
| CB4856                                                                                      | HS | IV | 8612363 | 8614683 | WBGene00018334 | cyp-33E2   | F42A9.5    | 0.119014383455104   |             |
| AGIWUR4458                                                                                  |    |    |         |         |                |            |            |                     |             |
| CB4856                                                                                      | HS | IV | 8616006 | 8617147 | WBGene00018336 | F42A9.7    | F42A9.7    | -0.0823493905260673 | AGIWUR26310 |
| CB4856                                                                                      | HS | IV | 8617285 | 8618153 | WBGene00018332 | F42A9.3    | F42A9.3    | -0.137942407896791  | AGIWUR21805 |
| CB4856                                                                                      | HS | IV | 8618244 | 8618788 | WBGene00018337 | F42A9.8    | F42A9.8    | -0.168324977273411  | AGIWUR17831 |
| CB4856                                                                                      | HS | IV | 8620683 | 8626149 | WBGene00003034 | lin-49     | F42A9.2    | -0.198326877643876  | AGIWUR15629 |
| CB4856                                                                                      | HS | IV | 8631334 | 8644019 | WBGene00006483 | dgk-4      | F42A9.1    | 0.0905069357288379  | AGIWUR31290 |
| CB4856                                                                                      | HS | IV | 8644732 | 8645345 | WBGene00016767 | C49C8.3    | C49C8.3    | 0.0751094514836872  | AGIWUR16082 |
| CB4856                                                                                      | HS | IV | 8645521 | 8648429 | WBGene00016768 | cyp-33E1   | C49C8.4    | -0.108886344469365  |             |

|                                                                        |    |    |         |         |                |          |          |                      |             |
|------------------------------------------------------------------------|----|----|---------|---------|----------------|----------|----------|----------------------|-------------|
| AGIWUR34645                                                            |    |    |         |         |                |          |          |                      |             |
| CB4856                                                                 | HS | IV | 8648596 | 8653677 | WBGene00016769 | C49C8.5  | C49C8.5  | 0.643348909520169    | AGIWUR21299 |
| CB4856                                                                 | HS | IV | 8654604 | 8656829 | WBGene00016765 | C49C8.1  | C49C8.1  | 0.423610107893463    | AGIWUR6466  |
| CB4856                                                                 | HS | IV | 8657455 | 8658184 | WBGene00016770 | C49C8.6  | C49C8.6  | -0.00500716838392989 | AGIWUR9489  |
| CB4856                                                                 | HS | IV | 8666252 | 8667177 | WBGene00017235 | F08B4.3  | F08B4.3  | -0.0268870967127235  | AGIWUR5523  |
| CB4856                                                                 | HS | IV | 8668941 | 8676542 | WBGene00000397 | cdh-5    | F08B4.2  | -0.0709323772362378  |             |
| AGIWUR11543;AGIWUR30314;AGIWUR32142                                    |    |    |         |         |                |          |          |                      |             |
| CB4856                                                                 | HS | IV | 8677590 | 8678019 | WBGene00255375 | F08B4.8  | F08B4.8  | 0.223603969482625    | AGIWUR22110 |
| CB4856                                                                 | HS | IV | 8678695 | 8679325 | WBGene00017236 | F08B4.4  | F08B4.4  | 0.00764067031058779  | AGIWUR989   |
| CB4856                                                                 | HS | IV | 8682239 | 8686610 | WBGene00017237 | pole-2   | F08B4.5  | -0.0614362639530288  |             |
| AGIWUR19783;AGIWUR31958                                                |    |    |         |         |                |          |          |                      |             |
| CB4856                                                                 | HS | IV | 8686756 | 8687810 | WBGene00017238 | F08B4.7  | F08B4.7  | 0.116017345582404    |             |
| AGIWUR1268;AGIWUR30177                                                 |    |    |         |         |                |          |          |                      |             |
| CB4856                                                                 | HS | IV | 8688273 | 8691513 | WBGene00002028 | hst-1    | F08B4.6  | 0.106084048916891    | AGIWUR10146 |
| CB4856                                                                 | HS | IV | 8692086 | 8696553 | WBGene00000994 | dic-1    | F08B4.1  | 0.113442109753416    |             |
| AGIWUR9759;AGIWUR35715                                                 |    |    |         |         |                |          |          |                      |             |
| CB4856                                                                 | HS | IV | 8697736 | 8702699 | WBGene00019230 | ttll-11  | H23L24.3 | -0.134232004299178   |             |
| AGIWUR37576                                                            |    |    |         |         |                |          |          |                      |             |
| CB4856                                                                 | HS | IV | 8703043 | 8705606 | WBGene00019231 | H23L24.4 | H23L24.4 | -0.0764888549961045  |             |
| AGIWUR33495                                                            |    |    |         |         |                |          |          |                      |             |
| CB4856                                                                 | HS | IV | 8712635 | 8715027 | WBGene00004052 | parg-2   | H23L24.5 | 0.0592812708527681   |             |
| AGIWUR20011                                                            |    |    |         |         |                |          |          |                      |             |
| CB4856                                                                 | HS | IV | 8715247 | 8717881 | WBGene00019229 | ipla-5   | H23L24.2 | 0.109895726386094    |             |
| AGIWUR35798                                                            |    |    |         |         |                |          |          |                      |             |
| CB4856                                                                 | HS | IV | 8724020 | 8724876 | WBGene00009014 | F21D5.9  | F21D5.9  | 0.0366646895173144   | AGIWUR22252 |
| CB4856                                                                 | HS | IV | 8725722 | 8728060 | WBGene00009006 | F21D5.1  | F21D5.1  | -0.0324098634250003  |             |
| AGIWUR5139;AGIWUR23171;AGIWUR26887;AGIWUR27754;AGIWUR34703;AGIWUR36880 |    |    |         |         |                |          |          |                      |             |
| CB4856                                                                 | HS | IV | 8728139 | 8730510 | WBGene00009007 | otub-3   | F21D5.2  | 0.114701422108915    |             |
| AGIWUR5723;AGIWUR5991;AGIWUR13125;AGIWUR18617;AGIWUR25556              |    |    |         |         |                |          |          |                      |             |
| CB4856                                                                 | HS | IV | 8730721 | 8735686 | WBGene00009008 | F21D5.3  | F21D5.3  | -0.101797527863543   | AGIWUR19369 |
| CB4856                                                                 | HS | IV | 8735695 | 8739394 | WBGene00009010 | F21D5.5  | F21D5.5  | 0.123401051443725    | AGIWUR8645  |
| CB4856                                                                 | HS | IV | 8739504 | 8740026 | WBGene00009013 | mrps-33  | F21D5.8  | 0.182716509969659    | AGIWUR26351 |
| CB4856                                                                 | HS | IV | 8740140 | 8741388 | WBGene00009011 | F21D5.6  | F21D5.6  | -0.245140142838238   | AGIWUR32885 |
| CB4856                                                                 | HS | IV | 8741383 | 8743704 | WBGene00009012 | F21D5.7  | F21D5.7  | 0.15199808308388     |             |
| AGIWUR448;AGIWUR7143;AGIWUR44082                                       |    |    |         |         |                |          |          |                      |             |
| CB4856                                                                 | HS | IV | 8744411 | 8745691 | WBGene00008972 | F20C5.7  | F20C5.7  | -0.172798618179836   | AGIWUR17508 |
| CB4856                                                                 | HS | IV | 8746252 | 8752676 | WBGene00004051 | parg-1   | F20C5.1  | 0.033843785273497    |             |
| AGIWUR4893;AGIWUR38395;AGIWUR43587                                     |    |    |         |         |                |          |          |                      |             |
| CB4856                                                                 | HS | IV | 8753195 | 8754823 | WBGene00008968 | F20C5.3  | F20C5.3  | -0.0795179196799918  | AGIWUR12683 |



|                                                                                  |    |    |         |         |                |          |          |                     |             |
|----------------------------------------------------------------------------------|----|----|---------|---------|----------------|----------|----------|---------------------|-------------|
| CB4856                                                                           | HS | IV | 8755038 | 8762057 | WBGene00002222 | k1p-11   | F20C5.2  | 0.157112745857789   |             |
| AGIWUR5353;AGIWUR17348;AGIWUR26051;AGIWUR27395                                   |    |    |         |         |                |          |          |                     |             |
| CB4856                                                                           | HS | IV | 8764867 | 8767450 | WBGene00008969 | F20C5.4  | F20C5.4  | 0.0774409690487659  | AGIWUR25943 |
| CB4856                                                                           | HS | IV | 8767688 | 8770092 | WBGene00008970 | F20C5.5  | F20C5.5  | -0.140607419390202  | AGIWUR33556 |
| CB4856                                                                           | HS | IV | 8771558 | 8773206 | WBGene00008971 | F20C5.6  | F20C5.6  | -0.0380669448119066 |             |
| AGIWUR25050;AGIWUR31933;AGIWUR40251                                              |    |    |         |         |                |          |          |                     |             |
| CB4856                                                                           | HS | IV | 8773977 | 8778145 | WBGene00007900 | C33D9.6  | C33D9.6  | -0.109640565098104  |             |
| AGIWUR13080;AGIWUR24131;AGIWUR35116;AGIWUR41899;AGIWUR42317                      |    |    |         |         |                |          |          |                     |             |
| CB4856                                                                           | HS | IV | 8778721 | 8780872 | WBGene00007899 | C33D9.5  | C33D9.5  | -0.206688281504825  | AGIWUR13505 |
| CB4856                                                                           | HS | IV | 8783271 | 8785254 | WBGene00194651 | C33D9.13 | C33D9.13 | 0.183637733828562   |             |
| AGIWUR30795                                                                      |    |    |         |         |                |          |          |                     |             |
| CB4856                                                                           | HS | IV | 8787459 | 8788057 | WBGene00044239 | C33D9.10 | C33D9.10 | -0.0633594336378192 |             |
| AGIWUR14289;AGIWUR29107;AGIWUR29938;AGIWUR33034;AGIWUR38129                      |    |    |         |         |                |          |          |                     |             |
| CB4856                                                                           | HS | IV | 8788449 | 8790244 | WBGene00005698 | sru-35   | C33D9.4  | 0.177865796605738   | AGIWUR3912  |
| CB4856                                                                           | HS | IV | 8790742 | 8793294 | WBGene00007898 | C33D9.3  | C33D9.3  | 0.242068159793138   | AGIWUR40327 |
| CB4856                                                                           | HS | IV | 8796881 | 8798355 | WBGene00007897 | c1ec-182 | C33D9.2  | -0.0476985581843827 |             |
| AGIWUR38966                                                                      |    |    |         |         |                |          |          |                     |             |
| CB4856                                                                           | HS | IV | 8799089 | 8813539 | WBGene00001366 | exc-5    | C33D9.1  | 0.0724497229172645  |             |
| AGIWUR702;AGIWUR39104                                                            |    |    |         |         |                |          |          |                     |             |
| CB4856                                                                           | HS | IV | 8816335 | 8818525 | WBGene00012118 | grsp-2   | T28C6.1  | 0.0164392256328112  |             |
| AGIWUR5776;AGIWUR8431;AGIWUR8780;AGIWUR11470;AGIWUR29223;AGIWUR29771;AGIWUR34493 |    |    |         |         |                |          |          |                     |             |
| CB4856                                                                           | HS | IV | 8818555 | 8819158 | WBGene00045183 | T28C6.10 | T28C6.10 | -0.0936772928007343 |             |
| AGIWUR2357;AGIWUR9034;AGIWUR27977;AGIWUR30031;AGIWUR41136                        |    |    |         |         |                |          |          |                     |             |
| CB4856                                                                           | HS | IV | 8820356 | 8821265 | WBGene00012119 | T28C6.3  | T28C6.3  | -0.186316692998277  | AGIWUR3511  |
| CB4856                                                                           | HS | IV | 8821447 | 8822874 | WBGene00012120 | T28C6.5  | T28C6.5  | -0.0708992013648295 | AGIWUR23333 |
| CB4856                                                                           | HS | IV | 8840725 | 8842805 | WBGene00011706 | T11B7.1  | T11B7.1  | 0.0342600311689178  | AGIWUR462   |
| CB4856                                                                           | HS | IV | 8843621 | 8844491 | WBGene00011707 | T11B7.2  | T11B7.2  | 0.0864309503310032  | AGIWUR18714 |
| CB4856                                                                           | HS | IV | 8848182 | 8849673 | WBGene00000692 | col-118  | T11B7.3  | 0.0220757911530072  |             |
| AGIWUR9680;AGIWUR43006                                                           |    |    |         |         |                |          |          |                     |             |
| CB4856                                                                           | HS | IV | 8850865 | 8851127 | WBGene00044914 | T11B7.6  | T11B7.6  | 0.0334964035577716  | AGIWUR38341 |
| CB4856                                                                           | HS | IV | 8852500 | 8862228 | WBGene00001132 | alp-1    | T11B7.4  | -0.0568297300709917 |             |
| AGIWUR1301;AGIWUR11637;AGIWUR14354;AGIWUR16309                                   |    |    |         |         |                |          |          |                     |             |
| CB4856                                                                           | HS | IV | 8862173 | 8865483 | WBGene00007492 | C09G9.1  | C09G9.1  | 0.0145456868803926  |             |
| AGIWUR6290;AGIWUR24125;AGIWUR40398                                               |    |    |         |         |                |          |          |                     |             |
| CB4856                                                                           | HS | IV | 8868036 | 8869679 | WBGene00007493 | npp-23   | C09G9.2  | 0.156647480215049   | AGIWUR42471 |
| CB4856                                                                           | HS | IV | 8869962 | 8873057 | WBGene00007494 | C09G9.3  | C09G9.3  | -0.017436234303839  |             |
| AGIWUR10147;AGIWUR37282                                                          |    |    |         |         |                |          |          |                     |             |
| CB4856                                                                           | HS | IV | 8873820 | 8874007 | WBGene00045323 | C09G9.9  | C09G9.9  | 0.00873780712968841 |             |
| AGIWUR13666;AGIWUR14560;AGIWUR17102;AGIWUR28067;AGIWUR33063                      |    |    |         |         |                |          |          |                     |             |

|                                                                         |    |    |         |         |                |           |         |                             |             |
|-------------------------------------------------------------------------|----|----|---------|---------|----------------|-----------|---------|-----------------------------|-------------|
| CB4856                                                                  | HS | IV | 8874129 | 8877022 | WBGene00006409 | hdl-2     | C09G9.4 | 0.00693580054401544         | AGIWUR18595 |
| CB4856                                                                  | HS | IV | 8877553 | 8879910 | WBGene00007496 | npax-4    | C09G9.7 | -0.0135850948175662         | AGIWUR3477  |
| CB4856                                                                  | HS | IV | 8881481 | 8882240 | WBGene00007497 | C09G9.8   | C09G9.8 | 0.0646792903233839          | AGIWUR35470 |
| CB4856                                                                  | HS | IV | 8886528 | 8888602 | WBGene00007495 | C09G9.5   | C09G9.5 | 0.362067123555735           |             |
| AGIWUR1804;AGIWUR30771                                                  |    |    |         |         |                |           |         |                             |             |
| CB4856                                                                  | HS | IV | 8888976 | 8890999 | WBGene00003864 | oma-1     | C09G9.6 | -0.0682583111991875         | AGIWUR35807 |
| CB4856                                                                  | HS | IV | 8891466 | 8892747 | WBGene00005007 | spr-2     | C27B7.1 | 0.188049042047427           |             |
| AGIWUR5937;AGIWUR16694                                                  |    |    |         |         |                |           |         |                             |             |
| CB4856                                                                  | HS | IV | 8892858 | 8893854 | WBGene00007760 | C27B7.2   | C27B7.2 | -0.0381995856736488         | AGIWUR23338 |
| CB4856                                                                  | HS | IV | 8894083 | 8901386 | WBGene00007761 | rad-26    | C27B7.4 | -0.0901458977517953         |             |
| AGIWUR14504;AGIWUR17257;AGIWUR21870;AGIWUR23761;AGIWUR27573;AGIWUR42108 |    |    |         |         |                |           |         |                             |             |
| CB4856                                                                  | HS | IV | 8901646 | 8903177 | WBGene00007762 | C27B7.5   | C27B7.5 | -0.0103443722808638         | AGIWUR23632 |
| CB4856                                                                  | HS | IV | 8903222 | 8906205 | WBGene00007763 | C27B7.6   | C27B7.6 | 0.0598706818531394          | AGIWUR44147 |
| CB4856                                                                  | HS | IV | 8907047 | 8915383 | WBGene00007764 | C27B7.7   | C27B7.7 | 0.092955610185153           | AGIWUR44416 |
| CB4856                                                                  | HS | IV | 8915472 | 8916110 | WBGene00007765 | C27B7.9   | C27B7.9 | -0.150028494562102          | AGIWUR39920 |
| CB4856                                                                  | HS | IV | 8916408 | 8918890 | WBGene00004307 | rap-1     | C27B7.8 | -0.120073071873882          |             |
| AGIWUR9710;AGIWUR16339;AGIWUR18115;AGIWUR32787;AGIWUR38012;AGIWUR39863  |    |    |         |         |                |           |         |                             |             |
| CB4856                                                                  | HS | IV | 8924161 | 8926112 | WBGene00008363 | D1046.2   | D1046.2 | 0.019682105728803           |             |
| AGIWUR2947;AGIWUR32878                                                  |    |    |         |         |                |           |         |                             |             |
| CB4856                                                                  | HS | IV | 8926335 | 8930315 | WBGene00008362 | cfim-2    | D1046.1 | -0.0594542528501592         | AGIWUR43416 |
| CB4856                                                                  | HS | IV | 8930442 | 8932791 | WBGene00008364 | slc-25A26 |         | D1046.3 -0.09165057834484   |             |
| AGIWUR37641                                                             |    |    |         |         |                |           |         |                             |             |
| CB4856                                                                  | HS | IV | 8933997 | 8937400 | WBGene00008365 | D1046.4   | D1046.4 | 0.208581204657183           |             |
| AGIWUR4421;AGIWUR21306;AGIWUR29332                                      |    |    |         |         |                |           |         |                             |             |
| CB4856                                                                  | HS | IV | 8956489 | 8965534 | WBGene00008366 | tpa-1     | D1046.5 | -0.00942694498872498        | AGIWUR13759 |
| CB4856                                                                  | HS | IV | 8966133 | 8967903 | WBGene00008272 | C53B4.2   | C53B4.2 | 0.0148126140429721          | AGIWUR12201 |
| CB4856                                                                  | HS | IV | 8968290 | 8970565 | WBGene00008271 | C53B4.1   | C53B4.1 | -0.0232394781636227         | AGIWUR35347 |
| CB4856                                                                  | HS | IV | 8970868 | 8973707 | WBGene00008273 | C53B4.3   | C53B4.3 | 0.0465838445616651          | AGIWUR18768 |
| CB4856                                                                  | HS | IV | 8975532 | 8984706 | WBGene00008274 | C53B4.4   | C53B4.4 | -0.0594180828365758         | AGIWUR9423  |
| CB4856                                                                  | HS | IV | 8984866 | 8986774 | WBGene00008275 | nstp-1    | C53B4.6 | 0.0797906392511614          | AGIWUR16097 |
| CB4856                                                                  | HS | IV | 8987130 | 8990444 | WBGene00000266 | bre-1     | C53B4.7 | -0.0741638127138513         |             |
| AGIWUR2014;AGIWUR6820;AGIWUR10995;AGIWUR14717;AGIWUR21811;AGIWUR33573   |    |    |         |         |                |           |         |                             |             |
| CB4856                                                                  | HS | IV | 8993086 | 9000774 | WBGene00008277 | mltn-12   | C53B4.8 | 0.267861917219752           | AGIWUR43232 |
| CB4856                                                                  | HS | IV | 9001145 | 9002734 | WBGene00008285 | C53D6.8   | C53D6.8 | -0.0899537069161411         | AGIWUR36472 |
| CB4856                                                                  | HS | IV | 9002837 | 9005410 | WBGene00006852 | unc-129   | C53D6.2 | 0.166407659824188           | AGIWUR24153 |
| CB4856                                                                  | HS | IV | 9010584 | 9012339 | WBGene00044241 | C53D6.11  |         | C53D6.11 -0.175134347409224 |             |
| AGIWUR9918;AGIWUR38669                                                  |    |    |         |         |                |           |         |                             |             |
| CB4856                                                                  | HS | IV | 9016788 | 9019101 | WBGene00008280 | acc-2     | C53D6.3 | 0.00158071980488828         |             |
| AGIWUR5422;AGIWUR31435;AGIWUR43909                                      |    |    |         |         |                |           |         |                             |             |

|                                                                                  |    |    |         |         |                |          |          |                     |             |
|----------------------------------------------------------------------------------|----|----|---------|---------|----------------|----------|----------|---------------------|-------------|
| CB4856                                                                           | HS | IV | 9019175 | 9020940 | WBGene00008281 | C53D6.4  | C53D6.4  | -0.197979532976195  | AGIWUR14521 |
| CB4856                                                                           | HS | IV | 9021515 | 9023607 | WBGene00005906 | srx-15   | C53D6.9  | 0.0352204044296016  |             |
| AGIWUR17975;AGIWUR34822                                                          |    |    |         |         |                |          |          |                     |             |
| CB4856                                                                           | HS | IV | 9024738 | 9027598 | WBGene00008282 | C53D6.5  | C53D6.5  | 0.0116145339692766  | AGIWUR44862 |
| CB4856                                                                           | HS | IV | 9027686 | 9032659 | WBGene00008283 | C53D6.6  | C53D6.6  | -0.0548890179320427 | AGIWUR17419 |
| CB4856                                                                           | HS | IV | 9033576 | 9034440 | WBGene00023424 | C53D6.10 | C53D6.10 | 0.092711428575214   |             |
| AGIWUR7408                                                                       |    |    |         |         |                |          |          |                     |             |
| CB4856                                                                           | HS | IV | 9034845 | 9037163 | WBGene00008284 | C53D6.7  | C53D6.7  | 0.18464703729294    | AGIWUR3673  |
| CB4856                                                                           | HS | IV | 9039575 | 9040504 | WBGene00013516 | Y73F4A.3 | Y73F4A.3 | 0.488598096740638   |             |
| AGIWUR10887                                                                      |    |    |         |         |                |          |          |                     |             |
| CB4856                                                                           | HS | IV | 9042387 | 9043347 | WBGene00013515 | Y73F4A.2 | Y73F4A.2 | 0.228382914445953   |             |
| AGIWUR3643                                                                       |    |    |         |         |                |          |          |                     |             |
| CB4856                                                                           | HS | IV | 9043938 | 9045369 | WBGene00013514 | Y73F4A.1 | Y73F4A.1 | 0.322687075289217   |             |
| AGIWUR9218                                                                       |    |    |         |         |                |          |          |                     |             |
| CB4856                                                                           | HS | IV | 9070010 | 9073622 | WBGene00003610 | nhr-11   | ZC410.1  | -0.0109705603760903 |             |
| AGIWUR7171;AGIWUR11583;AGIWUR23108;AGIWUR39961                                   |    |    |         |         |                |          |          |                     |             |
| CB4856                                                                           | HS | IV | 9074673 | 9076571 | WBGene00013880 | mppb-1   | ZC410.2  | -0.0390848934053203 | AGIWUR19324 |
| CB4856                                                                           | HS | IV | 9076501 | 9078807 | WBGene00013881 | mans-4   | ZC410.3  | -0.143612387763833  |             |
| AGIWUR9478;AGIWUR18890;AGIWUR19559                                               |    |    |         |         |                |          |          |                     |             |
| CB4856                                                                           | HS | IV | 9082361 | 9087554 | WBGene00006663 | twk-8    | ZC410.4  | 0.0257815263423029  |             |
| AGIWUR23492;AGIWUR23900                                                          |    |    |         |         |                |          |          |                     |             |
| CB4856                                                                           | HS | IV | 9088594 | 9092193 | WBGene00013882 | msa-1    | ZC410.5  | -0.142024146302811  |             |
| AGIWUR3044;AGIWUR5696;AGIWUR19247;AGIWUR31771                                    |    |    |         |         |                |          |          |                     |             |
| CB4856                                                                           | HS | IV | 9092217 | 9094468 | WBGene00003066 | lpl-1    | ZC410.7  | -0.0936776291617711 |             |
| AGIWUR13244;AGIWUR23652;AGIWUR27179                                              |    |    |         |         |                |          |          |                     |             |
| CB4856                                                                           | HS | IV | 9094541 | 9095653 | WBGene00002046 | icl-1    | C01F6.8  | -0.0572628417355689 |             |
| AGIWUR3303;AGIWUR13660                                                           |    |    |         |         |                |          |          |                     |             |
| CB4856                                                                           | HS | IV | 9095754 | 9096231 | WBGene00007223 | C01F6.9  | C01F6.9  | -0.0207133901523484 |             |
| AGIWUR1398;AGIWUR29038                                                           |    |    |         |         |                |          |          |                     |             |
| CB4856                                                                           | HS | IV | 9096842 | 9099364 | WBGene00007221 | cpna-3   | C01F6.1  | -0.131090874422737  |             |
| AGIWUR2412;AGIWUR10869;AGIWUR24822                                               |    |    |         |         |                |          |          |                     |             |
| CB4856                                                                           | HS | IV | 9099242 | 9101592 | WBGene00007222 | C01F6.2  | C01F6.2  | 0.239329711059751   | AGIWUR12163 |
| CB4856                                                                           | HS | IV | 9101773 | 9103851 | WBGene00000374 | cyp-31A1 | C01F6.3  | 0.0348399796953549  |             |
| AGIWUR3245                                                                       |    |    |         |         |                |          |          |                     |             |
| CB4856                                                                           | HS | IV | 9104966 | 9107609 | WBGene00001413 | fem-3    | C01F6.4  | 0.112960522985146   | AGIWUR43635 |
| CB4856                                                                           | HS | IV | 9108931 | 9109753 | WBGene00000120 | aly-1    | C01F6.5  | 0.0815369207660908  | AGIWUR13547 |
| CB4856                                                                           | HS | IV | 9119098 | 9130378 | WBGene00006438 | nrfl-1   | C01F6.6  | 0.162660221767084   |             |
| AGIWUR548;AGIWUR8424;AGIWUR27484;AGIWUR31768;AGIWUR33238;AGIWUR34798;AGIWUR37061 |    |    |         |         |                |          |          |                     |             |
| CB4856                                                                           | HS | IV | 9132600 | 9135477 | WBGene00009073 | delm-1   | F23B2.3  | -0.0636567939721173 |             |

AGIWUR2991;AGIWUR25145;AGIWUR25402

|        |    |    |         |         |                 |        |          |                     |            |
|--------|----|----|---------|---------|-----------------|--------|----------|---------------------|------------|
| CB4856 | HS | IV | 9136933 | 9146210 | WBGene00000906  | daf-10 | F23B2.4  | -0.151119961338627  | AGIWUR2652 |
| CB4856 | HS | IV | 9146337 | 9146869 | WBGene000009078 | rpb-12 | F23B2.13 | -0.0365626659097025 |            |

AGIWUR18561

|        |    |    |         |         |                |          |          |                     |             |
|--------|----|----|---------|---------|----------------|----------|----------|---------------------|-------------|
| CB4856 | HS | IV | 9147468 | 9148579 | WBGene00000121 | aly-2    | F23B2.6  | 0.152033705043019   | AGIWUR995   |
| CB4856 | HS | IV | 9148949 | 9149297 | WBGene00043283 | F23B2.9  | F23B2.9  | -0.0464128964456254 | AGIWUR32127 |
| CB4856 | HS | IV | 9150491 | 9152043 | WBGene00009075 | F23B2.7  | F23B2.7  | -0.0300099270626237 | AGIWUR26059 |
| CB4856 | HS | IV | 9152819 | 9154320 | WBGene00009077 | F23B2.10 | F23B2.10 | 0.154115217651371   |             |

AGIWUR26346;AGIWUR39763

|        |    |    |         |         |                |       |          |                  |  |
|--------|----|----|---------|---------|----------------|-------|----------|------------------|--|
| CB4856 | HS | IV | 9155079 | 9159019 | WBGene00003958 | pcp-3 | F23B2.11 | 0.46722399115848 |  |
|--------|----|----|---------|---------|----------------|-------|----------|------------------|--|

AGIWUR14667

|        |    |    |         |         |                |       |          |                    |  |
|--------|----|----|---------|---------|----------------|-------|----------|--------------------|--|
| CB4856 | HS | IV | 9160640 | 9165127 | WBGene00003957 | pcp-2 | F23B2.12 | -0.261341444491668 |  |
|--------|----|----|---------|---------|----------------|-------|----------|--------------------|--|

AGIWUR25329

|        |    |    |         |         |                |         |         |                     |             |
|--------|----|----|---------|---------|----------------|---------|---------|---------------------|-------------|
| CB4856 | HS | IV | 9185064 | 9186023 | WBGene00007411 | C07C7.1 | C07C7.1 | 0.252238520839517   | AGIWUR28190 |
| CB4856 | HS | IV | 9186815 | 9191122 | WBGene00008112 | C46C2.4 | C46C2.4 | -0.0304239723793813 | AGIWUR34546 |
| CB4856 | HS | IV | 9191639 | 9192622 | WBGene00008113 | C46C2.5 | C46C2.5 | 0.357366896563903   | AGIWUR15595 |
| CB4856 | HS | IV | 9200102 | 9212235 | WBGene00006941 | wnk-1   | C46C2.1 | -0.513683874325594  | AGIWUR29399 |
| CB4856 | HS | IV | 9212375 | 9214236 | WBGene00008114 | C46C2.6 | C46C2.6 | 0.0395216617056908  |             |

AGIWUR1073;AGIWUR10519;AGIWUR11852;AGIWUR15701;AGIWUR29304;AGIWUR30848

|        |    |    |         |         |                |          |          |                    |             |
|--------|----|----|---------|---------|----------------|----------|----------|--------------------|-------------|
| CB4856 | HS | IV | 9216952 | 9220397 | WBGene00008110 | C46C2.2  | C46C2.2  | -0.13619126716778  | AGIWUR14022 |
| CB4856 | HS | IV | 9225125 | 9227781 | WBGene00008111 | C46C2.3  | C46C2.3  | 0.221927816117589  | AGIWUR26119 |
| CB4856 | HS | IV | 9228277 | 9231051 | WBGene00012426 | Y11D7A.1 | Y11D7A.1 | 0.0090799551524805 |             |

AGIWUR3515;AGIWUR25965

|        |    |    |         |         |                |          |          |                   |  |
|--------|----|----|---------|---------|----------------|----------|----------|-------------------|--|
| CB4856 | HS | IV | 9233028 | 9241387 | WBGene00012428 | Y11D7A.3 | Y11D7A.3 | 0.110552191143611 |  |
|--------|----|----|---------|---------|----------------|----------|----------|-------------------|--|

AGIWUR29448

|        |    |    |         |         |                |        |          |                   |  |
|--------|----|----|---------|---------|----------------|--------|----------|-------------------|--|
| CB4856 | HS | IV | 9242225 | 9243999 | WBGene00004281 | rab-28 | Y11D7A.4 | 0.115428304529331 |  |
|--------|----|----|---------|---------|----------------|--------|----------|-------------------|--|

AGIWUR8803

|        |    |    |         |         |                |          |          |                     |  |
|--------|----|----|---------|---------|----------------|----------|----------|---------------------|--|
| CB4856 | HS | IV | 9244520 | 9245523 | WBGene00012429 | Y11D7A.5 | Y11D7A.5 | -0.0392123470313441 |  |
|--------|----|----|---------|---------|----------------|----------|----------|---------------------|--|

AGIWUR33747;AGIWUR38826

|        |    |    |         |         |                |           |           |                     |  |
|--------|----|----|---------|---------|----------------|-----------|-----------|---------------------|--|
| CB4856 | HS | IV | 9247156 | 9248088 | WBGene00014863 | Y11D7A.16 | Y11D7A.16 | -0.0831750619662119 |  |
|--------|----|----|---------|---------|----------------|-----------|-----------|---------------------|--|

AGIWUR12333;AGIWUR24561

|        |    |    |         |         |                |          |          |                   |  |
|--------|----|----|---------|---------|----------------|----------|----------|-------------------|--|
| CB4856 | HS | IV | 9251379 | 9253913 | WBGene00012432 | Y11D7A.8 | Y11D7A.8 | 0.220918854760164 |  |
|--------|----|----|---------|---------|----------------|----------|----------|-------------------|--|

AGIWUR23676;AGIWUR37799;AGIWUR40803

|        |    |    |         |         |                |          |          |                   |  |
|--------|----|----|---------|---------|----------------|----------|----------|-------------------|--|
| CB4856 | HS | IV | 9253979 | 9256117 | WBGene00012433 | Y11D7A.9 | Y11D7A.9 | 0.246604195783343 |  |
|--------|----|----|---------|---------|----------------|----------|----------|-------------------|--|

AGIWUR1652

|        |    |    |         |         |                |           |           |                    |  |
|--------|----|----|---------|---------|----------------|-----------|-----------|--------------------|--|
| CB4856 | HS | IV | 9258913 | 9259764 | WBGene00012434 | Y11D7A.10 | Y11D7A.10 | 0.0333072973833612 |  |
|--------|----|----|---------|---------|----------------|-----------|-----------|--------------------|--|

AGIWUR39649

|        |    |    |         |         |                |         |           |                    |  |
|--------|----|----|---------|---------|----------------|---------|-----------|--------------------|--|
| CB4856 | HS | IV | 9260610 | 9261787 | WBGene00000694 | col-120 | Y11D7A.11 | -0.599977181033834 |  |
|--------|----|----|---------|---------|----------------|---------|-----------|--------------------|--|

AGIWUR34720

|                         |    |    |         |         |                |           |           |                     |             |
|-------------------------|----|----|---------|---------|----------------|-----------|-----------|---------------------|-------------|
| CB4856                  | HS | IV | 9261808 | 9264265 | WBGene00012435 | flh-1     | Y11D7A.12 | 0.15079701500558    |             |
| AGIWUR26190             |    |    |         |         |                |           |           |                     |             |
| CB4856                  | HS | IV | 9270096 | 9271935 | WBGene00012436 | flh-3     | Y11D7A.13 | 0.177319681364192   |             |
| AGIWUR12856             |    |    |         |         |                |           |           |                     |             |
| CB4856                  | HS | IV | 9272582 | 9273639 | WBGene00045309 | srg-52    | Y11D7A.18 | 0.0416316238277075  |             |
| AGIWUR14678;AGIWUR16760 |    |    |         |         |                |           |           |                     |             |
| CB4856                  | HS | IV | 9274416 | 9283113 | WBGene00012437 | hum-9     | Y11D7A.14 | 0.00864972168412415 |             |
| AGIWUR20979             |    |    |         |         |                |           |           |                     |             |
| CB4856                  | HS | IV | 9292296 | 9293925 | WBGene00008778 | nhr-264   | F14A5.1   | 0.0175356985357764  | AGIWUR42246 |
| CB4856                  | HS | IV | 9294899 | 9296406 | WBGene00009871 | F49C12.1  | F49C12.1  | -0.038404541848001  |             |
| AGIWUR18302             |    |    |         |         |                |           |           |                     |             |
| CB4856                  | HS | IV | 9298024 | 9299220 | WBGene00009872 | F49C12.2  | F49C12.2  | 0.256560783585542   |             |
| AGIWUR7653              |    |    |         |         |                |           |           |                     |             |
| CB4856                  | HS | IV | 9300427 | 9301951 | WBGene00009873 | F49C12.3  | F49C12.3  |                     |             |
| -0.00842655695822625    |    |    |         |         |                |           |           |                     |             |
| AGIWUR10306             |    |    |         |         |                |           |           |                     |             |
| CB4856                  | HS | IV | 9302665 | 9304094 | WBGene00009874 | F49C12.4  | F49C12.4  | -0.062523874970557  |             |
| AGIWUR44441             |    |    |         |         |                |           |           |                     |             |
| CB4856                  | HS | IV | 9304917 | 9307165 | WBGene00009875 | F49C12.5  | F49C12.5  | -0.0413506235388912 |             |
| AGIWUR36045             |    |    |         |         |                |           |           |                     |             |
| CB4856                  | HS | IV | 9307338 | 9309109 | WBGene00009876 | F49C12.6  | F49C12.6  | 0.0226685235150619  |             |
| AGIWUR22142             |    |    |         |         |                |           |           |                     |             |
| CB4856                  | HS | IV | 9309108 | 9312927 | WBGene00009877 | F49C12.7  | F49C12.7  | 0.0400255455443226  |             |
| AGIWUR25176             |    |    |         |         |                |           |           |                     |             |
| CB4856                  | HS | IV | 9314810 | 9316215 | WBGene00009878 | F49C12.9  | F49C12.9  | -0.166616398949094  |             |
| AGIWUR30770             |    |    |         |         |                |           |           |                     |             |
| CB4856                  | HS | IV | 9316639 | 9318632 | WBGene00004463 | rpn-7     | F49C12.8  | -0.131746450850027  |             |
| AGIWUR30692;AGIWUR41894 |    |    |         |         |                |           |           |                     |             |
| CB4856                  | HS | IV | 9319380 | 9320143 | WBGene00009880 | F49C12.11 | F49C12.11 | 0.159574480765663   |             |
| AGIWUR5414              |    |    |         |         |                |           |           |                     |             |
| CB4856                  | HS | IV | 9320122 | 9321089 | WBGene00009881 | F49C12.12 | F49C12.12 | 0.134423995749188   |             |
| AGIWUR29619             |    |    |         |         |                |           |           |                     |             |
| CB4856                  | HS | IV | 9321801 | 9322528 | WBGene00009882 | vha-17    | F49C12.13 | 0.110235965189274   |             |
| AGIWUR10460;AGIWUR33594 |    |    |         |         |                |           |           |                     |             |
| CB4856                  | HS | IV | 9324435 | 9327516 | WBGene00009884 | F49C12.15 | F49C12.15 | 0.159908177899341   |             |
| AGIWUR1749              |    |    |         |         |                |           |           |                     |             |
| CB4856                  | HS | IV | 9328010 | 9328745 | WBGene00011855 | clec-183  | T20D3.1   | -0.189910187540287  |             |
| AGIWUR27131             |    |    |         |         |                |           |           |                     |             |
| CB4856                  | HS | IV | 9328973 | 9330855 | WBGene00011856 | T20D3.2   | T20D3.2   | -0.12959989571519   |             |
| AGIWUR37376;AGIWUR43822 |    |    |         |         |                |           |           |                     |             |

|                                                                                  |    |    |         |         |                |          |          |                     |             |
|----------------------------------------------------------------------------------|----|----|---------|---------|----------------|----------|----------|---------------------|-------------|
| CB4856                                                                           | HS | IV | 9333342 | 9335916 | WBGene00011857 | T20D3.3  | T20D3.3  | -0.0852036041367032 |             |
| AGIWUR640;AGIWUR2173;AGIWUR11482;AGIWUR21374;AGIWUR24100;AGIWUR25036;AGIWUR34649 |    |    |         |         |                |          |          |                     |             |
| CB4856                                                                           | HS | IV | 9337044 | 9338567 | WBGene00011858 | T20D3.5  | T20D3.5  | 0.132537607447095   |             |
| AGIWUR6055;AGIWUR15510;AGIWUR24330                                               |    |    |         |         |                |          |          |                     |             |
| CB4856                                                                           | HS | IV | 9338587 | 9339305 | WBGene00011859 | T20D3.6  | T20D3.6  | 0.0695848828498775  | AGIWUR10001 |
| CB4856                                                                           | HS | IV | 9339403 | 9341790 | WBGene00006931 | vps-26   | T20D3.7  | -0.0829524683046117 | AGIWUR22148 |
| CB4856                                                                           | HS | IV | 9341964 | 9343152 | WBGene00011860 | T20D3.8  | T20D3.8  | 0.146540665728462   | AGIWUR6522  |
| CB4856                                                                           | HS | IV | 9343358 | 9366506 | WBGene00007505 | pezo-1   | C10C5.1  | -0.0547674261113449 |             |
| AGIWUR3741;AGIWUR15461;AGIWUR19565;AGIWUR37952                                   |    |    |         |         |                |          |          |                     |             |
| CB4856                                                                           | HS | IV | 9371508 | 9373636 | WBGene00007506 | C10C5.2  | C10C5.2  | 0.203130173333367   |             |
| AGIWUR14726;AGIWUR25513                                                          |    |    |         |         |                |          |          |                     |             |
| CB4856                                                                           | HS | IV | 9374733 | 9376492 | WBGene00007507 | C10C5.3  | C10C5.3  | 0.0203089988065166  | AGIWUR3415  |
| CB4856                                                                           | HS | IV | 9378552 | 9380450 | WBGene00007508 | C10C5.4  | C10C5.4  | 0.13701136711847    | AGIWUR32390 |
| CB4856                                                                           | HS | IV | 9381515 | 9383115 | WBGene00007509 | C10C5.5  | C10C5.5  | 0.0324053049574324  | AGIWUR3133  |
| CB4856                                                                           | HS | IV | 9385126 | 9385713 | WBGene00007511 | C10C5.7  | C10C5.7  | -0.190280858395623  | AGIWUR28883 |
| CB4856                                                                           | HS | IV | 9386208 | 9394930 | WBGene00000911 | daf-15   | C10C5.6  | -0.149583224117151  |             |
| AGIWUR15043;AGIWUR24389                                                          |    |    |         |         |                |          |          |                     |             |
| CB4856                                                                           | HS | IV | 9394934 | 9396218 | WBGene00000695 | col-121  | F56D5.1  | -0.138258153198275  | AGIWUR43719 |
| CB4856                                                                           | HS | IV | 9396920 | 9398603 | WBGene00010147 | F56D5.2  | F56D5.2  | -0.0536026237804723 | AGIWUR29719 |
| CB4856                                                                           | HS | IV | 9399653 | 9401293 | WBGene00010148 | F56D5.3  | F56D5.3  | 0.108118403325779   | AGIWUR947   |
| CB4856                                                                           | HS | IV | 9401922 | 9412653 | WBGene00010150 | F56D5.6  | F56D5.6  | 0.072646429170927   | AGIWUR16853 |
| CB4856                                                                           | HS | IV | 9418432 | 9422506 | WBGene00010152 | F56D5.9  | F56D5.9  | 0.00498731896913718 | AGIWUR9437  |
| CB4856                                                                           | HS | IV | 9423395 | 9424415 | WBGene00010153 | srxa-2   | F56D5.10 | -0.0877998714484338 |             |
| AGIWUR11246                                                                      |    |    |         |         |                |          |          |                     |             |
| CB4856                                                                           | HS | IV | 9428259 | 9439077 | WBGene00010316 | F59B8.1  | F59B8.1  | 0.013183593824877   |             |
| AGIWUR9633;AGIWUR25189;AGIWUR27633                                               |    |    |         |         |                |          |          |                     |             |
| CB4856                                                                           | HS | IV | 9439043 | 9440893 | WBGene00010317 | idh-1    | F59B8.2  | -0.0482776973294676 | AGIWUR21726 |
| CB4856                                                                           | HS | IV | 9442877 | 9444516 | WBGene00009544 | F38E11.9 | F38E11.9 | 0.245867003659866   |             |
| AGIWUR6817                                                                       |    |    |         |         |                |          |          |                     |             |
| CB4856                                                                           | HS | IV | 9444791 | 9445507 | WBGene00002012 | hsp-12.3 | F38E11.1 | 0.241376430672767   |             |
| AGIWUR5661;AGIWUR7122;AGIWUR9794;AGIWUR13490;AGIWUR20005;AGIWUR20124             |    |    |         |         |                |          |          |                     |             |
| CB4856                                                                           | HS | IV | 9446385 | 9446884 | WBGene00002013 | hsp-12.6 | F38E11.2 | 0.093888947785425   |             |
| AGIWUR6281;AGIWUR11904;AGIWUR17211;AGIWUR25673;AGIWUR30513;AGIWUR35348           |    |    |         |         |                |          |          |                     |             |
| CB4856                                                                           | HS | IV | 9449473 | 9457501 | WBGene00009541 | cutl-17  | F38E11.4 | -0.022058953905991  |             |
| AGIWUR12258;AGIWUR20388;AGIWUR31001;AGIWUR36293                                  |    |    |         |         |                |          |          |                     |             |
| CB4856                                                                           | HS | IV | 9459731 | 9463998 | WBGene00009542 | copb-2   | F38E11.5 | -0.0248333514080077 |             |
| AGIWUR4755;AGIWUR16599;AGIWUR26454;AGIWUR34313;AGIWUR34549;AGIWUR40798           |    |    |         |         |                |          |          |                     |             |
| CB4856                                                                           | HS | IV | 9463951 | 9467518 | WBGene00009543 | F38E11.6 | F38E11.6 | -0.14183199343237   |             |
| AGIWUR2349                                                                       |    |    |         |         |                |          |          |                     |             |

|                                               |    |         |         |                |           |           |                      |
|-----------------------------------------------|----|---------|---------|----------------|-----------|-----------|----------------------|
| CB4856 HS                                     | IV | 9473680 | 9475365 | WBGene00014752 | F38E11.8  | F38E11.8  | 0.0996016339261967   |
| AGIWUR40862                                   |    |         |         |                |           |           |                      |
| CB4856 HS                                     | IV | 9475863 | 9477446 | WBGene00006949 | wrt-3     | F38E11.7  | -0.00847881954048102 |
| AGIWUR3094;AGIWUR9220;AGIWUR33893;AGIWUR39063 |    |         |         |                |           |           |                      |
| CB4856 HS                                     | IV | 9482053 | 9485140 | WBGene00007887 | gadr-2    | C33A12.12 | -0.10334811590552    |
| AGIWUR36875                                   |    |         |         |                |           |           |                      |
| CB4856 HS                                     | IV | 9486272 | 9487631 | WBGene00005665 | sru-2     | C33A12.13 | 0.0483314722869963   |
| AGIWUR3401;AGIWUR6766;AGIWUR23330             |    |         |         |                |           |           |                      |
| CB4856 HS                                     | IV | 9488670 | 9490194 | WBGene00005664 | sru-1     | C33A12.14 | 0.257571403965985    |
| AGIWUR1098                                    |    |         |         |                |           |           |                      |
| CB4856 HS                                     | IV | 9490620 | 9491991 | WBGene00005669 | sru-6     | C33A12.8  | -0.0911003803395296  |
| AGIWUR6449                                    |    |         |         |                |           |           |                      |
| CB4856 HS                                     | IV | 9492576 | 9493220 | WBGene00014693 | C33A12.18 | C33A12.18 | -0.0615140015222799  |
| AGIWUR3246;AGIWUR34967                        |    |         |         |                |           |           |                      |
| CB4856 HS                                     | IV | 9494032 | 9495519 | WBGene00005668 | sru-5     | C33A12.9  | 0.10043224416158     |
| AGIWUR15262;AGIWUR38061                       |    |         |         |                |           |           |                      |
| CB4856 HS                                     | IV | 9496606 | 9497888 | WBGene00005666 | sru-3     | C33A12.11 | 0.0852296628739886   |
| AGIWUR19248                                   |    |         |         |                |           |           |                      |
| CB4856 HS                                     | IV | 9498388 | 9499588 | WBGene00005667 | sru-4     | C33A12.10 | -0.127914103510831   |
| AGIWUR18393                                   |    |         |         |                |           |           |                      |
| CB4856 HS                                     | IV | 9500311 | 9502568 | WBGene00007885 | ugt-21    | C33A12.6  | 0.16615421094582     |
| AGIWUR7536;AGIWUR29751                        |    |         |         |                |           |           |                      |
| CB4856 HS                                     | IV | 9502572 | 9505292 | WBGene00007889 | C33A12.16 | C33A12.16 | -0.0790983588222982  |
| AGIWUR21842;AGIWUR26855;AGIWUR30931           |    |         |         |                |           |           |                      |
| CB4856 HS                                     | IV | 9505615 | 9506326 | WBGene00007888 | ttr-9     | C33A12.15 | 0.167999914768426    |
| AGIWUR33075                                   |    |         |         |                |           |           |                      |
| CB4856 HS                                     | IV | 9506936 | 9508779 | WBGene00007886 | ethe-1    | C33A12.7  | 0.190811682367713    |
| AGIWUR27815                                   |    |         |         |                |           |           |                      |
| CB4856 HS                                     | IV | 9510055 | 9510594 | WBGene00007883 | C33A12.4  | C33A12.4  | -0.165893572909706   |
| AGIWUR14783                                   |    |         |         |                |           |           |                      |
| CB4856 HS                                     | IV | 9510748 | 9513002 | WBGene00007882 | C33A12.3  | C33A12.3  | 0.0235641008403533   |
| AGIWUR38679                                   |    |         |         |                |           |           |                      |
| CB4856 HS                                     | IV | 9516992 | 9518410 | WBGene00007890 | C33A12.19 | C33A12.19 | 0.356653526492504    |
| AGIWUR12496                                   |    |         |         |                |           |           |                      |
| CB4856 HS                                     | IV | 9518367 | 9518927 | WBGene00007881 | nlp-35    | C33A12.2  | 0.0840539785042473   |
| AGIWUR14739                                   |    |         |         |                |           |           |                      |
| CB4856 HS                                     | IV | 9523764 | 9524895 | WBGene00007880 | C33A12.1  | C33A12.1  | -0.0785619475117709  |
| AGIWUR15621                                   |    |         |         |                |           |           |                      |
| CB4856 HS                                     | IV | 9526359 | 9528350 | WBGene00001239 | elo-1     | F56H11.4  | 0.0655355427816851   |

AGIWUR19591;AGIWUR20671;AGIWUR26778  
 CB4856 HS IV 9528355 9529569 WBGene00010176 F56H11.6 F56H11.6 -0.0957930248476195  
 AGIWUR44359  
 CB4856 HS IV 9529947 9531378 WBGene00001245 elo-7 F56H11.3 0.18453285769348  
 AGIWUR10588;AGIWUR38339;AGIWUR44859  
 CB4856 HS IV 9531357 9533171 WBGene00010175 F56H11.2 F56H11.2 -0.0663021881426058  
 AGIWUR38244  
 CB4856 HS IV 9540808 9546250 WBGene00001403 fbl-1 F56H11.1 -0.0373834523339891  
 AGIWUR3088;AGIWUR21630;AGIWUR27626;AGIWUR31406;AGIWUR35333;AGIWUR35815  
 CB4856 HS IV 9546286 9560428 WBGene00011456 T05A1.5 T05A1.5 0.153324833031501  
 AGIWUR30574;AGIWUR36667;AGIWUR36862  
 CB4856 HS IV 9568828 9580071 WBGene00003808 npr-2 T05A1.1 0.230707118242831 AGIWUR9649  
 CB4856 HS IV 9587100 9588834 WBGene00009186 trcs-1 F27C8.6 0.0176072678570982  
 AGIWUR23993;AGIWUR24542;AGIWUR43108  
 CB4856 HS IV 9589795 9592529 WBGene00009185 F27C8.5 F27C8.5 -0.201629715393977 AGIWUR25567  
 CB4856 HS IV 9593667 9594425 WBGene00005003 spp-18 F27C8.4 0.131956812835996 AGIWUR21130  
 CB4856 HS IV 9595088 9595933 WBGene00009184 F27C8.3 F27C8.3 -0.0556654741866192  
 AGIWUR17532;AGIWUR18902;AGIWUR31320;AGIWUR33452;AGIWUR35776  
 CB4856 HS IV 9596497 9599081 WBGene00009183 F27C8.2 F27C8.2 -0.044843140414605  
 AGIWUR11750;AGIWUR19540;AGIWUR21046;AGIWUR26418  
 CB4856 HS IV 9598986 9601695 WBGene00000002 aat-1 F27C8.1 -0.0332395141027018 AGIWUR12999  
 CB4856 HS IV 9614970 9620140 WBGene00001249 elt-1 W09C2.1 -0.0559714081616391 AGIWUR18559  
 CB4856 HS IV 9625910 9634948 WBGene00003151 mca-1 W09C2.3 0.08391164679142  
 AGIWUR8635;AGIWUR13889;AGIWUR15173;AGIWUR23235;AGIWUR27015;AGIWUR29670  
 CB4856 HS IV 9636980 9642003 WBGene00000953 del-2 F58G6.6 0.181751482272219 AGIWUR33261  
 CB4856 HS IV 9643422 9644268 WBGene00010278 F58G6.8 F58G6.8 -0.0505684971567435 AGIWUR25483  
 CB4856 HS IV 9644245 9647934 WBGene00010272 amph-1 F58G6.1 0.162469765974748  
 AGIWUR8192;AGIWUR9748;AGIWUR15924;AGIWUR32381;AGIWUR43634  
 CB4856 HS IV 9649043 9650490 WBGene00010273 srm-3 F58G6.2 -0.0269721900103015  
 AGIWUR28922;AGIWUR39645  
 CB4856 HS IV 9651394 9652484 WBGene00044107 F58G6.9 F58G6.9 -0.120188890632185  
 AGIWUR735;AGIWUR3220;AGIWUR14260;AGIWUR23851;AGIWUR29022  
 CB4856 HS IV 9653535 9654175 WBGene00010274 F58G6.3 F58G6.3 0.0884860708494912 AGIWUR40504  
 CB4856 HS IV 9654317 9655588 WBGene00010277 F58G6.7 F58G6.7 0.185725701852352 AGIWUR22873  
 CB4856 HS IV 9658053 9663941 WBGene00010275 acc-1 F58G6.4 0.146066495044201 AGIWUR29262  
 CB4856 HS IV 9664365 9675672 WBGene00003627 nhr-34 F58G6.5 0.0274041398835783  
 AGIWUR3607;AGIWUR9087;AGIWUR9865;AGIWUR17700;AGIWUR20213;AGIWUR38487;AGIWUR39401;AGIWUR43484  
 CB4856 HS IV 9680387 9680941 WBGene00002091 ins-8 ZK1251.11 0.110897257315678  
 AGIWUR12964



|                                                                         |    |         |         |                |          |          |                      |             |
|-------------------------------------------------------------------------|----|---------|---------|----------------|----------|----------|----------------------|-------------|
| CB4856 HS                                                               | IV | 9682013 | 9682826 | WBGene00002090 | ins-7    | ZK1251.2 | 0.0999384847867493   |             |
| AGIWUR35925                                                             |    |         |         |                |          |          |                      |             |
| CB4856 HS                                                               | IV | 9682984 | 9683533 | WBGene00014240 | htas-1   | ZK1251.1 | -0.14245603746614    |             |
| AGIWUR13934                                                             |    |         |         |                |          |          |                      |             |
| CB4856 HS                                                               | IV | 9683617 | 9684473 | WBGene00014241 | ZK1251.3 | ZK1251.3 | 0.020879621630769    |             |
| AGIWUR19628                                                             |    |         |         |                |          |          |                      |             |
| CB4856 HS                                                               | IV | 9687049 | 9688392 | WBGene00014996 | ZK1251.5 | ZK1251.5 | -0.102015059549164   |             |
| AGIWUR16631;AGIWUR36524                                                 |    |         |         |                |          |          |                      |             |
| CB4856 HS                                                               | IV | 9690932 | 9691465 | WBGene00014242 | sdz-36   | ZK1251.7 | -0.038929383027595   |             |
| AGIWUR42072                                                             |    |         |         |                |          |          |                      |             |
| CB4856 HS                                                               | IV | 9693202 | 9697005 | WBGene00006664 | twk-9    | ZK1251.8 | 0.139276877011122    |             |
| AGIWUR5316;AGIWUR12010;AGIWUR41514                                      |    |         |         |                |          |          |                      |             |
| CB4856 HS                                                               | IV | 9696989 | 9706723 | WBGene00014243 | dcaf-1   | ZK1251.9 | -0.0172109182371649  |             |
| AGIWUR40370                                                             |    |         |         |                |          |          |                      |             |
| CB4856 HS                                                               | IV | 9707148 | 9707764 | WBGene00010484 | dph-3    | K01H12.1 | 0.000326161315887141 |             |
| AGIWUR11984;AGIWUR15311;AGIWUR21907;AGIWUR29882;AGIWUR39442;AGIWUR44342 |    |         |         |                |          |          |                      |             |
| CB4856 HS                                                               | IV | 9708170 | 9709305 | WBGene00010485 | ant-1.3  | K01H12.2 | -0.235134753248888   |             |
| AGIWUR22865                                                             |    |         |         |                |          |          |                      |             |
| CB4856 HS                                                               | IV | 9710202 | 9712419 | WBGene00003629 | nhr-38   | K01H12.3 | 0.0537426997476977   |             |
| AGIWUR15627;AGIWUR30641;AGIWUR42905                                     |    |         |         |                |          |          |                      |             |
| CB4856 HS                                                               | IV | 9713082 | 9714886 | WBGene00010486 | K01H12.4 | K01H12.4 | 0.175739006495247    |             |
| AGIWUR42932                                                             |    |         |         |                |          |          |                      |             |
| CB4856 HS                                                               | IV | 9725251 | 9728576 | WBGene00003728 | nhr-138  | C28D4.9  | 0.190274121522521    | AGIWUR5703  |
| CB4856 HS                                                               | IV | 9728676 | 9731314 | WBGene00003690 | nhr-100  | C28D4.1  | -0.00138824356098333 | AGIWUR14259 |
| CB4856 HS                                                               | IV | 9731737 | 9737621 | WBGene00000509 | cka-1    | C28D4.2  | 0.0862057992924665   | AGIWUR39127 |
| CB4856 HS                                                               | IV | 9738510 | 9739220 | WBGene00007796 | C28D4.10 | C28D4.10 | -0.107603009873226   |             |
| AGIWUR28516                                                             |    |         |         |                |          |          |                      |             |
| CB4856 HS                                                               | IV | 9739219 | 9740908 | WBGene00001607 | gln-6    | C28D4.3  | -0.0969211743678002  |             |
| AGIWUR8252;AGIWUR27183;AGIWUR32269                                      |    |         |         |                |          |          |                      |             |
| CB4856 HS                                                               | IV | 9741875 | 9743147 | WBGene00007794 | C28D4.7  | C28D4.7  | 0.147467579009511    | AGIWUR7363  |
| CB4856 HS                                                               | IV | 9743765 | 9745003 | WBGene00007792 | C28D4.4  | C28D4.4  | 0.246865437982803    | AGIWUR43339 |
| CB4856 HS                                                               | IV | 9745555 | 9746862 | WBGene00007793 | C28D4.5  | C28D4.5  | -0.0554228840428008  |             |
| AGIWUR8420;AGIWUR34963                                                  |    |         |         |                |          |          |                      |             |
| CB4856 HS                                                               | IV | 9757648 | 9764494 | WBGene00003687 | nhr-97   | H27C11.1 | -0.00997526118842806 |             |
| AGIWUR10437;AGIWUR25208;AGIWUR26811;AGIWUR42455;AGIWUR44637             |    |         |         |                |          |          |                      |             |
| CB4856 HS                                                               | IV | 9765669 | 9766436 | WBGene00011749 | ssp-36   | T13F2.12 | 0.131680836950567    |             |
| AGIWUR11597                                                             |    |         |         |                |          |          |                      |             |
| CB4856 HS                                                               | IV | 9772510 | 9773470 | WBGene00000301 | cav-1    | T13F2.8  | -0.335498462837512   |             |
| AGIWUR3025;AGIWUR6303;AGIWUR17426;AGIWUR24603;AGIWUR43155               |    |         |         |                |          |          |                      |             |

|                                                           |    |    |         |         |                |          |          |                     |             |
|-----------------------------------------------------------|----|----|---------|---------|----------------|----------|----------|---------------------|-------------|
| CB4856                                                    | HS | IV | 9774563 | 9777634 | WBGene00011747 | sna-2    | T13F2.7  | 0.149595537845936   | AGIWUR32315 |
| CB4856                                                    | HS | IV | 9778288 | 9781203 | WBGene00011746 | T13F2.6  | T13F2.6  | -0.238584300091091  | AGIWUR39516 |
| CB4856                                                    | HS | IV | 9789808 | 9791917 | WBGene00011744 | T13F2.4  | T13F2.4  | -0.132653204449502  | AGIWUR39540 |
| CB4856                                                    | HS | IV | 9791945 | 9796592 | WBGene00004031 | pis-1    | T13F2.3  | -0.0310166032253747 | AGIWUR17460 |
| CB4856                                                    | HS | IV | 9796688 | 9797354 | WBGene00011743 | T13F2.2  | T13F2.2  | -0.0825167586996063 |             |
| AGIWUR2648;AGIWUR40457                                    |    |    |         |         |                |          |          |                     |             |
| CB4856                                                    | HS | IV | 9799429 | 9802638 | WBGene00001396 | fat-4    | T13F2.1  | 0.199858504799295   |             |
| AGIWUR13144;AGIWUR23506;AGIWUR33115                       |    |    |         |         |                |          |          |                     |             |
| CB4856                                                    | HS | IV | 9803023 | 9806119 | WBGene00001395 | fat-3    | W08D2.4  | 0.152810916045034   | AGIWUR19711 |
| CB4856                                                    | HS | IV | 9806416 | 9810733 | WBGene00012340 | dct-15   | W08D2.3  | 0.324454554326258   | AGIWUR20257 |
| CB4856                                                    | HS | IV | 9812444 | 9815526 | WBGene00001188 | egl-20   | W08D2.1  | -0.0942518712436229 |             |
| AGIWUR16385;AGIWUR23531;AGIWUR27673;AGIWUR33623           |    |    |         |         |                |          |          |                     |             |
| CB4856                                                    | HS | IV | 9817412 | 9824632 | WBGene00012341 | catp-6   | W08D2.5  | 0.185062787967846   |             |
| AGIWUR6997;AGIWUR17095;AGIWUR22958;AGIWUR43986            |    |    |         |         |                |          |          |                     |             |
| CB4856                                                    | HS | IV | 9825694 | 9830620 | WBGene00012342 | mtr-4    | W08D2.7  | 0.0997379267208611  | AGIWUR36980 |
| CB4856                                                    | HS | IV | 9832935 | 9834822 | WBGene00002204 | kin-21   | W08D2.8  | -0.351243863939544  | AGIWUR37340 |
| CB4856                                                    | HS | IV | 9839057 | 9841084 | WBGene00002206 | kin-24   | K07F5.4  | -0.100874274575911  | AGIWUR26938 |
| CB4856                                                    | HS | IV | 9842371 | 9842992 | WBGene00045180 | K07F5.17 | K07F5.17 | 0.0573537444824109  |             |
| AGIWUR7217;AGIWUR9095;AGIWUR18583                         |    |    |         |         |                |          |          |                     |             |
| CB4856                                                    | HS | IV | 9844014 | 9844344 | WBGene00010633 | nspd-2   | K07F5.5  | -0.0856052354979617 | AGIWUR17317 |
| CB4856                                                    | HS | IV | 9844989 | 9846674 | WBGene00010634 | K07F5.6  | K07F5.6  | -0.133055116194635  | AGIWUR23014 |
| CB4856                                                    | HS | IV | 9847724 | 9848175 | WBGene00010635 | K07F5.7  | K07F5.7  | -0.142163518204948  | AGIWUR25972 |
| CB4856                                                    | HS | IV | 9848491 | 9849796 | WBGene00010636 | K07F5.8  | K07F5.8  | 0.134106789932474   |             |
| AGIWUR2188;AGIWUR2399;AGIWUR24222                         |    |    |         |         |                |          |          |                     |             |
| CB4856                                                    | HS | IV | 9852550 | 9853609 | WBGene00006050 | ssq-1    | K07F5.11 | 0.196403019026933   |             |
| AGIWUR10720                                               |    |    |         |         |                |          |          |                     |             |
| CB4856                                                    | HS | IV | 9856012 | 9858067 | WBGene00010637 | K07F5.12 | K07F5.12 | -0.0777796220036828 |             |
| AGIWUR15523;AGIWUR22601                                   |    |    |         |         |                |          |          |                     |             |
| CB4856                                                    | HS | IV | 9858488 | 9862118 | WBGene00003787 | npp-1    | K07F5.13 | -0.11390711889124   |             |
| AGIWUR8201;AGIWUR16295;AGIWUR35932                        |    |    |         |         |                |          |          |                     |             |
| CB4856                                                    | HS | IV | 9862221 | 9864076 | WBGene00010638 | K07F5.14 | K07F5.14 | 0.39226052686347    |             |
| AGIWUR39713                                               |    |    |         |         |                |          |          |                     |             |
| CB4856                                                    | HS | IV | 9864179 | 9864954 | WBGene00010640 | K07F5.16 | K07F5.16 | -0.0339106495974217 |             |
| AGIWUR43013                                               |    |    |         |         |                |          |          |                     |             |
| CB4856                                                    | HS | IV | 9865078 | 9866163 | WBGene00010639 | K07F5.15 | K07F5.15 | 0.0385478736095521  |             |
| AGIWUR2940;AGIWUR3047;AGIWUR17907;AGIWUR19206;AGIWUR41539 |    |    |         |         |                |          |          |                     |             |
| CB4856                                                    | HS | IV | 9879329 | 9882152 | WBGene00003603 | nhr-4    | F32B6.1  | 0.110518543304153   | AGIWUR40095 |
| CB4856                                                    | HS | IV | 9882132 | 9884383 | WBGene00009320 | F32B6.3  | F32B6.3  | 0.0566979726216985  | AGIWUR38724 |
| CB4856                                                    | HS | IV | 9884556 | 9887150 | WBGene00009319 | mccc-1   | F32B6.2  | -0.26764749574758   |             |

AGIWUR14175;AGIWUR25051;AGIWUR30913;AGIWUR44689

|        |    |    |         |         |                |          |          |                    |
|--------|----|----|---------|---------|----------------|----------|----------|--------------------|
| CB4856 | HS | IV | 9887190 | 9889929 | WBGene00009324 | F32B6.10 | F32B6.10 | 0.0931300129820318 |
|--------|----|----|---------|---------|----------------|----------|----------|--------------------|

AGIWUR12556

|        |    |    |         |         |                |         |         |                   |             |
|--------|----|----|---------|---------|----------------|---------|---------|-------------------|-------------|
| CB4856 | HS | IV | 9890585 | 9892038 | WBGene00009321 | F32B6.4 | F32B6.4 | 0.156362176986216 | AGIWUR10939 |
|--------|----|----|---------|---------|----------------|---------|---------|-------------------|-------------|

|        |    |    |         |         |                |       |         |                   |             |
|--------|----|----|---------|---------|----------------|-------|---------|-------------------|-------------|
| CB4856 | HS | IV | 9892739 | 9893779 | WBGene00006056 | sss-1 | F32B6.5 | 0.117882281163766 | AGIWUR38254 |
|--------|----|----|---------|---------|----------------|-------|---------|-------------------|-------------|

|        |    |    |         |         |                |        |         |                     |            |
|--------|----|----|---------|---------|----------------|--------|---------|---------------------|------------|
| CB4856 | HS | IV | 9895388 | 9896147 | WBGene00006049 | ssp-32 | F32B6.7 | -0.0352335901061469 | AGIWUR1266 |
|--------|----|----|---------|---------|----------------|--------|---------|---------------------|------------|

|        |    |    |         |         |                |       |         |                    |             |
|--------|----|----|---------|---------|----------------|-------|---------|--------------------|-------------|
| CB4856 | HS | IV | 9899012 | 9902513 | WBGene00009322 | tbc-3 | F32B6.8 | -0.194169052423817 | AGIWUR19284 |
|--------|----|----|---------|---------|----------------|-------|---------|--------------------|-------------|

|        |    |    |         |         |                |         |         |                   |            |
|--------|----|----|---------|---------|----------------|---------|---------|-------------------|------------|
| CB4856 | HS | IV | 9903908 | 9905903 | WBGene00009323 | best-13 | F32B6.9 | 0.213196440975436 | AGIWUR3199 |
|--------|----|----|---------|---------|----------------|---------|---------|-------------------|------------|

|        |    |    |         |         |                |       |         |                     |             |
|--------|----|----|---------|---------|----------------|-------|---------|---------------------|-------------|
| CB4856 | HS | IV | 9916530 | 9921996 | WBGene00009133 | bed-3 | F25H8.6 | -0.0135886484200132 | AGIWUR41049 |
|--------|----|----|---------|---------|----------------|-------|---------|---------------------|-------------|

|        |    |    |         |         |                |       |         |                   |
|--------|----|----|---------|---------|----------------|-------|---------|-------------------|
| CB4856 | HS | IV | 9921955 | 9928223 | WBGene00001113 | dur-1 | F25H8.5 | 0.123939793649578 |
|--------|----|----|---------|---------|----------------|-------|---------|-------------------|

AGIWUR18088;AGIWUR37175;AGIWUR44758

|        |    |    |         |         |                |         |         |                     |
|--------|----|----|---------|---------|----------------|---------|---------|---------------------|
| CB4856 | HS | IV | 9930899 | 9932240 | WBGene00009131 | F25H8.1 | F25H8.1 | -0.0324515474990523 |
|--------|----|----|---------|---------|----------------|---------|---------|---------------------|

AGIWUR3558;AGIWUR13798;AGIWUR38273

|        |    |    |         |         |                |         |         |                    |             |
|--------|----|----|---------|---------|----------------|---------|---------|--------------------|-------------|
| CB4856 | HS | IV | 9932235 | 9933879 | WBGene00009132 | F25H8.2 | F25H8.2 | -0.192848751742174 | AGIWUR23509 |
|--------|----|----|---------|---------|----------------|---------|---------|--------------------|-------------|

|        |    |    |         |         |                |        |         |                   |
|--------|----|----|---------|---------|----------------|--------|---------|-------------------|
| CB4856 | HS | IV | 9933910 | 9934285 | WBGene00004974 | spe-29 | F25H8.7 | 0.188367810341907 |
|--------|----|----|---------|---------|----------------|--------|---------|-------------------|

AGIWUR12135;AGIWUR14054;AGIWUR16647;AGIWUR19696;AGIWUR25093;AGIWUR25417

|        |    |    |         |         |                |       |         |                    |
|--------|----|----|---------|---------|----------------|-------|---------|--------------------|
| CB4856 | HS | IV | 9934767 | 9953433 | WBGene00001650 | gon-1 | F25H8.3 | -0.202704581713022 |
|--------|----|----|---------|---------|----------------|-------|---------|--------------------|

AGIWUR15816;AGIWUR29887;AGIWUR40536

|        |    |    |         |         |                |          |          |                    |
|--------|----|----|---------|---------|----------------|----------|----------|--------------------|
| CB4856 | HS | IV | 9964245 | 9966630 | WBGene00011762 | T13H10.2 | T13H10.2 | 0.0459025260825534 |
|--------|----|----|---------|---------|----------------|----------|----------|--------------------|

AGIWUR3038;AGIWUR9024;AGIWUR17513;AGIWUR18569

|        |    |    |         |         |                |       |          |                   |
|--------|----|----|---------|---------|----------------|-------|----------|-------------------|
| CB4856 | HS | IV | 9967095 | 9969181 | WBGene00002193 | kin-5 | T13H10.1 | 0.045204299630182 |
|--------|----|----|---------|---------|----------------|-------|----------|-------------------|

AGIWUR4224

|        |    |    |         |         |                |           |           |                   |
|--------|----|----|---------|---------|----------------|-----------|-----------|-------------------|
| CB4856 | HS | IV | 9969400 | 9971200 | WBGene00008154 | C47E12.11 | C47E12.11 | 0.243888568431977 |
|--------|----|----|---------|---------|----------------|-----------|-----------|-------------------|

AGIWUR13467

|        |    |    |         |         |                |           |           |                   |
|--------|----|----|---------|---------|----------------|-----------|-----------|-------------------|
| CB4856 | HS | IV | 9972037 | 9972652 | WBGene00008155 | C47E12.12 | C47E12.12 | 0.200577717269617 |
|--------|----|----|---------|---------|----------------|-----------|-----------|-------------------|

AGIWUR27207

|        |    |    |         |         |                |           |           |                  |
|--------|----|----|---------|---------|----------------|-----------|-----------|------------------|
| CB4856 | HS | IV | 9972800 | 9973984 | WBGene00008153 | C47E12.10 | C47E12.10 | 0.14345596023345 |
|--------|----|----|---------|---------|----------------|-----------|-----------|------------------|

AGIWUR34366

|        |    |    |         |         |                |          |          |                   |
|--------|----|----|---------|---------|----------------|----------|----------|-------------------|
| CB4856 | HS | IV | 9974672 | 9975484 | WBGene00008152 | C47E12.9 | C47E12.9 | 0.198943643079504 |
|--------|----|----|---------|---------|----------------|----------|----------|-------------------|

AGIWUR29301

|        |    |    |         |         |                |           |           |                     |
|--------|----|----|---------|---------|----------------|-----------|-----------|---------------------|
| CB4856 | HS | IV | 9975496 | 9976384 | WBGene00044240 | C47E12.14 | C47E12.14 | 0.00987421159812829 |
|--------|----|----|---------|---------|----------------|-----------|-----------|---------------------|

AGIWUR30214;AGIWUR33392;AGIWUR34516

|        |    |    |         |         |                |       |          |                    |
|--------|----|----|---------|---------|----------------|-------|----------|--------------------|
| CB4856 | HS | IV | 9978122 | 9980770 | WBGene00000964 | dhp-2 | C47E12.8 | 0.0751198097444057 |
|--------|----|----|---------|---------|----------------|-------|----------|--------------------|

AGIWUR34299

|        |    |    |         |         |                |          |          |                    |
|--------|----|----|---------|---------|----------------|----------|----------|--------------------|
| CB4856 | HS | IV | 9980724 | 9982276 | WBGene00008151 | C47E12.7 | C47E12.7 | -0.101479508114856 |
|--------|----|----|---------|---------|----------------|----------|----------|--------------------|

AGIWUR18656

|        |    |    |         |         |                |       |          |                    |
|--------|----|----|---------|---------|----------------|-------|----------|--------------------|
| CB4856 | HS | IV | 9983195 | 9989678 | WBGene00008150 | mam-2 | C47E12.6 | -0.074379508880078 |
|--------|----|----|---------|---------|----------------|-------|----------|--------------------|

AGIWUR29556

|        |    |    |         |         |                |       |          |                    |
|--------|----|----|---------|---------|----------------|-------|----------|--------------------|
| CB4856 | HS | IV | 9989670 | 9995034 | WBGene00006699 | uba-1 | C47E12.5 | -0.265605011049005 |
|--------|----|----|---------|---------|----------------|-------|----------|--------------------|

AGIWUR10534;AGIWUR11941;AGIWUR17729;AGIWUR18720;AGIWUR28621;AGIWUR29207;AGIWUR32686;AGIWUR34505;AGIWUR35578  
 ;AGIWUR41605  
 CB4856 HS IV 9995472 9999032 WBGene00008149 pyp-1 C47E12.4 0.0542305404630499  
 AGIWUR3161;AGIWUR26414  
 CB4856 HS IV 9999047 10001846 WBGene00008148 C47E12.3 C47E12.3  
 -0.169079985775175 AGIWUR23502  
 CB4856 HS IV 10001972 10003534 WBGene00008147 C47E12.2 C47E12.2  
 0.0903314158238828 AGIWUR44403  
 CB4856 HS IV 10003726 10005599 WBGene00005663 sars-1 C47E12.1  
 -0.0606758157851299 AGIWUR1796;AGIWUR5322;AGIWUR11890;AGIWUR31242  
 CB4856 HS IV 10009354 10014187 WBGene00009678 magu-4 F44D12.1  
 0.225706483129766 AGIWUR3382  
 CB4856 HS IV 10013958 10016398 WBGene00009679 F44D12.2 F44D12.2  
 0.222578984064015 AGIWUR6307  
 CB4856 HS IV 10017425 10021286 WBGene00009686 ent-7 F44D12.9  
 0.106067829746218 AGIWUR21559  
 CB4856 HS IV 10023291 10025226 WBGene00009685 F44D12.8 F44D12.8  
 -0.0298908389613324 AGIWUR19688  
 CB4856 HS IV 10026413 10027666 WBGene00009681 gipc-2 F44D12.4  
 -0.362331729451068 AGIWUR34255  
 CB4856 HS IV 10032972 10033155 WBGene00045002 F44D12.12 F44D12.12  
 0.366449933980221 AGIWUR20102  
 CB4856 HS IV 10033363 10034820 WBGene00009683 F44D12.6 F44D12.6  
 0.0248826654997671 AGIWUR8676;AGIWUR30156;AGIWUR38109  
 CB4856 HS IV 10036627 10037066 WBGene00009687 F44D12.10 F44D12.10  
 0.0301398004306019  
 AGIWUR7081;AGIWUR7294;AGIWUR15394;AGIWUR18459;AGIWUR19867;AGIWUR22633;AGIWUR27241;AGIWUR33146;AGIWUR34661;A  
 GIWUR40121;AGIWUR40462  
 CB4856 HS IV 10037452 10039043 WBGene00014375 F44D12.11 F44D12.11  
 0.21667575263712 AGIWUR25592  
 CB4856 HS IV 10039773 10040903 WBGene00011424 dhs-31 T04B2.6 0.0184500383034907  
 AGIWUR19849;AGIWUR41560  
 CB4856 HS IV 10041130 10042432 WBGene00011421 T04B2.1 T04B2.1 0.237929713173187  
 AGIWUR7713;AGIWUR10342;AGIWUR36383;AGIWUR38194  
 CB4856 HS IV 10043183 10045739 WBGene00001487 frk-1 T04B2.2 0.202895195109654  
 AGIWUR40759  
 CB4856 HS IV 10047408 10050554 WBGene00011422 T04B2.3 T04B2.3 0.172695596635668  
 AGIWUR18224  
 CB4856 HS IV 10050581 10051188 WBGene00044018 T04B2.8 T04B2.8 0.0996449456611463

AGIWUR4874;AGIWUR8285;AGIWUR24191;AGIWUR35191;AGIWUR38908  
 CB4856 HS IV 10051286 10053650 WBGene00005723 srv-12 T04B2.4 -0.0123185954116822  
 AGIWUR15022  
 CB4856 HS IV 10054036 10056250 WBGene00011425 T04B2.7 T04B2.7 0.0799057282137206  
 AGIWUR36502  
 CB4856 HS IV 10056591 10062849 WBGene00011423 ip1a-7 T04B2.5 0.0585545183392826  
 AGIWUR712;AGIWUR11375;AGIWUR21307;AGIWUR21939;AGIWUR30091;AGIWUR33006;AGIWUR41031;AGIWUR44901  
 CB4856 HS IV 10067824 10070251 WBGene00000858 cwn-2 W01B6.1 -0.0105874973336562  
 AGIWUR9085;AGIWUR12598;AGIWUR15419;AGIWUR28973;AGIWUR37317  
 CB4856 HS IV 10070270 10072626 WBGene00012170 W01B6.3 W01B6.3 0.414045475554045  
 AGIWUR22414  
 CB4856 HS IV 10075414 10075775 WBGene00012171 W01B6.4 W01B6.4 0.149434034756436  
 AGIWUR5168  
 CB4856 HS IV 10076325 10078705 WBGene00012172 W01B6.5 W01B6.5 0.227911228503583  
 AGIWUR27903  
 CB4856 HS IV 10081155 10082610 WBGene00012173 W01B6.6 W01B6.6 0.0487694733054385  
 AGIWUR5015;AGIWUR41383  
 CB4856 HS IV 10082867 10082962 WBGene00045182 W01B6.10 W01B6.10  
 0.00661392604648725 AGIWUR29759  
 CB4856 HS IV 10083491 10084440 WBGene00012174 W01B6.8 W01B6.8 -0.152812142683917  
 AGIWUR34753  
 CB4856 HS IV 10084454 10085438 WBGene00000593 col-2 W01B6.7 -0.318295882555973  
 AGIWUR30833  
 CB4856 HS IV 10086137 10088437 WBGene00003576 ndc-80 W01B6.9 -0.0836885953310347  
 AGIWUR293;AGIWUR3177;AGIWUR28049  
 CB4856 HS IV 10088367 10089894 WBGene00007304 ttr-39 C04G2.1 0.0561478573845129  
 AGIWUR35819  
 CB4856 HS IV 10090658 10092379 WBGene00007305 C04G2.2 C04G2.2 0.186767763611446  
 AGIWUR3541  
 CB4856 HS IV 10094198 10095259 WBGene00007306 C04G2.5 C04G2.5 0.0462960380376529  
 AGIWUR33346  
 CB4856 HS IV 10097196 10106556 WBGene00001001 dis-3 C04G2.6 -0.223492662696271  
 AGIWUR33485  
 CB4856 HS IV 10106917 10110412 WBGene00001204 egl-38 C04G2.7 -0.0288590970685334  
 AGIWUR43499  
 CB4856 HS IV 10110347 10111577 WBGene00007307 spch-1 C04G2.8 0.278007574841045  
 AGIWUR2944  
 CB4856 HS IV 10111721 10112028 WBGene00045104 C04G2.12 C04G2.12  
 -0.0121470972874791 AGIWUR10102;AGIWUR30391

|                                                 |                                                             |          |                |                                    |
|-------------------------------------------------|-------------------------------------------------------------|----------|----------------|------------------------------------|
| CB4856 HS IV                                    | 10112870                                                    | 10114287 | WBGene00007308 | C04G2.9 C04G2.9 0.250205963209076  |
| AGIWUR3561                                      |                                                             |          |                |                                    |
| CB4856 HS IV                                    | 10115389                                                    | 10118084 | WBGene00007309 | C04G2.10 C04G2.10                  |
| 0.176843309174711                               | AGIWUR41110                                                 |          |                |                                    |
| CB4856 HS IV                                    | 10119460                                                    | 10122305 | WBGene00007310 | irld-21 C04G2.11                   |
| -0.0787968196730233                             | AGIWUR43001                                                 |          |                |                                    |
| CB4856 HS IV                                    | 10122120                                                    | 10126675 | WBGene00010676 | K08F4.1 K08F4.1 -0.102180518615846 |
| AGIWUR6421;AGIWUR24373;AGIWUR44754              |                                                             |          |                |                                    |
| CB4856 HS IV                                    | 10126749                                                    | 10128956 | WBGene00010677 | gtbp-1 K08F4.2 -0.116250784771259  |
| AGIWUR444;AGIWUR1140;AGIWUR31820;AGIWUR42248    |                                                             |          |                |                                    |
| CB4856 HS IV                                    | 10129257                                                    | 10130244 | WBGene00010678 | K08F4.3 K08F4.3 0.0750933801541702 |
| AGIWUR6612                                      |                                                             |          |                |                                    |
| CB4856 HS IV                                    | 10130257                                                    | 10133283 | WBGene00001621 | glt-3 K08F4.4 0.310761738537813    |
| AGIWUR13198                                     |                                                             |          |                |                                    |
| CB4856 HS IV                                    | 10134932                                                    | 10135887 | WBGene00010679 | K08F4.5 K08F4.5 0.177117671019341  |
| AGIWUR28659                                     |                                                             |          |                |                                    |
| CB4856 HS IV                                    | 10138124                                                    | 10139104 | WBGene00010680 | K08F4.12 K08F4.12                  |
| 0.180583068580939                               | AGIWUR43473                                                 |          |                |                                    |
| CB4856 HS IV                                    | 10139380                                                    | 10140285 | WBGene00001751 | gst-3 K08F4.11                     |
| -0.0408180394980011                             | AGIWUR15799                                                 |          |                |                                    |
| CB4856 HS IV                                    | 10145249                                                    | 10146222 | WBGene00000975 | dhs-12 K08F4.9 -0.248978422490932  |
| AGIWUR15183;AGIWUR15296;AGIWUR17821;AGIWUR17973 |                                                             |          |                |                                    |
| CB4856 HS IV                                    | 10146226                                                    | 10147105 | WBGene00011777 | T14G10.8 T14G10.8                  |
| -0.179185583888973                              | AGIWUR34844                                                 |          |                |                                    |
| CB4856 HS IV                                    | 10147031                                                    | 10149038 | WBGene00011776 | hpo-5 T14G10.7                     |
| 0.0325764433749391                              | AGIWUR43385                                                 |          |                |                                    |
| CB4856 HS IV                                    | 10149166                                                    | 10150602 | WBGene00006638 | tsp-12 T14G10.6                    |
| -0.106933733933126                              | AGIWUR33375                                                 |          |                |                                    |
| CB4856 HS IV                                    | 10151949                                                    | 10155636 | WBGene00011775 | T14G10.5 T14G10.5                  |
| 0.0966439981085507                              | AGIWUR16222;AGIWUR42213;AGIWUR44173                         |          |                |                                    |
| CB4856 HS IV                                    | 10155775                                                    | 10156771 | WBGene00011774 | ttr-54 T14G10.4                    |
| -0.0211784626057678                             | AGIWUR25565                                                 |          |                |                                    |
| CB4856 HS IV                                    | 10158038                                                    | 10159243 | WBGene00011773 | ttr-53 T14G10.3                    |
| 0.0791547857183339                              | AGIWUR43146                                                 |          |                |                                    |
| CB4856 HS IV                                    | 10162008                                                    | 10164390 | WBGene00004091 | pps-1 T14G10.1                     |
| 0.243733213546339                               | AGIWUR14039                                                 |          |                |                                    |
| CB4856 HS IV                                    | 10164331                                                    | 10174341 | WBGene00004254 | pxf-1 T14G10.2                     |
| -0.215750666247118                              | AGIWUR18067;AGIWUR19827;AGIWUR21600;AGIWUR27870;AGIWUR36386 |          |                |                                    |
| CB4856 HS IV                                    | 10176680                                                    | 10178099 | WBGene00010556 | rack-1 K04D7.1 0.114937654721589   |

|                                                                                                |    |    |          |          |                |           |          |                    |  |
|------------------------------------------------------------------------------------------------|----|----|----------|----------|----------------|-----------|----------|--------------------|--|
| AGIWUR2243;AGIWUR11655;AGIWUR14450;AGIWUR16648;AGIWUR24842;AGIWUR43131                         |    |    |          |          |                |           |          |                    |  |
| CB4856                                                                                         | HS | IV | 10177968 | 10180304 | WBGene00010557 | mispn-1   | K04D7.2  | 0.0430853950985091 |  |
| AGIWUR29722;AGIWUR30885                                                                        |    |    |          |          |                |           |          |                    |  |
| CB4856                                                                                         | HS | IV | 10180660 | 10183939 | WBGene00001794 | gta-1     | K04D7.3  | 0.116983624100301  |  |
| AGIWUR3779;AGIWUR5118;AGIWUR12585                                                              |    |    |          |          |                |           |          |                    |  |
| CB4856                                                                                         | HS | IV | 10183851 | 10194424 | WBGene00010558 | ptp-4     | K04D7.4  |                    |  |
| -0.00485460640611146                                                                           |    |    |          |          |                |           |          |                    |  |
| AGIWUR7030;AGIWUR11134;AGIWUR22388;AGIWUR24476;AGIWUR27283;AGIWUR40206;AGIWUR41498;AGIWUR42425 |    |    |          |          |                |           |          |                    |  |
| CB4856                                                                                         | HS | IV | 10197820 | 10202993 | WBGene00001653 | gon-4     | K04D7.5  | -0.262933204548563 |  |
| AGIWUR17084                                                                                    |    |    |          |          |                |           |          |                    |  |
| CB4856                                                                                         | HS | IV | 10203729 | 10203964 | WBGene00045022 | K04D7.7   | K04D7.7  | 0.0400613635387339 |  |
| AGIWUR28428;AGIWUR30611                                                                        |    |    |          |          |                |           |          |                    |  |
| CB4856                                                                                         | HS | IV | 10204185 | 10206073 | WBGene00010559 | K04D7.6   | K04D7.6  | 0.212047749444311  |  |
| AGIWUR27252;AGIWUR44586                                                                        |    |    |          |          |                |           |          |                    |  |
| CB4856                                                                                         | HS | IV | 10206189 | 10214911 | WBGene00000019 | abt-1     | C24F3.5  | 0.0211236238152139 |  |
| AGIWUR25441                                                                                    |    |    |          |          |                |           |          |                    |  |
| CB4856                                                                                         | HS | IV | 10214986 | 10219308 | WBGene00007698 | qns-1     | C24F3.4  | -0.171380186312377 |  |
| AGIWUR200;AGIWUR9742;AGIWUR16857;AGIWUR29306                                                   |    |    |          |          |                |           |          |                    |  |
| CB4856                                                                                         | HS | IV | 10219373 | 10221281 | WBGene00007696 | tram-1    | C24F3.1  | -0.113722457896043 |  |
| AGIWUR296;AGIWUR3729;AGIWUR4771;AGIWUR13767;AGIWUR14881;AGIWUR20042;AGIWUR32443;AGIWUR32814    |    |    |          |          |                |           |          |                    |  |
| CB4856                                                                                         | HS | IV | 10222472 | 10223745 | WBGene00007697 | C24F3.2   | C24F3.2  | -0.241260878386639 |  |
| AGIWUR16729                                                                                    |    |    |          |          |                |           |          |                    |  |
| CB4856                                                                                         | HS | IV | 10224023 | 10226342 | WBGene00003531 | nas-12    | C24F3.3  | 0.0874864064910597 |  |
| AGIWUR9183;AGIWUR18486;AGIWUR23887;AGIWUR39103;AGIWUR42188;AGIWUR44445                         |    |    |          |          |                |           |          |                    |  |
| CB4856                                                                                         | HS | IV | 10226334 | 10227639 | WBGene00008509 | F01G10.6  |          | F01G10.6           |  |
| 0.126141042150815 AGIWUR38080                                                                  |    |    |          |          |                |           |          |                    |  |
| CB4856                                                                                         | HS | IV | 10227987 | 10231060 | WBGene00008508 | F01G10.5  |          | F01G10.5           |  |
| -0.205797666092417 AGIWUR18121                                                                 |    |    |          |          |                |           |          |                    |  |
| CB4856                                                                                         | HS | IV | 10231375 | 10232552 | WBGene00008507 | F01G10.4  |          | F01G10.4           |  |
| 0.754856144309599 AGIWUR16428                                                                  |    |    |          |          |                |           |          |                    |  |
| CB4856                                                                                         | HS | IV | 10233321 | 10235329 | WBGene00001158 | ech-9     | F01G10.3 |                    |  |
| 0.0242957617361697 AGIWUR33647                                                                 |    |    |          |          |                |           |          |                    |  |
| CB4856                                                                                         | HS | IV | 10236626 | 10239176 | WBGene00001157 | ech-8     | F01G10.2 |                    |  |
| 0.110020049347357 AGIWUR30960                                                                  |    |    |          |          |                |           |          |                    |  |
| CB4856                                                                                         | HS | IV | 10239278 | 10241859 | WBGene00008510 | lip1-7    | F01G10.7 |                    |  |
| 0.156916999364928 AGIWUR3315;AGIWUR11327                                                       |    |    |          |          |                |           |          |                    |  |
| CB4856                                                                                         | HS | IV | 10243591 | 10245752 | WBGene00008506 | tk1-1     | F01G10.1 |                    |  |
| -0.119035199601955 AGIWUR22815;AGIWUR24020;AGIWUR41119;AGIWUR43337                             |    |    |          |          |                |           |          |                    |  |
| CB4856                                                                                         | HS | IV | 10246160 | 10249785 | WBGene00008512 | F01G10.10 |          | F01G10.10          |  |

|                      |                                                           |          |                |           |           |
|----------------------|-----------------------------------------------------------|----------|----------------|-----------|-----------|
| 0.0120641931396968   | AGIWUR10003                                               |          |                |           |           |
| CB4856 HS IV         | 10250646                                                  | 10255844 | WBGene00000910 | daf-14    | F01G10.8  |
| -0.0696416562126352  | AGIWUR20358                                               |          |                |           |           |
| CB4856 HS IV         | 10255755                                                  | 10259657 | WBGene00008511 | F01G10.9  | F01G10.9  |
| 0.187698641234588    | AGIWUR6188;AGIWUR9546;AGIWUR10240;AGIWUR14914;AGIWUR44928 |          |                |           |           |
| CB4856 HS IV         | 10268882                                                  | 10269228 | WBGene00012781 | nspd-7    | Y43C5A.1  |
| -0.00737642516841674 | AGIWUR14919                                               |          |                |           |           |
| CB4856 HS IV         | 10269883                                                  | 10272691 | WBGene00012782 | Y43C5A.2  | Y43C5A.2  |
| 0.246411557910537    | AGIWUR16256;AGIWUR17505;AGIWUR22870;AGIWUR44812           |          |                |           |           |
| CB4856 HS IV         | 10274036                                                  | 10275411 | WBGene00012783 | Y43C5A.3  | Y43C5A.3  |
| 0.225790477473183    | AGIWUR4497;AGIWUR10434;AGIWUR13683                        |          |                |           |           |
| CB4856 HS IV         | 10277264                                                  | 10277918 | WBGene00044922 | Y43C5A.7  | Y43C5A.7  |
| -0.141516697289138   | AGIWUR34336                                               |          |                |           |           |
| CB4856 HS IV         | 10277989                                                  | 10279501 | WBGene00012784 | Y43C5A.4  | Y43C5A.4  |
| 0.139648976811971    | AGIWUR28573                                               |          |                |           |           |
| CB4856 HS IV         | 10279457                                                  | 10281582 | WBGene00006568 | thk-1     | Y43C5A.5  |
| 0.246103964535269    | AGIWUR5016                                                |          |                |           |           |
| CB4856 HS IV         | 10281637                                                  | 10284244 | WBGene00004297 | rad-51    | Y43C5A.6  |
| -0.162334687672525   | AGIWUR18645;AGIWUR33535;AGIWUR36015                       |          |                |           |           |
| CB4856 HS IV         | 10286955                                                  | 10293013 | WBGene00004140 | ebax-1    | R09E10.7  |
| -0.0328657380270911  | AGIWUR43680                                               |          |                |           |           |
| CB4856 HS IV         | 10292928                                                  | 10294130 | WBGene00011176 | R09E10.6  | R09E10.6  |
| -0.103492845636698   | AGIWUR21841                                               |          |                |           |           |
| CB4856 HS IV         | 10296046                                                  | 10302310 | WBGene00011175 | R09E10.5  | R09E10.5  |
| -0.00571936583775656 | AGIWUR27517                                               |          |                |           |           |
| CB4856 HS IV         | 10304845                                                  | 10307880 | WBGene00011174 | acs-23    | R09E10.4  |
| 0.186039468287749    | AGIWUR1309;AGIWUR21443;AGIWUR21599                        |          |                |           |           |
| CB4856 HS IV         | 10310116                                                  | 10310429 | WBGene00011177 | R09E10.8  | R09E10.8  |
| -0.129181244837033   | AGIWUR29195                                               |          |                |           |           |
| CB4856 HS IV         | 10310772                                                  | 10313670 | WBGene00011173 | acs-18    | R09E10.3  |
| 0.106490365348355    | AGIWUR13284                                               |          |                |           |           |
| CB4856 HS IV         | 10314139                                                  | 10314576 | WBGene00044254 | R09E10.10 | R09E10.10 |
| 0.0871120732015909   | AGIWUR31311;AGIWUR33716;AGIWUR36979                       |          |                |           |           |
| CB4856 HS IV         | 10314989                                                  | 10317377 | WBGene00011178 | R09E10.9  | R09E10.9  |
| 0.223491233614592    | AGIWUR3962                                                |          |                |           |           |
| CB4856 HS IV         | 10317558                                                  | 10318293 | WBGene00011172 | R09E10.2  | R09E10.2  |
| 0.220084452788333    | AGIWUR38681                                               |          |                |           |           |
| CB4856 HS IV         | 10319351                                                  | 10321170 | WBGene00011171 | R09E10.1  | R09E10.1  |
| -0.081631525298798   | AGIWUR35003                                               |          |                |           |           |



|                                                                                                                                                                                                                                          |    |    |          |          |                |          |          |                     |
|------------------------------------------------------------------------------------------------------------------------------------------------------------------------------------------------------------------------------------------|----|----|----------|----------|----------------|----------|----------|---------------------|
| CB4856                                                                                                                                                                                                                                   | HS | IV | 10324255 | 10350217 | WBGene00006779 | unc-43   | K11E8.1  | -0.0314332553430816 |
| AGIWUR4340;AGIWUR6349;AGIWUR7878;AGIWUR7921;AGIWUR8651;AGIWUR9769;AGIWUR9871;AGIWUR10142;AGIWUR10176;AGIWUR11503;AGIWUR12155;AGIWUR18114;AGIWUR20811;AGIWUR30344;AGIWUR37623;AGIWUR39280;AGIWUR39753;AGIWUR41763;AGIWUR42419;AGIWUR44510 |    |    |          |          |                |          |          |                     |
| CB4856                                                                                                                                                                                                                                   | HS | IV | 10351445 | 10352343 | WBGene00012785 | Y43C5B.2 | Y43C5B.2 |                     |
| 0.0153304802026373 AGIWUR22600                                                                                                                                                                                                           |    |    |          |          |                |          |          |                     |
| CB4856                                                                                                                                                                                                                                   | HS | IV | 10353167 | 10355120 | WBGene00012786 | Y43C5B.3 | Y43C5B.3 |                     |
| -0.0884190359406318 AGIWUR29043                                                                                                                                                                                                          |    |    |          |          |                |          |          |                     |
| CB4856                                                                                                                                                                                                                                   | HS | IV | 10355046 | 10357170 | WBGene00011236 | R11A8.1  | R11A8.1  | 0.00357525236840672 |
| AGIWUR20547                                                                                                                                                                                                                              |    |    |          |          |                |          |          |                     |
| CB4856                                                                                                                                                                                                                                   | HS | IV | 10358141 | 10360219 | WBGene00011237 | gkow-1   | R11A8.2  | 0.0858670620632846  |
| AGIWUR16364                                                                                                                                                                                                                              |    |    |          |          |                |          |          |                     |
| CB4856                                                                                                                                                                                                                                   | HS | IV | 10360800 | 10363331 | WBGene00011238 | ugt-59   | R11A8.3  | 0.00400858819526828 |
| AGIWUR31384                                                                                                                                                                                                                              |    |    |          |          |                |          |          |                     |
| CB4856                                                                                                                                                                                                                                   | HS | IV | 10366333 | 10367790 | WBGene00011239 | pges-2   | R11A8.5  | 0.0302747821242271  |
| AGIWUR18136                                                                                                                                                                                                                              |    |    |          |          |                |          |          |                     |
| CB4856                                                                                                                                                                                                                                   | HS | IV | 10368607 | 10373136 | WBGene00002152 | iars-1   | R11A8.6  | -0.0509866598024615 |
| AGIWUR822;AGIWUR2745;AGIWUR7114                                                                                                                                                                                                          |    |    |          |          |                |          |          |                     |
| CB4856                                                                                                                                                                                                                                   | HS | IV | 10372638 | 10373821 | WBGene00011241 | mpz-5    | R11A8.8  | 0.0496264629933161  |
| AGIWUR16355;AGIWUR25461                                                                                                                                                                                                                  |    |    |          |          |                |          |          |                     |
| CB4856                                                                                                                                                                                                                                   | HS | IV | 10374905 | 10387318 | WBGene00011240 | R11A8.7  | R11A8.7  | -0.0214032142120963 |
| AGIWUR902;AGIWUR3127;AGIWUR9042;AGIWUR10806;AGIWUR18248;AGIWUR18961;AGIWUR24502;AGIWUR29166;AGIWUR43502                                                                                                                                  |    |    |          |          |                |          |          |                     |
| CB4856                                                                                                                                                                                                                                   | HS | IV | 10387413 | 10388345 | WBGene00003064 | lpd-8    | R10H10.1 |                     |
| -0.102235112452282 AGIWUR20350                                                                                                                                                                                                           |    |    |          |          |                |          |          |                     |
| CB4856                                                                                                                                                                                                                                   | HS | IV | 10388483 | 10393294 | WBGene00011222 | R10H10.3 | R10H10.3 |                     |
| 0.133183807733086 AGIWUR6660;AGIWUR15226;AGIWUR31267                                                                                                                                                                                     |    |    |          |          |                |          |          |                     |
| CB4856                                                                                                                                                                                                                                   | HS | IV | 10394591 | 10394958 | WBGene00011223 | R10H10.4 | R10H10.4 |                     |
| -0.00411732452180047 AGIWUR22287                                                                                                                                                                                                         |    |    |          |          |                |          |          |                     |
| CB4856                                                                                                                                                                                                                                   | HS | IV | 10404012 | 10408530 | WBGene00001669 | gpa-7    | R10H10.5 |                     |
| -0.202472537193339 AGIWUR26769                                                                                                                                                                                                           |    |    |          |          |                |          |          |                     |
| CB4856                                                                                                                                                                                                                                   | HS | IV | 10408703 | 10409477 | WBGene00011224 | R10H10.6 | R10H10.6 |                     |
| 0.11850522734936 AGIWUR6359                                                                                                                                                                                                              |    |    |          |          |                |          |          |                     |
| CB4856                                                                                                                                                                                                                                   | HS | IV | 10409985 | 10413928 | WBGene00011225 | R10H10.7 | R10H10.7 |                     |
| 0.0866736160183645 AGIWUR12860                                                                                                                                                                                                           |    |    |          |          |                |          |          |                     |
| CB4856                                                                                                                                                                                                                                   | HS | IV | 10414030 | 10417881 | WBGene00008733 | F13B12.6 | F13B12.6 |                     |
| 0.0965495352680374 AGIWUR8525;AGIWUR10975;AGIWUR19192                                                                                                                                                                                    |    |    |          |          |                |          |          |                     |
| CB4856                                                                                                                                                                                                                                   | HS | IV | 10422610 | 10424635 | WBGene00008729 | F13B12.1 | F13B12.1 |                     |
| 0.0394612619436696 AGIWUR21607;AGIWUR33993;AGIWUR37529                                                                                                                                                                                   |    |    |          |          |                |          |          |                     |
| CB4856                                                                                                                                                                                                                                   | HS | IV | 10426231 | 10429110 | WBGene00008730 | F13B12.2 | F13B12.2 |                     |

|                                                                         |                                                                       |          |                |          |                            |
|-------------------------------------------------------------------------|-----------------------------------------------------------------------|----------|----------------|----------|----------------------------|
| -0.132551263432465                                                      | AGIWUR28816;AGIWUR37040;AGIWUR38086                                   |          |                |          |                            |
| CB4856 HS IV                                                            | 10436708                                                              | 10438410 | WBGene00002084 | ins-1    | F13B12.5                   |
| 0.0161967763428486                                                      | AGIWUR33522;AGIWUR34508;AGIWUR37691                                   |          |                |          |                            |
| CB4856 HS IV                                                            | 10439123                                                              | 10443819 | WBGene00008731 | F13B12.3 | F13B12.3                   |
| 0.259575837763936                                                       | AGIWUR6185;AGIWUR43439                                                |          |                |          |                            |
| CB4856 HS IV                                                            | 10444094                                                              | 10444584 | WBGene00008734 | F13B12.7 | F13B12.7                   |
| 0.219722416590136                                                       | AGIWUR41881                                                           |          |                |          |                            |
| CB4856 HS IV                                                            | 10444583                                                              | 10449899 | WBGene00008732 | F13B12.4 | F13B12.4                   |
| -0.223312839509232                                                      | AGIWUR16795                                                           |          |                |          |                            |
| CB4856 HS IV                                                            | 10450802                                                              | 10453098 | WBGene00008490 | F01D4.8  | F01D4.8 0.223464890731755  |
| AGIWUR41212                                                             |                                                                       |          |                |          |                            |
| CB4856 HS IV                                                            | 10454432                                                              | 10457237 | WBGene00008489 | srb-17   | F01D4.7 0.0570761144013598 |
| AGIWUR4263;AGIWUR34342;AGIWUR35770                                      |                                                                       |          |                |          |                            |
| CB4856 HS IV                                                            | 10458863                                                              | 10461766 | WBGene00003167 | mec-3    | F01D4.6 0.0915365564847157 |
| AGIWUR1570;AGIWUR4280;AGIWUR9851;AGIWUR12694                            |                                                                       |          |                |          |                            |
| CB4856 HS IV                                                            | 10464588                                                              | 10467240 | WBGene00008485 | ugt-43   | F01D4.1 0.0450985897956295 |
| AGIWUR3944;AGIWUR9096;AGIWUR16273;AGIWUR17471;AGIWUR27317;AGIWUR30495   |                                                                       |          |                |          |                            |
| CB4856 HS IV                                                            | 10469741                                                              | 10471899 | WBGene00008486 | ugt-44   | F01D4.2 -0.284632665657208 |
| AGIWUR4885                                                              |                                                                       |          |                |          |                            |
| CB4856 HS IV                                                            | 10472778                                                              | 10478168 | WBGene00008491 | bgnt-1.1 | F01D4.9                    |
| -0.0251580904286781                                                     | AGIWUR42817                                                           |          |                |          |                            |
| CB4856 HS IV                                                            | 10478450                                                              | 10481844 | WBGene00001189 | egl-21   | F01D4.4                    |
| -0.00919830939523081                                                    | AGIWUR782;AGIWUR10945;AGIWUR21638;AGIWUR30012                         |          |                |          |                            |
| CB4856 HS IV                                                            | 10482629                                                              | 10483655 | WBGene00008488 | F01D4.5  | F01D4.5 0.0606485694944023 |
| AGIWUR31233;AGIWUR39452                                                 |                                                                       |          |                |          |                            |
| CB4856 HS IV                                                            | 10484110                                                              | 10492952 | WBGene00000419 | ced-5    | C02F4.1 -0.150498294088912 |
| AGIWUR14004;AGIWUR17614;AGIWUR20229;AGIWUR21408;AGIWUR36560;AGIWUR37218 |                                                                       |          |                |          |                            |
| CB4856 HS IV                                                            | 10493071                                                              | 10501599 | WBGene00006527 | tax-6    | C02F4.2 0.166042581138817  |
| AGIWUR16185;AGIWUR24485                                                 |                                                                       |          |                |          |                            |
| CB4856 HS IV                                                            | 10513887                                                              | 10515228 | WBGene00007264 | C02F4.4  | C02F4.4 0.0129037446454152 |
| AGIWUR24466                                                             |                                                                       |          |                |          |                            |
| CB4856 HS IV                                                            | 10521422                                                              | 10530597 | WBGene00000288 | cal-4    | T07G12.1                   |
| -0.0845918090184687                                                     | AGIWUR9574;AGIWUR15671;AGIWUR30680                                    |          |                |          |                            |
| CB4856 HS IV                                                            | 10533943                                                              | 10536442 | WBGene00011594 | T07G12.3 | T07G12.3                   |
| 0.000924753726042837                                                    | AGIWUR2713                                                            |          |                |          |                            |
| CB4856 HS IV                                                            | 10541495                                                              | 10545091 | WBGene00011596 | T07G12.5 | T07G12.5                   |
| 0.0547918639622695                                                      | AGIWUR14244                                                           |          |                |          |                            |
| CB4856 HS IV                                                            | 10547088                                                              | 10555442 | WBGene00011597 | zim-1    | T07G12.6                   |
| -0.114573365663901                                                      | AGIWUR9315;AGIWUR9412;AGIWUR20517;AGIWUR36426;AGIWUR43050;AGIWUR45065 |          |                |          |                            |

|                                                                                                                                                                     |                                     |          |                |          |                             |
|---------------------------------------------------------------------------------------------------------------------------------------------------------------------|-------------------------------------|----------|----------------|----------|-----------------------------|
| CB4856 HS IV                                                                                                                                                        | 10555247                            | 10558221 | WBGene00011600 | zim-2    | T07G12.10                   |
| -0.0491118387698108                                                                                                                                                 | AGIWUR17323                         |          |                |          |                             |
| CB4856 HS IV                                                                                                                                                        | 10558721                            | 10561130 | WBGene00011601 | zim-3    | T07G12.11                   |
| -0.0152345641948326                                                                                                                                                 | AGIWUR20579                         |          |                |          |                             |
| CB4856 HS IV                                                                                                                                                        | 10561905                            | 10563947 | WBGene00001867 | him-8    | T07G12.12                   |
| 0.141031706913621                                                                                                                                                   | AGIWUR11669;AGIWUR17932;AGIWUR29184 |          |                |          |                             |
| CB4856 HS IV                                                                                                                                                        | 10576350                            | 10578288 | WBGene00001163 | efn-2    | C43F9.8 -0.0737104821855983 |
| AGIWUR576                                                                                                                                                           |                                     |          |                |          |                             |
| CB4856 HS IV                                                                                                                                                        | 10578667                            | 10581786 | WBGene00008076 | lgc-43   | C43F9.9 -0.0913363825036964 |
| AGIWUR35328                                                                                                                                                         |                                     |          |                |          |                             |
| CB4856 HS IV                                                                                                                                                        | 10584537                            | 10587400 | WBGene00008077 | oac-8    | C43F9.10                    |
| 0.170968896048349                                                                                                                                                   | AGIWUR11560                         |          |                |          |                             |
| CB4856 HS IV                                                                                                                                                        | 10587553                            | 10589147 | WBGene00008072 | C43F9.4  | C43F9.4 0.0226724481974871  |
| AGIWUR21238;AGIWUR31087;AGIWUR37630                                                                                                                                 |                                     |          |                |          |                             |
| CB4856 HS IV                                                                                                                                                        | 10589294                            | 10590749 | WBGene00008073 | C43F9.5  | C43F9.5 0.018889106631244   |
| AGIWUR26479                                                                                                                                                         |                                     |          |                |          |                             |
| CB4856 HS IV                                                                                                                                                        | 10590925                            | 10593042 | WBGene00008074 | nkb-2    | C43F9.6 0.140169472514533   |
| AGIWUR40207                                                                                                                                                         |                                     |          |                |          |                             |
| CB4856 HS IV                                                                                                                                                        | 10593068                            | 10593575 | WBGene00008075 | C43F9.7  | C43F9.7 -0.255812913190127  |
| AGIWUR30846                                                                                                                                                         |                                     |          |                |          |                             |
| CB4856 HS IV                                                                                                                                                        | 10596805                            | 10600030 | WBGene00045024 | C43F9.11 | C43F9.11                    |
| 0.136176480514359                                                                                                                                                   |                                     |          |                |          |                             |
| AGIWUR2244;AGIWUR3422;AGIWUR3911;AGIWUR5466;AGIWUR11308;AGIWUR17380;AGIWUR17551;AGIWUR20450;AGIWUR20607;AGIWUR29357;AGIWUR34540;AGIWUR36202;AGIWUR36488;AGIWUR40584 |                                     |          |                |          |                             |
| CB4856 HS IV                                                                                                                                                        | 10600314                            | 10601852 | WBGene00011179 | R09H10.1 | R09H10.1                    |
| -0.00151029860467489                                                                                                                                                | AGIWUR43641                         |          |                |          |                             |
| CB4856 HS IV                                                                                                                                                        | 10602944                            | 10606894 | WBGene00011180 | R09H10.2 | R09H10.2                    |
| 0.160588624525733                                                                                                                                                   | AGIWUR447                           |          |                |          |                             |
| CB4856 HS IV                                                                                                                                                        | 10606902                            | 10608861 | WBGene00011181 | R09H10.3 | R09H10.3                    |
| 0.00393537915708642                                                                                                                                                 | AGIWUR27996                         |          |                |          |                             |
| CB4856 HS IV                                                                                                                                                        | 10608575                            | 10609744 | WBGene00011183 | R09H10.6 | R09H10.6                    |
| -0.207546886648347                                                                                                                                                  | AGIWUR20822                         |          |                |          |                             |
| CB4856 HS IV                                                                                                                                                        | 10615427                            | 10620958 | WBGene00004228 | ptr-14   | R09H10.4                    |
| -0.0176831263566157                                                                                                                                                 | AGIWUR26151                         |          |                |          |                             |
| CB4856 HS IV                                                                                                                                                        | 10621111                            | 10621832 | WBGene00011184 | R09H10.7 | R09H10.7                    |
| 0.0986144776523972                                                                                                                                                  | AGIWUR33527                         |          |                |          |                             |
| CB4856 HS IV                                                                                                                                                        | 10621684                            | 10628861 | WBGene00011182 | R09H10.5 | R09H10.5                    |
| -0.0675093710951433                                                                                                                                                 | AGIWUR7981;AGIWUR11151;AGIWUR18797  |          |                |          |                             |
| CB4856 HS IV                                                                                                                                                        | 10629431                            | 10631245 | WBGene00044977 | F56C4.4  | F56C4.4 0.144827689571933   |

|                                                                       |    |    |          |          |                |         |         |                     |
|-----------------------------------------------------------------------|----|----|----------|----------|----------------|---------|---------|---------------------|
| AGIWUR4833;AGIWUR11064;AGIWUR20553;AGIWUR32137                        |    |    |          |          |                |         |         |                     |
| CB4856                                                                | HS | IV | 10637060 | 10639213 | WBGene00010144 | F56C4.1 | F56C4.1 | 0.120022537250575   |
| AGIWUR2736                                                            |    |    |          |          |                |         |         |                     |
| CB4856                                                                | HS | IV | 10639277 | 10642690 | WBGene00010145 | F56C4.2 | F56C4.2 | 0.234578961584695   |
| AGIWUR21153                                                           |    |    |          |          |                |         |         |                     |
| CB4856                                                                | HS | IV | 10642912 | 10654147 | WBGene00010146 | glb-19  | F56C4.3 | -0.134782004576049  |
| AGIWUR12731                                                           |    |    |          |          |                |         |         |                     |
| CB4856                                                                | HS | IV | 10656874 | 10660774 | WBGene00010646 | K08C7.1 | K08C7.1 | 0.0901208066666968  |
| AGIWUR7095                                                            |    |    |          |          |                |         |         |                     |
| CB4856                                                                | HS | IV | 10661857 | 10664404 | WBGene00001476 | fmo-1   | K08C7.2 | -0.0330084933557018 |
| AGIWUR44143                                                           |    |    |          |          |                |         |         |                     |
| CB4856                                                                | HS | IV | 10664412 | 10665685 | WBGene00010649 | K08C7.7 | K08C7.7 | 0.366759281456332   |
| AGIWUR3375                                                            |    |    |          |          |                |         |         |                     |
| CB4856                                                                | HS | IV | 10666827 | 10679289 | WBGene00001328 | epi-1   | K08C7.3 | 0.223922531470016   |
| AGIWUR26700                                                           |    |    |          |          |                |         |         |                     |
| CB4856                                                                | HS | IV | 10679383 | 10680475 | WBGene00010647 | K08C7.4 | K08C7.4 | 0.0891754708796846  |
| AGIWUR4296;AGIWUR4337;AGIWUR23573;AGIWUR30664;AGIWUR41434;AGIWUR43000 |    |    |          |          |                |         |         |                     |
| CB4856                                                                | HS | IV | 10682524 | 10684385 | WBGene00001477 | fmo-2   | K08C7.5 | -0.152515477547504  |
| AGIWUR10619;AGIWUR14319                                               |    |    |          |          |                |         |         |                     |
| CB4856                                                                | HS | IV | 10684432 | 10685894 | WBGene00010648 | K08C7.6 | K08C7.6 | -0.0715693031598281 |
| AGIWUR34138                                                           |    |    |          |          |                |         |         |                     |
| CB4856                                                                | HS | IV | 10687592 | 10688135 | WBGene00011289 | R102.2  | R102.2  | 0.00786808696258134 |
| AGIWUR40102                                                           |    |    |          |          |                |         |         |                     |
| CB4856                                                                | HS | IV | 10689640 | 10690309 | WBGene00194984 | R102.15 | R102.15 | -0.0930543915080211 |
| AGIWUR2156;AGIWUR35917;AGIWUR40196                                    |    |    |          |          |                |         |         |                     |
| CB4856                                                                | HS | IV | 10690444 | 10691789 | WBGene00011290 | R102.3  | R102.3  | 0.164250971455566   |
| AGIWUR24495;AGIWUR25359;AGIWUR30903                                   |    |    |          |          |                |         |         |                     |
| CB4856                                                                | HS | IV | 10691991 | 10695303 | WBGene00011291 | R102.4  | R102.4  | -0.0553288478167477 |
| AGIWUR37470                                                           |    |    |          |          |                |         |         |                     |
| CB4856                                                                | HS | IV | 10695309 | 10697071 | WBGene00011292 | R102.5  | R102.5  | 0.206749822764186   |
| AGIWUR29945                                                           |    |    |          |          |                |         |         |                     |
| CB4856                                                                | HS | IV | 10705463 | 10707313 | WBGene00011297 | R102.10 | R102.10 | 0.104074012071333   |
| AGIWUR149                                                             |    |    |          |          |                |         |         |                     |
| CB4856                                                                | HS | IV | 10710057 | 10711794 | WBGene00011296 | glb-21  | R102.9  | 0.100420410946477   |
| AGIWUR23699                                                           |    |    |          |          |                |         |         |                     |
| CB4856                                                                | HS | IV | 10716648 | 10721755 | WBGene00003568 | ncx-3   | ZC168.1 | 0.129734733607059   |
| AGIWUR15067                                                           |    |    |          |          |                |         |         |                     |
| CB4856                                                                | HS | IV | 10728572 | 10729003 | WBGene00013856 | ZC168.2 | ZC168.2 | 0.0445361429399647  |
| AGIWUR30191                                                           |    |    |          |          |                |         |         |                     |

|                                                                                   |    |          |          |                |          |         |                     |
|-----------------------------------------------------------------------------------|----|----------|----------|----------------|----------|---------|---------------------|
| CB4856 HS                                                                         | IV | 10732832 | 10734632 | WBGene00013857 | orc-5    | ZC168.3 | 0.102341777499003   |
| AGIWUR27343                                                                       |    |          |          |                |          |         |                     |
| CB4856 HS                                                                         | IV | 10735259 | 10737177 | WBGene00000865 | cyb-1    | ZC168.4 | -0.0979172405406672 |
| AGIWUR26407                                                                       |    |          |          |                |          |         |                     |
| CB4856 HS                                                                         | IV | 10737474 | 10738189 | WBGene00001730 | grl-21   | ZC168.5 | -0.105578664513924  |
| AGIWUR10750;AGIWUR29076;AGIWUR30387;AGIWUR33665;AGIWUR33768                       |    |          |          |                |          |         |                     |
| CB4856 HS                                                                         | IV | 10738204 | 10738658 | WBGene00013858 | ssp-34   | ZC168.6 | 0.0075782669929545  |
| AGIWUR33627                                                                       |    |          |          |                |          |         |                     |
| CB4856 HS                                                                         | IV | 10744779 | 10748275 | WBGene00012009 | T25B9.3  | T25B9.3 | 0.24987825370715    |
| AGIWUR11156                                                                       |    |          |          |                |          |         |                     |
| CB4856 HS                                                                         | IV | 10748385 | 10750153 | WBGene00012007 | T25B9.1  | T25B9.1 | -0.0162035048843947 |
| AGIWUR23959                                                                       |    |          |          |                |          |         |                     |
| CB4856 HS                                                                         | IV | 10755760 | 10757716 | WBGene00012010 | T25B9.4  | T25B9.4 | -0.115378751986224  |
| AGIWUR34909                                                                       |    |          |          |                |          |         |                     |
| CB4856 HS                                                                         | IV | 10758126 | 10760795 | WBGene00012012 | T25B9.6  | T25B9.6 | 0.118703961921689   |
| AGIWUR38356                                                                       |    |          |          |                |          |         |                     |
| CB4856 HS                                                                         | IV | 10761597 | 10764496 | WBGene00012013 | ugt-54   | T25B9.7 | 0.157943083183115   |
| AGIWUR36767                                                                       |    |          |          |                |          |         |                     |
| CB4856 HS                                                                         | IV | 10764520 | 10765297 | WBGene00044990 | T25B9.11 |         | T25B9.11            |
| 0.0410794252915183 AGIWUR1346;AGIWUR13843;AGIWUR27155;AGIWUR34391;AGIWUR44154     |    |          |          |                |          |         |                     |
| CB4856 HS                                                                         | IV | 10765441 | 10766067 | WBGene00044991 | T25B9.12 |         | T25B9.12            |
| 0.169463040900686 AGIWUR9993;AGIWUR39829;AGIWUR41583;AGIWUR42368;AGIWUR44664      |    |          |          |                |          |         |                     |
| CB4856 HS                                                                         | IV | 10766481 | 10768429 | WBGene00012014 | T25B9.8  | T25B9.8 | -0.152147501498902  |
| AGIWUR21253                                                                       |    |          |          |                |          |         |                     |
| CB4856 HS                                                                         | IV | 10769653 | 10777755 | WBGene00012015 | T25B9.9  | T25B9.9 | -0.0109132358526995 |
| AGIWUR19060                                                                       |    |          |          |                |          |         |                     |
| CB4856 HS                                                                         | IV | 10778985 | 10780711 | WBGene00007384 | swt-3    | C06G8.1 | 0.13176360349709    |
| AGIWUR12296;AGIWUR16026;AGIWUR27123                                               |    |          |          |                |          |         |                     |
| CB4856 HS                                                                         | IV | 10785024 | 10786831 | WBGene00005085 | srd-7    | C06G8.4 | -0.0545112867390132 |
| AGIWUR8806;AGIWUR11850;AGIWUR19272;AGIWUR35602                                    |    |          |          |                |          |         |                     |
| CB4856 HS                                                                         | IV | 10790598 | 10794597 | WBGene00003876 | pept-2   | C06G8.2 | -0.117896067910117  |
| AGIWUR6846;AGIWUR24610;AGIWUR25825                                                |    |          |          |                |          |         |                     |
| CB4856 HS                                                                         | IV | 10799614 | 10802250 | WBGene00014669 | zipt-2.1 |         | C06G8.3             |
| -0.0924491314194675 AGIWUR20694;AGIWUR24626;AGIWUR26420                           |    |          |          |                |          |         |                     |
| CB4856 HS                                                                         | IV | 10812409 | 10825953 | WBGene00011259 | miz-1    | R13.4   | 0.143585891265797   |
| AGIWUR2408;AGIWUR6546;AGIWUR11507;AGIWUR15807;AGIWUR19435;AGIWUR19882;AGIWUR41489 |    |          |          |                |          |         |                     |
| CB4856 HS                                                                         | IV | 10826028 | 10828021 | WBGene00011257 | npax-3   | R13.2   | 0.122192197616233   |
| AGIWUR30327                                                                       |    |          |          |                |          |         |                     |
| CB4856 HS                                                                         | IV | 10829549 | 10832248 | WBGene00011258 | best-15  | R13.3   | 0.166524533345704   |

|                      |    |    |          |          |                |          |         |                     |
|----------------------|----|----|----------|----------|----------------|----------|---------|---------------------|
| AGIWUR38177          |    |    |          |          |                |          |         |                     |
| CB4856               | HS | IV | 10834363 | 10835130 | WBGene00014825 | R13.5    | R13.5   | 0.127684054939373   |
| AGIWUR1203;          |    |    |          |          |                |          |         |                     |
| AGIWUR28576;         |    |    |          |          |                |          |         |                     |
| AGIWUR40220          |    |    |          |          |                |          |         |                     |
| CB4856               | HS | IV | 10844594 | 10845620 | WBGene00011721 | T11G6.7  | T11G6.7 | 0.015438753065145   |
| AGIWUR499            |    |    |          |          |                |          |         |                     |
| CB4856               | HS | IV | 10849749 | 10851933 | WBGene00011719 | T11G6.4  | T11G6.4 | 0.0692900163966286  |
| AGIWUR11558          |    |    |          |          |                |          |         |                     |
| CB4856               | HS | IV | 10852669 | 10855366 | WBGene00011718 | T11G6.3  | T11G6.3 | 0.087647870146716   |
| AGIWUR28703          |    |    |          |          |                |          |         |                     |
| CB4856               | HS | IV | 10855485 | 10858559 | WBGene00011717 | T11G6.2  | T11G6.2 | 0.202160410055553   |
| AGIWUR12551          |    |    |          |          |                |          |         |                     |
| CB4856               | HS | IV | 10858957 | 10861295 | WBGene00002001 | hars-1   | T11G6.1 | -0.0814689679372247 |
| AGIWUR14510;         |    |    |          |          |                |          |         |                     |
| AGIWUR14542;         |    |    |          |          |                |          |         |                     |
| AGIWUR22495          |    |    |          |          |                |          |         |                     |
| CB4856               | HS | IV | 10861402 | 10864232 | WBGene00011722 | T11G6.8  | T11G6.8 | 0.133155635821369   |
| AGIWUR34117          |    |    |          |          |                |          |         |                     |
| CB4856               | HS | IV | 10864331 | 10873632 | WBGene00008750 | F13E9.1  | F13E9.1 | -0.120076481738979  |
| AGIWUR12104;         |    |    |          |          |                |          |         |                     |
| AGIWUR13811;         |    |    |          |          |                |          |         |                     |
| AGIWUR16606          |    |    |          |          |                |          |         |                     |
| CB4856               | HS | IV | 10873673 | 10874627 | WBGene00008761 | F13E9.12 |         | F13E9.12            |
| -0.148441054066224   |    |    |          |          |                |          |         |                     |
| AGIWUR31437          |    |    |          |          |                |          |         |                     |
| CB4856               | HS | IV | 10877144 | 10877296 | WBGene00008751 | fipr-14  | F13E9.2 | -0.104941095014063  |
| AGIWUR28316          |    |    |          |          |                |          |         |                     |
| CB4856               | HS | IV | 10877836 | 10879727 | WBGene00008755 | sdz-13   | F13E9.6 | 0.0739992615864464  |
| AGIWUR10549          |    |    |          |          |                |          |         |                     |
| CB4856               | HS | IV | 10881549 | 10882523 | WBGene00044797 | F13E9.13 |         | F13E9.13            |
| 0.237607440547841    |    |    |          |          |                |          |         |                     |
| AGIWUR13634          |    |    |          |          |                |          |         |                     |
| CB4856               | HS | IV | 10882972 | 10884363 | WBGene00008754 | F13E9.5  | F13E9.5 | 0.207940052546419   |
| AGIWUR4319           |    |    |          |          |                |          |         |                     |
| CB4856               | HS | IV | 10885238 | 10886015 | WBGene00008759 | F13E9.10 |         | F13E9.10            |
| -0.112545646259946   |    |    |          |          |                |          |         |                     |
| AGIWUR20583          |    |    |          |          |                |          |         |                     |
| CB4856               | HS | IV | 10889471 | 10889878 | WBGene00045208 | F13E9.15 |         | F13E9.15            |
| -0.00754084693490142 |    |    |          |          |                |          |         |                     |
| AGIWUR34664          |    |    |          |          |                |          |         |                     |
| CB4856               | HS | IV | 10891333 | 10892093 | WBGene00045207 | F13E9.14 |         | F13E9.14            |
| 0.205475945379106    |    |    |          |          |                |          |         |                     |
| AGIWUR7566;          |    |    |          |          |                |          |         |                     |
| AGIWUR9516;          |    |    |          |          |                |          |         |                     |
| AGIWUR42487          |    |    |          |          |                |          |         |                     |
| CB4856               | HS | IV | 10893648 | 10894355 | WBGene00008757 | F13E9.8  | F13E9.8 | 0.82441299961228    |
| AGIWUR24368          |    |    |          |          |                |          |         |                     |
| CB4856               | HS | IV | 10895225 | 10896612 | WBGene00008753 | F13E9.4  | F13E9.4 | 0.0978114371423144  |
| AGIWUR12837          |    |    |          |          |                |          |         |                     |
| CB4856               | HS | IV | 10897655 | 10899180 | WBGene00008758 | F13E9.9  | F13E9.9 | 0.00586029568476043 |
| AGIWUR22978          |    |    |          |          |                |          |         |                     |

|                                                                                                           |    |                                     |          |                |           |          |                     |
|-----------------------------------------------------------------------------------------------------------|----|-------------------------------------|----------|----------------|-----------|----------|---------------------|
| CB4856 HS                                                                                                 | IV | 10900370                            | 10901386 | WBGene00014006 | ZK596.1   | ZK596.1  | 0.25111637095142    |
| AGIWUR11142                                                                                               |    |                                     |          |                |           |          |                     |
| CB4856 HS                                                                                                 | IV | 10901913                            | 10904382 | WBGene00014008 | ZK596.3   | ZK596.3  | 0.0322066516885489  |
| AGIWUR13858                                                                                               |    |                                     |          |                |           |          |                     |
| CB4856 HS                                                                                                 | IV | 10908131                            | 10909306 | WBGene00014007 | ZK596.2   | ZK596.2  | 0.0588422610619936  |
| AGIWUR43993                                                                                               |    |                                     |          |                |           |          |                     |
| CB4856 HS                                                                                                 | IV | 10909915                            | 10913078 | WBGene00014001 | pyk-2     | ZK593.1  | -0.191316345068588  |
| AGIWUR19204                                                                                               |    |                                     |          |                |           |          |                     |
| CB4856 HS                                                                                                 | IV | 10913361                            | 10914582 | WBGene00014002 | ZK593.2   | ZK593.2  | 0.177427793199259   |
| AGIWUR208                                                                                                 |    |                                     |          |                |           |          |                     |
| CB4856 HS                                                                                                 | IV | 10916597                            | 10917718 | WBGene00014003 | ZK593.3   | ZK593.3  | 0.226954881142547   |
| AGIWUR15333                                                                                               |    |                                     |          |                |           |          |                     |
| CB4856 HS                                                                                                 | IV | 10920075                            | 10926807 | WBGene00004319 | rbr-2     | ZK593.4  | 0.00692427958412978 |
| AGIWUR10324;AGIWUR33503                                                                                   |    |                                     |          |                |           |          |                     |
| CB4856 HS                                                                                                 | IV | 10926730                            | 10933203 | WBGene00001017 | dnc-1     | ZK593.5  | 0.0621884667780499  |
| AGIWUR4036;AGIWUR15883;AGIWUR30150                                                                        |    |                                     |          |                |           |          |                     |
| CB4856 HS                                                                                                 | IV | 10933502                            | 10934200 | WBGene00003081 | lsm-7     | ZK593.7  | -0.0496753040569828 |
| AGIWUR7816                                                                                                |    |                                     |          |                |           |          |                     |
| CB4856 HS                                                                                                 | IV | 10934186                            | 10935914 | WBGene00002981 | lgg-2     | ZK593.6  | -0.11235604628941   |
| AGIWUR5996;AGIWUR9128;AGIWUR16430;AGIWUR18825;AGIWUR28298;AGIWUR28809;AGIWUR32345;AGIWUR36092;AGIWUR37432 |    |                                     |          |                |           |          |                     |
| CB4856 HS                                                                                                 | IV | 10937454                            | 10939935 | WBGene00014004 | fic-1     | ZK593.8  | 0.154184120706963   |
| AGIWUR10636                                                                                               |    |                                     |          |                |           |          |                     |
| CB4856 HS                                                                                                 | IV | 10940959                            | 10942869 | WBGene00014005 | ZK593.9   | ZK593.9  | -0.172170343300952  |
| AGIWUR27344                                                                                               |    |                                     |          |                |           |          |                     |
| CB4856 HS                                                                                                 | IV | 10949767                            | 10951133 | WBGene00013474 | Y69E1A.2  |          | Y69E1A.2            |
| 0.137236790081403                                                                                         |    | AGIWUR34021                         |          |                |           |          |                     |
| CB4856 HS                                                                                                 | IV | 10956863                            | 10957698 | WBGene00013477 | Y69E1A.5  |          | Y69E1A.5            |
| 0.222072441192752                                                                                         |    | AGIWUR15234                         |          |                |           |          |                     |
| CB4856 HS                                                                                                 | IV | 10958372                            | 10961208 | WBGene00005531 | sri-19    | Y69E1A.6 |                     |
| -0.0142635408892584                                                                                       |    | AGIWUR24828;AGIWUR40891             |          |                |           |          |                     |
| CB4856 HS                                                                                                 | IV | 10961355                            | 10966459 | WBGene00000171 | aqp-3     | Y69E1A.7 |                     |
| 0.0870559900403274                                                                                        |    | AGIWUR16033                         |          |                |           |          |                     |
| CB4856 HS                                                                                                 | IV | 10966590                            | 10968166 | WBGene00013478 | Y69E1A.8  |          | Y69E1A.8            |
| 0.175715334923169                                                                                         |    | AGIWUR36844                         |          |                |           |          |                     |
| CB4856 HS                                                                                                 | IV | 10982068                            | 10985030 | WBGene00012794 | Y43E12A.2 |          | Y43E12A.2           |
| -0.157494345042122                                                                                        |    | AGIWUR19508;AGIWUR21438             |          |                |           |          |                     |
| CB4856 HS                                                                                                 | IV | 10990999                            | 10994137 | WBGene00008776 | F13H10.5  |          | F13H10.5            |
| 0.0791927012451481                                                                                        |    | AGIWUR23815;AGIWUR29827;AGIWUR37699 |          |                |           |          |                     |
| CB4856 HS                                                                                                 | IV | 11002119                            | 11003801 | WBGene00045056 | F13H10.9  |          | F13H10.9            |

|                                                                                                                                                  |                                                           |          |                |          |          |                     |
|--------------------------------------------------------------------------------------------------------------------------------------------------|-----------------------------------------------------------|----------|----------------|----------|----------|---------------------|
| 0.0632234618905958                                                                                                                               | AGIWUR837;AGIWUR25734;AGIWUR43446                         |          |                |          |          |                     |
| CB4856 HS IV                                                                                                                                     | 11004573                                                  | 11005070 | WBGene00008773 | F13H10.1 | F13H10.1 |                     |
| 0.173709996131739                                                                                                                                | AGIWUR8767                                                |          |                |          |          |                     |
| CB4856 HS IV                                                                                                                                     | 11009296                                                  | 11010103 | WBGene00008777 | F13H10.6 | F13H10.6 |                     |
| -0.0463811458906811                                                                                                                              | AGIWUR18010                                               |          |                |          |          |                     |
| CB4856 HS IV                                                                                                                                     | 11009981                                                  | 11012020 | WBGene00003586 | ndx-9    | F13H10.2 |                     |
| 0.0134685922627522                                                                                                                               | AGIWUR43255                                               |          |                |          |          |                     |
| CB4856 HS IV                                                                                                                                     | 11012119                                                  | 11015883 | WBGene00008774 | F13H10.3 | F13H10.3 |                     |
| 0.142122458029544                                                                                                                                | AGIWUR736                                                 |          |                |          |          |                     |
| CB4856 HS IV                                                                                                                                     | 11016229                                                  | 11021902 | WBGene00008775 | mogs-1   | F13H10.4 |                     |
| 0.00430950934957153                                                                                                                              | AGIWUR8586;AGIWUR8727;AGIWUR15668;AGIWUR24442;AGIWUR44599 |          |                |          |          |                     |
| CB4856 HS IV                                                                                                                                     | 11022603                                                  | 11025870 | WBGene00000109 | alh-3    | F36H1.6  | -0.070531436008443  |
| AGIWUR5136;AGIWUR12312;AGIWUR17773;AGIWUR30861;AGIWUR35885;AGIWUR37536                                                                           |                                                           |          |                |          |          |                     |
| CB4856 HS IV                                                                                                                                     | 11028477                                                  | 11029105 | WBGene00009494 | hrg-5    | F36H1.9  | -0.180484084902377  |
| AGIWUR23826                                                                                                                                      |                                                           |          |                |          |          |                     |
| CB4856 HS IV                                                                                                                                     | 11030160                                                  | 11031082 | WBGene00009493 | hrg-4    | F36H1.5  | 0.415537708286394   |
| AGIWUR2400                                                                                                                                       |                                                           |          |                |          |          |                     |
| CB4856 HS IV                                                                                                                                     | 11031171                                                  | 11033581 | WBGene00009495 | hrg-6    | F36H1.10 |                     |
| -0.0343219998816995                                                                                                                              | AGIWUR18494                                               |          |                |          |          |                     |
| CB4856 HS IV                                                                                                                                     | 11036548                                                  | 11038148 | WBGene00001426 | fkf-1    | F36H1.1  | 0.0512143659853375  |
| AGIWUR3040;AGIWUR12315;AGIWUR21537;AGIWUR37162                                                                                                   |                                                           |          |                |          |          |                     |
| CB4856 HS IV                                                                                                                                     | 11038662                                                  | 11047422 | WBGene00006490 | kdin-1   | F36H1.2  | 0.139545279388789   |
| AGIWUR7040;AGIWUR17878;AGIWUR22372;AGIWUR28170;AGIWUR36853;AGIWUR43480                                                                           |                                                           |          |                |          |          |                     |
| CB4856 HS IV                                                                                                                                     | 11049171                                                  | 11049632 | WBGene00009496 | F36H1.11 | F36H1.11 |                     |
| -0.317459047779346                                                                                                                               | AGIWUR32032                                               |          |                |          |          |                     |
| CB4856 HS IV                                                                                                                                     | 11050128                                                  | 11052430 | WBGene00009492 | F36H1.3  | F36H1.3  | 0.00889591909997733 |
| AGIWUR19348                                                                                                                                      |                                                           |          |                |          |          |                     |
| CB4856 HS IV                                                                                                                                     | 11052816                                                  | 11053634 | WBGene00009497 | F36H1.12 | F36H1.12 |                     |
| -0.325202955669468                                                                                                                               | AGIWUR34392                                               |          |                |          |          |                     |
| CB4856 HS IV                                                                                                                                     | 11054308                                                  | 11063613 | WBGene00002992 | lin-3    | F36H1.4  | 0.0548091978271721  |
| AGIWUR54;AGIWUR748;AGIWUR2711;AGIWUR5458;AGIWUR5804;AGIWUR6726;AGIWUR7349;AGIWUR8580;AGIWUR16415;AGIWUR26047;AGIWUR26767;AGIWUR40552;AGIWUR42101 |                                                           |          |                |          |          |                     |
| CB4856 HS IV                                                                                                                                     | 11063512                                                  | 11064152 | WBGene00012382 | ttr-16   | Y5F2A.1  | -0.18605646215328   |
| AGIWUR35777                                                                                                                                      |                                                           |          |                |          |          |                     |
| CB4856 HS IV                                                                                                                                     | 11066018                                                  | 11067072 | WBGene00012383 | ttr-17   | Y5F2A.2  | -0.0625571239901372 |
| AGIWUR20365;AGIWUR35910;AGIWUR38875                                                                                                              |                                                           |          |                |          |          |                     |
| CB4856 HS IV                                                                                                                                     | 11069387                                                  | 11070950 | WBGene00012384 | Y5F2A.3  | Y5F2A.3  | 0.126775809238243   |
| AGIWUR8611;AGIWUR10963;AGIWUR19805;AGIWUR20173;AGIWUR21012;AGIWUR29326;AGIWUR35458;AGIWUR43963                                                   |                                                           |          |                |          |          |                     |
| CB4856 HS IV                                                                                                                                     | 11076085                                                  | 11078582 | WBGene00012385 | Y5F2A.4  | Y5F2A.4  | 0.125104179315079   |



|                                                                         |    |    |                     |                         |                |          |          |                     |
|-------------------------------------------------------------------------|----|----|---------------------|-------------------------|----------------|----------|----------|---------------------|
| AGIWUR43902                                                             |    |    |                     |                         |                |          |          |                     |
| CB4856                                                                  | HS | IV | 11078677            | 11081055                | WBGene00010882 | atg-7    | M7.5     | -0.0465280508739356 |
| AGIWUR36657;AGIWUR43525                                                 |    |    |                     |                         |                |          |          |                     |
| CB4856                                                                  | HS | IV | 11080989            | 11082253                | WBGene00002344 | let-70   | M7.1     | 0.0995437135497248  |
| AGIWUR11476;AGIWUR18418;AGIWUR19817;AGIWUR24836;AGIWUR40767;AGIWUR43507 |    |    |                     |                         |                |          |          |                     |
| CB4856                                                                  | HS | IV | 11083735            | 11086050                | WBGene00002214 | k1c-1    | M7.2     | -0.0128243390617149 |
| AGIWUR2976;AGIWUR21767;AGIWUR40967;AGIWUR41854                          |    |    |                     |                         |                |          |          |                     |
| CB4856                                                                  | HS | IV | 11086074            | 11092552                | WBGene00000246 | bcc-1    | M7.3     | -0.204701684727681  |
| AGIWUR38663                                                             |    |    |                     |                         |                |          |          |                     |
| CB4856                                                                  | HS | IV | 11093843            | 11095085                | WBGene00010884 | M7.8     | M7.8     | 0.0822697499170495  |
| AGIWUR42600                                                             |    |    |                     |                         |                |          |          |                     |
| CB4856                                                                  | HS | IV | 11096724            | 11097982                | WBGene00010887 | M7.12    | M7.12    | -0.0230071800525291 |
| AGIWUR32734                                                             |    |    |                     |                         |                |          |          |                     |
| CB4856                                                                  | HS | IV | 11098448            | 11100371                | WBGene00006071 | str-3    | M7.13    | -0.0679716408046396 |
| AGIWUR28180                                                             |    |    |                     |                         |                |          |          |                     |
| CB4856                                                                  | HS | IV | 11100631            | 11101478                | WBGene00010885 | M7.9     | M7.9     | -0.107077248783709  |
| AGIWUR41741                                                             |    |    |                     |                         |                |          |          |                     |
| CB4856                                                                  | HS | IV | 11101962            | 11102695                | WBGene00010886 | M7.10    | M7.10    | -1.30655590427076   |
| AGIWUR13450                                                             |    |    |                     |                         |                |          |          |                     |
| CB4856                                                                  | HS | IV | 11103255            | 11104262                | WBGene00011483 | T05E11.7 |          | T05E11.7            |
|                                                                         |    |    | 0.00902910623936926 | AGIWUR19919             |                |          |          |                     |
| CB4856                                                                  | HS | IV | 11104743            | 11105820                | WBGene00011484 | T05E11.8 |          | T05E11.8            |
|                                                                         |    |    | 0.0347607487809931  | AGIWUR34023             |                |          |          |                     |
| CB4856                                                                  | HS | IV | 11108494            | 11110017                | WBGene00011482 | hpo-4    | T05E11.6 |                     |
|                                                                         |    |    | -0.0884786012093031 | AGIWUR2772              |                |          |          |                     |
| CB4856                                                                  | HS | IV | 11110102            | 11111045                | WBGene00004474 | rps-5    | T05E11.1 |                     |
|                                                                         |    |    | 0.326185953699692   | AGIWUR15009;AGIWUR19637 |                |          |          |                     |
| CB4856                                                                  | HS | IV | 11112999            | 11116754                | WBGene00011479 | T05E11.2 |          | T05E11.2            |
|                                                                         |    |    | 0.0777277248893711  | AGIWUR5936              |                |          |          |                     |
| CB4856                                                                  | HS | IV | 11116732            | 11118887                | WBGene00011481 | imp-2    | T05E11.5 |                     |
|                                                                         |    |    | 0.210637879145416   | AGIWUR34176             |                |          |          |                     |
| CB4856                                                                  | HS | IV | 11119298            | 11123155                | WBGene00011480 | enpl-1   | T05E11.3 |                     |
|                                                                         |    |    | 0.145527312215027   | AGIWUR8786              |                |          |          |                     |
| CB4856                                                                  | HS | IV | 11123133            | 11124862                | WBGene00004985 | spo-11   | T05E11.4 |                     |
|                                                                         |    |    | 0.0247827284548823  | AGIWUR29114             |                |          |          |                     |
| CB4856                                                                  | HS | IV | 11126024            | 11131162                | WBGene00004204 | swsn-4   | F01G4.1  | 0.00976200518594439 |
| AGIWUR11401;AGIWUR19740;AGIWUR26530;AGIWUR29970;AGIWUR39043;AGIWUR39371 |    |    |                     |                         |                |          |          |                     |
| CB4856                                                                  | HS | IV | 11131279            | 11133785                | WBGene00000181 | ard-1    | F01G4.2  | 0.0795072381204456  |
| AGIWUR9929;AGIWUR40487;AGIWUR41787                                      |    |    |                     |                         |                |          |          |                     |

|                                                                                                                                                                    |    |          |          |                |          |          |                     |
|--------------------------------------------------------------------------------------------------------------------------------------------------------------------|----|----------|----------|----------------|----------|----------|---------------------|
| CB4856 HS<br>AGIWUR33640                                                                                                                                           | IV | 11135566 | 11142360 | WBGene00008502 | skih-2   | F01G4.3  | -0.249832806343655  |
| CB4856 HS<br>AGIWUR41438                                                                                                                                           | IV | 11143345 | 11145923 | WBGene00008503 | F01G4.4  | F01G4.4  | -0.161655777141196  |
| CB4856 HS<br>AGIWUR42508                                                                                                                                           | IV | 11146106 | 11147247 | WBGene00008504 | F01G4.5  | F01G4.5  | 0.118521617320521   |
| CB4856 HS<br>AGIWUR886;AGIWUR1602;AGIWUR3823;AGIWUR7003;AGIWUR7501;AGIWUR15287;AGIWUR15503;AGIWUR17652;AGIWUR23154;AGIWUR25021;AGIWUR29635;AGIWUR34643;AGIWUR36572 | IV | 11146940 | 11149504 | WBGene00008505 | F01G4.6  | F01G4.6  | -0.0679892085547333 |
| CB4856 HS<br>AGIWUR32022                                                                                                                                           | IV | 11149189 | 11154334 | WBGene00007444 | C08F8.2  | C08F8.2  | -0.0727321975263511 |
| CB4856 HS<br>AGIWUR20028                                                                                                                                           | IV | 11155029 | 11156634 | WBGene00007445 | C08F8.3  | C08F8.3  | -0.253961651145696  |
| CB4856 HS<br>AGIWUR35424                                                                                                                                           | IV | 11157102 | 11159492 | WBGene00007446 | mboa-4   | C08F8.4  | 0.00657994285095143 |
| CB4856 HS<br>-0.058829370963462                                                                                                                                    | IV | 11159570 | 11160807 | WBGene00219217 | C08F8.15 | C08F8.15 |                     |
| CB4856 HS<br>AGIWUR36439                                                                                                                                           | IV | 11162768 | 11164622 | WBGene00007448 | C08F8.6  | C08F8.6  | 0.337989973204321   |
| CB4856 HS<br>AGIWUR10293                                                                                                                                           | IV | 11169834 | 11174783 | WBGene00003657 | nhr-67   | C08F8.8  | -0.195567479369671  |
| CB4856 HS<br>AGIWUR32104                                                                                                                                           | IV | 11177286 | 11178200 | WBGene00004309 | rap-3    | C08F8.7  | 0.0489865045591742  |
| CB4856 HS<br>AGIWUR40303                                                                                                                                           | IV | 11179645 | 11183001 | WBGene00011122 | cpt-2    | R07H5.2  | 0.227825251410664   |
| CB4856 HS<br>AGIWUR7927                                                                                                                                            | IV | 11183132 | 11184310 | WBGene00004199 | prx-14   | R07H5.1  | 0.136124732462664   |
| CB4856 HS<br>AGIWUR7532                                                                                                                                            | IV | 11184243 | 11186000 | WBGene00011123 | nuaf-3   | R07H5.3  | 0.159530082990365   |
| CB4856 HS<br>AGIWUR41396                                                                                                                                           | IV | 11187012 | 11188264 | WBGene00011124 | sdz-27   | R07H5.4  | 0.167778232559108   |
| CB4856 HS<br>AGIWUR7288                                                                                                                                            | IV | 11188891 | 11189613 | WBGene00011127 | fbxb-79  | R07H5.7  | -0.0717874147764679 |
| CB4856 HS<br>AGIWUR16050                                                                                                                                           | IV | 11207531 | 11209359 | WBGene00011129 | R07H5.9  | R07H5.9  | 0.166406093273421   |
| CB4856 HS<br>AGIWUR30176                                                                                                                                           | IV | 11209309 | 11210831 | WBGene00011128 | R07H5.8  | R07H5.8  | -0.140258781988395  |
| CB4856 HS<br>AGIWUR8968;AGIWUR15795;AGIWUR30053                                                                                                                    | IV | 11213651 | 11218137 | WBGene00011130 | zip-6    | R07H5.10 |                     |
| CB4856 HS<br>0.3750159318337                                                                                                                                       | IV |          |          |                |          |          |                     |
| AGIWUR28427                                                                                                                                                        |    |          |          |                |          |          |                     |

|                                                                                        |          |          |                |                                     |
|----------------------------------------------------------------------------------------|----------|----------|----------------|-------------------------------------|
| CB4856 HS IV                                                                           | 11220727 | 11221755 | WBGene00045197 | C29F4.4 C29F4.4 0.00788685667180022 |
| AGIWUR19584;AGIWUR24136                                                                |          |          |                |                                     |
| CB4856 HS IV                                                                           | 11222048 | 11223936 | WBGene00007809 | C29F4.3 C29F4.3 0.128326865198945   |
| AGIWUR2326;AGIWUR18475;AGIWUR33132                                                     |          |          |                |                                     |
| CB4856 HS IV                                                                           | 11226502 | 11230307 | WBGene00007808 | best-7 C29F4.2 0.416212083746608    |
| AGIWUR9612                                                                             |          |          |                |                                     |
| CB4856 HS IV                                                                           | 11231670 | 11233124 | WBGene00007338 | C05C12.6 C05C12.6                   |
| -0.273884114023258 AGIWUR18612;AGIWUR23713                                             |          |          |                |                                     |
| CB4856 HS IV                                                                           | 11246451 | 11248081 | WBGene00007336 | C05C12.4 C05C12.4                   |
| 0.0265419913835734 AGIWUR5435;AGIWUR7534;AGIWUR8031;AGIWUR9057;AGIWUR27100;AGIWUR28815 |          |          |                |                                     |
| CB4856 HS IV                                                                           | 11248884 | 11259535 | WBGene00001795 | gtl-1 C05C12.3                      |
| 0.315570322767673 AGIWUR22273                                                          |          |          |                |                                     |
| CB4856 HS IV                                                                           | 11260412 | 11261185 | WBGene00007337 | C05C12.5 C05C12.5                   |
| 0.123133316107117 AGIWUR44003                                                          |          |          |                |                                     |
| CB4856 HS IV                                                                           | 11261844 | 11263075 | WBGene00010046 | F54D1.1 F54D1.1 0.192826034107757   |
| AGIWUR12500                                                                            |          |          |                |                                     |
| CB4856 HS IV                                                                           | 11266290 | 11271352 | WBGene00003606 | nhr-7 F54D1.4 0.273237847863355     |
| AGIWUR30721                                                                            |          |          |                |                                     |
| CB4856 HS IV                                                                           | 11273483 | 11281924 | WBGene00001796 | gtl-2 F54D1.5 0.198074059683078     |
| AGIWUR24761                                                                            |          |          |                |                                     |
| CB4856 HS IV                                                                           | 11287811 | 11294913 | WBGene00010047 | F54D1.6 F54D1.6 0.0109493244942005  |
| AGIWUR32639                                                                            |          |          |                |                                     |
| CB4856 HS IV                                                                           | 11295074 | 11296887 | WBGene00007114 | mttu-1 B0035.16                     |
| 0.0725250627899516 AGIWUR8709                                                          |          |          |                |                                     |
| CB4856 HS IV                                                                           | 11296952 | 11298388 | WBGene00007113 | B0035.15 B0035.15                   |
| 0.02425316152347 AGIWUR19989                                                           |          |          |                |                                     |
| CB4856 HS IV                                                                           | 11299008 | 11304789 | WBGene00001019 | dnj-1 B0035.14                      |
| 0.14272778504327 AGIWUR32054;AGIWUR41709                                               |          |          |                |                                     |
| CB4856 HS IV                                                                           | 11304721 | 11306762 | WBGene00007112 | B0035.13 B0035.13                   |
| -0.190449983133046 AGIWUR33214;AGIWUR41564;AGIWUR42935                                 |          |          |                |                                     |
| CB4856 HS IV                                                                           | 11310972 | 11312515 | WBGene00007105 | B0035.1 B0035.1 -0.0588660696111081 |
| AGIWUR6910;AGIWUR24062;AGIWUR36481;AGIWUR37302                                         |          |          |                |                                     |
| CB4856 HS IV                                                                           | 11312437 | 11313980 | WBGene00001020 | dnj-2 B0035.2 0.216608046192901     |
| AGIWUR39962                                                                            |          |          |                |                                     |
| CB4856 HS IV                                                                           | 11314078 | 11315116 | WBGene00007106 | B0035.3 B0035.3 0.107813656738314   |
| AGIWUR7573                                                                             |          |          |                |                                     |
| CB4856 HS IV                                                                           | 11315142 | 11315877 | WBGene00007107 | pfd-4 B0035.4 0.00765626629716643   |
| AGIWUR34374;AGIWUR43014;AGIWUR44476                                                    |          |          |                |                                     |
| CB4856 HS IV                                                                           | 11317419 | 11319951 | WBGene00007108 | gsdpd-1 B0035.5 0.143505537740026   |

|                                                                                                        |    |    |          |          |                |                                    |
|--------------------------------------------------------------------------------------------------------|----|----|----------|----------|----------------|------------------------------------|
| AGIWUR239;AGIWUR15655;AGIWUR34155                                                                      |    |    |          |          |                |                                    |
| CB4856                                                                                                 | HS | IV | 11320320 | 11320697 | WBGene00044290 | B0035.18 B0035.18                  |
| -0.04882814452953 AGIWUR42866                                                                          |    |    |          |          |                |                                    |
| CB4856                                                                                                 | HS | IV | 11320800 | 11323634 | WBGene00007109 | B0035.6 B0035.6 0.0215535958825193 |
| AGIWUR28931                                                                                            |    |    |          |          |                |                                    |
| CB4856                                                                                                 | HS | IV | 11323885 | 11324470 | WBGene00001921 | his-47 B0035.7 -0.202158099656522  |
| AGIWUR2738;AGIWUR21949;AGIWUR27672;AGIWUR30476;AGIWUR39690                                             |    |    |          |          |                |                                    |
| CB4856                                                                                                 | HS | IV | 11327356 | 11327569 | WBGene00235095 | B0035.21 B0035.21                  |
| -0.128825269802475 AGIWUR7626                                                                          |    |    |          |          |                |                                    |
| CB4856                                                                                                 | HS | IV | 11327576 | 11329369 | WBGene00007110 | leo-1 B0035.11                     |
| 0.0289541991912046 AGIWUR878;AGIWUR4853;AGIWUR30506;AGIWUR39319                                        |    |    |          |          |                |                                    |
| CB4856                                                                                                 | HS | IV | 11329466 | 11332969 | WBGene00007111 | sart-3 B0035.12                    |
| -0.151135992579672 AGIWUR40276                                                                         |    |    |          |          |                |                                    |
| CB4856                                                                                                 | HS | IV | 11333079 | 11337184 | WBGene00010061 | F54E12.2 F54E12.2                  |
| 0.0828825680256413 AGIWUR14228;AGIWUR28750                                                             |    |    |          |          |                |                                    |
| CB4856                                                                                                 | HS | IV | 11341325 | 11359863 | WBGene00002223 | klp-12 T01G1.1                     |
| -0.00482352209494508 AGIWUR4114;AGIWUR19671;AGIWUR23903                                                |    |    |          |          |                |                                    |
| CB4856                                                                                                 | HS | IV | 11359864 | 11361509 | WBGene00044025 | T01G1.4 T01G1.4 0.0754294984796111 |
| AGIWUR18422                                                                                            |    |    |          |          |                |                                    |
| CB4856                                                                                                 | HS | IV | 11365605 | 11371836 | WBGene00011338 | sec-31 T01G1.3 0.145042871905677   |
| AGIWUR30781                                                                                            |    |    |          |          |                |                                    |
| CB4856                                                                                                 | HS | IV | 11372991 | 11377627 | WBGene00010351 | cbd-1 H02I12.1                     |
| 0.216314841509616 AGIWUR1977                                                                           |    |    |          |          |                |                                    |
| CB4856                                                                                                 | HS | IV | 11378174 | 11379348 | WBGene00010352 | fbxb-76 H02I12.2                   |
| 0.033292188611747 AGIWUR41180                                                                          |    |    |          |          |                |                                    |
| CB4856                                                                                                 | HS | IV | 11394543 | 11396728 | WBGene00006459 | tag-89 H02I12.3                    |
| 0.323487045833163 AGIWUR8649;AGIWUR21996;AGIWUR42002                                                   |    |    |          |          |                |                                    |
| CB4856                                                                                                 | HS | IV | 11396788 | 11398317 | WBGene00001108 | dsl-6 H02I12.4                     |
| -0.254786291176808 AGIWUR3759                                                                          |    |    |          |          |                |                                    |
| CB4856                                                                                                 | HS | IV | 11401884 | 11403338 | WBGene00010353 | memi-3 H02I12.5                    |
| -0.0907361293319298 AGIWUR44329                                                                        |    |    |          |          |                |                                    |
| CB4856                                                                                                 | HS | IV | 11403961 | 11406066 | WBGene00010354 | cyp-31A2 H02I12.8                  |
| -0.00979567202433884 AGIWUR1332                                                                        |    |    |          |          |                |                                    |
| CB4856                                                                                                 | HS | IV | 11410228 | 11413001 | WBGene00009035 | gfat-2 F22B3.4 -0.205818706844102  |
| AGIWUR910;AGIWUR3963;AGIWUR6608;AGIWUR8102;AGIWUR15198;AGIWUR18863;AGIWUR32594;AGIWUR40623;AGIWUR43992 |    |    |          |          |                |                                    |
| CB4856                                                                                                 | HS | IV | 11413208 | 11415020 | WBGene00045122 | F22B3.10 F22B3.10                  |
| 0.0483747126869281 AGIWUR37720                                                                         |    |    |          |          |                |                                    |
| CB4856                                                                                                 | HS | IV | 11415598 | 11416824 | WBGene00009036 | F22B3.5 F22B3.5 0.171997504522312  |
| AGIWUR8998;AGIWUR21522;AGIWUR32760;AGIWUR38677                                                         |    |    |          |          |                |                                    |

|                                                                                              |    |          |          |                |          |          |                     |
|----------------------------------------------------------------------------------------------|----|----------|----------|----------------|----------|----------|---------------------|
| CB4856 HS                                                                                    | IV | 11417581 | 11421796 | WBGene00009038 | F22B3.7  | F22B3.7  | 0.211210953590646   |
| AGIWUR44684                                                                                  |    |          |          |                |          |          |                     |
| CB4856 HS                                                                                    | IV | 11422711 | 11425251 | WBGene00009039 | F22B3.8  | F22B3.8  | -0.0585669137348628 |
| AGIWUR9347;AGIWUR15133;AGIWUR19339;AGIWUR27538                                               |    |          |          |                |          |          |                     |
| CB4856 HS                                                                                    | IV | 11425742 | 11447060 | WBGene00002192 | kin-4    | C10C6.1  | -0.0780182278507029 |
| AGIWUR13495;AGIWUR36397                                                                      |    |          |          |                |          |          |                     |
| CB4856 HS                                                                                    | IV | 11459984 | 11463195 | WBGene00007006 | npr-3    | C10C6.2  | 0.101529694542941   |
| AGIWUR4533                                                                                   |    |          |          |                |          |          |                     |
| CB4856 HS                                                                                    | IV | 11463609 | 11465189 | WBGene00007512 | C10C6.3  | C10C6.3  | -0.130262476469596  |
| AGIWUR17673;AGIWUR28120                                                                      |    |          |          |                |          |          |                     |
| CB4856 HS                                                                                    | IV | 11465433 | 11467239 | WBGene00007515 | C10C6.7  | C10C6.7  | -0.158227085995245  |
| AGIWUR1267;AGIWUR1584;AGIWUR20291                                                            |    |          |          |                |          |          |                     |
| CB4856 HS                                                                                    | IV | 11470185 | 11473419 | WBGene00007513 | wht-2    | C10C6.5  | -0.0868858671515294 |
| AGIWUR1848;AGIWUR11284;AGIWUR22623;AGIWUR29007;AGIWUR39331;AGIWUR45150                       |    |          |          |                |          |          |                     |
| CB4856 HS                                                                                    | IV | 11473363 | 11479251 | WBGene00007514 | catp-8   | C10C6.6  | -0.218764700514564  |
| AGIWUR10656;AGIWUR17810;AGIWUR31938                                                          |    |          |          |                |          |          |                     |
| CB4856 HS                                                                                    | IV | 11479358 | 11480369 | WBGene00003148 | mbf-1    | H21P03.1 |                     |
| -0.0486311315873067 AGIWUR28512                                                              |    |          |          |                |          |          |                     |
| CB4856 HS                                                                                    | IV | 11480846 | 11482437 | WBGene00010409 | H21P03.2 | H21P03.2 |                     |
| -0.180438289574036 AGIWUR27589                                                               |    |          |          |                |          |          |                     |
| CB4856 HS                                                                                    | IV | 11482668 | 11498167 | WBGene00004892 | sms-1    | H21P03.3 |                     |
| -0.000606204405936062 AGIWUR6928;AGIWUR20047;AGIWUR27142;AGIWUR32836;AGIWUR41669;AGIWUR44350 |    |          |          |                |          |          |                     |
| CB4856 HS                                                                                    | IV | 11504716 | 11509723 | WBGene00006678 | twk-25   | M04B2.5  | 0.144713382563207   |
| AGIWUR24160                                                                                  |    |          |          |                |          |          |                     |
| CB4856 HS                                                                                    | IV | 11509726 | 11510764 | WBGene00010848 | M04B2.6  | M04B2.6  | 0.11095324769394    |
| AGIWUR43084                                                                                  |    |          |          |                |          |          |                     |
| CB4856 HS                                                                                    | IV | 11517186 | 11517620 | WBGene00045319 | M04B2.8  | M04B2.8  | 0.0962462848224006  |
| AGIWUR8716;AGIWUR25069;AGIWUR38609;AGIWUR40846                                               |    |          |          |                |          |          |                     |
| CB4856 HS                                                                                    | IV | 11518422 | 11521031 | WBGene00010847 | M04B2.4  | M04B2.4  | 0.17784160585731    |
| AGIWUR40957                                                                                  |    |          |          |                |          |          |                     |
| CB4856 HS                                                                                    | IV | 11521290 | 11522214 | WBGene00001585 | gfl-1    | M04B2.3  | 0.151662422261769   |
| AGIWUR38859                                                                                  |    |          |          |                |          |          |                     |
| CB4856 HS                                                                                    | IV | 11524642 | 11527954 | WBGene00003218 | mep-1    | M04B2.1  | -0.128663182143478  |
| AGIWUR26739                                                                                  |    |          |          |                |          |          |                     |
| CB4856 HS                                                                                    | IV | 11528052 | 11530715 | WBGene00010846 | M04B2.2  | M04B2.2  | 0.102528275396951   |
| AGIWUR2719                                                                                   |    |          |          |                |          |          |                     |
| CB4856 HS                                                                                    | IV | 11530650 | 11548586 | WBGene00010849 | M04B2.7  | M04B2.7  | 0.0834751664127538  |
| AGIWUR40341                                                                                  |    |          |          |                |          |          |                     |
| CB4856 HS                                                                                    | IV | 11550002 | 11551987 | WBGene00000702 | col-128  | F12F6.9  | -0.0271249021085991 |

|                                     |    |                                                            |          |                |           |           |                     |
|-------------------------------------|----|------------------------------------------------------------|----------|----------------|-----------|-----------|---------------------|
| AGIWUR26388                         |    |                                                            |          |                |           |           |                     |
| CB4856 HS                           | IV | 11554489                                                   | 11558261 | WBGene00008723 | F12F6.8   | F12F6.8   | -0.223044039820544  |
| AGIWUR31855                         |    |                                                            |          |                |           |           |                     |
| CB4856 HS                           | IV | 11558737                                                   | 11561891 | WBGene00008722 | F12F6.7   | F12F6.7   | -0.0417494475719238 |
| AGIWUR18979                         |    |                                                            |          |                |           |           |                     |
| CB4856 HS                           | IV | 11561986                                                   | 11566194 | WBGene00004755 | sec-24.1  |           | F12F6.6             |
| -0.180466593517306                  |    | AGIWUR11185;AGIWUR12547;AGIWUR14071;AGIWUR40393            |          |                |           |           |                     |
| CB4856 HS                           | IV | 11570500                                                   | 11578699 | WBGene00006406 | srgp-1    | F12F6.5   |                     |
| -0.00517293763076054                |    | AGIWUR5747                                                 |          |                |           |           |                     |
| CB4856 HS                           | IV | 11578757                                                   | 11584066 | WBGene00004360 | rib-1     | F12F6.3   | -0.382983532123317  |
| AGIWUR21192;AGIWUR34748             |    |                                                            |          |                |           |           |                     |
| CB4856 HS                           | IV | 11585224                                                   | 11588321 | WBGene00008720 | F12F6.1   | F12F6.1   | 0.119006925444017   |
| AGIWUR20751                         |    |                                                            |          |                |           |           |                     |
| CB4856 HS                           | IV | 11588263                                                   | 11592240 | WBGene00009589 | F40F11.4  |           | F40F11.4            |
| 0.182788405231145                   |    | AGIWUR22717                                                |          |                |           |           |                     |
| CB4856 HS                           | IV | 11592351                                                   | 11594003 | WBGene00009588 | F40F11.3  |           | F40F11.3            |
| 0.072158328802125                   |    | AGIWUR10426                                                |          |                |           |           |                     |
| CB4856 HS                           | IV | 11594244                                                   | 11601695 | WBGene00009587 | mig-38    | F40F11.2  |                     |
| -0.145734332571163                  |    | AGIWUR15204                                                |          |                |           |           |                     |
| CB4856 HS                           | IV | 11602641                                                   | 11603283 | WBGene00004480 | rps-11    | F40F11.1  |                     |
| 0.285420613930476                   |    | AGIWUR3267;AGIWUR24771;AGIWUR29833;AGIWUR41945;AGIWUR42716 |          |                |           |           |                     |
| CB4856 HS                           | IV | 11603613                                                   | 11604927 | WBGene00012497 | ragc-1    | Y24F12A.2 |                     |
| 0.219272418854031                   |    | AGIWUR10140                                                |          |                |           |           |                     |
| CB4856 HS                           | IV | 11605254                                                   | 11607457 | WBGene00012496 | Y24F12A.1 |           | Y24F12A.1           |
| 0.268385802186327                   |    | AGIWUR38440                                                |          |                |           |           |                     |
| CB4856 HS                           | IV | 11619502                                                   | 11620938 | WBGene00001107 | dsl-5     | F58B3.8   | 0.0414632506533534  |
| AGIWUR547;AGIWUR15690               |    |                                                            |          |                |           |           |                     |
| CB4856 HS                           | IV | 11621443                                                   | 11623174 | WBGene00003093 | lys-4     | F58B3.1   | 0.582695359594123   |
| AGIWUR39966                         |    |                                                            |          |                |           |           |                     |
| CB4856 HS                           | IV | 11624255                                                   | 11625582 | WBGene00003094 | lys-5     | F58B3.2   | 0.413916873985261   |
| AGIWUR19394                         |    |                                                            |          |                |           |           |                     |
| CB4856 HS                           | IV | 11626910                                                   | 11627947 | WBGene00003095 | lys-6     | F58B3.3   | 0.356653887539702   |
| AGIWUR36906                         |    |                                                            |          |                |           |           |                     |
| CB4856 HS                           | IV | 11628757                                                   | 11631850 | WBGene00010231 | F58B3.4   | F58B3.4   | 0.0548952546515409  |
| AGIWUR6455                          |    |                                                            |          |                |           |           |                     |
| CB4856 HS                           | IV | 11631941                                                   | 11635487 | WBGene00003415 | mars-1    | F58B3.5   | -0.123349676295874  |
| AGIWUR12127;AGIWUR12383;AGIWUR19727 |    |                                                            |          |                |           |           |                     |
| CB4856 HS                           | IV | 11636648                                                   | 11638208 | WBGene00010232 | F58B3.6   | F58B3.6   | 0.08595037780856    |
| AGIWUR1821;AGIWUR13189;AGIWUR24826  |    |                                                            |          |                |           |           |                     |

|                                                              |    |          |          |                |                                     |
|--------------------------------------------------------------|----|----------|----------|----------------|-------------------------------------|
| CB4856 HS<br>AGIWUR25433                                     | IV | 11638316 | 11640097 | WBGene00010233 | F58B3.7 F58B3.7 0.121736903375307   |
| CB4856 HS<br>AGIWUR38959                                     | IV | 11640047 | 11641015 | WBGene00010234 | ttr-50 F58B3.9 -0.0979093763172063  |
| CB4856 HS<br>AGIWUR6247                                      | IV | 11645597 | 11648893 | WBGene00014088 | ZK809.8 ZK809.8 0.271016045906316   |
| CB4856 HS<br>AGIWUR44861                                     | IV | 11650715 | 11652033 | WBGene00006491 | ac1-3 ZK809.2 0.0504273332624958    |
| CB4856 HS<br>AGIWUR10668;AGIWUR32126;AGIWUR34914;AGIWUR37719 | IV | 11652403 | 11653461 | WBGene00014086 | ZK809.3 ZK809.3 -0.0307131113089198 |
| CB4856 HS<br>AGIWUR14683                                     | IV | 11653422 | 11655470 | WBGene00001320 | ent-1 ZK809.4 -0.145679509578464    |
| CB4856 HS<br>AGIWUR4363                                      | IV | 11656730 | 11659425 | WBGene00014087 | ZK809.5 ZK809.5 0.142211186702642   |
| CB4856 HS<br>AGIWUR15773                                     | IV | 11659800 | 11665203 | WBGene00014076 | ZK792.1 ZK792.1 0.255499539112332   |
| CB4856 HS<br>AGIWUR32942                                     | IV | 11665310 | 11667989 | WBGene00194934 | ZK809.9 ZK809.9 -0.0888123329760964 |
| CB4856 HS<br>AGIWUR33183                                     | IV | 11668024 | 11671505 | WBGene00014080 | atg-4.2 ZK792.8 -0.0783100966788979 |
| CB4856 HS<br>AGIWUR42581                                     | IV | 11673816 | 11675635 | WBGene00002130 | inx-8 ZK792.2 0.0114733833628922    |
| CB4856 HS<br>AGIWUR16911                                     | IV | 11676354 | 11678497 | WBGene00002131 | inx-9 ZK792.3 -0.20398718498134     |
| CB4856 HS<br>AGIWUR14826                                     | IV | 11678440 | 11682005 | WBGene00014077 | ZK792.4 ZK792.4 0.221738741051757   |
| CB4856 HS<br>AGIWUR21899                                     | IV | 11684975 | 11688118 | WBGene00014078 | ZK792.5 ZK792.5 0.0343948136350498  |
| CB4856 HS<br>AGIWUR34480                                     | IV | 11688227 | 11691088 | WBGene00002335 | let-60 ZK792.6 -0.240355514804435   |
| CB4856 HS<br>AGIWUR44766                                     | IV | 11694359 | 11696464 | WBGene00014079 | ZK792.7 ZK792.7 0.180408873267502   |
| CB4856 HS<br>AGIWUR28561                                     | IV | 11696443 | 11699895 | WBGene00001079 | dpy-20 T22B3.1 -0.0217369390245867  |
| CB4856 HS<br>AGIWUR45199                                     | IV | 11703185 | 11704016 | WBGene00011911 | T22B3.3 T22B3.3 0.0136898106095913  |
| CB4856 HS<br>AGIWUR42929                                     | IV | 11704246 | 11708264 | WBGene00011910 | alg-3 T22B3.2 -0.031071423815062    |
| CB4856 HS                                                    | IV | 11715039 | 11729276 | WBGene00010444 | magi-1 K01A6.2 -0.0866425359686964  |

|                                                                                    |    |    |          |          |                |          |          |                     |  |
|------------------------------------------------------------------------------------|----|----|----------|----------|----------------|----------|----------|---------------------|--|
| AGIWUR7822;AGIWUR13519;AGIWUR17756;AGIWUR24742;AGIWUR27030;AGIWUR34487;AGIWUR43990 |    |    |          |          |                |          |          |                     |  |
| CB4856                                                                             | HS | IV | 11735325 | 11742305 | WBGene00010448 | K01A6.6  | K01A6.6  | 0.133574396585585   |  |
| AGIWUR29459                                                                        |    |    |          |          |                |          |          |                     |  |
| CB4856                                                                             | HS | IV | 11742706 | 11743789 | WBGene00010447 | K01A6.5  | K01A6.5  | -0.0304763513459818 |  |
| AGIWUR16888                                                                        |    |    |          |          |                |          |          |                     |  |
| CB4856                                                                             | HS | IV | 11745640 | 11748640 | WBGene00001577 | gem-4    | T12A7.1  | 0.115343968761966   |  |
| AGIWUR14415                                                                        |    |    |          |          |                |          |          |                     |  |
| CB4856                                                                             | HS | IV | 11749154 | 11751074 | WBGene00011727 | T12A7.6  | T12A7.6  | 0.139751988524645   |  |
| AGIWUR14379                                                                        |    |    |          |          |                |          |          |                     |  |
| CB4856                                                                             | HS | IV | 11751872 | 11752945 | WBGene00011728 | T12A7.7  | T12A7.7  | -0.0250058136723279 |  |
| AGIWUR3767                                                                         |    |    |          |          |                |          |          |                     |  |
| CB4856                                                                             | HS | IV | 11752987 | 11754387 | WBGene00011724 | sc1-18   | T12A7.3  | -0.265506354363558  |  |
| AGIWUR26905                                                                        |    |    |          |          |                |          |          |                     |  |
| CB4856                                                                             | HS | IV | 11755274 | 11755970 | WBGene00185100 | T12A7.9  | T12A7.9  | -0.125649364105751  |  |
| AGIWUR37943                                                                        |    |    |          |          |                |          |          |                     |  |
| CB4856                                                                             | HS | IV | 11756381 | 11761064 | WBGene00011723 | T12A7.2  | T12A7.2  | 0.128745291794385   |  |
| AGIWUR3478;AGIWUR5238;AGIWUR7874;AGIWUR16576;AGIWUR22434;AGIWUR34793;AGIWUR37106   |    |    |          |          |                |          |          |                     |  |
| CB4856                                                                             | HS | IV | 11768639 | 11773742 | WBGene00011725 | lips-5   | T12A7.4  | 0.0286098351831328  |  |
| AGIWUR10418;AGIWUR26358;AGIWUR39694                                                |    |    |          |          |                |          |          |                     |  |
| CB4856                                                                             | HS | IV | 11779216 | 11786969 | WBGene00011726 | lpr-2    | T12A7.5  | 0.127872710696314   |  |
| AGIWUR8854;AGIWUR12875                                                             |    |    |          |          |                |          |          |                     |  |
| CB4856                                                                             | HS | IV | 11783941 | 11792593 | WBGene00010350 | H01G02.3 |          | H01G02.3            |  |
| -0.239709474500978 AGIWUR13502;AGIWUR21251;AGIWUR40362                             |    |    |          |          |                |          |          |                     |  |
| CB4856                                                                             | HS | IV | 11798667 | 11801088 | WBGene00010349 | dyf-18   | H01G02.2 |                     |  |
| 0.0998044050632911 AGIWUR32927                                                     |    |    |          |          |                |          |          |                     |  |
| CB4856                                                                             | HS | IV | 11801697 | 11803144 | WBGene00045108 | H01G02.4 |          | H01G02.4            |  |
| 0.00877091369774785 AGIWUR9688;AGIWUR24665                                         |    |    |          |          |                |          |          |                     |  |
| CB4856                                                                             | HS | IV | 11803273 | 11804152 | WBGene00010348 | H01G02.1 |          | H01G02.1            |  |
| 0.133499756086016 AGIWUR1707;AGIWUR8257;AGIWUR23953;AGIWUR25577                    |    |    |          |          |                |          |          |                     |  |
| CB4856                                                                             | HS | IV | 11814247 | 11819612 | WBGene00010918 | M117.1   | M117.1   | 0.246813564289251   |  |
| AGIWUR3124                                                                         |    |    |          |          |                |          |          |                     |  |
| CB4856                                                                             | HS | IV | 11820505 | 11821917 | WBGene00003920 | par-5    | M117.2   | 0.269613961365755   |  |
| AGIWUR5263;AGIWUR5896;AGIWUR26028;AGIWUR34257                                      |    |    |          |          |                |          |          |                     |  |
| CB4856                                                                             | HS | IV | 11823516 | 11823938 | WBGene00010919 | M117.3   | M117.3   | 0.263564237091234   |  |
| AGIWUR43702                                                                        |    |    |          |          |                |          |          |                     |  |
| CB4856                                                                             | HS | IV | 11828973 | 11830446 | WBGene00010921 | fbxb-4   | M117.5   | -0.0309064082940802 |  |
| AGIWUR5287;AGIWUR17122;AGIWUR27546                                                 |    |    |          |          |                |          |          |                     |  |
| CB4856                                                                             | HS | IV | 11830799 | 11833556 | WBGene00010920 | M117.4   | M117.4   | 0.310306787238076   |  |
| AGIWUR6805                                                                         |    |    |          |          |                |          |          |                     |  |



|                                                                     |    |                                     |          |                |           |           |                     |
|---------------------------------------------------------------------|----|-------------------------------------|----------|----------------|-----------|-----------|---------------------|
| CB4856 HS                                                           | IV | 11834390                            | 11836020 | WBGene00044768 | M117.7    | M117.7    | -0.0063232063931844 |
| AGIWUR38728                                                         |    |                                     |          |                |           |           |                     |
| CB4856 HS                                                           | IV | 11838980                            | 11840423 | WBGene00009546 | fbxb-3    | F38H4.2   | -0.265915028819938  |
| AGIWUR38113                                                         |    |                                     |          |                |           |           |                     |
| CB4856 HS                                                           | IV | 11842421                            | 11846350 | WBGene00009547 | F38H4.3   | F38H4.3   | 0.144235098507323   |
| AGIWUR6905                                                          |    |                                     |          |                |           |           |                     |
| CB4856 HS                                                           | IV | 11847009                            | 11847871 | WBGene00009550 | F38H4.6   | F38H4.6   | 0.00582894134219458 |
| AGIWUR21232                                                         |    |                                     |          |                |           |           |                     |
| CB4856 HS                                                           | IV | 11848232                            | 11850309 | WBGene00009548 | F38H4.4   | F38H4.4   | 0.110399145235194   |
| AGIWUR3661                                                          |    |                                     |          |                |           |           |                     |
| CB4856 HS                                                           | IV | 11850950                            | 11855159 | WBGene00006415 | tag-30    | F38H4.7   | 0.0606239170817169  |
| AGIWUR2752                                                          |    |                                     |          |                |           |           |                     |
| CB4856 HS                                                           | IV | 11854828                            | 11856376 | WBGene00001151 | ech-2     | F38H4.8   | -0.118068676316273  |
| AGIWUR23837                                                         |    |                                     |          |                |           |           |                     |
| CB4856 HS                                                           | IV | 11856629                            | 11860460 | WBGene00002363 | let-92    | F38H4.9   | 0.0703773989155145  |
| AGIWUR5253;AGIWUR5272;AGIWUR5474;AGIWUR5480;AGIWUR11755;AGIWUR36054 |    |                                     |          |                |           |           |                     |
| CB4856 HS                                                           | IV | 11860555                            | 11862498 | WBGene00009551 | F38H4.10  | F38H4.10  |                     |
| 0.221954546043472                                                   |    | AGIWUR7377                          |          |                |           |           |                     |
| CB4856 HS                                                           | IV | 11864532                            | 11875738 | WBGene00007801 | trpa-1    | C29E6.2   | 0.131150508372913   |
| AGIWUR16343;AGIWUR19719;AGIWUR26134;AGIWUR40717                     |    |                                     |          |                |           |           |                     |
| CB4856 HS                                                           | IV | 11878549                            | 11883407 | WBGene00007802 | cutl-27   | C29E6.4   | 0.133785393378865   |
| AGIWUR40702                                                         |    |                                     |          |                |           |           |                     |
| CB4856 HS                                                           | IV | 11885530                            | 11891081 | WBGene00002827 | let-653   | C29E6.1   | -0.177941625426318  |
| AGIWUR20827                                                         |    |                                     |          |                |           |           |                     |
| CB4856 HS                                                           | IV | 11899683                            | 11902910 | WBGene00003633 | nhr-43    | C29E6.5   | 0.194522662770506   |
| AGIWUR3447                                                          |    |                                     |          |                |           |           |                     |
| CB4856 HS                                                           | IV | 11912005                            | 11913245 | WBGene00012163 | VZK822L.2 | VZK822L.2 |                     |
| 0.0771744572330153                                                  |    | AGIWUR895                           |          |                |           |           |                     |
| CB4856 HS                                                           | IV | 11913691                            | 11915796 | WBGene00001398 | fat-6     | VZK822L.1 |                     |
| 0.365050472297302                                                   |    | AGIWUR11968;AGIWUR32999;AGIWUR39182 |          |                |           |           |                     |
| CB4856 HS                                                           | IV | 11922358                            | 11923174 | WBGene00014090 | ZK822.2   | ZK822.2   | 0.137290219671236   |
| AGIWUR13802                                                         |    |                                     |          |                |           |           |                     |
| CB4856 HS                                                           | IV | 11924685                            | 11925397 | WBGene00044009 | ZK822.6   | ZK822.6   | 0.243570298626427   |
| AGIWUR16060;AGIWUR25195;AGIWUR36482                                 |    |                                     |          |                |           |           |                     |
| CB4856 HS                                                           | IV | 11926023                            | 11928415 | WBGene00014091 | ZK822.4   | ZK822.4   | 0.153277372482812   |
| AGIWUR4838                                                          |    |                                     |          |                |           |           |                     |
| CB4856 HS                                                           | IV | 11930872                            | 11935718 | WBGene00003736 | nhx-9     | ZK822.3   | 0.023203844332496   |
| AGIWUR30705;AGIWUR32431;AGIWUR41714                                 |    |                                     |          |                |           |           |                     |
| CB4856 HS                                                           | IV | 11937384                            | 11940604 | WBGene00014092 | ZK822.5   | ZK822.5   | 0.205919689659355   |

|                                                                        |    |    |          |          |                |         |          |                     |
|------------------------------------------------------------------------|----|----|----------|----------|----------------|---------|----------|---------------------|
| AGIWUR14263;AGIWUR25076;AGIWUR28171                                    |    |    |          |          |                |         |          |                     |
| CB4856                                                                 | HS | IV | 11940603 | 11942385 | WBGene00014093 | ZK829.1 | ZK829.1  | -0.0355949635668331 |
| AGIWUR980;AGIWUR26330;AGIWUR43730                                      |    |    |          |          |                |         |          |                     |
| CB4856                                                                 | HS | IV | 11943314 | 11945721 | WBGene00014094 | ZK829.3 | ZK829.3  | 0.0321562757542306  |
| AGIWUR18368                                                            |    |    |          |          |                |         |          |                     |
| CB4856                                                                 | HS | IV | 11946106 | 11949817 | WBGene00001839 | hdl-1   | ZK829.2  | -0.0186720794910791 |
| AGIWUR17660                                                            |    |    |          |          |                |         |          |                     |
| CB4856                                                                 | HS | IV | 11950570 | 11952208 | WBGene00006555 | tbx-36  | ZK829.5  | -0.207282962799763  |
| AGIWUR30920                                                            |    |    |          |          |                |         |          |                     |
| CB4856                                                                 | HS | IV | 11953249 | 11955541 | WBGene00014095 | gdh-1   | ZK829.4  | 0.0347364159385286  |
| AGIWUR3935;AGIWUR10461;AGIWUR14208;AGIWUR20797;AGIWUR40982             |    |    |          |          |                |         |          |                     |
| CB4856                                                                 | HS | IV | 11957547 | 11959804 | WBGene00006566 | tgt-1   | ZK829.6  | 0.247091278790123   |
| AGIWUR1767                                                             |    |    |          |          |                |         |          |                     |
| CB4856                                                                 | HS | IV | 11959823 | 11961535 | WBGene00014096 |         | ZK829.7  | 0.0182724100864888  |
| AGIWUR14518                                                            |    |    |          |          |                |         |          |                     |
| CB4856                                                                 | HS | IV | 11963910 | 11965427 | WBGene00005591 | srj-1   | ZK829.8  | 0.0471986537102209  |
| AGIWUR2300                                                             |    |    |          |          |                |         |          |                     |
| CB4856                                                                 | HS | IV | 11965665 | 11968703 | WBGene00004907 | snf-8   | ZK829.10 |                     |
| 0.183057946871353 AGIWUR38948                                          |    |    |          |          |                |         |          |                     |
| CB4856                                                                 | HS | IV | 11970534 | 11972789 | WBGene00014097 |         | ZK829.9  | 0.0327348579808504  |
| AGIWUR8490                                                             |    |    |          |          |                |         |          |                     |
| CB4856                                                                 | HS | IV | 11972697 | 12011007 | WBGene00006759 | unc-22  | ZK617.1  | 0.0514154235401891  |
| AGIWUR3562;AGIWUR13699;AGIWUR28418;AGIWUR39579                         |    |    |          |          |                |         |          |                     |
| CB4856                                                                 | HS | IV | 12013420 | 12014045 | WBGene00004971 | spe-17  | ZK617.3  | 0.0247722826357855  |
| AGIWUR42758                                                            |    |    |          |          |                |         |          |                     |
| CB4856                                                                 | HS | IV | 12014189 | 12015686 | WBGene00014009 | lips-6  | ZK617.2  | -0.116313562795357  |
| AGIWUR5897                                                             |    |    |          |          |                |         |          |                     |
| CB4856                                                                 | HS | IV | 12026882 | 12029174 | WBGene00011742 | tgn-38  | T12G3.7  | 0.137387871935911   |
| AGIWUR3714;AGIWUR14906;AGIWUR17093;AGIWUR20016;AGIWUR24430;AGIWUR44919 |    |    |          |          |                |         |          |                     |
| CB4856                                                                 | HS | IV | 12030047 | 12031271 | WBGene00011741 |         | T12G3.6  | 0.0841576882068331  |
| AGIWUR28845                                                            |    |    |          |          |                |         |          |                     |
| CB4856                                                                 | HS | IV | 12031314 | 12032154 | WBGene00011740 | mrpl-51 | T12G3.5  | -0.0668933199322721 |
| AGIWUR4307;AGIWUR6927;AGIWUR43099                                      |    |    |          |          |                |         |          |                     |
| CB4856                                                                 | HS | IV | 12034252 | 12037051 | WBGene00011737 | sqst-1  | T12G3.1  | 0.226945426902093   |
| AGIWUR1200                                                             |    |    |          |          |                |         |          |                     |
| CB4856                                                                 | HS | IV | 12038985 | 12046967 | WBGene00011738 |         | T12G3.2  | 0.00899979668776041 |
| AGIWUR16765;AGIWUR33601;AGIWUR44249                                    |    |    |          |          |                |         |          |                     |
| CB4856                                                                 | HS | IV | 12048256 | 12049943 | WBGene00011739 |         | T12G3.4  | 0.0034659246355524  |
| AGIWUR36660                                                            |    |    |          |          |                |         |          |                     |

|                                                       |    |          |          |                |          |          |                     |
|-------------------------------------------------------|----|----------|----------|----------------|----------|----------|---------------------|
| CB4856 HS                                             | IV | 12049862 | 12051226 | WBGene00000270 | bre-5    | T12G3.8  | 0.187878140548465   |
| AGIWUR24329                                           |    |          |          |                |          |          |                     |
| CB4856 HS                                             | IV | 12051484 | 12055785 | WBGene00005015 | spt-5    | K08E4.1  | 0.153711242302752   |
| AGIWUR6774                                            |    |          |          |                |          |          |                     |
| CB4856 HS                                             | IV | 12055670 | 12056656 | WBGene00010666 | K08E4.2  | K08E4.2  | -0.187162631185641  |
| AGIWUR24105                                           |    |          |          |                |          |          |                     |
| CB4856 HS                                             | IV | 12057626 | 12059951 | WBGene00010667 | K08E4.3  | K08E4.3  | -0.213708440103222  |
| AGIWUR26770                                           |    |          |          |                |          |          |                     |
| CB4856 HS                                             | IV | 12060397 | 12061329 | WBGene00045283 | K08E4.8  | K08E4.8  | 0.051377036650631   |
| AGIWUR35311;AGIWUR41068                               |    |          |          |                |          |          |                     |
| CB4856 HS                                             | IV | 12066572 | 12066884 | WBGene00010668 | K08E4.4  | K08E4.4  | 0.173916499393659   |
| AGIWUR16321                                           |    |          |          |                |          |          |                     |
| CB4856 HS                                             | IV | 12068890 | 12074914 | WBGene00010669 | bath-37  | K08E4.5  | -0.0578941692889812 |
| AGIWUR5644;AGIWUR10958                                |    |          |          |                |          |          |                     |
| CB4856 HS                                             | IV | 12075744 | 12076950 | WBGene00045036 | K08E4.7  | K08E4.7  | 0.170306800132829   |
| AGIWUR10309                                           |    |          |          |                |          |          |                     |
| CB4856 HS                                             | IV | 12077107 | 12078162 | WBGene00010670 | K08E4.6  | K08E4.6  | -0.168895623939791  |
| AGIWUR20378                                           |    |          |          |                |          |          |                     |
| CB4856 HS                                             | IV | 12079463 | 12084362 | WBGene00008682 | lex-1    | F11A10.1 |                     |
| -0.00459655523028601 AGIWUR18425;AGIWUR36995          |    |          |          |                |          |          |                     |
| CB4856 HS                                             | IV | 12084478 | 12085320 | WBGene00008683 | repo-1   | F11A10.2 |                     |
| -0.219541951064384 AGIWUR23785                        |    |          |          |                |          |          |                     |
| CB4856 HS                                             | IV | 12085423 | 12087060 | WBGene00008688 | F11A10.7 |          | F11A10.7            |
| -0.147448379579266 AGIWUR34296                        |    |          |          |                |          |          |                     |
| CB4856 HS                                             | IV | 12087017 | 12089095 | WBGene00008687 | F11A10.6 |          | F11A10.6            |
| 0.0080602213800347 AGIWUR28237                        |    |          |          |                |          |          |                     |
| CB4856 HS                                             | IV | 12089247 | 12092213 | WBGene00008684 | mig-32   | F11A10.3 |                     |
| -0.0667482506317114 AGIWUR38996                       |    |          |          |                |          |          |                     |
| CB4856 HS                                             | IV | 12092322 | 12093472 | WBGene00044329 | cpsf-4   | F11A10.8 |                     |
| -0.247944592048382 AGIWUR15808;AGIWUR22988            |    |          |          |                |          |          |                     |
| CB4856 HS                                             | IV | 12094372 | 12096692 | WBGene00008686 | F11A10.5 |          | F11A10.5            |
| -0.0939344423622472 AGIWUR17214                       |    |          |          |                |          |          |                     |
| CB4856 HS                                             | IV | 12096779 | 12105762 | WBGene00008685 | mon-2    | F11A10.4 |                     |
| -0.135944875988809 AGIWUR9219;AGIWUR38240;AGIWUR38547 |    |          |          |                |          |          |                     |
| CB4856 HS                                             | IV | 12105858 | 12108388 | WBGene00010889 | M18.3    | M18.3    | 0.11921430254019    |
| AGIWUR41362                                           |    |          |          |                |          |          |                     |
| CB4856 HS                                             | IV | 12108672 | 12110275 | WBGene00000703 | col-129  | M18.1    | 0.149995771669779   |
| AGIWUR8374                                            |    |          |          |                |          |          |                     |
| CB4856 HS                                             | IV | 12110586 | 12111577 | WBGene00010888 | d1c-2    | M18.2    | 0.00465619996536937 |

|                                                             |    |    |             |          |                |          |          |                     |
|-------------------------------------------------------------|----|----|-------------|----------|----------------|----------|----------|---------------------|
| AGIWUR14688;AGIWUR15276;AGIWUR15586                         |    |    |             |          |                |          |          |                     |
| CB4856                                                      | HS | IV | 12114810    | 12121183 | WBGene00010890 | ddb-1    | M18.5    | 0.265183086199759   |
| AGIWUR10292                                                 |    |    |             |          |                |          |          |                     |
| CB4856                                                      | HS | IV | 12121266    | 12122881 | WBGene00010891 | M18.6    | M18.6    | 0.0110637208790454  |
| AGIWUR34671;AGIWUR40569;AGIWUR42513                         |    |    |             |          |                |          |          |                     |
| CB4856                                                      | HS | IV | 12123155    | 12124807 | WBGene00000122 | aly-3    | M18.7    | -0.0392643283340117 |
| AGIWUR20179;AGIWUR27251                                     |    |    |             |          |                |          |          |                     |
| CB4856                                                      | HS | IV | 12124952    | 12126785 | WBGene00010892 | dhhc-6   | M18.8    | -0.0979329360816266 |
| AGIWUR26917                                                 |    |    |             |          |                |          |          |                     |
| CB4856                                                      | HS | IV | 12129504    | 12135096 | WBGene00003010 | lin-24   | B0001.1  | 0.0738281863658816  |
| AGIWUR998                                                   |    |    |             |          |                |          |          |                     |
| CB4856                                                      | HS | IV | 12135074    | 12138193 | WBGene00007089 | B0001.4  | B0001.4  | -0.131607987674887  |
| AGIWUR34195                                                 |    |    |             |          |                |          |          |                     |
| CB4856                                                      | HS | IV | 12138847    | 12141057 | WBGene00007093 | B0001.8  | B0001.8  | 0.0751331738618042  |
| AGIWUR38687                                                 |    |    |             |          |                |          |          |                     |
| CB4856                                                      | HS | IV | 12141161    | 12143331 | WBGene00007090 | B0001.5  | B0001.5  | 0.0320156755780125  |
| AGIWUR38103                                                 |    |    |             |          |                |          |          |                     |
| CB4856                                                      | HS | IV | 12143431    | 12145731 | WBGene00007088 | B0001.3  | B0001.3  | 0.0960399290386427  |
| AGIWUR14977;AGIWUR37338;AGIWUR44425                         |    |    |             |          |                |          |          |                     |
| CB4856                                                      | HS | IV | 12146486    | 12150975 | WBGene00007087 | B0001.2  | B0001.2  | -0.185068211116892  |
| AGIWUR25713                                                 |    |    |             |          |                |          |          |                     |
| CB4856                                                      | HS | IV | 12151170    | 12154245 | WBGene00007092 | B0001.7  | B0001.7  | -0.0479713277933023 |
| AGIWUR41334                                                 |    |    |             |          |                |          |          |                     |
| CB4856                                                      | HS | IV | 12156838    | 12164266 | WBGene00007091 | eri-12   | B0001.6  | 0.163585057964898   |
| AGIWUR36393                                                 |    |    |             |          |                |          |          |                     |
| CB4856                                                      | HS | IV | 12168244    | 12169216 | WBGene00008967 | F20B10.3 |          | F20B10.3            |
| -0.28414619501718                                           |    |    | AGIWUR43417 |          |                |          |          |                     |
| CB4856                                                      | HS | IV | 12170824    | 12178335 | WBGene00003772 | nlr-1    | F20B10.1 |                     |
| 0.0552566390233622                                          |    |    | AGIWUR2056  |          |                |          |          |                     |
| CB4856                                                      | HS | IV | 12200978    | 12207956 | WBGene00009435 | F35G2.1  | F35G2.1  | 0.0346525628398986  |
| AGIWUR2732;AGIWUR28383;AGIWUR39547                          |    |    |             |          |                |          |          |                     |
| CB4856                                                      | HS | IV | 12208192    | 12209010 | WBGene00009436 | marb-1   | F35G2.2  | -0.366548971279512  |
| AGIWUR18307;AGIWUR25328;AGIWUR26517;AGIWUR34553;AGIWUR42977 |    |    |             |          |                |          |          |                     |
| CB4856                                                      | HS | IV | 12209708    | 12210737 | WBGene00009437 | F35G2.3  | F35G2.3  | 0.0560551320789351  |
| AGIWUR26562                                                 |    |    |             |          |                |          |          |                     |
| CB4856                                                      | HS | IV | 12211098    | 12215987 | WBGene00004025 | phy-2    | F35G2.4  | 0.146596647514329   |
| AGIWUR7106                                                  |    |    |             |          |                |          |          |                     |
| CB4856                                                      | HS | IV | 12219609    | 12222889 | WBGene00009438 | F35G2.5  | F35G2.5  | 0.03912689373883    |
| AGIWUR10427;AGIWUR24979;AGIWUR25805                         |    |    |             |          |                |          |          |                     |

|                      |                                                            |          |                |                 |                           |
|----------------------|------------------------------------------------------------|----------|----------------|-----------------|---------------------------|
| CB4856 HS IV         | 12222872                                                   | 12227112 | WBGene00012704 | mlt-3           | Y39C12A.1                 |
| 0.11235828578763     | AGIWUR25518                                                |          |                |                 |                           |
| CB4856 HS IV         | 12227910                                                   | 12229779 | WBGene00012705 | sre-18          | Y39C12A.3                 |
| -0.0301838044440474  | AGIWUR22014                                                |          |                |                 |                           |
| CB4856 HS IV         | 12231310                                                   | 12231631 | WBGene00045314 | Y39C12A.10      | Y39C12A.10                |
| -0.00876215751886278 | AGIWUR4014;AGIWUR15890;AGIWUR23137;AGIWUR25704;AGIWUR38992 |          |                |                 |                           |
| CB4856 HS IV         | 12232489                                                   | 12233408 | WBGene00012706 | sre-17          | Y39C12A.4                 |
| 0.0390636018590005   | AGIWUR6305;AGIWUR6896                                      |          |                |                 |                           |
| CB4856 HS IV         | 12234139                                                   | 12236111 | WBGene00012707 | sre-16          | Y39C12A.5                 |
| 0.156325159474264    | AGIWUR7617;AGIWUR22914;AGIWUR39281                         |          |                |                 |                           |
| CB4856 HS IV         | 12237175                                                   | 12238951 | WBGene00012708 | sre-19          | Y39C12A.6                 |
| -0.315557986915572   | AGIWUR11239                                                |          |                |                 |                           |
| CB4856 HS IV         | 12241363                                                   | 12244806 | WBGene00012709 | sre-15          | Y39C12A.7                 |
| 0.121477007862921    | AGIWUR8094                                                 |          |                |                 |                           |
| CB4856 HS IV         | 12251111                                                   | 12252663 | WBGene00001044 | dnj-26          | Y39C12A.8                 |
| 0.254265482932711    | AGIWUR15323                                                |          |                |                 |                           |
| CB4856 HS IV         | 12257637                                                   | 12259192 | WBGene00012710 | Y39C12A.9       | Y39C12A.9                 |
| -0.0426479091146259  | AGIWUR9675                                                 |          |                |                 |                           |
| CB4856 HS IV         | 12259797                                                   | 12261449 | WBGene00016579 | sre-14          | C42C1.1 0.176485254142572 |
| AGIWUR9188           |                                                            |          |                |                 |                           |
| CB4856 HS IV         | 12265526                                                   | 12268306 | WBGene00016580 | C42C1.2 C42C1.2 | -0.721935608461308        |
| AGIWUR27865          |                                                            |          |                |                 |                           |
| CB4856 HS IV         | 12268995                                                   | 12269533 | WBGene00004448 | rp1-34          | C42C1.14                  |
| 0.340386005085826    | AGIWUR8628                                                 |          |                |                 |                           |
| CB4856 HS IV         | 12269594                                                   | 12270492 | WBGene00016581 | C42C1.3 C42C1.3 | 0.0222749099786714        |
| AGIWUR17440          |                                                            |          |                |                 |                           |
| CB4856 HS IV         | 12270490                                                   | 12275992 | WBGene00016582 | C42C1.4 C42C1.4 | 0.15389911296994          |
| AGIWUR1169           |                                                            |          |                |                 |                           |
| CB4856 HS IV         | 12276083                                                   | 12278059 | WBGene00016583 | tag-335         | C42C1.5 0.143358585319698 |
| AGIWUR1600           |                                                            |          |                |                 |                           |
| CB4856 HS IV         | 12278729                                                   | 12279546 | WBGene00016591 | C42C1.13        | C42C1.13                  |
| -0.0735697863434197  | AGIWUR38119                                                |          |                |                 |                           |
| CB4856 HS IV         | 12279659                                                   | 12281917 | WBGene00016589 | C42C1.11        | C42C1.11                  |
| -0.10019716032326    | AGIWUR9093;AGIWUR25940;AGIWUR37458;AGIWUR41625             |          |                |                 |                           |
| CB4856 HS IV         | 12282739                                                   | 12287820 | WBGene00016588 | hpo-12          | C42C1.10                  |
| 0.0406088416213102   | AGIWUR12191;AGIWUR14023;AGIWUR25224;AGIWUR43531            |          |                |                 |                           |
| CB4856 HS IV         | 12287928                                                   | 12289392 | WBGene00016592 | er1-1           | C42C1.15                  |
| 0.157563560758042    | AGIWUR8866                                                 |          |                |                 |                           |
| CB4856 HS IV         | 12289449                                                   | 12290994 | WBGene00016587 | C42C1.9 C42C1.9 | -0.263313808634344        |



|                                                                                         |          |          |                |           |           |                     |
|-----------------------------------------------------------------------------------------|----------|----------|----------------|-----------|-----------|---------------------|
| CB4856 HS IV                                                                            | 12390264 | 12391396 | WBGene00004492 | rps-23    | F28D1.7   | 0.177911263181484   |
| AGIWUR15756;AGIWUR39218                                                                 |          |          |                |           |           |                     |
| CB4856 HS IV                                                                            | 12391591 | 12392120 | WBGene00009219 | dpm-3     | F28D1.11  |                     |
| -0.26452491078446 AGIWUR3122;AGIWUR6771;AGIWUR17201;AGIWUR23209;AGIWUR32254;AGIWUR34150 |          |          |                |           |           |                     |
| CB4856 HS IV                                                                            | 12392121 | 12398706 | WBGene00009218 | acs-20    | F28D1.9   | -0.051225309519622  |
| AGIWUR6360;AGIWUR11480;AGIWUR27506;AGIWUR34666;AGIWUR37887;AGIWUR43532                  |          |          |                |           |           |                     |
| CB4856 HS IV                                                                            | 12404374 | 12408697 | WBGene00001580 | gex-3     | F28D1.10  |                     |
| 0.0411499701216975 AGIWUR23995;AGIWUR30797;AGIWUR40839                                  |          |          |                |           |           |                     |
| CB4856 HS IV                                                                            | 12408895 | 12410468 | WBGene00008580 | dsb-1     | F08G5.1   | -0.038372605893823  |
| AGIWUR7802                                                                              |          |          |                |           |           |                     |
| CB4856 HS IV                                                                            | 12410467 | 12412219 | WBGene00008581 | ac1-13    | F08G5.2   | 0.144428222447539   |
| AGIWUR15747                                                                             |          |          |                |           |           |                     |
| CB4856 HS IV                                                                            | 12412923 | 12417582 | WBGene00008582 | F08G5.3   | F08G5.3   | 0.0431099211127011  |
| AGIWUR1489;AGIWUR11150;AGIWUR22785;AGIWUR39630                                          |          |          |                |           |           |                     |
| CB4856 HS IV                                                                            | 12425217 | 12432533 | WBGene00008583 | ugt-65    | F08G5.5   | -0.0842403020648295 |
| AGIWUR12087;AGIWUR17157;AGIWUR24039;AGIWUR37416                                         |          |          |                |           |           |                     |
| CB4856 HS IV                                                                            | 12432640 | 12435001 | WBGene00023502 | cllec-184 | F08G5.7   |                     |
| -0.336485861461307 AGIWUR18437                                                          |          |          |                |           |           |                     |
| CB4856 HS IV                                                                            | 12435802 | 12438274 | WBGene00008584 | irg-4     | F08G5.6   | 0.233323725218611   |
| AGIWUR38591                                                                             |          |          |                |           |           |                     |
| CB4856 HS IV                                                                            | 12442068 | 12443035 | WBGene00255469 | C25G4.17  | C25G4.17  |                     |
| 0.058255651211268 AGIWUR25856                                                           |          |          |                |           |           |                     |
| CB4856 HS IV                                                                            | 12443236 | 12444046 | WBGene00007730 | C25G4.2   | C25G4.2   | -0.0898324605388616 |
| AGIWUR13600                                                                             |          |          |                |           |           |                     |
| CB4856 HS IV                                                                            | 12444450 | 12445884 | WBGene00007731 | C25G4.3   | C25G4.3   | 0.109938885933467   |
| AGIWUR12772                                                                             |          |          |                |           |           |                     |
| CB4856 HS IV                                                                            | 12445801 | 12451299 | WBGene00001085 | dpy-26    | C25G4.5   | 0.137376236457479   |
| AGIWUR4086;AGIWUR33667;AGIWUR34816                                                      |          |          |                |           |           |                     |
| CB4856 HS IV                                                                            | 12452066 | 12454215 | WBGene00007732 | spe-44    | C25G4.4   | 0.0314580118047765  |
| AGIWUR9240                                                                              |          |          |                |           |           |                     |
| CB4856 HS IV                                                                            | 12455097 | 12456175 | WBGene00007733 | smz-1     | C25G4.6   | -0.0946636030887191 |
| AGIWUR21117                                                                             |          |          |                |           |           |                     |
| CB4856 HS IV                                                                            | 12456913 | 12458561 | WBGene00007734 | C25G4.7   | C25G4.7   | 0.0127273514099357  |
| AGIWUR28094                                                                             |          |          |                |           |           |                     |
| CB4856 HS IV                                                                            | 12459819 | 12463412 | WBGene00007735 | C25G4.8   | C25G4.8   | 0.00805947720495581 |
| AGIWUR12518;AGIWUR34070                                                                 |          |          |                |           |           |                     |
| CB4856 HS IV                                                                            | 12468658 | 12474889 | WBGene00007736 | igdb-2    | C25G4.10  |                     |
| 0.0559095414500206 AGIWUR26780                                                          |          |          |                |           |           |                     |
| CB4856 HS IV                                                                            | 12487579 | 12489721 | WBGene00005689 | sru-26    | T04A11.12 |                     |

|                                                                                                                                  |                                    |          |                |           |           |                     |
|----------------------------------------------------------------------------------------------------------------------------------|------------------------------------|----------|----------------|-----------|-----------|---------------------|
| 0.113948810784463                                                                                                                | AGIWUR37757                        |          |                |           |           |                     |
| CB4856 HS IV                                                                                                                     | 12490791                           | 12495298 | WBGene00001865 | him-6     | T04A11.6  |                     |
| 0.0937868861259492                                                                                                               | AGIWUR44976                        |          |                |           |           |                     |
| CB4856 HS IV                                                                                                                     | 12496065                           | 12497844 | WBGene00005683 | sru-20    | T04A11.7  |                     |
| -0.0739046660690512                                                                                                              | AGIWUR43611                        |          |                |           |           |                     |
| CB4856 HS IV                                                                                                                     | 12498538                           | 12500413 | WBGene00005682 | sru-19    | T04A11.8  |                     |
| -0.265987679537945                                                                                                               | AGIWUR38884                        |          |                |           |           |                     |
| CB4856 HS IV                                                                                                                     | 12502256                           | 12504055 | WBGene00005681 | sru-18    | T04A11.9  |                     |
| -0.197072792362571                                                                                                               | AGIWUR22213                        |          |                |           |           |                     |
| CB4856 HS IV                                                                                                                     | 12507409                           | 12507566 | WBGene00045131 | T04A11.14 | T04A11.14 |                     |
| -0.293586666681936                                                                                                               | AGIWUR14695                        |          |                |           |           |                     |
| CB4856 HS IV                                                                                                                     | 12517110                           | 12518128 | WBGene00009954 | F53B2.1   | F53B2.1   | 0.163925560018612   |
| AGIWUR10830                                                                                                                      |                                    |          |                |           |           |                     |
| CB4856 HS IV                                                                                                                     | 12521239                           | 12522621 | WBGene00005676 | sru-13    | F53B2.4   | -0.274390568066345  |
| AGIWUR38780                                                                                                                      |                                    |          |                |           |           |                     |
| CB4856 HS IV                                                                                                                     | 12524478                           | 12525509 | WBGene00009955 | eak-4     | F53B2.3   | 0.207731954404197   |
| AGIWUR40563                                                                                                                      |                                    |          |                |           |           |                     |
| CB4856 HS IV                                                                                                                     | 12526260                           | 12527339 | WBGene00009957 | F53B2.8   | F53B2.8   | 0.681745526917169   |
| AGIWUR11000                                                                                                                      |                                    |          |                |           |           |                     |
| CB4856 HS IV                                                                                                                     | 12528529                           | 12531166 | WBGene00009956 | F53B2.5   | F53B2.5   | 0.0656981046721565  |
| AGIWUR2861;AGIWUR19916;AGIWUR28988                                                                                               |                                    |          |                |           |           |                     |
| CB4856 HS IV                                                                                                                     | 12542034                           | 12545729 | WBGene00001820 | ham-1     | F53B2.6   | -0.0900025494192844 |
| AGIWUR1006;AGIWUR4237;AGIWUR6168;AGIWUR14548;AGIWUR16905;AGIWUR17346;AGIWUR23386;AGIWUR25307;AGIWUR33707;AGIWUR34203;AGIWUR41967 |                                    |          |                |           |           |                     |
| CB4856 HS IV                                                                                                                     | 12548129                           | 12554681 | WBGene00014081 | ZK795.1   | ZK795.1   | -0.222621482983326  |
| AGIWUR38827                                                                                                                      |                                    |          |                |           |           |                     |
| CB4856 HS IV                                                                                                                     | 12557072                           | 12558975 | WBGene00014082 | ZK795.2   | ZK795.2   |                     |
| -0.00989806067406285                                                                                                             | AGIWUR8412;AGIWUR17586;AGIWUR33634 |          |                |           |           |                     |
| CB4856 HS IV                                                                                                                     | 12559365                           | 12560719 | WBGene00014083 | ZK795.3   | ZK795.3   | 0.0418752387231915  |
| AGIWUR11867                                                                                                                      |                                    |          |                |           |           |                     |
| CB4856 HS IV                                                                                                                     | 12560749                           | 12561201 | WBGene00014084 | snb-7     | ZK795.4   | -0.123000898516708  |
| AGIWUR15016;AGIWUR39153                                                                                                          |                                    |          |                |           |           |                     |
| CB4856 HS IV                                                                                                                     | 12563775                           | 12566111 | WBGene00010671 | eak-7     | K08E7.1   | 0.0382477998606632  |
| AGIWUR8409                                                                                                                       |                                    |          |                |           |           |                     |
| CB4856 HS IV                                                                                                                     | 12565983                           | 12567226 | WBGene00002002 | hsb-1     | K08E7.2   | 0.0420009520868661  |
| AGIWUR9703                                                                                                                       |                                    |          |                |           |           |                     |
| CB4856 HS IV                                                                                                                     | 12567842                           | 12570622 | WBGene00002368 | let-99    | K08E7.3   | 0.0873257370831571  |
| AGIWUR12809                                                                                                                      |                                    |          |                |           |           |                     |
| CB4856 HS IV                                                                                                                     | 12573370                           | 12578870 | WBGene00010673 | K08E7.5   | K08E7.5   | 0.0702681958993345  |



AGIWUR8564;AGIWUR19836;AGIWUR31015;AGIWUR31638;AGIWUR38386;AGIWUR39800;AGIWUR40401  
 CB4856 HS IV 12579055 12581128 WBGene00010674 K08E7.6 K08E7.6 -0.0388874514344781  
 AGIWUR39385  
 CB4856 HS IV 12585192 12586216 WBGene00010675 K08E7.8 K08E7.8 -0.0813068139868101  
 AGIWUR21419  
 CB4856 HS IV 12586511 12590428 WBGene00000841 cul-6 K08E7.7 0.543707494125556  
 AGIWUR28440  
 CB4856 HS IV 12591697 12599169 WBGene00003995 pgp-1 K08E7.9 0.199794687622735  
 AGIWUR12495  
 CB4856 HS IV 12601126 12605425 WBGene00013224 Y55D9A.2 Y55D9A.2  
 -0.132912202692377 AGIWUR8804;AGIWUR26146  
 CB4856 HS IV 12605700 12614723 WBGene00013223 efa-6 Y55D9A.1  
 0.120752471237224  
 AGIWUR231;AGIWUR5658;AGIWUR8719;AGIWUR14800;AGIWUR29089;AGIWUR32656;AGIWUR33205;AGIWUR34962;AGIWUR36389;AGI  
 WUR45118  
 CB4856 HS IV 12622093 12631022 WBGene00000186 ark-1 C01C7.1 0.197411941114401  
 AGIWUR6011  
 CB4856 HS IV 12640447 12650652 WBGene00006916 vha-7 C26H9A.1  
 0.0744986630682494 AGIWUR10849;AGIWUR20516;AGIWUR33193;AGIWUR40517;AGIWUR43760  
 CB4856 HS IV 12653403 12674773 WBGene00007752 wdfy-3 C26H9A.2  
 -0.0412347304007188 AGIWUR6728;AGIWUR14116;AGIWUR23638;AGIWUR41522;AGIWUR41680  
 CB4856 HS IV 12675207 12676000 WBGene00011941 T23B5.4 T23B5.4 0.00795929859555145  
 AGIWUR7224  
 CB4856 HS IV 12677398 12684378 WBGene00011939 prmt-9 T23B5.1 0.0946183909631699  
 AGIWUR15729;AGIWUR21183;AGIWUR36147  
 CB4856 HS IV 12688655 12703991 WBGene00011940 T23B5.3 T23B5.3 0.0169752311399183  
 AGIWUR2290;AGIWUR2511;AGIWUR8373;AGIWUR17180;AGIWUR29168;AGIWUR32930;AGIWUR32938  
 CB4856 HS IV 12704111 12706755 WBGene00007780 C27D8.4 C27D8.4 0.012808225095041  
 AGIWUR3968  
 CB4856 HS IV 12706714 12711744 WBGene00007779 C27D8.3 C27D8.3 0.190729906779904  
 AGIWUR7885  
 CB4856 HS IV 12712765 12714771 WBGene00007778 C27D8.2 C27D8.2 -0.0997672871746076  
 AGIWUR37386  
 CB4856 HS IV 12717831 12719391 WBGene00007777 C27D8.1 C27D8.1 -0.144147385017892  
 AGIWUR19597  
 CB4856 HS IV 12719960 12720997 WBGene00011949 T23F6.1 T23F6.1 -0.171442291399639  
 AGIWUR555;AGIWUR21553;AGIWUR25722;AGIWUR27233;AGIWUR42033;AGIWUR44778  
 CB4856 HS IV 12721356 12723015 WBGene00011950 T23F6.2 T23F6.2 0.0379763731385463  
 AGIWUR6919

|                                                                                                            |    |          |          |                |           |         |                     |
|------------------------------------------------------------------------------------------------------------|----|----------|----------|----------------|-----------|---------|---------------------|
| CB4856 HS                                                                                                  | IV | 12723103 | 12724651 | WBGene00011951 | T23F6.3   | T23F6.3 | 0.183549953985327   |
| AGIWUR6892                                                                                                 |    |          |          |                |           |         |                     |
| CB4856 HS                                                                                                  | IV | 12724948 | 12730095 | WBGene00004315 | rbd-1     | T23F6.4 | -0.130647858147436  |
| AGIWUR7447;AGIWUR20940;AGIWUR22173;AGIWUR25199;AGIWUR27648;AGIWUR29331;AGIWUR34066;AGIWUR35698;AGIWUR39765 |    |          |          |                |           |         |                     |
| CB4856 HS                                                                                                  | IV | 12734262 | 12734895 | WBGene00045184 | T23F6.7   | T23F6.7 | -0.104618426419581  |
| AGIWUR9615;AGIWUR15641;AGIWUR31164;AGIWUR31497;AGIWUR33297                                                 |    |          |          |                |           |         |                     |
| CB4856 HS                                                                                                  | IV | 12735187 | 12741523 | WBGene00011952 | T23F6.5   | T23F6.5 | 0.101636746774771   |
| AGIWUR36912                                                                                                |    |          |          |                |           |         |                     |
| CB4856 HS                                                                                                  | IV | 12743039 | 12744813 | WBGene00007987 | C36H8.1   | C36H8.1 | 0.105019566704968   |
| AGIWUR11471;AGIWUR16086;AGIWUR26266                                                                        |    |          |          |                |           |         |                     |
| CB4856 HS                                                                                                  | IV | 12746584 | 12749721 | WBGene00002128 | inx-6     | C36H8.2 | 0.176185906242595   |
| AGIWUR8891;AGIWUR37533;AGIWUR44695                                                                         |    |          |          |                |           |         |                     |
| CB4856 HS                                                                                                  | IV | 12754558 | 12757673 | WBGene00001452 | flp-9     | C36H8.3 | -0.166902897799943  |
| AGIWUR15622;AGIWUR17526;AGIWUR21930;AGIWUR25621;AGIWUR28951;AGIWUR31273;AGIWUR34191;AGIWUR34712            |    |          |          |                |           |         |                     |
| CB4856 HS                                                                                                  | IV | 12773862 | 12787513 | WBGene00006767 | unc-31    | ZK897.1 | 0.0885195635862708  |
| AGIWUR40041                                                                                                |    |          |          |                |           |         |                     |
| CB4856 HS                                                                                                  | IV | 12789041 | 12790512 | WBGene00008554 | F07C6.3   | F07C6.3 | 0.181440273572933   |
| AGIWUR872                                                                                                  |    |          |          |                |           |         |                     |
| CB4856 HS                                                                                                  | IV | 12791171 | 12791685 | WBGene00008553 | F07C6.2   | F07C6.2 | 0.0194787130185983  |
| AGIWUR329;AGIWUR28099;AGIWUR28140;AGIWUR32182;AGIWUR39821                                                  |    |          |          |                |           |         |                     |
| CB4856 HS                                                                                                  | IV | 12792795 | 12793274 | WBGene00045067 | F07C6.6   | F07C6.6 | 0.0734960137596889  |
| AGIWUR17651;AGIWUR27327;AGIWUR27461;AGIWUR32761;AGIWUR42888                                                |    |          |          |                |           |         |                     |
| CB4856 HS                                                                                                  | IV | 12793816 | 12796164 | WBGene00004030 | pin-2     | F07C6.1 | 0.224607332205041   |
| AGIWUR12942                                                                                                |    |          |          |                |           |         |                     |
| CB4856 HS                                                                                                  | IV | 12805931 | 12830112 | WBGene00008555 | F07C6.4   | F07C6.4 | 0.054239689663127   |
| AGIWUR5109;AGIWUR10157;AGIWUR13724;AGIWUR35786                                                             |    |          |          |                |           |         |                     |
| CB4856 HS                                                                                                  | IV | 12836510 | 12840674 | WBGene00010828 | M02B1.3   | M02B1.3 | 0.134320256390465   |
| AGIWUR28765;AGIWUR40819;AGIWUR42206                                                                        |    |          |          |                |           |         |                     |
| CB4856 HS                                                                                                  | IV | 12845696 | 12848428 | WBGene00010827 | M02B1.2   | M02B1.2 | -0.0329464922974569 |
| AGIWUR34338                                                                                                |    |          |          |                |           |         |                     |
| CB4856 HS                                                                                                  | IV | 12849506 | 12854408 | WBGene00005153 | srf-3     | M02B1.1 | 0.0518442066696831  |
| AGIWUR41492                                                                                                |    |          |          |                |           |         |                     |
| CB4856 HS                                                                                                  | IV | 12855549 | 12859928 | WBGene00014139 | nstp-5    | ZK896.9 | -0.0125977229575067 |
| AGIWUR18936                                                                                                |    |          |          |                |           |         |                     |
| CB4856 HS                                                                                                  | IV | 12860137 | 12865935 | WBGene00001543 | gcy-18    | ZK896.8 | -0.545980427535357  |
| AGIWUR29403                                                                                                |    |          |          |                |           |         |                     |
| CB4856 HS                                                                                                  | IV | 12869270 | 12871513 | WBGene00014137 | cllec-187 |         | ZK896.6             |
| 0.150619603808202 AGIWUR9398                                                                               |    |          |          |                |           |         |                     |
| CB4856 HS                                                                                                  | IV | 12872829 | 12875360 | WBGene00014132 | ZK896.1   | ZK896.1 | 0.113055717257458   |

|                                                             |    |                                                             |          |                |          |           |                     |
|-------------------------------------------------------------|----|-------------------------------------------------------------|----------|----------------|----------|-----------|---------------------|
| AGIWUR32204                                                 |    |                                                             |          |                |          |           |                     |
| CB4856 HS                                                   | IV | 12876965                                                    | 12879667 | WBGene00014136 | ZK896.5  | ZK896.5   | 0.37353582192257    |
| AGIWUR21817                                                 |    |                                                             |          |                |          |           |                     |
| CB4856 HS                                                   | IV | 12880634                                                    | 12883146 | WBGene00014135 | ZK896.4  | ZK896.4   | 0.431350519392067   |
| AGIWUR34775                                                 |    |                                                             |          |                |          |           |                     |
| CB4856 HS                                                   | IV | 12883505                                                    | 12886127 | WBGene00014134 | ZK896.3  | ZK896.3   | -0.0548274238520392 |
| AGIWUR4993;AGIWUR16444;AGIWUR24848                          |    |                                                             |          |                |          |           |                     |
| CB4856 HS                                                   | IV | 12887102                                                    | 12890508 | WBGene00010660 | K08D8.6  | K08D8.6   | 0.0699894300055295  |
| AGIWUR3610;AGIWUR16326;AGIWUR20149;AGIWUR20866;AGIWUR21444  |    |                                                             |          |                |          |           |                     |
| CB4856 HS                                                   | IV | 12892513                                                    | 12893283 | WBGene00010655 | K08D8.1  | K08D8.1   | 0.165827877908616   |
| AGIWUR25160;AGIWUR34928;AGIWUR42392;AGIWUR43870;AGIWUR44833 |    |                                                             |          |                |          |           |                     |
| CB4856 HS                                                   | IV | 12893773                                                    | 12894724 | WBGene00194926 | K08D8.12 |           | K08D8.12            |
| 0.405070836634758                                           |    | AGIWUR11140;AGIWUR27285;AGIWUR30099;AGIWUR39581;AGIWUR39736 |          |                |          |           |                     |
| CB4856 HS                                                   | IV | 12903785                                                    | 12906659 | WBGene00010657 | K08D8.3  | K08D8.3   | 0.346908360756371   |
| AGIWUR5630                                                  |    |                                                             |          |                |          |           |                     |
| CB4856 HS                                                   | IV | 12907469                                                    | 12909998 | WBGene00010658 | K08D8.4  | K08D8.4   | 0.213549658792518   |
| AGIWUR633;AGIWUR4055;AGIWUR20476                            |    |                                                             |          |                |          |           |                     |
| CB4856 HS                                                   | IV | 12910647                                                    | 12912145 | WBGene00010659 | K08D8.5  | K08D8.5   | 0.0747157597515944  |
| AGIWUR5854;AGIWUR9526;AGIWUR32040;AGIWUR33244;AGIWUR40070   |    |                                                             |          |                |          |           |                     |
| CB4856 HS                                                   | IV | 12912790                                                    | 12914969 | WBGene00007864 | irg-6    | C32H11.1  |                     |
| 0.0834217061364715                                          |    | AGIWUR10713;AGIWUR12335;AGIWUR31481                         |          |                |          |           |                     |
| CB4856 HS                                                   | IV | 12916043                                                    | 12917293 | WBGene00007865 | srz-15   | C32H11.2  |                     |
| 0.00845104803107066                                         |    | AGIWUR4336                                                  |          |                |          |           |                     |
| CB4856 HS                                                   | IV | 12918611                                                    | 12920393 | WBGene00007866 | C32H11.3 |           | C32H11.3            |
| -0.189690220473112                                          |    | AGIWUR563                                                   |          |                |          |           |                     |
| CB4856 HS                                                   | IV | 12921264                                                    | 12923288 | WBGene00007867 | C32H11.4 |           | C32H11.4            |
| -0.219685717087319                                          |    | AGIWUR12257                                                 |          |                |          |           |                     |
| CB4856 HS                                                   | IV | 12923525                                                    | 12924432 | WBGene00007868 | C32H11.5 |           | C32H11.5            |
| 0.0681492024524726                                          |    | AGIWUR971;AGIWUR25407                                       |          |                |          |           |                     |
| CB4856 HS                                                   | IV | 12925866                                                    | 12926805 | WBGene00007869 | C32H11.6 |           | C32H11.6            |
| 0.155356526075153                                           |    | AGIWUR15139                                                 |          |                |          |           |                     |
| CB4856 HS                                                   | IV | 12930707                                                    | 12931514 | WBGene00007870 | C32H11.7 |           | C32H11.7            |
| -0.108237024760015                                          |    | AGIWUR18444                                                 |          |                |          |           |                     |
| CB4856 HS                                                   | IV | 12940106                                                    | 12941405 | WBGene00007875 | dod-24   | C32H11.12 |                     |
| 0.0334406547613675                                          |    | AGIWUR33110                                                 |          |                |          |           |                     |
| CB4856 HS                                                   | IV | 12942933                                                    | 12944526 | WBGene00007876 | dct-19   | C32H11.13 |                     |
| -0.414004286211467                                          |    | AGIWUR9992                                                  |          |                |          |           |                     |
| CB4856 HS                                                   | IV | 12944887                                                    | 12946577 | WBGene00010122 | F55G11.1 |           | F55G11.1            |
| 0.087538272275566                                           |    | AGIWUR12449                                                 |          |                |          |           |                     |

|                                                                                                                                                                                                                                                                                                                                                                |                                                                        |          |                |          |          |
|----------------------------------------------------------------------------------------------------------------------------------------------------------------------------------------------------------------------------------------------------------------------------------------------------------------------------------------------------------------|------------------------------------------------------------------------|----------|----------------|----------|----------|
| CB4856 HS IV                                                                                                                                                                                                                                                                                                                                                   | 12950315                                                               | 12957128 | WBGene00000021 | abt-3    | F55G11.9 |
| 0.120599726011551                                                                                                                                                                                                                                                                                                                                              | AGIWUR38787                                                            |          |                |          |          |
| CB4856 HS IV                                                                                                                                                                                                                                                                                                                                                   | 12958030                                                               | 12959594 | WBGene00010126 | F55G11.6 | F55G11.6 |
| 0.163441648508527                                                                                                                                                                                                                                                                                                                                              | AGIWUR8760                                                             |          |                |          |          |
| CB4856 HS IV                                                                                                                                                                                                                                                                                                                                                   | 12960436                                                               | 12962120 | WBGene00010127 | F55G11.7 | F55G11.7 |
| 0.149046823495343                                                                                                                                                                                                                                                                                                                                              | AGIWUR9714                                                             |          |                |          |          |
| CB4856 HS IV                                                                                                                                                                                                                                                                                                                                                   | 12962808                                                               | 12964625 | WBGene00010128 | F55G11.8 | F55G11.8 |
| -0.515681894982794                                                                                                                                                                                                                                                                                                                                             | AGIWUR22605                                                            |          |                |          |          |
| CB4856 HS IV                                                                                                                                                                                                                                                                                                                                                   | 12965387                                                               | 12967318 | WBGene00010125 | dod-22   | F55G11.5 |
| -0.161794525458273                                                                                                                                                                                                                                                                                                                                             | AGIWUR25463                                                            |          |                |          |          |
| CB4856 HS IV                                                                                                                                                                                                                                                                                                                                                   | 12967448                                                               | 12969289 | WBGene00010123 | F55G11.2 | F55G11.2 |
| 0.12390822403772                                                                                                                                                                                                                                                                                                                                               | AGIWUR27920                                                            |          |                |          |          |
| CB4856 HS IV                                                                                                                                                                                                                                                                                                                                                   | 12970270                                                               | 12971974 | WBGene00014771 | F55G11.3 | F55G11.3 |
| 0.107760829984818                                                                                                                                                                                                                                                                                                                                              | AGIWUR2906;AGIWUR28495;AGIWUR33446;AGIWUR34281;AGIWUR34577;AGIWUR40510 |          |                |          |          |
| CB4856 HS IV                                                                                                                                                                                                                                                                                                                                                   | 12973624                                                               | 12975591 | WBGene00010124 | F55G11.4 | F55G11.4 |
| -0.34083456549271                                                                                                                                                                                                                                                                                                                                              | AGIWUR16709                                                            |          |                |          |          |
| CB4856 HS IV                                                                                                                                                                                                                                                                                                                                                   | 12976231                                                               | 12978343 | WBGene00010745 | dod-17   | K10D11.1 |
| 0.130037260182355                                                                                                                                                                                                                                                                                                                                              | AGIWUR40735                                                            |          |                |          |          |
| CB4856 HS IV                                                                                                                                                                                                                                                                                                                                                   | 12979017                                                               | 12981940 | WBGene00010746 | K10D11.2 | K10D11.2 |
| 0.11696580876795                                                                                                                                                                                                                                                                                                                                               | AGIWUR16720;AGIWUR27060                                                |          |                |          |          |
| CB4856 HS IV                                                                                                                                                                                                                                                                                                                                                   | 12982119                                                               | 12986088 | WBGene00010747 | K10D11.3 | K10D11.3 |
| -0.00739608286122362                                                                                                                                                                                                                                                                                                                                           | AGIWUR375                                                              |          |                |          |          |
| CB4856 HS IV                                                                                                                                                                                                                                                                                                                                                   | 12986726                                                               | 12989455 | WBGene00010750 | K10D11.6 | K10D11.6 |
| -0.200899574951515                                                                                                                                                                                                                                                                                                                                             | AGIWUR38923                                                            |          |                |          |          |
| CB4856 HS IV                                                                                                                                                                                                                                                                                                                                                   | 12989685                                                               | 12991843 | WBGene00010749 | K10D11.5 | K10D11.5 |
| -0.140774962870491                                                                                                                                                                                                                                                                                                                                             | AGIWUR32026                                                            |          |                |          |          |
| CB4856 HS IV                                                                                                                                                                                                                                                                                                                                                   | 12992157                                                               | 12994462 | WBGene00010748 | K10D11.4 | K10D11.4 |
| 0.681470148050435                                                                                                                                                                                                                                                                                                                                              | AGIWUR23605                                                            |          |                |          |          |
| CB4856 HS IV                                                                                                                                                                                                                                                                                                                                                   | 12994676                                                               | 12995924 | WBGene00045198 | K10D11.7 | K10D11.7 |
| -0.0367448760448195                                                                                                                                                                                                                                                                                                                                            | AGIWUR9382;AGIWUR15214;AGIWUR16890;AGIWUR33905;AGIWUR34781             |          |                |          |          |
| CB4856 HS IV                                                                                                                                                                                                                                                                                                                                                   | 13009116                                                               | 13035955 | WBGene00003150 | mbk-2    | F49E11.1 |
| -0.0497307977240107                                                                                                                                                                                                                                                                                                                                            |                                                                        |          |                |          |          |
| AGIWUR1792;AGIWUR5161;AGIWUR6014;AGIWUR7031;AGIWUR7450;AGIWUR7488;AGIWUR8472;AGIWUR8614;AGIWUR9221;AGIWUR11544;AGIWUR14795;AGIWUR17676;AGIWUR17802;AGIWUR18717;AGIWUR18810;AGIWUR19747;AGIWUR20031;AGIWUR20460;AGIWUR21573;AGIWUR21792;AGIWUR22205;AGIWUR25369;AGIWUR26815;AGIWUR28415;AGIWUR30531;AGIWUR31681;AGIWUR33258;AGIWUR34682;AGIWUR35026;AGIWUR44228 |                                                                        |          |                |          |          |
| CB4856 HS IV                                                                                                                                                                                                                                                                                                                                                   | 13035956                                                               | 13039021 | WBGene00009889 | F49E11.2 | F49E11.2 |
| 0.0773136129979637                                                                                                                                                                                                                                                                                                                                             | AGIWUR885;AGIWUR18578;AGIWUR28259;AGIWUR32335                          |          |                |          |          |
| CB4856 HS IV                                                                                                                                                                                                                                                                                                                                                   | 13042391                                                               | 13046858 | WBGene00000134 | amt-2    | F49E11.3 |

|                       |             |          |                |          |           |                     |
|-----------------------|-------------|----------|----------------|----------|-----------|---------------------|
| 0.1033852543232       | AGIWUR13890 |          |                |          |           |                     |
| CB4856 HS IV          | 13047197    | 13048262 | WBGene00009890 | sc1-9    | F49E11.4  |                     |
| -0.0681401517717557   | AGIWUR5966  |          |                |          |           |                     |
| CB4856 HS IV          | 13048457    | 13049835 | WBGene00009891 | sc1-10   | F49E11.5  |                     |
| -0.283885996561046    | AGIWUR31865 |          |                |          |           |                     |
| CB4856 HS IV          | 13051377    | 13052149 | WBGene00009892 | sc1-11   | F49E11.6  |                     |
| 0.531207096029269     | AGIWUR843   |          |                |          |           |                     |
| CB4856 HS IV          | 13053297    | 13055154 | WBGene00009893 | F49E11.7 | F49E11.7  |                     |
| 0.231370126175694     | AGIWUR44526 |          |                |          |           |                     |
| CB4856 HS IV          | 13055357    | 13055768 | WBGene00009894 | F49E11.8 | F49E11.8  |                     |
| -0.0219041149503134   | AGIWUR30147 |          |                |          |           |                     |
| CB4856 HS IV          | 13056376    | 13057271 | WBGene00004742 | sc1-1    | F49E11.9  |                     |
| 0.0286333361266893    | AGIWUR25578 |          |                |          |           |                     |
| CB4856 HS IV          | 13057678    | 13059085 | WBGene00009895 | sc1-2    | F49E11.10 |                     |
| 0.268204691068894     | AGIWUR22496 |          |                |          |           |                     |
| CB4856 HS IV          | 13059618    | 13060695 | WBGene00009896 | sc1-3    | F49E11.11 |                     |
| 0.186406605015138     | AGIWUR1835  |          |                |          |           |                     |
| CB4856 HS IV          | 13061774    | 13063205 | WBGene00008026 | sc1-4    | C39E9.1   | -0.0864044079623127 |
| AGIWUR40780           |             |          |                |          |           |                     |
| CB4856 HS IV          | 13064003    | 13065159 | WBGene00008027 | sc1-5    | C39E9.2   | 0.0130768688198586  |
| AGIWUR16531           |             |          |                |          |           |                     |
| CB4856 HS IV          | 13065766    | 13067300 | WBGene00000705 | col-131  | C39E9.3   | -0.118542917576574  |
| AGIWUR12644           |             |          |                |          |           |                     |
| CB4856 HS IV          | 13068751    | 13070290 | WBGene00008028 | sc1-6    | C39E9.4   | 0.283443138891393   |
| AGIWUR458             |             |          |                |          |           |                     |
| CB4856 HS IV          | 13070479    | 13071221 | WBGene00008029 | sc1-7    | C39E9.5   | -0.185487654490217  |
| AGIWUR12072           |             |          |                |          |           |                     |
| CB4856 HS IV          | 13071754    | 13072478 | WBGene00008030 | sc1-8    | C39E9.6   | 0.00494612450429877 |
| AGIWUR44929           |             |          |                |          |           |                     |
| CB4856 HS IV          | 13072660    | 13076720 | WBGene00008031 | C39E9.7  | C39E9.7   | -0.144315193365902  |
| AGIWUR36436           |             |          |                |          |           |                     |
| CB4856 HS IV          | 13079446    | 13082781 | WBGene00008032 | C39E9.8  | C39E9.8   | 0.103800612043081   |
| AGIWUR612;AGIWUR22734 |             |          |                |          |           |                     |
| CB4856 HS IV          | 13087005    | 13089619 | WBGene00008033 | spin-2   | C39E9.10  |                     |
| 0.140772449944103     | AGIWUR29849 |          |                |          |           |                     |
| CB4856 HS IV          | 13089578    | 13091067 | WBGene00000706 | col-132  | C39E9.9   | 0.116619420739744   |
| AGIWUR15066           |             |          |                |          |           |                     |
| CB4856 HS IV          | 13091187    | 13093853 | WBGene00008034 | C39E9.11 | C39E9.11  |                     |
| -0.146078052923093    | AGIWUR17054 |          |                |          |           |                     |

|                                                             |                                                                       |          |                |          |                             |
|-------------------------------------------------------------|-----------------------------------------------------------------------|----------|----------------|----------|-----------------------------|
| CB4856 HS IV                                                | 13094007                                                              | 13095490 | WBGene00008035 | C39E9.12 | C39E9.12                    |
| 0.219238192046888                                           | AGIWUR24925                                                           |          |                |          |                             |
| CB4856 HS IV                                                | 13095762                                                              | 13097065 | WBGene00004339 | rfc-3    | C39E9.13                    |
| -0.106637117406478                                          | AGIWUR144;AGIWUR10555;AGIWUR13424;AGIWUR40682                         |          |                |          |                             |
| CB4856 HS IV                                                | 13096958                                                              | 13098836 | WBGene00001007 | dli-1    | C39E9.14                    |
| -0.0163553505484044                                         | AGIWUR3418;AGIWUR7426;AGIWUR35722;AGIWUR37928                         |          |                |          |                             |
| CB4856 HS IV                                                | 13099378                                                              | 13100608 | WBGene00007201 | exos-4.1 | B0564.1                     |
| 0.0558197995075309                                          | AGIWUR27813;AGIWUR33869                                               |          |                |          |                             |
| CB4856 HS IV                                                | 13100715                                                              | 13104641 | WBGene00007207 | B0564.7  | B0564.7 0.127927128553345   |
| AGIWUR2841                                                  |                                                                       |          |                |          |                             |
| CB4856 HS IV                                                | 13105323                                                              | 13106927 | WBGene00023421 | rde-11   | B0564.11                    |
| 0.0235715413129718                                          | AGIWUR1580                                                            |          |                |          |                             |
| CB4856 HS IV                                                | 13107659                                                              | 13111500 | WBGene00007202 | B0564.2  | B0564.2 -0.10919819458254   |
| AGIWUR9047;AGIWUR11732                                      |                                                                       |          |                |          |                             |
| CB4856 HS IV                                                | 13119096                                                              | 13124387 | WBGene00006766 | unc-30   | B0564.10                    |
| -0.0665094580411414                                         | AGIWUR1590;AGIWUR3331;AGIWUR27447;AGIWUR33252;AGIWUR35405;AGIWUR36465 |          |                |          |                             |
| CB4856 HS IV                                                | 13138991                                                              | 13142354 | WBGene00008623 | F09E8.1  | F09E8.1 0.0881453703374389  |
| AGIWUR42795                                                 |                                                                       |          |                |          |                             |
| CB4856 HS IV                                                | 13149576                                                              | 13150569 | WBGene00008626 | F09E8.8  | F09E8.8 -0.154013581556992  |
| AGIWUR38329                                                 |                                                                       |          |                |          |                             |
| CB4856 HS IV                                                | 13150552                                                              | 13154441 | WBGene00008624 | F09E8.2  | F09E8.2 0.0540108151737364  |
| AGIWUR3879;AGIWUR41374;AGIWUR44977                          |                                                                       |          |                |          |                             |
| CB4856 HS IV                                                | 13155228                                                              | 13164056 | WBGene00003421 | msh-5    | F09E8.3 0.0534052005700119  |
| AGIWUR6808;AGIWUR7907;AGIWUR22916                           |                                                                       |          |                |          |                             |
| CB4856 HS IV                                                | 13165516                                                              | 13166815 | WBGene00008625 | sc1-14   | F09E8.5 0.184279694252086   |
| AGIWUR19778;AGIWUR27818                                     |                                                                       |          |                |          |                             |
| CB4856 HS IV                                                | 13170544                                                              | 13173694 | WBGene00003533 | nas-14   | F09E8.6 0.130237407168536   |
| AGIWUR5805;AGIWUR19870;AGIWUR28940                          |                                                                       |          |                |          |                             |
| CB4856 HS IV                                                | 13174157                                                              | 13179457 | WBGene00002974 | lev-1    | F09E8.7 -0.0370363703534675 |
| AGIWUR20176                                                 |                                                                       |          |                |          |                             |
| CB4856 HS IV                                                | 13180179                                                              | 13180911 | WBGene00044978 | F58D2.3  | F58D2.3 -0.183744547128958  |
| AGIWUR31280                                                 |                                                                       |          |                |          |                             |
| CB4856 HS IV                                                | 13183072                                                              | 13186984 | WBGene00010240 | gadr-1   | F58D2.1 -0.162415593338411  |
| AGIWUR28122                                                 |                                                                       |          |                |          |                             |
| CB4856 HS IV                                                | 13193563                                                              | 13197382 | WBGene00008177 | C48D1.1  | C48D1.1 -0.056315145940113  |
| AGIWUR2280                                                  |                                                                       |          |                |          |                             |
| CB4856 HS IV                                                | 13206783                                                              | 13207278 | WBGene00044909 | C48D1.7  | C48D1.7 0.0294574037249351  |
| AGIWUR16247;AGIWUR19522;AGIWUR20384;AGIWUR37541;AGIWUR42217 |                                                                       |          |                |          |                             |
| CB4856 HS IV                                                | 13209729                                                              | 13214566 | WBGene00000501 | cho-1    | C48D1.3 0.213448298970762   |

|                                                                       |    |          |          |                |           |          |                     |  |
|-----------------------------------------------------------------------|----|----------|----------|----------------|-----------|----------|---------------------|--|
| AGIWUR26521                                                           |    |          |          |                |           |          |                     |  |
| CB4856 HS                                                             | IV | 13221961 | 13232974 | WBGene00008178 | C48D1.5   | C48D1.5  | 0.115910419590964   |  |
| AGIWUR9021;AGIWUR9601;AGIWUR33314                                     |    |          |          |                |           |          |                     |  |
| CB4856 HS                                                             | IV | 13232943 | 13236585 | WBGene00010435 | JC8.2     | JC8.2    | -0.130899392071095  |  |
| AGIWUR24175                                                           |    |          |          |                |           |          |                     |  |
| CB4856 HS                                                             | IV | 13237281 | 13239441 | WBGene00006466 | tag-115   | JC8.13   | -0.0526321426895144 |  |
| AGIWUR9056                                                            |    |          |          |                |           |          |                     |  |
| CB4856 HS                                                             | IV | 13239588 | 13240651 | WBGene00004424 | rp1-12    | JC8.3    | 0.157859147801265   |  |
| AGIWUR4632;AGIWUR6964;AGIWUR7060;AGIWUR9613;AGIWUR11217;AGIWUR13131   |    |          |          |                |           |          |                     |  |
| CB4856 HS                                                             | IV | 13241051 | 13243401 | WBGene00003037 | lin-54    | JC8.6    | -0.297986282913055  |  |
| AGIWUR35358                                                           |    |          |          |                |           |          |                     |  |
| CB4856 HS                                                             | IV | 13243673 | 13244296 | WBGene00010436 | JC8.4     | JC8.4    | -0.239213575716668  |  |
| AGIWUR18188                                                           |    |          |          |                |           |          |                     |  |
| CB4856 HS                                                             | IV | 13244324 | 13247160 | WBGene00010437 | cox-11    | JC8.5    | 0.141751142223582   |  |
| AGIWUR39629                                                           |    |          |          |                |           |          |                     |  |
| CB4856 HS                                                             | IV | 13247261 | 13250699 | WBGene00010439 | JC8.7     | JC8.7    | 0.0431307415363626  |  |
| AGIWUR3986;AGIWUR23796;AGIWUR29016                                    |    |          |          |                |           |          |                     |  |
| CB4856 HS                                                             | IV | 13250648 | 13252311 | WBGene00010440 | ttr-51    | JC8.8    | -0.0555425434820993 |  |
| AGIWUR1763;AGIWUR9407;AGIWUR17465;AGIWUR24987;AGIWUR39926;AGIWUR40897 |    |          |          |                |           |          |                     |  |
| CB4856 HS                                                             | IV | 13254225 | 13255538 | WBGene00044737 | ttr-45    | JC8.14   | 0.0746912973053924  |  |
| AGIWUR7141;AGIWUR15386;AGIWUR23834;AGIWUR25802;AGIWUR36581            |    |          |          |                |           |          |                     |  |
| CB4856 HS                                                             | IV | 13256051 | 13259076 | WBGene00010442 | bus-12    | JC8.12   | -0.0823769956527389 |  |
| AGIWUR24223                                                           |    |          |          |                |           |          |                     |  |
| CB4856 HS                                                             | IV | 13261556 | 13272514 | WBGene00006763 | unc-26    | JC8.10   | -0.0627919322275208 |  |
| AGIWUR3166;AGIWUR31782;AGIWUR33371                                    |    |          |          |                |           |          |                     |  |
| CB4856 HS                                                             | IV | 13273911 | 13282878 | WBGene00013460 | cpsf-3    | Y67H2A.1 |                     |  |
| 0.129121033579906 AGIWUR210                                           |    |          |          |                |           |          |                     |  |
| CB4856 HS                                                             | IV | 13283002 | 13289536 | WBGene00013465 | Y67H2A.10 |          | Y67H2A.10           |  |
| -0.313473268098356 AGIWUR36969                                        |    |          |          |                |           |          |                     |  |
| CB4856 HS                                                             | IV | 13289776 | 13297869 | WBGene00013461 | Y67H2A.2  |          | Y67H2A.2            |  |
| 0.0358002239661506 AGIWUR41344                                        |    |          |          |                |           |          |                     |  |
| CB4856 HS                                                             | IV | 13297926 | 13300066 | WBGene00013462 | micu-1    | Y67H2A.4 |                     |  |
| 0.159422518010174 AGIWUR5915;AGIWUR6075                               |    |          |          |                |           |          |                     |  |
| CB4856 HS                                                             | IV | 13300179 | 13300720 | WBGene00013463 | kdp-1     | Y67H2A.5 |                     |  |
| 0.0414388135293322 AGIWUR747                                          |    |          |          |                |           |          |                     |  |
| CB4856 HS                                                             | IV | 13300828 | 13304145 | WBGene00000818 | csn-6     | Y67H2A.6 |                     |  |
| 0.0589436616381036 AGIWUR12038                                        |    |          |          |                |           |          |                     |  |
| CB4856 HS                                                             | IV | 13303746 | 13310818 | WBGene00013464 | Y67H2A.7  |          | Y67H2A.7            |  |
| -0.00632891114950951 AGIWUR15280                                      |    |          |          |                |           |          |                     |  |

|                        |                                                                       |          |                |            |                             |
|------------------------|-----------------------------------------------------------------------|----------|----------------|------------|-----------------------------|
| CB4856 HS IV           | 13315644                                                              | 13318811 | WBGene00001393 | fat-1      | Y67H2A.8                    |
| 0.111678235744936      | AGIWUR12237;AGIWUR36063                                               |          |                |            |                             |
| CB4856 HS IV           | 13320158                                                              | 13321831 | WBGene00014941 | Y67H2A.9   | Y67H2A.9                    |
| -0.0626579864936261    | AGIWUR1097;AGIWUR1417;AGIWUR12240;AGIWUR18964;AGIWUR22391;AGIWUR43346 |          |                |            |                             |
| CB4856 HS IV           | 13323850                                                              | 13326394 | WBGene00001394 | fat-2      | W02A2.1 0.134186787975164   |
| AGIWUR34363            |                                                                       |          |                |            |                             |
| CB4856 HS IV           | 13328359                                                              | 13329497 | WBGene00001390 | far-6      | W02A2.2 0.212304171551873   |
| AGIWUR29425            |                                                                       |          |                |            |                             |
| CB4856 HS IV           | 13329508                                                              | 13331406 | WBGene00004156 | pqn-74     | W02A2.3 -0.166155593087623  |
| AGIWUR7098             |                                                                       |          |                |            |                             |
| CB4856 HS IV           | 13342858                                                              | 13346189 | WBGene00012190 | W02A2.5    | W02A2.5 -0.0617001721247448 |
| AGIWUR2236;AGIWUR38536 |                                                                       |          |                |            |                             |
| CB4856 HS IV           | 13347665                                                              | 13348599 | WBGene00044280 | W02A2.9    | W02A2.9 0.0131868501638444  |
| AGIWUR39519            |                                                                       |          |                |            |                             |
| CB4856 HS IV           | 13348870                                                              | 13353193 | WBGene00004333 | rec-8      | W02A2.6 0.118522584658384   |
| AGIWUR6839             |                                                                       |          |                |            |                             |
| CB4856 HS IV           | 13353723                                                              | 13356104 | WBGene00003230 | mex-5      | W02A2.7 -0.197073213037912  |
| AGIWUR24629            |                                                                       |          |                |            |                             |
| CB4856 HS IV           | 13356113                                                              | 13358601 | WBGene00012191 | W02A2.8    | W02A2.8 -0.178905378764572  |
| AGIWUR29239            |                                                                       |          |                |            |                             |
| CB4856 HS IV           | 13365169                                                              | 13368435 | WBGene00013375 | srsx-25    | Y62E10A.4                   |
| -0.0134335048330474    | AGIWUR37939                                                           |          |                |            |                             |
| CB4856 HS IV           | 13368368                                                              | 13369417 | WBGene00000093 | agt-1      | Y62E10A.5                   |
| 0.00609412200843806    | AGIWUR14160;AGIWUR35728;AGIWUR37488                                   |          |                |            |                             |
| CB4856 HS IV           | 13369424                                                              | 13370285 | WBGene00004410 | r1a-2      | Y62E10A.1                   |
| 0.192506314158091      | AGIWUR9256;AGIWUR30171;AGIWUR41654                                    |          |                |            |                             |
| CB4856 HS IV           | 13370653                                                              | 13371613 | WBGene00013373 | Y62E10A.2  | Y62E10A.2                   |
| 0.224452418320695      | AGIWUR32819                                                           |          |                |            |                             |
| CB4856 HS IV           | 13371999                                                              | 13377383 | WBGene00013376 | Y62E10A.6  | Y62E10A.6                   |
| 0.31721040239203       | AGIWUR36222                                                           |          |                |            |                             |
| CB4856 HS IV           | 13378016                                                              | 13380407 | WBGene00003142 | mau-8      | Y62E10A.8                   |
| 0.0618268410041303     | AGIWUR11971                                                           |          |                |            |                             |
| CB4856 HS IV           | 13380387                                                              | 13381923 | WBGene00013378 | emc-3      | Y62E10A.10                  |
| 0.190289034501367      | AGIWUR43645                                                           |          |                |            |                             |
| CB4856 HS IV           | 13382055                                                              | 13384316 | WBGene00004278 | rab-19     | Y62E10A.9                   |
| 0.0926493324900708     | AGIWUR22027;AGIWUR43076;AGIWUR44348                                   |          |                |            |                             |
| CB4856 HS IV           | 13383905                                                              | 13386091 | WBGene00044745 | Y62E10A.20 | Y62E10A.20                  |
| 0.0967073832353877     | AGIWUR15148;AGIWUR29097                                               |          |                |            |                             |
| CB4856 HS IV           | 13386294                                                              | 13387358 | WBGene00014938 | mdt-9      | Y62E10A.11                  |



|                                                                                               |                                                                                     |          |                |                       |
|-----------------------------------------------------------------------------------------------|-------------------------------------------------------------------------------------|----------|----------------|-----------------------|
| -0.118546825213457                                                                            | AGIWUR19242;AGIWUR26065                                                             |          |                |                       |
| CB4856 HS IV                                                                                  | 13387469                                                                            | 13389209 | WBGene00003077 | lsm-3 Y62E10A.12      |
| 0.0333905358660704                                                                            | AGIWUR5031;AGIWUR29539;AGIWUR33021;AGIWUR35748;AGIWUR38348;AGIWUR40337              |          |                |                       |
| CB4856 HS IV                                                                                  | 13389146                                                                            | 13398799 | WBGene00013379 | Y62E10A.13 Y62E10A.13 |
| 0.0633192025752614                                                                            |                                                                                     |          |                |                       |
| AGIWUR1459;AGIWUR1661;AGIWUR21061;AGIWUR32539;AGIWUR32818;AGIWUR34098;AGIWUR35714;AGIWUR43565 |                                                                                     |          |                |                       |
| CB4856 HS IV                                                                                  | 13399068                                                                            | 13400506 | WBGene00013380 | memi-2 Y62E10A.14     |
| -0.270575883157654                                                                            | AGIWUR5865;AGIWUR34235                                                              |          |                |                       |
| CB4856 HS IV                                                                                  | 13401306                                                                            | 13403831 | WBGene00013381 | cyp-31A5 Y62E10A.15   |
| -0.176193193863273                                                                            | AGIWUR28184                                                                         |          |                |                       |
| CB4856 HS IV                                                                                  | 13403769                                                                            | 13408306 | WBGene00013385 | Y62E10A.19 Y62E10A.19 |
| -0.0647216208283332                                                                           | AGIWUR10040;AGIWUR18675;AGIWUR20403;AGIWUR23523;AGIWUR39058;AGIWUR42855;AGIWUR44771 |          |                |                       |
| CB4856 HS IV                                                                                  | 13408606                                                                            | 13412895 | WBGene00013382 | gcl-1 Y62E10A.16      |
| -0.30275964935557                                                                             | AGIWUR39074                                                                         |          |                |                       |
| CB4856 HS IV                                                                                  | 13413560                                                                            | 13415954 | WBGene00013383 | aptf-2 Y62E10A.17     |
| 0.0674342446467593                                                                            | AGIWUR2952;AGIWUR10679                                                              |          |                |                       |
| CB4856 HS IV                                                                                  | 13416041                                                                            | 13421927 | WBGene00004029 | pik-1 K09B11.1        |
| -0.201957931351684                                                                            | AGIWUR40481                                                                         |          |                |                       |
| CB4856 HS IV                                                                                  | 13422500                                                                            | 13429379 | WBGene00010709 | nol-9 K09B11.2        |
| 0.0564919901132335                                                                            | AGIWUR32343                                                                         |          |                |                       |
| CB4856 HS IV                                                                                  | 13431288                                                                            | 13434068 | WBGene00010712 | K09B11.5 K09B11.5     |
| 0.0436774845122283                                                                            | AGIWUR1133;AGIWUR37524                                                              |          |                |                       |
| CB4856 HS IV                                                                                  | 13434188                                                                            | 13445375 | WBGene00010714 | mam-3 K09B11.10       |
| 0.265440066421498                                                                             | AGIWUR34784                                                                         |          |                |                       |
| CB4856 HS IV                                                                                  | 13445819                                                                            | 13454954 | WBGene00010713 | uso-1 K09B11.9        |
| 0.162496337220315                                                                             | AGIWUR22969                                                                         |          |                |                       |
| CB4856 HS IV                                                                                  | 13456976                                                                            | 13458841 | WBGene00045062 | Y38H8A.8 Y38H8A.8     |
| 0.093250418169978                                                                             | AGIWUR24056                                                                         |          |                |                       |
| CB4856 HS IV                                                                                  | 13466139                                                                            | 13469402 | WBGene00012639 | fezf-1 Y38H8A.5       |
| -0.0594885351876124                                                                           | AGIWUR31080                                                                         |          |                |                       |
| CB4856 HS IV                                                                                  | 13474432                                                                            | 13476225 | WBGene00012636 | Y38H8A.2 Y38H8A.2     |
| 0.231109298940891                                                                             | AGIWUR3266;AGIWUR12111;AGIWUR37091;AGIWUR38610;AGIWUR44125;AGIWUR44481              |          |                |                       |
| CB4856 HS IV                                                                                  | 13476935                                                                            | 13502852 | WBGene00012868 | tbc-9 Y45F10A.6       |
| 0.14081635715144                                                                              | AGIWUR31457                                                                         |          |                |                       |
| CB4856 HS IV                                                                                  | 13505270                                                                            | 13505762 | WBGene00003755 | nlp-17 Y45F10A.5      |
| -0.0830419361297521                                                                           | AGIWUR8556;AGIWUR23648                                                              |          |                |                       |
| CB4856 HS IV                                                                                  | 13506079                                                                            | 13509225 | WBGene00012867 | selD-1 Y45F10A.4      |
| 0.161414709807005                                                                             | AGIWUR10820                                                                         |          |                |                       |
| CB4856 HS IV                                                                                  | 13509224                                                                            | 13513426 | WBGene00012866 | afmd-2 Y45F10A.3      |

|                      |                                                            |          |                |            |                           |
|----------------------|------------------------------------------------------------|----------|----------------|------------|---------------------------|
| -0.286031124132698   | AGIWUR33223                                                |          |                |            |                           |
| CB4856 HS IV         | 13513369                                                   | 13521870 | WBGene00003582 | dcap-2     | F52G2.1                   |
| -0.00764554985602217 | AGIWUR14135;AGIWUR28797;AGIWUR33187                        |          |                |            |                           |
| CB4856 HS IV         | 13521970                                                   | 13540271 | WBGene00004681 | rsd-2      | F52G2.2 0.157098192134955 |
| AGIWUR42570          |                                                            |          |                |            |                           |
| CB4856 HS IV         | 13543402                                                   | 13548230 | WBGene00009943 | F52G2.3    | F52G2.3 0.266357008277042 |
| AGIWUR43070          |                                                            |          |                |            |                           |
| CB4856 HS IV         | 13549605                                                   | 13561729 | WBGene00012875 | Y45F10B.13 | Y45F10B.13                |
| 0.15530784865586     | AGIWUR1433;AGIWUR1775;AGIWUR16615;AGIWUR37079              |          |                |            |                           |
| CB4856 HS IV         | 13561861                                                   | 13574440 | WBGene00004265 | qui-1      | Y45F10B.10                |
| 0.246308276470813    | AGIWUR414;AGIWUR5539;AGIWUR38295                           |          |                |            |                           |
| CB4856 HS IV         | 13575058                                                   | 13576740 | WBGene00005088 | srd-10     | Y45F10B.14                |
| -0.105130175221994   | AGIWUR31343                                                |          |                |            |                           |
| CB4856 HS IV         | 13579253                                                   | 13582112 | WBGene00005679 | sru-16     | Y45F10B.4                 |
| -0.0161829566480289  | AGIWUR16693;AGIWUR38014                                    |          |                |            |                           |
| CB4856 HS IV         | 13583209                                                   | 13584479 | WBGene00005675 | sru-12     | Y45F10B.5                 |
| 0.194747943278209    | AGIWUR43576                                                |          |                |            |                           |
| CB4856 HS IV         | 13584946                                                   | 13587288 | WBGene00005674 | sru-11     | Y45F10B.6                 |
| 0.147201450512954    | AGIWUR21838                                                |          |                |            |                           |
| CB4856 HS IV         | 13587475                                                   | 13588237 | WBGene00012874 | Y45F10B.12 | Y45F10B.12                |
| 0.0698829771594411   | AGIWUR35600                                                |          |                |            |                           |
| CB4856 HS IV         | 13588993                                                   | 13590337 | WBGene00005672 | sru-9      | Y45F10B.11                |
| -0.132559097898858   | AGIWUR34417                                                |          |                |            |                           |
| CB4856 HS IV         | 13594517                                                   | 13596279 | WBGene00012870 | Y45F10B.2  | Y45F10B.2                 |
| 0.0124216853439565   | AGIWUR36105;AGIWUR41860                                    |          |                |            |                           |
| CB4856 HS IV         | 13598755                                                   | 13600436 | WBGene00045045 | Y45F10B.17 | Y45F10B.17                |
| 0.355619541177326    | AGIWUR21237                                                |          |                |            |                           |
| CB4856 HS IV         | 13603549                                                   | 13604197 | WBGene00012876 | Y45F10B.15 | Y45F10B.15                |
| 0.292354634979366    | AGIWUR4125                                                 |          |                |            |                           |
| CB4856 HS IV         | 13604969                                                   | 13607263 | WBGene00045059 | Y45F10B.18 | Y45F10B.18                |
| -0.122015648347539   | AGIWUR6109;AGIWUR28546                                     |          |                |            |                           |
| CB4856 HS IV         | 13607436                                                   | 13609892 | WBGene00007460 | C08F11.13  | C08F11.13                 |
| 0.0403812266009997   | AGIWUR8724;AGIWUR37159                                     |          |                |            |                           |
| CB4856 HS IV         | 13611328                                                   | 13611579 | WBGene00045286 | C08F11.19  | C08F11.19                 |
| 0.134378398097839    | AGIWUR5449;AGIWUR14418;AGIWUR21976;AGIWUR24286;AGIWUR27726 |          |                |            |                           |
| CB4856 HS IV         | 13611812                                                   | 13612210 | WBGene00045285 | C08F11.18  | C08F11.18                 |
| 0.0592803556984025   | AGIWUR5645;AGIWUR11696;AGIWUR15085;AGIWUR23111;AGIWUR33000 |          |                |            |                           |
| CB4856 HS IV         | 13612805                                                   | 13618061 | WBGene00007461 | C08F11.14  | C08F11.14                 |
| 0.15862085957285     | AGIWUR961                                                  |          |                |            |                           |

|                                     |                                                 |          |                |           |                             |
|-------------------------------------|-------------------------------------------------|----------|----------------|-----------|-----------------------------|
| CB4856 HS IV                        | 13619508                                        | 13621513 | WBGene00007452 | C08F11.3  | C08F11.3                    |
| -0.0574045241322554                 | AGIWUR13220;AGIWUR13316;AGIWUR20736;AGIWUR33351 |          |                |           |                             |
| CB4856 HS IV                        | 13621987                                        | 13623134 | WBGene00007451 | C08F11.2  | C08F11.2                    |
| 0.0251176415470158                  | AGIWUR638;AGIWUR12018;AGIWUR15459;AGIWUR39370   |          |                |           |                             |
| CB4856 HS IV                        | 13633499                                        | 13635179 | WBGene00007453 | fbxa-98   | C08F11.5                    |
| 0.470524532907788                   | AGIWUR5958                                      |          |                |           |                             |
| CB4856 HS IV                        | 13637288                                        | 13638525 | WBGene00007454 | C08F11.7  | C08F11.7                    |
| 0.754641789225378                   | AGIWUR19769                                     |          |                |           |                             |
| CB4856 HS IV                        | 13639260                                        | 13644402 | WBGene00007455 | ugt-22    | C08F11.8                    |
| 0.194893498626435                   | AGIWUR2529                                      |          |                |           |                             |
| CB4856 HS IV                        | 13644463                                        | 13645923 | WBGene00007456 | srz-29    | C08F11.9                    |
| -0.0919911713998962                 | AGIWUR41021                                     |          |                |           |                             |
| CB4856 HS IV                        | 13646735                                        | 13647658 | WBGene00007458 | ule-4     | C08F11.11                   |
| 0.092670334917667                   | AGIWUR11720                                     |          |                |           |                             |
| CB4856 HS IV                        | 13648039                                        | 13649335 | WBGene00007457 | C08F11.10 | C08F11.10                   |
| 0.0117157560491563                  | AGIWUR11031                                     |          |                |           |                             |
| CB4856 HS IV                        | 13649836                                        | 13650338 | WBGene00045069 | C08F11.17 | C08F11.17                   |
| 0.106309065292214                   | AGIWUR16107;AGIWUR16421;AGIWUR19761;AGIWUR37431 |          |                |           |                             |
| CB4856 HS IV                        | 13651014                                        | 13651512 | WBGene00007459 | C08F11.12 | C08F11.12                   |
| 0.360929017056522                   | AGIWUR9420                                      |          |                |           |                             |
| CB4856 HS IV                        | 13653955                                        | 13655851 | WBGene00044256 | Y45F10C.6 | Y45F10C.6                   |
| 1.38342299115658                    | AGIWUR23085                                     |          |                |           |                             |
| CB4856 HS IV                        | 13662116                                        | 13662671 | WBGene00012878 | Y45F10C.2 | Y45F10C.2                   |
| 0.404182647802189                   | AGIWUR37828                                     |          |                |           |                             |
| CB4856 HS IV                        | 13663398                                        | 13664190 | WBGene00012880 | Y45F10C.4 | Y45F10C.4                   |
| 0.27361039128164                    | AGIWUR23361                                     |          |                |           |                             |
| CB4856 HS IV                        | 13665345                                        | 13666909 | WBGene00012879 | fbxa-215  | Y45F10C.3                   |
| 0.0830864057499738                  | AGIWUR42106                                     |          |                |           |                             |
| CB4856 HS IV                        | 13673804                                        | 13677823 | WBGene00011960 | oac-48    | T23G4.4 0.00794343676748177 |
| AGIWUR10707;AGIWUR24857;AGIWUR40749 |                                                 |          |                |           |                             |
| CB4856 HS IV                        | 13678951                                        | 13680333 | WBGene00011961 | T23G4.5   | T23G4.5 -0.191593853479384  |
| AGIWUR35188                         |                                                 |          |                |           |                             |
| CB4856 HS IV                        | 13685076                                        | 13687016 | WBGene00011959 | nyn-1     | T23G4.3 0.184355817507184   |
| AGIWUR1504                          |                                                 |          |                |           |                             |
| CB4856 HS IV                        | 13688324                                        | 13689131 | WBGene00011958 | T23G4.2   | T23G4.2 0.0893007634323348  |
| AGIWUR41972                         |                                                 |          |                |           |                             |
| CB4856 HS IV                        | 13701240                                        | 13704082 | WBGene00006580 | tlp-1     | T23G4.1 0.237247633653517   |
| AGIWUR28090                         |                                                 |          |                |           |                             |
| CB4856 HS IV                        | 13726930                                        | 13732829 | WBGene00008123 | ent-4     | C47A4.2 0.0494103318218517  |

|                                                                                                                                              |    |          |          |                |            |            |                     |
|----------------------------------------------------------------------------------------------------------------------------------------------|----|----------|----------|----------------|------------|------------|---------------------|
| AGIWUR21058                                                                                                                                  |    |          |          |                |            |            |                     |
| CB4856 HS                                                                                                                                    | IV | 13740951 | 13742344 | WBGene00008124 | C47A4.3    | C47A4.3    | 0.0138080270442718  |
| AGIWUR42090                                                                                                                                  |    |          |          |                |            |            |                     |
| CB4856 HS                                                                                                                                    | IV | 13742550 | 13742985 | WBGene00045287 | C47A4.7    | C47A4.7    | -0.0282220613542306 |
| AGIWUR25662                                                                                                                                  |    |          |          |                |            |            |                     |
| CB4856 HS                                                                                                                                    | IV | 13744155 | 13744988 | WBGene00014703 | C47A4.4    | C47A4.4    | -0.165926655703161  |
| AGIWUR17605                                                                                                                                  |    |          |          |                |            |            |                     |
| CB4856 HS                                                                                                                                    | IV | 13745709 | 13745967 | WBGene00008125 | C47A4.5    | C47A4.5    | -0.014454436684062  |
| AGIWUR36297                                                                                                                                  |    |          |          |                |            |            |                     |
| CB4856 HS                                                                                                                                    | IV | 13750334 | 13770495 | WBGene00012891 | sorb-1     | Y45F10D.13 |                     |
| -0.0468775259979983                                                                                                                          |    |          |          |                |            |            |                     |
| AGIWUR13231;AGIWUR15599;AGIWUR20295;AGIWUR24204;AGIWUR26844                                                                                  |    |          |          |                |            |            |                     |
| CB4856 HS                                                                                                                                    | IV | 13773548 | 13774678 | WBGene00012883 | Y45F10D.2  |            | Y45F10D.2           |
| 0.265818075060276                                                                                                                            |    |          |          |                |            |            |                     |
| AGIWUR13053                                                                                                                                  |    |          |          |                |            |            |                     |
| CB4856 HS                                                                                                                                    | IV | 13776415 | 13777149 | WBGene00044257 | Y45F10D.16 |            | Y45F10D.16          |
| 0.083839002564515                                                                                                                            |    |          |          |                |            |            |                     |
| AGIWUR729;AGIWUR6269;AGIWUR9214                                                                                                              |    |          |          |                |            |            |                     |
| CB4856 HS                                                                                                                                    | IV | 13777808 | 13778812 | WBGene00004430 | rp1-18     | Y45F10D.12 |                     |
| 0.136248935965591                                                                                                                            |    |          |          |                |            |            |                     |
| AGIWUR319;AGIWUR4112;AGIWUR9238;AGIWUR37931;AGIWUR41838;AGIWUR44465                                                                          |    |          |          |                |            |            |                     |
| CB4856 HS                                                                                                                                    | IV | 13778866 | 13782396 | WBGene00001635 | gly-10     | Y45F10D.3  |                     |
| 0.180605524602631                                                                                                                            |    |          |          |                |            |            |                     |
| AGIWUR9113                                                                                                                                   |    |          |          |                |            |            |                     |
| CB4856 HS                                                                                                                                    | IV | 13782385 | 13785646 | WBGene00012890 | lact-9     | Y45F10D.11 |                     |
| 0.258438596313667                                                                                                                            |    |          |          |                |            |            |                     |
| AGIWUR40217                                                                                                                                  |    |          |          |                |            |            |                     |
| CB4856 HS                                                                                                                                    | IV | 13785743 | 13786961 | WBGene00012889 | Y45F10D.10 |            | Y45F10D.10          |
| 0.0612469574798737                                                                                                                           |    |          |          |                |            |            |                     |
| AGIWUR23138;AGIWUR33058;AGIWUR36898;AGIWUR39358                                                                                              |    |          |          |                |            |            |                     |
| CB4856 HS                                                                                                                                    | IV | 13786945 | 13788727 | WBGene00012888 | sas-6      | Y45F10D.9  |                     |
| 0.220738213441496                                                                                                                            |    |          |          |                |            |            |                     |
| AGIWUR12327                                                                                                                                  |    |          |          |                |            |            |                     |
| CB4856 HS                                                                                                                                    | IV | 13788936 | 13796224 | WBGene00012887 | Y45F10D.7  |            | Y45F10D.7           |
| 0.137697453575015                                                                                                                            |    |          |          |                |            |            |                     |
| AGIWUR26040                                                                                                                                  |    |          |          |                |            |            |                     |
| CB4856 HS                                                                                                                                    | IV | 13796255 | 13797904 | WBGene00012886 | Y45F10D.6  |            | Y45F10D.6           |
| -0.128665338054098                                                                                                                           |    |          |          |                |            |            |                     |
| AGIWUR33489                                                                                                                                  |    |          |          |                |            |            |                     |
| CB4856 HS                                                                                                                                    | IV | 13804206 | 13807777 | WBGene00012892 | Y45F10D.14 |            | Y45F10D.14          |
| 0.0396255293785996                                                                                                                           |    |          |          |                |            |            |                     |
| AGIWUR25961                                                                                                                                  |    |          |          |                |            |            |                     |
| CB4856 HS                                                                                                                                    | IV | 13817487 | 13820962 | WBGene00012893 | Y45F10D.15 |            | Y45F10D.15          |
| -0.033375187271429                                                                                                                           |    |          |          |                |            |            |                     |
| AGIWUR3598                                                                                                                                   |    |          |          |                |            |            |                     |
| CB4856 HS                                                                                                                                    | IV | 13827886 | 13844997 | WBGene00010374 | rga-5      | H08M01.2   |                     |
| 0.125892039924964                                                                                                                            |    |          |          |                |            |            |                     |
| AGIWUR1256;AGIWUR6570;AGIWUR6804;AGIWUR16603;AGIWUR18694;AGIWUR19134;AGIWUR25806;AGIWUR34783;AGIWUR35545;AGIWUR39495;AGIWUR43718;AGIWUR44172 |    |          |          |                |            |            |                     |
| CB4856 HS                                                                                                                                    | IV | 13847777 | 13852712 | WBGene00007199 | B0513.7    | B0513.7    | 0.00823457186246568 |
| AGIWUR5510;AGIWUR40527                                                                                                                       |    |          |          |                |            |            |                     |

|                                                                                                                                                           |          |          |                |           |           |                     |
|-----------------------------------------------------------------------------------------------------------------------------------------------------------|----------|----------|----------------|-----------|-----------|---------------------|
| CB4856 HS IV                                                                                                                                              | 13880138 | 13881546 | WBGene00007196 | B0513.4   | B0513.4   | 0.131792187677325   |
| AGIWUR10382                                                                                                                                               |          |          |                |           |           |                     |
| CB4856 HS IV                                                                                                                                              | 13882225 | 13882620 | WBGene00004443 | rp1-29    | B0513.3   | 0.0562838651443442  |
| AGIWUR3930;AGIWUR14691;AGIWUR15375;AGIWUR30112;AGIWUR30805;AGIWUR35741;AGIWUR42921                                                                        |          |          |                |           |           |                     |
| CB4856 HS IV                                                                                                                                              | 13882734 | 13884177 | WBGene00007195 | B0513.2   | B0513.2   | -0.0951808258066245 |
| AGIWUR4762;AGIWUR15258;AGIWUR30424;AGIWUR32810                                                                                                            |          |          |                |           |           |                     |
| CB4856 HS IV                                                                                                                                              | 13888089 | 13893985 | WBGene00001562 | lin-66    | B0513.1   | -0.0233025659285371 |
| AGIWUR19479;AGIWUR20559;AGIWUR42857;AGIWUR43601                                                                                                           |          |          |                |           |           |                     |
| CB4856 HS IV                                                                                                                                              | 13897817 | 13902874 | WBGene00012536 | Y37A1A.3  |           | Y37A1A.3            |
| 0.0915383869272244 AGIWUR7072                                                                                                                             |          |          |                |           |           |                     |
| CB4856 HS IV                                                                                                                                              | 13905991 | 13912297 | WBGene00012535 | Y37A1A.2  |           | Y37A1A.2            |
| 0.0386222538008738 AGIWUR23675;AGIWUR39180;AGIWUR42520                                                                                                    |          |          |                |           |           |                     |
| CB4856 HS IV                                                                                                                                              | 13934445 | 13964001 | WBGene00045063 | Y37A1A.4  |           | Y37A1A.4            |
| -0.118251972196582                                                                                                                                        |          |          |                |           |           |                     |
| AGIWUR6496;AGIWUR7639;AGIWUR12903;AGIWUR16192;AGIWUR20473;AGIWUR20664;AGIWUR21287;AGIWUR22079;AGIWUR26424;AGIWUR28173;AGIWUR29843;AGIWUR38442;AGIWUR38689 |          |          |                |           |           |                     |
| CB4856 HS IV                                                                                                                                              | 13964359 | 13979847 | WBGene00044989 | Y37A1B.17 |           | Y37A1B.17           |
| 0.0483481659346836 AGIWUR3355;AGIWUR8863;AGIWUR21633;AGIWUR27631;AGIWUR29167                                                                              |          |          |                |           |           |                     |
| CB4856 HS IV                                                                                                                                              | 13981087 | 13982525 | WBGene00001575 | gei-18    | Y37A1B.15 |                     |
| 0.206169194184874 AGIWUR19287;AGIWUR27437                                                                                                                 |          |          |                |           |           |                     |
| CB4856 HS IV                                                                                                                                              | 13982636 | 13984141 | WBGene00006598 | tor-2     | Y37A1B.13 |                     |
| 0.779701796248699 AGIWUR21555                                                                                                                             |          |          |                |           |           |                     |
| CB4856 HS IV                                                                                                                                              | 13989094 | 14012026 | WBGene00001190 | egl-23    | Y37A1B.11 |                     |
| 0.103026827887245 AGIWUR25296                                                                                                                             |          |          |                |           |           |                     |
| CB4856 HS IV                                                                                                                                              | 14014024 | 14015944 | WBGene00005810 | srw-63    | Y37A1B.10 |                     |
| -0.0224810753423021 AGIWUR34340                                                                                                                           |          |          |                |           |           |                     |
| CB4856 HS IV                                                                                                                                              | 14016099 | 14019983 | WBGene00012542 | ir1d-56   | Y37A1B.9  |                     |
| 0.0393837249029652 AGIWUR18144                                                                                                                            |          |          |                |           |           |                     |
| CB4856 HS IV                                                                                                                                              | 14020198 | 14024628 | WBGene00012541 | ir1d-55   | Y37A1B.8  |                     |
| 0.070028822645301 AGIWUR38811                                                                                                                             |          |          |                |           |           |                     |
| CB4856 HS IV                                                                                                                                              | 14042595 | 14043780 | WBGene00012540 | Y37A1B.7  |           | Y37A1B.7            |
| -0.0130441881885481 AGIWUR38138                                                                                                                           |          |          |                |           |           |                     |
| CB4856 HS IV                                                                                                                                              | 14051200 | 14056676 | WBGene00012538 | Y37A1B.5  |           | Y37A1B.5            |
| 0.160151219758966 AGIWUR6852;AGIWUR40734                                                                                                                  |          |          |                |           |           |                     |
| CB4856 HS IV                                                                                                                                              | 14059551 | 14060712 | WBGene00012537 | Y37A1B.4  |           | Y37A1B.4            |
| 0.0379386792960914 AGIWUR1505;AGIWUR10911;AGIWUR16676;AGIWUR44769                                                                                         |          |          |                |           |           |                     |
| CB4856 HS IV                                                                                                                                              | 14061005 | 14069854 | WBGene00003086 | lst-4     | Y37A1B.2  |                     |
| -0.131355592734552 AGIWUR3964;AGIWUR20485;AGIWUR37987                                                                                                     |          |          |                |           |           |                     |
| CB4856 HS IV                                                                                                                                              | 14071503 | 14076743 | WBGene00003085 | ccar-1    | Y37A1B.1  |                     |

|                      |                                                                        |          |                |          |          |
|----------------------|------------------------------------------------------------------------|----------|----------------|----------|----------|
| -0.253843716946273   | AGIWUR19476;AGIWUR27341                                                |          |                |          |          |
| CB4856 HS IV         | 14077441                                                               | 14083559 | WBGene00009924 | cfp-1    | F52B11.1 |
| 0.201367672887651    | AGIWUR34871                                                            |          |                |          |          |
| CB4856 HS IV         | 14083318                                                               | 14084695 | WBGene00009925 | F52B11.2 | F52B11.2 |
| 0.124978903562264    | AGIWUR6410                                                             |          |                |          |          |
| CB4856 HS IV         | 14091254                                                               | 14096617 | WBGene00009926 | noah-2   | F52B11.3 |
| 0.212174287713628    | AGIWUR42435                                                            |          |                |          |          |
| CB4856 HS IV         | 14098325                                                               | 14099368 | WBGene00000707 | col-133  | F52B11.4 |
| 0.157030185954234    | AGIWUR23056                                                            |          |                |          |          |
| CB4856 HS IV         | 14102095                                                               | 14103231 | WBGene00009927 | F52B11.5 | F52B11.5 |
| 0.0817222966504421   | AGIWUR2614;AGIWUR25317;AGIWUR39751                                     |          |                |          |          |
| CB4856 HS IV         | 14106584                                                               | 14107715 | WBGene00002117 | ins-34   | F52B11.6 |
| 0.0572537749986015   | AGIWUR41432                                                            |          |                |          |          |
| CB4856 HS IV         | 14107721                                                               | 14116034 | WBGene00012543 | nkcc-1   | Y37A1C.1 |
| 0.048589320827606    | AGIWUR2790;AGIWUR15781;AGIWUR21124;AGIWUR37379;AGIWUR39725             |          |                |          |          |
| CB4856 HS IV         | 14129391                                                               | 14131061 | WBGene00010388 | srz-42   | H12I19.1 |
| -0.0323987958006366  | AGIWUR30887                                                            |          |                |          |          |
| CB4856 HS IV         | 14132070                                                               | 14134330 | WBGene00010394 | srz-59   | H12I19.7 |
| 0.220283924098798    | AGIWUR36275                                                            |          |                |          |          |
| CB4856 HS IV         | 14142081                                                               | 14143873 | WBGene00010390 | srz-30   | H12I19.3 |
| -0.0767608839371867  | AGIWUR3130;AGIWUR15872;AGIWUR25242;AGIWUR29676;AGIWUR32133;AGIWUR42099 |          |                |          |          |
| CB4856 HS IV         | 14145665                                                               | 14148869 | WBGene00010391 | oac-37   | H12I19.4 |
| -0.00383049163484017 | AGIWUR12381                                                            |          |                |          |          |
| CB4856 HS IV         | 14150331                                                               | 14153361 | WBGene00010392 | oac-38   | H12I19.5 |
| 0.0235468706788726   | AGIWUR26448                                                            |          |                |          |          |
| CB4856 HS IV         | 14154511                                                               | 14154913 | WBGene00010395 | H12I19.8 | H12I19.8 |
| -0.112018188936105   | AGIWUR15654                                                            |          |                |          |          |
| CB4856 HS IV         | 14155270                                                               | 14158048 | WBGene00011025 | R05A10.8 | R05A10.8 |
| 0.177937398423895    | AGIWUR20126;AGIWUR41257                                                |          |                |          |          |
| CB4856 HS IV         | 14160354                                                               | 14162872 | WBGene00011024 | R05A10.7 | R05A10.7 |
| -0.281016443115487   | AGIWUR13597                                                            |          |                |          |          |
| CB4856 HS IV         | 14165776                                                               | 14168487 | WBGene00011023 | R05A10.6 | R05A10.6 |
| -0.23096107387232    | AGIWUR7296                                                             |          |                |          |          |
| CB4856 HS IV         | 14168906                                                               | 14170838 | WBGene00011022 | R05A10.5 | R05A10.5 |
| -0.0924280679319658  | AGIWUR17174                                                            |          |                |          |          |
| CB4856 HS IV         | 14172481                                                               | 14173216 | WBGene00011021 | R05A10.4 | R05A10.4 |
| 0.154447551978997    | AGIWUR13880                                                            |          |                |          |          |
| CB4856 HS IV         | 14173642                                                               | 14176473 | WBGene00011020 | R05A10.3 | R05A10.3 |
| 0.357608240096054    | AGIWUR1079                                                             |          |                |          |          |

|                                                 |                                                                         |          |                |                   |                     |
|-------------------------------------------------|-------------------------------------------------------------------------|----------|----------------|-------------------|---------------------|
| CB4856 HS IV                                    | 14177200                                                                | 14178940 | WBGene00011019 | R05A10.2          | R05A10.2            |
| 0.176846886394822                               | AGIWUR9589                                                              |          |                |                   |                     |
| CB4856 HS IV                                    | 14182377                                                                | 14192674 | WBGene00011018 | R05A10.1          | R05A10.1            |
| -0.0665815396866152                             | AGIWUR11624;AGIWUR43235                                                 |          |                |                   |                     |
| CB4856 HS IV                                    | 14193430                                                                | 14195989 | WBGene00010483 | K01G12.3          | K01G12.3            |
| 0.139639845784937                               | AGIWUR23314;AGIWUR30947                                                 |          |                |                   |                     |
| CB4856 HS IV                                    | 14196440                                                                | 14198824 | WBGene00008535 | F02H6.2 F02H6.2   | -0.0100051525508746 |
| AGIWUR3140;AGIWUR7706                           |                                                                         |          |                |                   |                     |
| CB4856 HS IV                                    | 14199263                                                                | 14201780 | WBGene00008534 | F02H6.1 F02H6.1   | -0.184385686844168  |
| AGIWUR21214                                     |                                                                         |          |                |                   |                     |
| CB4856 HS IV                                    | 14203427                                                                | 14205357 | WBGene00008536 | F02H6.3 F02H6.3   | -0.193105538919028  |
| AGIWUR10428;AGIWUR21966;AGIWUR28377;AGIWUR31985 |                                                                         |          |                |                   |                     |
| CB4856 HS IV                                    | 14207564                                                                | 14219159 | WBGene00008537 | F02H6.4 F02H6.4   | -0.0560614605171059 |
| AGIWUR12439                                     |                                                                         |          |                |                   |                     |
| CB4856 HS IV                                    | 14219871                                                                | 14224439 | WBGene00008538 | sqrd-1 F02H6.5    | 0.153618848784035   |
| AGIWUR17864                                     |                                                                         |          |                |                   |                     |
| CB4856 HS IV                                    | 14225918                                                                | 14228169 | WBGene00008540 | F02H6.7 F02H6.7   | 0.0321697811644039  |
| AGIWUR14179                                     |                                                                         |          |                |                   |                     |
| CB4856 HS IV                                    | 14229336                                                                | 14230899 | WBGene00008539 | F02H6.6 F02H6.6   | -0.313024125459757  |
| AGIWUR2933;AGIWUR31731;AGIWUR36044              |                                                                         |          |                |                   |                     |
| CB4856 HS IV                                    | 14234341                                                                | 14239076 | WBGene00013411 | Y64G10A.1         | Y64G10A.1           |
| -0.288275567636695                              | AGIWUR24728                                                             |          |                |                   |                     |
| CB4856 HS IV                                    | 14245439                                                                | 14250213 | WBGene00013417 | srab-24 Y64G10A.8 |                     |
| -0.117150210381227                              | AGIWUR31275;AGIWUR33166;AGIWUR42828                                     |          |                |                   |                     |
| CB4856 HS IV                                    | 14276466                                                                | 14285523 | WBGene00013415 | ilcr-1 Y64G10A.6  |                     |
| -0.0324511319753817                             | AGIWUR37644                                                             |          |                |                   |                     |
| CB4856 HS IV                                    | 14291901                                                                | 14319564 | WBGene00013416 | Y64G10A.7         | Y64G10A.7           |
| -0.0921173927621592                             | AGIWUR16745;AGIWUR24103;AGIWUR27809;AGIWUR41358;AGIWUR41377;AGIWUR42644 |          |                |                   |                     |
| CB4856 HS IV                                    | 14319834                                                                | 14321755 | WBGene00013454 | fbxa-126          | Y67A10A.5           |
| 0.103186294591636                               | AGIWUR8515                                                              |          |                |                   |                     |
| CB4856 HS IV                                    | 14323244                                                                | 14325665 | WBGene00013453 | fbxa-83 Y67A10A.4 |                     |
| 0.0527173260228935                              | AGIWUR15944                                                             |          |                |                   |                     |
| CB4856 HS IV                                    | 14328995                                                                | 14334459 | WBGene00013452 | Y67A10A.3         | Y67A10A.3           |
| 0.296378830814255                               | AGIWUR42727                                                             |          |                |                   |                     |
| CB4856 HS IV                                    | 14335194                                                                | 14336491 | WBGene00045099 | Y67A10A.13        | Y67A10A.13          |
| 0.00645565723633634                             | AGIWUR19281;AGIWUR37071                                                 |          |                |                   |                     |
| CB4856 HS IV                                    | 14338057                                                                | 14339279 | WBGene00013451 | Y67A10A.2         | Y67A10A.2           |
| -0.372630465129641                              | AGIWUR26715;AGIWUR40793                                                 |          |                |                   |                     |
| CB4856 HS IV                                    | 14339968                                                                | 14342112 | WBGene00044906 | Y67A10A.11        | Y67A10A.11          |

|                                    |                                                           |          |                |            |            |                     |
|------------------------------------|-----------------------------------------------------------|----------|----------------|------------|------------|---------------------|
| 0.032554761981471                  | AGIWUR5989                                                |          |                |            |            |                     |
| CB4856 HS IV                       | 14342660                                                  | 14343856 | WBGene00013459 | Y67A10A.10 | Y67A10A.10 |                     |
| -0.0256573594685552                | AGIWUR41956                                               |          |                |            |            |                     |
| CB4856 HS IV                       | 14345435                                                  | 14350751 | WBGene00013450 | oac-56     | Y67A10A.1  |                     |
| -0.0519158083334927                | AGIWUR22040                                               |          |                |            |            |                     |
| CB4856 HS IV                       | 14374114                                                  | 14379643 | WBGene00013456 | Y67A10A.7  | Y67A10A.7  |                     |
| 0.190295915328786                  | AGIWUR10747;AGIWUR41785                                   |          |                |            |            |                     |
| CB4856 HS IV                       | 14379953                                                  | 14383701 | WBGene00013457 | paqr-3     | Y67A10A.8  |                     |
| -0.0337828573093457                | AGIWUR12238                                               |          |                |            |            |                     |
| CB4856 HS IV                       | 14394138                                                  | 14400368 | WBGene00013458 | Y67A10A.9  | Y67A10A.9  |                     |
| -0.0518830952577574                | AGIWUR35244                                               |          |                |            |            |                     |
| CB4856 HS IV                       | 14419711                                                  | 14422038 | WBGene00045060 | F55B11.7   | F55B11.7   |                     |
| 0.00526655824944999                | AGIWUR20609;AGIWUR37396                                   |          |                |            |            |                     |
| CB4856 HS IV                       | 14422268                                                  | 14423294 | WBGene00010084 | F55B11.2   | F55B11.2   |                     |
| 0.249963736998863                  | AGIWUR9340                                                |          |                |            |            |                     |
| CB4856 HS IV                       | 14424693                                                  | 14425859 | WBGene00010085 | F55B11.3   | F55B11.3   |                     |
| -0.587150554817079                 | AGIWUR26421                                               |          |                |            |            |                     |
| CB4856 HS IV                       | 14427695                                                  | 14428464 | WBGene00010087 | F55B11.5   | F55B11.5   |                     |
| 0.0155423403281905                 | AGIWUR37102                                               |          |                |            |            |                     |
| CB4856 HS IV                       | 14429574                                                  | 14430920 | WBGene00010086 | F55B11.4   | F55B11.4   |                     |
| -0.0106585002378115                | AGIWUR5871;AGIWUR7295;AGIWUR13797;AGIWUR39876;AGIWUR41646 |          |                |            |            |                     |
| CB4856 HS IV                       | 14436367                                                  | 14444183 | WBGene00006606 | tra-3      | LLC1.1     | -0.0434733650177801 |
| AGIWUR18748                        |                                                           |          |                |            |            |                     |
| CB4856 HS IV                       | 14456900                                                  | 14464098 | WBGene00010793 | LLC1.2     | LLC1.2     | 0.0877549218589451  |
| AGIWUR19648                        |                                                           |          |                |            |            |                     |
| CB4856 HS IV                       | 14464517                                                  | 14469136 | WBGene00010794 | dld-1      | LLC1.3     | -0.0347708478206563 |
| AGIWUR1832;AGIWUR15974;AGIWUR42021 |                                                           |          |                |            |            |                     |
| CB4856 HS IV                       | 14482334                                                  | 14486439 | WBGene00013292 | Y57G11A.4  | Y57G11A.4  |                     |
| 0.198122505503111                  | AGIWUR25101                                               |          |                |            |            |                     |
| CB4856 HS IV                       | 14487086                                                  | 14505166 | WBGene00013289 | tag-273    | Y57G11A.1  |                     |
| -0.134022864104395                 | AGIWUR3903;AGIWUR7605;AGIWUR27692                         |          |                |            |            |                     |
| CB4856 HS IV                       | 14511884                                                  | 14512505 | WBGene00013293 | Y57G11A.5  | Y57G11A.5  |                     |
| 0.0258725945766587                 | AGIWUR30207                                               |          |                |            |            |                     |
| CB4856 HS IV                       | 14514376                                                  | 14515118 | WBGene00044097 | srh-64     | Y57G11A.6  |                     |
| 0.146846066645836                  | AGIWUR28692                                               |          |                |            |            |                     |
| CB4856 HS IV                       | 14517022                                                  | 14519539 | WBGene00013290 | Y57G11A.2  | Y57G11A.2  |                     |
| -0.0295719095396727                | AGIWUR16288                                               |          |                |            |            |                     |
| CB4856 HS IV                       | 14519759                                                  | 14520999 | WBGene00012087 | T27E7.1    | T27E7.1    | 0.0444326237929502  |
| AGIWUR4550                         |                                                           |          |                |            |            |                     |



|                                            |                |             |           |                    |
|--------------------------------------------|----------------|-------------|-----------|--------------------|
| CB4856 HS IV 14522464 14523677             | WBGene00005286 | srh-65      | T27E7.2   | -0.13723678387414  |
| AGIWUR5005                                 |                |             |           |                    |
| CB4856 HS IV 14523868 14525197             | WBGene00005285 | srh-63      | T27E7.8   | 0.541055564929712  |
| AGIWUR20602                                |                |             |           |                    |
| CB4856 HS IV 14527093 14527343             | WBGene00045313 | T27E7.12    |           | T27E7.12           |
| 0.1597961727373 AGIWUR32313                |                |             |           |                    |
| CB4856 HS IV 14529018 14530809             | WBGene00012088 | T27E7.3     | T27E7.3   | 0.168239432509839  |
| AGIWUR32906                                |                |             |           |                    |
| CB4856 HS IV 14531180 14531646             | WBGene00044268 | T27E7.10    |           | T27E7.10           |
| -0.23322479377753 AGIWUR17144;AGIWUR40545  |                |             |           |                    |
| CB4856 HS IV 14533518 14535067             | WBGene00012089 | T27E7.4     | T27E7.4   | 0.154659953704062  |
| AGIWUR36082                                |                |             |           |                    |
| CB4856 HS IV 14537163 14538325             | WBGene00012090 | T27E7.5     | T27E7.5   | -0.192159508667404 |
| AGIWUR17253                                |                |             |           |                    |
| CB4856 HS IV 14539762 14542602             | WBGene00012091 | pals-29     | T27E7.6   | 1.54109912511766   |
| AGIWUR2847;AGIWUR6198;AGIWUR10921          |                |             |           |                    |
| CB4856 HS IV 14546933 14549386             | WBGene00012093 | T27E7.9     | T27E7.9   | -0.244310043527154 |
| AGIWUR33290                                |                |             |           |                    |
| CB4856 HS IV 14549827 14551957             | WBGene00013294 | pals-30     | Y57G11B.1 |                    |
| 0.142834339021785 AGIWUR43995              |                |             |           |                    |
| CB4856 HS IV 14553598 14554883             | WBGene00013298 | Y57G11B.6   |           | Y57G11B.6          |
| -0.0494590877475618 AGIWUR21498            |                |             |           |                    |
| CB4856 HS IV 14565330 14567331             | WBGene00013295 | Y57G11B.2   |           | Y57G11B.2          |
| 0.0244231381739786 AGIWUR36699             |                |             |           |                    |
| CB4856 HS IV 14570160 14572721             | WBGene00077763 | Y57G11B.97  |           | Y57G11B.97         |
| 0.287974473027153 AGIWUR12079;AGIWUR37121  |                |             |           |                    |
| CB4856 HS IV 14574819 14576580             | WBGene00013297 | Y57G11B.5   |           | Y57G11B.5          |
| 0.29495107348469 AGIWUR33753               |                |             |           |                    |
| CB4856 HS IV 14577004 14577273             | WBGene00255522 | Y57G11B.223 |           | Y57G11B.223        |
| -0.0288437717118004 AGIWUR36876            |                |             |           |                    |
| CB4856 HS IV 14616603 14623961             | WBGene00007058 | dmd-6       | F13G11.1  |                    |
| -0.311123797540196 AGIWUR18122;AGIWUR41975 |                |             |           |                    |
| CB4856 HS IV 14633099 14634405             | WBGene00008772 | irld-4      | F13G11.2  |                    |
| -0.121623095000118 AGIWUR19940             |                |             |           |                    |
| CB4856 HS IV 14635126 14636051             | WBGene00045038 | ule-2       | F13G11.3  |                    |
| 0.339631682881423 AGIWUR16361              |                |             |           |                    |
| CB4856 HS IV 14637751 14641229             | WBGene00013328 | Y57G11C.39  |           | Y57G11C.39         |
| 0.313069502516825 AGIWUR36645              |                |             |           |                    |
| CB4856 HS IV 14643025 14653376             | WBGene00013322 | Y57G11C.32  |           | Y57G11C.32         |

|                     |                                    |          |                |                   |             |
|---------------------|------------------------------------|----------|----------------|-------------------|-------------|
| 0.029678117928289   | AGIWUR13955                        |          |                |                   |             |
| CB4856 HS IV        | 14655535                           | 14655916 | WBGene00045282 | Y57G11C.56        | Y57G11C.56  |
| -0.011986444201967  | AGIWUR27072;AGIWUR40230            |          |                |                   |             |
| CB4856 HS IV        | 14657081                           | 14658165 | WBGene00013323 | Y57G11C.33        | Y57G11C.33  |
| -0.0363947771818136 | AGIWUR11773;AGIWUR31272            |          |                |                   |             |
| CB4856 HS IV        | 14658319                           | 14675141 | WBGene00013326 | anoh-2 Y57G11C.37 |             |
| 0.0761739075269317  | AGIWUR43237                        |          |                |                   |             |
| CB4856 HS IV        | 14683043                           | 14687405 | WBGene00013321 | Y57G11C.31        | Y57G11C.31  |
| -0.0717001702917628 | AGIWUR12323                        |          |                |                   |             |
| CB4856 HS IV        | 14694032                           | 14699940 | WBGene00001818 | haf-8 Y57G11C.1   |             |
| -0.0693459690153855 | AGIWUR32154                        |          |                |                   |             |
| CB4856 HS IV        | 14703209                           | 14704255 | WBGene00013329 | Y57G11C.40        | Y57G11C.40  |
| 0.0544216913156319  | AGIWUR30195                        |          |                |                   |             |
| CB4856 HS IV        | 14705536                           | 14706402 | WBGene00013330 | Y57G11C.41        | Y57G11C.41  |
| 0.0895429021113463  | AGIWUR28191                        |          |                |                   |             |
| CB4856 HS IV        | 14728534                           | 14745676 | WBGene00013331 | Y57G11C.42        | Y57G11C.42  |
| 0.224393683053059   | AGIWUR6177;AGIWUR42172;AGIWUR44605 |          |                |                   |             |
| CB4856 HS IV        | 14754089                           | 14754969 | WBGene00077762 | Y57G11C.499       | Y57G11C.499 |
| 0.039147473552628   | AGIWUR36923                        |          |                |                   |             |
| CB4856 HS IV        | 14758362                           | 14760945 | WBGene00013304 | Y57G11C.6         | Y57G11C.6   |
| 0.0904120140284697  | AGIWUR5415;AGIWUR6344              |          |                |                   |             |
| CB4856 HS IV        | 14761818                           | 14765434 | WBGene00013303 | Y57G11C.5         | Y57G11C.5   |
| 0.154114595663895   | AGIWUR557                          |          |                |                   |             |
| CB4856 HS IV        | 14765629                           | 14766665 | WBGene00013302 | vti-1 Y57G11C.4   |             |
| -0.189059789928839  | AGIWUR18568                        |          |                |                   |             |
| CB4856 HS IV        | 14766773                           | 14767730 | WBGene00013324 | mrps-7 Y57G11C.34 |             |
| 0.0803207260647625  | AGIWUR41282                        |          |                |                   |             |
| CB4856 HS IV        | 14768155                           | 14769282 | WBGene00013301 | Y57G11C.3         | Y57G11C.3   |
| 0.0760457543083142  | AGIWUR1560;AGIWUR3449;AGIWUR5876   |          |                |                   |             |
| CB4856 HS IV        | 14769441                           | 14770719 | WBGene00013332 | Y57G11C.43        | Y57G11C.43  |
| 0.121462878617958   | AGIWUR11667                        |          |                |                   |             |
| CB4856 HS IV        | 14770654                           | 14771425 | WBGene00013333 | Y57G11C.44        | Y57G11C.44  |
| -0.0782797015816872 | AGIWUR25285                        |          |                |                   |             |
| CB4856 HS IV        | 14771419                           | 14773535 | WBGene00013325 | Y57G11C.36        | Y57G11C.36  |
| 0.0199684069997623  | AGIWUR44730                        |          |                |                   |             |
| CB4856 HS IV        | 14773598                           | 14774634 | WBGene00044258 | Y57G11C.51        | Y57G11C.51  |
| -0.189283750892024  | AGIWUR44818                        |          |                |                   |             |
| CB4856 HS IV        | 14780940                           | 14781266 | WBGene00045311 | Y57G11C.57        | Y57G11C.57  |
| -0.311291542265133  | AGIWUR23356                        |          |                |                   |             |

|                                                                                                                                  |                                                                        |          |                 |              |              |
|----------------------------------------------------------------------------------------------------------------------------------|------------------------------------------------------------------------|----------|-----------------|--------------|--------------|
| CB4856 HS IV                                                                                                                     | 14782644                                                               | 14783342 | WBGene000194649 | Y57G11C.1130 | Y57G11C.1130 |
| -0.0525425572938261                                                                                                              | AGIWUR29716                                                            |          |                 |              |              |
| CB4856 HS IV                                                                                                                     | 14783341                                                               | 14784252 | WBGene00013334  | nlp-56       | Y57G11C.45   |
| -0.211939770796892                                                                                                               | AGIWUR32710                                                            |          |                 |              |              |
| CB4856 HS IV                                                                                                                     | 14787168                                                               | 14790843 | WBGene00013307  | Y57G11C.9    | Y57G11C.9    |
| -0.0990154845827607                                                                                                              |                                                                        |          |                 |              |              |
| AGIWUR12676;AGIWUR14588;AGIWUR17507;AGIWUR18185;AGIWUR18687;AGIWUR32905;AGIWUR40587;AGIWUR43681                                  |                                                                        |          |                 |              |              |
| CB4856 HS IV                                                                                                                     | 14790818                                                               | 14792887 | WBGene00001558  | gdi-1        | Y57G11C.10   |
| -0.254946414177361                                                                                                               | AGIWUR20763;AGIWUR35736;AGIWUR44186                                    |          |                 |              |              |
| CB4856 HS IV                                                                                                                     | 14793119                                                               | 14796375 | WBGene00000763  | coq-3        | Y57G11C.11   |
| 0.129857522252689                                                                                                                | AGIWUR3632;AGIWUR32574;AGIWUR39151;AGIWUR42391;AGIWUR43225             |          |                 |              |              |
| CB4856 HS IV                                                                                                                     | 14796417                                                               | 14797544 | WBGene00013308  | nuo-3        | Y57G11C.12   |
| 0.0951535173786375                                                                                                               |                                                                        |          |                 |              |              |
| AGIWUR900;AGIWUR4845;AGIWUR13485;AGIWUR14053;AGIWUR19896;AGIWUR20504;AGIWUR26997;AGIWUR35472;AGIWUR38753;AGIWUR41292;AGIWUR42681 |                                                                        |          |                 |              |              |
| CB4856 HS IV                                                                                                                     | 14798149                                                               | 14799229 | WBGene00000192  | arl-8        | Y57G11C.13   |
| 0.0554497547672543                                                                                                               | AGIWUR2999;AGIWUR15427;AGIWUR15779;AGIWUR17064;AGIWUR28321;AGIWUR41048 |          |                 |              |              |
| CB4856 HS IV                                                                                                                     | 14799311                                                               | 14801063 | WBGene00013310  | Y57G11C.14   | Y57G11C.14   |
| 0.328114086158163                                                                                                                | AGIWUR26615                                                            |          |                 |              |              |
| CB4856 HS IV                                                                                                                     | 14803103                                                               | 14803480 | WBGene00045029  | Y57G11C.54   | Y57G11C.54   |
| 0.102255684132256                                                                                                                | AGIWUR4085;AGIWUR6020;AGIWUR12212;AGIWUR20576;AGIWUR28328              |          |                 |              |              |
| CB4856 HS IV                                                                                                                     | 14807189                                                               | 14809958 | WBGene00023520  | oig-5        | Y57G11C.50   |
| 0.0185002464990109                                                                                                               | AGIWUR17302;AGIWUR29275                                                |          |                 |              |              |
| CB4856 HS IV                                                                                                                     | 14822540                                                               | 14825264 | WBGene00013311  | sec-61       | Y57G11C.15   |
| -0.14333758357661                                                                                                                | AGIWUR26320                                                            |          |                 |              |              |
| CB4856 HS IV                                                                                                                     | 14825679                                                               | 14826448 | WBGene00004487  | rps-18       | Y57G11C.16   |
| 0.360160185145217                                                                                                                | AGIWUR31968;AGIWUR37362                                                |          |                 |              |              |
| CB4856 HS IV                                                                                                                     | 14826449                                                               | 14829115 | WBGene00013312  | hhat-2       | Y57G11C.17   |
| -0.0133609279019264                                                                                                              | AGIWUR33555                                                            |          |                 |              |              |
| CB4856 HS IV                                                                                                                     | 14837112                                                               | 14853662 | WBGene00013317  | Y57G11C.22   | Y57G11C.22   |
| 0.0568360390314084                                                                                                               | AGIWUR3328;AGIWUR9873                                                  |          |                 |              |              |
| CB4856 HS IV                                                                                                                     | 14854003                                                               | 14854426 | WBGene00044741  | Y57G11C.52   | Y57G11C.52   |
| -0.125885215343985                                                                                                               | AGIWUR2076;AGIWUR10413;AGIWUR32636;AGIWUR36749;AGIWUR37684             |          |                 |              |              |
| CB4856 HS IV                                                                                                                     | 14855331                                                               | 14861791 | WBGene00013318  | Y57G11C.23   | Y57G11C.23   |
| 0.306205508260311                                                                                                                | AGIWUR4719                                                             |          |                 |              |              |
| CB4856 HS IV                                                                                                                     | 14862447                                                               | 14869951 | WBGene00013327  | Y57G11C.38   | Y57G11C.38   |
| 0.158286522004197                                                                                                                | AGIWUR15936                                                            |          |                 |              |              |
| CB4856 HS IV                                                                                                                     | 14879490                                                               | 14900652 | WBGene00001330  | eps-8        | Y57G11C.24   |
| 0.188293556335886                                                                                                                | AGIWUR641;AGIWUR27191;AGIWUR32076;AGIWUR35401;AGIWUR36433              |          |                 |              |              |

|                                                |                                                 |          |                |            |            |                     |
|------------------------------------------------|-------------------------------------------------|----------|----------------|------------|------------|---------------------|
| CB4856 HS IV                                   | 14904994                                        | 14909686 | WBGene00013336 | pnc-2      | Y57G11C.47 |                     |
| -0.0972989594557188                            | AGIWUR24181                                     |          |                |            |            |                     |
| CB4856 HS IV                                   | 14919610                                        | 14920421 | WBGene00013319 | ccch-5     | Y57G11C.25 |                     |
| -0.259495207230993                             | AGIWUR21538                                     |          |                |            |            |                     |
| CB4856 HS IV                                   | 14924444                                        | 14926046 | WBGene00014923 | Y57G11C.26 | Y57G11C.26 |                     |
| 0.057895988050551                              | AGIWUR14344;AGIWUR26021                         |          |                |            |            |                     |
| CB4856 HS IV                                   | 14927059                                        | 14928623 | WBGene00014925 | Y57G11C.29 | Y57G11C.29 |                     |
| 0.190693317962713                              | AGIWUR7530;AGIWUR39249                          |          |                |            |            |                     |
| CB4856 HS IV                                   | 14929721                                        | 14931931 | WBGene00014924 | Y57G11C.28 | Y57G11C.28 |                     |
| -0.0512191292211881                            | AGIWUR40086                                     |          |                |            |            |                     |
| CB4856 HS IV                                   | 14938896                                        | 14941898 | WBGene00014926 | Y57G11C.30 | Y57G11C.30 |                     |
| -0.0988953224133375                            | AGIWUR37285                                     |          |                |            |            |                     |
| CB4856 HS IV                                   | 14942286                                        | 14945328 | WBGene00013337 | Y57G11C.48 | Y57G11C.48 |                     |
| 0.0522500673836035                             | AGIWUR33033                                     |          |                |            |            |                     |
| CB4856 HS IV                                   | 14950652                                        | 14954226 | WBGene00045146 | Y41E3.22   | Y41E3.22   |                     |
| -0.0383283902203706                            | AGIWUR11004;AGIWUR13696;AGIWUR31781;AGIWUR44633 |          |                |            |            |                     |
| CB4856 HS IV                                   | 14954206                                        | 14958914 | WBGene00012762 | Y41E3.1    | Y41E3.1    | -0.110727760152951  |
| AGIWUR33798                                    |                                                 |          |                |            |            |                     |
| CB4856 HS IV                                   | 14974292                                        | 14974561 | WBGene00045000 | Y41E3.20   | Y41E3.20   |                     |
| -0.0794388380144868                            | AGIWUR5211                                      |          |                |            |            |                     |
| CB4856 HS IV                                   | 14981609                                        | 14996306 | WBGene00012763 | atln-2     | Y41E3.3    | -0.0195395051231166 |
| AGIWUR39088                                    |                                                 |          |                |            |            |                     |
| CB4856 HS IV                                   | 15008503                                        | 15013183 | WBGene00001336 | qars-1     | Y41E3.4    | 0.179851715002062   |
| AGIWUR33851                                    |                                                 |          |                |            |            |                     |
| CB4856 HS IV                                   | 15014042                                        | 15025513 | WBGene00012765 | Y41E3.7    | Y41E3.7    | 0.143244790546734   |
| AGIWUR7796;AGIWUR32310;AGIWUR32659;AGIWUR37732 |                                                 |          |                |            |            |                     |
| CB4856 HS IV                                   | 15025710                                        | 15037036 | WBGene00012767 | fcd-2      | Y41E3.9    | -0.094365487509112  |
| AGIWUR24036                                    |                                                 |          |                |            |            |                     |
| CB4856 HS IV                                   | 15037321                                        | 15039551 | WBGene00012768 | eef-1B.2   | Y41E3.10   |                     |
| -0.0161217260638971                            | AGIWUR22719;AGIWUR28123;AGIWUR37620             |          |                |            |            |                     |
| CB4856 HS IV                                   | 15039619                                        | 15049273 | WBGene00012769 | Y41E3.11   | Y41E3.11   |                     |
| 0.0964842440904041                             | AGIWUR7425;AGIWUR12350;AGIWUR28909;AGIWUR36823  |          |                |            |            |                     |
| CB4856 HS IV                                   | 15049411                                        | 15053371 | WBGene00012770 | srt-47     | Y41E3.12   |                     |
| -0.336818597434771                             | AGIWUR5695                                      |          |                |            |            |                     |
| CB4856 HS IV                                   | 15056131                                        | 15057889 | WBGene00044979 | Y41E3.19   | Y41E3.19   |                     |
| 0.238588244244378                              | AGIWUR38414                                     |          |                |            |            |                     |
| CB4856 HS IV                                   | 15058294                                        | 15058694 | WBGene00012771 | Y41E3.13   | Y41E3.13   |                     |
| -0.0476664309455685                            | AGIWUR39152                                     |          |                |            |            |                     |
| CB4856 HS IV                                   | 15061929                                        | 15065748 | WBGene00044003 | Y41E3.18   | Y41E3.18   |                     |

|                                                                                                |                                                                       |                |           |          |                    |  |
|------------------------------------------------------------------------------------------------|-----------------------------------------------------------------------|----------------|-----------|----------|--------------------|--|
| 0.0921382478030019                                                                             | AGIWUR10034;AGIWUR15352                                               |                |           |          |                    |  |
| CB4856 HS IV                                                                                   | 15065866 15068918                                                     | WBGene00012773 | srt-48    | Y41E3.15 |                    |  |
| 0.0756853148089283                                                                             | AGIWUR37577;AGIWUR44448                                               |                |           |          |                    |  |
| CB4856 HS IV                                                                                   | 15074692 15088581                                                     | WBGene00012775 | srt-50    | Y41E3.17 |                    |  |
| -0.0557633849232682                                                                            | AGIWUR4268;AGIWUR5689;AGIWUR13957;AGIWUR21801;AGIWUR28319;AGIWUR36582 |                |           |          |                    |  |
| CB4856 HS IV                                                                                   | 15092881 15098376                                                     | WBGene00012772 | srt-49    | Y41E3.14 |                    |  |
| -0.0359650782828815                                                                            | AGIWUR25669                                                           |                |           |          |                    |  |
| CB4856 HS IV                                                                                   | 15103629 15106483                                                     | WBGene00010950 | srt-44    | M199.1   | 0.106107820224413  |  |
| AGIWUR28281                                                                                    |                                                                       |                |           |          |                    |  |
| CB4856 HS IV                                                                                   | 15108775 15110915                                                     | WBGene00010951 | M199.2    | M199.2   | 0.0090152474751708 |  |
| AGIWUR10267                                                                                    |                                                                       |                |           |          |                    |  |
| CB4856 HS IV                                                                                   | 15115569 15117823                                                     | WBGene00010952 | cllec-188 |          | M199.3             |  |
| -0.157297133701363                                                                             | AGIWUR27564                                                           |                |           |          |                    |  |
| CB4856 HS IV                                                                                   | 15120519 15122548                                                     | WBGene00010954 | cllec-189 |          | M199.6             |  |
| 0.0300637543922004                                                                             | AGIWUR32713                                                           |                |           |          |                    |  |
| CB4856 HS IV                                                                                   | 15123182 15124393                                                     | WBGene00010955 | M199.7    | M199.7   | 0.113671063626625  |  |
| AGIWUR22985                                                                                    |                                                                       |                |           |          |                    |  |
| CB4856 HS IV                                                                                   | 15124931 15126122                                                     | WBGene00010953 | cllec-190 |          | M199.4             |  |
| 0.00905710768395096                                                                            | AGIWUR10019                                                           |                |           |          |                    |  |
| CB4856 HS IV                                                                                   | 15127491 15127794                                                     | WBGene00044998 | M199.9    | M199.9   | 0.0477099977200899 |  |
| AGIWUR14687;AGIWUR16889;AGIWUR27904;AGIWUR31600;AGIWUR42202                                    |                                                                       |                |           |          |                    |  |
| CB4856 HS IV                                                                                   | 15129666 15131797                                                     | WBGene00000708 | col-135   | M199.5   | 0.267375379182393  |  |
| AGIWUR42402                                                                                    |                                                                       |                |           |          |                    |  |
| CB4856 HS IV                                                                                   | 15139101 15140932                                                     | WBGene00005208 | srg-51    | Y40H7A.8 |                    |  |
| -0.229977063406495                                                                             | AGIWUR28884                                                           |                |           |          |                    |  |
| CB4856 HS IV                                                                                   | 15143773 15147204                                                     | WBGene00006138 | str-78    | Y40H7A.1 |                    |  |
| -0.0411219631931292                                                                            | AGIWUR5149                                                            |                |           |          |                    |  |
| CB4856 HS IV                                                                                   | 15167800 15175536                                                     | WBGene00012744 | Y40H7A.4  |          | Y40H7A.4           |  |
| -0.0802787418174677                                                                            |                                                                       |                |           |          |                    |  |
| AGIWUR1824;AGIWUR18651;AGIWUR20328;AGIWUR20976;AGIWUR27625;AGIWUR34304;AGIWUR40849;AGIWUR41662 |                                                                       |                |           |          |                    |  |
| CB4856 HS IV                                                                                   | 15179922 15182953                                                     | WBGene00005101 | srd-23    | Y40H7A.5 |                    |  |
| -0.148259479312952                                                                             | AGIWUR6509                                                            |                |           |          |                    |  |
| CB4856 HS IV                                                                                   | 15192299 15203023                                                     | WBGene00005056 | sra-30    | Y40H7A.6 |                    |  |
| -0.0233542125414514                                                                            | AGIWUR24500                                                           |                |           |          |                    |  |
| CB4856 HS IV                                                                                   | 15207593 15209522                                                     | WBGene00012746 | Y40H7A.9  |          | Y40H7A.9           |  |
| 0.78377645702477                                                                               | AGIWUR21815                                                           |                |           |          |                    |  |
| CB4856 HS IV                                                                                   | 15210123 15215626                                                     | WBGene00012747 | Y40H7A.10 |          | Y40H7A.10          |  |
| 0.229833467241402                                                                              | AGIWUR12949                                                           |                |           |          |                    |  |
| CB4856 HS IV                                                                                   | 15219686 15220346                                                     | WBGene00012748 | Y40H7A.11 |          | Y40H7A.11          |  |

|                       |                                                             |          |                |           |           |
|-----------------------|-------------------------------------------------------------|----------|----------------|-----------|-----------|
| -0.0590945057959367   | AGIWUR36967                                                 |          |                |           |           |
| CB4856 HS IV          | 15236251                                                    | 15243675 | WBGene00013517 | lgc-52    | Y73F8A.2  |
| 0.115729583238041     | AGIWUR9569                                                  |          |                |           |           |
| CB4856 HS IV          | 15245955                                                    | 15246371 | WBGene00044259 | Y73F8A.36 | Y73F8A.36 |
| -0.0422491668199587   | AGIWUR13828;AGIWUR18916;AGIWUR29753;AGIWUR30089;AGIWUR40751 |          |                |           |           |
| CB4856 HS IV          | 15250152                                                    | 15252257 | WBGene00005625 | srj-42    | Y73F8A.3  |
| -0.1020885496305      | AGIWUR32614;AGIWUR37734;AGIWUR41029                         |          |                |           |           |
| CB4856 HS IV          | 15255690                                                    | 15257628 | WBGene00014948 | Y73F8A.4  | Y73F8A.4  |
| 0.355814098106675     | AGIWUR6659;AGIWUR23773                                      |          |                |           |           |
| CB4856 HS IV          | 15259879                                                    | 15269045 | WBGene00013518 | Y73F8A.5  | Y73F8A.5  |
| -0.00725030479905442  | AGIWUR5580                                                  |          |                |           |           |
| CB4856 HS IV          | 15270160                                                    | 15275835 | WBGene00000370 | cgc-1     | Y73F8A.6  |
| 0.266012130240814     | AGIWUR40979                                                 |          |                |           |           |
| CB4856 HS IV          | 15288019                                                    | 15289505 | WBGene00006079 | str-11    | Y73F8A.7  |
| 0.187025661252434     | AGIWUR13196;AGIWUR43672                                     |          |                |           |           |
| CB4856 HS IV          | 15294340                                                    | 15295297 | WBGene00013519 | Y73F8A.10 | Y73F8A.10 |
| -0.0493730355305022   | AGIWUR2474                                                  |          |                |           |           |
| CB4856 HS IV          | 15302421                                                    | 15309408 | WBGene00013520 | best-21   | Y73F8A.11 |
| -0.124555838031984    | AGIWUR25474                                                 |          |                |           |           |
| CB4856 HS IV          | 15312247                                                    | 15313982 | WBGene00013522 | Y73F8A.13 | Y73F8A.13 |
| -0.042962690740211    | AGIWUR16964                                                 |          |                |           |           |
| CB4856 HS IV          | 15321579                                                    | 15322183 | WBGene00013524 | Y73F8A.15 | Y73F8A.15 |
| -0.0513618069390986   | AGIWUR25245                                                 |          |                |           |           |
| CB4856 HS IV          | 15323893                                                    | 15325189 | WBGene00006558 | tbx-39    | Y73F8A.16 |
| 0.065319446284696     | AGIWUR40555                                                 |          |                |           |           |
| CB4856 HS IV          | 15326939                                                    | 15328186 | WBGene00006559 | tbx-40    | Y73F8A.17 |
| 0.0398313792498044    | AGIWUR22353                                                 |          |                |           |           |
| CB4856 HS IV          | 15337078                                                    | 15339821 | WBGene00013525 | irld-59   | Y73F8A.18 |
| -0.000586998517213111 | AGIWUR27948                                                 |          |                |           |           |
| CB4856 HS IV          | 15361555                                                    | 15368260 | WBGene00006441 | cpna-4    | Y73F8A.19 |
| -0.143249741117948    | AGIWUR10706                                                 |          |                |           |           |
| CB4856 HS IV          | 15378460                                                    | 15381686 | WBGene00013526 | Y73F8A.20 | Y73F8A.20 |
| 0.27692198487817      | AGIWUR35971                                                 |          |                |           |           |
| CB4856 HS IV          | 15423920                                                    | 15424366 | WBGene00045025 | Y73F8A.39 | Y73F8A.39 |
| 0.0203984722130954    | AGIWUR8018;AGIWUR20983;AGIWUR30345;AGIWUR42566;AGIWUR43731  |          |                |           |           |
| CB4856 HS IV          | 15442960                                                    | 15444581 | WBGene00013528 | Y73F8A.23 | Y73F8A.23 |
| 0.17279235152513      | AGIWUR39226                                                 |          |                |           |           |
| CB4856 HS IV          | 15445368                                                    | 15453187 | WBGene00013529 | Y73F8A.24 | Y73F8A.24 |
| 0.24338488194679      | AGIWUR6088                                                  |          |                |           |           |

|                                                                                                                                                         |    |    |          |          |                |              |              |
|---------------------------------------------------------------------------------------------------------------------------------------------------------|----|----|----------|----------|----------------|--------------|--------------|
| CB4856                                                                                                                                                  | HS | IV | 15455137 | 15471488 | WBGene00013530 | ntl-11       | Y73F8A.25    |
| -0.116697808448098<br>AGIWUR1774;AGIWUR2229;AGIWUR11645;AGIWUR12402;AGIWUR18303;AGIWUR25732;AGIWUR28053;AGIWUR29737;AGIWUR35606;AGIWUR37418;AGIWUR42623 |    |    |          |          |                |              |              |
| CB4856                                                                                                                                                  | HS | IV | 15472809 | 15473682 | WBGene00013532 | Y73F8A.27    | Y73F8A.27    |
| -0.165543605046517<br>AGIWUR8366;AGIWUR15188;AGIWUR20529;AGIWUR21845;AGIWUR23023;AGIWUR31382                                                            |    |    |          |          |                |              |              |
| CB4856                                                                                                                                                  | HS | IV | 15473660 | 15477512 | WBGene00013531 | Y73F8A.26    | Y73F8A.26    |
| 0.020244037855667<br>AGIWUR6318;AGIWUR34926                                                                                                             |    |    |          |          |                |              |              |
| CB4856                                                                                                                                                  | HS | IV | 15497567 | 15510980 | WBGene00013534 | acr-24       | Y73F8A.30    |
| 0.127491961259683<br>AGIWUR3707                                                                                                                         |    |    |          |          |                |              |              |
| CB4856                                                                                                                                                  | HS | IV | 15513786 | 15514464 | WBGene00013535 | gyg-3        | Y73F8A.31    |
| -0.140943288497<br>AGIWUR1385;AGIWUR8902;AGIWUR21518;AGIWUR34407                                                                                        |    |    |          |          |                |              |              |
| CB4856                                                                                                                                                  | HS | IV | 15514537 | 15521258 | WBGene00013536 | Y73F8A.32    | Y73F8A.32    |
| 0.00989282144011616<br>AGIWUR2334;AGIWUR33625                                                                                                           |    |    |          |          |                |              |              |
| CB4856                                                                                                                                                  | HS | IV | 15533167 | 15539959 | WBGene00013539 | Y73F8A.35    | Y73F8A.35    |
| -0.00165363772475047<br>AGIWUR42953                                                                                                                     |    |    |          |          |                |              |              |
| CB4856                                                                                                                                                  | HS | IV | 15550854 | 15554721 | WBGene00013632 | Y105C5A.1    | Y105C5A.1    |
| 0.0169032686478552<br>AGIWUR3354;AGIWUR13296;AGIWUR13372;AGIWUR23799;AGIWUR23986;AGIWUR28284;AGIWUR43025                                                |    |    |          |          |                |              |              |
| CB4856                                                                                                                                                  | HS | IV | 15591973 | 15592386 | WBGene00045016 | Y105C5A.30   | Y105C5A.30   |
| -0.0478563207019125<br>AGIWUR25604;AGIWUR37634;AGIWUR39230                                                                                              |    |    |          |          |                |              |              |
| CB4856                                                                                                                                                  | HS | IV | 15612768 | 15617087 | WBGene00013633 | Y105C5A.8    | Y105C5A.8    |
| 0.08308621715965<br>AGIWUR28785                                                                                                                         |    |    |          |          |                |              |              |
| CB4856                                                                                                                                                  | HS | IV | 15646031 | 15646433 | WBGene00185102 | Y105C5A.1268 | Y105C5A.1268 |
| -0.0606841187178713<br>AGIWUR29947                                                                                                                      |    |    |          |          |                |              |              |
| CB4856                                                                                                                                                  | HS | IV | 15689201 | 15722267 | WBGene00013639 | Y105C5A.15   | Y105C5A.15   |
| -0.0811428865252264<br>AGIWUR7273;AGIWUR15147;AGIWUR15364;AGIWUR16294;AGIWUR25313                                                                       |    |    |          |          |                |              |              |
| CB4856                                                                                                                                                  | HS | IV | 15820059 | 15825617 | WBGene00013642 | daf-38       | Y105C5A.23   |
| 0.8151944871212<br>AGIWUR18586                                                                                                                          |    |    |          |          |                |              |              |
| CB4856                                                                                                                                                  | HS | IV | 15849875 | 15852905 | WBGene00013643 | Y105C5A.24   | Y105C5A.24   |
| 0.101008457778285<br>AGIWUR15451                                                                                                                        |    |    |          |          |                |              |              |
| CB4856                                                                                                                                                  | HS | IV | 15860221 | 15861442 | WBGene00013644 | Y105C5A.25   | Y105C5A.25   |
| 0.36171123779503<br>AGIWUR14488                                                                                                                         |    |    |          |          |                |              |              |
| CB4856                                                                                                                                                  | HS | IV | 15870643 | 15872221 | WBGene00013645 | Y105C5B.1    | Y105C5B.1    |
| 0.30986770168589<br>AGIWUR22250                                                                                                                         |    |    |          |          |                |              |              |
| CB4856                                                                                                                                                  | HS | IV | 15872933 | 15882377 | WBGene00001549 | gcy-25       | Y105C5B.2    |
| -0.0183559043785744<br>AGIWUR4121;AGIWUR28709                                                                                                           |    |    |          |          |                |              |              |
| CB4856                                                                                                                                                  | HS | IV | 15899935 | 15901225 | WBGene00013647 | Y105C5B.5    | Y105C5B.5    |
| 0.037375241233125<br>AGIWUR10199                                                                                                                        |    |    |          |          |                |              |              |
| CB4856                                                                                                                                                  | HS | IV | 15906582 | 15910091 | WBGene00005726 | srv-15       | Y105C5B.6    |

|                     |                                                 |          |                |                   |              |
|---------------------|-------------------------------------------------|----------|----------------|-------------------|--------------|
| 0.214419765125969   | AGIWUR43627                                     |          |                |                   |              |
| CB4856 HS IV        | 15914997                                        | 15919234 | WBGene00013648 | Y105C5B.7         | Y105C5B.7    |
| 0.351270100976202   | AGIWUR5491                                      |          |                |                   |              |
| CB4856 HS IV        | 15930581                                        | 15931813 | WBGene00013650 | Y105C5B.9         | Y105C5B.9    |
| 0.160587760215131   | AGIWUR9620                                      |          |                |                   |              |
| CB4856 HS IV        | 15937112                                        | 15941491 | WBGene00013651 | Y105C5B.11        | Y105C5B.11   |
| 0.120528529128072   | AGIWUR4903;AGIWUR15594;AGIWUR21513              |          |                |                   |              |
| CB4856 HS IV        | 15942535                                        | 15944430 | WBGene00013652 | sams-2 Y105C5B.12 |              |
| 0.0145828960781031  | AGIWUR43488                                     |          |                |                   |              |
| CB4856 HS IV        | 15946784                                        | 15947438 | WBGene00004816 | skr-10 Y105C5B.13 |              |
| -0.204152533845354  | AGIWUR4957                                      |          |                |                   |              |
| CB4856 HS IV        | 15949725                                        | 15950861 | WBGene00013653 | Y105C5B.14        | Y105C5B.14   |
| 0.139991653969354   | AGIWUR42421                                     |          |                |                   |              |
| CB4856 HS IV        | 15951909                                        | 15954836 | WBGene00013654 | Y105C5B.15        | Y105C5B.15   |
| 0.208553770580481   | AGIWUR569                                       |          |                |                   |              |
| CB4856 HS IV        | 15956571                                        | 15962712 | WBGene00013655 | lgc-19 Y105C5B.16 |              |
| -0.0120750984386735 | AGIWUR44188                                     |          |                |                   |              |
| CB4856 HS IV        | 15963124                                        | 15964425 | WBGene00013656 | Y105C5B.17        | Y105C5B.17   |
| -0.0192210330092095 | AGIWUR25817                                     |          |                |                   |              |
| CB4856 HS IV        | 15964640                                        | 15965679 | WBGene00013657 | Y105C5B.18        | Y105C5B.18   |
| -0.0937863852222494 | AGIWUR24962;AGIWUR28919;AGIWUR31362;AGIWUR33863 |          |                |                   |              |
| CB4856 HS IV        | 15981575                                        | 15983970 | WBGene00013658 | Y105C5B.19        | Y105C5B.19   |
| 0.114144207602173   | AGIWUR13191                                     |          |                |                   |              |
| CB4856 HS IV        | 15993454                                        | 15994605 | WBGene00013659 | Y105C5B.20        | Y105C5B.20   |
| 0.00735472158865136 | AGIWUR44271                                     |          |                |                   |              |
| CB4856 HS IV        | 15997858                                        | 16026847 | WBGene00002175 | jac-1 Y105C5B.21  |              |
| -0.0489145926438441 | AGIWUR19039;AGIWUR20231                         |          |                |                   |              |
| CB4856 HS IV        | 16057283                                        | 16061358 | WBGene00013661 | Y105C5B.23        | Y105C5B.23   |
| 0.0237728014791241  | AGIWUR25871                                     |          |                |                   |              |
| CB4856 HS IV        | 16063326                                        | 16064132 | WBGene00005220 | srg-63 Y105C5B.24 |              |
| -0.012121290548242  | AGIWUR7527;AGIWUR22419;AGIWUR32294;AGIWUR38092  |          |                |                   |              |
| CB4856 HS IV        | 16090484                                        | 16091939 | WBGene00044085 | Y105C5B.30        | Y105C5B.30   |
| 0.323322816463099   | AGIWUR13023;AGIWUR28227                         |          |                |                   |              |
| CB4856 HS IV        | 16132464                                        | 16134179 | WBGene00013665 | h1h-32 Y105C5B.29 |              |
| -0.105254808038449  | AGIWUR21888                                     |          |                |                   |              |
| CB4856 HS IV        | 16142544                                        | 16147155 | WBGene00013662 | Y105C5B.25        | Y105C5B.25   |
| 0.182338354157716   | AGIWUR6295                                      |          |                |                   |              |
| CB4856 HS IV        | 16156908                                        | 16165267 | WBGene00220260 | Y105C5B.1420      | Y105C5B.1420 |
| -0.0303699166186999 | AGIWUR30234;AGIWUR35772                         |          |                |                   |              |



|                         |                                                                                    |          |                |           |                             |
|-------------------------|------------------------------------------------------------------------------------|----------|----------------|-----------|-----------------------------|
| CB4856 HS IV            | 16167785                                                                           | 16170859 | WBGene00001604 | gln-3     | Y105C5B.28                  |
| 0.140288538155001       | AGIWUR3320;AGIWUR11501;AGIWUR13974;AGIWUR21293;AGIWUR27036;AGIWUR32466;AGIWUR38304 |          |                |           |                             |
| CB4856 HS IV            | 16197048                                                                           | 16201417 | WBGene00012416 | Y7A9A.1   | Y7A9A.1 0.0559269855406264  |
| AGIWUR22558             |                                                                                    |          |                |           |                             |
| CB4856 HS IV            | 16202374                                                                           | 16205321 | WBGene00010411 | H25K10.1  | H25K10.1                    |
| -0.0720321941310731     | AGIWUR28701;AGIWUR41997                                                            |          |                |           |                             |
| CB4856 HS IV            | 16210723                                                                           | 16211013 | WBGene00010412 | H25K10.2  | H25K10.2                    |
| -0.224512987372053      | AGIWUR41059                                                                        |          |                |           |                             |
| CB4856 HS IV            | 16219652                                                                           | 16221659 | WBGene00005722 | srv-11    | H25K10.3                    |
| 0.16366892258963        | AGIWUR41993                                                                        |          |                |           |                             |
| CB4856 HS IV            | 16226047                                                                           | 16227122 | WBGene00010413 | H25K10.4  | H25K10.4                    |
| 0.229243580786111       | AGIWUR19112                                                                        |          |                |           |                             |
| CB4856 HS IV            | 16230452                                                                           | 16233128 | WBGene00010414 | hpa-1     | H25K10.5                    |
| -0.329856056983856      | AGIWUR1004                                                                         |          |                |           |                             |
| CB4856 HS IV            | 16233148                                                                           | 16236555 | WBGene00010415 | irld-39   | H25K10.6                    |
| -0.109085279011504      | AGIWUR12877                                                                        |          |                |           |                             |
| CB4856 HS IV            | 16236732                                                                           | 16238655 | WBGene00005808 | srw-61    | H25K10.7                    |
| 0.673988823034325       | AGIWUR20698                                                                        |          |                |           |                             |
| CB4856 HS IV            | 16247431                                                                           | 16251790 | WBGene00009535 | F38C2.1   | F38C2.1 -0.086794587496331  |
| AGIWUR1967              |                                                                                    |          |                |           |                             |
| CB4856 HS IV            | 16254764                                                                           | 16256274 | WBGene00001961 | hlh-17    | F38C2.2 0.0133176748965464  |
| AGIWUR39384             |                                                                                    |          |                |           |                             |
| CB4856 HS IV            | 16257668                                                                           | 16259417 | WBGene00009540 | hlh-31    | F38C2.8 0.0559578116913855  |
| AGIWUR14645;AGIWUR37847 |                                                                                    |          |                |           |                             |
| CB4856 HS IV            | 16271263                                                                           | 16273187 | WBGene00009536 | F38C2.4   | F38C2.4 -0.150711639908547  |
| AGIWUR16881             |                                                                                    |          |                |           |                             |
| CB4856 HS IV            | 16276647                                                                           | 16277391 | WBGene00009539 | F38C2.7   | F38C2.7 -0.0127610944130518 |
| AGIWUR36786             |                                                                                    |          |                |           |                             |
| CB4856 HS IV            | 16278202                                                                           | 16279018 | WBGene00009537 | ccch-2    | F38C2.5 -0.29367959120224   |
| AGIWUR2753              |                                                                                    |          |                |           |                             |
| CB4856 HS IV            | 16279634                                                                           | 16280714 | WBGene00009538 | cllec-191 | F38C2.6                     |
| 0.0411745038103977      | AGIWUR43506                                                                        |          |                |           |                             |
| CB4856 HS IV            | 16281520                                                                           | 16283423 | WBGene00045026 | Y7A9C.10  | Y7A9C.10                    |
| 0.121557015858372       | AGIWUR25908                                                                        |          |                |           |                             |
| CB4856 HS IV            | 16286655                                                                           | 16287825 | WBGene00023517 | srz-75    | Y7A9C.9 -0.0229599077329659 |
| AGIWUR5516;AGIWUR11469  |                                                                                    |          |                |           |                             |
| CB4856 HS IV            | 16288113                                                                           | 16289310 | WBGene00023518 | srz-76    | Y7A9C.8 -0.038262740829575  |
| AGIWUR29943             |                                                                                    |          |                |           |                             |
| CB4856 HS IV            | 16289558                                                                           | 16290835 | WBGene00012419 | srz-73    | Y7A9C.3 -0.262306107273899  |

|                                                                                |    |    |          |          |                |          |                             |
|--------------------------------------------------------------------------------|----|----|----------|----------|----------------|----------|-----------------------------|
| AGIWUR4987;AGIWUR29474;AGIWUR31684                                             |    |    |          |          |                |          |                             |
| CB4856                                                                         | HS | IV | 16291988 | 16293070 | WBGene00023510 | srz-40   | Y7A9C.5 -0.105321842305765  |
| AGIWUR3818                                                                     |    |    |          |          |                |          |                             |
| CB4856                                                                         | HS | IV | 16293199 | 16293482 | WBGene00045105 | Y7A9C.11 | Y7A9C.11                    |
| 0.127284772149959 AGIWUR1833                                                   |    |    |          |          |                |          |                             |
| CB4856                                                                         | HS | IV | 16293619 | 16293923 | WBGene00045106 | Y7A9C.12 | Y7A9C.12                    |
| 0.102166921584008 AGIWUR18794;AGIWUR27829;AGIWUR41685                          |    |    |          |          |                |          |                             |
| CB4856                                                                         | HS | IV | 16294154 | 16298479 | WBGene00012418 | Y7A9C.1  | Y7A9C.1 -0.0844850786228175 |
| AGIWUR10327;AGIWUR12900;AGIWUR29256;AGIWUR40799;AGIWUR44868                    |    |    |          |          |                |          |                             |
| CB4856                                                                         | HS | IV | 16298813 | 16299012 | WBGene00045107 | Y7A9C.13 | Y7A9C.13                    |
| 0.0612615810360353 AGIWUR10892;AGIWUR11887;AGIWUR12721;AGIWUR22530;AGIWUR23429 |    |    |          |          |                |          |                             |
| CB4856                                                                         | HS | IV | 16299151 | 16300272 | WBGene00023514 | srz-72   | Y7A9C.7 -0.235946208403688  |
| AGIWUR953;AGIWUR34466                                                          |    |    |          |          |                |          |                             |
| CB4856                                                                         | HS | IV | 16300588 | 16301746 | WBGene00023511 | srz-41   | Y7A9C.6 -0.093680095849427  |
| AGIWUR22366;AGIWUR29053                                                        |    |    |          |          |                |          |                             |
| CB4856                                                                         | HS | IV | 16303614 | 16306235 | WBGene00014862 | Y7A9C.2  | Y7A9C.2 -0.0370262262111165 |
| AGIWUR2421;AGIWUR8717                                                          |    |    |          |          |                |          |                             |
| CB4856                                                                         | HS | IV | 16306312 | 16306839 | WBGene00023509 | srz-39   | Y7A9C.4 -0.0511933273611698 |
| AGIWUR19605;AGIWUR25345;AGIWUR35351;AGIWUR39465;AGIWUR42243                    |    |    |          |          |                |          |                             |
| CB4856                                                                         | HS | IV | 16308225 | 16309829 | WBGene00004287 | rac-2    | K03D3.10                    |
| -0.190145853715109 AGIWUR1338                                                  |    |    |          |          |                |          |                             |
| CB4856                                                                         | HS | IV | 16311079 | 16319703 | WBGene00044670 | rac-3    | K03D3.13                    |
| -0.00335990811981812 AGIWUR12250;AGIWUR12813;AGIWUR35498;AGIWUR44020           |    |    |          |          |                |          |                             |
| CB4856                                                                         | HS | IV | 16320139 | 16320506 | WBGene00010531 | K03D3.5  | K03D3.5 -0.315712457750557  |
| AGIWUR6101                                                                     |    |    |          |          |                |          |                             |
| CB4856                                                                         | HS | IV | 16321166 | 16323195 | WBGene00010530 | srz-61   | K03D3.4 0.0872517983503074  |
| AGIWUR38770;AGIWUR43421                                                        |    |    |          |          |                |          |                             |
| CB4856                                                                         | HS | IV | 16323673 | 16324973 | WBGene00043052 | srz-104  | K03D3.11                    |
| -0.026215415611663 AGIWUR19731                                                 |    |    |          |          |                |          |                             |
| CB4856                                                                         | HS | IV | 16325172 | 16326601 | WBGene00044587 | srz-105  | K03D3.12                    |
| 0.0257820693049284 AGIWUR40134                                                 |    |    |          |          |                |          |                             |
| CB4856                                                                         | HS | IV | 16326718 | 16327965 | WBGene00010529 | srz-21   | K03D3.3 -0.0580676209161455 |
| AGIWUR40769                                                                    |    |    |          |          |                |          |                             |
| CB4856                                                                         | HS | IV | 16328135 | 16328614 | WBGene00010528 | K03D3.2  | K03D3.2 0.0901264780094087  |
| AGIWUR13565                                                                    |    |    |          |          |                |          |                             |
| CB4856                                                                         | HS | IV | 16329459 | 16331059 | WBGene00010527 | srz-74   | K03D3.1 0.0996244189721622  |
| AGIWUR13697                                                                    |    |    |          |          |                |          |                             |
| CB4856                                                                         | HS | IV | 16331365 | 16332611 | WBGene00045100 | K03D3.14 | K03D3.14                    |
| 0.0314175021857768 AGIWUR7604                                                  |    |    |          |          |                |          |                             |

|                                                                         |                                                             |          |                |            |           |                     |
|-------------------------------------------------------------------------|-------------------------------------------------------------|----------|----------------|------------|-----------|---------------------|
| CB4856 HS IV                                                            | 16332885                                                    | 16334461 | WBGene00023513 | srz-71     | C35D6.10  |                     |
| 0.459586605872692                                                       | AGIWUR20690                                                 |          |                |            |           |                     |
| CB4856 HS IV                                                            | 16335337                                                    | 16336503 | WBGene00023508 | srz-38     | C35D6.9   | 0.0974758061470733  |
| AGIWUR21322;AGIWUR27500                                                 |                                                             |          |                |            |           |                     |
| CB4856 HS IV                                                            | 16337021                                                    | 16338502 | WBGene00045101 | C35D6.13   |           | C35D6.13            |
| -0.135179606664096                                                      | AGIWUR22054;AGIWUR25308                                     |          |                |            |           |                     |
| CB4856 HS IV                                                            | 16338562                                                    | 16339098 | WBGene00045040 | C35D6.12   |           | C35D6.12            |
| 0.0516475715388198                                                      | AGIWUR33321                                                 |          |                |            |           |                     |
| CB4856 HS IV                                                            | 16341625                                                    | 16345442 | WBGene00005434 | srh-224    | C35D6.8   | 0.0816023946450581  |
| AGIWUR7329;AGIWUR13640                                                  |                                                             |          |                |            |           |                     |
| CB4856 HS IV                                                            | 16347168                                                    | 16347430 | WBGene00007960 | C35D6.3    | C35D6.3   | -0.246473595470002  |
| AGIWUR40446                                                             |                                                             |          |                |            |           |                     |
| CB4856 HS IV                                                            | 16348409                                                    | 16348751 | WBGene00045028 | C35D6.11   |           | C35D6.11            |
| -0.0237957320468318                                                     | AGIWUR2973;AGIWUR5282;AGIWUR16135;AGIWUR20681;AGIWUR36159   |          |                |            |           |                     |
| CB4856 HS IV                                                            | 16350990                                                    | 16351601 | WBGene00007961 | C35D6.4    | C35D6.4   | -0.0675473327819986 |
| AGIWUR5086                                                              |                                                             |          |                |            |           |                     |
| CB4856 HS IV                                                            | 16366996                                                    | 16368943 | WBGene00007962 | C35D6.5    | C35D6.5   | 0.226117348673148   |
| AGIWUR5610                                                              |                                                             |          |                |            |           |                     |
| CB4856 HS IV                                                            | 16381378                                                    | 16382235 | WBGene00012420 | Y7A9D.1    | Y7A9D.1   | -0.0756195430919702 |
| AGIWUR32721;AGIWUR33229;AGIWUR37237;AGIWUR41776;AGIWUR43445;AGIWUR45148 |                                                             |          |                |            |           |                     |
| CB4856 HS IV                                                            | 16398839                                                    | 16399875 | WBGene00013418 | Y65A5A.1   |           | Y65A5A.1            |
| -0.0983730136294003                                                     | AGIWUR30411                                                 |          |                |            |           |                     |
| CB4856 HS IV                                                            | 16412020                                                    | 16416808 | WBGene00013419 | Y65A5A.2   |           | Y65A5A.2            |
| -0.237727950302977                                                      | AGIWUR26456                                                 |          |                |            |           |                     |
| CB4856 HS IV                                                            | 16424637                                                    | 16429895 | WBGene00012423 | Y10G11A.1  |           | Y10G11A.1           |
| 0.152033055429134                                                       | AGIWUR5130;AGIWUR7085                                       |          |                |            |           |                     |
| CB4856 HS IV                                                            | 16432231                                                    | 16437953 | WBGene00012424 | d1c-3      | Y10G11A.2 |                     |
| 0.582025144574922                                                       | AGIWUR19845                                                 |          |                |            |           |                     |
| CB4856 HS IV                                                            | 16443263                                                    | 16446683 | WBGene00012425 | d1c-4      | Y10G11A.3 |                     |
| 0.0749826803391525                                                      | AGIWUR23539                                                 |          |                |            |           |                     |
| CB4856 HS IV                                                            | 16454270                                                    | 16454579 | WBGene00045185 | VY10G11R.4 |           | VY10G11R.4          |
| 0.0776528424849392                                                      | AGIWUR10617;AGIWUR13766;AGIWUR19304;AGIWUR37200;AGIWUR40802 |          |                |            |           |                     |
| CB4856 HS IV                                                            | 16468723                                                    | 16469064 | WBGene00045097 | VY10G11R.2 |           | VY10G11R.2          |
| -0.222669233565194                                                      | AGIWUR6952;AGIWUR14946;AGIWUR15445;AGIWUR29398;AGIWUR36369  |          |                |            |           |                     |
| CB4856 HS IV                                                            | 16469580                                                    | 16470881 | WBGene00012159 | VY10G11R.1 |           | VY10G11R.1          |
| -0.395991697165289                                                      | AGIWUR4731                                                  |          |                |            |           |                     |
| CB4856 HS IV                                                            | 16474044                                                    | 16477192 | WBGene00013098 | Y51H4A.1   |           | Y51H4A.1            |
| -0.362236330665345                                                      | AGIWUR13939                                                 |          |                |            |           |                     |
| CB4856 HS IV                                                            | 16482784                                                    | 16489021 | WBGene00004357 | rho-1      | Y51H4A.3  |                     |

|                                                                                             |                                                 |                |                   |           |
|---------------------------------------------------------------------------------------------|-------------------------------------------------|----------------|-------------------|-----------|
| -0.122424056907044                                                                          | AGIWUR2147;AGIWUR39259                          |                |                   |           |
| CB4856 HS IV                                                                                | 16493428 16494510                               | WBGene00013099 | Y51H4A.2          | Y51H4A.2  |
| -0.360517790999859                                                                          | AGIWUR5454                                      |                |                   |           |
| CB4856 HS IV                                                                                | 16503249 16505682                               | WBGene00013100 | zip-7 Y51H4A.4    |           |
| 0.323839057325827                                                                           | AGIWUR8385;AGIWUR41524                          |                |                   |           |
| CB4856 HS IV                                                                                | 16522529 16526132                               | WBGene00013101 | Y51H4A.5          | Y51H4A.5  |
| -0.00633473881145719                                                                        | AGIWUR31950                                     |                |                   |           |
| CB4856 HS IV                                                                                | 16533661 16533962                               | WBGene00013102 | Y51H4A.6          | Y51H4A.6  |
| -0.238336514195916                                                                          | AGIWUR42976                                     |                |                   |           |
| CB4856 HS IV                                                                                | 16535730 16542894                               | WBGene00013103 | Y51H4A.7          | Y51H4A.7  |
| 0.0795875700904389                                                                          | AGIWUR18320                                     |                |                   |           |
| CB4856 HS IV                                                                                | 16551492 16554348                               | WBGene00000709 | col-136 Y51H4A.28 |           |
| -0.0791011050614525                                                                         | AGIWUR28306;AGIWUR33242                         |                |                   |           |
| CB4856 HS IV                                                                                | 16575102 16578549                               | WBGene00013104 | Y51H4A.8          | Y51H4A.8  |
| 0.295494028977799                                                                           | AGIWUR43151                                     |                |                   |           |
| CB4856 HS IV                                                                                | 16601480 16602776                               | WBGene00000710 | col-137 Y51H4A.9  |           |
| -0.163822795702956                                                                          | AGIWUR17787                                     |                |                   |           |
| CB4856 HS IV                                                                                | 16627976 16628441                               | WBGene00013120 | fipr-28 Y51H4A.26 |           |
| -0.158593680329933                                                                          | AGIWUR12842                                     |                |                   |           |
| CB4856 HS IV                                                                                | 16656613 16657359                               | WBGene00013109 | Y51H4A.15         | Y51H4A.15 |
| -0.196660172292088                                                                          | AGIWUR26764                                     |                |                   |           |
| CB4856 HS IV                                                                                | 16664320 16671467                               | WBGene00013111 | sta-1 Y51H4A.17   |           |
| 0.0394027605663814                                                                          |                                                 |                |                   |           |
| AGIWUR1252;AGIWUR2004;AGIWUR3505;AGIWUR5230;AGIWUR21787;AGIWUR22093;AGIWUR26957;AGIWUR34933 |                                                 |                |                   |           |
| CB4856 HS IV                                                                                | 16720715 16722736                               | WBGene00013116 | Y51H4A.22         | Y51H4A.22 |
| -0.00476559692592105                                                                        | AGIWUR3435                                      |                |                   |           |
| CB4856 HS IV                                                                                | 16722916 16723892                               | WBGene00013117 | Y51H4A.23         | Y51H4A.23 |
| -0.216187228030586                                                                          | AGIWUR39803                                     |                |                   |           |
| CB4856 HS IV                                                                                | 16736329 16743178                               | WBGene00013119 | Y51H4A.25         | Y51H4A.25 |
| 0.126892764295221                                                                           | AGIWUR25777;AGIWUR38342                         |                |                   |           |
| CB4856 HS IV                                                                                | 16758420 16758769                               | WBGene00045321 | Y43D4A.10         | Y43D4A.10 |
| -0.159629526289297                                                                          | AGIWUR15417;AGIWUR20545;AGIWUR31612;AGIWUR34955 |                |                   |           |
| CB4856 HS IV                                                                                | 16775827 16785172                               | WBGene00012791 | Y43D4A.5          | Y43D4A.5  |
| -0.0856835668114009                                                                         | AGIWUR9735                                      |                |                   |           |
| CB4856 HS IV                                                                                | 16787327 16788510                               | WBGene00012792 | Y43D4A.6          | Y43D4A.6  |
| -0.104930018670658                                                                          | AGIWUR21279;AGIWUR36471;AGIWUR42890             |                |                   |           |
| CB4856 HS IV                                                                                | 16826324 16828020                               | WBGene00013776 | Y116A8A.6         | Y116A8A.6 |
| 0.0914218950684695                                                                          | AGIWUR7119                                      |                |                   |           |
| CB4856 HS IV                                                                                | 16831666 16832984                               | WBGene00013778 | cllec-194         | Y116A8A.8 |

|                      |                                                                                   |          |                |            |            |
|----------------------|-----------------------------------------------------------------------------------|----------|----------------|------------|------------|
| -0.324885650933187   | AGIWUR35391                                                                       |          |                |            |            |
| CB4856 HS IV         | 16847829                                                                          | 16854943 | WBGene00003130 | map-2      | Y116A8A.9  |
| -0.00590920715156251 | AGIWUR9535                                                                        |          |                |            |            |
| CB4856 HS IV         | 16855044                                                                          | 16863443 | WBGene00020284 | mel-46     | T06A10.1   |
| -0.0653380500613565  | AGIWUR38585                                                                       |          |                |            |            |
| CB4856 HS IV         | 16862396                                                                          | 16865479 | WBGene00020287 | lsy-13     | T06A10.4   |
| -0.166682876616875   | AGIWUR21297                                                                       |          |                |            |            |
| CB4856 HS IV         | 16865838                                                                          | 16866504 | WBGene00020286 | T06A10.3   | T06A10.3   |
| 0.0253793502868884   | AGIWUR18852                                                                       |          |                |            |            |
| CB4856 HS IV         | 16920341                                                                          | 16924071 | WBGene00013785 | nep-23     | Y116A8C.4  |
| 0.389040677505452    | AGIWUR7228                                                                        |          |                |            |            |
| CB4856 HS IV         | 16928334                                                                          | 16929067 | WBGene00014976 | Y116A8C.7  | Y116A8C.7  |
| -0.151202308240904   | AGIWUR6180;AGIWUR11548;AGIWUR21776;AGIWUR22996;AGIWUR37782                        |          |                |            |            |
| CB4856 HS IV         | 16930837                                                                          | 16931177 | WBGene00045128 | Y116A8C.49 | Y116A8C.49 |
| 0.0510996311800325   | AGIWUR4096                                                                        |          |                |            |            |
| CB4856 HS IV         | 16931990                                                                          | 16933113 | WBGene00013788 | Y116A8C.8  | Y116A8C.8  |
| -0.0682925330802036  | AGIWUR929;AGIWUR9903                                                              |          |                |            |            |
| CB4856 HS IV         | 16934266                                                                          | 16939111 | WBGene00013790 | Y116A8C.10 | Y116A8C.10 |
| 0.0604175330858343   | AGIWUR1366;AGIWUR8901;AGIWUR28542;AGIWUR34521;AGIWUR40850;AGIWUR42572;AGIWUR44503 |          |                |            |            |
| CB4856 HS IV         | 16939804                                                                          | 16946910 | WBGene00013789 | Y116A8C.9  | Y116A8C.9  |
| -0.327788911034656   | AGIWUR37459                                                                       |          |                |            |            |
| CB4856 HS IV         | 16947120                                                                          | 16949734 | WBGene00000184 | arf-6      | Y116A8C.12 |
| 0.0649431325069934   | AGIWUR22709                                                                       |          |                |            |            |
| CB4856 HS IV         | 16950065                                                                          | 16962868 | WBGene00013792 | Y116A8C.13 | Y116A8C.13 |
| 0.194936476462349    | AGIWUR12465                                                                       |          |                |            |            |
| CB4856 HS IV         | 16965284                                                                          | 16970490 | WBGene00004402 | rom-3      | Y116A8C.14 |
| 0.176819130735423    | AGIWUR10932                                                                       |          |                |            |            |
| CB4856 HS IV         | 16988828                                                                          | 16989771 | WBGene00013791 | Y116A8C.11 | Y116A8C.11 |
| -0.10530277983065    | AGIWUR673;AGIWUR30500;AGIWUR33757;AGIWUR38152;AGIWUR41182;AGIWUR42358             |          |                |            |            |
| CB4856 HS IV         | 16995777                                                                          | 17014953 | WBGene00004403 | rom-4      | Y116A8C.16 |
| -0.148081432165275   | AGIWUR5163;AGIWUR22741;AGIWUR30005                                                |          |                |            |            |
| CB4856 HS IV         | 17022990                                                                          | 17023922 | WBGene00045315 | Y116A8C.52 | Y116A8C.52 |
| 0.0263460655202836   | AGIWUR38540                                                                       |          |                |            |            |
| CB4856 HS IV         | 17024318                                                                          | 17025132 | WBGene00013794 | dct-13     | Y116A8C.17 |
| 0.00559468121767726  | AGIWUR4796                                                                        |          |                |            |            |
| CB4856 HS IV         | 17028931                                                                          | 17030594 | WBGene00013795 | nhr-229    | Y116A8C.18 |
| -0.149057389654104   | AGIWUR8246;AGIWUR27868                                                            |          |                |            |            |
| CB4856 HS IV         | 17038923                                                                          | 17039667 | WBGene00013796 | Y116A8C.19 | Y116A8C.19 |
| -0.202885053465534   | AGIWUR10845                                                                       |          |                |            |            |

|                                                                                               |                                                                        |          |                |                   |            |
|-----------------------------------------------------------------------------------------------|------------------------------------------------------------------------|----------|----------------|-------------------|------------|
| CB4856 HS IV                                                                                  | 17040913                                                               | 17041523 | WBGene00013797 | Y116A8C.20        | Y116A8C.20 |
| -0.0854682843459234                                                                           | AGIWUR14834                                                            |          |                |                   |            |
| CB4856 HS IV                                                                                  | 17046470                                                               | 17048357 | WBGene00013799 | athp-3 Y116A8C.22 |            |
| -0.345027848754206                                                                            | AGIWUR26399                                                            |          |                |                   |            |
| CB4856 HS IV                                                                                  | 17053594                                                               | 17055513 | WBGene00013800 | Y116A8C.23        | Y116A8C.23 |
| -0.132795750689866                                                                            | AGIWUR13331                                                            |          |                |                   |            |
| CB4856 HS IV                                                                                  | 17056746                                                               | 17057831 | WBGene00045280 | Y116A8C.51        | Y116A8C.51 |
| 0.122811662736284                                                                             | AGIWUR4143;AGIWUR15519;AGIWUR36264                                     |          |                |                   |            |
| CB4856 HS IV                                                                                  | 17068795                                                               | 17070903 | WBGene00013801 | Y116A8C.24        | Y116A8C.24 |
| 0.0650180418134916                                                                            | AGIWUR12026                                                            |          |                |                   |            |
| CB4856 HS IV                                                                                  | 17079606                                                               | 17087438 | WBGene00013803 | snx-13 Y116A8C.26 |            |
| -0.0109307080567458                                                                           | AGIWUR1253;AGIWUR16582;AGIWUR22196;AGIWUR30792;AGIWUR39567;AGIWUR41148 |          |                |                   |            |
| CB4856 HS IV                                                                                  | 17088058                                                               | 17088834 | WBGene00004914 | snr-1 Y116A8C.42  |            |
| -0.0943284156363795                                                                           |                                                                        |          |                |                   |            |
| AGIWUR2910;AGIWUR2945;AGIWUR15577;AGIWUR21296;AGIWUR22559;AGIWUR27398;AGIWUR34517;AGIWUR40521 |                                                                        |          |                |                   |            |
| CB4856 HS IV                                                                                  | 17088851                                                               | 17090646 | WBGene00013814 | Y116A8C.43        | Y116A8C.43 |
| 0.0815774214420877                                                                            | AGIWUR9877                                                             |          |                |                   |            |
| CB4856 HS IV                                                                                  | 17090630                                                               | 17096286 | WBGene00013804 | Y116A8C.27        | Y116A8C.27 |
| 0.11821805809128                                                                              | AGIWUR14712                                                            |          |                |                   |            |
| CB4856 HS IV                                                                                  | 17096386                                                               | 17100246 | WBGene00013805 | bca-2 Y116A8C.28  |            |
| 0.00769577542450151                                                                           | AGIWUR8202;AGIWUR34891                                                 |          |                |                   |            |
| CB4856 HS IV                                                                                  | 17100225                                                               | 17103715 | WBGene00013807 | Y116A8C.30        | Y116A8C.30 |
| 0.0992718775717183                                                                            | AGIWUR15694                                                            |          |                |                   |            |
| CB4856 HS IV                                                                                  | 17104179                                                               | 17110982 | WBGene00013808 | sfa-1 Y116A8C.32  |            |
| 0.378050393603753                                                                             | AGIWUR19437                                                            |          |                |                   |            |
| CB4856 HS IV                                                                                  | 17111082                                                               | 17116666 | WBGene00000889 | cyn-13 Y116A8C.34 |            |
| -0.0665288006279336                                                                           | AGIWUR20202                                                            |          |                |                   |            |
| CB4856 HS IV                                                                                  | 17116763                                                               | 17118760 | WBGene00006698 | uaf-2 Y116A8C.35  |            |
| -0.183652206655912                                                                            | AGIWUR22742                                                            |          |                |                   |            |
| CB4856 HS IV                                                                                  | 17119684                                                               | 17126266 | WBGene00006405 | itsn-1 Y116A8C.36 |            |
| -0.0459560815585549                                                                           | AGIWUR25288;AGIWUR26969;AGIWUR31401;AGIWUR32319                        |          |                |                   |            |
| CB4856 HS IV                                                                                  | 17130066                                                               | 17131075 | WBGene00013810 | Y116A8C.37        | Y116A8C.37 |
| 0.155710192799392                                                                             | AGIWUR9715                                                             |          |                |                   |            |
| CB4856 HS IV                                                                                  | 17137348                                                               | 17142989 | WBGene00045043 | Y116A8C.48        | Y116A8C.48 |
| -0.0385740767495233                                                                           | AGIWUR3839;AGIWUR13359;AGIWUR17919;AGIWUR22945                         |          |                |                   |            |
| CB4856 HS IV                                                                                  | 17144355                                                               | 17150971 | WBGene00013812 | Y116A8C.40        | Y116A8C.40 |
| 0.0882114940026373                                                                            | AGIWUR9796;AGIWUR10092                                                 |          |                |                   |            |
| CB4856 HS IV                                                                                  | 17162024                                                               | 17162634 | WBGene00004819 | skr-13 C52D10.8   |            |
| -0.139791674380778                                                                            | AGIWUR30480                                                            |          |                |                   |            |

|                                     |                                                                       |          |                |           |           |                     |
|-------------------------------------|-----------------------------------------------------------------------|----------|----------------|-----------|-----------|---------------------|
| CB4856 HS IV                        | 17163554                                                              | 17164226 | WBGene00004815 | skr-9     | C52D10.7  |                     |
| -0.475695192251419                  | AGIWUR42025                                                           |          |                |           |           |                     |
| CB4856 HS IV                        | 17167253                                                              | 17168051 | WBGene00004818 | skr-12    | C52D10.6  |                     |
| -0.0745615579270229                 | AGIWUR11514                                                           |          |                |           |           |                     |
| CB4856 HS IV                        | 17176477                                                              | 17189805 | WBGene00016877 | C52D10.3  | C52D10.3  |                     |
| -0.0319352651832929                 | AGIWUR28085;AGIWUR36872;AGIWUR39260                                   |          |                |           |           |                     |
| CB4856 HS IV                        | 17190177                                                              | 17191891 | WBGene00001460 | flp-17    | C52D10.11 |                     |
| -0.156959640852737                  | AGIWUR23495                                                           |          |                |           |           |                     |
| CB4856 HS IV                        | 17197905                                                              | 17206845 | WBGene00016879 | cnm-1     | C52D10.12 |                     |
| 0.185574048584112                   | AGIWUR25040                                                           |          |                |           |           |                     |
| CB4856 HS IV                        | 17216333                                                              | 17217368 | WBGene00013779 | Y116A8B.1 | Y116A8B.1 |                     |
| 0.230735009121828                   | AGIWUR6796                                                            |          |                |           |           |                     |
| CB4856 HS IV                        | 17223774                                                              | 17225019 | WBGene00013781 | Y116A8B.4 | Y116A8B.4 |                     |
| 0.099159170035958                   | AGIWUR5030;AGIWUR6033;AGIWUR28449;AGIWUR32021;AGIWUR35102;AGIWUR37333 |          |                |           |           |                     |
| CB4856 HS IV                        | 17226014                                                              | 17231056 | WBGene00013782 | npr-32    | Y116A8B.5 |                     |
| 0.141908346471142                   | AGIWUR8559                                                            |          |                |           |           |                     |
| CB4856 HS IV                        | 17239941                                                              | 17243212 | WBGene00013995 | mboa-5    | ZK550.1   | -0.0707906512020635 |
| AGIWUR11027;AGIWUR21565;AGIWUR26813 |                                                                       |          |                |           |           |                     |
| CB4856 HS IV                        | 17245584                                                              | 17249750 | WBGene00013996 | ZK550.2   | ZK550.2   | 0.415706641040991   |
| AGIWUR37560                         |                                                                       |          |                |           |           |                     |
| CB4856 HS IV                        | 17250131                                                              | 17254964 | WBGene00013997 | ZK550.3   | ZK550.3   | 0.00195608230007949 |
| AGIWUR13238                         |                                                                       |          |                |           |           |                     |
| CB4856 HS IV                        | 17255301                                                              | 17257562 | WBGene00013998 | ZK550.4   | ZK550.4   | 0.163633534392091   |
| AGIWUR2456;AGIWUR42569              |                                                                       |          |                |           |           |                     |
| CB4856 HS IV                        | 17257504                                                              | 17259410 | WBGene00013999 | ZK550.5   | ZK550.5   | -0.0562129880372488 |
| AGIWUR2165;AGIWUR11834;AGIWUR37733  |                                                                       |          |                |           |           |                     |
| CB4856 HS IV                        | 17260307                                                              | 17262485 | WBGene00014000 | ZK550.6   | ZK550.6   | 0.137722460052358   |
| AGIWUR2507;AGIWUR7827               |                                                                       |          |                |           |           |                     |
| CB4856 HS IV                        | 17264297                                                              | 17264814 | WBGene00044244 | F26D10.13 | F26D10.13 |                     |
| -0.208290037450639                  | AGIWUR8280;AGIWUR10704;AGIWUR24795;AGIWUR25868                        |          |                |           |           |                     |
| CB4856 HS IV                        | 17265579                                                              | 17266926 | WBGene00006229 | str-187   | F26D10.8  |                     |
| 0.157734936161917                   | AGIWUR1710                                                            |          |                |           |           |                     |
| CB4856 HS IV                        | 17269342                                                              | 17272183 | WBGene00000224 | atgp-1    | F26D10.9  |                     |
| 0.11205459505817                    | AGIWUR31914                                                           |          |                |           |           |                     |
| CB4856 HS IV                        | 17272231                                                              | 17273652 | WBGene00001606 | gln-5     | F26D10.10 |                     |
| 0.102487871614052                   | AGIWUR34181                                                           |          |                |           |           |                     |
| CB4856 HS IV                        | 17275581                                                              | 17276864 | WBGene00009155 | lhfp-4    | F26D10.11 |                     |
| 0.135505042184623                   | AGIWUR42728                                                           |          |                |           |           |                     |
| CB4856 HS IV                        | 17276956                                                              | 17277748 | WBGene00009156 | cllec-196 | F26D10.12 |                     |

|                                                                                                                                    |                         |          |                |          |          |                     |
|------------------------------------------------------------------------------------------------------------------------------------|-------------------------|----------|----------------|----------|----------|---------------------|
| -0.492448973117408                                                                                                                 | AGIWUR7487              |          |                |          |          |                     |
| CB4856 HS IV                                                                                                                       | 17278959                | 17281330 | WBGene00002005 | hsp-1    | F26D10.3 |                     |
| -0.336297656499266                                                                                                                 |                         |          |                |          |          |                     |
| AGIWUR6894;AGIWUR15751;AGIWUR17478;AGIWUR18500;AGIWUR21587;AGIWUR23964;AGIWUR26492;AGIWUR28010;AGIWUR33671;AGIWUR41303;AGIWUR41534 |                         |          |                |          |          |                     |
| CB4856 HS IV                                                                                                                       | 17281456                | 17284199 | WBGene00012128 | nra-1    | T28F3.1  | 0.195333692913252   |
| AGIWUR2747                                                                                                                         |                         |          |                |          |          |                     |
| CB4856 HS IV                                                                                                                       | 17285733                | 17287454 | WBGene00044067 | zipt-7.1 | T28F3.3  |                     |
| -0.283321210989371                                                                                                                 | AGIWUR20648             |          |                |          |          |                     |
| CB4856 HS IV                                                                                                                       | 17288171                | 17291733 | WBGene00012130 | slc-17.4 | T28F3.4  |                     |
| -0.178483945115929                                                                                                                 | AGIWUR18244;AGIWUR18531 |          |                |          |          |                     |
| CB4856 HS IV                                                                                                                       | 17294793                | 17300629 | WBGene00012131 | T28F3.5  | T28F3.5  | 0.0936276375748548  |
| AGIWUR41791                                                                                                                        |                         |          |                |          |          |                     |
| CB4856 HS IV                                                                                                                       | 17300809                | 17302033 | WBGene00012132 | ifta-2   | T28F3.6  | 0.435095725700825   |
| AGIWUR19088                                                                                                                        |                         |          |                |          |          |                     |
| CB4856 HS IV                                                                                                                       | 17302242                | 17304370 | WBGene00012133 | T28F3.7  | T28F3.7  | 0.116802838895824   |
| AGIWUR43806                                                                                                                        |                         |          |                |          |          |                     |
| CB4856 HS IV                                                                                                                       | 17308525                | 17311695 | WBGene00012135 | T28F3.9  | T28F3.9  | 0.185602083081296   |
| AGIWUR31439                                                                                                                        |                         |          |                |          |          |                     |
| CB4856 HS IV                                                                                                                       | 17312141                | 17315462 | WBGene00004908 | snf-9    | C49C3.1  | 0.182596554369157   |
| AGIWUR27569                                                                                                                        |                         |          |                |          |          |                     |
| CB4856 HS IV                                                                                                                       | 17316710                | 17318246 | WBGene00008192 | C49C3.2  | C49C3.2  | 0.00229191255488104 |
| AGIWUR38738                                                                                                                        |                         |          |                |          |          |                     |
| CB4856 HS IV                                                                                                                       | 17319353                | 17320027 | WBGene00008193 | C49C3.3  | C49C3.3  | 0.0240434604647124  |
| AGIWUR29862;AGIWUR35793                                                                                                            |                         |          |                |          |          |                     |
| CB4856 HS IV                                                                                                                       | 17320795                | 17328662 | WBGene00008194 | C49C3.4  | C49C3.4  | 0.230974246902804   |
| AGIWUR38518                                                                                                                        |                         |          |                |          |          |                     |
| CB4856 HS IV                                                                                                                       | 17329192                | 17330737 | WBGene00008195 | ceh-88   | C49C3.5  | 0.130586002602843   |
| AGIWUR8331;AGIWUR13535;AGIWUR24087;AGIWUR35702                                                                                     |                         |          |                |          |          |                     |
| CB4856 HS IV                                                                                                                       | 17331527                | 17332447 | WBGene00008196 | C49C3.6  | C49C3.6  | 0.0351201395956728  |
| AGIWUR10924                                                                                                                        |                         |          |                |          |          |                     |
| CB4856 HS IV                                                                                                                       | 17332573                | 17333645 | WBGene00008197 | C49C3.7  | C49C3.7  | -0.0325679807430284 |
| AGIWUR42814                                                                                                                        |                         |          |                |          |          |                     |
| CB4856 HS IV                                                                                                                       | 17334193                | 17335094 | WBGene00008204 | C49C3.15 | C49C3.15 |                     |
| 0.0453926747198032                                                                                                                 | AGIWUR31876;AGIWUR40425 |          |                |          |          |                     |
| CB4856 HS IV                                                                                                                       | 17335203                | 17336681 | WBGene00008198 | C49C3.8  | C49C3.8  | 0.217808782876522   |
| AGIWUR42771                                                                                                                        |                         |          |                |          |          |                     |
| CB4856 HS IV                                                                                                                       | 17336800                | 17338984 | WBGene00008200 | C49C3.10 | C49C3.10 |                     |
| -0.0265742185699924                                                                                                                | AGIWUR30175             |          |                |          |          |                     |



|                                                |                                                          |          |                |                 |                     |
|------------------------------------------------|----------------------------------------------------------|----------|----------------|-----------------|---------------------|
| CB4856 HS IV                                   | 17339640                                                 | 17342314 | WBGene00008199 | C49C3.9 C49C3.9 | 0.0364759556739109  |
| AGIWUR35239                                    |                                                          |          |                |                 |                     |
| CB4856 HS IV                                   | 17343782                                                 | 17344805 | WBGene00008201 | C49C3.11        | C49C3.11            |
| -0.272994033727578                             | AGIWUR37871                                              |          |                |                 |                     |
| CB4856 HS IV                                   | 17345568                                                 | 17346695 | WBGene00008202 | clec-197        | C49C3.12            |
| -0.258483773691225                             | AGIWUR31392                                              |          |                |                 |                     |
| CB4856 HS IV                                   | 17347168                                                 | 17351076 | WBGene00008203 | clec-198        | C49C3.13            |
| 0.0670047314819753                             | AGIWUR33042                                              |          |                |                 |                     |
| CB4856 HS IV                                   | 17351886                                                 | 17357895 | WBGene00007820 | clec-199        | C30H6.1             |
| -0.0987195537305423                            | AGIWUR19025;AGIWUR33156                                  |          |                |                 |                     |
| CB4856 HS IV                                   | 17358139                                                 | 17360635 | WBGene00007821 | clec-201        | C30H6.3             |
| -0.0739271918373827                            | AGIWUR43767                                              |          |                |                 |                     |
| CB4856 HS IV                                   | 17361443                                                 | 17364583 | WBGene00007822 | clec-202        | C30H6.4             |
| 0.0975138644523703                             | AGIWUR8247                                               |          |                |                 |                     |
| CB4856 HS IV                                   | 17364791                                                 | 17366491 | WBGene00006487 | zipt-22 C30H6.2 | -0.018386695434625  |
| AGIWUR20952                                    |                                                          |          |                |                 |                     |
| CB4856 HS IV                                   | 17368592                                                 | 17370618 | WBGene00007827 | nlp-54 C30H6.10 |                     |
| 0.00128331858735331                            | AGIWUR11946;AGIWUR16831;AGIWUR19598;AGIWUR29665          |          |                |                 |                     |
| CB4856 HS IV                                   | 17371769                                                 | 17375638 | WBGene00007823 | C30H6.5 C30H6.5 | -0.287951126636318  |
| AGIWUR18277;AGIWUR21420;AGIWUR21814            |                                                          |          |                |                 |                     |
| CB4856 HS IV                                   | 17376427                                                 | 17379317 | WBGene00001811 | haf-1 C30H6.6   | -0.0829773563086187 |
| AGIWUR2043;AGIWUR5177;AGIWUR21139              |                                                          |          |                |                 |                     |
| CB4856 HS IV                                   | 17379247                                                 | 17380188 | WBGene00007826 | C30H6.9 C30H6.9 | -0.0302306041404865 |
| AGIWUR21945                                    |                                                          |          |                |                 |                     |
| CB4856 HS IV                                   | 17380626                                                 | 17382225 | WBGene00007824 | dlat-2 C30H6.7  | -0.258143435565394  |
| AGIWUR33786                                    |                                                          |          |                |                 |                     |
| CB4856 HS IV                                   | 17382298                                                 | 17383087 | WBGene00007825 | C30H6.8 C30H6.8 | -0.166383031752799  |
| AGIWUR8005;AGIWUR25239;AGIWUR26763;AGIWUR40999 |                                                          |          |                |                 |                     |
| CB4856 HS IV                                   | 17383370                                                 | 17386783 | WBGene00044238 | C30H6.12        | C30H6.12            |
| 0.0602502645315726                             | AGIWUR303;AGIWUR4607;AGIWUR11706;AGIWUR32487;AGIWUR34320 |          |                |                 |                     |
| CB4856 HS IV                                   | 17386763                                                 | 17387492 | WBGene00011374 | T02D1.8 T02D1.8 | 0.243217029845466   |
| AGIWUR20749;AGIWUR36007;AGIWUR36236            |                                                          |          |                |                 |                     |
| CB4856 HS IV                                   | 17393974                                                 | 17395333 | WBGene00005677 | sru-14 T02D1.2  | 0.0121208842943616  |
| AGIWUR1863;AGIWUR12530                         |                                                          |          |                |                 |                     |
| CB4856 HS IV                                   | 17396210                                                 | 17397491 | WBGene00005678 | sru-15 T02D1.3  | -0.1368213232183    |
| AGIWUR43037                                    |                                                          |          |                |                 |                     |
| CB4856 HS IV                                   | 17399776                                                 | 17402336 | WBGene00011371 | T02D1.4 T02D1.4 | -0.0260857840667237 |
| AGIWUR37043                                    |                                                          |          |                |                 |                     |
| CB4856 HS IV                                   | 17402463                                                 | 17405630 | WBGene00004061 | pmp-4 T02D1.5   | 0.204941612095126   |

|                                                            |    |       |          |                                     |                |          |          |                     |  |
|------------------------------------------------------------|----|-------|----------|-------------------------------------|----------------|----------|----------|---------------------|--|
| AGIWUR9352;AGIWUR13782;AGIWUR30490;AGIWUR37445             |    |       |          |                                     |                |          |          |                     |  |
| CB4856                                                     | HS | IV    | 17408231 | 17417794                            | WBGene00011372 | npr-26   | T02D1.6  | 0.123055098802221   |  |
| AGIWUR6871                                                 |    |       |          |                                     |                |          |          |                     |  |
| CB4856                                                     | HS | IV    | 17427717 | 17429602                            | WBGene00007357 | C06A12.3 |          | C06A12.3            |  |
| 0.349274520594928                                          |    |       |          | AGIWUR31400                         |                |          |          |                     |  |
| CB4856                                                     | HS | IV    | 17429637 | 17431968                            | WBGene00007358 | lact-6   | C06A12.5 |                     |  |
| 0.0136627313010198                                         |    |       |          | AGIWUR4456;AGIWUR12935              |                |          |          |                     |  |
| CB4856                                                     | HS | IV    | 17432977 | 17436652                            | WBGene00001550 | gcy-27   | C06A12.4 |                     |  |
| 0.0288435145701413                                         |    |       |          | AGIWUR31564                         |                |          |          |                     |  |
| CB4856                                                     | HS | IV    | 17437338 | 17438155                            | WBGene00007359 | C06A12.8 |          | C06A12.8            |  |
| 0.0440874446377881                                         |    |       |          | AGIWUR32750                         |                |          |          |                     |  |
| CB4856                                                     | HS | IV    | 17440642 | 17442125                            | WBGene00045013 | F08A7.1  | F08A7.1  | 0.403950418988432   |  |
| AGIWUR6277;AGIWUR17924;AGIWUR26032;AGIWUR39716;AGIWUR45208 |    |       |          |                                     |                |          |          |                     |  |
| CB4856                                                     | HS | IV    | 17442827 | 17443738                            | WBGene00023501 | F11E6.11 |          | F11E6.11            |  |
| 0.0364648247022643                                         |    |       |          | AGIWUR41389                         |                |          |          |                     |  |
| CB4856                                                     | HS | IV    | 17444125 | 17450543                            | WBGene00008711 | F11E6.8  | F11E6.8  | 0.22490614393174    |  |
| AGIWUR924                                                  |    |       |          |                                     |                |          |          |                     |  |
| CB4856                                                     | HS | IV    | 17457834 | 17461272                            | WBGene00008710 | F11E6.7  | F11E6.7  | 0.140018511708032   |  |
| AGIWUR37764                                                |    |       |          |                                     |                |          |          |                     |  |
| CB4856                                                     | HS | IV    | 17461909 | 17463158                            | WBGene00008713 | F11E6.10 |          | F11E6.10            |  |
| -0.00719523227690821                                       |    |       |          | AGIWUR15528;AGIWUR19371;AGIWUR28688 |                |          |          |                     |  |
| CB4856                                                     | HS | IV    | 17464451 | 17465986                            | WBGene00008709 | F11E6.6  | F11E6.6  | 0.095732195432916   |  |
| AGIWUR38814                                                |    |       |          |                                     |                |          |          |                     |  |
| CB4856                                                     | HS | IV    | 17466060 | 17467408                            | WBGene00001240 | elo-2    | F11E6.5  | 0.340799513930598   |  |
| AGIWUR15442                                                |    |       |          |                                     |                |          |          |                     |  |
| CB4856                                                     | HS | IV    | 17469347 | 17470387                            | WBGene00008708 | F11E6.4  | F11E6.4  | -0.0279443487527669 |  |
| AGIWUR25207                                                |    |       |          |                                     |                |          |          |                     |  |
| CB4856                                                     | HS | IV    | 17470510 | 17472025                            | WBGene00008707 | F11E6.3  | F11E6.3  | 0.507731193587004   |  |
| AGIWUR753;AGIWUR11490                                      |    |       |          |                                     |                |          |          |                     |  |
| CB4856                                                     | HS | IV    | 17473334 | 17479397                            | WBGene00008706 | gba-3    | F11E6.1  | 0.0188064657145075  |  |
| AGIWUR26597;AGIWUR26714                                    |    |       |          |                                     |                |          |          |                     |  |
| CB4856                                                     | HS | IV    | 17480396 | 17483332                            | WBGene00007067 | 4R79.2   | 4R79.2   | 0.156934892718729   |  |
| AGIWUR14144                                                |    |       |          |                                     |                |          |          |                     |  |
| CB4856                                                     | HS | IV    | 17486871 | 17490779                            | WBGene00003525 | nas-6    | 4R79.1   | 0.151402293964992   |  |
| AGIWUR30655                                                |    |       |          |                                     |                |          |          |                     |  |
| CB4856                                                     | HS | MtDNA | 113      | 549                                 | WBGene00010957 | nduo-6   | MTCE.3   | -0.104290053827876  |  |
| AGIWUR24989;AGIWUR35041                                    |    |       |          |                                     |                |          |          |                     |  |
| CB4856                                                     | HS | MtDNA | 549      | 783                                 | WBGene00010958 | ndf1-4   | MTCE.4   | -0.0148638748769088 |  |
| AGIWUR23526;AGIWUR34575                                    |    |       |          |                                     |                |          |          |                     |  |

|                                                                                              |    |       |       |       |                |          |          |                     |             |
|----------------------------------------------------------------------------------------------|----|-------|-------|-------|----------------|----------|----------|---------------------|-------------|
| CB4856                                                                                       | HS | MtDNA | 898   | 1593  | WBGene00014454 | MTCE.7   | MTCE.7   | -0.0134005208409089 |             |
| AGIWUR7913;AGIWUR13747;AGIWUR22917;AGIWUR36868;AGIWUR41384                                   |    |       |       |       |                |          |          |                     |             |
| CB4856                                                                                       | HS | MtDNA | 1763  | 2635  | WBGene00010959 | nduo-1   | MTCE.11  | 0.123441918749574   |             |
| AGIWUR28777;AGIWUR31173                                                                      |    |       |       |       |                |          |          |                     |             |
| CB4856                                                                                       | HS | MtDNA | 2634  | 3235  | WBGene00010960 | atp-6    | MTCE.12  | 0.209650037123076   |             |
| AGIWUR4315;AGIWUR23319                                                                       |    |       |       |       |                |          |          |                     |             |
| CB4856                                                                                       | HS | MtDNA | 3389  | 4269  | WBGene00010961 | nduo-2   | MTCE.16  | 0.112330502237191   |             |
| AGIWUR13582;AGIWUR27453;AGIWUR34174                                                          |    |       |       |       |                |          |          |                     |             |
| CB4856                                                                                       | HS | MtDNA | 4504  | 5621  | WBGene00000829 | ctb-1    | MTCE.21  | 0.23058205311599    |             |
| AGIWUR13075;AGIWUR32293                                                                      |    |       |       |       |                |          |          |                     |             |
| CB4856                                                                                       | HS | MtDNA | 5678  | 6449  | WBGene00010962 | ctc-3    | MTCE.23  | -0.0791017758520489 |             |
| AGIWUR16275;AGIWUR21151;AGIWUR33004                                                          |    |       |       |       |                |          |          |                     |             |
| CB4856                                                                                       | HS | MtDNA | 6506  | 7808  | WBGene00010963 | nduo-4   | MTCE.25  | 0.157040218839175   |             |
| AGIWUR2185;AGIWUR25147;AGIWUR28528;AGIWUR32111;AGIWUR33776;AGIWUR38430;AGIWUR43128           |    |       |       |       |                |          |          |                     |             |
| CB4856                                                                                       | HS | MtDNA | 7827  | 9428  | WBGene00010964 | ctc-1    | MTCE.26  | -0.0816507998910154 |             |
| AGIWUR14543;AGIWUR27788;AGIWUR34673;AGIWUR38561;AGIWUR40016                                  |    |       |       |       |                |          |          |                     |             |
| CB4856                                                                                       | HS | MtDNA | 9649  | 10348 | WBGene00010965 | ctc-2    | MTCE.31  | 0.131812663538166   |             |
| AGIWUR3817;AGIWUR15036                                                                       |    |       |       |       |                |          |          |                     |             |
| CB4856                                                                                       | HS | MtDNA | 10403 | 11354 | WBGene00014472 | MTCE.33  | MTCE.33  | 0.121961465135867   |             |
| AGIWUR35310;AGIWUR39867                                                                      |    |       |       |       |                |          |          |                     |             |
| CB4856                                                                                       | HS | MtDNA | 11356 | 11691 | WBGene00010966 | nduo-3   | MTCE.34  | 0.221434876056106   |             |
| AGIWUR35958;AGIWUR36046                                                                      |    |       |       |       |                |          |          |                     |             |
| CB4856                                                                                       | HS | MtDNA | 11691 | 13272 | WBGene00010967 | nduo-5   | MTCE.35  | 0.312785751368638   |             |
| AGIWUR5384;AGIWUR5608;AGIWUR6469;AGIWUR27940;AGIWUR29535;AGIWUR34029                         |    |       |       |       |                |          |          |                     |             |
| CB4856                                                                                       | HS | V     | 1663  | 6632  | WBGene00015153 | B0348.5  | B0348.5  | 0.100666843630283   | AGIWUR43464 |
| CB4856                                                                                       | HS | V     | 6588  | 7822  | WBGene00002061 | ife-3    | B0348.6  | -0.0817129439766635 |             |
| AGIWUR1089;AGIWUR2583;AGIWUR3915;AGIWUR15574;AGIWUR31428;AGIWUR34420;AGIWUR35684;AGIWUR40770 |    |       |       |       |                |          |          |                     |             |
| CB4856                                                                                       | HS | V     | 20825 | 43697 | WBGene00001177 | egl-8    | B0348.4  | 0.0794559514295567  |             |
| AGIWUR27169;AGIWUR28430;AGIWUR43926                                                          |    |       |       |       |                |          |          |                     |             |
| CB4856                                                                                       | HS | V     | 45310 | 46916 | WBGene00015152 | B0348.2  | B0348.2  | 1.14697814068192    | AGIWUR29175 |
| CB4856                                                                                       | HS | V     | 48922 | 49619 | WBGene00015151 | B0348.1  | B0348.1  | 0.0686211762124467  |             |
| AGIWUR7437;AGIWUR12945;AGIWUR15241;AGIWUR19933;AGIWUR38670;AGIWUR42802                       |    |       |       |       |                |          |          |                     |             |
| CB4856                                                                                       | HS | V     | 49956 | 56046 | WBGene00021413 | srt-52   | Y38C9B.2 | -0.215023833314566  |             |
| AGIWUR8074                                                                                   |    |       |       |       |                |          |          |                     |             |
| CB4856                                                                                       | HS | V     | 59239 | 63509 | WBGene00021412 | cyp-29A3 | Y38C9B.1 |                     |             |
| -0.00859416583570294 AGIWUR1490                                                              |    |       |       |       |                |          |          |                     |             |
| CB4856                                                                                       | HS | V     | 63726 | 64503 | WBGene00021414 | Y38C9B.3 | Y38C9B.3 | -0.047766376951822  |             |
| AGIWUR15767                                                                                  |    |       |       |       |                |          |          |                     |             |
| CB4856                                                                                       | HS | V     | 64564 | 83831 | WBGene00018976 | daam-1   | F56E10.2 | -0.061461181593867  |             |

AGIWUR12745;AGIWUR21333  
CB4856 HS V 103394 104064 WBGene00004496 rps-27 F56E10.4 0.205908907930777  
AGIWUR15986  
CB4856 HS V 104826 118188 WBGene00018975 F56E10.1 F56E10.1 -0.124161425109047  
AGIWUR30224;AGIWUR37479  
CB4856 HS V 118043 122966 WBGene00000480 cgp-1 Y38C9A.2 -0.170204051577739  
AGIWUR7387;AGIWUR17842;AGIWUR23609  
CB4856 HS V 124010 126758 WBGene00020999 W03F9.1 W03F9.1 -0.0606039328962833 AGIWUR40968  
CB4856 HS V 127000 128034 WBGene00021000 W03F9.2 W03F9.2 0.0736881956176205  
AGIWUR413;AGIWUR3259;AGIWUR9935;AGIWUR38374  
CB4856 HS V 128237 131754 WBGene00021004 sftb-2 W03F9.10 0.0105456126491115  
AGIWUR1576;AGIWUR40301  
CB4856 HS V 132450 134993 WBGene00021001 W03F9.3 W03F9.3 0.133523437185204 AGIWUR9969  
CB4856 HS V 137177 141370 WBGene00044512 W03F9.11 W03F9.11 0.105876603464892  
AGIWUR452  
CB4856 HS V 142449 142799 WBGene00023356 W03F9.8 W03F9.8 -0.116333390481811  
AGIWUR15929;AGIWUR34727  
CB4856 HS V 143047 144617 WBGene00005302 srh-81 W03F9.7 0.0304939564203544  
AGIWUR8210;AGIWUR27656;AGIWUR28230  
CB4856 HS V 145194 146931 WBGene00005303 srh-82 W03F9.6 -0.151935405522192 AGIWUR27502  
CB4856 HS V 147538 152104 WBGene00021002 W03F9.4 W03F9.4 0.164456799812982 AGIWUR22684  
CB4856 HS V 156825 166866 WBGene00006648 ttb-1 W03F9.5 -0.236739984360938 AGIWUR17082  
CB4856 HS V 177421 184966 WBGene00000838 cul-3 Y108G3AL.1 0.0672601368698267  
AGIWUR7760;AGIWUR19520;AGIWUR25925;AGIWUR29443;AGIWUR44731  
CB4856 HS V 186169 200777 WBGene00044689 arid-1 Y108G3AL.7 -0.170802078799374  
AGIWUR8634;AGIWUR41275  
CB4856 HS V 201600 204279 WBGene00077643 trpp-1 DC2.8 -0.0270248679687626 AGIWUR13239  
CB4856 HS V 204382 209758 WBGene00017080 lec-12 DC2.3 -0.33478522718576 AGIWUR11135  
CB4856 HS V 210148 212787 WBGene00017082 DC2.5 DC2.5 0.268373326640013 AGIWUR26784  
CB4856 HS V 217154 219473 WBGene00005299 srh-78 DC2.2 -0.194103831601265 AGIWUR34036  
CB4856 HS V 219932 222776 WBGene00005301 srh-80 DC2.1 -0.119842533028867 AGIWUR15830  
CB4856 HS V 222995 226947 WBGene00005298 srh-77 DC2.6 0.0282501231393866 AGIWUR24387  
CB4856 HS V 228858 234672 WBGene00017083 kin-33 DC2.7 0.0927780094168038  
AGIWUR2580;AGIWUR6254;AGIWUR15785;AGIWUR20620  
CB4856 HS V 236750 238192 WBGene00019814 R02C2.1 R02C2.1 1.83710741087303 AGIWUR19767  
CB4856 HS V 238963 240362 WBGene00019817 R02C2.6 R02C2.6 -0.209180500390608 AGIWUR5843  
CB4856 HS V 241326 242618 WBGene00019818 R02C2.7 R02C2.7 -0.229943505206725 AGIWUR28807  
CB4856 HS V 244469 245846 WBGene00019815 kin-34 R02C2.2 -0.242830866899524 AGIWUR21942  
CB4856 HS V 246618 251756 WBGene00006419 oac-39 R02C2.3 2.81019808469507 AGIWUR18420

|                                                                       |    |   |        |        |                |          |          |                      |             |
|-----------------------------------------------------------------------|----|---|--------|--------|----------------|----------|----------|----------------------|-------------|
| CB4856                                                                | HS | V | 252364 | 254691 | WBGene00006172 | str-121  | R02C2.5  | 0.0454909265005838   | AGIWUR29847 |
| CB4856                                                                | HS | V | 254912 | 257992 | WBGene00019816 | nhr-204  | R02C2.4  | -0.00797133560341123 | AGIWUR43394 |
| CB4856                                                                | HS | V | 268238 | 271419 | WBGene00021981 | lgc-26   | Y58G8A.1 | -0.00541008497500961 |             |
| AGIWUR1175                                                            |    |   |        |        |                |          |          |                      |             |
| CB4856                                                                | HS | V | 271984 | 272937 | WBGene00044513 | Y58G8A.5 | Y58G8A.5 | 0.164609544714061    |             |
| AGIWUR3273;AGIWUR7079;AGIWUR9802;AGIWUR25645;AGIWUR36238              |    |   |        |        |                |          |          |                      |             |
| CB4856                                                                | HS | V | 276989 | 281716 | WBGene00021983 | npr-5    | Y58G8A.4 | 0.240623250994705    |             |
| AGIWUR6860;AGIWUR37723;AGIWUR42426                                    |    |   |        |        |                |          |          |                      |             |
| CB4856                                                                | HS | V | 297949 | 300005 | WBGene00018010 | F33E11.2 | F33E11.2 | -0.241750467183209   |             |
| AGIWUR15878                                                           |    |   |        |        |                |          |          |                      |             |
| CB4856                                                                | HS | V | 300015 | 304713 | WBGene00018011 | F33E11.3 | F33E11.3 | -0.0422615580054497  |             |
| AGIWUR16662                                                           |    |   |        |        |                |          |          |                      |             |
| CB4856                                                                | HS | V | 305457 | 311565 | WBGene00018013 | phf-10   | F33E11.6 | -0.0369859963396761  |             |
| AGIWUR7995;AGIWUR39428                                                |    |   |        |        |                |          |          |                      |             |
| CB4856                                                                | HS | V | 320204 | 323647 | WBGene00003614 | nhr-15   | F33E11.1 | -0.0139039617859655  |             |
| AGIWUR9738;AGIWUR22028;AGIWUR23891;AGIWUR36943;AGIWUR43837            |    |   |        |        |                |          |          |                      |             |
| CB4856                                                                | HS | V | 323774 | 330725 | WBGene00000022 | abt-4    | Y39D8C.1 | 0.0583301968576055   |             |
| AGIWUR5072                                                            |    |   |        |        |                |          |          |                      |             |
| CB4856                                                                | HS | V | 334646 | 336861 | WBGene00020708 | dmd-8    | T22H9.4  | 0.170321541998613    | AGIWUR27406 |
| CB4856                                                                | HS | V | 343428 | 347623 | WBGene00020707 | wago-10  | T22H9.3  | 0.00639746551312825  |             |
| AGIWUR2687;AGIWUR8699;AGIWUR10606;AGIWUR26893;AGIWUR28965;AGIWUR40430 |    |   |        |        |                |          |          |                      |             |
| CB4856                                                                | HS | V | 349374 | 359016 | WBGene00020706 | atg-9    | T22H9.2  | -0.269117796943734   |             |
| AGIWUR12285;AGIWUR27158                                               |    |   |        |        |                |          |          |                      |             |
| CB4856                                                                | HS | V | 359766 | 363705 | WBGene00020705 | T22H9.1  | T22H9.1  | 0.0255310631305576   | AGIWUR40024 |
| CB4856                                                                | HS | V | 364950 | 369088 | WBGene00021450 | mltn-6   | Y39D8B.2 | -0.0858356028797482  |             |
| AGIWUR25789                                                           |    |   |        |        |                |          |          |                      |             |
| CB4856                                                                | HS | V | 374408 | 379672 | WBGene00021451 | mltn-8   | Y39D8B.3 | -0.338821770062041   |             |
| AGIWUR24991                                                           |    |   |        |        |                |          |          |                      |             |
| CB4856                                                                | HS | V | 381901 | 384688 | WBGene00022643 | ZK6.8    | ZK6.8    | 0.239706261202132    | AGIWUR3417  |
| CB4856                                                                | HS | V | 385713 | 388090 | WBGene00022642 | lip1-5   | ZK6.7    | -0.0108336955392154  | AGIWUR40960 |
| CB4856                                                                | HS | V | 388697 | 391598 | WBGene00022641 | ZK6.6    | ZK6.6    | 0.30211899672511     | AGIWUR42231 |
| CB4856                                                                | HS | V | 392628 | 395117 | WBGene00022640 | nhr-254  | ZK6.5    | -0.377486043849054   | AGIWUR28089 |
| CB4856                                                                | HS | V | 396827 | 398756 | WBGene00022639 | nhr-253  | ZK6.4    | 0.303773776190853    | AGIWUR19862 |
| CB4856                                                                | HS | V | 400192 | 401602 | WBGene00022638 | sc1-27   | ZK6.3    | 0.127602685451773    | AGIWUR22678 |
| CB4856                                                                | HS | V | 401688 | 403128 | WBGene00005284 | srh-62   | ZK6.9    | -0.0188611841716009  | AGIWUR9555  |
| CB4856                                                                | HS | V | 404619 | 405997 | WBGene00022637 | nhr-252  | ZK6.2    | -0.160598794745684   | AGIWUR27857 |
| CB4856                                                                | HS | V | 408265 | 410080 | WBGene00022636 | nhr-278  | ZK6.1    | -0.0324885924576757  | AGIWUR41645 |
| CB4856                                                                | HS | V | 411782 | 414760 | WBGene00022644 | dod-19   | ZK6.10   | -0.113051500419919   | AGIWUR35435 |
| CB4856                                                                | HS | V | 415713 | 417708 | WBGene00022645 | ZK6.11   | ZK6.11   | -0.0966872510252408  | AGIWUR21388 |

|                                                                                                                      |    |   |        |        |                |          |          |                      |             |
|----------------------------------------------------------------------------------------------------------------------|----|---|--------|--------|----------------|----------|----------|----------------------|-------------|
| CB4856                                                                                                               | HS | V | 419435 | 421839 | WBGene00021448 | Y39D8A.1 | Y39D8A.1 | 0.00451418637865908  |             |
| AGIWUR327;AGIWUR8494;AGIWUR13402;AGIWUR17855;AGIWUR18239;AGIWUR18452;AGIWUR22056;AGIWUR35812;AGIWUR41891;AGIWUR43529 |    |   |        |        |                |          |          |                      |             |
| CB4856                                                                                                               | HS | V | 422498 | 424064 | WBGene00015259 | dod-20   | B0554.6  | 0.326653137543074    | AGIWUR38983 |
| CB4856                                                                                                               | HS | V | 424440 | 426560 | WBGene00015258 | B0554.5  | B0554.5  | 0.0361050415805462   | AGIWUR9976  |
| CB4856                                                                                                               | HS | V | 429144 | 433574 | WBGene00015257 | B0554.4  | B0554.4  | -0.159346384174301   |             |
| AGIWUR2740;AGIWUR5771;AGIWUR24531                                                                                    |    |   |        |        |                |          |          |                      |             |
| CB4856                                                                                                               | HS | V | 434198 | 436726 | WBGene00015255 | B0554.2  | B0554.2  | 0.198925663356514    |             |
| AGIWUR11783;AGIWUR41253                                                                                              |    |   |        |        |                |          |          |                      |             |
| CB4856                                                                                                               | HS | V | 437576 | 441023 | WBGene00015260 | B0554.7  | B0554.7  | -0.00761944449623186 | AGIWUR16317 |
| CB4856                                                                                                               | HS | V | 441820 | 443293 | WBGene00005256 | srh-33   | M02H5.9  | 0.181313234578901    | AGIWUR7920  |
| CB4856                                                                                                               | HS | V | 444893 | 446674 | WBGene00005257 | srh-34   | M02H5.10 | -0.0065777872273145  |             |
| AGIWUR28651                                                                                                          |    |   |        |        |                |          |          |                      |             |
| CB4856                                                                                                               | HS | V | 447569 | 449230 | WBGene00005258 | srh-35   | M02H5.11 | 0.0435337003561038   |             |
| AGIWUR18900                                                                                                          |    |   |        |        |                |          |          |                      |             |
| CB4856                                                                                                               | HS | V | 449915 | 450438 | WBGene00019744 | M02H5.8  | M02H5.8  | 0.492975705621216    | AGIWUR37280 |
| CB4856                                                                                                               | HS | V | 451451 | 453746 | WBGene00003713 | nhr-123  | M02H5.7  | -0.0157285575239374  | AGIWUR38106 |
| CB4856                                                                                                               | HS | V | 454009 | 456772 | WBGene00003688 | nhr-98   | M02H5.6  | 0.107637084996551    | AGIWUR11409 |
| CB4856                                                                                                               | HS | V | 459734 | 461899 | WBGene00019743 | nhr-203  | M02H5.5  | -0.0732493123081035  | AGIWUR39587 |
| CB4856                                                                                                               | HS | V | 462600 | 464963 | WBGene00019742 | nhr-202  | M02H5.4  | 0.117351938885051    | AGIWUR16331 |
| CB4856                                                                                                               | HS | V | 465757 | 467491 | WBGene00019741 | nhr-201  | M02H5.3  | 0.142129878683512    | AGIWUR3037  |
| CB4856                                                                                                               | HS | V | 467567 | 468560 | WBGene00019745 | srbc-57  | M02H5.12 | 0.0644050516486008   |             |
| AGIWUR15097                                                                                                          |    |   |        |        |                |          |          |                      |             |
| CB4856                                                                                                               | HS | V | 472889 | 474631 | WBGene00019740 | srt-31   | M02H5.2  | 0.106612761332862    | AGIWUR43022 |
| CB4856                                                                                                               | HS | V | 474791 | 477150 | WBGene00003689 | nhr-99   | M02H5.1  | 0.0113906086171678   |             |
| AGIWUR14192;AGIWUR23003;AGIWUR43277                                                                                  |    |   |        |        |                |          |          |                      |             |
| CB4856                                                                                                               | HS | V | 478162 | 480710 | WBGene00003645 | nhr-55   | T01G6.7  | 0.223256547231841    | AGIWUR25933 |
| CB4856                                                                                                               | HS | V | 480811 | 483355 | WBGene00003720 | nhr-130  | T01G6.8  | 0.0349639889849733   | AGIWUR34491 |
| CB4856                                                                                                               | HS | V | 484901 | 486895 | WBGene00020153 | nhr-212  | T01G6.6  | 0.190462332656546    | AGIWUR23170 |
| CB4856                                                                                                               | HS | V | 486990 | 489104 | WBGene00020152 | nhr-211  | T01G6.5  | 0.147936880269424    |             |
| AGIWUR16625;AGIWUR39859;AGIWUR39924                                                                                  |    |   |        |        |                |          |          |                      |             |
| CB4856                                                                                                               | HS | V | 489647 | 491430 | WBGene00003696 | nhr-106  | T01G6.4  | -0.0967989033365591  | AGIWUR18097 |
| CB4856                                                                                                               | HS | V | 491732 | 493641 | WBGene00006233 | str-196  | T01G6.3  | 0.365690928451409    | AGIWUR30475 |
| CB4856                                                                                                               | HS | V | 494499 | 497287 | WBGene00003721 | nhr-131  | T01G6.2  | 0.280311707625873    | AGIWUR5940  |
| CB4856                                                                                                               | HS | V | 497839 | 498943 | WBGene00020151 | T01G6.1  | T01G6.1  | -0.0722399198041757  | AGIWUR24893 |
| CB4856                                                                                                               | HS | V | 499770 | 501330 | WBGene00006282 | str-256  | T01G6.9  | -0.171635522172634   | AGIWUR27783 |
| CB4856                                                                                                               | HS | V | 502142 | 503223 | WBGene00020154 | T01G6.10 | T01G6.10 | 0.034722540375892    |             |
| AGIWUR4126;AGIWUR17221;AGIWUR38447                                                                                   |    |   |        |        |                |          |          |                      |             |
| CB4856                                                                                                               | HS | V | 504028 | 504616 | WBGene00004144 | pqn-60   | R11G11.7 | 0.109049141262563    |             |

|                         |   |        |        |                |          |           |                      |             |
|-------------------------|---|--------|--------|----------------|----------|-----------|----------------------|-------------|
| AGIWUR13341             |   |        |        |                |          |           |                      |             |
| CB4856 HS               | V | 505491 | 506068 | WBGene00020014 | R11G11.6 | R11G11.6  | 0.0496509979112858   |             |
| AGIWUR21543             |   |        |        |                |          |           |                      |             |
| CB4856 HS               | V | 508112 | 509803 | WBGene00005851 | srw-104  | R11G11.8  | -0.00996926522698782 |             |
| AGIWUR15163;AGIWUR43712 |   |        |        |                |          |           |                      |             |
| CB4856 HS               | V | 511194 | 512520 | WBGene00005260 | srh-37   | R11G11.9  | 0.170491465461148    |             |
| AGIWUR6632              |   |        |        |                |          |           |                      |             |
| CB4856 HS               | V | 513390 | 515226 | WBGene00005852 | srw-105  | R11G11.10 | -0.0806775081339399  |             |
| AGIWUR41200             |   |        |        |                |          |           |                      |             |
| CB4856 HS               | V | 515787 | 517388 | WBGene00005853 | srw-106  | R11G11.11 | -0.0548812598098305  |             |
| AGIWUR15100             |   |        |        |                |          |           |                      |             |
| CB4856 HS               | V | 519852 | 521617 | WBGene00005854 | srw-107  | R11G11.13 | -0.0503228636049222  |             |
| AGIWUR24048             |   |        |        |                |          |           |                      |             |
| CB4856 HS               | V | 521702 | 524218 | WBGene00020016 | lip1-3   | R11G11.14 | 0.466143495552874    |             |
| AGIWUR43454             |   |        |        |                |          |           |                      |             |
| CB4856 HS               | V | 525666 | 526691 | WBGene00006119 | str-54   | R11G11.15 | 0.156450097577864    |             |
| AGIWUR10962;AGIWUR38855 |   |        |        |                |          |           |                      |             |
| CB4856 HS               | V | 527902 | 528869 | WBGene00005855 | srw-108  | R11G11.5  | -0.122234653301586   |             |
| AGIWUR42181             |   |        |        |                |          |           |                      |             |
| CB4856 HS               | V | 529277 | 530557 | WBGene00005600 | srj-12   | R11G11.4  | 0.0648314062477748   |             |
| AGIWUR9716;AGIWUR30691  |   |        |        |                |          |           |                      |             |
| CB4856 HS               | V | 530799 | 532024 | WBGene00020013 | R11G11.3 | R11G11.3  | 0.0527177976313151   |             |
| AGIWUR39705             |   |        |        |                |          |           |                      |             |
| CB4856 HS               | V | 532290 | 534064 | WBGene00003648 | nhr-58   | R11G11.2  | -0.211926148384737   |             |
| AGIWUR814;AGIWUR43924   |   |        |        |                |          |           |                      |             |
| CB4856 HS               | V | 534446 | 536226 | WBGene00003722 | nhr-132  | R11G11.1  | 0.0255921197765652   |             |
| AGIWUR30967             |   |        |        |                |          |           |                      |             |
| CB4856 HS               | V | 536628 | 537418 | WBGene00015759 | C14C6.5  | C14C6.5   | -0.270723629919896   |             |
| AGIWUR33256;AGIWUR33998 |   |        |        |                |          |           |                      |             |
| CB4856 HS               | V | 539460 | 541485 | WBGene00015758 | nhr-155  | C14C6.4   | -0.0319576116980649  | AGIWUR27454 |
| CB4856 HS               | V | 543469 | 545359 | WBGene00015757 | C14C6.3  | C14C6.3   | -0.0696708182606303  | AGIWUR38250 |
| CB4856 HS               | V | 545844 | 548080 | WBGene00015760 | C14C6.6  | C14C6.6   | 0.240498596539771    | AGIWUR30450 |
| CB4856 HS               | V | 548713 | 550619 | WBGene00015761 | C14C6.7  | C14C6.7   | 0.0479760093860397   | AGIWUR41855 |
| CB4856 HS               | V | 554374 | 556155 | WBGene00005899 | srx-8    | C14C6.9   | -0.0400782367414276  | AGIWUR30075 |
| CB4856 HS               | V | 560195 | 562956 | WBGene00005898 | srx-7    | C14C6.1   | 0.0452507014506915   | AGIWUR985   |
| CB4856 HS               | V | 563134 | 564446 | WBGene00015756 | C14C6.2  | C14C6.2   | 0.19395131426025     | AGIWUR44552 |
| CB4856 HS               | V | 564391 | 566084 | WBGene00005585 | sri-73   | C14C6.10  | -0.144328892598669   |             |
| AGIWUR19650             |   |        |        |                |          |           |                      |             |
| CB4856 HS               | V | 566719 | 568205 | WBGene00005584 | sri-72   | C14C6.11  | -0.0416706411144796  |             |

|                        |    |   |        |        |                |          |          |                                  |
|------------------------|----|---|--------|--------|----------------|----------|----------|----------------------------------|
| AGIWUR20755            |    |   |        |        |                |          |          |                                  |
| CB4856                 | HS | V | 570571 | 571205 | WBGene00015763 | C14C6.12 | C14C6.12 | 0.195450748499411                |
| AGIWUR2344             |    |   |        |        |                |          |          |                                  |
| CB4856                 | HS | V | 572031 | 574739 | WBGene00015764 | C14C6.13 | C14C6.13 | -0.0706022015717753              |
| AGIWUR20391            |    |   |        |        |                |          |          |                                  |
| CB4856                 | HS | V | 576370 | 578428 | WBGene00019453 | K06H6.5  | K06H6.5  | -0.0061967289462439 AGIWUR27993  |
| CB4856                 | HS | V | 581916 | 583431 | WBGene00019451 | nstp-7   | K06H6.3  | -0.110567149649562 AGIWUR29404   |
| CB4856                 | HS | V | 583801 | 585308 | WBGene00019454 | K06H6.6  | K06H6.6  | -0.176659985200255 AGIWUR29139   |
| CB4856                 | HS | V | 585848 | 587250 | WBGene00019450 | K06H6.2  | K06H6.2  | 0.0905278213106175 AGIWUR32952   |
| CB4856                 | HS | V | 588135 | 589646 | WBGene00019449 | K06H6.1  | K06H6.1  | -0.0560739520353568 AGIWUR36953  |
| CB4856                 | HS | V | 590482 | 592463 | WBGene00022758 | ZK488.6  | ZK488.6  | 0.092603030949455 AGIWUR10298    |
| CB4856                 | HS | V | 593259 | 595677 | WBGene00022757 | ZK488.5  | ZK488.5  | -0.167017436368028 AGIWUR11121   |
| CB4856                 | HS | V | 600595 | 602482 | WBGene00022756 | nhr-251  | ZK488.4  | 0.0795072718282386 AGIWUR21345   |
| CB4856                 | HS | V | 603665 | 604205 | WBGene00004177 | pqn-98   | ZK488.7  | 0.00306780606582002 AGIWUR12119  |
| CB4856                 | HS | V | 604723 | 606183 | WBGene00005857 | srw-110  | ZK488.8  | -0.0395609714255452              |
| AGIWUR4227;AGIWUR21610 |    |   |        |        |                |          |          |                                  |
| CB4856                 | HS | V | 606781 | 608944 | WBGene00005856 | srw-109  | ZK488.9  | 0.121390957665962 AGIWUR43361    |
| CB4856                 | HS | V | 609144 | 609726 | WBGene00004176 | pqn-97   | ZK488.10 | 0.279593529621315                |
| AGIWUR11417            |    |   |        |        |                |          |          |                                  |
| CB4856                 | HS | V | 610445 | 612513 | WBGene00003680 | nhr-90   | ZK488.2  | 0.0931398124611498 AGIWUR33832   |
| CB4856                 | HS | V | 612781 | 614908 | WBGene00022755 | nhr-250  | ZK488.1  | -0.00208070624256873 AGIWUR20154 |
| CB4856                 | HS | V | 615576 | 616728 | WBGene00018624 | F48G7.13 | F48G7.13 | -0.0513733393462559              |
| AGIWUR8576             |    |   |        |        |                |          |          |                                  |
| CB4856                 | HS | V | 619434 | 621679 | WBGene00018615 | F48G7.4  | F48G7.4  | 0.0828732894131852 AGIWUR43563   |
| CB4856                 | HS | V | 622170 | 622951 | WBGene00018616 | F48G7.5  | F48G7.5  | -0.385346643176337 AGIWUR20604   |
| CB4856                 | HS | V | 623298 | 625022 | WBGene00018617 | srt-17   | F48G7.6  | 0.322839307088391 AGIWUR22569    |
| CB4856                 | HS | V | 625752 | 626390 | WBGene00018618 | F48G7.7  | F48G7.7  | 0.0690104760593435 AGIWUR42807   |
| CB4856                 | HS | V | 627095 | 627650 | WBGene00018619 | F48G7.8  | F48G7.8  | 0.261621641503456 AGIWUR25428    |
| CB4856                 | HS | V | 628059 | 628623 | WBGene00018620 | F48G7.9  | F48G7.9  | -0.290786005727291 AGIWUR23150   |
| CB4856                 | HS | V | 634142 | 634893 | WBGene00018621 | F48G7.10 | F48G7.10 | -0.174614440043083               |
| AGIWUR39400            |    |   |        |        |                |          |          |                                  |
| CB4856                 | HS | V | 636587 | 637501 | WBGene00018614 | pals-31  | F48G7.2  | 0.532043112744777 AGIWUR42892    |
| CB4856                 | HS | V | 638628 | 639928 | WBGene00005621 | srj-37   | F48G7.1  | 0.00296292559104216 AGIWUR42858  |
| CB4856                 | HS | V | 640799 | 642893 | WBGene00018622 | nhr-190  | F48G7.11 | -0.132573782388693               |
| AGIWUR20655            |    |   |        |        |                |          |          |                                  |
| CB4856                 | HS | V | 643762 | 646199 | WBGene00018623 | F48G7.12 | F48G7.12 | 0.6701933252498                  |
| AGIWUR5201             |    |   |        |        |                |          |          |                                  |
| CB4856                 | HS | V | 647188 | 649741 | WBGene00017959 | ugt-42   | F31F4.7  | 0.16915260226564 AGIWUR22094     |
| CB4856                 | HS | V | 651837 | 653040 | WBGene00005593 | srj-5    | F31F4.16 | 0.162103470478165                |



|                                                          |    |   |        |        |                |          |          |                      |             |
|----------------------------------------------------------|----|---|--------|--------|----------------|----------|----------|----------------------|-------------|
| AGIWUR33839                                              |    |   |        |        |                |          |          |                      |             |
| CB4856                                                   | HS | V | 653303 | 654502 | WBGene00005594 | srj-6    | F31F4.8  | -0.243885478554949   | AGIWUR31845 |
| CB4856                                                   | HS | V | 654727 | 655923 | WBGene00005451 | srh-245  | F31F4.9  | -0.194777297431749   | AGIWUR1794  |
| CB4856                                                   | HS | V | 656499 | 657778 | WBGene00005452 | srh-246  | F31F4.18 | 0.000995984905087788 |             |
| AGIWUR12239                                              |    |   |        |        |                |          |          |                      |             |
| CB4856                                                   | HS | V | 658476 | 660310 | WBGene00017963 | F31F4.17 | F31F4.17 | 0.0262800499736535   |             |
| AGIWUR26694                                              |    |   |        |        |                |          |          |                      |             |
| CB4856                                                   | HS | V | 660681 | 661954 | WBGene00005320 | srh-101  | F31F4.10 | 0.387474946929015    |             |
| AGIWUR14309;AGIWUR23039                                  |    |   |        |        |                |          |          |                      |             |
| CB4856                                                   | HS | V | 662479 | 664443 | WBGene00017960 | F31F4.11 | F31F4.11 | 0.0943737187848921   |             |
| AGIWUR28684                                              |    |   |        |        |                |          |          |                      |             |
| CB4856                                                   | HS | V | 664797 | 665923 | WBGene00005472 | srh-266  | F31F4.6  | -0.363297133829963   | AGIWUR12540 |
| CB4856                                                   | HS | V | 665919 | 667494 | WBGene00017961 | nhr-180  | F31F4.12 | 0.135776453889198    |             |
| AGIWUR13553;AGIWUR38977;AGIWUR39200                      |    |   |        |        |                |          |          |                      |             |
| CB4856                                                   | HS | V | 667896 | 671442 | WBGene00005687 | sru-24   | F31F4.13 | -0.152798931550475   |             |
| AGIWUR1691;AGIWUR6096;AGIWUR7045;AGIWUR16318;AGIWUR18111 |    |   |        |        |                |          |          |                      |             |
| CB4856                                                   | HS | V | 672245 | 674313 | WBGene00005688 | sru-25   | F31F4.14 | 0.205105138046595    |             |
| AGIWUR29944                                              |    |   |        |        |                |          |          |                      |             |
| CB4856                                                   | HS | V | 674911 | 676754 | WBGene00017962 | fbxa-72  | F31F4.15 | 0.0344510551250927   |             |
| AGIWUR29718                                              |    |   |        |        |                |          |          |                      |             |
| CB4856                                                   | HS | V | 677034 | 678920 | WBGene00005912 | srx-21   | F31F4.4  | 0.216322878220362    | AGIWUR21802 |
| CB4856                                                   | HS | V | 679963 | 681465 | WBGene00005913 | srx-22   | F31F4.3  | 0.174004066075163    |             |
| AGIWUR42097;AGIWUR43628                                  |    |   |        |        |                |          |          |                      |             |
| CB4856                                                   | HS | V | 682331 | 683970 | WBGene00005914 | srx-23   | F31F4.2  | 0.0223840122686827   | AGIWUR41650 |
| CB4856                                                   | HS | V | 684060 | 686289 | WBGene00017957 | F31F4.1  | F31F4.1  | 0.0396385473592744   | AGIWUR15879 |
| CB4856                                                   | HS | V | 687684 | 690004 | WBGene00019244 | H25P19.1 | H25P19.1 | 0.0652571298422693   |             |
| AGIWUR40390                                              |    |   |        |        |                |          |          |                      |             |
| CB4856                                                   | HS | V | 690875 | 692770 | WBGene00005895 | srx-4    | Y49C4A.5 | -0.0788542558283627  |             |
| AGIWUR19415                                              |    |   |        |        |                |          |          |                      |             |
| CB4856                                                   | HS | V | 696523 | 699614 | WBGene00021709 | ugt-29   | Y49C4A.8 | -0.21653044876583    |             |
| AGIWUR1072;AGIWUR38841                                   |    |   |        |        |                |          |          |                      |             |
| CB4856                                                   | HS | V | 700079 | 701669 | WBGene00005896 | srx-5    | Y49C4A.4 | 0.13902631699543     |             |
| AGIWUR28320                                              |    |   |        |        |                |          |          |                      |             |
| CB4856                                                   | HS | V | 702560 | 703745 | WBGene00021708 | srbc-37  | Y49C4A.3 | 0.0913374299515453   |             |
| AGIWUR3871;AGIWUR30163                                   |    |   |        |        |                |          |          |                      |             |
| CB4856                                                   | HS | V | 707218 | 708453 | WBGene00021707 | srbc-38  | Y49C4A.2 | 0.0408472140043905   |             |
| AGIWUR5061;AGIWUR12514;AGIWUR28023                       |    |   |        |        |                |          |          |                      |             |
| CB4856                                                   | HS | V | 709108 | 710566 | WBGene00021706 | srbc-39  | Y49C4A.1 | -0.040718848235068   |             |
| AGIWUR2939                                               |    |   |        |        |                |          |          |                      |             |

|                                                                                                |   |        |        |                |           |          |                     |             |
|------------------------------------------------------------------------------------------------|---|--------|--------|----------------|-----------|----------|---------------------|-------------|
| CB4856 HS                                                                                      | V | 710642 | 712921 | WBGene00021710 | cyp-33C11 | Y49C4A.9 | -0.0582814877375428 |             |
| AGIWUR24386                                                                                    |   |        |        |                |           |          |                     |             |
| CB4856 HS                                                                                      | V | 715833 | 719831 | WBGene00019242 | srbc-40   | H24009.1 | -0.084551814541511  |             |
| AGIWUR36794                                                                                    |   |        |        |                |           |          |                     |             |
| CB4856 HS                                                                                      | V | 722695 | 723827 | WBGene00019243 | fbxb-72   | H24009.2 | 0.0436141845753095  |             |
| AGIWUR15315                                                                                    |   |        |        |                |           |          |                     |             |
| CB4856 HS                                                                                      | V | 724207 | 728103 | WBGene00001564 | icl-1     | C05E4.9  | -0.159390335206005  |             |
| AGIWUR3072;AGIWUR10341;AGIWUR12073;AGIWUR15664;AGIWUR16363;AGIWUR22644;AGIWUR33040;AGIWUR42667 |   |        |        |                |           |          |                     |             |
| CB4856 HS                                                                                      | V | 728312 | 734279 | WBGene00005228 | srh-2     | C05E4.14 | -0.0718076289275693 |             |
| AGIWUR538;AGIWUR4676;AGIWUR34038                                                               |   |        |        |                |           |          |                     |             |
| CB4856 HS                                                                                      | V | 734420 | 736271 | WBGene00005613 | srj-25    | C05E4.10 | 0.00629549974373411 |             |
| AGIWUR37614                                                                                    |   |        |        |                |           |          |                     |             |
| CB4856 HS                                                                                      | V | 736803 | 738870 | WBGene00005612 | srj-24    | C05E4.11 | -0.0104471658590493 |             |
| AGIWUR42876                                                                                    |   |        |        |                |           |          |                     |             |
| CB4856 HS                                                                                      | V | 742120 | 743273 | WBGene00015489 | C05E4.7   | C05E4.7  | -0.0291645987576468 | AGIWUR5225  |
| CB4856 HS                                                                                      | V | 743648 | 745475 | WBGene00006182 | str-134   | C05E4.6  | 0.105239296325506   | AGIWUR31792 |
| CB4856 HS                                                                                      | V | 746397 | 747649 | WBGene00006181 | str-133   | C05E4.5  | 0.179995573096929   | AGIWUR2230  |
| CB4856 HS                                                                                      | V | 748344 | 750467 | WBGene00005516 | sri-4     | C05E4.4  | -0.146133056457391  | AGIWUR39397 |
| CB4856 HS                                                                                      | V | 751326 | 752779 | WBGene00006288 | str-262   | C05E4.13 | 0.140089217553459   |             |
| AGIWUR34956                                                                                    |   |        |        |                |           |          |                     |             |
| CB4856 HS                                                                                      | V | 753283 | 755124 | WBGene00005642 | srp-1     | C05E4.3  | 0.192368351465323   | AGIWUR27054 |
| CB4856 HS                                                                                      | V | 756469 | 757892 | WBGene00006087 | str-20    | C05E4.2  | -0.0463662513771528 | AGIWUR33476 |
| CB4856 HS                                                                                      | V | 762734 | 764593 | WBGene00005643 | srp-2     | C05E4.1  | 0.542775259589614   | AGIWUR41978 |
| CB4856 HS                                                                                      | V | 765032 | 772585 | WBGene00006266 | str-238   | R09E12.4 | 0.0940761716676253  |             |
| AGIWUR4387                                                                                     |   |        |        |                |           |          |                     |             |
| CB4856 HS                                                                                      | V | 773518 | 774854 | WBGene00019983 | sti-1     | R09E12.3 | -0.395290082074968  |             |
| AGIWUR10844;AGIWUR12820                                                                        |   |        |        |                |           |          |                     |             |
| CB4856 HS                                                                                      | V | 774995 | 777272 | WBGene00019982 | srbc-58   | R09E12.2 | -0.214011919355103  |             |
| AGIWUR39807                                                                                    |   |        |        |                |           |          |                     |             |
| CB4856 HS                                                                                      | V | 777571 | 778235 | WBGene00044514 | R09E12.9  | R09E12.9 | 0.312352862787211   |             |
| AGIWUR2083;AGIWUR5324;AGIWUR43324                                                              |   |        |        |                |           |          |                     |             |
| CB4856 HS                                                                                      | V | 778639 | 780223 | WBGene00019981 | srbc-59   | R09E12.1 | 0.0739496555885837  |             |
| AGIWUR13673;AGIWUR16438                                                                        |   |        |        |                |           |          |                     |             |
| CB4856 HS                                                                                      | V | 780299 | 781803 | WBGene00044091 | srbc-60   | R09E12.8 | 0.00706442762178927 |             |
| AGIWUR11174                                                                                    |   |        |        |                |           |          |                     |             |
| CB4856 HS                                                                                      | V | 782732 | 784763 | WBGene00020060 | srab-16   | R13D11.6 | 0.0328283807725844  |             |
| AGIWUR39334                                                                                    |   |        |        |                |           |          |                     |             |
| CB4856 HS                                                                                      | V | 787431 | 789888 | WBGene00020059 | srab-15   | R13D11.5 | 0.112281994960165   |             |
| AGIWUR26822;AGIWUR31101;AGIWUR41356                                                            |   |        |        |                |           |          |                     |             |

|                                                                                                           |   |        |        |                |          |          |                      |             |
|-----------------------------------------------------------------------------------------------------------|---|--------|--------|----------------|----------|----------|----------------------|-------------|
| CB4856 HS                                                                                                 | V | 802550 | 804741 | WBGene00020062 | nhr-270  | R13D11.8 | 0.121659433639497    |             |
| AGIWUR7489                                                                                                |   |        |        |                |          |          |                      |             |
| CB4856 HS                                                                                                 | V | 810793 | 814726 | WBGene00020058 | R13D11.4 | R13D11.4 | 0.113699141233564    |             |
| AGIWUR25263                                                                                               |   |        |        |                |          |          |                      |             |
| CB4856 HS                                                                                                 | V | 815016 | 816873 | WBGene00020057 | R13D11.3 | R13D11.3 | -0.216733236644236   |             |
| AGIWUR20422                                                                                               |   |        |        |                |          |          |                      |             |
| CB4856 HS                                                                                                 | V | 817482 | 818733 | WBGene00020056 | R13D11.1 | R13D11.1 | 0.196770304210178    |             |
| AGIWUR27687                                                                                               |   |        |        |                |          |          |                      |             |
| CB4856 HS                                                                                                 | V | 823156 | 824972 | WBGene00005921 | srx-30   | F41H8.3  | 0.0653917072738133   |             |
| AGIWUR13632;AGIWUR38148                                                                                   |   |        |        |                |          |          |                      |             |
| CB4856 HS                                                                                                 | V | 826411 | 828761 | WBGene00018313 | F41H8.2  | F41H8.2  | 0.00879759655332002  | AGIWUR34562 |
| CB4856 HS                                                                                                 | V | 833668 | 835463 | WBGene00018312 | F41H8.1  | F41H8.1  | 0.183800152244435    | AGIWUR32946 |
| CB4856 HS                                                                                                 | V | 839421 | 839934 | WBGene00044778 | K09C6.10 | K09C6.10 | 0.0274310050603503   |             |
| AGIWUR2115                                                                                                |   |        |        |                |          |          |                      |             |
| CB4856 HS                                                                                                 | V | 844450 | 845373 | WBGene00019560 | K09C6.6  | K09C6.6  | -0.00132127830684858 | AGIWUR19380 |
| CB4856 HS                                                                                                 | V | 846715 | 848858 | WBGene00019559 | srbc-13  | K09C6.5  | 0.0873569927609443   | AGIWUR23450 |
| CB4856 HS                                                                                                 | V | 849499 | 851332 | WBGene00019558 | srbc-12  | K09C6.4  | 0.00801117918931116  | AGIWUR39150 |
| CB4856 HS                                                                                                 | V | 852484 | 853126 | WBGene00019557 | K09C6.3  | K09C6.3  | -0.249315998314986   | AGIWUR19218 |
| CB4856 HS                                                                                                 | V | 853436 | 855082 | WBGene00019563 | K09C6.9  | K09C6.9  | 0.294562621253762    | AGIWUR1931  |
| CB4856 HS                                                                                                 | V | 856849 | 862061 | WBGene00019556 | K09C6.2  | K09C6.2  | 0.126993534374368    |             |
| AGIWUR23309;AGIWUR31796                                                                                   |   |        |        |                |          |          |                      |             |
| CB4856 HS                                                                                                 | V | 865074 | 866829 | WBGene00020155 | T02B11.3 | T02B11.3 | -0.019720398842253   |             |
| AGIWUR9089;AGIWUR9821;AGIWUR16661;AGIWUR23990;AGIWUR26089;AGIWUR29584;AGIWUR40374;AGIWUR41779;AGIWUR44136 |   |        |        |                |          |          |                      |             |
| CB4856 HS                                                                                                 | V | 869481 | 871129 | WBGene00020156 | T02B11.4 | T02B11.4 | 0.293741923317581    |             |
| AGIWUR4354;AGIWUR20286;AGIWUR37778                                                                        |   |        |        |                |          |          |                      |             |
| CB4856 HS                                                                                                 | V | 874008 | 875728 | WBGene00006118 | str-53   | T02B11.2 | -0.100477193204473   |             |
| AGIWUR25762;AGIWUR42040                                                                                   |   |        |        |                |          |          |                      |             |
| CB4856 HS                                                                                                 | V | 876245 | 877265 | WBGene00044777 | T02B11.9 | T02B11.9 | 0.0955768447959393   |             |
| AGIWUR7027;AGIWUR16432;AGIWUR24052                                                                        |   |        |        |                |          |          |                      |             |
| CB4856 HS                                                                                                 | V | 877530 | 878667 | WBGene00044776 | T02B11.8 | T02B11.8 |                      |             |
| -0.00906088776254599 AGIWUR5303;AGIWUR25999;AGIWUR31851;AGIWUR40465;AGIWUR41074                           |   |        |        |                |          |          |                      |             |
| CB4856 HS                                                                                                 | V | 879793 | 881574 | WBGene00005210 | srg-53   | T02B11.1 | 0.0691215778958858   |             |
| AGIWUR879                                                                                                 |   |        |        |                |          |          |                      |             |
| CB4856 HS                                                                                                 | V | 882176 | 884424 | WBGene00005622 | srj-38   | T02B11.5 | 0.0368522580338357   |             |
| AGIWUR650                                                                                                 |   |        |        |                |          |          |                      |             |
| CB4856 HS                                                                                                 | V | 884881 | 889274 | WBGene00020157 | T02B11.6 | T02B11.6 | -0.0204064599563178  |             |
| AGIWUR2914;AGIWUR43173                                                                                    |   |        |        |                |          |          |                      |             |
| CB4856 HS                                                                                                 | V | 894930 | 899187 | WBGene00003550 | nas-32   | T02B11.7 | -0.043967854346687   |             |
| AGIWUR18338;AGIWUR20939;AGIWUR32505;AGIWUR38638;AGIWUR39727;AGIWUR42992                                   |   |        |        |                |          |          |                      |             |

|                                                                         |   |         |         |                |          |          |                      |             |
|-------------------------------------------------------------------------|---|---------|---------|----------------|----------|----------|----------------------|-------------|
| CB4856 HS                                                               | V | 899310  | 903665  | WBGene00001480 | fmo-5    | H24K24.5 | 0.239863793673347    |             |
| AGIWUR16238                                                             |   |         |         |                |          |          |                      |             |
| CB4856 HS                                                               | V | 904950  | 911214  | WBGene00019241 | H24K24.4 | H24K24.4 | -0.131299660709923   |             |
| AGIWUR38390                                                             |   |         |         |                |          |          |                      |             |
| CB4856 HS                                                               | V | 911776  | 916315  | WBGene00019240 | H24K24.3 | H24K24.3 | -0.0565495058899144  |             |
| AGIWUR3416;AGIWUR23565                                                  |   |         |         |                |          |          |                      |             |
| CB4856 HS                                                               | V | 917817  | 925945  | WBGene00019239 | H24K24.2 | H24K24.2 | -0.152276089797052   |             |
| AGIWUR26433                                                             |   |         |         |                |          |          |                      |             |
| CB4856 HS                                                               | V | 936464  | 939228  | WBGene00021747 | Y50D4C.2 | Y50D4C.2 |                      |             |
| -0.00115083940624672 AGIWUR14286                                        |   |         |         |                |          |          |                      |             |
| CB4856 HS                                                               | V | 939391  | 945244  | WBGene00021748 | Y50D4C.3 | Y50D4C.3 | -0.236033267628731   |             |
| AGIWUR37729                                                             |   |         |         |                |          |          |                      |             |
| CB4856 HS                                                               | V | 946732  | 949860  | WBGene00021750 | Y50D4C.6 | Y50D4C.6 |                      |             |
| -0.00813776566422675 AGIWUR25709                                        |   |         |         |                |          |          |                      |             |
| CB4856 HS                                                               | V | 951454  | 964800  | WBGene00005024 | sqv-6    | Y50D4C.4 | 0.038719298304704    |             |
| AGIWUR5529                                                              |   |         |         |                |          |          |                      |             |
| CB4856 HS                                                               | V | 982534  | 996207  | WBGene00006770 | unc-34   | Y50D4C.1 | -0.297907093262352   |             |
| AGIWUR16552;AGIWUR41806                                                 |   |         |         |                |          |          |                      |             |
| CB4856 HS                                                               | V | 998289  | 1003753 | WBGene00021749 | Y50D4C.5 | Y50D4C.5 | -0.266494712358552   |             |
| AGIWUR35566                                                             |   |         |         |                |          |          |                      |             |
| CB4856 HS                                                               | V | 1008803 | 1018350 | WBGene00019971 | ergo-1   | R09A1.1  | -0.197615791103336   | AGIWUR24215 |
| CB4856 HS                                                               | V | 1018337 | 1023144 | WBGene00019972 | R09A1.2  | R09A1.2  | -0.207795508615504   | AGIWUR32045 |
| CB4856 HS                                                               | V | 1023782 | 1027073 | WBGene00019973 | R09A1.3  | R09A1.3  | 0.269724545268108    | AGIWUR40489 |
| CB4856 HS                                                               | V | 1027904 | 1033385 | WBGene00019975 | flp-34   | R09A1.5  | -0.00447592687550635 |             |
| AGIWUR18884;AGIWUR30787                                                 |   |         |         |                |          |          |                      |             |
| CB4856 HS                                                               | V | 1042692 | 1048580 | WBGene00015344 | nra-4    | C02E11.1 | 0.0897820176481181   |             |
| AGIWUR11453;AGIWUR24900;AGIWUR31213;AGIWUR39654                         |   |         |         |                |          |          |                      |             |
| CB4856 HS                                                               | V | 1050126 | 1053014 | WBGene00019625 | K10C9.4  | K10C9.4  | 0.162058114573501    | AGIWUR13036 |
| CB4856 HS                                                               | V | 1054602 | 1055773 | WBGene00044515 | K10C9.9  | K10C9.9  | -0.151302267638046   |             |
| AGIWUR16400;AGIWUR22203;AGIWUR27064;AGIWUR31901;AGIWUR40912             |   |         |         |                |          |          |                      |             |
| CB4856 HS                                                               | V | 1056548 | 1058987 | WBGene00006255 | str-224  | K10C9.8  | 0.092859108550817    | AGIWUR16313 |
| CB4856 HS                                                               | V | 1061595 | 1067908 | WBGene00019624 | K10C9.3  | K10C9.3  | 0.0845251309793964   |             |
| AGIWUR40890;AGIWUR44492                                                 |   |         |         |                |          |          |                      |             |
| CB4856 HS                                                               | V | 1075200 | 1079597 | WBGene00019623 | K10C9.1  | K10C9.1  | -0.0028255881933239  |             |
| AGIWUR25743;AGIWUR26540;AGIWUR29157;AGIWUR32093;AGIWUR32144;AGIWUR38999 |   |         |         |                |          |          |                      |             |
| CB4856 HS                                                               | V | 1081483 | 1082372 | WBGene00268189 | Y50D4B.9 | Y50D4B.9 | -0.0558523154765664  |             |
| AGIWUR36491                                                             |   |         |         |                |          |          |                      |             |
| CB4856 HS                                                               | V | 1084316 | 1087272 | WBGene00021745 | Y50D4B.6 | Y50D4B.6 | 0.0668943443948091   |             |
| AGIWUR26156                                                             |   |         |         |                |          |          |                      |             |

|                                                                                               |    |   |         |         |                |          |          |                      |             |
|-----------------------------------------------------------------------------------------------|----|---|---------|---------|----------------|----------|----------|----------------------|-------------|
| CB4856                                                                                        | HS | V | 1088283 | 1089891 | WBGene00021744 | clec-203 | Y50D4B.5 | 0.021295715386259    |             |
| AGIWUR24505                                                                                   |    |   |         |         |                |          |          |                      |             |
| CB4856                                                                                        | HS | V | 1092657 | 1098951 | WBGene00021743 | Y50D4B.4 | Y50D4B.4 | 0.0322948382923833   |             |
| AGIWUR42320;AGIWUR44641                                                                       |    |   |         |         |                |          |          |                      |             |
| CB4856                                                                                        | HS | V | 1101186 | 1104046 | WBGene00021741 | Y50D4B.2 | Y50D4B.2 | 0.0788000603753147   |             |
| AGIWUR11172                                                                                   |    |   |         |         |                |          |          |                      |             |
| CB4856                                                                                        | HS | V | 1112933 | 1129360 | WBGene00021740 | Y50D4B.1 | Y50D4B.1 | 0.138596649841929    |             |
| AGIWUR41609;AGIWUR44635                                                                       |    |   |         |         |                |          |          |                      |             |
| CB4856                                                                                        | HS | V | 1130088 | 1131942 | WBGene00021072 | W07B8.4  | W07B8.4  | -0.0833470715082392  | AGIWUR31431 |
| CB4856                                                                                        | HS | V | 1132598 | 1134036 | WBGene00000785 | cpr-5    | W07B8.5  | -0.00652717951708759 |             |
| AGIWUR9037;AGIWUR27737;AGIWUR39996                                                            |    |   |         |         |                |          |          |                      |             |
| CB4856                                                                                        | HS | V | 1134485 | 1139172 | WBGene00021070 | cpr-8    | W07B8.1  | 0.164728246401426    | AGIWUR5094  |
| CB4856                                                                                        | HS | V | 1141770 | 1146498 | WBGene00020663 | cutl-22  | T21H3.4  | -0.11025251318355    | AGIWUR17117 |
| CB4856                                                                                        | HS | V | 1156271 | 1158174 | WBGene00000552 | cmd-1    | T21H3.3  | 0.133384137694126    |             |
| AGIWUR2590;AGIWUR9349;AGIWUR13292;AGIWUR33879;AGIWUR34932;AGIWUR37455;AGIWUR40916;AGIWUR45191 |    |   |         |         |                |          |          |                      |             |
| CB4856                                                                                        | HS | V | 1165673 | 1174969 | WBGene00004230 | ptr-16   | T21H3.2  | 0.26136308909992     | AGIWUR7971  |
| CB4856                                                                                        | HS | V | 1176724 | 1178864 | WBGene00020662 | T21H3.1  | T21H3.1  | 0.488744750001141    |             |
| AGIWUR5708;AGIWUR6366;AGIWUR13610;AGIWUR28256;AGIWUR28832;AGIWUR36759                         |    |   |         |         |                |          |          |                      |             |
| CB4856                                                                                        | HS | V | 1179604 | 1181548 | WBGene00017764 | F25A2.1  | F25A2.1  | 0.0171768255673035   |             |
| AGIWUR19707;AGIWUR22186;AGIWUR32036;AGIWUR37356                                               |    |   |         |         |                |          |          |                      |             |
| CB4856                                                                                        | HS | V | 1182806 | 1184644 | WBGene00021737 | Y50D4A.3 | Y50D4A.3 | 0.0744468450076123   |             |
| AGIWUR37975                                                                                   |    |   |         |         |                |          |          |                      |             |
| CB4856                                                                                        | HS | V | 1196072 | 1207792 | WBGene00021736 | wrb-1    | Y50D4A.2 | -0.0582619121639034  |             |
| AGIWUR29205                                                                                   |    |   |         |         |                |          |          |                      |             |
| CB4856                                                                                        | HS | V | 1207889 | 1219874 | WBGene00021735 | Y50D4A.1 | Y50D4A.1 | -0.0788889743252312  |             |
| AGIWUR17146                                                                                   |    |   |         |         |                |          |          |                      |             |
| CB4856                                                                                        | HS | V | 1223901 | 1235445 | WBGene00016539 | madd-2   | C39F7.2  | -0.0355835416126968  | AGIWUR12478 |
| CB4856                                                                                        | HS | V | 1260465 | 1262616 | WBGene00016538 | C39F7.1  | C39F7.1  | -0.209079055197892   | AGIWUR27762 |
| CB4856                                                                                        | HS | V | 1262628 | 1263989 | WBGene00004266 | rab-1    | C39F7.4  | 0.133348806551494    |             |
| AGIWUR8106;AGIWUR10175;AGIWUR15670;AGIWUR20977;AGIWUR30892;AGIWUR40582;AGIWUR43515            |    |   |         |         |                |          |          |                      |             |
| CB4856                                                                                        | HS | V | 1264773 | 1270160 | WBGene00016540 | C39F7.5  | C39F7.5  | 0.0827668534106376   | AGIWUR14855 |
| CB4856                                                                                        | HS | V | 1270911 | 1273043 | WBGene00022288 | Y75B7B.1 | Y75B7B.1 | 0.216814080247985    |             |
| AGIWUR43411                                                                                   |    |   |         |         |                |          |          |                      |             |
| CB4856                                                                                        | HS | V | 1274210 | 1276006 | WBGene00022289 | Y75B7B.2 | Y75B7B.2 | 0.178914015213075    |             |
| AGIWUR15950                                                                                   |    |   |         |         |                |          |          |                      |             |
| CB4856                                                                                        | HS | V | 1276420 | 1285700 | WBGene00004053 | tank-1   | ZK1005.1 | 0.0882367612335226   |             |
| AGIWUR2481;AGIWUR29658;AGIWUR32914                                                            |    |   |         |         |                |          |          |                      |             |
| CB4856                                                                                        | HS | V | 1288841 | 1299332 | WBGene00001171 | egl-2    | F16B3.1  | -0.175354833216915   | AGIWUR41827 |
| CB4856                                                                                        | HS | V | 1315105 | 1315524 | WBGene00017502 | F16B3.2  | F16B3.2  | -0.134414669559621   | AGIWUR34396 |

|                                                                                                                                                       |    |   |         |         |                |           |           |                      |             |
|-------------------------------------------------------------------------------------------------------------------------------------------------------|----|---|---------|---------|----------------|-----------|-----------|----------------------|-------------|
| CB4856                                                                                                                                                | HS | V | 1315643 | 1317919 | WBGene00044774 | F16B3.3   | F16B3.3   | 0.0506162540267634   |             |
| AGIWUR2659;AGIWUR2880;AGIWUR5172;AGIWUR5984;AGIWUR14866;AGIWUR18012;AGIWUR23552;AGIWUR24334;AGIWUR24824;AGIWUR30074;AGIWUR33277;AGIWUR37172           |    |   |         |         |                |           |           |                      |             |
| CB4856                                                                                                                                                | HS | V | 1332275 | 1358164 | WBGene00022285 | Y75B7AL.2 | Y75B7AL.2 | -0.0430088564771887  |             |
| AGIWUR8365;AGIWUR16645;AGIWUR25866;AGIWUR41586                                                                                                        |    |   |         |         |                |           |           |                      |             |
| CB4856                                                                                                                                                | HS | V | 1373120 | 1383254 | WBGene00022286 | rga-4     | Y75B7AL.4 | -0.423470220055188   |             |
| AGIWUR36713                                                                                                                                           |    |   |         |         |                |           |           |                      |             |
| CB4856                                                                                                                                                | HS | V | 1391163 | 1392103 | WBGene00022287 | Y75B7AR.1 | Y75B7AR.1 | 0.0321430633345052   |             |
| AGIWUR8594                                                                                                                                            |    |   |         |         |                |           |           |                      |             |
| CB4856                                                                                                                                                | HS | V | 1393112 | 1411616 | WBGene00004925 | snt-5     | R12A1.2   | 0.232563924700022    |             |
| AGIWUR15426;AGIWUR26619;AGIWUR28167                                                                                                                   |    |   |         |         |                |           |           |                      |             |
| CB4856                                                                                                                                                | HS | V | 1422796 | 1425794 | WBGene00020017 | R12A1.3   | R12A1.3   | -0.122388377073867   |             |
| AGIWUR1907;AGIWUR36237                                                                                                                                |    |   |         |         |                |           |           |                      |             |
| CB4856                                                                                                                                                | HS | V | 1427653 | 1432137 | WBGene00001578 | ges-1     | R12A1.4   | -0.138987330391441   | AGIWUR39263 |
| CB4856                                                                                                                                                | HS | V | 1434339 | 1435804 | WBGene00019976 | fbxa-195  | R09B5.1   | -0.178079988065535   |             |
| AGIWUR15706                                                                                                                                           |    |   |         |         |                |           |           |                      |             |
| CB4856                                                                                                                                                | HS | V | 1439179 | 1441871 | WBGene00019979 | R09B5.11  | R09B5.11  | 0.35282772802856     |             |
| AGIWUR21597                                                                                                                                           |    |   |         |         |                |           |           |                      |             |
| CB4856                                                                                                                                                | HS | V | 1442588 | 1442876 | WBGene00044900 | cnc-11    | R09B5.13  | 0.299359079718208    |             |
| AGIWUR2922;AGIWUR7262;AGIWUR9640;AGIWUR41712;AGIWUR43465                                                                                              |    |   |         |         |                |           |           |                      |             |
| CB4856                                                                                                                                                | HS | V | 1444044 | 1444280 | WBGene00000555 | cnc-1     | R09B5.2   | 0.311934292110115    | AGIWUR36656 |
| CB4856                                                                                                                                                | HS | V | 1445381 | 1445832 | WBGene00000559 | cnc-5     | R09B5.10  | -0.167482172587201   |             |
| AGIWUR14026                                                                                                                                           |    |   |         |         |                |           |           |                      |             |
| CB4856                                                                                                                                                | HS | V | 1447195 | 1447707 | WBGene00000558 | cnc-4     | R09B5.9   | -0.30316436441133    | AGIWUR28592 |
| CB4856                                                                                                                                                | HS | V | 1448004 | 1448790 | WBGene00000557 | cnc-3     | R09B5.8   | -0.070814689707964   | AGIWUR39532 |
| CB4856                                                                                                                                                | HS | V | 1449665 | 1450189 | WBGene00000556 | cnc-2     | R09B5.3   | -0.110926306601701   |             |
| AGIWUR1432;AGIWUR12946;AGIWUR14737;AGIWUR38057;AGIWUR40413;AGIWUR45034                                                                                |    |   |         |         |                |           |           |                      |             |
| CB4856                                                                                                                                                | HS | V | 1451634 | 1454340 | WBGene00005611 | srj-23    | R09B5.7   | -0.0390024790560366  |             |
| AGIWUR498;AGIWUR28473;AGIWUR36052                                                                                                                     |    |   |         |         |                |           |           |                      |             |
| CB4856                                                                                                                                                | HS | V | 1455062 | 1456646 | WBGene00019980 | chil-14   | R09B5.12  | 0.0899841457831698   |             |
| AGIWUR44056                                                                                                                                           |    |   |         |         |                |           |           |                      |             |
| CB4856                                                                                                                                                | HS | V | 1460369 | 1461613 | WBGene00019978 | hacd-1    | R09B5.6   | -0.00779870701100016 |             |
| AGIWUR5379;AGIWUR19041;AGIWUR34145                                                                                                                    |    |   |         |         |                |           |           |                      |             |
| CB4856                                                                                                                                                | HS | V | 1462063 | 1464699 | WBGene00019977 | fpn-1.2   | R09B5.4   | 0.456901036159152    | AGIWUR31821 |
| CB4856                                                                                                                                                | HS | V | 1464990 | 1466360 | WBGene00004139 | pqn-54    | R09B5.5   | -0.43749898642838    | AGIWUR41618 |
| CB4856                                                                                                                                                | HS | V | 1467744 | 1471105 | WBGene00018757 | tag-304   | F53E2.1   | -0.241661527529724   | AGIWUR29558 |
| CB4856                                                                                                                                                | HS | V | 1475072 | 1479576 | WBGene00006794 | unc-60    | C38C3.5   | -0.0376872405273261  |             |
| AGIWUR324;AGIWUR2449;AGIWUR2803;AGIWUR4564;AGIWUR7681;AGIWUR10222;AGIWUR18543;AGIWUR20925;AGIWUR26152;AGIWUR28373;AGIWUR29218;AGIWUR39824;AGIWUR42409 |    |   |         |         |                |           |           |                      |             |

|                                                             |    |   |         |         |                |          |          |                       |             |
|-------------------------------------------------------------|----|---|---------|---------|----------------|----------|----------|-----------------------|-------------|
| CB4856                                                      | HS | V | 1482042 | 1484015 | WBGene00016513 | C38C3.4  | C38C3.4  | 0.0717588152758015    |             |
| AGIWUR1850;AGIWUR9335;AGIWUR14308                           |    |   |         |         |                |          |          |                       |             |
| CB4856                                                      | HS | V | 1484828 | 1491604 | WBGene00016514 | C38C3.6  | C38C3.6  | -0.125886537943477    | AGIWUR43075 |
| CB4856                                                      | HS | V | 1494769 | 1495453 | WBGene00045390 | C38C3.10 | C38C3.10 | 0.122836679234067     |             |
| AGIWUR32515                                                 |    |   |         |         |                |          |          |                       |             |
| CB4856                                                      | HS | V | 1495634 | 1497985 | WBGene00016512 | C38C3.3  | C38C3.3  | 0.114782451246771     | AGIWUR42559 |
| CB4856                                                      | HS | V | 1499440 | 1500687 | WBGene00005690 | sru-27   | C38C3.2  | 0.00524035552088975   | AGIWUR29744 |
| CB4856                                                      | HS | V | 1501420 | 1505310 | WBGene00016516 | C38C3.8  | C38C3.8  | -0.388707369976504    |             |
| AGIWUR29041;AGIWUR31012                                     |    |   |         |         |                |          |          |                       |             |
| CB4856                                                      | HS | V | 1510024 | 1511630 | WBGene00016517 | nhr-260  | C38C3.9  | 0.137359784350753     | AGIWUR14282 |
| CB4856                                                      | HS | V | 1518736 | 1519807 | WBGene00023317 | K02H11.8 | K02H11.8 | 0.0375226248897675    |             |
| AGIWUR4057                                                  |    |   |         |         |                |          |          |                       |             |
| CB4856                                                      | HS | V | 1520463 | 1521945 | WBGene00006268 | str-240  | K02H11.2 | 0.0361079780675411    |             |
| AGIWUR41821                                                 |    |   |         |         |                |          |          |                       |             |
| CB4856                                                      | HS | V | 1522785 | 1524224 | WBGene00006270 | str-243  | K02H11.7 | 0.155439021752088     |             |
| AGIWUR35522                                                 |    |   |         |         |                |          |          |                       |             |
| CB4856                                                      | HS | V | 1524502 | 1525687 | WBGene00006267 | str-239  | K02H11.1 | 0.0104962993280067    |             |
| AGIWUR17216;AGIWUR44671                                     |    |   |         |         |                |          |          |                       |             |
| CB4856                                                      | HS | V | 1526467 | 1528085 | WBGene00006265 | str-236  | K02H11.3 | -0.158821939928336    |             |
| AGIWUR25872                                                 |    |   |         |         |                |          |          |                       |             |
| CB4856                                                      | HS | V | 1528824 | 1531259 | WBGene00019348 | K02H11.4 | K02H11.4 | 0.329135188228481     |             |
| AGIWUR31621                                                 |    |   |         |         |                |          |          |                       |             |
| CB4856                                                      | HS | V | 1532030 | 1533304 | WBGene00006248 | str-216  | K02H11.5 | -0.0853081663315791   |             |
| AGIWUR16290;AGIWUR33379                                     |    |   |         |         |                |          |          |                       |             |
| CB4856                                                      | HS | V | 1533892 | 1534415 | WBGene00019349 | trx-5    | K02H11.6 | 0.00636914009561718   |             |
| AGIWUR5711                                                  |    |   |         |         |                |          |          |                       |             |
| CB4856                                                      | HS | V | 1535224 | 1537079 | WBGene00019350 | K02H11.9 | K02H11.9 | 0.0311412768462667    |             |
| AGIWUR7169                                                  |    |   |         |         |                |          |          |                       |             |
| CB4856                                                      | HS | V | 1538364 | 1541824 | WBGene00018707 | oac-31   | F52F10.3 | -0.147321242658199    |             |
| AGIWUR3780                                                  |    |   |         |         |                |          |          |                       |             |
| CB4856                                                      | HS | V | 1542517 | 1545791 | WBGene00018708 | oac-32   | F52F10.4 | -0.191524924986761    |             |
| AGIWUR37337                                                 |    |   |         |         |                |          |          |                       |             |
| CB4856                                                      | HS | V | 1548143 | 1550701 | WBGene00018706 | F52F10.2 | F52F10.2 | -0.0541103696323262   |             |
| AGIWUR30363                                                 |    |   |         |         |                |          |          |                       |             |
| CB4856                                                      | HS | V | 1551044 | 1553102 | WBGene00018709 | srsx-8   | F52F10.5 | -0.041529363166279    |             |
| AGIWUR4739                                                  |    |   |         |         |                |          |          |                       |             |
| CB4856                                                      | HS | V | 1567076 | 1585532 | WBGene00000387 | cdc-25.2 | F16B4.8  | -0.0819003765773125   |             |
| AGIWUR22718;AGIWUR23475;AGIWUR34143;AGIWUR38017;AGIWUR40845 |    |   |         |         |                |          |          |                       |             |
| CB4856                                                      | HS | V | 1585722 | 1586028 | WBGene00017509 | F16B4.7  | F16B4.7  | -0.000923067309096304 |             |

AGIWUR2074;AGIWUR36242  
CB4856 HS V 1588548 1591727 WBGene00017507 F16B4.5 F16B4.5 0.0303412520249831  
AGIWUR22275;AGIWUR23024;AGIWUR35644  
CB4856 HS V 1594019 1594665 WBGene00017506 F16B4.4 F16B4.4 -0.132693580772212  
AGIWUR14436;AGIWUR21983;AGIWUR24255;AGIWUR25347;AGIWUR31339;AGIWUR42496  
CB4856 HS V 1596144 1598689 WBGene00017505 F16B4.3 F16B4.3 0.0424534184719434 AGIWUR20497  
CB4856 HS V 1601038 1603916 WBGene00017504 F16B4.2 F16B4.2 -0.036439792848256 AGIWUR28708  
CB4856 HS V 1603934 1607846 WBGene00017510 nhr-178 F16B4.9 0.0645301255515491 AGIWUR31021  
CB4856 HS V 1610263 1612747 WBGene00017503 nhr-177 F16B4.1 0.123967960467919 AGIWUR1914  
CB4856 HS V 1612803 1614826 WBGene00017511 srbc-41 F16B4.10 0.00491713209876909  
AGIWUR42512  
CB4856 HS V 1615723 1618072 WBGene00017512 nhr-179 F16B4.11 0.297286105307428  
AGIWUR12425  
CB4856 HS V 1619194 1621536 WBGene00003707 nhr-117 F16B4.12 0.0716197311099576  
AGIWUR11701;AGIWUR28007;AGIWUR41153;AGIWUR42311  
CB4856 HS V 1622636 1624433 WBGene00003700 nhr-110 Y46H3D.5 0.0754204960737788  
AGIWUR16766  
CB4856 HS V 1625225 1626818 WBGene00021610 nhr-237 Y46H3D.6 0.078080212520268  
AGIWUR3104  
CB4856 HS V 1628106 1629432 WBGene00021611 nhr-238 Y46H3D.7 0.0181243279945367  
AGIWUR1379  
CB4856 HS V 1630309 1631248 WBGene00021612 Y46H3D.8 Y46H3D.8 -0.292485366159948  
AGIWUR27368  
CB4856 HS V 1632017 1635883 WBGene00021609 irld-17 Y46H3D.4 0.0233983065396064  
AGIWUR27296  
CB4856 HS V 1636159 1639281 WBGene00006253 str-222 Y46H3D.3 0.948891019558966  
AGIWUR13494;AGIWUR21212;AGIWUR21818  
CB4856 HS V 1640308 1642287 WBGene00006252 str-221 Y46H3D.2 0.0315730665999308  
AGIWUR10629;AGIWUR12769;AGIWUR24631  
CB4856 HS V 1642499 1643121 WBGene00021608 Y46H3D.1 Y46H3D.1 0.134977245917739  
AGIWUR2223;AGIWUR11726;AGIWUR13295;AGIWUR14828;AGIWUR29088;AGIWUR32631;AGIWUR39494  
CB4856 HS V 1644169 1647728 WBGene00000108 alh-2 K04F1.15 0.0500717842266507  
AGIWUR6897  
CB4856 HS V 1648300 1651143 WBGene00019393 irld-45 K04F1.14 0.127994882553262  
AGIWUR7514  
CB4856 HS V 1651345 1654444 WBGene00019392 irld-44 K04F1.13 -0.0298522938461883  
AGIWUR8683  
CB4856 HS V 1655090 1657364 WBGene00019391 irld-11 K04F1.12 -0.192510606662889  
AGIWUR2258



|                         |    |   |         |         |                |          |          |                     |                     |
|-------------------------|----|---|---------|---------|----------------|----------|----------|---------------------|---------------------|
| CB4856                  | HS | V | 1658072 | 1659636 | WBGene00019384 | K04F1.1  | K04F1.1  | 0.0988421024192903  | AGIWUR27851         |
| CB4856                  | HS | V | 1660297 | 1662150 | WBGene00019390 | irld-43  | K04F1.11 | 0.282920469084043   |                     |
| AGIWUR17985;AGIWUR42790 |    |   |         |         |                |          |          |                     |                     |
| CB4856                  | HS | V | 1662570 | 1664503 | WBGene00019389 | irld-40  | K04F1.10 | -0.0449577766601461 |                     |
| AGIWUR26847             |    |   |         |         |                |          |          |                     |                     |
| CB4856                  | HS | V | 1664650 | 1665950 | WBGene00019388 | K04F1.9  | K04F1.9  | -0.0592984599249444 | AGIWUR20834         |
| CB4856                  | HS | V | 1667204 | 1667813 | WBGene00019387 | K04F1.8  | K04F1.8  | 0.20569604686887    | AGIWUR38947         |
| CB4856                  | HS | V | 1668516 | 1670630 | WBGene00019386 | irld-42  | K04F1.7  | -0.0682500812085411 | AGIWUR31674         |
| CB4856                  | HS | V | 1670973 | 1673439 | WBGene00019385 | irld-41  | K04F1.6  | 0.14096380992589    | AGIWUR21923         |
| CB4856                  | HS | V | 1673543 | 1675613 | WBGene00005843 | srw-96   | K04F1.2  | -0.0105125744259054 | AGIWUR42752         |
| CB4856                  | HS | V | 1676474 | 1678328 | WBGene00005845 | srw-98   | K04F1.3  | -0.11104772384508   | AGIWUR42917         |
| CB4856                  | HS | V | 1679208 | 1680870 | WBGene00005838 | srw-91   | K04F1.4  | 0.218333281795196   | AGIWUR23336         |
| CB4856                  | HS | V | 1682579 | 1685089 | WBGene00005229 | srh-3    | K04F1.5  | -0.354553182875055  | AGIWUR13668         |
| CB4856                  | HS | V | 1685628 | 1686864 | WBGene00005231 | srh-5    | K04F1.16 | 0.00225181072921288 |                     |
| AGIWUR20402             |    |   |         |         |                |          |          |                     |                     |
| CB4856                  | HS | V | 1687495 | 1689687 | WBGene00021604 | Y46H3C.4 |          | Y46H3C.4            | 1.09373769514607    |
| AGIWUR18415             |    |   |         |         |                |          |          |                     |                     |
| CB4856                  | HS | V | 1691029 | 1692052 | WBGene00021605 | Y46H3C.5 |          | Y46H3C.5            | -0.126685093789643  |
| AGIWUR3831              |    |   |         |         |                |          |          |                     |                     |
| CB4856                  | HS | V | 1697889 | 1701617 | WBGene00021606 | Y46H3C.6 |          | Y46H3C.6            | -0.0956024230027737 |
| AGIWUR43236             |    |   |         |         |                |          |          |                     |                     |
| CB4856                  | HS | V | 1702051 | 1704053 | WBGene00005837 | srw-90   | Y46H3C.3 | -0.0118281555183044 |                     |
| AGIWUR9837              |    |   |         |         |                |          |          |                     |                     |
| CB4856                  | HS | V | 1708741 | 1710663 | WBGene00005846 | srw-99   | Y46H3C.2 | 0.00658840207756484 |                     |
| AGIWUR13161             |    |   |         |         |                |          |          |                     |                     |
| CB4856                  | HS | V | 1711209 | 1715399 | WBGene00005847 | srw-100  | Y46H3C.1 | -0.0809762895796391 |                     |
| AGIWUR25705             |    |   |         |         |                |          |          |                     |                     |
| CB4856                  | HS | V | 1717243 | 1719464 | WBGene00005850 | srw-103  | ZK697.5  | 0.119250144952742   | AGIWUR13701         |
| CB4856                  | HS | V | 1720227 | 1721973 | WBGene00005849 | srw-102  | ZK697.12 | -0.288428221054819  |                     |
| AGIWUR23406             |    |   |         |         |                |          |          |                     |                     |
| CB4856                  | HS | V | 1722266 | 1725261 | WBGene00005848 | srw-101  | ZK697.13 | 0.0564034058284673  |                     |
| AGIWUR6004              |    |   |         |         |                |          |          |                     |                     |
| CB4856                  | HS | V | 1725653 | 1727632 | WBGene00005539 | sri-27   | ZK697.4  | 0.0297618864252893  | AGIWUR23655         |
| CB4856                  | HS | V | 1729116 | 1730649 | WBGene00022806 | ZK697.3  | ZK697.3  | -0.0128752656199538 | AGIWUR32139         |
| CB4856                  | HS | V | 1730759 | 1732000 | WBGene00001769 | gst-21   | ZK697.6  | 0.0417087884987009  | AGIWUR36708         |
| CB4856                  | HS | V | 1734869 | 1736767 | WBGene00006205 | str-160  | ZK697.10 | -0.114360197588303  |                     |
| AGIWUR1209              |    |   |         |         |                |          |          |                     |                     |
| CB4856                  | HS | V | 1738927 | 1741157 | WBGene00022807 | srab-25  | ZK697.7  | 0.0181493542080791  | AGIWUR16633         |
| CB4856                  | HS | V | 1743771 | 1747969 | WBGene00022805 | nhr-256  | ZK697.2  | 0.144766780333352   |                     |

AGIWUR7017;AGIWUR8600;AGIWUR28647  
 CB4856 HS V 1748432 1749153 WBGene00022808 ZK697.8 ZK697.8 0.112444344125624  
 AGIWUR17448;AGIWUR25011;AGIWUR27665;AGIWUR31649  
 CB4856 HS V 1750001 1751549 WBGene00005410 srh-199 ZK697.11 -0.0558463473172184  
 AGIWUR10138;AGIWUR40344;AGIWUR44497  
 CB4856 HS V 1752796 1753856 WBGene00022804 ZK697.1 ZK697.1 -0.143179420311364 AGIWUR8405  
 CB4856 HS V 1754238 1755689 WBGene00022809 ZK697.14 ZK697.14 -0.0247519991446747  
 AGIWUR31379  
 CB4856 HS V 1760861 1765305 WBGene00021602 clec-205 Y46H3B.1 0.128088637095496  
 AGIWUR8341  
 CB4856 HS V 1765311 1771734 WBGene00000976 dhs-13 F36H9.3 -0.085138728768932  
 AGIWUR16906;AGIWUR23989;AGIWUR24571;AGIWUR29221;AGIWUR33084;AGIWUR37543  
 CB4856 HS V 1773826 1774918 WBGene00018115 F36H9.7 F36H9.7 -0.0803983979663849  
 AGIWUR6284;AGIWUR24760;AGIWUR25424;AGIWUR26480  
 CB4856 HS V 1779657 1782022 WBGene00018113 F36H9.5 F36H9.5 -0.395112386542302 AGIWUR32450  
 CB4856 HS V 1788511 1793250 WBGene00018111 F36H9.2 F36H9.2 -0.214249400315123 AGIWUR7637  
 CB4856 HS V 1798200 1799694 WBGene000268194 F36H9.10 F36H9.10 -0.0626757161678748  
 AGIWUR33123  
 CB4856 HS V 1799726 1803143 WBGene00018114 srt-41 F36H9.6 0.402616255761968  
 AGIWUR1923;AGIWUR21739;AGIWUR39411  
 CB4856 HS V 1804334 1804971 WBGene00002016 hsp-16.2 Y46H3A.3 0.391866384852619  
 AGIWUR33481  
 CB4856 HS V 1805178 1805875 WBGene00002018 hsp-16.41 Y46H3A.2 0.43050876400968  
 AGIWUR5399;AGIWUR40972  
 CB4856 HS V 1807450 1809468 WBGene00021599 srt-42 Y46H3A.1 0.228622456464925  
 AGIWUR28255;AGIWUR43360  
 CB4856 HS V 1809560 1811135 WBGene00021600 Y46H3A.4 Y46H3A.4 -0.0881662455713546  
 AGIWUR20038  
 CB4856 HS V 1811423 1814116 WBGene00021601 Y46H3A.5 Y46H3A.5 -0.0450300628471907  
 AGIWUR26944;AGIWUR42495  
 CB4856 HS V 1815852 1821323 WBGene00001632 gly-7 Y46H3A.6 0.0640401029150439  
 AGIWUR9988  
 CB4856 HS V 1821579 1823096 WBGene00044344 mrp1-39 Y46H3A.7 -0.212235338764973  
 AGIWUR20002  
 CB4856 HS V 1823077 1830073 WBGene00021309 Y32G9B.1 Y32G9B.1 0.0903222275744575  
 AGIWUR23123  
 CB4856 HS V 1842044 1844807 WBGene00020394 T10B5.8 T10B5.8 0.165730361482876  
 AGIWUR20519;AGIWUR29587  
 CB4856 HS V 1846201 1848015 WBGene00020393 T10B5.7 T10B5.7 -0.0565075247385494 AGIWUR22131

|                                                                                                                                |    |   |         |         |                |           |           |                     |                     |
|--------------------------------------------------------------------------------------------------------------------------------|----|---|---------|---------|----------------|-----------|-----------|---------------------|---------------------|
| CB4856                                                                                                                         | HS | V | 1848073 | 1851445 | WBGene00020388 | T10B5.2   | T10B5.2   | 0.0309136434516795  | AGIWUR27215         |
| CB4856                                                                                                                         | HS | V | 1852449 | 1856276 | WBGene00020396 | T10B5.10  |           | T10B5.10            | 0.280242482050696   |
| AGIWUR30645                                                                                                                    |    |   |         |         |                |           |           |                     |                     |
| CB4856                                                                                                                         | HS | V | 1864181 | 1868571 | WBGene00020389 | T10B5.3   | T10B5.3   | 0.120436189031103   |                     |
| AGIWUR38;AGIWUR4999;AGIWUR9987;AGIWUR31559                                                                                     |    |   |         |         |                |           |           |                     |                     |
| CB4856                                                                                                                         | HS | V | 1869213 | 1870558 | WBGene00020392 | kn1-3     | T10B5.6   | -0.106887552792607  | AGIWUR5520          |
| CB4856                                                                                                                         | HS | V | 1870421 | 1871789 | WBGene00020390 | T10B5.4   | T10B5.4   | -0.0540943211698348 | AGIWUR20357         |
| CB4856                                                                                                                         | HS | V | 1872246 | 1875526 | WBGene00020391 | cct-7     | T10B5.5   | 0.0893922374078819  |                     |
| AGIWUR3536;AGIWUR13115;AGIWUR17600;AGIWUR24679;AGIWUR37923                                                                     |    |   |         |         |                |           |           |                     |                     |
| CB4856                                                                                                                         | HS | V | 1875478 | 1882265 | WBGene00021305 | zig-11    | Y32G9A.8  |                     | -0.255377328528553  |
| AGIWUR22727                                                                                                                    |    |   |         |         |                |           |           |                     |                     |
| CB4856                                                                                                                         | HS | V | 1895797 | 1906560 | WBGene00021304 | nphp-2    | Y32G9A.6  |                     | 0.0746735419657423  |
| AGIWUR40867                                                                                                                    |    |   |         |         |                |           |           |                     |                     |
| CB4856                                                                                                                         | HS | V | 1907654 | 1908528 | WBGene00021303 | Y32G9A.5  |           | Y32G9A.5            | -0.0324999400091048 |
| AGIWUR12249                                                                                                                    |    |   |         |         |                |           |           |                     |                     |
| CB4856                                                                                                                         | HS | V | 1908855 | 1910692 | WBGene00005644 | srp-3     | Y32G9A.4  |                     | 0.416762796670479   |
| AGIWUR13979                                                                                                                    |    |   |         |         |                |           |           |                     |                     |
| CB4856                                                                                                                         | HS | V | 1911402 | 1913572 | WBGene00021302 | Y32G9A.3  |           | Y32G9A.3            | 0.172486651570119   |
| AGIWUR15769                                                                                                                    |    |   |         |         |                |           |           |                     |                     |
| CB4856                                                                                                                         | HS | V | 1913627 | 1917986 | WBGene00044517 | Y32G9A.13 |           | Y32G9A.13           | -0.13200398445747   |
| AGIWUR6335;AGIWUR14178;AGIWUR20443;AGIWUR22055;AGIWUR33726;AGIWUR37482                                                         |    |   |         |         |                |           |           |                     |                     |
| CB4856                                                                                                                         | HS | V | 1918539 | 1921029 | WBGene00021301 | Y32G9A.2  |           | Y32G9A.2            | -0.0948372616835869 |
| AGIWUR19923                                                                                                                    |    |   |         |         |                |           |           |                     |                     |
| CB4856                                                                                                                         | HS | V | 1921621 | 1922381 | WBGene00001785 | gst-37    | Y32G9A.1  |                     | -0.0329466994474625 |
| AGIWUR4468;AGIWUR15840                                                                                                         |    |   |         |         |                |           |           |                     |                     |
| CB4856                                                                                                                         | HS | V | 1923116 | 1925565 | WBGene00020277 | T06A1.1   | T06A1.1   | -0.110597407467345  | AGIWUR34808         |
| CB4856                                                                                                                         | HS | V | 1927223 | 1931413 | WBGene00020280 | T06A1.5   | T06A1.5   | -0.079323008098843  | AGIWUR21341         |
| CB4856                                                                                                                         | HS | V | 1944955 | 1953349 | WBGene00020279 | glb-25    | T06A1.4   | 0.0224743325613694  |                     |
| AGIWUR627;AGIWUR1111;AGIWUR4223;AGIWUR7808;AGIWUR17908;AGIWUR20988;AGIWUR21891;AGIWUR23733;AGIWUR24723;AGIWUR37834;AGIWUR45105 |    |   |         |         |                |           |           |                     |                     |
| CB4856                                                                                                                         | HS | V | 1953912 | 1956560 | WBGene00005604 | srj-16    | T06A1.2   | 0.12734719419093    | AGIWUR33567         |
| CB4856                                                                                                                         | HS | V | 1957417 | 1957932 | WBGene00044518 | fipr-25   | T06A1.7   | 0.120335861330594   |                     |
| AGIWUR1522;AGIWUR16811;AGIWUR24089;AGIWUR29190;AGIWUR41979                                                                     |    |   |         |         |                |           |           |                     |                     |
| CB4856                                                                                                                         | HS | V | 1960137 | 1961403 | WBGene00021494 | Y40B10B.1 |           | Y40B10B.1           | 0.21987606215348    |
| AGIWUR15579                                                                                                                    |    |   |         |         |                |           |           |                     |                     |
| CB4856                                                                                                                         | HS | V | 1962815 | 1964906 | WBGene00005603 | srj-15    | Y40B10B.2 |                     | -0.0742332121800482 |
| AGIWUR9421;AGIWUR25828                                                                                                         |    |   |         |         |                |           |           |                     |                     |
| CB4856                                                                                                                         | HS | V | 1969528 | 1974514 | WBGene00020343 | acs-3     | T08B1.6   | -0.48345900103306   | AGIWUR39853         |
| CB4856                                                                                                                         | HS | V | 1975418 | 1977261 | WBGene00020342 | fbxa-201  |           | T08B1.5             | 0.0175298296090043  |

AGIWUR23246;AGIWUR29026;AGIWUR35886  
 CB4856 HS V 1979435 1982664 WBGene00020341 T08B1.4 T08B1.4 0.0650411289705137  
 AGIWUR13175;AGIWUR14799;AGIWUR20161;AGIWUR27409;AGIWUR38153;AGIWUR43363  
 CB4856 HS V 1982631 1987045 WBGene00020340 T08B1.1 T08B1.1 0.00473921232994279 AGIWUR23266  
 CB4856 HS V 1989476 1992918 WBGene00006589 tnt-4 T08B1.2 0.174776946619027  
 AGIWUR21520;AGIWUR45074  
 CB4856 HS V 1996100 1999581 WBGene00000111 alh-5 T08B1.3 0.0478657896831951 AGIWUR37322  
 CB4856 HS V 2000418 2004329 WBGene00019089 clec-206 F59A7.1 -0.0107603214906913  
 AGIWUR8715  
 CB4856 HS V 2005057 2006804 WBGene00019096 cys1-4 F59A7.9 -0.138303692404373 AGIWUR38987  
 CB4856 HS V 2007360 2007709 WBGene00023306 F59A7.10 F59A7.10 -0.21919449570407  
 AGIWUR28358  
 CB4856 HS V 2008609 2011620 WBGene00019095 F59A7.8 F59A7.8 -0.35650978747152 AGIWUR11972  
 CB4856 HS V 2013418 2013860 WBGene00044519 F59A7.11 F59A7.11 0.702197447596192  
 AGIWUR11090;AGIWUR18576  
 CB4856 HS V 2015836 2016541 WBGene00019090 F59A7.2 F59A7.2 0.0625208039569927  
 AGIWUR3374;AGIWUR38564  
 CB4856 HS V 2022674 2024710 WBGene00019092 F59A7.5 F59A7.5 0.0434442239329731  
 AGIWUR8988;AGIWUR21220  
 CB4856 HS V 2030177 2030407 WBGene00044520 F59A7.12 F59A7.12 0.0604128516244922  
 AGIWUR13534  
 CB4856 HS V 2030619 2031475 WBGene00001857 hil-6 F59A7.4 -0.113799632459481  
 AGIWUR4410;AGIWUR41283  
 CB4856 HS V 2033792 2035645 WBGene00021488 srab-23 Y40B10A.3 -0.138787019521297  
 AGIWUR34938;AGIWUR35892;AGIWUR36570  
 CB4856 HS V 2038193 2042359 WBGene00021489 Y40B10A.4 Y40B10A.4 0.0277222753146589  
 AGIWUR1482  
 CB4856 HS V 2043352 2046253 WBGene00021490 Y40B10A.5 Y40B10A.5 0.0445669504998563  
 AGIWUR16333  
 CB4856 HS V 2049223 2050172 WBGene00021491 comt-4 Y40B10A.6 0.0193086699854375  
 AGIWUR40501  
 CB4856 HS V 2052231 2053600 WBGene00021492 comt-5 Y40B10A.7 0.0431594083824347  
 AGIWUR41205  
 CB4856 HS V 2057537 2061129 WBGene00021487 comt-3 Y40B10A.2 0.200100018097988  
 AGIWUR4448  
 CB4856 HS V 2061111 2066844 WBGene00003676 nhr-86 Y40B10A.8 -0.12772915710547  
 AGIWUR16383  
 CB4856 HS V 2068449 2069143 WBGene00021486 lbp-9 Y40B10A.1 0.11398154951239  
 AGIWUR759;AGIWUR42829

|                                                                                                                                                           |   |         |         |                |           |           |                     |             |
|-----------------------------------------------------------------------------------------------------------------------------------------------------------|---|---------|---------|----------------|-----------|-----------|---------------------|-------------|
| CB4856 HS                                                                                                                                                 | V | 2069207 | 2072896 | WBGene00021493 | Y40B10A.9 | Y40B10A.9 | 0.201457120980876   |             |
| AGIWUR9779                                                                                                                                                |   |         |         |                |           |           |                     |             |
| CB4856 HS                                                                                                                                                 | V | 2086279 | 2089819 | WBGene00018094 | F36F12.3  | F36F12.3  | -0.0476822119892262 |             |
| AGIWUR2494;AGIWUR8943;AGIWUR11717;AGIWUR13195;AGIWUR14727;AGIWUR15308;AGIWUR15958;AGIWUR17370;AGIWUR21645;AGIWUR21769;AGIWUR24549;AGIWUR30250;AGIWUR30745 |   |         |         |                |           |           |                     |             |
| CB4856 HS                                                                                                                                                 | V | 2090669 | 2091735 | WBGene00018099 | ztf-28    | F36F12.8  | -0.171978021132755  |             |
| AGIWUR35689                                                                                                                                               |   |         |         |                |           |           |                     |             |
| CB4856 HS                                                                                                                                                 | V | 2096072 | 2097257 | WBGene00018096 | cllec-207 | F36F12.5  | -0.187476980714395  |             |
| AGIWUR13902                                                                                                                                               |   |         |         |                |           |           |                     |             |
| CB4856 HS                                                                                                                                                 | V | 2097953 | 2099153 | WBGene00018097 | cllec-208 | F36F12.6  | -0.378300119377309  |             |
| AGIWUR17623                                                                                                                                               |   |         |         |                |           |           |                     |             |
| CB4856 HS                                                                                                                                                 | V | 2099349 | 2100051 | WBGene00018098 | F36F12.7  | F36F12.7  | -0.092562943306616  |             |
| AGIWUR13503                                                                                                                                               |   |         |         |                |           |           |                     |             |
| CB4856 HS                                                                                                                                                 | V | 2100062 | 2103218 | WBGene00018092 | F36F12.1  | F36F12.1  | -0.0565951872385737 |             |
| AGIWUR13743                                                                                                                                               |   |         |         |                |           |           |                     |             |
| CB4856 HS                                                                                                                                                 | V | 2103658 | 2106076 | WBGene00017722 | F22F7.4   | F22F7.4   | 0.241849990343639   | AGIWUR23521 |
| CB4856 HS                                                                                                                                                 | V | 2106398 | 2109418 | WBGene00000514 | ckb-4     | F22F7.5   | -0.179756388001833  |             |
| AGIWUR17305;AGIWUR28551;AGIWUR34233                                                                                                                       |   |         |         |                |           |           |                     |             |
| CB4856 HS                                                                                                                                                 | V | 2115490 | 2118644 | WBGene00017723 | bgnt-1.2  | F22F7.6   | 0.0535124236272599  |             |
| AGIWUR5028                                                                                                                                                |   |         |         |                |           |           |                     |             |
| CB4856 HS                                                                                                                                                 | V | 2122866 | 2127299 | WBGene00017720 | F22F7.2   | F22F7.2   | -0.249962898151015  |             |
| AGIWUR13725;AGIWUR30695                                                                                                                                   |   |         |         |                |           |           |                     |             |
| CB4856 HS                                                                                                                                                 | V | 2127535 | 2130100 | WBGene00017719 | ldp-1     | F22F7.1   | 0.362434460725694   | AGIWUR26701 |
| CB4856 HS                                                                                                                                                 | V | 2131476 | 2140042 | WBGene00017724 | F22F7.7   | F22F7.7   | -0.264741496838454  | AGIWUR38755 |
| CB4856 HS                                                                                                                                                 | V | 2144020 | 2144508 | WBGene00268198 | F22F7.12  | F22F7.12  | 0.0177765384254425  |             |
| AGIWUR29493                                                                                                                                               |   |         |         |                |           |           |                     |             |
| CB4856 HS                                                                                                                                                 | V | 2147095 | 2148626 | WBGene00016693 | srbc-20   | C45H4.11  | 0.0279207345877204  |             |
| AGIWUR11502                                                                                                                                               |   |         |         |                |           |           |                     |             |
| CB4856 HS                                                                                                                                                 | V | 2151762 | 2153010 | WBGene00016692 | srbc-24   | C45H4.10  | -0.11951438032782   |             |
| AGIWUR29865                                                                                                                                               |   |         |         |                |           |           |                     |             |
| CB4856 HS                                                                                                                                                 | V | 2153574 | 2155112 | WBGene00016691 | srbc-23   | C45H4.9   | 0.0803959220000241  | AGIWUR35642 |
| CB4856 HS                                                                                                                                                 | V | 2155532 | 2156635 | WBGene00016689 | srbc-21   | C45H4.7   | -0.2590012250495    | AGIWUR9672  |
| CB4856 HS                                                                                                                                                 | V | 2157130 | 2158274 | WBGene00016690 | srbc-22   | C45H4.8   | -0.175079241344789  | AGIWUR18608 |
| CB4856 HS                                                                                                                                                 | V | 2158674 | 2159427 | WBGene00016695 | C45H4.14  | C45H4.14  | -0.118481102693073  |             |
| AGIWUR5246;AGIWUR27391;AGIWUR40317                                                                                                                        |   |         |         |                |           |           |                     |             |
| CB4856 HS                                                                                                                                                 | V | 2161500 | 2163835 | WBGene00006281 | str-255   | C45H4.15  | 0.263967685977902   |             |
| AGIWUR39636                                                                                                                                               |   |         |         |                |           |           |                     |             |
| CB4856 HS                                                                                                                                                 | V | 2164826 | 2166779 | WBGene00016696 | srbc-19   | C45H4.16  | 0.200380416480048   |             |
| AGIWUR16474;AGIWUR35248;AGIWUR37129                                                                                                                       |   |         |         |                |           |           |                     |             |

|                                                             |    |   |         |         |                |           |          |                      |             |
|-------------------------------------------------------------|----|---|---------|---------|----------------|-----------|----------|----------------------|-------------|
| CB4856                                                      | HS | V | 2169306 | 2170668 | WBGene00016688 | srbc-18   | C45H4.6  | -0.130068391608972   | AGIWUR30026 |
| CB4856                                                      | HS | V | 2171418 | 2174412 | WBGene00005709 | sru-46    | C45H4.5  | -0.0140831929308023  | AGIWUR11450 |
| CB4856                                                      | HS | V | 2175542 | 2177503 | WBGene00044087 | C45H4.18  | C45H4.18 | -0.0294488456184498  |             |
| AGIWUR4518;AGIWUR36492                                      |    |   |         |         |                |           |          |                      |             |
| CB4856                                                      | HS | V | 2177714 | 2179116 | WBGene00016687 | srbc-17   | C45H4.3  | -0.182700835836897   | AGIWUR32870 |
| CB4856                                                      | HS | V | 2179586 | 2181759 | WBGene00016686 | cyp-33C1  | C45H4.2  | 0.00599414115935382  |             |
| AGIWUR43067                                                 |    |   |         |         |                |           |          |                      |             |
| CB4856                                                      | HS | V | 2182038 | 2183191 | WBGene00016685 | srbc-16   | C45H4.1  | 0.274386681560308    | AGIWUR28585 |
| CB4856                                                      | HS | V | 2183521 | 2186535 | WBGene00016697 | cyp-33C2  | C45H4.17 | 0.473680015621509    |             |
| AGIWUR13520                                                 |    |   |         |         |                |           |          |                      |             |
| CB4856                                                      | HS | V | 2188280 | 2189062 | WBGene00021165 | Y5H2B.3   | Y5H2B.3  | -0.262013312360758   | AGIWUR30403 |
| CB4856                                                      | HS | V | 2189586 | 2191222 | WBGene00021166 | srbc-42   | Y5H2B.4  | -0.00366409058151262 | AGIWUR16020 |
| CB4856                                                      | HS | V | 2192477 | 2196823 | WBGene00003612 | nhr-13    | Y5H2B.2  | 0.0610068417361731   | AGIWUR31918 |
| CB4856                                                      | HS | V | 2198059 | 2201415 | WBGene00021167 | cyp-32B1  | Y5H2B.5  | 0.131364828200461    |             |
| AGIWUR20546                                                 |    |   |         |         |                |           |          |                      |             |
| CB4856                                                      | HS | V | 2201581 | 2204397 | WBGene00021168 | cyp-33C12 | Y5H2B.6  | 0.111314824665135    |             |
| AGIWUR27493                                                 |    |   |         |         |                |           |          |                      |             |
| CB4856                                                      | HS | V | 2205030 | 2206281 | WBGene00021169 | srt-40    | Y5H2B.7  | 0.000614693329484162 |             |
| AGIWUR17162;AGIWUR26968;AGIWUR27794                         |    |   |         |         |                |           |          |                      |             |
| CB4856                                                      | HS | V | 2207180 | 2210209 | WBGene00021164 | Y5H2B.1   | Y5H2B.1  | 0.367514814800788    | AGIWUR20260 |
| CB4856                                                      | HS | V | 2210516 | 2212114 | WBGene00003723 | nhr-133   | F44C8.8  | -0.166086249001417   | AGIWUR22577 |
| CB4856                                                      | HS | V | 2212899 | 2214460 | WBGene00018415 | nhr-184   | F44C8.9  | 0.0459513716334037   |             |
| AGIWUR15480;AGIWUR20409;AGIWUR32815;AGIWUR32949;AGIWUR33909 |    |   |         |         |                |           |          |                      |             |
| CB4856                                                      | HS | V | 2215724 | 2218091 | WBGene00018414 | nstp-8    | F44C8.7  | -0.16286304048196    | AGIWUR5605  |
| CB4856                                                      | HS | V | 2219004 | 2221305 | WBGene00003646 | nhr-56    | F44C8.6  | 0.11435771976204     | AGIWUR16627 |
| CB4856                                                      | HS | V | 2221948 | 2225296 | WBGene00003718 | nhr-128   | F44C8.5  | -0.0358818728667716  |             |
| AGIWUR14749;AGIWUR18311;AGIWUR25768;AGIWUR26935             |    |   |         |         |                |           |          |                      |             |
| CB4856                                                      | HS | V | 2225430 | 2227042 | WBGene00003693 | nhr-103   | F44C8.4  | -0.143156486282308   | AGIWUR14265 |
| CB4856                                                      | HS | V | 2227203 | 2228981 | WBGene00003617 | nhr-18    | F44C8.3  | -0.0417238735434902  | AGIWUR23493 |
| CB4856                                                      | HS | V | 2229081 | 2230984 | WBGene00003716 | nhr-126   | F44C8.10 | -0.0288842102101854  |             |
| AGIWUR3148;AGIWUR9146;AGIWUR11153;AGIWUR13084               |    |   |         |         |                |           |          |                      |             |
| CB4856                                                      | HS | V | 2231124 | 2233381 | WBGene00003724 | nhr-134   | F44C8.2  | 0.362179182617989    | AGIWUR787   |
| CB4856                                                      | HS | V | 2233482 | 2235138 | WBGene00003686 | nhr-96    | F44C8.11 | 0.100630419287185    |             |
| AGIWUR29784                                                 |    |   |         |         |                |           |          |                      |             |
| CB4856                                                      | HS | V | 2236162 | 2237937 | WBGene00018413 | cyp-33C4  | F44C8.1  | 0.079243130421359    |             |
| AGIWUR1806;AGIWUR8637                                       |    |   |         |         |                |           |          |                      |             |
| CB4856                                                      | HS | V | 2242196 | 2242772 | WBGene00023039 | F41B5.11  | F41B5.11 | -0.0174152494547686  |             |
| AGIWUR16567                                                 |    |   |         |         |                |           |          |                      |             |
| CB4856                                                      | HS | V | 2242778 | 2244871 | WBGene00018262 | cyp-33C3  | F41B5.4  | 0.14131204405405     |             |

|                         |   |         |         |                |           |           |                     |             |  |
|-------------------------|---|---------|---------|----------------|-----------|-----------|---------------------|-------------|--|
| AGIWUR43831             |   |         |         |                |           |           |                     |             |  |
| CB4856 HS               | V | 2245015 | 2247015 | WBGene00018261 | cyp-33C5  | F41B5.3   | -0.0310999985603893 |             |  |
| AGIWUR42271             |   |         |         |                |           |           |                     |             |  |
| CB4856 HS               | V | 2247472 | 2249335 | WBGene00018264 | cyp-33C6  | F41B5.7   | 0.0595785553845118  |             |  |
| AGIWUR36205             |   |         |         |                |           |           |                     |             |  |
| CB4856 HS               | V | 2250545 | 2252553 | WBGene00018260 | cyp-33C7  | F41B5.2   | -0.0306269551348599 |             |  |
| AGIWUR39759             |   |         |         |                |           |           |                     |             |  |
| CB4856 HS               | V | 2252804 | 2254603 | WBGene00006279 | str-253   | F41B5.8   | 0.0866957144900784  | AGIWUR43104 |  |
| CB4856 HS               | V | 2255533 | 2256658 | WBGene00023284 | F41B5.1   | F41B5.1   | 0.1409149451319     | AGIWUR11202 |  |
| CB4856 HS               | V | 2257420 | 2259913 | WBGene00018265 | nhr-182   | F41B5.9   | 0.0748039924018915  | AGIWUR41433 |  |
| CB4856 HS               | V | 2262489 | 2264634 | WBGene00018266 | nhr-183   | F41B5.10  | -0.193384946677579  |             |  |
| AGIWUR34818;AGIWUR34908 |   |         |         |                |           |           |                     |             |  |
| CB4856 HS               | V | 2264909 | 2267058 | WBGene00021163 | nhr-275   | Y5H2A.2   | -0.407677478451919  | AGIWUR10872 |  |
| CB4856 HS               | V | 2271175 | 2271861 | WBGene00021162 | Y5H2A.1   | Y5H2A.1   | -0.0482811048322063 | AGIWUR20420 |  |
| CB4856 HS               | V | 2272441 | 2274353 | WBGene00044521 | Y5H2A.4   | Y5H2A.4   | -0.142270345361047  | AGIWUR553   |  |
| CB4856 HS               | V | 2274842 | 2275977 | WBGene00000027 | abu-4     | Y5H2A.3   | -0.343776480782946  | AGIWUR11350 |  |
| CB4856 HS               | V | 2276018 | 2278246 | WBGene00003649 | nhr-59    | T27B7.1   | 0.016589555449313   | AGIWUR5243  |  |
| CB4856 HS               | V | 2278826 | 2281387 | WBGene00020853 | fbxa-137  | T27B7.7   | 0.0154801179176811  |             |  |
| AGIWUR29600             |   |         |         |                |           |           |                     |             |  |
| CB4856 HS               | V | 2281828 | 2284963 | WBGene00020852 | nhr-228   | T27B7.6   | 0.134849176619252   | AGIWUR36659 |  |
| CB4856 HS               | V | 2285279 | 2287520 | WBGene00020851 | nhr-227   | T27B7.5   | -0.1229223320874    | AGIWUR14453 |  |
| CB4856 HS               | V | 2288328 | 2290468 | WBGene00020849 | nhr-225   | T27B7.2   | -0.0811722311656009 | AGIWUR19641 |  |
| CB4856 HS               | V | 2288487 | 2294798 | WBGene00003705 | nhr-115   | T27B7.4   | 0.00551526551721793 | AGIWUR29278 |  |
| CB4856 HS               | V | 2294822 | 2296967 | WBGene00020850 | nhr-226   | T27B7.3   | -0.0216157136805055 | AGIWUR5248  |  |
| CB4856 HS               | V | 2298945 | 2301005 | WBGene00235117 | Y19D10B.8 | Y19D10B.8 | -0.0731740629754025 |             |  |
| AGIWUR33818             |   |         |         |                |           |           |                     |             |  |
| CB4856 HS               | V | 2301743 | 2303868 | WBGene00021232 | irld-15   | Y19D10B.3 | -0.128573335582879  |             |  |
| AGIWUR1695              |   |         |         |                |           |           |                     |             |  |
| CB4856 HS               | V | 2304355 | 2309159 | WBGene00021233 | Y19D10B.4 | Y19D10B.4 | -0.180922282296244  |             |  |
| AGIWUR30881             |   |         |         |                |           |           |                     |             |  |
| CB4856 HS               | V | 2311291 | 2313809 | WBGene00021230 | Y19D10B.1 | Y19D10B.1 | -0.0706121790270338 |             |  |
| AGIWUR23689             |   |         |         |                |           |           |                     |             |  |
| CB4856 HS               | V | 2313962 | 2318163 | WBGene00021234 | irld-16   | Y19D10B.5 | -0.0409241668211298 |             |  |
| AGIWUR19389             |   |         |         |                |           |           |                     |             |  |
| CB4856 HS               | V | 2324510 | 2326827 | WBGene00017501 | pud-3     | F15E11.15 | -0.582284749887682  |             |  |
| AGIWUR26728             |   |         |         |                |           |           |                     |             |  |
| CB4856 HS               | V | 2326678 | 2327262 | WBGene00017498 | pud-4     | F15E11.12 | -0.196818738541022  |             |  |
| AGIWUR26194             |   |         |         |                |           |           |                     |             |  |
| CB4856 HS               | V | 2339567 | 2341408 | WBGene00017493 | irld-30   | F15E11.4  | -0.0827579978193018 |             |  |

|                                                                                               |    |   |         |         |                |           |            |                     |             |
|-----------------------------------------------------------------------------------------------|----|---|---------|---------|----------------|-----------|------------|---------------------|-------------|
| AGIWUR10991                                                                                   |    |   |         |         |                |           |            |                     |             |
| CB4856                                                                                        | HS | V | 2342016 | 2344508 | WBGene00017494 | irld-31   | F15E11.5   | -0.104289614695434  |             |
| AGIWUR16975                                                                                   |    |   |         |         |                |           |            |                     |             |
| CB4856                                                                                        | HS | V | 2453414 | 2456147 | WBGene00018911 | F56A4.3   | F56A4.3    | 0.185156194659151   | AGIWUR27891 |
| CB4856                                                                                        | HS | V | 2561690 | 2564701 | WBGene00001758 | gst-10    | Y45G12C.2  | 0.0825363583563323  |             |
| AGIWUR3108;AGIWUR12703;AGIWUR23562;AGIWUR42382                                                |    |   |         |         |                |           |            |                     |             |
| CB4856                                                                                        | HS | V | 2565683 | 2568878 | WBGene00021565 | Y45G12C.1 | Y45G12C.1  | 0.082078748059244   |             |
| AGIWUR33496                                                                                   |    |   |         |         |                |           |            |                     |             |
| CB4856                                                                                        | HS | V | 2568876 | 2570743 | WBGene00005607 | srj-19    | Y45G12C.14 | 0.047290461837644   |             |
| AGIWUR27902;AGIWUR41936                                                                       |    |   |         |         |                |           |            |                     |             |
| CB4856                                                                                        | HS | V | 2571527 | 2573208 | WBGene00005608 | srj-20    | Y45G12C.15 | -0.229138399025788  |             |
| AGIWUR27705                                                                                   |    |   |         |         |                |           |            |                     |             |
| CB4856                                                                                        | HS | V | 2577903 | 2579816 | WBGene00016232 | srt-4     | C29G2.4    | 0.385257922929167   | AGIWUR20535 |
| CB4856                                                                                        | HS | V | 2580872 | 2582939 | WBGene00016231 | C29G2.3   | C29G2.3    | -0.142497223395088  | AGIWUR37256 |
| CB4856                                                                                        | HS | V | 2582867 | 2585908 | WBGene00016234 | C29G2.6   | C29G2.6    | -0.0430730466392415 | AGIWUR28534 |
| CB4856                                                                                        | HS | V | 2590393 | 2591758 | WBGene00016230 | C29G2.2   | C29G2.2    | 0.00764413300923117 |             |
| AGIWUR19539;AGIWUR20711;AGIWUR24384;AGIWUR28086;AGIWUR35312;AGIWUR36193;AGIWUR41857           |    |   |         |         |                |           |            |                     |             |
| CB4856                                                                                        | HS | V | 2592487 | 2595062 | WBGene00018760 | irg-3     | F53E10.4   | -0.127901529236844  |             |
| AGIWUR34840                                                                                   |    |   |         |         |                |           |            |                     |             |
| CB4856                                                                                        | HS | V | 2596020 | 2598930 | WBGene00018761 | F53E10.5  | F53E10.5   | -0.238794278092781  |             |
| AGIWUR19102                                                                                   |    |   |         |         |                |           |            |                     |             |
| CB4856                                                                                        | HS | V | 2602153 | 2603063 | WBGene00018762 | F53E10.6  | F53E10.6   | 0.147588584266146   |             |
| AGIWUR3618                                                                                    |    |   |         |         |                |           |            |                     |             |
| CB4856                                                                                        | HS | V | 2608656 | 2615247 | WBGene00000056 | acr-17    | F53E10.2   | 0.0957419772356376  |             |
| AGIWUR21260                                                                                   |    |   |         |         |                |           |            |                     |             |
| CB4856                                                                                        | HS | V | 2615790 | 2618554 | WBGene00018758 | F53E10.1  | F53E10.1   | 0.129703053781296   |             |
| AGIWUR8011;AGIWUR15797                                                                        |    |   |         |         |                |           |            |                     |             |
| CB4856                                                                                        | HS | V | 2618999 | 2620714 | WBGene00005477 | srh-271   | W02H5.6    | 0.0502194324927974  |             |
| AGIWUR10433;AGIWUR18408;AGIWUR35984                                                           |    |   |         |         |                |           |            |                     |             |
| CB4856                                                                                        | HS | V | 2638843 | 2646620 | WBGene00020957 | W02H5.2   | W02H5.2    | -0.243098455282613  |             |
| AGIWUR11330;AGIWUR17167;AGIWUR19063                                                           |    |   |         |         |                |           |            |                     |             |
| CB4856                                                                                        | HS | V | 2647037 | 2652712 | WBGene00020962 | W02H5.8   | W02H5.8    | -0.116304576543895  | AGIWUR17071 |
| CB4856                                                                                        | HS | V | 2653079 | 2662655 | WBGene00020955 | angl-1    | W02G9.5    | -0.112378564203852  | AGIWUR10994 |
| CB4856                                                                                        | HS | V | 2662964 | 2665003 | WBGene00003579 | ndx-2     | W02G9.1    | -0.223042692758888  | AGIWUR24002 |
| CB4856                                                                                        | HS | V | 2666866 | 2670234 | WBGene00020954 | W02G9.4   | W02G9.4    | -0.161636614139617  | AGIWUR29410 |
| CB4856                                                                                        | HS | V | 2671464 | 2688500 | WBGene00020952 | kel-8     | W02G9.2    | -0.0121541976203949 |             |
| AGIWUR3574;AGIWUR4374;AGIWUR14073;AGIWUR18975;AGIWUR23190;AGIWUR25226;AGIWUR30569;AGIWUR37100 |    |   |         |         |                |           |            |                     |             |
| CB4856                                                                                        | HS | V | 2688461 | 2694430 | WBGene00021564 | Y45G12B.3 | Y45G12B.3  | -0.145936710558859  |             |
| AGIWUR43901                                                                                   |    |   |         |         |                |           |            |                     |             |



|                                                 |    |   |         |         |                |           |           |                      |             |
|-------------------------------------------------|----|---|---------|---------|----------------|-----------|-----------|----------------------|-------------|
| CB4856                                          | HS | V | 2694768 | 2698864 | WBGene00021563 | Y45G12B.2 | Y45G12B.2 | -0.0556293716972749  |             |
| AGIWUR18287;AGIWUR25218                         |    |   |         |         |                |           |           |                      |             |
| CB4856                                          | HS | V | 2698972 | 2707024 | WBGene00021562 | nuo-5     | Y45G12B.1 | -0.00833240114868961 |             |
| AGIWUR20241;AGIWUR25712;AGIWUR38658;AGIWUR42997 |    |   |         |         |                |           |           |                      |             |
| CB4856                                          | HS | V | 2706781 | 2711599 | WBGene00016048 | C24B9.3   | C24B9.3   | 0.0114517548653126   |             |
| AGIWUR966;AGIWUR17192;AGIWUR41142;AGIWUR41995   |    |   |         |         |                |           |           |                      |             |
| CB4856                                          | HS | V | 2712034 | 2713632 | WBGene00016049 | srt-28    | C24B9.4   | -0.291405282834214   | AGIWUR19236 |
| CB4856                                          | HS | V | 2715274 | 2717000 | WBGene00016047 | srt-26    | C24B9.2   | 0.0433052321366194   | AGIWUR15766 |
| CB4856                                          | HS | V | 2717395 | 2719135 | WBGene00016050 | srt-29    | C24B9.5   | -0.0324313287691691  | AGIWUR16487 |
| CB4856                                          | HS | V | 2719696 | 2720863 | WBGene00016051 | srt-27    | C24B9.6   | 0.0351999387476969   | AGIWUR9939  |
| CB4856                                          | HS | V | 2721290 | 2722655 | WBGene00005217 | srg-60    | C24B9.15  | -0.301654378323226   |             |
| AGIWUR14062                                     |    |   |         |         |                |           |           |                      |             |
| CB4856                                          | HS | V | 2722903 | 2725325 | WBGene00005216 | srg-59    | C24B9.7   | -0.271007166615901   | AGIWUR30333 |
| CB4856                                          | HS | V | 2725902 | 2727201 | WBGene00006081 | str-13    | C24B9.8   | -0.184567628504832   | AGIWUR5432  |
| CB4856                                          | HS | V | 2728536 | 2730243 | WBGene00006099 | str-33    | C24B9.1   | -0.149264449071422   | AGIWUR17470 |
| CB4856                                          | HS | V | 2730594 | 2731098 | WBGene00016052 | dod-3     | C24B9.9   | -0.0780262529630136  | AGIWUR30647 |
| CB4856                                          | HS | V | 2732177 | 2734460 | WBGene00005214 | srg-57    | C24B9.14  | -0.212514498012888   |             |
| AGIWUR28096                                     |    |   |         |         |                |           |           |                      |             |
| CB4856                                          | HS | V | 2735531 | 2738274 | WBGene00005213 | srg-56    | C24B9.10  | -0.012232818883767   |             |
| AGIWUR39080                                     |    |   |         |         |                |           |           |                      |             |
| CB4856                                          | HS | V | 2740444 | 2744326 | WBGene00005219 | srg-62    | C24B9.12  | -0.00922348107236193 |             |
| AGIWUR2554                                      |    |   |         |         |                |           |           |                      |             |
| CB4856                                          | HS | V | 2745013 | 2746947 | WBGene00005916 | srx-25    | C24B9.13  | -0.0524688723899747  |             |
| AGIWUR10481                                     |    |   |         |         |                |           |           |                      |             |
| CB4856                                          | HS | V | 2748152 | 2750106 | WBGene00005915 | srx-24    | C24B9.16  | 0.136559371876111    |             |
| AGIWUR13684                                     |    |   |         |         |                |           |           |                      |             |
| CB4856                                          | HS | V | 2751256 | 2753107 | WBGene00005917 | srx-26    | R05D8.4   | 0.0300583721229666   | AGIWUR33456 |
| CB4856                                          | HS | V | 2753306 | 2755158 | WBGene00005918 | srx-27    | R05D8.12  | 0.0924045904852999   |             |
| AGIWUR5205;AGIWUR11166;AGIWUR30165              |    |   |         |         |                |           |           |                      |             |
| CB4856                                          | HS | V | 2755701 | 2757276 | WBGene00005919 | srx-28    | R05D8.5   | 0.068545822050587    | AGIWUR31039 |
| CB4856                                          | HS | V | 2758174 | 2759556 | WBGene00005215 | srg-58    | R05D8.6   | 0.170281801022089    | AGIWUR6399  |
| CB4856                                          | HS | V | 2761825 | 2763208 | WBGene00019885 | R05D8.7   | R05D8.7   | 0.138804923513785    | AGIWUR20612 |
| CB4856                                          | HS | V | 2763981 | 2765274 | WBGene00000977 | dhs-14    | R05D8.8   | 0.0523272146723297   |             |
| AGIWUR14412;AGIWUR30446                         |    |   |         |         |                |           |           |                      |             |
| CB4856                                          | HS | V | 2766271 | 2767503 | WBGene00019886 | R05D8.9   | R05D8.9   | 0.544759237002769    | AGIWUR42273 |
| CB4856                                          | HS | V | 2768419 | 2769854 | WBGene00000978 | dhs-15    | R05D8.10  | -0.0324757627343271  |             |
| AGIWUR36965                                     |    |   |         |         |                |           |           |                      |             |
| CB4856                                          | HS | V | 2771860 | 2773519 | WBGene00005279 | srh-56    | R05D8.3   | 0.125136926581478    |             |
| AGIWUR17184;AGIWUR31165;AGIWUR34838             |    |   |         |         |                |           |           |                      |             |

|                                                                                   |    |   |         |         |                |          |           |                       |             |
|-----------------------------------------------------------------------------------|----|---|---------|---------|----------------|----------|-----------|-----------------------|-------------|
| CB4856                                                                            | HS | V | 2774342 | 2776258 | WBGene00005606 | srj-18   | R05D8.2   | 0.0433604828932568    |             |
| AGIWUR22116;AGIWUR30340;AGIWUR37772                                               |    |   |         |         |                |          |           |                       |             |
| CB4856                                                                            | HS | V | 2776442 | 2779233 | WBGene00005605 | srj-17   | R05D8.1   | 0.0250956239446123    |             |
| AGIWUR18696;AGIWUR37375                                                           |    |   |         |         |                |          |           |                       |             |
| CB4856                                                                            | HS | V | 2779384 | 2780845 | WBGene00019887 | R05D8.11 | R05D8.11  | -0.0544564922995026   |             |
| AGIWUR37072                                                                       |    |   |         |         |                |          |           |                       |             |
| CB4856                                                                            | HS | V | 2781943 | 2807934 | WBGene00004130 | ketn-1   | F54E2.3   | -0.046845011965428    |             |
| AGIWUR1666;AGIWUR8340;AGIWUR14563;AGIWUR30694;AGIWUR35122;AGIWUR39274;AGIWUR40581 |    |   |         |         |                |          |           |                       |             |
| CB4856                                                                            | HS | V | 2810398 | 2812017 | WBGene00018823 | F54E2.1  | F54E2.1   | -0.0962854316865984   | AGIWUR29760 |
| CB4856                                                                            | HS | V | 2812531 | 2813948 | WBGene00268206 | F54E2.9  | F54E2.9   | 0.531941325442193     | AGIWUR14121 |
| CB4856                                                                            | HS | V | 2816883 | 2818217 | WBGene00018826 | srt-34   | F54E2.6   | -0.138033846938233    | AGIWUR25520 |
| CB4856                                                                            | HS | V | 2819581 | 2821668 | WBGene00005259 | srh-36   | T03D3.4   | -0.000894017632575128 |             |
| AGIWUR3593;AGIWUR4361;AGIWUR7859                                                  |    |   |         |         |                |          |           |                       |             |
| CB4856                                                                            | HS | V | 2823806 | 2826831 | WBGene00020183 | T03D3.5  | T03D3.5   | -0.0856617464499116   | AGIWUR3087  |
| CB4856                                                                            | HS | V | 2832966 | 2834921 | WBGene00005629 | srj-50   | T03D3.2   | -0.220135195195614    | AGIWUR22775 |
| CB4856                                                                            | HS | V | 2835411 | 2836601 | WBGene00005627 | srj-45   | T03D3.6   | 0.0683378222233602    | AGIWUR33727 |
| CB4856                                                                            | HS | V | 2837634 | 2838805 | WBGene00023335 | T03D3.7  | T03D3.7   | -0.356652238244652    | AGIWUR15810 |
| CB4856                                                                            | HS | V | 2839154 | 2840318 | WBGene00023336 | T03D3.8  | T03D3.8   | -0.00936427896105396  | AGIWUR29605 |
| CB4856                                                                            | HS | V | 2841018 | 2842241 | WBGene00023337 | T03D3.9  | T03D3.9   | 0.165909657715643     |             |
| AGIWUR19942;AGIWUR44223                                                           |    |   |         |         |                |          |           |                       |             |
| CB4856                                                                            | HS | V | 2842946 | 2844240 | WBGene00023338 | T03D3.10 | T03D3.10  | 0.050588279665436     |             |
| AGIWUR12011;AGIWUR26145                                                           |    |   |         |         |                |          |           |                       |             |
| CB4856                                                                            | HS | V | 2844563 | 2845871 | WBGene00005626 | srj-44   | T03D3.11  | -0.24650298187858     |             |
| AGIWUR10080                                                                       |    |   |         |         |                |          |           |                       |             |
| CB4856                                                                            | HS | V | 2846250 | 2848340 | WBGene00005628 | srj-49   | T03D3.12  | -0.14420783900985     |             |
| AGIWUR8827                                                                        |    |   |         |         |                |          |           |                       |             |
| CB4856                                                                            | HS | V | 2849343 | 2852031 | WBGene00020182 | ugt-53   | T03D3.1   | -0.169303897269824    | AGIWUR43938 |
| CB4856                                                                            | HS | V | 2852425 | 2853605 | WBGene00023339 | T03D3.13 | T03D3.13  | -0.411762974397927    |             |
| AGIWUR40784                                                                       |    |   |         |         |                |          |           |                       |             |
| CB4856                                                                            | HS | V | 2854393 | 2855573 | WBGene00005635 | srj-57   | T03D3.14  | 0.140355850028149     |             |
| AGIWUR481                                                                         |    |   |         |         |                |          |           |                       |             |
| CB4856                                                                            | HS | V | 2856082 | 2857942 | WBGene00005634 | srj-55   | Y45G12A.1 | -0.181103771353708    |             |
| AGIWUR42694                                                                       |    |   |         |         |                |          |           |                       |             |
| CB4856                                                                            | HS | V | 2858660 | 2859838 | WBGene00005633 | srj-54   | F37B4.11  | -0.142773509214985    |             |
| AGIWUR8532                                                                        |    |   |         |         |                |          |           |                       |             |
| CB4856                                                                            | HS | V | 2860130 | 2861605 | WBGene00005476 | srh-270  | F37B4.5   | 0.0418494718382458    | AGIWUR30782 |
| CB4856                                                                            | HS | V | 2863333 | 2865001 | WBGene00005478 | srh-272  | F37B4.4   | -0.202679398075125    | AGIWUR6780  |
| CB4856                                                                            | HS | V | 2865199 | 2867284 | WBGene00005447 | srh-240  | F37B4.13  | -0.214376698766965    |             |
| AGIWUR1223                                                                        |    |   |         |         |                |          |           |                       |             |

|                                                                                               |    |   |         |         |                |          |          |                      |             |
|-----------------------------------------------------------------------------------------------|----|---|---------|---------|----------------|----------|----------|----------------------|-------------|
| CB4856                                                                                        | HS | V | 2867792 | 2869603 | WBGene00005448 | srh-241  | F37B4.6  | 0.291103026919862    | AGIWUR3234  |
| CB4856                                                                                        | HS | V | 2870427 | 2872106 | WBGene00005449 | srh-243  | F37B4.3  | 0.0349001972424139   | AGIWUR44846 |
| CB4856                                                                                        | HS | V | 2872465 | 2875600 | WBGene00018138 | folr-2   | F37B4.7  | -0.178421161008339   |             |
| AGIWUR5700;AGIWUR9537;AGIWUR14965;AGIWUR15205;AGIWUR27435;AGIWUR30621;AGIWUR32404;AGIWUR43045 |    |   |         |         |                |          |          |                      |             |
| CB4856                                                                                        | HS | V | 2875734 | 2877609 | WBGene00018140 | F37B4.10 | F37B4.10 | -0.211301957229798   |             |
| AGIWUR38144                                                                                   |    |   |         |         |                |          |          |                      |             |
| CB4856                                                                                        | HS | V | 2877804 | 2879901 | WBGene00006104 | str-39   | F37B4.12 | -0.00852254044805889 |             |
| AGIWUR16037                                                                                   |    |   |         |         |                |          |          |                      |             |
| CB4856                                                                                        | HS | V | 2881393 | 2883753 | WBGene00002055 | ifc-1    | F37B4.2  | 0.236830798980005    | AGIWUR20904 |
| CB4856                                                                                        | HS | V | 2884711 | 2886425 | WBGene00018139 | sre-24   | F37B4.9  | 0.0402587024144063   | AGIWUR25959 |
| CB4856                                                                                        | HS | V | 2887191 | 2888781 | WBGene00005751 | srw-4    | F37B4.8  | 0.237113367817397    | AGIWUR17156 |
| CB4856                                                                                        | HS | V | 2889302 | 2890029 | WBGene00044523 | F37B4.14 | F37B4.14 | 0.017002795587151    |             |
| AGIWUR7633;AGIWUR13078;AGIWUR13575;AGIWUR31735                                                |    |   |         |         |                |          |          |                      |             |
| CB4856                                                                                        | HS | V | 2893276 | 2895584 | WBGene00005344 | srh-127  | F37B4.1  | -0.0204197140481126  | AGIWUR1744  |
| CB4856                                                                                        | HS | V | 2896637 | 2898434 | WBGene00016281 | pals-32  | C31B8.4  | 0.733351572750514    |             |
| AGIWUR7768;AGIWUR16666;AGIWUR29442                                                            |    |   |         |         |                |          |          |                      |             |
| CB4856                                                                                        | HS | V | 2898436 | 2899967 | WBGene00006111 | str-46   | C31B8.6  | 0.164040199267597    | AGIWUR23220 |
| CB4856                                                                                        | HS | V | 2900448 | 2903355 | WBGene00016282 | C31B8.7  | C31B8.7  | 0.154324450377434    | AGIWUR647   |
| CB4856                                                                                        | HS | V | 2905767 | 2909698 | WBGene00016283 | zmp-3    | C31B8.8  | -0.0464077683489101  | AGIWUR28295 |
| CB4856                                                                                        | HS | V | 2911082 | 2913001 | WBGene00016284 | C31B8.9  | C31B8.9  | 0.1512754411489      | AGIWUR31880 |
| CB4856                                                                                        | HS | V | 2914248 | 2916172 | WBGene00005362 | srh-146  | C31B8.3  | 0.161747766360618    |             |
| AGIWUR10530;AGIWUR20427;AGIWUR23935;AGIWUR23968;AGIWUR32765                                   |    |   |         |         |                |          |          |                      |             |
| CB4856                                                                                        | HS | V | 2916523 | 2918034 | WBGene00016280 | C31B8.2  | C31B8.2  | -0.039604433571002   |             |
| AGIWUR4147;AGIWUR9281;AGIWUR9646;AGIWUR12282;AGIWUR15923;AGIWUR18521;AGIWUR19038;AGIWUR43160  |    |   |         |         |                |          |          |                      |             |
| CB4856                                                                                        | HS | V | 2918830 | 2920008 | WBGene00005630 | srj-51   | C31B8.10 | 0.200297779212271    |             |
| AGIWUR20464;AGIWUR28135;AGIWUR28956;AGIWUR32501;AGIWUR33894                                   |    |   |         |         |                |          |          |                      |             |
| CB4856                                                                                        | HS | V | 2920600 | 2922694 | WBGene00005261 | srh-38   | C31B8.11 | 0.0492029745503189   |             |
| AGIWUR43647                                                                                   |    |   |         |         |                |          |          |                      |             |
| CB4856                                                                                        | HS | V | 2925193 | 2927722 | WBGene00016285 | C31B8.12 | C31B8.12 | -0.014271943894423   |             |
| AGIWUR15874                                                                                   |    |   |         |         |                |          |          |                      |             |
| CB4856                                                                                        | HS | V | 2930053 | 2931170 | WBGene00044602 | C31B8.16 | C31B8.16 | 0.0446177203580693   |             |
| AGIWUR3699;AGIWUR42580                                                                        |    |   |         |         |                |          |          |                      |             |
| CB4856                                                                                        | HS | V | 2931552 | 2932988 | WBGene00016279 | C31B8.1  | C31B8.1  | 0.116380623491508    | AGIWUR38619 |
| CB4856                                                                                        | HS | V | 2933143 | 2934175 | WBGene00005453 | srh-247  | C31B8.13 | 0.212103332227199    |             |
| AGIWUR18435                                                                                   |    |   |         |         |                |          |          |                      |             |
| CB4856                                                                                        | HS | V | 2935178 | 2936199 | WBGene00005455 | srh-249  | C31B8.14 | 0.397004161516373    |             |
| AGIWUR23607                                                                                   |    |   |         |         |                |          |          |                      |             |
| CB4856                                                                                        | HS | V | 2937311 | 2938597 | WBGene00005888 | srw-141  | H27D07.2 | -0.0297523437817215  |             |
| AGIWUR4724;AGIWUR39410                                                                        |    |   |         |         |                |          |          |                      |             |

|                                                 |   |                 |                |                  |                      |             |
|-------------------------------------------------|---|-----------------|----------------|------------------|----------------------|-------------|
| CB4856 HS<br>AGIWUR2779                         | V | 2939603 2941505 | WBGene00005890 | srw-143 H27D07.3 | -0.0782464786960801  |             |
| CB4856 HS<br>AGIWUR8026                         | V | 2942571 2943959 | WBGene00005884 | srw-137 H27D07.4 | 0.0776262647167423   |             |
| CB4856 HS<br>AGIWUR13211                        | V | 2944379 2945682 | WBGene00005308 | srh-87 H27D07.6  | -0.0129838480714985  |             |
| CB4856 HS<br>AGIWUR26758                        | V | 2946813 2948416 | WBGene00005875 | srw-128 H27D07.1 | 0.0882670875123273   |             |
| CB4856 HS<br>AGIWUR25472                        | V | 2950712 2952202 | WBGene00005869 | srw-122 H27D07.5 | 0.317360560876617    |             |
| CB4856 HS<br>AGIWUR1897;AGIWUR37067             | V | 2953193 2954289 | WBGene00005873 | srw-126 H05B21.1 | 0.0850789516145167   |             |
| CB4856 HS<br>AGIWUR39328                        | V | 2954404 2955442 | WBGene00005454 | srh-248 H05B21.2 | 0.243670569710799    |             |
| CB4856 HS<br>AGIWUR29592                        | V | 2957016 2958302 | WBGene00005889 | srw-142 H05B21.3 | -0.00513622359481403 |             |
| CB4856 HS                                       | V | 2961632 2963060 | WBGene00005885 | srw-138 C44C3.3  | 0.016891099737828    | AGIWUR39049 |
| CB4856 HS<br>AGIWUR13677;AGIWUR28717            | V | 2965422 2966702 | WBGene00005863 | srw-116 C44C3.10 | -0.263806680962101   |             |
| CB4856 HS<br>AGIWUR9864;AGIWUR24809             | V | 2969349 2971164 | WBGene00005307 | srh-86 C44C3.4   | -0.153313691373529   |             |
| CB4856 HS                                       | V | 2971949 2973485 | WBGene00005876 | srw-129 C44C3.2  | 0.122964558286347    | AGIWUR12878 |
| CB4856 HS<br>AGIWUR33523                        | V | 2974029 2975385 | WBGene00005870 | srw-123 C44C3.11 | -0.14848225415686    |             |
| CB4856 HS                                       | V | 2976587 2977886 | WBGene00005871 | srw-124 C44C3.1  | -0.118885212371482   | AGIWUR15851 |
| CB4856 HS                                       | V | 2978760 2980078 | WBGene00005865 | srw-118 C44C3.5  | -0.0317540523703546  | AGIWUR29350 |
| CB4856 HS                                       | V | 2982152 2983451 | WBGene00005864 | srw-117 C44C3.6  | -0.0120307639983377  | AGIWUR23329 |
| CB4856 HS<br>AGIWUR23695;AGIWUR44571            | V | 2984077 2985409 | WBGene00005886 | srw-139 C44C3.7  | 0.0611341996957355   |             |
| CB4856 HS                                       | V | 2986192 2987507 | WBGene00005306 | srh-85 C44C3.8   | 0.0615454395296986   | AGIWUR31725 |
| CB4856 HS<br>AGIWUR2561;AGIWUR25386;AGIWUR32591 | V | 2988460 2990091 | WBGene00005305 | srh-84 K12D9.2   | 0.114333974275752    |             |
| CB4856 HS                                       | V | 2990313 2991585 | WBGene00005868 | srw-121 K12D9.3  | -0.13960883527032    | AGIWUR8427  |
| CB4856 HS                                       | V | 2992622 2993916 | WBGene00005862 | srw-115 K12D9.4  | 0.0880113816604142   | AGIWUR18613 |
| CB4856 HS                                       | V | 2994899 2996205 | WBGene00005867 | srw-120 K12D9.5  | 0.0603115215993535   | AGIWUR28704 |
| CB4856 HS                                       | V | 2997092 2997917 | WBGene00005872 | srw-125 K12D9.6  | -0.0334547977480995  | AGIWUR18143 |
| CB4856 HS                                       | V | 2998542 2999836 | WBGene00005866 | srw-119 K12D9.7  | 0.716071498918191    | AGIWUR20695 |
| CB4856 HS<br>AGIWUR11996;AGIWUR30855            | V | 3000426 3002016 | WBGene00005861 | srw-114 K12D9.8  | -0.135600867422809   |             |

|                                               |    |   |         |         |                |           |           |                     |             |
|-----------------------------------------------|----|---|---------|---------|----------------|-----------|-----------|---------------------|-------------|
| CB4856                                        | HS | V | 3004141 | 3006064 | WBGene00005859 | srw-112   | K12D9.9   | 0.186153057089774   | AGIWUR21370 |
| CB4856                                        | HS | V | 3006728 | 3008123 | WBGene00005878 | srw-131   | K12D9.13  | 0.206761094412086   |             |
| AGIWUR23697;AGIWUR25350                       |    |   |         |         |                |           |           |                     |             |
| CB4856                                        | HS | V | 3008907 | 3010568 | WBGene00005883 | srw-136   | K12D9.10  | 0.0802639945204113  |             |
| AGIWUR6161                                    |    |   |         |         |                |           |           |                     |             |
| CB4856                                        | HS | V | 3010927 | 3011671 | WBGene00005882 | srw-135   | K12D9.11  | -0.0171213726102772 |             |
| AGIWUR15455;AGIWUR35172                       |    |   |         |         |                |           |           |                     |             |
| CB4856                                        | HS | V | 3014485 | 3016034 | WBGene00019675 | K12D9.1   | K12D9.1   | 0.0271884341658293  | AGIWUR7110  |
| CB4856                                        | HS | V | 3018361 | 3021406 | WBGene00077758 | irld-12   | K12D9.14  | -0.075603109861536  |             |
| AGIWUR16081                                   |    |   |         |         |                |           |           |                     |             |
| CB4856                                        | HS | V | 3024520 | 3027931 | WBGene00019105 | asp-8     | F59D6.3   | 0.161461128295741   | AGIWUR35580 |
| CB4856                                        | HS | V | 3028294 | 3029583 | WBGene00019104 | asp-7     | F59D6.2   | 0.247388173938212   | AGIWUR31111 |
| CB4856                                        | HS | V | 3029655 | 3032443 | WBGene00019106 | irld-38   | F59D6.4   | 0.0177299216947935  | AGIWUR24135 |
| CB4856                                        | HS | V | 3032578 | 3034336 | WBGene00005755 | srw-8     | F59D6.5   | -0.369600040543643  | AGIWUR2680  |
| CB4856                                        | HS | V | 3035130 | 3037689 | WBGene00019107 | irld-10   | F59D6.6   | -0.274245719903729  | AGIWUR22111 |
| CB4856                                        | HS | V | 3037812 | 3039382 | WBGene00019108 | chpf-2    | F59D6.7   | -0.204401024479289  | AGIWUR34475 |
| CB4856                                        | HS | V | 3045144 | 3052149 | WBGene00019103 | F59D6.1   | F59D6.1   | -0.0912430265665325 | AGIWUR3414  |
| CB4856                                        | HS | V | 3054553 | 3055667 | WBGene00016855 | C50H11.8  | C50H11.8  | -0.351131492569314  |             |
| AGIWUR27749                                   |    |   |         |         |                |           |           |                     |             |
| CB4856                                        | HS | V | 3057699 | 3059096 | WBGene00006271 | str-244   | C50H11.9  | -0.273231688918145  |             |
| AGIWUR750                                     |    |   |         |         |                |           |           |                     |             |
| CB4856                                        | HS | V | 3059640 | 3062178 | WBGene00016856 | srt-15    | C50H11.10 | -0.293918049016213  |             |
| AGIWUR24385                                   |    |   |         |         |                |           |           |                     |             |
| CB4856                                        | HS | V | 3063160 | 3064518 | WBGene00016857 | srt-16    | C50H11.11 | -0.409489147542114  |             |
| AGIWUR21675                                   |    |   |         |         |                |           |           |                     |             |
| CB4856                                        | HS | V | 3066228 | 3067497 | WBGene00005400 | srh-185   | C50H11.7  | 0.383274096117094   |             |
| AGIWUR8079                                    |    |   |         |         |                |           |           |                     |             |
| CB4856                                        | HS | V | 3068135 | 3069201 | WBGene00006105 | str-40    | C50H11.12 | -0.159188340654357  |             |
| AGIWUR10195                                   |    |   |         |         |                |           |           |                     |             |
| CB4856                                        | HS | V | 3069898 | 3071648 | WBGene00016858 | C50H11.13 | C50H11.13 | -0.0609586607414165 |             |
| AGIWUR5643;AGIWUR9917;AGIWUR18242;AGIWUR24776 |    |   |         |         |                |           |           |                     |             |
| CB4856                                        | HS | V | 3075407 | 3077173 | WBGene00016854 | srt-10    | C50H11.6  | -0.114085068378795  |             |
| AGIWUR36442                                   |    |   |         |         |                |           |           |                     |             |
| CB4856                                        | HS | V | 3078072 | 3079300 | WBGene00016853 | srt-9     | C50H11.5  | 0.201126171173914   |             |
| AGIWUR7906                                    |    |   |         |         |                |           |           |                     |             |
| CB4856                                        | HS | V | 3079449 | 3080892 | WBGene00016859 | srt-5     | C50H11.14 | 0.133409797192041   |             |
| AGIWUR35025                                   |    |   |         |         |                |           |           |                     |             |
| CB4856                                        | HS | V | 3081771 | 3083027 | WBGene00016852 | srt-7     | C50H11.4  | 0.095944726778562   |             |
| AGIWUR42233                                   |    |   |         |         |                |           |           |                     |             |

|                                                            |    |   |         |         |                |           |           |                     |             |
|------------------------------------------------------------|----|---|---------|---------|----------------|-----------|-----------|---------------------|-------------|
| CB4856                                                     | HS | V | 3083645 | 3085127 | WBGene00016851 | srt-71    | C50H11.3  | 0.0702013313298329  |             |
| AGIWUR15342;AGIWUR18706                                    |    |   |         |         |                |           |           |                     |             |
| CB4856                                                     | HS | V | 3086560 | 3087986 | WBGene00016850 | srt-8     | C50H11.2  | 0.0712523373731662  |             |
| AGIWUR25845                                                |    |   |         |         |                |           |           |                     |             |
| CB4856                                                     | HS | V | 3089074 | 3091351 | WBGene00016849 | acs-21    | C50H11.1  | 0.0684337500720389  |             |
| AGIWUR12607;AGIWUR13127;AGIWUR34615                        |    |   |         |         |                |           |           |                     |             |
| CB4856                                                     | HS | V | 3091815 | 3094501 | WBGene00016860 | cyp-33C9  | C50H11.15 | 0.0530652773599893  |             |
| AGIWUR35734                                                |    |   |         |         |                |           |           |                     |             |
| CB4856                                                     | HS | V | 3095090 | 3096177 | WBGene00006132 | str-70    | C50H11.16 | 0.0143828031304629  |             |
| AGIWUR12740;AGIWUR36852                                    |    |   |         |         |                |           |           |                     |             |
| CB4856                                                     | HS | V | 3097130 | 3098688 | WBGene00016861 | C50H11.17 | C50H11.17 | 0.0184493174948628  |             |
| AGIWUR26203                                                |    |   |         |         |                |           |           |                     |             |
| CB4856                                                     | HS | V | 3103128 | 3104234 | WBGene00006128 | str-66    | Y73C8C.5  | -0.0870855611403378 |             |
| AGIWUR21799                                                |    |   |         |         |                |           |           |                     |             |
| CB4856                                                     | HS | V | 3104790 | 3105910 | WBGene00006131 | str-69    | Y73C8C.11 | 0.0531874049548353  |             |
| AGIWUR16419                                                |    |   |         |         |                |           |           |                     |             |
| CB4856                                                     | HS | V | 3106228 | 3107550 | WBGene00006130 | str-68    | Y73C8C.6  | -0.0165183923572547 |             |
| AGIWUR38915                                                |    |   |         |         |                |           |           |                     |             |
| CB4856                                                     | HS | V | 3107792 | 3109664 | WBGene00022264 | sdz-34    | Y73C8C.7  | -0.0439789603007714 |             |
| AGIWUR9429                                                 |    |   |         |         |                |           |           |                     |             |
| CB4856                                                     | HS | V | 3110089 | 3113851 | WBGene00022265 | Y73C8C.8  | Y73C8C.8  | -0.275846721118673  |             |
| AGIWUR8522                                                 |    |   |         |         |                |           |           |                     |             |
| CB4856                                                     | HS | V | 3115303 | 3118128 | WBGene00022262 | Y73C8C.3  | Y73C8C.3  | -0.267522604033487  |             |
| AGIWUR20824                                                |    |   |         |         |                |           |           |                     |             |
| CB4856                                                     | HS | V | 3118377 | 3120323 | WBGene00022261 | clec-210  | Y73C8C.2  | -0.439036468610885  |             |
| AGIWUR326                                                  |    |   |         |         |                |           |           |                     |             |
| CB4856                                                     | HS | V | 3122969 | 3124222 | WBGene00006269 | str-242   | Y73C8C.1  | -0.0454981278977922 |             |
| AGIWUR33082;AGIWUR37993                                    |    |   |         |         |                |           |           |                     |             |
| CB4856                                                     | HS | V | 3125212 | 3125469 | WBGene00044524 | Y73C8C.12 | Y73C8C.12 | -0.0282544990228892 |             |
| AGIWUR1216;AGIWUR12325;AGIWUR26265;AGIWUR28602;AGIWUR39102 |    |   |         |         |                |           |           |                     |             |
| CB4856                                                     | HS | V | 3125566 | 3127770 | WBGene00022267 | Y73C8C.10 | Y73C8C.10 | 0.0225188171905053  |             |
| AGIWUR10724;AGIWUR12344;AGIWUR40970                        |    |   |         |         |                |           |           |                     |             |
| CB4856                                                     | HS | V | 3129125 | 3133406 | WBGene00017174 | tat-6     | F02C9.3   | -0.117367726261502  |             |
| AGIWUR38702;AGIWUR40033;AGIWUR44141                        |    |   |         |         |                |           |           |                     |             |
| CB4856                                                     | HS | V | 3133705 | 3137382 | WBGene00017173 | F02C9.2   | F02C9.2   | 0.0476736909860023  |             |
| AGIWUR2321;AGIWUR4262;AGIWUR29080                          |    |   |         |         |                |           |           |                     |             |
| CB4856                                                     | HS | V | 3137431 | 3138588 | WBGene00017175 | ir1d-3    | F02C9.4   | 0.0446173747024634  | AGIWUR39610 |
| CB4856                                                     | HS | V | 3138703 | 3139090 | WBGene00017172 | F02C9.1   | F02C9.1   | 0.171899282550724   | AGIWUR34685 |
| CB4856                                                     | HS | V | 3139931 | 3141290 | WBGene00016475 | srab-9    | C36C5.6   | -0.0848774375404533 |             |

AGIWUR11504;AGIWUR26115;AGIWUR32463

|        |    |   |         |         |                |         |          |                    |             |
|--------|----|---|---------|---------|----------------|---------|----------|--------------------|-------------|
| CB4856 | HS | V | 3143094 | 3144597 | WBGene00016476 | srab-10 | C36C5.7  | 0.416688920703724  | AGIWUR23471 |
| CB4856 | HS | V | 3145203 | 3147032 | WBGene00016477 | srab-11 | C36C5.8  | 0.0270161244633726 | AGIWUR35579 |
| CB4856 | HS | V | 3148215 | 3149489 | WBGene00016478 | srt-72  | C36C5.9  | 0.681365792548176  | AGIWUR19941 |
| CB4856 | HS | V | 3150488 | 3151962 | WBGene00016479 | srab-6  | C36C5.10 | 0.136543887697529  |             |

AGIWUR37693

|        |    |   |         |         |                |        |          |                    |  |
|--------|----|---|---------|---------|----------------|--------|----------|--------------------|--|
| CB4856 | HS | V | 3153485 | 3155172 | WBGene00016480 | srab-7 | C36C5.11 | -0.148914268719786 |  |
|--------|----|---|---------|---------|----------------|--------|----------|--------------------|--|

AGIWUR42020

|        |    |   |         |         |                |          |          |                    |             |
|--------|----|---|---------|---------|----------------|----------|----------|--------------------|-------------|
| CB4856 | HS | V | 3157077 | 3157870 | WBGene00016474 | C36C5.5  | C36C5.5  | -0.129352740392779 | AGIWUR24051 |
| CB4856 | HS | V | 3158406 | 3159165 | WBGene00016481 | C36C5.12 | C36C5.12 | 0.370517650785919  |             |

AGIWUR4426

|        |    |   |         |         |                |          |          |                    |             |
|--------|----|---|---------|---------|----------------|----------|----------|--------------------|-------------|
| CB4856 | HS | V | 3166560 | 3167268 | WBGene00016473 | C36C5.4  | C36C5.4  | 0.112632551217477  | AGIWUR29268 |
| CB4856 | HS | V | 3167968 | 3168750 | WBGene00016484 | C36C5.15 | C36C5.15 | 0.0361720589273773 |             |

AGIWUR21646

|        |    |   |         |         |                |        |          |                    |             |
|--------|----|---|---------|---------|----------------|--------|----------|--------------------|-------------|
| CB4856 | HS | V | 3170138 | 3171408 | WBGene00016472 | srbc-6 | C36C5.3  | 2.68262104220456   | AGIWUR19765 |
| CB4856 | HS | V | 3176461 | 3177978 | WBGene00016471 | srab-8 | C36C5.2  | -0.335684218744209 | AGIWUR31318 |
| CB4856 | HS | V | 3179527 | 3181064 | WBGene00016470 | srab-5 | C36C5.1  | -0.455800027673845 | AGIWUR38960 |
| CB4856 | HS | V | 3188350 | 3189841 | WBGene00002246 | lag-2  | Y73C8B.4 | 0.0410046088599589 |             |

AGIWUR4259

|        |    |   |         |         |                |          |          |                   |  |
|--------|----|---|---------|---------|----------------|----------|----------|-------------------|--|
| CB4856 | HS | V | 3191302 | 3193233 | WBGene00022260 | Y73C8B.3 | Y73C8B.3 | 0.112725259047281 |  |
|--------|----|---|---------|---------|----------------|----------|----------|-------------------|--|

AGIWUR26298

|        |    |   |         |         |                |          |          |                    |  |
|--------|----|---|---------|---------|----------------|----------|----------|--------------------|--|
| CB4856 | HS | V | 3193394 | 3195002 | WBGene00022259 | Y73C8B.2 | Y73C8B.2 | 0.0805065179417532 |  |
|--------|----|---|---------|---------|----------------|----------|----------|--------------------|--|

AGIWUR43261

|        |    |   |         |         |                |          |          |                     |  |
|--------|----|---|---------|---------|----------------|----------|----------|---------------------|--|
| CB4856 | HS | V | 3197268 | 3198333 | WBGene00044525 | Y73C8B.5 | Y73C8B.5 | -0.0681600045256401 |  |
|--------|----|---|---------|---------|----------------|----------|----------|---------------------|--|

AGIWUR5299;AGIWUR26367;AGIWUR32194;AGIWUR34388;AGIWUR40466

|        |    |   |         |         |                |         |         |                     |             |
|--------|----|---|---------|---------|----------------|---------|---------|---------------------|-------------|
| CB4856 | HS | V | 3210189 | 3223218 | WBGene00000168 | apx-1   | K08D9.3 | -0.346936090119677  | AGIWUR37888 |
| CB4856 | HS | V | 3223612 | 3227058 | WBGene00019526 | K08D9.5 | K08D9.5 | -0.0288318607744196 |             |

AGIWUR6970;AGIWUR8617;AGIWUR19552;AGIWUR20987

|        |    |   |         |         |                |         |          |                     |             |
|--------|----|---|---------|---------|----------------|---------|----------|---------------------|-------------|
| CB4856 | HS | V | 3227796 | 3230128 | WBGene00019524 | K08D9.2 | K08D9.2  | 0.0474275580957473  | AGIWUR21368 |
| CB4856 | HS | V | 3231398 | 3234987 | WBGene00019527 | K08D9.6 | K08D9.6  | -0.0852742238871915 | AGIWUR23029 |
| CB4856 | HS | V | 3236874 | 3240436 | WBGene00006084 | str-16  | Y73C8A.1 | 0.0621501931492645  |             |

AGIWUR24411;AGIWUR28177

|        |    |   |         |         |                |        |           |                    |  |
|--------|----|---|---------|---------|----------------|--------|-----------|--------------------|--|
| CB4856 | HS | V | 3241424 | 3242636 | WBGene00005599 | srj-11 | T28A11.12 | -0.120620321916828 |  |
|--------|----|---|---------|---------|----------------|--------|-----------|--------------------|--|

AGIWUR41289

|        |    |   |         |         |                |        |           |                     |  |
|--------|----|---|---------|---------|----------------|--------|-----------|---------------------|--|
| CB4856 | HS | V | 3243287 | 3244495 | WBGene00001771 | gst-23 | T28A11.11 | -0.0678668986749433 |  |
|--------|----|---|---------|---------|----------------|--------|-----------|---------------------|--|

AGIWUR10803;AGIWUR16486;AGIWUR36289;AGIWUR37107

|        |    |   |         |         |                |       |           |                   |  |
|--------|----|---|---------|---------|----------------|-------|-----------|-------------------|--|
| CB4856 | HS | V | 3245003 | 3246722 | WBGene00005595 | srj-7 | T28A11.10 | 0.538705688496476 |  |
|--------|----|---|---------|---------|----------------|-------|-----------|-------------------|--|

AGIWUR19781

|        |    |   |         |         |                |       |          |                     |  |
|--------|----|---|---------|---------|----------------|-------|----------|---------------------|--|
| CB4856 | HS | V | 3247815 | 3249140 | WBGene00005596 | srj-8 | T28A11.9 | -0.0520733484373901 |  |
|--------|----|---|---------|---------|----------------|-------|----------|---------------------|--|

|                                                                        |   |         |         |                |                   |           |                     |
|------------------------------------------------------------------------|---|---------|---------|----------------|-------------------|-----------|---------------------|
| AGIWUR41430                                                            |   |         |         |                |                   |           |                     |
| CB4856 HS                                                              | V | 3249743 | 3250205 | WBGene00020875 | T28A11.13         | T28A11.13 | -0.0570705121082575 |
| AGIWUR12351                                                            |   |         |         |                |                   |           |                     |
| CB4856 HS                                                              | V | 3253469 | 3254590 | WBGene00006123 | str-58 T28A11.8   |           | 0.0224776282091717  |
| AGIWUR28675;AGIWUR34848                                                |   |         |         |                |                   |           |                     |
| CB4856 HS                                                              | V | 3254602 | 3256151 | WBGene00020877 | srt-63 T28A11.15  |           | 0.191899814169798   |
| AGIWUR20639                                                            |   |         |         |                |                   |           |                     |
| CB4856 HS                                                              | V | 3257577 | 3258289 | WBGene00044526 | T28A11.22         | T28A11.22 | -0.156940299344724  |
| AGIWUR8845;AGIWUR24114;AGIWUR31464;AGIWUR39416                         |   |         |         |                |                   |           |                     |
| CB4856 HS                                                              | V | 3258372 | 3259218 | WBGene00020878 | T28A11.16         | T28A11.16 | 0.139150404022617   |
| AGIWUR33578                                                            |   |         |         |                |                   |           |                     |
| CB4856 HS                                                              | V | 3260375 | 3262082 | WBGene00020874 | srbc-5 T28A11.7   |           | -0.0729245264326401 |
| AGIWUR12723                                                            |   |         |         |                |                   |           |                     |
| CB4856 HS                                                              | V | 3262571 | 3263235 | WBGene00020873 | T28A11.6          | T28A11.6  | 0.0945085905163312  |
| AGIWUR7694;AGIWUR29877;AGIWUR32742;AGIWUR38034;AGIWUR40987;AGIWUR44557 |   |         |         |                |                   |           |                     |
| CB4856 HS                                                              | V | 3266828 | 3268050 | WBGene00020880 | T28A11.18         | T28A11.18 | 0.139394643815899   |
| AGIWUR38778                                                            |   |         |         |                |                   |           |                     |
| CB4856 HS                                                              | V | 3268809 | 3269510 | WBGene00020881 | T28A11.19         | T28A11.19 | 0.0127350768478225  |
| AGIWUR7073                                                             |   |         |         |                |                   |           |                     |
| CB4856 HS                                                              | V | 3270553 | 3271242 | WBGene00020872 | T28A11.5          | T28A11.5  | 1.00522335848735    |
| AGIWUR18249;AGIWUR35583                                                |   |         |         |                |                   |           |                     |
| CB4856 HS                                                              | V | 3271395 | 3273256 | WBGene00020882 | T28A11.20         | T28A11.20 | -0.391678990091147  |
| AGIWUR17791                                                            |   |         |         |                |                   |           |                     |
| CB4856 HS                                                              | V | 3274054 | 3274374 | WBGene00020871 | T28A11.4          | T28A11.4  | -0.324500388818635  |
| AGIWUR24975                                                            |   |         |         |                |                   |           |                     |
| CB4856 HS                                                              | V | 3275333 | 3276110 | WBGene00020870 | T28A11.3          | T28A11.3  | 0.217232331699922   |
| AGIWUR35661                                                            |   |         |         |                |                   |           |                     |
| CB4856 HS                                                              | V | 3276956 | 3278147 | WBGene00020883 | fbxa-64 T28A11.21 |           | -0.0385731266985179 |
| AGIWUR21947                                                            |   |         |         |                |                   |           |                     |
| CB4856 HS                                                              | V | 3280379 | 3281169 | WBGene00020869 | T28A11.2          | T28A11.2  | -0.191669457104707  |
| AGIWUR45206                                                            |   |         |         |                |                   |           |                     |
| CB4856 HS                                                              | V | 3281828 | 3282704 | WBGene00269355 | T28A11.25         | T28A11.25 | 0.0709600834892248  |
| AGIWUR7972                                                             |   |         |         |                |                   |           |                     |
| CB4856 HS                                                              | V | 3283257 | 3284930 | WBGene00006127 | str-64 T28A11.1   |           | -0.102343731352667  |
| AGIWUR3736;AGIWUR6694                                                  |   |         |         |                |                   |           |                     |
| CB4856 HS                                                              | V | 3286432 | 3287460 | WBGene00018057 | F35F10.7          | F35F10.7  | 0.00222380386947041 |
| AGIWUR4804                                                             |   |         |         |                |                   |           |                     |
| CB4856 HS                                                              | V | 3287995 | 3289385 | WBGene00018056 | F35F10.6          | F35F10.6  | -0.0811344698109702 |
| AGIWUR20667                                                            |   |         |         |                |                   |           |                     |



|                                                           |    |   |         |         |                |           |           |                     |             |
|-----------------------------------------------------------|----|---|---------|---------|----------------|-----------|-----------|---------------------|-------------|
| CB4856                                                    | HS | V | 3289635 | 3293435 | WBGene00018054 | F35F10.4  | F35F10.4  | -0.108881466421718  |             |
| AGIWUR4521;AGIWUR5943;AGIWUR14466;AGIWUR23650;AGIWUR36797 |    |   |         |         |                |           |           |                     |             |
| CB4856                                                    | HS | V | 3296108 | 3297864 | WBGene00006013 | srx-122   | F35F10.8  | -0.110065379275721  |             |
| AGIWUR6060                                                |    |   |         |         |                |           |           |                     |             |
| CB4856                                                    | HS | V | 3298885 | 3301998 | WBGene00018058 | srbc-1    | F35F10.9  | 0.0956450420909833  |             |
| AGIWUR12295                                               |    |   |         |         |                |           |           |                     |             |
| CB4856                                                    | HS | V | 3302415 | 3307363 | WBGene00018059 | F35F10.10 | F35F10.10 | -0.13061251234253   |             |
| AGIWUR44417                                               |    |   |         |         |                |           |           |                     |             |
| CB4856                                                    | HS | V | 3308469 | 3309689 | WBGene00018053 | srbc-3    | F35F10.2  | 0.0668871242596936  |             |
| AGIWUR20747                                               |    |   |         |         |                |           |           |                     |             |
| CB4856                                                    | HS | V | 3310123 | 3312117 | WBGene00018060 | arrd-18   | F35F10.11 | -0.331743105095933  |             |
| AGIWUR34169                                               |    |   |         |         |                |           |           |                     |             |
| CB4856                                                    | HS | V | 3313286 | 3315516 | WBGene00018061 | arrd-19   | F35F10.12 | 0.0419771395491466  |             |
| AGIWUR3862;AGIWUR22827                                    |    |   |         |         |                |           |           |                     |             |
| CB4856                                                    | HS | V | 3320720 | 3324279 | WBGene00015882 | C17B7.8   | C17B7.8   | -0.111569158034293  | AGIWUR4566  |
| CB4856                                                    | HS | V | 3330915 | 3332113 | WBGene00015883 | C17B7.9   | C17B7.9   | -0.127170621446732  | AGIWUR42983 |
| CB4856                                                    | HS | V | 3333635 | 3339070 | WBGene00015879 | C17B7.5   | C17B7.5   | 0.00763339006204866 | AGIWUR30643 |
| CB4856                                                    | HS | V | 3339348 | 3340092 | WBGene00015878 | C17B7.4   | C17B7.4   | 0.0406960133667944  |             |
| AGIWUR14925;AGIWUR28398                                   |    |   |         |         |                |           |           |                     |             |
| CB4856                                                    | HS | V | 3340179 | 3342006 | WBGene00015884 | C17B7.10  | C17B7.10  | -0.167372952595506  |             |
| AGIWUR25791                                               |    |   |         |         |                |           |           |                     |             |
| CB4856                                                    | HS | V | 3345307 | 3346484 | WBGene00015885 | fbxa-65   | C17B7.11  | 0.405060063289865   |             |
| AGIWUR19694                                               |    |   |         |         |                |           |           |                     |             |
| CB4856                                                    | HS | V | 3350177 | 3350967 | WBGene00268213 | C17B7.15  | C17B7.15  | 0.0791665583781178  |             |
| AGIWUR5840                                                |    |   |         |         |                |           |           |                     |             |
| CB4856                                                    | HS | V | 3354667 | 3355513 | WBGene00015436 | C04E12.6  | C04E12.6  | 0.40643026002172    |             |
| AGIWUR22660                                               |    |   |         |         |                |           |           |                     |             |
| CB4856                                                    | HS | V | 3355848 | 3357193 | WBGene00015437 | scrm-3    | C04E12.7  | -0.163004298516718  |             |
| AGIWUR284;AGIWUR27159;AGIWUR40065                         |    |   |         |         |                |           |           |                     |             |
| CB4856                                                    | HS | V | 3358567 | 3361093 | WBGene00015435 | C04E12.5  | C04E12.5  |                     |             |
| -0.00219290870887079 AGIWUR14815                          |    |   |         |         |                |           |           |                     |             |
| CB4856                                                    | HS | V | 3362775 | 3368340 | WBGene00015434 | C04E12.4  | C04E12.4  | -0.10373492414759   |             |
| AGIWUR40921                                               |    |   |         |         |                |           |           |                     |             |
| CB4856                                                    | HS | V | 3370942 | 3372773 | WBGene00006012 | srx-121   | C04E12.8  | -0.0555680134934375 |             |
| AGIWUR41071                                               |    |   |         |         |                |           |           |                     |             |
| CB4856                                                    | HS | V | 3374362 | 3377073 | WBGene00015438 | srbc-2    | C04E12.9  | -0.240293397648349  |             |
| AGIWUR9314;AGIWUR10084;AGIWUR15107;AGIWUR26825            |    |   |         |         |                |           |           |                     |             |
| CB4856                                                    | HS | V | 3377536 | 3382850 | WBGene00015439 | C04E12.10 | C04E12.10 | -0.0502531080910726 |             |
| AGIWUR28568                                               |    |   |         |         |                |           |           |                     |             |

|                                                                                  |   |         |         |                |          |           |                      |             |
|----------------------------------------------------------------------------------|---|---------|---------|----------------|----------|-----------|----------------------|-------------|
| CB4856 HS                                                                        | V | 3385695 | 3388156 | WBGene00015440 | arrd-20  | C04E12.11 | -0.133398165260106   |             |
| AGIWUR9441                                                                       |   |         |         |                |          |           |                      |             |
| CB4856 HS                                                                        | V | 3392111 | 3393296 | WBGene00020619 | T20D4.13 | T20D4.13  | 0.057317035656018    |             |
| AGIWUR32543;AGIWUR44356;AGIWUR44364                                              |   |         |         |                |          |           |                      |             |
| CB4856 HS                                                                        | V | 3393478 | 3394688 | WBGene00020620 | T20D4.15 | T20D4.15  | -0.0323504757628807  |             |
| AGIWUR13888;AGIWUR26446;AGIWUR32049                                              |   |         |         |                |          |           |                      |             |
| CB4856 HS                                                                        | V | 3395275 | 3395966 | WBGene00020622 | T20D4.17 | T20D4.17  | -0.0440452506120153  |             |
| AGIWUR9905                                                                       |   |         |         |                |          |           |                      |             |
| CB4856 HS                                                                        | V | 3397065 | 3397800 | WBGene00020618 | T20D4.12 | T20D4.12  | -0.0636464489739215  |             |
| AGIWUR10809                                                                      |   |         |         |                |          |           |                      |             |
| CB4856 HS                                                                        | V | 3398690 | 3399640 | WBGene00020617 | T20D4.11 | T20D4.11  | -0.431794512636143   |             |
| AGIWUR32038                                                                      |   |         |         |                |          |           |                      |             |
| CB4856 HS                                                                        | V | 3400252 | 3401063 | WBGene00020616 | T20D4.10 | T20D4.10  | 0.0230241144708234   |             |
| AGIWUR23484                                                                      |   |         |         |                |          |           |                      |             |
| CB4856 HS                                                                        | V | 3401645 | 3402356 | WBGene00044718 | T20D4.20 | T20D4.20  | -0.173719277475505   |             |
| AGIWUR29094                                                                      |   |         |         |                |          |           |                      |             |
| CB4856 HS                                                                        | V | 3405709 | 3407893 | WBGene00020614 | T20D4.8  | T20D4.8   | -0.0717859399207583  | AGIWUR34715 |
| CB4856 HS                                                                        | V | 3408912 | 3409519 | WBGene00020613 | T20D4.7  | T20D4.7   | 0.237400111061723    | AGIWUR41765 |
| CB4856 HS                                                                        | V | 3410520 | 3412858 | WBGene00020612 | arrd-22  | T20D4.6   | -0.517299572205699   | AGIWUR24818 |
| CB4856 HS                                                                        | V | 3413344 | 3417770 | WBGene00020611 | T20D4.5  | T20D4.5   | 0.0867189075912762   |             |
| AGIWUR18362;AGIWUR36984                                                          |   |         |         |                |          |           |                      |             |
| CB4856 HS                                                                        | V | 3418263 | 3422733 | WBGene00020609 | T20D4.3  | T20D4.3   | -0.143920474010677   |             |
| AGIWUR14715;AGIWUR23453                                                          |   |         |         |                |          |           |                      |             |
| CB4856 HS                                                                        | V | 3422949 | 3424441 | WBGene00020623 | srab-21  | T20D4.18  | 0.0840359367809267   |             |
| AGIWUR23103                                                                      |   |         |         |                |          |           |                      |             |
| CB4856 HS                                                                        | V | 3426376 | 3427733 | WBGene00020608 | srab-22  | T20D4.2   | -0.0852397972220409  | AGIWUR42868 |
| CB4856 HS                                                                        | V | 3428999 | 3430408 | WBGene00020607 | srab-20  | T20D4.1   | -0.334792026597254   | AGIWUR3585  |
| CB4856 HS                                                                        | V | 3430669 | 3431446 | WBGene00020624 | T20D4.19 | T20D4.19  | 0.125074328708817    |             |
| AGIWUR15291                                                                      |   |         |         |                |          |           |                      |             |
| CB4856 HS                                                                        | V | 3432259 | 3433658 | WBGene00005597 | srj-9    | T20C4.1   | 0.0288357959932277   | AGIWUR11391 |
| CB4856 HS                                                                        | V | 3441504 | 3444877 | WBGene00000478 | cfz-2    | F27E11.3  | -0.00936809885295276 |             |
| AGIWUR757;AGIWUR7380;AGIWUR10239;AGIWUR15707;AGIWUR27031;AGIWUR28201;AGIWUR30282 |   |         |         |                |          |           |                      |             |
| CB4856 HS                                                                        | V | 3459740 | 3463071 | WBGene00017868 | slc-28.2 | F27E11.2  | -0.0743311993693307  |             |
| AGIWUR6289                                                                       |   |         |         |                |          |           |                      |             |
| CB4856 HS                                                                        | V | 3463814 | 3466150 | WBGene00017867 | slc-28.1 | F27E11.1  | 0.116873602163055    |             |
| AGIWUR29163                                                                      |   |         |         |                |          |           |                      |             |
| CB4856 HS                                                                        | V | 3467453 | 3468545 | WBGene00001781 | gst-33   | C02A12.1  | 0.522633609070557    |             |
| AGIWUR37263                                                                      |   |         |         |                |          |           |                      |             |
| CB4856 HS                                                                        | V | 3469445 | 3470882 | WBGene00015315 | srbc-29  | C02A12.2  | -0.0915997929836792  |             |

|                                                                        |    |   |         |         |                |          |           |                      |             |
|------------------------------------------------------------------------|----|---|---------|---------|----------------|----------|-----------|----------------------|-------------|
| AGIWUR20182                                                            |    |   |         |         |                |          |           |                      |             |
| CB4856                                                                 | HS | V | 3471870 | 3475121 | WBGene00044088 | oac-2    | C02A12.8  | 0.0362418518893861   |             |
| AGIWUR9707;AGIWUR37879                                                 |    |   |         |         |                |          |           |                      |             |
| CB4856                                                                 | HS | V | 3476405 | 3477596 | WBGene00044089 | srbc-31  | C02A12.9  | -0.00230013773083826 |             |
| AGIWUR25970                                                            |    |   |         |         |                |          |           |                      |             |
| CB4856                                                                 | HS | V | 3478031 | 3480446 | WBGene00015316 | srbc-30  | C02A12.3  | 0.0360443746379531   |             |
| AGIWUR22138;AGIWUR22731                                                |    |   |         |         |                |          |           |                      |             |
| CB4856                                                                 | HS | V | 3481421 | 3482600 | WBGene00003096 | lys-7    | C02A12.4  | 0.125013192638409    |             |
| AGIWUR21327                                                            |    |   |         |         |                |          |           |                      |             |
| CB4856                                                                 | HS | V | 3483091 | 3484781 | WBGene00044090 | srbc-33  | C02A12.10 | 0.0316444033039822   |             |
| AGIWUR15981                                                            |    |   |         |         |                |          |           |                      |             |
| CB4856                                                                 | HS | V | 3485549 | 3486957 | WBGene00015317 | srbc-32  | C02A12.5  | -0.0227618057418906  |             |
| AGIWUR13444;AGIWUR26033                                                |    |   |         |         |                |          |           |                      |             |
| CB4856                                                                 | HS | V | 3489228 | 3490535 | WBGene00015318 | srbc-36  | C02A12.6  | -0.0433645377502305  |             |
| AGIWUR44918                                                            |    |   |         |         |                |          |           |                      |             |
| CB4856                                                                 | HS | V | 3491361 | 3492598 | WBGene00015575 | srbc-35  | C07G3.7   | 0.0269449168785894   | AGIWUR14490 |
| CB4856                                                                 | HS | V | 3493637 | 3496943 | WBGene00269378 | C07G3.15 | C07G3.15  | -0.158867525390463   |             |
| AGIWUR44418                                                            |    |   |         |         |                |          |           |                      |             |
| CB4856                                                                 | HS | V | 3502307 | 3503077 | WBGene00015578 | C07G3.10 | C07G3.10  | -0.0368405696817504  |             |
| AGIWUR38399                                                            |    |   |         |         |                |          |           |                      |             |
| CB4856                                                                 | HS | V | 3503130 | 3506352 | WBGene00015577 | ugt-64   | C07G3.9   | 0.160289452589055    |             |
| AGIWUR4206;AGIWUR16194;AGIWUR27047                                     |    |   |         |         |                |          |           |                      |             |
| CB4856                                                                 | HS | V | 3507822 | 3509251 | WBGene00006256 | str-225  | C07G3.6   | -0.20216928085819    | AGIWUR1173  |
| CB4856                                                                 | HS | V | 3510178 | 3512038 | WBGene00006259 | str-228  | C07G3.5   | 0.146443625101563    | AGIWUR27547 |
| CB4856                                                                 | HS | V | 3512681 | 3514343 | WBGene00006257 | str-226  | C07G3.4   | 0.32384782373807     | AGIWUR29424 |
| CB4856                                                                 | HS | V | 3518189 | 3519801 | WBGene00006258 | str-227  | C07G3.3   | 0.41492774540227     | AGIWUR20857 |
| CB4856                                                                 | HS | V | 3522496 | 3523373 | WBGene00044119 | srh-191  | C07G3.11  | 0.296851123195131    |             |
| AGIWUR3466;AGIWUR20550                                                 |    |   |         |         |                |          |           |                      |             |
| CB4856                                                                 | HS | V | 3523587 | 3524575 | WBGene00015574 | irg-1    | C07G3.2   | -0.22816428153306    |             |
| AGIWUR3896;AGIWUR15501;AGIWUR26755;AGIWUR27297;AGIWUR35590;AGIWUR39514 |    |   |         |         |                |          |           |                      |             |
| CB4856                                                                 | HS | V | 3525274 | 3526178 | WBGene00020747 | T24A6.7  | T24A6.7   | -0.232445434422617   | AGIWUR2091  |
| CB4856                                                                 | HS | V | 3527182 | 3530413 | WBGene00006286 | str-260  | T24A6.6   | -0.0647037513179898  | AGIWUR17196 |
| CB4856                                                                 | HS | V | 3530703 | 3532380 | WBGene00020746 | srbc-66  | T24A6.5   | -0.0231307041091124  | AGIWUR11780 |
| CB4856                                                                 | HS | V | 3533003 | 3535235 | WBGene00020748 | nhr-221  | T24A6.8   | -0.061067333845247   | AGIWUR27511 |
| CB4856                                                                 | HS | V | 3536196 | 3538407 | WBGene00003683 | nhr-93   | T24A6.9   | 0.0352533414046836   |             |
| AGIWUR14893;AGIWUR35485                                                |    |   |         |         |                |          |           |                      |             |
| CB4856                                                                 | HS | V | 3538929 | 3540329 | WBGene00020749 | srbc-67  | T24A6.10  | -0.00350614213703704 |             |
| AGIWUR29858                                                            |    |   |         |         |                |          |           |                      |             |
| CB4856                                                                 | HS | V | 3541586 | 3543444 | WBGene00020750 | nhr-222  | T24A6.11  | -0.0497704842490396  |             |

|                                                                                                 |    |   |         |         |                |          |          |                     |             |
|-------------------------------------------------------------------------------------------------|----|---|---------|---------|----------------|----------|----------|---------------------|-------------|
| AGIWUR45167                                                                                     |    |   |         |         |                |          |          |                     |             |
| CB4856                                                                                          | HS | V | 3544081 | 3544969 | WBGene00020751 | srbc-69  | T24A6.12 | -0.0402948692575578 |             |
| AGIWUR18305                                                                                     |    |   |         |         |                |          |          |                     |             |
| CB4856                                                                                          | HS | V | 3545677 | 3546617 | WBGene00020752 | srbc-68  | T24A6.13 | -0.148929618354008  |             |
| AGIWUR22134                                                                                     |    |   |         |         |                |          |          |                     |             |
| CB4856                                                                                          | HS | V | 3546969 | 3549685 | WBGene00005877 | srw-130  | T24A6.14 | -0.042944073206721  |             |
| AGIWUR40579                                                                                     |    |   |         |         |                |          |          |                     |             |
| CB4856                                                                                          | HS | V | 3549853 | 3551269 | WBGene00005533 | sri-21   | T24A6.4  | -0.231394399920873  | AGIWUR24721 |
| CB4856                                                                                          | HS | V | 3551346 | 3551865 | WBGene00001737 | grl-28   | T24A6.15 | -0.144267168860623  |             |
| AGIWUR25251                                                                                     |    |   |         |         |                |          |          |                     |             |
| CB4856                                                                                          | HS | V | 3553134 | 3554568 | WBGene00020756 | T24A6.20 | T24A6.20 | 0.0579090212417124  |             |
| AGIWUR993;AGIWUR6754;AGIWUR17149;AGIWUR29084                                                    |    |   |         |         |                |          |          |                     |             |
| CB4856                                                                                          | HS | V | 3554611 | 3555236 | WBGene00001738 | grl-29   | T24A6.18 | 0.155342943244944   |             |
| AGIWUR36854                                                                                     |    |   |         |         |                |          |          |                     |             |
| CB4856                                                                                          | HS | V | 3556286 | 3556804 | WBGene00001739 | grl-30   | T24A6.3  | 0.0125293828821871  |             |
| AGIWUR11277;AGIWUR13308;AGIWUR16687;AGIWUR26402;AGIWUR30986;AGIWUR32654;AGIWUR40692;AGIWUR44446 |    |   |         |         |                |          |          |                     |             |
| CB4856                                                                                          | HS | V | 3557206 | 3557778 | WBGene00020755 | grl-31   | T24A6.19 | -0.114352872086981  |             |
| AGIWUR44762                                                                                     |    |   |         |         |                |          |          |                     |             |
| CB4856                                                                                          | HS | V | 3575055 | 3575874 | WBGene00001736 | grl-27   | F40C5.3  | -0.490619507076048  | AGIWUR25823 |
| CB4856                                                                                          | HS | V | 3579023 | 3585042 | WBGene00020696 | T22F3.3  | T22F3.3  | -0.28207254273042   |             |
| AGIWUR8623;AGIWUR10935                                                                          |    |   |         |         |                |          |          |                     |             |
| CB4856                                                                                          | HS | V | 3585313 | 3586064 | WBGene00004422 | rp1-11.1 | T22F3.4  | 0.2579843703998     |             |
| AGIWUR6406;AGIWUR22697;AGIWUR26264                                                              |    |   |         |         |                |          |          |                     |             |
| CB4856                                                                                          | HS | V | 3586639 | 3589015 | WBGene00020695 | T22F3.2  | T22F3.2  | 0.103316405419589   | AGIWUR7830  |
| CB4856                                                                                          | HS | V | 3589029 | 3592199 | WBGene00044705 | T22F3.12 | T22F3.12 |                     |             |
| -0.00936477698379345 AGIWUR15774;AGIWUR32295                                                    |    |   |         |         |                |          |          |                     |             |
| CB4856                                                                                          | HS | V | 3592768 | 3594973 | WBGene00005423 | srh-213  | T22F3.5  | -0.242072591407057  | AGIWUR3939  |
| CB4856                                                                                          | HS | V | 3595191 | 3597152 | WBGene00005422 | srh-212  | T22F3.6  | 0.0784913785523917  | AGIWUR13236 |
| CB4856                                                                                          | HS | V | 3597753 | 3601021 | WBGene00020697 | T22F3.7  | T22F3.7  | 0.155833850064508   | AGIWUR44509 |
| CB4856                                                                                          | HS | V | 3602052 | 3605425 | WBGene00020698 | T22F3.8  | T22F3.8  | -0.142910066773767  | AGIWUR21890 |
| CB4856                                                                                          | HS | V | 3606818 | 3610927 | WBGene00020699 | T22F3.10 | T22F3.10 | 0.0392756295123373  |             |
| AGIWUR38785                                                                                     |    |   |         |         |                |          |          |                     |             |
| CB4856                                                                                          | HS | V | 3612173 | 3614551 | WBGene00020700 | T22F3.11 | T22F3.11 | -0.266835816608378  |             |
| AGIWUR707;AGIWUR22769                                                                           |    |   |         |         |                |          |          |                     |             |
| CB4856                                                                                          | HS | V | 3622382 | 3623698 | WBGene00005985 | srx-94   | F59B1.5  | -0.0738472840947733 | AGIWUR22337 |
| CB4856                                                                                          | HS | V | 3625022 | 3627044 | WBGene00019098 | F59B1.4  | F59B1.4  | -0.0381535061804712 | AGIWUR36888 |
| CB4856                                                                                          | HS | V | 3629473 | 3631691 | WBGene00019099 | F59B1.6  | F59B1.6  | 0.433998998426485   | AGIWUR21295 |
| CB4856                                                                                          | HS | V | 3633341 | 3634683 | WBGene00019097 | F59B1.2  | F59B1.2  | 0.0190241450262878  |             |
| AGIWUR6873;AGIWUR19168;AGIWUR41274;AGIWUR41970;AGIWUR43406                                      |    |   |         |         |                |          |          |                     |             |

|                                                                                    |    |   |         |         |                |           |           |                     |             |
|------------------------------------------------------------------------------------|----|---|---------|---------|----------------|-----------|-----------|---------------------|-------------|
| CB4856                                                                             | HS | V | 3634688 | 3637173 | WBGene00005932 | srx-41    | F59B1.7   | 0.143280979537282   | AGIWUR40658 |
| CB4856                                                                             | HS | V | 3641858 | 3644243 | WBGene00019100 | F59B1.8   | F59B1.8   | -0.0165147424698961 | AGIWUR25579 |
| CB4856                                                                             | HS | V | 3644745 | 3647954 | WBGene00019101 | F59B1.10  | F59B1.10  | 0.0395429899635165  |             |
| AGIWUR11522                                                                        |    |   |         |         |                |           |           |                     |             |
| CB4856                                                                             | HS | V | 3649773 | 3651457 | WBGene00006165 | str-114   | F59B1.1   | -0.149503322524844  | AGIWUR26857 |
| CB4856                                                                             | HS | V | 3651686 | 3659499 | WBGene00000062 | acr-23    | F59B1.9   | -0.161151055142879  | AGIWUR24298 |
| CB4856                                                                             | HS | V | 3664871 | 3666987 | WBGene00006164 | str-113   | Y39H10B.1 | 0.00326520063949065 |             |
| AGIWUR42664                                                                        |    |   |         |         |                |           |           |                     |             |
| CB4856                                                                             | HS | V | 3668728 | 3670631 | WBGene00044527 | Y39H10B.2 | Y39H10B.2 | 0.013745869888087   |             |
| AGIWUR1568;AGIWUR10702                                                             |    |   |         |         |                |           |           |                     |             |
| CB4856                                                                             | HS | V | 3673380 | 3676632 | WBGene00021081 | pals-33   | W08A12.4  | 1.35644087023216    |             |
| AGIWUR25982                                                                        |    |   |         |         |                |           |           |                     |             |
| CB4856                                                                             | HS | V | 3682853 | 3686474 | WBGene00021080 | W08A12.3  | W08A12.3  | -0.0889892944099504 |             |
| AGIWUR23717                                                                        |    |   |         |         |                |           |           |                     |             |
| CB4856                                                                             | HS | V | 3687110 | 3701864 | WBGene00021078 | unc-132   | W08A12.1  | -0.223006737613478  |             |
| AGIWUR10957                                                                        |    |   |         |         |                |           |           |                     |             |
| CB4856                                                                             | HS | V | 3704988 | 3712796 | WBGene00003025 | lin-40    | T27C4.4   | -0.0612842427826319 |             |
| AGIWUR6346;AGIWUR11359;AGIWUR19273;AGIWUR20650;AGIWUR24147;AGIWUR30880;AGIWUR43792 |    |   |         |         |                |           |           |                     |             |
| CB4856                                                                             | HS | V | 3712779 | 3715969 | WBGene00020854 | T27C4.1   | T27C4.1   | 0.132250514663689   |             |
| AGIWUR5398;AGIWUR38936;AGIWUR42805;AGIWUR44078                                     |    |   |         |         |                |           |           |                     |             |
| CB4856                                                                             | HS | V | 3725072 | 3726775 | WBGene00006096 | str-30    | T27C4.3   | -0.0171442481142732 | AGIWUR43466 |
| CB4856                                                                             | HS | V | 3727482 | 3739398 | WBGene00020855 | hpo-36    | T27C4.2   | -0.016655260877867  |             |
| AGIWUR10356;AGIWUR40347;AGIWUR42612                                                |    |   |         |         |                |           |           |                     |             |
| CB4856                                                                             | HS | V | 3743576 | 3749401 | WBGene00003479 | mtm-9     | Y39H10A.3 | -0.0210544620971875 |             |
| AGIWUR25442;AGIWUR36850;AGIWUR39616                                                |    |   |         |         |                |           |           |                     |             |
| CB4856                                                                             | HS | V | 3749494 | 3757074 | WBGene00021482 | Y39H10A.6 | Y39H10A.6 | -0.150338484404813  |             |
| AGIWUR15606                                                                        |    |   |         |         |                |           |           |                     |             |
| CB4856                                                                             | HS | V | 3757047 | 3759469 | WBGene00000498 | chk-1     | Y39H10A.7 | -0.164615457956424  |             |
| AGIWUR1558;AGIWUR23006;AGIWUR31592;AGIWUR32015;AGIWUR42878                         |    |   |         |         |                |           |           |                     |             |
| CB4856                                                                             | HS | V | 3761139 | 3766306 | WBGene00021479 | oac-55    | Y39H10A.2 | 0.106037344521265   |             |
| AGIWUR21286                                                                        |    |   |         |         |                |           |           |                     |             |
| CB4856                                                                             | HS | V | 3767204 | 3767734 | WBGene00021478 | Y39H10A.1 | Y39H10A.1 | 0.162953999776065   |             |
| AGIWUR30517                                                                        |    |   |         |         |                |           |           |                     |             |
| CB4856                                                                             | HS | V | 3768570 | 3769776 | WBGene00019964 | R08E5.4   | R08E5.4   | 0.018593426425868   | AGIWUR19614 |
| CB4856                                                                             | HS | V | 3769801 | 3771518 | WBGene00019961 | R08E5.1   | R08E5.1   | 0.088207826079036   |             |
| AGIWUR22836;AGIWUR35303;AGIWUR37563                                                |    |   |         |         |                |           |           |                     |             |
| CB4856                                                                             | HS | V | 3772021 | 3775546 | WBGene00019963 | R08E5.3   | R08E5.3   | 0.152817297003851   | AGIWUR19259 |
| CB4856                                                                             | HS | V | 3774533 | 3776136 | WBGene00019962 | cys1-3    | R08E5.2   | 0.182272082744006   |             |
| AGIWUR7833;AGIWUR18152;AGIWUR20551;AGIWUR20799                                     |    |   |         |         |                |           |           |                     |             |

|                                                                                     |   |                 |                |          |          |                     |             |
|-------------------------------------------------------------------------------------|---|-----------------|----------------|----------|----------|---------------------|-------------|
| CB4856 HS<br>AGIWUR4405                                                             | V | 3777553 3784213 | WBGene00019965 | R08F11.1 | R08F11.1 | 0.185152323928966   |             |
| CB4856 HS<br>AGIWUR24390                                                            | V | 3790133 3793766 | WBGene00019970 | R08F11.7 | R08F11.7 | -0.318695439406229  |             |
| CB4856 HS<br>AGIWUR18782                                                            | V | 3794733 3798587 | WBGene00019969 | fpn-1.3  | R08F11.6 | 0.171677472903659   |             |
| CB4856 HS<br>AGIWUR24318                                                            | V | 3798605 3800478 | WBGene00019966 | srt-30   | R08F11.2 | -0.119147963089189  |             |
| CB4856 HS<br>AGIWUR2301                                                             | V | 3800782 3803531 | WBGene00019967 | cyp-33C8 | R08F11.3 | -0.0275527127777782 |             |
| CB4856 HS<br>AGIWUR3076                                                             | V | 3803845 3805531 | WBGene00019968 | R08F11.4 | R08F11.4 | -0.0169709252579562 |             |
| CB4856 HS<br>AGIWUR27147                                                            | V | 3806261 3807752 | WBGene00005754 | srw-7    | R08F11.5 | 0.0480948563684329  |             |
| CB4856 HS<br>AGIWUR12194                                                            | V | 3808636 3810708 | WBGene00005753 | srw-6    | H10D18.3 | 0.072729670457921   |             |
| CB4856 HS<br>AGIWUR5987                                                             | V | 3810786 3811634 | WBGene00019179 | sc1-13   | H10D18.4 | 0.157311133787887   |             |
| CB4856 HS<br>AGIWUR34033                                                            | V | 3812596 3813363 | WBGene00019178 | sc1-12   | H10D18.2 | -0.0456113393624271 |             |
| CB4856 HS<br>AGIWUR1798;AGIWUR17439;AGIWUR39972;AGIWUR40273;AGIWUR42309;AGIWUR43558 | V | 3813737 3831659 | WBGene00019180 | H10D18.5 | H10D18.5 | -0.0541418155527169 |             |
| CB4856 HS<br>AGIWUR43683                                                            | V | 3841859 3844007 | WBGene00018543 | ugt-32   | F47C10.6 | 0.0777350954382214  |             |
| CB4856 HS<br>AGIWUR24112                                                            | V | 3844645 3847151 | WBGene00018539 | nhr-185  | F47C10.1 | 0.422655240924752   |             |
| CB4856 HS<br>AGIWUR37295                                                            | V | 3850127 3851796 | WBGene00018540 | btb-21   | F47C10.2 | -0.161862278203923  |             |
| CB4856 HS<br>AGIWUR37709                                                            | V | 3852286 3854947 | WBGene00018541 | nhr-186  | F47C10.3 | -0.197549466354182  |             |
| CB4856 HS<br>AGIWUR32751                                                            | V | 3856329 3857861 | WBGene00018544 | nhr-188  | F47C10.7 | 0.0561962499494317  |             |
| CB4856 HS<br>AGIWUR23666                                                            | V | 3858461 3860243 | WBGene00018545 | nhr-189  | F47C10.8 | 0.0586231344725352  |             |
| CB4856 HS<br>AGIWUR31141                                                            | V | 3861089 3862933 | WBGene00018542 | nhr-187  | F47C10.4 | -0.0922491663150593 |             |
| CB4856 HS                                                                           | V | 3866556 3869005 | WBGene00015900 | nhr-157  | C17E7.5  | 0.012968014405768   | AGIWUR31162 |
| CB4856 HS                                                                           | V | 3871174 3873216 | WBGene00015901 | nhr-158  | C17E7.6  | 0.190480846771441   | AGIWUR18937 |
| CB4856 HS                                                                           | V | 3875245 3878382 | WBGene00015902 | nhr-159  | C17E7.7  | 0.0722845178956621  | AGIWUR34504 |

|                                                |    |   |         |         |                |          |          |                     |             |
|------------------------------------------------|----|---|---------|---------|----------------|----------|----------|---------------------|-------------|
| CB4856                                         | HS | V | 3880798 | 3886204 | WBGene00003714 | nhr-124  | C17E7.8  | 0.181193502941976   | AGIWUR12597 |
| CB4856                                         | HS | V | 3887750 | 3889286 | WBGene00015906 | C17E7.13 | C17E7.13 | -0.223337739816333  |             |
| AGIWUR26604                                    |    |   |         |         |                |          |          |                     |             |
| CB4856                                         | HS | V | 3889287 | 3890861 | WBGene00015903 | C17E7.9  | C17E7.9  | -0.0496242074579953 | AGIWUR10808 |
| CB4856                                         | HS | V | 3890968 | 3892026 | WBGene00015905 | C17E7.12 | C17E7.12 | -0.204010949820869  |             |
| AGIWUR20122                                    |    |   |         |         |                |          |          |                     |             |
| CB4856                                         | HS | V | 3892856 | 3894573 | WBGene00015899 | C17E7.4  | C17E7.4  | 0.0311026605106672  | AGIWUR36235 |
| CB4856                                         | HS | V | 3894961 | 3898208 | WBGene00015898 | sre-9    | C17E7.3  | -0.111110990483944  |             |
| AGIWUR1726;AGIWUR23776;AGIWUR40013             |    |   |         |         |                |          |          |                     |             |
| CB4856                                         | HS | V | 3898800 | 3900202 | WBGene00015904 | irld-22  | C17E7.10 | 0.0780505615457212  |             |
| AGIWUR29385                                    |    |   |         |         |                |          |          |                     |             |
| CB4856                                         | HS | V | 3900497 | 3902558 | WBGene00006260 | str-229  | C17E7.11 | 0.0768724439031621  |             |
| AGIWUR39812                                    |    |   |         |         |                |          |          |                     |             |
| CB4856                                         | HS | V | 3903107 | 3904545 | WBGene00005404 | srh-190  | C17E7.2  | -0.111077762030448  | AGIWUR3000  |
| CB4856                                         | HS | V | 3906141 | 3908435 | WBGene00015897 | nhr-156  | C17E7.1  | -0.0319911942177358 |             |
| AGIWUR558;AGIWUR5994;AGIWUR33341;AGIWUR41453   |    |   |         |         |                |          |          |                     |             |
| CB4856                                         | HS | V | 3909098 | 3910945 | WBGene00005952 | srx-61   | T20C7.1  | -0.113863097881609  | AGIWUR14959 |
| CB4856                                         | HS | V | 3912772 | 3914597 | WBGene00005959 | srx-68   | K07C6.11 | -0.343316830498873  |             |
| AGIWUR25156                                    |    |   |         |         |                |          |          |                     |             |
| CB4856                                         | HS | V | 3916839 | 3918446 | WBGene00005958 | srx-67   | K07C6.10 | 0.100156743231229   |             |
| AGIWUR12123                                    |    |   |         |         |                |          |          |                     |             |
| CB4856                                         | HS | V | 3919589 | 3920825 | WBGene00005957 | srx-66   | K07C6.9  | -0.0218333105216999 | AGIWUR27346 |
| CB4856                                         | HS | V | 3921935 | 3922964 | WBGene00005956 | srx-65   | K07C6.8  | -0.149861842445358  | AGIWUR41357 |
| CB4856                                         | HS | V | 3923376 | 3926642 | WBGene00005960 | srx-69   | K07C6.13 | -0.203541525720354  |             |
| AGIWUR20121                                    |    |   |         |         |                |          |          |                     |             |
| CB4856                                         | HS | V | 3929399 | 3930678 | WBGene00005955 | srx-64   | K07C6.7  | 0.065165746624805   | AGIWUR27079 |
| CB4856                                         | HS | V | 3931626 | 3933394 | WBGene00005954 | srx-63   | K07C6.6  | 0.0128872204183272  |             |
| AGIWUR24551;AGIWUR26628                        |    |   |         |         |                |          |          |                     |             |
| CB4856                                         | HS | V | 3933960 | 3934950 | WBGene00005961 | srx-70   | K07C6.15 | 0.299121720294712   |             |
| AGIWUR30774;AGIWUR36074                        |    |   |         |         |                |          |          |                     |             |
| CB4856                                         | HS | V | 3936326 | 3938496 | WBGene00019473 | cyp-35A5 | K07C6.5  | -0.122664724475109  |             |
| AGIWUR1573;AGIWUR21781;AGIWUR22277;AGIWUR42606 |    |   |         |         |                |          |          |                     |             |
| CB4856                                         | HS | V | 3939032 | 3941235 | WBGene00019472 | cyp-35B1 | K07C6.4  | -0.0666022983816763 |             |
| AGIWUR32263                                    |    |   |         |         |                |          |          |                     |             |
| CB4856                                         | HS | V | 3942215 | 3944457 | WBGene00019471 | cyp-35B2 | K07C6.3  | 0.117653153575415   |             |
| AGIWUR11302                                    |    |   |         |         |                |          |          |                     |             |
| CB4856                                         | HS | V | 3945353 | 3947044 | WBGene00019470 | cyp-35B3 | K07C6.2  | -0.0990663605011397 |             |
| AGIWUR44312                                    |    |   |         |         |                |          |          |                     |             |
| CB4856                                         | HS | V | 3947365 | 3948952 | WBGene00019469 | srz-89   | K07C6.1  | 0.114289065988448   | AGIWUR17566 |

|                                                                                                                      |    |   |         |         |                |           |          |                      |             |
|----------------------------------------------------------------------------------------------------------------------|----|---|---------|---------|----------------|-----------|----------|----------------------|-------------|
| CB4856                                                                                                               | HS | V | 3950027 | 3952097 | WBGene00020386 | cyp-34A4  | T09H2.1  | 0.134458118970354    |             |
| AGIWUR16851                                                                                                          |    |   |         |         |                |           |          |                      |             |
| CB4856                                                                                                               | HS | V | 3954039 | 3955460 | WBGene00006274 | str-247   | B0213.9  | 0.0239789757804374   |             |
| AGIWUR29066;AGIWUR30225;AGIWUR30460                                                                                  |    |   |         |         |                |           |          |                      |             |
| CB4856                                                                                                               | HS | V | 3955766 | 3957715 | WBGene00015040 | cyp-34A5  | B0213.10 | -0.0610761400869562  |             |
| AGIWUR2873;AGIWUR4685;AGIWUR10311;AGIWUR11935;AGIWUR17491;AGIWUR28198;AGIWUR39604                                    |    |   |         |         |                |           |          |                      |             |
| CB4856                                                                                                               | HS | V | 3958160 | 3961358 | WBGene00015041 | cyp-34A6  | B0213.11 | 0.0926592986508545   |             |
| AGIWUR10465                                                                                                          |    |   |         |         |                |           |          |                      |             |
| CB4856                                                                                                               | HS | V | 3961760 | 3963815 | WBGene00015042 | cyp-34A7  | B0213.12 | 0.0917973379617587   |             |
| AGIWUR36195                                                                                                          |    |   |         |         |                |           |          |                      |             |
| CB4856                                                                                                               | HS | V | 3964779 | 3967880 | WBGene00015043 | cyp-34A8  | B0213.14 | 0.108046862697705    |             |
| AGIWUR14373                                                                                                          |    |   |         |         |                |           |          |                      |             |
| CB4856                                                                                                               | HS | V | 3968134 | 3970514 | WBGene00015044 | cyp-34A9  | B0213.15 | -0.211556728650982   |             |
| AGIWUR2584;AGIWUR10028;AGIWUR10829;AGIWUR16241;AGIWUR18901;AGIWUR23794                                               |    |   |         |         |                |           |          |                      |             |
| CB4856                                                                                                               | HS | V | 3970712 | 3973001 | WBGene00015045 | cyp-34A10 | B0213.16 | 0.00332748288665385  |             |
| AGIWUR35138                                                                                                          |    |   |         |         |                |           |          |                      |             |
| CB4856                                                                                                               | HS | V | 3974661 | 3976264 | WBGene00006141 | str-82    | B0213.8  | -0.119304987512035   | AGIWUR36544 |
| CB4856                                                                                                               | HS | V | 3977264 | 3978811 | WBGene00006142 | str-83    | B0213.7  | -0.305152978752458   | AGIWUR26623 |
| CB4856                                                                                                               | HS | V | 3978836 | 3979134 | WBGene00015046 | nlp-34    | B0213.17 | -0.195835440731702   |             |
| AGIWUR5401                                                                                                           |    |   |         |         |                |           |          |                      |             |
| CB4856                                                                                                               | HS | V | 3980055 | 3980622 | WBGene00003769 | nlp-31    | B0213.6  | -0.330732532358597   | AGIWUR18556 |
| CB4856                                                                                                               | HS | V | 3981980 | 3982741 | WBGene00003768 | nlp-30    | B0213.5  | -0.160285480113441   | AGIWUR27472 |
| CB4856                                                                                                               | HS | V | 3984413 | 3984847 | WBGene00003767 | nlp-29    | B0213.4  | 0.143180839910462    |             |
| AGIWUR3874;AGIWUR24246;AGIWUR25364;AGIWUR35635;AGIWUR36359                                                           |    |   |         |         |                |           |          |                      |             |
| CB4856                                                                                                               | HS | V | 3987900 | 3988312 | WBGene00003766 | nlp-28    | B0213.3  | 0.215218323156838    |             |
| AGIWUR1823;AGIWUR3034;AGIWUR3079;AGIWUR11292;AGIWUR12737;AGIWUR20737;AGIWUR31288;AGIWUR32617;AGIWUR33370;AGIWUR33926 |    |   |         |         |                |           |          |                      |             |
| CB4856                                                                                                               | HS | V | 3989377 | 3989770 | WBGene00003765 | nlp-27    | B0213.2  | 0.127887209571286    |             |
| AGIWUR23726;AGIWUR25464                                                                                              |    |   |         |         |                |           |          |                      |             |
| CB4856                                                                                                               | HS | V | 3992655 | 3994180 | WBGene00019567 | K09D9.9   | K09D9.9  | 0.0262710190215856   | AGIWUR20835 |
| CB4856                                                                                                               | HS | V | 3994780 | 3995938 | WBGene00005953 | srx-62    | K09D9.10 | 0.120779049040648    |             |
| AGIWUR14251                                                                                                          |    |   |         |         |                |           |          |                      |             |
| CB4856                                                                                                               | HS | V | 3997124 | 4001465 | WBGene00019568 | K09D9.11  | K09D9.11 | 0.251162181595593    |             |
| AGIWUR4967                                                                                                           |    |   |         |         |                |           |          |                      |             |
| CB4856                                                                                                               | HS | V | 4002327 | 4004309 | WBGene00019569 | K09D9.12  | K09D9.12 | -0.04154272549426    |             |
| AGIWUR11640                                                                                                          |    |   |         |         |                |           |          |                      |             |
| CB4856                                                                                                               | HS | V | 4005567 | 4007517 | WBGene00005234 | srh-8     | K09D9.8  | -0.204313900963596   | AGIWUR42726 |
| CB4856                                                                                                               | HS | V | 4008227 | 4009818 | WBGene00005233 | srh-7     | K09D9.7  | -0.00379661651573748 | AGIWUR28976 |
| CB4856                                                                                                               | HS | V | 4010470 | 4011966 | WBGene00005230 | srh-4     | K09D9.6  | -0.111625683688442   | AGIWUR42420 |



|                                                                                   |    |   |         |         |                |          |          |                     |             |
|-----------------------------------------------------------------------------------|----|---|---------|---------|----------------|----------|----------|---------------------|-------------|
| CB4856                                                                            | HS | V | 4013021 | 4014628 | WBGene00006107 | str-42   | K09D9.5  | 0.0685921326723027  |             |
| AGIWUR22127;AGIWUR24418                                                           |    |   |         |         |                |          |          |                     |             |
| CB4856                                                                            | HS | V | 4015587 | 4016938 | WBGene00005232 | srh-6    | K09D9.4  | 0.0062376533873536  |             |
| AGIWUR28540;AGIWUR41631                                                           |    |   |         |         |                |          |          |                     |             |
| CB4856                                                                            | HS | V | 4017080 | 4019026 | WBGene00005836 | srw-89   | K09D9.13 | -0.0821444372710571 |             |
| AGIWUR9432                                                                        |    |   |         |         |                |          |          |                     |             |
| CB4856                                                                            | HS | V | 4019488 | 4020601 | WBGene00019566 | K09D9.3  | K09D9.3  | 0.0442842018656355  | AGIWUR17366 |
| CB4856                                                                            | HS | V | 4022609 | 4024475 | WBGene00019565 | cyp-35A3 | K09D9.2  | 0.0161656973334146  |             |
| AGIWUR21092;AGIWUR23742;AGIWUR29860;AGIWUR40665                                   |    |   |         |         |                |          |          |                     |             |
| CB4856                                                                            | HS | V | 4025091 | 4026212 | WBGene00019564 | K09D9.1  | K09D9.1  | -0.262144104188382  | AGIWUR30594 |
| CB4856                                                                            | HS | V | 4031619 | 4033446 | WBGene00016786 | cyp-35A4 | C49G7.8  | 0.0059169019268186  |             |
| AGIWUR16323;AGIWUR38020;AGIWUR39215                                               |    |   |         |         |                |          |          |                     |             |
| CB4856                                                                            | HS | V | 4038821 | 4039934 | WBGene00077593 | C49G7.12 | C49G7.12 | 0.0232369486893926  |             |
| AGIWUR1545                                                                        |    |   |         |         |                |          |          |                     |             |
| CB4856                                                                            | HS | V | 4040409 | 4042004 | WBGene00016788 | C49G7.10 | C49G7.10 | 0.091745224468653   |             |
| AGIWUR1228;AGIWUR4669;AGIWUR11163;AGIWUR13514;AGIWUR28269;AGIWUR31558;AGIWUR39242 |    |   |         |         |                |          |          |                     |             |
| CB4856                                                                            | HS | V | 4042404 | 4043599 | WBGene00016783 | irg-2    | C49G7.5  | 0.58714539051128    | AGIWUR19682 |
| CB4856                                                                            | HS | V | 4047841 | 4049354 | WBGene00005385 | srh-169  | C49G7.2  | 0.281958300079044   | AGIWUR21978 |
| CB4856                                                                            | HS | V | 4054191 | 4055109 | WBGene00016789 | djr-1.2  | C49G7.11 | 0.0696717412649157  |             |
| AGIWUR30122                                                                       |    |   |         |         |                |          |          |                     |             |
| CB4856                                                                            | HS | V | 4056165 | 4062184 | WBGene00017035 | D1065.3  | D1065.3  | 0.0308620497328209  |             |
| AGIWUR9655;AGIWUR15863;AGIWUR37113;AGIWUR40042                                    |    |   |         |         |                |          |          |                     |             |
| CB4856                                                                            | HS | V | 4062497 | 4068573 | WBGene00023264 | D1065.2  | D1065.2  | 0.0985932326795211  | AGIWUR24744 |
| CB4856                                                                            | HS | V | 4069424 | 4071542 | WBGene00005420 | srh-210  | D1065.4  | -0.0438253410637817 | AGIWUR36401 |
| CB4856                                                                            | HS | V | 4073755 | 4077548 | WBGene00017034 | otpl-2   | D1065.1  | 0.159255531536908   | AGIWUR30779 |
| CB4856                                                                            | HS | V | 4078061 | 4079813 | WBGene00005421 | srh-211  | D1065.5  | -0.218054793400162  | AGIWUR12980 |
| CB4856                                                                            | HS | V | 4081228 | 4083052 | WBGene00018190 | F38H12.5 | F38H12.5 | -0.0742200626123921 |             |
| AGIWUR6655;AGIWUR32282;AGIWUR40051                                                |    |   |         |         |                |          |          |                     |             |
| CB4856                                                                            | HS | V | 4095040 | 4100541 | WBGene00018189 | nhr-181  | F38H12.3 | 0.123754555738625   |             |
| AGIWUR23566                                                                       |    |   |         |         |                |          |          |                     |             |
| CB4856                                                                            | HS | V | 4101867 | 4103893 | WBGene00005624 | srj-40   | F38H12.2 | 0.0234849757052409  |             |
| AGIWUR1960                                                                        |    |   |         |         |                |          |          |                     |             |
| CB4856                                                                            | HS | V | 4104598 | 4106244 | WBGene00005623 | srj-39   | F38H12.1 | -0.0289075068302793 |             |
| AGIWUR19120                                                                       |    |   |         |         |                |          |          |                     |             |
| CB4856                                                                            | HS | V | 4106373 | 4108138 | WBGene00005879 | srw-132  | T05B4.5  | -0.0915637748589315 | AGIWUR44738 |
| CB4856                                                                            | HS | V | 4110634 | 4112616 | WBGene00005881 | srw-134  | T05B4.7  | -0.0669182193030879 | AGIWUR38922 |
| CB4856                                                                            | HS | V | 4113335 | 4114727 | WBGene00005880 | srw-133  | T05B4.6  | 0.017971766050576   | AGIWUR11913 |
| CB4856                                                                            | HS | V | 4117585 | 4118432 | WBGene00020240 | T05B4.9  | T05B4.9  | 0.308020460748712   | AGIWUR20216 |
| CB4856                                                                            | HS | V | 4119890 | 4120729 | WBGene00020241 | T05B4.10 | T05B4.10 | -0.0576646218638723 |             |

|                                                                                  |    |   |         |         |                |           |           |                     |
|----------------------------------------------------------------------------------|----|---|---------|---------|----------------|-----------|-----------|---------------------|
| AGIWUR25881                                                                      |    |   |         |         |                |           |           |                     |
| CB4856                                                                           | HS | V | 4121489 | 4122517 | WBGene00020242 | phat-5    | T05B4.11  | 0.0665182437414975  |
| AGIWUR8147;AGIWUR9076;AGIWUR14271;AGIWUR30063;AGIWUR41290;AGIWUR44095            |    |   |         |         |                |           |           |                     |
| CB4856                                                                           | HS | V | 4123329 | 4124862 | WBGene00020243 | T05B4.12  | T05B4.12  | 0.0927373266888729  |
| AGIWUR35874                                                                      |    |   |         |         |                |           |           |                     |
| CB4856                                                                           | HS | V | 4126319 | 4127535 | WBGene00020244 | T05B4.13  | T05B4.13  | -0.197279161878777  |
| AGIWUR21784                                                                      |    |   |         |         |                |           |           |                     |
| CB4856                                                                           | HS | V | 4127868 | 4129602 | WBGene00020238 | T05B4.4   | T05B4.4   | 0.00362224286775792 |
| AGIWUR27590                                                                      |    |   |         |         |                |           |           |                     |
| CB4856                                                                           | HS | V | 4129904 | 4130909 | WBGene00020237 | phat-4    | T05B4.3   | 0.280543668376049   |
| AGIWUR24108;AGIWUR28429                                                          |    |   |         |         |                |           |           |                     |
| CB4856                                                                           | HS | V | 4131925 | 4134981 | WBGene00003647 | nhr-57    | T05B4.2   | 0.208020534462282   |
| AGIWUR4984;AGIWUR6609;AGIWUR9301;AGIWUR10813;AGIWUR15809;AGIWUR19457;AGIWUR36903 |    |   |         |         |                |           |           |                     |
| CB4856                                                                           | HS | V | 4134968 | 4138825 | WBGene00020236 | lgc-1     | T05B4.1   | -0.0431911540706209 |
| AGIWUR12300;AGIWUR14909                                                          |    |   |         |         |                |           |           |                     |
| CB4856                                                                           | HS | V | 4139008 | 4143120 | WBGene00044528 | lgc-29    | Y45G5AL.2 | -0.110856519684903  |
| AGIWUR6685;AGIWUR40865                                                           |    |   |         |         |                |           |           |                     |
| CB4856                                                                           | HS | V | 4144505 | 4147571 | WBGene00021554 | Y45G5AL.1 | Y45G5AL.1 | 0.100273100953306   |
| AGIWUR44946                                                                      |    |   |         |         |                |           |           |                     |
| CB4856                                                                           | HS | V | 4147550 | 4152296 | WBGene00021558 | Y45G5AM.6 | Y45G5AM.6 | 0.183447992855577   |
| AGIWUR15909                                                                      |    |   |         |         |                |           |           |                     |
| CB4856                                                                           | HS | V | 4160383 | 4160889 | WBGene00021557 | Y45G5AM.5 | Y45G5AM.5 | -0.415924407301903  |
| AGIWUR43106                                                                      |    |   |         |         |                |           |           |                     |
| CB4856                                                                           | HS | V | 4163222 | 4163611 | WBGene00043666 | Y45G5AM.4 | Y45G5AM.4 | 0.03161389865262    |
| AGIWUR36153                                                                      |    |   |         |         |                |           |           |                     |
| CB4856                                                                           | HS | V | 4164554 | 4166825 | WBGene00021556 | Y45G5AM.3 | Y45G5AM.3 | 0.12286333598696    |
| AGIWUR26169                                                                      |    |   |         |         |                |           |           |                     |
| CB4856                                                                           | HS | V | 4166796 | 4169837 | WBGene00021559 | Y45G5AM.7 | Y45G5AM.7 | -0.275680787040631  |
| AGIWUR22011                                                                      |    |   |         |         |                |           |           |                     |
| CB4856                                                                           | HS | V | 4175882 | 4181357 | WBGene00021555 | Y45G5AM.2 | Y45G5AM.2 | -0.14561504610985   |
| AGIWUR12069                                                                      |    |   |         |         |                |           |           |                     |
| CB4856                                                                           | HS | V | 4181332 | 4191515 | WBGene00021561 | Y45G5AM.9 | Y45G5AM.9 | 0.0328092093776675  |
| AGIWUR11428;AGIWUR18622;AGIWUR43252                                              |    |   |         |         |                |           |           |                     |
| CB4856                                                                           | HS | V | 4195577 | 4199399 | WBGene00019276 | H43I07.3  | H43I07.3  | 0.0105454045328859  |
| AGIWUR27848                                                                      |    |   |         |         |                |           |           |                     |
| CB4856                                                                           | HS | V | 4199485 | 4203696 | WBGene00019275 | rpac-40   | H43I07.2  | 0.32313292988098    |
| AGIWUR7057                                                                       |    |   |         |         |                |           |           |                     |
| CB4856                                                                           | HS | V | 4204721 | 4209303 | WBGene00019274 | H43I07.1  | H43I07.1  | -0.285510987948383  |
| AGIWUR18443                                                                      |    |   |         |         |                |           |           |                     |
| CB4856                                                                           | HS | V | 4219643 | 4222197 | WBGene00003747 | nlp-9     | E03D2.2   | -0.0409012079281119 |
| AGIWUR39554                                                                      |    |   |         |         |                |           |           |                     |

|                                                                     |    |   |         |         |                |          |          |                     |                    |
|---------------------------------------------------------------------|----|---|---------|---------|----------------|----------|----------|---------------------|--------------------|
| CB4856                                                              | HS | V | 4236418 | 4238056 | WBGene00003751 | nlp-13   | E03D2.1  | 0.0109817542991273  | AGIWUR6822         |
| CB4856                                                              | HS | V | 4239150 | 4240392 | WBGene00005415 | srh-204  | E03D2.3  | 0.302795087474561   | AGIWUR34830        |
| CB4856                                                              | HS | V | 4240952 | 4242531 | WBGene00017107 | srt-12   | E03D2.4  | -0.158219960269411  | AGIWUR44820        |
| CB4856                                                              | HS | V | 4247969 | 4250147 | WBGene00022528 | srt-13   | ZC142.1  | 0.0730884607427704  | AGIWUR2916         |
| CB4856                                                              | HS | V | 4253502 | 4256574 | WBGene00022529 | srt-14   | ZC142.2  | -0.143570254193575  | AGIWUR28474        |
| CB4856                                                              | HS | V | 4257957 | 4260190 | WBGene00018554 | srt-3    | F47D2.3  | 0.011181511391019   | AGIWUR40923        |
| CB4856                                                              | HS | V | 4261485 | 4264616 | WBGene00018555 | srt-35   | F47D2.4  | 0.295208280501241   | AGIWUR26325        |
| CB4856                                                              | HS | V | 4269486 | 4271358 | WBGene00018557 | srt-38   | F47D2.6  | 0.0550393678266632  | AGIWUR30244        |
| CB4856                                                              | HS | V | 4288412 | 4290193 | WBGene00005406 | srh-193  | F47D2.9  | 0.0081741841562657  | AGIWUR36547        |
| CB4856                                                              | HS | V | 4291836 | 4293525 | WBGene00005407 | srh-194  | F47D2.10 | -0.0680397158037795 |                    |
| AGIWUR29375                                                         |    |   |         |         |                |          |          |                     |                    |
| CB4856                                                              | HS | V | 4296721 | 4298089 | WBGene00269432 | ZC132.11 |          | ZC132.11            |                    |
| 0.000450935497526395 AGIWUR1308;AGIWUR24756;AGIWUR30767;AGIWUR35418 |    |   |         |         |                |          |          |                     |                    |
| CB4856                                                              | HS | V | 4300626 | 4311784 | WBGene00022521 | ZC132.2  | ZC132.2  | -0.0235174774343401 |                    |
| AGIWUR3578;AGIWUR5811;AGIWUR38417                                   |    |   |         |         |                |          |          |                     |                    |
| CB4856                                                              | HS | V | 4311993 | 4315157 | WBGene00005405 | srh-192  | ZC132.7  | -0.0812032269930931 | AGIWUR31160        |
| CB4856                                                              | HS | V | 4315725 | 4317713 | WBGene00022526 | ZC132.8  | ZC132.8  | 0.317194332085364   | AGIWUR24614        |
| CB4856                                                              | HS | V | 4317920 | 4320001 | WBGene00022527 | ZC132.9  | ZC132.9  | 0.0153660423048443  | AGIWUR4580         |
| CB4856                                                              | HS | V | 4320460 | 4322218 | WBGene00235310 | R02D1.2  | R02D1.2  | 0.0515089790619436  |                    |
| AGIWUR24861;AGIWUR42264                                             |    |   |         |         |                |          |          |                     |                    |
| CB4856                                                              | HS | V | 4327121 | 4328736 | WBGene00017060 | D2063.1  | D2063.1  | 0.0206294186950635  |                    |
| AGIWUR2289;AGIWUR6390;AGIWUR22124;AGIWUR40360                       |    |   |         |         |                |          |          |                     |                    |
| CB4856                                                              | HS | V | 4329039 | 4332550 | WBGene00017061 | oac-12   | D2063.2  | 0.0680543046811604  | AGIWUR6604         |
| CB4856                                                              | HS | V | 4336762 | 4338925 | WBGene00044529 | irld-1   | D2063.4  | -0.154667272534639  |                    |
| AGIWUR17360;AGIWUR26355                                             |    |   |         |         |                |          |          |                     |                    |
| CB4856                                                              | HS | V | 4338854 | 4341308 | WBGene00017062 | glrx-3   | D2063.3  | 0.115099295693454   | AGIWUR5206         |
| CB4856                                                              | HS | V | 4341443 | 4346050 | WBGene00017981 | figl-1   | F32D1.1  | 0.222479937514514   | AGIWUR37838        |
| CB4856                                                              | HS | V | 4346089 | 4346425 | WBGene00017982 | hpo-18   | F32D1.2  | -0.203538689628845  |                    |
| AGIWUR18888;AGIWUR34489                                             |    |   |         |         |                |          |          |                     |                    |
| CB4856                                                              | HS | V | 4347166 | 4349768 | WBGene00003159 | mcm-7    | F32D1.10 | 0.0439429271130738  |                    |
| AGIWUR26538;AGIWUR27545                                             |    |   |         |         |                |          |          |                     |                    |
| CB4856                                                              | HS | V | 4349774 | 4361552 | WBGene00017983 | F32D1.3  | F32D1.3  | 0.081005841956129   | AGIWUR39251        |
| CB4856                                                              | HS | V | 4362722 | 4364650 | WBGene00001722 | grl-13   | F32D1.4  | -0.0596887109552657 | AGIWUR27074        |
| CB4856                                                              | HS | V | 4365447 | 4366483 | WBGene00044530 | F32D1.11 |          | F32D1.11            | -0.110703071541723 |
| AGIWUR14449;AGIWUR19290;AGIWUR22820                                 |    |   |         |         |                |          |          |                     |                    |
| CB4856                                                              | HS | V | 4369351 | 4371383 | WBGene00017984 | F32D1.5  | F32D1.5  | -0.131800079353255  |                    |
| AGIWUR12479;AGIWUR18525;AGIWUR24068                                 |    |   |         |         |                |          |          |                     |                    |
| CB4856                                                              | HS | V | 4371807 | 4373811 | WBGene00017988 | fipp-1   | F32D1.9  | 0.0404848539931528  | AGIWUR17104        |
| CB4856                                                              | HS | V | 4373760 | 4374874 | WBGene00017985 | neg-1    | F32D1.6  | 0.0229962631836749  | AGIWUR35653        |

|                                                                                                                   |    |   |         |         |                |           |           |                      |             |
|-------------------------------------------------------------------------------------------------------------------|----|---|---------|---------|----------------|-----------|-----------|----------------------|-------------|
| CB4856                                                                                                            | HS | V | 4374974 | 4376173 | WBGene00017986 | F32D1.7   | F32D1.7   | -0.183603183376512   | AGIWUR15298 |
| CB4856                                                                                                            | HS | V | 4376619 | 4377722 | WBGene00017987 | F32D1.8   | F32D1.8   | 0.0590183707168173   |             |
| AGIWUR9211;AGIWUR17294;AGIWUR17529;AGIWUR23378;AGIWUR26753                                                        |    |   |         |         |                |           |           |                      |             |
| CB4856                                                                                                            | HS | V | 4379643 | 4381592 | WBGene00269436 | F13A2.14  | F13A2.14  | 0.00229533352404143  |             |
| AGIWUR4194                                                                                                        |    |   |         |         |                |           |           |                      |             |
| CB4856                                                                                                            | HS | V | 4382916 | 4385242 | WBGene00017411 | F13A2.2   | F13A2.2   | 0.273393641184775    | AGIWUR6317  |
| CB4856                                                                                                            | HS | V | 4386808 | 4387502 | WBGene00044531 | F13A2.9   | F13A2.9   | 0.065426709725279    |             |
| AGIWUR12461;AGIWUR18733;AGIWUR36382;AGIWUR40455;AGIWUR41304                                                       |    |   |         |         |                |           |           |                      |             |
| CB4856                                                                                                            | HS | V | 4393540 | 4396357 | WBGene00017412 | F13A2.3   | F13A2.3   | -0.00460974999332731 | AGIWUR8025  |
| CB4856                                                                                                            | HS | V | 4398635 | 4400218 | WBGene00017413 | F13A2.4   | F13A2.4   | -0.0825193083023024  | AGIWUR7096  |
| CB4856                                                                                                            | HS | V | 4401298 | 4401940 | WBGene00017414 | F13A2.5   | F13A2.5   | -0.193341867522758   | AGIWUR2818  |
| CB4856                                                                                                            | HS | V | 4402749 | 4404530 | WBGene00017415 | F13A2.6   | F13A2.6   | -0.265337598753155   | AGIWUR43256 |
| CB4856                                                                                                            | HS | V | 4407819 | 4410280 | WBGene00003708 | nhr-118   | F13A2.8   | 0.0611262945581448   |             |
| AGIWUR5659;AGIWUR18832;AGIWUR26406;AGIWUR33940;AGIWUR39095                                                        |    |   |         |         |                |           |           |                      |             |
| CB4856                                                                                                            | HS | V | 4410943 | 4412401 | WBGene00021617 | Y47D7A.3  | Y47D7A.3  | -0.0923947597310528  |             |
| AGIWUR407                                                                                                         |    |   |         |         |                |           |           |                      |             |
| CB4856                                                                                                            | HS | V | 4412748 | 4414663 | WBGene00001714 | grl-5     | Y47D7A.5  | 0.402169025171426    |             |
| AGIWUR456                                                                                                         |    |   |         |         |                |           |           |                      |             |
| CB4856                                                                                                            | HS | V | 4416022 | 4416814 | WBGene00235165 | Y47D7A.18 | Y47D7A.18 | -0.313448211783889   |             |
| AGIWUR35916                                                                                                       |    |   |         |         |                |           |           |                      |             |
| CB4856                                                                                                            | HS | V | 4419454 | 4419867 | WBGene00021620 | Y47D7A.7  | Y47D7A.7  | -0.114274664951727   |             |
| AGIWUR9054                                                                                                        |    |   |         |         |                |           |           |                      |             |
| CB4856                                                                                                            | HS | V | 4420275 | 4420746 | WBGene00021616 | Y47D7A.2  | Y47D7A.2  | -0.243814519806318   |             |
| AGIWUR14377                                                                                                       |    |   |         |         |                |           |           |                      |             |
| CB4856                                                                                                            | HS | V | 4420997 | 4421596 | WBGene00004820 | skr-14    | Y47D7A.8  | -0.0475701287350052  |             |
| AGIWUR20702                                                                                                       |    |   |         |         |                |           |           |                      |             |
| CB4856                                                                                                            | HS | V | 4422406 | 4423065 | WBGene00004813 | skr-7     | Y47D7A.1  | -0.122409791141887   |             |
| AGIWUR38009                                                                                                       |    |   |         |         |                |           |           |                      |             |
| CB4856                                                                                                            | HS | V | 4423609 | 4423968 | WBGene00021621 | Y47D7A.9  | Y47D7A.9  | -0.052089852176433   |             |
| AGIWUR12979                                                                                                       |    |   |         |         |                |           |           |                      |             |
| CB4856                                                                                                            | HS | V | 4427769 | 4428302 | WBGene00021623 | Y47D7A.11 | Y47D7A.11 | -0.174141348814367   |             |
| AGIWUR626;AGIWUR1575;AGIWUR3659;AGIWUR6144;AGIWUR8714;AGIWUR19752;AGIWUR36378;AGIWUR38334;AGIWUR38504;AGIWUR43833 |    |   |         |         |                |           |           |                      |             |
| CB4856                                                                                                            | HS | V | 4428950 | 4429676 | WBGene00021624 | Y47D7A.12 | Y47D7A.12 | -0.0983629775981143  |             |
| AGIWUR3137                                                                                                        |    |   |         |         |                |           |           |                      |             |
| CB4856                                                                                                            | HS | V | 4431791 | 4433185 | WBGene00021627 | Y47D7A.15 | Y47D7A.15 | -0.25749464388997    |             |
| AGIWUR1754;AGIWUR7726;AGIWUR11111;AGIWUR23580;AGIWUR27475                                                         |    |   |         |         |                |           |           |                      |             |
| CB4856                                                                                                            | HS | V | 4434883 | 4435928 | WBGene00021625 | Y47D7A.13 | Y47D7A.13 | -0.133887488165392   |             |
| AGIWUR10566                                                                                                       |    |   |         |         |                |           |           |                      |             |

|                                                                                                                                     |    |   |         |         |                |            |            |                      |
|-------------------------------------------------------------------------------------------------------------------------------------|----|---|---------|---------|----------------|------------|------------|----------------------|
| CB4856                                                                                                                              | HS | V | 4438932 | 4443223 | WBGene00044637 | rft-1      | Y47D7A.16  | 0.012531354200795    |
| AGIWUR20975;AGIWUR25736                                                                                                             |    |   |         |         |                |            |            |                      |
| CB4856                                                                                                                              | HS | V | 4443110 | 4450555 | WBGene00021626 | rft-2      | Y47D7A.14  | 0.0379842665751218   |
| AGIWUR10755;AGIWUR11742;AGIWUR12084;AGIWUR23538;AGIWUR28386;AGIWUR30389;AGIWUR33218;AGIWUR39710                                     |    |   |         |         |                |            |            |                      |
| CB4856                                                                                                                              | HS | V | 4451049 | 4454734 | WBGene00019224 | gnrr-5     | H22D07.1   | -0.0162441586026176  |
| AGIWUR44776                                                                                                                         |    |   |         |         |                |            |            |                      |
| CB4856                                                                                                                              | HS | V | 4471365 | 4473602 | WBGene00020370 | T08H10.3   | T08H10.3   | -0.0357882085175651  |
| AGIWUR30288                                                                                                                         |    |   |         |         |                |            |            |                      |
| CB4856                                                                                                                              | HS | V | 4474843 | 4476996 | WBGene00006101 | str-35     | T08H10.2   | 0.0971824831497643   |
| AGIWUR27901;AGIWUR32256                                                                                                             |    |   |         |         |                |            |            |                      |
| CB4856                                                                                                                              | HS | V | 4477561 | 4479191 | WBGene00006100 | str-34     | T08H10.5   | 0.382996220152021    |
| AGIWUR19786                                                                                                                         |    |   |         |         |                |            |            |                      |
| CB4856                                                                                                                              | HS | V | 4480680 | 4481546 | WBGene00020371 | T08H10.4   | T08H10.4   | -0.0835182980200369  |
| AGIWUR43086                                                                                                                         |    |   |         |         |                |            |            |                      |
| CB4856                                                                                                                              | HS | V | 4483459 | 4486543 | WBGene00020369 | T08H10.1   | T08H10.1   | 0.0755624733485867   |
| AGIWUR990                                                                                                                           |    |   |         |         |                |            |            |                      |
| CB4856                                                                                                                              | HS | V | 4497463 | 4511449 | WBGene00006796 | unc-62     | T28F12.2   | -0.0379229045793963  |
| AGIWUR15699;AGIWUR16484;AGIWUR18052;AGIWUR21053;AGIWUR21660;AGIWUR22015;AGIWUR25612;AGIWUR26913;AGIWUR30675;AGIWUR35589;AGIWUR41385 |    |   |         |         |                |            |            |                      |
| CB4856                                                                                                                              | HS | V | 4511977 | 4516947 | WBGene00020904 | T28F12.1   | T28F12.1   | -0.0428639709207417  |
| AGIWUR17708                                                                                                                         |    |   |         |         |                |            |            |                      |
| CB4856                                                                                                                              | HS | V | 4517643 | 4549291 | WBGene00004947 | sos-1      | T28F12.3   | 0.112609062793602    |
| AGIWUR4204                                                                                                                          |    |   |         |         |                |            |            |                      |
| CB4856                                                                                                                              | HS | V | 4556055 | 4557114 | WBGene00022017 | Y61A9LA.5  | Y61A9LA.5  | 0.104955758631487    |
| AGIWUR15931                                                                                                                         |    |   |         |         |                |            |            |                      |
| CB4856                                                                                                                              | HS | V | 4558318 | 4559801 | WBGene00022018 | Y61A9LA.7  | Y61A9LA.7  | 0.29982972026563     |
| AGIWUR8198;AGIWUR13524;AGIWUR17992;AGIWUR19357;AGIWUR39108;AGIWUR41819                                                              |    |   |         |         |                |            |            |                      |
| CB4856                                                                                                                              | HS | V | 4562215 | 4570043 | WBGene00022019 | sut-2      | Y61A9LA.8  | 0.0173705050466104   |
| AGIWUR20263;AGIWUR29703;AGIWUR34769;AGIWUR39327;AGIWUR39758;AGIWUR44236;AGIWUR45069                                                 |    |   |         |         |                |            |            |                      |
| CB4856                                                                                                                              | HS | V | 4571143 | 4585167 | WBGene00022015 | Y61A9LA.3  | Y61A9LA.3  | -0.00226899615719223 |
| AGIWUR3402;AGIWUR4011;AGIWUR10244;AGIWUR10368                                                                                       |    |   |         |         |                |            |            |                      |
| CB4856                                                                                                                              | HS | V | 4592838 | 4602014 | WBGene00022014 | Y61A9LA.1  | Y61A9LA.1  | 0.102913105592059    |
| AGIWUR28333                                                                                                                         |    |   |         |         |                |            |            |                      |
| CB4856                                                                                                                              | HS | V | 4605004 | 4606926 | WBGene00022022 | Y61A9LA.11 | Y61A9LA.11 | -0.181586719367434   |
| AGIWUR34478                                                                                                                         |    |   |         |         |                |            |            |                      |
| CB4856                                                                                                                              | HS | V | 4607039 | 4615817 | WBGene00022021 | Y61A9LA.10 | Y61A9LA.10 | 0.124792147442189    |
| AGIWUR16782                                                                                                                         |    |   |         |         |                |            |            |                      |
| CB4856                                                                                                                              | HS | V | 4616156 | 4617766 | WBGene00018814 | F54D11.4   | F54D11.4   | -0.235222448953706   |
| AGIWUR40577                                                                                                                         |    |   |         |         |                |            |            |                      |

|                                                                        |    |   |         |         |                |          |          |                      |             |
|------------------------------------------------------------------------|----|---|---------|---------|----------------|----------|----------|----------------------|-------------|
| CB4856                                                                 | HS | V | 4617938 | 4628510 | WBGene00018812 | sumv-2   | F54D11.2 | -0.00480530006332369 |             |
| AGIWUR7205;AGIWUR11926;AGIWUR16823;AGIWUR22271;AGIWUR34312;AGIWUR35666 |    |   |         |         |                |          |          |                      |             |
| CB4856                                                                 | HS | V | 4628580 | 4635263 | WBGene00018811 | pmt-2    | F54D11.1 | 0.136349806081044    |             |
| AGIWUR42429;AGIWUR44478                                                |    |   |         |         |                |          |          |                      |             |
| CB4856                                                                 | HS | V | 4635327 | 4637145 | WBGene00018813 | F54D11.3 | F54D11.3 | 0.330746116573401    |             |
| AGIWUR10374                                                            |    |   |         |         |                |          |          |                      |             |
| CB4856                                                                 | HS | V | 4642952 | 4646931 | WBGene00004928 | soc-1    | F41F3.2  | -0.149914514731893   | AGIWUR29213 |
| CB4856                                                                 | HS | V | 4647665 | 4648241 | WBGene00018297 | F41F3.3  | F41F3.3  | -0.24653972060274    | AGIWUR8735  |
| CB4856                                                                 | HS | V | 4648832 | 4650726 | WBGene00044533 | F41F3.8  | F41F3.8  | 0.0888170497133514   |             |
| AGIWUR3540;AGIWUR11934;AGIWUR30905;AGIWUR34907;AGIWUR43347             |    |   |         |         |                |          |          |                      |             |
| CB4856                                                                 | HS | V | 4652863 | 4654007 | WBGene00000712 | col-139  | F41F3.4  | -0.330512281179459   | AGIWUR17250 |
| CB4856                                                                 | HS | V | 4655475 | 4655786 | WBGene00269385 | F41F3.9  | F41F3.9  | 1.84999860103983     | AGIWUR18253 |
| CB4856                                                                 | HS | V | 4656158 | 4657812 | WBGene00005966 | srx-75   | F41F3.5  | 0.0681332467639688   | AGIWUR38791 |
| CB4856                                                                 | HS | V | 4658949 | 4662500 | WBGene00005965 | srx-74   | F41F3.6  | -0.117249047241224   | AGIWUR37537 |
| CB4856                                                                 | HS | V | 4663616 | 4665751 | WBGene00005964 | srx-73   | F41F3.7  | 0.0316821783001719   | AGIWUR39489 |
| CB4856                                                                 | HS | V | 4666745 | 4668736 | WBGene00005968 | srx-77   | K03B4.5  | 0.156946588591389    | AGIWUR36430 |
| CB4856                                                                 | HS | V | 4671030 | 4672610 | WBGene00219236 | K03B4.9  | K03B4.9  | 0.0296580258611048   | AGIWUR10250 |
| CB4856                                                                 | HS | V | 4681975 | 4685110 | WBGene00019355 | K03B4.4  | K03B4.4  | -0.066270720345905   | AGIWUR20172 |
| CB4856                                                                 | HS | V | 4687107 | 4688028 | WBGene00006392 | taf-10   | K03B4.3  | -0.0306880086446242  | AGIWUR45166 |
| CB4856                                                                 | HS | V | 4687974 | 4689231 | WBGene00019354 | K03B4.2  | K03B4.2  | 0.178501519290668    | AGIWUR5490  |
| CB4856                                                                 | HS | V | 4689330 | 4691611 | WBGene00019353 | K03B4.1  | K03B4.1  | 0.0485159284358225   | AGIWUR43290 |
| CB4856                                                                 | HS | V | 4691605 | 4692433 | WBGene00019357 | cpg-8    | K03B4.7  | -0.126895494314747   |             |
| AGIWUR20437;AGIWUR38950                                                |    |   |         |         |                |          |          |                      |             |
| CB4856                                                                 | HS | V | 4694974 | 4700289 | WBGene00022584 | ZC266.1  | ZC266.1  | 0.346630741734548    |             |
| AGIWUR1042;AGIWUR25299                                                 |    |   |         |         |                |          |          |                      |             |
| CB4856                                                                 | HS | V | 4710764 | 4714911 | WBGene00018211 | oac-24   | F39G3.6  | 0.0651353471474767   | AGIWUR31878 |
| CB4856                                                                 | HS | V | 4715388 | 4720148 | WBGene00004195 | prx-6    | F39G3.7  | 0.103068434766531    | AGIWUR44604 |
| CB4856                                                                 | HS | V | 4722618 | 4724621 | WBGene00018210 | F39G3.5  | F39G3.5  | -0.0237550000070748  | AGIWUR29741 |
| CB4856                                                                 | HS | V | 4724663 | 4726726 | WBGene00018209 | F39G3.4  | F39G3.4  | -0.205145203033692   | AGIWUR3506  |
| CB4856                                                                 | HS | V | 4726721 | 4730234 | WBGene00006570 | tig-2    | F39G3.8  | 0.00618940685425251  | AGIWUR18954 |
| CB4856                                                                 | HS | V | 4731911 | 4734723 | WBGene00018208 | F39G3.3  | F39G3.3  | -0.179079646529743   |             |
| AGIWUR460;AGIWUR10436;AGIWUR41800                                      |    |   |         |         |                |          |          |                      |             |
| CB4856                                                                 | HS | V | 4737834 | 4741169 | WBGene00018207 | F39G3.2  | F39G3.2  | 0.316761104649785    | AGIWUR7231  |
| CB4856                                                                 | HS | V | 4742427 | 4745373 | WBGene00018206 | ugt-61   | F39G3.1  | 0.213621326110665    | AGIWUR3749  |
| CB4856                                                                 | HS | V | 4745569 | 4748089 | WBGene00015985 | C18G1.7  | C18G1.7  | -0.0530711654761218  | AGIWUR40127 |
| CB4856                                                                 | HS | V | 4750580 | 4753808 | WBGene00015984 | C18G1.6  | C18G1.6  | 0.0780382877522552   | AGIWUR27193 |
| CB4856                                                                 | HS | V | 4754313 | 4755469 | WBGene00001855 | hil-4    | C18G1.5  | 0.135453104883295    |             |
| AGIWUR2414;AGIWUR12114;AGIWUR20399;AGIWUR21732;AGIWUR40557;AGIWUR42531 |    |   |         |         |                |          |          |                      |             |
| CB4856                                                                 | HS | V | 4755985 | 4758584 | WBGene00003994 | pgl-3    | C18G1.4  | -0.100941935199629   | AGIWUR829   |

|                                                                                  |   |         |         |                |          |          |                     |             |
|----------------------------------------------------------------------------------|---|---------|---------|----------------|----------|----------|---------------------|-------------|
| CB4856 HS                                                                        | V | 4760974 | 4764179 | WBGene00015982 | bgnt-1.4 | C18G1.3  | 0.119257590226108   |             |
| AGIWUR39744                                                                      |   |         |         |                |          |          |                     |             |
| CB4856 HS                                                                        | V | 4764266 | 4766601 | WBGene00015986 | C18G1.8  | C18G1.8  | 0.227742902706247   | AGIWUR16977 |
| CB4856 HS                                                                        | V | 4767886 | 4769753 | WBGene00015987 | C18G1.9  | C18G1.9  | -0.210347874818671  | AGIWUR27591 |
| CB4856 HS                                                                        | V | 4770670 | 4773091 | WBGene00015981 | elt-7    | C18G1.2  | -0.0343986137426793 | AGIWUR25029 |
| CB4856 HS                                                                        | V | 4777960 | 4780019 | WBGene00015980 | C18G1.1  | C18G1.1  | -0.0042955901353281 | AGIWUR10156 |
| CB4856 HS                                                                        | V | 4783613 | 4786140 | WBGene00022013 | Y60C6A.1 | Y60C6A.1 | -0.0505409349834078 |             |
| AGIWUR16948                                                                      |   |         |         |                |          |          |                     |             |
| CB4856 HS                                                                        | V | 4794599 | 4796996 | WBGene00019840 | R02F11.2 | R02F11.2 | -0.0478114910722143 |             |
| AGIWUR2726;AGIWUR5721;AGIWUR23238;AGIWUR35491                                    |   |         |         |                |          |          |                     |             |
| CB4856 HS                                                                        | V | 4801094 | 4802626 | WBGene00019839 | R02F11.1 | R02F11.1 | -0.225535187319146  |             |
| AGIWUR29210                                                                      |   |         |         |                |          |          |                     |             |
| CB4856 HS                                                                        | V | 4802647 | 4805947 | WBGene00019841 | R02F11.3 | R02F11.3 | -0.0668794091576226 |             |
| AGIWUR17799;AGIWUR29564                                                          |   |         |         |                |          |          |                     |             |
| CB4856 HS                                                                        | V | 4810865 | 4818663 | WBGene00019842 | R02F11.4 | R02F11.4 | -0.136370213830753  |             |
| AGIWUR17550                                                                      |   |         |         |                |          |          |                     |             |
| CB4856 HS                                                                        | V | 4818701 | 4823344 | WBGene00016509 | adss-1   | C37H5.6  | 0.114743884730373   |             |
| AGIWUR3440;AGIWUR8948;AGIWUR9961;AGIWUR22132;AGIWUR22362;AGIWUR36251;AGIWUR36473 |   |         |         |                |          |          |                     |             |
| CB4856 HS                                                                        | V | 4824130 | 4826760 | WBGene00002010 | hsp-6    | C37H5.8  | 0.0638387497609685  |             |
| AGIWUR10444;AGIWUR26791                                                          |   |         |         |                |          |          |                     |             |
| CB4856 HS                                                                        | V | 4827360 | 4836025 | WBGene00016508 | C37H5.5  | C37H5.5  | 0.105131700077152   | AGIWUR32683 |
| CB4856 HS                                                                        | V | 4836027 | 4840010 | WBGene00003528 | nas-9    | C37H5.9  | 0.536526977520538   | AGIWUR7821  |
| CB4856 HS                                                                        | V | 4840619 | 4841269 | WBGene00000859 | cwp-1    | C37H5.10 | -0.435097232942569  |             |
| AGIWUR10874                                                                      |   |         |         |                |          |          |                     |             |
| CB4856 HS                                                                        | V | 4841940 | 4842567 | WBGene00000860 | cwp-2    | C37H5.11 | -0.265872107588477  |             |
| AGIWUR292                                                                        |   |         |         |                |          |          |                     |             |
| CB4856 HS                                                                        | V | 4842836 | 4843845 | WBGene00000861 | cwp-3    | C37H5.4  | -0.0735024801611255 | AGIWUR2144  |
| CB4856 HS                                                                        | V | 4844685 | 4846984 | WBGene00016507 | abhd-5.2 | C37H5.3  | -0.0344248739811031 |             |
| AGIWUR26648;AGIWUR36638                                                          |   |         |         |                |          |          |                     |             |
| CB4856 HS                                                                        | V | 4847653 | 4849838 | WBGene00016506 | abhd-5.1 | C37H5.2  | -0.254845086249427  |             |
| AGIWUR25974                                                                      |   |         |         |                |          |          |                     |             |
| CB4856 HS                                                                        | V | 4851472 | 4857260 | WBGene00003591 | nex-4    | C37H5.1  | 0.0227804761171022  | AGIWUR22444 |
| CB4856 HS                                                                        | V | 4857149 | 4862965 | WBGene00016511 | C37H5.13 | C37H5.13 | -0.0764644369808885 |             |
| AGIWUR894;AGIWUR6151;AGIWUR15127;AGIWUR17736;AGIWUR20020;AGIWUR22385;AGIWUR27555 |   |         |         |                |          |          |                     |             |
| CB4856 HS                                                                        | V | 4865648 | 4870355 | WBGene00005110 | srd-32   | T19H12.5 | 0.0375233406349738  |             |
| AGIWUR40248                                                                      |   |         |         |                |          |          |                     |             |
| CB4856 HS                                                                        | V | 4872303 | 4874200 | WBGene00005111 | srd-33   | T19H12.4 | 0.179998389130617   |             |
| AGIWUR15862                                                                      |   |         |         |                |          |          |                     |             |
| CB4856 HS                                                                        | V | 4874923 | 4879319 | WBGene00020590 | T19H12.6 | T19H12.6 | 0.400032089544875   |             |

|                                                                                   |   |         |         |                |           |           |                     |                     |
|-----------------------------------------------------------------------------------|---|---------|---------|----------------|-----------|-----------|---------------------|---------------------|
| AGIWUR28964                                                                       |   |         |         |                |           |           |                     |                     |
| CB4856 HS                                                                         | V | 4879945 | 4881477 | WBGene00006098 | str-32    | T19H12.7  |                     | -0.0269878847762151 |
| AGIWUR24416                                                                       |   |         |         |                |           |           |                     |                     |
| CB4856 HS                                                                         | V | 4882178 | 4884319 | WBGene00020591 | nhr-220   | T19H12.8  |                     | -0.312908532052669  |
| AGIWUR21627                                                                       |   |         |         |                |           |           |                     |                     |
| CB4856 HS                                                                         | V | 4884790 | 4885420 | WBGene00044282 | T19H12.12 | T19H12.12 |                     | -0.104546188585497  |
| AGIWUR7237                                                                        |   |         |         |                |           |           |                     |                     |
| CB4856 HS                                                                         | V | 4885672 | 4886809 | WBGene00020589 | T19H12.3  | T19H12.3  |                     | -0.0727222733625688 |
| AGIWUR21961                                                                       |   |         |         |                |           |           |                     |                     |
| CB4856 HS                                                                         | V | 4887187 | 4889629 | WBGene00020592 | ugt-12    | T19H12.9  |                     | 0.0069735395358137  |
| AGIWUR26207                                                                       |   |         |         |                |           |           |                     |                     |
| CB4856 HS                                                                         | V | 4890429 | 4891422 | WBGene00020588 | T19H12.2  | T19H12.2  |                     | 0.138304947123103   |
| AGIWUR8639;AGIWUR8820                                                             |   |         |         |                |           |           |                     |                     |
| CB4856 HS                                                                         | V | 4892588 | 4895071 | WBGene00020593 | ugt-11    | T19H12.10 |                     | -0.0358986205065968 |
| AGIWUR33007                                                                       |   |         |         |                |           |           |                     |                     |
| CB4856 HS                                                                         | V | 4896028 | 4897969 | WBGene00020587 | ugt-9     | T19H12.1  |                     | 0.0335361451880978  |
| AGIWUR1830                                                                        |   |         |         |                |           |           |                     |                     |
| CB4856 HS                                                                         | V | 4898217 | 4900082 | WBGene00020594 | ugt-10    | T19H12.11 |                     | -0.236350427812306  |
| AGIWUR2113                                                                        |   |         |         |                |           |           |                     |                     |
| CB4856 HS                                                                         | V | 4901374 | 4903010 | WBGene00019235 | H23N18.4  | H23N18.4  |                     | 0.0306887634930186  |
| AGIWUR15965;AGIWUR37437;AGIWUR41886                                               |   |         |         |                |           |           |                     |                     |
| CB4856 HS                                                                         | V | 4903930 | 4905918 | WBGene00019234 | ugt-8     | H23N18.3  |                     | 0.532019550908224   |
| AGIWUR35284                                                                       |   |         |         |                |           |           |                     |                     |
| CB4856 HS                                                                         | V | 4906253 | 4908258 | WBGene00019233 | ugt-14    | H23N18.2  |                     | -0.0288345762390083 |
| AGIWUR1674                                                                        |   |         |         |                |           |           |                     |                     |
| CB4856 HS                                                                         | V | 4908868 | 4911399 | WBGene00019232 | ugt-13    | H23N18.1  |                     | 0.0312688185649588  |
| AGIWUR10867;AGIWUR24424;AGIWUR29728                                               |   |         |         |                |           |           |                     |                     |
| CB4856 HS                                                                         | V | 4911712 | 4912381 | WBGene00019236 | H23N18.5  | H23N18.5  |                     | -0.308977627530719  |
| AGIWUR19342                                                                       |   |         |         |                |           |           |                     |                     |
| CB4856 HS                                                                         | V | 4913061 | 4915079 | WBGene00044534 | H23N18.6  | H23N18.6  |                     | -0.202731341214027  |
| AGIWUR26450;AGIWUR31107;AGIWUR36453                                               |   |         |         |                |           |           |                     |                     |
| CB4856 HS                                                                         | V | 4918154 | 4918585 | WBGene00015340 | C02E7.7   | C02E7.7   | 0.165523421471875   | AGIWUR24668         |
| CB4856 HS                                                                         | V | 4919207 | 4919586 | WBGene00015339 | C02E7.6   | C02E7.6   | -0.436555241990252  |                     |
| AGIWUR2706;AGIWUR4643;AGIWUR16815;AGIWUR18589;AGIWUR20623;AGIWUR37703;AGIWUR43853 |   |         |         |                |           |           |                     |                     |
| CB4856 HS                                                                         | V | 4920342 | 4920790 | WBGene00015341 | C02E7.8   | C02E7.8   | 0.0936286947773928  | AGIWUR11061         |
| CB4856 HS                                                                         | V | 4921102 | 4922616 | WBGene00005248 | srh-23    | C02E7.5   | 0.85188422053186    | AGIWUR18669         |
| CB4856 HS                                                                         | V | 4923292 | 4924594 | WBGene00005247 | srh-22    | C02E7.4   | -0.0694379257251185 | AGIWUR33717         |
| CB4856 HS                                                                         | V | 4924918 | 4926224 | WBGene00005245 | srh-20    | C02E7.3   | 0.246313592544059   | AGIWUR34535         |
| CB4856 HS                                                                         | V | 4926671 | 4928181 | WBGene00005246 | srh-21    | C02E7.2   | 0.060113579964888   | AGIWUR37003         |



|                                                                                    |    |   |         |         |                |          |          |                      |             |
|------------------------------------------------------------------------------------|----|---|---------|---------|----------------|----------|----------|----------------------|-------------|
| CB4856                                                                             | HS | V | 4928278 | 4929942 | WBGene00006238 | str-205  | C02E7.9  | -0.0276834635872723  | AGIWUR22281 |
| CB4856                                                                             | HS | V | 4930817 | 4933027 | WBGene00015342 | C02E7.10 | C02E7.10 | -0.0891805155760519  |             |
| AGIWUR2084                                                                         |    |   |         |         |                |          |          |                      |             |
| CB4856                                                                             | HS | V | 4934706 | 4939085 | WBGene00015338 | catp-2   | C02E7.1  | 0.134293858986018    | AGIWUR11404 |
| CB4856                                                                             | HS | V | 4939260 | 4940641 | WBGene00006246 | str-213  | C02E7.11 | -0.276328101905547   |             |
| AGIWUR9176                                                                         |    |   |         |         |                |          |          |                      |             |
| CB4856                                                                             | HS | V | 4941196 | 4942414 | WBGene00006245 | str-212  | C02E7.12 | -0.00200695397425132 |             |
| AGIWUR13654;AGIWUR26919                                                            |    |   |         |         |                |          |          |                      |             |
| CB4856                                                                             | HS | V | 4943116 | 4944319 | WBGene00006244 | str-211  | C02E7.13 | 0.0565267662683109   |             |
| AGIWUR19419                                                                        |    |   |         |         |                |          |          |                      |             |
| CB4856                                                                             | HS | V | 4945662 | 4948299 | WBGene00006243 | str-210  | F26G5.11 | 0.0860850075615618   |             |
| AGIWUR5249;AGIWUR20666                                                             |    |   |         |         |                |          |          |                      |             |
| CB4856                                                                             | HS | V | 4948935 | 4951024 | WBGene00006242 | str-209  | F26G5.5  | 0.0328785988236255   | AGIWUR31438 |
| CB4856                                                                             | HS | V | 4951734 | 4953035 | WBGene00006240 | str-207  | F26G5.4  | 0.0794349814805635   | AGIWUR2049  |
| CB4856                                                                             | HS | V | 4954250 | 4955989 | WBGene00005100 | srd-22   | F26G5.3  | -0.267777688673121   | AGIWUR12411 |
| CB4856                                                                             | HS | V | 4956829 | 4958572 | WBGene00006241 | str-208  | F26G5.2  | 0.0635085650244358   | AGIWUR12648 |
| CB4856                                                                             | HS | V | 4958603 | 4963098 | WBGene00006523 | tam-1    | F26G5.9  | -0.136327044555534   |             |
| AGIWUR8886;AGIWUR16292;AGIWUR16850;AGIWUR17900;AGIWUR35397;AGIWUR35895;AGIWUR38065 |    |   |         |         |                |          |          |                      |             |
| CB4856                                                                             | HS | V | 4971770 | 4973043 | WBGene00017845 | srsx-9   | F26G5.10 | 0.101365414740014    |             |
| AGIWUR35069                                                                        |    |   |         |         |                |          |          |                      |             |
| CB4856                                                                             | HS | V | 4973314 | 4974777 | WBGene00044117 | srsx-10  | F26G5.12 | -0.00401971405810464 |             |
| AGIWUR29835;AGIWUR29983                                                            |    |   |         |         |                |          |          |                      |             |
| CB4856                                                                             | HS | V | 4975485 | 4977502 | WBGene00017843 | F26G5.1  | F26G5.1  | -0.0888957857895143  | AGIWUR21735 |
| CB4856                                                                             | HS | V | 4977934 | 4979160 | WBGene00015736 | srsx-11  | C13D9.4  | -0.104496886394716   |             |
| AGIWUR6710;AGIWUR18113                                                             |    |   |         |         |                |          |          |                      |             |
| CB4856                                                                             | HS | V | 4979947 | 4980973 | WBGene00015737 | srsx-12  | C13D9.5  | -0.0191662962204635  | AGIWUR26886 |
| CB4856                                                                             | HS | V | 4981809 | 4983191 | WBGene00015738 | srsx-13  | C13D9.6  | -0.0317296487142364  | AGIWUR42234 |
| CB4856                                                                             | HS | V | 4983748 | 4987197 | WBGene00003573 | ncx-8    | C13D9.7  | -0.295469493198171   |             |
| AGIWUR6415;AGIWUR24815;AGIWUR31203                                                 |    |   |         |         |                |          |          |                      |             |
| CB4856                                                                             | HS | V | 4991505 | 4995064 | WBGene00003574 | ncx-9    | C13D9.8  | -0.00643291595327078 | AGIWUR19023 |
| CB4856                                                                             | HS | V | 4997048 | 5000558 | WBGene00015739 | ugt-7    | C13D9.9  | 0.068997011473293    | AGIWUR21056 |
| CB4856                                                                             | HS | V | 5001686 | 5003414 | WBGene00005659 | srr-8    | C13D9.3  | 0.0654999812817021   | AGIWUR3691  |
| CB4856                                                                             | HS | V | 5007229 | 5011702 | WBGene00005656 | srr-5    | C13D9.2  | 0.0223977817579977   | AGIWUR31596 |
| CB4856                                                                             | HS | V | 5012994 | 5015059 | WBGene00005657 | srr-6    | C13D9.1  | -0.0527285213197821  | AGIWUR19957 |
| CB4856                                                                             | HS | V | 5019224 | 5022369 | WBGene00005655 | srr-4    | K11D12.3 | 0.0314807629838025   |             |
| AGIWUR16882                                                                        |    |   |         |         |                |          |          |                      |             |
| CB4856                                                                             | HS | V | 5023706 | 5027723 | WBGene00019644 | cpt-4    | K11D12.4 | -0.237059285884991   |             |
| AGIWUR10491                                                                        |    |   |         |         |                |          |          |                      |             |
| CB4856                                                                             | HS | V | 5029324 | 5030811 | WBGene00019645 | swt-7    | K11D12.5 | 0.0913700460982625   |             |

|                                                             |   |         |         |                |           |           |                     |             |
|-------------------------------------------------------------|---|---------|---------|----------------|-----------|-----------|---------------------|-------------|
| AGIWUR6855                                                  |   |         |         |                |           |           |                     |             |
| CB4856 HS                                                   | V | 5033398 | 5034171 | WBGene00044535 | K11D12.13 | K11D12.13 | -0.13602138726446   |             |
| AGIWUR6605;AGIWUR23117;AGIWUR31448                          |   |         |         |                |           |           |                     |             |
| CB4856 HS                                                   | V | 5034528 | 5035169 | WBGene00019646 | K11D12.6  | K11D12.6  | -0.0172599625197094 |             |
| AGIWUR6484                                                  |   |         |         |                |           |           |                     |             |
| CB4856 HS                                                   | V | 5035252 | 5036464 | WBGene00019647 | K11D12.7  | K11D12.7  | 0.0171143471945996  |             |
| AGIWUR25453                                                 |   |         |         |                |           |           |                     |             |
| CB4856 HS                                                   | V | 5036572 | 5038658 | WBGene00019650 | K11D12.11 | K11D12.11 | -0.0329375012669004 |             |
| AGIWUR11290                                                 |   |         |         |                |           |           |                     |             |
| CB4856 HS                                                   | V | 5039669 | 5041003 | WBGene00019648 | K11D12.8  | K11D12.8  | -0.216038249981443  |             |
| AGIWUR31955                                                 |   |         |         |                |           |           |                     |             |
| CB4856 HS                                                   | V | 5042408 | 5046203 | WBGene00019649 | K11D12.9  | K11D12.9  | -0.0181171677760172 |             |
| AGIWUR32970                                                 |   |         |         |                |           |           |                     |             |
| CB4856 HS                                                   | V | 5049541 | 5052214 | WBGene00004136 | pqn-51    | K11D12.2  | -0.027838982001211  |             |
| AGIWUR12989;AGIWUR15695;AGIWUR15696;AGIWUR25674;AGIWUR31797 |   |         |         |                |           |           |                     |             |
| CB4856 HS                                                   | V | 5052261 | 5053490 | WBGene00019651 | K11D12.12 | K11D12.12 | 0.0694874554720499  |             |
| AGIWUR37796                                                 |   |         |         |                |           |           |                     |             |
| CB4856 HS                                                   | V | 5053619 | 5056473 | WBGene00000862 | cwp-4     | K11D12.1  | 0.0681675263001988  |             |
| AGIWUR40515                                                 |   |         |         |                |           |           |                     |             |
| CB4856 HS                                                   | V | 5056378 | 5064803 | WBGene00003374 | mlk-1     | K11D12.10 | -0.0664871905519622 |             |
| AGIWUR16397;AGIWUR31783;AGIWUR32510                         |   |         |         |                |           |           |                     |             |
| CB4856 HS                                                   | V | 5067637 | 5069665 | WBGene00021975 | Y58A7A.1  | Y58A7A.1  | -0.0315829726279908 |             |
| AGIWUR8433                                                  |   |         |         |                |           |           |                     |             |
| CB4856 HS                                                   | V | 5071695 | 5072231 | WBGene00021976 | Y58A7A.2  | Y58A7A.2  | -0.368322885124168  |             |
| AGIWUR32706                                                 |   |         |         |                |           |           |                     |             |
| CB4856 HS                                                   | V | 5077849 | 5080903 | WBGene00021977 | Y58A7A.3  | Y58A7A.3  | 0.00283685356292196 |             |
| AGIWUR2789;AGIWUR17112;AGIWUR33812;AGIWUR39349              |   |         |         |                |           |           |                     |             |
| CB4856 HS                                                   | V | 5082002 | 5085007 | WBGene00021978 | Y58A7A.4  | Y58A7A.4  | 0.667688507789848   |             |
| AGIWUR35117                                                 |   |         |         |                |           |           |                     |             |
| CB4856 HS                                                   | V | 5085886 | 5087121 | WBGene00021979 | Y58A7A.5  | Y58A7A.5  | 0.564751891020933   |             |
| AGIWUR37032                                                 |   |         |         |                |           |           |                     |             |
| CB4856 HS                                                   | V | 5087601 | 5089484 | WBGene00021980 | glb-32    | Y58A7A.6  | -0.0515502891175892 |             |
| AGIWUR16777                                                 |   |         |         |                |           |           |                     |             |
| CB4856 HS                                                   | V | 5093715 | 5096277 | WBGene00015444 | C04F5.2   | C04F5.2   | 0.115853564697948   | AGIWUR36566 |
| CB4856 HS                                                   | V | 5097150 | 5098907 | WBGene00006782 | unc-46    | C04F5.3   | 0.127257559958001   |             |
| AGIWUR3171;AGIWUR5049;AGIWUR16856;AGIWUR35187               |   |         |         |                |           |           |                     |             |
| CB4856 HS                                                   | V | 5100098 | 5102117 | WBGene00015446 | srab-1    | C04F5.4   | -0.0457698137408569 | AGIWUR42529 |
| CB4856 HS                                                   | V | 5103042 | 5105034 | WBGene00015447 | srab-2    | C04F5.5   | 0.0279118115016725  | AGIWUR4344  |
| CB4856 HS                                                   | V | 5105764 | 5107916 | WBGene00015448 | srab-3    | C04F5.6   | -0.0463293432403429 | AGIWUR1011  |

|                                                                                                        |    |   |         |         |                |          |          |                     |             |
|--------------------------------------------------------------------------------------------------------|----|---|---------|---------|----------------|----------|----------|---------------------|-------------|
| CB4856                                                                                                 | HS | V | 5108180 | 5110791 | WBGene00015449 | ugt-63   | C04F5.7  | -0.0457350580012226 |             |
| AGIWUR27307;AGIWUR28572;AGIWUR30566;AGIWUR40417                                                        |    |   |         |         |                |          |          |                     |             |
| CB4856                                                                                                 | HS | V | 5111518 | 5113754 | WBGene00015450 | C04F5.8  | C04F5.8  | -0.110741378808786  | AGIWUR35055 |
| CB4856                                                                                                 | HS | V | 5114749 | 5119209 | WBGene00015451 | C04F5.9  | C04F5.9  | 0.169309240263658   | AGIWUR31490 |
| CB4856                                                                                                 | HS | V | 5119939 | 5126916 | WBGene00004795 | sid-1    | C04F5.1  | -0.369584267230699  | AGIWUR24735 |
| CB4856                                                                                                 | HS | V | 5127055 | 5130076 | WBGene00017468 | F14F9.5  | F14F9.5  | -0.237925233940523  | AGIWUR36714 |
| CB4856                                                                                                 | HS | V | 5130318 | 5131538 | WBGene00044536 | F14F9.8  | F14F9.8  | 0.00162473321704226 |             |
| AGIWUR74;AGIWUR1622;AGIWUR6008;AGIWUR25330;AGIWUR26386;AGIWUR29636;AGIWUR32108;AGIWUR40651;AGIWUR45182 |    |   |         |         |                |          |          |                     |             |
| CB4856                                                                                                 | HS | V | 5132741 | 5137100 | WBGene00017467 | F14F9.4  | F14F9.4  | -0.0854416199420918 | AGIWUR4813  |
| CB4856                                                                                                 | HS | V | 5142300 | 5143798 | WBGene00005346 | srh-129  | F14F9.7  | 0.0423993953510475  | AGIWUR36675 |
| CB4856                                                                                                 | HS | V | 5144831 | 5145781 | WBGene00017465 | F14F9.2  | F14F9.2  | 0.0622746655704001  | AGIWUR10319 |
| CB4856                                                                                                 | HS | V | 5146179 | 5150464 | WBGene00017469 | F14F9.6  | F14F9.6  | -0.292230831109245  | AGIWUR44128 |
| CB4856                                                                                                 | HS | V | 5151180 | 5152982 | WBGene00005347 | srh-130  | F14F9.1  | 0.108652955041808   |             |
| AGIWUR15975;AGIWUR23770;AGIWUR45119                                                                    |    |   |         |         |                |          |          |                     |             |
| CB4856                                                                                                 | HS | V | 5154057 | 5155516 | WBGene00005929 | srx-38   | C03A7.5  | -0.154797235302448  | AGIWUR24941 |
| CB4856                                                                                                 | HS | V | 5156653 | 5157760 | WBGene00005930 | srx-39   | C03A7.6  | 0.1330470322        |             |
| AGIWUR7660;AGIWUR15660                                                                                 |    |   |         |         |                |          |          |                     |             |
| CB4856                                                                                                 | HS | V | 5163269 | 5194608 | WBGene00000031 | abu-8    | C03A7.14 | -0.177811174429177  |             |
| AGIWUR5374;AGIWUR13664;AGIWUR21378;AGIWUR26006;AGIWUR37231;AGIWUR39433;AGIWUR43459                     |    |   |         |         |                |          |          |                     |             |
| CB4856                                                                                                 | HS | V | 5195926 | 5198340 | WBGene00021614 | Y47A7.2  | Y47A7.2  | -0.303353582732647  | AGIWUR32030 |
| CB4856                                                                                                 | HS | V | 5204481 | 5213468 | WBGene00021613 | Y47A7.1  | Y47A7.1  | 0.158783520912719   | AGIWUR43172 |
| CB4856                                                                                                 | HS | V | 5223423 | 5230471 | WBGene00021732 | Y49G5B.1 | Y49G5B.1 | -0.165915836596572  |             |
| AGIWUR10915;AGIWUR30491;AGIWUR42762                                                                    |    |   |         |         |                |          |          |                     |             |
| CB4856                                                                                                 | HS | V | 5230475 | 5233891 | WBGene00016862 | C52A10.1 | C52A10.1 | 0.228298412975338   |             |
| AGIWUR38429                                                                                            |    |   |         |         |                |          |          |                     |             |
| CB4856                                                                                                 | HS | V | 5237417 | 5239440 | WBGene00016864 | C52A10.3 | C52A10.3 | 0.159416067690247   |             |
| AGIWUR9942;AGIWUR17072;AGIWUR18741;AGIWUR27518;AGIWUR32753;AGIWUR35543                                 |    |   |         |         |                |          |          |                     |             |
| CB4856                                                                                                 | HS | V | 5240203 | 5240451 | WBGene00044537 | B0238.15 | B0238.15 | -0.0151461920589391 |             |
| AGIWUR20789                                                                                            |    |   |         |         |                |          |          |                     |             |
| CB4856                                                                                                 | HS | V | 5240768 | 5243136 | WBGene00015067 | B0238.1  | B0238.1  | -0.0999286065543874 | AGIWUR23849 |
| CB4856                                                                                                 | HS | V | 5243815 | 5248021 | WBGene00015077 | B0238.13 | B0238.13 | -0.112489219515726  |             |
| AGIWUR7988;AGIWUR21729;AGIWUR22553;AGIWUR24752;AGIWUR44017                                             |    |   |         |         |                |          |          |                     |             |
| CB4856                                                                                                 | HS | V | 5249037 | 5249873 | WBGene00015078 | srt-66   | B0238.14 | 0.0357703217025023  |             |
| AGIWUR4331                                                                                             |    |   |         |         |                |          |          |                     |             |
| CB4856                                                                                                 | HS | V | 5250604 | 5252116 | WBGene00015068 | srt-68   | B0238.3  | -0.106762808092673  |             |
| AGIWUR6333;AGIWUR7946;AGIWUR27879                                                                      |    |   |         |         |                |          |          |                     |             |
| CB4856                                                                                                 | HS | V | 5256142 | 5257458 | WBGene00015069 | srt-67   | B0238.5  | -0.0291216663243086 | AGIWUR13781 |
| CB4856                                                                                                 | HS | V | 5258036 | 5259548 | WBGene00015070 | srt-70   | B0238.6  | -0.085160509873774  |             |
| AGIWUR7541;AGIWUR44643                                                                                 |    |   |         |         |                |          |          |                     |             |

|                                                                      |    |   |         |         |                |          |          |                     |             |
|----------------------------------------------------------------------|----|---|---------|---------|----------------|----------|----------|---------------------|-------------|
| CB4856                                                               | HS | V | 5260332 | 5263099 | WBGene00015071 | B0238.7  | B0238.7  | -0.128457856574491  |             |
| AGIWUR18267;AGIWUR28110                                              |    |   |         |         |                |          |          |                     |             |
| CB4856                                                               | HS | V | 5263951 | 5265776 | WBGene00015072 | srt-69   | B0238.8  | -0.0789017183311449 | AGIWUR1864  |
| CB4856                                                               | HS | V | 5267822 | 5268823 | WBGene00015076 | B0238.12 | B0238.12 | -0.0233656086161576 |             |
| AGIWUR2000;AGIWUR4711;AGIWUR8300;AGIWUR10378;AGIWUR21191;AGIWUR31864 |    |   |         |         |                |          |          |                     |             |
| CB4856                                                               | HS | V | 5269485 | 5270744 | WBGene00015075 | B0238.11 | B0238.11 | 0.12618460338798    |             |
| AGIWUR5198;AGIWUR8055;AGIWUR32992                                    |    |   |         |         |                |          |          |                     |             |
| CB4856                                                               | HS | V | 5274074 | 5275615 | WBGene00015074 | natc-2   | B0238.10 | -0.24105387944503   |             |
| AGIWUR18864                                                          |    |   |         |         |                |          |          |                     |             |
| CB4856                                                               | HS | V | 5275554 | 5278101 | WBGene00015073 | B0238.9  | B0238.9  | 0.0980851129102369  | AGIWUR26181 |
| CB4856                                                               | HS | V | 5286407 | 5287360 | WBGene00021731 | Y49G5A.1 | Y49G5A.1 | 0.352801589766141   |             |
| AGIWUR10627                                                          |    |   |         |         |                |          |          |                     |             |
| CB4856                                                               | HS | V | 5303689 | 5311246 | WBGene00003567 | ncx-2    | C10G8.5  | -0.0487860659915844 |             |
| AGIWUR16673;AGIWUR28589;AGIWUR39724;AGIWUR40302                      |    |   |         |         |                |          |          |                     |             |
| CB4856                                                               | HS | V | 5311935 | 5312349 | WBGene00015683 | C10G8.4  | C10G8.4  | -0.195188693237435  |             |
| AGIWUR16031;AGIWUR16827;AGIWUR17490                                  |    |   |         |         |                |          |          |                     |             |
| CB4856                                                               | HS | V | 5312890 | 5314289 | WBGene00015682 | C10G8.3  | C10G8.3  | 0.208095045182629   | AGIWUR6462  |
| CB4856                                                               | HS | V | 5314404 | 5315589 | WBGene00015681 | C10G8.2  | C10G8.2  | -0.115106957151625  | AGIWUR37429 |
| CB4856                                                               | HS | V | 5315513 | 5319577 | WBGene00000455 | ceh-34   | C10G8.6  | 0.00693308546235905 | AGIWUR37117 |
| CB4856                                                               | HS | V | 5323204 | 5324616 | WBGene00000454 | ceh-33   | C10G8.7  | 0.212880021711488   | AGIWUR5584  |
| CB4856                                                               | HS | V | 5324806 | 5328470 | WBGene00015684 | C10G8.8  | C10G8.8  | 0.0937151156984513  |             |
| AGIWUR1144;AGIWUR21620                                               |    |   |         |         |                |          |          |                     |             |
| CB4856                                                               | HS | V | 5331267 | 5333055 | WBGene00005183 | srg-26   | C10G8.1  | 0.137720039465141   | AGIWUR38452 |
| CB4856                                                               | HS | V | 5334888 | 5336329 | WBGene00005185 | srg-28   | T09D3.2  | 0.237649540356563   | AGIWUR7914  |
| CB4856                                                               | HS | V | 5337184 | 5339013 | WBGene00005186 | srg-29   | T09D3.6  | -0.353322123068949  | AGIWUR18570 |
| CB4856                                                               | HS | V | 5339797 | 5341309 | WBGene00005184 | srg-27   | T09D3.7  | 0.133960135781922   | AGIWUR20874 |
| CB4856                                                               | HS | V | 5342139 | 5344365 | WBGene00005182 | srg-25   | T09D3.5  | 0.233917820095608   | AGIWUR33862 |
| CB4856                                                               | HS | V | 5346619 | 5349571 | WBGene00020384 | T09D3.3  | T09D3.3  | 2.11498937439806    | AGIWUR21034 |
| CB4856                                                               | HS | V | 5351783 | 5353067 | WBGene00005087 | srd-9    | T09D3.1  | -0.0200420969017348 | AGIWUR34801 |
| CB4856                                                               | HS | V | 5354062 | 5358225 | WBGene00020385 | nhr-216  | T09D3.4  | 0.161137696304637   | AGIWUR17754 |
| CB4856                                                               | HS | V | 5365163 | 5366792 | WBGene00044538 | T09D3.8  | T09D3.8  | -0.101316649273974  |             |
| AGIWUR11112;AGIWUR28461;AGIWUR31607                                  |    |   |         |         |                |          |          |                     |             |
| CB4856                                                               | HS | V | 5372418 | 5377500 | WBGene00016430 | C35A11.3 | C35A11.3 | 0.0232735042528542  |             |
| AGIWUR6176                                                           |    |   |         |         |                |          |          |                     |             |
| CB4856                                                               | HS | V | 5386110 | 5389409 | WBGene00016429 | C35A11.2 | C35A11.2 | 0.0387715766472994  |             |
| AGIWUR35099                                                          |    |   |         |         |                |          |          |                     |             |
| CB4856                                                               | HS | V | 5389480 | 5393148 | WBGene00016431 | C35A11.4 | C35A11.4 | 0.467743616419131   |             |
| AGIWUR5955                                                           |    |   |         |         |                |          |          |                     |             |
| CB4856                                                               | HS | V | 5405358 | 5408386 | WBGene00016428 | dmsr-7   | C35A11.1 | 0.0911623968918684  |             |

|                                                                         |    |   |         |         |                |          |         |                     |                     |
|-------------------------------------------------------------------------|----|---|---------|---------|----------------|----------|---------|---------------------|---------------------|
| AGIWUR31595                                                             |    |   |         |         |                |          |         |                     |                     |
| CB4856                                                                  | HS | V | 5410955 | 5413001 | WBGene00017262 | F08F3.4  | F08F3.4 | 0.338847489256846   | AGIWUR23133         |
| CB4856                                                                  | HS | V | 5413320 | 5415073 | WBGene00017266 | F08F3.10 |         | F08F3.10            | 0.0634396375443433  |
| AGIWUR16702                                                             |    |   |         |         |                |          |         |                     |                     |
| CB4856                                                                  | HS | V | 5418044 | 5420067 | WBGene00017263 | F08F3.6  | F08F3.6 | 0.161233128449933   |                     |
| AGIWUR143;AGIWUR10790;AGIWUR29581                                       |    |   |         |         |                |          |         |                     |                     |
| CB4856                                                                  | HS | V | 5421018 | 5423488 | WBGene00000373 | cyp-14A5 |         | F08F3.7             | 0.194326518982999   |
| AGIWUR43753                                                             |    |   |         |         |                |          |         |                     |                     |
| CB4856                                                                  | HS | V | 5428160 | 5430431 | WBGene00004358 | rhr-1    | F08F3.3 | 0.0249924815222728  |                     |
| AGIWUR15061;AGIWUR22455;AGIWUR28598;AGIWUR30549;AGIWUR31196;AGIWUR43016 |    |   |         |         |                |          |         |                     |                     |
| CB4856                                                                  | HS | V | 5431316 | 5432557 | WBGene00017264 | F08F3.8  | F08F3.8 | 0.108773909550492   | AGIWUR15174         |
| CB4856                                                                  | HS | V | 5433392 | 5437066 | WBGene00017261 | ac1-6    | F08F3.2 | 0.129430492716253   | AGIWUR43644         |
| CB4856                                                                  | HS | V | 5437084 | 5439161 | WBGene00017265 | snpc-1.3 |         | F08F3.9             | -0.0800231483039529 |
| AGIWUR14435                                                             |    |   |         |         |                |          |         |                     |                     |
| CB4856                                                                  | HS | V | 5446138 | 5448721 | WBGene00017260 | F08F3.1  | F08F3.1 | -0.0855375702740084 |                     |
| AGIWUR13926;AGIWUR43486                                                 |    |   |         |         |                |          |         |                     |                     |
| CB4856                                                                  | HS | V | 5449287 | 5453715 | WBGene00001593 | glc-3    | ZC317.3 | 0.099537929581107   | AGIWUR2075          |
| CB4856                                                                  | HS | V | 5460106 | 5461438 | WBGene00022588 | ZC317.2  | ZC317.2 | 0.00922215963496953 | AGIWUR27671         |
| CB4856                                                                  | HS | V | 5461528 | 5462994 | WBGene00005224 | srg-67   | ZC317.4 | -0.110069480841627  | AGIWUR10677         |
| CB4856                                                                  | HS | V | 5463791 | 5465435 | WBGene00005225 | srg-68   | ZC317.5 | 0.0675791112594606  | AGIWUR23244         |
| CB4856                                                                  | HS | V | 5471779 | 5473144 | WBGene00022587 | ZC317.1  | ZC317.1 | -0.181313137147371  | AGIWUR23867         |
| CB4856                                                                  | HS | V | 5480750 | 5482415 | WBGene00005223 | srg-66   | T05C3.7 | 0.0305316877320019  | AGIWUR30145         |
| CB4856                                                                  | HS | V | 5483086 | 5484966 | WBGene00005222 | srg-65   | T05C3.8 | 0.00486863332593046 | AGIWUR24244         |
| CB4856                                                                  | HS | V | 5485697 | 5488866 | WBGene00001727 | gr1-18   | T05C3.4 | 0.156346257065152   | AGIWUR3326          |
| CB4856                                                                  | HS | V | 5490370 | 5493646 | WBGene00020256 | T05C3.6  | T05C3.6 | -0.0917217926316418 | AGIWUR20647         |
| CB4856                                                                  | HS | V | 5493747 | 5503010 | WBGene00020254 | T05C3.2  | T05C3.2 | -0.321204308250602  | AGIWUR30515         |
| CB4856                                                                  | HS | V | 5503033 | 5504856 | WBGene00001037 | dnj-19   | T05C3.5 | -0.0766347154800915 |                     |
| AGIWUR6756;AGIWUR15692;AGIWUR18960;AGIWUR39985;AGIWUR40578;AGIWUR44931  |    |   |         |         |                |          |         |                     |                     |
| CB4856                                                                  | HS | V | 5505253 | 5509956 | WBGene00003637 | nhr-47   | C24G6.4 | -0.0591956334063624 |                     |
| AGIWUR39007;AGIWUR40807                                                 |    |   |         |         |                |          |         |                     |                     |
| CB4856                                                                  | HS | V | 5509934 | 5513830 | WBGene00016061 | hpo-15   | C24G6.6 | 0.0223583287567912  |                     |
| AGIWUR5425;AGIWUR7430;AGIWUR10964                                       |    |   |         |         |                |          |         |                     |                     |
| CB4856                                                                  | HS | V | 5514348 | 5520458 | WBGene00016060 | mms-19   | C24G6.3 | 0.2315193245638     | AGIWUR12501         |
| CB4856                                                                  | HS | V | 5523727 | 5530733 | WBGene00016059 | C24G6.2  | C24G6.2 | 0.293837876523465   | AGIWUR41996         |
| CB4856                                                                  | HS | V | 5530725 | 5533845 | WBGene00001710 | gr1-1    | C24G6.7 | -0.119072747995786  | AGIWUR32944         |
| CB4856                                                                  | HS | V | 5534101 | 5536243 | WBGene00016062 | C24G6.8  | C24G6.8 | 0.141429589807286   |                     |
| AGIWUR4807;AGIWUR34241;AGIWUR34262                                      |    |   |         |         |                |          |         |                     |                     |
| CB4856                                                                  | HS | V | 5536681 | 5537713 | WBGene00006376 | syp-2    | C24G6.1 | -0.157999818015618  | AGIWUR15027         |
| CB4856                                                                  | HS | V | 5538800 | 5545766 | WBGene00000477 | cft-1    | C18C4.2 | 0.194732441460948   | AGIWUR14907         |

|                                                            |    |   |         |         |                |          |          |                      |             |
|------------------------------------------------------------|----|---|---------|---------|----------------|----------|----------|----------------------|-------------|
| CB4856                                                     | HS | V | 5545669 | 5548073 | WBGene00015965 | ugt-48   | C18C4.3  | 0.022600970037896    |             |
| AGIWUR1728;AGIWUR19654;AGIWUR22191                         |    |   |         |         |                |          |          |                      |             |
| CB4856                                                     | HS | V | 5550315 | 5557281 | WBGene00015966 | C18C4.5  | C18C4.5  | 0.0613204433563581   | AGIWUR35146 |
| CB4856                                                     | HS | V | 5558890 | 5564298 | WBGene00015964 | glb-5    | C18C4.1  | -0.118287304049336   | AGIWUR36782 |
| CB4856                                                     | HS | V | 5564306 | 5567219 | WBGene00015968 | C18C4.7  | C18C4.7  | -0.0383307356558249  |             |
| AGIWUR6245;AGIWUR44207                                     |    |   |         |         |                |          |          |                      |             |
| CB4856                                                     | HS | V | 5568209 | 5570533 | WBGene00015969 | glb-6    | C18C4.9  | -0.212029968448582   |             |
| AGIWUR5075;AGIWUR34571;AGIWUR42521                         |    |   |         |         |                |          |          |                      |             |
| CB4856                                                     | HS | V | 5575410 | 5581713 | WBGene00002215 | klc-2    | C18C4.10 | 0.0415799471494198   |             |
| AGIWUR16149;AGIWUR18996;AGIWUR28335;AGIWUR33837            |    |   |         |         |                |          |          |                      |             |
| CB4856                                                     | HS | V | 5583161 | 5584343 | WBGene00003927 | pas-6    | CD4.6    | -0.236582548994758   | AGIWUR23093 |
| CB4856                                                     | HS | V | 5585182 | 5586500 | WBGene00044542 | CD4.11   | CD4.11   | 0.0486044444499099   | AGIWUR10838 |
| CB4856                                                     | HS | V | 5589652 | 5591838 | WBGene00016991 | CD4.5    | CD4.5    | 0.177230571317599    | AGIWUR15443 |
| CB4856                                                     | HS | V | 5592685 | 5593612 | WBGene00016990 | vps-37   | CD4.4    | 0.0638217118408182   | AGIWUR41592 |
| CB4856                                                     | HS | V | 5593706 | 5594499 | WBGene00016989 | CD4.3    | CD4.3    | -0.01271152845184    |             |
| AGIWUR5478;AGIWUR13375                                     |    |   |         |         |                |          |          |                      |             |
| CB4856                                                     | HS | V | 5594615 | 5595842 | WBGene00000795 | crn-2    | CD4.2    | 0.0954929345590116   | AGIWUR2005  |
| CB4856                                                     | HS | V | 5595653 | 5596551 | WBGene00016992 | zhit-1   | CD4.7    | -0.22686947791226    |             |
| AGIWUR26205;AGIWUR29405;AGIWUR29560                        |    |   |         |         |                |          |          |                      |             |
| CB4856                                                     | HS | V | 5597061 | 5597450 | WBGene00022970 | CD4.10   | CD4.10   | 0.0247575374678597   |             |
| AGIWUR2884;AGIWUR10510;AGIWUR37326;AGIWUR37399;AGIWUR38444 |    |   |         |         |                |          |          |                      |             |
| CB4856                                                     | HS | V | 5606555 | 5609368 | WBGene00016988 | CD4.1    | CD4.1    | 0.128763194568568    |             |
| AGIWUR3887;AGIWUR12184;AGIWUR16190;AGIWUR22946             |    |   |         |         |                |          |          |                      |             |
| CB4856                                                     | HS | V | 5609414 | 5613219 | WBGene00019756 | M03E7.4  | M03E7.4  | -0.0117922122189942  |             |
| AGIWUR1269;AGIWUR7806;AGIWUR36925                          |    |   |         |         |                |          |          |                      |             |
| CB4856                                                     | HS | V | 5617601 | 5618319 | WBGene00019754 | M03E7.2  | M03E7.2  | -0.112179913622267   | AGIWUR15374 |
| CB4856                                                     | HS | V | 5618291 | 5620140 | WBGene00019757 | memb-2   | M03E7.5  | -0.207061294197878   | AGIWUR23665 |
| CB4856                                                     | HS | V | 5623642 | 5624637 | WBGene00019753 | M03E7.1  | M03E7.1  | 0.17089456478457     | AGIWUR18874 |
| CB4856                                                     | HS | V | 5624727 | 5630892 | WBGene00000071 | acy-4    | T01C2.1  | 0.265928771861674    | AGIWUR6301  |
| CB4856                                                     | HS | V | 5644487 | 5646231 | WBGene00006008 | srx-117  | C14C11.5 | 0.000987928777115954 |             |
| AGIWUR26107;AGIWUR33030;AGIWUR41327                        |    |   |         |         |                |          |          |                      |             |
| CB4856                                                     | HS | V | 5647564 | 5651040 | WBGene00015768 | C14C11.4 | C14C11.4 |                      |             |
| -0.00407379172764166 AGIWUR5796                            |    |   |         |         |                |          |          |                      |             |
| CB4856                                                     | HS | V | 5654449 | 5658699 | WBGene00015767 | hex-2    | C14C11.3 | 0.139230381822955    |             |
| AGIWUR28993                                                |    |   |         |         |                |          |          |                      |             |
| CB4856                                                     | HS | V | 5658713 | 5660704 | WBGene00003507 | mut-14   | C14C11.6 | -0.193680692647737   |             |
| AGIWUR17638                                                |    |   |         |         |                |          |          |                      |             |
| CB4856                                                     | HS | V | 5665242 | 5666082 | WBGene00015769 | C14C11.7 | C14C11.7 | -0.0397030475700397  |             |
| AGIWUR15135                                                |    |   |         |         |                |          |          |                      |             |

|                                                                        |    |   |         |         |                |           |           |                     |             |
|------------------------------------------------------------------------|----|---|---------|---------|----------------|-----------|-----------|---------------------|-------------|
| CB4856                                                                 | HS | V | 5669611 | 5676111 | WBGene00004104 | pqn-13    | C14C11.8  | 0.0939443174574341  |             |
| AGIWUR30520                                                            |    |   |         |         |                |           |           |                     |             |
| CB4856                                                                 | HS | V | 5678600 | 5682630 | WBGene00017768 | F25B4.5   | F25B4.5   | 0.0268042569494895  | AGIWUR37076 |
| CB4856                                                                 | HS | V | 5682721 | 5684589 | WBGene00017769 | hmg-1     | F25B4.6   | 0.197158891652485   | AGIWUR30393 |
| CB4856                                                                 | HS | V | 5684875 | 5685728 | WBGene00017767 | F25B4.4   | F25B4.4   | -0.142365290404449  | AGIWUR17106 |
| CB4856                                                                 | HS | V | 5685726 | 5687381 | WBGene00017770 | F25B4.7   | F25B4.7   | 0.0521775792685766  |             |
| AGIWUR7148;AGIWUR16812;AGIWUR20659;AGIWUR31628;AGIWUR32518;AGIWUR34484 |    |   |         |         |                |           |           |                     |             |
| CB4856                                                                 | HS | V | 5690103 | 5691715 | WBGene00017771 | F25B4.8   | F25B4.8   | -0.18662247399767   |             |
| AGIWUR8731;AGIWUR13190;AGIWUR19738;AGIWUR20436;AGIWUR21867;AGIWUR31668 |    |   |         |         |                |           |           |                     |             |
| CB4856                                                                 | HS | V | 5700010 | 5701080 | WBGene00017772 | clec-1    | F25B4.9   | 0.159399126025724   | AGIWUR31369 |
| CB4856                                                                 | HS | V | 5709418 | 5712335 | WBGene00017766 | peli-1    | F25B4.2   | 0.128112633126749   |             |
| AGIWUR7805;AGIWUR31214                                                 |    |   |         |         |                |           |           |                     |             |
| CB4856                                                                 | HS | V | 5712818 | 5714756 | WBGene00017765 | gcst-1    | F25B4.1   | 0.175570480981161   |             |
| AGIWUR11264;AGIWUR16183;AGIWUR16623                                    |    |   |         |         |                |           |           |                     |             |
| CB4856                                                                 | HS | V | 5714760 | 5716581 | WBGene00044539 | K09H11.9  | K09H11.9  | -0.0216084895040707 |             |
| AGIWUR370;AGIWUR8555;AGIWUR16863                                       |    |   |         |         |                |           |           |                     |             |
| CB4856                                                                 | HS | V | 5723079 | 5726545 | WBGene00019601 | K09H11.4  | K09H11.4  | -0.381620745151761  |             |
| AGIWUR37085                                                            |    |   |         |         |                |           |           |                     |             |
| CB4856                                                                 | HS | V | 5727290 | 5729593 | WBGene00006015 | srx-124   | K09H11.8  | -0.0868993416140267 |             |
| AGIWUR20319                                                            |    |   |         |         |                |           |           |                     |             |
| CB4856                                                                 | HS | V | 5731312 | 5734595 | WBGene00006014 | srx-123   | K09H11.2  | -0.0867242561485613 |             |
| AGIWUR35596                                                            |    |   |         |         |                |           |           |                     |             |
| CB4856                                                                 | HS | V | 5734844 | 5735984 | WBGene00019603 | K09H11.6  | K09H11.6  | 0.0936688099721446  |             |
| AGIWUR198;AGIWUR28113                                                  |    |   |         |         |                |           |           |                     |             |
| CB4856                                                                 | HS | V | 5747723 | 5752033 | WBGene00019599 | K09H11.1  | K09H11.1  | 0.0759815230390997  |             |
| AGIWUR6658;AGIWUR25254;AGIWUR40166                                     |    |   |         |         |                |           |           |                     |             |
| CB4856                                                                 | HS | V | 5754670 | 5755558 | WBGene00044541 | K09H11.11 | K09H11.11 | -0.0467003534817465 |             |
| AGIWUR3096;AGIWUR11398;AGIWUR36361;AGIWUR37461;AGIWUR41423             |    |   |         |         |                |           |           |                     |             |
| CB4856                                                                 | HS | V | 5758224 | 5760232 | WBGene00016891 | C53A3.1   | C53A3.1   | -0.0224555099827288 |             |
| AGIWUR3869;AGIWUR8455;AGIWUR10857                                      |    |   |         |         |                |           |           |                     |             |
| CB4856                                                                 | HS | V | 5770456 | 5771767 | WBGene00018424 | F44E7.2   | F44E7.2   | -0.0603029920101124 |             |
| AGIWUR39531;AGIWUR43941                                                |    |   |         |         |                |           |           |                     |             |
| CB4856                                                                 | HS | V | 5771945 | 5772497 | WBGene00018425 | F44E7.3   | F44E7.3   | -0.374229933873451  | AGIWUR27519 |
| CB4856                                                                 | HS | V | 5772831 | 5777034 | WBGene00018426 | F44E7.4   | F44E7.4   | 0.0776261140814807  |             |
| AGIWUR6258;AGIWUR7214;AGIWUR10257;AGIWUR17718;AGIWUR37927              |    |   |         |         |                |           |           |                     |             |
| CB4856                                                                 | HS | V | 5778818 | 5780947 | WBGene00018427 | F44E7.5   | F44E7.5   | -0.123847214304006  |             |
| AGIWUR4722;AGIWUR5044;AGIWUR5808;AGIWUR15449;AGIWUR16199;AGIWUR28981   |    |   |         |         |                |           |           |                     |             |
| CB4856                                                                 | HS | V | 5781317 | 5782787 | WBGene00018428 | fbxa-183  | F44E7.6   | -0.0136368332797661 |             |
| AGIWUR22543                                                            |    |   |         |         |                |           |           |                     |             |

|                                                                                             |    |   |         |         |                |          |          |                      |             |
|---------------------------------------------------------------------------------------------|----|---|---------|---------|----------------|----------|----------|----------------------|-------------|
| CB4856                                                                                      | HS | V | 5782893 | 5785648 | WBGene00018429 | F44E7.7  | F44E7.7  | 0.147716329565016    | AGIWUR13903 |
| CB4856                                                                                      | HS | V | 5785959 | 5790066 | WBGene00018430 | nhr-142  | F44E7.8  | 0.106660999321131    |             |
| AGIWUR35477;AGIWUR37111                                                                     |    |   |         |         |                |          |          |                      |             |
| CB4856                                                                                      | HS | V | 5791230 | 5792122 | WBGene00018431 | F44E7.9  | F44E7.9  | 0.0556759994930527   | AGIWUR43388 |
| CB4856                                                                                      | HS | V | 5792331 | 5794857 | WBGene00022576 | ZC250.2  | ZC250.2  | -0.0503151272088136  | AGIWUR34319 |
| CB4856                                                                                      | HS | V | 5794688 | 5798232 | WBGene00022577 | nstp-3   | ZC250.3  | 0.191875900919319    | AGIWUR3913  |
| CB4856                                                                                      | HS | V | 5799673 | 5805666 | WBGene00000893 | cyn-17   | ZC250.1  | 0.0183012344550151   |             |
| AGIWUR16547;AGIWUR26654                                                                     |    |   |         |         |                |          |          |                      |             |
| CB4856                                                                                      | HS | V | 5805767 | 5807532 | WBGene00045306 | ZC250.5  | ZC250.5  | 0.0685915409803446   | AGIWUR35199 |
| CB4856                                                                                      | HS | V | 5812316 | 5813157 | WBGene00045305 | ZC250.4  | ZC250.4  | -0.00201349555825026 |             |
| AGIWUR1578;AGIWUR13681;AGIWUR26046;AGIWUR43378                                              |    |   |         |         |                |          |          |                      |             |
| CB4856                                                                                      | HS | V | 5826833 | 5832866 | WBGene00002637 | let-418  | F26F12.7 | -0.15271976088423    |             |
| AGIWUR6725;AGIWUR13247;AGIWUR14742;AGIWUR30477;AGIWUR34699;AGIWUR43629                      |    |   |         |         |                |          |          |                      |             |
| CB4856                                                                                      | HS | V | 5833831 | 5835183 | WBGene00005297 | srh-76   | F26F12.6 | -0.108333058606699   |             |
| AGIWUR2120                                                                                  |    |   |         |         |                |          |          |                      |             |
| CB4856                                                                                      | HS | V | 5835855 | 5836871 | WBGene00000713 | col-140  | F26F12.1 | -0.769196172093572   |             |
| AGIWUR18993                                                                                 |    |   |         |         |                |          |          |                      |             |
| CB4856                                                                                      | HS | V | 5837572 | 5838613 | WBGene00017833 | F26F12.2 | F26F12.2 | 0.230032267009818    |             |
| AGIWUR15256                                                                                 |    |   |         |         |                |          |          |                      |             |
| CB4856                                                                                      | HS | V | 5838960 | 5845739 | WBGene00017834 | F26F12.3 | F26F12.3 | -0.039747913703208   |             |
| AGIWUR290;AGIWUR8936;AGIWUR9237;AGIWUR16429;AGIWUR17239;AGIWUR19312;AGIWUR28755;AGIWUR42064 |    |   |         |         |                |          |          |                      |             |
| CB4856                                                                                      | HS | V | 5854848 | 5856414 | WBGene00044544 | F26F12.8 | F26F12.8 | 0.249966240212011    |             |
| AGIWUR1899;AGIWUR8610;AGIWUR12476;AGIWUR24453;AGIWUR34690                                   |    |   |         |         |                |          |          |                      |             |
| CB4856                                                                                      | HS | V | 5863984 | 5865149 | WBGene00017836 | F26F12.5 | F26F12.5 | 0.247648428858138    |             |
| AGIWUR289;AGIWUR1983;AGIWUR2375;AGIWUR2704;AGIWUR33158                                      |    |   |         |         |                |          |          |                      |             |
| CB4856                                                                                      | HS | V | 5866134 | 5867952 | WBGene00017835 | F26F12.4 | F26F12.4 | 0.0409097020239848   |             |
| AGIWUR9893                                                                                  |    |   |         |         |                |          |          |                      |             |
| CB4856                                                                                      | HS | V | 5872084 | 5874914 | WBGene00015360 | C02G6.2  | C02G6.2  | -0.0898068720300067  |             |
| AGIWUR18549;AGIWUR32969;AGIWUR35538;AGIWUR39767                                             |    |   |         |         |                |          |          |                      |             |
| CB4856                                                                                      | HS | V | 5876370 | 5879942 | WBGene00015359 | C02G6.1  | C02G6.1  | -0.120125154731145   | AGIWUR15967 |
| CB4856                                                                                      | HS | V | 5881052 | 5882450 | WBGene00044803 | C02G6.3  | C02G6.3  | 0.0767331589288505   |             |
| AGIWUR3176;AGIWUR25574;AGIWUR28650                                                          |    |   |         |         |                |          |          |                      |             |
| CB4856                                                                                      | HS | V | 5882665 | 5883835 | WBGene00015424 | C04E6.8  | C04E6.8  | 0.202598105366294    |             |
| AGIWUR2858;AGIWUR5076;AGIWUR11028;AGIWUR19894;AGIWUR31647;AGIWUR40369                       |    |   |         |         |                |          |          |                      |             |
| CB4856                                                                                      | HS | V | 5893312 | 5895208 | WBGene00015423 | C04E6.7  | C04E6.7  | 0.120746021913778    |             |
| AGIWUR2831;AGIWUR4042;AGIWUR17377                                                           |    |   |         |         |                |          |          |                      |             |
| CB4856                                                                                      | HS | V | 5895388 | 5898602 | WBGene00001698 | grd-9    | C04E6.6  | 0.156826434066655    | AGIWUR37827 |
| CB4856                                                                                      | HS | V | 5902133 | 5904831 | WBGene00015422 | C04E6.5  | C04E6.5  | -0.205767427971026   | AGIWUR16915 |
| CB4856                                                                                      | HS | V | 5904917 | 5906352 | WBGene00005093 | srd-15   | C04E6.10 | 0.0411166700642145   |             |



|                                                                                                |    |   |         |         |                |          |         |                     |                    |
|------------------------------------------------------------------------------------------------|----|---|---------|---------|----------------|----------|---------|---------------------|--------------------|
| AGIWUR25561                                                                                    |    |   |         |         |                |          |         |                     |                    |
| CB4856                                                                                         | HS | V | 5907408 | 5909620 | WBGene00015421 | C04E6.4  | C04E6.4 | -0.100182104858062  | AGIWUR38659        |
| CB4856                                                                                         | HS | V | 5912726 | 5913757 | WBGene00015427 | C04E6.13 |         | C04E6.13            | 0.0679422329614692 |
| AGIWUR30644                                                                                    |    |   |         |         |                |          |         |                     |                    |
| CB4856                                                                                         | HS | V | 5914097 | 5917891 | WBGene00015425 | C04E6.11 |         | C04E6.11            | 0.140764531985811  |
| AGIWUR4820;AGIWUR13300;AGIWUR16133;AGIWUR18878;AGIWUR25001;AGIWUR33865;AGIWUR34856;AGIWUR41339 |    |   |         |         |                |          |         |                     |                    |
| CB4856                                                                                         | HS | V | 5918062 | 5919835 | WBGene00015426 | C04E6.12 |         | C04E6.12            | 0.636147330101128  |
| AGIWUR19866                                                                                    |    |   |         |         |                |          |         |                     |                    |
| CB4856                                                                                         | HS | V | 5920121 | 5920395 | WBGene00015420 | C04E6.3  | C04E6.3 | 0.0191549655887533  |                    |
| AGIWUR4955;AGIWUR10644;AGIWUR19172;AGIWUR27814;AGIWUR40512                                     |    |   |         |         |                |          |         |                     |                    |
| CB4856                                                                                         | HS | V | 5922545 | 5924297 | WBGene00015419 | srsx-18  | C04E6.2 | 0.134675630387063   | AGIWUR18814        |
| CB4856                                                                                         | HS | V | 5927647 | 5930417 | WBGene00019032 | srsx-17  | F58D7.1 | -0.090458242180822  | AGIWUR41420        |
| CB4856                                                                                         | HS | V | 5930847 | 5933435 | WBGene00019763 | galt-1   | M03F8.4 | 0.283289796717527   |                    |
| AGIWUR21765;AGIWUR37492                                                                        |    |   |         |         |                |          |         |                     |                    |
| CB4856                                                                                         | HS | V | 5933662 | 5936791 | WBGene00019764 | M03F8.5  | M03F8.5 | 0.193028083954056   | AGIWUR31881        |
| CB4856                                                                                         | HS | V | 5940024 | 5943362 | WBGene00019762 | M03F8.3  | M03F8.3 | 0.0463288583242187  |                    |
| AGIWUR17052;AGIWUR27293                                                                        |    |   |         |         |                |          |         |                     |                    |
| CB4856                                                                                         | HS | V | 5943474 | 5950991 | WBGene00004206 | pst-1    | M03F8.2 | -0.198821881511967  |                    |
| AGIWUR2524;AGIWUR6470;AGIWUR8666;AGIWUR11767;AGIWUR17252;AGIWUR22609                           |    |   |         |         |                |          |         |                     |                    |
| CB4856                                                                                         | HS | V | 5951433 | 5953872 | WBGene00019761 | M03F8.1  | M03F8.1 | 0.0333582845485374  | AGIWUR14350        |
| CB4856                                                                                         | HS | V | 5953831 | 5954840 | WBGene00019765 | M03F8.6  | M03F8.6 | 0.151625029998987   |                    |
| AGIWUR29423;AGIWUR41081                                                                        |    |   |         |         |                |          |         |                     |                    |
| CB4856                                                                                         | HS | V | 5960585 | 5963882 | WBGene00003954 | pcm-1    | C10F3.5 | -0.119704526788158  |                    |
| AGIWUR9721;AGIWUR22533;AGIWUR32790;AGIWUR39510                                                 |    |   |         |         |                |          |         |                     |                    |
| CB4856                                                                                         | HS | V | 5961813 | 5969175 | WBGene00015678 | mcp-1    | C10F3.4 | -0.0694198132406036 | AGIWUR6540         |
| CB4856                                                                                         | HS | V | 5976029 | 5981513 | WBGene00000069 | acy-2    | C10F3.3 | 0.134225521247549   | AGIWUR29420        |
| CB4856                                                                                         | HS | V | 5983745 | 5985473 | WBGene00000979 | dhs-16   | C10F3.2 | 0.0557063706349332  | AGIWUR25144        |
| CB4856                                                                                         | HS | V | 5985440 | 5986855 | WBGene00015679 | C10F3.7  | C10F3.7 | -0.06653335639845   | AGIWUR30945        |
| CB4856                                                                                         | HS | V | 5987003 | 5990252 | WBGene00001508 | fut-8    | C10F3.6 | 0.257740084875932   | AGIWUR8362         |
| CB4856                                                                                         | HS | V | 5996323 | 5999344 | WBGene00015677 | cpg-4    | C10F3.1 | -0.0954468853571289 | AGIWUR29999        |
| CB4856                                                                                         | HS | V | 6003601 | 6016087 | WBGene00001345 | fos-1    | F29G9.4 | -0.190258313296965  | AGIWUR34164        |
| CB4856                                                                                         | HS | V | 6016049 | 6017669 | WBGene00004502 | rpt-2    | F29G9.5 | 0.192783405648985   | AGIWUR8467         |
| CB4856                                                                                         | HS | V | 6017970 | 6018886 | WBGene00000159 | aps-1    | F29G9.3 | -0.0272737457854841 |                    |
| AGIWUR5131;AGIWUR10646;AGIWUR26206                                                             |    |   |         |         |                |          |         |                     |                    |
| CB4856                                                                                         | HS | V | 6018994 | 6026337 | WBGene00017931 | picc-1   | F29G9.2 | 0.124843052194895   |                    |
| AGIWUR14915;AGIWUR30183;AGIWUR39248                                                            |    |   |         |         |                |          |         |                     |                    |
| CB4856                                                                                         | HS | V | 6026330 | 6034923 | WBGene00000980 | dhs-17   | F29G9.6 | -0.0174676564678347 | AGIWUR9125         |
| CB4856                                                                                         | HS | V | 6041196 | 6043185 | WBGene00019804 | R01B10.2 |         | R01B10.2            | -0.268207701064723 |
| AGIWUR39768                                                                                    |    |   |         |         |                |          |         |                     |                    |

|                                                                                                                                                                                  |    |   |         |         |                |           |           |                     |             |
|----------------------------------------------------------------------------------------------------------------------------------------------------------------------------------|----|---|---------|---------|----------------|-----------|-----------|---------------------|-------------|
| CB4856                                                                                                                                                                           | HS | V | 6044028 | 6045671 | WBGene00000534 | cpi-2     | R01B10.1  | -0.16379805019214   |             |
| AGIWUR363;AGIWUR9475;AGIWUR13614;AGIWUR15479;AGIWUR17723;AGIWUR37763;AGIWUR40451;AGIWUR43366                                                                                     |    |   |         |         |                |           |           |                     |             |
| CB4856                                                                                                                                                                           | HS | V | 6045640 | 6047908 | WBGene00019806 | R01B10.4  | R01B10.4  | 0.266358917226263   |             |
| AGIWUR5448                                                                                                                                                                       |    |   |         |         |                |           |           |                     |             |
| CB4856                                                                                                                                                                           | HS | V | 6047922 | 6051259 | WBGene00019807 | jamp-1    | R01B10.5  | 0.140510730027234   |             |
| AGIWUR6308;AGIWUR24410;AGIWUR39284;AGIWUR42295                                                                                                                                   |    |   |         |         |                |           |           |                     |             |
| CB4856                                                                                                                                                                           | HS | V | 6055589 | 6056743 | WBGene00005098 | srd-20    | Y38A10A.1 | 0.0156631594130001  |             |
| AGIWUR5427                                                                                                                                                                       |    |   |         |         |                |           |           |                     |             |
| CB4856                                                                                                                                                                           | HS | V | 6057366 | 6063430 | WBGene00021389 | Y38A10A.2 | Y38A10A.2 |                     |             |
| -0.00784106940607998 AGIWUR24984                                                                                                                                                 |    |   |         |         |                |           |           |                     |             |
| CB4856                                                                                                                                                                           | HS | V | 6065507 | 6067089 | WBGene00005236 | srh-10    | Y38A10A.3 | 0.0929033515760853  |             |
| AGIWUR32924                                                                                                                                                                      |    |   |         |         |                |           |           |                     |             |
| CB4856                                                                                                                                                                           | HS | V | 6067811 | 6070068 | WBGene00021390 | fbxa-214  | Y38A10A.4 | -0.0663165304580282 |             |
| AGIWUR4835;AGIWUR25614;AGIWUR35294                                                                                                                                               |    |   |         |         |                |           |           |                     |             |
| CB4856                                                                                                                                                                           | HS | V | 6096028 | 6096903 | WBGene00021392 | Y38A10A.7 | Y38A10A.7 | 0.0866801379372699  |             |
| AGIWUR40565                                                                                                                                                                      |    |   |         |         |                |           |           |                     |             |
| CB4856                                                                                                                                                                           | HS | V | 6097105 | 6099083 | WBGene00021391 | smut-1    | Y38A10A.6 | -0.256477519855459  |             |
| AGIWUR34126                                                                                                                                                                      |    |   |         |         |                |           |           |                     |             |
| CB4856                                                                                                                                                                           | HS | V | 6098993 | 6100553 | WBGene00000802 | crt-1     | Y38A10A.5 | -0.0596508639269651 |             |
| AGIWUR5761;AGIWUR21954;AGIWUR27741;AGIWUR42525;AGIWUR42873                                                                                                                       |    |   |         |         |                |           |           |                     |             |
| CB4856                                                                                                                                                                           | HS | V | 6105607 | 6107530 | WBGene00017535 | atf-8     | F17A9.3   | 0.0473272856141689  | AGIWUR8129  |
| CB4856                                                                                                                                                                           | HS | V | 6107828 | 6114856 | WBGene00017534 | F17A9.2   | F17A9.2   | 0.0920824322831155  | AGIWUR1903  |
| CB4856                                                                                                                                                                           | HS | V | 6116521 | 6117849 | WBGene00017533 | fbxa-178  | F17A9.1   | 0.12202199703564    |             |
| AGIWUR12696;AGIWUR27014;AGIWUR43258                                                                                                                                              |    |   |         |         |                |           |           |                     |             |
| CB4856                                                                                                                                                                           | HS | V | 6118332 | 6120206 | WBGene00017538 | ceh-49    | F17A9.6   | 0.00647368274736948 | AGIWUR6485  |
| CB4856                                                                                                                                                                           | HS | V | 6120909 | 6202626 | WBGene00006436 | ttn-1     | W06H8.8   | -0.0792491980994754 |             |
| AGIWUR467;AGIWUR2055;AGIWUR18482;AGIWUR20833;AGIWUR24654;AGIWUR27263;AGIWUR27556;AGIWUR28812;AGIWUR29196;AGIWUR30343;AGIWUR31761;AGIWUR35868;AGIWUR38312;AGIWUR39023;AGIWUR40449 |    |   |         |         |                |           |           |                     |             |
| CB4856                                                                                                                                                                           | HS | V | 6204875 | 6206134 | WBGene00021067 | W06H8.4   | W06H8.4   | -0.101906903190253  | AGIWUR32308 |
| CB4856                                                                                                                                                                           | HS | V | 6206755 | 6208551 | WBGene00021066 | W06H8.2   | W06H8.2   | -0.169061644499694  | AGIWUR36532 |
| CB4856                                                                                                                                                                           | HS | V | 6208840 | 6217647 | WBGene00004373 | rme-1     | W06H8.1   | -0.0613942572980868 |             |
| AGIWUR7403;AGIWUR21968;AGIWUR28544;AGIWUR35361;AGIWUR35611;AGIWUR40187                                                                                                           |    |   |         |         |                |           |           |                     |             |
| CB4856                                                                                                                                                                           | HS | V | 6218134 | 6219562 | WBGene00006239 | str-206   | W06H8.7   | -0.222148025753579  | AGIWUR20590 |
| CB4856                                                                                                                                                                           | HS | V | 6221249 | 6227047 | WBGene00021068 | W06H8.6   | W06H8.6   | -0.334942180600672  | AGIWUR39330 |
| CB4856                                                                                                                                                                           | HS | V | 6235176 | 6237807 | WBGene00019522 | K08B12.3  | K08B12.3  | 0.131348923589165   |             |
| AGIWUR32080                                                                                                                                                                      |    |   |         |         |                |           |           |                     |             |
| CB4856                                                                                                                                                                           | HS | V | 6249172 | 6252453 | WBGene00019521 | dmd-7     | K08B12.2  | 0.151650877024117   |             |
| AGIWUR4928;AGIWUR11191;AGIWUR24510;AGIWUR30182;AGIWUR41338                                                                                                                       |    |   |         |         |                |           |           |                     |             |
| CB4856                                                                                                                                                                           | HS | V | 6268565 | 6270481 | WBGene00017966 | F31F7.3   | F31F7.3   | -0.0461729372789605 | AGIWUR14173 |

|                                                            |    |   |         |         |                |          |         |                     |                     |
|------------------------------------------------------------|----|---|---------|---------|----------------|----------|---------|---------------------|---------------------|
| CB4856                                                     | HS | V | 6270852 | 6274911 | WBGene00017965 | F31F7.2  | F31F7.2 | 0.034694642497195   | AGIWUR26123         |
| CB4856                                                     | HS | V | 6276439 | 6278160 | WBGene00017964 | F31F7.1  | F31F7.1 | -0.23653508600823   |                     |
| AGIWUR7941;AGIWUR24895;AGIWUR30996                         |    |   |         |         |                |          |         |                     |                     |
| CB4856                                                     | HS | V | 6279005 | 6280146 | WBGene00019668 | fil-2    | K12B6.3 | 0.309258893413718   | AGIWUR22934         |
| CB4856                                                     | HS | V | 6280380 | 6281136 | WBGene00019669 | K12B6.4  | K12B6.4 | 0.0983210731438975  | AGIWUR1920          |
| CB4856                                                     | HS | V | 6281359 | 6284865 | WBGene00019667 | K12B6.2  | K12B6.2 | 0.038832921191382   |                     |
| AGIWUR5809;AGIWUR7245;AGIWUR34843                          |    |   |         |         |                |          |         |                     |                     |
| CB4856                                                     | HS | V | 6284920 | 6286434 | WBGene00005640 | srn-1    | K12B6.5 | 0.0169908978972     | AGIWUR6389          |
| CB4856                                                     | HS | V | 6291390 | 6292666 | WBGene00023432 | K12B6.9  | K12B6.9 | 0.192603380383478   |                     |
| AGIWUR4049;AGIWUR4367;AGIWUR38219                          |    |   |         |         |                |          |         |                     |                     |
| CB4856                                                     | HS | V | 6293920 | 6294342 | WBGene00019670 | K12B6.6  | K12B6.6 | 0.00433184809750831 | AGIWUR36632         |
| CB4856                                                     | HS | V | 6303771 | 6308337 | WBGene00019666 | sago-1   | K12B6.1 | 0.070674811041048   | AGIWUR3629          |
| CB4856                                                     | HS | V | 6308811 | 6312001 | WBGene00019672 | K12B6.8  | K12B6.8 | 0.0081006066501228  |                     |
| AGIWUR2931;AGIWUR42737                                     |    |   |         |         |                |          |         |                     |                     |
| CB4856                                                     | HS | V | 6314176 | 6316467 | WBGene00020892 | T28C12.5 |         | T28C12.5            | -0.18451335121012   |
| AGIWUR9229                                                 |    |   |         |         |                |          |         |                     |                     |
| CB4856                                                     | HS | V | 6316932 | 6326390 | WBGene00020891 | T28C12.4 |         | T28C12.4            | -0.168162885455947  |
| AGIWUR30512                                                |    |   |         |         |                |          |         |                     |                     |
| CB4856                                                     | HS | V | 6327223 | 6328865 | WBGene00020890 | fbxa-202 |         | T28C12.3            | -0.0484402028217552 |
| AGIWUR33622                                                |    |   |         |         |                |          |         |                     |                     |
| CB4856                                                     | HS | V | 6329197 | 6331074 | WBGene00020889 | T28C12.2 |         | T28C12.2            | 0.282378137420764   |
| AGIWUR3720                                                 |    |   |         |         |                |          |         |                     |                     |
| CB4856                                                     | HS | V | 6331907 | 6334008 | WBGene00020888 | T28C12.1 |         | T28C12.1            | 0.19200290098931    |
| AGIWUR19956                                                |    |   |         |         |                |          |         |                     |                     |
| CB4856                                                     | HS | V | 6334014 | 6336119 | WBGene00020893 | T28C12.6 |         | T28C12.6            | -0.0829130781375236 |
| AGIWUR4707                                                 |    |   |         |         |                |          |         |                     |                     |
| CB4856                                                     | HS | V | 6356025 | 6362997 | WBGene00017430 | bcl-11   | F13H6.1 | -0.0978552250670184 |                     |
| AGIWUR5640;AGIWUR13167;AGIWUR19155;AGIWUR27208;AGIWUR28028 |    |   |         |         |                |          |         |                     |                     |
| CB4856                                                     | HS | V | 6363408 | 6365671 | WBGene00017431 | F13H6.3  | F13H6.3 | 0.167228531483598   | AGIWUR2859          |
| CB4856                                                     | HS | V | 6366433 | 6368533 | WBGene00017432 | F13H6.4  | F13H6.4 | 0.0419776738493081  | AGIWUR19816         |
| CB4856                                                     | HS | V | 6372114 | 6374933 | WBGene00017433 | F13H6.5  | F13H6.5 | 0.073232490245247   | AGIWUR29519         |
| CB4856                                                     | HS | V | 6386550 | 6389734 | WBGene00019016 | F57F4.2  | F57F4.2 | -0.0766623686488366 | AGIWUR38900         |
| CB4856                                                     | HS | V | 6390463 | 6392523 | WBGene00019015 | F57F4.1  | F57F4.1 | 0.0480595886043815  |                     |
| AGIWUR39573;AGIWUR44431                                    |    |   |         |         |                |          |         |                     |                     |
| CB4856                                                     | HS | V | 6414993 | 6417494 | WBGene00020270 | T05H4.7  | T05H4.7 | 0.0791080685984298  |                     |
| AGIWUR11848;AGIWUR13753;AGIWUR27899                        |    |   |         |         |                |          |         |                     |                     |
| CB4856                                                     | HS | V | 6417495 | 6424155 | WBGene00020273 | T05H4.10 |         | T05H4.10            | -0.0196612102129494 |
| AGIWUR14056;AGIWUR28336                                    |    |   |         |         |                |          |         |                     |                     |
| CB4856                                                     | HS | V | 6424252 | 6425952 | WBGene00020274 | T05H4.11 |         | T05H4.11            | 0.0847918098585865  |

|                                                                                 |    |   |         |         |                |          |                                         |
|---------------------------------------------------------------------------------|----|---|---------|---------|----------------|----------|-----------------------------------------|
| AGIWUR4559                                                                      |    |   |         |         |                |          |                                         |
| CB4856                                                                          | HS | V | 6426193 | 6427112 | WBGene00020275 | atp-4    | T05H4.12 -0.213061838514795             |
| AGIWUR11354;AGIWUR39237                                                         |    |   |         |         |                |          |                                         |
| CB4856                                                                          | HS | V | 6427212 | 6429927 | WBGene00000110 | alh-4    | T05H4.13 0.050506136036045              |
| AGIWUR2450;AGIWUR15252;AGIWUR16978;AGIWUR26494;AGIWUR42388                      |    |   |         |         |                |          |                                         |
| CB4856                                                                          | HS | V | 6431331 | 6433496 | WBGene00001513 | gad-1    | T05H4.14 -0.105942483842277             |
| AGIWUR27490                                                                     |    |   |         |         |                |          |                                         |
| CB4856                                                                          | HS | V | 6434130 | 6436401 | WBGene00020269 | erfa-1   | T05H4.6 0.0854479824295806              |
| AGIWUR19051;AGIWUR41329                                                         |    |   |         |         |                |          |                                         |
| CB4856                                                                          | HS | V | 6436578 | 6437884 | WBGene00020268 | hpo-19   | T05H4.5 0.0714389177325181              |
| AGIWUR2866;AGIWUR12634;AGIWUR23152;AGIWUR29714;AGIWUR29872                      |    |   |         |         |                |          |                                         |
| CB4856                                                                          | HS | V | 6438913 | 6440036 | WBGene00020267 | T05H4.4  | T05H4.4 0.0188214708955279 AGIWUR7136   |
| CB4856                                                                          | HS | V | 6440202 | 6441711 | WBGene00020276 | T05H4.15 | T05H4.15 -0.0291601367723562            |
| AGIWUR9764;AGIWUR14615;AGIWUR31804                                              |    |   |         |         |                |          |                                         |
| CB4856                                                                          | HS | V | 6442337 | 6447556 | WBGene00020266 | T05H4.3  | T05H4.3 -0.0950966835985234 AGIWUR10846 |
| CB4856                                                                          | HS | V | 6448656 | 6450217 | WBGene00020265 | fbxa-196 | T05H4.2 0.0385301909284124              |
| AGIWUR11813                                                                     |    |   |         |         |                |          |                                         |
| CB4856                                                                          | HS | V | 6450898 | 6452231 | WBGene00020264 | ac1-8    | T05H4.1 -0.160159857542617 AGIWUR9693   |
| CB4856                                                                          | HS | V | 6453196 | 6454973 | WBGene00022646 | ac1-9    | ZK40.1 -0.0461100662875378              |
| AGIWUR1627;AGIWUR3340;AGIWUR5728;AGIWUR8126;AGIWUR14958;AGIWUR27729;AGIWUR36534 |    |   |         |         |                |          |                                         |
| CB4856                                                                          | HS | V | 6465065 | 6487880 | WBGene00006815 | unc-83   | W01A11.3 0.203926330990152              |
| AGIWUR16191;AGIWUR27240;AGIWUR35896;AGIWUR39953                                 |    |   |         |         |                |          |                                         |
| CB4856                                                                          | HS | V | 6488203 | 6489120 | WBGene00002273 | lec-10   | W01A11.4 0.300763631989653              |
| AGIWUR24405                                                                     |    |   |         |         |                |          |                                         |
| CB4856                                                                          | HS | V | 6490068 | 6493921 | WBGene00020911 | cpt-6    | W01A11.5 0.110635565486266              |
| AGIWUR6635                                                                      |    |   |         |         |                |          |                                         |
| CB4856                                                                          | HS | V | 6497110 | 6498484 | WBGene00020910 | dgtr-1   | W01A11.2 -0.00960030382579902           |
| AGIWUR41901                                                                     |    |   |         |         |                |          |                                         |
| CB4856                                                                          | HS | V | 6499224 | 6502428 | WBGene00020909 | W01A11.1 | W01A11.1 -0.176706397686099             |
| AGIWUR19791                                                                     |    |   |         |         |                |          |                                         |
| CB4856                                                                          | HS | V | 6502369 | 6504181 | WBGene00003385 | moc-2    | W01A11.6 0.0367225238509885             |
| AGIWUR8181;AGIWUR17085                                                          |    |   |         |         |                |          |                                         |
| CB4856                                                                          | HS | V | 6504538 | 6505500 | WBGene00020912 | W01A11.7 | W01A11.7 -0.0227720913133211            |
| AGIWUR9030;AGIWUR22292                                                          |    |   |         |         |                |          |                                         |
| CB4856                                                                          | HS | V | 6506752 | 6508803 | WBGene00006723 | ubh-3    | Y40G12A.1 -0.147708862947642            |
| AGIWUR32889                                                                     |    |   |         |         |                |          |                                         |
| CB4856                                                                          | HS | V | 6508831 | 6509884 | WBGene00006722 | ubh-2    | Y40G12A.2 0.0281989445264497            |
| AGIWUR21082                                                                     |    |   |         |         |                |          |                                         |
| CB4856                                                                          | HS | V | 6509910 | 6511409 | WBGene00006721 | ubh-1    | F46E10.8 0.0743652572204425             |

AGIWUR1295;AGIWUR2582;AGIWUR31493  
 CB4856 HS V 6511588 6515240 WBGene00001073 dpy-11 F46E10.9 -0.0346109028021111  
 AGIWUR4187;AGIWUR9323;AGIWUR27533  
 CB4856 HS V 6515276 6516526 WBGene00018491 mdh-1 F46E10.10 -0.285914121330324  
 AGIWUR17671;AGIWUR18530;AGIWUR23213;AGIWUR25558  
 CB4856 HS V 6520435 6521099 WBGene00018489 F46E10.2 F46E10.2 -0.134315353940085  
 AGIWUR21257;AGIWUR44482  
 CB4856 HS V 6524989 6532089 WBGene00018488 acs-1 F46E10.1 -0.167742655819898  
 AGIWUR5838;AGIWUR11960;AGIWUR12542;AGIWUR35496;AGIWUR41551  
 CB4856 HS V 6532071 6533074 WBGene00018492 hpo-26 F46E10.11 -0.0173821518561077  
 AGIWUR13002  
 CB4856 HS V 6533614 6546491 WBGene00001089 dre-1 K04A8.6 0.26714023631015 AGIWUR39647  
 CB4856 HS V 6550171 6551817 WBGene00019376 lip1-4 K04A8.5 0.511480094796363 AGIWUR28247  
 CB4856 HS V 6552348 6560196 WBGene00006665 twk-10 K04A8.4 0.0349056688927636  
 AGIWUR20906;AGIWUR24464;AGIWUR32424;AGIWUR34785;AGIWUR35009  
 CB4856 HS V 6562048 6564181 WBGene00019374 K04A8.2 K04A8.2 -0.217518634073091 AGIWUR12303  
 CB4856 HS V 6566336 6568747 WBGene00019373 K04A8.1 K04A8.1 0.0398051172138647 AGIWUR25697  
 CB4856 HS V 6573983 6575797 WBGene00001506 fut-2 EGAP9.2 0.0197642775970506 AGIWUR15948  
 CB4856 HS V 6576867 6577541 WBGene00044545 EGAP9.4 EGAP9.4 0.00517328205284784 AGIWUR3584  
 CB4856 HS V 6578185 6580182 WBGene00017151 EGAP9.3 EGAP9.3 -0.192590137653685 AGIWUR32024  
 CB4856 HS V 6580843 6584390 WBGene00022846 ZK1055.5 ZK1055.5 -0.433553915600651  
 AGIWUR17780  
 CB4856 HS V 6585632 6587421 WBGene00022845 ZK1055.4 ZK1055.4  
 -0.00609080698464037 AGIWUR17432  
 CB4856 HS V 6590583 6593634 WBGene00022843 ZK1055.2 ZK1055.2 0.0287025756276464  
 AGIWUR3803;AGIWUR37365  
 CB4856 HS V 6594194 6599208 WBGene00001829 hcp-1 ZK1055.1 -0.30660829110851  
 AGIWUR35243  
 CB4856 HS V 6599190 6602604 WBGene00022847 ZK1055.6 ZK1055.6 -0.164598009458642  
 AGIWUR6987;AGIWUR12831;AGIWUR22387;AGIWUR34246  
 CB4856 HS V 6602728 6605375 WBGene00022848 ZK1055.7 ZK1055.7 0.222119896499304  
 AGIWUR2670  
 CB4856 HS V 6606439 6611158 WBGene00002148 gon-14 F44C4.4 -0.0605715248676386  
 AGIWUR14569;AGIWUR23270  
 CB4856 HS V 6614674 6615845 WBGene00000784 cpr-4 F44C4.3 0.166899494305305 AGIWUR3924  
 CB4856 HS V 6622268 6624694 WBGene00018412 nhr-37 F44C4.2 0.169341931573858 AGIWUR9206  
 CB4856 HS V 6624702 6626344 WBGene00004092 ppt-1 F44C4.5 0  
 AGIWUR1731;AGIWUR34415;AGIWUR35478  
 CB4856 HS V 6633269 6639665 WBGene00004740 scd-2 T10H9.2 0.0360873601218881 AGIWUR40660

|                                                                                              |    |   |         |         |                 |          |          |                     |             |
|----------------------------------------------------------------------------------------------|----|---|---------|---------|-----------------|----------|----------|---------------------|-------------|
| CB4856                                                                                       | HS | V | 6649617 | 6652050 | WBGene00020424  | T10H9.1  | T10H9.1  | 0.0307946377710699  | AGIWUR5182  |
| CB4856                                                                                       | HS | V | 6652353 | 6653742 | WBGene00044779  | T10H9.8  | T10H9.8  | 0.0319655177573335  |             |
| AGIWUR8114;AGIWUR33853;AGIWUR35324;AGIWUR44021                                               |    |   |         |         |                 |          |          |                     |             |
| CB4856                                                                                       | HS | V | 6653613 | 6655449 | WBGene00020425  | syx-18   | T10H9.3  | 0.0708672608924878  | AGIWUR31028 |
| CB4856                                                                                       | HS | V | 6655562 | 6656501 | WBGene00004897  | snb-1    | T10H9.4  | 0.0888485273263484  | AGIWUR27645 |
| CB4856                                                                                       | HS | V | 6662191 | 6665813 | WBGene00004062  | pmp-5    | T10H9.5  | 0.330430214108471   |             |
| AGIWUR4313;AGIWUR10836;AGIWUR26677;AGIWUR39783                                               |    |   |         |         |                 |          |          |                     |             |
| CB4856                                                                                       | HS | V | 6667400 | 6668841 | WBGene00006224  | str-180  | T10H9.6  | 0.227699058405899   | AGIWUR37919 |
| CB4856                                                                                       | HS | V | 6669823 | 6672036 | WBGene00019654  | K11G9.3  | K11G9.3  | 0.11137185791258    | AGIWUR27046 |
| CB4856                                                                                       | HS | V | 6674267 | 6676426 | WBGene00019653  | K11G9.2  | K11G9.2  | -0.0788986050415863 |             |
| AGIWUR7173;AGIWUR12294;AGIWUR20235                                                           |    |   |         |         |                 |          |          |                     |             |
| CB4856                                                                                       | HS | V | 6676799 | 6679072 | WBGene00019652  | K11G9.1  | K11G9.1  | -0.116474633981359  | AGIWUR25997 |
| CB4856                                                                                       | HS | V | 6679317 | 6681573 | WBGene00001210  | egl-46   | K11G9.4  | -0.0940502930775389 |             |
| AGIWUR43254;AGIWUR44810                                                                      |    |   |         |         |                 |          |          |                     |             |
| CB4856                                                                                       | HS | V | 6685807 | 6688492 | WBGene00019655  | K11G9.5  | K11G9.5  | 0.0689174405381117  | AGIWUR27658 |
| CB4856                                                                                       | HS | V | 6691371 | 6691863 | WBGene00003473  | mtl-1    | K11G9.6  | 0.222929384547246   | AGIWUR30106 |
| CB4856                                                                                       | HS | V | 6692247 | 6694768 | WBGene000175027 | W02F12.8 | W02F12.8 | -0.026888635393032  |             |
| AGIWUR7094;AGIWUR16478;AGIWUR25256;AGIWUR25915;AGIWUR27056                                   |    |   |         |         |                 |          |          |                     |             |
| CB4856                                                                                       | HS | V | 6695147 | 6697652 | WBGene00020947  | W02F12.2 | W02F12.2 | 0.0798176586668964  |             |
| AGIWUR16259;AGIWUR29622                                                                      |    |   |         |         |                 |          |          |                     |             |
| CB4856                                                                                       | HS | V | 6703057 | 6704573 | WBGene00020948  | era-1    | W02F12.3 | -0.182471125537154  |             |
| AGIWUR2317;AGIWUR14785                                                                       |    |   |         |         |                 |          |          |                     |             |
| CB4856                                                                                       | HS | V | 6704551 | 6706932 | WBGene00020949  | W02F12.4 | W02F12.4 | 0.00527521481728943 |             |
| AGIWUR4588;AGIWUR5119;AGIWUR7662;AGIWUR14147;AGIWUR32770;AGIWUR42348;AGIWUR43423;AGIWUR44413 |    |   |         |         |                 |          |          |                     |             |
| CB4856                                                                                       | HS | V | 6707058 | 6709101 | WBGene00020950  | dlst-1   | W02F12.5 | -0.134479172464976  |             |
| AGIWUR25914;AGIWUR28729;AGIWUR41820                                                          |    |   |         |         |                 |          |          |                     |             |
| CB4856                                                                                       | HS | V | 6709579 | 6710679 | WBGene00020951  | sna-1    | W02F12.6 | 0.0202955512847502  |             |
| AGIWUR32989                                                                                  |    |   |         |         |                 |          |          |                     |             |
| CB4856                                                                                       | HS | V | 6714990 | 6716302 | WBGene00023355  | W02F12.1 | W02F12.1 | 0.125472266029643   |             |
| AGIWUR37104                                                                                  |    |   |         |         |                 |          |          |                     |             |
| CB4856                                                                                       | HS | V | 6716855 | 6718297 | WBGene00005187  | srg-30   | W02F12.7 | 0.0997801168998733  |             |
| AGIWUR4155;AGIWUR7870                                                                        |    |   |         |         |                 |          |          |                     |             |
| CB4856                                                                                       | HS | V | 6720397 | 6723005 | WBGene00022624  | ZC487.2  | ZC487.2  | 0.367121699790631   | AGIWUR22572 |
| CB4856                                                                                       | HS | V | 6723466 | 6723764 | WBGene00022625  | ZC487.3  | ZC487.3  | -0.144242234834651  | AGIWUR39508 |
| CB4856                                                                                       | HS | V | 6727812 | 6730262 | WBGene00022623  | ZC487.1  | ZC487.1  | -0.0210661832833843 |             |
| AGIWUR2837;AGIWUR31367;AGIWUR40962                                                           |    |   |         |         |                 |          |          |                     |             |
| CB4856                                                                                       | HS | V | 6730281 | 6731694 | WBGene00001718  | grl-9    | ZC487.4  | -0.253168487012798  | AGIWUR23579 |
| CB4856                                                                                       | HS | V | 6731831 | 6733092 | WBGene00001717  | grl-8    | ZC487.5  | -0.0362881097374359 | AGIWUR7134  |
| CB4856                                                                                       | HS | V | 6745039 | 6748613 | WBGene00020806  | T25F10.3 | T25F10.3 | -0.10908676906319   |             |

|                                                                                  |    |   |         |         |                |          |          |                    |                     |
|----------------------------------------------------------------------------------|----|---|---------|---------|----------------|----------|----------|--------------------|---------------------|
| AGIWUR8750                                                                       |    |   |         |         |                |          |          |                    |                     |
| CB4856                                                                           | HS | V | 6758135 | 6760418 | WBGene00000936 | dbl-1    | T25F10.2 |                    | -0.0522625472590441 |
| AGIWUR23643;AGIWUR28633                                                          |    |   |         |         |                |          |          |                    |                     |
| CB4856                                                                           | HS | V | 6760442 | 6762461 | WBGene00020807 | T25F10.4 | T25F10.4 |                    | -0.0271193478357166 |
| AGIWUR39846                                                                      |    |   |         |         |                |          |          |                    |                     |
| CB4856                                                                           | HS | V | 6762476 | 6765072 | WBGene00000244 | bbs-8    | T25F10.5 |                    | -0.0637197348596805 |
| AGIWUR14361                                                                      |    |   |         |         |                |          |          |                    |                     |
| CB4856                                                                           | HS | V | 6765560 | 6768732 | WBGene00020808 | clik-1   | T25F10.6 |                    | 0.225748987338992   |
| AGIWUR2591;AGIWUR4800;AGIWUR6940;AGIWUR20249;AGIWUR35744;AGIWUR37233;AGIWUR37861 |    |   |         |         |                |          |          |                    |                     |
| CB4856                                                                           | HS | V | 6768429 | 6768788 | WBGene00020805 | T25F10.1 | T25F10.1 |                    | -0.102068805774591  |
| AGIWUR11123                                                                      |    |   |         |         |                |          |          |                    |                     |
| CB4856                                                                           | HS | V | 6769662 | 6771704 | WBGene00005253 | srh-30   | ZC404.12 |                    | 0.124046397976453   |
| AGIWUR35108                                                                      |    |   |         |         |                |          |          |                    |                     |
| CB4856                                                                           | HS | V | 6774351 | 6776196 | WBGene00005251 | srh-28   | ZC404.5  |                    | -0.0167617380546119 |
| AGIWUR20842;AGIWUR25637;AGIWUR33788                                              |    |   |         |         |                |          |          |                    |                     |
| CB4856                                                                           | HS | V | 6778551 | 6779700 | WBGene00022602 | ZC404.7  | ZC404.7  | 0.0991393482179355 | AGIWUR31102         |
| CB4856                                                                           | HS | V | 6783187 | 6784922 | WBGene00004984 | spn-4    | ZC404.8  | 0.200351186951703  | AGIWUR39701         |
| CB4856                                                                           | HS | V | 6785457 | 6787866 | WBGene00004975 | spe-39   | ZC404.3  | 0.0356387070654485 |                     |
| AGIWUR16328;AGIWUR19002;AGIWUR26551                                              |    |   |         |         |                |          |          |                    |                     |
| CB4856                                                                           | HS | V | 6788449 | 6792665 | WBGene00022603 | gck-2    | ZC404.9  | 0.0845075123255725 | AGIWUR1270          |
| CB4856                                                                           | HS | V | 6793936 | 6795130 | WBGene00022601 | ZC404.1  | ZC404.1  | 0.138187256697404  | AGIWUR30969         |
| CB4856                                                                           | HS | V | 6798151 | 6799664 | WBGene00022606 | dmsr-9   | ZC404.13 |                    | 0.00270603549463289 |
| AGIWUR43059                                                                      |    |   |         |         |                |          |          |                    |                     |
| CB4856                                                                           | HS | V | 6800724 | 6801950 | WBGene00022604 | dmsr-10  | ZC404.10 |                    | 0.120155646642195   |
| AGIWUR16456                                                                      |    |   |         |         |                |          |          |                    |                     |
| CB4856                                                                           | HS | V | 6802412 | 6804096 | WBGene00022605 | dmsr-11  | ZC404.11 |                    | 0.713957910877374   |
| AGIWUR11218                                                                      |    |   |         |         |                |          |          |                    |                     |
| CB4856                                                                           | HS | V | 6804512 | 6806440 | WBGene00019262 | dmsr-12  | H34P18.1 |                    | 1.87841866507356    |
| AGIWUR24451                                                                      |    |   |         |         |                |          |          |                    |                     |
| CB4856                                                                           | HS | V | 6810421 | 6813449 | WBGene00020522 | T15B7.10 | T15B7.10 |                    | 0.103100826700578   |
| AGIWUR30507                                                                      |    |   |         |         |                |          |          |                    |                     |
| CB4856                                                                           | HS | V | 6813700 | 6815016 | WBGene00020529 | T15B7.17 | T15B7.17 |                    | 0.0318139573211056  |
| AGIWUR1853                                                                       |    |   |         |         |                |          |          |                    |                     |
| CB4856                                                                           | HS | V | 6815666 | 6817284 | WBGene00020523 | dmsr-14  | T15B7.11 |                    | -0.130073543934773  |
| AGIWUR43501                                                                      |    |   |         |         |                |          |          |                    |                     |
| CB4856                                                                           | HS | V | 6817890 | 6819912 | WBGene00020524 | dmsr-13  | T15B7.12 |                    | -0.0449960459913132 |
| AGIWUR552                                                                        |    |   |         |         |                |          |          |                    |                     |
| CB4856                                                                           | HS | V | 6821809 | 6826872 | WBGene00020520 | T15B7.8  | T15B7.8  | 0.180081409208833  |                     |
| AGIWUR2448;AGIWUR29808;AGIWUR37151                                               |    |   |         |         |                |          |          |                    |                     |

|                                                                                                                                                                                                                                                                                                                                   |    |   |         |         |                |           |           |                     |             |
|-----------------------------------------------------------------------------------------------------------------------------------------------------------------------------------------------------------------------------------------------------------------------------------------------------------------------------------|----|---|---------|---------|----------------|-----------|-----------|---------------------|-------------|
| CB4856                                                                                                                                                                                                                                                                                                                            | HS | V | 6827146 | 6828886 | WBGene00020525 | dmsr-15   | T15B7.13  | -0.0850446592083998 |             |
| AGIWUR34598                                                                                                                                                                                                                                                                                                                       |    |   |         |         |                |           |           |                     |             |
| CB4856                                                                                                                                                                                                                                                                                                                            | HS | V | 6829666 | 6830721 | WBGene00000714 | col-141   | T15B7.5   | -0.46736085492134   | AGIWUR38706 |
| CB4856                                                                                                                                                                                                                                                                                                                            | HS | V | 6831163 | 6832256 | WBGene00000715 | col-142   | T15B7.4   | 0.238897520894369   | AGIWUR2207  |
| CB4856                                                                                                                                                                                                                                                                                                                            | HS | V | 6832290 | 6835342 | WBGene00020526 | T15B7.14  | T15B7.14  | -0.0649044888361088 |             |
| AGIWUR1085                                                                                                                                                                                                                                                                                                                        |    |   |         |         |                |           |           |                     |             |
| CB4856                                                                                                                                                                                                                                                                                                                            | HS | V | 6835635 | 6836700 | WBGene00000716 | col-143   | T15B7.3   | -0.358543064836058  |             |
| AGIWUR14313;AGIWUR35443                                                                                                                                                                                                                                                                                                           |    |   |         |         |                |           |           |                     |             |
| CB4856                                                                                                                                                                                                                                                                                                                            | HS | V | 6836725 | 6838630 | WBGene00020527 | T15B7.15  | T15B7.15  | -0.224604194825134  |             |
| AGIWUR28460                                                                                                                                                                                                                                                                                                                       |    |   |         |         |                |           |           |                     |             |
| CB4856                                                                                                                                                                                                                                                                                                                            | HS | V | 6839256 | 6840254 | WBGene00020517 | hpo-8     | T15B7.2   | -0.0691340966443974 |             |
| AGIWUR8620;AGIWUR16296;AGIWUR22235                                                                                                                                                                                                                                                                                                |    |   |         |         |                |           |           |                     |             |
| CB4856                                                                                                                                                                                                                                                                                                                            | HS | V | 6840217 | 6842970 | WBGene00020528 | lgc-54    | T15B7.16  | -0.0540408851566845 |             |
| AGIWUR22007                                                                                                                                                                                                                                                                                                                       |    |   |         |         |                |           |           |                     |             |
| CB4856                                                                                                                                                                                                                                                                                                                            | HS | V | 6842737 | 6846652 | WBGene00020516 | T15B7.1   | T15B7.1   | 0.326159534986761   |             |
| AGIWUR1514;AGIWUR38289                                                                                                                                                                                                                                                                                                            |    |   |         |         |                |           |           |                     |             |
| CB4856                                                                                                                                                                                                                                                                                                                            | HS | V | 6850538 | 6851900 | WBGene00016959 | C55H1.1   | C55H1.1   | -0.0256572266469304 | AGIWUR44315 |
| CB4856                                                                                                                                                                                                                                                                                                                            | HS | V | 6852568 | 6854803 | WBGene00001672 | gpa-10    | C55H1.2   | -0.0351254176813942 | AGIWUR35673 |
| CB4856                                                                                                                                                                                                                                                                                                                            | HS | V | 6870304 | 6873809 | WBGene00020586 | frpr-18   | T19F4.1   | 0.0820505226977106  |             |
| AGIWUR16517;AGIWUR27580;AGIWUR38008;AGIWUR43783                                                                                                                                                                                                                                                                                   |    |   |         |         |                |           |           |                     |             |
| CB4856                                                                                                                                                                                                                                                                                                                            | HS | V | 6881340 | 6891836 | WBGene00006803 | unc-70    | K11C4.3   | 0.0212626007013332  |             |
| AGIWUR18280;AGIWUR30869                                                                                                                                                                                                                                                                                                           |    |   |         |         |                |           |           |                     |             |
| CB4856                                                                                                                                                                                                                                                                                                                            | HS | V | 6895078 | 6896922 | WBGene00019643 | K11C4.2   | K11C4.2   | 0.115647551158325   | AGIWUR8851  |
| CB4856                                                                                                                                                                                                                                                                                                                            | HS | V | 6896999 | 6898497 | WBGene00019642 | K11C4.1   | K11C4.1   | 0.210719317761807   | AGIWUR38868 |
| CB4856                                                                                                                                                                                                                                                                                                                            | HS | V | 6898540 | 6900223 | WBGene00003844 | odc-1     | K11C4.4   | -0.156015346945823  |             |
| AGIWUR2487;AGIWUR11379                                                                                                                                                                                                                                                                                                            |    |   |         |         |                |           |           |                     |             |
| CB4856                                                                                                                                                                                                                                                                                                                            | HS | V | 6901697 | 6929038 | WBGene00006801 | unc-68    | K11C4.5   | -0.0106831013137985 |             |
| AGIWUR14992;AGIWUR39287                                                                                                                                                                                                                                                                                                           |    |   |         |         |                |           |           |                     |             |
| CB4856                                                                                                                                                                                                                                                                                                                            | HS | V | 6931539 | 6934288 | WBGene00021963 | lip1-6    | Y57E12B.3 | 0.167765427132403   |             |
| AGIWUR4700                                                                                                                                                                                                                                                                                                                        |    |   |         |         |                |           |           |                     |             |
| CB4856                                                                                                                                                                                                                                                                                                                            | HS | V | 6945711 | 6947547 | WBGene00021964 | Y57E12B.4 | Y57E12B.4 | 0.128301850122538   |             |
| AGIWUR1238;AGIWUR29950;AGIWUR43060                                                                                                                                                                                                                                                                                                |    |   |         |         |                |           |           |                     |             |
| CB4856                                                                                                                                                                                                                                                                                                                            | HS | V | 6948543 | 6948831 | WBGene00021961 | Y57E12B.1 | Y57E12B.1 | 0.0865339273429591  |             |
| AGIWUR26340                                                                                                                                                                                                                                                                                                                       |    |   |         |         |                |           |           |                     |             |
| CB4856                                                                                                                                                                                                                                                                                                                            | HS | V | 6950835 | 6953897 | WBGene00005188 | srg-31    | T07H8.5   | -0.0455984412272992 | AGIWUR25906 |
| CB4856                                                                                                                                                                                                                                                                                                                            | HS | V | 6956537 | 6966422 | WBGene00003165 | mec-1     | T07H8.4   | -0.074996648174269  |             |
| AGIWUR183;AGIWUR1152;AGIWUR1352;AGIWUR1406;AGIWUR2128;AGIWUR2365;AGIWUR3217;AGIWUR3635;AGIWUR4131;AGIWUR4455;AGIWUR4803;AGIWUR5260;AGIWUR5262;AGIWUR5882;AGIWUR6045;AGIWUR6798;AGIWUR6876;AGIWUR7189;AGIWUR7519;AGIWUR7826;AGIWUR8269;AGIWUR8453;AGIWUR10141;AGIWUR10410;AGIWUR10495;AGIWUR11070;AGIWUR12307;AGIWUR13928;AGIWUR14 |    |   |         |         |                |           |           |                     |             |



095;AGIWUR14680;AGIWUR15177;AGIWUR15278;AGIWUR15432;AGIWUR15854;AGIWUR16054;AGIWUR16955;AGIWUR17421;AGIWUR17962;AGIWUR17979;AGIWUR18581;AGIWUR19416;AGIWUR19924;AGIWUR23324;AGIWUR24879;AGIWUR25606;AGIWUR25850;AGIWUR25949;AGIWUR26192;AGIWUR26221;AGIWUR26245;AGIWUR26710;AGIWUR26836;AGIWUR26958;AGIWUR28366;AGIWUR28379;AGIWUR28699;AGIWUR28906;AGIWUR29899;AGIWUR29988;AGIWUR30069;AGIWUR32078;AGIWUR32276;AGIWUR32477;AGIWUR32711;AGIWUR33705;AGIWUR34629;AGIWUR34984;AGIWUR37874;AGIWUR38167;AGIWUR38861;AGIWUR39597;AGIWUR39601;AGIWUR39607;AGIWUR40195;AGIWUR41223;AGIWUR41367;AGIWUR41615;AGIWUR42408;AGIWUR42450;AGIWUR43092;AGIWUR43763;AGIWUR43791;AGIWUR45104;AGIWUR45161  
 CB4856 HS V 6966396 6970127 WBGene00004229 ptr-15 T07H8.6 0.0103885231432237 AGIWUR38294  
 CB4856 HS V 6971867 6973149 WBGene00005950 srx-59 T07H8.3 -0.085809390807376 AGIWUR9812  
 CB4856 HS V 6973523 6974832 WBGene00006029 srx-138 T07H8.2 -0.00662693720413632  
 AGIWUR5395;AGIWUR15714;AGIWUR23100;AGIWUR38964;AGIWUR40330  
 CB4856 HS V 6976347 6977387 WBGene00005907 srx-16 T07H8.1 -0.10295853627141  
 AGIWUR3703;AGIWUR34635  
 CB4856 HS V 6977754 6979116 WBGene00020333 sre-12 T07H8.7 -0.064388573740275 AGIWUR40082  
 CB4856 HS V 6980595 6982913 WBGene00016364 nhr-161 C33G8.7 0.0439748498052799 AGIWUR40108  
 CB4856 HS V 6983411 6986043 WBGene00016368 nhr-163 C33G8.12 0.158918769761078  
 AGIWUR12632  
 CB4856 HS V 6986141 6987773 WBGene00016365 nhr-139 C33G8.8 0.257736070333116 AGIWUR32935  
 CB4856 HS V 6987864 6989676 WBGene00016366 nhr-140 C33G8.9 -0.0181328068745774 AGIWUR40078  
 CB4856 HS V 6990148 6991863 WBGene00016367 nhr-162 C33G8.10 -0.189728162701808  
 AGIWUR9428  
 CB4856 HS V 6995215 6997123 WBGene00003697 nhr-107 C33G8.11 -0.172619893356732  
 AGIWUR39250  
 CB4856 HS V 6998819 7000651 WBGene00003632 nhr-42 C33G8.6 0.0673308491334375 AGIWUR147  
 CB4856 HS V 7004150 7005825 WBGene00016363 srab-4 C33G8.5 0.161404196630637 AGIWUR23745  
 CB4856 HS V 7006264 7006818 WBGene00016362 C33G8.4 C33G8.4 0.12808428275167 AGIWUR4418  
 CB4856 HS V 7009761 7012244 WBGene00016360 C33G8.2 C33G8.2 0.0742644080936117 AGIWUR21137  
 CB4856 HS V 7012917 7014412 WBGene00005874 srw-127 C33G8.1 0.0847246434425344 AGIWUR16566  
 CB4856 HS V 7014462 7015972 WBGene00016369 C33G8.13 C33G8.13 -0.137975755901051  
 AGIWUR31072  
 CB4856 HS V 7017359 7018851 WBGene00017615 srsx-32 F20A1.3 -0.0999211447019652 AGIWUR30545  
 CB4856 HS V 7018901 7021803 WBGene00017616 F20A1.4 F20A1.4 0.223423438240959  
 AGIWUR24840;AGIWUR41280  
 CB4856 HS V 7024632 7027083 WBGene00017618 F20A1.6 F20A1.6 -0.0658437422480671  
 AGIWUR12474;AGIWUR24968  
 CB4856 HS V 7028329 7036570 WBGene00006666 twk-11 F20A1.7 0.103050754211617  
 AGIWUR1314;AGIWUR5939;AGIWUR10417;AGIWUR31941  
 CB4856 HS V 7046312 7049250 WBGene00017614 F20A1.2 F20A1.2 -0.0856121331554487 AGIWUR26504  
 CB4856 HS V 7049434 7051311 WBGene00017620 tofu-2 F20A1.9 0.0214223364038801 AGIWUR11374

|                                                                                                |    |   |         |         |                |            |            |                      |             |
|------------------------------------------------------------------------------------------------|----|---|---------|---------|----------------|------------|------------|----------------------|-------------|
| CB4856                                                                                         | HS | V | 7051679 | 7052179 | WBGene00017613 | F20A1.1    | F20A1.1    | -0.0453258171347226  | AGIWUR18795 |
| CB4856                                                                                         | HS | V | 7052717 | 7053200 | WBGene00017621 | F20A1.10   | F20A1.10   | -0.0781209073773184  |             |
| AGIWUR22725                                                                                    |    |   |         |         |                |            |            |                      |             |
| CB4856                                                                                         | HS | V | 7054738 | 7055410 | WBGene00021958 | Y57E12AL.4 | Y57E12AL.4 | 0.0216014308870331   |             |
| AGIWUR14197                                                                                    |    |   |         |         |                |            |            |                      |             |
| CB4856                                                                                         | HS | V | 7058095 | 7058507 | WBGene00021957 | Y57E12AL.2 | Y57E12AL.2 | 0.182442825046703    |             |
| AGIWUR14838                                                                                    |    |   |         |         |                |            |            |                      |             |
| CB4856                                                                                         | HS | V | 7058547 | 7059624 | WBGene00003164 | mdt-6      | Y57E12AL.5 | 0.0770618214434773   |             |
| AGIWUR41027                                                                                    |    |   |         |         |                |            |            |                      |             |
| CB4856                                                                                         | HS | V | 7059698 | 7060470 | WBGene00021959 | Y57E12AL.6 | Y57E12AL.6 | 0.0674093703114096   |             |
| AGIWUR8481                                                                                     |    |   |         |         |                |            |            |                      |             |
| CB4856                                                                                         | HS | V | 7060811 | 7062695 | WBGene00021956 | Y57E12AL.1 | Y57E12AL.1 | -0.179954280691259   |             |
| AGIWUR34298                                                                                    |    |   |         |         |                |            |            |                      |             |
| CB4856                                                                                         | HS | V | 7063174 | 7063718 | WBGene00021960 | Y57E12AM.1 | Y57E12AM.1 | 0.0303613382255969   |             |
| AGIWUR2965;AGIWUR29220;AGIWUR31548;AGIWUR36754;AGIWUR39340;AGIWUR40810                         |    |   |         |         |                |            |            |                      |             |
| CB4856                                                                                         | HS | V | 7063703 | 7065322 | WBGene00044612 | Y57E12AR.1 | Y57E12AR.1 | 0.0328962906605756   |             |
| AGIWUR20069;AGIWUR42428;AGIWUR45178                                                            |    |   |         |         |                |            |            |                      |             |
| CB4856                                                                                         | HS | V | 7072585 | 7075835 | WBGene00017850 | F27B10.1   | F27B10.1   | 0.0469621000538361   |             |
| AGIWUR41140                                                                                    |    |   |         |         |                |            |            |                      |             |
| CB4856                                                                                         | HS | V | 7075877 | 7081569 | WBGene00003786 | npa-1      | VC5.3      | -0.136524696003751   |             |
| AGIWUR3667;AGIWUR14589;AGIWUR16472;AGIWUR29431;AGIWUR32224;AGIWUR34728;AGIWUR35446;AGIWUR36991 |    |   |         |         |                |            |            |                      |             |
| CB4856                                                                                         | HS | V | 7081537 | 7084662 | WBGene00007029 | mys-1      | VC5.4      | 0.129568391725138    | AGIWUR13192 |
| CB4856                                                                                         | HS | V | 7085916 | 7088854 | WBGene00020908 | VC5.2      | VC5.2      | -0.013594937909355   | AGIWUR24342 |
| CB4856                                                                                         | HS | V | 7089498 | 7091601 | WBGene00044699 | nhr-286    | VC5.6      | -0.00557745764673001 | AGIWUR9847  |
| CB4856                                                                                         | HS | V | 7091714 | 7093770 | WBGene00003725 | nhr-135    | VC5.5      | 0.0330385085588905   | AGIWUR10215 |
| CB4856                                                                                         | HS | V | 7102478 | 7103442 | WBGene00020907 | VC5.1      | VC5.1      | 0.191814227395038    | AGIWUR22964 |
| CB4856                                                                                         | HS | V | 7103697 | 7114436 | WBGene00003849 | odr-2      | T01C4.2    | -0.0180993836746968  |             |
| AGIWUR17952;AGIWUR24443;AGIWUR32476                                                            |    |   |         |         |                |            |            |                      |             |
| CB4856                                                                                         | HS | V | 7117452 | 7118896 | WBGene00005924 | srx-33     | T01C4.3    | -0.0765960041672162  | AGIWUR29466 |
| CB4856                                                                                         | HS | V | 7119063 | 7120268 | WBGene00005925 | srx-34     | T01C4.4    | -0.249115721915018   | AGIWUR11889 |
| CB4856                                                                                         | HS | V | 7120717 | 7122495 | WBGene00005926 | srx-35     | T01C4.5    | -0.0766102978988012  | AGIWUR12316 |
| CB4856                                                                                         | HS | V | 7123658 | 7128890 | WBGene00020141 | lmd-5      | T01C4.1    | 0.197558522947569    | AGIWUR29072 |
| CB4856                                                                                         | HS | V | 7129146 | 7129560 | WBGene00044546 | T01C4.8    | T01C4.8    | -0.0630613877628647  | AGIWUR22183 |
| CB4856                                                                                         | HS | V | 7129707 | 7131074 | WBGene00005927 | srx-36     | T01C4.6    | 0.0348062909891356   | AGIWUR30051 |
| CB4856                                                                                         | HS | V | 7131595 | 7132324 | WBGene00005928 | srx-37     | T01C4.7    | -0.0238218089491542  |             |
| AGIWUR38511;AGIWUR40716                                                                        |    |   |         |         |                |            |            |                      |             |
| CB4856                                                                                         | HS | V | 7134263 | 7135682 | WBGene00271437 | F10D2.16   | F10D2.16   | -0.0147985998827744  |             |
| AGIWUR25074                                                                                    |    |   |         |         |                |            |            |                      |             |
| CB4856                                                                                         | HS | V | 7136277 | 7138417 | WBGene00006163 | str-112    | F10D2.4    | -0.127946230358409   | AGIWUR35411 |

|                                                                        |    |   |         |         |                |          |          |                      |             |
|------------------------------------------------------------------------|----|---|---------|---------|----------------|----------|----------|----------------------|-------------|
| CB4856                                                                 | HS | V | 7139477 | 7141964 | WBGene00017331 | ugt-40   | F10D2.5  | 0.76637830792777     | AGIWUR19001 |
| CB4856                                                                 | HS | V | 7141942 | 7145318 | WBGene00017332 | ugt-37   | F10D2.6  | 0.0691069336954921   | AGIWUR35557 |
| CB4856                                                                 | HS | V | 7145656 | 7147470 | WBGene00017333 | ugt-38   | F10D2.7  | -0.0683295361009115  | AGIWUR35761 |
| CB4856                                                                 | HS | V | 7148688 | 7150692 | WBGene00017334 | F10D2.8  | F10D2.8  | 0.0763170419288346   |             |
| AGIWUR20425;AGIWUR31721                                                |    |   |         |         |                |          |          |                      |             |
| CB4856                                                                 | HS | V | 7151353 | 7153146 | WBGene00001399 | fat-7    | F10D2.9  | 0.0578591808547824   | AGIWUR40290 |
| CB4856                                                                 | HS | V | 7154503 | 7156224 | WBGene00017335 | F10D2.10 | F10D2.10 | 0.0972593495467535   |             |
| AGIWUR33513                                                            |    |   |         |         |                |          |          |                      |             |
| CB4856                                                                 | HS | V | 7157142 | 7159190 | WBGene00017329 | ugt-39   | F10D2.2  | -0.00436820125782234 |             |
| AGIWUR8332;AGIWUR25276;AGIWUR40193                                     |    |   |         |         |                |          |          |                      |             |
| CB4856                                                                 | HS | V | 7159691 | 7161016 | WBGene00006237 | str-204  | F10D2.1  | -0.187311455030775   | AGIWUR22344 |
| CB4856                                                                 | HS | V | 7161068 | 7163595 | WBGene00017336 | ugt-41   | F10D2.11 | 0.331509547201419    |             |
| AGIWUR39992                                                            |    |   |         |         |                |          |          |                      |             |
| CB4856                                                                 | HS | V | 7164510 | 7165895 | WBGene00005304 | srh-83   | F09G2.7  | 0.174392730819485    | AGIWUR25097 |
| CB4856                                                                 | HS | V | 7167009 | 7169281 | WBGene00017315 | ugt-36   | F09G2.6  | 0.04631448428509     | AGIWUR43649 |
| CB4856                                                                 | HS | V | 7175501 | 7178783 | WBGene00017314 | lgc-39   | F09G2.5  | 0.18561795219598     | AGIWUR13218 |
| CB4856                                                                 | HS | V | 7179172 | 7182853 | WBGene00017313 | cpsf-2   | F09G2.4  | 0.0234074076371193   | AGIWUR10595 |
| CB4856                                                                 | HS | V | 7184910 | 7188483 | WBGene00017312 | pitr-5   | F09G2.3  | -0.293247628109349   | AGIWUR38058 |
| CB4856                                                                 | HS | V | 7188332 | 7193662 | WBGene00017316 | F09G2.8  | F09G2.8  | 0.0197899172255802   | AGIWUR31237 |
| CB4856                                                                 | HS | V | 7193766 | 7196137 | WBGene00017317 | attf-2   | F09G2.9  | -0.0385435344383591  |             |
| AGIWUR9026;AGIWUR17703;AGIWUR19961;AGIWUR24522;AGIWUR29842;AGIWUR38507 |    |   |         |         |                |          |          |                      |             |
| CB4856                                                                 | HS | V | 7196916 | 7198437 | WBGene00017311 | F09G2.2  | F09G2.2  | -0.188078097288919   | AGIWUR36789 |
| CB4856                                                                 | HS | V | 7200224 | 7205609 | WBGene00017310 | F09G2.1  | F09G2.1  | 0.0754952016436974   | AGIWUR11948 |
| CB4856                                                                 | HS | V | 7205626 | 7214903 | WBGene00015743 | soap-1   | C13F10.4 | -0.0203159253313974  |             |
| AGIWUR35914                                                            |    |   |         |         |                |          |          |                      |             |
| CB4856                                                                 | HS | V | 7215010 | 7219088 | WBGene00015744 | C13F10.5 | C13F10.5 | -0.12974656679482    |             |
| AGIWUR4255;AGIWUR25008;AGIWUR34248;AGIWUR38845                         |    |   |         |         |                |          |          |                      |             |
| CB4856                                                                 | HS | V | 7219054 | 7221039 | WBGene00015745 | C13F10.6 | C13F10.6 | 0.0737187738257497   |             |
| AGIWUR13009;AGIWUR21878;AGIWUR40522                                    |    |   |         |         |                |          |          |                      |             |
| CB4856                                                                 | HS | V | 7221473 | 7222156 | WBGene00015742 | kxd-1    | C13F10.2 | -0.0880170335126138  |             |
| AGIWUR14508                                                            |    |   |         |         |                |          |          |                      |             |
| CB4856                                                                 | HS | V | 7222049 | 7223279 | WBGene00015746 | C13F10.7 | C13F10.7 | -0.0230380954977942  |             |
| AGIWUR38641                                                            |    |   |         |         |                |          |          |                      |             |
| CB4856                                                                 | HS | V | 7224078 | 7225204 | WBGene00015741 | C13F10.1 | C13F10.1 | 0.0913474430208474   |             |
| AGIWUR38607;AGIWUR42008                                                |    |   |         |         |                |          |          |                      |             |
| CB4856                                                                 | HS | V | 7225223 | 7226320 | WBGene00001428 | fkf-3    | C05C8.3  | 0.00524178756818117  | AGIWUR9907  |
| CB4856                                                                 | HS | V | 7226376 | 7230848 | WBGene00001563 | gei-6    | C05C8.4  | -0.340602599658098   | AGIWUR15203 |
| CB4856                                                                 | HS | V | 7232434 | 7234826 | WBGene00015462 | C05C8.5  | C05C8.5  | 0.198017583679222    | AGIWUR31801 |
| CB4856                                                                 | HS | V | 7234922 | 7237130 | WBGene00015463 | hpo-9    | C05C8.6  | -0.0576323664025082  |             |

AGIWUR2698;AGIWUR3991;AGIWUR12483;AGIWUR16790  
CB4856 HS V 7237381 7239658 WBGene00015466 hyls-1 C05C8.9 0.013256931912994  
AGIWUR11456;AGIWUR25540;AGIWUR31894;AGIWUR37578  
CB4856 HS V 7239771 7241366 WBGene00015460 C05C8.1 C05C8.1 -0.187612492662838 AGIWUR26908  
CB4856 HS V 7242907 7247321 WBGene00015464 C05C8.7 C05C8.7 0.0900433172853718  
AGIWUR1752;AGIWUR8368;AGIWUR16592;AGIWUR22581;AGIWUR36915;AGIWUR40208  
CB4856 HS V 7252325 7255157 WBGene00015465 C05C8.8 C05C8.8 -0.0145435984408131 AGIWUR39223  
CB4856 HS V 7258808 7260157 WBGene00044547 C13A2.12 C13A2.12 -0.126585599350914  
AGIWUR12736;AGIWUR45175  
CB4856 HS V 7262565 7264148 WBGene00015725 C13A2.9 C13A2.9 0.0488157586484768 AGIWUR21866  
CB4856 HS V 7264576 7265377 WBGene00023235 C13A2.8 C13A2.8 0.0279966406735905  
AGIWUR1246;AGIWUR26717;AGIWUR31889;AGIWUR33907;AGIWUR43367  
CB4856 HS V 7266353 7268806 WBGene00015724 C13A2.7 C13A2.7 0.0148922818764392  
AGIWUR13134;AGIWUR23165;AGIWUR32284  
CB4856 HS V 7269731 7272787 WBGene00015723 C13A2.6 C13A2.6 0.0191659193723641 AGIWUR4210  
CB4856 HS V 7275791 7278472 WBGene00015722 C13A2.5 C13A2.5 -0.110006794702235 AGIWUR16539  
CB4856 HS V 7279310 7280530 WBGene00015721 C13A2.4 C13A2.4 2.51256379092157 AGIWUR20014  
CB4856 HS V 7282337 7284667 WBGene00015720 C13A2.3 C13A2.3 0.0848259104546685 AGIWUR37246  
CB4856 HS V 7286185 7287399 WBGene00015719 C13A2.2 C13A2.2 -0.179252785859179 AGIWUR24599  
CB4856 HS V 7289027 7291831 WBGene00015718 C13A2.1 C13A2.1 0.255072903139048 AGIWUR21997  
CB4856 HS V 7292754 7295381 WBGene00017231 F07G11.4 F07G11.4 -0.160789096087408  
AGIWUR33430  
CB4856 HS V 7296300 7297363 WBGene00005617 srj-32 F07G11.5 -0.155022084443805  
AGIWUR2894  
CB4856 HS V 7298771 7301472 WBGene00017230 F07G11.3 F07G11.3 0.246592441541479  
AGIWUR25605  
CB4856 HS V 7307389 7309556 WBGene00017228 F07G11.1 F07G11.1 0.130415103828849  
AGIWUR9956  
CB4856 HS V 7311726 7313333 WBGene00005897 srx-6 F07G11.8 -0.133311616692756  
AGIWUR38568  
CB4856 HS V 7314136 7321009 WBGene00017233 lmd-4 F07G11.9 0.0892029151871361  
AGIWUR7636  
CB4856 HS V 7324038 7325385 WBGene00005983 srx-92 F10G2.6 -0.447111831650679 AGIWUR32095  
CB4856 HS V 7327135 7327755 WBGene00017365 F10G2.4 F10G2.4 -0.180578604448591 AGIWUR43997  
CB4856 HS V 7328392 7330001 WBGene00017364 clec-7 F10G2.3 0.183655610924751 AGIWUR26607  
CB4856 HS V 7331168 7331779 WBGene00017363 F10G2.2 F10G2.2 0.0881402862000069 AGIWUR45026  
CB4856 HS V 7332562 7333424 WBGene00017362 F10G2.1 F10G2.1 0.131660615712176 AGIWUR5849  
CB4856 HS V 7333774 7337168 WBGene00017366 F10G2.7 F10G2.7 0.0163322809401523 AGIWUR18051  
CB4856 HS V 7338633 7339831 WBGene00005402 srh-187 F10G2.8 0.0856500579778077 AGIWUR19069

|                                    |    |   |         |         |                |          |          |                     |             |
|------------------------------------|----|---|---------|---------|----------------|----------|----------|---------------------|-------------|
| CB4856                             | HS | V | 7340436 | 7341484 | WBGene00017367 | nhr-263  | F10G2.9  | -0.176284467798566  |             |
| AGIWUR27218;AGIWUR32274            |    |   |         |         |                |          |          |                     |             |
| CB4856                             | HS | V | 7342156 | 7343838 | WBGene00015396 | nhr-148  | C03G6.10 | -0.0207356975460744 |             |
| AGIWUR1793                         |    |   |         |         |                |          |          |                     |             |
| CB4856                             | HS | V | 7344061 | 7345234 | WBGene00005450 | srh-244  | C03G6.9  | 0.0852927606077047  | AGIWUR1764  |
| CB4856                             | HS | V | 7346301 | 7348135 | WBGene00015395 | nhr-147  | C03G6.8  | -0.252342173317491  |             |
| AGIWUR6976;AGIWUR17637;AGIWUR20992 |    |   |         |         |                |          |          |                     |             |
| CB4856                             | HS | V | 7348211 | 7349664 | WBGene00015397 | nhr-149  | C03G6.12 | 0.0379220357838257  |             |
| AGIWUR44680                        |    |   |         |         |                |          |          |                     |             |
| CB4856                             | HS | V | 7350881 | 7352236 | WBGene00005439 | srh-231  | C03G6.11 | 0.0399394864250864  |             |
| AGIWUR34403                        |    |   |         |         |                |          |          |                     |             |
| CB4856                             | HS | V | 7353040 | 7354254 | WBGene00005480 | srh-275  | C03G6.7  | 0.0257471386556123  | AGIWUR3671  |
| CB4856                             | HS | V | 7354445 | 7355510 | WBGene00015398 | tag-293  | C03G6.13 | -0.12240166603074   |             |
| AGIWUR31359                        |    |   |         |         |                |          |          |                     |             |
| CB4856                             | HS | V | 7357451 | 7358882 | WBGene00015394 | C03G6.6  | C03G6.6  | -0.0224130016944359 | AGIWUR4749  |
| CB4856                             | HS | V | 7359997 | 7361773 | WBGene00015399 | cyp-35A1 | C03G6.14 | -0.131222518721087  |             |
| AGIWUR26541;AGIWUR41697            |    |   |         |         |                |          |          |                     |             |
| CB4856                             | HS | V | 7365251 | 7366204 | WBGene00015393 | C03G6.5  | C03G6.5  | 0.113197285538323   | AGIWUR1692  |
| CB4856                             | HS | V | 7366534 | 7367619 | WBGene00005403 | srh-189  | C03G6.20 | -0.15780450518351   |             |
| AGIWUR5041;AGIWUR36294             |    |   |         |         |                |          |          |                     |             |
| CB4856                             | HS | V | 7369759 | 7372131 | WBGene00005602 | srj-14   | C03G6.3  | 0.0343504492673796  |             |
| AGIWUR3412;AGIWUR3516;AGIWUR34953  |    |   |         |         |                |          |          |                     |             |
| CB4856                             | HS | V | 7374390 | 7375594 | WBGene00005947 | srx-56   | C03G6.2  | -0.0287430474516537 |             |
| AGIWUR5407;AGIWUR32097             |    |   |         |         |                |          |          |                     |             |
| CB4856                             | HS | V | 7376409 | 7377742 | WBGene00005948 | srx-57   | C03G6.1  | 0.504867232705365   | AGIWUR19687 |
| CB4856                             | HS | V | 7377897 | 7379484 | WBGene00015401 | srsx-24  | C03G6.16 | 0.252630703783668   |             |
| AGIWUR31434                        |    |   |         |         |                |          |          |                     |             |
| CB4856                             | HS | V | 7379745 | 7381069 | WBGene00015402 | C03G6.17 | C03G6.17 | 0.324737840757299   |             |
| AGIWUR32749                        |    |   |         |         |                |          |          |                     |             |
| CB4856                             | HS | V | 7382021 | 7383309 | WBGene00005646 | srp-5    | C03G6.18 | 0.334660129126624   |             |
| AGIWUR4547                         |    |   |         |         |                |          |          |                     |             |
| CB4856                             | HS | V | 7384232 | 7386173 | WBGene00005647 | srp-6    | C03G6.19 | 0.134976427742622   |             |
| AGIWUR1521                         |    |   |         |         |                |          |          |                     |             |
| CB4856                             | HS | V | 7388390 | 7389871 | WBGene00015361 | C02H6.1  | C02H6.1  | 0.0112616324892505  | AGIWUR15685 |
| CB4856                             | HS | V | 7390529 | 7392111 | WBGene00015362 | fbxa-105 | C02H6.2  | -0.0101234843551978 |             |
| AGIWUR44525                        |    |   |         |         |                |          |          |                     |             |
| CB4856                             | HS | V | 7393550 | 7395459 | WBGene00005900 | srx-9    | R13D7.6  | -0.0611462442555126 | AGIWUR37970 |
| CB4856                             | HS | V | 7398390 | 7399302 | WBGene00001789 | gst-41   | R13D7.7  | 0.212489477048397   | AGIWUR42946 |
| CB4856                             | HS | V | 7399904 | 7400199 | WBGene00044548 | cnc-9    | R13D7.11 | 0.0021791986110351  |             |

AGIWUR6901;AGIWUR8643;AGIWUR11457

|        |    |   |         |         |                |        |         |                     |             |
|--------|----|---|---------|---------|----------------|--------|---------|---------------------|-------------|
| CB4856 | HS | V | 7400888 | 7402192 | WBGene00005951 | srx-60 | R13D7.4 | 0.195345828703151   | AGIWUR37472 |
| CB4856 | HS | V | 7402655 | 7403910 | WBGene00005601 | srj-13 | R13D7.3 | 0.0389549865584513  | AGIWUR29550 |
| CB4856 | HS | V | 7404821 | 7405871 | WBGene00006091 | str-24 | R13D7.9 | 0.00588673094191039 |             |

AGIWUR4229;AGIWUR12780

|        |    |   |         |         |                |       |          |                   |  |
|--------|----|---|---------|---------|----------------|-------|----------|-------------------|--|
| CB4856 | HS | V | 7407547 | 7408814 | WBGene00020055 | srt-6 | R13D7.10 | -0.19633052746976 |  |
|--------|----|---|---------|---------|----------------|-------|----------|-------------------|--|

AGIWUR18133

|        |    |   |         |         |                |          |          |                    |             |
|--------|----|---|---------|---------|----------------|----------|----------|--------------------|-------------|
| CB4856 | HS | V | 7409899 | 7411253 | WBGene00020054 | R13D7.2  | R13D7.2  | -0.110999104554852 | AGIWUR23364 |
| CB4856 | HS | V | 7411995 | 7413059 | WBGene00006106 | str-41   | R13D7.1  | -0.131521085931277 | AGIWUR39155 |
| CB4856 | HS | V | 7413437 | 7413840 | WBGene00017567 | F18E3.11 | F18E3.11 | 0.262022970136822  |             |

AGIWUR16027;AGIWUR28494

|        |    |   |         |         |                |          |          |                    |  |
|--------|----|---|---------|---------|----------------|----------|----------|--------------------|--|
| CB4856 | HS | V | 7414941 | 7415344 | WBGene00045275 | F18E3.12 | F18E3.12 | 0.0606022177102501 |  |
|--------|----|---|---------|---------|----------------|----------|----------|--------------------|--|

AGIWUR26393;AGIWUR34940

|        |    |   |         |         |                |          |          |                   |  |
|--------|----|---|---------|---------|----------------|----------|----------|-------------------|--|
| CB4856 | HS | V | 7416116 | 7416628 | WBGene00045276 | F18E3.13 | F18E3.13 | 0.269984063422378 |  |
|--------|----|---|---------|---------|----------------|----------|----------|-------------------|--|

AGIWUR790

|        |    |   |         |         |                |         |         |                     |             |
|--------|----|---|---------|---------|----------------|---------|---------|---------------------|-------------|
| CB4856 | HS | V | 7417660 | 7419828 | WBGene00005814 | srw-67  | F18E3.2 | -0.0347848183271404 | AGIWUR22042 |
| CB4856 | HS | V | 7420462 | 7421713 | WBGene00017564 | srxa-4  | F18E3.1 | 0.0622615693762363  | AGIWUR22088 |
| CB4856 | HS | V | 7421855 | 7422937 | WBGene00005343 | srh-126 | F18E3.3 | 0.131938376000928   |             |

AGIWUR3174;AGIWUR10542;AGIWUR11741;AGIWUR22896;AGIWUR25510;AGIWUR35121;AGIWUR39022

|        |    |   |         |         |                |          |          |                    |  |
|--------|----|---|---------|---------|----------------|----------|----------|--------------------|--|
| CB4856 | HS | V | 7423573 | 7424578 | WBGene00017566 | F18E3.10 | F18E3.10 | 0.0483470157934018 |  |
|--------|----|---|---------|---------|----------------|----------|----------|--------------------|--|

AGIWUR24955

|        |    |   |         |         |                |        |         |                    |             |
|--------|----|---|---------|---------|----------------|--------|---------|--------------------|-------------|
| CB4856 | HS | V | 7425259 | 7426694 | WBGene00005815 | srw-68 | F18E3.4 | 0.0795494579910558 | AGIWUR25357 |
| CB4856 | HS | V | 7427326 | 7428980 | WBGene00005816 | srw-69 | F18E3.5 | -0.109614199143818 | AGIWUR18382 |
| CB4856 | HS | V | 7429684 | 7431116 | WBGene00005818 | srw-71 | F18E3.6 | 0.150402834849684  | AGIWUR31118 |
| CB4856 | HS | V | 7431822 | 7433160 | WBGene00005825 | srw-78 | F18E3.9 | 0.0382634899640237 |             |

AGIWUR1755;AGIWUR3992;AGIWUR8503;AGIWUR12691;AGIWUR15111;AGIWUR29806;AGIWUR31635

|        |    |   |         |         |                |       |         |                    |  |
|--------|----|---|---------|---------|----------------|-------|---------|--------------------|--|
| CB4856 | HS | V | 7433401 | 7435650 | WBGene00017565 | ddo-2 | F18E3.7 | -0.151557929120675 |  |
|--------|----|---|---------|---------|----------------|-------|---------|--------------------|--|

AGIWUR31689;AGIWUR40261;AGIWUR42918;AGIWUR43676

|        |    |   |         |         |                |         |         |                   |  |
|--------|----|---|---------|---------|----------------|---------|---------|-------------------|--|
| CB4856 | HS | V | 7435413 | 7436962 | WBGene00017789 | F25E5.8 | F25E5.8 | 0.100706434395548 |  |
|--------|----|---|---------|---------|----------------|---------|---------|-------------------|--|

AGIWUR5670;AGIWUR27478;AGIWUR29340;AGIWUR42027

|        |    |   |         |         |                |         |         |                    |  |
|--------|----|---|---------|---------|----------------|---------|---------|--------------------|--|
| CB4856 | HS | V | 7437506 | 7437919 | WBGene00017790 | F25E5.9 | F25E5.9 | -0.239065339475199 |  |
|--------|----|---|---------|---------|----------------|---------|---------|--------------------|--|

AGIWUR4161;AGIWUR18222;AGIWUR20571;AGIWUR21570;AGIWUR30302;AGIWUR35467

|        |    |   |         |         |                |          |          |                     |  |
|--------|----|---|---------|---------|----------------|----------|----------|---------------------|--|
| CB4856 | HS | V | 7438285 | 7439933 | WBGene00017792 | F25E5.16 | F25E5.16 | -0.0664581746402977 |  |
|--------|----|---|---------|---------|----------------|----------|----------|---------------------|--|

AGIWUR26187

|        |    |   |         |         |                |         |         |                    |             |
|--------|----|---|---------|---------|----------------|---------|---------|--------------------|-------------|
| CB4856 | HS | V | 7440107 | 7441483 | WBGene00017788 | F25E5.7 | F25E5.7 | -0.317902200329363 | AGIWUR16933 |
| CB4856 | HS | V | 7445065 | 7446712 | WBGene00017787 | nhr-141 | F25E5.6 | 0.488205958850133  | AGIWUR40405 |
| CB4856 | HS | V | 7447273 | 7448884 | WBGene00017786 | F25E5.5 | F25E5.5 | 0.211267193523756  |             |

AGIWUR3591;AGIWUR4736;AGIWUR41263

|        |    |   |         |         |                |         |         |                     |            |
|--------|----|---|---------|---------|----------------|---------|---------|---------------------|------------|
| CB4856 | HS | V | 7449353 | 7451149 | WBGene00017785 | F25E5.4 | F25E5.4 | -0.0620125107877616 | AGIWUR3460 |
|--------|----|---|---------|---------|----------------|---------|---------|---------------------|------------|

|                                   |    |   |         |         |                |          |           |                      |             |
|-----------------------------------|----|---|---------|---------|----------------|----------|-----------|----------------------|-------------|
| CB4856                            | HS | V | 7451721 | 7452899 | WBGene00017784 | F25E5.3  | F25E5.3   | -0.0378713513913809  | AGIWUR44505 |
| CB4856                            | HS | V | 7452946 | 7454318 | WBGene00017791 | try-8    | F25E5.10  | -0.133211648400215   |             |
| AGIWUR13538                       |    |   |         |         |                |          |           |                      |             |
| CB4856                            | HS | V | 7455819 | 7457597 | WBGene00017783 | F25E5.2  | F25E5.2   | -0.257381512899215   | AGIWUR35524 |
| CB4856                            | HS | V | 7458252 | 7459150 | WBGene00005314 | srh-93   | F25E5.15  | 0.138070123287008    |             |
| AGIWUR42344                       |    |   |         |         |                |          |           |                      |             |
| CB4856                            | HS | V | 7459685 | 7460998 | WBGene00005313 | srh-92   | F25E5.13  | -0.0711659755625025  |             |
| AGIWUR8682                        |    |   |         |         |                |          |           |                      |             |
| CB4856                            | HS | V | 7461750 | 7462949 | WBGene00005312 | srh-91   | F25E5.11  | -0.0311667809401275  |             |
| AGIWUR5456;AGIWUR11180            |    |   |         |         |                |          |           |                      |             |
| CB4856                            | HS | V | 7465889 | 7471223 | WBGene00017782 | F25E5.1  | F25E5.1   | -0.0381190091352543  | AGIWUR4137  |
| CB4856                            | HS | V | 7471651 | 7472915 | WBGene00006094 | str-28   | F25E5.12  | -0.00422635936511107 |             |
| AGIWUR9253                        |    |   |         |         |                |          |           |                      |             |
| CB4856                            | HS | V | 7473299 | 7475013 | WBGene00006095 | str-29   | C18B10.9  | 0.087051446339824    |             |
| AGIWUR4836;AGIWUR23362            |    |   |         |         |                |          |           |                      |             |
| CB4856                            | HS | V | 7475626 | 7476866 | WBGene00005342 | srh-125  | C18B10.8  | 0.15825755699543     |             |
| AGIWUR21451                       |    |   |         |         |                |          |           |                      |             |
| CB4856                            | HS | V | 7477241 | 7478504 | WBGene00006231 | str-190  | C18B10.7  | -0.167165726083935   |             |
| AGIWUR10689                       |    |   |         |         |                |          |           |                      |             |
| CB4856                            | HS | V | 7479217 | 7481049 | WBGene00015963 | C18B10.6 | C18B10.6  | -0.0209027359943921  |             |
| AGIWUR838;AGIWUR10121;AGIWUR43551 |    |   |         |         |                |          |           |                      |             |
| CB4856                            | HS | V | 7481868 | 7483171 | WBGene00006285 | str-259  | C18B10.10 | -0.0376779837894285  |             |
| AGIWUR6434;AGIWUR33505            |    |   |         |         |                |          |           |                      |             |
| CB4856                            | HS | V | 7483316 | 7485100 | WBGene00015962 | srbc-8   | C18B10.5  | -0.023100976095118   |             |
| AGIWUR2319;AGIWUR21711            |    |   |         |         |                |          |           |                      |             |
| CB4856                            | HS | V | 7486131 | 7487618 | WBGene00015961 | srbc-7   | C18B10.4  | 0.219516653646572    |             |
| AGIWUR18606                       |    |   |         |         |                |          |           |                      |             |
| CB4856                            | HS | V | 7489134 | 7490440 | WBGene00015960 | srbc-9   | C18B10.3  | 0.0329708247899929   |             |
| AGIWUR15347;AGIWUR27013           |    |   |         |         |                |          |           |                      |             |
| CB4856                            | HS | V | 7491875 | 7493024 | WBGene00015959 | srbc-10  | C18B10.2  | 0.170594116208058    |             |
| AGIWUR44235                       |    |   |         |         |                |          |           |                      |             |
| CB4856                            | HS | V | 7493880 | 7495289 | WBGene00015958 | srbc-11  | C18B10.1  | -0.13625273242889    |             |
| AGIWUR38818                       |    |   |         |         |                |          |           |                      |             |
| CB4856                            | HS | V | 7497740 | 7499055 | WBGene00005300 | srh-79   | C04F2.1   | -0.173002529801389   | AGIWUR34383 |
| CB4856                            | HS | V | 7499652 | 7500958 | WBGene00005431 | srh-221  | C04F2.2   | 0.0884572319296932   |             |
| AGIWUR22231;AGIWUR40815           |    |   |         |         |                |          |           |                      |             |
| CB4856                            | HS | V | 7501534 | 7502673 | WBGene00005438 | srh-230  | C04F2.3   | 0.0479584930210217   |             |
| AGIWUR36299;AGIWUR42880           |    |   |         |         |                |          |           |                      |             |
| CB4856                            | HS | V | 7502840 | 7504371 | WBGene00005437 | srh-229  | C04F2.4   | 0.0108558526768494   |             |

AGIWUR4123;AGIWUR13226;AGIWUR20592

CB4856 HS V 7504653 7505945 WBGene00005473 srh-267 C04F2.5 0.487697666777559

AGIWUR12092;AGIWUR19173

CB4856 HS V 7506914 7508265 WBGene00006097 str-31 C54F6.10 0.196485248344299

AGIWUR37093

CB4856 HS V 7508994 7510602 WBGene00016927 nhr-172 C54F6.9 0.445301911538107 AGIWUR8052

CB4856 HS V 7511765 7513684 WBGene00016926 nhr-171 C54F6.8 0.330450424230021 AGIWUR21182

CB4856 HS V 7515245 7517307 WBGene00016925 srb-18 C54F6.7 0.108716911453356 AGIWUR22330

CB4856 HS V 7517685 7520177 WBGene00016928 srb-19 C54F6.11 0.0194106017530071

AGIWUR6103

CB4856 HS V 7522032 7522364 WBGene00044113 C54F6.15 C54F6.15 -0.411904150053736

AGIWUR3238;AGIWUR29620;AGIWUR37411;AGIWUR39092;AGIWUR40472

CB4856 HS V 7523692 7525421 WBGene00016924 C54F6.6 C54F6.6 0.020023618372818 AGIWUR42339

CB4856 HS V 7529116 7529450 WBGene00016923 C54F6.5 C54F6.5 0.0206030095260381 AGIWUR8243

CB4856 HS V 7530261 7531463 WBGene00016922 swt-2 C54F6.4 -0.151758426126358 AGIWUR34665

CB4856 HS V 7533247 7535074 WBGene00016921 C54F6.3 C54F6.3 0.295751915374681 AGIWUR10479

CB4856 HS V 7536919 7537909 WBGene00016929 C54F6.12 C54F6.12 -0.01017452714839

AGIWUR901

CB4856 HS V 7539315 7540891 WBGene00005474 srh-268 C54F6.1 -0.0986270352624858 AGIWUR38594

CB4856 HS V 7540890 7544838 WBGene00003731 nhx-3 C54F6.13 -0.080596142954267

AGIWUR24901

CB4856 HS V 7546468 7548012 WBGene00001500 ftn-1 C54F6.14 -0.27822112863556

AGIWUR4104;AGIWUR10941;AGIWUR19302;AGIWUR25571

CB4856 HS V 7552121 7552708 WBGene00017599 F19F10.3 F19F10.3 0.0542174474613528

AGIWUR17858

CB4856 HS V 7552756 7553923 WBGene00017600 ttr-10 F19F10.4 0.294206896951046

AGIWUR205

CB4856 HS V 7555810 7557387 WBGene00005534 sri-22 F19F10.2 -0.0918265567723626

AGIWUR26691;AGIWUR41410

CB4856 HS V 7557541 7558783 WBGene00017601 ets-7 F19F10.5 -0.125946642780002

AGIWUR4260

CB4856 HS V 7560252 7561615 WBGene00017602 clec-211 F19F10.6 -0.0599502734653843

AGIWUR30534

CB4856 HS V 7562714 7564245 WBGene00017598 F19F10.1 F19F10.1 -0.116891590959942

AGIWUR44088

CB4856 HS V 7566232 7567059 WBGene00017603 clec-212 F19F10.7 -0.0612563908522281

AGIWUR868

CB4856 HS V 7569696 7570390 WBGene00017604 F19F10.8 F19F10.8 0.109902049679083

AGIWUR12944;AGIWUR17120;AGIWUR21096;AGIWUR29979



|                                                                     |    |   |         |         |                |           |           |                     |
|---------------------------------------------------------------------|----|---|---------|---------|----------------|-----------|-----------|---------------------|
| CB4856                                                              | HS | V | 7571950 | 7575715 | WBGene00017605 | F19F10.9  | F19F10.9  | 0.0738151130989255  |
| AGIWUR36257                                                         |    |   |         |         |                |           |           |                     |
| CB4856                                                              | HS | V | 7575750 | 7581532 | WBGene00017608 | F19F10.12 | F19F10.12 | -0.139431536294463  |
| AGIWUR21931;AGIWUR36890;AGIWUR40367                                 |    |   |         |         |                |           |           |                     |
| CB4856                                                              | HS | V | 7581473 | 7587698 | WBGene00017607 | F19F10.11 | F19F10.11 | 0.0231934721892433  |
| AGIWUR22956;AGIWUR25815                                             |    |   |         |         |                |           |           |                     |
| CB4856                                                              | HS | V | 7587996 | 7594740 | WBGene00016816 | C50E3.5   | C50E3.5   | -0.188965271243777  |
|                                                                     |    |   |         |         |                |           |           | AGIWUR38076         |
| CB4856                                                              | HS | V | 7594875 | 7596409 | WBGene00016818 | C50E3.7   | C50E3.7   | 0.0971340638455302  |
|                                                                     |    |   |         |         |                |           |           | AGIWUR27300         |
| CB4856                                                              | HS | V | 7598029 | 7598369 | WBGene00016819 | C50E3.8   | C50E3.8   | -0.113776013593156  |
|                                                                     |    |   |         |         |                |           |           | AGIWUR20841         |
| CB4856                                                              | HS | V | 7599257 | 7600424 | WBGene00016820 | C50E3.9   | C50E3.9   | 0.0367462997026138  |
|                                                                     |    |   |         |         |                |           |           | AGIWUR37388         |
| CB4856                                                              | HS | V | 7600609 | 7601543 | WBGene00016821 | sc1-26    | C50E3.10  | -0.333499787992149  |
| AGIWUR39347                                                         |    |   |         |         |                |           |           |                     |
| CB4856                                                              | HS | V | 7602213 | 7603486 | WBGene00016822 | C50E3.11  | C50E3.11  | -0.355696283174621  |
| AGIWUR3880;AGIWUR6076;AGIWUR9166;AGIWUR9454;AGIWUR18332;AGIWUR20959 |    |   |         |         |                |           |           |                     |
| CB4856                                                              | HS | V | 7603806 | 7609946 | WBGene00044738 | fol1-3    | C50E3.16  | 0.105951503398025   |
| AGIWUR7594;AGIWUR28960                                              |    |   |         |         |                |           |           |                     |
| CB4856                                                              | HS | V | 7610370 | 7610963 | WBGene00016814 | C50E3.2   | C50E3.2   | -0.0343729256269292 |
|                                                                     |    |   |         |         |                |           |           | AGIWUR43867         |
| CB4856                                                              | HS | V | 7611267 | 7611905 | WBGene00016813 | clcc-214  | C50E3.1   | 0.215065391034107   |
| AGIWUR9667                                                          |    |   |         |         |                |           |           |                     |
| CB4856                                                              | HS | V | 7612344 | 7615648 | WBGene00044549 | clcc-215  | C50E3.14  | -0.0386528375222523 |
| AGIWUR7336;AGIWUR28371                                              |    |   |         |         |                |           |           |                     |
| CB4856                                                              | HS | V | 7618414 | 7620349 | WBGene00044550 | C50E3.15  | C50E3.15  | -0.0105783450310559 |
| AGIWUR35919;AGIWUR36118                                             |    |   |         |         |                |           |           |                     |
| CB4856                                                              | HS | V | 7620504 | 7622061 | WBGene00016823 | C50E3.12  | C50E3.12  | -0.212773701674038  |
| AGIWUR7090;AGIWUR16388;AGIWUR17311                                  |    |   |         |         |                |           |           |                     |
| CB4856                                                              | HS | V | 7622335 | 7624252 | WBGene00016824 | C50E3.13  | C50E3.13  | -0.0850213696772855 |
| AGIWUR29608                                                         |    |   |         |         |                |           |           |                     |
| CB4856                                                              | HS | V | 7624952 | 7626453 | WBGene00017201 | grsp-4    | F07C4.7   | 0.051228700321694   |
|                                                                     |    |   |         |         |                |           |           | AGIWUR10100         |
| CB4856                                                              | HS | V | 7626850 | 7627780 | WBGene00017200 | F07C4.6   | F07C4.6   | -0.0283890466654064 |
|                                                                     |    |   |         |         |                |           |           | AGIWUR39813         |
| CB4856                                                              | HS | V | 7629804 | 7631298 | WBGene00005108 | srd-30    | F07C4.5   | -0.0519754998039712 |
|                                                                     |    |   |         |         |                |           |           | AGIWUR14520         |
| CB4856                                                              | HS | V | 7632032 | 7633172 | WBGene00005103 | srd-25    | F07C4.4   | -0.117879803898772  |
|                                                                     |    |   |         |         |                |           |           | AGIWUR30077         |
| CB4856                                                              | HS | V | 7633399 | 7634757 | WBGene00005109 | srd-31    | F07C4.8   | 0.0784961022174206  |
|                                                                     |    |   |         |         |                |           |           | AGIWUR41386         |
| CB4856                                                              | HS | V | 7635769 | 7636882 | WBGene00005107 | srd-29    | F07C4.3   | -0.0365173426738572 |
|                                                                     |    |   |         |         |                |           |           | AGIWUR1831          |
| CB4856                                                              | HS | V | 7637277 | 7637792 | WBGene00017202 | clcc-46   | F07C4.9   | 0.325403470775342   |
|                                                                     |    |   |         |         |                |           |           | AGIWUR9953          |
| CB4856                                                              | HS | V | 7638105 | 7638622 | WBGene00017199 | clcc-45   | F07C4.2   | 0.686934184946047   |
|                                                                     |    |   |         |         |                |           |           | AGIWUR24928         |
| CB4856                                                              | HS | V | 7638944 | 7639869 | WBGene00017203 | F07C4.10  | F07C4.10  | 0.643791471456352   |
| AGIWUR22824                                                         |    |   |         |         |                |           |           |                     |
| CB4856                                                              | HS | V | 7642558 | 7643516 | WBGene00017204 | F07C4.11  | F07C4.11  | -0.205230294392106  |
| AGIWUR37360                                                         |    |   |         |         |                |           |           |                     |

|                                                                         |    |   |         |         |                 |           |           |                     |             |
|-------------------------------------------------------------------------|----|---|---------|---------|-----------------|-----------|-----------|---------------------|-------------|
| CB4856                                                                  | HS | V | 7645754 | 7647069 | WBGene00006112  | str-47    | F07C4.1   | -0.116987390854603  | AGIWUR28091 |
| CB4856                                                                  | HS | V | 7647836 | 7649817 | WBGene00017205  | F07C4.12  | F07C4.12  | -0.148089773538186  |             |
| AGIWUR14177;AGIWUR21706                                                 |    |   |         |         |                 |           |           |                     |             |
| CB4856                                                                  | HS | V | 7650242 | 7651857 | WBGene00005441  | srh-234   | F07C4.14  | 0.0193032134758138  |             |
| AGIWUR30304                                                             |    |   |         |         |                 |           |           |                     |             |
| CB4856                                                                  | HS | V | 7652338 | 7653667 | WBGene00005411  | srh-200   | F07C4.13  | 0.00805036933056513 |             |
| AGIWUR44692                                                             |    |   |         |         |                 |           |           |                     |             |
| CB4856                                                                  | HS | V | 7668240 | 7669000 | WBGene00015708  | C12D5.5   | C12D5.5   | -0.342060711005248  | AGIWUR34402 |
| CB4856                                                                  | HS | V | 7672089 | 7673253 | WBGene00015707  | C12D5.4   | C12D5.4   | -0.0619290522132783 |             |
| AGIWUR2897;AGIWUR42966;AGIWUR44218                                      |    |   |         |         |                 |           |           |                     |             |
| CB4856                                                                  | HS | V | 7676204 | 7676965 | WBGene00015706  | C12D5.3   | C12D5.3   | 0.1881799158177     | AGIWUR1116  |
| CB4856                                                                  | HS | V | 7679314 | 7681615 | WBGene00015709  | cyp-33A1  | C12D5.7   | 0.208119415265912   |             |
| AGIWUR36221                                                             |    |   |         |         |                 |           |           |                     |             |
| CB4856                                                                  | HS | V | 7681820 | 7683957 | WBGene00015712  | sre-11    | C12D5.11  | -0.256191510829273  |             |
| AGIWUR29774                                                             |    |   |         |         |                 |           |           |                     |             |
| CB4856                                                                  | HS | V | 7684363 | 7686335 | WBGene00003684  | nhr-94    | C12D5.8   | -0.110469336303356  |             |
| AGIWUR17409;AGIWUR18470;AGIWUR24192;AGIWUR38643;AGIWUR40479;AGIWUR43922 |    |   |         |         |                 |           |           |                     |             |
| CB4856                                                                  | HS | V | 7686350 | 7688228 | WBGene00015705  | nhr-152   | C12D5.2   | 0.311388362326564   | AGIWUR41171 |
| CB4856                                                                  | HS | V | 7688237 | 7689988 | WBGene00015710  | C12D5.9   | C12D5.9   | 0.118986648693991   | AGIWUR41038 |
| CB4856                                                                  | HS | V | 7690594 | 7692043 | WBGene00006194  | str-147   | C12D5.1   | 0.197632696960542   |             |
| AGIWUR29458;AGIWUR43240                                                 |    |   |         |         |                 |           |           |                     |             |
| CB4856                                                                  | HS | V | 7692071 | 7693488 | WBGene00015711  | C12D5.10  | C12D5.10  | -0.0415579489089097 |             |
| AGIWUR4130;AGIWUR17148;AGIWUR35652                                      |    |   |         |         |                 |           |           |                     |             |
| CB4856                                                                  | HS | V | 7697142 | 7700760 | WBGene00022654  | ZK105.3   | ZK105.3   | 0.161862859265967   | AGIWUR26366 |
| CB4856                                                                  | HS | V | 7701048 | 7703636 | WBGene00022655  | srsx-40   | ZK105.4   | 0.0569507889661978  | AGIWUR24681 |
| CB4856                                                                  | HS | V | 7705616 | 7706955 | WBGene00005750  | srw-3     | ZK105.2   | 0.139900784793661   | AGIWUR44099 |
| CB4856                                                                  | HS | V | 7709050 | 7710037 | WBGene00022658  | srh-188   | ZK105.7   | -0.0490027397494601 |             |
| AGIWUR17472;AGIWUR35760                                                 |    |   |         |         |                 |           |           |                     |             |
| CB4856                                                                  | HS | V | 7712239 | 7713168 | WBGene000235114 | ZK105.13  | ZK105.13  | 0.157704445598755   |             |
| AGIWUR5750                                                              |    |   |         |         |                 |           |           |                     |             |
| CB4856                                                                  | HS | V | 7713990 | 7714698 | WBGene00022653  | ZK105.1   | ZK105.1   | 0.24461359460595    | AGIWUR5908  |
| CB4856                                                                  | HS | V | 7721181 | 7724065 | WBGene00022657  | ZK105.6   | ZK105.6   | -0.26644722440858   | AGIWUR40107 |
| CB4856                                                                  | HS | V | 7724494 | 7726110 | WBGene00044551  | ZK105.8   | ZK105.8   | -0.0138171299468368 |             |
| AGIWUR6482;AGIWUR39137;AGIWUR42851                                      |    |   |         |         |                 |           |           |                     |             |
| CB4856                                                                  | HS | V | 7728813 | 7730317 | WBGene00022410  | Y97E10C.1 | Y97E10C.1 | -0.0502677747811866 |             |
| AGIWUR23151                                                             |    |   |         |         |                 |           |           |                     |             |
| CB4856                                                                  | HS | V | 7731839 | 7733495 | WBGene00044342  | T05B11.7  | T05B11.7  |                     |             |
| -0.000170024204372954 AGIWUR3311;AGIWUR35193                            |    |   |         |         |                 |           |           |                     |             |
| CB4856                                                                  | HS | V | 7735619 | 7737024 | WBGene00005661  | srr-10    | T05B11.6  | -0.036572416252235  |             |

|                                                                                                                                                         |    |   |         |         |                |          |          |                     |             |
|---------------------------------------------------------------------------------------------------------------------------------------------------------|----|---|---------|---------|----------------|----------|----------|---------------------|-------------|
| AGIWUR44351                                                                                                                                             |    |   |         |         |                |          |          |                     |             |
| CB4856                                                                                                                                                  | HS | V | 7738010 | 7739596 | WBGene00005660 | srr-9    | T05B11.2 | 0.0601680895373384  |             |
| AGIWUR42129                                                                                                                                             |    |   |         |         |                |          |          |                     |             |
| CB4856                                                                                                                                                  | HS | V | 7748863 | 7751368 | WBGene00020245 | T05B11.1 | T05B11.1 | 0.234462704057503   |             |
| AGIWUR26544                                                                                                                                             |    |   |         |         |                |          |          |                     |             |
| CB4856                                                                                                                                                  | HS | V | 7751901 | 7754139 | WBGene00020247 | T05B11.4 | T05B11.4 | 0.203064228491023   |             |
| AGIWUR36773                                                                                                                                             |    |   |         |         |                |          |          |                     |             |
| CB4856                                                                                                                                                  | HS | V | 7756749 | 7757854 | WBGene00023340 | T05B11.5 | T05B11.5 | 0.0417812548024967  |             |
| AGIWUR12624;AGIWUR27525;AGIWUR40406                                                                                                                     |    |   |         |         |                |          |          |                     |             |
| CB4856                                                                                                                                                  | HS | V | 7760474 | 7761633 | WBGene00016150 | hint-3   | C26F1.7  | -0.109508558870314  | AGIWUR28712 |
| CB4856                                                                                                                                                  | HS | V | 7771328 | 7773273 | WBGene00016149 | frpr-3   | C26F1.6  | 0.590700842564027   | AGIWUR21381 |
| CB4856                                                                                                                                                  | HS | V | 7774441 | 7775759 | WBGene00001719 | grl-10   | C26F1.5  | 0.181722739928553   | AGIWUR700   |
| CB4856                                                                                                                                                  | HS | V | 7775742 | 7776079 | WBGene00004453 | rpl-39   | C26F1.9  | -0.0723119408348261 | AGIWUR17213 |
| CB4856                                                                                                                                                  | HS | V | 7776576 | 7777236 | WBGene00004499 | rps-30   | C26F1.4  | 0.0772504960522014  |             |
| AGIWUR2827;AGIWUR13715;AGIWUR20076;AGIWUR25322;AGIWUR32322;AGIWUR33401;AGIWUR40641                                                                      |    |   |         |         |                |          |          |                     |             |
| CB4856                                                                                                                                                  | HS | V | 7777300 | 7778985 | WBGene00016148 | C26F1.3  | C26F1.3  | 0.069812152547982   |             |
| AGIWUR60;AGIWUR12951;AGIWUR33169;AGIWUR36881                                                                                                            |    |   |         |         |                |          |          |                     |             |
| CB4856                                                                                                                                                  | HS | V | 7781811 | 7784595 | WBGene00016147 | cyp-32A1 | C26F1.2  | 0.0352808007373788  |             |
| AGIWUR44527                                                                                                                                             |    |   |         |         |                |          |          |                     |             |
| CB4856                                                                                                                                                  | HS | V | 7785417 | 7787712 | WBGene00016146 | C26F1.1  | C26F1.1  | -0.233403538861515  |             |
| AGIWUR6041;AGIWUR11348;AGIWUR18024;AGIWUR29985;AGIWUR33124;AGIWUR33236                                                                                  |    |   |         |         |                |          |          |                     |             |
| CB4856                                                                                                                                                  | HS | V | 7793367 | 7794025 | WBGene00001464 | flp-21   | C26F1.10 | 0.0695791931619389  |             |
| AGIWUR8251                                                                                                                                              |    |   |         |         |                |          |          |                     |             |
| CB4856                                                                                                                                                  | HS | V | 7801518 | 7803727 | WBGene00022812 | uvs-1    | ZK742.2  | 0.0960862573300467  | AGIWUR34269 |
| CB4856                                                                                                                                                  | HS | V | 7805064 | 7814656 | WBGene00002078 | xpo-1    | ZK742.1  | -0.110141067731099  |             |
| AGIWUR721;AGIWUR1219;AGIWUR5682;AGIWUR11323;AGIWUR14384;AGIWUR15800;AGIWUR23048;AGIWUR23160;AGIWUR26928;AGIWUR28172;AGIWUR34718;AGIWUR39925;AGIWUR40454 |    |   |         |         |                |          |          |                     |             |
| CB4856                                                                                                                                                  | HS | V | 7820578 | 7821477 | WBGene00002256 | lbp-4    | ZK742.5  | 0.110665257240486   | AGIWUR42605 |
| CB4856                                                                                                                                                  | HS | V | 7827201 | 7842388 | WBGene00003242 | mig-6    | C37C3.6  | 0.0586979890334334  |             |
| AGIWUR27540;AGIWUR30637;AGIWUR44675                                                                                                                     |    |   |         |         |                |          |          |                     |             |
| CB4856                                                                                                                                                  | HS | V | 7842543 | 7844299 | WBGene00001697 | grd-8    | C37C3.4  | -0.0847292139044491 | AGIWUR13235 |
| CB4856                                                                                                                                                  | HS | V | 7844343 | 7847164 | WBGene00016500 | memo-1   | C37C3.8  | 0.0406293315346451  |             |
| AGIWUR21318;AGIWUR38933;AGIWUR42472;AGIWUR43233                                                                                                         |    |   |         |         |                |          |          |                     |             |
| CB4856                                                                                                                                                  | HS | V | 7849984 | 7851029 | WBGene00016497 | vps-32.2 | C37C3.3  | -0.294574985922598  |             |
| AGIWUR16738                                                                                                                                             |    |   |         |         |                |          |          |                     |             |
| CB4856                                                                                                                                                  | HS | V | 7852286 | 7853975 | WBGene00016501 | C37C3.9  | C37C3.9  | -0.0195692108981778 | AGIWUR18544 |
| CB4856                                                                                                                                                  | HS | V | 7854991 | 7857925 | WBGene00016496 | C37C3.2  | C37C3.2  | 0.0474920220373471  |             |
| AGIWUR10421;AGIWUR15189;AGIWUR29926;AGIWUR38035                                                                                                         |    |   |         |         |                |          |          |                     |             |
| CB4856                                                                                                                                                  | HS | V | 7857963 | 7859909 | WBGene00016495 | C37C3.1  | C37C3.1  | -0.188863497927933  | AGIWUR30764 |

|                                     |   |         |         |                |           |            |                     |             |
|-------------------------------------|---|---------|---------|----------------|-----------|------------|---------------------|-------------|
| CB4856 HS                           | V | 7862275 | 7863070 | WBGene00016502 | C37C3.10  | C37C3.10   | 0.44184440221678    |             |
| AGIWUR21569                         |   |         |         |                |           |            |                     |             |
| CB4856 HS                           | V | 7863458 | 7864731 | WBGene00016503 | C37C3.11  | C37C3.11   | -0.101139924356328  |             |
| AGIWUR13987                         |   |         |         |                |           |            |                     |             |
| CB4856 HS                           | V | 7868470 | 7870807 | WBGene00077712 | nipi-4    | F40A3.5    | 0.0519508193167493  | AGIWUR32728 |
| CB4856 HS                           | V | 7875756 | 7876789 | WBGene00018219 | F40A3.4   | F40A3.4    | -0.107512487590143  |             |
| AGIWUR390;AGIWUR13174;AGIWUR23869   |   |         |         |                |           |            |                     |             |
| CB4856 HS                           | V | 7877490 | 7878514 | WBGene00018218 | F40A3.3   | F40A3.3    | 0.187879932396752   | AGIWUR4725  |
| CB4856 HS                           | V | 7878914 | 7881403 | WBGene00018217 | F40A3.2   | F40A3.2    | 0.284609020231581   | AGIWUR10577 |
| CB4856 HS                           | V | 7891530 | 7895518 | WBGene00018216 | F40A3.1   | F40A3.1    | 0.0807899957993623  | AGIWUR36055 |
| CB4856 HS                           | V | 7895465 | 7899861 | WBGene00018222 | F40A3.7   | F40A3.7    | 0.336958743411589   | AGIWUR45014 |
| CB4856 HS                           | V | 7914420 | 7915728 | WBGene00005902 | srx-11    | Y97E10B.6  | 0.315319345795148   |             |
| AGIWUR27174                         |   |         |         |                |           |            |                     |             |
| CB4856 HS                           | V | 7925783 | 7926756 | WBGene00022406 | srsx-7    | Y97E10B.4  | 0.111593957412255   |             |
| AGIWUR17411                         |   |         |         |                |           |            |                     |             |
| CB4856 HS                           | V | 7927084 | 7928451 | WBGene00022405 | srsx-6    | Y97E10B.3  | 0.468394009205763   |             |
| AGIWUR18933                         |   |         |         |                |           |            |                     |             |
| CB4856 HS                           | V | 7928960 | 7930337 | WBGene00022404 | srsx-5    | Y97E10B.2  | 0.0491962298770341  |             |
| AGIWUR15793                         |   |         |         |                |           |            |                     |             |
| CB4856 HS                           | V | 7930475 | 7933098 | WBGene00003575 | ncx-10    | Y97E10B.7  | 0.0389394778305849  |             |
| AGIWUR25969                         |   |         |         |                |           |            |                     |             |
| CB4856 HS                           | V | 7934457 | 7935113 | WBGene00022407 | srsx-4    | Y97E10B.8  | 0.0177692133699221  |             |
| AGIWUR8695                          |   |         |         |                |           |            |                     |             |
| CB4856 HS                           | V | 7936144 | 7937252 | WBGene00022408 | srsx-3    | Y97E10B.9  | 0.0158401504162793  |             |
| AGIWUR41183                         |   |         |         |                |           |            |                     |             |
| CB4856 HS                           | V | 7938605 | 7940383 | WBGene00022409 | srt-53    | Y97E10B.10 | -0.0508145723184512 |             |
| AGIWUR12412;AGIWUR36109;AGIWUR44229 |   |         |         |                |           |            |                     |             |
| CB4856 HS                           | V | 7943868 | 7946857 | WBGene00022403 | Y97E10B.1 | Y97E10B.1  | 0.201946638382545   |             |
| AGIWUR9706                          |   |         |         |                |           |            |                     |             |
| CB4856 HS                           | V | 7947231 | 7948615 | WBGene00017821 | F26D11.4  | F26D11.4   | 0.0129539264209431  |             |
| AGIWUR33936                         |   |         |         |                |           |            |                     |             |
| CB4856 HS                           | V | 7951625 | 7952955 | WBGene00017822 | cllec-216 | F26D11.5   | -0.303276105450586  |             |
| AGIWUR19386;AGIWUR35862;AGIWUR41728 |   |         |         |                |           |            |                     |             |
| CB4856 HS                           | V | 7953354 | 7954652 | WBGene00045393 | F26D11.13 | F26D11.13  | 0.989392357652958   |             |
| AGIWUR5740                          |   |         |         |                |           |            |                     |             |
| CB4856 HS                           | V | 7954793 | 7955363 | WBGene00045392 | pals-35   | F26D11.12  | 0.188007459320119   |             |
| AGIWUR21854                         |   |         |         |                |           |            |                     |             |
| CB4856 HS                           | V | 7955404 | 7956497 | WBGene00017823 | pals-34   | F26D11.6   | 0.0138731910478751  |             |
| AGIWUR4877;AGIWUR18296              |   |         |         |                |           |            |                     |             |

|                                                                                     |   |                 |                |            |            |                     |             |
|-------------------------------------------------------------------------------------|---|-----------------|----------------|------------|------------|---------------------|-------------|
| CB4856 HS<br>AGIWUR38445                                                            | V | 7957277 7958840 | WBGene00017824 | clec-217   | F26D11.9   | -0.110479926952651  |             |
| CB4856 HS<br>AGIWUR14036                                                            | V | 7959270 7960958 | WBGene00017819 | F26D11.2   | F26D11.2   | 0.4818984370729     |             |
| CB4856 HS<br>AGIWUR33539                                                            | V | 7961539 7968899 | WBGene00000488 | che-7      | F26D11.10  | -0.0366159505671391 |             |
| CB4856 HS<br>AGIWUR7383;AGIWUR44679                                                 | V | 7972924 7977774 | WBGene00002632 | let-413    | F26D11.11  | 0.13080677055036    |             |
| CB4856 HS<br>AGIWUR42437                                                            | V | 7981545 7982662 | WBGene00017818 | F26D11.1   | F26D11.1   | 0.0416475886809113  |             |
| CB4856 HS<br>AGIWUR7366                                                             | V | 7982656 7983431 | WBGene00022394 | Y97E10AL.3 | Y97E10AL.3 | 0.0329700610421959  |             |
| CB4856 HS<br>AGIWUR23178                                                            | V | 7983849 7985954 | WBGene00022393 | abhd-12    | Y97E10AL.2 | -0.0503235971166234 |             |
| CB4856 HS<br>AGIWUR36575                                                            | V | 7993789 7994666 | WBGene00022395 | ceh-76     | Y97E10AM.1 | 0.174838214207154   |             |
| CB4856 HS<br>AGIWUR41368                                                            | V | 7996178 8000233 | WBGene00022397 | Y97E10AR.2 | Y97E10AR.2 | 0.155666610414669   |             |
| CB4856 HS<br>AGIWUR6325;AGIWUR21011;AGIWUR26692;AGIWUR31456;AGIWUR38523;AGIWUR39332 | V | 8001451 8004690 | WBGene00022396 | Y97E10AR.1 | Y97E10AR.1 | 0.00899746542476265 |             |
| CB4856 HS<br>AGIWUR24477;AGIWUR28438;AGIWUR30489;AGIWUR37606;AGIWUR41982            | V | 8005326 8005692 | WBGene00044552 | Y97E10AR.8 | Y97E10AR.8 | 0.0981293292654062  |             |
| CB4856 HS<br>AGIWUR4548                                                             | V | 8006179 8007510 | WBGene00022398 | Y97E10AR.3 | Y97E10AR.3 | 0.0816354723963215  |             |
| CB4856 HS<br>AGIWUR31544                                                            | V | 8008028 8010443 | WBGene00022399 | Y97E10AR.4 | Y97E10AR.4 | 0.193509200921083   |             |
| CB4856 HS<br>AGIWUR44898                                                            | V | 8010475 8011108 | WBGene00022402 | lmtr-2     | Y97E10AR.7 | 0.116903624515288   |             |
| CB4856 HS<br>AGIWUR14983                                                            | V | 8011219 8012345 | WBGene00022400 | rpb-9      | Y97E10AR.5 | 0.031507712868839   |             |
| CB4856 HS<br>AGIWUR2712                                                             | V | 8012401 8014182 | WBGene00022401 | Y97E10AR.6 | Y97E10AR.6 | 0.115583313021453   |             |
| CB4856 HS<br>AGIWUR12380;AGIWUR16581;AGIWUR21967;AGIWUR31278                        | V | 8017947 8021715 | WBGene00018398 | sptl-2     | F43H9.2    | 0.0344638692811667  |             |
| CB4856 HS                                                                           | V | 8022218 8023308 | WBGene00001152 | ech-3      | F43H9.1    | -0.0391340540335143 | AGIWUR38133 |
| CB4856 HS                                                                           | V | 8023195 8024940 | WBGene00018399 | F43H9.3    | F43H9.3    | 0.0938056285565345  | AGIWUR30800 |
| CB4856 HS                                                                           | V | 8026691 8028789 | WBGene00018400 | F43H9.4    | F43H9.4    | 0.237674819412106   | AGIWUR2161  |
| CB4856 HS                                                                           | V | 8029439 8031214 | WBGene00003865 | oma-2      | ZC513.6    | -0.0206765995133615 | AGIWUR10685 |
| CB4856 HS                                                                           | V | 8031411 8035014 | WBGene00006935 | vars-1     | ZC513.4    | -0.134399771014331  |             |

AGIWUR21496;AGIWUR24632;AGIWUR29054;AGIWUR39461

|        |    |   |         |         |                |         |         |                    |            |
|--------|----|---|---------|---------|----------------|---------|---------|--------------------|------------|
| CB4856 | HS | V | 8035111 | 8039506 | WBGene00022629 | ZC513.5 | ZC513.5 | 0.224162989172029  | AGIWUR6084 |
| CB4856 | HS | V | 8039469 | 8040387 | WBGene00023209 | ZC513.7 | ZC513.7 | -0.187402093975869 |            |

AGIWUR11496;AGIWUR17404;AGIWUR38696

|        |    |   |         |         |                |         |          |                    |             |
|--------|----|---|---------|---------|----------------|---------|----------|--------------------|-------------|
| CB4856 | HS | V | 8047044 | 8049528 | WBGene00022628 | ZC513.3 | ZC513.3  | 0.0628425242942701 | AGIWUR33455 |
| CB4856 | HS | V | 8049744 | 8050893 | WBGene00000620 | col-43  | ZC513.8  | 0.0527655440654939 | AGIWUR957   |
| CB4856 | HS | V | 8052137 | 8053730 | WBGene00006060 | sth-1   | ZC513.12 | 0.163458510954429  |             |

AGIWUR27227

|        |    |   |         |         |                |         |         |                     |  |
|--------|----|---|---------|---------|----------------|---------|---------|---------------------|--|
| CB4856 | HS | V | 8054430 | 8057558 | WBGene00022627 | ZC513.2 | ZC513.2 | -0.0334664579258019 |  |
|--------|----|---|---------|---------|----------------|---------|---------|---------------------|--|

AGIWUR27743;AGIWUR44063

|        |    |   |         |         |                |         |          |                  |  |
|--------|----|---|---------|---------|----------------|---------|----------|------------------|--|
| CB4856 | HS | V | 8058659 | 8060317 | WBGene00006187 | str-138 | ZC513.11 | 0.14373823553477 |  |
|--------|----|---|---------|---------|----------------|---------|----------|------------------|--|

AGIWUR36260

|        |    |   |         |         |                |          |          |                    |            |
|--------|----|---|---------|---------|----------------|----------|----------|--------------------|------------|
| CB4856 | HS | V | 8060873 | 8062174 | WBGene00006186 | str-139  | ZC513.9  | 0.0638480149583502 | AGIWUR8996 |
| CB4856 | HS | V | 8063247 | 8065079 | WBGene00022630 | fbxa-223 | ZC513.10 | 0.0611339811976137 |            |

AGIWUR41957

|        |    |   |         |         |                |         |         |                     |             |
|--------|----|---|---------|---------|----------------|---------|---------|---------------------|-------------|
| CB4856 | HS | V | 8065780 | 8067900 | WBGene00006188 | str-140 | C09H5.3 | 0.0174013928443433  | AGIWUR12899 |
| CB4856 | HS | V | 8068152 | 8069737 | WBGene00006190 | str-143 | C09H5.4 | -0.0537820573994363 | AGIWUR22797 |
| CB4856 | HS | V | 8070643 | 8072266 | WBGene00006191 | str-144 | C09H5.5 | -0.425388025806779  | AGIWUR24395 |
| CB4856 | HS | V | 8076012 | 8079914 | WBGene00015660 | catp-3  | C09H5.2 | -0.0586663157773835 |             |

AGIWUR20050;AGIWUR41311

|        |    |   |         |         |                |         |         |                     |             |
|--------|----|---|---------|---------|----------------|---------|---------|---------------------|-------------|
| CB4856 | HS | V | 8080367 | 8081678 | WBGene00006180 | str-131 | C09H5.6 | -0.115887676882182  | AGIWUR14503 |
| CB4856 | HS | V | 8082367 | 8082767 | WBGene00015659 | C09H5.1 | C09H5.1 | 0.0786393428874801  | AGIWUR15945 |
| CB4856 | HS | V | 8084120 | 8085241 | WBGene00015661 | C09H5.7 | C09H5.7 | -0.0925853474398792 | AGIWUR19755 |
| CB4856 | HS | V | 8085884 | 8087283 | WBGene00006177 | str-128 | C09H5.8 | 0.0568072666086792  | AGIWUR39552 |
| CB4856 | HS | V | 8089319 | 8090695 | WBGene00006179 | str-130 | C09H5.9 | 0.792070014178957   | AGIWUR20800 |
| CB4856 | HS | V | 8090973 | 8092485 | WBGene00006178 | str-129 | F58G4.5 | -0.0460280554262127 | AGIWUR24912 |
| CB4856 | HS | V | 8093335 | 8095468 | WBGene00006193 | str-146 | F58G4.6 | -0.25598624817415   | AGIWUR34556 |
| CB4856 | HS | V | 8096394 | 8098339 | WBGene00006192 | str-145 | F58G4.7 | 0.0862220090050716  | AGIWUR31757 |
| CB4856 | HS | V | 8099621 | 8100484 | WBGene00019066 | sdz-23  | F58G4.4 | 0.00239240614552294 | AGIWUR33239 |
| CB4856 | HS | V | 8102484 | 8106905 | WBGene00006149 | str-90  | F58G4.2 | 0.0434843016992801  | AGIWUR24341 |
| CB4856 | HS | V | 8108970 | 8118131 | WBGene00019064 | myo-5   | F58G4.1 | 0.0832385994803957  | AGIWUR42109 |
| CB4856 | HS | V | 8118264 | 8120351 | WBGene00017020 | D1014.7 | D1014.7 | -0.0118427421105451 | AGIWUR28183 |
| CB4856 | HS | V | 8121168 | 8123470 | WBGene00017019 | D1014.6 | D1014.6 | 0.0606642411663003  | AGIWUR10069 |
| CB4856 | HS | V | 8123684 | 8126710 | WBGene00017018 | D1014.5 | D1014.5 | 0.344758435824195   | AGIWUR26747 |
| CB4856 | HS | V | 8126663 | 8129352 | WBGene00005006 | spr-1   | D1014.8 | 0.129120221387488   |             |

AGIWUR2032;AGIWUR11463;AGIWUR13038

|        |    |   |         |         |                |         |         |                     |             |
|--------|----|---|---------|---------|----------------|---------|---------|---------------------|-------------|
| CB4856 | HS | V | 8130388 | 8133329 | WBGene00017016 | snap-1  | D1014.3 | -0.0277200068921175 | AGIWUR11044 |
| CB4856 | HS | V | 8133432 | 8134985 | WBGene00017017 | D1014.4 | D1014.4 | 0.0809060102088157  |             |

AGIWUR1511;AGIWUR18218;AGIWUR39125;AGIWUR39914

|                                                                                                            |    |   |         |         |                |           |           |                      |             |
|------------------------------------------------------------------------------------------------------------|----|---|---------|---------|----------------|-----------|-----------|----------------------|-------------|
| CB4856                                                                                                     | HS | V | 8143761 | 8147782 | WBGene00017015 | D1014.2   | D1014.2   | 0.0368584416667197   | AGIWUR18107 |
| CB4856                                                                                                     | HS | V | 8157746 | 8159844 | WBGene00006309 | su1-2     | D1014.1   | 0.15588201470052     | AGIWUR14310 |
| CB4856                                                                                                     | HS | V | 8159929 | 8161643 | WBGene00017636 | F20D6.6   | F20D6.6   | 0.109504937149655    | AGIWUR12077 |
| CB4856                                                                                                     | HS | V | 8177093 | 8177449 | WBGene00017638 | F20D6.9   | F20D6.9   | -0.0969060319484072  | AGIWUR25233 |
| CB4856                                                                                                     | HS | V | 8179131 | 8183442 | WBGene00005648 | srp-7     | F20D6.4   | 0.0623932638244327   |             |
| AGIWUR10926;AGIWUR15736;AGIWUR41757                                                                        |    |   |         |         |                |           |           |                      |             |
| CB4856                                                                                                     | HS | V | 8183730 | 8185772 | WBGene00005649 | srp-8     | F20D6.3   | 0.0350538891713001   |             |
| AGIWUR14471;AGIWUR14902;AGIWUR23568;AGIWUR43404                                                            |    |   |         |         |                |           |           |                      |             |
| CB4856                                                                                                     | HS | V | 8186039 | 8187319 | WBGene00017634 | F20D6.2   | F20D6.2   | -0.0544901447559578  | AGIWUR9313  |
| CB4856                                                                                                     | HS | V | 8187803 | 8190116 | WBGene00043069 | F20D6.12  | F20D6.12  | 0.0332644041211081   |             |
| AGIWUR12284                                                                                                |    |   |         |         |                |           |           |                      |             |
| CB4856                                                                                                     | HS | V | 8190699 | 8192050 | WBGene00017633 | F20D6.1   | F20D6.1   | 0.259099151197686    | AGIWUR6718  |
| CB4856                                                                                                     | HS | V | 8192060 | 8195937 | WBGene00017639 | F20D6.10  | F20D6.10  | 0.206811004712345    |             |
| AGIWUR8103                                                                                                 |    |   |         |         |                |           |           |                      |             |
| CB4856                                                                                                     | HS | V | 8196774 | 8199094 | WBGene00017640 | F20D6.11  | F20D6.11  | -0.0832577253728637  |             |
| AGIWUR5525                                                                                                 |    |   |         |         |                |           |           |                      |             |
| CB4856                                                                                                     | HS | V | 8201808 | 8202546 | WBGene00019478 | cri-2     | K07C11.5  | 0.0856194594149358   |             |
| AGIWUR42010                                                                                                |    |   |         |         |                |           |           |                      |             |
| CB4856                                                                                                     | HS | V | 8203379 | 8205986 | WBGene00019477 | K07C11.4  | K07C11.4  | -0.0188922268421958  |             |
| AGIWUR17869                                                                                                |    |   |         |         |                |           |           |                      |             |
| CB4856                                                                                                     | HS | V | 8207235 | 8208013 | WBGene00019476 | K07C11.3  | K07C11.3  | 0.115380501699626    |             |
| AGIWUR5481                                                                                                 |    |   |         |         |                |           |           |                      |             |
| CB4856                                                                                                     | HS | V | 8207930 | 8213968 | WBGene00019479 | K07C11.7  | K07C11.7  | 0.142526406425123    |             |
| AGIWUR1879;AGIWUR11564;AGIWUR41258                                                                         |    |   |         |         |                |           |           |                      |             |
| CB4856                                                                                                     | HS | V | 8215534 | 8217884 | WBGene00019480 | K07C11.8  | K07C11.8  | 0.289692838458176    |             |
| AGIWUR703                                                                                                  |    |   |         |         |                |           |           |                      |             |
| CB4856                                                                                                     | HS | V | 8218279 | 8221316 | WBGene00019481 | cogc-6    | K07C11.9  | 0.196429720135948    |             |
| AGIWUR44423                                                                                                |    |   |         |         |                |           |           |                      |             |
| CB4856                                                                                                     | HS | V | 8221410 | 8223587 | WBGene00000098 | air-1     | K07C11.2  | -0.00968101949294642 |             |
| AGIWUR1464;AGIWUR10508;AGIWUR24452                                                                         |    |   |         |         |                |           |           |                      |             |
| CB4856                                                                                                     | HS | V | 8224965 | 8226037 | WBGene00003937 | pax-1     | K07C11.1  | -0.0606411124205835  |             |
| AGIWUR6074                                                                                                 |    |   |         |         |                |           |           |                      |             |
| CB4856                                                                                                     | HS | V | 8226061 | 8226852 | WBGene00019482 | K07C11.10 | K07C11.10 | -0.0087286725979645  |             |
| AGIWUR23380                                                                                                |    |   |         |         |                |           |           |                      |             |
| CB4856                                                                                                     | HS | V | 8228300 | 8238409 | WBGene00004395 | rol-3     | C16D9.2   | 0.00175535414634309  |             |
| AGIWUR28970;AGIWUR41147                                                                                    |    |   |         |         |                |           |           |                      |             |
| CB4856                                                                                                     | HS | V | 8238959 | 8240021 | WBGene00015858 | C16D9.3   | C16D9.3   | -0.00839582132187378 |             |
| AGIWUR2918;AGIWUR12819;AGIWUR13836;AGIWUR22036;AGIWUR25212;AGIWUR26109;AGIWUR37663;AGIWUR40907;AGIWUR41937 |    |   |         |         |                |           |           |                      |             |
| CB4856                                                                                                     | HS | V | 8240928 | 8242898 | WBGene00015859 | C16D9.4   | C16D9.4   | 0.0713784835146321   | AGIWUR39886 |

|                                                                               |    |   |         |         |                |          |          |                      |             |
|-------------------------------------------------------------------------------|----|---|---------|---------|----------------|----------|----------|----------------------|-------------|
| CB4856                                                                        | HS | V | 8243709 | 8245400 | WBGene00015860 | C16D9.5  | C16D9.5  | 0.189752632770459    |             |
| AGIWUR7962;AGIWUR25590;AGIWUR41064                                            |    |   |         |         |                |          |          |                      |             |
| CB4856                                                                        | HS | V | 8248123 | 8250289 | WBGene00015861 | C16D9.6  | C16D9.6  | 0.0640972851428572   | AGIWUR15092 |
| CB4856                                                                        | HS | V | 8256831 | 8258076 | WBGene00015862 | srt-25   | C16D9.7  | -0.146558291274832   | AGIWUR9495  |
| CB4856                                                                        | HS | V | 8259316 | 8261315 | WBGene00015857 | C16D9.1  | C16D9.1  | 0.154394554311514    | AGIWUR16555 |
| CB4856                                                                        | HS | V | 8261390 | 8263566 | WBGene00015863 | C16D9.8  | C16D9.8  | 0.159878162739322    | AGIWUR11845 |
| CB4856                                                                        | HS | V | 8264241 | 8264663 | WBGene00015864 | C16D9.9  | C16D9.9  | -0.267722547347176   | AGIWUR40396 |
| CB4856                                                                        | HS | V | 8265202 | 8266385 | WBGene00017679 | F21F8.5  | F21F8.5  | -0.0661225522199729  | AGIWUR890   |
| CB4856                                                                        | HS | V | 8267511 | 8268937 | WBGene00000219 | asp-6    | F21F8.7  | 0.427102900212894    | AGIWUR29921 |
| CB4856                                                                        | HS | V | 8269254 | 8272058 | WBGene00017678 | asp-12   | F21F8.4  | -0.136294776046332   | AGIWUR24711 |
| CB4856                                                                        | HS | V | 8272375 | 8274046 | WBGene00000218 | asp-5    | F21F8.3  | 0.205286723420114    |             |
| AGIWUR5560;AGIWUR23001;AGIWUR28611;AGIWUR31817                                |    |   |         |         |                |          |          |                      |             |
| CB4856                                                                        | HS | V | 8274353 | 8275757 | WBGene00017677 | asp-11   | F21F8.2  | 0.130602008985382    | AGIWUR24174 |
| CB4856                                                                        | HS | V | 8275898 | 8277041 | WBGene00006185 | str-137  | F21F8.8  | 0.945583063352953    |             |
| AGIWUR20524;AGIWUR37534                                                       |    |   |         |         |                |          |          |                      |             |
| CB4856                                                                        | HS | V | 8277516 | 8278930 | WBGene00006184 | str-136  | F21F8.9  | -0.288847333066689   | AGIWUR42835 |
| CB4856                                                                        | HS | V | 8279375 | 8282167 | WBGene00006183 | str-135  | F21F8.10 | 0.199482509231125    |             |
| AGIWUR22082                                                                   |    |   |         |         |                |          |          |                      |             |
| CB4856                                                                        | HS | V | 8282333 | 8284900 | WBGene00017681 | slc-17.5 | F21F8.11 | 0.283594277145307    |             |
| AGIWUR9561                                                                    |    |   |         |         |                |          |          |                      |             |
| CB4856                                                                        | HS | V | 8292064 | 8293516 | WBGene00005190 | srg-33   | F21F8.1  | -0.00660359376117103 | AGIWUR38187 |
| CB4856                                                                        | HS | V | 8293809 | 8294900 | WBGene00020939 | W02D7.3  | W02D7.3  | 0.222603406933127    | AGIWUR37768 |
| CB4856                                                                        | HS | V | 8296558 | 8297604 | WBGene00020940 | W02D7.4  | W02D7.4  | 0.143095830782574    | AGIWUR7250  |
| CB4856                                                                        | HS | V | 8297700 | 8299244 | WBGene00020941 | W02D7.5  | W02D7.5  | 0.0487468090402228   | AGIWUR41016 |
| CB4856                                                                        | HS | V | 8299753 | 8301507 | WBGene00020942 | W02D7.6  | W02D7.6  | 0.11429615513417     | AGIWUR2754  |
| CB4856                                                                        | HS | V | 8301490 | 8302580 | WBGene00004766 | sel-9    | W02D7.7  | -0.0251584205586717  |             |
| AGIWUR305;AGIWUR3250;AGIWUR5175;AGIWUR6945;AGIWUR8272;AGIWUR17351;AGIWUR19473 |    |   |         |         |                |          |          |                      |             |
| CB4856                                                                        | HS | V | 8302887 | 8304469 | WBGene00020946 | W02D7.11 | W02D7.11 | 0.462096781567485    |             |
| AGIWUR13639                                                                   |    |   |         |         |                |          |          |                      |             |
| CB4856                                                                        | HS | V | 8305120 | 8306460 | WBGene00020943 | W02D7.8  | W02D7.8  | -0.0308538812104437  | AGIWUR28197 |
| CB4856                                                                        | HS | V | 8307942 | 8310766 | WBGene00020938 | clcc-218 | W02D7.2  | 0.189991924351378    |             |
| AGIWUR39060;AGIWUR41065                                                       |    |   |         |         |                |          |          |                      |             |
| CB4856                                                                        | HS | V | 8311510 | 8312041 | WBGene00044356 | W02D7.12 | W02D7.12 | -0.451762187105574   |             |
| AGIWUR27526                                                                   |    |   |         |         |                |          |          |                      |             |
| CB4856                                                                        | HS | V | 8318435 | 8322863 | WBGene00020945 | clcc-219 | W02D7.10 | -0.259989518754665   |             |
| AGIWUR25784                                                                   |    |   |         |         |                |          |          |                      |             |
| CB4856                                                                        | HS | V | 8323426 | 8323885 | WBGene00023354 | W02D7.1  | W02D7.1  | 0.0625315385063483   |             |
| AGIWUR5151;AGIWUR11873;AGIWUR23778;AGIWUR28332                                |    |   |         |         |                |          |          |                      |             |
| CB4856                                                                        | HS | V | 8326191 | 8326514 | WBGene00020944 | W02D7.9  | W02D7.9  | 0.0598413308811718   | AGIWUR41935 |



|                                                                       |    |   |         |         |                |           |           |                      |             |
|-----------------------------------------------------------------------|----|---|---------|---------|----------------|-----------|-----------|----------------------|-------------|
| CB4856                                                                | HS | V | 8336658 | 8340675 | WBGene00006582 | tmd-2     | C08D8.2   | 0.182044818182055    |             |
| AGIWUR24109;AGIWUR37546                                               |    |   |         |         |                |           |           |                      |             |
| CB4856                                                                | HS | V | 8345759 | 8349909 | WBGene00015592 | C08D8.1   | C08D8.1   | 0.251501658953345    | AGIWUR31565 |
| CB4856                                                                | HS | V | 8351671 | 8353085 | WBGene00018180 | srsx-22   | F38E1.8   | -0.0668459445820195  | AGIWUR42326 |
| CB4856                                                                | HS | V | 8353793 | 8355008 | WBGene00044126 | srsx-23   | F38E1.12  | -0.0529060225856965  |             |
| AGIWUR32398;AGIWUR33303                                               |    |   |         |         |                |           |           |                      |             |
| CB4856                                                                | HS | V | 8355953 | 8358185 | WBGene00003395 | mom-2     | F38E1.7   | -0.0261196191613724  |             |
| AGIWUR9372;AGIWUR18335;AGIWUR22584;AGIWUR36859;AGIWUR40063            |    |   |         |         |                |           |           |                      |             |
| CB4856                                                                | HS | V | 8358203 | 8359163 | WBGene00018181 | F38E1.9   | F38E1.9   | -0.136021958254975   |             |
| AGIWUR17431;AGIWUR24194                                               |    |   |         |         |                |           |           |                      |             |
| CB4856                                                                | HS | V | 8359818 | 8361394 | WBGene00018179 | F38E1.6   | F38E1.6   | -0.110522570808578   | AGIWUR11093 |
| CB4856                                                                | HS | V | 8371014 | 8374027 | WBGene00001664 | gpa-2     | F38E1.5   | 0.0595402557292841   | AGIWUR29092 |
| CB4856                                                                | HS | V | 8374027 | 8375474 | WBGene00018182 | F38E1.10  | F38E1.10  | -0.365345674282719   |             |
| AGIWUR12738                                                           |    |   |         |         |                |           |           |                      |             |
| CB4856                                                                | HS | V | 8376117 | 8377944 | WBGene00018178 | F38E1.3   | F38E1.3   | 0.205895990469855    | AGIWUR6638  |
| CB4856                                                                | HS | V | 8378903 | 8379925 | WBGene00018183 | F38E1.11  | F38E1.11  | -0.0460448473736967  |             |
| AGIWUR34757                                                           |    |   |         |         |                |           |           |                      |             |
| CB4856                                                                | HS | V | 8379474 | 8383747 | WBGene00018694 | F52E1.5   | F52E1.5   | 0.339595234483713    |             |
| AGIWUR9540;AGIWUR37783                                                |    |   |         |         |                |           |           |                      |             |
| CB4856                                                                | HS | V | 8383922 | 8384867 | WBGene00044696 | F52E1.14  | F52E1.14  | 0.0818429520008248   |             |
| AGIWUR8044;AGIWUR9472;AGIWUR17987;AGIWUR34787;AGIWUR37989;AGIWUR42621 |    |   |         |         |                |           |           |                      |             |
| CB4856                                                                | HS | V | 8384774 | 8386268 | WBGene00002021 | hsp-17    | F52E1.7   | -0.102769038506921   | AGIWUR43590 |
| CB4856                                                                | HS | V | 8387356 | 8392324 | WBGene00001534 | gcy-7     | F52E1.4   | -0.0767105211380326  | AGIWUR37358 |
| CB4856                                                                | HS | V | 8392357 | 8394383 | WBGene00018696 | pho-6     | F52E1.8   | -0.042807075343104   | AGIWUR24061 |
| CB4856                                                                | HS | V | 8394800 | 8396344 | WBGene00018693 | F52E1.3   | F52E1.3   | 0.106720100698792    | AGIWUR42980 |
| CB4856                                                                | HS | V | 8398145 | 8402669 | WBGene00018697 | F52E1.9   | F52E1.9   | 0.156869821809798    | AGIWUR32593 |
| CB4856                                                                | HS | V | 8410595 | 8411831 | WBGene00018692 | F52E1.2   | F52E1.2   | -0.00653243716666196 | AGIWUR18541 |
| CB4856                                                                | HS | V | 8411775 | 8413513 | WBGene00018698 | vha-18    | F52E1.10  | -0.187379301080664   |             |
| AGIWUR24887                                                           |    |   |         |         |                |           |           |                      |             |
| CB4856                                                                | HS | V | 8414085 | 8415254 | WBGene00004078 | pos-1     | F52E1.1   | 0.111907770563       | AGIWUR7897  |
| CB4856                                                                | HS | V | 8415687 | 8444773 | WBGene00018700 | lmd-3     | F52E1.13  | -0.049718222810724   |             |
| AGIWUR2888;AGIWUR29288;AGIWUR40480;AGIWUR43671                        |    |   |         |         |                |           |           |                      |             |
| CB4856                                                                | HS | V | 8446608 | 8448009 | WBGene00020720 | T23B12.5  | T23B12.5  |                      |             |
| -0.00228356550668529 AGIWUR43508                                      |    |   |         |         |                |           |           |                      |             |
| CB4856                                                                | HS | V | 8455396 | 8457606 | WBGene00044553 | T23B12.11 | T23B12.11 | 0.0143408880869869   |             |
| AGIWUR21695;AGIWUR33424                                               |    |   |         |         |                |           |           |                      |             |
| CB4856                                                                | HS | V | 8457616 | 8460419 | WBGene00020721 | T23B12.6  | T23B12.6  | -0.156506266130607   |             |
| AGIWUR33383;AGIWUR39766;AGIWUR45189                                   |    |   |         |         |                |           |           |                      |             |
| CB4856                                                                | HS | V | 8461096 | 8462116 | WBGene00001040 | dnj-22    | T23B12.7  | 0.110470513750366    |             |

|                                                                        |    |   |         |         |                |          |          |                     |             |
|------------------------------------------------------------------------|----|---|---------|---------|----------------|----------|----------|---------------------|-------------|
| AGIWUR4124                                                             |    |   |         |         |                |          |          |                     |             |
| CB4856                                                                 | HS | V | 8462327 | 8465569 | WBGene00020719 | natc-1   | T23B12.4 | 0.161311339451107   |             |
| AGIWUR41325                                                            |    |   |         |         |                |          |          |                     |             |
| CB4856                                                                 | HS | V | 8465617 | 8467159 | WBGene00020718 | mrps-2   | T23B12.3 | 0.0649070423154878  |             |
| AGIWUR42622                                                            |    |   |         |         |                |          |          |                     |             |
| CB4856                                                                 | HS | V | 8467265 | 8468943 | WBGene00020717 | mrpl-4   | T23B12.2 | -0.0303016699140723 |             |
| AGIWUR1921;AGIWUR3134;AGIWUR8568;AGIWUR26621                           |    |   |         |         |                |          |          |                     |             |
| CB4856                                                                 | HS | V | 8469040 | 8470072 | WBGene00020716 | phf-30   | T23B12.1 | 0.0904805578366776  |             |
| AGIWUR4944;AGIWUR7828;AGIWUR43934                                      |    |   |         |         |                |          |          |                     |             |
| CB4856                                                                 | HS | V | 8470013 | 8471244 | WBGene00020722 | T23B12.8 | T23B12.8 | 0.191842557257923   |             |
| AGIWUR3007;AGIWUR8513                                                  |    |   |         |         |                |          |          |                     |             |
| CB4856                                                                 | HS | V | 8494889 | 8502336 | WBGene00004256 | pxn-1    | ZK994.3  | -0.203690732885422  |             |
| AGIWUR29049;AGIWUR39160                                                |    |   |         |         |                |          |          |                     |             |
| CB4856                                                                 | HS | V | 8502591 | 8504591 | WBGene00022842 | ZK994.6  | ZK994.6  | 0.11164454215737    | AGIWUR38282 |
| CB4856                                                                 | HS | V | 8510237 | 8512663 | WBGene00022840 | ZK994.1  | ZK994.1  | -0.172172874390204  | AGIWUR26288 |
| CB4856                                                                 | HS | V | 8512689 | 8513463 | WBGene00018481 | F45F2.9  | F45F2.9  | 0.0127543083628634  |             |
| AGIWUR3538;AGIWUR12227;AGIWUR14370;AGIWUR18337;AGIWUR30838;AGIWUR37139 |    |   |         |         |                |          |          |                     |             |
| CB4856                                                                 | HS | V | 8513577 | 8518764 | WBGene00018482 | F45F2.10 | F45F2.10 | -0.10354451793124   |             |
| AGIWUR20897                                                            |    |   |         |         |                |          |          |                     |             |
| CB4856                                                                 | HS | V | 8519346 | 8520896 | WBGene00018483 | F45F2.11 | F45F2.11 | -0.130983432130918  |             |
| AGIWUR34803                                                            |    |   |         |         |                |          |          |                     |             |
| CB4856                                                                 | HS | V | 8521503 | 8524555 | WBGene00018480 | otpl-7   | F45F2.7  | 0.0156058094018308  | AGIWUR1825  |
| CB4856                                                                 | HS | V | 8525908 | 8528580 | WBGene00018479 | otpl-6   | F45F2.6  | 0.115818537990116   | AGIWUR1512  |
| CB4856                                                                 | HS | V | 8529519 | 8532465 | WBGene00018478 | otpl-5   | F45F2.5  | -0.0895424890312002 | AGIWUR999   |
| CB4856                                                                 | HS | V | 8537331 | 8539614 | WBGene00018477 | otpl-4   | F45F2.1  | 0.143721896191946   | AGIWUR5463  |
| CB4856                                                                 | HS | V | 8539728 | 8545566 | WBGene00017798 | slc-17.8 | F25G6.7  | -0.0161910274884498 |             |
| AGIWUR40015                                                            |    |   |         |         |                |          |          |                     |             |
| CB4856                                                                 | HS | V | 8546128 | 8548880 | WBGene00003816 | asns-1   | F25G6.6  | -0.25480588131138   | AGIWUR24276 |
| CB4856                                                                 | HS | V | 8549289 | 8551165 | WBGene00006435 | stdh-4   | F25G6.5  | 0.273995363499425   | AGIWUR23729 |
| CB4856                                                                 | HS | V | 8552695 | 8555388 | WBGene00000054 | acr-15   | F25G6.4  | 0.123872796436531   | AGIWUR44252 |
| CB4856                                                                 | HS | V | 8561216 | 8564345 | WBGene00000055 | acr-16   | F25G6.3  | 0.0400065805691305  |             |
| AGIWUR16589;AGIWUR21014;AGIWUR42576                                    |    |   |         |         |                |          |          |                     |             |
| CB4856                                                                 | HS | V | 8564303 | 8565175 | WBGene00017799 | F25G6.8  | F25G6.8  | 0.0420321127754839  | AGIWUR39719 |
| CB4856                                                                 | HS | V | 8565275 | 8570077 | WBGene00017800 | F25G6.9  | F25G6.9  | 0.159876709700232   | AGIWUR11988 |
| CB4856                                                                 | HS | V | 8570311 | 8581397 | WBGene00017797 | symk-1   | F25G6.2  | 0.0160190899124308  |             |
| AGIWUR4549;AGIWUR20084                                                 |    |   |         |         |                |          |          |                     |             |
| CB4856                                                                 | HS | V | 8581261 | 8583576 | WBGene00015670 | C10B5.1  | C10B5.1  | 0.0284302434835553  | AGIWUR36163 |
| CB4856                                                                 | HS | V | 8583553 | 8584554 | WBGene00015671 | C10B5.3  | C10B5.3  | 0.13799397587303    | AGIWUR28344 |
| CB4856                                                                 | HS | V | 8594914 | 8597500 | WBGene00007055 | tag-196  | F41E6.6  | -0.167483825781833  | AGIWUR30420 |

|                                                                                                                      |    |   |         |         |                |          |          |                      |             |
|----------------------------------------------------------------------------------------------------------------------|----|---|---------|---------|----------------|----------|----------|----------------------|-------------|
| CB4856                                                                                                               | HS | V | 8597851 | 8599292 | WBGene00018288 | F41E6.7  | F41E6.7  | -0.076028025958208   | AGIWUR17625 |
| CB4856                                                                                                               | HS | V | 8599584 | 8601412 | WBGene00018289 | F41E6.8  | F41E6.8  | 0.0486670155626197   | AGIWUR31859 |
| CB4856                                                                                                               | HS | V | 8602084 | 8602825 | WBGene00044554 | F41E6.15 | F41E6.15 | -0.0287016338102895  |             |
| AGIWUR12689;AGIWUR20045;AGIWUR24139;AGIWUR36787;AGIWUR37343                                                          |    |   |         |         |                |          |          |                      |             |
| CB4856                                                                                                               | HS | V | 8603480 | 8605469 | WBGene00018286 | F41E6.5  | F41E6.5  | 0.000484175162323908 | AGIWUR16835 |
| CB4856                                                                                                               | HS | V | 8607800 | 8615841 | WBGene00018285 | smk-1    | F41E6.4  | -0.207867528339412   |             |
| AGIWUR654;AGIWUR5459;AGIWUR13596;AGIWUR14276;AGIWUR14346;AGIWUR15894;AGIWUR18138;AGIWUR18721;AGIWUR22723;AGIWUR22728 |    |   |         |         |                |          |          |                      |             |
| CB4856                                                                                                               | HS | V | 8619032 | 8619869 | WBGene00001694 | grd-5    | F41E6.2  | -0.324240772047725   | AGIWUR25134 |
| CB4856                                                                                                               | HS | V | 8619925 | 8621348 | WBGene00018292 | F41E6.11 | F41E6.11 | -0.521494525633889   |             |
| AGIWUR16678                                                                                                          |    |   |         |         |                |          |          |                      |             |
| CB4856                                                                                                               | HS | V | 8626900 | 8629129 | WBGene00018293 | F41E6.12 | F41E6.12 | -0.0433455169695875  |             |
| AGIWUR31874                                                                                                          |    |   |         |         |                |          |          |                      |             |
| CB4856                                                                                                               | HS | V | 8629223 | 8631325 | WBGene00018294 | atg-18   | F41E6.13 | 0.113291685840077    |             |
| AGIWUR9216;AGIWUR10459;AGIWUR27595                                                                                   |    |   |         |         |                |          |          |                      |             |
| CB4856                                                                                                               | HS | V | 8631871 | 8635675 | WBGene00018295 | oac-29   | F41E6.14 | 0.133352450733522    |             |
| AGIWUR6170                                                                                                           |    |   |         |         |                |          |          |                      |             |
| CB4856                                                                                                               | HS | V | 8635820 | 8637006 | WBGene00001721 | grl-12   | F28A12.2 | 0.0837197619371297   |             |
| AGIWUR39621                                                                                                          |    |   |         |         |                |          |          |                      |             |
| CB4856                                                                                                               | HS | V | 8638237 | 8640585 | WBGene00017879 | acd-4    | F28A12.1 | -0.208876110664194   |             |
| AGIWUR23065                                                                                                          |    |   |         |         |                |          |          |                      |             |
| CB4856                                                                                                               | HS | V | 8640596 | 8641344 | WBGene00017880 | F28A12.3 | F28A12.3 | -0.107927455700917   |             |
| AGIWUR39240                                                                                                          |    |   |         |         |                |          |          |                      |             |
| CB4856                                                                                                               | HS | V | 8641491 | 8643225 | WBGene00017881 | asp-13   | F28A12.4 | 0.449982068007179    |             |
| AGIWUR6336                                                                                                           |    |   |         |         |                |          |          |                      |             |
| CB4856                                                                                                               | HS | V | 8666065 | 8671680 | WBGene00022538 | ZC190.4  | ZC190.4  | -0.017229324690561   | AGIWUR3159  |
| CB4856                                                                                                               | HS | V | 8674602 | 8677293 | WBGene00022540 | ZC190.6  | ZC190.6  | 0.00146614011073254  | AGIWUR4434  |
| CB4856                                                                                                               | HS | V | 8681350 | 8682939 | WBGene00022537 | ZC190.2  | ZC190.2  | 0.0240451377898019   | AGIWUR22064 |
| CB4856                                                                                                               | HS | V | 8682955 | 8686160 | WBGene00000541 | cln-3.3  | ZC190.1  | 0.2204788027659      | AGIWUR40054 |
| CB4856                                                                                                               | HS | V | 8686071 | 8686864 | WBGene00022541 | ZC190.7  | ZC190.7  | -0.271908398019079   | AGIWUR30409 |
| CB4856                                                                                                               | HS | V | 8686958 | 8688435 | WBGene00022542 | ZC190.8  | ZC190.8  | 0.210038315579668    | AGIWUR41198 |
| CB4856                                                                                                               | HS | V | 8694329 | 8696507 | WBGene00022544 | ZC190.10 | ZC190.10 | -0.180771913115635   |             |
| AGIWUR30061                                                                                                          |    |   |         |         |                |          |          |                      |             |
| CB4856                                                                                                               | HS | V | 8701432 | 8703060 | WBGene00022535 | ZC178.1  | ZC178.1  | -0.0384132117346354  | AGIWUR35182 |
| CB4856                                                                                                               | HS | V | 8705437 | 8709880 | WBGene00022536 | ZC178.2  | ZC178.2  | 0.024657621394141    | AGIWUR19531 |
| CB4856                                                                                                               | HS | V | 8716495 | 8720893 | WBGene00001616 | glr-5    | ZC196.7  | 0.175333418779609    |             |
| AGIWUR8923;AGIWUR33190                                                                                               |    |   |         |         |                |          |          |                      |             |
| CB4856                                                                                                               | HS | V | 8721198 | 8722260 | WBGene00022551 | ZC196.8  | ZC196.8  | 0.0540055659591072   | AGIWUR10032 |
| CB4856                                                                                                               | HS | V | 8726516 | 8728894 | WBGene00022550 | droe-8   | ZC196.6  | 1.30209423656993     |             |

AGIWUR16914;AGIWUR36682;AGIWUR37378

|        |    |   |         |         |                |         |         |                     |             |
|--------|----|---|---------|---------|----------------|---------|---------|---------------------|-------------|
| CB4856 | HS | V | 8729458 | 8732789 | WBGene00022549 | ZC196.5 | ZC196.5 | 0.362474279167142   | AGIWUR34777 |
| CB4856 | HS | V | 8733106 | 8735781 | WBGene00022548 | ZC196.4 | ZC196.4 | 0.44609223062702    | AGIWUR8712  |
| CB4856 | HS | V | 8736674 | 8738437 | WBGene00022547 | ZC196.3 | ZC196.3 | 0.447063389096358   | AGIWUR38070 |
| CB4856 | HS | V | 8739437 | 8742259 | WBGene00022546 | ZC196.2 | ZC196.2 | -0.0941979846467529 | AGIWUR26730 |
| CB4856 | HS | V | 8742804 | 8745045 | WBGene00022545 | ZC196.1 | ZC196.1 | -0.090346672681715  |             |

AGIWUR21259;AGIWUR38916;AGIWUR39614

|        |    |   |         |         |                |          |         |                            |             |
|--------|----|---|---------|---------|----------------|----------|---------|----------------------------|-------------|
| CB4856 | HS | V | 8753695 | 8754873 | WBGene00015222 | B0507.5  | B0507.5 | 0.0697888885624032         | AGIWUR12863 |
| CB4856 | HS | V | 8754970 | 8755759 | WBGene00015221 | B0507.4  | B0507.4 | 0.0852625409112013         | AGIWUR44217 |
| CB4856 | HS | V | 8755897 | 8757098 | WBGene00235307 | B0507.17 |         | B0507.17 0.328800810100343 |             |

AGIWUR20645

|        |    |   |         |         |                |         |          |                     |             |
|--------|----|---|---------|---------|----------------|---------|----------|---------------------|-------------|
| CB4856 | HS | V | 8760687 | 8763194 | WBGene00015225 | B0507.8 | B0507.8  | 2.54443980252382    | AGIWUR2410  |
| CB4856 | HS | V | 8764888 | 8766038 | WBGene00015226 | B0507.9 | B0507.9  | 0.359208119962164   | AGIWUR25026 |
| CB4856 | HS | V | 8768909 | 8770876 | WBGene00015220 | B0507.3 | B0507.3  | 0.327226629894181   | AGIWUR10104 |
| CB4856 | HS | V | 8771899 | 8773781 | WBGene00006006 | srx-115 | B0507.11 | -0.0409437495428349 |             |

AGIWUR14341;AGIWUR19285

|        |    |   |         |         |                |         |         |                    |             |
|--------|----|---|---------|---------|----------------|---------|---------|--------------------|-------------|
| CB4856 | HS | V | 8774332 | 8776630 | WBGene00015219 | B0507.2 | B0507.2 | 0.19031826456445   | AGIWUR12931 |
| CB4856 | HS | V | 8776570 | 8779318 | WBGene00015218 | B0507.1 | B0507.1 | 0.0278716222401467 | AGIWUR10922 |
| CB4856 | HS | V | 8783422 | 8784165 | WBGene00015275 | C01B7.3 | C01B7.3 | -0.135837829688716 | AGIWUR6935  |
| CB4856 | HS | V | 8786551 | 8792771 | WBGene00006342 | sup-37  | C01B7.1 | 0.105243639732428  |             |

AGIWUR12890;AGIWUR24197;AGIWUR33572

|        |    |   |         |         |                |        |         |                     |  |
|--------|----|---|---------|---------|----------------|--------|---------|---------------------|--|
| CB4856 | HS | V | 8792696 | 8795567 | WBGene00006467 | magu-2 | C01B7.4 | -0.0372123311057626 |  |
|--------|----|---|---------|---------|----------------|--------|---------|---------------------|--|

AGIWUR6705;AGIWUR7116;AGIWUR29311

|        |    |   |         |         |                |          |         |                            |             |
|--------|----|---|---------|---------|----------------|----------|---------|----------------------------|-------------|
| CB4856 | HS | V | 8800151 | 8800996 | WBGene00015276 | C01B7.5  | C01B7.5 | 0.143023533087497          | AGIWUR31037 |
| CB4856 | HS | V | 8805416 | 8819955 | WBGene00004457 | rpm-1    | C01B7.6 | 0.0729573517662345         | AGIWUR13055 |
| CB4856 | HS | V | 8865351 | 8867297 | WBGene00017192 | F07B7.14 |         | F07B7.14 0.175537930133659 |             |

AGIWUR21155

|        |    |   |         |         |                |           |  |                              |  |
|--------|----|---|---------|---------|----------------|-----------|--|------------------------------|--|
| CB4856 | HS | V | 8876035 | 8877015 | WBGene00017152 | EGAP798.1 |  | EGAP798.1 -0.118272008303091 |  |
|--------|----|---|---------|---------|----------------|-----------|--|------------------------------|--|

AGIWUR42453

|        |    |   |         |         |                |        |          |                    |  |
|--------|----|---|---------|---------|----------------|--------|----------|--------------------|--|
| CB4856 | HS | V | 8898195 | 8898645 | WBGene00001892 | his-18 | K06C4.10 | -0.215429480067932 |  |
|--------|----|---|---------|---------|----------------|--------|----------|--------------------|--|

AGIWUR14430

|        |    |   |         |         |                |         |          |                    |  |
|--------|----|---|---------|---------|----------------|---------|----------|--------------------|--|
| CB4856 | HS | V | 8899276 | 8902221 | WBGene00019448 | frpr-13 | K06C4.17 | 0.0455170636443984 |  |
|--------|----|---|---------|---------|----------------|---------|----------|--------------------|--|

AGIWUR41740

|        |    |   |         |         |                |         |         |                    |             |
|--------|----|---|---------|---------|----------------|---------|---------|--------------------|-------------|
| CB4856 | HS | V | 8902339 | 8905364 | WBGene00019445 | frpr-12 | K06C4.9 | 0.054600924343462  | AGIWUR17925 |
| CB4856 | HS | V | 8907629 | 8909442 | WBGene00019444 | frpr-11 | K06C4.8 | 0.205451688797289  | AGIWUR7490  |
| CB4856 | HS | V | 8909725 | 8914033 | WBGene00003386 | mod-1   | K06C4.6 | 0.0317579140588258 |             |

AGIWUR19981;AGIWUR24514;AGIWUR44071

|        |    |   |         |         |                |         |          |                   |             |
|--------|----|---|---------|---------|----------------|---------|----------|-------------------|-------------|
| CB4856 | HS | V | 8914915 | 8916795 | WBGene00019443 | K06C4.7 | K06C4.7  | 0.149987917524012 | AGIWUR14865 |
| CB4856 | HS | V | 8923088 | 8923936 | WBGene00019203 | ttr-47  | H14N18.3 | 0.126095676904185 |             |

|                                                                                    |    |   |         |         |                |          |           |                     |
|------------------------------------------------------------------------------------|----|---|---------|---------|----------------|----------|-----------|---------------------|
| AGIWUR16282                                                                        |    |   |         |         |                |          |           |                     |
| CB4856                                                                             | HS | V | 8923900 | 8928938 | WBGene00019204 | H14N18.4 | H14N18.4  | -0.0253703857623369 |
| AGIWUR4412;AGIWUR22862;AGIWUR24807;AGIWUR27204;AGIWUR33845;AGIWUR35410             |    |   |         |         |                |          |           |                     |
| CB4856                                                                             | HS | V | 8932618 | 8934265 | WBGene00019202 | H14N18.2 | H14N18.2  | 1.0795959625215     |
| AGIWUR19763                                                                        |    |   |         |         |                |          |           |                     |
| CB4856                                                                             | HS | V | 8936359 | 8939676 | WBGene00006760 | unc-23   | H14N18.1  | -0.118185096422135  |
| AGIWUR36885                                                                        |    |   |         |         |                |          |           |                     |
| CB4856                                                                             | HS | V | 8939592 | 8944063 | WBGene00020554 | T19A5.3  | T19A5.3   | -0.148028356932086  |
| AGIWUR9403;AGIWUR21691;AGIWUR24644;AGIWUR24708;AGIWUR26711;AGIWUR39995;AGIWUR40351 |    |   |         |         |                |          |           |                     |
| CB4856                                                                             | HS | V | 8947799 | 8956294 | WBGene00001526 | gck-1    | T19A5.2   | 0.131211643285451   |
| AGIWUR7524;AGIWUR14367;AGIWUR20465;AGIWUR25186;AGIWUR39460;AGIWUR40989             |    |   |         |         |                |          |           |                     |
| CB4856                                                                             | HS | V | 8957045 | 8961935 | WBGene00020553 | T19A5.1  | T19A5.1   | 0.0577142841426017  |
| AGIWUR27563                                                                        |    |   |         |         |                |          |           |                     |
| CB4856                                                                             | HS | V | 8961915 | 8964099 | WBGene00003634 | nhr-44   | T19A5.4   | -0.137268320068539  |
| AGIWUR18736                                                                        |    |   |         |         |                |          |           |                     |
| CB4856                                                                             | HS | V | 8964711 | 8968406 | WBGene00020555 | nhr-219  | T19A5.5   | -0.0587632145829966 |
| AGIWUR15634                                                                        |    |   |         |         |                |          |           |                     |
| CB4856                                                                             | HS | V | 8968737 | 8969955 | WBGene00019114 | nhr-194  | F59E11.8  | 0.179181905762629   |
| AGIWUR42742                                                                        |    |   |         |         |                |          |           |                     |
| CB4856                                                                             | HS | V | 8970744 | 8972364 | WBGene00019115 | nhr-195  | F59E11.10 | 0.170980221203887   |
| AGIWUR42909                                                                        |    |   |         |         |                |          |           |                     |
| CB4856                                                                             | HS | V | 8973182 | 8974943 | WBGene00019116 | nhr-143  | F59E11.11 | -0.0482324142219941 |
| AGIWUR26665                                                                        |    |   |         |         |                |          |           |                     |
| CB4856                                                                             | HS | V | 8975698 | 8977465 | WBGene00019117 | nhr-144  | F59E11.12 | 0.121056283244321   |
| AGIWUR2070;AGIWUR5823;AGIWUR7596;AGIWUR21861;AGIWUR25053;AGIWUR41239               |    |   |         |         |                |          |           |                     |
| CB4856                                                                             | HS | V | 8979522 | 8980929 | WBGene00006143 | str-84   | F59E11.13 | -0.123286573522121  |
| AGIWUR27796                                                                        |    |   |         |         |                |          |           |                     |
| CB4856                                                                             | HS | V | 8982387 | 8983689 | WBGene00006145 | str-86   | F59E11.14 | -0.0831964986341642 |
| AGIWUR12913                                                                        |    |   |         |         |                |          |           |                     |
| CB4856                                                                             | HS | V | 8984525 | 8985840 | WBGene00006144 | str-85   | F59E11.15 | 0.108775362478329   |
| AGIWUR44467                                                                        |    |   |         |         |                |          |           |                     |
| CB4856                                                                             | HS | V | 8986694 | 8987965 | WBGene00006146 | str-87   | F59E11.16 | -0.0332543578562632 |
| AGIWUR3731                                                                         |    |   |         |         |                |          |           |                     |
| CB4856                                                                             | HS | V | 8990244 | 8991664 | WBGene00019113 | F59E11.7 | F59E11.7  | -0.1052455535249    |
| AGIWUR3934;AGIWUR7034;AGIWUR9590;AGIWUR10453;AGIWUR16102;AGIWUR30847               |    |   |         |         |                |          |           |                     |
| CB4856                                                                             | HS | V | 8991789 | 8993142 | WBGene00019112 | F59E11.6 | F59E11.6  | -0.0428218980365198 |
| AGIWUR14515                                                                        |    |   |         |         |                |          |           |                     |
| CB4856                                                                             | HS | V | 8995101 | 8996664 | WBGene00019111 | F59E11.5 | F59E11.5  | 0.0245818509407556  |
| AGIWUR21952                                                                        |    |   |         |         |                |          |           |                     |
| CB4856                                                                             | HS | V | 8998599 | 9001352 | WBGene00005535 | sri-23   | F59E11.3  | 0.135109301151899   |
| AGIWUR44649                                                                        |    |   |         |         |                |          |           |                     |
| CB4856                                                                             | HS | V | 9001475 | 9003100 | WBGene00019109 | F59E11.2 | F59E11.2  | 0.0530352238749296  |

AGIWUR9207;AGIWUR11718;AGIWUR41284

CB4856 HS V 9003709 9004967 WBGene00005892 srx-1 F59E11.1 0.103055059907581

AGIWUR9999

CB4856 HS V 9005543 9006931 WBGene00005894 srx-3 R03H4.3 -0.111817563197299 AGIWUR26052

CB4856 HS V 9009475 9010788 WBGene00005893 srx-2 R03H4.2 0.00509250883002643 AGIWUR9140

CB4856 HS V 9011244 9011565 WBGene00023327 R03H4.8 R03H4.8 0.0833878105597865

AGIWUR7761;AGIWUR13453;AGIWUR19516;AGIWUR25492;AGIWUR37990

CB4856 HS V 9012199 9013865 WBGene00005412 srh-201 R03H4.9 -0.0808441007912801 AGIWUR3855

CB4856 HS V 9014408 9015640 WBGene00019850 srt-18 R03H4.4 -0.0879092850640486 AGIWUR6053

CB4856 HS V 9016864 9019318 WBGene00019849 oac-40 R03H4.1 -0.14634179102492 AGIWUR14055

CB4856 HS V 9019595 9022178 WBGene00019851 oac-41 R03H4.5 0.122293156676767 AGIWUR13765

CB4856 HS V 9022361 9024806 WBGene00044617 bus-1 R03H4.6 -0.101542170500765

AGIWUR6644;AGIWUR9344

CB4856 HS V 9025513 9026540 WBGene00019853 srsx-20 R03H4.7 0.0540404062747286

AGIWUR2800;AGIWUR18747;AGIWUR30131;AGIWUR35466

CB4856 HS V 9030548 9032593 WBGene00016095 C25E10.5 C25E10.5 0.0753477724544744

AGIWUR32429

CB4856 HS V 9033567 9035605 WBGene00016094 C25E10.4 C25E10.4 0.370320399621903

AGIWUR5021

CB4856 HS V 9036236 9040289 WBGene00016093 srsx-34 C25E10.3 0.455646887218769

AGIWUR14246;AGIWUR22371;AGIWUR42503;AGIWUR42809

CB4856 HS V 9041330 9043677 WBGene00016092 cyp-33B1 C25E10.2 -0.0193648771442145

AGIWUR816;AGIWUR6140;AGIWUR39399

CB4856 HS V 9045171 9046967 WBGene00016091 nhr-30 C25E10.1 0.0323280306160463

AGIWUR17500

CB4856 HS V 9050102 9051191 WBGene00016096 C25E10.7 C25E10.7 0.10038519143199

AGIWUR44248

CB4856 HS V 9053322 9053995 WBGene00016097 C25E10.8 C25E10.8 0.150963443611977

AGIWUR386;AGIWUR11321;AGIWUR12719;AGIWUR26576

CB4856 HS V 9054268 9054844 WBGene00023417 swm-1 C25E10.9 0.122468964951877

AGIWUR435;AGIWUR3111;AGIWUR11880;AGIWUR15292

CB4856 HS V 9055326 9056392 WBGene00016099 C25E10.10 C25E10.10 0.21983804155888

AGIWUR16698

CB4856 HS V 9057543 9058332 WBGene00016100 C25E10.11 C25E10.11 0.210100014183622

AGIWUR35724

CB4856 HS V 9059750 9060481 WBGene00023431 C25E10.13 C25E10.13 0.00990202848896082

AGIWUR10531;AGIWUR28693;AGIWUR31323;AGIWUR40791;AGIWUR41640

CB4856 HS V 9060494 9062441 WBGene00016101 C25E10.12 C25E10.12 -0.0208540204171683

AGIWUR18021

|                                                                       |    |   |         |         |                |           |           |                     |             |
|-----------------------------------------------------------------------|----|---|---------|---------|----------------|-----------|-----------|---------------------|-------------|
| CB4856                                                                | HS | V | 9067976 | 9068390 | WBGene00020862 | fip-2     | T27E4.4   | -0.171763347024509  | AGIWUR28034 |
| CB4856                                                                | HS | V | 9068368 | 9069694 | WBGene00020863 | T27E4.5   | T27E4.5   | 0.193124764399451   |             |
| AGIWUR1035;AGIWUR8082;AGIWUR15817;AGIWUR22970                         |    |   |         |         |                |           |           |                     |             |
| CB4856                                                                | HS | V | 9069865 | 9073528 | WBGene00020864 | oac-50    | T27E4.6   | 0.00999093233166626 | AGIWUR36336 |
| CB4856                                                                | HS | V | 9074784 | 9076322 | WBGene00020865 | T27E4.7   | T27E4.7   | 0.0872963250127494  |             |
| AGIWUR34270;AGIWUR35657;AGIWUR37836                                   |    |   |         |         |                |           |           |                     |             |
| CB4856                                                                | HS | V | 9092345 | 9094345 | WBGene00020861 | T27E4.1   | T27E4.1   | 0.0838233339292369  |             |
| AGIWUR639;AGIWUR19829;AGIWUR29731                                     |    |   |         |         |                |           |           |                     |             |
| CB4856                                                                | HS | V | 9096007 | 9097233 | WBGene00017659 | F21C10.10 | F21C10.10 | -0.263863680681714  |             |
| AGIWUR25059                                                           |    |   |         |         |                |           |           |                     |             |
| CB4856                                                                | HS | V | 9097121 | 9098696 | WBGene00017658 | F21C10.9  | F21C10.9  | 0.274090545503318   |             |
| AGIWUR7021;AGIWUR8613;AGIWUR11231;AGIWUR12515;AGIWUR12623;AGIWUR44908 |    |   |         |         |                |           |           |                     |             |
| CB4856                                                                | HS | V | 9099638 | 9101133 | WBGene00017661 | frpr-6    | F21C10.12 | 0.0846844835872282  |             |
| AGIWUR11739                                                           |    |   |         |         |                |           |           |                     |             |
| CB4856                                                                | HS | V | 9109584 | 9111013 | WBGene00004119 | pqn-31    | F21C10.8  | 0.391875592196907   |             |
| AGIWUR10968                                                           |    |   |         |         |                |           |           |                     |             |
| CB4856                                                                | HS | V | 9112767 | 9122180 | WBGene00017657 | F21C10.7  | F21C10.7  | 0.167991182273612   |             |
| AGIWUR43657                                                           |    |   |         |         |                |           |           |                     |             |
| CB4856                                                                | HS | V | 9123489 | 9123809 | WBGene00017660 | F21C10.11 | F21C10.11 | 0.0192200420229613  |             |
| AGIWUR1058;AGIWUR5369;AGIWUR7951;AGIWUR8268;AGIWUR14237;AGIWUR24278   |    |   |         |         |                |           |           |                     |             |
| CB4856                                                                | HS | V | 9124480 | 9124994 | WBGene00017656 | F21C10.6  | F21C10.6  | -0.0900116974849157 |             |
| AGIWUR43227                                                           |    |   |         |         |                |           |           |                     |             |
| CB4856                                                                | HS | V | 9125645 | 9126006 | WBGene00017655 | F21C10.5  | F21C10.5  | 0.00486255479505537 |             |
| AGIWUR34079                                                           |    |   |         |         |                |           |           |                     |             |
| CB4856                                                                | HS | V | 9126679 | 9127593 | WBGene00017654 | F21C10.4  | F21C10.4  | 0.186682867379913   |             |
| AGIWUR25641                                                           |    |   |         |         |                |           |           |                     |             |
| CB4856                                                                | HS | V | 9128710 | 9130943 | WBGene00017653 | F21C10.3  | F21C10.3  | -0.0730181836277062 |             |
| AGIWUR3740                                                            |    |   |         |         |                |           |           |                     |             |
| CB4856                                                                | HS | V | 9132384 | 9133275 | WBGene00017652 | F21C10.1  | F21C10.1  |                     |             |
| -0.00228080141013898 AGIWUR35855                                      |    |   |         |         |                |           |           |                     |             |
| CB4856                                                                | HS | V | 9134255 | 9135347 | WBGene00015053 | B0222.1   | B0222.1   | -0.0267376386975062 | AGIWUR14873 |
| CB4856                                                                | HS | V | 9135656 | 9137718 | WBGene00015054 | pitr-2    | B0222.2   | 0.0267361917254956  | AGIWUR11677 |
| CB4856                                                                | HS | V | 9138946 | 9141397 | WBGene00015055 | pitr-3    | B0222.3   | -0.0975426024213255 |             |
| AGIWUR12154;AGIWUR17374;AGIWUR25525;AGIWUR26220                       |    |   |         |         |                |           |           |                     |             |
| CB4856                                                                | HS | V | 9144630 | 9146899 | WBGene00006418 | tag-38    | B0222.4   | 0.480260595200257   | AGIWUR12107 |
| CB4856                                                                | HS | V | 9152321 | 9154872 | WBGene00015056 | B0222.5   | B0222.5   | -0.0100644209568799 | AGIWUR11803 |
| CB4856                                                                | HS | V | 9162051 | 9163005 | WBGene00000718 | col-145   | B0222.7   | -0.267958366241057  | AGIWUR11578 |
| CB4856                                                                | HS | V | 9164297 | 9165307 | WBGene00000599 | col-10    | B0222.8   | -0.517744132400072  | AGIWUR33641 |
| CB4856                                                                | HS | V | 9165820 | 9168041 | WBGene00044582 | B0222.11  | B0222.11  | 0.140679521054023   |             |

AGIWUR15091;AGIWUR20798

|        |    |   |         |         |                |        |         |                     |             |
|--------|----|---|---------|---------|----------------|--------|---------|---------------------|-------------|
| CB4856 | HS | V | 9168393 | 9173024 | WBGene00015057 | gad-3  | B0222.9 | -0.511315787512455  | AGIWUR35004 |
| CB4856 | HS | V | 9174089 | 9175250 | WBGene00004107 | pqn-16 | C24B5.5 | -0.124084291234558  | AGIWUR31890 |
| CB4856 | HS | V | 9175798 | 9177997 | WBGene00016045 | spas-1 | C24B5.2 | -0.0790996916569893 |             |

AGIWUR5281;AGIWUR20143

|        |    |   |         |         |                |         |         |                     |             |
|--------|----|---|---------|---------|----------------|---------|---------|---------------------|-------------|
| CB4856 | HS | V | 9177949 | 9181719 | WBGene00004216 | ptr-1   | C24B5.3 | -0.182186693021093  | AGIWUR9758  |
| CB4856 | HS | V | 9191617 | 9195877 | WBGene00016044 | C24B5.1 | C24B5.1 | 0.167356751191587   | AGIWUR35120 |
| CB4856 | HS | V | 9195821 | 9197326 | WBGene00016046 | C24B5.4 | C24B5.4 | -0.0386043350387588 | AGIWUR28612 |
| CB4856 | HS | V | 9197751 | 9198987 | WBGene00006221 | str-177 | T18H9.4 | -0.0342474678814444 |             |

AGIWUR2394;AGIWUR11610;AGIWUR18614;AGIWUR33614

|        |    |   |         |         |                |        |         |                   |             |
|--------|----|---|---------|---------|----------------|--------|---------|-------------------|-------------|
| CB4856 | HS | V | 9199680 | 9204734 | WBGene00000215 | asp-2  | T18H9.2 | 0.60446165199815  | AGIWUR17206 |
| CB4856 | HS | V | 9204703 | 9207467 | WBGene00002132 | inx-10 | T18H9.5 | 0.013090094792064 |             |

AGIWUR9782;AGIWUR15209;AGIWUR34590

|        |    |   |         |         |                |         |         |                     |             |
|--------|----|---|---------|---------|----------------|---------|---------|---------------------|-------------|
| CB4856 | HS | V | 9209463 | 9213654 | WBGene00007023 | mdt-27  | T18H9.6 | -0.225042943672035  | AGIWUR33734 |
| CB4856 | HS | V | 9213746 | 9217243 | WBGene00044077 | tag-232 | T18H9.7 | -0.0832810453989179 | AGIWUR15379 |
| CB4856 | HS | V | 9221866 | 9224354 | WBGene00001695 | grd-6   | T18H9.1 | -0.292749646508252  | AGIWUR8669  |
| CB4856 | HS | V | 9226094 | 9227523 | WBGene00017193 | F07C3.2 | F07C3.2 | 0.282299717359115   | AGIWUR28489 |
| CB4856 | HS | V | 9227710 | 9232396 | WBGene00017194 | F07C3.3 | F07C3.3 | 0.0286458567609662  | AGIWUR2492  |
| CB4856 | HS | V | 9234610 | 9243221 | WBGene00017195 | glo-4   | F07C3.4 | -0.108872331265265  |             |

AGIWUR18442;AGIWUR21236;AGIWUR30949;AGIWUR33447;AGIWUR35250;AGIWUR39020

|        |    |   |         |         |                |       |         |                   |  |
|--------|----|---|---------|---------|----------------|-------|---------|-------------------|--|
| CB4856 | HS | V | 9244402 | 9246360 | WBGene00000003 | aat-2 | F07C3.7 | 0.167048042940877 |  |
|--------|----|---|---------|---------|----------------|-------|---------|-------------------|--|

AGIWUR8898;AGIWUR30371;AGIWUR33955;AGIWUR43403

|        |    |   |         |         |                |         |          |                     |             |
|--------|----|---|---------|---------|----------------|---------|----------|---------------------|-------------|
| CB4856 | HS | V | 9250275 | 9254223 | WBGene00004211 | ptd-2   | F07C3.1  | -0.0522067594354558 | AGIWUR19663 |
| CB4856 | HS | V | 9254219 | 9254632 | WBGene00017197 | F07C3.9 | F07C3.9  | -0.029435727358651  | AGIWUR36578 |
| CB4856 | HS | V | 9256864 | 9261124 | WBGene00017198 | nhr-36  | F07C3.10 | 0.00290050133181996 |             |

AGIWUR5452

|        |    |   |         |         |                |          |         |                    |  |
|--------|----|---|---------|---------|----------------|----------|---------|--------------------|--|
| CB4856 | HS | V | 9263800 | 9266499 | WBGene00022788 | slc-17.7 | ZK682.2 | -0.327152544347692 |  |
|--------|----|---|---------|---------|----------------|----------|---------|--------------------|--|

AGIWUR27401

|        |    |   |         |         |                |         |         |                    |            |
|--------|----|---|---------|---------|----------------|---------|---------|--------------------|------------|
| CB4856 | HS | V | 9280702 | 9282154 | WBGene00001954 | hlh-10  | ZK682.4 | -0.173793776661749 | AGIWUR4665 |
| CB4856 | HS | V | 9284129 | 9287617 | WBGene00022789 | lron-2  | ZK682.5 | 0.0203806645524445 | AGIWUR4188 |
| CB4856 | HS | V | 9290683 | 9292118 | WBGene00022790 | ZK682.7 | ZK682.7 | -0.035379683347446 | AGIWUR7624 |
| CB4856 | HS | V | 9297632 | 9302158 | WBGene00018405 | F44A2.5 | F44A2.5 | 0.16584514127238   |            |

AGIWUR10464;AGIWUR10630;AGIWUR43500

|        |    |   |         |         |                |         |         |                     |             |
|--------|----|---|---------|---------|----------------|---------|---------|---------------------|-------------|
| CB4856 | HS | V | 9303326 | 9304622 | WBGene00018404 | nhr-39  | F44A2.4 | 0.47816955100383    | AGIWUR25387 |
| CB4856 | HS | V | 9305416 | 9310926 | WBGene00018403 | F44A2.3 | F44A2.3 | 0.158768651111371   | AGIWUR5487  |
| CB4856 | HS | V | 9318311 | 9320995 | WBGene00018402 | kvs-3   | F44A2.2 | -0.0631939105070956 | AGIWUR34457 |
| CB4856 | HS | V | 9321503 | 9322905 | WBGene00018406 | F44A2.7 | F44A2.7 | 0.179415516428792   | AGIWUR39794 |
| CB4856 | HS | V | 9323085 | 9327209 | WBGene00006499 | tag-153 | F44A2.1 | -0.0873455510586538 |             |

AGIWUR3118;AGIWUR11728;AGIWUR21919;AGIWUR31459;AGIWUR34827;AGIWUR41537



|                                                                                                                        |    |   |         |         |                |           |           |                     |             |
|------------------------------------------------------------------------------------------------------------------------|----|---|---------|---------|----------------|-----------|-----------|---------------------|-------------|
| CB4856                                                                                                                 | HS | V | 9327145 | 9333062 | WBGene00019465 | ac1-14    | K07B1.5   | 0.0579357798025013  |             |
| AGIWUR5902;AGIWUR21744;AGIWUR42125                                                                                     |    |   |         |         |                |           |           |                     |             |
| CB4856                                                                                                                 | HS | V | 9334773 | 9336668 | WBGene00006729 | ucp-4     | K07B1.3   | -0.0793625014981387 | AGIWUR23287 |
| CB4856                                                                                                                 | HS | V | 9336762 | 9338858 | WBGene00000766 | coq-6     | K07B1.2   | -0.0720093661991292 | AGIWUR24967 |
| CB4856                                                                                                                 | HS | V | 9338859 | 9344218 | WBGene00019466 | tos-1     | K07B1.6   | -0.162985390920883  |             |
| AGIWUR7103;AGIWUR19971;AGIWUR23532;AGIWUR25576;AGIWUR27157;AGIWUR29383;AGIWUR30086;AGIWUR30658;AGIWUR33209;AGIWUR36988 |    |   |         |         |                |           |           |                     |             |
| CB4856                                                                                                                 | HS | V | 9345022 | 9346962 | WBGene00019467 | K07B1.7   | K07B1.7   | 0.0495850794028607  |             |
| AGIWUR11067;AGIWUR29876                                                                                                |    |   |         |         |                |           |           |                     |             |
| CB4856                                                                                                                 | HS | V | 9345772 | 9348687 | WBGene00006623 | try-5     | K07B1.1   | -0.202622349244649  | AGIWUR40119 |
| CB4856                                                                                                                 | HS | V | 9349987 | 9351332 | WBGene00005938 | srx-47    | E02C12.3  | 0.00121514286134339 |             |
| AGIWUR30857                                                                                                            |    |   |         |         |                |           |           |                     |             |
| CB4856                                                                                                                 | HS | V | 9353247 | 9354497 | WBGene00005937 | srx-46    | E02C12.2  | 0.227669806915664   |             |
| AGIWUR39729                                                                                                            |    |   |         |         |                |           |           |                     |             |
| CB4856                                                                                                                 | HS | V | 9354512 | 9355471 | WBGene00017091 | ttr-40    | E02C12.4  | 0.0199703401138436  |             |
| AGIWUR41676                                                                                                            |    |   |         |         |                |           |           |                     |             |
| CB4856                                                                                                                 | HS | V | 9355505 | 9356541 | WBGene00023485 | ttr-49    | E02C12.13 | -0.0925672054761328 |             |
| AGIWUR9606;AGIWUR10008;AGIWUR23715                                                                                     |    |   |         |         |                |           |           |                     |             |
| CB4856                                                                                                                 | HS | V | 9356750 | 9359774 | WBGene00001665 | gpa-3     | E02C12.5  | 0.0686548386787269  |             |
| AGIWUR30793                                                                                                            |    |   |         |         |                |           |           |                     |             |
| CB4856                                                                                                                 | HS | V | 9369549 | 9371086 | WBGene00017092 | E02C12.6  | E02C12.6  | 0.306702204175659   |             |
| AGIWUR25049                                                                                                            |    |   |         |         |                |           |           |                     |             |
| CB4856                                                                                                                 | HS | V | 9371620 | 9373613 | WBGene00017093 | E02C12.8  | E02C12.8  | 0.0210204426677008  |             |
| AGIWUR16233;AGIWUR41103                                                                                                |    |   |         |         |                |           |           |                     |             |
| CB4856                                                                                                                 | HS | V | 9373954 | 9374842 | WBGene00017094 | E02C12.9  | E02C12.9  | -0.0790386297447787 |             |
| AGIWUR5285                                                                                                             |    |   |         |         |                |           |           |                     |             |
| CB4856                                                                                                                 | HS | V | 9375099 | 9378404 | WBGene00017095 | E02C12.10 | E02C12.10 | 0.135966049422924   |             |
| AGIWUR5101                                                                                                             |    |   |         |         |                |           |           |                     |             |
| CB4856                                                                                                                 | HS | V | 9379435 | 9379908 | WBGene00017096 | E02C12.11 | E02C12.11 | -0.0974332116967425 |             |
| AGIWUR34551                                                                                                            |    |   |         |         |                |           |           |                     |             |
| CB4856                                                                                                                 | HS | V | 9386179 | 9400062 | WBGene00002036 | hum-2     | F36D4.3   | -0.164360666771859  |             |
| AGIWUR15165;AGIWUR16315;AGIWUR25547                                                                                    |    |   |         |         |                |           |           |                     |             |
| CB4856                                                                                                                 | HS | V | 9400327 | 9401855 | WBGene00018088 | trpp-4    | F36D4.2   | -0.0819638711507285 | AGIWUR33543 |
| CB4856                                                                                                                 | HS | V | 9401805 | 9406360 | WBGene00018089 | F36D4.4   | F36D4.4   | 0.142164603425526   | AGIWUR1817  |
| CB4856                                                                                                                 | HS | V | 9417056 | 9419298 | WBGene00018087 | F36D4.1   | F36D4.1   | -0.199695591235841  | AGIWUR36788 |
| CB4856                                                                                                                 | HS | V | 9419292 | 9425762 | WBGene00018090 | F36D4.5   | F36D4.5   | -0.148934133059678  |             |
| AGIWUR6465;AGIWUR6807;AGIWUR7542;AGIWUR11462;AGIWUR23487;AGIWUR27935;AGIWUR35955;AGIWUR39168                           |    |   |         |         |                |           |           |                     |             |
| CB4856                                                                                                                 | HS | V | 9426852 | 9427523 | WBGene00018091 | F36D4.6   | F36D4.6   | 0.0535958868200446  | AGIWUR18771 |
| CB4856                                                                                                                 | HS | V | 9444050 | 9460639 | WBGene00019237 | H24G06.1  | H24G06.1  | 0.190272853061076   |             |

AGIWUR8707;AGIWUR38127;AGIWUR44261

|        |    |   |         |         |                |         |         |                     |             |
|--------|----|---|---------|---------|----------------|---------|---------|---------------------|-------------|
| CB4856 | HS | V | 9460686 | 9462705 | WBGene00008556 | F07D3.3 | F07D3.3 | -0.0176348095043757 | AGIWUR9046  |
| CB4856 | HS | V | 9471975 | 9473796 | WBGene00001449 | flp-6   | F07D3.2 | 0.0250577452541592  | AGIWUR27152 |
| CB4856 | HS | V | 9478163 | 9479601 | WBGene00003522 | nas-3   | K06A4.1 | -0.490795749491022  |             |

AGIWUR1048;AGIWUR7670;AGIWUR13476;AGIWUR13931;AGIWUR17705;AGIWUR33871

|        |    |   |         |         |                |         |         |                     |             |
|--------|----|---|---------|---------|----------------|---------|---------|---------------------|-------------|
| CB4856 | HS | V | 9484206 | 9489033 | WBGene00010592 | K06A4.2 | K06A4.2 | 0.083057303985818   | AGIWUR5894  |
| CB4856 | HS | V | 9490028 | 9491715 | WBGene00010597 | K06A4.7 | K06A4.7 | 0.046450423272967   | AGIWUR17974 |
| CB4856 | HS | V | 9497042 | 9499372 | WBGene00010593 | gsn1-1  | K06A4.3 | 0.275337839453892   | AGIWUR4604  |
| CB4856 | HS | V | 9501401 | 9504580 | WBGene00010594 | swt-5   | K06A4.4 | -0.235797523068791  | AGIWUR10451 |
| CB4856 | HS | V | 9505603 | 9507049 | WBGene00010595 | haao-1  | K06A4.5 | 0.248116792149142   | AGIWUR4297  |
| CB4856 | HS | V | 9508079 | 9510476 | WBGene00008669 | acs-14  | F11A3.1 | -0.0175150714874199 | AGIWUR34411 |
| CB4856 | HS | V | 9510406 | 9510719 | WBGene00077496 | F11A3.4 | F11A3.4 | 0.227355890164159   | AGIWUR18321 |
| CB4856 | HS | V | 9512506 | 9513466 | WBGene00014734 | F11A3.3 | F11A3.3 | -0.121080172619883  |             |

AGIWUR5652;AGIWUR23491

|        |    |   |         |         |                |             |         |                   |  |
|--------|----|---|---------|---------|----------------|-------------|---------|-------------------|--|
| CB4856 | HS | V | 9513824 | 9517585 | WBGene00008670 | eif-2Bdelta | F11A3.2 | 0.115552864529493 |  |
|--------|----|---|---------|---------|----------------|-------------|---------|-------------------|--|

AGIWUR6022

|        |    |   |         |         |                |          |          |                    |            |
|--------|----|---|---------|---------|----------------|----------|----------|--------------------|------------|
| CB4856 | HS | V | 9517519 | 9518933 | WBGene00008233 | C50F4.8  | C50F4.8  | 0.213370116747171  | AGIWUR9165 |
| CB4856 | HS | V | 9521676 | 9523036 | WBGene00014711 | C50F4.15 | C50F4.15 | 0.0450454758874428 |            |

AGIWUR4792;AGIWUR8304

|        |    |   |         |         |                |          |          |                    |             |
|--------|----|---|---------|---------|----------------|----------|----------|--------------------|-------------|
| CB4856 | HS | V | 9523167 | 9524199 | WBGene00008234 | C50F4.9  | C50F4.9  | -0.131825039326313 | AGIWUR3907  |
| CB4856 | HS | V | 9526698 | 9529259 | WBGene00008229 | C50F4.1  | C50F4.1  | 0.380204188684582  | AGIWUR39754 |
| CB4856 | HS | V | 9529951 | 9531577 | WBGene00008235 | C50F4.10 | C50F4.10 | 0.156198472105306  |             |

AGIWUR42661

|        |    |   |         |         |                |         |         |                    |             |
|--------|----|---|---------|---------|----------------|---------|---------|--------------------|-------------|
| CB4856 | HS | V | 9531819 | 9534537 | WBGene00008230 | pfk-1.2 | C50F4.2 | -0.095722646156263 | AGIWUR26495 |
| CB4856 | HS | V | 9534926 | 9536404 | WBGene00008231 | tag-329 | C50F4.3 | -0.245701415396177 |             |

AGIWUR15122;AGIWUR19502;AGIWUR39574

|        |    |   |         |         |                |          |          |                    |             |
|--------|----|---|---------|---------|----------------|----------|----------|--------------------|-------------|
| CB4856 | HS | V | 9536771 | 9537769 | WBGene00008232 | C50F4.4  | C50F4.4  | -0.149159854512336 | AGIWUR16123 |
| CB4856 | HS | V | 9537672 | 9539738 | WBGene00008236 | C50F4.12 | C50F4.12 | -0.120748725766133 |             |

AGIWUR24897;AGIWUR34125;AGIWUR34467;AGIWUR37554

|        |    |   |         |         |                |          |          |                   |  |
|--------|----|---|---------|---------|----------------|----------|----------|-------------------|--|
| CB4856 | HS | V | 9539844 | 9541606 | WBGene00008238 | C50F4.16 | C50F4.16 | 0.138152319801856 |  |
|--------|----|---|---------|---------|----------------|----------|----------|-------------------|--|

AGIWUR2870

|        |    |   |         |         |                |       |          |                    |  |
|--------|----|---|---------|---------|----------------|-------|----------|--------------------|--|
| CB4856 | HS | V | 9541782 | 9544226 | WBGene00003160 | mdf-1 | C50F4.11 | 0.0946883583876925 |  |
|--------|----|---|---------|---------|----------------|-------|----------|--------------------|--|

AGIWUR2261

|        |    |   |         |         |                |        |          |                     |  |
|--------|----|---|---------|---------|----------------|--------|----------|---------------------|--|
| CB4856 | HS | V | 9544611 | 9545398 | WBGene00001909 | his-35 | C50F4.13 | -0.0215434661353662 |  |
|--------|----|---|---------|---------|----------------|--------|----------|---------------------|--|

AGIWUR5006;AGIWUR6688;AGIWUR9765;AGIWUR19176;AGIWUR25348;AGIWUR38982

|        |    |   |         |         |                |         |         |                     |           |
|--------|----|---|---------|---------|----------------|---------|---------|---------------------|-----------|
| CB4856 | HS | V | 9546092 | 9546838 | WBGene00001910 | C50F4.6 | C50F4.6 | -0.0478730370311329 | AGIWUR818 |
| CB4856 | HS | V | 9547083 | 9547607 | WBGene00001911 | his-37  | C50F4.7 | 0.0813945538723848  |           |

AGIWUR5363;AGIWUR6028

|        |    |   |         |         |                |         |          |                    |  |
|--------|----|---|---------|---------|----------------|---------|----------|--------------------|--|
| CB4856 | HS | V | 9547606 | 9549836 | WBGene00008237 | nstp-10 | C50F4.14 | 0.0509120821443894 |  |
|--------|----|---|---------|---------|----------------|---------|----------|--------------------|--|

AGIWUR10756;AGIWUR24316;AGIWUR40160

|        |    |   |         |         |                |        |         |                     |            |
|--------|----|---|---------|---------|----------------|--------|---------|---------------------|------------|
| CB4856 | HS | V | 9550644 | 9556064 | WBGene00009098 | ehbp-1 | F25B3.1 | -0.0159265405151459 | AGIWUR7819 |
|--------|----|---|---------|---------|----------------|--------|---------|---------------------|------------|

|        |    |   |         |         |                |        |         |                     |  |
|--------|----|---|---------|---------|----------------|--------|---------|---------------------|--|
| CB4856 | HS | V | 9556226 | 9561643 | WBGene00009100 | rgef-1 | F25B3.3 | -0.0550683493951993 |  |
|--------|----|---|---------|---------|----------------|--------|---------|---------------------|--|

AGIWUR23351;AGIWUR35083;AGIWUR44618

|        |    |   |         |         |                |         |         |                   |             |
|--------|----|---|---------|---------|----------------|---------|---------|-------------------|-------------|
| CB4856 | HS | V | 9568749 | 9570295 | WBGene00009102 | F25B3.5 | F25B3.5 | 0.152139370999443 | AGIWUR39474 |
|--------|----|---|---------|---------|----------------|---------|---------|-------------------|-------------|

|        |    |   |         |         |                |         |         |                     |             |
|--------|----|---|---------|---------|----------------|---------|---------|---------------------|-------------|
| CB4856 | HS | V | 9577128 | 9579946 | WBGene00009099 | F25B3.2 | F25B3.2 | -0.0643460825826594 | AGIWUR27474 |
|--------|----|---|---------|---------|----------------|---------|---------|---------------------|-------------|

|        |    |   |         |         |                |        |         |                    |             |
|--------|----|---|---------|---------|----------------|--------|---------|--------------------|-------------|
| CB4856 | HS | V | 9580041 | 9582644 | WBGene00009103 | rtfo-1 | F25B3.6 | 0.0165572320602152 | AGIWUR32432 |
|--------|----|---|---------|---------|----------------|--------|---------|--------------------|-------------|

|        |    |   |         |         |                |         |         |                     |  |
|--------|----|---|---------|---------|----------------|---------|---------|---------------------|--|
| CB4856 | HS | V | 9583545 | 9590523 | WBGene00010727 | K09G1.1 | K09G1.1 | -0.0493996710211597 |  |
|--------|----|---|---------|---------|----------------|---------|---------|---------------------|--|

AGIWUR9171;AGIWUR25494;AGIWUR35434

|        |    |   |         |         |                |         |         |                    |             |
|--------|----|---|---------|---------|----------------|---------|---------|--------------------|-------------|
| CB4856 | HS | V | 9590617 | 9591255 | WBGene00010728 | K09G1.2 | K09G1.2 | -0.180744753533265 | AGIWUR21454 |
|--------|----|---|---------|---------|----------------|---------|---------|--------------------|-------------|

|        |    |   |         |         |                |         |         |                     |             |
|--------|----|---|---------|---------|----------------|---------|---------|---------------------|-------------|
| CB4856 | HS | V | 9597351 | 9597566 | WBGene00010729 | K09G1.3 | K09G1.3 | -0.0969143899570595 | AGIWUR34774 |
|--------|----|---|---------|---------|----------------|---------|---------|---------------------|-------------|

|        |    |   |         |         |                |       |         |                     |             |
|--------|----|---|---------|---------|----------------|-------|---------|---------------------|-------------|
| CB4856 | HS | V | 9608562 | 9614942 | WBGene00001053 | dop-2 | K09G1.4 | -0.0460268847961611 | AGIWUR40950 |
|--------|----|---|---------|---------|----------------|-------|---------|---------------------|-------------|

|        |    |   |         |         |                |        |          |                   |  |
|--------|----|---|---------|---------|----------------|--------|----------|-------------------|--|
| CB4856 | HS | V | 9616031 | 9617654 | WBGene00004146 | pqn-63 | T06E4.11 | -0.18975124098532 |  |
|--------|----|---|---------|---------|----------------|--------|----------|-------------------|--|

AGIWUR39956

|        |    |   |         |         |                |          |          |                    |  |
|--------|----|---|---------|---------|----------------|----------|----------|--------------------|--|
| CB4856 | HS | V | 9618233 | 9619019 | WBGene00011537 | T06E4.10 | T06E4.10 | -0.193013493204568 |  |
|--------|----|---|---------|---------|----------------|----------|----------|--------------------|--|

AGIWUR42536

|        |    |   |         |         |                |         |         |                    |  |
|--------|----|---|---------|---------|----------------|---------|---------|--------------------|--|
| CB4856 | HS | V | 9620150 | 9621036 | WBGene00011536 | T06E4.9 | T06E4.9 | -0.473590615735739 |  |
|--------|----|---|---------|---------|----------------|---------|---------|--------------------|--|

AGIWUR17247;AGIWUR19509;AGIWUR27759;AGIWUR36271;AGIWUR41455;AGIWUR43957

|        |    |   |         |         |                |         |         |                    |  |
|--------|----|---|---------|---------|----------------|---------|---------|--------------------|--|
| CB4856 | HS | V | 9622105 | 9622934 | WBGene00011535 | T06E4.8 | T06E4.8 | -0.371661653427871 |  |
|--------|----|---|---------|---------|----------------|---------|---------|--------------------|--|

AGIWUR5829;AGIWUR8168;AGIWUR9243;AGIWUR10103;AGIWUR31043

|        |    |   |         |         |                |         |         |                    |            |
|--------|----|---|---------|---------|----------------|---------|---------|--------------------|------------|
| CB4856 | HS | V | 9626404 | 9628143 | WBGene00011534 | T06E4.7 | T06E4.7 | 0.0883089126717183 | AGIWUR9548 |
|--------|----|---|---------|---------|----------------|---------|---------|--------------------|------------|

|        |    |   |         |         |                |          |          |                    |  |
|--------|----|---|---------|---------|----------------|----------|----------|--------------------|--|
| CB4856 | HS | V | 9628314 | 9629110 | WBGene00044011 | T06E4.12 | T06E4.12 | -0.297497064433465 |  |
|--------|----|---|---------|---------|----------------|----------|----------|--------------------|--|

AGIWUR411;AGIWUR3675;AGIWUR14554;AGIWUR26188;AGIWUR31848

|        |    |   |         |         |                |         |         |                    |  |
|--------|----|---|---------|---------|----------------|---------|---------|--------------------|--|
| CB4856 | HS | V | 9629943 | 9631012 | WBGene00000719 | col-146 | T06E4.6 | 0.0165651680502741 |  |
|--------|----|---|---------|---------|----------------|---------|---------|--------------------|--|

AGIWUR823;AGIWUR3653;AGIWUR6351;AGIWUR15529;AGIWUR28793

|        |    |   |         |         |                |         |         |                  |            |
|--------|----|---|---------|---------|----------------|---------|---------|------------------|------------|
| CB4856 | HS | V | 9632029 | 9633338 | WBGene00000720 | col-147 | T06E4.4 | 0.97976401381483 | AGIWUR7879 |
|--------|----|---|---------|---------|----------------|---------|---------|------------------|------------|

|        |    |   |         |         |                |       |         |                    |  |
|--------|----|---|---------|---------|----------------|-------|---------|--------------------|--|
| CB4856 | HS | V | 9634861 | 9645595 | WBGene00000226 | atl-1 | T06E4.3 | 0.0713808167806249 |  |
|--------|----|---|---------|---------|----------------|-------|---------|--------------------|--|

AGIWUR10638;AGIWUR18456;AGIWUR41912

|        |    |   |         |         |                |       |         |                     |  |
|--------|----|---|---------|---------|----------------|-------|---------|---------------------|--|
| CB4856 | HS | V | 9645746 | 9650297 | WBGene00001830 | hcp-2 | T06E4.1 | -0.0322099882536815 |  |
|--------|----|---|---------|---------|----------------|-------|---------|---------------------|--|

AGIWUR1535;AGIWUR38072

|        |    |   |         |         |                |          |         |                    |  |
|--------|----|---|---------|---------|----------------|----------|---------|--------------------|--|
| CB4856 | HS | V | 9654755 | 9657975 | WBGene00007140 | cyp-29A4 | B0331.1 | 0.0691662437018516 |  |
|--------|----|---|---------|---------|----------------|----------|---------|--------------------|--|

AGIWUR26929

|        |    |   |         |         |                |         |         |                   |             |
|--------|----|---|---------|---------|----------------|---------|---------|-------------------|-------------|
| CB4856 | HS | V | 9658931 | 9661614 | WBGene00007141 | pittr-4 | B0331.2 | 0.139335264182071 | AGIWUR21848 |
|--------|----|---|---------|---------|----------------|---------|---------|-------------------|-------------|

|        |    |   |         |         |                |         |         |                      |            |
|--------|----|---|---------|---------|----------------|---------|---------|----------------------|------------|
| CB4856 | HS | V | 9666700 | 9670050 | WBGene00013962 | ZK287.1 | ZK287.1 | -0.00921547354828967 | AGIWUR5092 |
|--------|----|---|---------|---------|----------------|---------|---------|----------------------|------------|

|        |    |   |         |         |                |        |         |                    |             |
|--------|----|---|---------|---------|----------------|--------|---------|--------------------|-------------|
| CB4856 | HS | V | 9670028 | 9673630 | WBGene00013963 | sulp-8 | ZK287.2 | -0.101911143114134 | AGIWUR23963 |
|--------|----|---|---------|---------|----------------|--------|---------|--------------------|-------------|

|        |    |   |         |         |                |         |         |                    |             |
|--------|----|---|---------|---------|----------------|---------|---------|--------------------|-------------|
| CB4856 | HS | V | 9678277 | 9679302 | WBGene00013964 | ZK287.3 | ZK287.3 | 0.0879628162827633 | AGIWUR14407 |
|--------|----|---|---------|---------|----------------|---------|---------|--------------------|-------------|

|        |    |   |         |         |                |         |         |                   |  |
|--------|----|---|---------|---------|----------------|---------|---------|-------------------|--|
| CB4856 | HS | V | 9679357 | 9680215 | WBGene00013968 | ZK287.9 | ZK287.9 | 0.100339816948193 |  |
|--------|----|---|---------|---------|----------------|---------|---------|-------------------|--|

AGIWUR3299;AGIWUR3857;AGIWUR4248;AGIWUR19258;AGIWUR24574;AGIWUR26804;AGIWUR27249;AGIWUR30486;AGIWUR31680;AGIWUR37264

|                                                                                |    |   |         |         |                |          |          |                      |             |
|--------------------------------------------------------------------------------|----|---|---------|---------|----------------|----------|----------|----------------------|-------------|
| CB4856                                                                         | HS | V | 9680173 | 9685715 | WBGene00013965 | ZK287.4  | ZK287.4  | 0.207818796185965    | AGIWUR8288  |
| CB4856                                                                         | HS | V | 9689686 | 9690615 | WBGene00004320 | rbx-1    | ZK287.5  | -0.0138029735568379  |             |
| AGIWUR1130;AGIWUR15983;AGIWUR18688;AGIWUR21768;AGIWUR27088;AGIWUR41715         |    |   |         |         |                |          |          |                      |             |
| CB4856                                                                         | HS | V | 9691039 | 9692159 | WBGene00013966 | ztf-9    | ZK287.6  | 0.0399523133854913   |             |
| AGIWUR11148;AGIWUR11795;AGIWUR15603;AGIWUR16629                                |    |   |         |         |                |          |          |                      |             |
| CB4856                                                                         | HS | V | 9692899 | 9694785 | WBGene00013967 | ZK287.7  | ZK287.7  | 0.142287449753145    | AGIWUR43503 |
| CB4856                                                                         | HS | V | 9697129 | 9701552 | WBGene00001842 | her-1    | ZK287.8  | 0.120539079929611    |             |
| AGIWUR2045;AGIWUR11114;AGIWUR12264;AGIWUR22029;AGIWUR33994;AGIWUR34851         |    |   |         |         |                |          |          |                      |             |
| CB4856                                                                         | HS | V | 9711447 | 9713632 | WBGene00009586 | F40F9.10 | F40F9.10 | 0.133317267385939    |             |
| AGIWUR3196                                                                     |    |   |         |         |                |          |          |                      |             |
| CB4856                                                                         | HS | V | 9715209 | 9716380 | WBGene00009581 | F40F9.3  | F40F9.3  | -0.0294813273223808  |             |
| AGIWUR3237;AGIWUR12679;AGIWUR24727;AGIWUR42854                                 |    |   |         |         |                |          |          |                      |             |
| CB4856                                                                         | HS | V | 9716697 | 9718051 | WBGene00006230 | str-188  | F40F9.4  | -0.0842917304515289  | AGIWUR9381  |
| CB4856                                                                         | HS | V | 9718462 | 9719724 | WBGene00014754 | F40F9.11 | F40F9.11 | 0.0375299253942565   |             |
| AGIWUR367;AGIWUR4670;AGIWUR8858;AGIWUR8900;AGIWUR17425;AGIWUR30807;AGIWUR40618 |    |   |         |         |                |          |          |                      |             |
| CB4856                                                                         | HS | V | 9719743 | 9724118 | WBGene00009582 | F40F9.5  | F40F9.5  | 0.178818347159368    | AGIWUR12858 |
| CB4856                                                                         | HS | V | 9725972 | 9729510 | WBGene00009583 | aagr-3   | F40F9.6  | 0.25096322885396     | AGIWUR8286  |
| CB4856                                                                         | HS | V | 9730110 | 9734022 | WBGene00009584 | drap-1   | F40F9.7  | -0.109433406350287   |             |
| AGIWUR6724;AGIWUR11997;AGIWUR15401;AGIWUR15476;AGIWUR22214;AGIWUR34305         |    |   |         |         |                |          |          |                      |             |
| CB4856                                                                         | HS | V | 9734103 | 9735316 | WBGene00009585 | cal-7    | F40F9.8  | -0.00734526705167227 | AGIWUR40235 |
| CB4856                                                                         | HS | V | 9737556 | 9739740 | WBGene00000172 | aqp-4    | F40F9.9  | 0.00568407310592356  | AGIWUR18766 |
| CB4856                                                                         | HS | V | 9741206 | 9744326 | WBGene00010251 | sta-2    | F58E6.1  | 0.159805583367216    |             |
| AGIWUR6189;AGIWUR14897;AGIWUR16493;AGIWUR18977;AGIWUR39584;AGIWUR43036         |    |   |         |         |                |          |          |                      |             |
| CB4856                                                                         | HS | V | 9745240 | 9749228 | WBGene00077697 | F58E6.13 | F58E6.13 | 0.13371314857019     |             |
| AGIWUR2338;AGIWUR12430                                                         |    |   |         |         |                |          |          |                      |             |
| CB4856                                                                         | HS | V | 9749971 | 9750408 | WBGene00010253 | F58E6.4  | F58E6.4  | -0.106641264353802   | AGIWUR1069  |
| CB4856                                                                         | HS | V | 9752076 | 9752861 | WBGene00010255 | F58E6.6  | F58E6.6  | -0.106864016395642   | AGIWUR24247 |
| CB4856                                                                         | HS | V | 9753423 | 9754581 | WBGene00010254 | F58E6.5  | F58E6.5  | -0.0960875391906981  | AGIWUR18939 |
| CB4856                                                                         | HS | V | 9755076 | 9755808 | WBGene00010257 | F58E6.8  | F58E6.8  | -0.0176222268743818  |             |
| AGIWUR2576;AGIWUR16776;AGIWUR17087;AGIWUR36175                                 |    |   |         |         |                |          |          |                      |             |
| CB4856                                                                         | HS | V | 9756954 | 9757984 | WBGene00010258 | F58E6.11 | F58E6.11 | -0.0240830934693665  |             |
| AGIWUR10045                                                                    |    |   |         |         |                |          |          |                      |             |
| CB4856                                                                         | HS | V | 9764645 | 9769361 | WBGene00006778 | unc-42   | F58E6.10 | -0.0567139699912325  |             |
| AGIWUR40416                                                                    |    |   |         |         |                |          |          |                      |             |
| CB4856                                                                         | HS | V | 9772430 | 9774881 | WBGene00009768 | F46B6.2  | F46B6.2  | 0.179650513425121    | AGIWUR14437 |
| CB4856                                                                         | HS | V | 9774897 | 9775834 | WBGene00009776 | F46B6.12 | F46B6.12 | -0.0843813653354069  |             |
| AGIWUR24747;AGIWUR42292                                                        |    |   |         |         |                |          |          |                      |             |
| CB4856                                                                         | HS | V | 9775935 | 9777743 | WBGene00004882 | smg-4    | F46B6.3  | -0.199795467958388   |             |
| AGIWUR15546;AGIWUR24438;AGIWUR29576;AGIWUR35194;AGIWUR44130                    |    |   |         |         |                |          |          |                      |             |

|                                                                                                                                                                                                        |    |   |         |         |                |          |          |                     |             |
|--------------------------------------------------------------------------------------------------------------------------------------------------------------------------------------------------------|----|---|---------|---------|----------------|----------|----------|---------------------|-------------|
| CB4856                                                                                                                                                                                                 | HS | V | 9777863 | 9779518 | WBGene00009769 | F46B6.4  | F46B6.4  | 0.145964294803669   | AGIWUR28824 |
| CB4856                                                                                                                                                                                                 | HS | V | 9779550 | 9783062 | WBGene00009770 | F46B6.5  | F46B6.5  | -0.0164811993754199 |             |
| AGIWUR3043;AGIWUR9088;AGIWUR12125;AGIWUR22800;AGIWUR24084;AGIWUR24726;AGIWUR29962;AGIWUR31112;AGIWUR32190                                                                                              |    |   |         |         |                |          |          |                     |             |
| CB4856                                                                                                                                                                                                 | HS | V | 9783167 | 9786868 | WBGene00009771 | F46B6.6  | F46B6.6  | 0.216341565207269   | AGIWUR17683 |
| CB4856                                                                                                                                                                                                 | HS | V | 9786949 | 9789707 | WBGene00009772 | ztf-7    | F46B6.7  | -0.0442914765740312 |             |
| AGIWUR2863;AGIWUR4966;AGIWUR6956;AGIWUR7130;AGIWUR9529;AGIWUR10038;AGIWUR14760;AGIWUR15597;AGIWUR19058;AGIWUR23791;AGIWUR25977;AGIWUR29172;AGIWUR29972;AGIWUR31314;AGIWUR33929;AGIWUR35152;AGIWUR40593 |    |   |         |         |                |          |          |                     |             |
| CB4856                                                                                                                                                                                                 | HS | V | 9791567 | 9793234 | WBGene00009773 | lip1-2   | F46B6.8  | -0.14882377488682   | AGIWUR21540 |
| CB4856                                                                                                                                                                                                 | HS | V | 9796862 | 9798270 | WBGene00009774 | F46B6.9  | F46B6.9  | 0.312916965272008   |             |
| AGIWUR4462;AGIWUR18178                                                                                                                                                                                 |    |   |         |         |                |          |          |                     |             |
| CB4856                                                                                                                                                                                                 | HS | V | 9798926 | 9799179 | WBGene00044192 | F46B6.13 | F46B6.13 | -0.236387190941898  |             |
| AGIWUR313;AGIWUR12061;AGIWUR17444;AGIWUR18951;AGIWUR39217                                                                                                                                              |    |   |         |         |                |          |          |                     |             |
| CB4856                                                                                                                                                                                                 | HS | V | 9801463 | 9802028 | WBGene00009775 | F46B6.10 | F46B6.10 | -0.0632965208046272 |             |
| AGIWUR5952;AGIWUR39386                                                                                                                                                                                 |    |   |         |         |                |          |          |                     |             |
| CB4856                                                                                                                                                                                                 | HS | V | 9803476 | 9804607 | WBGene00005702 | sru-39   | F46B6.11 | -0.0969560167807604 |             |
| AGIWUR39929                                                                                                                                                                                            |    |   |         |         |                |          |          |                     |             |
| CB4856                                                                                                                                                                                                 | HS | V | 9805461 | 9806600 | WBGene00005700 | sru-37   | C50C10.1 | -0.11364706850944   |             |
| AGIWUR24732                                                                                                                                                                                            |    |   |         |         |                |          |          |                     |             |
| CB4856                                                                                                                                                                                                 | HS | V | 9807635 | 9809432 | WBGene00005696 | sru-33   | C50C10.8 | -0.0792135358700463 |             |
| AGIWUR25941                                                                                                                                                                                            |    |   |         |         |                |          |          |                     |             |
| CB4856                                                                                                                                                                                                 | HS | V | 9811461 | 9812619 | WBGene00005692 | sru-29   | C50C10.2 | 0.010026701232257   |             |
| AGIWUR7544                                                                                                                                                                                             |    |   |         |         |                |          |          |                     |             |
| CB4856                                                                                                                                                                                                 | HS | V | 9813838 | 9815007 | WBGene00005693 | sru-30   | C50C10.3 | -0.107699679552676  |             |
| AGIWUR36392                                                                                                                                                                                            |    |   |         |         |                |          |          |                     |             |
| CB4856                                                                                                                                                                                                 | HS | V | 9816690 | 9817862 | WBGene00005694 | sru-31   | C50C10.4 | -0.19879679513037   |             |
| AGIWUR12905                                                                                                                                                                                            |    |   |         |         |                |          |          |                     |             |
| CB4856                                                                                                                                                                                                 | HS | V | 9819279 | 9820210 | WBGene00005695 | sru-32   | C50C10.5 | 0.118058881620322   |             |
| AGIWUR7644;AGIWUR12393;AGIWUR12687;AGIWUR13938;AGIWUR24740;AGIWUR24921;AGIWUR28299;AGIWUR38405;AGIWUR44059                                                                                             |    |   |         |         |                |          |          |                     |             |
| CB4856                                                                                                                                                                                                 | HS | V | 9820554 | 9821824 | WBGene00006232 | str-193  | C50C10.6 | -0.121257764868713  |             |
| AGIWUR6862                                                                                                                                                                                             |    |   |         |         |                |          |          |                     |             |
| CB4856                                                                                                                                                                                                 | HS | V | 9822619 | 9824249 | WBGene00006070 | str-2    | C50C10.7 | -0.113049069722027  |             |
| AGIWUR28381                                                                                                                                                                                            |    |   |         |         |                |          |          |                     |             |
| CB4856                                                                                                                                                                                                 | HS | V | 9827156 | 9828401 | WBGene00005697 | sru-34   | C50C10.9 | -0.0916015215243586 |             |
| AGIWUR1612;AGIWUR26289                                                                                                                                                                                 |    |   |         |         |                |          |          |                     |             |
| CB4856                                                                                                                                                                                                 | HS | V | 9829068 | 9830444 | WBGene00014817 | R07B5.1  | R07B5.1  | 0.00735966191195558 |             |
| AGIWUR5180;AGIWUR9324                                                                                                                                                                                  |    |   |         |         |                |          |          |                     |             |
| CB4856                                                                                                                                                                                                 | HS | V | 9830978 | 9831908 | WBGene00014818 | R07B5.2  | R07B5.2  | 0.0975895380845455  |             |
| AGIWUR5210;AGIWUR38357                                                                                                                                                                                 |    |   |         |         |                |          |          |                     |             |
| CB4856                                                                                                                                                                                                 | HS | V | 9832742 | 9834000 | WBGene00005703 | sru-40   | R07B5.3  | 0.28034016391963    | AGIWUR10727 |

|                                                                                                |    |   |         |         |                |          |           |                      |             |
|------------------------------------------------------------------------------------------------|----|---|---------|---------|----------------|----------|-----------|----------------------|-------------|
| CB4856                                                                                         | HS | V | 9834463 | 9836088 | WBGene00005701 | sru-38   | R07B5.4   | -0.0911637926780582  | AGIWUR15518 |
| CB4856                                                                                         | HS | V | 9837979 | 9839588 | WBGene00011084 | srsx-21  | R07B5.5   | 0.0318895501581711   | AGIWUR25575 |
| CB4856                                                                                         | HS | V | 9841676 | 9843179 | WBGene00005699 | sru-36   | R07B5.6   | 0.0198906067399083   | AGIWUR8930  |
| CB4856                                                                                         | HS | V | 9843866 | 9846161 | WBGene00005671 | sru-8    | R07B5.7   | -0.317832905003765   | AGIWUR21957 |
| CB4856                                                                                         | HS | V | 9846158 | 9859963 | WBGene00045419 | lsy-12   | R07B5.9   | -0.0885923174092769  |             |
| AGIWUR7788;AGIWUR14451;AGIWUR18405;AGIWUR18991;AGIWUR21009;AGIWUR22924;AGIWUR27328;AGIWUR30577 |    |   |         |         |                |          |           |                      |             |
| CB4856                                                                                         | HS | V | 9866628 | 9868411 | WBGene00011701 | srab-17  | T11A5.2   | 0.0187581462448465   |             |
| AGIWUR26966;AGIWUR29976;AGIWUR37974                                                            |    |   |         |         |                |          |           |                      |             |
| CB4856                                                                                         | HS | V | 9869887 | 9871439 | WBGene00011702 | srab-18  | T11A5.3   | 0.0981531702269027   | AGIWUR44934 |
| CB4856                                                                                         | HS | V | 9874009 | 9875899 | WBGene00011703 | srab-19  | T11A5.4   | -0.0139224359775572  | AGIWUR44659 |
| CB4856                                                                                         | HS | V | 9876687 | 9879504 | WBGene00043059 | srab-26  | T11A5.7   | -0.0347239337492637  |             |
| AGIWUR12889;AGIWUR32842                                                                        |    |   |         |         |                |          |           |                      |             |
| CB4856                                                                                         | HS | V | 9880114 | 9881181 | WBGene00011704 | sdz-31   | T11A5.5   | -0.173135336641163   | AGIWUR30501 |
| CB4856                                                                                         | HS | V | 9882034 | 9885960 | WBGene00011705 | T11A5.6  | T11A5.6   | -0.00749660518585049 |             |
| AGIWUR4479;AGIWUR12299;AGIWUR17100;AGIWUR20013;AGIWUR22364                                     |    |   |         |         |                |          |           |                      |             |
| CB4856                                                                                         | HS | V | 9889839 | 9894849 | WBGene00008239 | fshr-1   | C50H2.1   | 0.147051570187314    |             |
| AGIWUR15231;AGIWUR21400;AGIWUR23775                                                            |    |   |         |         |                |          |           |                      |             |
| CB4856                                                                                         | HS | V | 9899587 | 9907644 | WBGene00001211 | egl-47   | C50H2.2   | 0.0996660482160525   |             |
| AGIWUR1630;AGIWUR25213                                                                         |    |   |         |         |                |          |           |                      |             |
| CB4856                                                                                         | HS | V | 9907632 | 9915103 | WBGene00003173 | mec-9    | C50H2.3   | 0.251936721356131    |             |
| AGIWUR8109;AGIWUR20278                                                                         |    |   |         |         |                |          |           |                      |             |
| CB4856                                                                                         | HS | V | 9916975 | 9919167 | WBGene00008240 | C50H2.4  | C50H2.4   | 0.0765547372020157   |             |
| AGIWUR6240;AGIWUR13906;AGIWUR34958                                                             |    |   |         |         |                |          |           |                      |             |
| CB4856                                                                                         | HS | V | 9918770 | 9919790 | WBGene00008241 | C50H2.5  | C50H2.5   | 0.0181847482044155   | AGIWUR4106  |
| CB4856                                                                                         | HS | V | 9921337 | 9922194 | WBGene00008242 | ceh-75   | C50H2.6   | -0.150571015340109   | AGIWUR44098 |
| CB4856                                                                                         | HS | V | 9923285 | 9923936 | WBGene00008243 | C50H2.7  | C50H2.7   | -0.0258625820177336  | AGIWUR26387 |
| CB4856                                                                                         | HS | V | 9926544 | 9927884 | WBGene00008246 | C50H2.13 | C50H2.13  | 0.206946476335235    |             |
| AGIWUR37920                                                                                    |    |   |         |         |                |          |           |                      |             |
| CB4856                                                                                         | HS | V | 9927782 | 9930775 | WBGene00011576 | rmh-2    | T07C12.12 | -0.239948935169565   |             |
| AGIWUR26741                                                                                    |    |   |         |         |                |          |           |                      |             |
| CB4856                                                                                         | HS | V | 9931019 | 9932368 | WBGene00044204 | suds-3   | T07C12.14 | -0.207286282625999   |             |
| AGIWUR11628;AGIWUR14798;AGIWUR38926                                                            |    |   |         |         |                |          |           |                      |             |
| CB4856                                                                                         | HS | V | 9935548 | 9937535 | WBGene00005618 | srj-33   | T07C12.1  | 0.0119888903509677   |             |
| AGIWUR9624                                                                                     |    |   |         |         |                |          |           |                      |             |
| CB4856                                                                                         | HS | V | 9937804 | 9940885 | WBGene00014833 | T07C12.4 | T07C12.4  | 0.00522684862282752  |             |
| AGIWUR12419;AGIWUR17109;AGIWUR34432                                                            |    |   |         |         |                |          |           |                      |             |
| CB4856                                                                                         | HS | V | 9941691 | 9942999 | WBGene00005619 | srj-34   | T07C12.5  | 0.158416880923408    |             |
| AGIWUR30726;AGIWUR40882                                                                        |    |   |         |         |                |          |           |                      |             |
| CB4856                                                                                         | HS | V | 9944393 | 9945895 | WBGene00011570 | sre-28   | T07C12.6  | -0.244586677311854   |             |

|                                                                               |    |   |          |          |                |           |           |                     |
|-------------------------------------------------------------------------------|----|---|----------|----------|----------------|-----------|-----------|---------------------|
| AGIWUR27875                                                                   |    |   |          |          |                |           |           |                     |
| CB4856                                                                        | HS | V | 9951233  | 9952182  | WBGene00011571 | ttr-46    | T07C12.7  | -0.135887811653611  |
| AGIWUR3342;AGIWUR14268                                                        |    |   |          |          |                |           |           |                     |
| CB4856                                                                        | HS | V | 9952699  | 9956883  | WBGene00011572 | mam-5     | T07C12.8  | 0.170418277792904   |
| AGIWUR5217                                                                    |    |   |          |          |                |           |           |                     |
| CB4856                                                                        | HS | V | 9956879  | 9958331  | WBGene00011573 | anmt-3    | T07C12.9  | -0.336640235102367  |
| AGIWUR20955;AGIWUR23694;AGIWUR38361                                           |    |   |          |          |                |           |           |                     |
| CB4856                                                                        | HS | V | 9959997  | 9960337  | WBGene00011574 | T07C12.10 | T07C12.10 | 0.155820678443927   |
| AGIWUR36362                                                                   |    |   |          |          |                |           |           |                     |
| CB4856                                                                        | HS | V | 9966404  | 9976226  | WBGene00006777 | unc-41    | C27H6.1   | 0.230902664315654   |
| AGIWUR15466;AGIWUR44126                                                       |    |   |          |          |                |           |           |                     |
| CB4856                                                                        | HS | V | 9978791  | 9980802  | WBGene00007784 | ruvb-1    | C27H6.2   | -0.178559391317934  |
| AGIWUR21285;AGIWUR38782                                                       |    |   |          |          |                |           |           |                     |
| CB4856                                                                        | HS | V | 9981249  | 9982766  | WBGene00007785 | tofu-1    | C27H6.3   | 0.098045302209532   |
| AGIWUR8036;AGIWUR34372                                                        |    |   |          |          |                |           |           |                     |
| CB4856                                                                        | HS | V | 9982868  | 9983932  | WBGene00077500 | C27H6.9   | C27H6.9   | 0.0967075858758903  |
| AGIWUR8798;AGIWUR30656;AGIWUR37688                                            |    |   |          |          |                |           |           |                     |
| CB4856                                                                        | HS | V | 9983924  | 9986277  | WBGene00007786 | rmd-2     | C27H6.4   | 0.137652337229698   |
| CB4856                                                                        | HS | V | 9986330  | 9987788  | WBGene00007787 | C27H6.8   | C27H6.8   | -0.106534925426774  |
| AGIWUR23276;AGIWUR30527;AGIWUR31051;AGIWUR31999;AGIWUR35154;AGIWUR37913       |    |   |          |          |                |           |           |                     |
| CB4856                                                                        | HS | V | 9987916  | 9991642  | WBGene00004323 | rde-1     | K08H10.7  | 0.113374504846046   |
| AGIWUR8121                                                                    |    |   |          |          |                |           |           |                     |
| CB4856                                                                        | HS | V | 9991812  | 9992792  | WBGene00010699 | trpp-6    | K08H10.9  | -0.0163689524472055 |
| AGIWUR41394                                                                   |    |   |          |          |                |           |           |                     |
| CB4856                                                                        | HS | V | 9993732  | 9995883  | WBGene00010698 | K08H10.6  | K08H10.6  | 0.0907861807762682  |
| AGIWUR583                                                                     |    |   |          |          |                |           |           |                     |
| CB4856                                                                        | HS | V | 9997094  | 9998481  | WBGene00014805 | K08H10.5  | K08H10.5  | 0.0190070383482048  |
| AGIWUR9000                                                                    |    |   |          |          |                |           |           |                     |
| CB4856                                                                        | HS | V | 10001118 | 10002766 | WBGene00077491 | K08H10.10 | K08H10.10 |                     |
| 0.129431543897123 AGIWUR13436;AGIWUR30142;AGIWUR34222                         |    |   |          |          |                |           |           |                     |
| CB4856                                                                        | HS | V | 10004755 | 10007482 | WBGene00010697 | uda-1     | K08H10.4  |                     |
| -0.0154370215244928 AGIWUR13430;AGIWUR19067;AGIWUR40611                       |    |   |          |          |                |           |           |                     |
| CB4856                                                                        | HS | V | 10011871 | 10028158 | WBGene00002263 | lea-1     | K08H10.1  |                     |
| 0.135023033626986 AGIWUR11182;AGIWUR11697;AGIWUR17882;AGIWUR38029;AGIWUR39700 |    |   |          |          |                |           |           |                     |
| CB4856                                                                        | HS | V | 10028150 | 10031094 | WBGene00011543 | ac1-2     | T06E8.1   | -0.0710987278295541 |
| AGIWUR9552;AGIWUR14141;AGIWUR39235                                            |    |   |          |          |                |           |           |                     |
| CB4856                                                                        | HS | V | 10035746 | 10036413 | WBGene00011544 | T06E8.2   | T06E8.2   | 0.0161753621928273  |
| AGIWUR36746                                                                   |    |   |          |          |                |           |           |                     |
| CB4856                                                                        | HS | V | 10037340 | 10048726 | WBGene00010177 | F57A8.1   | F57A8.1   | 0.031577060921073   |

|                                                           |    |   |          |          |                |          |                             |
|-----------------------------------------------------------|----|---|----------|----------|----------------|----------|-----------------------------|
| AGIWUR9377;AGIWUR19620;AGIWUR26218;AGIWUR41504            |    |   |          |          |                |          |                             |
| CB4856                                                    | HS | V | 10050047 | 10054913 | WBGene00010178 | yif-1    | F57A8.2 0.0946531634202392  |
| AGIWUR4863;AGIWUR17667                                    |    |   |          |          |                |          |                             |
| CB4856                                                    | HS | V | 10064503 | 10064939 | WBGene00010183 | fipr-13  | F57A8.8 0.205257046635245   |
| AGIWUR19773                                               |    |   |          |          |                |          |                             |
| CB4856                                                    | HS | V | 10067087 | 10068818 | WBGene00010179 | F57A8.4  | F57A8.4 -0.0805700407988468 |
| AGIWUR12584                                               |    |   |          |          |                |          |                             |
| CB4856                                                    | HS | V | 10069369 | 10070641 | WBGene00010180 | nhr-192  | F57A8.5 -0.0162356496559788 |
| AGIWUR13885                                               |    |   |          |          |                |          |                             |
| CB4856                                                    | HS | V | 10071945 | 10073893 | WBGene00010181 | F57A8.6  | F57A8.6 -0.0493513008357906 |
| AGIWUR33295;AGIWUR38993;AGIWUR44089                       |    |   |          |          |                |          |                             |
| CB4856                                                    | HS | V | 10075749 | 10077804 | WBGene00010182 | F57A8.7  | F57A8.7 0.0275109303958558  |
| AGIWUR23052                                               |    |   |          |          |                |          |                             |
| CB4856                                                    | HS | V | 10077905 | 10078344 | WBGene00011001 | R04B5.1  | R04B5.1 -0.0413664645813299 |
| AGIWUR39091                                               |    |   |          |          |                |          |                             |
| CB4856                                                    | HS | V | 10080119 | 10081739 | WBGene00011002 | nhr-205  | R04B5.3 0.260280108985627   |
| AGIWUR10466                                               |    |   |          |          |                |          |                             |
| CB4856                                                    | HS | V | 10082141 | 10084043 | WBGene00003611 | nhr-12   | R04B5.4 -0.102993438499492  |
| AGIWUR27082                                               |    |   |          |          |                |          |                             |
| CB4856                                                    | HS | V | 10085281 | 10087313 | WBGene00011004 | R04B5.6  | R04B5.6 -0.101405212077196  |
| AGIWUR21782                                               |    |   |          |          |                |          |                             |
| CB4856                                                    | HS | V | 10087480 | 10088998 | WBGene00011003 | R04B5.5  | R04B5.5 0.173894487160656   |
| AGIWUR21261                                               |    |   |          |          |                |          |                             |
| CB4856                                                    | HS | V | 10089157 | 10090561 | WBGene00011005 | R04B5.7  | R04B5.7 -0.0821395508975478 |
| AGIWUR30661                                               |    |   |          |          |                |          |                             |
| CB4856                                                    | HS | V | 10090688 | 10091252 | WBGene00011008 | R04B5.11 | R04B5.11                    |
| 0.166711422142725                                         |    |   |          |          |                |          |                             |
| AGIWUR5081;AGIWUR6922;AGIWUR16433;AGIWUR19085;AGIWUR42467 |    |   |          |          |                |          |                             |
| CB4856                                                    | HS | V | 10094720 | 10096311 | WBGene00005127 | srd-49   | R04B5.8 0.0218628619663814  |
| AGIWUR15531                                               |    |   |          |          |                |          |                             |
| CB4856                                                    | HS | V | 10096305 | 10098597 | WBGene00011006 | ugt-47   | R04B5.9 0.0860038003154244  |
| AGIWUR42833                                               |    |   |          |          |                |          |                             |
| CB4856                                                    | HS | V | 10098904 | 10099205 | WBGene00011007 | R04B5.10 | R04B5.10                    |
| -0.170370150320714                                        |    |   |          |          |                |          |                             |
| AGIWUR5592                                                |    |   |          |          |                |          |                             |
| CB4856                                                    | HS | V | 10100156 | 10102016 | WBGene00044044 | C08B6.14 | C08B6.14                    |
| 0.0292285770138259                                        |    |   |          |          |                |          |                             |
| AGIWUR23984                                               |    |   |          |          |                |          |                             |
| CB4856                                                    | HS | V | 10102592 | 10104946 | WBGene00007422 | ugt-17   | C08B6.1 -0.109177645320678  |
| AGIWUR16806                                               |    |   |          |          |                |          |                             |
| CB4856                                                    | HS | V | 10107684 | 10109905 | WBGene00007431 | C08B6.11 | C08B6.11                    |
| 0.273735049524471                                         |    |   |          |          |                |          |                             |
| AGIWUR13572                                               |    |   |          |          |                |          |                             |



|                                                                              |   |          |          |                |                  |                     |
|------------------------------------------------------------------------------|---|----------|----------|----------------|------------------|---------------------|
| CB4856 HS                                                                    | V | 10109872 | 10112287 | WBGene00007424 | C08B6.3 C08B6.3  | 0.261680019612992   |
| AGIWUR37592                                                                  |   |          |          |                |                  |                     |
| CB4856 HS                                                                    | V | 10117765 | 10119688 | WBGene00007426 | C08B6.5 C08B6.5  | 0.03807543945869    |
| AGIWUR14625                                                                  |   |          |          |                |                  |                     |
| CB4856 HS                                                                    | V | 10119574 | 10120986 | WBGene00007432 | srxa-18 C08B6.12 |                     |
| -0.011899217950778 AGIWUR36957                                               |   |          |          |                |                  |                     |
| CB4856 HS                                                                    | V | 10121134 | 10122770 | WBGene00044012 | srxa-19 C08B6.13 |                     |
| 0.0194856731641306 AGIWUR27566;AGIWUR44831                                   |   |          |          |                |                  |                     |
| CB4856 HS                                                                    | V | 10123638 | 10124689 | WBGene00007427 | C08B6.6 C08B6.6  | 0.205610774074151   |
| AGIWUR8597                                                                   |   |          |          |                |                  |                     |
| CB4856 HS                                                                    | V | 10125052 | 10127570 | WBGene00007430 | C08B6.10         | C08B6.10            |
| -0.0970959403183844 AGIWUR6529                                               |   |          |          |                |                  |                     |
| CB4856 HS                                                                    | V | 10127492 | 10130295 | WBGene00000142 | aos-1 C08B6.9    | 0.0539019775856513  |
| AGIWUR24404;AGIWUR32403;AGIWUR35539;AGIWUR38336                              |   |          |          |                |                  |                     |
| CB4856 HS                                                                    | V | 10130405 | 10134148 | WBGene00007428 | wdr-20 C08B6.7   | -0.0594391062247954 |
| AGIWUR4283;AGIWUR10640;AGIWUR12917;AGIWUR19139;AGIWUR20882;AGIWUR24602       |   |          |          |                |                  |                     |
| CB4856 HS                                                                    | V | 10134643 | 10143081 | WBGene00007429 | C08B6.8 C08B6.8  | -0.0913492964348945 |
| AGIWUR20990;AGIWUR33580                                                      |   |          |          |                |                  |                     |
| CB4856 HS                                                                    | V | 10143936 | 10144192 | WBGene00077449 | C08B6.15         | C08B6.15            |
| -0.0282082258212943 AGIWUR717;AGIWUR3577;AGIWUR20236;AGIWUR38212;AGIWUR43073 |   |          |          |                |                  |                     |
| CB4856 HS                                                                    | V | 10144408 | 10145251 | WBGene00008253 | C51E3.8 C51E3.8  | 0.0880469614154666  |
| AGIWUR30989                                                                  |   |          |          |                |                  |                     |
| CB4856 HS                                                                    | V | 10145905 | 10148977 | WBGene00008254 | C51E3.9 C51E3.9  | -0.0855043282796082 |
| AGIWUR22043                                                                  |   |          |          |                |                  |                     |
| CB4856 HS                                                                    | V | 10150066 | 10152159 | WBGene00008248 | srsx-27 C51E3.2  | 0.00183614075610539 |
| AGIWUR23884;AGIWUR25522                                                      |   |          |          |                |                  |                     |
| CB4856 HS                                                                    | V | 10152583 | 10154756 | WBGene00008249 | srsx-28 C51E3.3  | 0.134767976789092   |
| AGIWUR10539;AGIWUR19267;AGIWUR25349                                          |   |          |          |                |                  |                     |
| CB4856 HS                                                                    | V | 10154998 | 10156381 | WBGene00008250 | srsx-29 C51E3.4  | -0.226134197855057  |
| AGIWUR5433                                                                   |   |          |          |                |                  |                     |
| CB4856 HS                                                                    | V | 10158833 | 10160297 | WBGene00008251 | srsx-30 C51E3.5  | 0.116905476357017   |
| AGIWUR13139;AGIWUR18898                                                      |   |          |          |                |                  |                     |
| CB4856 HS                                                                    | V | 10160439 | 10161161 | WBGene00008255 | C51E3.10         | C51E3.10            |
| 0.106889074427375 AGIWUR5502                                                 |   |          |          |                |                  |                     |
| CB4856 HS                                                                    | V | 10164135 | 10166463 | WBGene00008252 | C51E3.6 C51E3.6  | 0.203607885961633   |
| AGIWUR15393;AGIWUR33155;AGIWUR38537                                          |   |          |          |                |                  |                     |
| CB4856 HS                                                                    | V | 10169197 | 10173753 | WBGene00001172 | egl-3 C51E3.7    | 0.0299108124461078  |
| AGIWUR1410;AGIWUR10673;AGIWUR10823;AGIWUR32937                               |   |          |          |                |                  |                     |
| CB4856 HS                                                                    | V | 10179535 | 10183154 | WBGene00000840 | cul-5 ZK856.1    | 0.25435192426669    |

|                                                                                                                      |    |   |          |          |
|----------------------------------------------------------------------------------------------------------------------|----|---|----------|----------|
| AGIWUR10749                                                                                                          |    |   |          |          |
| CB4856                                                                                                               | HS | V | 10183284 | 10184446 |
| AGIWUR1992                                                                                                           |    |   |          |          |
| CB4856                                                                                                               | HS | V | 10184689 | 10186007 |
| -0.134288057380282 AGIWUR11214                                                                                       |    |   |          |          |
| CB4856                                                                                                               | HS | V | 10198704 | 10199942 |
| AGIWUR24559                                                                                                          |    |   |          |          |
| CB4856                                                                                                               | HS | V | 10201856 | 10202610 |
| AGIWUR4691;AGIWUR21535;AGIWUR29202;AGIWUR31126                                                                       |    |   |          |          |
| CB4856                                                                                                               | HS | V | 10202538 | 10203485 |
| AGIWUR8017;AGIWUR29777;AGIWUR42156;AGIWUR44854                                                                       |    |   |          |          |
| CB4856                                                                                                               | HS | V | 10203772 | 10205587 |
| -0.28225232644246 AGIWUR11220                                                                                        |    |   |          |          |
| CB4856                                                                                                               | HS | V | 10205683 | 10206602 |
| 0.339824971505482 AGIWUR35370                                                                                        |    |   |          |          |
| CB4856                                                                                                               | HS | V | 10206619 | 10210344 |
| -0.206915201621277 AGIWUR11722                                                                                       |    |   |          |          |
| CB4856                                                                                                               | HS | V | 10210444 | 10212127 |
| AGIWUR41962                                                                                                          |    |   |          |          |
| CB4856                                                                                                               | HS | V | 10212929 | 10216305 |
| -0.183365283217974 AGIWUR20340;AGIWUR26577;AGIWUR37582                                                               |    |   |          |          |
| CB4856                                                                                                               | HS | V | 10217079 | 10219022 |
| 0.121218902941187 AGIWUR1092;AGIWUR14205;AGIWUR31390                                                                 |    |   |          |          |
| CB4856                                                                                                               | HS | V | 10219455 | 10220470 |
| 0.246931427560813 AGIWUR15994                                                                                        |    |   |          |          |
| CB4856                                                                                                               | HS | V | 10223513 | 10225760 |
| AGIWUR24683                                                                                                          |    |   |          |          |
| CB4856                                                                                                               | HS | V | 10226885 | 10227434 |
| AGIWUR25644                                                                                                          |    |   |          |          |
| CB4856                                                                                                               | HS | V | 10228043 | 10228460 |
| 0.20230522727074 AGIWUR16878                                                                                         |    |   |          |          |
| CB4856                                                                                                               | HS | V | 10228641 | 10229322 |
| 0.0469766193068999 AGIWUR24231                                                                                       |    |   |          |          |
| CB4856                                                                                                               | HS | V | 10231821 | 10233430 |
| 0.00282561163706241 AGIWUR41878                                                                                      |    |   |          |          |
| CB4856                                                                                                               | HS | V | 10236160 | 10238902 |
| AGIWUR1056;AGIWUR7083;AGIWUR9511;AGIWUR14024;AGIWUR18462;AGIWUR22716;AGIWUR25429;AGIWUR27421;AGIWUR35675;AGIWUR39350 |    |   |          |          |
| CB4856                                                                                                               | HS | V | 10240573 | 10241188 |

|                      |                                                                         |          |                |          |          |                     |  |
|----------------------|-------------------------------------------------------------------------|----------|----------------|----------|----------|---------------------|--|
| -0.0809839269339854  | AGIWUR15826                                                             |          |                |          |          |                     |  |
| CB4856 HS V          | 10241784                                                                | 10242718 | WBGene00000721 | col-148  | C12D8.8  | -0.296895796319996  |  |
| AGIWUR13025          |                                                                         |          |                |          |          |                     |  |
| CB4856 HS V          | 10242787                                                                | 10243205 | WBGene00007538 | C12D8.9  | C12D8.9  | 0.0807994616032204  |  |
| AGIWUR8119           |                                                                         |          |                |          |          |                     |  |
| CB4856 HS V          | 10248907                                                                | 10252895 | WBGene00000102 | akt-1    | C12D8.10 |                     |  |
| -0.0116825505470048  | AGIWUR3065;AGIWUR5113;AGIWUR14046;AGIWUR43925                           |          |                |          |          |                     |  |
| CB4856 HS V          | 10252821                                                                | 10255055 | WBGene00004405 | rop-1    | C12D8.11 |                     |  |
| -0.0543466770369427  | AGIWUR2067;AGIWUR16535;AGIWUR21656                                      |          |                |          |          |                     |  |
| CB4856 HS V          | 10256360                                                                | 10258654 | WBGene00012494 | nhr-232  | Y22F5A.1 |                     |  |
| 0.250393342889727    | AGIWUR2700                                                              |          |                |          |          |                     |  |
| CB4856 HS V          | 10258661                                                                | 10260554 | WBGene00005530 | sri-18   | Y22F5A.2 |                     |  |
| -0.187741561215829   | AGIWUR12538                                                             |          |                |          |          |                     |  |
| CB4856 HS V          | 10261131                                                                | 10270314 | WBGene00004364 | ric-4    | Y22F5A.3 |                     |  |
| -0.0148700630851559  | AGIWUR13824;AGIWUR14867;AGIWUR17495;AGIWUR21980                         |          |                |          |          |                     |  |
| CB4856 HS V          | 10277827                                                                | 10279127 | WBGene00003090 | lys-1    | Y22F5A.4 |                     |  |
| -0.0262123627581854  | AGIWUR13848;AGIWUR17373;AGIWUR20455;AGIWUR29828;AGIWUR30263;AGIWUR33540 |          |                |          |          |                     |  |
| CB4856 HS V          | 10280310                                                                | 10281474 | WBGene00003091 | lys-2    | Y22F5A.5 |                     |  |
| 0.207506152145319    | AGIWUR37008                                                             |          |                |          |          |                     |  |
| CB4856 HS V          | 10282204                                                                | 10283544 | WBGene00003092 | lys-3    | Y22F5A.6 |                     |  |
| 0.151368990362004    | AGIWUR44748                                                             |          |                |          |          |                     |  |
| CB4856 HS V          | 10287564                                                                | 10289272 | WBGene00007096 | B0024.3  | B0024.3  |                     |  |
| -0.00640753742701961 | AGIWUR8921                                                              |          |                |          |          |                     |  |
| CB4856 HS V          | 10289721                                                                | 10291710 | WBGene00007104 | B0024.15 | B0024.15 |                     |  |
| -0.0962227583731661  | AGIWUR36356                                                             |          |                |          |          |                     |  |
| CB4856 HS V          | 10291697                                                                | 10292869 | WBGene00000722 | col-149  | B0024.1  | 0.545669237530353   |  |
| AGIWUR37769          |                                                                         |          |                |          |          |                     |  |
| CB4856 HS V          | 10293563                                                                | 10294623 | WBGene00000723 | col-150  | B0024.2  | 0.170771371210858   |  |
| AGIWUR37941          |                                                                         |          |                |          |          |                     |  |
| CB4856 HS V          | 10297399                                                                | 10298865 | WBGene00007097 | B0024.4  | B0024.4  | 0.689632518990022   |  |
| AGIWUR44276          |                                                                         |          |                |          |          |                     |  |
| CB4856 HS V          | 10299473                                                                | 10307354 | WBGene00000491 | che-12   | B0024.8  | 0.111237659515767   |  |
| AGIWUR3900           |                                                                         |          |                |          |          |                     |  |
| CB4856 HS V          | 10308291                                                                | 10314053 | WBGene00001533 | gcy-6    | B0024.6  | 0.657420895931221   |  |
| AGIWUR18920          |                                                                         |          |                |          |          |                     |  |
| CB4856 HS V          | 10314641                                                                | 10315304 | WBGene00007099 | trx-2    | B0024.9  | -0.0142876022717999 |  |
| AGIWUR37553          |                                                                         |          |                |          |          |                     |  |
| CB4856 HS V          | 10315245                                                                | 10317394 | WBGene00007100 | B0024.10 | B0024.10 |                     |  |
| 0.209336131441859    | AGIWUR4937                                                              |          |                |          |          |                     |  |

|                                                            |                                                                        |          |                |          |                             |
|------------------------------------------------------------|------------------------------------------------------------------------|----------|----------------|----------|-----------------------------|
| CB4856 HS V                                                | 10317490                                                               | 10319534 | WBGene00007101 | B0024.11 | B0024.11                    |
| 0.0864565696823938                                         | AGIWUR40598                                                            |          |                |          |                             |
| CB4856 HS V                                                | 10319535                                                               | 10320158 | WBGene00001646 | gna-1    | B0024.12                    |
| 0.0515090378655625                                         | AGIWUR36410                                                            |          |                |          |                             |
| CB4856 HS V                                                | 10320715                                                               | 10322304 | WBGene00007102 | B0024.13 | B0024.13                    |
| -0.213278877803253                                         | AGIWUR19097;AGIWUR26092;AGIWUR29028;AGIWUR32735                        |          |                |          |                             |
| CB4856 HS V                                                | 10322288                                                               | 10332112 | WBGene00007103 | crm-1    | B0024.14                    |
| -0.0611905736195313                                        | AGIWUR4802;AGIWUR12222;AGIWUR14025;AGIWUR21491;AGIWUR22518;AGIWUR40898 |          |                |          |                             |
| CB4856 HS V                                                | 10335443                                                               | 10338355 | WBGene00000200 | arx-2    | K07C5.1 -0.151381112138349  |
| AGIWUR20870                                                |                                                                        |          |                |          |                             |
| CB4856 HS V                                                | 10339500                                                               | 10340971 | WBGene00010625 | K07C5.2  | K07C5.2 0.0822450883796932  |
| AGIWUR5598                                                 |                                                                        |          |                |          |                             |
| CB4856 HS V                                                | 10343032                                                               | 10345489 | WBGene00010626 | K07C5.3  | K07C5.3 0.110908299352282   |
| AGIWUR28656                                                |                                                                        |          |                |          |                             |
| CB4856 HS V                                                | 10346662                                                               | 10350154 | WBGene00010632 | K07C5.9  | K07C5.9 -0.0431725327656665 |
| AGIWUR3318;AGIWUR7900;AGIWUR14780;AGIWUR17856;AGIWUR27080  |                                                                        |          |                |          |                             |
| CB4856 HS V                                                | 10350471                                                               | 10352978 | WBGene00010627 | K07C5.4  | K07C5.4 -0.229491301167036  |
| AGIWUR11758;AGIWUR13751;AGIWUR31089;AGIWUR36058            |                                                                        |          |                |          |                             |
| CB4856 HS V                                                | 10353584                                                               | 10355837 | WBGene00010629 | K07C5.6  | K07C5.6 -0.0706056155105337 |
| AGIWUR35576                                                |                                                                        |          |                |          |                             |
| CB4856 HS V                                                | 10356285                                                               | 10357903 | WBGene00010628 | ceeh-2   | K07C5.5 -0.0628547974234026 |
| AGIWUR2367;AGIWUR11689;AGIWUR43744                         |                                                                        |          |                |          |                             |
| CB4856 HS V                                                | 10358544                                                               | 10361430 | WBGene00010630 | ttl1-15  | K07C5.7 0.315528729189279   |
| AGIWUR2920                                                 |                                                                        |          |                |          |                             |
| CB4856 HS V                                                | 10362261                                                               | 10366014 | WBGene00010631 | cash-1   | K07C5.8 -0.032315790048397  |
| AGIWUR7634;AGIWUR18426;AGIWUR20669                         |                                                                        |          |                |          |                             |
| CB4856 HS V                                                | 10368556                                                               | 10369868 | WBGene00005532 | sri-20   | AC3.1 0.159292764380365     |
| AGIWUR10661                                                |                                                                        |          |                |          |                             |
| CB4856 HS V                                                | 10372325                                                               | 10374245 | WBGene00007070 | ugt-49   | AC3.2 0.082740261875859     |
| AGIWUR29691                                                |                                                                        |          |                |          |                             |
| CB4856 HS V                                                | 10374851                                                               | 10376884 | WBGene00044022 | AC3.9    | AC3.9 0.209769998230748     |
| AGIWUR28600                                                |                                                                        |          |                |          |                             |
| CB4856 HS V                                                | 10376985                                                               | 10377317 | WBGene00077502 | AC3.11   | AC3.11 -0.0424985735769878  |
| AGIWUR6781;AGIWUR26582;AGIWUR29815;AGIWUR32777;AGIWUR40707 |                                                                        |          |                |          |                             |
| CB4856 HS V                                                | 10378982                                                               | 10379364 | WBGene00077503 | AC3.12   | AC3.12 -0.149644463245833   |
| AGIWUR3223;AGIWUR15051;AGIWUR27034;AGIWUR43064;AGIWUR43093 |                                                                        |          |                |          |                             |
| CB4856 HS V                                                | 10384157                                                               | 10385711 | WBGene00004964 | spe-10   | AC3.10 -0.139473442902336   |
| AGIWUR21504                                                |                                                                        |          |                |          |                             |
| CB4856 HS V                                                | 10388402                                                               | 10393504 | WBGene00007071 | AC3.5    | AC3.5                       |

|                       |                                                                         |          |                |           |          |                     |
|-----------------------|-------------------------------------------------------------------------|----------|----------------|-----------|----------|---------------------|
| 0.000260314476605572  | AGIWUR3186;AGIWUR10575;AGIWUR24403;AGIWUR35180                          |          |                |           |          |                     |
| CB4856 HS V           | 10393531                                                                | 10395232 | WBGene00000724 | col-151   | AC3.6    | 0.04990289628158    |
| AGIWUR37545           |                                                                         |          |                |           |          |                     |
| CB4856 HS V           | 10395663                                                                | 10397817 | WBGene00007072 | ugt-1     | AC3.7    | 0.300820152197137   |
| AGIWUR6758            |                                                                         |          |                |           |          |                     |
| CB4856 HS V           | 10398717                                                                | 10401307 | WBGene00007073 | ugt-2     | AC3.8    | -0.0797643515883273 |
| AGIWUR24429           |                                                                         |          |                |           |          |                     |
| CB4856 HS V           | 10401447                                                                | 10402904 | WBGene00008875 | F15H10.8  |          | F15H10.8            |
| 0.033477492535583     | AGIWUR3582;AGIWUR4498;AGIWUR5126;AGIWUR15892;AGIWUR20758;AGIWUR39123    |          |                |           |          |                     |
| CB4856 HS V           | 10403184                                                                | 10406424 | WBGene00008874 | F15H10.7  |          | F15H10.7            |
| 0.0868515106756877    | AGIWUR6174                                                              |          |                |           |          |                     |
| CB4856 HS V           | 10410240                                                                | 10412149 | WBGene00008873 | F15H10.6  |          | F15H10.6            |
| 0.0319848104513571    | AGIWUR40937                                                             |          |                |           |          |                     |
| CB4856 HS V           | 10413332                                                                | 10414692 | WBGene00044013 | F15H10.9  |          | F15H10.9            |
| 0.169081936178564     | AGIWUR2037                                                              |          |                |           |          |                     |
| CB4856 HS V           | 10415734                                                                | 10417025 | WBGene00044014 | F15H10.10 |          | F15H10.10           |
| 0.807221020751963     | AGIWUR29823;AGIWUR44691                                                 |          |                |           |          |                     |
| CB4856 HS V           | 10417617                                                                | 10419053 | WBGene00008872 | F15H10.5  |          | F15H10.5            |
| 0.254388895441385     | AGIWUR4994;AGIWUR14497                                                  |          |                |           |          |                     |
| CB4856 HS V           | 10423907                                                                | 10425092 | WBGene00000601 | col-12    | F15H10.1 |                     |
| 0.718381182065002     | AGIWUR4286                                                              |          |                |           |          |                     |
| CB4856 HS V           | 10425362                                                                | 10426399 | WBGene00000144 | apc-10    | F15H10.3 |                     |
| 0.102282964172278     | AGIWUR26869;AGIWUR44725                                                 |          |                |           |          |                     |
| CB4856 HS V           | 10426633                                                                | 10428731 | WBGene00008871 | tag-314   | F15H10.4 |                     |
| 0.136727319561635     | AGIWUR40256                                                             |          |                |           |          |                     |
| CB4856 HS V           | 10428726                                                                | 10433604 | WBGene00012529 | Y32F6A.4  |          | Y32F6A.4            |
| 0.199790468323734     | AGIWUR11049;AGIWUR15338;AGIWUR22164;AGIWUR27644;AGIWUR28480;AGIWUR32635 |          |                |           |          |                     |
| CB4856 HS V           | 10436912                                                                | 10441149 | WBGene00012527 | set-22    | Y32F6A.1 |                     |
| 0.0816091761685183    | AGIWUR21850                                                             |          |                |           |          |                     |
| CB4856 HS V           | 10441979                                                                | 10446459 | WBGene00012528 | pap-1     | Y32F6A.3 |                     |
| -0.000962860123173037 | AGIWUR12613;AGIWUR17884                                                 |          |                |           |          |                     |
| CB4856 HS V           | 10446534                                                                | 10453781 | WBGene00012530 | Y32F6A.5  |          | Y32F6A.5            |
| 0.0674033890039318    | AGIWUR31672                                                             |          |                |           |          |                     |
| CB4856 HS V           | 10453748                                                                | 10457347 | WBGene00009058 | F22E12.1  |          | F22E12.1            |
| 0.0585621293315199    | AGIWUR3370                                                              |          |                |           |          |                     |
| CB4856 HS V           | 10459188                                                                | 10463364 | WBGene00009060 | F22E12.3  |          | F22E12.3            |
| 0.248656963615181     | AGIWUR16080                                                             |          |                |           |          |                     |
| CB4856 HS V           | 10462282                                                                | 10464660 | WBGene00009059 | chw-1     | F22E12.2 |                     |
| 0.0953984343915835    | AGIWUR32911                                                             |          |                |           |          |                     |

|                                                                                                                                    |    |   |          |          |                |          |          |                     |
|------------------------------------------------------------------------------------------------------------------------------------|----|---|----------|----------|----------------|----------|----------|---------------------|
| CB4856                                                                                                                             | HS | V | 10468411 | 10476952 | WBGene00001178 | egl-9    | F22E12.4 |                     |
| -0.0264721069240936                                                                                                                |    |   |          |          |                |          |          |                     |
| AGIWUR8432;AGIWUR12790;AGIWUR13943;AGIWUR16371;AGIWUR18187;AGIWUR21119;AGIWUR21574;AGIWUR31407;AGIWUR33133;AGIWUR36086;AGIWUR36899 |    |   |          |          |                |          |          |                     |
| CB4856                                                                                                                             | HS | V | 10478566 | 10480963 | WBGene00012532 | crp-1    | Y32F6B.3 |                     |
| 0.217202894008828                                                                                                                  |    |   |          |          |                |          |          |                     |
| CB4856                                                                                                                             | HS | V | 10480949 | 10484740 | WBGene00012531 | Y32F6B.1 | Y32F6B.1 |                     |
| -0.0309766422652835                                                                                                                |    |   |          |          |                |          |          |                     |
| CB4856                                                                                                                             | HS | V | 10486473 | 10490048 | WBGene00003570 | ncx-5    | Y32F6B.2 |                     |
| 0.119932652652807                                                                                                                  |    |   |          |          |                |          |          |                     |
| CB4856                                                                                                                             | HS | V | 10491743 | 10493268 | WBGene00000173 | aqp-5    | C35A5.1  | -0.0337020923309286 |
| AGIWUR18028                                                                                                                        |    |   |          |          |                |          |          |                     |
| CB4856                                                                                                                             | HS | V | 10493406 | 10496477 | WBGene00007946 | ugt-33   | C35A5.2  | -0.256492723612054  |
| AGIWUR25829                                                                                                                        |    |   |          |          |                |          |          |                     |
| CB4856                                                                                                                             | HS | V | 10497059 | 10499324 | WBGene00007948 | C35A5.4  | C35A5.4  | 0.0597415025355623  |
| AGIWUR30625                                                                                                                        |    |   |          |          |                |          |          |                     |
| CB4856                                                                                                                             | HS | V | 10499355 | 10501395 | WBGene00007947 | C35A5.3  | C35A5.3  | 0.00456806238791074 |
| AGIWUR12046;AGIWUR35018;AGIWUR44995                                                                                                |    |   |          |          |                |          |          |                     |
| CB4856                                                                                                                             | HS | V | 10502116 | 10503111 | WBGene00044024 | C35A5.11 | C35A5.11 |                     |
| -0.0231817641352139                                                                                                                |    |   |          |          |                |          |          |                     |
| CB4856                                                                                                                             | HS | V | 10504193 | 10505401 | WBGene00044016 | C35A5.10 | C35A5.10 |                     |
| -0.409511148828889                                                                                                                 |    |   |          |          |                |          |          |                     |
| CB4856                                                                                                                             | HS | V | 10505850 | 10507829 | WBGene00007949 | C35A5.5  | C35A5.5  | -0.0291390823789213 |
| AGIWUR30308                                                                                                                        |    |   |          |          |                |          |          |                     |
| CB4856                                                                                                                             | HS | V | 10509055 | 10510451 | WBGene00007950 | C35A5.6  | C35A5.6  | 0.0781398268151641  |
| AGIWUR13574                                                                                                                        |    |   |          |          |                |          |          |                     |
| CB4856                                                                                                                             | HS | V | 10510684 | 10514371 | WBGene00007951 | dmsr-8   | C35A5.7  | 0.140993941653742   |
| AGIWUR14579;AGIWUR39136;AGIWUR44611                                                                                                |    |   |          |          |                |          |          |                     |
| CB4856                                                                                                                             | HS | V | 10521992 | 10525908 | WBGene00007952 | C35A5.8  | C35A5.8  | -0.146581421850563  |
| AGIWUR6377;AGIWUR17776;AGIWUR23357;AGIWUR34779;AGIWUR36167                                                                         |    |   |          |          |                |          |          |                     |
| CB4856                                                                                                                             | HS | V | 10526298 | 10528396 | WBGene00007953 | hda-11   | C35A5.9  | -0.0357304497495043 |
| AGIWUR13484;AGIWUR23917;AGIWUR33306                                                                                                |    |   |          |          |                |          |          |                     |
| CB4856                                                                                                                             | HS | V | 10528754 | 10530568 | WBGene00009108 | F25D1.3  | F25D1.3  | 0.0366308988726551  |
| AGIWUR27819                                                                                                                        |    |   |          |          |                |          |          |                     |
| CB4856                                                                                                                             | HS | V | 10530641 | 10532848 | WBGene00009107 | F25D1.2  | F25D1.2  | -0.0822593165728494 |
| AGIWUR14084                                                                                                                        |    |   |          |          |                |          |          |                     |
| CB4856                                                                                                                             | HS | V | 10532894 | 10536388 | WBGene00006460 | ppm-1    | F25D1.1  | -0.0559090399737663 |
| AGIWUR38079                                                                                                                        |    |   |          |          |                |          |          |                     |
| CB4856                                                                                                                             | HS | V | 10538493 | 10538788 | WBGene00077506 | F25D1.7  | F25D1.7  | 0.0481778836970044  |

|                                                                        |    |   |          |          |                |          |          |                     |  |
|------------------------------------------------------------------------|----|---|----------|----------|----------------|----------|----------|---------------------|--|
| AGIWUR3338;AGIWUR15506;AGIWUR20953;AGIWUR28164;AGIWUR28456             |    |   |          |          |                |          |          |                     |  |
| CB4856                                                                 | HS | V | 10540324 | 10545742 | WBGene00009109 | degt-1   | F25D1.4  | -0.155272004654817  |  |
| AGIWUR27927                                                            |    |   |          |          |                |          |          |                     |  |
| CB4856                                                                 | HS | V | 10545741 | 10546799 | WBGene00009110 | F25D1.5  | F25D1.5  | 0.317610000203452   |  |
| AGIWUR36901                                                            |    |   |          |          |                |          |          |                     |  |
| CB4856                                                                 | HS | V | 10547598 | 10549081 | WBGene00005112 | srd-34   | F32G8.1  | -0.0113697813338502 |  |
| AGIWUR11030                                                            |    |   |          |          |                |          |          |                     |  |
| CB4856                                                                 | HS | V | 10550017 | 10554493 | WBGene00009338 | F32G8.2  | F32G8.2  | -0.11778877737455   |  |
| AGIWUR24079;AGIWUR31469;AGIWUR33558                                    |    |   |          |          |                |          |          |                     |  |
| CB4856                                                                 | HS | V | 10554616 | 10555238 | WBGene00009339 | F32G8.3  | F32G8.3  | 0.6553246061541     |  |
| AGIWUR21055                                                            |    |   |          |          |                |          |          |                     |  |
| CB4856                                                                 | HS | V | 10557976 | 10560793 | WBGene00009340 | best-14  | F32G8.4  | 0.0446020551436193  |  |
| AGIWUR10997;AGIWUR24165;AGIWUR30762;AGIWUR38864                        |    |   |          |          |                |          |          |                     |  |
| CB4856                                                                 | HS | V | 10560921 | 10562150 | WBGene00000725 | col-152  | F32G8.5  | -0.135024481945421  |  |
| AGIWUR6215                                                             |    |   |          |          |                |          |          |                     |  |
| CB4856                                                                 | HS | V | 10564880 | 10566445 | WBGene00000298 | cat-4    | F32G8.6  | 0.192000366304875   |  |
| AGIWUR23788                                                            |    |   |          |          |                |          |          |                     |  |
| CB4856                                                                 | HS | V | 10566365 | 10576419 | WBGene00006934 | vps-54   | T21C9.2  | -0.0953164688877393 |  |
| AGIWUR6454;AGIWUR10348;AGIWUR12955;AGIWUR14416;AGIWUR17131;AGIWUR25888 |    |   |          |          |                |          |          |                     |  |
| CB4856                                                                 | HS | V | 10576513 | 10578322 | WBGene00011890 | mics-1   | T21C9.1  | 0.0527109275878352  |  |
| AGIWUR12337                                                            |    |   |          |          |                |          |          |                     |  |
| CB4856                                                                 | HS | V | 10578428 | 10579141 | WBGene00011892 | T21C9.4  | T21C9.4  | 0.0294473428485986  |  |
| AGIWUR13694                                                            |    |   |          |          |                |          |          |                     |  |
| CB4856                                                                 | HS | V | 10579309 | 10580693 | WBGene00003065 | lpd-9    | T21C9.5  | 0.115956176177786   |  |
| AGIWUR30951                                                            |    |   |          |          |                |          |          |                     |  |
| CB4856                                                                 | HS | V | 10581887 | 10587164 | WBGene00011893 | T21C9.6  | T21C9.6  | 0.28534425131912    |  |
| AGIWUR12083                                                            |    |   |          |          |                |          |          |                     |  |
| CB4856                                                                 | HS | V | 10587167 | 10588794 | WBGene00005189 | srg-32   | T21C9.7  | -0.0389632115650009 |  |
| AGIWUR6145                                                             |    |   |          |          |                |          |          |                     |  |
| CB4856                                                                 | HS | V | 10590548 | 10592653 | WBGene00011895 | T21C9.9  | T21C9.9  | -0.0398162227637808 |  |
| AGIWUR34880                                                            |    |   |          |          |                |          |          |                     |  |
| CB4856                                                                 | HS | V | 10593936 | 10594906 | WBGene00011896 | T21C9.11 |          | T21C9.11            |  |
| -0.0826251183453923 AGIWUR32886                                        |    |   |          |          |                |          |          |                     |  |
| CB4856                                                                 | HS | V | 10597266 | 10598666 | WBGene00011898 | T21C9.13 |          | T21C9.13            |  |
| -0.274653573039357 AGIWUR14188                                         |    |   |          |          |                |          |          |                     |  |
| CB4856                                                                 | HS | V | 10599105 | 10602147 | WBGene00011897 | scpl-4   | T21C9.12 |                     |  |
| 0.138535921084115 AGIWUR10563                                          |    |   |          |          |                |          |          |                     |  |
| CB4856                                                                 | HS | V | 10602458 | 10605568 | WBGene00010418 | H27A22.1 |          | H27A22.1            |  |
| -0.0133942052614362 AGIWUR33284                                        |    |   |          |          |                |          |          |                     |  |

|                                                                         |                                                                         |          |                |          |                             |
|-------------------------------------------------------------------------|-------------------------------------------------------------------------|----------|----------------|----------|-----------------------------|
| CB4856 HS V                                                             | 10612926                                                                | 10615511 | WBGene00010375 | H09F14.1 | H09F14.1                    |
| 0.0546452338094721                                                      | AGIWUR24872                                                             |          |                |          |                             |
| CB4856 HS V                                                             | 10633058                                                                | 10635411 | WBGene00003114 | mab-23   | C32C4.5 0.0237119984994059  |
| AGIWUR21001;AGIWUR26989;AGIWUR29956;AGIWUR34519;AGIWUR44313;AGIWUR44808 |                                                                         |          |                |          |                             |
| CB4856 HS V                                                             | 10636022                                                                | 10645135 | WBGene00007862 | C32C4.1  | C32C4.1 -0.0123397448057609 |
| AGIWUR36603                                                             |                                                                         |          |                |          |                             |
| CB4856 HS V                                                             | 10645020                                                                | 10646963 | WBGene00007863 | C32C4.3  | C32C4.3 0.129920115107469   |
| AGIWUR5767;AGIWUR27045                                                  |                                                                         |          |                |          |                             |
| CB4856 HS V                                                             | 10648446                                                                | 10651952 | WBGene00000174 | aqp-6    | C32C4.2 -0.0446302232078288 |
| AGIWUR9151                                                              |                                                                         |          |                |          |                             |
| CB4856 HS V                                                             | 10651995                                                                | 10654265 | WBGene00044286 | ugt-35   | C32C4.7 0.0338725089644942  |
| AGIWUR29194                                                             |                                                                         |          |                |          |                             |
| CB4856 HS V                                                             | 10654417                                                                | 10656976 | WBGene00009255 | ugt-34   | F29F11.2                    |
| -0.071527838182317                                                      | AGIWUR34667;AGIWUR40200                                                 |          |                |          |                             |
| CB4856 HS V                                                             | 10658194                                                                | 10659658 | WBGene00009256 | tut-2    | F29F11.3                    |
| -0.140182150779626                                                      | AGIWUR33697                                                             |          |                |          |                             |
| CB4856 HS V                                                             | 10659635                                                                | 10661467 | WBGene00005022 | sqv-4    | F29F11.1                    |
| -0.00899240794524392                                                    | AGIWUR17812;AGIWUR20431;AGIWUR22370;AGIWUR37842;AGIWUR39068;AGIWUR41179 |          |                |          |                             |
| CB4856 HS V                                                             | 10667586                                                                | 10670860 | WBGene00006667 | twk-12   | F29F11.4                    |
| 0.0421906436403336                                                      | AGIWUR24447                                                             |          |                |          |                             |
| CB4856 HS V                                                             | 10672459                                                                | 10675644 | WBGene00000445 | ceh-22   | F29F11.5                    |
| -0.0812763730300459                                                     | AGIWUR12965;AGIWUR20993;AGIWUR30917                                     |          |                |          |                             |
| CB4856 HS V                                                             | 10682422                                                                | 10686537 | WBGene00001747 | gsp-1    | F29F11.6                    |
| -0.177248669319187                                                      | AGIWUR17355                                                             |          |                |          |                             |
| CB4856 HS V                                                             | 10702549                                                                | 10704906 | WBGene00004083 | pph-1    | C05A2.1 -0.0409981235781487 |
| AGIWUR9032;AGIWUR15633;AGIWUR16147;AGIWUR22418;AGIWUR24808              |                                                                         |          |                |          |                             |
| CB4856 HS V                                                             | 10712165                                                                | 10732507 | WBGene00012117 | T28B11.1 | T28B11.1                    |
| 0.0257563039141324                                                      | AGIWUR585;AGIWUR14500;AGIWUR41017                                       |          |                |          |                             |
| CB4856 HS V                                                             | 10733931                                                                | 10736892 | WBGene00003405 | mre-11   | ZC302.1 -0.0986492136828048 |
| AGIWUR33458                                                             |                                                                         |          |                |          |                             |
| CB4856 HS V                                                             | 10737116                                                                | 10739350 | WBGene00013862 | wdr-5.3  | ZC302.2 0.136308295881104   |
| AGIWUR14638                                                             |                                                                         |          |                |          |                             |
| CB4856 HS V                                                             | 10742466                                                                | 10743749 | WBGene00005610 | srj-22   | F28H7.1 0.22138343437852    |
| AGIWUR40243                                                             |                                                                         |          |                |          |                             |
| CB4856 HS V                                                             | 10744642                                                                | 10746469 | WBGene00005609 | srj-21   | F28H7.11                    |
| -0.0547349058274769                                                     | AGIWUR12071                                                             |          |                |          |                             |
| CB4856 HS V                                                             | 10746548                                                                | 10747337 | WBGene00009238 | selt-1.2 | F28H7.4                     |
| 0.057455518270408                                                       | AGIWUR38788                                                             |          |                |          |                             |
| CB4856 HS V                                                             | 10747944                                                                | 10748938 | WBGene00009236 | F28H7.2  | F28H7.2 0.202811324238924   |



|                                                                                               |   |                         |          |                |           |          |                     |  |
|-----------------------------------------------------------------------------------------------|---|-------------------------|----------|----------------|-----------|----------|---------------------|--|
| AGIWUR3011                                                                                    |   |                         |          |                |           |          |                     |  |
| CB4856 HS                                                                                     | V | 10749607                | 10750788 | WBGene00009237 | F28H7.3   | F28H7.3  | 0.227544768708567   |  |
| AGIWUR35986                                                                                   |   |                         |          |                |           |          |                     |  |
| CB4856 HS                                                                                     | V | 10751057                | 10754147 | WBGene00009240 | F28H7.7   | F28H7.7  | 0.214194627733518   |  |
| AGIWUR2905                                                                                    |   |                         |          |                |           |          |                     |  |
| CB4856 HS                                                                                     | V | 10754469                | 10756664 | WBGene00009239 | ir1d-6    | F28H7.6  | 0.137891329041565   |  |
| AGIWUR1059                                                                                    |   |                         |          |                |           |          |                     |  |
| CB4856 HS                                                                                     | V | 10758958                | 10760663 | WBGene00009241 | F28H7.8   | F28H7.8  | -0.126036778522565  |  |
| AGIWUR9083                                                                                    |   |                         |          |                |           |          |                     |  |
| CB4856 HS                                                                                     | V | 10760658                | 10762790 | WBGene00009242 | sre-6     | F28H7.9  | -0.0431378678302026 |  |
| AGIWUR41255;AGIWUR42176                                                                       |   |                         |          |                |           |          |                     |  |
| CB4856 HS                                                                                     | V | 10764366                | 10768454 | WBGene00003838 | ocr-1     | F28H7.10 |                     |  |
| 0.088456485402828                                                                             |   | AGIWUR35218             |          |                |           |          |                     |  |
| CB4856 HS                                                                                     | V | 10768465                | 10770217 | WBGene00008370 | D1054.1   | D1054.1  | 0.138303729294055   |  |
| AGIWUR44989                                                                                   |   |                         |          |                |           |          |                     |  |
| CB4856 HS                                                                                     | V | 10770321                | 10771351 | WBGene00003923 | pas-2     | D1054.2  | -0.282100180675849  |  |
| AGIWUR20271;AGIWUR21995;AGIWUR34386;AGIWUR40199                                               |   |                         |          |                |           |          |                     |  |
| CB4856 HS                                                                                     | V | 10771451                | 10772832 | WBGene00008371 | D1054.3   | D1054.3  | -0.230179425245203  |  |
| AGIWUR3336;AGIWUR4673;AGIWUR15639;AGIWUR16549                                                 |   |                         |          |                |           |          |                     |  |
| CB4856 HS                                                                                     | V | 10772819                | 10776578 | WBGene00008372 | D1054.5   | D1054.5  | 0.274827843949247   |  |
| AGIWUR41456                                                                                   |   |                         |          |                |           |          |                     |  |
| CB4856 HS                                                                                     | V | 10778475                | 10780019 | WBGene00008373 | D1054.6   | D1054.6  | -0.0927841261364915 |  |
| AGIWUR39343                                                                                   |   |                         |          |                |           |          |                     |  |
| CB4856 HS                                                                                     | V | 10781459                | 10783380 | WBGene00008374 | cllec-220 | D1054.7  |                     |  |
| -0.00622408065778757                                                                          |   | AGIWUR32354;AGIWUR38925 |          |                |           |          |                     |  |
| CB4856 HS                                                                                     | V | 10784236                | 10785367 | WBGene00008375 | D1054.8   | D1054.8  | -0.131529733680047  |  |
| AGIWUR20991                                                                                   |   |                         |          |                |           |          |                     |  |
| CB4856 HS                                                                                     | V | 10785801                | 10791057 | WBGene00008376 | D1054.9   | D1054.9  | 0.21952623547324    |  |
| AGIWUR3559;AGIWUR5305;AGIWUR10996;AGIWUR13468;AGIWUR13746;AGIWUR19183;AGIWUR28311;AGIWUR34506 |   |                         |          |                |           |          |                     |  |
| CB4856 HS                                                                                     | V | 10791975                | 10792830 | WBGene00008377 | D1054.10  | D1054.10 |                     |  |
| 0.378064498768975                                                                             |   | AGIWUR31296             |          |                |           |          |                     |  |
| CB4856 HS                                                                                     | V | 10793793                | 10794924 | WBGene00008378 | ule-3     | D1054.11 |                     |  |
| 0.218136826209463                                                                             |   | AGIWUR7075              |          |                |           |          |                     |  |
| CB4856 HS                                                                                     | V | 10796863                | 10798157 | WBGene00005399 | srh-184   | D1054.12 |                     |  |
| 0.193491132809797                                                                             |   | AGIWUR26639             |          |                |           |          |                     |  |
| CB4856 HS                                                                                     | V | 10798360                | 10799475 | WBGene00005379 | srh-163   | D1054.16 |                     |  |
| 0.0144192624183432                                                                            |   | AGIWUR15060;AGIWUR25635 |          |                |           |          |                     |  |
| CB4856 HS                                                                                     | V | 10802336                | 10804474 | WBGene00008379 | secs-1    | D1054.13 |                     |  |
| 0.10611737803576                                                                              |   | AGIWUR31281             |          |                |           |          |                     |  |

|                                                                                                             |                                                             |          |                |          |                             |
|-------------------------------------------------------------------------------------------------------------|-------------------------------------------------------------|----------|----------------|----------|-----------------------------|
| CB4856 HS V                                                                                                 | 10804721                                                    | 10806034 | WBGene00008380 | prp-38   | D1054.14                    |
| -0.0750169555657765                                                                                         | AGIWUR30839;AGIWUR36917                                     |          |                |          |                             |
| CB4856 HS V                                                                                                 | 10806131                                                    | 10807973 | WBGene00006481 | plrg-1   | D1054.15                    |
| -0.0978698266101965                                                                                         | AGIWUR34148                                                 |          |                |          |                             |
| CB4856 HS V                                                                                                 | 10812343                                                    | 10813487 | WBGene00007797 | C29A12.1 | C29A12.1                    |
| -0.043662018113336                                                                                          | AGIWUR4242                                                  |          |                |          |                             |
| CB4856 HS V                                                                                                 | 10814113                                                    | 10816718 | WBGene00002985 | lig-1    | C29A12.3                    |
| -0.0943211346766351                                                                                         | AGIWUR1609;AGIWUR22411                                      |          |                |          |                             |
| CB4856 HS V                                                                                                 | 10825012                                                    | 10846695 | WBGene00007799 | nrx-1    | C29A12.4                    |
| -0.0744731886919299                                                                                         |                                                             |          |                |          |                             |
| AGIWUR9816;AGIWUR10025;AGIWUR14320;AGIWUR17861;AGIWUR18536;AGIWUR19055;AGIWUR36206;AGIWUR36484;AGIWUR37045; |                                                             |          |                |          |                             |
| AGIWUR38337;AGIWUR38411;AGIWUR41061;AGIWUR43338                                                             |                                                             |          |                |          |                             |
| CB4856 HS V                                                                                                 | 10847193                                                    | 10852502 | WBGene00007800 | C29A12.6 | C29A12.6                    |
| -0.283190079574002                                                                                          | AGIWUR7641                                                  |          |                |          |                             |
| CB4856 HS V                                                                                                 | 10852519                                                    | 10865792 | WBGene00010012 | saeg-1   | F53H10.2                    |
| 0.0780482826269555                                                                                          | AGIWUR15318;AGIWUR22336;AGIWUR24998;AGIWUR35859;AGIWUR37415 |          |                |          |                             |
| CB4856 HS V                                                                                                 | 10880837                                                    | 10883399 | WBGene00009326 | F32D8.1  | F32D8.1 -0.152673459848481  |
| AGIWUR7811                                                                                                  |                                                             |          |                |          |                             |
| CB4856 HS V                                                                                                 | 10883778                                                    | 10886102 | WBGene00009327 | F32D8.2  | F32D8.2 0.32892509044453    |
| AGIWUR40386                                                                                                 |                                                             |          |                |          |                             |
| CB4856 HS V                                                                                                 | 10886837                                                    | 10887965 | WBGene00009328 | F32D8.3  | F32D8.3 -0.173368083818999  |
| AGIWUR42274                                                                                                 |                                                             |          |                |          |                             |
| CB4856 HS V                                                                                                 | 10887873                                                    | 10889004 | WBGene00043302 | F32D8.11 | F32D8.11                    |
| 0.0634465677763298                                                                                          | AGIWUR2373;AGIWUR10990;AGIWUR29778;AGIWUR42702;AGIWUR45151  |          |                |          |                             |
| CB4856 HS V                                                                                                 | 10888572                                                    | 10891030 | WBGene00009334 | F32D8.12 | F32D8.12                    |
| -0.206678077661604                                                                                          | AGIWUR31365;AGIWUR36246                                     |          |                |          |                             |
| CB4856 HS V                                                                                                 | 10891338                                                    | 10893560 | WBGene00009329 | F32D8.4  | F32D8.4 -0.0158480954409814 |
| AGIWUR39233                                                                                                 |                                                             |          |                |          |                             |
| CB4856 HS V                                                                                                 | 10893649                                                    | 10894788 | WBGene00009336 | F32D8.14 | F32D8.14                    |
| 0.12068599594672                                                                                            | AGIWUR4301;AGIWUR30461                                      |          |                |          |                             |
| CB4856 HS V                                                                                                 | 10896658                                                    | 10897143 | WBGene00001303 | emo-1    | F32D8.6 -0.465343217782898  |
| AGIWUR34849                                                                                                 |                                                             |          |                |          |                             |
| CB4856 HS V                                                                                                 | 10898435                                                    | 10900701 | WBGene00009331 | F32D8.7  | F32D8.7 0.0210448890670056  |
| AGIWUR27643                                                                                                 |                                                             |          |                |          |                             |
| CB4856 HS V                                                                                                 | 10900563                                                    | 10901303 | WBGene00005001 | spp-16   | F32D8.9 -0.112317758972033  |
| AGIWUR36125                                                                                                 |                                                             |          |                |          |                             |
| CB4856 HS V                                                                                                 | 10901480                                                    | 10902782 | WBGene00009332 | F32D8.8  | F32D8.8 -0.0853487433361906 |
| AGIWUR44171                                                                                                 |                                                             |          |                |          |                             |
| CB4856 HS V                                                                                                 | 10904059                                                    | 10906774 | WBGene00009325 | F32D8.15 | F32D8.15                    |

|                                                                        |                                                                                   |          |                |                  |                    |
|------------------------------------------------------------------------|-----------------------------------------------------------------------------------|----------|----------------|------------------|--------------------|
| 0.203162096163312                                                      | AGIWUR5514                                                                        |          |                |                  |                    |
| CB4856 HS V                                                            | 10906755                                                                          | 10909171 | WBGene00009333 | F32D8.10         | F32D8.10           |
| 0.374115440132694                                                      | AGIWUR1368                                                                        |          |                |                  |                    |
| CB4856 HS V                                                            | 10917648                                                                          | 10918401 | WBGene00010235 | F58B4.2 F58B4.2  | 0.0578859262058327 |
| AGIWUR12490                                                            |                                                                                   |          |                |                  |                    |
| CB4856 HS V                                                            | 10918861                                                                          | 10921847 | WBGene00003549 | nas-31 F58B4.1   | -0.079391468082632 |
| AGIWUR9906;AGIWUR11402;AGIWUR21749;AGIWUR23262;AGIWUR23820;AGIWUR40710 |                                                                                   |          |                |                  |                    |
| CB4856 HS V                                                            | 10925322                                                                          | 10926796 | WBGene00010239 | F58B4.6 F58B4.6  | 0.221373119824865  |
| AGIWUR8914                                                             |                                                                                   |          |                |                  |                    |
| CB4856 HS V                                                            | 10929811                                                                          | 10930774 | WBGene00010236 | F58B4.3 F58B4.3  | 0.112637182278787  |
| AGIWUR359                                                              |                                                                                   |          |                |                  |                    |
| CB4856 HS V                                                            | 10930778                                                                          | 10931289 | WBGene00010237 | scvp-1 F58B4.4   | -0.385159689932905 |
| AGIWUR33317                                                            |                                                                                   |          |                |                  |                    |
| CB4856 HS V                                                            | 10932647                                                                          | 10934245 | WBGene00010238 | F58B4.5 F58B4.5  | 0.210108883146404  |
| AGIWUR16464                                                            |                                                                                   |          |                |                  |                    |
| CB4856 HS V                                                            | 10934228                                                                          | 10936920 | WBGene00008923 | F17C11.12        | F17C11.12          |
| 0.113495208959442                                                      | AGIWUR4805                                                                        |          |                |                  |                    |
| CB4856 HS V                                                            | 10937633                                                                          | 10938849 | WBGene00008922 | F17C11.11        | F17C11.11          |
| 0.0349269580819467                                                     | AGIWUR8176                                                                        |          |                |                  |                    |
| CB4856 HS V                                                            | 10939245                                                                          | 10939612 | WBGene00050890 | F17C11.16        | F17C11.16          |
| -0.032359301313571                                                     | AGIWUR4887;AGIWUR9224;AGIWUR13452;AGIWUR13645;AGIWUR41559                         |          |                |                  |                    |
| CB4856 HS V                                                            | 10941450                                                                          | 10944302 | WBGene00077761 | zip-9 F17C11.17  |                    |
| -0.172319551748563                                                     | AGIWUR2242;AGIWUR6734;AGIWUR25942;AGIWUR34136;AGIWUR38340;AGIWUR38704;AGIWUR39056 |          |                |                  |                    |
| CB4856 HS V                                                            | 10948212                                                                          | 10949129 | WBGene00008914 | F17C11.2         | F17C11.2           |
| -0.110894209419264                                                     | AGIWUR20468                                                                       |          |                |                  |                    |
| CB4856 HS V                                                            | 10949857                                                                          | 10951821 | WBGene00000726 | col-153 F17C11.3 |                    |
| -0.0238020765875753                                                    | AGIWUR22834                                                                       |          |                |                  |                    |
| CB4856 HS V                                                            | 10951818                                                                          | 10953472 | WBGene00008915 | F17C11.4         | F17C11.4           |
| 0.272248136793324                                                      | AGIWUR37270                                                                       |          |                |                  |                    |
| CB4856 HS V                                                            | 10953501                                                                          | 10954434 | WBGene00008916 | cllec-221        | F17C11.5           |
| -0.0831791174870684                                                    | AGIWUR11860                                                                       |          |                |                  |                    |
| CB4856 HS V                                                            | 10955091                                                                          | 10955952 | WBGene00008917 | F17C11.6         | F17C11.6           |
| -0.0462318468090999                                                    | AGIWUR7977;AGIWUR14608;AGIWUR23095                                                |          |                |                  |                    |
| CB4856 HS V                                                            | 10955923                                                                          | 10957020 | WBGene00023503 | F17C11.13        | F17C11.13          |
| -0.0982454278417784                                                    | AGIWUR13427                                                                       |          |                |                  |                    |
| CB4856 HS V                                                            | 10956910                                                                          | 10958821 | WBGene00008918 | F17C11.7         | F17C11.7           |
| 0.0254903469298702                                                     | AGIWUR13347;AGIWUR36662                                                           |          |                |                  |                    |
| CB4856 HS V                                                            | 10958928                                                                          | 10960919 | WBGene00008919 | vps-36 F17C11.8  |                    |
| 0.0733327304594686                                                     | AGIWUR5553;AGIWUR23059;AGIWUR28557;AGIWUR40486                                    |          |                |                  |                    |

|                                                |                                                                        |          |                |                 |                     |
|------------------------------------------------|------------------------------------------------------------------------|----------|----------------|-----------------|---------------------|
| CB4856 HS V                                    | 10961722                                                               | 10965562 | WBGene00008921 | F17C11.10       | F17C11.10           |
| -0.181594543526757                             | AGIWUR6666;AGIWUR29011;AGIWUR36798                                     |          |                |                 |                     |
| CB4856 HS V                                    | 10965675                                                               | 10968070 | WBGene00008920 | eef-1G F17C11.9 |                     |
| -0.139341424786712                             | AGIWUR5607;AGIWUR10732;AGIWUR16495;AGIWUR20982;AGIWUR42601             |          |                |                 |                     |
| CB4856 HS V                                    | 10970399                                                               | 10981213 | WBGene00009968 | fig-1 F53B7.5   | 0.0890366141253995  |
| AGIWUR14199                                    |                                                                        |          |                |                 |                     |
| CB4856 HS V                                    | 10992099                                                               | 10994817 | WBGene00009965 | frpr-9 F53B7.2  | -0.0196033225585204 |
| AGIWUR38039                                    |                                                                        |          |                |                 |                     |
| CB4856 HS V                                    | 10999102                                                               | 10999642 | WBGene00009969 | F53B7.7 F53B7.7 | -0.24812543612566   |
| AGIWUR29607                                    |                                                                        |          |                |                 |                     |
| CB4856 HS V                                    | 10999658                                                               | 11000713 | WBGene00009966 | F53B7.3 F53B7.3 | 0.187919272181986   |
| AGIWUR31116                                    |                                                                        |          |                |                 |                     |
| CB4856 HS V                                    | 11000957                                                               | 11002534 | WBGene00009967 | F53B7.4 F53B7.4 | 0.0553526689216186  |
| AGIWUR15378;AGIWUR32446                        |                                                                        |          |                |                 |                     |
| CB4856 HS V                                    | 11011589                                                               | 11012465 | WBGene00007553 | C13G3.1 C13G3.1 | 0.291727621443064   |
| AGIWUR5612                                     |                                                                        |          |                |                 |                     |
| CB4856 HS V                                    | 11021069                                                               | 11022884 | WBGene00001991 | hot-6 C13G3.2   | 0.169050674271622   |
| AGIWUR35399                                    |                                                                        |          |                |                 |                     |
| CB4856 HS V                                    | 11027153                                                               | 11030845 | WBGene00007554 | pptr-2 C13G3.3  | 0.0372116137434375  |
| AGIWUR6753;AGIWUR10456;AGIWUR15563;AGIWUR23456 |                                                                        |          |                |                 |                     |
| CB4856 HS V                                    | 11036462                                                               | 11039425 | WBGene00006443 | pak-2 C45B11.1  |                     |
| 0.140114647699152                              | AGIWUR4837;AGIWUR12671                                                 |          |                |                 |                     |
| CB4856 HS V                                    | 11041824                                                               | 11042301 | WBGene00008106 | C45B11.5        | C45B11.5            |
| -0.103080184254997                             | AGIWUR45002                                                            |          |                |                 |                     |
| CB4856 HS V                                    | 11042817                                                               | 11043855 | WBGene00008105 | C45B11.2        | C45B11.2            |
| -0.24858107785977                              | AGIWUR2224;AGIWUR5947                                                  |          |                |                 |                     |
| CB4856 HS V                                    | 11044067                                                               | 11045734 | WBGene00045379 | C45B11.6        | C45B11.6            |
| 0.0467597407596281                             | AGIWUR9924;AGIWUR28606;AGIWUR30898;AGIWUR32180;AGIWUR37183;AGIWUR43770 |          |                |                 |                     |
| CB4856 HS V                                    | 11045696                                                               | 11046899 | WBGene00000981 | dhs-18 C45B11.3 |                     |
| 0.120379803568618                              | AGIWUR38705                                                            |          |                |                 |                     |
| CB4856 HS V                                    | 11047227                                                               | 11048744 | WBGene00005295 | srh-74 C45B11.4 |                     |
| -0.0602252188737338                            | AGIWUR14311;AGIWUR26356                                                |          |                |                 |                     |
| CB4856 HS V                                    | 11052457                                                               | 11053107 | WBGene00271444 | T04C12.33       | T04C12.33           |
| -0.129918815641602                             | AGIWUR36779                                                            |          |                |                 |                     |
| CB4856 HS V                                    | 11054127                                                               | 11055142 | WBGene00011429 | T04C12.7        | T04C12.7            |
| 0.192702260970616                              | AGIWUR19762                                                            |          |                |                 |                     |
| CB4856 HS V                                    | 11055306                                                               | 11057143 | WBGene00005296 | srh-75 T04C12.2 |                     |
| 0.0491097751719582                             | AGIWUR13499                                                            |          |                |                 |                     |
| CB4856 HS V                                    | 11058649                                                               | 11059264 | WBGene00011427 | T04C12.1        | T04C12.1            |

|                                                                         |                                                                         |
|-------------------------------------------------------------------------|-------------------------------------------------------------------------|
| 0.0533941193059246                                                      | AGIWUR14776;AGIWUR18085;AGIWUR19163;AGIWUR26042;AGIWUR26550;AGIWUR38351 |
| CB4856 HS V                                                             | 11062439 11063245 WBGene00050889 T04C12.9 T04C12.9                      |
| -0.0722801905061505                                                     | AGIWUR2246;AGIWUR4116;AGIWUR21052;AGIWUR38044;AGIWUR42482               |
| CB4856 HS V                                                             | 11064954 11065634 WBGene00011428 T04C12.3 T04C12.3                      |
| 0.172862291677442                                                       | AGIWUR5731;AGIWUR6696;AGIWUR6992;AGIWUR24917;AGIWUR28081;AGIWUR40873    |
| CB4856 HS V                                                             | 11068069 11069358 WBGene00011430 T04C12.8 T04C12.8                      |
| 0.092489482576668                                                       | AGIWUR42678                                                             |
| CB4856 HS V                                                             | 11071690 11074498 WBGene00000065 act-3 T04C12.4                         |
| 0.00455014882488669                                                     | AGIWUR13229;AGIWUR23078;AGIWUR29810;AGIWUR42315                         |
| CB4856 HS V                                                             | 11076723 11078168 WBGene00000064 act-2 T04C12.5                         |
| 0.237716108323276                                                       | AGIWUR9001                                                              |
| CB4856 HS V                                                             | 11079167 11082497 WBGene00000063 act-1 T04C12.6                         |
| 0.197744051726989                                                       | AGIWUR9269                                                              |
| CB4856 HS V                                                             | 11088154 11097970 WBGene00012776 Y42A5A.1 Y42A5A.1                      |
| 0.258406730773107                                                       | AGIWUR16408                                                             |
| CB4856 HS V                                                             | 11098950 11107288 WBGene00012779 cdk1-1 Y42A5A.4                        |
| -0.0490489119098019                                                     | AGIWUR22818                                                             |
| CB4856 HS V                                                             | 11107535 11109747 WBGene00012780 Y42A5A.5 Y42A5A.5                      |
| -0.222627855515983                                                      | AGIWUR31100                                                             |
| CB4856 HS V                                                             | 11110063 11113103 WBGene00010405 erfa-3 H19N07.1                        |
| -0.231217123274673                                                      | AGIWUR16557                                                             |
| CB4856 HS V                                                             | 11113914 11118818 WBGene00010406 math-33 H19N07.2                       |
| -0.0529594147375985                                                     | AGIWUR9079;AGIWUR13855                                                  |
| CB4856 HS V                                                             | 11118721 11119730 WBGene00010407 H19N07.3 H19N07.3                      |
| 0.284782608276101                                                       | AGIWUR9792                                                              |
| CB4856 HS V                                                             | 11119813 11122579 WBGene00010408 mboa-2 H19N07.4                        |
| 0.200677811143285                                                       | AGIWUR25266                                                             |
| CB4856 HS V                                                             | 11122820 11123867 WBGene00007385 atp-5 C06H2.1 -0.0210823897048238      |
| AGIWUR18502;AGIWUR24548;AGIWUR30030;AGIWUR39039;AGIWUR39317;AGIWUR40026 |                                                                         |
| CB4856 HS V                                                             | 11124303 11125053 WBGene00007390 lmtr-3 C06H2.6 -0.146323404294277      |
| AGIWUR18923;AGIWUR20009                                                 |                                                                         |
| CB4856 HS V                                                             | 11125222 11127306 WBGene00007386 C06H2.2 C06H2.2 0.0711110168676949     |
| AGIWUR30603                                                             |                                                                         |
| CB4856 HS V                                                             | 11127497 11130085 WBGene00007387 jmjd-5 C06H2.3                         |
| -0.000626466591132413                                                   | AGIWUR9255                                                              |
| CB4856 HS V                                                             | 11134609 11140323 WBGene00007389 glb-3 C06H2.5 -0.0330954667547836      |
| AGIWUR780                                                               |                                                                         |
| CB4856 HS V                                                             | 11141498 11143121 WBGene00007388 folt-1 C06H2.4 0.178062076229956       |
| AGIWUR43335                                                             |                                                                         |

|                                                                          |   |          |          |                |                                    |
|--------------------------------------------------------------------------|---|----------|----------|----------------|------------------------------------|
| CB4856 HS<br>AGIWUR29570                                                 | V | 11143062 | 11144758 | WBGene00007391 | C06H2.7 C06H2.7 -0.258848510520908 |
| CB4856 HS<br>AGIWUR8258                                                  | V | 11149705 | 11151309 | WBGene00011838 | T19C4.1 T19C4.1 0.100679456186193  |
| CB4856 HS<br>AGIWUR13750                                                 | V | 11151339 | 11152430 | WBGene00005196 | srg-39 T19C4.2 -0.12226080931271   |
| CB4856 HS<br>AGIWUR26785                                                 | V | 11152575 | 11155653 | WBGene00005195 | srg-38 T19C4.8 0.114679766575531   |
| CB4856 HS<br>AGIWUR13312                                                 | V | 11157090 | 11158706 | WBGene00005199 | srg-42 T19C4.9 0.364224140325643   |
| CB4856 HS<br>AGIWUR30808                                                 | V | 11160452 | 11161891 | WBGene00005198 | srg-41 T19C4.3 -0.176385066808916  |
| CB4856 HS<br>AGIWUR38932                                                 | V | 11163036 | 11164575 | WBGene00005197 | srg-40 T19C4.4 -0.124752021056397  |
| CB4856 HS<br>0.165523419435235                                           | V | 11165853 | 11167640 | WBGene00014841 | T19C4.10 T19C4.10                  |
| AGIWUR28571;AGIWUR44720                                                  |   |          |          |                |                                    |
| CB4856 HS<br>AGIWUR44772                                                 | V | 11172215 | 11174452 | WBGene00011839 | T19C4.5 T19C4.5 0.175772520279322  |
| CB4856 HS<br>AGIWUR42384                                                 | V | 11174567 | 11177559 | WBGene00001663 | gpa-1 T19C4.6 0.138313788801371    |
| CB4856 HS<br>0.121913488918629                                           | V | 11183224 | 11183643 | WBGene00012152 | cnc-10 VK10D6R.1                   |
| AGIWUR4385                                                               |   |          |          |                |                                    |
| CB4856 HS<br>AGIWUR8747                                                  | V | 11191283 | 11193638 | WBGene00010741 | lgc-49 K10D6.1 -0.0875996017013456 |
| CB4856 HS<br>AGIWUR9438;AGIWUR26231;AGIWUR43418                          | V | 11193733 | 11196010 | WBGene00010742 | K10D6.2 K10D6.2 -0.190320181825927 |
| CB4856 HS<br>AGIWUR15976;AGIWUR19250;AGIWUR20801;AGIWUR22472;AGIWUR38353 | V | 11200665 | 11201392 | WBGene00010743 | K10D6.3 K10D6.3 0.110273619476585  |
| CB4856 HS<br>AGIWUR23468                                                 | V | 11201905 | 11216774 | WBGene00010744 | K10D6.4 K10D6.4 0.164643220987848  |
| CB4856 HS<br>0.115889189954018                                           | V | 11217583 | 11219902 | WBGene00011830 | cyp-29A2 T19B10.1                  |
| AGIWUR36091                                                              |   |          |          |                |                                    |
| CB4856 HS<br>-0.0348060442859142                                         | V | 11221302 | 11222834 | WBGene00011831 | T19B10.2 T19B10.2                  |
| AGIWUR3115;AGIWUR10805;AGIWUR11521;AGIWUR25739;AGIWUR29837;AGIWUR39360   |   |          |          |                |                                    |
| CB4856 HS<br>-0.0983008763708817                                         | V | 11222772 | 11226018 | WBGene00011832 | bga1-1 T19B10.3                    |
| AGIWUR14003;AGIWUR17301;AGIWUR27843                                      |   |          |          |                |                                    |
| CB4856 HS<br>-0.198966917419967                                          | V | 11226314 | 11228703 | WBGene00004152 | pqn-70 T19B10.4                    |
| AGIWUR3150;AGIWUR23106                                                   |   |          |          |                |                                    |
| CB4856 HS                                                                | V | 11234650 | 11237428 | WBGene00011833 | T19B10.5 T19B10.5                  |

|                      |                                                                       |          |                |           |           |
|----------------------|-----------------------------------------------------------------------|----------|----------------|-----------|-----------|
| -0.228018632027846   | AGIWUR22092                                                           |          |                |           |           |
| CB4856 HS V          | 11237438                                                              | 11239331 | WBGene00011834 | dvc-1     | T19B10.6  |
| 0.0031660806051832   | AGIWUR13415;AGIWUR15411;AGIWUR41047                                   |          |                |           |           |
| CB4856 HS V          | 11239675                                                              | 11241780 | WBGene00002072 | ima-1     | T19B10.7  |
| 0.103915435226941    | AGIWUR5907;AGIWUR8615;AGIWUR15144                                     |          |                |           |           |
| CB4856 HS V          | 11241879                                                              | 11244726 | WBGene00011835 | T19B10.8  | T19B10.8  |
| -0.0142121673085747  | AGIWUR7678;AGIWUR38740                                                |          |                |           |           |
| CB4856 HS V          | 11244839                                                              | 11245927 | WBGene00003509 | mxl-1     | T19B10.11 |
| 0.011646141103741    | AGIWUR42940                                                           |          |                |           |           |
| CB4856 HS V          | 11248146                                                              | 11250866 | WBGene00011836 | mam-4     | T19B10.9  |
| 0.0223033105073958   | AGIWUR1265;AGIWUR8663;AGIWUR13972;AGIWUR22475;AGIWUR23365;AGIWUR31468 |          |                |           |           |
| CB4856 HS V          | 11251035                                                              | 11251211 | WBGene00050898 | T19B10.12 | T19B10.12 |
| -0.0634832915476196  | AGIWUR487;AGIWUR6099;AGIWUR24637;AGIWUR29982;AGIWUR40878              |          |                |           |           |
| CB4856 HS V          | 11251415                                                              | 11252529 | WBGene00011837 | srsx-33   | T19B10.10 |
| 0.00526024699409788  | AGIWUR40610                                                           |          |                |           |           |
| CB4856 HS V          | 11254013                                                              | 11255080 | WBGene00008552 | srsx-31   | F07B10.6  |
| 0.0471676904609586   | AGIWUR24817;AGIWUR36194                                               |          |                |           |           |
| CB4856 HS V          | 11256521                                                              | 11258996 | WBGene00008551 | lgc-36    | F07B10.5  |
| 0.0303961530034931   | AGIWUR12869                                                           |          |                |           |           |
| CB4856 HS V          | 11259312                                                              | 11260722 | WBGene00077514 | F07B10.7  | F07B10.7  |
| 0.307368475062716    | AGIWUR17989                                                           |          |                |           |           |
| CB4856 HS V          | 11261264                                                              | 11263116 | WBGene00008550 | F07B10.4  | F07B10.4  |
| 0.0999618931427957   | AGIWUR18448;AGIWUR26396                                               |          |                |           |           |
| CB4856 HS V          | 11263523                                                              | 11265711 | WBGene00000539 | cln-3.1   | F07B10.1  |
| 0.344734507150967    | AGIWUR23122                                                           |          |                |           |           |
| CB4856 HS V          | 11266981                                                              | 11268323 | WBGene00006167 | str-116   | F07B10.2  |
| -0.316256509708866   | AGIWUR32627                                                           |          |                |           |           |
| CB4856 HS V          | 11269091                                                              | 11270426 | WBGene00006166 | str-115   | F07B10.3  |
| -0.00922258903241513 | AGIWUR8426                                                            |          |                |           |           |
| CB4856 HS V          | 11271351                                                              | 11272467 | WBGene00007283 | cllec-222 | C03E10.6  |
| 0.0553848067386795   | AGIWUR34617                                                           |          |                |           |           |
| CB4856 HS V          | 11273148                                                              | 11278161 | WBGene00007282 | cllec-223 | C03E10.5  |
| -0.115795438594265   | AGIWUR34212                                                           |          |                |           |           |
| CB4856 HS V          | 11282572                                                              | 11286039 | WBGene00001645 | gly-20    | C03E10.4  |
| 0.0754827083567573   | AGIWUR10498;AGIWUR14558;AGIWUR31763                                   |          |                |           |           |
| CB4856 HS V          | 11286602                                                              | 11288412 | WBGene00007281 | C03E10.3  | C03E10.3  |
| -0.0437848458744936  | AGIWUR22175;AGIWUR35237;AGIWUR43907                                   |          |                |           |           |
| CB4856 HS V          | 11291188                                                              | 11292569 | WBGene00007279 | C03E10.1  | C03E10.1  |
| -0.17276265240974    | AGIWUR31775                                                           |          |                |           |           |

|                                                                       |   |          |          |                |          |          |                     |
|-----------------------------------------------------------------------|---|----------|----------|----------------|----------|----------|---------------------|
| CB4856 HS                                                             | V | 11294693 | 11296562 | WBGene00011403 | T03F7.6  | T03F7.6  | 0.0782831051645321  |
| AGIWUR30648                                                           |   |          |          |                |          |          |                     |
| CB4856 HS                                                             | V | 11296696 | 11298732 | WBGene00011402 | T03F7.5  | T03F7.5  | -0.0983130695774577 |
| AGIWUR25048                                                           |   |          |          |                |          |          |                     |
| CB4856 HS                                                             | V | 11299373 | 11300639 | WBGene00005270 | srh-47   | T03F7.4  |                     |
| -9.11736853366207e-05 AGIWUR8046;AGIWUR39403                          |   |          |          |                |          |          |                     |
| CB4856 HS                                                             | V | 11301607 | 11302886 | WBGene00005269 | srh-46   | T03F7.3  | -0.0163007072810881 |
| AGIWUR18968                                                           |   |          |          |                |          |          |                     |
| CB4856 HS                                                             | V | 11303651 | 11304979 | WBGene00005268 | srh-45   | T03F7.2  | 0.0726847378359055  |
| AGIWUR15350;AGIWUR19467                                               |   |          |          |                |          |          |                     |
| CB4856 HS                                                             | V | 11305070 | 11308446 | WBGene00004910 | snf-11   | T03F7.1  | 0.069561906561173   |
| AGIWUR20858                                                           |   |          |          |                |          |          |                     |
| CB4856 HS                                                             | V | 11311456 | 11313445 | WBGene00011404 | T03F7.7  | T03F7.7  | -0.0646228491918617 |
| AGIWUR17896;AGIWUR18547                                               |   |          |          |                |          |          |                     |
| CB4856 HS                                                             | V | 11313400 | 11316901 | WBGene00009830 | cutl-18  | F47G9.3  | 0.120705315805429   |
| AGIWUR31545                                                           |   |          |          |                |          |          |                     |
| CB4856 HS                                                             | V | 11317214 | 11321786 | WBGene00009831 | F47G9.4  | F47G9.4  | -0.0177139904945527 |
| AGIWUR4717;AGIWUR9709;AGIWUR14335;AGIWUR21384;AGIWUR42673             |   |          |          |                |          |          |                     |
| CB4856 HS                                                             | V | 11322322 | 11323820 | WBGene00006189 | str-141  | F47G9.2  | -0.0259348413838021 |
| AGIWUR9795                                                            |   |          |          |                |          |          |                     |
| CB4856 HS                                                             | V | 11323965 | 11326964 | WBGene00009829 | F47G9.1  | F47G9.1  | 0.113502955287165   |
| AGIWUR8533;AGIWUR11906;AGIWUR24323                                    |   |          |          |                |          |          |                     |
| CB4856 HS                                                             | V | 11329400 | 11330775 | WBGene00009833 | F47G9.6  | F47G9.6  | -0.140031262594031  |
| AGIWUR24729                                                           |   |          |          |                |          |          |                     |
| CB4856 HS                                                             | V | 11332987 | 11334293 | WBGene00044203 | T02E9.6  | T02E9.6  | -0.116563227860305  |
| AGIWUR1151;AGIWUR30893                                                |   |          |          |                |          |          |                     |
| CB4856 HS                                                             | V | 11342233 | 11344773 | WBGene00011383 | T02E9.5  | T02E9.5  | 0.0134237448836414  |
| AGIWUR4132;AGIWUR6704;AGIWUR13819;AGIWUR22708;AGIWUR22756;AGIWUR24772 |   |          |          |                |          |          |                     |
| CB4856 HS                                                             | V | 11344831 | 11347012 | WBGene00001716 | grl-7    | T02E9.2  | 0.311811500852084   |
| AGIWUR14923;AGIWUR42462                                               |   |          |          |                |          |          |                     |
| CB4856 HS                                                             | V | 11349310 | 11352993 | WBGene00011381 | npr-25   | T02E9.1  | 0.166692426871411   |
| AGIWUR27897                                                           |   |          |          |                |          |          |                     |
| CB4856 HS                                                             | V | 11362453 | 11366221 | WBGene00011382 | dop-5    | T02E9.3  | 0.0190984965582306  |
| AGIWUR6998                                                            |   |          |          |                |          |          |                     |
| CB4856 HS                                                             | V | 11375742 | 11377990 | WBGene00000554 | cnb-1    | F55C10.1 |                     |
| -0.0552085836863796 AGIWUR15966                                       |   |          |          |                |          |          |                     |
| CB4856 HS                                                             | V | 11383105 | 11384353 | WBGene00010109 | F55C10.5 | F55C10.5 |                     |
| -0.0537817819494215 AGIWUR28132                                       |   |          |          |                |          |          |                     |
| CB4856 HS                                                             | V | 11385360 | 11386529 | WBGene00000727 | col-154  | F55C10.2 |                     |



|                                                                                              |             |          |                |          |          |                     |
|----------------------------------------------------------------------------------------------|-------------|----------|----------------|----------|----------|---------------------|
| -0.538484254442086                                                                           | AGIWUR18601 |          |                |          |          |                     |
| CB4856 HS V                                                                                  | 11386698    | 11388678 | WBGene00010108 | F55C10.4 | F55C10.4 |                     |
| -0.0261443870436304                                                                          | AGIWUR44361 |          |                |          |          |                     |
| CB4856 HS V                                                                                  | 11390273    | 11390494 | WBGene00010526 | K03B8.11 | K03B8.11 |                     |
| -0.403809312320073                                                                           | AGIWUR10764 |          |                |          |          |                     |
| CB4856 HS V                                                                                  | 11392320    | 11393508 | WBGene00003535 | nas-16   | K03B8.1  | -0.0126467534120005 |
| AGIWUR5158;AGIWUR9549                                                                        |             |          |                |          |          |                     |
| CB4856 HS V                                                                                  | 11398916    | 11400528 | WBGene00003536 | nas-17   | K03B8.2  | -0.379400670193448  |
| AGIWUR16781                                                                                  |             |          |                |          |          |                     |
| CB4856 HS V                                                                                  | 11401195    | 11402690 | WBGene00003538 | nas-19   | K03B8.5  | -0.210070498186319  |
| AGIWUR2377                                                                                   |             |          |                |          |          |                     |
| CB4856 HS V                                                                                  | 11407523    | 11409543 | WBGene00010524 | K03B8.6  | K03B8.6  | 0.0740657891132583  |
| AGIWUR9809;AGIWUR37619                                                                       |             |          |                |          |          |                     |
| CB4856 HS V                                                                                  | 11409467    | 11411019 | WBGene00010525 | K03B8.8  | K03B8.8  | 0.160747664820584   |
| AGIWUR796;AGIWUR8221;AGIWUR10078;AGIWUR13769;AGIWUR34518;AGIWUR40338;AGIWUR44676             |             |          |                |          |          |                     |
| CB4856 HS V                                                                                  | 11411511    | 11412769 | WBGene00001712 | gr1-3    | K03B8.7  | -0.144577504675594  |
| AGIWUR3545                                                                                   |             |          |                |          |          |                     |
| CB4856 HS V                                                                                  | 11412870    | 11415159 | WBGene00000951 | deg-3    | K03B8.9  | 0.168741577659446   |
| AGIWUR33003                                                                                  |             |          |                |          |          |                     |
| CB4856 HS V                                                                                  | 11415342    | 11420293 | WBGene00000955 | des-2    | T26H10.1 |                     |
| 0.207346171312134                                                                            | AGIWUR24189 |          |                |          |          |                     |
| CB4856 HS V                                                                                  | 11438770    | 11441618 | WBGene00010191 | dmsr-1   | F57B7.1  | 0.151478172139392   |
| AGIWUR10396;AGIWUR16007                                                                      |             |          |                |          |          |                     |
| CB4856 HS V                                                                                  | 11441925    | 11443603 | WBGene00010192 | F57B7.2  | F57B7.2  | 0.0695446390841514  |
| AGIWUR12817                                                                                  |             |          |                |          |          |                     |
| CB4856 HS V                                                                                  | 11446633    | 11449245 | WBGene00003248 | mig-17   | F57B7.4  | -0.0669118659921573 |
| AGIWUR40715                                                                                  |             |          |                |          |          |                     |
| CB4856 HS V                                                                                  | 11449223    | 11450357 | WBGene00000729 | col-156  | F57B7.3  | -0.913206358047702  |
| AGIWUR10540                                                                                  |             |          |                |          |          |                     |
| CB4856 HS V                                                                                  | 11462999    | 11466770 | WBGene00006486 | zipt-21  | T11F9.2  | -0.0542174820834482 |
| AGIWUR1480                                                                                   |             |          |                |          |          |                     |
| CB4856 HS V                                                                                  | 11466844    | 11470663 | WBGene00000007 | aat-6    | T11F9.4  | 0.0593698769622097  |
| AGIWUR20033                                                                                  |             |          |                |          |          |                     |
| CB4856 HS V                                                                                  | 11470868    | 11472349 | WBGene00003539 | nas-20   | T11F9.3  | 0.421578620117444   |
| AGIWUR1380;AGIWUR5186;AGIWUR11424;AGIWUR18119                                                |             |          |                |          |          |                     |
| CB4856 HS V                                                                                  | 11472561    | 11473973 | WBGene00003540 | nas-21   | T11F9.5  | 0.359475929658096   |
| AGIWUR4677;AGIWUR5223;AGIWUR9699;AGIWUR11738;AGIWUR12453;AGIWUR17204;AGIWUR18508;AGIWUR43832 |             |          |                |          |          |                     |
| CB4856 HS V                                                                                  | 11474699    | 11477951 | WBGene00003541 | nas-22   | T11F9.6  | 0.203818187317301   |
| AGIWUR3819;AGIWUR8826;AGIWUR9112;AGIWUR26329;AGIWUR36117;AGIWUR37505;AGIWUR42006             |             |          |                |          |          |                     |

|                                                                                    |                                     |          |                |          |                             |
|------------------------------------------------------------------------------------|-------------------------------------|----------|----------------|----------|-----------------------------|
| CB4856 HS V                                                                        | 11478413                            | 11479243 | WBGene00005235 | srh-9    | T11F9.17                    |
| 0.127210532726046                                                                  | AGIWUR24741;AGIWUR43754;AGIWUR44860 |          |                |          |                             |
| CB4856 HS V                                                                        | 11485858                            | 11487266 | WBGene00005227 | srh-1    | T11F9.18                    |
| 0.383886722288926                                                                  | AGIWUR24579                         |          |                |          |                             |
| CB4856 HS V                                                                        | 11487152                            | 11488275 | WBGene00011712 | T11F9.10 | T11F9.10                    |
| 0.0858964796438686                                                                 | AGIWUR16276                         |          |                |          |                             |
| CB4856 HS V                                                                        | 11489050                            | 11490328 | WBGene00000982 | dhs-19   | T11F9.11                    |
| 0.211527064563828                                                                  | AGIWUR39451                         |          |                |          |                             |
| CB4856 HS V                                                                        | 11491829                            | 11492590 | WBGene00011716 | T11F9.19 | T11F9.19                    |
| 0.112493271264913                                                                  | AGIWUR31163                         |          |                |          |                             |
| CB4856 HS V                                                                        | 11493556                            | 11496379 | WBGene00011713 | T11F9.12 | T11F9.12                    |
| 0.385334716215752                                                                  | AGIWUR14163                         |          |                |          |                             |
| CB4856 HS V                                                                        | 11501444                            | 11503127 | WBGene00044019 | C55A6.12 | C55A6.12                    |
| -0.0351513804954635                                                                | AGIWUR10900                         |          |                |          |                             |
| CB4856 HS V                                                                        | 11503811                            | 11504884 | WBGene00008330 | C55A6.1  | C55A6.1 0.126981955956772   |
| AGIWUR2304;AGIWUR41867                                                             |                                     |          |                |          |                             |
| CB4856 HS V                                                                        | 11505352                            | 11508271 | WBGene00008339 | C55A6.10 | C55A6.10                    |
| 0.00264204742290985                                                                | AGIWUR2761                          |          |                |          |                             |
| CB4856 HS V                                                                        | 11509068                            | 11512318 | WBGene00008331 | ttl1-5   | C55A6.2 0.00551929458887379 |
| AGIWUR31123;AGIWUR43920                                                            |                                     |          |                |          |                             |
| CB4856 HS V                                                                        | 11512313                            | 11513436 | WBGene00008332 | C55A6.3  | C55A6.3 -0.128056138263926  |
| AGIWUR30062                                                                        |                                     |          |                |          |                             |
| CB4856 HS V                                                                        | 11513665                            | 11514737 | WBGene00008335 | C55A6.6  | C55A6.6 0.11672266915426    |
| AGIWUR7253                                                                         |                                     |          |                |          |                             |
| CB4856 HS V                                                                        | 11515084                            | 11516191 | WBGene00008334 | sdz-8    | C55A6.5 0.190103176641724   |
| AGIWUR44215                                                                        |                                     |          |                |          |                             |
| CB4856 HS V                                                                        | 11516445                            | 11517889 | WBGene00008333 | C55A6.4  | C55A6.4 0.0687666734247721  |
| AGIWUR12044                                                                        |                                     |          |                |          |                             |
| CB4856 HS V                                                                        | 11518100                            | 11518702 | WBGene00008337 | C55A6.8  | C55A6.8 0.0407303139704212  |
| AGIWUR3620;AGIWUR12782;AGIWUR19330                                                 |                                     |          |                |          |                             |
| CB4856 HS V                                                                        | 11519335                            | 11520530 | WBGene00008336 | C55A6.7  | C55A6.7 0.0346357545004046  |
| AGIWUR4983;AGIWUR10473;AGIWUR12082;AGIWUR43879                                     |                                     |          |                |          |                             |
| CB4856 HS V                                                                        | 11520515                            | 11521554 | WBGene00008340 | C55A6.11 | C55A6.11                    |
| -0.0956474489145194                                                                | AGIWUR17876                         |          |                |          |                             |
| CB4856 HS V                                                                        | 11521653                            | 11523384 | WBGene00008338 | pafo-1   | C55A6.9 0.254675125873543   |
| AGIWUR4256                                                                         |                                     |          |                |          |                             |
| CB4856 HS V                                                                        | 11527831                            | 11541219 | WBGene00009532 | ccch-1   | F38B7.1 -0.0580547773602262 |
| AGIWUR1888;AGIWUR15184;AGIWUR18653;AGIWUR21592;AGIWUR31708;AGIWUR35392;AGIWUR38363 |                                     |          |                |          |                             |
| CB4856 HS V                                                                        | 11543857                            | 11545290 | WBGene00009533 | F38B7.2  | F38B7.2 -0.0444601187311946 |

|                                                                               |    |   |          |          |                |          |                            |
|-------------------------------------------------------------------------------|----|---|----------|----------|----------------|----------|----------------------------|
| AGIWUR5222;AGIWUR12757;AGIWUR16809;AGIWUR30377;AGIWUR33388                    |    |   |          |          |                |          |                            |
| CB4856                                                                        | HS | V | 11545536 | 11546376 | WBGene00077536 | F38B7.10 | F38B7.10                   |
| -0.0151974747076578 AGIWUR1421;AGIWUR14756;AGIWUR33638                        |    |   |          |          |                |          |                            |
| CB4856                                                                        | HS | V | 11549107 | 11551560 | WBGene00009534 | F38B7.3  | F38B7.3 -0.235055471902896 |
| AGIWUR33781                                                                   |    |   |          |          |                |          |                            |
| CB4856                                                                        | HS | V | 11552679 | 11554222 | WBGene00005976 | srx-85   | F38B7.4 0.0344984551837193 |
| AGIWUR36588                                                                   |    |   |          |          |                |          |                            |
| CB4856                                                                        | HS | V | 11554635 | 11558127 | WBGene00001110 | duo-1    | F38B7.5 0.136057477444034  |
| AGIWUR6255;AGIWUR23547;AGIWUR41872                                            |    |   |          |          |                |          |                            |
| CB4856                                                                        | HS | V | 11558319 | 11559881 | WBGene00005962 | srx-71   | F38B7.6 0.151834510600931  |
| AGIWUR33725                                                                   |    |   |          |          |                |          |                            |
| CB4856                                                                        | HS | V | 11560078 | 11561650 | WBGene00005963 | srx-72   | F38B7.9 0.0845603961330488 |
| AGIWUR5244;AGIWUR41450                                                        |    |   |          |          |                |          |                            |
| CB4856                                                                        | HS | V | 11562943 | 11564508 | WBGene00005977 | srx-86   | F38B7.7 0.06799950937546   |
| AGIWUR22026;AGIWUR22798                                                       |    |   |          |          |                |          |                            |
| CB4856                                                                        | HS | V | 11564873 | 11566771 | WBGene00005978 | srx-87   | F38B7.8 0.0687163482305273 |
| AGIWUR5096;AGIWUR11440;AGIWUR14755                                            |    |   |          |          |                |          |                            |
| CB4856                                                                        | HS | V | 11566804 | 11573091 | WBGene00004064 | pms-2    | H12C20.2                   |
| 0.0361175891304732 AGIWUR22401;AGIWUR36857;AGIWUR38193                        |    |   |          |          |                |          |                            |
| CB4856                                                                        | HS | V | 11573440 | 11575709 | WBGene00003658 | nhr-68   | H12C20.3                   |
| 0.119603915527339 AGIWUR12727                                                 |    |   |          |          |                |          |                            |
| CB4856                                                                        | HS | V | 11576631 | 11577911 | WBGene00005982 | srx-91   | H12C20.4                   |
| 0.0749188281204507 AGIWUR1007;AGIWUR11759;AGIWUR22109;AGIWUR31195;AGIWUR31842 |    |   |          |          |                |          |                            |
| CB4856                                                                        | HS | V | 11581126 | 11582458 | WBGene00005981 | srx-90   | H12C20.5                   |
| -0.0342682831576724 AGIWUR28808                                               |    |   |          |          |                |          |                            |
| CB4856                                                                        | HS | V | 11583512 | 11585115 | WBGene00005979 | srx-88   | F43A11.1                   |
| -0.165792376530023 AGIWUR12245                                                |    |   |          |          |                |          |                            |
| CB4856                                                                        | HS | V | 11586259 | 11588133 | WBGene00005980 | srx-89   | F43A11.3                   |
| -0.029492814709311 AGIWUR8733;AGIWUR29031;AGIWUR33331;AGIWUR35615             |    |   |          |          |                |          |                            |
| CB4856                                                                        | HS | V | 11589733 | 11592931 | WBGene00005973 | srx-82   | F43A11.6                   |
| -0.0435589958718134 AGIWUR5392;AGIWUR12579                                    |    |   |          |          |                |          |                            |
| CB4856                                                                        | HS | V | 11593727 | 11594971 | WBGene00005971 | srx-80   | F43A11.4                   |
| -0.00100103092375381 AGIWUR26018                                              |    |   |          |          |                |          |                            |
| CB4856                                                                        | HS | V | 11595919 | 11597096 | WBGene00005972 | srx-81   | F43A11.5                   |
| -0.0191469263227591 AGIWUR1854;AGIWUR40726                                    |    |   |          |          |                |          |                            |
| CB4856                                                                        | HS | V | 11597346 | 11598897 | WBGene00005974 | srx-83   | F43A11.7                   |
| 0.0119374413135418 AGIWUR31700                                                |    |   |          |          |                |          |                            |
| CB4856                                                                        | HS | V | 11599107 | 11600628 | WBGene00005975 | srx-84   | F35B12.1                   |
| -0.113269303135035 AGIWUR17845;AGIWUR35416                                    |    |   |          |          |                |          |                            |

|                                                                                                |                                                                        |          |                |           |                            |
|------------------------------------------------------------------------------------------------|------------------------------------------------------------------------|----------|----------------|-----------|----------------------------|
| CB4856 HS V                                                                                    | 11601119                                                               | 11602358 | WBGene00009388 | F35B12.9  | F35B12.9                   |
| -0.0185319037211658                                                                            | AGIWUR1481;AGIWUR14629;AGIWUR18779;AGIWUR43752                         |          |                |           |                            |
| CB4856 HS V                                                                                    | 11602294                                                               | 11604563 | WBGene00000983 | dhs-20    | F35B12.2                   |
| 0.382772132970443                                                                              | AGIWUR1985                                                             |          |                |           |                            |
| CB4856 HS V                                                                                    | 11609096                                                               | 11610149 | WBGene00009384 | piit-1    | F35B12.4                   |
| 0.0719102125326359                                                                             | AGIWUR44326                                                            |          |                |           |                            |
| CB4856 HS V                                                                                    | 11610708                                                               | 11613054 | WBGene00009385 | sas-5     | F35B12.5                   |
| 0.0449556988172963                                                                             | AGIWUR12489                                                            |          |                |           |                            |
| CB4856 HS V                                                                                    | 11613307                                                               | 11614888 | WBGene00009386 | tag-290   | F35B12.6                   |
| 0.0171041363152895                                                                             | AGIWUR13593                                                            |          |                |           |                            |
| CB4856 HS V                                                                                    | 11616283                                                               | 11616829 | WBGene00003762 | nlp-24    | F35B12.7                   |
| 0.194071890430931                                                                              | AGIWUR2533;AGIWUR13008;AGIWUR22163;AGIWUR24238;AGIWUR32188;AGIWUR39141 |          |                |           |                            |
| CB4856 HS V                                                                                    | 11616812                                                               | 11618266 | WBGene00009387 | glb-15    | F35B12.8                   |
| 0.108189114149745                                                                              | AGIWUR37261                                                            |          |                |           |                            |
| CB4856 HS V                                                                                    | 11625954                                                               | 11629322 | WBGene00009389 | F35B12.10 | F35B12.10                  |
| 0.071840956344424                                                                              | AGIWUR31419                                                            |          |                |           |                            |
| CB4856 HS V                                                                                    | 11631434                                                               | 11637291 | WBGene00012100 | sipa-1    | T27F2.2 0.201803580000943  |
| AGIWUR40216                                                                                    |                                                                        |          |                |           |                            |
| CB4856 HS V                                                                                    | 11644760                                                               | 11645370 | WBGene00000249 | bir-1     | T27F2.3 0.0157253123452126 |
| AGIWUR10307                                                                                    |                                                                        |          |                |           |                            |
| CB4856 HS V                                                                                    | 11645481                                                               | 11650090 | WBGene00004806 | skp-1     | T27F2.1 0.0750019722885806 |
| AGIWUR2641                                                                                     |                                                                        |          |                |           |                            |
| CB4856 HS V                                                                                    | 11650079                                                               | 11650774 | WBGene00012101 | zip-10    | T27F2.4 0.067668878798183  |
| AGIWUR6110;AGIWUR19171;AGIWUR21334;AGIWUR34172                                                 |                                                                        |          |                |           |                            |
| CB4856 HS V                                                                                    | 11661670                                                               | 11665085 | WBGene00000449 | ceh-27    | F46F3.1 0.035777178554433  |
| AGIWUR17161                                                                                    |                                                                        |          |                |           |                            |
| CB4856 HS V                                                                                    | 11667476                                                               | 11669390 | WBGene00009791 | F46F3.3   | F46F3.3 0.185754298575425  |
| AGIWUR8266;AGIWUR11650;AGIWUR14168;AGIWUR16448;AGIWUR26148;AGIWUR36536;AGIWUR42656;AGIWUR42960 |                                                                        |          |                |           |                            |
| CB4856 HS V                                                                                    | 11669348                                                               | 11672594 | WBGene00009790 | lgc-44    | F46F3.2 0.38599980402094   |
| AGIWUR7570                                                                                     |                                                                        |          |                |           |                            |
| CB4856 HS V                                                                                    | 11675942                                                               | 11685268 | WBGene00000146 | ape-1     | F46F3.4 0.0424407327646907 |
| AGIWUR2585                                                                                     |                                                                        |          |                |           |                            |
| CB4856 HS V                                                                                    | 11687426                                                               | 11689174 | WBGene00012281 | W05E10.2  | W05E10.2                   |
| 0.00604663947631856                                                                            | AGIWUR16303                                                            |          |                |           |                            |
| CB4856 HS V                                                                                    | 11689413                                                               | 11691691 | WBGene00012280 | W05E10.1  | W05E10.1                   |
| 0.287555743477803                                                                              | AGIWUR31908                                                            |          |                |           |                            |
| CB4856 HS V                                                                                    | 11693188                                                               | 11695697 | WBGene00012282 | W05E10.5  | W05E10.5                   |
| 0.133759776588802                                                                              | AGIWUR304                                                              |          |                |           |                            |
| CB4856 HS V                                                                                    | 11701764                                                               | 11705400 | WBGene00000453 | ceh-32    | W05E10.3                   |

|                                    |                                                             |          |                |           |           |                     |
|------------------------------------|-------------------------------------------------------------|----------|----------------|-----------|-----------|---------------------|
| 0.00198777845170373                | AGIWUR16411;AGIWUR39527;AGIWUR43749                         |          |                |           |           |                     |
| CB4856 HS V                        | 11709775                                                    | 11715903 | WBGene00006609 | tre-3     | W05E10.4  |                     |
| 0.0445454856957603                 | AGIWUR17988;AGIWUR19737;AGIWUR37150                         |          |                |           |           |                     |
| CB4856 HS V                        | 11718089                                                    | 11725652 | WBGene00000907 | daf-11    | B0240.3   | 0.0600742700381343  |
| AGIWUR23822                        |                                                             |          |                |           |           |                     |
| CB4856 HS V                        | 11727900                                                    | 11730160 | WBGene00004359 | rhr-2     | B0240.1   | 0.0201451017355296  |
| AGIWUR10193                        |                                                             |          |                |           |           |                     |
| CB4856 HS V                        | 11731120                                                    | 11733472 | WBGene00007118 | npp-22    | B0240.4   | 0.0798127919953266  |
| AGIWUR10766                        |                                                             |          |                |           |           |                     |
| CB4856 HS V                        | 11733733                                                    | 11736968 | WBGene00007117 | spe-42    | B0240.2   | 0.152796805178853   |
| AGIWUR9063                         |                                                             |          |                |           |           |                     |
| CB4856 HS V                        | 11740065                                                    | 11754109 | WBGene00011436 | T04F3.1   | T04F3.1   | -0.0892010512814085 |
| AGIWUR37668                        |                                                             |          |                |           |           |                     |
| CB4856 HS V                        | 11757668                                                    | 11758598 | WBGene00011437 | T04F3.2   | T04F3.2   | 0.0464854455753061  |
| AGIWUR37822                        |                                                             |          |                |           |           |                     |
| CB4856 HS V                        | 11758935                                                    | 11760570 | WBGene00011438 | T04F3.3   | T04F3.3   | 0.0874502323171473  |
| AGIWUR2595;AGIWUR18129;AGIWUR40947 |                                                             |          |                |           |           |                     |
| CB4856 HS V                        | 11760671                                                    | 11761894 | WBGene00077538 | T04F3.5   | T04F3.5   | 0.0893478436928223  |
| AGIWUR8529                         |                                                             |          |                |           |           |                     |
| CB4856 HS V                        | 11761893                                                    | 11763152 | WBGene00011439 | T04F3.4   | T04F3.4   | -0.165763854356845  |
| AGIWUR40120                        |                                                             |          |                |           |           |                     |
| CB4856 HS V                        | 11763140                                                    | 11764382 | WBGene00010075 | F55A11.1  | F55A11.1  |                     |
| 0.0795177429278926                 | AGIWUR6498                                                  |          |                |           |           |                     |
| CB4856 HS V                        | 11764904                                                    | 11767222 | WBGene00006373 | syx-5     | F55A11.2  |                     |
| 0.222251596965414                  | AGIWUR44160                                                 |          |                |           |           |                     |
| CB4856 HS V                        | 11767328                                                    | 11769899 | WBGene00004768 | sel-11    | F55A11.3  |                     |
| 0.0919014255185324                 | AGIWUR15843                                                 |          |                |           |           |                     |
| CB4856 HS V                        | 11770456                                                    | 11773495 | WBGene00010077 | F55A11.4  | F55A11.4  |                     |
| 0.00202127092345883                | AGIWUR5298;AGIWUR7111;AGIWUR18868                           |          |                |           |           |                     |
| CB4856 HS V                        | 11773720                                                    | 11776631 | WBGene00044631 | bus-18    | F55A11.5  |                     |
| 0.0147187486146567                 | AGIWUR15849;AGIWUR24966;AGIWUR28370;AGIWUR28599;AGIWUR31508 |          |                |           |           |                     |
| CB4856 HS V                        | 11776838                                                    | 11783422 | WBGene00010079 | F55A11.6  | F55A11.6  |                     |
| 0.203092999977475                  | AGIWUR34008                                                 |          |                |           |           |                     |
| CB4856 HS V                        | 11783340                                                    | 11784616 | WBGene00010082 | F55A11.11 | F55A11.11 |                     |
| 0.0951915802491463                 | AGIWUR13045                                                 |          |                |           |           |                     |
| CB4856 HS V                        | 11784573                                                    | 11787443 | WBGene00010080 | F55A11.7  | F55A11.7  |                     |
| -0.0097891848663707                | AGIWUR11196                                                 |          |                |           |           |                     |
| CB4856 HS V                        | 11788157                                                    | 11789121 | WBGene00010081 | F55A11.8  | F55A11.8  |                     |
| 0.135203703356169                  | AGIWUR34175                                                 |          |                |           |           |                     |

|                                                                                                                                                                                           |    |   |          |          |                |          |          |                     |
|-------------------------------------------------------------------------------------------------------------------------------------------------------------------------------------------|----|---|----------|----------|----------------|----------|----------|---------------------|
| CB4856                                                                                                                                                                                    | HS | V | 11789550 | 11800544 | WBGene00014300 | D2023.1  | D2023.1  | 0.0635484628047376  |
| AGIWUR536;AGIWUR3337;AGIWUR6597;AGIWUR7176;AGIWUR7685;AGIWUR12399;AGIWUR14258;AGIWUR20071;AGIWUR22319;AGIWUR22876;AGIWUR27785;AGIWUR29680;AGIWUR30851;AGIWUR30970;AGIWUR37689;AGIWUR41203 |    |   |          |          |                |          |          |                     |
| CB4856                                                                                                                                                                                    | HS | V | 11802105 | 11811943 | WBGene00008407 | D2023.3  | D2023.3  | 0.0169477163268157  |
| AGIWUR13552                                                                                                                                                                               |    |   |          |          |                |          |          |                     |
| CB4856                                                                                                                                                                                    | HS | V | 11817783 | 11822529 | WBGene00004258 | pyc-1    | D2023.2  | -0.168886768026009  |
| AGIWUR3941;AGIWUR5430;AGIWUR24488;AGIWUR26160;AGIWUR38320;AGIWUR39419                                                                                                                     |    |   |          |          |                |          |          |                     |
| CB4856                                                                                                                                                                                    | HS | V | 11825033 | 11825762 | WBGene00008408 | D2023.4  | D2023.4  |                     |
| -0.000760255017331346 AGIWUR28004                                                                                                                                                         |    |   |          |          |                |          |          |                     |
| CB4856                                                                                                                                                                                    | HS | V | 11825897 | 11827067 | WBGene00008409 | mpst-1   | D2023.5  | 0.0981208526749011  |
| AGIWUR2371                                                                                                                                                                                |    |   |          |          |                |          |          |                     |
| CB4856                                                                                                                                                                                    | HS | V | 11827306 | 11829370 | WBGene00008410 | D2023.6  | D2023.6  | 0.181528237664526   |
| AGIWUR39106                                                                                                                                                                               |    |   |          |          |                |          |          |                     |
| CB4856                                                                                                                                                                                    | HS | V | 11829582 | 11831220 | WBGene00000731 | col-158  | D2023.7  | -0.338566249341152  |
| AGIWUR34847                                                                                                                                                                               |    |   |          |          |                |          |          |                     |
| CB4856                                                                                                                                                                                    | HS | V | 11831203 | 11843625 | WBGene00011261 | nphp-4   | R13H4.1  | -0.0382522270582299 |
| AGIWUR34994                                                                                                                                                                               |    |   |          |          |                |          |          |                     |
| CB4856                                                                                                                                                                                    | HS | V | 11845877 | 11852165 | WBGene00001978 | hmp-1    | R13H4.4  | -0.0169191801305986 |
| AGIWUR6777;AGIWUR24555                                                                                                                                                                    |    |   |          |          |                |          |          |                     |
| CB4856                                                                                                                                                                                    | HS | V | 11860675 | 11862289 | WBGene00011263 | R13H4.5  | R13H4.5  | 0.0752767003088017  |
| AGIWUR27117                                                                                                                                                                               |    |   |          |          |                |          |          |                     |
| CB4856                                                                                                                                                                                    | HS | V | 11863117 | 11864913 | WBGene00011264 | R13H4.6  | R13H4.6  | -0.130962635878433  |
| AGIWUR14613                                                                                                                                                                               |    |   |          |          |                |          |          |                     |
| CB4856                                                                                                                                                                                    | HS | V | 11866438 | 11868234 | WBGene00011265 | R13H4.7  | R13H4.7  |                     |
| -0.00705737309823373 AGIWUR35907                                                                                                                                                          |    |   |          |          |                |          |          |                     |
| CB4856                                                                                                                                                                                    | HS | V | 11875360 | 11879141 | WBGene00010788 | sulp-4   | K12G11.1 |                     |
| 0.023673760152449 AGIWUR43811                                                                                                                                                             |    |   |          |          |                |          |          |                     |
| CB4856                                                                                                                                                                                    | HS | V | 11880068 | 11883160 | WBGene00010789 | sulp-5   | K12G11.2 |                     |
| 0.191511311846335 AGIWUR10275;AGIWUR28603;AGIWUR33364                                                                                                                                     |    |   |          |          |                |          |          |                     |
| CB4856                                                                                                                                                                                    | HS | V | 11888236 | 11889634 | WBGene00010790 | sodh-1   | K12G11.3 |                     |
| -0.272002207075697 AGIWUR19293;AGIWUR22729                                                                                                                                                |    |   |          |          |                |          |          |                     |
| CB4856                                                                                                                                                                                    | HS | V | 11889719 | 11891194 | WBGene00010791 | sodh-2   | K12G11.4 |                     |
| 0.206687607533176 AGIWUR7398                                                                                                                                                              |    |   |          |          |                |          |          |                     |
| CB4856                                                                                                                                                                                    | HS | V | 11891812 | 11893451 | WBGene00005967 | srx-76   | K12G11.5 |                     |
| -0.0402371584272716 AGIWUR22594;AGIWUR37306;AGIWUR41361                                                                                                                                   |    |   |          |          |                |          |          |                     |
| CB4856                                                                                                                                                                                    | HS | V | 11894331 | 11895808 | WBGene00010792 | K12G11.6 | K12G11.6 |                     |
| -0.0792680674476536 AGIWUR7419                                                                                                                                                            |    |   |          |          |                |          |          |                     |
| CB4856                                                                                                                                                                                    | HS | V | 11899072 | 11916623 | WBGene00004855 | sma-1    | R31.1    | -0.0807476346424822 |
| AGIWUR10020;AGIWUR22705;AGIWUR35546;AGIWUR37626;AGIWUR42804;AGIWUR45024                                                                                                                   |    |   |          |          |                |          |          |                     |

|                                                                       |                |         |         |                     |
|-----------------------------------------------------------------------|----------------|---------|---------|---------------------|
| CB4856 HS V 11917564 11924654                                         | WBGene00011270 | R31.2   | R31.2   | 0.0170788168360501  |
| AGIWUR240;AGIWUR32724                                                 |                |         |         |                     |
| CB4856 HS V 11924632 11927406                                         | WBGene00003886 | osm-6   | R31.3   | 0.109286776135395   |
| AGIWUR28117                                                           |                |         |         |                     |
| CB4856 HS V 11927661 11933246                                         | WBGene00010284 | aman-2  | F58H1.1 | -0.195749988553507  |
| AGIWUR18036;AGIWUR33704;AGIWUR35490                                   |                |         |         |                     |
| CB4856 HS V 11933881 11935052                                         | WBGene00010286 | F58H1.3 | F58H1.3 | -0.0193795174055822 |
| AGIWUR9064;AGIWUR15551;AGIWUR22696;AGIWUR33803                        |                |         |         |                     |
| CB4856 HS V 11935148 11936528                                         | WBGene00138720 | F58H1.8 | F58H1.8 | -0.114460113819208  |
| AGIWUR9603                                                            |                |         |         |                     |
| CB4856 HS V 11936505 11937794                                         | WBGene00001466 | flr-2   | F58H1.4 | -0.104196846538493  |
| AGIWUR5295;AGIWUR13263;AGIWUR24230;AGIWUR38451                        |                |         |         |                     |
| CB4856 HS V 11942625 11944656                                         | WBGene00010289 | F58H1.6 | F58H1.6 | 0.133282145735873   |
| AGIWUR2655;AGIWUR8435;AGIWUR29734                                     |                |         |         |                     |
| CB4856 HS V 11958393 11962699                                         | WBGene00010288 | F58H1.5 | F58H1.5 | -0.0849883690695883 |
| AGIWUR13260;AGIWUR22778;AGIWUR23737                                   |                |         |         |                     |
| CB4856 HS V 11963007 11964821                                         | WBGene00010290 | F58H1.7 | F58H1.7 | 0.129406986244805   |
| AGIWUR2934;AGIWUR9376;AGIWUR13051;AGIWUR13113;AGIWUR19170;AGIWUR20927 |                |         |         |                     |
| CB4856 HS V 11975515 11976756                                         | WBGene00000781 | cpr-1   | C52E4.1 | 0.529372114736568   |
| AGIWUR38171;AGIWUR44556                                               |                |         |         |                     |
| CB4856 HS V 11976777 11978459                                         | WBGene00003235 | mif-2   | C52E4.2 | -0.0529121425035939 |
| AGIWUR17960                                                           |                |         |         |                     |
| CB4856 HS V 11978518 11979970                                         | WBGene00004917 | snr-4   | C52E4.3 | -0.11349425914897   |
| AGIWUR9177                                                            |                |         |         |                     |
| CB4856 HS V 11980502 11982450                                         | WBGene00004501 | rpt-1   | C52E4.4 | -0.0832643649271478 |
| AGIWUR64;AGIWUR28575;AGIWUR40117                                      |                |         |         |                     |
| CB4856 HS V 11982901 11986115                                         | WBGene00008258 | mans-2  | C52E4.5 | 0.198655542871053   |
| AGIWUR8557                                                            |                |         |         |                     |
| CB4856 HS V 11991011 11993767                                         | WBGene00000876 | cyl-1   | C52E4.6 | -0.0756152586604522 |
| AGIWUR19976;AGIWUR44208                                               |                |         |         |                     |
| CB4856 HS V 11994295 11995858                                         | WBGene00008259 | C52E4.7 | C52E4.7 | -0.155024295518388  |
| AGIWUR33143                                                           |                |         |         |                     |
| CB4856 HS V 11995868 12001965                                         | WBGene00001553 | gcy-33  | F57F5.2 | 0.381991424972355   |
| AGIWUR6682                                                            |                |         |         |                     |
| CB4856 HS V 12003028 12004600                                         | WBGene00010204 | F57F5.1 | F57F5.1 | 0.112390614278709   |
| AGIWUR12276;AGIWUR20040;AGIWUR32898                                   |                |         |         |                     |
| CB4856 HS V 12004616 12006605                                         | WBGene00010205 | F57F5.3 | F57F5.3 | -0.0602736820411556 |
| AGIWUR39013                                                           |                |         |         |                     |
| CB4856 HS V 12009537 12013605                                         | WBGene00000073 | add-2   | F57F5.4 | -0.158301504924708  |

|                                                                        |    |   |          |          |                |          |          |                     |  |
|------------------------------------------------------------------------|----|---|----------|----------|----------------|----------|----------|---------------------|--|
| AGIWUR9329;AGIWUR31353;AGIWUR39004                                     |    |   |          |          |                |          |          |                     |  |
| CB4856                                                                 | HS | V | 12014385 | 12032131 | WBGene00004032 | pkc-1    | F57F5.5  | -0.0404422097897026 |  |
| AGIWUR8741;AGIWUR15869;AGIWUR21697;AGIWUR35101;AGIWUR39298;AGIWUR41185 |    |   |          |          |                |          |          |                     |  |
| CB4856                                                                 | HS | V | 12032257 | 12040873 | WBGene00002241 | kup-1    | F10C2.2  | 0.13338017253885    |  |
| AGIWUR7433                                                             |    |   |          |          |                |          |          |                     |  |
| CB4856                                                                 | HS | V | 12041556 | 12045347 | WBGene00008645 | F10C2.4  | F10C2.4  | 0.138397901065488   |  |
| AGIWUR15408                                                            |    |   |          |          |                |          |          |                     |  |
| CB4856                                                                 | HS | V | 12045432 | 12048631 | WBGene00008646 | F10C2.5  | F10C2.5  | 0.0827966344089184  |  |
| AGIWUR42690                                                            |    |   |          |          |                |          |          |                     |  |
| CB4856                                                                 | HS | V | 12048745 | 12052182 | WBGene00001095 | dars-2   | F10C2.6  | -0.103703149559939  |  |
| AGIWUR15266;AGIWUR20285;AGIWUR42451                                    |    |   |          |          |                |          |          |                     |  |
| CB4856                                                                 | HS | V | 12053952 | 12056320 | WBGene00008647 | F10C2.7  | F10C2.7  | 0.0748558341962013  |  |
| AGIWUR18774                                                            |    |   |          |          |                |          |          |                     |  |
| CB4856                                                                 | HS | V | 12056575 | 12059747 | WBGene00011087 | R07B7.2  | R07B7.2  | 0.327233354723436   |  |
| AGIWUR41963                                                            |    |   |          |          |                |          |          |                     |  |
| CB4856                                                                 | HS | V | 12060234 | 12063368 | WBGene00000533 | clh-6    | R07B7.1  | 0.00765422430532681 |  |
| AGIWUR25470;AGIWUR40237;AGIWUR43301                                    |    |   |          |          |                |          |          |                     |  |
| CB4856                                                                 | HS | V | 12063432 | 12065391 | WBGene00004138 | pqn-53   | R07B7.3  | -0.333796199268795  |  |
| AGIWUR27696                                                            |    |   |          |          |                |          |          |                     |  |
| CB4856                                                                 | HS | V | 12065960 | 12067957 | WBGene00011088 | kmo-2    | R07B7.4  | 0.0878138227410243  |  |
| AGIWUR13702;AGIWUR15063;AGIWUR19014                                    |    |   |          |          |                |          |          |                     |  |
| CB4856                                                                 | HS | V | 12068725 | 12070519 | WBGene00011089 | kmo-1    | R07B7.5  | 0.302392644053938   |  |
| AGIWUR3864                                                             |    |   |          |          |                |          |          |                     |  |
| CB4856                                                                 | HS | V | 12072862 | 12074986 | WBGene00011090 | R07B7.6  | R07B7.6  | 0.0867209841918584  |  |
| AGIWUR10108;AGIWUR27116;AGIWUR33997;AGIWUR35278                        |    |   |          |          |                |          |          |                     |  |
| CB4856                                                                 | HS | V | 12078044 | 12080374 | WBGene00011093 | R07B7.9  | R07B7.9  | -0.0247272597560428 |  |
| AGIWUR14262                                                            |    |   |          |          |                |          |          |                     |  |
| CB4856                                                                 | HS | V | 12081089 | 12084316 | WBGene00011092 | R07B7.8  | R07B7.8  | 0.591309421943876   |  |
| AGIWUR7397                                                             |    |   |          |          |                |          |          |                     |  |
| CB4856                                                                 | HS | V | 12084186 | 12086460 | WBGene00011094 | R07B7.10 |          | R07B7.10            |  |
| 0.204152991885476 AGIWUR4600                                           |    |   |          |          |                |          |          |                     |  |
| CB4856                                                                 | HS | V | 12087234 | 12088931 | WBGene00011095 | gana-1   | R07B7.11 |                     |  |
| 0.155101858673678 AGIWUR1945                                           |    |   |          |          |                |          |          |                     |  |
| CB4856                                                                 | HS | V | 12089073 | 12091812 | WBGene00011096 | R07B7.12 |          | R07B7.12            |  |
| 0.0998448925020821 AGIWUR15;AGIWUR15650;AGIWUR17447                    |    |   |          |          |                |          |          |                     |  |
| CB4856                                                                 | HS | V | 12092006 | 12093862 | WBGene00011097 | nhr-206  | R07B7.13 |                     |  |
| 0.0628541913664629 AGIWUR31961                                         |    |   |          |          |                |          |          |                     |  |
| CB4856                                                                 | HS | V | 12094374 | 12095947 | WBGene00011099 | nhr-208  | R07B7.15 |                     |  |
| 0.0045615109230237 AGIWUR15985                                         |    |   |          |          |                |          |          |                     |  |



|                                   |             |          |                |                                     |
|-----------------------------------|-------------|----------|----------------|-------------------------------------|
| CB4856 HS V                       | 12096234    | 12097845 | WBGene00011098 | nhr-207 R07B7.14                    |
| 0.464536392765675                 | AGIWUR6595  |          |                |                                     |
| CB4856 HS V                       | 12098149    | 12100111 | WBGene00011100 | nhr-209 R07B7.16                    |
| 0.0559082326426505                | AGIWUR29309 |          |                |                                     |
| CB4856 HS V                       | 12101293    | 12103286 | WBGene00007547 | nhr-154 C13C4.2 -0.0838821315607916 |
| AGIWUR8400                        |             |          |                |                                     |
| CB4856 HS V                       | 12104273    | 12106507 | WBGene00007546 | nhr-153 C13C4.1 0.180256023143086   |
| AGIWUR39908                       |             |          |                |                                     |
| CB4856 HS V                       | 12107142    | 12109201 | WBGene00003726 | nhr-136 C13C4.3 0.245012285026023   |
| AGIWUR39836                       |             |          |                |                                     |
| CB4856 HS V                       | 12109168    | 12110978 | WBGene00007548 | C13C4.4 C13C4.4 -0.120641148646058  |
| AGIWUR37050                       |             |          |                |                                     |
| CB4856 HS V                       | 12114993    | 12117443 | WBGene00007549 | spin-1 C13C4.5 0.391395163838929    |
| AGIWUR16171                       |             |          |                |                                     |
| CB4856 HS V                       | 12118828    | 12120814 | WBGene00007551 | C13C4.7 C13C4.7 -0.223476347543103  |
| AGIWUR3454                        |             |          |                |                                     |
| CB4856 HS V                       | 12121587    | 12125096 | WBGene00007550 | C13C4.6 C13C4.6 0.082275828583926   |
| AGIWUR31466                       |             |          |                |                                     |
| CB4856 HS V                       | 12124850    | 12130788 | WBGene00007757 | C27A7.6 C27A7.6 0.229290238245778   |
| AGIWUR40902                       |             |          |                |                                     |
| CB4856 HS V                       | 12131442    | 12137395 | WBGene00007753 | C27A7.1 C27A7.1 -0.0367664680198274 |
| AGIWUR29919                       |             |          |                |                                     |
| CB4856 HS V                       | 12138354    | 12140322 | WBGene00007754 | C27A7.2 C27A7.2 -0.186345412175494  |
| AGIWUR35166                       |             |          |                |                                     |
| CB4856 HS V                       | 12140876    | 12144259 | WBGene00007755 | C27A7.3 C27A7.3 0.0972933642179594  |
| AGIWUR1656;AGIWUR4008;AGIWUR17633 |             |          |                |                                     |
| CB4856 HS V                       | 12144295    | 12150689 | WBGene00000490 | che-11 C27A7.4 -0.173807832856479   |
| AGIWUR4075                        |             |          |                |                                     |
| CB4856 HS V                       | 12153076    | 12154264 | WBGene00007758 | C27A7.8 C27A7.8 -0.293829439118773  |
| AGIWUR21800;AGIWUR23789           |             |          |                |                                     |
| CB4856 HS V                       | 12154263    | 12154654 | WBGene00007759 | C27A7.9 C27A7.9 0.0431890049676849  |
| AGIWUR18457                       |             |          |                |                                     |
| CB4856 HS V                       | 12154875    | 12162299 | WBGene00007756 | C27A7.5 C27A7.5 0.0804259907897702  |
| AGIWUR4399                        |             |          |                |                                     |
| CB4856 HS V                       | 12163206    | 12164535 | WBGene00005592 | srj-4 C27A7.7 0.153552755474903     |
| AGIWUR26885                       |             |          |                |                                     |
| CB4856 HS V                       | 12165212    | 12166662 | WBGene00012147 | VC27A7L.1 VC27A7L.1                 |
| 0.016958440175495                 | AGIWUR16217 |          |                |                                     |
| CB4856 HS V                       | 12166706    | 12167753 | WBGene00000614 | col-37 ZK863.2 -0.0326298190420076  |

|                                                                  |    |   |          |          |                |          |          |                     |
|------------------------------------------------------------------|----|---|----------|----------|----------------|----------|----------|---------------------|
| AGIWUR43462                                                      |    |   |          |          |                |          |          |                     |
| CB4856                                                           | HS | V | 12168222 | 12170208 | WBGene00014122 | ZK863.1  | ZK863.1  | -0.0645413058425683 |
| AGIWUR734;AGIWUR13262;AGIWUR31650                                |    |   |          |          |                |          |          |                     |
| CB4856                                                           | HS | V | 12177088 | 12179438 | WBGene00044790 | clcc-224 |          | ZK863.9             |
| 0.146790134431541 AGIWUR9415;AGIWUR27979;AGIWUR28764;AGIWUR32666 |    |   |          |          |                |          |          |                     |
| CB4856                                                           | HS | V | 12179503 | 12181410 | WBGene00014123 | elpc-3   | ZK863.3  | 0.233854233772393   |
| AGIWUR36908                                                      |    |   |          |          |                |          |          |                     |
| CB4856                                                           | HS | V | 12181501 | 12184194 | WBGene00014124 | usip-1   | ZK863.4  | 0.0363619405207061  |
| AGIWUR10858                                                      |    |   |          |          |                |          |          |                     |
| CB4856                                                           | HS | V | 12184949 | 12186245 | WBGene00005082 | srd-4    | ZK863.5  | 0.0875958073766414  |
| AGIWUR4801                                                       |    |   |          |          |                |          |          |                     |
| CB4856                                                           | HS | V | 12186335 | 12187496 | WBGene00014125 | ZK863.8  | ZK863.8  | 0.160782879330489   |
| AGIWUR2181                                                       |    |   |          |          |                |          |          |                     |
| CB4856                                                           | HS | V | 12191519 | 12192211 | WBGene00001088 | dpy-30   | ZK863.6  | -0.139645357081168  |
| AGIWUR14525;AGIWUR23895;AGIWUR28944;AGIWUR35982                  |    |   |          |          |                |          |          |                     |
| CB4856                                                           | HS | V | 12192273 | 12194445 | WBGene00004384 | rnp-1    | ZK863.7  | -0.0693105720499236 |
| AGIWUR10525;AGIWUR31476;AGIWUR42654                              |    |   |          |          |                |          |          |                     |
| CB4856                                                           | HS | V | 12194457 | 12205494 | WBGene00014098 | ogdh-2   | ZK836.2  | -0.0383594731094057 |
| AGIWUR6700;AGIWUR15933;AGIWUR32427                               |    |   |          |          |                |          |          |                     |
| CB4856                                                           | HS | V | 12213327 | 12225935 | WBGene00006874 | vab-8    | K12F2.2  | 0.109043620216813   |
| AGIWUR29761                                                      |    |   |          |          |                |          |          |                     |
| CB4856                                                           | HS | V | 12226816 | 12234343 | WBGene00003515 | myo-3    | K12F2.1  | 0.0124890763348695  |
| AGIWUR39311                                                      |    |   |          |          |                |          |          |                     |
| CB4856                                                           | HS | V | 12236895 | 12238599 | WBGene00011448 | tag-348  | T04H1.1  | 0.198967123848229   |
| AGIWUR7345                                                       |    |   |          |          |                |          |          |                     |
| CB4856                                                           | HS | V | 12238938 | 12240316 | WBGene00005827 | srw-80   | T04H1.10 |                     |
| 0.122615856226389 AGIWUR21658                                    |    |   |          |          |                |          |          |                     |
| CB4856                                                           | HS | V | 12241409 | 12241945 | WBGene00011450 | ttr-22   | T04H1.3  | 0.228031367758335   |
| AGIWUR3349;AGIWUR4769;AGIWUR13278;AGIWUR25891                    |    |   |          |          |                |          |          |                     |
| CB4856                                                           | HS | V | 12241962 | 12245059 | WBGene00011449 | T04H1.2  | T04H1.2  | 0.0653840967489252  |
| AGIWUR2792;AGIWUR12771;AGIWUR16025;AGIWUR31410;AGIWUR38140       |    |   |          |          |                |          |          |                     |
| CB4856                                                           | HS | V | 12245594 | 12251246 | WBGene00004296 | rad-50   | T04H1.4  | -0.111844170865968  |
| AGIWUR21464                                                      |    |   |          |          |                |          |          |                     |
| CB4856                                                           | HS | V | 12251341 | 12252407 | WBGene00011451 | T04H1.5  | T04H1.5  | 0.191751212001408   |
| AGIWUR10392                                                      |    |   |          |          |                |          |          |                     |
| CB4856                                                           | HS | V | 12252623 | 12255450 | WBGene00003075 | lrx-1    | T04H1.6  | -0.037129207938138  |
| AGIWUR1303                                                       |    |   |          |          |                |          |          |                     |
| CB4856                                                           | HS | V | 12255547 | 12258804 | WBGene00011452 | ugt-55   | T04H1.7  | 0.186698387221256   |
| AGIWUR11839                                                      |    |   |          |          |                |          |          |                     |

|                                                                                        |          |          |                |          |          |                     |
|----------------------------------------------------------------------------------------|----------|----------|----------------|----------|----------|---------------------|
| CB4856 HS V                                                                            | 12258982 | 12261205 | WBGene00011453 | ugt-56   | T04H1.8  | 0.0345382357185651  |
| AGIWUR34483;AGIWUR37835                                                                |          |          |                |          |          |                     |
| CB4856 HS V                                                                            | 12261804 | 12263368 | WBGene00006539 | tbb-6    | T04H1.9  | 0.00444893953282666 |
| AGIWUR44382                                                                            |          |          |                |          |          |                     |
| CB4856 HS V                                                                            | 12263369 | 12263896 | WBGene00010091 | ssp-35   | F55C5.1  | 0.0747190745991198  |
| AGIWUR39324                                                                            |          |          |                |          |          |                     |
| CB4856 HS V                                                                            | 12264002 | 12265492 | WBGene00010092 | F55C5.2  | F55C5.2  | 0.0463249042087952  |
| AGIWUR41701                                                                            |          |          |                |          |          |                     |
| CB4856 HS V                                                                            | 12265707 | 12269549 | WBGene00006677 | twk-24   | F55C5.3  | -0.156580476994286  |
| AGIWUR23192                                                                            |          |          |                |          |          |                     |
| CB4856 HS V                                                                            | 12270271 | 12271551 | WBGene00010094 | tsfm-1   | F55C5.5  | -0.118089906644283  |
| AGIWUR2050;AGIWUR9824;AGIWUR31526                                                      |          |          |                |          |          |                     |
| CB4856 HS V                                                                            | 12271873 | 12275676 | WBGene00010093 | capg-2   | F55C5.4  | -0.0388339097501937 |
| AGIWUR40113                                                                            |          |          |                |          |          |                     |
| CB4856 HS V                                                                            | 12275625 | 12277046 | WBGene00044791 | bnc-1    | F55C5.11 |                     |
| 0.190088801313172 AGIWUR24922                                                          |          |          |                |          |          |                     |
| CB4856 HS V                                                                            | 12279506 | 12281461 | WBGene00010095 | F55C5.6  | F55C5.6  | 0.0667556577680113  |
| AGIWUR36761                                                                            |          |          |                |          |          |                     |
| CB4856 HS V                                                                            | 12283487 | 12283999 | WBGene00010098 | F55C5.10 | F55C5.10 |                     |
| 0.358652786950086 AGIWUR24288                                                          |          |          |                |          |          |                     |
| CB4856 HS V                                                                            | 12284060 | 12288615 | WBGene00010096 | rskd-1   | F55C5.7  |                     |
| -0.00655632802773631 AGIWUR20265;AGIWUR20565;AGIWUR36910;AGIWUR40876                   |          |          |                |          |          |                     |
| CB4856 HS V                                                                            | 12288922 | 12291658 | WBGene00010097 | srpa-68  | F55C5.8  | 0.0504598122374542  |
| AGIWUR4738;AGIWUR11042;AGIWUR28005;AGIWUR30627;AGIWUR33642;AGIWUR44914                 |          |          |                |          |          |                     |
| CB4856 HS V                                                                            | 12292214 | 12293802 | WBGene00005241 | srh-16   | F55C5.9  | 0.0909904729818738  |
| AGIWUR30040                                                                            |          |          |                |          |          |                     |
| CB4856 HS V                                                                            | 12302484 | 12306978 | WBGene00001493 | frm-7    | C51F7.1  | -0.0614079060870125 |
| AGIWUR18582                                                                            |          |          |                |          |          |                     |
| CB4856 HS V                                                                            | 12307490 | 12308658 | WBGene00005202 | srg-45   | C51F7.2  | 0.0715301014735594  |
| AGIWUR10609                                                                            |          |          |                |          |          |                     |
| CB4856 HS V                                                                            | 12308849 | 12310342 | WBGene00011014 | hpo-30   | R04F11.1 |                     |
| -0.124893818473723 AGIWUR27617                                                         |          |          |                |          |          |                     |
| CB4856 HS V                                                                            | 12314919 | 12317180 | WBGene00011016 | R04F11.3 | R04F11.3 |                     |
| -0.270136328254456 AGIWUR28374                                                         |          |          |                |          |          |                     |
| CB4856 HS V                                                                            | 12317278 | 12318019 | WBGene00011017 | R04F11.5 | R04F11.5 |                     |
| -0.164076969146576 AGIWUR26518                                                         |          |          |                |          |          |                     |
| CB4856 HS V                                                                            | 12318385 | 12320229 | WBGene00011015 | R04F11.2 | R04F11.2 |                     |
| 0.142348049405576 AGIWUR549;AGIWUR9276;AGIWUR21822;AGIWUR24633;AGIWUR37581;AGIWUR41818 |          |          |                |          |          |                     |
| CB4856 HS V                                                                            | 12320187 | 12337744 | WBGene00006668 | twk-13   | R04F11.4 |                     |

|                     |                                                                                     |          |                |                     |
|---------------------|-------------------------------------------------------------------------------------|----------|----------------|---------------------|
| 0.0826678634523876  | AGIWUR28680;AGIWUR39921;AGIWUR40661                                                 |          |                |                     |
| CB4856 HS V         | 12342314                                                                            | 12343469 | WBGene00009092 | tomm-20 F23H12.2    |
| 0.00841608684681283 | AGIWUR10782                                                                         |          |                |                     |
| CB4856 HS V         | 12344188                                                                            | 12345919 | WBGene00004898 | snb-2 F23H12.1      |
| -0.122346494911152  | AGIWUR13735;AGIWUR22688;AGIWUR24346;AGIWUR26228;AGIWUR32107;AGIWUR39035;AGIWUR41382 |          |                |                     |
| CB4856 HS V         | 12345935                                                                            | 12350451 | WBGene00009093 | F23H12.3 F23H12.3   |
| 0.0688808492181927  | AGIWUR18327                                                                         |          |                |                     |
| CB4856 HS V         | 12352994                                                                            | 12354314 | WBGene00005018 | sqt-3 F23H12.4      |
| 0.0362158200067313  | AGIWUR30261;AGIWUR42458                                                             |          |                |                     |
| CB4856 HS V         | 12356256                                                                            | 12357309 | WBGene00050938 | F23H12.11 F23H12.11 |
| -0.0328588069727807 | AGIWUR12590;AGIWUR34990                                                             |          |                |                     |
| CB4856 HS V         | 12358647                                                                            | 12363691 | WBGene00009094 | F23H12.5 F23H12.5   |
| 0.0908817735248828  | AGIWUR40074                                                                         |          |                |                     |
| CB4856 HS V         | 12363754                                                                            | 12369537 | WBGene00001539 | gcy-13 F23H12.6     |
| 0.160560350399909   | AGIWUR26383                                                                         |          |                |                     |
| CB4856 HS V         | 12371730                                                                            | 12372870 | WBGene00009095 | F23H12.7 F23H12.7   |
| 0.0435595002515736  | AGIWUR33584                                                                         |          |                |                     |
| CB4856 HS V         | 12377556                                                                            | 12378832 | WBGene00010461 | K01D12.1 K01D12.1   |
| -0.226157820254343  | AGIWUR30600                                                                         |          |                |                     |
| CB4856 HS V         | 12381254                                                                            | 12385623 | WBGene00010463 | K01D12.3 K01D12.3   |
| 0.109140843653373   | AGIWUR38470                                                                         |          |                |                     |
| CB4856 HS V         | 12387041                                                                            | 12395706 | WBGene00006669 | twk-14 K01D12.4     |
| -0.0655003741011591 | AGIWUR11110;AGIWUR24894;AGIWUR31992                                                 |          |                |                     |
| CB4856 HS V         | 12397845                                                                            | 12398783 | WBGene00010464 | K01D12.5 K01D12.5   |
| -0.135023840507262  | AGIWUR7580                                                                          |          |                |                     |
| CB4856 HS V         | 12398759                                                                            | 12400859 | WBGene00010465 | K01D12.6 K01D12.6   |
| -0.190757769146278  | AGIWUR951;AGIWUR1257;AGIWUR19449;AGIWUR39885                                        |          |                |                     |
| CB4856 HS V         | 12402655                                                                            | 12403234 | WBGene00010467 | K01D12.8 K01D12.8   |
| -0.0598560685816487 | AGIWUR5069;AGIWUR9752;AGIWUR18695;AGIWUR44052                                       |          |                |                     |
| CB4856 HS V         | 12403942                                                                            | 12404651 | WBGene00010468 | K01D12.9 K01D12.9   |
| -0.334809223355792  | AGIWUR35425                                                                         |          |                |                     |
| CB4856 HS V         | 12406229                                                                            | 12407017 | WBGene00010469 | K01D12.10 K01D12.10 |
| -0.0561764962338893 | AGIWUR443                                                                           |          |                |                     |
| CB4856 HS V         | 12407428                                                                            | 12408592 | WBGene00010470 | cdr-4 K01D12.11     |
| 0.00806100591004899 | AGIWUR3045                                                                          |          |                |                     |
| CB4856 HS V         | 12409369                                                                            | 12410513 | WBGene00010473 | hrg-2 K01D12.14     |
| -0.0218997651207626 | AGIWUR26565                                                                         |          |                |                     |
| CB4856 HS V         | 12410879                                                                            | 12412091 | WBGene00010472 | cdr-7 K01D12.13     |
| 0.19753004813238    | AGIWUR13221                                                                         |          |                |                     |

|                                                                        |                                                             |          |                |           |           |                     |
|------------------------------------------------------------------------|-------------------------------------------------------------|----------|----------------|-----------|-----------|---------------------|
| CB4856 HS V                                                            | 12412506                                                    | 12413698 | WBGene00010471 | cdr-6     | K01D12.12 |                     |
| 0.209311126101754                                                      | AGIWUR43496                                                 |          |                |           |           |                     |
| CB4856 HS V                                                            | 12414640                                                    | 12415709 | WBGene00008296 | cdr-2     | C54D10.1  |                     |
| 0.0400211525262399                                                     | AGIWUR22071                                                 |          |                |           |           |                     |
| CB4856 HS V                                                            | 12416358                                                    | 12417377 | WBGene00008297 | cdr-3     | C54D10.2  |                     |
| 0.120540913696829                                                      | AGIWUR40901                                                 |          |                |           |           |                     |
| CB4856 HS V                                                            | 12418592                                                    | 12419428 | WBGene00008298 | C54D10.3  | C54D10.3  |                     |
| 0.149577810068678                                                      | AGIWUR16125;AGIWUR29602;AGIWUR33587;AGIWUR35265;AGIWUR38616 |          |                |           |           |                     |
| CB4856 HS V                                                            | 12419492                                                    | 12420944 | WBGene00008299 | C54D10.4  | C54D10.4  |                     |
| 0.217938274406954                                                      | AGIWUR12106                                                 |          |                |           |           |                     |
| CB4856 HS V                                                            | 12429357                                                    | 12431196 | WBGene00008300 | C54D10.5  | C54D10.5  |                     |
| -0.0156462216996855                                                    | AGIWUR5470                                                  |          |                |           |           |                     |
| CB4856 HS V                                                            | 12431368                                                    | 12432289 | WBGene00045400 | C54D10.13 | C54D10.13 |                     |
| 0.0700249188205042                                                     | AGIWUR3457                                                  |          |                |           |           |                     |
| CB4856 HS V                                                            | 12432365                                                    | 12433817 | WBGene00005249 | srh-25    | C54D10.6  |                     |
| 0.111410307253784                                                      | AGIWUR17191                                                 |          |                |           |           |                     |
| CB4856 HS V                                                            | 12434361                                                    | 12436952 | WBGene00044787 | pals-36   | C54D10.12 |                     |
| 0.764976848604167                                                      | AGIWUR21228                                                 |          |                |           |           |                     |
| CB4856 HS V                                                            | 12437499                                                    | 12441266 | WBGene00138721 | pals-37   | C54D10.14 |                     |
| 0.138482821872993                                                      | AGIWUR22417                                                 |          |                |           |           |                     |
| CB4856 HS V                                                            | 12445184                                                    | 12446956 | WBGene00008302 | pals-38   | C54D10.8  |                     |
| 0.988254239391043                                                      | AGIWUR44320                                                 |          |                |           |           |                     |
| CB4856 HS V                                                            | 12447499                                                    | 12448661 | WBGene00008303 | C54D10.9  | C54D10.9  |                     |
| 0.371646122454935                                                      | AGIWUR2442                                                  |          |                |           |           |                     |
| CB4856 HS V                                                            | 12448685                                                    | 12450002 | WBGene00008304 | C54D10.10 | C54D10.10 |                     |
| 0.740874845845832                                                      | AGIWUR21029                                                 |          |                |           |           |                     |
| CB4856 HS V                                                            | 12450807                                                    | 12453336 | WBGene00009200 | F28C1.1   | F28C1.1   | 0.114726733265661   |
| AGIWUR34773                                                            |                                                             |          |                |           |           |                     |
| CB4856 HS V                                                            | 12453955                                                    | 12463008 | WBGene00001179 | egl-10    | F28C1.2   | -0.0964393900769172 |
| AGIWUR5517;AGIWUR14567;AGIWUR19931;AGIWUR28668;AGIWUR29452;AGIWUR33579 |                                                             |          |                |           |           |                     |
| CB4856 HS V                                                            | 12468683                                                    | 12473533 | WBGene00009201 | F28C1.3   | F28C1.3   | 0.038384814013444   |
| AGIWUR4004;AGIWUR7132;AGIWUR13049;AGIWUR17663;AGIWUR36408              |                                                             |          |                |           |           |                     |
| CB4856 HS V                                                            | 12478413                                                    | 12484442 | WBGene00000228 | atn-1     | W04D2.1   | 0.151528844611096   |
| AGIWUR26457;AGIWUR30926                                                |                                                             |          |                |           |           |                     |
| CB4856 HS V                                                            | 12484885                                                    | 12486068 | WBGene00012242 | srt-39    | W04D2.2   | 0.0472739011883645  |
| AGIWUR42463                                                            |                                                             |          |                |           |           |                     |
| CB4856 HS V                                                            | 12487266                                                    | 12493264 | WBGene00002133 | inx-11    | W04D2.3   | -0.0689121718213688 |
| AGIWUR21702                                                            |                                                             |          |                |           |           |                     |
| CB4856 HS V                                                            | 12493239                                                    | 12494622 | WBGene00012244 | mrps-11   | W04D2.5   | 0.151350933706281   |

|                                                                       |    |   |          |          |                |          |          |                     |
|-----------------------------------------------------------------------|----|---|----------|----------|----------------|----------|----------|---------------------|
| AGIWUR5065;AGIWUR13820;AGIWUR15166                                    |    |   |          |          |                |          |          |                     |
| CB4856                                                                | HS | V | 12494728 | 12497755 | WBGene00012243 | W04D2.4  | W04D2.4  | 0.149489686305401   |
| AGIWUR26542                                                           |    |   |          |          |                |          |          |                     |
| CB4856                                                                | HS | V | 12498213 | 12503738 | WBGene00012245 | W04D2.6  | W04D2.6  | 0.167512063922123   |
| AGIWUR19864;AGIWUR37066                                               |    |   |          |          |                |          |          |                     |
| CB4856                                                                | HS | V | 12505244 | 12506260 | WBGene00012145 | nlp-46   | T28H10.4 |                     |
| -0.251549650099002                                                    |    |   |          |          |                |          |          |                     |
| AGIWUR16141                                                           |    |   |          |          |                |          |          |                     |
| CB4856                                                                | HS | V | 12510645 | 12512201 | WBGene00012143 | T28H10.2 |          | T28H10.2            |
| 0.0547470046888758                                                    |    |   |          |          |                |          |          |                     |
| AGIWUR10112;AGIWUR28923;AGIWUR29056;AGIWUR36962                       |    |   |          |          |                |          |          |                     |
| CB4856                                                                | HS | V | 12512986 | 12514941 | WBGene00012144 | T28H10.3 |          | T28H10.3            |
| -0.133568770438073                                                    |    |   |          |          |                |          |          |                     |
| AGIWUR15495;AGIWUR21042;AGIWUR21714;AGIWUR33773;AGIWUR42383           |    |   |          |          |                |          |          |                     |
| CB4856                                                                | HS | V | 12514875 | 12517205 | WBGene00000285 | cal-1    |          | C13C12.1            |
| 0.205085743399021                                                     |    |   |          |          |                |          |          |                     |
| AGIWUR31413                                                           |    |   |          |          |                |          |          |                     |
| CB4856                                                                | HS | V | 12523647 | 12525656 | WBGene00007552 | C13C12.2 |          | C13C12.2            |
| 0.132129102268135                                                     |    |   |          |          |                |          |          |                     |
| AGIWUR2397;AGIWUR13466;AGIWUR39611                                    |    |   |          |          |                |          |          |                     |
| CB4856                                                                | HS | V | 12527058 | 12528023 | WBGene00009721 | F45D3.1  | F45D3.1  | -0.648473873431595  |
| AGIWUR12145                                                           |    |   |          |          |                |          |          |                     |
| CB4856                                                                | HS | V | 12541040 | 12542973 | WBGene00009722 | F45D3.2  | F45D3.2  | 0.209677698580826   |
| AGIWUR13978                                                           |    |   |          |          |                |          |          |                     |
| CB4856                                                                | HS | V | 12549216 | 12550385 | WBGene00009723 | F45D3.3  | F45D3.3  | 0.232288185727363   |
| AGIWUR7531                                                            |    |   |          |          |                |          |          |                     |
| CB4856                                                                | HS | V | 12552211 | 12553301 | WBGene00009724 | F45D3.4  | F45D3.4  | -0.127633577191532  |
| AGIWUR10584;AGIWUR22383                                               |    |   |          |          |                |          |          |                     |
| CB4856                                                                | HS | V | 12560710 | 12563383 | WBGene00004759 | sel-1    | F45D3.5  | -0.0652111980322019 |
| AGIWUR12278;AGIWUR20293;AGIWUR29900                                   |    |   |          |          |                |          |          |                     |
| CB4856                                                                | HS | V | 12563487 | 12565785 | WBGene00008452 | mrps-5   | E02A10.1 |                     |
| 0.161640792061931                                                     |    |   |          |          |                |          |          |                     |
| AGIWUR14293                                                           |    |   |          |          |                |          |          |                     |
| CB4856                                                                | HS | V | 12566016 | 12567951 | WBGene00008454 | E02A10.4 |          | E02A10.4            |
| -0.21001763807414                                                     |    |   |          |          |                |          |          |                     |
| AGIWUR21249                                                           |    |   |          |          |                |          |          |                     |
| CB4856                                                                | HS | V | 12575308 | 12576895 | WBGene00001732 | grl-23   | E02A10.2 |                     |
| -0.058288281765595                                                    |    |   |          |          |                |          |          |                     |
| AGIWUR35126                                                           |    |   |          |          |                |          |          |                     |
| CB4856                                                                | HS | V | 12583726 | 12587991 | WBGene00008453 | E02A10.3 |          | E02A10.3            |
| 0.043831261831583                                                     |    |   |          |          |                |          |          |                     |
| AGIWUR1496;AGIWUR3722;AGIWUR18897                                     |    |   |          |          |                |          |          |                     |
| CB4856                                                                | HS | V | 12588309 | 12589644 | WBGene00007584 | C14C10.1 |          | C14C10.1            |
| 0.138968723427443                                                     |    |   |          |          |                |          |          |                     |
| AGIWUR2794                                                            |    |   |          |          |                |          |          |                     |
| CB4856                                                                | HS | V | 12589633 | 12590717 | WBGene00007590 | ttr-43   | C14C10.7 |                     |
| 0.144360299488865                                                     |    |   |          |          |                |          |          |                     |
| AGIWUR29794                                                           |    |   |          |          |                |          |          |                     |
| CB4856                                                                | HS | V | 12590979 | 12592477 | WBGene00007585 | C14C10.2 |          | C14C10.2            |
| 0.00135069117316133                                                   |    |   |          |          |                |          |          |                     |
| AGIWUR2163;AGIWUR9585;AGIWUR29812;AGIWUR36093;AGIWUR40434;AGIWUR44127 |    |   |          |          |                |          |          |                     |

|                                                                                                             |                                                 |          |                |          |                            |
|-------------------------------------------------------------------------------------------------------------|-------------------------------------------------|----------|----------------|----------|----------------------------|
| CB4856 HS V                                                                                                 | 12592568                                        | 12596296 | WBGene00007587 | mma-1    | C14C10.4                   |
| 0.358291371198417                                                                                           | AGIWUR23046                                     |          |                |          |                            |
| CB4856 HS V                                                                                                 | 12596393                                        | 12599151 | WBGene00007586 | ril-2    | C14C10.3                   |
| 0.119472851429531                                                                                           | AGIWUR6809;AGIWUR15074;AGIWUR31193;AGIWUR31739  |          |                |          |                            |
| CB4856 HS V                                                                                                 | 12600192                                        | 12607304 | WBGene00007588 | C14C10.5 | C14C10.5                   |
| -0.0475720857332003                                                                                         | AGIWUR13491;AGIWUR21045;AGIWUR34022;AGIWUR39851 |          |                |          |                            |
| CB4856 HS V                                                                                                 | 12607413                                        | 12608107 | WBGene00007589 | erg-28   | C14C10.6                   |
| -0.17134733322888                                                                                           | AGIWUR24094                                     |          |                |          |                            |
| CB4856 HS V                                                                                                 | 12609826                                        | 12610857 | WBGene00013853 | ZC116.1  | ZC116.1 0.324596862614781  |
| AGIWUR38261                                                                                                 |                                                 |          |                |          |                            |
| CB4856 HS V                                                                                                 | 12611329                                        | 12628738 | WBGene00013855 | ZC116.3  | ZC116.3 0.135223293023882  |
| AGIWUR14;AGIWUR5873;AGIWUR10800;AGIWUR12287;AGIWUR13102;AGIWUR21054;AGIWUR30097;AGIWUR30478                 |                                                 |          |                |          |                            |
| CB4856 HS V                                                                                                 | 12628957                                        | 12629905 | WBGene00044198 | F56H9.6  | F56H9.6 0.0907139697935015 |
| AGIWUR33770                                                                                                 |                                                 |          |                |          |                            |
| CB4856 HS V                                                                                                 | 12630170                                        | 12632148 | WBGene00006004 | srx-113  | F56H9.1 0.123669925161596  |
| AGIWUR6265;AGIWUR43399                                                                                      |                                                 |          |                |          |                            |
| CB4856 HS V                                                                                                 | 12632490                                        | 12633638 | WBGene00050977 | F56H9.7  | F56H9.7 -0.147775069383785 |
| AGIWUR8350;AGIWUR11631;AGIWUR21197                                                                          |                                                 |          |                |          |                            |
| CB4856 HS V                                                                                                 | 12637663                                        | 12638237 | WBGene00010174 | F56H9.2  | F56H9.2 0.137648839217885  |
| AGIWUR42483                                                                                                 |                                                 |          |                |          |                            |
| CB4856 HS V                                                                                                 | 12638852                                        | 12640470 | WBGene00001670 | gpa-8    | F56H9.3 -0.139672342509526 |
| AGIWUR36549                                                                                                 |                                                 |          |                |          |                            |
| CB4856 HS V                                                                                                 | 12646827                                        | 12649313 | WBGene00001671 | gpa-9    | F56H9.4 0.0838063695527902 |
| AGIWUR41400                                                                                                 |                                                 |          |                |          |                            |
| CB4856 HS V                                                                                                 | 12649858                                        | 12658718 | WBGene00003011 | lin-25   | F56H9.5 0.0994578656814635 |
| AGIWUR40170                                                                                                 |                                                 |          |                |          |                            |
| CB4856 HS V                                                                                                 | 12658668                                        | 12659687 | WBGene00012277 | ccch-3   | W05B10.2                   |
| 0.0705504196558131                                                                                          | AGIWUR913;AGIWUR4527;AGIWUR37880;AGIWUR44491    |          |                |          |                            |
| CB4856 HS V                                                                                                 | 12659704                                        | 12660330 | WBGene00012276 | his-74   | W05B10.1                   |
| -0.180525172784904                                                                                          | AGIWUR21591                                     |          |                |          |                            |
| CB4856 HS V                                                                                                 | 12661304                                        | 12661659 | WBGene00012278 | W05B10.3 | W05B10.3                   |
| 0.0269694657309976                                                                                          |                                                 |          |                |          |                            |
| AGIWUR5588;AGIWUR11557;AGIWUR17691;AGIWUR29657;AGIWUR30731;AGIWUR31536;AGIWUR32212;AGIWUR34463;AGIWUR43549; |                                                 |          |                |          |                            |
| AGIWUR44193                                                                                                 |                                                 |          |                |          |                            |
| CB4856 HS V                                                                                                 | 12668226                                        | 12669689 | WBGene00012279 | W05B10.4 | W05B10.4                   |
| 0.281973303152975                                                                                           | AGIWUR32489                                     |          |                |          |                            |
| CB4856 HS V                                                                                                 | 12670907                                        | 12672726 | WBGene00006007 | srx-116  | W05B10.5                   |
| 0.156251444724807                                                                                           | AGIWUR42124                                     |          |                |          |                            |
| CB4856 HS V                                                                                                 | 12680107                                        | 12692364 | WBGene00010735 | frpr-15  | K10C8.2 0.432645038591653  |

|                                                                                |    |   |          |          |                |          |          |                     |  |
|--------------------------------------------------------------------------------|----|---|----------|----------|----------------|----------|----------|---------------------|--|
| AGIWUR19256;AGIWUR21031                                                        |    |   |          |          |                |          |          |                     |  |
| CB4856                                                                         | HS | V | 12692486 | 12695255 | WBGene00010734 | parn-1   | K10C8.1  | 0.154998936173063   |  |
| AGIWUR5380;AGIWUR29696                                                         |    |   |          |          |                |          |          |                     |  |
| CB4856                                                                         | HS | V | 12696225 | 12696877 | WBGene00010737 | K10C8.4  | K10C8.4  | -0.0850861981919877 |  |
| AGIWUR3597                                                                     |    |   |          |          |                |          |          |                     |  |
| CB4856                                                                         | HS | V | 12697794 | 12704273 | WBGene00010736 | istr-1   | K10C8.3  | -0.210207856064264  |  |
| AGIWUR17103;AGIWUR21085;AGIWUR33300;AGIWUR35232                                |    |   |          |          |                |          |          |                     |  |
| CB4856                                                                         | HS | V | 12704382 | 12707761 | WBGene00011242 | R11D1.1  | R11D1.1  | 0.0847273010357554  |  |
| AGIWUR39860                                                                    |    |   |          |          |                |          |          |                     |  |
| CB4856                                                                         | HS | V | 12708678 | 12710700 | WBGene00011243 | R11D1.2  | R11D1.2  | 0.146051308557478   |  |
| AGIWUR7737                                                                     |    |   |          |          |                |          |          |                     |  |
| CB4856                                                                         | HS | V | 12711293 | 12712109 | WBGene00011244 | R11D1.3  | R11D1.3  | -0.0987878044645605 |  |
| AGIWUR19840                                                                    |    |   |          |          |                |          |          |                     |  |
| CB4856                                                                         | HS | V | 12713035 | 12714220 | WBGene00011245 | R11D1.4  | R11D1.4  | -0.306065481075612  |  |
| AGIWUR9359                                                                     |    |   |          |          |                |          |          |                     |  |
| CB4856                                                                         | HS | V | 12714503 | 12716549 | WBGene00006222 | str-178  | R11D1.5  | -0.031893942557387  |  |
| AGIWUR3222                                                                     |    |   |          |          |                |          |          |                     |  |
| CB4856                                                                         | HS | V | 12716616 | 12718722 | WBGene00006225 | str-181  | R11D1.6  | 0.149130398438541   |  |
| AGIWUR5561                                                                     |    |   |          |          |                |          |          |                     |  |
| CB4856                                                                         | HS | V | 12720058 | 12722727 | WBGene00011246 | R11D1.7  | R11D1.7  | -0.111895025488971  |  |
| AGIWUR24869                                                                    |    |   |          |          |                |          |          |                     |  |
| CB4856                                                                         | HS | V | 12724562 | 12725993 | WBGene00045336 | R11D1.12 |          | R11D1.12            |  |
| 0.0576575898582146 AGIWUR14180;AGIWUR14693;AGIWUR16055;AGIWUR24942;AGIWUR26376 |    |   |          |          |                |          |          |                     |  |
| CB4856                                                                         | HS | V | 12727171 | 12727621 | WBGene00045517 | R11D1.13 |          | R11D1.13            |  |
| 0.0435445571507849 AGIWUR16530;AGIWUR29414;AGIWUR33362;AGIWUR36100             |    |   |          |          |                |          |          |                     |  |
| CB4856                                                                         | HS | V | 12727593 | 12728112 | WBGene00004442 | rp1-28   | R11D1.8  | -0.0412776269437494 |  |
| AGIWUR32903;AGIWUR35759                                                        |    |   |          |          |                |          |          |                     |  |
| CB4856                                                                         | HS | V | 12728631 | 12729416 | WBGene00011247 | mrp1-49  | R11D1.9  | 0.0408669584645125  |  |
| AGIWUR19366;AGIWUR34528;AGIWUR44439                                            |    |   |          |          |                |          |          |                     |  |
| CB4856                                                                         | HS | V | 12729520 | 12731801 | WBGene00011248 | R11D1.10 |          | R11D1.10            |  |
| -0.0217992385748111 AGIWUR18000                                                |    |   |          |          |                |          |          |                     |  |
| CB4856                                                                         | HS | V | 12731772 | 12733645 | WBGene00000984 | dhs-21   | R11D1.11 |                     |  |
| 0.0772320519994025 AGIWUR471;AGIWUR5236;AGIWUR10383                            |    |   |          |          |                |          |          |                     |  |
| CB4856                                                                         | HS | V | 12734183 | 12736041 | WBGene00007604 | xbx-9    | C15C8.1  | 0.17048124760089    |  |
| AGIWUR42554                                                                    |    |   |          |          |                |          |          |                     |  |
| CB4856                                                                         | HS | V | 12736703 | 12741211 | WBGene00000521 | cky-1    | C15C8.2  | -0.103092839214331  |  |
| AGIWUR14255;AGIWUR27971;AGIWUR29840                                            |    |   |          |          |                |          |          |                     |  |
| CB4856                                                                         | HS | V | 12742041 | 12744207 | WBGene00007605 | asp-10   | C15C8.3  | -0.137881412849676  |  |
| AGIWUR21210                                                                    |    |   |          |          |                |          |          |                     |  |



|                                                                                |    |   |          |          |                |         |          |                     |
|--------------------------------------------------------------------------------|----|---|----------|----------|----------------|---------|----------|---------------------|
| CB4856                                                                         | HS | V | 12745201 | 12747463 | WBGene00007606 | C15C8.4 | C15C8.4  | -0.119682059184452  |
| AGIWUR16153;AGIWUR25403;AGIWUR26667                                            |    |   |          |          |                |         |          |                     |
| CB4856                                                                         | HS | V | 12748292 | 12749963 | WBGene00007607 | C15C8.5 | C15C8.5  | 0.164060359600597   |
| AGIWUR10751                                                                    |    |   |          |          |                |         |          |                     |
| CB4856                                                                         | HS | V | 12750030 | 12751545 | WBGene00007608 | C15C8.6 | C15C8.6  | 0.134285117380042   |
| AGIWUR26274                                                                    |    |   |          |          |                |         |          |                     |
| CB4856                                                                         | HS | V | 12751603 | 12752507 | WBGene00045460 | C15C8.8 | C15C8.8  | -0.0383955017169058 |
| AGIWUR4939;AGIWUR8729;AGIWUR13587;AGIWUR39928;AGIWUR40646                      |    |   |          |          |                |         |          |                     |
| CB4856                                                                         | HS | V | 12752762 | 12754893 | WBGene00001675 | gpa-13  | F18E2.5  | 0.345197330124218   |
| AGIWUR35469                                                                    |    |   |          |          |                |         |          |                     |
| CB4856                                                                         | HS | V | 12757591 | 12760227 | WBGene00008936 | pap1-1  | F18E2.1  | 0.105586084243592   |
| AGIWUR19152                                                                    |    |   |          |          |                |         |          |                     |
| CB4856                                                                         | HS | V | 12761044 | 12763375 | WBGene00006512 | abcf-1  | F18E2.2  | 0.0359641905227894  |
| AGIWUR107;AGIWUR5368;AGIWUR41006;AGIWUR43678                                   |    |   |          |          |                |         |          |                     |
| CB4856                                                                         | HS | V | 12763945 | 12767933 | WBGene00004738 | scc-3   | F18E2.3  | -0.216400617456841  |
| AGIWUR20773                                                                    |    |   |          |          |                |         |          |                     |
| CB4856                                                                         | HS | V | 12769268 | 12770845 | WBGene00008937 | srt-43  | F18E2.4  | 0.0446677396363429  |
| AGIWUR45016                                                                    |    |   |          |          |                |         |          |                     |
| CB4856                                                                         | HS | V | 12773522 | 12783063 | WBGene00013902 | ZC455.1 | ZC455.1  | -0.0698311123747102 |
| AGIWUR5386;AGIWUR43768                                                         |    |   |          |          |                |         |          |                     |
| CB4856                                                                         | HS | V | 12783222 | 12784864 | WBGene00013907 | sre-20  | ZC455.7  | 0.931563494518889   |
| AGIWUR19270                                                                    |    |   |          |          |                |         |          |                     |
| CB4856                                                                         | HS | V | 12785154 | 12787126 | WBGene00001429 | fkf-4   | ZC455.10 |                     |
| 0.0434691919911696 AGIWUR2842                                                  |    |   |          |          |                |         |          |                     |
| CB4856                                                                         | HS | V | 12787269 | 12788551 | WBGene00013909 | srbc-44 | ZC455.9  | 0.0535774916900742  |
| AGIWUR23977                                                                    |    |   |          |          |                |         |          |                     |
| CB4856                                                                         | HS | V | 12789197 | 12790518 | WBGene00013908 | srbc-43 | ZC455.8  |                     |
| 0.000980630283191175 AGIWUR31402                                               |    |   |          |          |                |         |          |                     |
| CB4856                                                                         | HS | V | 12790698 | 12792965 | WBGene00013906 | ugt-5   | ZC455.6  | -0.227687127627834  |
| AGIWUR26588;AGIWUR32844;AGIWUR35067;AGIWUR35571;AGIWUR42083;AGIWUR44576        |    |   |          |          |                |         |          |                     |
| CB4856                                                                         | HS | V | 12793020 | 12795336 | WBGene00013905 | ugt-4   | ZC455.5  | -0.0733896866743109 |
| AGIWUR17590;AGIWUR32025;AGIWUR37226;AGIWUR44616                                |    |   |          |          |                |         |          |                     |
| CB4856                                                                         | HS | V | 12795484 | 12798154 | WBGene00013904 | ugt-6   | ZC455.4  | 0.0399369238327694  |
| AGIWUR2287                                                                     |    |   |          |          |                |         |          |                     |
| CB4856                                                                         | HS | V | 12798327 | 12800193 | WBGene00013903 | ugt-3   | ZC455.3  | 0.55129667112945    |
| AGIWUR23933                                                                    |    |   |          |          |                |         |          |                     |
| CB4856                                                                         | HS | V | 12803574 | 12804550 | WBGene00013910 | srbc-45 | ZC455.11 |                     |
| -0.0141600522686041 AGIWUR5861;AGIWUR24206;AGIWUR34533;AGIWUR37594;AGIWUR41557 |    |   |          |          |                |         |          |                     |
| CB4856                                                                         | HS | V | 12805149 | 12806128 | WBGene00044102 | srbc-46 | ZC455.12 |                     |

|                                     |                                                                      |          |                |          |          |                     |  |
|-------------------------------------|----------------------------------------------------------------------|----------|----------------|----------|----------|---------------------|--|
| -0.0183730252929468                 | AGIWUR5830                                                           |          |                |          |          |                     |  |
| CB4856 HS V                         | 12806490                                                             | 12808277 | WBGene00077562 | ZC443.7  | ZC443.7  | -0.0189070543746408 |  |
| AGIWUR3475;AGIWUR31113              |                                                                      |          |                |          |          |                     |  |
| CB4856 HS V                         | 12808422                                                             | 12810080 | WBGene00013896 | ZC443.1  | ZC443.1  | 0.127723043692445   |  |
| AGIWUR20062                         |                                                                      |          |                |          |          |                     |  |
| CB4856 HS V                         | 12812258                                                             | 12814122 | WBGene00013898 | ZC443.3  | ZC443.3  | 0.0497007495081192  |  |
| AGIWUR17607                         |                                                                      |          |                |          |          |                     |  |
| CB4856 HS V                         | 12816912                                                             | 12819545 | WBGene00013899 | ZC443.4  | ZC443.4  | 0.0362185005139803  |  |
| AGIWUR34599                         |                                                                      |          |                |          |          |                     |  |
| CB4856 HS V                         | 12820265                                                             | 12822758 | WBGene00013900 | ugt-18   | ZC443.5  | 0.163402435910789   |  |
| AGIWUR10265                         |                                                                      |          |                |          |          |                     |  |
| CB4856 HS V                         | 12825024                                                             | 12827432 | WBGene00013901 | ugt-16   | ZC443.6  | 0.436755571377795   |  |
| AGIWUR4668                          |                                                                      |          |                |          |          |                     |  |
| CB4856 HS V                         | 12827770                                                             | 12830109 | WBGene00008097 | ugt-15   | C44H9.1  | 0.362241665001508   |  |
| AGIWUR39382                         |                                                                      |          |                |          |          |                     |  |
| CB4856 HS V                         | 12830804                                                             | 12834438 | WBGene00008098 | C44H9.2  | C44H9.2  | 0.146102731631987   |  |
| AGIWUR13206                         |                                                                      |          |                |          |          |                     |  |
| CB4856 HS V                         | 12835708                                                             | 12839783 | WBGene00008099 | C44H9.4  | C44H9.4  | 0.277653549038352   |  |
| AGIWUR41365                         |                                                                      |          |                |          |          |                     |  |
| CB4856 HS V                         | 12842494                                                             | 12845330 | WBGene00008101 | C44H9.6  | C44H9.6  | 0.247292911366035   |  |
| AGIWUR44468                         |                                                                      |          |                |          |          |                     |  |
| CB4856 HS V                         | 12846721                                                             | 12849864 | WBGene00008100 | C44H9.5  | C44H9.5  | -0.124281367914051  |  |
| AGIWUR12662;AGIWUR43467             |                                                                      |          |                |          |          |                     |  |
| CB4856 HS V                         | 12853015                                                             | 12854839 | WBGene00008102 | C44H9.7  | C44H9.7  | 0.378764094495411   |  |
| AGIWUR18702;AGIWUR19111;AGIWUR29062 |                                                                      |          |                |          |          |                     |  |
| CB4856 HS V                         | 12859381                                                             | 12863833 | WBGene00011587 | T07F10.1 |          | T07F10.1            |  |
| 0.42210507214401                    | AGIWUR12497                                                          |          |                |          |          |                     |  |
| CB4856 HS V                         | 12868026                                                             | 12870035 | WBGene00011589 | T07F10.3 |          | T07F10.3            |  |
| -0.113963358323995                  | AGIWUR5418;AGIWUR8235;AGIWUR9659;AGIWUR10901;AGIWUR13177;AGIWUR33700 |          |                |          |          |                     |  |
| CB4856 HS V                         | 12872053                                                             | 12882108 | WBGene00011590 | bus-19   | T07F10.4 |                     |  |
| 0.0806416545444417                  | AGIWUR573;AGIWUR18516;AGIWUR42616                                    |          |                |          |          |                     |  |
| CB4856 HS V                         | 12882078                                                             | 12885960 | WBGene00011287 | glb-24   | R90.5    | -0.115085368502015  |  |
| AGIWUR12824;AGIWUR18804;AGIWUR38495 |                                                                      |          |                |          |          |                     |  |
| CB4856 HS V                         | 12891523                                                             | 12895872 | WBGene00011283 | R90.1    | R90.1    | 0.110545600190342   |  |
| AGIWUR14152;AGIWUR38711             |                                                                      |          |                |          |          |                     |  |
| CB4856 HS V                         | 12903551                                                             | 12904160 | WBGene00011284 | ttr-27   | R90.2    | 0.0163950567606719  |  |
| AGIWUR18386                         |                                                                      |          |                |          |          |                     |  |
| CB4856 HS V                         | 12904213                                                             | 12905168 | WBGene00011285 | ttr-28   | R90.3    | 0.365172686413957   |  |
| AGIWUR1453                          |                                                                      |          |                |          |          |                     |  |

|                                                            |   |          |          |                |         |          |                     |
|------------------------------------------------------------|---|----------|----------|----------------|---------|----------|---------------------|
| CB4856 HS                                                  | V | 12906131 | 12906746 | WBGene00011286 | ttr-29  | R90.4    | 0.427943353040426   |
| AGIWUR25178                                                |   |          |          |                |         |          |                     |
| CB4856 HS                                                  | V | 12910113 | 12917198 | WBGene00003738 | nid-1   | F54F3.1  | 0.0822816492633827  |
| AGIWUR44234                                                |   |          |          |                |         |          |                     |
| CB4856 HS                                                  | V | 12917450 | 12918902 | WBGene00014770 | F54F3.2 | F54F3.2  | 0.229554792694387   |
| AGIWUR20453;AGIWUR24291                                    |   |          |          |                |         |          |                     |
| CB4856 HS                                                  | V | 12919952 | 12921692 | WBGene00010062 | lip1-1  | F54F3.3  | 0.257464932827299   |
| AGIWUR44387                                                |   |          |          |                |         |          |                     |
| CB4856 HS                                                  | V | 12922608 | 12924156 | WBGene00010063 | dhfs-4  | F54F3.4  | 0.170423845494431   |
| AGIWUR2741                                                 |   |          |          |                |         |          |                     |
| CB4856 HS                                                  | V | 12924441 | 12928173 | WBGene00004150 | pqn-67  | T16G1.1  | 0.0494554175403685  |
| AGIWUR806;AGIWUR25408;AGIWUR26872                          |   |          |          |                |         |          |                     |
| CB4856 HS                                                  | V | 12929478 | 12932966 | WBGene00011796 | T16G1.2 | T16G1.2  | -0.111633550434181  |
| AGIWUR33                                                   |   |          |          |                |         |          |                     |
| CB4856 HS                                                  | V | 12932941 | 12935112 | WBGene00011801 | T16G1.7 | T16G1.7  | 0.337363926972412   |
| AGIWUR18524                                                |   |          |          |                |         |          |                     |
| CB4856 HS                                                  | V | 12935538 | 12937263 | WBGene00011800 | T16G1.6 | T16G1.6  | 0.520634867276689   |
| AGIWUR22206;AGIWUR22875;AGIWUR25143                        |   |          |          |                |         |          |                     |
| CB4856 HS                                                  | V | 12937654 | 12939506 | WBGene00011799 | T16G1.5 | T16G1.5  | 0.0425786882474997  |
| AGIWUR22764                                                |   |          |          |                |         |          |                     |
| CB4856 HS                                                  | V | 12940038 | 12941847 | WBGene00011798 | T16G1.4 | T16G1.4  | 0.511682633410519   |
| AGIWUR4039;AGIWUR26972;AGIWUR30778                         |   |          |          |                |         |          |                     |
| CB4856 HS                                                  | V | 12942365 | 12944329 | WBGene00011797 | T16G1.3 | T16G1.3  | -0.0899554205562954 |
| AGIWUR9650                                                 |   |          |          |                |         |          |                     |
| CB4856 HS                                                  | V | 12944861 | 12946853 | WBGene00001711 | grl-2   | T16G1.8  | 0.0725629980537628  |
| AGIWUR39625                                                |   |          |          |                |         |          |                     |
| CB4856 HS                                                  | V | 12946815 | 12950658 | WBGene00011802 | T16G1.9 | T16G1.9  | 0.0317050267600898  |
| AGIWUR42413                                                |   |          |          |                |         |          |                     |
| CB4856 HS                                                  | V | 12952636 | 12953208 | WBGene00004151 | pqn-68  | T16G1.10 |                     |
| -0.128561123465166 AGIWUR24781                             |   |          |          |                |         |          |                     |
| CB4856 HS                                                  | V | 12954002 | 12955229 | WBGene00001233 | eif-3.K | T16G1.11 |                     |
| 0.0963919672534992 AGIWUR12786;AGIWUR16029;AGIWUR16352     |   |          |          |                |         |          |                     |
| CB4856 HS                                                  | V | 12955203 | 12961149 | WBGene00011307 | mpst-7  | R186.6   | -0.0461446662218172 |
| AGIWUR36157                                                |   |          |          |                |         |          |                     |
| CB4856 HS                                                  | V | 12961474 | 12963336 | WBGene00011305 | R186.1  | R186.1   | 0.157564793619754   |
| AGIWUR27464                                                |   |          |          |                |         |          |                     |
| CB4856 HS                                                  | V | 12964376 | 12966022 | WBGene00005113 | srd-35  | R186.2   | 0.0343538073191851  |
| AGIWUR7784;AGIWUR33653;AGIWUR35769;AGIWUR44051;AGIWUR45110 |   |          |          |                |         |          |                     |
| CB4856 HS                                                  | V | 12966000 | 12967210 | WBGene00011306 | R186.3  | R186.3   | 0.184303157495314   |

|                                                                                                            |   |          |          |                |          |          |                     |  |
|------------------------------------------------------------------------------------------------------------|---|----------|----------|----------------|----------|----------|---------------------|--|
| AGIWUR12413                                                                                                |   |          |          |                |          |          |                     |  |
| CB4856 HS                                                                                                  | V | 12967309 | 12967982 | WBGene00011309 | R186.8   | R186.8   | 0.0579396248497606  |  |
| AGIWUR8865;AGIWUR11438;AGIWUR14545;AGIWUR19202;AGIWUR28961;AGIWUR29160;AGIWUR36476;AGIWUR40001;AGIWUR43571 |   |          |          |                |          |          |                     |  |
| CB4856 HS                                                                                                  | V | 12968855 | 12970730 | WBGene00003031 | lin-46   | R186.4   | 0.26298488975576    |  |
| AGIWUR25766                                                                                                |   |          |          |                |          |          |                     |  |
| CB4856 HS                                                                                                  | V | 12971110 | 12973282 | WBGene00011308 | R186.7   | R186.7   | -0.330760512066021  |  |
| AGIWUR34982                                                                                                |   |          |          |                |          |          |                     |  |
| CB4856 HS                                                                                                  | V | 12973261 | 12976704 | WBGene00004793 | shw-3    | R186.5   | 0.108118777850626   |  |
| AGIWUR30708                                                                                                |   |          |          |                |          |          |                     |  |
| CB4856 HS                                                                                                  | V | 12988543 | 12992185 | WBGene00008851 | F15B9.8  | F15B9.8  | 0.0748320437157197  |  |
| AGIWUR9286;AGIWUR19700;AGIWUR20843                                                                         |   |          |          |                |          |          |                     |  |
| CB4856 HS                                                                                                  | V | 12993180 | 12994822 | WBGene00001109 | ds1-7    | F15B9.9  | 0.0445517703617053  |  |
| AGIWUR34207                                                                                                |   |          |          |                |          |          |                     |  |
| CB4856 HS                                                                                                  | V | 12995569 | 12996836 | WBGene00001389 | far-5    | F15B9.3  | -0.0649827322472429 |  |
| AGIWUR5382;AGIWUR7263;AGIWUR41491;AGIWUR45201                                                              |   |          |          |                |          |          |                     |  |
| CB4856 HS                                                                                                  | V | 12996787 | 12997524 | WBGene00001387 | far-3    | F15B9.1  | -0.131208189540628  |  |
| AGIWUR34379                                                                                                |   |          |          |                |          |          |                     |  |
| CB4856 HS                                                                                                  | V | 12998427 | 12999659 | WBGene00001388 | far-4    | F15B9.2  | -0.3648435965394    |  |
| AGIWUR39090                                                                                                |   |          |          |                |          |          |                     |  |
| CB4856 HS                                                                                                  | V | 13002317 | 13006987 | WBGene00008848 | inft-2   | F15B9.4  | 0.145325927050649   |  |
| AGIWUR36918                                                                                                |   |          |          |                |          |          |                     |  |
| CB4856 HS                                                                                                  | V | 13006981 | 13008925 | WBGene00045418 | F15B9.10 | F15B9.10 |                     |  |
| 0.121731518123706 AGIWUR7185                                                                               |   |          |          |                |          |          |                     |  |
| CB4856 HS                                                                                                  | V | 13014144 | 13016641 | WBGene00008850 | F15B9.6  | F15B9.6  | 0.222676674910494   |  |
| AGIWUR13550                                                                                                |   |          |          |                |          |          |                     |  |
| CB4856 HS                                                                                                  | V | 13019068 | 13033373 | WBGene00001475 | fmi-1    | F15B9.7  | 0.0655035394082208  |  |
| AGIWUR21662;AGIWUR42470;AGIWUR43120                                                                        |   |          |          |                |          |          |                     |  |
| CB4856 HS                                                                                                  | V | 13033529 | 13034164 | WBGene00012335 | W07G4.1  | W07G4.1  | -0.0990081938169989 |  |
| AGIWUR6064;AGIWUR28273                                                                                     |   |          |          |                |          |          |                     |  |
| CB4856 HS                                                                                                  | V | 13034267 | 13034704 | WBGene00077565 | W07G4.7  | W07G4.7  | -0.142419579811884  |  |
| AGIWUR11268                                                                                                |   |          |          |                |          |          |                     |  |
| CB4856 HS                                                                                                  | V | 13036996 | 13041879 | WBGene00012337 | W07G4.3  | W07G4.3  | -0.0891795720742206 |  |
| AGIWUR1071;AGIWUR12298;AGIWUR14469;AGIWUR14495;AGIWUR31800;AGIWUR32655;AGIWUR43836                         |   |          |          |                |          |          |                     |  |
| CB4856 HS                                                                                                  | V | 13043712 | 13046355 | WBGene00002250 | lap-2    | W07G4.4  | -0.212031185065289  |  |
| AGIWUR38316                                                                                                |   |          |          |                |          |          |                     |  |
| CB4856 HS                                                                                                  | V | 13047980 | 13049238 | WBGene00012339 | W07G4.5  | W07G4.5  | 0.189673038552431   |  |
| AGIWUR3319                                                                                                 |   |          |          |                |          |          |                     |  |
| CB4856 HS                                                                                                  | V | 13049730 | 13053910 | WBGene00005652 | srr-1    | W07G4.6  | 0.0905363324029942  |  |
| AGIWUR30904                                                                                                |   |          |          |                |          |          |                     |  |

|                                                                                              |   |          |          |                |         |         |                     |
|----------------------------------------------------------------------------------------------|---|----------|----------|----------------|---------|---------|---------------------|
| CB4856 HS                                                                                    | V | 13065461 | 13065794 | WBGene00009631 | F42E8.2 | F42E8.2 | 0.0466784592926146  |
| AGIWUR41554                                                                                  |   |          |          |                |         |         |                     |
| CB4856 HS                                                                                    | V | 13066640 | 13071152 | WBGene00007908 | C34B4.3 | C34B4.3 | 0.187115621683402   |
| AGIWUR9410;AGIWUR40112                                                                       |   |          |          |                |         |         |                     |
| CB4856 HS                                                                                    | V | 13083055 | 13090260 | WBGene00007907 | C34B4.2 | C34B4.2 | 0.107883538901294   |
| AGIWUR14470;AGIWUR23901;AGIWUR38007                                                          |   |          |          |                |         |         |                     |
| CB4856 HS                                                                                    | V | 13089803 | 13092512 | WBGene00007909 | C34B4.4 | C34B4.4 |                     |
| -0.00938234677078009 AGIWUR26382;AGIWUR37670                                                 |   |          |          |                |         |         |                     |
| CB4856 HS                                                                                    | V | 13092666 | 13094446 | WBGene00077698 | lurp-4  | C34B4.7 | 0.137138288212068   |
| AGIWUR5631;AGIWUR11097                                                                       |   |          |          |                |         |         |                     |
| CB4856 HS                                                                                    | V | 13095954 | 13097457 | WBGene00007910 | C34B4.5 | C34B4.5 | -0.349043496702286  |
| AGIWUR38581                                                                                  |   |          |          |                |         |         |                     |
| CB4856 HS                                                                                    | V | 13098910 | 13110337 | WBGene00003143 | max-1   | C34B4.1 | 0.11716126221674    |
| AGIWUR39031                                                                                  |   |          |          |                |         |         |                     |
| CB4856 HS                                                                                    | V | 13116488 | 13120167 | WBGene00007150 | acly-2  | B0365.1 | 0.101077749557952   |
| AGIWUR4217                                                                                   |   |          |          |                |         |         |                     |
| CB4856 HS                                                                                    | V | 13120676 | 13123421 | WBGene00007151 | B0365.2 | B0365.2 | -0.0298906648432107 |
| AGIWUR14820                                                                                  |   |          |          |                |         |         |                     |
| CB4856 HS                                                                                    | V | 13126414 | 13129995 | WBGene00001137 | eat-6   | B0365.3 | -0.166846622431454  |
| AGIWUR190;AGIWUR311;AGIWUR2417;AGIWUR3481;AGIWUR3982;AGIWUR25633;AGIWUR27717;AGIWUR33762     |   |          |          |                |         |         |                     |
| CB4856 HS                                                                                    | V | 13131873 | 13133565 | WBGene00219208 | B0365.9 | B0365.9 | 0.101738786139492   |
| AGIWUR34951                                                                                  |   |          |          |                |         |         |                     |
| CB4856 HS                                                                                    | V | 13134965 | 13138101 | WBGene00007153 | clec-41 | B0365.6 | 0.105659676848228   |
| AGIWUR3662;AGIWUR18488;AGIWUR26592;AGIWUR36559;AGIWUR44784                                   |   |          |          |                |         |         |                     |
| CB4856 HS                                                                                    | V | 13138981 | 13152466 | WBGene00007154 | dhc-3   | B0365.7 | 0.0316571318762757  |
| AGIWUR24444;AGIWUR29005                                                                      |   |          |          |                |         |         |                     |
| CB4856 HS                                                                                    | V | 13152894 | 13176111 | WBGene00011647 | noca-1  | T09E8.1 | -0.0934752028005494 |
| AGIWUR2137;AGIWUR2843;AGIWUR4645;AGIWUR19230;AGIWUR24927;AGIWUR34375;AGIWUR42573;AGIWUR43631 |   |          |          |                |         |         |                     |
| CB4856 HS                                                                                    | V | 13176711 | 13180189 | WBGene00001874 | him-17  | T09E8.2 | 0.133885172365098   |
| AGIWUR42908                                                                                  |   |          |          |                |         |         |                     |
| CB4856 HS                                                                                    | V | 13180330 | 13181534 | WBGene00011648 | cni-1   | T09E8.3 | -0.0778627917792116 |
| AGIWUR7422;AGIWUR16265;AGIWUR18132;AGIWUR37833                                               |   |          |          |                |         |         |                     |
| CB4856 HS                                                                                    | V | 13181580 | 13184237 | WBGene00011649 | T09E8.4 | T09E8.4 | -0.0168009760688737 |
| AGIWUR146                                                                                    |   |          |          |                |         |         |                     |
| CB4856 HS                                                                                    | V | 13185684 | 13187428 | WBGene00005518 | sri-6   | T09E8.5 | -0.044454468092411  |
| AGIWUR29710                                                                                  |   |          |          |                |         |         |                     |
| CB4856 HS                                                                                    | V | 13188025 | 13189406 | WBGene00044199 | F57B1.8 | F57B1.8 | 0.0155326279351602  |
| AGIWUR1263;AGIWUR10046;AGIWUR29953                                                           |   |          |          |                |         |         |                     |
| CB4856 HS                                                                                    | V | 13191707 | 13193538 | WBGene00006311 | sun-1   | F57B1.2 | 0.0648465573752102  |

|                                                                                                |    |   |          |          |                |         |                             |
|------------------------------------------------------------------------------------------------|----|---|----------|----------|----------------|---------|-----------------------------|
| AGIWUR36486                                                                                    |    |   |          |          |                |         |                             |
| CB4856                                                                                         | HS | V | 13193933 | 13195648 | WBGene00010187 | F57B1.1 | F57B1.1 0.125853455993933   |
| AGIWUR12797;AGIWUR18184;AGIWUR21634;AGIWUR24778;AGIWUR26707;AGIWUR39169                        |    |   |          |          |                |         |                             |
| CB4856                                                                                         | HS | V | 13196088 | 13197923 | WBGene00045488 | F57B1.9 | F57B1.9 0.124943640368884   |
| AGIWUR11389;AGIWUR18594;AGIWUR29360;AGIWUR32520;AGIWUR36306;AGIWUR38732                        |    |   |          |          |                |         |                             |
| CB4856                                                                                         | HS | V | 13200982 | 13202192 | WBGene00000733 | col-160 | F57B1.4 0.149216786154124   |
| AGIWUR7499                                                                                     |    |   |          |          |                |         |                             |
| CB4856                                                                                         | HS | V | 13207763 | 13208762 | WBGene00010188 | F57B1.5 | F57B1.5 -0.0898569689521924 |
| AGIWUR35756                                                                                    |    |   |          |          |                |         |                             |
| CB4856                                                                                         | HS | V | 13209645 | 13213462 | WBGene00010189 | F57B1.6 | F57B1.6 -0.027019686951169  |
| AGIWUR3188                                                                                     |    |   |          |          |                |         |                             |
| CB4856                                                                                         | HS | V | 13222620 | 13225941 | WBGene00007929 | dmd-10  | C34D1.1 -0.027091219272398  |
| AGIWUR28168;AGIWUR36450                                                                        |    |   |          |          |                |         |                             |
| CB4856                                                                                         | HS | V | 13236171 | 13236604 | WBGene00007930 | dmd-11  | C34D1.2 0.117963896684689   |
| AGIWUR25121                                                                                    |    |   |          |          |                |         |                             |
| CB4856                                                                                         | HS | V | 13246591 | 13249536 | WBGene00003850 | odr-3   | C34D1.3 -0.112317735662522  |
| AGIWUR520                                                                                      |    |   |          |          |                |         |                             |
| CB4856                                                                                         | HS | V | 13257097 | 13259311 | WBGene00007931 | C34D1.4 | C34D1.4 -0.0857785295142186 |
| AGIWUR26252                                                                                    |    |   |          |          |                |         |                             |
| CB4856                                                                                         | HS | V | 13264546 | 13269820 | WBGene00007932 | zip-5   | C34D1.5 -0.0818496565958604 |
| AGIWUR12576                                                                                    |    |   |          |          |                |         |                             |
| CB4856                                                                                         | HS | V | 13273153 | 13295978 | WBGene00009337 | uig-1   | F32F2.1 0.0738496142296681  |
| AGIWUR6427;AGIWUR10081;AGIWUR10403;AGIWUR16513;AGIWUR18628;AGIWUR19651;AGIWUR21862;AGIWUR43746 |    |   |          |          |                |         |                             |
| CB4856                                                                                         | HS | V | 13297520 | 13298050 | WBGene00007747 | C26E1.1 | C26E1.1 0.222599369806108   |
| AGIWUR35253                                                                                    |    |   |          |          |                |         |                             |
| CB4856                                                                                         | HS | V | 13301652 | 13304785 | WBGene00007749 | ceh-79  | C26E1.3 0.0946970504890601  |
| AGIWUR27287                                                                                    |    |   |          |          |                |         |                             |
| CB4856                                                                                         | HS | V | 13305138 | 13307271 | WBGene00007748 | C26E1.2 | C26E1.2 -0.0917671698966416 |
| AGIWUR24177                                                                                    |    |   |          |          |                |         |                             |
| CB4856                                                                                         | HS | V | 13308916 | 13309423 | WBGene00008217 | C50B6.1 | C50B6.1 -0.111558602988612  |
| AGIWUR2180;AGIWUR7650;AGIWUR34812;AGIWUR42323                                                  |    |   |          |          |                |         |                             |
| CB4856                                                                                         | HS | V | 13310186 | 13312260 | WBGene00008218 | nasp-2  | C50B6.2 0.155064968960524   |
| AGIWUR1780                                                                                     |    |   |          |          |                |         |                             |
| CB4856                                                                                         | HS | V | 13313575 | 13315812 | WBGene00008219 | C50B6.3 | C50B6.3 0.11325735147943    |
| AGIWUR28232                                                                                    |    |   |          |          |                |         |                             |
| CB4856                                                                                         | HS | V | 13318464 | 13320080 | WBGene00005243 | srh-18  | C50B6.5 -0.109040859300441  |
| AGIWUR26672                                                                                    |    |   |          |          |                |         |                             |
| CB4856                                                                                         | HS | V | 13320984 | 13322355 | WBGene00005240 | srh-15  | C50B6.6 0.111072570660845   |
| AGIWUR9319                                                                                     |    |   |          |          |                |         |                             |

|                                                                                                           |                                    |          |                |                 |                             |
|-----------------------------------------------------------------------------------------------------------|------------------------------------|----------|----------------|-----------------|-----------------------------|
| CB4856 HS V                                                                                               | 13322369                           | 13324979 | WBGene00008220 | C50B6.7 C50B6.7 | -0.105628157293687          |
| AGIWUR37223                                                                                               |                                    |          |                |                 |                             |
| CB4856 HS V                                                                                               | 13326339                           | 13327634 | WBGene00014710 | C50B6.13        | C50B6.13                    |
| 0.595404431954649                                                                                         | AGIWUR9436;AGIWUR21227             |          |                |                 |                             |
| CB4856 HS V                                                                                               | 13327763                           | 13328866 | WBGene00006102 | str-37          | C50B6.12                    |
| 0.00148765590412125                                                                                       | AGIWUR41798                        |          |                |                 |                             |
| CB4856 HS V                                                                                               | 13329193                           | 13331019 | WBGene00003719 | nhr-129         | C50B6.14                    |
| -0.042123379560759                                                                                        | AGIWUR41684                        |          |                |                 |                             |
| CB4856 HS V                                                                                               | 13331117                           | 13333871 | WBGene00008221 | nhr-168         | C50B6.8 0.0304944315369502  |
| AGIWUR18922                                                                                               |                                    |          |                |                 |                             |
| CB4856 HS V                                                                                               | 13336369                           | 13337957 | WBGene00008222 | C50B6.9 C50B6.9 | 0.111869732020962           |
| AGIWUR40384                                                                                               |                                    |          |                |                 |                             |
| CB4856 HS V                                                                                               | 13337991                           | 13339718 | WBGene00006072 | str-4           | C50B6.10                    |
| 0.0212167288162144                                                                                        | AGIWUR7313;AGIWUR29755;AGIWUR35114 |          |                |                 |                             |
| CB4856 HS V                                                                                               | 13340240                           | 13343040 | WBGene00008223 | lgc-48          | C50B6.11                    |
| -0.0406625133706635                                                                                       | AGIWUR4680                         |          |                |                 |                             |
| CB4856 HS V                                                                                               | 13346278                           | 13356101 | WBGene00006693 | twk-43          | F32H5.7 0.00772589489502717 |
| AGIWUR1564;AGIWUR6551;AGIWUR16179;AGIWUR26578;AGIWUR32931;AGIWUR33454;AGIWUR35141;AGIWUR37747;AGIWUR40696 |                                    |          |                |                 |                             |
| CB4856 HS V                                                                                               | 13356101                           | 13358079 | WBGene00009347 | F32H5.1 F32H5.1 | 0.250920216621903           |
| AGIWUR3189                                                                                                |                                    |          |                |                 |                             |
| CB4856 HS V                                                                                               | 13359334                           | 13360024 | WBGene00009349 | F32H5.3 F32H5.3 | -0.0338052629794507         |
| AGIWUR33526;AGIWUR33920                                                                                   |                                    |          |                |                 |                             |
| CB4856 HS V                                                                                               | 13361203                           | 13363357 | WBGene00009350 | F32H5.4 F32H5.4 | 0.0965340779894621          |
| AGIWUR693;AGIWUR24348;AGIWUR36416                                                                         |                                    |          |                |                 |                             |
| CB4856 HS V                                                                                               | 13363715                           | 13364728 | WBGene00005203 | srg-46          | F32H5.5 0.169830197056772   |
| AGIWUR23784                                                                                               |                                    |          |                |                 |                             |
| CB4856 HS V                                                                                               | 13367252                           | 13369990 | WBGene00006016 | srx-125         | F32H5.6 0.0694527855669018  |
| AGIWUR7412;AGIWUR9295;AGIWUR12807;AGIWUR17136;AGIWUR28275;AGIWUR43239                                     |                                    |          |                |                 |                             |
| CB4856 HS V                                                                                               | 13370083                           | 13380262 | WBGene00010867 | tag-260         | M04G12.1                    |
| 0.262768940487154                                                                                         | AGIWUR22793                        |          |                |                 |                             |
| CB4856 HS V                                                                                               | 13381189                           | 13383077 | WBGene00000789 | cpz-2           | M04G12.2                    |
| -0.00276590214088301                                                                                      | AGIWUR646;AGIWUR7308;AGIWUR35528   |          |                |                 |                             |
| CB4856 HS V                                                                                               | 13383019                           | 13385898 | WBGene00001554 | gcy-34          | M04G12.3                    |
| 0.0181820675117983                                                                                        | AGIWUR44723                        |          |                |                 |                             |
| CB4856 HS V                                                                                               | 13386065                           | 13391393 | WBGene00010868 | somi-1          | M04G12.4                    |
| 0.0492715500053107                                                                                        | AGIWUR33719;AGIWUR38576            |          |                |                 |                             |
| CB4856 HS V                                                                                               | 13404031                           | 13406014 | WBGene00009979 | cutl-1          | F53F1.1 0.21288731678009    |
| AGIWUR27799                                                                                               |                                    |          |                |                 |                             |
| CB4856 HS V                                                                                               | 13406816                           | 13408265 | WBGene00009980 | F53F1.2 F53F1.2 | 0.228615907930759           |

|                                       |   |            |          |                |         |          |                     |  |
|---------------------------------------|---|------------|----------|----------------|---------|----------|---------------------|--|
| AGIWUR5471                            |   |            |          |                |         |          |                     |  |
| CB4856 HS                             | V | 13408242   | 13409832 | WBGene00009981 | F53F1.3 | F53F1.3  | 0.104272648603542   |  |
| AGIWUR392                             |   |            |          |                |         |          |                     |  |
| CB4856 HS                             | V | 13411077   | 13411717 | WBGene00009982 | F53F1.4 | F53F1.4  | -0.0863079042859898 |  |
| AGIWUR6086; AGIWUR23571               |   |            |          |                |         |          |                     |  |
| CB4856 HS                             | V | 13414902   | 13416121 | WBGene00009983 | cut-2   | F53F1.5  | -0.226674978725626  |  |
| AGIWUR19257                           |   |            |          |                |         |          |                     |  |
| CB4856 HS                             | V | 13416103   | 13417604 | WBGene00009984 | F53F1.6 | F53F1.6  | 0.448294328358486   |  |
| AGIWUR40851                           |   |            |          |                |         |          |                     |  |
| CB4856 HS                             | V | 13419217   | 13420740 | WBGene00005719 | srv-8   | F53F1.7  | 0.187818753097586   |  |
| AGIWUR23144                           |   |            |          |                |         |          |                     |  |
| CB4856 HS                             | V | 13421140   | 13423147 | WBGene00005720 | srv-9   | F53F1.8  | 0.0775143851795388  |  |
| AGIWUR31461                           |   |            |          |                |         |          |                     |  |
| CB4856 HS                             | V | 13423908   | 13425266 | WBGene00005721 | srv-10  | F53F1.9  | 0.325898357750456   |  |
| AGIWUR11420                           |   |            |          |                |         |          |                     |  |
| CB4856 HS                             | V | 13425572   | 13426882 | WBGene00005096 | srd-18  | F53F1.10 |                     |  |
| -0.214125883262796                    |   | AGIWUR9433 |          |                |         |          |                     |  |
| CB4856 HS                             | V | 13430651   | 13432714 | WBGene00005095 | srd-17  | Y2H9A.2  | 0.303127097878235   |  |
| AGIWUR19936; AGIWUR39164              |   |            |          |                |         |          |                     |  |
| CB4856 HS                             | V | 13433050   | 13437545 | WBGene00003222 | mes-4   | Y2H9A.1  | 0.030941826251202   |  |
| AGIWUR3310; AGIWUR3946; AGIWUR40132   |   |            |          |                |         |          |                     |  |
| CB4856 HS                             | V | 13445745   | 13448815 | WBGene00012381 | Y2H9A.4 | Y2H9A.4  | 0.102076378766208   |  |
| AGIWUR16927                           |   |            |          |                |         |          |                     |  |
| CB4856 HS                             | V | 13451197   | 13452968 | WBGene00014744 | F25H9.9 | F25H9.9  | -0.0181868159974456 |  |
| AGIWUR18861; AGIWUR19729              |   |            |          |                |         |          |                     |  |
| CB4856 HS                             | V | 13453634   | 13455447 | WBGene00009134 | lurp-2  | F25H9.1  | -0.178014045140947  |  |
| AGIWUR10925                           |   |            |          |                |         |          |                     |  |
| CB4856 HS                             | V | 13455748   | 13457506 | WBGene00009136 | lurp-3  | F25H9.3  | -0.0126925719420079 |  |
| AGIWUR12404                           |   |            |          |                |         |          |                     |  |
| CB4856 HS                             | V | 13458083   | 13459504 | WBGene00009135 | F25H9.2 | F25H9.2  | -0.0161198383860945 |  |
| AGIWUR44437                           |   |            |          |                |         |          |                     |  |
| CB4856 HS                             | V | 13459525   | 13461803 | WBGene00009137 | bath-39 | F25H9.4  | -0.0728919790075189 |  |
| AGIWUR26645; AGIWUR30359; AGIWUR38033 |   |            |          |                |         |          |                     |  |
| CB4856 HS                             | V | 13463128   | 13467131 | WBGene00001496 | frm-10  | F25H9.5  | -0.0937126765730074 |  |
| AGIWUR33216                           |   |            |          |                |         |          |                     |  |
| CB4856 HS                             | V | 13466924   | 13468361 | WBGene00009138 | F25H9.6 | F25H9.6  | 0.0139041576892591  |  |
| AGIWUR32693                           |   |            |          |                |         |          |                     |  |
| CB4856 HS                             | V | 13468376   | 13469087 | WBGene00009139 | F25H9.7 | F25H9.7  | 0.0671380396617849  |  |
| AGIWUR43654                           |   |            |          |                |         |          |                     |  |



|                                                                                                |   |                                                                        |          |                |          |          |                     |
|------------------------------------------------------------------------------------------------|---|------------------------------------------------------------------------|----------|----------------|----------|----------|---------------------|
| CB4856 HS                                                                                      | V | 13469066                                                               | 13473679 | WBGene00011692 | T10G3.1  | T10G3.1  | 0.415450401648111   |
| AGIWUR7241                                                                                     |   |                                                                        |          |                |          |          |                     |
| CB4856 HS                                                                                      | V | 13474228                                                               | 13476382 | WBGene00045340 | T10G3.8  | T10G3.8  | -0.0945461251168771 |
| AGIWUR14677;AGIWUR41060                                                                        |   |                                                                        |          |                |          |          |                     |
| CB4856 HS                                                                                      | V | 13477384                                                               | 13479858 | WBGene00011693 | T10G3.2  | T10G3.2  | 0.0370693742953989  |
| AGIWUR8086;AGIWUR22954                                                                         |   |                                                                        |          |                |          |          |                     |
| CB4856 HS                                                                                      | V | 13482075                                                               | 13484435 | WBGene00011695 | T10G3.4  | T10G3.4  | 0.0640158094570307  |
| AGIWUR35537                                                                                    |   |                                                                        |          |                |          |          |                     |
| CB4856 HS                                                                                      | V | 13487026                                                               | 13489626 | WBGene00011694 | T10G3.3  | T10G3.3  | -0.0113786759011685 |
| AGIWUR26800                                                                                    |   |                                                                        |          |                |          |          |                     |
| CB4856 HS                                                                                      | V | 13491068                                                               | 13497372 | WBGene00011696 | eea-1    | T10G3.5  | -0.0602242206077443 |
| AGIWUR8015;AGIWUR12733;AGIWUR12749;AGIWUR19148;AGIWUR20934;AGIWUR24622;AGIWUR29618;AGIWUR33391 |   |                                                                        |          |                |          |          |                     |
| CB4856 HS                                                                                      | V | 13497690                                                               | 13498819 | WBGene00001808 | gut-2    | T10G3.6  |                     |
| -0.00906366921551438                                                                           |   | AGIWUR7892;AGIWUR22967;AGIWUR32644;AGIWUR40313;AGIWUR43259;AGIWUR44390 |          |                |          |          |                     |
| CB4856 HS                                                                                      | V | 13498786                                                               | 13511718 | WBGene00000233 | avr-15   | R11G10.1 |                     |
| 0.273052694910199                                                                              |   | AGIWUR30125;AGIWUR36531;AGIWUR42208                                    |          |                |          |          |                     |
| CB4856 HS                                                                                      | V | 13511905                                                               | 13515215 | WBGene00011249 | R11G10.2 |          | R11G10.2            |
| 0.0185517321167623                                                                             |   | AGIWUR5998;AGIWUR9152;AGIWUR37805                                      |          |                |          |          |                     |
| CB4856 HS                                                                                      | V | 13523530                                                               | 13529658 | WBGene00044045 | R11G10.3 |          | R11G10.3            |
| -0.0339036478278993                                                                            |   | AGIWUR15842;AGIWUR24465                                                |          |                |          |          |                     |
| CB4856 HS                                                                                      | V | 13529562                                                               | 13530744 | WBGene00008341 | ttr-44   | C56A3.2  | -0.313146569014251  |
| AGIWUR16445                                                                                    |   |                                                                        |          |                |          |          |                     |
| CB4856 HS                                                                                      | V | 13531743                                                               | 13536105 | WBGene00008342 | frpr-5   | C56A3.3  | 0.133373806276682   |
| AGIWUR41300                                                                                    |   |                                                                        |          |                |          |          |                     |
| CB4856 HS                                                                                      | V | 13550520                                                               | 13551810 | WBGene00008343 | C56A3.4  | C56A3.4  | -0.262739203050991  |
| AGIWUR30441;AGIWUR34820;AGIWUR37682;AGIWUR38750                                                |   |                                                                        |          |                |          |          |                     |
| CB4856 HS                                                                                      | V | 13551911                                                               | 13553373 | WBGene00008344 | C56A3.5  | C56A3.5  | 0.0966380049986899  |
| AGIWUR15348                                                                                    |   |                                                                        |          |                |          |          |                     |
| CB4856 HS                                                                                      | V | 13553374                                                               | 13556408 | WBGene00008345 | C56A3.6  | C56A3.6  | -0.176038973033549  |
| AGIWUR25755                                                                                    |   |                                                                        |          |                |          |          |                     |
| CB4856 HS                                                                                      | V | 13557104                                                               | 13559922 | WBGene00000302 | cav-2    | C56A3.7  | 0.106892467198895   |
| AGIWUR36224                                                                                    |   |                                                                        |          |                |          |          |                     |
| CB4856 HS                                                                                      | V | 13560278                                                               | 13561992 | WBGene00008346 | C56A3.8  | C56A3.8  | 0.0809697064311177  |
| AGIWUR2902;AGIWUR12612;AGIWUR22047                                                             |   |                                                                        |          |                |          |          |                     |
| CB4856 HS                                                                                      | V | 13562105                                                               | 13563913 | WBGene00001726 | gr1-17   | C56A3.1  | 1.09533308901187    |
| AGIWUR20018                                                                                    |   |                                                                        |          |                |          |          |                     |
| CB4856 HS                                                                                      | V | 13565863                                                               | 13566968 | WBGene00008224 | C50B8.1  | C50B8.1  |                     |
| -0.00522912309020818                                                                           |   | AGIWUR40609                                                            |          |                |          |          |                     |
| CB4856 HS                                                                                      | V | 13566931                                                               | 13568657 | WBGene00008225 | nuaf-1   | C50B8.3  | -0.163652347428249  |

|                                                                        |   |                         |          |                |          |         |                     |
|------------------------------------------------------------------------|---|-------------------------|----------|----------------|----------|---------|---------------------|
| AGIWUR31957                                                            |   |                         |          |                |          |         |                     |
| CB4856 HS                                                              | V | 13568850                | 13570030 | WBGene00000250 | bir-2    | C50B8.2 | 0.144261234522617   |
| AGIWUR40461                                                            |   |                         |          |                |          |         |                     |
| CB4856 HS                                                              | V | 13572037                | 13573423 | WBGene00008226 | C50B8.4  | C50B8.4 | 0.00791958882653176 |
| AGIWUR13777                                                            |   |                         |          |                |          |         |                     |
| CB4856 HS                                                              | V | 13578972                | 13580807 | WBGene00008228 | C50B8.6  | C50B8.6 | -0.179839676877322  |
| AGIWUR10703                                                            |   |                         |          |                |          |         |                     |
| CB4856 HS                                                              | V | 13580993                | 13584643 | WBGene00008227 | C50B8.5  | C50B8.5 | 0.149388121802837   |
| AGIWUR40816                                                            |   |                         |          |                |          |         |                     |
| CB4856 HS                                                              | V | 13584903                | 13585369 | WBGene00009985 | F53F4.1  | F53F4.1 | -0.13788750496832   |
| AGIWUR26165                                                            |   |                         |          |                |          |         |                     |
| CB4856 HS                                                              | V | 13588206                | 13588479 | WBGene00045195 | F53F4.17 |         | F53F4.17            |
| 0.0620831314795183                                                     |   | AGIWUR30395             |          |                |          |         |                     |
| CB4856 HS                                                              | V | 13588612                | 13589585 | WBGene00009986 | F53F4.2  | F53F4.2 | 0.212220073950688   |
| AGIWUR10582                                                            |   |                         |          |                |          |         |                     |
| CB4856 HS                                                              | V | 13592124                | 13593183 | WBGene00009987 | tbcb-1   | F53F4.3 | 0.0125568903631681  |
| AGIWUR11278;AGIWUR24957;AGIWUR31578;AGIWUR38807                        |   |                         |          |                |          |         |                     |
| CB4856 HS                                                              | V | 13593383                | 13598269 | WBGene00009988 | F53F4.4  | F53F4.4 | -0.0327585723180039 |
| AGIWUR5440;AGIWUR29243;AGIWUR30894                                     |   |                         |          |                |          |         |                     |
| CB4856 HS                                                              | V | 13598331                | 13600982 | WBGene00004328 | rdy-2    | F53F4.6 | 0.196302147801022   |
| AGIWUR10827                                                            |   |                         |          |                |          |         |                     |
| CB4856 HS                                                              | V | 13603276                | 13606701 | WBGene00001479 | fmo-4    | F53F4.5 | 0.14346399030534    |
| AGIWUR8267;AGIWUR11593;AGIWUR14457;AGIWUR15870;AGIWUR23166;AGIWUR32253 |   |                         |          |                |          |         |                     |
| CB4856 HS                                                              | V | 13611337                | 13611888 | WBGene00009995 | F53F4.13 |         | F53F4.13            |
| 0.247083258247645                                                      |   | AGIWUR23892             |          |                |          |         |                     |
| CB4856 HS                                                              | V | 13612439                | 13613979 | WBGene00009990 | F53F4.7  | F53F4.7 | 0.179666808201281   |
| AGIWUR7953;AGIWUR24081;AGIWUR27468;AGIWUR28108;AGIWUR31833;AGIWUR33916 |   |                         |          |                |          |         |                     |
| CB4856 HS                                                              | V | 13614236                | 13617723 | WBGene00009991 | F53F4.8  | F53F4.8 | 0.349774491111331   |
| AGIWUR14887                                                            |   |                         |          |                |          |         |                     |
| CB4856 HS                                                              | V | 13617851                | 13619686 | WBGene00005089 | srd-11   | F53F4.9 | -0.126327745664955  |
| AGIWUR30493                                                            |   |                         |          |                |          |         |                     |
| CB4856 HS                                                              | V | 13620976                | 13621459 | WBGene00009997 | F53F4.15 |         | F53F4.15            |
| 0.118948805847834                                                      |   | AGIWUR2105              |          |                |          |         |                     |
| CB4856 HS                                                              | V | 13621371                | 13621820 | WBGene00023419 | F53F4.16 |         | F53F4.16            |
| -0.00129250501186107                                                   |   | AGIWUR33852;AGIWUR39333 |          |                |          |         |                     |
| CB4856 HS                                                              | V | 13622107                | 13624525 | WBGene00009993 | F53F4.11 |         | F53F4.11            |
| -0.0075449414902522                                                    |   | AGIWUR5780              |          |                |          |         |                     |
| CB4856 HS                                                              | V | 13626031                | 13627482 | WBGene00009994 | F53F4.12 |         | F53F4.12            |
| 0.112587795921321                                                      |   | AGIWUR9467              |          |                |          |         |                     |

|                                                                         |                                                                                                          |          |                |                                     |          |
|-------------------------------------------------------------------------|----------------------------------------------------------------------------------------------------------|----------|----------------|-------------------------------------|----------|
| CB4856 HS V                                                             | 13627573                                                                                                 | 13629831 | WBGene00009996 | F53F4.14                            | F53F4.14 |
| 0.261214406745815                                                       | AGIWUR9184                                                                                               |          |                |                                     |          |
| CB4856 HS V                                                             | 13629798                                                                                                 | 13634220 | WBGene00010426 | H37A05.2                            | H37A05.2 |
| 0.416998076598926                                                       | AGIWUR38170                                                                                              |          |                |                                     |          |
| CB4856 HS V                                                             | 13646884                                                                                                 | 13648397 | WBGene00044200 | H37A05.4                            | H37A05.4 |
| 0.140247225762142                                                       | AGIWUR575;AGIWUR1900;AGIWUR15836;AGIWUR21231;AGIWUR35946;AGIWUR38688;AGIWUR44826                         |          |                |                                     |          |
| CB4856 HS V                                                             | 13650262                                                                                                 | 13654129 | WBGene00010425 | lpin-1 H37A05.1                     |          |
| 0.174413891418041                                                       |                                                                                                          |          |                |                                     |          |
|                                                                         | AGIWUR2643;AGIWUR4507;AGIWUR9267;AGIWUR16504;AGIWUR18966;AGIWUR23328;AGIWUR29667;AGIWUR30580;AGIWUR31663 |          |                |                                     |          |
| CB4856 HS V                                                             | 13661261                                                                                                 | 13664233 | WBGene00010279 | letm-1 F58G11.1                     |          |
| 0.132494012293137                                                       | AGIWUR2941                                                                                               |          |                |                                     |          |
| CB4856 HS V                                                             | 13665397                                                                                                 | 13669292 | WBGene00010280 | rde-12 F58G11.2                     |          |
| -0.311681349325776                                                      | AGIWUR4244;AGIWUR13280;AGIWUR18784;AGIWUR25411;AGIWUR28193;AGIWUR32694;AGIWUR43200                       |          |                |                                     |          |
| CB4856 HS V                                                             | 13669353                                                                                                 | 13671958 | WBGene00010281 | F58G11.3                            | F58G11.3 |
| 0.390197704353415                                                       | AGIWUR7764                                                                                               |          |                |                                     |          |
| CB4856 HS V                                                             | 13672597                                                                                                 | 13676024 | WBGene00010282 | F58G11.4                            | F58G11.4 |
| 0.124747422167842                                                       | AGIWUR45194                                                                                              |          |                |                                     |          |
| CB4856 HS V                                                             | 13675988                                                                                                 | 13678598 | WBGene00006442 | tag-65 F58G11.5                     |          |
| 0.185016026992146                                                       | AGIWUR25787;AGIWUR34042;AGIWUR42886                                                                      |          |                |                                     |          |
| CB4856 HS V                                                             | 13678875                                                                                                 | 13681539 | WBGene00010283 | ccz-1 F58G11.6                      |          |
| 0.108813437522544                                                       | AGIWUR38090                                                                                              |          |                |                                     |          |
| CB4856 HS V                                                             | 13689892                                                                                                 | 13703330 | WBGene00011326 | T01D3.1 T01D3.1 0.00817193608866962 |          |
| AGIWUR6558;AGIWUR11831;AGIWUR40023                                      |                                                                                                          |          |                |                                     |          |
| CB4856 HS V                                                             | 13704929                                                                                                 | 13711085 | WBGene00011328 | T01D3.3 T01D3.3 0.0673281704572188  |          |
| AGIWUR15077;AGIWUR42302                                                 |                                                                                                          |          |                |                                     |          |
| CB4856 HS V                                                             | 13712854                                                                                                 | 13716624 | WBGene00011329 | zipt-9 T01D3.5 0.0384609441356272   |          |
| AGIWUR16842;AGIWUR19607                                                 |                                                                                                          |          |                |                                     |          |
| CB4856 HS V                                                             | 13716824                                                                                                 | 13720402 | WBGene00011330 | T01D3.6 T01D3.6 0.0149464315862065  |          |
| AGIWUR15921;AGIWUR25854;AGIWUR27027;AGIWUR29108;AGIWUR29892;AGIWUR30923 |                                                                                                          |          |                |                                     |          |
| CB4856 HS V                                                             | 13721249                                                                                                 | 13722196 | WBGene00009425 | sc1-16 F35E12.1                     |          |
| 0.128120394106746                                                       | AGIWUR6100                                                                                               |          |                |                                     |          |
| CB4856 HS V                                                             | 13722254                                                                                                 | 13724881 | WBGene00009426 | F35E12.2                            | F35E12.2 |
| 0.196554515416604                                                       | AGIWUR16340                                                                                              |          |                |                                     |          |
| CB4856 HS V                                                             | 13725905                                                                                                 | 13727014 | WBGene00009427 | fbxa-181                            | F35E12.3 |
| -0.0907144728650238                                                     | AGIWUR28078                                                                                              |          |                |                                     |          |
| CB4856 HS V                                                             | 13727763                                                                                                 | 13730776 | WBGene00009431 | dct-17 F35E12.7                     |          |
| 0.135066248335461                                                       | AGIWUR32743                                                                                              |          |                |                                     |          |
| CB4856 HS V                                                             | 13731506                                                                                                 | 13733387 | WBGene00009428 | F35E12.4                            | F35E12.4 |
| 0.535616978791586                                                       | AGIWUR23886                                                                                              |          |                |                                     |          |

|                                                                                                                   |                                    |          |                |           |                             |
|-------------------------------------------------------------------------------------------------------------------|------------------------------------|----------|----------------|-----------|-----------------------------|
| CB4856 HS V                                                                                                       | 13734118                           | 13736247 | WBGene00009430 | F35E12.6  | F35E12.6                    |
| 0.196800632798691                                                                                                 | AGIWUR2036                         |          |                |           |                             |
| CB4856 HS V                                                                                                       | 13737007                           | 13738474 | WBGene00009429 | irg-5     | F35E12.5                    |
| 0.0126752350209216                                                                                                | AGIWUR30275                        |          |                |           |                             |
| CB4856 HS V                                                                                                       | 13741321                           | 13745127 | WBGene00009433 | F35E12.9  | F35E12.9                    |
| -0.186286015910155                                                                                                | AGIWUR35609;AGIWUR36025            |          |                |           |                             |
| CB4856 HS V                                                                                                       | 13745696                           | 13748758 | WBGene00009434 | F35E12.10 | F35E12.10                   |
| 0.102662599485331                                                                                                 | AGIWUR6787                         |          |                |           |                             |
| CB4856 HS V                                                                                                       | 13749181                           | 13751972 | WBGene00009432 | cld-9     | F35E12.8                    |
| -0.110640065797719                                                                                                | AGIWUR25822                        |          |                |           |                             |
| CB4856 HS V                                                                                                       | 13755011                           | 13756409 | WBGene00008986 | F20G2.2   | F20G2.2 0.0311995939775791  |
| AGIWUR38701                                                                                                       |                                    |          |                |           |                             |
| CB4856 HS V                                                                                                       | 13758090                           | 13759945 | WBGene00044920 | F20G2.7   | F20G2.7 -0.0204158757576725 |
| AGIWUR6299;AGIWUR17995;AGIWUR22254;AGIWUR33333;AGIWUR37779;AGIWUR44262                                            |                                    |          |                |           |                             |
| CB4856 HS V                                                                                                       | 13763077                           | 13765980 | WBGene00008989 | F20G2.6   | F20G2.6 0.00449640260517192 |
| AGIWUR30925                                                                                                       |                                    |          |                |           |                             |
| CB4856 HS V                                                                                                       | 13765926                           | 13768552 | WBGene00008987 | F20G2.3   | F20G2.3 -0.258741321518524  |
| AGIWUR23110                                                                                                       |                                    |          |                |           |                             |
| CB4856 HS V                                                                                                       | 13769669                           | 13771279 | WBGene00003543 | nas-24    | F20G2.4 -0.322371296117137  |
| AGIWUR9822                                                                                                        |                                    |          |                |           |                             |
| CB4856 HS V                                                                                                       | 13771508                           | 13773695 | WBGene00008988 | F20G2.5   | F20G2.5 0.112577668935796   |
| AGIWUR967;AGIWUR2052;AGIWUR2758;AGIWUR5251;AGIWUR8818;AGIWUR31389;AGIWUR32219;AGIWUR33248;AGIWUR34200;AGIWUR38036 |                                    |          |                |           |                             |
| CB4856 HS V                                                                                                       | 13775751                           | 13777767 | WBGene00009971 | F53C11.1  | F53C11.1                    |
| 0.232985522030724                                                                                                 | AGIWUR41401                        |          |                |           |                             |
| CB4856 HS V                                                                                                       | 13778015                           | 13778592 | WBGene00044921 | F53C11.9  | F53C11.9                    |
| -0.00625446676420083                                                                                              | AGIWUR658;AGIWUR7729;AGIWUR17506   |          |                |           |                             |
| CB4856 HS V                                                                                                       | 13778633                           | 13781625 | WBGene00009972 | oac-33    | F53C11.2                    |
| 0.0720877775396627                                                                                                | AGIWUR43622                        |          |                |           |                             |
| CB4856 HS V                                                                                                       | 13782399                           | 13784102 | WBGene00009973 | F53C11.3  | F53C11.3                    |
| -0.270153692498509                                                                                                | AGIWUR21156                        |          |                |           |                             |
| CB4856 HS V                                                                                                       | 13784095                           | 13787712 | WBGene00009974 | F53C11.4  | F53C11.4                    |
| -0.0265812892297657                                                                                               | AGIWUR6856;AGIWUR16078;AGIWUR17928 |          |                |           |                             |
| CB4856 HS V                                                                                                       | 13787536                           | 13796254 | WBGene00009975 | F53C11.5  | F53C11.5                    |
| 0.0824150225911264                                                                                                | AGIWUR14374                        |          |                |           |                             |
| CB4856 HS V                                                                                                       | 13796641                           | 13800577 | WBGene00006684 | twk-32    | F53C11.6                    |
| 0.0378820479224009                                                                                                | AGIWUR19031                        |          |                |           |                             |
| CB4856 HS V                                                                                                       | 13800976                           | 13804282 | WBGene00009976 | swan-2    | F53C11.7                    |
| 0.0151812071027457                                                                                                | AGIWUR2857                         |          |                |           |                             |

|                                                             |                                                                                 |          |                |           |          |                     |
|-------------------------------------------------------------|---------------------------------------------------------------------------------|----------|----------------|-----------|----------|---------------------|
| CB4856 HS V                                                 | 13804395                                                                        | 13807237 | WBGene00009977 | swan-1    | F53C11.8 |                     |
| 0.0991051589520575                                          | AGIWUR2829;AGIWUR14332;AGIWUR14646;AGIWUR26673;AGIWUR34285;AGIWUR41780          |          |                |           |          |                     |
| CB4856 HS V                                                 | 13813309                                                                        | 13815272 | WBGene00000447 | ceh-24    | F55B12.1 |                     |
| -0.221743431491811                                          | AGIWUR29993                                                                     |          |                |           |          |                     |
| CB4856 HS V                                                 | 13815374                                                                        | 13816977 | WBGene00010088 | F55B12.2  |          | F55B12.2            |
| 0.0829336443522566                                          | AGIWUR6477                                                                      |          |                |           |          |                     |
| CB4856 HS V                                                 | 13818132                                                                        | 13822980 | WBGene00004767 | sel-10    | F55B12.3 |                     |
| -0.0801312591248031                                         | AGIWUR41;AGIWUR9842;AGIWUR13814;AGIWUR27608;AGIWUR34431;AGIWUR37471;AGIWUR39533 |          |                |           |          |                     |
| CB4856 HS V                                                 | 13823052                                                                        | 13825222 | WBGene00010089 | hpo-31    | F55B12.4 |                     |
| 0.0921697652989839                                          | AGIWUR17921;AGIWUR28404;AGIWUR28902;AGIWUR39706                                 |          |                |           |          |                     |
| CB4856 HS V                                                 | 13828208                                                                        | 13831040 | WBGene00003812 | nrf-5     | F55B12.5 |                     |
| 0.014242348666798                                           | AGIWUR14186                                                                     |          |                |           |          |                     |
| CB4856 HS V                                                 | 13831113                                                                        | 13832905 | WBGene00006210 | str-165   | F55B12.6 |                     |
| 0.130184014398406                                           | AGIWUR23102                                                                     |          |                |           |          |                     |
| CB4856 HS V                                                 | 13834251                                                                        | 13836581 | WBGene00006020 | srx-129   | F55B12.9 |                     |
| -0.107668818927006                                          | AGIWUR19811;AGIWUR37331                                                         |          |                |           |          |                     |
| CB4856 HS V                                                 | 13837473                                                                        | 13838682 | WBGene00006019 | srx-128   | F55B12.7 |                     |
| 0.269258979272187                                           | AGIWUR22941                                                                     |          |                |           |          |                     |
| CB4856 HS V                                                 | 13839769                                                                        | 13840281 | WBGene00077439 | F55B12.10 |          | F55B12.10           |
| -0.0175729565340674                                         | AGIWUR14927;AGIWUR31593;AGIWUR32913;AGIWUR36567;AGIWUR37092                     |          |                |           |          |                     |
| CB4856 HS V                                                 | 13840741                                                                        | 13842187 | WBGene00005908 | srx-17    | F55B12.8 |                     |
| -0.0618516087129652                                         | AGIWUR16351                                                                     |          |                |           |          |                     |
| CB4856 HS V                                                 | 13843447                                                                        | 13844962 | WBGene00006021 | srx-130   | F09F3.1  | -0.0438151137065983 |
| AGIWUR12608;AGIWUR12670;AGIWUR20875;AGIWUR44651             |                                                                                 |          |                |           |          |                     |
| CB4856 HS V                                                 | 13845436                                                                        | 13846727 | WBGene00006022 | srx-131   | F09F3.2  | -0.0418685333122539 |
| AGIWUR14507                                                 |                                                                                 |          |                |           |          |                     |
| CB4856 HS V                                                 | 13847230                                                                        | 13848414 | WBGene00006023 | srx-132   | F09F3.3  | -0.0146602263630644 |
| AGIWUR7957                                                  |                                                                                 |          |                |           |          |                     |
| CB4856 HS V                                                 | 13848679                                                                        | 13849969 | WBGene00006024 | srx-133   | F09F3.4  | -0.16826466486812   |
| AGIWUR2081                                                  |                                                                                 |          |                |           |          |                     |
| CB4856 HS V                                                 | 13850470                                                                        | 13853199 | WBGene00008627 | F09F3.5   | F09F3.5  | 0.0287610321607765  |
| AGIWUR16921                                                 |                                                                                 |          |                |           |          |                     |
| CB4856 HS V                                                 | 13853834                                                                        | 13855260 | WBGene00008628 | ttr-21    | F09F3.6  | -0.281149937391339  |
| AGIWUR29376;AGIWUR31698;AGIWUR33752;AGIWUR34397;AGIWUR39923 |                                                                                 |          |                |           |          |                     |
| CB4856 HS V                                                 | 13854878                                                                        | 13856476 | WBGene00006025 | srx-134   | F09F3.7  | -0.238132986301496  |
| AGIWUR3077                                                  |                                                                                 |          |                |           |          |                     |
| CB4856 HS V                                                 | 13857448                                                                        | 13858942 | WBGene00006027 | srx-136   | F09F3.12 |                     |
| -0.0457355779833071                                         | AGIWUR12174;AGIWUR19548;AGIWUR37830                                             |          |                |           |          |                     |
| CB4856 HS V                                                 | 13859301                                                                        | 13861321 | WBGene00006026 | srx-135   | F09F3.11 |                     |

|                                              |             |          |  |                |          |                             |
|----------------------------------------------|-------------|----------|--|----------------|----------|-----------------------------|
| 0.721556596356713                            | AGIWUR21897 |          |  | WBGene00006028 | srx-137  | F09F3.13                    |
| CB4856 HS V                                  | 13862805    | 13864110 |  |                |          |                             |
| -0.20602889969294                            | AGIWUR21439 |          |  | WBGene00008630 | nhr-175  | F09F3.10                    |
| CB4856 HS V                                  | 13866706    | 13868473 |  |                |          |                             |
| 0.0972087084427837                           | AGIWUR37589 |          |  | WBGene00014732 | F09F3.8  | F09F3.8 -0.321867615838506  |
| CB4856 HS V                                  | 13869888    | 13872529 |  |                |          |                             |
| AGIWUR18228                                  |             |          |  | WBGene00008629 | cpt-5    | F09F3.9 0.371164646767017   |
| CB4856 HS V                                  | 13873153    | 13875891 |  |                |          |                             |
| AGIWUR27803                                  |             |          |  | WBGene00011929 | T22G5.1  | T22G5.1 -0.47294132607969   |
| CB4856 HS V                                  | 13876837    | 13877949 |  |                |          |                             |
| AGIWUR38579                                  |             |          |  | WBGene00002259 | lbp-7    | T22G5.2 0.33652421706757    |
| CB4856 HS V                                  | 13879552    | 13880213 |  |                |          |                             |
| AGIWUR5469                                   |             |          |  | WBGene00011930 | T22G5.3  | T22G5.3 -0.0415605883640531 |
| CB4856 HS V                                  | 13880908    | 13883937 |  |                |          |                             |
| AGIWUR10007                                  |             |          |  | WBGene00011931 | srsx-19  | T22G5.4 0.0785402250401841  |
| CB4856 HS V                                  | 13887658    | 13889458 |  |                |          |                             |
| AGIWUR39026                                  |             |          |  | WBGene00004997 | spp-12   | T22G5.7 0.251457826159424   |
| CB4856 HS V                                  | 13889918    | 13890295 |  |                |          |                             |
| AGIWUR10860                                  |             |          |  | WBGene00002260 | lbp-8    | T22G5.6 0.199120267752965   |
| CB4856 HS V                                  | 13890679    | 13891364 |  |                |          |                             |
| AGIWUR7757;AGIWUR22889                       |             |          |  | WBGene00011932 | spt1-3   | T22G5.5 0.35883653550006    |
| CB4856 HS V                                  | 13893325    | 13896405 |  |                |          |                             |
| AGIWUR2196;AGIWUR2376;AGIWUR4449;AGIWUR23193 |             |          |  | WBGene00007362 | cyp-35C1 | C06B3.3                     |
| CB4856 HS V                                  | 13896663    | 13898488 |  |                |          |                             |
| -0.14925195055539                            | AGIWUR23062 |          |  | WBGene00007361 | oac-3    | C06B3.2 -0.19591774893298   |
| CB4856 HS V                                  | 13899513    | 13902653 |  |                |          |                             |
| AGIWUR19326;AGIWUR20418;AGIWUR25380          |             |          |  | WBGene00007360 | C06B3.1  | C06B3.1 -0.441386947351722  |
| CB4856 HS V                                  | 13902795    | 13903886 |  |                |          |                             |
| AGIWUR38921                                  |             |          |  | WBGene00007364 | stdh-3   | C06B3.5 -0.159960836466826  |
| CB4856 HS V                                  | 13904611    | 13905996 |  |                |          |                             |
| AGIWUR33232                                  |             |          |  | WBGene00007363 | stdh-1   | C06B3.4 0.0989308595559883  |
| CB4856 HS V                                  | 13906492    | 13908135 |  |                |          |                             |
| AGIWUR6267                                   |             |          |  | WBGene00007365 | C06B3.6  | C06B3.6 0.100770404689076   |
| CB4856 HS V                                  | 13908133    | 13909513 |  |                |          |                             |
| AGIWUR1890                                   |             |          |  | WBGene00007366 | C06B3.7  | C06B3.7 -0.0350133976069191 |
| CB4856 HS V                                  | 13909686    | 13911524 |  |                |          |                             |
| AGIWUR10558                                  |             |          |  | WBGene00001552 | gcy-32   | C06B3.8 0.0939361263338361  |
| CB4856 HS V                                  | 13912080    | 13915436 |  |                |          |                             |
| AGIWUR43888                                  |             |          |  |                |          |                             |

|                      |                                     |          |                |                   |                    |
|----------------------|-------------------------------------|----------|----------------|-------------------|--------------------|
| CB4856 HS V          | 13916496                            | 13918051 | WBGene00006278 | str-252 C06B3.9   | 0.0541714379039862 |
| AGIWUR25893          |                                     |          |                |                   |                    |
| CB4856 HS V          | 13918641                            | 13920032 | WBGene00006277 | str-250 C06B3.10  |                    |
| -0.00121374243168937 | AGIWUR13257                         |          |                |                   |                    |
| CB4856 HS V          | 13921030                            | 13922404 | WBGene00005933 | srx-42 C06B3.11   |                    |
| 1.33001221309099     | AGIWUR21430;AGIWUR25384             |          |                |                   |                    |
| CB4856 HS V          | 13924151                            | 13925807 | WBGene00044114 | srxa-11 C06B3.12  |                    |
| -0.0848685105118432  | AGIWUR25293;AGIWUR27699             |          |                |                   |                    |
| CB4856 HS V          | 13926698                            | 13929320 | WBGene00044115 | srxa-12 C06B3.13  |                    |
| 0.103949905994499    | AGIWUR29606;AGIWUR36139;AGIWUR41790 |          |                |                   |                    |
| CB4856 HS V          | 13929803                            | 13931252 | WBGene00044116 | srxa-13 C06B3.14  |                    |
| 0.0724332425995815   | AGIWUR11485;AGIWUR26810             |          |                |                   |                    |
| CB4856 HS V          | 13931525                            | 13932198 | WBGene00189947 | C06B3.16          | C06B3.16           |
| 0.108106125647446    | AGIWUR3507                          |          |                |                   |                    |
| CB4856 HS V          | 13932575                            | 13934645 | WBGene00011185 | R10D12.1          | R10D12.1           |
| 0.119848186062438    | AGIWUR1456                          |          |                |                   |                    |
| CB4856 HS V          | 13937223                            | 13939602 | WBGene00011197 | srw-145 R10D12.17 |                    |
| -0.0830237074311775  | AGIWUR27930                         |          |                |                   |                    |
| CB4856 HS V          | 13940139                            | 13942182 | WBGene00001062 | dpr-1 R10D12.2    |                    |
| -0.325106766351931   | AGIWUR18986                         |          |                |                   |                    |
| CB4856 HS V          | 13943462                            | 13944589 | WBGene00006018 | srx-127 R10D12.3  |                    |
| -0.0305922089261941  | AGIWUR28843                         |          |                |                   |                    |
| CB4856 HS V          | 13945248                            | 13946485 | WBGene00005901 | srx-10 R10D12.4   |                    |
| 0.129490578449549    | AGIWUR36137                         |          |                |                   |                    |
| CB4856 HS V          | 13946969                            | 13948799 | WBGene00011186 | cllec-226         | R10D12.5           |
| -0.0348263927046926  | AGIWUR14296                         |          |                |                   |                    |
| CB4856 HS V          | 13949319                            | 13949640 | WBGene00011187 | R10D12.6          | R10D12.6           |
| -0.136129396623291   | AGIWUR31172                         |          |                |                   |                    |
| CB4856 HS V          | 13950066                            | 13950394 | WBGene00011188 | R10D12.7          | R10D12.7           |
| 0.0768130623934518   | AGIWUR23207                         |          |                |                   |                    |
| CB4856 HS V          | 13950733                            | 13953291 | WBGene00011189 | R10D12.8          | R10D12.8           |
| 0.220141172469688    | AGIWUR6538                          |          |                |                   |                    |
| CB4856 HS V          | 13954277                            | 13956176 | WBGene00011190 | swt-6 R10D12.9    |                    |
| 0.161189092310789    | AGIWUR4056;AGIWUR12190;AGIWUR26090  |          |                |                   |                    |
| CB4856 HS V          | 13956161                            | 13958347 | WBGene00011191 | R10D12.10         | R10D12.10          |
| -0.0839228530770697  | AGIWUR7758;AGIWUR23659              |          |                |                   |                    |
| CB4856 HS V          | 13958746                            | 13961016 | WBGene00011192 | srh-24 R10D12.11  |                    |
| -0.148093584328371   | AGIWUR2603;AGIWUR4584;AGIWUR9879    |          |                |                   |                    |
| CB4856 HS V          | 13961265                            | 13961977 | WBGene00011193 | algn-13 R10D12.12 |                    |

|                                                                                                 |                                                            |          |                |           |           |                     |
|-------------------------------------------------------------------------------------------------|------------------------------------------------------------|----------|----------------|-----------|-----------|---------------------|
| 0.0793001195038343                                                                              | AGIWUR1988                                                 |          |                |           |           |                     |
| CB4856 HS V                                                                                     | 13962417                                                   | 13963840 | WBGene00011194 | R10D12.13 | R10D12.13 |                     |
| -0.0891220946561204                                                                             | AGIWUR9954;AGIWUR10705;AGIWUR18062;AGIWUR43283             |          |                |           |           |                     |
| CB4856 HS V                                                                                     | 13963734                                                   | 13965797 | WBGene00011195 | sao-1     | R10D12.14 |                     |
| -0.10370852495075                                                                               | AGIWUR18990;AGIWUR31397;AGIWUR34082;AGIWUR39963            |          |                |           |           |                     |
| CB4856 HS V                                                                                     | 13979571                                                   | 13980907 | WBGene00045401 | eol-1     | T26F2.3   | 1.92677923588183    |
| AGIWUR22948                                                                                     |                                                            |          |                |           |           |                     |
| CB4856 HS V                                                                                     | 13981568                                                   | 13982971 | WBGene00012058 | T26F2.2   | T26F2.2   | 0.210021137608885   |
| AGIWUR15010                                                                                     |                                                            |          |                |           |           |                     |
| CB4856 HS V                                                                                     | 13985137                                                   | 13987072 | WBGene00001310 | end-1     | F58E10.2  |                     |
| -0.20250585952209                                                                               | AGIWUR8175                                                 |          |                |           |           |                     |
| CB4856 HS V                                                                                     | 13987166                                                   | 14006079 | WBGene00010259 | ric-7     | F58E10.1  |                     |
| -0.0699835407095057                                                                             |                                                            |          |                |           |           |                     |
| AGIWUR11260;AGIWUR19271;AGIWUR22169;AGIWUR22854;AGIWUR33583;AGIWUR34027;AGIWUR36597;AGIWUR42820 |                                                            |          |                |           |           |                     |
| CB4856 HS V                                                                                     | 14008768                                                   | 14012218 | WBGene00010260 | ddx-17    | F58E10.3  |                     |
| -0.0427475034601095                                                                             | AGIWUR7766;AGIWUR10134;AGIWUR28864;AGIWUR33511;AGIWUR38214 |          |                |           |           |                     |
| CB4856 HS V                                                                                     | 14012333                                                   | 14013644 | WBGene00000097 | aip-1     | F58E10.4  |                     |
| 0.0552872252528225                                                                              | AGIWUR42494                                                |          |                |           |           |                     |
| CB4856 HS V                                                                                     | 14014701                                                   | 14015850 | WBGene00001311 | end-3     | F58E10.5  |                     |
| 0.0296478701276683                                                                              | AGIWUR20810                                                |          |                |           |           |                     |
| CB4856 HS V                                                                                     | 14015978                                                   | 14017576 | WBGene00010261 | srh-308   | F58E10.6  |                     |
| 0.0634694500274708                                                                              | AGIWUR22290                                                |          |                |           |           |                     |
| CB4856 HS V                                                                                     | 14018270                                                   | 14018673 | WBGene00003474 | mtl-2     | T08G5.10  |                     |
| -0.0195997224227611                                                                             | AGIWUR31900                                                |          |                |           |           |                     |
| CB4856 HS V                                                                                     | 14018766                                                   | 14020332 | WBGene00011622 | T08G5.1   | T08G5.1   | 0.0432180662991462  |
| AGIWUR41045                                                                                     |                                                            |          |                |           |           |                     |
| CB4856 HS V                                                                                     | 14020628                                                   | 14021737 | WBGene00077572 | T08G5.14  | T08G5.14  |                     |
| 0.0276274733184172                                                                              | AGIWUR39576                                                |          |                |           |           |                     |
| CB4856 HS V                                                                                     | 14026336                                                   | 14027484 | WBGene00011624 | T08G5.3   | T08G5.3   | -0.070882617528536  |
| AGIWUR99;AGIWUR1082;AGIWUR19837;AGIWUR20924;AGIWUR35998                                         |                                                            |          |                |           |           |                     |
| CB4856 HS V                                                                                     | 14030184                                                   | 14032584 | WBGene00014834 | T08G5.4   | T08G5.4   | 0.0466845014763102  |
| AGIWUR9751;AGIWUR42190                                                                          |                                                            |          |                |           |           |                     |
| CB4856 HS V                                                                                     | 14033950                                                   | 14034393 | WBGene00002093 | ins-10    | T08G5.12  |                     |
| 0.147089651656616                                                                               | AGIWUR40111                                                |          |                |           |           |                     |
| CB4856 HS V                                                                                     | 14034323                                                   | 14038372 | WBGene00011625 | vps-39    | T08G5.5   | -0.0229205301418176 |
| AGIWUR2812;AGIWUR16018;AGIWUR25794;AGIWUR38233;AGIWUR44385                                      |                                                            |          |                |           |           |                     |
| CB4856 HS V                                                                                     | 14038896                                                   | 14040234 | WBGene00050930 | T08G5.13  | T08G5.13  |                     |
| 0.0638755452691537                                                                              | AGIWUR11059;AGIWUR16384;AGIWUR30398                        |          |                |           |           |                     |
| CB4856 HS V                                                                                     | 14057840                                                   | 14064529 | WBGene00010250 | F58D12.3  | F58D12.3  |                     |



|                         |                                                                                 |                |                                    |
|-------------------------|---------------------------------------------------------------------------------|----------------|------------------------------------|
| 0.0494717960078392      | AGIWUR1597;AGIWUR31940;AGIWUR35221;AGIWUR43868                                  |                |                                    |
| CB4856 HS V             | 14067819 14071215                                                               | WBGene00045355 | D1086.17 D1086.17                  |
| 0.132776382324826       | AGIWUR12879;AGIWUR16108;AGIWUR34946;AGIWUR35308                                 |                |                                    |
| CB4856 HS V             | 14071646 14073719                                                               | WBGene00077448 | D1086.20 D1086.20                  |
| -0.0690231436046971     | AGIWUR546;AGIWUR21272                                                           |                |                                    |
| CB4856 HS V             | 14074456 14076725                                                               | WBGene00044081 | D1086.11 D1086.11                  |
| 0.149029449013933       | AGIWUR9110;AGIWUR31787                                                          |                |                                    |
| CB4856 HS V             | 14079801 14081766                                                               | WBGene00008393 | D1086.6 D1086.6 0.154394242086158  |
| AGIWUR6916;AGIWUR27761  |                                                                                 |                |                                    |
| CB4856 HS V             | 14082753 14083584                                                               | WBGene00044080 | D1086.10 D1086.10                  |
| 0.485337945796015       | AGIWUR5549                                                                      |                |                                    |
| CB4856 HS V             | 14084270 14085811                                                               | WBGene00008394 | D1086.7 D1086.7 0.167645700152731  |
| AGIWUR3028;AGIWUR13342  |                                                                                 |                |                                    |
| CB4856 HS V             | 14085889 14087169                                                               | WBGene00045405 | D1086.18 D1086.18                  |
| -0.190836774523692      | AGIWUR34218                                                                     |                |                                    |
| CB4856 HS V             | 14088351 14088704                                                               | WBGene00045406 | D1086.19 D1086.19                  |
| -0.167624765754768      | AGIWUR8143;AGIWUR14209;AGIWUR16516;AGIWUR22654;AGIWUR29990                      |                |                                    |
| CB4856 HS V             | 14088893 14090359                                                               | WBGene00008392 | D1086.5 D1086.5 0.0530894569296549 |
| AGIWUR23610             |                                                                                 |                |                                    |
| CB4856 HS V             | 14090719 14092435                                                               | WBGene00001864 | him-5 D1086.4 0.125626800007232    |
| AGIWUR44490             |                                                                                 |                |                                    |
| CB4856 HS V             | 14092792 14093986                                                               | WBGene00008390 | D1086.3 D1086.3 -0.58204068206655  |
| AGIWUR14700             |                                                                                 |                |                                    |
| CB4856 HS V             | 14094105 14097088                                                               | WBGene00008395 | D1086.8 D1086.8 0.255463412962218  |
| AGIWUR12365             |                                                                                 |                |                                    |
| CB4856 HS V             | 14097038 14098668                                                               | WBGene00008389 | D1086.2 D1086.2 0.294449606619143  |
| AGIWUR4031              |                                                                                 |                |                                    |
| CB4856 HS V             | 14098858 14100390                                                               | WBGene00008388 | D1086.1 D1086.1 0.0632361267865065 |
| AGIWUR34537             |                                                                                 |                |                                    |
| CB4856 HS V             | 14101186 14102821                                                               | WBGene00044082 | D1086.12 D1086.12                  |
| -0.0214275509448782     | AGIWUR36541                                                                     |                |                                    |
| CB4856 HS V             | 14104270 14106416                                                               | WBGene00008396 | D1086.9 D1086.9 -0.111504680903994 |
| AGIWUR22373;AGIWUR29291 |                                                                                 |                |                                    |
| CB4856 HS V             | 14107811 14110151                                                               | WBGene00044201 | H39E23.3 H39E23.3                  |
| -0.261279284279222      | AGIWUR7418;AGIWUR8050;AGIWUR9150;AGIWUR9268;AGIWUR17164;AGIWUR29655;AGIWUR40848 |                |                                    |
| CB4856 HS V             | 14110361 14112027                                                               | WBGene00010432 | H39E23.2 H39E23.2                  |
| -0.169334391356289      | AGIWUR10876                                                                     |                |                                    |
| CB4856 HS V             | 14112039 14141119                                                               | WBGene00003916 | par-1 H39E23.1                     |
| 0.100665749431603       | AGIWUR16278;AGIWUR16410;AGIWUR19436;AGIWUR27928;AGIWUR32541;AGIWUR41271         |                |                                    |

|                                  |   |                                  |          |                |           |          |                     |
|----------------------------------|---|----------------------------------|----------|----------------|-----------|----------|---------------------|
| CB4856 HS                        | V | 14144030                         | 14145411 | WBGene00007084 | AH10.3    | AH10.3   |                     |
| -5.99440028974385e-05            |   | AGIWUR30614                      |          |                |           |          |                     |
| CB4856 HS                        | V | 14146499                         | 14148784 | WBGene00007082 | acs-10    | AH10.1   | 0.0640476365695264  |
| AGIWUR12516                      |   |                                  |          |                |           |          |                     |
| CB4856 HS                        | V | 14156831                         | 14157622 | WBGene00007083 | AH10.2    | AH10.2   | -0.0407737484701816 |
| AGIWUR34461                      |   |                                  |          |                |           |          |                     |
| CB4856 HS                        | V | 14157663                         | 14160862 | WBGene00011364 | T02B5.3   | T02B5.3  | -0.347154994990442  |
| AGIWUR26497                      |   |                                  |          |                |           |          |                     |
| CB4856 HS                        | V | 14161551                         | 14162841 | WBGene00005104 | srd-26    | T02B5.4  | 0.0579883793089975  |
| AGIWUR8800                       |   |                                  |          |                |           |          |                     |
| CB4856 HS                        | V | 14163260                         | 14166730 | WBGene00011362 | T02B5.1   | T02B5.1  | 0.269960135597196   |
| AGIWUR16187                      |   |                                  |          |                |           |          |                     |
| CB4856 HS                        | V | 14167228                         | 14167729 | WBGene00011363 | ocam-1    | T02B5.2  | -0.0426479675693949 |
| AGIWUR27567                      |   |                                  |          |                |           |          |                     |
| CB4856 HS                        | V | 14168362                         | 14171481 | WBGene00013875 | ZC376.3   | ZC376.3  | 0.00140886899895598 |
| AGIWUR44554                      |   |                                  |          |                |           |          |                     |
| CB4856 HS                        | V | 14171645                         | 14175355 | WBGene00013874 | ZC376.2   | ZC376.2  | -0.452456009768587  |
| AGIWUR25072                      |   |                                  |          |                |           |          |                     |
| CB4856 HS                        | V | 14175517                         | 14182960 | WBGene00013873 | ZC376.1   | ZC376.1  | -0.215494795530528  |
| AGIWUR25901                      |   |                                  |          |                |           |          |                     |
| CB4856 HS                        | V | 14183124                         | 14185667 | WBGene00006613 | trm-1     | ZC376.5  | -0.224622492597153  |
| AGIWUR20951                      |   |                                  |          |                |           |          |                     |
| CB4856 HS                        | V | 14185691                         | 14192156 | WBGene00013877 | ZC376.6   | ZC376.6  | 0.0890889800987402  |
| AGIWUR30098                      |   |                                  |          |                |           |          |                     |
| CB4856 HS                        | V | 14193685                         | 14197695 | WBGene00013878 | atfs-1    | ZC376.7  | 0.191562670998042   |
| AGIWUR14731                      |   |                                  |          |                |           |          |                     |
| CB4856 HS                        | V | 14205776                         | 14209010 | WBGene00011793 | T16A9.3   | T16A9.3  | -0.0211743865417642 |
| AGIWUR801;AGIWUR8622;AGIWUR32892 |   |                                  |          |                |           |          |                     |
| CB4856 HS                        | V | 14209170                         | 14210873 | WBGene00006261 | str-230   | T16A9.2  | 0.120786976019269   |
| AGIWUR11289                      |   |                                  |          |                |           |          |                     |
| CB4856 HS                        | V | 14215343                         | 14220730 | WBGene00011794 | nep-21    | T16A9.4  | 0.133086954624801   |
| AGIWUR27727                      |   |                                  |          |                |           |          |                     |
| CB4856 HS                        | V | 14225397                         | 14226414 | WBGene00050975 | K02E11.11 |          | K02E11.11           |
| -0.228455727511947               |   | AGIWUR642;AGIWUR3294;AGIWUR20831 |          |                |           |          |                     |
| CB4856 HS                        | V | 14232281                         | 14236076 | WBGene00010510 | ent-3     | K02E11.1 |                     |
| -0.0742846840342164              |   | AGIWUR24207                      |          |                |           |          |                     |
| CB4856 HS                        | V | 14239942                         | 14241151 | WBGene00044109 | K02E11.10 |          | K02E11.10           |
| -0.277881345997772               |   | AGIWUR33374                      |          |                |           |          |                     |
| CB4856 HS                        | V | 14244204                         | 14246104 | WBGene00010511 | sre-7     | K02E11.2 |                     |

|                                   |                                                |          |                |                  |                     |
|-----------------------------------|------------------------------------------------|----------|----------------|------------------|---------------------|
| 0.543257369259239                 | AGIWUR19699                                    |          |                |                  |                     |
| CB4856 HS V                       | 14246276                                       | 14246909 | WBGene00010512 | K02E11.3         | K02E11.3            |
| 0.281325340335329                 | AGIWUR42262                                    |          |                |                  |                     |
| CB4856 HS V                       | 14247476                                       | 14248137 | WBGene00010513 | K02E11.4         | K02E11.4            |
| 0.0575021815162691                | AGIWUR8828;AGIWUR19022;AGIWUR19695;AGIWUR20713 |          |                |                  |                     |
| CB4856 HS V                       | 14250627                                       | 14251510 | WBGene00010515 | K02E11.6         | K02E11.6            |
| 0.0674121839843931                | AGIWUR8194;AGIWUR14347;AGIWUR17081             |          |                |                  |                     |
| CB4856 HS V                       | 14253488                                       | 14254321 | WBGene00010516 | K02E11.7         | K02E11.7            |
| -0.0217474786502265               | AGIWUR15018                                    |          |                |                  |                     |
| CB4856 HS V                       | 14257107                                       | 14259231 | WBGene00009596 | sre-8 F40G12.1   |                     |
| 0.143595775749279                 | AGIWUR44907                                    |          |                |                  |                     |
| CB4856 HS V                       | 14259544                                       | 14260931 | WBGene00009597 | F40G12.2         | F40G12.2            |
| 0.14054136044812                  | AGIWUR20587                                    |          |                |                  |                     |
| CB4856 HS V                       | 14261990                                       | 14267317 | WBGene00009598 | F40G12.3         | F40G12.3            |
| -0.190576576703718                | AGIWUR8470                                     |          |                |                  |                     |
| CB4856 HS V                       | 14267761                                       | 14268639 | WBGene00009599 | F40G12.4         | F40G12.4            |
| -0.236698408119352                | AGIWUR13152                                    |          |                |                  |                     |
| CB4856 HS V                       | 14269182                                       | 14270636 | WBGene00009600 | F40G12.5         | F40G12.5            |
| 0.244504505255401                 | AGIWUR14463                                    |          |                |                  |                     |
| CB4856 HS V                       | 14271143                                       | 14273047 | WBGene00009601 | F40G12.6         | F40G12.6            |
| 0.066624897746598                 | AGIWUR11143                                    |          |                |                  |                     |
| CB4856 HS V                       | 14275669                                       | 14276343 | WBGene00009602 | F40G12.7         | F40G12.7            |
| -0.0579437276715993               | AGIWUR28116                                    |          |                |                  |                     |
| CB4856 HS V                       | 14278312                                       | 14279877 | WBGene00009603 | srt-33 F40G12.8  |                     |
| -0.133905059352152                | AGIWUR32323                                    |          |                |                  |                     |
| CB4856 HS V                       | 14281120                                       | 14282322 | WBGene00044002 | srt-74 F40G12.15 |                     |
| -0.293800520136358                | AGIWUR10878;AGIWUR27270                        |          |                |                  |                     |
| CB4856 HS V                       | 14282482                                       | 14282997 | WBGene00009604 | F40G12.9         | F40G12.9            |
| -0.0689957912259711               | AGIWUR13071                                    |          |                |                  |                     |
| CB4856 HS V                       | 14283528                                       | 14285327 | WBGene00009605 | F40G12.10        | F40G12.10           |
| 0.113655912768248                 | AGIWUR42439                                    |          |                |                  |                     |
| CB4856 HS V                       | 14286171                                       | 14288056 | WBGene00009606 | F40G12.11        | F40G12.11           |
| -0.148524635243326                | AGIWUR11643                                    |          |                |                  |                     |
| CB4856 HS V                       | 14288733                                       | 14289718 | WBGene00008788 | F14D7.1 F14D7.1  | -0.0386266535125861 |
| AGIWUR224;AGIWUR11807;AGIWUR17635 |                                                |          |                |                  |                     |
| CB4856 HS V                       | 14291910                                       | 14293712 | WBGene00008789 | F14D7.2 F14D7.2  | -0.235934485161923  |
| AGIWUR29824                       |                                                |          |                |                  |                     |
| CB4856 HS V                       | 14295828                                       | 14298132 | WBGene00008791 | F14D7.4 F14D7.4  | 0.0717190255894788  |
| AGIWUR2077;AGIWUR35633            |                                                |          |                |                  |                     |

|                                                                                                                                             |                                                                        |          |                |          |          |                     |
|---------------------------------------------------------------------------------------------------------------------------------------------|------------------------------------------------------------------------|----------|----------------|----------|----------|---------------------|
| CB4856 HS V                                                                                                                                 | 14299180                                                               | 14299642 | WBGene00008792 | F14D7.5  | F14D7.5  | 0.113093692439621   |
| AGIWUR1779                                                                                                                                  |                                                                        |          |                |          |          |                     |
| CB4856 HS V                                                                                                                                 | 14300014                                                               | 14300561 | WBGene00045331 | F14D7.12 | F14D7.12 |                     |
| -0.120970943923194                                                                                                                          | AGIWUR7767;AGIWUR25853;AGIWUR35920;AGIWUR36552;AGIWUR37897             |          |                |          |          |                     |
| CB4856 HS V                                                                                                                                 | 14301413                                                               | 14306444 | WBGene00008793 | F14D7.6  | F14D7.6  | -0.247854142915873  |
| AGIWUR15208                                                                                                                                 |                                                                        |          |                |          |          |                     |
| CB4856 HS V                                                                                                                                 | 14310389                                                               | 14311236 | WBGene00008798 | F14D7.11 | F14D7.11 |                     |
| 0.0180732675911823                                                                                                                          | AGIWUR2201                                                             |          |                |          |          |                     |
| CB4856 HS V                                                                                                                                 | 14311882                                                               | 14312788 | WBGene00008795 | F14D7.8  | F14D7.8  | -0.178048474780044  |
| AGIWUR10018                                                                                                                                 |                                                                        |          |                |          |          |                     |
| CB4856 HS V                                                                                                                                 | 14313759                                                               | 14314333 | WBGene00009802 | F47B8.1  | F47B8.1  | -0.150804670204712  |
| AGIWUR30750                                                                                                                                 |                                                                        |          |                |          |          |                     |
| CB4856 HS V                                                                                                                                 | 14315859                                                               | 14316625 | WBGene00009803 | F47B8.2  | F47B8.2  | 0.126932019907859   |
| AGIWUR41770                                                                                                                                 |                                                                        |          |                |          |          |                     |
| CB4856 HS V                                                                                                                                 | 14320546                                                               | 14321313 | WBGene00044194 | F47B8.14 | F47B8.14 |                     |
| -0.0289080925528689                                                                                                                         | AGIWUR7504;AGIWUR9913;AGIWUR32975;AGIWUR38665;AGIWUR41324              |          |                |          |          |                     |
| CB4856 HS V                                                                                                                                 | 14329069                                                               | 14330080 | WBGene00009807 | pepm-1   | F47B8.6  | 0.203643198791273   |
| AGIWUR10391                                                                                                                                 |                                                                        |          |                |          |          |                     |
| CB4856 HS V                                                                                                                                 | 14331674                                                               | 14332667 | WBGene00009809 | F47B8.8  | F47B8.8  | 0.0216760985850293  |
| AGIWUR38545                                                                                                                                 |                                                                        |          |                |          |          |                     |
| CB4856 HS V                                                                                                                                 | 14333416                                                               | 14334803 | WBGene00009808 | srm-4    | F47B8.7  | -0.0391679160444927 |
| AGIWUR33260                                                                                                                                 |                                                                        |          |                |          |          |                     |
| CB4856 HS V                                                                                                                                 | 14337049                                                               | 14338808 | WBGene00009810 | srm-6    | F47B8.9  | -0.171665380679511  |
| AGIWUR8149;AGIWUR29529                                                                                                                      |                                                                        |          |                |          |          |                     |
| CB4856 HS V                                                                                                                                 | 14343068                                                               | 14346964 | WBGene00009811 | F47B8.10 | F47B8.10 |                     |
| -0.0613191995994899                                                                                                                         | AGIWUR30997                                                            |          |                |          |          |                     |
| CB4856 HS V                                                                                                                                 | 14347731                                                               | 14350776 | WBGene00013024 | cept-2   | Y49A3A.1 |                     |
| -0.364777345366708                                                                                                                          | AGIWUR16913;AGIWUR33405;AGIWUR42443                                    |          |                |          |          |                     |
| CB4856 HS V                                                                                                                                 | 14351207                                                               | 14354421 | WBGene00013025 | vha-13   | Y49A3A.2 |                     |
| -0.000656881458081848                                                                                                                       |                                                                        |          |                |          |          |                     |
| AGIWUR2828;AGIWUR4109;AGIWUR6352;AGIWUR7215;AGIWUR12423;AGIWUR12812;AGIWUR18412;AGIWUR19376;AGIWUR33598;AGIWUR33706;AGIWUR38557;AGIWUR44816 |                                                                        |          |                |          |          |                     |
| CB4856 HS V                                                                                                                                 | 14354410                                                               | 14355754 | WBGene00013026 | Y49A3A.3 | Y49A3A.3 |                     |
| 0.0902986627206452                                                                                                                          | AGIWUR9557                                                             |          |                |          |          |                     |
| CB4856 HS V                                                                                                                                 | 14356076                                                               | 14356823 | WBGene00000877 | cyn-1    | Y49A3A.5 |                     |
| -0.323841140719034                                                                                                                          | AGIWUR2731;AGIWUR19749;AGIWUR22880;AGIWUR24716;AGIWUR26930;AGIWUR32649 |          |                |          |          |                     |
| CB4856 HS V                                                                                                                                 | 14356900                                                               | 14358390 | WBGene00013027 | Y49A3A.4 | Y49A3A.4 |                     |
| 0.131320147771417                                                                                                                           | AGIWUR38068                                                            |          |                |          |          |                     |
| CB4856 HS V                                                                                                                                 | 14373389                                                               | 14375799 | WBGene00006775 | unc-39   | F56A12.1 |                     |

|                     |                                                 |          |                |                  |           |
|---------------------|-------------------------------------------------|----------|----------------|------------------|-----------|
| -0.17501782738703   | AGIWUR35843                                     |          |                |                  |           |
| CB4856 HS V         | 14376099                                        | 14379066 | WBGene00010143 | F56A12.2         | F56A12.2  |
| -0.0180473321596732 | AGIWUR35255                                     |          |                |                  |           |
| CB4856 HS V         | 14392240                                        | 14392772 | WBGene00007618 | C15H11.10        | C15H11.10 |
| -0.0200675290509764 | AGIWUR28622                                     |          |                |                  |           |
| CB4856 HS V         | 14395070                                        | 14395749 | WBGene00077576 | C15H11.13        | C15H11.13 |
| 0.123878755943199   | AGIWUR2315                                      |          |                |                  |           |
| CB4856 HS V         | 14409078                                        | 14411986 | WBGene00007614 | gnrr-2 C15H11.2  |           |
| -0.114514292418644  | AGIWUR36691                                     |          |                |                  |           |
| CB4856 HS V         | 14412400                                        | 14415792 | WBGene00003834 | nx-f-1 C15H11.3  |           |
| 0.155917194793453   | AGIWUR12693                                     |          |                |                  |           |
| CB4856 HS V         | 14415814                                        | 14416176 | WBGene00007619 | C15H11.11        | C15H11.11 |
| 0.113943290019471   | AGIWUR30610                                     |          |                |                  |           |
| CB4856 HS V         | 14416067                                        | 14417835 | WBGene00003835 | nx-f-2 C15H11.6  |           |
| -0.0960742193765718 | AGIWUR19959                                     |          |                |                  |           |
| CB4856 HS V         | 14417903                                        | 14420096 | WBGene00007615 | set-31 C15H11.5  |           |
| -0.374936190913942  | AGIWUR27949                                     |          |                |                  |           |
| CB4856 HS V         | 14420071                                        | 14421450 | WBGene00000985 | dhs-22 C15H11.4  |           |
| -0.246841047578844  | AGIWUR10213;AGIWUR15538;AGIWUR27388;AGIWUR40728 |          |                |                  |           |
| CB4856 HS V         | 14421566                                        | 14422618 | WBGene00003922 | pas-1 C15H11.7   |           |
| 0.00955691891765831 | AGIWUR30109;AGIWUR43121;AGIWUR44076             |          |                |                  |           |
| CB4856 HS V         | 14422720                                        | 14423383 | WBGene00007616 | rpoa-12 C15H11.8 |           |
| -0.217630816220559  | AGIWUR9582;AGIWUR11619;AGIWUR13169              |          |                |                  |           |
| CB4856 HS V         | 14423776                                        | 14425008 | WBGene00007617 | rrbs-1 C15H11.9  |           |
| -0.220288639191217  | AGIWUR2187;AGIWUR22700;AGIWUR35444;AGIWUR37023  |          |                |                  |           |
| CB4856 HS V         | 14429165                                        | 14430500 | WBGene00009079 | F23B12.1         | F23B12.1  |
| -0.0288148146334848 | AGIWUR17727                                     |          |                |                  |           |
| CB4856 HS V         | 14431310                                        | 14432359 | WBGene00001170 | egl-1 F23B12.9   |           |
| -0.107905736432071  | AGIWUR33982                                     |          |                |                  |           |
| CB4856 HS V         | 14434563                                        | 14435743 | WBGene00005706 | sru-43 F23B12.2  |           |
| 0.0442223110831805  | AGIWUR30624;AGIWUR42345                         |          |                |                  |           |
| CB4856 HS V         | 14441057                                        | 14445346 | WBGene00009081 | F23B12.4         | F23B12.4  |
| 0.105889359601766   | AGIWUR26802;AGIWUR27323;AGIWUR44559             |          |                |                  |           |
| CB4856 HS V         | 14445324                                        | 14447608 | WBGene00009082 | dlat-1 F23B12.5  |           |
| 0.145235538218035   | AGIWUR13860                                     |          |                |                  |           |
| CB4856 HS V         | 14447629                                        | 14449587 | WBGene00006465 | fntb-1 F23B12.6  |           |
| -0.103856264091872  | AGIWUR6698;AGIWUR21483;AGIWUR30837              |          |                |                  |           |
| CB4856 HS V         | 14449697                                        | 14452971 | WBGene00009084 | F23B12.7         | F23B12.7  |
| 0.0584395261062323  | AGIWUR4829;AGIWUR35599                          |          |                |                  |           |

|                                                                                   |                                                                                   |          |                |           |                             |
|-----------------------------------------------------------------------------------|-----------------------------------------------------------------------------------|----------|----------------|-----------|-----------------------------|
| CB4856 HS V                                                                       | 14453305                                                                          | 14456998 | WBGene00000257 | bmk-1     | F23B12.8                    |
| 0.0165358376648603                                                                | AGIWUR3443;AGIWUR36706                                                            |          |                |           |                             |
| CB4856 HS V                                                                       | 14460624                                                                          | 14461132 | WBGene00008590 | F08H9.2   | F08H9.2 0.216150900844138   |
| AGIWUR5738;AGIWUR9504;AGIWUR13305;AGIWUR15895;AGIWUR18011;AGIWUR38364;AGIWUR39285 |                                                                                   |          |                |           |                             |
| CB4856 HS V                                                                       | 14461943                                                                          | 14462809 | WBGene00008591 | F08H9.3   | F08H9.3 -0.0136722629997639 |
| AGIWUR42607                                                                       |                                                                                   |          |                |           |                             |
| CB4856 HS V                                                                       | 14463588                                                                          | 14464428 | WBGene00008592 | F08H9.4   | F08H9.4 0.351996206542271   |
| AGIWUR12207                                                                       |                                                                                   |          |                |           |                             |
| CB4856 HS V                                                                       | 14465095                                                                          | 14468246 | WBGene00023515 | srz-97    | F08H9.12                    |
| -0.013274325276516                                                                | AGIWUR16877;AGIWUR39019;AGIWUR43230                                               |          |                |           |                             |
| CB4856 HS V                                                                       | 14469191                                                                          | 14472448 | WBGene00008594 | cllec-57  | F08H9.6 0.131751973443397   |
| AGIWUR25819;AGIWUR26410                                                           |                                                                                   |          |                |           |                             |
| CB4856 HS V                                                                       | 14472529                                                                          | 14474374 | WBGene00008593 | cllec-227 | F08H9.5                     |
| 0.0257108730312554                                                                | AGIWUR12601;AGIWUR28943;AGIWUR34139                                               |          |                |           |                             |
| CB4856 HS V                                                                       | 14474399                                                                          | 14476794 | WBGene00008595 | cllec-56  | F08H9.7 0.33368367412875    |
| AGIWUR8691                                                                        |                                                                                   |          |                |           |                             |
| CB4856 HS V                                                                       | 14476903                                                                          | 14479003 | WBGene00008596 | cllec-54  | F08H9.8 0.0723546804522286  |
| AGIWUR43177                                                                       |                                                                                   |          |                |           |                             |
| CB4856 HS V                                                                       | 14479284                                                                          | 14482195 | WBGene00008597 | cllec-55  | F08H9.9 -0.0980776205165146 |
| AGIWUR30079                                                                       |                                                                                   |          |                |           |                             |
| CB4856 HS V                                                                       | 14482287                                                                          | 14482836 | WBGene00194788 | R02D5.10  | R02D5.10                    |
| 0.0148484914623008                                                                | AGIWUR13960;AGIWUR22681;AGIWUR27498;AGIWUR31073;AGIWUR40594                       |          |                |           |                             |
| CB4856 HS V                                                                       | 14483160                                                                          | 14484346 | WBGene00010977 | R02D5.3   | R02D5.3 -0.247244301995204  |
| AGIWUR16897                                                                       |                                                                                   |          |                |           |                             |
| CB4856 HS V                                                                       | 14508249                                                                          | 14509655 | WBGene00010976 | R02D5.1   | R02D5.1 -0.0767587295380956 |
| AGIWUR12339;AGIWUR42123                                                           |                                                                                   |          |                |           |                             |
| CB4856 HS V                                                                       | 14509738                                                                          | 14511123 | WBGene00077577 | R02D5.9   | R02D5.9 0.0640242968958562  |
| AGIWUR21673                                                                       |                                                                                   |          |                |           |                             |
| CB4856 HS V                                                                       | 14518351                                                                          | 14519368 | WBGene00050937 | R02D5.8   | R02D5.8 0.124134967018611   |
| AGIWUR38956                                                                       |                                                                                   |          |                |           |                             |
| CB4856 HS V                                                                       | 14519371                                                                          | 14521100 | WBGene00194707 | C53A5.17  | C53A5.17                    |
| 0.0582379664408244                                                                | AGIWUR3775;AGIWUR8040;AGIWUR11708;AGIWUR13521;AGIWUR25149;AGIWUR25297;AGIWUR29485 |          |                |           |                             |
| CB4856 HS V                                                                       | 14523329                                                                          | 14524129 | WBGene00008262 | ril-1     | C53A5.1 0.1659849634055     |
| AGIWUR2119;AGIWUR4729;AGIWUR20901;AGIWUR21355;AGIWUR42930;AGIWUR43238             |                                                                                   |          |                |           |                             |
| CB4856 HS V                                                                       | 14525389                                                                          | 14527411 | WBGene00001834 | hda-1     | C53A5.3 0.103201590425453   |
| AGIWUR5903                                                                        |                                                                                   |          |                |           |                             |
| CB4856 HS V                                                                       | 14531115                                                                          | 14542893 | WBGene00008265 | kcn1-4    | C53A5.5 0.34342496262895    |
| AGIWUR4093                                                                        |                                                                                   |          |                |           |                             |
| CB4856 HS V                                                                       | 14543588                                                                          | 14545866 | WBGene00008266 | C53A5.6   | C53A5.6 -0.0160400592884038 |

|                                                                                                                                                                                |   |             |          |                |                 |                     |
|--------------------------------------------------------------------------------------------------------------------------------------------------------------------------------|---|-------------|----------|----------------|-----------------|---------------------|
| AGIWUR12806                                                                                                                                                                    |   |             |          |                |                 |                     |
| CB4856 HS                                                                                                                                                                      | V | 14546873    | 14554546 | WBGene00008270 | C53A5.13        | C53A5.13            |
| -0.15327504671574                                                                                                                                                              |   | AGIWUR22437 |          |                |                 |                     |
| CB4856 HS                                                                                                                                                                      | V | 14554980    | 14556287 | WBGene00005204 | srg-47 C53A5.8  | -0.105060351298866  |
| AGIWUR29829                                                                                                                                                                    |   |             |          |                |                 |                     |
| CB4856 HS                                                                                                                                                                      | V | 14557038    | 14558866 | WBGene00008267 | C53A5.9 C53A5.9 | 0.845574875027339   |
| AGIWUR3180                                                                                                                                                                     |   |             |          |                |                 |                     |
| CB4856 HS                                                                                                                                                                      | V | 14559612    | 14561293 | WBGene00008268 | srt-32 C53A5.10 |                     |
| 0.133890335311753                                                                                                                                                              |   | AGIWUR6672  |          |                |                 |                     |
| CB4856 HS                                                                                                                                                                      | V | 14562565    | 14564639 | WBGene00008269 | C53A5.11        | C53A5.11            |
| 3.16786797712341                                                                                                                                                               |   | AGIWUR19518 |          |                |                 |                     |
| CB4856 HS                                                                                                                                                                      | V | 14564752    | 14579719 | WBGene00001519 | gar-3 Y40H4A.1  | 0                   |
| AGIWUR19736;AGIWUR36424;AGIWUR39730                                                                                                                                            |   |             |          |                |                 |                     |
| CB4856 HS                                                                                                                                                                      | V | 14583306    | 14585451 | WBGene00012741 | Y40H4A.2        | Y40H4A.2            |
| -0.14637468849387                                                                                                                                                              |   | AGIWUR37624 |          |                |                 |                     |
| CB4856 HS                                                                                                                                                                      | V | 14591474    | 14593642 | WBGene00014822 | R11H6.6 R11H6.6 | -0.109756874748618  |
| AGIWUR37957                                                                                                                                                                    |   |             |          |                |                 |                     |
| CB4856 HS                                                                                                                                                                      | V | 14595268    | 14597067 | WBGene00003982 | pes-9 R11H6.1   | -0.119386291050398  |
| AGIWUR912;AGIWUR12621;AGIWUR13853;AGIWUR21199;AGIWUR22229                                                                                                                      |   |             |          |                |                 |                     |
| CB4856 HS                                                                                                                                                                      | V | 14597939    | 14600092 | WBGene00011250 | R11H6.2 R11H6.2 | -0.0358593121197686 |
| AGIWUR26564                                                                                                                                                                    |   |             |          |                |                 |                     |
| CB4856 HS                                                                                                                                                                      | V | 14600272    | 14606535 | WBGene00011251 | glb-22 R11H6.3  | -0.239595374866802  |
| AGIWUR38644                                                                                                                                                                    |   |             |          |                |                 |                     |
| CB4856 HS                                                                                                                                                                      | V | 14609943    | 14610705 | WBGene00011252 | R11H6.4 R11H6.4 | -0.11956364029643   |
| AGIWUR28376                                                                                                                                                                    |   |             |          |                |                 |                     |
| CB4856 HS                                                                                                                                                                      | V | 14610734    | 14612222 | WBGene00011253 | R11H6.5 R11H6.5 | 0.0341387335115861  |
| AGIWUR40698                                                                                                                                                                    |   |             |          |                |                 |                     |
| CB4856 HS                                                                                                                                                                      | V | 14612432    | 14613706 | WBGene00009650 | ccnk-1 F43D2.1  | -0.0668488242398002 |
| AGIWUR32184                                                                                                                                                                    |   |             |          |                |                 |                     |
| CB4856 HS                                                                                                                                                                      | V | 14621135    | 14629384 | WBGene00001986 | hot-1 F43D2.4   | -0.357974776653178  |
| AGIWUR27200                                                                                                                                                                    |   |             |          |                |                 |                     |
| CB4856 HS                                                                                                                                                                      | V | 14629377    | 14635180 | WBGene00044191 | F43D2.6 F43D2.6 | 0.179962959872016   |
| AGIWUR23;AGIWUR4702;AGIWUR8799;AGIWUR11684;AGIWUR13617;AGIWUR14871;AGIWUR23346;AGIWUR30060;AGIWUR30678;AGIWUR30858;AGIWUR31003;AGIWUR31315;AGIWUR31350;AGIWUR32612;AGIWUR34854 |   |             |          |                |                 |                     |
| CB4856 HS                                                                                                                                                                      | V | 14635582    | 14637751 | WBGene00009651 | F43D2.2 F43D2.2 | 0.122796172797177   |
| AGIWUR14791                                                                                                                                                                    |   |             |          |                |                 |                     |
| CB4856 HS                                                                                                                                                                      | V | 14638945    | 14640015 | WBGene00045516 | F43D2.7 F43D2.7 | 0.115042323202225   |
| AGIWUR20996;AGIWUR22378;AGIWUR28161;AGIWUR31836;AGIWUR40482                                                                                                                    |   |             |          |                |                 |                     |
| CB4856 HS                                                                                                                                                                      | V | 14641101    | 14641382 | WBGene00008319 | C54G10.1        | C54G10.1            |

|                                                                                                            |                                                                      |          |                |           |          |                     |
|------------------------------------------------------------------------------------------------------------|----------------------------------------------------------------------|----------|----------------|-----------|----------|---------------------|
| 0.0223675027445509                                                                                         | AGIWUR16483                                                          |          |                |           |          |                     |
| CB4856 HS V                                                                                                | 14642739                                                             | 14645979 | WBGene00004337 | rfc-1     | C54G10.2 |                     |
| -0.104696302471399                                                                                         | AGIWUR2489;AGIWUR8541;AGIWUR9916;AGIWUR13984;AGIWUR27850;AGIWUR37721 |          |                |           |          |                     |
| CB4856 HS V                                                                                                | 14646739                                                             | 14653464 | WBGene00004060 | pmp-3     | C54G10.3 |                     |
| -0.120363054130909                                                                                         | AGIWUR27604                                                          |          |                |           |          |                     |
| CB4856 HS V                                                                                                | 14653491                                                             | 14658174 | WBGene00008320 | slc-25A29 | C54G10.4 |                     |
| -0.185149907727528                                                                                         |                                                                      |          |                |           |          |                     |
| AGIWUR4735;AGIWUR15437;AGIWUR24609;AGIWUR28968;AGIWUR33112;AGIWUR38903;AGIWUR39305;AGIWUR40437;AGIWUR40699 |                                                                      |          |                |           |          |                     |
| CB4856 HS V                                                                                                | 14661305                                                             | 14662928 | WBGene00005242 | srh-17    | C47E8.2  | -0.0491727874905656 |
| AGIWUR38401                                                                                                |                                                                      |          |                |           |          |                     |
| CB4856 HS V                                                                                                | 14663306                                                             | 14665927 | WBGene00008146 | C47E8.9   | C47E8.9  |                     |
| -0.00358092913240782                                                                                       | AGIWUR16984;AGIWUR29136;AGIWUR33718                                  |          |                |           |          |                     |
| CB4856 HS V                                                                                                | 14666005                                                             | 14667158 | WBGene00008141 | C47E8.1   | C47E8.1  | 0.196392368221745   |
| AGIWUR3716;AGIWUR6200;AGIWUR12161;AGIWUR42797                                                              |                                                                      |          |                |           |          |                     |
| CB4856 HS V                                                                                                | 14667897                                                             | 14668743 | WBGene00044216 | C47E8.10  | C47E8.10 |                     |
| 0.23585561473655                                                                                           | AGIWUR377;AGIWUR3153;AGIWUR17976;AGIWUR22180;AGIWUR31385             |          |                |           |          |                     |
| CB4856 HS V                                                                                                | 14680314                                                             | 14683751 | WBGene00008142 | C47E8.3   | C47E8.3  | 0.0429046533726938  |
| AGIWUR16754                                                                                                |                                                                      |          |                |           |          |                     |
| CB4856 HS V                                                                                                | 14683706                                                             | 14685528 | WBGene00008143 | C47E8.4   | C47E8.4  | 0.0507617135690825  |
| AGIWUR36395                                                                                                |                                                                      |          |                |           |          |                     |
| CB4856 HS V                                                                                                | 14684918                                                             | 14688543 | WBGene00000915 | daf-21    | C47E8.5  | -0.35519629175813   |
| AGIWUR9991;AGIWUR14975;AGIWUR21712;AGIWUR29884;AGIWUR30998;AGIWUR37657                                     |                                                                      |          |                |           |          |                     |
| CB4856 HS V                                                                                                | 14688616                                                             | 14688959 | WBGene00044180 | C47E8.11  | C47E8.11 |                     |
| 0.134375528224587                                                                                          | AGIWUR297;AGIWUR6077;AGIWUR42319;AGIWUR42457;AGIWUR43490             |          |                |           |          |                     |
| CB4856 HS V                                                                                                | 14689154                                                             | 14691861 | WBGene00008144 | gasr-8    | C47E8.6  |                     |
| -0.00726616602517627                                                                                       | AGIWUR32623                                                          |          |                |           |          |                     |
| CB4856 HS V                                                                                                | 14691854                                                             | 14697107 | WBGene00006836 | unc-112   | C47E8.7  | 0.0921717668808011  |
| AGIWUR188;AGIWUR26949;AGIWUR36523                                                                          |                                                                      |          |                |           |          |                     |
| CB4856 HS V                                                                                                | 14698957                                                             | 14707601 | WBGene00008145 | set-5     | C47E8.8  | -0.096069081211823  |
| AGIWUR23099                                                                                                |                                                                      |          |                |           |          |                     |
| CB4856 HS V                                                                                                | 14711949                                                             | 14712296 | WBGene00014819 | R08A2.6   | R08A2.6  | 0.0558001859126831  |
| AGIWUR8279;AGIWUR14356;AGIWUR25788;AGIWUR32369;AGIWUR34440                                                 |                                                                      |          |                |           |          |                     |
| CB4856 HS V                                                                                                | 14712663                                                             | 14714072 | WBGene00011136 | R08A2.5   | R08A2.5  | 0.107100496276584   |
| AGIWUR32248                                                                                                |                                                                      |          |                |           |          |                     |
| CB4856 HS V                                                                                                | 14714207                                                             | 14715720 | WBGene00011133 | R08A2.2   | R08A2.2  | 0.0451018551777498  |
| AGIWUR28225;AGIWUR36004                                                                                    |                                                                      |          |                |           |          |                     |
| CB4856 HS V                                                                                                | 14718601                                                             | 14719591 | WBGene00011132 | R08A2.1   | R08A2.1  | 0.0940236915987782  |
| AGIWUR23398                                                                                                |                                                                      |          |                |           |          |                     |
| CB4856 HS V                                                                                                | 14723324                                                             | 14724766 | WBGene00011137 | R08A2.7   | R08A2.7  |                     |



|                                                                       |                                                 |          |                |           |           |                     |
|-----------------------------------------------------------------------|-------------------------------------------------|----------|----------------|-----------|-----------|---------------------|
| -0.00662229607498332                                                  | AGIWUR11484                                     |          |                |           |           |                     |
| CB4856 HS V                                                           | 14726907                                        | 14727328 | WBGene00013046 | Y50E8A.1  | Y50E8A.1  |                     |
| -0.121771584387149                                                    | AGIWUR10947                                     |          |                |           |           |                     |
| CB4856 HS V                                                           | 14728441                                        | 14728854 | WBGene00013047 | Y50E8A.2  | Y50E8A.2  |                     |
| -0.0914092627552687                                                   | AGIWUR18648                                     |          |                |           |           |                     |
| CB4856 HS V                                                           | 14729643                                        | 14731129 | WBGene00003861 | oig-3     | Y50E8A.3  |                     |
| 0.0591462910566261                                                    | AGIWUR18726                                     |          |                |           |           |                     |
| CB4856 HS V                                                           | 14731095                                        | 14734237 | WBGene00006795 | unc-61    | Y50E8A.4  |                     |
| -0.209824211540012                                                    | AGIWUR12148;AGIWUR21715;AGIWUR34974;AGIWUR39479 |          |                |           |           |                     |
| CB4856 HS V                                                           | 14734660                                        | 14736169 | WBGene00013048 | Y50E8A.5  | Y50E8A.5  |                     |
| 0.123841912820055                                                     | AGIWUR25169                                     |          |                |           |           |                     |
| CB4856 HS V                                                           | 14738542                                        | 14741326 | WBGene00013049 | Y50E8A.6  | Y50E8A.6  |                     |
| 0.100075711719451                                                     | AGIWUR24930                                     |          |                |           |           |                     |
| CB4856 HS V                                                           | 14745684                                        | 14748708 | WBGene00013050 | lip1-8    | Y50E8A.7  |                     |
| 0.071024859342665                                                     | AGIWUR39197                                     |          |                |           |           |                     |
| CB4856 HS V                                                           | 14758785                                        | 14765831 | WBGene00013056 | Y50E8A.14 | Y50E8A.14 |                     |
| -0.0301376296798752                                                   | AGIWUR27161;AGIWUR30646                         |          |                |           |           |                     |
| CB4856 HS V                                                           | 14773258                                        | 14777697 | WBGene00001817 | haf-7     | Y50E8A.16 |                     |
| 0.0754259683010776                                                    | AGIWUR43772                                     |          |                |           |           |                     |
| CB4856 HS V                                                           | 14778336                                        | 14779714 | WBGene00013052 | scrm-7    | Y50E8A.9  |                     |
| -0.00211627481566623                                                  | AGIWUR24090                                     |          |                |           |           |                     |
| CB4856 HS V                                                           | 14779996                                        | 14781078 | WBGene00013053 | Y50E8A.10 | Y50E8A.10 |                     |
| 0.0491121279448752                                                    | AGIWUR40189                                     |          |                |           |           |                     |
| CB4856 HS V                                                           | 14781493                                        | 14782209 | WBGene00013054 | Y50E8A.11 | Y50E8A.11 |                     |
| -0.101818977711286                                                    | AGIWUR3125;AGIWUR4148;AGIWUR20735;AGIWUR22683   |          |                |           |           |                     |
| CB4856 HS V                                                           | 14782658                                        | 14784065 | WBGene00013055 | Y50E8A.12 | Y50E8A.12 |                     |
| 0.193659937977063                                                     | AGIWUR9036                                      |          |                |           |           |                     |
| CB4856 HS V                                                           | 14784167                                        | 14815659 | WBGene00008183 | rin-1     | C48G7.3   | 0.0121568784983097  |
| AGIWUR11451;AGIWUR18250;AGIWUR32306                                   |                                                 |          |                |           |           |                     |
| CB4856 HS V                                                           | 14821853                                        | 14824453 | WBGene00012291 | W06A7.2   | W06A7.2   | 0.068062026953541   |
| AGIWUR26273                                                           |                                                 |          |                |           |           |                     |
| CB4856 HS V                                                           | 14824664                                        | 14829533 | WBGene00012293 | W06A7.4   | W06A7.4   | 0.226832910298706   |
| AGIWUR11198                                                           |                                                 |          |                |           |           |                     |
| CB4856 HS V                                                           | 14829177                                        | 14847413 | WBGene00004336 | ret-1     | W06A7.3   | -0.0993078962764864 |
| AGIWUR4614;AGIWUR9051;AGIWUR32940;AGIWUR33542;AGIWUR39865;AGIWUR43561 |                                                 |          |                |           |           |                     |
| CB4856 HS V                                                           | 14852826                                        | 14858596 | WBGene00013883 | npr-13    | ZC412.1   | 0.0902443559263659  |
| AGIWUR24587                                                           |                                                 |          |                |           |           |                     |
| CB4856 HS V                                                           | 14863168                                        | 14867992 | WBGene00001540 | gcy-14    | ZC412.2   | 0.184280244643428   |
| AGIWUR25373                                                           |                                                 |          |                |           |           |                     |

|                                                             |                                                                      |          |                |           |           |                     |
|-------------------------------------------------------------|----------------------------------------------------------------------|----------|----------------|-----------|-----------|---------------------|
| CB4856 HS V                                                 | 14868645                                                             | 14871547 | WBGene00013884 | ZC412.3   | ZC412.3   |                     |
| -0.00622502871435593                                        | AGIWUR22737;AGIWUR26775;AGIWUR32462;AGIWUR32846;AGIWUR41774          |          |                |           |           |                     |
| CB4856 HS V                                                 | 14874198                                                             | 14875470 | WBGene00013886 | ZC412.5   | ZC412.5   | 0.149526957949435   |
| AGIWUR9631                                                  |                                                                      |          |                |           |           |                     |
| CB4856 HS V                                                 | 14875945                                                             | 14876824 | WBGene00050943 | ZC412.10  |           | ZC412.10            |
| -0.126750627277822                                          | AGIWUR19669;AGIWUR20199;AGIWUR25392;AGIWUR38413;AGIWUR41778          |          |                |           |           |                     |
| CB4856 HS V                                                 | 14884585                                                             | 14884880 | WBGene00044272 | nspa-4    | H12D21.13 |                     |
| -0.231821176983283                                          | AGIWUR1631;AGIWUR9028;AGIWUR23094;AGIWUR23657;AGIWUR31671            |          |                |           |           |                     |
| CB4856 HS V                                                 | 14891450                                                             | 14893435 | WBGene00010380 | mpst-2    | H12D21.4  |                     |
| 0.0332318059864019                                          | AGIWUR3938                                                           |          |                |           |           |                     |
| CB4856 HS V                                                 | 14894053                                                             | 14894798 | WBGene00010381 | H12D21.5  |           | H12D21.5            |
| 0.0148916137548643                                          | AGIWUR18903;AGIWUR37094;AGIWUR42491                                  |          |                |           |           |                     |
| CB4856 HS V                                                 | 14895647                                                             | 14899013 | WBGene00010383 | mpst-3    | H12D21.7  |                     |
| 0.20073241106989                                            | AGIWUR7967                                                           |          |                |           |           |                     |
| CB4856 HS V                                                 | 14899791                                                             | 14911929 | WBGene00010386 | H12D21.10 |           | H12D21.10           |
| 0.0896906672822144                                          | AGIWUR4311;AGIWUR6332;AGIWUR9362;AGIWUR10420;AGIWUR32434;AGIWUR38707 |          |                |           |           |                     |
| CB4856 HS V                                                 | 14915906                                                             | 14917682 | WBGene00010387 | H12D21.11 |           | H12D21.11           |
| -0.048377949546861                                          | AGIWUR28713                                                          |          |                |           |           |                     |
| CB4856 HS V                                                 | 14917735                                                             | 14921609 | WBGene00012364 | zmp-4     | W09D12.1  |                     |
| 0.0499279441063827                                          | AGIWUR31014                                                          |          |                |           |           |                     |
| CB4856 HS V                                                 | 14921988                                                             | 14924204 | WBGene00005211 | srg-54    | W09D12.3  |                     |
| -0.172417253081447                                          | AGIWUR10044;AGIWUR13039;AGIWUR19865                                  |          |                |           |           |                     |
| CB4856 HS V                                                 | 14926710                                                             | 14928342 | WBGene00005212 | srg-55    | W09D12.2  |                     |
| 0.202020554518204                                           | AGIWUR15180                                                          |          |                |           |           |                     |
| CB4856 HS V                                                 | 14936898                                                             | 14939367 | WBGene00044176 | C30G7.2   | C30G7.2   | 0.200920451981778   |
| AGIWUR15345;AGIWUR19514;AGIWUR20514;AGIWUR20840;AGIWUR40778 |                                                                      |          |                |           |           |                     |
| CB4856 HS V                                                 | 14942137                                                             | 14945704 | WBGene00044177 | C30G7.3   | C30G7.3   | 0.034873191995235   |
| AGIWUR41197                                                 |                                                                      |          |                |           |           |                     |
| CB4856 HS V                                                 | 14946622                                                             | 14947229 | WBGene00044178 | C30G7.4   | C30G7.4   | 0.273485952657545   |
| AGIWUR30727;AGIWUR32223;AGIWUR44853                         |                                                                      |          |                |           |           |                     |
| CB4856 HS V                                                 | 14949777                                                             | 14952796 | WBGene00001852 | hil-1     | C30G7.1   | 0.274237461281546   |
| AGIWUR6850                                                  |                                                                      |          |                |           |           |                     |
| CB4856 HS V                                                 | 14953115                                                             | 14954733 | WBGene00044179 | C30G7.5   | C30G7.5   | -0.0365452884035133 |
| AGIWUR13663;AGIWUR24010                                     |                                                                      |          |                |           |           |                     |
| CB4856 HS V                                                 | 14971436                                                             | 14972419 | WBGene00008522 | F02D8.5   | F02D8.5   | 0.321745153746207   |
| AGIWUR7448                                                  |                                                                      |          |                |           |           |                     |
| CB4856 HS V                                                 | 14972907                                                             | 14978779 | WBGene00008520 | F02D8.1   | F02D8.1   | -0.0329413909038383 |
| AGIWUR14274                                                 |                                                                      |          |                |           |           |                     |
| CB4856 HS V                                                 | 14978505                                                             | 14980159 | WBGene00001701 | grd-12    | F02D8.2   | 0.0125768377058559  |

|                                                  |   |          |          |                |          |          |                     |  |  |
|--------------------------------------------------|---|----------|----------|----------------|----------|----------|---------------------|--|--|
| AGIWUR8753                                       |   |          |          |                |          |          |                     |  |  |
| CB4856 HS<br>AGIWUR25693                         | V | 14980354 | 14982626 | WBGene00006960 | xbx-1    | F02D8.3  | 0.176821505795946   |  |  |
| CB4856 HS<br>AGIWUR34606                         | V | 14984893 | 14987571 | WBGene00008521 | F02D8.4  | F02D8.4  | 0.198203155535047   |  |  |
| CB4856 HS<br>AGIWUR15169                         | V | 14987556 | 14991024 | WBGene00011318 | cdt-2    | T01C3.1  | 0.144582962603057   |  |  |
| CB4856 HS<br>AGIWUR38466                         | V | 14991168 | 14991649 | WBGene00011319 | T01C3.2  | T01C3.2  | -0.0562504959908754 |  |  |
| CB4856 HS<br>AGIWUR20486                         | V | 14991707 | 14992677 | WBGene00011320 | T01C3.3  | T01C3.3  | 0.109505575293351   |  |  |
| CB4856 HS<br>AGIWUR31420                         | V | 14993838 | 14995201 | WBGene00011321 | fil-1    | T01C3.4  | 0.169585251368064   |  |  |
| CB4856 HS<br>AGIWUR1135                          | V | 14996536 | 14998121 | WBGene00011322 | irld-14  | T01C3.5  | 0.157342018589858   |  |  |
| CB4856 HS<br>0.0413133878536271                  | V | 14998991 | 15000029 | WBGene00011325 | T01C3.11 |          | T01C3.11            |  |  |
| CB4856 HS<br>AGIWUR35806                         | V | 15000011 | 15000594 | WBGene00004485 | rps-16   | T01C3.6  | 0.240424572737888   |  |  |
| AGIWUR8459;AGIWUR18895                           |   |          |          |                |          |          |                     |  |  |
| CB4856 HS<br>AGIWUR20438;AGIWUR21536;AGIWUR25217 | V | 15000653 | 15002273 | WBGene00001423 | fib-1    | T01C3.7  | -0.442817187688789  |  |  |
| CB4856 HS<br>AGIWUR16375                         | V | 15002543 | 15005055 | WBGene00011323 | mut-15   | T01C3.8  | -0.0333368520112582 |  |  |
| CB4856 HS<br>AGIWUR28084                         | V | 15005100 | 15006400 | WBGene00011324 | T01C3.9  | T01C3.9  | -0.0390164415562246 |  |  |
| CB4856 HS<br>0.06059755613003                    | V | 15006412 | 15011660 | WBGene00003775 | nmr-2    | T01C3.10 |                     |  |  |
| AGIWUR2690;AGIWUR21972                           |   |          |          |                |          |          |                     |  |  |
| CB4856 HS<br>AGIWUR36992                         | V | 15011870 | 15014222 | WBGene00008832 | obr-2    | F14H8.1  | 0.135195448467655   |  |  |
| CB4856 HS<br>AGIWUR22268                         | V | 15019224 | 15020325 | WBGene00008833 | F14H8.2  | F14H8.2  | -0.251732771000992  |  |  |
| CB4856 HS<br>AGIWUR36821                         | V | 15021032 | 15022049 | WBGene00008835 | F14H8.5  | F14H8.5  | -0.121677095359429  |  |  |
| CB4856 HS<br>AGIWUR23604                         | V | 15023844 | 15025150 | WBGene00008834 | F14H8.4  | F14H8.4  | 0.416671206196061   |  |  |
| CB4856 HS<br>AGIWUR33769                         | V | 15025740 | 15031473 | WBGene00000562 | cng-1    | F14H8.6  | 0.0341683168538651  |  |  |
| CB4856 HS<br>AGIWUR2845                          | V | 15039152 | 15048207 | WBGene00004747 | sdc-3    | C25D7.3  | -0.0924117547417609 |  |  |

|                                                                       |                                                             |          |                |           |           |                    |
|-----------------------------------------------------------------------|-------------------------------------------------------------|----------|----------------|-----------|-----------|--------------------|
| CB4856 HS V                                                           | 15051011                                                    | 15052530 | WBGene00007716 | fbxa-82   | C25D7.4   | 0.166549098942324  |
| AGIWUR10372                                                           |                                                             |          |                |           |           |                    |
| CB4856 HS V                                                           | 15053765                                                    | 15056280 | WBGene00007717 | C25D7.5   | C25D7.5   | 0.187089091065245  |
| AGIWUR24839                                                           |                                                             |          |                |           |           |                    |
| CB4856 HS V                                                           | 15056289                                                    | 15056744 | WBGene00050940 | C25D7.16  | C25D7.16  |                    |
| 0.203141852764199                                                     | AGIWUR9975                                                  |          |                |           |           |                    |
| CB4856 HS V                                                           | 15056719                                                    | 15059599 | WBGene00003155 | mcm-3     | C25D7.6   | -0.186346127299707 |
| AGIWUR8062;AGIWUR8850;AGIWUR19068;AGIWUR40939;AGIWUR41661;AGIWUR43165 |                                                             |          |                |           |           |                    |
| CB4856 HS V                                                           | 15060249                                                    | 15061530 | WBGene00007722 | C25D7.15  | C25D7.15  |                    |
| 0.0878632275799731                                                    | AGIWUR122;AGIWUR3050;AGIWUR3052;AGIWUR26496;AGIWUR34917     |          |                |           |           |                    |
| CB4856 HS V                                                           | 15061488                                                    | 15064087 | WBGene00004308 | rap-2     | C25D7.7   | -0.230259923931875 |
| AGIWUR28629                                                           |                                                             |          |                |           |           |                    |
| CB4856 HS V                                                           | 15066298                                                    | 15067464 | WBGene00007718 | otub-1    | C25D7.8   | -0.140227154732802 |
| AGIWUR22406                                                           |                                                             |          |                |           |           |                    |
| CB4856 HS V                                                           | 15067465                                                    | 15068581 | WBGene00007720 | C25D7.10  | C25D7.10  |                    |
| 0.0236135844231313                                                    | AGIWUR30033                                                 |          |                |           |           |                    |
| CB4856 HS V                                                           | 15068678                                                    | 15069504 | WBGene00001021 | dnj-3     | C01G10.12 |                    |
| -0.0637778972581664                                                   | AGIWUR17693                                                 |          |                |           |           |                    |
| CB4856 HS V                                                           | 15071748                                                    | 15080152 | WBGene00006808 | unc-76    | C01G10.11 |                    |
| 0.0190639687783518                                                    | AGIWUR3430;AGIWUR13249;AGIWUR13398;AGIWUR42081              |          |                |           |           |                    |
| CB4856 HS V                                                           | 15080134                                                    | 15082533 | WBGene00007237 | C01G10.10 | C01G10.10 |                    |
| -0.0033181825132047                                                   | AGIWUR17288                                                 |          |                |           |           |                    |
| CB4856 HS V                                                           | 15082530                                                    | 15084139 | WBGene00007236 | C01G10.9  | C01G10.9  |                    |
| 0.167935962311237                                                     | AGIWUR42749                                                 |          |                |           |           |                    |
| CB4856 HS V                                                           | 15084059                                                    | 15085382 | WBGene00007235 | C01G10.8  | C01G10.8  |                    |
| -0.227459646607638                                                    | AGIWUR24212;AGIWUR27098;AGIWUR27860;AGIWUR40458;AGIWUR43962 |          |                |           |           |                    |
| CB4856 HS V                                                           | 15085747                                                    | 15087064 | WBGene00007234 | C01G10.7  | C01G10.7  |                    |
| -0.147210505014101                                                    | AGIWUR22086                                                 |          |                |           |           |                    |
| CB4856 HS V                                                           | 15087656                                                    | 15088336 | WBGene00007233 | C01G10.6  | C01G10.6  |                    |
| 0.0940358421094594                                                    | AGIWUR21700                                                 |          |                |           |           |                    |
| CB4856 HS V                                                           | 15088427                                                    | 15088699 | WBGene00077583 | C01G10.18 | C01G10.18 |                    |
| 0.168162539000486                                                     | AGIWUR32231                                                 |          |                |           |           |                    |
| CB4856 HS V                                                           | 15090757                                                    | 15091062 | WBGene00044658 | C01G10.17 | C01G10.17 |                    |
| -0.318368693671641                                                    | AGIWUR31764                                                 |          |                |           |           |                    |
| CB4856 HS V                                                           | 15092966                                                    | 15094338 | WBGene00007241 | C01G10.16 | C01G10.16 |                    |
| 0.19540475504748                                                      | AGIWUR38976                                                 |          |                |           |           |                    |
| CB4856 HS V                                                           | 15095049                                                    | 15097452 | WBGene00005969 | srx-78    | C01G10.3  |                    |
| 0.0168494633593586                                                    | AGIWUR38301                                                 |          |                |           |           |                    |
| CB4856 HS V                                                           | 15097674                                                    | 15099554 | WBGene00005970 | srx-79    | C01G10.2  |                    |

|                      |                                     |          |                |                 |                     |
|----------------------|-------------------------------------|----------|----------------|-----------------|---------------------|
| -0.0838338290618168  | AGIWUR43742                         |          |                |                 |                     |
| CB4856 HS V          | 15099747                            | 15104389 | WBGene00007230 | C01G10.1        | C01G10.1            |
| 0.115435472534477    | AGIWUR43126                         |          |                |                 |                     |
| CB4856 HS V          | 15104724                            | 15105197 | WBGene00077584 | C01G10.19       | C01G10.19           |
| 0.0976599317876001   | AGIWUR22856                         |          |                |                 |                     |
| CB4856 HS V          | 15106094                            | 15106473 | WBGene00007238 | C01G10.13       | C01G10.13           |
| -0.162665614647039   | AGIWUR36941                         |          |                |                 |                     |
| CB4856 HS V          | 15109577                            | 15110345 | WBGene00013566 | Y75B12A.2       | Y75B12A.2           |
| 0.0571028224589831   | AGIWUR5674                          |          |                |                 |                     |
| CB4856 HS V          | 15111960                            | 15113628 | WBGene00011342 | T01G5.7 T01G5.7 | 0.144161264522108   |
| AGIWUR41464          |                                     |          |                |                 |                     |
| CB4856 HS V          | 15113781                            | 15114092 | WBGene00011341 | T01G5.6 T01G5.6 | 0.192399754976165   |
| AGIWUR38981          |                                     |          |                |                 |                     |
| CB4856 HS V          | 15116844                            | 15119617 | WBGene00011339 | T01G5.1 T01G5.1 | 0.327991541857966   |
| AGIWUR32926          |                                     |          |                |                 |                     |
| CB4856 HS V          | 15121729                            | 15125228 | WBGene00011340 | ugt-30 T01G5.2  | 0.0814917933908852  |
| AGIWUR40589          |                                     |          |                |                 |                     |
| CB4856 HS V          | 15126212                            | 15127513 | WBGene00005615 | srj-27 T01G5.3  | 0.00306659051756419 |
| AGIWUR27734          |                                     |          |                |                 |                     |
| CB4856 HS V          | 15128171                            | 15129986 | WBGene00005658 | srr-7 T01G5.4   | -0.0193487657634543 |
| AGIWUR30840          |                                     |          |                |                 |                     |
| CB4856 HS V          | 15130497                            | 15132516 | WBGene00006215 | str-171 T01G5.5 |                     |
| -0.00560951624039241 | AGIWUR9632                          |          |                |                 |                     |
| CB4856 HS V          | 15134188                            | 15136801 | WBGene00010685 | aip1-1 K08F9.2  | 0.138489447055022   |
| AGIWUR12725          |                                     |          |                |                 |                     |
| CB4856 HS V          | 15137273                            | 15139888 | WBGene00010684 | K08F9.1 K08F9.1 |                     |
| -0.00233661191822598 | AGIWUR31121;AGIWUR34826;AGIWUR37417 |          |                |                 |                     |
| CB4856 HS V          | 15140547                            | 15143923 | WBGene00010686 | K08F9.3 K08F9.3 | 0.316801905834496   |
| AGIWUR44170          |                                     |          |                |                 |                     |
| CB4856 HS V          | 15144019                            | 15146435 | WBGene00010687 | K08F9.4 K08F9.4 | 0.115991661282521   |
| AGIWUR30773          |                                     |          |                |                 |                     |
| CB4856 HS V          | 15149046                            | 15150733 | WBGene00011665 | T09F5.1 T09F5.1 | 0.11112253207048    |
| AGIWUR35738          |                                     |          |                |                 |                     |
| CB4856 HS V          | 15150961                            | 15151638 | WBGene00011666 | T09F5.2 T09F5.2 | 0.0852773650650755  |
| AGIWUR18789          |                                     |          |                |                 |                     |
| CB4856 HS V          | 15151845                            | 15153369 | WBGene00005276 | srh-53 T09F5.15 |                     |
| 0.0180439434570516   | AGIWUR21704;AGIWUR30575             |          |                |                 |                     |
| CB4856 HS V          | 15153577                            | 15154994 | WBGene00005278 | srh-55 T09F5.5  | 0.207197065053997   |
| AGIWUR37126          |                                     |          |                |                 |                     |

|                                                                                                                       |          |          |                |            |           |                    |
|-----------------------------------------------------------------------------------------------------------------------|----------|----------|----------------|------------|-----------|--------------------|
| CB4856 HS V                                                                                                           | 15155139 | 15156457 | WBGene00005277 | srh-54     | T09F5.6   | 0.0418132079995566 |
| AGIWUR1667;AGIWUR34644                                                                                                |          |          |                |            |           |                    |
| CB4856 HS V                                                                                                           | 15158991 | 15160546 | WBGene00006110 | str-45     | T09F5.3   | 0.15332297740887   |
| AGIWUR6042                                                                                                            |          |          |                |            |           |                    |
| CB4856 HS V                                                                                                           | 15161003 | 15162433 | WBGene00014835 | T09F5.4    | T09F5.4   | 0.0185005690363207 |
| AGIWUR19205;AGIWUR21794                                                                                               |          |          |                |            |           |                    |
| CB4856 HS V                                                                                                           | 15163082 | 15164518 | WBGene00023506 | srz-11     | T09F5.16  |                    |
| 0.0252056517393018 AGIWUR12429;AGIWUR40422                                                                            |          |          |                |            |           |                    |
| CB4856 HS V                                                                                                           | 15164743 | 15166318 | WBGene00014836 | T09F5.12   |           | T09F5.12           |
| 0.035605725676747                                                                                                     |          |          |                |            |           |                    |
| AGIWUR5187;AGIWUR9932;AGIWUR16230;AGIWUR23997;AGIWUR25680;AGIWUR25747;AGIWUR31915;AGIWUR37507;AGIWUR37916;AGIWUR44722 |          |          |                |            |           |                    |
| CB4856 HS V                                                                                                           | 15170462 | 15171642 | WBGene00005483 | srh-278    | T09F5.8   | 0.124196961479046  |
| AGIWUR30203                                                                                                           |          |          |                |            |           |                    |
| CB4856 HS V                                                                                                           | 15173635 | 15174856 | WBGene00014837 | T09F5.13   |           | T09F5.13           |
| -0.105305148512991 AGIWUR15078                                                                                        |          |          |                |            |           |                    |
| CB4856 HS V                                                                                                           | 15175673 | 15176324 | WBGene00011668 | clcc-47    | T09F5.9   | -0.116236116711072 |
| AGIWUR4783;AGIWUR31179;AGIWUR31331                                                                                    |          |          |                |            |           |                    |
| CB4856 HS V                                                                                                           | 15176768 | 15179484 | WBGene00005772 | srw-25     | T09F5.14  |                    |
| -0.0395268182525408 AGIWUR23703;AGIWUR41505                                                                           |          |          |                |            |           |                    |
| CB4856 HS V                                                                                                           | 15180057 | 15181785 | WBGene00011669 | T09F5.10   |           | T09F5.10           |
| 0.181756735290722 AGIWUR27301                                                                                         |          |          |                |            |           |                    |
| CB4856 HS V                                                                                                           | 15182440 | 15184125 | WBGene00011670 | fbxa-84    | T09F5.11  |                    |
| -0.0114464910658114 AGIWUR34280                                                                                       |          |          |                |            |           |                    |
| CB4856 HS V                                                                                                           | 15184706 | 15185878 | WBGene00013567 | Y75B12B.1  |           | Y75B12B.1          |
| -0.179921946473433 AGIWUR7998;AGIWUR34678                                                                             |          |          |                |            |           |                    |
| CB4856 HS V                                                                                                           | 15185891 | 15186300 | WBGene00013568 | Y75B12B.3  |           | Y75B12B.3          |
| 0.17900184560335 AGIWUR7577;AGIWUR19953;AGIWUR29967;AGIWUR31867;AGIWUR38866;AGIWUR41247                               |          |          |                |            |           |                    |
| CB4856 HS V                                                                                                           | 15186582 | 15187787 | WBGene00000883 | cyn-7      | Y75B12B.2 |                    |
| -0.347661676680069 AGIWUR14782;AGIWUR26242                                                                            |          |          |                |            |           |                    |
| CB4856 HS V                                                                                                           | 15187989 | 15189588 | WBGene00013569 | bath-36    | Y75B12B.4 |                    |
| 0.142405601103187 AGIWUR4808                                                                                          |          |          |                |            |           |                    |
| CB4856 HS V                                                                                                           | 15189927 | 15190926 | WBGene00000879 | cyn-3      | Y75B12B.5 |                    |
| 0.0532852775004837 AGIWUR29379;AGIWUR29942                                                                            |          |          |                |            |           |                    |
| CB4856 HS V                                                                                                           | 15191296 | 15191836 | WBGene00013573 | Y75B12B.11 |           | Y75B12B.11         |
| 0.024786766227157 AGIWUR1882;AGIWUR21973;AGIWUR35511;AGIWUR36041;AGIWUR40308                                          |          |          |                |            |           |                    |
| CB4856 HS V                                                                                                           | 15192572 | 15197661 | WBGene00004037 | plc-2      | Y75B12B.6 |                    |
| -0.215940177625907 AGIWUR37464                                                                                        |          |          |                |            |           |                    |
| CB4856 HS V                                                                                                           | 15198255 | 15199396 | WBGene00005748 | srw-1      | Y75B12B.7 |                    |

|                                    |                       |          |  |                |            |                             |
|------------------------------------|-----------------------|----------|--|----------------|------------|-----------------------------|
| -0.0489058438182788                | AGIWUR11483           |          |  | WBGene00077440 | Y75B12B.14 | Y75B12B.14                  |
| CB4856 HS V                        | 15205095              | 15206552 |  |                |            |                             |
| -0.0108519807014935                | AGIWUR4002;AGIWUR4181 |          |  |                |            |                             |
| CB4856 HS V                        | 15212169              | 15213706 |  | WBGene00005536 | sri-24     | C41G6.11                    |
| -0.225767612954456                 | AGIWUR30590           |          |  |                |            |                             |
| CB4856 HS V                        | 15215475              | 15216889 |  | WBGene00005538 | sri-26     | C41G6.14                    |
| -0.111418817833718                 | AGIWUR34017           |          |  |                |            |                             |
| CB4856 HS V                        | 15217005              | 15219320 |  | WBGene00005537 | sri-25     | C41G6.10                    |
| 0.12041215188801                   | AGIWUR41083           |          |  |                |            |                             |
| CB4856 HS V                        | 15219946              | 15221377 |  | WBGene00005381 | srh-165    | C41G6.9 0.0931855164379272  |
| AGIWUR17371                        |                       |          |  |                |            |                             |
| CB4856 HS V                        | 15221682              | 15223114 |  | WBGene00008057 | irld-25    | C41G6.6 0.151718818608638   |
| AGIWUR10550                        |                       |          |  |                |            |                             |
| CB4856 HS V                        | 15223968              | 15225359 |  | WBGene00005771 | srw-24     | C41G6.7 0.142183412084364   |
| AGIWUR35860                        |                       |          |  |                |            |                             |
| CB4856 HS V                        | 15225950              | 15227472 |  | WBGene00005761 | srw-14     | C41G6.8 0.243204858318295   |
| AGIWUR17235                        |                       |          |  |                |            |                             |
| CB4856 HS V                        | 15228092              | 15230075 |  | WBGene00008055 | cyp-34A3   | C41G6.1                     |
| -0.067931252181503                 | AGIWUR27581           |          |  |                |            |                             |
| CB4856 HS V                        | 15230543              | 15231893 |  | WBGene00005762 | srw-15     | C41G6.3 0.10809159492387    |
| AGIWUR7178                         |                       |          |  |                |            |                             |
| CB4856 HS V                        | 15232500              | 15233844 |  | WBGene00005760 | srw-13     | C41G6.15                    |
| -0.160286080232072                 | AGIWUR17125           |          |  |                |            |                             |
| CB4856 HS V                        | 15233894              | 15235761 |  | WBGene00008056 | nhr-164    | C41G6.5 0.0149761771531809  |
| AGIWUR41753                        |                       |          |  |                |            |                             |
| CB4856 HS V                        | 15237334              | 15238650 |  | WBGene00005759 | srw-12     | C41G6.2 0.123357284439251   |
| AGIWUR1197                         |                       |          |  |                |            |                             |
| CB4856 HS V                        | 15239070              | 15240315 |  | WBGene00005758 | srw-11     | M01B2.11                    |
| -0.242147836196196                 | AGIWUR1583            |          |  |                |            |                             |
| CB4856 HS V                        | 15241584              | 15243943 |  | WBGene00010799 | chil-12    | M01B2.6 0.0574558386740858  |
| AGIWUR28079                        |                       |          |  |                |            |                             |
| CB4856 HS V                        | 15244756              | 15247707 |  | WBGene00002211 | kin-30     | M01B2.1 0.0452661598556885  |
| AGIWUR2872;AGIWUR26412;AGIWUR37435 |                       |          |  |                |            |                             |
| CB4856 HS V                        | 15252382              | 15253291 |  | WBGene00010798 | srbc-76    | M01B2.4 0.25598731356091    |
| AGIWUR28878                        |                       |          |  |                |            |                             |
| CB4856 HS V                        | 15253829              | 15254805 |  | WBGene00010797 | srbc-75    | M01B2.3 -0.0121595540346249 |
| AGIWUR7779                         |                       |          |  |                |            |                             |
| CB4856 HS V                        | 15257581              | 15259149 |  | WBGene00010800 | srsx-37    | M01B2.7 0.12509708350672    |
| AGIWUR25045                        |                       |          |  |                |            |                             |

|                                                |                                                |          |                |          |           |                     |
|------------------------------------------------|------------------------------------------------|----------|----------------|----------|-----------|---------------------|
| CB4856 HS V                                    | 15260238                                       | 15260786 | WBGene00010801 | M01B2.8  | M01B2.8   | -0.282725404114662  |
| AGIWUR34144                                    |                                                |          |                |          |           |                     |
| CB4856 HS V                                    | 15260890                                       | 15262244 | WBGene00010803 | M01B2.10 |           | M01B2.10            |
| 0.230395696715838                              | AGIWUR12440                                    |          |                |          |           |                     |
| CB4856 HS V                                    | 15263005                                       | 15264231 | WBGene00045337 | M01B2.12 |           | M01B2.12            |
| 0.0572758054958884                             | AGIWUR23366;AGIWUR39919                        |          |                |          |           |                     |
| CB4856 HS V                                    | 15264653                                       | 15265786 | WBGene00045338 | M01B2.13 |           | M01B2.13            |
| 0.264045097162708                              | AGIWUR22195;AGIWUR36262                        |          |                |          |           |                     |
| CB4856 HS V                                    | 15266436                                       | 15267505 | WBGene00045339 | T10H4.13 |           | T10H4.13            |
| 0.209373459696912                              | AGIWUR15224;AGIWUR29329                        |          |                |          |           |                     |
| CB4856 HS V                                    | 15270147                                       | 15272363 | WBGene00011697 | T10H4.4  | T10H4.4   | 0.116531907093081   |
| AGIWUR11665                                    |                                                |          |                |          |           |                     |
| CB4856 HS V                                    | 15273383                                       | 15274857 | WBGene00005763 | srw-16   | T10H4.5   | -0.0063789609849163 |
| AGIWUR21435;AGIWUR32739;AGIWUR38813            |                                                |          |                |          |           |                     |
| CB4856 HS V                                    | 15275443                                       | 15276900 | WBGene00005764 | srw-17   | T10H4.6   | -0.197710219898329  |
| AGIWUR36781                                    |                                                |          |                |          |           |                     |
| CB4856 HS V                                    | 15277612                                       | 15278972 | WBGene00005765 | srw-18   | T10H4.7   | -0.0364000142561829 |
| AGIWUR40153;AGIWUR42041                        |                                                |          |                |          |           |                     |
| CB4856 HS V                                    | 15279782                                       | 15281395 | WBGene00005766 | srw-19   | T10H4.8   | 0.0382714348802011  |
| AGIWUR25938                                    |                                                |          |                |          |           |                     |
| CB4856 HS V                                    | 15281899                                       | 15283562 | WBGene00005942 | srx-51   | T10H4.9   | 0.123371725669574   |
| AGIWUR5846;AGIWUR18176;AGIWUR22189;AGIWUR23255 |                                                |          |                |          |           |                     |
| CB4856 HS V                                    | 15284242                                       | 15285551 | WBGene00014839 | T10H4.1  | T10H4.1   | -0.182390060222087  |
| AGIWUR20134;AGIWUR27880                        |                                                |          |                |          |           |                     |
| CB4856 HS V                                    | 15285605                                       | 15287925 | WBGene00011698 | cyp-34A1 |           | T10H4.10            |
| -0.0275239163596521                            | AGIWUR34196;AGIWUR36752                        |          |                |          |           |                     |
| CB4856 HS V                                    | 15288924                                       | 15291107 | WBGene00011699 | cyp-34A2 |           | T10H4.11            |
| -0.0480199039328664                            | AGIWUR9841;AGIWUR12717;AGIWUR25983;AGIWUR37300 |          |                |          |           |                     |
| CB4856 HS V                                    | 15292490                                       | 15293965 | WBGene00006153 | str-96   | T10H4.2   | 0.180870891858707   |
| AGIWUR28458                                    |                                                |          |                |          |           |                     |
| CB4856 HS V                                    | 15296853                                       | 15298700 | WBGene00000783 | cpr-3    | T10H4.12  |                     |
| 0.196143988860072                              | AGIWUR17997                                    |          |                |          |           |                     |
| CB4856 HS V                                    | 15299190                                       | 15301890 | WBGene00005940 | srx-49   | T26H8.3   | 0.247739592462848   |
| AGIWUR10126                                    |                                                |          |                |          |           |                     |
| CB4856 HS V                                    | 15302371                                       | 15303725 | WBGene00005939 | srx-48   | T26H8.2   | 0.0556231840588284  |
| AGIWUR31605                                    |                                                |          |                |          |           |                     |
| CB4856 HS V                                    | 15304607                                       | 15305602 | WBGene00077588 | T26H8.5  | T26H8.5   | -0.0877356277645109 |
| AGIWUR36665                                    |                                                |          |                |          |           |                     |
| CB4856 HS V                                    | 15307562                                       | 15309063 | WBGene00014195 | srz-10   | ZK1037.11 |                     |



|                     |                                                                       |          |                |           |                            |
|---------------------|-----------------------------------------------------------------------|----------|----------------|-----------|----------------------------|
| -0.0641290635924179 | AGIWUR35045                                                           |          |                |           |                            |
| CB4856 HS V         | 15310120                                                              | 15310437 | WBGene00045514 | ZK1037.12 | ZK1037.12                  |
| 0.0237155790598766  | AGIWUR3212;AGIWUR5803;AGIWUR13301;AGIWUR18102;AGIWUR41748             |          |                |           |                            |
| CB4856 HS V         | 15311080                                                              | 15312536 | WBGene00014190 | irld-62   | ZK1037.1                   |
| -0.0179519860128243 | AGIWUR1413;AGIWUR6378;AGIWUR44594                                     |          |                |           |                            |
| CB4856 HS V         | 15312982                                                              | 15314230 | WBGene00014993 | ZK1037.2  | ZK1037.2                   |
| 0.725585472303188   | AGIWUR24023;AGIWUR27900                                               |          |                |           |                            |
| CB4856 HS V         | 15314668                                                              | 15315927 | WBGene00014191 | srt-22    | ZK1037.3                   |
| -0.276040593538552  | AGIWUR27698                                                           |          |                |           |                            |
| CB4856 HS V         | 15316497                                                              | 15318425 | WBGene00014192 | nhr-246   | ZK1037.4                   |
| -0.0573470770640592 | AGIWUR12217                                                           |          |                |           |                            |
| CB4856 HS V         | 15318961                                                              | 15320553 | WBGene00045515 | ZK1037.13 | ZK1037.13                  |
| -0.118165962035858  | AGIWUR28286                                                           |          |                |           |                            |
| CB4856 HS V         | 15323853                                                              | 15325351 | WBGene00014193 | nhr-247   | ZK1037.5                   |
| -0.0283649475367032 | AGIWUR3093                                                            |          |                |           |                            |
| CB4856 HS V         | 15325822                                                              | 15327795 | WBGene00014194 | ZK1037.6  | ZK1037.6                   |
| 0.113793155865535   | AGIWUR30444                                                           |          |                |           |                            |
| CB4856 HS V         | 15328656                                                              | 15330064 | WBGene00005817 | srw-70    | ZK1037.7                   |
| -0.18292161804348   | AGIWUR1333                                                            |          |                |           |                            |
| CB4856 HS V         | 15330614                                                              | 15332774 | WBGene00005499 | srh-295   | ZK1037.8                   |
| -0.208321060510442  | AGIWUR8748                                                            |          |                |           |                            |
| CB4856 HS V         | 15333151                                                              | 15334571 | WBGene00005860 | srw-113   | ZK1037.9                   |
| -0.112457279252695  | AGIWUR28439                                                           |          |                |           |                            |
| CB4856 HS V         | 15334782                                                              | 15337505 | WBGene00006953 | wrt-7     | ZK1037.10                  |
| -0.12376571200539   | AGIWUR34552                                                           |          |                |           |                            |
| CB4856 HS V         | 15338569                                                              | 15339482 | WBGene00044086 | cllec-228 | H02K04.2                   |
| -0.16330826189211   | AGIWUR23656                                                           |          |                |           |                            |
| CB4856 HS V         | 15340136                                                              | 15341446 | WBGene00010355 | cllec-229 | H02K04.1                   |
| -0.134928321100194  | AGIWUR13041                                                           |          |                |           |                            |
| CB4856 HS V         | 15342056                                                              | 15344572 | WBGene00006954 | wrt-8     | C29F3.2 -0.123823924857394 |
| AGIWUR24077         |                                                                       |          |                |           |                            |
| CB4856 HS V         | 15346674                                                              | 15347411 | WBGene00007804 | C29F3.3   | C29F3.3 0.0363157021514677 |
| AGIWUR15493         |                                                                       |          |                |           |                            |
| CB4856 HS V         | 15347847                                                              | 15349144 | WBGene00007806 | cllec-230 | C29F3.5                    |
| -0.019911313693652  | AGIWUR153;AGIWUR19005;AGIWUR25227;AGIWUR32717;AGIWUR41233;AGIWUR45193 |          |                |           |                            |
| CB4856 HS V         | 15349449                                                              | 15350662 | WBGene00007805 | cllec-231 | C29F3.4                    |
| -0.242992544355305  | AGIWUR37420                                                           |          |                |           |                            |
| CB4856 HS V         | 15352574                                                              | 15353862 | WBGene00005949 | srx-58    | C29F3.6 -0.214696071588349 |
| AGIWUR41130         |                                                                       |          |                |           |                            |

|                                                                                                 |                                                            |          |                |                                     |
|-------------------------------------------------------------------------------------------------|------------------------------------------------------------|----------|----------------|-------------------------------------|
| CB4856 HS V                                                                                     | 15354833                                                   | 15357572 | WBGene00007807 | C29F3.7 C29F3.7 -0.199153013246761  |
| AGIWUR39682                                                                                     |                                                            |          |                |                                     |
| CB4856 HS V                                                                                     | 15357696                                                   | 15360738 | WBGene00001150 | ech-1.1 C29F3.1 -0.173689518136673  |
| AGIWUR34719                                                                                     |                                                            |          |                |                                     |
| CB4856 HS V                                                                                     | 15363604                                                   | 15365013 | WBGene00005325 | srh-106 R08H2.14                    |
| -0.010349842218905                                                                              | AGIWUR529;AGIWUR43325                                      |          |                |                                     |
| CB4856 HS V                                                                                     | 15365298                                                   | 15366825 | WBGene00005326 | srh-107 R08H2.12                    |
| -0.0707318091264337                                                                             | AGIWUR8881;AGIWUR12553;AGIWUR26384;AGIWUR26419;AGIWUR33182 |          |                |                                     |
| CB4856 HS V                                                                                     | 15367159                                                   | 15368289 | WBGene00005327 | srh-108 R08H2.11                    |
| -0.151647462295535                                                                              | AGIWUR6959;AGIWUR10639;AGIWUR15625                         |          |                |                                     |
| CB4856 HS V                                                                                     | 15368470                                                   | 15370215 | WBGene00011150 | nhr-269 R08H2.9 0.213523221855274   |
| AGIWUR22961                                                                                     |                                                            |          |                |                                     |
| CB4856 HS V                                                                                     | 15370867                                                   | 15372950 | WBGene00011149 | R08H2.8 R08H2.8 -0.0591717204383482 |
| AGIWUR35406                                                                                     |                                                            |          |                |                                     |
| CB4856 HS V                                                                                     | 15373676                                                   | 15374113 | WBGene00011151 | R08H2.10 R08H2.10                   |
| -0.0786067391873386                                                                             | AGIWUR37438                                                |          |                |                                     |
| CB4856 HS V                                                                                     | 15374900                                                   | 15376323 | WBGene00005275 | srh-52 R08H2.7 0.0621842949176639   |
| AGIWUR25436                                                                                     |                                                            |          |                |                                     |
| CB4856 HS V                                                                                     | 15376501                                                   | 15378003 | WBGene00005340 | srh-122 R08H2.5 0.238167209850338   |
| AGIWUR24573                                                                                     |                                                            |          |                |                                     |
| CB4856 HS V                                                                                     | 15378367                                                   | 15379917 | WBGene00005457 | srh-251 R08H2.4 0.355698156033309   |
| AGIWUR18065                                                                                     |                                                            |          |                |                                     |
| CB4856 HS V                                                                                     | 15381097                                                   | 15382305 | WBGene00000986 | dhs-23 R08H2.1 -0.0689674575823886  |
| AGIWUR35197                                                                                     |                                                            |          |                |                                     |
| CB4856 HS V                                                                                     | 15382439                                                   | 15383839 | WBGene00006147 | str-88 R08H2.2 -0.0610523751435936  |
| AGIWUR2182                                                                                      |                                                            |          |                |                                     |
| CB4856 HS V                                                                                     | 15385033                                                   | 15386653 | WBGene00006157 | str-102 R08H2.13                    |
| 0.219867379122537                                                                               | AGIWUR25002                                                |          |                |                                     |
| CB4856 HS V                                                                                     | 15386923                                                   | 15388870 | WBGene00005386 | srh-170 R08H2.3 0.0579486354654684  |
| AGIWUR34041                                                                                     |                                                            |          |                |                                     |
| CB4856 HS V                                                                                     | 15393108                                                   | 15394957 | WBGene00011538 | T06E6.1 T06E6.1 0.141476449782139   |
| AGIWUR3213                                                                                      |                                                            |          |                |                                     |
| CB4856 HS V                                                                                     | 15395696                                                   | 15397348 | WBGene00000868 | cyb-3 T06E6.2 -0.194393958131831    |
| AGIWUR10457;AGIWUR11193;AGIWUR18348;AGIWUR18947;AGIWUR19045;AGIWUR22627;AGIWUR36099;AGIWUR44565 |                                                            |          |                |                                     |
| CB4856 HS V                                                                                     | 15397385                                                   | 15398828 | WBGene00005931 | fbxa-199 T06E6.3                    |
| -0.0906636777450371                                                                             | AGIWUR8885                                                 |          |                |                                     |
| CB4856 HS V                                                                                     | 15398939                                                   | 15399791 | WBGene00044759 | T06E6.15 T06E6.15                   |
| 0.198924082435315                                                                               | AGIWUR14475;AGIWUR43886                                    |          |                |                                     |
| CB4856 HS V                                                                                     | 15400327                                                   | 15401820 | WBGene00005519 | sri-7 T06E6.4 -0.0429180183277138   |

AGIWUR28308;AGIWUR32085;AGIWUR44685

|                                                                                |    |   |          |          |                |          |                             |
|--------------------------------------------------------------------------------|----|---|----------|----------|----------------|----------|-----------------------------|
| CB4856                                                                         | HS | V | 15402277 | 15404385 | WBGene00011539 | fbxa-135 | T06E6.5                     |
| 0.292811024274441 AGIWUR9210;AGIWUR29642;AGIWUR36860;AGIWUR41930               |    |   |          |          |                |          |                             |
| CB4856                                                                         | HS | V | 15405159 | 15406760 | WBGene00005464 | srh-258  | T06E6.7 0.0979304106019114  |
| AGIWUR3933                                                                     |    |   |          |          |                |          |                             |
| CB4856                                                                         | HS | V | 15407228 | 15411380 | WBGene00005463 | srh-257  | T06E6.6 0.0740580752016129  |
| AGIWUR5150;AGIWUR6121;AGIWUR9002                                               |    |   |          |          |                |          |                             |
| CB4856                                                                         | HS | V | 15411433 | 15412725 | WBGene00011541 | srbc-63  | T06E6.11                    |
| 0.164231784832491 AGIWUR20907                                                  |    |   |          |          |                |          |                             |
| CB4856                                                                         | HS | V | 15414147 | 15415349 | WBGene00005470 | srh-264  | T06E6.8 0.189390850053805   |
| AGIWUR11829                                                                    |    |   |          |          |                |          |                             |
| CB4856                                                                         | HS | V | 15416251 | 15417616 | WBGene00005471 | srh-265  | T06E6.9 0.213896320487904   |
| AGIWUR37761                                                                    |    |   |          |          |                |          |                             |
| CB4856                                                                         | HS | V | 15418131 | 15419395 | WBGene00011540 | T06E6.10 | T06E6.10                    |
| 0.0847799551706458 AGIWUR40932                                                 |    |   |          |          |                |          |                             |
| CB4856                                                                         | HS | V | 15419820 | 15421506 | WBGene00005469 | srh-263  | T06E6.12                    |
| -0.0773356501388864 AGIWUR8797;AGIWUR27731;AGIWUR36405;AGIWUR37131;AGIWUR40154 |    |   |          |          |                |          |                             |
| CB4856                                                                         | HS | V | 15421673 | 15423658 | WBGene00011542 | fbxa-104 | T06E6.13                    |
| -0.251827455054785 AGIWUR21268                                                 |    |   |          |          |                |          |                             |
| CB4856                                                                         | HS | V | 15423746 | 15425498 | WBGene00012533 | fbxa-209 | Y36E3A.1                    |
| 0.0467431302896903 AGIWUR5589                                                  |    |   |          |          |                |          |                             |
| CB4856                                                                         | HS | V | 15427305 | 15432722 | WBGene00012070 | T26H5.8  | T26H5.8 0.104516551747645   |
| AGIWUR3269;AGIWUR13122;AGIWUR17414                                             |    |   |          |          |                |          |                             |
| CB4856                                                                         | HS | V | 15437132 | 15438673 | WBGene00006168 | str-117  | T26H5.7 0.0058268471273033  |
| AGIWUR24354;AGIWUR35605                                                        |    |   |          |          |                |          |                             |
| CB4856                                                                         | HS | V | 15438798 | 15440332 | WBGene00014846 | T26H5.6  | T26H5.6 -0.0416686862976063 |
| AGIWUR38172;AGIWUR43959                                                        |    |   |          |          |                |          |                             |
| CB4856                                                                         | HS | V | 15441324 | 15442979 | WBGene00005460 | srh-254  | T26H5.1 0.168776146463188   |
| AGIWUR12876;AGIWUR23679;AGIWUR28403;AGIWUR35260;AGIWUR39764                    |    |   |          |          |                |          |                             |
| CB4856                                                                         | HS | V | 15443401 | 15443808 | WBGene00044783 | T26H5.10 | T26H5.10                    |
| 0.0976935733882631 AGIWUR7855;AGIWUR21215;AGIWUR29464;AGIWUR32228              |    |   |          |          |                |          |                             |
| CB4856                                                                         | HS | V | 15444916 | 15445420 | WBGene00044206 | T26H5.9  | T26H5.9 0.283590856665374   |
| AGIWUR669;AGIWUR10973;AGIWUR15693;AGIWUR34140;AGIWUR43316                      |    |   |          |          |                |          |                             |
| CB4856                                                                         | HS | V | 15445853 | 15447282 | WBGene00005446 | srh-239  | T26H5.3 0.00259365534489131 |
| AGIWUR29286                                                                    |    |   |          |          |                |          |                             |
| CB4856                                                                         | HS | V | 15447640 | 15448138 | WBGene00012069 | T26H5.4  | T26H5.4 -0.0401490282381145 |
| AGIWUR22733                                                                    |    |   |          |          |                |          |                             |
| CB4856                                                                         | HS | V | 15449631 | 15451521 | WBGene00005780 | srw-33   | T26H5.5 0.0535763918513323  |
| AGIWUR16165                                                                    |    |   |          |          |                |          |                             |

|                                                                                               |             |          |                |                  |                     |
|-----------------------------------------------------------------------------------------------|-------------|----------|----------------|------------------|---------------------|
| CB4856 HS V                                                                                   | 15452333    | 15455840 | WBGene00005445 | srh-238 T23F1.1  | 0.190553888254025   |
| AGIWUR7147;AGIWUR42643                                                                        |             |          |                |                  |                     |
| CB4856 HS V                                                                                   | 15456066    | 15457445 | WBGene00011947 | T23F1.3 T23F1.3  | 0.160272145341937   |
| AGIWUR25858                                                                                   |             |          |                |                  |                     |
| CB4856 HS V                                                                                   | 15457815    | 15459188 | WBGene00006133 | str-71 T23F1.4   | -0.097490025511302  |
| AGIWUR32145                                                                                   |             |          |                |                  |                     |
| CB4856 HS V                                                                                   | 15459413    | 15464425 | WBGene00011948 | T23F1.5 T23F1.5  | -0.116519692452289  |
| AGIWUR18005                                                                                   |             |          |                |                  |                     |
| CB4856 HS V                                                                                   | 15465677    | 15467099 | WBGene00004153 | pqn-71 T23F1.6   | -0.149920218222976  |
| AGIWUR41589                                                                                   |             |          |                |                  |                     |
| CB4856 HS V                                                                                   | 15471335    | 15476122 | WBGene00001054 | dpr-1 T23F1.7    | 0.17855658184317    |
| AGIWUR42365                                                                                   |             |          |                |                  |                     |
| CB4856 HS V                                                                                   | 15476086    | 15478566 | WBGene00007368 | C06B8.2 C06B8.2  | 0.148406161071131   |
| AGIWUR19011;AGIWUR28409                                                                       |             |          |                |                  |                     |
| CB4856 HS V                                                                                   | 15479398    | 15481677 | WBGene00007367 | nhr-150 C06B8.1  | 0.22549947971142    |
| AGIWUR11858                                                                                   |             |          |                |                  |                     |
| CB4856 HS V                                                                                   | 15482149    | 15483665 | WBGene00077594 | nhr-151 C06B8.12 |                     |
| 0.019134963400802                                                                             | AGIWUR37535 |          |                |                  |                     |
| CB4856 HS V                                                                                   | 15486388    | 15487118 | WBGene00007373 | C06B8.11         | C06B8.11            |
| 0.235715687860787                                                                             | AGIWUR19586 |          |                |                  |                     |
| CB4856 HS V                                                                                   | 15488064    | 15489401 | WBGene00005768 | srw-21 C06B8.9   | 0.586513177695946   |
| AGIWUR22410                                                                                   |             |          |                |                  |                     |
| CB4856 HS V                                                                                   | 15491003    | 15492770 | WBGene00007370 | str-264 C06B8.4  | 0.159981076562252   |
| AGIWUR6224                                                                                    |             |          |                |                  |                     |
| CB4856 HS V                                                                                   | 15493980    | 15495761 | WBGene00005428 | srh-218 C06B8.10 |                     |
| 0.282883904891339                                                                             | AGIWUR17980 |          |                |                  |                     |
| CB4856 HS V                                                                                   | 15496269    | 15497567 | WBGene00005429 | srh-219 C06B8.6  | 0.00974444189048018 |
| AGIWUR42051                                                                                   |             |          |                |                  |                     |
| CB4856 HS V                                                                                   | 15498743    | 15511421 | WBGene00007372 | C06B8.7 C06B8.7  | 0.0417415083489665  |
| AGIWUR30713                                                                                   |             |          |                |                  |                     |
| CB4856 HS V                                                                                   | 15512166    | 15512780 | WBGene00004452 | rp1-38 C06B8.8   | -0.145876390945936  |
| AGIWUR2954;AGIWUR10276;AGIWUR18225;AGIWUR19497;AGIWUR29421;AGIWUR36954;AGIWUR39941            |             |          |                |                  |                     |
| CB4856 HS V                                                                                   | 15512765    | 15522020 | WBGene00008997 | lgc-31 F21A3.7   | 0.0455393045257946  |
| AGIWUR2141;AGIWUR5441;AGIWUR11882;AGIWUR22753;AGIWUR25835;AGIWUR32893;AGIWUR35667;AGIWUR43072 |             |          |                |                  |                     |
| CB4856 HS V                                                                                   | 15529369    | 15530767 | WBGene00005481 | srh-276 F21A3.1  | -0.0373931060552772 |
| AGIWUR14696                                                                                   |             |          |                |                  |                     |
| CB4856 HS V                                                                                   | 15530783    | 15533251 | WBGene00219316 | F21A3.11         | F21A3.11            |
| 0.212709555276568                                                                             | AGIWUR7750  |          |                |                  |                     |
| CB4856 HS V                                                                                   | 15536620    | 15537986 | WBGene00008994 | F21A3.4 F21A3.4  | 0.0737499380490725  |

|                                                                                                |   |                                                                                 |          |                |          |          |                     |  |
|------------------------------------------------------------------------------------------------|---|---------------------------------------------------------------------------------|----------|----------------|----------|----------|---------------------|--|
| AGIWUR18374                                                                                    |   |                                                                                 |          |                |          |          |                     |  |
| CB4856 HS                                                                                      | V | 15538244                                                                        | 15547020 | WBGene00008995 | prde-1   | F21A3.5  | -0.0501049765197106 |  |
| AGIWUR27874;AGIWUR36842                                                                        |   |                                                                                 |          |                |          |          |                     |  |
| CB4856 HS                                                                                      | V | 15551155                                                                        | 15559147 | WBGene00000057 | acr-18   | F28F8.1  | -0.0541949005863476 |  |
| AGIWUR12480                                                                                    |   |                                                                                 |          |                |          |          |                     |  |
| CB4856 HS                                                                                      | V | 15567394                                                                        | 15569889 | WBGene00009221 | acs-2    | F28F8.2  | -0.229194271575083  |  |
| AGIWUR7908;AGIWUR28624;AGIWUR29438;AGIWUR30410;AGIWUR38477;AGIWUR41007;AGIWUR42897;AGIWUR44518 |   |                                                                                 |          |                |          |          |                     |  |
| CB4856 HS                                                                                      | V | 15569935                                                                        | 15570742 | WBGene00003079 | lsm-5    | F28F8.3  | 0.0804228136317882  |  |
| AGIWUR4058;AGIWUR18048;AGIWUR26535;AGIWUR35988;AGIWUR37591;AGIWUR38266;AGIWUR42575             |   |                                                                                 |          |                |          |          |                     |  |
| CB4856 HS                                                                                      | V | 15571490                                                                        | 15574106 | WBGene00009225 | fbxa-94  | F28F8.8  | 0.130324224073647   |  |
| AGIWUR41240                                                                                    |   |                                                                                 |          |                |          |          |                     |  |
| CB4856 HS                                                                                      | V | 15574098                                                                        | 15575403 | WBGene00009223 | mdt-28   | F28F8.5  | 0.106830688598642   |  |
| AGIWUR1213                                                                                     |   |                                                                                 |          |                |          |          |                     |  |
| CB4856 HS                                                                                      | V | 15575498                                                                        | 15577443 | WBGene00006446 | atx-3    | F28F8.6  | -0.0104997004203167 |  |
| AGIWUR34792                                                                                    |   |                                                                                 |          |                |          |          |                     |  |
| CB4856 HS                                                                                      | V | 15577569                                                                        | 15578486 | WBGene00044188 | F28F8.9  | F28F8.9  | 0.0348198328915394  |  |
| AGIWUR6762;AGIWUR33145;AGIWUR41510                                                             |   |                                                                                 |          |                |          |          |                     |  |
| CB4856 HS                                                                                      | V | 15578984                                                                        | 15590617 | WBGene00009224 | F28F8.7  | F28F8.7  | 0.0336251826092102  |  |
| AGIWUR39186                                                                                    |   |                                                                                 |          |                |          |          |                     |  |
| CB4856 HS                                                                                      | V | 15585067                                                                        | 15593185 | WBGene00007165 | B0391.10 |          | B0391.10            |  |
| 0.13561018619166                                                                               |   | AGIWUR10516                                                                     |          |                |          |          |                     |  |
| CB4856 HS                                                                                      | V | 15593462                                                                        | 15593799 | WBGene00007164 | fbxa-139 |          | B0391.9             |  |
| -0.0175571122358793                                                                            |   | AGIWUR119;AGIWUR1454;AGIWUR3371;AGIWUR16116;AGIWUR19563;AGIWUR27242;AGIWUR42247 |          |                |          |          |                     |  |
| CB4856 HS                                                                                      | V | 15595055                                                                        | 15596466 | WBGene00014643 | B0391.8  | B0391.8  | 0.251990381407846   |  |
| AGIWUR37846                                                                                    |   |                                                                                 |          |                |          |          |                     |  |
| CB4856 HS                                                                                      | V | 15600400                                                                        | 15602345 | WBGene00007166 | fbxa-152 |          | B0391.11            |  |
| 0.130255268148686                                                                              |   | AGIWUR35465                                                                     |          |                |          |          |                     |  |
| CB4856 HS                                                                                      | V | 15605673                                                                        | 15610384 | WBGene00007162 | fbxa-153 |          | B0391.5             |  |
| -0.0249721755518717                                                                            |   | AGIWUR17241;AGIWUR31489;AGIWUR37968                                             |          |                |          |          |                     |  |
| CB4856 HS                                                                                      | V | 15610890                                                                        | 15612591 | WBGene00006080 | str-12   | B0391.4  | -0.157548131786608  |  |
| AGIWUR35912                                                                                    |   |                                                                                 |          |                |          |          |                     |  |
| CB4856 HS                                                                                      | V | 15613186                                                                        | 15614968 | WBGene00006289 | str-263  | B0391.12 |                     |  |
| -0.0530324670638924                                                                            |   | AGIWUR28380                                                                     |          |                |          |          |                     |  |
| CB4856 HS                                                                                      | V | 15614937                                                                        | 15617611 | WBGene00007161 | B0391.3  | B0391.3  | 0.184316228023173   |  |
| AGIWUR24303                                                                                    |   |                                                                                 |          |                |          |          |                     |  |
| CB4856 HS                                                                                      | V | 15618180                                                                        | 15619395 | WBGene00007160 | B0391.1  | B0391.1  | -0.282081782189316  |  |
| AGIWUR23157                                                                                    |   |                                                                                 |          |                |          |          |                     |  |
| CB4856 HS                                                                                      | V | 15620022                                                                        | 15621232 | WBGene00014722 | C55A1.13 |          | C55A1.13            |  |
| 0.205298089050866                                                                              |   | AGIWUR18236;AGIWUR31370                                                         |          |                |          |          |                     |  |

|                                                                                |   |          |          |                |          |          |                     |
|--------------------------------------------------------------------------------|---|----------|----------|----------------|----------|----------|---------------------|
| CB4856 HS                                                                      | V | 15621818 | 15623077 | WBGene00008321 | C55A1.1  | C55A1.1  | 0.0540002572392666  |
| AGIWUR8124                                                                     |   |          |          |                |          |          |                     |
| CB4856 HS                                                                      | V | 15624355 | 15625515 | WBGene00005192 | srg-35   | C55A1.2  | 0.123890284763432   |
| AGIWUR14553;AGIWUR44396                                                        |   |          |          |                |          |          |                     |
| CB4856 HS                                                                      | V | 15625861 | 15626223 | WBGene00008326 | C55A1.11 | C55A1.11 |                     |
| -0.261261055081729 AGIWUR13748                                                 |   |          |          |                |          |          |                     |
| CB4856 HS                                                                      | V | 15626452 | 15627238 | WBGene00008325 | C55A1.9  | C55A1.9  | -0.172821081933008  |
| AGIWUR21342                                                                    |   |          |          |                |          |          |                     |
| CB4856 HS                                                                      | V | 15628125 | 15629643 | WBGene00006275 | str-248  | C55A1.3  | -0.180664828145719  |
| AGIWUR32115                                                                    |   |          |          |                |          |          |                     |
| CB4856 HS                                                                      | V | 15630204 | 15631509 | WBGene00014723 | srz-49   | C55A1.16 |                     |
| 0.691041092814179 AGIWUR19030;AGIWUR20618                                      |   |          |          |                |          |          |                     |
| CB4856 HS                                                                      | V | 15632718 | 15635277 | WBGene00008329 | C55A1.15 | C55A1.15 |                     |
| 0.0112286575768863 AGIWUR3100;AGIWUR4333;AGIWUR30124;AGIWUR38191;AGIWUR40753   |   |          |          |                |          |          |                     |
| CB4856 HS                                                                      | V | 15635565 | 15637240 | WBGene00008328 | srz-43   | C55A1.14 |                     |
| 0.0320956320307455 AGIWUR7007;AGIWUR13658                                      |   |          |          |                |          |          |                     |
| CB4856 HS                                                                      | V | 15637416 | 15638953 | WBGene00008327 | srz-44   | C55A1.12 |                     |
| -0.327108665592196 AGIWUR40530                                                 |   |          |          |                |          |          |                     |
| CB4856 HS                                                                      | V | 15639678 | 15642499 | WBGene00005384 | srh-168  | C55A1.10 |                     |
| 0.0266997779614817 AGIWUR4275;AGIWUR44912                                      |   |          |          |                |          |          |                     |
| CB4856 HS                                                                      | V | 15644875 | 15646478 | WBGene00006090 | str-23   | C55A1.5  | -0.0196345591077254 |
| AGIWUR20741                                                                    |   |          |          |                |          |          |                     |
| CB4856 HS                                                                      | V | 15648102 | 15648848 | WBGene00008323 | C55A1.6  | C55A1.6  | -0.0220322926497847 |
| AGIWUR2288;AGIWUR7298;AGIWUR18106;AGIWUR26132;AGIWUR32979;AGIWUR38974          |   |          |          |                |          |          |                     |
| CB4856 HS                                                                      | V | 15650467 | 15652413 | WBGene00005705 | sru-42   | C55A1.8  | 0.184032365926876   |
| AGIWUR38344                                                                    |   |          |          |                |          |          |                     |
| CB4856 HS                                                                      | V | 15652438 | 15659079 | WBGene00009978 | F53E4.1  | F53E4.1  | 0.0173022284716904  |
| AGIWUR625;AGIWUR1120;AGIWUR7353;AGIWUR9791;AGIWUR17711;AGIWUR31888;AGIWUR32784 |   |          |          |                |          |          |                     |
| CB4856 HS                                                                      | V | 15669170 | 15670091 | WBGene00010599 | K06B4.4  | K06B4.4  | 0.0134049745989531  |
| AGIWUR1472;AGIWUR14005                                                         |   |          |          |                |          |          |                     |
| CB4856 HS                                                                      | V | 15670472 | 15671784 | WBGene00077450 | K06B4.15 | K06B4.15 |                     |
| -0.136027637984728 AGIWUR31005                                                 |   |          |          |                |          |          |                     |
| CB4856 HS                                                                      | V | 15672666 | 15673236 | WBGene00010598 | K06B4.3  | K06B4.3  | -0.246342784802314  |
| AGIWUR27844                                                                    |   |          |          |                |          |          |                     |
| CB4856 HS                                                                      | V | 15674026 | 15675620 | WBGene00003641 | nhr-51   | K06B4.1  | 0.00627737589808186 |
| AGIWUR10709;AGIWUR13389                                                        |   |          |          |                |          |          |                     |
| CB4856 HS                                                                      | V | 15677582 | 15680074 | WBGene00003642 | nhr-52   | K06B4.2  | 0.0486057998470244  |
| AGIWUR33467                                                                    |   |          |          |                |          |          |                     |
| CB4856 HS                                                                      | V | 15686090 | 15687590 | WBGene00010600 | nhr-196  | K06B4.5  | 0.277374225699491   |

|                                     |   |                                     |          |                |                  |                     |
|-------------------------------------|---|-------------------------------------|----------|----------------|------------------|---------------------|
| AGIWUR20684                         |   |                                     |          |                |                  |                     |
| CB4856 HS                           | V | 15687960                            | 15689759 | WBGene00010602 | nhr-197 K06B4.7  | 2.69559558854614    |
| AGIWUR18830                         |   |                                     |          |                |                  |                     |
| CB4856 HS                           | V | 15690204                            | 15691606 | WBGene00010601 | nhr-268 K06B4.6  | 0.14703990867797    |
| AGIWUR26445                         |   |                                     |          |                |                  |                     |
| CB4856 HS                           | V | 15691999                            | 15693161 | WBGene00014800 | nhr-200 K06B4.13 |                     |
| -0.0316371872756891                 |   | AGIWUR15076                         |          |                |                  |                     |
| CB4856 HS                           | V | 15693994                            | 15696217 | WBGene00010603 | nhr-198 K06B4.8  | 0.1115462243236     |
| AGIWUR7936                          |   |                                     |          |                |                  |                     |
| CB4856 HS                           | V | 15696785                            | 15698199 | WBGene00005920 | srx-29 K06B4.9   | 0.0179438270981267  |
| AGIWUR3617                          |   |                                     |          |                |                  |                     |
| CB4856 HS                           | V | 15698528                            | 15699899 | WBGene00010604 | nhr-199 K06B4.10 |                     |
| 0.213656157768783                   |   | AGIWUR6613                          |          |                |                  |                     |
| CB4856 HS                           | V | 15700606                            | 15702363 | WBGene00003643 | nhr-53 K06B4.11  |                     |
| 0.182603709872655                   |   | AGIWUR42551                         |          |                |                  |                     |
| CB4856 HS                           | V | 15704960                            | 15709528 | WBGene00006686 | twk-34 K06B4.12  |                     |
| 0.0289117005849517                  |   | AGIWUR42155                         |          |                |                  |                     |
| CB4856 HS                           | V | 15709578                            | 15710501 | WBGene00012397 | Y6E2A.1 Y6E2A.1  | 2.09147860399109    |
| AGIWUR21730                         |   |                                     |          |                |                  |                     |
| CB4856 HS                           | V | 15710787                            | 15711998 | WBGene00006156 | str-101 Y6E2A.2  | -0.0325121009118821 |
| AGIWUR2563                          |   |                                     |          |                |                  |                     |
| CB4856 HS                           | V | 15712248                            | 15715644 | WBGene00012398 | Y6E2A.4 Y6E2A.4  | 0.36783201665749    |
| AGIWUR2462                          |   |                                     |          |                |                  |                     |
| CB4856 HS                           | V | 15716419                            | 15718660 | WBGene00012399 | Y6E2A.5 Y6E2A.5  | 0.39685634220873    |
| AGIWUR3329;AGIWUR44726;AGIWUR44897  |   |                                     |          |                |                  |                     |
| CB4856 HS                           | V | 15719870                            | 15721292 | WBGene00012400 | Y6E2A.7 Y6E2A.7  | 1.30790362927525    |
| AGIWUR23084                         |   |                                     |          |                |                  |                     |
| CB4856 HS                           | V | 15722188                            | 15723999 | WBGene00005357 | srh-140 Y6E2A.6  | -0.18935481805103   |
| AGIWUR44528                         |   |                                     |          |                |                  |                     |
| CB4856 HS                           | V | 15724849                            | 15726702 | WBGene00012401 | ir1d-57 Y6E2A.8  | 0.0272348333018613  |
| AGIWUR40186                         |   |                                     |          |                |                  |                     |
| CB4856 HS                           | V | 15726841                            | 15728353 | WBGene00012402 | sfxn-1.3         | Y6E2A.9             |
| -0.162522224222304                  |   | AGIWUR26428;AGIWUR29355;AGIWUR41643 |          |                |                  |                     |
| CB4856 HS                           | V | 15729238                            | 15730532 | WBGene00050915 | Y6E2A.10         | Y6E2A.10            |
| 0.202084526616012                   |   | AGIWUR40704                         |          |                |                  |                     |
| CB4856 HS                           | V | 15730779                            | 15732309 | WBGene00006103 | str-38 T23D5.2   | -0.0616294244304285 |
| AGIWUR24345;AGIWUR36279;AGIWUR40640 |   |                                     |          |                |                  |                     |
| CB4856 HS                           | V | 15732863                            | 15733668 | WBGene00011942 | T23D5.3 T23D5.3  | -0.363394737169402  |
| AGIWUR3432                          |   |                                     |          |                |                  |                     |

|                         |   |                                                             |          |                |          |          |                     |
|-------------------------|---|-------------------------------------------------------------|----------|----------------|----------|----------|---------------------|
| CB4856 HS               | V | 15734023                                                    | 15735820 | WBGene00006093 | str-27   | T23D5.1  | 0.237368561764213   |
| AGIWUR28342             |   |                                                             |          |                |          |          |                     |
| CB4856 HS               | V | 15737020                                                    | 15739659 | WBGene00014844 | T23D5.5  | T23D5.5  | -0.111966850325856  |
| AGIWUR19384             |   |                                                             |          |                |          |          |                     |
| CB4856 HS               | V | 15740517                                                    | 15741951 | WBGene00006085 | str-18   | T23D5.6  | 0.101058360535287   |
| AGIWUR32407             |   |                                                             |          |                |          |          |                     |
| CB4856 HS               | V | 15743260                                                    | 15744478 | WBGene00006086 | str-19   | T23D5.7  | -0.131288907854527  |
| AGIWUR17721;AGIWUR43854 |   |                                                             |          |                |          |          |                     |
| CB4856 HS               | V | 15745404                                                    | 15745652 | WBGene00077456 | T23D5.14 | T23D5.14 |                     |
| 0.168291196179545       |   | AGIWUR24664;AGIWUR26354;AGIWUR26713;AGIWUR29651;AGIWUR44216 |          |                |          |          |                     |
| CB4856 HS               | V | 15750932                                                    | 15752149 | WBGene00006108 | str-43   | T23D5.9  | 0.0521979290741967  |
| AGIWUR15500             |   |                                                             |          |                |          |          |                     |
| CB4856 HS               | V | 15755031                                                    | 15756394 | WBGene00006076 | str-8    | T23D5.11 |                     |
| 0.409846946089834       |   | AGIWUR21147                                                 |          |                |          |          |                     |
| CB4856 HS               | V | 15758749                                                    | 15760417 | WBGene00006077 | str-9    | F57A10.1 |                     |
| -0.153086599273271      |   | AGIWUR18310                                                 |          |                |          |          |                     |
| CB4856 HS               | V | 15760426                                                    | 15766172 | WBGene00001813 | haf-3    | F57A10.3 |                     |
| -0.0678447948091989     |   | AGIWUR38570                                                 |          |                |          |          |                     |
| CB4856 HS               | V | 15766575                                                    | 15767272 | WBGene00010184 | F57A10.2 | F57A10.2 |                     |
| 0.0188451137024561      |   | AGIWUR45066                                                 |          |                |          |          |                     |
| CB4856 HS               | V | 15769438                                                    | 15770371 | WBGene00010185 | F57A10.4 | F57A10.4 |                     |
| -0.106443765782725      |   | AGIWUR19566                                                 |          |                |          |          |                     |
| CB4856 HS               | V | 15770302                                                    | 15773239 | WBGene00003650 | nhr-60   | F57A10.5 |                     |
| -0.0943144399052898     |   | AGIWUR31604                                                 |          |                |          |          |                     |
| CB4856 HS               | V | 15774946                                                    | 15776676 | WBGene00010186 | nhr-283  | F57A10.6 |                     |
| 0.262024360441311       |   | AGIWUR22663                                                 |          |                |          |          |                     |
| CB4856 HS               | V | 15777718                                                    | 15779247 | WBGene00012056 | nhr-285  | T26E4.16 |                     |
| -0.0811435838963224     |   | AGIWUR25482                                                 |          |                |          |          |                     |
| CB4856 HS               | V | 15779693                                                    | 15781082 | WBGene00012043 | ir1d-52  | T26E4.1  | -0.0936427329168517 |
| AGIWUR19642             |   |                                                             |          |                |          |          |                     |
| CB4856 HS               | V | 15781401                                                    | 15782011 | WBGene00012044 | T26E4.2  | T26E4.2  | 0.237072896931329   |
| AGIWUR39816             |   |                                                             |          |                |          |          |                     |
| CB4856 HS               | V | 15782794                                                    | 15784470 | WBGene00012045 | T26E4.3  | T26E4.3  | -0.0480451474952668 |
| AGIWUR44007             |   |                                                             |          |                |          |          |                     |
| CB4856 HS               | V | 15784929                                                    | 15786597 | WBGene00012048 | srxa-17  | T26E4.6  | 0.0319986546368209  |
| AGIWUR8380              |   |                                                             |          |                |          |          |                     |
| CB4856 HS               | V | 15790476                                                    | 15792583 | WBGene00012046 | T26E4.4  | T26E4.4  | -0.0555110162417303 |
| AGIWUR1297;AGIWUR22296  |   |                                                             |          |                |          |          |                     |
| CB4856 HS               | V | 15793570                                                    | 15795194 | WBGene00012049 | T26E4.7  | T26E4.7  | 0.0596451934541182  |



|                                                                                                                                   |   |                         |          |                |                                     |
|-----------------------------------------------------------------------------------------------------------------------------------|---|-------------------------|----------|----------------|-------------------------------------|
| AGIWUR39128                                                                                                                       |   |                         |          |                |                                     |
| CB4856 HS                                                                                                                         | V | 15799212                | 15802723 | WBGene00012051 | T26E4.9 T26E4.9 0.176662772080103   |
| AGIWUR16925                                                                                                                       |   |                         |          |                |                                     |
| CB4856 HS                                                                                                                         | V | 15804843                | 15805750 | WBGene00012053 | srbc-74 T26E4.13                    |
| -0.0358812681382625                                                                                                               |   | AGIWUR8264              |          |                |                                     |
| CB4856 HS                                                                                                                         | V | 15808119                | 15810036 | WBGene00012055 | srsx-36 T26E4.15                    |
| 0.328792186489328                                                                                                                 |   | AGIWUR23418             |          |                |                                     |
| CB4856 HS                                                                                                                         | V | 15810784                | 15811330 | WBGene00010016 | F54B8.1 F54B8.1 -0.164772273372035  |
| AGIWUR958                                                                                                                         |   |                         |          |                |                                     |
| CB4856 HS                                                                                                                         | V | 15814237                | 15815659 | WBGene00010018 | fbxa-69 F54B8.3 -0.0958534352884151 |
| AGIWUR21915                                                                                                                       |   |                         |          |                |                                     |
| CB4856 HS                                                                                                                         | V | 15816464                | 15817143 | WBGene00010019 | F54B8.4 F54B8.4 0.0316401521454672  |
| AGIWUR1221;AGIWUR1619;AGIWUR11144;AGIWUR22397;AGIWUR31675;AGIWUR33561;AGIWUR33604;AGIWUR35475;AGIWUR38821;AGIWUR40872;AGIWUR44858 |   |                         |          |                |                                     |
| CB4856 HS                                                                                                                         | V | 15817410                | 15817846 | WBGene00000014 | abf-3 F54B8.5 0.151098540493981     |
| AGIWUR35529                                                                                                                       |   |                         |          |                |                                     |
| CB4856 HS                                                                                                                         | V | 15818427                | 15819827 | WBGene00044103 | srbc-47 F54B8.14                    |
| -0.119287595322723                                                                                                                |   | AGIWUR16708;AGIWUR36182 |          |                |                                     |
| CB4856 HS                                                                                                                         | V | 15820283                | 15821383 | WBGene00010020 | srbc-48 F54B8.6 0.159500693650213   |
| AGIWUR42422                                                                                                                       |   |                         |          |                |                                     |
| CB4856 HS                                                                                                                         | V | 15821698                | 15822884 | WBGene00010021 | srbc-49 F54B8.7 0.543854372553211   |
| AGIWUR20962                                                                                                                       |   |                         |          |                |                                     |
| CB4856 HS                                                                                                                         | V | 15823898                | 15824966 | WBGene00010022 | srbc-50 F54B8.8 0.122077095914719   |
| AGIWUR7657                                                                                                                        |   |                         |          |                |                                     |
| CB4856 HS                                                                                                                         | V | 15826410                | 15827429 | WBGene00010023 | srbc-51 F54B8.9 0.137803146138143   |
| AGIWUR31717                                                                                                                       |   |                         |          |                |                                     |
| CB4856 HS                                                                                                                         | V | 15827823                | 15828882 | WBGene00010024 | srbc-52 F54B8.10                    |
| -0.0052919923395276                                                                                                               |   | AGIWUR35751             |          |                |                                     |
| CB4856 HS                                                                                                                         | V | 15829022                | 15830007 | WBGene00044105 | srbc-55 F54B8.16                    |
| -0.0529897509535866                                                                                                               |   | AGIWUR26313             |          |                |                                     |
| CB4856 HS                                                                                                                         | V | 15830586                | 15831686 | WBGene00010026 | srbc-56 F54B8.12                    |
| 0.0737123650553033                                                                                                                |   | AGIWUR4572;AGIWUR45179  |          |                |                                     |
| CB4856 HS                                                                                                                         | V | 15832436                | 15833722 | WBGene00010025 | srbc-54 F54B8.11                    |
| 0.216010733372654                                                                                                                 |   | AGIWUR13949             |          |                |                                     |
| CB4856 HS                                                                                                                         | V | 15834745                | 15837403 | WBGene00044104 | srbc-53 F54B8.15                    |
| 0.0303297403988809                                                                                                                |   | AGIWUR13012;AGIWUR24832 |          |                |                                     |
| CB4856 HS                                                                                                                         | V | 15837524                | 15839522 | WBGene00003556 | nas-40 F54B8.13                     |
| 0.0162957951350249                                                                                                                |   | AGIWUR34477;AGIWUR39894 |          |                |                                     |
| CB4856 HS                                                                                                                         | V | 15839967                | 15841195 | WBGene00005365 | srh-149 K08G2.13                    |

|                    |                                                             |          |                |                  |                     |  |
|--------------------|-------------------------------------------------------------|----------|----------------|------------------|---------------------|--|
| 0.210806958898589  | AGIWUR15882                                                 |          |                |                  |                     |  |
| CB4856 HS V        | 15841837                                                    | 15844214 | WBGene00005368 | srh-152 K08G2.3  | -0.0305576032749437 |  |
| AGIWUR23740        |                                                             |          |                |                  |                     |  |
| CB4856 HS V        | 15844453                                                    | 15844768 | WBGene00050949 | K08G2.16         | K08G2.16            |  |
| 0.0467526610817437 | AGIWUR19175;AGIWUR26507;AGIWUR29082;AGIWUR39015;AGIWUR41335 |          |                |                  |                     |  |
| CB4856 HS V        | 15845931                                                    | 15847306 | WBGene00005366 | srh-150 K08G2.2  | 0.0173394786214738  |  |
| AGIWUR38885        |                                                             |          |                |                  |                     |  |
| CB4856 HS V        | 15855012                                                    | 15856148 | WBGene00005369 | srh-153 K08G2.11 |                     |  |
| 0.119754247463603  | AGIWUR27955                                                 |          |                |                  |                     |  |
| CB4856 HS V        | 15858838                                                    | 15859227 | WBGene00014803 | K08G2.14         | K08G2.14            |  |
| 0.0368060925993698 | AGIWUR7388;AGIWUR25421                                      |          |                |                  |                     |  |
| CB4856 HS V        | 15859960                                                    | 15860985 | WBGene00005367 | srh-151 K08G2.6  | 0.059751413735933   |  |
| AGIWUR24228        |                                                             |          |                |                  |                     |  |
| CB4856 HS V        | 15861452                                                    | 15862699 | WBGene00010688 | srz-12 K08G2.7   | 0.0943785649703077  |  |
| AGIWUR2579         |                                                             |          |                |                  |                     |  |
| CB4856 HS V        | 15863342                                                    | 15864458 | WBGene00005503 | srh-299 K08G2.9  | 0.0795055301194099  |  |
| AGIWUR22771        |                                                             |          |                |                  |                     |  |
| CB4856 HS V        | 15865088                                                    | 15865811 | WBGene00005498 | srh-294 K08G2.10 |                     |  |
| 0.228653515706319  | AGIWUR5785;AGIWUR24066;AGIWUR27707                          |          |                |                  |                     |  |
| CB4856 HS V        | 15866139                                                    | 15867333 | WBGene00005497 | srh-293 K08G2.8  | -0.241062852104465  |  |
| AGIWUR25448        |                                                             |          |                |                  |                     |  |
| CB4856 HS V        | 15867683                                                    | 15869051 | WBGene00011513 | fbxa-197         | T06C12.4            |  |
| 0.272693582331677  | AGIWUR25587                                                 |          |                |                  |                     |  |
| CB4856 HS V        | 15869311                                                    | 15870636 | WBGene00011514 | fbxa-198         | T06C12.5            |  |
| -0.194254264507917 | AGIWUR22215;AGIWUR24784;AGIWUR35646                         |          |                |                  |                     |  |
| CB4856 HS V        | 15871170                                                    | 15872351 | WBGene00006122 | str-57           | T06C12.2            |  |
| 0.0540936029463204 | AGIWUR3263                                                  |          |                |                  |                     |  |
| CB4856 HS V        | 15872573                                                    | 15873770 | WBGene00006121 | str-56           | T06C12.3            |  |
| -0.202644542920299 | AGIWUR4744                                                  |          |                |                  |                     |  |
| CB4856 HS V        | 15874093                                                    | 15876408 | WBGene00003692 | nhr-102          | T06C12.6            |  |
| 0.156575873084025  | AGIWUR17090                                                 |          |                |                  |                     |  |
| CB4856 HS V        | 15876732                                                    | 15879619 | WBGene00003674 | nhr-84           | T06C12.7            |  |
| 0.0778228592277017 | AGIWUR11870                                                 |          |                |                  |                     |  |
| CB4856 HS V        | 15885662                                                    | 15886059 | WBGene00011516 | T06C12.9         | T06C12.9            |  |
| -0.147976939282718 | AGIWUR29957                                                 |          |                |                  |                     |  |
| CB4856 HS V        | 15886719                                                    | 15888851 | WBGene00011517 | cgt-1            | T06C12.10           |  |
| 0.250069381407403  | AGIWUR26795                                                 |          |                |                  |                     |  |
| CB4856 HS V        | 15892061                                                    | 15892520 | WBGene00011519 | T06C12.12        | T06C12.12           |  |
| 0.160447204805537  | AGIWUR22023                                                 |          |                |                  |                     |  |

|                         |                         |          |                |           |                             |
|-------------------------|-------------------------|----------|----------------|-----------|-----------------------------|
| CB4856 HS V             | 15892996                | 15894160 | WBGene00011518 | T06C12.11 | T06C12.11                   |
| 0.174913319610514       | AGIWUR41573             |          |                |           |                             |
| CB4856 HS V             | 15894454                | 15896765 | WBGene00011520 | nhr-213   | T06C12.13                   |
| 0.169714517056006       | AGIWUR5439              |          |                |           |                             |
| CB4856 HS V             | 15897996                | 15899415 | WBGene00006124 | str-60    | T06C12.1                    |
| 0.0372786954139155      | AGIWUR44430             |          |                |           |                             |
| CB4856 HS V             | 15899996                | 15900900 | WBGene00011521 | T06C12.14 | T06C12.14                   |
| 0.106172534434913       | AGIWUR9101              |          |                |           |                             |
| CB4856 HS V             | 15901142                | 15902166 | WBGene00014832 | srab-27   | T06C12.15                   |
| -0.0498094737837507     | AGIWUR14272;AGIWUR26824 |          |                |           |                             |
| CB4856 HS V             | 15905620                | 15907032 | WBGene00009418 | F35E8.2   | F35E8.2 -0.191727684151031  |
| AGIWUR12319;AGIWUR42594 |                         |          |                |           |                             |
| CB4856 HS V             | 15912148                | 15913056 | WBGene00009420 | F35E8.6   | F35E8.6 -0.010596546967836  |
| AGIWUR6094              |                         |          |                |           |                             |
| CB4856 HS V             | 15914014                | 15915142 | WBGene00009421 | F35E8.7   | F35E8.7 -0.0895186310198675 |
| AGIWUR36084             |                         |          |                |           |                             |
| CB4856 HS V             | 15915216                | 15916079 | WBGene00001786 | gst-38    | F35E8.8 -0.165366702626191  |
| AGIWUR4624              |                         |          |                |           |                             |
| CB4856 HS V             | 15916334                | 15917558 | WBGene00009422 | F35E8.9   | F35E8.9 -0.213812374201629  |
| AGIWUR3483              |                         |          |                |           |                             |
| CB4856 HS V             | 15921309                | 15922818 | WBGene00000412 | cdr-1     | F35E8.11                    |
| -0.176561060743987      | AGIWUR32534             |          |                |           |                             |
| CB4856 HS V             | 15922939                | 15924471 | WBGene00003698 | nhr-108   | F35E8.12                    |
| 0.225753218689269       | AGIWUR15760             |          |                |           |                             |
| CB4856 HS V             | 15926425                | 15928425 | WBGene00011505 | pzf-1     | T05G11.1                    |
| -0.148885011104841      | AGIWUR19186             |          |                |           |                             |
| CB4856 HS V             | 15930182                | 15931084 | WBGene00011506 | srbc-77   | T05G11.2                    |
| -0.0468389472765951     | AGIWUR5982              |          |                |           |                             |
| CB4856 HS V             | 15931292                | 15932490 | WBGene00005773 | srw-26    | T05G11.3                    |
| -0.0735217386631319     | AGIWUR30587             |          |                |           |                             |
| CB4856 HS V             | 15933267                | 15934976 | WBGene00005774 | srw-27    | T05G11.4                    |
| -0.062547441032307      | AGIWUR37244             |          |                |           |                             |
| CB4856 HS V             | 15935948                | 15937110 | WBGene00005775 | srw-28    | T05G11.5                    |
| -0.127181801624059      | AGIWUR36679;AGIWUR39032 |          |                |           |                             |
| CB4856 HS V             | 15937194                | 15938538 | WBGene00005799 | srw-52    | T05G11.8                    |
| 0.0921257675257721      | AGIWUR4369              |          |                |           |                             |
| CB4856 HS V             | 15938776                | 15940354 | WBGene00005802 | srw-55    | T05G11.6                    |
| -0.181336046786718      | AGIWUR4347              |          |                |           |                             |
| CB4856 HS V             | 15943425                | 15944854 | WBGene00005800 | srw-53    | T05G11.7                    |

|                      |                                     |          |                |          |          |                     |
|----------------------|-------------------------------------|----------|----------------|----------|----------|---------------------|
| 0.103296597217184    | AGIWUR16562                         |          |                |          |          |                     |
| CB4856 HS V          | 15947299                            | 15948461 | WBGene00005805 | srw-58   | H24D24.2 |                     |
| -0.279902785004731   | AGIWUR27357                         |          |                |          |          |                     |
| CB4856 HS V          | 15949716                            | 15951003 | WBGene00005806 | srw-59   | H24D24.1 |                     |
| -0.176571993324802   | AGIWUR21694                         |          |                |          |          |                     |
| CB4856 HS V          | 15951432                            | 15952862 | WBGene00005803 | srw-56   | F36G9.16 |                     |
| 0.0443949268927302   | AGIWUR36809                         |          |                |          |          |                     |
| CB4856 HS V          | 15953595                            | 15955032 | WBGene00005804 | srw-57   | F36G9.1  |                     |
| -0.00165054967361211 | AGIWUR34845                         |          |                |          |          |                     |
| CB4856 HS V          | 15955797                            | 15957028 | WBGene00005401 | srh-186  | F36G9.2  | 0.0519479277242318  |
| AGIWUR8604           |                                     |          |                |          |          |                     |
| CB4856 HS V          | 15957406                            | 15959554 | WBGene00009485 | F36G9.3  | F36G9.3  | 0.144208737732679   |
| AGIWUR19685          |                                     |          |                |          |          |                     |
| CB4856 HS V          | 15959808                            | 15961915 | WBGene00014751 | F36G9.4  | F36G9.4  | -0.186475657922146  |
| AGIWUR31171          |                                     |          |                |          |          |                     |
| CB4856 HS V          | 15962086                            | 15963232 | WBGene00005515 | sri-3    | F36G9.10 |                     |
| -0.0434069019524816  | AGIWUR15677;AGIWUR17012;AGIWUR28051 |          |                |          |          |                     |
| CB4856 HS V          | 15963849                            | 15965212 | WBGene00005514 | sri-2    | F36G9.9  | 0.109297640111098   |
| AGIWUR1372           |                                     |          |                |          |          |                     |
| CB4856 HS V          | 15966245                            | 15967642 | WBGene00005513 | sri-1    | F36G9.8  | 0.0947925568947898  |
| AGIWUR26153          |                                     |          |                |          |          |                     |
| CB4856 HS V          | 15968474                            | 15969753 | WBGene00009486 | F36G9.7  | F36G9.7  | -0.0730050653199044 |
| AGIWUR35022          |                                     |          |                |          |          |                     |
| CB4856 HS V          | 15970433                            | 15972579 | WBGene00005686 | sru-23   | F36G9.6  | 0.932780166331451   |
| AGIWUR22156          |                                     |          |                |          |          |                     |
| CB4856 HS V          | 15972907                            | 15974936 | WBGene00005685 | sru-22   | F36G9.5  | -0.0410302179915352 |
| AGIWUR28181          |                                     |          |                |          |          |                     |
| CB4856 HS V          | 15978714                            | 15981666 | WBGene00009488 | oac-20   | F36G9.12 |                     |
| -0.143327652179044   | AGIWUR23069                         |          |                |          |          |                     |
| CB4856 HS V          | 15981691                            | 15982854 | WBGene00009490 | fbxa-99  | F36G9.14 |                     |
| -0.252096592787213   | AGIWUR27467                         |          |                |          |          |                     |
| CB4856 HS V          | 15983294                            | 15986640 | WBGene00009489 | F36G9.13 |          | F36G9.13            |
| 0.0947959401999512   | AGIWUR30823                         |          |                |          |          |                     |
| CB4856 HS V          | 15987494                            | 15988174 | WBGene00009491 | F36G9.15 |          | F36G9.15            |
| 0.15461431122554     | AGIWUR25824;AGIWUR39952             |          |                |          |          |                     |
| CB4856 HS V          | 15988754                            | 15991607 | WBGene00007380 | C06C6.6  | C06C6.6  | -0.272395419286207  |
| AGIWUR5010           |                                     |          |                |          |          |                     |
| CB4856 HS V          | 15992150                            | 15995607 | WBGene00007381 | C06C6.7  | C06C6.7  | 0.145062005392343   |
| AGIWUR11685          |                                     |          |                |          |          |                     |

|                                    |   |                                    |          |                |          |          |                     |
|------------------------------------|---|------------------------------------|----------|----------------|----------|----------|---------------------|
| CB4856 HS                          | V | 15996214                           | 15996745 | WBGene00007383 | C06C6.9  | C06C6.9  | -0.198119742465526  |
| AGIWUR44824                        |   |                                    |          |                |          |          |                     |
| CB4856 HS                          | V | 15997136                           | 15997768 | WBGene00007382 | C06C6.8  | C06C6.8  | -0.108111484665214  |
| AGIWUR6150                         |   |                                    |          |                |          |          |                     |
| CB4856 HS                          | V | 15997761                           | 16000653 | WBGene00003640 | nhr-50   | C06C6.5  | -0.118228038359005  |
| AGIWUR4454;AGIWUR26657;AGIWUR29520 |   |                                    |          |                |          |          |                     |
| CB4856 HS                          | V | 16002588                           | 16004728 | WBGene00003653 | nhr-63   | C06C6.4  | 0.103926714421426   |
| AGIWUR17261                        |   |                                    |          |                |          |          |                     |
| CB4856 HS                          | V | 16006304                           | 16007605 | WBGene00006262 | str-231  | C06C6.3  | -0.16221787690975   |
| AGIWUR41558                        |   |                                    |          |                |          |          |                     |
| CB4856 HS                          | V | 16008332                           | 16009664 | WBGene00006264 | str-233  | C06C6.2  | 0.979531162313082   |
| AGIWUR18585                        |   |                                    |          |                |          |          |                     |
| CB4856 HS                          | V | 16010710                           | 16012112 | WBGene00007379 | C06C6.1  | C06C6.1  | -0.0310438209392458 |
| AGIWUR45005                        |   |                                    |          |                |          |          |                     |
| CB4856 HS                          | V | 16012537                           | 16014226 | WBGene00011686 | T10C6.2  | T10C6.2  | -0.159946547463834  |
| AGIWUR29743                        |   |                                    |          |                |          |          |                     |
| CB4856 HS                          | V | 16014509                           | 16015752 | WBGene00006263 | str-232  | T10C6.1  | 0.0807890996707901  |
| AGIWUR21772                        |   |                                    |          |                |          |          |                     |
| CB4856 HS                          | V | 16017971                           | 16019862 | WBGene00005934 | srx-43   | T10C6.3  | 0.00649797427267451 |
| AGIWUR6572;AGIWUR7974              |   |                                    |          |                |          |          |                     |
| CB4856 HS                          | V | 16020342                           | 16022652 | WBGene00005935 | srx-44   | T10C6.4  | 0.25125105048398    |
| AGIWUR22415                        |   |                                    |          |                |          |          |                     |
| CB4856 HS                          | V | 16023351                           | 16024185 | WBGene00011687 | T10C6.5  | T10C6.5  | 0.152071472618188   |
| AGIWUR13803;AGIWUR29687            |   |                                    |          |                |          |          |                     |
| CB4856 HS                          | V | 16024326                           | 16027454 | WBGene00011688 | T10C6.6  | T10C6.6  | -0.0647532565228612 |
| AGIWUR11648;AGIWUR33048            |   |                                    |          |                |          |          |                     |
| CB4856 HS                          | V | 16027449                           | 16031713 | WBGene00011689 | T10C6.7  | T10C6.7  | -0.184823894214675  |
| AGIWUR38717                        |   |                                    |          |                |          |          |                     |
| CB4856 HS                          | V | 16036413                           | 16038293 | WBGene00011691 | T10C6.10 |          | T10C6.10            |
| 0.138702281667986                  |   | AGIWUR7120;AGIWUR17168;AGIWUR30370 |          |                |          |          |                     |
| CB4856 HS                          | V | 16041828                           | 16042283 | WBGene00001876 | his-2    | T10C6.13 |                     |
| -0.434814965105698                 |   | AGIWUR18145                        |          |                |          |          |                     |
| CB4856 HS                          | V | 16044296                           | 16045874 | WBGene00050899 | T10C6.15 |          | T10C6.15            |
| 1.01887945748947                   |   | AGIWUR44157                        |          |                |          |          |                     |
| CB4856 HS                          | V | 16046873                           | 16047446 | WBGene00013961 | ZK285.2  | ZK285.2  | -0.027174081283337  |
| AGIWUR44047                        |   |                                    |          |                |          |          |                     |
| CB4856 HS                          | V | 16047808                           | 16049147 | WBGene00006234 | str-198  | ZK285.1  | -0.167221926832017  |
| AGIWUR35495                        |   |                                    |          |                |          |          |                     |
| CB4856 HS                          | V | 16049492                           | 16051554 | WBGene00008821 | best-12  | F14H3.2  | 0.0447598373403961  |

|                                     |   |                                    |          |                |                  |                     |
|-------------------------------------|---|------------------------------------|----------|----------------|------------------|---------------------|
| AGIWUR39204                         |   |                                    |          |                |                  |                     |
| CB4856 HS                           | V | 16051923                           | 16053510 | WBGene00008822 | F14H3.3 F14H3.3  | 0.010787216378862   |
| AGIWUR44849                         |   |                                    |          |                |                  |                     |
| CB4856 HS                           | V | 16053900                           | 16055072 | WBGene00008823 | F14H3.4 F14H3.4  | 0.100879257654434   |
| AGIWUR3490                          |   |                                    |          |                |                  |                     |
| CB4856 HS                           | V | 16055806                           | 16057054 | WBGene00008824 | F14H3.5 F14H3.5  | -0.0511340321216061 |
| AGIWUR2701                          |   |                                    |          |                |                  |                     |
| CB4856 HS                           | V | 16057322                           | 16058892 | WBGene00008825 | F14H3.6 F14H3.6  | 0.247531065811307   |
| AGIWUR24313                         |   |                                    |          |                |                  |                     |
| CB4856 HS                           | V | 16059781                           | 16060235 | WBGene00219414 | F14H3.15         | F14H3.15            |
| -0.187135462260903                  |   | AGIWUR36744                        |          |                |                  |                     |
| CB4856 HS                           | V | 16063551                           | 16064108 | WBGene00014735 | cyp-35D2         | F14H3.13            |
| 0.0261725023493353                  |   | AGIWUR43917                        |          |                |                  |                     |
| CB4856 HS                           | V | 16064447                           | 16067002 | WBGene00008827 | F14H3.8 F14H3.8  | 0.112182401582099   |
| AGIWUR4110                          |   |                                    |          |                |                  |                     |
| CB4856 HS                           | V | 16067949                           | 16068763 | WBGene00008828 | F14H3.9 F14H3.9  | -0.378206582459696  |
| AGIWUR20501                         |   |                                    |          |                |                  |                     |
| CB4856 HS                           | V | 16069238                           | 16071301 | WBGene00008829 | cyp-35D1         | F14H3.10            |
| -0.228865824532598                  |   | AGIWUR18064                        |          |                |                  |                     |
| CB4856 HS                           | V | 16071325                           | 16072738 | WBGene00008830 | nhr-176 F14H3.11 |                     |
| 0.0517497086885603                  |   | AGIWUR13486;AGIWUR17452            |          |                |                  |                     |
| CB4856 HS                           | V | 16072765                           | 16073956 | WBGene00005598 | srj-10 F14H3.1   | 0.137536000627263   |
| AGIWUR29645                         |   |                                    |          |                |                  |                     |
| CB4856 HS                           | V | 16074113                           | 16075323 | WBGene00008831 | F14H3.12         | F14H3.12            |
| 0.222016130477623                   |   | AGIWUR2204                         |          |                |                  |                     |
| CB4856 HS                           | V | 16075659                           | 16077308 | WBGene00005616 | srj-29 F22B8.1   | 0.227507945713723   |
| AGIWUR36282                         |   |                                    |          |                |                  |                     |
| CB4856 HS                           | V | 16077979                           | 16079234 | WBGene00014741 | F22B8.2 F22B8.2  | 0.393126221981754   |
| AGIWUR15244                         |   |                                    |          |                |                  |                     |
| CB4856 HS                           | V | 16086572                           | 16088217 | WBGene00009047 | F22B8.4 F22B8.4  | 0.0612739231304005  |
| AGIWUR44672                         |   |                                    |          |                |                  |                     |
| CB4856 HS                           | V | 16090985                           | 16092117 | WBGene00009046 | F22B8.3 F22B8.3  | -0.0870660348423407 |
| AGIWUR21008                         |   |                                    |          |                |                  |                     |
| CB4856 HS                           | V | 16094584                           | 16097320 | WBGene00009049 | F22B8.7 F22B8.7  | 0.0603375609022265  |
| AGIWUR15062                         |   |                                    |          |                |                  |                     |
| CB4856 HS                           | V | 16097985                           | 16100209 | WBGene00006075 | str-7 F22B8.5    | 0.0164949218005663  |
| AGIWUR15383;AGIWUR19926;AGIWUR42258 |   |                                    |          |                |                  |                     |
| CB4856 HS                           | V | 16100627                           | 16102750 | WBGene00009048 | cth-1 F22B8.6    |                     |
| -0.00528086667880601                |   | AGIWUR9763;AGIWUR36127;AGIWUR42001 |          |                |                  |                     |

|                                                           |    |   |          |          |                |          |          |                     |
|-----------------------------------------------------------|----|---|----------|----------|----------------|----------|----------|---------------------|
| CB4856                                                    | HS | V | 16103894 | 16105950 | WBGene00009706 | argk-1   | F44G3.2  | 0.166889839298388   |
| AGIWUR1153;AGIWUR5200;AGIWUR18061;AGIWUR18759;AGIWUR36128 |    |   |          |          |                |          |          |                     |
| CB4856                                                    | HS | V | 16112237 | 16112968 | WBGene00014757 | F44G3.4  | F44G3.4  | -0.220183422147412  |
| AGIWUR14212;AGIWUR36160                                   |    |   |          |          |                |          |          |                     |
| CB4856                                                    | HS | V | 16112992 | 16114337 | WBGene00009707 | srxa-16  | F44G3.5  | -0.190947582141528  |
| AGIWUR36396                                               |    |   |          |          |                |          |          |                     |
| CB4856                                                    | HS | V | 16115681 | 16116897 | WBGene00006092 | str-25   | F44G3.11 |                     |
| 0.106605482335798 AGIWUR7233                              |    |   |          |          |                |          |          |                     |
| CB4856                                                    | HS | V | 16117363 | 16118701 | WBGene00006158 | str-103  | F44G3.1  |                     |
| -0.00446310237755121 AGIWUR41093                          |    |   |          |          |                |          |          |                     |
| CB4856                                                    | HS | V | 16121824 | 16122648 | WBGene00004809 | skr-3    | F44G3.6  | 0.358272536312285   |
| AGIWUR29757                                               |    |   |          |          |                |          |          |                     |
| CB4856                                                    | HS | V | 16125811 | 16127497 | WBGene00044661 | fbxa-143 | F44G3.14 |                     |
| 0.304815834587797 AGIWUR21812                             |    |   |          |          |                |          |          |                     |
| CB4856                                                    | HS | V | 16128131 | 16129089 | WBGene00044660 | fbxa-87  | F44G3.13 |                     |
| 0.243089317583916 AGIWUR7460;AGIWUR29772                  |    |   |          |          |                |          |          |                     |
| CB4856                                                    | HS | V | 16129409 | 16130979 | WBGene00044659 | fbxa-142 | F44G3.12 |                     |
| -0.0722351227725726 AGIWUR14461                           |    |   |          |          |                |          |          |                     |
| CB4856                                                    | HS | V | 16131180 | 16133283 | WBGene00009709 | fbxa-144 | F44G3.8  |                     |
| 0.0358712257152516 AGIWUR29526;AGIWUR33518                |    |   |          |          |                |          |          |                     |
| CB4856                                                    | HS | V | 16133781 | 16137143 | WBGene00009708 | F44G3.7  | F44G3.7  | 0.195158033164486   |
| AGIWUR25611                                               |    |   |          |          |                |          |          |                     |
| CB4856                                                    | HS | V | 16138846 | 16139627 | WBGene00009710 | F44G3.10 | F44G3.10 |                     |
| 0.218768219163643 AGIWUR7611;AGIWUR37760;AGIWUR40817      |    |   |          |          |                |          |          |                     |
| CB4856                                                    | HS | V | 16140314 | 16141164 | WBGene00008631 | F10A3.1  | F10A3.1  | 0.546920141634486   |
| AGIWUR34865                                               |    |   |          |          |                |          |          |                     |
| CB4856                                                    | HS | V | 16142008 | 16143116 | WBGene00008632 | fbxa-88  | F10A3.2  | 0.167999433932046   |
| AGIWUR31979                                               |    |   |          |          |                |          |          |                     |
| CB4856                                                    | HS | V | 16143615 | 16144653 | WBGene00008633 | fbxa-18  | F10A3.3  | -0.0430737244705419 |
| AGIWUR10313                                               |    |   |          |          |                |          |          |                     |
| CB4856                                                    | HS | V | 16144986 | 16146263 | WBGene00008638 | F10A3.16 | F10A3.16 |                     |
| -0.0665028858832528 AGIWUR14428                           |    |   |          |          |                |          |          |                     |
| CB4856                                                    | HS | V | 16147039 | 16148327 | WBGene00014733 | F10A3.10 | F10A3.10 |                     |
| -0.136168002876349 AGIWUR582                              |    |   |          |          |                |          |          |                     |
| CB4856                                                    | HS | V | 16149125 | 16151870 | WBGene00008634 | F10A3.4  | F10A3.4  | 0.22174139167889    |
| AGIWUR18361                                               |    |   |          |          |                |          |          |                     |
| CB4856                                                    | HS | V | 16151978 | 16153475 | WBGene00006280 | str-254  | F10A3.9  | 0.0466188885669245  |
| AGIWUR7211;AGIWUR44010                                    |    |   |          |          |                |          |          |                     |
| CB4856                                                    | HS | V | 16153855 | 16155211 | WBGene00006154 | str-97   | F10A3.8  | -0.0388256299455438 |

|                                                        |                                                 |          |                |          |          |                     |
|--------------------------------------------------------|-------------------------------------------------|----------|----------------|----------|----------|---------------------|
| AGIWUR13410;AGIWUR25754;AGIWUR37364                    |                                                 |          |                |          |          |                     |
| CB4856 HS V                                            | 16155451                                        | 16156722 | WBGene00008635 | F10A3.7  | F10A3.7  | 0.0940175525802172  |
| AGIWUR32120                                            |                                                 |          |                |          |          |                     |
| CB4856 HS V                                            | 16157335                                        | 16158491 | WBGene00006155 | str-99   | F10A3.6  | -0.0761211076175643 |
| AGIWUR1542                                             |                                                 |          |                |          |          |                     |
| CB4856 HS V                                            | 16158679                                        | 16159694 | WBGene00045507 | F10A3.17 | F10A3.17 |                     |
| 0.0713891464975749                                     | AGIWUR32356                                     |          |                |          |          |                     |
| CB4856 HS V                                            | 16160685                                        | 16162224 | WBGene00006161 | str-109  | F10A3.5  | 0.0275454451746784  |
| AGIWUR3013                                             |                                                 |          |                |          |          |                     |
| CB4856 HS V                                            | 16162685                                        | 16163795 | WBGene00008636 | F10A3.11 | F10A3.11 |                     |
| -0.164554216880655                                     | AGIWUR12243                                     |          |                |          |          |                     |
| CB4856 HS V                                            | 16164019                                        | 16165473 | WBGene00008637 | F10A3.12 | F10A3.12 |                     |
| -0.0509566829306989                                    | AGIWUR37426                                     |          |                |          |          |                     |
| CB4856 HS V                                            | 16166236                                        | 16167409 | WBGene00006160 | str-108  | F10A3.13 |                     |
| 0.0738468979684921                                     | AGIWUR15968                                     |          |                |          |          |                     |
| CB4856 HS V                                            | 16167875                                        | 16169126 | WBGene00006162 | str-111  | F10A3.15 |                     |
| 0.167855231214226                                      | AGIWUR15156                                     |          |                |          |          |                     |
| CB4856 HS V                                            | 16173743                                        | 16175857 | WBGene00010589 | cyp-33D1 | K05D4.4  |                     |
| 0.125098699395184                                      | AGIWUR15132;AGIWUR26937;AGIWUR28056;AGIWUR32245 |          |                |          |          |                     |
| CB4856 HS V                                            | 16176287                                        | 16177491 | WBGene00014799 | K05D4.5  | K05D4.5  | 0.215800666958089   |
| AGIWUR19570;AGIWUR25619;AGIWUR36956                    |                                                 |          |                |          |          |                     |
| CB4856 HS V                                            | 16178532                                        | 16179966 | WBGene00014798 | K05D4.1  | K05D4.1  | 0.0513174358471664  |
| AGIWUR13418;AGIWUR22857                                |                                                 |          |                |          |          |                     |
| CB4856 HS V                                            | 16180650                                        | 16181861 | WBGene00006159 | str-106  | K05D4.2  | -0.011410736721051  |
| AGIWUR36320                                            |                                                 |          |                |          |          |                     |
| CB4856 HS V                                            | 16182410                                        | 16183540 | WBGene00010590 | srz-13   | K05D4.8  | 0.293499087622886   |
| AGIWUR9886                                             |                                                 |          |                |          |          |                     |
| CB4856 HS V                                            | 16185403                                        | 16186920 | WBGene00005482 | srh-277  | K05D4.6  | -0.115776671531179  |
| AGIWUR114;AGIWUR2111;AGIWUR2913;AGIWUR7866;AGIWUR39691 |                                                 |          |                |          |          |                     |
| CB4856 HS V                                            | 16187728                                        | 16189129 | WBGene00005485 | srh-280  | K05D4.7  | 0.022194676209641   |
| AGIWUR4413;AGIWUR6895;AGIWUR19136;AGIWUR25620          |                                                 |          |                |          |          |                     |
| CB4856 HS V                                            | 16190785                                        | 16192262 | WBGene00005486 | srh-281  | F11A5.1  | -0.128681345816576  |
| AGIWUR15987                                            |                                                 |          |                |          |          |                     |
| CB4856 HS V                                            | 16193356                                        | 16194581 | WBGene00005484 | srh-279  | F11A5.2  | -0.0652215584151365 |
| AGIWUR40342                                            |                                                 |          |                |          |          |                     |
| CB4856 HS V                                            | 16194939                                        | 16195544 | WBGene00008671 | F11A5.3  | F11A5.3  | 0.0336203022941834  |
| AGIWUR28861                                            |                                                 |          |                |          |          |                     |
| CB4856 HS V                                            | 16195679                                        | 16196290 | WBGene00008672 | F11A5.4  | F11A5.4  | 0.263438113733775   |
| AGIWUR37086                                            |                                                 |          |                |          |          |                     |



|                     |                                                 |          |                |                                     |
|---------------------|-------------------------------------------------|----------|----------------|-------------------------------------|
| CB4856 HS V         | 16198379                                        | 16201045 | WBGene00008673 | F11A5.5 F11A5.5 -0.228800140835524  |
| AGIWUR44997         |                                                 |          |                |                                     |
| CB4856 HS V         | 16202030                                        | 16202740 | WBGene00045510 | F11A5.17 F11A5.17                   |
| 0.165947091127151   | AGIWUR5781;AGIWUR36739;AGIWUR40497              |          |                |                                     |
| CB4856 HS V         | 16202809                                        | 16204862 | WBGene00045511 | F11A5.18 F11A5.18                   |
| -0.111991242320382  | AGIWUR12498;AGIWUR15612;AGIWUR25301;AGIWUR40184 |          |                |                                     |
| CB4856 HS V         | 16205188                                        | 16206818 | WBGene00008675 | irld-26 F11A5.7 -0.172199230795272  |
| AGIWUR991           |                                                 |          |                |                                     |
| CB4856 HS V         | 16206943                                        | 16209916 | WBGene00008676 | oac-15 F11A5.8 -0.0838466200437686  |
| AGIWUR43379         |                                                 |          |                |                                     |
| CB4856 HS V         | 16210952                                        | 16211454 | WBGene00044184 | F11A5.16 F11A5.16                   |
| 0.0454298408207765  | AGIWUR13277;AGIWUR19353;AGIWUR36561;AGIWUR43875 |          |                |                                     |
| CB4856 HS V         | 16214890                                        | 16217706 | WBGene00008677 | F11A5.9 F11A5.9 -0.19529827041935   |
| AGIWUR17833         |                                                 |          |                |                                     |
| CB4856 HS V         | 16217701                                        | 16218605 | WBGene00008680 | F11A5.15 F11A5.15                   |
| -0.0538264657090286 | AGIWUR37713                                     |          |                |                                     |
| CB4856 HS V         | 16219541                                        | 16221948 | WBGene00001591 | glc-1 F11A5.10                      |
| -0.0394069988413221 | AGIWUR29186                                     |          |                |                                     |
| CB4856 HS V         | 16222323                                        | 16223415 | WBGene00005547 | sri-35 F11A5.11                     |
| 0.0208888397543401  | AGIWUR6562;AGIWUR31026;AGIWUR32138              |          |                |                                     |
| CB4856 HS V         | 16224327                                        | 16225540 | WBGene00008678 | stdh-2 F11A5.12                     |
| -0.267562451789925  | AGIWUR16829                                     |          |                |                                     |
| CB4856 HS V         | 16225701                                        | 16225887 | WBGene00014322 | F11A5.14 F11A5.14                   |
| 0.0490046569488687  | AGIWUR15158                                     |          |                |                                     |
| CB4856 HS V         | 16226013                                        | 16226681 | WBGene00008679 | F11A5.13 F11A5.13                   |
| -0.0113829598966273 | AGIWUR21002                                     |          |                |                                     |
| CB4856 HS V         | 16227127                                        | 16229893 | WBGene00009028 | F21H7.2 F21H7.2 0.0398349153383428  |
| AGIWUR23420         |                                                 |          |                |                                     |
| CB4856 HS V         | 16230203                                        | 16231043 | WBGene00009033 | F21H7.12 F21H7.12                   |
| 0.00230378585827395 | AGIWUR43397                                     |          |                |                                     |
| CB4856 HS V         | 16231032                                        | 16232317 | WBGene00001770 | gst-22 F21H7.1 0.324854834277131    |
| AGIWUR20527         |                                                 |          |                |                                     |
| CB4856 HS V         | 16232652                                        | 16233335 | WBGene00009029 | F21H7.3 F21H7.3 -0.0471130827504638 |
| AGIWUR18667         |                                                 |          |                |                                     |
| CB4856 HS V         | 16233924                                        | 16234896 | WBGene00009030 | clcc-233 F21H7.4                    |
| 0.0412349724210177  | AGIWUR23753                                     |          |                |                                     |
| CB4856 HS V         | 16235171                                        | 16235747 | WBGene00005317 | srh-98 F21H7.14                     |
| 0.157284489308307   | AGIWUR15119                                     |          |                |                                     |
| CB4856 HS V         | 16237523                                        | 16238824 | WBGene00009031 | F21H7.5 F21H7.5 -0.353527955647765  |

|                                                                        |   |                                     |          |                |                   |                     |
|------------------------------------------------------------------------|---|-------------------------------------|----------|----------------|-------------------|---------------------|
| AGIWUR30066                                                            |   |                                     |          |                |                   |                     |
| CB4856 HS                                                              | V | 16239333                            | 16240447 | WBGene00014740 | F21H7.6 F21H7.6   | -0.0250858197860238 |
| AGIWUR22044;AGIWUR35030                                                |   |                                     |          |                |                   |                     |
| CB4856 HS                                                              | V | 16241217                            | 16242445 | WBGene00005322 | srh-103 F21H7.13  |                     |
| -0.131367655308193                                                     |   | AGIWUR7209                          |          |                |                   |                     |
| CB4856 HS                                                              | V | 16242818                            | 16244178 | WBGene00005323 | srh-104 F21H7.7   | -0.106434519089413  |
| AGIWUR26850                                                            |   |                                     |          |                |                   |                     |
| CB4856 HS                                                              | V | 16246879                            | 16248455 | WBGene00005315 | srh-95 F21H7.11   |                     |
| 0.0479233640619299                                                     |   | AGIWUR10690;AGIWUR27139;AGIWUR34427 |          |                |                   |                     |
| CB4856 HS                                                              | V | 16248583                            | 16253787 | WBGene00001545 | gcy-20 F21H7.9    | -0.136480661386161  |
| AGIWUR34558                                                            |   |                                     |          |                |                   |                     |
| CB4856 HS                                                              | V | 16254301                            | 16256398 | WBGene00009032 | bgnt-1.3 F21H7.10 |                     |
| 0.155981327685218                                                      |   | AGIWUR37791                         |          |                |                   |                     |
| CB4856 HS                                                              | V | 16258442                            | 16260686 | WBGene00011750 | nhr-218 T13F3.2   | -0.267711311996224  |
| AGIWUR988                                                              |   |                                     |          |                |                   |                     |
| CB4856 HS                                                              | V | 16261647                            | 16263953 | WBGene00003717 | nhr-127 T13F3.3   | -0.093838690869763  |
| AGIWUR40703                                                            |   |                                     |          |                |                   |                     |
| CB4856 HS                                                              | V | 16265097                            | 16265607 | WBGene00011751 | T13F3.4 T13F3.4   | -0.0649214111567531 |
| AGIWUR9411;AGIWUR16759;AGIWUR18945;AGIWUR27431;AGIWUR29628;AGIWUR35257 |   |                                     |          |                |                   |                     |
| CB4856 HS                                                              | V | 16266765                            | 16268150 | WBGene00044653 | T13F3.9 T13F3.9   | 0.0147047463016801  |
| AGIWUR23129;AGIWUR24605;AGIWUR40089                                    |   |                                     |          |                |                   |                     |
| CB4856 HS                                                              | V | 16268335                            | 16269567 | WBGene00011752 | fbxa-2 T13F3.5    | 0.0274336831426512  |
| AGIWUR17354;AGIWUR22932;AGIWUR34541                                    |   |                                     |          |                |                   |                     |
| CB4856 HS                                                              | V | 16270216                            | 16271223 | WBGene00011753 | T13F3.6 T13F3.6   | -0.0502852636543096 |
| AGIWUR20125;AGIWUR21281                                                |   |                                     |          |                |                   |                     |
| CB4856 HS                                                              | V | 16271536                            | 16272498 | WBGene00044205 | T13F3.8 T13F3.8   | 0.258161502134476   |
| AGIWUR12595                                                            |   |                                     |          |                |                   |                     |
| CB4856 HS                                                              | V | 16272686                            | 16275410 | WBGene00011754 | T13F3.7 T13F3.7   | -0.0296743384817715 |
| AGIWUR11446                                                            |   |                                     |          |                |                   |                     |
| CB4856 HS                                                              | V | 16275913                            | 16277698 | WBGene00006227 | str-183 T13F3.1   | 0.0470573996100505  |
| AGIWUR17043                                                            |   |                                     |          |                |                   |                     |
| CB4856 HS                                                              | V | 16278191                            | 16280612 | WBGene00009226 | cyp-37B1 F28G4.1  |                     |
| 0.25552798397341                                                       |   | AGIWUR38767                         |          |                |                   |                     |
| CB4856 HS                                                              | V | 16280602                            | 16282321 | WBGene00009227 | F28G4.2 F28G4.2   | 0.167840216041786   |
| AGIWUR29795                                                            |   |                                     |          |                |                   |                     |
| CB4856 HS                                                              | V | 16283018                            | 16285894 | WBGene00009229 | F28G4.4 F28G4.4   | 0.197755166068813   |
| AGIWUR15182;AGIWUR16824;AGIWUR27000                                    |   |                                     |          |                |                   |                     |
| CB4856 HS                                                              | V | 16286151                            | 16287719 | WBGene00009228 | F28G4.3 F28G4.3   | -0.0671849065066388 |
| AGIWUR37528                                                            |   |                                     |          |                |                   |                     |

|                                    |                                                                         |          |                |          |           |                     |
|------------------------------------|-------------------------------------------------------------------------|----------|----------------|----------|-----------|---------------------|
| CB4856 HS V                        | 16288788                                                                | 16292154 | WBGene00009230 | oac-18   | F28G4.5   | -0.0331899205294279 |
| AGIWUR32845                        |                                                                         |          |                |          |           |                     |
| CB4856 HS V                        | 16292709                                                                | 16295600 | WBGene00007829 | oac-5    | C31A11.1  |                     |
| -0.187682094754932                 | AGIWUR27043                                                             |          |                |          |           |                     |
| CB4856 HS V                        | 16297370                                                                | 16298278 | WBGene00007831 | srbc-83  | C31A11.3  |                     |
| 0.131483500554442                  | AGIWUR11713;AGIWUR17091                                                 |          |                |          |           |                     |
| CB4856 HS V                        | 16298969                                                                | 16299862 | WBGene00044106 | srbc-84  | C31A11.10 |                     |
| -0.345327487898475                 | AGIWUR7876                                                              |          |                |          |           |                     |
| CB4856 HS V                        | 16300576                                                                | 16301478 | WBGene00007832 | srbc-82  | C31A11.4  |                     |
| 0.00927809140516711                | AGIWUR27488                                                             |          |                |          |           |                     |
| CB4856 HS V                        | 16302717                                                                | 16306156 | WBGene00007833 | oac-6    | C31A11.5  |                     |
| -0.407379873173214                 | AGIWUR21759                                                             |          |                |          |           |                     |
| CB4856 HS V                        | 16307682                                                                | 16309623 | WBGene00007834 | srxa-7   | C31A11.6  |                     |
| 0.115402981060589                  | AGIWUR6387                                                              |          |                |          |           |                     |
| CB4856 HS V                        | 16309805                                                                | 16314752 | WBGene00007835 | oac-7    | C31A11.7  |                     |
| 0.0164788071966324                 | AGIWUR45204                                                             |          |                |          |           |                     |
| CB4856 HS V                        | 16315304                                                                | 16317226 | WBGene00006247 | str-214  | C31A11.9  |                     |
| 0.0440095557759594                 | AGIWUR32118                                                             |          |                |          |           |                     |
| CB4856 HS V                        | 16317567                                                                | 16318805 | WBGene00005395 | srh-180  | F57G8.1   | 0.125030038100554   |
| AGIWUR7163                         |                                                                         |          |                |          |           |                     |
| CB4856 HS V                        | 16320797                                                                | 16327477 | WBGene00005747 | srv-36   | F57G8.8   | 0.190514960452129   |
| AGIWUR662;AGIWUR19347;AGIWUR23944  |                                                                         |          |                |          |           |                     |
| CB4856 HS V                        | 16329370                                                                | 16330242 | WBGene00010216 | F57G8.7  | F57G8.7   | 0.407356563753764   |
| AGIWUR2979                         |                                                                         |          |                |          |           |                     |
| CB4856 HS V                        | 16333712                                                                | 16335063 | WBGene00005383 | srh-167  | F57G8.3   | 0.0918310742248245  |
| AGIWUR21109                        |                                                                         |          |                |          |           |                     |
| CB4856 HS V                        | 16336626                                                                | 16338277 | WBGene00005834 | srw-87   | F57G8.4   | 0.0292066556225663  |
| AGIWUR11621                        |                                                                         |          |                |          |           |                     |
| CB4856 HS V                        | 16339024                                                                | 16341536 | WBGene00010214 | F57G8.5  | F57G8.5   | 0.132174620518217   |
| AGIWUR2510;AGIWUR10277;AGIWUR21099 |                                                                         |          |                |          |           |                     |
| CB4856 HS V                        | 16342497                                                                | 16344272 | WBGene00010215 | nhr-193  | F57G8.6   | -0.0633884540683969 |
| AGIWUR30592                        |                                                                         |          |                |          |           |                     |
| CB4856 HS V                        | 16344375                                                                | 16346506 | WBGene00012349 | W08G11.5 |           | W08G11.5            |
| -0.204938009609114                 | AGIWUR40666                                                             |          |                |          |           |                     |
| CB4856 HS V                        | 16347060                                                                | 16349833 | WBGene00012346 | W08G11.1 |           | W08G11.1            |
| 0.212943687363414                  | AGIWUR24072                                                             |          |                |          |           |                     |
| CB4856 HS V                        | 16357521                                                                | 16367574 | WBGene00012348 | pptr-1   | W08G11.4  |                     |
| -0.0412141646525708                | AGIWUR15748;AGIWUR23092;AGIWUR23926;AGIWUR30777;AGIWUR42165;AGIWUR43390 |          |                |          |           |                     |
| CB4856 HS V                        | 16367681                                                                | 16372097 | WBGene00012347 | W08G11.3 |           | W08G11.3            |

|                                                                                    |             |          |                |          |          |                     |  |
|------------------------------------------------------------------------------------|-------------|----------|----------------|----------|----------|---------------------|--|
| -0.142683307063038                                                                 | AGIWUR18074 |          |                |          |          |                     |  |
| CB4856 HS V                                                                        | 16372417    | 16374776 | WBGene00005745 | srv-34   | F13A7.3  | -0.143076563902692  |  |
| AGIWUR3625                                                                         |             |          |                |          |          |                     |  |
| CB4856 HS V                                                                        | 16376239    | 16377949 | WBGene00008724 | F13A7.1  | F13A7.1  | -0.184510851863465  |  |
| AGIWUR36448                                                                        |             |          |                |          |          |                     |  |
| CB4856 HS V                                                                        | 16378892    | 16380488 | WBGene00005746 | srv-35   | F13A7.4  | 0.320882276559725   |  |
| AGIWUR1064;AGIWUR24283                                                             |             |          |                |          |          |                     |  |
| CB4856 HS V                                                                        | 16382167    | 16383829 | WBGene00008725 | F13A7.7  | F13A7.7  | 0.29965638321921    |  |
| AGIWUR8127                                                                         |             |          |                |          |          |                     |  |
| CB4856 HS V                                                                        | 16384490    | 16386136 | WBGene00005576 | sri-64   | F13A7.6  | -0.221629064718632  |  |
| AGIWUR9997;AGIWUR25215;AGIWUR29874                                                 |             |          |                |          |          |                     |  |
| CB4856 HS V                                                                        | 16386662    | 16388368 | WBGene00005577 | sri-65   | F13A7.8  | -0.192286363631358  |  |
| AGIWUR25201                                                                        |             |          |                |          |          |                     |  |
| CB4856 HS V                                                                        | 16389241    | 16389865 | WBGene00004817 | skr-11   | F13A7.9  | -0.256445356632135  |  |
| AGIWUR11715                                                                        |             |          |                |          |          |                     |  |
| CB4856 HS V                                                                        | 16390891    | 16392406 | WBGene00001792 | gst-44   | F13A7.10 |                     |  |
| 0.520097016532983                                                                  | AGIWUR3708  |          |                |          |          |                     |  |
| CB4856 HS V                                                                        | 16392482    | 16393828 | WBGene00005140 | srd-63   | F13A7.2  | 0.183089411310005   |  |
| AGIWUR2129;AGIWUR23449;AGIWUR32161;AGIWUR33690                                     |             |          |                |          |          |                     |  |
| CB4856 HS V                                                                        | 16394015    | 16395075 | WBGene00008726 | F13A7.11 | F13A7.11 |                     |  |
| 0.0148210379349862                                                                 | AGIWUR19640 |          |                |          |          |                     |  |
| CB4856 HS V                                                                        | 16396359    | 16398502 | WBGene00008727 | F13A7.12 | F13A7.12 |                     |  |
| 0.278638591886587                                                                  | AGIWUR39641 |          |                |          |          |                     |  |
| CB4856 HS V                                                                        | 16399688    | 16401625 | WBGene00008728 | sre-36   | F13A7.13 |                     |  |
| -0.228076728394615                                                                 | AGIWUR14743 |          |                |          |          |                     |  |
| CB4856 HS V                                                                        | 16405751    | 16407699 | WBGene00006375 | syp-1    | F26D2.2  | 0.0513590660182563  |  |
| AGIWUR3001;AGIWUR12902                                                             |             |          |                |          |          |                     |  |
| CB4856 HS V                                                                        | 16407963    | 16410270 | WBGene00009148 | F26D2.3  | F26D2.3  | -0.0601081315088088 |  |
| AGIWUR1510;AGIWUR11211;AGIWUR21865;AGIWUR24161;AGIWUR27772;AGIWUR40093;AGIWUR44150 |             |          |                |          |          |                     |  |
| CB4856 HS V                                                                        | 16410713    | 16411843 | WBGene00005361 | srh-145  | F26D2.4  | 0.0180189275732614  |  |
| AGIWUR9297                                                                         |             |          |                |          |          |                     |  |
| CB4856 HS V                                                                        | 16412687    | 16413786 | WBGene00005360 | srh-144  | F26D2.5  | 0.131167877118046   |  |
| AGIWUR45095                                                                        |             |          |                |          |          |                     |  |
| CB4856 HS V                                                                        | 16414068    | 16415247 | WBGene00014745 | F26D2.8  | F26D2.8  | 0.0956129826504095  |  |
| AGIWUR44;AGIWUR27522                                                               |             |          |                |          |          |                     |  |
| CB4856 HS V                                                                        | 16415694    | 16417114 | WBGene00006120 | str-55   | F26D2.7  | -0.0596895210179014 |  |
| AGIWUR2221                                                                         |             |          |                |          |          |                     |  |
| CB4856 HS V                                                                        | 16418433    | 16420425 | WBGene00009154 | F26D2.16 | F26D2.16 |                     |  |
| -0.460001374971149                                                                 | AGIWUR32894 |          |                |          |          |                     |  |

|                                    |                                                                                    |          |                |          |          |                     |
|------------------------------------|------------------------------------------------------------------------------------|----------|----------------|----------|----------|---------------------|
| CB4856 HS V                        | 16420996                                                                           | 16422774 | WBGene00005795 | srw-48   | F26D2.9  | 0.229474052346971   |
| AGIWUR28331                        |                                                                                    |          |                |          |          |                     |
| CB4856 HS V                        | 16423099                                                                           | 16424507 | WBGene00005776 | srw-29   | F26D2.11 |                     |
| 0.012433509807698                  | AGIWUR31643                                                                        |          |                |          |          |                     |
| CB4856 HS V                        | 16424854                                                                           | 16429603 | WBGene00009149 | F26D2.10 | F26D2.10 |                     |
| 0.0211990884434581                 | AGIWUR6760;AGIWUR29245;AGIWUR41595                                                 |          |                |          |          |                     |
| CB4856 HS V                        | 16430240                                                                           | 16431861 | WBGene00006134 | str-73   | F26D2.1  | 0.189355633722824   |
| AGIWUR22361                        |                                                                                    |          |                |          |          |                     |
| CB4856 HS V                        | 16432009                                                                           | 16433572 | WBGene00009150 | clec-234 | F26D2.12 |                     |
| -0.123085960219212                 | AGIWUR7612;AGIWUR16991;AGIWUR24649;AGIWUR26856;AGIWUR27037;AGIWUR33724;AGIWUR44070 |          |                |          |          |                     |
| CB4856 HS V                        | 16434722                                                                           | 16435610 | WBGene00009151 | F26D2.13 | F26D2.13 |                     |
| 0.228146248859289                  | AGIWUR22570                                                                        |          |                |          |          |                     |
| CB4856 HS V                        | 16435855                                                                           | 16436736 | WBGene00009152 | F26D2.14 | F26D2.14 |                     |
| 0.110594744920826                  | AGIWUR11473;AGIWUR14643                                                            |          |                |          |          |                     |
| CB4856 HS V                        | 16437846                                                                           | 16438934 | WBGene00009153 | F26D2.15 | F26D2.15 |                     |
| 0.188588456895004                  | AGIWUR15745                                                                        |          |                |          |          |                     |
| CB4856 HS V                        | 16439667                                                                           | 16442450 | WBGene00011617 | T08G3.4  | T08G3.4  | 0.24111298771127    |
| AGIWUR1245;AGIWUR13961;AGIWUR18166 |                                                                                    |          |                |          |          |                     |
| CB4856 HS V                        | 16443926                                                                           | 16445734 | WBGene00005358 | srh-141  | T08G3.5  | -0.0506252467257768 |
| AGIWUR13063                        |                                                                                    |          |                |          |          |                     |
| CB4856 HS V                        | 16445976                                                                           | 16447165 | WBGene00011618 | T08G3.6  | T08G3.6  | 0.0140161378318702  |
| AGIWUR25599                        |                                                                                    |          |                |          |          |                     |
| CB4856 HS V                        | 16448035                                                                           | 16449344 | WBGene00011621 | T08G3.13 | T08G3.13 |                     |
| 0.0202833970201493                 | AGIWUR15610                                                                        |          |                |          |          |                     |
| CB4856 HS V                        | 16457269                                                                           | 16458814 | WBGene00006083 | str-15   | T08G3.1  | 0.00935580859622043 |
| AGIWUR34333                        |                                                                                    |          |                |          |          |                     |
| CB4856 HS V                        | 16459388                                                                           | 16460965 | WBGene00005359 | srh-142  | T08G3.3  | -0.0684188654718589 |
| AGIWUR21874                        |                                                                                    |          |                |          |          |                     |
| CB4856 HS V                        | 16462438                                                                           | 16466357 | WBGene00011619 | T08G3.7  | T08G3.7  | -0.0573854845478348 |
| AGIWUR15711                        |                                                                                    |          |                |          |          |                     |
| CB4856 HS V                        | 16466466                                                                           | 16467940 | WBGene00005707 | sru-44   | T08G3.8  | 0.195608937340012   |
| AGIWUR20001                        |                                                                                    |          |                |          |          |                     |
| CB4856 HS V                        | 16469367                                                                           | 16471016 | WBGene00005355 | srh-138  | T08G3.12 |                     |
| -0.098790902921631                 | AGIWUR37531                                                                        |          |                |          |          |                     |
| CB4856 HS V                        | 16471442                                                                           | 16473397 | WBGene00005782 | srw-35   | T08G3.10 |                     |
| 0.112871281609408                  | AGIWUR13977                                                                        |          |                |          |          |                     |
| CB4856 HS V                        | 16475677                                                                           | 16476825 | WBGene00006017 | srx-126  | T08G3.9  | 0.215549985180576   |
| AGIWUR32135                        |                                                                                    |          |                |          |          |                     |
| CB4856 HS V                        | 16478698                                                                           | 16479375 | WBGene00011620 | T08G3.11 | T08G3.11 |                     |

|                                                 |                                                                                    |          |                |                   |                     |
|-------------------------------------------------|------------------------------------------------------------------------------------|----------|----------------|-------------------|---------------------|
| 0.0969701878988545                              | AGIWUR43715                                                                        |          |                |                   |                     |
| CB4856 HS V                                     | 16481580                                                                           | 16482000 | WBGene00010202 | F57E7.1 F57E7.1   | -0.224131083471834  |
| AGIWUR31789                                     |                                                                                    |          |                |                   |                     |
| CB4856 HS V                                     | 16482420                                                                           | 16483144 | WBGene00010203 | F57E7.2 F57E7.2   | -0.248862006855713  |
| AGIWUR13259                                     |                                                                                    |          |                |                   |                     |
| CB4856 HS V                                     | 16483981                                                                           | 16485382 | WBGene00005356 | srh-139 F57E7.3   | 0.0375326982314768  |
| AGIWUR15646                                     |                                                                                    |          |                |                   |                     |
| CB4856 HS V                                     | 16486978                                                                           | 16487574 | WBGene00012520 | Y32B12A.5         | Y32B12A.5           |
| -0.0767949157344088                             | AGIWUR3890                                                                         |          |                |                   |                     |
| CB4856 HS V                                     | 16488472                                                                           | 16489104 | WBGene00012516 | sqst-4 Y32B12A.1  |                     |
| -0.0218376773358848                             | AGIWUR20316                                                                        |          |                |                   |                     |
| CB4856 HS V                                     | 16489531                                                                           | 16490520 | WBGene00012517 | srbc-73 Y32B12A.2 |                     |
| -0.0837155547711088                             | AGIWUR22720                                                                        |          |                |                   |                     |
| CB4856 HS V                                     | 16490760                                                                           | 16491547 | WBGene00005465 | srh-259 Y32B12A.6 |                     |
| -0.0641391261974036                             | AGIWUR4254;AGIWUR15269;AGIWUR20175                                                 |          |                |                   |                     |
| CB4856 HS V                                     | 16492170                                                                           | 16493458 | WBGene00005466 | srh-260 Y32B12A.7 |                     |
| -0.0637881195920471                             | AGIWUR3405;AGIWUR29973                                                             |          |                |                   |                     |
| CB4856 HS V                                     | 16493655                                                                           | 16494449 | WBGene00012518 | comt-2 Y32B12A.3  |                     |
| -0.0563035000373633                             | AGIWUR3690;AGIWUR15142;AGIWUR25810;AGIWUR27894;AGIWUR28027;AGIWUR28665;AGIWUR35500 |          |                |                   |                     |
| CB4856 HS V                                     | 16494730                                                                           | 16495227 | WBGene00012519 | Y32B12A.4         | Y32B12A.4           |
| 0.236724590768203                               | AGIWUR16079                                                                        |          |                |                   |                     |
| CB4856 HS V                                     | 16495994                                                                           | 16497596 | WBGene00005353 | srh-136 F36D3.6   | 0.00470997070092594 |
| AGIWUR4040                                      |                                                                                    |          |                |                   |                     |
| CB4856 HS V                                     | 16499352                                                                           | 16502879 | WBGene00009469 | F36D3.1 F36D3.1   | -0.13979302490743   |
| AGIWUR15881                                     |                                                                                    |          |                |                   |                     |
| CB4856 HS V                                     | 16502947                                                                           | 16503282 | WBGene00044189 | F36D3.14          | F36D3.14            |
| 0.188037251543992                               | AGIWUR1797;AGIWUR4391;AGIWUR5212;AGIWUR34875;AGIWUR41228                           |          |                |                   |                     |
| CB4856 HS V                                     | 16503947                                                                           | 16505917 | WBGene00003644 | nhr-54 F36D3.2    |                     |
| -0.00176681945278467                            | AGIWUR18110                                                                        |          |                |                   |                     |
| CB4856 HS V                                     | 16506897                                                                           | 16508705 | WBGene00005654 | srr-3 F36D3.3     | -0.185593058385322  |
| AGIWUR21200;AGIWUR30737;AGIWUR35699             |                                                                                    |          |                |                   |                     |
| CB4856 HS V                                     | 16516472                                                                           | 16517719 | WBGene00009470 | F36D3.4 F36D3.4   | -0.12365060275445   |
| AGIWUR14766                                     |                                                                                    |          |                |                   |                     |
| CB4856 HS V                                     | 16518183                                                                           | 16520245 | WBGene00009472 | F36D3.7 F36D3.7   | 0.0607228306527539  |
| AGIWUR10953;AGIWUR12499;AGIWUR23247;AGIWUR34317 |                                                                                    |          |                |                   |                     |
| CB4856 HS V                                     | 16520600                                                                           | 16522270 | WBGene00005781 | srw-34 F36D3.13   |                     |
| 0.096136374743474                               | AGIWUR4748                                                                         |          |                |                   |                     |
| CB4856 HS V                                     | 16528935                                                                           | 16530213 | WBGene00219326 | F36D3.16          | F36D3.16            |
| 0.106175470080235                               | AGIWUR3090                                                                         |          |                |                   |                     |

|                                    |                                                |          |                |           |                             |
|------------------------------------|------------------------------------------------|----------|----------------|-----------|-----------------------------|
| CB4856 HS V                        | 16531373                                       | 16532690 | WBGene00009474 | clec-235  | F36D3.10                    |
| 0.30691094441279                   | AGIWUR22246;AGIWUR34028                        |          |                |           |                             |
| CB4856 HS V                        | 16533004                                       | 16534110 | WBGene00000782 | cpr-2     | F36D3.9 -0.171231725517694  |
| AGIWUR7124                         |                                                |          |                |           |                             |
| CB4856 HS V                        | 16537001                                       | 16537771 | WBGene00012521 | Y32B12B.1 | Y32B12B.1                   |
| -0.21174472984574                  | AGIWUR43482                                    |          |                |           |                             |
| CB4856 HS V                        | 16538396                                       | 16549854 | WBGene00012522 | Y32B12B.2 | Y32B12B.2                   |
| 0.121564779081985                  | AGIWUR11254;AGIWUR41877                        |          |                |           |                             |
| CB4856 HS V                        | 16550980                                       | 16552282 | WBGene00012523 | srbc-65   | Y32B12B.3                   |
| 0.116332844094801                  | AGIWUR27274                                    |          |                |           |                             |
| CB4856 HS V                        | 16553327                                       | 16563504 | WBGene00012524 | Y32B12B.4 | Y32B12B.4                   |
| -0.124965097842784                 | AGIWUR28882                                    |          |                |           |                             |
| CB4856 HS V                        | 16565939                                       | 16567572 | WBGene00005708 | sru-45    | Y32B12B.7                   |
| -0.149865728808147                 | AGIWUR43428                                    |          |                |           |                             |
| CB4856 HS V                        | 16569387                                       | 16571340 | WBGene00006471 | nhr-233   | Y32B12B.6                   |
| -0.0739829103038874                | AGIWUR8446                                     |          |                |           |                             |
| CB4856 HS V                        | 16573468                                       | 16574952 | WBGene00006196 | str-149   | Y32B12B.5                   |
| 0.0354189440801145                 | AGIWUR31136                                    |          |                |           |                             |
| CB4856 HS V                        | 16578459                                       | 16580524 | WBGene00011396 | nhr-271   | T03E6.3 -0.121760290042134  |
| AGIWUR4028                         |                                                |          |                |           |                             |
| CB4856 HS V                        | 16581037                                       | 16583175 | WBGene00011395 | T03E6.2   | T03E6.2 0.655930290987913   |
| AGIWUR20782                        |                                                |          |                |           |                             |
| CB4856 HS V                        | 16586742                                       | 16588528 | WBGene00005820 | srw-73    | T03E6.6 0.0648053302133711  |
| AGIWUR1802                         |                                                |          |                |           |                             |
| CB4856 HS V                        | 16590101                                       | 16592042 | WBGene00005475 | srh-269   | T03E6.5 -0.0899878439391877 |
| AGIWUR38015                        |                                                |          |                |           |                             |
| CB4856 HS V                        | 16592572                                       | 16595346 | WBGene00000776 | cp1-1     | T03E6.7 0.156152396496829   |
| AGIWUR4698;AGIWUR43048;AGIWUR43652 |                                                |          |                |           |                             |
| CB4856 HS V                        | 16598989                                       | 16600723 | WBGene00045356 | T03E6.9   | T03E6.9 0.657160391875839   |
| AGIWUR18668;AGIWUR41414            |                                                |          |                |           |                             |
| CB4856 HS V                        | 16600567                                       | 16603369 | WBGene00011397 | T03E6.8   | T03E6.8 -0.0630732269512633 |
| AGIWUR22270                        |                                                |          |                |           |                             |
| CB4856 HS V                        | 16603529                                       | 16610952 | WBGene00194769 | Y32B12C.5 | Y32B12C.5                   |
| 0.0761934494043062                 | AGIWUR1181;AGIWUR25930;AGIWUR32738;AGIWUR38459 |          |                |           |                             |
| CB4856 HS V                        | 16612792                                       | 16614767 | WBGene00012526 | Y32B12C.3 | Y32B12C.3                   |
| 0.193061773092106                  | AGIWUR23808                                    |          |                |           |                             |
| CB4856 HS V                        | 16618341                                       | 16620908 | WBGene00050904 | Y70C5A.3  | Y70C5A.3                    |
| 0.27815105894431                   | AGIWUR31825                                    |          |                |           |                             |
| CB4856 HS V                        | 16621396                                       | 16623211 | WBGene00013490 | Y70C5A.2  | Y70C5A.2                    |

|                        |                                                             |          |                |          |          |                     |  |
|------------------------|-------------------------------------------------------------|----------|----------------|----------|----------|---------------------|--|
| -0.0875900275401964    | AGIWUR12702;AGIWUR30116                                     |          |                |          |          |                     |  |
| CB4856 HS V            | 16624008                                                    | 16627970 | WBGene00012308 | oac-53   | W06G6.1  | -0.104263498291305  |  |
| AGIWUR25651            |                                                             |          |                |          |          |                     |  |
| CB4856 HS V            | 16629291                                                    | 16629648 | WBGene00012309 | W06G6.2  | W06G6.2  | -0.217056027718775  |  |
| AGIWUR17424            |                                                             |          |                |          |          |                     |  |
| CB4856 HS V            | 16629900                                                    | 16631155 | WBGene00005099 | srd-21   | W06G6.3  | -0.120709436988887  |  |
| AGIWUR13478            |                                                             |          |                |          |          |                     |  |
| CB4856 HS V            | 16632737                                                    | 16634085 | WBGene00005102 | srd-24   | W06G6.4  | 0.0490845612179958  |  |
| AGIWUR8474;AGIWUR44750 |                                                             |          |                |          |          |                     |  |
| CB4856 HS V            | 16634252                                                    | 16635619 | WBGene00005822 | srw-75   | W06G6.13 |                     |  |
| 0.113764508127254      | AGIWUR19212                                                 |          |                |          |          |                     |  |
| CB4856 HS V            | 16645997                                                    | 16646481 | WBGene00012311 | W06G6.9  | W06G6.9  | 0.0226374324656859  |  |
| AGIWUR42180            |                                                             |          |                |          |          |                     |  |
| CB4856 HS V            | 16646791                                                    | 16647193 | WBGene00012312 | W06G6.10 |          | W06G6.10            |  |
| 0.0380966373361336     | AGIWUR9521                                                  |          |                |          |          |                     |  |
| CB4856 HS V            | 16648027                                                    | 16648480 | WBGene00219308 | W06G6.20 |          | W06G6.20            |  |
| -0.036054120943481     | AGIWUR3552;AGIWUR17521;AGIWUR40622;AGIWUR43972;AGIWUR44176  |          |                |          |          |                     |  |
| CB4856 HS V            | 16666340                                                    | 16666747 | WBGene00044185 | F14F8.14 |          | F14F8.14            |  |
| -0.00516884684351293   | AGIWUR10328;AGIWUR15648;AGIWUR18851;AGIWUR42476;AGIWUR44067 |          |                |          |          |                     |  |
| CB4856 HS V            | 16667691                                                    | 16668573 | WBGene00008817 | F14F8.9  | F14F8.9  | -0.0686119684010835 |  |
| AGIWUR22108            |                                                             |          |                |          |          |                     |  |
| CB4856 HS V            | 16669339                                                    | 16671290 | WBGene00006125 | str-61   | F14F8.1  | -0.215712914671298  |  |
| AGIWUR39904            |                                                             |          |                |          |          |                     |  |
| CB4856 HS V            | 16671622                                                    | 16672186 | WBGene00008816 | F14F8.8  | F14F8.8  | 0.261713836622654   |  |
| AGIWUR4826             |                                                             |          |                |          |          |                     |  |
| CB4856 HS V            | 16673423                                                    | 16674690 | WBGene00008813 | srz-2    | F14F8.2  | -0.394860373482048  |  |
| AGIWUR6690             |                                                             |          |                |          |          |                     |  |
| CB4856 HS V            | 16675853                                                    | 16677551 | WBGene00008814 | srz-1    | F14F8.3  |                     |  |
| -0.00993404411838839   | AGIWUR21849                                                 |          |                |          |          |                     |  |
| CB4856 HS V            | 16677623                                                    | 16679337 | WBGene00008815 | srz-103  | F14F8.4  | -0.192583634438664  |  |
| AGIWUR41520            |                                                             |          |                |          |          |                     |  |
| CB4856 HS V            | 16680281                                                    | 16682656 | WBGene00005791 | srw-44   | F14F8.6  | 0.0337001506788912  |  |
| AGIWUR104              |                                                             |          |                |          |          |                     |  |
| CB4856 HS V            | 16683186                                                    | 16684878 | WBGene00005783 | srw-36   | F14F8.7  | -0.0841728466508167 |  |
| AGIWUR29070            |                                                             |          |                |          |          |                     |  |
| CB4856 HS V            | 16686025                                                    | 16687083 | WBGene00005790 | srw-43   | F14F8.5  | -0.0504908036389171 |  |
| AGIWUR29683            |                                                             |          |                |          |          |                     |  |
| CB4856 HS V            | 16687527                                                    | 16689866 | WBGene00023505 | srz-102  | F14F8.13 |                     |  |
| -0.00940555270446275   | AGIWUR497                                                   |          |                |          |          |                     |  |



|                                                                      |                                               |          |                |           |                             |  |
|----------------------------------------------------------------------|-----------------------------------------------|----------|----------------|-----------|-----------------------------|--|
| CB4856 HS V                                                          | 16692125                                      | 16693832 | WBGene00005789 | srw-42    | F14F8.11                    |  |
| -0.00223705271038721                                                 | AGIWUR30032                                   |          |                |           |                             |  |
| CB4856 HS V                                                          | 16697478                                      | 16699773 | WBGene00005788 | srw-41    | F14F8.10                    |  |
| 0.0662159734853347                                                   | AGIWUR37516                                   |          |                |           |                             |  |
| CB4856 HS V                                                          | 16700199                                      | 16704409 | WBGene00013492 | Y70C5C.1  | Y70C5C.1                    |  |
| -0.014179601485278                                                   | AGIWUR21778                                   |          |                |           |                             |  |
| CB4856 HS V                                                          | 16705082                                      | 16706647 | WBGene00013493 | cllec-9   | Y70C5C.2                    |  |
| 0.155353060891027                                                    | AGIWUR39973                                   |          |                |           |                             |  |
| CB4856 HS V                                                          | 16709977                                      | 16710778 | WBGene00023516 | srz-98    | Y70C5C.7                    |  |
| 0.145474124304727                                                    | AGIWUR22402;AGIWUR26467;AGIWUR31812           |          |                |           |                             |  |
| CB4856 HS V                                                          | 16713449                                      | 16715195 | WBGene00013494 | irld-58   | Y70C5C.3                    |  |
| -0.322915868713078                                                   | AGIWUR6228                                    |          |                |           |                             |  |
| CB4856 HS V                                                          | 16715480                                      | 16716718 | WBGene00005354 | srh-137   | Y70C5C.4                    |  |
| 0.0317968010621295                                                   | AGIWUR13217                                   |          |                |           |                             |  |
| CB4856 HS V                                                          | 16718418                                      | 16721993 | WBGene00013495 | cllec-236 | Y70C5C.5                    |  |
| -0.113121889665157                                                   | AGIWUR15366;AGIWUR24547;AGIWUR25863           |          |                |           |                             |  |
| CB4856 HS V                                                          | 16722061                                      | 16723844 | WBGene00003702 | nhr-112   | Y70C5C.6                    |  |
| -0.165211899357862                                                   | AGIWUR4411;AGIWUR17712;AGIWUR18788            |          |                |           |                             |  |
| CB4856 HS V                                                          | 16728731                                      | 16729960 | WBGene00012027 | fbxa-127  | T25E12.12                   |  |
| -0.100232087250886                                                   | AGIWUR42116                                   |          |                |           |                             |  |
| CB4856 HS V                                                          | 16733901                                      | 16735594 | WBGene00012025 | cllec-38  | T25E12.10                   |  |
| 0.0569914975582089                                                   | AGIWUR6517                                    |          |                |           |                             |  |
| CB4856 HS V                                                          | 16735765                                      | 16737404 | WBGene00012023 | cllec-34  | T25E12.8                    |  |
| -0.0179671033078774                                                  | AGIWUR1485;AGIWUR8334;AGIWUR32502;AGIWUR34931 |          |                |           |                             |  |
| CB4856 HS V                                                          | 16737673                                      | 16739200 | WBGene00012024 | cllec-29  | T25E12.9                    |  |
| 0.159355208534996                                                    | AGIWUR41772                                   |          |                |           |                             |  |
| CB4856 HS V                                                          | 16739268                                      | 16741588 | WBGene00012022 | cllec-39  | T25E12.7                    |  |
| -0.0509828809282746                                                  | AGIWUR32712                                   |          |                |           |                             |  |
| CB4856 HS V                                                          | 16742423                                      | 16744881 | WBGene00012021 | T25E12.6  | T25E12.6                    |  |
| -0.342992919288584                                                   | AGIWUR36964                                   |          |                |           |                             |  |
| CB4856 HS V                                                          | 16745080                                      | 16746258 | WBGene00012020 | gyg-2     | T25E12.5                    |  |
| -0.0496821787992729                                                  | AGIWUR36841                                   |          |                |           |                             |  |
| CB4856 HS V                                                          | 16747559                                      | 16788435 | WBGene00012019 | dkf-2     | T25E12.4                    |  |
| -0.0462603848158221                                                  | AGIWUR6610;AGIWUR31450;AGIWUR31584            |          |                |           |                             |  |
| CB4856 HS V                                                          | 16789267                                      | 16792771 | WBGene00012315 | immt-2    | W06H3.1 -0.172380748240868  |  |
| AGIWUR148;AGIWUR3517;AGIWUR15542;AGIWUR21222;AGIWUR38953;AGIWUR41677 |                                               |          |                |           |                             |  |
| CB4856 HS V                                                          | 16792764                                      | 16795007 | WBGene00004248 | pus-1     | W06H3.2 -0.352194006783595  |  |
| AGIWUR19463                                                          |                                               |          |                |           |                             |  |
| CB4856 HS V                                                          | 16794878                                      | 16802004 | WBGene00012316 | ctps-1    | W06H3.3 -0.0126206053504472 |  |

|                                    |                         |          |                |         |                            |
|------------------------------------|-------------------------|----------|----------------|---------|----------------------------|
| AGIWUR41343                        |                         |          |                |         |                            |
| CB4856 HS V                        | 16802874                | 16814563 | WBGene00013606 | cand-1  | Y102A5A.1                  |
| -0.375440037109579                 | AGIWUR30164             |          |                |         |                            |
| CB4856 HS V                        | 16815567                | 16820712 | WBGene00011850 | T20B3.1 | T20B3.1 0.110078939787567  |
| AGIWUR33326                        |                         |          |                |         |                            |
| CB4856 HS V                        | 16825290                | 16827592 | WBGene00005426 | srh-216 | T20B3.5 0.0627689195925081 |
| AGIWUR7258                         |                         |          |                |         |                            |
| CB4856 HS V                        | 16828235                | 16829755 | WBGene00005424 | srh-214 | T20B3.4 0.0643627122476449 |
| AGIWUR12153                        |                         |          |                |         |                            |
| CB4856 HS V                        | 16830557                | 16832021 | WBGene00005425 | srh-215 | T20B3.3 -0.376611567044959 |
| AGIWUR25568                        |                         |          |                |         |                            |
| CB4856 HS V                        | 16833316                | 16839141 | WBGene00004026 | phy-3   | T20B3.7 -0.105015381553606 |
| AGIWUR19081                        |                         |          |                |         |                            |
| CB4856 HS V                        | 16839145                | 16841061 | WBGene00011853 | clec-40 | T20B3.13                   |
| 0.512095799067071                  | AGIWUR29336             |          |                |         |                            |
| CB4856 HS V                        | 16841459                | 16842863 | WBGene00011851 | clec-23 | T20B3.8 0.0315112559210409 |
| AGIWUR14153                        |                         |          |                |         |                            |
| CB4856 HS V                        | 16843241                | 16844696 | WBGene00044331 | clec-25 | T20B3.15                   |
| 0.158225172128057                  | AGIWUR32341             |          |                |         |                            |
| CB4856 HS V                        | 16846867                | 16848466 | WBGene00044332 | clec-36 | T20B3.16                   |
| 0.282390663623433                  | AGIWUR9285;AGIWUR17755  |          |                |         |                            |
| CB4856 HS V                        | 16848611                | 16850130 | WBGene00011852 | clec-26 | T20B3.12                   |
| 0.477296093895365                  | AGIWUR13391             |          |                |         |                            |
| CB4856 HS V                        | 16850394                | 16852095 | WBGene00013609 | clec-37 | Y102A5B.3                  |
| 0.0798042508434982                 | AGIWUR37056             |          |                |         |                            |
| CB4856 HS V                        | 16852291                | 16854053 | WBGene00013608 | clec-35 | Y102A5B.2                  |
| -0.0451182267934636                | AGIWUR14364;AGIWUR34707 |          |                |         |                            |
| CB4856 HS V                        | 16854646                | 16856152 | WBGene00013607 | clec-27 | Y102A5B.1                  |
| 0.175784424473742                  | AGIWUR5046              |          |                |         |                            |
| CB4856 HS V                        | 16856437                | 16858077 | WBGene00009854 | clec-31 | F49A5.2 -0.328671071238531 |
| AGIWUR16982                        |                         |          |                |         |                            |
| CB4856 HS V                        | 16858429                | 16860040 | WBGene00009855 | clec-22 | F49A5.3 0.0519154064593916 |
| AGIWUR1555;AGIWUR6322;AGIWUR16586  |                         |          |                |         |                            |
| CB4856 HS V                        | 16860228                | 16861869 | WBGene00009860 | clec-32 | F49A5.9 0.359455321192428  |
| AGIWUR25174                        |                         |          |                |         |                            |
| CB4856 HS V                        | 16862012                | 16863890 | WBGene00009856 | clec-24 | F49A5.4 0.0677264188974513 |
| AGIWUR7771;AGIWUR14539;AGIWUR16880 |                         |          |                |         |                            |
| CB4856 HS V                        | 16865704                | 16867226 | WBGene00009857 | clec-28 | F49A5.5 0.362210365041902  |
| AGIWUR34482                        |                         |          |                |         |                            |

|                                   |   |                                                             |          |                |          |           |                     |
|-----------------------------------|---|-------------------------------------------------------------|----------|----------------|----------|-----------|---------------------|
| CB4856 HS                         | V | 16867678                                                    | 16869845 | WBGene00009859 | clec-33  | F49A5.7   | 0.555188651422467   |
| AGIWUR45121                       |   |                                                             |          |                |          |           |                     |
| CB4856 HS                         | V | 16870742                                                    | 16871487 | WBGene00009858 | thn-4    | F49A5.6   | 0.0778768715473088  |
| AGIWUR2062                        |   |                                                             |          |                |          |           |                     |
| CB4856 HS                         | V | 16873942                                                    | 16875455 | WBGene00005770 | srw-23   | F49A5.8   | 0.0502077429340071  |
| AGIWUR9227                        |   |                                                             |          |                |          |           |                     |
| CB4856 HS                         | V | 16875877                                                    | 16876144 | WBGene00044195 | F49A5.10 | F49A5.10  |                     |
| -0.0368726839885021               |   | AGIWUR17436;AGIWUR22208;AGIWUR28545;AGIWUR29932;AGIWUR43591 |          |                |          |           |                     |
| CB4856 HS                         | V | 16878724                                                    | 16880154 | WBGene00008617 | F09C6.3  | F09C6.3   | -0.159365600204135  |
| AGIWUR41965                       |   |                                                             |          |                |          |           |                     |
| CB4856 HS                         | V | 16880994                                                    | 16881336 | WBGene00044278 | F09C6.14 | F09C6.14  |                     |
| 0.184823780932804                 |   | AGIWUR11479;AGIWUR13626;AGIWUR22926;AGIWUR26443;AGIWUR44638 |          |                |          |           |                     |
| CB4856 HS                         | V | 16881901                                                    | 16882310 | WBGene00044181 | F09C6.11 | F09C6.11  |                     |
| 0.0601837321327094                |   | AGIWUR19891;AGIWUR21290;AGIWUR38265;AGIWUR43218;AGIWUR43793 |          |                |          |           |                     |
| CB4856 HS                         | V | 16882878                                                    | 16883142 | WBGene00044182 | F09C6.12 | F09C6.12  |                     |
| 0.177356673538058                 |   | AGIWUR10485;AGIWUR20232;AGIWUR31606;AGIWUR41910;AGIWUR44596 |          |                |          |           |                     |
| CB4856 HS                         | V | 16885075                                                    | 16885403 | WBGene00044183 | F09C6.13 | F09C6.13  |                     |
| 0.477867606507176                 |   | AGIWUR5166;AGIWUR14599;AGIWUR14672;AGIWUR24787;AGIWUR27503  |          |                |          |           |                     |
| CB4856 HS                         | V | 16887413                                                    | 16888479 | WBGene00008615 | F09C6.1  | F09C6.1   | 0.0771131119648638  |
| AGIWUR43328                       |   |                                                             |          |                |          |           |                     |
| CB4856 HS                         | V | 16889275                                                    | 16890749 | WBGene00008616 | fbxa-44  | F09C6.2   | -0.0446865216408714 |
| AGIWUR3276;AGIWUR8021;AGIWUR37377 |   |                                                             |          |                |          |           |                     |
| CB4856 HS                         | V | 16893740                                                    | 16894107 | WBGene00077492 | F09C6.15 | F09C6.15  |                     |
| 1.00209173183998                  |   | AGIWUR1114;AGIWUR25469                                      |          |                |          |           |                     |
| CB4856 HS                         | V | 16894230                                                    | 16895553 | WBGene00005650 | srp-9    | F09C6.5   | 0.144917160701236   |
| AGIWUR21568;AGIWUR41911           |   |                                                             |          |                |          |           |                     |
| CB4856 HS                         | V | 16896358                                                    | 16897728 | WBGene00005651 | srp-10   | F09C6.4   | 0.011468873430192   |
| AGIWUR4775                        |   |                                                             |          |                |          |           |                     |
| CB4856 HS                         | V | 16898457                                                    | 16899455 | WBGene00008618 | fbxa-45  | F09C6.6   | -0.137450846970257  |
| AGIWUR45116                       |   |                                                             |          |                |          |           |                     |
| CB4856 HS                         | V | 16901215                                                    | 16902826 | WBGene00005145 | srd-68   | F09C6.7   | -0.22460508163791   |
| AGIWUR9408                        |   |                                                             |          |                |          |           |                     |
| CB4856 HS                         | V | 16907969                                                    | 16909971 | WBGene00077493 | F09C6.16 | F09C6.16  |                     |
| -0.0368608481783053               |   | AGIWUR3518;AGIWUR14063                                      |          |                |          |           |                     |
| CB4856 HS                         | V | 16912234                                                    | 16915350 | WBGene00003706 | nhr-116  | F09C6.9   | 0.136729568487187   |
| AGIWUR10178                       |   |                                                             |          |                |          |           |                     |
| CB4856 HS                         | V | 16915373                                                    | 16916179 | WBGene00008620 | F09C6.10 | F09C6.10  |                     |
| -0.131714261154515                |   | AGIWUR4409;AGIWUR11154;AGIWUR21121;AGIWUR38731;AGIWUR40439  |          |                |          |           |                     |
| CB4856 HS                         | V | 16917196                                                    | 16918478 | WBGene00013610 | fbxa-206 | Y102A5C.1 |                     |

|                     |                                                 |          |                |            |            |
|---------------------|-------------------------------------------------|----------|----------------|------------|------------|
| -0.252622421077352  | AGIWUR32733                                     |          |                |            |            |
| CB4856 HS V         | 16918782                                        | 16919784 | WBGene00013611 | Y102A5C.2  | Y102A5C.2  |
| -0.211453786804234  | AGIWUR16511;AGIWUR35854;AGIWUR38293;AGIWUR44018 |          |                |            |            |
| CB4856 HS V         | 16919780                                        | 16921323 | WBGene00013612 | fbxa-207   | Y102A5C.3  |
| -0.121440031266297  | AGIWUR4834;AGIWUR21721;AGIWUR23457;AGIWUR42510  |          |                |            |            |
| CB4856 HS V         | 16922252                                        | 16924258 | WBGene00013613 | Y102A5C.4  | Y102A5C.4  |
| 0.204241855803533   | AGIWUR2578                                      |          |                |            |            |
| CB4856 HS V         | 16924985                                        | 16926125 | WBGene00044220 | Y102A5C.35 | Y102A5C.35 |
| -0.0954687377188641 | AGIWUR8646                                      |          |                |            |            |
| CB4856 HS V         | 16926920                                        | 16927445 | WBGene00044213 | Y102A5C.36 | Y102A5C.36 |
| -0.291120516892121  | AGIWUR1655                                      |          |                |            |            |
| CB4856 HS V         | 16928328                                        | 16928999 | WBGene00014954 | Y102A5C.5  | Y102A5C.5  |
| -0.232353926425374  | AGIWUR7475;AGIWUR7938;AGIWUR18033               |          |                |            |            |
| CB4856 HS V         | 16929167                                        | 16930063 | WBGene00014955 | Y102A5C.6  | Y102A5C.6  |
| -0.0121933171622128 | AGIWUR5552;AGIWUR6206;AGIWUR31531               |          |                |            |            |
| CB4856 HS V         | 16943191                                        | 16943836 | WBGene00014956 | Y102A5C.11 | Y102A5C.11 |
| -0.0179701021673324 | AGIWUR11429;AGIWUR21276;AGIWUR30634             |          |                |            |            |
| CB4856 HS V         | 16947158                                        | 16948111 | WBGene00013619 | fbxa-112   | Y102A5C.13 |
| 0.162871526476406   | AGIWUR24401                                     |          |                |            |            |
| CB4856 HS V         | 16956529                                        | 16957991 | WBGene00013621 | cllec-239  | Y102A5C.16 |
| -0.1017596322475    | AGIWUR5509                                      |          |                |            |            |
| CB4856 HS V         | 16958657                                        | 16965675 | WBGene00001161 | efl-1      | Y102A5C.18 |
| 0.0636596119270263  | AGIWUR31042;AGIWUR35577                         |          |                |            |            |
| CB4856 HS V         | 16966814                                        | 16968586 | WBGene00013623 | fbxa-90    | Y102A5C.19 |
| -0.102783765797108  | AGIWUR14527                                     |          |                |            |            |
| CB4856 HS V         | 16969039                                        | 16970965 | WBGene00013624 | srbc-80    | Y102A5C.20 |
| 0.0269234857376821  | AGIWUR36434                                     |          |                |            |            |
| CB4856 HS V         | 16972434                                        | 16974088 | WBGene00005338 | srh-119    | Y102A5C.21 |
| 0.164231527956106   | AGIWUR31546                                     |          |                |            |            |
| CB4856 HS V         | 16975219                                        | 16976717 | WBGene00005945 | srx-54     | Y102A5C.22 |
| 1.10565555150494    | AGIWUR19658;AGIWUR21218                         |          |                |            |            |
| CB4856 HS V         | 16977191                                        | 16978408 | WBGene00013625 | srz-53     | Y102A5C.23 |
| 0.212915070447465   | AGIWUR26238                                     |          |                |            |            |
| CB4856 HS V         | 16979010                                        | 16980244 | WBGene00005946 | srx-55     | Y102A5C.24 |
| -0.0104614650005672 | AGIWUR36283                                     |          |                |            |            |
| CB4856 HS V         | 16984044                                        | 16985395 | WBGene00013627 | srz-52     | Y102A5C.26 |
| 0.309321116380091   | AGIWUR19574                                     |          |                |            |            |
| CB4856 HS V         | 16986460                                        | 16987135 | WBGene00077624 | Y102A5C.40 | Y102A5C.40 |
| -0.219658266392862  | AGIWUR40450                                     |          |                |            |            |

|                         |                                                                         |          |                |                 |                             |
|-------------------------|-------------------------------------------------------------------------|----------|----------------|-----------------|-----------------------------|
| CB4856 HS V             | 16990810                                                                | 16991459 | WBGene00001706 | grd-17          | Y102A5C.34                  |
| 0.217952529295376       | AGIWUR18992;AGIWUR41502                                                 |          |                |                 |                             |
| CB4856 HS V             | 16992034                                                                | 16993910 | WBGene00013629 | srz-95          | Y102A5C.33                  |
| 0.348235435613816       | AGIWUR22065                                                             |          |                |                 |                             |
| CB4856 HS V             | 16998933                                                                | 17000304 | WBGene00006249 | str-217         | Y102A5C.28                  |
| -0.355082615023322      | AGIWUR10775                                                             |          |                |                 |                             |
| CB4856 HS V             | 17001467                                                                | 17003587 | WBGene00005521 | sri-9           | Y102A5C.29                  |
| 0.176296036985066       | AGIWUR34695                                                             |          |                |                 |                             |
| CB4856 HS V             | 17003980                                                                | 17005066 | WBGene00014957 | Y102A5C.30      | Y102A5C.30                  |
| -0.112494178526883      | AGIWUR3275                                                              |          |                |                 |                             |
| CB4856 HS V             | 17005489                                                                | 17006753 | WBGene00005348 | srh-131         | Y102A5C.31                  |
| -0.150789786754819      | AGIWUR42747                                                             |          |                |                 |                             |
| CB4856 HS V             | 17007232                                                                | 17008402 | WBGene00005581 | sri-69          | Y102A5C.32                  |
| 0.0162371068218583      | AGIWUR40373                                                             |          |                |                 |                             |
| CB4856 HS V             | 17008673                                                                | 17009388 | WBGene00009914 | F49H6.13        | F49H6.13                    |
| 0.0236868902725629      | AGIWUR35282                                                             |          |                |                 |                             |
| CB4856 HS V             | 17010062                                                                | 17011849 | WBGene00009905 | cllec-240       | F49H6.1                     |
| 0.120256751118636       | AGIWUR7659                                                              |          |                |                 |                             |
| CB4856 HS V             | 17012127                                                                | 17013332 | WBGene00009906 | cllec-241       | F49H6.2                     |
| -0.0733275361911332     | AGIWUR41928                                                             |          |                |                 |                             |
| CB4856 HS V             | 17013646                                                                | 17013861 | WBGene00050928 | F49H6.16        | F49H6.16                    |
| 0.0154196100019126      | AGIWUR11947;AGIWUR12220;AGIWUR29541;AGIWUR36769;AGIWUR39561             |          |                |                 |                             |
| CB4856 HS V             | 17014408                                                                | 17015326 | WBGene00009907 | F49H6.3 F49H6.3 | -0.0509703098995171         |
| AGIWUR44169             |                                                                         |          |                |                 |                             |
| CB4856 HS V             | 17016175                                                                | 17016446 | WBGene00045502 | F49H6.14        | F49H6.14                    |
| -0.0459593502726654     | AGIWUR9144;AGIWUR19042;AGIWUR28769;AGIWUR39378                          |          |                |                 |                             |
| CB4856 HS V             | 17017087                                                                | 17019800 | WBGene00005316 | srh-97          | F49H6.4 -0.0917546649716172 |
| AGIWUR4678              |                                                                         |          |                |                 |                             |
| CB4856 HS V             | 17019990                                                                | 17020226 | WBGene00050965 | F49H6.17        | F49H6.17                    |
| -0.049578637233314      | AGIWUR21780;AGIWUR22613;AGIWUR30372;AGIWUR35838;AGIWUR43274;AGIWUR43610 |          |                |                 |                             |
| CB4856 HS V             | 17020907                                                                | 17021461 | WBGene00009913 | F49H6.12        | F49H6.12                    |
| -0.0866160423016415     | AGIWUR15422;AGIWUR21659;AGIWUR24462;AGIWUR27313;AGIWUR32570             |          |                |                 |                             |
| CB4856 HS V             | 17023473                                                                | 17025347 | WBGene00009908 | F49H6.5 F49H6.5 | 0.680318760624388           |
| AGIWUR21039             |                                                                         |          |                |                 |                             |
| CB4856 HS V             | 17027255                                                                | 17028374 | WBGene00014768 | F49H6.6 F49H6.6 | 0.14475822494307            |
| AGIWUR12196;AGIWUR15561 |                                                                         |          |                |                 |                             |
| CB4856 HS V             | 17028884                                                                | 17030448 | WBGene00005784 | srw-37          | F49H6.7 0.0398811962746537  |
| AGIWUR28075             |                                                                         |          |                |                 |                             |
| CB4856 HS V             | 17030738                                                                | 17032772 | WBGene00009910 | srz-92          | F49H6.9 0.0358191877086291  |

AGIWUR2313;AGIWUR2642;AGIWUR5170;AGIWUR16949;AGIWUR30126;AGIWUR32196;AGIWUR34131  
 CB4856 HS V 17033218 17035950 WBGene00009912 srz-94 F49H6.11  
 0.340320066797168 AGIWUR37649  
 CB4856 HS V 17036410 17037862 WBGene00009911 srz-93 F49H6.10  
 -0.0429739448460733 AGIWUR6095  
 CB4856 HS V 17040739 17041961 WBGene00050976 F28B1.11 F28B1.11  
 -0.196462868060419 AGIWUR3533  
 CB4856 HS V 17042592 17043783 WBGene00009195 hpo-33 F28B1.1 -0.288420863894191  
 AGIWUR21710  
 CB4856 HS V 17044786 17049822 WBGene00009196 F28B1.2 F28B1.2 -0.0170424694323437  
 AGIWUR29073  
 CB4856 HS V 17051015 17051617 WBGene00077494 F28B1.12 F28B1.12  
 0.0119194088096286 AGIWUR29490  
 CB4856 HS V 17052004 17055349 WBGene00009197 F28B1.3 F28B1.3 0.167751585442778  
 AGIWUR32415  
 CB4856 HS V 17055431 17057052 WBGene00009198 F28B1.4 F28B1.4 0.0915908793205293  
 AGIWUR43815  
 CB4856 HS V 17057135 17059919 WBGene00009199 F28B1.5 F28B1.5 -0.404776236399181  
 AGIWUR27451  
 CB4856 HS V 17060287 17061675 WBGene00005578 sri-66 F28B1.6 -0.088199248533563  
 AGIWUR5923  
 CB4856 HS V 17061889 17063095 WBGene00045381 F28B1.9 F28B1.9 -0.199148360384088  
 AGIWUR26072;AGIWUR42486  
 CB4856 HS V 17063417 17064823 WBGene00005462 srh-256 F28B1.7 -0.0326704721419024  
 AGIWUR1913;AGIWUR35236  
 CB4856 HS V 17064976 17066471 WBGene00005461 srh-255 F28B1.8 0.148373337407101  
 AGIWUR23182  
 CB4856 HS V 17067146 17067854 WBGene00050958 F28B1.10 F28B1.10  
 -0.0737716101885546 AGIWUR36506  
 CB4856 HS V 17068627 17069533 WBGene00045382 T05E12.8 T05E12.8  
 -0.151582337914794 AGIWUR15678  
 CB4856 HS V 17070527 17071678 WBGene00011485 srbc-14 T05E12.2  
 0.0892032907227467 AGIWUR39008  
 CB4856 HS V 17074290 17076000 WBGene00006176 str-125 T05E12.1  
 -0.0858705270750795 AGIWUR38712  
 CB4856 HS V 17076874 17077989 WBGene00011486 T05E12.3 T05E12.3  
 0.41669642833741 AGIWUR29382  
 CB4856 HS V 17078257 17079895 WBGene00005767 srw-20 T05E12.4  
 0.0294537608717675 AGIWUR43453

|                                                            |                                                             |          |                |          |                             |
|------------------------------------------------------------|-------------------------------------------------------------|----------|----------------|----------|-----------------------------|
| CB4856 HS V                                                | 17080492                                                    | 17082818 | WBGene00045500 | T05E12.9 | T05E12.9                    |
| -0.403120148414365                                         | AGIWUR39435;AGIWUR41395                                     |          |                |          |                             |
| CB4856 HS V                                                | 17085002                                                    | 17090023 | WBGene00011487 | T05E12.6 | T05E12.6                    |
| -0.0108702621343362                                        | AGIWUR6518;AGIWUR14154;AGIWUR29463;AGIWUR40326;AGIWUR42300  |          |                |          |                             |
| CB4856 HS V                                                | 17090362                                                    | 17091693 | WBGene00005444 | srh-237  | T05E12.7                    |
| 0.379656313263794                                          | AGIWUR6479;AGIWUR19438;AGIWUR36456                          |          |                |          |                             |
| CB4856 HS V                                                | 17092570                                                    | 17093420 | WBGene00013935 | ZK218.1  | ZK218.1 0.148009982392706   |
| AGIWUR24739                                                |                                                             |          |                |          |                             |
| CB4856 HS V                                                | 17094180                                                    | 17094485 | WBGene00050963 | ZK218.15 | ZK218.15                    |
| -0.023645393108497                                         | AGIWUR14594;AGIWUR24596;AGIWUR27095;AGIWUR36385;AGIWUR36538 |          |                |          |                             |
| CB4856 HS V                                                | 17097927                                                    | 17098766 | WBGene00013937 | ZK218.3  | ZK218.3 0.25870246538169    |
| AGIWUR6219                                                 |                                                             |          |                |          |                             |
| CB4856 HS V                                                | 17099347                                                    | 17100364 | WBGene00013938 | ZK218.4  | ZK218.4 0.147436781572391   |
| AGIWUR32987                                                |                                                             |          |                |          |                             |
| CB4856 HS V                                                | 17101132                                                    | 17102017 | WBGene00013939 | ZK218.5  | ZK218.5 -0.102138365988616  |
| AGIWUR2008                                                 |                                                             |          |                |          |                             |
| CB4856 HS V                                                | 17103410                                                    | 17104627 | WBGene00013940 | nhr-248  | ZK218.6 -0.0213803059853799 |
| AGIWUR1901                                                 |                                                             |          |                |          |                             |
| CB4856 HS V                                                | 17105783                                                    | 17106656 | WBGene00013941 | ZK218.7  | ZK218.7 0.027941410754905   |
| AGIWUR24098                                                |                                                             |          |                |          |                             |
| CB4856 HS V                                                | 17107530                                                    | 17108418 | WBGene00013943 | ZK218.11 | ZK218.11                    |
| 0.0487309750156717                                         | AGIWUR2994                                                  |          |                |          |                             |
| CB4856 HS V                                                | 17109684                                                    | 17110448 | WBGene00045492 | ZK218.14 | ZK218.14                    |
| 0.0208678714680417                                         | AGIWUR3949;AGIWUR7949;AGIWUR33943                           |          |                |          |                             |
| CB4856 HS V                                                | 17114540                                                    | 17114887 | WBGene00014981 | ZK218.9  | ZK218.9 -0.0461433100493238 |
| AGIWUR2424;AGIWUR15452;AGIWUR22073;AGIWUR28343;AGIWUR39661 |                                                             |          |                |          |                             |
| CB4856 HS V                                                | 17116026                                                    | 17117009 | WBGene00013942 | ZK218.8  | ZK218.8 -0.0507622828410135 |
| AGIWUR24794                                                |                                                             |          |                |          |                             |
| CB4856 HS V                                                | 17146825                                                    | 17153266 | WBGene00014753 | F40D4.14 | F40D4.14                    |
| -0.0502900653749436                                        | AGIWUR3920;AGIWUR28464                                      |          |                |          |                             |
| CB4856 HS V                                                | 17159874                                                    | 17162621 | WBGene00009571 | F40D4.12 | F40D4.12                    |
| 0.158205947104031                                          | AGIWUR14728;AGIWUR30832;AGIWUR31537                         |          |                |          |                             |
| CB4856 HS V                                                | 17162900                                                    | 17165509 | WBGene00005321 | srh-102  | F40D4.11                    |
| 0.00916598121752088                                        | AGIWUR38142                                                 |          |                |          |                             |
| CB4856 HS V                                                | 17166028                                                    | 17167557 | WBGene00009569 | srz-66   | F40D4.9 -0.0889000300027103 |
| AGIWUR28911                                                |                                                             |          |                |          |                             |
| CB4856 HS V                                                | 17167833                                                    | 17169279 | WBGene00009570 | srz-65   | F40D4.10                    |
| 0.160476631659768                                          | AGIWUR21917                                                 |          |                |          |                             |
| CB4856 HS V                                                | 17169442                                                    | 17170922 | WBGene00005798 | srw-51   | F40D4.8 0.2506710575385     |

|                                                         |   |                         |          |                |                  |                     |
|---------------------------------------------------------|---|-------------------------|----------|----------------|------------------|---------------------|
| AGIWUR10986                                             |   |                         |          |                |                  |                     |
| CB4856 HS                                               | V | 17171851                | 17173313 | WBGene00009568 | srbc-26 F40D4.7  | -0.0677004022300558 |
| AGIWUR43279                                             |   |                         |          |                |                  |                     |
| CB4856 HS                                               | V | 17174038                | 17175530 | WBGene00009567 | srbc-25 F40D4.6  | -0.0102100064426409 |
| AGIWUR151;AGIWUR44899                                   |   |                         |          |                |                  |                     |
| CB4856 HS                                               | V | 17176716                | 17178067 | WBGene00009566 | srsx-1 F40D4.5   | 0.0993260101113949  |
| AGIWUR9027                                              |   |                         |          |                |                  |                     |
| CB4856 HS                                               | V | 17178757                | 17180002 | WBGene00005390 | srh-174 F40D4.1  | 0.0275463751525784  |
| AGIWUR20313;AGIWUR44339                                 |   |                         |          |                |                  |                     |
| CB4856 HS                                               | V | 17184396                | 17186082 | WBGene00005378 | srh-162 F40D4.4  | 0.019997677460704   |
| AGIWUR6806;AGIWUR34277                                  |   |                         |          |                |                  |                     |
| CB4856 HS                                               | V | 17186873                | 17188680 | WBGene00005413 | srh-202 Y68A4A.1 |                     |
| 0.586265564066959                                       |   | AGIWUR18682             |          |                |                  |                     |
| CB4856 HS                                               | V | 17189186                | 17190499 | WBGene00006235 | str-199 Y68A4A.3 |                     |
| 0.0235289605382469                                      |   | AGIWUR34565             |          |                |                  |                     |
| CB4856 HS                                               | V | 17193031                | 17199003 | WBGene00013467 | Y68A4A.5         | Y68A4A.5            |
| -0.127513626296312                                      |   | AGIWUR14113;AGIWUR28008 |          |                |                  |                     |
| CB4856 HS                                               | V | 17199418                | 17201736 | WBGene00013468 | srz-96 Y68A4A.6  |                     |
| 0.123238011497918                                       |   | AGIWUR40306             |          |                |                  |                     |
| CB4856 HS                                               | V | 17205641                | 17207160 | WBGene00005821 | srw-74 Y68A4A.11 |                     |
| 0.0186560200871018                                      |   | AGIWUR40920             |          |                |                  |                     |
| CB4856 HS                                               | V | 17209065                | 17209955 | WBGene00014944 | Y68A4A.12        | Y68A4A.12           |
| -0.0325836772847428                                     |   | AGIWUR43560             |          |                |                  |                     |
| CB4856 HS                                               | V | 17210716                | 17212039 | WBGene00005443 | srh-236 Y68A4A.9 |                     |
| -0.16797549985171                                       |   | AGIWUR6236              |          |                |                  |                     |
| CB4856 HS                                               | V | 17213043                | 17214212 | WBGene00005332 | srh-113 Y68A4A.7 |                     |
| 0.0274580127702304                                      |   | AGIWUR42610             |          |                |                  |                     |
| CB4856 HS                                               | V | 17215066                | 17216751 | WBGene00014943 | Y68A4A.8         | Y68A4A.8            |
| -0.0543223730679792                                     |   | AGIWUR5679              |          |                |                  |                     |
| CB4856 HS                                               | V | 17217990                | 17219004 | WBGene00011840 | srbc-62 T19C9.1  | 0.178556867415626   |
| AGIWUR32160                                             |   |                         |          |                |                  |                     |
| CB4856 HS                                               | V | 17219253                | 17220445 | WBGene00005328 | srh-109 T19C9.4  | -0.289625645286907  |
| AGIWUR39083                                             |   |                         |          |                |                  |                     |
| CB4856 HS                                               | V | 17222386                | 17223405 | WBGene00005458 | srh-252 T19C9.3  | -0.0203820677387707 |
| AGIWUR15804                                             |   |                         |          |                |                  |                     |
| CB4856 HS                                               | V | 17225086                | 17226219 | WBGene00005331 | srh-112 T19C9.2  | 0.132745679019066   |
| AGIWUR41950                                             |   |                         |          |                |                  |                     |
| CB4856 HS                                               | V | 17229555                | 17229990 | WBGene00011842 | T19C9.6 T19C9.6  | -0.0336458822788233 |
| AGIWUR28;AGIWUR1422;AGIWUR14042;AGIWUR17957;AGIWUR25905 |   |                         |          |                |                  |                     |



|                                                                                 |   |          |          |                |           |          |                     |
|---------------------------------------------------------------------------------|---|----------|----------|----------------|-----------|----------|---------------------|
| CB4856 HS                                                                       | V | 17234329 | 17234630 | WBGene00050933 | T19C9.9   | T19C9.9  | -0.0850774883122316 |
| AGIWUR4141;AGIWUR19550;AGIWUR26952;AGIWUR34168;AGIWUR36985                      |   |          |          |                |           |          |                     |
| CB4856 HS                                                                       | V | 17236592 | 17238097 | WBGene00050934 | T19C9.10  |          | T19C9.10            |
| -0.00814297816632514 AGIWUR4377;AGIWUR19269;AGIWUR26611;AGIWUR41291;AGIWUR42252 |   |          |          |                |           |          |                     |
| CB4856 HS                                                                       | V | 17239097 | 17240656 | WBGene00011844 | T19C9.8   | T19C9.8  | -0.0921927868509833 |
| AGIWUR39193                                                                     |   |          |          |                |           |          |                     |
| CB4856 HS                                                                       | V | 17241708 | 17242652 | WBGene00013472 | Y68A4B.3  |          | Y68A4B.3            |
| -0.112279466519784 AGIWUR4089;AGIWUR12735                                       |   |          |          |                |           |          |                     |
| CB4856 HS                                                                       | V | 17243767 | 17245506 | WBGene00013471 | cllec-242 |          | Y68A4B.2            |
| 0.206604085825785 AGIWUR41908                                                   |   |          |          |                |           |          |                     |
| CB4856 HS                                                                       | V | 17247325 | 17249015 | WBGene00013470 | cllec-243 |          | Y68A4B.1            |
| 0.0269380115673385 AGIWUR4918                                                   |   |          |          |                |           |          |                     |
| CB4856 HS                                                                       | V | 17251911 | 17252309 | WBGene00219383 | Y61B8A.6  |          | Y61B8A.6            |
| -0.0654329511497753 AGIWUR9858;AGIWUR38279                                      |   |          |          |                |           |          |                     |
| CB4856 HS                                                                       | V | 17252931 | 17255128 | WBGene00005335 | srh-116   | Y61B8A.1 |                     |
| 0.554775535718794 AGIWUR22833                                                   |   |          |          |                |           |          |                     |
| CB4856 HS                                                                       | V | 17255754 | 17257194 | WBGene00005334 | srh-115   | Y61B8A.2 |                     |
| 0.134337338209146 AGIWUR27892                                                   |   |          |          |                |           |          |                     |
| CB4856 HS                                                                       | V | 17259173 | 17260534 | WBGene00044654 | fbxa-85   | Y61B8A.4 |                     |
| 0.0392428712584021 AGIWUR32797                                                  |   |          |          |                |           |          |                     |
| CB4856 HS                                                                       | V | 17260674 | 17262325 | WBGene00005794 | srw-47    | K10G4.2  | 0.152562515643282   |
| AGIWUR42524                                                                     |   |          |          |                |           |          |                     |
| CB4856 HS                                                                       | V | 17264066 | 17264955 | WBGene00010752 | K10G4.3   | K10G4.3  | -0.126628981181601  |
| AGIWUR19495                                                                     |   |          |          |                |           |          |                     |
| CB4856 HS                                                                       | V | 17271730 | 17272888 | WBGene00005336 | srh-117   | K10G4.6  | -0.278952000273516  |
| AGIWUR10777                                                                     |   |          |          |                |           |          |                     |
| CB4856 HS                                                                       | V | 17273524 | 17275059 | WBGene00044202 | K10G4.10  |          | K10G4.10            |
| -0.0845890505586664 AGIWUR17927;AGIWUR27492                                     |   |          |          |                |           |          |                     |
| CB4856 HS                                                                       | V | 17278367 | 17285169 | WBGene00010753 | K10G4.4   | K10G4.4  | 0.22802778433322    |
| AGIWUR19573                                                                     |   |          |          |                |           |          |                     |
| CB4856 HS                                                                       | V | 17292214 | 17293729 | WBGene00005793 | srw-46    | K10G4.8  | -0.0877746076487416 |
| AGIWUR874                                                                       |   |          |          |                |           |          |                     |
| CB4856 HS                                                                       | V | 17294413 | 17297359 | WBGene00077629 | K10G4.13  |          | K10G4.13            |
| 0.432807870314482 AGIWUR4790                                                    |   |          |          |                |           |          |                     |
| CB4856 HS                                                                       | V | 17303054 | 17304438 | WBGene00005582 | sri-70    | Y61B8B.1 |                     |
| 0.230909839694472 AGIWUR10381                                                   |   |          |          |                |           |          |                     |
| CB4856 HS                                                                       | V | 17316351 | 17317719 | WBGene00023507 | srz-26    | F31E9.7  | -0.095004866588031  |
| AGIWUR29264                                                                     |   |          |          |                |           |          |                     |
| CB4856 HS                                                                       | V | 17318147 | 17319515 | WBGene00009298 | srz-58    | F31E9.5  | 0.100365878830928   |

|                                                                                                                    |    |   |          |          |                |                                    |
|--------------------------------------------------------------------------------------------------------------------|----|---|----------|----------|----------------|------------------------------------|
| AGIWUR38599                                                                                                        |    |   |          |          |                |                                    |
| CB4856                                                                                                             | HS | V | 17319596 | 17322444 | WBGene00009295 | fbxa-180 F31E9.1                   |
| -0.0424035895240866 AGIWUR31899                                                                                    |    |   |          |          |                |                                    |
| CB4856                                                                                                             | HS | V | 17322615 | 17324518 | WBGene00009296 | F31E9.3 F31E9.3 0.110406098426562  |
| AGIWUR2504;AGIWUR3170;AGIWUR4495;AGIWUR7491;AGIWUR7699;AGIWUR16129;AGIWUR18574;AGIWUR30010;AGIWUR39662;AGIWUR44275 |    |   |          |          |                |                                    |
| CB4856                                                                                                             | HS | V | 17324907 | 17326168 | WBGene00045408 | F31E9.8 F31E9.8 0.0466694970402042 |
| AGIWUR388                                                                                                          |    |   |          |          |                |                                    |
| CB4856                                                                                                             | HS | V | 17326453 | 17327967 | WBGene00009297 | sdz-16 F31E9.4 -0.245435082870806  |
| AGIWUR6249;AGIWUR25089                                                                                             |    |   |          |          |                |                                    |
| CB4856                                                                                                             | HS | V | 17331570 | 17335546 | WBGene00009836 | fbxa-185 F47H4.4                   |
| -0.0199800695167562 AGIWUR4082;AGIWUR14040;AGIWUR14183;AGIWUR28850                                                 |    |   |          |          |                |                                    |
| CB4856                                                                                                             | HS | V | 17336138 | 17338335 | WBGene00009837 | fbxa-186 F47H4.6                   |
| -0.0693915415533946 AGIWUR43890                                                                                    |    |   |          |          |                |                                    |
| CB4856                                                                                                             | HS | V | 17339084 | 17342780 | WBGene00009838 | fbxa-187 F47H4.7                   |
| -0.0978402025646528 AGIWUR34510                                                                                    |    |   |          |          |                |                                    |
| CB4856                                                                                                             | HS | V | 17347922 | 17348625 | WBGene00004811 | skr-5 F47H4.10                     |
| 0.00559625850663714 AGIWUR3296                                                                                     |    |   |          |          |                |                                    |
| CB4856                                                                                                             | HS | V | 17348665 | 17350180 | WBGene00009834 | lsy-27 F47H4.1 -0.0988908002448898 |
| AGIWUR2966                                                                                                         |    |   |          |          |                |                                    |
| CB4856                                                                                                             | HS | V | 17350387 | 17352870 | WBGene00009841 | fbxa-134 F47H4.11                  |
| 0.107004850412521 AGIWUR726                                                                                        |    |   |          |          |                |                                    |
| CB4856                                                                                                             | HS | V | 17353325 | 17360212 | WBGene00009835 | F47H4.2 F47H4.2 -0.301038226682871 |
| AGIWUR31591                                                                                                        |    |   |          |          |                |                                    |
| CB4856                                                                                                             | HS | V | 17369715 | 17371468 | WBGene00014764 | srz-46 F47H4.3 -0.0374731040030376 |
| AGIWUR5100                                                                                                         |    |   |          |          |                |                                    |
| CB4856                                                                                                             | HS | V | 17371544 | 17376745 | WBGene00012491 | Y20C6A.1 Y20C6A.1                  |
| 0.234983519832282 AGIWUR12193                                                                                      |    |   |          |          |                |                                    |
| CB4856                                                                                                             | HS | V | 17377406 | 17379226 | WBGene00012492 | fbxb-7 Y20C6A.2                    |
| -0.189551653138498 AGIWUR14771                                                                                     |    |   |          |          |                |                                    |
| CB4856                                                                                                             | HS | V | 17380232 | 17381119 | WBGene00077495 | Y20C6A.4 Y20C6A.4                  |
| -0.13814647077983 AGIWUR4613                                                                                       |    |   |          |          |                |                                    |
| CB4856                                                                                                             | HS | V | 17382090 | 17383373 | WBGene00012493 | Y20C6A.3 Y20C6A.3                  |
| -0.00407647139075529 AGIWUR36562                                                                                   |    |   |          |          |                |                                    |
| CB4856                                                                                                             | HS | V | 17395674 | 17398034 | WBGene00005339 | srh-120 T27C5.1                    |
| -0.00274140310795712 AGIWUR25062                                                                                   |    |   |          |          |                |                                    |
| CB4856                                                                                                             | HS | V | 17400123 | 17401774 | WBGene00005944 | srx-53 T27C5.2 -0.223508763988709  |
| AGIWUR2034                                                                                                         |    |   |          |          |                |                                    |
| CB4856                                                                                                             | HS | V | 17404611 | 17405823 | WBGene00023512 | srz-51 T27C5.11                    |

|                     |                                     |          |                |           |           |                     |  |
|---------------------|-------------------------------------|----------|----------------|-----------|-----------|---------------------|--|
| 0.0185913073523665  | AGIWUR11238                         |          |                |           |           |                     |  |
| CB4856 HS V         | 17406306                            | 17407503 | WBGene00012078 | srz-50    | T27C5.4   | -0.0524992192807332 |  |
| AGIWUR42655         |                                     |          |                |           |           |                     |  |
| CB4856 HS V         | 17410255                            | 17411705 | WBGene00005349 | srh-132   | T27C5.5   | 0.00960471853456468 |  |
| AGIWUR27579         |                                     |          |                |           |           |                     |  |
| CB4856 HS V         | 17412602                            | 17413098 | WBGene00012079 | T27C5.6   | T27C5.6   | 0.040848390615186   |  |
| AGIWUR37517         |                                     |          |                |           |           |                     |  |
| CB4856 HS V         | 17413546                            | 17414749 | WBGene00012080 | clec-244  |           | T27C5.7             |  |
| -0.0399964618362736 | AGIWUR27963;AGIWUR29663;AGIWUR32941 |          |                |           |           |                     |  |
| CB4856 HS V         | 17415278                            | 17416743 | WBGene00044059 | T27C5.12  |           | T27C5.12            |  |
| 0.606775400176886   | AGIWUR25726                         |          |                |           |           |                     |  |
| CB4856 HS V         | 17417133                            | 17418391 | WBGene00012081 | T27C5.8   | T27C5.8   | 0.232688697553741   |  |
| AGIWUR37095         |                                     |          |                |           |           |                     |  |
| CB4856 HS V         | 17419156                            | 17420298 | WBGene00044096 | srh-96    | T27C5.14  |                     |  |
| -0.194394695521961  | AGIWUR40955                         |          |                |           |           |                     |  |
| CB4856 HS V         | 17429701                            | 17430166 | WBGene00012083 | T27C5.10  |           | T27C5.10            |  |
| -0.0309435216818335 | AGIWUR4231;AGIWUR13140;AGIWUR38544  |          |                |           |           |                     |  |
| CB4856 HS V         | 17431203                            | 17432501 | WBGene00044100 | srbc-27   | F20E11.15 |                     |  |
| -0.330117649283102  | AGIWUR43044                         |          |                |           |           |                     |  |
| CB4856 HS V         | 17432993                            | 17435209 | WBGene00044101 | srbc-28   | F20E11.16 |                     |  |
| -0.0433091541614239 | AGIWUR5255                          |          |                |           |           |                     |  |
| CB4856 HS V         | 17435678                            | 17436592 | WBGene00206495 | F20E11.18 |           | F20E11.18           |  |
| 0.241155557445639   | AGIWUR14662                         |          |                |           |           |                     |  |
| CB4856 HS V         | 17436985                            | 17438417 | WBGene00008982 | srsx-2    | F20E11.2  |                     |  |
| -0.16101558251793   | AGIWUR3063                          |          |                |           |           |                     |  |
| CB4856 HS V         | 17442581                            | 17445668 | WBGene00005374 | srh-158   | F20E11.13 |                     |  |
| -0.012616905267552  | AGIWUR14378;AGIWUR40459             |          |                |           |           |                     |  |
| CB4856 HS V         | 17446348                            | 17447636 | WBGene00005376 | srh-160   | F20E11.3  |                     |  |
| 0.0372524743791773  | AGIWUR21027                         |          |                |           |           |                     |  |
| CB4856 HS V         | 17448332                            | 17449590 | WBGene00005373 | srh-157   | F20E11.8  |                     |  |
| -0.0372739368132917 | AGIWUR8991;AGIWUR31658              |          |                |           |           |                     |  |
| CB4856 HS V         | 17452676                            | 17453805 | WBGene00005377 | srh-161   | F20E11.14 |                     |  |
| -0.155999153038305  | AGIWUR10052                         |          |                |           |           |                     |  |
| CB4856 HS V         | 17458533                            | 17460161 | WBGene00008981 | srz-48    | F20E11.1  |                     |  |
| -0.204835390855072  | AGIWUR1569                          |          |                |           |           |                     |  |
| CB4856 HS V         | 17460813                            | 17462432 | WBGene00008983 | F20E11.5  |           | F20E11.5            |  |
| -0.137634375561967  | AGIWUR25782                         |          |                |           |           |                     |  |
| CB4856 HS V         | 17464578                            | 17466730 | WBGene00008984 | F20E11.7  |           | F20E11.7            |  |
| 0.0288658948332676  | AGIWUR36820                         |          |                |           |           |                     |  |

|                         |                                                           |          |                |                                     |
|-------------------------|-----------------------------------------------------------|----------|----------------|-------------------------------------|
| CB4856 HS V             | 17472319                                                  | 17473481 | WBGene00005333 | srh-114 F08E10.8                    |
| 0.105797215997443       | AGIWUR23613                                               |          |                |                                     |
| CB4856 HS V             | 17473999                                                  | 17475471 | WBGene00005341 | srh-123 F08E10.3                    |
| 0.10083330485468        | AGIWUR43710                                               |          |                |                                     |
| CB4856 HS V             | 17476790                                                  | 17478108 | WBGene00008574 | srbc-61 F08E10.2                    |
| 0.194197276831662       | AGIWUR37212                                               |          |                |                                     |
| CB4856 HS V             | 17478333                                                  | 17479386 | WBGene00005329 | srh-110 F08E10.4                    |
| 0.0999053471507301      | AGIWUR5026                                                |          |                |                                     |
| CB4856 HS V             | 17480851                                                  | 17481855 | WBGene00005459 | srh-253 F08E10.5                    |
| -0.0572478039758622     | AGIWUR44105                                               |          |                |                                     |
| CB4856 HS V             | 17487346                                                  | 17488833 | WBGene00010536 | K03D7.9 K03D7.9 0.198711995186043   |
| AGIWUR27680             |                                                           |          |                |                                     |
| CB4856 HS V             | 17489502                                                  | 17491609 | WBGene00010535 | K03D7.8 K03D7.8 -0.0791207743575537 |
| AGIWUR35923             |                                                           |          |                |                                     |
| CB4856 HS V             | 17492077                                                  | 17493832 | WBGene00010534 | fbxa-102 K03D7.7                    |
| 0.157684318779355       | AGIWUR25951                                               |          |                |                                     |
| CB4856 HS V             | 17494306                                                  | 17496171 | WBGene00005337 | srh-118 K03D7.6 -0.0360195779523229 |
| AGIWUR33420             |                                                           |          |                |                                     |
| CB4856 HS V             | 17499044                                                  | 17505021 | WBGene00014796 | K03D7.3 K03D7.3 0.112669162170954   |
| AGIWUR22757             |                                                           |          |                |                                     |
| CB4856 HS V             | 17508793                                                  | 17510214 | WBGene00005779 | srw-32 K03D7.11                     |
| -0.138252837028728      | AGIWUR28798                                               |          |                |                                     |
| CB4856 HS V             | 17511533                                                  | 17519857 | WBGene00005792 | srw-45 K03D7.10                     |
| -0.137232646583348      | AGIWUR3827;AGIWUR5632;AGIWUR10237;AGIWUR11287;AGIWUR42706 |          |                |                                     |
| CB4856 HS V             | 17521037                                                  | 17527479 | WBGene00007672 | fbxa-136 C18D4.2                    |
| -0.00319455262887214    | AGIWUR23664;AGIWUR26139                                   |          |                |                                     |
| CB4856 HS V             | 17528029                                                  | 17529910 | WBGene00007678 | srz-90 C18D4.9 -0.0742920220327496  |
| AGIWUR27577             |                                                           |          |                |                                     |
| CB4856 HS V             | 17530303                                                  | 17530714 | WBGene00219493 | C18D4.12 C18D4.12                   |
| -0.17392318465834       | AGIWUR10696                                               |          |                |                                     |
| CB4856 HS V             | 17530813                                                  | 17531510 | WBGene00007674 | C18D4.4 C18D4.4 -0.0803960633853222 |
| AGIWUR29903             |                                                           |          |                |                                     |
| CB4856 HS V             | 17532353                                                  | 17532786 | WBGene00007673 | C18D4.3 C18D4.3 -0.0286657228842078 |
| AGIWUR30181             |                                                           |          |                |                                     |
| CB4856 HS V             | 17535615                                                  | 17538373 | WBGene00007675 | C18D4.6 C18D4.6 -0.0120144877279031 |
| AGIWUR10351;AGIWUR42998 |                                                           |          |                |                                     |
| CB4856 HS V             | 17540595                                                  | 17542272 | WBGene00014679 | srz-25 C18D4.5 0.021099172440926    |
| AGIWUR13682             |                                                           |          |                |                                     |
| CB4856 HS V             | 17542719                                                  | 17544108 | WBGene00007676 | srz-57 C18D4.7 0.139501632084727    |

|                                                           |   |                                                            |          |                 |          |         |                     |
|-----------------------------------------------------------|---|------------------------------------------------------------|----------|-----------------|----------|---------|---------------------|
| AGIWUR32653                                               |   |                                                            |          |                 |          |         |                     |
| CB4856 HS                                                 | V | 17544175                                                   | 17546974 | WBGene00007677  | C18D4.8  | C18D4.8 | -0.0241592443536351 |
| AGIWUR41632                                               |   |                                                            |          |                 |          |         |                     |
| CB4856 HS                                                 | V | 17547383                                                   | 17549288 | WBGene00045293  | fbxa-175 |         | C38D9.12            |
| 0.0793003610370278                                        |   | AGIWUR34376                                                |          |                 |          |         |                     |
| CB4856 HS                                                 | V | 17549675                                                   | 17551196 | WBGene00008017  | fbxa-176 |         | C38D9.9             |
| 0.120016667086565                                         |   | AGIWUR14301                                                |          |                 |          |         |                     |
| CB4856 HS                                                 | V | 17555854                                                   | 17558477 | WBGene00008015  | fbxa-174 |         | C38D9.7             |
| 0.714415041613499                                         |   | AGIWUR20461                                                |          |                 |          |         |                     |
| CB4856 HS                                                 | V | 17563171                                                   | 17566003 | WBGene00008009  | fbxa-171 |         | C38D9.1             |
| -0.234428315036704                                        |   | AGIWUR22354                                                |          |                 |          |         |                     |
| CB4856 HS                                                 | V | 17567513                                                   | 17571603 | WBGene00008010  | C38D9.2  | C38D9.2 | 0.0627968879520306  |
| AGIWUR10796                                               |   |                                                            |          |                 |          |         |                     |
| CB4856 HS                                                 | V | 17584793                                                   | 17585876 | WBGene00008012  | fbxa-133 |         | C38D9.4             |
| 0.0706619605727994                                        |   | AGIWUR24992                                                |          |                 |          |         |                     |
| CB4856 HS                                                 | V | 17592387                                                   | 17594243 | WBGene00012403  | srz-45   | Y6G8.1  | 1.35049222631776    |
| AGIWUR24279                                               |   |                                                            |          |                 |          |         |                     |
| CB4856 HS                                                 | V | 17594349                                                   | 17598971 | WBGene00012404  | Y6G8.2   | Y6G8.2  | -0.0924272978146572 |
| AGIWUR37650                                               |   |                                                            |          |                 |          |         |                     |
| CB4856 HS                                                 | V | 17599978                                                   | 17600872 | WBGene00050974  | Y6G8.9   | Y6G8.9  | -0.127438088803043  |
| AGIWUR2079;AGIWUR23739                                    |   |                                                            |          |                 |          |         |                     |
| CB4856 HS                                                 | V | 17601820                                                   | 17602954 | WBGene00012405  | ztf-25   | Y6G8.3  | -0.0240228297618739 |
| AGIWUR37324                                               |   |                                                            |          |                 |          |         |                     |
| CB4856 HS                                                 | V | 17603185                                                   | 17603945 | WBGene00077459  | Y6G8.10  | Y6G8.10 | 0.175999356647102   |
| AGIWUR11426                                               |   |                                                            |          |                 |          |         |                     |
| CB4856 HS                                                 | V | 17607379                                                   | 17607690 | WBGene00077460  | Y6G8.11  | Y6G8.11 |                     |
| -8.88178419700125e-16                                     |   | AGIWUR1681;AGIWUR13086;AGIWUR21320;AGIWUR33835;AGIWUR39121 |          |                 |          |         |                     |
| CB4856 HS                                                 | V | 17608097                                                   | 17609597 | WBGene00012406  | srz-91   | Y6G8.4  | -0.0744521617133547 |
| AGIWUR13792                                               |   |                                                            |          |                 |          |         |                     |
| CB4856 HS                                                 | V | 17613792                                                   | 17614357 | WBGene000138715 | Y6G8.14  | Y6G8.14 | -0.312427273740999  |
| AGIWUR18983;AGIWUR32925                                   |   |                                                            |          |                 |          |         |                     |
| CB4856 HS                                                 | V | 17616473                                                   | 17616921 | WBGene00044208  | Y6G8.6   | Y6G8.6  | 0.0912795252133476  |
| AGIWUR4430;AGIWUR5423;AGIWUR16001;AGIWUR40934;AGIWUR41144 |   |                                                            |          |                 |          |         |                     |
| CB4856 HS                                                 | V | 17620194                                                   | 17622750 | WBGene00045501  | Y6G8.8   | Y6G8.8  | 1.18450930130265    |
| AGIWUR7206;AGIWUR18354                                    |   |                                                            |          |                 |          |         |                     |
| CB4856 HS                                                 | V | 17625127                                                   | 17627598 | WBGene000195165 | F57G4.11 |         | F57G4.11            |
| 1.36856375327135                                          |   | AGIWUR30502                                                |          |                 |          |         |                     |
| CB4856 HS                                                 | V | 17628866                                                   | 17630215 | WBGene00045506  | F57G4.10 |         | F57G4.10            |
| 0.0719462667407549                                        |   | AGIWUR2368;AGIWUR2435;AGIWUR18799;AGIWUR20217              |          |                 |          |         |                     |

|                                                                                                                                              |    |   |          |          |                |          |                            |
|----------------------------------------------------------------------------------------------------------------------------------------------|----|---|----------|----------|----------------|----------|----------------------------|
| CB4856                                                                                                                                       | HS | V | 17637982 | 17640042 | WBGene00010209 | fbxa-191 | F57G4.4                    |
| -0.166572782055106 AGIWUR34789                                                                                                               |    |   |          |          |                |          |                            |
| CB4856                                                                                                                                       | HS | V | 17640672 | 17650527 | WBGene00010212 | fbxa-192 | F57G4.8                    |
| -0.0135841488766411                                                                                                                          |    |   |          |          |                |          |                            |
| AGIWUR4316;AGIWUR4368;AGIWUR7320;AGIWUR14928;AGIWUR17320;AGIWUR20534;AGIWUR22976;AGIWUR25735;AGIWUR27646;AGIWUR31741;AGIWUR41603;AGIWUR42867 |    |   |          |          |                |          |                            |
| CB4856                                                                                                                                       | HS | V | 17653482 | 17655281 | WBGene00010295 | fbxa-193 | F59A1.9                    |
| -0.476677846895493 AGIWUR276                                                                                                                 |    |   |          |          |                |          |                            |
| CB4856                                                                                                                                       | HS | V | 17655581 | 17656654 | WBGene00010294 | fbxa-129 | F59A1.8                    |
| -0.0873124514995296 AGIWUR9387;AGIWUR44072                                                                                                   |    |   |          |          |                |          |                            |
| CB4856                                                                                                                                       | HS | V | 17656892 | 17658198 | WBGene00010293 | fbxa-108 | F59A1.7                    |
| -0.0486428262377423 AGIWUR17141;AGIWUR41177                                                                                                  |    |   |          |          |                |          |                            |
| CB4856                                                                                                                                       | HS | V | 17660303 | 17661810 | WBGene00010296 | dgat-2   | F59A1.10                   |
| 0.27480159482991 AGIWUR3725                                                                                                                  |    |   |          |          |                |          |                            |
| CB4856                                                                                                                                       | HS | V | 17661802 | 17665475 | WBGene00010297 | F59A1.11 | F59A1.11                   |
| 0.0783589811199938 AGIWUR4003                                                                                                                |    |   |          |          |                |          |                            |
| CB4856                                                                                                                                       | HS | V | 17668882 | 17671330 | WBGene00006148 | str-89   | F59A1.4 0.126055606847295  |
| AGIWUR22398                                                                                                                                  |    |   |          |          |                |          |                            |
| CB4856                                                                                                                                       | HS | V | 17671700 | 17673443 | WBGene00006151 | str-93   | F59A1.14                   |
| -0.0343154394568668 AGIWUR15703                                                                                                              |    |   |          |          |                |          |                            |
| CB4856                                                                                                                                       | HS | V | 17674946 | 17676653 | WBGene00006150 | str-92   | F59A1.3 0.0909250998040942 |
| AGIWUR33147                                                                                                                                  |    |   |          |          |                |          |                            |
| CB4856                                                                                                                                       | HS | V | 17678358 | 17680208 | WBGene00014779 | F59A1.2  | F59A1.2 0.0765919383206111 |
| AGIWUR24205;AGIWUR27684                                                                                                                      |    |   |          |          |                |          |                            |
| CB4856                                                                                                                                       | HS | V | 17680661 | 17683907 | WBGene00010300 | F59A1.15 | F59A1.15                   |
| 0.108973555971144 AGIWUR40297                                                                                                                |    |   |          |          |                |          |                            |
| CB4856                                                                                                                                       | HS | V | 17684149 | 17684968 | WBGene00010301 | F59A1.16 | F59A1.16                   |
| -0.249745403532722 AGIWUR20039                                                                                                               |    |   |          |          |                |          |                            |
| CB4856                                                                                                                                       | HS | V | 17685192 | 17686074 | WBGene00010292 | F59A1.6  | F59A1.6 -0.480623012239002 |
| AGIWUR24435                                                                                                                                  |    |   |          |          |                |          |                            |
| CB4856                                                                                                                                       | HS | V | 17687211 | 17690994 | WBGene00010299 | F59A1.13 | F59A1.13                   |
| 0.0505586274649552 AGIWUR39181                                                                                                               |    |   |          |          |                |          |                            |
| CB4856                                                                                                                                       | HS | V | 17692502 | 17695827 | WBGene00012515 | Y26G10.1 | Y26G10.1                   |
| -0.21293259004378 AGIWUR5760                                                                                                                 |    |   |          |          |                |          |                            |
| CB4856                                                                                                                                       | HS | V | 17701212 | 17703285 | WBGene00005255 | srh-32   | Y26G10.2                   |
| 0.0291144150196896 AGIWUR10909                                                                                                               |    |   |          |          |                |          |                            |
| CB4856                                                                                                                                       | HS | V | 17704362 | 17706117 | WBGene00050973 | Y26G10.3 | Y26G10.3                   |
| 0.0323579497827375 AGIWUR22451;AGIWUR38578                                                                                                   |    |   |          |          |                |          |                            |
| CB4856                                                                                                                                       | HS | V | 17706114 | 17706875 | WBGene00012305 | W06D12.6 | W06D12.6                   |

|                     |                                                            |          |                |           |           |                    |
|---------------------|------------------------------------------------------------|----------|----------------|-----------|-----------|--------------------|
| 0.0399631059599566  | AGIWUR29688                                                |          |                |           |           |                    |
| CB4856 HS V         | 17707184                                                   | 17709823 | WBGene00005254 | srh-31    | W06D12.7  |                    |
| -0.109362070090016  | AGIWUR7156                                                 |          |                |           |           |                    |
| CB4856 HS V         | 17710040                                                   | 17714377 | WBGene00006685 | twk-33    | W06D12.5  |                    |
| 0.228526440498612   | AGIWUR23332;AGIWUR39569;AGIWUR43456                        |          |                |           |           |                    |
| CB4856 HS V         | 17718947                                                   | 17721293 | WBGene00006137 | str-77    | W06D12.4  |                    |
| -0.0602704502126574 | AGIWUR8320                                                 |          |                |           |           |                    |
| CB4856 HS V         | 17725004                                                   | 17726818 | WBGene00001397 | fat-5     | W06D12.3  |                    |
| 0.58564479207319    | AGIWUR14736;AGIWUR20562;AGIWUR22243;AGIWUR27469            |          |                |           |           |                    |
| CB4856 HS V         | 17726799                                                   | 17730381 | WBGene00006692 | twk-42    | W06D12.2  |                    |
| 0.127398674737041   | AGIWUR35124                                                |          |                |           |           |                    |
| CB4856 HS V         | 17733568                                                   | 17739899 | WBGene00012304 | cutl-4    | W06D12.1  |                    |
| 0.00266161850179003 | AGIWUR5269;AGIWUR9713;AGIWUR10938                          |          |                |           |           |                    |
| CB4856 HS V         | 17743651                                                   | 17747059 | WBGene00006688 | twk-36    | R12G8.2   | -0.204049094867856 |
| AGIWUR29554         |                                                            |          |                |           |           |                    |
| CB4856 HS V         | 17747966                                                   | 17749243 | WBGene00011254 | R12G8.1   | R12G8.1   | -0.505688640235384 |
| AGIWUR20029         |                                                            |          |                |           |           |                    |
| CB4856 HS V         | 17755892                                                   | 17764751 | WBGene00004003 | pgp-9     | C47A10.1  |                    |
| 0.43610745692521    | AGIWUR15356                                                |          |                |           |           |                    |
| CB4856 HS V         | 17767549                                                   | 17769621 | WBGene00005489 | srh-284   | C47A10.3  |                    |
| 0.170427297284174   | AGIWUR13539                                                |          |                |           |           |                    |
| CB4856 HS V         | 17769653                                                   | 17773208 | WBGene00008126 | sre-21    | C47A10.4  |                    |
| -0.104684202843023  | AGIWUR6720;AGIWUR10002;AGIWUR10999                         |          |                |           |           |                    |
| CB4856 HS V         | 17774187                                                   | 17777227 | WBGene00008127 | ddo-1     | C47A10.5  |                    |
| 0.198797109633643   | AGIWUR14884                                                |          |                |           |           |                    |
| CB4856 HS V         | 17777924                                                   | 17779487 | WBGene00008129 | C47A10.12 | C47A10.12 |                    |
| 0.116173496632179   | AGIWUR12728                                                |          |                |           |           |                    |
| CB4856 HS V         | 17780448                                                   | 17783639 | WBGene00008128 | srab-12   | C47A10.6  |                    |
| -0.149914166574711  | AGIWUR29939                                                |          |                |           |           |                    |
| CB4856 HS V         | 17789494                                                   | 17789738 | WBGene00050897 | C47A10.13 | C47A10.13 |                    |
| -0.0388384971224163 | AGIWUR8974;AGIWUR10304;AGIWUR21806;AGIWUR28302;AGIWUR42390 |          |                |           |           |                    |
| CB4856 HS V         | 17790491                                                   | 17792470 | WBGene00005494 | srh-290   | C47A10.11 |                    |
| 0.454968141159124   | AGIWUR19006                                                |          |                |           |           |                    |
| CB4856 HS V         | 17792679                                                   | 17794086 | WBGene00005493 | srh-289   | C47A10.10 |                    |
| 0.0423599689015219  | AGIWUR14885                                                |          |                |           |           |                    |
| CB4856 HS V         | 17794909                                                   | 17795755 | WBGene00005492 | srh-288   | C47A10.7  |                    |
| 0.192558451860715   | AGIWUR9355                                                 |          |                |           |           |                    |
| CB4856 HS V         | 17796200                                                   | 17798889 | WBGene00005909 | srx-18    | C47A10.8  |                    |
| -0.0912347311953354 | AGIWUR744                                                  |          |                |           |           |                    |

|                                                                                                                                              |                                                                                  |          |                |                                     |           |
|----------------------------------------------------------------------------------------------------------------------------------------------|----------------------------------------------------------------------------------|----------|----------------|-------------------------------------|-----------|
| CB4856 HS V                                                                                                                                  | 17800838                                                                         | 17801906 | WBGene00005491 | srh-287 C47A10.9                    |           |
| -0.140206639399332                                                                                                                           | AGIWUR32425                                                                      |          |                |                                     |           |
| CB4856 HS V                                                                                                                                  | 17802410                                                                         | 17802619 | WBGene00050893 | Y94A7B.11                           | Y94A7B.11 |
| 0.154392973511364                                                                                                                            | AGIWUR8422;AGIWUR35883;AGIWUR43835                                               |          |                |                                     |           |
| CB4856 HS V                                                                                                                                  | 17802769                                                                         | 17803923 | WBGene00005496 | srh-292 Y94A7B.1                    |           |
| -0.0330909002627235                                                                                                                          | AGIWUR34250                                                                      |          |                |                                     |           |
| CB4856 HS V                                                                                                                                  | 17805486                                                                         | 17808611 | WBGene00005495 | srh-291 Y94A7B.3                    |           |
| 0.0823412112908279                                                                                                                           | AGIWUR7471                                                                       |          |                |                                     |           |
| CB4856 HS V                                                                                                                                  | 17810353                                                                         | 17812794 | WBGene00005500 | srh-296 Y94A7B.4                    |           |
| -0.0183153544204426                                                                                                                          | AGIWUR21677                                                                      |          |                |                                     |           |
| CB4856 HS V                                                                                                                                  | 17818867                                                                         | 17821003 | WBGene00005502 | srh-298 Y94A7B.5                    |           |
| -0.106599276799632                                                                                                                           | AGIWUR44774                                                                      |          |                |                                     |           |
| CB4856 HS V                                                                                                                                  | 17822105                                                                         | 17823889 | WBGene00005504 | srh-300 Y94A7B.6                    |           |
| -0.083582657932908                                                                                                                           | AGIWUR16526                                                                      |          |                |                                     |           |
| CB4856 HS V                                                                                                                                  | 17824910                                                                         | 17827774 | WBGene00005505 | srh-301 Y94A7B.8                    |           |
| -0.167526605054183                                                                                                                           | AGIWUR14106                                                                      |          |                |                                     |           |
| CB4856 HS V                                                                                                                                  | 17828610                                                                         | 17829983 | WBGene00005508 | srh-304 Y94A7B.9                    |           |
| -0.0460084957222744                                                                                                                          | AGIWUR4451                                                                       |          |                |                                     |           |
| CB4856 HS V                                                                                                                                  | 17831650                                                                         | 17833418 | WBGene00005507 | srh-303 Y94A7B.7                    |           |
| 0.5828760600713                                                                                                                              | AGIWUR19659                                                                      |          |                |                                     |           |
| CB4856 HS V                                                                                                                                  | 17837360                                                                         | 17838119 | WBGene00013341 | Y59A8A.7                            | Y59A8A.7  |
| -0.00803998716187326                                                                                                                         | AGIWUR19908                                                                      |          |                |                                     |           |
| CB4856 HS V                                                                                                                                  | 17838831                                                                         | 17841188 | WBGene00005506 | srh-302 Y59A8A.5                    |           |
| -0.0845258914182541                                                                                                                          | AGIWUR38418                                                                      |          |                |                                     |           |
| CB4856 HS V                                                                                                                                  | 17841483                                                                         | 17844206 | WBGene00005490 | srh-286 Y59A8A.4                    |           |
| -0.141129280710496                                                                                                                           | AGIWUR23633                                                                      |          |                |                                     |           |
| CB4856 HS V                                                                                                                                  | 17845739                                                                         | 17855989 | WBGene00013340 | tcc-1 Y59A8A.3                      |           |
| 0.0968200829128953                                                                                                                           | AGIWUR2535;AGIWUR5566;AGIWUR7194;AGIWUR15447;AGIWUR21458;AGIWUR27254;AGIWUR32170 |          |                |                                     |           |
| CB4856 HS V                                                                                                                                  | 17861368                                                                         | 17870651 | WBGene00000813 | csn-1 Y59A8A.1                      |           |
| 0.101340196725578                                                                                                                            | AGIWUR10688;AGIWUR14162;AGIWUR37627                                              |          |                |                                     |           |
| CB4856 HS V                                                                                                                                  | 17871401                                                                         | 17879913 | WBGene00013339 | phf-14 Y59A8A.2                     |           |
| 0.0158952374405565                                                                                                                           | AGIWUR31159                                                                      |          |                |                                     |           |
| CB4856 HS V                                                                                                                                  | 17879844                                                                         | 17888984 | WBGene00007394 | C06H5.6 C06H5.6 -0.0118892817589717 |           |
| AGIWUR7896;AGIWUR8502;AGIWUR8823;AGIWUR15190;AGIWUR16651;AGIWUR18629;AGIWUR21138;AGIWUR25545;AGIWUR28925;AGIWUR35720;AGIWUR40621;AGIWUR44512 |                                                                                  |          |                |                                     |           |
| CB4856 HS V                                                                                                                                  | 17892426                                                                         | 17892706 | WBGene00045346 | C06H5.9 C06H5.9 -0.10224908485538   |           |
| AGIWUR3364;AGIWUR10273;AGIWUR10645;AGIWUR27916;AGIWUR42380                                                                                   |                                                                                  |          |                |                                     |           |
| CB4856 HS V                                                                                                                                  | 17895268                                                                         | 17896804 | WBGene00007392 | fbxa-156 C06H5.1                    |           |
| 0.0787460299153917                                                                                                                           | AGIWUR25046                                                                      |          |                |                                     |           |



|                                    |                                                           |          |                |                 |                            |
|------------------------------------|-----------------------------------------------------------|----------|----------------|-----------------|----------------------------|
| CB4856 HS V                        | 17897546                                                  | 17897746 | WBGene00219446 | C06H5.13        | C06H5.13                   |
| -0.0168308975259723                | AGIWUR952;AGIWUR14193;AGIWUR20483;AGIWUR22689;AGIWUR33984 |          |                |                 |                            |
| CB4856 HS V                        | 17899803                                                  | 17901913 | WBGene00007393 | fbxa-157        | C06H5.2                    |
| 0.16282909421291                   | AGIWUR32833                                               |          |                |                 |                            |
| CB4856 HS V                        | 17910304                                                  | 17917241 | WBGene00007395 | dcar-1          | C06H5.7 0.152333786675992  |
| AGIWUR4617;AGIWUR10116;AGIWUR43125 |                                                           |          |                |                 |                            |
| CB4856 HS V                        | 17921776                                                  | 17924185 | WBGene00008442 | E01B7.2 E01B7.2 | -0.147492924402957         |
| AGIWUR9023                         |                                                           |          |                |                 |                            |
| CB4856 HS V                        | 17924916                                                  | 17934225 | WBGene00008441 | usp-50          | E01B7.1 -0.162478795020333 |
| AGIWUR11877;AGIWUR13337            |                                                           |          |                |                 |                            |
| CB4856 HS V                        | 17936332                                                  | 17949184 | WBGene00001080 | dpy-21          | Y59A8B.1                   |
| 0.0859557965180784                 | AGIWUR39389                                               |          |                |                 |                            |
| CB4856 HS V                        | 17951348                                                  | 17952820 | WBGene00013356 | Y59A8B.24       | Y59A8B.24                  |
| -0.0629524398712382                | AGIWUR42293                                               |          |                |                 |                            |
| CB4856 HS V                        | 17954054                                                  | 17966847 | WBGene00013355 | gck-3           | Y59A8B.23                  |
| -0.0397330414033181                | AGIWUR29083                                               |          |                |                 |                            |
| CB4856 HS V                        | 17968510                                                  | 17980082 | WBGene00013354 | snx-6           | Y59A8B.22                  |
| -0.0998773323270825                | AGIWUR31388                                               |          |                |                 |                            |
| CB4856 HS V                        | 17986260                                                  | 17994546 | WBGene00013353 | Y59A8B.21       | Y59A8B.21                  |
| -0.0313964108929561                | AGIWUR40332                                               |          |                |                 |                            |
| CB4856 HS V                        | 17995347                                                  | 18001368 | WBGene00013352 | lon-8           | Y59A8B.20                  |
| 0.0501402402153754                 | AGIWUR8675;AGIWUR9102;AGIWUR15282;AGIWUR17603;AGIWUR19833 |          |                |                 |                            |
| CB4856 HS V                        | 18007230                                                  | 18009041 | WBGene00013351 | Y59A8B.19       | Y59A8B.19                  |
| 0.125313709052259                  | AGIWUR17315                                               |          |                |                 |                            |
| CB4856 HS V                        | 18010017                                                  | 18010837 | WBGene00045459 | Y59A8B.26       | Y59A8B.26                  |
| -0.0743319209769813                | AGIWUR12442;AGIWUR21434                                   |          |                |                 |                            |
| CB4856 HS V                        | 18012413                                                  | 18014216 | WBGene00005350 | srh-133         | Y59A8B.3                   |
| -0.076072876260338                 | AGIWUR8992                                                |          |                |                 |                            |
| CB4856 HS V                        | 18014641                                                  | 18017326 | WBGene00005351 | srh-134         | Y59A8B.4                   |
| 0.0862279672671598                 | AGIWUR5306                                                |          |                |                 |                            |
| CB4856 HS V                        | 18017904                                                  | 18020014 | WBGene00005511 | srh-307         | Y59A8B.5                   |
| 0.0880284589269689                 | AGIWUR5710;AGIWUR35581                                    |          |                |                 |                            |
| CB4856 HS V                        | 18022479                                                  | 18042353 | WBGene00013343 | prp-6           | Y59A8B.6                   |
| 0.27117644951945                   | AGIWUR7680                                                |          |                |                 |                            |
| CB4856 HS V                        | 18043571                                                  | 18052323 | WBGene00013344 | ebp-1           | Y59A8B.7                   |
| -0.256915135471694                 | AGIWUR16212                                               |          |                |                 |                            |
| CB4856 HS V                        | 18070021                                                  | 18081957 | WBGene00013347 | Y59A8B.10       | Y59A8B.10                  |
| 0.0724834655981113                 | AGIWUR38201                                               |          |                |                 |                            |
| CB4856 HS V                        | 18082406                                                  | 18085127 | WBGene00013348 | fbxa-106        | Y59A8B.11                  |

|                     |                                                                                   |          |                |                  |           |
|---------------------|-----------------------------------------------------------------------------------|----------|----------------|------------------|-----------|
| 0.155905865804424   | AGIWUR14652                                                                       |          |                |                  |           |
| CB4856 HS V         | 18085630                                                                          | 18086225 | WBGene00013349 | Y59A8B.12        | Y59A8B.12 |
| 0.0986232149468727  | AGIWUR24593                                                                       |          |                |                  |           |
| CB4856 HS V         | 18087123                                                                          | 18097996 | WBGene00013350 | slr-2 Y59A8B.13  |           |
| -0.100870858679383  | AGIWUR5909                                                                        |          |                |                  |           |
| CB4856 HS V         | 18098676                                                                          | 18106868 | WBGene00003919 | par-4 Y59A8B.14  |           |
| -0.0377136387651529 | AGIWUR43625                                                                       |          |                |                  |           |
| CB4856 HS V         | 18108269                                                                          | 18114755 | WBGene00012562 | Y37H2A.1         | Y37H2A.1  |
| 0.261288210548496   | AGIWUR15257                                                                       |          |                |                  |           |
| CB4856 HS V         | 18115402                                                                          | 18123594 | WBGene00050935 | Y37H2A.16        | Y37H2A.16 |
| -0.022962600315708  | AGIWUR5789;AGIWUR9443;AGIWUR11169;AGIWUR17775;AGIWUR27302;AGIWUR29776;AGIWUR41474 |          |                |                  |           |
| CB4856 HS V         | 18123939                                                                          | 18125245 | WBGene00012564 | fbxa-107         | Y37H2A.4  |
| 0.0471603291882321  | AGIWUR43709                                                                       |          |                |                  |           |
| CB4856 HS V         | 18125375                                                                          | 18127205 | WBGene00012565 | fbxa-210         | Y37H2A.5  |
| -0.174636542423086  | AGIWUR20368                                                                       |          |                |                  |           |
| CB4856 HS V         | 18127519                                                                          | 18128885 | WBGene00012566 | fbxa-211         | Y37H2A.6  |
| -0.150756720599718  | AGIWUR12070;AGIWUR24650;AGIWUR37600                                               |          |                |                  |           |
| CB4856 HS V         | 18129171                                                                          | 18131125 | WBGene00044758 | Y37H2A.12        | Y37H2A.12 |
| -0.118466057247407  | AGIWUR39737                                                                       |          |                |                  |           |
| CB4856 HS V         | 18131667                                                                          | 18133232 | WBGene00219210 | Y37H2A.18        | Y37H2A.18 |
| -0.0349316436282372 | AGIWUR26503                                                                       |          |                |                  |           |
| CB4856 HS V         | 18134722                                                                          | 18136022 | WBGene00012568 | fbxa-212         | Y37H2A.8  |
| -0.0449849279392609 | AGIWUR25803;AGIWUR41974                                                           |          |                |                  |           |
| CB4856 HS V         | 18136704                                                                          | 18137714 | WBGene00012569 | fbxc-46 Y37H2A.9 |           |
| 0.111809832558418   | AGIWUR40984                                                                       |          |                |                  |           |
| CB4856 HS V         | 18138995                                                                          | 18140687 | WBGene00012570 | Y37H2A.10        | Y37H2A.10 |
| -0.0130221282557628 | AGIWUR10504                                                                       |          |                |                  |           |
| CB4856 HS V         | 18141461                                                                          | 18142577 | WBGene00012571 | Y37H2A.11        | Y37H2A.11 |
| 0.0685346515293297  | AGIWUR28154                                                                       |          |                |                  |           |
| CB4856 HS V         | 18142849                                                                          | 18143543 | WBGene00045417 | Y37H2A.13        | Y37H2A.13 |
| 0.325139041934393   | AGIWUR19;AGIWUR2328;AGIWUR27028;AGIWUR27310                                       |          |                |                  |           |
| CB4856 HS V         | 18143716                                                                          | 18144720 | WBGene00045416 | Y37H2A.14        | Y37H2A.14 |
| 0.462568228617895   | AGIWUR25981                                                                       |          |                |                  |           |
| CB4856 HS V         | 18146965                                                                          | 18154396 | WBGene00206536 | C14A6.16         | C14A6.16  |
| 0.222560070814698   | AGIWUR26918                                                                       |          |                |                  |           |
| CB4856 HS V         | 18159652                                                                          | 18161339 | WBGene00050956 | C14A6.13         | C14A6.13  |
| -0.0891805129062266 | AGIWUR13918                                                                       |          |                |                  |           |
| CB4856 HS V         | 18162034                                                                          | 18162668 | WBGene00050955 | C14A6.12         | C14A6.12  |
| 0.0597621718594823  | AGIWUR3236;AGIWUR21166;AGIWUR21466                                                |          |                |                  |           |

|                                                           |                                                |          |                |                                     |
|-----------------------------------------------------------|------------------------------------------------|----------|----------------|-------------------------------------|
| CB4856 HS V                                               | 18163439                                       | 18164858 | WBGene00007569 | C14A6.5 C14A6.5                     |
| -0.00765753300276906                                      | AGIWUR38662                                    |          |                |                                     |
| CB4856 HS V                                               | 18165294                                       | 18167261 | WBGene00007570 | C14A6.6 C14A6.6 0.118764648896345   |
| AGIWUR43342                                               |                                                |          |                |                                     |
| CB4856 HS V                                               | 18167634                                       | 18168450 | WBGene00007571 | C14A6.7 C14A6.7 0.1426147756742     |
| AGIWUR22025                                               |                                                |          |                |                                     |
| CB4856 HS V                                               | 18169087                                       | 18171618 | WBGene00007572 | C14A6.8 C14A6.8 0.163212831454853   |
| AGIWUR30547                                               |                                                |          |                |                                     |
| CB4856 HS V                                               | 18172484                                       | 18178759 | WBGene00007853 | C31G12.4 C31G12.4                   |
| -0.097583866033657                                        | AGIWUR25686;AGIWUR31906                        |          |                |                                     |
| CB4856 HS V                                               | 18179943                                       | 18181373 | WBGene00007850 | C31G12.1 C31G12.1                   |
| -0.0292521027238308                                       | AGIWUR44939                                    |          |                |                                     |
| CB4856 HS V                                               | 18185210                                       | 18185461 | WBGene00007852 | C31G12.3 C31G12.3                   |
| -0.0935367093803343                                       | AGIWUR11940                                    |          |                |                                     |
| CB4856 HS V                                               | 18186111                                       | 18188331 | WBGene00007851 | clec-245 C31G12.2                   |
| 0.0956002646594456                                        | AGIWUR25381                                    |          |                |                                     |
| CB4856 HS V                                               | 18189560                                       | 18191047 | WBGene00008892 | clec-246 F16H6.2                    |
| 0.115371894845953                                         | AGIWUR2615;AGIWUR21493;AGIWUR36344;AGIWUR38574 |          |                |                                     |
| CB4856 HS V                                               | 18191412                                       | 18194167 | WBGene00008891 | clec-42 F16H6.1 0.216507885958397   |
| AGIWUR6841                                                |                                                |          |                |                                     |
| CB4856 HS V                                               | 18195306                                       | 18197863 | WBGene00008893 | F16H6.3 F16H6.3 -0.0321682668245051 |
| AGIWUR7554                                                |                                                |          |                |                                     |
| CB4856 HS V                                               | 18198721                                       | 18205815 | WBGene00008894 | F16H6.4 F16H6.4 0.0153487086788049  |
| AGIWUR11811;AGIWUR29561                                   |                                                |          |                |                                     |
| CB4856 HS V                                               | 18207064                                       | 18209171 | WBGene00008897 | F16H6.7 F16H6.7 -0.0332652972336067 |
| AGIWUR32034                                               |                                                |          |                |                                     |
| CB4856 HS V                                               | 18217084                                       | 18222299 | WBGene00008899 | F16H6.9 F16H6.9 0.0610465782647243  |
| AGIWUR12021                                               |                                                |          |                |                                     |
| CB4856 HS V                                               | 18222746                                       | 18224447 | WBGene00008900 | F16H6.10 F16H6.10                   |
| -0.0257222542325426                                       | AGIWUR29693                                    |          |                |                                     |
| CB4856 HS V                                               | 18227037                                       | 18231455 | WBGene00012572 | Y37H2B.1 Y37H2B.1                   |
| -0.118258959163435                                        | AGIWUR22690                                    |          |                |                                     |
| CB4856 HS V                                               | 18231635                                       | 18237223 | WBGene00014821 | R10E8.7 R10E8.7 -0.140427968871172  |
| AGIWUR28066;AGIWUR30825                                   |                                                |          |                |                                     |
| CB4856 HS V                                               | 18238122                                       | 18240736 | WBGene00011213 | R10E8.8 R10E8.8 0.206572241597716   |
| AGIWUR20037                                               |                                                |          |                |                                     |
| CB4856 HS V                                               | 18242339                                       | 18252416 | WBGene00011207 | R10E8.1 R10E8.1 0.216993813677568   |
| AGIWUR5910;AGIWUR8723;AGIWUR17037;AGIWUR20949;AGIWUR20966 |                                                |          |                |                                     |
| CB4856 HS V                                               | 18253794                                       | 18254403 | WBGene00011208 | R10E8.2 R10E8.2 0.205530035792849   |

|                                                                                                |   |                                                           |          |                |           |          |                     |
|------------------------------------------------------------------------------------------------|---|-----------------------------------------------------------|----------|----------------|-----------|----------|---------------------|
| AGIWUR22380                                                                                    |   |                                                           |          |                |           |          |                     |
| CB4856 HS                                                                                      | V | 18254783                                                  | 18257067 | WBGene00011211 | R10E8.5   | R10E8.5  | -0.0528620964837865 |
| AGIWUR30162                                                                                    |   |                                                           |          |                |           |          |                     |
| CB4856 HS                                                                                      | V | 18259270                                                  | 18266370 | WBGene00011212 | R10E8.6   | R10E8.6  | 0.299303696185671   |
| AGIWUR11589                                                                                    |   |                                                           |          |                |           |          |                     |
| CB4856 HS                                                                                      | V | 18267292                                                  | 18268844 | WBGene00012574 | fbxa-213  |          | Y37H2C.3            |
| -0.063808334284154                                                                             |   | AGIWUR33649                                               |          |                |           |          |                     |
| CB4856 HS                                                                                      | V | 18269616                                                  | 18269985 | WBGene00004812 | skr-6     | Y37H2C.2 |                     |
| -0.0403430655755379                                                                            |   | AGIWUR27438                                               |          |                |           |          |                     |
| CB4856 HS                                                                                      | V | 18270703                                                  | 18272256 | WBGene00012575 | Y37H2C.4  |          | Y37H2C.4            |
| -0.12611623262533                                                                              |   | AGIWUR20744                                               |          |                |           |          |                     |
| CB4856 HS                                                                                      | V | 18272889                                                  | 18277694 | WBGene00012573 | Y37H2C.1  |          | Y37H2C.1            |
| 0.130400424855094                                                                              |   | AGIWUR17827                                               |          |                |           |          |                     |
| CB4856 HS                                                                                      | V | 18282897                                                  | 18290590 | WBGene00013058 | cllec-247 |          | Y51A2A.1            |
| 0.0862621197287341                                                                             |   | AGIWUR43134                                               |          |                |           |          |                     |
| CB4856 HS                                                                                      | V | 18290942                                                  | 18291348 | WBGene00013060 | Y51A2A.4  |          | Y51A2A.4            |
| -0.112033274962066                                                                             |   | AGIWUR16311                                               |          |                |           |          |                     |
| CB4856 HS                                                                                      | V | 18292595                                                  | 18292944 | WBGene00077445 | Y51A2A.12 |          | Y51A2A.12           |
| 0.0670868253303922                                                                             |   | AGIWUR755;AGIWUR23757;AGIWUR31475;AGIWUR41999;AGIWUR42533 |          |                |           |          |                     |
| CB4856 HS                                                                                      | V | 18298806                                                  | 18300713 | WBGene00013061 | Y51A2A.5  |          | Y51A2A.5            |
| -0.0921293311178788                                                                            |   | AGIWUR41693                                               |          |                |           |          |                     |
| CB4856 HS                                                                                      | V | 18309386                                                  | 18310203 | WBGene00014906 | fbxa-109  |          | Y51A2A.8            |
| -0.0869239179396288                                                                            |   | AGIWUR38308;AGIWUR43586                                   |          |                |           |          |                     |
| CB4856 HS                                                                                      | V | 18310924                                                  | 18311985 | WBGene00014907 | fbxa-117  |          | Y51A2A.9            |
| -0.134863608345865                                                                             |   | AGIWUR23063                                               |          |                |           |          |                     |
| CB4856 HS                                                                                      | V | 18318595                                                  | 18319744 | WBGene00007182 | fbxb-119  |          | B0462.3             |
| -0.0778030568632291                                                                            |   |                                                           |          |                |           |          |                     |
| AGIWUR6162;AGIWUR11568;AGIWUR13340;AGIWUR14758;AGIWUR16201;AGIWUR17658;AGIWUR29562;AGIWUR40018 |   |                                                           |          |                |           |          |                     |
| CB4856 HS                                                                                      | V | 18320110                                                  | 18321527 | WBGene00005580 | sri-68    | B0462.2  | -0.149657930440329  |
| AGIWUR30149;AGIWUR39795                                                                        |   |                                                           |          |                |           |          |                     |
| CB4856 HS                                                                                      | V | 18325035                                                  | 18328791 | WBGene00007181 | B0462.1   | B0462.1  | 0.341594018403952   |
| AGIWUR32448                                                                                    |   |                                                           |          |                |           |          |                     |
| CB4856 HS                                                                                      | V | 18329112                                                  | 18331179 | WBGene00007183 | B0462.4   | B0462.4  | 0.191272276567814   |
| AGIWUR14082                                                                                    |   |                                                           |          |                |           |          |                     |
| CB4856 HS                                                                                      | V | 18351021                                                  | 18352672 | WBGene00119201 | C08E8.11  |          | C08E8.11            |
| -0.137032573477242                                                                             |   | AGIWUR33378                                               |          |                |           |          |                     |
| CB4856 HS                                                                                      | V | 18353510                                                  | 18355842 | WBGene00007438 | C08E8.2   | C08E8.2  | 0.0780460194047787  |
| AGIWUR19655;AGIWUR23477;AGIWUR40483                                                            |   |                                                           |          |                |           |          |                     |
| CB4856 HS                                                                                      | V | 18358035                                                  | 18359555 | WBGene00045496 | C08E8.8   | C08E8.8  | -0.149961925339698  |

|                                                                                          |    |   |          |          |                |                                     |
|------------------------------------------------------------------------------------------|----|---|----------|----------|----------------|-------------------------------------|
| AGIWUR1498;AGIWUR11590;AGIWUR13685;AGIWUR14012;AGIWUR37565                               |    |   |          |          |                |                                     |
| CB4856                                                                                   | HS | V | 18359818 | 18359988 | WBGene00007441 | C08E8.5 C08E8.5 0.0781806474702211  |
| AGIWUR31154                                                                              |    |   |          |          |                |                                     |
| CB4856                                                                                   | HS | V | 18361051 | 18362543 | WBGene00007437 | C08E8.1 C08E8.1 0.180787134692501   |
| AGIWUR13037;AGIWUR22262;AGIWUR29468                                                      |    |   |          |          |                |                                     |
| CB4856                                                                                   | HS | V | 18364858 | 18365224 | WBGene00050891 | C08E8.9 C08E8.9 0.0407636272728258  |
| AGIWUR12572;AGIWUR29261;AGIWUR38952;AGIWUR42879;AGIWUR44736                              |    |   |          |          |                |                                     |
| CB4856                                                                                   | HS | V | 18368014 | 18368422 | WBGene00007442 | C08E8.6 C08E8.6 -0.254346456350625  |
| AGIWUR29226                                                                              |    |   |          |          |                |                                     |
| CB4856                                                                                   | HS | V | 18371846 | 18373528 | WBGene00007440 | C08E8.4 C08E8.4 0.292814971115793   |
| AGIWUR33396;AGIWUR42447                                                                  |    |   |          |          |                |                                     |
| CB4856                                                                                   | HS | V | 18374494 | 18376755 | WBGene00013066 | Y51A2B.2 Y51A2B.2                   |
| -0.147480684908252 AGIWUR530                                                             |    |   |          |          |                |                                     |
| CB4856                                                                                   | HS | V | 18379119 | 18379289 | WBGene00013071 | Y51A2B.8 Y51A2B.8                   |
| 0.05017014582686 AGIWUR11261;AGIWUR15571;AGIWUR26511;AGIWUR35990;AGIWUR37522;AGIWUR43960 |    |   |          |          |                |                                     |
| CB4856                                                                                   | HS | V | 18380620 | 18382690 | WBGene00013067 | nhr-288 Y51A2B.3                    |
| 0.244221172153894 AGIWUR6038                                                             |    |   |          |          |                |                                     |
| CB4856                                                                                   | HS | V | 18386252 | 18389146 | WBGene00013068 | Y51A2B.4 Y51A2B.4                   |
| -0.121000902696396 AGIWUR28115                                                           |    |   |          |          |                |                                     |
| CB4856                                                                                   | HS | V | 18389280 | 18391337 | WBGene00013069 | Y51A2B.5 Y51A2B.5                   |
| -0.0081356789869691 AGIWUR3971                                                           |    |   |          |          |                |                                     |
| CB4856                                                                                   | HS | V | 18392007 | 18394303 | WBGene00013070 | Y51A2B.6 Y51A2B.6                   |
| 0.499187869958595 AGIWUR20290                                                            |    |   |          |          |                |                                     |
| CB4856                                                                                   | HS | V | 18395338 | 18395749 | WBGene00050907 | Y51A2B.9 Y51A2B.9                   |
| 0.176439104688607 AGIWUR15787;AGIWUR15989;AGIWUR19344;AGIWUR25724;AGIWUR40333            |    |   |          |          |                |                                     |
| CB4856                                                                                   | HS | V | 18398450 | 18400374 | WBGene00005828 | srw-81 Y51A2B.7                     |
| 0.0202258005375313 AGIWUR14210                                                           |    |   |          |          |                |                                     |
| CB4856                                                                                   | HS | V | 18406896 | 18408138 | WBGene00014984 | ZK262.12 ZK262.12                   |
| 0.0455896401264502 AGIWUR29494;AGIWUR39668                                               |    |   |          |          |                |                                     |
| CB4856                                                                                   | HS | V | 18409043 | 18410242 | WBGene00005417 | srh-207 ZK262.1 0.00462223839656062 |
| AGIWUR24982                                                                              |    |   |          |          |                |                                     |
| CB4856                                                                                   | HS | V | 18410758 | 18412987 | WBGene00013949 | ZK262.2 ZK262.2 0.287850374089428   |
| AGIWUR1816                                                                               |    |   |          |          |                |                                     |
| CB4856                                                                                   | HS | V | 18414351 | 18416861 | WBGene00013950 | ZK262.3 ZK262.3 0.141428984046883   |
| AGIWUR39692                                                                              |    |   |          |          |                |                                     |
| CB4856                                                                                   | HS | V | 18417749 | 18419893 | WBGene00005409 | srh-198 ZK262.13                    |
| -0.1236856983433 AGIWUR10509;AGIWUR15365                                                 |    |   |          |          |                |                                     |
| CB4856                                                                                   | HS | V | 18421097 | 18423477 | WBGene00005614 | srj-26 ZK262.10                     |
| -0.218021952854 AGIWUR12493;AGIWUR38321;AGIWUR40538                                      |    |   |          |          |                |                                     |

|                     |   |                         |          |                |           |           |                     |
|---------------------|---|-------------------------|----------|----------------|-----------|-----------|---------------------|
| CB4856 HS           | V | 18423883                | 18424207 | WBGene00013951 | ZK262.4   | ZK262.4   | -0.105608508282371  |
| AGIWUR19656         |   |                         |          |                |           |           |                     |
| CB4856 HS           | V | 18426580                | 18430537 | WBGene00005830 | srw-83    | ZK262.6   | -0.0679133822534155 |
| AGIWUR18266         |   |                         |          |                |           |           |                     |
| CB4856 HS           | V | 18431750                | 18434172 | WBGene00005829 | srw-82    | ZK262.7   | 0.073202227378772   |
| AGIWUR4528          |   |                         |          |                |           |           |                     |
| CB4856 HS           | V | 18440578                | 18441340 | WBGene00013954 | ZK262.9   | ZK262.9   | 0.0186892578330156  |
| AGIWUR34089         |   |                         |          |                |           |           |                     |
| CB4856 HS           | V | 18444418                | 18447019 | WBGene00013944 | ZK228.1   | ZK228.1   | 0.101645945812752   |
| AGIWUR6424          |   |                         |          |                |           |           |                     |
| CB4856 HS           | V | 18455355                | 18455934 | WBGene00050900 | ZK228.11  |           | ZK228.11            |
| -0.0357599047478736 |   | AGIWUR27728             |          |                |           |           |                     |
| CB4856 HS           | V | 18458238                | 18461231 | WBGene00013946 | ZK228.3   | ZK228.3   | 0.0547352086938773  |
| AGIWUR704           |   |                         |          |                |           |           |                     |
| CB4856 HS           | V | 18462804                | 18465320 | WBGene00013947 | ZK228.4   | ZK228.4   | -0.0296551700883239 |
| AGIWUR27462         |   |                         |          |                |           |           |                     |
| CB4856 HS           | V | 18471985                | 18473530 | WBGene00005397 | srh-182   | ZK228.5   | -0.0413042468905989 |
| AGIWUR27804         |   |                         |          |                |           |           |                     |
| CB4856 HS           | V | 18474523                | 18476268 | WBGene00005396 | srh-181   | ZK228.6   | 0.0333944849042496  |
| AGIWUR6220          |   |                         |          |                |           |           |                     |
| CB4856 HS           | V | 18476390                | 18478061 | WBGene00005394 | srh-179   | ZK228.7   | 0.047064601352572   |
| AGIWUR29334         |   |                         |          |                |           |           |                     |
| CB4856 HS           | V | 18478467                | 18480331 | WBGene00005393 | srh-178   | ZK228.8   | 0.258503198026847   |
| AGIWUR6209          |   |                         |          |                |           |           |                     |
| CB4856 HS           | V | 18481131                | 18487258 | WBGene00013083 | Y51A2D.18 |           | Y51A2D.18           |
| -0.0344315705915452 |   | AGIWUR19122             |          |                |           |           |                     |
| CB4856 HS           | V | 18492265                | 18508201 | WBGene00004830 | slo-1     | Y51A2D.19 |                     |
| 0.233119924455278   |   | AGIWUR35207;AGIWUR43931 |          |                |           |           |                     |
| CB4856 HS           | V | 18508873                | 18512632 | WBGene00013072 | Y51A2D.1  |           | Y51A2D.1            |
| 0.0350443776692195  |   | AGIWUR24034             |          |                |           |           |                     |
| CB4856 HS           | V | 18516789                | 18523875 | WBGene00013073 | hmit-1.1  |           | Y51A2D.4            |
| 0.0931705911102796  |   | AGIWUR9464              |          |                |           |           |                     |
| CB4856 HS           | V | 18524760                | 18529156 | WBGene00013074 | hmit-1.2  |           | Y51A2D.5            |
| -0.175373199531897  |   | AGIWUR26939             |          |                |           |           |                     |
| CB4856 HS           | V | 18533924                | 18549129 | WBGene00013075 | Y51A2D.7  |           | Y51A2D.7            |
| 0.0727489243206776  |   | AGIWUR40539             |          |                |           |           |                     |
| CB4856 HS           | V | 18550022                | 18553867 | WBGene00013076 | Y51A2D.8  |           | Y51A2D.8            |
| -0.131876223774569  |   | AGIWUR41015             |          |                |           |           |                     |
| CB4856 HS           | V | 18555387                | 18556643 | WBGene00013077 | ttr-24    | Y51A2D.9  |                     |

|                                                                                     |                                                          |          |                |           |           |                     |
|-------------------------------------------------------------------------------------|----------------------------------------------------------|----------|----------------|-----------|-----------|---------------------|
| 0.201725931546825                                                                   | AGIWUR9673                                               |          |                |           |           |                     |
| CB4856 HS V                                                                         | 18556714                                                 | 18558099 | WBGene00013078 | ttr-25    | Y51A2D.10 |                     |
| 0.153131288385591                                                                   | AGIWUR27649                                              |          |                |           |           |                     |
| CB4856 HS V                                                                         | 18558748                                                 | 18560308 | WBGene00013079 | ttr-26    | Y51A2D.11 |                     |
| 0.093622168781657                                                                   | AGIWUR38389                                              |          |                |           |           |                     |
| CB4856 HS V                                                                         | 18562178                                                 | 18564886 | WBGene00005191 | srg-34    | Y51A2D.12 |                     |
| -0.0794782936158995                                                                 | AGIWUR5864;AGIWUR15788;AGIWUR28658                       |          |                |           |           |                     |
| CB4856 HS V                                                                         | 18571833                                                 | 18573026 | WBGene00044210 | Y51A2D.21 | Y51A2D.21 |                     |
| 0.0192109345663098                                                                  | AGIWUR69;AGIWUR12741;AGIWUR19445;AGIWUR23107;AGIWUR31627 |          |                |           |           |                     |
| CB4856 HS V                                                                         | 18573056                                                 | 18579784 | WBGene00013080 | Y51A2D.13 | Y51A2D.13 |                     |
| 0.18992970555721                                                                    | AGIWUR33983                                              |          |                |           |           |                     |
| CB4856 HS V                                                                         | 18582658                                                 | 18582963 | WBGene00013081 | Y51A2D.14 | Y51A2D.14 |                     |
| 0.0412496147759551                                                                  | AGIWUR35808                                              |          |                |           |           |                     |
| CB4856 HS V                                                                         | 18592754                                                 | 18614101 | WBGene00013082 | grdn-1    | Y51A2D.15 |                     |
| -0.0434474780996394                                                                 | AGIWUR699;AGIWUR3278;AGIWUR40624                         |          |                |           |           |                     |
| CB4856 HS V                                                                         | 18616599                                                 | 18620043 | WBGene00003660 | nhr-70    | Y51A2D.17 |                     |
| 0.276727804697837                                                                   | AGIWUR6583                                               |          |                |           |           |                     |
| CB4856 HS V                                                                         | 18620057                                                 | 18623093 | WBGene00013479 | Y69H2.1   | Y69H2.1   | 0.210219017199749   |
| AGIWUR4951                                                                          |                                                          |          |                |           |           |                     |
| CB4856 HS V                                                                         | 18623198                                                 | 18626852 | WBGene00050884 | Y69H2.15  | Y69H2.15  |                     |
| 0.232770993222409                                                                   | AGIWUR11539;AGIWUR42398                                  |          |                |           |           |                     |
| CB4856 HS V                                                                         | 18628680                                                 | 18636348 | WBGene00013480 | egas-3    | Y69H2.2   | -0.0824071006872256 |
| AGIWUR12373                                                                         |                                                          |          |                |           |           |                     |
| CB4856 HS V                                                                         | 18638484                                                 | 18639591 | WBGene00013489 | col-42    | Y69H2.14  |                     |
| 0.000777496762681906                                                                | AGIWUR4525;AGIWUR33265                                   |          |                |           |           |                     |
| CB4856 HS V                                                                         | 18640337                                                 | 18648392 | WBGene00013486 | egas-1    | Y69H2.11  |                     |
| 0.161434663055822                                                                   | AGIWUR27908                                              |          |                |           |           |                     |
| CB4856 HS V                                                                         | 18650343                                                 | 18656165 | WBGene00013487 | egas-2    | Y69H2.12  |                     |
| 0.140883083852263                                                                   | AGIWUR11285                                              |          |                |           |           |                     |
| CB4856 HS V                                                                         | 18656094                                                 | 18664116 | WBGene00013481 | Y69H2.3   | Y69H2.3   | 0.0858305296483159  |
| AGIWUR14840;AGIWUR15424;AGIWUR24446;AGIWUR25250;AGIWUR30766;AGIWUR39487;AGIWUR40523 |                                                          |          |                |           |           |                     |
| CB4856 HS V                                                                         | 18670315                                                 | 18684360 | WBGene00013485 | Y69H2.10  | Y69H2.10  |                     |
| -0.0226262739928123                                                                 | AGIWUR10385;AGIWUR23560;AGIWUR34119                      |          |                |           |           |                     |
| CB4856 HS V                                                                         | 18685060                                                 | 18686349 | WBGene00077455 | Y69H2.17  | Y69H2.17  |                     |
| -0.0754938161956122                                                                 | AGIWUR9288;AGIWUR16970;AGIWUR45036                       |          |                |           |           |                     |
| CB4856 HS V                                                                         | 18686315                                                 | 18689843 | WBGene00006714 | ubc-19    | Y69H2.6   | 0.0543974535242953  |
| AGIWUR6785                                                                          |                                                          |          |                |           |           |                     |
| CB4856 HS V                                                                         | 18689989                                                 | 18696069 | WBGene00013482 | Y69H2.7   | Y69H2.7   | -0.117814695613776  |
| AGIWUR29711;AGIWUR41114                                                             |                                                          |          |                |           |           |                     |

|                     |                                                           |          |                         |           |         |                     |
|---------------------|-----------------------------------------------------------|----------|-------------------------|-----------|---------|---------------------|
| CB4856 HS V         | 18701540                                                  | 18706098 | WBGene00013484          | Y69H2.9   | Y69H2.9 | -0.170947772016796  |
| AGIWUR13319         |                                                           |          |                         |           |         |                     |
| CB4856 HS V         | 18706031                                                  | 18706254 | WBGene00077451          | Y69H2.16  |         | Y69H2.16            |
| -0.281511775880661  | AGIWUR12659                                               |          |                         |           |         |                     |
| CB4856 HS V         | 18709810                                                  | 18711696 | WBGene00194680          | Y17D7C.6  |         | Y17D7C.6            |
| 0.0932124251531778  | AGIWUR37831                                               |          |                         |           |         |                     |
| CB4856 HS V         | 18713728                                                  | 18714612 | WBGene00050903          | Y17D7C.4  |         | Y17D7C.4            |
| -0.0228362843971208 | AGIWUR689;AGIWUR4289;AGIWUR8035                           |          | AGIWUR26888;AGIWUR35127 |           |         |                     |
| CB4856 HS V         | 18716075                                                  | 18719944 | WBGene00012456          | Y17D7C.2  |         | Y17D7C.2            |
| -0.0677157638883932 | AGIWUR12235                                               |          |                         |           |         |                     |
| CB4856 HS V         | 18720589                                                  | 18723771 | WBGene00045366          | Y17D7C.3  |         | Y17D7C.3            |
| 0.120757074341956   | AGIWUR22892;AGIWUR44345                                   |          |                         |           |         |                     |
| CB4856 HS V         | 18728703                                                  | 18729374 | WBGene00077655          | asp-19    | ZK384.6 | -0.0274257849067379 |
| AGIWUR5848          |                                                           |          |                         |           |         |                     |
| CB4856 HS V         | 18731991                                                  | 18732772 | WBGene00013971          | scl-19    | ZK384.1 | 0.0403799768095938  |
| AGIWUR33613         |                                                           |          |                         |           |         |                     |
| CB4856 HS V         | 18732802                                                  | 18734466 | WBGene00013972          | scl-20    | ZK384.2 | -0.0785781215425327 |
| AGIWUR29469         |                                                           |          |                         |           |         |                     |
| CB4856 HS V         | 18738955                                                  | 18742208 | WBGene00045364          | clec-250  |         | F11D11.14           |
| 0.0613454039842729  | AGIWUR14561;AGIWUR19691;AGIWUR42947                       |          |                         |           |         |                     |
| CB4856 HS V         | 18742427                                                  | 18745266 | WBGene00045363          | F11D11.13 |         | F11D11.13           |
| -0.0692000467098306 | AGIWUR372;AGIWUR17003                                     |          |                         |           |         |                     |
| CB4856 HS V         | 18745718                                                  | 18746987 | WBGene00008703          | clec-251  |         | F11D11.8            |
| 1.06023199943712    | AGIWUR24107                                               |          |                         |           |         |                     |
| CB4856 HS V         | 18747943                                                  | 18748826 | WBGene00008702          | clec-252  |         | F11D11.7            |
| -0.230831750265207  | AGIWUR30950                                               |          |                         |           |         |                     |
| CB4856 HS V         | 18749579                                                  | 18750199 | WBGene00045362          | F11D11.12 |         | F11D11.12           |
| -0.0550945223767059 | AGIWUR1476;AGIWUR2080;AGIWUR33437;AGIWUR41696;AGIWUR44609 |          |                         |           |         |                     |
| CB4856 HS V         | 18750163                                                  | 18750691 | WBGene00206492          | F11D11.21 |         | F11D11.21           |
| -0.0703156853260536 | AGIWUR1746                                                |          |                         |           |         |                     |
| CB4856 HS V         | 18751267                                                  | 18752299 | WBGene00045361          | clec-253  |         | F11D11.11           |
| -0.027407696154794  | AGIWUR9867;AGIWUR17636                                    |          |                         |           |         |                     |
| CB4856 HS V         | 18752482                                                  | 18753136 | WBGene00008701          | F11D11.6  |         | F11D11.6            |
| 0.0507589545703704  | AGIWUR6810;AGIWUR14978;AGIWUR29426                        |          |                         |           |         |                     |
| CB4856 HS V         | 18753500                                                  | 18754428 | WBGene00008700          | clec-254  |         | F11D11.5            |
| 0.365286639319988   | AGIWUR11388                                               |          |                         |           |         |                     |
| CB4856 HS V         | 18755450                                                  | 18756760 | WBGene00050971          | F11D11.15 |         | F11D11.15           |
| 0.349522789659382   | AGIWUR7429;AGIWUR24923                                    |          |                         |           |         |                     |
| CB4856 HS V         | 18756846                                                  | 18757678 | WBGene00077442          | F11D11.16 |         | F11D11.16           |



|                      |                                                                                                             |          |                |           |           |
|----------------------|-------------------------------------------------------------------------------------------------------------|----------|----------------|-----------|-----------|
| -0.0415391667709102  | AGIWUR4444;AGIWUR5749;AGIWUR14017;AGIWUR24396;AGIWUR44023                                                   |          |                |           |           |
| CB4856 HS V          | 18757982                                                                                                    | 18760285 | WBGene00008698 | F11D11.3  | F11D11.3  |
| -0.00423199975915001 | AGIWUR30167                                                                                                 |          |                |           |           |
| CB4856 HS V          | 18761378                                                                                                    | 18763526 | WBGene00008699 | F11D11.4  | F11D11.4  |
| -0.39208426729088    | AGIWUR35106                                                                                                 |          |                |           |           |
| CB4856 HS V          | 18767754                                                                                                    | 18768414 | WBGene00077659 | F11D11.19 | F11D11.19 |
| 0.0111876591479163   | AGIWUR24782                                                                                                 |          |                |           |           |
| CB4856 HS V          | 18771690                                                                                                    | 18772639 | WBGene00012454 | clec-256  | Y17D7B.6  |
| 0.133779226597447    | AGIWUR32361;AGIWUR35140                                                                                     |          |                |           |           |
| CB4856 HS V          | 18773061                                                                                                    | 18774024 | WBGene00044892 | clec-257  | Y17D7B.8  |
| -0.135103497613615   | AGIWUR43865                                                                                                 |          |                |           |           |
| CB4856 HS V          | 18775226                                                                                                    | 18776195 | WBGene00012453 | Y17D7B.5  | Y17D7B.5  |
| 0.0166995376814549   | AGIWUR36694;AGIWUR37221                                                                                     |          |                |           |           |
| CB4856 HS V          | 18776198                                                                                                    | 18780216 | WBGene00012452 | Y17D7B.4  | Y17D7B.4  |
| 0.206549046839296    | AGIWUR2942                                                                                                  |          |                |           |           |
| CB4856 HS V          | 18780490                                                                                                    | 18782605 | WBGene00014562 | Y17D7B.7  | Y17D7B.7  |
| 0.0140385073467613   |                                                                                                             |          |                |           |           |
|                      | AGIWUR13145;AGIWUR14363;AGIWUR22346;AGIWUR24800;AGIWUR34763;AGIWUR36743;AGIWUR37503;AGIWUR41056;AGIWUR44064 |          |                |           |           |
|                      | ;AGIWUR44944                                                                                                |          |                |           |           |
| CB4856 HS V          | 18784954                                                                                                    | 18786788 | WBGene00012451 | Y17D7B.3  | Y17D7B.3  |
| 0.132494322377143    | AGIWUR11530                                                                                                 |          |                |           |           |
| CB4856 HS V          | 18787806                                                                                                    | 18789617 | WBGene00012450 | Y17D7B.2  | Y17D7B.2  |
| -0.0558584159210032  | AGIWUR8884                                                                                                  |          |                |           |           |
| CB4856 HS V          | 18790958                                                                                                    | 18794781 | WBGene00012449 | nhr-231   | Y17D7B.1  |
| 0.225305334915207    | AGIWUR3281;AGIWUR3287                                                                                       |          |                |           |           |
| CB4856 HS V          | 18796106                                                                                                    | 18800822 | WBGene00008309 | nhr-170   | C54E10.5  |
| 0.119840138160333    | AGIWUR4988                                                                                                  |          |                |           |           |
| CB4856 HS V          | 18804080                                                                                                    | 18806509 | WBGene00005522 | sri-10    | C54E10.4  |
| -0.125799510950275   | AGIWUR35247                                                                                                 |          |                |           |           |
| CB4856 HS V          | 18808069                                                                                                    | 18808670 | WBGene00008310 | C54E10.6  | C54E10.6  |
| 0.0658897910978231   | AGIWUR20520                                                                                                 |          |                |           |           |
| CB4856 HS V          | 18811005                                                                                                    | 18813481 | WBGene00008308 | C54E10.3  | C54E10.3  |
| -0.0499862574777055  | AGIWUR32525                                                                                                 |          |                |           |           |
| CB4856 HS V          | 18815036                                                                                                    | 18818593 | WBGene00008306 | C54E10.1  | C54E10.1  |
| -0.400101984291221   | AGIWUR12625                                                                                                 |          |                |           |           |
| CB4856 HS V          | 18819766                                                                                                    | 18831422 | WBGene00008307 | ncs-5     | C54E10.2  |
| 0.148393999170525    | AGIWUR7427                                                                                                  |          |                |           |           |
| CB4856 HS V          | 18832327                                                                                                    | 18837214 | WBGene00012448 | cyp-33D3  | Y17D7A.4  |
| 0.0776071742210593   | AGIWUR43577                                                                                                 |          |                |           |           |

|                                                                                             |                                     |          |                |           |           |
|---------------------------------------------------------------------------------------------|-------------------------------------|----------|----------------|-----------|-----------|
| CB4856 HS V                                                                                 | 18839310                            | 18845401 | WBGene00003655 | nhr-65    | Y17D7A.3  |
| 0.176218379945595                                                                           | AGIWUR8708                          |          |                |           |           |
| CB4856 HS V                                                                                 | 18846817                            | 18852729 | WBGene00012446 | nhr-230   | Y17D7A.1  |
| 0.0457580320678836                                                                          | AGIWUR23803;AGIWUR40110             |          |                |           |           |
| CB4856 HS V                                                                                 | 18853127                            | 18859221 | WBGene00006945 | wars-1    | Y80D3A.1  |
| 0.027388035847105                                                                           | AGIWUR39065                         |          |                |           |           |
| CB4856 HS V                                                                                 | 18860287                            | 18894974 | WBGene00001258 | emb-4     | Y80D3A.2  |
| -0.233023866174678                                                                          |                                     |          |                |           |           |
| AGIWUR228;AGIWUR4092;AGIWUR9326;AGIWUR10162;AGIWUR34227;AGIWUR35514;AGIWUR38064;AGIWUR42024 |                                     |          |                |           |           |
| CB4856 HS V                                                                                 | 18895317                            | 18900532 | WBGene00013584 | nhr-243   | Y80D3A.4  |
| -0.0487226200268651                                                                         | AGIWUR41496                         |          |                |           |           |
| CB4856 HS V                                                                                 | 18912038                            | 18918109 | WBGene00013585 | cyp-42A1  | Y80D3A.5  |
| 0.0608357405356319                                                                          | AGIWUR7466;AGIWUR41876;AGIWUR42942  |          |                |           |           |
| CB4856 HS V                                                                                 | 18919296                            | 18931379 | WBGene00004236 | ptr-22    | Y80D3A.7  |
| 0.0270744948833652                                                                          | AGIWUR13202                         |          |                |           |           |
| CB4856 HS V                                                                                 | 18940641                            | 18946905 | WBGene00013586 | Y80D3A.8  | Y80D3A.8  |
| 0.146488692911149                                                                           | AGIWUR41159;AGIWUR44894             |          |                |           |           |
| CB4856 HS V                                                                                 | 18953118                            | 18957317 | WBGene00013587 | Y80D3A.9  | Y80D3A.9  |
| 0.0546225899271118                                                                          | AGIWUR42361                         |          |                |           |           |
| CB4856 HS V                                                                                 | 18958240                            | 18960172 | WBGene00012702 | ztf-20    | Y39B6A.46 |
| 0.0759572004060436                                                                          | AGIWUR22117                         |          |                |           |           |
| CB4856 HS V                                                                                 | 18960969                            | 18967842 | WBGene00012701 | Y39B6A.43 | Y39B6A.43 |
| 0.171862462730129                                                                           | AGIWUR14234                         |          |                |           |           |
| CB4856 HS V                                                                                 | 18968021                            | 18969640 | WBGene00012700 | Y39B6A.42 | Y39B6A.42 |
| -0.527485238602797                                                                          | AGIWUR22324;AGIWUR30146             |          |                |           |           |
| CB4856 HS V                                                                                 | 18970500                            | 18977976 | WBGene00012699 | Y39B6A.41 | Y39B6A.41 |
| -0.0455167338361413                                                                         | AGIWUR26695                         |          |                |           |           |
| CB4856 HS V                                                                                 | 18979336                            | 18981193 | WBGene00012698 | sws-1     | Y39B6A.40 |
| 0.114126735873434                                                                           | AGIWUR12800                         |          |                |           |           |
| CB4856 HS V                                                                                 | 18981306                            | 18985870 | WBGene00012697 | mrps-35   | Y39B6A.39 |
| 0.157484086304697                                                                           | AGIWUR40852                         |          |                |           |           |
| CB4856 HS V                                                                                 | 18986498                            | 18990421 | WBGene00012696 | reps-1    | Y39B6A.38 |
| -0.106255500736458                                                                          | AGIWUR11454;AGIWUR30291;AGIWUR39000 |          |                |           |           |
| CB4856 HS V                                                                                 | 18990850                            | 18993799 | WBGene00012695 | Y39B6A.37 | Y39B6A.37 |
| -0.258488611160562                                                                          | AGIWUR27863                         |          |                |           |           |
| CB4856 HS V                                                                                 | 18993940                            | 18998200 | WBGene00012694 | Y39B6A.36 | Y39B6A.36 |
| 0.129503658786241                                                                           | AGIWUR3112                          |          |                |           |           |
| CB4856 HS V                                                                                 | 18998345                            | 19000918 | WBGene00006567 | tgt-2     | Y39B6A.35 |
| -0.130471600674962                                                                          | AGIWUR30400                         |          |                |           |           |

|                     |                                                                                  |          |                |           |           |
|---------------------|----------------------------------------------------------------------------------|----------|----------------|-----------|-----------|
| CB4856 HS V         | 19001018                                                                         | 19001856 | WBGene00012693 | Y39B6A.34 | Y39B6A.34 |
| 0.147505577641503   | AGIWUR4047                                                                       |          |                |           |           |
| CB4856 HS V         | 19001956                                                                         | 19006711 | WBGene00012692 | Y39B6A.33 | Y39B6A.33 |
| -0.258894224328781  | AGIWUR11551                                                                      |          |                |           |           |
| CB4856 HS V         | 19008635                                                                         | 19013833 | WBGene00012690 | Y39B6A.31 | Y39B6A.31 |
| 0.114361070066577   | AGIWUR12356                                                                      |          |                |           |           |
| CB4856 HS V         | 19014573                                                                         | 19020001 | WBGene00012689 | Y39B6A.30 | Y39B6A.30 |
| 0.0574804367243864  | AGIWUR2723;AGIWUR3868;AGIWUR8560;AGIWUR19395;AGIWUR22745;AGIWUR25998;AGIWUR35972 |          |                |           |           |
| CB4856 HS V         | 19020487                                                                         | 19024765 | WBGene00012688 | Y39B6A.29 | Y39B6A.29 |
| -0.076533871196256  | AGIWUR29897                                                                      |          |                |           |           |
| CB4856 HS V         | 19031742                                                                         | 19035255 | WBGene00012686 | Y39B6A.27 | Y39B6A.27 |
| 0.154201527249759   | AGIWUR12883;AGIWUR21823;AGIWUR22555                                              |          |                |           |           |
| CB4856 HS V         | 19035753                                                                         | 19037320 | WBGene00012683 | asp-17    | Y39B6A.24 |
| 0.0257726952630177  | AGIWUR28496                                                                      |          |                |           |           |
| CB4856 HS V         | 19039058                                                                         | 19042605 | WBGene00012682 | asp-16    | Y39B6A.23 |
| -0.054582077582368  | AGIWUR29027                                                                      |          |                |           |           |
| CB4856 HS V         | 19043215                                                                         | 19044853 | WBGene00012681 | asp-15    | Y39B6A.22 |
| -0.0091846618677085 | AGIWUR2429                                                                       |          |                |           |           |
| CB4856 HS V         | 19047047                                                                         | 19048669 | WBGene00012680 | Y39B6A.21 | Y39B6A.21 |
| -0.127082594074071  | AGIWUR26567                                                                      |          |                |           |           |
| CB4856 HS V         | 19049461                                                                         | 19050825 | WBGene00000214 | asp-1     | Y39B6A.20 |
| 0.474558120115894   | AGIWUR25099                                                                      |          |                |           |           |
| CB4856 HS V         | 19060180                                                                         | 19067034 | WBGene00006696 | twk-46    | Y39B6A.19 |
| 0.329688878790277   | AGIWUR13015;AGIWUR14878;AGIWUR16757                                              |          |                |           |           |
| CB4856 HS V         | 19068621                                                                         | 19074237 | WBGene00012679 | Y39B6A.18 | Y39B6A.18 |
| -0.116628687968861  | AGIWUR34309                                                                      |          |                |           |           |
| CB4856 HS V         | 19076654                                                                         | 19082641 | WBGene00003685 | nhp-95    | Y39B6A.17 |
| 0.101268704077383   | AGIWUR15473;AGIWUR22074;AGIWUR37574                                              |          |                |           |           |
| CB4856 HS V         | 19087723                                                                         | 19092668 | WBGene00012703 | nhp-145   | Y39B6A.47 |
| 0.0420542438696514  | AGIWUR17417;AGIWUR35409                                                          |          |                |           |           |
| CB4856 HS V         | 19099085                                                                         | 19101108 | WBGene00012678 | Y39B6A.16 | Y39B6A.16 |
| -0.124688386775652  | AGIWUR34959                                                                      |          |                |           |           |
| CB4856 HS V         | 19101961                                                                         | 19118412 | WBGene00012676 | pro-3     | Y39B6A.14 |
| -0.15447478166057   | AGIWUR4302;AGIWUR23872                                                           |          |                |           |           |
| CB4856 HS V         | 19118505                                                                         | 19119425 | WBGene00012675 | Y39B6A.13 | Y39B6A.13 |
| -0.129370001701965  | AGIWUR1697;AGIWUR18271;AGIWUR25659;AGIWUR42276                                   |          |                |           |           |
| CB4856 HS V         | 19119527                                                                         | 19124915 | WBGene00012674 | bed-1     | Y39B6A.12 |
| 0.0255527225767231  | AGIWUR8314                                                                       |          |                |           |           |
| CB4856 HS V         | 19127530                                                                         | 19130938 | WBGene00012673 | dyf-17    | Y39B6A.11 |

|                                     |                                                                        |          |                |           |           |                     |
|-------------------------------------|------------------------------------------------------------------------|----------|----------------|-----------|-----------|---------------------|
| 0.102816850159977                   | AGIWUR31302                                                            |          |                |           |           |                     |
| CB4856 HS V                         | 19131531                                                               | 19133603 | WBGene00012672 | Y39B6A.10 | Y39B6A.10 |                     |
| 0.106342963934996                   | AGIWUR28432                                                            |          |                |           |           |                     |
| CB4856 HS V                         | 19136509                                                               | 19138986 | WBGene00012671 | Y39B6A.9  | Y39B6A.9  |                     |
| -0.255625722708851                  | AGIWUR37848                                                            |          |                |           |           |                     |
| CB4856 HS V                         | 19140795                                                               | 19145542 | WBGene00012670 | Y39B6A.8  | Y39B6A.8  |                     |
| -0.0376839996593463                 | AGIWUR9446;AGIWUR12441;AGIWUR23017;AGIWUR25985;AGIWUR31414;AGIWUR38533 |          |                |           |           |                     |
| CB4856 HS V                         | 19145778                                                               | 19149147 | WBGene00012669 | Y39B6A.7  | Y39B6A.7  |                     |
| 0.0867527613619665                  | AGIWUR5513;AGIWUR7476                                                  |          |                |           |           |                     |
| CB4856 HS V                         | 19154106                                                               | 19157674 | WBGene00006639 | tsp-13    | Y39B6A.6  |                     |
| -0.0937866251747783                 | AGIWUR1772                                                             |          |                |           |           |                     |
| CB4856 HS V                         | 19157659                                                               | 19158877 | WBGene00012668 | Y39B6A.5  | Y39B6A.5  |                     |
| 0.0836842666871007                  | AGIWUR38840                                                            |          |                |           |           |                     |
| CB4856 HS V                         | 19174806                                                               | 19187899 | WBGene00001987 | hot-2     | Y39B6A.48 |                     |
| -0.00143334102272519                | AGIWUR11607;AGIWUR30465;AGIWUR44669                                    |          |                |           |           |                     |
| CB4856 HS V                         | 19189246                                                               | 19190035 | WBGene00012666 | Y39B6A.3  | Y39B6A.3  |                     |
| -0.0306333870433946                 | AGIWUR4119;AGIWUR9133;AGIWUR19452                                      |          |                |           |           |                     |
| CB4856 HS V                         | 19190547                                                               | 19199080 | WBGene00012665 | pph-5     | Y39B6A.2  |                     |
| -0.278845600958454                  | AGIWUR17724;AGIWUR26103;AGIWUR30573;AGIWUR40282                        |          |                |           |           |                     |
| CB4856 HS V                         | 19201013                                                               | 19203607 | WBGene00012664 | Y39B6A.1  | Y39B6A.1  |                     |
| 0.126368048444031                   | AGIWUR381;AGIWUR1405;AGIWUR30522                                       |          |                |           |           |                     |
| CB4856 HS V                         | 19207684                                                               | 19211895 | WBGene00003669 | nhr-79    | T26H2.9   | -0.453099478724761  |
| AGIWUR33400                         |                                                                        |          |                |           |           |                     |
| CB4856 HS V                         | 19213685                                                               | 19217138 | WBGene00005653 | srr-2     | T26H2.8   | -0.0182766911815415 |
| AGIWUR39912                         |                                                                        |          |                |           |           |                     |
| CB4856 HS V                         | 19217975                                                               | 19222908 | WBGene00012068 | oac-49    | T26H2.7   | 0.0718253025956459  |
| AGIWUR12320;AGIWUR34436             |                                                                        |          |                |           |           |                     |
| CB4856 HS V                         | 19252181                                                               | 19253054 | WBGene00219452 | F21D9.11  | F21D9.11  |                     |
| -0.508028141187189                  | AGIWUR32988                                                            |          |                |           |           |                     |
| CB4856 HS V                         | 19253820                                                               | 19256758 | WBGene00009018 | F21D9.4   | F21D9.4   | 0.0943561939825335  |
| AGIWUR14486;AGIWUR27967;AGIWUR40913 |                                                                        |          |                |           |           |                     |
| CB4856 HS V                         | 19257583                                                               | 19257753 | WBGene00009017 | F21D9.3   | F21D9.3   |                     |
| -0.00245046987130593                | AGIWUR44583                                                            |          |                |           |           |                     |
| CB4856 HS V                         | 19258483                                                               | 19262449 | WBGene00009016 | F21D9.2   | F21D9.2   | -0.237832331446162  |
| AGIWUR31772                         |                                                                        |          |                |           |           |                     |
| CB4856 HS V                         | 19264597                                                               | 19269661 | WBGene00009015 | F21D9.1   | F21D9.1   |                     |
| -0.00657535671697662                | AGIWUR11826                                                            |          |                |           |           |                     |
| CB4856 HS V                         | 19279218                                                               | 19279988 | WBGene00009021 | F21D9.8   | F21D9.8   | -0.169402936282958  |
| AGIWUR27067                         |                                                                        |          |                |           |           |                     |

|                         |                                                                         |          |                |                  |                     |
|-------------------------|-------------------------------------------------------------------------|----------|----------------|------------------|---------------------|
| CB4856 HS V             | 19282614                                                                | 19284594 | WBGene00010099 | fbxb-117         | F55C9.1             |
| -0.121668925938892      | AGIWUR13275                                                             |          |                |                  |                     |
| CB4856 HS V             | 19287009                                                                | 19288173 | WBGene00010100 | F55C9.3 F55C9.3  | -0.0767940599093961 |
| AGIWUR494               |                                                                         |          |                |                  |                     |
| CB4856 HS V             | 19288755                                                                | 19289889 | WBGene00010101 | fbxb-57 F55C9.4  | -0.0494709043738748 |
| AGIWUR24142             |                                                                         |          |                |                  |                     |
| CB4856 HS V             | 19290616                                                                | 19291028 | WBGene00010102 | F55C9.5 F55C9.5  | -0.358383938067635  |
| AGIWUR19911             |                                                                         |          |                |                  |                     |
| CB4856 HS V             | 19299562                                                                | 19300461 | WBGene00077663 | F55C9.14         | F55C9.14            |
| -0.158851318239947      | AGIWUR6689                                                              |          |                |                  |                     |
| CB4856 HS V             | 19301076                                                                | 19302034 | WBGene00010105 | fbxb-62 F55C9.8  | -0.12622413669531   |
| AGIWUR8848              |                                                                         |          |                |                  |                     |
| CB4856 HS V             | 19302787                                                                | 19303728 | WBGene00044197 | fbxb-63 F55C9.13 |                     |
| -0.370245850985035      | AGIWUR2799                                                              |          |                |                  |                     |
| CB4856 HS V             | 19307242                                                                | 19307583 | WBGene00010107 | F55C9.11         | F55C9.11            |
| -0.116596008823105      | AGIWUR11613;AGIWUR17151;AGIWUR17890;AGIWUR25273;AGIWUR41312;AGIWUR44273 |          |                |                  |                     |
| CB4856 HS V             | 19308707                                                                | 19309687 | WBGene00077441 | C43D7.10         | C43D7.10            |
| 0.0552488115476231      | AGIWUR30843;AGIWUR31224                                                 |          |                |                  |                     |
| CB4856 HS V             | 19310583                                                                | 19311058 | WBGene00008070 | C43D7.8 C43D7.8  | -0.0917707452817664 |
| AGIWUR33714             |                                                                         |          |                |                  |                     |
| CB4856 HS V             | 19313275                                                                | 19316512 | WBGene00008071 | fbxb-64 C43D7.9  | -0.314255173272723  |
| AGIWUR31078             |                                                                         |          |                |                  |                     |
| CB4856 HS V             | 19317362                                                                | 19318500 | WBGene00005418 | srh-208 C43D7.6  | 0.0359797785924005  |
| AGIWUR23104             |                                                                         |          |                |                  |                     |
| CB4856 HS V             | 19319033                                                                | 19319460 | WBGene00008069 | C43D7.7 C43D7.7  | -0.157993826888724  |
| AGIWUR38919             |                                                                         |          |                |                  |                     |
| CB4856 HS V             | 19320624                                                                | 19321203 | WBGene00008068 | sdz-6 C43D7.5    | -0.21199925941866   |
| AGIWUR42821             |                                                                         |          |                |                  |                     |
| CB4856 HS V             | 19321901                                                                | 19322487 | WBGene00008067 | C43D7.4 C43D7.4  | -0.0196905118970099 |
| AGIWUR30874;AGIWUR38230 |                                                                         |          |                |                  |                     |
| CB4856 HS V             | 19324105                                                                | 19325882 | WBGene00014702 | C43D7.3 C43D7.3  | -0.0228971223167154 |
| AGIWUR12126;AGIWUR22143 |                                                                         |          |                |                  |                     |
| CB4856 HS V             | 19329563                                                                | 19330747 | WBGene00008066 | fbxb-65 C43D7.2  | -0.0836333523128889 |
| AGIWUR44975             |                                                                         |          |                |                  |                     |
| CB4856 HS V             | 19332425                                                                | 19349495 | WBGene00007583 | C14B4.2 C14B4.2  | -0.0496688142898591 |
| AGIWUR32835;AGIWUR36110 |                                                                         |          |                |                  |                     |
| CB4856 HS V             | 19370602                                                                | 19371331 | WBGene00012808 | Y43F8A.1         | Y43F8A.1            |
| 0.055029407621447       | AGIWUR26806                                                             |          |                |                  |                     |
| CB4856 HS V             | 19371553                                                                | 19376247 | WBGene00012809 | Y43F8A.2         | Y43F8A.2            |

|                         |                                                                        |          |                |          |          |                     |
|-------------------------|------------------------------------------------------------------------|----------|----------------|----------|----------|---------------------|
| 0.107807275573997       | AGIWUR28395                                                            |          |                |          |          |                     |
| CB4856 HS V             | 19377444                                                               | 19381031 | WBGene00012810 | nceh-1   | Y43F8A.3 |                     |
| -0.172232836930066      | AGIWUR31819                                                            |          |                |          |          |                     |
| CB4856 HS V             | 19381268                                                               | 19384760 | WBGene00005831 | srw-84   | Y43F8A.4 |                     |
| 0.023709912443497       | AGIWUR43294                                                            |          |                |          |          |                     |
| CB4856 HS V             | 19384887                                                               | 19390120 | WBGene00012811 | Y43F8A.5 | Y43F8A.5 |                     |
| -0.0895587778182056     | AGIWUR7721;AGIWUR20141;AGIWUR20247;AGIWUR27153;AGIWUR28536;AGIWUR29250 |          |                |          |          |                     |
| CB4856 HS V             | 19395055                                                               | 19396609 | WBGene00007727 | C25F9.8  | C25F9.8  | -0.229410835122064  |
| AGIWUR44804             |                                                                        |          |                |          |          |                     |
| CB4856 HS V             | 19397828                                                               | 19398982 | WBGene00045413 | C25F9.13 | C25F9.13 |                     |
| 0.0149380820240683      | AGIWUR475                                                              |          |                |          |          |                     |
| CB4856 HS V             | 19400142                                                               | 19400715 | WBGene00005833 | srw-86   | C25F9.7  | -0.0149771936820926 |
| AGIWUR6983              |                                                                        |          |                |          |          |                     |
| CB4856 HS V             | 19402296                                                               | 19402955 | WBGene00045412 | C25F9.12 | C25F9.12 |                     |
| -0.103129160066816      | AGIWUR1593;AGIWUR18466;AGIWUR19405;AGIWUR25246;AGIWUR28580             |          |                |          |          |                     |
| CB4856 HS V             | 19403530                                                               | 19405326 | WBGene00007726 | C25F9.6  | C25F9.6  | 0.694199289039609   |
| AGIWUR21894             |                                                                        |          |                |          |          |                     |
| CB4856 HS V             | 19405685                                                               | 19406394 | WBGene00044291 | C25F9.10 | C25F9.10 |                     |
| -0.287105046870936      | AGIWUR2366;AGIWUR17710;AGIWUR42481                                     |          |                |          |          |                     |
| CB4856 HS V             | 19407739                                                               | 19410857 | WBGene00007725 | C25F9.5  | C25F9.5  | 0.0796759831828204  |
| AGIWUR5091              |                                                                        |          |                |          |          |                     |
| CB4856 HS V             | 19411274                                                               | 19413914 | WBGene00007724 | C25F9.4  | C25F9.4  | -0.156769592796456  |
| AGIWUR26318             |                                                                        |          |                |          |          |                     |
| CB4856 HS V             | 19416633                                                               | 19418004 | WBGene00007728 | C25F9.9  | C25F9.9  | 0.0311838614930151  |
| AGIWUR14245;AGIWUR39624 |                                                                        |          |                |          |          |                     |
| CB4856 HS V             | 19418212                                                               | 19418911 | WBGene00050967 | C25F9.15 | C25F9.15 |                     |
| -0.0865403497482244     | AGIWUR2951;AGIWUR35208;AGIWUR39664                                     |          |                |          |          |                     |
| CB4856 HS V             | 19421471                                                               | 19426774 | WBGene00007723 | C25F9.2  | C25F9.2  | -0.187092202552904  |
| AGIWUR34473             |                                                                        |          |                |          |          |                     |
| CB4856 HS V             | 19429440                                                               | 19431687 | WBGene00005832 | srw-85   | C25F9.1  | -0.103353744168832  |
| AGIWUR1639              |                                                                        |          |                |          |          |                     |
| CB4856 HS V             | 19432441                                                               | 19433072 | WBGene00045411 | C25F9.11 | C25F9.11 |                     |
| 0.305555116005225       | AGIWUR27999;AGIWUR36828                                                |          |                |          |          |                     |
| CB4856 HS V             | 19436484                                                               | 19437217 | WBGene00045461 | C25F9.14 | C25F9.14 |                     |
| -0.199312809747768      | AGIWUR9904;AGIWUR27826;AGIWUR29040;AGIWUR42961                         |          |                |          |          |                     |
| CB4856 HS V             | 19437899                                                               | 19445605 | WBGene00010850 | M04C3.1  | M04C3.1  | -0.0625183285184656 |
| AGIWUR15238;AGIWUR16598 |                                                                        |          |                |          |          |                     |
| CB4856 HS V             | 19445873                                                               | 19448901 | WBGene00010851 | M04C3.2  | M04C3.2  | -0.253285872604697  |
| AGIWUR3985;AGIWUR21107  |                                                                        |          |                |          |          |                     |

|                                                                                                                       |                                                                                   |          |                |                 |                    |
|-----------------------------------------------------------------------------------------------------------------------|-----------------------------------------------------------------------------------|----------|----------------|-----------------|--------------------|
| CB4856 HS V                                                                                                           | 19449738                                                                          | 19450914 | WBGene00206418 | M04C3.5 M04C3.5 | -0.252316534363019 |
| AGIWUR10907                                                                                                           |                                                                                   |          |                |                 |                    |
| CB4856 HS V                                                                                                           | 19452183                                                                          | 19455031 | WBGene00012824 | Y43F8B.14       | Y43F8B.14          |
| 0.12333037776249                                                                                                      | AGIWUR7744                                                                        |          |                |                 |                    |
| CB4856 HS V                                                                                                           | 19460818                                                                          | 19462102 | WBGene00045415 | Y43F8B.15       | Y43F8B.15          |
| -0.149641535131197                                                                                                    | AGIWUR1838;AGIWUR3164;AGIWUR37500;AGIWUR41629                                     |          |                |                 |                    |
| CB4856 HS V                                                                                                           | 19462912                                                                          | 19463759 | WBGene00195177 | Y43F8B.25       | Y43F8B.25          |
| -0.457671573276571                                                                                                    | AGIWUR45162                                                                       |          |                |                 |                    |
| CB4856 HS V                                                                                                           | 19468383                                                                          | 19469554 | WBGene00012822 | Y43F8B.12       | Y43F8B.12          |
| -0.256669412410353                                                                                                    | AGIWUR15046                                                                       |          |                |                 |                    |
| CB4856 HS V                                                                                                           | 19470694                                                                          | 19472501 | WBGene00012821 | Y43F8B.11       | Y43F8B.11          |
| 0.0728178873164822                                                                                                    | AGIWUR11074                                                                       |          |                |                 |                    |
| CB4856 HS V                                                                                                           | 19474464                                                                          | 19476942 | WBGene00012820 | Y43F8B.10       | Y43F8B.10          |
| 0.0358417373810216                                                                                                    | AGIWUR22443                                                                       |          |                |                 |                    |
| CB4856 HS V                                                                                                           | 19479203                                                                          | 19480459 | WBGene00012819 | Y43F8B.9        | Y43F8B.9           |
| -0.146505013641059                                                                                                    | AGIWUR2851                                                                        |          |                |                 |                    |
| CB4856 HS V                                                                                                           | 19483637                                                                          | 19483895 | WBGene00014888 | Y43F8B.8        | Y43F8B.8           |
| 0.0206718740524021                                                                                                    | AGIWUR11075;AGIWUR22024;AGIWUR28783;AGIWUR29367;AGIWUR33429                       |          |                |                 |                    |
| CB4856 HS V                                                                                                           | 19485319                                                                          | 19485873 | WBGene00219302 | Y43F8B.28       | Y43F8B.28          |
| -0.376644770491928                                                                                                    | AGIWUR27524                                                                       |          |                |                 |                    |
| CB4856 HS V                                                                                                           | 19485916                                                                          | 19486746 | WBGene00050911 | Y43F8B.18       | Y43F8B.18          |
| 0.152180876094276                                                                                                     | AGIWUR1861;AGIWUR18935                                                            |          |                |                 |                    |
| CB4856 HS V                                                                                                           | 19490761                                                                          | 19491231 | WBGene00012818 | Y43F8B.7        | Y43F8B.7           |
| 0.0146179007821585                                                                                                    | AGIWUR13017;AGIWUR18716                                                           |          |                |                 |                    |
| CB4856 HS V                                                                                                           | 19493885                                                                          | 19494657 | WBGene00012817 | Y43F8B.6        | Y43F8B.6           |
| -0.00447720239547955                                                                                                  | AGIWUR42352                                                                       |          |                |                 |                    |
| CB4856 HS V                                                                                                           | 19494762                                                                          | 19495687 | WBGene00012816 | sc1-21 Y43F8B.5 |                    |
| -0.0299747660945746                                                                                                   | AGIWUR20613                                                                       |          |                |                 |                    |
| CB4856 HS V                                                                                                           | 19503108                                                                          | 19519950 | WBGene00012814 | Y43F8B.3        | Y43F8B.3           |
| -0.0588370047334124                                                                                                   | AGIWUR27061;AGIWUR30319;AGIWUR39677                                               |          |                |                 |                    |
| CB4856 HS V                                                                                                           | 19519925                                                                          | 19533110 | WBGene00012813 | Y43F8B.2        | Y43F8B.2           |
| 0.0282131673073009                                                                                                    |                                                                                   |          |                |                 |                    |
| AGIWUR5140;AGIWUR8653;AGIWUR11230;AGIWUR13882;AGIWUR16244;AGIWUR24976;AGIWUR26509;AGIWUR26843;AGIWUR31243;AGIWUR38299 |                                                                                   |          |                |                 |                    |
| CB4856 HS V                                                                                                           | 19534880                                                                          | 19546200 | WBGene00012812 | Y43F8B.1        | Y43F8B.1           |
| 0.0344837156947637                                                                                                    | AGIWUR4012;AGIWUR9462;AGIWUR20201;AGIWUR20421;AGIWUR20989;AGIWUR35973;AGIWUR40150 |          |                |                 |                    |
| CB4856 HS V                                                                                                           | 19548239                                                                          | 19549784 | WBGene00086559 | Y43F8B.20       | Y43F8B.20          |
| 0.0272966542962134                                                                                                    | AGIWUR37706                                                                       |          |                |                 |                    |
| CB4856 HS V                                                                                                           | 19551008                                                                          | 19555969 | WBGene00007177 | oac-1 B0399.2   | 0.0896510514659536 |

AGIWUR32001;AGIWUR33010

CB4856 HS V 19565386 19606115 WBGene00007176 kcn1-1 B0399.1 0.061018126748658

AGIWUR25702;AGIWUR29918

CB4856 HS V 19607511 19608346 WBGene00003763 nlp-25 Y43F8C.1

-0.0540299750324031 AGIWUR26743

CB4856 HS V 19609494 19612099 WBGene00012840 grsp-1 Y43F8C.20

-0.0967979756041197 AGIWUR5647;AGIWUR38806

CB4856 HS V 19613461 19614533 WBGene00003764 nlp-26 Y43F8C.2

0.30963128287096 AGIWUR26915

CB4856 HS V 19614558 19622551 WBGene00012825 Y43F8C.3 Y43F8C.3

-0.0447720713395467 AGIWUR8607;AGIWUR9609

CB4856 HS V 19625062 19630753 WBGene00012826 dyf-19 Y43F8C.4

0.22350407728333 AGIWUR20380

CB4856 HS V 19633062 19640908 WBGene00012828 Y43F8C.6 Y43F8C.6

-0.0394407566137627 AGIWUR7964

CB4856 HS V 19641292 19644083 WBGene00012829 Y43F8C.7 Y43F8C.7

-0.0465602606762126 AGIWUR32615

CB4856 HS V 19644239 19645758 WBGene00012830 mrps-28 Y43F8C.8

-0.0779078331984291 AGIWUR2235;AGIWUR13361;AGIWUR20245;AGIWUR21105;AGIWUR28455;AGIWUR30763;AGIWUR31409

CB4856 HS V 19646088 19647338 WBGene00012831 Y43F8C.9 Y43F8C.9

-0.065331016395195 AGIWUR11322

CB4856 HS V 19650438 19655251 WBGene00012832 dmd-3 Y43F8C.10

-0.0366684171580696 AGIWUR41418

CB4856 HS V 19670259 19671411 WBGene00012833 Y43F8C.11 Y43F8C.11

0.107977171921114 AGIWUR35037

CB4856 HS V 19674843 19693043 WBGene00003413 mrp-7 Y43F8C.12

-0.0381638361313819 AGIWUR7172;AGIWUR10445;AGIWUR24658;AGIWUR29604;AGIWUR43123

CB4856 HS V 19693896 19697398 WBGene00012834 Y43F8C.13 Y43F8C.13

0.143264938983576 AGIWUR15896

CB4856 HS V 19697560 19705212 WBGene00012835 ani-3 Y43F8C.14

0.0840331334539428 AGIWUR23978

CB4856 HS V 19705205 19706379 WBGene00012839 Y43F8C.18 Y43F8C.18

0.0714632184902562 AGIWUR6142;AGIWUR28019;AGIWUR32124;AGIWUR32673;AGIWUR34660;AGIWUR44782

CB4856 HS V 19706890 19708949 WBGene00005714 srv-3 Y43F8C.19

0.059165947018113 AGIWUR44295

CB4856 HS V 19709775 19710614 WBGene00012836 Y43F8C.15 Y43F8C.15

-0.434266185805265 AGIWUR32879

CB4856 HS V 19714213 19715519 WBGene00012837 Y43F8C.16 Y43F8C.16

-0.104099031023911 AGIWUR10556;AGIWUR41075



|                         |                                                |          |                |                  |                     |
|-------------------------|------------------------------------------------|----------|----------------|------------------|---------------------|
| CB4856 HS V             | 19727481                                       | 19727964 | WBGene00013819 | Y116F11A.6       | Y116F11A.6          |
| -0.0765061965319926     | AGIWUR17758                                    |          |                |                  |                     |
| CB4856 HS V             | 19729038                                       | 19729590 | WBGene00013817 | Y116F11A.3       | Y116F11A.3          |
| -0.00838333485661913    | AGIWUR15941                                    |          |                |                  |                     |
| CB4856 HS V             | 19730588                                       | 19732165 | WBGene00013816 | Y116F11A.1       | Y116F11A.1          |
| -0.0726155666360944     | AGIWUR20538;AGIWUR42748                        |          |                |                  |                     |
| CB4856 HS V             | 19733411                                       | 19735075 | WBGene00014615 | Y116F11A.4       | Y116F11A.4          |
| -0.102754420024562      | AGIWUR1684;AGIWUR15569;AGIWUR33436;AGIWUR44464 |          |                |                  |                     |
| CB4856 HS V             | 19735077                                       | 19737607 | WBGene00012252 | W04E12.7         | W04E12.7            |
| -0.0727085796267435     | AGIWUR28982;AGIWUR29879;AGIWUR35186            |          |                |                  |                     |
| CB4856 HS V             | 19738417                                       | 19739393 | WBGene00012246 | fbxa-131         | W04E12.1            |
| 0.101109876702663       | AGIWUR27629                                    |          |                |                  |                     |
| CB4856 HS V             | 19739559                                       | 19741117 | WBGene00012247 | W04E12.2         | W04E12.2            |
| 0.059388612422886       | AGIWUR15328                                    |          |                |                  |                     |
| CB4856 HS V             | 19741951                                       | 19742312 | WBGene00012248 | W04E12.3         | W04E12.3            |
| 0.174457187875758       | AGIWUR25773                                    |          |                |                  |                     |
| CB4856 HS V             | 19746152                                       | 19748540 | WBGene00012250 | W04E12.5         | W04E12.5            |
| -0.109766193667463      | AGIWUR39057                                    |          |                |                  |                     |
| CB4856 HS V             | 19748987                                       | 19751212 | WBGene00012251 | clec-49 W04E12.6 |                     |
| -0.101370171441669      | AGIWUR32                                       |          |                |                  |                     |
| CB4856 HS V             | 19752400                                       | 19755368 | WBGene00012253 | clec-50 W04E12.8 |                     |
| 0.214431323010192       | AGIWUR44477                                    |          |                |                  |                     |
| CB4856 HS V             | 19756553                                       | 19758552 | WBGene00012254 | W04E12.9         | W04E12.9            |
| 0.311721396578143       | AGIWUR11345                                    |          |                |                  |                     |
| CB4856 HS V             | 19768261                                       | 19770929 | WBGene00050946 | M162.12 M162.12  | 0.104894294628891   |
| AGIWUR37664             |                                                |          |                |                  |                     |
| CB4856 HS V             | 19773401                                       | 19774975 | WBGene00014811 | M162.9 M162.9    | -0.107309633554632  |
| AGIWUR28727;AGIWUR29002 |                                                |          |                |                  |                     |
| CB4856 HS V             | 19777247                                       | 19778708 | WBGene00044655 | fbxa-194         | M162.11             |
| 0.0808730475797765      | AGIWUR5922;AGIWUR35071                         |          |                |                  |                     |
| CB4856 HS V             | 19780123                                       | 19782314 | WBGene00010930 | srt-46 M162.4    | -0.186905818264094  |
| AGIWUR38377             |                                                |          |                |                  |                     |
| CB4856 HS V             | 19784129                                       | 19785961 | WBGene00010929 | srt-45 M162.3    | -0.0287814432658156 |
| AGIWUR43248             |                                                |          |                |                  |                     |
| CB4856 HS V             | 19788704                                       | 19789281 | WBGene00010928 | clec-258         | M162.2              |
| 0.410651849998489       | AGIWUR1086                                     |          |                |                  |                     |
| CB4856 HS V             | 19790043                                       | 19791248 | WBGene00010927 | clec-259         | M162.1              |
| -0.097040216521826      | AGIWUR15647                                    |          |                |                  |                     |
| CB4856 HS V             | 19797999                                       | 19801133 | WBGene00013820 | Y116F11B.2       | Y116F11B.2          |

|                     |                                     |          |                |             |             |  |
|---------------------|-------------------------------------|----------|----------------|-------------|-------------|--|
| -0.243205774314197  | AGIWUR577                           |          |                |             |             |  |
| CB4856 HS V         | 19815133                            | 19816451 | WBGene00000920 | daf-28      | Y116F11B.1  |  |
| -0.183136360094899  | AGIWUR14505                         |          |                |             |             |  |
| CB4856 HS V         | 19822748                            | 19830099 | WBGene00003959 | pcp-4       | Y116F11B.3  |  |
| 0.180810055911682   | AGIWUR32657                         |          |                |             |             |  |
| CB4856 HS V         | 19836442                            | 19839342 | WBGene00005785 | srw-38      | Y116F11B.5  |  |
| -0.0223905451956572 | AGIWUR34111                         |          |                |             |             |  |
| CB4856 HS V         | 19839403                            | 19841472 | WBGene00013821 | srz-35      | Y116F11B.4  |  |
| 0.0313971127453883  | AGIWUR11931                         |          |                |             |             |  |
| CB4856 HS V         | 19848314                            | 19855250 | WBGene00013823 | Y116F11B.7  | Y116F11B.7  |  |
| -0.265943775701999  | AGIWUR26854                         |          |                |             |             |  |
| CB4856 HS V         | 19855174                            | 19867983 | WBGene00013825 | Y116F11B.9  | Y116F11B.9  |  |
| 0.148577366894462   | AGIWUR15712;AGIWUR38310;AGIWUR39456 |          |                |             |             |  |
| CB4856 HS V         | 19870506                            | 19873931 | WBGene00013826 | Y116F11B.10 | Y116F11B.10 |  |
| 0.0648269998104318  | AGIWUR5727                          |          |                |             |             |  |
| CB4856 HS V         | 19881374                            | 19895350 | WBGene00001629 | gly-4       | Y116F11B.12 |  |
| 0.209641459350095   | AGIWUR44184                         |          |                |             |             |  |
| CB4856 HS V         | 19897977                            | 19907434 | WBGene00013361 | fars-2      | Y60A3A.13   |  |
| -0.0286081354542933 | AGIWUR22328;AGIWUR27164;AGIWUR42038 |          |                |             |             |  |
| CB4856 HS V         | 19908765                            | 19916023 | WBGene00000499 | chk-2       | Y60A3A.12   |  |
| 0.0894669845475935  | AGIWUR5614                          |          |                |             |             |  |
| CB4856 HS V         | 19916557                            | 19919996 | WBGene00013365 | Y60A3A.19   | Y60A3A.19   |  |
| 0.0528945686581843  | AGIWUR1610;AGIWUR39964              |          |                |             |             |  |
| CB4856 HS V         | 19921697                            | 19922600 | WBGene00013364 | Y60A3A.16   | Y60A3A.16   |  |
| -0.108720228597029  | AGIWUR13571                         |          |                |             |             |  |
| CB4856 HS V         | 19922931                            | 19924049 | WBGene00014934 | Y60A3A.17   | Y60A3A.17   |  |
| -0.0786232111197496 | AGIWUR28300                         |          |                |             |             |  |
| CB4856 HS V         | 19924224                            | 19925033 | WBGene00004810 | skr-4       | Y60A3A.18   |  |
| 0.0849361740528387  | AGIWUR21479;AGIWUR23516;AGIWUR37687 |          |                |             |             |  |
| CB4856 HS V         | 19927782                            | 19934323 | WBGene00013362 | algn-7      | Y60A3A.14   |  |
| -0.384378514348229  | AGIWUR37566                         |          |                |             |             |  |
| CB4856 HS V         | 19934795                            | 19946629 | WBGene00000987 | dhs-24      | Y60A3A.10   |  |
| -0.273604236998853  | AGIWUR26087;AGIWUR37453             |          |                |             |             |  |
| CB4856 HS V         | 19946691                            | 19949093 | WBGene00013360 | Y60A3A.9    | Y60A3A.9    |  |
| 0.112766250412438   | AGIWUR4870                          |          |                |             |             |  |
| CB4856 HS V         | 19949982                            | 19955122 | WBGene00013359 | Y60A3A.8    | Y60A3A.8    |  |
| 0.169021483109304   | AGIWUR21853                         |          |                |             |             |  |
| CB4856 HS V         | 19955453                            | 19958912 | WBGene00013358 | abhd-3.1    | Y60A3A.7    |  |
| -0.097785952425717  | AGIWUR19672                         |          |                |             |             |  |

|                                                                                                |                                                                         |          |                |            |            |
|------------------------------------------------------------------------------------------------|-------------------------------------------------------------------------|----------|----------------|------------|------------|
| CB4856 HS V                                                                                    | 19959044                                                                | 19960916 | WBGene00005388 | srh-172    | Y60A3A.6   |
| -0.162825562088431                                                                             | AGIWUR7190                                                              |          |                |            |            |
| CB4856 HS V                                                                                    | 19965700                                                                | 19972559 | WBGene00005387 | srh-171    | Y60A3A.5   |
| -0.0683587799152683                                                                            | AGIWUR31131                                                             |          |                |            |            |
| CB4856 HS V                                                                                    | 19973284                                                                | 19975063 | WBGene00005389 | srh-173    | Y60A3A.4   |
| 0.0553705530658553                                                                             | AGIWUR9556                                                              |          |                |            |            |
| CB4856 HS V                                                                                    | 19975610                                                                | 19978320 | WBGene00005398 | srh-183    | Y60A3A.3   |
| -0.035161917516584                                                                             | AGIWUR22288                                                             |          |                |            |            |
| CB4856 HS V                                                                                    | 19978620                                                                | 19981882 | WBGene00023519 | Y60A3A.24  | Y60A3A.24  |
| 0.196761183607882                                                                              | AGIWUR10345;AGIWUR29702                                                 |          |                |            |            |
| CB4856 HS V                                                                                    | 19982994                                                                | 19986313 | WBGene00013357 | cllec-260  | Y60A3A.2   |
| -0.352889917445658                                                                             | AGIWUR17195                                                             |          |                |            |            |
| CB4856 HS V                                                                                    | 19987984                                                                | 19990504 | WBGene00005579 | sri-67     | Y60A3A.22  |
| -0.0175582193411463                                                                            | AGIWUR9481                                                              |          |                |            |            |
| CB4856 HS V                                                                                    | 19991207                                                                | 19994189 | WBGene00044211 | Y60A3A.25  | Y60A3A.25  |
| 0.239173872489614                                                                              | AGIWUR18341;AGIWUR26967                                                 |          |                |            |            |
| CB4856 HS V                                                                                    | 19995986                                                                | 20004485 | WBGene00006786 | unc-51     | Y60A3A.1   |
| -0.151562145425737                                                                             | AGIWUR2393;AGIWUR4960;AGIWUR34898                                       |          |                |            |            |
| CB4856 HS V                                                                                    | 20007770                                                                | 20009195 | WBGene00013367 | Y60A3A.23  | Y60A3A.23  |
| 0.0144215398561127                                                                             |                                                                         |          |                |            |            |
| AGIWUR2176;AGIWUR14126;AGIWUR19113;AGIWUR24124;AGIWUR28719;AGIWUR29428;AGIWUR33373;AGIWUR41318 |                                                                         |          |                |            |            |
| CB4856 HS V                                                                                    | 20011959                                                                | 20015077 | WBGene00013366 | Y60A3A.21  | Y60A3A.21  |
| 0.30276178339001                                                                               | AGIWUR11192;AGIWUR19356;AGIWUR31108;AGIWUR35001;AGIWUR37667;AGIWUR44305 |          |                |            |            |
| CB4856 HS V                                                                                    | 20023046                                                                | 20036667 | WBGene00013746 | lgc-55     | Y113G7A.5  |
| 0.152036003107447                                                                              | AGIWUR17669                                                             |          |                |            |            |
| CB4856 HS V                                                                                    | 20037587                                                                | 20039419 | WBGene00013753 | Y113G7A.16 | Y113G7A.16 |
| 0.212941739785176                                                                              | AGIWUR35813                                                             |          |                |            |            |
| CB4856 HS V                                                                                    | 20040927                                                                | 20047398 | WBGene00013747 | spe-19     | Y113G7A.10 |
| 0.0300548631465807                                                                             | AGIWUR20899                                                             |          |                |            |            |
| CB4856 HS V                                                                                    | 20053733                                                                | 20064174 | WBGene00006652 | ttx-1      | Y113G7A.6  |
| -0.0761964880039869                                                                            | AGIWUR13073;AGIWUR31199;AGIWUR39096;AGIWUR43427                         |          |                |            |            |
| CB4856 HS V                                                                                    | 20075935                                                                | 20087733 | WBGene00001485 | fre-1      | Y113G7A.8  |
| 0.0188533826277126                                                                             | AGIWUR11871                                                             |          |                |            |            |
| CB4856 HS V                                                                                    | 20087848                                                                | 20090743 | WBGene00000940 | dcs-1      | Y113G7A.9  |
| -0.0677127143456602                                                                            | AGIWUR19604                                                             |          |                |            |            |
| CB4856 HS V                                                                                    | 20091263                                                                | 20105685 | WBGene00004754 | sec-23     | Y113G7A.3  |
| -0.241255510860328                                                                             | AGIWUR20961;AGIWUR27455                                                 |          |                |            |            |
| CB4856 HS V                                                                                    | 20105632                                                                | 20120675 | WBGene00003566 | ncx-1      | Y113G7A.4  |
| 0.213963335589092                                                                              | AGIWUR12631                                                             |          |                |            |            |

|                        |                                     |          |                |                 |                     |
|------------------------|-------------------------------------|----------|----------------|-----------------|---------------------|
| CB4856 HS V            | 20128416                            | 20133142 | WBGene00013748 | ssu-1           | Y113G7A.11          |
| -0.000770169556707501  | AGIWUR9872                          |          |                |                 |                     |
| CB4856 HS V            | 20135864                            | 20138449 | WBGene00013751 | Y113G7A.14      | Y113G7A.14          |
| 0.22802456642449       | AGIWUR29412                         |          |                |                 |                     |
| CB4856 HS V            | 20144247                            | 20146805 | WBGene00013749 | Y113G7A.12      | Y113G7A.12          |
| 0.12435639432635       | AGIWUR19626                         |          |                |                 |                     |
| CB4856 HS V            | 20148195                            | 20150357 | WBGene00013750 | Y113G7A.13      | Y113G7A.13          |
| -0.417548733193835     | AGIWUR30341                         |          |                |                 |                     |
| CB4856 HS V            | 20151489                            | 20155442 | WBGene00008946 | F19B2.7 F19B2.7 | 0.0951067371357546  |
| AGIWUR43667            |                                     |          |                |                 |                     |
| CB4856 HS V            | 20158523                            | 20161788 | WBGene00008945 | F19B2.6 F19B2.6 | -0.250340853900731  |
| AGIWUR9773             |                                     |          |                |                 |                     |
| CB4856 HS V            | 20162649                            | 20164561 | WBGene00008944 | F19B2.5 F19B2.5 | -0.0541679500409016 |
| AGIWUR26790            |                                     |          |                |                 |                     |
| CB4856 HS V            | 20167309                            | 20169283 | WBGene00008943 | srz-36 F19B2.4  | 0.0160519104034176  |
| AGIWUR19481            |                                     |          |                |                 |                     |
| CB4856 HS V            | 20172821                            | 20173999 | WBGene00008942 | srz-34 F19B2.2  | 0.0612032967013203  |
| AGIWUR29579            |                                     |          |                |                 |                     |
| CB4856 HS V            | 20174988                            | 20182756 | WBGene00008941 | srz-33 F19B2.1  | -0.198202616616852  |
| AGIWUR3249;AGIWUR12827 |                                     |          |                |                 |                     |
| CB4856 HS V            | 20183843                            | 20186679 | WBGene00008947 | srz-16 F19B2.8  | 0.0564180435214849  |
| AGIWUR22368            |                                     |          |                |                 |                     |
| CB4856 HS V            | 20187710                            | 20188882 | WBGene00013754 | fbxa-116        | Y113G7B.1           |
| -0.126688280552057     | AGIWUR41446                         |          |                |                 |                     |
| CB4856 HS V            | 20190535                            | 20192152 | WBGene00013755 | fbxa-115        | Y113G7B.3           |
| 0.256639481864235      | AGIWUR16439;AGIWUR19447;AGIWUR23667 |          |                |                 |                     |
| CB4856 HS V            | 20193463                            | 20195246 | WBGene00005427 | srh-217         | Y113G7B.2           |
| -0.048843092571671     | AGIWUR9761                          |          |                |                 |                     |
| CB4856 HS V            | 20196971                            | 20198242 | WBGene00013756 | ftr-1           | Y113G7B.4           |
| 0.202185470387573      | AGIWUR13945                         |          |                |                 |                     |
| CB4856 HS V            | 20199262                            | 20200640 | WBGene00001482 | fog-2           | Y113G7B.5           |
| -0.0559020399661403    | AGIWUR19874;AGIWUR34434;AGIWUR39227 |          |                |                 |                     |
| CB4856 HS V            | 20201616                            | 20202874 | WBGene00013758 | fbxa-114        | Y113G7B.7           |
| 0.0933671777540894     | AGIWUR968                           |          |                |                 |                     |
| CB4856 HS V            | 20203422                            | 20204503 | WBGene00013757 | fbxa-113        | Y113G7B.6           |
| -0.119923127786423     | AGIWUR24213                         |          |                |                 |                     |
| CB4856 HS V            | 20204528                            | 20206180 | WBGene00013759 | fbxb-59         | Y113G7B.8           |
| -0.0733965791790876    | AGIWUR32951                         |          |                |                 |                     |
| CB4856 HS V            | 20206318                            | 20207907 | WBGene00013760 | srbc-34         | Y113G7B.9           |

|                                                                                                                     |                                                                        |          |                |            |            |                     |
|---------------------------------------------------------------------------------------------------------------------|------------------------------------------------------------------------|----------|----------------|------------|------------|---------------------|
| -0.102243459079214                                                                                                  | AGIWUR7968;AGIWUR26183                                                 |          |                |            |            |                     |
| CB4856 HS V                                                                                                         | 20208685                                                               | 20212451 | WBGene00013762 | Y113G7B.12 | Y113G7B.12 |                     |
| -0.126947630691886                                                                                                  | AGIWUR21855                                                            |          |                |            |            |                     |
| CB4856 HS V                                                                                                         | 20213821                                                               | 20215297 | WBGene00013761 | Y113G7B.11 | Y113G7B.11 |                     |
| 1.47134181916336                                                                                                    | AGIWUR23594                                                            |          |                |            |            |                     |
| CB4856 HS V                                                                                                         | 20224856                                                               | 20225458 | WBGene00013770 | Y113G7B.26 | Y113G7B.26 |                     |
| -0.0282149370827351                                                                                                 | AGIWUR25398                                                            |          |                |            |            |                     |
| CB4856 HS V                                                                                                         | 20226835                                                               | 20228829 | WBGene00013763 | Y113G7B.14 | Y113G7B.14 |                     |
| -0.44027453212014                                                                                                   | AGIWUR17338                                                            |          |                |            |            |                     |
| CB4856 HS V                                                                                                         | 20234807                                                               | 20237743 | WBGene00013768 | sld-5      | Y113G7B.24 |                     |
| -0.0426860679268621                                                                                                 | AGIWUR3715                                                             |          |                |            |            |                     |
| CB4856 HS V                                                                                                         | 20239180                                                               | 20249482 | WBGene00004203 | swsn-1     | Y113G7B.23 |                     |
| -0.166960400125728                                                                                                  | AGIWUR18515                                                            |          |                |            |            |                     |
| CB4856 HS V                                                                                                         | 20250881                                                               | 20267244 | WBGene00007017 | mdt-17     | Y113G7B.18 |                     |
| -0.100846810338346                                                                                                  |                                                                        |          |                |            |            |                     |
| AGIWUR2457;AGIWUR2923;AGIWUR6091;AGIWUR7506;AGIWUR11809;AGIWUR15271;AGIWUR20509;AGIWUR33020;AGIWUR33876;AGIWUR41067 |                                                                        |          |                |            |            |                     |
| CB4856 HS V                                                                                                         | 20267377                                                               | 20269711 | WBGene00013766 | prmt-1     | Y113G7B.17 |                     |
| -0.187641818888679                                                                                                  | AGIWUR18691;AGIWUR32192;AGIWUR35752                                    |          |                |            |            |                     |
| CB4856 HS V                                                                                                         | 20270107                                                               | 20275732 | WBGene00013765 | cdkr-3     | Y113G7B.16 |                     |
| -0.0477663539466127                                                                                                 | AGIWUR3128;AGIWUR11138;AGIWUR23975;AGIWUR24040;AGIWUR28760;AGIWUR35598 |          |                |            |            |                     |
| CB4856 HS V                                                                                                         | 20278160                                                               | 20279861 | WBGene00004173 | pqn-94     | ZC15.8     | 0.388495793769525   |
| AGIWUR7199                                                                                                          |                                                                        |          |                |            |            |                     |
| CB4856 HS V                                                                                                         | 20281391                                                               | 20289417 | WBGene00013835 | mlt-4      | ZC15.7     | -0.122227218344861  |
| AGIWUR32698                                                                                                         |                                                                        |          |                |            |            |                     |
| CB4856 HS V                                                                                                         | 20289939                                                               | 20294488 | WBGene00013834 | cllec-261  | ZC15.6     |                     |
| -0.121858284815757                                                                                                  | AGIWUR1972                                                             |          |                |            |            |                     |
| CB4856 HS V                                                                                                         | 20303588                                                               | 20304908 | WBGene00013832 | ZC15.3     | ZC15.3     | 0.00923449403977372 |
| AGIWUR43150                                                                                                         |                                                                        |          |                |            |            |                     |
| CB4856 HS V                                                                                                         | 20306103                                                               | 20308919 | WBGene00013830 | ZC15.1     | ZC15.1     | 0.0584803691340907  |
| AGIWUR7067                                                                                                          |                                                                        |          |                |            |            |                     |
| CB4856 HS V                                                                                                         | 20310148                                                               | 20311656 | WBGene00045050 | ZC15.10    | ZC15.10    | 0.264181610319671   |
| AGIWUR3810;AGIWUR21680;AGIWUR40158                                                                                  |                                                                        |          |                |            |            |                     |
| CB4856 HS V                                                                                                         | 20311819                                                               | 20315628 | WBGene00013831 | cllec-262  | ZC15.2     |                     |
| -0.0167806044143637                                                                                                 | AGIWUR18438                                                            |          |                |            |            |                     |
| CB4856 HS V                                                                                                         | 20317742                                                               | 20324024 | WBGene00013771 | Y113G7C.1  | Y113G7C.1  |                     |
| 0.0891477893135484                                                                                                  | AGIWUR11288                                                            |          |                |            |            |                     |
| CB4856 HS V                                                                                                         | 20325728                                                               | 20328056 | WBGene00012612 | Y38H6A.1   | Y38H6A.1   |                     |
| -0.21074775889801                                                                                                   | AGIWUR1354                                                             |          |                |            |            |                     |

|                                                                                     |                                                |          |                |                 |                     |
|-------------------------------------------------------------------------------------|------------------------------------------------|----------|----------------|-----------------|---------------------|
| CB4856 HS V                                                                         | 20329705                                       | 20335364 | WBGene00077669 | Y38H6A.5        | Y38H6A.5            |
| 0.0400273429557934                                                                  | AGIWUR9711;AGIWUR32556;AGIWUR33345;AGIWUR34192 |          |                |                 |                     |
| CB4856 HS V                                                                         | 20345203                                       | 20348127 | WBGene00012614 | Y38H6A.3        | Y38H6A.3            |
| 0.0956345194124459                                                                  | AGIWUR19521                                    |          |                |                 |                     |
| CB4856 HS V                                                                         | 20348247                                       | 20349925 | WBGene00014874 | Y38H6A.4        | Y38H6A.4            |
| 0.0739006850645705                                                                  | AGIWUR26688                                    |          |                |                 |                     |
| CB4856 HS V                                                                         | 20356802                                       | 20365718 | WBGene00001700 | grd-11 K02E2.2  | -0.0930787876829635 |
| AGIWUR28288                                                                         |                                                |          |                |                 |                     |
| CB4856 HS V                                                                         | 20365708                                       | 20366939 | WBGene00010509 | K02E2.8 K02E2.8 | -0.251419045655393  |
| AGIWUR3684                                                                          |                                                |          |                |                 |                     |
| CB4856 HS V                                                                         | 20367480                                       | 20369253 | WBGene00005392 | srh-177 K02E2.3 | 0.00635792588902007 |
| AGIWUR35201                                                                         |                                                |          |                |                 |                     |
| CB4856 HS V                                                                         | 20375536                                       | 20376301 | WBGene00002118 | ins-35 K02E2.4  | 0.237040912540488   |
| AGIWUR3688                                                                          |                                                |          |                |                 |                     |
| CB4856 HS V                                                                         | 20377128                                       | 20379410 | WBGene00014794 | K02E2.5 K02E2.5 | -0.0634712805489022 |
| AGIWUR1067;AGIWUR26609                                                              |                                                |          |                |                 |                     |
| CB4856 HS V                                                                         | 20380561                                       | 20382036 | WBGene00010507 | K02E2.6 K02E2.6 | 0.273654683517741   |
| AGIWUR8603                                                                          |                                                |          |                |                 |                     |
| CB4856 HS V                                                                         | 20384769                                       | 20391009 | WBGene00010508 | K02E2.7 K02E2.7 | 0.178449549945991   |
| AGIWUR24074                                                                         |                                                |          |                |                 |                     |
| CB4856 HS V                                                                         | 20387715                                       | 20393367 | WBGene00010004 | F53H2.1 F53H2.1 | 0.360060957520664   |
| AGIWUR21255                                                                         |                                                |          |                |                 |                     |
| CB4856 HS V                                                                         | 20394073                                       | 20394700 | WBGene00010005 | cnc-7 F53H2.2   | -0.0676296348608814 |
| AGIWUR7651;AGIWUR10762;AGIWUR22903;AGIWUR23224;AGIWUR29673;AGIWUR34032              |                                                |          |                |                 |                     |
| CB4856 HS V                                                                         | 20396078                                       | 20422035 | WBGene00010006 | F53H2.3 F53H2.3 | 0.00341014492325176 |
| AGIWUR4475;AGIWUR5951;AGIWUR21698;AGIWUR37532;AGIWUR42730;AGIWUR44574               |                                                |          |                |                 |                     |
| CB4856 HS V                                                                         | 20425301                                       | 20431337 | WBGene00001406 | fce-2 F48F5.5   | -0.198924715843781  |
| AGIWUR26833                                                                         |                                                |          |                |                 |                     |
| CB4856 HS V                                                                         | 20440232                                       | 20446477 | WBGene00009846 | F48F5.2 F48F5.2 | 0.0145485839968007  |
| AGIWUR27354;AGIWUR31784;AGIWUR32244                                                 |                                                |          |                |                 |                     |
| CB4856 HS V                                                                         | 20448288                                       | 20453202 | WBGene00009848 | F48F5.6 F48F5.6 | 0.121384149185031   |
| AGIWUR15429;AGIWUR17816;AGIWUR19087;AGIWUR20963;AGIWUR27787;AGIWUR35783;AGIWUR39911 |                                                |          |                |                 |                     |
| CB4856 HS V                                                                         | 20454111                                       | 20456433 | WBGene00005147 | srd-70 F48F5.4  | -0.0161567044797621 |
| AGIWUR34323                                                                         |                                                |          |                |                 |                     |
| CB4856 HS V                                                                         | 20458654                                       | 20464486 | WBGene00007121 | B0250.4 B0250.4 | -0.0559958108418952 |
| AGIWUR34256                                                                         |                                                |          |                |                 |                     |
| CB4856 HS V                                                                         | 20469703                                       | 20470485 | WBGene00007125 | B0250.8 B0250.8 | 0.0379130079806345  |
| AGIWUR43956                                                                         |                                                |          |                |                 |                     |
| CB4856 HS V                                                                         | 20471566                                       | 20472496 | WBGene00050926 | B0250.11        | B0250.11            |

|                                                                                                            |                                    |          |                |           |           |                     |
|------------------------------------------------------------------------------------------------------------|------------------------------------|----------|----------------|-----------|-----------|---------------------|
| -0.16808912606635                                                                                          | AGIWUR5746                         |          |                |           |           |                     |
| CB4856 HS V                                                                                                | 20473022                           | 20476061 | WBGene00007124 | B0250.7   | B0250.7   | -0.207756734063395  |
| AGIWUR22645                                                                                                |                                    |          |                |           |           |                     |
| CB4856 HS V                                                                                                | 20476748                           | 20479089 | WBGene00007119 | calf-1    | B0250.2   | 0.00802801864326241 |
| AGIWUR38425                                                                                                |                                    |          |                |           |           |                     |
| CB4856 HS V                                                                                                | 20480792                           | 20485385 | WBGene00007126 | dhcr-7    | B0250.9   | -0.0567811851175186 |
| AGIWUR7054                                                                                                 |                                    |          |                |           |           |                     |
| CB4856 HS V                                                                                                | 20487645                           | 20489202 | WBGene00007127 | srbc-78   | B0250.10  |                     |
| 0.034997266461545                                                                                          | AGIWUR41033                        |          |                |           |           |                     |
| CB4856 HS V                                                                                                | 20490771                           | 20492485 | WBGene00007123 | srbc-79   | B0250.6   | -0.201013926649823  |
| AGIWUR42298                                                                                                |                                    |          |                |           |           |                     |
| CB4856 HS V                                                                                                | 20493924                           | 20497348 | WBGene00007122 | B0250.5   | B0250.5   | -0.139149345088257  |
| AGIWUR32723;AGIWUR36887                                                                                    |                                    |          |                |           |           |                     |
| CB4856 HS V                                                                                                | 20497922                           | 20499103 | WBGene00012615 | dct-16    | Y38H6C.1  |                     |
| 0.635422889702522                                                                                          | AGIWUR14745                        |          |                |           |           |                     |
| CB4856 HS V                                                                                                | 20499899                           | 20500494 | WBGene00012616 | dct-14    | Y38H6C.3  |                     |
| 0.000964873703044766                                                                                       |                                    |          |                |           |           |                     |
| AGIWUR9853;AGIWUR19303;AGIWUR24521;AGIWUR25903;AGIWUR28169;AGIWUR28994;AGIWUR29363;AGIWUR33453;AGIWUR38174 |                                    |          |                |           |           |                     |
| CB4856 HS V                                                                                                | 20500812                           | 20503228 | WBGene00005812 | srw-65    | Y38H6C.2  |                     |
| -0.117335400849424                                                                                         | AGIWUR2254                         |          |                |           |           |                     |
| CB4856 HS V                                                                                                | 20504875                           | 20505097 | WBGene00012617 | Y38H6C.4  |           | Y38H6C.4            |
| -0.0759554931768145                                                                                        | AGIWUR9045                         |          |                |           |           |                     |
| CB4856 HS V                                                                                                | 20514637                           | 20515706 | WBGene00012621 | Y38H6C.8  |           | Y38H6C.8            |
| 0.337504794768828                                                                                          | AGIWUR10442                        |          |                |           |           |                     |
| CB4856 HS V                                                                                                | 20516298                           | 20518036 | WBGene00012623 | fbxa-149  |           | Y38H6C.10           |
| -0.149869411131759                                                                                         | AGIWUR24018                        |          |                |           |           |                     |
| CB4856 HS V                                                                                                | 20520250                           | 20522270 | WBGene00012622 | Y38H6C.9  |           | Y38H6C.9            |
| 0.134417398462674                                                                                          | AGIWUR1386                         |          |                |           |           |                     |
| CB4856 HS V                                                                                                | 20522621                           | 20524512 | WBGene00012624 | fbxa-150  |           | Y38H6C.11           |
| 0.0960504164029246                                                                                         | AGIWUR3580;AGIWUR15698;AGIWUR27527 |          |                |           |           |                     |
| CB4856 HS V                                                                                                | 20524700                           | 20525866 | WBGene00005382 | srh-166   | Y38H6C.12 |                     |
| 0.0758965501155355                                                                                         | AGIWUR14164                        |          |                |           |           |                     |
| CB4856 HS V                                                                                                | 20529953                           | 20534169 | WBGene00012626 | famh-161  |           | Y38H6C.14           |
| 0.0834442233030996                                                                                         | AGIWUR2469                         |          |                |           |           |                     |
| CB4856 HS V                                                                                                | 20534774                           | 20536308 | WBGene00012627 | Y38H6C.15 |           | Y38H6C.15           |
| 0.171445556358936                                                                                          | AGIWUR41427                        |          |                |           |           |                     |
| CB4856 HS V                                                                                                | 20536430                           | 20538155 | WBGene00012628 | Y38H6C.16 |           | Y38H6C.16           |
| -0.0651798923822167                                                                                        | AGIWUR15764                        |          |                |           |           |                     |
| CB4856 HS V                                                                                                | 20540395                           | 20544192 | WBGene00012629 | slc-36.3  |           | Y38H6C.17           |

|                                                                        |                                                            |          |                |           |                            |
|------------------------------------------------------------------------|------------------------------------------------------------|----------|----------------|-----------|----------------------------|
| 0.226200966870163                                                      | AGIWUR2656                                                 |          |                |           |                            |
| CB4856 HS V                                                            | 20546626                                                   | 20547148 | WBGene00012630 | Y38H6C.18 | Y38H6C.18                  |
| -0.370041447959961                                                     | AGIWUR25153                                                |          |                |           |                            |
| CB4856 HS V                                                            | 20547261                                                   | 20551164 | WBGene00012632 | Y38H6C.20 | Y38H6C.20                  |
| 0.0136293471117241                                                     | AGIWUR34360                                                |          |                |           |                            |
| CB4856 HS V                                                            | 20552294                                                   | 20553071 | WBGene00012631 | Y38H6C.19 | Y38H6C.19                  |
| -0.192629574718245                                                     | AGIWUR19219                                                |          |                |           |                            |
| CB4856 HS V                                                            | 20554116                                                   | 20555267 | WBGene00012633 | Y38H6C.21 | Y38H6C.21                  |
| 0.284395250340367                                                      | AGIWUR29870                                                |          |                |           |                            |
| CB4856 HS V                                                            | 20555629                                                   | 20556360 | WBGene00012634 | Y38H6C.23 | Y38H6C.23                  |
| 0.15828052207493                                                       | AGIWUR24290                                                |          |                |           |                            |
| CB4856 HS V                                                            | 20557945                                                   | 20558379 | WBGene00000015 | abf-4     | Y38H6C.22                  |
| 0.112109873345419                                                      | AGIWUR5038                                                 |          |                |           |                            |
| CB4856 HS V                                                            | 20559080                                                   | 20561895 | WBGene00009166 | F26F2.1   | F26F2.1 -0.168129235728252 |
| AGIWUR9644;AGIWUR24078;AGIWUR43885                                     |                                                            |          |                |           |                            |
| CB4856 HS V                                                            | 20564383                                                   | 20564666 | WBGene00219309 | F26F2.13  | F26F2.13                   |
| -0.158267204061511                                                     | AGIWUR33359                                                |          |                |           |                            |
| CB4856 HS V                                                            | 20565410                                                   | 20566541 | WBGene00009168 | F26F2.3   | F26F2.3 -0.577823641127809 |
| AGIWUR19294                                                            |                                                            |          |                |           |                            |
| CB4856 HS V                                                            | 20569295                                                   | 20570191 | WBGene00009169 | F26F2.4   | F26F2.4 -0.141831807900765 |
| AGIWUR9279;AGIWUR30803;AGIWUR33977;AGIWUR38558;AGIWUR40546;AGIWUR44909 |                                                            |          |                |           |                            |
| CB4856 HS V                                                            | 20573717                                                   | 20574000 | WBGene00009170 | F26F2.5   | F26F2.5 -0.480988796360595 |
| AGIWUR38019                                                            |                                                            |          |                |           |                            |
| CB4856 HS V                                                            | 20574625                                                   | 20577636 | WBGene00009171 | cllec-263 | F26F2.6                    |
| 0.156754518465625                                                      | AGIWUR15828                                                |          |                |           |                            |
| CB4856 HS V                                                            | 20579546                                                   | 20580678 | WBGene00023504 | F26F2.8   | F26F2.8 -0.152387487898703 |
| AGIWUR3190;AGIWUR14596;AGIWUR29229;AGIWUR35095                         |                                                            |          |                |           |                            |
| CB4856 HS V                                                            | 20580996                                                   | 20590321 | WBGene00009172 | F26F2.7   | F26F2.7 -0.123479354654251 |
| AGIWUR34182                                                            |                                                            |          |                |           |                            |
| CB4856 HS V                                                            | 20600095                                                   | 20602474 | WBGene00000736 | col-163   | F46B3.17                   |
| -0.194381390423287                                                     | AGIWUR17760                                                |          |                |           |                            |
| CB4856 HS V                                                            | 20603366                                                   | 20604378 | WBGene00009758 | ttr-11    | F46B3.3 0.0339658800202258 |
| AGIWUR5985;AGIWUR15582;AGIWUR37486                                     |                                                            |          |                |           |                            |
| CB4856 HS V                                                            | 20607804                                                   | 20608559 | WBGene00009759 | ttr-12    | F46B3.4 -0.125475069408391 |
| AGIWUR28886;AGIWUR29298                                                |                                                            |          |                |           |                            |
| CB4856 HS V                                                            | 20609794                                                   | 20613929 | WBGene00001691 | grd-2     | F46B3.5 0.201864808914169  |
| AGIWUR11921                                                            |                                                            |          |                |           |                            |
| CB4856 HS V                                                            | 20614382                                                   | 20615054 | WBGene00050932 | F46B3.19  | F46B3.19                   |
| 0.065541974180638                                                      | AGIWUR5624;AGIWUR19280;AGIWUR21487;AGIWUR28143;AGIWUR35096 |          |                |           |                            |



|                         |                                                                        |          |                |          |                             |
|-------------------------|------------------------------------------------------------------------|----------|----------------|----------|-----------------------------|
| CB4856 HS V             | 20618120                                                               | 20618656 | WBGene00009760 | F46B3.7  | F46B3.7                     |
| -0.00314763356902592    | AGIWUR21128                                                            |          |                |          |                             |
| CB4856 HS V             | 20618910                                                               | 20621966 | WBGene00077434 | F46B3.20 | F46B3.20                    |
| -0.0232904076396476     | AGIWUR4884                                                             |          |                |          |                             |
| CB4856 HS V             | 20622650                                                               | 20623160 | WBGene00009761 | F46B3.8  | F46B3.8 -0.920176128804734  |
| AGIWUR11360             |                                                                        |          |                |          |                             |
| CB4856 HS V             | 20623630                                                               | 20624887 | WBGene00077436 | F46B3.22 | F46B3.22                    |
| 0.140990079726929       | AGIWUR12526;AGIWUR21313;AGIWUR32702;AGIWUR39543;AGIWUR43533            |          |                |          |                             |
| CB4856 HS V             | 20625186                                                               | 20626143 | WBGene00009762 | F46B3.9  | F46B3.9 -0.0713477183671358 |
| AGIWUR40468             |                                                                        |          |                |          |                             |
| CB4856 HS V             | 20626711                                                               | 20628206 | WBGene00009763 | srz-18   | F46B3.11                    |
| 0.0103372083268933      | AGIWUR15575                                                            |          |                |          |                             |
| CB4856 HS V             | 20628422                                                               | 20629802 | WBGene00009764 | srz-17   | F46B3.12                    |
| 1.32226727256385        | AGIWUR21470                                                            |          |                |          |                             |
| CB4856 HS V             | 20630148                                                               | 20631329 | WBGene00009765 | F46B3.14 | F46B3.14                    |
| -0.00387217278445462    | AGIWUR7603;AGIWUR12522;AGIWUR13428;AGIWUR24567;AGIWUR36158;AGIWUR43491 |          |                |          |                             |
| CB4856 HS V             | 20632985                                                               | 20633689 | WBGene00009766 | F46B3.15 | F46B3.15                    |
| 0.0547615319284178      | AGIWUR17891;AGIWUR44745;AGIWUR45040                                    |          |                |          |                             |
| CB4856 HS V             | 20634462                                                               | 20635313 | WBGene00009767 | F46B3.16 | F46B3.16                    |
| -0.0954598429528719     | AGIWUR31887                                                            |          |                |          |                             |
| CB4856 HS V             | 20635943                                                               | 20636576 | WBGene00012849 | ttr-13   | Y44A6B.4                    |
| -0.0152266490421358     | AGIWUR4635;AGIWUR32172;AGIWUR34647;AGIWUR34876;AGIWUR35235             |          |                |          |                             |
| CB4856 HS V             | 20636864                                                               | 20638444 | WBGene00012848 | Y44A6B.3 | Y44A6B.3                    |
| -0.0612593384739624     | AGIWUR39781                                                            |          |                |          |                             |
| CB4856 HS V             | 20639594                                                               | 20641049 | WBGene00012846 | srxa-14  | Y44A6B.1                    |
| -0.10126826192494       | AGIWUR11441;AGIWUR28556;AGIWUR32560                                    |          |                |          |                             |
| CB4856 HS V             | 20642289                                                               | 20644356 | WBGene00012847 | srxa-15  | Y44A6B.2                    |
| -0.134699426239921      | AGIWUR6148;AGIWUR10441;AGIWUR28261                                     |          |                |          |                             |
| CB4856 HS V             | 20654652                                                               | 20659742 | WBGene00012184 | mnr-1    | W01F3.1 0.0785549510841008  |
| AGIWUR27576             |                                                                        |          |                |          |                             |
| CB4856 HS V             | 20660325                                                               | 20662031 | WBGene00012185 | W01F3.2  | W01F3.2 0.239839451638773   |
| AGIWUR21598             |                                                                        |          |                |          |                             |
| CB4856 HS V             | 20667209                                                               | 20678513 | WBGene00012186 | mlt-11   | W01F3.3 -0.10858647853408   |
| AGIWUR34807;AGIWUR41668 |                                                                        |          |                |          |                             |
| CB4856 HS V             | 20681420                                                               | 20683014 | WBGene00009999 | srsx-35  | F53F8.2 0.0452944126484156  |
| AGIWUR5741;AGIWUR37284  |                                                                        |          |                |          |                             |
| CB4856 HS V             | 20685683                                                               | 20688770 | WBGene00009998 | k1f-2    | F53F8.1 -0.257504176608091  |
| AGIWUR30841             |                                                                        |          |                |          |                             |
| CB4856 HS V             | 20688734                                                               | 20689532 | WBGene00010000 | F53F8.3  | F53F8.3 -0.125225076196136  |

|                                                                       |   |                                                           |          |                |          |                             |
|-----------------------------------------------------------------------|---|-----------------------------------------------------------|----------|----------------|----------|-----------------------------|
| AGIWUR22910                                                           |   |                                                           |          |                |          |                             |
| CB4856 HS                                                             | V | 20690582                                                  | 20691685 | WBGene00010001 | F53F8.4  | F53F8.4                     |
| -0.00952062742755899                                                  |   | AGIWUR27499                                               |          |                |          |                             |
| CB4856 HS                                                             | V | 20700340                                                  | 20704048 | WBGene00010002 | F53F8.5  | F53F8.5 -0.423679614854755  |
| AGIWUR19422                                                           |   |                                                           |          |                |          |                             |
| CB4856 HS                                                             | V | 20708728                                                  | 20709794 | WBGene00010003 | F53F8.6  | F53F8.6                     |
| -0.00725644965047323                                                  |   | AGIWUR37872                                               |          |                |          |                             |
| CB4856 HS                                                             | V | 20713920                                                  | 20716872 | WBGene00012850 | Y44A6C.1 | Y44A6C.1                    |
| 0.149804276901405                                                     |   | AGIWUR7317                                                |          |                |          |                             |
| CB4856 HS                                                             | V | 20717872                                                  | 20729271 | WBGene00012319 | ipla-3   | W07A8.2 0.021803641432534   |
| AGIWUR7440                                                            |   |                                                           |          |                |          |                             |
| CB4856 HS                                                             | V | 20729948                                                  | 20744385 | WBGene00001043 | dnj-25   | W07A8.3 -0.0695454697903095 |
| AGIWUR24301                                                           |   |                                                           |          |                |          |                             |
| CB4856 HS                                                             | V | 20752883                                                  | 20760317 | WBGene00004013 | pha-4    | F38A6.1 0.115937408496332   |
| AGIWUR4940;AGIWUR7056;AGIWUR10928;AGIWUR11116;AGIWUR33259;AGIWUR39144 |   |                                                           |          |                |          |                             |
| CB4856 HS                                                             | V | 20764955                                                  | 20770161 | WBGene00001248 | elp-1    | F38A6.2 0.103798570855053   |
| AGIWUR28578                                                           |   |                                                           |          |                |          |                             |
| CB4856 HS                                                             | V | 20773743                                                  | 20775369 | WBGene00009528 | F38A6.4  | F38A6.4 0.0432091908493435  |
| AGIWUR3923                                                            |   |                                                           |          |                |          |                             |
| CB4856 HS                                                             | V | 20780413                                                  | 20785259 | WBGene00001851 | hif-1    | F38A6.3 0.0217293026139243  |
| AGIWUR4461;AGIWUR8388;AGIWUR13579;AGIWUR16367;AGIWUR17143;AGIWUR40614 |   |                                                           |          |                |          |                             |
| CB4856 HS                                                             | V | 20789471                                                  | 20790784 | WBGene00012853 | Y44A6D.2 | Y44A6D.2                    |
| 0.176254506195395                                                     |   | AGIWUR15098                                               |          |                |          |                             |
| CB4856 HS                                                             | V | 20790768                                                  | 20792413 | WBGene00012854 | Y44A6D.3 | Y44A6D.3                    |
| 0.197437779673427                                                     |   | AGIWUR6196;AGIWUR8125;AGIWUR11022;AGIWUR14203;AGIWUR30558 |          |                |          |                             |
| CB4856 HS                                                             | V | 20798218                                                  | 20801207 | WBGene00004748 | sdf-9    | Y44A6D.4                    |
| 0.183765525881593                                                     |   | AGIWUR37586                                               |          |                |          |                             |
| CB4856 HS                                                             | V | 20801184                                                  | 20803006 | WBGene00012855 | Y44A6D.5 | Y44A6D.5                    |
| 0.103683304828905                                                     |   | AGIWUR43513                                               |          |                |          |                             |
| CB4856 HS                                                             | V | 20816142                                                  | 20816553 | WBGene00011394 | T03D8.7  | T03D8.7 0.053284501025642   |
| AGIWUR8909                                                            |   |                                                           |          |                |          |                             |
| CB4856 HS                                                             | V | 20816576                                                  | 20820330 | WBGene00011393 | T03D8.6  | T03D8.6 0.0372229962103567  |
| AGIWUR11094                                                           |   |                                                           |          |                |          |                             |
| CB4856 HS                                                             | V | 20820366                                                  | 20825028 | WBGene00001547 | gcy-22   | T03D8.5 0.0421778494214466  |
| AGIWUR38984                                                           |   |                                                           |          |                |          |                             |
| CB4856 HS                                                             | V | 20825559                                                  | 20827740 | WBGene00001723 | grl-14   | T03D8.4 -0.0366173715150833 |
| AGIWUR2172                                                            |   |                                                           |          |                |          |                             |
| CB4856 HS                                                             | V | 20827715                                                  | 20828939 | WBGene00011392 | sbt-1    | T03D8.3 -0.401534269455977  |
| AGIWUR26432;AGIWUR35497                                               |   |                                                           |          |                |          |                             |

|                                                                                                |    |   |          |          |                |           |           |                     |
|------------------------------------------------------------------------------------------------|----|---|----------|----------|----------------|-----------|-----------|---------------------|
| CB4856                                                                                         | HS | V | 20829811 | 20837552 | WBGene00003830 | num-1     | T03D8.1   | 0.0481502836787993  |
| AGIWUR3244;AGIWUR15343;AGIWUR24653                                                             |    |   |          |          |                |           |           |                     |
| CB4856                                                                                         | HS | V | 20838080 | 20838768 | WBGene00011391 | mrps-12   | T03D8.2   | 0.120063976909712   |
| AGIWUR36932                                                                                    |    |   |          |          |                |           |           |                     |
| CB4856                                                                                         | HS | V | 20838865 | 20841582 | WBGene00009289 | exos-7    | F31D4.1   | 0.100406774389715   |
| AGIWUR6280                                                                                     |    |   |          |          |                |           |           |                     |
| CB4856                                                                                         | HS | V | 20841573 | 20845546 | WBGene00009290 | F31D4.2   | F31D4.2   | -0.212592820657271  |
| AGIWUR13395;AGIWUR14102;AGIWUR21065;AGIWUR29128;AGIWUR33661;AGIWUR41259                        |    |   |          |          |                |           |           |                     |
| CB4856                                                                                         | HS | V | 20846113 | 20847727 | WBGene00001431 | fkf-6     | F31D4.3   | -0.170430914501313  |
| AGIWUR4919;AGIWUR13185;AGIWUR20145;AGIWUR25639;AGIWUR26171;AGIWUR31644;AGIWUR32800;AGIWUR43487 |    |   |          |          |                |           |           |                     |
| CB4856                                                                                         | HS | V | 20847702 | 20850666 | WBGene00009291 | clcc-264  | F31D4.4   |                     |
| -0.0887625293803547 AGIWUR35224                                                                |    |   |          |          |                |           |           |                     |
| CB4856                                                                                         | HS | V | 20850833 | 20851897 | WBGene00009294 | F31D4.9   | F31D4.9   | -0.0743570461980152 |
| AGIWUR30890                                                                                    |    |   |          |          |                |           |           |                     |
| CB4856                                                                                         | HS | V | 20854143 | 20858576 | WBGene00009292 | F31D4.5   | F31D4.5   | 0.150706906132889   |
| AGIWUR42985                                                                                    |    |   |          |          |                |           |           |                     |
| CB4856                                                                                         | HS | V | 20859344 | 20861153 | WBGene00006622 | try-4     | F31D4.6   | 0.144999871757192   |
| AGIWUR26925                                                                                    |    |   |          |          |                |           |           |                     |
| CB4856                                                                                         | HS | V | 20862969 | 20865743 | WBGene00006687 | twk-35    | F31D4.7   | 0.172927275545753   |
| AGIWUR2822                                                                                     |    |   |          |          |                |           |           |                     |
| CB4856                                                                                         | HS | V | 20866749 | 20868429 | WBGene00009293 | F31D4.8   | F31D4.8   | 0.16058251950108    |
| AGIWUR43069                                                                                    |    |   |          |          |                |           |           |                     |
| CB4856                                                                                         | HS | V | 20879854 | 20898906 | WBGene00006812 | unc-80    | F25C8.3   | -0.0665987871909408 |
| AGIWUR27704                                                                                    |    |   |          |          |                |           |           |                     |
| CB4856                                                                                         | HS | V | 20898840 | 20903441 | WBGene00000139 | amx-3     | F25C8.2   | 0.332854802551751   |
| AGIWUR6474                                                                                     |    |   |          |          |                |           |           |                     |
| CB4856                                                                                         | HS | V | 20903977 | 20907433 | WBGene00009106 | acs-12    | F25C8.4   | 0.0756036977371473  |
| AGIWUR25618                                                                                    |    |   |          |          |                |           |           |                     |
| CB4856                                                                                         | HS | V | 20907470 | 20909746 | WBGene00009104 | F25C8.1   | F25C8.1   | -0.165938259471276  |
| AGIWUR6493                                                                                     |    |   |          |          |                |           |           |                     |
| CB4856                                                                                         | HS | V | 20910467 | 20914387 | WBGene00044187 | ttll-9    | F25C8.5   | 0.0292487988668997  |
| AGIWUR11335;AGIWUR21432                                                                        |    |   |          |          |                |           |           |                     |
| CB4856                                                                                         | HS | V | 20915486 | 20922738 | WBGene00012857 | pbo-5     | Y44A6E.1  |                     |
| 0.0016487194417536 AGIWUR18324;AGIWUR27277;AGIWUR29637                                         |    |   |          |          |                |           |           |                     |
| CB4856                                                                                         | HS | X | 42728    | 46924    | WBGene00022203 | Y73B3A.1  | Y73B3A.1  | -0.15793021470818   |
| AGIWUR22888                                                                                    |    |   |          |          |                |           |           |                     |
| CB4856                                                                                         | HS | X | 78429    | 80400    | WBGene00022218 | Y73B3A.16 | Y73B3A.16 | 0.246599659237113   |
| AGIWUR23894                                                                                    |    |   |          |          |                |           |           |                     |
| CB4856                                                                                         | HS | X | 135793   | 138075   | WBGene00022209 | Y73B3A.7  | Y73B3A.7  | 0.104631527042756   |

|                                                                         |    |   |        |        |                |          |          |                      |             |
|-------------------------------------------------------------------------|----|---|--------|--------|----------------|----------|----------|----------------------|-------------|
| AGIWUR25027                                                             |    |   |        |        |                |          |          |                      |             |
| CB4856                                                                  | HS | X | 140434 | 140683 | WBGene00022210 | Y73B3A.8 | Y73B3A.8 | 0.157565292059771    |             |
| AGIWUR23454                                                             |    |   |        |        |                |          |          |                      |             |
| CB4856                                                                  | HS | X | 150363 | 157246 | WBGene00022211 | Y73B3A.9 | Y73B3A.9 | -0.205134829194879   |             |
| AGIWUR23115                                                             |    |   |        |        |                |          |          |                      |             |
| CB4856                                                                  | HS | X | 159638 | 160920 | WBGene00044700 | T08D2.9  | T08D2.9  | 0.0563901630050303   | AGIWUR16884 |
| CB4856                                                                  | HS | X | 164036 | 171839 | WBGene00011607 | T08D2.2  | T08D2.2  | -0.122885206323796   | AGIWUR17378 |
| CB4856                                                                  | HS | X | 177396 | 177856 | WBGene00011609 | T08D2.4  | T08D2.4  | 0.000693733356545323 |             |
| AGIWUR14158;AGIWUR14916;AGIWUR19089;AGIWUR23194;AGIWUR35007             |    |   |        |        |                |          |          |                      |             |
| CB4856                                                                  | HS | X | 192834 | 197901 | WBGene00011613 | T08D2.8  | T08D2.8  | 0.203244141091337    | AGIWUR5792  |
| CB4856                                                                  | HS | X | 199262 | 207723 | WBGene00022227 | Y73B3B.5 | Y73B3B.5 | 0.120765121702552    |             |
| AGIWUR22104                                                             |    |   |        |        |                |          |          |                      |             |
| CB4856                                                                  | HS | X | 211441 | 211676 | WBGene00022225 | Y73B3B.3 | Y73B3B.3 | -0.182209066635934   |             |
| AGIWUR18398                                                             |    |   |        |        |                |          |          |                      |             |
| CB4856                                                                  | HS | X | 221017 | 225084 | WBGene00007077 | AC8.5    | AC8.5    | 0.019589460983477    | AGIWUR44399 |
| CB4856                                                                  | HS | X | 269127 | 270029 | WBGene00022432 | math-43  | Y108F1.4 | -0.148264554732192   |             |
| AGIWUR34721                                                             |    |   |        |        |                |          |          |                      |             |
| CB4856                                                                  | HS | X | 270408 | 274012 | WBGene00022433 | Y108F1.5 | Y108F1.5 | -0.346203889788818   |             |
| AGIWUR39937                                                             |    |   |        |        |                |          |          |                      |             |
| CB4856                                                                  | HS | X | 297234 | 299287 | WBGene00020083 | R57.2    | R57.2    | 0.158285620307371    | AGIWUR31539 |
| CB4856                                                                  | HS | X | 301832 | 308298 | WBGene00020082 | gcp-2.1  | R57.1    | 0.224799210781759    |             |
| AGIWUR15035;AGIWUR31471                                                 |    |   |        |        |                |          |          |                      |             |
| CB4856                                                                  | HS | X | 308762 | 311323 | WBGene00019734 | M02E1.2  | M02E1.2  | -0.146092141767705   |             |
| AGIWUR10337;AGIWUR35098;AGIWUR37692                                     |    |   |        |        |                |          |          |                      |             |
| CB4856                                                                  | HS | X | 326113 | 334600 | WBGene00019733 | M02E1.1  | M02E1.1  | 0.117838370862914    |             |
| AGIWUR13020;AGIWUR36891;AGIWUR38182                                     |    |   |        |        |                |          |          |                      |             |
| CB4856                                                                  | HS | X | 334580 | 341232 | WBGene00015431 | C04E7.4  | C04E7.4  | -0.103510407422661   | AGIWUR4709  |
| CB4856                                                                  | HS | X | 344127 | 346289 | WBGene00015430 | C04E7.3  | C04E7.3  | -0.11675385873096    | AGIWUR11024 |
| CB4856                                                                  | HS | X | 353619 | 357939 | WBGene00015429 | sor-3    | C04E7.2  | -0.309459407602496   | AGIWUR32632 |
| CB4856                                                                  | HS | X | 358092 | 360198 | WBGene00015428 | C04E7.1  | C04E7.1  | 0.143697272180171    | AGIWUR39667 |
| CB4856                                                                  | HS | X | 360779 | 362938 | WBGene00045270 | C04E7.5  | C04E7.5  | -0.0115204931846202  |             |
| AGIWUR1304;AGIWUR6863;AGIWUR26142;AGIWUR34587                           |    |   |        |        |                |          |          |                      |             |
| CB4856                                                                  | HS | X | 372235 | 376900 | WBGene00019862 | nrde-3   | R04A9.2  | 0.00602166707066942  | AGIWUR34371 |
| CB4856                                                                  | HS | X | 377133 | 380605 | WBGene00019863 | R04A9.3  | R04A9.3  | 0.188427420041198    |             |
| AGIWUR1910;AGIWUR27720;AGIWUR39047                                      |    |   |        |        |                |          |          |                      |             |
| CB4856                                                                  | HS | X | 381338 | 382709 | WBGene00002060 | ife-2    | R04A9.4  | 0.0114955351823607   | AGIWUR44493 |
| CB4856                                                                  | HS | X | 384382 | 388797 | WBGene00019864 | ceh-93   | R04A9.5  | 0.111208032570243    | AGIWUR4933  |
| CB4856                                                                  | HS | X | 391360 | 394828 | WBGene00044281 | R04A9.7  | R04A9.7  | 0.103099353231076    |             |
| AGIWUR15403;AGIWUR22517;AGIWUR22851;AGIWUR29510;AGIWUR35082;AGIWUR39575 |    |   |        |        |                |          |          |                      |             |

|                                                         |    |   |        |        |                |          |          |                    |             |
|---------------------------------------------------------|----|---|--------|--------|----------------|----------|----------|--------------------|-------------|
| CB4856                                                  | HS | X | 397567 | 400687 | WBGene00019865 | R04A9.6  | R04A9.6  | 0.208383313772078  |             |
| AGIWUR184;AGIWUR3927;AGIWUR6837;AGIWUR17015;AGIWUR38506 |    |   |        |        |                |          |          |                    |             |
| CB4856                                                  | HS | X | 404897 | 405357 | WBGene00019861 | R04A9.1  | R04A9.1  | -0.16147612930676  | AGIWUR29396 |
| CB4856                                                  | HS | X | 406459 | 416633 | WBGene00022858 | ZK1193.2 | ZK1193.2 | 0.186952768663476  |             |
| AGIWUR30557                                             |    |   |        |        |                |          |          |                    |             |
| CB4856                                                  | HS | X | 417482 | 420361 | WBGene00022859 | ZK1193.3 | ZK1193.3 | 0.0116178967910603 |             |
| AGIWUR31872                                             |    |   |        |        |                |          |          |                    |             |
| CB4856                                                  | HS | X | 421707 | 423033 | WBGene00000608 | col-19   | ZK1193.1 | 0.144179494631983  |             |
| AGIWUR6664;AGIWUR10326                                  |    |   |        |        |                |          |          |                    |             |
| CB4856                                                  | HS | X | 422890 | 425631 | WBGene00022860 | ZK1193.4 | ZK1193.4 | -0.197125169130429 |             |
| AGIWUR10253                                             |    |   |        |        |                |          |          |                    |             |
| CB4856                                                  | HS | X | 427043 | 433799 | WBGene00022861 | dve-1    | ZK1193.5 | 0.0244329154050518 |             |
| AGIWUR26243;AGIWUR30037;AGIWUR42054;AGIWUR44587         |    |   |        |        |                |          |          |                    |             |
| CB4856                                                  | HS | X | 446356 | 450212 | WBGene00018683 | F52D1.2  | F52D1.2  | 0.269619233686818  | AGIWUR11405 |
| CB4856                                                  | HS | X | 450446 | 457648 | WBGene00004127 | abu-12   | F52D1.3  | 0.157710254695445  | AGIWUR18676 |
| CB4856                                                  | HS | X | 460651 | 466912 | WBGene00018682 | aagr-4   | F52D1.1  | 0.164795314425145  | AGIWUR38943 |
| CB4856                                                  | HS | X | 476561 | 478283 | WBGene00044556 | F38G1.3  | F38G1.3  | 0.167035757932652  |             |
| AGIWUR21457;AGIWUR27213;AGIWUR30357                     |    |   |        |        |                |          |          |                    |             |
| CB4856                                                  | HS | X | 481378 | 486504 | WBGene00000484 | che-2    | F38G1.1  | 0.0785016215532295 | AGIWUR16263 |
| CB4856                                                  | HS | X | 489695 | 492273 | WBGene00001185 | egl-17   | F38G1.2  | -0.254379633998836 | AGIWUR37293 |
| CB4856                                                  | HS | X | 493211 | 497510 | WBGene00015137 | B0310.1  | B0310.1  | 0.171881016426173  | AGIWUR27738 |
| CB4856                                                  | HS | X | 501965 | 506943 | WBGene00015138 | B0310.2  | B0310.2  | 0.177910649326827  | AGIWUR23228 |
| CB4856                                                  | HS | X | 510818 | 520880 | WBGene00015139 | B0310.3  | B0310.3  | 0.125926563883925  | AGIWUR20693 |
| CB4856                                                  | HS | X | 525929 | 530289 | WBGene00015141 | ugt-46   | B0310.5  | 0.183330458139956  | AGIWUR40037 |
| CB4856                                                  | HS | X | 530551 | 531009 | WBGene00015142 | B0310.6  | B0310.6  | -0.16851124725704  | AGIWUR16990 |
| CB4856                                                  | HS | X | 531841 | 535834 | WBGene00017898 | F28C10.3 | F28C10.3 | 0.173144320756986  |             |
| AGIWUR13471                                             |    |   |        |        |                |          |          |                    |             |
| CB4856                                                  | HS | X | 537303 | 538910 | WBGene00017899 | F28C10.4 | F28C10.4 | -0.167940756820936 |             |
| AGIWUR27250                                             |    |   |        |        |                |          |          |                    |             |
| CB4856                                                  | HS | X | 543107 | 544256 | WBGene00017896 | F28C10.1 | F28C10.1 | 0.125245155889154  |             |
| AGIWUR6343                                              |    |   |        |        |                |          |          |                    |             |
| CB4856                                                  | HS | X | 555788 | 557191 | WBGene00001962 | hlh-19   | F57C12.3 | 0.217499321943291  |             |
| AGIWUR32848                                             |    |   |        |        |                |          |          |                    |             |
| CB4856                                                  | HS | X | 558141 | 563657 | WBGene00003554 | nas-38   | F57C12.1 | -0.122121259215315 |             |
| AGIWUR34589                                             |    |   |        |        |                |          |          |                    |             |
| CB4856                                                  | HS | X | 563719 | 572701 | WBGene00003408 | mrp-2    | F57C12.4 | 0.133303798092753  |             |
| AGIWUR6975;AGIWUR36018;AGIWUR45099                      |    |   |        |        |                |          |          |                    |             |
| CB4856                                                  | HS | X | 576318 | 587483 | WBGene00003407 | mrp-1    | F57C12.5 | 0.271583546579141  |             |
| AGIWUR9284;AGIWUR13774;AGIWUR34067                      |    |   |        |        |                |          |          |                    |             |

|                                                                                                                                                                     |    |   |        |        |                |          |          |                      |             |
|---------------------------------------------------------------------------------------------------------------------------------------------------------------------|----|---|--------|--------|----------------|----------|----------|----------------------|-------------|
| CB4856                                                                                                                                                              | HS | X | 593960 | 596289 | WBGene00017423 | F13C5.2  | F13C5.2  | -0.082207088754163   |             |
| AGIWUR10683;AGIWUR13371;AGIWUR22552;AGIWUR22732;AGIWUR31040;AGIWUR35162                                                                                             |    |   |        |        |                |          |          |                      |             |
| CB4856                                                                                                                                                              | HS | X | 596314 | 599553 | WBGene00017424 | F13C5.3  | F13C5.3  | -0.0338760860892244  |             |
| AGIWUR302;AGIWUR6079;AGIWUR9605;AGIWUR11481;AGIWUR16677;AGIWUR17142;AGIWUR21336;AGIWUR23589;AGIWUR28821;AGIWUR33103;AGIWUR36497;AGIWUR37477;AGIWUR41870;AGIWUR43585 |    |   |        |        |                |          |          |                      |             |
| CB4856                                                                                                                                                              | HS | X | 602172 | 604922 | WBGene00017422 | F13C5.1  | F13C5.1  | 0.200243539001373    | AGIWUR20727 |
| CB4856                                                                                                                                                              | HS | X | 604872 | 608492 | WBGene00017426 | F13C5.5  | F13C5.5  | 0.16970645348        | AGIWUR43112 |
| CB4856                                                                                                                                                              | HS | X | 611120 | 621290 | WBGene00006825 | unc-96   | F13C5.6  | 0.0350817678929829   | AGIWUR38876 |
| CB4856                                                                                                                                                              | HS | X | 629188 | 632868 | WBGene00019776 | M6.4     | M6.4     | -0.0972108414318082  | AGIWUR22702 |
| CB4856                                                                                                                                                              | HS | X | 633703 | 636993 | WBGene00004011 | pha-2    | M6.3     | 0.029368838031866    |             |
| AGIWUR2968;AGIWUR10208;AGIWUR16900;AGIWUR22412;AGIWUR23724;AGIWUR24946;AGIWUR28447;AGIWUR39161;AGIWUR40151                                                          |    |   |        |        |                |          |          |                      |             |
| CB4856                                                                                                                                                              | HS | X | 642156 | 654903 | WBGene00002056 | ifc-2    | M6.1     | 0.0668489088698863   |             |
| AGIWUR13526;AGIWUR33635;AGIWUR35773;AGIWUR42995                                                                                                                     |    |   |        |        |                |          |          |                      |             |
| CB4856                                                                                                                                                              | HS | X | 656188 | 658511 | WBGene00020571 | lpr-7    | T19D7.3  | -0.134052280138482   |             |
| AGIWUR18294;AGIWUR27906                                                                                                                                             |    |   |        |        |                |          |          |                      |             |
| CB4856                                                                                                                                                              | HS | X | 658477 | 661777 | WBGene00020572 | rund-1   | T19D7.4  | 0.100712776084336    | AGIWUR36812 |
| CB4856                                                                                                                                                              | HS | X | 664714 | 666300 | WBGene00020573 | T19D7.5  | T19D7.5  | 0.188720384633257    | AGIWUR792   |
| CB4856                                                                                                                                                              | HS | X | 669684 | 670800 | WBGene00020574 | T19D7.6  | T19D7.6  | 0.231868817496453    | AGIWUR37273 |
| CB4856                                                                                                                                                              | HS | X | 673027 | 676484 | WBGene00020569 | lgc-32   | T19D7.1  | 0.227185855026772    | AGIWUR27396 |
| CB4856                                                                                                                                                              | HS | X | 676435 | 680419 | WBGene00020575 | T19D7.7  | T19D7.7  | 0.115251917651611    | AGIWUR41783 |
| CB4856                                                                                                                                                              | HS | X | 681129 | 682780 | WBGene00021185 | Y9C12A.1 | Y9C12A.1 | 0.0438195533798016   |             |
| AGIWUR9671                                                                                                                                                          |    |   |        |        |                |          |          |                      |             |
| CB4856                                                                                                                                                              | HS | X | 692978 | 703036 | WBGene00017184 | ncam-1   | F02G3.1  | 0.312375916013994    |             |
| AGIWUR5275;AGIWUR5619;AGIWUR11793;AGIWUR40249                                                                                                                       |    |   |        |        |                |          |          |                      |             |
| CB4856                                                                                                                                                              | HS | X | 703029 | 714478 | WBGene00002150 | irk-2    | M02A10.2 | -0.00428458740561677 |             |
| AGIWUR28735                                                                                                                                                         |    |   |        |        |                |          |          |                      |             |
| CB4856                                                                                                                                                              | HS | X | 720330 | 725957 | WBGene00004829 | sli-1    | M02A10.3 | 0.244636339154095    |             |
| AGIWUR16071                                                                                                                                                         |    |   |        |        |                |          |          |                      |             |
| CB4856                                                                                                                                                              | HS | X | 731160 | 735672 | WBGene00015364 | npr-19   | C02H7.2  | 0.0964206027396433   | AGIWUR36999 |
| CB4856                                                                                                                                                              | HS | X | 751211 | 759732 | WBGene00000086 | aex-3    | C02H7.3  | 0.168213275558294    |             |
| AGIWUR9247;AGIWUR24583;AGIWUR31811;AGIWUR33793                                                                                                                      |    |   |        |        |                |          |          |                      |             |
| CB4856                                                                                                                                                              | HS | X | 763769 | 766713 | WBGene00001127 | dyf-11   | C02H7.1  | -0.0684430402279999  | AGIWUR33461 |
| CB4856                                                                                                                                                              | HS | X | 767023 | 768069 | WBGene00020216 | trap-2   | T04G9.5  | 0.155939632964671    |             |
| AGIWUR1311;AGIWUR14535;AGIWUR14666;AGIWUR28463;AGIWUR32471;AGIWUR43584                                                                                              |    |   |        |        |                |          |          |                      |             |
| CB4856                                                                                                                                                              | HS | X | 768596 | 770776 | WBGene00002071 | ile-2    | T04G9.3  | -0.133461111449483   | AGIWUR20795 |
| CB4856                                                                                                                                                              | HS | X | 770833 | 771882 | WBGene00020218 | T04G9.7  | T04G9.7  | 2.85188997413144e-05 |             |
| AGIWUR9050;AGIWUR38408;AGIWUR38566;AGIWUR43698                                                                                                                      |    |   |        |        |                |          |          |                      |             |
| CB4856                                                                                                                                                              | HS | X | 772353 | 775371 | WBGene00020215 | T04G9.4  | T04G9.4  | 0.152410080450718    | AGIWUR18022 |
| CB4856                                                                                                                                                              | HS | X | 777721 | 780514 | WBGene00003534 | nas-15   | T04G9.2  | 0.479539145084442    |             |

AGIWUR6169;AGIWUR9460

|        |    |   |        |        |                |         |         |                     |             |
|--------|----|---|--------|--------|----------------|---------|---------|---------------------|-------------|
| CB4856 | HS | X | 780528 | 785624 | WBGene00020217 | T04G9.6 | T04G9.6 | 0.26119296914962    | AGIWUR25013 |
| CB4856 | HS | X | 788353 | 796142 | WBGene00020214 | attf-5  | T04G9.1 | -0.0645569630397453 | AGIWUR24528 |
| CB4856 | HS | X | 802796 | 804264 | WBGene00017779 | gtr-1   | F25E2.1 | 0.0700761901686624  | AGIWUR19478 |
| CB4856 | HS | X | 806993 | 810794 | WBGene00017780 | F25E2.2 | F25E2.2 | -0.169513053669618  | AGIWUR29915 |
| CB4856 | HS | X | 811173 | 813163 | WBGene00017781 | F25E2.3 | F25E2.3 | 0.194400452792227   | AGIWUR9834  |
| CB4856 | HS | X | 813852 | 815929 | WBGene00002058 | ifd-2   | F25E2.4 | 0.187665660917199   | AGIWUR17114 |
| CB4856 | HS | X | 817927 | 825475 | WBGene00000899 | daf-3   | F25E2.5 | -0.207090671097262  |             |

AGIWUR2490;AGIWUR2974;AGIWUR8571;AGIWUR16462;AGIWUR19235;AGIWUR20554;AGIWUR23624;AGIWUR25067;AGIWUR29176;AGIWUR30818;AGIWUR40071

|        |    |   |        |        |                |          |          |                  |
|--------|----|---|--------|--------|----------------|----------|----------|------------------|
| CB4856 | HS | X | 830258 | 833760 | WBGene00018213 | F39H12.2 | F39H12.2 | 0.14840992383135 |
|--------|----|---|--------|--------|----------------|----------|----------|------------------|

AGIWUR39216

|        |    |   |        |        |                |          |          |                    |
|--------|----|---|--------|--------|----------------|----------|----------|--------------------|
| CB4856 | HS | X | 834778 | 837758 | WBGene00018212 | F39H12.1 | F39H12.1 | 0.0317154697527933 |
|--------|----|---|--------|--------|----------------|----------|----------|--------------------|

AGIWUR17434

|        |    |   |        |        |                |          |          |                   |
|--------|----|---|--------|--------|----------------|----------|----------|-------------------|
| CB4856 | HS | X | 838144 | 841493 | WBGene00018214 | F39H12.3 | F39H12.3 | 0.152350823442415 |
|--------|----|---|--------|--------|----------------|----------|----------|-------------------|

AGIWUR30604

|        |    |   |        |        |                |        |          |                    |
|--------|----|---|--------|--------|----------------|--------|----------|--------------------|
| CB4856 | HS | X | 845731 | 851516 | WBGene00018215 | igcm-1 | F39H12.4 | 0.0630039346123468 |
|--------|----|---|--------|--------|----------------|--------|----------|--------------------|

AGIWUR40820

|        |    |   |        |        |                |       |          |                    |
|--------|----|---|--------|--------|----------------|-------|----------|--------------------|
| CB4856 | HS | X | 864925 | 871089 | WBGene00018987 | lgl-1 | F56F10.4 | 0.0776547780014667 |
|--------|----|---|--------|--------|----------------|-------|----------|--------------------|

AGIWUR20878

|        |    |   |        |        |                |          |          |                   |
|--------|----|---|--------|--------|----------------|----------|----------|-------------------|
| CB4856 | HS | X | 872517 | 875948 | WBGene00018984 | F56F10.1 | F56F10.1 | 0.100116241342092 |
|--------|----|---|--------|--------|----------------|----------|----------|-------------------|

AGIWUR1210;AGIWUR8208;AGIWUR14901;AGIWUR15405;AGIWUR19430;AGIWUR37374

|        |    |   |        |        |                |        |        |                   |
|--------|----|---|--------|--------|----------------|--------|--------|-------------------|
| CB4856 | HS | X | 877239 | 879881 | WBGene00022502 | ZC13.1 | ZC13.1 | 0.026540325326728 |
|--------|----|---|--------|--------|----------------|--------|--------|-------------------|

AGIWUR4898;AGIWUR18529;AGIWUR36418

|        |    |   |        |        |                |        |        |                    |             |
|--------|----|---|--------|--------|----------------|--------|--------|--------------------|-------------|
| CB4856 | HS | X | 880629 | 883049 | WBGene00022503 | ZC13.2 | ZC13.2 | 0.0916450671865894 | AGIWUR44486 |
|--------|----|---|--------|--------|----------------|--------|--------|--------------------|-------------|

|        |    |   |        |        |                |       |        |                     |
|--------|----|---|--------|--------|----------------|-------|--------|---------------------|
| CB4856 | HS | X | 882967 | 888394 | WBGene00022504 | mam-1 | ZC13.3 | 0.00732918877713118 |
|--------|----|---|--------|--------|----------------|-------|--------|---------------------|

AGIWUR6310;AGIWUR40476

|        |    |   |        |        |                |       |        |                     |             |
|--------|----|---|--------|--------|----------------|-------|--------|---------------------|-------------|
| CB4856 | HS | X | 892228 | 898117 | WBGene00003104 | mab-7 | ZC13.4 | -0.0961975135750404 | AGIWUR18071 |
|--------|----|---|--------|--------|----------------|-------|--------|---------------------|-------------|

|        |    |   |        |        |                |         |         |                    |
|--------|----|---|--------|--------|----------------|---------|---------|--------------------|
| CB4856 | HS | X | 899508 | 902599 | WBGene00044557 | ZC13.10 | ZC13.10 | 0.0603172621482573 |
|--------|----|---|--------|--------|----------------|---------|---------|--------------------|

AGIWUR2564;AGIWUR42796

|        |    |   |        |        |                |          |          |                    |
|--------|----|---|--------|--------|----------------|----------|----------|--------------------|
| CB4856 | HS | X | 913290 | 914853 | WBGene00018078 | F35H12.6 | F35H12.6 | 0.0890821576765548 |
|--------|----|---|--------|--------|----------------|----------|----------|--------------------|

AGIWUR19934

|        |    |   |        |        |                |        |          |                   |
|--------|----|---|--------|--------|----------------|--------|----------|-------------------|
| CB4856 | HS | X | 915874 | 918290 | WBGene00004769 | sel-12 | F35H12.3 | 0.153043113405326 |
|--------|----|---|--------|--------|----------------|--------|----------|-------------------|

AGIWUR8596;AGIWUR15902

|        |    |   |        |        |                |          |          |                   |
|--------|----|---|--------|--------|----------------|----------|----------|-------------------|
| CB4856 | HS | X | 918353 | 920193 | WBGene00018077 | F35H12.5 | F35H12.5 | 0.159564779020201 |
|--------|----|---|--------|--------|----------------|----------|----------|-------------------|

AGIWUR39745

|        |    |   |        |        |                |        |          |                      |
|--------|----|---|--------|--------|----------------|--------|----------|----------------------|
| CB4856 | HS | X | 920200 | 924511 | WBGene00018076 | pifk-1 | F35H12.4 | -0.00545817092848111 |
|--------|----|---|--------|--------|----------------|--------|----------|----------------------|

AGIWUR39475

|        |    |   |        |        |                |        |          |                   |
|--------|----|---|--------|--------|----------------|--------|----------|-------------------|
| CB4856 | HS | X | 924964 | 932255 | WBGene00018075 | tbc-11 | F35H12.2 | 0.234755766771247 |
|--------|----|---|--------|--------|----------------|--------|----------|-------------------|

|                                                                                     |    |   |         |         |                |          |          |                      |
|-------------------------------------------------------------------------------------|----|---|---------|---------|----------------|----------|----------|----------------------|
| AGIWUR39704                                                                         |    |   |         |         |                |          |          |                      |
| CB4856                                                                              | HS | X | 933804  | 934906  | WBGene00018079 | F35H12.7 | F35H12.7 | 0.0900604727789833   |
| AGIWUR12471                                                                         |    |   |         |         |                |          |          |                      |
| CB4856                                                                              | HS | X | 935460  | 937704  | WBGene00018074 | F35H12.1 | F35H12.1 | 0.110284260307847    |
| AGIWUR17036                                                                         |    |   |         |         |                |          |          |                      |
| CB4856                                                                              | HS | X | 938516  | 942608  | WBGene00018779 | F53H8.3  | F53H8.3  | 0.159683513480354    |
| CB4856                                                                              | HS | X | 944826  | 948883  | WBGene00004893 | sms-2    | F53H8.4  | -0.118714850662084   |
| AGIWUR10675;AGIWUR16059;AGIWUR19890;AGIWUR31185;AGIWUR35157;AGIWUR36174;AGIWUR43169 |    |   |         |         |                |          |          |                      |
| CB4856                                                                              | HS | X | 950782  | 954233  | WBGene00000195 | arr-1    | F53H8.2  | -0.255129615145279   |
| CB4856                                                                              | HS | X | 954839  | 957762  | WBGene00000164 | apm-3    | F53H8.1  | 0.118473292265357    |
| AGIWUR12166;AGIWUR44192;AGIWUR45022                                                 |    |   |         |         |                |          |          |                      |
| CB4856                                                                              | HS | X | 957881  | 960568  | WBGene00016642 | chil-10  | C44C1.2  | -0.174210653671572   |
| CB4856                                                                              | HS | X | 960569  | 963202  | WBGene00003563 | ncs-1    | C44C1.3  | 0.0441042342121154   |
| CB4856                                                                              | HS | X | 969074  | 970270  | WBGene00016645 | C44C1.6  | C44C1.6  | 0.168556553616627    |
| CB4856                                                                              | HS | X | 970583  | 974816  | WBGene00016643 | vps-45   | C44C1.4  | 0.084754701592173    |
| AGIWUR8956;AGIWUR18258;AGIWUR38973                                                  |    |   |         |         |                |          |          |                      |
| CB4856                                                                              | HS | X | 975525  | 978445  | WBGene00016644 | abhd-3.2 | C44C1.5  | 0.283784927645804    |
| AGIWUR12864                                                                         |    |   |         |         |                |          |          |                      |
| CB4856                                                                              | HS | X | 980776  | 983030  | WBGene00016641 | C44C1.1  | C44C1.1  | 0.211438166082388    |
| CB4856                                                                              | HS | X | 984581  | 991456  | WBGene00000958 | dgk-1    | C09E10.2 | -0.241045410921626   |
| AGIWUR5498                                                                          |    |   |         |         |                |          |          |                      |
| CB4856                                                                              | HS | X | 1004337 | 1009412 | WBGene00018861 | cutl-21  | F55A4.10 | 0.0276888405363227   |
| AGIWUR34441                                                                         |    |   |         |         |                |          |          |                      |
| CB4856                                                                              | HS | X | 1011501 | 1012347 | WBGene00023069 | rncs-1   | F55A4.9  | -0.106687684099303   |
| CB4856                                                                              | HS | X | 1012731 | 1017567 | WBGene00018854 | nlf-1    | F55A4.2  | 0.0918513137919312   |
| AGIWUR3564;AGIWUR4708;AGIWUR21428;AGIWUR23400;AGIWUR32736;AGIWUR41565               |    |   |         |         |                |          |          |                      |
| CB4856                                                                              | HS | X | 1023477 | 1023780 | WBGene00018855 | F55A4.3  | F55A4.3  | -0.204626582969625   |
| CB4856                                                                              | HS | X | 1024646 | 1025838 | WBGene00018856 | F55A4.4  | F55A4.4  | -0.00302520425738795 |
| CB4856                                                                              | HS | X | 1027673 | 1035286 | WBGene00018857 | stau-1   | F55A4.5  | 0.00981488779506456  |
| AGIWUR10835;AGIWUR23559                                                             |    |   |         |         |                |          |          |                      |
| CB4856                                                                              | HS | X | 1035548 | 1037046 | WBGene00018853 | sec-22   | F55A4.1  | 0.235211276361365    |
| CB4856                                                                              | HS | X | 1037023 | 1038447 | WBGene00018859 | F55A4.7  | F55A4.7  | 0.0343784283101449   |
| AGIWUR4952;AGIWUR5421;AGIWUR10067;AGIWUR14857;AGIWUR20097;AGIWUR24312;AGIWUR37548   |    |   |         |         |                |          |          |                      |
| CB4856                                                                              | HS | X | 1038514 | 1046206 | WBGene00018860 | vpat-1   | F55A4.8  | 0.140242455125992    |
| AGIWUR2518;AGIWUR5258;AGIWUR18590;AGIWUR29451                                       |    |   |         |         |                |          |          |                      |
| CB4856                                                                              | HS | X | 1054081 | 1056843 | WBGene00003565 | ncs-3    | K03E6.3  | -0.0997432645719094  |
| CB4856                                                                              | HS | X | 1057487 | 1062447 | WBGene00006741 | unc-1    | K03E6.5  | -0.00736718394956171 |
| AGIWUR2302;AGIWUR14006;AGIWUR20781                                                  |    |   |         |         |                |          |          |                      |
| CB4856                                                                              | HS | X | 1066789 | 1069033 | WBGene00019364 | mksr-1   | K03E6.4  | -0.04586789316122    |



|                                                                                                           |    |   |         |         |                |          |          |                       |             |
|-----------------------------------------------------------------------------------------------------------|----|---|---------|---------|----------------|----------|----------|-----------------------|-------------|
| CB4856                                                                                                    | HS | X | 1073908 | 1079451 | WBGene00002988 | lim-6    | K03E6.1  | 0.20341067015076      |             |
| AGIWUR8993;AGIWUR10111;AGIWUR20616;AGIWUR21171;AGIWUR36958;AGIWUR43242                                    |    |   |         |         |                |          |          |                       |             |
| CB4856                                                                                                    | HS | X | 1079446 | 1080653 | WBGene00003991 | pfn-3    | K03E6.6  | 0.0943219687200729    |             |
| AGIWUR14050;AGIWUR16785;AGIWUR17554;AGIWUR22606;AGIWUR34446;AGIWUR35978                                   |    |   |         |         |                |          |          |                       |             |
| CB4856                                                                                                    | HS | X | 1084214 | 1088148 | WBGene00019365 | rei-2    | K03E6.7  | 0.0914397557853661    | AGIWUR9250  |
| CB4856                                                                                                    | HS | X | 1095547 | 1097013 | WBGene00018634 | F49E7.2  | F49E7.2  | 0.232636860955051     | AGIWUR9891  |
| CB4856                                                                                                    | HS | X | 1097152 | 1103320 | WBGene00004377 | rme-6    | F49E7.1  | -0.000800813339481454 |             |
| AGIWUR1339;AGIWUR17283;AGIWUR18352;AGIWUR27630;AGIWUR32031;AGIWUR35210;AGIWUR37190;AGIWUR39437            |    |   |         |         |                |          |          |                       |             |
| CB4856                                                                                                    | HS | X | 1104212 | 1106247 | WBGene00002062 | ife-4    | C05D9.5  | 0.113962605423621     | AGIWUR2875  |
| CB4856                                                                                                    | HS | X | 1107969 | 1110110 | WBGene00015473 | C05D9.4  | C05D9.4  | -0.0523223927928296   | AGIWUR3752  |
| CB4856                                                                                                    | HS | X | 1111903 | 1116794 | WBGene00015472 | C05D9.3  | C05D9.3  | 0.139917867510457     | AGIWUR42743 |
| CB4856                                                                                                    | HS | X | 1117192 | 1119405 | WBGene00015474 | C05D9.7  | C05D9.7  | -0.0329462323726037   | AGIWUR25615 |
| CB4856                                                                                                    | HS | X | 1122422 | 1124308 | WBGene00015476 | C05D9.9  | C05D9.9  | 0.0944435237299714    |             |
| AGIWUR28491;AGIWUR45071                                                                                   |    |   |         |         |                |          |          |                       |             |
| CB4856                                                                                                    | HS | X | 1125170 | 1128288 | WBGene00015471 | lmp-2    | C05D9.2  | 0.295538660213396     | AGIWUR42105 |
| CB4856                                                                                                    | HS | X | 1128986 | 1132925 | WBGene00004927 | snx-1    | C05D9.1  | -0.0872502843350293   | AGIWUR40310 |
| CB4856                                                                                                    | HS | X | 1132993 | 1148585 | WBGene00020128 | R193.2   | R193.2   | -0.066287413740282    |             |
| AGIWUR619;AGIWUR14015;AGIWUR19955;AGIWUR21988;AGIWUR24806;AGIWUR31506;AGIWUR33612;AGIWUR39536;AGIWUR41598 |    |   |         |         |                |          |          |                       |             |
| CB4856                                                                                                    | HS | X | 1151547 | 1153545 | WBGene00020129 | R193.3   | R193.3   | -0.00341787561748053  | AGIWUR33696 |
| CB4856                                                                                                    | HS | X | 1154948 | 1155613 | WBGene00020127 | R193.1   | R193.1   | 0.018020073381277     | AGIWUR37642 |
| CB4856                                                                                                    | HS | X | 1163153 | 1177172 | WBGene00020490 | tmc-1    | T13G4.3  | 0.127139492414298     | AGIWUR5257  |
| CB4856                                                                                                    | HS | X | 1180284 | 1187932 | WBGene00020489 | hot-8    | T13G4.2  | -0.0446831375340064   | AGIWUR17480 |
| CB4856                                                                                                    | HS | X | 1188453 | 1190752 | WBGene00020491 | T13G4.4  | T13G4.4  | 0.119826205747565     | AGIWUR41536 |
| CB4856                                                                                                    | HS | X | 1193148 | 1193858 | WBGene00020488 | T13G4.1  | T13G4.1  | -0.0817784985031462   | AGIWUR44589 |
| CB4856                                                                                                    | HS | X | 1195108 | 1198481 | WBGene00020492 | T13G4.5  | T13G4.5  | 0.112791574647085     | AGIWUR28194 |
| CB4856                                                                                                    | HS | X | 1202606 | 1203763 | WBGene00020494 | T13G4.7  | T13G4.7  | -0.0356967221616786   | AGIWUR29871 |
| CB4856                                                                                                    | HS | X | 1209411 | 1210683 | WBGene00016724 | C46H3.1  | C46H3.1  | 0.0812325683969917    | AGIWUR22802 |
| CB4856                                                                                                    | HS | X | 1211760 | 1230758 | WBGene00016725 | C46H3.2  | C46H3.2  | -0.0817280236957849   |             |
| AGIWUR35176;AGIWUR42826                                                                                   |    |   |         |         |                |          |          |                       |             |
| CB4856                                                                                                    | HS | X | 1245984 | 1247892 | WBGene00006635 | tsp-9    | C25G6.2  | 0.247016297400801     | AGIWUR37946 |
| CB4856                                                                                                    | HS | X | 1247833 | 1249838 | WBGene00016109 | C25G6.4  | C25G6.4  | -0.141260340312729    |             |
| AGIWUR21889;AGIWUR30220;AGIWUR35983;AGIWUR37039                                                           |    |   |         |         |                |          |          |                       |             |
| CB4856                                                                                                    | HS | X | 1270898 | 1272561 | WBGene00016107 | C25G6.1  | C25G6.1  | 0.129234482800468     | AGIWUR15410 |
| CB4856                                                                                                    | HS | X | 1272788 | 1275416 | WBGene00016874 | C52B11.5 | C52B11.5 | 0.220029555399737     |             |
| AGIWUR34464                                                                                               |    |   |         |         |                |          |          |                       |             |
| CB4856                                                                                                    | HS | X | 1295278 | 1298823 | WBGene00016872 | dop-4    | C52B11.3 | 0.259379976189013     |             |
| AGIWUR7407                                                                                                |    |   |         |         |                |          |          |                       |             |
| CB4856                                                                                                    | HS | X | 1300149 | 1309504 | WBGene00016871 | inso-1   | C52B11.2 | -0.0318496766284646   |             |
| AGIWUR5254;AGIWUR19809;AGIWUR21664;AGIWUR23766;AGIWUR26079;AGIWUR28297;AGIWUR40402                        |    |   |         |         |                |          |          |                       |             |

|                                                                                                                                                             |    |   |         |         |                |          |          |                      |             |
|-------------------------------------------------------------------------------------------------------------------------------------------------------------|----|---|---------|---------|----------------|----------|----------|----------------------|-------------|
| CB4856                                                                                                                                                      | HS | X | 1311605 | 1316634 | WBGene00019272 | H42K12.3 | H42K12.3 | 0.152364473634282    |             |
| AGIWUR33012                                                                                                                                                 |    |   |         |         |                |          |          |                      |             |
| CB4856                                                                                                                                                      | HS | X | 1321353 | 1327985 | WBGene00003965 | pdh-1    | H42K12.1 | -0.0560117879706077  |             |
| AGIWUR29723                                                                                                                                                 |    |   |         |         |                |          |          |                      |             |
| CB4856                                                                                                                                                      | HS | X | 1328143 | 1329947 | WBGene00017666 | F21E9.2  | F21E9.2  | -0.130829461574693   | AGIWUR18182 |
| CB4856                                                                                                                                                      | HS | X | 1335363 | 1336915 | WBGene00017667 | ttr-37   | F21E9.3  | -0.181897442600157   | AGIWUR28934 |
| CB4856                                                                                                                                                      | HS | X | 1343837 | 1344410 | WBGene00017668 | ins-39   | F21E9.4  | 0.480468286139684    | AGIWUR19013 |
| CB4856                                                                                                                                                      | HS | X | 1355556 | 1356482 | WBGene00017670 | F21E9.6  | F21E9.6  | 0.0351847045676212   | AGIWUR33293 |
| CB4856                                                                                                                                                      | HS | X | 1357771 | 1358532 | WBGene00018940 | F56C3.3  | F56C3.3  | 0.172407935991153    | AGIWUR20347 |
| CB4856                                                                                                                                                      | HS | X | 1359720 | 1362036 | WBGene00018941 | F56C3.4  | F56C3.4  | -0.0322700891871595  | AGIWUR22669 |
| CB4856                                                                                                                                                      | HS | X | 1362816 | 1363997 | WBGene00018942 | F56C3.5  | F56C3.5  | -0.0426016109960123  | AGIWUR12830 |
| CB4856                                                                                                                                                      | HS | X | 1365474 | 1367516 | WBGene00018943 | dgn-2    | F56C3.6  | -0.0179490427617539  |             |
| AGIWUR15039;AGIWUR33689                                                                                                                                     |    |   |         |         |                |          |          |                      |             |
| CB4856                                                                                                                                                      | HS | X | 1370543 | 1370786 | WBGene00018944 | F56C3.7  | F56C3.7  | -0.0819467520386983  | AGIWUR3068  |
| CB4856                                                                                                                                                      | HS | X | 1372012 | 1374630 | WBGene00018939 | fbxa-190 | F56C3.2  | -0.0101403663666151  |             |
| AGIWUR11442                                                                                                                                                 |    |   |         |         |                |          |          |                      |             |
| CB4856                                                                                                                                                      | HS | X | 1381375 | 1381665 | WBGene00044558 | F56C3.10 | F56C3.10 | 0.0053602247855089   |             |
| AGIWUR2372;AGIWUR19801;AGIWUR30724;AGIWUR32967;AGIWUR42194                                                                                                  |    |   |         |         |                |          |          |                      |             |
| CB4856                                                                                                                                                      | HS | X | 1384318 | 1384638 | WBGene00018945 | F56C3.8  | F56C3.8  | -0.2824770835511     | AGIWUR18707 |
| CB4856                                                                                                                                                      | HS | X | 1386248 | 1388160 | WBGene00018938 | F56C3.1  | F56C3.1  | 0.0172996256878539   | AGIWUR37168 |
| CB4856                                                                                                                                                      | HS | X | 1391800 | 1393991 | WBGene00018946 | F56C3.9  | F56C3.9  | -0.271849609566397   | AGIWUR26315 |
| CB4856                                                                                                                                                      | HS | X | 1396353 | 1396551 | WBGene00019267 | H39E20.1 | H39E20.1 | 0.0224718743136663   |             |
| AGIWUR10559                                                                                                                                                 |    |   |         |         |                |          |          |                      |             |
| CB4856                                                                                                                                                      | HS | X | 1398824 | 1400751 | WBGene00022731 | ZK402.5  | ZK402.5  | -0.578604949072609   | AGIWUR27189 |
| CB4856                                                                                                                                                      | HS | X | 1404271 | 1406101 | WBGene00022728 | ZK402.1  | ZK402.1  | 0.13338713433727     | AGIWUR22523 |
| CB4856                                                                                                                                                      | HS | X | 1408836 | 1410652 | WBGene00000025 | abu-2    | F19G12.7 | -0.139124056828122   |             |
| AGIWUR19145                                                                                                                                                 |    |   |         |         |                |          |          |                      |             |
| CB4856                                                                                                                                                      | HS | X | 1413144 | 1416545 | WBGene00005244 | srh-19   | F19G12.5 | -0.195214550911373   |             |
| AGIWUR14945                                                                                                                                                 |    |   |         |         |                |          |          |                      |             |
| CB4856                                                                                                                                                      | HS | X | 1417304 | 1417477 | WBGene00017612 | F19G12.4 | F19G12.4 | -0.0533686987557092  |             |
| AGIWUR1694;AGIWUR5185;AGIWUR16213                                                                                                                           |    |   |         |         |                |          |          |                      |             |
| CB4856                                                                                                                                                      | HS | X | 1425727 | 1426164 | WBGene00017611 | F19G12.3 | F19G12.3 |                      |             |
| -0.00752688209791152 AGIWUR32948                                                                                                                            |    |   |         |         |                |          |          |                      |             |
| CB4856                                                                                                                                                      | HS | X | 1427774 | 1430871 | WBGene00017610 | F19G12.2 | F19G12.2 | 0.207925263748755    |             |
| AGIWUR40163                                                                                                                                                 |    |   |         |         |                |          |          |                      |             |
| CB4856                                                                                                                                                      | HS | X | 1439261 | 1440261 | WBGene00021046 | sedl-1   | W05H7.3  | 0.0446726244427911   | AGIWUR2320  |
| CB4856                                                                                                                                                      | HS | X | 1440366 | 1446643 | WBGene00021047 | zfp-3    | W05H7.4  | -0.00783353959207034 |             |
| AGIWUR10664;AGIWUR21164;AGIWUR22713;AGIWUR25733;AGIWUR33192;AGIWUR33399;AGIWUR37599;AGIWUR40048;AGIWUR40099;AGIWUR40219;AGIWUR42218;AGIWUR42733;AGIWUR43726 |    |   |         |         |                |          |          |                      |             |

|                                                                                                                                              |    |   |         |         |                |           |           |                     |             |
|----------------------------------------------------------------------------------------------------------------------------------------------|----|---|---------|---------|----------------|-----------|-----------|---------------------|-------------|
| CB4856                                                                                                                                       | HS | X | 1450768 | 1452306 | WBGene00021044 | W05H7.1   | W05H7.1   | 0.068799363451161   | AGIWUR28997 |
| CB4856                                                                                                                                       | HS | X | 1452695 | 1454000 | WBGene00016997 | cebp-1    | D1005.3   | 0.0277236623342603  | AGIWUR7092  |
| CB4856                                                                                                                                       | HS | X | 1459047 | 1462793 | WBGene00016996 | D1005.2   | D1005.2   | 0.104985310382098   | AGIWUR38343 |
| CB4856                                                                                                                                       | HS | X | 1463110 | 1464799 | WBGene00017000 | D1005.6   | D1005.6   | 1.20576789792075    | AGIWUR21560 |
| CB4856                                                                                                                                       | HS | X | 1470998 | 1472919 | WBGene00016999 | D1005.5   | D1005.5   | -0.121626464086245  | AGIWUR25343 |
| CB4856                                                                                                                                       | HS | X | 1479542 | 1484398 | WBGene00016995 | acly-1    | D1005.1   | -0.0790316997818374 |             |
| AGIWUR2651;AGIWUR19932;AGIWUR34267;AGIWUR38476                                                                                               |    |   |         |         |                |           |           |                     |             |
| CB4856                                                                                                                                       | HS | X | 1484853 | 1485818 | WBGene00016998 | D1005.4   | D1005.4   | -0.0155843185073108 |             |
| AGIWUR6861;AGIWUR20502;AGIWUR36467;AGIWUR37562                                                                                               |    |   |         |         |                |           |           |                     |             |
| CB4856                                                                                                                                       | HS | X | 1486473 | 1489326 | WBGene00000988 | dhs-25    | F09E10.3  | 0.316318629056383   |             |
| AGIWUR6958                                                                                                                                   |    |   |         |         |                |           |           |                     |             |
| CB4856                                                                                                                                       | HS | X | 1489672 | 1494356 | WBGene00017295 | F09E10.5  | F09E10.5  | 0.0805951537498473  |             |
| AGIWUR22470                                                                                                                                  |    |   |         |         |                |           |           |                     |             |
| CB4856                                                                                                                                       | HS | X | 1495074 | 1497681 | WBGene00017296 | F09E10.6  | F09E10.6  | 0.0420180747815539  |             |
| AGIWUR15544                                                                                                                                  |    |   |         |         |                |           |           |                     |             |
| CB4856                                                                                                                                       | HS | X | 1500180 | 1501852 | WBGene00017297 | F09E10.7  | F09E10.7  | 0.0995620665858681  |             |
| AGIWUR3344;AGIWUR5999;AGIWUR7563;AGIWUR14284;AGIWUR21040;AGIWUR21617;AGIWUR24684;AGIWUR26365;AGIWUR31714;AGIWUR33549;AGIWUR36843;AGIWUR43253 |    |   |         |         |                |           |           |                     |             |
| CB4856                                                                                                                                       | HS | X | 1502860 | 1503278 | WBGene00017294 | F09E10.1  | F09E10.1  | 0.0558744800229611  |             |
| AGIWUR40122                                                                                                                                  |    |   |         |         |                |           |           |                     |             |
| CB4856                                                                                                                                       | HS | X | 1504131 | 1504841 | WBGene00006650 | tts-1     | F09E10.11 | -0.0530392547055931 |             |
| AGIWUR9901;AGIWUR15248;AGIWUR21990;AGIWUR22247;AGIWUR25378;AGIWUR28345                                                                       |    |   |         |         |                |           |           |                     |             |
| CB4856                                                                                                                                       | HS | X | 1505190 | 1505626 | WBGene00022982 | F09E10.10 | F09E10.10 | 0.110715590176359   |             |
| AGIWUR1241;AGIWUR1434;AGIWUR10913;AGIWUR26832;AGIWUR36065                                                                                    |    |   |         |         |                |           |           |                     |             |
| CB4856                                                                                                                                       | HS | X | 1510480 | 1521487 | WBGene00017298 | toca-1    | F09E10.8  | 0.0714750529970125  |             |
| AGIWUR15186                                                                                                                                  |    |   |         |         |                |           |           |                     |             |
| CB4856                                                                                                                                       | HS | X | 1536366 | 1540287 | WBGene00019436 | K06A9.2   | K06A9.2   | -0.118729550465933  | AGIWUR8972  |
| CB4856                                                                                                                                       | HS | X | 1547505 | 1560124 | WBGene00019435 | K06A9.1   | K06A9.1   | 0.0176979069492798  |             |
| AGIWUR976;AGIWUR18127                                                                                                                        |    |   |         |         |                |           |           |                     |             |
| CB4856                                                                                                                                       | HS | X | 1568678 | 1572854 | WBGene00019146 | H02F09.3  | H02F09.3  | 0.505617533794051   |             |
| AGIWUR14894                                                                                                                                  |    |   |         |         |                |           |           |                     |             |
| CB4856                                                                                                                                       | HS | X | 1573220 | 1574010 | WBGene00019145 | H02F09.2  | H02F09.2  | 0.368997752682804   |             |
| AGIWUR30326                                                                                                                                  |    |   |         |         |                |           |           |                     |             |
| CB4856                                                                                                                                       | HS | X | 1576637 | 1591296 | WBGene00006955 | wrt-9     | B0344.2   | -0.0437516344506679 |             |
| AGIWUR1818;AGIWUR5585                                                                                                                        |    |   |         |         |                |           |           |                     |             |
| CB4856                                                                                                                                       | HS | X | 1604906 | 1619115 | WBGene00019188 | H11E01.3  | H11E01.3  | 0.0386898523799122  |             |
| AGIWUR2438;AGIWUR14187;AGIWUR17474;AGIWUR31358;AGIWUR41516                                                                                   |    |   |         |         |                |           |           |                     |             |
| CB4856                                                                                                                                       | HS | X | 1621481 | 1625247 | WBGene00019187 | H11E01.2  | H11E01.2  | 0.0279616818830917  |             |
| AGIWUR17159                                                                                                                                  |    |   |         |         |                |           |           |                     |             |

|                                                                         |    |   |         |         |                |           |           |                      |             |
|-------------------------------------------------------------------------|----|---|---------|---------|----------------|-----------|-----------|----------------------|-------------|
| CB4856                                                                  | HS | X | 1628137 | 1629454 | WBGene00019186 | fbxb-58   | H11E01.1  | -0.095981766553999   |             |
| AGIWUR41566                                                             |    |   |         |         |                |           |           |                      |             |
| CB4856                                                                  | HS | X | 1630615 | 1635727 | WBGene00022723 | ZK380.2   | ZK380.2   | -0.0202872158254852  | AGIWUR11129 |
| CB4856                                                                  | HS | X | 1651419 | 1653897 | WBGene00022724 | ZK380.4   | ZK380.4   | 0.0612806487315902   | AGIWUR12753 |
| CB4856                                                                  | HS | X | 1655522 | 1656936 | WBGene00006551 | tbx-32    | ZK380.1   | -0.373719422159166   | AGIWUR10520 |
| CB4856                                                                  | HS | X | 1667019 | 1668848 | WBGene00019991 | R09H3.3   | R09H3.3   | 0.0783219644754354   | AGIWUR16590 |
| CB4856                                                                  | HS | X | 1671148 | 1674165 | WBGene00006550 | tbx-31    | C36C9.2   | -0.191465819640046   | AGIWUR28414 |
| CB4856                                                                  | HS | X | 1676205 | 1678121 | WBGene00016486 | fbxa-170  | C36C9.3   | -0.0099281907651747  |             |
| AGIWUR11766;AGIWUR14810;AGIWUR17800                                     |    |   |         |         |                |           |           |                      |             |
| CB4856                                                                  | HS | X | 1681752 | 1681886 | WBGene00219849 | C36C9.10  | C36C9.10  | -0.0723851621275848  |             |
| AGIWUR20054;AGIWUR26371;AGIWUR40994                                     |    |   |         |         |                |           |           |                      |             |
| CB4856                                                                  | HS | X | 1682954 | 1686419 | WBGene00016485 | meg-4     | C36C9.1   | 0.127307940271897    |             |
| AGIWUR5290;AGIWUR14478                                                  |    |   |         |         |                |           |           |                      |             |
| CB4856                                                                  | HS | X | 1699788 | 1703938 | WBGene00016488 | C36C9.5   | C36C9.5   | 0.408425935921159    | AGIWUR25128 |
| CB4856                                                                  | HS | X | 1706370 | 1706638 | WBGene00017224 | F07G6.5   | F07G6.5   | 0.0146593710086087   | AGIWUR37961 |
| CB4856                                                                  | HS | X | 1710293 | 1711212 | WBGene00017225 | fbxa-52   | F07G6.6   | 0.0220712194058237   | AGIWUR45205 |
| CB4856                                                                  | HS | X | 1714351 | 1715487 | WBGene00044583 | F07G6.9   | F07G6.9   | -0.062150001623805   |             |
| AGIWUR6243;AGIWUR29401;AGIWUR39325;AGIWUR44809                          |    |   |         |         |                |           |           |                      |             |
| CB4856                                                                  | HS | X | 1716442 | 1718568 | WBGene00017226 | fbxa-53   | F07G6.7   | -0.00316518161000623 |             |
| AGIWUR7155;AGIWUR25529;AGIWUR32530                                      |    |   |         |         |                |           |           |                      |             |
| CB4856                                                                  | HS | X | 1720093 | 1720428 | WBGene00017227 | F07G6.8   | F07G6.8   | -0.325711756459321   |             |
| AGIWUR21530;AGIWUR23105;AGIWUR23920;AGIWUR30816;AGIWUR36057;AGIWUR40612 |    |   |         |         |                |           |           |                      |             |
| CB4856                                                                  | HS | X | 1727356 | 1729154 | WBGene00017222 | F07G6.2   | F07G6.2   | -0.0467816164377979  | AGIWUR44319 |
| CB4856                                                                  | HS | X | 1729858 | 1731819 | WBGene00017221 | dgn-3     | F07G6.1   | -0.271636391626118   | AGIWUR5604  |
| CB4856                                                                  | HS | X | 1737906 | 1739229 | WBGene00045271 | F07G6.10  | F07G6.10  | 0.113761514744805    |             |
| AGIWUR31342                                                             |    |   |         |         |                |           |           |                      |             |
| CB4856                                                                  | HS | X | 1745096 | 1746217 | WBGene00022292 | Y75D11A.3 | Y75D11A.3 | 0.0815900023471521   |             |
| AGIWUR1373;AGIWUR2826;AGIWUR4858;AGIWUR13158;AGIWUR41378                |    |   |         |         |                |           |           |                      |             |
| CB4856                                                                  | HS | X | 1777355 | 1778146 | WBGene00001237 | elc-2     | W03H1.2   | 0.0772012578185537   | AGIWUR8069  |
| CB4856                                                                  | HS | X | 1786907 | 1788405 | WBGene00000185 | arg-1     | F31A9.3   | 0.00650937581216304  |             |
| AGIWUR12589;AGIWUR18681;AGIWUR19310;AGIWUR34927;AGIWUR44042             |    |   |         |         |                |           |           |                      |             |
| CB4856                                                                  | HS | X | 1794816 | 1795673 | WBGene00017941 | F31A9.2   | F31A9.2   | 0.0732205991683994   | AGIWUR2252  |
| CB4856                                                                  | HS | X | 1806833 | 1807767 | WBGene00015771 | got-1.3   | C14E2.2   | -0.0251679924670309  | AGIWUR33854 |
| CB4856                                                                  | HS | X | 1810686 | 1811536 | WBGene00015772 | C14E2.3   | C14E2.3   | -0.188489461797987   | AGIWUR15532 |
| CB4856                                                                  | HS | X | 1816361 | 1816762 | WBGene00044562 | C14E2.7   | C14E2.7   | 0.0040930430088757   |             |
| AGIWUR1121;AGIWUR9109;AGIWUR24714;AGIWUR42117;AGIWUR44298               |    |   |         |         |                |           |           |                      |             |
| CB4856                                                                  | HS | X | 1823616 | 1825340 | WBGene00015774 | C14E2.5   | C14E2.5   | -0.0854250814140762  | AGIWUR7100  |
| CB4856                                                                  | HS | X | 1826466 | 1827354 | WBGene00015770 | C14E2.1   | C14E2.1   | -0.0411979758349936  | AGIWUR10204 |
| CB4856                                                                  | HS | X | 1827738 | 1828487 | WBGene00015775 | C14E2.6   | C14E2.6   | 0.336675682730016    | AGIWUR656   |

|                                                                       |   |         |         |                 |          |          |                     |             |
|-----------------------------------------------------------------------|---|---------|---------|-----------------|----------|----------|---------------------|-------------|
| CB4856 HS                                                             | X | 1834445 | 1839024 | WBGene00020829  | T26C11.3 | T26C11.3 | 0.194285747334391   |             |
| AGIWUR27549                                                           |   |         |         |                 |          |          |                     |             |
| CB4856 HS                                                             | X | 1840554 | 1845565 | WBGene00020830  | T26C11.4 | T26C11.4 | -0.124042681790684  |             |
| AGIWUR24882                                                           |   |         |         |                 |          |          |                     |             |
| CB4856 HS                                                             | X | 1846608 | 1848675 | WBGene00000462  | ceh-41   | T26C11.5 | 0.076335561086597   |             |
| AGIWUR30638                                                           |   |         |         |                 |          |          |                     |             |
| CB4856 HS                                                             | X | 1848795 | 1852736 | WBGene00000444  | ceh-21   | T26C11.6 | -0.125811823528685  |             |
| AGIWUR20034;AGIWUR42019                                               |   |         |         |                 |          |          |                     |             |
| CB4856 HS                                                             | X | 1853874 | 1856189 | WBGene00000460  | ceh-39   | T26C11.7 | -0.403599382135351  |             |
| AGIWUR17728                                                           |   |         |         |                 |          |          |                     |             |
| CB4856 HS                                                             | X | 1860722 | 1863543 | WBGene00044563  | T26C11.8 | T26C11.8 | -0.133168931425574  |             |
| AGIWUR13940;AGIWUR41424                                               |   |         |         |                 |          |          |                     |             |
| CB4856 HS                                                             | X | 1865246 | 1866638 | WBGene00006560  | tbx-41   | T26C11.1 | -0.0611734850870365 |             |
| AGIWUR10415                                                           |   |         |         |                 |          |          |                     |             |
| CB4856 HS                                                             | X | 1892187 | 1893272 | WBGene00015118  | B0294.3  | B0294.3  | 0.0166304205766972  |             |
| AGIWUR903;AGIWUR5963;AGIWUR22701;AGIWUR25360;AGIWUR36315              |   |         |         |                 |          |          |                     |             |
| CB4856 HS                                                             | X | 1896662 | 1897343 | WBGene00015117  | B0294.1  | B0294.1  | -0.185510614826608  | AGIWUR37631 |
| CB4856 HS                                                             | X | 1910943 | 1913357 | WBGene00022508  | ZC53.1   | ZC53.1   | -0.316336293955057  | AGIWUR16565 |
| CB4856 HS                                                             | X | 1915258 | 1917162 | WBGene00004352  | rgs-9    | ZC53.7   | 0.145493147884947   | AGIWUR2771  |
| CB4856 HS                                                             | X | 1917437 | 1919755 | WBGene00022512  | dot-1.5  | ZC53.6   | 0.0476387091015695  | AGIWUR38437 |
| CB4856 HS                                                             | X | 1923723 | 1924238 | WBGene00022509  | ZC53.2   | ZC53.2   | 0.100505785100863   | AGIWUR14607 |
| CB4856 HS                                                             | X | 1925750 | 1937689 | WBGene00022511  | ZC53.4   | ZC53.4   | -0.0738153183035779 | AGIWUR2275  |
| CB4856 HS                                                             | X | 1937947 | 1942199 | WBGene00021987  | fbxa-40  | Y59E1A.1 | 0.165565165998721   |             |
| AGIWUR6971                                                            |   |         |         |                 |          |          |                     |             |
| CB4856 HS                                                             | X | 1955550 | 1956824 | WBGene00018691  | fbxa-17  | F52D2.10 | -0.0427470833868835 |             |
| AGIWUR44400                                                           |   |         |         |                 |          |          |                     |             |
| CB4856 HS                                                             | X | 1962573 | 1966188 | WBGene00018689  | F52D2.7  | F52D2.7  | 0.182271603645059   | AGIWUR5190  |
| CB4856 HS                                                             | X | 1969875 | 1972657 | WBGene00006139  | str-79   | F52D2.9  | 0.0521052201324803  | AGIWUR34890 |
| CB4856 HS                                                             | X | 1973796 | 1974523 | WBGene00018687  | F52D2.5  | F52D2.5  | -0.0122588598553159 |             |
| AGIWUR4221;AGIWUR5847;AGIWUR24939;AGIWUR26041;AGIWUR36663;AGIWUR42686 |   |         |         |                 |          |          |                     |             |
| CB4856 HS                                                             | X | 1978014 | 1980938 | WBGene000219451 | F52D2.12 | F52D2.12 | -0.296824005502724  |             |
| AGIWUR34636                                                           |   |         |         |                 |          |          |                     |             |
| CB4856 HS                                                             | X | 1983714 | 1984833 | WBGene00018690  | fbxa-46  | F52D2.8  | 0.0440561028653446  |             |
| AGIWUR9476;AGIWUR13269;AGIWUR27954;AGIWUR29303                        |   |         |         |                 |          |          |                     |             |
| CB4856 HS                                                             | X | 1986429 | 1989607 | WBGene00001569  | meg-3    | F52D2.4  | 0.066201029858977   | AGIWUR30104 |
| CB4856 HS                                                             | X | 1990734 | 1992649 | WBGene00021484  | Y40A1A.2 | Y40A1A.2 | -0.0551439301598471 |             |
| AGIWUR11963;AGIWUR40969;AGIWUR41408                                   |   |         |         |                 |          |          |                     |             |
| CB4856 HS                                                             | X | 1995731 | 1998112 | WBGene00021485  | Y40A1A.3 | Y40A1A.3 | -0.0676959030019857 |             |
| AGIWUR7356;AGIWUR27578                                                |   |         |         |                 |          |          |                     |             |

|                                                                                              |   |                 |                |                   |                    |                     |             |
|----------------------------------------------------------------------------------------------|---|-----------------|----------------|-------------------|--------------------|---------------------|-------------|
| CB4856 HS<br>AGIWUR41690                                                                     | X | 2001030 2002631 | WBGene00021483 | Y40A1A.1          | Y40A1A.1           | -0.348105352364675  |             |
| CB4856 HS<br>AGIWUR27143                                                                     | X | 2013151 2018062 | WBGene00022419 | Y102A11A.9        | Y102A11A.9         | 0.305678637574712   |             |
| CB4856 HS<br>AGIWUR42775                                                                     | X | 2019148 2025737 | WBGene00022413 | Y102A11A.3        | Y102A11A.3         | 0.287657946755584   |             |
| CB4856 HS<br>AGIWUR41940                                                                     | X | 2026642 2031010 | WBGene00022412 | Y102A11A.2        | Y102A11A.2         | 0.271248583696288   |             |
| CB4856 HS<br>AGIWUR14358;AGIWUR22481;AGIWUR35764;AGIWUR37140;AGIWUR41055                     | X | 2030959 2031588 | WBGene00022415 | Y102A11A.5        | Y102A11A.5         | -0.0927727216586938 |             |
| CB4856 HS<br>AGIWUR11400                                                                     | X | 2031963 2035245 | WBGene00022416 | Y102A11A.6        | Y102A11A.6         | 0.177931955404762   |             |
| CB4856 HS<br>AGIWUR24151                                                                     | X | 2035943 2038220 | WBGene00022417 | Y102A11A.7        | Y102A11A.7         | -0.0431045400238723 |             |
| CB4856 HS<br>AGIWUR5133;AGIWUR5331;AGIWUR6948;AGIWUR10058;AGIWUR18787;AGIWUR21402            | X | 2039397 2046360 | WBGene00022418 | igcm-4 Y102A11A.8 |                    | -0.0673468781973963 |             |
| CB4856 HS<br>AGIWUR11614                                                                     | X | 2051907 2054048 | WBGene00022411 | Y102A11A.1        | Y102A11A.1         | 0.0382727115117412  |             |
| CB4856 HS<br>AGIWUR14793                                                                     | X | 2065038 2066567 | WBGene00044753 | F49H12.7          | F49H12.7           | 0.180227527144124   |             |
| CB4856 HS<br>AGIWUR9065;AGIWUR9826;AGIWUR20288                                               | X | 2066554 2070441 | WBGene00018657 | ac1-4 F49H12.6    |                    | 0.0508152530586159  |             |
| CB4856 HS<br>AGIWUR5705                                                                      | X | 2074448 2075944 | WBGene00018656 | F49H12.5          | F49H12.5           | 0.205748366023979   |             |
| CB4856 HS<br>-0.00270065751518977                                                            | X | 2079836 2081487 | WBGene00018655 | F49H12.4          | F49H12.4           |                     |             |
| CB4856 HS<br>AGIWUR30404                                                                     | X | 2084375 2085057 | WBGene00018654 | F49H12.3          | F49H12.3           | -0.0586797311266709 |             |
| CB4856 HS<br>AGIWUR43736                                                                     | X | 2086057 2086730 | WBGene00018653 | F49H12.2          | F49H12.2           | 0.00146642473599456 |             |
| CB4856 HS<br>AGIWUR50;AGIWUR1628;AGIWUR22146;AGIWUR28258;AGIWUR28522;AGIWUR33708;AGIWUR37286 | X | 2089659 2093253 | WBGene00003087 | lsy-2 F49H12.1    |                    | 0.0454906198861629  |             |
| CB4856 HS                                                                                    | X | 2093475 2094842 | WBGene00000737 | col-164 T21D9.1   | 0.0943561852740045 |                     | AGIWUR4292  |
| CB4856 HS                                                                                    | X | 2095370 2096058 | WBGene00020645 | T21D9.2 T21D9.2   | -0.221222975005189 |                     | AGIWUR16571 |
| CB4856 HS<br>AGIWUR22369;AGIWUR33958                                                         | X | 2105629 2107170 | WBGene00018736 | F53B1.3 F53B1.3   | -0.127666454933584 |                     |             |
| CB4856 HS                                                                                    | X | 2108982 2111441 | WBGene00018735 | F53B1.2 F53B1.2   | -0.194512466377017 |                     | AGIWUR28367 |
| CB4856 HS                                                                                    | X | 2111397 2113103 | WBGene00018737 | F53B1.4 F53B1.4   | 0.148860433002039  |                     | AGIWUR11271 |
| CB4856 HS                                                                                    | X | 2114629 2118257 | WBGene00018738 | swip-10 F53B1.6   | 0.308221404720868  |                     | AGIWUR20532 |

|                                                                                               |    |   |         |         |                |          |          |                     |             |
|-----------------------------------------------------------------------------------------------|----|---|---------|---------|----------------|----------|----------|---------------------|-------------|
| CB4856                                                                                        | HS | X | 2118894 | 2121061 | WBGene00001667 | gpa-5    | F53B1.7  | -0.144039480661715  | AGIWUR2116  |
| CB4856                                                                                        | HS | X | 2123413 | 2130241 | WBGene00018739 | F53B1.8  | F53B1.8  | -0.100375059154384  |             |
| AGIWUR11157;AGIWUR24254;AGIWUR26319                                                           |    |   |         |         |                |          |          |                     |             |
| CB4856                                                                                        | HS | X | 2144605 | 2145647 | WBGene00001065 | dpy-3    | EGAP7.1  | -0.545197146929564  | AGIWUR27602 |
| CB4856                                                                                        | HS | X | 2147614 | 2149252 | WBGene00018591 | npax-2   | F48B9.5  | -0.0563667302043065 | AGIWUR4555  |
| CB4856                                                                                        | HS | X | 2163384 | 2164069 | WBGene00018590 | nlp-37   | F48B9.4  | -0.217877203253767  | AGIWUR34654 |
| CB4856                                                                                        | HS | X | 2165109 | 2173849 | WBGene00018589 | F48B9.3  | F48B9.3  | -0.0324832218352866 |             |
| AGIWUR2612;AGIWUR8870;AGIWUR28980;AGIWUR42374                                                 |    |   |         |         |                |          |          |                     |             |
| CB4856                                                                                        | HS | X | 2173890 | 2176411 | WBGene00018593 | F48B9.8  | F48B9.8  | 0.23241083696775    | AGIWUR31971 |
| CB4856                                                                                        | HS | X | 2180888 | 2185854 | WBGene00018587 | F48B9.1  | F48B9.1  | -0.106789761316291  | AGIWUR27228 |
| CB4856                                                                                        | HS | X | 2192504 | 2195348 | WBGene00001515 | gap-1    | T24C12.2 | -0.161820100530621  |             |
| AGIWUR24037                                                                                   |    |   |         |         |                |          |          |                     |             |
| CB4856                                                                                        | HS | X | 2196525 | 2203961 | WBGene00020765 | T24C12.3 | T24C12.3 | 0.175674392154857   |             |
| AGIWUR34456                                                                                   |    |   |         |         |                |          |          |                     |             |
| CB4856                                                                                        | HS | X | 2204050 | 2205063 | WBGene00020766 | T24C12.4 | T24C12.4 | -0.629953133398571  |             |
| AGIWUR31433                                                                                   |    |   |         |         |                |          |          |                     |             |
| CB4856                                                                                        | HS | X | 2215630 | 2218980 | WBGene00003968 | peb-1    | T14F9.4  | -0.0075984723236413 |             |
| AGIWUR21146;AGIWUR30492                                                                       |    |   |         |         |                |          |          |                     |             |
| CB4856                                                                                        | HS | X | 2221150 | 2226620 | WBGene00020509 | hex-1    | T14F9.3  | 0.182982249553794   |             |
| AGIWUR1715;AGIWUR24945;AGIWUR26864;AGIWUR32391                                                |    |   |         |         |                |          |          |                     |             |
| CB4856                                                                                        | HS | X | 2229208 | 2230122 | WBGene00003018 | lin-32   | T14F9.5  | 0.0275399167838888  | AGIWUR33532 |
| CB4856                                                                                        | HS | X | 2234321 | 2236706 | WBGene00020508 | T14F9.2  | T14F9.2  | -0.294392363468324  | AGIWUR30683 |
| CB4856                                                                                        | HS | X | 2237911 | 2240255 | WBGene00020507 | vha-15   | T14F9.1  | 0.0707312676157716  | AGIWUR23485 |
| CB4856                                                                                        | HS | X | 2241738 | 2242618 | WBGene00004423 | rp1-11.2 | F07D10.1 | 0.486660133745639   |             |
| AGIWUR4463;AGIWUR5995;AGIWUR11434;AGIWUR20528;AGIWUR26031;AGIWUR36131;AGIWUR37677;AGIWUR38852 |    |   |         |         |                |          |          |                     |             |
| CB4856                                                                                        | HS | X | 2255852 | 2258101 | WBGene00000797 | crn-4    | AH9.2    | 0.0220092784587429  | AGIWUR16169 |
| CB4856                                                                                        | HS | X | 2259150 | 2260526 | WBGene00014999 | AH9.3    | AH9.3    | 0.0639778448521859  | AGIWUR8206  |
| CB4856                                                                                        | HS | X | 2263176 | 2267472 | WBGene00044701 | AH9.6    | AH9.6    | 0.188685232325069   |             |
| AGIWUR1909;AGIWUR4754                                                                         |    |   |         |         |                |          |          |                     |             |
| CB4856                                                                                        | HS | X | 2271025 | 2274337 | WBGene00015000 | AH9.4    | AH9.4    | -0.0366997212223366 | AGIWUR29159 |
| CB4856                                                                                        | HS | X | 2283998 | 2287188 | WBGene00020427 | sav-1    | T10H10.3 | -0.216018704507512  |             |
| AGIWUR35953                                                                                   |    |   |         |         |                |          |          |                     |             |
| CB4856                                                                                        | HS | X | 2294750 | 2298193 | WBGene00020426 | T10H10.2 | T10H10.2 | -0.0343311898958465 |             |
| AGIWUR43952                                                                                   |    |   |         |         |                |          |          |                     |             |
| CB4856                                                                                        | HS | X | 2303082 | 2314914 | WBGene00002039 | hum-6    | T10H10.1 | 0.0930308228176742  |             |
| AGIWUR38516                                                                                   |    |   |         |         |                |          |          |                     |             |
| CB4856                                                                                        | HS | X | 2314896 | 2319333 | WBGene00020135 | aakg-4   | T01B6.3  | -0.0868166091481868 |             |
| AGIWUR13944;AGIWUR20760                                                                       |    |   |         |         |                |          |          |                     |             |
| CB4856                                                                                        | HS | X | 2335684 | 2348635 | WBGene00020134 | T01B6.1  | T01B6.1  | -0.10563101562857   |             |

AGIWUR3958;AGIWUR4904;AGIWUR12927;AGIWUR17462;AGIWUR19138;AGIWUR21280;AGIWUR22799;AGIWUR24274;AGIWUR31031;AGIWUR34130;AGIWUR35858;AGIWUR38941;AGIWUR41041;AGIWUR43996  
 CB4856 HS X 2360097 2364818 WBGene00020767 lgc-40 T24D8.1 -0.0652503784488712 AGIWUR21614  
 CB4856 HS X 2365700 2365942 WBGene00020769 T24D8.6 T24D8.6 0.0752658506976767  
 AGIWUR7743;AGIWUR26204;AGIWUR32420;AGIWUR34389;AGIWUR36696;AGIWUR44279  
 CB4856 HS X 2375997 2379060 WBGene00018578 F47G3.3 F47G3.3 0.027403384566659 AGIWUR44829  
 CB4856 HS X 2382691 2384764 WBGene00018577 asna-2 F47G3.2 -0.0812044511591612 AGIWUR19401  
 CB4856 HS X 2385765 2392695 WBGene00018576 F47G3.1 F47G3.1 -0.0526258729627394 AGIWUR11303  
 CB4856 HS X 2395505 2398826 WBGene00016619 C43H6.6 C43H6.6 0.0071247746608023  
 AGIWUR2029;AGIWUR18869;AGIWUR19237;AGIWUR31119;AGIWUR35215  
 CB4856 HS X 2398812 2402057 WBGene00016620 dhhc-9 C43H6.7 0.0308364249106905  
 AGIWUR5071;AGIWUR27531;AGIWUR40331  
 CB4856 HS X 2404024 2407364 WBGene00016617 C43H6.4 C43H6.4 0.162579341389244 AGIWUR3069  
 CB4856 HS X 2407467 2409567 WBGene00016616 C43H6.3 C43H6.3 -0.010569699027783  
 AGIWUR6923;AGIWUR21325  
 CB4856 HS X 2409570 2412966 WBGene00016614 trpp-12 C43H6.1 0.0214498312483222  
 AGIWUR4699;AGIWUR9360;AGIWUR22546;AGIWUR25479;AGIWUR36654  
 CB4856 HS X 2412953 2413377 WBGene00001959 h1h-15 C43H6.8 -0.100894779768376 AGIWUR16405  
 CB4856 HS X 2413909 2417892 WBGene00001618 glr-7 C43H6.9 0.44137430300826 AGIWUR17578  
 CB4856 HS X 2418425 2419877 WBGene00020303 T07D1.5 T07D1.5 -0.00846053696929694 AGIWUR37199  
 CB4856 HS X 2420462 2427504 WBGene00001551 gcy-31 T07D1.1 0.173712400497998 AGIWUR2312  
 CB4856 HS X 2429862 2439158 WBGene00020301 T07D1.2 T07D1.2 0.0917836571695183  
 AGIWUR7384;AGIWUR28486;AGIWUR34400  
 CB4856 HS X 2442970 2443404 WBGene00020302 T07D1.3 T07D1.3 0.147829396245691 AGIWUR44069  
 CB4856 HS X 2445500 2455949 WBGene00001484 fox-1 T07D1.4 -0.0189300577101417  
 AGIWUR3748;AGIWUR30879;AGIWUR33746  
 CB4856 HS X 2467347 2471308 WBGene00019866 R04B3.1 R04B3.1 0.0417235591436445 AGIWUR4954  
 CB4856 HS X 2471540 2473718 WBGene00019867 R04B3.2 R04B3.2 -0.00378647875453098 AGIWUR3145  
 CB4856 HS X 2473758 2476030 WBGene00019868 R04B3.3 R04B3.3 0.308562546873425 AGIWUR2415  
 CB4856 HS X 2477107 2478765 WBGene00019319 K02E10.5 K02E10.5 -0.0166430468586594  
 AGIWUR29502  
 CB4856 HS X 2480755 2482911 WBGene00019320 K02E10.6 K02E10.6 -0.0452899583388877  
 AGIWUR36677  
 CB4856 HS X 2483263 2488296 WBGene00019318 K02E10.4 K02E10.4 -0.0494888606875974  
 AGIWUR8951;AGIWUR15514;AGIWUR32000;AGIWUR32607  
 CB4856 HS X 2489044 2494339 WBGene00001844 hid-1 K02E10.2 0.0248102436623188  
 AGIWUR9595;AGIWUR16184;AGIWUR22838;AGIWUR23855;AGIWUR43646;AGIWUR44331  
 CB4856 HS X 2496180 2501001 WBGene00019317 K02E10.1 K02E10.1 0.0122780708965262  
 AGIWUR9485



|                                                                                                            |    |   |         |         |                |          |          |                      |             |
|------------------------------------------------------------------------------------------------------------|----|---|---------|---------|----------------|----------|----------|----------------------|-------------|
| CB4856                                                                                                     | HS | X | 2501003 | 2508549 | WBGene00019321 | K02E10.7 | K02E10.7 | 0.0592870370321128   |             |
| AGIWUR45028                                                                                                |    |   |         |         |                |          |          |                      |             |
| CB4856                                                                                                     | HS | X | 2509608 | 2515317 | WBGene00006365 | syg-1    | K02E10.8 | -0.0256385353544193  |             |
| AGIWUR8570;AGIWUR29333                                                                                     |    |   |         |         |                |          |          |                      |             |
| CB4856                                                                                                     | HS | X | 2525191 | 2532457 | WBGene00044061 | tbc-12   | R11B5.1  | 0.0189860976525527   | AGIWUR30102 |
| CB4856                                                                                                     | HS | X | 2540066 | 2541053 | WBGene00018715 | F52H2.3  | F52H2.3  | 0.171824247102382    | AGIWUR6056  |
| CB4856                                                                                                     | HS | X | 2543391 | 2548028 | WBGene00018716 | F52H2.4  | F52H2.4  | -0.119102797738095   | AGIWUR26943 |
| CB4856                                                                                                     | HS | X | 2552436 | 2557726 | WBGene00000004 | aat-3    | F52H2.2  | -0.528866896138577   | AGIWUR21672 |
| CB4856                                                                                                     | HS | X | 2557976 | 2559638 | WBGene00018717 | F52H2.5  | F52H2.5  | 0.105720095134707    | AGIWUR7255  |
| CB4856                                                                                                     | HS | X | 2559727 | 2564147 | WBGene00018718 | F52H2.6  | F52H2.6  | 0.0474996590159651   |             |
| AGIWUR1964;AGIWUR9945;AGIWUR11343;AGIWUR35339                                                              |    |   |         |         |                |          |          |                      |             |
| CB4856                                                                                                     | HS | X | 2566557 | 2572653 | WBGene00018719 | F52H2.7  | F52H2.7  | 0.0662482222452816   | AGIWUR9017  |
| CB4856                                                                                                     | HS | X | 2572863 | 2576697 | WBGene00018714 | F52H2.1  | F52H2.1  | 0.725618795683511    | AGIWUR23592 |
| CB4856                                                                                                     | HS | X | 2577742 | 2578262 | WBGene00045268 | ttr-42   | H01M10.3 | -0.0422368079488784  |             |
| AGIWUR18181;AGIWUR31853                                                                                    |    |   |         |         |                |          |          |                      |             |
| CB4856                                                                                                     | HS | X | 2578211 | 2580574 | WBGene00019143 | H01M10.1 | H01M10.1 | -0.404071441822806   |             |
| AGIWUR29748                                                                                                |    |   |         |         |                |          |          |                      |             |
| CB4856                                                                                                     | HS | X | 2584539 | 2585739 | WBGene00019144 | H01M10.2 | H01M10.2 | 0.0878784406684847   |             |
| AGIWUR43764                                                                                                |    |   |         |         |                |          |          |                      |             |
| CB4856                                                                                                     | HS | X | 2594003 | 2606732 | WBGene00003630 | nhr-40   | T03G6.2  | 0.215332332547614    |             |
| AGIWUR203;AGIWUR11036;AGIWUR21316;AGIWUR45083                                                              |    |   |         |         |                |          |          |                      |             |
| CB4856                                                                                                     | HS | X | 2608228 | 2609989 | WBGene00020194 | T03G6.1  | T03G6.1  | 0.0381562323077187   | AGIWUR42652 |
| CB4856                                                                                                     | HS | X | 2610826 | 2615726 | WBGene00020195 | T03G6.3  | T03G6.3  | 0.270169337872112    | AGIWUR39954 |
| CB4856                                                                                                     | HS | X | 2621274 | 2664373 | WBGene00018837 | F54G2.1  | F54G2.1  | -0.00169289424611829 |             |
| AGIWUR21188;AGIWUR34450                                                                                    |    |   |         |         |                |          |          |                      |             |
| CB4856                                                                                                     | HS | X | 2672427 | 2672759 | WBGene00022919 | C09B7.4  | C09B7.4  | 0.0306035977232604   |             |
| AGIWUR472;AGIWUR11888;AGIWUR14220;AGIWUR26186;AGIWUR35518                                                  |    |   |         |         |                |          |          |                      |             |
| CB4856                                                                                                     | HS | X | 2673471 | 2682379 | WBGene00004780 | ser-7    | C09B7.1  | 0.00520271158119989  |             |
| AGIWUR21887;AGIWUR40148;AGIWUR40519                                                                        |    |   |         |         |                |          |          |                      |             |
| CB4856                                                                                                     | HS | X | 2682754 | 2687184 | WBGene00020511 | immt-1   | T14G11.3 | -0.15450716568728    |             |
| AGIWUR21136                                                                                                |    |   |         |         |                |          |          |                      |             |
| CB4856                                                                                                     | HS | X | 2688945 | 2692022 | WBGene00020510 | T14G11.1 | T14G11.1 | 0.0166182134517108   |             |
| AGIWUR2431;AGIWUR17996;AGIWUR22135;AGIWUR23764;AGIWUR32517;AGIWUR32564;AGIWUR35471;AGIWUR39291;AGIWUR39542 |    |   |         |         |                |          |          |                      |             |
| CB4856                                                                                                     | HS | X | 2694908 | 2698273 | WBGene00020158 | T02C5.1  | T02C5.1  | 0.124054090468189    |             |
| AGIWUR40757;AGIWUR43458                                                                                    |    |   |         |         |                |          |          |                      |             |
| CB4856                                                                                                     | HS | X | 2698257 | 2705859 | WBGene00020160 | igcm-3   | T02C5.3  | -0.0780655465856697  |             |
| AGIWUR21354;AGIWUR38472;AGIWUR40980                                                                        |    |   |         |         |                |          |          |                      |             |
| CB4856                                                                                                     | HS | X | 2710918 | 2748114 | WBGene00006742 | unc-2    | T02C5.5  | 0.19196356969231     |             |
| AGIWUR282;AGIWUR15155                                                                                      |    |   |         |         |                |          |          |                      |             |

|                                                                                                        |    |   |         |         |                |           |           |                     |             |
|--------------------------------------------------------------------------------------------------------|----|---|---------|---------|----------------|-----------|-----------|---------------------|-------------|
| CB4856                                                                                                 | HS | X | 2769588 | 2770060 | WBGene00018888 | F55F1.2   | F55F1.2   | -0.0576867701075727 | AGIWUR62    |
| CB4856                                                                                                 | HS | X | 2772042 | 2799247 | WBGene00006496 | cgef-1    | C14A11.3  | 0.00587283425308893 |             |
| AGIWUR17834;AGIWUR33860;AGIWUR34012;AGIWUR36036                                                        |    |   |         |         |                |           |           |                     |             |
| CB4856                                                                                                 | HS | X | 2803112 | 2804830 | WBGene00015748 | C14A11.2  | C14A11.2  | -0.126380993400947  |             |
| AGIWUR21605                                                                                            |    |   |         |         |                |           |           |                     |             |
| CB4856                                                                                                 | HS | X | 2805075 | 2807528 | WBGene00015750 | C14A11.5  | C14A11.5  | 0.116242159387652   |             |
| AGIWUR28637;AGIWUR29994;AGIWUR33322                                                                    |    |   |         |         |                |           |           |                     |             |
| CB4856                                                                                                 | HS | X | 2807911 | 2809635 | WBGene00050944 | C14A11.9  | C14A11.9  | -0.215420999622298  |             |
| AGIWUR28185                                                                                            |    |   |         |         |                |           |           |                     |             |
| CB4856                                                                                                 | HS | X | 2810484 | 2814125 | WBGene00015751 | C14A11.6  | C14A11.6  | 0.104069502468578   |             |
| AGIWUR40572;AGIWUR42224                                                                                |    |   |         |         |                |           |           |                     |             |
| CB4856                                                                                                 | HS | X | 2820431 | 2822433 | WBGene00006632 | tsp-6     | C14A11.1  | -0.0367285051789779 |             |
| AGIWUR4926;AGIWUR10463;AGIWUR16224;AGIWUR16558                                                         |    |   |         |         |                |           |           |                     |             |
| CB4856                                                                                                 | HS | X | 2823501 | 2826827 | WBGene00006055 | ssr-2     | C14A11.7  | 0.152978160565414   |             |
| AGIWUR1100                                                                                             |    |   |         |         |                |           |           |                     |             |
| CB4856                                                                                                 | HS | X | 2834222 | 2840292 | WBGene00022201 | Y71H10B.1 | Y71H10B.1 |                     |             |
| -0.00873967650408147                                                                                   |    |   |         |         |                |           |           |                     |             |
| AGIWUR944;AGIWUR5971;AGIWUR7849;AGIWUR9130;AGIWUR17991;AGIWUR18894;AGIWUR19077;AGIWUR38626;AGIWUR43058 |    |   |         |         |                |           |           |                     |             |
| CB4856                                                                                                 | HS | X | 2843922 | 2852520 | WBGene00002210 | kin-29    | F58H12.1  | 0.0842037377458116  |             |
| AGIWUR5264;AGIWUR14602;AGIWUR16974;AGIWUR23969;AGIWUR32652                                             |    |   |         |         |                |           |           |                     |             |
| CB4856                                                                                                 | HS | X | 2853678 | 2857603 | WBGene00018740 | tra-4     | F53B3.1   | -0.134323778533268  |             |
| AGIWUR2299;AGIWUR17562                                                                                 |    |   |         |         |                |           |           |                     |             |
| CB4856                                                                                                 | HS | X | 2864211 | 2865683 | WBGene00018744 | F53B3.6   | F53B3.6   | 0.141907459741821   | AGIWUR12334 |
| CB4856                                                                                                 | HS | X | 2865960 | 2871060 | WBGene00018742 | F53B3.3   | F53B3.3   | 0.241903733343559   |             |
| AGIWUR5232;AGIWUR8771;AGIWUR37860                                                                      |    |   |         |         |                |           |           |                     |             |
| CB4856                                                                                                 | HS | X | 2872739 | 2879619 | WBGene00018743 | F53B3.5   | F53B3.5   | -0.084230170487233  | AGIWUR37342 |
| CB4856                                                                                                 | HS | X | 2885863 | 2890625 | WBGene00015171 | vang-1    | B0410.2   | -0.0484316357095071 | AGIWUR27637 |
| CB4856                                                                                                 | HS | X | 2890612 | 2891491 | WBGene00015172 | B0410.3   | B0410.3   | 0.0237856556956952  | AGIWUR35784 |
| CB4856                                                                                                 | HS | X | 2892484 | 2898356 | WBGene00044304 | F52B10.3  | F52B10.3  | 0.00752008630897283 |             |
| AGIWUR17121;AGIWUR31609                                                                                |    |   |         |         |                |           |           |                     |             |
| CB4856                                                                                                 | HS | X | 2909536 | 2918038 | WBGene00003776 | nmy-1     | F52B10.1  | 0.0629880030000889  |             |
| AGIWUR2608;AGIWUR3742;AGIWUR6745;AGIWUR33243;AGIWUR39326;AGIWUR44379                                   |    |   |         |         |                |           |           |                     |             |
| CB4856                                                                                                 | HS | X | 2918730 | 2923984 | WBGene00044303 | hst-3.2   | F52B10.2  | 0.0607290240967826  |             |
| AGIWUR3291;AGIWUR40841                                                                                 |    |   |         |         |                |           |           |                     |             |
| CB4856                                                                                                 | HS | X | 2933361 | 2937740 | WBGene00022200 | fard-1    | Y71H10A.2 | 0.255149123568135   |             |
| AGIWUR7983;AGIWUR12871;AGIWUR22212                                                                     |    |   |         |         |                |           |           |                     |             |
| CB4856                                                                                                 | HS | X | 2940872 | 2945481 | WBGene00022199 | pfk-1.1   | Y71H10A.1 | 0.0191503017475432  |             |
| AGIWUR6779;AGIWUR29236                                                                                 |    |   |         |         |                |           |           |                     |             |
| CB4856                                                                                                 | HS | X | 2945803 | 2946570 | WBGene00044901 | Y41G9A.10 | Y41G9A.10 | -0.348171848419014  |             |

AGIWUR24427;AGIWUR27514;AGIWUR27676;AGIWUR28212;AGIWUR34418  
 CB4856 HS X 2946667 2949025 WBGene00021529 Y41G9A.5 Y41G9A.5 -0.156598989435919  
 AGIWUR26260  
 CB4856 HS X 2957934 2968167 WBGene00021528 gbb-1 Y41G9A.4 -0.0172246566010519  
 AGIWUR24071;AGIWUR30929  
 CB4856 HS X 2976457 2981008 WBGene00021527 aakg-3 Y41G9A.3 0.266120605899701  
 AGIWUR36721  
 CB4856 HS X 2982056 2984125 WBGene00021526 Y41G9A.2 Y41G9A.2 -0.0194838767085876  
 AGIWUR14896  
 CB4856 HS X 2984278 2991375 WBGene00003885 osm-5 Y41G9A.1 -0.036810112234976  
 AGIWUR29544  
 CB4856 HS X 2998303 3003803 WBGene00021530 Y41G9A.6 Y41G9A.6 -0.0548749110013098  
 AGIWUR4734  
 CB4856 HS X 3009499 3010175 WBGene00021656 Y48D7A.1 Y48D7A.1 0.030713820276695  
 AGIWUR39448  
 CB4856 HS X 3012190 3018555 WBGene00001461 flp-18 Y48D7A.2 -0.127033103250252  
 AGIWUR22573  
 CB4856 HS X 3025505 3026976 WBGene00000175 aqp-7 M02F4.8 -0.012349028664957 AGIWUR18600  
 CB4856 HS X 3027253 3030762 WBGene00019735 M02F4.1 M02F4.1 -0.127471242450456 AGIWUR11119  
 CB4856 HS X 3031723 3033203 WBGene00019738 clec-265 M02F4.7 0.187451008527143  
 AGIWUR442  
 CB4856 HS X 3033325 3034303 WBGene00019736 M02F4.2 M02F4.2 0.834334091287817 AGIWUR18919  
 CB4856 HS X 3036427 3045806 WBGene00016343 cnm-3 C33D12.2 -0.0597874055823371  
 AGIWUR2882;AGIWUR5098;AGIWUR5720;AGIWUR7394;AGIWUR24199;AGIWUR24738;AGIWUR31588;AGIWUR39336  
 CB4856 HS X 3050365 3054585 WBGene00006679 twk-26 C33D12.3 0.388632435060192  
 AGIWUR28243  
 CB4856 HS X 3055257 3059385 WBGene00016344 rsef-1 C33D12.6 0.16805922779369  
 AGIWUR2392  
 CB4856 HS X 3063585 3065551 WBGene00000451 ceh-30 C33D12.7 0.102834318734581  
 AGIWUR20536  
 CB4856 HS X 3068650 3070396 WBGene00000452 ceh-31 C33D12.1 0.123348347287271  
 AGIWUR1382  
 CB4856 HS X 3081125 3085336 WBGene00006670 twk-16 F52E4.4 -0.0291326123672158  
 AGIWUR10197;AGIWUR23264;AGIWUR27801;AGIWUR28179  
 CB4856 HS X 3085829 3087345 WBGene00018702 F52E4.5 F52E4.5 0.313864110399907 AGIWUR13956  
 CB4856 HS X 3089496 3092457 WBGene00018701 pccb-1 F52E4.1 0.070616006126432  
 AGIWUR1837;AGIWUR6654;AGIWUR9003;AGIWUR12787;AGIWUR20116;AGIWUR32561;AGIWUR32604;AGIWUR40672;AGIWUR41415  
 CB4856 HS X 3092395 3094448 WBGene00006948 wrt-2 F52E4.6 0.0273453066956399  
 AGIWUR373;AGIWUR722;AGIWUR13619

|                                                                                   |    |   |         |         |                |         |          |                     |             |
|-----------------------------------------------------------------------------------|----|---|---------|---------|----------------|---------|----------|---------------------|-------------|
| CB4856                                                                            | HS | X | 3095434 | 3099837 | WBGene00018703 | sec-3   | F52E4.7  | 0.118623153390182   | AGIWUR41191 |
| CB4856                                                                            | HS | X | 3103250 | 3106279 | WBGene00019611 | K10B3.5 | K10B3.5  | 0.0212225410230094  |             |
| AGIWUR25536;AGIWUR25538                                                           |    |   |         |         |                |         |          |                     |             |
| CB4856                                                                            | HS | X | 3106543 | 3110630 | WBGene00019612 | gpcp-1  | K10B3.6  | 0.297325659808712   |             |
| AGIWUR17177;AGIWUR26068;AGIWUR44080                                               |    |   |         |         |                |         |          |                     |             |
| CB4856                                                                            | HS | X | 3112083 | 3113382 | WBGene00001685 | gpd-3   | K10B3.7  | 0.275858958631275   |             |
| AGIWUR6643;AGIWUR7153;AGIWUR12023;AGIWUR23960;AGIWUR36409;AGIWUR36989             |    |   |         |         |                |         |          |                     |             |
| CB4856                                                                            | HS | X | 3113434 | 3114771 | WBGene00001684 | gpd-2   | K10B3.8  | 0.459769007204574   | AGIWUR22539 |
| CB4856                                                                            | HS | X | 3114668 | 3116538 | WBGene00003124 | mai-1   | K10B3.9  | -0.008404142854463  | AGIWUR35840 |
| CB4856                                                                            | HS | X | 3117439 | 3127073 | WBGene00004951 | spc-1   | K10B3.10 | 0.00792950680138027 |             |
| AGIWUR4438;AGIWUR7942;AGIWUR9370;AGIWUR10005;AGIWUR12089;AGIWUR31510;AGIWUR42440  |    |   |         |         |                |         |          |                     |             |
| CB4856                                                                            | HS | X | 3135486 | 3136663 | WBGene00019609 | K10B3.1 | K10B3.1  | 0.044974537045011   |             |
| AGIWUR7520;AGIWUR7583;AGIWUR12761;AGIWUR22048;AGIWUR25116;AGIWUR44994             |    |   |         |         |                |         |          |                     |             |
| CB4856                                                                            | HS | X | 3146573 | 3147088 | WBGene00015790 | C15C7.4 | C15C7.4  | -0.143250368223607  | AGIWUR34652 |
| CB4856                                                                            | HS | X | 3151148 | 3152461 | WBGene00015791 | C15C7.5 | C15C7.5  | -0.172799586561487  |             |
| AGIWUR560;AGIWUR19372;AGIWUR23873;AGIWUR28059;AGIWUR30270;AGIWUR39946             |    |   |         |         |                |         |          |                     |             |
| CB4856                                                                            | HS | X | 3159940 | 3164424 | WBGene00002220 | gcc-1   | C15C7.2  | 0.120599661007574   |             |
| AGIWUR4551;AGIWUR14889;AGIWUR28773;AGIWUR30268;AGIWUR30613;AGIWUR43739            |    |   |         |         |                |         |          |                     |             |
| CB4856                                                                            | HS | X | 3164525 | 3165650 | WBGene00015789 | syx-6   | C15C7.1  | 0.147495584594479   |             |
| AGIWUR1944;AGIWUR3669;AGIWUR41127;AGIWUR45171                                     |    |   |         |         |                |         |          |                     |             |
| CB4856                                                                            | HS | X | 3165796 | 3167579 | WBGene00015793 | C15C7.7 | C15C7.7  | 0.28936017858344    | AGIWUR40953 |
| CB4856                                                                            | HS | X | 3167570 | 3170556 | WBGene00015792 | C15C7.6 | C15C7.6  | -0.115963101171499  |             |
| AGIWUR6524;AGIWUR10308;AGIWUR33805;AGIWUR40453                                    |    |   |         |         |                |         |          |                     |             |
| CB4856                                                                            | HS | X | 3171424 | 3178695 | WBGene00002217 | klp-4   | F56E3.3  | 0.0901893631800021  |             |
| AGIWUR3576;AGIWUR7058;AGIWUR15218;AGIWUR26622;AGIWUR30042;AGIWUR32297;AGIWUR33608 |    |   |         |         |                |         |          |                     |             |
| CB4856                                                                            | HS | X | 3206818 | 3209644 | WBGene00017893 | F28B4.4 | F28B4.4  | 0.235714395401568   | AGIWUR22272 |
| CB4856                                                                            | HS | X | 3210470 | 3220367 | WBGene00017891 | rgl-1   | F28B4.2  | 0.1208278165109     |             |
| AGIWUR11313;AGIWUR17316;AGIWUR20300;AGIWUR36614;AGIWUR36742;AGIWUR40752           |    |   |         |         |                |         |          |                     |             |
| CB4856                                                                            | HS | X | 3227489 | 3235408 | WBGene00017892 | F28B4.3 | F28B4.3  | 0.182668020140078   | AGIWUR28431 |
| CB4856                                                                            | HS | X | 3235768 | 3243624 | WBGene00018237 | irg-7   | F40F4.6  | 0.134816440235308   | AGIWUR39079 |
| CB4856                                                                            | HS | X | 3243886 | 3245980 | WBGene00018238 | F40F4.7 | F40F4.7  | -0.0246097564635086 | AGIWUR14512 |
| CB4856                                                                            | HS | X | 3247045 | 3250529 | WBGene00004124 | pqn-37  | F40F4.8  | -0.266358518518244  | AGIWUR35686 |
| CB4856                                                                            | HS | X | 3252963 | 3256265 | WBGene00006535 | tba-9   | F40F4.5  | -0.0188174887177901 | AGIWUR37481 |
| CB4856                                                                            | HS | X | 3257010 | 3258155 | WBGene00002255 | lbp-3   | F40F4.4  | -0.133328014989619  |             |
| AGIWUR4882;AGIWUR22843;AGIWUR31099                                                |    |   |         |         |                |         |          |                     |             |
| CB4856                                                                            | HS | X | 3259087 | 3259855 | WBGene00002253 | lbp-1   | F40F4.3  | 0.181624213871245   | AGIWUR15823 |
| CB4856                                                                            | HS | X | 3260610 | 3261470 | WBGene00002254 | lbp-2   | F40F4.2  | 0.0624263344113771  | AGIWUR17137 |
| CB4856                                                                            | HS | X | 3262900 | 3264161 | WBGene00018236 | fbxb-71 | F40F4.1  | -0.0630430604603269 | AGIWUR33431 |
| CB4856                                                                            | HS | X | 3267294 | 3270906 | WBGene00006308 | sul-1   | K09C4.8  | 0.201744014432775   | AGIWUR36553 |

|                                                                        |    |   |         |         |                |          |          |                      |             |
|------------------------------------------------------------------------|----|---|---------|---------|----------------|----------|----------|----------------------|-------------|
| CB4856                                                                 | HS | X | 3271353 | 3271773 | WBGene00019553 | K09C4.9  | K09C4.9  | -0.291191516446152   | AGIWUR12345 |
| CB4856                                                                 | HS | X | 3272730 | 3273155 | WBGene00019552 | K09C4.7  | K09C4.7  | -0.267570194921317   | AGIWUR7564  |
| CB4856                                                                 | HS | X | 3274757 | 3275768 | WBGene00019551 | K09C4.6  | K09C4.6  | 0.0379293378253305   | AGIWUR37707 |
| CB4856                                                                 | HS | X | 3276020 | 3280230 | WBGene00019554 | K09C4.10 | K09C4.10 | 0.121120155787301    |             |
| AGIWUR18845                                                            |    |   |         |         |                |          |          |                      |             |
| CB4856                                                                 | HS | X | 3282602 | 3285721 | WBGene00019550 | K09C4.5  | K09C4.5  | 0.0885399020993702   |             |
| AGIWUR1581;AGIWUR33875;AGIWUR44903                                     |    |   |         |         |                |          |          |                      |             |
| CB4856                                                                 | HS | X | 3289485 | 3292412 | WBGene00019549 | K09C4.4  | K09C4.4  | -0.0863663565019142  | AGIWUR18440 |
| CB4856                                                                 | HS | X | 3293290 | 3294369 | WBGene00002006 | hsp-2    | K09C4.3  | -0.308296001718907   |             |
| AGIWUR17108;AGIWUR24868;AGIWUR30948;AGIWUR37512                        |    |   |         |         |                |          |          |                      |             |
| CB4856                                                                 | HS | X | 3296482 | 3297993 | WBGene00019548 | K09C4.2  | K09C4.2  | 0.0194668038707109   | AGIWUR6444  |
| CB4856                                                                 | HS | X | 3298832 | 3301637 | WBGene00019547 | K09C4.1  | K09C4.1  | 0.143950877614346    | AGIWUR35316 |
| CB4856                                                                 | HS | X | 3302070 | 3303927 | WBGene00017382 | F11D5.5  | F11D5.5  | 0.172991216147088    |             |
| AGIWUR19390;AGIWUR29499                                                |    |   |         |         |                |          |          |                      |             |
| CB4856                                                                 | HS | X | 3304026 | 3306939 | WBGene00043980 | F11D5.7  | F11D5.7  | 0.368011416479513    |             |
| AGIWUR17430;AGIWUR29001;AGIWUR29773                                    |    |   |         |         |                |          |          |                      |             |
| CB4856                                                                 | HS | X | 3315321 | 3324229 | WBGene00017381 | ddr-2    | F11D5.3  | -0.127174747907873   | AGIWUR26574 |
| CB4856                                                                 | HS | X | 3325166 | 3326275 | WBGene00017383 | F11D5.6  | F11D5.6  | -0.0432526610266564  |             |
| AGIWUR6111;AGIWUR19770;AGIWUR19885;AGIWUR31566;AGIWUR31777             |    |   |         |         |                |          |          |                      |             |
| CB4856                                                                 | HS | X | 3333130 | 3347302 | WBGene00017380 | F11D5.1  | F11D5.1  | -0.0910643005739047  |             |
| AGIWUR21170;AGIWUR35228;AGIWUR36050                                    |    |   |         |         |                |          |          |                      |             |
| CB4856                                                                 | HS | X | 3348121 | 3348642 | WBGene00022826 | ZK816.3  | ZK816.3  | 0.192753201693673    | AGIWUR28879 |
| CB4856                                                                 | HS | X | 3348878 | 3350401 | WBGene00022827 | ZK816.4  | ZK816.4  | -0.116992734690155   | AGIWUR5143  |
| CB4856                                                                 | HS | X | 3359062 | 3360656 | WBGene00022825 | ZK816.1  | ZK816.1  | 0.251368338819164    | AGIWUR7579  |
| CB4856                                                                 | HS | X | 3360722 | 3362493 | WBGene00000989 | dhs-26   | ZK816.5  | 0.18325305369215     |             |
| AGIWUR30451;AGIWUR35473                                                |    |   |         |         |                |          |          |                      |             |
| CB4856                                                                 | HS | X | 3368959 | 3373217 | WBGene00022767 | ZK563.2  | ZK563.2  | -0.0228767749059475  | AGIWUR18934 |
| CB4856                                                                 | HS | X | 3373247 | 3374740 | WBGene00000524 | clc-3    | ZK563.4  | 0.195927415590763    | AGIWUR27033 |
| CB4856                                                                 | HS | X | 3376874 | 3379234 | WBGene00022769 | sorf-1   | ZK563.5  | -0.00758958175515989 |             |
| AGIWUR5888;AGIWUR12956;AGIWUR13650;AGIWUR25096;AGIWUR33967;AGIWUR43263 |    |   |         |         |                |          |          |                      |             |
| CB4856                                                                 | HS | X | 3380480 | 3382838 | WBGene00044355 | ZK563.7  | ZK563.7  | -0.13011342934147    |             |
| AGIWUR34423;AGIWUR42244                                                |    |   |         |         |                |          |          |                      |             |
| CB4856                                                                 | HS | X | 3382868 | 3385547 | WBGene00022770 | acp-1    | ZK563.6  | -0.0609394307282773  | AGIWUR39590 |
| CB4856                                                                 | HS | X | 3393864 | 3397656 | WBGene00006865 | slcf-2   | ZK563.1  | -0.0541607395432293  |             |
| AGIWUR37355;AGIWUR38288                                                |    |   |         |         |                |          |          |                      |             |
| CB4856                                                                 | HS | X | 3397613 | 3400017 | WBGene00000503 | cht-1    | C04F6.3  | -0.8895969802671     | AGIWUR35268 |
| CB4856                                                                 | HS | X | 3408664 | 3411683 | WBGene00006810 | unc-78   | C04F6.4  | 0.0475356257334907   |             |
| AGIWUR1669;AGIWUR16113;AGIWUR17514;AGIWUR25638                         |    |   |         |         |                |          |          |                      |             |
| CB4856                                                                 | HS | X | 3412876 | 3414708 | WBGene00000990 | dhs-27   | C04F6.5  | 0.0215363620498952   | AGIWUR29086 |

|                                                                                                          |    |   |         |         |                |          |          |                     |                     |
|----------------------------------------------------------------------------------------------------------|----|---|---------|---------|----------------|----------|----------|---------------------|---------------------|
| CB4856                                                                                                   | HS | X | 3424816 | 3427337 | WBGene00044564 | ZK813.6  | ZK813.6  | -0.126648341839821  |                     |
| AGIWUR15263;AGIWUR34459                                                                                  |    |   |         |         |                |          |          |                     |                     |
| CB4856                                                                                                   | HS | X | 3427372 | 3430120 | WBGene00022823 | ZK813.4  | ZK813.4  | -0.134651696295627  | AGIWUR25241         |
| CB4856                                                                                                   | HS | X | 3441839 | 3442458 | WBGene00022822 | ZK813.3  | ZK813.3  | 0.0307633275301402  |                     |
| AGIWUR10722;AGIWUR12466;AGIWUR20222;AGIWUR20531;AGIWUR38971                                              |    |   |         |         |                |          |          |                     |                     |
| CB4856                                                                                                   | HS | X | 3443782 | 3444420 | WBGene00022821 | ZK813.2  | ZK813.2  | 0.243860214457444   | AGIWUR28329         |
| CB4856                                                                                                   | HS | X | 3444802 | 3445283 | WBGene00045394 | ZK813.7  | ZK813.7  | 0.119251565120292   |                     |
| AGIWUR3984;AGIWUR4660;AGIWUR9902;AGIWUR11733;AGIWUR22422;AGIWUR26236;AGIWUR35956;AGIWUR36513;AGIWUR44011 |    |   |         |         |                |          |          |                     |                     |
| CB4856                                                                                                   | HS | X | 3446311 | 3448253 | WBGene00022820 | ZK813.1  | ZK813.1  | 0.0681681315090117  | AGIWUR8539          |
| CB4856                                                                                                   | HS | X | 3448744 | 3451222 | WBGene00022824 | ZK813.5  | ZK813.5  | 0.136745120979818   | AGIWUR14288         |
| CB4856                                                                                                   | HS | X | 3451945 | 3465925 | WBGene00004729 | sax-3    | ZK377.2  | -0.0682778140285993 |                     |
| AGIWUR15391;AGIWUR19547;AGIWUR28949;AGIWUR29051;AGIWUR37636;AGIWUR42492                                  |    |   |         |         |                |          |          |                     |                     |
| CB4856                                                                                                   | HS | X | 3480251 | 3483649 | WBGene00006952 | wrt-6    | ZK377.1  | -0.0358676715074164 |                     |
| AGIWUR4539;AGIWUR16131;AGIWUR26666;AGIWUR32164;AGIWUR34901                                               |    |   |         |         |                |          |          |                     |                     |
| CB4856                                                                                                   | HS | X | 3486309 | 3486838 | WBGene00015715 | C12D12.4 |          | C12D12.4            | -0.0916012507054802 |
| AGIWUR27243                                                                                              |    |   |         |         |                |          |          |                     |                     |
| CB4856                                                                                                   | HS | X | 3487101 | 3487996 | WBGene00022922 | C12D12.7 |          | C12D12.7            | 0.046864662717244   |
| AGIWUR17188                                                                                              |    |   |         |         |                |          |          |                     |                     |
| CB4856                                                                                                   | HS | X | 3489293 | 3491155 | WBGene00015714 | C12D12.3 |          | C12D12.3            | 0.151207524089447   |
| AGIWUR20187;AGIWUR27237;AGIWUR28908;AGIWUR33500                                                          |    |   |         |         |                |          |          |                     |                     |
| CB4856                                                                                                   | HS | X | 3496026 | 3499165 | WBGene00001620 | glt-1    | C12D12.2 |                     | -0.143148817502978  |
| AGIWUR20640;AGIWUR30222                                                                                  |    |   |         |         |                |          |          |                     |                     |
| CB4856                                                                                                   | HS | X | 3499253 | 3505251 | WBGene00015713 | C12D12.1 |          | C12D12.1            | -0.0018865592486188 |
| AGIWUR17039;AGIWUR19364                                                                                  |    |   |         |         |                |          |          |                     |                     |
| CB4856                                                                                                   | HS | X | 3505286 | 3511529 | WBGene00015716 | sox-4    | C12D12.5 |                     | 0.306115840888897   |
| AGIWUR772;AGIWUR8579;AGIWUR38135                                                                         |    |   |         |         |                |          |          |                     |                     |
| CB4856                                                                                                   | HS | X | 3528812 | 3531826 | WBGene00006864 | npr-16   | F56B6.5  | 0.167827872198291   | AGIWUR9194          |
| CB4856                                                                                                   | HS | X | 3531841 | 3532811 | WBGene00018937 | F56B6.6  | F56B6.6  | -0.129019142941479  |                     |
| AGIWUR2309;AGIWUR7014;AGIWUR24773;AGIWUR28044;AGIWUR29035;AGIWUR36026                                    |    |   |         |         |                |          |          |                     |                     |
| CB4856                                                                                                   | HS | X | 3537641 | 3540940 | WBGene00006863 | gyg-1    | F56B6.4  | 0.10198847870912    |                     |
| AGIWUR4402;AGIWUR40739                                                                                   |    |   |         |         |                |          |          |                     |                     |
| CB4856                                                                                                   | HS | X | 3542558 | 3557599 | WBGene00004350 | rgs-7    | F56B6.2  | 0.0650944737769867  |                     |
| AGIWUR8199;AGIWUR17813;AGIWUR29479;AGIWUR32324;AGIWUR32993;AGIWUR34005                                   |    |   |         |         |                |          |          |                     |                     |
| CB4856                                                                                                   | HS | X | 3558839 | 3563974 | WBGene00006928 | vit-4    | F59D8.2  | 0.255390705795447   |                     |
| AGIWUR3280;AGIWUR20585                                                                                   |    |   |         |         |                |          |          |                     |                     |
| CB4856                                                                                                   | HS | X | 3567355 | 3572549 | WBGene00006927 | vit-3    | F59D8.1  | -0.295053570822265  | AGIWUR15620         |
| CB4856                                                                                                   | HS | X | 3573051 | 3573562 | WBGene00020845 | T27A10.5 |          | T27A10.5            | -0.0780822444361791 |
| AGIWUR1640                                                                                               |    |   |         |         |                |          |          |                     |                     |
| CB4856                                                                                                   | HS | X | 3576608 | 3578830 | WBGene00000515 | ckc-1    | T27A10.3 |                     | 0.172536326734011   |

AGIWUR449;AGIWUR4215;AGIWUR8145  
CB4856 HS X 3588858 3596497 WBGene00020846 T27A10.6 T27A10.6 0.23199825919993  
AGIWUR4757;AGIWUR15179;AGIWUR15354  
CB4856 HS X 3597276 3600475 WBGene00020847 cgr-1 T27A10.7 0.311806190302953  
AGIWUR2139  
CB4856 HS X 3601800 3604360 WBGene00015954 C18B2.3 C18B2.3 0.163183884110486 AGIWUR35650  
CB4856 HS X 3604291 3605741 WBGene00015955 C18B2.4 C18B2.4 0.05797571773968 AGIWUR41181  
CB4856 HS X 3606668 3611092 WBGene00015956 C18B2.5 C18B2.5 0.309546285830305  
AGIWUR14917;AGIWUR15676  
CB4856 HS X 3613353 3617378 WBGene00015957 del-9 C18B2.6 0.0631141736951815 AGIWUR40349  
CB4856 HS X 3623522 3628359 WBGene00015953 C18B2.2 C18B2.2 0.183102978186974 AGIWUR37215  
CB4856 HS X 3628316 3630884 WBGene00015952 C18B2.1 C18B2.1 -0.0991411947440408 AGIWUR28851  
CB4856 HS X 3632367 3633747 WBGene00001759 gst-11 R11G1.3 0.0478482570653624  
AGIWUR1123;AGIWUR11838;AGIWUR17670;AGIWUR34809  
CB4856 HS X 3639189 3644896 WBGene00020012 R11G1.6 R11G1.6 0.11998634912802  
AGIWUR18151;AGIWUR22592;AGIWUR35254;AGIWUR36233;AGIWUR36775  
CB4856 HS X 3646320 3650150 WBGene00004727 sax-1 R11G1.4 0.0487562422885901  
AGIWUR3701;AGIWUR7535;AGIWUR44764  
CB4856 HS X 3652017 3655419 WBGene00020011 R11G1.2 R11G1.2 -0.0314938903306583  
AGIWUR18566;AGIWUR29373  
CB4856 HS X 3656272 3657265 WBGene00044725 R11G1.7 R11G1.7 0.157517353420545 AGIWUR18423  
CB4856 HS X 3659492 3666879 WBGene00020010 R11G1.1 R11G1.1 0.0573848171690674 AGIWUR9479  
CB4856 HS X 3668100 3668942 WBGene00015354 snet-1 C02F12.3 -0.0376273064186003  
AGIWUR3210;AGIWUR35056  
CB4856 HS X 3670374 3672098 WBGene00015355 C02F12.5 C02F12.5 0.0176311322350813  
AGIWUR42617  
CB4856 HS X 3672378 3673918 WBGene00045215 ceh-63 C02F12.10 0.12873489109317  
AGIWUR24651;AGIWUR30317;AGIWUR41987  
CB4856 HS X 3674041 3678557 WBGene00006431 tag-52 C02F12.4 -0.43059030188693  
AGIWUR35687  
CB4856 HS X 3681170 3684232 WBGene00006643 tsp-17 C02F12.1 -0.0224305244640384  
AGIWUR71;AGIWUR691;AGIWUR2919;AGIWUR7781;AGIWUR9164;AGIWUR10882;AGIWUR25534;AGIWUR25780;AGIWUR29313;AGIWUR44582;AGIWUR45202  
CB4856 HS X 3684212 3689205 WBGene00015356 tag-278 C02F12.7 0.0952851128832837  
AGIWUR44429  
CB4856 HS X 3690143 3693238 WBGene00015357 C02F12.8 C02F12.8 -0.199444443106351  
AGIWUR30932  
CB4856 HS X 3696903 3700807 WBGene00015358 C02F12.9 C02F12.9 0.0929184778748242  
AGIWUR8648;AGIWUR21142;AGIWUR37573;AGIWUR38180

|                                                                                                                                  |    |   |         |         |                |         |          |                     |             |
|----------------------------------------------------------------------------------------------------------------------------------|----|---|---------|---------|----------------|---------|----------|---------------------|-------------|
| CB4856                                                                                                                           | HS | X | 3706551 | 3713382 | WBGene00015293 | C01C4.3 | C01C4.3  | 0.400149094152862   |             |
| AGIWUR101;AGIWUR13011;AGIWUR31216                                                                                                |    |   |         |         |                |         |          |                     |             |
| CB4856                                                                                                                           | HS | X | 3716314 | 3718566 | WBGene00015292 | C01C4.2 | C01C4.2  | -0.0624989216800254 |             |
| AGIWUR380;AGIWUR7965;AGIWUR10650;AGIWUR12661                                                                                     |    |   |         |         |                |         |          |                     |             |
| CB4856                                                                                                                           | HS | X | 3727553 | 3728446 | WBGene00003739 | nlp-1   | C01C4.1  | 0.150906041638576   | AGIWUR42191 |
| CB4856                                                                                                                           | HS | X | 3729281 | 3731960 | WBGene00006454 | aex-4   | T14G12.2 | 0.356143746819446   |             |
| AGIWUR5944                                                                                                                       |    |   |         |         |                |         |          |                     |             |
| CB4856                                                                                                                           | HS | X | 3731894 | 3733457 | WBGene00006408 | tag-18  | T14G12.3 | 0.0446508755655515  |             |
| AGIWUR26566                                                                                                                      |    |   |         |         |                |         |          |                     |             |
| CB4856                                                                                                                           | HS | X | 3740208 | 3742323 | WBGene00001434 | fkx-2   | T14G12.4 | 0.0462658672621425  |             |
| AGIWUR928;AGIWUR1294;AGIWUR4150;AGIWUR7793;AGIWUR14765;AGIWUR30544                                                               |    |   |         |         |                |         |          |                     |             |
| CB4856                                                                                                                           | HS | X | 3763057 | 3764395 | WBGene00018534 | F47B7.3 | F47B7.3  | 0.0471064276309257  |             |
| AGIWUR32605;AGIWUR39322                                                                                                          |    |   |         |         |                |         |          |                     |             |
| CB4856                                                                                                                           | HS | X | 3765324 | 3766626 | WBGene00018535 | F47B7.4 | F47B7.4  | -0.188324017678537  | AGIWUR9808  |
| CB4856                                                                                                                           | HS | X | 3767795 | 3768817 | WBGene00018536 | F47B7.5 | F47B7.5  | -0.0387540064030567 | AGIWUR13937 |
| CB4856                                                                                                                           | HS | X | 3769731 | 3770643 | WBGene00018537 | F47B7.6 | F47B7.6  | -0.0397158708551153 | AGIWUR41486 |
| CB4856                                                                                                                           | HS | X | 3772763 | 3778080 | WBGene00018533 | F47B7.2 | F47B7.2  | 0.0532062549951373  |             |
| AGIWUR213;AGIWUR9801;AGIWUR15390;AGIWUR19993;AGIWUR23514;AGIWUR24158;AGIWUR34104;AGIWUR34713;AGIWUR37042;AGIWUR44702             |    |   |         |         |                |         |          |                     |             |
| CB4856                                                                                                                           | HS | X | 3778091 | 3781118 | WBGene00018538 | marg-1  | F47B7.7  | -0.0517534837090956 | AGIWUR36494 |
| CB4856                                                                                                                           | HS | X | 3788026 | 3788532 | WBGene00018532 | F47B7.1 | F47B7.1  | -0.0205055195598058 |             |
| AGIWUR5087;AGIWUR6046                                                                                                            |    |   |         |         |                |         |          |                     |             |
| CB4856                                                                                                                           | HS | X | 3789757 | 3792815 | WBGene00018026 | F35A5.4 | F35A5.4  | -0.0307434439102234 |             |
| AGIWUR3889;AGIWUR9459;AGIWUR9820                                                                                                 |    |   |         |         |                |         |          |                     |             |
| CB4856                                                                                                                           | HS | X | 3793912 | 3795395 | WBGene00018027 | F35A5.5 | F35A5.5  | -0.0598470102801976 |             |
| AGIWUR230;AGIWUR7864;AGIWUR12138;AGIWUR12675;AGIWUR20530;AGIWUR22072;AGIWUR23940;AGIWUR29917;AGIWUR37314;AGIWUR38248;AGIWUR42205 |    |   |         |         |                |         |          |                     |             |
| CB4856                                                                                                                           | HS | X | 3798179 | 3799741 | WBGene00000033 | abu-10  | F35A5.3  | -0.327050343364784  | AGIWUR37428 |
| CB4856                                                                                                                           | HS | X | 3800045 | 3802771 | WBGene00001335 | erp-1   | F35A5.8  | 0.0620223825637947  |             |
| AGIWUR6029;AGIWUR8627;AGIWUR42411;AGIWUR45109                                                                                    |    |   |         |         |                |         |          |                     |             |
| CB4856                                                                                                                           | HS | X | 3805084 | 3805749 | WBGene00018025 | F35A5.2 | F35A5.2  | 0.073081376267595   | AGIWUR43919 |
| CB4856                                                                                                                           | HS | X | 3807460 | 3816429 | WBGene00018024 | F35A5.1 | F35A5.1  | -0.30160751381395   |             |
| AGIWUR16665;AGIWUR20440;AGIWUR21793                                                                                              |    |   |         |         |                |         |          |                     |             |
| CB4856                                                                                                                           | HS | X | 3816851 | 3826963 | WBGene00001441 | fkx-9   | K03C7.2  | 0.137801902522247   |             |
| AGIWUR1451;AGIWUR3258;AGIWUR6593;AGIWUR15006;AGIWUR16658;AGIWUR20846;AGIWUR21069;AGIWUR26982;AGIWUR27201                         |    |   |         |         |                |         |          |                     |             |
| CB4856                                                                                                                           | HS | X | 3827231 | 3829300 | WBGene00019359 | K03C7.3 | K03C7.3  | -0.147428965912718  | AGIWUR5541  |
| CB4856                                                                                                                           | HS | X | 3840869 | 3842468 | WBGene00022515 | ttr-48  | ZC64.2   | -0.160321613012694  |             |
| AGIWUR7561;AGIWUR8684;AGIWUR35317;AGIWUR40258                                                                                    |    |   |         |         |                |         |          |                     |             |
| CB4856                                                                                                                           | HS | X | 3843367 | 3857797 | WBGene00000441 | ceh-18  | ZC64.3   | 0.103389163071569   |             |



AGIWUR2095;AGIWUR8429;AGIWUR8825;AGIWUR22735;AGIWUR27675;AGIWUR28338;AGIWUR37278  
 CB4856 HS X 3869753 3873295 WBGene00002987 lim-4 ZC64.4 0.0701138986761727 AGIWUR27888  
 CB4856 HS X 3879782 3893309 WBGene00018569 F47F2.1 F47F2.1 0.140598471788603  
 AGIWUR8897;AGIWUR10596;AGIWUR21221;AGIWUR41611  
 CB4856 HS X 3893964 3895677 WBGene00018571 F47F2.3 F47F2.3 -0.283297950876237 AGIWUR27605  
 CB4856 HS X 3904591 3907671 WBGene00006321 sup-12 T22B2.4 -0.00290955726920883  
 AGIWUR4964;AGIWUR13589;AGIWUR35264;AGIWUR37936;AGIWUR39225;AGIWUR40172  
 CB4856 HS X 3908144 3911380 WBGene00020669 T22B2.5 T22B2.5 -0.0464436048580188  
 AGIWUR11095;AGIWUR14481;AGIWUR17029;AGIWUR20075;AGIWUR36801;AGIWUR39173;AGIWUR41209;AGIWUR45062  
 CB4856 HS X 3914765 3915848 WBGene00020670 T22B2.6 T22B2.6 -0.160164825638539  
 AGIWUR3107;AGIWUR3588;AGIWUR7204;AGIWUR8957;AGIWUR11412;AGIWUR11915;AGIWUR17333;AGIWUR19664;AGIWUR26137;AGI  
 WUR29664;AGIWUR32235;AGIWUR35489;AGIWUR36229;AGIWUR37239;AGIWUR44863;AGIWUR44904  
 CB4856 HS X 3917301 3919835 WBGene00020667 T22B2.3 T22B2.3 -0.225667419300376 AGIWUR4053  
 CB4856 HS X 3921068 3923233 WBGene00020666 T22B2.2 T22B2.2 -0.15942841046305 AGIWUR34034  
 CB4856 HS X 3926081 3929576 WBGene00020665 T22B2.1 T22B2.1 -0.542946542121493 AGIWUR13633  
 CB4856 HS X 3931631 3937897 WBGene00020567 T19D2.1 T19D2.1 0.180129006801216 AGIWUR8958  
 CB4856 HS X 3939401 3940092 WBGene00020568 T19D2.3 T19D2.3 0.040239336151302 AGIWUR40361  
 CB4856 HS X 3940141 3943313 WBGene00004184 T19D2.2 T19D2.2 -0.0222672665165087  
 AGIWUR288;AGIWUR6348;AGIWUR7010;AGIWUR18174;AGIWUR20877;AGIWUR21653;AGIWUR33189;AGIWUR36185  
 CB4856 HS X 3958497 3961907 WBGene00003007 lin-18 C16B8.1 0.108110549175853  
 AGIWUR3203;AGIWUR25846;AGIWUR29365  
 CB4856 HS X 3961930 3966432 WBGene00015822 C16B8.2 C16B8.2 -0.0397284627082026  
 AGIWUR6092;AGIWUR11035;AGIWUR35161  
 CB4856 HS X 3968036 3968637 WBGene00015823 C16B8.3 C16B8.3 0.0374103889663031  
 AGIWUR4953;AGIWUR18034;AGIWUR24168;AGIWUR35144  
 CB4856 HS X 3970389 3973634 WBGene00015824 C16B8.4 C16B8.4 -0.121010469288224 AGIWUR20367  
 CB4856 HS X 3985104 3985465 WBGene00022926 C16B8.5 C16B8.5 0.0282728395895191  
 AGIWUR6001;AGIWUR7797;AGIWUR14016;AGIWUR21798;AGIWUR33763  
 CB4856 HS X 3997340 3999341 WBGene00019829 R02E12.5 R02E12.5 0.0413306613048796  
 AGIWUR26862  
 CB4856 HS X 4003532 4007634 WBGene00019828 R02E12.4 R02E12.4 -0.112312062939373  
 AGIWUR39405  
 CB4856 HS X 4008058 4016185 WBGene00019830 hrg-1 R02E12.6 -0.270929113513262  
 AGIWUR22265  
 CB4856 HS X 4012219 4021956 WBGene00019827 mop-25.1 R02E12.2 -0.319516015243938  
 AGIWUR35677  
 CB4856 HS X 4022273 4025584 WBGene00000049 acr-10 R02E12.8 0.078756874693914  
 AGIWUR13780  
 CB4856 HS X 4056835 4071493 WBGene00020294 T06F4.1 T06F4.1 0.125747459099824

AGIWUR12454;AGIWUR40322  
CB4856 HS X 4078236 4081045 WBGene00044566 T06F4.3 T06F4.3 0.0130273716877021  
AGIWUR9614;AGIWUR19207;AGIWUR22647;AGIWUR33199;AGIWUR34873  
CB4856 HS X 4094867 4100573 WBGene00000531 clh-4 T06F4.2 0.0131751193255067  
AGIWUR7616;AGIWUR14496;AGIWUR23097;AGIWUR26114  
CB4856 HS X 4101687 4102125 WBGene00044724 R02E4.3 R02E4.3 0.0093259000971031  
AGIWUR4745;AGIWUR30953;AGIWUR38166  
CB4856 HS X 4103447 4104521 WBGene00019826 R02E4.1 R02E4.1 -0.100883810411205  
AGIWUR13674;AGIWUR27146  
CB4856 HS X 4107476 4110496 WBGene00044021 R02E4.2 R02E4.2 -0.0277984247330387  
AGIWUR16898;AGIWUR41313  
CB4856 HS X 4110442 4111474 WBGene00017307 F09F9.2 F09F9.2 0.117547090744406 AGIWUR15733  
CB4856 HS X 4115330 4117027 WBGene00017306 F09F9.1 F09F9.1 0.180195770850077 AGIWUR2150  
CB4856 HS X 4117951 4119487 WBGene00045395 F09F9.5 F09F9.5 0.0391060005329567  
AGIWUR15072;AGIWUR17778  
CB4856 HS X 4119652 4121016 WBGene00017308 F09F9.3 F09F9.3 0.0851019686481607 AGIWUR7987  
CB4856 HS X 4121786 4128431 WBGene00017309 F09F9.4 F09F9.4 0.332901239121144 AGIWUR3191  
CB4856 HS X 4135133 4147662 WBGene00022745 ZK470.2 ZK470.2 0.0531078358268218  
AGIWUR4037;AGIWUR17753;AGIWUR18130  
CB4856 HS X 4148648 4153443 WBGene00006410 nck-1 ZK470.5 -0.133747390785658  
AGIWUR19892;AGIWUR25883;AGIWUR27962;AGIWUR30810;AGIWUR33783  
CB4856 HS X 4167459 4169791 WBGene00219362 ZK470.14 ZK470.14 0.140178418195053  
AGIWUR25015  
CB4856 HS X 4176065 4177494 WBGene00022747 ZK470.6 ZK470.6 -0.254921238400663  
AGIWUR244;AGIWUR9011;AGIWUR18872;AGIWUR21207  
CB4856 HS X 4177917 4186756 WBGene00003412 mrp-6 F20B6.3 0.0576852211264223  
AGIWUR11769;AGIWUR13096;AGIWUR28457;AGIWUR31143;AGIWUR32298;AGIWUR35622;AGIWUR38453;AGIWUR40403  
CB4856 HS X 4191094 4193144 WBGene00006921 vha-12 F20B6.2 0.180160864998111  
AGIWUR6392;AGIWUR21906;AGIWUR38099  
CB4856 HS X 4194019 4194785 WBGene00017628 F20B6.4 F20B6.4 -0.0560737048469111 AGIWUR38287  
CB4856 HS X 4201650 4202214 WBGene00017630 F20B6.6 F20B6.6 0.00610098149535432 AGIWUR43841  
CB4856 HS X 4204602 4206444 WBGene00017632 F20B6.9 F20B6.9 0.0464182408487703  
AGIWUR5286;AGIWUR38141  
CB4856 HS X 4210573 4217290 WBGene00001994 hpk-1 F20B6.8 0.100271347494534  
AGIWUR1171;AGIWUR11680  
CB4856 HS X 4218279 4218458 WBGene00020922 W01H2.2 W01H2.2 -0.383685524877765 AGIWUR21224  
CB4856 HS X 4227857 4235846 WBGene00004285 rab-37 W01H2.3 -0.0562891458412231  
AGIWUR7026;AGIWUR19855;AGIWUR22772;AGIWUR29998;AGIWUR35671;AGIWUR42634  
CB4856 HS X 4246554 4247212 WBGene00018602 F48D6.4 F48D6.4 0.173833607031299

AGIWUR4659;AGIWUR14142;AGIWUR26030;AGIWUR44362

CB4856 HS X 4249249 4250764 WBGene00001957 h1h-13 F48D6.3 -0.0408602788199723

AGIWUR12271;AGIWUR31055

CB4856 HS X 4252356 4254174 WBGene00005716 srv-5 F48D6.2 0.0257085550350524 AGIWUR32042

CB4856 HS X 4255154 4256812 WBGene00006393 taf-11.1 F48D6.1 0.0777164568007542

AGIWUR12189

CB4856 HS X 4257061 4259094 WBGene00005717 srv-6 C52B9.5 -0.00222002897702289 AGIWUR38894

CB4856 HS X 4260652 4264591 WBGene00016867 C52B9.4 C52B9.4 0.119342483168532 AGIWUR2170

CB4856 HS X 4265851 4270486 WBGene00016866 coe1-1 C52B9.3 -0.051308880718179

AGIWUR6040;AGIWUR13947;AGIWUR22554;AGIWUR33368;AGIWUR36165;AGIWUR37755;AGIWUR40505

CB4856 HS X 4271169 4274229 WBGene00003179 mec-18 C52B9.9 0.172364599655177 AGIWUR1282

CB4856 HS X 4273914 4274750 WBGene00016869 C52B9.10 C52B9.10 -0.401204028819274

AGIWUR5387

CB4856 HS X 4274786 4279344 WBGene00006680 twk-28 C52B9.6 0.0203144078430224

AGIWUR8740;AGIWUR10284;AGIWUR44110

CB4856 HS X 4280980 4284176 WBGene00016865 ets-9 C52B9.2 0.0487075659390985 AGIWUR41782

CB4856 HS X 4284189 4284901 WBGene00016870 ets-10 C52B9.11 0.161104284676098

AGIWUR19859

CB4856 HS X 4286737 4291494 WBGene00000510 cka-2 C52B9.1 -0.0685564113617372

AGIWUR4895;AGIWUR24931;AGIWUR37447;AGIWUR37628;AGIWUR39879;AGIWUR42350

CB4856 HS X 4291475 4297630 WBGene00003907 paf-2 C52B9.7 -0.00267734187820068

AGIWUR1054;AGIWUR26277

CB4856 HS X 4297860 4304398 WBGene00016868 C52B9.8 C52B9.8 -0.180288300477368 AGIWUR22938

CB4856 HS X 4328400 4328916 WBGene00016039 C24A8.5 C24A8.5 0.00295593708864672 AGIWUR16655

CB4856 HS X 4339634 4343702 WBGene00017472 cst-1 F14H12.4 0.0603196355114957

AGIWUR38627

CB4856 HS X 4344215 4345644 WBGene00017471 F14H12.3 F14H12.3 0.202384819309167

AGIWUR39369

CB4856 HS X 4350498 4352744 WBGene00017470 F14H12.2 F14H12.2 0.0313894564301282

AGIWUR5219

CB4856 HS X 4353618 4354820 WBGene00000738 col-165 F14H12.1 -0.282572621297668

AGIWUR4381;AGIWUR38491

CB4856 HS X 4357015 4357567 WBGene00017473 F14H12.6 F14H12.6 -0.0830022266268813

AGIWUR27312

CB4856 HS X 4361927 4362283 WBGene00017474 F14H12.7 F14H12.7 0.093378047967267

AGIWUR32261

CB4856 HS X 4362936 4363315 WBGene00219368 F14H12.17 F14H12.17 -0.116857096692801

AGIWUR40009

CB4856 HS X 4365305 4366332 WBGene00020120 R160.3 R160.3 -0.0948366184518221 AGIWUR21678

|                                                                                                                        |    |   |         |         |                |          |          |                            |             |
|------------------------------------------------------------------------------------------------------------------------|----|---|---------|---------|----------------|----------|----------|----------------------------|-------------|
| CB4856                                                                                                                 | HS | X | 4367159 | 4367514 | WBGene00219369 | R160.10  | R160.10  | 0.0312937585588244         | AGIWUR35788 |
| CB4856                                                                                                                 | HS | X | 4370014 | 4370856 | WBGene00020122 | R160.5   | R160.5   | -0.0667050229704387        | AGIWUR13004 |
| CB4856                                                                                                                 | HS | X | 4371036 | 4373211 | WBGene00020123 | R160.6   | R160.6   | 0.0803851726461033         | AGIWUR26469 |
| CB4856                                                                                                                 | HS | X | 4376595 | 4376850 | WBGene00020119 | R160.2   | R160.2   | -0.0268579792458015        | AGIWUR27023 |
| CB4856                                                                                                                 | HS | X | 4378004 | 4383366 | WBGene00003084 | lst-2    | R160.7   | 0.292004973945816          | AGIWUR785   |
| CB4856                                                                                                                 | HS | X | 4389365 | 4393796 | WBGene00001082 | dpy-23   | R160.1   | 0.0625339063850703         |             |
| AGIWUR4657;AGIWUR6146;AGIWUR37164                                                                                      |    |   |         |         |                |          |          |                            |             |
| CB4856                                                                                                                 | HS | X | 4403159 | 4407145 | WBGene00017040 | D1079.1  | D1079.1  | -0.216740937195532         | AGIWUR29911 |
| CB4856                                                                                                                 | HS | X | 4408089 | 4409133 | WBGene00017477 | F15A8.4  | F15A8.4  | -0.175383221677869         | AGIWUR21412 |
| CB4856                                                                                                                 | HS | X | 4411359 | 4416079 | WBGene00001052 | dop-1    | F15A8.5  | -0.0100120597743469        |             |
| AGIWUR5927;AGIWUR12192;AGIWUR20100;AGIWUR22632;AGIWUR30934                                                             |    |   |         |         |                |          |          |                            |             |
| CB4856                                                                                                                 | HS | X | 4430929 | 4437512 | WBGene00017478 | F15A8.6  | F15A8.6  | -0.22127521766282          | AGIWUR33964 |
| CB4856                                                                                                                 | HS | X | 4440941 | 4441726 | WBGene00017476 | F15A8.1  | F15A8.1  | 0.0902325304944842         | AGIWUR39320 |
| CB4856                                                                                                                 | HS | X | 4442152 | 4448383 | WBGene00017794 | mltn-13  | F25F6.1  | -0.0228432129147578        |             |
| AGIWUR20642;AGIWUR27594                                                                                                |    |   |         |         |                |          |          |                            |             |
| CB4856                                                                                                                 | HS | X | 4454120 | 4457304 | WBGene00017177 | F02E8.4  | F02E8.4  | 0.156958889689728          | AGIWUR29684 |
| CB4856                                                                                                                 | HS | X | 4458272 | 4459264 | WBGene00000157 | aps-2    | F02E8.3  | -0.0403553483252148        |             |
| AGIWUR18349;AGIWUR23286;AGIWUR24757;AGIWUR31667                                                                        |    |   |         |         |                |          |          |                            |             |
| CB4856                                                                                                                 | HS | X | 4459603 | 4462609 | WBGene00017178 | atg-16.1 |          | F02E8.5 0.0601803159597232 |             |
| AGIWUR40988                                                                                                            |    |   |         |         |                |          |          |                            |             |
| CB4856                                                                                                                 | HS | X | 4466518 | 4469005 | WBGene00017176 | nmur-3   | F02E8.2  | 0.0800199735217024         | AGIWUR11312 |
| CB4856                                                                                                                 | HS | X | 4469743 | 4471476 | WBGene00000207 | asb-2    | F02E8.1  | 0.116548981739315          |             |
| AGIWUR7405;AGIWUR8491;AGIWUR21740;AGIWUR34730;AGIWUR38595;AGIWUR42226                                                  |    |   |         |         |                |          |          |                            |             |
| CB4856                                                                                                                 | HS | X | 4472244 | 4488851 | WBGene00003561 | ncr-1    | F02E8.6  | -0.00489262048233208       | AGIWUR16168 |
| CB4856                                                                                                                 | HS | X | 4491651 | 4492208 | WBGene00023460 | F46H6.5  | F46H6.5  | 0.112131259750107          | AGIWUR43882 |
| CB4856                                                                                                                 | HS | X | 4494914 | 4504388 | WBGene00000959 | dgk-2    | F46H6.2  | 0.169333472062034          |             |
| AGIWUR8189;AGIWUR8947;AGIWUR12916;AGIWUR22238;AGIWUR23464;AGIWUR25341;AGIWUR27280;AGIWUR28757;AGIWUR30229;AGIWUR42723  |    |   |         |         |                |          |          |                            |             |
| CB4856                                                                                                                 | HS | X | 4508509 | 4510960 | WBGene00004356 | rhi-1    | F46H6.1  | -0.14964425833379          |             |
| AGIWUR3599;AGIWUR16396;AGIWUR24273;AGIWUR27364                                                                         |    |   |         |         |                |          |          |                            |             |
| CB4856                                                                                                                 | HS | X | 4514099 | 4516894 | WBGene00005008 | spr-3    | C07A12.5 | -0.10842268527106          |             |
| AGIWUR19165;AGIWUR42543                                                                                                |    |   |         |         |                |          |          |                            |             |
| CB4856                                                                                                                 | HS | X | 4517748 | 4521069 | WBGene00015561 | C07A12.7 | C07A12.7 | -0.282581431082544         |             |
| AGIWUR15126;AGIWUR25240                                                                                                |    |   |         |         |                |          |          |                            |             |
| CB4856                                                                                                                 | HS | X | 4524155 | 4526536 | WBGene00003963 | pdi-2    | C07A12.4 | -0.179230943939846         |             |
| AGIWUR3408;AGIWUR14954;AGIWUR15713;AGIWUR20132;AGIWUR21475;AGIWUR25287;AGIWUR28983;AGIWUR29415;AGIWUR43162;AGIWUR43873 |    |   |         |         |                |          |          |                            |             |
| CB4856                                                                                                                 | HS | X | 4532430 | 4537545 | WBGene00003628 | nhr-35   | C07A12.3 | 0.107648626728214          |             |
| AGIWUR12593                                                                                                            |    |   |         |         |                |          |          |                            |             |

|                                                                                                                                                |   |                 |                |          |          |                     |
|------------------------------------------------------------------------------------------------------------------------------------------------|---|-----------------|----------------|----------|----------|---------------------|
| CB4856 HS<br>AGIWUR39936                                                                                                                       | X | 4544876 4545418 | WBGene00015560 | C07A12.2 | C07A12.2 | -0.201229078802484  |
| CB4856 HS<br>AGIWUR10070                                                                                                                       | X | 4562163 4562880 | WBGene00015495 | C05E11.6 | C05E11.6 | 0.130486739460574   |
| CB4856 HS<br>AGIWUR20267                                                                                                                       | X | 4565302 4569393 | WBGene00000136 | amt-4    | C05E11.5 | -0.120148050857901  |
| CB4856 HS<br>AGIWUR2915                                                                                                                        | X | 4571448 4573914 | WBGene00000133 | amt-1    | C05E11.4 | 0.020748857535569   |
| CB4856 HS<br>AGIWUR36785                                                                                                                       | X | 4578249 4581724 | WBGene00015494 | C05E11.3 | C05E11.3 | -0.0229006548774624 |
| CB4856 HS<br>AGIWUR21270                                                                                                                       | X | 4581586 4585679 | WBGene00015496 | C05E11.7 | C05E11.7 | -0.178072118445151  |
| CB4856 HS<br>AGIWUR32772                                                                                                                       | X | 4586917 4587993 | WBGene00015493 | C05E11.2 | C05E11.2 | 0.0351263434780682  |
| CB4856 HS<br>AGIWUR41193                                                                                                                       | X | 4588768 4590446 | WBGene00015492 | lnp-1    | C05E11.1 | -0.0142079808845779 |
| CB4856 HS<br>AGIWUR4207;AGIWUR7649;AGIWUR11808;AGIWUR12376;AGIWUR16211;AGIWUR34929;AGIWUR35398;AGIWUR38482;AGIWUR42059;AGIWUR42237;AGIWUR43382 | X | 4591281 4592404 | WBGene00001455 | flp-12   | C05E11.8 | 0.0625790305599558  |
| CB4856 HS<br>AGIWUR24159;AGIWUR33442                                                                                                           | X | 4596016 4605928 | WBGene00020496 | spat-3   | T13H2.5  | -0.154184601763994  |
| CB4856 HS<br>AGIWUR2057;AGIWUR7236;AGIWUR8289;AGIWUR17805;AGIWUR21667;AGIWUR36009;AGIWUR41841                                                  | X | 4610926 4620423 | WBGene00004148 | pqn-65   | T13H2.4  | -0.0357248800136931 |
| CB4856 HS<br>AGIWUR15591                                                                                                                       | X | 4629039 4631838 | WBGene00016706 | C46C11.3 | C46C11.3 | 0.202811903019235   |
| CB4856 HS<br>AGIWUR36196                                                                                                                       | X | 4632348 4635784 | WBGene00016705 | C46C11.2 | C46C11.2 | -0.195483234354258  |
| CB4856 HS<br>AGIWUR26837                                                                                                                       | X | 4637242 4643695 | WBGene00016704 | hos1-1   | C46C11.1 | -0.127817696216269  |
| CB4856 HS<br>AGIWUR25422;AGIWUR33961                                                                                                           | X | 4644404 4647192 | WBGene00044567 | C46C11.4 | C46C11.4 | -0.0937255747013861 |
| CB4856 HS<br>AGIWUR39877                                                                                                                       | X | 4647526 4649197 | WBGene00017532 | ent-5    | F16H11.3 | -0.0980188881932378 |
| CB4856 HS<br>AGIWUR10788;AGIWUR22423;AGIWUR26594                                                                                               | X | 4653434 4654157 | WBGene00000428 | ceh-1    | F16H11.4 | -0.0741654311570326 |
| CB4856 HS<br>AGIWUR1648                                                                                                                        | X | 4656433 4660318 | WBGene00003635 | nhr-45   | F16H11.5 | 0.307072248906035   |
| CB4856 HS<br>AGIWUR30876                                                                                                                       | X | 4668071 4673234 | WBGene00017530 | F16H11.1 | F16H11.1 | 0.100049074073995   |

|                                                                                               |    |   |         |         |                |          |          |                     |             |
|-----------------------------------------------------------------------------------------------|----|---|---------|---------|----------------|----------|----------|---------------------|-------------|
| CB4856                                                                                        | HS | X | 4673706 | 4677283 | WBGene00019345 | tmem-135 | K02G10.3 | 0.0857348098588808  |             |
| AGIWUR24352                                                                                   |    |   |         |         |                |          |          |                     |             |
| CB4856                                                                                        | HS | X | 4677342 | 4678129 | WBGene00001454 | flp-11   | K02G10.4 | -0.199573326146676  |             |
| AGIWUR387;AGIWUR13935;AGIWUR23795;AGIWUR25362;AGIWUR33739;AGIWUR34739;AGIWUR35075;AGIWUR44123 |    |   |         |         |                |          |          |                     |             |
| CB4856                                                                                        | HS | X | 4687763 | 4691316 | WBGene00019346 |          | K02G10.5 | -0.027001413346051  |             |
| AGIWUR44406                                                                                   |    |   |         |         |                |          |          |                     |             |
| CB4856                                                                                        | HS | X | 4696952 | 4699461 | WBGene00002044 | hyl-2    | K02G10.6 | -0.169441283948794  |             |
| AGIWUR24282                                                                                   |    |   |         |         |                |          |          |                     |             |
| CB4856                                                                                        | HS | X | 4702965 | 4704970 | WBGene00000176 | aqp-8    | K02G10.7 | 0.355673034365607   |             |
| AGIWUR14200                                                                                   |    |   |         |         |                |          |          |                     |             |
| CB4856                                                                                        | HS | X | 4707188 | 4709812 | WBGene00019344 | dhhc-10  | K02G10.1 | 0.154173154586786   |             |
| AGIWUR41098                                                                                   |    |   |         |         |                |          |          |                     |             |
| CB4856                                                                                        | HS | X | 4709772 | 4711744 | WBGene00001032 | dnj-14   | K02G10.8 | 0.0756907181155819  |             |
| AGIWUR126;AGIWUR12952;AGIWUR18427;AGIWUR29641;AGIWUR38758;AGIWUR40737                         |    |   |         |         |                |          |          |                     |             |
| CB4856                                                                                        | HS | X | 4712279 | 4715080 | WBGene00018878 | glit-1   | F55D10.3 | 0.230728284819508   |             |
| AGIWUR8019                                                                                    |    |   |         |         |                |          |          |                     |             |
| CB4856                                                                                        | HS | X | 4715178 | 4715801 | WBGene00004438 | rpl-25.1 | F55D10.2 | -0.151446377247797  |             |
| AGIWUR3501;AGIWUR18829                                                                        |    |   |         |         |                |          |          |                     |             |
| CB4856                                                                                        | HS | X | 4716244 | 4720640 | WBGene00018879 |          | F55D10.4 | 0.0977128943024352  |             |
| AGIWUR8758                                                                                    |    |   |         |         |                |          |          |                     |             |
| CB4856                                                                                        | HS | X | 4722877 | 4727481 | WBGene00018880 | acc-3    | F55D10.5 | 0.00513742259509087 |             |
| AGIWUR17945                                                                                   |    |   |         |         |                |          |          |                     |             |
| CB4856                                                                                        | HS | X | 4732964 | 4738592 | WBGene00018877 | aman-1   | F55D10.1 | 0.30131906418155    |             |
| AGIWUR33927                                                                                   |    |   |         |         |                |          |          |                     |             |
| CB4856                                                                                        | HS | X | 4738964 | 4749083 | WBGene00003056 | lon-2    | C39E6.1  | -0.0447494569778755 | AGIWUR33141 |
| CB4856                                                                                        | HS | X | 4754678 | 4755160 | WBGene00016537 | C39E6.2  | C39E6.2  | -0.12067775695562   | AGIWUR13911 |
| CB4856                                                                                        | HS | X | 4758804 | 4761612 | WBGene00003377 | mls-2    | C39E6.4  | 0.00205929911239267 | AGIWUR29708 |
| CB4856                                                                                        | HS | X | 4767178 | 4769985 | WBGene00003807 | npr-1    | C39E6.6  | 0.0669392783431491  | AGIWUR43511 |
| CB4856                                                                                        | HS | X | 4777512 | 4782297 | WBGene00018377 | hum-10   | F43C9.3  | -0.095964884122397  |             |
| AGIWUR36723;AGIWUR38269                                                                       |    |   |         |         |                |          |          |                     |             |
| CB4856                                                                                        | HS | X | 4786118 | 4790323 | WBGene00018376 | F43C9.2  | F43C9.2  | 0.112228319122227   | AGIWUR33921 |
| CB4856                                                                                        | HS | X | 4793266 | 4796158 | WBGene00018375 | F43C9.1  | F43C9.1  | 0.347036454943417   | AGIWUR29075 |
| CB4856                                                                                        | HS | X | 4796095 | 4800128 | WBGene00003245 | mig-13   | F43C9.4  | 0.197358929879563   |             |
| AGIWUR2697;AGIWUR29599;AGIWUR30719                                                            |    |   |         |         |                |          |          |                     |             |
| CB4856                                                                                        | HS | X | 4805998 | 4811536 | WBGene00019960 | ztf-16   | R08E3.4  | 0.0557351485401387  |             |
| AGIWUR272;AGIWUR8112;AGIWUR11016;AGIWUR21775;AGIWUR22153;AGIWUR28337;AGIWUR41656;AGIWUR44561  |    |   |         |         |                |          |          |                     |             |
| CB4856                                                                                        | HS | X | 4818599 | 4821708 | WBGene00019959 | R08E3.3  | R08E3.3  | 0.168002885780743   |             |
| AGIWUR8990;AGIWUR29698;AGIWUR44869                                                            |    |   |         |         |                |          |          |                     |             |
| CB4856                                                                                        | HS | X | 4822661 | 4824680 | WBGene00019958 | R08E3.2  | R08E3.2  | -0.034703152971697  | AGIWUR35969 |

|                                                                                                          |    |   |         |         |                |          |          |                     |             |
|----------------------------------------------------------------------------------------------------------|----|---|---------|---------|----------------|----------|----------|---------------------|-------------|
| CB4856                                                                                                   | HS | X | 4825003 | 4834905 | WBGene00019957 | R08E3.1  | R08E3.1  | 0.0440820539977063  |             |
| AGIWUR1704;AGIWUR8945;AGIWUR10834;AGIWUR11213;AGIWUR17358;AGIWUR38709                                    |    |   |         |         |                |          |          |                     |             |
| CB4856                                                                                                   | HS | X | 4834881 | 4853065 | WBGene00018193 | F39C12.1 | F39C12.1 | -0.0373798436665052 |             |
| AGIWUR28106                                                                                              |    |   |         |         |                |          |          |                     |             |
| CB4856                                                                                                   | HS | X | 4854069 | 4860036 | WBGene00000072 | add-1    | F39C12.2 | 0.110585529634512   |             |
| AGIWUR6120;AGIWUR26945;AGIWUR30618;AGIWUR36537;AGIWUR43003                                               |    |   |         |         |                |          |          |                     |             |
| CB4856                                                                                                   | HS | X | 4866075 | 4866690 | WBGene00044568 | ntc-1    | F39C12.4 | -0.196807382986627  |             |
| AGIWUR14092;AGIWUR17933;AGIWUR25041;AGIWUR26292;AGIWUR29232                                              |    |   |         |         |                |          |          |                     |             |
| CB4856                                                                                                   | HS | X | 4866684 | 4874657 | WBGene00006640 | tsp-14   | F39C12.3 | 0.0406291067986793  |             |
| AGIWUR7113;AGIWUR18083;AGIWUR23404;AGIWUR25913;AGIWUR36849;AGIWUR40724;AGIWUR42162                       |    |   |         |         |                |          |          |                     |             |
| CB4856                                                                                                   | HS | X | 4885951 | 4889575 | WBGene00020323 | arrd-23  | T07F12.3 | 0.110599979367727   |             |
| AGIWUR14501                                                                                              |    |   |         |         |                |          |          |                     |             |
| CB4856                                                                                                   | HS | X | 4890221 | 4892328 | WBGene00020322 | T07F12.2 | T07F12.2 | -0.146431321624515  |             |
| AGIWUR12321;AGIWUR14348;AGIWUR33947;AGIWUR34000;AGIWUR34056;AGIWUR35997;AGIWUR40084                      |    |   |         |         |                |          |          |                     |             |
| CB4856                                                                                                   | HS | X | 4894055 | 4896615 | WBGene00020321 | T07F12.1 | T07F12.1 | 0.189638804123271   |             |
| AGIWUR38934                                                                                              |    |   |         |         |                |          |          |                     |             |
| CB4856                                                                                                   | HS | X | 4896602 | 4898163 | WBGene00020324 | T07F12.4 | T07F12.4 | 0.268274461136942   |             |
| AGIWUR3036                                                                                               |    |   |         |         |                |          |          |                     |             |
| CB4856                                                                                                   | HS | X | 4907290 | 4912323 | WBGene00019403 | K05B2.2  | K05B2.2  | -0.162682631471256  | AGIWUR22809 |
| CB4856                                                                                                   | HS | X | 4912308 | 4915979 | WBGene00002052 | ifa-4    | K05B2.3  | 0.0327294281332868  | AGIWUR8151  |
| CB4856                                                                                                   | HS | X | 4919019 | 4920988 | WBGene00019404 | K05B2.4  | K05B2.4  | 0.00311952796082338 | AGIWUR3149  |
| CB4856                                                                                                   | HS | X | 4921252 | 4929757 | WBGene00003986 | mct-4    | K05B2.5  | 0.185205859951992   |             |
| AGIWUR1296;AGIWUR2543;AGIWUR5527;AGIWUR10729;AGIWUR18533;AGIWUR21418;AGIWUR25450;AGIWUR28400;AGIWUR39815 |    |   |         |         |                |          |          |                     |             |
| CB4856                                                                                                   | HS | X | 4948049 | 4955331 | WBGene00006475 | tyra-3   | M03F4.3  | 0.166918898930705   | AGIWUR44037 |
| CB4856                                                                                                   | HS | X | 4957329 | 4958067 | WBGene00019758 | M03F4.4  | M03F4.4  | -0.132383784279117  | AGIWUR32869 |
| CB4856                                                                                                   | HS | X | 4960553 | 4964416 | WBGene00000066 | act-4    | M03F4.2  | -0.235630672040473  |             |
| AGIWUR24973;AGIWUR26902                                                                                  |    |   |         |         |                |          |          |                     |             |
| CB4856                                                                                                   | HS | X | 4964413 | 4969459 | WBGene00019759 | M03F4.6  | M03F4.6  | -0.206056275332225  | AGIWUR37710 |
| CB4856                                                                                                   | HS | X | 4969537 | 4972281 | WBGene00019760 | calu-1   | M03F4.7  | -0.0200727503117903 |             |
| AGIWUR8128;AGIWUR11525;AGIWUR13302;AGIWUR24024;AGIWUR25793;AGIWUR31221;AGIWUR40414                       |    |   |         |         |                |          |          |                     |             |
| CB4856                                                                                                   | HS | X | 4972575 | 4997598 | WBGene00022501 | ZC8.6    | ZC8.6    | -0.0844529855491416 |             |
| AGIWUR20769;AGIWUR22221;AGIWUR44515                                                                      |    |   |         |         |                |          |          |                     |             |
| CB4856                                                                                                   | HS | X | 4999270 | 5003515 | WBGene00022499 | set-30   | ZC8.3    | 0.0947463030694298  | AGIWUR11661 |
| CB4856                                                                                                   | HS | X | 5005269 | 5007024 | WBGene00022498 | hsd-2    | ZC8.1    | 0.177797983856007   | AGIWUR15242 |
| CB4856                                                                                                   | HS | X | 5009300 | 5011222 | WBGene00022616 | hsd-3    | ZC449.6  | -0.217165332480176  |             |
| AGIWUR21264;AGIWUR39014                                                                                  |    |   |         |         |                |          |          |                     |             |
| CB4856                                                                                                   | HS | X | 5014040 | 5015452 | WBGene00045365 | ZC449.7  | ZC449.7  | 0.0641367482072481  |             |
| AGIWUR2844;AGIWUR39162                                                                                   |    |   |         |         |                |          |          |                     |             |
| CB4856                                                                                                   | HS | X | 5017924 | 5021064 | WBGene00022613 | sek-3    | ZC449.3  | 0.141237648798718   | AGIWUR32402 |

|                                                                                                |    |   |         |         |                |           |          |                     |                     |
|------------------------------------------------------------------------------------------------|----|---|---------|---------|----------------|-----------|----------|---------------------|---------------------|
| CB4856                                                                                         | HS | X | 5021215 | 5024258 | WBGene00022612 | ZC449.2   | ZC449.2  | -0.102294880227594  | AGIWUR16052         |
| CB4856                                                                                         | HS | X | 5024420 | 5028165 | WBGene00022611 | ZC449.1   | ZC449.1  | -0.121876423178325  |                     |
| AGIWUR17967;AGIWUR31767                                                                        |    |   |         |         |                |           |          |                     |                     |
| CB4856                                                                                         | HS | X | 5028184 | 5029568 | WBGene00022614 | ZC449.4   | ZC449.4  | -0.214880490738494  | AGIWUR20026         |
| CB4856                                                                                         | HS | X | 5035030 | 5037773 | WBGene00022615 | ZC449.5   | ZC449.5  | -0.0395905969043118 |                     |
| AGIWUR9356;AGIWUR13636;AGIWUR22963;AGIWUR25078;AGIWUR32327;AGIWUR36618                         |    |   |         |         |                |           |          |                     |                     |
| CB4856                                                                                         | HS | X | 5043976 | 5044746 | WBGene00022024 | Y64H9A.2  |          | Y64H9A.2            | 0.0946689884269185  |
| AGIWUR11654                                                                                    |    |   |         |         |                |           |          |                     |                     |
| CB4856                                                                                         | HS | X | 5057273 | 5057581 | WBGene00022023 | Y64H9A.1  |          | Y64H9A.1            | 0.0190196012902462  |
| AGIWUR12543                                                                                    |    |   |         |         |                |           |          |                     |                     |
| CB4856                                                                                         | HS | X | 5058367 | 5058733 | WBGene00016070 | C24H10.4  |          | C24H10.4            | -0.173972744301373  |
| AGIWUR27501                                                                                    |    |   |         |         |                |           |          |                     |                     |
| CB4856                                                                                         | HS | X | 5061056 | 5062209 | WBGene00016069 | C24H10.3  |          | C24H10.3            | -0.0283858269227695 |
| AGIWUR2962;AGIWUR14100                                                                         |    |   |         |         |                |           |          |                     |                     |
| CB4856                                                                                         | HS | X | 5064602 | 5066663 | WBGene00016068 | C24H10.2  |          | C24H10.2            | -0.228207313746697  |
| AGIWUR9762                                                                                     |    |   |         |         |                |           |          |                     |                     |
| CB4856                                                                                         | HS | X | 5072019 | 5074425 | WBGene00016067 | C24H10.1  |          | C24H10.1            | -0.237394861631433  |
| AGIWUR25124                                                                                    |    |   |         |         |                |           |          |                     |                     |
| CB4856                                                                                         | HS | X | 5074399 | 5078120 | WBGene00006861 | cal-5     | C24H10.5 |                     | 0.397635521068697   |
| AGIWUR30530                                                                                    |    |   |         |         |                |           |          |                     |                     |
| CB4856                                                                                         | HS | X | 5079773 | 5084489 | WBGene00016600 | ets-5     | C42D8.4  | -0.0197499671031558 | AGIWUR35943         |
| CB4856                                                                                         | HS | X | 5087840 | 5092538 | WBGene00006862 | pnk-4     | C42D8.3  | -0.0188549516172252 |                     |
| AGIWUR20818;AGIWUR40779;AGIWUR44864                                                            |    |   |         |         |                |           |          |                     |                     |
| CB4856                                                                                         | HS | X | 5092458 | 5097067 | WBGene00000039 | acn-1     | C42D8.5  | 0.118019150069458   | AGIWUR38360         |
| CB4856                                                                                         | HS | X | 5101032 | 5106173 | WBGene00006926 | vit-2     | C42D8.2  | 0.363562351654249   |                     |
| AGIWUR7138;AGIWUR13310;AGIWUR30312                                                             |    |   |         |         |                |           |          |                     |                     |
| CB4856                                                                                         | HS | X | 5106260 | 5107039 | WBGene00044299 | C42D8.9   | C42D8.9  | 0.158515973995923   |                     |
| AGIWUR486;AGIWUR17383;AGIWUR42735                                                              |    |   |         |         |                |           |          |                     |                     |
| CB4856                                                                                         | HS | X | 5109504 | 5112452 | WBGene00016599 | C42D8.1   | C42D8.1  | -0.304099897104599  | AGIWUR34679         |
| CB4856                                                                                         | HS | X | 5112422 | 5116866 | WBGene00000149 | ap1-1     | C42D8.8  | -0.0877628776760675 |                     |
| AGIWUR8657;AGIWUR10776;AGIWUR13543;AGIWUR28682;AGIWUR32921;AGIWUR35954;AGIWUR38873;AGIWUR41528 |    |   |         |         |                |           |          |                     |                     |
| CB4856                                                                                         | HS | X | 5138991 | 5146742 | WBGene00016292 | tbc-7     | C31H2.1  | 0.12557000378291    | AGIWUR23489         |
| CB4856                                                                                         | HS | X | 5148804 | 5150476 | WBGene00001070 | dpy-8     | C31H2.2  | 0.0466815046656777  | AGIWUR25466         |
| CB4856                                                                                         | HS | X | 5151547 | 5154399 | WBGene00016293 | C31H2.3   | C31H2.3  | -0.26507116092886   | AGIWUR40194         |
| CB4856                                                                                         | HS | X | 5155093 | 5159667 | WBGene00016294 | C31H2.4   | C31H2.4  | -0.0274651182255141 | AGIWUR39874         |
| CB4856                                                                                         | HS | X | 5163055 | 5163439 | WBGene00017150 | EGAP5.1   | EGAP5.1  | 0.206303818356176   | AGIWUR14391         |
| CB4856                                                                                         | HS | X | 5165395 | 5168778 | WBGene00020197 | mans-3    | T03G11.4 |                     | 0.15101881916037    |
| AGIWUR10489                                                                                    |    |   |         |         |                |           |          |                     |                     |
| CB4856                                                                                         | HS | X | 5168739 | 5171119 | WBGene00044732 | T03G11.10 |          | T03G11.10           | 0.104303737473571   |



|                                                                                                             |    |   |         |         |                |           |           |                      |
|-------------------------------------------------------------------------------------------------------------|----|---|---------|---------|----------------|-----------|-----------|----------------------|
| AGIWUR14189;AGIWUR18431                                                                                     |    |   |         |         |                |           |           |                      |
| CB4856                                                                                                      | HS | X | 5174369 | 5177506 | WBGene00020196 | T03G11.3  | T03G11.3  | -0.0630039345437829  |
| AGIWUR35567                                                                                                 |    |   |         |         |                |           |           |                      |
| CB4856                                                                                                      | HS | X | 5177519 | 5179210 | WBGene00020199 | T03G11.6  | T03G11.6  | 0.00588521863171199  |
| AGIWUR2097;AGIWUR6235;AGIWUR26975                                                                           |    |   |         |         |                |           |           |                      |
| CB4856                                                                                                      | HS | X | 5180174 | 5181495 | WBGene00005711 | sru-48    | T03G11.2  | -0.0223285907372652  |
| AGIWUR37034                                                                                                 |    |   |         |         |                |           |           |                      |
| CB4856                                                                                                      | HS | X | 5183828 | 5186623 | WBGene00044584 | T03G11.9  | T03G11.9  | 0.11612060029855     |
| AGIWUR7733;AGIWUR10680                                                                                      |    |   |         |         |                |           |           |                      |
| CB4856                                                                                                      | HS | X | 5186921 | 5189077 | WBGene00006983 | zig-6     | T03G11.8  | 0.206579960373599    |
| AGIWUR17299;AGIWUR28407;AGIWUR44746                                                                         |    |   |         |         |                |           |           |                      |
| CB4856                                                                                                      | HS | X | 5196110 | 5204250 | WBGene00004145 | pqn-62    | T03G11.1  | 0.0967977808939797   |
| AGIWUR4007;AGIWUR5125;AGIWUR30497;AGIWUR31491                                                               |    |   |         |         |                |           |           |                      |
| CB4856                                                                                                      | HS | X | 5205760 | 5216230 | WBGene00019250 | H28G03.2  | H28G03.2  | -0.0127903843902377  |
| AGIWUR817;AGIWUR31145;AGIWUR37381;AGIWUR43675                                                               |    |   |         |         |                |           |           |                      |
| CB4856                                                                                                      | HS | X | 5216363 | 5219095 | WBGene00019249 | H28G03.1  | H28G03.1  | 0.00334371909877795  |
| AGIWUR804;AGIWUR5930;AGIWUR9399;AGIWUR20705;AGIWUR21613;AGIWUR37275;AGIWUR44938                             |    |   |         |         |                |           |           |                      |
| CB4856                                                                                                      | HS | X | 5220406 | 5222042 | WBGene00019251 | H28G03.3  | H28G03.3  | -0.00704356308135434 |
| AGIWUR32465                                                                                                 |    |   |         |         |                |           |           |                      |
| CB4856                                                                                                      | HS | X | 5234669 | 5243408 | WBGene00003477 | mtm-5     | H28G03.6  | -0.0436073354465041  |
| AGIWUR17321                                                                                                 |    |   |         |         |                |           |           |                      |
| CB4856                                                                                                      | HS | X | 5244317 | 5246927 | WBGene00021323 | Y34B4A.7  | Y34B4A.7  | -0.0180876754188759  |
| AGIWUR2665;AGIWUR15980;AGIWUR25310                                                                          |    |   |         |         |                |           |           |                      |
| CB4856                                                                                                      | HS | X | 5249851 | 5252787 | WBGene00021326 | Y34B4A.10 | Y34B4A.10 | 0.141820396492095    |
| AGIWUR18285                                                                                                 |    |   |         |         |                |           |           |                      |
| CB4856                                                                                                      | HS | X | 5253001 | 5255068 | WBGene00021322 | Y34B4A.6  | Y34B4A.6  | 0.227629653380163    |
| AGIWUR10605                                                                                                 |    |   |         |         |                |           |           |                      |
| CB4856                                                                                                      | HS | X | 5255194 | 5256855 | WBGene00021325 | Y34B4A.9  | Y34B4A.9  | 0.0891799213930158   |
| AGIWUR19937;AGIWUR39655                                                                                     |    |   |         |         |                |           |           |                      |
| CB4856                                                                                                      | HS | X | 5257213 | 5258384 | WBGene00021321 | Y34B4A.5  | Y34B4A.5  | 0.176466915629691    |
| AGIWUR44254                                                                                                 |    |   |         |         |                |           |           |                      |
| CB4856                                                                                                      | HS | X | 5264330 | 5271799 | WBGene00021320 | Y34B4A.4  | Y34B4A.4  | -0.0428463522652081  |
| AGIWUR2026;AGIWUR35951                                                                                      |    |   |         |         |                |           |           |                      |
| CB4856                                                                                                      | HS | X | 5271780 | 5275287 | WBGene00021324 | Y34B4A.8  | Y34B4A.8  | -0.254157697170937   |
| AGIWUR30828                                                                                                 |    |   |         |         |                |           |           |                      |
| CB4856                                                                                                      | HS | X | 5275567 | 5278813 | WBGene00002031 | hst-6     | Y34B4A.3  | 0.0174651944870945   |
| AGIWUR663                                                                                                   |    |   |         |         |                |           |           |                      |
| CB4856                                                                                                      | HS | X | 5279497 | 5283719 | WBGene00021319 | Y34B4A.2  | Y34B4A.2  | 0.0933354260309214   |
| AGIWUR406;AGIWUR7277;AGIWUR8792;AGIWUR10761;AGIWUR15875;AGIWUR21692;AGIWUR24499;AGIWUR25055;AGIWUR26841;AGI |    |   |         |         |                |           |           |                      |

WUR29281;AGIWUR29621;AGIWUR37635;AGIWUR41542  
CB4856 HS X 5283831 5289726 WBGene00017974 vps-41 F32A6.3 -0.0953067279544468  
AGIWUR24978;AGIWUR33755  
CB4856 HS X 5289728 5303512 WBGene00000092 ags-3 F32A6.4 -0.0244633673200259  
AGIWUR2762;AGIWUR6181;AGIWUR6713;AGIWUR8007;AGIWUR19964;AGIWUR23829;AGIWUR32302  
CB4856 HS X 5298561 5306328 WBGene00017973 ift-81 F32A6.2 -0.0258420600536047  
AGIWUR4111;AGIWUR6031;AGIWUR6950;AGIWUR10167;AGIWUR11518;AGIWUR17046;AGIWUR17375;AGIWUR22547;AGIWUR23483;AGIWUR35816  
CB4856 HS X 5307489 5323385 WBGene00006064 sto-2 F32A6.5 0.134823538300223 AGIWUR30928  
CB4856 HS X 5329455 5332339 WBGene00016134 C26B9.5 C26B9.5 0.244642925377264 AGIWUR13099  
CB4856 HS X 5332969 5335468 WBGene00016135 C26B9.6 C26B9.6 0.146904431583737 AGIWUR9069  
CB4856 HS X 5338273 5340182 WBGene00016133 C26B9.3 C26B9.3 0.0396979937559294 AGIWUR41485  
CB4856 HS X 5340189 5342202 WBGene00016132 C26B9.2 C26B9.2 0.191162547521163 AGIWUR14514  
CB4856 HS X 5342307 5342841 WBGene00016136 C26B9.7 C26B9.7 0.0401872378392087  
AGIWUR25278;AGIWUR29045;AGIWUR31795;AGIWUR32458;AGIWUR37242;AGIWUR43461  
CB4856 HS X 5344520 5348411 WBGene00016131 C26B9.1 C26B9.1 -0.288651075005189 AGIWUR34413  
CB4856 HS X 5349098 5352423 WBGene00006371 syx-3 F35C8.4 0.0452254218855082 AGIWUR7704  
CB4856 HS X 5353033 5354144 WBGene00003990 pfn-2 F35C8.6 0.162703097417813  
AGIWUR7182;AGIWUR10564  
CB4856 HS X 5355638 5364322 WBGene00018037 chtl-1 F35C8.7 -0.31315143316079 AGIWUR15722  
CB4856 HS X 5365808 5367619 WBGene00018036 F35C8.5 F35C8.5 0.0651001956854671 AGIWUR38857  
CB4856 HS X 5368468 5372059 WBGene00002177 jkk-1 F35C8.3 0.15916276393771 AGIWUR13137  
CB4856 HS X 5372149 5374443 WBGene00018038 F35C8.8 F35C8.8 -0.161937814439636 AGIWUR41387  
CB4856 HS X 5375070 5376911 WBGene00018035 sek-4 F35C8.2 -0.160324312276203 AGIWUR22777  
CB4856 HS X 5377607 5379353 WBGene00018034 sek-5 F35C8.1 -0.272143075748728 AGIWUR3165  
CB4856 HS X 5386248 5394330 WBGene00015387 kcnl-3 C03F11.1 -0.0573998456288551  
AGIWUR24146  
CB4856 HS X 5394508 5397400 WBGene00015388 C03F11.2 C03F11.2 0.180853641741458  
AGIWUR26439  
CB4856 HS X 5397676 5400626 WBGene00015389 scav-1 C03F11.3 0.283048161363281  
AGIWUR28074  
CB4856 HS X 5401437 5406443 WBGene00015390 C03F11.4 C03F11.4 0.20139586951394  
AGIWUR36310  
CB4856 HS X 5406562 5414350 WBGene00016559 C41A3.2 C41A3.2 0.0707295053334605  
AGIWUR4001;AGIWUR38812  
CB4856 HS X 5413810 5441958 WBGene00016558 pks-1 C41A3.1 0.134257549337415  
AGIWUR7593;AGIWUR7992  
CB4856 HS X 5445163 5448085 WBGene00016106 C25F6.7 C25F6.7 0.0270372050296785  
AGIWUR7887;AGIWUR15484;AGIWUR15991;AGIWUR27938;AGIWUR33932

|                                                                                                                       |    |   |         |         |                |          |          |                     |             |
|-----------------------------------------------------------------------------------------------------------------------|----|---|---------|---------|----------------|----------|----------|---------------------|-------------|
| CB4856                                                                                                                | HS | X | 5448241 | 5450010 | WBGene00044569 | C25F6.8  | C25F6.8  | -0.191936027111004  |             |
| AGIWUR13339;AGIWUR22448;AGIWUR37292                                                                                   |    |   |         |         |                |          |          |                     |             |
| CB4856                                                                                                                | HS | X | 5450262 | 5450823 | WBGene00016105 | C25F6.6  | C25F6.6  | 0.236670568834447   | AGIWUR38872 |
| CB4856                                                                                                                | HS | X | 5461256 | 5466310 | WBGene00016104 | ddr-1    | C25F6.4  | 0.114061234509769   | AGIWUR44016 |
| CB4856                                                                                                                | HS | X | 5467870 | 5472684 | WBGene00016103 | dpyd-1   | C25F6.3  | 0.195821817493592   | AGIWUR8451  |
| CB4856                                                                                                                | HS | X | 5479700 | 5484941 | WBGene00001006 | dlg-1    | C25F6.2  | 0.0477691301216154  |             |
| AGIWUR6452;AGIWUR6973;AGIWUR37028                                                                                     |    |   |         |         |                |          |          |                     |             |
| CB4856                                                                                                                | HS | X | 5486487 | 5488102 | WBGene00016102 | C25F6.1  | C25F6.1  | 0.0984002606850982  | AGIWUR28493 |
| CB4856                                                                                                                | HS | X | 5488777 | 5489111 | WBGene00018876 | F55D1.2  | F55D1.2  | -0.18860273684656   | AGIWUR25880 |
| CB4856                                                                                                                | HS | X | 5489838 | 5490113 | WBGene00018875 | F55D1.1  | F55D1.1  | 0.058321609027649   | AGIWUR2924  |
| CB4856                                                                                                                | HS | X | 5492915 | 5496000 | WBGene00044623 | bus-8    | T23F2.1  | 0.162354070742596   | AGIWUR8554  |
| CB4856                                                                                                                | HS | X | 5496122 | 5505248 | WBGene00020735 | T23F2.2  | T23F2.2  | 0.16946969423303    |             |
| AGIWUR3692;AGIWUR12559;AGIWUR23951                                                                                    |    |   |         |         |                |          |          |                     |             |
| CB4856                                                                                                                | HS | X | 5514798 | 5515080 | WBGene00020737 | T23F2.4  | T23F2.4  | 0.0331118452131793  | AGIWUR42924 |
| CB4856                                                                                                                | HS | X | 5516454 | 5517162 | WBGene00020738 | T23F2.5  | T23F2.5  | -0.0975211875715143 | AGIWUR17349 |
| CB4856                                                                                                                | HS | X | 5519876 | 5522819 | WBGene00016934 | mboa-3   | C54G7.2  | 0.344325108591157   | AGIWUR4306  |
| CB4856                                                                                                                | HS | X | 5525199 | 5538514 | WBGene00002983 | lgx-1    | C54G7.3  | -0.0370757339868697 |             |
| AGIWUR2468;AGIWUR35142                                                                                                |    |   |         |         |                |          |          |                     |             |
| CB4856                                                                                                                | HS | X | 5543951 | 5545529 | WBGene00016933 | C54G7.1  | C54G7.1  | 0.0682184849407328  | AGIWUR7203  |
| CB4856                                                                                                                | HS | X | 5545684 | 5552756 | WBGene00016935 | ifta-1   | C54G7.4  | 0.105571264407738   | AGIWUR32065 |
| CB4856                                                                                                                | HS | X | 5559021 | 5561330 | WBGene00016518 | C38C5.1  | C38C5.1  | 0.0645798494063641  | AGIWUR21309 |
| CB4856                                                                                                                | HS | X | 5575932 | 5590815 | WBGene00003166 | mec-2    | F14D12.4 | 0.0564411571911689  |             |
| AGIWUR5405;AGIWUR9147;AGIWUR16683;AGIWUR18760;AGIWUR25075;AGIWUR25491;AGIWUR38095;AGIWUR38202;AGIWUR41977;AGIWUR43004 |    |   |         |         |                |          |          |                     |             |
| CB4856                                                                                                                | HS | X | 5593133 | 5594965 | WBGene00006826 | unc-97   | F14D12.2 | -0.0930008417034687 |             |
| AGIWUR3367;AGIWUR8261;AGIWUR9120;AGIWUR12267;AGIWUR12558;AGIWUR39269                                                  |    |   |         |         |                |          |          |                     |             |
| CB4856                                                                                                                | HS | X | 5595778 | 5599330 | WBGene00017464 | sulp-2   | F14D12.5 | 0.230060605674265   |             |
| AGIWUR12101;AGIWUR24371;AGIWUR32052;AGIWUR42406                                                                       |    |   |         |         |                |          |          |                     |             |
| CB4856                                                                                                                | HS | X | 5603766 | 5609133 | WBGene00017463 | F14D12.1 | F14D12.1 | 0.083173995054203   |             |
| AGIWUR14060;AGIWUR18971;AGIWUR41801                                                                                   |    |   |         |         |                |          |          |                     |             |
| CB4856                                                                                                                | HS | X | 5609155 | 5611250 | WBGene00006411 | octr-1   | F14D12.6 | -0.0671529741040082 |             |
| AGIWUR27771;AGIWUR34399;AGIWUR35742                                                                                   |    |   |         |         |                |          |          |                     |             |
| CB4856                                                                                                                | HS | X | 5630356 | 5632302 | WBGene00020658 | T21F4.1  | T21F4.1  | 0.082525460878653   | AGIWUR14167 |
| CB4856                                                                                                                | HS | X | 5637887 | 5638075 | WBGene00044570 | T22B7.8  | T22B7.8  | 0.178786322926813   |             |
| AGIWUR20092;AGIWUR30776;AGIWUR30830;AGIWUR35628;AGIWUR42724                                                           |    |   |         |         |                |          |          |                     |             |
| CB4856                                                                                                                | HS | X | 5638582 | 5641363 | WBGene00020673 | T22B7.4  | T22B7.4  | -0.0857929971061235 | AGIWUR17746 |
| CB4856                                                                                                                | HS | X | 5642911 | 5644940 | WBGene00005718 | srv-7    | T22B7.5  | -0.0988031831278864 | AGIWUR7545  |
| CB4856                                                                                                                | HS | X | 5647378 | 5650213 | WBGene00020672 | T22B7.3  | T22B7.3  | -0.125218573346807  | AGIWUR1146  |
| CB4856                                                                                                                | HS | X | 5651869 | 5653925 | WBGene00020674 | T22B7.7  | T22B7.7  | 0.312426785925428   | AGIWUR13647 |

|                                                                                                                                   |    |   |         |         |                |          |          |                     |                     |
|-----------------------------------------------------------------------------------------------------------------------------------|----|---|---------|---------|----------------|----------|----------|---------------------|---------------------|
| CB4856                                                                                                                            | HS | X | 5663837 | 5674060 | WBGene00001182 | egl-13   | T22B7.1  | -0.0237469800303014 |                     |
| AGIWUR15053;AGIWUR18785;AGIWUR21583;AGIWUR27020                                                                                   |    |   |         |         |                |          |          |                     |                     |
| CB4856                                                                                                                            | HS | X | 5675246 | 5680225 | WBGene00020919 | set-19   | W01C8.3  | -0.0902995122906618 |                     |
| AGIWUR3495;AGIWUR5274;AGIWUR14343;AGIWUR34668                                                                                     |    |   |         |         |                |          |          |                     |                     |
| CB4856                                                                                                                            | HS | X | 5680349 | 5684741 | WBGene00020920 | set-20   | W01C8.4  | 0.0168038852929868  | AGIWUR11570         |
| CB4856                                                                                                                            | HS | X | 5692399 | 5694426 | WBGene00020918 | W01C8.1  | W01C8.1  | 0.259029908810443   | AGIWUR23186         |
| CB4856                                                                                                                            | HS | X | 5694475 | 5697308 | WBGene00020921 | W01C8.5  | W01C8.5  | 0.256129489336292   |                     |
| AGIWUR3723;AGIWUR7945;AGIWUR43807                                                                                                 |    |   |         |         |                |          |          |                     |                     |
| CB4856                                                                                                                            | HS | X | 5705719 | 5710625 | WBGene00000295 | cat-1    | W01C8.6  | -0.0377521072874938 |                     |
| AGIWUR4252;AGIWUR19213;AGIWUR23916                                                                                                |    |   |         |         |                |          |          |                     |                     |
| CB4856                                                                                                                            | HS | X | 5714279 | 5717601 | WBGene00017108 | cyp-43A1 |          | E03E2.1             | -0.0946283737312745 |
| AGIWUR6770;AGIWUR8326;AGIWUR17479;AGIWUR18439;AGIWUR42387;AGIWUR44987                                                             |    |   |         |         |                |          |          |                     |                     |
| CB4856                                                                                                                            | HS | X | 5717538 | 5720268 | WBGene00016568 | C41G11.1 |          | C41G11.1            | 0.0399094614189206  |
| AGIWUR1606;AGIWUR11627;AGIWUR19917;AGIWUR25682;AGIWUR28142;AGIWUR35183                                                            |    |   |         |         |                |          |          |                     |                     |
| CB4856                                                                                                                            | HS | X | 5720438 | 5728656 | WBGene00004349 | rgs-6    | C41G11.3 |                     | -0.0237004301912207 |
| AGIWUR25314;AGIWUR29193                                                                                                           |    |   |         |         |                |          |          |                     |                     |
| CB4856                                                                                                                            | HS | X | 5738761 | 5743307 | WBGene00016570 | gnrr-4   | C41G11.4 |                     | 0.159296729077162   |
| AGIWUR39635                                                                                                                       |    |   |         |         |                |          |          |                     |                     |
| CB4856                                                                                                                            | HS | X | 5760281 | 5763392 | WBGene00016937 | tag-294  | C54H2.3  | 0.126611809342105   | AGIWUR6339          |
| CB4856                                                                                                                            | HS | X | 5766482 | 5770793 | WBGene00016938 | C54H2.4  | C54H2.4  | -0.102088785226031  | AGIWUR15372         |
| CB4856                                                                                                                            | HS | X | 5776251 | 5778884 | WBGene00006368 | sym-3    | C54H2.1  | -0.13784397938427   |                     |
| AGIWUR2331;AGIWUR18041;AGIWUR20651;AGIWUR23478                                                                                    |    |   |         |         |                |          |          |                     |                     |
| CB4856                                                                                                                            | HS | X | 5778875 | 5780758 | WBGene00004788 | sft-4    | C54H2.5  | 0.136694055408041   |                     |
| AGIWUR8477;AGIWUR9575;AGIWUR11346;AGIWUR14701;AGIWUR34782;AGIWUR41146                                                             |    |   |         |         |                |          |          |                     |                     |
| CB4856                                                                                                                            | HS | X | 5783405 | 5786406 | WBGene00018516 | tag-257  | F46G11.3 |                     | 0.0684199991468226  |
| AGIWUR13771                                                                                                                       |    |   |         |         |                |          |          |                     |                     |
| CB4856                                                                                                                            | HS | X | 5786493 | 5787353 | WBGene00045269 | F46G11.6 |          | F46G11.6            | -0.38043546967802   |
| AGIWUR20936                                                                                                                       |    |   |         |         |                |          |          |                     |                     |
| CB4856                                                                                                                            | HS | X | 5788096 | 5790345 | WBGene00018515 | F46G11.2 |          | F46G11.2            | 0.14417782419519    |
| AGIWUR4630;AGIWUR41476                                                                                                            |    |   |         |         |                |          |          |                     |                     |
| CB4856                                                                                                                            | HS | X | 5791703 | 5797328 | WBGene00018514 | F46G11.1 |          | F46G11.1            | -0.0863455799304811 |
| AGIWUR14159;AGIWUR16979                                                                                                           |    |   |         |         |                |          |          |                     |                     |
| CB4856                                                                                                                            | HS | X | 5797313 | 5798790 | WBGene00018517 | F46G11.4 |          | F46G11.4            | -0.360644623181294  |
| AGIWUR28013                                                                                                                       |    |   |         |         |                |          |          |                     |                     |
| CB4856                                                                                                                            | HS | X | 5804379 | 5805922 | WBGene00017428 | F13D11.3 |          | F13D11.3            | 0.23079041391067    |
| AGIWUR8316;AGIWUR8680;AGIWUR33918;AGIWUR37491;AGIWUR38571                                                                         |    |   |         |         |                |          |          |                     |                     |
| CB4856                                                                                                                            | HS | X | 5822277 | 5827755 | WBGene00001824 | hbl-1    | F13D11.2 |                     | 0.00725880704361614 |
| AGIWUR1043;AGIWUR8461;AGIWUR11581;AGIWUR15453;AGIWUR20933;AGIWUR24101;AGIWUR31648;AGIWUR31830;AGIWUR33022;AGIWUR35804;AGIWUR41028 |    |   |         |         |                |          |          |                     |                     |

|                                                                                    |    |   |         |         |                |          |          |                       |                     |             |
|------------------------------------------------------------------------------------|----|---|---------|---------|----------------|----------|----------|-----------------------|---------------------|-------------|
| CB4856                                                                             | HS | X | 5829376 | 5832027 | WBGene00017427 | acp-5    | F13D11.1 |                       | -0.0399355320487338 |             |
| AGIWUR5445;AGIWUR11396;AGIWUR23581                                                 |    |   |         |         |                |          |          |                       |                     |             |
| CB4856                                                                             | HS | X | 5831918 | 5834858 | WBGene00017429 | F13D11.4 | F13D11.4 |                       | 0.131504944517587   |             |
| AGIWUR5892                                                                         |    |   |         |         |                |          |          |                       |                     |             |
| CB4856                                                                             | HS | X | 5838039 | 5839778 | WBGene00021060 | dct-11   | W06B11.3 |                       | -0.123973631355938  |             |
| AGIWUR21625                                                                        |    |   |         |         |                |          |          |                       |                     |             |
| CB4856                                                                             | HS | X | 5841592 | 5845987 | WBGene00004245 | puf-9    | W06B11.2 |                       | 0.0642722753246723  |             |
| AGIWUR6309;AGIWUR16845;AGIWUR30458                                                 |    |   |         |         |                |          |          |                       |                     |             |
| CB4856                                                                             | HS | X | 5849104 | 5851971 | WBGene00021059 | atat-2   | W06B11.1 |                       | 0.180728577622946   |             |
| AGIWUR1959                                                                         |    |   |         |         |                |          |          |                       |                     |             |
| CB4856                                                                             | HS | X | 5851954 | 5854260 | WBGene00001984 | hog-1    | W06B11.4 |                       | 0.0748439971267914  |             |
| AGIWUR9208                                                                         |    |   |         |         |                |          |          |                       |                     |             |
| CB4856                                                                             | HS | X | 5862708 | 5873320 | WBGene00006424 | ctbp-1   | F49E10.5 |                       | 0.0135867675438086  |             |
| AGIWUR5330;AGIWUR41828                                                             |    |   |         |         |                |          |          |                       |                     |             |
| CB4856                                                                             | HS | X | 5875898 | 5881716 | WBGene00018641 | F49E10.4 | F49E10.4 |                       | -0.0866962069519781 |             |
| AGIWUR9852;AGIWUR13472;AGIWUR16268;AGIWUR41839                                     |    |   |         |         |                |          |          |                       |                     |             |
| CB4856                                                                             | HS | X | 5885865 | 5886823 | WBGene00001450 | flp-7    | F49E10.3 |                       | -0.0751466673067736 |             |
| AGIWUR358;AGIWUR2865;AGIWUR4562;AGIWUR35967                                        |    |   |         |         |                |          |          |                       |                     |             |
| CB4856                                                                             | HS | X | 5890380 | 5894757 | WBGene00018640 | F49E10.2 | F49E10.2 |                       | 0.0727533316634474  |             |
| AGIWUR32917                                                                        |    |   |         |         |                |          |          |                       |                     |             |
| CB4856                                                                             | HS | X | 5897342 | 5902152 | WBGene00018639 | tbc-16   | F49E10.1 |                       | 0.0565365149378261  |             |
| AGIWUR22634                                                                        |    |   |         |         |                |          |          |                       |                     |             |
| CB4856                                                                             | HS | X | 5904627 | 5905346 | WBGene00019160 | crf-1    | H05L03.3 |                       | -0.0912178229406528 |             |
| AGIWUR36178                                                                        |    |   |         |         |                |          |          |                       |                     |             |
| CB4856                                                                             | HS | X | 5919656 | 5920494 | WBGene00021268 | capa-1   | Y23B4A.2 |                       | 0.121583272719818   |             |
| AGIWUR13010                                                                        |    |   |         |         |                |          |          |                       |                     |             |
| CB4856                                                                             | HS | X | 5931122 | 5934532 | WBGene00001175 | egl-6    | C46F4.1  | 0.0318667276495841    |                     | AGIWUR10686 |
| CB4856                                                                             | HS | X | 5935780 | 5937549 | WBGene00044571 | C46F4.3  | C46F4.3  | 0.0992454481741381    |                     |             |
| AGIWUR3474;AGIWUR15765;AGIWUR18513;AGIWUR32363                                     |    |   |         |         |                |          |          |                       |                     |             |
| CB4856                                                                             | HS | X | 5937506 | 5944510 | WBGene00016716 | acs-17   | C46F4.2  | 0.280062968136803     |                     |             |
| AGIWUR6231;AGIWUR17820;AGIWUR20521;AGIWUR20972;AGIWUR22389;AGIWUR29029             |    |   |         |         |                |          |          |                       |                     |             |
| CB4856                                                                             | HS | X | 5945821 | 5948869 | WBGene00003254 | mig-23   | R07E4.4  | -0.038936264953854    |                     | AGIWUR10959 |
| CB4856                                                                             | HS | X | 5949529 | 5953174 | WBGene00019938 | R07E4.5  | R07E4.5  | -0.0890793309515416   |                     | AGIWUR41208 |
| CB4856                                                                             | HS | X | 5953450 | 5953815 | WBGene00019937 | R07E4.3  | R07E4.3  | -0.0247993096279941   |                     | AGIWUR17110 |
| CB4856                                                                             | HS | X | 5959115 | 5970158 | WBGene00019935 | R07E4.1  | R07E4.1  | -0.000616905400588674 |                     |             |
| AGIWUR11245;AGIWUR31261                                                            |    |   |         |         |                |          |          |                       |                     |             |
| CB4856                                                                             | HS | X | 5970677 | 5977854 | WBGene00002190 | kin-2    | R07E4.6  | -0.0393245255651795   |                     |             |
| AGIWUR8994;AGIWUR10317;AGIWUR10536;AGIWUR14932;AGIWUR15995;AGIWUR34314;AGIWUR35178 |    |   |         |         |                |          |          |                       |                     |             |
| CB4856                                                                             | HS | X | 5984975 | 5992103 | WBGene00002224 | k1p-13   | F22F4.3  | 0.207436961315169     |                     | AGIWUR36520 |

|                                                                                                                                                                    |    |   |         |         |                |         |         |                     |             |
|--------------------------------------------------------------------------------------------------------------------------------------------------------------------|----|---|---------|---------|----------------|---------|---------|---------------------|-------------|
| CB4856                                                                                                                                                             | HS | X | 5992099 | 5992859 | WBGene00017718 | F22F4.5 | F22F4.5 | -0.141092062934163  |             |
| AGIWUR24185;AGIWUR27325;AGIWUR28641                                                                                                                                |    |   |         |         |                |         |         |                     |             |
| CB4856                                                                                                                                                             | HS | X | 5996156 | 5998243 | WBGene00002125 | inx-3   | F22F4.2 | 0.0257270029374399  |             |
| AGIWUR11328;AGIWUR26870;AGIWUR41549;AGIWUR42844                                                                                                                    |    |   |         |         |                |         |         |                     |             |
| CB4856                                                                                                                                                             | HS | X | 5998310 | 6001534 | WBGene00017717 | F22F4.4 | F22F4.4 | 0.0588034114684923  | AGIWUR30783 |
| CB4856                                                                                                                                                             | HS | X | 6004482 | 6007071 | WBGene00017716 | F22F4.1 | F22F4.1 | 0.283673195216146   | AGIWUR8904  |
| CB4856                                                                                                                                                             | HS | X | 6006969 | 6011310 | WBGene00015622 | C09B8.3 | C09B8.3 | 0.231901419390283   | AGIWUR18158 |
| CB4856                                                                                                                                                             | HS | X | 6015492 | 6017584 | WBGene00015625 | C09B8.8 | C09B8.8 | -0.100871211280739  | AGIWUR25377 |
| CB4856                                                                                                                                                             | HS | X | 6018442 | 6019936 | WBGene00015623 | C09B8.4 | C09B8.4 | 0.0269256849856525  | AGIWUR28618 |
| CB4856                                                                                                                                                             | HS | X | 6020866 | 6022569 | WBGene00015624 | C09B8.5 | C09B8.5 | 0.00132496838898    | AGIWUR22489 |
| CB4856                                                                                                                                                             | HS | X | 6031469 | 6034525 | WBGene00002146 | ipp-5   | C09B8.1 | 0.190300367293233   |             |
| AGIWUR7509;AGIWUR39391;AGIWUR43663                                                                                                                                 |    |   |         |         |                |         |         |                     |             |
| CB4856                                                                                                                                                             | HS | X | 6034463 | 6039496 | WBGene00002023 | hsp-25  | C09B8.6 | 0.188470265751356   |             |
| AGIWUR3529;AGIWUR6104;AGIWUR20413;AGIWUR30435;AGIWUR39439;AGIWUR42269                                                                                              |    |   |         |         |                |         |         |                     |             |
| CB4856                                                                                                                                                             | HS | X | 6044309 | 6048610 | WBGene00003911 | pak-1   | C09B8.7 | 0.0442709640403507  |             |
| AGIWUR25778;AGIWUR39887                                                                                                                                            |    |   |         |         |                |         |         |                     |             |
| CB4856                                                                                                                                                             | HS | X | 6053058 | 6057177 | WBGene00016661 | C45B2.6 | C45B2.6 | 0.084201089628845   | AGIWUR40366 |
| CB4856                                                                                                                                                             | HS | X | 6058255 | 6060242 | WBGene00001602 | gln-1   | C45B2.5 | 0.0123112390974924  |             |
| AGIWUR483;AGIWUR9520;AGIWUR30943                                                                                                                                   |    |   |         |         |                |         |         |                     |             |
| CB4856                                                                                                                                                             | HS | X | 6060754 | 6065986 | WBGene00004219 | ptr-4   | C45B2.7 | 0.165859252879942   |             |
| AGIWUR7044;AGIWUR10815;AGIWUR13775;AGIWUR35960;AGIWUR42720;AGIWUR44398                                                                                             |    |   |         |         |                |         |         |                     |             |
| CB4856                                                                                                                                                             | HS | X | 6070497 | 6081833 | WBGene00001587 | ggr-2   | C45B2.4 | -0.174884253545021  | AGIWUR16871 |
| CB4856                                                                                                                                                             | HS | X | 6082960 | 6083333 | WBGene00016660 | C45B2.3 | C45B2.3 | -0.0226034469770653 | AGIWUR36757 |
| CB4856                                                                                                                                                             | HS | X | 6084739 | 6085189 | WBGene00016659 | C45B2.2 | C45B2.2 | -0.135670266151817  |             |
| AGIWUR7351;AGIWUR20052;AGIWUR28037;AGIWUR36337;AGIWUR44487                                                                                                         |    |   |         |         |                |         |         |                     |             |
| CB4856                                                                                                                                                             | HS | X | 6086124 | 6086567 | WBGene00016658 | C45B2.1 | C45B2.1 | 0.0461770547070177  | AGIWUR13077 |
| CB4856                                                                                                                                                             | HS | X | 6087985 | 6088391 | WBGene00016662 | C45B2.8 | C45B2.8 | 0.134473596870119   | AGIWUR42228 |
| CB4856                                                                                                                                                             | HS | X | 6089033 | 6092124 | WBGene00002007 | hsp-3   | C15H9.6 | -0.0616490100599929 |             |
| AGIWUR794;AGIWUR4634;AGIWUR7413;AGIWUR7841;AGIWUR20115;AGIWUR27420;AGIWUR27912;AGIWUR33491;AGIWUR37727;AGIWUR38048;AGIWUR38338;AGIWUR41750;AGIWUR41826;AGIWUR45001 |    |   |         |         |                |         |         |                     |             |
| CB4856                                                                                                                                                             | HS | X | 6093286 | 6097574 | WBGene00015801 | C15H9.5 | C15H9.5 | -0.261681153233536  | AGIWUR10532 |
| CB4856                                                                                                                                                             | HS | X | 6101158 | 6105526 | WBGene00015800 | C15H9.4 | C15H9.4 | -0.128351978556464  | AGIWUR43548 |
| CB4856                                                                                                                                                             | HS | X | 6106926 | 6109338 | WBGene00015802 | kynu-1  | C15H9.7 | -0.126778578064467  | AGIWUR18801 |
| CB4856                                                                                                                                                             | HS | X | 6110754 | 6113057 | WBGene00004193 | prx-3   | C15H9.8 | 0.124241135694987   |             |
| AGIWUR4666;AGIWUR15011;AGIWUR15322;AGIWUR31300;AGIWUR35692                                                                                                         |    |   |         |         |                |         |         |                     |             |
| CB4856                                                                                                                                                             | HS | X | 6115804 | 6118051 | WBGene00015799 | C15H9.3 | C15H9.3 | 0.0614411696522028  |             |
| AGIWUR21830;AGIWUR23000;AGIWUR29763                                                                                                                                |    |   |         |         |                |         |         |                     |             |
| CB4856                                                                                                                                                             | HS | X | 6118776 | 6120436 | WBGene00015798 | C15H9.2 | C15H9.2 | -0.133083563417234  | AGIWUR29727 |
| CB4856                                                                                                                                                             | HS | X | 6122315 | 6127541 | WBGene00003778 | nnt-1   | C15H9.1 | 0.21044114679582    | AGIWUR7268  |

|                                                                                                                                                                                                                   |    |   |         |         |                 |           |           |                     |             |
|-------------------------------------------------------------------------------------------------------------------------------------------------------------------------------------------------------------------|----|---|---------|---------|-----------------|-----------|-----------|---------------------|-------------|
| CB4856                                                                                                                                                                                                            | HS | X | 6127457 | 6128326 | WBGene00015803  | C15H9.9   | C15H9.9   | 0.0865858872958007  | AGIWUR18082 |
| CB4856                                                                                                                                                                                                            | HS | X | 6129535 | 6138332 | WBGene00022202  | Y72A10A.1 | Y72A10A.1 | 0.274447028389917   |             |
| AGIWUR13394                                                                                                                                                                                                       |    |   |         |         |                 |           |           |                     |             |
| CB4856                                                                                                                                                                                                            | HS | X | 6142546 | 6150545 | WBGene00016423  | tag-275   | C34H3.1   | 0.12449252525017    | AGIWUR24326 |
| CB4856                                                                                                                                                                                                            | HS | X | 6159388 | 6160523 | WBGene00003846  | odd-2     | C34H3.2   | 0.296291240462319   | AGIWUR34622 |
| CB4856                                                                                                                                                                                                            | HS | X | 6169305 | 6173748 | WBGene00020786  | T25B2.2   | T25B2.2   | 0.334998680054467   | AGIWUR42133 |
| CB4856                                                                                                                                                                                                            | HS | X | 6176129 | 6177154 | WBGene00077592  | T25B2.3   | T25B2.3   | 0.0487951740714685  | AGIWUR29729 |
| CB4856                                                                                                                                                                                                            | HS | X | 6179241 | 6180140 | WBGene00020484  | T13C5.3   | T13C5.3   | 0.0397550724752644  | AGIWUR32692 |
| CB4856                                                                                                                                                                                                            | HS | X | 6180650 | 6181425 | WBGene00020487  | T13C5.7   | T13C5.7   | 0.173803074642089   | AGIWUR4318  |
| CB4856                                                                                                                                                                                                            | HS | X | 6188148 | 6189422 | WBGene000206360 | T13C5.10  | T13C5.10  | 0.0727907399542449  |             |
| AGIWUR3002                                                                                                                                                                                                        |    |   |         |         |                 |           |           |                     |             |
| CB4856                                                                                                                                                                                                            | HS | X | 6191590 | 6192948 | WBGene00020485  | ceh-54    | T13C5.4   | -0.166767619038769  | AGIWUR15363 |
| CB4856                                                                                                                                                                                                            | HS | X | 6196927 | 6200818 | WBGene00000905  | daf-9     | T13C5.1   | 0.0546266932085011  | AGIWUR17268 |
| CB4856                                                                                                                                                                                                            | HS | X | 6201875 | 6204922 | WBGene00000245  | bca-1     | T13C5.5   | -0.0607459223047444 |             |
| AGIWUR7829;AGIWUR10187;AGIWUR11293;AGIWUR21637                                                                                                                                                                    |    |   |         |         |                 |           |           |                     |             |
| CB4856                                                                                                                                                                                                            | HS | X | 6205180 | 6206475 | WBGene00077690  | mtp-18    | T13C5.8   | -0.210577988020116  |             |
| AGIWUR13852;AGIWUR15465                                                                                                                                                                                           |    |   |         |         |                 |           |           |                     |             |
| CB4856                                                                                                                                                                                                            | HS | X | 6206581 | 6207626 | WBGene00020486  | T13C5.6   | T13C5.6   | -0.35968940777328   | AGIWUR19108 |
| CB4856                                                                                                                                                                                                            | HS | X | 6208161 | 6208563 | WBGene00015782  | C14F11.7  | C14F11.7  | -0.333518901403163  |             |
| AGIWUR44304                                                                                                                                                                                                       |    |   |         |         |                 |           |           |                     |             |
| CB4856                                                                                                                                                                                                            | HS | X | 6208761 | 6213911 | WBGene00015779  | lrch-1    | C14F11.2  | 0.125062662028606   |             |
| AGIWUR15777                                                                                                                                                                                                       |    |   |         |         |                 |           |           |                     |             |
| CB4856                                                                                                                                                                                                            | HS | X | 6226131 | 6230701 | WBGene00001803  | lite-1    | C14F11.3  | 0.284382242113127   |             |
| AGIWUR41630                                                                                                                                                                                                       |    |   |         |         |                 |           |           |                     |             |
| CB4856                                                                                                                                                                                                            | HS | X | 6230920 | 6233048 | WBGene00015780  | C14F11.4  | C14F11.4  | 0.182243589143367   |             |
| AGIWUR10334;AGIWUR14376;AGIWUR42427                                                                                                                                                                               |    |   |         |         |                 |           |           |                     |             |
| CB4856                                                                                                                                                                                                            | HS | X | 6233149 | 6235541 | WBGene00002024  | hsp-43    | C14F11.5  | 0.144041361703518   |             |
| AGIWUR803;AGIWUR2757;AGIWUR3346;AGIWUR5545;AGIWUR7080;AGIWUR11542;AGIWUR12158;AGIWUR12947;AGIWUR13833;AGIWUR20327;AGIWUR24200;AGIWUR26078;AGIWUR26161;AGIWUR27483;AGIWUR30002;AGIWUR31377;AGIWUR37840;AGIWUR41660 |    |   |         |         |                 |           |           |                     |             |
| CB4856                                                                                                                                                                                                            | HS | X | 6238021 | 6239115 | WBGene00015781  | C14F11.6  | C14F11.6  | 0.185449105317314   |             |
| AGIWUR1730                                                                                                                                                                                                        |    |   |         |         |                 |           |           |                     |             |
| CB4856                                                                                                                                                                                                            | HS | X | 6240955 | 6242709 | WBGene00015778  | got-2.2   | C14F11.1  | -0.158492089965183  |             |
| AGIWUR9797;AGIWUR14781;AGIWUR26879                                                                                                                                                                                |    |   |         |         |                 |           |           |                     |             |
| CB4856                                                                                                                                                                                                            | HS | X | 6252274 | 6253785 | WBGene00021050  | W05H9.3   | W05H9.3   | -0.370202413547386  | AGIWUR35259 |
| CB4856                                                                                                                                                                                                            | HS | X | 6263648 | 6266913 | WBGene00021051  | W05H9.4   | W05H9.4   | 0.00395939264084966 | AGIWUR44050 |
| CB4856                                                                                                                                                                                                            | HS | X | 6267043 | 6271087 | WBGene00021049  | W05H9.2   | W05H9.2   | 0.0588387124276579  |             |
| AGIWUR8667;AGIWUR12910;AGIWUR13830;AGIWUR39746;AGIWUR44532                                                                                                                                                        |    |   |         |         |                 |           |           |                     |             |
| CB4856                                                                                                                                                                                                            | HS | X | 6272089 | 6273768 | WBGene00021048  | W05H9.1   | W05H9.1   | 0.0368268723035499  | AGIWUR30479 |
| CB4856                                                                                                                                                                                                            | HS | X | 6279801 | 6281015 | WBGene00000739  | col-166   | T07H6.3   | -0.240858163039467  |             |

AGIWUR37078;AGIWUR44419

CB4856 HS X 6281847 6291732 WBGene00002976 lev-9 T07H6.5 0.0284852623266545

AGIWUR2946;AGIWUR21872;AGIWUR24441;AGIWUR32386

CB4856 HS X 6293124 6298195 WBGene00003394 mom-1 T07H6.2 0.0354429443614119 AGIWUR4640

CB4856 HS X 6300138 6305211 WBGene00020330 T07H6.1 T07H6.1 0.134796112723212 AGIWUR44690

CB4856 HS X 6311715 6314588 WBGene00020420 T10E10.3 T10E10.3 0.201216732426283

AGIWUR439

CB4856 HS X 6314529 6322819 WBGene00020421 T10E10.4 T10E10.4 -0.0435158115002299

AGIWUR46

CB4856 HS X 6323297 6324539 WBGene00000740 col-167 T10E10.2 -0.438486587420233

AGIWUR40205

CB4856 HS X 6329160 6330127 WBGene00000742 col-169 T10E10.5 -0.249139529449726

AGIWUR18709

CB4856 HS X 6331620 6332686 WBGene00000743 col-170 T10E10.6 -0.21814108089904

AGIWUR1815

CB4856 HS X 6335279 6338035 WBGene00015381 C03B1.13 C03B1.13 -0.108179965454806

AGIWUR25465

CB4856 HS X 6341835 6345842 WBGene00015378 C03B1.7 C03B1.7 -0.50493427527914 AGIWUR27113

CB4856 HS X 6346359 6347113 WBGene00015379 C03B1.9 C03B1.9 0.0250657868842321

AGIWUR1881;AGIWUR13826;AGIWUR18914;AGIWUR19974;AGIWUR23191;AGIWUR24202;AGIWUR32257;AGIWUR34582;AGIWUR37352

CB4856 HS X 6350187 6351876 WBGene00015377 C03B1.6 C03B1.6 -0.0993817619721784

AGIWUR9258;AGIWUR38721

CB4856 HS X 6355585 6357689 WBGene00015376 C03B1.5 C03B1.5 0.0220927867115215 AGIWUR14829

CB4856 HS X 6359383 6360758 WBGene00015382 C03B1.14 C03B1.14 0.0969887512765339

AGIWUR20078

CB4856 HS X 6364496 6365717 WBGene00015375 C03B1.4 C03B1.4 -0.208598228620124 AGIWUR44475

CB4856 HS X 6366013 6366831 WBGene00015374 C03B1.3 C03B1.3 -0.044372188093412 AGIWUR9747

CB4856 HS X 6367614 6373157 WBGene00015373 C03B1.2 C03B1.2 0.114357009174559 AGIWUR29724

CB4856 HS X 6374751 6375592 WBGene00015372 C03B1.1 C03B1.1 0.156271585472858 AGIWUR17004

CB4856 HS X 6376459 6377684 WBGene00003053 lmp-1 C03B1.12 0.0421335754934367

AGIWUR27222;AGIWUR33434

CB4856 HS X 6379484 6384845 WBGene00020130 igcm-2 SSSD1.1 -0.0633007478032974 AGIWUR41163

CB4856 HS X 6385280 6387863 WBGene00020691 igdb-3 T22E5.3 -0.08320099608836 AGIWUR40893

CB4856 HS X 6388255 6391591 WBGene00044572 T22E5.7 T22E5.7 0.0160006806977258

AGIWUR17271;AGIWUR19093;AGIWUR37241;AGIWUR38134;AGIWUR42347

CB4856 HS X 6403424 6406981 WBGene00001622 glt-4 T22E5.2 -0.204507556219393 AGIWUR27019

CB4856 HS X 6408470 6410359 WBGene00003495 mup-2 T22E5.5 -0.0310449274099014

AGIWUR2620;AGIWUR15971;AGIWUR21994;AGIWUR30200;AGIWUR36727;AGIWUR40271;AGIWUR41617

CB4856 HS X 6412886 6413488 WBGene00020690 T22E5.1 T22E5.1 0.101029209703201



AGIWUR4696;AGIWUR12616;AGIWUR17543;AGIWUR17768;AGIWUR31630;AGIWUR44181  
 CB4856 HS X 6414148 6416400 WBGene00020692 T22E5.6 T22E5.6 -0.123417594803607 AGIWUR27334  
 CB4856 HS X 6421036 6430610 WBGene00019617 K10C2.1 K10C2.1 -0.0434848562708581 AGIWUR13082  
 CB4856 HS X 6430695 6433788 WBGene00019618 K10C2.2 K10C2.2 -0.0972209908553587 AGIWUR31252  
 CB4856 HS X 6436440 6437645 WBGene00045265 K10C2.8 K10C2.8 0.297600986962696  
 AGIWUR11725;AGIWUR42028;AGIWUR42307  
 CB4856 HS X 6443055 6443473 WBGene00019622 K10C2.7 K10C2.7 0.155549006094109  
 AGIWUR2183;AGIWUR16937;AGIWUR22507;AGIWUR36334;AGIWUR39501  
 CB4856 HS X 6444189 6446664 WBGene00019619 asp-14 K10C2.3 0.247690578187479 AGIWUR11999  
 CB4856 HS X 6446649 6448999 WBGene00019620 fah-1 K10C2.4 -0.103066223297086  
 AGIWUR10551;AGIWUR17534;AGIWUR30736;AGIWUR31151  
 CB4856 HS X 6449959 6450939 WBGene00001715 grl-6 K10C2.5 0.161360964369845 AGIWUR35833  
 CB4856 HS X 6451363 6451859 WBGene00019621 K10C2.6 K10C2.6 -0.010464170270712  
 AGIWUR3279;AGIWUR4945;AGIWUR27791;AGIWUR32387;AGIWUR37818  
 CB4856 HS X 6451800 6455179 WBGene00003551 nas-33 K04E7.3 -0.0259888592940616  
 AGIWUR16368;AGIWUR20434;AGIWUR27178;AGIWUR42590  
 CB4856 HS X 6456687 6461767 WBGene00003877 pept-1 K04E7.2 0.417184960289777 AGIWUR35390  
 CB4856 HS X 6462029 6463228 WBGene00019383 K04E7.1 K04E7.1 -0.0790582427836908 AGIWUR11377  
 CB4856 HS X 6463412 6465861 WBGene00015784 C15B12.2 C15B12.2 0.154531903978551  
 AGIWUR19482;AGIWUR23863;AGIWUR31366  
 CB4856 HS X 6467284 6467562 WBGene00015785 C15B12.3 C15B12.3 0.0712592632267652  
 AGIWUR35027  
 CB4856 HS X 6468799 6469803 WBGene00044573 C15B12.9 C15B12.9 0.067825782914487  
 AGIWUR12978;AGIWUR17588;AGIWUR32647  
 CB4856 HS X 6470366 6473748 WBGene00015786 C15B12.4 C15B12.4 0.0531388718358734  
 AGIWUR18689  
 CB4856 HS X 6474274 6476645 WBGene00015788 C15B12.8 C15B12.8 0.157556618080495  
 AGIWUR9292  
 CB4856 HS X 6476738 6479086 WBGene00015783 C15B12.1 C15B12.1 0.222566979858433  
 AGIWUR15568  
 CB4856 HS X 6479447 6484810 WBGene00001517 gar-1 C15B12.5 -0.143091398185884  
 AGIWUR16993;AGIWUR18743;AGIWUR37260  
 CB4856 HS X 6496823 6499836 WBGene00015787 C15B12.6 C15B12.6 0.150637213535104  
 AGIWUR17851;AGIWUR20196;AGIWUR43327  
 CB4856 HS X 6499928 6504613 WBGene00000393 cdf-1 C15B12.7 -0.00953916898621721  
 AGIWUR21474;AGIWUR32017;AGIWUR36111;AGIWUR37609  
 CB4856 HS X 6506884 6509882 WBGene00001619 glr-8 F22A3.3 -0.0340964536127606  
 AGIWUR3455;AGIWUR18484;AGIWUR21797  
 CB4856 HS X 6510929 6512195 WBGene00044605 ttr-36 F22A3.7 -0.00470822351891709

AGIWUR298;AGIWUR5370;AGIWUR19336;AGIWUR19999  
 CB4856 HS X 6512285 6512956 WBGene00017688 ttr-35 F22A3.2 -0.132417861089532 AGIWUR21619  
 CB4856 HS X 6518883 6522656 WBGene00017687 ets-4 F22A3.1 0.134395938430534  
 AGIWUR889;AGIWUR3485;AGIWUR9857;AGIWUR11604;AGIWUR17443;AGIWUR24709;AGIWUR28144;AGIWUR30453;AGIWUR34260;AGIWUR34579  
 CB4856 HS X 6522596 6530148 WBGene00017690 ceh-60 F22A3.5 0.0388761888104687  
 AGIWUR4658;AGIWUR39511  
 CB4856 HS X 6533493 6536840 WBGene00017691 ily-5 F22A3.6 0.217992632917071  
 AGIWUR4971;AGIWUR38630  
 CB4856 HS X 6542992 6543983 WBGene00020505 T14E8.2 T14E8.2 0.0930815906115088 AGIWUR20726  
 CB4856 HS X 6553288 6564207 WBGene00020504 svh-2 T14E8.1 0.16918508830224  
 AGIWUR2337;AGIWUR14132;AGIWUR37556  
 CB4856 HS X 6564175 6569518 WBGene00020506 dop-3 T14E8.3 0.152821562549942  
 AGIWUR10355;AGIWUR12156;AGIWUR26923  
 CB4856 HS X 6582004 6585237 WBGene00020885 T28B4.2 T28B4.2 -0.0412006969455581 AGIWUR24266  
 CB4856 HS X 6587898 6596135 WBGene00020884 T28B4.1 T28B4.1 -0.110529275145721 AGIWUR24308  
 CB4856 HS X 6596425 6597121 WBGene00020886 ttr-6 T28B4.3 -0.0772001353227871 AGIWUR24030  
 CB4856 HS X 6597918 6598866 WBGene00020887 T28B4.4 T28B4.4 -0.0777651280838896 AGIWUR26842  
 CB4856 HS X 6601558 6603212 WBGene00044574 F23G4.1 F23G4.1 -0.0772425633644005  
 AGIWUR10940;AGIWUR25657;AGIWUR37205  
 CB4856 HS X 6607203 6609045 WBGene00000786 cpr-6 C25B8.3 -0.0760033612947089  
 AGIWUR4925;AGIWUR5195;AGIWUR8195;AGIWUR11216;AGIWUR11804;AGIWUR20912;AGIWUR28068;AGIWUR28947  
 CB4856 HS X 6610054 6615343 WBGene00044297 C25B8.8 C25B8.8 0.0249713456827045  
 AGIWUR27278;AGIWUR29524  
 CB4856 HS X 6617393 6622915 WBGene00016088 clec-266 C25B8.4 -1.07327170208561  
 AGIWUR19062;AGIWUR24639;AGIWUR25897;AGIWUR35797;AGIWUR39462;AGIWUR40914  
 CB4856 HS X 6619022 6628017 WBGene00002233 kqt-1 C25B8.1 -0.148091214525873 AGIWUR20419  
 CB4856 HS X 6628041 6631537 WBGene00016090 aexr-2 C25B8.7 -0.0365402422100605  
 AGIWUR3032;AGIWUR6225;AGIWUR42800  
 CB4856 HS X 6631927 6635035 WBGene00016089 aexr-1 C25B8.5 -0.0874639750167674  
 AGIWUR10697;AGIWUR15587;AGIWUR44665  
 CB4856 HS X 6636561 6640620 WBGene00003710 nhr-120 C25B8.6 0.0748745103926538 AGIWUR24251  
 CB4856 HS X 6645654 6651753 WBGene00016976 C56E10.3 C56E10.3 -0.041587179972316  
 AGIWUR16579  
 CB4856 HS X 6655547 6659966 WBGene00016975 nhr-173 C56E10.1 -0.12935378437376  
 AGIWUR38723  
 CB4856 HS X 6661791 6669011 WBGene00003727 nhr-137 C56E10.4 -0.360586564807974  
 AGIWUR26005  
 CB4856 HS X 6672830 6674407 WBGene00000745 col-172 F38B6.5 0.00961708297237696

AGIWUR2848;AGIWUR4663;AGIWUR37133

|        |    |   |         |         |                |         |         |                    |            |
|--------|----|---|---------|---------|----------------|---------|---------|--------------------|------------|
| CB4856 | HS | X | 6674869 | 6679848 | WBGene00018174 | F38B6.4 | F38B6.4 | 0.190602579121034  | AGIWUR5569 |
| CB4856 | HS | X | 6680901 | 6682783 | WBGene00044575 | F38B6.8 | F38B6.8 | 0.0985288423973385 |            |

AGIWUR32608;AGIWUR44990

|        |    |   |         |         |                |         |         |                   |  |
|--------|----|---|---------|---------|----------------|---------|---------|-------------------|--|
| CB4856 | HS | X | 6684440 | 6690085 | WBGene00018175 | F38B6.6 | F38B6.6 | 0.155201365290496 |  |
|--------|----|---|---------|---------|----------------|---------|---------|-------------------|--|

AGIWUR25333;AGIWUR42026

|        |    |   |         |         |                |         |         |                    |             |
|--------|----|---|---------|---------|----------------|---------|---------|--------------------|-------------|
| CB4856 | HS | X | 6693735 | 6695662 | WBGene00018173 | F38B6.3 | F38B6.3 | 0.148953917437101  | AGIWUR1165  |
| CB4856 | HS | X | 6695820 | 6698337 | WBGene00018176 | F38B6.7 | F38B6.7 | 0.243054771436224  | AGIWUR20268 |
| CB4856 | HS | X | 6698533 | 6700826 | WBGene00018172 | F38B6.2 | F38B6.2 | 0.0165606109008323 |             |

AGIWUR8745;AGIWUR28477

|        |    |   |         |         |                |       |          |                    |  |
|--------|----|---|---------|---------|----------------|-------|----------|--------------------|--|
| CB4856 | HS | X | 6702463 | 6709142 | WBGene00000042 | acr-2 | K11G12.2 | 0.0947847268951469 |  |
|--------|----|---|---------|---------|----------------|-------|----------|--------------------|--|

AGIWUR12651;AGIWUR15050

|        |    |   |         |         |                |       |          |                      |  |
|--------|----|---|---------|---------|----------------|-------|----------|----------------------|--|
| CB4856 | HS | X | 6709538 | 6712925 | WBGene00000043 | acr-3 | K11G12.7 | -0.00360249294889492 |  |
|--------|----|---|---------|---------|----------------|-------|----------|----------------------|--|

AGIWUR1653

|        |    |   |         |         |                |        |          |                   |  |
|--------|----|---|---------|---------|----------------|--------|----------|-------------------|--|
| CB4856 | HS | X | 6713577 | 6716381 | WBGene00003530 | nas-11 | K11G12.1 | 0.131381717913712 |  |
|--------|----|---|---------|---------|----------------|--------|----------|-------------------|--|

AGIWUR25194

|        |    |   |         |         |                |       |          |                   |  |
|--------|----|---|---------|---------|----------------|-------|----------|-------------------|--|
| CB4856 | HS | X | 6719666 | 6723066 | WBGene00004876 | smf-1 | K11G12.4 | 0.134749146182518 |  |
|--------|----|---|---------|---------|----------------|-------|----------|-------------------|--|

AGIWUR3059

|        |    |   |         |         |                |           |          |                    |  |
|--------|----|---|---------|---------|----------------|-----------|----------|--------------------|--|
| CB4856 | HS | X | 6723500 | 6725668 | WBGene00019656 | slc-25A10 | K11G12.5 | -0.189758599100875 |  |
|--------|----|---|---------|---------|----------------|-----------|----------|--------------------|--|

AGIWUR19365

|        |    |   |         |         |                |          |          |                   |  |
|--------|----|---|---------|---------|----------------|----------|----------|-------------------|--|
| CB4856 | HS | X | 6725781 | 6729748 | WBGene00019657 | K11G12.6 | K11G12.6 | 0.152647983801712 |  |
|--------|----|---|---------|---------|----------------|----------|----------|-------------------|--|

AGIWUR6530;AGIWUR10261;AGIWUR11629

|        |    |   |         |         |                |         |         |                   |             |
|--------|----|---|---------|---------|----------------|---------|---------|-------------------|-------------|
| CB4856 | HS | X | 6729997 | 6733315 | WBGene00019843 | R03E9.2 | R03E9.2 | 0.122143134181737 | AGIWUR12973 |
|--------|----|---|---------|---------|----------------|---------|---------|-------------------|-------------|

|        |    |   |         |         |                |       |         |                     |  |
|--------|----|---|---------|---------|----------------|-------|---------|---------------------|--|
| CB4856 | HS | X | 6742351 | 6743899 | WBGene00003163 | mdl-1 | R03E9.1 | -0.0598691243921046 |  |
|--------|----|---|---------|---------|----------------|-------|---------|---------------------|--|

AGIWUR4901;AGIWUR16512;AGIWUR26064;AGIWUR45173

|        |    |   |         |         |                |        |         |                   |  |
|--------|----|---|---------|---------|----------------|--------|---------|-------------------|--|
| CB4856 | HS | X | 6747296 | 6761738 | WBGene00019844 | abts-4 | R03E9.3 | 0.103330662093496 |  |
|--------|----|---|---------|---------|----------------|--------|---------|-------------------|--|

AGIWUR6213;AGIWUR6511;AGIWUR21622;AGIWUR27359;AGIWUR31458;AGIWUR35645

|        |    |   |         |         |                |       |         |                     |  |
|--------|----|---|---------|---------|----------------|-------|---------|---------------------|--|
| CB4856 | HS | X | 6766083 | 6772946 | WBGene00002149 | irk-1 | R03E9.4 | -0.0296137240169481 |  |
|--------|----|---|---------|---------|----------------|-------|---------|---------------------|--|

AGIWUR5497;AGIWUR11639

|        |    |   |         |         |                |          |          |                   |  |
|--------|----|---|---------|---------|----------------|----------|----------|-------------------|--|
| CB4856 | HS | X | 6783157 | 6784197 | WBGene00019226 | H22K11.3 | H22K11.3 | 0.145956156626961 |  |
|--------|----|---|---------|---------|----------------|----------|----------|-------------------|--|

AGIWUR36514

|        |    |   |         |         |                |        |          |                   |  |
|--------|----|---|---------|---------|----------------|--------|----------|-------------------|--|
| CB4856 | HS | X | 6784411 | 6787296 | WBGene00019225 | bga1-2 | H22K11.2 | 0.210275202531463 |  |
|--------|----|---|---------|---------|----------------|--------|----------|-------------------|--|

AGIWUR40471

|        |    |   |         |         |                |        |          |                    |  |
|--------|----|---|---------|---------|----------------|--------|----------|--------------------|--|
| CB4856 | HS | X | 6787256 | 6789578 | WBGene00019227 | sgca-1 | H22K11.4 | -0.107023342009599 |  |
|--------|----|---|---------|---------|----------------|--------|----------|--------------------|--|

AGIWUR35089

|        |    |   |         |         |                |       |          |                   |  |
|--------|----|---|---------|---------|----------------|-------|----------|-------------------|--|
| CB4856 | HS | X | 6791064 | 6792715 | WBGene00000216 | asp-3 | H22K11.1 | 0.238962245583096 |  |
|--------|----|---|---------|---------|----------------|-------|----------|-------------------|--|

AGIWUR6252;AGIWUR11666;AGIWUR14411;AGIWUR14860;AGIWUR31198;AGIWUR36688

|        |    |   |         |         |                |         |         |                    |  |
|--------|----|---|---------|---------|----------------|---------|---------|--------------------|--|
| CB4856 | HS | X | 6800688 | 6803700 | WBGene00019749 | M03A8.3 | M03A8.3 | 0.0734383939657506 |  |
|--------|----|---|---------|---------|----------------|---------|---------|--------------------|--|

AGIWUR7715;AGIWUR32523

|                                                                                                                       |    |   |         |         |                |         |         |                      |             |
|-----------------------------------------------------------------------------------------------------------------------|----|---|---------|---------|----------------|---------|---------|----------------------|-------------|
| CB4856                                                                                                                | HS | X | 6809104 | 6817266 | WBGene00019748 | atg-2   | M03A8.2 | 0.10365620962933     | AGIWUR4789  |
| CB4856                                                                                                                | HS | X | 6818438 | 6820080 | WBGene00000991 | dhs-28  | M03A8.1 | -0.0688561480868959  |             |
| AGIWUR7084;AGIWUR8935;AGIWUR10246;AGIWUR13173;AGIWUR15478;AGIWUR33060;AGIWUR33621                                     |    |   |         |         |                |         |         |                      |             |
| CB4856                                                                                                                | HS | X | 6820005 | 6823268 | WBGene00001572 | gei-15  | M03A8.4 | 0.0564483851304054   | AGIWUR6969  |
| CB4856                                                                                                                | HS | X | 6823890 | 6825862 | WBGene00018257 | F41B4.1 | F41B4.1 | -0.124876488732703   | AGIWUR30496 |
| CB4856                                                                                                                | HS | X | 6831251 | 6835266 | WBGene00018258 | F41B4.2 | F41B4.2 | -0.0781327700499466  |             |
| AGIWUR6648;AGIWUR31181                                                                                                |    |   |         |         |                |         |         |                      |             |
| CB4856                                                                                                                | HS | X | 6835487 | 6836115 | WBGene00018259 | F41B4.3 | F41B4.3 | -0.453694766696511   | AGIWUR26760 |
| CB4856                                                                                                                | HS | X | 6836386 | 6840615 | WBGene00001617 | glr-6   | F41B4.4 | 0.0485468796575903   |             |
| AGIWUR8107;AGIWUR34692                                                                                                |    |   |         |         |                |         |         |                      |             |
| CB4856                                                                                                                | HS | X | 6841258 | 6842129 | WBGene00000210 | asg-2   | C53B7.4 | -0.243272473369998   | AGIWUR24638 |
| CB4856                                                                                                                | HS | X | 6844755 | 6845976 | WBGene00016894 | C53B7.3 | C53B7.3 | -0.00335859251894632 |             |
| AGIWUR39143;AGIWUR43670                                                                                               |    |   |         |         |                |         |         |                      |             |
| CB4856                                                                                                                | HS | X | 6846233 | 6847547 | WBGene00016893 | C53B7.2 | C53B7.2 | 0.0481924923283432   |             |
| AGIWUR12377;AGIWUR30277                                                                                               |    |   |         |         |                |         |         |                      |             |
| CB4856                                                                                                                | HS | X | 6853618 | 6860922 | WBGene00004370 | rig-3   | C53B7.1 | 0.155281894549116    | AGIWUR369   |
| CB4856                                                                                                                | HS | X | 6860946 | 6863414 | WBGene00016896 | nep-4   | C53B7.7 | -0.100087626784841   |             |
| AGIWUR10965;AGIWUR15889;AGIWUR21335                                                                                   |    |   |         |         |                |         |         |                      |             |
| CB4856                                                                                                                | HS | X | 6864313 | 6865939 | WBGene00003856 | odr-10  | C53B7.5 | -0.242627341328335   | AGIWUR17818 |
| CB4856                                                                                                                | HS | X | 6870354 | 6871670 | WBGene00018276 | F41C6.2 | F41C6.2 | -0.049880839889525   | AGIWUR21975 |
| CB4856                                                                                                                | HS | X | 6873359 | 6874823 | WBGene00018278 | F41C6.4 | F41C6.4 | -0.00751693257100072 | AGIWUR42965 |
| CB4856                                                                                                                | HS | X | 6875131 | 6877536 | WBGene00000746 | col-173 | F41C6.5 | 0.0293461126791215   | AGIWUR44310 |
| CB4856                                                                                                                | HS | X | 6880909 | 6881571 | WBGene00018279 | F41C6.6 | F41C6.6 | -0.0675943865666397  | AGIWUR9981  |
| CB4856                                                                                                                | HS | X | 6882493 | 6885277 | WBGene00018280 | F41C6.7 | F41C6.7 | -0.0740872980346694  | AGIWUR37348 |
| CB4856                                                                                                                | HS | X | 6889689 | 6897147 | WBGene00006746 | unc-6   | F41C6.1 | -0.220164010474388   | AGIWUR36208 |
| CB4856                                                                                                                | HS | X | 6898650 | 6899948 | WBGene00017446 | F14B8.4 | F14B8.4 | 0.145956755911545    | AGIWUR26049 |
| CB4856                                                                                                                | HS | X | 6901378 | 6903985 | WBGene00003987 | pes-23  | F14B8.3 | 0.366453702278307    |             |
| AGIWUR7012;AGIWUR11006;AGIWUR22618                                                                                    |    |   |         |         |                |         |         |                      |             |
| CB4856                                                                                                                | HS | X | 6904721 | 6905849 | WBGene00017445 | sid-5   | F14B8.2 | 0.120069883401589    | AGIWUR3606  |
| CB4856                                                                                                                | HS | X | 6914254 | 6921126 | WBGene00003732 | nhx-4   | F14B8.1 | 0.252307140643833    | AGIWUR24792 |
| CB4856                                                                                                                | HS | X | 6921646 | 6924764 | WBGene00017449 | otpl-3  | F14B8.7 | 0.0977015382353192   | AGIWUR35094 |
| CB4856                                                                                                                | HS | X | 6924804 | 6928704 | WBGene00017447 | F14B8.5 | F14B8.5 | -0.0269129956678622  |             |
| AGIWUR2134;AGIWUR7909;AGIWUR15355;AGIWUR16145;AGIWUR16298;AGIWUR18264;AGIWUR28130;AGIWUR34979;AGIWUR40952;AGIWUR41459 |    |   |         |         |                |         |         |                      |             |
| CB4856                                                                                                                | HS | X | 6929262 | 6932359 | WBGene00017448 | F14B8.6 | F14B8.6 | 0.247592608318715    | AGIWUR30709 |
| CB4856                                                                                                                | HS | X | 6935732 | 6939041 | WBGene00015866 | C16E9.2 | C16E9.2 | 0.0968278682032171   |             |
| AGIWUR31984;AGIWUR40570;AGIWUR40974                                                                                   |    |   |         |         |                |         |         |                      |             |
| CB4856                                                                                                                | HS | X | 6940253 | 6943713 | WBGene00015865 | C16E9.1 | C16E9.1 | 0.492679286719209    | AGIWUR38169 |
| CB4856                                                                                                                | HS | X | 6943740 | 6956399 | WBGene00002123 | inx-1   | C16E9.4 | 0.0357749796000419   |             |

|                                                                        |    |   |         |         |                |           |           |                     |             |
|------------------------------------------------------------------------|----|---|---------|---------|----------------|-----------|-----------|---------------------|-------------|
| AGIWUR1327;AGIWUR4443;AGIWUR41082                                      |    |   |         |         |                |           |           |                     |             |
| CB4856                                                                 | HS | X | 6967369 | 6974864 | WBGene00017156 | F01E11.3  | F01E11.3  | -0.16494280866166   |             |
| AGIWUR8518;AGIWUR17384;AGIWUR32545                                     |    |   |         |         |                |           |           |                     |             |
| CB4856                                                                 | HS | X | 6980784 | 6983132 | WBGene00219372 | F01E11.17 | F01E11.17 | -0.130653871169788  |             |
| AGIWUR29020                                                            |    |   |         |         |                |           |           |                     |             |
| CB4856                                                                 | HS | X | 6991727 | 6994162 | WBGene00017154 | ugt-57    | F01E11.1  | 0.125845327120011   |             |
| AGIWUR1259;AGIWUR9010;AGIWUR39364                                      |    |   |         |         |                |           |           |                     |             |
| CB4856                                                                 | HS | X | 6994784 | 6996620 | WBGene00006642 | tsp-16    | F01E11.4  | 0.184522806997798   |             |
| AGIWUR15782                                                            |    |   |         |         |                |           |           |                     |             |
| CB4856                                                                 | HS | X | 6996873 | 7005575 | WBGene00017157 | tyra-2    | F01E11.5  | 0.0424000839881709  |             |
| AGIWUR1834;AGIWUR19308;AGIWUR32958;AGIWUR34968                         |    |   |         |         |                |           |           |                     |             |
| CB4856                                                                 | HS | X | 7020033 | 7023950 | WBGene00000283 | cah-5     | R173.1    | 0.13362056381321    | AGIWUR13092 |
| CB4856                                                                 | HS | X | 7029136 | 7029638 | WBGene00020126 | flp-26    | R173.4    | -0.0362243034447651 | AGIWUR20847 |
| CB4856                                                                 | HS | X | 7030225 | 7036084 | WBGene00020125 | R173.3    | R173.3    | 0.150498683702081   | AGIWUR11682 |
| CB4856                                                                 | HS | X | 7050577 | 7055667 | WBGene00006712 | ubc-17    | B0403.2   | 0.0303124204099374  |             |
| AGIWUR6165;AGIWUR7860;AGIWUR8038;AGIWUR9008;AGIWUR14371;AGIWUR37718    |    |   |         |         |                |           |           |                     |             |
| CB4856                                                                 | HS | X | 7057731 | 7061190 | WBGene00015169 | B0403.5   | B0403.5   | 0.0351945621672476  |             |
| AGIWUR25613;AGIWUR42236                                                |    |   |         |         |                |           |           |                     |             |
| CB4856                                                                 | HS | X | 7061203 | 7063330 | WBGene00015167 | B0403.3   | B0403.3   | -0.0703704282966662 | AGIWUR23954 |
| CB4856                                                                 | HS | X | 7066345 | 7068563 | WBGene00015168 | pdi-6     | B0403.4   | 0.0833655966796272  |             |
| AGIWUR13446;AGIWUR43810                                                |    |   |         |         |                |           |           |                     |             |
| CB4856                                                                 | HS | X | 7071410 | 7075337 | WBGene00043982 | B0403.6   | B0403.6   | 0.1734246670211     |             |
| AGIWUR11703;AGIWUR39969                                                |    |   |         |         |                |           |           |                     |             |
| CB4856                                                                 | HS | X | 7083417 | 7086008 | WBGene00016467 | C36B7.4   | C36B7.4   | 0.343664849760558   | AGIWUR5620  |
| CB4856                                                                 | HS | X | 7089228 | 7096449 | WBGene00016468 | C36B7.5   | C36B7.5   | -0.279326385478743  | AGIWUR10931 |
| CB4856                                                                 | HS | X | 7097434 | 7100338 | WBGene00016469 | C36B7.6   | C36B7.6   | -0.196870672295915  |             |
| AGIWUR5911;AGIWUR24672;AGIWUR26892;AGIWUR34244;AGIWUR38062             |    |   |         |         |                |           |           |                     |             |
| CB4856                                                                 | HS | X | 7101777 | 7102136 | WBGene00016466 | C36B7.3   | C36B7.3   | -0.0898468421332792 | AGIWUR17906 |
| CB4856                                                                 | HS | X | 7106407 | 7108436 | WBGene00016465 | C36B7.2   | C36B7.2   | 0.122873971619109   | AGIWUR9259  |
| CB4856                                                                 | HS | X | 7112889 | 7114863 | WBGene00016464 | C36B7.1   | C36B7.1   | -0.107551049730535  |             |
| AGIWUR16046;AGIWUR22687                                                |    |   |         |         |                |           |           |                     |             |
| CB4856                                                                 | HS | X | 7116205 | 7116996 | WBGene00001841 | hen-1     | C36B7.7   | 0.0602551553367192  | AGIWUR31932 |
| CB4856                                                                 | HS | X | 7126648 | 7139646 | WBGene00002163 | ist-1     | C54D1.3   | 0.0449218284201853  |             |
| AGIWUR8309;AGIWUR22991;AGIWUR28042;AGIWUR32682;AGIWUR43007;AGIWUR44474 |    |   |         |         |                |           |           |                     |             |
| CB4856                                                                 | HS | X | 7139875 | 7140566 | WBGene00016912 | clcc-86   | C54D1.2   | -0.192600899512886  | AGIWUR21885 |
| CB4856                                                                 | HS | X | 7140504 | 7143641 | WBGene00000116 | alh-10    | C54D1.4   | 0.132364016428511   | AGIWUR9700  |
| CB4856                                                                 | HS | X | 7143918 | 7151235 | WBGene00016913 | lam-2     | C54D1.5   | -0.173214234960507  |             |
| AGIWUR1996;AGIWUR27256                                                 |    |   |         |         |                |           |           |                     |             |
| CB4856                                                                 | HS | X | 7153889 | 7156035 | WBGene00016914 | C54D1.7   | C54D1.7   | 0.30456483613767    | AGIWUR27463 |

|                                                                                               |    |   |         |         |                |          |          |                      |             |
|-----------------------------------------------------------------------------------------------|----|---|---------|---------|----------------|----------|----------|----------------------|-------------|
| CB4856                                                                                        | HS | X | 7159036 | 7166021 | WBGene00004004 | pgp-10   | C54D1.1  | -0.230659292537965   | AGIWUR15114 |
| CB4856                                                                                        | HS | X | 7166005 | 7170625 | WBGene00000238 | bar-1    | C54D1.6  | 0.302982480213441    | AGIWUR1646  |
| CB4856                                                                                        | HS | X | 7177641 | 7178922 | WBGene00044577 | F43E12.1 | F43E12.1 | 0.0674787431898896   |             |
| AGIWUR7496;AGIWUR16469;AGIWUR42022;AGIWUR44522                                                |    |   |         |         |                |          |          |                      |             |
| CB4856                                                                                        | HS | X | 7187355 | 7188482 | WBGene00016940 | C55B6.4  | C55B6.4  | -0.0801779434579331  | AGIWUR32410 |
| CB4856                                                                                        | HS | X | 7194564 | 7198291 | WBGene00001025 | dnj-7    | C55B6.2  | -0.115157930480776   |             |
| AGIWUR1962;AGIWUR10779;AGIWUR11340;AGIWUR14618;AGIWUR30335;AGIWUR34569                        |    |   |         |         |                |          |          |                      |             |
| CB4856                                                                                        | HS | X | 7200364 | 7204044 | WBGene00016939 | C55B6.1  | C55B6.1  | -0.0454922654322694  | AGIWUR30579 |
| CB4856                                                                                        | HS | X | 7204742 | 7205295 | WBGene00016941 | C55B6.5  | C55B6.5  | 0.123077613680287    | AGIWUR4101  |
| CB4856                                                                                        | HS | X | 7206719 | 7209985 | WBGene00022829 | ZK867.2  | ZK867.2  | -0.0610544514083822  |             |
| AGIWUR27793;AGIWUR39082                                                                       |    |   |         |         |                |          |          |                      |             |
| CB4856                                                                                        | HS | X | 7211705 | 7213956 | WBGene00044283 | spp-22   | ZK867.3  | -0.350709184189768   | AGIWUR30676 |
| CB4856                                                                                        | HS | X | 7218109 | 7226825 | WBGene00044068 | syd-9    | ZK867.1  | 0.0244447261329572   |             |
| AGIWUR366;AGIWUR8810;AGIWUR22384;AGIWUR28559                                                  |    |   |         |         |                |          |          |                      |             |
| CB4856                                                                                        | HS | X | 7230330 | 7238662 | WBGene00018519 | F46H5.3  | F46H5.3  | -0.109462168873154   |             |
| AGIWUR2881;AGIWUR5451;AGIWUR6990;AGIWUR30972;AGIWUR32854                                      |    |   |         |         |                |          |          |                      |             |
| CB4856                                                                                        | HS | X | 7238666 | 7242983 | WBGene00018522 | F46H5.7  | F46H5.7  | -0.00298775716913546 |             |
| AGIWUR9564;AGIWUR9695;AGIWUR14090;AGIWUR18319;AGIWUR19653;AGIWUR23962;AGIWUR26751;AGIWUR36620 |    |   |         |         |                |          |          |                      |             |
| CB4856                                                                                        | HS | X | 7245057 | 7254792 | WBGene00018520 | F46H5.4  | F46H5.4  | -0.020626907960569   | AGIWUR39855 |
| CB4856                                                                                        | HS | X | 7255927 | 7256978 | WBGene00018521 | F46H5.5  | F46H5.5  | 0.133559366127423    | AGIWUR29869 |
| CB4856                                                                                        | HS | X | 7258116 | 7260377 | WBGene00018523 | lact-1   | F46H5.8  | -0.0215312867083739  |             |
| AGIWUR2426;AGIWUR13200;AGIWUR29644                                                            |    |   |         |         |                |          |          |                      |             |
| CB4856                                                                                        | HS | X | 7265652 | 7267893 | WBGene00018518 | F46H5.2  | F46H5.2  | 0.00986557828202272  |             |
| AGIWUR7598;AGIWUR15397;AGIWUR17951;AGIWUR27236;AGIWUR37973                                    |    |   |         |         |                |          |          |                      |             |
| CB4856                                                                                        | HS | X | 7267989 | 7272067 | WBGene00001696 | grd-7    | F46H5.6  | 0.0226176751223139   | AGIWUR8059  |
| CB4856                                                                                        | HS | X | 7272334 | 7280322 | WBGene00006750 | unc-10   | T10A3.1  | 0.133331852291552    |             |
| AGIWUR1087;AGIWUR8869;AGIWUR23174;AGIWUR43203                                                 |    |   |         |         |                |          |          |                      |             |
| CB4856                                                                                        | HS | X | 7292138 | 7296035 | WBGene00019351 | lron-7   | K03A1.2  | 0.10790353862865     | AGIWUR24250 |
| CB4856                                                                                        | HS | X | 7296098 | 7298751 | WBGene00019352 | K03A1.4  | K03A1.4  | 0.0194250266571565   | AGIWUR14580 |
| CB4856                                                                                        | HS | X | 7301357 | 7305570 | WBGene00006351 | sur-5    | K03A1.5  | 0.0261422916831453   |             |
| AGIWUR8047;AGIWUR19938;AGIWUR20779;AGIWUR21098                                                |    |   |         |         |                |          |          |                      |             |
| CB4856                                                                                        | HS | X | 7312175 | 7313976 | WBGene00020338 | T08A9.6  | T08A9.6  | -0.207486013850433   |             |
| AGIWUR11970;AGIWUR20221;AGIWUR32288                                                           |    |   |         |         |                |          |          |                      |             |
| CB4856                                                                                        | HS | X | 7314969 | 7315353 | WBGene00004988 | spp-3    | T08A9.7  | -0.116603550044651   |             |
| AGIWUR831;AGIWUR28222;AGIWUR42444                                                             |    |   |         |         |                |          |          |                      |             |
| CB4856                                                                                        | HS | X | 7315995 | 7316818 | WBGene00004987 | spp-2    | T08A9.12 | 0.0755286799971988   |             |
| AGIWUR2832;AGIWUR4441;AGIWUR7152;AGIWUR41734                                                  |    |   |         |         |                |          |          |                      |             |
| CB4856                                                                                        | HS | X | 7317341 | 7317681 | WBGene00004991 | spp-6    | T08A9.10 | -0.279384221049931   |             |
| AGIWUR3981                                                                                    |    |   |         |         |                |          |          |                      |             |

|                                                                                                                                                        |    |   |         |         |                |          |          |                     |             |
|--------------------------------------------------------------------------------------------------------------------------------------------------------|----|---|---------|---------|----------------|----------|----------|---------------------|-------------|
| CB4856                                                                                                                                                 | HS | X | 7318239 | 7318798 | WBGene00004989 | spp-4    | T08A9.8  | 0.0793665769182361  | AGIWUR39959 |
| CB4856                                                                                                                                                 | HS | X | 7319935 | 7320384 | WBGene00004990 | spp-5    | T08A9.9  | -0.201625441383182  | AGIWUR16988 |
| CB4856                                                                                                                                                 | HS | X | 7321999 | 7322415 | WBGene00044442 | T08A9.13 | T08A9.13 | 0.176256560158752   |             |
| AGIWUR739;AGIWUR14660;AGIWUR17977;AGIWUR19453;AGIWUR23763                                                                                              |    |   |         |         |                |          |          |                     |             |
| CB4856                                                                                                                                                 | HS | X | 7327605 | 7329677 | WBGene00004912 | sng-1    | T08A9.3  | 0.272984047829915   | AGIWUR19181 |
| CB4856                                                                                                                                                 | HS | X | 7329818 | 7330669 | WBGene00020339 | ttr-59   | T08A9.11 | 0.277733883789486   |             |
| AGIWUR43881                                                                                                                                            |    |   |         |         |                |          |          |                     |             |
| CB4856                                                                                                                                                 | HS | X | 7331189 | 7331903 | WBGene00020335 | ttr-30   | T08A9.2  | 0.0564687623264852  | AGIWUR26782 |
| CB4856                                                                                                                                                 | HS | X | 7334714 | 7340224 | WBGene00020334 | epg-7    | T08A9.1  | -0.0236874813826269 | AGIWUR13141 |
| CB4856                                                                                                                                                 | HS | X | 7341509 | 7342780 | WBGene00015565 | C07D8.6  | C07D8.6  | -0.140333809179415  |             |
| AGIWUR2633;AGIWUR25877                                                                                                                                 |    |   |         |         |                |          |          |                     |             |
| CB4856                                                                                                                                                 | HS | X | 7344047 | 7344551 | WBGene00015564 | C07D8.5  | C07D8.5  | -0.118363394101351  | AGIWUR16285 |
| CB4856                                                                                                                                                 | HS | X | 7362082 | 7363663 | WBGene00015562 | C07D8.2  | C07D8.2  | -0.0873151182483642 | AGIWUR2955  |
| CB4856                                                                                                                                                 | HS | X | 7365567 | 7366298 | WBGene00016985 | C56G3.2  | C56G3.2  | -0.0665476622343695 |             |
| AGIWUR3048;AGIWUR12259;AGIWUR20965;AGIWUR21589;AGIWUR22826;AGIWUR29368;AGIWUR31432;AGIWUR35429                                                         |    |   |         |         |                |          |          |                     |             |
| CB4856                                                                                                                                                 | HS | X | 7377302 | 7388400 | WBGene00016984 | npr-8    | C56G3.1  | -0.0386403710068324 | AGIWUR30083 |
| CB4856                                                                                                                                                 | HS | X | 7390574 | 7392276 | WBGene00015667 | C10A4.6  | C10A4.6  | 0.102189196250891   | AGIWUR8450  |
| CB4856                                                                                                                                                 | HS | X | 7393467 | 7395987 | WBGene00015666 | gad-2    | C10A4.5  | 0.140652735520548   | AGIWUR36308 |
| CB4856                                                                                                                                                 | HS | X | 7398884 | 7400858 | WBGene00050957 | C10A4.10 | C10A4.10 | -0.0596323121598132 |             |
| AGIWUR23007                                                                                                                                            |    |   |         |         |                |          |          |                     |             |
| CB4856                                                                                                                                                 | HS | X | 7402131 | 7403609 | WBGene00015665 | C10A4.4  | C10A4.4  | 0.279116557742428   | AGIWUR10942 |
| CB4856                                                                                                                                                 | HS | X | 7407456 | 7408703 | WBGene00015664 | C10A4.3  | C10A4.3  | 0.058738718390396   | AGIWUR6197  |
| CB4856                                                                                                                                                 | HS | X | 7410235 | 7412749 | WBGene00015663 | C10A4.2  | C10A4.2  | 0.0625859037779817  | AGIWUR37959 |
| CB4856                                                                                                                                                 | HS | X | 7413611 | 7415520 | WBGene00015668 | C10A4.7  | C10A4.7  | -0.102703534737659  | AGIWUR1003  |
| CB4856                                                                                                                                                 | HS | X | 7415839 | 7418627 | WBGene00015662 | C10A4.1  | C10A4.1  | -0.0367385897643437 | AGIWUR5893  |
| CB4856                                                                                                                                                 | HS | X | 7420871 | 7422628 | WBGene00045456 | C10A4.9  | C10A4.9  | 0.241369510335531   |             |
| AGIWUR3200;AGIWUR10221;AGIWUR10599;AGIWUR13837;AGIWUR15117                                                                                             |    |   |         |         |                |          |          |                     |             |
| CB4856                                                                                                                                                 | HS | X | 7422641 | 7424881 | WBGene00003380 | mnem-2   | C10A4.8  | 0.0747407543574585  | AGIWUR7370  |
| CB4856                                                                                                                                                 | HS | X | 7431472 | 7433548 | WBGene00000523 | clc-2    | C01C10.1 | -0.0010308943327102 |             |
| AGIWUR8585;AGIWUR41135                                                                                                                                 |    |   |         |         |                |          |          |                     |             |
| CB4856                                                                                                                                                 | HS | X | 7433632 | 7435733 | WBGene00000526 | clc-5    | C01C10.4 | 0.0545553252086606  |             |
| AGIWUR9626                                                                                                                                             |    |   |         |         |                |          |          |                     |             |
| CB4856                                                                                                                                                 | HS | X | 7435602 | 7438000 | WBGene00015294 | C01C10.2 | C01C10.2 | 0.109427695167946   |             |
| AGIWUR10583;AGIWUR28046;AGIWUR41797                                                                                                                    |    |   |         |         |                |          |          |                     |             |
| CB4856                                                                                                                                                 | HS | X | 7439396 | 7442577 | WBGene00015295 | ac1-12   | C01C10.3 | 0.476467650335117   |             |
| AGIWUR24331                                                                                                                                            |    |   |         |         |                |          |          |                     |             |
| CB4856                                                                                                                                                 | HS | X | 7458293 | 7463736 | WBGene00004949 | sox-2    | K08A8.2  | -0.0303038054338414 |             |
| AGIWUR580;AGIWUR1927;AGIWUR2157;AGIWUR9025;AGIWUR12690;AGIWUR16873;AGIWUR17998;AGIWUR18918;AGIWUR23196;AGIWUR23402;AGIWUR29307;AGIWUR34708;AGIWUR35922 |    |   |         |         |                |          |          |                     |             |

|                                                                                                             |    |   |         |         |                |          |          |                      |             |
|-------------------------------------------------------------------------------------------------------------|----|---|---------|---------|----------------|----------|----------|----------------------|-------------|
| CB4856                                                                                                      | HS | X | 7465193 | 7475014 | WBGene00000591 | coh-1    | K08A8.3  | -0.0608583465906056  |             |
| AGIWUR8999;AGIWUR9946;AGIWUR16896;AGIWUR24797;AGIWUR25003;AGIWUR30115                                       |    |   |         |         |                |          |          |                      |             |
| CB4856                                                                                                      | HS | X | 7479248 | 7481010 | WBGene00003185 | mek-1    | K08A8.1  | 0.111074024003333    |             |
| AGIWUR4305;AGIWUR11188;AGIWUR43700                                                                          |    |   |         |         |                |          |          |                      |             |
| CB4856                                                                                                      | HS | X | 7481326 | 7485038 | WBGene00018608 | F48E3.9  | F48E3.9  | 0.0828454353591876   |             |
| AGIWUR4018;AGIWUR26749;AGIWUR26772                                                                          |    |   |         |         |                |          |          |                      |             |
| CB4856                                                                                                      | HS | X | 7485864 | 7490707 | WBGene00001637 | gly-12   | F48E3.1  | 0.544024142603124    | AGIWUR21551 |
| CB4856                                                                                                      | HS | X | 7493724 | 7495591 | WBGene00018605 | F48E3.4  | F48E3.4  | -0.0963417509711508  | AGIWUR24512 |
| CB4856                                                                                                      | HS | X | 7495684 | 7500982 | WBGene00018604 | uggt-1   | F48E3.3  | -0.113710677244317   | AGIWUR23074 |
| CB4856                                                                                                      | HS | X | 7501236 | 7502674 | WBGene00018606 | F48E3.6  | F48E3.6  | 0.0426917296022946   | AGIWUR16467 |
| CB4856                                                                                                      | HS | X | 7503823 | 7506633 | WBGene00000061 | lgc-11   | F48E3.7  | 0.00872325070289115  | AGIWUR43951 |
| CB4856                                                                                                      | HS | X | 7507885 | 7517694 | WBGene00018607 | F48E3.8  | F48E3.8  | 0.0219323601208146   |             |
| AGIWUR13250;AGIWUR17401;AGIWUR20280;AGIWUR34154;AGIWUR35820;AGIWUR41858                                     |    |   |         |         |                |          |          |                      |             |
| CB4856                                                                                                      | HS | X | 7525571 | 7527433 | WBGene00018485 | F46C8.3  | F46C8.3  | 0.174866288918727    | AGIWUR15002 |
| CB4856                                                                                                      | HS | X | 7528616 | 7532732 | WBGene00000438 | ceh-14   | F46C8.5  | -0.00572830214479403 | AGIWUR29513 |
| CB4856                                                                                                      | HS | X | 7536417 | 7537792 | WBGene00001069 | dpy-7    | F46C8.6  | -0.0321251267457745  |             |
| AGIWUR4342;AGIWUR38497                                                                                      |    |   |         |         |                |          |          |                      |             |
| CB4856                                                                                                      | HS | X | 7537844 | 7540129 | WBGene00018486 | glb-16   | F46C8.7  | 0.176254464071693    | AGIWUR8108  |
| CB4856                                                                                                      | HS | X | 7546842 | 7548365 | WBGene00000747 | col-174  | F46C8.2  | -0.246289948801703   | AGIWUR17224 |
| CB4856                                                                                                      | HS | X | 7548458 | 7551218 | WBGene00018484 | F46C8.1  | F46C8.1  | 0.0598198507435939   | AGIWUR21652 |
| CB4856                                                                                                      | HS | X | 7551204 | 7554426 | WBGene00018487 | F46C8.8  | F46C8.8  | -0.437158073327073   | AGIWUR23957 |
| CB4856                                                                                                      | HS | X | 7556788 | 7559085 | WBGene00019803 | PDB1.1   | PDB1.1   | 0.188831472835004    |             |
| AGIWUR8001;AGIWUR9508;AGIWUR11133;AGIWUR16595;AGIWUR20548;AGIWUR26709                                       |    |   |         |         |                |          |          |                      |             |
| CB4856                                                                                                      | HS | X | 7560024 | 7562093 | WBGene00017243 | F08C6.5  | F08C6.5  | -0.0322837607764175  | AGIWUR31069 |
| CB4856                                                                                                      | HS | X | 7562831 | 7564805 | WBGene00006063 | sto-1    | F08C6.4  | 0.120548781299453    | AGIWUR31380 |
| CB4856                                                                                                      | HS | X | 7565323 | 7568152 | WBGene00007059 | vps-52   | F08C6.3  | 0.10913060082407     | AGIWUR5089  |
| CB4856                                                                                                      | HS | X | 7568137 | 7569722 | WBGene00017244 | apy-1    | F08C6.6  | -0.0550052223275372  | AGIWUR19261 |
| CB4856                                                                                                      | HS | X | 7570374 | 7573751 | WBGene00006827 | unc-98   | F08C6.7  | 0.303520973279163    | AGIWUR41594 |
| CB4856                                                                                                      | HS | X | 7572110 | 7581059 | WBGene00017241 | pcyt-1   | F08C6.2  | 0.345581156138757    |             |
| AGIWUR294;AGIWUR13737                                                                                       |    |   |         |         |                |          |          |                      |             |
| CB4856                                                                                                      | HS | X | 7585587 | 7595414 | WBGene00000083 | adt-2    | F08C6.1  | 0.121936102775064    |             |
| AGIWUR10684;AGIWUR11003;AGIWUR15407;AGIWUR18101;AGIWUR19164;AGIWUR21177;AGIWUR26814;AGIWUR40645;AGIWUR40834 |    |   |         |         |                |          |          |                      |             |
| ;AGIWUR41449;AGIWUR42558;AGIWUR43389                                                                        |    |   |         |         |                |          |          |                      |             |
| CB4856                                                                                                      | HS | X | 7596927 | 7599824 | WBGene00016657 | C44E12.1 | C44E12.1 | -0.118785622223452   |             |
| AGIWUR899;AGIWUR7416;AGIWUR11671;AGIWUR12930;AGIWUR13227;AGIWUR43370                                        |    |   |         |         |                |          |          |                      |             |
| CB4856                                                                                                      | HS | X | 7599836 | 7608135 | WBGene00006671 | twk-17   | C44E12.3 | 0.104734498897788    |             |
| AGIWUR3885;AGIWUR20444;AGIWUR20522;AGIWUR24943;AGIWUR29077;AGIWUR33963;AGIWUR39488                          |    |   |         |         |                |          |          |                      |             |
| CB4856                                                                                                      | HS | X | 7627649 | 7627848 | WBGene00017813 | F26A10.1 | F26A10.1 | 0.0721063437540472   |             |
| AGIWUR2562                                                                                                  |    |   |         |         |                |          |          |                      |             |



|                                                                                                            |    |   |         |         |                |          |          |                     |             |
|------------------------------------------------------------------------------------------------------------|----|---|---------|---------|----------------|----------|----------|---------------------|-------------|
| CB4856                                                                                                     | HS | X | 7630905 | 7637172 | WBGene00017814 | F26A10.2 | F26A10.2 | -0.0696668095591582 |             |
| AGIWUR12816;AGIWUR43740                                                                                    |    |   |         |         |                |          |          |                     |             |
| CB4856                                                                                                     | HS | X | 7651132 | 7651548 | WBGene00017862 | F27D9.3  | F27D9.3  | 0.00112572645494424 | AGIWUR33666 |
| CB4856                                                                                                     | HS | X | 7653135 | 7654425 | WBGene00017863 | F27D9.4  | F27D9.4  | 0.214648609295061   | AGIWUR37245 |
| CB4856                                                                                                     | HS | X | 7657538 | 7687738 | WBGene00017864 | pcca-1   | F27D9.5  | -0.0872705619710024 |             |
| AGIWUR2629;AGIWUR3378;AGIWUR6786;AGIWUR14447;AGIWUR31106;AGIWUR38037                                       |    |   |         |         |                |          |          |                     |             |
| CB4856                                                                                                     | HS | X | 7690590 | 7707086 | WBGene00002242 | kvs-1    | C53C9.3  | -0.0529146577348119 |             |
| AGIWUR2769;AGIWUR11806;AGIWUR34819                                                                         |    |   |         |         |                |          |          |                     |             |
| CB4856                                                                                                     | HS | X | 7710170 | 7710716 | WBGene00019583 | K09F5.4  | K09F5.4  | -0.21182831683706   | AGIWUR25180 |
| CB4856                                                                                                     | HS | X | 7719272 | 7725583 | WBGene00044698 | K09F5.6  | K09F5.6  | 0.0933726737621257  |             |
| AGIWUR5167;AGIWUR13606;AGIWUR14314;AGIWUR22242;AGIWUR39871                                                 |    |   |         |         |                |          |          |                     |             |
| CB4856                                                                                                     | HS | X | 7725955 | 7726383 | WBGene00004999 | spp-14   | K09F5.3  | 0.118153610970587   | AGIWUR11497 |
| CB4856                                                                                                     | HS | X | 7727889 | 7733168 | WBGene00006925 | vit-1    | K09F5.2  | -0.60685529114221   | AGIWUR31944 |
| CB4856                                                                                                     | HS | X | 7733334 | 7736271 | WBGene00019584 | set-12   | K09F5.5  | -0.0990399446385286 | AGIWUR39637 |
| CB4856                                                                                                     | HS | X | 7739653 | 7741906 | WBGene00019582 | K09F5.1  | K09F5.1  | -0.048797306669476  | AGIWUR8592  |
| CB4856                                                                                                     | HS | X | 7744239 | 7750010 | WBGene00004335 | ref-2    | C47C12.3 | 0.0396288860596137  |             |
| AGIWUR12202;AGIWUR17761;AGIWUR31512;AGIWUR35474                                                            |    |   |         |         |                |          |          |                     |             |
| CB4856                                                                                                     | HS | X | 7754046 | 7754284 | WBGene00016736 | C47C12.2 | C47C12.2 | -0.0746146416677238 |             |
| AGIWUR14617                                                                                                |    |   |         |         |                |          |          |                     |             |
| CB4856                                                                                                     | HS | X | 7763187 | 7774915 | WBGene00000950 | deg-1    | C47C12.6 | 0.12105425225746    |             |
| AGIWUR12770                                                                                                |    |   |         |         |                |          |          |                     |             |
| CB4856                                                                                                     | HS | X | 7774859 | 7776689 | WBGene00003171 | mec-7    | ZK154.3  | -0.132509127989789  |             |
| AGIWUR35991;AGIWUR36555                                                                                    |    |   |         |         |                |          |          |                     |             |
| CB4856                                                                                                     | HS | X | 7777031 | 7782537 | WBGene00022666 | ZK154.4  | ZK154.4  | -0.271030403776912  | AGIWUR35005 |
| CB4856                                                                                                     | HS | X | 7783190 | 7787966 | WBGene00022667 | ZK154.5  | ZK154.5  | 0.111028636757727   | AGIWUR30208 |
| CB4856                                                                                                     | HS | X | 7790178 | 7793563 | WBGene00022668 | ZK154.6  | ZK154.6  | 0.115701556203652   |             |
| AGIWUR5581;AGIWUR6159;AGIWUR34648                                                                          |    |   |         |         |                |          |          |                     |             |
| CB4856                                                                                                     | HS | X | 7795046 | 7798287 | WBGene00000075 | adm-4    | ZK154.7  | 0.0295027269063972  | AGIWUR20603 |
| CB4856                                                                                                     | HS | X | 7798955 | 7799780 | WBGene00019846 | gpx-7    | R03G5.5  | 0.0280622641400843  |             |
| AGIWUR17391;AGIWUR26627;AGIWUR31329;AGIWUR34737                                                            |    |   |         |         |                |          |          |                     |             |
| CB4856                                                                                                     | HS | X | 7800445 | 7805676 | WBGene00019845 | irld-13  | R03G5.3  | -0.104241364169365  | AGIWUR27593 |
| CB4856                                                                                                     | HS | X | 7805629 | 7809134 | WBGene00019847 | R03G5.6  | R03G5.6  | 0.122423854510243   |             |
| AGIWUR39142;AGIWUR41155                                                                                    |    |   |         |         |                |          |          |                     |             |
| CB4856                                                                                                     | HS | X | 7816720 | 7821045 | WBGene00004758 | sek-1    | R03G5.2  | 0.083651557749425   | AGIWUR29353 |
| CB4856                                                                                                     | HS | X | 7823652 | 7825769 | WBGene00001169 | eef-1A.2 | R03G5.1  | 0.0424314180213017  |             |
| AGIWUR8817;AGIWUR13058;AGIWUR15776;AGIWUR20915;AGIWUR23861;AGIWUR35550;AGIWUR38611;AGIWUR39303;AGIWUR41511 |    |   |         |         |                |          |          |                     |             |
| CB4856                                                                                                     | HS | X | 7827085 | 7834535 | WBGene00006310 | su1-3    | C54D2.4  | 0.419450820236991   | AGIWUR45187 |
| CB4856                                                                                                     | HS | X | 7838899 | 7839381 | WBGene00016916 | C54D2.2  | C54D2.2  | -0.186406725567252  | AGIWUR18655 |
| CB4856                                                                                                     | HS | X | 7842632 | 7845438 | WBGene00016915 | C54D2.1  | C54D2.1  | -0.155574336909126  | AGIWUR37793 |

|                                                                                                                               |    |   |         |         |                |           |           |                     |             |
|-------------------------------------------------------------------------------------------------------------------------------|----|---|---------|---------|----------------|-----------|-----------|---------------------|-------------|
| CB4856                                                                                                                        | HS | X | 7846190 | 7847460 | WBGene00045210 | C54D2.6   | C54D2.6   | -0.219144044403199  |             |
| AGIWUR8415;AGIWUR15984                                                                                                        |    |   |         |         |                |           |           |                     |             |
| CB4856                                                                                                                        | HS | X | 7847682 | 7875954 | WBGene00000367 | cca-1     | C54D2.5   | 0.0319015776300269  |             |
| AGIWUR13850;AGIWUR17664;AGIWUR22438;AGIWUR36286                                                                               |    |   |         |         |                |           |           |                     |             |
| CB4856                                                                                                                        | HS | X | 7879771 | 7880948 | WBGene00016535 | C39D10.8  | C39D10.8  | 0.211189633439806   |             |
| AGIWUR154;AGIWUR858;AGIWUR1029;AGIWUR1163;AGIWUR17488;AGIWUR25598;AGIWUR25753;AGIWUR30213;AGIWUR39081;AGIWUR39426;AGIWUR44038 |    |   |         |         |                |           |           |                     |             |
| CB4856                                                                                                                        | HS | X | 7884288 | 7887479 | WBGene00016531 | C39D10.3  | C39D10.3  | 0.125613455573101   |             |
| AGIWUR11017                                                                                                                   |    |   |         |         |                |           |           |                     |             |
| CB4856                                                                                                                        | HS | X | 7889215 | 7889765 | WBGene00016530 | C39D10.2  | C39D10.2  | -0.106432468204986  |             |
| AGIWUR927                                                                                                                     |    |   |         |         |                |           |           |                     |             |
| CB4856                                                                                                                        | HS | X | 7890410 | 7892396 | WBGene00016532 | C39D10.5  | C39D10.5  | -0.0333122293956061 |             |
| AGIWUR25921                                                                                                                   |    |   |         |         |                |           |           |                     |             |
| CB4856                                                                                                                        | HS | X | 7896221 | 7897773 | WBGene00016533 | C39D10.6  | C39D10.6  | 0.0465374860298109  |             |
| AGIWUR42464                                                                                                                   |    |   |         |         |                |           |           |                     |             |
| CB4856                                                                                                                        | HS | X | 7901631 | 7901990 | WBGene00016536 | C39D10.9  | C39D10.9  | -0.601570313207076  |             |
| AGIWUR40149                                                                                                                   |    |   |         |         |                |           |           |                     |             |
| CB4856                                                                                                                        | HS | X | 7903280 | 7905466 | WBGene00043983 | C39D10.11 | C39D10.11 | 0.137584465962523   |             |
| AGIWUR42504;AGIWUR44558                                                                                                       |    |   |         |         |                |           |           |                     |             |
| CB4856                                                                                                                        | HS | X | 7906964 | 7907119 | WBGene00016529 | C39D10.1  | C39D10.1  | -0.145212754794751  |             |
| AGIWUR8159                                                                                                                    |    |   |         |         |                |           |           |                     |             |
| CB4856                                                                                                                        | HS | X | 7907955 | 7913930 | WBGene00016534 | C39D10.7  | C39D10.7  | 0.101976669561724   |             |
| AGIWUR28583                                                                                                                   |    |   |         |         |                |           |           |                     |             |
| CB4856                                                                                                                        | HS | X | 7925434 | 7926594 | WBGene00006981 | zig-4     | C09C7.1   | -0.0436174703865095 |             |
| AGIWUR17450;AGIWUR19354;AGIWUR30211                                                                                           |    |   |         |         |                |           |           |                     |             |
| CB4856                                                                                                                        | HS | X | 7930738 | 7931808 | WBGene00006980 | zig-3     | C14F5.2   | 0.274054061965593   | AGIWUR2314  |
| CB4856                                                                                                                        | HS | X | 7937635 | 7945048 | WBGene00006588 | tnt-3     | C14F5.3   | 0.0369263530057076  |             |
| AGIWUR26799;AGIWUR31168;AGIWUR36095                                                                                           |    |   |         |         |                |           |           |                     |             |
| CB4856                                                                                                                        | HS | X | 7954355 | 7956211 | WBGene00015776 | dct-1     | C14F5.1   | -0.201043039640634  | AGIWUR26731 |
| CB4856                                                                                                                        | HS | X | 7956196 | 7958303 | WBGene00015777 | sfxn-2    | C14F5.4   | -0.0527860868834207 | AGIWUR21473 |
| CB4856                                                                                                                        | HS | X | 7959452 | 7961723 | WBGene00004774 | sem-5     | C14F5.5   | 0.0747378825210916  | AGIWUR1438  |
| CB4856                                                                                                                        | HS | X | 7976700 | 7980657 | WBGene00018466 | F45E1.5   | F45E1.5   | 0.187012393764318   | AGIWUR29946 |
| CB4856                                                                                                                        | HS | X | 7981382 | 7982070 | WBGene00001945 | his-71    | F45E1.6   | -0.118931156936336  | AGIWUR28969 |
| CB4856                                                                                                                        | HS | X | 7985979 | 7988981 | WBGene00018465 | F45E1.4   | F45E1.4   | 0.117803983832426   |             |
| AGIWUR3201;AGIWUR6769                                                                                                         |    |   |         |         |                |           |           |                     |             |
| CB4856                                                                                                                        | HS | X | 7988931 | 7998229 | WBGene00018467 | sdpn-1    | F45E1.7   | 0.178985650872944   | AGIWUR28499 |
| CB4856                                                                                                                        | HS | X | 8003819 | 8009400 | WBGene00018462 | F45E1.1   | F45E1.1   | -0.0291094823151683 | AGIWUR39595 |
| CB4856                                                                                                                        | HS | X | 8014983 | 8026858 | WBGene00016407 | C34D10.2  | C34D10.2  | 0.123338871269194   |             |
| AGIWUR1066;AGIWUR8041                                                                                                         |    |   |         |         |                |           |           |                     |             |

|                                                                                                                                 |    |   |         |         |                |          |          |                      |             |
|---------------------------------------------------------------------------------------------------------------------------------|----|---|---------|---------|----------------|----------|----------|----------------------|-------------|
| CB4856                                                                                                                          | HS | X | 8029479 | 8031614 | WBGene00016406 | C34D10.1 | C34D10.1 | -0.161139044485196   |             |
| AGIWUR27238                                                                                                                     |    |   |         |         |                |          |          |                      |             |
| CB4856                                                                                                                          | HS | X | 8041327 | 8044409 | WBGene00006962 | xol-1    | C18A11.5 | -0.0880528907147688  |             |
| AGIWUR19381;AGIWUR39183                                                                                                         |    |   |         |         |                |          |          |                      |             |
| CB4856                                                                                                                          | HS | X | 8045552 | 8047416 | WBGene00015950 | C18A11.4 | C18A11.4 | 0.39312175761672     |             |
| AGIWUR36837                                                                                                                     |    |   |         |         |                |          |          |                      |             |
| CB4856                                                                                                                          | HS | X | 8050476 | 8058220 | WBGene00001000 | dim-1    | C18A11.7 | 0.0239904354613572   |             |
| AGIWUR746;AGIWUR3893;AGIWUR6746;AGIWUR13907;AGIWUR14088;AGIWUR16775;AGIWUR17481;AGIWUR19007;AGIWUR35992;AGIWUR36156;AGIWUR36589 |    |   |         |         |                |          |          |                      |             |
| CB4856                                                                                                                          | HS | X | 8061123 | 8065688 | WBGene00015949 | C18A11.3 | C18A11.3 | 0.276882848549072    |             |
| AGIWUR9153                                                                                                                      |    |   |         |         |                |          |          |                      |             |
| CB4856                                                                                                                          | HS | X | 8067568 | 8068095 | WBGene00015948 | C18A11.2 | C18A11.2 | 0.104959901447229    |             |
| AGIWUR31132                                                                                                                     |    |   |         |         |                |          |          |                      |             |
| CB4856                                                                                                                          | HS | X | 8069328 | 8070289 | WBGene00015947 | C18A11.1 | C18A11.1 | -0.155299508518      |             |
| AGIWUR22349;AGIWUR27090;AGIWUR37350;AGIWUR38997                                                                                 |    |   |         |         |                |          |          |                      |             |
| CB4856                                                                                                                          | HS | X | 8078063 | 8080256 | WBGene00016714 | C46F2.1  | C46F2.1  | -0.12365342217557    | AGIWUR24718 |
| CB4856                                                                                                                          | HS | X | 8080869 | 8084018 | WBGene00019492 | K07E3.4  | K07E3.4  | 0.0545953037475968   | AGIWUR28196 |
| CB4856                                                                                                                          | HS | X | 8084210 | 8086550 | WBGene00000929 | dao-3    | K07E3.3  | 0.159872490474729    | AGIWUR33499 |
| CB4856                                                                                                                          | HS | X | 8087554 | 8089427 | WBGene00006890 | vem-1    | K07E3.8  | 0.224968110563847    | AGIWUR5567  |
| CB4856                                                                                                                          | HS | X | 8089826 | 8098863 | WBGene00019493 | catp-5   | K07E3.7  | -0.175000271938835   | AGIWUR33219 |
| CB4856                                                                                                                          | HS | X | 8104305 | 8107557 | WBGene00019491 | K07E3.2  | K07E3.2  | 0.133978342130944    |             |
| AGIWUR4890;AGIWUR34188                                                                                                          |    |   |         |         |                |          |          |                      |             |
| CB4856                                                                                                                          | HS | X | 8110449 | 8114762 | WBGene00019490 | K07E3.1  | K07E3.1  | -0.288578249124848   | AGIWUR34231 |
| CB4856                                                                                                                          | HS | X | 8116636 | 8120133 | WBGene00001953 | hlh-8    | C02B8.4  | -0.197719207399076   | AGIWUR37979 |
| CB4856                                                                                                                          | HS | X | 8120410 | 8123220 | WBGene00219375 | C02B8.12 | C02B8.12 | -0.173889597697776   |             |
| AGIWUR39796                                                                                                                     |    |   |         |         |                |          |          |                      |             |
| CB4856                                                                                                                          | HS | X | 8133155 | 8136326 | WBGene00015324 | C02B8.6  | C02B8.6  | -0.0685197863865117  |             |
| AGIWUR5064;AGIWUR14981;AGIWUR16481;AGIWUR17832;AGIWUR30095;AGIWUR30413;AGIWUR42682                                              |    |   |         |         |                |          |          |                      |             |
| CB4856                                                                                                                          | HS | X | 8137721 | 8137879 | WBGene00015325 | C02B8.7  | C02B8.7  | -0.159226661243149   | AGIWUR31418 |
| CB4856                                                                                                                          | HS | X | 8139446 | 8140243 | WBGene00015322 | C02B8.3  | C02B8.3  | -0.0263170248345159  |             |
| AGIWUR2189;AGIWUR25989                                                                                                          |    |   |         |         |                |          |          |                      |             |
| CB4856                                                                                                                          | HS | X | 8147710 | 8148588 | WBGene00015320 | C02B8.1  | C02B8.1  | -0.0970475914933946  | AGIWUR14484 |
| CB4856                                                                                                                          | HS | X | 8149563 | 8150716 | WBGene00017714 | F22F1.2  | F22F1.2  | 0.253970613327576    | AGIWUR41354 |
| CB4856                                                                                                                          | HS | X | 8159153 | 8160084 | WBGene00001854 | hil-3    | F22F1.1  | 0.0488082440715125   | AGIWUR7999  |
| CB4856                                                                                                                          | HS | X | 8161839 | 8163073 | WBGene00017715 | F22F1.3  | F22F1.3  | -0.00211880930259767 | AGIWUR24544 |
| CB4856                                                                                                                          | HS | X | 8169930 | 8172913 | WBGene00015922 | C17H11.2 | C17H11.2 | 0.0155064845616337   |             |
| AGIWUR41888                                                                                                                     |    |   |         |         |                |          |          |                      |             |
| CB4856                                                                                                                          | HS | X | 8173910 | 8180865 | WBGene00015921 | C17H11.1 | C17H11.1 | 0.144489090798967    |             |
| AGIWUR43707                                                                                                                     |    |   |         |         |                |          |          |                      |             |

|                                     |    |   |         |         |                |          |           |                      |             |
|-------------------------------------|----|---|---------|---------|----------------|----------|-----------|----------------------|-------------|
| CB4856                              | HS | X | 8181031 | 8181640 | WBGene00015924 | C17H11.4 | C17H11.4  | 0.977398242078237    |             |
| AGIWUR23254                         |    |   |         |         |                |          |           |                      |             |
| CB4856                              | HS | X | 8183008 | 8185133 | WBGene00015925 | C17H11.5 | C17H11.5  | 0.0719570321470613   |             |
| AGIWUR38063                         |    |   |         |         |                |          |           |                      |             |
| CB4856                              | HS | X | 8185175 | 8203784 | WBGene00015926 | C17H11.6 | C17H11.6  | 0.094481573614928    |             |
| AGIWUR8111;AGIWUR29624;AGIWUR40357  |    |   |         |         |                |          |           |                      |             |
| CB4856                              | HS | X | 8208748 | 8211149 | WBGene00000391 | cdd-1    | C47D2.2   | 0.197166157684194    | AGIWUR13118 |
| CB4856                              | HS | X | 8215050 | 8215668 | WBGene00016738 | C47D2.1  | C47D2.1   | -0.050072804297546   | AGIWUR12024 |
| CB4856                              | HS | X | 8219728 | 8220064 | WBGene00019292 | K02A6.1  | K02A6.1   | -0.234814158123039   | AGIWUR628   |
| CB4856                              | HS | X | 8224391 | 8224902 | WBGene00019293 | K02A6.2  | K02A6.2   | -0.378617239970843   | AGIWUR21360 |
| CB4856                              | HS | X | 8228068 | 8231934 | WBGene00019294 | K02A6.3  | K02A6.3   | -0.371352918967474   | AGIWUR36272 |
| CB4856                              | HS | X | 8232254 | 8236316 | WBGene00019780 | M60.4    | M60.4     | 0.17662680314869     | AGIWUR8759  |
| CB4856                              | HS | X | 8242056 | 8247869 | WBGene00019779 | endu-2   | M60.2     | 0.0430216806120711   | AGIWUR28695 |
| CB4856                              | HS | X | 8248207 | 8252458 | WBGene00019781 | M60.6    | M60.6     | 0.143630753656314    |             |
| AGIWUR6639;AGIWUR20670;AGIWUR39957  |    |   |         |         |                |          |           |                      |             |
| CB4856                              | HS | X | 8258149 | 8261175 | WBGene00019782 | M60.7    | M60.7     | -0.116940593854656   | AGIWUR16017 |
| CB4856                              | HS | X | 8262421 | 8271021 | WBGene00017421 | cutl-29  | F13B9.6   | 0.215110122737213    | AGIWUR18221 |
| CB4856                              | HS | X | 8275158 | 8283301 | WBGene00002239 | ksr-1    | F13B9.5   | 0.107948351406282    | AGIWUR15566 |
| CB4856                              | HS | X | 8283282 | 8285219 | WBGene00001425 | fis-2    | F13B9.8   | -0.108198066895856   | AGIWUR29120 |
| CB4856                              | HS | X | 8285683 | 8286785 | WBGene00017420 | F13B9.2  | F13B9.2   | 0.24918842494306     | AGIWUR31567 |
| CB4856                              | HS | X | 8287261 | 8294514 | WBGene00017419 | F13B9.1  | F13B9.1   | 0.166053381787318    | AGIWUR13018 |
| CB4856                              | HS | X | 8294625 | 8296675 | WBGene00019987 | R09F10.3 | R09F10.3  | 0.0781293255204467   |             |
| AGIWUR23087                         |    |   |         |         |                |          |           |                      |             |
| CB4856                              | HS | X | 8299119 | 8299654 | WBGene00000427 | ced-13   | R09F10.9  | -0.133010983470196   |             |
| AGIWUR36309                         |    |   |         |         |                |          |           |                      |             |
| CB4856                              | HS | X | 8300030 | 8302395 | WBGene00002127 | inx-5    | R09F10.4  | -0.103391299173704   |             |
| AGIWUR8644;AGIWUR33230              |    |   |         |         |                |          |           |                      |             |
| CB4856                              | HS | X | 8306225 | 8307700 | WBGene00019988 | R09F10.5 | R09F10.5  | 0.0428719567451719   |             |
| AGIWUR18056                         |    |   |         |         |                |          |           |                      |             |
| CB4856                              | HS | X | 8313128 | 8314267 | WBGene00005239 | srh-13   | R09F10.10 | 0.000170425868797786 |             |
| AGIWUR6738                          |    |   |         |         |                |          |           |                      |             |
| CB4856                              | HS | X | 8315524 | 8316278 | WBGene00005238 | srh-12   | R09F10.11 | 0.0493930132362257   |             |
| AGIWUR16767;AGIWUR22171;AGIWUR31297 |    |   |         |         |                |          |           |                      |             |
| CB4856                              | HS | X | 8317637 | 8319050 | WBGene00005237 | srh-11   | R09F10.6  | -0.455469183835669   |             |
| AGIWUR29614                         |    |   |         |         |                |          |           |                      |             |
| CB4856                              | HS | X | 8323592 | 8325046 | WBGene00019986 | R09F10.1 | R09F10.1  | 0.140728401527848    |             |
| AGIWUR41725                         |    |   |         |         |                |          |           |                      |             |
| CB4856                              | HS | X | 8325099 | 8326451 | WBGene00019989 | R09F10.8 | R09F10.8  | -0.152645124574292   |             |
| AGIWUR24471                         |    |   |         |         |                |          |           |                      |             |

|                                                                                                                       |    |   |         |         |                |          |          |                     |             |
|-----------------------------------------------------------------------------------------------------------------------|----|---|---------|---------|----------------|----------|----------|---------------------|-------------|
| CB4856                                                                                                                | HS | X | 8327559 | 8327900 | WBGene00018883 | F55E10.4 | F55E10.4 | 0.119228265034252   |             |
| AGIWUR32061                                                                                                           |    |   |         |         |                |          |          |                     |             |
| CB4856                                                                                                                | HS | X | 8333247 | 8337948 | WBGene00018884 | F55E10.5 | F55E10.5 | -0.0641597931965441 |             |
| AGIWUR28678                                                                                                           |    |   |         |         |                |          |          |                     |             |
| CB4856                                                                                                                | HS | X | 8340693 | 8340986 | WBGene00018882 | F55E10.2 | F55E10.2 | 0.404895751843236   |             |
| AGIWUR19603                                                                                                           |    |   |         |         |                |          |          |                     |             |
| CB4856                                                                                                                | HS | X | 8341975 | 8342286 | WBGene00018881 | F55E10.1 | F55E10.1 | 0.183199243583618   |             |
| AGIWUR4035                                                                                                            |    |   |         |         |                |          |          |                     |             |
| CB4856                                                                                                                | HS | X | 8344700 | 8346408 | WBGene00018885 | drd-5    | F55E10.6 | 0.340431776887835   |             |
| AGIWUR1745                                                                                                            |    |   |         |         |                |          |          |                     |             |
| CB4856                                                                                                                | HS | X | 8348537 | 8351059 | WBGene00018886 | npr-28   | F55E10.7 | 0.144907916754917   |             |
| AGIWUR20796                                                                                                           |    |   |         |         |                |          |          |                     |             |
| CB4856                                                                                                                | HS | X | 8368534 | 8371609 | WBGene00018226 | F40B5.2  | F40B5.2  | -0.167989628463118  | AGIWUR10274 |
| CB4856                                                                                                                | HS | X | 8372206 | 8374474 | WBGene00018227 | nep-15   | F40B5.3  | -0.121523606084823  | AGIWUR17266 |
| CB4856                                                                                                                | HS | X | 8375288 | 8377304 | WBGene00018225 | nep-14   | F40B5.1  | -0.328130531780483  | AGIWUR37444 |
| CB4856                                                                                                                | HS | X | 8378557 | 8382700 | WBGene00018281 | tbx-18   | F41D9.1  | 0.219357983721947   | AGIWUR38939 |
| CB4856                                                                                                                | HS | X | 8382706 | 8384945 | WBGene00018282 | F41D9.2  | F41D9.2  | 0.0289522452980258  | AGIWUR19133 |
| CB4856                                                                                                                | HS | X | 8387448 | 8392584 | WBGene00006942 | wrk-1    | F41D9.3  | -0.063852464320874  |             |
| AGIWUR156;AGIWUR6021;AGIWUR13188;AGIWUR13370;AGIWUR19239;AGIWUR28819;AGIWUR37022;AGIWUR41612;AGIWUR41671              |    |   |         |         |                |          |          |                     |             |
| CB4856                                                                                                                | HS | X | 8403539 | 8408367 | WBGene00018283 | sup-3    | F41D9.5  | -0.0109795837748665 | AGIWUR24297 |
| CB4856                                                                                                                | HS | X | 8411698 | 8414195 | WBGene00017258 | F08F1.4  | F08F1.4  | 0.195330492916675   |             |
| AGIWUR4950;AGIWUR6123;AGIWUR12253;AGIWUR14710;AGIWUR15054;AGIWUR17264;AGIWUR18514;AGIWUR30864;AGIWUR43115;AGIWUR45009 |    |   |         |         |                |          |          |                     |             |
| CB4856                                                                                                                | HS | X | 8417424 | 8418524 | WBGene00004998 | spp-13   | F08F1.6  | 0.125385437985802   | AGIWUR2104  |
| CB4856                                                                                                                | HS | X | 8418646 | 8422055 | WBGene00006472 | tag-123  | F08F1.7  | -0.0488967822491198 |             |
| AGIWUR752;AGIWUR6564;AGIWUR12444;AGIWUR28314;AGIWUR34981;AGIWUR40903                                                  |    |   |         |         |                |          |          |                     |             |
| CB4856                                                                                                                | HS | X | 8422480 | 8423731 | WBGene00006649 | tth-1    | F08F1.8  | 0.0156711377392256  | AGIWUR37804 |
| CB4856                                                                                                                | HS | X | 8432663 | 8437346 | WBGene00002195 | kin-9    | F08F1.1  | 0.371528296666419   | AGIWUR36818 |
| CB4856                                                                                                                | HS | X | 8440192 | 8450417 | WBGene00017513 | F16F9.1  | F16F9.1  | 0.396657112364396   | AGIWUR30468 |
| CB4856                                                                                                                | HS | X | 8450381 | 8455640 | WBGene00001068 | dpy-6    | F16F9.2  | -0.278912545249619  | AGIWUR35261 |
| CB4856                                                                                                                | HS | X | 8457614 | 8459734 | WBGene00017514 | F16F9.3  | F16F9.3  | 0.341152693861614   | AGIWUR14547 |
| CB4856                                                                                                                | HS | X | 8459821 | 8463360 | WBGene00017515 | F16F9.4  | F16F9.4  | 0.0770476796101676  | AGIWUR23854 |
| CB4856                                                                                                                | HS | X | 8465832 | 8470256 | WBGene00003174 | mec-10   | F16F9.5  | 0.11159998048209    | AGIWUR42070 |
| CB4856                                                                                                                | HS | X | 8473723 | 8476176 | WBGene00003613 | nhr-14   | T01B10.4 | -0.179739735843754  |             |
| AGIWUR1892;AGIWUR2548;AGIWUR14751;AGIWUR15964;AGIWUR19124                                                             |    |   |         |         |                |          |          |                     |             |
| CB4856                                                                                                                | HS | X | 8495322 | 8498062 | WBGene00020137 | T01B10.5 | T01B10.5 | 0.06482935938745    |             |
| AGIWUR41525                                                                                                           |    |   |         |         |                |          |          |                     |             |
| CB4856                                                                                                                | HS | X | 8499664 | 8501037 | WBGene00001703 | grd-14   | T01B10.2 | -0.2                |             |

|                                                                                   |   |         |         |                |          |          |                      |             |
|-----------------------------------------------------------------------------------|---|---------|---------|----------------|----------|----------|----------------------|-------------|
| CB4856 HS                                                                         | X | 8501245 | 8502289 | WBGene00001693 | grd-4    | T01B10.1 | 0.0256365550991475   |             |
| AGIWUR5512                                                                        |   |         |         |                |          |          |                      |             |
| CB4856 HS                                                                         | X | 8507876 | 8514126 | WBGene00019148 | H03E18.1 | H03E18.1 | 0.241089255792113    |             |
| AGIWUR37696                                                                       |   |         |         |                |          |          |                      |             |
| CB4856 HS                                                                         | X | 8514088 | 8517830 | WBGene00019149 | H03E18.2 | H03E18.2 | -0.046953336943627   |             |
| AGIWUR17740                                                                       |   |         |         |                |          |          |                      |             |
| CB4856 HS                                                                         | X | 8528250 | 8531033 | WBGene00001448 | flp-5    | C03G5.7  | -0.114360339468263   |             |
| AGIWUR1829;AGIWUR34234                                                            |   |         |         |                |          |          |                      |             |
| CB4856 HS                                                                         | X | 8542867 | 8546021 | WBGene00015391 | sdha-1   | C03G5.1  | -0.157425537011336   |             |
| AGIWUR270;AGIWUR5327;AGIWUR26113;AGIWUR26614;AGIWUR30788                          |   |         |         |                |          |          |                      |             |
| CB4856 HS                                                                         | X | 8546451 | 8549056 | WBGene00017048 | D2021.4  | D2021.4  | 0.203421042241487    |             |
| AGIWUR6248;AGIWUR11716;AGIWUR20806                                                |   |         |         |                |          |          |                      |             |
| CB4856 HS                                                                         | X | 8552261 | 8556351 | WBGene00044071 | dhhc-14  | D2021.2  | -0.0521525302265102  |             |
| AGIWUR2179;AGIWUR13670;AGIWUR28378;AGIWUR41196                                    |   |         |         |                |          |          |                      |             |
| CB4856 HS                                                                         | X | 8557151 | 8563235 | WBGene00017046 | utx-1    | D2021.1  | -0.157283658414292   |             |
| AGIWUR4714;AGIWUR5935;AGIWUR18865;AGIWUR22140;AGIWUR25209;AGIWUR25406;AGIWUR35006 |   |         |         |                |          |          |                      |             |
| CB4856 HS                                                                         | X | 8571049 | 8575451 | WBGene00017571 | jmjd-3.1 | F18E9.5  | 0.397589717080544    |             |
| AGIWUR38593                                                                       |   |         |         |                |          |          |                      |             |
| CB4856 HS                                                                         | X | 8578585 | 8580104 | WBGene00044780 | F18E9.8  | F18E9.8  | -0.0352566270088603  |             |
| AGIWUR1800;AGIWUR4650;AGIWUR9990                                                  |   |         |         |                |          |          |                      |             |
| CB4856 HS                                                                         | X | 8580656 | 8583537 | WBGene00017570 | F18E9.4  | F18E9.4  | 0.147710871185062    |             |
| AGIWUR12635;AGIWUR15548;AGIWUR40652                                               |   |         |         |                |          |          |                      |             |
| CB4856 HS                                                                         | X | 8586147 | 8590290 | WBGene00017569 | F18E9.3  | F18E9.3  | 0.264134522677447    | AGIWUR42934 |
| CB4856 HS                                                                         | X | 8593187 | 8593974 | WBGene00003745 | nlp-7    | F18E9.2  | 0.158047380023064    | AGIWUR44693 |
| CB4856 HS                                                                         | X | 8595152 | 8597747 | WBGene00017573 | F18E9.7  | F18E9.7  | -0.00255703084639869 | AGIWUR25588 |
| CB4856 HS                                                                         | X | 8601535 | 8602366 | WBGene00017568 | F18E9.1  | F18E9.1  | -0.0243464253245893  | AGIWUR9199  |
| CB4856 HS                                                                         | X | 8607174 | 8607753 | WBGene00019265 | H35N09.1 | H35N09.1 | 0.128466322797426    |             |
| AGIWUR40490                                                                       |   |         |         |                |          |          |                      |             |
| CB4856 HS                                                                         | X | 8618418 | 8619756 | WBGene00019286 | K01A12.2 | K01A12.2 | 0.0718698645581348   |             |
| AGIWUR2797;AGIWUR18038;AGIWUR23292;AGIWUR32547;AGIWUR36214                        |   |         |         |                |          |          |                      |             |
| CB4856 HS                                                                         | X | 8620570 | 8625240 | WBGene00019287 | K01A12.3 | K01A12.3 | -0.191243636731967   |             |
| AGIWUR16423;AGIWUR36181;AGIWUR38635                                               |   |         |         |                |          |          |                      |             |
| CB4856 HS                                                                         | X | 8639389 | 8643431 | WBGene00017400 | stg-2    | F12D9.1  | 0.228066821822319    | AGIWUR31307 |
| CB4856 HS                                                                         | X | 8646606 | 8647097 | WBGene00017401 | F12D9.2  | F12D9.2  | 0.0650282249507406   | AGIWUR2405  |
| CB4856 HS                                                                         | X | 8660619 | 8671753 | WBGene00004369 | rig-1    | K09E2.4  | 0.040610902982305    |             |
| AGIWUR23760;AGIWUR27489;AGIWUR32360                                               |   |         |         |                |          |          |                      |             |
| CB4856 HS                                                                         | X | 8673060 | 8681653 | WBGene00019571 | K09E2.2  | K09E2.2  | 0.0704974833236891   | AGIWUR36350 |
| CB4856 HS                                                                         | X | 8681910 | 8686146 | WBGene00019570 | K09E2.1  | K09E2.1  | 0.121298178734108    |             |
| AGIWUR13311;AGIWUR34731;AGIWUR43898                                               |   |         |         |                |          |          |                      |             |

|                                                                                     |    |   |         |         |                |         |          |                      |             |
|-------------------------------------------------------------------------------------|----|---|---------|---------|----------------|---------|----------|----------------------|-------------|
| CB4856                                                                              | HS | X | 8697817 | 8702822 | WBGene00018728 | frpr-8  | F53A9.5  | 0.176867161495717    |             |
| AGIWUR1563;AGIWUR37929                                                              |    |   |         |         |                |         |          |                      |             |
| CB4856                                                                              | HS | X | 8704309 | 8707197 | WBGene00018727 | jbts-14 | F53A9.4  | -0.136734132351869   | AGIWUR39170 |
| CB4856                                                                              | HS | X | 8708365 | 8709370 | WBGene00018726 | F53A9.3 | F53A9.3  | -0.285872087538246   | AGIWUR22905 |
| CB4856                                                                              | HS | X | 8709764 | 8710137 | WBGene00018725 | kreg-1  | F53A9.2  | 0.112417306309196    |             |
| AGIWUR5464;AGIWUR7328;AGIWUR7798;AGIWUR15741;AGIWUR20454;AGIWUR30988                |    |   |         |         |                |         |          |                      |             |
| CB4856                                                                              | HS | X | 8711590 | 8711911 | WBGene00018724 | F53A9.1 | F53A9.1  | -0.0559574247291632  |             |
| AGIWUR32378;AGIWUR38157                                                             |    |   |         |         |                |         |          |                      |             |
| CB4856                                                                              | HS | X | 8713461 | 8713952 | WBGene00018729 | F53A9.6 | F53A9.6  | 0.278641881286649    | AGIWUR26199 |
| CB4856                                                                              | HS | X | 8716532 | 8716929 | WBGene00018730 | F53A9.7 | F53A9.7  | 0.1976809752076      | AGIWUR11432 |
| CB4856                                                                              | HS | X | 8718567 | 8718905 | WBGene00018731 | F53A9.8 | F53A9.8  | 0.369751151298283    | AGIWUR35395 |
| CB4856                                                                              | HS | X | 8720226 | 8720758 | WBGene00018732 | F53A9.9 | F53A9.9  | 0.198966754168426    | AGIWUR40805 |
| CB4856                                                                              | HS | X | 8721557 | 8723552 | WBGene00006587 | tnt-2   | F53A9.10 | 0.0952095271620408   |             |
| AGIWUR10214;AGIWUR15235;AGIWUR16730;AGIWUR22902;AGIWUR39188;AGIWUR39856;AGIWUR41250 |    |   |         |         |                |         |          |                      |             |
| CB4856                                                                              | HS | X | 8726798 | 8727406 | WBGene00017149 | EGAP4.1 | EGAP4.1  | -0.10097173043043    | AGIWUR37219 |
| CB4856                                                                              | HS | X | 8731310 | 8731922 | WBGene00019732 | M02D8.6 | M02D8.6  | 0.0708640426504292   | AGIWUR42632 |
| CB4856                                                                              | HS | X | 8732958 | 8737015 | WBGene00019729 | M02D8.3 | M02D8.3  | 0.0374149580494638   | AGIWUR43043 |
| CB4856                                                                              | HS | X | 8739048 | 8740171 | WBGene00019728 | M02D8.2 | M02D8.2  | 0.217461397188455    |             |
| AGIWUR13616;AGIWUR23732;AGIWUR26248;AGIWUR30537;AGIWUR39903                         |    |   |         |         |                |         |          |                      |             |
| CB4856                                                                              | HS | X | 8740789 | 8743057 | WBGene00044313 | M02D8.7 | M02D8.7  | 0.0312188557027406   |             |
| AGIWUR5408;AGIWUR35449                                                              |    |   |         |         |                |         |          |                      |             |
| CB4856                                                                              | HS | X | 8748434 | 8750969 | WBGene00019730 | asns-2  | M02D8.4  | -0.223769903755058   |             |
| AGIWUR19162;AGIWUR20337;AGIWUR21929;AGIWUR23261                                     |    |   |         |         |                |         |          |                      |             |
| CB4856                                                                              | HS | X | 8754576 | 8761580 | WBGene00019731 | M02D8.5 | M02D8.5  | 0.0142129348809679   | AGIWUR16000 |
| CB4856                                                                              | HS | X | 8763907 | 8766280 | WBGene00019727 | zig-12  | M02D8.1  | 0.232427528217544    | AGIWUR26789 |
| CB4856                                                                              | HS | X | 8778847 | 8784441 | WBGene00022811 | ZK721.4 | ZK721.4  | -0.145993156283275   | AGIWUR21245 |
| CB4856                                                                              | HS | X | 8784534 | 8787072 | WBGene00022810 | ZK721.3 | ZK721.3  | 0.000419566365657431 | AGIWUR959   |
| CB4856                                                                              | HS | X | 8789456 | 8790621 | WBGene00006764 | unc-27  | ZK721.2  | 0.0793388295113058   |             |
| AGIWUR8777;AGIWUR17569                                                              |    |   |         |         |                |         |          |                      |             |
| CB4856                                                                              | HS | X | 8792160 | 8796110 | WBGene00006477 | chup-1  | ZK721.1  | -0.10336269105057    |             |
| AGIWUR29227;AGIWUR32479                                                             |    |   |         |         |                |         |          |                      |             |
| CB4856                                                                              | HS | X | 8796545 | 8797835 | WBGene00019870 | R04E5.7 | R04E5.7  | -0.0291774256289967  |             |
| AGIWUR14421;AGIWUR36332;AGIWUR37318;AGIWUR40252;AGIWUR40895                         |    |   |         |         |                |         |          |                      |             |
| CB4856                                                                              | HS | X | 8801624 | 8806113 | WBGene00019871 | R04E5.8 | R04E5.8  | -0.132237359056327   |             |
| AGIWUR27571;AGIWUR40800                                                             |    |   |         |         |                |         |          |                      |             |
| CB4856                                                                              | HS | X | 8806174 | 8811142 | WBGene00019872 | R04E5.9 | R04E5.9  | 0.071687919910091    |             |
| AGIWUR7613;AGIWUR8776;AGIWUR11944;AGIWUR16588;AGIWUR24497;AGIWUR37816               |    |   |         |         |                |         |          |                      |             |
| CB4856                                                                              | HS | X | 8812143 | 8816805 | WBGene00019869 | cnm-2   | R04E5.2  | -0.141782698984155   | AGIWUR22058 |
| CB4856                                                                              | HS | X | 8820703 | 8824448 | WBGene00002057 | ifd-1   | R04E5.10 | 0.380066150270602    |             |

|                                                                        |    |   |         |         |                |          |          |                     |             |
|------------------------------------------------------------------------|----|---|---------|---------|----------------|----------|----------|---------------------|-------------|
| AGIWUR7275;AGIWUR21127                                                 |    |   |         |         |                |          |          |                     |             |
| CB4856                                                                 | HS | X | 8826627 | 8828540 | WBGene00016190 | C28G1.5  | C28G1.5  | 0.366911305284052   |             |
| AGIWUR27051;AGIWUR43751                                                |    |   |         |         |                |          |          |                     |             |
| CB4856                                                                 | HS | X | 8829920 | 8831262 | WBGene00016191 | C28G1.6  | C28G1.6  | 0.0733441315163716  | AGIWUR24667 |
| CB4856                                                                 | HS | X | 8831739 | 8835715 | WBGene00016188 | sec-15   | C28G1.3  | -0.0777215468232439 |             |
| AGIWUR2654;AGIWUR4425                                                  |    |   |         |         |                |          |          |                     |             |
| CB4856                                                                 | HS | X | 8836644 | 8837661 | WBGene00016187 | C28G1.2  | C28G1.2  | 0.0829952280292279  |             |
| AGIWUR6456;AGIWUR30481                                                 |    |   |         |         |                |          |          |                     |             |
| CB4856                                                                 | HS | X | 8847122 | 8848482 | WBGene00219376 | C28G1.10 | C28G1.10 | 0.0476197738720767  |             |
| AGIWUR42745                                                            |    |   |         |         |                |          |          |                     |             |
| CB4856                                                                 | HS | X | 8849137 | 8853621 | WBGene00016189 | C28G1.4  | C28G1.4  | -0.334437131310383  | AGIWUR32459 |
| CB4856                                                                 | HS | X | 8857056 | 8857954 | WBGene00015529 | C06E2.5  | C06E2.5  | 0.154747431131479   | AGIWUR40648 |
| CB4856                                                                 | HS | X | 8861258 | 8861650 | WBGene00044579 | C06E2.9  | C06E2.9  | -0.06752676607816   |             |
| AGIWUR7776;AGIWUR8306;AGIWUR12019;AGIWUR20105;AGIWUR24625              |    |   |         |         |                |          |          |                     |             |
| CB4856                                                                 | HS | X | 8866238 | 8866640 | WBGene00002092 | ins-9    | C06E2.8  | 0.0421109709688228  |             |
| AGIWUR17847;AGIWUR18385;AGIWUR22537;AGIWUR26370;AGIWUR28244            |    |   |         |         |                |          |          |                     |             |
| CB4856                                                                 | HS | X | 8867603 | 8869153 | WBGene00006717 | ubc-22   | C06E2.7  | 0.0693771652531954  | AGIWUR8878  |
| CB4856                                                                 | HS | X | 8869625 | 8871901 | WBGene00006716 | ubc-21   | C06E2.3  | 0.118906444347529   |             |
| AGIWUR2345;AGIWUR14287;AGIWUR40115                                     |    |   |         |         |                |          |          |                     |             |
| CB4856                                                                 | HS | X | 8872933 | 8874848 | WBGene00015527 | C06E2.1  | C06E2.1  | 0.112652212003853   | AGIWUR42187 |
| CB4856                                                                 | HS | X | 8879649 | 8880406 | WBGene00015528 | C06E2.2  | C06E2.2  | 0.0976442385735758  | AGIWUR44949 |
| CB4856                                                                 | HS | X | 8893129 | 8898517 | WBGene00015740 | C13E3.1  | C13E3.1  | 0.324004085465413   | AGIWUR22911 |
| CB4856                                                                 | HS | X | 8908050 | 8910837 | WBGene00017013 | ensh-1   | D1009.3  | 0.152723600239012   | AGIWUR6361  |
| CB4856                                                                 | HS | X | 8911293 | 8914261 | WBGene00000884 | cyn-8    | D1009.2  | 0.0833634106162293  |             |
| AGIWUR7443;AGIWUR10061;AGIWUR35701;AGIWUR36094;AGIWUR39431;AGIWUR39528 |    |   |         |         |                |          |          |                     |             |
| CB4856                                                                 | HS | X | 8917421 | 8919423 | WBGene00003752 | nlp-14   | D1009.4  | 0.051305176946661   | AGIWUR2900  |
| CB4856                                                                 | HS | X | 8931241 | 8939263 | WBGene00017012 | acs-22   | D1009.1  | -0.036862594380632  |             |
| AGIWUR4766;AGIWUR6135;AGIWUR9124;AGIWUR27367;AGIWUR32376               |    |   |         |         |                |          |          |                     |             |
| CB4856                                                                 | HS | X | 8939389 | 8940143 | WBGene00017014 | dylt-2   | D1009.5  | -0.0167989018719563 | AGIWUR21964 |
| CB4856                                                                 | HS | X | 8941139 | 8950978 | WBGene00017039 | trk-1    | D1073.1  | 0.109344477365485   |             |
| AGIWUR14010;AGIWUR16072;AGIWUR30714;AGIWUR32171                        |    |   |         |         |                |          |          |                     |             |
| CB4856                                                                 | HS | X | 8957616 | 8961170 | WBGene00016748 | aexr-3   | C48C5.3  | 0.488513093671305   | AGIWUR21382 |
| CB4856                                                                 | HS | X | 8980976 | 8985063 | WBGene00016747 | nmur-1   | C48C5.1  | -0.12054819886461   |             |
| AGIWUR14619;AGIWUR16262;AGIWUR27846                                    |    |   |         |         |                |          |          |                     |             |
| CB4856                                                                 | HS | X | 8988137 | 8991972 | WBGene00006672 | twk-18   | C24A3.6  | 0.246976448901567   | AGIWUR6794  |
| CB4856                                                                 | HS | X | 8992406 | 8994763 | WBGene00016034 | C24A3.4  | C24A3.4  | -0.0213113811104853 |             |
| AGIWUR3347;AGIWUR9135;AGIWUR17732;AGIWUR32265;AGIWUR35548;AGIWUR41716  |    |   |         |         |                |          |          |                     |             |
| CB4856                                                                 | HS | X | 8997479 | 8998909 | WBGene00016033 | C24A3.2  | C24A3.2  | 0.25786151708283    |             |
| AGIWUR13952;AGIWUR26014;AGIWUR28903                                    |    |   |         |         |                |          |          |                     |             |



|                                                                                                                                |    |   |         |         |                 |           |           |                     |             |
|--------------------------------------------------------------------------------------------------------------------------------|----|---|---------|---------|-----------------|-----------|-----------|---------------------|-------------|
| CB4856                                                                                                                         | HS | X | 9001239 | 9006053 | WBGene00016032  | C24A3.1   | C24A3.1   | 0.316024936031805   |             |
| AGIWUR17679;AGIWUR40654                                                                                                        |    |   |         |         |                 |           |           |                     |             |
| CB4856                                                                                                                         | HS | X | 9009780 | 9010457 | WBGene00044580  | C24A3.9   | C24A3.9   | 0.00190912598743775 |             |
| AGIWUR12458;AGIWUR20948;AGIWUR35053;AGIWUR43393                                                                                |    |   |         |         |                 |           |           |                     |             |
| CB4856                                                                                                                         | HS | X | 9015773 | 9016799 | WBGene00020790  | T25B6.4   | T25B6.4   | 0.149793572307811   | AGIWUR26573 |
| CB4856                                                                                                                         | HS | X | 9020588 | 9021755 | WBGene00020791  | T25B6.5   | T25B6.5   | 0.254495807064938   | AGIWUR13577 |
| CB4856                                                                                                                         | HS | X | 9021922 | 9022833 | WBGene00020792  | T25B6.6   | T25B6.6   | 0.12918164041163    | AGIWUR27292 |
| CB4856                                                                                                                         | HS | X | 9027604 | 9028285 | WBGene00020789  | T25B6.3   | T25B6.3   | 0.0908576639685634  | AGIWUR28443 |
| CB4856                                                                                                                         | HS | X | 9029478 | 9033955 | WBGene00004911  | snf-12    | T25B6.7   | 0.182197958603959   | AGIWUR10581 |
| CB4856                                                                                                                         | HS | X | 9034554 | 9038547 | WBGene00020788  | nep-22    | T25B6.2   | 0.0474789251255903  |             |
| AGIWUR30322;AGIWUR36231                                                                                                        |    |   |         |         |                 |           |           |                     |             |
| CB4856                                                                                                                         | HS | X | 9040416 | 9041058 | WBGene00020787  | T25B6.1   | T25B6.1   | -0.168547311276983  | AGIWUR13768 |
| CB4856                                                                                                                         | HS | X | 9046213 | 9054885 | WBGene00018567  | F47E1.3   | F47E1.3   | -0.18275198222814   | AGIWUR11460 |
| CB4856                                                                                                                         | HS | X | 9057652 | 9061860 | WBGene00018566  | F47E1.2   | F47E1.2   | -0.0063601339249626 |             |
| AGIWUR23020;AGIWUR28657;AGIWUR33267;AGIWUR44410                                                                                |    |   |         |         |                 |           |           |                     |             |
| CB4856                                                                                                                         | HS | X | 9062834 | 9066591 | WBGene00018568  | F47E1.4   | F47E1.4   | 0.299791450693622   | AGIWUR17318 |
| CB4856                                                                                                                         | HS | X | 9073800 | 9077724 | WBGene00018565  | F47E1.1   | F47E1.1   | 0.119719758319759   | AGIWUR3858  |
| CB4856                                                                                                                         | HS | X | 9078945 | 9113613 | WBGene00000100  | ajm-1     | C25A11.4  | -0.094773830864356  |             |
| AGIWUR1659;AGIWUR2586;AGIWUR3751;AGIWUR5431;AGIWUR5755;AGIWUR10369;AGIWUR18886;AGIWUR19046;AGIWUR28888;AGIWUR42397;AGIWUR43790 |    |   |         |         |                 |           |           |                     |             |
| CB4856                                                                                                                         | HS | X | 9114368 | 9116891 | WBGene00016087  | C25A11.2  | C25A11.2  | -0.0225926882737859 |             |
| AGIWUR42121                                                                                                                    |    |   |         |         |                 |           |           |                     |             |
| CB4856                                                                                                                         | HS | X | 9119774 | 9121687 | WBGene00016086  | C25A11.1  | C25A11.1  | -0.194767804830933  |             |
| AGIWUR3468;AGIWUR28257;AGIWUR32811                                                                                             |    |   |         |         |                 |           |           |                     |             |
| CB4856                                                                                                                         | HS | X | 9121884 | 9123505 | WBGene000219374 | C25A11.10 | C25A11.10 | -0.0440994200410509 |             |
| AGIWUR17757;AGIWUR19421;AGIWUR20739;AGIWUR22486                                                                                |    |   |         |         |                 |           |           |                     |             |
| CB4856                                                                                                                         | HS | X | 9137927 | 9145656 | WBGene00015263  | B0563.6   | B0563.6   | -0.0156907848004249 |             |
| AGIWUR6329;AGIWUR10984;AGIWUR13642;AGIWUR15404;AGIWUR20913;AGIWUR21716;AGIWUR24233;AGIWUR38920;AGIWUR40946                     |    |   |         |         |                 |           |           |                     |             |
| CB4856                                                                                                                         | HS | X | 9146174 | 9147526 | WBGene00015262  | B0563.5   | B0563.5   | 0.0760541806066106  |             |
| AGIWUR16724;AGIWUR26839;AGIWUR28523;AGIWUR29996;AGIWUR40814                                                                    |    |   |         |         |                 |           |           |                     |             |
| CB4856                                                                                                                         | HS | X | 9150694 | 9160646 | WBGene00006479  | tmbi-4    | B0563.4   | 0.0835011289141896  | AGIWUR35222 |
| CB4856                                                                                                                         | HS | X | 9163164 | 9166368 | WBGene00006637  | tsp-11    | B0563.2   | -0.127255657949435  | AGIWUR39443 |
| CB4856                                                                                                                         | HS | X | 9168539 | 9169022 | WBGene00044687  | B0563.9   | B0563.9   | -0.0161918127103782 |             |
| AGIWUR1912;AGIWUR5988;AGIWUR17520;AGIWUR27703;AGIWUR42134                                                                      |    |   |         |         |                 |           |           |                     |             |
| CB4856                                                                                                                         | HS | X | 9171562 | 9172204 | WBGene00015261  | B0563.1   | B0563.1   | -0.0512583724289879 | AGIWUR20274 |
| CB4856                                                                                                                         | HS | X | 9173685 | 9174490 | WBGene00015265  | B0563.8   | B0563.8   | -0.328038510009925  | AGIWUR20718 |
| CB4856                                                                                                                         | HS | X | 9180062 | 9180923 | WBGene00044581  | Y81B9A.4  | Y81B9A.4  | 0.0589828175606995  |             |
| AGIWUR2260;AGIWUR26510;AGIWUR39823                                                                                             |    |   |         |         |                 |           |           |                     |             |
| CB4856                                                                                                                         | HS | X | 9182440 | 9182947 | WBGene00022317  | Y81B9A.3  | Y81B9A.3  | 0.0161522292911478  |             |

AGIWUR13980;AGIWUR14706;AGIWUR18027;AGIWUR19056;AGIWUR43732  
 CB4856 HS X 9184163 9190717 WBGene00022316 Y81B9A.2 Y81B9A.2 -0.149021187972087  
 AGIWUR4160  
 CB4856 HS X 9192444 9194382 WBGene00022315 Y81B9A.1 Y81B9A.1 -0.194082382184892  
 AGIWUR1439  
 CB4856 HS X 9211144 9212321 WBGene00044743 crb-3 C35B8.4 0.00777226315825175  
 AGIWUR10376;AGIWUR17275;AGIWUR17825;AGIWUR28825;AGIWUR37521  
 CB4856 HS X 9213953 9216856 WBGene00016438 C35B8.3 C35B8.3 0.194664077468026 AGIWUR18703  
 CB4856 HS X 9216867 9232075 WBGene00006887 vav-1 C35B8.2 -0.0987927883210782  
 AGIWUR455;AGIWUR11041;AGIWUR31927  
 CB4856 HS X 9233638 9234618 WBGene00000748 col-175 C35B8.1 -0.381198489213489 AGIWUR29914  
 CB4856 HS X 9235103 9242223 WBGene00017580 lgc-4 F18G5.4 0.0160188192353736 AGIWUR4317  
 CB4856 HS X 9247007 9249103 WBGene00001674 gpa-12 F18G5.3 0.132458621377307 AGIWUR24993  
 CB4856 HS X 9251818 9255717 WBGene00003981 pes-8 F18G5.2 -0.143659443659605 AGIWUR23852  
 CB4856 HS X 9256008 9257456 WBGene00017581 F18G5.5 F18G5.5 0.061717444322106 AGIWUR27652  
 CB4856 HS X 9259852 9261066 WBGene00017579 F18G5.1 F18G5.1 0.0191952029877207 AGIWUR40631  
 CB4856 HS X 9262027 9264331 WBGene00017582 F18G5.6 F18G5.6 0.133067496938172  
 AGIWUR791;AGIWUR2708;AGIWUR11787;AGIWUR38307  
 CB4856 HS X 9268626 9270855 WBGene00015181 B0416.5 B0416.5 -0.10377838572923  
 AGIWUR2846;AGIWUR16098;AGIWUR34193;AGIWUR40626  
 CB4856 HS X 9278953 9279947 WBGene00015180 B0416.4 B0416.4 -0.156958465264546  
 AGIWUR25648;AGIWUR36314;AGIWUR39520  
 CB4856 HS X 9291651 9293366 WBGene00015179 B0416.3 B0416.3 0.127263955549486 AGIWUR3498  
 CB4856 HS X 9293664 9296622 WBGene00001638 gly-13 B0416.6 -0.100422774363121 AGIWUR12912  
 CB4856 HS X 9296947 9297934 WBGene00015182 B0416.7 B0416.7 0.263591490965841  
 AGIWUR5443;AGIWUR7853;AGIWUR15838;AGIWUR18976;AGIWUR19220;AGIWUR22464;AGIWUR31115;AGIWUR31167;AGIWUR35787;AGIWUR44988  
 CB4856 HS X 9299147 9300131 WBGene00015178 B0416.2 B0416.2 0.0529110624081177 AGIWUR43083  
 CB4856 HS X 9303724 9310439 WBGene00015177 tmc-2 B0416.1 0.162977073728566 AGIWUR21090  
 CB4856 HS X 9310625 9311341 WBGene00045261 H29C22.1 H29C22.1 -0.0407066544434649  
 AGIWUR12636;AGIWUR32509  
 CB4856 HS X 9312648 9314488 WBGene00044788 ttr-38 F35G8.2 -0.19023197313202  
 AGIWUR1546;AGIWUR7857;AGIWUR16234;AGIWUR24607  
 CB4856 HS X 9315436 9319180 WBGene00018067 npr-7 F35G8.1 -0.141769436347044 AGIWUR12994  
 CB4856 HS X 9331133 9336632 WBGene00020595 T20B5.2 T20B5.2 0.0709328540291789 AGIWUR5555  
 CB4856 HS X 9336819 9342970 WBGene00000161 apa-2 T20B5.1 -0.00948026183245254  
 AGIWUR7529;AGIWUR19739;AGIWUR28855;AGIWUR36115  
 CB4856 HS X 9343333 9347430 WBGene00020596 oga-1 T20B5.3 0.0293961321542939  
 AGIWUR5115;AGIWUR11833;AGIWUR13581;AGIWUR24006;AGIWUR40314;AGIWUR45209

|                                                                                                                                                                                                                                                        |    |   |         |         |                |          |          |                     |             |
|--------------------------------------------------------------------------------------------------------------------------------------------------------------------------------------------------------------------------------------------------------|----|---|---------|---------|----------------|----------|----------|---------------------|-------------|
| CB4856                                                                                                                                                                                                                                                 | HS | X | 9349276 | 9349890 | WBGene00001463 | flp-20   | E01H11.3 | 0.206404261661328   |             |
| AGIWUR17940                                                                                                                                                                                                                                            |    |   |         |         |                |          |          |                     |             |
| CB4856                                                                                                                                                                                                                                                 | HS | X | 9364818 | 9386035 | WBGene00004033 | pkc-2    | E01H11.1 | 0.00635961502441873 |             |
| AGIWUR4394;AGIWUR5483;AGIWUR5665;AGIWUR8696;AGIWUR9373;AGIWUR10115;AGIWUR11392;AGIWUR16641;AGIWUR18117;AGIWUR27326;AGIWUR30526;AGIWUR33176;AGIWUR34297;AGIWUR34365;AGIWUR35659;AGIWUR38093;AGIWUR40292;AGIWUR44936                                     |    |   |         |         |                |          |          |                     |             |
| CB4856                                                                                                                                                                                                                                                 | HS | X | 9387341 | 9389189 | WBGene00016009 | C23F12.4 | C23F12.4 | 0.0260484053975194  |             |
| AGIWUR5651                                                                                                                                                                                                                                             |    |   |         |         |                |          |          |                     |             |
| CB4856                                                                                                                                                                                                                                                 | HS | X | 9391645 | 9394702 | WBGene00016008 | C23F12.3 | C23F12.3 | 0.343443249782934   |             |
| AGIWUR22232                                                                                                                                                                                                                                            |    |   |         |         |                |          |          |                     |             |
| CB4856                                                                                                                                                                                                                                                 | HS | X | 9397701 | 9427246 | WBGene00016006 | fln-2    | C23F12.1 | -0.106529828916377  |             |
| AGIWUR2768;AGIWUR3524;AGIWUR4234;AGIWUR6327;AGIWUR11527;AGIWUR13067;AGIWUR19340;AGIWUR21140;AGIWUR21986;AGIWUR27693;AGIWUR28234;AGIWUR33002;AGIWUR33525;AGIWUR36069;AGIWUR40435                                                                        |    |   |         |         |                |          |          |                     |             |
| CB4856                                                                                                                                                                                                                                                 | HS | X | 9428431 | 9430424 | WBGene00007130 | B0272.4  | B0272.4  | -0.192659940027056  | AGIWUR26263 |
| CB4856                                                                                                                                                                                                                                                 | HS | X | 9431432 | 9432745 | WBGene00007129 | B0272.3  | B0272.3  | -0.19638985738208   | AGIWUR18153 |
| CB4856                                                                                                                                                                                                                                                 | HS | X | 9434452 | 9436893 | WBGene00006538 | tbb-4    | B0272.1  | -0.129368337038541  | AGIWUR39009 |
| CB4856                                                                                                                                                                                                                                                 | HS | X | 9440079 | 9441571 | WBGene00007128 | memb-1   | B0272.2  | -0.336033293541448  | AGIWUR29736 |
| CB4856                                                                                                                                                                                                                                                 | HS | X | 9446664 | 9447612 | WBGene00014140 | ZK899.1  | ZK899.1  | 0.14177397605394    | AGIWUR2353  |
| CB4856                                                                                                                                                                                                                                                 | HS | X | 9447861 | 9449399 | WBGene00014145 | ZK899.7  | ZK899.7  | 0.0485475933470996  |             |
| AGIWUR17130;AGIWUR28669;AGIWUR36863                                                                                                                                                                                                                    |    |   |         |         |                |          |          |                     |             |
| CB4856                                                                                                                                                                                                                                                 | HS | X | 9450225 | 9451994 | WBGene00014141 | ZK899.2  | ZK899.2  | 0.0706737800058992  | AGIWUR13325 |
| CB4856                                                                                                                                                                                                                                                 | HS | X | 9453959 | 9454660 | WBGene00014142 | ZK899.3  | ZK899.3  | -0.052473782280666  | AGIWUR1908  |
| CB4856                                                                                                                                                                                                                                                 | HS | X | 9455485 | 9458348 | WBGene00006534 | tba-8    | ZK899.4  | 0.0692936061686886  | AGIWUR42441 |
| CB4856                                                                                                                                                                                                                                                 | HS | X | 9459911 | 9460934 | WBGene00014143 | ZK899.5  | ZK899.5  | 0.0255711265490284  | AGIWUR26787 |
| CB4856                                                                                                                                                                                                                                                 | HS | X | 9463356 | 9464725 | WBGene00014144 | ZK899.6  | ZK899.6  | -0.184911931546662  | AGIWUR21764 |
| CB4856                                                                                                                                                                                                                                                 | HS | X | 9472469 | 9516440 | WBGene00001516 | gap-2    | ZK899.8  | -0.0377853606705099 |             |
| AGIWUR1390;AGIWUR6256;AGIWUR8578;AGIWUR9282;AGIWUR9686;AGIWUR16619;AGIWUR19702;AGIWUR20064;AGIWUR20762;AGIWUR20894;AGIWUR23198;AGIWUR23501;AGIWUR24911;AGIWUR25718;AGIWUR26474;AGIWUR27862;AGIWUR29312;AGIWUR30264;AGIWUR32349;AGIWUR35911;AGIWUR40375 |    |   |         |         |                |          |          |                     |             |
| CB4856                                                                                                                                                                                                                                                 | HS | X | 9516393 | 9517187 | WBGene00007407 | C07B5.2  | C07B5.2  | -0.137539328310341  | AGIWUR35949 |
| CB4856                                                                                                                                                                                                                                                 | HS | X | 9519022 | 9521486 | WBGene00007410 | C07B5.6  | C07B5.6  | -0.012924836053207  | AGIWUR16034 |
| CB4856                                                                                                                                                                                                                                                 | HS | X | 9522488 | 9523173 | WBGene00007408 | C07B5.3  | C07B5.3  | -0.188059709228222  | AGIWUR31308 |
| CB4856                                                                                                                                                                                                                                                 | HS | X | 9529533 | 9536631 | WBGene00007409 | C07B5.4  | C07B5.4  | 0.0256865226224869  |             |
| AGIWUR3621;AGIWUR11381;AGIWUR27991;AGIWUR28114;AGIWUR31629;AGIWUR35020;AGIWUR36150;AGIWUR43450                                                                                                                                                         |    |   |         |         |                |          |          |                     |             |
| CB4856                                                                                                                                                                                                                                                 | HS | X | 9539905 | 9542430 | WBGene00003828 | nuc-1    | C07B5.5  | -0.117507981817159  |             |
| AGIWUR8544;AGIWUR19630;AGIWUR27016                                                                                                                                                                                                                     |    |   |         |         |                |          |          |                     |             |
| CB4856                                                                                                                                                                                                                                                 | HS | X | 9543670 | 9560801 | WBGene00009888 | F49E2.5  | F49E2.5  | 0.0746150311128284  |             |
| AGIWUR1096;AGIWUR1611;AGIWUR2644;AGIWUR2838;AGIWUR7511;AGIWUR8364;AGIWUR10828;AGIWUR14219;AGIWUR16672;AGIWUR19009;AGIWUR21819;AGIWUR23167;AGIWUR25326;AGIWUR29705;AGIWUR30817;AGIWUR35031;AGIWUR35540;AGIWUR35753;AGIWUR35876;AGIWUR42913              |    |   |         |         |                |          |          |                     |             |

|                                                                                                |    |   |         |         |                |          |          |                     |             |
|------------------------------------------------------------------------------------------------|----|---|---------|---------|----------------|----------|----------|---------------------|-------------|
| CB4856                                                                                         | HS | X | 9561850 | 9565981 | WBGene00009885 | F49E2.1  | F49E2.1  | 0.149119169206816   |             |
| AGIWUR6116;AGIWUR6559;AGIWUR10854;AGIWUR20850;AGIWUR30883;AGIWUR39455;AGIWUR42055              |    |   |         |         |                |          |          |                     |             |
| CB4856                                                                                         | HS | X | 9567296 | 9573723 | WBGene00009886 | F49E2.2  | F49E2.2  | 0.316881773037185   | AGIWUR6164  |
| CB4856                                                                                         | HS | X | 9573741 | 9575866 | WBGene00009887 | glb-17   | F49E2.4  | 0.0634350519136864  |             |
| AGIWUR11201;AGIWUR15486;AGIWUR23651;AGIWUR27022;AGIWUR34920;AGIWUR45030                        |    |   |         |         |                |          |          |                     |             |
| CB4856                                                                                         | HS | X | 9584664 | 9586344 | WBGene00007516 | gpx-5    | C11E4.1  | -0.137262698491827  |             |
| AGIWUR26679;AGIWUR40806                                                                        |    |   |         |         |                |          |          |                     |             |
| CB4856                                                                                         | HS | X | 9587942 | 9588879 | WBGene00007517 | gpx-3    | C11E4.2  | 0.112982121327311   |             |
| AGIWUR13307;AGIWUR43368                                                                        |    |   |         |         |                |          |          |                     |             |
| CB4856                                                                                         | HS | X | 9589423 | 9595459 | WBGene00007518 | del-8    | C11E4.3  | 0.0809755246479362  | AGIWUR15310 |
| CB4856                                                                                         | HS | X | 9595770 | 9595902 | WBGene00201289 | C11E4.14 | C11E4.14 | 0.150153500164171   |             |
| AGIWUR2498                                                                                     |    |   |         |         |                |          |          |                     |             |
| CB4856                                                                                         | HS | X | 9610563 | 9617045 | WBGene00007520 | C11E4.6  | C11E4.6  | 0.1034064065244     | AGIWUR27647 |
| CB4856                                                                                         | HS | X | 9617219 | 9619122 | WBGene00007521 | C11E4.7  | C11E4.7  | 0.233112618975223   | AGIWUR9290  |
| CB4856                                                                                         | HS | X | 9623304 | 9624714 | WBGene00007522 | C11E4.8  | C11E4.8  | -0.128738698945508  | AGIWUR4440  |
| CB4856                                                                                         | HS | X | 9626135 | 9626849 | WBGene00009378 | F34H10.1 | F34H10.1 | -0.166483210597307  |             |
| AGIWUR24854                                                                                    |    |   |         |         |                |          |          |                     |             |
| CB4856                                                                                         | HS | X | 9630423 | 9630875 | WBGene00009379 | F34H10.2 | F34H10.2 | 0.21069839957638    |             |
| AGIWUR32767                                                                                    |    |   |         |         |                |          |          |                     |             |
| CB4856                                                                                         | HS | X | 9633284 | 9635647 | WBGene00009380 | F34H10.3 | F34H10.3 | 0.0329478356495869  |             |
| AGIWUR9257                                                                                     |    |   |         |         |                |          |          |                     |             |
| CB4856                                                                                         | HS | X | 9635693 | 9636884 | WBGene00009382 | F34H10.5 | F34H10.5 | 0.0249767376320627  |             |
| AGIWUR44097                                                                                    |    |   |         |         |                |          |          |                     |             |
| CB4856                                                                                         | HS | X | 9648532 | 9650928 | WBGene00009381 | F34H10.4 | F34H10.4 | -0.330119267322198  |             |
| AGIWUR38929                                                                                    |    |   |         |         |                |          |          |                     |             |
| CB4856                                                                                         | HS | X | 9650999 | 9653116 | WBGene00000085 | aex-2    | T14B1.2  | -0.0278761731992088 | AGIWUR10230 |
| CB4856                                                                                         | HS | X | 9664499 | 9668755 | WBGene00011763 | T14B1.1  | T14B1.1  | 0.0941055081884974  |             |
| AGIWUR14041;AGIWUR17060;AGIWUR21205;AGIWUR41237                                                |    |   |         |         |                |          |          |                     |             |
| CB4856                                                                                         | HS | X | 9675844 | 9680169 | WBGene00002067 | ifp-1    | C43C3.1  | 0.257203452017344   |             |
| AGIWUR39748;AGIWUR42431                                                                        |    |   |         |         |                |          |          |                     |             |
| CB4856                                                                                         | HS | X | 9690745 | 9696718 | WBGene00008065 | npr-18   | C43C3.2  | 0.177716225479645   | AGIWUR12539 |
| CB4856                                                                                         | HS | X | 9698678 | 9701679 | WBGene00001123 | dyf-7    | C43C3.3  | 0.0665614758228728  |             |
| AGIWUR6186;AGIWUR13488;AGIWUR37978;AGIWUR40328                                                 |    |   |         |         |                |          |          |                     |             |
| CB4856                                                                                         | HS | X | 9706926 | 9708563 | WBGene00008865 | F15G9.1  | F15G9.1  | 0.177474885550661   |             |
| AGIWUR2786;AGIWUR18819;AGIWUR20324;AGIWUR23067;AGIWUR27181;AGIWUR28533;AGIWUR42907;AGIWUR43564 |    |   |         |         |                |          |          |                     |             |
| CB4856                                                                                         | HS | X | 9708590 | 9713713 | WBGene00008866 | F15G9.2  | F15G9.2  | -0.0379444668130606 | AGIWUR38649 |
| CB4856                                                                                         | HS | X | 9717589 | 9753764 | WBGene00001863 | him-4    | F15G9.4  | 0.16916054571568    | AGIWUR31653 |
| CB4856                                                                                         | HS | X | 9757271 | 9759306 | WBGene00011642 | T09B9.1  | T09B9.1  | -0.183592339183843  |             |
| AGIWUR27426;AGIWUR32169                                                                        |    |   |         |         |                |          |          |                     |             |

|                                                                                                                                                                       |    |   |         |         |                |          |          |                           |             |
|-----------------------------------------------------------------------------------------------------------------------------------------------------------------------|----|---|---------|---------|----------------|----------|----------|---------------------------|-------------|
| CB4856                                                                                                                                                                | HS | X | 9759297 | 9761281 | WBGene00011644 | T09B9.3  | T09B9.3  | 0.0544541640282592        | AGIWUR17627 |
| CB4856                                                                                                                                                                | HS | X | 9761483 | 9764922 | WBGene00011643 | slc-17.9 |          | T09B9.2 0.190179618798341 |             |
| AGIWUR19015                                                                                                                                                           |    |   |         |         |                |          |          |                           |             |
| CB4856                                                                                                                                                                | HS | X | 9771697 | 9774352 | WBGene00011645 | T09B9.4  | T09B9.4  | -0.146991664861577        | AGIWUR6173  |
| CB4856                                                                                                                                                                | HS | X | 9777831 | 9780251 | WBGene00011646 | T09B9.5  | T09B9.5  | 0.18681416064272          | AGIWUR31885 |
| CB4856                                                                                                                                                                | HS | X | 9780375 | 9789275 | WBGene00009482 | F36G3.1  | F36G3.1  | 0.148550628970419         |             |
| AGIWUR802;AGIWUR15540;AGIWUR16093;AGIWUR37210;AGIWUR42245;AGIWUR44981                                                                                                 |    |   |         |         |                |          |          |                           |             |
| CB4856                                                                                                                                                                | HS | X | 9792407 | 9794273 | WBGene00009483 | F36G3.2  | F36G3.2  | 0.338035060398155         |             |
| AGIWUR11079;AGIWUR15033;AGIWUR31455                                                                                                                                   |    |   |         |         |                |          |          |                           |             |
| CB4856                                                                                                                                                                | HS | X | 9798839 | 9801038 | WBGene00009484 | F36G3.3  | F36G3.3  | -0.0109585826496179       | AGIWUR26906 |
| CB4856                                                                                                                                                                | HS | X | 9801091 | 9807662 | WBGene00009799 | lgc-47   | F47A4.1  | 0.0875547828098293        |             |
| AGIWUR528;AGIWUR6353;AGIWUR10171;AGIWUR29701                                                                                                                          |    |   |         |         |                |          |          |                           |             |
| CB4856                                                                                                                                                                | HS | X | 9810202 | 9822273 | WBGene00001081 | dpy-22   | F47A4.2  | 0.0732165170121881        | AGIWUR4384  |
| CB4856                                                                                                                                                                | HS | X | 9823752 | 9831249 | WBGene00009800 | rrc-1    | F47A4.3  | 0.155184057148064         | AGIWUR44440 |
| CB4856                                                                                                                                                                | HS | X | 9833352 | 9838039 | WBGene00009801 | ipla-2   | F47A4.5  | -0.0390508499266762       | AGIWUR8383  |
| CB4856                                                                                                                                                                | HS | X | 9847275 | 9849518 | WBGene00006881 | vab-15   | R07B1.1  | 0.136737897297534         | AGIWUR21372 |
| CB4856                                                                                                                                                                | HS | X | 9850209 | 9851375 | WBGene00002271 | lec-8    | R07B1.10 | 0.178251847274904         |             |
| AGIWUR25560                                                                                                                                                           |    |   |         |         |                |          |          |                           |             |
| CB4856                                                                                                                                                                | HS | X | 9852139 | 9852909 | WBGene00002270 | lec-7    | R07B1.2  | 0.0310377499297396        |             |
| AGIWUR5220;AGIWUR7200;AGIWUR12362;AGIWUR21935;AGIWUR22868;AGIWUR25023;AGIWUR25252;AGIWUR25319;AGIWUR27786;AGIWUR29709;AGIWUR37997;AGIWUR39507;AGIWUR43141;AGIWUR43727 |    |   |         |         |                |          |          |                           |             |
| CB4856                                                                                                                                                                | HS | X | 9856918 | 9858083 | WBGene00011082 | R07B1.11 | R07B1.11 | 0.0527137950692449        |             |
| AGIWUR37912                                                                                                                                                           |    |   |         |         |                |          |          |                           |             |
| CB4856                                                                                                                                                                | HS | X | 9858339 | 9861735 | WBGene00011076 | scav-5   | R07B1.3  | -0.00296825157550629      | AGIWUR27332 |
| CB4856                                                                                                                                                                | HS | X | 9861646 | 9862960 | WBGene00001784 | gst-36   | R07B1.4  | -0.137016006768276        | AGIWUR21795 |
| CB4856                                                                                                                                                                | HS | X | 9864069 | 9866531 | WBGene00011077 | R07B1.5  | R07B1.5  | 0.153398458545567         | AGIWUR7300  |
| CB4856                                                                                                                                                                | HS | X | 9866660 | 9867921 | WBGene00011078 | R07B1.6  | R07B1.6  | -0.282914768004433        | AGIWUR39602 |
| CB4856                                                                                                                                                                | HS | X | 9869836 | 9870792 | WBGene00138711 | R07B1.13 | R07B1.13 | 0.234785966989003         |             |
| AGIWUR34623                                                                                                                                                           |    |   |         |         |                |          |          |                           |             |
| CB4856                                                                                                                                                                | HS | X | 9870804 | 9872654 | WBGene00001608 | R07B1.8  | R07B1.8  | -0.194636451711025        | AGIWUR28705 |
| CB4856                                                                                                                                                                | HS | X | 9872884 | 9882212 | WBGene00011083 | glo-1    | R07B1.12 | -0.191654206584921        |             |
| AGIWUR13929;AGIWUR23649;AGIWUR27945                                                                                                                                   |    |   |         |         |                |          |          |                           |             |
| CB4856                                                                                                                                                                | HS | X | 9884278 | 9889704 | WBGene00003410 | mrp-4    | F21G4.2  | -0.285118793867547        | AGIWUR18807 |
| CB4856                                                                                                                                                                | HS | X | 9889618 | 9892328 | WBGene00009023 | F21G4.1  | F21G4.1  | -0.0129572729292198       |             |
| AGIWUR23391;AGIWUR33969                                                                                                                                               |    |   |         |         |                |          |          |                           |             |
| CB4856                                                                                                                                                                | HS | X | 9895144 | 9897057 | WBGene00009024 | F21G4.3  | F21G4.3  | -0.029937545194505        | AGIWUR28779 |
| CB4856                                                                                                                                                                | HS | X | 9897313 | 9899476 | WBGene00009025 | phf-34   | F21G4.4  | 0.0741680828215765        | AGIWUR3666  |
| CB4856                                                                                                                                                                | HS | X | 9906148 | 9908116 | WBGene00009026 | F21G4.5  | F21G4.5  | 0.307744473190298         | AGIWUR38645 |
| CB4856                                                                                                                                                                | HS | X | 9908794 | 9917448 | WBGene00009027 | F21G4.6  | F21G4.6  | 0.299231498442756         | AGIWUR1469  |

|                                                                                                                        |    |   |          |          |                |          |         |                     |             |
|------------------------------------------------------------------------------------------------------------------------|----|---|----------|----------|----------------|----------|---------|---------------------|-------------|
| CB4856                                                                                                                 | HS | X | 9919302  | 9920346  | WBGene00007648 | folr-1   | C17G1.1 | -0.0662990870296927 | AGIWUR26776 |
| CB4856                                                                                                                 | HS | X | 9921557  | 9922843  | WBGene00007649 | C17G1.2  | C17G1.2 | -0.179108617119523  | AGIWUR25661 |
| CB4856                                                                                                                 | HS | X | 9922910  | 9925173  | WBGene00007650 | ugt-23   | C17G1.3 | 0.0968371274550623  | AGIWUR28073 |
| CB4856                                                                                                                 | HS | X | 9925728  | 9931460  | WBGene00007651 | nra-3    | C17G1.4 | -0.111461027530648  | AGIWUR9330  |
| CB4856                                                                                                                 | HS | X | 9932371  | 9937133  | WBGene00023491 | tsp-21   | C17G1.8 | 0.0336762881405157  | AGIWUR15686 |
| CB4856                                                                                                                 | HS | X | 9941630  | 9944838  | WBGene00007652 | C17G1.5  | C17G1.5 | 0.0218083791714161  |             |
| AGIWUR28795;AGIWUR36756                                                                                                |    |   |          |          |                |          |         |                     |             |
| CB4856                                                                                                                 | HS | X | 9944844  | 9949060  | WBGene00003553 | nas-37   | C17G1.6 | 0.23273153563262    | AGIWUR4277  |
| CB4856                                                                                                                 | HS | X | 9952579  | 9954533  | WBGene00007653 | cys1-1   | C17G1.7 | -0.0636044506695619 | AGIWUR28040 |
| CB4856                                                                                                                 | HS | X | 9958899  | 9964747  | WBGene00013919 | ZC506.1  | ZC506.1 | -0.0134628334201046 |             |
| AGIWUR8213;AGIWUR11908;AGIWUR12251;AGIWUR17485;AGIWUR19519;AGIWUR24133;AGIWUR24710;AGIWUR28753;AGIWUR35520;AGIWUR35766 |    |   |          |          |                |          |         |                     |             |
| CB4856                                                                                                                 | HS | X | 9965495  | 9968584  | WBGene00013920 | pssy-1   | ZC506.3 | 0.142248416929846   | AGIWUR5773  |
| CB4856                                                                                                                 | HS | X | 9968517  | 9976392  | WBGene00003232 | mg1-1    | ZC506.4 | 0.238023545159672   | AGIWUR6179  |
| CB4856                                                                                                                 | HS | X | 9982402  | 9985005  | WBGene00008954 | F19C6.5  | F19C6.5 | -0.0856855024209455 | AGIWUR12405 |
| CB4856                                                                                                                 | HS | X | 9991255  | 9999178  | WBGene00001708 | grk-1    | F19C6.1 | -0.155561479603604  |             |
| AGIWUR3423;AGIWUR6594;AGIWUR9252;AGIWUR19484;AGIWUR28775;AGIWUR30119;AGIWUR30987;AGIWUR31580;AGIWUR34424;AGIWUR36707   |    |   |          |          |                |          |         |                     |             |
| CB4856                                                                                                                 | HS | X | 10000935 | 10005408 | WBGene00008951 | F19C6.2  | F19C6.2 | 0.0128298907405267  |             |
| AGIWUR14774;AGIWUR18317;AGIWUR21208;AGIWUR23874;AGIWUR24789;AGIWUR25351                                                |    |   |          |          |                |          |         |                     |             |
| CB4856                                                                                                                 | HS | X | 10005733 | 10008755 | WBGene00008952 | F19C6.3  | F19C6.3 | 0.0505951087557044  |             |
| AGIWUR9397                                                                                                             |    |   |          |          |                |          |         |                     |             |
| CB4856                                                                                                                 | HS | X | 10015045 | 10018025 | WBGene00008953 | F19C6.4  | F19C6.4 | 0.122772478185057   |             |
| AGIWUR11952;AGIWUR20470;AGIWUR31977                                                                                    |    |   |          |          |                |          |         |                     |             |
| CB4856                                                                                                                 | HS | X | 10018046 | 10022304 | WBGene00009645 | F42G10.1 |         | F42G10.1            |             |
| 0.147174528593368 AGIWUR7303                                                                                           |    |   |          |          |                |          |         |                     |             |
| CB4856                                                                                                                 | HS | X | 10027856 | 10030130 | WBGene00003368 | mkk-4    |         | F42G10.2            |             |
| -0.0315009253151244 AGIWUR7431;AGIWUR19589                                                                             |    |   |          |          |                |          |         |                     |             |
| CB4856                                                                                                                 | HS | X | 10031088 | 10033283 | WBGene00012162 | sek-6    |         | VZC374L.1           |             |
| 0.0926162872895313 AGIWUR30961                                                                                         |    |   |          |          |                |          |         |                     |             |
| CB4856                                                                                                                 | HS | X | 10034836 | 10047417 | WBGene00013872 | ZC374.2  | ZC374.2 | 0.0844539555562367  |             |
| AGIWUR28487                                                                                                            |    |   |          |          |                |          |         |                     |             |
| CB4856                                                                                                                 | HS | X | 10049460 | 10052481 | WBGene00013871 | gnrr-3   | ZC374.1 | 0.0685815813291013  |             |
| AGIWUR25668                                                                                                            |    |   |          |          |                |          |         |                     |             |
| CB4856                                                                                                                 | HS | X | 10054281 | 10057524 | WBGene00013866 | cbs-1    | ZC373.1 | 0.0959692973538715  |             |
| AGIWUR2325                                                                                                             |    |   |          |          |                |          |         |                     |             |
| CB4856                                                                                                                 | HS | X | 10057925 | 10058437 | WBGene00013867 | ZC373.2  | ZC373.2 | -0.0836016983269374 |             |
| AGIWUR24519                                                                                                            |    |   |          |          |                |          |         |                     |             |
| CB4856                                                                                                                 | HS | X | 10060525 | 10061681 | WBGene00013868 | ZC373.3  | ZC373.3 | 0.0205622502939899  |             |

|                                                                                                                                            |   |                                                                        |          |                |          |          |                     |  |
|--------------------------------------------------------------------------------------------------------------------------------------------|---|------------------------------------------------------------------------|----------|----------------|----------|----------|---------------------|--|
| AGIWUR8982                                                                                                                                 |   |                                                                        |          |                |          |          |                     |  |
| CB4856 HS                                                                                                                                  | X | 10062451                                                               | 10069783 | WBGene00013869 | mlck-1   | ZC373.4  | -0.0726720129440608 |  |
| AGIWUR28216                                                                                                                                |   |                                                                        |          |                |          |          |                     |  |
| CB4856 HS                                                                                                                                  | X | 10072507                                                               | 10074391 | WBGene00013870 | ZC373.5  | ZC373.5  |                     |  |
| -0.00437121360961612                                                                                                                       |   | AGIWUR835;AGIWUR27101;AGIWUR42518;AGIWUR42861                          |          |                |          |          |                     |  |
| CB4856 HS                                                                                                                                  | X | 10075288                                                               | 10076357 | WBGene00000930 | dao-4    | ZC373.6  | 0.345687379842422   |  |
| AGIWUR28509                                                                                                                                |   |                                                                        |          |                |          |          |                     |  |
| CB4856 HS                                                                                                                                  | X | 10084627                                                               | 10104252 | WBGene00012326 | W07E11.1 | W07E11.1 |                     |  |
| 0.00641079869846717                                                                                                                        |   | AGIWUR4175;AGIWUR11508                                                 |          |                |          |          |                     |  |
| CB4856 HS                                                                                                                                  | X | 10104612                                                               | 10125483 | WBGene00006792 | unc-58   | T06H11.1 |                     |  |
| 0.321129293379214                                                                                                                          |   | AGIWUR26360                                                            |          |                |          |          |                     |  |
| CB4856 HS                                                                                                                                  | X | 10129588                                                               | 10130267 | WBGene00011552 | T06H11.2 | T06H11.2 |                     |  |
| 0.0864643727191492                                                                                                                         |   | AGIWUR38332                                                            |          |                |          |          |                     |  |
| CB4856 HS                                                                                                                                  | X | 10136129                                                               | 10138620 | WBGene00003384 | moc-1    | T06H11.4 |                     |  |
| -0.203762672771063                                                                                                                         |   | AGIWUR25632                                                            |          |                |          |          |                     |  |
| CB4856 HS                                                                                                                                  | X | 10139374                                                               | 10142013 | WBGene00008602 | oac-14   | F09B9.1  | -0.0157466699032307 |  |
| AGIWUR6547;AGIWUR23375;AGIWUR30796;AGIWUR39301                                                                                             |   |                                                                        |          |                |          |          |                     |  |
| CB4856 HS                                                                                                                                  | X | 10146889                                                               | 10153142 | WBGene00006839 | unc-115  | F09B9.2  | -0.0458054379696629 |  |
| AGIWUR531;AGIWUR1683;AGIWUR2406;AGIWUR8737;AGIWUR14699;AGIWUR17750;AGIWUR18007;AGIWUR32621;AGIWUR35554;AGIWUR37555;AGIWUR37856;AGIWUR38833 |   |                                                                        |          |                |          |          |                     |  |
| CB4856 HS                                                                                                                                  | X | 10154821                                                               | 10156856 | WBGene00008604 | F09B9.5  | F09B9.5  | 0.119366419186228   |  |
| AGIWUR13866;AGIWUR15513;AGIWUR24575                                                                                                        |   |                                                                        |          |                |          |          |                     |  |
| CB4856 HS                                                                                                                                  | X | 10156858                                                               | 10160438 | WBGene00001331 | erd-2    | F09B9.3  | 0.130381489670672   |  |
| AGIWUR12862                                                                                                                                |   |                                                                        |          |                |          |          |                     |  |
| CB4856 HS                                                                                                                                  | X | 10160631                                                               | 10161809 | WBGene00008603 | F09B9.4  | F09B9.4  | 0.0532815429064151  |  |
| AGIWUR18927                                                                                                                                |   |                                                                        |          |                |          |          |                     |  |
| CB4856 HS                                                                                                                                  | X | 10167096                                                               | 10171668 | WBGene00007396 | tiar-3   | C07A4.1  | 0.0648385382343104  |  |
| AGIWUR7064                                                                                                                                 |   |                                                                        |          |                |          |          |                     |  |
| CB4856 HS                                                                                                                                  | X | 10172326                                                               | 10174185 | WBGene00007397 | C07A4.2  | C07A4.2  | 0.0400152785460071  |  |
| AGIWUR12417                                                                                                                                |   |                                                                        |          |                |          |          |                     |  |
| CB4856 HS                                                                                                                                  | X | 10174985                                                               | 10175896 | WBGene00007398 | C07A4.3  | C07A4.3  | 0.15520336426059    |  |
| AGIWUR13464                                                                                                                                |   |                                                                        |          |                |          |          |                     |  |
| CB4856 HS                                                                                                                                  | X | 10177237                                                               | 10180662 | WBGene00008998 | ncs-4    | F21A10.1 |                     |  |
| -0.00133696330908784                                                                                                                       |   | AGIWUR31188                                                            |          |                |          |          |                     |  |
| CB4856 HS                                                                                                                                  | X | 10180953                                                               | 10194377 | WBGene00008999 | myrf-2   | F21A10.2 |                     |  |
| -0.172842795258227                                                                                                                         |   | AGIWUR8406;AGIWUR20315;AGIWUR22227;AGIWUR36013;AGIWUR42903;AGIWUR43892 |          |                |          |          |                     |  |
| CB4856 HS                                                                                                                                  | X | 10197706                                                               | 10200407 | WBGene00009674 | nucb-1   | F44A6.1  | -0.300516536051614  |  |
| AGIWUR17889;AGIWUR21581                                                                                                                    |   |                                                                        |          |                |          |          |                     |  |
| CB4856 HS                                                                                                                                  | X | 10201329                                                               | 10205433 | WBGene00004786 | sex-1    | F44A6.2  | -0.300010892755431  |  |

|                                                                |             |          |                |          |          |                     |  |  |
|----------------------------------------------------------------|-------------|----------|----------------|----------|----------|---------------------|--|--|
| AGIWUR14694; AGIWUR24896; AGIWUR30249                          |             |          |                |          |          |                     |  |  |
| CB4856 HS X                                                    | 10212771    | 10214165 | WBGene00009675 | F44A6.3  | F44A6.3  | 0.267179372609947   |  |  |
| AGIWUR25082                                                    |             |          |                |          |          |                     |  |  |
| CB4856 HS X                                                    | 10214443    | 10215495 | WBGene00009676 | F44A6.4  | F44A6.4  | 0.145636013381459   |  |  |
| AGIWUR34767                                                    |             |          |                |          |          |                     |  |  |
| CB4856 HS X                                                    | 10217310    | 10218760 | WBGene00009677 | F44A6.5  | F44A6.5  | 0.195650151912304   |  |  |
| AGIWUR29850                                                    |             |          |                |          |          |                     |  |  |
| CB4856 HS X                                                    | 10220644    | 10228137 | WBGene00007593 | C14H10.3 |          | C14H10.3            |  |  |
| 0.265301974850324                                              | AGIWUR41483 |          |                |          |          |                     |  |  |
| CB4856 HS X                                                    | 10233739    | 10236944 | WBGene00007591 | zipt-13  | C14H10.1 |                     |  |  |
| -0.0175079354290766                                            | AGIWUR24523 |          |                |          |          |                     |  |  |
| CB4856 HS X                                                    | 10239805    | 10241039 | WBGene00006135 | str-74   | C14H10.4 |                     |  |  |
| 0.0563828435851228                                             | AGIWUR42696 |          |                |          |          |                     |  |  |
| CB4856 HS X                                                    | 10242325    | 10252879 | WBGene00007592 | C14H10.2 |          | C14H10.2            |  |  |
| -0.0849620829179027                                            | AGIWUR33394 |          |                |          |          |                     |  |  |
| CB4856 HS X                                                    | 10258733    | 10260135 | WBGene00007861 | C32A9.1  | C32A9.1  | -0.14225567567602   |  |  |
| AGIWUR8449; AGIWUR16047; AGIWUR35637                           |             |          |                |          |          |                     |  |  |
| CB4856 HS X                                                    | 10273692    | 10278261 | WBGene00009618 | F41E7.2  | F41E7.2  | 0.0416535966269569  |  |  |
| AGIWUR12392; AGIWUR25610; AGIWUR37597                          |             |          |                |          |          |                     |  |  |
| CB4856 HS X                                                    | 10279599    | 10282842 | WBGene00009617 | F41E7.1  | F41E7.1  | 0.181953201181219   |  |  |
| AGIWUR907                                                      |             |          |                |          |          |                     |  |  |
| CB4856 HS X                                                    | 10282825    | 10285734 | WBGene00009619 | npr-6    | F41E7.3  | 0.246663612375023   |  |  |
| AGIWUR28581                                                    |             |          |                |          |          |                     |  |  |
| CB4856 HS X                                                    | 10302622    | 10303143 | WBGene00009620 | fip-5    | F41E7.4  | -0.217101133147754  |  |  |
| AGIWUR13840                                                    |             |          |                |          |          |                     |  |  |
| CB4856 HS X                                                    | 10304507    | 10304947 | WBGene00009621 | fipr-21  | F41E7.5  | 0.66500187911106    |  |  |
| AGIWUR20588                                                    |             |          |                |          |          |                     |  |  |
| CB4856 HS X                                                    | 10306595    | 10306951 | WBGene00009624 | cnc-8    | F41E7.8  | 0.0926484648954364  |  |  |
| AGIWUR9182; AGIWUR11541; AGIWUR16122; AGIWUR19341; AGIWUR43020 |             |          |                |          |          |                     |  |  |
| CB4856 HS X                                                    | 10307137    | 10310466 | WBGene00009622 | F41E7.6  | F41E7.6  | 0.0985531480574817  |  |  |
| AGIWUR756                                                      |             |          |                |          |          |                     |  |  |
| CB4856 HS X                                                    | 10307873    | 10312182 | WBGene00009623 | F41E7.7  | F41E7.7  | 0.0633358950187546  |  |  |
| AGIWUR28863                                                    |             |          |                |          |          |                     |  |  |
| CB4856 HS X                                                    | 10312756    | 10316005 | WBGene00009625 | F41E7.9  | F41E7.9  | -0.0808957988913539 |  |  |
| AGIWUR37898                                                    |             |          |                |          |          |                     |  |  |
| CB4856 HS X                                                    | 10317722    | 10321857 | WBGene00011107 | R07E3.6  | R07E3.6  | -0.209038898871265  |  |  |
| AGIWUR11980                                                    |             |          |                |          |          |                     |  |  |
| CB4856 HS X                                                    | 10324183    | 10327642 | WBGene00011106 | acl-5    | R07E3.5  | 0.216036443508127   |  |  |
| AGIWUR7281                                                     |             |          |                |          |          |                     |  |  |



|                                                                                    |   |                                    |          |                |           |           |                     |
|------------------------------------------------------------------------------------|---|------------------------------------|----------|----------------|-----------|-----------|---------------------|
| CB4856 HS                                                                          | X | 10330547                           | 10331900 | WBGene00011105 | R07E3.4   | R07E3.4   | -0.0390559946399858 |
| AGIWUR25740                                                                        |   |                                    |          |                |           |           |                     |
| CB4856 HS                                                                          | X | 10333861                           | 10338200 | WBGene00011104 | cut-5     | R07E3.3   | 0.0958156061526418  |
| AGIWUR41403                                                                        |   |                                    |          |                |           |           |                     |
| CB4856 HS                                                                          | X | 10339225                           | 10341161 | WBGene00011102 | R07E3.1   | R07E3.1   | -0.0221017712988143 |
| AGIWUR22504;AGIWUR33913;AGIWUR44194                                                |   |                                    |          |                |           |           |                     |
| CB4856 HS                                                                          | X | 10341732                           | 10344080 | WBGene00011108 | R07E3.7   | R07E3.7   |                     |
| -0.00160694809592155                                                               |   | AGIWUR39580                        |          |                |           |           |                     |
| CB4856 HS                                                                          | X | 10358476                           | 10360550 | WBGene00013028 | efhc-1    | Y49A10A.1 |                     |
| 0.256806176467731                                                                  |   | AGIWUR39558                        |          |                |           |           |                     |
| CB4856 HS                                                                          | X | 10371077                           | 10372664 | WBGene00044949 | Y49A10A.2 | Y49A10A.2 |                     |
| -0.219051615729744                                                                 |   | AGIWUR32528;AGIWUR34902            |          |                |           |           |                     |
| CB4856 HS                                                                          | X | 10373235                           | 10377832 | WBGene00004375 | rme-4     | F46F6.1   | 0.0633941571226622  |
| AGIWUR4542;AGIWUR14043;AGIWUR15056                                                 |   |                                    |          |                |           |           |                     |
| CB4856 HS                                                                          | X | 10379693                           | 10386508 | WBGene00001122 | dyf-6     | F46F6.4   | 0.155267553275483   |
| AGIWUR18040;AGIWUR18179                                                            |   |                                    |          |                |           |           |                     |
| CB4856 HS                                                                          | X | 10397243                           | 10402573 | WBGene00009793 | pkn-1     | F46F6.2   | -0.0662768782037126 |
| AGIWUR21969                                                                        |   |                                    |          |                |           |           |                     |
| CB4856 HS                                                                          | X | 10402526                           | 10406303 | WBGene00001804 | gur-3     | ZC504.5   | 0.275837162298433   |
| AGIWUR5039                                                                         |   |                                    |          |                |           |           |                     |
| CB4856 HS                                                                          | X | 10407150                           | 10409774 | WBGene00013916 | ZC504.1   | ZC504.1   | -0.111612288166109  |
| AGIWUR13279                                                                        |   |                                    |          |                |           |           |                     |
| CB4856 HS                                                                          | X | 10412725                           | 10416630 | WBGene00000047 | acr-8     | ZC504.2   | 0.361620325702106   |
| AGIWUR5108                                                                         |   |                                    |          |                |           |           |                     |
| CB4856 HS                                                                          | X | 10416639                           | 10419764 | WBGene00013917 | cdk-11.2  | ZC504.3   |                     |
| 0.0653313258943715                                                                 |   | AGIWUR41614                        |          |                |           |           |                     |
| CB4856 HS                                                                          | X | 10421655                           | 10428650 | WBGene00003247 | mig-15    | ZC504.4   | 0.00497606520178451 |
| AGIWUR3064;AGIWUR23047;AGIWUR34681;AGIWUR36617;AGIWUR37004;AGIWUR40485;AGIWUR41703 |   |                                    |          |                |           |           |                     |
| CB4856 HS                                                                          | X | 10444169                           | 10444674 | WBGene00008023 | C39B10.3  | C39B10.3  |                     |
| 0.240372505622654                                                                  |   | AGIWUR10562                        |          |                |           |           |                     |
| CB4856 HS                                                                          | X | 10447351                           | 10447755 | WBGene00008025 | C39B10.5  | C39B10.5  |                     |
| -0.116100546830753                                                                 |   | AGIWUR17118                        |          |                |           |           |                     |
| CB4856 HS                                                                          | X | 10454309                           | 10460341 | WBGene00008022 | lgc-41    | C39B10.2  |                     |
| 0.0356420369624626                                                                 |   | AGIWUR7852;AGIWUR20309;AGIWUR22317 |          |                |           |           |                     |
| CB4856 HS                                                                          | X | 10460546                           | 10463580 | WBGene00008021 | C39B10.1  | C39B10.1  |                     |
| -0.0714442004352218                                                                |   | AGIWUR34897                        |          |                |           |           |                     |
| CB4856 HS                                                                          | X | 10475527                           | 10475959 | WBGene00001252 | elt-4     | C39B10.6  |                     |
| 0.115263769076765                                                                  |   | AGIWUR17014                        |          |                |           |           |                     |
| CB4856 HS                                                                          | X | 10481240                           | 10483446 | WBGene00001250 | elt-2     | C33D3.1   | 0.0855063799651283  |



|                                                                                                            |    |   |                        |          |                |          |          |                     |
|------------------------------------------------------------------------------------------------------------|----|---|------------------------|----------|----------------|----------|----------|---------------------|
| CB4856                                                                                                     | HS | X | 10626518               | 10628807 | WBGene00010902 | M79.2    | M79.2    | 0.147216821798901   |
| AGIWUR502;AGIWUR38051                                                                                      |    |   |                        |          |                |          |          |                     |
| CB4856                                                                                                     | HS | X | 10644409               | 10666874 | WBGene00000908 | daf-12   | F11A1.3  | 0.09705648741713    |
| AGIWUR11162;AGIWUR39761;AGIWUR45021                                                                        |    |   |                        |          |                |          |          |                     |
| CB4856                                                                                                     | HS | X | 10668280               | 10674293 | WBGene00008746 | F13E6.2  | F13E6.2  | -0.132655637536128  |
| AGIWUR25415                                                                                                |    |   |                        |          |                |          |          |                     |
| CB4856                                                                                                     | HS | X | 10675706               | 10677109 | WBGene00008745 | F13E6.1  | F13E6.1  | 0.0725930847048168  |
| AGIWUR32239                                                                                                |    |   |                        |          |                |          |          |                     |
| CB4856                                                                                                     | HS | X | 10681998               | 10682963 | WBGene00008747 | phf-31   | F13E6.3  | -0.111716827643188  |
| AGIWUR20577                                                                                                |    |   |                        |          |                |          |          |                     |
| CB4856                                                                                                     | HS | X | 10691943               | 10694461 | WBGene00008748 | yap-1    | F13E6.4  | -0.016719953808142  |
| AGIWUR873;AGIWUR11673;AGIWUR18252;AGIWUR23825;AGIWUR32484                                                  |    |   |                        |          |                |          |          |                     |
| CB4856                                                                                                     | HS | X | 10695312               | 10697894 | WBGene00008749 | F13E6.5  | F13E6.5  | 0.254862077093915   |
| AGIWUR22704                                                                                                |    |   |                        |          |                |          |          |                     |
| CB4856                                                                                                     | HS | X | 10697854               | 10711869 | WBGene00006468 | rhgf-1   | F13E6.6  | -0.0707435284857354 |
| AGIWUR32532                                                                                                |    |   |                        |          |                |          |          |                     |
| CB4856                                                                                                     | HS | X | 10716318               | 10717173 | WBGene00011317 | T01C1.4  | T01C1.4  | 0.0609042703229612  |
| AGIWUR36558                                                                                                |    |   |                        |          |                |          |          |                     |
| CB4856                                                                                                     | HS | X | 10719554               | 10722054 | WBGene00011315 | mbr-1    | T01C1.2  | 0.0217301525504037  |
| AGIWUR17126;AGIWUR42959                                                                                    |    |   |                        |          |                |          |          |                     |
| CB4856                                                                                                     | HS | X | 10734326               | 10744355 | WBGene00001202 | egl-36   | R07A4.1  | -0.018784761903694  |
| AGIWUR14098                                                                                                |    |   |                        |          |                |          |          |                     |
| CB4856                                                                                                     | HS | X | 10744356               | 10746488 | WBGene00011073 | R07A4.2  | R07A4.2  | -0.172177526976537  |
| AGIWUR21532                                                                                                |    |   |                        |          |                |          |          |                     |
| CB4856                                                                                                     | HS | X | 10751666               | 10757708 | WBGene00011075 | R07A4.4  | R07A4.4  | 0.0954199725824143  |
| AGIWUR16492                                                                                                |    |   |                        |          |                |          |          |                     |
| CB4856                                                                                                     | HS | X | 10754917               | 10758140 | WBGene00011074 | R07A4.3  | R07A4.3  | -0.165502207180646  |
| AGIWUR35068                                                                                                |    |   |                        |          |                |          |          |                     |
| CB4856                                                                                                     | HS | X | 10769288               | 10782973 | WBGene00004862 | sma-9    | T05A10.1 |                     |
| -0.139607091141448                                                                                         |    |   |                        |          |                |          |          |                     |
| AGIWUR7667;AGIWUR8425;AGIWUR17994;AGIWUR18754;AGIWUR19109;AGIWUR26054;AGIWUR34116;AGIWUR34810;AGIWUR44751  |    |   |                        |          |                |          |          |                     |
| CB4856                                                                                                     | HS | X | 10782996               | 10783907 | WBGene00000525 | clc-4    | T05A10.2 |                     |
| -0.398858958895742                                                                                         |    |   |                        |          |                |          |          |                     |
|                                                                                                            |    |   | AGIWUR26254            |          |                |          |          |                     |
| CB4856                                                                                                     | HS | X | 10787503               | 10789700 | WBGene00011460 | ttr-14   | T05A10.3 |                     |
| -0.16026802231595                                                                                          |    |   |                        |          |                |          |          |                     |
| AGIWUR7785;AGIWUR26286;AGIWUR27583;AGIWUR27923;AGIWUR30927;AGIWUR33316;AGIWUR35945;AGIWUR42650;AGIWUR43068 |    |   |                        |          |                |          |          |                     |
| CB4856                                                                                                     | HS | X | 10789628               | 10792535 | WBGene00011462 | vap-2    | T05A10.5 |                     |
| 0.329826801340854                                                                                          |    |   |                        |          |                |          |          |                     |
|                                                                                                            |    |   | AGIWUR4601;AGIWUR31583 |          |                |          |          |                     |
| CB4856                                                                                                     | HS | X | 10792903               | 10794734 | WBGene00011463 | T05A10.6 | T05A10.6 |                     |

|                                                                                              |                                                                     |                         |                |          |                             |
|----------------------------------------------------------------------------------------------|---------------------------------------------------------------------|-------------------------|----------------|----------|-----------------------------|
| 0.113211274589132                                                                            |                                                                     | AGIWUR15837;AGIWUR26641 |                |          |                             |
| CB4856 HS X                                                                                  | 10794852                                                            | 10815004                | WBGene00004036 | plc-1    | F31B12.1                    |
| 0.12889741914722                                                                             | AGIWUR7963;AGIWUR11662;AGIWUR20227;AGIWUR26127;AGIWUR32796          |                         |                |          |                             |
| CB4856 HS X                                                                                  | 10816968                                                            | 10838650                | WBGene00001495 | frm-9    | F31B12.3                    |
| 0.0812440107950145                                                                           | AGIWUR41268;AGIWUR44578                                             |                         |                |          |                             |
| CB4856 HS X                                                                                  | 10842658                                                            | 10844674                | WBGene00007317 | C05A9.2  | C05A9.2 0.0349560407552971  |
| AGIWUR7259                                                                                   |                                                                     |                         |                |          |                             |
| CB4856 HS X                                                                                  | 10854320                                                            | 10859297                | WBGene00003999 | pgp-5    | C05A9.1 0.0162366993904168  |
| AGIWUR16649;AGIWUR20377;AGIWUR39244                                                          |                                                                     |                         |                |          |                             |
| CB4856 HS X                                                                                  | 10859351                                                            | 10864422                | WBGene00004002 | pgp-8    | T21E8.3 0.116815411336396   |
| AGIWUR37678                                                                                  |                                                                     |                         |                |          |                             |
| CB4856 HS X                                                                                  | 10871181                                                            | 10877465                | WBGene00004000 | pgp-6    | T21E8.1 -0.0145252986734334 |
| AGIWUR27854                                                                                  |                                                                     |                         |                |          |                             |
| CB4856 HS X                                                                                  | 10883567                                                            | 10884508                | WBGene00164972 | T21E8.7  | T21E8.7 0.00424213519987937 |
| AGIWUR1323                                                                                   |                                                                     |                         |                |          |                             |
| CB4856 HS X                                                                                  | 10886278                                                            | 10887052                | WBGene00011903 | T21E8.5  | T21E8.5 -0.0740549192130331 |
| AGIWUR38749                                                                                  |                                                                     |                         |                |          |                             |
| CB4856 HS X                                                                                  | 10888506                                                            | 10889028                | WBGene00009817 | F47B10.6 | F47B10.6                    |
| 0.061590137188035                                                                            | AGIWUR35274                                                         |                         |                |          |                             |
| CB4856 HS X                                                                                  | 10889041                                                            | 10890556                | WBGene00009816 | F47B10.5 | F47B10.5                    |
| 0.264340441640513                                                                            | AGIWUR1819;AGIWUR3353;AGIWUR3360;AGIWUR9921;AGIWUR11152;AGIWUR16718 |                         |                |          |                             |
| CB4856 HS X                                                                                  | 10891295                                                            | 10891707                | WBGene00009815 | F47B10.4 | F47B10.4                    |
| 0.105776757800257                                                                            | AGIWUR4612                                                          |                         |                |          |                             |
| CB4856 HS X                                                                                  | 10892190                                                            | 10893569                | WBGene00009814 | F47B10.3 | F47B10.3                    |
| -0.108877703515684                                                                           | AGIWUR42103                                                         |                         |                |          |                             |
| CB4856 HS X                                                                                  | 10893567                                                            | 10896598                | WBGene00009813 | haly-1   | F47B10.2                    |
| -0.0591544148226006                                                                          | AGIWUR18039;AGIWUR18232;AGIWUR21187;AGIWUR30251;AGIWUR42699         |                         |                |          |                             |
| CB4856 HS X                                                                                  | 10897678                                                            | 10900114                | WBGene00009812 | suca-1   | F47B10.1                    |
| 0.0725479489012382                                                                           |                                                                     |                         |                |          |                             |
| AGIWUR2889;AGIWUR3616;AGIWUR8658;AGIWUR11415;AGIWUR11812;AGIWUR16981;AGIWUR23660;AGIWUR26155 |                                                                     |                         |                |          |                             |
| CB4856 HS X                                                                                  | 10903278                                                            | 10905107                | WBGene00009818 | acbp-3   | F47B10.7                    |
| -0.0463181227178886                                                                          | AGIWUR21895                                                         |                         |                |          |                             |
| CB4856 HS X                                                                                  | 10905181                                                            | 10910768                | WBGene00009819 | F47B10.8 | F47B10.8                    |
| 0.15280709518317                                                                             | AGIWUR25552                                                         |                         |                |          |                             |
| CB4856 HS X                                                                                  | 10912118                                                            | 10914081                | WBGene00009820 | F47B10.9 | F47B10.9                    |
| -0.242512270731366                                                                           | AGIWUR3929;AGIWUR11878;AGIWUR12314;AGIWUR32006                      |                         |                |          |                             |
| CB4856 HS X                                                                                  | 10916765                                                            | 10920013                | WBGene00011882 | nstp-9   | T21B6.5 -0.029562654373505  |
| AGIWUR28758                                                                                  |                                                                     |                         |                |          |                             |
| CB4856 HS X                                                                                  | 10920533                                                            | 10928998                | WBGene00000961 | dgn-1    | T21B6.1 0.0166328980437234  |

|                                                                                                                                   |    |   |          |          |                |         |         |                     |  |
|-----------------------------------------------------------------------------------------------------------------------------------|----|---|----------|----------|----------------|---------|---------|---------------------|--|
| AGIWUR5992;AGIWUR6010;AGIWUR9266;AGIWUR31210;AGIWUR32355;AGIWUR39633                                                              |    |   |          |          |                |         |         |                     |  |
| CB4856                                                                                                                            | HS | X | 10938197 | 10941355 | WBGene00011879 | pho-7   | T21B6.2 | 0.214876026101114   |  |
| AGIWUR9383                                                                                                                        |    |   |          |          |                |         |         |                     |  |
| CB4856                                                                                                                            | HS | X | 10945160 | 10948970 | WBGene00011880 | T21B6.3 | T21B6.3 | 0.288819393068112   |  |
| AGIWUR12433                                                                                                                       |    |   |          |          |                |         |         |                     |  |
| CB4856                                                                                                                            | HS | X | 10950708 | 10951393 | WBGene00010717 | K09C8.7 | K09C8.7 | -0.144811344500413  |  |
| AGIWUR37457                                                                                                                       |    |   |          |          |                |         |         |                     |  |
| CB4856                                                                                                                            | HS | X | 10954134 | 10958236 | WBGene00003943 | pbo-4   | K09C8.1 | -0.0849086650290936 |  |
| AGIWUR5694;AGIWUR21821                                                                                                            |    |   |          |          |                |         |         |                     |  |
| CB4856                                                                                                                            | HS | X | 10958761 | 10959178 | WBGene00003757 | nlp-19  | K09C8.6 | 0.00212724154058552 |  |
| AGIWUR20445                                                                                                                       |    |   |          |          |                |         |         |                     |  |
| CB4856                                                                                                                            | HS | X | 10959568 | 10960937 | WBGene00010715 | K09C8.2 | K09C8.2 | -0.168179785594115  |  |
| AGIWUR14659                                                                                                                       |    |   |          |          |                |         |         |                     |  |
| CB4856                                                                                                                            | HS | X | 10960982 | 10964725 | WBGene00003529 | nas-10  | K09C8.3 | 0.0108653172111133  |  |
| AGIWUR21993                                                                                                                       |    |   |          |          |                |         |         |                     |  |
| CB4856                                                                                                                            | HS | X | 10966551 | 10969898 | WBGene00010716 | lge-1   | K09C8.4 | 0.00288718795336518 |  |
| AGIWUR23818                                                                                                                       |    |   |          |          |                |         |         |                     |  |
| CB4856                                                                                                                            | HS | X | 10970963 | 10972107 | WBGene00010718 | K09C8.8 | K09C8.8 | 0.366665874178401   |  |
| AGIWUR18755                                                                                                                       |    |   |          |          |                |         |         |                     |  |
| CB4856                                                                                                                            | HS | X | 10972172 | 10979265 | WBGene00004257 | pxn-2   | K09C8.5 | -0.0147190602734444 |  |
| AGIWUR22501                                                                                                                       |    |   |          |          |                |         |         |                     |  |
| CB4856                                                                                                                            | HS | X | 10982351 | 10987928 | WBGene00006897 | ver-4   | F59F3.5 | -0.5115623088541    |  |
| AGIWUR40866                                                                                                                       |    |   |          |          |                |         |         |                     |  |
| CB4856                                                                                                                            | HS | X | 10992483 | 10997846 | WBGene00006896 | ver-3   | F59F3.1 | -0.160652275212033  |  |
| AGIWUR5042;AGIWUR8537;AGIWUR18078;AGIWUR18120;AGIWUR18428;AGIWUR22182;AGIWUR33911;AGIWUR34669;AGIWUR39163;AGIWUR39571;AGIWUR44850 |    |   |          |          |                |         |         |                     |  |
| CB4856                                                                                                                            | HS | X | 10998004 | 10999276 | WBGene00010335 | F59F3.6 | F59F3.6 | 0.165364345660885   |  |
| AGIWUR13384                                                                                                                       |    |   |          |          |                |         |         |                     |  |
| CB4856                                                                                                                            | HS | X | 10999742 | 11001850 | WBGene00000750 | col-177 | F59F3.2 | 0.269012765368418   |  |
| AGIWUR10969                                                                                                                       |    |   |          |          |                |         |         |                     |  |
| CB4856                                                                                                                            | HS | X | 11004984 | 11008181 | WBGene00010334 | del-5   | F59F3.4 | -0.0170287680820955 |  |
| AGIWUR36770                                                                                                                       |    |   |          |          |                |         |         |                     |  |
| CB4856                                                                                                                            | HS | X | 11008266 | 11009070 | WBGene00010225 | ttr-31  | F58A3.5 | 0.11327461950091    |  |
| AGIWUR22294                                                                                                                       |    |   |          |          |                |         |         |                     |  |
| CB4856                                                                                                                            | HS | X | 11009558 | 11010640 | WBGene00010224 | F58A3.4 | F58A3.4 | -0.0839391508541585 |  |
| AGIWUR33904                                                                                                                       |    |   |          |          |                |         |         |                     |  |
| CB4856                                                                                                                            | HS | X | 11012662 | 11014412 | WBGene00010223 | F58A3.3 | F58A3.3 | -0.103761674130183  |  |
| AGIWUR21004                                                                                                                       |    |   |          |          |                |         |         |                     |  |
| CB4856                                                                                                                            | HS | X | 11016410 | 11023421 | WBGene00001184 | egl-15  | F58A3.2 | 0.146745105177425   |  |

AGIWUR2025;AGIWUR14387;AGIWUR17579;AGIWUR18150;AGIWUR22661;AGIWUR22831;AGIWUR23615;AGIWUR26322;AGIWUR26361;  
 AGIWUR28249;AGIWUR28413;AGIWUR33328;AGIWUR34362;AGIWUR35573;AGIWUR38056;AGIWUR39477;AGIWUR40101  
 CB4856 HS X 11028917 11040612 WBGene00002261 ldb-1 F58A3.1 -0.147105459787204  
 AGIWUR12215;AGIWUR18780;AGIWUR20417;AGIWUR26587;AGIWUR32684;AGIWUR42410  
 CB4856 HS X 11041032 11042877 WBGene00007483 C09F12.3 C09F12.3  
 0.193537663547565 AGIWUR12921  
 CB4856 HS X 11047446 11049271 WBGene00000522 clc-1 C09F12.1  
 0.15309417218495 AGIWUR37251  
 CB4856 HS X 11053915 11056970 WBGene00007482 C09F12.2 C09F12.2  
 0.355680708755036 AGIWUR5748  
 CB4856 HS X 11057401 11059794 WBGene00012261 lpr-3 W04G3.8 0.058759900541272  
 AGIWUR11517  
 CB4856 HS X 11059994 11061868 WBGene00012255 lpr-6 W04G3.1 -0.0453194538319686  
 AGIWUR6825  
 CB4856 HS X 11062132 11064539 WBGene00012256 lpr-5 W04G3.2 0.152123894701747  
 AGIWUR12969;AGIWUR25508  
 CB4856 HS X 11065133 11066811 WBGene00012257 lpr-4 W04G3.3 0.186767755705285  
 AGIWUR5276  
 CB4856 HS X 11068527 11071925 WBGene00000166 apt-9 W04G3.4 -0.196837715135069  
 AGIWUR18454  
 CB4856 HS X 11076182 11076767 WBGene00044151 W04G3.12 W04G3.12  
 0.193180747115752 AGIWUR19796;AGIWUR23344;AGIWUR40941;AGIWUR43619  
 CB4856 HS X 11077772 11078243 WBGene00044152 W04G3.10 W04G3.10  
 0.0941863319241207 AGIWUR9600;AGIWUR14595;AGIWUR20255;AGIWUR39365  
 CB4856 HS X 11080678 11087474 WBGene00012259 sulp-7 W04G3.6 0.0879429826646296  
 AGIWUR14526;AGIWUR17899;AGIWUR25281;AGIWUR25544;AGIWUR43216  
 CB4856 HS X 11089243 11090679 WBGene00044153 W04G3.11 W04G3.11  
 0.0911835109631163 AGIWUR7780;AGIWUR10269;AGIWUR27223;AGIWUR30755;AGIWUR42818  
 CB4856 HS X 11096158 11096935 WBGene00012218 W02H3.2 W02H3.2 -0.0688979523275179  
 AGIWUR16182  
 CB4856 HS X 11102587 11105460 WBGene00012217 W02H3.1 W02H3.1 0.122378453159591  
 AGIWUR14835  
 CB4856 HS X 11107376 11109316 WBGene00011140 R08B4.4 R08B4.4 0.181109789148  
 AGIWUR1513  
 CB4856 HS X 11109440 11115887 WBGene00001690 grd-1 R08B4.1 -0.0584760459868825  
 AGIWUR17903  
 CB4856 HS X 11116107 11116823 WBGene00011141 R08B4.5 R08B4.5 0.0555538865018397  
 AGIWUR24780;AGIWUR26045;AGIWUR30649;AGIWUR32569  
 CB4856 HS X 11118959 11121005 WBGene00011139 R08B4.3 R08B4.3 0.0359540513487815

|                                                                                                                       |    |   |          |          |                                                    |
|-----------------------------------------------------------------------------------------------------------------------|----|---|----------|----------|----------------------------------------------------|
| AGIWUR26481;AGIWUR44332                                                                                               |    |   |          |          |                                                    |
| CB4856                                                                                                                | HS | X | 11121916 | 11125615 | WBGene00044330 alr-1 R08B4.2 0.0435654048785734    |
| AGIWUR30021                                                                                                           |    |   |          |          |                                                    |
| CB4856                                                                                                                | HS | X | 11142971 | 11152820 | WBGene00007327 C05C9.3 C05C9.3 0.195421453877667   |
| AGIWUR5280                                                                                                            |    |   |          |          |                                                    |
| CB4856                                                                                                                | HS | X | 11153065 | 11157643 | WBGene00007326 C05C9.2 C05C9.2 -0.3528840644448924 |
| AGIWUR6141;AGIWUR40885                                                                                                |    |   |          |          |                                                    |
| CB4856                                                                                                                | HS | X | 11160981 | 11164006 | WBGene00007325 C05C9.1 C05C9.1 0.0360440176499512  |
| AGIWUR37380                                                                                                           |    |   |          |          |                                                    |
| CB4856                                                                                                                | HS | X | 11163958 | 11189591 | WBGene00008735 F13D2.1 F13D2.1 -0.0143315703278191 |
| AGIWUR9368;AGIWUR31805;AGIWUR34326                                                                                    |    |   |          |          |                                                    |
| CB4856                                                                                                                | HS | X | 11192485 | 11196841 | WBGene00007938 C34F6.1 C34F6.1 0.131338107636964   |
| AGIWUR23731                                                                                                           |    |   |          |          |                                                    |
| CB4856                                                                                                                | HS | X | 11199455 | 11200464 | WBGene00000751 col-178 C34F6.2 -0.147061746630893  |
| AGIWUR40880                                                                                                           |    |   |          |          |                                                    |
| CB4856                                                                                                                | HS | X | 11201465 | 11202488 | WBGene00000752 col-179 C34F6.3 -0.0401796787064397 |
| AGIWUR3484;AGIWUR4228;AGIWUR11395;AGIWUR12859;AGIWUR18664;AGIWUR21635;AGIWUR24699;AGIWUR30009;AGIWUR35779;AGIWUR37272 |    |   |          |          |                                                    |
| CB4856                                                                                                                | HS | X | 11202476 | 11203990 | WBGene00007945 C34F6.11 C34F6.11                   |
| -0.111600667327016 AGIWUR32368                                                                                        |    |   |          |          |                                                    |
| CB4856                                                                                                                | HS | X | 11204117 | 11207155 | WBGene00002029 hst-2 C34F6.4 -0.320906623453037    |
| AGIWUR28552                                                                                                           |    |   |          |          |                                                    |
| CB4856                                                                                                                | HS | X | 11207250 | 11208994 | WBGene00007939 C34F6.5 C34F6.5 0.112616388815006   |
| AGIWUR21;AGIWUR994                                                                                                    |    |   |          |          |                                                    |
| CB4856                                                                                                                | HS | X | 11210107 | 11215470 | WBGene00007941 C34F6.7 C34F6.7 -0.0118923022010016 |
| AGIWUR6467;AGIWUR32311;AGIWUR32877                                                                                    |    |   |          |          |                                                    |
| CB4856                                                                                                                | HS | X | 11215696 | 11218305 | WBGene00007942 idh-2 C34F6.8 0.115172504514931     |
| AGIWUR3586                                                                                                            |    |   |          |          |                                                    |
| CB4856                                                                                                                | HS | X | 11218135 | 11222811 | WBGene00007943 C34F6.9 C34F6.9 -0.129985824697652  |
| AGIWUR23073                                                                                                           |    |   |          |          |                                                    |
| CB4856                                                                                                                | HS | X | 11229213 | 11237383 | WBGene00007944 C34F6.10 C34F6.10                   |
| 0.221560027908792 AGIWUR42553                                                                                         |    |   |          |          |                                                    |
| CB4856                                                                                                                | HS | X | 11257361 | 11260225 | WBGene00007266 C03A3.1 C03A3.1 0.0982402463032326  |
| AGIWUR11397;AGIWUR29952;AGIWUR39266                                                                                   |    |   |          |          |                                                    |
| CB4856                                                                                                                | HS | X | 11262848 | 11266324 | WBGene00007267 C03A3.2 C03A3.2 0.161470002139526   |
| AGIWUR4732;AGIWUR8292                                                                                                 |    |   |          |          |                                                    |
| CB4856                                                                                                                | HS | X | 11267391 | 11269023 | WBGene00007268 C03A3.3 C03A3.3 0.0794144401430863  |
| AGIWUR44225                                                                                                           |    |   |          |          |                                                    |
| CB4856                                                                                                                | HS | X | 11271184 | 11275482 | WBGene00002050 ifa-1 F38B2.1 0.0189258823702261    |

AGIWUR2245;AGIWUR4997;AGIWUR15389;AGIWUR25371;AGIWUR31125;AGIWUR33213;AGIWUR38221;AGIWUR40353;AGIWUR40580;AGIWUR43826  
 CB4856 HS X 11278401 11279376 WBGene00009529 F38B2.2 F38B2.2 -0.0577228116810806  
 AGIWUR2233;AGIWUR17353;AGIWUR22429;AGIWUR23640;AGIWUR40315;AGIWUR40760  
 CB4856 HS X 11281716 11286346 WBGene00009530 F38B2.3 F38B2.3 0.102224479695465  
 AGIWUR4915  
 CB4856 HS X 11286443 11287717 WBGene00009531 F38B2.4 F38B2.4 0.188116863802873  
 AGIWUR5307;AGIWUR5637;AGIWUR26506;AGIWUR39548  
 CB4856 HS X 11294962 11296731 WBGene00002124 inx-2 F08G12.10  
 -0.0429990278337797 AGIWUR1732  
 CB4856 HS X 11298036 11299784 WBGene00008586 F08G12.2 F08G12.2  
 0.0495808473703256 AGIWUR40930  
 CB4856 HS X 11300283 11302094 WBGene00008587 F08G12.3 F08G12.3  
 -0.0797084803108028 AGIWUR19748  
 CB4856 HS X 11302074 11305873 WBGene00008585 F08G12.1 F08G12.1  
 -0.205743403362856 AGIWUR19035  
 CB4856 HS X 11307360 11308400 WBGene00006922 vhl-1 F08G12.4  
 0.135974634853056 AGIWUR501  
 CB4856 HS X 11308864 11310285 WBGene00008588 F08G12.5 F08G12.5  
 -0.0255842924699721 AGIWUR36011  
 CB4856 HS X 11313385 11315612 WBGene00044135 F08G12.11 F08G12.11  
 0.0552532292567141 AGIWUR2107;AGIWUR11925;AGIWUR30415;AGIWUR39046  
 CB4856 HS X 11317050 11318036 WBGene00008589 nlp-57 F08G12.8  
 -0.121566698957796 AGIWUR25391  
 CB4856 HS X 11318278 11321085 WBGene00013976 hizr-1 ZK455.6 0.0643805683441094  
 AGIWUR3772  
 CB4856 HS X 11321079 11324251 WBGene00000212 asm-2 ZK455.4 0.104156870493855  
 AGIWUR12179;AGIWUR20805;AGIWUR30554;AGIWUR45075  
 CB4856 HS X 11324517 11326901 WBGene00013975 ZK455.5 ZK455.5 0.142806203635629  
 AGIWUR16779  
 CB4856 HS X 11328591 11332072 WBGene00013974 npr-9 ZK455.3 0.00341714162951412  
 AGIWUR11847  
 CB4856 HS X 11332553 11338301 WBGene00001536 gcy-9 ZK455.2 -0.163484487351793  
 AGIWUR15202  
 CB4856 HS X 11339874 11343568 WBGene00000040 aco-1 ZK455.1 -0.0239408614978771  
 AGIWUR15192;AGIWUR20633;AGIWUR21869;AGIWUR30301  
 CB4856 HS X 11346455 11350244 WBGene00003843 oct-2 ZK455.8 0.122241665609969  
 AGIWUR2167;AGIWUR14035  
 CB4856 HS X 11352136 11357094 WBGene00003997 pgp-3 ZK455.7 0.133199826356313



AGIWUR11749;AGIWUR17389;AGIWUR20480;AGIWUR22101  
 CB4856 HS X 11358395 11364049 WBGene00003998 pgp-4 F42E11.1  
 -0.0268763409369654 AGIWUR28989;AGIWUR41306;AGIWUR44841  
 CB4856 HS X 11368719 11374358 WBGene00009632 ttyh-1 F42E11.2  
 0.0412273716995291 AGIWUR10181;AGIWUR19745;AGIWUR21649;AGIWUR22469;AGIWUR28938;AGIWUR38032;AGIWUR44333  
 CB4856 HS X 11374599 11375609 WBGene00009633 F42E11.3 F42E11.3  
 0.207747686413495 AGIWUR39282  
 CB4856 HS X 11375887 11377470 WBGene00006584 tni-1 F42E11.4  
 0.031035664765291 AGIWUR8414  
 CB4856 HS X 11384773 11392779 WBGene00008571 prmn-1 F08B12.1  
 0.0321930983033045 AGIWUR2776  
 CB4856 HS X 11393293 11394619 WBGene00004197 prx-12 F08B12.2  
 0.20337461276061 AGIWUR27319  
 CB4856 HS X 11394605 11405931 WBGene00004831 slo-2 F08B12.3  
 0.00302613059252632 AGIWUR1051;AGIWUR7985;AGIWUR23787;AGIWUR24004;AGIWUR26341  
 CB4856 HS X 11407054 11407730 WBGene00008572 F08B12.4 F08B12.4  
 0.227719799905479 AGIWUR9647  
 CB4856 HS X 11410181 11414887 WBGene00003970 pek-1 F46C3.1 0.126576338236996  
 AGIWUR522;AGIWUR2937;AGIWUR17263  
 CB4856 HS X 11416653 11418740 WBGene00009777 F46C3.2 F46C3.2 -0.0325875759001431  
 AGIWUR20393  
 CB4856 HS X 11419108 11420074 WBGene00045253 F46C3.6 F46C3.6 0.0907758130156693  
 AGIWUR6859;AGIWUR19299;AGIWUR25267;AGIWUR33107;AGIWUR35145;AGIWUR36021  
 CB4856 HS X 11420474 11433524 WBGene00002037 hum-4 F46C3.3 -0.0282432209282253  
 AGIWUR1757;AGIWUR4067;AGIWUR4936;AGIWUR18116;AGIWUR18323;AGIWUR19638;AGIWUR21461;AGIWUR22845  
 CB4856 HS X 11434792 11435899 WBGene00044703 F46C3.5 F46C3.5 -0.125473802593667  
 AGIWUR7105  
 CB4856 HS X 11436124 11437747 WBGene00044702 F46C3.4 F46C3.4 0.408675850558541  
 AGIWUR7674  
 CB4856 HS X 11444424 11446635 WBGene00009842 igeg-2 F48C5.1 -0.0910247750716513  
 AGIWUR24691  
 CB4856 HS X 11451617 11454195 WBGene00009843 F48C5.2 F48C5.2 -0.123889782252933  
 AGIWUR39842  
 CB4856 HS X 11465557 11484368 WBGene00003003 lin-14 T25C12.1  
 -0.0932311954842122 AGIWUR25830  
 CB4856 HS X 11491087 11499999 WBGene00012018 T25C12.3 T25C12.3  
 0.31130858241691 AGIWUR2452  
 CB4856 HS X 11502267 11509432 WBGene00009257 F29G6.1 F29G6.1 0.208961898897925  
 AGIWUR18243

|                                                                                                                                     |    |   |          |          |                |          |                             |
|-------------------------------------------------------------------------------------------------------------------------------------|----|---|----------|----------|----------------|----------|-----------------------------|
| CB4856                                                                                                                              | HS | X | 11509446 | 11511451 | WBGene00009258 | ccdc-149 | F29G6.2                     |
| 0.183909245584173 AGIWUR15047;AGIWUR17433;AGIWUR35296                                                                               |    |   |          |          |                |          |                             |
| CB4856                                                                                                                              | HS | X | 11511558 | 11519062 | WBGene00009259 | hpo-34   | F29G6.3 0.23128537341978    |
| AGIWUR844;AGIWUR23574;AGIWUR44644;AGIWUR44749                                                                                       |    |   |          |          |                |          |                             |
| CB4856                                                                                                                              | HS | X | 11522707 | 11533450 | WBGene00004746 | sdc-2    | C35C5.1 0.473680108019211   |
| AGIWUR6463                                                                                                                          |    |   |          |          |                |          |                             |
| CB4856                                                                                                                              | HS | X | 11534004 | 11536574 | WBGene00007957 | C35C5.8  | C35C5.8 -0.0696857041766084 |
| AGIWUR3917;AGIWUR30581;AGIWUR36963                                                                                                  |    |   |          |          |                |          |                             |
| CB4856                                                                                                                              | HS | X | 11536568 | 11537124 | WBGene00007958 | C35C5.9  | C35C5.9 0.163943177407528   |
| AGIWUR9875;AGIWUR17639;AGIWUR34507;AGIWUR35227;AGIWUR43027;AGIWUR44311                                                              |    |   |          |          |                |          |                             |
| CB4856                                                                                                                              | HS | X | 11537714 | 11541417 | WBGene00007954 | gcp-2.2  | C35C5.2 0.133261681385683   |
| AGIWUR19973;AGIWUR28266                                                                                                             |    |   |          |          |                |          |                             |
| CB4856                                                                                                                              | HS | X | 11542129 | 11545061 | WBGene00044121 | gcp-2.3  | C35C5.11                    |
| 0.100317778851007 AGIWUR24227                                                                                                       |    |   |          |          |                |          |                             |
| CB4856                                                                                                                              | HS | X | 11545091 | 11546495 | WBGene00007955 | selt-1.1 | C35C5.3                     |
| -0.133533033733379 AGIWUR22821                                                                                                      |    |   |          |          |                |          |                             |
| CB4856                                                                                                                              | HS | X | 11548608 | 11550740 | WBGene00003239 | mig-2    | C35C5.4 0.103869776649375   |
| AGIWUR1331;AGIWUR5810;AGIWUR8838;AGIWUR17531;AGIWUR43904;AGIWUR44479                                                                |    |   |          |          |                |          |                             |
| CB4856                                                                                                                              | HS | X | 11554795 | 11559858 | WBGene00007959 | C35C5.10 | C35C5.10                    |
| 0.226118878153024 AGIWUR2588                                                                                                        |    |   |          |          |                |          |                             |
| CB4856                                                                                                                              | HS | X | 11560915 | 11563697 | WBGene00002975 | lev-8    | C35C5.5 0.356700243302942   |
| AGIWUR35817                                                                                                                         |    |   |          |          |                |          |                             |
| CB4856                                                                                                                              | HS | X | 11563923 | 11569531 | WBGene00007956 | trpp-9   | C35C5.6 -0.01948109633285   |
| AGIWUR43921                                                                                                                         |    |   |          |          |                |          |                             |
| CB4856                                                                                                                              | HS | X | 11576247 | 11581727 | WBGene00001490 | frm-3    | H05G16.1                    |
| 0.0309045491097155                                                                                                                  |    |   |          |          |                |          |                             |
| AGIWUR18461;AGIWUR18670;AGIWUR20783;AGIWUR25861;AGIWUR28199;AGIWUR29720;AGIWUR33619;AGIWUR37114;AGIWUR40164;AGIWUR40423;AGIWUR43229 |    |   |          |          |                |          |                             |
| CB4856                                                                                                                              | HS | X | 11581751 | 11584960 | WBGene00009932 | F52D10.6 | F52D10.6                    |
| -0.0966903591296742 AGIWUR32267                                                                                                     |    |   |          |          |                |          |                             |
| CB4856                                                                                                                              | HS | X | 11585675 | 11589757 | WBGene00009929 | abts-2   | F52D10.1                    |
| -0.0577383888434646 AGIWUR18270                                                                                                     |    |   |          |          |                |          |                             |
| CB4856                                                                                                                              | HS | X | 11589686 | 11591719 | WBGene00009930 | F52D10.2 | F52D10.2                    |
| 0.0118877227831362 AGIWUR36851                                                                                                      |    |   |          |          |                |          |                             |
| CB4856                                                                                                                              | HS | X | 11603709 | 11605451 | WBGene00001502 | ftt-2    | F52D10.3                    |
| -0.04127327750051 AGIWUR5562;AGIWUR16612;AGIWUR30144                                                                                |    |   |          |          |                |          |                             |
| CB4856                                                                                                                              | HS | X | 11617462 | 11619795 | WBGene00009931 | F52D10.4 | F52D10.4                    |
| -0.282873714627545 AGIWUR33683                                                                                                      |    |   |          |          |                |          |                             |
| CB4856                                                                                                                              | HS | X | 11620047 | 11621996 | WBGene00006065 | sto-3    | F52D10.5                    |

|                                                                                                |                                                                        |          |                |           |          |                    |
|------------------------------------------------------------------------------------------------|------------------------------------------------------------------------|----------|----------------|-----------|----------|--------------------|
| -0.0968867617634048                                                                            | AGIWUR16696                                                            |          |                |           |          |                    |
| CB4856 HS X                                                                                    | 11622967                                                               | 11627113 | WBGene00006694 | twk-44    | Y71H9A.1 |                    |
| -0.00314931275768293                                                                           | AGIWUR2136;AGIWUR13930;AGIWUR22707;AGIWUR34157;AGIWUR36683;AGIWUR39124 |          |                |           |          |                    |
| CB4856 HS X                                                                                    | 11632407                                                               | 11636508 | WBGene00006068 | sto-6     | Y71H9A.2 |                    |
| 0.196586916351471                                                                              | AGIWUR37934                                                            |          |                |           |          |                    |
| CB4856 HS X                                                                                    | 11644143                                                               | 11647425 | WBGene00006066 | sto-4     | Y71H9A.3 |                    |
| -0.0394363868557228                                                                            | AGIWUR18972;AGIWUR20785;AGIWUR21265                                    |          |                |           |          |                    |
| CB4856 HS X                                                                                    | 11647423                                                               | 11648196 | WBGene00011446 | T04F8.8   | T04F8.8  | 0.122668436173058  |
| AGIWUR18677                                                                                    |                                                                        |          |                |           |          |                    |
| CB4856 HS X                                                                                    | 11648358                                                               | 11650918 | WBGene00011443 | cutl-11   | T04F8.4  | -0.239895934578994 |
| AGIWUR19813                                                                                    |                                                                        |          |                |           |          |                    |
| CB4856 HS X                                                                                    | 11653570                                                               | 11656569 | WBGene00011441 | T04F8.2   | T04F8.2  | 0.0112924464658359 |
| AGIWUR2428;AGIWUR19123                                                                         |                                                                        |          |                |           |          |                    |
| CB4856 HS X                                                                                    | 11659510                                                               | 11661660 | WBGene00011440 | sfxn-1.5  |          | T04F8.1            |
| -0.283223773716548                                                                             | AGIWUR30329                                                            |          |                |           |          |                    |
| CB4856 HS X                                                                                    | 11667127                                                               | 11672309 | WBGene00011444 | T04F8.6   | T04F8.6  |                    |
| 0.000852688216976372                                                                           |                                                                        |          |                |           |          |                    |
| AGIWUR7225;AGIWUR17517;AGIWUR18050;AGIWUR18678;AGIWUR18752;AGIWUR29417;AGIWUR31500;AGIWUR34985 |                                                                        |          |                |           |          |                    |
| CB4856 HS X                                                                                    | 11674416                                                               | 11677090 | WBGene00011447 | T04F8.9   | T04F8.9  | -0.100266922145444 |
| AGIWUR34736                                                                                    |                                                                        |          |                |           |          |                    |
| CB4856 HS X                                                                                    | 11677515                                                               | 11680980 | WBGene00011445 | T04F8.7   | T04F8.7  | 0.272355855332201  |
| AGIWUR5669;AGIWUR31052;AGIWUR38300                                                             |                                                                        |          |                |           |          |                    |
| CB4856 HS X                                                                                    | 11684661                                                               | 11685778 | WBGene00001981 | hnd-1     | C44C10.8 |                    |
| -0.0168504608833029                                                                            | AGIWUR25505                                                            |          |                |           |          |                    |
| CB4856 HS X                                                                                    | 11687000                                                               | 11688269 | WBGene00008088 | C44C10.7  |          | C44C10.7           |
| 0.116327468637772                                                                              | AGIWUR36171                                                            |          |                |           |          |                    |
| CB4856 HS X                                                                                    | 11690314                                                               | 11690789 | WBGene00008090 | C44C10.10 |          | C44C10.10          |
| -0.0901506794892617                                                                            | AGIWUR42468                                                            |          |                |           |          |                    |
| CB4856 HS X                                                                                    | 11691109                                                               | 11692456 | WBGene00008086 | C44C10.5  |          | C44C10.5           |
| -0.143677084641199                                                                             | AGIWUR26240                                                            |          |                |           |          |                    |
| CB4856 HS X                                                                                    | 11693464                                                               | 11695750 | WBGene00008085 | C44C10.4  |          | C44C10.4           |
| -0.0182226381659181                                                                            | AGIWUR6646                                                             |          |                |           |          |                    |
| CB4856 HS X                                                                                    | 11696996                                                               | 11698065 | WBGene00044133 | C44C10.12 |          | C44C10.12          |
| -0.0480744670328619                                                                            | AGIWUR37824;AGIWUR38613;AGIWUR42182                                    |          |                |           |          |                    |
| CB4856 HS X                                                                                    | 11698384                                                               | 11699098 | WBGene00008087 | C44C10.6  |          | C44C10.6           |
| 0.00138391488941281                                                                            | AGIWUR36681                                                            |          |                |           |          |                    |
| CB4856 HS X                                                                                    | 11702525                                                               | 11704500 | WBGene00008084 | C44C10.3  |          | C44C10.3           |
| 0.0560879974770172                                                                             | AGIWUR21455;AGIWUR29164;AGIWUR41440                                    |          |                |           |          |                    |
| CB4856 HS X                                                                                    | 11704888                                                               | 11707238 | WBGene00008083 | cyp-29A1  |          | C44C10.2           |

|                                               |                                                                        |          |                |           |                             |
|-----------------------------------------------|------------------------------------------------------------------------|----------|----------------|-----------|-----------------------------|
| 0.0552764024817076                            | AGIWUR6870                                                             |          |                |           |                             |
| CB4856 HS X                                   | 11707903                                                               | 11710190 | WBGene00043985 | C44C10.11 | C44C10.11                   |
| -0.00503999122180865                          | AGIWUR5144;AGIWUR21747;AGIWUR26369;AGIWUR35133;AGIWUR35582;AGIWUR40080 |          |                |           |                             |
| CB4856 HS X                                   | 11711307                                                               | 11712280 | WBGene00000753 | col-180   | C44C10.1                    |
| -0.399087278568068                            | AGIWUR19530                                                            |          |                |           |                             |
| CB4856 HS X                                   | 11713240                                                               | 11716511 | WBGene00008089 | C44C10.9  | C44C10.9                    |
| 0.0289449850779908                            | AGIWUR1389;AGIWUR14021                                                 |          |                |           |                             |
| CB4856 HS X                                   | 11721724                                                               | 11724195 | WBGene00008369 | D1053.4   | D1053.4 0.0994461932199133  |
| AGIWUR22031                                   |                                                                        |          |                |           |                             |
| CB4856 HS X                                   | 11726271                                                               | 11727936 | WBGene00001790 | gst-42    | D1053.1 -0.0631084109996056 |
| AGIWUR39657                                   |                                                                        |          |                |           |                             |
| CB4856 HS X                                   | 11728151                                                               | 11728891 | WBGene00008367 | D1053.2   | D1053.2 0.265541596108188   |
| AGIWUR4100                                    |                                                                        |          |                |           |                             |
| CB4856 HS X                                   | 11729586                                                               | 11733698 | WBGene00008368 | D1053.3   | D1053.3 -0.0901001627526616 |
| AGIWUR22019;AGIWUR42744                       |                                                                        |          |                |           |                             |
| CB4856 HS X                                   | 11746076                                                               | 11747249 | WBGene00008049 | C40H5.7   | C40H5.7 0.152835829468041   |
| AGIWUR42587                                   |                                                                        |          |                |           |                             |
| CB4856 HS X                                   | 11754776                                                               | 11756762 | WBGene00008045 | C40H5.2   | C40H5.2 0.00644498488622247 |
| AGIWUR45000                                   |                                                                        |          |                |           |                             |
| CB4856 HS X                                   | 11759198                                                               | 11764535 | WBGene00008047 | lact-7    | C40H5.4 -0.134881174763119  |
| AGIWUR2323;AGIWUR6946;AGIWUR12305;AGIWUR29315 |                                                                        |          |                |           |                             |
| CB4856 HS X                                   | 11764456                                                               | 11769378 | WBGene00006654 | ttx-3     | C40H5.5 -0.0783564430469941 |
| AGIWUR3181;AGIWUR40976                        |                                                                        |          |                |           |                             |
| CB4856 HS X                                   | 11775190                                                               | 11775728 | WBGene00008048 | hpo-41    | C40H5.6 0.0262993835258616  |
| AGIWUR7235                                    |                                                                        |          |                |           |                             |
| CB4856 HS X                                   | 11781463                                                               | 11784330 | WBGene00013631 | Y102F5A.1 | Y102F5A.1                   |
| -0.0952697141498255                           | AGIWUR41265                                                            |          |                |           |                             |
| CB4856 HS X                                   | 11798505                                                               | 11803656 | WBGene00004682 | rsd-3     | C34E11.1                    |
| -0.142887209486679                            | AGIWUR12992                                                            |          |                |           |                             |
| CB4856 HS X                                   | 11804210                                                               | 11805306 | WBGene00007937 | C34E11.4  | C34E11.4                    |
| 0.134260087687535                             | AGIWUR29254                                                            |          |                |           |                             |
| CB4856 HS X                                   | 11805378                                                               | 11814653 | WBGene00007935 | C34E11.2  | C34E11.2                    |
| -0.0724579902417375                           | AGIWUR6735;AGIWUR17971;AGIWUR18770;AGIWUR41165                         |          |                |           |                             |
| CB4856 HS X                                   | 11826093                                                               | 11836162 | WBGene00044079 | tag-241   | C34E11.3                    |
| -0.0356996792671289                           | AGIWUR21066                                                            |          |                |           |                             |
| CB4856 HS X                                   | 11836068                                                               | 11837478 | WBGene00006388 | taf-7.1   | F54F7.1 0.013559965719276   |
| AGIWUR43977                                   |                                                                        |          |                |           |                             |
| CB4856 HS X                                   | 11843663                                                               | 11845337 | WBGene00010064 | F54F7.2   | F54F7.2 -0.152401031420668  |
| AGIWUR20596                                   |                                                                        |          |                |           |                             |

|                     |   |                         |          |                |           |          |                     |
|---------------------|---|-------------------------|----------|----------------|-----------|----------|---------------------|
| CB4856 HS           | X | 11847856                | 11848695 | WBGene00045251 | F54F7.9   | F54F7.9  | 0.060854669117913   |
| AGIWUR36255         |   |                         |          |                |           |          |                     |
| CB4856 HS           | X | 11849392                | 11850182 | WBGene00010065 | F54F7.3   | F54F7.3  | 0.202618279519626   |
| AGIWUR44650         |   |                         |          |                |           |          |                     |
| CB4856 HS           | X | 11852794                | 11853729 | WBGene00006965 | xtr-1     | F54F7.4  | 0.0561138235544671  |
| AGIWUR11219         |   |                         |          |                |           |          |                     |
| CB4856 HS           | X | 11853818                | 11854996 | WBGene00010068 | F54F7.8   | F54F7.8  | -0.0871103784651392 |
| AGIWUR34989         |   |                         |          |                |           |          |                     |
| CB4856 HS           | X | 11857478                | 11862373 | WBGene00003219 | mes-1     | F54F7.5  | -0.23866423650521   |
| AGIWUR34339         |   |                         |          |                |           |          |                     |
| CB4856 HS           | X | 11865383                | 11866827 | WBGene00010066 | F54F7.6   | F54F7.6  | 0.0626402755789695  |
| AGIWUR14467         |   |                         |          |                |           |          |                     |
| CB4856 HS           | X | 11867971                | 11869360 | WBGene00010067 | dot-1.2   | F54F7.7  | 0.0467721642162475  |
| AGIWUR12110         |   |                         |          |                |           |          |                     |
| CB4856 HS           | X | 11875654                | 11877242 | WBGene00013389 | Y62H9A.1  |          | Y62H9A.1            |
| -0.0779080719621135 |   | AGIWUR11046             |          |                |           |          |                     |
| CB4856 HS           | X | 11877418                | 11878196 | WBGene00013390 | Y62H9A.2  |          | Y62H9A.2            |
| 0.00675061900915352 |   | AGIWUR43304             |          |                |           |          |                     |
| CB4856 HS           | X | 11879110                | 11879971 | WBGene00013391 | Y62H9A.3  |          | Y62H9A.3            |
| 0.0735995649852921  |   | AGIWUR45025             |          |                |           |          |                     |
| CB4856 HS           | X | 11880124                | 11881264 | WBGene00013392 | Y62H9A.4  |          | Y62H9A.4            |
| -0.0837313403850395 |   | AGIWUR33966             |          |                |           |          |                     |
| CB4856 HS           | X | 11882144                | 11882917 | WBGene00013393 | Y62H9A.5  |          | Y62H9A.5            |
| -0.0295376744632971 |   | AGIWUR33524             |          |                |           |          |                     |
| CB4856 HS           | X | 11883127                | 11884043 | WBGene00013394 | ule-5     | Y62H9A.6 |                     |
| 0.115069061887217   |   | AGIWUR14679             |          |                |           |          |                     |
| CB4856 HS           | X | 11884330                | 11886438 | WBGene00013395 | Y62H9A.7  |          | Y62H9A.7            |
| -0.111147512906282  |   | AGIWUR35290             |          |                |           |          |                     |
| CB4856 HS           | X | 11891259                | 11892422 | WBGene00013396 | Y62H9A.8  |          | Y62H9A.8            |
| 0.284347828211022   |   | AGIWUR19602             |          |                |           |          |                     |
| CB4856 HS           | X | 11895585                | 11898140 | WBGene00013397 | Y62H9A.9  |          | Y62H9A.9            |
| 0.0040803976489201  |   | AGIWUR45120             |          |                |           |          |                     |
| CB4856 HS           | X | 11904924                | 11907022 | WBGene00013399 | Y62H9A.11 |          | Y62H9A.11           |
| 0.128836672621779   |   | AGIWUR40597             |          |                |           |          |                     |
| CB4856 HS           | X | 11907267                | 11910145 | WBGene00045252 | Y62H9A.15 |          | Y62H9A.15           |
| 0.0322655786340995  |   | AGIWUR37686;AGIWUR42152 |          |                |           |          |                     |
| CB4856 HS           | X | 11914124                | 11915558 | WBGene00013400 | Y62H9A.12 |          | Y62H9A.12           |
| 0.102900206905874   |   | AGIWUR36585             |          |                |           |          |                     |
| CB4856 HS           | X | 11917005                | 11920158 | WBGene00013401 | Y62H9A.13 |          | Y62H9A.13           |

|                                                                       |                                               |          |                |                   |                     |  |
|-----------------------------------------------------------------------|-----------------------------------------------|----------|----------------|-------------------|---------------------|--|
| -0.179619598396996                                                    | AGIWUR26048                                   |          |                |                   |                     |  |
| CB4856 HS X                                                           | 11921252                                      | 11923138 | WBGene00013402 | Y62H9A.14         | Y62H9A.14           |  |
| -0.056122846015306                                                    | AGIWUR30338                                   |          |                |                   |                     |  |
| CB4856 HS X                                                           | 11924461                                      | 11927032 | WBGene00010119 | F55G7.1 F55G7.1   | -0.0907537155903415 |  |
| AGIWUR11372;AGIWUR22511                                               |                                               |          |                |                   |                     |  |
| CB4856 HS X                                                           | 11928107                                      | 11929372 | WBGene00045493 | F55G7.4 F55G7.4   | -0.263371910834538  |  |
| AGIWUR39073                                                           |                                               |          |                |                   |                     |  |
| CB4856 HS X                                                           | 11929899                                      | 11931646 | WBGene00010120 | dot-1.4 F55G7.2   | -0.12727815169643   |  |
| AGIWUR9664                                                            |                                               |          |                |                   |                     |  |
| CB4856 HS X                                                           | 11940336                                      | 11942051 | WBGene00010121 | F55G7.3 F55G7.3   | 0.291551449485422   |  |
| AGIWUR19193                                                           |                                               |          |                |                   |                     |  |
| CB4856 HS X                                                           | 11944313                                      | 11946834 | WBGene00011614 | nfya-1 T08D10.1   |                     |  |
| -0.383137040263222                                                    | AGIWUR28467                                   |          |                |                   |                     |  |
| CB4856 HS X                                                           | 11948843                                      | 11951893 | WBGene00011615 | lsd-1 T08D10.2    |                     |  |
| -0.162414988262643                                                    | AGIWUR18850                                   |          |                |                   |                     |  |
| CB4856 HS X                                                           | 11952085                                      | 11953329 | WBGene00044148 | T08D10.4          | T08D10.4            |  |
| -0.0635778991631502                                                   | AGIWUR17215;AGIWUR24785                       |          |                |                   |                     |  |
| CB4856 HS X                                                           | 11957563                                      | 11958395 | WBGene00206466 | T08D10.5          | T08D10.5            |  |
| -0.0334447299971181                                                   | AGIWUR1122                                    |          |                |                   |                     |  |
| CB4856 HS X                                                           | 11960145                                      | 11961509 | WBGene00008212 | C49F5.8 C49F5.8   | 0.215041871062146   |  |
| AGIWUR44049                                                           |                                               |          |                |                   |                     |  |
| CB4856 HS X                                                           | 11961443                                      | 11961777 | WBGene00268214 | C49F5.12          | C49F5.12            |  |
| 0.129295234705762                                                     | AGIWUR950;AGIWUR15616;AGIWUR43673             |          |                |                   |                     |  |
| CB4856 HS X                                                           | 11962413                                      | 11962646 | WBGene00045316 | C49F5.9 C49F5.9   | 0.0431485416502149  |  |
| AGIWUR18274;AGIWUR34913;AGIWUR35638;AGIWUR35757;AGIWUR44815           |                                               |          |                |                   |                     |  |
| CB4856 HS X                                                           | 11965962                                      | 11969784 | WBGene00008205 | sams-1 C49F5.1    | -0.200834191290519  |  |
| AGIWUR1947;AGIWUR7219;AGIWUR10862;AGIWUR24028;AGIWUR26342;AGIWUR32238 |                                               |          |                |                   |                     |  |
| CB4856 HS X                                                           | 11968034                                      | 12021212 | WBGene00012158 | ucr-2.1 VW06B3R.1 |                     |  |
| 0.060842003221234                                                     | AGIWUR8278;AGIWUR8939;AGIWUR16170;AGIWUR31443 |          |                |                   |                     |  |
| CB4856 HS X                                                           | 12028711                                      | 12031498 | WBGene00007115 | B0198.2 B0198.2   | 0.0212237851685932  |  |
| AGIWUR5120                                                            |                                               |          |                |                   |                     |  |
| CB4856 HS X                                                           | 12031598                                      | 12034037 | WBGene00006646 | tsp-20 B0198.1    | 0.308013491266784   |  |
| AGIWUR7276                                                            |                                               |          |                |                   |                     |  |
| CB4856 HS X                                                           | 12042593                                      | 12057049 | WBGene00007116 | B0198.3 B0198.3   | 0.116125434846004   |  |
| AGIWUR8482                                                            |                                               |          |                |                   |                     |  |
| CB4856 HS X                                                           | 12065264                                      | 12067432 | WBGene00007594 | lgc-23 C15A7.1    | 0.0673580636721827  |  |
| AGIWUR16523                                                           |                                               |          |                |                   |                     |  |
| CB4856 HS X                                                           | 12068550                                      | 12070563 | WBGene00045385 | lgc-24 C15A7.4    | 0.334827378168314   |  |
| AGIWUR25344                                                           |                                               |          |                |                   |                     |  |

|                                                                                                      |          |          |                |                 |                           |
|------------------------------------------------------------------------------------------------------|----------|----------|----------------|-----------------|---------------------------|
| CB4856 HS X                                                                                          | 12070743 | 12073863 | WBGene00007595 | C15A7.2 C15A7.2 | -0.0436644256644572       |
| AGIWUR26829;AGIWUR37909                                                                              |          |          |                |                 |                           |
| CB4856 HS X                                                                                          | 12076553 | 12093083 | WBGene00012226 | W03G11.4        | W03G11.4                  |
| -0.105236826005685 AGIWUR19534;AGIWUR32595                                                           |          |          |                |                 |                           |
| CB4856 HS X                                                                                          | 12100196 | 12103812 | WBGene00012225 | W03G11.3        | W03G11.3                  |
| -0.0257031026156156 AGIWUR6598;AGIWUR7282;AGIWUR8929;AGIWUR16839;AGIWUR22839;AGIWUR23249;AGIWUR41917 |          |          |                |                 |                           |
| CB4856 HS X                                                                                          | 12104930 | 12106081 | WBGene00000754 | col-181         | W03G11.1                  |
| -0.535812094869836 AGIWUR30503                                                                       |          |          |                |                 |                           |
| CB4856 HS X                                                                                          | 12106407 | 12108617 | WBGene00012224 | W03G11.2        | W03G11.2                  |
| 0.183412519538377 AGIWUR7267                                                                         |          |          |                |                 |                           |
| CB4856 HS X                                                                                          | 12109135 | 12111185 | WBGene00011354 | lgc-13          | T01H10.1                  |
| 0.0101260220644406 AGIWUR15109                                                                       |          |          |                |                 |                           |
| CB4856 HS X                                                                                          | 12111513 | 12113475 | WBGene00011355 | lgc-14          | T01H10.2                  |
| 0.09814536211438 AGIWUR6157;AGIWUR14058;AGIWUR33985;AGIWUR40554                                      |          |          |                |                 |                           |
| CB4856 HS X                                                                                          | 12114324 | 12115923 | WBGene00011356 | lgc-15          | T01H10.3                  |
| -0.045949935241298 AGIWUR16903                                                                       |          |          |                |                 |                           |
| CB4856 HS X                                                                                          | 12116615 | 12117763 | WBGene00011357 | T01H10.4        | T01H10.4                  |
| -0.0150744616316594 AGIWUR10006;AGIWUR28978;AGIWUR33766                                              |          |          |                |                 |                           |
| CB4856 HS X                                                                                          | 12118640 | 12120661 | WBGene00011358 | lgc-16          | T01H10.5                  |
| -0.0987755112550479 AGIWUR10023                                                                      |          |          |                |                 |                           |
| CB4856 HS X                                                                                          | 12121585 | 12125048 | WBGene00011359 | lgc-17          | T01H10.6                  |
| 0.00783957439513205 AGIWUR31474                                                                      |          |          |                |                 |                           |
| CB4856 HS X                                                                                          | 12125608 | 12128000 | WBGene00011360 | lgc-18          | T01H10.7                  |
| -0.255205689607916 AGIWUR397                                                                         |          |          |                |                 |                           |
| CB4856 HS X                                                                                          | 12128144 | 12141151 | WBGene00011361 | lyst-1          | T01H10.8                  |
| 0.0105654733603018 AGIWUR42346                                                                       |          |          |                |                 |                           |
| CB4856 HS X                                                                                          | 12142869 | 12143819 | WBGene00010926 | M153.3          | M153.3 -0.170383932405385 |
| AGIWUR36470                                                                                          |          |          |                |                 |                           |
| CB4856 HS X                                                                                          | 12144114 | 12145940 | WBGene00045481 | M153.5          | M153.5 0.0696451080297384 |
| AGIWUR15412                                                                                          |          |          |                |                 |                           |
| CB4856 HS X                                                                                          | 12146832 | 12148529 | WBGene00010924 | M153.1          | M153.1 -0.212284014479913 |
| AGIWUR36000                                                                                          |          |          |                |                 |                           |
| CB4856 HS X                                                                                          | 12150080 | 12151474 | WBGene00044144 | M153.4          | M153.4 0.0478576857580428 |
| AGIWUR5719;AGIWUR7960;AGIWUR16127;AGIWUR32416;AGIWUR43557                                            |          |          |                |                 |                           |
| CB4856 HS X                                                                                          | 12151359 | 12154105 | WBGene00010925 | M153.2          | M153.2 -0.197345152008557 |
| AGIWUR13412                                                                                          |          |          |                |                 |                           |
| CB4856 HS X                                                                                          | 12156407 | 12160039 | WBGene00010222 | F57G12.2        | F57G12.2                  |
| 0.00900228109046175 AGIWUR6500;AGIWUR11956;AGIWUR12822;AGIWUR28178                                   |          |          |                |                 |                           |
| CB4856 HS X                                                                                          | 12169092 | 12171681 | WBGene00010221 | F57G12.1        | F57G12.1                  |

|                                                                                                 |   |                         |          |                |          |          |                     |  |
|-------------------------------------------------------------------------------------------------|---|-------------------------|----------|----------------|----------|----------|---------------------|--|
| -0.107736894746085                                                                              |   | AGIWUR24594;AGIWUR27372 |          |                |          |          |                     |  |
| CB4856 HS                                                                                       | X | 12199655                | 12213049 | WBGene00000277 | cab-1    | C23H4.1  | 0.0698069978647293  |  |
| AGIWUR10784;AGIWUR10818;AGIWUR15448;AGIWUR17107;AGIWUR18304;AGIWUR36949;AGIWUR39077;AGIWUR41971 |   |                         |          |                |          |          |                     |  |
| CB4856 HS                                                                                       | X | 12217243                | 12219312 | WBGene00044132 | C23H4.8  | C23H4.8  | 0.146629199627601   |  |
| AGIWUR18650;AGIWUR25954                                                                         |   |                         |          |                |          |          |                     |  |
| CB4856 HS                                                                                       | X | 12219710                | 12222745 | WBGene00007691 | C23H4.2  | C23H4.2  | -0.116243799016615  |  |
| AGIWUR31189;AGIWUR35320;AGIWUR36580                                                             |   |                         |          |                |          |          |                     |  |
| CB4856 HS                                                                                       | X | 12222869                | 12226047 | WBGene00007695 | C23H4.7  | C23H4.7  | -0.166511281679218  |  |
| AGIWUR32273                                                                                     |   |                         |          |                |          |          |                     |  |
| CB4856 HS                                                                                       | X | 12226203                | 12229861 | WBGene00007692 | C23H4.3  | C23H4.3  | 0.108933320781714   |  |
| AGIWUR37430                                                                                     |   |                         |          |                |          |          |                     |  |
| CB4856 HS                                                                                       | X | 12229951                | 12233244 | WBGene00007693 | C23H4.4  | C23H4.4  | 0.0200098708225918  |  |
| AGIWUR7406                                                                                      |   |                         |          |                |          |          |                     |  |
| CB4856 HS                                                                                       | X | 12235621                | 12240781 | WBGene00007694 | C23H4.6  | C23H4.6  | 0.419410977932146   |  |
| AGIWUR31706                                                                                     |   |                         |          |                |          |          |                     |  |
| CB4856 HS                                                                                       | X | 12241627                | 12244637 | WBGene00008451 | E01G6.3  | E01G6.3  | 0.0922850054762545  |  |
| AGIWUR14402                                                                                     |   |                         |          |                |          |          |                     |  |
| CB4856 HS                                                                                       | X | 12256644                | 12258971 | WBGene00008450 | E01G6.2  | E01G6.2  | 0.187788853879052   |  |
| AGIWUR5313                                                                                      |   |                         |          |                |          |          |                     |  |
| CB4856 HS                                                                                       | X | 12260881                | 12266537 | WBGene00008449 | E01G6.1  | E01G6.1  | -0.0376656063924674 |  |
| AGIWUR6911                                                                                      |   |                         |          |                |          |          |                     |  |
| CB4856 HS                                                                                       | X | 12266912                | 12270941 | WBGene00010403 | otpl-8   | H19J13.1 |                     |  |
| -0.29925824539497 AGIWUR20322                                                                   |   |                         |          |                |          |          |                     |  |
| CB4856 HS                                                                                       | X | 12273638                | 12274691 | WBGene00010404 | H19J13.2 | H19J13.2 |                     |  |
| -0.0965027867717669 AGIWUR32478                                                                 |   |                         |          |                |          |          |                     |  |
| CB4856 HS                                                                                       | X | 12275042                | 12275677 | WBGene00007294 | C04B4.6  | C04B4.6  | 0.00133442605158063 |  |
| AGIWUR31570                                                                                     |   |                         |          |                |          |          |                     |  |
| CB4856 HS                                                                                       | X | 12280707                | 12282559 | WBGene00007289 | C04B4.1  | C04B4.1  | -0.040174104753909  |  |
| AGIWUR36736                                                                                     |   |                         |          |                |          |          |                     |  |
| CB4856 HS                                                                                       | X | 12283285                | 12285307 | WBGene00007290 | C04B4.2  | C04B4.2  | -0.116822120136597  |  |
| AGIWUR10264                                                                                     |   |                         |          |                |          |          |                     |  |
| CB4856 HS                                                                                       | X | 12285824                | 12287253 | WBGene00007291 | lips-2   | C04B4.3  |                     |  |
| -6.31758387816816e-05 AGIWUR12086                                                               |   |                         |          |                |          |          |                     |  |
| CB4856 HS                                                                                       | X | 12287659                | 12288354 | WBGene00007293 | C04B4.5  | C04B4.5  | 0.145572355465024   |  |
| AGIWUR44214                                                                                     |   |                         |          |                |          |          |                     |  |
| CB4856 HS                                                                                       | X | 12290839                | 12293267 | WBGene00007292 | C04B4.4  | C04B4.4  | 0.0395588615254638  |  |
| AGIWUR37988                                                                                     |   |                         |          |                |          |          |                     |  |
| CB4856 HS                                                                                       | X | 12293767                | 12295311 | WBGene00012299 | W06D11.1 | W06D11.1 |                     |  |
| -0.163876153095128 AGIWUR23674                                                                  |   |                         |          |                |          |          |                     |  |



|                                                           |                                                |          |                |           |                             |
|-----------------------------------------------------------|------------------------------------------------|----------|----------------|-----------|-----------------------------|
| CB4856 HS X                                               | 12296047                                       | 12296644 | WBGene00012300 | W06D11.2  | W06D11.2                    |
| -0.328981897060903                                        | AGIWUR11296                                    |          |                |           |                             |
| CB4856 HS X                                               | 12298683                                       | 12300022 | WBGene00012301 | W06D11.3  | W06D11.3                    |
| -0.0129867032690392                                       | AGIWUR2184                                     |          |                |           |                             |
| CB4856 HS X                                               | 12300134                                       | 12301282 | WBGene00012303 | W06D11.5  | W06D11.5                    |
| -0.100626623308346                                        | AGIWUR42832                                    |          |                |           |                             |
| CB4856 HS X                                               | 12301488                                       | 12302817 | WBGene00012302 | dot-1.3   | W06D11.4                    |
| 0.181915081287581                                         | AGIWUR8566                                     |          |                |           |                             |
| CB4856 HS X                                               | 12306865                                       | 12309482 | WBGene00008902 | phf-32    | F17A2.3 -0.166305933744243  |
| AGIWUR35016                                               |                                                |          |                |           |                             |
| CB4856 HS X                                               | 12310812                                       | 12312730 | WBGene00008903 | F17A2.4   | F17A2.4 -0.297575795906354  |
| AGIWUR27669                                               |                                                |          |                |           |                             |
| CB4856 HS X                                               | 12315568                                       | 12317673 | WBGene00006966 | xtr-2     | F17A2.1 -0.0685585046663828 |
| AGIWUR2512;AGIWUR9538;AGIWUR16671;AGIWUR33859;AGIWUR44395 |                                                |          |                |           |                             |
| CB4856 HS X                                               | 12318240                                       | 12320777 | WBGene00000461 | ceh-40    | F17A2.5 -0.209544571113979  |
| AGIWUR40436                                               |                                                |          |                |           |                             |
| CB4856 HS X                                               | 12321657                                       | 12322993 | WBGene00008904 | F17A2.13  | F17A2.13                    |
| -0.31503062650525                                         | AGIWUR36689                                    |          |                |           |                             |
| CB4856 HS X                                               | 12323739                                       | 12325432 | WBGene00005118 | srd-40    | F17A2.12                    |
| 0.189556878291437                                         | AGIWUR31745                                    |          |                |           |                             |
| CB4856 HS X                                               | 12326724                                       | 12328365 | WBGene00005119 | srd-41    | F17A2.6 0.520938070969154   |
| AGIWUR18512                                               |                                                |          |                |           |                             |
| CB4856 HS X                                               | 12328976                                       | 12330526 | WBGene00005123 | srd-45    | F17A2.7 -0.029053729827389  |
| AGIWUR44137                                               |                                                |          |                |           |                             |
| CB4856 HS X                                               | 12332095                                       | 12333302 | WBGene00005124 | srd-46    | F17A2.10                    |
| -0.00726923175692207                                      | AGIWUR16372                                    |          |                |           |                             |
| CB4856 HS X                                               | 12333642                                       | 12335290 | WBGene00005125 | srd-47    | F17A2.11                    |
| -0.0786148278993872                                       | AGIWUR33221                                    |          |                |           |                             |
| CB4856 HS X                                               | 12336108                                       | 12337752 | WBGene00005126 | srd-48    | F17A2.9 -0.442615322145557  |
| AGIWUR11538                                               |                                                |          |                |           |                             |
| CB4856 HS X                                               | 12338440                                       | 12340248 | WBGene00005122 | srd-44    | F17A2.8 0.239156123488116   |
| AGIWUR32586                                               |                                                |          |                |           |                             |
| CB4856 HS X                                               | 12340378                                       | 12341438 | WBGene00006979 | zig-2     | F42F12.2                    |
| -0.0529939120902236                                       | AGIWUR17101                                    |          |                |           |                             |
| CB4856 HS X                                               | 12342289                                       | 12342597 | WBGene00044397 | nspc-8    | F42F12.12                   |
| -0.139638151354309                                        | AGIWUR3560;AGIWUR10811;AGIWUR34815;AGIWUR41515 |          |                |           |                             |
| CB4856 HS X                                               | 12343609                                       | 12344043 | WBGene00009640 | nspc-10   | F42F12.9                    |
| -0.0168031817067043                                       | AGIWUR20803;AGIWUR25081                        |          |                |           |                             |
| CB4856 HS X                                               | 12347029                                       | 12347899 | WBGene00044140 | F42F12.11 | F42F12.11                   |

|                                                                                                |                                                            |                                     |                |          |                             |
|------------------------------------------------------------------------------------------------|------------------------------------------------------------|-------------------------------------|----------------|----------|-----------------------------|
| 0.163027682059083                                                                              |                                                            | AGIWUR23806;AGIWUR30383;AGIWUR41994 |                |          |                             |
| CB4856 HS X                                                                                    | 12350578                                                   | 12351788                            | WBGene00009635 | F42F12.3 | F42F12.3                    |
| 0.0931873829941114                                                                             | AGIWUR13631                                                |                                     |                |          |                             |
| CB4856 HS X                                                                                    | 12351978                                                   | 12352949                            | WBGene00009636 | F42F12.4 | F42F12.4                    |
| -0.226997809480857                                                                             | AGIWUR9513;AGIWUR25004;AGIWUR33036;AGIWUR42098             |                                     |                |          |                             |
| CB4856 HS X                                                                                    | 12353550                                                   | 12353768                            | WBGene00044398 | nspc-11  | F42F12.13                   |
| -0.0800724802079795                                                                            | AGIWUR7590;AGIWUR24310;AGIWUR29559;AGIWUR37495;AGIWUR41829 |                                     |                |          |                             |
| CB4856 HS X                                                                                    | 12356194                                                   | 12356681                            | WBGene00023493 | nspc-12  | F42F12.10                   |
| 0.0442568064063185                                                                             | AGIWUR20494;AGIWUR24317                                    |                                     |                |          |                             |
| CB4856 HS X                                                                                    | 12362397                                                   | 12363102                            | WBGene00008961 | F19H6.6  | F19H6.6                     |
| -0.00782910321371677                                                                           | AGIWUR43762                                                |                                     |                |          |                             |
| CB4856 HS X                                                                                    | 12363713                                                   | 12364904                            | WBGene00008960 | F19H6.5  | F19H6.5 -0.215393881139834  |
| AGIWUR22825                                                                                    |                                                            |                                     |                |          |                             |
| CB4856 HS X                                                                                    | 12365688                                                   | 12367255                            | WBGene00008959 | F19H6.4  | F19H6.4 -0.0689301134761369 |
| AGIWUR8462                                                                                     |                                                            |                                     |                |          |                             |
| CB4856 HS X                                                                                    | 12374223                                                   | 12378393                            | WBGene00008957 | glb-13   | F19H6.2 -0.0406004444767207 |
| AGIWUR12885;AGIWUR35693                                                                        |                                                            |                                     |                |          |                             |
| CB4856 HS X                                                                                    | 12389594                                                   | 12391474                            | WBGene00008956 | nek1-3   | F19H6.1 0.166088999187446   |
| AGIWUR10988                                                                                    |                                                            |                                     |                |          |                             |
| CB4856 HS X                                                                                    | 12394265                                                   | 12399534                            | WBGene00008924 | F17E5.2  | F17E5.2 0.128129834316165   |
| AGIWUR1387                                                                                     |                                                            |                                     |                |          |                             |
| CB4856 HS X                                                                                    | 12399517                                                   | 12414037                            | WBGene00002991 | lin-2    | F17E5.1 0.0329247191030184  |
| AGIWUR13913                                                                                    |                                                            |                                     |                |          |                             |
| CB4856 HS X                                                                                    | 12425730                                                   | 12426631                            | WBGene00023492 | T24D3.2  | T24D3.2 0.1245341658157     |
| AGIWUR6201;AGIWUR10096;AGIWUR16437;AGIWUR21018;AGIWUR30257;AGIWUR31249;AGIWUR40680;AGIWUR42163 |                                                            |                                     |                |          |                             |
| CB4856 HS X                                                                                    | 12434154                                                   | 12443915                            | WBGene00011824 | T18D3.7  | T18D3.7 -0.0284729392036214 |
| AGIWUR6965;AGIWUR18290;AGIWUR21788                                                             |                                                            |                                     |                |          |                             |
| CB4856 HS X                                                                                    | 12449896                                                   | 12451360                            | WBGene00011823 | T18D3.6  | T18D3.6 0.112998851265374   |
| AGIWUR27988                                                                                    |                                                            |                                     |                |          |                             |
| CB4856 HS X                                                                                    | 12451356                                                   | 12454328                            | WBGene00011826 | T18D3.9  | T18D3.9 -0.124334266877234  |
| AGIWUR23848                                                                                    |                                                            |                                     |                |          |                             |
| CB4856 HS X                                                                                    | 12454745                                                   | 12457934                            | WBGene00011820 | T18D3.1  | T18D3.1 0.060278765158964   |
| AGIWUR4299;AGIWUR13787;AGIWUR22278;AGIWUR22796                                                 |                                                            |                                     |                |          |                             |
| CB4856 HS X                                                                                    | 12459069                                                   | 12461639                            | WBGene00003854 | odr-7    | T18D3.2 -0.192187992180211  |
| AGIWUR22267;AGIWUR41458                                                                        |                                                            |                                     |                |          |                             |
| CB4856 HS X                                                                                    | 12463815                                                   | 12464378                            | WBGene00011822 | T18D3.5  | T18D3.5 0.345649340103551   |
| AGIWUR17653                                                                                    |                                                            |                                     |                |          |                             |
| CB4856 HS X                                                                                    | 12464640                                                   | 12466917                            | WBGene00011821 | cdf-2    | T18D3.3 0.00849115770082776 |
| AGIWUR23602                                                                                    |                                                            |                                     |                |          |                             |

|                                                                                                                       |    |   |          |          |                |         |          |                     |
|-----------------------------------------------------------------------------------------------------------------------|----|---|----------|----------|----------------|---------|----------|---------------------|
| CB4856                                                                                                                | HS | X | 12468061 | 12475348 | WBGene00003514 | myo-2   | T18D3.4  | 0.0757283288474868  |
| AGIWUR3996;AGIWUR9670;AGIWUR14689;AGIWUR15589;AGIWUR19019;AGIWUR21820;AGIWUR26437;AGIWUR30907;AGIWUR33713;AGIWUR36921 |    |   |          |          |                |         |          |                     |
| CB4856                                                                                                                | HS | X | 12475659 | 12477441 | WBGene00009725 | F45E6.1 | F45E6.1  | -0.0389795349944553 |
| AGIWUR32552                                                                                                           |    |   |          |          |                |         |          |                     |
| CB4856                                                                                                                | HS | X | 12480948 | 12484904 | WBGene00000222 | atf-6   | F45E6.2  | -0.0352864909958353 |
| AGIWUR6080;AGIWUR36726;AGIWUR42069                                                                                    |    |   |          |          |                |         |          |                     |
| CB4856                                                                                                                | HS | X | 12485054 | 12491102 | WBGene00009726 | tbc-13  | F45E6.3  | 0.0357820350294613  |
| AGIWUR42166                                                                                                           |    |   |          |          |                |         |          |                     |
| CB4856                                                                                                                | HS | X | 12492865 | 12495862 | WBGene00009727 | lips-1  | F45E6.4  | 0.183959855146584   |
| AGIWUR2685;AGIWUR6093;AGIWUR33965                                                                                     |    |   |          |          |                |         |          |                     |
| CB4856                                                                                                                | HS | X | 12502802 | 12503338 | WBGene00009728 | sdz-19  | F45E6.6  | -0.0299447376633575 |
| AGIWUR3292                                                                                                            |    |   |          |          |                |         |          |                     |
| CB4856                                                                                                                | HS | X | 12503885 | 12514048 | WBGene00004739 | scd-1   | H20J18.1 |                     |
| -0.00925375590035671 AGIWUR11901;AGIWUR30749;AGIWUR31931;AGIWUR42881                                                  |    |   |          |          |                |         |          |                     |
| CB4856                                                                                                                | HS | X | 12525344 | 12525783 | WBGene00007634 | C16D6.1 | C16D6.1  | 0.152792644153136   |
| AGIWUR33758                                                                                                           |    |   |          |          |                |         |          |                     |
| CB4856                                                                                                                | HS | X | 12526660 | 12527286 | WBGene00007636 | C16D6.3 | C16D6.3  | 0.0251422079660779  |
| AGIWUR38101                                                                                                           |    |   |          |          |                |         |          |                     |
| CB4856                                                                                                                | HS | X | 12537014 | 12551677 | WBGene00007635 | npr-4   | C16D6.2  | -0.0370058422211468 |
| AGIWUR4513;AGIWUR13566;AGIWUR38713                                                                                    |    |   |          |          |                |         |          |                     |
| CB4856                                                                                                                | HS | X | 12574069 | 12577209 | WBGene00011989 | T24D5.1 | T24D5.1  | 0.163797322932849   |
| AGIWUR44564                                                                                                           |    |   |          |          |                |         |          |                     |
| CB4856                                                                                                                | HS | X | 12580074 | 12583213 | WBGene00011991 | T24D5.3 | T24D5.3  | -0.0863252644866854 |
| AGIWUR29259                                                                                                           |    |   |          |          |                |         |          |                     |
| CB4856                                                                                                                | HS | X | 12583799 | 12586439 | WBGene00011990 | T24D5.2 | T24D5.2  | 0.0393357936270018  |
| AGIWUR2904                                                                                                            |    |   |          |          |                |         |          |                     |
| CB4856                                                                                                                | HS | X | 12597168 | 12597437 | WBGene00011992 | T24D5.4 | T24D5.4  | -0.0493830165883518 |
| AGIWUR12113                                                                                                           |    |   |          |          |                |         |          |                     |
| CB4856                                                                                                                | HS | X | 12598031 | 12599297 | WBGene00011993 | T24D5.5 | T24D5.5  | 0.143413047992567   |
| AGIWUR9730                                                                                                            |    |   |          |          |                |         |          |                     |
| CB4856                                                                                                                | HS | X | 12603622 | 12604708 | WBGene00044149 | T24D5.6 | T24D5.6  | 0.0564717400145742  |
| AGIWUR9923                                                                                                            |    |   |          |          |                |         |          |                     |
| CB4856                                                                                                                | HS | X | 12612727 | 12617880 | WBGene00011152 | R09A8.1 | R09A8.1  | 0.079879233517735   |
| AGIWUR12254                                                                                                           |    |   |          |          |                |         |          |                     |
| CB4856                                                                                                                | HS | X | 12619472 | 12623531 | WBGene00011153 | R09A8.2 | R09A8.2  | 0.106249304985379   |
| AGIWUR3121                                                                                                            |    |   |          |          |                |         |          |                     |
| CB4856                                                                                                                | HS | X | 12624655 | 12634354 | WBGene00006493 | tag-147 | R09A8.3  | -0.241815046803657  |
| AGIWUR18950                                                                                                           |    |   |          |          |                |         |          |                     |

|                                                                                  |   |          |          |                |                   |                     |
|----------------------------------------------------------------------------------|---|----------|----------|----------------|-------------------|---------------------|
| CB4856 HS                                                                        | X | 12636153 | 12637056 | WBGene00000755 | col-182 R09A8.4   | -0.219574545858112  |
| AGIWUR23947                                                                      |   |          |          |                |                   |                     |
| CB4856 HS                                                                        | X | 12638461 | 12640559 | WBGene00011154 | R09A8.5 R09A8.5   | -0.1335726822486    |
| AGIWUR17053                                                                      |   |          |          |                |                   |                     |
| CB4856 HS                                                                        | X | 12647117 | 12651487 | WBGene00010423 | zmp-5 H36L18.1    |                     |
| 0.0391658891541393 AGIWUR29634                                                   |   |          |          |                |                   |                     |
| CB4856 HS                                                                        | X | 12652591 | 12653520 | WBGene00010424 | H36L18.2 H36L18.2 |                     |
| 0.038546203081685 AGIWUR30293;AGIWUR43830                                        |   |          |          |                |                   |                     |
| CB4856 HS                                                                        | X | 12658476 | 12661062 | WBGene00007259 | C02B4.3 C02B4.3   | 0.0477214847902694  |
| AGIWUR16012;AGIWUR23291;AGIWUR23948                                              |   |          |          |                |                   |                     |
| CB4856 HS                                                                        | X | 12662478 | 12663627 | WBGene00045386 | C02B4.4 C02B4.4   | 0.188748007900298   |
| AGIWUR3227;AGIWUR7068;AGIWUR16049;AGIWUR39735;AGIWUR42448                        |   |          |          |                |                   |                     |
| CB4856 HS                                                                        | X | 12663760 | 12667854 | WBGene00003616 | nhr-17 C02B4.2    | 0.0522356544807447  |
| AGIWUR26583                                                                      |   |          |          |                |                   |                     |
| CB4856 HS                                                                        | X | 12678832 | 12689279 | WBGene00000082 | adt-1 C02B4.1     | -0.135207142566917  |
| AGIWUR3895                                                                       |   |          |          |                |                   |                     |
| CB4856 HS                                                                        | X | 12691573 | 12695652 | WBGene00011564 | ugt-50 T07C5.1    | 0.0114347755577295  |
| AGIWUR20308;AGIWUR44327                                                          |   |          |          |                |                   |                     |
| CB4856 HS                                                                        | X | 12695589 | 12699921 | WBGene00011568 | nhr-26 T07C5.5    | -0.0355392920615305 |
| AGIWUR5518                                                                       |   |          |          |                |                   |                     |
| CB4856 HS                                                                        | X | 12700393 | 12702063 | WBGene00011566 | nhr-214 T07C5.3   | -0.0236802036484676 |
| AGIWUR19201                                                                      |   |          |          |                |                   |                     |
| CB4856 HS                                                                        | X | 12703330 | 12704821 | WBGene00011565 | nhr-272 T07C5.2   | 0.315148505675635   |
| AGIWUR25523                                                                      |   |          |          |                |                   |                     |
| CB4856 HS                                                                        | X | 12705624 | 12808249 | WBGene00008901 | nhr-27 F16H9.2    | -0.138048860844024  |
| AGIWUR34047                                                                      |   |          |          |                |                   |                     |
| CB4856 HS                                                                        | X | 12843311 | 12845384 | WBGene00008260 | C52G5.2 C52G5.2   | 0.119438059591376   |
| AGIWUR37494                                                                      |   |          |          |                |                   |                     |
| CB4856 HS                                                                        | X | 12845811 | 12846143 | WBGene00008261 | C52G5.3 C52G5.3   | 0.0805288071964192  |
| AGIWUR24543                                                                      |   |          |          |                |                   |                     |
| CB4856 HS                                                                        | X | 12846437 | 12852601 | WBGene00000482 | chd-3 T14G8.1     | 0.0033765567039481  |
| AGIWUR26268                                                                      |   |          |          |                |                   |                     |
| CB4856 HS                                                                        | X | 12858019 | 12859541 | WBGene00011770 | T14G8.2 T14G8.2   | 0.0046635337958989  |
| AGIWUR412;AGIWUR3957;AGIWUR34879                                                 |   |          |          |                |                   |                     |
| CB4856 HS                                                                        | X | 12861237 | 12870025 | WBGene00011771 | T14G8.3 T14G8.3   | -0.0348999221580435 |
| AGIWUR16719;AGIWUR30205;AGIWUR33411                                              |   |          |          |                |                   |                     |
| CB4856 HS                                                                        | X | 12877480 | 12880328 | WBGene00001149 | bcat-1 K02A4.1    | 0.0818109493437724  |
| AGIWUR877;AGIWUR9819;AGIWUR12847;AGIWUR19912;AGIWUR22343;AGIWUR25440;AGIWUR26337 |   |          |          |                |                   |                     |
| CB4856 HS                                                                        | X | 12881126 | 12884989 | WBGene00001681 | gpc-1 K02A4.2     | -0.0113999787036931 |

AGIWUR1065;AGIWUR7269;AGIWUR12147;AGIWUR13497;AGIWUR17193;AGIWUR18451;AGIWUR20353;AGIWUR22933;AGIWUR33009;AGIWUR36230;AGIWUR36878;AGIWUR41561  
 CB4856 HS X 12907832 12920176 WBGene00004108 pqn-18 C34E7.1 0.137464694750586  
 AGIWUR11251  
 CB4856 HS X 12930336 12932025 WBGene00007933 C34E7.3 C34E7.3 0.0489927036073343  
 AGIWUR5962  
 CB4856 HS X 12932205 12934978 WBGene00007934 C34E7.4 C34E7.4 -0.0111799727034629  
 AGIWUR24073  
 CB4856 HS X 12938695 12940792 WBGene00007344 C05E7.2 C05E7.2 -0.0837371391521877  
 AGIWUR43111  
 CB4856 HS X 12941441 12943547 WBGene00007343 C05E7.1 C05E7.1 0.132773497131193  
 AGIWUR5159  
 CB4856 HS X 12945616 12946562 WBGene00007345 C05E7.3 C05E7.3 0.0708320494791108  
 AGIWUR44102  
 CB4856 HS X 12965485 12968731 WBGene00007346 frpr-2 C05E7.4 0.213213986784456  
 AGIWUR15330  
 CB4856 HS X 12968950 12975643 WBGene00004089 ppk-3 VF11C1L.1  
 0.116529174971566 AGIWUR4084  
 CB4856 HS X 12978505 12979854 WBGene00008693 F11C1.4 F11C1.4 -0.0921979602568852  
 AGIWUR4772  
 CB4856 HS X 12981775 12985852 WBGene00008692 scav-4 F11C1.3 0.328746245222288  
 AGIWUR5437;AGIWUR7703;AGIWUR24766  
 CB4856 HS X 12985790 12987219 WBGene00008691 mff-1 F11C1.2 0.346714179225984  
 AGIWUR7567  
 CB4856 HS X 12987334 12990365 WBGene00008690 F11C1.1 F11C1.1 0.00889416994175107  
 AGIWUR38893  
 CB4856 HS X 12991447 12999638 WBGene00008694 F11C1.5 F11C1.5 0.0125153028087657  
 AGIWUR955;AGIWUR6921;AGIWUR7291;AGIWUR14107;AGIWUR25945;AGIWUR27374;AGIWUR28924;AGIWUR31966;AGIWUR38085;AGIWUR39778;AGIWUR43066;AGIWUR44053  
 CB4856 HS X 13008493 13013962 WBGene00003623 nhr-25 F11C1.6 0.0709155993038326  
 AGIWUR112;AGIWUR11229;AGIWUR18735;AGIWUR26216;AGIWUR33480  
 CB4856 HS X 13018848 13022023 WBGene00008278 npr-10 C53C7.1 -0.226370837490778  
 AGIWUR30677  
 CB4856 HS X 13042182 13046220 WBGene00014294 C53C7.5 C53C7.5 0.107971306359533  
 AGIWUR1468;AGIWUR8123;AGIWUR9304;AGIWUR26719;AGIWUR29429;AGIWUR43147;AGIWUR43738;AGIWUR43899  
 CB4856 HS X 13048558 13050885 WBGene00008279 C53C7.3 C53C7.3 0.0118278659726996  
 AGIWUR43;AGIWUR783;AGIWUR5332;AGIWUR23440  
 CB4856 HS X 13051796 13055395 WBGene00010519 K03A11.1 K03A11.1  
 -0.159254410133814 AGIWUR3726;AGIWUR10438;AGIWUR18953;AGIWUR28685

|                                                             |                         |          |                |          |                            |
|-------------------------------------------------------------|-------------------------|----------|----------------|----------|----------------------------|
| CB4856 HS X                                                 | 13055860                | 13058381 | WBGene00045497 | K03A11.6 | K03A11.6                   |
| 0.162655906188467                                           | AGIWUR8903              |          |                |          |                            |
| CB4856 HS X                                                 | 13064168                | 13066936 | WBGene00010522 | K03A11.5 | K03A11.5                   |
| -0.0927825579073671                                         | AGIWUR31110             |          |                |          |                            |
| CB4856 HS X                                                 | 13067279                | 13068239 | WBGene00010520 | cpx-2    | K03A11.2                   |
| -0.245370573630084                                          | AGIWUR9477              |          |                |          |                            |
| CB4856 HS X                                                 | 13074682                | 13076092 | WBGene00000450 | ceh-28   | K03A11.3                   |
| 0.0563593914097238                                          | AGIWUR30609             |          |                |          |                            |
| CB4856 HS X                                                 | 13078172                | 13082045 | WBGene00010521 | K03A11.4 | K03A11.4                   |
| -0.000757204353979191                                       | AGIWUR28119;AGIWUR42048 |          |                |          |                            |
| CB4856 HS X                                                 | 13082626                | 13084235 | WBGene00006078 | str-10   | R03G8.5 0.189002959966659  |
| AGIWUR10323                                                 |                         |          |                |          |                            |
| CB4856 HS X                                                 | 13084573                | 13087646 | WBGene00010996 | R03G8.1  | R03G8.1 0.125152347113106  |
| AGIWUR40244                                                 |                         |          |                |          |                            |
| CB4856 HS X                                                 | 13091131                | 13094424 | WBGene00010998 | R03G8.3  | R03G8.3 0.130716681207865  |
| AGIWUR44752                                                 |                         |          |                |          |                            |
| CB4856 HS X                                                 | 13094558                | 13100445 | WBGene00011000 | R03G8.6  | R03G8.6 0.0997961363419932 |
| AGIWUR41046                                                 |                         |          |                |          |                            |
| CB4856 HS X                                                 | 13101306                | 13104205 | WBGene00010999 | R03G8.4  | R03G8.4 -0.381794025114172 |
| AGIWUR30157                                                 |                         |          |                |          |                            |
| CB4856 HS X                                                 | 13105184                | 13108543 | WBGene00008925 | F17H10.1 | F17H10.1                   |
| 0.13833929112737                                            | AGIWUR29715             |          |                |          |                            |
| CB4856 HS X                                                 | 13113772                | 13116390 | WBGene00008926 | F17H10.2 | F17H10.2                   |
| 0.117496620115471                                           | AGIWUR44308             |          |                |          |                            |
| CB4856 HS X                                                 | 13116352                | 13122291 | WBGene00008927 | snx-17   | F17H10.3                   |
| 0.0113476604530796                                          | AGIWUR19757             |          |                |          |                            |
| CB4856 HS X                                                 | 13125976                | 13126520 | WBGene00008928 | F17H10.4 | F17H10.4                   |
| 0.0311892814406214                                          | AGIWUR6044              |          |                |          |                            |
| CB4856 HS X                                                 | 13130263                | 13134124 | WBGene00008598 | spin-3   | F09A5.1 0.211773399321325  |
| AGIWUR37383                                                 |                         |          |                |          |                            |
| CB4856 HS X                                                 | 13135107                | 13139771 | WBGene00008599 | F09A5.2  | F09A5.2 0.0944222643664254 |
| AGIWUR40861                                                 |                         |          |                |          |                            |
| CB4856 HS X                                                 | 13139847                | 13140886 | WBGene00045245 | ttr-34   | F09A5.9 0.0365240648936744 |
| AGIWUR16227;AGIWUR16758;AGIWUR16976;AGIWUR31415;AGIWUR32230 |                         |          |                |          |                            |
| CB4856 HS X                                                 | 13141601                | 13152474 | WBGene00008600 | F09A5.3  | F09A5.3 0.125129808539812  |
| AGIWUR19338                                                 |                         |          |                |          |                            |
| CB4856 HS X                                                 | 13152821                | 13170113 | WBGene00008601 | F09A5.4  | F09A5.4 0.0669640745635753 |
| AGIWUR4543;AGIWUR20864;AGIWUR23880;AGIWUR28567;AGIWUR41955  |                         |          |                |          |                            |
| CB4856 HS X                                                 | 13177856                | 13178447 | WBGene00003741 | nlp-3    | F48C11.3                   |

|                                                                                                                                               |             |          |                |          |          |                     |
|-----------------------------------------------------------------------------------------------------------------------------------------------|-------------|----------|----------------|----------|----------|---------------------|
| -0.1004350069555                                                                                                                              | AGIWUR24480 |          |                |          |          |                     |
| CB4856 HS X                                                                                                                                   | 13182463    | 13189961 | WBGene00009844 | cwp-5    | F48C11.2 |                     |
| -0.0964605889819747                                                                                                                           | AGIWUR38605 |          |                |          |          |                     |
| CB4856 HS X                                                                                                                                   | 13191246    | 13193955 | WBGene00001668 | gpa-6    | F48C11.1 |                     |
| 0.180244477395446                                                                                                                             | AGIWUR8673  |          |                |          |          |                     |
| CB4856 HS X                                                                                                                                   | 13212390    | 13216707 | WBGene00006749 | unc-9    | R12H7.1  | -0.0481819568342292 |
| AGIWUR37395                                                                                                                                   |             |          |                |          |          |                     |
| CB4856 HS X                                                                                                                                   | 13217101    | 13219019 | WBGene00011255 | R12H7.4  | R12H7.4  | -0.103669236542064  |
| AGIWUR1046                                                                                                                                    |             |          |                |          |          |                     |
| CB4856 HS X                                                                                                                                   | 13218977    | 13221462 | WBGene00000217 | asp-4    | R12H7.2  | -0.187849646726773  |
| AGIWUR834;AGIWUR4136;AGIWUR14681;AGIWUR36693                                                                                                  |             |          |                |          |          |                     |
| CB4856 HS X                                                                                                                                   | 13222920    | 13223546 | WBGene00004826 | skr-20   | R12H7.5  | 0.150377465684599   |
| AGIWUR8378                                                                                                                                    |             |          |                |          |          |                     |
| CB4856 HS X                                                                                                                                   | 13223644    | 13224712 | WBGene00004825 | skr-19   | R12H7.3  | -0.0303551038677461 |
| AGIWUR5557;AGIWUR9972;AGIWUR11033;AGIWUR13815;AGIWUR20375;AGIWUR21446;AGIWUR30438;AGIWUR31990;AGIWUR35512;AGIWUR36622;AGIWUR42278;AGIWUR42725 |             |          |                |          |          |                     |
| CB4856 HS X                                                                                                                                   | 13225818    | 13226678 | WBGene00004827 | skr-21   | K08H2.1  | -0.213849366123052  |
| AGIWUR33637                                                                                                                                   |             |          |                |          |          |                     |
| CB4856 HS X                                                                                                                                   | 13228669    | 13232328 | WBGene00010694 | bgnt-1.5 |          | K08H2.9             |
| 0.0786016219885699                                                                                                                            | AGIWUR41025 |          |                |          |          |                     |
| CB4856 HS X                                                                                                                                   | 13234099    | 13234957 | WBGene00010689 | K08H2.2  | K08H2.2  | -0.18473564085863   |
| AGIWUR39457                                                                                                                                   |             |          |                |          |          |                     |
| CB4856 HS X                                                                                                                                   | 13237389    | 13238476 | WBGene00010690 | K08H2.3  | K08H2.3  | -0.513610253609023  |
| AGIWUR24564                                                                                                                                   |             |          |                |          |          |                     |
| CB4856 HS X                                                                                                                                   | 13238651    | 13240003 | WBGene00010691 | K08H2.4  | K08H2.4  | -0.522735092495472  |
| AGIWUR38828                                                                                                                                   |             |          |                |          |          |                     |
| CB4856 HS X                                                                                                                                   | 13241109    | 13242278 | WBGene00010692 | K08H2.5  | K08H2.5  | 0.118497671684832   |
| AGIWUR37660                                                                                                                                   |             |          |                |          |          |                     |
| CB4856 HS X                                                                                                                                   | 13245390    | 13247044 | WBGene00001995 | hpl-1    | K08H2.6  | 0.0260587658630165  |
| AGIWUR30567                                                                                                                                   |             |          |                |          |          |                     |
| CB4856 HS X                                                                                                                                   | 13247263    | 13248426 | WBGene00010693 | K08H2.7  | K08H2.7  | 0.230090540333843   |
| AGIWUR16768                                                                                                                                   |             |          |                |          |          |                     |
| CB4856 HS X                                                                                                                                   | 13251964    | 13256282 | WBGene00003626 | nhr-32   | K08H2.8  | 0.0697300423998009  |
| AGIWUR38246                                                                                                                                   |             |          |                |          |          |                     |
| CB4856 HS X                                                                                                                                   | 13262495    | 13264589 | WBGene00010704 | K09A11.1 |          | K09A11.1            |
| 0.0533125482118955                                                                                                                            | AGIWUR5726  |          |                |          |          |                     |
| CB4856 HS X                                                                                                                                   | 13265041    | 13267338 | WBGene00010705 | cyp-14A1 |          | K09A11.2            |
| -0.0797525399870338                                                                                                                           | AGIWUR19431 |          |                |          |          |                     |
| CB4856 HS X                                                                                                                                   | 13267562    | 13269697 | WBGene00010706 | cyp-14A2 |          | K09A11.3            |

|                                                                                                             |                                     |          |                |          |                             |
|-------------------------------------------------------------------------------------------------------------|-------------------------------------|----------|----------------|----------|-----------------------------|
| -0.404287769592916                                                                                          | AGIWUR19995                         |          |                |          |                             |
| CB4856 HS X                                                                                                 | 13271877                            | 13274218 | WBGene00010707 | cyp-14A3 | K09A11.4                    |
| 0.148135969685563                                                                                           | AGIWUR28698                         |          |                |          |                             |
| CB4856 HS X                                                                                                 | 13275315                            | 13278976 | WBGene00010708 | phf-33   | K09A11.5                    |
| -0.157038587438148                                                                                          | AGIWUR28036;AGIWUR30720             |          |                |          |                             |
| CB4856 HS X                                                                                                 | 13282096                            | 13284204 | WBGene00011009 | cyp-14A4 | R04D3.1                     |
| 0.181490228711342                                                                                           | AGIWUR8120                          |          |                |          |                             |
| CB4856 HS X                                                                                                 | 13285122                            | 13286633 | WBGene00011010 | R04D3.2  | R04D3.2 -0.0736035192985156 |
| AGIWUR41426                                                                                                 |                                     |          |                |          |                             |
| CB4856 HS X                                                                                                 | 13287779                            | 13288815 | WBGene00011012 | R04D3.4  | R04D3.4 -0.0592235416497022 |
| AGIWUR39895                                                                                                 |                                     |          |                |          |                             |
| CB4856 HS X                                                                                                 | 13288917                            | 13290631 | WBGene00011011 | R04D3.3  | R04D3.3 0.0376260643078759  |
| AGIWUR37441                                                                                                 |                                     |          |                |          |                             |
| CB4856 HS X                                                                                                 | 13291806                            | 13292984 | WBGene00005116 | srd-38   | R04D3.12                    |
| 0.0744708543166945                                                                                          | AGIWUR42329                         |          |                |          |                             |
| CB4856 HS X                                                                                                 | 13293415                            | 13294773 | WBGene00005114 | srd-36   | R04D3.6 0.0222446632193085  |
| AGIWUR23630                                                                                                 |                                     |          |                |          |                             |
| CB4856 HS X                                                                                                 | 13295164                            | 13297885 | WBGene00005115 | srd-37   | R04D3.11                    |
| 0.031310444390777                                                                                           | AGIWUR7041;AGIWUR21547              |          |                |          |                             |
| CB4856 HS X                                                                                                 | 13298994                            | 13300523 | WBGene00005117 | srd-39   | R04D3.8 -0.0800667807480204 |
| AGIWUR39585                                                                                                 |                                     |          |                |          |                             |
| CB4856 HS X                                                                                                 | 13301599                            | 13303457 | WBGene00005120 | srd-42   | R04D3.7 -0.0939931496453177 |
| AGIWUR25173                                                                                                 |                                     |          |                |          |                             |
| CB4856 HS X                                                                                                 | 13303905                            | 13305844 | WBGene00005121 | srd-43   | R04D3.9 0.27555037550964    |
| AGIWUR19251                                                                                                 |                                     |          |                |          |                             |
| CB4856 HS X                                                                                                 | 13307282                            | 13308845 | WBGene00011013 | srxa-8   | R04D3.10                    |
| 0.00214396326073452                                                                                         | AGIWUR10861                         |          |                |          |                             |
| CB4856 HS X                                                                                                 | 13310227                            | 13311830 | WBGene00009796 | F46G10.1 | F46G10.1                    |
| 0.0596486427312346                                                                                          |                                     |          |                |          |                             |
| AGIWUR13809;AGIWUR18540;AGIWUR23251;AGIWUR24687;AGIWUR30484;AGIWUR34867;AGIWUR35204;AGIWUR37443;AGIWUR41431 |                                     |          |                |          |                             |
| CB4856 HS X                                                                                                 | 13322963                            | 13327854 | WBGene00009797 | F46G10.2 | F46G10.2                    |
| -0.219323694457138                                                                                          | AGIWUR27847                         |          |                |          |                             |
| CB4856 HS X                                                                                                 | 13328252                            | 13331248 | WBGene00004801 | sir-2.2  | F46G10.7                    |
| 0.183232034055337                                                                                           | AGIWUR11869;AGIWUR16128;AGIWUR41063 |          |                |          |                             |
| CB4856 HS X                                                                                                 | 13332014                            | 13333825 | WBGene00004802 | sir-2.3  | F46G10.3                    |
| 0.10943584140287                                                                                            | AGIWUR25984                         |          |                |          |                             |
| CB4856 HS X                                                                                                 | 13334046                            | 13336784 | WBGene00009798 | F46G10.4 | F46G10.4                    |
| 0.107107151760474                                                                                           | AGIWUR3389                          |          |                |          |                             |
| CB4856 HS X                                                                                                 | 13338052                            | 13348118 | WBGene00004238 | ptr-24   | F46G10.5                    |



|                                                 |                                                                         |          |                |          |          |                     |
|-------------------------------------------------|-------------------------------------------------------------------------|----------|----------------|----------|----------|---------------------|
| 0.0818501830757974                              | AGIWUR39309                                                             |          |                |          |          |                     |
| CB4856 HS X                                     | 13349639                                                                | 13350804 | WBGene00003511 | mx1-3    | F46G10.6 |                     |
| 0.122935808502209                               | AGIWUR27752                                                             |          |                |          |          |                     |
| CB4856 HS X                                     | 13361201                                                                | 13365294 | WBGene00008213 | C49F8.1  | C49F8.1  | -0.504738706596349  |
| AGIWUR21450                                     |                                                                         |          |                |          |          |                     |
| CB4856 HS X                                     | 13371612                                                                | 13376992 | WBGene00008214 | gem-1    | C49F8.2  | -0.0572459170180792 |
| AGIWUR7625;AGIWUR28459;AGIWUR33570              |                                                                         |          |                |          |          |                     |
| CB4856 HS X                                     | 13386057                                                                | 13387547 | WBGene00008215 | C49F8.3  | C49F8.3  | -0.345106574554077  |
| AGIWUR11465                                     |                                                                         |          |                |          |          |                     |
| CB4856 HS X                                     | 13391949                                                                | 13395149 | WBGene00008518 | irld-2   | F02C12.4 |                     |
| 0.174663060782611                               | AGIWUR29427                                                             |          |                |          |          |                     |
| CB4856 HS X                                     | 13397323                                                                | 13397710 | WBGene00008517 | F02C12.3 |          | F02C12.3            |
| -0.0127610779544183                             | AGIWUR41613                                                             |          |                |          |          |                     |
| CB4856 HS X                                     | 13398198                                                                | 13399230 | WBGene00008516 | F02C12.2 |          | F02C12.2            |
| 0.233413657309661                               | AGIWUR19214                                                             |          |                |          |          |                     |
| CB4856 HS X                                     | 13402083                                                                | 13406415 | WBGene00008515 | F02C12.1 |          | F02C12.1            |
| -0.0826878720482056                             | AGIWUR866;AGIWUR5397;AGIWUR16048;AGIWUR28399                            |          |                |          |          |                     |
| CB4856 HS X                                     | 13406674                                                                | 13409644 | WBGene00008519 | cyp-13B1 |          | F02C12.5            |
| -0.02870353958218                               | AGIWUR29779;AGIWUR30525;AGIWUR31387;AGIWUR37308                         |          |                |          |          |                     |
| CB4856 HS X                                     | 13410720                                                                | 13411285 | WBGene00044405 | C29F7.8  | C29F7.8  | -0.0375072916814769 |
| AGIWUR23372;AGIWUR24426;AGIWUR24459;AGIWUR39234 |                                                                         |          |                |          |          |                     |
| CB4856 HS X                                     | 13412463                                                                | 13414617 | WBGene00007810 | C29F7.1  | C29F7.1  | 0.193962984284394   |
| AGIWUR1665                                      |                                                                         |          |                |          |          |                     |
| CB4856 HS X                                     | 13416078                                                                | 13418220 | WBGene00007811 | C29F7.2  | C29F7.2  | 0.0221546582870502  |
| AGIWUR15482                                     |                                                                         |          |                |          |          |                     |
| CB4856 HS X                                     | 13418841                                                                | 13419934 | WBGene00007812 | C29F7.3  | C29F7.3  | 0.183213281675954   |
| AGIWUR27922                                     |                                                                         |          |                |          |          |                     |
| CB4856 HS X                                     | 13421824                                                                | 13423427 | WBGene00001435 | fkx-3    | C29F7.4  | -0.135522906096151  |
| AGIWUR12036                                     |                                                                         |          |                |          |          |                     |
| CB4856 HS X                                     | 13427062                                                                | 13428842 | WBGene00001436 | fkx-4    | C29F7.5  | -0.418009537455603  |
| AGIWUR33148                                     |                                                                         |          |                |          |          |                     |
| CB4856 HS X                                     | 13436454                                                                | 13441883 | WBGene00007813 | jmjd-3.3 |          | C29F7.6             |
| 0.178003375284044                               | AGIWUR14123;AGIWUR19403;AGIWUR21987;AGIWUR37163;AGIWUR41094;AGIWUR41742 |          |                |          |          |                     |
| CB4856 HS X                                     | 13444980                                                                | 13448230 | WBGene00008527 | set-8    | F02D10.7 |                     |
| 0.00511622869812545                             | AGIWUR29127                                                             |          |                |          |          |                     |
| CB4856 HS X                                     | 13449586                                                                | 13451678 | WBGene00008526 | F02D10.6 |          | F02D10.6            |
| -0.12406088357595                               | AGIWUR32178                                                             |          |                |          |          |                     |
| CB4856 HS X                                     | 13452667                                                                | 13456658 | WBGene00001465 | flr-1    | F02D10.5 |                     |
| 0.113405545324085                               | AGIWUR14339                                                             |          |                |          |          |                     |

|                                                                                                |    |   |                                                                                   |          |                |          |                             |
|------------------------------------------------------------------------------------------------|----|---|-----------------------------------------------------------------------------------|----------|----------------|----------|-----------------------------|
| CB4856                                                                                         | HS | X | 13456889                                                                          | 13462619 | WBGene00008524 | F02D10.3 | F02D10.3                    |
| 0.0753388404723232                                                                             |    |   | AGIWUR2362;AGIWUR5227;AGIWUR11181;AGIWUR31334;AGIWUR31422;AGIWUR33407;AGIWUR35404 |          |                |          |                             |
| CB4856                                                                                         | HS | X | 13462668                                                                          | 13463893 | WBGene00008523 | F02D10.2 | F02D10.2                    |
| -0.123630690886062                                                                             |    |   | AGIWUR28889                                                                       |          |                |          |                             |
| CB4856                                                                                         | HS | X | 13466737                                                                          | 13467736 | WBGene00000756 | col-183  | F02D10.1                    |
| -0.255476910502884                                                                             |    |   | AGIWUR28871                                                                       |          |                |          |                             |
| CB4856                                                                                         | HS | X | 13469387                                                                          | 13470471 | WBGene00000757 | col-184  | F15A2.1 0.158239985240357   |
| AGIWUR23058;AGIWUR31053                                                                        |    |   |                                                                                   |          |                |          |                             |
| CB4856                                                                                         | HS | X | 13472155                                                                          | 13475899 | WBGene00006610 | tre-4    | F15A2.2 0.292271372631573   |
| AGIWUR43735                                                                                    |    |   |                                                                                   |          |                |          |                             |
| CB4856                                                                                         | HS | X | 13475964                                                                          | 13477456 | WBGene00001164 | efn-3    | F15A2.5 0.134346319408188   |
| AGIWUR588                                                                                      |    |   |                                                                                   |          |                |          |                             |
| CB4856                                                                                         | HS | X | 13478621                                                                          | 13481804 | WBGene00005128 | srd-50   | F15A2.4 0.0621215508981701  |
| AGIWUR36687                                                                                    |    |   |                                                                                   |          |                |          |                             |
| CB4856                                                                                         | HS | X | 13482649                                                                          | 13484913 | WBGene00005129 | srd-51   | F15A2.3 -0.0710442307286669 |
| AGIWUR37248                                                                                    |    |   |                                                                                   |          |                |          |                             |
| CB4856                                                                                         | HS | X | 13487555                                                                          | 13500662 | WBGene00004719 | sad-1    | F15A2.6 0.074363069034785   |
| AGIWUR4261;AGIWUR17936;AGIWUR25295;AGIWUR32392;AGIWUR36840;AGIWUR39256;AGIWUR39714;AGIWUR43372 |    |   |                                                                                   |          |                |          |                             |
| CB4856                                                                                         | HS | X | 13507564                                                                          | 13510094 | WBGene00010368 | H06A10.1 | H06A10.1                    |
| 0.221635785037719                                                                              |    |   | AGIWUR2679                                                                        |          |                |          |                             |
| CB4856                                                                                         | HS | X | 13515871                                                                          | 13518911 | WBGene00000406 | cdk-4    | F18H3.5 0.0743502019200442  |
| AGIWUR9653;AGIWUR20273;AGIWUR41553                                                             |    |   |                                                                                   |          |                |          |                             |
| CB4856                                                                                         | HS | X | 13519663                                                                          | 13521537 | WBGene00008939 | F18H3.1  | F18H3.1 -0.305198411514958  |
| AGIWUR19712;AGIWUR23248;AGIWUR25409;AGIWUR28478                                                |    |   |                                                                                   |          |                |          |                             |
| CB4856                                                                                         | HS | X | 13522264                                                                          | 13527483 | WBGene00003903 | pab-2    | F18H3.3 0.141595582287636   |
| AGIWUR4780;AGIWUR26610;AGIWUR29191;AGIWUR43409                                                 |    |   |                                                                                   |          |                |          |                             |
| CB4856                                                                                         | HS | X | 13529088                                                                          | 13532032 | WBGene00008940 | F18H3.4  | F18H3.4                     |
| -0.00705954650355523                                                                           |    |   | AGIWUR15998                                                                       |          |                |          |                             |
| CB4856                                                                                         | HS | X | 13532871                                                                          | 13536433 | WBGene00000051 | acr-12   | R01E6.4 0.0664824476036916  |
| AGIWUR42149                                                                                    |    |   |                                                                                   |          |                |          |                             |
| CB4856                                                                                         | HS | X | 13542574                                                                          | 13544599 | WBGene00000282 | cah-4    | R01E6.3 -0.0313040875443313 |
| AGIWUR2019;AGIWUR5716;AGIWUR6607;AGIWUR16164;AGIWUR22877;AGIWUR22998;AGIWUR40387               |    |   |                                                                                   |          |                |          |                             |
| CB4856                                                                                         | HS | X | 13544822                                                                          | 13550824 | WBGene00003848 | odr-1    | R01E6.1 0.120897133783945   |
| AGIWUR40730                                                                                    |    |   |                                                                                   |          |                |          |                             |
| CB4856                                                                                         | HS | X | 13552549                                                                          | 13556166 | WBGene00010970 | glb-20   | R01E6.6 0.0108215127035534  |
| AGIWUR23177;AGIWUR32303                                                                        |    |   |                                                                                   |          |                |          |                             |
| CB4856                                                                                         | HS | X | 13565486                                                                          | 13566536 | WBGene00010968 | R01E6.2  | R01E6.2 0.0969773933218896  |
| AGIWUR977;AGIWUR6356;AGIWUR8398;AGIWUR33428;AGIWUR35834                                        |    |   |                                                                                   |          |                |          |                             |
| CB4856                                                                                         | HS | X | 13567441                                                                          | 13569954 | WBGene00010971 | R01E6.7  | R01E6.7 -0.0274641875405512 |

|                                                                                                          |                                     |          |                |           |                             |  |
|----------------------------------------------------------------------------------------------------------|-------------------------------------|----------|----------------|-----------|-----------------------------|--|
| AGIWUR15289                                                                                              |                                     |          |                |           |                             |  |
| CB4856 HS X                                                                                              | 13578783                            | 13581728 | WBGene00010034 | F54B11.11 | F54B11.11                   |  |
| -0.0224194869216046                                                                                      | AGIWUR26327                         |          |                |           |                             |  |
| CB4856 HS X                                                                                              | 13582120                            | 13582757 | WBGene00010033 | F54B11.10 | F54B11.10                   |  |
| -0.161206760575064                                                                                       | AGIWUR11190                         |          |                |           |                             |  |
| CB4856 HS X                                                                                              | 13584775                            | 13589820 | WBGene00006816 | unc-84    | F54B11.3                    |  |
| 0.0512755340262938                                                                                       | AGIWUR1516;AGIWUR14318              |          |                |           |                             |  |
| CB4856 HS X                                                                                              | 13590035                            | 13591207 | WBGene00000598 | col-9     | F54B11.1                    |  |
| -0.0161223590451192                                                                                      | AGIWUR20177                         |          |                |           |                             |  |
| CB4856 HS X                                                                                              | 13591498                            | 13592461 | WBGene00000621 | col-44    | F54B11.2                    |  |
| -0.0180365052257283                                                                                      | AGIWUR41919                         |          |                |           |                             |  |
| CB4856 HS X                                                                                              | 13592618                            | 13593643 | WBGene00010027 | F54B11.4  | F54B11.4                    |  |
| -0.347812602388771                                                                                       | AGIWUR34481                         |          |                |           |                             |  |
| CB4856 HS X                                                                                              | 13594121                            | 13596068 | WBGene00010028 | F54B11.5  | F54B11.5                    |  |
| -0.13854610384807                                                                                        | AGIWUR24045                         |          |                |           |                             |  |
| CB4856 HS X                                                                                              | 13598449                            | 13599687 | WBGene00000262 | bra-1     | F54B11.6                    |  |
| -0.197835026455546                                                                                       | AGIWUR17923                         |          |                |           |                             |  |
| CB4856 HS X                                                                                              | 13600436                            | 13601534 | WBGene00010030 | F54B11.7  | F54B11.7                    |  |
| 0.0965792620484134                                                                                       | AGIWUR7344                          |          |                |           |                             |  |
| CB4856 HS X                                                                                              | 13602200                            | 13603918 | WBGene00010031 | F54B11.8  | F54B11.8                    |  |
| -0.00436852360222506                                                                                     | AGIWUR12031                         |          |                |           |                             |  |
| CB4856 HS X                                                                                              | 13605567                            | 13608369 | WBGene00010032 | F54B11.9  | F54B11.9                    |  |
| 0.290002129414399                                                                                        | AGIWUR14120                         |          |                |           |                             |  |
| CB4856 HS X                                                                                              | 13618874                            | 13619930 | WBGene00012440 | nlp-53    | Y12A6A.2                    |  |
| 0.0792277447549417                                                                                       | AGIWUR14392;AGIWUR15716;AGIWUR43825 |          |                |           |                             |  |
| CB4856 HS X                                                                                              | 13619938                            | 13621728 | WBGene00012439 | Y12A6A.1  | Y12A6A.1                    |  |
| 0.268982983686515                                                                                        | AGIWUR40926                         |          |                |           |                             |  |
| CB4856 HS X                                                                                              | 13625373                            | 13631166 | WBGene00006412 | nlg-1     | C40C9.5 -0.0285024669626015 |  |
| AGIWUR3446;AGIWUR3519;AGIWUR6253;AGIWUR16584;AGIWUR23334;AGIWUR27866;AGIWUR33301;AGIWUR34573;AGIWUR38156 |                                     |          |                |           |                             |  |
| CB4856 HS X                                                                                              | 13639877                            | 13642256 | WBGene00006673 | twk-20    | C40C9.1 0.219623889829911   |  |
| AGIWUR19296                                                                                              |                                     |          |                |           |                             |  |
| CB4856 HS X                                                                                              | 13642348                            | 13646898 | WBGene00000048 | acr-9     | C40C9.2 -0.212860048836219  |  |
| AGIWUR24132                                                                                              |                                     |          |                |           |                             |  |
| CB4856 HS X                                                                                              | 13647605                            | 13648334 | WBGene00008036 | C40C9.3   | C40C9.3 0.0697942638727493  |  |
| AGIWUR12524                                                                                              |                                     |          |                |           |                             |  |
| CB4856 HS X                                                                                              | 13651149                            | 13651737 | WBGene00008037 | C40C9.4   | C40C9.4 -0.0434962177263136 |  |
| AGIWUR34524                                                                                              |                                     |          |                |           |                             |  |
| CB4856 HS X                                                                                              | 13660519                            | 13662963 | WBGene00007285 | C04A11.1  | C04A11.1                    |  |
| -0.153869176262903                                                                                       | AGIWUR15658                         |          |                |           |                             |  |

|                                                                                            |    |   |          |          |                |          |                             |
|--------------------------------------------------------------------------------------------|----|---|----------|----------|----------------|----------|-----------------------------|
| CB4856                                                                                     | HS | X | 13664589 | 13665352 | WBGene00007288 | C04A11.5 | C04A11.5                    |
| 0.0396277141153289 AGIWUR3797                                                              |    |   |          |          |                |          |                             |
| CB4856                                                                                     | HS | X | 13665958 | 13668830 | WBGene00007286 | C04A11.2 | C04A11.2                    |
| -0.00931753821501324 AGIWUR10297                                                           |    |   |          |          |                |          |                             |
| CB4856                                                                                     | HS | X | 13677192 | 13682340 | WBGene00007287 | gck-4    | C04A11.3                    |
| -0.0476166361934123 AGIWUR34555                                                            |    |   |          |          |                |          |                             |
| CB4856                                                                                     | HS | X | 13687973 | 13695771 | WBGene00000074 | adm-2    | C04A11.4                    |
| -0.021795698502963 AGIWUR12265                                                             |    |   |          |          |                |          |                             |
| CB4856                                                                                     | HS | X | 13706928 | 13708002 | WBGene00010504 | K02D3.1  | K02D3.1 -0.0868920507013176 |
| AGIWUR309;AGIWUR7863;AGIWUR9204;AGIWUR36261                                                |    |   |          |          |                |          |                             |
| CB4856                                                                                     | HS | X | 13708619 | 13711964 | WBGene00010505 | K02D3.2  | K02D3.2 0.099315671641091   |
| AGIWUR3853                                                                                 |    |   |          |          |                |          |                             |
| CB4856                                                                                     | HS | X | 13714157 | 13716298 | WBGene00010773 | K11E4.1  | K11E4.1 0.00250155550263464 |
| AGIWUR16769                                                                                |    |   |          |          |                |          |                             |
| CB4856                                                                                     | HS | X | 13717584 | 13719217 | WBGene00010774 | K11E4.2  | K11E4.2 0.145745088579478   |
| AGIWUR9551                                                                                 |    |   |          |          |                |          |                             |
| CB4856                                                                                     | HS | X | 13719207 | 13722917 | WBGene00010775 | poml-1   | K11E4.3                     |
| -0.00529754024738871 AGIWUR31310                                                           |    |   |          |          |                |          |                             |
| CB4856                                                                                     | HS | X | 13727298 | 13734404 | WBGene00010776 | pix-1    | K11E4.4                     |
| -0.00310941622231642 AGIWUR4920                                                            |    |   |          |          |                |          |                             |
| CB4856                                                                                     | HS | X | 13747315 | 13751777 | WBGene00003661 | nhr-71   | K11E4.5 -0.0298606184685539 |
| AGIWUR2436;AGIWUR7635;AGIWUR15082;AGIWUR15554;AGIWUR15602;AGIWUR37166;AGIWUR40083          |    |   |          |          |                |          |                             |
| CB4856                                                                                     | HS | X | 13755771 | 13759391 | WBGene00010115 | aakb-1   | F55F3.1 0.135395386921825   |
| AGIWUR29247;AGIWUR31066;AGIWUR41100                                                        |    |   |          |          |                |          |                             |
| CB4856                                                                                     | HS | X | 13760237 | 13763998 | WBGene00010116 | F55F3.2  | F55F3.2 -0.0708754955791697 |
| AGIWUR17133;AGIWUR19209;AGIWUR35861;AGIWUR37018                                            |    |   |          |          |                |          |                             |
| CB4856                                                                                     | HS | X | 13765331 | 13770558 | WBGene00010117 | nkb-3    | F55F3.3 0.0434429649745338  |
| AGIWUR39006;AGIWUR43132                                                                    |    |   |          |          |                |          |                             |
| CB4856                                                                                     | HS | X | 13785479 | 13789238 | WBGene00010118 | F55F3.4  | F55F3.4 0.0874447618942922  |
| AGIWUR37949                                                                                |    |   |          |          |                |          |                             |
| CB4856                                                                                     | HS | X | 13790832 | 13792258 | WBGene00014217 | ZK1086.3 | ZK1086.3                    |
| -0.127850795192335 AGIWUR35791                                                             |    |   |          |          |                |          |                             |
| CB4856                                                                                     | HS | X | 13792305 | 13793625 | WBGene00014216 | ZK1086.2 | ZK1086.2                    |
| 0.0233388557355374 AGIWUR16136                                                             |    |   |          |          |                |          |                             |
| CB4856                                                                                     | HS | X | 13798222 | 13809857 | WBGene00014215 | obr-3    | ZK1086.1                    |
| 0.0471578883242634 AGIWUR15230;AGIWUR16536;AGIWUR20740;AGIWUR27701;AGIWUR35047;AGIWUR40410 |    |   |          |          |                |          |                             |
| CB4856                                                                                     | HS | X | 13817999 | 13823582 | WBGene00006676 | twk-23   | F19D8.1 0.122731163222683   |
| AGIWUR3421                                                                                 |    |   |          |          |                |          |                             |
| CB4856                                                                                     | HS | X | 13834427 | 13836522 | WBGene00008955 | F19D8.2  | F19D8.2 -0.36659109362218   |



|                                     |   |             |          |                |                                     |
|-------------------------------------|---|-------------|----------|----------------|-------------------------------------|
| CB4856 HS                           | X | 13977829    | 13979031 | WBGene00009851 | F48F7.6 F48F7.6 0.00854988770377219 |
| AGIWUR4649                          |   |             |          |                |                                     |
| CB4856 HS                           | X | 13979240    | 13980515 | WBGene00009852 | arrd-24 F48F7.7 0.171420683464472   |
| AGIWUR27486                         |   |             |          |                |                                     |
| CB4856 HS                           | X | 13980840    | 13981629 | WBGene00009853 | arrd-27 F48F7.8 0.0139469683764348  |
| AGIWUR645                           |   |             |          |                |                                     |
| CB4856 HS                           | X | 13984491    | 13985692 | WBGene00007842 | C31E10.1 C31E10.1                   |
| 0.00784297751810392                 |   | AGIWUR36680 |          |                |                                     |
| CB4856 HS                           | X | 13986607    | 13989009 | WBGene00007844 | irld-24 C31E10.3                    |
| 0.541502667543471                   |   | AGIWUR19946 |          |                |                                     |
| CB4856 HS                           | X | 13989496    | 13990180 | WBGene00007845 | C31E10.4 C31E10.4                   |
| 0.0979583566484754                  |   | AGIWUR9160  |          |                |                                     |
| CB4856 HS                           | X | 13991458    | 13995834 | WBGene00007846 | C31E10.5 C31E10.5                   |
| 0.0428403546378622                  |   | AGIWUR2218  |          |                |                                     |
| CB4856 HS                           | X | 13996307    | 13999351 | WBGene00007847 | C31E10.6 C31E10.6                   |
| -0.0522528229143973                 |   | AGIWUR19852 |          |                |                                     |
| CB4856 HS                           | X | 14001902    | 14003080 | WBGene00007848 | cytb-5.1 C31E10.7                   |
| 0.436481017996897                   |   | AGIWUR2725  |          |                |                                     |
| CB4856 HS                           | X | 14003020    | 14012595 | WBGene00007849 | tbc-19 C31E10.8                     |
| 0.2603869172172                     |   | AGIWUR26465 |          |                |                                     |
| CB4856 HS                           | X | 14020590    | 14022409 | WBGene00007295 | C04C11.1 C04C11.1                   |
| 0.313955260158384                   |   | AGIWUR2716  |          |                |                                     |
| CB4856 HS                           | X | 14033794    | 14037447 | WBGene00007296 | arrd-25 C04C11.2                    |
| -0.200364714419971                  |   | AGIWUR25327 |          |                |                                     |
| CB4856 HS                           | X | 14049535    | 14063884 | WBGene00001116 | dyc-1 C33G3.1 0.285082531262189     |
| AGIWUR42602                         |   |             |          |                |                                     |
| CB4856 HS                           | X | 14064313    | 14067984 | WBGene00007903 | lgc-21 C33G3.3 -0.242781656595616   |
| AGIWUR27168;AGIWUR31618;AGIWUR31972 |   |             |          |                |                                     |
| CB4856 HS                           | X | 14071162    | 14076295 | WBGene00007904 | C33G3.4 C33G3.4 0.0310229683372292  |
| AGIWUR35084                         |   |             |          |                |                                     |
| CB4856 HS                           | X | 14076316    | 14078674 | WBGene00007905 | C33G3.5 C33G3.5 -0.314701615935991  |
| AGIWUR10367                         |   |             |          |                |                                     |
| CB4856 HS                           | X | 14080381    | 14084318 | WBGene00007906 | C33G3.6 C33G3.6 0.0830288693230194  |
| AGIWUR4232                          |   |             |          |                |                                     |
| CB4856 HS                           | X | 14085508    | 14089581 | WBGene00008879 | F16B12.1 F16B12.1                   |
| -0.158711873261534                  |   | AGIWUR33817 |          |                |                                     |
| CB4856 HS                           | X | 14090389    | 14095490 | WBGene00001106 | dsl-4 F16B12.2                      |
| 0.106613935524401                   |   | AGIWUR31319 |          |                |                                     |
| CB4856 HS                           | X | 14095738    | 14098664 | WBGene00008880 | F16B12.4 F16B12.4                   |

|                                                             |             |             |                |          |          |                     |
|-------------------------------------------------------------|-------------|-------------|----------------|----------|----------|---------------------|
| 0.013099553906228                                           |             | AGIWUR37367 |                |          |          |                     |
| CB4856 HS X                                                 | 14100555    | 14101568    | WBGene00008881 | F16B12.5 | F16B12.5 |                     |
| -0.0327917012967429                                         | AGIWUR24008 |             |                |          |          |                     |
| CB4856 HS X                                                 | 14102359    | 14107905    | WBGene00008882 | F16B12.6 | F16B12.6 |                     |
| 0.141607213972033                                           | AGIWUR3685  |             |                |          |          |                     |
| CB4856 HS X                                                 | 14108545    | 14109714    | WBGene00008883 | F16B12.7 | F16B12.7 |                     |
| 0.0519137232009363                                          | AGIWUR44349 |             |                |          |          |                     |
| CB4856 HS X                                                 | 14111263    | 14113447    | WBGene00008884 | nhr-281  | F16B12.8 |                     |
| 0.0411717381555059                                          | AGIWUR28687 |             |                |          |          |                     |
| CB4856 HS X                                                 | 14116111    | 14116751    | WBGene00009235 | F28H6.7  | F28H6.7  | -0.191792551501946  |
| AGIWUR42982                                                 |             |             |                |          |          |                     |
| CB4856 HS X                                                 | 14117069    | 14125879    | WBGene00009234 | F28H6.6  | F28H6.6  | 0.369437151550525   |
| AGIWUR36143                                                 |             |             |                |          |          |                     |
| CB4856 HS X                                                 | 14127877    | 14133525    | WBGene00009233 | F28H6.4  | F28H6.4  | 0.0179032217455486  |
| AGIWUR14483                                                 |             |             |                |          |          |                     |
| CB4856 HS X                                                 | 14133896    | 14134344    | WBGene00044137 | F28H6.8  | F28H6.8  | -0.10025523841801   |
| AGIWUR12025;AGIWUR19471;AGIWUR27893;AGIWUR39148;AGIWUR39947 |             |             |                |          |          |                     |
| CB4856 HS X                                                 | 14137997    | 14140070    | WBGene00009232 | nkat-1   | F28H6.3  | 0.0838512502147779  |
| AGIWUR5953;AGIWUR24988;AGIWUR37065                          |             |             |                |          |          |                     |
| CB4856 HS X                                                 | 14141946    | 14144889    | WBGene00009231 | ceh-89   | F28H6.2  | 0.366478624912178   |
| AGIWUR17574                                                 |             |             |                |          |          |                     |
| CB4856 HS X                                                 | 14147700    | 14152070    | WBGene00000103 | akt-2    | F28H6.1  | -0.0103274879949229 |
| AGIWUR27380;AGIWUR32868                                     |             |             |                |          |          |                     |
| CB4856 HS X                                                 | 14155115    | 14157013    | WBGene00010995 | ceh-90   | R03E1.4  | -0.0990901497754306 |
| AGIWUR14794                                                 |             |             |                |          |          |                     |
| CB4856 HS X                                                 | 14158870    | 14161734    | WBGene00010994 | lgc-25   | R03E1.3  | 0.193155219200244   |
| AGIWUR25418;AGIWUR42901                                     |             |             |                |          |          |                     |
| CB4856 HS X                                                 | 14163099    | 14164506    | WBGene00010993 | vha-20   | R03E1.2  | 0.141981900453374   |
| AGIWUR39470                                                 |             |             |                |          |          |                     |
| CB4856 HS X                                                 | 14164634    | 14169779    | WBGene00006369 | sym-4    | R03E1.1  | -0.264820654297663  |
| AGIWUR24140;AGIWUR27190                                     |             |             |                |          |          |                     |
| CB4856 HS X                                                 | 14170864    | 14174063    | WBGene00007993 | idhb-1   | C37E2.1  | 0.0770507845957908  |
| AGIWUR20911;AGIWUR23240;AGIWUR25532;AGIWUR37250;AGIWUR43320 |             |             |                |          |          |                     |
| CB4856 HS X                                                 | 14176050    | 14178608    | WBGene00007994 | C37E2.2  | C37E2.2  | 0.00716409342903379 |
| AGIWUR24144;AGIWUR39279                                     |             |             |                |          |          |                     |
| CB4856 HS X                                                 | 14178988    | 14181705    | WBGene00007995 | C37E2.3  | C37E2.3  | 0.103218447114957   |
| AGIWUR218                                                   |             |             |                |          |          |                     |
| CB4856 HS X                                                 | 14183449    | 14185597    | WBGene00000457 | ceh-36   | C37E2.4  | -0.217278609335656  |
| AGIWUR21190                                                 |             |             |                |          |          |                     |

|                                               |   |          |          |                |          |         |                     |
|-----------------------------------------------|---|----------|----------|----------------|----------|---------|---------------------|
| CB4856 HS                                     | X | 14197373 | 14209153 | WBGene00000458 | ceh-37   | C37E2.5 | -0.0530894468274168 |
| AGIWUR10198;AGIWUR11270                       |   |          |          |                |          |         |                     |
| CB4856 HS                                     | X | 14214939 | 14219089 | WBGene00010605 | K06G5.1  | K06G5.1 | 0.171107591394991   |
| AGIWUR42150                                   |   |          |          |                |          |         |                     |
| CB4856 HS                                     | X | 14219568 | 14223256 | WBGene00010607 | K06G5.3  | K06G5.3 | 0.708256122742794   |
| AGIWUR23179                                   |   |          |          |                |          |         |                     |
| CB4856 HS                                     | X | 14225573 | 14228768 | WBGene00010606 | cyp-13B2 | K06G5.2 |                     |
| 0.744973186692572 AGIWUR19930                 |   |          |          |                |          |         |                     |
| CB4856 HS                                     | X | 14229668 | 14230876 | WBGene00005193 | srg-36   | K04C1.6 | 0.0573792107608537  |
| AGIWUR2949;AGIWUR2975;AGIWUR10474;AGIWUR34604 |   |          |          |                |          |         |                     |
| CB4856 HS                                     | X | 14233944 | 14235285 | WBGene00005194 | srg-37   | K04C1.1 | -0.169863165154584  |
| AGIWUR37515                                   |   |          |          |                |          |         |                     |
| CB4856 HS                                     | X | 14238695 | 14241350 | WBGene00010552 | K04C1.2  | K04C1.2 | -0.140695225540895  |
| AGIWUR39418                                   |   |          |          |                |          |         |                     |
| CB4856 HS                                     | X | 14241572 | 14243395 | WBGene00010553 | K04C1.3  | K04C1.3 | -0.0547456849187444 |
| AGIWUR22409                                   |   |          |          |                |          |         |                     |
| CB4856 HS                                     | X | 14245650 | 14246623 | WBGene00010554 | mlc-6    | K04C1.4 |                     |
| -0.00457815053431432 AGIWUR30373              |   |          |          |                |          |         |                     |
| CB4856 HS                                     | X | 14248053 | 14249846 | WBGene00010555 | K04C1.5  | K04C1.5 | -0.182647128282598  |
| AGIWUR32533;AGIWUR34151;AGIWUR42780           |   |          |          |                |          |         |                     |
| CB4856 HS                                     | X | 14250512 | 14252146 | WBGene00008464 | E02H4.6  | E02H4.6 | -0.233762563135432  |
| AGIWUR38164                                   |   |          |          |                |          |         |                     |
| CB4856 HS                                     | X | 14254039 | 14255139 | WBGene00008463 | E02H4.5  | E02H4.5 | 0.106878834071284   |
| AGIWUR6899;AGIWUR13133                        |   |          |          |                |          |         |                     |
| CB4856 HS                                     | X | 14262802 | 14263573 | WBGene00194907 | E02H4.8  | E02H4.8 | -0.062932884334943  |
| AGIWUR13007                                   |   |          |          |                |          |         |                     |
| CB4856 HS                                     | X | 14271959 | 14277040 | WBGene00000952 | del-1    | E02H4.1 | -0.0505901582786032 |
| AGIWUR8867                                    |   |          |          |                |          |         |                     |
| CB4856 HS                                     | X | 14278459 | 14281599 | WBGene00008460 | E02H4.2  | E02H4.2 | -0.0749084526100141 |
| AGIWUR2058                                    |   |          |          |                |          |         |                     |
| CB4856 HS                                     | X | 14284775 | 14293993 | WBGene00006517 | madd-3   | E02H4.3 | 0.0962209161927809  |
| AGIWUR40551;AGIWUR42950                       |   |          |          |                |          |         |                     |
| CB4856 HS                                     | X | 14295794 | 14296658 | WBGene00007532 | C11H1.8  | C11H1.8 | -0.0611629470845401 |
| AGIWUR9785                                    |   |          |          |                |          |         |                     |
| CB4856 HS                                     | X | 14298102 | 14303178 | WBGene00007530 | C11H1.5  | C11H1.5 | 0.173278986037767   |
| AGIWUR36760                                   |   |          |          |                |          |         |                     |
| CB4856 HS                                     | X | 14304946 | 14307767 | WBGene00007528 | C11H1.2  | C11H1.2 | -0.168346993356808  |
| AGIWUR34656                                   |   |          |          |                |          |         |                     |
| CB4856 HS                                     | X | 14307863 | 14311683 | WBGene00007529 | C11H1.3  | C11H1.3 | -0.0132615744483395 |



|                                    |   |                                                           |          |                |           |                             |
|------------------------------------|---|-----------------------------------------------------------|----------|----------------|-----------|-----------------------------|
| AGIWUR23360                        |   |                                                           |          |                |           |                             |
| CB4856 HS                          | X | 14313721                                                  | 14326800 | WBGene00004191 | prx-1     | C11H1.4 0.127295358823401   |
| AGIWUR3526;AGIWUR18665;AGIWUR32379 |   |                                                           |          |                |           |                             |
| CB4856 HS                          | X | 14327409                                                  | 14330195 | WBGene00007531 | C11H1.7   | C11H1.7 0.0905608625261287  |
| AGIWUR33624                        |   |                                                           |          |                |           |                             |
| CB4856 HS                          | X | 14332770                                                  | 14340481 | WBGene00004764 | sel-7     | K04G11.2                    |
| -0.0643805609283197                |   | AGIWUR7618;AGIWUR23720                                    |          |                |           |                             |
| CB4856 HS                          | X | 14345338                                                  | 14347574 | WBGene00010571 | K04G11.3  | K04G11.3                    |
| 0.264968955734973                  |   | AGIWUR5678                                                |          |                |           |                             |
| CB4856 HS                          | X | 14350140                                                  | 14352366 | WBGene00010572 | wdr-5.2   | K04G11.4                    |
| 0.0680425736510593                 |   | AGIWUR23939                                               |          |                |           |                             |
| CB4856 HS                          | X | 14353309                                                  | 14370370 | WBGene00002151 | irk-3     | K04G11.5                    |
| -0.0693861482222138                |   | AGIWUR11300                                               |          |                |           |                             |
| CB4856 HS                          | X | 14376955                                                  | 14377330 | WBGene00013371 | Y60A9A.1  | Y60A9A.1                    |
| -0.289299803609175                 |   | AGIWUR24349                                               |          |                |           |                             |
| CB4856 HS                          | X | 14381289                                                  | 14381891 | WBGene00013369 | Y60A9.2   | Y60A9.2 -0.0911534934407037 |
| AGIWUR37910                        |   |                                                           |          |                |           |                             |
| CB4856 HS                          | X | 14383251                                                  | 14383901 | WBGene00013370 | Y60A9.3   | Y60A9.3 0.104019019810702   |
| AGIWUR33592                        |   |                                                           |          |                |           |                             |
| CB4856 HS                          | X | 14392867                                                  | 14394615 | WBGene00013368 | Y60A9.1   | Y60A9.1 -0.270793752306897  |
| AGIWUR26091                        |   |                                                           |          |                |           |                             |
| CB4856 HS                          | X | 14406117                                                  | 14411181 | WBGene00011765 | frpr-17   | T14C1.1 -0.0931372577493095 |
| AGIWUR14528                        |   |                                                           |          |                |           |                             |
| CB4856 HS                          | X | 14411418                                                  | 14412855 | WBGene00045292 | fbxa-179  | T14C1.3                     |
| -0.0988119810306554                |   | AGIWUR28226                                               |          |                |           |                             |
| CB4856 HS                          | X | 14413578                                                  | 14415746 | WBGene00045291 | F23D12.10 | F23D12.10                   |
| -0.0810260715715723                |   | AGIWUR194;AGIWUR17650                                     |          |                |           |                             |
| CB4856 HS                          | X | 14416121                                                  | 14421579 | WBGene00009086 | F23D12.2  | F23D12.2                    |
| 0.144739988485921                  |   | AGIWUR25607;AGIWUR31917                                   |          |                |           |                             |
| CB4856 HS                          | X | 14423405                                                  | 14423883 | WBGene00009090 | fipr-3    | F23D12.6                    |
| 0.12039236765138                   |   | AGIWUR10622                                               |          |                |           |                             |
| CB4856 HS                          | X | 14423871                                                  | 14424751 | WBGene00194674 | F23D12.11 | F23D12.11                   |
| -0.0399490059889978                |   | AGIWUR21628                                               |          |                |           |                             |
| CB4856 HS                          | X | 14434212                                                  | 14435363 | WBGene00044136 | F23D12.8  | F23D12.8                    |
| 0.0419073092771747                 |   | AGIWUR11013;AGIWUR44943                                   |          |                |           |                             |
| CB4856 HS                          | X | 14436751                                                  | 14437656 | WBGene00044217 | F23D12.9  | F23D12.9                    |
| -0.0360568725609252                |   | AGIWUR4688;AGIWUR9629;AGIWUR20087;AGIWUR24983;AGIWUR37527 |          |                |           |                             |
| CB4856 HS                          | X | 14442621                                                  | 14443446 | WBGene00009087 | F23D12.3  | F23D12.3                    |
| -0.562578226283785                 |   | AGIWUR16391                                               |          |                |           |                             |

|                                                                         |                                                             |          |                |                 |                     |
|-------------------------------------------------------------------------|-------------------------------------------------------------|----------|----------------|-----------------|---------------------|
| CB4856 HS X                                                             | 14445001                                                    | 14446165 | WBGene00009088 | F23D12.4        | F23D12.4            |
| -0.360322041450833                                                      | AGIWUR15283                                                 |          |                |                 |                     |
| CB4856 HS X                                                             | 14448224                                                    | 14453562 | WBGene00009089 | jmjd-3.2        | F23D12.5            |
| -0.159303637255808                                                      | AGIWUR4166                                                  |          |                |                 |                     |
| CB4856 HS X                                                             | 14453557                                                    | 14453835 | WBGene00009091 | F23D12.7        | F23D12.7            |
| 0.162553027413995                                                       | AGIWUR43008                                                 |          |                |                 |                     |
| CB4856 HS X                                                             | 14454689                                                    | 14455519 | WBGene00044156 | Y66C5A.1        | Y66C5A.1            |
| 0.103115024465373                                                       | AGIWUR11294;AGIWUR16226;AGIWUR28674;AGIWUR35288;AGIWUR38878 |          |                |                 |                     |
| CB4856 HS X                                                             | 14460349                                                    | 14462139 | WBGene00044157 | Y66C5A.2        | Y66C5A.2            |
| 0.0609173567142434                                                      | AGIWUR12487;AGIWUR13381                                     |          |                |                 |                     |
| CB4856 HS X                                                             | 14462857                                                    | 14464400 | WBGene00010938 | M163.6 M163.6   | 0.0652342378714117  |
| AGIWUR2660                                                              |                                                             |          |                |                 |                     |
| CB4856 HS X                                                             | 14464809                                                    | 14467615 | WBGene00010939 | M163.7 M163.7   | 0.0801174335474641  |
| AGIWUR35597                                                             |                                                             |          |                |                 |                     |
| CB4856 HS X                                                             | 14469647                                                    | 14470066 | WBGene00044145 | M163.9 M163.9   | 0.163578273481374   |
| AGIWUR4009;AGIWUR5904;AGIWUR14096;AGIWUR15601;AGIWUR37296               |                                                             |          |                |                 |                     |
| CB4856 HS X                                                             | 14470987                                                    | 14471772 | WBGene00044146 | M163.10 M163.10 | -0.0952819929002136 |
| AGIWUR3264;AGIWUR8009;AGIWUR20332;AGIWUR23335;AGIWUR40949               |                                                             |          |                |                 |                     |
| CB4856 HS X                                                             | 14474038                                                    | 14476153 | WBGene00010937 | M163.5 M163.5   | -0.0639607352537581 |
| AGIWUR14359                                                             |                                                             |          |                |                 |                     |
| CB4856 HS X                                                             | 14479378                                                    | 14480256 | WBGene00044147 | M163.11 M163.11 |                     |
| -0.00682676187276376                                                    | AGIWUR2389;AGIWUR15730                                      |          |                |                 |                     |
| CB4856 HS X                                                             | 14480572                                                    | 14484702 | WBGene00001583 | gfi-3 M163.4    | 0.0135069900545002  |
| AGIWUR16280                                                             |                                                             |          |                |                 |                     |
| CB4856 HS X                                                             | 14485127                                                    | 14485955 | WBGene00010940 | M163.8 M163.8   | 0.0805647749237686  |
| AGIWUR1287;AGIWUR14317;AGIWUR22925                                      |                                                             |          |                |                 |                     |
| CB4856 HS X                                                             | 14490094                                                    | 14491115 | WBGene00001898 | his-24 M163.3   | -0.326352211567296  |
| AGIWUR14069;AGIWUR31222;AGIWUR32696;AGIWUR34761;AGIWUR38474;AGIWUR42369 |                                                             |          |                |                 |                     |
| CB4856 HS X                                                             | 14496085                                                    | 14499434 | WBGene00010936 | ztf-14 M163.2   | 0.208308068340076   |
| AGIWUR43318                                                             |                                                             |          |                |                 |                     |
| CB4856 HS X                                                             | 14502487                                                    | 14503862 | WBGene00010935 | M163.1 M163.1   | -0.376483020941063  |
| AGIWUR26347                                                             |                                                             |          |                |                 |                     |
| CB4856 HS X                                                             | 14511248                                                    | 14512912 | WBGene00008355 | fbxa-141        | D1025.3             |
| -0.0311783448276808                                                     | AGIWUR19594                                                 |          |                |                 |                     |
| CB4856 HS X                                                             | 14514136                                                    | 14515073 | WBGene00008354 | gcsh-1 D1025.2  | 0.0996900019246816  |
| AGIWUR34839                                                             |                                                             |          |                |                 |                     |
| CB4856 HS X                                                             | 14516860                                                    | 14519229 | WBGene00044134 | D1025.10        | D1025.10            |
| -0.0584203761327453                                                     | AGIWUR9627;AGIWUR37647                                      |          |                |                 |                     |
| CB4856 HS X                                                             | 14520763                                                    | 14522705 | WBGene00008353 | D1025.1 D1025.1 | -0.183776463291558  |



|                                                                                               |    |   |          |          |                |          |          |                     |
|-----------------------------------------------------------------------------------------------|----|---|----------|----------|----------------|----------|----------|---------------------|
| CB4856                                                                                        | HS | X | 14684877 | 14688322 | WBGene00000822 | csq-1    | F40E10.3 |                     |
| 0.196651108066153 AGIWUR5990;AGIWUR26198;AGIWUR34544                                          |    |   |          |          |                |          |          |                     |
| CB4856                                                                                        | HS | X | 14690846 | 14692999 | WBGene00004950 | sox-3    | F40E10.2 |                     |
| -0.00406735693249338 AGIWUR31056                                                              |    |   |          |          |                |          |          |                     |
| CB4856                                                                                        | HS | X | 14696412 | 14699977 | WBGene00001828 | hch-1    | F40E10.1 |                     |
| -0.495338472945164 AGIWUR35024                                                                |    |   |          |          |                |          |          |                     |
| CB4856                                                                                        | HS | X | 14701790 | 14703682 | WBGene00009573 | F40E10.5 | F40E10.5 |                     |
| -0.0685575322101606 AGIWUR38084                                                               |    |   |          |          |                |          |          |                     |
| CB4856                                                                                        | HS | X | 14703715 | 14706859 | WBGene00009574 | F40E10.6 | F40E10.6 |                     |
| -0.123162679584076                                                                            |    |   |          |          |                |          |          |                     |
| AGIWUR5715;AGIWUR7899;AGIWUR16909;AGIWUR27026;AGIWUR32719;AGIWUR36500;AGIWUR39306;AGIWUR39932 |    |   |          |          |                |          |          |                     |
| CB4856                                                                                        | HS | X | 14710475 | 14718779 | WBGene00006432 | tag-53   | F33C8.1  | 0.183858649975674   |
| AGIWUR8626;AGIWUR8942                                                                         |    |   |          |          |                |          |          |                     |
| CB4856                                                                                        | HS | X | 14721398 | 14723437 | WBGene00009357 | F33C8.2  | F33C8.2  | -0.0178760308621513 |
| AGIWUR10908                                                                                   |    |   |          |          |                |          |          |                     |
| CB4856                                                                                        | HS | X | 14726626 | 14729482 | WBGene00006634 | tsp-8    | F33C8.3  | 0.234137323737301   |
| AGIWUR40963                                                                                   |    |   |          |          |                |          |          |                     |
| CB4856                                                                                        | HS | X | 14732283 | 14734457 | WBGene00009358 | F33C8.4  | F33C8.4  | 0.153908404439346   |
| AGIWUR25047                                                                                   |    |   |          |          |                |          |          |                     |
| CB4856                                                                                        | HS | X | 14734443 | 14740088 | WBGene00007347 | C05G5.1  | C05G5.1  | 0.359127838213116   |
| AGIWUR4992                                                                                    |    |   |          |          |                |          |          |                     |
| CB4856                                                                                        | HS | X | 14747320 | 14750390 | WBGene00007348 | C05G5.2  | C05G5.2  | -0.414372161686362  |
| AGIWUR26168                                                                                   |    |   |          |          |                |          |          |                     |
| CB4856                                                                                        | HS | X | 14750849 | 14752011 | WBGene00007349 | C05G5.3  | C05G5.3  | 0.0625641340931029  |
| AGIWUR43661                                                                                   |    |   |          |          |                |          |          |                     |
| CB4856                                                                                        | HS | X | 14754026 | 14756459 | WBGene00007350 | suc1-1   | C05G5.4  | 0.320513039803288   |
| AGIWUR12280                                                                                   |    |   |          |          |                |          |          |                     |
| CB4856                                                                                        | HS | X | 14761966 | 14771885 | WBGene00012445 | Y16B4A.2 | Y16B4A.2 |                     |
| 0.0212584929536987 AGIWUR21626                                                                |    |   |          |          |                |          |          |                     |
| CB4856                                                                                        | HS | X | 14773538 | 14783564 | WBGene00006743 | unc-3    | Y16B4A.1 |                     |
| 0.137040294114113 AGIWUR11747                                                                 |    |   |          |          |                |          |          |                     |
| CB4856                                                                                        | HS | X | 14791008 | 14792980 | WBGene00009628 | tatn-1   | F42D1.2  | -0.297539047838787  |
| AGIWUR9033;AGIWUR21070;AGIWUR35338;AGIWUR43426                                                |    |   |          |          |                |          |          |                     |
| CB4856                                                                                        | HS | X | 14794217 | 14804359 | WBGene00009629 | spr-2    | F42D1.3  | -0.115709356663428  |
| AGIWUR11796                                                                                   |    |   |          |          |                |          |          |                     |
| CB4856                                                                                        | HS | X | 14807236 | 14807944 | WBGene00044139 | F42D1.4  | F42D1.4  | 0.00275267197258966 |
| AGIWUR12997;AGIWUR16902;AGIWUR28233;AGIWUR41590;AGIWUR44828                                   |    |   |          |          |                |          |          |                     |
| CB4856                                                                                        | HS | X | 14808846 | 14810849 | WBGene00000221 | atf-5    | T04C10.4 |                     |
| 0.141455941977338 AGIWUR6034                                                                  |    |   |          |          |                |          |          |                     |

|                                                                                                                                                            |                                                                                     |          |                |          |                            |
|------------------------------------------------------------------------------------------------------------------------------------------------------------|-------------------------------------------------------------------------------------|----------|----------------|----------|----------------------------|
| CB4856 HS X<br>-0.138433812796074                                                                                                                          | 14812361<br>AGIWUR41380                                                             | 14814380 | WBGene00011426 | T04C10.3 | T04C10.3                   |
| CB4856 HS X<br>-0.23365975239743                                                                                                                           | 14815828<br>AGIWUR14802;AGIWUR28806;AGIWUR30004;AGIWUR40253;AGIWUR42773;AGIWUR45112 | 14818507 | WBGene00001329 | epn-1    | T04C10.2                   |
| CB4856 HS X<br>-0.0522855762185443                                                                                                                         | 14819909<br>AGIWUR20624                                                             | 14824540 | WBGene00003149 | mbk-1    | T04C10.1                   |
| CB4856 HS X<br>0.389385189124711                                                                                                                           | 14831824<br>AGIWUR6732                                                              | 14838241 | WBGene00001055 | dpf-2    | C27C12.7                   |
| CB4856 HS X<br>0.0290199397620858                                                                                                                          | 14845937<br>AGIWUR3860;AGIWUR36066                                                  | 14849217 | WBGene00007772 | egrh-1   | C27C12.2                   |
| CB4856 HS X<br>0.32449191186144                                                                                                                            | 14849275<br>AGIWUR43410                                                             | 14852619 | WBGene00007775 | acd-3    | C27C12.5                   |
| CB4856 HS X<br>-0.266294079358865                                                                                                                          | 14852552<br>AGIWUR16057                                                             | 14853762 | WBGene00007771 | C27C12.1 | C27C12.1                   |
| CB4856 HS X<br>-0.0484843674419295                                                                                                                         | 14854131<br>AGIWUR24339                                                             | 14856518 | WBGene00007774 | C27C12.4 | C27C12.4                   |
| CB4856 HS X<br>-0.309141151731645                                                                                                                          | 14857303<br>AGIWUR9518                                                              | 14861801 | WBGene00007776 | dmd-4    | C27C12.6                   |
| CB4856 HS X<br>-0.227141357329838                                                                                                                          | 14863678<br>AGIWUR1471;AGIWUR20813;AGIWUR29142;AGIWUR41215;AGIWUR43019              | 14865844 | WBGene00007773 | C27C12.3 | C27C12.3                   |
| CB4856 HS X<br>AGIWUR36444                                                                                                                                 | 14867101                                                                            | 14868300 | WBGene00009300 | F31F6.1  | F31F6.1 -0.172457045940957 |
| CB4856 HS X<br>AGIWUR24956                                                                                                                                 | 14869606                                                                            | 14870675 | WBGene00009301 | F31F6.2  | F31F6.2 -0.130763034265422 |
| CB4856 HS X<br>AGIWUR19406;AGIWUR20525;AGIWUR31034                                                                                                         | 14876150                                                                            | 14878855 | WBGene00044138 | sssh-1   | F31F6.8 0.151960076248372  |
| CB4856 HS X<br>AGIWUR4453;AGIWUR7526;AGIWUR9122;AGIWUR9925;AGIWUR14557;AGIWUR15832;AGIWUR15891;AGIWUR25652;AGIWUR25878;AGIWUR34263;AGIWUR37944;AGIWUR44175 | 14881419                                                                            | 14882300 | WBGene00001451 | flp-8    | F31F6.4 0.092368067674065  |
| CB4856 HS X<br>AGIWUR20854                                                                                                                                 | 14888488                                                                            | 14894297 | WBGene00000902 | daf-6    | F31F6.5 0.0485097699850625 |
| CB4856 HS X<br>AGIWUR44277                                                                                                                                 | 14895145                                                                            | 14898449 | WBGene00003517 | nac-1    | F31F6.6 0.149120297987595  |
| CB4856 HS X<br>AGIWUR20024                                                                                                                                 | 14898505                                                                            | 14900772 | WBGene00009303 | lips-8   | F31F6.7 0.85104638422612   |
| CB4856 HS X<br>-0.11075810565635                                                                                                                           | 14901881<br>AGIWUR37112                                                             | 14905261 | WBGene00013497 | hex-5    | Y70D2A.2                   |
| CB4856 HS X<br>-0.404700651456529                                                                                                                          | 14918836<br>AGIWUR20397                                                             | 14923942 | WBGene00013496 | Y70D2A.1 | Y70D2A.1                   |

|                         |   |                                                                         |          |                |          |          |                     |
|-------------------------|---|-------------------------------------------------------------------------|----------|----------------|----------|----------|---------------------|
| CB4856 HS               | X | 14925031                                                                | 14928934 | WBGene00008808 | ntr-2    | F14F4.1  | -0.0124603379539892 |
| AGIWUR24360             |   |                                                                         |          |                |          |          |                     |
| CB4856 HS               | X | 14938502                                                                | 14946317 | WBGene00003411 | mrp-5    | F14F4.3  | 0.0101220987492727  |
| AGIWUR40460             |   |                                                                         |          |                |          |          |                     |
| CB4856 HS               | X | 14951200                                                                | 14954544 | WBGene00003909 | pag-3    | F45B8.4  | -0.34910614215129   |
| AGIWUR17163             |   |                                                                         |          |                |          |          |                     |
| CB4856 HS               | X | 14960544                                                                | 14961571 | WBGene00009720 | F45B8.3  | F45B8.3  | -0.145612199911008  |
| AGIWUR17468             |   |                                                                         |          |                |          |          |                     |
| CB4856 HS               | X | 14962922                                                                | 14963995 | WBGene00004353 | rgs-10   | F45B8.2  | -0.0684399707611032 |
| AGIWUR38642             |   |                                                                         |          |                |          |          |                     |
| CB4856 HS               | X | 14964553                                                                | 14965976 | WBGene00004354 | rgs-11   | F45B8.1  | -0.15217069599122   |
| AGIWUR19167             |   |                                                                         |          |                |          |          |                     |
| CB4856 HS               | X | 14968900                                                                | 14970271 | WBGene00008973 | F20D1.1  | F20D1.1  | 0.012415844380147   |
| AGIWUR33104             |   |                                                                         |          |                |          |          |                     |
| CB4856 HS               | X | 14970751                                                                | 14974779 | WBGene00008974 | tbc-1    | F20D1.2  | 0.121627934926952   |
| AGIWUR5402              |   |                                                                         |          |                |          |          |                     |
| CB4856 HS               | X | 14976117                                                                | 14978714 | WBGene00008975 | F20D1.3  | F20D1.3  | 0.0188367974526651  |
| AGIWUR25553;AGIWUR44272 |   |                                                                         |          |                |          |          |                     |
| CB4856 HS               | X | 14979374                                                                | 14980435 | WBGene00008980 | emre-1   | F20D1.10 |                     |
| 0.0169563316277435      |   | AGIWUR21288;AGIWUR30966;AGIWUR38147;AGIWUR40911;AGIWUR42285;AGIWUR44747 |          |                |          |          |                     |
| CB4856 HS               | X | 14980954                                                                | 14981675 | WBGene00000191 | arl-7    | F20D1.5  | 0.104389694265282   |
| AGIWUR40958             |   |                                                                         |          |                |          |          |                     |
| CB4856 HS               | X | 14983533                                                                | 14987365 | WBGene00004317 | rbg-1    | F20D1.6  | 0.141559915466292   |
| AGIWUR12759             |   |                                                                         |          |                |          |          |                     |
| CB4856 HS               | X | 14987369                                                                | 14991380 | WBGene00008977 | iglr-1   | F20D1.7  | 0.0307012556726622  |
| AGIWUR17966             |   |                                                                         |          |                |          |          |                     |
| CB4856 HS               | X | 14994752                                                                | 14999198 | WBGene00008978 | cutl-3   | F20D1.8  | 0.0982762467834446  |
| AGIWUR15768;AGIWUR27261 |   |                                                                         |          |                |          |          |                     |
| CB4856 HS               | X | 15002034                                                                | 15003941 | WBGene00008979 | F20D1.9  | F20D1.9  |                     |
| -0.00653527893957495    |   | AGIWUR33263                                                             |          |                |          |          |                     |
| CB4856 HS               | X | 15004064                                                                | 15007308 | WBGene00007668 | C18B12.6 |          | C18B12.6            |
| -0.0678223398505011     |   | AGIWUR25292                                                             |          |                |          |          |                     |
| CB4856 HS               | X | 15012684                                                                | 15012926 | WBGene00007663 | C18B12.1 |          | C18B12.1            |
| 0.00571653174957554     |   | AGIWUR22784                                                             |          |                |          |          |                     |
| CB4856 HS               | X | 15026308                                                                | 15031084 | WBGene00007664 | seb-3    | C18B12.2 |                     |
| -0.00256801804547813    |   | AGIWUR15522                                                             |          |                |          |          |                     |
| CB4856 HS               | X | 15031353                                                                | 15034541 | WBGene00001096 | dsc-1    | C18B12.3 |                     |
| 0.0718409831220628      |   | AGIWUR482;AGIWUR35604;AGIWUR37220                                       |          |                |          |          |                     |
| CB4856 HS               | X | 15036662                                                                | 15040602 | WBGene00007666 | C18B12.4 |          | C18B12.4            |

|                                                                                                          |                                               |          |                |          |          |                    |
|----------------------------------------------------------------------------------------------------------|-----------------------------------------------|----------|----------------|----------|----------|--------------------|
| 0.0357863558558922                                                                                       | AGIWUR41884                                   |          |                |          |          |                    |
| CB4856 HS X                                                                                              | 15042956                                      | 15045353 | WBGene00007667 | fbxa-97  | C18B12.5 |                    |
| -0.0182472346341882                                                                                      | AGIWUR7812                                    |          |                |          |          |                    |
| CB4856 HS X                                                                                              | 15051688                                      | 15052870 | WBGene00044141 | H03G16.6 |          | H03G16.6           |
| 0.348847158876256                                                                                        | AGIWUR568;AGIWUR19092;AGIWUR31424             |          |                |          |          |                    |
| CB4856 HS X                                                                                              | 15053883                                      | 15054652 | WBGene00010358 | H03G16.1 |          | H03G16.1           |
| -0.0840054831611914                                                                                      | AGIWUR16692                                   |          |                |          |          |                    |
| CB4856 HS X                                                                                              | 15055500                                      | 15056822 | WBGene00010361 | H03G16.5 |          | H03G16.5           |
| -0.0485983820304821                                                                                      | AGIWUR32198                                   |          |                |          |          |                    |
| CB4856 HS X                                                                                              | 15058509                                      | 15060399 | WBGene00010360 | fbxa-96  | H03G16.4 |                    |
| 0.0527081878713185                                                                                       | AGIWUR9111;AGIWUR12914;AGIWUR33212            |          |                |          |          |                    |
| CB4856 HS X                                                                                              | 15064015                                      | 15067184 | WBGene00014790 | H03G16.3 |          | H03G16.3           |
| 0.0311797232346134                                                                                       |                                               |          |                |          |          |                    |
| AGIWUR4038;AGIWUR23558;AGIWUR24798;AGIWUR30039;AGIWUR30542;AGIWUR41463;AGIWUR44210;AGIWUR44463           |                                               |          |                |          |          |                    |
| CB4856 HS X                                                                                              | 15067476                                      | 15069342 | WBGene00010359 | mam-6    | H03G16.2 |                    |
| -0.0385125546955241                                                                                      | AGIWUR3512                                    |          |                |          |          |                    |
| CB4856 HS X                                                                                              | 15069743                                      | 15076480 | WBGene00010434 | H40L08.3 |          | H40L08.3           |
| 0.179647330760026                                                                                        | AGIWUR4784;AGIWUR22840;AGIWUR44346            |          |                |          |          |                    |
| CB4856 HS X                                                                                              | 15076696                                      | 15077748 | WBGene00014793 | H40L08.2 |          | H40L08.2           |
| 0.133937245335346                                                                                        |                                               |          |                |          |          |                    |
| AGIWUR965;AGIWUR4962;AGIWUR10059;AGIWUR15584;AGIWUR34346;AGIWUR35856;AGIWUR36602;AGIWUR42221;AGIWUR43395 |                                               |          |                |          |          |                    |
| CB4856 HS X                                                                                              | 15080779                                      | 15084086 | WBGene00010433 | H40L08.1 |          | H40L08.1           |
| 0.095665501016942                                                                                        | AGIWUR31733                                   |          |                |          |          |                    |
| CB4856 HS X                                                                                              | 15084749                                      | 15088135 | WBGene00008609 | F09B12.5 |          | F09B12.5           |
| -0.249359540506377                                                                                       | AGIWUR32756                                   |          |                |          |          |                    |
| CB4856 HS X                                                                                              | 15089397                                      | 15093585 | WBGene00001468 | flr-4    | F09B12.6 |                    |
| 0.0602853112494541                                                                                       | AGIWUR41102                                   |          |                |          |          |                    |
| CB4856 HS X                                                                                              | 15095343                                      | 15097954 | WBGene00008607 | F09B12.3 |          | F09B12.3           |
| -0.00707123305290658                                                                                     | AGIWUR25770;AGIWUR36606                       |          |                |          |          |                    |
| CB4856 HS X                                                                                              | 15098066                                      | 15100416 | WBGene00008606 | dhhc-1   | F09B12.2 |                    |
| 0.0954335199775187                                                                                       | AGIWUR10831                                   |          |                |          |          |                    |
| CB4856 HS X                                                                                              | 15101787                                      | 15107967 | WBGene00008605 | mlt-9    | F09B12.1 |                    |
| 0.0701202166475525                                                                                       | AGIWUR4062;AGIWUR7385;AGIWUR36793;AGIWUR39663 |          |                |          |          |                    |
| CB4856 HS X                                                                                              | 15109951                                      | 15116618 | WBGene00011101 | R07D5.2  | R07D5.2  | 0.108844091487593  |
| AGIWUR37283;AGIWUR44061                                                                                  |                                               |          |                |          |          |                    |
| CB4856 HS X                                                                                              | 15120975                                      | 15147742 | WBGene00006747 | unc-7    | R07D5.1  | -0.179664468686191 |
| AGIWUR3980;AGIWUR16987;AGIWUR30189;AGIWUR31952                                                           |                                               |          |                |          |          |                    |
| CB4856 HS X                                                                                              | 15157359                                      | 15158749 | WBGene00007525 | C11G10.1 |          | C11G10.1           |
| -0.281511215848172                                                                                       | AGIWUR32660;AGIWUR37230                       |          |                |          |          |                    |

|                                                                                                                      |    |   |                                                                                                       |          |                |          |                             |  |
|----------------------------------------------------------------------------------------------------------------------|----|---|-------------------------------------------------------------------------------------------------------|----------|----------------|----------|-----------------------------|--|
| CB4856                                                                                                               | HS | X | 15161283                                                                                              | 15166222 | WBGene00011684 | T10B10.8 | T10B10.8                    |  |
|                                                                                                                      |    |   | 0.124736379135186 AGIWUR1307;AGIWUR8812;AGIWUR19532                                                   |          |                |          |                             |  |
| CB4856                                                                                                               | HS | X | 15168722                                                                                              | 15173621 | WBGene00003840 | ocr-3    | T10B10.7                    |  |
|                                                                                                                      |    |   | 0.0843837953863398 AGIWUR24640                                                                        |          |                |          |                             |  |
| CB4856                                                                                                               | HS | X | 15173904                                                                                              | 15178145 | WBGene00011679 | ucr-2.2  | T10B10.2                    |  |
|                                                                                                                      |    |   | 0.222542061557379 AGIWUR11998                                                                         |          |                |          |                             |  |
| CB4856                                                                                                               | HS | X | 15178096                                                                                              | 15181501 | WBGene00011680 | T10B10.3 | T10B10.3                    |  |
|                                                                                                                      |    |   | -0.0236146910420394                                                                                   |          |                |          |                             |  |
| AGIWUR1243;AGIWUR7773;AGIWUR9134;AGIWUR10929;AGIWUR14582;AGIWUR18013;AGIWUR19217;AGIWUR23455;AGIWUR26069;AGIWUR36469 |    |   |                                                                                                       |          |                |          |                             |  |
| CB4856                                                                                                               | HS | X | 15190100                                                                                              | 15193066 | WBGene00011681 | T10B10.4 | T10B10.4                    |  |
|                                                                                                                      |    |   | 0.0435247430284651 AGIWUR16848;AGIWUR22935;AGIWUR44845                                                |          |                |          |                             |  |
| CB4856                                                                                                               | HS | X | 15193086                                                                                              | 15194324 | WBGene00011683 | phat-6   | T10B10.6                    |  |
|                                                                                                                      |    |   | 0.236033115218607 AGIWUR8369                                                                          |          |                |          |                             |  |
| CB4856                                                                                                               | HS | X | 15195922                                                                                              | 15199136 | WBGene00011682 | snt-7    | T10B10.5                    |  |
|                                                                                                                      |    |   | -0.0732036238625664 AGIWUR39833;AGIWUR42120;AGIWUR44905                                               |          |                |          |                             |  |
| CB4856                                                                                                               | HS | X | 15209289                                                                                              | 15213259 | WBGene00010356 | H03A11.1 | H03A11.1                    |  |
|                                                                                                                      |    |   | -0.0526981376308697 AGIWUR17022;AGIWUR32933;AGIWUR43737                                               |          |                |          |                             |  |
| CB4856                                                                                                               | HS | X | 15225869                                                                                              | 15230645 | WBGene00010357 | H03A11.2 | H03A11.2                    |  |
|                                                                                                                      |    |   | -0.100590209140101 AGIWUR34239                                                                        |          |                |          |                             |  |
| CB4856                                                                                                               | HS | X | 15234829                                                                                              | 15246365 | WBGene00009552 | piki-1   | F39B1.1 0.0132653517828185  |  |
|                                                                                                                      |    |   | AGIWUR23824                                                                                           |          |                |          |                             |  |
| CB4856                                                                                                               | HS | X | 15250809                                                                                              | 15253877 | WBGene00009786 | F46F2.1  | F46F2.1 0.078379855119266   |  |
|                                                                                                                      |    |   | AGIWUR14648                                                                                           |          |                |          |                             |  |
| CB4856                                                                                                               | HS | X | 15257597                                                                                              | 15259048 | WBGene00009788 | F46F2.4  | F46F2.4 -0.122266009280214  |  |
|                                                                                                                      |    |   | AGIWUR36542                                                                                           |          |                |          |                             |  |
| CB4856                                                                                                               | HS | X | 15259579                                                                                              | 15260290 | WBGene00009787 | F46F2.3  | F46F2.3 -0.572431142818521  |  |
|                                                                                                                      |    |   | AGIWUR720;AGIWUR8033;AGIWUR37485                                                                      |          |                |          |                             |  |
| CB4856                                                                                                               | HS | X | 15262727                                                                                              | 15267857 | WBGene00009789 | F46F2.5  | F46F2.5 -0.0964615542806202 |  |
|                                                                                                                      |    |   | AGIWUR14029;AGIWUR19544                                                                               |          |                |          |                             |  |
| CB4856                                                                                                               | HS | X | 15269074                                                                                              | 15281110 | WBGene00002203 | kin-20   | F46F2.2 -0.0912494532097257 |  |
|                                                                                                                      |    |   | AGIWUR2546;AGIWUR3876;AGIWUR6680;AGIWUR29853                                                          |          |                |          |                             |  |
| CB4856                                                                                                               | HS | X | 15284182                                                                                              | 15286227 | WBGene00007262 | jud-4    | C02D4.1 -0.130238896026493  |  |
|                                                                                                                      |    |   | AGIWUR1289;AGIWUR4849;AGIWUR9307;AGIWUR20816;AGIWUR37557;AGIWUR44498                                  |          |                |          |                             |  |
| CB4856                                                                                                               | HS | X | 15286579                                                                                              | 15302963 | WBGene00004777 | ser-2    | C02D4.2 -0.0322723865886765 |  |
|                                                                                                                      |    |   | AGIWUR10251;AGIWUR15917;AGIWUR16808;AGIWUR28601;AGIWUR35275;AGIWUR36199                               |          |                |          |                             |  |
| CB4856                                                                                                               | HS | X | 15309374                                                                                              | 15314899 | WBGene00003681 | nhr-91   | Y15E3A.1                    |  |
|                                                                                                                      |    |   | 0.000826807522555484 AGIWUR391;AGIWUR8575;AGIWUR11164;AGIWUR30048;AGIWUR32782;AGIWUR38239;AGIWUR40936 |          |                |          |                             |  |
| CB4856                                                                                                               | HS | X | 15314874                                                                                              | 15317223 | WBGene00012441 | glb-28   | Y15E3A.2                    |  |



|                                                                                                 |                                                                                 |          |                |                  |                    |
|-------------------------------------------------------------------------------------------------|---------------------------------------------------------------------------------|----------|----------------|------------------|--------------------|
| 0.128407982685276                                                                               | AGIWUR2433                                                                      |          |                |                  |                    |
| CB4856 HS X                                                                                     | 15322249                                                                        | 15325809 | WBGene00012442 | Y15E3A.3         | Y15E3A.3           |
| -0.0189036657555697                                                                             | AGIWUR223                                                                       |          |                |                  |                    |
| CB4856 HS X                                                                                     | 15330964                                                                        | 15333960 | WBGene00012443 | Y15E3A.4         | Y15E3A.4           |
| 0.308399447452413                                                                               | AGIWUR986                                                                       |          |                |                  |                    |
| CB4856 HS X                                                                                     | 15343154                                                                        | 15344146 | WBGene00012444 | Y15E3A.5         | Y15E3A.5           |
| 0.0504517360327998                                                                              | AGIWUR9705                                                                      |          |                |                  |                    |
| CB4856 HS X                                                                                     | 15355238                                                                        | 15363861 | WBGene00007877 | nfki-1 C33A11.1  |                    |
| -0.0394412648722895                                                                             | AGIWUR2664;AGIWUR3693;AGIWUR5288;AGIWUR9684;AGIWUR18915;AGIWUR44109;AGIWUR44590 |          |                |                  |                    |
| CB4856 HS X                                                                                     | 15365994                                                                        | 15369999 | WBGene00007878 | C33A11.2         | C33A11.2           |
| -0.25510264878459                                                                               | AGIWUR11040                                                                     |          |                |                  |                    |
| CB4856 HS X                                                                                     | 15369974                                                                        | 15377685 | WBGene00006462 | tag-97 C33A11.4  |                    |
| -0.286495278401772                                                                              | AGIWUR20474                                                                     |          |                |                  |                    |
| CB4856 HS X                                                                                     | 15407931                                                                        | 15419290 | WBGene00009560 | psa-3 F39D8.2    | -0.220823393353403 |
| AGIWUR22299                                                                                     |                                                                                 |          |                |                  |                    |
| CB4856 HS X                                                                                     | 15420979                                                                        | 15425114 | WBGene00009561 | F39D8.3 F39D8.3  | -0.022460109689856 |
| AGIWUR19493;AGIWUR26499;AGIWUR35456                                                             |                                                                                 |          |                |                  |                    |
| CB4856 HS X                                                                                     | 15425274                                                                        | 15428180 | WBGene00003532 | nas-13 F39D8.4   | 0.0778934592825253 |
| AGIWUR20338;AGIWUR23299;AGIWUR24853;AGIWUR25911;AGIWUR28890;AGIWUR32864;AGIWUR35977;AGIWUR42757 |                                                                                 |          |                |                  |                    |
| CB4856 HS X                                                                                     | 15429925                                                                        | 15431198 | WBGene00010981 | blos-8 R03A10.1  |                    |
| -0.213182434554927                                                                              | AGIWUR39615                                                                     |          |                |                  |                    |
| CB4856 HS X                                                                                     | 15433787                                                                        | 15434972 | WBGene00010982 | flp-32 R03A10.2  |                    |
| 0.0919218333341831                                                                              | AGIWUR41012                                                                     |          |                |                  |                    |
| CB4856 HS X                                                                                     | 15435665                                                                        | 15440794 | WBGene00010983 | mocs-1 R03A10.3  |                    |
| 0.128824454456542                                                                               | AGIWUR38137                                                                     |          |                |                  |                    |
| CB4856 HS X                                                                                     | 15441731                                                                        | 15443641 | WBGene00010984 | nkat-3 R03A10.4  |                    |
| -0.104491120539251                                                                              | AGIWUR9337                                                                      |          |                |                  |                    |
| CB4856 HS X                                                                                     | 15446724                                                                        | 15450362 | WBGene00010985 | R03A10.5         | R03A10.5           |
| 0.22198950635973                                                                                | AGIWUR6587;AGIWUR27742;AGIWUR43903                                              |          |                |                  |                    |
| CB4856 HS X                                                                                     | 15461843                                                                        | 15470758 | WBGene00010986 | sprrr-1 R03A10.6 |                    |
| -0.0207422546974887                                                                             | AGIWUR15270;AGIWUR41095                                                         |          |                |                  |                    |
| CB4856 HS X                                                                                     | 15470795                                                                        | 15477402 | WBGene00008116 | C46E1.3 C46E1.3  | -0.049743391152111 |
| AGIWUR34412                                                                                     |                                                                                 |          |                |                  |                    |
| CB4856 HS X                                                                                     | 15479017                                                                        | 15485700 | WBGene00001556 | gcy-36 C46E1.2   | 0.151939870604059  |
| AGIWUR6436                                                                                      |                                                                                 |          |                |                  |                    |
| CB4856 HS X                                                                                     | 15488106                                                                        | 15491987 | WBGene00010396 | H13N06.2         | H13N06.2           |
| -0.0192853088898017                                                                             | AGIWUR20767                                                                     |          |                |                  |                    |
| CB4856 HS X                                                                                     | 15493536                                                                        | 15497504 | WBGene00001649 | gob-1 H13N06.3   |                    |
| 0.123345919726685                                                                               | AGIWUR19792                                                                     |          |                |                  |                    |

|                                                                                                                                  |    |   |          |          |                |          |          |                     |
|----------------------------------------------------------------------------------------------------------------------------------|----|---|----------|----------|----------------|----------|----------|---------------------|
| CB4856                                                                                                                           | HS | X | 15497555 | 15500279 | WBGene00010397 | suox-1   | H13N06.4 |                     |
| 0.0446516272773612                                                                                                               |    |   |          |          |                |          |          |                     |
| AGIWUR8075;AGIWUR8146;AGIWUR13927;AGIWUR21239;AGIWUR21902;AGIWUR25339;AGIWUR31516;AGIWUR38931                                    |    |   |          |          |                |          |          |                     |
| CB4856                                                                                                                           | HS | X | 15500259 | 15504895 | WBGene00006541 | tbh-1    | H13N06.6 |                     |
| -0.136095567539616                                                                                                               |    |   |          |          |                |          |          |                     |
| CB4856                                                                                                                           | HS | X | 15506037 | 15507880 | WBGene00006494 | zipt-7.2 | H13N06.5 |                     |
| 0.194003619167539                                                                                                                |    |   |          |          |                |          |          |                     |
| CB4856                                                                                                                           | HS | X | 15516655 | 15524020 | WBGene00001148 | eat-20   | H30A04.1 |                     |
| -0.1116792505949                                                                                                                 |    |   |          |          |                |          |          |                     |
| CB4856                                                                                                                           | HS | X | 15537662 | 15546323 | WBGene00007260 | olrn-1   | C02C6.2  | -0.0277849209842085 |
| AGIWUR33886                                                                                                                      |    |   |          |          |                |          |          |                     |
| CB4856                                                                                                                           | HS | X | 15546688 | 15552233 | WBGene00007261 | lron-3   | C02C6.3  | -0.0136349909822844 |
| AGIWUR11376;AGIWUR19492;AGIWUR26257;AGIWUR26685;AGIWUR42061;AGIWUR42454                                                          |    |   |          |          |                |          |          |                     |
| CB4856                                                                                                                           | HS | X | 15568890 | 15573693 | WBGene00001130 | dyn-1    | C02C6.1  | -0.0549795398419413 |
| AGIWUR28101                                                                                                                      |    |   |          |          |                |          |          |                     |
| CB4856                                                                                                                           | HS | X | 15577470 | 15586803 | WBGene00010703 | K09A9.6  | K09A9.6  | 0.156131873047391   |
| AGIWUR16950;AGIWUR34178                                                                                                          |    |   |          |          |                |          |          |                     |
| CB4856                                                                                                                           | HS | X | 15586812 | 15590397 | WBGene00001520 | gas-1    | K09A9.5  | 0.204754746004198   |
| AGIWUR9283                                                                                                                       |    |   |          |          |                |          |          |                     |
| CB4856                                                                                                                           | HS | X | 15591368 | 15595387 | WBGene00010702 | usp-33   | K09A9.4  | 0.0262730399612856  |
| AGIWUR41099                                                                                                                      |    |   |          |          |                |          |          |                     |
| CB4856                                                                                                                           | HS | X | 15601067 | 15603763 | WBGene00010701 | ent-2    | K09A9.3  | 0.0371501145342847  |
| AGIWUR33953;AGIWUR41849;AGIWUR43615                                                                                              |    |   |          |          |                |          |          |                     |
| CB4856                                                                                                                           | HS | X | 15604635 | 15606635 | WBGene00004276 | rab-14   | K09A9.2  | -0.0449344228235908 |
| AGIWUR725;AGIWUR4364;AGIWUR12647;AGIWUR19104;AGIWUR21129;AGIWUR22392;AGIWUR24016;AGIWUR29023;AGIWUR34364;AGIWUR36569;AGIWUR41345 |    |   |          |          |                |          |          |                     |
| CB4856                                                                                                                           | HS | X | 15607969 | 15610631 | WBGene00010700 | nipi-3   | K09A9.1  | -0.205946221496863  |
| AGIWUR1159;AGIWUR16805;AGIWUR18397;AGIWUR23922;AGIWUR33732                                                                       |    |   |          |          |                |          |          |                     |
| CB4856                                                                                                                           | HS | X | 15611824 | 15613791 | WBGene00010726 | K09E9.3  | K09E9.3  | -0.098507912412483  |
| AGIWUR4427;AGIWUR26149;AGIWUR27156;AGIWUR34050;AGIWUR38990;AGIWUR42599;AGIWUR43032                                               |    |   |          |          |                |          |          |                     |
| CB4856                                                                                                                           | HS | X | 15613805 | 15616519 | WBGene00010725 | erv-46   | K09E9.2  | 0.143764417492594   |
| AGIWUR44606                                                                                                                      |    |   |          |          |                |          |          |                     |
| CB4856                                                                                                                           | HS | X | 15620489 | 15626629 | WBGene00010724 | K09E9.1  | K09E9.1  | -0.168093866834594  |
| AGIWUR33744                                                                                                                      |    |   |          |          |                |          |          |                     |
| CB4856                                                                                                                           | HS | X | 15628606 | 15630440 | WBGene00044143 | K09E9.4  | K09E9.4  | -0.205669009343753  |
| AGIWUR15297                                                                                                                      |    |   |          |          |                |          |          |                     |
| CB4856                                                                                                                           | HS | X | 15642938 | 15644336 | WBGene00010372 | H08J19.1 |          | H08J19.1            |
| 0.0642437199307526                                                                                                               |    |   |          |          |                |          |          |                     |
| CB4856                                                                                                                           | HS | X | 15646380 | 15647369 | WBGene00010332 | F59D12.5 |          | F59D12.5            |

|                                                                      |                                     |          |                |          |                             |
|----------------------------------------------------------------------|-------------------------------------|----------|----------------|----------|-----------------------------|
| 0.159369936605197                                                    | AGIWUR28052                         |          |                |          |                             |
| CB4856 HS X                                                          | 15648263                            | 15650905 | WBGene00010331 | F59D12.3 | F59D12.3                    |
| 0.481156953781633                                                    | AGIWUR18081                         |          |                |          |                             |
| CB4856 HS X                                                          | 15666761                            | 15672363 | WBGene00010329 | F59D12.1 | F59D12.1                    |
| 0.133861975496183                                                    | AGIWUR31048                         |          |                |          |                             |
| CB4856 HS X                                                          | 15672743                            | 15675722 | WBGene00010330 | F59D12.2 | F59D12.2                    |
| 0.036179685825414                                                    | AGIWUR14911;AGIWUR32565;AGIWUR34025 |          |                |          |                             |
| CB4856 HS X                                                          | 15681693                            | 15687477 | WBGene00001687 | gpn-1    | F59D12.4                    |
| -0.0872681577589294                                                  | AGIWUR21149                         |          |                |          |                             |
| CB4856 HS X                                                          | 15689449                            | 15696423 | WBGene00007284 | C03H12.1 | C03H12.1                    |
| 0.173957393393788                                                    | AGIWUR27399                         |          |                |          |                             |
| CB4856 HS X                                                          | 15696700                            | 15698062 | WBGene00014039 | ZK662.2  | ZK662.2 -0.20731733295472   |
| AGIWUR7417                                                           |                                     |          |                |          |                             |
| CB4856 HS X                                                          | 15708195                            | 15716444 | WBGene00003638 | nhr-48   | ZK662.3 0.112351433769273   |
| AGIWUR7223;AGIWUR14331                                               |                                     |          |                |          |                             |
| CB4856 HS X                                                          | 15718625                            | 15720415 | WBGene00045494 | ZK662.6  | ZK662.6 -0.0302931024573221 |
| AGIWUR9757;AGIWUR29907;AGIWUR30215                                   |                                     |          |                |          |                             |
| CB4856 HS X                                                          | 15721270                            | 15723776 | WBGene00014040 | ZK662.5  | ZK662.5 0.148506931972862   |
| AGIWUR6125                                                           |                                     |          |                |          |                             |
| CB4856 HS X                                                          | 15726129                            | 15732025 | WBGene00023497 | lin-15B  | ZK662.4 0.079617925056457   |
| AGIWUR30716                                                          |                                     |          |                |          |                             |
| CB4856 HS X                                                          | 15731968                            | 15735386 | WBGene00023498 | lin-15A  | ZK678.1 0.00913383522709132 |
| AGIWUR22541                                                          |                                     |          |                |          |                             |
| CB4856 HS X                                                          | 15736844                            | 15740626 | WBGene00005221 | srg-64   | ZK678.6 -0.136198805410456  |
| AGIWUR2265                                                           |                                     |          |                |          |                             |
| CB4856 HS X                                                          | 15742610                            | 15744298 | WBGene00014068 | nhr-255  | ZK678.2 -0.194674745297942  |
| AGIWUR24393                                                          |                                     |          |                |          |                             |
| CB4856 HS X                                                          | 15747005                            | 15752138 | WBGene00014070 | srxa-9   | ZK678.4                     |
| 0.000118782781072468                                                 | AGIWUR15499;AGIWUR41953             |          |                |          |                             |
| CB4856 HS X                                                          | 15752258                            | 15757269 | WBGene00006950 | wrt-4    | ZK678.5 -0.130242524544188  |
| AGIWUR23427                                                          |                                     |          |                |          |                             |
| CB4856 HS X                                                          | 15757868                            | 15766354 | WBGene00044630 | bus-17   | ZK678.8 0.0754093939442653  |
| AGIWUR31074                                                          |                                     |          |                |          |                             |
| CB4856 HS X                                                          | 15767437                            | 15771509 | WBGene00012407 | Y7A5A.1  | Y7A5A.1 0.0140843024186452  |
| AGIWUR19392                                                          |                                     |          |                |          |                             |
| CB4856 HS X                                                          | 15771707                            | 15772735 | WBGene00012408 | Y7A5A.2  | Y7A5A.2 0.0288908571448747  |
| AGIWUR23529                                                          |                                     |          |                |          |                             |
| CB4856 HS X                                                          | 15781625                            | 15784670 | WBGene00012409 | Y7A5A.3  | Y7A5A.3 -0.0163500324525265 |
| AGIWUR2339;AGIWUR3012;AGIWUR5234;AGIWUR21524;AGIWUR35525;AGIWUR37483 |                                     |          |                |          |                             |

|                                                                                                |   |                                                |          |                |          |          |                     |
|------------------------------------------------------------------------------------------------|---|------------------------------------------------|----------|----------------|----------|----------|---------------------|
| CB4856 HS                                                                                      | X | 15786529                                       | 15786826 | WBGene00012411 | Y7A5A.5  | Y7A5A.5  | -0.188705965958397  |
| AGIWUR3965                                                                                     |   |                                                |          |                |          |          |                     |
| CB4856 HS                                                                                      | X | 15793767                                       | 15794936 | WBGene00044154 | Y7A5A.10 | Y7A5A.10 |                     |
| -0.0976386706319587                                                                            |   | AGIWUR21480                                    |          |                |          |          |                     |
| CB4856 HS                                                                                      | X | 15797332                                       | 15799695 | WBGene00012412 | Y7A5A.6  | Y7A5A.6  | -0.0123810809278169 |
| AGIWUR10682                                                                                    |   |                                                |          |                |          |          |                     |
| CB4856 HS                                                                                      | X | 15801310                                       | 15804172 | WBGene00012413 | Y7A5A.7  | Y7A5A.7  | 0.271245368730611   |
| AGIWUR35640                                                                                    |   |                                                |          |                |          |          |                     |
| CB4856 HS                                                                                      | X | 15811967                                       | 15819541 | WBGene00044155 | Y7A5A.11 | Y7A5A.11 |                     |
| 0.0943878471321562                                                                             |   | AGIWUR7266;AGIWUR26732;AGIWUR30174;AGIWUR38493 |          |                |          |          |                     |
| CB4856 HS                                                                                      | X | 15828626                                       | 15829772 | WBGene00219351 | Y7A5A.20 | Y7A5A.20 |                     |
| 0.0947422666282947                                                                             |   | AGIWUR33281                                    |          |                |          |          |                     |
| CB4856 HS                                                                                      | X | 15834052                                       | 15838546 | WBGene00010336 | acox-1.6 | F59F4.1  |                     |
| 0.109764426956769                                                                              |   | AGIWUR14537;AGIWUR31659;AGIWUR44657            |          |                |          |          |                     |
| CB4856 HS                                                                                      | X | 15841572                                       | 15842379 | WBGene00010337 | F59F4.2  | F59F4.2  | -0.150291363312623  |
| AGIWUR22010;AGIWUR24003;AGIWUR27657;AGIWUR44124;AGIWUR44610;AGIWUR45157                        |   |                                                |          |                |          |          |                     |
| CB4856 HS                                                                                      | X | 15842356                                       | 15847593 | WBGene00010338 | F59F4.3  | F59F4.3  | 0.166389173378011   |
| AGIWUR13623                                                                                    |   |                                                |          |                |          |          |                     |
| CB4856 HS                                                                                      | X | 15849885                                       | 15851771 | WBGene00010339 | ac1-1    | F59F4.4  | -0.299230274353796  |
| AGIWUR14275                                                                                    |   |                                                |          |                |          |          |                     |
| CB4856 HS                                                                                      | X | 15852935                                       | 15860608 | WBGene00010011 | F53H4.6  | F53H4.6  | -0.105696880289389  |
| AGIWUR5968;AGIWUR38837                                                                         |   |                                                |          |                |          |          |                     |
| CB4856 HS                                                                                      | X | 15861294                                       | 15865918 | WBGene00000803 | csb-1    | F53H4.1  | 0.0261435650573265  |
| AGIWUR4195;AGIWUR10825;AGIWUR17135;AGIWUR21736;AGIWUR30198;AGIWUR37770;AGIWUR40998             |   |                                                |          |                |          |          |                     |
| CB4856 HS                                                                                      | X | 15866411                                       | 15868764 | WBGene00010009 | F53H4.4  | F53H4.4  | -0.0170139026198974 |
| AGIWUR4350;AGIWUR10553;AGIWUR14414;AGIWUR24536;AGIWUR27418;AGIWUR30318;AGIWUR40238;AGIWUR43408 |   |                                                |          |                |          |          |                     |
| CB4856 HS                                                                                      | X | 15879096                                       | 15885617 | WBGene00010010 | gmeb-2   | F53H4.5  | 0.0449508495953115  |
| AGIWUR17153                                                                                    |   |                                                |          |                |          |          |                     |
| CB4856 HS                                                                                      | X | 15885604                                       | 15887593 | WBGene00010008 | F53H4.3  | F53H4.3  | -0.0742776700443617 |
| AGIWUR23300;AGIWUR37269;AGIWUR39299                                                            |   |                                                |          |                |          |          |                     |
| CB4856 HS                                                                                      | X | 15910638                                       | 15914159 | WBGene00009278 | npr-33   | F31B9.1  | -0.101594225936978  |
| AGIWUR32643                                                                                    |   |                                                |          |                |          |          |                     |
| CB4856 HS                                                                                      | X | 15915699                                       | 15917100 | WBGene00009281 | F31B9.4  | F31B9.4  | 0.218769035761467   |
| AGIWUR20462                                                                                    |   |                                                |          |                |          |          |                     |
| CB4856 HS                                                                                      | X | 15918137                                       | 15920423 | WBGene00009279 | F31B9.2  | F31B9.2  | -0.104620536730442  |
| AGIWUR3218                                                                                     |   |                                                |          |                |          |          |                     |
| CB4856 HS                                                                                      | X | 15923738                                       | 15925169 | WBGene00009280 | F31B9.3  | F31B9.3  | -0.259845371636299  |
| AGIWUR36631                                                                                    |   |                                                |          |                |          |          |                     |
| CB4856 HS                                                                                      | X | 15929958                                       | 15939324 | WBGene00003409 | mrp-3    | E03G2.2  | 0.115200584969459   |



|                                                                                                 |   |             |          |                |           |                             |
|-------------------------------------------------------------------------------------------------|---|-------------|----------|----------------|-----------|-----------------------------|
| CB4856 HS                                                                                       | X | 16103643    | 16123903 | WBGene00014214 | ZK1073.2  | ZK1073.2                    |
| 0.138578493659447                                                                               |   | AGIWUR10513 |          |                |           |                             |
| CB4856 HS                                                                                       | X | 16123942    | 16128865 | WBGene00014213 | ZK1073.1  | ZK1073.1                    |
| -0.00714447667435314                                                                            |   |             |          |                |           |                             |
| AGIWUR12484;AGIWUR13643;AGIWUR17965;AGIWUR20567;AGIWUR22715;AGIWUR27247;AGIWUR37118;AGIWUR42707 |   |             |          |                |           |                             |
| CB4856 HS                                                                                       | X | 16140507    | 16147022 | WBGene00008622 | F09C8.2   | F09C8.2 0.00987218094789544 |
| AGIWUR3954;AGIWUR39843                                                                          |   |             |          |                |           |                             |
| CB4856 HS                                                                                       | X | 16159648    | 16163548 | WBGene00008621 | F09C8.1   | F09C8.1 0.535899807223887   |
| AGIWUR27457                                                                                     |   |             |          |                |           |                             |
| CB4856 HS                                                                                       | X | 16184370    | 16185419 | WBGene00011227 | R11.2     | R11.2 -0.129974448875462    |
| AGIWUR38968                                                                                     |   |             |          |                |           |                             |
| CB4856 HS                                                                                       | X | 16189856    | 16195007 | WBGene00011226 | slc-25A21 | R11.1                       |
| 0.284689485901287                                                                               |   | AGIWUR3436  |          |                |           |                             |
| CB4856 HS                                                                                       | X | 16196911    | 16199932 | WBGene00011228 | R11.3     | R11.3 -0.540080500769855    |
| AGIWUR13201                                                                                     |   |             |          |                |           |                             |
| CB4856 HS                                                                                       | X | 16210303    | 16210651 | WBGene00011229 | R11.4     | R11.4 -0.100401578451198    |
| AGIWUR11349;AGIWUR39105                                                                         |   |             |          |                |           |                             |
| CB4856 HS                                                                                       | X | 16212606    | 16213072 | WBGene00009069 | F23A7.4   | F23A7.4 -0.141100254752212  |
| AGIWUR4574;AGIWUR7844;AGIWUR21278;AGIWUR27048;AGIWUR39685                                       |   |             |          |                |           |                             |
| CB4856 HS                                                                                       | X | 16217392    | 16217666 | WBGene00009067 | F23A7.1   | F23A7.1 0.0143963094131365  |
| AGIWUR12165                                                                                     |   |             |          |                |           |                             |
| CB4856 HS                                                                                       | X | 16220010    | 16223519 | WBGene00009068 | F23A7.3   | F23A7.3 0.163379940671884   |
| AGIWUR44777                                                                                     |   |             |          |                |           |                             |
| CB4856 HS                                                                                       | X | 16229463    | 16236856 | WBGene00009070 | F23A7.5   | F23A7.5 0.00122851906187549 |
| AGIWUR14137;AGIWUR17393;AGIWUR33960                                                             |   |             |          |                |           |                             |
| CB4856 HS                                                                                       | X | 16237273    | 16240702 | WBGene00009071 | F23A7.6   | F23A7.6 -0.101912390723594  |
| AGIWUR2598;AGIWUR4477;AGIWUR16594;AGIWUR39535;AGIWUR42446                                       |   |             |          |                |           |                             |
| CB4856 HS                                                                                       | X | 16245194    | 16245559 | WBGene00012378 | W10G6.1   | W10G6.1 0.128660818721491   |
| AGIWUR30616                                                                                     |   |             |          |                |           |                             |
| CB4856 HS                                                                                       | X | 16254843    | 16262151 | WBGene00004789 | sgk-1     | W10G6.2 0.243691703427587   |
| AGIWUR40954                                                                                     |   |             |          |                |           |                             |
| CB4856 HS                                                                                       | X | 16262295    | 16265686 | WBGene00003485 | mua-6     | W10G6.3 0.0711096832716116  |
| AGIWUR3794;AGIWUR30679                                                                          |   |             |          |                |           |                             |
| CB4856 HS                                                                                       | X | 16275769    | 16282436 | WBGene00004745 | sdc-1     | F52E10.1                    |
| 0.198378504012519                                                                               |   | AGIWUR7891  |          |                |           |                             |
| CB4856 HS                                                                                       | X | 16282806    | 16283203 | WBGene00009933 | F52E10.2  | F52E10.2                    |
| -0.00552041079873788                                                                            |   | AGIWUR8938  |          |                |           |                             |
| CB4856 HS                                                                                       | X | 16283803    | 16284069 | WBGene00009934 | F52E10.3  | F52E10.3                    |
| -0.0534005725420714                                                                             |   | AGIWUR4159  |          |                |           |                             |

|                                                                                                          |   |                                                                       |          |                |          |                             |
|----------------------------------------------------------------------------------------------------------|---|-----------------------------------------------------------------------|----------|----------------|----------|-----------------------------|
| CB4856 HS                                                                                                | X | 16285598                                                              | 16292990 | WBGene00009935 | F52E10.4 | F52E10.4                    |
| 0.0496575104685619                                                                                       |   | AGIWUR2646;AGIWUR2750;AGIWUR18312;AGIWUR22395;AGIWUR30979;AGIWUR44314 |          |                |          |                             |
| CB4856 HS                                                                                                | X | 16299904                                                              | 16304122 | WBGene00006674 | twk-21   | T01B4.1                     |
| -0.00337516329691745                                                                                     |   | AGIWUR9363                                                            |          |                |          |                             |
| CB4856 HS                                                                                                | X | 16306464                                                              | 16314998 | WBGene00006675 | twk-22   | T01B4.2 0.0273238687619859  |
| AGIWUR18542                                                                                              |   |                                                                       |          |                |          |                             |
| CB4856 HS                                                                                                | X | 16315356                                                              | 16317729 | WBGene00011310 | T01B4.3  | T01B4.3 -0.128276781583116  |
| AGIWUR34216                                                                                              |   |                                                                       |          |                |          |                             |
| CB4856 HS                                                                                                | X | 16329217                                                              | 16329997 | WBGene00007523 | C11G6.2  | C11G6.2 -0.157349006096782  |
| AGIWUR40547                                                                                              |   |                                                                       |          |                |          |                             |
| CB4856 HS                                                                                                | X | 16332440                                                              | 16346027 | WBGene00006384 | taf-3    | C11G6.1 -0.0795404236384636 |
| AGIWUR1561;AGIWUR11199;AGIWUR12052;AGIWUR16051;AGIWUR19008;AGIWUR33712;AGIWUR35393;AGIWUR37423           |   |                                                                       |          |                |          |                             |
| CB4856 HS                                                                                                | X | 16354976                                                              | 16359654 | WBGene00003624 | nhr-28   | C11G6.4 -0.0282209317722097 |
| AGIWUR8488;AGIWUR9598;AGIWUR9927;AGIWUR16883;AGIWUR19635;AGIWUR27806;AGIWUR38710;AGIWUR39679;AGIWUR41588 |   |                                                                       |          |                |          |                             |
| CB4856 HS                                                                                                | X | 16367229                                                              | 16373789 | WBGene00000035 | ace-1    | W09B12.1                    |
| 0.110105722689515                                                                                        |   | AGIWUR15181;AGIWUR18087;AGIWUR34105;AGIWUR44165                       |          |                |          |                             |
| CB4856 HS                                                                                                | X | 16376595                                                              | 16380047 | WBGene00006353 | sur-7    | F01G12.2                    |
| 0.101456492378801                                                                                        |   | AGIWUR24885                                                           |          |                |          |                             |
| CB4856 HS                                                                                                | X | 16380597                                                              | 16389371 | WBGene00002280 | let-2    | F01G12.5                    |
| 0.224535991646405                                                                                        |   | AGIWUR2727                                                            |          |                |          |                             |
| CB4856 HS                                                                                                | X | 16395076                                                              | 16396949 | WBGene00017170 | F01G12.1 | F01G12.1                    |
| -0.0225535377589559                                                                                      |   | AGIWUR33324                                                           |          |                |          |                             |
| CB4856 HS                                                                                                | X | 16398958                                                              | 16417063 | WBGene00020770 | eat-17   | T24D11.1                    |
| -0.185504504500069                                                                                       |   | AGIWUR9558;AGIWUR40096                                                |          |                |          |                             |
| CB4856 HS                                                                                                | X | 16446197                                                              | 16451336 | WBGene00018187 | F38E9.5  | F38E9.5 -0.210772336788885  |
| AGIWUR22680                                                                                              |   |                                                                       |          |                |          |                             |
| CB4856 HS                                                                                                | X | 16451942                                                              | 16452559 | WBGene00018186 | F38E9.4  | F38E9.4 -0.118154130427209  |
| AGIWUR17619;AGIWUR24265;AGIWUR42297                                                                      |   |                                                                       |          |                |          |                             |
| CB4856 HS                                                                                                | X | 16471058                                                              | 16474819 | WBGene00018184 | F38E9.1  | F38E9.1 -0.188500179742139  |
| AGIWUR22012                                                                                              |   |                                                                       |          |                |          |                             |
| CB4856 HS                                                                                                | X | 16487481                                                              | 16489397 | WBGene00000281 | cah-3    | K05G3.3 0.265275862916686   |
| AGIWUR12628                                                                                              |   |                                                                       |          |                |          |                             |
| CB4856 HS                                                                                                | X | 16494930                                                              | 16499875 | WBGene00019423 | K05G3.2  | K05G3.2 -0.353631210382112  |
| AGIWUR7369                                                                                               |   |                                                                       |          |                |          |                             |
| CB4856 HS                                                                                                | X | 16501332                                                              | 16501943 | WBGene00019422 | K05G3.1  | K05G3.1 -0.0369090438328517 |
| AGIWUR29717                                                                                              |   |                                                                       |          |                |          |                             |
| CB4856 HS                                                                                                | X | 16505248                                                              | 16507411 | WBGene00020795 | T25D1.3  | T25D1.3 -0.0121126348590144 |
| AGIWUR19131                                                                                              |   |                                                                       |          |                |          |                             |
| CB4856 HS                                                                                                | X | 16518137                                                              | 16522295 | WBGene00020793 | T25D1.1  | T25D1.1 0.00514881133741873 |





|                                                                         |   |          |          |                |                                     |
|-------------------------------------------------------------------------|---|----------|----------|----------------|-------------------------------------|
| CB4856 HS                                                               | X | 16745753 | 16748208 | WBGene00015673 | C10E2.2 C10E2.2 0.185641414097243   |
| AGIWUR3308                                                              |   |          |          |                |                                     |
| CB4856 HS                                                               | X | 16749755 | 16751110 | WBGene00015674 | C10E2.4 C10E2.4 -0.0920850583219046 |
| AGIWUR16706                                                             |   |          |          |                |                                     |
| CB4856 HS                                                               | X | 16751864 | 16753673 | WBGene00015675 | C10E2.5 C10E2.5 -0.105842755076408  |
| AGIWUR2100;AGIWUR3033;AGIWUR11634                                       |   |          |          |                |                                     |
| CB4856 HS                                                               | X | 16763153 | 16766656 | WBGene00015672 | C10E2.1 C10E2.1 -0.0250511123524326 |
| AGIWUR44107                                                             |   |          |          |                |                                     |
| CB4856 HS                                                               | X | 16767422 | 16770498 | WBGene00015676 | mct-6 C10E2.6 -0.346771898178156    |
| AGIWUR17867                                                             |   |          |          |                |                                     |
| CB4856 HS                                                               | X | 16780994 | 16782894 | WBGene00020144 | T01C8.3 T01C8.3 0.150656486378029   |
| AGIWUR41175                                                             |   |          |          |                |                                     |
| CB4856 HS                                                               | X | 16786438 | 16787620 | WBGene00020143 | T01C8.2 T01C8.2 0.228450149264166   |
| AGIWUR42620                                                             |   |          |          |                |                                     |
| CB4856 HS                                                               | X | 16787632 | 16790412 | WBGene00020145 | got-1.1 T01C8.4 -0.211698198432404  |
| AGIWUR3969                                                              |   |          |          |                |                                     |
| CB4856 HS                                                               | X | 16791347 | 16793137 | WBGene00020146 | got-1.2 T01C8.5 -0.124140974223102  |
| AGIWUR11961;AGIWUR17870;AGIWUR30233                                     |   |          |          |                |                                     |
| CB4856 HS                                                               | X | 16796087 | 16803357 | WBGene00020142 | aak-2 T01C8.1 -0.0458233527504852   |
| AGIWUR2222;AGIWUR6304;AGIWUR17730;AGIWUR36784;AGIWUR37853;AGIWUR43105   |   |          |          |                |                                     |
| CB4856 HS                                                               | X | 16803368 | 16807125 | WBGene00003168 | mec-4 T01C8.7 0.176495115651603     |
| AGIWUR16250                                                             |   |          |          |                |                                     |
| CB4856 HS                                                               | X | 16807461 | 16813673 | WBGene00000294 | cas-1 F41G4.2 0.155133299590825     |
| AGIWUR13644;AGIWUR15303;AGIWUR21211;AGIWUR24406                         |   |          |          |                |                                     |
| CB4856 HS                                                               | X | 16816260 | 16819268 | WBGene00006067 | sto-5 F41G4.3 -0.0403928587934232   |
| AGIWUR11224;AGIWUR13982;AGIWUR15700;AGIWUR16568;AGIWUR30756;AGIWUR40541 |   |          |          |                |                                     |
| CB4856 HS                                                               | X | 16829767 | 16830672 | WBGene00018308 | F41G4.4 F41G4.4 0.0522400380101473  |
| AGIWUR34367                                                             |   |          |          |                |                                     |
| CB4856 HS                                                               | X | 16833588 | 16836404 | WBGene00018310 | F41G4.7 F41G4.7 0.162528849116862   |
| AGIWUR8357;AGIWUR33677                                                  |   |          |          |                |                                     |
| CB4856 HS                                                               | X | 16841105 | 16842975 | WBGene00018307 | dyla-1 F41G4.1 0.263869391809475    |
| AGIWUR325                                                               |   |          |          |                |                                     |
| CB4856 HS                                                               | X | 16843355 | 16845024 | WBGene00018311 | F41G4.8 F41G4.8 0.270612611912407   |
| AGIWUR7728                                                              |   |          |          |                |                                     |
| CB4856 HS                                                               | X | 16845374 | 16862005 | WBGene00020632 | T20F7.5 T20F7.5 -0.147798932405129  |
| AGIWUR8382;AGIWUR14936                                                  |   |          |          |                |                                     |
| CB4856 HS                                                               | X | 16866069 | 16869031 | WBGene00020633 | aakg-2 T20F7.6 -0.112105017764065   |
| AGIWUR36879                                                             |   |          |          |                |                                     |
| CB4856 HS                                                               | X | 16872926 | 16878351 | WBGene00020630 | T20F7.1 T20F7.1 0.166688609006332   |

|                                                                         |   |          |          |                |          |         |                     |  |
|-------------------------------------------------------------------------|---|----------|----------|----------------|----------|---------|---------------------|--|
| AGIWUR4889                                                              |   |          |          |                |          |         |                     |  |
| CB4856 HS                                                               | X | 16878148 | 16880526 | WBGene00020634 | acs-9    | T20F7.7 | -0.154203040158852  |  |
| AGIWUR18018;AGIWUR22812                                                 |   |          |          |                |          |         |                     |  |
| CB4856 HS                                                               | X | 16891991 | 16893148 | WBGene00018203 | F39F10.3 |         | F39F10.3            |  |
| -0.317886652530817 AGIWUR33743                                          |   |          |          |                |          |         |                     |  |
| CB4856 HS                                                               | X | 16894884 | 16895916 | WBGene00018202 | F39F10.2 |         | F39F10.2            |  |
| 0.164768756640265 AGIWUR36126                                           |   |          |          |                |          |         |                     |  |
| CB4856 HS                                                               | X | 16902391 | 16904332 | WBGene00018204 | F39F10.4 |         | F39F10.4            |  |
| -0.0351697461805687 AGIWUR4716                                          |   |          |          |                |          |         |                     |  |
| CB4856 HS                                                               | X | 16913906 | 16916800 | WBGene00016255 | C30E1.6  | C30E1.6 | 0.0802968284048258  |  |
| AGIWUR22467;AGIWUR29826                                                 |   |          |          |                |          |         |                     |  |
| CB4856 HS                                                               | X | 16916812 | 16919319 | WBGene00016257 | C30E1.8  | C30E1.8 | -0.268181113212015  |  |
| AGIWUR41597                                                             |   |          |          |                |          |         |                     |  |
| CB4856 HS                                                               | X | 16921853 | 16922861 | WBGene00016254 | fbxb-114 |         | C30E1.5             |  |
| 0.109678959934127 AGIWUR31156                                           |   |          |          |                |          |         |                     |  |
| CB4856 HS                                                               | X | 16923936 | 16925917 | WBGene00016253 | C30E1.4  | C30E1.4 | 0.0131080476321026  |  |
| AGIWUR42296                                                             |   |          |          |                |          |         |                     |  |
| CB4856 HS                                                               | X | 16925954 | 16926821 | WBGene00016252 | C30E1.3  | C30E1.3 | -0.0563562809370621 |  |
| AGIWUR41174                                                             |   |          |          |                |          |         |                     |  |
| CB4856 HS                                                               | X | 16926964 | 16928023 | WBGene00016251 | C30E1.2  | C30E1.2 | 0.041199586210082   |  |
| AGIWUR28158                                                             |   |          |          |                |          |         |                     |  |
| CB4856 HS                                                               | X | 16929914 | 16931619 | WBGene00022951 | C30E1.9  | C30E1.9 | -0.0383292164558959 |  |
| AGIWUR1340;AGIWUR1400;AGIWUR9127;AGIWUR14609;AGIWUR33336                |   |          |          |                |          |         |                     |  |
| CB4856 HS                                                               | X | 16943323 | 16943517 | WBGene00219964 | F52G3.6  | F52G3.6 | 0.166951677479832   |  |
| AGIWUR34273                                                             |   |          |          |                |          |         |                     |  |
| CB4856 HS                                                               | X | 16944877 | 16948026 | WBGene00018711 | F52G3.3  | F52G3.3 | 0.21096939312253    |  |
| AGIWUR8520                                                              |   |          |          |                |          |         |                     |  |
| CB4856 HS                                                               | X | 16948355 | 16952113 | WBGene00018712 | F52G3.4  | F52G3.4 | -0.0478375501130905 |  |
| AGIWUR27777                                                             |   |          |          |                |          |         |                     |  |
| CB4856 HS                                                               | X | 16963871 | 16972808 | WBGene00018710 | F52G3.1  | F52G3.1 | 0.0962785349863609  |  |
| AGIWUR3424                                                              |   |          |          |                |          |         |                     |  |
| CB4856 HS                                                               | X | 16973227 | 16976130 | WBGene00018713 | F52G3.5  | F52G3.5 | -0.130864207669037  |  |
| AGIWUR17329                                                             |   |          |          |                |          |         |                     |  |
| CB4856 HS                                                               | X | 16986629 | 17008462 | WBGene00019347 | mb1-1    | K02H8.1 | -0.145560265595134  |  |
| AGIWUR10094;AGIWUR21006;AGIWUR27337;AGIWUR28511;AGIWUR33493;AGIWUR40744 |   |          |          |                |          |         |                     |  |
| CB4856 HS                                                               | X | 17013462 | 17014028 | WBGene00018030 | F35B3.3  | F35B3.3 | 0.304313768639729   |  |
| AGIWUR40040                                                             |   |          |          |                |          |         |                     |  |
| CB4856 HS                                                               | X | 17015297 | 17017814 | WBGene00018028 | F35B3.1  | F35B3.1 | -0.186273689359984  |  |
| AGIWUR12954                                                             |   |          |          |                |          |         |                     |  |

|                                                                                               |   |          |          |                |                 |                      |
|-----------------------------------------------------------------------------------------------|---|----------|----------|----------------|-----------------|----------------------|
| CB4856 HS                                                                                     | X | 17019616 | 17020958 | WBGene00018031 | F35B3.4 F35B3.4 | -0.165916972747191   |
| AGIWUR6234                                                                                    |   |          |          |                |                 |                      |
| CB4856 HS                                                                                     | X | 17021821 | 17030219 | WBGene00004121 | ptrn-1 F35B3.5  | -0.0307812894880426  |
| AGIWUR2363;AGIWUR37820                                                                        |   |          |          |                |                 |                      |
| CB4856 HS                                                                                     | X | 17035206 | 17042985 | WBGene00018033 | F35B3.7 F35B3.7 | -0.0173116173539274  |
| AGIWUR16065                                                                                   |   |          |          |                |                 |                      |
| CB4856 HS                                                                                     | X | 17044115 | 17045497 | WBGene00016268 | C30G4.2 C30G4.2 | -0.124085144718578   |
| AGIWUR30899                                                                                   |   |          |          |                |                 |                      |
| CB4856 HS                                                                                     | X | 17046261 | 17055581 | WBGene00001537 | gcy-11 C30G4.3  | 0.0296683712342674   |
| AGIWUR42669                                                                                   |   |          |          |                |                 |                      |
| CB4856 HS                                                                                     | X | 17056925 | 17072188 | WBGene00016269 | C30G4.4 C30G4.4 | 0.0624427226305069   |
| AGIWUR709;AGIWUR4881;AGIWUR5058;AGIWUR8872;AGIWUR31858;AGIWUR31945;AGIWUR37580;AGIWUR41091    |   |          |          |                |                 |                      |
| CB4856 HS                                                                                     | X | 17073810 | 17080685 | WBGene00016271 | irld-23 C30G4.6 | -0.00827868958441247 |
| AGIWUR155;AGIWUR11710;AGIWUR29104;AGIWUR29756;AGIWUR34987;AGIWUR36342;AGIWUR39395;AGIWUR43306 |   |          |          |                |                 |                      |
| CB4856 HS                                                                                     | X | 17081128 | 17082042 | WBGene00044773 | C08A9.10        | C08A9.10             |
| 0.225307760742883 AGIWUR19873;AGIWUR22703                                                     |   |          |          |                |                 |                      |
| CB4856 HS                                                                                     | X | 17083162 | 17083742 | WBGene00045273 | C08A9.11        | C08A9.11             |
| 0.121914210459749 AGIWUR28514                                                                 |   |          |          |                |                 |                      |
| CB4856 HS                                                                                     | X | 17087882 | 17093299 | WBGene00015583 | C08A9.3 C08A9.3 | -0.0515341059889183  |
| AGIWUR10031;AGIWUR22743;AGIWUR23148;AGIWUR31283;AGIWUR39427                                   |   |          |          |                |                 |                      |
| CB4856 HS                                                                                     | X | 17092718 | 17094223 | WBGene00004932 | sod-3 C08A9.1   | 0.136235249865583    |
| AGIWUR31330                                                                                   |   |          |          |                |                 |                      |
| CB4856 HS                                                                                     | X | 17094288 | 17096537 | WBGene00015586 | C08A9.6 C08A9.6 | -0.31536743299303    |
| AGIWUR30672                                                                                   |   |          |          |                |                 |                      |
| CB4856 HS                                                                                     | X | 17099112 | 17100752 | WBGene00015587 | sdz-2 C08A9.7   | -0.0423275126696172  |
| AGIWUR13578;AGIWUR33350;AGIWUR38756                                                           |   |          |          |                |                 |                      |
| CB4856 HS                                                                                     | X | 17102845 | 17104871 | WBGene00015588 | C08A9.8 C08A9.8 | 0.0245546841636575   |
| AGIWUR24190;AGIWUR42370                                                                       |   |          |          |                |                 |                      |
| CB4856 HS                                                                                     | X | 17109282 | 17110655 | WBGene00019576 | K09E3.5 K09E3.5 | -0.35074721535716    |
| AGIWUR9689                                                                                    |   |          |          |                |                 |                      |
| CB4856 HS                                                                                     | X | 17113965 | 17115189 | WBGene00019577 | K09E3.6 K09E3.6 | -0.107485764219976   |
| AGIWUR35743                                                                                   |   |          |          |                |                 |                      |
| CB4856 HS                                                                                     | X | 17117659 | 17117988 | WBGene00019574 | K09E3.2 K09E3.2 | -0.0382735891019799  |
| AGIWUR2162                                                                                    |   |          |          |                |                 |                      |
| CB4856 HS                                                                                     | X | 17119269 | 17120263 | WBGene00019575 | K09E3.4 K09E3.4 | -0.0441364507524558  |
| AGIWUR1080;AGIWUR6845;AGIWUR22791;AGIWUR24492                                                 |   |          |          |                |                 |                      |
| CB4856 HS                                                                                     | X | 17131348 | 17134527 | WBGene00019578 | K09E3.7 K09E3.7 | -0.35404957886495    |
| AGIWUR19317                                                                                   |   |          |          |                |                 |                      |

|                                     |   |                                                                        |          |                |           |           |                     |
|-------------------------------------|---|------------------------------------------------------------------------|----------|----------------|-----------|-----------|---------------------|
| CB4856 HS                           | X | 17135975                                                               | 17138110 | WBGene00020725 | cnp-3     | T23C6.3   | -0.0112848241041839 |
| AGIWUR12081                         |   |                                                                        |          |                |           |           |                     |
| CB4856 HS                           | X | 17147531                                                               | 17149927 | WBGene00020726 | T23C6.4   | T23C6.4   | -0.259656056043552  |
| AGIWUR19464                         |   |                                                                        |          |                |           |           |                     |
| CB4856 HS                           | X | 17151522                                                               | 17154595 | WBGene00007011 | mdt-1.2   | T23C6.1   | 0.0475225382438218  |
| AGIWUR698                           |   |                                                                        |          |                |           |           |                     |
| CB4856 HS                           | X | 17155088                                                               | 17157957 | WBGene00020727 | npr-21    | T23C6.5   | -0.305433985984038  |
| AGIWUR19735                         |   |                                                                        |          |                |           |           |                     |
| CB4856 HS                           | X | 17176490                                                               | 17176777 | WBGene00015121 | B0302.4   | B0302.4   | 0.0171444910052472  |
| AGIWUR31228                         |   |                                                                        |          |                |           |           |                     |
| CB4856 HS                           | X | 17178539                                                               | 17178992 | WBGene00015119 | B0302.2   | B0302.2   | 0.0298855678895027  |
| AGIWUR36023                         |   |                                                                        |          |                |           |           |                     |
| CB4856 HS                           | X | 17186380                                                               | 17193289 | WBGene00002207 | sid-3     | B0302.1   | 0.174549903959877   |
| AGIWUR9881                          |   |                                                                        |          |                |           |           |                     |
| CB4856 HS                           | X | 17193300                                                               | 17195137 | WBGene00015122 | B0302.5   | B0302.5   | 0.0663393616094492  |
| AGIWUR15536                         |   |                                                                        |          |                |           |           |                     |
| CB4856 HS                           | X | 17205243                                                               | 17209365 | WBGene00020365 | T08G2.2   | T08G2.2   | 0.145149908414225   |
| AGIWUR13064                         |   |                                                                        |          |                |           |           |                     |
| CB4856 HS                           | X | 17213144                                                               | 17214929 | WBGene00020366 | acdh-10   | T08G2.3   | -0.31903506690057   |
| AGIWUR21557;AGIWUR26581;AGIWUR38674 |   |                                                                        |          |                |           |           |                     |
| CB4856 HS                           | X | 17215018                                                               | 17217105 | WBGene00020812 | acdh-7    | T25G12.5  |                     |
| -0.250522226614713                  |   | AGIWUR35641                                                            |          |                |           |           |                     |
| CB4856 HS                           | X | 17222475                                                               | 17224464 | WBGene00004270 | rab-6.2   | T25G12.4  |                     |
| -0.0672746938107842                 |   | AGIWUR5495;AGIWUR12185;AGIWUR18195;AGIWUR26907;AGIWUR33675;AGIWUR33764 |          |                |           |           |                     |
| CB4856 HS                           | X | 17225197                                                               | 17230208 | WBGene00020813 | T25G12.6  | T25G12.6  |                     |
| 0.316834264543936                   |   | AGIWUR6172;AGIWUR9894                                                  |          |                |           |           |                     |
| CB4856 HS                           | X | 17230719                                                               | 17235838 | WBGene00000993 | dhs-30    | T25G12.7  |                     |
| 0.0619755564885525                  |   | AGIWUR20085;AGIWUR42792                                                |          |                |           |           |                     |
| CB4856 HS                           | X | 17236933                                                               | 17237855 | WBGene00020817 | T25G12.11 | T25G12.11 |                     |
| 0.0126046257337284                  |   | AGIWUR8755                                                             |          |                |           |           |                     |
| CB4856 HS                           | X | 17247674                                                               | 17248972 | WBGene00020810 | T25G12.2  | T25G12.2  |                     |
| -0.276209616837162                  |   | AGIWUR33125                                                            |          |                |           |           |                     |
| CB4856 HS                           | X | 17248837                                                               | 17250007 | WBGene00020809 | T25G12.1  | T25G12.1  |                     |
| -0.00183814282163119                |   | AGIWUR1918                                                             |          |                |           |           |                     |
| CB4856 HS                           | X | 17256235                                                               | 17256780 | WBGene00021500 | Y40C7B.4  | Y40C7B.4  |                     |
| -0.156305433200254                  |   | AGIWUR5826;AGIWUR10870;AGIWUR23992                                     |          |                |           |           |                     |
| CB4856 HS                           | X | 17258335                                                               | 17259585 | WBGene00021499 | Y40C7B.3  | Y40C7B.3  |                     |
| -0.0415557675186893                 |   | AGIWUR34942                                                            |          |                |           |           |                     |
| CB4856 HS                           | X | 17259889                                                               | 17263584 | WBGene00021498 | Y40C7B.1  | Y40C7B.1  |                     |

|                     |                                                                        |                |                 |                    |  |
|---------------------|------------------------------------------------------------------------|----------------|-----------------|--------------------|--|
| -0.112725417576718  | AGIWUR9091;AGIWUR15084                                                 |                |                 |                    |  |
| CB4856 HS X         | 17263831 17266460                                                      | WBGene00021501 | Y40C7B.5        | Y40C7B.5           |  |
| -0.106206521145978  | AGIWUR40180                                                            |                |                 |                    |  |
| CB4856 HS X         | 17266695 17269960                                                      | WBGene00016348 | C33E10.6        | C33E10.6           |  |
| -0.251388112552862  | AGIWUR39517                                                            |                |                 |                    |  |
| CB4856 HS X         | 17272934 17279532                                                      | WBGene00016347 | C33E10.5        | C33E10.5           |  |
| -0.217733039188467  | AGIWUR31699                                                            |                |                 |                    |  |
| CB4856 HS X         | 17280761 17283574                                                      | WBGene00023246 | C33E10.4        | C33E10.4           |  |
| 0.0742739711468516  | AGIWUR11057                                                            |                |                 |                    |  |
| CB4856 HS X         | 17284339 17285449                                                      | WBGene00023245 | C33E10.3        | C33E10.3           |  |
| -0.0173302669471527 | AGIWUR20722;AGIWUR33047                                                |                |                 |                    |  |
| CB4856 HS X         | 17286274 17287564                                                      | WBGene00023247 | C33E10.7        | C33E10.7           |  |
| -0.0118987250869775 | AGIWUR28214                                                            |                |                 |                    |  |
| CB4856 HS X         | 17293094 17294828                                                      | WBGene00016349 | C33E10.8        | C33E10.8           |  |
| -0.171712797112374  | AGIWUR14047                                                            |                |                 |                    |  |
| CB4856 HS X         | 17296644 17297231                                                      | WBGene00023248 | C33E10.9        | C33E10.9           |  |
| 0.212998591763657   | AGIWUR4144;AGIWUR19105;AGIWUR19349;AGIWUR39258                         |                |                 |                    |  |
| CB4856 HS X         | 17301374 17301923                                                      | WBGene00016350 | C33E10.10       | C33E10.10          |  |
| 0.0189545994610638  | AGIWUR15483;AGIWUR32562                                                |                |                 |                    |  |
| CB4856 HS X         | 17302719 17303994                                                      | WBGene00016346 | fbxa-120        | C33E10.2           |  |
| -0.204305776873344  | AGIWUR18344                                                            |                |                 |                    |  |
| CB4856 HS X         | 17305325 17306164                                                      | WBGene00016345 | C33E10.1        | C33E10.1           |  |
| -0.228963038608881  | AGIWUR34159                                                            |                |                 |                    |  |
| CB4856 HS X         | 17318584 17326603                                                      | WBGene00004220 | ptr-5 C53C11.3  |                    |  |
| -0.142304038545872  | AGIWUR18738                                                            |                |                 |                    |  |
| CB4856 HS X         | 17334052 17336169                                                      | WBGene00044770 | C53C11.5        | C53C11.5           |  |
| -0.116877907746439  | AGIWUR36267;AGIWUR38496                                                |                |                 |                    |  |
| CB4856 HS X         | 17337279 17338632                                                      | WBGene00016900 | C53C11.2        | C53C11.2           |  |
| 0.0754496467663452  | AGIWUR1053;AGIWUR10129;AGIWUR13719;AGIWUR15294;AGIWUR20496;AGIWUR31951 |                |                 |                    |  |
| CB4856 HS X         | 17339907 17342220                                                      | WBGene00016899 | C53C11.1        | C53C11.1           |  |
| 0.043293583134659   | AGIWUR10071                                                            |                |                 |                    |  |
| CB4856 HS X         | 17359770 17364764                                                      | WBGene00017338 | F10D7.1 F10D7.1 | 0.226963832550707  |  |
| AGIWUR43231         |                                                                        |                |                 |                    |  |
| CB4856 HS X         | 17364646 17368642                                                      | WBGene00017339 | F10D7.2 F10D7.2 | 0.085615312807942  |  |
| AGIWUR12776         |                                                                        |                |                 |                    |  |
| CB4856 HS X         | 17372318 17374877                                                      | WBGene00017340 | F10D7.3 F10D7.3 | -0.176984321643808 |  |
| AGIWUR41425         |                                                                        |                |                 |                    |  |
| CB4856 HS X         | 17378569 17381818                                                      | WBGene00017341 | F10D7.4 F10D7.4 | 0.0523217760217438 |  |
| AGIWUR22452         |                                                                        |                |                 |                    |  |

|                                                                                    |    |   |          |          |                 |          |          |                     |
|------------------------------------------------------------------------------------|----|---|----------|----------|-----------------|----------|----------|---------------------|
| CB4856                                                                             | HS | X | 17383125 | 17391615 | WBGene00017342  | F10D7.5  | F10D7.5  | -0.177126927647386  |
| AGIWUR1506;AGIWUR16573;AGIWUR19528;AGIWUR20197;AGIWUR29819;AGIWUR37849;AGIWUR44662 |    |   |          |          |                 |          |          |                     |
| CB4856                                                                             | HS | X | 17393789 | 17396556 | WBGene00006886  | vap-1    | F11C7.3  | 0.0463292202947976  |
| AGIWUR25126                                                                        |    |   |          |          |                 |          |          |                     |
| CB4856                                                                             | HS | X | 17396814 | 17397798 | WBGene00017376  | F11C7.2  | F11C7.2  | 0.122670083521214   |
| AGIWUR22548                                                                        |    |   |          |          |                 |          |          |                     |
| CB4856                                                                             | HS | X | 17398593 | 17399357 | WBGene00017379  | F11C7.7  | F11C7.7  | -0.095821961113959  |
| AGIWUR29574                                                                        |    |   |          |          |                 |          |          |                     |
| CB4856                                                                             | HS | X | 17401571 | 17402581 | WBGene00017378  | F11C7.6  | F11C7.6  | -0.096809108148749  |
| AGIWUR43595                                                                        |    |   |          |          |                 |          |          |                     |
| CB4856                                                                             | HS | X | 17402540 | 17414014 | WBGene00000792  | crb-1    | F11C7.4  | -0.306631456225189  |
| AGIWUR8685;AGIWUR17055;AGIWUR28897                                                 |    |   |          |          |                 |          |          |                     |
| CB4856                                                                             | HS | X | 17420211 | 17421582 | WBGene00003891  | osm-11   | F11C7.5  | 0.142777873204221   |
| AGIWUR67;AGIWUR19910;AGIWUR40771                                                   |    |   |          |          |                 |          |          |                     |
| CB4856                                                                             | HS | X | 17429042 | 17433103 | WBGene00017375  | pbo-6    | F11C7.1  | 0.183964955088465   |
| AGIWUR26634                                                                        |    |   |          |          |                 |          |          |                     |
| CB4856                                                                             | HS | X | 17434445 | 17438080 | WBGene00016489  | C36E6.1  | C36E6.1  | -0.0401763499070569 |
| AGIWUR10631;AGIWUR13541;AGIWUR41270                                                |    |   |          |          |                 |          |          |                     |
| CB4856                                                                             | HS | X | 17438619 | 17439751 | WBGene00044683  | C36E6.8  | C36E6.8  | 0.100888760021691   |
| AGIWUR4420;AGIWUR11987;AGIWUR31569;AGIWUR37832                                     |    |   |          |          |                 |          |          |                     |
| CB4856                                                                             | HS | X | 17452392 | 17455861 | WBGene00016490  | C36E6.2  | C36E6.2  | 0.0527868897597656  |
| AGIWUR29514                                                                        |    |   |          |          |                 |          |          |                     |
| CB4856                                                                             | HS | X | 17459115 | 17460778 | WBGene00003369  | mlc-1    | C36E6.3  | -0.0310104976186132 |
| AGIWUR8479;AGIWUR21106;AGIWUR22126;AGIWUR26754;AGIWUR37052                         |    |   |          |          |                 |          |          |                     |
| CB4856                                                                             | HS | X | 17460778 | 17464966 | WBGene00022647  | slc-17.1 |          | ZK54.1              |
| 0.0788194505723743 AGIWUR15167;AGIWUR35072;AGIWUR40379;AGIWUR43365                 |    |   |          |          |                 |          |          |                     |
| CB4856                                                                             | HS | X | 17467121 | 17474585 | WBGene00006602  | tps-1    | ZK54.2   | 0.091407543207719   |
| AGIWUR3579;AGIWUR8084;AGIWUR16998                                                  |    |   |          |          |                 |          |          |                     |
| CB4856                                                                             | HS | X | 17479842 | 17480309 | WBGene00020085  | R106.1   | R106.1   | -0.167242478515847  |
| AGIWUR7948                                                                         |    |   |          |          |                 |          |          |                     |
| CB4856                                                                             | HS | X | 17480653 | 17481960 | WBGene000206419 | R106.5   | R106.5   | 0.126228674746808   |
| AGIWUR6816;AGIWUR8226;AGIWUR12105;AGIWUR15357;AGIWUR25111;AGIWUR39075              |    |   |          |          |                 |          |          |                     |
| CB4856                                                                             | HS | X | 17483012 | 17486831 | WBGene00020086  | npr-24   | R106.2   | -0.169420379744187  |
| AGIWUR20558                                                                        |    |   |          |          |                 |          |          |                     |
| CB4856                                                                             | HS | X | 17518445 | 17528197 | WBGene00003600  | nhr-1    | R09G11.2 |                     |
| -0.236202788689768 AGIWUR2950;AGIWUR4048;AGIWUR32468;AGIWUR39789                   |    |   |          |          |                 |          |          |                     |
| CB4856                                                                             | HS | X | 17528344 | 17531980 | WBGene00006319  | sup-10   | R09G11.1 |                     |
| 0.170196837399114 AGIWUR22302;AGIWUR35729;AGIWUR37633                              |    |   |          |          |                 |          |          |                     |
| CB4856                                                                             | HS | X | 17532976 | 17534064 | WBGene00017938  | F31A3.3  | F31A3.3  | -0.225881027419647  |

|                                                                                                                                                                                     |    |   |          |          |                |            |          |                     |
|-------------------------------------------------------------------------------------------------------------------------------------------------------------------------------------|----|---|----------|----------|----------------|------------|----------|---------------------|
| <b>AGIWUR14131</b>                                                                                                                                                                  |    |   |          |          |                |            |          |                     |
| CB4856                                                                                                                                                                              | HS | X | 17553419 | 17554449 | WBGene00000026 | abu-3      | F31A3.1  | -0.593974977850698  |
| <b>AGIWUR19465</b>                                                                                                                                                                  |    |   |          |          |                |            |          |                     |
| CB4856                                                                                                                                                                              | HS | X | 17554946 | 17561464 | WBGene00017939 | F31A3.5    | F31A3.5  | -0.0403403986753004 |
| AGIWUR11105;AGIWUR12739;AGIWUR19710;AGIWUR33019;AGIWUR35493;AGIWUR43788                                                                                                             |    |   |          |          |                |            |          |                     |
| CB4856                                                                                                                                                                              | HS | X | 17567643 | 17571923 | WBGene00018191 | frpr-7     | F39B3.2  | -0.142606972230021  |
| <b>AGIWUR17280</b>                                                                                                                                                                  |    |   |          |          |                |            |          |                     |
| CB4856                                                                                                                                                                              | HS | X | 17578692 | 17579111 | WBGene00018192 | F39B3.3    | F39B3.3  | 0.0765791810927663  |
| <b>AGIWUR14256</b>                                                                                                                                                                  |    |   |          |          |                |            |          |                     |
| CB4856                                                                                                                                                                              | HS | X | 17600412 | 17601503 | WBGene00002272 | lec-9      | C16H3.2  | 0.155514794432644   |
| <b>AGIWUR23352</b>                                                                                                                                                                  |    |   |          |          |                |            |          |                     |
| CB4856                                                                                                                                                                              | HS | X | 17601607 | 17610048 | WBGene00015868 | C16H3.3    | C16H3.3  |                     |
| -0.00178408480191727 AGIWUR8937;AGIWUR32768                                                                                                                                         |    |   |          |          |                |            |          |                     |
| CB4856                                                                                                                                                                              | HS | X | 17617827 | 17619458 | WBGene00015867 | ncs-7      | C16H3.1  | 0.0211397268759335  |
| <b>AGIWUR9806</b>                                                                                                                                                                   |    |   |          |          |                |            |          |                     |
| CB4856                                                                                                                                                                              | HS | X | 17622778 | 17640743 | WBGene00019211 | H18N23.2   |          | H18N23.2            |
| 0.0691535492200899 AGIWUR637;AGIWUR9448;AGIWUR16628                                                                                                                                 |    |   |          |          |                |            |          |                     |
| CB4856                                                                                                                                                                              | HS | X | 17650178 | 17651594 | WBGene00044771 | tmem-218   |          | T23E7.5             |
| -0.0525160267285347 AGIWUR2801;AGIWUR33791                                                                                                                                          |    |   |          |          |                |            |          |                     |
| CB4856                                                                                                                                                                              | HS | X | 17662458 | 17665357 | WBGene00003744 | nlp-6      | T23E7.4  | -0.0826216852415218 |
| <b>AGIWUR7630;AGIWUR25902;AGIWUR28626;AGIWUR43164</b>                                                                                                                               |    |   |          |          |                |            |          |                     |
| CB4856                                                                                                                                                                              | HS | X | 17671029 | 17680793 | WBGene00020732 | T23E7.2    | T23E7.2  | 0.0640625206050203  |
| AGIWUR357;AGIWUR3225;AGIWUR7696;AGIWUR15128;AGIWUR17786;AGIWUR19744;AGIWUR22848;AGIWUR23185;AGIWUR24830;AGI<br>WUR31754;AGIWUR36428;AGIWUR39375;AGIWUR41150;AGIWUR42827;AGIWUR42893 |    |   |          |          |                |            |          |                     |
| CB4856                                                                                                                                                                              | HS | X | 17680873 | 17682294 | WBGene00044772 | T23E7.6    | T23E7.6  | 0.10977947275502    |
| AGIWUR7154;AGIWUR11579;AGIWUR12544;AGIWUR17726;AGIWUR31690;AGIWUR35251;AGIWUR36341;AGIWUR39773;AGIWUR40382;<br>AGIWUR41037                                                          |    |   |          |          |                |            |          |                     |
| CB4856                                                                                                                                                                              | HS | X | 17695232 | 17701744 | WBGene00017625 | cgt-2      | F20B4.6  | 0.127061460906341   |
| <b>AGIWUR4948;AGIWUR24597</b>                                                                                                                                                       |    |   |          |          |                |            |          |                     |
| CB4856                                                                                                                                                                              | HS | X | 17710286 | 17711674 | WBGene00019189 | H11L12.1   |          | H11L12.1            |
| -0.110400044008996 AGIWUR6383                                                                                                                                                       |    |   |          |          |                |            |          |                     |
| CB4856                                                                                                                                                                              | HS | X | 17714456 | 17714832 | WBGene00007069 | 6R55.2     | 6R55.2   | 0.0835872706958849  |
| <b>AGIWUR33343</b>                                                                                                                                                                  |    |   |          |          |                |            |          |                     |
| CB4856                                                                                                                                                                              | HS | X | 17714968 | 17718720 | WBGene00007068 | cTel155X.1 |          | cTel155X.1          |
| -0.0454793813246983 AGIWUR19047;AGIWUR34189;AGIWUR43038                                                                                                                             |    |   |          |          |                |            |          |                     |
| N2                                                                                                                                                                                  | CT | I | 3747     | 3909     | WBGene00023193 | Y74C9A.6   | Y74C9A.6 | 0.0807563065070553  |
| <b>AGIWUR10283</b>                                                                                                                                                                  |    |   |          |          |                |            |          |                     |
| N2                                                                                                                                                                                  | CT | I | 4116     | 10230    | WBGene00022277 | homt-1     | Y74C9A.3 | -0.145890344005899  |
| <b>AGIWUR36142</b>                                                                                                                                                                  |    |   |          |          |                |            |          |                     |

|                                                                                                                                 |    |   |        |        |                |           |           |                     |
|---------------------------------------------------------------------------------------------------------------------------------|----|---|--------|--------|----------------|-----------|-----------|---------------------|
| N2                                                                                                                              | CT | I | 11495  | 16837  | WBGene00022276 | nlp-40    | Y74C9A.2  | -0.085854210162454  |
| AGIWUR15573;AGIWUR25172                                                                                                         |    |   |        |        |                |           |           |                     |
| N2                                                                                                                              | CT | I | 17487  | 26781  | WBGene00022278 | rcor-1    | Y74C9A.4  | 0.0184684606650141  |
| AGIWUR26476                                                                                                                     |    |   |        |        |                |           |           |                     |
| N2                                                                                                                              | CT | I | 27591  | 32544  | WBGene00022279 | sesn-1    | Y74C9A.5  | 0.0155059348981883  |
| AGIWUR22971                                                                                                                     |    |   |        |        |                |           |           |                     |
| N2                                                                                                                              | CT | I | 43733  | 44677  | WBGene00022275 | Y74C9A.1  | Y74C9A.1  | 0.1665267020407     |
| AGIWUR5034                                                                                                                      |    |   |        |        |                |           |           |                     |
| N2                                                                                                                              | CT | I | 47467  | 49857  | WBGene00044345 | Y48G1C.12 | Y48G1C.12 | -0.287674086025444  |
| AGIWUR8212;AGIWUR32887;AGIWUR43575                                                                                              |    |   |        |        |                |           |           |                     |
| N2                                                                                                                              | CT | I | 49919  | 54426  | WBGene00021677 | pgs-1     | Y48G1C.4  | -0.193269135665719  |
| AGIWUR6338;AGIWUR29294;AGIWUR41966                                                                                              |    |   |        |        |                |           |           |                     |
| N2                                                                                                                              | CT | I | 55293  | 64066  | WBGene00021678 | Y48G1C.5  | Y48G1C.5  | 0.387048816015383   |
| AGIWUR12519                                                                                                                     |    |   |        |        |                |           |           |                     |
| N2                                                                                                                              | CT | I | 71425  | 81071  | WBGene00000812 | csk-1     | Y48G1C.2  | -0.0470320396311381 |
| AGIWUR18740;AGIWUR27071;AGIWUR29609;AGIWUR40038                                                                                 |    |   |        |        |                |           |           |                     |
| N2                                                                                                                              | CT | I | 81193  | 91020  | WBGene00021683 | Y48G1C.10 | Y48G1C.10 | -0.11620697524901   |
| AGIWUR1487;AGIWUR6768;AGIWUR17886                                                                                               |    |   |        |        |                |           |           |                     |
| N2                                                                                                                              | CT | I | 91380  | 92877  | WBGene00021682 | Y48G1C.9  | Y48G1C.9  | 0.0138227839012686  |
| AGIWUR6641;AGIWUR16497;AGIWUR29495                                                                                              |    |   |        |        |                |           |           |                     |
| N2                                                                                                                              | CT | I | 93024  | 94884  | WBGene00021676 | Y48G1C.1  | Y48G1C.1  | 0.0329178442160263  |
| AGIWUR20733                                                                                                                     |    |   |        |        |                |           |           |                     |
| N2                                                                                                                              | CT | I | 96544  | 108223 | WBGene00021681 | Y48G1C.8  | Y48G1C.8  | 0.0740162604965935  |
| AGIWUR2118;AGIWUR4958;AGIWUR17289;AGIWUR20729;AGIWUR23172;AGIWUR25122;AGIWUR30532;AGIWUR33151;AGIWUR37921                       |    |   |        |        |                |           |           |                     |
| N2                                                                                                                              | CT | I | 108670 | 110107 | WBGene00004274 | rab-11.1  | F53G12.1  | 0.282948599442078   |
| AGIWUR7280;AGIWUR18237                                                                                                          |    |   |        |        |                |           |           |                     |
| N2                                                                                                                              | CT | I | 111038 | 112417 | WBGene00004418 | rp1-7     | F53G12.10 | 0.109180636910153   |
| AGIWUR2263;AGIWUR3392;AGIWUR5751;AGIWUR6722;AGIWUR12865;AGIWUR17613;AGIWUR21588;AGIWUR25879;AGIWUR34428;AGIWUR39201;AGIWUR39669 |    |   |        |        |                |           |           |                     |
| N2                                                                                                                              | CT | I | 112285 | 113721 | WBGene00018774 | F53G12.9  | F53G12.9  | -0.0887009829943795 |
| AGIWUR6433;AGIWUR10455;AGIWUR10794;AGIWUR22121;AGIWUR25979;AGIWUR27830;AGIWUR36366;AGIWUR36737                                  |    |   |        |        |                |           |           |                     |
| N2                                                                                                                              | CT | I | 113807 | 114704 | WBGene00018773 | F53G12.8  | F53G12.8  | 0.214182238449095   |
| AGIWUR11234;AGIWUR20914                                                                                                         |    |   |        |        |                |           |           |                     |
| N2                                                                                                                              | CT | I | 115739 | 117438 | WBGene00000622 | col-45    | F53G12.7  | 0.212922420123018   |
| AGIWUR14279                                                                                                                     |    |   |        |        |                |           |           |                     |
| N2                                                                                                                              | CT | I | 118109 | 120870 | WBGene00004962 | spe-8     | F53G12.6  | 0.25935182063838    |
| AGIWUR621;AGIWUR6081;AGIWUR40104;AGIWUR43527                                                                                    |    |   |        |        |                |           |           |                     |
| N2                                                                                                                              | CT | I | 127297 | 134065 | WBGene00003229 | mex-3     | F53G12.5  | 0.118307235445092   |
| AGIWUR13975;AGIWUR29437;AGIWUR44108                                                                                             |    |   |        |        |                |           |           |                     |



|                                                                                               |    |   |        |        |                |           |           |                     |
|-----------------------------------------------------------------------------------------------|----|---|--------|--------|----------------|-----------|-----------|---------------------|
| N2                                                                                            | CT | I | 134337 | 137282 | WBGene00018772 | F53G12.4  | F53G12.4  | -0.15099045273098   |
| AGIWUR42484                                                                                   |    |   |        |        |                |           |           |                     |
| N2                                                                                            | CT | I | 146486 | 154850 | WBGene00000253 | bli-3     | F56C11.1  | 0.110889283073515   |
| AGIWUR3807                                                                                    |    |   |        |        |                |           |           |                     |
| N2                                                                                            | CT | I | 160172 | 166819 | WBGene00004225 | ptr-11    | F56C11.2  | 0.237958982720217   |
| AGIWUR42837                                                                                   |    |   |        |        |                |           |           |                     |
| N2                                                                                            | CT | I | 171340 | 175989 | WBGene00018958 | F56C11.6  | F56C11.6  | -0.084191868914278  |
| AGIWUR6883                                                                                    |    |   |        |        |                |           |           |                     |
| N2                                                                                            | CT | I | 178538 | 182161 | WBGene00018957 | F56C11.5  | F56C11.5  | -0.106596435527464  |
| AGIWUR2702                                                                                    |    |   |        |        |                |           |           |                     |
| N2                                                                                            | CT | I | 182079 | 182772 | WBGene00018955 | F56C11.3  | F56C11.3  | -0.193195443618011  |
| AGIWUR23793                                                                                   |    |   |        |        |                |           |           |                     |
| N2                                                                                            | CT | I | 183364 | 208465 | WBGene00000227 | atm-1     | Y48G1BL.2 | -0.0274571588454284 |
| AGIWUR463;AGIWUR33245;AGIWUR38423;AGIWUR39307                                                 |    |   |        |        |                |           |           |                     |
| N2                                                                                            | CT | I | 216028 | 216996 | WBGene00021662 | snp-3.3   | Y48G1BL.1 | -0.177989636525393  |
| AGIWUR11670                                                                                   |    |   |        |        |                |           |           |                     |
| N2                                                                                            | CT | I | 219735 | 221575 | WBGene00021664 | Y48G1BL.5 | Y48G1BL.5 | 0.15475290297235    |
| AGIWUR13754                                                                                   |    |   |        |        |                |           |           |                     |
| N2                                                                                            | CT | I | 238616 | 239021 | WBGene00021672 | Y48G1BM.7 | Y48G1BM.7 | -0.398568481392971  |
| AGIWUR38722                                                                                   |    |   |        |        |                |           |           |                     |
| N2                                                                                            | CT | I | 240491 | 245414 | WBGene00021668 | Y48G1BM.2 | Y48G1BM.2 | -0.0427704752438602 |
| AGIWUR29927                                                                                   |    |   |        |        |                |           |           |                     |
| N2                                                                                            | CT | I | 248624 | 251580 | WBGene00021673 | Y48G1BM.8 | Y48G1BM.8 | 0.0337731879625398  |
| AGIWUR38995                                                                                   |    |   |        |        |                |           |           |                     |
| N2                                                                                            | CT | I | 252118 | 254277 | WBGene00021667 | snp-3.2   | Y48G1BM.1 | -0.129580530991793  |
| AGIWUR11205                                                                                   |    |   |        |        |                |           |           |                     |
| N2                                                                                            | CT | I | 254277 | 259157 | WBGene00021675 | Y48G1BR.1 | Y48G1BR.1 | -0.0222643339532302 |
| AGIWUR4179;AGIWUR5959;AGIWUR23967;AGIWUR27432;AGIWUR32377;AGIWUR37148;AGIWUR43002;AGIWUR43138 |    |   |        |        |                |           |           |                     |
| N2                                                                                            | CT | I | 280120 | 280445 | WBGene00016904 | C53D5.3   | C53D5.3   | 0.0925498809038245  |
| AGIWUR33409                                                                                   |    |   |        |        |                |           |           |                     |
| N2                                                                                            | CT | I | 283500 | 286115 | WBGene00016903 | marc-4    | C53D5.2   | -0.194267072068534  |
| AGIWUR3252                                                                                    |    |   |        |        |                |           |           |                     |
| N2                                                                                            | CT | I | 286088 | 289185 | WBGene00016905 | ztf-3     | C53D5.4   | 0.123167886604516   |
| AGIWUR12744                                                                                   |    |   |        |        |                |           |           |                     |
| N2                                                                                            | CT | I | 291215 | 305468 | WBGene00016902 | C53D5.1   | C53D5.1   | -0.104057082171426  |
| AGIWUR2825                                                                                    |    |   |        |        |                |           |           |                     |
| N2                                                                                            | CT | I | 305811 | 311130 | WBGene00016906 | C53D5.5   | C53D5.5   | 0.0083338907965107  |
| AGIWUR41850                                                                                   |    |   |        |        |                |           |           |                     |
| N2                                                                                            | CT | I | 310981 | 314989 | WBGene00002077 | imb-3     | C53D5.6   | -0.0556649039942059 |
| AGIWUR3906;AGIWUR8209;AGIWUR34608                                                             |    |   |        |        |                |           |           |                     |
| N2                                                                                            | CT | I | 318390 | 323352 | WBGene00002079 | xpo-2     | Y48G1A.5  | 0.159230236787085   |
| AGIWUR26191                                                                                   |    |   |        |        |                |           |           |                     |
| N2                                                                                            | CT | I | 323855 | 330978 | WBGene00021660 | Y48G1A.4  | Y48G1A.4  | 0.0110896936488594  |
| AGIWUR8979                                                                                    |    |   |        |        |                |           |           |                     |

|                                                                                                                                                           |    |   |        |        |                 |           |           |                     |                     |             |
|-----------------------------------------------------------------------------------------------------------------------------------------------------------|----|---|--------|--------|-----------------|-----------|-----------|---------------------|---------------------|-------------|
| N2                                                                                                                                                        | CT | I | 332611 | 337839 | WBGene00000917  | daf-25    | Y48G1A.3  |                     | 0.0937325852172179  |             |
| AGIWUR35344                                                                                                                                               |    |   |        |        |                 |           |           |                     |                     |             |
| N2                                                                                                                                                        | CT | I | 343069 | 348424 | WBGene00021661  | mbtr-1    | Y48G1A.6  |                     | 0.0184155490536817  |             |
| AGIWUR1177                                                                                                                                                |    |   |        |        |                 |           |           |                     |                     |             |
| N2                                                                                                                                                        | CT | I | 348460 | 357193 | WBGene00021657  | Y48G1A.1  |           | Y48G1A.1            | -0.0857888296553    |             |
| AGIWUR10987                                                                                                                                               |    |   |        |        |                 |           |           |                     |                     |             |
| N2                                                                                                                                                        | CT | I | 357240 | 363901 | WBGene00020087  | R119.1    | R119.1    | -0.346867787205271  |                     | AGIWUR25426 |
| N2                                                                                                                                                        | CT | I | 364510 | 368319 | WBGene00020091  | rnp-8     | R119.7    | 0.208959349200818   |                     | AGIWUR25376 |
| N2                                                                                                                                                        | CT | I | 368370 | 373445 | WBGene00020088  | R119.2    | R119.2    | -0.243688455258265  |                     | AGIWUR10202 |
| N2                                                                                                                                                        | CT | I | 373571 | 379073 | WBGene00020089  | R119.3    | R119.3    | -0.105727356992759  |                     |             |
| AGIWUR3041;AGIWUR17217;AGIWUR27220;AGIWUR29433;AGIWUR30374;AGIWUR42548                                                                                    |    |   |        |        |                 |           |           |                     |                     |             |
| N2                                                                                                                                                        | CT | I | 379071 | 381902 | WBGene00004143  | pqn-59    | R119.4    | 0.219315018119751   |                     |             |
| AGIWUR5926;AGIWUR7401;AGIWUR13641;AGIWUR16067;AGIWUR19397;AGIWUR19860;AGIWUR21791;AGIWUR26455;AGIWUR28874;AGIWUR32613;AGIWUR36219;AGIWUR36591;AGIWUR38419 |    |   |        |        |                 |           |           |                     |                     |             |
| N2                                                                                                                                                        | CT | I | 382648 | 388564 | WBGene00006385  | taf-4     | R119.6    | -0.0690087868621774 |                     | AGIWUR11265 |
| N2                                                                                                                                                        | CT | I | 388470 | 394415 | WBGene00020090  | R119.5    | R119.5    | -0.0564577881244794 |                     |             |
| AGIWUR1299;AGIWUR1860                                                                                                                                     |    |   |        |        |                 |           |           |                     |                     |             |
| N2                                                                                                                                                        | CT | I | 398891 | 412915 | WBGene00021733  | otub-2    | Y50C1A.1  |                     | 0.0117827602641345  |             |
| AGIWUR9308;AGIWUR14492;AGIWUR36666                                                                                                                        |    |   |        |        |                 |           |           |                     |                     |             |
| N2                                                                                                                                                        | CT | I | 412911 | 418660 | WBGene00021734  | Y50C1A.2  |           | Y50C1A.2            | -0.0394240155929229 |             |
| AGIWUR12911                                                                                                                                               |    |   |        |        |                 |           |           |                     |                     |             |
| N2                                                                                                                                                        | CT | I | 420922 | 423713 | WBGene00015570  | C07F11.2  |           | C07F11.2            | -0.388432449596346  |             |
| AGIWUR14464                                                                                                                                               |    |   |        |        |                 |           |           |                     |                     |             |
| N2                                                                                                                                                        | CT | I | 443999 | 461605 | WBGene00006593  | tol-1     | C07F11.1  |                     | -0.127063486069677  |             |
| AGIWUR2677;AGIWUR10919;AGIWUR11990;AGIWUR12403;AGIWUR13788;AGIWUR18746;AGIWUR19485;AGIWUR26817;AGIWUR32956;AGIWUR39071;AGIWUR41796                        |    |   |        |        |                 |           |           |                     |                     |             |
| N2                                                                                                                                                        | CT | I | 461995 | 462651 | WBGene00021026  | W04C9.4   | W04C9.4   | -0.15486673834412   |                     | AGIWUR40613 |
| N2                                                                                                                                                        | CT | I | 462657 | 467131 | WBGene00021027  | W04C9.5   | W04C9.5   | -0.465683803468917  |                     | AGIWUR32438 |
| N2                                                                                                                                                        | CT | I | 477582 | 481954 | WBGene00021025  | cutl-13   | W04C9.3   | 0.00694024976595298 |                     |             |
| AGIWUR7157;AGIWUR17034;AGIWUR44870                                                                                                                        |    |   |        |        |                 |           |           |                     |                     |             |
| N2                                                                                                                                                        | CT | I | 482040 | 483880 | WBGene000235388 | W04C9.9   | W04C9.9   | 0.298398765376276   |                     | AGIWUR43955 |
| N2                                                                                                                                                        | CT | I | 488607 | 489905 | WBGene00021024  | W04C9.2   | W04C9.2   | -0.268892583879513  |                     | AGIWUR6890  |
| N2                                                                                                                                                        | CT | I | 489969 | 496150 | WBGene00001814  | haf-4     | W04C9.1   | 0.265021207288246   |                     | AGIWUR32786 |
| N2                                                                                                                                                        | CT | I | 496144 | 502042 | WBGene00022035  | Y65B4BL.3 |           | Y65B4BL.3           | 0.0239387368498818  |             |
| AGIWUR355                                                                                                                                                 |    |   |        |        |                 |           |           |                     |                     |             |
| N2                                                                                                                                                        | CT | I | 502932 | 506250 | WBGene00022036  | Y65B4BL.4 |           | Y65B4BL.4           | 0.0910355700594643  |             |
| AGIWUR42967                                                                                                                                               |    |   |        |        |                 |           |           |                     |                     |             |
| N2                                                                                                                                                        | CT | I | 506469 | 509056 | WBGene00022034  | deps-1    | Y65B4BL.2 |                     | 0.133090219835131   |             |
| AGIWUR44389                                                                                                                                               |    |   |        |        |                 |           |           |                     |                     |             |

|                                                                                                                                     |    |   |        |        |                |           |           |                     |
|-------------------------------------------------------------------------------------------------------------------------------------|----|---|--------|--------|----------------|-----------|-----------|---------------------|
| N2                                                                                                                                  | CT | I | 511052 | 519800 | WBGene00022037 | acs-13    | Y65B4BL.5 | 0.103218314562021   |
| AGIWUR5213;AGIWUR6411;AGIWUR12098;AGIWUR26016;AGIWUR28762;AGIWUR30485;AGIWUR41922                                                   |    |   |        |        |                |           |           |                     |
| N2                                                                                                                                  | CT | I | 520109 | 521554 | WBGene00022038 | Y65B4BL.6 | Y65B4BL.6 | -0.0957125816239692 |
| AGIWUR10694;AGIWUR14351;AGIWUR18806;AGIWUR24805;AGIWUR30981;AGIWUR33410;AGIWUR36376;AGIWUR36747;AGIWUR36896;AGIWUR42899;AGIWUR44259 |    |   |        |        |                |           |           |                     |
| N2                                                                                                                                  | CT | I | 530969 | 533084 | WBGene00022033 | Y65B4BL.1 | Y65B4BL.1 | 0.29467838628705    |
| AGIWUR40224                                                                                                                         |    |   |        |        |                |           |           |                     |
| N2                                                                                                                                  | CT | I | 534455 | 535344 | WBGene00022043 | psf-3     | Y65B4BR.8 | -0.241821261788452  |
| AGIWUR31655                                                                                                                         |    |   |        |        |                |           |           |                     |
| N2                                                                                                                                  | CT | I | 535791 | 536670 | WBGene00022042 | icd-2     | Y65B4BR.5 | -0.0524733730940294 |
| AGIWUR5033;AGIWUR8895;AGIWUR9943;AGIWUR17402;AGIWUR44103;AGIWUR45197                                                                |    |   |        |        |                |           |           |                     |
| N2                                                                                                                                  | CT | I | 537122 | 542200 | WBGene00007009 | wwp-1     | Y65B4BR.4 | 0.19928157894476    |
| AGIWUR1688;AGIWUR20352;AGIWUR38522                                                                                                  |    |   |        |        |                |           |           |                     |
| N2                                                                                                                                  | CT | I | 550696 | 556638 | WBGene00004235 | ptr-21    | Y65B4BR.3 | 0.0975145793714081  |
| AGIWUR8387                                                                                                                          |    |   |        |        |                |           |           |                     |
| N2                                                                                                                                  | CT | I | 557375 | 561671 | WBGene00002393 | lpr-1     | Y65B4BR.2 | -0.231573766126115  |
| AGIWUR5420                                                                                                                          |    |   |        |        |                |           |           |                     |
| N2                                                                                                                                  | CT | I | 562736 | 565181 | WBGene00022040 | Y65B4BR.1 | Y65B4BR.1 | -0.0104929242371519 |
| AGIWUR36108                                                                                                                         |    |   |        |        |                |           |           |                     |
| N2                                                                                                                                  | CT | I | 565436 | 566414 | WBGene00000434 | ceh-9     | Y65B4BR.9 | 0.0152539047667331  |
| AGIWUR20254;AGIWUR37142                                                                                                             |    |   |        |        |                |           |           |                     |
| N2                                                                                                                                  | CT | I | 572177 | 575120 | WBGene00001725 | grl-16    | Y65B4BR.6 | 0.319217480562278   |
| AGIWUR7933;AGIWUR10290;AGIWUR17115                                                                                                  |    |   |        |        |                |           |           |                     |
| N2                                                                                                                                  | CT | I | 582288 | 583748 | WBGene00044427 | F56A6.5   | F56A6.5   | 0.652902603581378   |
| AGIWUR5027;AGIWUR22482;AGIWUR31223                                                                                                  |    |   |        |        |                |           |           |                     |
| N2                                                                                                                                  | CT | I | 585831 | 607601 | WBGene00002040 | hum-7     | F56A6.2   | 0.258217245169439   |
| AGIWUR35233                                                                                                                         |    |   |        |        |                |           |           |                     |
| N2                                                                                                                                  | CT | I | 614651 | 629444 | WBGene00018923 | eme-1     | F56A6.4   | -0.0235844931776779 |
| AGIWUR9658;AGIWUR17702;AGIWUR40576                                                                                                  |    |   |        |        |                |           |           |                     |
| N2                                                                                                                                  | CT | I | 629492 | 636350 | WBGene00022029 | Y65B4A.6  | Y65B4A.6  | -0.0303270513910281 |
| AGIWUR16088                                                                                                                         |    |   |        |        |                |           |           |                     |
| N2                                                                                                                                  | CT | I | 636804 | 637852 | WBGene00022027 | vps-20    | Y65B4A.3  | -0.0854262553104252 |
| AGIWUR2007;AGIWUR15178;AGIWUR23419;AGIWUR28868;AGIWUR29377;AGIWUR42530                                                              |    |   |        |        |                |           |           |                     |
| N2                                                                                                                                  | CT | I | 638129 | 653986 | WBGene00022026 | Y65B4A.2  | Y65B4A.2  | -0.136053444032262  |
| AGIWUR28421                                                                                                                         |    |   |        |        |                |           |           |                     |
| N2                                                                                                                                  | CT | I | 654090 | 658810 | WBGene00022025 | Y65B4A.1  | Y65B4A.1  | -0.135491132903699  |
| AGIWUR30815                                                                                                                         |    |   |        |        |                |           |           |                     |
| N2                                                                                                                                  | CT | I | 659557 | 663686 | WBGene00022031 | Y65B4A.8  | Y65B4A.8  | 0.0858544914866268  |
| AGIWUR33639                                                                                                                         |    |   |        |        |                |           |           |                     |
| N2                                                                                                                                  | CT | I | 667615 | 674413 | WBGene00044461 | Y18H1A.14 | Y18H1A.14 |                     |

|                                                                        |    |   |                         |        |                |           |           |                                |
|------------------------------------------------------------------------|----|---|-------------------------|--------|----------------|-----------|-----------|--------------------------------|
| -0.00267781146910551                                                   |    |   | AGIWUR26159;AGIWUR30290 |        |                |           |           |                                |
| N2                                                                     | CT | I | 682876                  | 686599 | WBGene00021214 | hasp-2    | Y18H1A.10 | 0.0727989187024569             |
| AGIWUR12962                                                            |    |   |                         |        |                |           |           |                                |
| N2                                                                     | CT | I | 688286                  | 691267 | WBGene00021207 | Y18H1A.1  | Y18H1A.1  | 0.237483820539399              |
| AGIWUR42845                                                            |    |   |                         |        |                |           |           |                                |
| N2                                                                     | CT | I | 692026                  | 694948 | WBGene00021210 | Y18H1A.4  | Y18H1A.4  | -0.138785775214616             |
| AGIWUR32934;AGIWUR40014                                                |    |   |                         |        |                |           |           |                                |
| N2                                                                     | CT | I | 694982                  | 698322 | WBGene00021208 | Y18H1A.2  | Y18H1A.2  | 0.297649607105404              |
| AGIWUR21289                                                            |    |   |                         |        |                |           |           |                                |
| N2                                                                     | CT | I | 700274                  | 715874 | WBGene00021209 | hgap-1    | Y18H1A.3  | 0.108919022132078              |
| AGIWUR7556;AGIWUR13243;AGIWUR29984;AGIWUR33686;AGIWUR39061;AGIWUR39297 |    |   |                         |        |                |           |           |                                |
| N2                                                                     | CT | I | 717893                  | 719816 | WBGene00004332 | rec-1     | Y18H1A.7  | -0.0858526521622451            |
| AGIWUR12224                                                            |    |   |                         |        |                |           |           |                                |
| N2                                                                     | CT | I | 719929                  | 731078 | WBGene00004028 | pif-1     | Y18H1A.6  | 0.267670944384871              |
| AGIWUR23096                                                            |    |   |                         |        |                |           |           |                                |
| N2                                                                     | CT | I | 731068                  | 736552 | WBGene00044434 | Y18H1A.15 | Y18H1A.15 | 0.15627928317811               |
| AGIWUR8664                                                             |    |   |                         |        |                |           |           |                                |
| N2                                                                     | CT | I | 741913                  | 745570 | WBGene00000623 | col-46    | Y18H1A.13 | 0.230070196368249              |
| AGIWUR13435                                                            |    |   |                         |        |                |           |           |                                |
| N2                                                                     | CT | I | 748228                  | 757010 | WBGene00021213 | Y18H1A.9  | Y18H1A.9  | 0.232674521535102              |
| AGIWUR1232                                                             |    |   |                         |        |                |           |           |                                |
| N2                                                                     | CT | I | 758756                  | 760429 | WBGene00021212 | Y18H1A.8  | Y18H1A.8  | -0.235494360645115             |
| AGIWUR19119                                                            |    |   |                         |        |                |           |           |                                |
| N2                                                                     | CT | I | 760848                  | 761849 | WBGene00020282 | mps-3     | T06A4.2   | 0.236032113721665 AGIWUR43985  |
| N2                                                                     | CT | I | 763597                  | 770720 | WBGene00020283 | T06A4.3   | T06A4.3   | 0.162413605878525 AGIWUR4393   |
| N2                                                                     | CT | I | 770892                  | 776369 | WBGene00020281 | T06A4.1   | T06A4.1   | -0.183825273701475 AGIWUR22830 |
| N2                                                                     | CT | I | 803368                  | 835277 | WBGene00022518 | zfh-2     | ZC123.3   | 0.168580599494113              |
| AGIWUR8335;AGIWUR26889;AGIWUR32482;AGIWUR36028;AGIWUR37303;AGIWUR42904 |    |   |                         |        |                |           |           |                                |
| N2                                                                     | CT | I | 837996                  | 841746 | WBGene00022517 | ZC123.1   | ZC123.1   | -0.116921791069212             |
| AGIWUR1437;AGIWUR5409;AGIWUR11894;AGIWUR21175;AGIWUR35381;AGIWUR36327  |    |   |                         |        |                |           |           |                                |
| N2                                                                     | CT | I | 841742                  | 846763 | WBGene00022519 | ZC123.4   | ZC123.4   | 0.14661000187226               |
| AGIWUR20395;AGIWUR21786;AGIWUR27160;AGIWUR33235;AGIWUR38509            |    |   |                         |        |                |           |           |                                |
| N2                                                                     | CT | I | 853451                  | 872103 | WBGene00022388 | Y95B8A.8  | Y95B8A.8  | -0.239754763060049             |
| AGIWUR12290;AGIWUR40942                                                |    |   |                         |        |                |           |           |                                |
| N2                                                                     | CT | I | 873164                  | 882713 | WBGene00022389 | pde-6     | Y95B8A.10 | -0.01036225070145              |
| AGIWUR2879;AGIWUR8164;AGIWUR17662;AGIWUR23206;AGIWUR27165;AGIWUR27349  |    |   |                         |        |                |           |           |                                |
| N2                                                                     | CT | I | 882918                  | 890194 | WBGene00022386 | Y95B8A.6  | Y95B8A.6  | -0.0129725869248993            |
| AGIWUR26061;AGIWUR39290;AGIWUR39599                                    |    |   |                         |        |                |           |           |                                |
| N2                                                                     | CT | I | 897286                  | 906077 | WBGene00001678 | gpa-16    | Y95B8A.5  | 0.0428823599800658             |

|                                                                                                                                                                      |    |   |         |         |                |           |           |                     |
|----------------------------------------------------------------------------------------------------------------------------------------------------------------------|----|---|---------|---------|----------------|-----------|-----------|---------------------|
| AGIWUR36673                                                                                                                                                          |    |   |         |         |                |           |           |                     |
| N2                                                                                                                                                                   | CT | I | 907448  | 911189  | WBGene00022385 | Y95B8A.4  | Y95B8A.4  | 0.124086171347701   |
| AGIWUR27919                                                                                                                                                          |    |   |         |         |                |           |           |                     |
| N2                                                                                                                                                                   | CT | I | 912415  | 926877  | WBGene00022391 | Y95B8A.12 | Y95B8A.12 | -0.355645407151767  |
| AGIWUR20888;AGIWUR31755                                                                                                                                              |    |   |         |         |                |           |           |                     |
| N2                                                                                                                                                                   | CT | I | 938464  | 941773  | WBGene00022383 | Y95B8A.2  | Y95B8A.2  | 0.139205368637593   |
| AGIWUR3724;AGIWUR34637                                                                                                                                               |    |   |         |         |                |           |           |                     |
| N2                                                                                                                                                                   | CT | I | 942257  | 947710  | WBGene00003548 | nas-30    | Y95B8A.1  | 0.383034158340047   |
| AGIWUR13336                                                                                                                                                          |    |   |         |         |                |           |           |                     |
| N2                                                                                                                                                                   | CT | I | 948569  | 957404  | WBGene00003238 | mig-1     | Y34D9B.1  | -0.0304071571542135 |
| AGIWUR19889;AGIWUR24156;AGIWUR39680;AGIWUR41925                                                                                                                      |    |   |         |         |                |           |           |                     |
| N2                                                                                                                                                                   | CT | I | 963700  | 969426  | WBGene00018787 | cutl-20   | F54A5.2   | 0.143878536295873   |
| AGIWUR36883                                                                                                                                                          |    |   |         |         |                |           |           |                     |
| N2                                                                                                                                                                   | CT | I | 969089  | 976550  | WBGene00018788 | shc-1     | F54A5.3   | 0.0258186110416414  |
| AGIWUR1520;AGIWUR6328;AGIWUR7799;AGIWUR16360;AGIWUR21266;AGIWUR22224;AGIWUR23180;AGIWUR24163;AGIWUR25177;AGIWUR28900;AGIWUR30401;AGIWUR31527;AGIWUR33487;AGIWUR43199 |    |   |         |         |                |           |           |                     |
| N2                                                                                                                                                                   | CT | I | 989671  | 992181  | WBGene00018786 | hmbx-1    | F54A5.1   | 0.0389795765453309  |
| AGIWUR17420;AGIWUR21529;AGIWUR26430;AGIWUR28932;AGIWUR31846;AGIWUR38211                                                                                              |    |   |         |         |                |           |           |                     |
| N2                                                                                                                                                                   | CT | I | 996045  | 1005066 | WBGene00016932 | C54G6.3   | C54G6.3   | 0.0225269241438406  |
| AGIWUR22;AGIWUR16210;AGIWUR29308;AGIWUR31907;AGIWUR35462;AGIWUR41023                                                                                                 |    |   |         |         |                |           |           |                     |
| N2                                                                                                                                                                   | CT | I | 1006102 | 1010765 | WBGene00016931 | C54G6.2   | C54G6.2   | -0.215589308903211  |
| AGIWUR6501                                                                                                                                                           |    |   |         |         |                |           |           |                     |
| N2                                                                                                                                                                   | CT | I | 1011371 | 1014455 | WBGene00016930 | madf-6    | C54G6.1   | -0.093541963744201  |
| AGIWUR5134;AGIWUR11965;AGIWUR20597;AGIWUR20929;AGIWUR32037                                                                                                           |    |   |         |         |                |           |           |                     |
| N2                                                                                                                                                                   | CT | I | 1016403 | 1017180 | WBGene00005002 | spp-17    | C54G6.5   | -0.0158454623763973 |
| AGIWUR29378                                                                                                                                                          |    |   |         |         |                |           |           |                     |
| N2                                                                                                                                                                   | CT | I | 1018835 | 1019229 | WBGene00021335 | spp-23    | Y34D9A.11 | -0.121928178764342  |
| AGIWUR9839;AGIWUR10201;AGIWUR16077;AGIWUR24534;AGIWUR34141;AGIWUR39770                                                                                               |    |   |         |         |                |           |           |                     |
| N2                                                                                                                                                                   | CT | I | 1019827 | 1029910 | WBGene00021327 | mrp1-38   | Y34D9A.1  | -0.0827033055386508 |
| AGIWUR42178                                                                                                                                                          |    |   |         |         |                |           |           |                     |
| N2                                                                                                                                                                   | CT | I | 1030629 | 1033436 | WBGene00004952 | spd-1     | Y34D9A.4  | -0.0105135584896665 |
| AGIWUR8339;AGIWUR10414;AGIWUR10601;AGIWUR13233;AGIWUR34053                                                                                                           |    |   |         |         |                |           |           |                     |
| N2                                                                                                                                                                   | CT | I | 1034443 | 1040868 | WBGene00021329 | Y34D9A.3  | Y34D9A.3  | 0.11585129396984    |
| AGIWUR17558;AGIWUR19082;AGIWUR25332;AGIWUR28801;AGIWUR35935;AGIWUR41040;AGIWUR41363                                                                                  |    |   |         |         |                |           |           |                     |
| N2                                                                                                                                                                   | CT | I | 1041474 | 1048329 | WBGene00021332 | Y34D9A.7  | Y34D9A.7  | -0.0815865980900981 |
| AGIWUR3469                                                                                                                                                           |    |   |         |         |                |           |           |                     |
| N2                                                                                                                                                                   | CT | I | 1049596 | 1050727 | WBGene00021331 | glrx-10   | Y34D9A.6  | 0.119772652516605   |
| AGIWUR11461                                                                                                                                                          |    |   |         |         |                |           |           |                     |
| N2                                                                                                                                                                   | CT | I | 1050921 | 1053826 | WBGene00021333 | Y34D9A.8  | Y34D9A.8  | 0.0138420267718695  |
| AGIWUR13006;AGIWUR14778;AGIWUR23259;AGIWUR23416;AGIWUR24085;AGIWUR32213                                                                                              |    |   |         |         |                |           |           |                     |
| N2                                                                                                                                                                   | CT | I | 1053894 | 1066899 | WBGene00021334 | vps-4     | Y34D9A.10 | -0.113802420147898  |
| AGIWUR2517;AGIWUR33071;AGIWUR33422                                                                                                                                   |    |   |         |         |                |           |           |                     |

|                                                                                                                                                           |    |   |         |         |                |            |            |                     |             |
|-----------------------------------------------------------------------------------------------------------------------------------------------------------|----|---|---------|---------|----------------|------------|------------|---------------------|-------------|
| N2                                                                                                                                                        | CT | I | 1068484 | 1075010 | WBGene00001745 | gsa-1      | R06A10.2   | 0.125395701149618   |             |
| AGIWUR7028                                                                                                                                                |    |   |         |         |                |            |            |                     |             |
| N2                                                                                                                                                        | CT | I | 1084630 | 1088473 | WBGene00019909 | R06A10.1   | R06A10.1   | -0.22551176257969   |             |
| AGIWUR12833                                                                                                                                               |    |   |         |         |                |            |            |                     |             |
| N2                                                                                                                                                        | CT | I | 1088514 | 1089742 | WBGene00044895 | R06A10.5   | R06A10.5   | -0.108435119902932  |             |
| AGIWUR8078;AGIWUR13536;AGIWUR18834;AGIWUR20617;AGIWUR32661                                                                                                |    |   |         |         |                |            |            |                     |             |
| N2                                                                                                                                                        | CT | I | 1089666 | 1095796 | WBGene00019911 | R06A10.4   | R06A10.4   | 0.196502087885932   |             |
| AGIWUR18722                                                                                                                                               |    |   |         |         |                |            |            |                     |             |
| N2                                                                                                                                                        | CT | I | 1112418 | 1115501 | WBGene00236809 | ZK993.5    | ZK993.5    | 0.090695090162094   | AGIWUR41688 |
| N2                                                                                                                                                        | CT | I | 1128324 | 1131737 | WBGene00022837 | ceh-45     | ZK993.1    | 0.218901598891579   | AGIWUR30087 |
| N2                                                                                                                                                        | CT | I | 1136371 | 1154386 | WBGene00021689 | Y48G8AL.10 | Y48G8AL.10 | -0.0404671289995768 |             |
| AGIWUR4185;AGIWUR5373;AGIWUR25625                                                                                                                         |    |   |         |         |                |            |            |                     |             |
| N2                                                                                                                                                        | CT | I | 1154511 | 1156020 | WBGene00000165 | aps-3      | Y48G8AL.14 | -0.234298105979224  |             |
| AGIWUR10923                                                                                                                                               |    |   |         |         |                |            |            |                     |             |
| N2                                                                                                                                                        | CT | I | 1156579 | 1157474 | WBGene00004429 | rp1-17     | Y48G8AL.8  | 0.00260723546976038 |             |
| AGIWUR4065;AGIWUR7333;AGIWUR10981;AGIWUR14030;AGIWUR16076;AGIWUR16834;AGIWUR21488;AGIWUR22895;AGIWUR33449;AGIWUR37938;AGIWUR38748;AGIWUR41085;AGIWUR41517 |    |   |         |         |                |            |            |                     |             |
| N2                                                                                                                                                        | CT | I | 1157571 | 1162939 | WBGene00021687 | Y48G8AL.7  | Y48G8AL.7  | -0.1528872266815    |             |
| AGIWUR25543                                                                                                                                               |    |   |         |         |                |            |            |                     |             |
| N2                                                                                                                                                        | CT | I | 1162880 | 1175868 | WBGene00001816 | haf-6      | Y48G8AL.11 | -0.107587435464026  |             |
| AGIWUR20067                                                                                                                                               |    |   |         |         |                |            |            |                     |             |
| N2                                                                                                                                                        | CT | I | 1176471 | 1190829 | WBGene00004880 | smg-2      | Y48G8AL.6  | 0.00432210412212974 |             |
| AGIWUR59                                                                                                                                                  |    |   |         |         |                |            |            |                     |             |
| N2                                                                                                                                                        | CT | I | 1193158 | 1211434 | WBGene00021686 | Y48G8AL.5  | Y48G8AL.5  | 0.00496051052670143 |             |
| AGIWUR18159;AGIWUR45123                                                                                                                                   |    |   |         |         |                |            |            |                     |             |
| N2                                                                                                                                                        | CT | I | 1211485 | 1254669 | WBGene00021685 | herc-1     | Y48G8AL.1  | 0.262234825964827   |             |
| AGIWUR13334                                                                                                                                               |    |   |         |         |                |            |            |                     |             |
| N2                                                                                                                                                        | CT | I | 1254770 | 1258258 | WBGene00021692 | Y48G8AL.15 | Y48G8AL.15 | -0.159250595293711  |             |
| AGIWUR13059;AGIWUR26397;AGIWUR27751                                                                                                                       |    |   |         |         |                |            |            |                     |             |
| N2                                                                                                                                                        | CT | I | 1259374 | 1268155 | WBGene00001707 | grh-1      | Y48G8AR.1  | 0.0133946944627645  |             |
| AGIWUR17365                                                                                                                                               |    |   |         |         |                |            |            |                     |             |
| N2                                                                                                                                                        | CT | I | 1282101 | 1285435 | WBGene00021693 | Y48G8AR.2  | Y48G8AR.2  | -0.0452976899462403 |             |
| AGIWUR39120                                                                                                                                               |    |   |         |         |                |            |            |                     |             |
| N2                                                                                                                                                        | CT | I | 1287304 | 1287959 | WBGene00021694 | Y48G8AR.3  | Y48G8AR.3  | 0.116123673339665   |             |
| AGIWUR41090                                                                                                                                               |    |   |         |         |                |            |            |                     |             |
| N2                                                                                                                                                        | CT | I | 1305562 | 1328348 | WBGene00003400 | dapk-1     | K12C11.4   | 0.162346057350527   |             |
| AGIWUR11986                                                                                                                                               |    |   |         |         |                |            |            |                     |             |
| N2                                                                                                                                                        | CT | I | 1332698 | 1334074 | WBGene00044896 | K12C11.5   | K12C11.5   | 0.0298491692727243  |             |
| AGIWUR7756;AGIWUR20555;AGIWUR32336                                                                                                                        |    |   |         |         |                |            |            |                     |             |

|                                                                                                                               |    |   |         |         |                |            |            |                     |
|-------------------------------------------------------------------------------------------------------------------------------|----|---|---------|---------|----------------|------------|------------|---------------------|
| N2                                                                                                                            | CT | I | 1335321 | 1336867 | WBGene00019674 | K12C11.3   | K12C11.3   | 0.0392373956706376  |
| AGIWUR13813;AGIWUR27282;AGIWUR39984;AGIWUR42143                                                                               |    |   |         |         |                |            |            |                     |
| N2                                                                                                                            | CT | I | 1337012 | 1338216 | WBGene00045052 | K12C11.6   | K12C11.6   | -0.165154213911558  |
| AGIWUR12512;AGIWUR16762;AGIWUR45006                                                                                           |    |   |         |         |                |            |            |                     |
| N2                                                                                                                            | CT | I | 1338749 | 1339773 | WBGene00045053 | K12C11.7   | K12C11.7   | -0.100138964501627  |
| AGIWUR14477;AGIWUR15520;AGIWUR29050;AGIWUR30108;AGIWUR34743;AGIWUR36565;AGIWUR42371                                           |    |   |         |         |                |            |            |                     |
| N2                                                                                                                            | CT | I | 1340678 | 1341258 | WBGene00004888 | smo-1      | K12C11.2   | 0.0828785047254224  |
| AGIWUR36454;AGIWUR38737                                                                                                       |    |   |         |         |                |            |            |                     |
| N2                                                                                                                            | CT | I | 1341218 | 1344692 | WBGene00019673 | K12C11.1   | K12C11.1   | 0.039063657503168   |
| AGIWUR3302;AGIWUR43117                                                                                                        |    |   |         |         |                |            |            |                     |
| N2                                                                                                                            | CT | I | 1348503 | 1359595 | WBGene00022363 | Y92H12BL.1 | Y92H12BL.1 | -0.260876609627729  |
| AGIWUR15759;AGIWUR28550;AGIWUR44414                                                                                           |    |   |         |         |                |            |            |                     |
| N2                                                                                                                            | CT | I | 1365309 | 1376409 | WBGene00022366 | Y92H12BL.5 | Y92H12BL.5 | -0.261342555048905  |
| AGIWUR35560                                                                                                                   |    |   |         |         |                |            |            |                     |
| N2                                                                                                                            | CT | I | 1376942 | 1385057 | WBGene00022365 | Y92H12BL.4 | Y92H12BL.4 | 0.134287683025267   |
| AGIWUR6416;AGIWUR23727                                                                                                        |    |   |         |         |                |            |            |                     |
| N2                                                                                                                            | CT | I | 1385818 | 1392759 | WBGene00022367 | Y92H12BM.1 | Y92H12BM.1 | -0.0655922463394303 |
| AGIWUR24013;AGIWUR35109                                                                                                       |    |   |         |         |                |            |            |                     |
| N2                                                                                                                            | CT | I | 1394569 | 1402975 | WBGene00022372 | Y92H12BR.7 | Y92H12BR.7 | -0.224989829647198  |
| AGIWUR22492                                                                                                                   |    |   |         |         |                |            |            |                     |
| N2                                                                                                                            | CT | I | 1405935 | 1413100 | WBGene00022371 | set-29     | Y92H12BR.6 | -0.0668094889494331 |
| AGIWUR42567                                                                                                                   |    |   |         |         |                |            |            |                     |
| N2                                                                                                                            | CT | I | 1413915 | 1415807 | WBGene00022368 | Y92H12BR.2 | Y92H12BR.2 | 0.143011489304591   |
| AGIWUR36024                                                                                                                   |    |   |         |         |                |            |            |                     |
| N2                                                                                                                            | CT | I | 1416586 | 1425201 | WBGene00022369 | Y92H12BR.3 | Y92H12BR.3 | -0.0557942565367355 |
| AGIWUR1737;AGIWUR4253;AGIWUR5022;AGIWUR5477;AGIWUR7001;AGIWUR8655;AGIWUR21433;AGIWUR25311;AGIWUR27839;AGIWUR31391;AGIWUR41245 |    |   |         |         |                |            |            |                     |
| N2                                                                                                                            | CT | I | 1427227 | 1433695 | WBGene00022370 | Y92H12BR.4 | Y92H12BR.4 | -0.0960358532095826 |
| AGIWUR17553;AGIWUR20837;AGIWUR27978;AGIWUR31709;AGIWUR35420                                                                   |    |   |         |         |                |            |            |                     |
| N2                                                                                                                            | CT | I | 1436279 | 1441331 | WBGene00022373 | mrp1-15    | Y92H12BR.8 | -0.310851976191131  |
| AGIWUR31574                                                                                                                   |    |   |         |         |                |            |            |                     |
| N2                                                                                                                            | CT | I | 1442048 | 1443942 | WBGene00018159 | F37F2.2    | F37F2.2    | 0.0710208484428811  |
| AGIWUR8713                                                                                                                    |    |   |         |         |                |            |            |                     |
| N2                                                                                                                            | CT | I | 1446497 | 1465358 | WBGene00004969 | spe-15     | F47G6.4    | 0.104334627336844   |
| AGIWUR2637;AGIWUR3005;AGIWUR4351;AGIWUR25255;AGIWUR32395;AGIWUR35658                                                          |    |   |         |         |                |            |            |                     |
| N2                                                                                                                            | CT | I | 1465597 | 1469587 | WBGene00018580 | F47G6.3    | F47G6.3    | 0.317013889699341   |
| AGIWUR38276                                                                                                                   |    |   |         |         |                |            |            |                     |
| N2                                                                                                                            | CT | I | 1471227 | 1479920 | WBGene00018579 | acs-16     | F47G6.2    | -0.196759165760451  |
| AGIWUR42596                                                                                                                   |    |   |         |         |                |            |            |                     |
| N2                                                                                                                            | CT | I | 1483083 | 1490494 | WBGene00001115 | dyb-1      | F47G6.1    | -0.302085043693683  |
| AGIWUR6684;AGIWUR22860;AGIWUR35939                                                                                            |    |   |         |         |                |            |            |                     |
| N2                                                                                                                            | CT | I | 1490887 | 1514411 | WBGene00022361 | Y92H12A.5  | Y92H12A.5  | -0.0986963167444008 |

|                                                                                                         |    |   |         |         |                |            |            |                     |
|---------------------------------------------------------------------------------------------------------|----|---|---------|---------|----------------|------------|------------|---------------------|
| AGIWUR13887;AGIWUR31743                                                                                 |    |   |         |         |                |            |            |                     |
| N2                                                                                                      | CT | I | 1514755 | 1540911 | WBGene00022360 | Y92H12A.4  | Y92H12A.4  | -0.0504273805851048 |
| AGIWUR7916;AGIWUR18838                                                                                  |    |   |         |         |                |            |            |                     |
| N2                                                                                                      | CT | I | 1543525 | 1556196 | WBGene00022358 | Y92H12A.2  | Y92H12A.2  | 0.0677667091869676  |
| AGIWUR12716                                                                                             |    |   |         |         |                |            |            |                     |
| N2                                                                                                      | CT | I | 1566929 | 1580196 | WBGene00005077 | src-1      | Y92H12A.1  | 0.00988569444204934 |
| AGIWUR29323;AGIWUR36808                                                                                 |    |   |         |         |                |            |            |                     |
| N2                                                                                                      | CT | I | 1581394 | 1593668 | WBGene00022270 | Y73E7A.3   | Y73E7A.3   | 0.0971494737923706  |
| AGIWUR9496                                                                                              |    |   |         |         |                |            |            |                     |
| N2                                                                                                      | CT | I | 1594659 | 1596184 | WBGene00022271 | cpx-1      | Y73E7A.4   | 0.0201049373399869  |
| AGIWUR20188                                                                                             |    |   |         |         |                |            |            |                     |
| N2                                                                                                      | CT | I | 1600624 | 1601457 | WBGene00022272 | Y73E7A.5   | Y73E7A.5   | -0.304538286934302  |
| AGIWUR28873                                                                                             |    |   |         |         |                |            |            |                     |
| N2                                                                                                      | CT | I | 1601838 | 1606926 | WBGene00022269 | Y73E7A.2   | Y73E7A.2   | -0.246280623389342  |
| AGIWUR16524                                                                                             |    |   |         |         |                |            |            |                     |
| N2                                                                                                      | CT | I | 1607658 | 1610041 | WBGene00022273 | Y73E7A.6   | Y73E7A.6   |                     |
| -0.00940224686056368 AGIWUR32464;AGIWUR39665                                                            |    |   |         |         |                |            |            |                     |
| N2                                                                                                      | CT | I | 1610390 | 1620080 | WBGene00044440 | adpr-1     | Y73E7A.9   | -0.223573205880933  |
| AGIWUR8254;AGIWUR35568                                                                                  |    |   |         |         |                |            |            |                     |
| N2                                                                                                      | CT | I | 1621346 | 1628476 | WBGene00000269 | bre-4      | Y73E7A.7   | 0.0119100828762981  |
| AGIWUR34680                                                                                             |    |   |         |         |                |            |            |                     |
| N2                                                                                                      | CT | I | 1629003 | 1633498 | WBGene00022268 | Y73E7A.1   | Y73E7A.1   | -0.0552503165363358 |
| AGIWUR1633;AGIWUR3458;AGIWUR3977;AGIWUR7843;AGIWUR11159;AGIWUR21506;AGIWUR22736;AGIWUR23690;AGIWUR42544 |    |   |         |         |                |            |            |                     |
| N2                                                                                                      | CT | I | 1634613 | 1644107 | WBGene00022274 | Y73E7A.8   | Y73E7A.8   | -0.424281680182183  |
| AGIWUR20107                                                                                             |    |   |         |         |                |            |            |                     |
| N2                                                                                                      | CT | I | 1644588 | 1651394 | WBGene00003111 | mab-20     | Y71G12B.20 | 0.156952708563046   |
| AGIWUR27582;AGIWUR40456                                                                                 |    |   |         |         |                |            |            |                     |
| N2                                                                                                      | CT | I | 1652901 | 1655399 | WBGene00022156 | Y71G12B.18 | Y71G12B.18 | 0.117539798013475   |
| AGIWUR116                                                                                               |    |   |         |         |                |            |            |                     |
| N2                                                                                                      | CT | I | 1655616 | 1656726 | WBGene00004168 | pqn-88     | Y71G12B.21 | -0.224984301915605  |
| AGIWUR26050                                                                                             |    |   |         |         |                |            |            |                     |
| N2                                                                                                      | CT | I | 1657513 | 1663331 | WBGene00044358 | Y71G12B.33 | Y71G12B.33 | 0.193818042250536   |
| AGIWUR2249;AGIWUR8734;AGIWUR20752;AGIWUR30652                                                           |    |   |         |         |                |            |            |                     |
| N2                                                                                                      | CT | I | 1667501 | 1669792 | WBGene00022155 | Y71G12B.17 | Y71G12B.17 | 0.104181352118989   |
| AGIWUR42831                                                                                             |    |   |         |         |                |            |            |                     |
| N2                                                                                                      | CT | I | 1670036 | 1672742 | WBGene00022158 | Y71G12B.23 | Y71G12B.23 | -0.177934038823103  |
| AGIWUR5132;AGIWUR11929;AGIWUR32676                                                                      |    |   |         |         |                |            |            |                     |
| N2                                                                                                      | CT | I | 1680450 | 1685063 | WBGene00022154 | drag-1     | Y71G12B.16 | -0.19327140638873   |
| AGIWUR35035                                                                                             |    |   |         |         |                |            |            |                     |



|                                                                         |    |   |         |         |                |            |            |                     |
|-------------------------------------------------------------------------|----|---|---------|---------|----------------|------------|------------|---------------------|
| N2                                                                      | CT | I | 1686216 | 1693457 | WBGene00044348 | Y71G12B.31 | Y71G12B.31 | -0.108956239405827  |
| AGIWUR1166;AGIWUR4811;AGIWUR35486                                       |    |   |         |         |                |            |            |                     |
| N2                                                                      | CT | I | 1698094 | 1701128 | WBGene00006702 | ubc-3      | Y71G12B.15 | -0.0233171141578286 |
| AGIWUR4490;AGIWUR30533                                                  |    |   |         |         |                |            |            |                     |
| N2                                                                      | CT | I | 1701361 | 1701808 | WBGene00003080 | lsm-6      | Y71G12B.14 | -0.18592903386946   |
| AGIWUR4447;AGIWUR11056                                                  |    |   |         |         |                |            |            |                     |
| N2                                                                      | CT | I | 1702105 | 1708008 | WBGene00022153 | Y71G12B.13 | Y71G12B.13 | -0.129797543602642  |
| AGIWUR12172                                                             |    |   |         |         |                |            |            |                     |
| N2                                                                      | CT | I | 1709587 | 1715568 | WBGene00022152 | atg-5      | Y71G12B.12 | -0.0939772286049685 |
| AGIWUR7357;AGIWUR29374;AGIWUR37289                                      |    |   |         |         |                |            |            |                     |
| N2                                                                      | CT | I | 1721592 | 1740670 | WBGene00006771 | tlx-1      | Y71G12B.11 | 0.0309291216431324  |
| AGIWUR12058;AGIWUR13591;AGIWUR32962;AGIWUR33419;AGIWUR38217;AGIWUR43568 |    |   |         |         |                |            |            |                     |
| N2                                                                      | CT | I | 1740647 | 1751055 | WBGene00022159 | mppa-1     | Y71G12B.24 | -0.146387235445038  |
| AGIWUR24046                                                             |    |   |         |         |                |            |            |                     |
| N2                                                                      | CT | I | 1751481 | 1754410 | WBGene00022150 | Y71G12B.10 | Y71G12B.10 | -0.251431854910916  |
| AGIWUR41998                                                             |    |   |         |         |                |            |            |                     |
| N2                                                                      | CT | I | 1755329 | 1766400 | WBGene00022149 | lin-65     | Y71G12B.9  | -0.0478485432984952 |
| AGIWUR776;AGIWUR21654                                                   |    |   |         |         |                |            |            |                     |
| N2                                                                      | CT | I | 1767887 | 1790157 | WBGene00022148 | ddx-27     | Y71G12B.8  | 0.208700844937802   |
| AGIWUR18548                                                             |    |   |         |         |                |            |            |                     |
| N2                                                                      | CT | I | 1793254 | 1796424 | WBGene00022146 | Y71G12B.6  | Y71G12B.6  | -0.205150386964993  |
| AGIWUR4786                                                              |    |   |         |         |                |            |            |                     |
| N2                                                                      | CT | I | 1797435 | 1798722 | WBGene00022162 | Y71G12B.27 | Y71G12B.27 | 0.071291445681922   |
| AGIWUR15897                                                             |    |   |         |         |                |            |            |                     |
| N2                                                                      | CT | I | 1799717 | 1806986 | WBGene00022145 | Y71G12B.5  | Y71G12B.5  | -0.0453027956193606 |
| AGIWUR2625;AGIWUR25042                                                  |    |   |         |         |                |            |            |                     |
| N2                                                                      | CT | I | 1808091 | 1811835 | WBGene00022144 | pghm-1     | Y71G12B.4  | -0.0545366727924268 |
| AGIWUR4145;AGIWUR9299;AGIWUR10064;AGIWUR17445;AGIWUR18149;AGIWUR45023   |    |   |         |         |                |            |            |                     |
| N2                                                                      | CT | I | 1812892 | 1813581 | WBGene00022143 | Y71G12B.3  | Y71G12B.3  | 0.217794216129761   |
| AGIWUR14630                                                             |    |   |         |         |                |            |            |                     |
| N2                                                                      | CT | I | 1813909 | 1816061 | WBGene00044349 | Y71G12B.32 | Y71G12B.32 | 0.207652227926332   |
| AGIWUR3178;AGIWUR36722;AGIWUR39264                                      |    |   |         |         |                |            |            |                     |
| N2                                                                      | CT | I | 1816150 | 1818496 | WBGene00022142 | Y71G12B.2  | Y71G12B.2  | -0.0562777446108038 |
| AGIWUR13069                                                             |    |   |         |         |                |            |            |                     |
| N2                                                                      | CT | I | 1818581 | 1822948 | WBGene00044347 | Y71G12B.30 | Y71G12B.30 | -0.133580771554668  |
| AGIWUR19858;AGIWUR26230                                                 |    |   |         |         |                |            |            |                     |
| N2                                                                      | CT | I | 1823447 | 1825967 | WBGene00022141 | chaf-2     | Y71G12B.1  | -0.104233985048154  |
| AGIWUR6848                                                              |    |   |         |         |                |            |            |                     |
| N2                                                                      | CT | I | 1832115 | 1832641 | WBGene00044746 | C53H9.3    | C53H9.3    | -0.110677904616871  |

AGIWUR17914;AGIWUR20995;AGIWUR22306;AGIWUR23217;AGIWUR33050;AGIWUR42007  
 N2 CT I 1832897 1834764 WBGene00016907 C53H9.2 C53H9.2 0.0496530511592521  
 AGIWUR5438;AGIWUR6589;AGIWUR6611;AGIWUR16807;AGIWUR17795;AGIWUR20304;AGIWUR26029;AGIWUR27807;AGIWUR31482;AGIWUR33037;AGIWUR34381;AGIWUR34900  
 N2 CT I 1834881 1835439 WBGene00004441 rp1-27 C53H9.1 -0.129320866285507 AGIWUR15399  
 N2 CT I 1835631 1841936 WBGene00001196 eg1-30 M01D7.7 0.126864315820402  
 AGIWUR554;AGIWUR27713  
 N2 CT I 1842445 1843227 WBGene00001309 emr-1 M01D7.6 0.132376734389361 AGIWUR40352  
 N2 CT I 1843384 1843899 WBGene00003750 nlp-12 M01D7.5 -0.022710093775089  
 AGIWUR7286;AGIWUR33113  
 N2 CT I 1845221 1850523 WBGene00006461 tag-96 M01D7.4 -0.175935905671691 AGIWUR22089  
 N2 CT I 1851681 1852280 WBGene00044897 M01D7.9 M01D7.9 -0.0610848486622366  
 AGIWUR1984;AGIWUR13390;AGIWUR16714  
 N2 CT I 1856459 1860578 WBGene00019706 M01D7.1 M01D7.1 0.0604590812352379 AGIWUR43544  
 N2 CT I 1862607 1872306 WBGene00004743 scm-1 M01D7.2 0.0642781684668634 AGIWUR25971  
 N2 CT I 1874033 1883639 WBGene00022139 tub-2 Y71G12A.3 -0.135629889201827  
 AGIWUR28588  
 N2 CT I 1885205 1894905 WBGene00022140 Y71G12A.4 Y71G12A.4 -0.0697186158427225  
 AGIWUR36911  
 N2 CT I 1895161 1923088 WBGene00022138 trpp-10 Y71G12A.2 -0.049394821333705  
 AGIWUR19988;AGIWUR29483  
 N2 CT I 1924300 1932260 WBGene00021766 hex-4 Y51F10.5 -0.274289249560493  
 AGIWUR620  
 N2 CT I 1932352 1945212 WBGene00021765 Y51F10.4 Y51F10.4 -0.101448655301651  
 AGIWUR33035  
 N2 CT I 1950594 1958527 WBGene00021771 spe-48 Y51F10.10 0.0696448978068851  
 AGIWUR38998  
 N2 CT I 1958707 1965267 WBGene00044438 Y51F10.11 Y51F10.11 -0.221808516945474  
 AGIWUR3528;AGIWUR6982;AGIWUR40531  
 N2 CT I 1967772 1973882 WBGene00021764 Y51F10.3 Y51F10.3 -0.0246106584626951  
 AGIWUR6418  
 N2 CT I 1977993 1983436 WBGene00021763 Y51F10.2 Y51F10.2 0.240503657026803  
 AGIWUR19000  
 N2 CT I 1988246 2010525 WBGene00021238 gap-3 Y20F4.3 -0.205576656177319  
 AGIWUR11087;AGIWUR20405;AGIWUR25539;AGIWUR31637;AGIWUR32847;AGIWUR44046  
 N2 CT I 2026277 2033966 WBGene00021237 crtc-1 Y20F4.2 0.0438716849770913 AGIWUR16307  
 N2 CT I 2034383 2043805 WBGene00021239 Y20F4.4 Y20F4.4 -0.101726255872633 AGIWUR3718  
 N2 CT I 2049140 2050177 WBGene00044435 Y20F4.8 Y20F4.8 0.166778277947836  
 AGIWUR4442;AGIWUR5343;AGIWUR18496

|                                                                                                                                                         |    |   |         |         |                |            |            |                      |             |
|---------------------------------------------------------------------------------------------------------------------------------------------------------|----|---|---------|---------|----------------|------------|------------|----------------------|-------------|
| N2                                                                                                                                                      | CT | I | 2061667 | 2064077 | WBGene00021346 | Y37E3.1    | Y37E3.1    | -0.118283460589218   | AGIWUR16488 |
| N2                                                                                                                                                      | CT | I | 2064909 | 2065481 | WBGene00021348 | moag-4     | Y37E3.4    | -0.00047163198719602 | AGIWUR5629  |
| N2                                                                                                                                                      | CT | I | 2065727 | 2069049 | WBGene00021349 | arl-13     | Y37E3.5    | -1.11200330369305    | AGIWUR20970 |
| N2                                                                                                                                                      | CT | I | 2069086 | 2069587 | WBGene00004409 | rla-1      | Y37E3.7    | 0.34693183726186     |             |
| AGIWUR3039;AGIWUR4288;AGIWUR14249;AGIWUR27765;AGIWUR37184;AGIWUR40288                                                                                   |    |   |         |         |                |            |            |                      |             |
| N2                                                                                                                                                      | CT | I | 2069681 | 2070607 | WBGene00021350 | Y37E3.8    | Y37E3.8    | 0.00457738143200537  |             |
| AGIWUR13326;AGIWUR16500;AGIWUR18905;AGIWUR33748;AGIWUR34085;AGIWUR35002;AGIWUR38325;AGIWUR39997                                                         |    |   |         |         |                |            |            |                      |             |
| N2                                                                                                                                                      | CT | I | 2071352 | 2072547 | WBGene00004014 | phb-1      | Y37E3.9    | -0.208711148810924   | AGIWUR8000  |
| N2                                                                                                                                                      | CT | I | 2072680 | 2076906 | WBGene00021351 | eif-2alpha | Y37E3.10   | -0.0902686681429188  |             |
| AGIWUR6037;AGIWUR23060;AGIWUR26110;AGIWUR41959                                                                                                          |    |   |         |         |                |            |            |                      |             |
| N2                                                                                                                                                      | CT | I | 2078959 | 2085662 | WBGene00021352 | Y37E3.11   | Y37E3.11   | 0.03089743143188     |             |
| AGIWUR2995                                                                                                                                              |    |   |         |         |                |            |            |                      |             |
| N2                                                                                                                                                      | CT | I | 2085673 | 2093822 | WBGene00021353 | igl-3      | Y37E3.13   | -0.10539709822165    |             |
| AGIWUR15489;AGIWUR30008                                                                                                                                 |    |   |         |         |                |            |            |                      |             |
| N2                                                                                                                                                      | CT | I | 2097346 | 2123443 | WBGene00003799 | npp-13     | Y37E3.15   | 0.0365653119357621   |             |
| AGIWUR11120;AGIWUR13240                                                                                                                                 |    |   |         |         |                |            |            |                      |             |
| N2                                                                                                                                                      | CT | I | 2128590 | 2145971 | WBGene00021355 | Y37E3.17   | Y37E3.17   | 0.0762782901104      |             |
| AGIWUR25279                                                                                                                                             |    |   |         |         |                |            |            |                      |             |
| N2                                                                                                                                                      | CT | I | 2160042 | 2209629 | WBGene00021009 | afd-1      | W03F11.6   | 0.0711787667082797   |             |
| AGIWUR4041;AGIWUR5559;AGIWUR9161;AGIWUR9303;AGIWUR14028;AGIWUR14832;AGIWUR15541;AGIWUR17457;AGIWUR21460;AGIWUR36718;AGIWUR37855;AGIWUR39179;AGIWUR39762 |    |   |         |         |                |            |            |                      |             |
| N2                                                                                                                                                      | CT | I | 2216100 | 2219479 | WBGene00021008 | W03F11.5   | W03F11.5   | -0.0481942534297257  |             |
| AGIWUR42538                                                                                                                                             |    |   |         |         |                |            |            |                      |             |
| N2                                                                                                                                                      | CT | I | 2219471 | 2222313 | WBGene00021005 | ule-1      | W03F11.1   | -0.0585411258965465  |             |
| AGIWUR3046                                                                                                                                              |    |   |         |         |                |            |            |                      |             |
| N2                                                                                                                                                      | CT | I | 2223307 | 2233099 | WBGene00001542 | gcy-17     | W03F11.2   | -0.0540272135547735  |             |
| AGIWUR33861                                                                                                                                             |    |   |         |         |                |            |            |                      |             |
| N2                                                                                                                                                      | CT | I | 2233744 | 2234957 | WBGene00021006 | dct-9      | W03F11.3   | 0.0718455644069547   |             |
| AGIWUR22187                                                                                                                                             |    |   |         |         |                |            |            |                      |             |
| N2                                                                                                                                                      | CT | I | 2235617 | 2241210 | WBGene00021007 | W03F11.4   | W03F11.4   | 0.286395546977555    |             |
| AGIWUR9560                                                                                                                                              |    |   |         |         |                |            |            |                      |             |
| N2                                                                                                                                                      | CT | I | 2242230 | 2247223 | WBGene00017399 | lgc-51     | F12B6.3    | 0.198607989708345    | AGIWUR28630 |
| N2                                                                                                                                                      | CT | I | 2250131 | 2254901 | WBGene00017398 | slc-17.6   | F12B6.2    | 0.134633006287397    |             |
| AGIWUR20287;AGIWUR25238;AGIWUR39652;AGIWUR42417                                                                                                         |    |   |         |         |                |            |            |                      |             |
| N2                                                                                                                                                      | CT | I | 2255923 | 2272866 | WBGene00000020 | abt-2      | F12B6.1    | 0.0941427870547997   |             |
| AGIWUR23301;AGIWUR28644                                                                                                                                 |    |   |         |         |                |            |            |                      |             |
| N2                                                                                                                                                      | CT | I | 2279835 | 2281516 | WBGene00021458 | Y39G10AL.1 | Y39G10AL.1 | 0.150356667103016    |             |
| AGIWUR36209                                                                                                                                             |    |   |         |         |                |            |            |                      |             |
| N2                                                                                                                                                      | CT | I | 2281504 | 2291183 | WBGene00000408 | cdk-7      | Y39G10AL.3 | -0.190782804104419   |             |

|                                                             |    |   |         |         |                |             |                                 |
|-------------------------------------------------------------|----|---|---------|---------|----------------|-------------|---------------------------------|
| AGIWUR39048                                                 |    |   |         |         |                |             |                                 |
| N2                                                          | CT | I | 2293132 | 2297312 | WBGene00021469 | Y39G10AR.11 | Y39G10AR.11 0.0115301392223373  |
| AGIWUR22260                                                 |    |   |         |         |                |             |                                 |
| N2                                                          | CT | I | 2297280 | 2304393 | WBGene00021470 | tpx1-1      | Y39G10AR.12 0.432992863522481   |
| AGIWUR12614;AGIWUR36527                                     |    |   |         |         |                |             |                                 |
| N2                                                          | CT | I | 2304512 | 2306816 | WBGene00002047 | icp-1       | Y39G10AR.13 -0.0562571615758252 |
| AGIWUR14808;AGIWUR28043;AGIWUR29130;AGIWUR29237;AGIWUR38297 |    |   |         |         |                |             |                                 |
| N2                                                          | CT | I | 2306985 | 2308975 | WBGene00021467 | Y39G10AR.9  | Y39G10AR.9 -0.220298288161178   |
| AGIWUR6667                                                  |    |   |         |         |                |             |                                 |
| N2                                                          | CT | I | 2308976 | 2312129 | WBGene00021476 | nsun-4      | Y39G10AR.21 0.0741711819830186  |
| AGIWUR13426                                                 |    |   |         |         |                |             |                                 |
| N2                                                          | CT | I | 2312496 | 2313008 | WBGene00021475 | tbca-1      | Y39G10AR.20 -0.0860710768929973 |
| AGIWUR41500                                                 |    |   |         |         |                |             |                                 |
| N2                                                          | CT | I | 2313271 | 2316003 | WBGene00021466 | eif-2gamma  | Y39G10AR.8 0.162847787446682    |
| AGIWUR1012;AGIWUR30510                                      |    |   |         |         |                |             |                                 |
| N2                                                          | CT | I | 2316307 | 2318305 | WBGene00021465 | ekl-7       | Y39G10AR.7 0.114669955668704    |
| AGIWUR18593                                                 |    |   |         |         |                |             |                                 |
| N2                                                          | CT | I | 2318291 | 2321847 | WBGene00003156 | mcm-4       | Y39G10AR.14 -0.101917856012925  |
| AGIWUR23145                                                 |    |   |         |         |                |             |                                 |
| N2                                                          | CT | I | 2322025 | 2322596 | WBGene00219275 | Y39G10AR.32 | Y39G10AR.32 -0.281071133736527  |
| AGIWUR27494                                                 |    |   |         |         |                |             |                                 |
| N2                                                          | CT | I | 2327989 | 2330162 | WBGene00021477 | srbc-64     | Y39G10AR.22 0.0581816310368648  |
| AGIWUR16180                                                 |    |   |         |         |                |             |                                 |
| N2                                                          | CT | I | 2330895 | 2332652 | WBGene00021472 | Y39G10AR.16 | Y39G10AR.16 0.23634507805013    |
| AGIWUR4806;AGIWUR12047;AGIWUR19458;AGIWUR24864;AGIWUR39806  |    |   |         |         |                |             |                                 |
| N2                                                          | CT | I | 2333312 | 2338693 | WBGene00021464 | ugt-31      | Y39G10AR.6 0.446729632390461    |
| AGIWUR16968                                                 |    |   |         |         |                |             |                                 |
| N2                                                          | CT | I | 2342216 | 2350468 | WBGene00021463 | zeel-1      | Y39G10AR.5 0.227961533146969    |
| AGIWUR22312                                                 |    |   |         |         |                |             |                                 |
| N2                                                          | CT | I | 2357883 | 2372964 | WBGene00021461 | nekl-1      | Y39G10AR.3 -0.18456741061586    |
| AGIWUR3700;AGIWUR12255                                      |    |   |         |         |                |             |                                 |
| N2                                                          | CT | I | 2377089 | 2381851 | WBGene00021473 | sydn-1      | Y39G10AR.17 0.255794964768159   |
| AGIWUR29573;AGIWUR29726                                     |    |   |         |         |                |             |                                 |
| N2                                                          | CT | I | 2382953 | 2401492 | WBGene00021474 | dot-1.1     | Y39G10AR.18 -0.044047696937489  |
| AGIWUR2332;AGIWUR3782;AGIWUR25161;AGIWUR29638               |    |   |         |         |                |             |                                 |
| N2                                                          | CT | I | 2402232 | 2409987 | WBGene00021460 | zwl-1       | Y39G10AR.2 0.0047416760467911   |
| AGIWUR39214;AGIWUR43207;AGIWUR45076                         |    |   |         |         |                |             |                                 |
| N2                                                          | CT | I | 2415133 | 2418521 | WBGene00017741 | F23C8.13    | F23C8.13 -0.05056647079976      |
| AGIWUR805                                                   |    |   |         |         |                |             |                                 |

|                                                                         |    |   |         |         |                |            |            |                      |             |
|-------------------------------------------------------------------------|----|---|---------|---------|----------------|------------|------------|----------------------|-------------|
| N2                                                                      | CT | I | 2418450 | 2420801 | WBGene00017734 | F23C8.5    | F23C8.5    | 0.00384529869123451  |             |
| AGIWUR9817;AGIWUR12095;AGIWUR12773;AGIWUR21578;AGIWUR22886;AGIWUR43078  |    |   |         |         |                |            |            |                      |             |
| N2                                                                      | CT | I | 2420803 | 2421816 | WBGene00017735 | did-2      | F23C8.6    | 0.282015589854176    | AGIWUR36365 |
| N2                                                                      | CT | I | 2429675 | 2432601 | WBGene00017737 | F23C8.8    | F23C8.8    | -0.0018679821767762  | AGIWUR29692 |
| N2                                                                      | CT | I | 2432570 | 2433755 | WBGene00017738 | F23C8.9    | F23C8.9    | -0.114926734076836   |             |
| AGIWUR11516;AGIWUR12714;AGIWUR24496;AGIWUR39273;AGIWUR44822;AGIWUR45164 |    |   |         |         |                |            |            |                      |             |
| N2                                                                      | CT | I | 2434004 | 2435708 | WBGene00017733 | ubxn-1     | F23C8.4    | -0.0468450748762486  | AGIWUR26378 |
| N2                                                                      | CT | I | 2438767 | 2442948 | WBGene00017732 | F23C8.3    | F23C8.3    | -0.00631834954803612 |             |
| AGIWUR4209;AGIWUR24398;AGIWUR32650;AGIWUR34132                          |    |   |         |         |                |            |            |                      |             |
| N2                                                                      | CT | I | 2445420 | 2445983 | WBGene00023273 | F23C8.2    | F23C8.2    | 0.0291842419082649   | AGIWUR10294 |
| N2                                                                      | CT | I | 2446740 | 2448369 | WBGene00017731 | F23C8.1    | F23C8.1    | 0.00926123720483396  | AGIWUR34435 |
| N2                                                                      | CT | I | 2449414 | 2451366 | WBGene00017739 | F23C8.11   | F23C8.11   | -0.0808711338063199  |             |
| AGIWUR5077                                                              |    |   |         |         |                |            |            |                      |             |
| N2                                                                      | CT | I | 2451908 | 2464637 | WBGene00002141 | inx-19     | T16H5.1    | 0.294309931067405    | AGIWUR2403  |
| N2                                                                      | CT | I | 2468787 | 2471972 | WBGene00022280 | Y74C10AL.2 | Y74C10AL.2 | -0.0724908988023039  |             |
| AGIWUR21766                                                             |    |   |         |         |                |            |            |                      |             |
| N2                                                                      | CT | I | 2472066 | 2485391 | WBGene00022281 | abtm-1     | Y74C10AR.3 | -0.0570820360988367  |             |
| AGIWUR5309;AGIWUR8973;AGIWUR10270;AGIWUR25468;AGIWUR30612;AGIWUR33610   |    |   |         |         |                |            |            |                      |             |
| N2                                                                      | CT | I | 2485867 | 2489780 | WBGene00001232 | eif-3.I    | Y74C10AR.1 | -0.0705429972292748  |             |
| AGIWUR29413                                                             |    |   |         |         |                |            |            |                      |             |
| N2                                                                      | CT | I | 2489976 | 2497371 | WBGene00021277 | Y23H5B.6   | Y23H5B.6   | -0.0690194781856377  |             |
| AGIWUR38087                                                             |    |   |         |         |                |            |            |                      |             |
| N2                                                                      | CT | I | 2498134 | 2506259 | WBGene00021276 | Y23H5B.5   | Y23H5B.5   | -0.132932636207841   |             |
| AGIWUR5878;AGIWUR6191;AGIWUR6274;AGIWUR28260                            |    |   |         |         |                |            |            |                      |             |
| N2                                                                      | CT | I | 2506891 | 2513710 | WBGene00021278 | Y23H5B.7   | Y23H5B.7   | 0.0579551124003168   |             |
| AGIWUR29322;AGIWUR30588                                                 |    |   |         |         |                |            |            |                      |             |
| N2                                                                      | CT | I | 2533268 | 2542114 | WBGene00021275 | dmsr-2     | Y23H5B.4   | 0.202898517377362    |             |
| AGIWUR14185                                                             |    |   |         |         |                |            |            |                      |             |
| N2                                                                      | CT | I | 2544749 | 2546163 | WBGene00021274 | Y23H5B.3   | Y23H5B.3   | -0.22934928934284    |             |
| AGIWUR14576                                                             |    |   |         |         |                |            |            |                      |             |
| N2                                                                      | CT | I | 2546897 | 2548358 | WBGene00021279 | Y23H5B.8   | Y23H5B.8   | -0.123676537731353   |             |
| AGIWUR24104                                                             |    |   |         |         |                |            |            |                      |             |
| N2                                                                      | CT | I | 2549296 | 2550543 | WBGene00021273 | Y23H5B.2   | Y23H5B.2   | -0.170978727220463   |             |
| AGIWUR20479                                                             |    |   |         |         |                |            |            |                      |             |
| N2                                                                      | CT | I | 2551375 | 2551590 | WBGene00021280 | nspd-8     | Y23H5B.9   | 0.00788733688492371  |             |
| AGIWUR21495                                                             |    |   |         |         |                |            |            |                      |             |
| N2                                                                      | CT | I | 2556252 | 2557425 | WBGene00194701 | Y23H5B.12  | Y23H5B.12  | 0.0242779542261031   |             |
| AGIWUR19243                                                             |    |   |         |         |                |            |            |                      |             |
| N2                                                                      | CT | I | 2558300 | 2560110 | WBGene00016950 | C55C2.4    | C55C2.4    | 0.093860739659247    | AGIWUR14938 |

|                                                                                                                        |    |   |         |         |                |          |          |                      |             |
|------------------------------------------------------------------------------------------------------------------------|----|---|---------|---------|----------------|----------|----------|----------------------|-------------|
| N2                                                                                                                     | CT | I | 2560396 | 2561820 | WBGene00016949 | C55C2.3  | C55C2.3  | -0.0103031745528503  |             |
| AGIWUR5924;AGIWUR10632                                                                                                 |    |   |         |         |                |          |          |                      |             |
| N2                                                                                                                     | CT | I | 2562616 | 2563049 | WBGene00006047 | ssp-19   | C55C2.2  | 0.313714920724614    | AGIWUR13085 |
| N2                                                                                                                     | CT | I | 2568872 | 2570746 | WBGene00016948 | scrt-1   | C55C2.1  | 0.149923048608341    | AGIWUR37839 |
| N2                                                                                                                     | CT | I | 2571782 | 2576020 | WBGene00000006 | aat-5    | C55C2.5  | 0.0498650702987424   |             |
| AGIWUR2506;AGIWUR10049;AGIWUR18292;AGIWUR40198                                                                         |    |   |         |         |                |          |          |                      |             |
| N2                                                                                                                     | CT | I | 2580935 | 2586126 | WBGene00001404 | fbp-1    | K07A3.1  | -0.0792646749699326  |             |
| AGIWUR9040;AGIWUR12995;AGIWUR25728;AGIWUR35028;AGIWUR35818                                                             |    |   |         |         |                |          |          |                      |             |
| N2                                                                                                                     | CT | I | 2587527 | 2595294 | WBGene00004226 | ptr-12   | K07A3.2  | 0.0677090873912549   |             |
| AGIWUR617;AGIWUR33884;AGIWUR35603                                                                                      |    |   |         |         |                |          |          |                      |             |
| N2                                                                                                                     | CT | I | 2599979 | 2602627 | WBGene00019461 | K07A3.3  | K07A3.3  | 0.22098795187606     |             |
| AGIWUR13808;AGIWUR24193;AGIWUR42169                                                                                    |    |   |         |         |                |          |          |                      |             |
| N2                                                                                                                     | CT | I | 2606754 | 2617360 | WBGene00000832 | ctn-1    | Y23H5A.5 | 0.21458295195415     |             |
| AGIWUR10113;AGIWUR17733;AGIWUR41210;AGIWUR41252                                                                        |    |   |         |         |                |          |          |                      |             |
| N2                                                                                                                     | CT | I | 2617560 | 2620425 | WBGene00021271 | spe-47   | Y23H5A.4 | 0.292470396298681    |             |
| AGIWUR24731                                                                                                            |    |   |         |         |                |          |          |                      |             |
| N2                                                                                                                     | CT | I | 2620654 | 2621859 | WBGene00021270 | Y23H5A.3 | Y23H5A.3 | -0.0936957970798513  |             |
| AGIWUR40693                                                                                                            |    |   |         |         |                |          |          |                      |             |
| N2                                                                                                                     | CT | I | 2621957 | 2623186 | WBGene00021269 | Y23H5A.2 | Y23H5A.2 | -0.0499896811146243  |             |
| AGIWUR22648                                                                                                            |    |   |         |         |                |          |          |                      |             |
| N2                                                                                                                     | CT | I | 2623102 | 2628577 | WBGene00000800 | cars-1   | Y23H5A.7 | 0.0389862646620678   |             |
| AGIWUR23131                                                                                                            |    |   |         |         |                |          |          |                      |             |
| N2                                                                                                                     | CT | I | 2629685 | 2632320 | WBGene00000801 | cars-2   | Y23H5A.1 | 0.0747570815022094   |             |
| AGIWUR1077;AGIWUR6380;AGIWUR10780;AGIWUR19734;AGIWUR20638                                                              |    |   |         |         |                |          |          |                      |             |
| N2                                                                                                                     | CT | I | 2632987 | 2634561 | WBGene00023172 | Y23H5A.8 | Y23H5A.8 | -0.097556586280513   |             |
| AGIWUR14216                                                                                                            |    |   |         |         |                |          |          |                      |             |
| N2                                                                                                                     | CT | I | 2638649 | 2639419 | WBGene00018231 | F40E3.3  | F40E3.3  | -0.0677968223139844  |             |
| AGIWUR4066;AGIWUR10758;AGIWUR23936;AGIWUR24120;AGIWUR24171;AGIWUR31356;AGIWUR35745;AGIWUR37922;AGIWUR39709;AGIWUR43197 |    |   |         |         |                |          |          |                      |             |
| N2                                                                                                                     | CT | I | 2642724 | 2643778 | WBGene00018230 | mage-1   | F40E3.2  | -0.149587896782066   | AGIWUR23200 |
| N2                                                                                                                     | CT | I | 2645273 | 2657241 | WBGene00018232 | F40E3.5  | F40E3.5  | 0.0613181556836802   |             |
| AGIWUR26138;AGIWUR32507                                                                                                |    |   |         |         |                |          |          |                      |             |
| N2                                                                                                                     | CT | I | 2668160 | 2672434 | WBGene00017979 | F32B5.6  | F32B5.6  | -0.00441850104687092 |             |
| AGIWUR7646;AGIWUR13992;AGIWUR30184                                                                                     |    |   |         |         |                |          |          |                      |             |
| N2                                                                                                                     | CT | I | 2672940 | 2682797 | WBGene00017980 | F32B5.7  | F32B5.7  | -0.0753392851480559  |             |
| AGIWUR6695;AGIWUR6824;AGIWUR13525;AGIWUR18240;AGIWUR27541;AGIWUR31729                                                  |    |   |         |         |                |          |          |                      |             |
| N2                                                                                                                     | CT | I | 2686639 | 2689493 | WBGene00000788 | cpz-1    | F32B5.8  | -0.192776091774835   | AGIWUR41569 |
| N2                                                                                                                     | CT | I | 2692074 | 2692467 | WBGene00017978 | F32B5.4  | F32B5.4  | 0.147129666563341    |             |
| AGIWUR7463;AGIWUR9486;AGIWUR10833;AGIWUR14697;AGIWUR21940;AGIWUR33121;AGIWUR33897;AGIWUR44678;AGIWUR45085              |    |   |         |         |                |          |          |                      |             |

|                                                                      |    |   |         |         |                |           |           |                     |             |
|----------------------------------------------------------------------|----|---|---------|---------|----------------|-----------|-----------|---------------------|-------------|
| N2                                                                   | CT | I | 2692757 | 2694084 | WBGene00017977 | F32B5.3   | F32B5.3   | -0.12205986862708   | AGIWUR18941 |
| N2                                                                   | CT | I | 2697399 | 2699955 | WBGene00017976 | F32B5.2   | F32B5.2   | 0.01691891241048    | AGIWUR23268 |
| N2                                                                   | CT | I | 2706883 | 2717549 | WBGene00003006 | lin-17    | Y71F9B.5  | -0.152008417948331  |             |
| AGIWUR27001;AGIWUR35050                                              |    |   |         |         |                |           |           |                     |             |
| N2                                                                   | CT | I | 2718027 | 2721475 | WBGene00001048 | dnj-30    | Y71F9B.16 | -0.101449596226397  |             |
| AGIWUR40146                                                          |    |   |         |         |                |           |           |                     |             |
| N2                                                                   | CT | I | 2721879 | 2726724 | WBGene00022128 | Y71F9B.6  | Y71F9B.6  | -0.0114053399809428 |             |
| AGIWUR19507                                                          |    |   |         |         |                |           |           |                     |             |
| N2                                                                   | CT | I | 2727014 | 2727545 | WBGene00004920 | snr-7     | Y71F9B.4  | -0.152505853874665  |             |
| AGIWUR7048                                                           |    |   |         |         |                |           |           |                     |             |
| N2                                                                   | CT | I | 2730004 | 2731453 | WBGene00022127 | yop-1     | Y71F9B.3  | 0.230796093763254   |             |
| AGIWUR5660;AGIWUR6385;AGIWUR8144;AGIWUR16646;AGIWUR35160;AGIWUR37496 |    |   |         |         |                |           |           |                     |             |
| N2                                                                   | CT | I | 2731562 | 2735371 | WBGene00022126 | Y71F9B.2  | Y71F9B.2  | -0.224797391695155  |             |
| AGIWUR8231                                                           |    |   |         |         |                |           |           |                     |             |
| N2                                                                   | CT | I | 2735345 | 2742508 | WBGene00022129 | lron-11   | Y71F9B.8  | 0.150950605279564   |             |
| AGIWUR4975;AGIWUR8612                                                |    |   |         |         |                |           |           |                     |             |
| N2                                                                   | CT | I | 2755540 | 2758204 | WBGene00004043 | plk-2     | Y71F9B.7  | 0.114848728548026   |             |
| AGIWUR32009                                                          |    |   |         |         |                |           |           |                     |             |
| N2                                                                   | CT | I | 2759023 | 2761044 | WBGene00022130 | Y71F9B.9  | Y71F9B.9  | -0.235927450286844  |             |
| AGIWUR15089                                                          |    |   |         |         |                |           |           |                     |             |
| N2                                                                   | CT | I | 2761158 | 2776097 | WBGene00004946 | sop-3     | Y71F9B.10 | -0.064686266203708  |             |
| AGIWUR13710;AGIWUR15065;AGIWUR23349                                  |    |   |         |         |                |           |           |                     |             |
| N2                                                                   | CT | I | 2776370 | 2778726 | WBGene00022131 | Y71F9B.13 | Y71F9B.13 | 0.142331537601162   |             |
| AGIWUR18999;AGIWUR21201                                              |    |   |         |         |                |           |           |                     |             |
| N2                                                                   | CT | I | 2780850 | 2784276 | WBGene00022133 | Y71F9B.15 | Y71F9B.15 | 0.153260518412981   |             |
| AGIWUR16378;AGIWUR33305                                              |    |   |         |         |                |           |           |                     |             |
| N2                                                                   | CT | I | 2784620 | 2786077 | WBGene00020990 | W03D8.9   | W03D8.9   | 0.114061848556108   | AGIWUR3317  |
| N2                                                                   | CT | I | 2786332 | 2787514 | WBGene00020991 | W03D8.10  | W03D8.10  | 0.434307637492996   |             |
| AGIWUR21745                                                          |    |   |         |         |                |           |           |                     |             |
| N2                                                                   | CT | I | 2791687 | 2794976 | WBGene00020989 | W03D8.8   | W03D8.8   | -0.0804016229316797 |             |
| AGIWUR22441;AGIWUR29065;AGIWUR38128                                  |    |   |         |         |                |           |           |                     |             |
| N2                                                                   | CT | I | 2796130 | 2797238 | WBGene00020988 | W03D8.7   | W03D8.7   | -0.198676132953548  | AGIWUR11786 |
| N2                                                                   | CT | I | 2798175 | 2800878 | WBGene00020985 | W03D8.2   | W03D8.2   | 0.145950516674521   | AGIWUR7975  |
| N2                                                                   | CT | I | 2802822 | 2815786 | WBGene00002174 | itx-1     | W03D8.6   | -0.0295512897900387 | AGIWUR14038 |
| N2                                                                   | CT | I | 2816415 | 2817646 | WBGene00020987 | W03D8.5   | W03D8.5   | 0.283137962633857   |             |
| AGIWUR3546;AGIWUR4156;AGIWUR9484;AGIWUR19425;AGIWUR24118             |    |   |         |         |                |           |           |                     |             |
| N2                                                                   | CT | I | 2818744 | 2820701 | WBGene00044796 | W03D8.11  | W03D8.11  | 0.022111955284208   |             |
| AGIWUR42963                                                          |    |   |         |         |                |           |           |                     |             |
| N2                                                                   | CT | I | 2820869 | 2822300 | WBGene00020986 | W03D8.3   | W03D8.3   | 0.238860548840744   | AGIWUR40700 |

|                                                                                 |    |   |         |         |                |            |            |                      |             |
|---------------------------------------------------------------------------------|----|---|---------|---------|----------------|------------|------------|----------------------|-------------|
| N2                                                                              | CT | I | 2823254 | 2830311 | WBGene00004077 | pop-1      | W10C8.2    | -0.0745185140673179  | AGIWUR37103 |
| N2                                                                              | CT | I | 2832872 | 2833253 | WBGene00021126 | W10C8.3    | W10C8.3    | 0.145569359919747    | AGIWUR28937 |
| N2                                                                              | CT | I | 2845859 | 2849792 | WBGene00021125 | ccb-2      | W10C8.1    | 0.00168287798723732  |             |
| AGIWUR17713;AGIWUR29981;AGIWUR44951                                             |    |   |         |         |                |            |            |                      |             |
| N2                                                                              | CT | I | 2851963 | 2853903 | WBGene00021127 | W10C8.4    | W10C8.4    | 0.115935203342183    |             |
| AGIWUR2101;AGIWUR26297;AGIWUR28145                                              |    |   |         |         |                |            |            |                      |             |
| N2                                                                              | CT | I | 2858524 | 2859913 | WBGene00044433 | W10C8.6    | W10C8.6    | -0.227279568052557   |             |
| AGIWUR1574;AGIWUR2177;AGIWUR33520;AGIWUR42210;AGIWUR45158                       |    |   |         |         |                |            |            |                      |             |
| N2                                                                              | CT | I | 2862403 | 2864446 | WBGene00022116 | Y71F9AL.11 | Y71F9AL.11 | 0.176730287829661    |             |
| AGIWUR36633                                                                     |    |   |         |         |                |            |            |                      |             |
| N2                                                                              | CT | I | 2866508 | 2870167 | WBGene00022115 | Y71F9AL.10 | Y71F9AL.10 |                      |             |
| -0.00503495354267791 AGIWUR30152                                                |    |   |         |         |                |            |            |                      |             |
| N2                                                                              | CT | I | 2870608 | 2875289 | WBGene00022117 | Y71F9AL.12 | Y71F9AL.12 | -0.0509216828091361  |             |
| AGIWUR29739                                                                     |    |   |         |         |                |            |            |                      |             |
| N2                                                                              | CT | I | 2875395 | 2876324 | WBGene00004412 | rp1-1      | Y71F9AL.13 | -0.00214219000398508 |             |
| AGIWUR13419;AGIWUR14964                                                         |    |   |         |         |                |            |            |                      |             |
| N2                                                                              | CT | I | 2876932 | 2878523 | WBGene00022114 | Y71F9AL.9  | Y71F9AL.9  | 0.0389189519832716   |             |
| AGIWUR15225;AGIWUR43288                                                         |    |   |         |         |                |            |            |                      |             |
| N2                                                                              | CT | I | 2878578 | 2880929 | WBGene00022113 | Y71F9AL.8  | Y71F9AL.8  | -0.0175741698508389  |             |
| AGIWUR29805                                                                     |    |   |         |         |                |            |            |                      |             |
| N2                                                                              | CT | I | 2880919 | 2883454 | WBGene00022118 | dnc-5      | Y71F9AL.14 | 0.0985693473002476   |             |
| AGIWUR1789;AGIWUR5524;AGIWUR13460;AGIWUR25120;AGIWUR26338                       |    |   |         |         |                |            |            |                      |             |
| N2                                                                              | CT | I | 2883546 | 2893718 | WBGene00000199 | arx-1      | Y71F9AL.16 | 0.0262654370626851   |             |
| AGIWUR11177                                                                     |    |   |         |         |                |            |            |                      |             |
| N2                                                                              | CT | I | 2895329 | 2900860 | WBGene00022119 | copa-1     | Y71F9AL.17 | -0.0896773550434986  |             |
| AGIWUR19351                                                                     |    |   |         |         |                |            |            |                      |             |
| N2                                                                              | CT | I | 2901325 | 2903006 | WBGene00001791 | gst-43     | Y71F9AL.5  | 0.035512562453377    |             |
| AGIWUR21982                                                                     |    |   |         |         |                |            |            |                      |             |
| N2                                                                              | CT | I | 2903596 | 2907751 | WBGene00022110 | Y71F9AL.4  | Y71F9AL.4  |                      |             |
| -0.00934277157368513 AGIWUR25316                                                |    |   |         |         |                |            |            |                      |             |
| N2                                                                              | CT | I | 2925212 | 2928134 | WBGene00022107 | Y71F9AL.1  | Y71F9AL.1  | -0.134384833666031   |             |
| AGIWUR2864                                                                      |    |   |         |         |                |            |            |                      |             |
| N2                                                                              | CT | I | 2928395 | 2929687 | WBGene00022122 | trap-1     | Y71F9AM.6  | 0.0474432903731579   |             |
| AGIWUR4502;AGIWUR4985;AGIWUR5165;AGIWUR5707;AGIWUR13179;AGIWUR27433;AGIWUR45195 |    |   |         |         |                |            |            |                      |             |
| N2                                                                              | CT | I | 2929736 | 2931361 | WBGene00003836 | nxt-1      | Y71F9AM.5  | -0.085577660539542   |             |
| AGIWUR15059                                                                     |    |   |         |         |                |            |            |                      |             |
| N2                                                                              | CT | I | 2931461 | 2947152 | WBGene00022121 | cogc-3     | Y71F9AM.4  | -0.12666941825694    |             |
| AGIWUR4108;AGIWUR6047;AGIWUR36855;AGIWUR41452                                   |    |   |         |         |                |            |            |                      |             |
| N2                                                                              | CT | I | 2949600 | 2957910 | WBGene00000237 | bam-2      | Y71F9AR.1  | 0.211525604094764    |             |



|                                                                                                           |    |   |         |         |                |            |            |                     |             |
|-----------------------------------------------------------------------------------------------------------|----|---|---------|---------|----------------|------------|------------|---------------------|-------------|
| AGIWUR41421                                                                                               |    |   |         |         |                |            |            |                     |             |
| N2                                                                                                        | CT | I | 2981531 | 2983076 | WBGene00044894 | Y71F9AR.4  | Y71F9AR.4  | -0.0881569850236765 |             |
| AGIWUR18847                                                                                               |    |   |         |         |                |            |            |                     |             |
| N2                                                                                                        | CT | I | 2983213 | 2985167 | WBGene00022123 | Y71F9AR.2  | Y71F9AR.2  | -0.374043756578143  |             |
| AGIWUR19262                                                                                               |    |   |         |         |                |            |            |                     |             |
| N2                                                                                                        | CT | I | 2986104 | 2995914 | WBGene00022124 | supr-1     | Y71F9AR.3  | -0.277803752038947  |             |
| AGIWUR10209                                                                                               |    |   |         |         |                |            |            |                     |             |
| N2                                                                                                        | CT | I | 2996401 | 3001382 | WBGene00001046 | dnj-28     | Y54E10BL.4 | -0.241833947125148  |             |
| AGIWUR1394                                                                                                |    |   |         |         |                |            |            |                     |             |
| N2                                                                                                        | CT | I | 3001360 | 3002847 | WBGene00021839 | nduf-5     | Y54E10BL.5 | -0.18242346368805   |             |
| AGIWUR6233                                                                                                |    |   |         |         |                |            |            |                     |             |
| N2                                                                                                        | CT | I | 3015742 | 3021531 | WBGene00021843 | Y54E10BR.4 | Y54E10BR.4 | 0.119905288159558   |             |
| AGIWUR20452                                                                                               |    |   |         |         |                |            |            |                     |             |
| N2                                                                                                        | CT | I | 3021651 | 3028396 | WBGene00021842 | Y54E10BR.3 | Y54E10BR.3 | -0.0135974243594994 |             |
| AGIWUR41419                                                                                               |    |   |         |         |                |            |            |                     |             |
| N2                                                                                                        | CT | I | 3028307 | 3031092 | WBGene00021844 | Y54E10BR.5 | Y54E10BR.5 | 0.124040880604035   |             |
| AGIWUR27706;AGIWUR30378                                                                                   |    |   |         |         |                |            |            |                     |             |
| N2                                                                                                        | CT | I | 3031212 | 3032938 | WBGene00021845 | rpb-7      | Y54E10BR.6 | -0.0400105889629288 |             |
| AGIWUR32718                                                                                               |    |   |         |         |                |            |            |                     |             |
| N2                                                                                                        | CT | I | 3032935 | 3034761 | WBGene00021841 | Y54E10BR.2 | Y54E10BR.2 | 0.100653016452733   |             |
| AGIWUR2238;AGIWUR18683;AGIWUR24455;AGIWUR43905                                                            |    |   |         |         |                |            |            |                     |             |
| N2                                                                                                        | CT | I | 3035193 | 3047794 | WBGene00003387 | mod-5      | Y54E10BR.7 | 0.142226787509244   |             |
| AGIWUR24272                                                                                               |    |   |         |         |                |            |            |                     |             |
| N2                                                                                                        | CT | I | 3052018 | 3059185 | WBGene00021846 | ztf-23     | Y54E10BR.8 | -0.0845174515335572 |             |
| AGIWUR33528                                                                                               |    |   |         |         |                |            |            |                     |             |
| N2                                                                                                        | CT | I | 3059151 | 3069393 | WBGene00021840 | Y54E10BR.1 | Y54E10BR.1 | -0.0541699556520374 |             |
| AGIWUR14801                                                                                               |    |   |         |         |                |            |            |                     |             |
| N2                                                                                                        | CT | I | 3069325 | 3070150 | WBGene00000205 | arx-7      | M01B12.3   | -0.141821276273996  |             |
| AGIWUR5428                                                                                                |    |   |         |         |                |            |            |                     |             |
| N2                                                                                                        | CT | I | 3070973 | 3084874 | WBGene00019697 | M01B12.4   | M01B12.4   | 0.0420259271730536  |             |
| AGIWUR16943;AGIWUR36776;AGIWUR37540                                                                       |    |   |         |         |                |            |            |                     |             |
| N2                                                                                                        | CT | I | 3085011 | 3096285 | WBGene00019698 | riok-1     | M01B12.5   | -0.0457046954554521 |             |
| AGIWUR5372;AGIWUR5467;AGIWUR12452;AGIWUR27824;AGIWUR28472;AGIWUR30070;AGIWUR34208;AGIWUR36598;AGIWUR41932 |    |   |         |         |                |            |            |                     |             |
| N2                                                                                                        | CT | I | 3094513 | 3109596 | WBGene00003654 | nhr-64     | C45E1.1    | 0.0994856119737442  | AGIWUR14818 |
| N2                                                                                                        | CT | I | 3115036 | 3117628 | WBGene00016663 | C45E1.4    | C45E1.4    | 0.197748289911488   | AGIWUR41381 |
| N2                                                                                                        | CT | I | 3137185 | 3138447 | WBGene00000626 | col-49     | K09H9.3    | 0.428941644338654   | AGIWUR23696 |
| N2                                                                                                        | CT | I | 3138541 | 3140601 | WBGene00045387 | K09H9.8    | K09H9.8    | 0.0240858696711861  |             |
| AGIWUR6683;AGIWUR9499;AGIWUR29974                                                                         |    |   |         |         |                |            |            |                     |             |
| N2                                                                                                        | CT | I | 3141704 | 3143197 | WBGene00019597 | K09H9.5    | K09H9.5    | -0.23179728712195   | AGIWUR19387 |

|                                                                                              |    |   |         |         |                |            |            |                     |             |
|----------------------------------------------------------------------------------------------|----|---|---------|---------|----------------|------------|------------|---------------------|-------------|
| N2                                                                                           | CT | I | 3144410 | 3147793 | WBGene00003062 | lpd-6      | K09H9.6    | 0.0421363109348789  | AGIWUR13406 |
| N2                                                                                           | CT | I | 3147996 | 3150349 | WBGene00019595 | K09H9.2    | K09H9.2    | -0.36750027701814   | AGIWUR25014 |
| N2                                                                                           | CT | I | 3150346 | 3162387 | WBGene00006888 | vbh-1      | Y54E10A.9  | 0.153154109465591   |             |
| AGIWUR36846                                                                                  |    |   |         |         |                |            |            |                     |             |
| N2                                                                                           | CT | I | 3162803 | 3163649 | WBGene00021829 | mrpl-17    | Y54E10A.7  | -0.0426424655084716 |             |
| AGIWUR1305                                                                                   |    |   |         |         |                |            |            |                     |             |
| N2                                                                                           | CT | I | 3163688 | 3167925 | WBGene00021828 | Y54E10A.6  | Y54E10A.6  | 0.0905240328918033  |             |
| AGIWUR24704                                                                                  |    |   |         |         |                |            |            |                     |             |
| N2                                                                                           | CT | I | 3167908 | 3171230 | WBGene00021827 | dnc-6      | Y54E10A.5  | -0.0739561996772409 |             |
| AGIWUR5057;AGIWUR9073;AGIWUR40125                                                            |    |   |         |         |                |            |            |                     |             |
| N2                                                                                           | CT | I | 3173243 | 3176319 | WBGene00021830 | Y54E10A.10 | Y54E10A.10 | -0.177001162026201  |             |
| AGIWUR13178                                                                                  |    |   |         |         |                |            |            |                     |             |
| N2                                                                                           | CT | I | 3176419 | 3192857 | WBGene00021831 | Y54E10A.11 | Y54E10A.11 | -0.125231823190488  |             |
| AGIWUR2164;AGIWUR16574                                                                       |    |   |         |         |                |            |            |                     |             |
| N2                                                                                           | CT | I | 3193528 | 3198838 | WBGene00021832 | Y54E10A.12 | Y54E10A.12 | -0.152105500645678  |             |
| AGIWUR12213                                                                                  |    |   |         |         |                |            |            |                     |             |
| N2                                                                                           | CT | I | 3199540 | 3203229 | WBGene00021833 | Y54E10A.13 | Y54E10A.13 | 0.0548605270520541  |             |
| AGIWUR9596                                                                                   |    |   |         |         |                |            |            |                     |             |
| N2                                                                                           | CT | I | 3206730 | 3209294 | WBGene00021835 | Y54E10A.17 | Y54E10A.17 | 0.0510357230111804  |             |
| AGIWUR37690                                                                                  |    |   |         |         |                |            |            |                     |             |
| N2                                                                                           | CT | I | 3211046 | 3217366 | WBGene00001481 | fog-1      | Y54E10A.4  | -0.104807103383589  |             |
| AGIWUR13603;AGIWUR15435;AGIWUR35965                                                          |    |   |         |         |                |            |            |                     |             |
| N2                                                                                           | CT | I | 3217296 | 3222950 | WBGene00004404 | rom-5      | Y54E10A.14 | -0.0500175811496444 |             |
| AGIWUR37258                                                                                  |    |   |         |         |                |            |            |                     |             |
| N2                                                                                           | CT | I | 3223160 | 3228104 | WBGene00000413 | cdt-1      | Y54E10A.15 | -0.241993387401102  |             |
| AGIWUR7164;AGIWUR8441;AGIWUR9365;AGIWUR10177;AGIWUR14248;AGIWUR14397;AGIWUR28748;AGIWUR40356 |    |   |         |         |                |            |            |                     |             |
| N2                                                                                           | CT | I | 3229431 | 3233294 | WBGene00021826 | txl-1      | Y54E10A.3  | 0.0892918073647344  |             |
| AGIWUR39852                                                                                  |    |   |         |         |                |            |            |                     |             |
| N2                                                                                           | CT | I | 3233391 | 3255678 | WBGene00003258 | cogc-1     | Y54E10A.2  | -0.189082406050614  |             |
| AGIWUR30427;AGIWUR32820;AGIWUR39620                                                          |    |   |         |         |                |            |            |                     |             |
| N2                                                                                           | CT | I | 3259871 | 3264254 | WBGene00021553 | tyr-5      | Y44E3B.2   | -0.172254311983126  |             |
| AGIWUR23134                                                                                  |    |   |         |         |                |            |            |                     |             |
| N2                                                                                           | CT | I | 3264237 | 3266762 | WBGene00021552 | zip-4      | Y44E3B.1   | -0.136795619911227  |             |
| AGIWUR2699;AGIWUR20566;AGIWUR20700;AGIWUR26560;AGIWUR28062;AGIWUR30568;AGIWUR32351           |    |   |         |         |                |            |            |                     |             |
| N2                                                                                           | CT | I | 3267094 | 3269116 | WBGene00020915 | nol-5      | W01B11.3   | 0.0336169877624375  |             |
| AGIWUR37743                                                                                  |    |   |         |         |                |            |            |                     |             |
| N2                                                                                           | CT | I | 3269406 | 3280883 | WBGene00004154 | pqn-72     | W01B11.5   | 0.117395055397146   |             |
| AGIWUR12149;AGIWUR23263;AGIWUR25848;AGIWUR35656;AGIWUR42564;AGIWUR43889                      |    |   |         |         |                |            |            |                     |             |
| N2                                                                                           | CT | I | 3287336 | 3293127 | WBGene00020914 | sulp-6     | W01B11.2   | -0.0816964534881546 |             |

AGIWUR2355;AGIWUR10745;AGIWUR30073;AGIWUR36750;AGIWUR37204;AGIWUR39158  
N2 CT I 3293142 3294356 WBGene00020917 W01B11.6 W01B11.6 -0.0490533621965721  
AGIWUR11957;AGIWUR23982;AGIWUR24179  
N2 CT I 3299606 3300490 WBGene00020913 W01B11.1 W01B11.1 0.263963551388041  
AGIWUR1462  
N2 CT I 3302001 3307587 WBGene00000036 ace-2 Y44E3A.2 -0.0997474329753647  
AGIWUR33576  
N2 CT I 3317978 3318584 WBGene00021548 trx-4 Y44E3A.3 -0.178803578366928  
AGIWUR13327  
N2 CT I 3319540 3330673 WBGene00021549 Y44E3A.4 Y44E3A.4 0.0494632310944159  
AGIWUR4866;AGIWUR12826;AGIWUR21456;AGIWUR37487  
N2 CT I 3338367 3340219 WBGene00021547 Y44E3A.1 Y44E3A.1 -0.113067361244233  
AGIWUR6438;AGIWUR21696;AGIWUR28706  
N2 CT I 3340231 3349907 WBGene00021551 Y44E3A.6 Y44E3A.6 -0.0672542227468007  
AGIWUR19599;AGIWUR28799  
N2 CT I 3367640 3368550 WBGene00021035 W05F2.3 W05F2.3 0.0465328510689877  
AGIWUR11491;AGIWUR17920;AGIWUR23022;AGIWUR38692;AGIWUR40671;AGIWUR42685  
N2 CT I 3368785 3371444 WBGene00021038 W05F2.6 W05F2.6 -0.129973749820419 AGIWUR10259  
N2 CT I 3371769 3373834 WBGene00021037 fbxa-203 W05F2.5 -0.0920041252806527  
AGIWUR18896  
N2 CT I 3374776 3407189 WBGene00021036 W05F2.4 W05F2.4 0.119595474316566  
AGIWUR1629;AGIWUR8478;AGIWUR12583;AGIWUR15753;AGIWUR22393;AGIWUR23436;AGIWUR32189;AGIWUR34613  
N2 CT I 3408033 3415238 WBGene00019362 cdk-2 K03E5.3 0.0230699784732025 AGIWUR23928  
N2 CT I 3419600 3424211 WBGene00019361 K03E5.2 K03E5.2 -0.0404622427045966  
AGIWUR1571;AGIWUR13604;AGIWUR16735;AGIWUR17165;AGIWUR21604;AGIWUR26478;AGIWUR26766;AGIWUR27970;AGIWUR30728;  
AGIWUR31092;AGIWUR37714;AGIWUR39861;AGIWUR43156;AGIWUR43908  
N2 CT I 3427177 3433207 WBGene00019360 neto-1 K03E5.1 0.256377306452239 AGIWUR34916  
N2 CT I 3433157 3438543 WBGene00004775 sep-1 Y47G6A.12 -0.0788259234474982  
AGIWUR2398  
N2 CT I 3439108 3449175 WBGene00006440 tag-63 Y47G6A.28 -0.181826199321414  
AGIWUR25852  
N2 CT I 3449326 3462177 WBGene00003422 msh-6 Y47G6A.11 0.105544431406582  
AGIWUR22181  
N2 CT I 3462270 3468187 WBGene00021640 Y47G6A.14 Y47G6A.14 -0.108296354238369  
AGIWUR1119  
N2 CT I 3467132 3478515 WBGene00004978 spg-7 Y47G6A.10 0.0880889980911697  
AGIWUR21359  
N2 CT I 3479329 3481439 WBGene00021638 Y47G6A.9 Y47G6A.9  
-0.00613531037905091 AGIWUR35431

|                                                                                                                                  |    |   |         |         |                |           |           |                     |
|----------------------------------------------------------------------------------------------------------------------------------|----|---|---------|---------|----------------|-----------|-----------|---------------------|
| N2                                                                                                                               | CT | I | 3481987 | 3484499 | WBGene00000794 | crn-1     | Y47G6A.8  | 0.033394340388508   |
| AGIWUR13801;AGIWUR22565                                                                                                          |    |   |         |         |                |           |           |                     |
| N2                                                                                                                               | CT | I | 3487812 | 3499706 | WBGene00021643 | ccep-290  | Y47G6A.17 | -0.190422301481449  |
| AGIWUR3330;AGIWUR15688                                                                                                           |    |   |         |         |                |           |           |                     |
| N2                                                                                                                               | CT | I | 3502738 | 3508421 | WBGene00021637 | Y47G6A.7  | Y47G6A.7  | -0.0731393966273011 |
| AGIWUR6082;AGIWUR7088;AGIWUR24590                                                                                                |    |   |         |         |                |           |           |                     |
| N2                                                                                                                               | CT | I | 3508397 | 3512735 | WBGene00021644 | Y47G6A.18 | Y47G6A.18 | -0.0209209919218516 |
| AGIWUR4776;AGIWUR5770;AGIWUR6663;AGIWUR14345;AGIWUR18070;AGIWUR30279;AGIWUR31587;AGIWUR36047;AGIWUR38200;AGIWUR38330;AGIWUR41216 |    |   |         |         |                |           |           |                     |
| N2                                                                                                                               | CT | I | 3516450 | 3523387 | WBGene00021636 | pcaf-1    | Y47G6A.6  | -0.0937478944896313 |
| AGIWUR32442                                                                                                                      |    |   |         |         |                |           |           |                     |
| N2                                                                                                                               | CT | I | 3523313 | 3529956 | WBGene00021645 | Y47G6A.19 | Y47G6A.19 | 0.0716606091581475  |
| AGIWUR31354                                                                                                                      |    |   |         |         |                |           |           |                     |
| N2                                                                                                                               | CT | I | 3533885 | 3539196 | WBGene00021635 | Y47G6A.5  | Y47G6A.5  | -0.227606832867909  |
| AGIWUR37951                                                                                                                      |    |   |         |         |                |           |           |                     |
| N2                                                                                                                               | CT | I | 3539554 | 3546904 | WBGene00004389 | rnp-6     | Y47G6A.20 | -0.0204755444775619 |
| AGIWUR16653;AGIWUR31705;AGIWUR35799;AGIWUR39341                                                                                  |    |   |         |         |                |           |           |                     |
| N2                                                                                                                               | CT | I | 3547071 | 3552005 | WBGene00021634 | rde-10    | Y47G6A.4  | 0.185678557035416   |
| AGIWUR39093                                                                                                                      |    |   |         |         |                |           |           |                     |
| N2                                                                                                                               | CT | I | 3551949 | 3559807 | WBGene00021646 | Y47G6A.21 | Y47G6A.21 | -0.0322904636621271 |
| AGIWUR20916;AGIWUR42118                                                                                                          |    |   |         |         |                |           |           |                     |
| N2                                                                                                                               | CT | I | 3559923 | 3562851 | WBGene00021647 | Y47G6A.22 | Y47G6A.22 | -0.215339350791229  |
| AGIWUR28433                                                                                                                      |    |   |         |         |                |           |           |                     |
| N2                                                                                                                               | CT | I | 3564040 | 3565068 | WBGene00045399 | Y47G6A.33 | Y47G6A.33 | 0.0889828461132742  |
| AGIWUR25152;AGIWUR41843                                                                                                          |    |   |         |         |                |           |           |                     |
| N2                                                                                                                               | CT | I | 3565012 | 3600729 | WBGene00003060 | lpd-3     | Y47G6A.23 | -0.121204841086064  |
| AGIWUR25264;AGIWUR43063                                                                                                          |    |   |         |         |                |           |           |                     |
| N2                                                                                                                               | CT | I | 3601291 | 3602908 | WBGene00021633 | Y47G6A.3  | Y47G6A.3  | 0.171258780709094   |
| AGIWUR21723                                                                                                                      |    |   |         |         |                |           |           |                     |
| N2                                                                                                                               | CT | I | 3603343 | 3604537 | WBGene00044436 | Y47G6A.31 | Y47G6A.31 | -0.0165577092385538 |
| AGIWUR2009;AGIWUR4486;AGIWUR11467;AGIWUR16255                                                                                    |    |   |         |         |                |           |           |                     |
| N2                                                                                                                               | CT | I | 3604520 | 3605763 | WBGene00021648 | mis-12    | Y47G6A.24 | -0.119541851719482  |
| AGIWUR31284                                                                                                                      |    |   |         |         |                |           |           |                     |
| N2                                                                                                                               | CT | I | 3606411 | 3608345 | WBGene00021649 | Y47G6A.25 | Y47G6A.25 | -0.142486995177546  |
| AGIWUR16764;AGIWUR17972;AGIWUR30368;AGIWUR34454;AGIWUR38799                                                                      |    |   |         |         |                |           |           |                     |
| N2                                                                                                                               | CT | I | 3608395 | 3612301 | WBGene00002144 | inx-22    | Y47G6A.2  | -0.121304555173682  |
| AGIWUR32737                                                                                                                      |    |   |         |         |                |           |           |                     |
| N2                                                                                                                               | CT | I | 3611909 | 3618317 | WBGene00002143 | inx-21    | Y47G6A.1  | -0.0415894364628517 |
| AGIWUR2419                                                                                                                       |    |   |         |         |                |           |           |                     |

|                                                                                    |    |   |         |         |                |           |           |                     |             |
|------------------------------------------------------------------------------------|----|---|---------|---------|----------------|-----------|-----------|---------------------|-------------|
| N2                                                                                 | CT | I | 3618889 | 3619697 | WBGene00021650 | Y47G6A.26 | Y47G6A.26 | 0.166432577807269   |             |
| AGIWUR10804                                                                        |    |   |         |         |                |           |           |                     |             |
| N2                                                                                 | CT | I | 3620582 | 3625087 | WBGene00044437 | Y47G6A.32 | Y47G6A.32 | 0.041084054863104   |             |
| AGIWUR28152;AGIWUR35782;AGIWUR39596                                                |    |   |         |         |                |           |           |                     |             |
| N2                                                                                 | CT | I | 3629471 | 3631112 | WBGene00000284 | cah-6     | T28F2.3   | 0.241899006587852   | AGIWUR29909 |
| N2                                                                                 | CT | I | 3631086 | 3636485 | WBGene00020902 | jmjc-1    | T28F2.4   | 0.0570230630093627  |             |
| AGIWUR10716;AGIWUR27941                                                            |    |   |         |         |                |           |           |                     |             |
| N2                                                                                 | CT | I | 3637353 | 3638819 | WBGene00020901 | T28F2.2   | T28F2.2   | -0.123041045651965  |             |
| AGIWUR3655;AGIWUR17862;AGIWUR19553;AGIWUR28347;AGIWUR30674;AGIWUR35823             |    |   |         |         |                |           |           |                     |             |
| N2                                                                                 | CT | I | 3639648 | 3641347 | WBGene00020900 | T28F2.1   | T28F2.1   | 0.256168276577664   | AGIWUR41008 |
| N2                                                                                 | CT | I | 3641668 | 3647009 | WBGene00000368 | ccb-1     | T28F2.5   | 0.0625583248449058  |             |
| AGIWUR17902;AGIWUR36522                                                            |    |   |         |         |                |           |           |                     |             |
| N2                                                                                 | CT | I | 3651230 | 3652599 | WBGene00000627 | col-50    | T28F2.6   | -0.0358478616885534 |             |
| AGIWUR28502;AGIWUR33906                                                            |    |   |         |         |                |           |           |                     |             |
| N2                                                                                 | CT | I | 3653997 | 3655265 | WBGene00000628 | col-51    | T28F2.8   | 1.1616682232897     | AGIWUR29327 |
| N2                                                                                 | CT | I | 3655413 | 3662183 | WBGene00020903 | acd-5     | T28F2.7   | 0.0273455281614474  | AGIWUR13129 |
| N2                                                                                 | CT | I | 3666923 | 3671700 | WBGene00004890 | smp-2     | D1037.2   | -0.141929374361643  | AGIWUR14570 |
| N2                                                                                 | CT | I | 3680178 | 3680944 | WBGene00001501 | ftn-2     | D1037.3   | 0.140586264599481   |             |
| AGIWUR8517;AGIWUR21576;AGIWUR30113;AGIWUR39905;AGIWUR40881;AGIWUR45149             |    |   |         |         |                |           |           |                     |             |
| N2                                                                                 | CT | I | 3682772 | 3684118 | WBGene00004272 | rab-8     | D1037.4   | -0.083171733179455  |             |
| AGIWUR8091;AGIWUR21531;AGIWUR23567;AGIWUR31383;AGIWUR34408;AGIWUR40705;AGIWUR44617 |    |   |         |         |                |           |           |                     |             |
| N2                                                                                 | CT | I | 3684783 | 3690192 | WBGene00017025 | D1037.1   | D1037.1   | 0.0546277198112382  | AGIWUR23371 |
| N2                                                                                 | CT | I | 3690181 | 3694021 | WBGene00017026 | ipla-4    | D1037.5   | 0.194962446809956   | AGIWUR39546 |
| N2                                                                                 | CT | I | 3694296 | 3697549 | WBGene00003418 | msh-2     | H26D21.2  | -0.153936156919855  |             |
| AGIWUR4168                                                                         |    |   |         |         |                |           |           |                     |             |
| N2                                                                                 | CT | I | 3698102 | 3699300 | WBGene00002042 | hus-1     | H26D21.1  | -0.0562952448310341 |             |
| AGIWUR20692                                                                        |    |   |         |         |                |           |           |                     |             |
| N2                                                                                 | CT | I | 3706030 | 3709435 | WBGene00017651 | F21A9.2   | F21A9.2   | -0.262449245103635  | AGIWUR4947  |
| N2                                                                                 | CT | I | 3712133 | 3713134 | WBGene00017650 | F21A9.1   | F21A9.1   | 0.0594317557532644  | AGIWUR22805 |
| N2                                                                                 | CT | I | 3713142 | 3721157 | WBGene00003040 | lin-59    | T12F5.4   | 0.445445468750632   |             |
| AGIWUR22950;AGIWUR24884;AGIWUR25052                                                |    |   |         |         |                |           |           |                     |             |
| N2                                                                                 | CT | I | 3726011 | 3731265 | WBGene00001601 | glh-4     | T12F5.3   | -0.214294535806003  | AGIWUR15176 |
| N2                                                                                 | CT | I | 3732982 | 3740479 | WBGene00004147 | larp-5    | T12F5.5   | 0.117282590254025   |             |
| AGIWUR11520;AGIWUR29583;AGIWUR33557                                                |    |   |         |         |                |           |           |                     |             |
| N2                                                                                 | CT | I | 3741456 | 3742646 | WBGene00020466 | sld-2     | T12F5.1   | -0.266264440339272  | AGIWUR14577 |
| N2                                                                                 | CT | I | 3748523 | 3753958 | WBGene00002135 | inx-13    | Y8G1A.2   | 0.0932605743653436  |             |
| AGIWUR5735;AGIWUR7745;AGIWUR14145;AGIWUR26568;AGIWUR30702;AGIWUR38532              |    |   |         |         |                |           |           |                     |             |
| N2                                                                                 | CT | I | 3755457 | 3759077 | WBGene00002134 | inx-12    | ZK770.3   | -0.0327792101249962 |             |
| AGIWUR5815;AGIWUR12211;AGIWUR19906                                                 |    |   |         |         |                |           |           |                     |             |

|                                                                                                                                                          |    |   |         |         |                |          |          |                       |             |
|----------------------------------------------------------------------------------------------------------------------------------------------------------|----|---|---------|---------|----------------|----------|----------|-----------------------|-------------|
| N2                                                                                                                                                       | CT | I | 3769681 | 3773876 | WBGene00022815 | asic-1   | ZK770.1  | -0.1745977669634      | AGIWUR39041 |
| N2                                                                                                                                                       | CT | I | 3774706 | 3777468 | WBGene00016324 | C32E8.6  | C32E8.6  | -0.00255178672160605  |             |
| AGIWUR13968;AGIWUR42073                                                                                                                                  |    |   |         |         |                |          |          |                       |             |
| N2                                                                                                                                                       | CT | I | 3778089 | 3781690 | WBGene00004368 | ric-19   | C32E8.7  | -0.101203813708432    | AGIWUR5505  |
| N2                                                                                                                                                       | CT | I | 3782118 | 3783294 | WBGene00016323 | C32E8.5  | C32E8.5  | -0.511016171999887    |             |
| AGIWUR10554;AGIWUR18167                                                                                                                                  |    |   |         |         |                |          |          |                       |             |
| N2                                                                                                                                                       | CT | I | 3783835 | 3784435 | WBGene00016322 | C32E8.4  | C32E8.4  | 0.0839000540733537    |             |
| AGIWUR25087;AGIWUR28898;AGIWUR38913                                                                                                                      |    |   |         |         |                |          |          |                       |             |
| N2                                                                                                                                                       | CT | I | 3786588 | 3787494 | WBGene00016321 | tppp-1   | C32E8.3  | -0.143461307765275    | AGIWUR830   |
| N2                                                                                                                                                       | CT | I | 3788036 | 3788909 | WBGene00004425 | rpl-13   | C32E8.2  | 0.294189716748193     |             |
| AGIWUR4831;AGIWUR12028;AGIWUR21601;AGIWUR24937;AGIWUR36210;AGIWUR40534;AGIWUR40558;AGIWUR40887                                                           |    |   |         |         |                |          |          |                       |             |
| N2                                                                                                                                                       | CT | I | 3789309 | 3792797 | WBGene00004217 | ptr-2    | C32E8.8  | 0.0830502594905278    |             |
| AGIWUR13785;AGIWUR26858;AGIWUR38652                                                                                                                      |    |   |         |         |                |          |          |                       |             |
| N2                                                                                                                                                       | CT | I | 3794556 | 3798069 | WBGene00016325 | C32E8.9  | C32E8.9  | -0.000669922808452128 | AGIWUR631   |
| N2                                                                                                                                                       | CT | I | 3798566 | 3805737 | WBGene00006751 | unc-11   | C32E8.10 | 0.0108265674251005    |             |
| AGIWUR7869;AGIWUR17953;AGIWUR22953;AGIWUR24588;AGIWUR25836;AGIWUR39231;AGIWUR39504                                                                       |    |   |         |         |                |          |          |                       |             |
| N2                                                                                                                                                       | CT | I | 3807458 | 3816809 | WBGene00016326 | ubr-1    | C32E8.11 | 0.113146052585986     |             |
| AGIWUR21445                                                                                                                                              |    |   |         |         |                |          |          |                       |             |
| N2                                                                                                                                                       | CT | I | 3817996 | 3821505 | WBGene00003797 | npp-11   | F53F10.5 | 0.240385180677771     |             |
| AGIWUR20808                                                                                                                                              |    |   |         |         |                |          |          |                       |             |
| N2                                                                                                                                                       | CT | I | 3821656 | 3821990 | WBGene00023066 | F53F10.7 | F53F10.7 | -0.182619994829288    |             |
| AGIWUR7872;AGIWUR22404;AGIWUR22849;AGIWUR28979;AGIWUR36927                                                                                               |    |   |         |         |                |          |          |                       |             |
| N2                                                                                                                                                       | CT | I | 3824947 | 3826514 | WBGene00006833 | unc-108  | F53F10.4 | 0.0754422281661844    |             |
| AGIWUR4694;AGIWUR13234;AGIWUR19555;AGIWUR21037;AGIWUR23542;AGIWUR33385;AGIWUR35111;AGIWUR36324;AGIWUR37033;AGIWUR41608                                   |    |   |         |         |                |          |          |                       |             |
| N2                                                                                                                                                       | CT | I | 3827219 | 3828143 | WBGene00018765 | mpc-2    | F53F10.3 | 0.0661484756127919    |             |
| AGIWUR21074                                                                                                                                              |    |   |         |         |                |          |          |                       |             |
| N2                                                                                                                                                       | CT | I | 3828239 | 3829308 | WBGene00044423 | F53F10.8 | F53F10.8 | -0.264730856831571    |             |
| AGIWUR6429;AGIWUR15090;AGIWUR36207;AGIWUR43512                                                                                                           |    |   |         |         |                |          |          |                       |             |
| N2                                                                                                                                                       | CT | I | 3830562 | 3834124 | WBGene00018764 | F53F10.2 | F53F10.2 | -0.0596607258625976   |             |
| AGIWUR2264;AGIWUR6729;AGIWUR9892;AGIWUR13356;AGIWUR14555;AGIWUR19732;AGIWUR23173;AGIWUR25744;AGIWUR26007;AGIWUR27943;AGIWUR29611;AGIWUR36716;AGIWUR42029 |    |   |         |         |                |          |          |                       |             |
| N2                                                                                                                                                       | CT | I | 3834115 | 3837807 | WBGene00018763 | F53F10.1 | F53F10.1 | -0.21686416103794     |             |
| AGIWUR22095                                                                                                                                              |    |   |         |         |                |          |          |                       |             |
| N2                                                                                                                                                       | CT | I | 3838237 | 3839899 | WBGene00020187 | gsp-4    | T03F1.5  | 0.095285950323083     | AGIWUR8768  |
| N2                                                                                                                                                       | CT | I | 3839809 | 3841558 | WBGene00020188 | T03F1.6  | T03F1.6  | -0.126186630204641    |             |
| AGIWUR6276;AGIWUR15360;AGIWUR19567                                                                                                                       |    |   |         |         |                |          |          |                       |             |
| N2                                                                                                                                                       | CT | I | 3853810 | 3854233 | WBGene00020192 | T03F1.11 | T03F1.11 | -0.186313021111999    |             |
| AGIWUR41326                                                                                                                                              |    |   |         |         |                |          |          |                       |             |

|                                                                                 |    |   |         |         |                |          |          |                     |             |
|---------------------------------------------------------------------------------|----|---|---------|---------|----------------|----------|----------|---------------------|-------------|
| N2                                                                              | CT | I | 3854169 | 3859292 | WBGene00020189 | tfbm-1   | T03F1.7  | 0.138373103005069   | AGIWUR20942 |
| N2                                                                              | CT | I | 3859376 | 3862729 | WBGene00020190 | guk-1    | T03F1.8  | -0.100392123662377  |             |
| AGIWUR2473;AGIWUR5012;AGIWUR19709;AGIWUR27356                                   |    |   |         |         |                |          |          |                     |             |
| N2                                                                              | CT | I | 3862775 | 3865938 | WBGene00001832 | hcp-4    | T03F1.9  | -0.0803754797777891 |             |
| AGIWUR6379;AGIWUR7648;AGIWUR29704;AGIWUR37109                                   |    |   |         |         |                |          |          |                     |             |
| N2                                                                              | CT | I | 3867541 | 3869109 | WBGene00020185 | pgk-1    | T03F1.3  | -0.167313344459263  | AGIWUR13438 |
| N2                                                                              | CT | I | 3869214 | 3870114 | WBGene00000764 | coq-4    | T03F1.2  | -0.179958580822397  |             |
| AGIWUR4077;AGIWUR4428;AGIWUR8265                                                |    |   |         |         |                |          |          |                     |             |
| N2                                                                              | CT | I | 3870642 | 3871267 | WBGene00219725 | linc-63  | T03F1.13 | -0.488387120763923  |             |
| AGIWUR21463                                                                     |    |   |         |         |                |          |          |                     |             |
| N2                                                                              | CT | I | 3871474 | 3873428 | WBGene00020191 | clcc-53  | T03F1.10 | 0.0259283600986322  |             |
| AGIWUR12742                                                                     |    |   |         |         |                |          |          |                     |             |
| N2                                                                              | CT | I | 3874037 | 3875995 | WBGene00020184 | uba-5    | T03F1.1  | 0.0788149496821688  |             |
| AGIWUR13281;AGIWUR14762;AGIWUR40606                                             |    |   |         |         |                |          |          |                     |             |
| N2                                                                              | CT | I | 3875974 | 3876711 | WBGene00020193 | T03F1.12 | T03F1.12 | -0.219313108182355  |             |
| AGIWUR6414;AGIWUR30180;AGIWUR33159;AGIWUR36650;AGIWUR37016                      |    |   |         |         |                |          |          |                     |             |
| N2                                                                              | CT | I | 3877063 | 3880747 | WBGene00016837 | C50F2.3  | C50F2.3  | -0.130551740031617  | AGIWUR4648  |
| N2                                                                              | CT | I | 3881816 | 3888313 | WBGene00016836 | C50F2.2  | C50F2.2  | -0.0579396190027968 | AGIWUR20836 |
| N2                                                                              | CT | I | 3888331 | 3891598 | WBGene00016838 | C50F2.4  | C50F2.4  | -0.0513609232737977 | AGIWUR21618 |
| N2                                                                              | CT | I | 3892332 | 3895271 | WBGene00016835 | C50F2.1  | C50F2.1  | 0.177612795106374   | AGIWUR30897 |
| N2                                                                              | CT | I | 3898046 | 3899840 | WBGene00001430 | fkf-5    | C50F2.6  | 0.408337794980058   |             |
| AGIWUR566;AGIWUR5699;AGIWUR6375;AGIWUR8997;AGIWUR14812;AGIWUR17905;AGIWUR26306  |    |   |         |         |                |          |          |                     |             |
| N2                                                                              | CT | I | 3900407 | 3901437 | WBGene00016840 | C50F2.7  | C50F2.7  | -0.160111435761161  | AGIWUR34430 |
| N2                                                                              | CT | I | 3901432 | 3905208 | WBGene00016841 | magu-3   | C50F2.8  | -0.133721325052916  | AGIWUR10248 |
| N2                                                                              | CT | I | 3908747 | 3909701 | WBGene00003950 | pbs-4    | T20F5.2  | -0.0759944543040314 |             |
| AGIWUR3637;AGIWUR19846;AGIWUR21083;AGIWUR23708;AGIWUR40592;AGIWUR43430          |    |   |         |         |                |          |          |                     |             |
| N2                                                                              | CT | I | 3909629 | 3910544 | WBGene00020625 | mrrf-1   | T20F5.3  | -0.177697327464887  | AGIWUR14724 |
| N2                                                                              | CT | I | 3912635 | 3915458 | WBGene00020626 | T20F5.4  | T20F5.4  | -0.165375449626994  | AGIWUR17512 |
| N2                                                                              | CT | I | 3916064 | 3916391 | WBGene00023142 | T20F5.1  | T20F5.1  | 0.170601932729653   | AGIWUR5544  |
| N2                                                                              | CT | I | 3917911 | 3920172 | WBGene00020627 | T20F5.5  | T20F5.5  | -0.0293475983843763 | AGIWUR7752  |
| N2                                                                              | CT | I | 3920177 | 3925162 | WBGene00020628 | T20F5.6  | T20F5.6  | 0.175256252201244   |             |
| AGIWUR29764;AGIWUR39526;AGIWUR41846                                             |    |   |         |         |                |          |          |                     |             |
| N2                                                                              | CT | I | 3925434 | 3927887 | WBGene00020629 | T20F5.7  | T20F5.7  | 0.13606999300028    |             |
| AGIWUR1843;AGIWUR5114;AGIWUR7038;AGIWUR9628;AGIWUR12435;AGIWUR24370;AGIWUR34443 |    |   |         |         |                |          |          |                     |             |
| N2                                                                              | CT | I | 3930830 | 3931552 | WBGene00020653 | T21E3.2  | T21E3.2  | -0.125015846783618  | AGIWUR6826  |
| N2                                                                              | CT | I | 3932210 | 3934813 | WBGene00020652 | egg-4    | T21E3.1  | -0.0172251672209409 | AGIWUR3682  |
| N2                                                                              | CT | I | 3935272 | 3953991 | WBGene00003072 | lrr-2    | T21E3.3  | 0.0469179932837318  |             |
| AGIWUR29102;AGIWUR33825                                                         |    |   |         |         |                |          |          |                     |             |
| N2                                                                              | CT | I | 3968118 | 3970474 | WBGene00018531 | F47B3.7  | F47B3.7  | 0.166982407836318   | AGIWUR2971  |

|                                                                                                                                                                                  |    |   |         |         |                |          |          |                     |             |
|----------------------------------------------------------------------------------------------------------------------------------------------------------------------------------|----|---|---------|---------|----------------|----------|----------|---------------------|-------------|
| N2                                                                                                                                                                               | CT | I | 3974063 | 3977351 | WBGene00017909 | F28H1.4  | F28H1.4  | -0.0279917215384557 | AGIWUR4979  |
| N2                                                                                                                                                                               | CT | I | 3978493 | 3979538 | WBGene00017910 | F28H1.5  | F28H1.5  | 0.0279528509720386  | AGIWUR27721 |
| N2                                                                                                                                                                               | CT | I | 3983171 | 3986915 | WBGene00000197 | aars-2   | F28H1.3  | 0.0957531906305853  |             |
| AGIWUR5656;AGIWUR5960;AGIWUR22497;AGIWUR31140;AGIWUR35129;AGIWUR42993                                                                                                            |    |   |         |         |                |          |          |                     |             |
| N2                                                                                                                                                                               | CT | I | 3987842 | 3988699 | WBGene00000779 | cpn-3    | F28H1.2  | -0.0304383446663881 | AGIWUR1643  |
| N2                                                                                                                                                                               | CT | I | 3995709 | 3996950 | WBGene00017908 | F28H1.1  | F28H1.1  | 0.113978617215267   |             |
| AGIWUR6699;AGIWUR23035;AGIWUR27226;AGIWUR33403;AGIWUR36968;AGIWUR44156;AGIWUR44775                                                                                               |    |   |         |         |                |          |          |                     |             |
| N2                                                                                                                                                                               | CT | I | 3999348 | 4031739 | WBGene00006805 | unc-73   | F55C7.7  | 0.064275361742169   |             |
| AGIWUR1149;AGIWUR3451;AGIWUR8764;AGIWUR9185;AGIWUR9442;AGIWUR24092;AGIWUR29201;AGIWUR29929;AGIWUR30982;AGIWUR34557;AGIWUR35974;AGIWUR36594;AGIWUR42637                           |    |   |         |         |                |          |          |                     |             |
| N2                                                                                                                                                                               | CT | I | 4035702 | 4090884 | WBGene00006820 | unc-89   | C09D1.1  | 0.227042602283184   |             |
| AGIWUR6300;AGIWUR7462;AGIWUR9086;AGIWUR10960;AGIWUR10976;AGIWUR12117;AGIWUR13718;AGIWUR19966;AGIWUR21298;AGIWUR28254;AGIWUR29472;AGIWUR32385;AGIWUR33294;AGIWUR33479;AGIWUR43580 |    |   |         |         |                |          |          |                     |             |
| N2                                                                                                                                                                               | CT | I | 4094179 | 4098330 | WBGene00016066 | acd-2    | C24G7.4  | 0.00351899759370689 | AGIWUR36711 |
| N2                                                                                                                                                                               | CT | I | 4103713 | 4108045 | WBGene00016064 | acd-1    | C24G7.2  | -0.0523334730057985 |             |
| AGIWUR8785;AGIWUR10183                                                                                                                                                           |    |   |         |         |                |          |          |                     |             |
| N2                                                                                                                                                                               | CT | I | 4109407 | 4112385 | WBGene00016063 | delm-2   | C24G7.1  | 0.100842806208534   |             |
| AGIWUR10048;AGIWUR20136                                                                                                                                                          |    |   |         |         |                |          |          |                     |             |
| N2                                                                                                                                                                               | CT | I | 4114734 | 4116370 | WBGene00000867 | cyb-2.2  | H31G24.4 | -0.10552142080148   |             |
| AGIWUR32371                                                                                                                                                                      |    |   |         |         |                |          |          |                     |             |
| N2                                                                                                                                                                               | CT | I | 4123481 | 4124723 | WBGene00019253 | H31G24.1 | H31G24.1 | 0.241355234022513   |             |
| AGIWUR24730                                                                                                                                                                      |    |   |         |         |                |          |          |                     |             |
| N2                                                                                                                                                                               | CT | I | 4126056 | 4129307 | WBGene00003029 | lin-44   | E01A2.3  | -0.0654475540342068 |             |
| AGIWUR3426;AGIWUR26281;AGIWUR28498;AGIWUR29789;AGIWUR34306;AGIWUR44057                                                                                                           |    |   |         |         |                |          |          |                     |             |
| N2                                                                                                                                                                               | CT | I | 4129469 | 4132292 | WBGene00002696 | let-504  | E01A2.4  | 0.137934179817218   | AGIWUR28032 |
| N2                                                                                                                                                                               | CT | I | 4132500 | 4135239 | WBGene00017085 | E01A2.2  | E01A2.2  | 0.199812208358428   |             |
| AGIWUR606;AGIWUR16300;AGIWUR28446;AGIWUR41107                                                                                                                                    |    |   |         |         |                |          |          |                     |             |
| N2                                                                                                                                                                               | CT | I | 4135239 | 4137074 | WBGene00017087 | E01A2.5  | E01A2.5  | -0.110651409491172  | AGIWUR9789  |
| N2                                                                                                                                                                               | CT | I | 4137134 | 4140634 | WBGene00017088 | akir-1   | E01A2.6  | 0.281689028668378   | AGIWUR15450 |
| N2                                                                                                                                                                               | CT | I | 4139514 | 4142367 | WBGene00017084 | E01A2.1  | E01A2.1  | -0.105903032362907  | AGIWUR44336 |
| N2                                                                                                                                                                               | CT | I | 4148832 | 4149429 | WBGene00020040 | R12E2.15 | R12E2.15 | 0.171496551556508   |             |
| AGIWUR12434;AGIWUR26472                                                                                                                                                          |    |   |         |         |                |          |          |                     |             |
| N2                                                                                                                                                                               | CT | I | 4151099 | 4151761 | WBGene00020032 | R12E2.6  | R12E2.6  | 0.215480934383592   | AGIWUR21859 |
| N2                                                                                                                                                                               | CT | I | 4153957 | 4154550 | WBGene00020033 | R12E2.7  | R12E2.7  | 0.160701919246199   | AGIWUR14061 |
| N2                                                                                                                                                                               | CT | I | 4155542 | 4158733 | WBGene00020034 | R12E2.8  | R12E2.8  | -0.391424107125073  | AGIWUR2190  |
| N2                                                                                                                                                                               | CT | I | 4159014 | 4161149 | WBGene00002137 | inx-15   | R12E2.9  | -0.116143094855095  | AGIWUR34283 |
| N2                                                                                                                                                                               | CT | I | 4162035 | 4165015 | WBGene00002138 | inx-16   | R12E2.5  | -0.253630698156508  | AGIWUR26075 |
| N2                                                                                                                                                                               | CT | I | 4165135 | 4167229 | WBGene00002139 | inx-17   | R12E2.4  | -0.0464296162094247 |             |
| AGIWUR9327;AGIWUR17226;AGIWUR20101;AGIWUR22560                                                                                                                                   |    |   |         |         |                |          |          |                     |             |



|                                                                                               |    |   |         |         |                |           |           |                      |             |
|-----------------------------------------------------------------------------------------------|----|---|---------|---------|----------------|-----------|-----------|----------------------|-------------|
| N2                                                                                            | CT | I | 4172433 | 4173739 | WBGene00020036 | R12E2.11  | R12E2.11  | 0.105463765942147    |             |
| AGIWUR10106                                                                                   |    |   |         |         |                |           |           |                      |             |
| N2                                                                                            | CT | I | 4173743 | 4174774 | WBGene00020037 | mrps-6    | R12E2.12  | -0.0603351233443643  |             |
| AGIWUR38727                                                                                   |    |   |         |         |                |           |           |                      |             |
| N2                                                                                            | CT | I | 4175319 | 4177271 | WBGene00004464 | rpn-8     | R12E2.3   | 0.105466183326929    |             |
| AGIWUR18623;AGIWUR22338                                                                       |    |   |         |         |                |           |           |                      |             |
| N2                                                                                            | CT | I | 4177305 | 4178447 | WBGene00020038 | R12E2.13  | R12E2.13  | 0.259373222394852    |             |
| AGIWUR3754;AGIWUR18414;AGIWUR22505;AGIWUR41014;AGIWUR42132                                    |    |   |         |         |                |           |           |                      |             |
| N2                                                                                            | CT | I | 4178812 | 4182158 | WBGene00020031 | suco-1    | R12E2.2   | -0.00965864346551371 | AGIWUR2927  |
| N2                                                                                            | CT | I | 4182221 | 4184992 | WBGene00020030 | R12E2.1   | R12E2.1   | -0.216532820309997   | AGIWUR29439 |
| N2                                                                                            | CT | I | 4190142 | 4193129 | WBGene00015975 | cas-2     | C18E3.6   | 0.18910021396529     | AGIWUR19315 |
| N2                                                                                            | CT | I | 4193241 | 4203303 | WBGene00015974 | C18E3.5   | C18E3.5   | 0.226291829774484    | AGIWUR18123 |
| N2                                                                                            | CT | I | 4203458 | 4208537 | WBGene00015972 | C18E3.3   | C18E3.3   | 0.103014668540611    | AGIWUR9106  |
| N2                                                                                            | CT | I | 4208515 | 4210341 | WBGene00001985 | hop-1     | C18E3.8   | -0.0261402455372384  | AGIWUR15216 |
| N2                                                                                            | CT | I | 4210979 | 4212667 | WBGene00015971 | swsn-2.2  | C18E3.2   | -0.171167502214564   |             |
| AGIWUR22115                                                                                   |    |   |         |         |                |           |           |                      |             |
| N2                                                                                            | CT | I | 4212708 | 4214317 | WBGene00015970 | C18E3.1   | C18E3.1   | 0.0149223572371238   |             |
| AGIWUR5693;AGIWUR8501;AGIWUR13498                                                             |    |   |         |         |                |           |           |                      |             |
| N2                                                                                            | CT | I | 4214294 | 4215768 | WBGene00015976 | C18E3.9   | C18E3.9   | 0.163465276923525    | AGIWUR20276 |
| N2                                                                                            | CT | I | 4229577 | 4236039 | WBGene00003516 | nab-1     | C43E11.6  | 0.0208647949319891   |             |
| AGIWUR2476;AGIWUR3623;AGIWUR14586;AGIWUR14740;AGIWUR15070;AGIWUR28263;AGIWUR34361;AGIWUR39076 |    |   |         |         |                |           |           |                      |             |
| N2                                                                                            | CT | I | 4239088 | 4242727 | WBGene00003584 | ndx-7     | C43E11.7  | -0.154936303709604   |             |
| AGIWUR3786                                                                                    |    |   |         |         |                |           |           |                      |             |
| N2                                                                                            | CT | I | 4242821 | 4247582 | WBGene00016606 | exoc-7    | C43E11.8  | 0.15303060403847     |             |
| AGIWUR18146                                                                                   |    |   |         |         |                |           |           |                      |             |
| N2                                                                                            | CT | I | 4247754 | 4249415 | WBGene00007001 | tufm-2    | C43E11.4  | -0.0432701643066613  |             |
| AGIWUR11352;AGIWUR18532;AGIWUR37882;AGIWUR40266                                               |    |   |         |         |                |           |           |                      |             |
| N2                                                                                            | CT | I | 4249482 | 4253170 | WBGene00016608 | cogc-5    | C43E11.11 | 0.0521648541215676   |             |
| AGIWUR16563                                                                                   |    |   |         |         |                |           |           |                      |             |
| N2                                                                                            | CT | I | 4253242 | 4254139 | WBGene00016609 | C43E11.12 | C43E11.12 | 0.0283586976657091   |             |
| AGIWUR19632                                                                                   |    |   |         |         |                |           |           |                      |             |
| N2                                                                                            | CT | I | 4254380 | 4264699 | WBGene00016603 | met-1     | C43E11.3  | -0.079057321555581   |             |
| AGIWUR2423;AGIWUR5245;AGIWUR8984;AGIWUR14864;AGIWUR15911;AGIWUR26980;AGIWUR38107              |    |   |         |         |                |           |           |                      |             |
| N2                                                                                            | CT | I | 4265109 | 4267238 | WBGene00016602 | mus-81    | C43E11.2  | -0.0691102607952168  |             |
| AGIWUR1293                                                                                    |    |   |         |         |                |           |           |                      |             |
| N2                                                                                            | CT | I | 4267199 | 4267967 | WBGene00016607 | C43E11.9  | C43E11.9  | 0.172321288727243    |             |
| AGIWUR3376;AGIWUR11694                                                                        |    |   |         |         |                |           |           |                      |             |
| N2                                                                                            | CT | I | 4268070 | 4270287 | WBGene00000382 | cdc-6     | C43E11.10 | 0.149004700432325    |             |
| AGIWUR23938                                                                                   |    |   |         |         |                |           |           |                      |             |

|                                                                                    |    |   |         |         |                |          |          |                     |             |
|------------------------------------------------------------------------------------|----|---|---------|---------|----------------|----------|----------|---------------------|-------------|
| N2                                                                                 | CT | I | 4270697 | 4273332 | WBGene00016601 | acin-1   | C43E11.1 | 0.0243506811016196  |             |
| AGIWUR26821                                                                        |    |   |         |         |                |          |          |                     |             |
| N2                                                                                 | CT | I | 4273896 | 4274742 | WBGene00021631 | Y47D9A.4 | Y47D9A.4 | 0.108020977535606   |             |
| AGIWUR20658                                                                        |    |   |         |         |                |          |          |                     |             |
| N2                                                                                 | CT | I | 4277684 | 4279622 | WBGene00021632 | Y47D9A.5 | Y47D9A.5 | 0.0477158652130143  |             |
| AGIWUR13379                                                                        |    |   |         |         |                |          |          |                     |             |
| N2                                                                                 | CT | I | 4298184 | 4302243 | WBGene00021629 | scpl-3   | Y47D9A.2 | 0.253594262313645   |             |
| AGIWUR34572;AGIWUR41718                                                            |    |   |         |         |                |          |          |                     |             |
| N2                                                                                 | CT | I | 4303930 | 4308244 | WBGene00021628 | Y47D9A.1 | Y47D9A.1 | 0.109510443378216   |             |
| AGIWUR1935;AGIWUR8700;AGIWUR37027                                                  |    |   |         |         |                |          |          |                     |             |
| N2                                                                                 | CT | I | 4321095 | 4359080 | WBGene00000140 | anc-1    | ZK973.6  | -0.0417884055663826 |             |
| AGIWUR2453;AGIWUR11299;AGIWUR11875;AGIWUR21024;AGIWUR28673;AGIWUR37202;AGIWUR38158 |    |   |         |         |                |          |          |                     |             |
| N2                                                                                 | CT | I | 4359207 | 4362548 | WBGene00000045 | acr-6    | ZK973.5  | 0.231297035918701   | AGIWUR12825 |
| N2                                                                                 | CT | I | 4363415 | 4364048 | WBGene00022833 | ZK973.4  | ZK973.4  | 0.309795571007395   | AGIWUR43472 |
| N2                                                                                 | CT | I | 4364906 | 4367049 | WBGene00022834 | ZK973.8  | ZK973.8  | 0.131184422838256   | AGIWUR38768 |
| N2                                                                                 | CT | I | 4368089 | 4370504 | WBGene00022832 | pdp-1    | ZK973.3  | 0.155537391127634   | AGIWUR38319 |
| N2                                                                                 | CT | I | 4370419 | 4372138 | WBGene00022835 | ZK973.9  | ZK973.9  | 0.0632971527675341  | AGIWUR26896 |
| N2                                                                                 | CT | I | 4372255 | 4373018 | WBGene00003061 | lpd-5    | ZK973.10 | -0.181045436916623  |             |
| AGIWUR9768                                                                         |    |   |         |         |                |          |          |                     |             |
| N2                                                                                 | CT | I | 4373656 | 4379329 | WBGene00022831 | cec-10   | ZK973.2  | 0.208279463485596   | AGIWUR11355 |
| N2                                                                                 | CT | I | 4379325 | 4381948 | WBGene00022836 | ZK973.11 | ZK973.11 |                     |             |
| -0.00822303737404617 AGIWUR40438                                                   |    |   |         |         |                |          |          |                     |             |
| N2                                                                                 | CT | I | 4382565 | 4385218 | WBGene00022830 | ZK973.1  | ZK973.1  | -0.101077076931951  | AGIWUR15329 |
| N2                                                                                 | CT | I | 4386785 | 4401980 | WBGene00000962 | dhc-1    | T21E12.4 | 0.112919603488657   |             |
| AGIWUR25546;AGIWUR28865                                                            |    |   |         |         |                |          |          |                     |             |
| N2                                                                                 | CT | I | 4401956 | 4404585 | WBGene00020655 | T21E12.3 | T21E12.3 | -0.0355029015532944 |             |
| AGIWUR37344                                                                        |    |   |         |         |                |          |          |                     |             |
| N2                                                                                 | CT | I | 4409689 | 4426137 | WBGene00015704 | tiam-1   | C11D9.1  | -0.0174839302461991 |             |
| AGIWUR16;AGIWUR16270                                                               |    |   |         |         |                |          |          |                     |             |
| N2                                                                                 | CT | I | 4428467 | 4444342 | WBGene00016562 | C41D11.3 | C41D11.3 | -0.0768587962120106 |             |
| AGIWUR18411;AGIWUR25427;AGIWUR32861;AGIWUR34009                                    |    |   |         |         |                |          |          |                     |             |
| N2                                                                                 | CT | I | 4444719 | 4446598 | WBGene00001231 | eif-3.H  | C41D11.2 | 0.189442391790664   |             |
| AGIWUR21203                                                                        |    |   |         |         |                |          |          |                     |             |
| N2                                                                                 | CT | I | 4446577 | 4448461 | WBGene00000787 | cps-6    | C41D11.8 | -0.186474534813616  |             |
| AGIWUR1461;AGIWUR12582;AGIWUR32366                                                 |    |   |         |         |                |          |          |                     |             |
| N2                                                                                 | CT | I | 4448576 | 4449774 | WBGene00016567 | C41D11.9 | C41D11.9 | -0.119261560951596  |             |
| AGIWUR9473                                                                         |    |   |         |         |                |          |          |                     |             |
| N2                                                                                 | CT | I | 4449879 | 4450927 | WBGene00016564 | cmt-1    | C41D11.5 | -0.160521925230213  |             |
| AGIWUR43287                                                                        |    |   |         |         |                |          |          |                     |             |

|                                                                        |    |   |         |         |                |            |            |                     |             |
|------------------------------------------------------------------------|----|---|---------|---------|----------------|------------|------------|---------------------|-------------|
| N2                                                                     | CT | I | 4451200 | 4456805 | WBGene00016566 | eri-7      | C41D11.7   | -0.158868951718919  |             |
| AGIWUR27075                                                            |    |   |         |         |                |            |            |                     |             |
| N2                                                                     | CT | I | 4457383 | 4469461 | WBGene00016561 | eri-6      | C41D11.1   | 0.031203391235386   |             |
| AGIWUR9474;AGIWUR15095;AGIWUR33241                                     |    |   |         |         |                |            |            |                     |             |
| N2                                                                     | CT | I | 4481203 | 4508930 | WBGene00020131 | gcy-28     | T01A4.1    | 0.106003375750198   |             |
| AGIWUR8023;AGIWUR9811;AGIWUR10432;AGIWUR11693;AGIWUR25389;AGIWUR29324  |    |   |         |         |                |            |            |                     |             |
| N2                                                                     | CT | I | 4508917 | 4511126 | WBGene00022470 | mrp1-19    | Y119C1B.4  | -0.0572132375888259 |             |
| AGIWUR28354                                                            |    |   |         |         |                |            |            |                     |             |
| N2                                                                     | CT | I | 4511440 | 4516512 | WBGene00022471 | Y119C1B.5  | Y119C1B.5  | -0.0178301567033259 |             |
| AGIWUR39560                                                            |    |   |         |         |                |            |            |                     |             |
| N2                                                                     | CT | I | 4517260 | 4518491 | WBGene00022472 | Y119C1B.6  | Y119C1B.6  | 0.0184223681868532  |             |
| AGIWUR7587;AGIWUR14994;AGIWUR16399;AGIWUR27205;AGIWUR37427;AGIWUR38985 |    |   |         |         |                |            |            |                     |             |
| N2                                                                     | CT | I | 4520070 | 4522768 | WBGene00044754 | Y119C1B.12 | Y119C1B.12 | -0.17893456055709   |             |
| AGIWUR5460;AGIWUR27225;AGIWUR42488                                     |    |   |         |         |                |            |            |                     |             |
| N2                                                                     | CT | I | 4526232 | 4534798 | WBGene00022473 | bet-1      | Y119C1B.8  | -0.0950449730788474 |             |
| AGIWUR1031;AGIWUR3966;AGIWUR43474                                      |    |   |         |         |                |            |            |                     |             |
| N2                                                                     | CT | I | 4537449 | 4539725 | WBGene00022474 | zig-9      | Y119C1B.9  | 0.0962288927958035  |             |
| AGIWUR17606                                                            |    |   |         |         |                |            |            |                     |             |
| N2                                                                     | CT | I | 4549695 | 4552758 | WBGene00022469 | Y119C1B.3  | Y119C1B.3  | -0.622368022902263  |             |
| AGIWUR19268                                                            |    |   |         |         |                |            |            |                     |             |
| N2                                                                     | CT | I | 4552851 | 4553121 | WBGene00044441 | Y119C1B.11 | Y119C1B.11 | 0.140453361753884   |             |
| AGIWUR4602;AGIWUR7834;AGIWUR9928;AGIWUR28645;AGIWUR31236               |    |   |         |         |                |            |            |                     |             |
| N2                                                                     | CT | I | 4554126 | 4555203 | WBGene00022467 | Y119C1B.1  | Y119C1B.1  | 0.333603871553194   |             |
| AGIWUR24218                                                            |    |   |         |         |                |            |            |                     |             |
| N2                                                                     | CT | I | 4555343 | 4556814 | WBGene00022475 | Y119C1B.10 | Y119C1B.10 | -0.216741936264322  |             |
| AGIWUR39830                                                            |    |   |         |         |                |            |            |                     |             |
| N2                                                                     | CT | I | 4557664 | 4563694 | WBGene00017010 | D1007.15   | D1007.15   | -0.245929352779415  |             |
| AGIWUR9638                                                             |    |   |         |         |                |            |            |                     |             |
| N2                                                                     | CT | I | 4564035 | 4565976 | WBGene00004113 | pqn-24     | D1007.14   | -0.171113546853807  |             |
| AGIWUR5942                                                             |    |   |         |         |                |            |            |                     |             |
| N2                                                                     | CT | I | 4566495 | 4568385 | WBGene00017009 | D1007.13   | D1007.13   | -0.139049619754479  |             |
| AGIWUR36815                                                            |    |   |         |         |                |            |            |                     |             |
| N2                                                                     | CT | I | 4568962 | 4570027 | WBGene00000440 | ceh-17     | D1007.1    | 0.320664662991025   | AGIWUR7465  |
| N2                                                                     | CT | I | 4571214 | 4572787 | WBGene00000629 | col-52     | D1007.2    | 0.0645372521219656  | AGIWUR32251 |
| N2                                                                     | CT | I | 4575782 | 4577204 | WBGene00017001 | D1007.3    | D1007.3    | 0.171199600059789   | AGIWUR11775 |
| N2                                                                     | CT | I | 4578695 | 4579740 | WBGene00044421 | D1007.18   | D1007.18   | -0.176547096219934  |             |
| AGIWUR1057;AGIWUR2948;AGIWUR11364;AGIWUR23273;AGIWUR28118              |    |   |         |         |                |            |            |                     |             |
| N2                                                                     | CT | I | 4579964 | 4580601 | WBGene00017002 | D1007.4    | D1007.4    | -0.320998790170684  | AGIWUR33335 |
| N2                                                                     | CT | I | 4580692 | 4583810 | WBGene00017003 | D1007.5    | D1007.5    | -0.0122632449730684 |             |

AGIWUR6591;AGIWUR13479  
 N2 CT I 4583873 4584505 WBGene00004479 rps-10 D1007.6 0.158217793122456  
 AGIWUR23072;AGIWUR34651  
 N2 CT I 4585115 4586177 WBGene00004436 rpl-24.1 D1007.12 0.157182017050018  
 AGIWUR2234;AGIWUR7117;AGIWUR7732;AGIWUR16379;AGIWUR17943;AGIWUR18712;AGIWUR21241;AGIWUR28846;AGIWUR31144;AGIWUR31405;AGIWUR32422;AGIWUR32535  
 N2 CT I 4586273 4589463 WBGene00017007 D1007.10 D1007.10  
 -0.00185920061664735 AGIWUR22139;AGIWUR22225  
 N2 CT I 4589380 4589899 WBGene00045048 D1007.19 D1007.19 -0.157020226514003  
 AGIWUR9696;AGIWUR15492;AGIWUR15856;AGIWUR24796;AGIWUR32400  
 N2 CT I 4590430 4591587 WBGene00017006 D1007.9 D1007.9 -0.175734917282451 AGIWUR6994  
 N2 CT I 4597914 4602666 WBGene00017004 nrd-1 D1007.7 0.0772209607677166  
 AGIWUR12783;AGIWUR16196;AGIWUR18660;AGIWUR21356;AGIWUR22525;AGIWUR37310  
 N2 CT I 4603217 4604196 WBGene00017011 eaf-1 D1007.16 -0.080016009552665  
 AGIWUR42215  
 N2 CT I 4604175 4605385 WBGene00017005 D1007.8 D1007.8 -0.279817115812786 AGIWUR31149  
 N2 CT I 4605655 4610202 WBGene00016654 C44E4.5 C44E4.5 -0.288866018750113  
 AGIWUR38528;AGIWUR40268  
 N2 CT I 4610147 4633377 WBGene00016650 ubr-4 C44E4.1 -0.0672562984431959  
 AGIWUR26053;AGIWUR26807;AGIWUR44636  
 N2 CT I 4634103 4635620 WBGene00016653 C44E4.4 C44E4.4 0.157251364635829  
 AGIWUR10614;AGIWUR20679  
 N2 CT I 4635722 4637328 WBGene00016655 acbp-1 C44E4.6 -0.0906455306117948 AGIWUR39810  
 N2 CT I 4637432 4640882 WBGene00016652 got-2.1 C44E4.3 -0.235813170195096 AGIWUR9876  
 N2 CT I 4641003 4644069 WBGene00022466 Y119C1A.1 Y119C1A.1 -0.10544524961219  
 AGIWUR36777  
 N2 CT I 4644677 4645657 WBGene00015008 lmd-2 B0041.3 -0.192780090011503 AGIWUR22463  
 N2 CT I 4645641 4646963 WBGene00004415 rpl-4 B0041.4 0.131181192132122  
 AGIWUR1725;AGIWUR9422;AGIWUR14581;AGIWUR19810;AGIWUR33413;AGIWUR42912  
 N2 CT I 4647280 4648275 WBGene00015011 B0041.8 B0041.8 -0.0608903604145654  
 AGIWUR864;AGIWUR12611;AGIWUR13671;AGIWUR30350  
 N2 CT I 4648272 4650770 WBGene00015009 B0041.5 B0041.5 0.00214361800840024 AGIWUR43682  
 N2 CT I 4652145 4652906 WBGene00015010 ptps-1 B0041.6 -0.0989304676228064  
 AGIWUR1589;AGIWUR18373;AGIWUR27336;AGIWUR28856;AGIWUR39809;AGIWUR42507  
 N2 CT I 4653471 4660151 WBGene00015007 ain-2 B0041.2 0.0455510128498195  
 AGIWUR108;AGIWUR2251;AGIWUR8966;AGIWUR12167;AGIWUR12517;AGIWUR13698;AGIWUR29300;AGIWUR30748;AGIWUR30865;AGIWUR32722  
 N2 CT I 4665744 4671738 WBGene00006961 xnp-1 B0041.7 -0.0405521417226353  
 AGIWUR6803;AGIWUR7645;AGIWUR8360;AGIWUR9104;AGIWUR18059;AGIWUR25526;AGIWUR26185;AGIWUR26197;AGIWUR32396;AGIWUR32722

WUR34797;AGIWUR35523;AGIWUR41946  
N2 CT I 4675135 4679409 WBGene00006791 unc-57 T04D1.3 0.0422222676456236  
AGIWUR19596;AGIWUR20386;AGIWUR30589  
N2 CT I 4679671 4682755 WBGene00020212 T04D1.2 T04D1.2 -0.21962123402786 AGIWUR20292  
N2 CT I 4685865 4698575 WBGene00007053 chd-7 T04D1.4 -0.00493967370307224 AGIWUR42196  
N2 CT I 4704598 4705881 WBGene00021112 W09C3.4 W09C3.4 -0.0966162948282658 AGIWUR1005  
N2 CT I 4706682 4708762 WBGene00021111 W09C3.3 W09C3.3 -0.299435197632194 AGIWUR16434  
N2 CT I 4709262 4710712 WBGene00021113 gsp-3 W09C3.6 0.42298921336404  
AGIWUR17793;AGIWUR31790  
N2 CT I 4711414 4713572 WBGene00021110 W09C3.2 W09C3.2 0.268344596173968 AGIWUR13150  
N2 CT I 4714320 4715485 WBGene00021114 W09C3.7 W09C3.7 0.0881469551015108 AGIWUR37490  
N2 CT I 4716059 4717441 WBGene00021115 W09C3.8 W09C3.8 -0.0953879568713578 AGIWUR9668  
N2 CT I 4719789 4721098 WBGene00015696 C10H11.7 C10H11.7 0.287674126257333  
AGIWUR22151  
N2 CT I 4721131 4723960 WBGene00015695 ugt-26 C10H11.6 0.341661488938744  
AGIWUR8772  
N2 CT I 4724065 4726779 WBGene00015694 ugt-27 C10H11.5 0.114686288458211  
AGIWUR3550;AGIWUR34887;AGIWUR35735  
N2 CT I 4727280 4730366 WBGene00015693 ugt-28 C10H11.4 0.14965511957659  
AGIWUR10641;AGIWUR42541  
N2 CT I 4731603 4735276 WBGene00015692 ugt-25 C10H11.3 -0.253576961740615  
AGIWUR33026  
N2 CT I 4735471 4738100 WBGene00015697 mlst-8 C10H11.8 -0.292681285066051  
AGIWUR33168  
N2 CT I 4738171 4744321 WBGene00002694 let-502 C10H11.9 -0.107728634204156  
AGIWUR13661;AGIWUR36987  
N2 CT I 4747490 4759601 WBGene00015691 viln-1 C10H11.1 0.152128807646367  
AGIWUR26405  
N2 CT I 4759820 4761321 WBGene00015698 kca-1 C10H11.10 -0.0255396237273153  
AGIWUR10472;AGIWUR41596  
N2 CT I 4769694 4771358 WBGene00019767 rpa-2 M04F3.1 -0.136005618139329 AGIWUR40091  
N2 CT I 4771348 4773673 WBGene00019770 M04F3.4 M04F3.4 -0.0186954423744794  
AGIWUR6019;AGIWUR14997;AGIWUR27654;AGIWUR28372;AGIWUR32364  
N2 CT I 4773818 4788358 WBGene00019771 M04F3.5 M04F3.5 0.0123695729870512  
AGIWUR32895;AGIWUR36661  
N2 CT I 4789190 4789592 WBGene00023067 rpl-41.1 F54D7.6 -0.143310563054996  
AGIWUR16924  
N2 CT I 4790292 4790649 WBGene00023068 rpl-41.2 F54D7.7 -0.256358804519689  
AGIWUR5284;AGIWUR28223

|                                                                                                |    |   |         |         |                |          |          |                     |             |
|------------------------------------------------------------------------------------------------|----|---|---------|---------|----------------|----------|----------|---------------------|-------------|
| N2                                                                                             | CT | I | 4790644 | 4792560 | WBGene00006984 | zig-7    | F54D7.4  | -0.161724312391115  | AGIWUR1938  |
| N2                                                                                             | CT | I | 4800043 | 4804268 | WBGene00018798 | gnrr-1   | F54D7.3  | 0.138694428762461   | AGIWUR35863 |
| N2                                                                                             | CT | I | 4805607 | 4809674 | WBGene00018797 | F54D7.2  | F54D7.2  | 0.011686075048857   |             |
| AGIWUR13252;AGIWUR32663;AGIWUR38228;AGIWUR41575                                                |    |   |         |         |                |          |          |                     |             |
| N2                                                                                             | CT | I | 4821933 | 4824811 | WBGene00019012 | F57C9.6  | F57C9.6  | -0.196383899910874  | AGIWUR8277  |
| N2                                                                                             | CT | I | 4824921 | 4826633 | WBGene00019013 | tofu-4   | F57C9.7  | -0.270341228496589  |             |
| AGIWUR17499;AGIWUR26308                                                                        |    |   |         |         |                |          |          |                     |             |
| N2                                                                                             | CT | I | 4827072 | 4829794 | WBGene00002034 | htp-3    | F57C9.5  | -0.0609058395350459 | AGIWUR12950 |
| N2                                                                                             | CT | I | 4830135 | 4835619 | WBGene00019011 | F57C9.4  | F57C9.4  | -0.0961328370790362 |             |
| AGIWUR3295;AGIWUR5793;AGIWUR12169;AGIWUR24527;AGIWUR27565;AGIWUR37268                          |    |   |         |         |                |          |          |                     |             |
| N2                                                                                             | CT | I | 4836187 | 4844966 | WBGene00019010 | glo-2    | F57C9.3  | 0.0675723101996777  | AGIWUR34322 |
| N2                                                                                             | CT | I | 4845013 | 4847336 | WBGene00019009 | cllec-90 | F57C9.2  | -0.0180281425464357 |             |
| AGIWUR3253;AGIWUR3898;AGIWUR4431;AGIWUR28280;AGIWUR28715;AGIWUR32897                           |    |   |         |         |                |          |          |                     |             |
| N2                                                                                             | CT | I | 4848425 | 4850717 | WBGene00019008 | pdxk-1   | F57C9.1  | 0.00249328573318941 |             |
| AGIWUR4151;AGIWUR8744;AGIWUR38672;AGIWUR42153;AGIWUR43420;AGIWUR43542                          |    |   |         |         |                |          |          |                     |             |
| N2                                                                                             | CT | I | 4850682 | 4867825 | WBGene00015303 | rga-6    | C01F4.2  | -0.0320504009516016 |             |
| AGIWUR6175;AGIWUR8844                                                                          |    |   |         |         |                |          |          |                     |             |
| N2                                                                                             | CT | I | 4884903 | 4895495 | WBGene00017795 | F25F8.1  | F25F8.1  | -0.137064576006876  | AGIWUR32285 |
| N2                                                                                             | CT | I | 4896003 | 4897541 | WBGene00017674 | F21F3.4  | F21F3.4  | -0.129349033084221  | AGIWUR17618 |
| N2                                                                                             | CT | I | 4897620 | 4900977 | WBGene00006774 | unc-38   | F21F3.5  | 0.131819524975981   | AGIWUR19032 |
| N2                                                                                             | CT | I | 4901918 | 4903264 | WBGene00017673 | icmt-1   | F21F3.3  | 0.0901277467026667  | AGIWUR10653 |
| N2                                                                                             | CT | I | 4903437 | 4905138 | WBGene00017672 | F21F3.2  | F21F3.2  | 0.589519069842725   | AGIWUR36704 |
| N2                                                                                             | CT | I | 4906786 | 4911829 | WBGene00017671 | pgal-1   | F21F3.1  | 0.150815106367643   |             |
| AGIWUR10360;AGIWUR11221;AGIWUR39787                                                            |    |   |         |         |                |          |          |                     |             |
| N2                                                                                             | CT | I | 4911805 | 4914047 | WBGene00017675 | F21F3.6  | F21F3.6  | 0.21389073281481    |             |
| AGIWUR6443;AGIWUR19391;AGIWUR23423;AGIWUR28728                                                 |    |   |         |         |                |          |          |                     |             |
| N2                                                                                             | CT | I | 4918372 | 4920770 | WBGene00017676 | F21F3.7  | F21F3.7  | -0.161494599533071  |             |
| AGIWUR4819;AGIWUR10338;AGIWUR11236;AGIWUR12715;AGIWUR18328;AGIWUR22480;AGIWUR36384;AGIWUR42305 |    |   |         |         |                |          |          |                     |             |
| N2                                                                                             | CT | I | 4920707 | 4926233 | WBGene00002075 | imb-1    | F28B3.8  | 0.212248747503914   |             |
| AGIWUR17237;AGIWUR19494;AGIWUR21477;AGIWUR23298;AGIWUR26174;AGIWUR40448                        |    |   |         |         |                |          |          |                     |             |
| N2                                                                                             | CT | I | 4926592 | 4928840 | WBGene00017886 | F28B3.5  | F28B3.5  | -0.104129497320496  |             |
| AGIWUR3834;AGIWUR29211                                                                         |    |   |         |         |                |          |          |                     |             |
| N2                                                                                             | CT | I | 4928654 | 4932147 | WBGene00017888 | acl-11   | F28B3.9  | -0.228405970449003  | AGIWUR26348 |
| N2                                                                                             | CT | I | 4934118 | 4949332 | WBGene00017885 | dip-2    | F28B3.4  | 0.162398483569774   |             |
| AGIWUR3431;AGIWUR18607;AGIWUR29662;AGIWUR33088;AGIWUR34513;AGIWUR42148                         |    |   |         |         |                |          |          |                     |             |
| N2                                                                                             | CT | I | 4949327 | 4950410 | WBGene00017889 | F28B3.10 | F28B3.10 | 0.0407890795990689  |             |
| AGIWUR37298                                                                                    |    |   |         |         |                |          |          |                     |             |
| N2                                                                                             | CT | I | 4950583 | 4951550 | WBGene00017887 | F28B3.6  | F28B3.6  | -0.0699079040219832 |             |
| AGIWUR14419;AGIWUR15223;AGIWUR19224;AGIWUR29297;AGIWUR31798;AGIWUR41653                        |    |   |         |         |                |          |          |                     |             |

|                                                                        |    |   |         |         |                |           |           |                     |             |
|------------------------------------------------------------------------|----|---|---------|---------|----------------|-----------|-----------|---------------------|-------------|
| N2                                                                     | CT | I | 4951570 | 4957667 | WBGene00001860 | him-1     | F28B3.7   | 0.189766663214016   | AGIWUR5462  |
| N2                                                                     | CT | I | 4957776 | 4958309 | WBGene00044431 | W03G9.8   | W03G9.8   | -0.240488951296435  |             |
| AGIWUR521;AGIWUR2774;AGIWUR10077;AGIWUR19733;AGIWUR42359               |    |   |         |         |                |           |           |                     |             |
| N2                                                                     | CT | I | 4962451 | 4964745 | WBGene00021014 | W03G9.2   | W03G9.2   | 0.0439456684791431  | AGIWUR17245 |
| N2                                                                     | CT | I | 4964667 | 4967089 | WBGene00000155 | app-1     | W03G9.4   | -0.161093835336846  | AGIWUR31837 |
| N2                                                                     | CT | I | 4968007 | 4970245 | WBGene00021016 | W03G9.5   | W03G9.5   | 0.0838234866596856  | AGIWUR898   |
| N2                                                                     | CT | I | 4969923 | 4972243 | WBGene00044432 | W03G9.9   | W03G9.9   | 0.0409725067650797  |             |
| AGIWUR4097;AGIWUR15675                                                 |    |   |         |         |                |           |           |                     |             |
| N2                                                                     | CT | I | 4980307 | 4983958 | WBGene00004900 | snf-1     | W03G9.1   | 0.411962938501764   | AGIWUR37640 |
| N2                                                                     | CT | I | 4984760 | 4986739 | WBGene00003906 | paf-1     | W03G9.6   | 0.0746520208885499  | AGIWUR30136 |
| N2                                                                     | CT | I | 4986954 | 4989454 | WBGene00021017 | cil-7     | W03G9.7   | -0.115041619688645  | AGIWUR41717 |
| N2                                                                     | CT | I | 4989568 | 4994675 | WBGene00001117 | dyf-1     | F54C1.5   | -0.0882562965629861 | AGIWUR4202  |
| N2                                                                     | CT | I | 4996839 | 5003161 | WBGene00003221 | mes-3     | F54C1.3   | -0.147974769172982  |             |
| AGIWUR28141;AGIWUR30866;AGIWUR40884                                    |    |   |         |         |                |           |           |                     |             |
| N2                                                                     | CT | I | 5003351 | 5005163 | WBGene00001050 | dom-3     | F54C1.2   | -0.196470603494266  | AGIWUR4782  |
| N2                                                                     | CT | I | 5004924 | 5006057 | WBGene00018792 | F54C1.8   | F54C1.8   | 0.163251254408276   |             |
| AGIWUR8345;AGIWUR9536;AGIWUR21501;AGIWUR36845                          |    |   |         |         |                |           |           |                     |             |
| N2                                                                     | CT | I | 5006706 | 5007991 | WBGene00006058 | sst-20    | F54C1.9   | 0.194891090282891   | AGIWUR11233 |
| N2                                                                     | CT | I | 5008770 | 5013581 | WBGene00018789 | F54C1.1   | F54C1.1   | 0.12384006629191    | AGIWUR29730 |
| N2                                                                     | CT | I | 5014351 | 5016260 | WBGene00018791 | F54C1.6   | F54C1.6   | -0.106943494701258  | AGIWUR27151 |
| N2                                                                     | CT | I | 5018770 | 5020166 | WBGene00003934 | pat-10    | F54C1.7   | -0.0384373022249669 |             |
| AGIWUR6495;AGIWUR16624;AGIWUR26202;AGIWUR38199                         |    |   |         |         |                |           |           |                     |             |
| N2                                                                     | CT | I | 5020748 | 5023210 | WBGene00016730 | C46H11.6  | C46H11.6  | 0.00849124085471509 |             |
| AGIWUR39021                                                            |    |   |         |         |                |           |           |                     |             |
| N2                                                                     | CT | I | 5023889 | 5041149 | WBGene00002979 | lfe-2     | C46H11.4  | 0.0294310607404462  |             |
| AGIWUR527;AGIWUR15498;AGIWUR15600;AGIWUR22329;AGIWUR39734              |    |   |         |         |                |           |           |                     |             |
| N2                                                                     | CT | I | 5041492 | 5042055 | WBGene00016729 | C46H11.3  | C46H11.3  | -0.130587986245322  |             |
| AGIWUR2153;AGIWUR17010;AGIWUR19831;AGIWUR31265;AGIWUR41786             |    |   |         |         |                |           |           |                     |             |
| N2                                                                     | CT | I | 5042102 | 5043453 | WBGene00016731 | C46H11.7  | C46H11.7  | 0.136848118520504   |             |
| AGIWUR10507                                                            |    |   |         |         |                |           |           |                     |             |
| N2                                                                     | CT | I | 5044201 | 5045720 | WBGene00016732 | phat-1    | C46H11.8  | -0.0249508512357748 |             |
| AGIWUR10717                                                            |    |   |         |         |                |           |           |                     |             |
| N2                                                                     | CT | I | 5050040 | 5052523 | WBGene00016728 | C46H11.2  | C46H11.2  | -0.14552059976586   |             |
| AGIWUR43572                                                            |    |   |         |         |                |           |           |                     |             |
| N2                                                                     | CT | I | 5052529 | 5054960 | WBGene00016734 | C46H11.10 | C46H11.10 | -0.0682669702416927 |             |
| AGIWUR25478                                                            |    |   |         |         |                |           |           |                     |             |
| N2                                                                     | CT | I | 5055686 | 5056039 | WBGene00016727 | C46H11.1  | C46H11.1  | 0.130807709240525   |             |
| AGIWUR1249;AGIWUR10642;AGIWUR11922;AGIWUR15339;AGIWUR28513;AGIWUR41170 |    |   |         |         |                |           |           |                     |             |
| N2                                                                     | CT | I | 5058251 | 5068829 | WBGene00016735 | fhod-1    | C46H11.11 | 0.350033440222658   |             |

|                                                             |    |   |         |         |                |            |            |                     |             |
|-------------------------------------------------------------|----|---|---------|---------|----------------|------------|------------|---------------------|-------------|
| AGIWUR2364                                                  |    |   |         |         |                |            |            |                     |             |
| N2                                                          | CT | I | 5079911 | 5082279 | WBGene00016258 | vha-16     | C30F8.2    | -0.0157301230870246 |             |
| AGIWUR9041;AGIWUR12777;AGIWUR38333                          |    |   |         |         |                |            |            |                     |             |
| N2                                                          | CT | I | 5086317 | 5093793 | WBGene00002213 | kin-32     | C30F8.4    | -0.241727939677581  | AGIWUR30640 |
| N2                                                          | CT | I | 5096601 | 5100579 | WBGene00016259 | C30F8.3    | C30F8.3    | 0.0515267527680798  | AGIWUR38945 |
| N2                                                          | CT | I | 5100751 | 5101674 | WBGene00022465 | ift-20     | Y110A7A.20 | -0.255909919041395  |             |
| AGIWUR43171                                                 |    |   |         |         |                |            |            |                     |             |
| N2                                                          | CT | I | 5101682 | 5103467 | WBGene00004959 | spe-5      | Y110A7A.12 | -0.212607826668339  |             |
| AGIWUR45082                                                 |    |   |         |         |                |            |            |                     |             |
| N2                                                          | CT | I | 5103581 | 5104956 | WBGene00000502 | chp-1      | Y110A7A.13 | -0.0859755691744777 |             |
| AGIWUR23337                                                 |    |   |         |         |                |            |            |                     |             |
| N2                                                          | CT | I | 5105110 | 5106204 | WBGene00003924 | pas-3      | Y110A7A.14 | -0.0260397562532191 |             |
| AGIWUR17561;AGIWUR38486;AGIWUR39496;AGIWUR41863             |    |   |         |         |                |            |            |                     |             |
| N2                                                          | CT | I | 5106204 | 5107625 | WBGene00022460 | use-1      | Y110A7A.11 | 0.0218470998229812  |             |
| AGIWUR8138;AGIWUR10961;AGIWUR39888                          |    |   |         |         |                |            |            |                     |             |
| N2                                                          | CT | I | 5107833 | 5110183 | WBGene00000001 | aap-1      | Y110A7A.10 | -0.0392789779373146 |             |
| AGIWUR5137                                                  |    |   |         |         |                |            |            |                     |             |
| N2                                                          | CT | I | 5110075 | 5111154 | WBGene00045212 | Y110A7A.21 | Y110A7A.21 | -0.568215693077367  |             |
| AGIWUR7396                                                  |    |   |         |         |                |            |            |                     |             |
| N2                                                          | CT | I | 5114119 | 5118852 | WBGene00022463 | elpc-1     | Y110A7A.16 | -0.149585149553996  |             |
| AGIWUR39107                                                 |    |   |         |         |                |            |            |                     |             |
| N2                                                          | CT | I | 5119223 | 5123985 | WBGene00022459 | Y110A7A.9  | Y110A7A.9  | -0.0490687281013154 |             |
| AGIWUR5638;AGIWUR13186;AGIWUR37146                          |    |   |         |         |                |            |            |                     |             |
| N2                                                          | CT | I | 5123916 | 5127199 | WBGene00003132 | mat-1      | Y110A7A.17 | 0.0581813814816954  |             |
| AGIWUR10232;AGIWUR10763;AGIWUR11746;AGIWUR18147;AGIWUR21523 |    |   |         |         |                |            |            |                     |             |
| N2                                                          | CT | I | 5127828 | 5129611 | WBGene00022458 | prp-31     | Y110A7A.8  | -0.121777357397271  |             |
| AGIWUR13052                                                 |    |   |         |         |                |            |            |                     |             |
| N2                                                          | CT | I | 5129640 | 5131065 | WBGene00022457 | Y110A7A.7  | Y110A7A.7  | -0.103456423920743  |             |
| AGIWUR36758                                                 |    |   |         |         |                |            |            |                     |             |
| N2                                                          | CT | I | 5131288 | 5134101 | WBGene00022456 | pfkb-1.1   | Y110A7A.6  | 0.0476950873529436  |             |
| AGIWUR12324;AGIWUR19557;AGIWUR24616;AGIWUR42679             |    |   |         |         |                |            |            |                     |             |
| N2                                                          | CT | I | 5134709 | 5137971 | WBGene00003475 | mtm-1      | Y110A7A.5  | -0.0934262938726018 |             |
| AGIWUR8180                                                  |    |   |         |         |                |            |            |                     |             |
| N2                                                          | CT | I | 5138256 | 5139382 | WBGene00022455 | tyms-1     | Y110A7A.4  | -0.0830846588591143 |             |
| AGIWUR26036;AGIWUR30844;AGIWUR32359                         |    |   |         |         |                |            |            |                     |             |
| N2                                                          | CT | I | 5141675 | 5149226 | WBGene00006797 | unc-63     | Y110A7A.3  | -0.0625493161424071 |             |
| AGIWUR19692                                                 |    |   |         |         |                |            |            |                     |             |
| N2                                                          | CT | I | 5154529 | 5158467 | WBGene00022454 | Y110A7A.2  | Y110A7A.2  | -0.192335059670283  |             |
| AGIWUR12450                                                 |    |   |         |         |                |            |            |                     |             |



|                                                                                  |    |   |         |         |                |          |            |                     |             |
|----------------------------------------------------------------------------------|----|---|---------|---------|----------------|----------|------------|---------------------|-------------|
| N2                                                                               | CT | I | 5158511 | 5162231 | WBGene00004094 | ppw-2    | Y110A7A.18 | 0.290040887060135   |             |
| AGIWUR38604                                                                      |    |   |         |         |                |          |            |                     |             |
| N2                                                                               | CT | I | 5165152 | 5171313 | WBGene00001833 | hcp-6    | Y110A7A.1  | -0.105273194489531  |             |
| AGIWUR23546;AGIWUR27668;AGIWUR29091                                              |    |   |         |         |                |          |            |                     |             |
| N2                                                                               | CT | I | 5171285 | 5176664 | WBGene00004955 | spd-5    | F56A3.4    | -0.147546643726145  | AGIWUR43280 |
| N2                                                                               | CT | I | 5176466 | 5182801 | WBGene00003792 | npp-6    | F56A3.3    | -0.131408778081076  |             |
| AGIWUR31488;AGIWUR37695                                                          |    |   |         |         |                |          |            |                     |             |
| N2                                                                               | CT | I | 5182736 | 5186234 | WBGene00018909 | slx-1    | F56A3.2    | -0.198856588605171  | AGIWUR23385 |
| N2                                                                               | CT | I | 5186926 | 5188995 | WBGene00000272 | bro-1    | F56A3.5    | 0.0142456084124749  | AGIWUR18690 |
| N2                                                                               | CT | I | 5190142 | 5195243 | WBGene00018908 | fncm-1   | F56A3.1    | -0.0817286865690932 | AGIWUR16044 |
| N2                                                                               | CT | I | 5196078 | 5200102 | WBGene00016328 | pde-5    | C32E12.2   | -0.198393232084476  |             |
| AGIWUR4483;AGIWUR25559;AGIWUR44681                                               |    |   |         |         |                |          |            |                     |             |
| N2                                                                               | CT | I | 5200258 | 5203504 | WBGene00016329 | osr-1    | C32E12.3   | -0.243291593191371  |             |
| AGIWUR37480                                                                      |    |   |         |         |                |          |            |                     |             |
| N2                                                                               | CT | I | 5204540 | 5215218 | WBGene00004771 | sem-2    | C32E12.5   | 0.465663135312238   |             |
| AGIWUR14738;AGIWUR27347                                                          |    |   |         |         |                |          |            |                     |             |
| N2                                                                               | CT | I | 5230549 | 5242607 | WBGene00016330 | C32E12.4 | C32E12.4   | 0.084550680032411   |             |
| AGIWUR34566                                                                      |    |   |         |         |                |          |            |                     |             |
| N2                                                                               | CT | I | 5244283 | 5245402 | WBGene00015092 | mrpl-47  | B0261.4    | -0.154485999240098  | AGIWUR25197 |
| N2                                                                               | CT | I | 5245743 | 5263413 | WBGene00002583 | let-363  | B0261.2    | 0.181976218521573   | AGIWUR44044 |
| N2                                                                               | CT | I | 5263694 | 5268380 | WBGene00015091 | B0261.1  | B0261.1    | 0.143415320064822   | AGIWUR18289 |
| N2                                                                               | CT | I | 5269545 | 5270941 | WBGene00015095 | B0261.7  | B0261.7    | -0.0715920112898303 | AGIWUR8322  |
| N2                                                                               | CT | I | 5271265 | 5272037 | WBGene00015096 | B0261.8  | B0261.8    | -0.152843975555447  | AGIWUR2556  |
| N2                                                                               | CT | I | 5272846 | 5274339 | WBGene00015312 | C01G8.1  | C01G8.1    | 0.0422769035246304  |             |
| AGIWUR694;AGIWUR16178;AGIWUR34561                                                |    |   |         |         |                |          |            |                     |             |
| N2                                                                               | CT | I | 5274693 | 5278708 | WBGene00000540 | cln-3.2  | C01G8.2    | -0.0997760136691301 | AGIWUR30422 |
| N2                                                                               | CT | I | 5278803 | 5281526 | WBGene00000965 | dhs-1    | C01G8.3    | -0.1926651438833    | AGIWUR15951 |
| N2                                                                               | CT | I | 5282085 | 5283944 | WBGene00001022 | dnj-4    | C01G8.4    | -0.112214873840308  | AGIWUR42    |
| N2                                                                               | CT | I | 5284062 | 5291604 | WBGene00001333 | erm-1    | C01G8.5    | 0.226791956092249   | AGIWUR16002 |
| N2                                                                               | CT | I | 5298755 | 5300331 | WBGene00015313 | hpo-32   | C01G8.6    | -0.0666113446047838 | AGIWUR26468 |
| N2                                                                               | CT | I | 5300901 | 5317392 | WBGene00002717 | let-526  | C01G8.9    | 0.0347795567791884  |             |
| AGIWUR7817;AGIWUR8550;AGIWUR8678;AGIWUR20851;AGIWUR25435;AGIWUR30166;AGIWUR37870 |    |   |         |         |                |          |            |                     |             |
| N2                                                                               | CT | I | 5317491 | 5318124 | WBGene00018598 | F48C1.5  | F48C1.5    | -0.206448195782347  | AGIWUR33414 |
| N2                                                                               | CT | I | 5318225 | 5319301 | WBGene00018599 | F48C1.6  | F48C1.6    | 0.177910530946836   | AGIWUR37907 |
| N2                                                                               | CT | I | 5319720 | 5321117 | WBGene00018595 | fbxa-145 | F48C1.2    | -0.335220709888443  |             |
| AGIWUR1383                                                                       |    |   |         |         |                |          |            |                     |             |
| N2                                                                               | CT | I | 5324511 | 5330222 | WBGene00018594 | aman-3   | F48C1.1    | -0.0504095792385133 |             |
| AGIWUR25737;AGIWUR28725;AGIWUR31540                                              |    |   |         |         |                |          |            |                     |             |
| N2                                                                               | CT | I | 5330578 | 5332194 | WBGene00004965 | spe-11   | F48C1.7    | 0.250206398352351   | AGIWUR39988 |

|                                                                     |    |   |         |         |                |           |           |                     |             |
|---------------------------------------------------------------------|----|---|---------|---------|----------------|-----------|-----------|---------------------|-------------|
| N2                                                                  | CT | I | 5332249 | 5332780 | WBGene00018601 | F48C1.9   | F48C1.9   | -0.242398214889265  | AGIWUR10340 |
| N2                                                                  | CT | I | 5338922 | 5342012 | WBGene00018865 | F55A12.6  | F55A12.6  | -0.223280357745033  |             |
| AGIWUR15674                                                         |    |   |         |         |                |           |           |                     |             |
| N2                                                                  | CT | I | 5342180 | 5344724 | WBGene00000150 | apm-1     | F55A12.7  | -0.0473194357294453 |             |
| AGIWUR9311                                                          |    |   |         |         |                |           |           |                     |             |
| N2                                                                  | CT | I | 5345927 | 5349657 | WBGene00018864 | F55A12.5  | F55A12.5  | -0.04665332262676   |             |
| AGIWUR43597                                                         |    |   |         |         |                |           |           |                     |             |
| N2                                                                  | CT | I | 5349646 | 5353767 | WBGene00018866 | nath-10   | F55A12.8  | 0.0308685964170525  |             |
| AGIWUR6506                                                          |    |   |         |         |                |           |           |                     |             |
| N2                                                                  | CT | I | 5354160 | 5357026 | WBGene00000966 | dhs-2     | F55A12.4  | -0.237277522179847  |             |
| AGIWUR6834;AGIWUR39323                                              |    |   |         |         |                |           |           |                     |             |
| N2                                                                  | CT | I | 5358522 | 5365170 | WBGene00004087 | ppk-1     | F55A12.3  | 0.133785491361383   |             |
| AGIWUR9665                                                          |    |   |         |         |                |           |           |                     |             |
| N2                                                                  | CT | I | 5365265 | 5366875 | WBGene00018863 | F55A12.2  | F55A12.2  | -0.13625931163083   |             |
| AGIWUR5975;AGIWUR16690;AGIWUR23746                                  |    |   |         |         |                |           |           |                     |             |
| N2                                                                  | CT | I | 5366944 | 5367829 | WBGene00018867 | F55A12.10 | F55A12.10 | -0.249997472775984  |             |
| AGIWUR25431                                                         |    |   |         |         |                |           |           |                     |             |
| N2                                                                  | CT | I | 5368478 | 5372643 | WBGene00018862 | wago-2    | F55A12.1  | -0.0592962861676369 |             |
| AGIWUR28246                                                         |    |   |         |         |                |           |           |                     |             |
| N2                                                                  | CT | I | 5372854 | 5384508 | WBGene00004131 | pqn-44    | F55A12.9  | 0.294625405065889   |             |
| AGIWUR896;AGIWUR27262                                               |    |   |         |         |                |           |           |                     |             |
| N2                                                                  | CT | I | 5384639 | 5385737 | WBGene00016042 | C24A11.5  | C24A11.5  | 0.0327292989776877  |             |
| AGIWUR7145                                                          |    |   |         |         |                |           |           |                     |             |
| N2                                                                  | CT | I | 5396269 | 5396503 | WBGene00016043 | C24A11.6  | C24A11.6  | -0.243962750865423  |             |
| AGIWUR14300                                                         |    |   |         |         |                |           |           |                     |             |
| N2                                                                  | CT | I | 5401757 | 5402896 | WBGene00016040 | C24A11.1  | C24A11.1  | 0.0482828659830776  |             |
| AGIWUR5355                                                          |    |   |         |         |                |           |           |                     |             |
| N2                                                                  | CT | I | 5402889 | 5408344 | WBGene00001491 | frm-4     | C24A11.8  | 0.163983873609314   |             |
| AGIWUR981;AGIWUR4212;AGIWUR6365;AGIWUR15596;AGIWUR16887;AGIWUR31981 |    |   |         |         |                |           |           |                     |             |
| N2                                                                  | CT | I | 5412841 | 5415629 | WBGene00000761 | coq-1     | C24A11.9  | -0.0634850947665715 |             |
| AGIWUR43800                                                         |    |   |         |         |                |           |           |                     |             |
| N2                                                                  | CT | I | 5416649 | 5420731 | WBGene00016278 | C30H7.2   | C30H7.2   | 0.0486826842427135  | AGIWUR21269 |
| N2                                                                  | CT | I | 5421313 | 5428457 | WBGene00017855 | F27C1.6   | F27C1.6   | -0.127370015885397  | AGIWUR3947  |
| N2                                                                  | CT | I | 5428469 | 5429908 | WBGene00000230 | atp-3     | F27C1.7   | -0.0302636715725662 |             |
| AGIWUR4068;AGIWUR34961                                              |    |   |         |         |                |           |           |                     |             |
| N2                                                                  | CT | I | 5430164 | 5431449 | WBGene00017852 | F27C1.2   | F27C1.2   | 0.330590906859345   |             |
| AGIWUR2440;AGIWUR34813                                              |    |   |         |         |                |           |           |                     |             |
| N2                                                                  | CT | I | 5432158 | 5433054 | WBGene00001067 | dpy-5     | F27C1.8   | 0.0941371930937649  |             |
| AGIWUR27120;AGIWUR44335                                             |    |   |         |         |                |           |           |                     |             |

|                                                                                  |    |   |         |         |                |          |          |                     |             |
|----------------------------------------------------------------------------------|----|---|---------|---------|----------------|----------|----------|---------------------|-------------|
| N2                                                                               | CT | I | 5433907 | 5443026 | WBGene00017858 | F27C1.11 | F27C1.11 | 0.155643903388258   |             |
| AGIWUR5701;AGIWUR9333;AGIWUR22774;AGIWUR27305;AGIWUR27976                        |    |   |         |         |                |          |          |                     |             |
| N2                                                                               | CT | I | 5443878 | 5446855 | WBGene00017860 | F27C1.13 | F27C1.13 | -0.105620557571796  |             |
| AGIWUR6830;AGIWUR24304;AGIWUR35087;AGIWUR39993;AGIWUR41117;AGIWUR42850           |    |   |         |         |                |          |          |                     |             |
| N2                                                                               | CT | I | 5455730 | 5459550 | WBGene00020262 | fer1-1   | T05E8.1  | -0.386375451537059  | AGIWUR22748 |
| N2                                                                               | CT | I | 5463480 | 5469627 | WBGene00001859 | hil-8    | T05E8.2  | 0.127563002497918   |             |
| AGIWUR8595;AGIWUR8928;AGIWUR15131;AGIWUR28796;AGIWUR36374                        |    |   |         |         |                |          |          |                     |             |
| N2                                                                               | CT | I | 5472321 | 5479438 | WBGene00020263 | let-355  | T05E8.3  | -0.0346907491349313 | AGIWUR30390 |
| N2                                                                               | CT | I | 5479550 | 5484643 | WBGene00015635 | C09D4.4  | C09D4.4  | -0.0472137203843737 | AGIWUR10054 |
| N2                                                                               | CT | I | 5484779 | 5486354 | WBGene00004431 | rp1-19   | C09D4.5  | 0.0496314207359312  | AGIWUR34311 |
| N2                                                                               | CT | I | 5486487 | 5487150 | WBGene00015636 | C09D4.6  | C09D4.6  | 0.125221874618793   | AGIWUR45087 |
| N2                                                                               | CT | I | 5488309 | 5490626 | WBGene00015634 | C09D4.3  | C09D4.3  | 0.241178997347479   | AGIWUR5653  |
| N2                                                                               | CT | I | 5491424 | 5493263 | WBGene00015633 | C09D4.2  | C09D4.2  | -0.131539844924573  | AGIWUR16931 |
| N2                                                                               | CT | I | 5497679 | 5505447 | WBGene00015632 | C09D4.1  | C09D4.1  | 0.0402748300003157  | AGIWUR27450 |
| N2                                                                               | CT | I | 5505377 | 5507023 | WBGene00019076 | mrp1-24  | F59A3.3  | -0.0611681099948118 | AGIWUR34650 |
| N2                                                                               | CT | I | 5507123 | 5509288 | WBGene00019077 | zipt-11  | F59A3.4  | 0.0568823775620171  |             |
| AGIWUR5874;AGIWUR13042;AGIWUR14294;AGIWUR18200                                   |    |   |         |         |                |          |          |                     |             |
| N2                                                                               | CT | I | 5509473 | 5511705 | WBGene00019079 | rpa-4    | F59A3.6  | 0.0989879131921967  |             |
| AGIWUR22494;AGIWUR27515;AGIWUR32418;AGIWUR38402                                  |    |   |         |         |                |          |          |                     |             |
| N2                                                                               | CT | I | 5512048 | 5514557 | WBGene00019075 | F59A3.2  | F59A3.2  | -0.120818573250158  | AGIWUR6715  |
| N2                                                                               | CT | I | 5514651 | 5516025 | WBGene00185086 | F59A3.12 | F59A3.12 | -0.114751832127041  |             |
| AGIWUR27384                                                                      |    |   |         |         |                |          |          |                     |             |
| N2                                                                               | CT | I | 5520389 | 5529763 | WBGene00019074 | cpd-1    | F59A3.1  | 0.131336140040997   |             |
| AGIWUR832;AGIWUR9804;AGIWUR16154;AGIWUR23805;AGIWUR36548;AGIWUR40265;AGIWUR40556 |    |   |         |         |                |          |          |                     |             |
| N2                                                                               | CT | I | 5530618 | 5533710 | WBGene00019082 | pup-3    | F59A3.9  | -0.135489253586409  | AGIWUR5052  |
| N2                                                                               | CT | I | 5542630 | 5543334 | WBGene00019083 | F59A3.10 | F59A3.10 | 0.0558640777584705  |             |
| AGIWUR23620                                                                      |    |   |         |         |                |          |          |                     |             |
| N2                                                                               | CT | I | 5546120 | 5561642 | WBGene00006594 | tom-1    | M01A10.2 | -0.0072292031715957 |             |
| AGIWUR11147;AGIWUR11431;AGIWUR21101;AGIWUR27403;AGIWUR28716;AGIWUR31664          |    |   |         |         |                |          |          |                     |             |
| N2                                                                               | CT | I | 5563827 | 5566265 | WBGene00019692 | M01A10.1 | M01A10.1 | -0.0538067879262787 |             |
| AGIWUR14718                                                                      |    |   |         |         |                |          |          |                     |             |
| N2                                                                               | CT | I | 5566343 | 5570081 | WBGene00019713 | pqn-52   | M01E11.4 | 0.08427548772059    |             |
| AGIWUR6355;AGIWUR8778;AGIWUR14340;AGIWUR18170;AGIWUR19043;AGIWUR39174            |    |   |         |         |                |          |          |                     |             |
| N2                                                                               | CT | I | 5571787 | 5573019 | WBGene00000474 | cey-3    | M01E11.5 | -0.122731400901041  |             |
| AGIWUR15351;AGIWUR34621                                                          |    |   |         |         |                |          |          |                     |             |
| N2                                                                               | CT | I | 5573214 | 5576749 | WBGene00019712 | rmh-1    | M01E11.3 | -0.174249204595666  |             |
| AGIWUR30964                                                                      |    |   |         |         |                |          |          |                     |             |
| N2                                                                               | CT | I | 5579666 | 5581979 | WBGene00019711 | M01E11.2 | M01E11.2 | -0.197055356181821  |             |
| AGIWUR34357                                                                      |    |   |         |         |                |          |          |                     |             |

|                                                                                                                                               |    |   |         |         |                |           |           |                     |             |
|-----------------------------------------------------------------------------------------------------------------------------------------------|----|---|---------|---------|----------------|-----------|-----------|---------------------|-------------|
| N2                                                                                                                                            | CT | I | 5582005 | 5583471 | WBGene00019710 | M01E11.1  | M01E11.1  | -0.0218997225556983 |             |
| AGIWUR18685                                                                                                                                   |    |   |         |         |                |           |           |                     |             |
| N2                                                                                                                                            | CT | I | 5583407 | 5607529 | WBGene00006508 | tns-1     | M01E11.7  | 0.0196080007133643  |             |
| AGIWUR6532;AGIWUR6811;AGIWUR11533;AGIWUR11928;AGIWUR15727;AGIWUR18697;AGIWUR19135;AGIWUR21857;AGIWUR30199;AGIWUR31547;AGIWUR36030;AGIWUR38255 |    |   |         |         |                |           |           |                     |             |
| N2                                                                                                                                            | CT | I | 5607820 | 5608841 | WBGene00006726 | ubl-5     | F46F11.4  | -0.266856533387068  |             |
| AGIWUR38965                                                                                                                                   |    |   |         |         |                |           |           |                     |             |
| N2                                                                                                                                            | CT | I | 5609310 | 5610270 | WBGene00006919 | vha-10    | F46F11.5  | 0.138732198272761   |             |
| AGIWUR5301;AGIWUR16359                                                                                                                        |    |   |         |         |                |           |           |                     |             |
| N2                                                                                                                                            | CT | I | 5610375 | 5616402 | WBGene00018512 | trpp-8    | F46F11.9  | 0.037898438887062   |             |
| AGIWUR28006                                                                                                                                   |    |   |         |         |                |           |           |                     |             |
| N2                                                                                                                                            | CT | I | 5616593 | 5618682 | WBGene00018509 | F46F11.6  | F46F11.6  | -0.118615527050077  |             |
| AGIWUR31483                                                                                                                                   |    |   |         |         |                |           |           |                     |             |
| N2                                                                                                                                            | CT | I | 5619569 | 5620668 | WBGene00000473 | cey-2     | F46F11.2  | 0.0482034997346386  |             |
| AGIWUR19929;AGIWUR20244;AGIWUR20969;AGIWUR39577;AGIWUR39981;AGIWUR43534                                                                       |    |   |         |         |                |           |           |                     |             |
| N2                                                                                                                                            | CT | I | 5620751 | 5623035 | WBGene00018510 | F46F11.7  | F46F11.7  | -0.3370059694922    |             |
| AGIWUR6851                                                                                                                                    |    |   |         |         |                |           |           |                     |             |
| N2                                                                                                                                            | CT | I | 5623019 | 5624475 | WBGene00018513 | F46F11.10 | F46F11.10 | -0.232650350223381  |             |
| AGIWUR14352;AGIWUR29230                                                                                                                       |    |   |         |         |                |           |           |                     |             |
| N2                                                                                                                                            | CT | I | 5624558 | 5626288 | WBGene00018511 | F46F11.8  | F46F11.8  | -0.131613001703256  |             |
| AGIWUR13272                                                                                                                                   |    |   |         |         |                |           |           |                     |             |
| N2                                                                                                                                            | CT | I | 5627819 | 5637622 | WBGene00018508 | F46F11.1  | F46F11.1  | -0.105867059297957  |             |
| AGIWUR40503                                                                                                                                   |    |   |         |         |                |           |           |                     |             |
| N2                                                                                                                                            | CT | I | 5643310 | 5644057 | WBGene00044616 | M01A12.4  | M01A12.4  | 0.035977337710217   |             |
| AGIWUR32316                                                                                                                                   |    |   |         |         |                |           |           |                     |             |
| N2                                                                                                                                            | CT | I | 5644729 | 5646370 | WBGene00000630 | col-53    | M01A12.1  | 0.119604391808564   |             |
| AGIWUR31336;AGIWUR38774                                                                                                                       |    |   |         |         |                |           |           |                     |             |
| N2                                                                                                                                            | CT | I | 5646369 | 5649656 | WBGene00018890 | F55F8.2   | F55F8.2   | 0.269929956138165   | AGIWUR37570 |
| N2                                                                                                                                            | CT | I | 5649756 | 5653648 | WBGene00018891 | F55F8.3   | F55F8.3   | -0.235266397342169  | AGIWUR43787 |
| N2                                                                                                                                            | CT | I | 5653804 | 5655857 | WBGene00018892 | cir-1     | F55F8.4   | 0.156309676140259   |             |
| AGIWUR18388;AGIWUR44318                                                                                                                       |    |   |         |         |                |           |           |                     |             |
| N2                                                                                                                                            | CT | I | 5655950 | 5658118 | WBGene00018893 | wdr-12    | F55F8.5   | -0.231638761929478  | AGIWUR44268 |
| N2                                                                                                                                            | CT | I | 5657980 | 5658723 | WBGene00018894 | mff-2     | F55F8.6   | 0.0686513164236331  | AGIWUR22067 |
| N2                                                                                                                                            | CT | I | 5662143 | 5667160 | WBGene00004224 | ptr-10    | F55F8.1   | -0.0851367614296068 | AGIWUR34950 |
| N2                                                                                                                                            | CT | I | 5667069 | 5668837 | WBGene00018896 | F55F8.8   | F55F8.8   | -0.0402820963864023 | AGIWUR44721 |
| N2                                                                                                                                            | CT | I | 5669950 | 5673352 | WBGene00018897 | zipt-2.4  | F55F8.9   | -0.119293208421361  |             |
| AGIWUR33516                                                                                                                                   |    |   |         |         |                |           |           |                     |             |
| N2                                                                                                                                            | CT | I | 5674304 | 5676609 | WBGene00020558 | T19B4.5   | T19B4.5   | 0.0244639593209488  |             |
| AGIWUR11276;AGIWUR12993;AGIWUR32131                                                                                                           |    |   |         |         |                |           |           |                     |             |

|                                                                                                                                                         |    |   |         |         |                |          |          |                       |             |
|---------------------------------------------------------------------------------------------------------------------------------------------------------|----|---|---------|---------|----------------|----------|----------|-----------------------|-------------|
| N2                                                                                                                                                      | CT | I | 5676827 | 5677646 | WBGene00001039 | dnj-21   | T19B4.4  | -0.173928859407539    | AGIWUR16865 |
| N2                                                                                                                                                      | CT | I | 5678638 | 5679862 | WBGene00020557 | T19B4.3  | T19B4.3  | -0.149916740027708    |             |
| AGIWUR27841;AGIWUR39756;AGIWUR40511;AGIWUR44979                                                                                                         |    |   |         |         |                |          |          |                       |             |
| N2                                                                                                                                                      | CT | I | 5679844 | 5691503 | WBGene00006776 | unc-40   | T19B4.7  | -0.118506717862196    | AGIWUR10286 |
| N2                                                                                                                                                      | CT | I | 5691838 | 5697506 | WBGene00003793 | npp-7    | T19B4.2  | 0.0252083789854609    |             |
| AGIWUR623;AGIWUR6784;AGIWUR10030;AGIWUR11279;AGIWUR12845;AGIWUR28597;AGIWUR30194;AGIWUR36089;AGIWUR37196                                                |    |   |         |         |                |          |          |                       |             |
| N2                                                                                                                                                      | CT | I | 5702156 | 5706838 | WBGene00020556 | pamn-1   | T19B4.1  | -0.137071251400178    |             |
| AGIWUR1427;AGIWUR1919;AGIWUR4740;AGIWUR7671;AGIWUR18929;AGIWUR19185;AGIWUR19546;AGIWUR19808;AGIWUR21670;AGIWUR22000;AGIWUR33507;AGIWUR34825;AGIWUR36338 |    |   |         |         |                |          |          |                       |             |
| N2                                                                                                                                                      | CT | I | 5716574 | 5725772 | WBGene00002989 | lim-7    | C04F1.3  | 0.24758688801551      | AGIWUR315   |
| N2                                                                                                                                                      | CT | I | 5726308 | 5729310 | WBGene00015442 | C04F1.1  | C04F1.1  | -0.197799011692087    |             |
| AGIWUR21075;AGIWUR37345                                                                                                                                 |    |   |         |         |                |          |          |                       |             |
| N2                                                                                                                                                      | CT | I | 5729793 | 5735842 | WBGene00018994 | F56H1.3  | F56H1.3  | 0.0632852467410849    | AGIWUR3566  |
| N2                                                                                                                                                      | CT | I | 5741186 | 5741622 | WBGene00269393 | F56H1.11 | F56H1.11 | 0.27189681394159      |             |
| AGIWUR11632                                                                                                                                             |    |   |         |         |                |          |          |                       |             |
| N2                                                                                                                                                      | CT | I | 5741868 | 5743571 | WBGene00004505 | rpt-5    | F56H1.4  | 0.0553994189765579    |             |
| AGIWUR4545;AGIWUR10484;AGIWUR34653;AGIWUR44921                                                                                                          |    |   |         |         |                |          |          |                       |             |
| N2                                                                                                                                                      | CT | I | 5744148 | 5745617 | WBGene00044305 | rad-8    | F56H1.6  | -0.121884179239069    |             |
| AGIWUR15763;AGIWUR22891                                                                                                                                 |    |   |         |         |                |          |          |                       |             |
| N2                                                                                                                                                      | CT | I | 5746633 | 5754278 | WBGene00000493 | che-14   | F56H1.1  | -0.223012139302703    | AGIWUR27291 |
| N2                                                                                                                                                      | CT | I | 5754312 | 5760803 | WBGene00018995 | ccpp-1   | F56H1.5  | -0.0673849326907323   |             |
| AGIWUR12374;AGIWUR14910;AGIWUR28454                                                                                                                     |    |   |         |         |                |          |          |                       |             |
| N2                                                                                                                                                      | CT | I | 5760897 | 5762435 | WBGene00045483 | oxy-5    | F56H1.7  | -0.256439543458921    |             |
| AGIWUR6195;AGIWUR37147                                                                                                                                  |    |   |         |         |                |          |          |                       |             |
| N2                                                                                                                                                      | CT | I | 5764030 | 5768190 | WBGene00020694 | dhhc-11  | T22E7.2  | 0.026263416968952     | AGIWUR20471 |
| N2                                                                                                                                                      | CT | I | 5768919 | 5773627 | WBGene00020693 | lron-8   | T22E7.1  | -0.116890766897051    |             |
| AGIWUR7310;AGIWUR37476                                                                                                                                  |    |   |         |         |                |          |          |                       |             |
| N2                                                                                                                                                      | CT | I | 5774585 | 5775610 | WBGene00001856 | hil-5    | B0414.3  | 0.00478626228162327   |             |
| AGIWUR31929;AGIWUR38263                                                                                                                                 |    |   |         |         |                |          |          |                       |             |
| N2                                                                                                                                                      | CT | I | 5776154 | 5788610 | WBGene00004393 | rnt-1    | B0414.2  | 0.261311993303615     | AGIWUR35389 |
| N2                                                                                                                                                      | CT | I | 5788634 | 5791752 | WBGene00000772 | cpb-3    | B0414.5  | 0.212936319370378     | AGIWUR11416 |
| N2                                                                                                                                                      | CT | I | 5792324 | 5795114 | WBGene00001600 | glh-3    | B0414.6  | -0.000594588370514515 | AGIWUR26903 |
| N2                                                                                                                                                      | CT | I | 5795404 | 5801299 | WBGene00003472 | mtk-1    | B0414.7  | -0.0440263722928318   |             |
| AGIWUR5791;AGIWUR9780;AGIWUR32266                                                                                                                       |    |   |         |         |                |          |          |                       |             |
| N2                                                                                                                                                      | CT | I | 5801872 | 5803266 | WBGene00015175 | srz-4    | B0414.1  | -0.173880551691372    | AGIWUR4046  |
| N2                                                                                                                                                      | CT | I | 5803959 | 5807291 | WBGene00015176 | vps-51   | B0414.8  | -0.140930828163086    | AGIWUR1676  |
| N2                                                                                                                                                      | CT | I | 5807709 | 5815637 | WBGene00003020 | lin-35   | C32F10.2 | 0.0976921244513385    |             |
| AGIWUR39684                                                                                                                                             |    |   |         |         |                |          |          |                       |             |
| N2                                                                                                                                                      | CT | I | 5815609 | 5818132 | WBGene00001973 | hmg-3    | C32F10.5 | -0.0507799881903281   |             |

|                                                                       |    |   |         |         |                |           |           |                     |             |
|-----------------------------------------------------------------------|----|---|---------|---------|----------------|-----------|-----------|---------------------|-------------|
| AGIWUR20478                                                           |    |   |         |         |                |           |           |                     |             |
| N2                                                                    | CT | I | 5818477 | 5821134 | WBGene00003601 | nhr-2     | C32F10.6  | -0.164530795813045  |             |
| AGIWUR39715                                                           |    |   |         |         |                |           |           |                     |             |
| N2                                                                    | CT | I | 5822841 | 5826148 | WBGene00016333 | C32F10.8  | C32F10.8  | 0.141921689311056   |             |
| AGIWUR11408;AGIWUR13429;AGIWUR22672;AGIWUR24518;AGIWUR28667           |    |   |         |         |                |           |           |                     |             |
| N2                                                                    | CT | I | 5829072 | 5834640 | WBGene00016331 | obr-4     | C32F10.1  | -0.0754740688697018 |             |
| AGIWUR16969;AGIWUR31133                                               |    |   |         |         |                |           |           |                     |             |
| N2                                                                    | CT | I | 5834644 | 5837392 | WBGene00018002 | twk-47    | F33D11.5  | 0.0675617554068131  |             |
| AGIWUR6580                                                            |    |   |         |         |                |           |           |                     |             |
| N2                                                                    | CT | I | 5840289 | 5841888 | WBGene00000436 | ceh-12    | F33D11.4  | -0.0233578703765103 |             |
| AGIWUR24005                                                           |    |   |         |         |                |           |           |                     |             |
| N2                                                                    | CT | I | 5842709 | 5844050 | WBGene00000631 | col-54    | F33D11.3  | -0.262675877719815  |             |
| AGIWUR26608                                                           |    |   |         |         |                |           |           |                     |             |
| N2                                                                    | CT | I | 5844836 | 5846466 | WBGene00018003 | F33D11.6  | F33D11.6  | 0.409644954377061   |             |
| AGIWUR20606                                                           |    |   |         |         |                |           |           |                     |             |
| N2                                                                    | CT | I | 5847477 | 5849391 | WBGene00018001 | F33D11.2  | F33D11.2  | 0.282377633294766   |             |
| AGIWUR26643                                                           |    |   |         |         |                |           |           |                     |             |
| N2                                                                    | CT | I | 5852045 | 5852962 | WBGene00018000 | F33D11.1  | F33D11.1  | 0.0885873222747375  |             |
| AGIWUR2935;AGIWUR8296;AGIWUR17179;AGIWUR33917;AGIWUR37035;AGIWUR38448 |    |   |         |         |                |           |           |                     |             |
| N2                                                                    | CT | I | 5854261 | 5855047 | WBGene00018005 | F33D11.8  | F33D11.8  | -0.0606787689558725 |             |
| AGIWUR1231;AGIWUR12588                                                |    |   |         |         |                |           |           |                     |             |
| N2                                                                    | CT | I | 5857548 | 5862557 | WBGene00018006 | hpo-3     | F33D11.9  | -0.129300097486148  |             |
| AGIWUR20778;AGIWUR26526;AGIWUR29283                                   |    |   |         |         |                |           |           |                     |             |
| N2                                                                    | CT | I | 5862644 | 5866431 | WBGene00018009 | dhhc-3    | F33D11.12 | -0.116752880629027  |             |
| AGIWUR35887                                                           |    |   |         |         |                |           |           |                     |             |
| N2                                                                    | CT | I | 5866514 | 5868139 | WBGene00018007 | F33D11.10 | F33D11.10 | -0.0821220798439128 |             |
| AGIWUR11065;AGIWUR33616                                               |    |   |         |         |                |           |           |                     |             |
| N2                                                                    | CT | I | 5868266 | 5869954 | WBGene00018008 | vpr-1     | F33D11.11 | 0.063078602597507   |             |
| AGIWUR24026                                                           |    |   |         |         |                |           |           |                     |             |
| N2                                                                    | CT | I | 5872174 | 5874343 | WBGene00016421 | cdc-7     | C34G6.5   | -0.121958677091019  | AGIWUR4240  |
| N2                                                                    | CT | I | 5874422 | 5878954 | WBGene00016422 | noah-1    | C34G6.6   | -0.0225501969987505 | AGIWUR31175 |
| N2                                                                    | CT | I | 5886613 | 5895970 | WBGene00003996 | pgp-2     | C34G6.4   | 0.00787285225337797 | AGIWUR25666 |
| N2                                                                    | CT | I | 5898303 | 5902112 | WBGene00016419 | tyr-4     | C34G6.2   | -0.0316808149248402 | AGIWUR39659 |
| N2                                                                    | CT | I | 5902106 | 5904695 | WBGene00004109 | stam-1    | C34G6.7   | 0.141502046268394   |             |
| AGIWUR1601;AGIWUR1672;AGIWUR38163;AGIWUR39752                         |    |   |         |         |                |           |           |                     |             |
| N2                                                                    | CT | I | 5906662 | 5918229 | WBGene00016418 | hpo-27    | C34G6.1   | 0.437346968399538   |             |
| AGIWUR1717;AGIWUR13154;AGIWUR14544                                    |    |   |         |         |                |           |           |                     |             |
| N2                                                                    | CT | I | 5919055 | 5935416 | WBGene00015028 | B0207.5   | B0207.5   | -0.161503908513101  | AGIWUR5023  |
| N2                                                                    | CT | I | 5935370 | 5936957 | WBGene00015029 | B0207.6   | B0207.6   | -0.116678234073646  | AGIWUR21951 |

|                                                                                                             |    |   |         |         |                |          |          |                     |                     |
|-------------------------------------------------------------------------------------------------------------|----|---|---------|---------|----------------|----------|----------|---------------------|---------------------|
| N2                                                                                                          | CT | I | 5937477 | 5938885 | WBGene00000099 | air-2    | B0207.4  | -0.0546115277426331 |                     |
| AGIWUR8154;AGIWUR34964                                                                                      |    |   |         |         |                |          |          |                     |                     |
| N2                                                                                                          | CT | I | 5942419 | 5945537 | WBGene00001676 | gpa-14   | B0207.3  | 0.0491526335487027  | AGIWUR7895          |
| N2                                                                                                          | CT | I | 5945581 | 5947620 | WBGene00015030 | B0207.7  | B0207.7  | 0.220490513592443   | AGIWUR22759         |
| N2                                                                                                          | CT | I | 5951136 | 5951742 | WBGene00015031 | B0207.8  | B0207.8  | 0.363402133436256   | AGIWUR38503         |
| N2                                                                                                          | CT | I | 5955031 | 5956883 | WBGene00015027 | B0207.2  | B0207.2  | 0.0410361800258574  |                     |
| AGIWUR25443;AGIWUR37060;AGIWUR41309                                                                         |    |   |         |         |                |          |          |                     |                     |
| N2                                                                                                          | CT | I | 5957461 | 5958457 | WBGene00015032 | B0207.9  | B0207.9  | 0.125391066636503   | AGIWUR15640         |
| N2                                                                                                          | CT | I | 5959008 | 5959526 | WBGene00015033 | B0207.10 |          | B0207.10            | -0.495136865102211  |
| AGIWUR5455                                                                                                  |    |   |         |         |                |          |          |                     |                     |
| N2                                                                                                          | CT | I | 5962953 | 5964183 | WBGene00015034 | B0207.11 |          | B0207.11            | -0.0116237884880022 |
| AGIWUR25597                                                                                                 |    |   |         |         |                |          |          |                     |                     |
| N2                                                                                                          | CT | I | 5965062 | 5967211 | WBGene00015026 | B0207.1  | B0207.1  | 0.10079021855902    | AGIWUR35700         |
| N2                                                                                                          | CT | I | 5967250 | 5973320 | WBGene00000232 | avr-14   | B0207.12 |                     | 0.0658010201218993  |
| AGIWUR636;AGIWUR9364;AGIWUR18879;AGIWUR37041;AGIWUR37132                                                    |    |   |         |         |                |          |          |                     |                     |
| N2                                                                                                          | CT | I | 5981778 | 5985869 | WBGene00015504 | C06A5.6  | C06A5.6  | -0.0746488026891257 | AGIWUR39294         |
| N2                                                                                                          | CT | I | 5986443 | 5990581 | WBGene00015501 | C06A5.3  | C06A5.3  | -0.0790743716873941 | AGIWUR35558         |
| N2                                                                                                          | CT | I | 5990741 | 5992658 | WBGene00004803 | sir-2.4  | C06A5.11 |                     | -0.241612778005997  |
| AGIWUR43540                                                                                                 |    |   |         |         |                |          |          |                     |                     |
| N2                                                                                                          | CT | I | 5992661 | 6003363 | WBGene00006823 | unc-94   | C06A5.7  | -0.0529080980710237 |                     |
| AGIWUR4768;AGIWUR18849;AGIWUR18987;AGIWUR20008;AGIWUR20709;AGIWUR27311;AGIWUR32220;AGIWUR33730;AGIWUR35148; |    |   |         |         |                |          |          |                     |                     |
| AGIWUR36712;AGIWUR40863                                                                                     |    |   |         |         |                |          |          |                     |                     |
| N2                                                                                                          | CT | I | 6004599 | 6007595 | WBGene00044414 | C06A5.12 |          | C06A5.12            | -0.364116596716302  |
| AGIWUR28163;AGIWUR31238;AGIWUR34035;AGIWUR42647;AGIWUR42784                                                 |    |   |         |         |                |          |          |                     |                     |
| N2                                                                                                          | CT | I | 6008105 | 6009606 | WBGene00015505 | C06A5.8  | C06A5.8  | -0.123854071923422  |                     |
| AGIWUR34087;AGIWUR37759                                                                                     |    |   |         |         |                |          |          |                     |                     |
| N2                                                                                                          | CT | I | 6009782 | 6011586 | WBGene00004380 | rnf-1    | C06A5.9  | 0.0557211170404535  |                     |
| AGIWUR4178;AGIWUR27456                                                                                      |    |   |         |         |                |          |          |                     |                     |
| N2                                                                                                          | CT | I | 6011977 | 6022516 | WBGene00015499 | inst-1   | C06A5.1  | 0.0245187169424792  | AGIWUR33571         |
| N2                                                                                                          | CT | I | 6022660 | 6026874 | WBGene00000814 | csn-2    | B0025.2  | -0.187569471971843  | AGIWUR5887          |
| N2                                                                                                          | CT | I | 6027194 | 6028370 | WBGene00015001 | B0025.4  | B0025.4  | -0.39021436325481   | AGIWUR11731         |
| N2                                                                                                          | CT | I | 6028486 | 6033457 | WBGene00006932 | vps-34   | B0025.1  | -0.2194724493155    |                     |
| AGIWUR18092;AGIWUR25361;AGIWUR41664;AGIWUR42560                                                             |    |   |         |         |                |          |          |                     |                     |
| N2                                                                                                          | CT | I | 6035452 | 6037745 | WBGene00016155 | C27A12.4 |          | C27A12.4            |                     |
| -0.00543850965359827 AGIWUR43310                                                                            |    |   |         |         |                |          |          |                     |                     |
| N2                                                                                                          | CT | I | 6038406 | 6041265 | WBGene00006492 | let-391  | C27A12.3 |                     | -0.344349317531602  |
| AGIWUR4733                                                                                                  |    |   |         |         |                |          |          |                     |                     |
| N2                                                                                                          | CT | I | 6041672 | 6046018 | WBGene00016154 | C27A12.2 |          | C27A12.2            | -0.0991266138231595 |
| AGIWUR17644                                                                                                 |    |   |         |         |                |          |          |                     |                     |

|                                                                                                                                                                                                                                                                                              |    |   |         |         |                |          |          |                     |             |
|----------------------------------------------------------------------------------------------------------------------------------------------------------------------------------------------------------------------------------------------------------------------------------------------|----|---|---------|---------|----------------|----------|----------|---------------------|-------------|
| N2                                                                                                                                                                                                                                                                                           | CT | I | 6046832 | 6050462 | WBGene00000429 | ceh-2    | C27A12.5 | 0.104349931014666   |             |
| AGIWUR28248                                                                                                                                                                                                                                                                                  |    |   |         |         |                |          |          |                     |             |
| N2                                                                                                                                                                                                                                                                                           | CT | I | 6053785 | 6055821 | WBGene00016156 | C27A12.6 | C27A12.6 | -0.106706229200369  |             |
| AGIWUR2214;AGIWUR7904;AGIWUR27980;AGIWUR37666                                                                                                                                                                                                                                                |    |   |         |         |                |          |          |                     |             |
| N2                                                                                                                                                                                                                                                                                           | CT | I | 6055947 | 6058424 | WBGene00016157 | C27A12.7 | C27A12.7 | 0.319992487681541   |             |
| AGIWUR7052;AGIWUR18453;AGIWUR30076;AGIWUR32444                                                                                                                                                                                                                                               |    |   |         |         |                |          |          |                     |             |
| N2                                                                                                                                                                                                                                                                                           | CT | I | 6058546 | 6061033 | WBGene00016158 | ari-1    | C27A12.8 | -0.184532295146603  |             |
| AGIWUR43402                                                                                                                                                                                                                                                                                  |    |   |         |         |                |          |          |                     |             |
| N2                                                                                                                                                                                                                                                                                           | CT | I | 6061752 | 6068040 | WBGene00016159 | C27A12.9 | C27A12.9 | 0.0216416147011032  |             |
| AGIWUR2352;AGIWUR10114;AGIWUR11058;AGIWUR38416;AGIWUR44563;AGIWUR45035                                                                                                                                                                                                                       |    |   |         |         |                |          |          |                     |             |
| N2                                                                                                                                                                                                                                                                                           | CT | I | 6068526 | 6070122 | WBGene00022749 | ZK484.3  | ZK484.3  | -0.163132604419795  |             |
| AGIWUR23472;AGIWUR25484;AGIWUR42142                                                                                                                                                                                                                                                          |    |   |         |         |                |          |          |                     |             |
| N2                                                                                                                                                                                                                                                                                           | CT | I | 6070236 | 6078895 | WBGene00022750 | ZK484.4  | ZK484.4  | -0.139310645231907  |             |
| AGIWUR32976;AGIWUR33451                                                                                                                                                                                                                                                                      |    |   |         |         |                |          |          |                     |             |
| N2                                                                                                                                                                                                                                                                                           | CT | I | 6081782 | 6085962 | WBGene00001819 | haf-9    | ZK484.2  | -0.135007132871479  |             |
| AGIWUR2028;AGIWUR12808;AGIWUR25179;AGIWUR39792;AGIWUR43940                                                                                                                                                                                                                                   |    |   |         |         |                |          |          |                     |             |
| N2                                                                                                                                                                                                                                                                                           | CT | I | 6087366 | 6087764 | WBGene00022751 | ZK484.5  | ZK484.5  | 0.18672934922461    | AGIWUR40045 |
| N2                                                                                                                                                                                                                                                                                           | CT | I | 6090015 | 6090919 | WBGene00022752 | ZK484.6  | ZK484.6  | 0.0812768958358454  | AGIWUR15679 |
| N2                                                                                                                                                                                                                                                                                           | CT | I | 6093305 | 6094426 | WBGene00022748 | oaz-1    | ZK484.1  | 0.0793580983062832  |             |
| AGIWUR5633;AGIWUR6260;AGIWUR9669;AGIWUR10174;AGIWUR10329;AGIWUR11262;AGIWUR14480;AGIWUR16682;AGIWUR17416;AGIWUR18340;AGIWUR18545;AGIWUR22968;AGIWUR23831;AGIWUR23930;AGIWUR25183;AGIWUR25365;AGIWUR26539;AGIWUR26756;AGIWUR30941;AGIWUR34252;AGIWUR34836;AGIWUR40956;AGIWUR41471;AGIWUR45198 |    |   |         |         |                |          |          |                     |             |
| N2                                                                                                                                                                                                                                                                                           | CT | I | 6095060 | 6096589 | WBGene00022753 | ZK484.7  | ZK484.7  | 0.336032214681065   | AGIWUR24816 |
| N2                                                                                                                                                                                                                                                                                           | CT | I | 6097494 | 6097837 | WBGene00022754 | nspd-1   | ZK484.8  | 0.113116750618154   | AGIWUR17934 |
| N2                                                                                                                                                                                                                                                                                           | CT | I | 6098927 | 6099731 | WBGene00020840 | spch-3   | T27A3.4  | 0.263397681393664   | AGIWUR32101 |
| N2                                                                                                                                                                                                                                                                                           | CT | I | 6100261 | 6101789 | WBGene00020841 | T27A3.5  | T27A3.5  | 0.481714117215581   | AGIWUR19455 |
| N2                                                                                                                                                                                                                                                                                           | CT | I | 6102032 | 6102463 | WBGene00006044 | ssp-16   | T27A3.3  | 0.108592778471643   |             |
| AGIWUR14575;AGIWUR23833;AGIWUR26401;AGIWUR29267;AGIWUR33358;AGIWUR42127                                                                                                                                                                                                                      |    |   |         |         |                |          |          |                     |             |
| N2                                                                                                                                                                                                                                                                                           | CT | I | 6104805 | 6105589 | WBGene00044611 | T27A3.8  | T27A3.8  | 0.241166927956892   | AGIWUR22882 |
| N2                                                                                                                                                                                                                                                                                           | CT | I | 6105863 | 6107715 | WBGene00020842 | T27A3.6  | T27A3.6  | -0.0370125803876959 |             |
| AGIWUR18567;AGIWUR24268;AGIWUR41070                                                                                                                                                                                                                                                          |    |   |         |         |                |          |          |                     |             |
| N2                                                                                                                                                                                                                                                                                           | CT | I | 6107809 | 6109679 | WBGene00020843 | T27A3.7  | T27A3.7  | 0.197122322762434   | AGIWUR37549 |
| N2                                                                                                                                                                                                                                                                                           | CT | I | 6110134 | 6114537 | WBGene00020839 | usp-5    | T27A3.2  | 0.345092141582132   | AGIWUR22004 |
| N2                                                                                                                                                                                                                                                                                           | CT | I | 6122590 | 6126851 | WBGene00020838 | trak-1   | T27A3.1  | 0.161434778657927   |             |
| AGIWUR9827;AGIWUR13114;AGIWUR18998;AGIWUR19263;AGIWUR20155;AGIWUR21043;AGIWUR21050;AGIWUR21240;AGIWUR25994;AGIWUR26331;AGIWUR34093                                                                                                                                                           |    |   |         |         |                |          |          |                     |             |
| N2                                                                                                                                                                                                                                                                                           | CT | I | 6133245 | 6137978 | WBGene00003878 | pept-3   | F56F4.5  | -0.0350783321181822 | AGIWUR25162 |
| N2                                                                                                                                                                                                                                                                                           | CT | I | 6137994 | 6138955 | WBGene00018981 | F56F4.4  | F56F4.4  | 0.221191614954878   | AGIWUR7191  |
| N2                                                                                                                                                                                                                                                                                           | CT | I | 6139216 | 6140444 | WBGene00018982 | abt-6    | F56F4.6  | -0.306894284159283  |             |



AGIWUR6130;AGIWUR7439;AGIWUR21554  
N2 CT I 6141469 6144386 WBGene00018980 F56F4.3 F56F4.3 0.0550880570956895  
AGIWUR1365;AGIWUR31670  
N2 CT I 6145455 6146477 WBGene00018979 ttr-55 F56F4.2 -0.0329073617081397  
AGIWUR9831;AGIWUR12974;AGIWUR17577;AGIWUR23966;AGIWUR27059  
N2 CT I 6146461 6147068 WBGene00050896 ttr-56 F56F4.9 0.195377469579354 AGIWUR33891  
N2 CT I 6149197 6150480 WBGene00045498 F56F4.8 F56F4.8 -0.133672332769019  
AGIWUR18973;AGIWUR22403;AGIWUR42734  
N2 CT I 6154075 6157438 WBGene00020379 T09B4.5 T09B4.5 0.0304082946311208  
AGIWUR8668;AGIWUR31230  
N2 CT I 6157473 6159264 WBGene00020380 T09B4.6 T09B4.6 0.27396150212771 AGIWUR26255  
N2 CT I 6164719 6166539 WBGene00020382 T09B4.8 T09B4.8 -0.0540037369539377 AGIWUR22457  
N2 CT I 6167940 6168642 WBGene00020378 T09B4.4 T09B4.4 -0.293639656111122 AGIWUR8464  
N2 CT I 6176252 6178057 WBGene00020377 T09B4.3 T09B4.3 0.13265407477089 AGIWUR20677  
N2 CT I 6177983 6180840 WBGene00020383 tin-44 T09B4.9 0.0434564601132941 AGIWUR33554  
N2 CT I 6181314 6183913 WBGene00000500 chn-1 T09B4.10 -0.159890980716785  
AGIWUR3531;AGIWUR14093;AGIWUR30546  
N2 CT I 6184072 6185368 WBGene00020376 T09B4.2 T09B4.2 -0.314907124233004 AGIWUR5828  
N2 CT I 6185462 6188121 WBGene00020375 pigv-1 T09B4.1 0.0616732087718397 AGIWUR2739  
N2 CT I 6188157 6192632 WBGene00020259 T05E7.3 T05E7.3 0.00371573478907194  
AGIWUR8483;AGIWUR13425;AGIWUR16427;AGIWUR36048  
N2 CT I 6192552 6194897 WBGene00020260 T05E7.4 T05E7.4 -0.26865158456944 AGIWUR3464  
N2 CT I 6199141 6200193 WBGene00000632 col-55 T05E7.2 -0.124434455220507 AGIWUR45093  
N2 CT I 6200798 6202076 WBGene00020261 vet-1 T05E7.5 -0.129206061632749 AGIWUR29881  
N2 CT I 6203897 6206927 WBGene00020258 T05E7.1 T05E7.1 -0.38966222069368 AGIWUR11566  
N2 CT I 6206955 6211155 WBGene00020347 ech-1.2 T08B2.7 -0.0534939711342686  
AGIWUR1878;AGIWUR13286;AGIWUR24847;AGIWUR27700  
N2 CT I 6211270 6211885 WBGene00020348 mrpl-23 T08B2.8 -0.134446437238953 AGIWUR12288  
N2 CT I 6211986 6214645 WBGene00001497 fars-1 T08B2.9 0.15139802270842  
AGIWUR15691;AGIWUR18498;AGIWUR21754;AGIWUR24091;AGIWUR31467;AGIWUR34640;AGIWUR39566  
N2 CT I 6215669 6219911 WBGene00020346 rbm-5 T08B2.5 -0.0328207648694896  
AGIWUR389;AGIWUR3390;AGIWUR17098;AGIWUR17725;AGIWUR21019;AGIWUR24671;AGIWUR42870;AGIWUR45169  
N2 CT I 6220090 6220766 WBGene00004486 rps-17 T08B2.10 -0.120060394635981  
AGIWUR6912;AGIWUR15081;AGIWUR16480;AGIWUR16946;AGIWUR21104;AGIWUR24229;AGIWUR24253;AGIWUR26223;AGIWUR28324;  
AGIWUR28853;AGIWUR32494;AGIWUR38938;AGIWUR40673;AGIWUR43660  
N2 CT I 6221245 6223116 WBGene00020349 T08B2.11 T08B2.11 -0.120910229068913  
AGIWUR41230  
N2 CT I 6232777 6234280 WBGene00000633 col-56 T08B2.2 -0.172071594221539  
AGIWUR18477;AGIWUR21810;AGIWUR23961

|                                                                                                                                                                    |    |   |         |         |                |           |           |                      |             |
|--------------------------------------------------------------------------------------------------------------------------------------------------------------------|----|---|---------|---------|----------------|-----------|-----------|----------------------|-------------|
| N2                                                                                                                                                                 | CT | I | 6249556 | 6250197 | WBGene00005000 | spp-15    | C48E7.10  | 0.0582677297556504   |             |
| AGIWUR26334                                                                                                                                                        |    |   |         |         |                |           |           |                      |             |
| N2                                                                                                                                                                 | CT | I | 6250475 | 6252834 | WBGene00000583 | cof-2     | C48E7.5   | 0.177011563650596    |             |
| AGIWUR25222;AGIWUR43373                                                                                                                                            |    |   |         |         |                |           |           |                      |             |
| N2                                                                                                                                                                 | CT | I | 6252986 | 6253584 | WBGene00016754 | cebp-2    | C48E7.11  | -0.188684098068023   |             |
| AGIWUR4905                                                                                                                                                         |    |   |         |         |                |           |           |                      |             |
| N2                                                                                                                                                                 | CT | I | 6253701 | 6254947 | WBGene00003059 | lpd-2     | C48E7.3   | 0.0137651067607578   | AGIWUR36039 |
| N2                                                                                                                                                                 | CT | I | 6255035 | 6257791 | WBGene00016750 | let-611   | C48E7.2   | -0.0816469061925389  | AGIWUR8583  |
| N2                                                                                                                                                                 | CT | I | 6260249 | 6264540 | WBGene00016749 | C48E7.1   | C48E7.1   | 0.139331393662459    | AGIWUR25489 |
| N2                                                                                                                                                                 | CT | I | 6265691 | 6269073 | WBGene00016753 | oac-9     | C48E7.8   | 0.152697038665154    | AGIWUR7858  |
| N2                                                                                                                                                                 | CT | I | 6269561 | 6271541 | WBGene00006689 | twk-37    | C48E7.9   | 0.130286831301973    | AGIWUR32998 |
| N2                                                                                                                                                                 | CT | I | 6271866 | 6273780 | WBGene00015688 | C10G11.8  | C10G11.8  | 0.121237672874745    |             |
| AGIWUR25031;AGIWUR33880;AGIWUR36459                                                                                                                                |    |   |         |         |                |           |           |                      |             |
| N2                                                                                                                                                                 | CT | I | 6284973 | 6289340 | WBGene00015687 | chdp-1    | C10G11.7  | -0.111817535278991   |             |
| AGIWUR4250                                                                                                                                                         |    |   |         |         |                |           |           |                      |             |
| N2                                                                                                                                                                 | CT | I | 6289433 | 6293855 | WBGene00015686 | C10G11.6  | C10G11.6  | -0.247275307503514   |             |
| AGIWUR8034                                                                                                                                                         |    |   |         |         |                |           |           |                      |             |
| N2                                                                                                                                                                 | CT | I | 6295067 | 6297625 | WBGene00004068 | pnk-1     | C10G11.5  | 0.0453122087448401   |             |
| AGIWUR13687;AGIWUR29299;AGIWUR36480;AGIWUR43272                                                                                                                    |    |   |         |         |                |           |           |                      |             |
| N2                                                                                                                                                                 | CT | I | 6297767 | 6299729 | WBGene00005272 | srh-49    | C10G11.4  | 0.156199203215822    |             |
| AGIWUR16346                                                                                                                                                        |    |   |         |         |                |           |           |                      |             |
| N2                                                                                                                                                                 | CT | I | 6300493 | 6302298 | WBGene00005274 | srh-51    | C10G11.3  | -0.290747304498888   |             |
| AGIWUR12171;AGIWUR16140                                                                                                                                            |    |   |         |         |                |           |           |                      |             |
| N2                                                                                                                                                                 | CT | I | 6302474 | 6304263 | WBGene00005273 | srh-50    | C10G11.2  | -0.167957074362356   |             |
| AGIWUR41687                                                                                                                                                        |    |   |         |         |                |           |           |                      |             |
| N2                                                                                                                                                                 | CT | I | 6304916 | 6306363 | WBGene00015690 | C10G11.10 | C10G11.10 | 0.0962182291874747   |             |
| AGIWUR33367                                                                                                                                                        |    |   |         |         |                |           |           |                      |             |
| N2                                                                                                                                                                 | CT | I | 6309114 | 6310781 | WBGene00017817 | F26B1.5   | F26B1.5   | 0.227539122138288    |             |
| AGIWUR7184;AGIWUR31624                                                                                                                                             |    |   |         |         |                |           |           |                      |             |
| N2                                                                                                                                                                 | CT | I | 6311229 | 6312413 | WBGene00000634 | col-58    | F26B1.4   | 0.159923005682858    | AGIWUR2202  |
| N2                                                                                                                                                                 | CT | I | 6312750 | 6314624 | WBGene00005171 | srg-14    | F26B1.6   | -0.00609599110963543 | AGIWUR3070  |
| N2                                                                                                                                                                 | CT | I | 6315233 | 6317267 | WBGene00002073 | ima-2     | F26B1.3   | 0.170044097296778    |             |
| AGIWUR10902;AGIWUR14196;AGIWUR25439;AGIWUR31579;AGIWUR37813                                                                                                        |    |   |         |         |                |           |           |                      |             |
| N2                                                                                                                                                                 | CT | I | 6317701 | 6320365 | WBGene00017816 | hrpk-1    | F26B1.2   | 0.101056601359625    |             |
| AGIWUR1418;AGIWUR1827;AGIWUR3187;AGIWUR5329;AGIWUR9787;AGIWUR16221;AGIWUR17680;AGIWUR18701;AGIWUR18921;AGIWUR26852;AGIWUR27039;AGIWUR36351;AGIWUR39126;AGIWUR43994 |    |   |         |         |                |           |           |                      |             |
| N2                                                                                                                                                                 | CT | I | 6320289 | 6324018 | WBGene00002601 | let-381   | F26B1.7   | 0.127575466644606    | AGIWUR36974 |
| N2                                                                                                                                                                 | CT | I | 6342231 | 6356678 | WBGene00000254 | bli-4     | K04F10.4  | 0.0723683558988775   |             |
| AGIWUR3978;AGIWUR12697;AGIWUR17473;AGIWUR25337;AGIWUR32461;AGIWUR34393;AGIWUR42192;AGIWUR44317                                                                     |    |   |         |         |                |           |           |                      |             |

|                                                                                                                                              |    |   |         |         |                |          |          |                      |             |
|----------------------------------------------------------------------------------------------------------------------------------------------|----|---|---------|---------|----------------|----------|----------|----------------------|-------------|
| N2                                                                                                                                           | CT | I | 6356614 | 6358410 | WBGene00003499 | mut-2    | K04F10.6 | 0.0531254875067013   |             |
| AGIWUR2874;AGIWUR9366;AGIWUR9500;AGIWUR26345;AGIWUR33780;AGIWUR36604;AGIWUR41011;AGIWUR42263                                                 |    |   |         |         |                |          |          |                      |             |
| N2                                                                                                                                           | CT | I | 6358585 | 6360457 | WBGene00019396 | K04F10.3 | K04F10.3 | -0.182325852772946   |             |
| AGIWUR13704                                                                                                                                  |    |   |         |         |                |          |          |                      |             |
| N2                                                                                                                                           | CT | I | 6360844 | 6364172 | WBGene00019395 | K04F10.2 | K04F10.2 | -0.243128376128745   |             |
| AGIWUR4876                                                                                                                                   |    |   |         |         |                |          |          |                      |             |
| N2                                                                                                                                           | CT | I | 6364886 | 6366224 | WBGene00019394 | K04F10.1 | K04F10.1 | -0.0567516021113086  |             |
| AGIWUR3231                                                                                                                                   |    |   |         |         |                |          |          |                      |             |
| N2                                                                                                                                           | CT | I | 6366331 | 6368078 | WBGene00019399 | K04F10.7 | K04F10.7 | -0.209603176827757   |             |
| AGIWUR6668                                                                                                                                   |    |   |         |         |                |          |          |                      |             |
| N2                                                                                                                                           | CT | I | 6368270 | 6369598 | WBGene00022586 | ZC308.4  | ZC308.4  | -0.313351366497955   | AGIWUR37754 |
| N2                                                                                                                                           | CT | I | 6369934 | 6386183 | WBGene00001596 | gld-2    | ZC308.1  | 0.239298734827225    |             |
| AGIWUR1922;AGIWUR5338;AGIWUR9092;AGIWUR24999                                                                                                 |    |   |         |         |                |          |          |                      |             |
| N2                                                                                                                                           | CT | I | 6386149 | 6392524 | WBGene00022592 | klu-2    | ZC328.2  | -0.138014903376206   | AGIWUR9565  |
| N2                                                                                                                                           | CT | I | 6404587 | 6405705 | WBGene00022591 | cuti-1   | ZC328.1  | 0.0539073478648247   |             |
| AGIWUR28749;AGIWUR40109;AGIWUR42212                                                                                                          |    |   |         |         |                |          |          |                      |             |
| N2                                                                                                                                           | CT | I | 6405882 | 6406936 | WBGene00022594 | ZC328.5  | ZC328.5  | -0.178733383767458   | AGIWUR29601 |
| N2                                                                                                                                           | CT | I | 6407458 | 6409212 | WBGene00004721 | san-1    | ZC328.4  | -0.145312370630425   |             |
| AGIWUR10499;AGIWUR16704;AGIWUR24958;AGIWUR38192;AGIWUR40688                                                                                  |    |   |         |         |                |          |          |                      |             |
| N2                                                                                                                                           | CT | I | 6409050 | 6417010 | WBGene00022593 | ZC328.3  | ZC328.3  | -0.0351930236963671  |             |
| AGIWUR2496;AGIWUR16461;AGIWUR19232                                                                                                           |    |   |         |         |                |          |          |                      |             |
| N2                                                                                                                                           | CT | I | 6418565 | 6418809 | WBGene00019992 | R10A10.1 | R10A10.1 | 0.10053880050333     |             |
| AGIWUR38650                                                                                                                                  |    |   |         |         |                |          |          |                      |             |
| N2                                                                                                                                           | CT | I | 6420660 | 6421985 | WBGene00019993 | rbx-2    | R10A10.2 | -0.0225985804863811  |             |
| AGIWUR20356                                                                                                                                  |    |   |         |         |                |          |          |                      |             |
| N2                                                                                                                                           | CT | I | 6421978 | 6425794 | WBGene00018156 | ncbp-1   | F37E3.1  | -0.0291101944489469  | AGIWUR26304 |
| N2                                                                                                                                           | CT | I | 6425793 | 6428942 | WBGene00018157 | lron-6   | F37E3.2  | -0.121832882190324   | AGIWUR1813  |
| N2                                                                                                                                           | CT | I | 6429525 | 6431586 | WBGene00018158 | comp-1   | F37E3.3  | 0.0714752349860692   |             |
| AGIWUR1030;AGIWUR34352                                                                                                                       |    |   |         |         |                |          |          |                      |             |
| N2                                                                                                                                           | CT | I | 6436058 | 6441192 | WBGene00004924 | snt-4    | T23H2.2  | 0.00114146701806561  | AGIWUR23814 |
| N2                                                                                                                                           | CT | I | 6441637 | 6446465 | WBGene00020742 | T23H2.3  | T23H2.3  | -0.00537760843958068 |             |
| AGIWUR2836;AGIWUR2981;AGIWUR5671;AGIWUR11513;AGIWUR12657;AGIWUR14273;AGIWUR15264;AGIWUR15865;AGIWUR20917;AGIWUR26561;AGIWUR34382;AGIWUR43457 |    |   |         |         |                |          |          |                      |             |
| N2                                                                                                                                           | CT | I | 6447304 | 6453933 | WBGene00003798 | npp-12   | T23H2.1  | 0.210395406850542    |             |
| AGIWUR565;AGIWUR8913;AGIWUR37341;AGIWUR41730                                                                                                 |    |   |         |         |                |          |          |                      |             |
| N2                                                                                                                                           | CT | I | 6453875 | 6456984 | WBGene00020743 | mam-8    | T23H2.4  | -0.0367686372309928  | AGIWUR24944 |
| N2                                                                                                                                           | CT | I | 6457061 | 6458479 | WBGene00004273 | rab-10   | T23H2.5  | -0.0239492898106022  |             |
| AGIWUR1929;AGIWUR2575;AGIWUR4282;AGIWUR8097;AGIWUR10011;AGIWUR21666;AGIWUR34705                                                              |    |   |         |         |                |          |          |                      |             |
| N2                                                                                                                                           | CT | I | 6460433 | 6464286 | WBGene00019432 | kn1-2    | K06A5.4  | -0.33231780368904    | AGIWUR32152 |

|                                                                        |    |   |         |         |                |          |           |                      |             |
|------------------------------------------------------------------------|----|---|---------|---------|----------------|----------|-----------|----------------------|-------------|
| N2                                                                     | CT | I | 6464197 | 6466941 | WBGene00019433 | acdH-3   | K06A5.6   | -0.180053167364568   | AGIWUR7557  |
| N2                                                                     | CT | I | 6466752 | 6467515 | WBGene00019431 | K06A5.3  | K06A5.3   | 0.107801731051824    | AGIWUR8782  |
| N2                                                                     | CT | I | 6468113 | 6469392 | WBGene00019430 | K06A5.2  | K06A5.2   | 0.176751022511271    | AGIWUR24586 |
| N2                                                                     | CT | I | 6469386 | 6471995 | WBGene00000386 | cdc-25.1 | K06A5.7   | 0.176573920175365    |             |
| AGIWUR40783                                                            |    |   |         |         |                |          |           |                      |             |
| N2                                                                     | CT | I | 6474183 | 6489030 | WBGene00019434 | nmtN-1   | K06A5.8   | 0.0345579180643014   |             |
| AGIWUR3470;AGIWUR27663;AGIWUR38621                                     |    |   |         |         |                |          |           |                      |             |
| N2                                                                     | CT | I | 6490716 | 6492727 | WBGene00000937 | dbr-1    | C55B7.8   | -0.0634557845951136  | AGIWUR15559 |
| N2                                                                     | CT | I | 6492722 | 6494754 | WBGene00007018 | mdt-18   | C55B7.9   | -0.0179933247727888  | AGIWUR24134 |
| N2                                                                     | CT | I | 6494216 | 6496109 | WBGene00016944 | uri-1    | C55B7.5   | -0.0214311095336512  | AGIWUR23828 |
| N2                                                                     | CT | I | 6497436 | 6499560 | WBGene00016943 | acdH-1   | C55B7.4   | 0.105963124629417    |             |
| AGIWUR9071;AGIWUR12896;AGIWUR13562;AGIWUR24409;AGIWUR29961             |    |   |         |         |                |          |           |                      |             |
| N2                                                                     | CT | I | 6507894 | 6511630 | WBGene00001627 | gly-2    | C55B7.2   | -0.106793147938392   | AGIWUR38944 |
| N2                                                                     | CT | I | 6511612 | 6513843 | WBGene00016947 | C55B7.11 | C55B7.11  | -0.306598484085821   |             |
| AGIWUR317;AGIWUR10946;AGIWUR17661;AGIWUR19575;AGIWUR40605              |    |   |         |         |                |          |           |                      |             |
| N2                                                                     | CT | I | 6513928 | 6517507 | WBGene00001599 | glh-2    | C55B7.1   | 0.108279392098872    | AGIWUR14020 |
| N2                                                                     | CT | I | 6517575 | 6520879 | WBGene00000483 | che-1    | C55B7.12  | 0.00327071322620487  |             |
| AGIWUR40311                                                            |    |   |         |         |                |          |           |                      |             |
| N2                                                                     | CT | I | 6525045 | 6528689 | WBGene00020414 | T10E9.4  | T10E9.4   | 0.0839650058692278   | AGIWUR11816 |
| N2                                                                     | CT | I | 6529158 | 6530099 | WBGene00020416 | T10E9.6  | T10E9.6   | 0.144471519223035    | AGIWUR1670  |
| N2                                                                     | CT | I | 6530131 | 6533031 | WBGene00020417 | nuo-2    | T10E9.7   | 0.0538577533746398   |             |
| AGIWUR3800;AGIWUR20696;AGIWUR23397                                     |    |   |         |         |                |          |           |                      |             |
| N2                                                                     | CT | I | 6534072 | 6539193 | WBGene00020413 | T10E9.3  | T10E9.3   | -0.00272741033716706 | AGIWUR7632  |
| N2                                                                     | CT | I | 6539129 | 6541084 | WBGene00020418 | T10E9.8  | T10E9.8   | -0.203653738364587   |             |
| AGIWUR8524;AGIWUR10486;AGIWUR10560;AGIWUR16490;AGIWUR32642;AGIWUR35271 |    |   |         |         |                |          |           |                      |             |
| N2                                                                     | CT | I | 6542090 | 6544966 | WBGene00020412 | T10E9.2  | T10E9.2   | 0.0164536369985449   | AGIWUR39070 |
| N2                                                                     | CT | I | 6545110 | 6546593 | WBGene00020411 | T10E9.1  | T10E9.1   | -0.168192372948768   | AGIWUR29543 |
| N2                                                                     | CT | I | 6548644 | 6550447 | WBGene00019005 | F57B10.8 | F57B10.8  | -0.0094136173475956  |             |
| AGIWUR34149                                                            |    |   |         |         |                |          |           |                      |             |
| N2                                                                     | CT | I | 6550536 | 6552665 | WBGene00019006 | spg-20   | F57B10.9  | -0.156007955648082   |             |
| AGIWUR2257                                                             |    |   |         |         |                |          |           |                      |             |
| N2                                                                     | CT | I | 6552834 | 6553379 | WBGene00019007 | ucr-11   | F57B10.14 | -0.359954017828247   |             |
| AGIWUR26529                                                            |    |   |         |         |                |          |           |                      |             |
| N2                                                                     | CT | I | 6553481 | 6554290 | WBGene00000896 | dad-1    | F57B10.10 | -0.285840506508258   |             |
| AGIWUR15439                                                            |    |   |         |         |                |          |           |                      |             |
| N2                                                                     | CT | I | 6554729 | 6558623 | WBGene00006607 | tre-1    | F57B10.7  | -0.159114359967113   |             |
| AGIWUR30347                                                            |    |   |         |         |                |          |           |                      |             |
| N2                                                                     | CT | I | 6558696 | 6562346 | WBGene00019004 | xpg-1    | F57B10.6  | -0.192684063044647   |             |
| AGIWUR13434                                                            |    |   |         |         |                |          |           |                      |             |

|                                                                         |    |   |         |         |                |          |           |                       |             |
|-------------------------------------------------------------------------|----|---|---------|---------|----------------|----------|-----------|-----------------------|-------------|
| N2                                                                      | CT | I | 6562699 | 6563660 | WBGene00019003 | F57B10.5 | F57B10.5  | -0.108134848167573    |             |
| AGIWUR37962                                                             |    |   |         |         |                |          |           |                       |             |
| N2                                                                      | CT | I | 6563629 | 6564451 | WBGene00000236 | bag-1    | F57B10.11 | -0.108248473164647    |             |
| AGIWUR18247                                                             |    |   |         |         |                |          |           |                       |             |
| N2                                                                      | CT | I | 6564749 | 6565868 | WBGene00003184 | mei-2    | F57B10.12 | -0.2530215588739      |             |
| AGIWUR37281                                                             |    |   |         |         |                |          |           |                       |             |
| N2                                                                      | CT | I | 6566173 | 6568905 | WBGene00019002 | F57B10.4 | F57B10.4  | 0.192828883302395     |             |
| AGIWUR37891                                                             |    |   |         |         |                |          |           |                       |             |
| N2                                                                      | CT | I | 6569494 | 6572598 | WBGene00019001 | ipgm-1   | F57B10.3  | 0.147020111402997     |             |
| AGIWUR7348;AGIWUR17880;AGIWUR19488;AGIWUR23845                          |    |   |         |         |                |          |           |                       |             |
| N2                                                                      | CT | I | 6574004 | 6585510 | WBGene00002783 | let-607  | F57B10.1  | -0.0115410803149927   |             |
| AGIWUR10303;AGIWUR13630;AGIWUR16293;AGIWUR22955;AGIWUR28124;AGIWUR31341 |    |   |         |         |                |          |           |                       |             |
| N2                                                                      | CT | I | 6585039 | 6587882 | WBGene00006624 | try-6    | F48A9.3   | -0.0852145895376566   | AGIWUR17630 |
| N2                                                                      | CT | I | 6592332 | 6593831 | WBGene00018582 | F48A9.2  | F48A9.2   | 0.0664790994442104    | AGIWUR22685 |
| N2                                                                      | CT | I | 6594320 | 6596231 | WBGene00018581 | F48A9.1  | F48A9.1   | -0.151611048668814    | AGIWUR30733 |
| N2                                                                      | CT | I | 6596919 | 6598928 | WBGene00017067 | D2092.6  | D2092.6   | -0.106935411045492    | AGIWUR13165 |
| N2                                                                      | CT | I | 6598981 | 6607520 | WBGene00017066 | maco-1   | D2092.5   | -0.151769043228864    |             |
| AGIWUR6251;AGIWUR33086                                                  |    |   |         |         |                |          |           |                       |             |
| N2                                                                      | CT | I | 6612188 | 6615990 | WBGene00017065 | D2092.4  | D2092.4   | -0.196468050129202    | AGIWUR33325 |
| N2                                                                      | CT | I | 6616304 | 6618560 | WBGene00006645 | tsp-19   | D2092.7   | -0.0672463986024887   | AGIWUR38000 |
| N2                                                                      | CT | I | 6620665 | 6621292 | WBGene00017068 | D2092.8  | D2092.8   | -0.0405380465902114   | AGIWUR24576 |
| N2                                                                      | CT | I | 6621687 | 6624894 | WBGene00000050 | acr-11   | D2092.3   | 0.0463561652359239    | AGIWUR4258  |
| N2                                                                      | CT | I | 6625066 | 6626788 | WBGene00017064 | ppfr-2   | D2092.2   | 0.0739860208621401    | AGIWUR39480 |
| N2                                                                      | CT | I | 6627045 | 6627914 | WBGene00044610 | D2092.10 | D2092.10  | 0.0457644311204217    |             |
| AGIWUR21189;AGIWUR22339;AGIWUR38102;AGIWUR40477                         |    |   |         |         |                |          |           |                       |             |
| N2                                                                      | CT | I | 6629717 | 6637429 | WBGene00017063 | mctp-1   | D2092.1   | -0.0117275112365522   | AGIWUR30994 |
| N2                                                                      | CT | I | 6640662 | 6642643 | WBGene00006625 | try-7    | ZC581.6   | 0.278169893335216     | AGIWUR4027  |
| N2                                                                      | CT | I | 6651220 | 6655430 | WBGene00022633 | ZC581.3  | ZC581.3   | 0.0214557686801022    | AGIWUR20637 |
| N2                                                                      | CT | I | 6655608 | 6658371 | WBGene00022632 | ZC581.2  | ZC581.2   | 0.104119762638975     |             |
| AGIWUR13462;AGIWUR32856;AGIWUR33302                                     |    |   |         |         |                |          |           |                       |             |
| N2                                                                      | CT | I | 6660436 | 6662315 | WBGene00022634 | ZC581.7  | ZC581.7   | 0.13767965376347      | AGIWUR41254 |
| N2                                                                      | CT | I | 6663050 | 6665160 | WBGene00022631 | nek1-2   | ZC581.1   | -0.240885664452165    | AGIWUR4970  |
| N2                                                                      | CT | I | 6665077 | 6673840 | WBGene00022635 | ZC581.9  | ZC581.9   | 0.00359219498854202   | AGIWUR14388 |
| N2                                                                      | CT | I | 6687349 | 6691662 | WBGene00020712 | ckr-1    | T23B3.4   | 0.123927520553048     | AGIWUR27855 |
| N2                                                                      | CT | I | 6706766 | 6708919 | WBGene00020714 | T23B3.6  | T23B3.6   | -0.0808973837732161   | AGIWUR31861 |
| N2                                                                      | CT | I | 6711512 | 6712327 | WBGene00020711 | rmd-5    | T23B3.3   | 0.0186758098126463    | AGIWUR43249 |
| N2                                                                      | CT | I | 6715949 | 6717090 | WBGene00020710 | T23B3.2  | T23B3.2   | -0.0362708844712163   | AGIWUR4376  |
| N2                                                                      | CT | I | 6717819 | 6719430 | WBGene00020709 | T23B3.1  | T23B3.1   | -0.000888070294173815 | AGIWUR41299 |
| N2                                                                      | CT | I | 6719368 | 6723059 | WBGene00020933 | W02D3.4  | W02D3.4   | 0.0350862908955669    | AGIWUR22746 |

|                                                                                     |    |   |         |         |                |          |          |                     |             |
|-------------------------------------------------------------------------------------|----|---|---------|---------|----------------|----------|----------|---------------------|-------------|
| N2                                                                                  | CT | I | 6724917 | 6728330 | WBGene00003170 | mec-6    | W02D3.3  | -0.106269694856461  | AGIWUR969   |
| N2                                                                                  | CT | I | 6728290 | 6729376 | WBGene00002258 | lbp-6    | W02D3.5  | -0.0948953195187627 | AGIWUR30217 |
| N2                                                                                  | CT | I | 6729996 | 6730959 | WBGene00007057 | ant-1.2  | W02D3.6  | -0.144063573635842  | AGIWUR30633 |
| N2                                                                                  | CT | I | 6731267 | 6732280 | WBGene00002257 | lbp-5    | W02D3.7  | 0.12321663353771    |             |
| AGIWUR35562;AGIWUR35903                                                             |    |   |         |         |                |          |          |                     |             |
| N2                                                                                  | CT | I | 6734029 | 6736161 | WBGene00004883 | smg-5    | W02D3.8  | -0.247243371826016  | AGIWUR40678 |
| N2                                                                                  | CT | I | 6736680 | 6741175 | WBGene00020932 | dhod-1   | W02D3.2  | 0.0478767704525431  | AGIWUR16146 |
| N2                                                                                  | CT | I | 6741274 | 6741877 | WBGene00020931 | cytb-5.2 | W02D3.1  | -0.178297615894309  |             |
| AGIWUR6119;AGIWUR17412                                                              |    |   |         |         |                |          |          |                     |             |
| N2                                                                                  | CT | I | 6741984 | 6742358 | WBGene00020937 | W02D3.12 | W02D3.12 | -0.054524098322446  |             |
| AGIWUR27444                                                                         |    |   |         |         |                |          |          |                     |             |
| N2                                                                                  | CT | I | 6742293 | 6745341 | WBGene00006773 | unc-37   | W02D3.9  | -0.147966015477231  |             |
| AGIWUR5383;AGIWUR17092                                                              |    |   |         |         |                |          |          |                     |             |
| N2                                                                                  | CT | I | 6745991 | 6753031 | WBGene00020935 | fnci-1   | W02D3.10 | 0.0607168368237732  |             |
| AGIWUR9400;AGIWUR35508                                                              |    |   |         |         |                |          |          |                     |             |
| N2                                                                                  | CT | I | 6753219 | 6756348 | WBGene00020936 | hrpf-1   | W02D3.11 | 0.0682193812042007  |             |
| AGIWUR3301;AGIWUR4929;AGIWUR6674;AGIWUR15926;AGIWUR19943;AGIWUR35377                |    |   |         |         |                |          |          |                     |             |
| N2                                                                                  | CT | I | 6757763 | 6758178 | WBGene00001682 | gpc-2    | F08B6.2  | -0.0612220159215129 |             |
| AGIWUR8016;AGIWUR25894                                                              |    |   |         |         |                |          |          |                     |             |
| N2                                                                                  | CT | I | 6758181 | 6760179 | WBGene00017240 | calu-2   | F08B6.3  | -0.047594378449169  | AGIWUR31    |
| N2                                                                                  | CT | I | 6761228 | 6767797 | WBGene00006819 | unc-87   | F08B6.4  | 0.0977822836783888  |             |
| AGIWUR5112;AGIWUR7202;AGIWUR19433;AGIWUR32709                                       |    |   |         |         |                |          |          |                     |             |
| N2                                                                                  | CT | I | 6773976 | 6780151 | WBGene00004111 | pqn-21   | C37A2.5  | 0.229559032078395   |             |
| AGIWUR8188;AGIWUR13214;AGIWUR28740;AGIWUR31351;AGIWUR36292;AGIWUR38150;AGIWUR42687  |    |   |         |         |                |          |          |                     |             |
| N2                                                                                  | CT | I | 6780806 | 6784396 | WBGene00000871 | cye-1    | C37A2.4  | 0.1756086830603     |             |
| AGIWUR21118;AGIWUR35011                                                             |    |   |         |         |                |          |          |                     |             |
| N2                                                                                  | CT | I | 6784854 | 6787139 | WBGene00016491 | acd-5    | C37A2.3  | 0.164133054034728   |             |
| AGIWUR16440;AGIWUR35452;AGIWUR44135                                                 |    |   |         |         |                |          |          |                     |             |
| N2                                                                                  | CT | I | 6788032 | 6789002 | WBGene00016492 | C37A2.6  | C37A2.6  | -0.278304622990991  |             |
| AGIWUR6422;AGIWUR37330                                                              |    |   |         |         |                |          |          |                     |             |
| N2                                                                                  | CT | I | 6789039 | 6789738 | WBGene00016493 | C37A2.7  | C37A2.7  | -0.0399770120224385 |             |
| AGIWUR6374;AGIWUR44421                                                              |    |   |         |         |                |          |          |                     |             |
| N2                                                                                  | CT | I | 6791025 | 6797470 | WBGene00004110 | pqn-20   | C37A2.2  | 0.219272405095154   | AGIWUR19579 |
| N2                                                                                  | CT | I | 6798232 | 6799674 | WBGene00016494 | C37A2.8  | C37A2.8  | -0.0859256343909269 |             |
| AGIWUR28525;AGIWUR44472                                                             |    |   |         |         |                |          |          |                     |             |
| N2                                                                                  | CT | I | 6800386 | 6804860 | WBGene00017098 | E02D9.1  | E02D9.1  | -0.154421175300495  |             |
| AGIWUR17002;AGIWUR18835;AGIWUR27530;AGIWUR29337;AGIWUR32622;AGIWUR35400;AGIWUR42665 |    |   |         |         |                |          |          |                     |             |
| N2                                                                                  | CT | I | 6804788 | 6810451 | WBGene00019324 | K02F2.5  | K02F2.5  | 0.121453760894219   |             |
| AGIWUR7002;AGIWUR14204;AGIWUR16418;AGIWUR24188;AGIWUR38556;AGIWUR42759              |    |   |         |         |                |          |          |                     |             |

|                                                                                                                                                                                                      |    |   |         |         |                |          |          |                     |             |
|------------------------------------------------------------------------------------------------------------------------------------------------------------------------------------------------------|----|---|---------|---------|----------------|----------|----------|---------------------|-------------|
| N2                                                                                                                                                                                                   | CT | I | 6812664 | 6814248 | WBGene00006740 | ulp-5    | K02F2.4  | -0.141345673448493  | AGIWUR25907 |
| N2                                                                                                                                                                                                   | CT | I | 6814511 | 6834687 | WBGene00019323 | teg-4    | K02F2.3  | 0.0673592642838923  | AGIWUR33779 |
| N2                                                                                                                                                                                                   | CT | I | 6836375 | 6838140 | WBGene00019322 | ahcy-1   | K02F2.2  | 0.356188082297667   |             |
| AGIWUR287;AGIWUR1378;AGIWUR4956;AGIWUR8493;AGIWUR9338;AGIWUR9562;AGIWUR12159;AGIWUR14900;AGIWUR17808;AGIWUR17829;AGIWUR19142;AGIWUR23216;AGIWUR23428;AGIWUR26001;AGIWUR28582;AGIWUR29154;AGIWUR32426 |    |   |         |         |                |          |          |                     |             |
| N2                                                                                                                                                                                                   | CT | I | 6838354 | 6843343 | WBGene00001056 | dpy-3    | K02F2.1  | 0.00667368033455418 | AGIWUR15334 |
| N2                                                                                                                                                                                                   | CT | I | 6843589 | 6845134 | WBGene00001075 | dpy-14   | H27M09.4 | -0.259354162192308  |             |
| AGIWUR26750                                                                                                                                                                                          |    |   |         |         |                |          |          |                     |             |
| N2                                                                                                                                                                                                   | CT | I | 6845175 | 6846952 | WBGene00019248 | H27M09.5 | H27M09.5 | 0.0564655920940318  |             |
| AGIWUR12565                                                                                                                                                                                          |    |   |         |         |                |          |          |                     |             |
| N2                                                                                                                                                                                                   | CT | I | 6847511 | 6849923 | WBGene00019247 | syp-4    | H27M09.3 | 0.00693193579331108 |             |
| AGIWUR16231                                                                                                                                                                                          |    |   |         |         |                |          |          |                     |             |
| N2                                                                                                                                                                                                   | CT | I | 6850409 | 6851356 | WBGene00019246 | rpb-5    | H27M09.2 | -0.108313728239837  |             |
| AGIWUR41547                                                                                                                                                                                          |    |   |         |         |                |          |          |                     |             |
| N2                                                                                                                                                                                                   | CT | I | 6851372 | 6854140 | WBGene00019245 | sacy-1   | H27M09.1 | 0.211718809016428   |             |
| AGIWUR16956;AGIWUR24226;AGIWUR38168;AGIWUR39686;AGIWUR41837                                                                                                                                          |    |   |         |         |                |          |          |                     |             |
| N2                                                                                                                                                                                                   | CT | I | 6862397 | 6870424 | WBGene00044898 | let-383  | T21G5.6  | 0.0416214552859753  |             |
| AGIWUR3358;AGIWUR6039;AGIWUR10814;AGIWUR19853;AGIWUR35561                                                                                                                                            |    |   |         |         |                |          |          |                     |             |
| N2                                                                                                                                                                                                   | CT | I | 6870415 | 6871911 | WBGene00020660 | T21G5.2  | T21G5.2  | 0.18233794559513    |             |
| AGIWUR21753;AGIWUR29068;AGIWUR35710                                                                                                                                                                  |    |   |         |         |                |          |          |                     |             |
| N2                                                                                                                                                                                                   | CT | I | 6872597 | 6873755 | WBGene00020661 | smz-2    | T21G5.4  | 0.208343457384029   | AGIWUR42609 |
| N2                                                                                                                                                                                                   | CT | I | 6874304 | 6876928 | WBGene00020659 | T21G5.1  | T21G5.1  | 0.185712724688704   | AGIWUR26740 |
| N2                                                                                                                                                                                                   | CT | I | 6877080 | 6888217 | WBGene00006423 | asd-2    | T21G5.5  | 0.308361924011145   |             |
| AGIWUR22524;AGIWUR24899;AGIWUR25729;AGIWUR34706;AGIWUR38832;AGIWUR43537;AGIWUR44294                                                                                                                  |    |   |         |         |                |          |          |                     |             |
| N2                                                                                                                                                                                                   | CT | I | 6889254 | 6891501 | WBGene00016742 | C48B6.4  | C48B6.4  | 0.172491466312312   | AGIWUR13786 |
| N2                                                                                                                                                                                                   | CT | I | 6897755 | 6900619 | WBGene00016743 | srb-15   | C48B6.5  | 0.22106054670907    | AGIWUR12549 |
| N2                                                                                                                                                                                                   | CT | I | 6900947 | 6913579 | WBGene00004879 | smg-1    | C48B6.6  | 0.0470809614456975  |             |
| AGIWUR26267;AGIWUR29121;AGIWUR35234                                                                                                                                                                  |    |   |         |         |                |          |          |                     |             |
| N2                                                                                                                                                                                                   | CT | I | 6915049 | 6916609 | WBGene00016741 | C48B6.3  | C48B6.3  | -0.0407012519195202 |             |
| AGIWUR3569;AGIWUR8775;AGIWUR16126;AGIWUR22913;AGIWUR32725;AGIWUR33646                                                                                                                                |    |   |         |         |                |          |          |                     |             |
| N2                                                                                                                                                                                                   | CT | I | 6916766 | 6917560 | WBGene00016740 | C48B6.2  | C48B6.2  | -0.123420962240264  | AGIWUR3988  |
| N2                                                                                                                                                                                                   | CT | I | 6923076 | 6923688 | WBGene00016746 | C48B6.10 | C48B6.10 | -0.197692662897734  |             |
| AGIWUR2589;AGIWUR8621;AGIWUR26363;AGIWUR28730;AGIWUR30871;AGIWUR44258                                                                                                                                |    |   |         |         |                |          |          |                     |             |
| N2                                                                                                                                                                                                   | CT | I | 6924288 | 6925463 | WBGene00016745 | C48B6.9  | C48B6.9  | 0.0237408665084082  | AGIWUR21629 |
| N2                                                                                                                                                                                                   | CT | I | 6926262 | 6929664 | WBGene00020399 | ztf-4    | T10B11.3 | 0.0340369038858555  |             |
| AGIWUR20363                                                                                                                                                                                          |    |   |         |         |                |          |          |                     |             |
| N2                                                                                                                                                                                                   | CT | I | 6931138 | 6936928 | WBGene00020398 | cerk-1   | T10B11.2 | -0.0833421313073508 |             |
| AGIWUR8530                                                                                                                                                                                           |    |   |         |         |                |          |          |                     |             |
| N2                                                                                                                                                                                                   | CT | I | 6937504 | 6939618 | WBGene00020400 | T10B11.4 | T10B11.4 | 0.61261804200042    |             |

|                                                                                                                       |    |   |         |         |                |          |          |                               |
|-----------------------------------------------------------------------------------------------------------------------|----|---|---------|---------|----------------|----------|----------|-------------------------------|
| AGIWUR31514                                                                                                           |    |   |         |         |                |          |          |                               |
| N2                                                                                                                    | CT | I | 6940249 | 6941950 | WBGene00020401 | T10B11.5 | T10B11.5 | -0.137811292449346            |
| AGIWUR43470                                                                                                           |    |   |         |         |                |          |          |                               |
| N2                                                                                                                    | CT | I | 6943176 | 6945358 | WBGene00020402 | T10B11.6 | T10B11.6 | -0.0374177665380913           |
| AGIWUR14326                                                                                                           |    |   |         |         |                |          |          |                               |
| N2                                                                                                                    | CT | I | 6945596 | 6950499 | WBGene00020403 | T10B11.7 | T10B11.7 | -0.089710242265622            |
| AGIWUR41683                                                                                                           |    |   |         |         |                |          |          |                               |
| N2                                                                                                                    | CT | I | 6951135 | 6951982 | WBGene00020397 | pcbd-1   | T10B11.1 | 0.0829189495805522            |
| AGIWUR16908                                                                                                           |    |   |         |         |                |          |          |                               |
| N2                                                                                                                    | CT | I | 6951900 | 6954252 | WBGene00020404 | T10B11.8 | T10B11.8 | -0.226370647565542            |
| AGIWUR11281                                                                                                           |    |   |         |         |                |          |          |                               |
| N2                                                                                                                    | CT | I | 6954414 | 6961139 | WBGene00016260 | rege-1   | C30F12.1 | 0.149815366671069             |
| AGIWUR409;AGIWUR6954;AGIWUR24743;AGIWUR28854;AGIWUR31266;AGIWUR32912                                                  |    |   |         |         |                |          |          |                               |
| N2                                                                                                                    | CT | I | 6967670 | 6970190 | WBGene00016261 | C30F12.2 | C30F12.2 | 0.00133309408153348           |
| AGIWUR4610;AGIWUR34084                                                                                                |    |   |         |         |                |          |          |                               |
| N2                                                                                                                    | CT | I | 6970367 | 6971879 | WBGene00016262 | C30F12.3 | C30F12.3 | -0.26043070466017             |
| AGIWUR15866                                                                                                           |    |   |         |         |                |          |          |                               |
| N2                                                                                                                    | CT | I | 6972157 | 6973789 | WBGene00016263 | C30F12.4 | C30F12.4 | 0.0975198760809057            |
| AGIWUR17475                                                                                                           |    |   |         |         |                |          |          |                               |
| N2                                                                                                                    | CT | I | 6974558 | 6977100 | WBGene00016266 | idhg-2   | C30F12.7 | -0.105542146651935            |
| AGIWUR38700                                                                                                           |    |   |         |         |                |          |          |                               |
| N2                                                                                                                    | CT | I | 6989067 | 6992106 | WBGene00016265 | trhr-1   | C30F12.6 | -0.211675484923108            |
| AGIWUR4257                                                                                                            |    |   |         |         |                |          |          |                               |
| N2                                                                                                                    | CT | I | 6991951 | 6999706 | WBGene00016264 | C30F12.5 | C30F12.5 | 0.0158113861774698            |
| AGIWUR3647;AGIWUR41737                                                                                                |    |   |         |         |                |          |          |                               |
| N2                                                                                                                    | CT | I | 7002870 | 7003481 | WBGene00010371 | H06001.4 | H06001.4 | 0.0813866890427688            |
| AGIWUR24652                                                                                                           |    |   |         |         |                |          |          |                               |
| N2                                                                                                                    | CT | I | 7005443 | 7009190 | WBGene00010370 | ctg-1    | H06001.3 | -0.120903090266177            |
| AGIWUR39363                                                                                                           |    |   |         |         |                |          |          |                               |
| N2                                                                                                                    | CT | I | 7009139 | 7015212 | WBGene00010369 | chd-1    | H06001.2 | 0.0326380363982643            |
| AGIWUR350                                                                                                             |    |   |         |         |                |          |          |                               |
| N2                                                                                                                    | CT | I | 7015912 | 7021743 | WBGene00003964 | pdi-3    | H06001.1 | 0.0568839504008132            |
| AGIWUR20997;AGIWUR22066                                                                                               |    |   |         |         |                |          |          |                               |
| N2                                                                                                                    | CT | I | 7021946 | 7029076 | WBGene00008852 | ubql-1   | F15C11.2 | 0.0633240833002171            |
| AGIWUR2160;AGIWUR4824;AGIWUR10320;AGIWUR10692;AGIWUR12397;AGIWUR13433;AGIWUR13487;AGIWUR23339;AGIWUR37152;AGIWUR44055 |    |   |         |         |                |          |          |                               |
| N2                                                                                                                    | CT | I | 7038900 | 7048832 | WBGene00004773 | sem-4    | F15C11.1 | 0.324316124427114             |
| AGIWUR17306;AGIWUR32821;AGIWUR36613;AGIWUR38195;AGIWUR39733                                                           |    |   |         |         |                |          |          |                               |
| N2                                                                                                                    | CT | I | 7050042 | 7051712 | WBGene00044764 | W01A8.7  | W01A8.7  | -1.05738223437372 AGIWUR24025 |



|                                                                        |    |   |         |         |                |          |          |                      |             |
|------------------------------------------------------------------------|----|---|---------|---------|----------------|----------|----------|----------------------|-------------|
| N2                                                                     | CT | I | 7057170 | 7059351 | WBGene00007024 | plin-1   | W01A8.1  | 0.179793604477645    |             |
| AGIWUR6882;AGIWUR21896;AGIWUR25710;AGIWUR39335;AGIWUR41766             |    |   |         |         |                |          |          |                      |             |
| N2                                                                     | CT | I | 7065263 | 7067899 | WBGene00012165 | cutl-6   | W01A8.3  | 0.143462548813162    | AGIWUR6403  |
| N2                                                                     | CT | I | 7068106 | 7069186 | WBGene00012166 | nuo-6    | W01A8.4  | 0.149853869383022    |             |
| AGIWUR5024;AGIWUR14516;AGIWUR20848                                     |    |   |         |         |                |          |          |                      |             |
| N2                                                                     | CT | I | 7069440 | 7070728 | WBGene00012167 | tofu-5   | W01A8.5  | -0.0328829521675971  |             |
| AGIWUR10884;AGIWUR16983;AGIWUR23898;AGIWUR29769;AGIWUR44504            |    |   |         |         |                |          |          |                      |             |
| N2                                                                     | CT | I | 7070649 | 7074733 | WBGene00012168 | W01A8.6  | W01A8.6  | 0.0488007418226175   | AGIWUR2324  |
| N2                                                                     | CT | I | 7075918 | 7079566 | WBGene00002198 | kin-14   | F22D6.1  | -0.145818979425082   | AGIWUR11797 |
| N2                                                                     | CT | I | 7079868 | 7081520 | WBGene00009050 | F22D6.2  | F22D6.2  | 0.0552390686923001   |             |
| AGIWUR7047;AGIWUR7697;AGIWUR28913;AGIWUR33699                          |    |   |         |         |                |          |          |                      |             |
| N2                                                                     | CT | I | 7088030 | 7090062 | WBGene00003815 | nars-1   | F22D6.3  | -0.0677424277815106  |             |
| AGIWUR8353;AGIWUR28891;AGIWUR31912                                     |    |   |         |         |                |          |          |                      |             |
| N2                                                                     | CT | I | 7090623 | 7091371 | WBGene00009051 | nduf-6   | F22D6.4  | 0.108332763410633    | AGIWUR24434 |
| N2                                                                     | CT | I | 7091309 | 7094537 | WBGene00004186 | prpf-4   | F22D6.5  | -0.119525434036689   | AGIWUR11477 |
| N2                                                                     | CT | I | 7095486 | 7098406 | WBGene00009052 | ekl-1    | F22D6.6  | -0.0723175349668992  | AGIWUR22881 |
| N2                                                                     | CT | I | 7098981 | 7099497 | WBGene00043279 | F22D6.8  | F22D6.8  | -0.221637246276746   |             |
| AGIWUR5007;AGIWUR5895;AGIWUR19127;AGIWUR27377;AGIWUR36296;AGIWUR44085  |    |   |         |         |                |          |          |                      |             |
| N2                                                                     | CT | I | 7099810 | 7101775 | WBGene00009054 | F22D6.9  | F22D6.9  | -0.00349979503202746 | AGIWUR19730 |
| N2                                                                     | CT | I | 7102216 | 7103392 | WBGene00009056 | F22D6.15 | F22D6.15 | -0.100760782420726   |             |
| AGIWUR11066;AGIWUR24483;AGIWUR44167                                    |    |   |         |         |                |          |          |                      |             |
| N2                                                                     | CT | I | 7105302 | 7106926 | WBGene00000636 | col-60   | F22D6.10 | 0.346209075527698    |             |
| AGIWUR14941                                                            |    |   |         |         |                |          |          |                      |             |
| N2                                                                     | CT | I | 7110240 | 7112287 | WBGene00001643 | gly-18   | F22D6.11 | -0.0778967871790668  |             |
| AGIWUR10272                                                            |    |   |         |         |                |          |          |                      |             |
| N2                                                                     | CT | I | 7112903 | 7115001 | WBGene00001644 | gly-19   | F22D6.12 | -0.106697434383846   |             |
| AGIWUR30017;AGIWUR32849                                                |    |   |         |         |                |          |          |                      |             |
| N2                                                                     | CT | I | 7116092 | 7116889 | WBGene00010740 | K10D3.6  | K10D3.6  | -0.0407325435652099  |             |
| AGIWUR34630;AGIWUR43978                                                |    |   |         |         |                |          |          |                      |             |
| N2                                                                     | CT | I | 7117808 | 7121545 | WBGene00001614 | glr-3    | K10D3.1  | -0.269862856125516   |             |
| AGIWUR1117;AGIWUR20863                                                 |    |   |         |         |                |          |          |                      |             |
| N2                                                                     | CT | I | 7121657 | 7122194 | WBGene00219281 | K10D3.8  | K10D3.8  | 0.00774978313436936  | AGIWUR40179 |
| N2                                                                     | CT | I | 7122614 | 7128423 | WBGene00006753 | unc-14   | K10D3.2  | -0.119953472488192   |             |
| AGIWUR5593;AGIWUR16242;AGIWUR16992;AGIWUR17744;AGIWUR22269;AGIWUR37434 |    |   |         |         |                |          |          |                      |             |
| N2                                                                     | CT | I | 7132747 | 7134312 | WBGene00006394 | taf-11.2 | K10D3.3  | -0.155447143982766   |             |
| AGIWUR23016;AGIWUR35624;AGIWUR37192                                    |    |   |         |         |                |          |          |                      |             |
| N2                                                                     | CT | I | 7134738 | 7139973 | WBGene00010738 | K10D3.4  | K10D3.4  | 0.00411907532803646  | AGIWUR12834 |
| N2                                                                     | CT | I | 7140278 | 7147230 | WBGene00010427 | hpo-11   | H37N21.1 | 0.053928468618901    |             |
| AGIWUR9880;AGIWUR43725                                                 |    |   |         |         |                |          |          |                      |             |

|                                                                                                           |    |   |         |         |                |         |         |                     |             |
|-----------------------------------------------------------------------------------------------------------|----|---|---------|---------|----------------|---------|---------|---------------------|-------------|
| N2                                                                                                        | CT | I | 7149937 | 7151887 | WBGene00010645 | fec1-1  | K07G5.6 | -0.123455349242086  | AGIWUR6918  |
| N2                                                                                                        | CT | I | 7152463 | 7156868 | WBGene00010641 | crml-1  | K07G5.1 | 0.160657466656398   |             |
| AGIWUR923;AGIWUR2297;AGIWUR24001;AGIWUR40638                                                              |    |   |         |         |                |         |         |                     |             |
| N2                                                                                                        | CT | I | 7159714 | 7160917 | WBGene00006963 | xpa-1   | K07G5.2 | -0.116055174652082  | AGIWUR9973  |
| N2                                                                                                        | CT | I | 7161016 | 7166518 | WBGene00010642 | mks-6   | K07G5.3 | 0.065376487069158   |             |
| AGIWUR17006;AGIWUR35676                                                                                   |    |   |         |         |                |         |         |                     |             |
| N2                                                                                                        | CT | I | 7166932 | 7168783 | WBGene00010643 | K07G5.4 | K07G5.4 | 0.171427775654598   | AGIWUR19839 |
| N2                                                                                                        | CT | I | 7169997 | 7172189 | WBGene00010644 | K07G5.5 | K07G5.5 | 0.0373831955024926  | AGIWUR36732 |
| N2                                                                                                        | CT | I | 7172463 | 7174156 | WBGene00010870 | let-522 | M05B5.2 | 0.0159029844804444  | AGIWUR13948 |
| N2                                                                                                        | CT | I | 7177953 | 7179430 | WBGene00010869 | M05B5.1 | M05B5.1 | 0.579352943279382   | AGIWUR15124 |
| N2                                                                                                        | CT | I | 7183053 | 7185709 | WBGene00010873 | trpa-2  | M05B5.6 | -0.116517198092193  | AGIWUR13437 |
| N2                                                                                                        | CT | I | 7185695 | 7188298 | WBGene00010871 | M05B5.3 | M05B5.3 | 0.281922037915695   | AGIWUR6763  |
| N2                                                                                                        | CT | I | 7188465 | 7190581 | WBGene00010872 | M05B5.4 | M05B5.4 | 0.00694571592317406 |             |
| AGIWUR6384;AGIWUR17510                                                                                    |    |   |         |         |                |         |         |                     |             |
| N2                                                                                                        | CT | I | 7190834 | 7193924 | WBGene00001949 | hlh-2   | M05B5.5 | -0.0979877745549587 |             |
| AGIWUR8155;AGIWUR10611;AGIWUR18355                                                                        |    |   |         |         |                |         |         |                     |             |
| N2                                                                                                        | CT | I | 7202242 | 7203533 | WBGene00000637 | col-61  | C01H6.1 | 0.454943751202999   | AGIWUR17413 |
| N2                                                                                                        | CT | I | 7204541 | 7207717 | WBGene00007252 | mlt-2   | C01H6.2 | -0.0374405060116416 | AGIWUR13393 |
| N2                                                                                                        | CT | I | 7208028 | 7209866 | WBGene00007253 | C01H6.3 | C01H6.3 | 0.0266775247940361  | AGIWUR12247 |
| N2                                                                                                        | CT | I | 7210515 | 7212579 | WBGene00007254 | C01H6.4 | C01H6.4 | -0.223165740290831  |             |
| AGIWUR31742;AGIWUR32511                                                                                   |    |   |         |         |                |         |         |                     |             |
| N2                                                                                                        | CT | I | 7214745 | 7221781 | WBGene00003622 | nhr-23  | C01H6.5 | 0.277860218056487   |             |
| AGIWUR5349;AGIWUR8686;AGIWUR11774;AGIWUR22468;AGIWUR27636;AGIWUR31994;AGIWUR33632;AGIWUR34495;AGIWUR36432 |    |   |         |         |                |         |         |                     |             |
| N2                                                                                                        | CT | I | 7222296 | 7224381 | WBGene00007255 | cnm-4   | C01H6.6 | -0.151495194043562  |             |
| AGIWUR485;AGIWUR20649;AGIWUR41720                                                                         |    |   |         |         |                |         |         |                     |             |
| N2                                                                                                        | CT | I | 7224656 | 7227767 | WBGene00007256 | swsn-9  | C01H6.7 | -0.0305262498300962 | AGIWUR16237 |
| N2                                                                                                        | CT | I | 7227859 | 7229434 | WBGene00007257 | C01H6.8 | C01H6.8 | -0.1087584067875    |             |
| AGIWUR18870;AGIWUR23323;AGIWUR27055;AGIWUR27094                                                           |    |   |         |         |                |         |         |                     |             |
| N2                                                                                                        | CT | I | 7229433 | 7233121 | WBGene00007258 | hasp-1  | C01H6.9 | -0.10149672060684   |             |
| AGIWUR21484;AGIWUR22965                                                                                   |    |   |         |         |                |         |         |                     |             |
| N2                                                                                                        | CT | I | 7233645 | 7234501 | WBGene00011062 | R06C7.2 | R06C7.2 | -0.108829109671792  | AGIWUR43578 |
| N2                                                                                                        | CT | I | 7235371 | 7238790 | WBGene00011061 | wago-1  | R06C7.1 | 0.227565680609565   |             |
| AGIWUR2605;AGIWUR31860                                                                                    |    |   |         |         |                |         |         |                     |             |
| N2                                                                                                        | CT | I | 7238994 | 7243967 | WBGene00000963 | dhp-1   | R06C7.3 | -0.0384366786922836 |             |
| AGIWUR11332;AGIWUR32947                                                                                   |    |   |         |         |                |         |         |                     |             |
| N2                                                                                                        | CT | I | 7246849 | 7248741 | WBGene00011064 | adsl-1  | R06C7.5 | -0.0829783470352892 |             |
| AGIWUR2006;AGIWUR8376;AGIWUR29052;AGIWUR41518                                                             |    |   |         |         |                |         |         |                     |             |
| N2                                                                                                        | CT | I | 7248828 | 7251422 | WBGene00003041 | lin-61  | R06C7.7 | -0.178275951508062  |             |
| AGIWUR29775;AGIWUR42249                                                                                   |    |   |         |         |                |         |         |                     |             |

|                                                                       |    |   |         |         |                |          |          |                     |             |
|-----------------------------------------------------------------------|----|---|---------|---------|----------------|----------|----------|---------------------|-------------|
| N2                                                                    | CT | I | 7251941 | 7255223 | WBGene00000275 | bub-1    | R06C7.8  | 0.163716989691139   | AGIWUR20021 |
| N2                                                                    | CT | I | 7255380 | 7258700 | WBGene00011066 | ztf-15   | R06C7.9  | 0.0922925173079232  | AGIWUR32881 |
| N2                                                                    | CT | I | 7258915 | 7267117 | WBGene00002348 | myo-1    | R06C7.10 | 0.438949083341917   |             |
| AGIWUR24541                                                           |    |   |         |         |                |          |          |                     |             |
| N2                                                                    | CT | I | 7269179 | 7273005 | WBGene00006656 | twk-1    | F21C3.1  | 0.125696658643852   | AGIWUR16353 |
| N2                                                                    | CT | I | 7274282 | 7278573 | WBGene00009001 | tyr-3    | F21C3.2  | 0.132814479915662   | AGIWUR19725 |
| N2                                                                    | CT | I | 7278802 | 7279609 | WBGene00077548 | F21C3.7  | F21C3.7  | 0.0500718348464559  |             |
| AGIWUR21181;AGIWUR29371;AGIWUR42066                                   |    |   |         |         |                |          |          |                     |             |
| N2                                                                    | CT | I | 7279658 | 7280501 | WBGene00009002 | hint-1   | F21C3.3  | -0.149640229961371  | AGIWUR34525 |
| N2                                                                    | CT | I | 7280552 | 7282871 | WBGene00004324 | rde-2    | F21C3.4  | -0.134825245435508  | AGIWUR37884 |
| N2                                                                    | CT | I | 7282964 | 7283818 | WBGene00009004 | pfd-6    | F21C3.5  | -0.186162652566514  | AGIWUR14191 |
| N2                                                                    | CT | I | 7283907 | 7285762 | WBGene00009005 | F21C3.6  | F21C3.6  | -0.0571443833426049 | AGIWUR6232  |
| N2                                                                    | CT | I | 7291272 | 7293331 | WBGene00008762 | ztf-2    | F13G3.1  | -0.0832276560936736 | AGIWUR38805 |
| N2                                                                    | CT | I | 7294038 | 7295687 | WBGene00005131 | srd-53   | F13G3.2  | 0.13765353263478    | AGIWUR18194 |
| N2                                                                    | CT | I | 7295753 | 7297004 | WBGene00008770 | F13G3.12 | F13G3.12 | -0.218198132033901  |             |
| AGIWUR44355                                                           |    |   |         |         |                |          |          |                     |             |
| N2                                                                    | CT | I | 7296913 | 7299983 | WBGene00008763 | F13G3.3  | F13G3.3  | -0.0205905485480464 | AGIWUR37892 |
| N2                                                                    | CT | I | 7300062 | 7300913 | WBGene00008764 | dylt-1   | F13G3.4  | 0.261905987129261   |             |
| AGIWUR23442;AGIWUR40549                                               |    |   |         |         |                |          |          |                     |             |
| N2                                                                    | CT | I | 7301007 | 7303227 | WBGene00008765 | ttx-7    | F13G3.5  | -0.13352236291615   |             |
| AGIWUR26166;AGIWUR32307                                               |    |   |         |         |                |          |          |                     |             |
| N2                                                                    | CT | I | 7303300 | 7304690 | WBGene00008766 | F13G3.6  | F13G3.6  | -0.0396143466854078 | AGIWUR33952 |
| N2                                                                    | CT | I | 7304918 | 7307010 | WBGene00008767 | F13G3.7  | F13G3.7  | -0.115822237870237  |             |
| AGIWUR7091;AGIWUR24366;AGIWUR27990                                    |    |   |         |         |                |          |          |                     |             |
| N2                                                                    | CT | I | 7307117 | 7308626 | WBGene00008769 | mrp1-13  | F13G3.11 | 0.0182691447630723  |             |
| AGIWUR7546;AGIWUR8371;AGIWUR24043;AGIWUR27410;AGIWUR37354;AGIWUR37886 |    |   |         |         |                |          |          |                     |             |
| N2                                                                    | CT | I | 7308603 | 7311939 | WBGene00001136 | eat-5    | F13G3.8  | -0.043329823239227  | AGIWUR15708 |
| N2                                                                    | CT | I | 7312797 | 7313525 | WBGene00003236 | mif-3    | F13G3.9  | -0.103205511591977  | AGIWUR6050  |
| N2                                                                    | CT | I | 7313585 | 7314277 | WBGene00008768 | F13G3.10 | F13G3.10 | -0.317435102985753  |             |
| AGIWUR10810                                                           |    |   |         |         |                |          |          |                     |             |
| N2                                                                    | CT | I | 7317646 | 7318337 | WBGene00009915 | F52A8.1  | F52A8.1  | 0.0013080264617118  |             |
| AGIWUR17070;AGIWUR32537                                               |    |   |         |         |                |          |          |                     |             |
| N2                                                                    | CT | I | 7318290 | 7321085 | WBGene00001680 | gpb-2    | F52A8.2  | 0.198290180192915   |             |
| AGIWUR5017;AGIWUR30919                                                |    |   |         |         |                |          |          |                     |             |
| N2                                                                    | CT | I | 7322270 | 7324415 | WBGene00009916 | F52A8.3  | F52A8.3  | -0.178703496360681  |             |
| AGIWUR15576;AGIWUR38874;AGIWUR39839                                   |    |   |         |         |                |          |          |                     |             |
| N2                                                                    | CT | I | 7339204 | 7345949 | WBGene00009917 | glb-18   | F52A8.4  | -0.127046551008657  | AGIWUR25073 |
| N2                                                                    | CT | I | 7345932 | 7347427 | WBGene00009918 | gcsh-2   | F52A8.5  | -0.119150758053015  | AGIWUR45177 |
| N2                                                                    | CT | I | 7347222 | 7350386 | WBGene00009919 | kbr1-1   | F52A8.6  | -0.0815662153771362 |             |

AGIWUR12791;AGIWUR16926;AGIWUR22612;AGIWUR29694;AGIWUR39394;AGIWUR40419  
 N2 CT I 7350312 7352235 WBGene00002136 inx-14 F07A5.1 -0.0955522257943588  
 AGIWUR519;AGIWUR43444  
 N2 CT I 7352415 7353701 WBGene00008541 F07A5.2 F07A5.2 0.16416224251442 AGIWUR31313  
 N2 CT I 7354491 7357180 WBGene00008542 scav-6 F07A5.3 -0.333249816342841 AGIWUR34532  
 N2 CT I 7357180 7359100 WBGene00008543 F07A5.4 F07A5.4 -0.00322241727530237  
 AGIWUR5394;AGIWUR32250;AGIWUR43624  
 N2 CT I 7360199 7371534 WBGene00006306 sue-1 F07A5.5 0.0785996568279703  
 AGIWUR7614;AGIWUR42629  
 N2 CT I 7376604 7383197 WBGene00006754 unc-15 F07A5.7 0.20266651430649  
 AGIWUR979;AGIWUR5073;AGIWUR7505;AGIWUR11096;AGIWUR28192;AGIWUR34853;AGIWUR44241  
 N2 CT I 7384398 7388792 WBGene00007597 C15A11.2 C15A11.2 0.128525038865517  
 AGIWUR25007  
 N2 CT I 7389049 7395918 WBGene00004944 sol-1 C15A11.3 -0.120478619951707  
 AGIWUR36489  
 N2 CT I 7398824 7401023 WBGene00007598 C15A11.4 C15A11.4  
 -0.00560791034427766 AGIWUR3755  
 N2 CT I 7404950 7408511 WBGene00007599 C15A11.7 C15A11.7 -0.129279611394299  
 AGIWUR5504;AGIWUR10256;AGIWUR20323  
 N2 CT I 7422785 7454088 WBGene00006752 unc-13 ZK524.2 0.0147512850738174 AGIWUR25843  
 N2 CT I 7454660 7456953 WBGene00004958 spe-4 ZK524.1 0.0656496430730904 AGIWUR9983  
 N2 CT I 7457153 7460756 WBGene00003074 lars-2 ZK524.3 -0.0905169964574473 AGIWUR37098  
 N2 CT I 7460858 7466424 WBGene00013994 ZK524.4 ZK524.4 -0.191477958112282  
 AGIWUR7548;AGIWUR15682;AGIWUR18485;AGIWUR23215;AGIWUR24454;AGIWUR32072;AGIWUR39429;AGIWUR40886  
 N2 CT I 7472611 7476946 WBGene00012136 T28F4.1 T28F4.1 0.0831076842113347 AGIWUR23973  
 N2 CT I 7480108 7483392 WBGene00012137 asic-2 T28F4.2 0.0819982632549019 AGIWUR28627  
 N2 CT I 7484159 7486302 WBGene00012138 T28F4.3 T28F4.3 0.280515545545994  
 AGIWUR3863;AGIWUR23076;AGIWUR41466  
 N2 CT I 7486577 7490174 WBGene00012139 T28F4.4 T28F4.4 -0.225044959035984 AGIWUR26867  
 N2 CT I 7491816 7492934 WBGene00012140 T28F4.5 T28F4.5 -0.237259210752366  
 AGIWUR3589;AGIWUR3804;AGIWUR5333;AGIWUR18046;AGIWUR25627;AGIWUR36240  
 N2 CT I 7492788 7494700 WBGene00012141 T28F4.6 T28F4.6 0.0420863403784253 AGIWUR22039  
 N2 CT I 7495437 7503577 WBGene00007042 pbrm-1 C26C6.1 0.0355515340188779  
 AGIWUR4581;AGIWUR8361;AGIWUR8965;AGIWUR20774  
 N2 CT I 7503576 7505580 WBGene00007742 C26C6.8 C26C6.8 0.0318631497688866  
 AGIWUR24774;AGIWUR26471  
 N2 CT I 7505951 7506693 WBGene00007740 C26C6.6 C26C6.6 0.114772751594202 AGIWUR1050  
 N2 CT I 7508721 7512593 WBGene00007741 glb-8 C26C6.7 0.150676358493098 AGIWUR32542  
 N2 CT I 7512918 7513726 WBGene00077553 C26C6.10 C26C6.10 -0.0696820535539544

AGIWUR8783;AGIWUR12734;AGIWUR16803;AGIWUR31486;AGIWUR45154

|                                                                                                                                  |    |   |         |         |                |          |          |                       |             |
|----------------------------------------------------------------------------------------------------------------------------------|----|---|---------|---------|----------------|----------|----------|-----------------------|-------------|
| N2                                                                                                                               | CT | I | 7514117 | 7515126 | WBGene00007743 | C26C6.9  | C26C6.9  | -0.217231446040781    | AGIWUR8485  |
| N2                                                                                                                               | CT | I | 7522116 | 7526703 | WBGene00001648 | goa-1    | C26C6.2  | 0.33387516118131      |             |
| AGIWUR13528;AGIWUR17695;AGIWUR38775;AGIWUR41116                                                                                  |    |   |         |         |                |          |          |                       |             |
| N2                                                                                                                               | CT | I | 7527224 | 7531715 | WBGene00003552 | nas-36   | C26C6.3  | 0.149025546610412     | AGIWUR16556 |
| N2                                                                                                                               | CT | I | 7532315 | 7535997 | WBGene00007739 | C26C6.4  | C26C6.4  | -0.860434340952496    | AGIWUR19863 |
| N2                                                                                                                               | CT | I | 7536204 | 7542157 | WBGene00000938 | dcp-66   | C26C6.5  | -0.0429352814474644   |             |
| AGIWUR1334;AGIWUR14944;AGIWUR20106;AGIWUR32961;AGIWUR44832                                                                       |    |   |         |         |                |          |          |                       |             |
| N2                                                                                                                               | CT | I | 7552975 | 7554553 | WBGene00012029 | T25G3.1  | T25G3.1  | 0.0179016990889025    | AGIWUR18597 |
| N2                                                                                                                               | CT | I | 7554855 | 7559916 | WBGene00000496 | chs-1    | T25G3.2  | -0.0646115800225306   | AGIWUR19128 |
| N2                                                                                                                               | CT | I | 7559839 | 7562349 | WBGene00012030 | T25G3.3  | T25G3.3  | -0.127483999385397    |             |
| AGIWUR3427;AGIWUR4620;AGIWUR5004;AGIWUR7005;AGIWUR12640;AGIWUR22358;AGIWUR23711;AGIWUR27358;AGIWUR31286;AGIWUR31532;AGIWUR40279  |    |   |         |         |                |          |          |                       |             |
| N2                                                                                                                               | CT | I | 7564584 | 7567719 | WBGene00012031 | T25G3.4  | T25G3.4  | 0.229249995851597     |             |
| AGIWUR186;AGIWUR12674;AGIWUR13829;AGIWUR42301                                                                                    |    |   |         |         |                |          |          |                       |             |
| N2                                                                                                                               | CT | I | 7567775 | 7571250 | WBGene00008411 | mans-1   | D2030.1  | -0.0548293869697991   |             |
| AGIWUR1155;AGIWUR3168;AGIWUR4637;AGIWUR12685;AGIWUR20584;AGIWUR26209;AGIWUR26452;AGIWUR30258;AGIWUR38235;AGIWUR41375;AGIWUR42688 |    |   |         |         |                |          |          |                       |             |
| N2                                                                                                                               | CT | I | 7574195 | 7578564 | WBGene00008412 | D2030.2  | D2030.2  | -0.136450345069616    |             |
| AGIWUR13197;AGIWUR43842;AGIWUR43976                                                                                              |    |   |         |         |                |          |          |                       |             |
| N2                                                                                                                               | CT | I | 7578512 | 7580833 | WBGene00008413 | D2030.3  | D2030.3  | 0.00814731502464117   |             |
| AGIWUR13349;AGIWUR37279                                                                                                          |    |   |         |         |                |          |          |                       |             |
| N2                                                                                                                               | CT | I | 7580944 | 7581628 | WBGene00008414 | D2030.4  | D2030.4  | -0.0552899774602089   | AGIWUR31361 |
| N2                                                                                                                               | CT | I | 7582106 | 7583349 | WBGene00008415 | mce-1    | D2030.5  | -0.162843370491586    |             |
| AGIWUR7421;AGIWUR9392;AGIWUR21647;AGIWUR32440;AGIWUR39252;AGIWUR44166                                                            |    |   |         |         |                |          |          |                       |             |
| N2                                                                                                                               | CT | I | 7583810 | 7585340 | WBGene00008421 | D2030.12 | D2030.12 | 0.0971016263572455    |             |
| AGIWUR34170                                                                                                                      |    |   |         |         |                |          |          |                       |             |
| N2                                                                                                                               | CT | I | 7585324 | 7588367 | WBGene00004178 | prg-1    | D2030.6  | 0.106682216715747     | AGIWUR10305 |
| N2                                                                                                                               | CT | I | 7588580 | 7590565 | WBGene00008417 | D2030.7  | D2030.7  | -0.142944831424956    | AGIWUR29435 |
| N2                                                                                                                               | CT | I | 7590543 | 7591204 | WBGene00008420 | D2030.11 | D2030.11 | -0.0537945131864888   |             |
| AGIWUR30935                                                                                                                      |    |   |         |         |                |          |          |                       |             |
| N2                                                                                                                               | CT | I | 7591288 | 7595198 | WBGene00008418 | D2030.8  | D2030.8  | -0.143489591770523    | AGIWUR31838 |
| N2                                                                                                                               | CT | I | 7596507 | 7602203 | WBGene00008419 | wdr-23   | D2030.9  | -0.000350530090085677 |             |
| AGIWUR1501;AGIWUR4494;AGIWUR8516;AGIWUR23572;AGIWUR25857;AGIWUR41529                                                             |    |   |         |         |                |          |          |                       |             |
| N2                                                                                                                               | CT | I | 7602307 | 7608245 | WBGene00000084 | aex-1    | D2030.10 | -0.0479069354616639   |             |
| AGIWUR10350;AGIWUR16639;AGIWUR17325;AGIWUR19915;AGIWUR29156;AGIWUR30595;AGIWUR37321                                              |    |   |         |         |                |          |          |                       |             |
| N2                                                                                                                               | CT | I | 7614176 | 7634135 | WBGene00003071 | lrp-1    | F29D11.1 | 0.118116416212485     |             |
| AGIWUR29566                                                                                                                      |    |   |         |         |                |          |          |                       |             |
| N2                                                                                                                               | CT | I | 7634494 | 7639780 | WBGene00009254 | capg-1   | F29D11.2 | 0.129767156725834     |             |

AGIWUR1032;AGIWUR21417  
N2 CT I 7640338 7641767 WBGene00009140 F26A3.1 F26A3.1 0.336511330365217  
AGIWUR2059;AGIWUR17278;AGIWUR34924  
N2 CT I 7642270 7643328 WBGene00009141 ncbp-2 F26A3.2 -0.103307561414063 AGIWUR28835  
N2 CT I 7643431 7649777 WBGene00004508 rrf-1 F26A3.8 -0.0278289582364213  
AGIWUR5335;AGIWUR25229  
N2 CT I 7650418 7656336 WBGene00001214 ego-1 F26A3.3 -0.143523859377993 AGIWUR44352  
N2 CT I 7656978 7658291 WBGene00009142 F26A3.4 F26A3.4 0.256389261803507  
AGIWUR14432;AGIWUR20058;AGIWUR35343  
N2 CT I 7667729 7669900 WBGene00009143 F26A3.5 F26A3.5 0.38703774582658 AGIWUR25193  
N2 CT I 7670314 7672714 WBGene00009144 del-3 F26A3.6 -0.123510492104634 AGIWUR30425  
N2 CT I 7674734 7676127 WBGene00009145 F26A3.7 F26A3.7 -0.111999800686338 AGIWUR23284  
N2 CT I 7676668 7679061 WBGene00011975 T24B1.1 T24B1.1 0.0372063439124624 AGIWUR18387  
N2 CT I 7679454 7683041 WBGene00011972 T23G11.7 T23G11.7 0.138656588396543  
AGIWUR25258;AGIWUR36273  
N2 CT I 7683341 7694210 WBGene00011970 r1bp-1 T23G11.5 -0.127579077931832  
AGIWUR25068  
N2 CT I 7694325 7695233 WBGene00011969 T23G11.4 T23G11.4 -0.117393171117493  
AGIWUR38478  
N2 CT I 7695661 7698227 WBGene00001595 gld-1 T23G11.3 0.1424891309839  
AGIWUR3931;AGIWUR7691;AGIWUR8949;AGIWUR9950;AGIWUR13665;AGIWUR16668;AGIWUR17200;AGIWUR25690;AGIWUR30259;AGIWUR35080;AGIWUR37229;AGIWUR42811  
N2 CT I 7698301 7699037 WBGene00011973 T23G11.10 T23G11.10 0.251827771068346  
AGIWUR28833  
N2 CT I 7699543 7700958 WBGene00001647 gna-2 T23G11.2 -0.214774538564317  
AGIWUR38355  
N2 CT I 7701365 7702053 WBGene00011968 T23G11.1 T23G11.1 0.343283666051798  
AGIWUR4190  
N2 CT I 7702429 7704584 WBGene00009187 F27D4.1 F27D4.1 -0.128733495256295 AGIWUR30511  
N2 CT I 7704565 7707049 WBGene00009188 lsy-22 F27D4.2 0.0385186374790374  
AGIWUR3195;AGIWUR10700;AGIWUR10886;AGIWUR11509;AGIWUR13652;AGIWUR16965;AGIWUR18957;AGIWUR21690;AGIWUR23469;AGIWUR26882;AGIWUR38016;AGIWUR41279  
N2 CT I 7723754 7724656 WBGene00009191 F27D4.7 F27D4.7 -0.202767287310252 AGIWUR32828  
N2 CT I 7725019 7727112 WBGene00009189 F27D4.4 F27D4.4 -0.0347504694161174 AGIWUR45003  
N2 CT I 7727267 7729092 WBGene00006518 bckd-1B F27D4.5 0.0179804542484323  
AGIWUR6557;AGIWUR28991;AGIWUR29478  
N2 CT I 7729184 7729878 WBGene00077543 F27D4.8 F27D4.8 -0.152509911951412  
AGIWUR8217;AGIWUR12100;AGIWUR27032;AGIWUR32572;AGIWUR43980  
N2 CT I 7731121 7737995 WBGene00009190 F27D4.6 F27D4.6 0.417695235639599

AGIWUR9006;AGIWUR33873;AGIWUR45113

|                                                                                                        |    |   |         |         |                |          |          |  |
|--------------------------------------------------------------------------------------------------------|----|---|---------|---------|----------------|----------|----------|--|
| N2                                                                                                     | CT | I | 7755778 | 7756353 | WBGene00010291 | F58H10.1 | F58H10.1 |  |
| -0.000633428291269666 AGIWUR742;AGIWUR9492;AGIWUR18367;AGIWUR22334;AGIWUR37012;AGIWUR40797;AGIWUR44521 |    |   |         |         |                |          |          |  |

|                                    |    |   |         |         |                |       |          |                    |
|------------------------------------|----|---|---------|---------|----------------|-------|----------|--------------------|
| N2                                 | CT | I | 7766532 | 7772231 | WBGene00003818 | nsf-1 | H15N14.2 | 0.0626688180008568 |
| AGIWUR5898;AGIWUR23021;AGIWUR40675 |    |   |         |         |                |       |          |                    |

|                         |    |   |         |         |                |       |          |                    |
|-------------------------|----|---|---------|---------|----------------|-------|----------|--------------------|
| N2                      | CT | I | 7773180 | 7777652 | WBGene00000079 | adr-1 | H15N14.1 | -0.114063064309214 |
| AGIWUR36832;AGIWUR41920 |    |   |         |         |                |       |          |                    |

|    |    |   |         |         |                |         |         |                     |             |
|----|----|---|---------|---------|----------------|---------|---------|---------------------|-------------|
| N2 | CT | I | 7786205 | 7793539 | WBGene00008401 | D2005.6 | D2005.6 | -0.0449778658711004 | AGIWUR22650 |
|----|----|---|---------|---------|----------------|---------|---------|---------------------|-------------|

|    |    |   |         |         |                |       |         |                   |             |
|----|----|---|---------|---------|----------------|-------|---------|-------------------|-------------|
| N2 | CT | I | 7800458 | 7801822 | WBGene00003746 | nlp-8 | D2005.2 | 0.179589567828604 | AGIWUR14278 |
|----|----|---|---------|---------|----------------|-------|---------|-------------------|-------------|

|    |    |   |         |         |                |         |         |                    |             |
|----|----|---|---------|---------|----------------|---------|---------|--------------------|-------------|
| N2 | CT | I | 7813761 | 7815042 | WBGene00008398 | D2005.3 | D2005.3 | 0.0147837620722235 | AGIWUR39084 |
|----|----|---|---------|---------|----------------|---------|---------|--------------------|-------------|

|    |    |   |         |         |                 |         |         |                     |             |
|----|----|---|---------|---------|-----------------|---------|---------|---------------------|-------------|
| N2 | CT | I | 7819579 | 7820489 | WBGene000086551 | D2005.7 | D2005.7 | -0.0946952698552916 | AGIWUR22887 |
|----|----|---|---------|---------|-----------------|---------|---------|---------------------|-------------|

|    |    |   |         |         |                |       |         |                     |            |
|----|----|---|---------|---------|----------------|-------|---------|---------------------|------------|
| N2 | CT | I | 7820831 | 7826433 | WBGene00008400 | drh-3 | D2005.5 | -0.0761918931755297 | AGIWUR6818 |
|----|----|---|---------|---------|----------------|-------|---------|---------------------|------------|

|    |    |   |         |         |                |        |         |                  |             |
|----|----|---|---------|---------|----------------|--------|---------|------------------|-------------|
| N2 | CT | I | 7826442 | 7831629 | WBGene00009271 | glna-3 | F30F8.2 | 0.13811668993031 | AGIWUR18761 |
|----|----|---|---------|---------|----------------|--------|---------|------------------|-------------|

|    |    |   |         |         |                |         |         |                    |             |
|----|----|---|---------|---------|----------------|---------|---------|--------------------|-------------|
| N2 | CT | I | 7832692 | 7835453 | WBGene00009270 | F30F8.1 | F30F8.1 | 0.0251925371487918 | AGIWUR20487 |
|----|----|---|---------|---------|----------------|---------|---------|--------------------|-------------|

|    |    |   |         |         |                |        |         |                     |             |
|----|----|---|---------|---------|----------------|--------|---------|---------------------|-------------|
| N2 | CT | I | 7835814 | 7836967 | WBGene00009272 | gras-1 | F30F8.3 | -0.0565496306724658 | AGIWUR42039 |
|----|----|---|---------|---------|----------------|--------|---------|---------------------|-------------|

|    |    |   |         |         |                |         |         |                    |  |
|----|----|---|---------|---------|----------------|---------|---------|--------------------|--|
| N2 | CT | I | 7837063 | 7840022 | WBGene00009276 | F30F8.9 | F30F8.9 | -0.120489821979678 |  |
|----|----|---|---------|---------|----------------|---------|---------|--------------------|--|

AGIWUR12971;AGIWUR13463

|    |    |   |         |         |                |          |          |                    |  |
|----|----|---|---------|---------|----------------|----------|----------|--------------------|--|
| N2 | CT | I | 7840442 | 7846923 | WBGene00009277 | F30F8.10 | F30F8.10 | -0.135593244473173 |  |
|----|----|---|---------|---------|----------------|----------|----------|--------------------|--|

AGIWUR8230;AGIWUR31083;AGIWUR35509;AGIWUR43910

|    |    |   |         |         |                |         |         |                     |             |
|----|----|---|---------|---------|----------------|---------|---------|---------------------|-------------|
| N2 | CT | I | 7847246 | 7848920 | WBGene00009274 | F30F8.5 | F30F8.5 | -0.0701895091086513 | AGIWUR42023 |
|----|----|---|---------|---------|----------------|---------|---------|---------------------|-------------|

|    |    |   |         |         |                |       |         |                   |             |
|----|----|---|---------|---------|----------------|-------|---------|-------------------|-------------|
| N2 | CT | I | 7848975 | 7853631 | WBGene00006386 | taf-5 | F30F8.8 | -0.17428397918834 | AGIWUR13028 |
|----|----|---|---------|---------|----------------|-------|---------|-------------------|-------------|

|    |    |   |         |         |                |       |         |                   |           |
|----|----|---|---------|---------|----------------|-------|---------|-------------------|-----------|
| N2 | CT | I | 7853750 | 7857850 | WBGene00000163 | apb-3 | R11A5.1 | -0.16468910237036 | AGIWUR978 |
|----|----|---|---------|---------|----------------|-------|---------|-------------------|-----------|

|    |    |   |         |         |                |       |         |                      |             |
|----|----|---|---------|---------|----------------|-------|---------|----------------------|-------------|
| N2 | CT | I | 7857823 | 7859417 | WBGene00011230 | nud-2 | R11A5.2 | -0.00634018464577935 | AGIWUR24764 |
|----|----|---|---------|---------|----------------|-------|---------|----------------------|-------------|

|    |    |   |         |         |                |         |         |                   |             |
|----|----|---|---------|---------|----------------|---------|---------|-------------------|-------------|
| N2 | CT | I | 7862736 | 7863553 | WBGene00011231 | R11A5.3 | R11A5.3 | 0.179647749928227 | AGIWUR16938 |
|----|----|---|---------|---------|----------------|---------|---------|-------------------|-------------|

|    |    |   |         |         |                |       |         |                     |             |
|----|----|---|---------|---------|----------------|-------|---------|---------------------|-------------|
| N2 | CT | I | 7866136 | 7872080 | WBGene00011232 | pck-2 | R11A5.4 | -0.0537965544392165 | AGIWUR14830 |
|----|----|---|---------|---------|----------------|-------|---------|---------------------|-------------|

|    |    |   |         |         |                |        |         |                   |  |
|----|----|---|---------|---------|----------------|--------|---------|-------------------|--|
| N2 | CT | I | 7872057 | 7875554 | WBGene00011235 | suro-1 | R11A5.7 | 0.121993485863586 |  |
|----|----|---|---------|---------|----------------|--------|---------|-------------------|--|

AGIWUR1591;AGIWUR9643;AGIWUR18550;AGIWUR25192;AGIWUR29119

|    |    |   |         |         |                |          |          |                   |  |
|----|----|---|---------|---------|----------------|----------|----------|-------------------|--|
| N2 | CT | I | 7884319 | 7885769 | WBGene00010110 | F55D12.1 | F55D12.1 | 0.154980998536901 |  |
|----|----|---|---------|---------|----------------|----------|----------|-------------------|--|

AGIWUR28202

|    |    |   |         |         |                |          |          |                     |  |
|----|----|---|---------|---------|----------------|----------|----------|---------------------|--|
| N2 | CT | I | 7889310 | 7894864 | WBGene00010111 | F55D12.2 | F55D12.2 | -0.0149448087354749 |  |
|----|----|---|---------|---------|----------------|----------|----------|---------------------|--|

AGIWUR30725

|    |    |   |         |         |                |         |          |                     |  |
|----|----|---|---------|---------|----------------|---------|----------|---------------------|--|
| N2 | CT | I | 7896125 | 7897725 | WBGene00010112 | nhr-191 | F55D12.3 | -0.0929950548407765 |  |
|----|----|---|---------|---------|----------------|---------|----------|---------------------|--|

AGIWUR40247

|    |    |   |         |         |                |        |          |                   |  |
|----|----|---|---------|---------|----------------|--------|----------|-------------------|--|
| N2 | CT | I | 7899037 | 7903334 | WBGene00006790 | unc-55 | F55D12.4 | 0.173738669181683 |  |
|----|----|---|---------|---------|----------------|--------|----------|-------------------|--|

AGIWUR29846

|    |    |   |         |         |                |          |          |                   |  |
|----|----|---|---------|---------|----------------|----------|----------|-------------------|--|
| N2 | CT | I | 7906826 | 7914269 | WBGene00010113 | F55D12.5 | F55D12.5 | 0.179586147242329 |  |
|----|----|---|---------|---------|----------------|----------|----------|-------------------|--|

AGIWUR6230

|    |    |   |         |         |                |         |         |                   |  |
|----|----|---|---------|---------|----------------|---------|---------|-------------------|--|
| N2 | CT | I | 7913937 | 7918341 | WBGene00008991 | F20G4.2 | F20G4.2 | 0.205380760561694 |  |
|----|----|---|---------|---------|----------------|---------|---------|-------------------|--|

AGIWUR833;AGIWUR9193;AGIWUR38969

|                                                                                                                                              |    |   |         |         |                |           |          |                      |             |
|----------------------------------------------------------------------------------------------------------------------------------------------|----|---|---------|---------|----------------|-----------|----------|----------------------|-------------|
| N2                                                                                                                                           | CT | I | 7918443 | 7926338 | WBGene00008990 | smg1-1    | F20G4.1  | -0.0949804235880602  | AGIWUR24802 |
| N2                                                                                                                                           | CT | I | 7926623 | 7934577 | WBGene00003777 | nmy-2     | F20G4.3  | 0.131527035477525    |             |
| AGIWUR1539;AGIWUR3678;AGIWUR4118;AGIWUR15521;AGIWUR21394;AGIWUR21683;AGIWUR26098;AGIWUR31723;AGIWUR36619;AGIWUR38685;AGIWUR42013;AGIWUR45084 |    |   |         |         |                |           |          |                      |             |
| N2                                                                                                                                           | CT | I | 7936223 | 7938328 | WBGene00011912 | T22C1.1   | T22C1.1  | -0.0744420496212435  | AGIWUR12142 |
| N2                                                                                                                                           | CT | I | 7938560 | 7940388 | WBGene00011914 | T22C1.3   | T22C1.3  | 0.0425245698451064   | AGIWUR24799 |
| N2                                                                                                                                           | CT | I | 7940893 | 7941994 | WBGene00011916 | T22C1.5   | T22C1.5  | 0.0396134904105763   |             |
| AGIWUR618;AGIWUR3363;AGIWUR8190;AGIWUR8908;AGIWUR9720;AGIWUR28946                                                                            |    |   |         |         |                |           |          |                      |             |
| N2                                                                                                                                           | CT | I | 7942719 | 7945588 | WBGene00011917 | T22C1.6   | T22C1.6  | 0.288448484500801    | AGIWUR19335 |
| N2                                                                                                                                           | CT | I | 7946186 | 7951593 | WBGene00002179 | jph-1     | T22C1.7  | 0.0555777223581249   |             |
| AGIWUR3743;AGIWUR13804;AGIWUR18557;AGIWUR18715;AGIWUR22762;AGIWUR37124                                                                       |    |   |         |         |                |           |          |                      |             |
| N2                                                                                                                                           | CT | I | 7955977 | 7958505 | WBGene00011918 | T22C1.8   | T22C1.8  | 0.388017378060361    | AGIWUR19143 |
| N2                                                                                                                                           | CT | I | 7958647 | 7960158 | WBGene00011919 | T22C1.9   | T22C1.9  | 0.128095371056253    |             |
| AGIWUR14647;AGIWUR17388;AGIWUR33828;AGIWUR40991                                                                                              |    |   |         |         |                |           |          |                      |             |
| N2                                                                                                                                           | CT | I | 7960388 | 7961460 | WBGene00011921 | T22C1.12  | T22C1.12 | 0.162494995143366    |             |
| AGIWUR39086                                                                                                                                  |    |   |         |         |                |           |          |                      |             |
| N2                                                                                                                                           | CT | I | 7962052 | 7972443 | WBGene00004318 | rbg-2     | T22C1.10 | 0.108841983674605    |             |
| AGIWUR34380                                                                                                                                  |    |   |         |         |                |           |          |                      |             |
| N2                                                                                                                                           | CT | I | 7972473 | 7977078 | WBGene00010366 | H05L14.1  | H05L14.1 | 0.0503997053295251   |             |
| AGIWUR3563                                                                                                                                   |    |   |         |         |                |           |          |                      |             |
| N2                                                                                                                                           | CT | I | 7980237 | 7993159 | WBGene00010367 | H05L14.2  | H05L14.2 | -0.294411193033088   |             |
| AGIWUR24280                                                                                                                                  |    |   |         |         |                |           |          |                      |             |
| N2                                                                                                                                           | CT | I | 7995738 | 7996669 | WBGene00008315 | C54G4.5   | C54G4.5  | -0.00798548607406779 | AGIWUR19383 |
| N2                                                                                                                                           | CT | I | 7996728 | 8003179 | WBGene00008314 | C54G4.4   | C54G4.4  | -0.0931709963145941  | AGIWUR2268  |
| N2                                                                                                                                           | CT | I | 8005127 | 8006448 | WBGene00008313 | C54G4.3   | C54G4.3  | 0.0682215490620077   |             |
| AGIWUR11601;AGIWUR24007;AGIWUR43355                                                                                                          |    |   |         |         |                |           |          |                      |             |
| N2                                                                                                                                           | CT | I | 8006650 | 8009118 | WBGene00008312 | C54G4.2   | C54G4.2  | 0.274915426578012    | AGIWUR25325 |
| N2                                                                                                                                           | CT | I | 8014412 | 8019572 | WBGene00008311 | rskn-2    | C54G4.1  | 0.245773003989278    |             |
| AGIWUR7952;AGIWUR17948;AGIWUR28022                                                                                                           |    |   |         |         |                |           |          |                      |             |
| N2                                                                                                                                           | CT | I | 8019501 | 8022730 | WBGene00008317 | C54G4.7   | C54G4.7  | -0.121710956983163   |             |
| AGIWUR32071;AGIWUR34039;AGIWUR43802                                                                                                          |    |   |         |         |                |           |          |                      |             |
| N2                                                                                                                                           | CT | I | 8022674 | 8024422 | WBGene00000869 | cyc-1     | C54G4.8  | 0.0274124768019242   |             |
| AGIWUR8905;AGIWUR9205;AGIWUR12984;AGIWUR23480;AGIWUR28992;AGIWUR36574                                                                        |    |   |         |         |                |           |          |                      |             |
| N2                                                                                                                                           | CT | I | 8024880 | 8026525 | WBGene00008318 | C54G4.9   | C54G4.9  | -0.16138139035421    | AGIWUR42787 |
| N2                                                                                                                                           | CT | I | 8026606 | 8028752 | WBGene00010560 | eif-2beta | K04G2.1  | 0.190692120803941    |             |
| AGIWUR9491;AGIWUR22485;AGIWUR24936;AGIWUR35928;AGIWUR40176                                                                                   |    |   |         |         |                |           |          |                      |             |
| N2                                                                                                                                           | CT | I | 8030959 | 8032886 | WBGene00045192 | aho-3     | K04G2.2  | 0.341184027830938    | AGIWUR36029 |
| N2                                                                                                                                           | CT | I | 8032863 | 8035696 | WBGene00010562 | cdc-48.3  | K04G2.3  | -0.0782384271348064  |             |
| AGIWUR8959                                                                                                                                   |    |   |         |         |                |           |          |                      |             |



|                                                                                               |    |   |         |         |                |          |          |                      |             |
|-----------------------------------------------------------------------------------------------|----|---|---------|---------|----------------|----------|----------|----------------------|-------------|
| N2                                                                                            | CT | I | 8036944 | 8039752 | WBGene00010564 | ath-1    | K04G2.5  | -0.0280877449912822  |             |
| AGIWUR7565;AGIWUR22477;AGIWUR35481                                                            |    |   |         |         |                |          |          |                      |             |
| N2                                                                                            | CT | I | 8039879 | 8040526 | WBGene00010569 | scbp-2   | K04G2.11 | -0.207725614662728   |             |
| AGIWUR10517                                                                                   |    |   |         |         |                |          |          |                      |             |
| N2                                                                                            | CT | I | 8040799 | 8043277 | WBGene00010565 | vac1-14  | K04G2.6  | 0.0925248543031092   | AGIWUR459   |
| N2                                                                                            | CT | I | 8047345 | 8049351 | WBGene00010566 | K04G2.7  | K04G2.7  | -0.600209531638224   | AGIWUR13374 |
| N2                                                                                            | CT | I | 8050043 | 8055489 | WBGene00000156 | apr-1    | K04G2.8  | 0.107472956832337    |             |
| AGIWUR2386;AGIWUR8642;AGIWUR15749;AGIWUR23225;AGIWUR24248;AGIWUR24940;AGIWUR33692;AGIWUR41192 |    |   |         |         |                |          |          |                      |             |
| N2                                                                                            | CT | I | 8055459 | 8057029 | WBGene00010567 | K04G2.9  | K04G2.9  | -0.135450976483366   | AGIWUR13708 |
| N2                                                                                            | CT | I | 8057762 | 8060557 | WBGene00010568 | K04G2.10 | K04G2.10 | -0.0900514404723314  |             |
| AGIWUR31263                                                                                   |    |   |         |         |                |          |          |                      |             |
| N2                                                                                            | CT | I | 8060791 | 8061793 | WBGene00008935 | F18C12.4 | F18C12.4 | 0.0224956448317979   |             |
| AGIWUR11272                                                                                   |    |   |         |         |                |          |          |                      |             |
| N2                                                                                            | CT | I | 8062059 | 8081671 | WBGene00000485 | che-3    | F18C12.1 | -0.0533333923375139  |             |
| AGIWUR19754;AGIWUR31660;AGIWUR42151                                                           |    |   |         |         |                |          |          |                      |             |
| N2                                                                                            | CT | I | 8083583 | 8095574 | WBGene00004378 | rme-8    | F18C12.2 | 0.0615274293603427   |             |
| AGIWUR1718;AGIWUR4249                                                                         |    |   |         |         |                |          |          |                      |             |
| N2                                                                                            | CT | I | 8095740 | 8098444 | WBGene00008934 | F18C12.3 | F18C12.3 |                      |             |
| -0.00697516907063367 AGIWUR23155                                                              |    |   |         |         |                |          |          |                      |             |
| N2                                                                                            | CT | I | 8103601 | 8109227 | WBGene00005009 | spr-4    | C09H6.1  | -0.123571271619925   | AGIWUR22535 |
| N2                                                                                            | CT | I | 8109746 | 8119314 | WBGene00002999 | lin-10   | C09H6.2  | 0.00292251165803492  | AGIWUR34214 |
| N2                                                                                            | CT | I | 8125801 | 8130091 | WBGene00003136 | mau-2    | C09H6.3  | -0.178107521206961   | AGIWUR29187 |
| N2                                                                                            | CT | I | 8133891 | 8135051 | WBGene00012113 | T28B8.1  | T28B8.1  | -0.0649406553265699  |             |
| AGIWUR234;AGIWUR7128;AGIWUR13741;AGIWUR18450;AGIWUR31586;AGIWUR35869                          |    |   |         |         |                |          |          |                      |             |
| N2                                                                                            | CT | I | 8139468 | 8142537 | WBGene00012116 | del-4    | T28B8.5  | -0.00146082277047288 | AGIWUR41269 |
| N2                                                                                            | CT | I | 8147400 | 8149723 | WBGene00002101 | ins-18   | T28B8.2  | -0.0154708062906472  | AGIWUR37506 |
| N2                                                                                            | CT | I | 8150331 | 8151368 | WBGene00044122 | T28B8.6  | T28B8.6  | 0.11081261331277     |             |
| AGIWUR3015;AGIWUR12297;AGIWUR24914                                                            |    |   |         |         |                |          |          |                      |             |
| N2                                                                                            | CT | I | 8151985 | 8159732 | WBGene00012114 | T28B8.3  | T28B8.3  | -0.0116786566653317  | AGIWUR24289 |
| N2                                                                                            | CT | I | 8160512 | 8168643 | WBGene00012115 | T28B8.4  | T28B8.4  | -0.104455497826589   |             |
| AGIWUR7458;AGIWUR11534;AGIWUR12150;AGIWUR29517;AGIWUR36686                                    |    |   |         |         |                |          |          |                      |             |
| N2                                                                                            | CT | I | 8172721 | 8173489 | WBGene00023413 | H31B20.2 | H31B20.2 | 0.329918348281797    |             |
| AGIWUR3366;AGIWUR40756                                                                        |    |   |         |         |                |          |          |                      |             |
| N2                                                                                            | CT | I | 8174888 | 8208740 | WBGene00008570 | kcn1-2   | F08A10.1 | 0.00131798009975181  |             |
| AGIWUR11841;AGIWUR13112;AGIWUR15015;AGIWUR27508;AGIWUR31988;AGIWUR43818                       |    |   |         |         |                |          |          |                      |             |
| N2                                                                                            | CT | I | 8208712 | 8210703 | WBGene00011379 | T02E1.7  | T02E1.7  | 0.229639505334217    | AGIWUR28236 |
| N2                                                                                            | CT | I | 8210931 | 8212411 | WBGene00011378 | T02E1.6  | T02E1.6  | 0.212008926121623    | AGIWUR11385 |
| N2                                                                                            | CT | I | 8212362 | 8218361 | WBGene00000967 | dhs-3    | T02E1.5  | -0.0987901297846552  |             |
| AGIWUR11837;AGIWUR21469                                                                       |    |   |         |         |                |          |          |                      |             |

|                                                                         |    |   |         |         |                |          |         |                      |             |
|-------------------------------------------------------------------------|----|---|---------|---------|----------------|----------|---------|----------------------|-------------|
| N2                                                                      | CT | I | 8219998 | 8223009 | WBGene00011375 | T02E1.2  | T02E1.2 | -0.0291556916291142  | AGIWUR13580 |
| N2                                                                      | CT | I | 8224539 | 8226297 | WBGene00004966 | spe-12   | T02E1.1 | 0.269287887579925    | AGIWUR35507 |
| N2                                                                      | CT | I | 8226509 | 8240637 | WBGene00013955 | kri-1    | ZK265.1 | -0.197317709577312   |             |
| AGIWUR16436;AGIWUR37773;AGIWUR41475                                     |    |   |         |         |                |          |         |                      |             |
| N2                                                                      | CT | I | 8242104 | 8243572 | WBGene00013956 | ZK265.3  | ZK265.3 | 0.270577675218606    |             |
| AGIWUR13680;AGIWUR16508;AGIWUR18985                                     |    |   |         |         |                |          |         |                      |             |
| N2                                                                      | CT | I | 8243695 | 8244963 | WBGene00000639 | col-63   | ZK265.2 | 0.0880838732957088   | AGIWUR22009 |
| N2                                                                      | CT | I | 8245722 | 8250896 | WBGene00000433 | ceh-8    | ZK265.4 | 0.0631049758892939   | AGIWUR32521 |
| N2                                                                      | CT | I | 8253452 | 8254961 | WBGene00044094 | fitm-2   | ZK265.9 | 0.0420564222410622   | AGIWUR37013 |
| N2                                                                      | CT | I | 8255348 | 8256312 | WBGene00013958 | ZK265.6  | ZK265.6 | -0.188474805041679   |             |
| AGIWUR7197;AGIWUR34833;AGIWUR42498                                      |    |   |         |         |                |          |         |                      |             |
| N2                                                                      | CT | I | 8256360 | 8258939 | WBGene00013957 | sre-23   | ZK265.5 | 0.199711302885583    |             |
| AGIWUR18546;AGIWUR38634                                                 |    |   |         |         |                |          |         |                      |             |
| N2                                                                      | CT | I | 8262039 | 8268990 | WBGene00013959 | ZK265.7  | ZK265.7 | -0.133909954197501   | AGIWUR1840  |
| N2                                                                      | CT | I | 8270304 | 8275701 | WBGene00013960 | cutl-8   | ZK265.8 | -0.152091793247566   |             |
| AGIWUR23965;AGIWUR30635                                                 |    |   |         |         |                |          |         |                      |             |
| N2                                                                      | CT | I | 8275611 | 8288124 | WBGene00011344 | T01G9.2  | T01G9.2 | -0.0738904793690054  |             |
| AGIWUR22898;AGIWUR27052                                                 |    |   |         |         |                |          |         |                      |             |
| N2                                                                      | CT | I | 8288959 | 8291077 | WBGene00002196 | kin-10   | T01G9.6 | 0.0955309715871264   |             |
| AGIWUR14009;AGIWUR14529                                                 |    |   |         |         |                |          |         |                      |             |
| N2                                                                      | CT | I | 8291289 | 8293640 | WBGene00003788 | npp-2    | T01G9.4 | -0.121889853763168   | AGIWUR31441 |
| N2                                                                      | CT | I | 8294881 | 8296940 | WBGene00003183 | mei-1    | T01G9.5 | 0.0392946060928558   |             |
| AGIWUR22653;AGIWUR25821;AGIWUR25892;AGIWUR43030                         |    |   |         |         |                |          |         |                      |             |
| N2                                                                      | CT | I | 8296917 | 8307566 | WBGene00009920 | abts-1   | F52B5.1 | -0.0483900632032022  | AGIWUR30789 |
| N2                                                                      | CT | I | 8313228 | 8315432 | WBGene00009923 | F52B5.7  | F52B5.7 | -0.00649557178617677 | AGIWUR36330 |
| N2                                                                      | CT | I | 8315898 | 8318250 | WBGene00009921 | F52B5.2  | F52B5.2 | -0.196656139149715   |             |
| AGIWUR12506;AGIWUR37654;AGIWUR39112                                     |    |   |         |         |                |          |         |                      |             |
| N2                                                                      | CT | I | 8318347 | 8323987 | WBGene00009922 | F52B5.3  | F52B5.3 | 0.00665127883351957  | AGIWUR15537 |
| N2                                                                      | CT | I | 8324120 | 8328853 | WBGene00000467 | cep-1    | F52B5.5 | 0.0107551732540152   | AGIWUR34163 |
| N2                                                                      | CT | I | 8329062 | 8329684 | WBGene00004439 | rp1-25.2 | F52B5.6 | -0.0485901107768836  |             |
| AGIWUR14531;AGIWUR21549;AGIWUR23326;AGIWUR37715;AGIWUR38978;AGIWUR41115 |    |   |         |         |                |          |         |                      |             |
| N2                                                                      | CT | I | 8330552 | 8332783 | WBGene00007911 | C34B7.1  | C34B7.1 | -0.255690987468943   |             |
| AGIWUR2961;AGIWUR20830;AGIWUR24915                                      |    |   |         |         |                |          |         |                      |             |
| N2                                                                      | CT | I | 8333082 | 8336144 | WBGene00007914 | mys-4    | C34B7.4 | -0.265788077644423   | AGIWUR30760 |
| N2                                                                      | CT | I | 8336966 | 8341826 | WBGene00007912 | C34B7.2  | C34B7.2 | -0.0226691956716754  |             |
| AGIWUR3075;AGIWUR7142;AGIWUR24662;AGIWUR29512                           |    |   |         |         |                |          |         |                      |             |
| N2                                                                      | CT | I | 8341709 | 8346023 | WBGene00007913 | cyp-36A1 | C34B7.3 | 0.106714760531748    |             |
| AGIWUR26344                                                             |    |   |         |         |                |          |         |                      |             |
| N2                                                                      | CT | I | 8353410 | 8357828 | WBGene00006531 | tba-5    | F16D3.1 | -0.0345730809994111  |             |

AGIWUR20180;AGIWUR43630

|    |    |   |         |         |                |         |         |                     |             |
|----|----|---|---------|---------|----------------|---------|---------|---------------------|-------------|
| N2 | CT | I | 8358254 | 8363858 | WBGene00004684 | rsd-6   | F16D3.2 | 0.00421107625513173 | AGIWUR25032 |
| N2 | CT | I | 8363954 | 8369917 | WBGene00008887 | tbcd-1  | F16D3.4 | -0.116655761217025  | AGIWUR15687 |
| N2 | CT | I | 8377601 | 8392768 | WBGene00011827 | T19A6.1 | T19A6.1 | -0.0693649412468602 |             |

AGIWUR416;AGIWUR7327;AGIWUR31170;AGIWUR37062

|    |    |   |         |         |                |       |         |                    |  |
|----|----|---|---------|---------|----------------|-------|---------|--------------------|--|
| N2 | CT | I | 8394728 | 8398626 | WBGene00003596 | ngp-1 | T19A6.2 | 0.0810983167907438 |  |
|----|----|---|---------|---------|----------------|-------|---------|--------------------|--|

AGIWUR14013;AGIWUR17089;AGIWUR36590

|    |    |   |         |         |                |         |         |                    |             |
|----|----|---|---------|---------|----------------|---------|---------|--------------------|-------------|
| N2 | CT | I | 8398918 | 8400472 | WBGene00011828 | nepr-1  | T19A6.3 | -0.197108660055781 | AGIWUR20226 |
| N2 | CT | I | 8401389 | 8403939 | WBGene00011829 | T19A6.4 | T19A6.4 | 0.199679583754017  |             |

AGIWUR3638;AGIWUR42337;AGIWUR43968

|    |    |   |         |         |                |         |         |                   |  |
|----|----|---|---------|---------|----------------|---------|---------|-------------------|--|
| N2 | CT | I | 8404547 | 8405955 | WBGene00008529 | F02E9.3 | F02E9.3 | 0.186850088869472 |  |
|----|----|---|---------|---------|----------------|---------|---------|-------------------|--|

AGIWUR27790;AGIWUR41404

|    |    |   |         |         |                |         |         |                     |             |
|----|----|---|---------|---------|----------------|---------|---------|---------------------|-------------|
| N2 | CT | I | 8406828 | 8407645 | WBGene00008528 | F02E9.1 | F02E9.1 | -0.255440186975964  | AGIWUR14333 |
| N2 | CT | I | 8407802 | 8410804 | WBGene00003014 | lin-28  | F02E9.2 | -0.0342278921568253 |             |

AGIWUR28453;AGIWUR32342

|    |    |   |         |         |                |          |          |                    |             |
|----|----|---|---------|---------|----------------|----------|----------|--------------------|-------------|
| N2 | CT | I | 8413253 | 8416195 | WBGene00008531 | F02E9.7  | F02E9.7  | 0.110160998443687  | AGIWUR27934 |
| N2 | CT | I | 8435958 | 8438638 | WBGene00008648 | F10D11.2 | F10D11.2 | 0.0262617155220202 |             |

AGIWUR38994

|    |    |   |         |         |                |          |          |                     |  |
|----|----|---|---------|---------|----------------|----------|----------|---------------------|--|
| N2 | CT | I | 8439756 | 8440470 | WBGene00008649 | F10D11.3 | F10D11.3 | -0.0159888374047661 |  |
|----|----|---|---------|---------|----------------|----------|----------|---------------------|--|

AGIWUR20074

|    |    |   |         |         |                |          |          |                   |  |
|----|----|---|---------|---------|----------------|----------|----------|-------------------|--|
| N2 | CT | I | 8441543 | 8442452 | WBGene00008650 | F10D11.4 | F10D11.4 | 0.259092558925309 |  |
|----|----|---|---------|---------|----------------|----------|----------|-------------------|--|

AGIWUR38060

|    |    |   |         |         |                |          |          |                  |  |
|----|----|---|---------|---------|----------------|----------|----------|------------------|--|
| N2 | CT | I | 8442695 | 8444934 | WBGene00008651 | F10D11.5 | F10D11.5 | 0.11257011665876 |  |
|----|----|---|---------|---------|----------------|----------|----------|------------------|--|

AGIWUR6906

|    |    |   |         |         |                |          |          |                    |  |
|----|----|---|---------|---------|----------------|----------|----------|--------------------|--|
| N2 | CT | I | 8445351 | 8451023 | WBGene00008652 | F10D11.6 | F10D11.6 | 0.0320551537673008 |  |
|----|----|---|---------|---------|----------------|----------|----------|--------------------|--|

AGIWUR25958

|    |    |   |         |         |                |         |         |                  |             |
|----|----|---|---------|---------|----------------|---------|---------|------------------|-------------|
| N2 | CT | I | 8460225 | 8463015 | WBGene00006844 | unc-120 | D1081.2 | 0.33872174309324 | AGIWUR32798 |
|----|----|---|---------|---------|----------------|---------|---------|------------------|-------------|

|    |    |   |         |         |                |         |         |                      |            |
|----|----|---|---------|---------|----------------|---------|---------|----------------------|------------|
| N2 | CT | I | 8463356 | 8469309 | WBGene00008381 | D1081.3 | D1081.3 | -0.00143915028386044 | AGIWUR4534 |
|----|----|---|---------|---------|----------------|---------|---------|----------------------|------------|

|    |    |   |         |         |                |          |          |                     |  |
|----|----|---|---------|---------|----------------|----------|----------|---------------------|--|
| N2 | CT | I | 8469922 | 8471852 | WBGene00045508 | D1081.10 | D1081.10 | -0.0597487140251887 |  |
|----|----|---|---------|---------|----------------|----------|----------|---------------------|--|

AGIWUR32516;AGIWUR38018

|    |    |   |         |         |                |          |          |                  |  |
|----|----|---|---------|---------|----------------|----------|----------|------------------|--|
| N2 | CT | I | 8472556 | 8473481 | WBGene00050879 | D1081.11 | D1081.11 | 0.17559924050726 |  |
|----|----|---|---------|---------|----------------|----------|----------|------------------|--|

AGIWUR24143

|    |    |   |         |         |                |          |          |                   |  |
|----|----|---|---------|---------|----------------|----------|----------|-------------------|--|
| N2 | CT | I | 8474061 | 8474767 | WBGene00086554 | D1081.12 | D1081.12 | 0.227004133842072 |  |
|----|----|---|---------|---------|----------------|----------|----------|-------------------|--|

AGIWUR6030;AGIWUR32272

|    |    |   |         |         |                |         |         |                   |             |
|----|----|---|---------|---------|----------------|---------|---------|-------------------|-------------|
| N2 | CT | I | 8481152 | 8482538 | WBGene00008383 | D1081.5 | D1081.5 | 0.301502726664122 | AGIWUR28444 |
|----|----|---|---------|---------|----------------|---------|---------|-------------------|-------------|

|    |    |   |         |         |                |         |         |                    |  |
|----|----|---|---------|---------|----------------|---------|---------|--------------------|--|
| N2 | CT | I | 8482759 | 8485694 | WBGene00008384 | D1081.6 | D1081.6 | -0.121436785625786 |  |
|----|----|---|---------|---------|----------------|---------|---------|--------------------|--|

AGIWUR9889;AGIWUR12027;AGIWUR23754;AGIWUR31661;AGIWUR41169

|    |    |   |         |         |                |         |         |                    |             |
|----|----|---|---------|---------|----------------|---------|---------|--------------------|-------------|
| N2 | CT | I | 8485876 | 8487043 | WBGene00008387 | D1081.9 | D1081.9 | 0.0936763464952008 | AGIWUR17852 |
|----|----|---|---------|---------|----------------|---------|---------|--------------------|-------------|

|    |    |   |         |         |                |         |         |                    |             |
|----|----|---|---------|---------|----------------|---------|---------|--------------------|-------------|
| N2 | CT | I | 8487618 | 8490938 | WBGene00008385 | D1081.7 | D1081.7 | -0.142592887788826 | AGIWUR13110 |
|----|----|---|---------|---------|----------------|---------|---------|--------------------|-------------|

|                                                                                                           |    |   |         |         |                |          |          |                     |             |
|-----------------------------------------------------------------------------------------------------------|----|---|---------|---------|----------------|----------|----------|---------------------|-------------|
| N2                                                                                                        | CT | I | 8491291 | 8495855 | WBGene00008386 | cdc-5L   | D1081.8  | -0.0770080128156501 | AGIWUR1233  |
| N2                                                                                                        | CT | I | 8498114 | 8502412 | WBGene00000431 | ceh-6    | K02B12.1 | 0.00234136107765437 |             |
| AGIWUR39847                                                                                               |    |   |         |         |                |          |          |                     |             |
| N2                                                                                                        | CT | I | 8509041 | 8511412 | WBGene00010496 | sec-12   | K02B12.3 | 0.276969664781408   |             |
| AGIWUR33956                                                                                               |    |   |         |         |                |          |          |                     |             |
| N2                                                                                                        | CT | I | 8511600 | 8512505 | WBGene00010495 | K02B12.2 | K02B12.2 | -0.154729227004911  |             |
| AGIWUR10637                                                                                               |    |   |         |         |                |          |          |                     |             |
| N2                                                                                                        | CT | I | 8513919 | 8517535 | WBGene00010497 | axl-1    | K02B12.4 | 0.0312125399325769  |             |
| AGIWUR10856;AGIWUR17622                                                                                   |    |   |         |         |                |          |          |                     |             |
| N2                                                                                                        | CT | I | 8517481 | 8526621 | WBGene00010498 | K02B12.5 | K02B12.5 | 0.00659932919172945 |             |
| AGIWUR18930                                                                                               |    |   |         |         |                |          |          |                     |             |
| N2                                                                                                        | CT | I | 8529380 | 8531338 | WBGene00006976 | zhp-3    | K02B12.8 | -0.0951671260000992 |             |
| AGIWUR5845                                                                                                |    |   |         |         |                |          |          |                     |             |
| N2                                                                                                        | CT | I | 8531760 | 8534527 | WBGene00001677 | gpa-15   | M04C7.1  | -0.743685837998651  | AGIWUR18844 |
| N2                                                                                                        | CT | I | 8540025 | 8544415 | WBGene00010855 | M04C7.4  | M04C7.4  | -0.207488452350653  | AGIWUR8927  |
| N2                                                                                                        | CT | I | 8546063 | 8546725 | WBGene00010854 | M04C7.3  | M04C7.3  | 0.0723187116511799  | AGIWUR33468 |
| N2                                                                                                        | CT | I | 8549513 | 8570998 | WBGene00001651 | gon-2    | T01H8.5  | -0.0287188756152865 |             |
| AGIWUR3928;AGIWUR20657;AGIWUR27009;AGIWUR28841;AGIWUR29968;AGIWUR31752;AGIWUR33924                        |    |   |         |         |                |          |          |                     |             |
| N2                                                                                                        | CT | I | 8571557 | 8573749 | WBGene00011353 | T01H8.2  | T01H8.2  | -0.136779761714664  | AGIWUR21519 |
| N2                                                                                                        | CT | I | 8573855 | 8580157 | WBGene00011352 | rskn-1   | T01H8.1  | 0.0127293746818218  |             |
| AGIWUR2751;AGIWUR11425;AGIWUR16452;AGIWUR19665;AGIWUR25198                                                |    |   |         |         |                |          |          |                     |             |
| N2                                                                                                        | CT | I | 8584081 | 8587505 | WBGene00000904 | daf-8    | R05D11.1 | 0.108291993828728   |             |
| AGIWUR2662;AGIWUR6435;AGIWUR14094                                                                         |    |   |         |         |                |          |          |                     |             |
| N2                                                                                                        | CT | I | 8591215 | 8591978 | WBGene00004305 | ran-4    | R05D11.3 | -0.0355185124921098 |             |
| AGIWUR243;AGIWUR4908                                                                                      |    |   |         |         |                |          |          |                     |             |
| N2                                                                                                        | CT | I | 8592092 | 8592926 | WBGene00011033 | R05D11.5 | R05D11.5 | -0.197456776242193  |             |
| AGIWUR32579                                                                                               |    |   |         |         |                |          |          |                     |             |
| N2                                                                                                        | CT | I | 8593027 | 8596225 | WBGene00011037 | R05D11.9 | R05D11.9 | -0.0970912591654347 |             |
| AGIWUR22806                                                                                               |    |   |         |         |                |          |          |                     |             |
| N2                                                                                                        | CT | I | 8596333 | 8598552 | WBGene00011034 | paxt-1   | R05D11.6 | -0.174043584664354  |             |
| AGIWUR40684                                                                                               |    |   |         |         |                |          |          |                     |             |
| N2                                                                                                        | CT | I | 8598658 | 8600923 | WBGene00011032 | R05D11.4 | R05D11.4 | 0.0530437101984198  |             |
| AGIWUR137;AGIWUR4605;AGIWUR11633;AGIWUR20068;AGIWUR30339;AGIWUR31404                                      |    |   |         |         |                |          |          |                     |             |
| N2                                                                                                        | CT | I | 8601339 | 8602034 | WBGene00011035 | snrp-27  | R05D11.7 | 0.2313554780918     | AGIWUR38331 |
| N2                                                                                                        | CT | I | 8602125 | 8605165 | WBGene00011036 | edc-3    | R05D11.8 | -0.0818214576997818 |             |
| AGIWUR28087                                                                                               |    |   |         |         |                |          |          |                     |             |
| N2                                                                                                        | CT | I | 8606404 | 8608631 | WBGene00009664 | idha-1   | F43G9.1  | 0.142615454602726   |             |
| AGIWUR1214;AGIWUR8312;AGIWUR18719;AGIWUR29935;AGIWUR31785;AGIWUR34086;AGIWUR35501;AGIWUR37048;AGIWUR43639 |    |   |         |         |                |          |          |                     |             |
| N2                                                                                                        | CT | I | 8609925 | 8611066 | WBGene00009665 | lmd-1    | F43G9.2  | -0.0660103340851119 |             |

AGIWUR9510;AGIWUR16545;AGIWUR21608;AGIWUR26157

|    |    |   |         |         |                |           |         |                   |  |
|----|----|---|---------|---------|----------------|-----------|---------|-------------------|--|
| N2 | CT | I | 8612728 | 8615175 | WBGene00009666 | slc-25A42 | F43G9.3 | 0.040157996955724 |  |
|----|----|---|---------|---------|----------------|-----------|---------|-------------------|--|

AGIWUR38648

|    |    |   |         |         |                |        |         |                    |            |
|----|----|---|---------|---------|----------------|--------|---------|--------------------|------------|
| N2 | CT | I | 8615388 | 8616420 | WBGene00009668 | cfim-1 | F43G9.5 | -0.105888289805012 | AGIWUR2016 |
|----|----|---|---------|---------|----------------|--------|---------|--------------------|------------|

|    |    |   |         |         |                |         |         |                   |             |
|----|----|---|---------|---------|----------------|---------|---------|-------------------|-------------|
| N2 | CT | I | 8617400 | 8618889 | WBGene00009670 | F43G9.8 | F43G9.8 | 0.199280479994699 | AGIWUR17255 |
|----|----|---|---------|---------|----------------|---------|---------|-------------------|-------------|

|    |    |   |         |         |                |       |         |                    |             |
|----|----|---|---------|---------|----------------|-------|---------|--------------------|-------------|
| N2 | CT | I | 8623017 | 8631184 | WBGene00001414 | fer-1 | F43G9.6 | 0.0306513885263513 | AGIWUR32229 |
|----|----|---|---------|---------|----------------|-------|---------|--------------------|-------------|

|    |    |   |         |         |                |       |          |                   |  |
|----|----|---|---------|---------|----------------|-------|----------|-------------------|--|
| N2 | CT | I | 8633925 | 8636044 | WBGene00000468 | ces-1 | F43G9.11 | 0.214345995708548 |  |
|----|----|---|---------|---------|----------------|-------|----------|-------------------|--|

AGIWUR40030

|    |    |   |         |         |                |       |         |                    |            |
|----|----|---|---------|---------|----------------|-------|---------|--------------------|------------|
| N2 | CT | I | 8636123 | 8637971 | WBGene00000777 | cpn-1 | F43G9.9 | -0.360779379949715 | AGIWUR7568 |
|----|----|---|---------|---------|----------------|-------|---------|--------------------|------------|

|    |    |   |         |         |                |        |          |                    |  |
|----|----|---|---------|---------|----------------|--------|----------|--------------------|--|
| N2 | CT | I | 8638514 | 8640236 | WBGene00009671 | mfap-1 | F43G9.10 | 0.0732492017626161 |  |
|----|----|---|---------|---------|----------------|--------|----------|--------------------|--|

AGIWUR36870

|    |    |   |         |         |                |          |          |                   |  |
|----|----|---|---------|---------|----------------|----------|----------|-------------------|--|
| N2 | CT | I | 8640508 | 8644399 | WBGene00009672 | F43G9.12 | F43G9.12 | 0.366419012604409 |  |
|----|----|---|---------|---------|----------------|----------|----------|-------------------|--|

AGIWUR3156;AGIWUR6132;AGIWUR7150;AGIWUR13796

|    |    |   |         |         |                |        |           |                    |  |
|----|----|---|---------|---------|----------------|--------|-----------|--------------------|--|
| N2 | CT | I | 8644460 | 8646304 | WBGene00012150 | syx-17 | VF39H2L.1 | -0.163603064759759 |  |
|----|----|---|---------|---------|----------------|--------|-----------|--------------------|--|

AGIWUR33011

|    |    |   |         |         |                |       |         |                    |  |
|----|----|---|---------|---------|----------------|-------|---------|--------------------|--|
| N2 | CT | I | 8646451 | 8651777 | WBGene00000890 | sig-7 | F39H2.2 | -0.201151042890754 |  |
|----|----|---|---------|---------|----------------|-------|---------|--------------------|--|

AGIWUR6319;AGIWUR9396;AGIWUR10898;AGIWUR19443;AGIWUR40323;AGIWUR41019

|    |    |   |         |         |                |        |         |                    |             |
|----|----|---|---------|---------|----------------|--------|---------|--------------------|-------------|
| N2 | CT | I | 8658874 | 8659967 | WBGene00009562 | flp-22 | F39H2.1 | -0.179008745233244 | AGIWUR19806 |
|----|----|---|---------|---------|----------------|--------|---------|--------------------|-------------|

|    |    |   |         |         |                |       |         |                     |             |
|----|----|---|---------|---------|----------------|-------|---------|---------------------|-------------|
| N2 | CT | I | 8660820 | 8663127 | WBGene00045237 | mrt-1 | F39H2.5 | 0.00585280919076325 | AGIWUR15553 |
|----|----|---|---------|---------|----------------|-------|---------|---------------------|-------------|

|    |    |   |         |         |                |       |         |                   |             |
|----|----|---|---------|---------|----------------|-------|---------|-------------------|-------------|
| N2 | CT | I | 8663048 | 8664143 | WBGene00006377 | syp-3 | F39H2.4 | 0.072533988032097 | AGIWUR18940 |
|----|----|---|---------|---------|----------------|-------|---------|-------------------|-------------|

|    |    |   |         |         |                |         |         |                     |            |
|----|----|---|---------|---------|----------------|---------|---------|---------------------|------------|
| N2 | CT | I | 8664925 | 8666499 | WBGene00009563 | F39H2.3 | F39H2.3 | -0.0637350895915496 | AGIWUR1893 |
|----|----|---|---------|---------|----------------|---------|---------|---------------------|------------|

|    |    |   |         |         |                |          |          |                     |  |
|----|----|---|---------|---------|----------------|----------|----------|---------------------|--|
| N2 | CT | I | 8666595 | 8669792 | WBGene00010620 | K07A12.1 | K07A12.1 | -0.0681785481761494 |  |
|----|----|---|---------|---------|----------------|----------|----------|---------------------|--|

AGIWUR4177

|    |    |   |         |         |                |       |          |                    |  |
|----|----|---|---------|---------|----------------|-------|----------|--------------------|--|
| N2 | CT | I | 8676666 | 8681325 | WBGene00010621 | egg-6 | K07A12.2 | -0.150986786020063 |  |
|----|----|---|---------|---------|----------------|-------|----------|--------------------|--|

AGIWUR2537;AGIWUR6447;AGIWUR13392;AGIWUR18818;AGIWUR31594;AGIWUR44231

|    |    |   |         |         |                |       |          |                    |  |
|----|----|---|---------|---------|----------------|-------|----------|--------------------|--|
| N2 | CT | I | 8683220 | 8687217 | WBGene00001990 | hot-5 | K07A12.6 | 0.0422468809273902 |  |
|----|----|---|---------|---------|----------------|-------|----------|--------------------|--|

AGIWUR18893

|    |    |   |         |         |                |          |          |                     |  |
|----|----|---|---------|---------|----------------|----------|----------|---------------------|--|
| N2 | CT | I | 8687634 | 8690937 | WBGene00010622 | K07A12.4 | K07A12.4 | -0.0506025106842838 |  |
|----|----|---|---------|---------|----------------|----------|----------|---------------------|--|

AGIWUR12861;AGIWUR13225;AGIWUR40426

|    |    |   |         |         |                |         |          |                     |  |
|----|----|---|---------|---------|----------------|---------|----------|---------------------|--|
| N2 | CT | I | 8691039 | 8692622 | WBGene00010624 | mrps-15 | K07A12.7 | -0.0888279585663554 |  |
|----|----|---|---------|---------|----------------|---------|----------|---------------------|--|

AGIWUR271

|    |    |   |         |         |                |       |          |                     |  |
|----|----|---|---------|---------|----------------|-------|----------|---------------------|--|
| N2 | CT | I | 8692946 | 8693468 | WBGene00000209 | asg-1 | K07A12.3 | 0.00602082597728426 |  |
|----|----|---|---------|---------|----------------|-------|----------|---------------------|--|

AGIWUR21398

|    |    |   |         |         |                |          |          |                   |  |
|----|----|---|---------|---------|----------------|----------|----------|-------------------|--|
| N2 | CT | I | 8693451 | 8695159 | WBGene00010623 | K07A12.5 | K07A12.5 | 0.104131083660841 |  |
|----|----|---|---------|---------|----------------|----------|----------|-------------------|--|

AGIWUR40

|    |    |   |         |         |                |       |          |                     |  |
|----|----|---|---------|---------|----------------|-------|----------|---------------------|--|
| N2 | CT | I | 8695205 | 8696376 | WBGene00003953 | pbs-7 | F39H11.5 | -0.0920488317479373 |  |
|----|----|---|---------|---------|----------------|-------|----------|---------------------|--|

AGIWUR15172;AGIWUR32863;AGIWUR39094;AGIWUR40619

|    |    |   |         |         |                |          |          |                   |  |
|----|----|---|---------|---------|----------------|----------|----------|-------------------|--|
| N2 | CT | I | 8696603 | 8697596 | WBGene00009565 | F39H11.1 | F39H11.1 | 0.143148155975432 |  |
|----|----|---|---------|---------|----------------|----------|----------|-------------------|--|

AGIWUR20511

|                                                                         |    |   |         |         |                |          |          |                      |             |
|-------------------------------------------------------------------------|----|---|---------|---------|----------------|----------|----------|----------------------|-------------|
| N2                                                                      | CT | I | 8697923 | 8701971 | WBGene00006577 | tlf-1    | F39H11.2 | 0.188282074459825    |             |
| AGIWUR18615;AGIWUR19525;AGIWUR27512;AGIWUR44922                         |    |   |         |         |                |          |          |                      |             |
| N2                                                                      | CT | I | 8702478 | 8705825 | WBGene00000409 | cdk-8    | F39H11.3 | 0.0825011704613985   |             |
| AGIWUR21102                                                             |    |   |         |         |                |          |          |                      |             |
| N2                                                                      | CT | I | 8705670 | 8724279 | WBGene00000527 | cle-1    | C36B1.1  | 0.118674417958073    |             |
| AGIWUR3067;AGIWUR23941;AGIWUR27821;AGIWUR32409;AGIWUR40629;AGIWUR41723  |    |   |         |         |                |          |          |                      |             |
| N2                                                                      | CT | I | 8727214 | 8728497 | WBGene00003925 | pas-4    | C36B1.4  | -0.0308585837996276  |             |
| AGIWUR1803;AGIWUR20887;AGIWUR43761                                      |    |   |         |         |                |          |          |                      |             |
| N2                                                                      | CT | I | 8728687 | 8730054 | WBGene00007971 | rpb-3    | C36B1.3  | -0.137789682911142   | AGIWUR39563 |
| N2                                                                      | CT | I | 8730156 | 8730922 | WBGene00044614 | C36B1.14 | C36B1.14 | -0.271771275938757   |             |
| AGIWUR5597                                                              |    |   |         |         |                |          |          |                      |             |
| N2                                                                      | CT | I | 8730905 | 8732125 | WBGene00044120 | C36B1.13 | C36B1.13 | 0.0239542732591111   |             |
| AGIWUR3219;AGIWUR15030;AGIWUR36543                                      |    |   |         |         |                |          |          |                      |             |
| N2                                                                      | CT | I | 8732219 | 8733436 | WBGene00007973 | C36B1.6  | C36B1.6  | -0.0356514194902449  |             |
| AGIWUR10616;AGIWUR14532;AGIWUR16176;AGIWUR16962;AGIWUR17067;AGIWUR30963 |    |   |         |         |                |          |          |                      |             |
| N2                                                                      | CT | I | 8733413 | 8735717 | WBGene00007972 | prp-4    | C36B1.5  | -0.253116590719262   | AGIWUR6599  |
| N2                                                                      | CT | I | 8736213 | 8737038 | WBGene00007974 | dhfr-1   | C36B1.7  | -0.240883582539354   |             |
| AGIWUR4679;AGIWUR12507;AGIWUR26096                                      |    |   |         |         |                |          |          |                      |             |
| N2                                                                      | CT | I | 8737072 | 8742548 | WBGene00007975 | glc-1    | C36B1.8  | 0.210837671678168    |             |
| AGIWUR14858;AGIWUR18949                                                 |    |   |         |         |                |          |          |                      |             |
| N2                                                                      | CT | I | 8743849 | 8746925 | WBGene00007976 | C36B1.9  | C36B1.9  | -0.00509529357049487 | AGIWUR42991 |
| N2                                                                      | CT | I | 8749616 | 8751397 | WBGene00007977 | gska-3   | C36B1.10 | 0.370503297227732    |             |
| AGIWUR27792                                                             |    |   |         |         |                |          |          |                      |             |
| N2                                                                      | CT | I | 8752236 | 8755678 | WBGene00007979 | imp-1    | C36B1.12 | -0.11215412171174    |             |
| AGIWUR17031                                                             |    |   |         |         |                |          |          |                      |             |
| N2                                                                      | CT | I | 8755846 | 8757603 | WBGene00007978 | C36B1.11 | C36B1.11 | -0.197237060383223   |             |
| AGIWUR2671                                                              |    |   |         |         |                |          |          |                      |             |
| N2                                                                      | CT | I | 8758156 | 8759032 | WBGene00008440 | DY3.8    | DY3.8    | -0.287021975678919   |             |
| AGIWUR28207;AGIWUR35048                                                 |    |   |         |         |                |          |          |                      |             |
| N2                                                                      | CT | I | 8759204 | 8759788 | WBGene00006574 | tin-13   | DY3.1    | -0.261849550455633   |             |
| AGIWUR18692;AGIWUR32809                                                 |    |   |         |         |                |          |          |                      |             |
| N2                                                                      | CT | I | 8762986 | 8765633 | WBGene00003052 | lmn-1    | DY3.2    | 0.0692148411321085   |             |
| AGIWUR31393;AGIWUR32136;AGIWUR45124                                     |    |   |         |         |                |          |          |                      |             |
| N2                                                                      | CT | I | 8768325 | 8771248 | WBGene00006618 | trt-1    | DY3.4    | -0.069275578704751   | AGIWUR33053 |
| N2                                                                      | CT | I | 8771275 | 8777514 | WBGene00004115 | pqn-26   | DY3.5    | -0.274506749796128   | AGIWUR42740 |
| N2                                                                      | CT | I | 8779731 | 8785415 | WBGene00008439 | mfb-1    | DY3.6    | 0.0514632372827926   |             |
| AGIWUR12938;AGIWUR30025                                                 |    |   |         |         |                |          |          |                      |             |
| N2                                                                      | CT | I | 8792965 | 8797293 | WBGene00006324 | sup-17   | DY3.7    | 0.154160934891623    | AGIWUR24707 |
| N2                                                                      | CT | I | 8798785 | 8801694 | WBGene00009453 | F36A2.3  | F36A2.3  | -0.0956171230858587  | AGIWUR5208  |

|                                                                         |    |   |         |         |                |          |          |                     |             |
|-------------------------------------------------------------------------|----|---|---------|---------|----------------|----------|----------|---------------------|-------------|
| N2                                                                      | CT | I | 8801612 | 8804697 | WBGene00009452 | F36A2.2  | F36A2.2  | -0.184899607249289  | AGIWUR32436 |
| N2                                                                      | CT | I | 8804799 | 8808081 | WBGene00009451 | cids-2   | F36A2.1  | -0.0595852863551425 | AGIWUR13864 |
| N2                                                                      | CT | I | 8808775 | 8813298 | WBGene00009455 | php-1    | F36A2.8  | -0.248585802753507  |             |
| AGIWUR9233;AGIWUR16121;AGIWUR31991;AGIWUR34048;AGIWUR40925              |    |   |         |         |                |          |          |                     |             |
| N2                                                                      | CT | I | 8813761 | 8814979 | WBGene00009454 | F36A2.7  | F36A2.7  | 0.116793704133833   |             |
| AGIWUR18419;AGIWUR27255                                                 |    |   |         |         |                |          |          |                     |             |
| N2                                                                      | CT | I | 8815554 | 8816193 | WBGene00004484 | rps-15   | F36A2.6  | -0.050309758413519  |             |
| AGIWUR10589;AGIWUR16337;AGIWUR20215;AGIWUR23222;AGIWUR31135;AGIWUR34061 |    |   |         |         |                |          |          |                     |             |
| N2                                                                      | CT | I | 8816978 | 8821359 | WBGene00009456 | F36A2.9  | F36A2.9  | 0.00290838200903565 | AGIWUR32707 |
| N2                                                                      | CT | I | 8822188 | 8823637 | WBGene00009458 | F36A2.11 | F36A2.11 | 0.0625108155771059  |             |
| AGIWUR14729                                                             |    |   |         |         |                |          |          |                     |             |
| N2                                                                      | CT | I | 8824401 | 8825628 | WBGene00023490 | F36A2.14 | F36A2.14 | 0.161693971849425   |             |
| AGIWUR38352                                                             |    |   |         |         |                |          |          |                     |             |
| N2                                                                      | CT | I | 8826167 | 8826670 | WBGene00009459 | F36A2.12 | F36A2.12 | 0.0814122662359678  |             |
| AGIWUR3383;AGIWUR3491;AGIWUR20812;AGIWUR24892                           |    |   |         |         |                |          |          |                     |             |
| N2                                                                      | CT | I | 8828048 | 8838719 | WBGene00009460 | ubr-5    | F36A2.13 | -0.0900253097666992 |             |
| AGIWUR2272;AGIWUR9912;AGIWUR27719;AGIWUR32971;AGIWUR34063;AGIWUR44432   |    |   |         |         |                |          |          |                     |             |
| N2                                                                      | CT | I | 8840634 | 8841163 | WBGene00009250 | F29D10.1 | F29D10.1 | 0.115022533347603   |             |
| AGIWUR6675                                                              |    |   |         |         |                |          |          |                     |             |
| N2                                                                      | CT | I | 8841770 | 8842323 | WBGene00009251 | F29D10.2 | F29D10.2 | 0.281934875652485   |             |
| AGIWUR35680                                                             |    |   |         |         |                |          |          |                     |             |
| N2                                                                      | CT | I | 8842552 | 8845595 | WBGene00009252 | F29D10.3 | F29D10.3 | 0.064906798850517   |             |
| AGIWUR40719                                                             |    |   |         |         |                |          |          |                     |             |
| N2                                                                      | CT | I | 8845809 | 8851116 | WBGene00002035 | hum-1    | F29D10.4 | -0.0674604249199486 |             |
| AGIWUR26300                                                             |    |   |         |         |                |          |          |                     |             |
| N2                                                                      | CT | I | 8853686 | 8861274 | WBGene00010137 | ztf-26   | F55H12.6 | -0.0621631140979364 |             |
| AGIWUR10402;AGIWUR26678;AGIWUR32959;AGIWUR43440                         |    |   |         |         |                |          |          |                     |             |
| N2                                                                      | CT | I | 8863996 | 8865475 | WBGene00219283 | F55H12.7 | F55H12.7 | -0.0644155087805087 |             |
| AGIWUR10168;AGIWUR13074;AGIWUR22738;AGIWUR23038;AGIWUR37370             |    |   |         |         |                |          |          |                     |             |
| N2                                                                      | CT | I | 8866907 | 8868293 | WBGene00010133 | F55H12.2 | F55H12.2 | -0.177587764797343  |             |
| AGIWUR12233                                                             |    |   |         |         |                |          |          |                     |             |
| N2                                                                      | CT | I | 8869709 | 8871698 | WBGene00010136 | F55H12.5 | F55H12.5 | 0.0382252225098796  |             |
| AGIWUR5794                                                              |    |   |         |         |                |          |          |                     |             |
| N2                                                                      | CT | I | 8871791 | 8875253 | WBGene00004901 | snf-2    | F55H12.1 | 0.297862467541692   |             |
| AGIWUR9487;AGIWUR19311                                                  |    |   |         |         |                |          |          |                     |             |
| N2                                                                      | CT | I | 8876319 | 8893051 | WBGene00010134 | F55H12.3 | F55H12.3 | -0.27317644839308   |             |
| AGIWUR9070                                                              |    |   |         |         |                |          |          |                     |             |
| N2                                                                      | CT | I | 8893308 | 8894137 | WBGene00010135 | F55H12.4 | F55H12.4 | -0.0928119924001418 |             |
| AGIWUR3304;AGIWUR5417;AGIWUR36249                                       |    |   |         |         |                |          |          |                     |             |

|                                                                        |    |   |         |         |                |          |          |                      |             |
|------------------------------------------------------------------------|----|---|---------|---------|----------------|----------|----------|----------------------|-------------|
| N2                                                                     | CT | I | 8897613 | 8901435 | WBGene00006765 | unc-29   | T08G11.5 | -0.227344389997483   |             |
| AGIWUR16459                                                            |    |   |         |         |                |          |          |                      |             |
| N2                                                                     | CT | I | 8902747 | 8905534 | WBGene00011631 | T08G11.4 | T08G11.4 | -0.0739461391460594  |             |
| AGIWUR14591                                                            |    |   |         |         |                |          |          |                      |             |
| N2                                                                     | CT | I | 8905644 | 8916805 | WBGene00011629 | T08G11.1 | T08G11.1 | 0.0442123371726311   |             |
| AGIWUR1995;AGIWUR15550;AGIWUR25916                                     |    |   |         |         |                |          |          |                      |             |
| N2                                                                     | CT | I | 8919329 | 8920516 | WBGene00044684 | T08G11.2 | T08G11.2 | 0.15505641276145     |             |
| AGIWUR9790;AGIWUR15705                                                 |    |   |         |         |                |          |          |                      |             |
| N2                                                                     | CT | I | 8921190 | 8925327 | WBGene00011630 | T08G11.3 | T08G11.3 | 0.181686581183452    |             |
| AGIWUR19825                                                            |    |   |         |         |                |          |          |                      |             |
| N2                                                                     | CT | I | 8928748 | 8931089 | WBGene00006641 | tsp-15   | F53B6.1  | -0.196127805551236   | AGIWUR2572  |
| N2                                                                     | CT | I | 8931035 | 8942287 | WBGene00009958 | madd-4   | F53B6.2  | 0.0419512723210662   |             |
| AGIWUR22167;AGIWUR26682;AGIWUR29905;AGIWUR37895;AGIWUR41106            |    |   |         |         |                |          |          |                      |             |
| N2                                                                     | CT | I | 8945533 | 8946205 | WBGene00009964 | fip-6    | F53B6.9  | -0.190482745000854   |             |
| AGIWUR7478;AGIWUR11131;AGIWUR11435;AGIWUR20023;AGIWUR25202;AGIWUR43705 |    |   |         |         |                |          |          |                      |             |
| N2                                                                     | CT | I | 8946686 | 8947201 | WBGene00009963 | fipr-26  | F53B6.8  | 0.336601213439693    | AGIWUR33720 |
| N2                                                                     | CT | I | 8947304 | 8948711 | WBGene00009959 | F53B6.4  | F53B6.4  | 0.3081392587944      |             |
| AGIWUR31357;AGIWUR34697                                                |    |   |         |         |                |          |          |                      |             |
| N2                                                                     | CT | I | 8948778 | 8954394 | WBGene00009962 | F53B6.7  | F53B6.7  | 0.0168605520893657   | AGIWUR3335  |
| N2                                                                     | CT | I | 8954559 | 8957482 | WBGene00009961 | cutl-7   | F53B6.6  | 0.083540984361294    | AGIWUR18610 |
| N2                                                                     | CT | I | 8958061 | 8960889 | WBGene00043049 | F32H2.11 | F32H2.11 | 0.72725043740911     |             |
| AGIWUR30582                                                            |    |   |         |         |                |          |          |                      |             |
| N2                                                                     | CT | I | 8962322 | 8966129 | WBGene00001568 | snpc-4   | F32H2.1  | 0.00798250070973694  | AGIWUR16674 |
| N2                                                                     | CT | I | 8966130 | 8967004 | WBGene00007026 | mdt-31   | F32H2.2  | -0.0314192991194453  | AGIWUR34254 |
| N2                                                                     | CT | I | 8966985 | 8970158 | WBGene00004953 | spd-2    | F32H2.3  | 0.195241997155108    | AGIWUR12491 |
| N2                                                                     | CT | I | 8970293 | 8971031 | WBGene00009346 | F32H2.10 | F32H2.10 | -0.112835249935465   |             |
| AGIWUR31683                                                            |    |   |         |         |                |          |          |                      |             |
| N2                                                                     | CT | I | 8971139 | 8973063 | WBGene00009341 | thoc-3   | F32H2.4  | -0.00823269240811619 | AGIWUR33313 |
| N2                                                                     | CT | I | 8973066 | 8974575 | WBGene00050880 | F32H2.12 | F32H2.12 | 0.175622874723826    |             |
| AGIWUR1994;AGIWUR33278                                                 |    |   |         |         |                |          |          |                      |             |
| N2                                                                     | CT | I | 8975384 | 8986534 | WBGene00009342 | fasn-1   | F32H2.5  | 0.255372145503895    |             |
| AGIWUR11210;AGIWUR43314                                                |    |   |         |         |                |          |          |                      |             |
| N2                                                                     | CT | I | 8989938 | 8993461 | WBGene00009345 | F32H2.8  | F32H2.8  | 0.118149376686178    | AGIWUR40399 |
| N2                                                                     | CT | I | 8994002 | 8998593 | WBGene00006532 | tba-6    | F32H2.9  | 0.0728276200686846   |             |
| AGIWUR6102;AGIWUR8788;AGIWUR19549                                      |    |   |         |         |                |          |          |                      |             |
| N2                                                                     | CT | I | 8998532 | 8999564 | WBGene00009343 | F32H2.6  | F32H2.6  | -0.0561371210523021  | AGIWUR6481  |
| N2                                                                     | CT | I | 9000097 | 9001721 | WBGene00009480 | F36F2.7  | F36F2.7  | 0.110275342707932    | AGIWUR19884 |
| N2                                                                     | CT | I | 9001913 | 9003963 | WBGene00009478 | syx-7    | F36F2.4  | -0.278220658044781   | AGIWUR4349  |
| N2                                                                     | CT | I | 9004513 | 9008708 | WBGene00009479 | fcp-1    | F36F2.6  | -0.0337271395975312  |             |



AGIWUR1634;AGIWUR1989;AGIWUR12067;AGIWUR12943;AGIWUR19990;AGIWUR23535;AGIWUR23931;AGIWUR33444;AGIWUR33850;AGIWUR35249;AGIWUR37967;AGIWUR38798

N2 CT I 9009260 9013885 WBGene00009477 rbp1-1 F36F2.3 -0.047055816110178

AGIWUR8448;AGIWUR9874;AGIWUR11081;AGIWUR20523;AGIWUR42216;AGIWUR44180

N2 CT I 9015357 9015711 WBGene00009481 F36F2.8 F36F2.8 0.211644984708975 AGIWUR18272

N2 CT I 9016755 9017994 WBGene00009476 F36F2.2 F36F2.2 -0.15385432074271 AGIWUR2277

N2 CT I 9018623 9020304 WBGene00009475 F36F2.1 F36F2.1 -0.0430195930548791 AGIWUR26314

N2 CT I 9020945 9025553 WBGene00006525 tax-2 F36F2.5 -0.106187062910889 AGIWUR29674

N2 CT I 9025779 9031232 WBGene00007854 C31H5.1 C31H5.1 -0.0104286414180992 AGIWUR2925

N2 CT I 9031274 9036695 WBGene00000058 acr-19 C31H5.3 0.0902386039286691 AGIWUR7763

N2 CT I 9041374 9041988 WBGene00007858 C31H5.7 C31H5.7 -0.189333707077648 AGIWUR33167

N2 CT I 9042270 9042599 WBGene00007855 C31H5.4 C31H5.4 -0.315187683047458 AGIWUR26962

N2 CT I 9043315 9046889 WBGene00007857 C31H5.6 C31H5.6 0.0887872586757972 AGIWUR44224

N2 CT I 9048188 9049427 WBGene00007856 C31H5.5 C31H5.5 -0.014721701697848 AGIWUR15377

N2 CT I 9049460 9055457 WBGene00001843 hgo-1 W06D4.1 -0.159856413044167 AGIWUR36152

N2 CT I 9056293 9057822 WBGene00012296 spe-46 W06D4.2 0.347862507545321

AGIWUR906;AGIWUR18763;AGIWUR24886

N2 CT I 9058852 9060473 WBGene00012297 W06D4.3 W06D4.3 0.015111972031665

AGIWUR9186;AGIWUR28315;AGIWUR40836

N2 CT I 9060493 9063160 WBGene00012298 prmt-7 W06D4.4 -0.17165344331414 AGIWUR3456

N2 CT I 9063588 9064403 WBGene00006503 snx-3 W06D4.5 -0.225180255054106 AGIWUR28774

N2 CT I 9065087 9070264 WBGene00004298 rad-54 W06D4.6 0.142238664761038

AGIWUR159;AGIWUR21282;AGIWUR26162

N2 CT I 9070247 9075077 WBGene00011531 rsbp-1 T06D10.1 0.0924923273448677

AGIWUR241;AGIWUR1536;AGIWUR4469;AGIWUR5365;AGIWUR12649;AGIWUR14014;AGIWUR18637;AGIWUR23781;AGIWUR24397;AGIWUR26444;AGIWUR26777;AGIWUR40003;AGIWUR43991

N2 CT I 9077565 9080024 WBGene00011532 chaf-1 T06D10.2 -0.0064817240388102

AGIWUR26057

N2 CT I 9095957 9100862 WBGene00003182 mef-2 W10D5.1 -0.0417022730583367

AGIWUR1934;AGIWUR2035;AGIWUR36060;AGIWUR40628

N2 CT I 9100846 9107939 WBGene00001574 gei-17 W10D5.3 -0.0215764578620643

AGIWUR1675;AGIWUR2117;AGIWUR7167;AGIWUR7510;AGIWUR9339;AGIWUR11898;AGIWUR12040;AGIWUR15245;AGIWUR21852;AGIWUR23780;AGIWUR23859;AGIWUR28852;AGIWUR32519;AGIWUR36685;AGIWUR37731;AGIWUR37792;AGIWUR37857;AGIWUR39942;AGIWUR42717

N2 CT I 9108173 9110918 WBGene00012376 nduf-7 W10D5.2 -0.181832347794993

AGIWUR9870;AGIWUR19362;AGIWUR25841;AGIWUR39958;AGIWUR42432

N2 CT I 9118115 9122398 WBGene00014115 glt-4 ZK858.1 -0.128487937058029

AGIWUR8183;AGIWUR20297;AGIWUR27306

N2 CT I 9123182 9124509 WBGene00014116 ZK858.2 ZK858.2 0.334906012181957 AGIWUR39603

|                                                                                                                                                        |    |   |         |         |                |          |           |                      |             |
|--------------------------------------------------------------------------------------------------------------------------------------------------------|----|---|---------|---------|----------------|----------|-----------|----------------------|-------------|
| N2                                                                                                                                                     | CT | I | 9124664 | 9126155 | WBGene00014121 | ZK858.8  | ZK858.8   | 0.292053243533733    | AGIWUR34245 |
| N2                                                                                                                                                     | CT | I | 9126140 | 9127101 | WBGene00014117 | cllec-91 | ZK858.3   | -0.230066163744912   | AGIWUR32994 |
| N2                                                                                                                                                     | CT | I | 9132538 | 9135753 | WBGene00003209 | mel-26   | ZK858.4   | 0.152910160287746    | AGIWUR17332 |
| N2                                                                                                                                                     | CT | I | 9135764 | 9138361 | WBGene00014118 | ZK858.5  | ZK858.5   | -0.0386160615886926  | AGIWUR21277 |
| N2                                                                                                                                                     | CT | I | 9138267 | 9145632 | WBGene00014119 | ZK858.6  | ZK858.6   | 0.248229139439392    | AGIWUR1164  |
| N2                                                                                                                                                     | CT | I | 9149474 | 9153252 | WBGene00010421 | slc-36.4 | H32K16.1  | -0.0814007664808081  |             |
| AGIWUR12001;AGIWUR14839;AGIWUR39085                                                                                                                    |    |   |         |         |                |          |           |                      |             |
| N2                                                                                                                                                     | CT | I | 9154228 | 9154789 | WBGene00010422 | H32K16.2 | H32K16.2  | 0.178555600241001    |             |
| AGIWUR19106                                                                                                                                            |    |   |         |         |                |          |           |                      |             |
| N2                                                                                                                                                     | CT | I | 9155513 | 9157411 | WBGene00009129 | F25H5.7  | F25H5.7   | 0.187490360745034    | AGIWUR22773 |
| N2                                                                                                                                                     | CT | I | 9159015 | 9159757 | WBGene00009128 | mrpl-54  | F25H5.6   | -0.138207906608546   | AGIWUR41190 |
| N2                                                                                                                                                     | CT | I | 9159938 | 9163261 | WBGene00009127 | clsp-1   | F25H5.5   | -0.119419074910772   | AGIWUR34600 |
| N2                                                                                                                                                     | CT | I | 9163531 | 9166952 | WBGene00001167 | eef-2    | F25H5.4   | 0.0914906806630604   |             |
| AGIWUR2082;AGIWUR2145;AGIWUR3539;AGIWUR3615;AGIWUR6960;AGIWUR18490;AGIWUR19460;AGIWUR20868;AGIWUR29742;AGIWUR34740;AGIWUR37900;AGIWUR42189;AGIWUR44830 |    |   |         |         |                |          |           |                      |             |
| N2                                                                                                                                                     | CT | I | 9168432 | 9177488 | WBGene00009126 | pyk-1    | F25H5.3   | 0.245468752750289    |             |
| AGIWUR13861;AGIWUR19221;AGIWUR20544;AGIWUR20814                                                                                                        |    |   |         |         |                |          |           |                      |             |
| N2                                                                                                                                                     | CT | I | 9177664 | 9178703 | WBGene00009130 | F25H5.8  | F25H5.8   | 0.216991617357237    | AGIWUR17782 |
| N2                                                                                                                                                     | CT | I | 9179941 | 9181119 | WBGene00009125 | F25H5.2  | F25H5.2   | 0.0101425620037539   | AGIWUR3832  |
| N2                                                                                                                                                     | CT | I | 9181819 | 9220766 | WBGene00006407 | lim-9    | F25H5.1   | 0.108908848444417    |             |
| AGIWUR4251;AGIWUR5434;AGIWUR8051;AGIWUR12308;AGIWUR12581;AGIWUR14843;AGIWUR27883;AGIWUR28401;AGIWUR34213;AGIWUR37608;AGIWUR40066                       |    |   |         |         |                |          |           |                      |             |
| N2                                                                                                                                                     | CT | I | 9221834 | 9226390 | WBGene00008107 | aspm-1   | C45G3.1   | 0.0702324493847297   |             |
| AGIWUR10033;AGIWUR19229;AGIWUR22943;AGIWUR26742;AGIWUR35966;AGIWUR38022                                                                                |    |   |         |         |                |          |           |                      |             |
| N2                                                                                                                                                     | CT | I | 9226905 | 9228184 | WBGene00001590 | C45G3.3  | C45G3.3   | -0.142596562050853   |             |
| AGIWUR3937;AGIWUR4120;AGIWUR8367;AGIWUR41921                                                                                                           |    |   |         |         |                |          |           |                      |             |
| N2                                                                                                                                                     | CT | I | 9228163 | 9232097 | WBGene00044008 | gip-2    | C45G3.5   | -0.1784792462418     | AGIWUR39028 |
| N2                                                                                                                                                     | CT | I | 9232071 | 9233560 | WBGene00000147 | aph-1    | VF36H2L.1 | 0.252586629086846    |             |
| AGIWUR20506                                                                                                                                            |    |   |         |         |                |          |           |                      |             |
| N2                                                                                                                                                     | CT | I | 9234174 | 9245924 | WBGene00009498 | tat-5    | F36H2.1   | 0.0999308357890776   | AGIWUR33349 |
| N2                                                                                                                                                     | CT | I | 9246028 | 9249383 | WBGene00009499 | ent-6    | F36H2.2   | -0.309992030341737   | AGIWUR33843 |
| N2                                                                                                                                                     | CT | I | 9249542 | 9250488 | WBGene00044247 | F36H2.4  | F36H2.4   | 0.155912087567695    |             |
| AGIWUR1039;AGIWUR13806;AGIWUR14703;AGIWUR14903                                                                                                         |    |   |         |         |                |          |           |                      |             |
| N2                                                                                                                                                     | CT | I | 9251838 | 9261657 | WBGene00009500 | F36H2.3  | F36H2.3   | -0.0948391204321863  |             |
| AGIWUR5375;AGIWUR18730                                                                                                                                 |    |   |         |         |                |          |           |                      |             |
| N2                                                                                                                                                     | CT | I | 9265951 | 9270919 | WBGene00008779 | F14B4.1  | F14B4.1   | -0.119835975063959   | AGIWUR35273 |
| N2                                                                                                                                                     | CT | I | 9271443 | 9278689 | WBGene00008780 | hxx-1    | F14B4.2   | 0.0686533063070716   |             |
| AGIWUR9996;AGIWUR14587;AGIWUR24932                                                                                                                     |    |   |         |         |                |          |           |                      |             |
| N2                                                                                                                                                     | CT | I | 9280963 | 9286577 | WBGene00008781 | rpoa-2   | F14B4.3   | 0.000985967485192418 | AGIWUR24437 |

|                                                             |    |   |         |         |                |          |          |                     |             |
|-------------------------------------------------------------|----|---|---------|---------|----------------|----------|----------|---------------------|-------------|
| N2                                                          | CT | I | 9287437 | 9289770 | WBGene00009173 | prom-1   | F26H9.1  | 0.153892373454365   | AGIWUR21546 |
| N2                                                          | CT | I | 9289753 | 9294035 | WBGene00009174 | F26H9.2  | F26H9.2  | 0.0921214930326428  |             |
| AGIWUR18009;AGIWUR21415;AGIWUR26246                         |    |   |         |         |                |          |          |                     |             |
| N2                                                          | CT | I | 9305751 | 9306844 | WBGene00009176 | nmat-2   | F26H9.4  | -0.144856004623932  | AGIWUR38957 |
| N2                                                          | CT | I | 9308442 | 9310221 | WBGene00004268 | rab-5    | F26H9.6  | -0.0363015234426083 |             |
| AGIWUR6586;AGIWUR20214;AGIWUR26895;AGIWUR43354              |    |   |         |         |                |          |          |                     |             |
| N2                                                          | CT | I | 9310329 | 9312641 | WBGene00006732 | uev-3    | F26H9.7  | -0.134773621052148  | AGIWUR29491 |
| N2                                                          | CT | I | 9312635 | 9314488 | WBGene00009177 | F26H9.5  | F26H9.5  | 0.00363164178958897 | AGIWUR38121 |
| N2                                                          | CT | I | 9317736 | 9327279 | WBGene00009178 | uggt-2   | F26H9.8  | 0.0402491054060787  | AGIWUR43492 |
| N2                                                          | CT | I | 9327857 | 9330928 | WBGene00007533 | cbl-1    | C12C8.2  | 0.0141025682525973  |             |
| AGIWUR4013;AGIWUR4482;AGIWUR30682;AGIWUR40616               |    |   |         |         |                |          |          |                     |             |
| N2                                                          | CT | I | 9334812 | 9342496 | WBGene00003026 | lin-41   | C12C8.3  | 0.0272495831051636  |             |
| AGIWUR30548;AGIWUR38608                                     |    |   |         |         |                |          |          |                     |             |
| N2                                                          | CT | I | 9344724 | 9349558 | WBGene00010857 | M04C9.2  | M04C9.2  | 0.144012725376479   |             |
| AGIWUR9274;AGIWUR27747;AGIWUR37255                          |    |   |         |         |                |          |          |                     |             |
| N2                                                          | CT | I | 9350274 | 9352700 | WBGene00010856 | M04C9.1  | M04C9.1  | -0.12339105898303   |             |
| AGIWUR13465;AGIWUR15038;AGIWUR30895;AGIWUR32551;AGIWUR38207 |    |   |         |         |                |          |          |                     |             |
| N2                                                          | CT | I | 9352882 | 9354541 | WBGene00010858 | M04C9.3  | M04C9.3  | -0.125338708716043  |             |
| AGIWUR17011;AGIWUR34564;AGIWUR40124                         |    |   |         |         |                |          |          |                     |             |
| N2                                                          | CT | I | 9355072 | 9357079 | WBGene00010859 | M04C9.4  | M04C9.4  | 0.19603948810261    | AGIWUR12795 |
| N2                                                          | CT | I | 9359075 | 9364180 | WBGene00001121 | dyf-5    | M04C9.5  | -0.0268894950073593 | AGIWUR3172  |
| N2                                                          | CT | I | 9364099 | 9389982 | WBGene00008878 | ppfr-1   | F16A11.3 | -0.229050810732893  |             |
| AGIWUR6600;AGIWUR24113;AGIWUR33603                          |    |   |         |         |                |          |          |                     |             |
| N2                                                          | CT | I | 9390829 | 9393095 | WBGene00008877 | rtcb-1   | F16A11.2 | -0.05977665315962   |             |
| AGIWUR39556                                                 |    |   |         |         |                |          |          |                     |             |
| N2                                                          | CT | I | 9393948 | 9404024 | WBGene00008876 | F16A11.1 | F16A11.1 |                     |             |
| -0.00155103623158581 AGIWUR4470                             |    |   |         |         |                |          |          |                     |             |
| N2                                                          | CT | I | 9408356 | 9410094 | WBGene00007641 | C17E4.1  | C17E4.1  | 0.081611208267935   | AGIWUR21934 |
| N2                                                          | CT | I | 9414456 | 9416703 | WBGene00219313 | C17E4.20 | C17E4.20 | 0.00708766375297998 |             |
| AGIWUR33741                                                 |    |   |         |         |                |          |          |                     |             |
| N2                                                          | CT | I | 9416704 | 9418884 | WBGene00007643 | marc-3   | C17E4.3  | -0.0771601586804627 |             |
| AGIWUR7149;AGIWUR44386                                      |    |   |         |         |                |          |          |                     |             |
| N2                                                          | CT | I | 9419368 | 9419998 | WBGene00007644 | C17E4.4  | C17E4.4  | -0.151094446858046  | AGIWUR38083 |
| N2                                                          | CT | I | 9419973 | 9420813 | WBGene00044236 | C17E4.11 | C17E4.11 | -0.112393676196511  |             |
| AGIWUR27536;AGIWUR36882                                     |    |   |         |         |                |          |          |                     |             |
| N2                                                          | CT | I | 9420907 | 9421992 | WBGene00003904 | pabp-2   | C17E4.5  | 0.0507529303630512  |             |
| AGIWUR3676;AGIWUR21561;AGIWUR38882;AGIWUR41249              |    |   |         |         |                |          |          |                     |             |
| N2                                                          | CT | I | 9422556 | 9431120 | WBGene00007645 | C17E4.6  | C17E4.6  | 0.102191363057758   |             |
| AGIWUR13805;AGIWUR17385;AGIWUR29208                         |    |   |         |         |                |          |          |                     |             |

|                                                                         |    |   |         |         |                |           |           |                      |             |
|-------------------------------------------------------------------------|----|---|---------|---------|----------------|-----------|-----------|----------------------|-------------|
| N2                                                                      | CT | I | 9431098 | 9433828 | WBGene00007646 | nkb-1     | C17E4.9   | 0.339739795809216    |             |
| AGIWUR8987;AGIWUR12137;AGIWUR17620;AGIWUR22816;AGIWUR23728;AGIWUR43795  |    |   |         |         |                |           |           |                      |             |
| N2                                                                      | CT | I | 9435377 | 9441029 | WBGene00007647 | C17E4.10  | C17E4.10  | -0.0321997691823626  |             |
| AGIWUR23779;AGIWUR25582;AGIWUR42996                                     |    |   |         |         |                |           |           |                      |             |
| N2                                                                      | CT | I | 9441010 | 9450731 | WBGene00003172 | mec-8     | F46A9.6   | 0.126230575028258    |             |
| AGIWUR10739;AGIWUR11464;AGIWUR28789;AGIWUR38678;AGIWUR43431;AGIWUR44090 |    |   |         |         |                |           |           |                      |             |
| N2                                                                      | CT | I | 9457456 | 9458842 | WBGene00009754 | F46A9.1   | F46A9.1   | 0.0881086612280892   | AGIWUR34224 |
| N2                                                                      | CT | I | 9459287 | 9460550 | WBGene00009755 | F46A9.2   | F46A9.2   | 0.346055900232843    | AGIWUR16726 |
| N2                                                                      | CT | I | 9463760 | 9468917 | WBGene00006681 | twk-29    | F46A9.3   | -0.20306321119485    | AGIWUR11445 |
| N2                                                                      | CT | I | 9469704 | 9470633 | WBGene00004808 | skr-2     | F46A9.4   | -0.141567498450858   | AGIWUR3845  |
| N2                                                                      | CT | I | 9471341 | 9472642 | WBGene00004807 | skr-1     | F46A9.5   | 0.101499677375562    |             |
| AGIWUR10859;AGIWUR17688;AGIWUR21590;AGIWUR24111;AGIWUR37526             |    |   |         |         |                |           |           |                      |             |
| N2                                                                      | CT | I | 9472642 | 9474794 | WBGene00009260 | calm-1    | F30A10.1  | -0.279064564964425   |             |
| AGIWUR3316                                                              |    |   |         |         |                |           |           |                      |             |
| N2                                                                      | CT | I | 9476597 | 9477181 | WBGene00045473 | F30A10.14 | F30A10.14 | -0.165128128807538   |             |
| AGIWUR13773                                                             |    |   |         |         |                |           |           |                      |             |
| N2                                                                      | CT | I | 9477478 | 9478098 | WBGene00009268 | F30A10.11 | F30A10.11 | -0.0562182991925066  |             |
| AGIWUR10060                                                             |    |   |         |         |                |           |           |                      |             |
| N2                                                                      | CT | I | 9478470 | 9479091 | WBGene00044680 | F30A10.13 | F30A10.13 | 0.0250503999639378   |             |
| AGIWUR16460;AGIWUR40269                                                 |    |   |         |         |                |           |           |                      |             |
| N2                                                                      | CT | I | 9479101 | 9480774 | WBGene00009261 | F30A10.2  | F30A10.2  | -0.122515217159591   |             |
| AGIWUR14176;AGIWUR14360;AGIWUR22666                                     |    |   |         |         |                |           |           |                      |             |
| N2                                                                      | CT | I | 9481629 | 9482275 | WBGene00009269 | F30A10.12 | F30A10.12 | 0.110350441564645    |             |
| AGIWUR5625;AGIWUR19501                                                  |    |   |         |         |                |           |           |                      |             |
| N2                                                                      | CT | I | 9483810 | 9486540 | WBGene00009263 | F30A10.4  | F30A10.4  | -0.0253375002350928  |             |
| AGIWUR16094                                                             |    |   |         |         |                |           |           |                      |             |
| N2                                                                      | CT | I | 9486642 | 9488229 | WBGene00006061 | stl-1     | F30A10.5  | -0.146759325796053   |             |
| AGIWUR12020                                                             |    |   |         |         |                |           |           |                      |             |
| N2                                                                      | CT | I | 9488488 | 9492620 | WBGene00009264 | sac-1     | F30A10.6  | -0.0603520018269741  |             |
| AGIWUR8404;AGIWUR15613;AGIWUR21401                                      |    |   |         |         |                |           |           |                      |             |
| N2                                                                      | CT | I | 9492615 | 9494589 | WBGene00009262 | F30A10.3  | F30A10.3  | -0.140430445709811   |             |
| AGIWUR7533;AGIWUR30325;AGIWUR31913                                      |    |   |         |         |                |           |           |                      |             |
| N2                                                                      | CT | I | 9501268 | 9505173 | WBGene00006062 | stn-1     | F30A10.8  | 0.0467387966849904   |             |
| AGIWUR11443;AGIWUR37826                                                 |    |   |         |         |                |           |           |                      |             |
| N2                                                                      | CT | I | 9506553 | 9511184 | WBGene00009267 | usp-48    | F30A10.10 | -0.00728707428748621 |             |
| AGIWUR41266                                                             |    |   |         |         |                |           |           |                      |             |
| N2                                                                      | CT | I | 9511181 | 9512236 | WBGene00004887 | smn-1     | C41G7.1   | -0.237529994808721   | AGIWUR40754 |
| N2                                                                      | CT | I | 9512428 | 9514755 | WBGene00002226 | k1p-16    | C41G7.2   | -0.00071019409311468 | AGIWUR16204 |
| N2                                                                      | CT | I | 9515002 | 9516776 | WBGene00077771 | C41G7.9   | C41G7.9   | -0.0273251605986138  |             |

AGIWUR9965;AGIWUR12718;AGIWUR34772  
 N2 CT I 9519244 9521275 WBGene00008062 set-32 C41G7.4 -0.119689393092528  
 AGIWUR11730;AGIWUR16788;AGIWUR18476  
 N2 CT I 9530816 9532831 WBGene00077525 C41G7.8 C41G7.8 -0.175993759390638  
 AGIWUR15227;AGIWUR15913;AGIWUR20146;AGIWUR21311  
 N2 CT I 9533580 9536271 WBGene00008064 C41G7.7 C41G7.7 0.115949840129307 AGIWUR40452  
 N2 CT I 9536465 9540966 WBGene00007984 irx-1 C36F7.1 -0.106004431610359  
 AGIWUR3595;AGIWUR4726;AGIWUR12384;AGIWUR15187;AGIWUR40383  
 N2 CT I 9544733 9558096 WBGene00007985 swah-1 C36F7.2 -0.212090403933473  
 AGIWUR4941;AGIWUR23912;AGIWUR33178  
 N2 CT I 9565394 9574377 WBGene00004372 rig-5 C36F7.4 -0.136731558231167  
 AGIWUR610;AGIWUR8403;AGIWUR17086;AGIWUR19523;AGIWUR44163  
 N2 CT I 9574762 9576141 WBGene00007986 C36F7.5 C36F7.5 -0.00298534578195486 AGIWUR26301  
 N2 CT I 9578526 9581267 WBGene00002276 lem-3 F42H11.2 -0.123864142046685  
 AGIWUR4832  
 N2 CT I 9581786 9582583 WBGene00044987 K07A1.17 K07A1.17 -0.112408588609552  
 AGIWUR11068  
 N2 CT I 9582682 9583533 WBGene00010608 K07A1.1 K07A1.1 -0.0825029621170117  
 AGIWUR3309;AGIWUR7293;AGIWUR13669;AGIWUR14108;AGIWUR25109;AGIWUR29244;AGIWUR34922;AGIWUR40044  
 N2 CT I 9583869 9584817 WBGene00010617 K07A1.13 K07A1.13 0.0118898587222827  
 AGIWUR31686  
 N2 CT I 9585317 9587206 WBGene00010609 dut-1 K07A1.2 -0.116739368025561  
 AGIWUR17209;AGIWUR24219;AGIWUR34406  
 N2 CT I 9587169 9588132 WBGene00010610 K07A1.3 K07A1.3 -0.09581476870353  
 AGIWUR10401;AGIWUR13401;AGIWUR21452  
 N2 CT I 9588710 9589931 WBGene00010611 K07A1.4 K07A1.4 0.203244525736963 AGIWUR21507  
 N2 CT I 9591939 9593103 WBGene00010613 K07A1.6 K07A1.6 0.14211339733789  
 AGIWUR12219;AGIWUR17738;AGIWUR20345;AGIWUR27107;AGIWUR29821  
 N2 CT I 9595276 9598363 WBGene00010614 cri-1 K07A1.7 -0.0540876252228912  
 AGIWUR6642;AGIWUR9009;AGIWUR42113  
 N2 CT I 9605896 9609025 WBGene00000177 aqp-9 K07A1.16 -0.304450223206183  
 AGIWUR14146;AGIWUR43748  
 N2 CT I 9608926 9609705 WBGene00010619 K07A1.15 K07A1.15 -0.305302344871947  
 AGIWUR34358  
 N2 CT I 9609501 9611620 WBGene00002070 ile-1 K07A1.8 0.179915497112447  
 AGIWUR11387;AGIWUR26158;AGIWUR44299;AGIWUR45019  
 N2 CT I 9611815 9615082 WBGene00010615 ate-1 K07A1.9 -0.065878756151152  
 AGIWUR5578;AGIWUR19246  
 N2 CT I 9615195 9616474 WBGene00010616 K07A1.10 K07A1.10 -0.161332753416153

AGIWUR8008;AGIWUR36377;AGIWUR40995;AGIWUR43062

|    |    |   |         |         |                |       |          |  |                    |
|----|----|---|---------|---------|----------------|-------|----------|--|--------------------|
| N2 | CT | I | 9616508 | 9618107 | WBGene00004312 | rba-1 | K07A1.11 |  | -0.056242073395218 |
|----|----|---|---------|---------|----------------|-------|----------|--|--------------------|

AGIWUR21971

|    |    |   |         |         |                |        |          |  |                   |
|----|----|---|---------|---------|----------------|--------|----------|--|-------------------|
| N2 | CT | I | 9618207 | 9619760 | WBGene00003036 | lin-53 | K07A1.12 |  | 0.149419773861494 |
|----|----|---|---------|---------|----------------|--------|----------|--|-------------------|

AGIWUR784;AGIWUR14734;AGIWUR15058;AGIWUR17077;AGIWUR22021;AGIWUR28468

|    |    |   |         |         |                |        |         |  |                    |
|----|----|---|---------|---------|----------------|--------|---------|--|--------------------|
| N2 | CT | I | 9621160 | 9625796 | WBGene00004488 | rps-19 | T05F1.3 |  | -0.117492435268787 |
|----|----|---|---------|---------|----------------|--------|---------|--|--------------------|

AGIWUR1014;AGIWUR3605;AGIWUR6371;AGIWUR9406;AGIWUR15578;AGIWUR17883;AGIWUR19787;AGIWUR21395;AGIWUR23441;AGIWUR32203;AGIWUR35058;AGIWUR41713

|    |    |   |         |         |                |       |         |                   |             |
|----|----|---|---------|---------|----------------|-------|---------|-------------------|-------------|
| N2 | CT | I | 9626241 | 9630848 | WBGene00002027 | hsr-9 | T05F1.6 | 0.160456951102155 | AGIWUR37000 |
|----|----|---|---------|---------|----------------|-------|---------|-------------------|-------------|

|    |    |   |         |         |                |         |         |                     |             |
|----|----|---|---------|---------|----------------|---------|---------|---------------------|-------------|
| N2 | CT | I | 9631388 | 9632402 | WBGene00011490 | T05F1.4 | T05F1.4 | -0.0647381191992533 | AGIWUR14722 |
|----|----|---|---------|---------|----------------|---------|---------|---------------------|-------------|

|    |    |   |         |         |                |         |         |                   |            |
|----|----|---|---------|---------|----------------|---------|---------|-------------------|------------|
| N2 | CT | I | 9633183 | 9635945 | WBGene00011491 | T05F1.5 | T05F1.5 | 0.249629439170848 | AGIWUR9793 |
|----|----|---|---------|---------|----------------|---------|---------|-------------------|------------|

|    |    |   |         |         |                |         |         |                    |           |
|----|----|---|---------|---------|----------------|---------|---------|--------------------|-----------|
| N2 | CT | I | 9638886 | 9641736 | WBGene00011492 | T05F1.7 | T05F1.7 | -0.117333254580393 | AGIWUR266 |
|----|----|---|---------|---------|----------------|---------|---------|--------------------|-----------|

|    |    |   |         |         |                |         |         |                   |             |
|----|----|---|---------|---------|----------------|---------|---------|-------------------|-------------|
| N2 | CT | I | 9642344 | 9643804 | WBGene00011493 | T05F1.8 | T05F1.8 | 0.259817924106848 | AGIWUR38596 |
|----|----|---|---------|---------|----------------|---------|---------|-------------------|-------------|

|    |    |   |         |         |                |         |         |                    |            |
|----|----|---|---------|---------|----------------|---------|---------|--------------------|------------|
| N2 | CT | I | 9645699 | 9647676 | WBGene00011494 | T05F1.9 | T05F1.9 | -0.165206775952646 | AGIWUR9312 |
|----|----|---|---------|---------|----------------|---------|---------|--------------------|------------|

|    |    |   |         |         |                |       |          |  |                    |
|----|----|---|---------|---------|----------------|-------|----------|--|--------------------|
| N2 | CT | I | 9647603 | 9649238 | WBGene00000968 | dhs-4 | T05F1.10 |  | -0.347587801556292 |
|----|----|---|---------|---------|----------------|-------|----------|--|--------------------|

AGIWUR27482

|    |    |   |         |         |                |          |  |          |                    |
|----|----|---|---------|---------|----------------|----------|--|----------|--------------------|
| N2 | CT | I | 9650499 | 9652946 | WBGene00011497 | T05F1.13 |  | T05F1.13 | -0.272252454914296 |
|----|----|---|---------|---------|----------------|----------|--|----------|--------------------|

AGIWUR14401

|    |    |   |         |         |                |          |  |          |                     |
|----|----|---|---------|---------|----------------|----------|--|----------|---------------------|
| N2 | CT | I | 9653021 | 9657040 | WBGene00011495 | T05F1.11 |  | T05F1.11 | -0.0771900443158593 |
|----|----|---|---------|---------|----------------|----------|--|----------|---------------------|

AGIWUR25086

|    |    |   |         |         |                |       |         |                    |            |
|----|----|---|---------|---------|----------------|-------|---------|--------------------|------------|
| N2 | CT | I | 9657012 | 9657871 | WBGene00007278 | lab-1 | C03D6.6 | -0.290131112454144 | AGIWUR9702 |
|----|----|---|---------|---------|----------------|-------|---------|--------------------|------------|

|    |    |   |         |         |                |        |         |                     |             |
|----|----|---|---------|---------|----------------|--------|---------|---------------------|-------------|
| N2 | CT | I | 9658274 | 9660080 | WBGene00007277 | asf1-1 | C03D6.5 | -0.0611924010568803 | AGIWUR14465 |
|----|----|---|---------|---------|----------------|--------|---------|---------------------|-------------|

|    |    |   |         |         |                |        |         |                   |             |
|----|----|---|---------|---------|----------------|--------|---------|-------------------|-------------|
| N2 | CT | I | 9660174 | 9664915 | WBGene00003800 | npp-14 | C03D6.4 | 0.208644726114088 | AGIWUR18409 |
|----|----|---|---------|---------|----------------|--------|---------|-------------------|-------------|

|    |    |   |         |         |                |       |         |                  |  |
|----|----|---|---------|---------|----------------|-------|---------|------------------|--|
| N2 | CT | I | 9665194 | 9668664 | WBGene00000466 | cel-1 | C03D6.3 | -0.1873026168984 |  |
|----|----|---|---------|---------|----------------|-------|---------|------------------|--|

AGIWUR2773;AGIWUR8832;AGIWUR16240;AGIWUR35365

|    |    |   |         |         |                |         |         |                    |             |
|----|----|---|---------|---------|----------------|---------|---------|--------------------|-------------|
| N2 | CT | I | 9668628 | 9670726 | WBGene00007275 | C03D6.1 | C03D6.1 | -0.225077610835882 | AGIWUR13138 |
|----|----|---|---------|---------|----------------|---------|---------|--------------------|-------------|

|    |    |   |         |         |                |          |  |          |                     |
|----|----|---|---------|---------|----------------|----------|--|----------|---------------------|
| N2 | CT | I | 9673668 | 9678553 | WBGene00007297 | C04F12.1 |  | C04F12.1 | -0.0440487141225567 |
|----|----|---|---------|---------|----------------|----------|--|----------|---------------------|

AGIWUR33114

|    |    |   |         |         |                |       |          |  |                     |
|----|----|---|---------|---------|----------------|-------|----------|--|---------------------|
| N2 | CT | I | 9685398 | 9688653 | WBGene00002069 | ikb-1 | C04F12.3 |  | -0.0418330386833929 |
|----|----|---|---------|---------|----------------|-------|----------|--|---------------------|

AGIWUR2266

|    |    |   |         |         |                |        |          |  |                      |
|----|----|---|---------|---------|----------------|--------|----------|--|----------------------|
| N2 | CT | I | 9689185 | 9690084 | WBGene00004426 | rp1-14 | C04F12.4 |  | -0.00515055271858955 |
|----|----|---|---------|---------|----------------|--------|----------|--|----------------------|

AGIWUR38081

|    |    |   |         |         |                |          |  |          |                    |
|----|----|---|---------|---------|----------------|----------|--|----------|--------------------|
| N2 | CT | I | 9690079 | 9690557 | WBGene00007299 | C04F12.5 |  | C04F12.5 | 0.0316593587670631 |
|----|----|---|---------|---------|----------------|----------|--|----------|--------------------|

AGIWUR2681;AGIWUR6569;AGIWUR15195;AGIWUR17394;AGIWUR19832;AGIWUR21206

|    |    |   |         |         |                |          |  |          |                    |
|----|----|---|---------|---------|----------------|----------|--|----------|--------------------|
| N2 | CT | I | 9692701 | 9693781 | WBGene00007300 | C04F12.6 |  | C04F12.6 | 0.0899841995057091 |
|----|----|---|---------|---------|----------------|----------|--|----------|--------------------|

AGIWUR7919

|    |    |   |         |         |                |          |  |          |                   |
|----|----|---|---------|---------|----------------|----------|--|----------|-------------------|
| N2 | CT | I | 9695707 | 9696762 | WBGene00007301 | C04F12.7 |  | C04F12.7 | 0.267744399596292 |
|----|----|---|---------|---------|----------------|----------|--|----------|-------------------|

AGIWUR8242

|    |    |   |         |         |                |          |  |          |                     |
|----|----|---|---------|---------|----------------|----------|--|----------|---------------------|
| N2 | CT | I | 9697237 | 9699561 | WBGene00007302 | C04F12.8 |  | C04F12.8 | -0.0008620330640845 |
|----|----|---|---------|---------|----------------|----------|--|----------|---------------------|

|                                                                                   |    |   |         |         |                |          |           |                      |             |
|-----------------------------------------------------------------------------------|----|---|---------|---------|----------------|----------|-----------|----------------------|-------------|
| AGIWUR19847                                                                       |    |   |         |         |                |          |           |                      |             |
| N2                                                                                | CT | I | 9710093 | 9710767 | WBGene00007303 | rnh-1.3  | C04F12.9  | -0.266949494237721   |             |
| AGIWUR2458                                                                        |    |   |         |         |                |          |           |                      |             |
| N2                                                                                | CT | I | 9711064 | 9712719 | WBGene00001405 | fce-1    | C04F12.10 | -0.190119649463604   |             |
| AGIWUR36986                                                                       |    |   |         |         |                |          |           |                      |             |
| N2                                                                                | CT | I | 9712825 | 9715230 | WBGene00007621 | C16C2.4  | C16C2.4   | -0.251902371348555   | AGIWUR25185 |
| N2                                                                                | CT | I | 9715321 | 9728108 | WBGene00007620 | ocr1-1   | C16C2.3   | 0.119696566311919    | AGIWUR34995 |
| N2                                                                                | CT | I | 9737823 | 9744190 | WBGene00001582 | gfi-2    | K02A11.1  | 0.20441841518479     |             |
| AGIWUR27008;AGIWUR33816                                                           |    |   |         |         |                |          |           |                      |             |
| N2                                                                                | CT | I | 9744242 | 9745990 | WBGene00010487 | K02A11.2 | K02A11.2  | 0.0799241011115717   |             |
| AGIWUR32384                                                                       |    |   |         |         |                |          |           |                      |             |
| N2                                                                                | CT | I | 9745967 | 9747923 | WBGene00010488 | endu-1   | K02A11.3  | -0.00714148822837224 |             |
| AGIWUR26684                                                                       |    |   |         |         |                |          |           |                      |             |
| N2                                                                                | CT | I | 9748517 | 9749953 | WBGene00044607 | K02A11.4 | K02A11.4  | -0.0846944137104799  |             |
| AGIWUR1620;AGIWUR25104;AGIWUR38391;AGIWUR44265;AGIWUR45015                        |    |   |         |         |                |          |           |                      |             |
| N2                                                                                | CT | I | 9754122 | 9757898 | WBGene00006352 | sur-6    | F26E4.1   | 0.291032299220185    |             |
| AGIWUR2096;AGIWUR2215;AGIWUR9115;AGIWUR12953;AGIWUR13411;AGIWUR24929              |    |   |         |         |                |          |           |                      |             |
| N2                                                                                | CT | I | 9757854 | 9760787 | WBGene00009157 | F26E4.2  | F26E4.2   | -0.105946352706276   | AGIWUR8064  |
| N2                                                                                | CT | I | 9762403 | 9767873 | WBGene00009158 | F26E4.3  | F26E4.3   | -0.137080100206751   |             |
| AGIWUR4512;AGIWUR27007                                                            |    |   |         |         |                |          |           |                      |             |
| N2                                                                                | CT | I | 9768836 | 9771068 | WBGene00009160 | F26E4.5  | F26E4.5   | 0.200456174268551    | AGIWUR23988 |
| N2                                                                                | CT | I | 9771061 | 9772565 | WBGene00009159 | F26E4.4  | F26E4.4   | -0.0509547496209883  | AGIWUR27196 |
| N2                                                                                | CT | I | 9773172 | 9774012 | WBGene00009161 | F26E4.6  | F26E4.6   | -0.151926847817709   | AGIWUR5123  |
| N2                                                                                | CT | I | 9774165 | 9779541 | WBGene00009162 | F26E4.7  | F26E4.7   | -0.0240770580924199  | AGIWUR18395 |
| N2                                                                                | CT | I | 9780287 | 9781418 | WBGene00009165 | gpx-1    | F26E4.12  | -0.171841780181067   |             |
| AGIWUR41088                                                                       |    |   |         |         |                |          |           |                      |             |
| N2                                                                                | CT | I | 9781338 | 9785722 | WBGene00009163 | drsh-1   | F26E4.10  | 0.0409980543021247   |             |
| AGIWUR9346;AGIWUR17525                                                            |    |   |         |         |                |          |           |                      |             |
| N2                                                                                | CT | I | 9785778 | 9787624 | WBGene00006528 | tba-1    | F26E4.8   | -0.0165133530681629  |             |
| AGIWUR26699;AGIWUR27386;AGIWUR38577                                               |    |   |         |         |                |          |           |                      |             |
| N2                                                                                | CT | I | 9788749 | 9790050 | WBGene00000371 | cco-1    | F26E4.9   | -0.109152432548662   |             |
| AGIWUR2388;AGIWUR7324;AGIWUR10896;AGIWUR25457;AGIWUR26663;AGIWUR29113;AGIWUR38370 |    |   |         |         |                |          |           |                      |             |
| N2                                                                                | CT | I | 9793756 | 9796675 | WBGene00009164 | hrd1-1   | F26E4.11  | 0.0884249705344224   |             |
| AGIWUR477;AGIWUR5508;AGIWUR9022                                                   |    |   |         |         |                |          |           |                      |             |
| N2                                                                                | CT | I | 9808904 | 9813075 | WBGene00003569 | ncx-4    | F35C12.2  | -0.0992522626872034  |             |
| AGIWUR18843;AGIWUR26111;AGIWUR27942;AGIWUR30673                                   |    |   |         |         |                |          |           |                      |             |
| N2                                                                                | CT | I | 9813034 | 9823448 | WBGene00009408 | F35C12.3 | F35C12.3  | -0.114328309299744   |             |
| AGIWUR41111                                                                       |    |   |         |         |                |          |           |                      |             |
| N2                                                                                | CT | I | 9829827 | 9830599 | WBGene00013449 | Y67A6A.1 | Y67A6A.1  | 0.105438409127791    |             |

|                                                                                                            |    |   |         |         |                |           |           |                      |             |
|------------------------------------------------------------------------------------------------------------|----|---|---------|---------|----------------|-----------|-----------|----------------------|-------------|
| AGIWUR44360                                                                                                |    |   |         |         |                |           |           |                      |             |
| N2                                                                                                         | CT | I | 9839598 | 9844809 | WBGene00003652 | nhr-62    | Y67A6A.2  | -0.353081308727715   |             |
| AGIWUR2485                                                                                                 |    |   |         |         |                |           |           |                      |             |
| N2                                                                                                         | CT | I | 9847406 | 9850082 | WBGene00006978 | zig-1     | K10C3.3   | 0.0343152605681034   |             |
| AGIWUR21169;AGIWUR39109;AGIWUR39381                                                                        |    |   |         |         |                |           |           |                      |             |
| N2                                                                                                         | CT | I | 9850020 | 9851791 | WBGene00010730 | ensa-1    | K10C3.2   | 0.128006069161192    |             |
| AGIWUR18495;AGIWUR30294;AGIWUR30891;AGIWUR35413;AGIWUR35421;AGIWUR41141                                    |    |   |         |         |                |           |           |                      |             |
| N2                                                                                                         | CT | I | 9853658 | 9863492 | WBGene00010731 | K10C3.4   | K10C3.4   | 0.113201863366481    |             |
| AGIWUR1891;AGIWUR30585                                                                                     |    |   |         |         |                |           |           |                      |             |
| N2                                                                                                         | CT | I | 9863588 | 9869055 | WBGene00010732 | K10C3.5   | K10C3.5   | -0.163402614377627   | AGIWUR42407 |
| N2                                                                                                         | CT | I | 9869632 | 9874676 | WBGene00003639 | nhr-49    | K10C3.6   | 0.224691946181543    |             |
| AGIWUR7928;AGIWUR12085;AGIWUR13755;AGIWUR22758                                                             |    |   |         |         |                |           |           |                      |             |
| N2                                                                                                         | CT | I | 9874698 | 9879119 | WBGene00002142 | inx-20    | T23H4.1   | -0.191069933198688   | AGIWUR21242 |
| N2                                                                                                         | CT | I | 9879183 | 9881504 | WBGene00003659 | nhr-69    | T23H4.2   | 0.0853958194517936   |             |
| AGIWUR5029;AGIWUR19276;AGIWUR24449                                                                         |    |   |         |         |                |           |           |                      |             |
| N2                                                                                                         | CT | I | 9886200 | 9888154 | WBGene00003524 | nas-5     | T23H4.3   | -0.0580817264688438  | AGIWUR21924 |
| N2                                                                                                         | CT | I | 9888356 | 9892223 | WBGene00003842 | oct-1     | F52F12.1  | 0.0694797282453941   |             |
| AGIWUR6287;AGIWUR17666;AGIWUR21319                                                                         |    |   |         |         |                |           |           |                      |             |
| N2                                                                                                         | CT | I | 9893698 | 9895596 | WBGene00000640 | col-64    | F52F12.2  | -0.078290342478776   |             |
| AGIWUR24554                                                                                                |    |   |         |         |                |           |           |                      |             |
| N2                                                                                                         | CT | I | 9895693 | 9900817 | WBGene00003396 | mom-4     | F52F12.3  | -0.00689454389388722 |             |
| AGIWUR385;AGIWUR4265;AGIWUR14861;AGIWUR22928;AGIWUR26295;AGIWUR27202;AGIWUR30831;AGIWUR34120               |    |   |         |         |                |           |           |                      |             |
| N2                                                                                                         | CT | I | 9901255 | 9902929 | WBGene00009937 | ls1-1     | F52F12.4  | -0.0733764560210073  |             |
| AGIWUR13054                                                                                                |    |   |         |         |                |           |           |                      |             |
| N2                                                                                                         | CT | I | 9902943 | 9910545 | WBGene00009939 | ztf-11    | F52F12.6  | 0.0340034295482896   |             |
| AGIWUR22662;AGIWUR22912                                                                                    |    |   |         |         |                |           |           |                      |             |
| N2                                                                                                         | CT | I | 9921211 | 9921961 | WBGene00009938 | F52F12.5  | F52F12.5  | 0.205964221214872    |             |
| AGIWUR14086                                                                                                |    |   |         |         |                |           |           |                      |             |
| N2                                                                                                         | CT | I | 9923610 | 9924280 | WBGene00009941 | F52F12.8  | F52F12.8  | 0.188170329445169    |             |
| AGIWUR14551                                                                                                |    |   |         |         |                |           |           |                      |             |
| N2                                                                                                         | CT | I | 9925978 | 9929032 | WBGene00009942 | F52F12.9  | F52F12.9  | 0.220829924798694    |             |
| AGIWUR9358;AGIWUR35586                                                                                     |    |   |         |         |                |           |           |                      |             |
| N2                                                                                                         | CT | I | 9928946 | 9930885 | WBGene00009940 | str1-1    | F52F12.7  | -0.0357143976004934  |             |
| AGIWUR24560                                                                                                |    |   |         |         |                |           |           |                      |             |
| N2                                                                                                         | CT | I | 9930972 | 9931882 | WBGene00013696 | Y106G6A.4 | Y106G6A.4 | 0.0713299419392435   |             |
| AGIWUR2031                                                                                                 |    |   |         |         |                |           |           |                      |             |
| N2                                                                                                         | CT | I | 9931870 | 9934290 | WBGene00013695 | epg-8     | Y106G6A.2 | 0.210523985706416    |             |
| AGIWUR2744;AGIWUR18245;AGIWUR18984;AGIWUR28290;AGIWUR31270;AGIWUR32991;AGIWUR41204;AGIWUR43220;AGIWUR43432 |    |   |         |         |                |           |           |                      |             |
| N2                                                                                                         | CT | I | 9934639 | 9936022 | WBGene00013697 | dsbn-1    | Y106G6A.5 | -0.0343465991647314  |             |



|                                                                                   |    |   |          |         |                |                |           |                     |                     |
|-----------------------------------------------------------------------------------|----|---|----------|---------|----------------|----------------|-----------|---------------------|---------------------|
| AGIWUR37460                                                                       |    |   |          |         |                |                |           |                     |                     |
| N2                                                                                | CT | I | 9936125  | 9938378 | WBGene00013694 | Y106G6A.1      | Y106G6A.1 | -0.185986512382222  |                     |
| AGIWUR3372;AGIWUR9642;AGIWUR28741                                                 |    |   |          |         |                |                |           |                     |                     |
| N2                                                                                | CT | I | 9947805  | 9953387 | WBGene00005023 | sqv-5          | T24D1.1   | 0.116230976852431   |                     |
| AGIWUR9388;AGIWUR42746                                                            |    |   |          |         |                |                |           |                     |                     |
| N2                                                                                | CT | I | 9953409  | 9955873 | WBGene00011985 | T24D1.2        | T24D1.2   | 0.0304525640337072  |                     |
| AGIWUR6789;AGIWUR19798;AGIWUR22341                                                |    |   |          |         |                |                |           |                     |                     |
| N2                                                                                | CT | I | 9956150  | 9958357 | WBGene00011988 | har-2          | T24D1.5   | -0.0667898909022462 | AGIWUR42509         |
| N2                                                                                | CT | I | 9958782  | 9960155 | WBGene00011986 | T24D1.3        | T24D1.3   | -0.115259938597251  | AGIWUR3679          |
| N2                                                                                | CT | I | 9960370  | 9961973 | WBGene00007043 | tag-179        | T24D1.4   | -0.183615806858757  |                     |
| AGIWUR14556;AGIWUR29087                                                           |    |   |          |         |                |                |           |                     |                     |
| N2                                                                                | CT | I | 9965580  | 9970037 | WBGene00003397 | mom-5          | T23D8.1   | -0.0127925520500494 |                     |
| AGIWUR7889;AGIWUR22460                                                            |    |   |          |         |                |                |           |                     |                     |
| N2                                                                                | CT | I | 9970037  | 9973177 | WBGene00006633 | tsp-7          | T23D8.2   | -0.118076224514176  | AGIWUR25168         |
| N2                                                                                | CT | I | 9973377  | 9976315 | WBGene00011944 | T23D8.3        | T23D8.3   | 0.0322526285836755  | AGIWUR31007         |
| N2                                                                                | CT | I | 9976393  | 9979662 | WBGene00001226 | eif-3.C        | T23D8.4   | 0.0798935291236349  |                     |
| AGIWUR3943;AGIWUR14459                                                            |    |   |          |         |                |                |           |                     |                     |
| N2                                                                                | CT | I | 9980064  | 9984848 | WBGene00006379 | sys-1          | T23D8.9   | -0.0258986131851042 |                     |
| AGIWUR584;AGIWUR11881;AGIWUR12778;AGIWUR27780;AGIWUR30185;AGIWUR34013;AGIWUR43769 |    |   |          |         |                |                |           |                     |                     |
| N2                                                                                | CT | I | 9988341  | 9988826 | WBGene00001941 | his-67         | T23D8.5   | -0.0098996557405826 | AGIWUR20059         |
| N2                                                                                | CT | I | 9989061  | 9989617 | WBGene00001942 | his-68         | T23D8.6   | 0.140571851498311   |                     |
| AGIWUR9020;AGIWUR10398;AGIWUR19130;AGIWUR38394;AGIWUR41721                        |    |   |          |         |                |                |           |                     |                     |
| N2                                                                                | CT | I | 9989802  | 9993975 | WBGene00011945 | hpo-24         | T23D8.7   | -0.129612974507612  |                     |
| AGIWUR8843;AGIWUR15233;AGIWUR36871                                                |    |   |          |         |                |                |           |                     |                     |
| N2                                                                                | CT | I | 9994731  | 9999928 | WBGene00000476 | cfi-1          | T23D8.8   | 0.0565588990960935  |                     |
| AGIWUR4844;AGIWUR34287;AGIWUR44917                                                |    |   |          |         |                |                |           |                     |                     |
| N2                                                                                | CT | I | 10014547 |         | 10015495       | WBGene00007274 | C03C11.1  | C03C11.1            |                     |
| 0.364052498481383 AGIWUR25138                                                     |    |   |          |         |                |                |           |                     |                     |
| N2                                                                                | CT | I | 10016778 |         | 10018114       | WBGene00001483 | fog-3     | C03C11.2            |                     |
| 0.0286905130275183 AGIWUR2227                                                     |    |   |          |         |                |                |           |                     |                     |
| N2                                                                                | CT | I | 10023810 |         | 10025831       | WBGene00008663 | eak-6     | F10G8.4             | -0.39954144431786   |
| AGIWUR19346                                                                       |    |   |          |         |                |                |           |                     |                     |
| N2                                                                                | CT | I | 10026188 |         | 10030058       | WBGene00003803 | rae-1     | F10G8.3             | -0.120191137619599  |
| AGIWUR14990                                                                       |    |   |          |         |                |                |           |                     |                     |
| N2                                                                                | CT | I | 10030174 |         | 10046760       | WBGene00008665 | ercc-1    | F10G8.7             | -0.0906936005981738 |
| AGIWUR7402;AGIWUR8445;AGIWUR8743;AGIWUR10512                                      |    |   |          |         |                |                |           |                     |                     |
| N2                                                                                | CT | I | 10046442 |         | 10048028       | WBGene00008664 | nubp-1    | F10G8.6             | -0.117836624102578  |
| AGIWUR7984;AGIWUR8402;AGIWUR9547;AGIWUR44930                                      |    |   |          |         |                |                |           |                     |                     |
| N2                                                                                | CT | I | 10048087 |         | 10050770       | WBGene00008667 | F10G8.9   | F10G8.9             | -0.0712071168649082 |

|                                     |    |   |                                                          |          |                |           |                             |
|-------------------------------------|----|---|----------------------------------------------------------|----------|----------------|-----------|-----------------------------|
| AGIWUR18885;AGIWUR29836;AGIWUR32672 |    |   |                                                          |          |                |           |                             |
| N2                                  | CT | I | 10050691                                                 | 10062026 | WBGene00008666 | F10G8.8   | F10G8.8 -0.0483601365683333 |
| AGIWUR15028;AGIWUR31677             |    |   |                                                          |          |                |           |                             |
| N2                                  | CT | I | 10072578                                                 | 10074399 | WBGene00007159 | B0379.7   | B0379.7 0.513440206438162   |
| AGIWUR21196                         |    |   |                                                          |          |                |           |                             |
| N2                                  | CT | I | 10074952                                                 | 10077749 | WBGene00007155 | B0379.1   | B0379.1 0.0741559790876032  |
| AGIWUR38309;AGIWUR41296;AGIWUR44354 |    |   |                                                          |          |                |           |                             |
| N2                                  | CT | I | 10080159                                                 | 10085777 | WBGene00003508 | mut-16    | B0379.3 0.0799315683959101  |
| AGIWUR788;AGIWUR33569               |    |   |                                                          |          |                |           |                             |
| N2                                  | CT | I | 10085713                                                 | 10102012 | WBGene00007054 | scpl-1    | B0379.4 0.259965422799944   |
| AGIWUR35678                         |    |   |                                                          |          |                |           |                             |
| N2                                  | CT | I | 10107393                                                 | 10109000 | WBGene00013698 | Y106G6D.1 | Y106G6D.1                   |
| -0.0950251321697104                 |    |   | AGIWUR15930                                              |          |                |           |                             |
| N2                                  | CT | I | 10110982                                                 | 10111916 | WBGene00013699 | Y106G6D.2 | Y106G6D.2                   |
| -0.11409747391955                   |    |   | AGIWUR24239                                              |          |                |           |                             |
| N2                                  | CT | I | 10112088                                                 | 10114256 | WBGene00013700 | Y106G6D.3 | Y106G6D.3                   |
| 0.0643579428937215                  |    |   | AGIWUR43241                                              |          |                |           |                             |
| N2                                  | CT | I | 10114759                                                 | 10116583 | WBGene00013701 | Y106G6D.4 | Y106G6D.4                   |
| 0.17100555294132                    |    |   | AGIWUR7232;AGIWUR36951                                   |          |                |           |                             |
| N2                                  | CT | I | 10117061                                                 | 10118134 | WBGene00013704 | Y106G6D.8 | Y106G6D.8                   |
| -0.0571059387436712                 |    |   | AGIWUR6334;AGIWUR8836;AGIWUR9264;AGIWUR27542;AGIWUR35825 |          |                |           |                             |
| N2                                  | CT | I | 10119209                                                 | 10122171 | WBGene00014965 | Y106G6D.5 | Y106G6D.5                   |
| -0.080416627569794                  |    |   | AGIWUR20599;AGIWUR43526                                  |          |                |           |                             |
| N2                                  | CT | I | 10122459                                                 | 10130215 | WBGene00013703 | Y106G6D.7 | Y106G6D.7                   |
| 0.0884808484120998                  |    |   | AGIWUR14206;AGIWUR26940                                  |          |                |           |                             |
| N2                                  | CT | I | 10147325                                                 | 10149888 | WBGene00008885 | F16C3.1   | F16C3.1 -0.171735100952564  |
| AGIWUR6363                          |    |   |                                                          |          |                |           |                             |
| N2                                  | CT | I | 10150280                                                 | 10155131 | WBGene00008886 | F16C3.2   | F16C3.2 -0.285256113525302  |
| AGIWUR7129                          |    |   |                                                          |          |                |           |                             |
| N2                                  | CT | I | 10155161                                                 | 10158558 | WBGene00023415 | F16C3.3   | F16C3.3 -0.162422588220302  |
| AGIWUR25814;AGIWUR41744             |    |   |                                                          |          |                |           |                             |
| N2                                  | CT | I | 10158951                                                 | 10160034 | WBGene00044243 | F16C3.4   | F16C3.4 0.0822292231169186  |
| AGIWUR37530;AGIWUR41968;AGIWUR44496 |    |   |                                                          |          |                |           |                             |
| N2                                  | CT | I | 10159982                                                 | 10161883 | WBGene00006447 | tag-72    | C25A1.3 -0.0152872817218164 |
| AGIWUR27730                         |    |   |                                                          |          |                |           |                             |
| N2                                  | CT | I | 10162379                                                 | 10163578 | WBGene00007705 | C25A1.1   | C25A1.1 0.0458644729805453  |
| AGIWUR38730                         |    |   |                                                          |          |                |           |                             |
| N2                                  | CT | I | 10163475                                                 | 10165135 | WBGene00001442 | fkh-10    | C25A1.2 -0.0297890243941641 |
| AGIWUR5426                          |    |   |                                                          |          |                |           |                             |

|                                                                                                            |    |   |          |          |                |           |           |                     |
|------------------------------------------------------------------------------------------------------------|----|---|----------|----------|----------------|-----------|-----------|---------------------|
| N2                                                                                                         | CT | I | 10169639 | 10172645 | WBGene00007706 | C25A1.4   | C25A1.4   | 0.190877785576999   |
| AGIWUR7340;AGIWUR20206;AGIWUR39825                                                                         |    |   |          |          |                |           |           |                     |
| N2                                                                                                         | CT | I | 10177181 | 10178921 | WBGene00007707 | C25A1.5   | C25A1.5   |                     |
| -0.00982363606840764 AGIWUR9829                                                                            |    |   |          |          |                |           |           |                     |
| N2                                                                                                         | CT | I | 10179832 | 10184075 | WBGene00002153 | iars-2    | C25A1.7   | -0.198453325157227  |
| AGIWUR4515;AGIWUR17911;AGIWUR22885;AGIWUR24106;AGIWUR27797;AGIWUR32150                                     |    |   |          |          |                |           |           |                     |
| N2                                                                                                         | CT | I | 10184478 | 10185470 | WBGene00007709 | clcc-87   | C25A1.8   | -0.0286239257215684 |
| AGIWUR10786;AGIWUR12722;AGIWUR14448;AGIWUR17486;AGIWUR31726;AGIWUR32435                                    |    |   |          |          |                |           |           |                     |
| N2                                                                                                         | CT | I | 10185780 | 10187550 | WBGene00007710 | rsa-1     | C25A1.9   | -0.116791350251473  |
| AGIWUR24491                                                                                                |    |   |          |          |                |           |           |                     |
| N2                                                                                                         | CT | I | 10187515 | 10190896 | WBGene00000931 | dao-5     | C25A1.10  |                     |
| 0.100629431029809 AGIWUR2193;AGIWUR14692;AGIWUR38010;AGIWUR41462                                           |    |   |          |          |                |           |           |                     |
| N2                                                                                                         | CT | I | 10191273 | 10192894 | WBGene00007711 | lid-1     | C25A1.12  |                     |
| 0.00259064201058301                                                                                        |    |   |          |          |                |           |           |                     |
| AGIWUR7759;AGIWUR12214;AGIWUR12894;AGIWUR18762;AGIWUR24648;AGIWUR30354;AGIWUR37784;AGIWUR42516;AGIWUR43176 |    |   |          |          |                |           |           |                     |
| N2                                                                                                         | CT | I | 10193242 | 10193999 | WBGene00007712 | mrpl-34   | C25A1.13  |                     |
| -0.123243566470098 AGIWUR6533                                                                              |    |   |          |          |                |           |           |                     |
| N2                                                                                                         | CT | I | 10193925 | 10197000 | WBGene00000095 | aha-1     | C25A1.11  |                     |
| -0.16438560674473 AGIWUR44293                                                                              |    |   |          |          |                |           |           |                     |
| N2                                                                                                         | CT | I | 10197321 | 10197596 | WBGene00007713 | C25A1.15  | C25A1.15  |                     |
| 0.0329609159240185 AGIWUR19876                                                                             |    |   |          |          |                |           |           |                     |
| N2                                                                                                         | CT | I | 10198286 | 10200440 | WBGene00013705 | Y106G6E.1 | Y106G6E.1 |                     |
| 0.205385686568469 AGIWUR11466                                                                              |    |   |          |          |                |           |           |                     |
| N2                                                                                                         | CT | I | 10221635 | 10222778 | WBGene00013708 | Y106G6E.4 | Y106G6E.4 |                     |
| -0.348849080128177 AGIWUR36816;AGIWUR38525                                                                 |    |   |          |          |                |           |           |                     |
| N2                                                                                                         | CT | I | 10222881 | 10227009 | WBGene00000426 | ced-12    | Y106G6E.5 |                     |
| -0.12415530074343 AGIWUR6640;AGIWUR10649;AGIWUR39379                                                       |    |   |          |          |                |           |           |                     |
| N2                                                                                                         | CT | I | 10227210 | 10231214 | WBGene00013709 | csnk-1    | Y106G6E.6 |                     |
| 0.120765323182075 AGIWUR6259;AGIWUR41120                                                                   |    |   |          |          |                |           |           |                     |
| N2                                                                                                         | CT | I | 10248256 | 10255327 | WBGene00003000 | lin-11    | ZC247.3   | -0.0471219218459078 |
| AGIWUR5317;AGIWUR13003;AGIWUR24260;AGIWUR25289;AGIWUR33061                                                 |    |   |          |          |                |           |           |                     |
| N2                                                                                                         | CT | I | 10255632 | 10262250 | WBGene00013860 | ZC247.2   | ZC247.2   | 0.27618169570049    |
| AGIWUR1179                                                                                                 |    |   |          |          |                |           |           |                     |
| N2                                                                                                         | CT | I | 10264314 | 10279234 | WBGene00013859 | ZC247.1   | ZC247.1   | 0.412174088121155   |
| AGIWUR19141                                                                                                |    |   |          |          |                |           |           |                     |
| N2                                                                                                         | CT | I | 10291870 | 10297927 | WBGene00007047 | wt5-1     | T20F10.1  |                     |
| -0.280979494545278 AGIWUR24166                                                                             |    |   |          |          |                |           |           |                     |
| N2                                                                                                         | CT | I | 10298140 | 10300598 | WBGene00011864 | T20F10.2  | T20F10.2  |                     |
| -0.064848032629544 AGIWUR17094;AGIWUR17549;AGIWUR23612;AGIWUR43299                                         |    |   |          |          |                |           |           |                     |

|                                                                        |    |   |                                                                      |          |                |           |                             |
|------------------------------------------------------------------------|----|---|----------------------------------------------------------------------|----------|----------------|-----------|-----------------------------|
| N2                                                                     | CT | I | 10300573                                                             | 10302945 | WBGene00011866 | T20F10.5  | T20F10.5                    |
| -0.025273173859429                                                     |    |   | AGIWUR5199;AGIWUR5957;AGIWUR9005;AGIWUR20137;AGIWUR28724;AGIWUR36038 |          |                |           |                             |
| N2                                                                     | CT | I | 10309757                                                             | 10311591 | WBGene00045057 | Y106G6G.7 | Y106G6G.7                   |
| -1.53969442218896                                                      |    |   | AGIWUR20883                                                          |          |                |           |                             |
| N2                                                                     | CT | I | 10319669                                                             | 10321493 | WBGene00013715 | Y106G6G.6 | Y106G6G.6                   |
| 0.171249489876476                                                      |    |   | AGIWUR13079;AGIWUR28186                                              |          |                |           |                             |
| N2                                                                     | CT | I | 10321711                                                             | 10323398 | WBGene00013713 | Y106G6G.4 | Y106G6G.4                   |
| 0.290365937166044                                                      |    |   | AGIWUR1645                                                           |          |                |           |                             |
| N2                                                                     | CT | I | 10323511                                                             | 10324145 | WBGene00013712 | dlc-6     | Y106G6G.3                   |
| 0.0435293517475071                                                     |    |   | AGIWUR14226                                                          |          |                |           |                             |
| N2                                                                     | CT | I | 10328984                                                             | 10330370 | WBGene00013710 | Y106G6G.1 | Y106G6G.1                   |
| 0.208725204230166                                                      |    |   | AGIWUR3549                                                           |          |                |           |                             |
| N2                                                                     | CT | I | 10330879                                                             | 10331808 | WBGene00004476 | rps-7     | ZC434.2 -0.0462939381987546 |
| AGIWUR1411;AGIWUR7247;AGIWUR25024                                      |    |   |                                                                      |          |                |           |                             |
| N2                                                                     | CT | I | 10331945                                                             | 10333082 | WBGene00013892 | ZC434.4   | ZC434.4 -0.0300848872442803 |
| AGIWUR35993                                                            |    |   |                                                                      |          |                |           |                             |
| N2                                                                     | CT | I | 10333471                                                             | 10334590 | WBGene00220261 | ZC434.10  | ZC434.10                    |
| -0.103628199506287                                                     |    |   | AGIWUR43270                                                          |          |                |           |                             |
| N2                                                                     | CT | I | 10334661                                                             | 10335739 | WBGene00013891 | ZC434.3   | ZC434.3 -0.179070734587031  |
| AGIWUR2990;AGIWUR17062;AGIWUR22980;AGIWUR26531                         |    |   |                                                                      |          |                |           |                             |
| N2                                                                     | CT | I | 10336395                                                             | 10341178 | WBGene00001337 | ears-1    | ZC434.5 -0.0659119931945433 |
| AGIWUR436;AGIWUR496;AGIWUR43053                                        |    |   |                                                                      |          |                |           |                             |
| N2                                                                     | CT | I | 10340997                                                             | 10345648 | WBGene00000148 | aph-2     | ZC434.6 0.126510759072737   |
| AGIWUR28276                                                            |    |   |                                                                      |          |                |           |                             |
| N2                                                                     | CT | I | 10345736                                                             | 10348061 | WBGene00013893 | ZC434.7   | ZC434.7 -0.196905016509544  |
| AGIWUR7669;AGIWUR26724;AGIWUR33950;AGIWUR39834;AGIWUR42693;AGIWUR43556 |    |   |                                                                      |          |                |           |                             |
| N2                                                                     | CT | I | 10348055                                                             | 10349379 | WBGene00013894 | ZC434.8   | ZC434.8 0.00880546952658801 |
| AGIWUR17368;AGIWUR26084                                                |    |   |                                                                      |          |                |           |                             |
| N2                                                                     | CT | I | 10356251                                                             | 10360890 | WBGene00013895 | ZC434.9   | ZC434.9 0.204146171132038   |
| AGIWUR44177                                                            |    |   |                                                                      |          |                |           |                             |
| N2                                                                     | CT | I | 10366621                                                             | 10371699 | WBGene00009743 | sptf-1    | F45H11.1                    |
| 0.103617911281077                                                      |    |   | AGIWUR2830;AGIWUR23379;AGIWUR41497                                   |          |                |           |                             |
| N2                                                                     | CT | I | 10373368                                                             | 10373862 | WBGene00003587 | ned-8     | F45H11.2                    |
| 0.114419913598049                                                      |    |   | AGIWUR23345                                                          |          |                |           |                             |
| N2                                                                     | CT | I | 10374809                                                             | 10379631 | WBGene00009744 | hpo-35    | F45H11.3                    |
| -0.035144597440012                                                     |    |   | AGIWUR4287;AGIWUR33299;AGIWUR33740;AGIWUR42031                       |          |                |           |                             |
| N2                                                                     | CT | I | 10381082                                                             | 10382040 | WBGene00009745 | F45H11.5  | F45H11.5                    |
| -0.121436514262168                                                     |    |   | AGIWUR3840;AGIWUR9168;AGIWUR22568;AGIWUR39623                        |          |                |           |                             |
| N2                                                                     | CT | I | 10382746                                                             | 10384222 | WBGene00077521 | maf-1     | F45H11.6                    |

0.0102320950388837

AGIWUR1078;AGIWUR6836;AGIWUR12363;AGIWUR12557;AGIWUR12681;AGIWUR25932;AGIWUR34710;AGIWUR39209;AGIWUR40992;AGIWUR43296;AGIWUR43530

|    |    |   |                                                                                                                    |                                                |                |            |            |                     |
|----|----|---|--------------------------------------------------------------------------------------------------------------------|------------------------------------------------|----------------|------------|------------|---------------------|
| N2 | CT | I | 10384219                                                                                                           | 10391388                                       | WBGene00003233 | mg1-2      | F45H11.4   |                     |
|    |    |   | -0.495283566088491                                                                                                 | AGIWUR4879;AGIWUR20282                         |                |            |            |                     |
| N2 | CT | I | 10398944                                                                                                           | 10400195                                       | WBGene00000843 | cup-2      | F25D7.1    | -0.015625824712644  |
|    |    |   | AGIWUR4401;AGIWUR20500                                                                                             |                                                |                |            |            |                     |
| N2 | CT | I | 10401065                                                                                                           | 10402774                                       | WBGene00009112 | tag-353    | F25D7.2    | 0.100814447313175   |
|    |    |   | AGIWUR6582                                                                                                         |                                                |                |            |            |                     |
| N2 | CT | I | 10409302                                                                                                           | 10414707                                       | WBGene00003847 | blmp-1     | F25D7.3    | -0.087785266373388  |
|    |    |   | AGIWUR1162;AGIWUR2993;AGIWUR8630;AGIWUR9914;AGIWUR13060;AGIWUR35588;AGIWUR36795;AGIWUR37572                        |                                                |                |            |            |                     |
| N2 | CT | I | 10422958                                                                                                           | 10429026                                       | WBGene00009114 | F25D7.5    | F25D7.5    | -0.0355615065700032 |
|    |    |   | AGIWUR14538;AGIWUR16277;AGIWUR26686                                                                                |                                                |                |            |            |                     |
| N2 | CT | I | 10429629                                                                                                           | 10432336                                       | WBGene00013716 | Y106G6H.1  |            | Y106G6H.1           |
|    |    |   | 0.0714883982700183                                                                                                 | AGIWUR3844                                     |                |            |            |                     |
| N2 | CT | I | 10432815                                                                                                           | 10435882                                       | WBGene00003902 | pab-1      | Y106G6H.2  |                     |
|    |    |   | 0.153716857937175                                                                                                  |                                                |                |            |            |                     |
|    |    |   | AGIWUR551;AGIWUR1625;AGIWUR4054;AGIWUR8505;AGIWUR14804;AGIWUR15583;AGIWUR16120;AGIWUR24249;AGIWUR29890;AGIWUR36402 |                                                |                |            |            |                     |
| N2 | CT | I | 10436254                                                                                                           | 10436884                                       | WBGene00004444 | rp1-30     | Y106G6H.3  |                     |
|    |    |   | -0.00693745061949613                                                                                               | AGIWUR24641                                    |                |            |            |                     |
| N2 | CT | I | 10436895                                                                                                           | 10437708                                       | WBGene00013717 | madf-10    | Y106G6H.4  |                     |
|    |    |   | -0.238318360721511                                                                                                 | AGIWUR8428                                     |                |            |            |                     |
| N2 | CT | I | 10438075                                                                                                           | 10443563                                       | WBGene00013718 | pdpr-1     | Y106G6H.5  |                     |
|    |    |   | 0.0578848263429919                                                                                                 | AGIWUR3494;AGIWUR4149;AGIWUR31485;AGIWUR40774  |                |            |            |                     |
| N2 | CT | I | 10443668                                                                                                           | 10446133                                       | WBGene00013719 | Y106G6H.6  |            | Y106G6H.6           |
|    |    |   | -0.284824315524052                                                                                                 | AGIWUR7986                                     |                |            |            |                     |
| N2 | CT | I | 10446661                                                                                                           | 10452071                                       | WBGene00004753 | sec-8      | Y106G6H.7  |                     |
|    |    |   | 0.0844403896164234                                                                                                 | AGIWUR20305                                    |                |            |            |                     |
| N2 | CT | I | 10452178                                                                                                           | 10452895                                       | WBGene00013720 | Y106G6H.8  |            | Y106G6H.8           |
|    |    |   | -0.151756288678864                                                                                                 | AGIWUR6889;AGIWUR24705;AGIWUR26727;AGIWUR31225 |                |            |            |                     |
| N2 | CT | I | 10464328                                                                                                           | 10471056                                       | WBGene00001112 | duo-3      | Y106G6H.12 |                     |
|    |    |   | -0.0760012902576044                                                                                                | AGIWUR27835                                    |                |            |            |                     |
| N2 | CT | I | 10472196                                                                                                           | 10473389                                       | WBGene00013724 | Y106G6H.14 |            | Y106G6H.14          |
|    |    |   | -0.20754184450799                                                                                                  | AGIWUR4557;AGIWUR19187;AGIWUR19475             |                |            |            |                     |
| N2 | CT | I | 10473513                                                                                                           | 10474449                                       | WBGene00013725 | ska-1      | Y106G6H.15 |                     |
|    |    |   | -0.116169436502419                                                                                                 | AGIWUR32773                                    |                |            |            |                     |
| N2 | CT | I | 10474835                                                                                                           | 10475525                                       | WBGene00013726 | Y106G6H.16 |            | Y106G6H.16          |
|    |    |   | -0.142789779351475                                                                                                 | AGIWUR31191                                    |                |            |            |                     |

|                                                                                                                                                           |    |   |          |          |                |          |         |                     |
|-----------------------------------------------------------------------------------------------------------------------------------------------------------|----|---|----------|----------|----------------|----------|---------|---------------------|
| N2                                                                                                                                                        | CT | I | 10475522 | 10478129 | WBGene00009508 | row-1    | F37D6.2 | -0.281340048495831  |
| AGIWUR11222                                                                                                                                               |    |   |          |          |                |          |         |                     |
| N2                                                                                                                                                        | CT | I | 10479283 | 10484969 | WBGene00009507 | mus-101  | F37D6.1 |                     |
| -0.00810484507686393 AGIWUR201;AGIWUR29531;AGIWUR41907                                                                                                    |    |   |          |          |                |          |         |                     |
| N2                                                                                                                                                        | CT | I | 10486714 | 10487322 | WBGene00009509 | F37D6.3  | F37D6.3 | 0.0567824970407287  |
| AGIWUR26244                                                                                                                                               |    |   |          |          |                |          |         |                     |
| N2                                                                                                                                                        | CT | I | 10488648 | 10489569 | WBGene00009510 | F37D6.4  | F37D6.4 | 0.198709999481452   |
| AGIWUR11781;AGIWUR16130;AGIWUR23068;AGIWUR24394;AGIWUR24669;AGIWUR39352                                                                                   |    |   |          |          |                |          |         |                     |
| N2                                                                                                                                                        | CT | I | 10501585 | 10505949 | WBGene00006445 | tag-68   | F37D6.6 | 0.149814459820433   |
| AGIWUR2748;AGIWUR11690;AGIWUR14931;AGIWUR27423;AGIWUR41788;AGIWUR43215                                                                                    |    |   |          |          |                |          |         |                     |
| N2                                                                                                                                                        | CT | I | 10507000 | 10515506 | WBGene00000492 | che-13   | F59C6.7 | -0.298100774264528  |
| AGIWUR10651                                                                                                                                               |    |   |          |          |                |          |         |                     |
| N2                                                                                                                                                        | CT | I | 10516036 | 10516432 | WBGene00206464 | F59C6.18 |         | F59C6.18            |
| -0.178178650273561 AGIWUR38691                                                                                                                            |    |   |          |          |                |          |         |                     |
| N2                                                                                                                                                        | CT | I | 10518379 | 10519263 | WBGene00010325 | exos-3   | F59C6.4 | -0.143906425578077  |
| AGIWUR35660                                                                                                                                               |    |   |          |          |                |          |         |                     |
| N2                                                                                                                                                        | CT | I | 10519360 | 10520761 | WBGene00010326 | F59C6.5  | F59C6.5 | -0.144398557250405  |
| AGIWUR2505                                                                                                                                                |    |   |          |          |                |          |         |                     |
| N2                                                                                                                                                        | CT | I | 10520863 | 10521986 | WBGene00044251 | F59C6.12 |         | F59C6.12            |
| -0.103981932407795 AGIWUR25235;AGIWUR38986                                                                                                                |    |   |          |          |                |          |         |                     |
| N2                                                                                                                                                        | CT | I | 10522091 | 10523996 | WBGene00010323 | dhhc-12  | F59C6.2 | 0.0477318794481487  |
| AGIWUR23798                                                                                                                                               |    |   |          |          |                |          |         |                     |
| N2                                                                                                                                                        | CT | I | 10524424 | 10525509 | WBGene00010324 | F59C6.3  | F59C6.3 | 0.218565073272914   |
| AGIWUR7210;AGIWUR25869                                                                                                                                    |    |   |          |          |                |          |         |                     |
| N2                                                                                                                                                        | CT | I | 10526533 | 10530095 | WBGene00044792 | F59C6.14 |         | F59C6.14            |
| -0.29549000478649                                                                                                                                         |    |   |          |          |                |          |         |                     |
| AGIWUR2011;AGIWUR7131;AGIWUR11982;AGIWUR22037;AGIWUR24402;AGIWUR24720;AGIWUR25617;AGIWUR28187;AGIWUR28827;AGIWUR36554;AGIWUR38820;AGIWUR39490;AGIWUR43929 |    |   |          |          |                |          |         |                     |
| N2                                                                                                                                                        | CT | I | 10530339 | 10531547 | WBGene00014789 | F59C6.10 |         | F59C6.10            |
| 0.169315992845724 AGIWUR29319                                                                                                                             |    |   |          |          |                |          |         |                     |
| N2                                                                                                                                                        | CT | I | 10532667 | 10534484 | WBGene00010328 | F59C6.11 |         | F59C6.11            |
| -0.348189001956039 AGIWUR14721                                                                                                                            |    |   |          |          |                |          |         |                     |
| N2                                                                                                                                                        | CT | I | 10543024 | 10546435 | WBGene00009116 | snx-27   | F25H2.2 | -0.0530750554740322 |
| AGIWUR29978                                                                                                                                               |    |   |          |          |                |          |         |                     |
| N2                                                                                                                                                        | CT | I | 10547721 | 10549876 | WBGene00009117 | F25H2.3  | F25H2.3 | -0.0259505492837917 |
| AGIWUR40211                                                                                                                                               |    |   |          |          |                |          |         |                     |
| N2                                                                                                                                                        | CT | I | 10551972 | 10553035 | WBGene00009118 | F25H2.4  | F25H2.4 | -0.126942540194701  |
| AGIWUR22807                                                                                                                                               |    |   |          |          |                |          |         |                     |
| N2                                                                                                                                                        | CT | I | 10553116 | 10553913 | WBGene00009119 | ndk-1    | F25H2.5 | -0.0375722581268789 |

AGIWUR1428;AGIWUR4491;AGIWUR7177;AGIWUR8978;AGIWUR10087;AGIWUR11437;AGIWUR13155;AGIWUR13297;AGIWUR14349;AGIWUR23883;AGIWUR25992;AGIWUR32023;AGIWUR32499;AGIWUR33225;AGIWUR36407;AGIWUR39612;AGIWUR41122;AGIWUR42164;AGIWUR44511;AGIWUR45155

|                                                                                                    |    |   |          |          |                |          |          |                     |
|----------------------------------------------------------------------------------------------------|----|---|----------|----------|----------------|----------|----------|---------------------|
| N2                                                                                                 | CT | I | 10554366 | 10557838 | WBGene00009120 | F25H2.6  | F25H2.6  | -0.140115240085848  |
| AGIWUR32606                                                                                        |    |   |          |          |                |          |          |                     |
| N2                                                                                                 | CT | I | 10558323 | 10560006 | WBGene00009121 | F25H2.7  | F25H2.7  | 0.0413472841464859  |
| AGIWUR30852                                                                                        |    |   |          |          |                |          |          |                     |
| N2                                                                                                 | CT | I | 10562968 | 10564914 | WBGene00006720 | ubc-25   | F25H2.8  | 0.200347014780242   |
| AGIWUR14963;AGIWUR16386;AGIWUR38751                                                                |    |   |          |          |                |          |          |                     |
| N2                                                                                                 | CT | I | 10566350 | 10567300 | WBGene00003926 | pas-5    | F25H2.9  | -0.056081327995102  |
| AGIWUR16852                                                                                        |    |   |          |          |                |          |          |                     |
| N2                                                                                                 | CT | I | 10567894 | 10569019 | WBGene00004408 | rla-0    | F25H2.10 |                     |
| 0.162658287867858 AGIWUR3634;AGIWUR4230;AGIWUR5948;AGIWUR12550;AGIWUR14129;AGIWUR17615;AGIWUR31740 |    |   |          |          |                |          |          |                     |
| N2                                                                                                 | CT | I | 10569112 | 10570030 | WBGene00009122 | tct-1    | F25H2.11 |                     |
| -0.0151477103548459 AGIWUR34683                                                                    |    |   |          |          |                |          |          |                     |
| N2                                                                                                 | CT | I | 10570079 | 10571916 | WBGene00009123 | F25H2.12 | F25H2.12 |                     |
| -0.165830842783544 AGIWUR42316                                                                     |    |   |          |          |                |          |          |                     |
| N2                                                                                                 | CT | I | 10571954 | 10577135 | WBGene00009124 | rtel-1   | F25H2.13 |                     |
| -0.13726292744359 AGIWUR14329                                                                      |    |   |          |          |                |          |          |                     |
| N2                                                                                                 | CT | I | 10579413 | 10580890 | WBGene00009243 | F29C6.1  | F29C6.1  | -0.0827771964546482 |
| AGIWUR1176;AGIWUR28962                                                                             |    |   |          |          |                |          |          |                     |
| N2                                                                                                 | CT | I | 10581538 | 10582609 | WBGene00011906 | hsp-12.1 | T22A3.2  |                     |
| 0.0254806177702953 AGIWUR22241                                                                     |    |   |          |          |                |          |          |                     |
| N2                                                                                                 | CT | I | 10588177 | 10590464 | WBGene00003083 | lst-1    | T22A3.3  | 0.0510829084296418  |
| AGIWUR4603                                                                                         |    |   |          |          |                |          |          |                     |
| N2                                                                                                 | CT | I | 10590678 | 10593972 | WBGene00044070 | set-18   | T22A3.4  | -0.0875910978515204 |
| AGIWUR474                                                                                          |    |   |          |          |                |          |          |                     |
| N2                                                                                                 | CT | I | 10595545 | 10598490 | WBGene00011909 | T22A3.6  | T22A3.6  | 0.256667814463023   |
| AGIWUR40214                                                                                        |    |   |          |          |                |          |          |                     |
| N2                                                                                                 | CT | I | 10598673 | 10606620 | WBGene00011908 | pash-1   | T22A3.5  | -0.0732123479746072 |
| AGIWUR31209                                                                                        |    |   |          |          |                |          |          |                     |
| N2                                                                                                 | CT | I | 10608466 | 10621433 | WBGene00002248 | lam-3    | T22A3.8  | -0.127145719936558  |
| AGIWUR5500;AGIWUR37672                                                                             |    |   |          |          |                |          |          |                     |
| N2                                                                                                 | CT | I | 10622952 | 10624361 | WBGene00016622 | mafr-1   | C43H8.2  | -0.180178965244291  |
| AGIWUR45017                                                                                        |    |   |          |          |                |          |          |                     |
| N2                                                                                                 | CT | I | 10624464 | 10625387 | WBGene00016621 | arch-1   | C43H8.1  | -0.0600001478548595 |
| AGIWUR41519                                                                                        |    |   |          |          |                |          |          |                     |
| N2                                                                                                 | CT | I | 10625388 | 10628387 | WBGene00015232 | B0511.6  | B0511.6  | 0.0548664572168889  |
| AGIWUR3687;AGIWUR4208;AGIWUR4272;AGIWUR4753;AGIWUR45010                                            |    |   |          |          |                |          |          |                     |

|                                                                        |    |   |          |          |                |          |          |                     |
|------------------------------------------------------------------------|----|---|----------|----------|----------------|----------|----------|---------------------|
| N2                                                                     | CT | I | 10628712 | 10631674 | WBGene00015231 | cutl-14  | B0511.5  | 0.0601230043619569  |
| AGIWUR12758                                                            |    |   |          |          |                |          |          |                     |
| N2                                                                     | CT | I | 10631665 | 10633150 | WBGene00015233 | B0511.7  | B0511.7  | 0.0227591874352946  |
| AGIWUR29044                                                            |    |   |          |          |                |          |          |                     |
| N2                                                                     | CT | I | 10633279 | 10634078 | WBGene00255714 | B0511.19 |          | B0511.19            |
| -0.0673874778098664 AGIWUR2149                                         |    |   |          |          |                |          |          |                     |
| N2                                                                     | CT | I | 10636692 | 10638977 | WBGene00044321 | mrps-30  | B0511.8  | -0.135435961637397  |
| AGIWUR24656                                                            |    |   |          |          |                |          |          |                     |
| N2                                                                     | CT | I | 10639079 | 10640230 | WBGene00015235 | cdc-26   | B0511.9  | -0.109906084063154  |
| AGIWUR4793;AGIWUR28476;AGIWUR31998;AGIWUR37074;AGIWUR37096;AGIWUR40826 |    |   |          |          |                |          |          |                     |
| N2                                                                     | CT | I | 10640465 | 10642281 | WBGene00001228 | EIF-3.E  | B0511.10 |                     |
| -0.0924157745982725 AGIWUR37070                                        |    |   |          |          |                |          |          |                     |
| N2                                                                     | CT | I | 10644245 | 10645617 | WBGene00015230 | tag-344  | B0511.4  | 0.0663463478813817  |
| AGIWUR24553                                                            |    |   |          |          |                |          |          |                     |
| N2                                                                     | CT | I | 10646762 | 10647777 | WBGene00015229 | fbxa-125 |          | B0511.3             |
| -0.0207662341231174 AGIWUR14685                                        |    |   |          |          |                |          |          |                     |
| N2                                                                     | CT | I | 10648606 | 10654179 | WBGene00015236 | B0511.11 |          | B0511.11            |
| 0.0214415320361425 AGIWUR44598                                         |    |   |          |          |                |          |          |                     |
| N2                                                                     | CT | I | 10654298 | 10666933 | WBGene00015237 | B0511.12 |          | B0511.12            |
| -0.171690455485903 AGIWUR11649;AGIWUR13533;AGIWUR15421                 |    |   |          |          |                |          |          |                     |
| N2                                                                     | CT | I | 10667808 | 10671301 | WBGene00001432 | fkf-7    | B0511.1  | -0.231589420843459  |
| AGIWUR39506                                                            |    |   |          |          |                |          |          |                     |
| N2                                                                     | CT | I | 10671460 | 10672589 | WBGene00016389 | C34B2.4  | C34B2.4  | 0.0679832847618158  |
| AGIWUR41157                                                            |    |   |          |          |                |          |          |                     |
| N2                                                                     | CT | I | 10675167 | 10676811 | WBGene00016390 | C34B2.5  | C34B2.5  | -0.0618728569965414 |
| AGIWUR7716;AGIWUR29153                                                 |    |   |          |          |                |          |          |                     |
| N2                                                                     | CT | I | 10676922 | 10682374 | WBGene00016391 | lonp-1   | C34B2.6  | 0.264954752925854   |
| AGIWUR943;AGIWUR2718;AGIWUR5681                                        |    |   |          |          |                |          |          |                     |
| N2                                                                     | CT | I | 10682472 | 10683155 | WBGene00016395 | C34B2.10 |          | C34B2.10            |
| -0.0121219661465748 AGIWUR14716;AGIWUR15847                            |    |   |          |          |                |          |          |                     |
| N2                                                                     | CT | I | 10683270 | 10685664 | WBGene00016392 | sdha-2   | C34B2.7  | -0.141938955131497  |
| AGIWUR38680                                                            |    |   |          |          |                |          |          |                     |
| N2                                                                     | CT | I | 10685825 | 10687058 | WBGene00016393 | C34B2.8  | C34B2.8  | -0.119747230592787  |
| AGIWUR1458;AGIWUR3758;AGIWUR26926;AGIWUR36412;AGIWUR43567;AGIWUR44915  |    |   |          |          |                |          |          |                     |
| N2                                                                     | CT | I | 10687363 | 10688068 | WBGene00016387 | kbp-5    | C34B2.2  | -0.0365661168113469 |
| AGIWUR11015                                                            |    |   |          |          |                |          |          |                     |
| N2                                                                     | CT | I | 10688332 | 10690790 | WBGene00016386 | tag-272  | C34B2.1  | -0.584423256368     |
| AGIWUR21234                                                            |    |   |          |          |                |          |          |                     |
| N2                                                                     | CT | I | 10691345 | 10696783 | WBGene00016396 | C34B2.11 |          | C34B2.11            |



|                                                                         |                                                             |          |                |                 |                     |  |
|-------------------------------------------------------------------------|-------------------------------------------------------------|----------|----------------|-----------------|---------------------|--|
| -0.287018052083177                                                      | AGIWUR2570;AGIWUR10840;AGIWUR43723                          |          |                |                 |                     |  |
| N2 CT I                                                                 | 10699562                                                    | 10703801 | WBGene00016394 | C34B2.9 C34B2.9 | -0.15733576820266   |  |
| AGIWUR34791                                                             |                                                             |          |                |                 |                     |  |
| N2 CT I                                                                 | 10708363                                                    | 10710376 | WBGene00015024 | B0205.10        | B0205.10            |  |
| 0.368181777298819                                                       | AGIWUR13757                                                 |          |                |                 |                     |  |
| N2 CT I                                                                 | 10713505                                                    | 10718201 | WBGene00015017 | B0205.1 B0205.1 | -0.0225777783228391 |  |
| AGIWUR28744                                                             |                                                             |          |                |                 |                     |  |
| N2 CT I                                                                 | 10720813                                                    | 10723496 | WBGene00015023 | B0205.9 B0205.9 | -0.0827702716640264 |  |
| AGIWUR7558                                                              |                                                             |          |                |                 |                     |  |
| N2 CT I                                                                 | 10724161                                                    | 10726136 | WBGene00015018 | srz-85 B0205.2  | -0.115351245420068  |  |
| AGIWUR40535                                                             |                                                             |          |                |                 |                     |  |
| N2 CT I                                                                 | 10726903                                                    | 10727364 | WBGene00044646 | B0205.14        | B0205.14            |  |
| -0.282449286060663                                                      | AGIWUR19150;AGIWUR26793;AGIWUR29668;AGIWUR31946;AGIWUR42563 |          |                |                 |                     |  |
| N2 CT I                                                                 | 10727755                                                    | 10728808 | WBGene00044644 | B0205.13        | B0205.13            |  |
| 0.139946292102                                                          | AGIWUR18822;AGIWUR35516;AGIWUR42241                         |          |                |                 |                     |  |
| N2 CT I                                                                 | 10728959                                                    | 10730287 | WBGene00015022 | B0205.8 B0205.8 | -0.0757094933612557 |  |
| AGIWUR1980                                                              |                                                             |          |                |                 |                     |  |
| N2 CT I                                                                 | 10730467                                                    | 10730743 | WBGene00044413 | B0205.12        | B0205.12            |  |
| -0.216810957969955                                                      | AGIWUR32246;AGIWUR34973;AGIWUR40595;AGIWUR42095;AGIWUR44666 |          |                |                 |                     |  |
| N2 CT I                                                                 | 10730712                                                    | 10732448 | WBGene00004466 | rpn-10 B0205.3  | 0.0248002658799606  |  |
| AGIWUR1283;AGIWUR18646;AGIWUR19121;AGIWUR19902;AGIWUR37875              |                                                             |          |                |                 |                     |  |
| N2 CT I                                                                 | 10732543                                                    | 10733686 | WBGene00015025 | mrpl-9 B0205.11 |                     |  |
| 0.123582799052592                                                       | AGIWUR17494                                                 |          |                |                 |                     |  |
| N2 CT I                                                                 | 10734022                                                    | 10736615 | WBGene00002191 | kin-3 B0205.7   | -0.128653637284215  |  |
| AGIWUR6814;AGIWUR14979;AGIWUR16721;AGIWUR31425;AGIWUR35891;AGIWUR36826  |                                                             |          |                |                 |                     |  |
| N2 CT I                                                                 | 10736697                                                    | 10739911 | WBGene00015021 | B0205.6 B0205.6 | -0.224654394720357  |  |
| AGIWUR33097                                                             |                                                             |          |                |                 |                     |  |
| N2 CT I                                                                 | 10740218                                                    | 10740590 | WBGene00015020 | B0205.5 B0205.5 | 0.0703048170491245  |  |
| AGIWUR43771                                                             |                                                             |          |                |                 |                     |  |
| N2 CT I                                                                 | 10741368                                                    | 10744445 | WBGene00015019 | B0205.4 B0205.4 | 0.206640940099315   |  |
| AGIWUR6510;AGIWUR34542                                                  |                                                             |          |                |                 |                     |  |
| N2 CT I                                                                 | 10750343                                                    | 10776700 | WBGene00000912 | daf-16 R13H8.1  | 0.261177963409637   |  |
| AGIWUR15683;AGIWUR17069;AGIWUR19627;AGIWUR26737;AGIWUR27096             |                                                             |          |                |                 |                     |  |
| N2 CT I                                                                 | 10781442                                                    | 10782890 | WBGene00018850 | gpx-8 F55A3.5   | -0.174909771066088  |  |
| AGIWUR1381                                                              |                                                             |          |                |                 |                     |  |
| N2 CT I                                                                 | 10785128                                                    | 10787863 | WBGene00018852 | F55A3.7 F55A3.7 | 0.153586391674713   |  |
| AGIWUR35755                                                             |                                                             |          |                |                 |                     |  |
| N2 CT I                                                                 | 10789130                                                    | 10793152 | WBGene00018849 | F55A3.3 F55A3.3 | 0.135990737976526   |  |
| AGIWUR21198;AGIWUR26112;AGIWUR28742;AGIWUR36072;AGIWUR43803;AGIWUR44363 |                                                             |          |                |                 |                     |  |

|                                                                                 |    |   |          |          |                |          |          |                     |
|---------------------------------------------------------------------------------|----|---|----------|----------|----------------|----------|----------|---------------------|
| N2                                                                              | CT | I | 10793161 | 10798059 | WBGene00018848 | F55A3.2  | F55A3.2  | -0.0963519509803863 |
| AGIWUR32325                                                                     |    |   |          |          |                |          |          |                     |
| N2                                                                              | CT | I | 10799623 | 10806901 | WBGene00018847 | marc-6   | F55A3.1  | 0.187269538286976   |
| AGIWUR19410                                                                     |    |   |          |          |                |          |          |                     |
| N2                                                                              | CT | I | 10806922 | 10808238 | WBGene00016461 | C35E7.9  | C35E7.9  | 0.123575001208436   |
| AGIWUR15468;AGIWUR34153                                                         |    |   |          |          |                |          |          |                     |
| N2                                                                              | CT | I | 10808590 | 10810497 | WBGene00016460 | C35E7.8  | C35E7.8  | -0.241146334592948  |
| AGIWUR12957                                                                     |    |   |          |          |                |          |          |                     |
| N2                                                                              | CT | I | 10810648 | 10812923 | WBGene00016462 | C35E7.10 |          | C35E7.10            |
| 0.192446030460783 AGIWUR1500                                                    |    |   |          |          |                |          |          |                     |
| N2                                                                              | CT | I | 10813815 | 10814904 | WBGene00016459 | C35E7.7  | C35E7.7  | -0.308247494022891  |
| AGIWUR27260                                                                     |    |   |          |          |                |          |          |                     |
| N2                                                                              | CT | I | 10817352 | 10819963 | WBGene00016458 | C35E7.6  | C35E7.6  | -0.0271882434685722 |
| AGIWUR19288                                                                     |    |   |          |          |                |          |          |                     |
| N2                                                                              | CT | I | 10823363 | 10828454 | WBGene00016457 | C35E7.5  | C35E7.5  | -0.138679201832478  |
| AGIWUR221;AGIWUR3071;AGIWUR7500;AGIWUR13387;AGIWUR13605;AGIWUR15219;AGIWUR35549 |    |   |          |          |                |          |          |                     |
| N2                                                                              | CT | I | 10831881 | 10834812 | WBGene00016456 | C35E7.4  | C35E7.4  | -0.385492021994742  |
| AGIWUR26878                                                                     |    |   |          |          |                |          |          |                     |
| N2                                                                              | CT | I | 10836985 | 10838877 | WBGene00016455 | C35E7.3  | C35E7.3  | -0.0759320029880888 |
| AGIWUR38197                                                                     |    |   |          |          |                |          |          |                     |
| N2                                                                              | CT | I | 10841114 | 10844647 | WBGene00016454 | C35E7.2  | C35E7.2  | -0.0647337128097245 |
| AGIWUR9766                                                                      |    |   |          |          |                |          |          |                     |
| N2                                                                              | CT | I | 10844772 | 10845922 | WBGene00016463 | C35E7.11 |          | C35E7.11            |
| -0.100328248941462 AGIWUR28616                                                  |    |   |          |          |                |          |          |                     |
| N2                                                                              | CT | I | 10846777 | 10850103 | WBGene00016453 | vet-2    | C35E7.1  | -0.154608671043205  |
| AGIWUR10906                                                                     |    |   |          |          |                |          |          |                     |
| N2                                                                              | CT | I | 10855935 | 10857620 | WBGene00021383 | Y37F4.2  | Y37F4.2  | 0.0281875904741753  |
| AGIWUR3056                                                                      |    |   |          |          |                |          |          |                     |
| N2                                                                              | CT | I | 10859534 | 10860769 | WBGene00021382 | Y37F4.1  | Y37F4.1  | -0.0357771660608659 |
| AGIWUR7087                                                                      |    |   |          |          |                |          |          |                     |
| N2                                                                              | CT | I | 10861215 | 10863453 | WBGene00021386 | Y37F4.5  | Y37F4.5  | 0.23900153032524    |
| AGIWUR44323                                                                     |    |   |          |          |                |          |          |                     |
| N2                                                                              | CT | I | 10863880 | 10866495 | WBGene00021388 | Y37F4.7  | Y37F4.7  | -0.105126835031974  |
| AGIWUR1404;AGIWUR3734                                                           |    |   |          |          |                |          |          |                     |
| N2                                                                              | CT | I | 10867554 | 10868530 | WBGene00044289 | Y37F4.8  | Y37F4.8  | 0.233107232615245   |
| AGIWUR36705                                                                     |    |   |          |          |                |          |          |                     |
| N2                                                                              | CT | I | 10870023 | 10875046 | WBGene00021387 | Y37F4.6  | Y37F4.6  | -0.139601357050147  |
| AGIWUR44270                                                                     |    |   |          |          |                |          |          |                     |
| N2                                                                              | CT | I | 10878047 | 10878378 | WBGene00020860 | nspd-10  | T27C10.7 |                     |

|                     |                                                                        |          |                |            |            |
|---------------------|------------------------------------------------------------------------|----------|----------------|------------|------------|
| 0.304012597241538   | AGIWUR23135                                                            |          |                |            |            |
| N2 CT I             | 10879138                                                               | 10879572 | WBGene00269435 | T27C10.9   | T27C10.9   |
| 0.0476768714095464  | AGIWUR40191                                                            |          |                |            |            |
| N2 CT I             | 10879769                                                               | 10894239 | WBGene00003068 | lrk-1      | T27C10.6   |
| -0.0516640988953476 | AGIWUR10723                                                            |          |                |            |            |
| N2 CT I             | 10899110                                                               | 10902024 | WBGene00020857 | srt-62     | T27C10.2   |
| 0.0940879098434904  | AGIWUR18376;AGIWUR33397                                                |          |                |            |            |
| N2 CT I             | 10906812                                                               | 10912203 | WBGene00018630 | F49D11.6   | F49D11.6   |
| -0.0544509298218125 | AGIWUR9641                                                             |          |                |            |            |
| N2 CT I             | 10912913                                                               | 10915796 | WBGene00018628 | F49D11.4   | F49D11.4   |
| 0.00199607138759106 | AGIWUR33044                                                            |          |                |            |            |
| N2 CT I             | 10917064                                                               | 10919095 | WBGene00018627 | F49D11.3   | F49D11.3   |
| -0.0141788683637198 | AGIWUR7428                                                             |          |                |            |            |
| N2 CT I             | 10921416                                                               | 10923484 | WBGene00018626 | F49D11.2   | F49D11.2   |
| -0.0173945071296222 | AGIWUR4503;AGIWUR16229;AGIWUR16872                                     |          |                |            |            |
| N2 CT I             | 10923574                                                               | 10923944 | WBGene00018631 | F49D11.7   | F49D11.7   |
| 0.142845096267235   | AGIWUR2557;AGIWUR8303;AGIWUR9080;AGIWUR9566;AGIWUR38563;AGIWUR40010    |          |                |            |            |
| N2 CT I             | 10924240                                                               | 10925753 | WBGene00000780 | cpn-4      | F49D11.8   |
| -0.126277920820133  | AGIWUR2714;AGIWUR20006;AGIWUR29506                                     |          |                |            |            |
| N2 CT I             | 10926883                                                               | 10933705 | WBGene00045433 | F49D11.10  | F49D11.10  |
| 0.0124228393576118  | AGIWUR42404                                                            |          |                |            |            |
| N2 CT I             | 10933810                                                               | 10935712 | WBGene00018632 | tag-296    | F49D11.9   |
| -0.0642852248725738 | AGIWUR11932                                                            |          |                |            |            |
| N2 CT I             | 10936819                                                               | 10940521 | WBGene00018625 | prp-17     | F49D11.1   |
| -0.10370501346058   | AGIWUR16544                                                            |          |                |            |            |
| N2 CT I             | 10940685                                                               | 10943922 | WBGene00045434 | Y95D11A.3  | Y95D11A.3  |
| -0.26988570584118   | AGIWUR10746;AGIWUR23575                                                |          |                |            |            |
| N2 CT I             | 10944210                                                               | 10945690 | WBGene00013605 | Y95D11A.1  | Y95D11A.1  |
| -0.162638200993623  | AGIWUR11591                                                            |          |                |            |            |
| N2 CT I             | 10958297                                                               | 10959906 | WBGene00044262 | Y95D11A.2  | Y95D11A.2  |
| 0.184772260249815   | AGIWUR38881                                                            |          |                |            |            |
| N2 CT I             | 10964473                                                               | 10966348 | WBGene00013121 | spe-38     | Y52B11A.1  |
| 0.319860950456546   | AGIWUR10936;AGIWUR13151;AGIWUR29137                                    |          |                |            |            |
| N2 CT I             | 10966394                                                               | 10970166 | WBGene00013122 | impt-1     | Y52B11A.2  |
| -0.119658308049056  | AGIWUR5756;AGIWUR11019;AGIWUR12958;AGIWUR13000;AGIWUR18911;AGIWUR29124 |          |                |            |            |
| N2 CT I             | 10970493                                                               | 10980111 | WBGene00013123 | Y52B11A.3  | Y52B11A.3  |
| -0.0912863620854236 | AGIWUR948;AGIWUR8774;AGIWUR10299;AGIWUR30518;AGIWUR35426;AGIWUR35479   |          |                |            |            |
| N2 CT I             | 11011435                                                               | 11014274 | WBGene00219422 | Y52B11A.20 | Y52B11A.20 |
| -0.0370521191043727 | AGIWUR3523;AGIWUR43245                                                 |          |                |            |            |

|                                                                      |    |   |                                                         |          |                |            |                            |
|----------------------------------------------------------------------|----|---|---------------------------------------------------------|----------|----------------|------------|----------------------------|
| N2                                                                   | CT | I | 11012959                                                | 11014739 | WBGene00077539 | Y52B11A.12 | Y52B11A.12                 |
| -0.324523432203658                                                   |    |   | AGIWUR8711;AGIWUR18783                                  |          |                |            |                            |
| N2                                                                   | CT | I | 11015486                                                | 11017497 | WBGene00013125 | clec-92    | Y52B11A.5                  |
| -0.539498450903225                                                   |    |   | AGIWUR15108                                             |          |                |            |                            |
| N2                                                                   | CT | I | 11018571                                                | 11025653 | WBGene00013126 | mltn-2     | Y52B11A.7                  |
| -0.542273997169505                                                   |    |   | AGIWUR13171;AGIWUR21642                                 |          |                |            |                            |
| N2                                                                   | CT | I | 11032339                                                | 11034055 | WBGene00013127 | Y52B11A.8  | Y52B11A.8                  |
| -0.0562180142913018                                                  |    |   | AGIWUR32358                                             |          |                |            |                            |
| N2                                                                   | CT | I | 11034057                                                | 11038857 | WBGene00013128 | dxbp-1     | Y52B11A.9                  |
| -0.141224327755534                                                   |    |   | AGIWUR22113                                             |          |                |            |                            |
| N2                                                                   | CT | I | 11039056                                                | 11052494 | WBGene00013129 | Y52B11A.10 | Y52B11A.10                 |
| -0.0747431198380024                                                  |    |   | AGIWUR18772;AGIWUR35839;AGIWUR36487                     |          |                |            |                            |
| N2                                                                   | CT | I | 11067699                                                | 11069996 | WBGene00014914 | Y52B11A.11 | Y52B11A.11                 |
| 0.215307942080843                                                    |    |   | AGIWUR356;AGIWUR941;AGIWUR13335;AGIWUR18309;AGIWUR23163 |          |                |            |                            |
| N2                                                                   | CT | I | 11075758                                                | 11134667 | WBGene00001980 | hmr-1      | W02B9.1 0.217315536096684  |
| AGIWUR2464;AGIWUR4079;AGIWUR7642;AGIWUR14037;AGIWUR25685;AGIWUR25807 |    |   |                                                         |          |                |            |                            |
| N2                                                                   | CT | I | 11142113                                                | 11144090 | WBGene00013929 | clec-93    | ZK39.4 -0.0893691226989173 |
| AGIWUR16569                                                          |    |   |                                                         |          |                |            |                            |
| N2                                                                   | CT | I | 11144652                                                | 11145696 | WBGene00044266 | ZK39.9     | ZK39.9 -0.134184713569804  |
| AGIWUR3953;AGIWUR18942;AGIWUR31124;AGIWUR35697;AGIWUR38465           |    |   |                                                         |          |                |            |                            |
| N2                                                                   | CT | I | 11146448                                                | 11148309 | WBGene00013928 | clec-94    | ZK39.3 -0.507799316153152  |
| AGIWUR7109                                                           |    |   |                                                         |          |                |            |                            |
| N2                                                                   | CT | I | 11148973                                                | 11150295 | WBGene00013927 | clec-95    | ZK39.2 -0.524217538272623  |
| AGIWUR14880                                                          |    |   |                                                         |          |                |            |                            |
| N2                                                                   | CT | I | 11151241                                                | 11151972 | WBGene00013930 | clec-96    | ZK39.5 -0.374414486481296  |
| AGIWUR38744                                                          |    |   |                                                         |          |                |            |                            |
| N2                                                                   | CT | I | 11152704                                                | 11154329 | WBGene00013931 | clec-97    | ZK39.6 -0.115357163775013  |
| AGIWUR3379;AGIWUR10205                                               |    |   |                                                         |          |                |            |                            |
| N2                                                                   | CT | I | 11156745                                                | 11158831 | WBGene00013933 | clec-99    | ZK39.8 -0.30595133178074   |
| AGIWUR13126                                                          |    |   |                                                         |          |                |            |                            |
| N2                                                                   | CT | I | 11160034                                                | 11162602 | WBGene00050881 | ZK39.10    | ZK39.10 0.321851754381119  |
| AGIWUR15295;AGIWUR25506                                              |    |   |                                                         |          |                |            |                            |
| N2                                                                   | CT | I | 11163811                                                | 11168736 | WBGene00013131 | Y52B11C.1  | Y52B11C.1                  |
| -0.0218708709158726                                                  |    |   | AGIWUR30055                                             |          |                |            |                            |
| N2                                                                   | CT | I | 11177805                                                | 11182115 | WBGene00004706 | rsr-1      | F28D9.1 0.23081215766911   |
| AGIWUR25663                                                          |    |   |                                                         |          |                |            |                            |
| N2                                                                   | CT | I | 11182817                                                | 11186137 | WBGene00005517 | sri-5      | F28D9.2 -0.849178311244652 |
| AGIWUR20194                                                          |    |   |                                                         |          |                |            |                            |
| N2                                                                   | CT | I | 11206922                                                | 11211842 | WBGene00012317 | ztf-6      | W06H12.1                   |

|                                                                      |                                                                      |
|----------------------------------------------------------------------|----------------------------------------------------------------------|
| -0.163648570235154                                                   | AGIWUR4883;AGIWUR5680;AGIWUR8022;AGIWUR21252;AGIWUR28412;AGIWUR42642 |
| N2 CT I 11212426 11215091                                            | WBGene00002119 ins-36 Y53H1A.4                                       |
| -0.113484938969117                                                   | AGIWUR17879;AGIWUR21406;AGIWUR34002;AGIWUR36162;AGIWUR38489          |
| N2 CT I 11216118 11221995                                            | WBGene00013177 rsy-1 Y53H1A.1                                        |
| -0.113214322317493                                                   | AGIWUR974;AGIWUR14921                                                |
| N2 CT I 11222326 11224400                                            | WBGene00013178 Y53H1A.2 Y53H1A.2                                     |
| -0.0829749883474431                                                  | AGIWUR14334;AGIWUR20569;AGIWUR21366                                  |
| N2 CT I 11224836 11233334                                            | WBGene00043056 nfya-2 Y53H1A.5                                       |
| -0.235878957986372                                                   | AGIWUR33672                                                          |
| N2 CT I 11234302 11235176                                            | WBGene00013179 clec-100 Y53H1A.3                                     |
| -0.176972538558344                                                   | AGIWUR16219                                                          |
| N2 CT I 11235385 11235594                                            | WBGene00044781 Y53H1A.6 Y53H1A.6                                     |
| 0.0120337227765841                                                   | AGIWUR13135                                                          |
| N2 CT I 11243836 11245003                                            | WBGene00009749 F46A8.6 F46A8.6 0.277984790524906                     |
| AGIWUR32965                                                          |                                                                      |
| N2 CT I 11245823 11246765                                            | WBGene00014760 F46A8.2 F46A8.2 0.0931909187119366                    |
| AGIWUR32278;AGIWUR33361                                              |                                                                      |
| N2 CT I 11248270 11249952                                            | WBGene00014761 F46A8.11 F46A8.11                                     |
| 0.0362788580833002                                                   | AGIWUR14328;AGIWUR40171                                              |
| N2 CT I 11250139 11251602                                            | WBGene00014759 F46A8.1 F46A8.1                                       |
| -0.00526274346530453                                                 | AGIWUR15744;AGIWUR23653;AGIWUR27635                                  |
| N2 CT I 11252238 11252981                                            | WBGene00009752 F46A8.9 F46A8.9 0.00169780873760317                   |
| AGIWUR9494                                                           |                                                                      |
| N2 CT I 11253256 11256022                                            | WBGene00009753 scrm-6 F46A8.10                                       |
| 0.225671720996463                                                    | AGIWUR31148                                                          |
| N2 CT I 11256550 11259225                                            | WBGene00009467 F36D1.8 F36D1.8 0.1366328510909                       |
| AGIWUR29021                                                          |                                                                      |
| N2 CT I 11263066 11263661                                            | WBGene00009466 F36D1.7 F36D1.7 -0.257192208327886                    |
| AGIWUR2766;AGIWUR3959;AGIWUR7252;AGIWUR15487;AGIWUR32950;AGIWUR45156 |                                                                      |
| N2 CT I 11265523 11265714                                            | WBGene00077524 F36D1.11 F36D1.11                                     |
| 0.148055024406128                                                    | AGIWUR3397;AGIWUR28134                                               |
| N2 CT I 11266070 11266474                                            | WBGene00009464 F36D1.5 F36D1.5 0.473905075040085                     |
| AGIWUR19361                                                          |                                                                      |
| N2 CT I 11268030 11268409                                            | WBGene00044246 F36D1.10 F36D1.10                                     |
| 0.0533053103536067                                                   | AGIWUR2407;AGIWUR4902;AGIWUR6043;AGIWUR20336;AGIWUR24359             |
| N2 CT I 11269946 11271226                                            | WBGene00009465 F36D1.6 F36D1.6 0.0998910273758327                    |
| AGIWUR5059;AGIWUR16986;AGIWUR23497                                   |                                                                      |
| N2 CT I 11271708 11272346                                            | WBGene00009463 F36D1.4 F36D1.4 0.0631369377264157                    |
| AGIWUR27994                                                          |                                                                      |

|                                                                                         |    |   |          |          |                |          |          |                     |
|-----------------------------------------------------------------------------------------|----|---|----------|----------|----------------|----------|----------|---------------------|
| N2                                                                                      | CT | I | 11274899 | 11276346 | WBGene00009468 | F36D1.9  | F36D1.9  | -0.202190337710364  |
| AGIWUR28466;AGIWUR30243;AGIWUR30436                                                     |    |   |          |          |                |          |          |                     |
| N2                                                                                      | CT | I | 11276451 | 11280018 | WBGene00009461 | madf-2   | F36D1.1  | -0.170002334608766  |
| AGIWUR18025                                                                             |    |   |          |          |                |          |          |                     |
| N2                                                                                      | CT | I | 11282473 | 11286290 | WBGene00009462 | sre-22   | F36D1.2  | 0.0224168307566797  |
| AGIWUR8829;AGIWUR32183                                                                  |    |   |          |          |                |          |          |                     |
| N2                                                                                      | CT | I | 11289044 | 11291868 | WBGene00005710 | sru-47   | F36D1.3  | -0.0952404457265423 |
| AGIWUR34147                                                                             |    |   |          |          |                |          |          |                     |
| N2                                                                                      | CT | I | 11292662 | 11294197 | WBGene00013181 | Y53H1B.2 |          | Y53H1B.2            |
| -0.0815764179024825 AGIWUR1839                                                          |    |   |          |          |                |          |          |                     |
| N2                                                                                      | CT | I | 11294593 | 11297206 | WBGene00013180 | cutl-10  | Y53H1B.1 |                     |
| 0.0820516109894101 AGIWUR9275                                                           |    |   |          |          |                |          |          |                     |
| N2                                                                                      | CT | I | 11300743 | 11301662 | WBGene00013182 | Y53H1B.4 |          | Y53H1B.4            |
| -0.040788806637682 AGIWUR40711                                                          |    |   |          |          |                |          |          |                     |
| N2                                                                                      | CT | I | 11305882 | 11307450 | WBGene00219319 | H25P06.5 |          | H25P06.5            |
| -0.202640015973882 AGIWUR14863;AGIWUR22874;AGIWUR29330;AGIWUR31715;AGIWUR39430          |    |   |          |          |                |          |          |                     |
| N2                                                                                      | CT | I | 11311516 | 11323110 | WBGene00010416 | hxx-2    | H25P06.1 |                     |
| 0.335582145965649 AGIWUR19499                                                           |    |   |          |          |                |          |          |                     |
| N2                                                                                      | CT | I | 11323527 | 11333152 | WBGene00000410 | cdk-9    | H25P06.2 |                     |
| 0.0955771233203002 AGIWUR2599;AGIWUR5704;AGIWUR16319;AGIWUR18803;AGIWUR22679            |    |   |          |          |                |          |          |                     |
| N2                                                                                      | CT | I | 11334223 | 11337431 | WBGene00014807 | M04D5.1  | M04D5.1  | -0.0385625884710379 |
| AGIWUR1348;AGIWUR28722                                                                  |    |   |          |          |                |          |          |                     |
| N2                                                                                      | CT | I | 11339787 | 11341521 | WBGene00077770 | M04D5.3  | M04D5.3  | -0.0936206154073957 |
| AGIWUR20198                                                                             |    |   |          |          |                |          |          |                     |
| N2                                                                                      | CT | I | 11361090 | 11362900 | WBGene00044250 | F56G4.7  | F56G4.7  | 0.0949735136297809  |
| AGIWUR219;AGIWUR6931;AGIWUR14752;AGIWUR17788;AGIWUR20636                                |    |   |          |          |                |          |          |                     |
| N2                                                                                      | CT | I | 11364321 | 11374334 | WBGene00010161 | F56G4.6  | F56G4.6  | -0.258169386068436  |
| AGIWUR42088                                                                             |    |   |          |          |                |          |          |                     |
| N2                                                                                      | CT | I | 11374620 | 11380127 | WBGene00010159 | F56G4.4  | F56G4.4  | -0.0735281662957199 |
| AGIWUR21621                                                                             |    |   |          |          |                |          |          |                     |
| N2                                                                                      | CT | I | 11380231 | 11388751 | WBGene00010160 | png-1    | F56G4.5  | -0.0725671061643567 |
| AGIWUR20127                                                                             |    |   |          |          |                |          |          |                     |
| N2                                                                                      | CT | I | 11388689 | 11396660 | WBGene00000010 | aat-9    | Y53H1C.1 |                     |
| 0.140655019666848 AGIWUR16336;AGIWUR17335;AGIWUR18837                                   |    |   |          |          |                |          |          |                     |
| N2                                                                                      | CT | I | 11400612 | 11416427 | WBGene00001215 | ego-2    | Y53H1C.2 |                     |
| -0.116969625725289 AGIWUR2467;AGIWUR2804;AGIWUR4341;AGIWUR10016;AGIWUR25366;AGIWUR45207 |    |   |          |          |                |          |          |                     |
| N2                                                                                      | CT | I | 11417844 | 11421236 | WBGene00013186 | Y53H1C.3 |          | Y53H1C.3            |
| 0.189008285834577 AGIWUR20556                                                           |    |   |          |          |                |          |          |                     |
| N2                                                                                      | CT | I | 11422190 | 11423600 | WBGene00007769 | C27C7.7  | C27C7.7  | -0.134062966059437  |

|                                                             |    |   |                         |          |                |           |          |                     |
|-------------------------------------------------------------|----|---|-------------------------|----------|----------------|-----------|----------|---------------------|
| AGIWUR13993                                                 |    |   |                         |          |                |           |          |                     |
| N2                                                          | CT | I | 11423993                | 11426054 | WBGene00007768 | C27C7.5   | C27C7.5  | 0.0578101532940094  |
| AGIWUR1894                                                  |    |   |                         |          |                |           |          |                     |
| N2                                                          | CT | I | 11429029                | 11432145 | WBGene00003664 | nhr-74    | C27C7.3  | 0.0343152046542468  |
| AGIWUR43950                                                 |    |   |                         |          |                |           |          |                     |
| N2                                                          | CT | I | 11443452                | 11446644 | WBGene00014992 | ZK1025.1  |          | ZK1025.1            |
| -0.0747528000460562                                         |    |   | AGIWUR9385              |          |                |           |          |                     |
| N2                                                          | CT | I | 11460780                | 11463074 | WBGene00014183 | ZK1025.3  |          | ZK1025.3            |
| -0.366577056143248                                          |    |   | AGIWUR9770              |          |                |           |          |                     |
| N2                                                          | CT | I | 11473218                | 11475677 | WBGene00003703 | nhr-113   | ZK1025.9 |                     |
| 0.22054414520996                                            |    |   | AGIWUR19572             |          |                |           |          |                     |
| N2                                                          | CT | I | 11483392                | 11484571 | WBGene00010652 | K08C9.5   | K08C9.5  | 0.165034142526276   |
| AGIWUR40298                                                 |    |   |                         |          |                |           |          |                     |
| N2                                                          | CT | I | 11484778                | 11486598 | WBGene00010650 | K08C9.1   | K08C9.1  | 0.235434178634186   |
| AGIWUR24763                                                 |    |   |                         |          |                |           |          |                     |
| N2                                                          | CT | I | 11486895                | 11488471 | WBGene00010651 | K08C9.2   | K08C9.2  | 0.373504061289237   |
| AGIWUR16644                                                 |    |   |                         |          |                |           |          |                     |
| N2                                                          | CT | I | 11489158                | 11490630 | WBGene00000641 | col-65    | K08C9.4  | 0.417477082695649   |
| AGIWUR17873                                                 |    |   |                         |          |                |           |          |                     |
| N2                                                          | CT | I | 11493036                | 11495080 | WBGene00045218 | K08C9.8   | K08C9.8  | -0.20788702851939   |
| AGIWUR14097;AGIWUR39873                                     |    |   |                         |          |                |           |          |                     |
| N2                                                          | CT | I | 11498914                | 11499655 | WBGene00010653 | K08C9.6   | K08C9.6  | 0.0601203631972762  |
| AGIWUR354;AGIWUR5663;AGIWUR10669;AGIWUR15581;AGIWUR43275    |    |   |                         |          |                |           |          |                     |
| N2                                                          | CT | I | 11501625                | 11507129 | WBGene00009318 | F32B4.8   | F32B4.8  | -0.204334798728684  |
| AGIWUR31965                                                 |    |   |                         |          |                |           |          |                     |
| N2                                                          | CT | I | 11510066                | 11512769 | WBGene00009312 | F32B4.1   | F32B4.1  | -0.158058359752895  |
| AGIWUR10881;AGIWUR12015;AGIWUR29788                         |    |   |                         |          |                |           |          |                     |
| N2                                                          | CT | I | 11512840                | 11513853 | WBGene00009313 | F32B4.2   | F32B4.2  | 0.149673118736624   |
| AGIWUR23120;AGIWUR37167;AGIWUR44941                         |    |   |                         |          |                |           |          |                     |
| N2                                                          | CT | I | 11515127                | 11517108 | WBGene00009316 | abhd-11.1 |          | F32B4.6             |
| -0.0737680802821412                                         |    |   | AGIWUR39042             |          |                |           |          |                     |
| N2                                                          | CT | I | 11517558                | 11526962 | WBGene00009314 | F32B4.4   | F32B4.4  | 0.123120659143442   |
| AGIWUR25980;AGIWUR30552                                     |    |   |                         |          |                |           |          |                     |
| N2                                                          | CT | I | 11526918                | 11557851 | WBGene00001131 | dys-1     | F15D3.1  | -0.0831537165460787 |
| AGIWUR12141;AGIWUR22309;AGIWUR24862;AGIWUR34445;AGIWUR40088 |    |   |                         |          |                |           |          |                     |
| N2                                                          | CT | I | 11557986                | 11558671 | WBGene00077557 | F15D3.9   | F15D3.9  | -0.252194240660479  |
| AGIWUR2903;AGIWUR3479;AGIWUR5850;AGIWUR17559;AGIWUR22084    |    |   |                         |          |                |           |          |                     |
| N2                                                          | CT | I | 11560637                | 11564387 | WBGene00008853 | cllec-101 |          | F15D3.2             |
| 0.123716170994824                                           |    |   | AGIWUR11727;AGIWUR34026 |          |                |           |          |                     |

|                                                        |    |   |          |          |                |          |          |                     |
|--------------------------------------------------------|----|---|----------|----------|----------------|----------|----------|---------------------|
| N2                                                     | CT | I | 11565238 | 11570803 | WBGene00008854 | F15D3.4  | F15D3.4  | -0.0279541579482601 |
| AGIWUR1550                                             |    |   |          |          |                |          |          |                     |
| N2                                                     | CT | I | 11570886 | 11571178 | WBGene00008855 | F15D3.5  | F15D3.5  | 0.656027199906778   |
| AGIWUR38955                                            |    |   |          |          |                |          |          |                     |
| N2                                                     | CT | I | 11572121 | 11577488 | WBGene00008856 | F15D3.6  | F15D3.6  | 0.430922731070718   |
| AGIWUR36119;AGIWUR37869                                |    |   |          |          |                |          |          |                     |
| N2                                                     | CT | I | 11578641 | 11579612 | WBGene00008857 | timmm-23 | F15D3.7  | -0.056107990906467  |
| AGIWUR37010                                            |    |   |          |          |                |          |          |                     |
| N2                                                     | CT | I | 11579861 | 11581986 | WBGene00008858 | pals-1   | F15D3.8  | 0.00241908270147917 |
| AGIWUR20103                                            |    |   |          |          |                |          |          |                     |
| N2                                                     | CT | I | 11582743 | 11586069 | WBGene00004963 | spe-9    | C17D12.6 |                     |
| 0.163515552309285 AGIWUR2003                           |    |   |          |          |                |          |          |                     |
| N2                                                     | CT | I | 11585922 | 11587294 | WBGene00007639 | C17D12.5 |          | C17D12.5            |
| 0.218022080007048 AGIWUR29807                          |    |   |          |          |                |          |          |                     |
| N2                                                     | CT | I | 11592302 | 11602095 | WBGene00006807 | unc-75   | C17D12.2 |                     |
| 0.0674419168187099 AGIWUR17392;AGIWUR20095             |    |   |          |          |                |          |          |                     |
| N2                                                     | CT | I | 11604027 | 11611314 | WBGene00007640 | C17D12.7 |          | C17D12.7            |
| -0.314691997321393 AGIWUR32357                         |    |   |          |          |                |          |          |                     |
| N2                                                     | CT | I | 11611672 | 11616244 | WBGene00007637 | dhhc-7   | C17D12.1 |                     |
| 0.034376978767753 AGIWUR38592                          |    |   |          |          |                |          |          |                     |
| N2                                                     | CT | I | 11616816 | 11620263 | WBGene00007638 | C17D12.3 |          | C17D12.3            |
| 0.113698707839461 AGIWUR9660                           |    |   |          |          |                |          |          |                     |
| N2                                                     | CT | I | 11630064 | 11632879 | WBGene00012265 | W04G5.4  | W04G5.4  | 0.0577232293508629  |
| AGIWUR32019;AGIWUR32119;AGIWUR43756                    |    |   |          |          |                |          |          |                     |
| N2                                                     | CT | I | 11633002 | 11638491 | WBGene00004275 | rab-11.2 |          | W04G5.2             |
| 0.251031737696778 AGIWUR6515;AGIWUR17616;AGIWUR24210   |    |   |          |          |                |          |          |                     |
| N2                                                     | CT | I | 11638482 | 11640414 | WBGene00012270 | W04G5.10 |          | W04G5.10            |
| -0.0202225061924786 AGIWUR4128;AGIWUR31161;AGIWUR34859 |    |   |          |          |                |          |          |                     |
| N2                                                     | CT | I | 11640687 | 11642206 | WBGene00002205 | kin-23   | W04G5.6  | -0.30437079351683   |
| AGIWUR14720                                            |    |   |          |          |                |          |          |                     |
| N2                                                     | CT | I | 11642625 | 11645420 | WBGene00012269 | W04G5.9  | W04G5.9  | 0.0320217026462366  |
| AGIWUR26630                                            |    |   |          |          |                |          |          |                     |
| N2                                                     | CT | I | 11646525 | 11647020 | WBGene00045075 | W04G5.12 |          | W04G5.12            |
| 0.0645928430490486 AGIWUR863;AGIWUR7332;AGIWUR13915    |    |   |          |          |                |          |          |                     |
| N2                                                     | CT | I | 11647753 | 11648428 | WBGene00045076 | W04G5.13 |          | W04G5.13            |
| 0.164673964079228 AGIWUR11630;AGIWUR42286;AGIWUR42442  |    |   |          |          |                |          |          |                     |
| N2                                                     | CT | I | 11649982 | 11651912 | WBGene00012268 | W04G5.8  | W04G5.8  | 0.0869768711406769  |
| AGIWUR29292                                            |    |   |          |          |                |          |          |                     |
| N2                                                     | CT | I | 11652789 | 11654254 | WBGene00012267 | W04G5.7  | W04G5.7  | 0.105457564373351   |



|                                                                                                         |    |   |          |          |                |          |                             |
|---------------------------------------------------------------------------------------------------------|----|---|----------|----------|----------------|----------|-----------------------------|
| AGIWUR227;AGIWUR4758;AGIWUR23631                                                                        |    |   |          |          |                |          |                             |
| N2                                                                                                      | CT | I | 11675850 | 11680975 | WBGene00002232 | kpc-1    | F11A6.1                     |
| -0.00554131365379895 AGIWUR6129;AGIWUR35941;AGIWUR40036;AGIWUR40532;AGIWUR41868;AGIWUR43223;AGIWUR44060 |    |   |          |          |                |          |                             |
| N2                                                                                                      | CT | I | 11680913 | 11682441 | WBGene00008681 | scrm-4   | F11A6.2 -0.374820686392946  |
| AGIWUR12708;AGIWUR15152;AGIWUR37914                                                                     |    |   |          |          |                |          |                             |
| N2                                                                                                      | CT | I | 11687811 | 11688522 | WBGene00077549 | F11A6.3  | F11A6.3 -0.18252880454142   |
| AGIWUR5970                                                                                              |    |   |          |          |                |          |                             |
| N2                                                                                                      | CT | I | 11688680 | 11690830 | WBGene00011935 | scrm-1   | T22H2.5 0.0250357823142435  |
| AGIWUR22686;AGIWUR42928                                                                                 |    |   |          |          |                |          |                             |
| N2                                                                                                      | CT | I | 11694722 | 11694997 | WBGene00011934 | T22H2.4  | T22H2.4 -0.15651118130951   |
| AGIWUR33144                                                                                             |    |   |          |          |                |          |                             |
| N2                                                                                                      | CT | I | 11695339 | 11697943 | WBGene00005523 | sri-11   | T22H2.3 0.289625737826425   |
| AGIWUR24552                                                                                             |    |   |          |          |                |          |                             |
| N2                                                                                                      | CT | I | 11699169 | 11701178 | WBGene00005524 | sri-12   | T22H2.1 0.289196093146073   |
| AGIWUR26364                                                                                             |    |   |          |          |                |          |                             |
| N2                                                                                                      | CT | I | 11701631 | 11703698 | WBGene00011936 | pgrn-1   | T22H2.6                     |
| -0.000237064719640578 AGIWUR27058;AGIWUR43309                                                           |    |   |          |          |                |          |                             |
| N2                                                                                                      | CT | I | 11703718 | 11706612 | WBGene00011933 | oac-47   | T22H2.2 0.0721922289307662  |
| AGIWUR23499                                                                                             |    |   |          |          |                |          |                             |
| N2                                                                                                      | CT | I | 11707818 | 11712197 | WBGene00009413 | oac-19   | F35E2.6 0.549467575633142   |
| AGIWUR25636                                                                                             |    |   |          |          |                |          |                             |
| N2                                                                                                      | CT | I | 11714956 | 11717616 | WBGene00009414 | F35E2.7  | F35E2.7 -0.226546487354867  |
| AGIWUR21665                                                                                             |    |   |          |          |                |          |                             |
| N2                                                                                                      | CT | I | 11718864 | 11719790 | WBGene00009415 | F35E2.8  | F35E2.8 0.164324534592945   |
| AGIWUR4814                                                                                              |    |   |          |          |                |          |                             |
| N2                                                                                                      | CT | I | 11719902 | 11722936 | WBGene00044270 | F35E2.10 | F35E2.10                    |
| 0.0696210888388356 AGIWUR4911;AGIWUR28015;AGIWUR32014;AGIWUR44280                                       |    |   |          |          |                |          |                             |
| N2                                                                                                      | CT | I | 11723427 | 11726326 | WBGene00009416 | F35E2.9  | F35E2.9 0.221322170112193   |
| AGIWUR15496                                                                                             |    |   |          |          |                |          |                             |
| N2                                                                                                      | CT | I | 11733940 | 11735964 | WBGene00009411 | F35E2.3  | F35E2.3 -0.0214820364404602 |
| AGIWUR643;AGIWUR24810;AGIWUR32708;AGIWUR40664;AGIWUR43891                                               |    |   |          |          |                |          |                             |
| N2                                                                                                      | CT | I | 11736637 | 11737699 | WBGene00009410 | F35E2.2  | F35E2.2 -0.0227918427122704 |
| AGIWUR38091                                                                                             |    |   |          |          |                |          |                             |
| N2                                                                                                      | CT | I | 11741603 | 11743951 | WBGene00009412 | F35E2.5  | F35E2.5 0.163881383276961   |
| AGIWUR19040;AGIWUR31412                                                                                 |    |   |          |          |                |          |                             |
| N2                                                                                                      | CT | I | 11744172 | 11747451 | WBGene00012946 | Y47H9B.2 | Y47H9B.2                    |
| 0.186287907156133 AGIWUR3183;AGIWUR27320;AGIWUR39374;AGIWUR42978                                        |    |   |          |          |                |          |                             |
| N2                                                                                                      | CT | I | 11747428 | 11792118 | WBGene00006876 | vab-10   | ZK1151.1                    |
| 0.162565247436676                                                                                       |    |   |          |          |                |          |                             |

|                                                                                                             |    |   |          |          |                |            |           |                     |
|-------------------------------------------------------------------------------------------------------------|----|---|----------|----------|----------------|------------|-----------|---------------------|
| AGIWUR5594;AGIWUR6483;AGIWUR14405;AGIWUR15572;AGIWUR17308;AGIWUR19666;AGIWUR20230;AGIWUR25708;AGIWUR38637   |    |   |          |          |                |            |           |                     |
| N2                                                                                                          | CT | I | 11797032 | 11797947 | WBGene00011384 | T02G6.1    | T02G6.1   | -0.0471216793668372 |
| AGIWUR30583                                                                                                 |    |   |          |          |                |            |           |                     |
| N2                                                                                                          | CT | I | 11800433 | 11804991 | WBGene00011385 | T02G6.2    | T02G6.2   |                     |
| 0.000575051976583474 AGIWUR1183;AGIWUR9681;AGIWUR13350;AGIWUR33790;AGIWUR38283;AGIWUR38543                  |    |   |          |          |                |            |           |                     |
| N2                                                                                                          | CT | I | 11809132 | 11811266 | WBGene00011387 | T02G6.4    | T02G6.4   | -0.16248841190732   |
| AGIWUR25717                                                                                                 |    |   |          |          |                |            |           |                     |
| N2                                                                                                          | CT | I | 11813779 | 11814451 | WBGene00011386 | T02G6.3    | T02G6.3   | 0.309966479436094   |
| AGIWUR33810                                                                                                 |    |   |          |          |                |            |           |                     |
| N2                                                                                                          | CT | I | 11815910 | 11819277 | WBGene00011388 | T02G6.5    | T02G6.5   | -0.208707014309718  |
| AGIWUR1129                                                                                                  |    |   |          |          |                |            |           |                     |
| N2                                                                                                          | CT | I | 11820688 | 11823459 | WBGene00086562 | T02G6.11   | T02G6.11  |                     |
| 0.100649391617037 AGIWUR4176;AGIWUR10405;AGIWUR11978;AGIWUR13971;AGIWUR40335;AGIWUR44344                    |    |   |          |          |                |            |           |                     |
| N2                                                                                                          | CT | I | 11827549 | 11828619 | WBGene00011390 | T02G6.7    | T02G6.7   | -0.137449086713604  |
| AGIWUR6776                                                                                                  |    |   |          |          |                |            |           |                     |
| N2                                                                                                          | CT | I | 11830985 | 11833166 | WBGene00012947 | Y47H9C.1   | Y47H9C.1  |                     |
| -0.248714193394417 AGIWUR41747                                                                              |    |   |          |          |                |            |           |                     |
| N2                                                                                                          | CT | I | 11836460 | 11849251 | WBGene00012948 | dhhc-2     | Y47H9C.2  |                     |
| -0.124360014421804 AGIWUR13146                                                                              |    |   |          |          |                |            |           |                     |
| N2                                                                                                          | CT | I | 11851566 | 11868105 | WBGene00000415 | ced-1      | Y47H9C.4  |                     |
| 0.0397164926423086 AGIWUR17222;AGIWUR19662;AGIWUR22787;AGIWUR40343                                          |    |   |          |          |                |            |           |                     |
| N2                                                                                                          | CT | I | 11888501 | 11890558 | WBGene00000821 | csp-3      | Y47H9C.6  |                     |
| 0.131614171042834 AGIWUR42697                                                                               |    |   |          |          |                |            |           |                     |
| N2                                                                                                          | CT | I | 11891549 | 11893727 | WBGene00012950 | eif-2Bbeta | Y47H9C.7  |                     |
| 0.00297988470431143 AGIWUR36725                                                                             |    |   |          |          |                |            |           |                     |
| N2                                                                                                          | CT | I | 11893881 | 11896284 | WBGene00012951 | Y47H9C.8   | Y47H9C.8  |                     |
| -0.246464371916465 AGIWUR13628                                                                              |    |   |          |          |                |            |           |                     |
| N2                                                                                                          | CT | I | 11898789 | 11901476 | WBGene00012952 | Y47H9C.9   | Y47H9C.9  |                     |
| -0.243557908536609 AGIWUR19718                                                                              |    |   |          |          |                |            |           |                     |
| N2                                                                                                          | CT | I | 11901608 | 11903305 | WBGene00012953 | fbxa-216   | Y47H9C.10 |                     |
| -0.160438292459425 AGIWUR18820                                                                              |    |   |          |          |                |            |           |                     |
| N2                                                                                                          | CT | I | 11903734 | 11905148 | WBGene00012954 | fbxa-217   | Y47H9C.11 |                     |
| -0.248273201309605 AGIWUR28607                                                                              |    |   |          |          |                |            |           |                     |
| N2                                                                                                          | CT | I | 11905957 | 11907484 | WBGene00014820 | R09B3.6    | R09B3.6   | 0.0613276450835127  |
| AGIWUR33163;AGIWUR44264                                                                                     |    |   |          |          |                |            |           |                     |
| N2                                                                                                          | CT | I | 11907571 | 11909280 | WBGene00001372 | exo-3      | R09B3.1   | -0.0396917057073516 |
| AGIWUR18555                                                                                                 |    |   |          |          |                |            |           |                     |
| N2                                                                                                          | CT | I | 11909366 | 11910104 | WBGene00011155 | R09B3.2    | R09B3.2   | -0.0472671008333485 |
| AGIWUR1991;AGIWUR2354;AGIWUR5088;AGIWUR17198;AGIWUR19184;AGIWUR19657;AGIWUR32430;AGIWUR32996;AGIWUR36348;AG |    |   |          |          |                |            |           |                     |

|                                                                         |    |   |                                                                                   |          |                |            |            |                     |
|-------------------------------------------------------------------------|----|---|-----------------------------------------------------------------------------------|----------|----------------|------------|------------|---------------------|
| IWUR38502                                                               |    |   |                                                                                   |          |                |            |            |                     |
| N2                                                                      | CT | I | 11910328                                                                          | 11911021 | WBGene00011156 | R09B3.3    | R09B3.3    | 0.0587797577334399  |
| AGIWUR19760                                                             |    |   |                                                                                   |          |                |            |            |                     |
| N2                                                                      | CT | I | 11911324                                                                          | 11912052 | WBGene00006707 | ubc-12     | R09B3.4    | -0.108232787327228  |
| AGIWUR27816                                                             |    |   |                                                                                   |          |                |            |            |                     |
| N2                                                                      | CT | I | 11912791                                                                          | 11917719 | WBGene00001836 | hda-3      | R06C1.1    | -0.113430412209325  |
| AGIWUR26718                                                             |    |   |                                                                                   |          |                |            |            |                     |
| N2                                                                      | CT | I | 11917834                                                                          | 11923915 | WBGene00011058 | fdps-1     | R06C1.2    | -0.178445643293879  |
| AGIWUR5488                                                              |    |   |                                                                                   |          |                |            |            |                     |
| N2                                                                      | CT | I | 11924785                                                                          | 11929511 | WBGene00006958 | wve-1      | R06C1.3    | -0.272629160379587  |
| AGIWUR2816;AGIWUR28617;AGIWUR38538                                      |    |   |                                                                                   |          |                |            |            |                     |
| N2                                                                      | CT | I | 11930704                                                                          | 11931757 | WBGene00011059 | R06C1.4    | R06C1.4    | 0.136421723986913   |
| AGIWUR13265;AGIWUR15867;AGIWUR18035;AGIWUR19895;AGIWUR36452;AGIWUR40223 |    |   |                                                                                   |          |                |            |            |                     |
| N2                                                                      | CT | I | 11947001                                                                          | 11953126 | WBGene00011060 | R06C1.6    | R06C1.6    | -0.0875892533926095 |
| AGIWUR16528                                                             |    |   |                                                                                   |          |                |            |            |                     |
| N2                                                                      | CT | I | 11953512                                                                          | 11961984 | WBGene00002004 | hsf-1      | Y53C10A.12 |                     |
| 0.134033506511969                                                       |    |   | AGIWUR5003                                                                        |          |                |            |            |                     |
| N2                                                                      | CT | I | 11966271                                                                          | 11967591 | WBGene00014915 | Y53C10A.1  | Y53C10A.1  |                     |
| -0.0556091737899633                                                     |    |   | AGIWUR3407;AGIWUR13951;AGIWUR27588;AGIWUR39138;AGIWUR40433                        |          |                |            |            |                     |
| N2                                                                      | CT | I | 11968022                                                                          | 11969847 | WBGene00013134 | hsf-2      | Y53C10A.3  |                     |
| -0.033803752825655                                                      |    |   | AGIWUR14077;AGIWUR30255                                                           |          |                |            |            |                     |
| N2                                                                      | CT | I | 11971179                                                                          | 11971797 | WBGene00044805 | Y53C10A.15 | Y53C10A.15 |                     |
| 0.0877009847371166                                                      |    |   | AGIWUR5972;AGIWUR10075;AGIWUR17097;AGIWUR25230;AGIWUR41924                        |          |                |            |            |                     |
| N2                                                                      | CT | I | 11979401                                                                          | 11985612 | WBGene00013135 | rga-2      | Y53C10A.4  |                     |
| 0.0893863270534236                                                      |    |   | AGIWUR7868                                                                        |          |                |            |            |                     |
| N2                                                                      | CT | I | 11998781                                                                          | 12002643 | WBGene00013136 | Y53C10A.5  | Y53C10A.5  |                     |
| 0.28391007821144                                                        |    |   | AGIWUR35184                                                                       |          |                |            |            |                     |
| N2                                                                      | CT | I | 12002552                                                                          | 12004997 | WBGene00013137 | Y53C10A.6  | Y53C10A.6  |                     |
| -0.20644637730544                                                       |    |   | AGIWUR28508                                                                       |          |                |            |            |                     |
| N2                                                                      | CT | I | 12005177                                                                          | 12006296 | WBGene00014916 | fbxa-124   | Y53C10A.7  |                     |
| 0.105252125454722                                                       |    |   | AGIWUR32469                                                                       |          |                |            |            |                     |
| N2                                                                      | CT | I | 12006911                                                                          | 12008040 | WBGene00014917 | fbxa-122   | Y53C10A.13 |                     |
| -0.213683497905979                                                      |    |   | AGIWUR4146;AGIWUR13689;AGIWUR26279;AGIWUR27755;AGIWUR38162                        |          |                |            |            |                     |
| N2                                                                      | CT | I | 12008625                                                                          | 12009625 | WBGene00014918 | fbxa-123   | Y53C10A.14 |                     |
| -0.381984528793337                                                      |    |   | AGIWUR4517                                                                        |          |                |            |            |                     |
| N2                                                                      | CT | I | 12011195                                                                          | 12018668 | WBGene00000023 | abt-5      | Y53C10A.9  |                     |
| 0.300365032192788                                                       |    |   | AGIWUR9468                                                                        |          |                |            |            |                     |
| N2                                                                      | CT | I | 12020756                                                                          | 12028313 | WBGene00013138 | Y53C10A.10 | Y53C10A.10 |                     |
| 0.267775103400549                                                       |    |   | AGIWUR3846;AGIWUR7803;AGIWUR19726;AGIWUR30908;AGIWUR33643;AGIWUR37169;AGIWUR42595 |          |                |            |            |                     |

|                                                          |    |   |          |          |                |           |           |                     |
|----------------------------------------------------------|----|---|----------|----------|----------------|-----------|-----------|---------------------|
| N2                                                       | CT | I | 12029927 | 12031762 | WBGene00010247 | F58D5.8   | F58D5.8   | 0.0606077631151223  |
| AGIWUR33736                                              |    |   |          |          |                |           |           |                     |
| N2                                                       | CT | I | 12032289 | 12033706 | WBGene00010246 | F58D5.7   | F58D5.7   | 0.326381655835984   |
| AGIWUR18434                                              |    |   |          |          |                |           |           |                     |
| N2                                                       | CT | I | 12034072 | 12037230 | WBGene00010245 | F58D5.6   | F58D5.6   | -0.110566981383521  |
| AGIWUR31967                                              |    |   |          |          |                |           |           |                     |
| N2                                                       | CT | I | 12041035 | 12045200 | WBGene00010244 | F58D5.5   | F58D5.5   | -0.0426589375041964 |
| AGIWUR541;AGIWUR6183;AGIWUR18314;AGIWUR21111;AGIWUR28012 |    |   |          |          |                |           |           |                     |
| N2                                                       | CT | I | 12045201 | 12046617 | WBGene00010248 | F58D5.9   | F58D5.9   | 0.0386769911238947  |
| AGIWUR21103                                              |    |   |          |          |                |           |           |                     |
| N2                                                       | CT | I | 12047469 | 12059798 | WBGene00002240 | ksr-2     | F58D5.4   | 0.0699850390055623  |
| AGIWUR8113                                               |    |   |          |          |                |           |           |                     |
| N2                                                       | CT | I | 12060271 | 12064897 | WBGene00002000 | hrp-2     | F58D5.1   | 0.0413496409732019  |
| AGIWUR10039                                              |    |   |          |          |                |           |           |                     |
| N2                                                       | CT | I | 12066010 | 12068668 | WBGene00010242 | F58D5.2   | F58D5.2   | -0.296612731354347  |
| AGIWUR41355                                              |    |   |          |          |                |           |           |                     |
| N2                                                       | CT | I | 12069806 | 12072878 | WBGene00010243 | F58D5.3   | F58D5.3   | 0.0149616074987771  |
| AGIWUR42289                                              |    |   |          |          |                |           |           |                     |
| N2                                                       | CT | I | 12084721 | 12087830 | WBGene00012958 | Y47H10A.2 |           | Y47H10A.2           |
| -0.0422925228941207 AGIWUR9810;AGIWUR11617;AGIWUR34817   |    |   |          |          |                |           |           |                     |
| N2                                                       | CT | I | 12088120 | 12089969 | WBGene00012959 | Y47H10A.3 |           | Y47H10A.3           |
| -0.757793861673439 AGIWUR19345                           |    |   |          |          |                |           |           |                     |
| N2                                                       | CT | I | 12091571 | 12094740 | WBGene00012960 | Y47H10A.4 |           | Y47H10A.4           |
| 0.176909171047303 AGIWUR7903                             |    |   |          |          |                |           |           |                     |
| N2                                                       | CT | I | 12095777 | 12097987 | WBGene00012961 | Y47H10A.5 |           | Y47H10A.5           |
| 0.97641047240116 AGIWUR33342                             |    |   |          |          |                |           |           |                     |
| N2                                                       | CT | I | 12098671 | 12106112 | WBGene00004509 | rrf-2     | M01G12.12 |                     |
| 0.0322976707049207 AGIWUR44168                           |    |   |          |          |                |           |           |                     |
| N2                                                       | CT | I | 12106912 | 12108503 | WBGene00010825 | M01G12.14 |           | M01G12.14           |
| -0.131348695259534 AGIWUR13895;AGIWUR22435               |    |   |          |          |                |           |           |                     |
| N2                                                       | CT | I | 12109096 | 12112505 | WBGene00010822 | M01G12.9  |           | M01G12.9            |
| 0.325495336773475 AGIWUR10130;AGIWUR16412;AGIWUR27321    |    |   |          |          |                |           |           |                     |
| N2                                                       | CT | I | 12114064 | 12116304 | WBGene00010821 | M01G12.7  |           | M01G12.7            |
| 2.58012125878702 AGIWUR27585                             |    |   |          |          |                |           |           |                     |
| N2                                                       | CT | I | 12117997 | 12122282 | WBGene00010820 | M01G12.6  |           | M01G12.6            |
| -0.338091773063296 AGIWUR15151                           |    |   |          |          |                |           |           |                     |
| N2                                                       | CT | I | 12122811 | 12125586 | WBGene00005858 | srw-111   | M01G12.4  |                     |
| -0.76401991376453 AGIWUR20447                            |    |   |          |          |                |           |           |                     |
| N2                                                       | CT | I | 12126455 | 12128965 | WBGene00010818 | srt-21    | M01G12.3  |                     |

|                                     |                                                            |          |                |           |         |                     |  |
|-------------------------------------|------------------------------------------------------------|----------|----------------|-----------|---------|---------------------|--|
| -0.221951640988916                  | AGIWUR8394                                                 |          |                |           |         |                     |  |
| N2 CT I                             | 12144007                                                   | 12146977 | WBGene00005529 | sri-17    | F15H9.3 | 0.236000902095999   |  |
| AGIWUR6764;AGIWUR41347              |                                                            |          |                |           |         |                     |  |
| N2 CT I                             | 12148080                                                   | 12150741 | WBGene00005528 | sri-16    | F15H9.4 | 0.0030980129491649  |  |
| AGIWUR44834                         |                                                            |          |                |           |         |                     |  |
| N2 CT I                             | 12151021                                                   | 12154333 | WBGene00005527 | sri-15    | F15H9.2 | -0.0828860242973732 |  |
| AGIWUR8549                          |                                                            |          |                |           |         |                     |  |
| N2 CT I                             | 12157151                                                   | 12158712 | WBGene00008870 | F15H9.1   | F15H9.1 | 0.366908053882363   |  |
| AGIWUR434;AGIWUR33445               |                                                            |          |                |           |         |                     |  |
| N2 CT I                             | 12160100                                                   | 12162091 | WBGene00077535 | F15H9.7   | F15H9.7 | -0.068386145355142  |  |
| AGIWUR16743;AGIWUR44656             |                                                            |          |                |           |         |                     |  |
| N2 CT I                             | 12162399                                                   | 12163703 | WBGene00011026 | R05D7.1   | R05D7.1 | -0.0573911960498208 |  |
| AGIWUR27624                         |                                                            |          |                |           |         |                     |  |
| N2 CT I                             | 12165729                                                   | 12168022 | WBGene00011027 | R05D7.2   | R05D7.2 | 0.147681524435882   |  |
| AGIWUR10353;AGIWUR10361;AGIWUR19900 |                                                            |          |                |           |         |                     |  |
| N2 CT I                             | 12168238                                                   | 12177782 | WBGene00011028 | R05D7.3   | R05D7.3 | -0.0128819871522614 |  |
| AGIWUR20284                         |                                                            |          |                |           |         |                     |  |
| N2 CT I                             | 12181046                                                   | 12183297 | WBGene00011029 | abhd-11.2 | R05D7.4 |                     |  |
| -0.229268368347245                  | AGIWUR12358                                                |          |                |           |         |                     |  |
| N2 CT I                             | 12183688                                                   | 12189007 | WBGene00011030 | R05D7.5   | R05D7.5 | -0.193999891877493  |  |
| AGIWUR7362                          |                                                            |          |                |           |         |                     |  |
| N2 CT I                             | 12189521                                                   | 12190218 | WBGene00077559 | R05D7.7   | R05D7.7 |                     |  |
| -0.00587982709194002                | AGIWUR3082;AGIWUR11879;AGIWUR19486;AGIWUR35942;AGIWUR38583 |          |                |           |         |                     |  |
| N2 CT I                             | 12202232                                                   | 12203717 | WBGene00007600 | C15C6.1   | C15C6.1 | 0.109472545217258   |  |
| AGIWUR33988                         |                                                            |          |                |           |         |                     |  |
| N2 CT I                             | 12203800                                                   | 12205809 | WBGene00007601 | C15C6.2   | C15C6.2 | 0.276568440478731   |  |
| AGIWUR7410;AGIWUR19117              |                                                            |          |                |           |         |                     |  |
| N2 CT I                             | 12207097                                                   | 12212206 | WBGene00007602 | C15C6.3   | C15C6.3 | 0.40135175860658    |  |
| AGIWUR13087                         |                                                            |          |                |           |         |                     |  |
| N2 CT I                             | 12213109                                                   | 12215184 | WBGene00007603 | C15C6.4   | C15C6.4 | -0.213539690350565  |  |
| AGIWUR2360                          |                                                            |          |                |           |         |                     |  |
| N2 CT I                             | 12218433                                                   | 12222298 | WBGene00008783 | F14B6.2   | F14B6.2 | -0.0658563755624293 |  |
| AGIWUR18283                         |                                                            |          |                |           |         |                     |  |
| N2 CT I                             | 12230418                                                   | 12232303 | WBGene00008784 | F14B6.3   | F14B6.3 | -0.155019095685404  |  |
| AGIWUR26961                         |                                                            |          |                |           |         |                     |  |
| N2 CT I                             | 12232689                                                   | 12235193 | WBGene00008787 | F14B6.6   | F14B6.6 | 0.00384662783030443 |  |
| AGIWUR15381                         |                                                            |          |                |           |         |                     |  |
| N2 CT I                             | 12236018                                                   | 12238252 | WBGene00008785 | F14B6.4   | F14B6.4 | 0.176224832338143   |  |
| AGIWUR38387                         |                                                            |          |                |           |         |                     |  |

|                                                             |    |   |          |          |                |          |          |                     |
|-------------------------------------------------------------|----|---|----------|----------|----------------|----------|----------|---------------------|
| N2                                                          | CT | I | 12239160 | 12241808 | WBGene00008786 | oac-16   | F14B6.5  | 0.0664509117222867  |
| AGIWUR42049                                                 |    |   |          |          |                |          |          |                     |
| N2                                                          | CT | I | 12245456 | 12246751 | WBGene00003672 | nhr-82   | F41D3.1  | -0.504609224088689  |
| AGIWUR30564                                                 |    |   |          |          |                |          |          |                     |
| N2                                                          | CT | I | 12247771 | 12250210 | WBGene00009607 | oac-26   | F41D3.2  | -0.14999373752298   |
| AGIWUR21424                                                 |    |   |          |          |                |          |          |                     |
| N2                                                          | CT | I | 12251906 | 12253554 | WBGene00009608 | nhr-265  | F41D3.3  | 0.155477828903418   |
| AGIWUR20066                                                 |    |   |          |          |                |          |          |                     |
| N2                                                          | CT | I | 12254506 | 12257180 | WBGene00009609 | oac-27   | F41D3.4  | 0.00999684003592094 |
| AGIWUR10798;AGIWUR12390;AGIWUR20094;AGIWUR38069;AGIWUR43226 |    |   |          |          |                |          |          |                     |
| N2                                                          | CT | I | 12264521 | 12266267 | WBGene00009611 | F41D3.6  | F41D3.6  | -0.165501605039515  |
| AGIWUR37864                                                 |    |   |          |          |                |          |          |                     |
| N2                                                          | CT | I | 12267045 | 12267491 | WBGene00009612 | F41D3.7  | F41D3.7  |                     |
| 0.000649667213070693 AGIWUR35359                            |    |   |          |          |                |          |          |                     |
| N2                                                          | CT | I | 12267499 | 12268128 | WBGene00009613 | F41D3.8  | F41D3.8  | 0.0338393555761147  |
| AGIWUR42139                                                 |    |   |          |          |                |          |          |                     |
| N2                                                          | CT | I | 12272981 | 12274636 | WBGene00009614 | F41D3.9  | F41D3.9  | -0.18395215635599   |
| AGIWUR39869                                                 |    |   |          |          |                |          |          |                     |
| N2                                                          | CT | I | 12276893 | 12278775 | WBGene00009616 | F41D3.11 | F41D3.11 |                     |
| 0.295191364106149 AGIWUR44485                               |    |   |          |          |                |          |          |                     |
| N2                                                          | CT | I | 12281221 | 12282615 | WBGene00010162 | F56H6.1  | F56H6.1  | 0.0923573375116336  |
| AGIWUR18565                                                 |    |   |          |          |                |          |          |                     |
| N2                                                          | CT | I | 12283270 | 12285384 | WBGene00010173 | F56H6.13 | F56H6.13 |                     |
| 0.0525767886127646 AGIWUR13846                              |    |   |          |          |                |          |          |                     |
| N2                                                          | CT | I | 12287199 | 12289307 | WBGene00010163 | F56H6.2  | F56H6.2  | 0.0879495727820778  |
| AGIWUR39362                                                 |    |   |          |          |                |          |          |                     |
| N2                                                          | CT | I | 12289552 | 12290191 | WBGene00010164 | F56H6.3  | F56H6.3  | -0.214263371742113  |
| AGIWUR16604                                                 |    |   |          |          |                |          |          |                     |
| N2                                                          | CT | I | 12290449 | 12292212 | WBGene00010165 | F56H6.4  | F56H6.4  | -1.78322154687697   |
| AGIWUR18750                                                 |    |   |          |          |                |          |          |                     |
| N2                                                          | CT | I | 12292269 | 12293936 | WBGene00010166 | gmd-2    | F56H6.5  | 0.0904436714185968  |
| AGIWUR7165                                                  |    |   |          |          |                |          |          |                     |
| N2                                                          | CT | I | 12294380 | 12296263 | WBGene00010167 | bgnt-1.6 | F56H6.6  |                     |
| -0.0715486000365617 AGIWUR963                               |    |   |          |          |                |          |          |                     |
| N2                                                          | CT | I | 12297734 | 12300817 | WBGene00010168 | F56H6.7  | F56H6.7  | 0.0462616270891463  |
| AGIWUR17051                                                 |    |   |          |          |                |          |          |                     |
| N2                                                          | CT | I | 12301424 | 12303157 | WBGene00010169 | c1ec-18  | F56H6.8  | 0.0550608880880077  |
| AGIWUR41003                                                 |    |   |          |          |                |          |          |                     |
| N2                                                          | CT | I | 12303599 | 12306820 | WBGene00010170 | F56H6.9  | F56H6.9  | -0.20020190773734   |

AGIWUR1010;AGIWUR14730

|                                     |    |   |                                     |          |                |           |                             |
|-------------------------------------|----|---|-------------------------------------|----------|----------------|-----------|-----------------------------|
| N2                                  | CT | I | 12307731                            | 12310406 | WBGene00010171 | oac-35    | F56H6.11                    |
| -0.00650137752425017                |    |   | AGIWUR41513                         |          |                |           |                             |
| N2                                  | CT | I | 12312335                            | 12314895 | WBGene00010172 | oac-36    | F56H6.12                    |
| 0.135893560135502                   |    |   | AGIWUR24225;AGIWUR26226;AGIWUR40420 |          |                |           |                             |
| N2                                  | CT | I | 12315193                            | 12316688 | WBGene00008159 | C47F8.3   | C47F8.3 -0.122301468654357  |
| AGIWUR13904                         |    |   |                                     |          |                |           |                             |
| N2                                  | CT | I | 12317321                            | 12318735 | WBGene00008160 | glct-4    | C47F8.4 0.0469191732357643  |
| AGIWUR15638                         |    |   |                                     |          |                |           |                             |
| N2                                  | CT | I | 12319350                            | 12320854 | WBGene00008162 | C47F8.6   | C47F8.6 -0.0237378222617277 |
| AGIWUR31086                         |    |   |                                     |          |                |           |                             |
| N2                                  | CT | I | 12321937                            | 12324062 | WBGene00008161 | C47F8.5   | C47F8.5 0.0354021123523811  |
| AGIWUR37700                         |    |   |                                     |          |                |           |                             |
| N2                                  | CT | I | 12326441                            | 12327030 | WBGene00008163 | C47F8.7   | C47F8.7 -0.0351870239599883 |
| AGIWUR4906                          |    |   |                                     |          |                |           |                             |
| N2                                  | CT | I | 12328100                            | 12329508 | WBGene00003671 | nhr-81    | C47F8.8 -0.068963435756066  |
| AGIWUR10579;AGIWUR25388;AGIWUR39749 |    |   |                                     |          |                |           |                             |
| N2                                  | CT | I | 12331085                            | 12333413 | WBGene00008158 | nhr-165   | C47F8.2 0.100574175731611   |
| AGIWUR37607                         |    |   |                                     |          |                |           |                             |
| N2                                  | CT | I | 12335035                            | 12336605 | WBGene00008157 | C47F8.1   | C47F8.1 -0.201919918235824  |
| AGIWUR45                            |    |   |                                     |          |                |           |                             |
| N2                                  | CT | I | 12337968                            | 12339239 | WBGene00011650 | glct-1    | T09E11.1                    |
| 0.0973197622726376                  |    |   | AGIWUR41546                         |          |                |           |                             |
| N2                                  | CT | I | 12341145                            | 12342826 | WBGene00011651 | nhr-217   | T09E11.2                    |
| 0.374810680086399                   |    |   | AGIWUR38513                         |          |                |           |                             |
| N2                                  | CT | I | 12344167                            | 12345702 | WBGene00011660 | T09E11.11 | T09E11.11                   |
| -0.160005143107618                  |    |   | AGIWUR9231                          |          |                |           |                             |
| N2                                  | CT | I | 12345819                            | 12347265 | WBGene00011659 | T09E11.10 | T09E11.10                   |
| 0.248076162835442                   |    |   | AGIWUR9137;AGIWUR26055;AGIWUR36895  |          |                |           |                             |
| N2                                  | CT | I | 12347700                            | 12349819 | WBGene00011658 | T09E11.9  | T09E11.9                    |
| 0.0471170948056852                  |    |   | AGIWUR36326                         |          |                |           |                             |
| N2                                  | CT | I | 12350692                            | 12352724 | WBGene00011657 | T09E11.8  | T09E11.8                    |
| -0.154196834914353                  |    |   | AGIWUR32745                         |          |                |           |                             |
| N2                                  | CT | I | 12353506                            | 12356337 | WBGene00011656 | oac-45    | T09E11.7                    |
| -0.00532625140368381                |    |   | AGIWUR34978                         |          |                |           |                             |
| N2                                  | CT | I | 12356942                            | 12359341 | WBGene00011654 | oac-44    | T09E11.5                    |
| -0.138002278542485                  |    |   | AGIWUR16338;AGIWUR30786             |          |                |           |                             |
| N2                                  | CT | I | 12359942                            | 12363416 | WBGene00011653 | oac-43    | T09E11.4                    |
| -0.0730604117766873                 |    |   | AGIWUR1706                          |          |                |           |                             |

|                      |    |   |                                    |          |                |           |                             |
|----------------------|----|---|------------------------------------|----------|----------------|-----------|-----------------------------|
| N2                   | CT | I | 12364718                           | 12365948 | WBGene00045103 | T09E11.12 | T09E11.12                   |
| -0.00441073821122862 |    |   | AGIWUR13986;AGIWUR27610            |          |                |           |                             |
| N2                   | CT | I | 12366335                           | 12368619 | WBGene00011655 | T09E11.6  | T09E11.6                    |
| -0.00186377807648874 |    |   | AGIWUR2283;AGIWUR21346;AGIWUR43303 |          |                |           |                             |
| N2                   | CT | I | 12374205                           | 12376649 | WBGene00011779 | bgnt-1.7  | T15D6.4                     |
| 0.144593186544019    |    |   | AGIWUR15806;AGIWUR17941            |          |                |           |                             |
| N2                   | CT | I | 12376904                           | 12378674 | WBGene00001642 | gly-17    | T15D6.3 0.307911634870059   |
| AGIWUR4623           |    |   |                                    |          |                |           |                             |
| N2                   | CT | I | 12379335                           | 12381032 | WBGene00001641 | gly-16    | T15D6.2 -0.0302005014376308 |
| AGIWUR19223          |    |   |                                    |          |                |           |                             |
| N2                   | CT | I | 12381808                           | 12383259 | WBGene00011780 | T15D6.5   | T15D6.5 0.0376796625053917  |
| AGIWUR15742          |    |   |                                    |          |                |           |                             |
| N2                   | CT | I | 12384277                           | 12385731 | WBGene00003667 | nhr-77    | T15D6.6 0.271444782229988   |
| AGIWUR37750          |    |   |                                    |          |                |           |                             |
| N2                   | CT | I | 12385766                           | 12388791 | WBGene00011781 | glct-3    | T15D6.7 -0.0270155056439236 |
| AGIWUR2441           |    |   |                                    |          |                |           |                             |
| N2                   | CT | I | 12392009                           | 12393585 | WBGene00011783 | T15D6.9   | T15D6.9 0.243681387098576   |
| AGIWUR21864          |    |   |                                    |          |                |           |                             |
| N2                   | CT | I | 12394120                           | 12396322 | WBGene00011784 | T15D6.10  | T15D6.10                    |
| 0.227568457543325    |    |   | AGIWUR795                          |          |                |           |                             |
| N2                   | CT | I | 12396644                           | 12398267 | WBGene00011785 | T15D6.11  | T15D6.11                    |
| -0.116130175031376   |    |   | AGIWUR40226                        |          |                |           |                             |
| N2                   | CT | I | 12399323                           | 12401206 | WBGene00011786 | T15D6.12  | T15D6.12                    |
| -0.14539048476587    |    |   | AGIWUR7270                         |          |                |           |                             |
| N2                   | CT | I | 12403110                           | 12404489 | WBGene00008470 | E03H4.2   | E03H4.2 0.124862796834726   |
| AGIWUR40136          |    |   |                                    |          |                |           |                             |
| N2                   | CT | I | 12405525                           | 12406946 | WBGene00008471 | E03H4.3   | E03H4.3 0.0764337886779014  |
| AGIWUR39310          |    |   |                                    |          |                |           |                             |
| N2                   | CT | I | 12407564                           | 12411435 | WBGene00008472 | E03H4.4   | E03H4.4 0.0804755138212272  |
| AGIWUR38190          |    |   |                                    |          |                |           |                             |
| N2                   | CT | I | 12413809                           | 12415745 | WBGene00008473 | E03H4.5   | E03H4.5 0.0106713158850162  |
| AGIWUR5938           |    |   |                                    |          |                |           |                             |
| N2                   | CT | I | 12417386                           | 12418800 | WBGene00008474 | nhr-174   | E03H4.6 0.122081681603356   |
| AGIWUR19291          |    |   |                                    |          |                |           |                             |
| N2                   | CT | I | 12421239                           | 12424411 | WBGene00008475 | oac-13    | E03H4.7 0.190344291762791   |
| AGIWUR4799           |    |   |                                    |          |                |           |                             |
| N2                   | CT | I | 12424555                           | 12426850 | WBGene00008476 | E03H4.8   | E03H4.8 -0.315402950076033  |
| AGIWUR40478          |    |   |                                    |          |                |           |                             |
| N2                   | CT | I | 12427388                           | 12429094 | WBGene00014729 | E03H4.9   | E03H4.9 0.131318594456304   |



AGIWUR6347;AGIWUR40147

|                        |    |   |                                                             |          |                |          |          |                     |
|------------------------|----|---|-------------------------------------------------------------|----------|----------------|----------|----------|---------------------|
| N2                     | CT | I | 12430028                                                    | 12431500 | WBGene00008477 | clec-17  | E03H4.10 |                     |
| -0.287914467182864     |    |   | AGIWUR22801                                                 |          |                |          |          |                     |
| N2                     | CT | I | 12433061                                                    | 12434886 | WBGene00008478 | E03H4.11 | E03H4.11 |                     |
| 0.114651653822436      |    |   | AGIWUR5267                                                  |          |                |          |          |                     |
| N2                     | CT | I | 12435726                                                    | 12437285 | WBGene00008479 | glct-2   | E03H4.12 |                     |
| 0.222651421014707      |    |   | AGIWUR34058                                                 |          |                |          |          |                     |
| N2                     | CT | I | 12439936                                                    | 12441253 | WBGene00003679 | nhr-89   | E03H4.13 |                     |
| 0.0296276579779606     |    |   | AGIWUR39890                                                 |          |                |          |          |                     |
| N2                     | CT | I | 12442299                                                    | 12443728 | WBGene00008289 | nhr-169  | C54C8.1  | -0.176406957176219  |
| AGIWUR43082            |    |   |                                                             |          |                |          |          |                     |
| N2                     | CT | I | 12444587                                                    | 12446502 | WBGene00008290 | bgnt-1.8 | C54C8.2  |                     |
| 0.154004550471359      |    |   | AGIWUR19147                                                 |          |                |          |          |                     |
| N2                     | CT | I | 12447167                                                    | 12448421 | WBGene00008291 | C54C8.3  | C54C8.3  | 0.0807839005630724  |
| AGIWUR7375             |    |   |                                                             |          |                |          |          |                     |
| N2                     | CT | I | 12449977                                                    | 12452027 | WBGene00008292 | C54C8.4  | C54C8.4  | 0.00234880669899962 |
| AGIWUR35933            |    |   |                                                             |          |                |          |          |                     |
| N2                     | CT | I | 12453389                                                    | 12454764 | WBGene00008293 | glct-5   | C54C8.5  | 0.251690814862697   |
| AGIWUR25504            |    |   |                                                             |          |                |          |          |                     |
| N2                     | CT | I | 12454853                                                    | 12455826 | WBGene00003098 | lys-9    | C54C8.6  | -0.120840253848489  |
| AGIWUR2072             |    |   |                                                             |          |                |          |          |                     |
| N2                     | CT | I | 12456918                                                    | 12457209 | WBGene00044242 | C54C8.12 | C54C8.12 |                     |
| 0.103867198157493      |    |   | AGIWUR19622;AGIWUR21351;AGIWUR24934;AGIWUR29563;AGIWUR35527 |          |                |          |          |                     |
| N2                     | CT | I | 12458028                                                    | 12458996 | WBGene00014714 | C54C8.8  | C54C8.8  | 0.0821024247270428  |
| AGIWUR2522             |    |   |                                                             |          |                |          |          |                     |
| N2                     | CT | I | 12459499                                                    | 12460903 | WBGene00008294 | clec-11  | C54C8.7  | 0.127690575336746   |
| AGIWUR6618;AGIWUR36802 |    |   |                                                             |          |                |          |          |                     |
| N2                     | CT | I | 12461645                                                    | 12461925 | WBGene00008295 | nlp-39   | C54C8.9  | 0.229235422746624   |
| AGIWUR2285             |    |   |                                                             |          |                |          |          |                     |
| N2                     | CT | I | 12462176                                                    | 12465831 | WBGene00001640 | gly-15   | C54C8.11 |                     |
| 0.0732963089795096     |    |   | AGIWUR4226;AGIWUR19199;AGIWUR41172                          |          |                |          |          |                     |
| N2                     | CT | I | 12470620                                                    | 12473404 | WBGene00012102 | T27F6.1  | T27F6.1  | 0.139539233670158   |
| AGIWUR6133             |    |   |                                                             |          |                |          |          |                     |
| N2                     | CT | I | 12474620                                                    | 12475934 | WBGene00077508 | T27F6.10 | T27F6.10 |                     |
| -0.166441423740817     |    |   | AGIWUR40057                                                 |          |                |          |          |                     |
| N2                     | CT | I | 12476685                                                    | 12478588 | WBGene00012103 | clec-12  | T27F6.2  | -0.471711475025243  |
| AGIWUR32740            |    |   |                                                             |          |                |          |          |                     |
| N2                     | CT | I | 12483809                                                    | 12486235 | WBGene00012104 | sygl-1   | T27F6.4  | 0.478864826747381   |
| AGIWUR43852            |    |   |                                                             |          |                |          |          |                     |

|                                                                                                                                                         |    |   |          |          |                |          |          |                     |
|---------------------------------------------------------------------------------------------------------------------------------------------------------|----|---|----------|----------|----------------|----------|----------|---------------------|
| N2                                                                                                                                                      | CT | I | 12486872 | 12490931 | WBGene00004190 | pars-2   | T27F6.5  | -0.29119309983777   |
| AGIWUR1856;AGIWUR2356;AGIWUR8002;AGIWUR8434;AGIWUR11790;AGIWUR11802;AGIWUR15588;AGIWUR16087;AGIWUR28139;AGIWUR29090;AGIWUR41244;AGIWUR43781;AGIWUR45063 |    |   |          |          |                |          |          |                     |
| N2                                                                                                                                                      | CT | I | 12490976 | 12494530 | WBGene00012105 | T27F6.6  | T27F6.6  | -0.273715277753949  |
| AGIWUR3497                                                                                                                                              |    |   |          |          |                |          |          |                     |
| N2                                                                                                                                                      | CT | I | 12494826 | 12497354 | WBGene00012106 | T27F6.7  | T27F6.7  | 0.329648954927531   |
| AGIWUR36447                                                                                                                                             |    |   |          |          |                |          |          |                     |
| N2                                                                                                                                                      | CT | I | 12497467 | 12505010 | WBGene00010768 | K11D2.1  | K11D2.1  | -0.0611024514565566 |
| AGIWUR17267;AGIWUR40837                                                                                                                                 |    |   |          |          |                |          |          |                     |
| N2                                                                                                                                                      | CT | I | 12505028 | 12508064 | WBGene00010769 | asah-1   | K11D2.2  | 0.0271573222959987  |
| AGIWUR37730                                                                                                                                             |    |   |          |          |                |          |          |                     |
| N2                                                                                                                                                      | CT | I | 12508299 | 12513419 | WBGene00006829 | unc-101  | K11D2.3  | -0.178053565927375  |
| AGIWUR417;AGIWUR2271;AGIWUR7234;AGIWUR18404;AGIWUR20120;AGIWUR22240;AGIWUR26389;AGIWUR38381;AGIWUR40794                                                 |    |   |          |          |                |          |          |                     |
| N2                                                                                                                                                      | CT | I | 12513516 | 12518694 | WBGene00010771 | K11D2.5  | K11D2.5  | -0.193135166481989  |
| AGIWUR11668                                                                                                                                             |    |   |          |          |                |          |          |                     |
| N2                                                                                                                                                      | CT | I | 12518787 | 12527906 | WBGene00010770 | K11D2.4  | K11D2.4  | 0.0872353174915146  |
| AGIWUR1842                                                                                                                                              |    |   |          |          |                |          |          |                     |
| N2                                                                                                                                                      | CT | I | 12528312 | 12532182 | WBGene00004181 | pri-2    | W02D9.1  | -0.0132117864571306 |
| AGIWUR3305                                                                                                                                              |    |   |          |          |                |          |          |                     |
| N2                                                                                                                                                      | CT | I | 12532669 | 12534400 | WBGene00012208 | W02D9.2  | W02D9.2  | -0.0917327489204141 |
| AGIWUR32177                                                                                                                                             |    |   |          |          |                |          |          |                     |
| N2                                                                                                                                                      | CT | I | 12535312 | 12537671 | WBGene00012209 | hmg-20   | W02D9.3  | 0.158425428817221   |
| AGIWUR2684;AGIWUR36464                                                                                                                                  |    |   |          |          |                |          |          |                     |
| N2                                                                                                                                                      | CT | I | 12551537 | 12552375 | WBGene00012216 | W02D9.10 | W02D9.10 |                     |
| 0.173277068245305 AGIWUR8060                                                                                                                            |    |   |          |          |                |          |          |                     |
| N2                                                                                                                                                      | CT | I | 12557164 | 12557563 | WBGene00012215 | W02D9.9  | W02D9.9  | 0.119730234942747   |
| AGIWUR19044                                                                                                                                             |    |   |          |          |                |          |          |                     |
| N2                                                                                                                                                      | CT | I | 12558547 | 12558944 | WBGene00012214 | W02D9.8  | W02D9.8  | 0.111701699560403   |
| AGIWUR38870                                                                                                                                             |    |   |          |          |                |          |          |                     |
| N2                                                                                                                                                      | CT | I | 12559245 | 12559674 | WBGene00012213 | W02D9.7  | W02D9.7  | -0.0178260802567074 |
| AGIWUR19286                                                                                                                                             |    |   |          |          |                |          |          |                     |
| N2                                                                                                                                                      | CT | I | 12560292 | 12560714 | WBGene00012212 | W02D9.6  | W02D9.6  | -0.0896327606480938 |
| AGIWUR5048                                                                                                                                              |    |   |          |          |                |          |          |                     |
| N2                                                                                                                                                      | CT | I | 12561040 | 12561560 | WBGene00012211 | ssp-37   | W02D9.5  | 0.152918599082255   |
| AGIWUR14307                                                                                                                                             |    |   |          |          |                |          |          |                     |
| N2                                                                                                                                                      | CT | I | 12562756 | 12564210 | WBGene00045474 | C49G9.2  | C49G9.2  | -0.144930127743347  |
| AGIWUR20355;AGIWUR23937;AGIWUR31109;AGIWUR35803;AGIWUR35835                                                                                             |    |   |          |          |                |          |          |                     |
| N2                                                                                                                                                      | CT | I | 12564356 | 12565893 | WBGene00008216 | mec-19   | C49G9.1  | -0.269234744459531  |
| AGIWUR41066                                                                                                                                             |    |   |          |          |                |          |          |                     |

|                                                                                                                                                                                                                      |    |   |          |          |                |          |          |                     |
|----------------------------------------------------------------------------------------------------------------------------------------------------------------------------------------------------------------------|----|---|----------|----------|----------------|----------|----------|---------------------|
| N2                                                                                                                                                                                                                   | CT | I | 12565804 | 12572801 | WBGene00001008 | d1k-1    | F33E2.2  | -0.0239276290501422 |
| AGIWUR40022;AGIWUR42874                                                                                                                                                                                              |    |   |          |          |                |          |          |                     |
| N2                                                                                                                                                                                                                   | CT | I | 12578108 | 12579205 | WBGene00077769 | F33E2.10 | F33E2.10 |                     |
| 0.0480324396053904 AGIWUR5546                                                                                                                                                                                        |    |   |          |          |                |          |          |                     |
| N2                                                                                                                                                                                                                   | CT | I | 12582074 | 12584711 | WBGene00009360 | F33E2.4  | F33E2.4  | 0.246171692582251   |
| AGIWUR43140                                                                                                                                                                                                          |    |   |          |          |                |          |          |                     |
| N2                                                                                                                                                                                                                   | CT | I | 12583786 | 12585119 | WBGene00045254 | F33E2.8  | F33E2.8  | 0.105941395730655   |
| AGIWUR28003;AGIWUR30710                                                                                                                                                                                              |    |   |          |          |                |          |          |                     |
| N2                                                                                                                                                                                                                   | CT | I | 12585382 | 12585971 | WBGene00009363 | F33E2.7  | F33E2.7  | 0.184150471989684   |
| AGIWUR16591                                                                                                                                                                                                          |    |   |          |          |                |          |          |                     |
| N2                                                                                                                                                                                                                   | CT | I | 12587242 | 12591091 | WBGene00009362 | F33E2.6  | F33E2.6  | -0.0807060613070334 |
| AGIWUR22599                                                                                                                                                                                                          |    |   |          |          |                |          |          |                     |
| N2                                                                                                                                                                                                                   | CT | I | 12591116 | 12597442 | WBGene00009361 | F33E2.5  | F33E2.5  | -0.0715657795870897 |
| AGIWUR2198;AGIWUR32087;AGIWUR32401                                                                                                                                                                                   |    |   |          |          |                |          |          |                     |
| N2                                                                                                                                                                                                                   | CT | I | 12603772 | 12606248 | WBGene00011581 | T07D10.1 | T07D10.1 |                     |
| 0.116134028135055 AGIWUR33134                                                                                                                                                                                        |    |   |          |          |                |          |          |                     |
| N2                                                                                                                                                                                                                   | CT | I | 12621171 | 12623084 | WBGene00011582 | ntr-1    | T07D10.2 |                     |
| 0.166523833819135 AGIWUR20900                                                                                                                                                                                        |    |   |          |          |                |          |          |                     |
| N2                                                                                                                                                                                                                   | CT | I | 12624235 | 12625238 | WBGene00011586 | flp-33   | T07D10.6 |                     |
| 0.075007442473499 AGIWUR26500                                                                                                                                                                                        |    |   |          |          |                |          |          |                     |
| N2                                                                                                                                                                                                                   | CT | I | 12626742 | 12628997 | WBGene00011583 | T07D10.3 | T07D10.3 |                     |
| 0.0450091797497052 AGIWUR36305                                                                                                                                                                                       |    |   |          |          |                |          |          |                     |
| N2                                                                                                                                                                                                                   | CT | I | 12640720 | 12641501 | WBGene00195255 | H16D19.7 | H16D19.7 |                     |
| -0.138245001409503 AGIWUR43884                                                                                                                                                                                       |    |   |          |          |                |          |          |                     |
| N2                                                                                                                                                                                                                   | CT | I | 12647376 | 12652087 | WBGene00010420 | mcrs-1   | H28016.2 |                     |
| -0.0102057125404365 AGIWUR40821                                                                                                                                                                                      |    |   |          |          |                |          |          |                     |
| N2                                                                                                                                                                                                                   | CT | I | 12652277 | 12654646 | WBGene00010419 | H28016.1 | H28016.1 |                     |
| 0.149124000150604                                                                                                                                                                                                    |    |   |          |          |                |          |          |                     |
| AGIWUR1002;AGIWUR6017;AGIWUR9225;AGIWUR15093;AGIWUR18400;AGIWUR19137;AGIWUR20909;AGIWUR21162;AGIWUR22474;AGIWUR25477;AGIWUR30636;AGIWUR30684;AGIWUR33565;AGIWUR37320;AGIWUR37771;AGIWUR38251;AGIWUR40047;AGIWUR42542 |    |   |          |          |                |          |          |                     |
| N2                                                                                                                                                                                                                   | CT | I | 12655449 | 12655970 | WBGene00012040 | T26E3.7  | T26E3.7  | -0.0652778342371851 |
| AGIWUR36996                                                                                                                                                                                                          |    |   |          |          |                |          |          |                     |
| N2                                                                                                                                                                                                                   | CT | I | 12657762 | 12659446 | WBGene00012041 | T26E3.8  | T26E3.8  | -0.0240037737194818 |
| AGIWUR37661                                                                                                                                                                                                          |    |   |          |          |                |          |          |                     |
| N2                                                                                                                                                                                                                   | CT | I | 12659729 | 12660647 | WBGene00044905 | T26E3.11 | T26E3.11 |                     |
| 0.423436711341834 AGIWUR41658                                                                                                                                                                                        |    |   |          |          |                |          |          |                     |
| N2                                                                                                                                                                                                                   | CT | I | 12661254 | 12661729 | WBGene00012039 | T26E3.6  | T26E3.6  | -0.18536989505446   |
| AGIWUR36512                                                                                                                                                                                                          |    |   |          |          |                |          |          |                     |
| N2                                                                                                                                                                                                                   | CT | I | 12662938 | 12663833 | WBGene00012038 | T26E3.5  | T26E3.5  | 0.00611866404888151 |

|                                                                                                       |    |   |          |          |                |           |          |                     |  |
|-------------------------------------------------------------------------------------------------------|----|---|----------|----------|----------------|-----------|----------|---------------------|--|
| AGIWUR1201                                                                                            |    |   |          |          |                |           |          |                     |  |
| N2                                                                                                    | CT | I | 12665067 | 12668893 | WBGene00012037 | T26E3.4   | T26E3.4  | -0.152963781844475  |  |
| AGIWUR2560;AGIWUR11531;AGIWUR28485;AGIWUR30882;AGIWUR32370;AGIWUR41162                                |    |   |          |          |                |           |          |                     |  |
| N2                                                                                                    | CT | I | 12669380 | 12674447 | WBGene00003921 | par-6     | T26E3.3  | 0.254861596278634   |  |
| AGIWUR4153;AGIWUR21135;AGIWUR24877                                                                    |    |   |          |          |                |           |          |                     |  |
| N2                                                                                                    | CT | I | 12679207 | 12681816 | WBGene00003578 | ndx-1     | T26E3.2  | 0.0269990198037462  |  |
| AGIWUR36323                                                                                           |    |   |          |          |                |           |          |                     |  |
| N2                                                                                                    | CT | I | 12681883 | 12682681 | WBGene00012042 | T26E3.10  |          | T26E3.10            |  |
| -0.0565214005039305 AGIWUR2023                                                                        |    |   |          |          |                |           |          |                     |  |
| N2                                                                                                    | CT | I | 12683238 | 12684359 | WBGene00012036 | cllec-103 |          | T26E3.1             |  |
| 0.000577341108520812 AGIWUR36031                                                                      |    |   |          |          |                |           |          |                     |  |
| N2                                                                                                    | CT | I | 12686116 | 12688206 | WBGene00005051 | sra-25    | T26E3.9  | -1.16361646354551   |  |
| AGIWUR23081                                                                                           |    |   |          |          |                |           |          |                     |  |
| N2                                                                                                    | CT | I | 12688727 | 12690572 | WBGene00005043 | sra-17    | F28C12.1 |                     |  |
| 0.0703507826655185 AGIWUR103                                                                          |    |   |          |          |                |           |          |                     |  |
| N2                                                                                                    | CT | I | 12692169 | 12693724 | WBGene00005044 | sra-18    | F28C12.2 |                     |  |
| -0.0704334701627065 AGIWUR40855                                                                       |    |   |          |          |                |           |          |                     |  |
| N2                                                                                                    | CT | I | 12694406 | 12695934 | WBGene00005045 | sra-19    | F28C12.3 |                     |  |
| -0.0505667617977936 AGIWUR2298;AGIWUR5976;AGIWUR10097;AGIWUR12389;AGIWUR26934;AGIWUR30505;AGIWUR39618 |    |   |          |          |                |           |          |                     |  |
| N2                                                                                                    | CT | I | 12696558 | 12698214 | WBGene00005046 | sra-20    | F28C12.4 |                     |  |
| -0.370011733499549 AGIWUR24117                                                                        |    |   |          |          |                |           |          |                     |  |
| N2                                                                                                    | CT | I | 12698904 | 12699200 | WBGene00077555 | F28C12.8  |          | F28C12.8            |  |
| -0.154726988633274 AGIWUR4271;AGIWUR9750;AGIWUR13760;AGIWUR22255;AGIWUR25005                          |    |   |          |          |                |           |          |                     |  |
| N2                                                                                                    | CT | I | 12699430 | 12701093 | WBGene00005047 | sra-21    | F28C12.5 |                     |  |
| 0.0178082443207979 AGIWUR44687                                                                        |    |   |          |          |                |           |          |                     |  |
| N2                                                                                                    | CT | I | 12701439 | 12702886 | WBGene00005048 | sra-22    | F28C12.7 |                     |  |
| 0.169448724012717 AGIWUR34243                                                                         |    |   |          |          |                |           |          |                     |  |
| N2                                                                                                    | CT | I | 12703435 | 12704727 | WBGene00005049 | sra-23    | T06G6.1  | 0.0797106359163111  |  |
| AGIWUR6499                                                                                            |    |   |          |          |                |           |          |                     |  |
| N2                                                                                                    | CT | I | 12705097 | 12706983 | WBGene00005050 | sra-24    | T06G6.2  | 0.170718648179337   |  |
| AGIWUR44570                                                                                           |    |   |          |          |                |           |          |                     |  |
| N2                                                                                                    | CT | I | 12707513 | 12708691 | WBGene00011550 | T06G6.11  |          | T06G6.11            |  |
| -0.158503501674023 AGIWUR6450                                                                         |    |   |          |          |                |           |          |                     |  |
| N2                                                                                                    | CT | I | 12708863 | 12711596 | WBGene00011545 | T06G6.3   | T06G6.3  | -0.0369026120622262 |  |
| AGIWUR36658                                                                                           |    |   |          |          |                |           |          |                     |  |
| N2                                                                                                    | CT | I | 12712158 | 12714722 | WBGene00011546 | T06G6.4   | T06G6.4  | -0.0459339901146265 |  |
| AGIWUR7160                                                                                            |    |   |          |          |                |           |          |                     |  |
| N2                                                                                                    | CT | I | 12715648 | 12716583 | WBGene00011547 | T06G6.5   | T06G6.5  |                     |  |
| 0.000129653720016165 AGIWUR30650                                                                      |    |   |          |          |                |           |          |                     |  |

|                                                                      |    |   |          |          |                |            |           |                     |
|----------------------------------------------------------------------|----|---|----------|----------|----------------|------------|-----------|---------------------|
| N2                                                                   | CT | I | 12718296 | 12719795 | WBGene00011548 | T06G6.6    | T06G6.6   | -0.949027299174071  |
| AGIWUR17689                                                          |    |   |          |          |                |            |           |                     |
| N2                                                                   | CT | I | 12720205 | 12722036 | WBGene00005835 | srw-88     | T06G6.7   | 0.223235868428107   |
| AGIWUR1507                                                           |    |   |          |          |                |            |           |                     |
| N2                                                                   | CT | I | 12722045 | 12722883 | WBGene00011551 | T06G6.12   |           | T06G6.12            |
| 0.0777355336261323 AGIWUR32980                                       |    |   |          |          |                |            |           |                     |
| N2                                                                   | CT | I | 12724751 | 12726206 | WBGene00011549 | T06G6.8    | T06G6.8   | 0.119311987392012   |
| AGIWUR34628                                                          |    |   |          |          |                |            |           |                     |
| N2                                                                   | CT | I | 12728137 | 12729870 | WBGene00006889 | pfd-3      | T06G6.9   | 0.0199401395152776  |
| AGIWUR1885;AGIWUR2341;AGIWUR7063;AGIWUR17219;AGIWUR19489;AGIWUR31484 |    |   |          |          |                |            |           |                     |
| N2                                                                   | CT | I | 12730011 | 12732753 | WBGene00012192 | W02A11.1   |           | W02A11.1            |
| -0.0656977552307954 AGIWUR8401                                       |    |   |          |          |                |            |           |                     |
| N2                                                                   | CT | I | 12733287 | 12741275 | WBGene00012193 | vps-25     | W02A11.2  |                     |
| -0.154936085207307 AGIWUR17203                                       |    |   |          |          |                |            |           |                     |
| N2                                                                   | CT | I | 12741588 | 12749318 | WBGene00006700 | uba-2      | W02A11.4  |                     |
| 0.220635857116452 AGIWUR31511                                        |    |   |          |          |                |            |           |                     |
| N2                                                                   | CT | I | 12749890 | 12752087 | WBGene00012195 | bath-34    | W02A11.5  |                     |
| -0.0423266351256144 AGIWUR9884;AGIWUR28264                           |    |   |          |          |                |            |           |                     |
| N2                                                                   | CT | I | 12758433 | 12759572 | WBGene00012196 | bath-35    | W02A11.8  |                     |
| -0.107227103666972 AGIWUR37753                                       |    |   |          |          |                |            |           |                     |
| N2                                                                   | CT | I | 12759545 | 12764960 | WBGene00000138 | amx-2      | B0019.1   | -0.0407569053502161 |
| AGIWUR19037                                                          |    |   |          |          |                |            |           |                     |
| N2                                                                   | CT | I | 12773659 | 12782282 | WBGene00007094 | B0019.2    | B0019.2   | 0.00192843189044423 |
| AGIWUR9959;AGIWUR22906                                               |    |   |          |          |                |            |           |                     |
| N2                                                                   | CT | I | 12783358 | 12784978 | WBGene00023459 | Y18D10A.26 |           | Y18D10A.26          |
| -0.162340058287164 AGIWUR24786;AGIWUR33759                           |    |   |          |          |                |            |           |                     |
| N2                                                                   | CT | I | 12787944 | 12806581 | WBGene00012474 | attf-6     | Y18D10A.1 |                     |
| 0.00251470130704945 AGIWUR42137                                      |    |   |          |          |                |            |           |                     |
| N2                                                                   | CT | I | 12807586 | 12809682 | WBGene00012475 | Y18D10A.2  |           | Y18D10A.2           |
| -0.195715235112603 AGIWUR13443                                       |    |   |          |          |                |            |           |                     |
| N2                                                                   | CT | I | 12809999 | 12815641 | WBGene00012476 | Y18D10A.3  |           | Y18D10A.3           |
| 0.189188863823638 AGIWUR36104                                        |    |   |          |          |                |            |           |                     |
| N2                                                                   | CT | I | 12815904 | 12816428 | WBGene00012477 | Y18D10A.4  |           | Y18D10A.4           |
| -0.069153764144799 AGIWUR2617                                        |    |   |          |          |                |            |           |                     |
| N2                                                                   | CT | I | 12819216 | 12825562 | WBGene00001746 | gsk-3      | Y18D10A.5 |                     |
| -0.0584281170823182 AGIWUR44507                                      |    |   |          |          |                |            |           |                     |
| N2                                                                   | CT | I | 12825664 | 12834143 | WBGene00003735 | nhx-8      | Y18D10A.6 |                     |
| 0.249223840254079 AGIWUR10024;AGIWUR18724;AGIWUR35964                |    |   |          |          |                |            |           |                     |
| N2                                                                   | CT | I | 12834665 | 12843233 | WBGene00004231 | ptr-17     | Y18D10A.7 |                     |

|                     |                                                                        |
|---------------------|------------------------------------------------------------------------|
| 0.0774771638001948  | AGIWUR2500;AGIWUR17127;AGIWUR35830;AGIWUR38073                         |
| N2 CT I             | 12844269 12853105 WBGene00012478 mxt-1 Y18D10A.8                       |
| 0.0546152152517827  | AGIWUR4070                                                             |
| N2 CT I             | 12853088 12858272 WBGene00012479 Y18D10A.9 Y18D10A.9                   |
| -0.173723980894685  | AGIWUR18598                                                            |
| N2 CT I             | 12859499 12861197 WBGene00012480 clec-104 Y18D10A.10                   |
| -0.288936099101548  | AGIWUR26490                                                            |
| N2 CT I             | 12861951 12863544 WBGene00012481 Y18D10A.11 Y18D10A.11                 |
| 0.192505133254127   | AGIWUR18588                                                            |
| N2 CT I             | 12864230 12865568 WBGene00012488 clec-105 Y18D10A.24                   |
| -0.161853522892892  | AGIWUR22133                                                            |
| N2 CT I             | 12866120 12866896 WBGene00012482 clec-106 Y18D10A.12                   |
| -0.153426039767592  | AGIWUR40586                                                            |
| N2 CT I             | 12866991 12869556 WBGene00012487 Y18D10A.23 Y18D10A.23                 |
| 0.156730789107195   | AGIWUR21563                                                            |
| N2 CT I             | 12878595 12902806 WBGene00003905 pad-1 Y18D10A.13                      |
| 0.164829397527448   | AGIWUR16264                                                            |
| N2 CT I             | 12903059 12904072 WBGene00012483 Y18D10A.16 Y18D10A.16                 |
| -0.109385692087592  | AGIWUR10347;AGIWUR19850;AGIWUR33702                                    |
| N2 CT I             | 12904470 12906212 WBGene00012484 car-1 Y18D10A.17                      |
| 0.0536621466960305  | AGIWUR9634;AGIWUR11573;AGIWUR13065;AGIWUR30240;AGIWUR35163;AGIWUR41272 |
| N2 CT I             | 12906462 12907754 WBGene00012485 fbxa-121 Y18D10A.18                   |
| -0.111487937759685  | AGIWUR33138                                                            |
| N2 CT I             | 12908304 12909436 WBGene00077556 Y18D10A.27 Y18D10A.27                 |
| -0.120938645329494  | AGIWUR5790;AGIWUR7354;AGIWUR9630                                       |
| N2 CT I             | 12916441 12918108 WBGene00001433 fkb-8 Y18D10A.25                      |
| -0.121137192048813  | AGIWUR3419;AGIWUR11778                                                 |
| N2 CT I             | 12918722 12919278 WBGene00001427 fkb-2 Y18D10A.19                      |
| -0.0857263817759737 | AGIWUR1517;AGIWUR18093;AGIWUR43780                                     |
| N2 CT I             | 12922004 12923548 WBGene00003989 pfn-1 Y18D10A.20                      |
| -0.0112966352486543 | AGIWUR749;AGIWUR10648;AGIWUR13965;AGIWUR14413;AGIWUR19323;AGIWUR22987  |
| N2 CT I             | 12929372 12931069 WBGene00012486 Y18D10A.21 Y18D10A.21                 |
| 0.102496985173754   | AGIWUR15932                                                            |
| N2 CT I             | 12932037 12933751 WBGene00014864 Y18D10A.22 Y18D10A.22                 |
| 0.0617639045676892  | AGIWUR28353                                                            |
| N2 CT I             | 12934767 12937252 WBGene00006484 tag-138 F08A8.6 -0.15372429216461     |
| AGIWUR2434          |                                                                        |
| N2 CT I             | 12938555 12942224 WBGene00008564 acox-1.1 F08A8.1                      |
| 0.0108966262264012  | AGIWUR34581                                                            |

|                                                                       |    |   |                        |          |                |          |                             |
|-----------------------------------------------------------------------|----|---|------------------------|----------|----------------|----------|-----------------------------|
| N2                                                                    | CT | I | 12942280               | 12946562 | WBGene00008565 | acox-1.2 | F08A8.2                     |
| 0.205491170657702                                                     |    |   | AGIWUR825              |          |                |          |                             |
| N2                                                                    | CT | I | 12951025               | 12954015 | WBGene00008567 | acox-1.4 | F08A8.4                     |
| -0.0397688703237944                                                   |    |   | AGIWUR1174;AGIWUR16821 |          |                |          |                             |
| N2                                                                    | CT | I | 12953969               | 12955322 | WBGene00045468 | F08A8.8  | F08A8.8 0.259685841170511   |
| AGIWUR441                                                             |    |   |                        |          |                |          |                             |
| N2                                                                    | CT | I | 12955328               | 12957902 | WBGene00008568 | F08A8.5  | F08A8.5 0.00756878890840973 |
| AGIWUR26122                                                           |    |   |                        |          |                |          |                             |
| N2                                                                    | CT | I | 12958639               | 12959955 | WBGene00008569 | fbxa-101 | F08A8.7                     |
| 0.00121106911434232                                                   |    |   | AGIWUR11695            |          |                |          |                             |
| N2                                                                    | CT | I | 12960313               | 12961606 | WBGene00008130 | fbxa-140 | C47B2.1                     |
| -0.234363184290867                                                    |    |   | AGIWUR4596             |          |                |          |                             |
| N2                                                                    | CT | I | 12962042               | 12964579 | WBGene00008131 | C47B2.2  | C47B2.2 -0.087990705215601  |
| AGIWUR30169                                                           |    |   |                        |          |                |          |                             |
| N2                                                                    | CT | I | 12964674               | 12966876 | WBGene00006529 | tba-2    | C47B2.3 -0.0165952039786581 |
| AGIWUR4560;AGIWUR7861;AGIWUR17254;AGIWUR33286                         |    |   |                        |          |                |          |                             |
| N2                                                                    | CT | I | 12967216               | 12968280 | WBGene00003948 | pbs-2    | C47B2.4 0.0250478564049033  |
| AGIWUR41108                                                           |    |   |                        |          |                |          |                             |
| N2                                                                    | CT | I | 12968921               | 12970238 | WBGene00001234 | eif-6    | C47B2.5 -0.0177495852289482 |
| AGIWUR1942;AGIWUR2030;AGIWUR4142;AGIWUR21916;AGIWUR24490              |    |   |                        |          |                |          |                             |
| N2                                                                    | CT | I | 12971120               | 12972347 | WBGene00004196 | prx-11   | C47B2.8 -0.181802786173016  |
| AGIWUR1599                                                            |    |   |                        |          |                |          |                             |
| N2                                                                    | CT | I | 12975183               | 12978749 | WBGene00008132 | gale-1   | C47B2.6 0.0467612723371378  |
| AGIWUR10738;AGIWUR34894                                               |    |   |                        |          |                |          |                             |
| N2                                                                    | CT | I | 12978839               | 12982452 | WBGene00008133 | efsc-1   | C47B2.7 0.038335917485707   |
| AGIWUR34915                                                           |    |   |                        |          |                |          |                             |
| N2                                                                    | CT | I | 12983004               | 12983974 | WBGene00008134 | C47B2.9  | C47B2.9 -0.160023282524564  |
| AGIWUR36090                                                           |    |   |                        |          |                |          |                             |
| N2                                                                    | CT | I | 12988223               | 12995475 | WBGene00003753 | nlp-15   | CC4.2 0.0505770899130287    |
| AGIWUR1711                                                            |    |   |                        |          |                |          |                             |
| N2                                                                    | CT | I | 12995803               | 13012859 | WBGene00004895 | smu-1    | CC4.3 -0.0721625258831242   |
| AGIWUR14067                                                           |    |   |                        |          |                |          |                             |
| N2                                                                    | CT | I | 13004437               | 13023625 | WBGene00004063 | pmr-1    | ZK256.1 -0.038681633714277  |
| AGIWUR12760;AGIWUR19470;AGIWUR21490;AGIWUR37538                       |    |   |                        |          |                |          |                             |
| N2                                                                    | CT | I | 13033483               | 13045555 | WBGene00012274 | W05B5.1  | W05B5.1 0.19068082407775    |
| AGIWUR130;AGIWUR13029;AGIWUR16053;AGIWUR21284;AGIWUR34592;AGIWUR42290 |    |   |                        |          |                |          |                             |
| N2                                                                    | CT | I | 13050445               | 13057435 | WBGene00012275 | npr-14   | W05B5.2 -0.275843457651305  |
| AGIWUR22861                                                           |    |   |                        |          |                |          |                             |
| N2                                                                    | CT | I | 13066924               | 13069038 | WBGene00012500 | hpo-2    | Y26D4A.2                    |

|                                                            |                                                            |          |                |                  |                    |
|------------------------------------------------------------|------------------------------------------------------------|----------|----------------|------------------|--------------------|
| -0.42085419264638                                          | AGIWUR24458                                                |          |                |                  |                    |
| N2 CT I                                                    | 13069529                                                   | 13071190 | WBGene00012502 | clec-107         | Y26D4A.4           |
| -0.0356655675339574                                        | AGIWUR8324                                                 |          |                |                  |                    |
| N2 CT I                                                    | 13073837                                                   | 13075124 | WBGene00044706 | Y26D4A.15        | Y26D4A.15          |
| -0.138207689561931                                         | AGIWUR1641;AGIWUR27615                                     |          |                |                  |                    |
| N2 CT I                                                    | 13075122                                                   | 13075381 | WBGene00044710 | Y26D4A.16        | Y26D4A.16          |
| 0.0430598313993293                                         | AGIWUR73                                                   |          |                |                  |                    |
| N2 CT I                                                    | 13077994                                                   | 13078880 | WBGene00045235 | Y26D4A.18        | Y26D4A.18          |
| -0.921181474587272                                         | AGIWUR39678                                                |          |                |                  |                    |
| N2 CT I                                                    | 13079742                                                   | 13080633 | WBGene00045236 | Y26D4A.19        | Y26D4A.19          |
| -0.0652004211336337                                        | AGIWUR40017                                                |          |                |                  |                    |
| N2 CT I                                                    | 13081448                                                   | 13082166 | WBGene00012504 | clec-108         | Y26D4A.6           |
| -0.34459758124474                                          | AGIWUR7770                                                 |          |                |                  |                    |
| N2 CT I                                                    | 13082681                                                   | 13082966 | WBGene00012509 | Y26D4A.12        | Y26D4A.12          |
| 0.117685086606739                                          | AGIWUR41342                                                |          |                |                  |                    |
| N2 CT I                                                    | 13083321                                                   | 13085505 | WBGene00012505 | pals-13          | Y26D4A.8           |
| 0.0847481325962365                                         | AGIWUR17033                                                |          |                |                  |                    |
| N2 CT I                                                    | 13085106                                                   | 13103119 | WBGene00007655 | C17H1.2 C17H1.2  | 0.0849304205237331 |
| AGIWUR9507;AGIWUR23034;AGIWUR29977;AGIWUR37866;AGIWUR42970 |                                                            |          |                |                  |                    |
| N2 CT I                                                    | 13104253                                                   | 13106298 | WBGene00007656 | pals-2 C17H1.3   | 1.88426789902733   |
| AGIWUR5622;AGIWUR17946;AGIWUR35948                         |                                                            |          |                |                  |                    |
| N2 CT I                                                    | 13107140                                                   | 13107457 | WBGene00044711 | pals-10 C17H1.11 |                    |
| 1.46743008593196                                           | AGIWUR9138;AGIWUR27537;AGIWUR32329;AGIWUR37188;AGIWUR42291 |          |                |                  |                    |
| N2 CT I                                                    | 13107492                                                   | 13112443 | WBGene00007657 | pals-3 C17H1.4   | 1.52808675955476   |
| AGIWUR37391                                                |                                                            |          |                |                  |                    |
| N2 CT I                                                    | 13113487                                                   | 13116434 | WBGene00007658 | pals-4 C17H1.5   | 1.5509233139638    |
| AGIWUR37559                                                |                                                            |          |                |                  |                    |
| N2 CT I                                                    | 13117629                                                   | 13120324 | WBGene00007654 | C17H1.1 C17H1.1  | 0.378969875519225  |
| AGIWUR17604;AGIWUR25487;AGIWUR28593                        |                                                            |          |                |                  |                    |
| N2 CT I                                                    | 13121092                                                   | 13123513 | WBGene00007662 | pals-8 C17H1.9   | 1.47501000801392   |
| AGIWUR32197                                                |                                                            |          |                |                  |                    |
| N2 CT I                                                    | 13124081                                                   | 13126650 | WBGene00044708 | pals-11 C17H1.13 |                    |
| 1.71887650290255                                           | AGIWUR17715                                                |          |                |                  |                    |
| N2 CT I                                                    | 13127152                                                   | 13127876 | WBGene00044722 | C17H1.12         | C17H1.12           |
| 0.0312131922666992                                         | AGIWUR6757;AGIWUR7071;AGIWUR11735;AGIWUR13554              |          |                |                  |                    |
| N2 CT I                                                    | 13128470                                                   | 13130409 | WBGene00007661 | pals-7 C17H1.8   | 0.232186559049217  |
| AGIWUR41771                                                |                                                            |          |                |                  |                    |
| N2 CT I                                                    | 13130808                                                   | 13132464 | WBGene00007659 | pals-5 C17H1.6   | 0.582266654904865  |
| AGIWUR7049                                                 |                                                            |          |                |                  |                    |



|                                                            |    |   |                                                            |          |                |           |                            |
|------------------------------------------------------------|----|---|------------------------------------------------------------|----------|----------------|-----------|----------------------------|
| N2                                                         | CT | I | 13133638                                                   | 13136156 | WBGene00044237 | pals-9    | C17H1.10                   |
| 2.33378761428706                                           |    |   | AGIWUR18891                                                |          |                |           |                            |
| N2                                                         | CT | I | 13136467                                                   | 13138521 | WBGene00007660 | pals-6    | C17H1.7 2.36293086621487   |
| AGIWUR2479                                                 |    |   |                                                            |          |                |           |                            |
| N2                                                         | CT | I | 13139132                                                   | 13141789 | WBGene00009061 | pals-14   | F22G12.1                   |
| 3.74992932730364                                           |    |   | AGIWUR8641;AGIWUR17238                                     |          |                |           |                            |
| N2                                                         | CT | I | 13144912                                                   | 13146453 | WBGene00044712 | pals-15   | F22G12.8                   |
| -0.214643443395487                                         |    |   | AGIWUR2413;AGIWUR10665;AGIWUR28917                         |          |                |           |                            |
| N2                                                         | CT | I | 13152575                                                   | 13153706 | WBGene00009063 | F22G12.3  | F22G12.3                   |
| -0.0659572407804712                                        |    |   | AGIWUR38346                                                |          |                |           |                            |
| N2                                                         | CT | I | 13155239                                                   | 13161508 | WBGene00009064 | F22G12.4  | F22G12.4                   |
| 0.117183960535904                                          |    |   | AGIWUR15762;AGIWUR18080;AGIWUR18882                        |          |                |           |                            |
| N2                                                         | CT | I | 13162492                                                   | 13182725 | WBGene00009065 | F22G12.5  | F22G12.5                   |
| 0.149818122889091                                          |    |   | AGIWUR21603                                                |          |                |           |                            |
| N2                                                         | CT | I | 13184852                                                   | 13188234 | WBGene00008905 | F17B5.1   | F17B5.1 -0.255546860808886 |
| AGIWUR11554                                                |    |   |                                                            |          |                |           |                            |
| N2                                                         | CT | I | 13189792                                                   | 13190583 | WBGene00138716 | F17B5.10  | F17B5.10                   |
| 0.0599196384078473                                         |    |   | AGIWUR9777                                                 |          |                |           |                            |
| N2                                                         | CT | I | 13190578                                                   | 13191921 | WBGene00045458 | F17B5.8   | F17B5.8 0.0584031591053318 |
| AGIWUR1859;AGIWUR10263;AGIWUR21965;AGIWUR23242;AGIWUR29567 |    |   |                                                            |          |                |           |                            |
| N2                                                         | CT | I | 13197179                                                   | 13198374 | WBGene00008907 | clec-109  | F17B5.3                    |
| 0.100845965404904                                          |    |   | AGIWUR6963;AGIWUR18308;AGIWUR20621;AGIWUR21937;AGIWUR41207 |          |                |           |                            |
| N2                                                         | CT | I | 13199359                                                   | 13200980 | WBGene00008908 | F17B5.4   | F17B5.4 0.0520205248493371 |
| AGIWUR11419;AGIWUR39916                                    |    |   |                                                            |          |                |           |                            |
| N2                                                         | CT | I | 13201710                                                   | 13204293 | WBGene00044058 | F17B5.6   | F17B5.6 0.017440900203499  |
| AGIWUR5127                                                 |    |   |                                                            |          |                |           |                            |
| N2                                                         | CT | I | 13204497                                                   | 13205403 | WBGene00008909 | clec-110  | F17B5.5                    |
| -0.050468846814538                                         |    |   | AGIWUR4687;AGIWUR17223;AGIWUR17887;AGIWUR29019             |          |                |           |                            |
| N2                                                         | CT | I | 13205664                                                   | 13207759 | WBGene00014235 | ZK1225.1  | ZK1225.1                   |
| 0.05614333469115                                           |    |   | AGIWUR129                                                  |          |                |           |                            |
| N2                                                         | CT | I | 13208441                                                   | 13210462 | WBGene00014236 | ZK1225.2  | ZK1225.2                   |
| -0.108658456932789                                         |    |   | AGIWUR9579;AGIWUR13739;AGIWUR37030                         |          |                |           |                            |
| N2                                                         | CT | I | 13210585                                                   | 13211352 | WBGene00044713 | ZK1225.9  | ZK1225.9                   |
| 0.0663633264630636                                         |    |   | AGIWUR719;AGIWUR16159;AGIWUR31446                          |          |                |           |                            |
| N2                                                         | CT | I | 13211826                                                   | 13213806 | WBGene00044714 | ZK1225.10 | ZK1225.10                  |
| -0.198340015297665                                         |    |   | AGIWUR37508;AGIWUR38006;AGIWUR42906                        |          |                |           |                            |
| N2                                                         | CT | I | 13214095                                                   | 13216230 | WBGene00014238 | ZK1225.4  | ZK1225.4                   |
| 0.181783053016066                                          |    |   | AGIWUR23716                                                |          |                |           |                            |
| N2                                                         | CT | I | 13216605                                                   | 13218867 | WBGene00014239 | ZK1225.5  | ZK1225.5                   |

|                                                                                                           |                                                                        |          |                |                 |                     |
|-----------------------------------------------------------------------------------------------------------|------------------------------------------------------------------------|----------|----------------|-----------------|---------------------|
| 0.0396315004053296                                                                                        | AGIWUR1722                                                             |          |                |                 |                     |
| N2 CT I                                                                                                   | 13219056                                                               | 13219545 | WBGene00006048 | ssp-31          | ZK1225.6            |
| 0.14139279583405                                                                                          | AGIWUR4043;AGIWUR11256;AGIWUR18577;AGIWUR20890;AGIWUR21770;AGIWUR43896 |          |                |                 |                     |
| N2 CT I                                                                                                   | 13227995                                                               | 13229751 | WBGene00014196 | ZK1053.1        | ZK1053.1            |
| -0.26620165228225                                                                                         | AGIWUR8882                                                             |          |                |                 |                     |
| N2 CT I                                                                                                   | 13232121                                                               | 13234686 | WBGene00014197 | ZK1053.2        | ZK1053.2            |
| 0.160203320255093                                                                                         | AGIWUR12680                                                            |          |                |                 |                     |
| N2 CT I                                                                                                   | 13235367                                                               | 13236662 | WBGene00014200 | scrm-2          | ZK1053.5            |
| 0.23770042145883                                                                                          | AGIWUR23919                                                            |          |                |                 |                     |
| N2 CT I                                                                                                   | 13237054                                                               | 13238302 | WBGene00044786 | ZK1053.7        | ZK1053.7            |
| 0.13468243193816                                                                                          | AGIWUR29991;AGIWUR34385                                                |          |                |                 |                     |
| N2 CT I                                                                                                   | 13238540                                                               | 13240726 | WBGene00014201 | ZK1053.6        | ZK1053.6            |
| 0.173636112300439                                                                                         | AGIWUR20160                                                            |          |                |                 |                     |
| N2 CT I                                                                                                   | 13241645                                                               | 13244797 | WBGene00014199 | ZK1053.4        | ZK1053.4            |
| -0.130729085008543                                                                                        | AGIWUR9930                                                             |          |                |                 |                     |
| N2 CT I                                                                                                   | 13246853                                                               | 13249789 | WBGene00014198 | ZK1053.3        | ZK1053.3            |
| -0.0880616190595482                                                                                       | AGIWUR10322                                                            |          |                |                 |                     |
| N2 CT I                                                                                                   | 13250519                                                               | 13252902 | WBGene00009693 | F44F1.1 F44F1.1 | -0.0490513981611214 |
| AGIWUR11569;AGIWUR12707;AGIWUR35981                                                                       |                                                                        |          |                |                 |                     |
| N2 CT I                                                                                                   | 13254141                                                               | 13257729 | WBGene00009695 | F44F1.3 F44F1.3 | 0.0349875496736036  |
| AGIWUR36983                                                                                               |                                                                        |          |                |                 |                     |
| N2 CT I                                                                                                   | 13258381                                                               | 13260217 | WBGene00009697 | F44F1.5 F44F1.5 |                     |
| -0.00897059635960318                                                                                      | AGIWUR24484                                                            |          |                |                 |                     |
| N2 CT I                                                                                                   | 13260933                                                               | 13262727 | WBGene00009698 | F44F1.6 F44F1.6 | -0.0503345167427671 |
| AGIWUR2878;AGIWUR9405;AGIWUR14989;AGIWUR18297;AGIWUR19140;AGIWUR22641;AGIWUR25795;AGIWUR33450;AGIWUR43720 |                                                                        |          |                |                 |                     |
| N2 CT I                                                                                                   | 13263803                                                               | 13265570 | WBGene00009696 | F44F1.4 F44F1.4 | -0.210521909977941  |
| AGIWUR33801                                                                                               |                                                                        |          |                |                 |                     |
| N2 CT I                                                                                                   | 13269984                                                               | 13272784 | WBGene00006902 | vet-6 F44F1.7   | -0.138528727331829  |
| AGIWUR16532                                                                                               |                                                                        |          |                |                 |                     |
| N2 CT I                                                                                                   | 13274111                                                               | 13276462 | WBGene00010804 | M01E5.1 M01E5.1 | -0.283807987434853  |
| AGIWUR23175;AGIWUR33900;AGIWUR42322                                                                       |                                                                        |          |                |                 |                     |
| N2 CT I                                                                                                   | 13277061                                                               | 13280175 | WBGene00010805 | M01E5.2 M01E5.2 | 0.0338797081227291  |
| AGIWUR39432                                                                                               |                                                                        |          |                |                 |                     |
| N2 CT I                                                                                                   | 13280892                                                               | 13286497 | WBGene00010806 | M01E5.3 M01E5.3 | 0.128438550400546   |
| AGIWUR24647;AGIWUR27603;AGIWUR30431;AGIWUR31429                                                           |                                                                        |          |                |                 |                     |
| N2 CT I                                                                                                   | 13287551                                                               | 13289542 | WBGene00010807 | M01E5.4 M01E5.4 | 0.076899923466121   |
| AGIWUR20792;AGIWUR38781                                                                                   |                                                                        |          |                |                 |                     |
| N2 CT I                                                                                                   | 13292506                                                               | 13297555 | WBGene00006595 | top-1 M01E5.5   | -0.0730345920727604 |
| AGIWUR1777;AGIWUR15898;AGIWUR16737;AGIWUR17593;AGIWUR26904;AGIWUR32658;AGIWUR39976                        |                                                                        |          |                |                 |                     |

|                                                                                           |    |   |          |          |                |          |          |                     |
|-------------------------------------------------------------------------------------------|----|---|----------|----------|----------------|----------|----------|---------------------|
| N2                                                                                        | CT | I | 13298209 | 13300716 | WBGene00010808 | sepa-1   | M01E5.6  | -0.336943858069599  |
| AGIWUR6207                                                                                |    |   |          |          |                |          |          |                     |
| N2                                                                                        | CT | I | 13302759 | 13304311 | WBGene00011431 | T04D3.1  | T04D3.1  | -0.215813605851837  |
| AGIWUR30784                                                                               |    |   |          |          |                |          |          |                     |
| N2                                                                                        | CT | I | 13307031 | 13308787 | WBGene00011432 | sdz-30   | T04D3.2  | 0.104905760794493   |
| AGIWUR10330;AGIWUR32859;AGIWUR44585                                                       |    |   |          |          |                |          |          |                     |
| N2                                                                                        | CT | I | 13309994 | 13310715 | WBGene00011435 | T04D3.8  | T04D3.8  | -0.308326253958201  |
| AGIWUR31158                                                                               |    |   |          |          |                |          |          |                     |
| N2                                                                                        | CT | I | 13310915 | 13318704 | WBGene00011433 | pde-1    | T04D3.3  | -0.0167306511954042 |
| AGIWUR2048                                                                                |    |   |          |          |                |          |          |                     |
| N2                                                                                        | CT | I | 13325230 | 13333508 | WBGene00001555 | gcy-35   | T04D3.4  | -0.21389687105545   |
| AGIWUR30654                                                                               |    |   |          |          |                |          |          |                     |
| N2                                                                                        | CT | I | 13333380 | 13336146 | WBGene00012343 | W08E3.2  | W08E3.2  | 0.342421817886647   |
| AGIWUR23946                                                                               |    |   |          |          |                |          |          |                     |
| N2                                                                                        | CT | I | 13337460 | 13338921 | WBGene00012345 | W08E3.4  | W08E3.4  | 0.0212823149937105  |
| AGIWUR15170                                                                               |    |   |          |          |                |          |          |                     |
| N2                                                                                        | CT | I | 13339397 | 13340224 | WBGene00004915 | snr-2    | W08E3.1  | -0.0794203980654142 |
| AGIWUR2020;AGIWUR17872;AGIWUR37716                                                        |    |   |          |          |                |          |          |                     |
| N2                                                                                        | CT | I | 13340327 | 13343940 | WBGene00012344 | ola-1    | W08E3.3  | 0.00710967126596174 |
| AGIWUR20746                                                                               |    |   |          |          |                |          |          |                     |
| N2                                                                                        | CT | I | 13344044 | 13346966 | WBGene00012732 | Y40B1A.1 | Y40B1A.1 |                     |
| 0.0734192740817621 AGIWUR8122;AGIWUR14845;AGIWUR22783;AGIWUR24127;AGIWUR30754;AGIWUR33337 |    |   |          |          |                |          |          |                     |
| N2                                                                                        | CT | I | 13347068 | 13349259 | WBGene00012733 | Y40B1A.2 | Y40B1A.2 |                     |
| -0.105952539766032 AGIWUR39339                                                            |    |   |          |          |                |          |          |                     |
| N2                                                                                        | CT | I | 13349410 | 13358674 | WBGene00012734 | Y40B1A.3 | Y40B1A.3 |                     |
| -0.131638460275551 AGIWUR7751;AGIWUR14091                                                 |    |   |          |          |                |          |          |                     |
| N2                                                                                        | CT | I | 13360401 | 13366888 | WBGene00012735 | sptf-3   | Y40B1A.4 |                     |
| -0.247030430653647 AGIWUR4406                                                             |    |   |          |          |                |          |          |                     |
| N2                                                                                        | CT | I | 13379917 | 13384371 | WBGene00007218 | C01A2.6  | C01A2.6  | -0.0354894881642362 |
| AGIWUR11252                                                                               |    |   |          |          |                |          |          |                     |
| N2                                                                                        | CT | I | 13384752 | 13387084 | WBGene00007217 | tads-1   | C01A2.5  | -0.012089129479115  |
| AGIWUR15887                                                                               |    |   |          |          |                |          |          |                     |
| N2                                                                                        | CT | I | 13387819 | 13391450 | WBGene00007215 | oxa-1    | C01A2.3  | -0.175415436396127  |
| AGIWUR15608;AGIWUR16802;AGIWUR22209;AGIWUR26992;AGIWUR29372;AGIWUR30785                   |    |   |          |          |                |          |          |                     |
| N2                                                                                        | CT | I | 13392118 | 13394001 | WBGene00007216 | C01A2.4  | C01A2.4  | -0.221634898918099  |
| AGIWUR11598                                                                               |    |   |          |          |                |          |          |                     |
| N2                                                                                        | CT | I | 13397270 | 13398529 | WBGene00007214 | C01A2.2  | C01A2.2  | -0.400574402764539  |
| AGIWUR43823                                                                               |    |   |          |          |                |          |          |                     |
| N2                                                                                        | CT | I | 13402447 | 13404106 | WBGene00007219 | nlp-38   | C01A2.7  | -0.0307127193960675 |

|                                                                                            |    |   |          |          |                |           |           |
|--------------------------------------------------------------------------------------------|----|---|----------|----------|----------------|-----------|-----------|
| AGIWUR11225;AGIWUR16600;AGIWUR17922;AGIWUR36114                                            |    |   |          |          |                |           |           |
| N2                                                                                         | CT | I | 13414273 | 13414465 | WBGene00077561 | W05H12.3  | W05H12.3  |
| 0.0522332907879459 AGIWUR9577;AGIWUR17249;AGIWUR24012;AGIWUR29770;AGIWUR38825              |    |   |          |          |                |           |           |
| N2                                                                                         | CT | I | 13418458 | 13423379 | WBGene00012289 | W05H12.1  | W05H12.1  |
| -0.0704874679546066 AGIWUR2538;AGIWUR7093;AGIWUR42065                                      |    |   |          |          |                |           |           |
| N2                                                                                         | CT | I | 13423994 | 13425148 | WBGene00044066 | fbxb-66   | Y40B1B.3  |
| -0.0109721980053505 AGIWUR5934                                                             |    |   |          |          |                |           |           |
| N2                                                                                         | CT | I | 13426454 | 13428471 | WBGene00012739 | Y40B1B.7  | Y40B1B.7  |
| -0.0295314040756232 AGIWUR19958                                                            |    |   |          |          |                |           |           |
| N2                                                                                         | CT | I | 13428913 | 13434717 | WBGene00012740 | slc-25A46 | Y40B1B.8  |
| -0.0675735093069716 AGIWUR4532;AGIWUR25826;AGIWUR38819;AGIWUR40634                         |    |   |          |          |                |           |           |
| N2                                                                                         | CT | I | 13435489 | 13437965 | WBGene00012738 | EIF-3.J   | Y40B1B.5  |
| 0.0567807767831141 AGIWUR5279                                                              |    |   |          |          |                |           |           |
| N2                                                                                         | CT | I | 13438058 | 13450216 | WBGene00005010 | spr-5     | Y40B1B.6  |
| 0.076249651010162 AGIWUR25838;AGIWUR27172;AGIWUR43055                                      |    |   |          |          |                |           |           |
| N2                                                                                         | CT | I | 13451463 | 13452841 | WBGene00013023 | Y48G10A.6 | Y48G10A.6 |
| -0.0197440688251298 AGIWUR1449;AGIWUR19843;AGIWUR21746;AGIWUR24663;AGIWUR26086;AGIWUR30523 |    |   |          |          |                |           |           |
| N2                                                                                         | CT | I | 13455356 | 13470439 | WBGene00013021 | Y48G10A.4 | Y48G10A.4 |
| -0.097606537265011 AGIWUR4727;AGIWUR25796;AGIWUR35731;AGIWUR39194;AGIWUR41307;AGIWUR44612  |    |   |          |          |                |           |           |
| N2                                                                                         | CT | I | 13471683 | 13474185 | WBGene00013020 | Y48G10A.3 | Y48G10A.3 |
| -0.183790026056361 AGIWUR36511                                                             |    |   |          |          |                |           |           |
| N2                                                                                         | CT | I | 13477214 | 13487404 | WBGene00013019 | Y48G10A.2 | Y48G10A.2 |
| -0.0784092740832918 AGIWUR14937                                                            |    |   |          |          |                |           |           |
| N2                                                                                         | CT | I | 13489552 | 13491226 | WBGene00013018 | Y48G10A.1 | Y48G10A.1 |
| -0.210667232043672 AGIWUR2483                                                              |    |   |          |          |                |           |           |
| N2                                                                                         | CT | I | 13491425 | 13493317 | WBGene00013603 | soem-1    | Y87G2A.17 |
| -0.219978030582158 AGIWUR34580                                                             |    |   |          |          |                |           |           |
| N2                                                                                         | CT | I | 13503045 | 13507064 | WBGene00003585 | ndx-8     | Y87G2A.14 |
| -0.192887325392185 AGIWUR42138                                                             |    |   |          |          |                |           |           |
| N2                                                                                         | CT | I | 13508785 | 13512026 | WBGene00044260 | Y87G2A.19 | Y87G2A.19 |
| 0.140467106694594 AGIWUR38809                                                              |    |   |          |          |                |           |           |
| N2                                                                                         | CT | I | 13512313 | 13514320 | WBGene00013604 | Y87G2A.18 | Y87G2A.18 |
| -0.161365835002975 AGIWUR37837                                                             |    |   |          |          |                |           |           |
| N2                                                                                         | CT | I | 13514550 | 13526254 | WBGene00013593 | Y87G2A.1  | Y87G2A.1  |
| 0.114771155142499 AGIWUR10029                                                              |    |   |          |          |                |           |           |
| N2                                                                                         | CT | I | 13528706 | 13531444 | WBGene00044261 | Y87G2A.20 | Y87G2A.20 |
| 0.0245825517321752 AGIWUR10888;AGIWUR20595;AGIWUR33352;AGIWUR35074;AGIWUR44230             |    |   |          |          |                |           |           |
| N2                                                                                         | CT | I | 13534718 | 13537014 | WBGene00013594 | Y87G2A.2  | Y87G2A.2  |
| -0.0511996330103273 AGIWUR11310                                                            |    |   |          |          |                |           |           |

|                                                                                                                                             |    |   |                                                                                   |          |                |           |                             |
|---------------------------------------------------------------------------------------------------------------------------------------------|----|---|-----------------------------------------------------------------------------------|----------|----------------|-----------|-----------------------------|
| N2                                                                                                                                          | CT | I | 13536892                                                                          | 13542703 | WBGene00013595 | atg-4.1   | Y87G2A.3                    |
| -0.03555339242528                                                                                                                           |    |   | AGIWUR21404                                                                       |          |                |           |                             |
| N2                                                                                                                                          | CT | I | 13543079                                                                          | 13545188 | WBGene00000089 | aex-6     | Y87G2A.4                    |
| 0.0646140767409031                                                                                                                          |    |   | AGIWUR6216;AGIWUR10423;AGIWUR15952;AGIWUR20591;AGIWUR26131;AGIWUR43384            |          |                |           |                             |
| N2                                                                                                                                          | CT | I | 13547898                                                                          | 13559361 | WBGene00006936 | glp-4     | Y87G2A.5                    |
| 0.169238714844157                                                                                                                           |    |   | AGIWUR33323                                                                       |          |                |           |                             |
| N2                                                                                                                                          | CT | I | 13560447                                                                          | 13563465 | WBGene00013602 | Y87G2A.16 | Y87G2A.16                   |
| -0.17087596651154                                                                                                                           |    |   | AGIWUR9625                                                                        |          |                |           |                             |
| N2                                                                                                                                          | CT | I | 13564567                                                                          | 13566362 | WBGene00001704 | grd-15    | Y87G2A.15                   |
| 0.269717570400816                                                                                                                           |    |   | AGIWUR1040                                                                        |          |                |           |                             |
| N2                                                                                                                                          | CT | I | 13566258                                                                          | 13572063 | WBGene00000891 | cyn-15    | Y87G2A.6                    |
| -0.100003746987404                                                                                                                          |    |   | AGIWUR11314                                                                       |          |                |           |                             |
| N2                                                                                                                                          | CT | I | 13572379                                                                          | 13575805 | WBGene00013596 | nyn-2     | Y87G2A.7                    |
| -0.199754496397629                                                                                                                          |    |   | AGIWUR32583;AGIWUR42958                                                           |          |                |           |                             |
| N2                                                                                                                                          | CT | I | 13576148                                                                          | 13581585 | WBGene00013597 | gpi-1     | Y87G2A.8                    |
| -0.00855883775553323                                                                                                                        |    |   | AGIWUR4888;AGIWUR42506                                                            |          |                |           |                             |
| N2                                                                                                                                          | CT | I | 13581698                                                                          | 13585295 | WBGene00006709 | ubc-14    | Y87G2A.9                    |
| -0.251534583931345                                                                                                                          |    |   | AGIWUR13481                                                                       |          |                |           |                             |
| N2                                                                                                                                          | CT | I | 13586037                                                                          | 13588831 | WBGene00013598 | vps-28    | Y87G2A.10                   |
| -0.0598517609323164                                                                                                                         |    |   | AGIWUR4233;AGIWUR7451;AGIWUR18989;AGIWUR19541;AGIWUR22158;AGIWUR22997;AGIWUR26235 |          |                |           |                             |
| N2                                                                                                                                          | CT | I | 13589099                                                                          | 13598505 | WBGene00013599 | eipr-1    | Y87G2A.11                   |
| 0.0574351496261691                                                                                                                          |    |   | AGIWUR26147                                                                       |          |                |           |                             |
| N2                                                                                                                                          | CT | I | 13598618                                                                          | 13603393 | WBGene00013601 | Y87G2A.13 | Y87G2A.13                   |
| 0.0251821374892991                                                                                                                          |    |   | AGIWUR15125                                                                       |          |                |           |                             |
| N2                                                                                                                                          | CT | I | 13603885                                                                          | 13626225 | WBGene00012386 | agef-1    | Y6B3A.1 0.0316536311893714  |
| AGIWUR25300;AGIWUR33210                                                                                                                     |    |   |                                                                                   |          |                |           |                             |
| N2                                                                                                                                          | CT | I | 13626522                                                                          | 13628447 | WBGene00012351 | W09C5.1   | W09C5.1 0.0924438862123544  |
| AGIWUR17955;AGIWUR23847;AGIWUR32726                                                                                                         |    |   |                                                                                   |          |                |           |                             |
| N2                                                                                                                                          | CT | I | 13629227                                                                          | 13633494 | WBGene00006793 | unc-59    | W09C5.2 -0.1951581510737    |
| AGIWUR44683                                                                                                                                 |    |   |                                                                                   |          |                |           |                             |
| N2                                                                                                                                          | CT | I | 13635042                                                                          | 13635958 | WBGene00014858 | W09C5.3   | W09C5.3 0.110478457725414   |
| AGIWUR3493;AGIWUR4777                                                                                                                       |    |   |                                                                                   |          |                |           |                             |
| N2                                                                                                                                          | CT | I | 13637845                                                                          | 13639311 | WBGene00002116 | ins-33    | W09C5.4 0.0250708979920873  |
| AGIWUR10812                                                                                                                                 |    |   |                                                                                   |          |                |           |                             |
| N2                                                                                                                                          | CT | I | 13640297                                                                          | 13648405 | WBGene00012352 | dkf-1     | W09C5.5 -0.0955486764666631 |
| AGIWUR22471                                                                                                                                 |    |   |                                                                                   |          |                |           |                             |
| N2                                                                                                                                          | CT | I | 13652939                                                                          | 13653704 | WBGene00004445 | rp1-31    | W09C5.6 -0.0703056715105905 |
| AGIWUR3290;AGIWUR3645;AGIWUR5928;AGIWUR8527;AGIWUR12729;AGIWUR14128;AGIWUR19084;AGIWUR22677;AGIWUR26990;AGIWUR30940;AGIWUR31232;AGIWUR42891 |    |   |                                                                                   |          |                |           |                             |

|                                                                      |    |   |          |          |                |          |          |                     |
|----------------------------------------------------------------------|----|---|----------|----------|----------------|----------|----------|---------------------|
| N2                                                                   | CT | I | 13654009 | 13658167 | WBGene00012353 | W09C5.7  | W09C5.7  | -0.0371442068555972 |
| AGIWUR16306                                                          |    |   |          |          |                |          |          |                     |
| N2                                                                   | CT | I | 13658171 | 13659128 | WBGene00012354 | W09C5.8  | W09C5.8  | -0.0400068191331222 |
| AGIWUR1781;AGIWUR3960;AGIWUR9938;AGIWUR16533;AGIWUR18251;AGIWUR25895 |    |   |          |          |                |          |          |                     |
| N2                                                                   | CT | I | 13663462 | 13674997 | WBGene00012234 | W04A4.5  | W04A4.5  | -0.103825826617602  |
| AGIWUR2477                                                           |    |   |          |          |                |          |          |                     |
| N2                                                                   | CT | I | 13676255 | 13677792 | WBGene00012233 | W04A4.4  | W04A4.4  | 0.0178566741858805  |
| AGIWUR39892                                                          |    |   |          |          |                |          |          |                     |
| N2                                                                   | CT | I | 13680415 | 13681366 | WBGene00012232 | W04A4.3  | W04A4.3  | 0.206705638595469   |
| AGIWUR12765                                                          |    |   |          |          |                |          |          |                     |
| N2                                                                   | CT | I | 13682137 | 13684417 | WBGene00012231 | W04A4.2  | W04A4.2  | 0.0917525393514982  |
| AGIWUR12922;AGIWUR28553;AGIWUR29183                                  |    |   |          |          |                |          |          |                     |
| N2                                                                   | CT | I | 13685303 | 13687582 | WBGene00012235 | W04A4.6  | W04A4.6  | -0.112243109148294  |
| AGIWUR30052;AGIWUR32598                                              |    |   |          |          |                |          |          |                     |
| N2                                                                   | CT | I | 13692929 | 13702954 | WBGene00012387 | Y6B3B.1  | Y6B3B.1  | -0.0200758537310302 |
| AGIWUR2983                                                           |    |   |          |          |                |          |          |                     |
| N2                                                                   | CT | I | 13709779 | 13719528 | WBGene00012388 | Y6B3B.3  | Y6B3B.3  | 0.0297013544496458  |
| AGIWUR35375                                                          |    |   |          |          |                |          |          |                     |
| N2                                                                   | CT | I | 13720125 | 13724453 | WBGene00012394 | hsd-1    | Y6B3B.11 |                     |
| 0.475893059168271 AGIWUR42334                                        |    |   |          |          |                |          |          |                     |
| N2                                                                   | CT | I | 13724577 | 13732046 | WBGene00006505 | lagr-1   | Y6B3B.10 |                     |
| -0.12795661325289 AGIWUR14852                                        |    |   |          |          |                |          |          |                     |
| N2                                                                   | CT | I | 13734958 | 13751124 | WBGene00012393 | Y6B3B.9  | Y6B3B.9  | -0.0456651367479797 |
| AGIWUR2653                                                           |    |   |          |          |                |          |          |                     |
| N2                                                                   | CT | I | 13751234 | 13756354 | WBGene00012390 | gpap-1   | Y6B3B.5  | -0.260958464566066  |
| AGIWUR18956                                                          |    |   |          |          |                |          |          |                     |
| N2                                                                   | CT | I | 13756730 | 13771773 | WBGene00012389 | Y6B3B.4  | Y6B3B.4  | -0.0779748740815593 |
| AGIWUR1970;AGIWUR5684;AGIWUR19132;AGIWUR32826                        |    |   |          |          |                |          |          |                     |
| N2                                                                   | CT | I | 13773067 | 13778782 | WBGene00012576 | Y37H9A.1 |          | Y37H9A.1            |
| -0.115636910792311 AGIWUR36695                                       |    |   |          |          |                |          |          |                     |
| N2                                                                   | CT | I | 13778899 | 13792165 | WBGene00012578 | Y37H9A.3 |          | Y37H9A.3            |
| -0.246986277752427 AGIWUR7845                                        |    |   |          |          |                |          |          |                     |
| N2                                                                   | CT | I | 13792645 | 13794152 | WBGene00003581 | ndx-4    | Y37H9A.6 |                     |
| -0.251456831989117 AGIWUR33795                                       |    |   |          |          |                |          |          |                     |
| N2                                                                   | CT | I | 13795277 | 13795867 | WBGene00014870 | Y37H9A.4 |          | Y37H9A.4            |
| 0.154728391989114 AGIWUR24358                                        |    |   |          |          |                |          |          |                     |
| N2                                                                   | CT | I | 13802390 | 13806801 | WBGene00044065 | tag-229  | W09G3.3  | -0.0926189249907328 |
| AGIWUR9860                                                           |    |   |          |          |                |          |          |                     |
| N2                                                                   | CT | I | 13806917 | 13812268 | WBGene00012366 | maea-1   | W09G3.2  | -0.128730220315999  |

|                                                                                              |    |   |          |          |                |                                     |
|----------------------------------------------------------------------------------------------|----|---|----------|----------|----------------|-------------------------------------|
| AGIWUR20326;AGIWUR24050;AGIWUR35534                                                          |    |   |          |          |                |                                     |
| N2                                                                                           | CT | I | 13814756 | 13827988 | WBGene00012369 | W09G3.6 W09G3.6 0.101861653276533   |
| AGIWUR9505                                                                                   |    |   |          |          |                |                                     |
| N2                                                                                           | CT | I | 13828102 | 13832146 | WBGene00012365 | W09G3.1 W09G3.1                     |
| -0.00424203043996663 AGIWUR21708;AGIWUR21737;AGIWUR23876;AGIWUR31807;AGIWUR34127;AGIWUR37740 |    |   |          |          |                |                                     |
| N2                                                                                           | CT | I | 13835292 | 13840047 | WBGene00012236 | W04A8.1 W04A8.1 -0.335580971438869  |
| AGIWUR8302                                                                                   |    |   |          |          |                |                                     |
| N2                                                                                           | CT | I | 13840706 | 13841846 | WBGene00012237 | W04A8.2 W04A8.2 0.13608937702302    |
| AGIWUR13981;AGIWUR15281;AGIWUR17643;AGIWUR36920;AGIWUR42788;AGIWUR44916                      |    |   |          |          |                |                                     |
| N2                                                                                           | CT | I | 13841895 | 13843480 | WBGene00012239 | W04A8.4 W04A8.4 -0.0829763900800113 |
| AGIWUR3994;AGIWUR38834;AGIWUR41125;AGIWUR42044                                               |    |   |          |          |                |                                     |
| N2                                                                                           | CT | I | 13844729 | 13846957 | WBGene00012238 | W04A8.3 W04A8.3 0.0354568857052495  |
| AGIWUR41862                                                                                  |    |   |          |          |                |                                     |
| N2                                                                                           | CT | I | 13849599 | 13850893 | WBGene00012240 | W04A8.5 W04A8.5 -0.0185506499582306 |
| AGIWUR25404                                                                                  |    |   |          |          |                |                                     |
| N2                                                                                           | CT | I | 13854632 | 13859699 | WBGene00012241 | W04A8.6 W04A8.6 -0.0705247986585551 |
| AGIWUR43163                                                                                  |    |   |          |          |                |                                     |
| N2                                                                                           | CT | I | 13861472 | 13887468 | WBGene00006382 | taf-1 W04A8.7 -0.0570725090930697   |
| AGIWUR29095                                                                                  |    |   |          |          |                |                                     |
| N2                                                                                           | CT | I | 13899085 | 13913854 | WBGene00006616 | trp-4 Y71A12B.4                     |
| 0.429887998125752 AGIWUR41758                                                                |    |   |          |          |                |                                     |
| N2                                                                                           | CT | I | 13915664 | 13917809 | WBGene00013502 | cllec-111 Y71A12B.5                 |
| 0.0724066761661426 AGIWUR36981                                                               |    |   |          |          |                |                                     |
| N2                                                                                           | CT | I | 13919375 | 13922122 | WBGene00013503 | cllec-112 Y71A12B.6                 |
| 0.0601936638266816 AGIWUR23899                                                               |    |   |          |          |                |                                     |
| N2                                                                                           | CT | I | 13938185 | 13942016 | WBGene00013505 | Y71A12B.8 Y71A12B.8                 |
| -0.306651555440554 AGIWUR3434                                                                |    |   |          |          |                |                                     |
| N2                                                                                           | CT | I | 13943079 | 13951628 | WBGene00013506 | usp-3 Y71A12B.9                     |
| -0.265344967850226 AGIWUR41370                                                               |    |   |          |          |                |                                     |
| N2                                                                                           | CT | I | 13952159 | 13953194 | WBGene00004475 | rps-6 Y71A12B.1                     |
| -0.0346152961932908 AGIWUR4211;AGIWUR15277;AGIWUR23183;AGIWUR37410;AGIWUR42537               |    |   |          |          |                |                                     |
| N2                                                                                           | CT | I | 13957199 | 13960440 | WBGene00013507 | Y71A12B.10 Y71A12B.10               |
| -0.0164121246035496 AGIWUR3766                                                               |    |   |          |          |                |                                     |
| N2                                                                                           | CT | I | 13978430 | 13980144 | WBGene00013508 | Y71A12B.11 Y71A12B.11               |
| 0.200274006745884 AGIWUR15619                                                                |    |   |          |          |                |                                     |
| N2                                                                                           | CT | I | 13984308 | 13989588 | WBGene00045058 | gadr-5 Y71A12B.17                   |
| 0.287927030381204 AGIWUR11183;AGIWUR29400                                                    |    |   |          |          |                |                                     |
| N2                                                                                           | CT | I | 13992582 | 13996221 | WBGene00013511 | Y71A12B.15 Y71A12B.15               |
| 0.0352871682135465 AGIWUR23417;AGIWUR23555                                                   |    |   |          |          |                |                                     |

|                      |    |   |                                                            |          |                |            |                             |
|----------------------|----|---|------------------------------------------------------------|----------|----------------|------------|-----------------------------|
| N2                   | CT | I | 13997363                                                   | 14007078 | WBGene00045077 | Y71A12B.18 | Y71A12B.18                  |
| 0.139605814569363    |    |   | AGIWUR33089                                                |          |                |            |                             |
| N2                   | CT | I | 14004412                                                   | 14008484 | WBGene00013509 | Y71A12B.12 | Y71A12B.12                  |
| -0.0488648806269545  |    |   | AGIWUR15382;AGIWUR42964                                    |          |                |            |                             |
| N2                   | CT | I | 14009871                                                   | 14011521 | WBGene00013865 | ZC334.7    | ZC334.7 0.0879238560918179  |
| AGIWUR38733          |    |   |                                                            |          |                |            |                             |
| N2                   | CT | I | 14012369                                                   | 14013629 | WBGene00002111 | ins-28     | ZC334.9 -0.0384073448528568 |
| AGIWUR19714          |    |   |                                                            |          |                |            |                             |
| N2                   | CT | I | 14018785                                                   | 14019759 | WBGene00002112 | ins-29     | ZC334.10                    |
| -0.0636269076236307  |    |   | AGIWUR5899;AGIWUR9154;AGIWUR12469;AGIWUR28025;AGIWUR32013  |          |                |            |                             |
| N2                   | CT | I | 14020364                                                   | 14021155 | WBGene00002108 | ins-25     | ZC334.8                     |
| -0.00790606975826158 |    |   | AGIWUR2131;AGIWUR3614;AGIWUR5931;AGIWUR17706;AGIWUR32860   |          |                |            |                             |
| N2                   | CT | I | 14027236                                                   | 14027588 | WBGene00002110 | ins-27     | ZC334.11                    |
| -0.0595647439159901  |    |   | AGIWUR1125;AGIWUR12173;AGIWUR16115;AGIWUR19429;AGIWUR27925 |          |                |            |                             |
| N2                   | CT | I | 14028997                                                   | 14029212 | WBGene00045396 | ZC334.12   | ZC334.12                    |
| 0.155492178377278    |    |   | AGIWUR3784;AGIWUR6250;AGIWUR31903;AGIWUR38530;AGIWUR42619  |          |                |            |                             |
| N2                   | CT | I | 14031147                                                   | 14031667 | WBGene00002107 | ins-24     | ZC334.3 -0.100345226892749  |
| AGIWUR3689           |    |   |                                                            |          |                |            |                             |
| N2                   | CT | I | 14035096                                                   | 14036057 | WBGene00002113 | ins-30     | ZC334.2 0.158206157931335   |
| AGIWUR40182          |    |   |                                                            |          |                |            |                             |
| N2                   | CT | I | 14037151                                                   | 14037803 | WBGene00002109 | ins-26     | ZC334.1 -0.333194945308193  |
| AGIWUR2102           |    |   |                                                            |          |                |            |                             |
| N2                   | CT | I | 14041627                                                   | 14043478 | WBGene00013512 | nhr-276    | Y71A12C.1                   |
| -0.0890545566451477  |    |   | AGIWUR30870                                                |          |                |            |                             |
| N2                   | CT | I | 14043531                                                   | 14045694 | WBGene00050878 | Y71A12C.3  | Y71A12C.3                   |
| -1.1012289326171     |    |   | AGIWUR19098                                                |          |                |            |                             |
| N2                   | CT | I | 14046234                                                   | 14048017 | WBGene00013513 | Y71A12C.2  | Y71A12C.2                   |
| -0.179018991814693   |    |   | AGIWUR9179;AGIWUR15094                                     |          |                |            |                             |
| N2                   | CT | I | 14048085                                                   | 14051003 | WBGene00004875 | smd-1      | F47G4.7 -0.0204565537222337 |
| AGIWUR33737          |    |   |                                                            |          |                |            |                             |
| N2                   | CT | I | 14052136                                                   | 14054154 | WBGene00009828 | F47G4.8    | F47G4.8 -0.0211918956414632 |
| AGIWUR4404           |    |   |                                                            |          |                |            |                             |
| N2                   | CT | I | 14054593                                                   | 14056894 | WBGene00009822 | cllec-113  | F47G4.1                     |
| -0.0573926811852914  |    |   | AGIWUR33408                                                |          |                |            |                             |
| N2                   | CT | I | 14059411                                                   | 14060829 | WBGene00009827 | hmg-6      | F47G4.6 0.271815307628835   |
| AGIWUR8349           |    |   |                                                            |          |                |            |                             |
| N2                   | CT | I | 14060876                                                   | 14062137 | WBGene00009826 | F47G4.5    | F47G4.5 0.319401478473646   |
| AGIWUR13877          |    |   |                                                            |          |                |            |                             |
| N2                   | CT | I | 14062749                                                   | 14068803 | WBGene00009825 | F47G4.4    | F47G4.4 0.0714649037108441  |



AGIWUR5650;AGIWUR9090;AGIWUR19297;AGIWUR26208;AGIWUR33296;AGIWUR39500  
 N2 CT I 14075836 14078211 WBGene00009824 gpdh-1 F47G4.3 -0.0618160597459863  
 AGIWUR20253  
 N2 CT I 14078193 14082643 WBGene00009823 gadr-6 F47G4.2 -0.0433203727260594  
 AGIWUR14336;AGIWUR14614  
 N2 CT I 14088094 14089858 WBGene00013404 fbxb-101 Y63D3A.3  
 0.159635265230168 AGIWUR20759  
 N2 CT I 14090738 14096346 WBGene00013403 fbxb-100 Y63D3A.2  
 -0.170328764577825 AGIWUR42011  
 N2 CT I 14097492 14101090 WBGene00013405 tdpt-1 Y63D3A.4  
 -0.392438445335069 AGIWUR8766  
 N2 CT I 14101236 14104475 WBGene00006565 tfg-1 Y63D3A.5  
 0.292644340607985 AGIWUR3031  
 N2 CT I 14104429 14113179 WBGene00001047 dnj-29 Y63D3A.6  
 0.107100361500901  
 AGIWUR2497;AGIWUR2707;AGIWUR8430;AGIWUR9345;AGIWUR14768;AGIWUR14847;AGIWUR15853;AGIWUR20958;AGIWUR23646;AGI  
 WUR25975;AGIWUR26974;AGIWUR26995;AGIWUR28054;AGIWUR28176;AGIWUR32588;AGIWUR35335;AGIWUR35775  
 N2 CT I 14113636 14114085 WBGene00013406 Y63D3A.7 Y63D3A.7  
 -0.189803079271069  
 AGIWUR7230;AGIWUR16354;AGIWUR21021;AGIWUR25749;AGIWUR29079;AGIWUR34860;AGIWUR35530;AGIWUR35904;AGIWUR43091;  
 AGIWUR44857  
 N2 CT I 14114194 14118650 WBGene00013407 Y63D3A.8 Y63D3A.8  
 -0.0203720707859461 AGIWUR5018;AGIWUR21326;AGIWUR39732  
 N2 CT I 14118753 14127199 WBGene00010537 mys-2 K03D10.3  
 0.0976565858888101 AGIWUR15721;AGIWUR29820  
 N2 CT I 14128594 14142207 WBGene00002181 kal-1 K03D10.1  
 0.136219462971617 AGIWUR36370  
 N2 CT I 14150731 14151041 WBGene00014700 C37A5.6 C37A5.6 -0.0042171547185923  
 AGIWUR31033  
 N2 CT I 14154769 14155249 WBGene00014698 C37A5.3 C37A5.3 -0.054340069293362  
 AGIWUR138;AGIWUR9321;AGIWUR10493;AGIWUR12985;AGIWUR39666  
 N2 CT I 14157611 14158076 WBGene00007992 fipr-24 C37A5.8 0.167598166630491  
 AGIWUR23130  
 N2 CT I 14158506 14161718 WBGene00007988 best-8 C37A5.1 -0.214737448890457  
 AGIWUR7467  
 N2 CT I 14163447 14168309 WBGene00007991 C37A5.7 C37A5.7 0.0706985607999346  
 AGIWUR43696  
 N2 CT I 14171864 14172786 WBGene00077520 C37A5.11 C37A5.11  
 -0.162293465424057 AGIWUR202;AGIWUR14942;AGIWUR22282;AGIWUR26996;AGIWUR33327

|                                                                         |    |   |          |          |                |          |         |                     |
|-------------------------------------------------------------------------|----|---|----------|----------|----------------|----------|---------|---------------------|
| N2                                                                      | CT | I | 14172840 | 14179360 | WBGene00004202 | pry-1    | C37A5.9 | 0.116452706014785   |
| AGIWUR33395                                                             |    |   |          |          |                |          |         |                     |
| N2                                                                      | CT | I | 14182787 | 14185717 | WBGene00014100 | ZK849.1  | ZK849.1 | 0.214063345288785   |
| AGIWUR13863                                                             |    |   |          |          |                |          |         |                     |
| N2                                                                      | CT | I | 14185647 | 14196295 | WBGene00014101 | gopc-1   | ZK849.2 | 0.174610644869651   |
| AGIWUR26761;AGIWUR33441;AGIWUR34814;AGIWUR41624;AGIWUR42335;AGIWUR42882 |    |   |          |          |                |          |         |                     |
| N2                                                                      | CT | I | 14198612 | 14199099 | WBGene00014104 | ZK849.6  | ZK849.6 | 0.332032675929799   |
| AGIWUR16143                                                             |    |   |          |          |                |          |         |                     |
| N2                                                                      | CT | I | 14200020 | 14204687 | WBGene00014103 | best-26  | ZK849.5 | -0.232548870652526  |
| AGIWUR7283;AGIWUR24096;AGIWUR30353                                      |    |   |          |          |                |          |         |                     |
| N2                                                                      | CT | I | 14205717 | 14208581 | WBGene00014102 | best-25  | ZK849.4 | 0.300189293700024   |
| AGIWUR15418                                                             |    |   |          |          |                |          |         |                     |
| N2                                                                      | CT | I | 14209215 | 14212501 | WBGene00008185 | best-10  | C49A1.2 | 0.0685738283335198  |
| AGIWUR31693                                                             |    |   |          |          |                |          |         |                     |
| N2                                                                      | CT | I | 14213681 | 14215790 | WBGene00008184 | C49A1.1  | C49A1.1 | -0.0770315419354617 |
| AGIWUR10091                                                             |    |   |          |          |                |          |         |                     |
| N2                                                                      | CT | I | 14216756 | 14220624 | WBGene00008186 | best-11  | C49A1.3 | 0.254464589310649   |
| AGIWUR23910                                                             |    |   |          |          |                |          |         |                     |
| N2                                                                      | CT | I | 14220783 | 14231360 | WBGene00001377 | eya-1    | C49A1.4 | -0.0649280868956685 |
| AGIWUR4852                                                              |    |   |          |          |                |          |         |                     |
| N2                                                                      | CT | I | 14237359 | 14241188 | WBGene00008187 | C49A1.5  | C49A1.5 | 0.148667620077314   |
| AGIWUR33564;AGIWUR41607                                                 |    |   |          |          |                |          |         |                     |
| N2                                                                      | CT | I | 14241898 | 14244452 | WBGene00008191 | C49A1.10 |         | C49A1.10            |
| -0.197293564308588 AGIWUR23897                                          |    |   |          |          |                |          |         |                     |
| N2                                                                      | CT | I | 14246228 | 14247314 | WBGene00008188 | clec-115 |         | C49A1.6             |
| 0.16577939326681 AGIWUR35266                                            |    |   |          |          |                |          |         |                     |
| N2                                                                      | CT | I | 14251061 | 14252362 | WBGene00010576 | clec-116 |         | K04H8.1             |
| -0.134413556228926 AGIWUR39037                                          |    |   |          |          |                |          |         |                     |
| N2                                                                      | CT | I | 14252957 | 14255510 | WBGene00010577 | K04H8.2  | K04H8.2 | -0.0856500579778077 |
| AGIWUR7769                                                              |    |   |          |          |                |          |         |                     |
| N2                                                                      | CT | I | 14255684 | 14256970 | WBGene00010578 | K04H8.3  | K04H8.3 | -0.120633599652789  |
| AGIWUR23282                                                             |    |   |          |          |                |          |         |                     |
| N2                                                                      | CT | I | 14263301 | 14271321 | WBGene00003980 | pes-7    | F09C3.1 | 0.151234017037117   |
| AGIWUR25123                                                             |    |   |          |          |                |          |         |                     |
| N2                                                                      | CT | I | 14271893 | 14274213 | WBGene00008610 | F09C3.2  | F09C3.2 | -0.011166792440239  |
| AGIWUR42136                                                             |    |   |          |          |                |          |         |                     |
| N2                                                                      | CT | I | 14283464 | 14285319 | WBGene00008613 | fbxb-69  | F09C3.5 | 0.0128550254628834  |
| AGIWUR25537                                                             |    |   |          |          |                |          |         |                     |
| N2                                                                      | CT | I | 14287872 | 14295898 | WBGene00008612 | fbxa-103 |         | F09C3.4             |

|                                     |                                     |          |                |            |                             |
|-------------------------------------|-------------------------------------|----------|----------------|------------|-----------------------------|
| 0.0419070287136956                  | AGIWUR3613                          |          |                |            |                             |
| N2 CT I                             | 14297287                            | 14298265 | WBGene00009862 | fbxb-67    | F49B2.2 -0.233857167475684  |
| AGIWUR34725                         |                                     |          |                |            |                             |
| N2 CT I                             | 14305070                            | 14307134 | WBGene00086555 | F49B2.7    | F49B2.7 -0.142596583524904  |
| AGIWUR6124                          |                                     |          |                |            |                             |
| N2 CT I                             | 14311009                            | 14312871 | WBGene00009863 | F49B2.3    | F49B2.3 0.203073815049697   |
| AGIWUR21423                         |                                     |          |                |            |                             |
| N2 CT I                             | 14319114                            | 14319913 | WBGene00268216 | F49B2.9    | F49B2.9 0.0723519485917556  |
| AGIWUR17709;AGIWUR21668;AGIWUR35873 |                                     |          |                |            |                             |
| N2 CT I                             | 14322237                            | 14328965 | WBGene00005078 | src-2      | F49B2.5 -0.0104864261248654 |
| AGIWUR33270                         |                                     |          |                |            |                             |
| N2 CT I                             | 14331085                            | 14339831 | WBGene00009865 | F49B2.6    | F49B2.6 -0.0500671347467154 |
| AGIWUR8730;AGIWUR31462;AGIWUR36353  |                                     |          |                |            |                             |
| N2 CT I                             | 14341571                            | 14343815 | WBGene00013666 | Y105E8A.1  | Y105E8A.1                   |
| -0.035663321582418                  | AGIWUR26600                         |          |                |            |                             |
| N2 CT I                             | 14347514                            | 14358326 | WBGene00013667 | Y105E8A.2  | Y105E8A.2                   |
| -0.0673462876077231                 | AGIWUR28921                         |          |                |            |                             |
| N2 CT I                             | 14358502                            | 14367594 | WBGene00013668 | Y105E8A.3  | Y105E8A.3                   |
| 0.240991412473981                   | AGIWUR38906                         |          |                |            |                             |
| N2 CT I                             | 14367608                            | 14369773 | WBGene00001156 | ech-7      | Y105E8A.4                   |
| 0.0973573707550557                  | AGIWUR4586                          |          |                |            |                             |
| N2 CT I                             | 14371142                            | 14376025 | WBGene00000241 | bbs-1      | Y105E8A.5                   |
| -0.25679102923797                   | AGIWUR133                           |          |                |            |                             |
| N2 CT I                             | 14378386                            | 14379425 | WBGene00044264 | Y105E8A.32 | Y105E8A.32                  |
| 0.115235024726832                   | AGIWUR17134                         |          |                |            |                             |
| N2 CT I                             | 14381344                            | 14384737 | WBGene00006824 | unc-95     | Y105E8A.6                   |
| 0.206492625541333                   | AGIWUR23275                         |          |                |            |                             |
| N2 CT I                             | 14390333                            | 14400222 | WBGene00002977 | lev-10     | Y105E8A.7                   |
| 0.198863937160283                   | AGIWUR23424;AGIWUR35694;AGIWUR38498 |          |                |            |                             |
| N2 CT I                             | 14400679                            | 14405649 | WBGene00013669 | Y105E8A.8  | Y105E8A.8                   |
| -0.0700173630710985                 | AGIWUR12986                         |          |                |            |                             |
| N2 CT I                             | 14406028                            | 14417942 | WBGene00000158 | apg-1      | Y105E8A.9                   |
| 0.138017884703361                   | AGIWUR1586;AGIWUR14637              |          |                |            |                             |
| N2 CT I                             | 14418197                            | 14431806 | WBGene00013670 | hpo-13     | Y105E8A.10                  |
| -0.18953903111889                   | AGIWUR42701                         |          |                |            |                             |
| N2 CT I                             | 14432793                            | 14433841 | WBGene00013671 | Y105E8A.11 | Y105E8A.11                  |
| -0.18411920966313                   | AGIWUR15864                         |          |                |            |                             |
| N2 CT I                             | 14436810                            | 14451880 | WBGene00013672 | catp-1     | Y105E8A.12                  |
| -0.0812466693832921                 | AGIWUR4487                          |          |                |            |                             |

|                                                                                              |    |   |          |          |                |            |            |
|----------------------------------------------------------------------------------------------|----|---|----------|----------|----------------|------------|------------|
| N2                                                                                           | CT | I | 14465380 | 14468214 | WBGene00013674 | Y105E8A.14 | Y105E8A.14 |
| 0.050612274789219                                                                            |    |   |          |          |                |            |            |
| AGIWUR918;AGIWUR7311;AGIWUR12133;AGIWUR12400;AGIWUR29395;AGIWUR31736;AGIWUR37639;AGIWUR43745 |    |   |          |          |                |            |            |
| N2                                                                                           | CT | I | 14468321 | 14469354 | WBGene00004489 | rps-20     | Y105E8A.16 |
| 0.126756117720591                                                                            |    |   |          |          |                |            |            |
| AGIWUR26559                                                                                  |    |   |          |          |                |            |            |
| N2                                                                                           | CT | I | 14469506 | 14476790 | WBGene00013676 | ekl-4      | Y105E8A.17 |
| -0.101496710674726                                                                           |    |   |          |          |                |            |            |
| AGIWUR43665;AGIWUR43829                                                                      |    |   |          |          |                |            |            |
| N2                                                                                           | CT | I | 14476674 | 14486767 | WBGene00013677 | yars-1     | Y105E8A.19 |
| 0.0481501448024071                                                                           |    |   |          |          |                |            |            |
| AGIWUR18952;AGIWUR25570                                                                      |    |   |          |          |                |            |            |
| N2                                                                                           | CT | I | 14486878 | 14496560 | WBGene00013678 | Y105E8A.20 | Y105E8A.20 |
| -0.260456476705686                                                                           |    |   |          |          |                |            |            |
| AGIWUR11146                                                                                  |    |   |          |          |                |            |            |
| N2                                                                                           | CT | I | 14496909 | 14498291 | WBGene00013685 | Y105E8A.28 | Y105E8A.28 |
| -0.00647710859812101                                                                         |    |   |          |          |                |            |            |
| AGIWUR6382                                                                                   |    |   |          |          |                |            |            |
| N2                                                                                           | CT | I | 14499727 | 14510552 | WBGene00013679 | Y105E8A.21 | Y105E8A.21 |
| -0.066674902637196                                                                           |    |   |          |          |                |            |            |
| AGIWUR3433                                                                                   |    |   |          |          |                |            |            |
| N2                                                                                           | CT | I | 14511431 | 14518719 | WBGene00001365 | exc-4      | Y105E8A.22 |
| -0.00764772080825882                                                                         |    |   |          |          |                |            |            |
| AGIWUR16297;AGIWUR28292                                                                      |    |   |          |          |                |            |            |
| N2                                                                                           | CT | I | 14529531 | 14546634 | WBGene00013683 | zoo-1      | Y105E8A.26 |
| 0.0705956840746627                                                                           |    |   |          |          |                |            |            |
| AGIWUR38954                                                                                  |    |   |          |          |                |            |            |
| N2                                                                                           | CT | I | 14552030 | 14565853 | WBGene00013680 | rpom-1     | Y105E8A.23 |
| 0.0923377926049191                                                                           |    |   |          |          |                |            |            |
| AGIWUR36449                                                                                  |    |   |          |          |                |            |            |
| N2                                                                                           | CT | I | 14567169 | 14616524 | WBGene00013682 | Y105E8A.25 | Y105E8A.25 |
| 0.00744154823912879                                                                          |    |   |          |          |                |            |            |
| AGIWUR1343;AGIWUR2683;AGIWUR4821;AGIWUR7929;AGIWUR18859;AGIWUR19624;AGIWUR36825              |    |   |          |          |                |            |            |
| N2                                                                                           | CT | I | 14620388 | 14620632 | WBGene00044265 | Y105E8B.11 | Y105E8B.11 |
| -0.0447272324556494                                                                          |    |   |          |          |                |            |            |
| AGIWUR949;AGIWUR4198;AGIWUR10506;AGIWUR29150;AGIWUR40348                                     |    |   |          |          |                |            |            |
| N2                                                                                           | CT | I | 14621173 | 14631254 | WBGene00002978 | lev-11     | Y105E8B.1  |
| 0.116227474684704                                                                            |    |   |          |          |                |            |            |
| AGIWUR10189;AGIWUR13276;AGIWUR26792;AGIWUR32066                                              |    |   |          |          |                |            |            |
| N2                                                                                           | CT | I | 14634456 | 14642653 | WBGene00013687 | exoc-8     | Y105E8B.2  |
| 0.00651638657722087                                                                          |    |   |          |          |                |            |            |
| AGIWUR34821;AGIWUR40365;AGIWUR40499;AGIWUR43251                                              |    |   |          |          |                |            |            |
| N2                                                                                           | CT | I | 14642714 | 14646600 | WBGene00013692 | Y105E8B.7  | Y105E8B.7  |
| -0.202504324120543                                                                           |    |   |          |          |                |            |            |
| AGIWUR3209                                                                                   |    |   |          |          |                |            |            |
| N2                                                                                           | CT | I | 14647782 | 14651456 | WBGene00013689 | bath-40    | Y105E8B.4  |
| 0.433696155989832                                                                            |    |   |          |          |                |            |            |
| AGIWUR35669                                                                                  |    |   |          |          |                |            |            |
| N2                                                                                           | CT | I | 14652116 | 14657275 | WBGene00013688 | riok-2     | Y105E8B.3  |
| 0.0137366260774812                                                                           |    |   |          |          |                |            |            |
| AGIWUR17763;AGIWUR26680;AGIWUR41638                                                          |    |   |          |          |                |            |            |
| N2                                                                                           | CT | I | 14657355 | 14661414 | WBGene00013690 | hprt-1     | Y105E8B.5  |
| -0.0449700648410403                                                                          |    |   |          |          |                |            |            |
| AGIWUR26599                                                                                  |    |   |          |          |                |            |            |
| N2                                                                                           | CT | I | 14662524 | 14662873 | WBGene00013691 | Y105E8B.6  | Y105E8B.6  |
| -0.0591038525223535                                                                          |    |   |          |          |                |            |            |
| AGIWUR6708;AGIWUR11489;AGIWUR23025;AGIWUR33975;AGIWUR37197;AGIWUR39910                       |    |   |          |          |                |            |            |

|                                                                                  |    |   |                                                                       |          |                |           |           |                     |
|----------------------------------------------------------------------------------|----|---|-----------------------------------------------------------------------|----------|----------------|-----------|-----------|---------------------|
| N2                                                                               | CT | I | 14663209                                                              | 14674822 | WBGene00001334 | ero-1     | Y105E8B.8 |                     |
| -0.0742617110337367                                                              |    |   | AGIWUR15790;AGIWUR38676                                               |          |                |           |           |                     |
| N2                                                                               | CT | I | 14675600                                                              | 14682566 | WBGene00013693 | Y105E8B.9 | Y105E8B.9 |                     |
| -0.199686519257641                                                               |    |   | AGIWUR1425;AGIWUR6556;AGIWUR10139;AGIWUR24148                         |          |                |           |           |                     |
| N2                                                                               | CT | I | 14688639                                                              | 14691736 | WBGene00013197 | ttm-5     | Y54E5A.1  |                     |
| -0.246445949042322                                                               |    |   | AGIWUR43809                                                           |          |                |           |           |                     |
| N2                                                                               | CT | I | 14694154                                                              | 14700392 | WBGene00013198 | Y54E5A.2  | Y54E5A.2  |                     |
| 0.291172488184223                                                                |    |   | AGIWUR12835;AGIWUR39872                                               |          |                |           |           |                     |
| N2                                                                               | CT | I | 14701122                                                              | 14706522 | WBGene00003790 | npp-4     | Y54E5A.4  |                     |
| -0.0640466777973847                                                              |    |   | AGIWUR665;AGIWUR10793;AGIWUR11371;AGIWUR15099;AGIWUR25502;AGIWUR33722 |          |                |           |           |                     |
| N2                                                                               | CT | I | 14707059                                                              | 14707875 | WBGene00013200 | Y54E5A.5  | Y54E5A.5  |                     |
| -0.0403966846703234                                                              |    |   | AGIWUR39609                                                           |          |                |           |           |                     |
| N2                                                                               | CT | I | 14708195                                                              | 14710961 | WBGene00013201 | dus-2     | Y54E5A.6  |                     |
| -0.116539850810122                                                               |    |   | AGIWUR32804                                                           |          |                |           |           |                     |
| N2                                                                               | CT | I | 14711081                                                              | 14715030 | WBGene00013202 | Y54E5A.7  | Y54E5A.7  |                     |
| -0.0586812475594538                                                              |    |   | AGIWUR27553                                                           |          |                |           |           |                     |
| N2                                                                               | CT | I | 14716528                                                              | 14719027 | WBGene00013203 | Y54E5A.8  | Y54E5A.8  |                     |
| -0.00939895119001211                                                             |    |   | AGIWUR31127;AGIWUR33181                                               |          |                |           |           |                     |
| N2                                                                               | CT | I | 14719167                                                              | 14720477 | WBGene00003951 | pbs-5     | K05C4.1   | -0.0494436644274368 |
| AGIWUR4323;AGIWUR6843                                                            |    |   |                                                                       |          |                |           |           |                     |
| N2                                                                               | CT | I | 14720588                                                              | 14721979 | WBGene00010579 | K05C4.2   | K05C4.2   | -0.0449631458969488 |
| AGIWUR97;AGIWUR12763;AGIWUR19503;AGIWUR28718;AGIWUR37026;AGIWUR39116;AGIWUR39497 |    |   |                                                                       |          |                |           |           |                     |
| N2                                                                               | CT | I | 14725296                                                              | 14726131 | WBGene00010586 | K05C4.10  | K05C4.10  |                     |
| -0.195718630852927                                                               |    |   | AGIWUR6961;AGIWUR7840;AGIWUR25950                                     |          |                |           |           |                     |
| N2                                                                               | CT | I | 14726804                                                              | 14730719 | WBGene00010585 | K05C4.9   | K05C4.9   | 0.0934881748739276  |
| AGIWUR29746                                                                      |    |   |                                                                       |          |                |           |           |                     |
| N2                                                                               | CT | I | 14732426                                                              | 14733549 | WBGene00010584 | K05C4.8   | K05C4.8   | 0.0707906585324372  |
| AGIWUR39087                                                                      |    |   |                                                                       |          |                |           |           |                     |
| N2                                                                               | CT | I | 14735236                                                              | 14736945 | WBGene00010581 | K05C4.4   | K05C4.4   | -0.340486756701491  |
| AGIWUR43308                                                                      |    |   |                                                                       |          |                |           |           |                     |
| N2                                                                               | CT | I | 14737702                                                              | 14738796 | WBGene00010583 | K05C4.7   | K05C4.7   | -0.068645637397065  |
| AGIWUR26735                                                                      |    |   |                                                                       |          |                |           |           |                     |
| N2                                                                               | CT | I | 14738882                                                              | 14742657 | WBGene00001979 | hmp-2     | K05C4.6   | -0.0846487781678942 |
| AGIWUR5348                                                                       |    |   |                                                                       |          |                |           |           |                     |
| N2                                                                               | CT | I | 14742765                                                              | 14747789 | WBGene00010582 | K05C4.5   | K05C4.5   | -0.138204604839082  |
| AGIWUR38011                                                                      |    |   |                                                                       |          |                |           |           |                     |
| N2                                                                               | CT | I | 14755154                                                              | 14756432 | WBGene00009559 | mtx-1     | F39B2.11  |                     |
| -0.0378900998623894                                                              |    |   | AGIWUR191;AGIWUR5779;AGIWUR11203;AGIWUR43974                          |          |                |           |           |                     |
| N2                                                                               | CT | I | 14756858                                                              | 14759354 | WBGene00001030 | dnj-12    | F39B2.10  |                     |

|                                                                                                |                                                                         |
|------------------------------------------------------------------------------------------------|-------------------------------------------------------------------------|
| -0.167029857037994                                                                             | AGIWUR13540;AGIWUR15860;AGIWUR19114;AGIWUR25936;AGIWUR32563;AGIWUR40305 |
| N2 CT I 14759918 14760654                                                                      | WBGene00004495 rps-26 F39B2.6 0.304076676831038                         |
| AGIWUR5600;AGIWUR11547;AGIWUR15702;AGIWUR16030;AGIWUR26227;AGIWUR35000;AGIWUR36505;AGIWUR42692 |                                                                         |
| N2 CT I 14760644 14768980                                                                      | WBGene00009558 F39B2.8 F39B2.8                                          |
| -0.00120661131673572                                                                           | AGIWUR40829                                                             |
| N2 CT I 14770689 14775007                                                                      | WBGene00009557 mtcu-1 F39B2.7 -0.140239544874349                        |
| AGIWUR33237                                                                                    |                                                                         |
| N2 CT I 14775184 14776663                                                                      | WBGene00009556 F39B2.5 F39B2.5 -0.253486505400989                       |
| AGIWUR3717                                                                                     |                                                                         |
| N2 CT I 14777139 14787804                                                                      | WBGene00006349 sur-2 F39B2.4 -0.116611498845785                         |
| AGIWUR2835                                                                                     |                                                                         |
| N2 CT I 14788125 14789517                                                                      | WBGene00009554 F39B2.3 F39B2.3 -0.144087851893226                       |
| AGIWUR9553;AGIWUR10012;AGIWUR18635;AGIWUR19118;AGIWUR28859;AGIWUR38962                         |                                                                         |
| N2 CT I 14790244 14790934                                                                      | WBGene00006730 uev-1 F39B2.2 -0.0434966888111354                        |
| AGIWUR32262                                                                                    |                                                                         |
| N2 CT I 14791040 14794371                                                                      | WBGene00009553 hinf-1 F39B2.1 0.151198147731232                         |
| AGIWUR523;AGIWUR1351;AGIWUR6152;AGIWUR7485;AGIWUR15969;AGIWUR17279;AGIWUR21722;AGIWUR25305     |                                                                         |
| N2 CT I 14794899 14797166                                                                      | WBGene00010766 K11B4.1 K11B4.1 -0.159162618270187                       |
| AGIWUR14744                                                                                    |                                                                         |
| N2 CT I 14797660 14798705                                                                      | WBGene00010767 blos-9 K11B4.2 -0.208714117188331                        |
| AGIWUR7970                                                                                     |                                                                         |
| N2 CT I 14807467 14815725                                                                      | WBGene00004889 smp-1 Y54E5B.1                                           |
| 0.223712781681676                                                                              | AGIWUR30467;AGIWUR30814                                                 |
| N2 CT I 14815706 14820222                                                                      | WBGene00013204 Y54E5B.2 Y54E5B.2                                        |
| -0.246883315621043                                                                             | AGIWUR11700;AGIWUR39232                                                 |
| N2 CT I 14820381 14821651                                                                      | WBGene00002324 let-49 Y54E5B.3                                          |
| -0.173960480867342                                                                             | AGIWUR23956                                                             |
| N2 CT I 14822050 14823996                                                                      | WBGene00006711 ubc-16 Y54E5B.4                                          |
| 0.00476206067154905                                                                            | AGIWUR12386;AGIWUR26881;AGIWUR26984;AGIWUR40178                         |
| N2 CT I 14824493 14825952                                                                      | WBGene00014921 Y54E5B.5 Y54E5B.5                                        |
| 0.0885564698264769                                                                             | AGIWUR12811;AGIWUR14671                                                 |
| N2 CT I 14826558 14827779                                                                      | WBGene00005839 srw-92 F32A7.1 0.0947186512482974                        |
| AGIWUR1679;AGIWUR23528;AGIWUR25181;AGIWUR30153;AGIWUR41623;AGIWUR41896                         |                                                                         |
| N2 CT I 14828200 14829594                                                                      | WBGene00005840 srw-93 F32A7.2 0.016010539352115                         |
| AGIWUR1982;AGIWUR19601;AGIWUR32483;AGIWUR33418                                                 |                                                                         |
| N2 CT I 14829667 14834839                                                                      | WBGene00009304 eva-1 F32A7.3                                            |
| -0.00461893324269269                                                                           | AGIWUR1324;AGIWUR10089;AGIWUR20986;AGIWUR37717;AGIWUR43383              |
| N2 CT I 14838917 14839138                                                                      | WBGene00044245 F32A7.8 F32A7.8 -0.100797943044334                       |
| AGIWUR10354;AGIWUR11237;AGIWUR18460;AGIWUR40339;AGIWUR41657                                    |                                                                         |

|                                                                                                                                                                                 |    |   |          |          |                |          |         |                     |
|---------------------------------------------------------------------------------------------------------------------------------------------------------------------------------|----|---|----------|----------|----------------|----------|---------|---------------------|
| N2                                                                                                                                                                              | CT | I | 14839856 | 14843128 | WBGene00009305 | F32A7.4  | F32A7.4 | -0.0362701288228617 |
| AGIWUR13160                                                                                                                                                                     |    |   |          |          |                |          |         |                     |
| N2                                                                                                                                                                              | CT | I | 14846476 | 14850137 | WBGene00009306 | mapH-1.1 |         | F32A7.5             |
| 0.242744190647416 AGIWUR5224;AGIWUR15454;AGIWUR20881;AGIWUR24422;AGIWUR29527                                                                                                    |    |   |          |          |                |          |         |                     |
| N2                                                                                                                                                                              | CT | I | 14850054 | 14855827 | WBGene00000088 | aex-5    | F32A7.6 | -0.0757813266349565 |
| AGIWUR36674                                                                                                                                                                     |    |   |          |          |                |          |         |                     |
| N2                                                                                                                                                                              | CT | I | 14855901 | 14863573 | WBGene00006789 | unc-54   | F11C3.3 | 0.40398138275804    |
| AGIWUR25719;AGIWUR36183;AGIWUR43581                                                                                                                                             |    |   |          |          |                |          |         |                     |
| N2                                                                                                                                                                              | CT | I | 14867924 | 14871467 | WBGene00008695 | F11C3.1  | F11C3.1 | -0.270707003053554  |
| AGIWUR21606                                                                                                                                                                     |    |   |          |          |                |          |         |                     |
| N2                                                                                                                                                                              | CT | I | 14872112 | 14875378 | WBGene00006845 | unc-122  | F11C3.2 | -0.192484274698833  |
| AGIWUR5296                                                                                                                                                                      |    |   |          |          |                |          |         |                     |
| N2                                                                                                                                                                              | CT | I | 14875784 | 14900213 | WBGene00001488 | frm-1    | ZK270.2 | -0.0198483626385908 |
| AGIWUR29071;AGIWUR39050;AGIWUR42633                                                                                                                                             |    |   |          |          |                |          |         |                     |
| N2                                                                                                                                                                              | CT | I | 14909240 | 14913083 | WBGene00004237 | ptr-23   | ZK270.1 | 0.101802151816349   |
| AGIWUR19053                                                                                                                                                                     |    |   |          |          |                |          |         |                     |
| N2                                                                                                                                                                              | CT | I | 14913623 | 14915571 | WBGene00009022 | F21F12.1 |         | F21F12.1            |
| 0.214076110367535 AGIWUR3298                                                                                                                                                    |    |   |          |          |                |          |         |                     |
| N2                                                                                                                                                                              | CT | I | 14919533 | 14951924 | WBGene00002189 | kin-1    | ZK909.2 | 0.0155776829414513  |
| AGIWUR2274;AGIWUR5154;AGIWUR8830;AGIWUR9986;AGIWUR11088;AGIWUR14732;AGIWUR18535;AGIWUR27166;AGIWUR34274;AGIWUR35252;AGIWUR38388;AGIWUR40098;AGIWUR41578;AGIWUR42171;AGIWUR43175 |    |   |          |          |                |          |         |                     |
| N2                                                                                                                                                                              | CT | I | 14953490 | 14955492 | WBGene00014148 | ZK909.3  | ZK909.3 | 0.0257148615192584  |
| AGIWUR12225;AGIWUR23203;AGIWUR29149;AGIWUR39359;AGIWUR39889                                                                                                                     |    |   |          |          |                |          |         |                     |
| N2                                                                                                                                                                              | CT | I | 14955647 | 14957097 | WBGene00014149 | fbxb-70  | ZK909.5 | -0.0515185767489079 |
| AGIWUR10119;AGIWUR38208;AGIWUR44401                                                                                                                                             |    |   |          |          |                |          |         |                     |
| N2                                                                                                                                                                              | CT | I | 14961501 | 14965361 | WBGene00000469 | ces-2    | ZK909.4 | -0.140129435759873  |
| AGIWUR13093                                                                                                                                                                     |    |   |          |          |                |          |         |                     |
| N2                                                                                                                                                                              | CT | I | 14967301 | 14968540 | WBGene00014150 | ZK909.6  | ZK909.6 | 0.0792693305780219  |
| AGIWUR20349                                                                                                                                                                     |    |   |          |          |                |          |         |                     |
| N2                                                                                                                                                                              | CT | I | 14975419 | 14980586 | WBGene00013970 | klu-1    | ZK337.2 | 0.237734008139959   |
| AGIWUR38347                                                                                                                                                                     |    |   |          |          |                |          |         |                     |
| N2                                                                                                                                                                              | CT | I | 14984178 | 14987658 | WBGene00006399 | tag-4    | ZK337.4 | 0.126566532656888   |
| AGIWUR16061                                                                                                                                                                     |    |   |          |          |                |          |         |                     |
| N2                                                                                                                                                                              | CT | I | 14993821 | 15001682 | WBGene00013969 | tep-1    | ZK337.1 | 0.102609990344199   |
| AGIWUR25691                                                                                                                                                                     |    |   |          |          |                |          |         |                     |
| N2                                                                                                                                                                              | CT | I | 15001854 | 15005608 | WBGene00003471 | mtD-1    | ZK337.5 | 0.135498706723009   |
| AGIWUR33354                                                                                                                                                                     |    |   |          |          |                |          |         |                     |
| N2                                                                                                                                                                              | CT | I | 15005603 | 15013904 | WBGene00009368 | pole-1   | F33H2.5 | -0.0141302003848907 |
| AGIWUR7795                                                                                                                                                                      |    |   |          |          |                |          |         |                     |

|                                                                                                                                                          |    |    |          |          |                |          |          |                               |
|----------------------------------------------------------------------------------------------------------------------------------------------------------|----|----|----------|----------|----------------|----------|----------|-------------------------------|
| N2                                                                                                                                                       | CT | I  | 15014851 | 15016595 | WBGene00009369 | F33H2.6  | F33H2.6  | -0.0653311588680783           |
| AGIWUR26108;AGIWUR28125;AGIWUR29986;AGIWUR34837;AGIWUR37775;AGIWUR38817                                                                                  |    |    |          |          |                |          |          |                               |
| N2                                                                                                                                                       | CT | I  | 15017283 | 15023017 | WBGene00001049 | dog-1    | F33H2.1  | -0.210764497700044            |
| AGIWUR16013                                                                                                                                              |    |    |          |          |                |          |          |                               |
| N2                                                                                                                                                       | CT | I  | 15023092 | 15027761 | WBGene00009366 | F33H2.2  | F33H2.2  | -0.151532126127961            |
| AGIWUR41707                                                                                                                                              |    |    |          |          |                |          |          |                               |
| N2                                                                                                                                                       | CT | I  | 15027717 | 15030666 | WBGene00009370 | set-10   | F33H2.7  | -0.158759986682787            |
| AGIWUR21015;AGIWUR27125                                                                                                                                  |    |    |          |          |                |          |          |                               |
| N2                                                                                                                                                       | CT | I  | 15031145 | 15033039 | WBGene00009371 | F33H2.8  | F33H2.8  | -0.0609082362460622           |
| AGIWUR34249                                                                                                                                              |    |    |          |          |                |          |          |                               |
| N2                                                                                                                                                       | CT | I  | 15034517 | 15035467 | WBGene00009367 | F33H2.3  | F33H2.3  | -0.0622068169404244           |
| AGIWUR26011                                                                                                                                              |    |    |          |          |                |          |          |                               |
| N2                                                                                                                                                       | CT | I  | 15036373 | 15040487 | WBGene00009284 | F31C3.2  | F31C3.2  | -0.100012910465509            |
| AGIWUR3373                                                                                                                                               |    |    |          |          |                |          |          |                               |
| N2                                                                                                                                                       | CT | I  | 15040427 | 15041274 | WBGene00000881 | cyn-5    | F31C3.1  | -0.0198966974194974           |
| AGIWUR8073;AGIWUR36731                                                                                                                                   |    |    |          |          |                |          |          |                               |
| N2                                                                                                                                                       | CT | I  | 15041433 | 15050700 | WBGene00009285 | F31C3.3  | F31C3.3  | 0.186910233547794             |
| AGIWUR40656                                                                                                                                              |    |    |          |          |                |          |          |                               |
| N2                                                                                                                                                       | CT | I  | 15050797 | 15052420 | WBGene00009286 | zipt-1   | F31C3.4  | 0.0503155024358648            |
| AGIWUR32215;AGIWUR36866;AGIWUR41938                                                                                                                      |    |    |          |          |                |          |          |                               |
| N2                                                                                                                                                       | CT | I  | 15053025 | 15053670 | WBGene00009287 | psf-2    | F31C3.5  | -0.221492857636123            |
| AGIWUR7586                                                                                                                                               |    |    |          |          |                |          |          |                               |
| N2                                                                                                                                                       | CT | I  | 15053617 | 15059003 | WBGene00009288 | F31C3.6  | F31C3.6  | 0.0103166032669586            |
| AGIWUR4435;AGIWUR6596;AGIWUR10855;AGIWUR23668;AGIWUR30942;AGIWUR43814                                                                                    |    |    |          |          |                |          |          |                               |
| N2                                                                                                                                                       | CT | I  | 15064301 | 15064453 | WBGene00004567 | rrn-2.1  | F31C3.11 |                               |
| -0.0416720846952856 AGIWUR3226;AGIWUR10771;AGIWUR23918;AGIWUR33092;AGIWUR34754                                                                           |    |    |          |          |                |          |          |                               |
| N2                                                                                                                                                       | CT | I  | 15064838 | 15068346 | WBGene00004622 | rrn-3.1  | F31C3.9  | 0.203017630452671             |
| AGIWUR1682;AGIWUR9181;AGIWUR9854;AGIWUR13031;AGIWUR16753;AGIWUR20764;AGIWUR24344;AGIWUR25995;AGIWUR26866;AGIWUR28966;AGIWUR31062;AGIWUR40604;AGIWUR42613 |    |    |          |          |                |          |          |                               |
| N2                                                                                                                                                       | CT | II | 1848     | 4717     | WBGene00007063 | 2L52.1   | 2L52.1   | -0.120669423946402 AGIWUR7229 |
| N2                                                                                                                                                       | CT | II | 5129     | 5483     | WBGene00022904 | C01B12.9 | C01B12.9 | -0.103318670637012            |
| AGIWUR3983;AGIWUR13294;AGIWUR20192;AGIWUR35059;AGIWUR42377                                                                                               |    |    |          |          |                |          |          |                               |
| N2                                                                                                                                                       | CT | II | 6664     | 9486     | WBGene00015287 | osta-1   | C01B12.4 | 0.108803865345564             |
| AGIWUR4697;AGIWUR29006;AGIWUR40725                                                                                                                       |    |    |          |          |                |          |          |                               |
| N2                                                                                                                                                       | CT | II | 9485     | 11846    | WBGene00015288 | best-4   | C01B12.5 | -0.107890633723377            |
| AGIWUR7492;AGIWUR13932;AGIWUR42239                                                                                                                       |    |    |          |          |                |          |          |                               |
| N2                                                                                                                                                       | CT | II | 12985    | 16001    | WBGene00015286 | best-3   | C01B12.3 | -0.199930682881602            |
| AGIWUR14530                                                                                                                                              |    |    |          |          |                |          |          |                               |
| N2                                                                                                                                                       | CT | II | 19538    | 22169    | WBGene00015285 | gmeb-1   | C01B12.2 | -0.239942418900198            |



AGIWUR30642;AGIWUR31147;AGIWUR31577;AGIWUR43552  
N2 CT II 23328 24458 WBGene00005017 sqt-2 C01B12.1 -0.0762708567651202  
AGIWUR13749;AGIWUR14151;AGIWUR38043  
N2 CT II 24666 25446 WBGene00015291 C01B12.8 C01B12.8 -0.285616243861691  
AGIWUR4616  
N2 CT II 25382 28423 WBGene00017745 F23F1.4 F23F1.4 -0.00138268694252641  
AGIWUR29868;AGIWUR33772  
N2 CT II 30061 31584 WBGene00017746 F23F1.5 F23F1.5 0.379205325199973 AGIWUR40336  
N2 CT II 31768 33610 WBGene00017744 fbxc-54 F23F1.3 -0.0799856191778687 AGIWUR18725  
N2 CT II 34204 35262 WBGene00017743 F23F1.2 F23F1.2 0.32369020738347 AGIWUR15988  
N2 CT II 35202 37313 WBGene00017747 F23F1.6 F23F1.6 -0.112733202002079 AGIWUR34202  
N2 CT II 38558 39537 WBGene00017748 F23F1.7 F23F1.7 -0.197559065485549 AGIWUR1202  
N2 CT II 41471 41982 WBGene00017750 F23F1.10 F23F1.10 -0.197011601836293  
AGIWUR3668;AGIWUR12855;AGIWUR14753;AGIWUR19238;AGIWUR28736  
N2 CT II 42181 46216 WBGene00004504 rpt-4 F23F1.8 0.110259349372274  
AGIWUR4840;AGIWUR5595;AGIWUR18020;AGIWUR20985;AGIWUR35442  
N2 CT II 45040 47479 WBGene00017749 rpoa-49 F23F1.9 -0.0615492569305758 AGIWUR41889  
N2 CT II 47580 50303 WBGene00016021 C23H3.5 C23H3.5 -0.0930252338671345 AGIWUR14601  
N2 CT II 51072 57576 WBGene00016020 spt1-1 C23H3.4 -0.094369695064529  
AGIWUR15255;AGIWUR28293;AGIWUR41602  
N2 CT II 57670 60040 WBGene00016019 C23H3.3 C23H3.3 0.17307248968606  
AGIWUR17330;AGIWUR18749;AGIWUR41138  
N2 CT II 61302 64340 WBGene00016018 C23H3.2 C23H3.2 0.0996043824186001  
AGIWUR1906;AGIWUR13184;AGIWUR26164;AGIWUR32918  
N2 CT II 69654 71279 WBGene00001193 eg1-26 C23H3.1 0.102999968196391 AGIWUR31601  
N2 CT II 71672 79266 WBGene00016022 C23H3.9 C23H3.9 0.464717614463602  
AGIWUR6544;AGIWUR37497;AGIWUR38816  
N2 CT II 84434 87823 WBGene00016809 C50D2.6 C50D2.6 0.602688515857469 AGIWUR28282  
N2 CT II 88221 91519 WBGene00016812 C50D2.9 C50D2.9 -0.229443838654541 AGIWUR14627  
N2 CT II 92169 95277 WBGene00016810 C50D2.7 C50D2.7 -0.139111966351177 AGIWUR26625  
N2 CT II 96127 98027 WBGene00016811 C50D2.8 C50D2.8 -0.30210098845218 AGIWUR13595  
N2 CT II 98404 98961 WBGene00016808 C50D2.5 C50D2.5 0.0611629034741377  
AGIWUR3897;AGIWUR20416;AGIWUR21779;AGIWUR31226  
N2 CT II 99647 101061 WBGene00044420 C50D2.10 C50D2.10 0.073437758034145  
AGIWUR3739;AGIWUR5801;AGIWUR7174;AGIWUR29349;AGIWUR42173  
N2 CT II 104534 105833 WBGene00000644 col-68 C50D2.4 0.444468378593843 AGIWUR5687  
N2 CT II 106189 107521 WBGene00016807 C50D2.3 C50D2.3 0.18713697569372 AGIWUR39774  
N2 CT II 109165 111429 WBGene00016806 C50D2.2 C50D2.2 -0.101515416366839  
AGIWUR1716;AGIWUR23387;AGIWUR40635

|                                                                                                                       |    |    |        |        |                |            |            |                     |             |
|-----------------------------------------------------------------------------------------------------------------------|----|----|--------|--------|----------------|------------|------------|---------------------|-------------|
| N2                                                                                                                    | CT | II | 111621 | 114454 | WBGene00016805 | C50D2.1    | C50D2.1    | -0.0699260832256421 | AGIWUR33829 |
| N2                                                                                                                    | CT | II | 114429 | 121222 | WBGene00019615 | K10B4.3    | K10B4.3    | -0.0262424478792482 | AGIWUR40135 |
| N2                                                                                                                    | CT | II | 123270 | 125004 | WBGene00019616 | nmur-2     | K10B4.4    | 0.222053310020893   | AGIWUR4619  |
| N2                                                                                                                    | CT | II | 126938 | 128706 | WBGene00005081 | srd-3      | K10B4.5    | -0.306900821499796  | AGIWUR20269 |
| N2                                                                                                                    | CT | II | 130983 | 133598 | WBGene00000857 | cwn-1      | K10B4.6    | 0.152666689385008   | AGIWUR16463 |
| N2                                                                                                                    | CT | II | 135466 | 139999 | WBGene00019613 | K10B4.1    | K10B4.1    | 0.0983986434447797  | AGIWUR11600 |
| N2                                                                                                                    | CT | II | 147241 | 152825 | WBGene00020798 | T25D3.4    | T25D3.4    | -0.17541142932137   | AGIWUR37414 |
| N2                                                                                                                    | CT | II | 152525 | 154936 | WBGene00020797 | T25D3.3    | T25D3.3    | -0.19460973899422   | AGIWUR40922 |
| N2                                                                                                                    | CT | II | 154875 | 156043 | WBGene00020796 | mrp1-28    | T25D3.2    | 0.00236668410561336 |             |
| AGIWUR5393;AGIWUR23054;AGIWUR24701;AGIWUR35171;AGIWUR35915;AGIWUR40250;AGIWUR43080                                    |    |    |        |        |                |            |            |                     |             |
| N2                                                                                                                    | CT | II | 162374 | 170628 | WBGene00001340 | etr-1      | T01D1.2    | -0.0185238404512136 |             |
| AGIWUR4015;AGIWUR8140;AGIWUR15274;AGIWUR21571;AGIWUR31029;AGIWUR31047;AGIWUR31656;AGIWUR32715;AGIWUR36529;AGIWUR42342 |    |    |        |        |                |            |            |                     |             |
| N2                                                                                                                    | CT | II | 171386 | 173779 | WBGene00044428 | T01D1.7    | T01D1.7    | 0.0684809182572113  |             |
| AGIWUR33551;AGIWUR37702                                                                                               |    |    |        |        |                |            |            |                     |             |
| N2                                                                                                                    | CT | II | 174401 | 175642 | WBGene00020148 | T01D1.3    | T01D1.3    | -0.114762039200304  | AGIWUR6933  |
| N2                                                                                                                    | CT | II | 176997 | 179093 | WBGene00020149 | T01D1.4    | T01D1.4    | 0.0484337631408778  | AGIWUR11472 |
| N2                                                                                                                    | CT | II | 179261 | 192078 | WBGene00044641 | T01D1.8    | T01D1.8    | 0.0784472115288906  |             |
| AGIWUR3097;AGIWUR10524;AGIWUR10527;AGIWUR16181;AGIWUR19838;AGIWUR28896                                                |    |    |        |        |                |            |            |                     |             |
| N2                                                                                                                    | CT | II | 192531 | 194558 | WBGene00000034 | abu-11     | T01D1.6    | 0.108250881108646   | AGIWUR5572  |
| N2                                                                                                                    | CT | II | 196985 | 211941 | WBGene00000497 | chs-2      | F48A11.1   | -0.0123467195378568 |             |
| AGIWUR6866;AGIWUR9413;AGIWUR12416;AGIWUR12580;AGIWUR13068;AGIWUR28174;AGIWUR32227;AGIWUR38725                         |    |    |        |        |                |            |            |                     |             |
| N2                                                                                                                    | CT | II | 213169 | 216621 | WBGene00018585 | F48A11.4   | F48A11.4   | -0.0286379158295667 |             |
| AGIWUR38865                                                                                                           |    |    |        |        |                |            |            |                     |             |
| N2                                                                                                                    | CT | II | 217049 | 220667 | WBGene00018586 | ubxn-3     | F48A11.5   | 0.300887047844258   |             |
| AGIWUR38277                                                                                                           |    |    |        |        |                |            |            |                     |             |
| N2                                                                                                                    | CT | II | 222700 | 232739 | WBGene00021545 | Y43H11AL.1 | Y43H11AL.1 | -0.226595947414378  |             |
| AGIWUR31822                                                                                                           |    |    |        |        |                |            |            |                     |             |
| N2                                                                                                                    | CT | II | 232852 | 237821 | WBGene00021546 | laat-1     | Y43H11AL.2 | 0.138753548079372   |             |
| AGIWUR382;AGIWUR607;AGIWUR4019;AGIWUR31192;AGIWUR32769;AGIWUR41132                                                    |    |    |        |        |                |            |            |                     |             |
| N2                                                                                                                    | CT | II | 240722 | 255182 | WBGene00004166 | pqn-85     | Y43H11AL.3 | 0.0782696717722207  |             |
| AGIWUR10541                                                                                                           |    |    |        |        |                |            |            |                     |             |
| N2                                                                                                                    | CT | II | 257819 | 261063 | WBGene00000296 | cat-2      | B0432.5    | -0.116197369315005  |             |
| AGIWUR7552;AGIWUR31219                                                                                                |    |    |        |        |                |            |            |                     |             |
| N2                                                                                                                    | CT | II | 264353 | 266077 | WBGene00044640 | B0432.14   | B0432.14   | 0.113936571115422   |             |
| AGIWUR7508;AGIWUR7619;AGIWUR9732;AGIWUR17555;AGIWUR23611;AGIWUR35504;AGIWUR36059;AGIWUR38673;AGIWUR40321              |    |    |        |        |                |            |            |                     |             |
| N2                                                                                                                    | CT | II | 266301 | 273966 | WBGene00015188 | B0432.7    | B0432.7    | -0.0654431095582422 |             |
| AGIWUR4743;AGIWUR10714                                                                                                |    |    |        |        |                |            |            |                     |             |
| N2                                                                                                                    | CT | II | 276212 | 278736 | WBGene00015189 | B0432.8    | B0432.8    | 0.021964423007752   | AGIWUR8831  |

|                                                |    |    |        |        |                |          |          |                      |             |
|------------------------------------------------|----|----|--------|--------|----------------|----------|----------|----------------------|-------------|
| N2                                             | CT | II | 278621 | 282576 | WBGene00015194 | B0432.13 | B0432.13 | -0.144101320489828   |             |
| AGIWUR20880                                    |    |    |        |        |                |          |          |                      |             |
| N2                                             | CT | II | 282576 | 283694 | WBGene00015190 | B0432.9  | B0432.9  | -0.289584267524752   | AGIWUR23197 |
| N2                                             | CT | II | 283887 | 286275 | WBGene00015191 | B0432.10 | B0432.10 | -0.126762142697265   |             |
| AGIWUR20057                                    |    |    |        |        |                |          |          |                      |             |
| N2                                             | CT | II | 286625 | 288850 | WBGene00015186 | misc-1   | B0432.4  | -0.0890982239518294  | AGIWUR20234 |
| N2                                             | CT | II | 288939 | 290391 | WBGene00015185 | mrpl-41  | B0432.3  | -0.275409980925065   | AGIWUR1350  |
| N2                                             | CT | II | 290582 | 291861 | WBGene00015184 | djr-1.1  | B0432.2  | -0.105166486093612   | AGIWUR11594 |
| N2                                             | CT | II | 293864 | 294706 | WBGene00015192 | B0432.11 | B0432.11 | 0.110359998639113    |             |
| AGIWUR35985                                    |    |    |        |        |                |          |          |                      |             |
| N2                                             | CT | II | 296291 | 297010 | WBGene00015193 | clcc-117 | B0432.12 | 0.395328426864184    |             |
| AGIWUR35170                                    |    |    |        |        |                |          |          |                      |             |
| N2                                             | CT | II | 297399 | 299735 | WBGene00015183 | B0432.1  | B0432.1  | -0.115063192976953   | AGIWUR9466  |
| N2                                             | CT | II | 302405 | 303659 | WBGene00019280 | K01A2.5  | K01A2.5  | -0.0925324280473667  | AGIWUR41704 |
| N2                                             | CT | II | 303924 | 305530 | WBGene00000645 | col-69   | K01A2.7  | -1.12099219955917    | AGIWUR24367 |
| N2                                             | CT | II | 307545 | 313969 | WBGene00019279 | K01A2.4  | K01A2.4  | -0.126419066839889   |             |
| AGIWUR1000;AGIWUR1739                          |    |    |        |        |                |          |          |                      |             |
| N2                                             | CT | II | 319785 | 321445 | WBGene00001391 | far-7    | K01A2.2  | -0.100315314774182   |             |
| AGIWUR24256;AGIWUR29060;AGIWUR40355            |    |    |        |        |                |          |          |                      |             |
| N2                                             | CT | II | 321442 | 323098 | WBGene00019284 | K01A2.10 | K01A2.10 | -0.240659839651189   |             |
| AGIWUR2318                                     |    |    |        |        |                |          |          |                      |             |
| N2                                             | CT | II | 326262 | 328224 | WBGene00019277 | sgcb-1   | K01A2.1  | -0.15309126392064    |             |
| AGIWUR7196;AGIWUR43662                         |    |    |        |        |                |          |          |                      |             |
| N2                                             | CT | II | 328564 | 332513 | WBGene00019285 | cbn-1    | K01A2.11 | -0.0789260059399304  |             |
| AGIWUR15086;AGIWUR18315;AGIWUR42119            |    |    |        |        |                |          |          |                      |             |
| N2                                             | CT | II | 337339 | 339248 | WBGene00000778 | cpn-2    | D1069.2  | -0.18476100071457    | AGIWUR32382 |
| N2                                             | CT | II | 341982 | 347891 | WBGene00017037 | D1069.3  | D1069.3  | -0.0730942407661761  |             |
| AGIWUR2482;AGIWUR11734;AGIWUR22668;AGIWUR31920 |    |    |        |        |                |          |          |                      |             |
| N2                                             | CT | II | 348266 | 357024 | WBGene00017038 | dmsr-4   | D1069.4  | 0.0285923986800012   |             |
| AGIWUR1416;AGIWUR19580                         |    |    |        |        |                |          |          |                      |             |
| N2                                             | CT | II | 362495 | 367555 | WBGene00004218 | ptr-3    | C41D7.2  | 0.0435222031209515   | AGIWUR13713 |
| N2                                             | CT | II | 375250 | 375835 | WBGene00015406 | C03H5.4  | C03H5.4  | -0.0841835726191302  |             |
| AGIWUR16004;AGIWUR28127;AGIWUR29633            |    |    |        |        |                |          |          |                      |             |
| N2                                             | CT | II | 380573 | 382257 | WBGene00015409 | C03H5.7  | C03H5.7  | 0.0574582921655535   |             |
| AGIWUR1131;AGIWUR3098;AGIWUR42721              |    |    |        |        |                |          |          |                      |             |
| N2                                             | CT | II | 382309 | 385358 | WBGene00015407 | C03H5.5  | C03H5.5  | -0.0961989847881952  | AGIWUR9543  |
| N2                                             | CT | II | 386134 | 387949 | WBGene00015405 | C03H5.3  | C03H5.3  | 0.0305162519691287   | AGIWUR35781 |
| N2                                             | CT | II | 388833 | 392732 | WBGene00015404 | nstp-4   | C03H5.2  | -0.00953976757136665 | AGIWUR10131 |
| N2                                             | CT | II | 402580 | 404235 | WBGene00015403 | clcc-10  | C03H5.1  | 0.0657090556303572   | AGIWUR17547 |

|                                                                                  |    |    |        |        |                |           |           |                     |             |
|----------------------------------------------------------------------------------|----|----|--------|--------|----------------|-----------|-----------|---------------------|-------------|
| N2                                                                               | CT | II | 406141 | 410961 | WBGene00016074 | C24H12.5  | C24H12.5  | -0.222501853918134  |             |
| AGIWUR38684                                                                      |    |    |        |        |                |           |           |                     |             |
| N2                                                                               | CT | II | 411222 | 416620 | WBGene00016073 | C24H12.4  | C24H12.4  | 0.0153174567162218  |             |
| AGIWUR8344;AGIWUR26796;AGIWUR27112;AGIWUR35447;AGIWUR44221                       |    |    |        |        |                |           |           |                     |             |
| N2                                                                               | CT | II | 417349 | 418882 | WBGene00016075 | C24H12.6  | C24H12.6  | 0.0106755639220033  |             |
| AGIWUR12274                                                                      |    |    |        |        |                |           |           |                     |             |
| N2                                                                               | CT | II | 419178 | 420568 | WBGene00016076 | C24H12.7  | C24H12.7  | 0.02482534743051    |             |
| AGIWUR2158                                                                       |    |    |        |        |                |           |           |                     |             |
| N2                                                                               | CT | II | 422319 | 423142 | WBGene00016077 | C24H12.8  | C24H12.8  | 0.135745683676765   |             |
| AGIWUR66                                                                         |    |    |        |        |                |           |           |                     |             |
| N2                                                                               | CT | II | 423624 | 427019 | WBGene00016078 | C24H12.9  | C24H12.9  | 0.153310289262809   |             |
| AGIWUR781;AGIWUR7070;AGIWUR11382;AGIWUR12130;AGIWUR15508;AGIWUR37267;AGIWUR45078 |    |    |        |        |                |           |           |                     |             |
| N2                                                                               | CT | II | 427603 | 429152 | WBGene00016080 | C24H12.11 | C24H12.11 | 0.0828078834714221  |             |
| AGIWUR31524                                                                      |    |    |        |        |                |           |           |                     |             |
| N2                                                                               | CT | II | 436867 | 438748 | WBGene00016072 | C24H12.2  | C24H12.2  | 0.0692420470103805  |             |
| AGIWUR8039                                                                       |    |    |        |        |                |           |           |                     |             |
| N2                                                                               | CT | II | 444132 | 446928 | WBGene00235338 | C24H12.19 | C24H12.19 | -0.251205020465331  |             |
| AGIWUR25847                                                                      |    |    |        |        |                |           |           |                     |             |
| N2                                                                               | CT | II | 448346 | 453156 | WBGene00021130 | W10D9.2   | W10D9.2   | -0.281338805032587  | AGIWUR34864 |
| N2                                                                               | CT | II | 456113 | 457886 | WBGene00185079 | W10D9.6   | W10D9.6   | -0.318706759325575  | AGIWUR5554  |
| N2                                                                               | CT | II | 461667 | 467365 | WBGene00021132 | nfyb-1    | W10D9.4   | -0.18615965693798   | AGIWUR25019 |
| N2                                                                               | CT | II | 468374 | 470475 | WBGene00021133 | tomm-22   | W10D9.5   | -0.225801214005195  | AGIWUR7361  |
| N2                                                                               | CT | II | 471247 | 475940 | WBGene00021073 | no1-1     | W07E6.1   | -0.0311033107987146 |             |
| AGIWUR4767;AGIWUR18751;AGIWUR29814;AGIWUR30790;AGIWUR35336;AGIWUR42846           |    |    |        |        |                |           |           |                     |             |
| N2                                                                               | CT | II | 476222 | 478063 | WBGene00021076 | W07E6.5   | W07E6.5   | -0.097828762791428  |             |
| AGIWUR697;AGIWUR10017;AGIWUR17438;AGIWUR35291;AGIWUR42424                        |    |    |        |        |                |           |           |                     |             |
| N2                                                                               | CT | II | 480722 | 484386 | WBGene00021074 | W07E6.2   | W07E6.2   | 0.00426907826844491 | AGIWUR43424 |
| N2                                                                               | CT | II | 484866 | 490403 | WBGene00004188 | prp-21    | W07E6.4   | 0.0886464569191094  | AGIWUR25405 |
| N2                                                                               | CT | II | 495424 | 498659 | WBGene00021075 | W07E6.3   | W07E6.3   | 0.0808668746694403  | AGIWUR28387 |
| N2                                                                               | CT | II | 503229 | 506014 | WBGene00005324 | T27A1.1   | T27A1.1   | -0.535803287814767  |             |
| AGIWUR10735;AGIWUR24620                                                          |    |    |        |        |                |           |           |                     |             |
| N2                                                                               | CT | II | 508245 | 509326 | WBGene00005512 | srh-105   | T27A1.7   | 0.819728008077492   | AGIWUR40738 |
| N2                                                                               | CT | II | 516014 | 521605 | WBGene00003106 | mab-9     | T27A1.6   | -0.113796027268464  |             |
| AGIWUR7631;AGIWUR14622;AGIWUR24220                                               |    |    |        |        |                |           |           |                     |             |
| N2                                                                               | CT | II | 522594 | 525983 | WBGene00020837 | slc-36.2  | T27A1.5   | -0.285483187003859  |             |
| AGIWUR8375                                                                       |    |    |        |        |                |           |           |                     |             |
| N2                                                                               | CT | II | 526574 | 530374 | WBGene00020836 | lgc-34    | T27A1.4   | -0.201548020807742  | AGIWUR23718 |
| N2                                                                               | CT | II | 535578 | 546944 | WBGene00020835 | T27A1.3   | T27A1.3   | -0.125656326215954  | AGIWUR41722 |
| N2                                                                               | CT | II | 546705 | 552031 | WBGene00015646 | mlt-10    | C09E8.3   | 0.0360736357365958  |             |

AGIWUR13193;AGIWUR31746  
N2 CT II 553086 554789 WBGene00015645 lips-7 C09E8.2 0.159213634948697  
AGIWUR27124;AGIWUR27958;AGIWUR30248  
N2 CT II 556485 564215 WBGene00015644 C09E8.1 C09E8.1 0.0649332507496414  
AGIWUR16148;AGIWUR22381;AGIWUR24838;AGIWUR43911  
N2 CT II 569236 572110 WBGene00021095 mlt-8 W08F4.6 -0.299873983852546 AGIWUR39199  
N2 CT II 574872 577732 WBGene00021096 W08F4.7 W08F4.7 -0.0635965625228767  
AGIWUR15585;AGIWUR17009;AGIWUR42523  
N2 CT II 577839 580593 WBGene00021097 cdc-37 W08F4.8 0.0539952168074711  
AGIWUR41954;AGIWUR45168  
N2 CT II 580602 582014 WBGene00021093 W08F4.3 W08F4.3 0.0687659567616059 AGIWUR6026  
N2 CT II 584798 586241 WBGene00044733 W08F4.13 W08F4.13 0.158892720018926  
AGIWUR8104  
N2 CT II 589161 589993 WBGene00268207 W08F4.20 W08F4.20 -0.164049931844039  
AGIWUR27767  
N2 CT II 590578 591210 WBGene00021099 W08F4.10 W08F4.10 -0.0264803272266914  
AGIWUR29;AGIWUR12451;AGIWUR19061;AGIWUR26023;AGIWUR36121  
N2 CT II 595207 602120 WBGene00003599 nhl-3 W04H10.3 -0.440254643031391  
AGIWUR39114  
N2 CT II 606350 606735 WBGene00206416 W04H10.5 W04H10.5 0.0520216190433045  
AGIWUR34751  
N2 CT II 614767 624543 WBGene00020207 T04B8.5 T04B8.5 -0.0765010820148886  
AGIWUR9756;AGIWUR21808;AGIWUR36894;AGIWUR41802;AGIWUR41815  
N2 CT II 627506 628662 WBGene00020205 arrd-1 T04B8.3 0.218644989283164 AGIWUR21856  
N2 CT II 630075 631980 WBGene00020204 T04B8.2 T04B8.2 -0.308151932235163 AGIWUR16818  
N2 CT II 637346 639488 WBGene00019497 K07E8.6 K07E8.6 -0.0448143442102391  
AGIWUR26831;AGIWUR32972  
N2 CT II 641010 650367 WBGene00019498 K07E8.7 K07E8.7 -0.0347215417551254 AGIWUR8822  
N2 CT II 650964 654062 WBGene00019496 frpr-14 K07E8.5 0.0449712637288124 AGIWUR41435  
N2 CT II 658669 659867 WBGene00019495 sdz-24 K07E8.3 0.362989974808466 AGIWUR38836  
N2 CT II 660091 661796 WBGene00005557 sri-45 K07E8.9 -0.251249500066429 AGIWUR3487  
N2 CT II 667755 668444 WBGene00019494 K07E8.1 K07E8.1 -0.325547173950323 AGIWUR39454  
N2 CT II 669506 671125 WBGene00005558 sri-46 K07E8.11 -0.0135234081721309  
AGIWUR22123  
N2 CT II 671542 673844 WBGene00005556 sri-44 K07E8.12 0.00853993002325604  
AGIWUR6105;AGIWUR19807  
N2 CT II 675603 678347 WBGene00021457 Y39F10C.1 Y39F10C.1 0.134153029921843  
AGIWUR14888  
N2 CT II 679025 679714 WBGene00020179 T02H6.9 T02H6.9 -0.435585395251682 AGIWUR35739

|                                                                                                                                                                                                                                |    |    |        |        |                 |           |           |                      |             |
|--------------------------------------------------------------------------------------------------------------------------------------------------------------------------------------------------------------------------------|----|----|--------|--------|-----------------|-----------|-----------|----------------------|-------------|
| N2                                                                                                                                                                                                                             | CT | II | 679777 | 680712 | WBGene00020180  | T02H6.10  | T02H6.10  | 0.132999365533522    |             |
| AGIWUR41544                                                                                                                                                                                                                    |    |    |        |        |                 |           |           |                      |             |
| N2                                                                                                                                                                                                                             | CT | II | 680832 | 681516 | WBGene00020178  | T02H6.8   | T02H6.8   | 0.0869940816643098   | AGIWUR11615 |
| N2                                                                                                                                                                                                                             | CT | II | 682626 | 683320 | WBGene00020177  | T02H6.7   | T02H6.7   | -0.00875205937744372 |             |
| AGIWUR2807;AGIWUR31704                                                                                                                                                                                                         |    |    |        |        |                 |           |           |                      |             |
| N2                                                                                                                                                                                                                             | CT | II | 683767 | 684116 | WBGene00020176  | T02H6.6   | T02H6.6   | 0.0118160547746538   | AGIWUR30315 |
| N2                                                                                                                                                                                                                             | CT | II | 685234 | 689014 | WBGene00020175  | T02H6.5   | T02H6.5   | 0.132152315683884    | AGIWUR10088 |
| N2                                                                                                                                                                                                                             | CT | II | 690049 | 691084 | WBGene00020174  | T02H6.4   | T02H6.4   | 0.217278281545495    | AGIWUR35824 |
| N2                                                                                                                                                                                                                             | CT | II | 691881 | 693456 | WBGene00020173  | T02H6.3   | T02H6.3   | 0.0947374947235406   |             |
| AGIWUR16045;AGIWUR20376;AGIWUR25904;AGIWUR30689;AGIWUR39982                                                                                                                                                                    |    |    |        |        |                 |           |           |                      |             |
| N2                                                                                                                                                                                                                             | CT | II | 700482 | 701125 | WBGene00020181  | T02H6.11  | T02H6.11  | 0.106097235525657    |             |
| AGIWUR22052;AGIWUR36290                                                                                                                                                                                                        |    |    |        |        |                 |           |           |                      |             |
| N2                                                                                                                                                                                                                             | CT | II | 702107 | 708608 | WBGene00020172  | thoc-1    | T02H6.2   | -0.130019598585758   |             |
| AGIWUR13124;AGIWUR24834;AGIWUR29393;AGIWUR34043;AGIWUR39938;AGIWUR39989                                                                                                                                                        |    |    |        |        |                 |           |           |                      |             |
| N2                                                                                                                                                                                                                             | CT | II | 709381 | 723699 | WBGene00020171  | T02H6.1   | T02H6.1   | 0.11229448146817     |             |
| AGIWUR1925;AGIWUR31002                                                                                                                                                                                                         |    |    |        |        |                 |           |           |                      |             |
| N2                                                                                                                                                                                                                             | CT | II | 723788 | 732513 | WBGene00021456  | Y39F10B.1 | Y39F10B.1 | 0.325294984774077    |             |
| AGIWUR578                                                                                                                                                                                                                      |    |    |        |        |                 |           |           |                      |             |
| N2                                                                                                                                                                                                                             | CT | II | 734607 | 738666 | WBGene00015614  | C08G5.1   | C08G5.1   | 0.0149116360025063   |             |
| AGIWUR7483;AGIWUR22598;AGIWUR26950                                                                                                                                                                                             |    |    |        |        |                 |           |           |                      |             |
| N2                                                                                                                                                                                                                             | CT | II | 739598 | 740852 | WBGene00015615  | fbxc-48   | C08G5.2   | -0.00191930994303569 | AGIWUR33530 |
| N2                                                                                                                                                                                                                             | CT | II | 741595 | 745128 | WBGene00015616  | C08G5.3   | C08G5.3   | 0.0563318662132009   | AGIWUR34991 |
| N2                                                                                                                                                                                                                             | CT | II | 745418 | 750164 | WBGene00004926  | snt-6     | C08G5.4   | 0.0384875208881077   | AGIWUR20804 |
| N2                                                                                                                                                                                                                             | CT | II | 756195 | 765317 | WBGene00044418  | C08G5.7   | C08G5.7   | -0.0576291334077137  |             |
| AGIWUR1376;AGIWUR2926;AGIWUR3173;AGIWUR7059;AGIWUR8584;AGIWUR11962;AGIWUR14089;AGIWUR15395;AGIWUR16770;AGIWUR16869;AGIWUR17068;AGIWUR17422;AGIWUR31479;AGIWUR32296;AGIWUR33655;AGIWUR35357;AGIWUR38066;AGIWUR38457;AGIWUR40764 |    |    |        |        |                 |           |           |                      |             |
| N2                                                                                                                                                                                                                             | CT | II | 770553 | 772117 | WBGene00015618  | C08G5.6   | C08G5.6   | 0.084916061834611    |             |
| AGIWUR31084;AGIWUR39491                                                                                                                                                                                                        |    |    |        |        |                 |           |           |                      |             |
| N2                                                                                                                                                                                                                             | CT | II | 775333 | 776780 | WBGene00021452  | Y39F10A.1 | Y39F10A.1 | -0.175208647567654   |             |
| AGIWUR13624                                                                                                                                                                                                                    |    |    |        |        |                 |           |           |                      |             |
| N2                                                                                                                                                                                                                             | CT | II | 779380 | 779882 | WBGene000269331 | Y39F10A.5 | Y39F10A.5 | 0.233035445505104    |             |
| AGIWUR43684                                                                                                                                                                                                                    |    |    |        |        |                 |           |           |                      |             |
| N2                                                                                                                                                                                                                             | CT | II | 781884 | 783001 | WBGene00021454  | Y39F10A.3 | Y39F10A.3 | 0.187397598643339    |             |
| AGIWUR5346;AGIWUR32953;AGIWUR43193                                                                                                                                                                                             |    |    |        |        |                 |           |           |                      |             |
| N2                                                                                                                                                                                                                             | CT | II | 787312 | 787994 | WBGene00018507  | F46F5.16  | F46F5.16  | -0.299553540742366   |             |
| AGIWUR29948                                                                                                                                                                                                                    |    |    |        |        |                 |           |           |                      |             |
| N2                                                                                                                                                                                                                             | CT | II | 788378 | 789175 | WBGene00018506  | F46F5.15  | F46F5.15  | -0.448435132548847   |             |
| AGIWUR11301                                                                                                                                                                                                                    |    |    |        |        |                 |           |           |                      |             |

|                        |    |    |        |        |                |           |           |                     |
|------------------------|----|----|--------|--------|----------------|-----------|-----------|---------------------|
| N2                     | CT | II | 8e+05  | 801454 | WBGene00018505 | F46F5.14  | F46F5.14  | 0.0951547290027808  |
| AGIWUR12850            |    |    |        |        |                |           |           |                     |
| N2                     | CT | II | 801728 | 802693 | WBGene00023287 | F46F5.3   | F46F5.3   | 0.0444068359933043  |
| AGIWUR4664;AGIWUR27371 |    |    |        |        |                |           |           |                     |
| N2                     | CT | II | 803309 | 803717 | WBGene00018504 | F46F5.13  | F46F5.13  | 0.616418404142427   |
| AGIWUR26178            |    |    |        |        |                |           |           |                     |
| N2                     | CT | II | 805028 | 806438 | WBGene00018495 | F46F5.4   | F46F5.4   | -0.258641889501643  |
| AGIWUR10079            |    |    |        |        |                |           |           |                     |
| N2                     | CT | II | 807372 | 808070 | WBGene00018503 | F46F5.12  | F46F5.12  | 0.0165892897472553  |
| AGIWUR5055             |    |    |        |        |                |           |           |                     |
| N2                     | CT | II | 808757 | 811887 | WBGene00018502 | F46F5.11  | F46F5.11  | 0.00947212717047918 |
| AGIWUR38924            |    |    |        |        |                |           |           |                     |
| N2                     | CT | II | 812141 | 813708 | WBGene00018496 | F46F5.5   | F46F5.5   | 0.137057962525983   |
| AGIWUR5636             |    |    |        |        |                |           |           |                     |
| N2                     | CT | II | 814452 | 814866 | WBGene00018497 | F46F5.6   | F46F5.6   | 0.446101951691039   |
| AGIWUR40706            |    |    |        |        |                |           |           |                     |
| N2                     | CT | II | 818578 | 820683 | WBGene00018498 | F46F5.7   | F46F5.7   | 0.0937062677928431  |
| AGIWUR4943;AGIWUR18449 |    |    |        |        |                |           |           |                     |
| N2                     | CT | II | 821408 | 821614 | WBGene00018499 | F46F5.8   | F46F5.8   | 0.139300558354479   |
| AGIWUR38844            |    |    |        |        |                |           |           |                     |
| N2                     | CT | II | 823829 | 825245 | WBGene00018501 | F46F5.10  | F46F5.10  |                     |
| -0.00637880867174445   |    |    |        |        |                |           |           |                     |
| N2                     | CT | II | 825848 | 827500 | WBGene00017869 | F28A10.1  | F28A10.1  | -0.243382611896619  |
| AGIWUR9597             |    |    |        |        |                |           |           |                     |
| N2                     | CT | II | 827891 | 830267 | WBGene00017870 | F28A10.2  | F28A10.2  |                     |
| -0.00785820761461764   |    |    |        |        |                |           |           |                     |
| N2                     | CT | II | 831069 | 831871 | WBGene00017878 | F28A10.10 | F28A10.10 | -0.016960550192044  |
| AGIWUR22041            |    |    |        |        |                |           |           |                     |
| N2                     | CT | II | 833607 | 835270 | WBGene00017877 | F28A10.9  | F28A10.9  | 0.00614877912138212 |
| AGIWUR6656;AGIWUR38454 |    |    |        |        |                |           |           |                     |
| N2                     | CT | II | 837719 | 838470 | WBGene00017876 | F28A10.8  | F28A10.8  | -0.22642212587207   |
| AGIWUR7741             |    |    |        |        |                |           |           |                     |
| N2                     | CT | II | 840567 | 841113 | WBGene00017871 | F28A10.3  | F28A10.3  | 0.47433219477463    |
| AGIWUR37007            |    |    |        |        |                |           |           |                     |
| N2                     | CT | II | 844274 | 845085 | WBGene00017872 | F28A10.4  | F28A10.4  | 0.00614949376790008 |
| AGIWUR21076            |    |    |        |        |                |           |           |                     |
| N2                     | CT | II | 845288 | 845686 | WBGene00017875 | F28A10.7  | F28A10.7  | 0.108193219257331   |
| AGIWUR26593            |    |    |        |        |                |           |           |                     |
| N2                     | CT | II | 846864 | 848603 | WBGene00017874 | acdH-9    | F28A10.6  | -0.0514298275309262 |
| AGIWUR29074            |    |    |        |        |                |           |           |                     |
| N2                     | CT | II | 849678 | 850654 | WBGene00017873 | F28A10.5  | F28A10.5  | -0.107013881131483  |
| AGIWUR39524            |    |    |        |        |                |           |           |                     |
| N2                     | CT | II | 862927 | 866901 | WBGene00021578 | Y46B2A.3  | Y46B2A.3  | 0.327544551318352   |

|                                               |    |    |        |        |                 |          |          |                     |             |
|-----------------------------------------------|----|----|--------|--------|-----------------|----------|----------|---------------------|-------------|
| AGIWUR35944                                   |    |    |        |        |                 |          |          |                     |             |
| N2                                            | CT | II | 868814 | 871699 | WBGene00021576  | fbxc-51  | Y46B2A.1 | 0.185652534957735   |             |
| AGIWUR29811                                   |    |    |        |        |                 |          |          |                     |             |
| N2                                            | CT | II | 873176 | 879001 | WBGene00000106  | alg-2    | T07D3.7  | 0.273711009625254   |             |
| AGIWUR35217;AGIWUR37697;AGIWUR40213           |    |    |        |        |                 |          |          |                     |             |
| N2                                            | CT | II | 881576 | 890710 | WBGene00020307  | T07D3.4  | T07D3.4  | -0.097519375949533  |             |
| AGIWUR7775;AGIWUR43697                        |    |    |        |        |                 |          |          |                     |             |
| N2                                            | CT | II | 893863 | 897379 | WBGene00020306  | T07D3.3  | T07D3.3  | -0.590802041374112  | AGIWUR20372 |
| N2                                            | CT | II | 898043 | 901164 | WBGene00020311  | T07D3.9  | T07D3.9  | -0.17743618499772   |             |
| AGIWUR4965;AGIWUR39971                        |    |    |        |        |                 |          |          |                     |             |
| N2                                            | CT | II | 904425 | 906039 | WBGene00020304  | fbxa-200 | T07D3.1  | -0.410530662816445  |             |
| AGIWUR27126                                   |    |    |        |        |                 |          |          |                     |             |
| N2                                            | CT | II | 907535 | 909631 | WBGene00019927  | fbxc-24  | R07C3.11 | 0.0668864817444916  |             |
| AGIWUR15211;AGIWUR21913;AGIWUR26453           |    |    |        |        |                 |          |          |                     |             |
| N2                                            | CT | II | 909884 | 911592 | WBGene00019926  | fbxc-27  | R07C3.10 | 0.212106256605506   |             |
| AGIWUR10868                                   |    |    |        |        |                 |          |          |                     |             |
| N2                                            | CT | II | 912003 | 913030 | WBGene00019925  | fbxc-31  | R07C3.9  | 0.303040188582089   | AGIWUR14658 |
| N2                                            | CT | II | 913680 | 915219 | WBGene00019924  | fbxc-33  | R07C3.8  | -0.436027644864309  | AGIWUR1761  |
| N2                                            | CT | II | 916051 | 917464 | WBGene00019923  | fbxc-29  | R07C3.7  | -0.0353309446776544 |             |
| AGIWUR5918;AGIWUR10571                        |    |    |        |        |                 |          |          |                     |             |
| N2                                            | CT | II | 917624 | 919417 | WBGene00045302  | fbxc-30  | R07C3.15 | 0.103570613104622   |             |
| AGIWUR27335                                   |    |    |        |        |                 |          |          |                     |             |
| N2                                            | CT | II | 919575 | 920407 | WBGene000269338 | R07C3.16 | R07C3.16 | 0.288097787269981   |             |
| AGIWUR17863                                   |    |    |        |        |                 |          |          |                     |             |
| N2                                            | CT | II | 923821 | 925192 | WBGene00019922  | fbxc-28  | R07C3.6  | -0.09923858427711   |             |
| AGIWUR564;AGIWUR11358;AGIWUR20652             |    |    |        |        |                 |          |          |                     |             |
| N2                                            | CT | II | 926496 | 927431 | WBGene00019929  | R07C3.13 | R07C3.13 | 0.372415656653069   |             |
| AGIWUR7319                                    |    |    |        |        |                 |          |          |                     |             |
| N2                                            | CT | II | 931171 | 932327 | WBGene00019921  | fbxc-34  | R07C3.5  | 0.283678737849327   | AGIWUR16572 |
| N2                                            | CT | II | 933018 | 936989 | WBGene00019920  | acs-15   | R07C3.4  | 0.0156879940338737  | AGIWUR7727  |
| N2                                            | CT | II | 938849 | 940683 | WBGene00019919  | R07C3.3  | R07C3.3  | 0.0413553984518851  | AGIWUR9697  |
| N2                                            | CT | II | 940983 | 943162 | WBGene00019918  | fbxc-36  | R07C3.2  | -0.167253226892578  | AGIWUR14198 |
| N2                                            | CT | II | 944066 | 946157 | WBGene00019917  | clec-43  | R07C3.1  | 0.25746598745129    | AGIWUR36973 |
| N2                                            | CT | II | 946485 | 948191 | WBGene00016303  | fbxc-32  | C32B5.10 | -0.196742128809294  |             |
| AGIWUR7472                                    |    |    |        |        |                 |          |          |                     |             |
| N2                                            | CT | II | 948432 | 950507 | WBGene00016304  | fbxc-41  | C32B5.11 | -0.186312303767652  |             |
| AGIWUR28739                                   |    |    |        |        |                 |          |          |                     |             |
| N2                                            | CT | II | 950842 | 952843 | WBGene00016305  | fbxc-57  | C32B5.12 | 0.119036362920658   |             |
| AGIWUR2248;AGIWUR3184;AGIWUR30209;AGIWUR31810 |    |    |        |        |                 |          |          |                     |             |



|                                     |    |    |         |         |                |          |           |                     |             |
|-------------------------------------|----|----|---------|---------|----------------|----------|-----------|---------------------|-------------|
| N2                                  | CT | II | 954953  | 956337  | WBGene00016302 | fbxc-7   | C32B5.9   | 0.170122088652864   | AGIWUR10362 |
| N2                                  | CT | II | 956674  | 957961  | WBGene00016301 | fbxc-6   | C32B5.8   | 0.101108160050213   | AGIWUR33819 |
| N2                                  | CT | II | 958918  | 960179  | WBGene00016309 | sdz-4    | C32B5.16  | -0.440416211708552  |             |
| AGIWUR17898                         |    |    |         |         |                |          |           |                     |             |
| N2                                  | CT | II | 960528  | 964260  | WBGene00016300 | C32B5.7  | C32B5.7   | -0.198412295291504  |             |
| AGIWUR15819;AGIWUR28262;AGIWUR37767 |    |    |         |         |                |          |           |                     |             |
| N2                                  | CT | II | 965576  | 967062  | WBGene00016307 | fbxc-18  | C32B5.14  | -0.0397575689438252 |             |
| AGIWUR34121                         |    |    |         |         |                |          |           |                     |             |
| N2                                  | CT | II | 968406  | 970523  | WBGene00016299 | C32B5.6  | C32B5.6   | -0.0918043973225453 | AGIWUR6752  |
| N2                                  | CT | II | 970645  | 972950  | WBGene00016308 | C32B5.15 | C32B5.15  | 0.0907958634528079  |             |
| AGIWUR41227                         |    |    |         |         |                |          |           |                     |             |
| N2                                  | CT | II | 974290  | 975511  | WBGene00016298 | fbxc-14  | C32B5.5   | 0.342699808555473   | AGIWUR22506 |
| N2                                  | CT | II | 976208  | 978951  | WBGene00044419 | fbxc-17  | C32B5.17  | 0.0271844678106188  |             |
| AGIWUR25275;AGIWUR40429             |    |    |         |         |                |          |           |                     |             |
| N2                                  | CT | II | 979423  | 980825  | WBGene00016297 | fbxc-15  | C32B5.4   | -0.0219209403151757 | AGIWUR41541 |
| N2                                  | CT | II | 981282  | 982435  | WBGene00016296 | fbxc-16  | C32B5.3   | 0.0243218128232741  |             |
| AGIWUR13034;AGIWUR18974;AGIWUR22521 |    |    |         |         |                |          |           |                     |             |
| N2                                  | CT | II | 986003  | 988666  | WBGene00016295 | fbxc-40  | C32B5.1   | 0.123830148321885   |             |
| AGIWUR33276;AGIWUR33872;AGIWUR41781 |    |    |         |         |                |          |           |                     |             |
| N2                                  | CT | II | 988737  | 991074  | WBGene00018456 | fbxc-39  | F45D11.10 | 0.0492979012342234  |             |
| AGIWUR14227                         |    |    |         |         |                |          |           |                     |             |
| N2                                  | CT | II | 991600  | 993638  | WBGene00018455 | fbxc-42  | F45D11.9  | -0.128658311914899  |             |
| AGIWUR39826                         |    |    |         |         |                |          |           |                     |             |
| N2                                  | CT | II | 993293  | 994189  | WBGene00018454 | fbxb-28  | F45D11.8  | -0.274733752788764  |             |
| AGIWUR11045;AGIWUR15570             |    |    |         |         |                |          |           |                     |             |
| N2                                  | CT | II | 1000437 | 1001449 | WBGene00018458 | fbxb-30  | F45D11.13 | -0.090159696961706  |             |
| AGIWUR44765                         |    |    |         |         |                |          |           |                     |             |
| N2                                  | CT | II | 1001703 | 1002437 | WBGene00018452 | F45D11.5 | F45D11.5  | 0.0931230886875314  |             |
| AGIWUR28527                         |    |    |         |         |                |          |           |                     |             |
| N2                                  | CT | II | 1021505 | 1023528 | WBGene00018448 | F45D11.1 | F45D11.1  | -0.50996370956615   |             |
| AGIWUR11280;AGIWUR21120             |    |    |         |         |                |          |           |                     |             |
| N2                                  | CT | II | 1023693 | 1024784 | WBGene00019700 | btb-11   | M01D1.3   | -0.199553983047544  | AGIWUR26307 |
| N2                                  | CT | II | 1028987 | 1033664 | WBGene00019699 | math-34  | M01D1.2   | 0.387052388096325   | AGIWUR42003 |
| N2                                  | CT | II | 1039697 | 1040564 | WBGene00019702 | fbxb-39  | M01D1.7   | -0.18704974103419   | AGIWUR12176 |
| N2                                  | CT | II | 1041321 | 1042327 | WBGene00019703 | fbxb-41  | M01D1.8   | 0.172212535797947   | AGIWUR34886 |
| N2                                  | CT | II | 1042969 | 1044025 | WBGene00019705 | fbxb-45  | M01D1.10  | 0.406664040315764   |             |
| AGIWUR40701                         |    |    |         |         |                |          |           |                     |             |
| N2                                  | CT | II | 1046505 | 1048276 | WBGene00006195 | str-148  | M01D1.1   | 0.0150528925684741  | AGIWUR17949 |
| N2                                  | CT | II | 1048863 | 1049949 | WBGene00019704 | fbxb-40  | M01D1.9   | -0.352020398378579  |             |

|                                                                                     |    |    |         |         |                |           |         |                      |                     |
|-------------------------------------------------------------------------------------|----|----|---------|---------|----------------|-----------|---------|----------------------|---------------------|
| AGIWUR9353;AGIWUR20714                                                              |    |    |         |         |                |           |         |                      |                     |
| N2                                                                                  | CT | II | 1057212 | 1059280 | WBGene00019311 | K02E7.6   | K02E7.6 | -0.209351086226798   |                     |
| AGIWUR13530;AGIWUR14487                                                             |    |    |         |         |                |           |         |                      |                     |
| N2                                                                                  | CT | II | 1059664 | 1060802 | WBGene00019313 | btb-10    | K02E7.9 | -0.00844783575096564 | AGIWUR2350          |
| N2                                                                                  | CT | II | 1065566 | 1066998 | WBGene00019314 | K02E7.10  |         | K02E7.10             | 0.341884431679466   |
| AGIWUR12881                                                                         |    |    |         |         |                |           |         |                      |                     |
| N2                                                                                  | CT | II | 1070640 | 1071490 | WBGene00019316 | K02E7.12  |         | K02E7.12             | -0.209357866207514  |
| AGIWUR28681                                                                         |    |    |         |         |                |           |         |                      |                     |
| N2                                                                                  | CT | II | 1074751 | 1075505 | WBGene00019315 | K02E7.11  |         | K02E7.11             | -0.0674637198296715 |
| AGIWUR7722                                                                          |    |    |         |         |                |           |         |                      |                     |
| N2                                                                                  | CT | II | 1083159 | 1083929 | WBGene00019306 | K02E7.1   | K02E7.1 | 0.0468447189274848   |                     |
| AGIWUR12424;AGIWUR33478;AGIWUR36865                                                 |    |    |         |         |                |           |         |                      |                     |
| N2                                                                                  | CT | II | 1092006 | 1097899 | WBGene00004902 | snf-3     | T13B5.1 | 0.199922323301422    | AGIWUR19715         |
| N2                                                                                  | CT | II | 1097926 | 1100819 | WBGene00020471 | pho-14    | T13B5.3 | -0.185353461145926   |                     |
| AGIWUR10194;AGIWUR28391                                                             |    |    |         |         |                |           |         |                      |                     |
| N2                                                                                  | CT | II | 1101371 | 1104509 | WBGene00020476 | T13B5.9   | T13B5.9 | -0.109259888271403   | AGIWUR26618         |
| N2                                                                                  | CT | II | 1104945 | 1106925 | WBGene00000617 | col-40    | T13B5.4 | -0.127775176998232   | AGIWUR17459         |
| N2                                                                                  | CT | II | 1108841 | 1110992 | WBGene00020472 | lips-11   | T13B5.5 | 0.379384894867924    | AGIWUR21783         |
| N2                                                                                  | CT | II | 1112189 | 1114226 | WBGene00020473 | lips-12   | T13B5.6 | 0.0761831559497681   | AGIWUR1562          |
| N2                                                                                  | CT | II | 1115641 | 1118033 | WBGene00020474 | lips-13   | T13B5.7 | 0.421106137343145    | AGIWUR32051         |
| N2                                                                                  | CT | II | 1121018 | 1123259 | WBGene00020475 | sut-1     | T13B5.8 | 0.0136490200634043   | AGIWUR17492         |
| N2                                                                                  | CT | II | 1123534 | 1127791 | WBGene00021103 | eri-3     | W09B6.3 | -0.0286652838024111  | AGIWUR1524          |
| N2                                                                                  | CT | II | 1127976 | 1132352 | WBGene00006387 | taf-6.1   | W09B6.2 | -0.0039139157613981  | AGIWUR14620         |
| N2                                                                                  | CT | II | 1132302 | 1134240 | WBGene00021104 | W09B6.4   | W09B6.4 | -0.137127592154233   |                     |
| AGIWUR11511;AGIWUR20518;AGIWUR21674;AGIWUR23256;AGIWUR28565;AGIWUR34057;AGIWUR36897 |    |    |         |         |                |           |         |                      |                     |
| N2                                                                                  | CT | II | 1136781 | 1152701 | WBGene00004076 | pod-2     | W09B6.1 | 0.226713247913329    |                     |
| AGIWUR4199;AGIWUR14789                                                              |    |    |         |         |                |           |         |                      |                     |
| N2                                                                                  | CT | II | 1163575 | 1165488 | WBGene00020740 | T23F4.2   | T23F4.2 | 0.16096163915863     | AGIWUR1509          |
| N2                                                                                  | CT | II | 1166490 | 1169168 | WBGene00020739 | T23F4.1   | T23F4.1 | -0.258925245557479   | AGIWUR11835         |
| N2                                                                                  | CT | II | 1169546 | 1172130 | WBGene00020741 | dlhd-1    | T23F4.3 | 0.277193842833486    | AGIWUR44663         |
| N2                                                                                  | CT | II | 1175976 | 1179323 | WBGene00003545 | nas-27    | T23F4.4 | 0.0560178857653479   | AGIWUR14074         |
| N2                                                                                  | CT | II | 1197374 | 1230782 | WBGene00018734 | F53A10.2  |         | F53A10.2             | 0.0754909457460649  |
| AGIWUR30798;AGIWUR41285;AGIWUR43186                                                 |    |    |         |         |                |           |         |                      |                     |
| N2                                                                                  | CT | II | 1233236 | 1252359 | WBGene00018572 | lin-42    | F47F6.1 | 0.132252526631312    |                     |
| AGIWUR15290;AGIWUR36002                                                             |    |    |         |         |                |           |         |                      |                     |
| N2                                                                                  | CT | II | 1255937 | 1258353 | WBGene00018575 | cllec-119 |         | F47F6.5              | 0.140334179096726   |
| AGIWUR24296;AGIWUR41961                                                             |    |    |         |         |                |           |         |                      |                     |
| N2                                                                                  | CT | II | 1259365 | 1262998 | WBGene00023410 | F47F6.9   | F47F6.9 | -0.0712243216254853  |                     |
| AGIWUR32467;AGIWUR38054                                                             |    |    |         |         |                |           |         |                      |                     |

|                                                                                                |    |    |         |         |                |           |           |                     |
|------------------------------------------------------------------------------------------------|----|----|---------|---------|----------------|-----------|-----------|---------------------|
| N2                                                                                             | CT | II | 1262987 | 1266890 | WBGene00018573 | oac-30    | F47F6.3   | 0.0949310692927439  |
| AGIWUR11993;AGIWUR35046                                                                        |    |    |         |         |                |           |           |                     |
| N2                                                                                             | CT | II | 1269540 | 1271914 | WBGene00005813 | srw-66    | Y57G7A.4  | 0.0235754337395613  |
| AGIWUR7731;AGIWUR8027                                                                          |    |    |         |         |                |           |           |                     |
| N2                                                                                             | CT | II | 1273169 | 1275539 | WBGene00021968 | Y57G7A.5  | Y57G7A.5  | 0.251030418577226   |
| AGIWUR11546                                                                                    |    |    |         |         |                |           |           |                     |
| N2                                                                                             | CT | II | 1275752 | 1276872 | WBGene00021974 | Y57G7A.11 | Y57G7A.11 | 0.0278438188448913  |
| AGIWUR17548                                                                                    |    |    |         |         |                |           |           |                     |
| N2                                                                                             | CT | II | 1278650 | 1281039 | WBGene00023499 | srz-63    | Y57G7A.12 | 0.047850974511535   |
| AGIWUR2017;AGIWUR41865;AGIWUR43322                                                             |    |    |         |         |                |           |           |                     |
| N2                                                                                             | CT | II | 1281974 | 1285614 | WBGene00021969 | Y57G7A.6  | Y57G7A.6  | 0.518440072548064   |
| AGIWUR17694                                                                                    |    |    |         |         |                |           |           |                     |
| N2                                                                                             | CT | II | 1285797 | 1286371 | WBGene00021967 | Y57G7A.3  | Y57G7A.3  | 0.232399725509366   |
| AGIWUR9015;AGIWUR19309;AGIWUR20491;AGIWUR25151;AGIWUR25756;AGIWUR39388                         |    |    |         |         |                |           |           |                     |
| N2                                                                                             | CT | II | 1288735 | 1293257 | WBGene00021970 | srz-64    | Y57G7A.7  | -0.27645048585093   |
| AGIWUR34238                                                                                    |    |    |         |         |                |           |           |                     |
| N2                                                                                             | CT | II | 1296078 | 1296746 | WBGene00021966 | Y57G7A.2  | Y57G7A.2  | -0.216771632962001  |
| AGIWUR8814                                                                                     |    |    |         |         |                |           |           |                     |
| N2                                                                                             | CT | II | 1298469 | 1299716 | WBGene00021965 | Y57G7A.1  | Y57G7A.1  | -0.0201667747194936 |
| AGIWUR20526                                                                                    |    |    |         |         |                |           |           |                     |
| N2                                                                                             | CT | II | 1300064 | 1301641 | WBGene00021972 | glb-31    | Y57G7A.9  | -0.101314516490852  |
| AGIWUR8263                                                                                     |    |    |         |         |                |           |           |                     |
| N2                                                                                             | CT | II | 1302497 | 1306136 | WBGene00021973 | emc-2     | Y57G7A.10 | -0.0951356443017453 |
| AGIWUR4278                                                                                     |    |    |         |         |                |           |           |                     |
| N2                                                                                             | CT | II | 1306240 | 1310133 | WBGene00000112 | alh-6     | F56D12.1  | 0.103926600402668   |
| AGIWUR21026;AGIWUR21258;AGIWUR24232;AGIWUR28867;AGIWUR34752;AGIWUR36615;AGIWUR43212            |    |    |         |         |                |           |           |                     |
| N2                                                                                             | CT | II | 1310518 | 1320437 | WBGene00018974 | fcho-1    | F56D12.6  | 0.0559448515440035  |
| AGIWUR3322;AGIWUR10578                                                                         |    |    |         |         |                |           |           |                     |
| N2                                                                                             | CT | II | 1321037 | 1323170 | WBGene00006924 | vig-1     | F56D12.5  | 0.409922604139208   |
| AGIWUR2756;AGIWUR18673;AGIWUR22674;AGIWUR30958;AGIWUR33919;AGIWUR35778;AGIWUR35851;AGIWUR41568 |    |    |         |         |                |           |           |                     |
| N2                                                                                             | CT | II | 1326995 | 1350136 | WBGene00002176 | jip-1     | F56D12.4  | -0.162084571709244  |
| AGIWUR11259                                                                                    |    |    |         |         |                |           |           |                     |
| N2                                                                                             | CT | II | 1350720 | 1355641 | WBGene00015728 | C13A10.1  | C13A10.1  | -0.0254353529407005 |
| AGIWUR42053                                                                                    |    |    |         |         |                |           |           |                     |
| N2                                                                                             | CT | II | 1357177 | 1358005 | WBGene00015729 | C13A10.2  | C13A10.2  | -0.148136641737517  |
| AGIWUR20549                                                                                    |    |    |         |         |                |           |           |                     |
| N2                                                                                             | CT | II | 1368103 | 1374988 | WBGene00018819 | rog-1     | F54D12.6  | 0.151106443179995   |
| AGIWUR42436;AGIWUR43632                                                                        |    |    |         |         |                |           |           |                     |
| N2                                                                                             | CT | II | 1377628 | 1378359 | WBGene00044424 | F54D12.10 | F54D12.10 | -0.163035107547059  |

|                                                                                    |    |    |         |         |                |           |                     |
|------------------------------------------------------------------------------------|----|----|---------|---------|----------------|-----------|---------------------|
| AGIWUR38508                                                                        |    |    |         |         |                |           |                     |
| N2                                                                                 | CT | II | 1380944 | 1381713 | WBGene00018822 | F54D12.9  | F54D12.9            |
| AGIWUR30305                                                                        |    |    |         |         |                |           |                     |
| N2                                                                                 | CT | II | 1381807 | 1385380 | WBGene00018820 | F54D12.7  | F54D12.7            |
| AGIWUR17467                                                                        |    |    |         |         |                |           |                     |
| N2                                                                                 | CT | II | 1386888 | 1391567 | WBGene00000008 | aat-7     | F54D12.3            |
| AGIWUR12832                                                                        |    |    |         |         |                |           | 0.178460976569047   |
| N2                                                                                 | CT | II | 1393488 | 1394105 | WBGene00044425 | F54D12.11 | F54D12.11           |
| AGIWUR1470;AGIWUR23949;AGIWUR28151;AGIWUR37605;AGIWUR41989                         |    |    |         |         |                |           | -0.0618768196831443 |
| N2                                                                                 | CT | II | 1395004 | 1398038 | WBGene00018821 | F54D12.8  | F54D12.8            |
| AGIWUR36291                                                                        |    |    |         |         |                |           | 0.177001216695256   |
| N2                                                                                 | CT | II | 1398761 | 1400030 | WBGene00018816 | F54D12.2  | F54D12.2            |
| AGIWUR41051                                                                        |    |    |         |         |                |           | 0.115196667417614   |
| N2                                                                                 | CT | II | 1400405 | 1401371 | WBGene00018815 | F54D12.1  | F54D12.1            |
| AGIWUR2284                                                                         |    |    |         |         |                |           | -0.0559679031946043 |
| N2                                                                                 | CT | II | 1401774 | 1402134 | WBGene00021786 | Y51H7C.8  | Y51H7C.8            |
| AGIWUR23325                                                                        |    |    |         |         |                |           | 0.120060693833196   |
| N2                                                                                 | CT | II | 1402569 | 1403215 | WBGene00021785 | Y51H7C.7  | Y51H7C.7            |
| AGIWUR3019                                                                         |    |    |         |         |                |           | -0.133814788910406  |
| N2                                                                                 | CT | II | 1403321 | 1409118 | WBGene00021784 | cogc-4    | Y51H7C.6            |
| AGIWUR9683;AGIWUR21974;AGIWUR26256;AGIWUR35503;AGIWUR35651;AGIWUR37749;AGIWUR41187 |    |    |         |         |                |           | -0.0456668359146928 |
| N2                                                                                 | CT | II | 1409184 | 1411472 | WBGene00021787 | Y51H7C.9  | Y51H7C.9            |
| AGIWUR30133                                                                        |    |    |         |         |                |           | 0.038921085507468   |
| N2                                                                                 | CT | II | 1412409 | 1420150 | WBGene00021783 | Y51H7C.5  | Y51H7C.5            |
| AGIWUR13720;AGIWUR20788;AGIWUR28870                                                |    |    |         |         |                |           | -0.0439042474664433 |
| N2                                                                                 | CT | II | 1420422 | 1423668 | WBGene00021788 | Y51H7C.10 | Y51H7C.10           |
| AGIWUR18507;AGIWUR32455;AGIWUR33386;AGIWUR37153;AGIWUR38549                        |    |    |         |         |                |           | -0.109474792995679  |
| N2                                                                                 | CT | II | 1425758 | 1437499 | WBGene00021789 | no1-6     | Y51H7C.11           |
| AGIWUR11653;AGIWUR20656                                                            |    |    |         |         |                |           | -0.0875521130536905 |
| N2                                                                                 | CT | II | 1438490 | 1439697 | WBGene00021781 | Y51H7C.3  | Y51H7C.3            |
| AGIWUR8694;AGIWUR17307;AGIWUR19226;AGIWUR22706;AGIWUR27660;AGIWUR42418             |    |    |         |         |                |           | -0.15770349238934   |
| N2                                                                                 | CT | II | 1440066 | 1446746 | WBGene00021790 | Y51H7C.12 | Y51H7C.12           |
| AGIWUR27053                                                                        |    |    |         |         |                |           | -0.187670481935143  |
| N2                                                                                 | CT | II | 1459140 | 1461307 | WBGene00044439 | Y51H7C.15 | Y51H7C.15           |
| AGIWUR793;AGIWUR1636;AGIWUR35924;AGIWUR36322;AGIWUR41340                           |    |    |         |         |                |           | 0.0201915859376571  |
| N2                                                                                 | CT | II | 1463268 | 1466546 | WBGene00021791 | Y51H7C.13 | Y51H7C.13           |
| AGIWUR16739                                                                        |    |    |         |         |                |           | 0.354316749062546   |
| N2                                                                                 | CT | II | 1467727 | 1469604 | WBGene00021779 | Y51H7C.1  | Y51H7C.1            |
| AGIWUR40157                                                                        |    |    |         |         |                |           | 0.20074055746168    |

|                                                                                                            |    |    |         |         |                |           |           |                      |
|------------------------------------------------------------------------------------------------------------|----|----|---------|---------|----------------|-----------|-----------|----------------------|
| N2                                                                                                         | CT | II | 1472625 | 1473581 | WBGene00044643 | H17B01.5  | H17B01.5  | 0.298720906385904    |
| AGIWUR42937                                                                                                |    |    |         |         |                |           |           |                      |
| N2                                                                                                         | CT | II | 1484094 | 1485764 | WBGene00019208 | lips-14   | H17B01.3  | -0.105310503858753   |
| AGIWUR28063                                                                                                |    |    |         |         |                |           |           |                      |
| N2                                                                                                         | CT | II | 1489930 | 1500330 | WBGene00019209 | emc-1     | H17B01.4  | 0.0210689755220699   |
| AGIWUR5311;AGIWUR12574;AGIWUR14027                                                                         |    |    |         |         |                |           |           |                      |
| N2                                                                                                         | CT | II | 1504566 | 1509831 | WBGene00019207 | fgt-1     | H17B01.1  | 0.0792269948508935   |
| AGIWUR3961;AGIWUR9439;AGIWUR14822;AGIWUR17175;AGIWUR35685;AGIWUR37584                                      |    |    |         |         |                |           |           |                      |
| N2                                                                                                         | CT | II | 1510288 | 1517454 | WBGene00021772 | math-45   | Y51H7BM.1 | -0.164236817645368   |
| AGIWUR22347                                                                                                |    |    |         |         |                |           |           |                      |
| N2                                                                                                         | CT | II | 1519222 | 1520328 | WBGene00044645 | Y51H7BR.8 | Y51H7BR.8 | 0.0565037902162011   |
| AGIWUR13474;AGIWUR17530;AGIWUR23980;AGIWUR31130;AGIWUR37906                                                |    |    |         |         |                |           |           |                      |
| N2                                                                                                         | CT | II | 1520384 | 1521842 | WBGene00005704 | sru-41    | Y51H7BR.6 | -0.00703549195313036 |
| AGIWUR12775;AGIWUR36218                                                                                    |    |    |         |         |                |           |           |                      |
| N2                                                                                                         | CT | II | 1523565 | 1525598 | WBGene00021778 | Y51H7BR.7 | Y51H7BR.7 | -0.230686913375018   |
| AGIWUR41969                                                                                                |    |    |         |         |                |           |           |                      |
| N2                                                                                                         | CT | II | 1529359 | 1535208 | WBGene00021776 | Y51H7BR.4 | Y51H7BR.4 | -0.152841589642512   |
| AGIWUR5447;AGIWUR16636;AGIWUR18616;AGIWUR23149;AGIWUR24516;AGIWUR25783;AGIWUR31085;AGIWUR38742;AGIWUR39425 |    |    |         |         |                |           |           |                      |
| N2                                                                                                         | CT | II | 1536231 | 1537275 | WBGene00021774 | fbxb-43   | Y51H7BR.2 | -0.171278295385336   |
| AGIWUR17877                                                                                                |    |    |         |         |                |           |           |                      |
| N2                                                                                                         | CT | II | 1537621 | 1538666 | WBGene00021773 | fbxb-42   | Y51H7BR.1 | -0.0323873920056741  |
| AGIWUR31502                                                                                                |    |    |         |         |                |           |           |                      |
| N2                                                                                                         | CT | II | 1538891 | 1539901 | WBGene00019416 | fbxb-44   | K05F6.5   | 0.0310699710608615   |
| AGIWUR4279;AGIWUR17677                                                                                     |    |    |         |         |                |           |           |                      |
| N2                                                                                                         | CT | II | 1543482 | 1545415 | WBGene00019415 | K05F6.4   | K05F6.4   | 0.122869580086091    |
| AGIWUR24379                                                                                                |    |    |         |         |                |           |           |                      |
| N2                                                                                                         | CT | II | 1545925 | 1546991 | WBGene00045486 | K05F6.12  | K05F6.12  | -0.0100300035973486  |
| AGIWUR28538                                                                                                |    |    |         |         |                |           |           |                      |
| N2                                                                                                         | CT | II | 1547060 | 1548182 | WBGene00269420 | K05F6.16  | K05F6.16  | -0.0492040217444671  |
| AGIWUR7272                                                                                                 |    |    |         |         |                |           |           |                      |
| N2                                                                                                         | CT | II | 1555257 | 1556335 | WBGene00019418 | fbxb-54   | K05F6.7   | 0.103496164426318    |
| AGIWUR5734                                                                                                 |    |    |         |         |                |           |           |                      |
| N2                                                                                                         | CT | II | 1567324 | 1567746 | WBGene00019419 | K05F6.8   | K05F6.8   | -0.129579852834749   |
| AGIWUR4026;AGIWUR22442;AGIWUR26126;AGIWUR30746;AGIWUR36813;AGIWUR44179                                     |    |    |         |         |                |           |           |                      |
| N2                                                                                                         | CT | II | 1570065 | 1571134 | WBGene00019420 | fbxb-46   | K05F6.9   | -0.125678612199169   |
| AGIWUR5730                                                                                                 |    |    |         |         |                |           |           |                      |
| N2                                                                                                         | CT | II | 1572522 | 1573300 | WBGene00269419 | K05F6.15  | K05F6.15  | -0.0437302268759208  |
| AGIWUR20317                                                                                                |    |    |         |         |                |           |           |                      |
| N2                                                                                                         | CT | II | 1574557 | 1576115 | WBGene00019421 | K05F6.10  | K05F6.10  | -0.182629692944254   |
| AGIWUR3384;AGIWUR5668;AGIWUR9394;AGIWUR24867                                                               |    |    |         |         |                |           |           |                      |
| N2                                                                                                         | CT | II | 1577471 | 1579986 | WBGene00020326 | math-38   | T07H3.3   | -0.130348639510045   |
| AGIWUR28995                                                                                                |    |    |         |         |                |           |           |                      |
| N2                                                                                                         | CT | II | 1582876 | 1584240 | WBGene00020327 | clcc-21   | T07H3.4   | -0.0785206157772151  |

AGIWUR7239;AGIWUR35909  
N2 CT II 1588542 1589945 WBGene00044429 T07H3.7 T07H3.7 -0.0323191897820951  
AGIWUR11204;AGIWUR19451;AGIWUR40079  
N2 CT II 1593480 1595237 WBGene00020328 clec-20 T07H3.5 0.571314669619285 AGIWUR37368  
N2 CT II 1598029 1599488 WBGene00020325 bath-46 T07H3.2 0.387662710680639 AGIWUR648  
N2 CT II 1599471 1600714 WBGene00020329 bath-26 T07H3.6 -0.0326207137509407 AGIWUR27574  
N2 CT II 1601789 1604618 WBGene00006464 bath-47 T07H3.1 0.20479771174417 AGIWUR1261  
N2 CT II 1604666 1606143 WBGene00015595 bath-33 C08E3.3 0.0155204615221667 AGIWUR35175  
N2 CT II 1606595 1607603 WBGene00015596 fbxa-161 C08E3.4 0.212576078869917  
AGIWUR37564  
N2 CT II 1607869 1609014 WBGene00015597 fbxa-162 C08E3.5 0.169501072860979  
AGIWUR13440  
N2 CT II 1609256 1610715 WBGene00015598 fbxa-163 C08E3.6 0.166139450334408  
AGIWUR10816;AGIWUR28346;AGIWUR37259  
N2 CT II 1611331 1612510 WBGene00015594 btb-15 C08E3.2 -0.222773100237291 AGIWUR30529  
N2 CT II 1612788 1614059 WBGene00015599 fbxa-164 C08E3.7 0.0200368960287651  
AGIWUR28121;AGIWUR30670;AGIWUR34271  
N2 CT II 1614793 1616463 WBGene00015600 fbxa-165 C08E3.8 0.0141951509963008  
AGIWUR14879  
N2 CT II 1616912 1619004 WBGene00015601 fbxa-166 C08E3.9 0.0903760474831987  
AGIWUR21789  
N2 CT II 1619894 1621261 WBGene00015602 fbxa-158 C08E3.10 2.21500059395332  
AGIWUR1075;AGIWUR11977;AGIWUR27950  
N2 CT II 1623907 1624672 WBGene00015604 fbxa-160 C08E3.12 0.052891307571592  
AGIWUR26010  
N2 CT II 1625966 1626883 WBGene00044415 C08E3.14 C08E3.14 -0.171030603976456  
AGIWUR16413;AGIWUR35631  
N2 CT II 1627479 1627883 WBGene00044416 C08E3.15 C08E3.15 2.88970193971934  
AGIWUR12234;AGIWUR14033;AGIWUR20688  
N2 CT II 1639213 1640596 WBGene00005293 srh-72 ZC204.5 -0.00334395472234128 AGIWUR31572  
N2 CT II 1644249 1644814 WBGene00022556 ZC204.6 ZC204.6 0.217383952814592 AGIWUR18821  
N2 CT II 1645410 1646299 WBGene00194714 ZC204.17 ZC204.17 0.236267919712457  
AGIWUR23907  
N2 CT II 1646597 1647568 WBGene00044695 fbxb-27 ZC204.16 -0.190792124573833  
AGIWUR5799;AGIWUR21143  
N2 CT II 1647908 1648865 WBGene00022558 fbxb-21 ZC204.8 0.252285931788431  
AGIWUR3003;AGIWUR17859  
N2 CT II 1649138 1650197 WBGene00022559 fbxb-20 ZC204.9 -0.16377675249589 AGIWUR31394  
N2 CT II 1650819 1651580 WBGene00022560 fbxb-16 ZC204.10 0.110028251670329

|                                                             |    |    |         |         |                |          |           |                     |             |
|-------------------------------------------------------------|----|----|---------|---------|----------------|----------|-----------|---------------------|-------------|
| AGIWUR12940                                                 |    |    |         |         |                |          |           |                     |             |
| N2                                                          | CT | II | 1652510 | 1653497 | WBGene00022557 | fbxb-15  | ZC204.7   | -0.0954797761788448 | AGIWUR27611 |
| N2                                                          | CT | II | 1653775 | 1654732 | WBGene00022561 | btb-13   | ZC204.11  | 0.0830976773535195  |             |
| AGIWUR16801                                                 |    |    |         |         |                |          |           |                     |             |
| N2                                                          | CT | II | 1655217 | 1656148 | WBGene00022555 | btb-12   | ZC204.3   | 0.161241833161013   | AGIWUR30043 |
| N2                                                          | CT | II | 1656263 | 1657302 | WBGene00022562 | ZC204.12 | ZC204.12  | 0.132687744724508   |             |
| AGIWUR4325;AGIWUR23512;AGIWUR25253;AGIWUR38231              |    |    |         |         |                |          |           |                     |             |
| N2                                                          | CT | II | 1663699 | 1665764 | WBGene00022554 | dux1-1   | ZC204.2   | 0.0280777552803304  |             |
| AGIWUR8677;AGIWUR19314                                      |    |    |         |         |                |          |           |                     |             |
| N2                                                          | CT | II | 1666325 | 1667482 | WBGene00022553 | ZC204.1  | ZC204.1   | -0.109858422115247  |             |
| AGIWUR14813;AGIWUR30212;AGIWUR36411;AGIWUR42000             |    |    |         |         |                |          |           |                     |             |
| N2                                                          | CT | II | 1667522 | 1669013 | WBGene00005844 | srw-97   | ZC204.15  | 0.149823461660224   |             |
| AGIWUR4173                                                  |    |    |         |         |                |          |           |                     |             |
| N2                                                          | CT | II | 1670833 | 1674337 | WBGene00003734 | nhx-6    | F58E1.6   | -0.0735565999143155 | AGIWUR15556 |
| N2                                                          | CT | II | 1676388 | 1677439 | WBGene00019037 | fbxb-17  | F58E1.5   | 0.0707683616651851  | AGIWUR9617  |
| N2                                                          | CT | II | 1677449 | 1679252 | WBGene00019038 | irld-37  | F58E1.7   | -0.219308953591881  | AGIWUR21516 |
| N2                                                          | CT | II | 1679381 | 1682134 | WBGene00019036 | irld-36  | F58E1.4   | 0.429280080800655   | AGIWUR38369 |
| N2                                                          | CT | II | 1682518 | 1683655 | WBGene00019035 | fbxb-26  | F58E1.3   | -0.105667182509588  | AGIWUR8917  |
| N2                                                          | CT | II | 1684048 | 1685091 | WBGene00019034 | fbxb-25  | F58E1.2   | 0.212099024959162   | AGIWUR21302 |
| N2                                                          | CT | II | 1688235 | 1689172 | WBGene00019040 | fbxb-19  | F58E1.9   | -0.16901514235319   |             |
| AGIWUR2980;AGIWUR24623;AGIWUR33051                          |    |    |         |         |                |          |           |                     |             |
| N2                                                          | CT | II | 1689696 | 1691077 | WBGene00019041 | fbxc-22  | F58E1.10  | 0.0261044360955074  |             |
| AGIWUR38601                                                 |    |    |         |         |                |          |           |                     |             |
| N2                                                          | CT | II | 1691557 | 1692907 | WBGene00019042 | fbxc-21  | F58E1.11  | -0.102422815674235  |             |
| AGIWUR28792                                                 |    |    |         |         |                |          |           |                     |             |
| N2                                                          | CT | II | 1693296 | 1694615 | WBGene00019043 | fbxc-26  | F58E1.12  | -0.0645424688532117 |             |
| AGIWUR27871                                                 |    |    |         |         |                |          |           |                     |             |
| N2                                                          | CT | II | 1694815 | 1695827 | WBGene00019044 | F58E1.13 | F58E1.13  | -0.306802515335718  |             |
| AGIWUR42519                                                 |    |    |         |         |                |          |           |                     |             |
| N2                                                          | CT | II | 1702384 | 1703463 | WBGene00019045 | fbxb-47  | F58E1.14  | -0.23216751844839   |             |
| AGIWUR1950                                                  |    |    |         |         |                |          |           |                     |             |
| N2                                                          | CT | II | 1704904 | 1706476 | WBGene00018442 | sdz-18   | F45C12.11 | -0.255919150208907  |             |
| AGIWUR31803                                                 |    |    |         |         |                |          |           |                     |             |
| N2                                                          | CT | II | 1706709 | 1707720 | WBGene00018441 | math-29  | F45C12.10 | 0.0819227820310591  |             |
| AGIWUR29511;AGIWUR39167                                     |    |    |         |         |                |          |           |                     |             |
| N2                                                          | CT | II | 1708432 | 1709696 | WBGene00018440 | F45C12.9 | F45C12.9  | 0.132630816649605   |             |
| AGIWUR37829                                                 |    |    |         |         |                |          |           |                     |             |
| N2                                                          | CT | II | 1710259 | 1711417 | WBGene00018439 | fbxa-184 | F45C12.8  | -0.0456031112066118 |             |
| AGIWUR11427;AGIWUR15075;AGIWUR21331;AGIWUR23042;AGIWUR42225 |    |    |         |         |                |          |           |                     |             |

|                                                                                                            |    |    |         |         |                |           |           |                      |             |
|------------------------------------------------------------------------------------------------------------|----|----|---------|---------|----------------|-----------|-----------|----------------------|-------------|
| N2                                                                                                         | CT | II | 1713238 | 1714397 | WBGene00018443 | btb-7     | F45C12.12 | 0.163102966611945    |             |
| AGIWUR35441                                                                                                |    |    |         |         |                |           |           |                      |             |
| N2                                                                                                         | CT | II | 1715162 | 1716497 | WBGene00018438 | btb-6     | F45C12.7  | -0.197556589227613   |             |
| AGIWUR9254                                                                                                 |    |    |         |         |                |           |           |                      |             |
| N2                                                                                                         | CT | II | 1718175 | 1719253 | WBGene00018444 | fbxb-48   | F45C12.13 | 0.0950154468650055   |             |
| AGIWUR32498                                                                                                |    |    |         |         |                |           |           |                      |             |
| N2                                                                                                         | CT | II | 1721323 | 1722423 | WBGene00018445 | fbxb-5    | F45C12.14 | 0.0154846902586172   |             |
| AGIWUR6059;AGIWUR14552;AGIWUR42708                                                                         |    |    |         |         |                |           |           |                      |             |
| N2                                                                                                         | CT | II | 1722770 | 1724186 | WBGene00018437 | btb-8     | F45C12.6  | 0.0475323669845267   |             |
| AGIWUR19396                                                                                                |    |    |         |         |                |           |           |                      |             |
| N2                                                                                                         | CT | II | 1726141 | 1727106 | WBGene00269388 | F45C12.17 | F45C12.17 | -0.0338363356810403  |             |
| AGIWUR7469;AGIWUR23367                                                                                     |    |    |         |         |                |           |           |                      |             |
| N2                                                                                                         | CT | II | 1728506 | 1730065 | WBGene00018435 | btb-9     | F45C12.4  | -0.00702743923241655 |             |
| AGIWUR20385;AGIWUR29933;AGIWUR32157                                                                        |    |    |         |         |                |           |           |                      |             |
| N2                                                                                                         | CT | II | 1730403 | 1732046 | WBGene00018434 | ceh-81    | F45C12.3  | -0.0585318866267688  |             |
| AGIWUR25864                                                                                                |    |    |         |         |                |           |           |                      |             |
| N2                                                                                                         | CT | II | 1732276 | 1733291 | WBGene00018433 | ceh-82    | F45C12.2  | -0.174681630154375   |             |
| AGIWUR16980                                                                                                |    |    |         |         |                |           |           |                      |             |
| N2                                                                                                         | CT | II | 1733718 | 1736533 | WBGene00018446 | ceh-83    | F45C12.15 | -0.153551214687958   |             |
| AGIWUR43133                                                                                                |    |    |         |         |                |           |           |                      |             |
| N2                                                                                                         | CT | II | 1736866 | 1738944 | WBGene00018447 | irld-9    | F45C12.16 | 0.0180710251165763   |             |
| AGIWUR1756                                                                                                 |    |    |         |         |                |           |           |                      |             |
| N2                                                                                                         | CT | II | 1739076 | 1741013 | WBGene00018432 | irld-33   | F45C12.1  | -0.00881787492202157 |             |
| AGIWUR35733                                                                                                |    |    |         |         |                |           |           |                      |             |
| N2                                                                                                         | CT | II | 1744483 | 1745859 | WBGene00018105 | cllec-19  | F36H5.6   | -0.0384788338385551  | AGIWUR34948 |
| N2                                                                                                         | CT | II | 1746189 | 1747582 | WBGene00006223 | str-179   | F36H5.7   | -0.110565081768137   |             |
| AGIWUR6697;AGIWUR7711;AGIWUR18141;AGIWUR18259;AGIWUR19978;AGIWUR25714;AGIWUR34971;AGIWUR42875;AGIWUR43866  |    |    |         |         |                |           |           |                      |             |
| N2                                                                                                         | CT | II | 1748378 | 1749943 | WBGene00206519 | F36H5.13  | F36H5.13  | 0.167724817558851    |             |
| AGIWUR24315                                                                                                |    |    |         |         |                |           |           |                      |             |
| N2                                                                                                         | CT | II | 1752749 | 1753090 | WBGene00018107 | F36H5.9   | F36H5.9   | 0.0713540074084955   | AGIWUR28515 |
| N2                                                                                                         | CT | II | 1753526 | 1754439 | WBGene00018109 | fbxb-12   | F36H5.11  | -0.191518403839169   |             |
| AGIWUR21376                                                                                                |    |    |         |         |                |           |           |                      |             |
| N2                                                                                                         | CT | II | 1756820 | 1757761 | WBGene00018108 | F36H5.10  | F36H5.10  |                      |             |
| -0.00872530321479115                                                                                       |    |    |         |         |                |           |           |                      |             |
| AGIWUR4473;AGIWUR14070;AGIWUR15873;AGIWUR17539;AGIWUR21671;AGIWUR22520;AGIWUR33979;AGIWUR38675;AGIWUR39220 |    |    |         |         |                |           |           |                      |             |
| N2                                                                                                         | CT | II | 1758326 | 1760667 | WBGene00018104 | fbxb-53   | F36H5.5   | -0.0346049137867137  | AGIWUR9607  |
| N2                                                                                                         | CT | II | 1761839 | 1762906 | WBGene00018103 | F36H5.4   | F36H5.4   | 0.121294658085606    |             |
| AGIWUR19793;AGIWUR21756;AGIWUR22590;AGIWUR25767;AGIWUR34490                                                |    |    |         |         |                |           |           |                      |             |
| N2                                                                                                         | CT | II | 1763372 | 1766555 | WBGene00018102 | math-28   | F36H5.3   | 0.321339195482894    |             |



AGIWUR2347;AGIWUR15007;AGIWUR27128

N2 CT II 1767802 1777394 WBGene00018101 math-27 F36H5.2 -0.274763040762243

AGIWUR11186;AGIWUR32824

N2 CT II 1772085 1778526 WBGene00015608 math-3 C08F1.4 -0.236529566532227

AGIWUR32321;AGIWUR38372

N2 CT II 1778772 1782409 WBGene00015609 math-4 C08F1.5 0.06104440494765907 AGIWUR13924

N2 CT II 1783451 1784481 WBGene00044417 C08F1.11 C08F1.11 -0.2527727383306

AGIWUR27089

N2 CT II 1785270 1786309 WBGene00015613 C08F1.10 C08F1.10 0.0932396326793441

AGIWUR3444;AGIWUR13602;AGIWUR23231;AGIWUR23253;AGIWUR27163;AGIWUR40491

N2 CT II 1787222 1788187 WBGene00015610 C08F1.6 C08F1.6 0.137076114232231 AGIWUR11918

N2 CT II 1789181 1790217 WBGene00015607 fbxb-13 C08F1.3 0.0549980908111705 AGIWUR38059

N2 CT II 1791981 1792962 WBGene00006088 str-21 C08F1.2 -0.0278494443024364 AGIWUR15309

N2 CT II 1797852 1801377 WBGene00015606 math-2 C08F1.1 0.212717897193035 AGIWUR37774

N2 CT II 1802107 1803302 WBGene00006089 str-22 C08F1.7 -0.84007501011388

AGIWUR10773;AGIWUR24537

N2 CT II 1817281 1818400 WBGene00020362 fbxb-10 T08E11.6 0.11609119437062

AGIWUR7747

N2 CT II 1818889 1820094 WBGene00020363 fbxa-3 T08E11.7 -0.0324965125467607

AGIWUR29418

N2 CT II 1821026 1823034 WBGene00020361 fbxc-19 T08E11.5 0.0049898677973168

AGIWUR22962;AGIWUR26801;AGIWUR29434;AGIWUR38598;AGIWUR39671;AGIWUR42018

N2 CT II 1824629 1830195 WBGene00020360 math-41 T08E11.4 -0.0381620810834828

AGIWUR14454

N2 CT II 1830632 1831789 WBGene00020359 math-40 T08E11.3 0.222312829343707

AGIWUR21133

N2 CT II 1832343 1833518 WBGene00020358 math-39 T08E11.2 -0.123018487731898

AGIWUR14134

N2 CT II 1833627 1835783 WBGene00020364 T08E11.8 T08E11.8 0.556725557659421

AGIWUR7322

N2 CT II 1840975 1842942 WBGene00016884 C52E2.5 C52E2.5 0.0902997122573028 AGIWUR28213

N2 CT II 1843165 1846234 WBGene00016883 C52E2.4 C52E2.4 -0.00273176950553555 AGIWUR9343

N2 CT II 1846990 1848154 WBGene00016885 fbxb-97 C52E2.6 -0.0888403624810099 AGIWUR4720

N2 CT II 1849430 1850403 WBGene00016886 fbxb-96 C52E2.7 0.0593262841801572 AGIWUR33334

N2 CT II 1852803 1853092 WBGene00016881 C52E2.2 C52E2.2 -0.0629141553579284 AGIWUR33694

N2 CT II 1854394 1855360 WBGene00016880 fbxb-95 C52E2.1 0.177038271347657

AGIWUR16918;AGIWUR31962;AGIWUR36994

N2 CT II 1862634 1863782 WBGene00015830 fbxb-98 C16C4.6 0.0360188509248633 AGIWUR26970

N2 CT II 1864578 1864884 WBGene00044359 C16C4.17 C16C4.17 0.30396875486362

AGIWUR5683;AGIWUR26687;AGIWUR28800;AGIWUR32417;AGIWUR33559

|    |    |    |         |         |                |         |          |                    |             |
|----|----|----|---------|---------|----------------|---------|----------|--------------------|-------------|
| N2 | CT | II | 1866386 | 1867894 | WBGene00015829 | math-15 | C16C4.5  | 0.815401587289179  | AGIWUR14519 |
| N2 | CT | II | 1869410 | 1870803 | WBGene00015828 | math-14 | C16C4.4  | 1.08325505215285   | AGIWUR20950 |
| N2 | CT | II | 1873480 | 1875106 | WBGene00015840 | math-11 | C16C4.16 | 0.0901045325281036 |             |

AGIWUR33822

|    |    |    |         |         |                |         |          |                    |             |
|----|----|----|---------|---------|----------------|---------|----------|--------------------|-------------|
| N2 | CT | II | 1875958 | 1877237 | WBGene00015827 | math-13 | C16C4.3  | 0.0195781352496551 | AGIWUR291   |
| N2 | CT | II | 1877579 | 1878763 | WBGene00015832 | math-16 | C16C4.8  | -0.156676762764357 | AGIWUR13056 |
| N2 | CT | II | 1879590 | 1880708 | WBGene00015833 | math-17 | C16C4.9  | 0.524420265009081  | AGIWUR27825 |
| N2 | CT | II | 1881611 | 1882805 | WBGene00015834 | math-5  | C16C4.10 | 1.40509462490564   |             |

AGIWUR44984

|    |    |    |         |         |                |        |          |                   |  |
|----|----|----|---------|---------|----------------|--------|----------|-------------------|--|
| N2 | CT | II | 1883596 | 1884735 | WBGene00015835 | math-6 | C16C4.11 | 0.953333780876261 |  |
|----|----|----|---------|---------|----------------|--------|----------|-------------------|--|

AGIWUR35980

|    |    |    |         |         |                |        |          |                   |  |
|----|----|----|---------|---------|----------------|--------|----------|-------------------|--|
| N2 | CT | II | 1885439 | 1886479 | WBGene00015836 | math-7 | C16C4.12 | 0.151856806936717 |  |
|----|----|----|---------|---------|----------------|--------|----------|-------------------|--|

AGIWUR25687

|    |    |    |         |         |                |        |          |                     |  |
|----|----|----|---------|---------|----------------|--------|----------|---------------------|--|
| N2 | CT | II | 1887209 | 1889171 | WBGene00015837 | math-8 | C16C4.13 | -0.0593990127505846 |  |
|----|----|----|---------|---------|----------------|--------|----------|---------------------|--|

AGIWUR20908

|    |    |    |         |         |                |        |          |                    |  |
|----|----|----|---------|---------|----------------|--------|----------|--------------------|--|
| N2 | CT | II | 1889909 | 1890782 | WBGene00015838 | math-9 | C16C4.14 | 0.0239329828807868 |  |
|----|----|----|---------|---------|----------------|--------|----------|--------------------|--|

AGIWUR34335

|    |    |    |         |         |                |         |         |                      |             |
|----|----|----|---------|---------|----------------|---------|---------|----------------------|-------------|
| N2 | CT | II | 1890851 | 1891699 | WBGene00015826 | math-12 | C16C4.2 | -0.387755104652506   | AGIWUR17591 |
| N2 | CT | II | 1900238 | 1901921 | WBGene00016719 | math-24 | C46F9.3 | -0.223496626969073   | AGIWUR32651 |
| N2 | CT | II | 1902281 | 1904446 | WBGene00016718 | math-23 | C46F9.2 | -0.00607191162747789 | AGIWUR5837  |
| N2 | CT | II | 1905429 | 1907775 | WBGene00016717 | math-22 | C46F9.1 | -0.0219497941295179  |             |

AGIWUR15993;AGIWUR33102

|    |    |    |         |         |                |         |         |                    |             |
|----|----|----|---------|---------|----------------|---------|---------|--------------------|-------------|
| N2 | CT | II | 1908161 | 1909735 | WBGene00018662 | math-30 | F52C6.5 | 0.0147727666170674 | AGIWUR14125 |
| N2 | CT | II | 1912450 | 1912841 | WBGene00018663 | math-31 | F52C6.6 | -0.224169646463246 | AGIWUR328   |
| N2 | CT | II | 1913605 | 1916376 | WBGene00018664 | bath-11 | F52C6.7 | -0.223181751611163 | AGIWUR41813 |
| N2 | CT | II | 1916713 | 1917958 | WBGene00018665 | bath-4  | F52C6.8 | -0.424346336220088 | AGIWUR32571 |
| N2 | CT | II | 1918319 | 1919439 | WBGene00018666 | bath-6  | F52C6.9 | -0.104373577195151 |             |

AGIWUR1207;AGIWUR16786;AGIWUR29145;AGIWUR41161

|    |    |    |         |         |                |        |          |                   |  |
|----|----|----|---------|---------|----------------|--------|----------|-------------------|--|
| N2 | CT | II | 1919926 | 1921111 | WBGene00018667 | bath-7 | F52C6.10 | -0.40655101138487 |  |
|----|----|----|---------|---------|----------------|--------|----------|-------------------|--|

AGIWUR5473

|    |    |    |         |         |                |        |          |                    |  |
|----|----|----|---------|---------|----------------|--------|----------|--------------------|--|
| N2 | CT | II | 1921452 | 1922744 | WBGene00018668 | bath-2 | F52C6.11 | -0.278033592769738 |  |
|----|----|----|---------|---------|----------------|--------|----------|--------------------|--|

AGIWUR14381

|    |    |    |         |         |                |         |         |                    |  |
|----|----|----|---------|---------|----------------|---------|---------|--------------------|--|
| N2 | CT | II | 1923140 | 1923827 | WBGene00018661 | F52C6.4 | F52C6.4 | 0.0151196101840663 |  |
|----|----|----|---------|---------|----------------|---------|---------|--------------------|--|

AGIWUR2439;AGIWUR6117;AGIWUR13431;AGIWUR24905;AGIWUR32132

|    |    |    |         |         |                |         |         |                    |  |
|----|----|----|---------|---------|----------------|---------|---------|--------------------|--|
| N2 | CT | II | 1924759 | 1925752 | WBGene00018660 | F52C6.3 | F52C6.3 | -0.185167225730493 |  |
|----|----|----|---------|---------|----------------|---------|---------|--------------------|--|

AGIWUR10072;AGIWUR19332

|    |    |    |         |         |                |         |         |                    |             |
|----|----|----|---------|---------|----------------|---------|---------|--------------------|-------------|
| N2 | CT | II | 1926462 | 1927347 | WBGene00018659 | F52C6.2 | F52C6.2 | -0.178682438933379 | AGIWUR29257 |
| N2 | CT | II | 1927879 | 1928734 | WBGene00018658 | bath-22 | F52C6.1 | -0.321181167445548 |             |

|                                                            |    |    |         |         |                |          |                              |                     |
|------------------------------------------------------------|----|----|---------|---------|----------------|----------|------------------------------|---------------------|
| AGIWUR7050;AGIWUR16188;AGIWUR18552;AGIWUR42126             |    |    |         |         |                |          |                              |                     |
| N2                                                         | CT | II | 1929149 | 1930086 | WBGene00018669 | F52C6.12 | F52C6.12                     | -0.0627302436638058 |
| AGIWUR9215;AGIWUR11588;AGIWUR21193;AGIWUR26570;AGIWUR42282 |    |    |         |         |                |          |                              |                     |
| N2                                                         | CT | II | 1930190 | 1930747 | WBGene00018670 | F52C6.13 | F52C6.13                     | -0.0266696491835923 |
| AGIWUR2092                                                 |    |    |         |         |                |          |                              |                     |
| N2                                                         | CT | II | 1930991 | 1934507 | WBGene00018671 | F52C6.14 | F52C6.14                     | -0.314310225484082  |
| AGIWUR11418                                                |    |    |         |         |                |          |                              |                     |
| N2                                                         | CT | II | 1937063 | 1940147 | WBGene00235352 | ZK250.13 | ZK250.13                     | -0.261871550976061  |
| AGIWUR42114                                                |    |    |         |         |                |          |                              |                     |
| N2                                                         | CT | II | 1944058 | 1945168 | WBGene00235354 | ZK250.14 | ZK250.14                     | 0.0556725601089765  |
| AGIWUR9209;AGIWUR37083                                     |    |    |         |         |                |          |                              |                     |
| N2                                                         | CT | II | 1953680 | 1955668 | WBGene00022690 | math-49  | ZK250.7 0.206028761560482    | AGIWUR24489         |
| N2                                                         | CT | II | 1956050 | 1958255 | WBGene00022691 | math-50  | ZK250.8 0.0105570643661395   | AGIWUR41755         |
| N2                                                         | CT | II | 1987285 | 1990667 | WBGene00021193 | math-44  | Y16E11A.1 -0.260635187678105 |                     |
| AGIWUR42798                                                |    |    |         |         |                |          |                              |                     |
| N2                                                         | CT | II | 1994047 | 1995701 | WBGene00016556 | math-21  | C40D2.3 -0.0396530606662542  |                     |
| AGIWUR9190;AGIWUR26554                                     |    |    |         |         |                |          |                              |                     |
| N2                                                         | CT | II | 1996537 | 1998531 | WBGene00016555 | math-20  | C40D2.2 -0.052793975299716   | AGIWUR12840         |
| N2                                                         | CT | II | 1999743 | 2000820 | WBGene00016557 | ceh-84   | C40D2.4 0.106523377080817    | AGIWUR25294         |
| N2                                                         | CT | II | 2011485 | 2012838 | WBGene00019137 | ceh-85   | F59H6.6 0.11909094128075     | AGIWUR34788         |
| N2                                                         | CT | II | 2012998 | 2013386 | WBGene00269394 | F59H6.15 | F59H6.15 0.12729769609361    |                     |
| AGIWUR9029                                                 |    |    |         |         |                |          |                              |                     |
| N2                                                         | CT | II | 2019654 | 2022441 | WBGene00019133 | F59H6.2  | F59H6.2 -0.235770734131297   | AGIWUR29740         |
| N2                                                         | CT | II | 2025642 | 2026610 | WBGene00019138 | bath-21  | F59H6.8 0.0206718896796607   | AGIWUR24725         |
| N2                                                         | CT | II | 2027612 | 2028812 | WBGene00019139 | bath-1   | F59H6.9 -0.243978663641411   | AGIWUR35302         |
| N2                                                         | CT | II | 2029232 | 2030467 | WBGene00019140 | bath-3   | F59H6.10 -0.302728729662087  |                     |
| AGIWUR1254                                                 |    |    |         |         |                |          |                              |                     |
| N2                                                         | CT | II | 2030750 | 2031952 | WBGene00019141 | bath-5   | F59H6.11 -0.207481299971912  |                     |
| AGIWUR2269                                                 |    |    |         |         |                |          |                              |                     |
| N2                                                         | CT | II | 2032569 | 2033243 | WBGene00019142 | btb-4    | F59H6.12 -0.20474200221288   |                     |
| AGIWUR41441;AGIWUR44999                                    |    |    |         |         |                |          |                              |                     |
| N2                                                         | CT | II | 2033586 | 2034812 | WBGene00206415 | F59H6.14 | F59H6.14 0.103653084482909   |                     |
| AGIWUR1220                                                 |    |    |         |         |                |          |                              |                     |
| N2                                                         | CT | II | 2035702 | 2039388 | WBGene00019132 | bath-19  | F59H6.1 -0.290664308720231   | AGIWUR32883         |
| N2                                                         | CT | II | 2040368 | 2041629 | WBGene00015012 | bath-20  | B0047.1 0.0785694256151075   |                     |
| AGIWUR19234;AGIWUR42677;AGIWUR44896                        |    |    |         |         |                |          |                              |                     |
| N2                                                         | CT | II | 2043089 | 2044087 | WBGene00015013 | btb-3    | B0047.2 -0.121980476591675   | AGIWUR36170         |
| N2                                                         | CT | II | 2044619 | 2045601 | WBGene00015014 | bath-24  | B0047.3 -0.208706067963092   | AGIWUR9357          |
| N2                                                         | CT | II | 2048061 | 2049175 | WBGene00015016 | bath-14  | B0047.5 -0.0634683551796411  |                     |

AGIWUR22179;AGIWUR23543

|    |    |    |         |         |                |          |          |                      |             |
|----|----|----|---------|---------|----------------|----------|----------|----------------------|-------------|
| N2 | CT | II | 2050023 | 2051679 | WBGene00017209 | F07E5.4  | F07E5.4  | 0.316250657695075    | AGIWUR13648 |
| N2 | CT | II | 2053919 | 2059072 | WBGene00017210 | F07E5.5  | F07E5.5  | -0.00636803153776988 | AGIWUR43260 |
| N2 | CT | II | 2059869 | 2064018 | WBGene00017211 | fbxb-36  | F07E5.6  | 0.311822572712467    | AGIWUR21594 |
| N2 | CT | II | 2068354 | 2068971 | WBGene00219315 | F07E5.12 | F07E5.12 | 0.086363926219466    |             |

AGIWUR2322

|    |    |    |         |         |                |         |         |                   |  |
|----|----|----|---------|---------|----------------|---------|---------|-------------------|--|
| N2 | CT | II | 2070593 | 2071516 | WBGene00017212 | F07E5.7 | F07E5.7 | -0.22799647632617 |  |
|----|----|----|---------|---------|----------------|---------|---------|-------------------|--|

AGIWUR2175;AGIWUR23158;AGIWUR36248

|    |    |    |         |         |                |          |          |                     |             |
|----|----|----|---------|---------|----------------|----------|----------|---------------------|-------------|
| N2 | CT | II | 2072221 | 2075830 | WBGene00017213 | F07E5.8  | F07E5.8  | 0.216985998907051   | AGIWUR11692 |
| N2 | CT | II | 2076291 | 2080526 | WBGene00017214 | F07E5.9  | F07E5.9  | 0.714462441737258   | AGIWUR21892 |
| N2 | CT | II | 2081557 | 2082016 | WBGene00020535 | T16A1.4  | T16A1.4  | -0.110823238929976  | AGIWUR35506 |
| N2 | CT | II | 2083595 | 2083826 | WBGene00020536 | T16A1.5  | T16A1.5  | 0.047371456340235   | AGIWUR15560 |
| N2 | CT | II | 2084129 | 2084891 | WBGene00020534 | fbxc-49  | T16A1.3  | -0.208452521971799  | AGIWUR3770  |
| N2 | CT | II | 2091772 | 2092111 | WBGene00269431 | T16A1.10 | T16A1.10 | 0.00959201063261084 |             |

AGIWUR5174

|    |    |    |         |         |                |         |         |                      |             |
|----|----|----|---------|---------|----------------|---------|---------|----------------------|-------------|
| N2 | CT | II | 2095304 | 2098671 | WBGene00020533 | T16A1.2 | T16A1.2 | 0.136059107072281    | AGIWUR25813 |
| N2 | CT | II | 2098871 | 2104149 | WBGene00020532 | math-42 | T16A1.1 | -0.00670192219714227 |             |

AGIWUR4912;AGIWUR5197;AGIWUR24871;AGIWUR27173;AGIWUR31259

|    |    |    |         |         |                |         |       |                    |             |
|----|----|----|---------|---------|----------------|---------|-------|--------------------|-------------|
| N2 | CT | II | 2104524 | 2106866 | WBGene00020075 | math-35 | R52.3 | 0.119944658993485  | AGIWUR19446 |
| N2 | CT | II | 2107197 | 2108395 | WBGene00020076 | R52.4   | R52.4 | 0.104341020342179  | AGIWUR29766 |
| N2 | CT | II | 2108787 | 2110043 | WBGene00020077 | R52.5   | R52.5 | 0.336171373078701  | AGIWUR35621 |
| N2 | CT | II | 2111227 | 2113048 | WBGene00020078 | R52.6   | R52.6 | -0.100892595669082 | AGIWUR17386 |
| N2 | CT | II | 2114554 | 2116894 | WBGene00005408 | srh-195 | R52.7 | -0.082542807171337 |             |

AGIWUR25884;AGIWUR27171;AGIWUR30449

|    |    |    |         |         |                |         |       |                   |  |
|----|----|----|---------|---------|----------------|---------|-------|-------------------|--|
| N2 | CT | II | 2117276 | 2122181 | WBGene00020080 | math-37 | R52.9 | 0.337017020972607 |  |
|----|----|----|---------|---------|----------------|---------|-------|-------------------|--|

AGIWUR22322;AGIWUR38481

|    |    |    |         |         |                |        |        |                  |  |
|----|----|----|---------|---------|----------------|--------|--------|------------------|--|
| N2 | CT | II | 2123687 | 2129281 | WBGene00020081 | sdz-29 | R52.10 | 0.27451428565662 |  |
|----|----|----|---------|---------|----------------|--------|--------|------------------|--|

AGIWUR997;AGIWUR7585;AGIWUR9725;AGIWUR17929;AGIWUR24130;AGIWUR36877;AGIWUR39906

|    |    |    |         |         |                |        |          |                    |             |
|----|----|----|---------|---------|----------------|--------|----------|--------------------|-------------|
| N2 | CT | II | 2131070 | 2132475 | WBGene00020073 | sdz-28 | R52.1    | -0.208804413390149 | AGIWUR26196 |
| N2 | CT | II | 2133666 | 2135704 | WBGene00016548 | hpo-7  | C40A11.5 | 0.225460846874345  |             |

AGIWUR40590

|    |    |    |         |         |                |           |           |                   |  |
|----|----|----|---------|---------|----------------|-----------|-----------|-------------------|--|
| N2 | CT | II | 2136822 | 2136909 | WBGene00016553 | C40A11.10 | C40A11.10 | 0.105021467930684 |  |
|----|----|----|---------|---------|----------------|-----------|-----------|-------------------|--|

AGIWUR29844

|    |    |    |         |         |                |          |          |                    |  |
|----|----|----|---------|---------|----------------|----------|----------|--------------------|--|
| N2 | CT | II | 2137422 | 2138951 | WBGene00016547 | C40A11.4 | C40A11.4 | -0.470365249544846 |  |
|----|----|----|---------|---------|----------------|----------|----------|--------------------|--|

AGIWUR17400

|    |    |    |         |         |                |          |          |                    |  |
|----|----|----|---------|---------|----------------|----------|----------|--------------------|--|
| N2 | CT | II | 2144292 | 2145666 | WBGene00016549 | C40A11.6 | C40A11.6 | 0.0277966611363292 |  |
|----|----|----|---------|---------|----------------|----------|----------|--------------------|--|

AGIWUR8253;AGIWUR18636;AGIWUR31194;AGIWUR37868;AGIWUR39471;AGIWUR42954

|    |    |    |         |         |                |          |          |                    |  |
|----|----|----|---------|---------|----------------|----------|----------|--------------------|--|
| N2 | CT | II | 2146950 | 2148775 | WBGene00016545 | C40A11.2 | C40A11.2 | -0.229683684314549 |  |
|----|----|----|---------|---------|----------------|----------|----------|--------------------|--|

AGIWUR19003

|                                                                     |    |    |         |         |                |           |           |                     |             |
|---------------------------------------------------------------------|----|----|---------|---------|----------------|-----------|-----------|---------------------|-------------|
| N2                                                                  | CT | II | 2148732 | 2150363 | WBGene00016550 | C40A11.7  | C40A11.7  | -0.49584090077707   |             |
| AGIWUR18171                                                         |    |    |         |         |                |           |           |                     |             |
| N2                                                                  | CT | II | 2150552 | 2151290 | WBGene00016551 | C40A11.8  | C40A11.8  | 0.0791024578356776  |             |
| AGIWUR23141;AGIWUR29012;AGIWUR41581                                 |    |    |         |         |                |           |           |                     |             |
| N2                                                                  | CT | II | 2154008 | 2155220 | WBGene00016544 | math-18   | C40A11.1  | 0.0496608666418616  |             |
| AGIWUR19325                                                         |    |    |         |         |                |           |           |                     |             |
| N2                                                                  | CT | II | 2163341 | 2163832 | WBGene00044360 | C33C12.11 | C33C12.11 | -0.155231800498187  |             |
| AGIWUR26375                                                         |    |    |         |         |                |           |           |                     |             |
| N2                                                                  | CT | II | 2165440 | 2166498 | WBGene00016336 | C33C12.4  | C33C12.4  | 0.289850376792028   |             |
| AGIWUR11200                                                         |    |    |         |         |                |           |           |                     |             |
| N2                                                                  | CT | II | 2170325 | 2173219 | WBGene00016338 | srb-14    | C33C12.6  | -0.168853066136879  |             |
| AGIWUR212;AGIWUR2539;AGIWUR6574;AGIWUR16245;AGIWUR18339;AGIWUR37823 |    |    |         |         |                |           |           |                     |             |
| N2                                                                  | CT | II | 2174586 | 2175289 | WBGene00016339 |           | C33C12.7  | 0.133161281629674   |             |
| AGIWUR41219                                                         |    |    |         |         |                |           |           |                     |             |
| N2                                                                  | CT | II | 2176741 | 2181990 | WBGene00016335 | gba-1     | C33C12.3  | -0.135353034088604  |             |
| AGIWUR19527                                                         |    |    |         |         |                |           |           |                     |             |
| N2                                                                  | CT | II | 2182503 | 2186434 | WBGene00016340 | gba-2     | C33C12.8  | 0.0320648117391551  |             |
| AGIWUR32624                                                         |    |    |         |         |                |           |           |                     |             |
| N2                                                                  | CT | II | 2187149 | 2189457 | WBGene00016341 | mtq-2     | C33C12.9  | -0.0706064177357906 |             |
| AGIWUR36138                                                         |    |    |         |         |                |           |           |                     |             |
| N2                                                                  | CT | II | 2192339 | 2194114 | WBGene00016342 |           | C33C12.10 | 0.0771942190863442  |             |
| AGIWUR44353                                                         |    |    |         |         |                |           |           |                     |             |
| N2                                                                  | CT | II | 2197846 | 2198675 | WBGene00016334 |           | C33C12.1  | -0.497337267584062  |             |
| AGIWUR20259                                                         |    |    |         |         |                |           |           |                     |             |
| N2                                                                  | CT | II | 2199143 | 2204139 | WBGene00021985 | Y59C2A.2  | Y59C2A.2  | -0.0465250228909246 |             |
| AGIWUR13216                                                         |    |    |         |         |                |           |           |                     |             |
| N2                                                                  | CT | II | 2208112 | 2212863 | WBGene00021984 | Y59C2A.1  | Y59C2A.1  | -0.115949724944659  |             |
| AGIWUR9506                                                          |    |    |         |         |                |           |           |                     |             |
| N2                                                                  | CT | II | 2215476 | 2219921 | WBGene00021986 | Y59C2A.3  | Y59C2A.3  | -0.177871848797942  |             |
| AGIWUR15526                                                         |    |    |         |         |                |           |           |                     |             |
| N2                                                                  | CT | II | 2224359 | 2225708 | WBGene00018784 | F54A3.5   | F54A3.5   | 0.208149831962677   | AGIWUR36961 |
| N2                                                                  | CT | II | 2225817 | 2232470 | WBGene00018785 | F54A3.6   | F54A3.6   | 0.0185840836468252  | AGIWUR44438 |
| N2                                                                  | CT | II | 2233540 | 2243539 | WBGene00018782 | cct-3     | F54A3.3   | 0.408322654740186   |             |
| AGIWUR2521;AGIWUR9717;AGIWUR20960;AGIWUR24186;AGIWUR32791           |    |    |         |         |                |           |           |                     |             |
| N2                                                                  | CT | II | 2255172 | 2261101 | WBGene00019586 | K09F6.3   | K09F6.3   | 0.348233450532217   |             |
| AGIWUR31678;AGIWUR37475                                             |    |    |         |         |                |           |           |                     |             |
| N2                                                                  | CT | II | 2262128 | 2265768 | WBGene00019587 | K09F6.4   | K09F6.4   | 0.294539916572283   | AGIWUR10760 |
| N2                                                                  | CT | II | 2274876 | 2279146 | WBGene00019589 | K09F6.6   | K09F6.6   | 0.224450599912577   | AGIWUR31027 |
| N2                                                                  | CT | II | 2280139 | 2280580 | WBGene00044361 | K09F6.11  | K09F6.11  | 0.0458483820415925  |             |

AGIWUR660;AGIWUR7865;AGIWUR12531;AGIWUR38262

|    |    |    |         |         |                |          |          |                    |
|----|----|----|---------|---------|----------------|----------|----------|--------------------|
| N2 | CT | II | 2287030 | 2290226 | WBGene00019593 | K09F6.10 | K09F6.10 | 0.0287075480994243 |
|----|----|----|---------|---------|----------------|----------|----------|--------------------|

AGIWUR39646

|    |    |    |         |         |                |         |         |                      |             |
|----|----|----|---------|---------|----------------|---------|---------|----------------------|-------------|
| N2 | CT | II | 2290896 | 2292184 | WBGene00019590 | K09F6.7 | K09F6.7 | -0.00643267753736332 | AGIWUR35281 |
|----|----|----|---------|---------|----------------|---------|---------|----------------------|-------------|

|    |    |    |         |         |                |         |         |                   |
|----|----|----|---------|---------|----------------|---------|---------|-------------------|
| N2 | CT | II | 2294693 | 2296265 | WBGene00019591 | fbxc-25 | K09F6.8 | 0.148542649774228 |
|----|----|----|---------|---------|----------------|---------|---------|-------------------|

AGIWUR7503;AGIWUR25600

|    |    |    |         |         |                |         |         |                    |             |
|----|----|----|---------|---------|----------------|---------|---------|--------------------|-------------|
| N2 | CT | II | 2297847 | 2298793 | WBGene00015111 | B0281.4 | B0281.4 | -0.163838565166493 | AGIWUR32252 |
|----|----|----|---------|---------|----------------|---------|---------|--------------------|-------------|

|    |    |    |         |         |                |         |         |                    |             |
|----|----|----|---------|---------|----------------|---------|---------|--------------------|-------------|
| N2 | CT | II | 2299854 | 2300946 | WBGene00015112 | B0281.5 | B0281.5 | -0.057855288132826 | AGIWUR17596 |
|----|----|----|---------|---------|----------------|---------|---------|--------------------|-------------|

|    |    |    |         |         |                |         |         |                     |             |
|----|----|----|---------|---------|----------------|---------|---------|---------------------|-------------|
| N2 | CT | II | 2301308 | 2302229 | WBGene00015113 | B0281.6 | B0281.6 | -0.0477805622231218 | AGIWUR30003 |
|----|----|----|---------|---------|----------------|---------|---------|---------------------|-------------|

|    |    |    |         |         |                |         |         |                    |
|----|----|----|---------|---------|----------------|---------|---------|--------------------|
| N2 | CT | II | 2307041 | 2308361 | WBGene00015110 | B0281.3 | B0281.3 | 0.0547056901156981 |
|----|----|----|---------|---------|----------------|---------|---------|--------------------|

AGIWUR10890;AGIWUR22129;AGIWUR38792

|    |    |    |         |         |                |         |         |                     |             |
|----|----|----|---------|---------|----------------|---------|---------|---------------------|-------------|
| N2 | CT | II | 2310071 | 2311074 | WBGene00023225 | B0281.7 | B0281.7 | -0.0136648061450693 | AGIWUR19027 |
|----|----|----|---------|---------|----------------|---------|---------|---------------------|-------------|

|    |    |    |         |         |                |         |         |                   |             |
|----|----|----|---------|---------|----------------|---------|---------|-------------------|-------------|
| N2 | CT | II | 2313067 | 2314927 | WBGene00015108 | B0281.1 | B0281.1 | 0.248521588283803 | AGIWUR29422 |
|----|----|----|---------|---------|----------------|---------|---------|-------------------|-------------|

|    |    |    |         |         |                |          |          |                   |
|----|----|----|---------|---------|----------------|----------|----------|-------------------|
| N2 | CT | II | 2315084 | 2315622 | WBGene00022869 | ZK1240.4 | ZK1240.4 | 0.321418871410594 |
|----|----|----|---------|---------|----------------|----------|----------|-------------------|

AGIWUR40750

|    |    |    |         |         |                |          |          |                   |
|----|----|----|---------|---------|----------------|----------|----------|-------------------|
| N2 | CT | II | 2316163 | 2317877 | WBGene00022870 | ZK1240.5 | ZK1240.5 | 0.272518165567254 |
|----|----|----|---------|---------|----------------|----------|----------|-------------------|

AGIWUR35040

|    |    |    |         |         |                |          |          |                    |
|----|----|----|---------|---------|----------------|----------|----------|--------------------|
| N2 | CT | II | 2318189 | 2320134 | WBGene00022873 | ZK1240.9 | ZK1240.9 | -0.336532279153251 |
|----|----|----|---------|---------|----------------|----------|----------|--------------------|

AGIWUR6381;AGIWUR34515;AGIWUR37334

|    |    |    |         |         |                |          |          |                   |
|----|----|----|---------|---------|----------------|----------|----------|-------------------|
| N2 | CT | II | 2320153 | 2321951 | WBGene00022868 | ZK1240.3 | ZK1240.3 | -0.36755899116303 |
|----|----|----|---------|---------|----------------|----------|----------|-------------------|

AGIWUR2960

|    |    |    |         |         |                |          |          |                     |
|----|----|----|---------|---------|----------------|----------|----------|---------------------|
| N2 | CT | II | 2322367 | 2322907 | WBGene00022871 | ZK1240.6 | ZK1240.6 | -0.0550781721511138 |
|----|----|----|---------|---------|----------------|----------|----------|---------------------|

AGIWUR5666

|    |    |    |         |         |                |          |          |                     |
|----|----|----|---------|---------|----------------|----------|----------|---------------------|
| N2 | CT | II | 2323376 | 2325215 | WBGene00022867 | ZK1240.2 | ZK1240.2 | 0.00664564083519004 |
|----|----|----|---------|---------|----------------|----------|----------|---------------------|

AGIWUR14511

|    |    |    |         |         |                |          |          |                  |
|----|----|----|---------|---------|----------------|----------|----------|------------------|
| N2 | CT | II | 2326995 | 2329053 | WBGene00022872 | ZK1240.8 | ZK1240.8 | 0.14798070643994 |
|----|----|----|---------|---------|----------------|----------|----------|------------------|

AGIWUR42400

|    |    |    |         |         |                |          |          |                    |
|----|----|----|---------|---------|----------------|----------|----------|--------------------|
| N2 | CT | II | 2329355 | 2331792 | WBGene00022866 | ZK1240.1 | ZK1240.1 | -0.477677563948803 |
|----|----|----|---------|---------|----------------|----------|----------|--------------------|

AGIWUR11319

|    |    |    |         |         |                |          |          |                   |
|----|----|----|---------|---------|----------------|----------|----------|-------------------|
| N2 | CT | II | 2332520 | 2334338 | WBGene00018385 | F43C11.8 | F43C11.8 | 0.314024387448219 |
|----|----|----|---------|---------|----------------|----------|----------|-------------------|

AGIWUR12050

|    |    |    |         |         |                |          |          |                   |
|----|----|----|---------|---------|----------------|----------|----------|-------------------|
| N2 | CT | II | 2335933 | 2337696 | WBGene00018384 | F43C11.7 | F43C11.7 | 0.215190231407632 |
|----|----|----|---------|---------|----------------|----------|----------|-------------------|

AGIWUR27872

|    |    |    |         |         |                |          |          |                    |
|----|----|----|---------|---------|----------------|----------|----------|--------------------|
| N2 | CT | II | 2337897 | 2340746 | WBGene00018386 | F43C11.9 | F43C11.9 | 0.0628368830195374 |
|----|----|----|---------|---------|----------------|----------|----------|--------------------|

AGIWUR20373

|    |    |    |         |         |                |          |          |                    |
|----|----|----|---------|---------|----------------|----------|----------|--------------------|
| N2 | CT | II | 2342433 | 2343925 | WBGene00018383 | F43C11.6 | F43C11.6 | -0.144160881153963 |
|----|----|----|---------|---------|----------------|----------|----------|--------------------|

AGIWUR25498

|    |    |    |         |         |                |          |          |                    |
|----|----|----|---------|---------|----------------|----------|----------|--------------------|
| N2 | CT | II | 2345118 | 2346028 | WBGene00018382 | F43C11.5 | F43C11.5 | 0.0180935864857794 |
|----|----|----|---------|---------|----------------|----------|----------|--------------------|

AGIWUR45203

|                                     |    |    |         |         |                |           |           |                     |
|-------------------------------------|----|----|---------|---------|----------------|-----------|-----------|---------------------|
| N2                                  | CT | II | 2347015 | 2350030 | WBGene00018381 | F43C11.4  | F43C11.4  | -0.224839861899813  |
| AGIWUR19877                         |    |    |         |         |                |           |           |                     |
| N2                                  | CT | II | 2350216 | 2351657 | WBGene00018387 | F43C11.10 | F43C11.10 | 0.314333830144403   |
| AGIWUR2098;AGIWUR5664;AGIWUR17935   |    |    |         |         |                |           |           |                     |
| N2                                  | CT | II | 2354776 | 2355972 | WBGene00018379 | F43C11.2  | F43C11.2  | -0.120757937790573  |
| AGIWUR27877                         |    |    |         |         |                |           |           |                     |
| N2                                  | CT | II | 2357095 | 2358278 | WBGene00018378 | F43C11.1  | F43C11.1  | -0.106716786203638  |
| AGIWUR35747;AGIWUR36438             |    |    |         |         |                |           |           |                     |
| N2                                  | CT | II | 2358801 | 2363773 | WBGene00018388 | F43C11.11 | F43C11.11 | 0.0800791610434519  |
| AGIWUR6497                          |    |    |         |         |                |           |           |                     |
| N2                                  | CT | II | 2365573 | 2366720 | WBGene00018389 | F43C11.12 | F43C11.12 | -0.438494889179962  |
| AGIWUR28662                         |    |    |         |         |                |           |           |                     |
| N2                                  | CT | II | 2367528 | 2368708 | WBGene00017520 | F16G10.5  | F16G10.5  | 0.215201045255309   |
| AGIWUR7640                          |    |    |         |         |                |           |           |                     |
| N2                                  | CT | II | 2369256 | 2370089 | WBGene00017519 | hpo-25    | F16G10.4  | 0.114196626562113   |
| AGIWUR33028                         |    |    |         |         |                |           |           |                     |
| N2                                  | CT | II | 2372390 | 2374340 | WBGene00017518 | F16G10.3  | F16G10.3  | -0.0135311634778397 |
| AGIWUR8438                          |    |    |         |         |                |           |           |                     |
| N2                                  | CT | II | 2375273 | 2376411 | WBGene00017517 | F16G10.2  | F16G10.2  | -0.246832673083619  |
| AGIWUR3215                          |    |    |         |         |                |           |           |                     |
| N2                                  | CT | II | 2377199 | 2377851 | WBGene00017521 | F16G10.6  | F16G10.6  | 0.134763710495362   |
| AGIWUR12468                         |    |    |         |         |                |           |           |                     |
| N2                                  | CT | II | 2379579 | 2380274 | WBGene00017522 | F16G10.7  | F16G10.7  | -0.136193076986808  |
| AGIWUR29225                         |    |    |         |         |                |           |           |                     |
| N2                                  | CT | II | 2381949 | 2383434 | WBGene00017523 | F16G10.8  | F16G10.8  | -0.0782102970725855 |
| AGIWUR20430                         |    |    |         |         |                |           |           |                     |
| N2                                  | CT | II | 2384186 | 2385595 | WBGene00017524 | F16G10.9  | F16G10.9  | -0.0297459706895662 |
| AGIWUR11291;AGIWUR33652;AGIWUR45181 |    |    |         |         |                |           |           |                     |
| N2                                  | CT | II | 2394916 | 2395964 | WBGene00017527 | F16G10.13 | F16G10.13 | -0.0542260113382218 |
| AGIWUR12983                         |    |    |         |         |                |           |           |                     |
| N2                                  | CT | II | 2404284 | 2404659 | WBGene00017516 | F16G10.1  | F16G10.1  | 0.0954221343005033  |
| AGIWUR30351                         |    |    |         |         |                |           |           |                     |
| N2                                  | CT | II | 2409643 | 2412741 | WBGene00018353 | fbxa-182  | F42G2.4   | 0.741416715802238   |
| AGIWUR13568;AGIWUR39835             |    |    |         |         |                |           |           |                     |
| N2                                  | CT | II | 2414119 | 2415531 | WBGene00044672 | fbxa-4    | F42G2.8   | -0.344782299750532  |
| AGIWUR27382;AGIWUR33844             |    |    |         |         |                |           |           |                     |
| N2                                  | CT | II | 2416101 | 2417971 | WBGene00018354 | F42G2.5   | F42G2.5   | 0.0891286729449483  |
| AGIWUR9576;AGIWUR25080;AGIWUR33778  |    |    |         |         |                |           |           |                     |
| N2                                  | CT | II | 2418448 | 2419025 | WBGene00044362 | F42G2.7   | F42G2.7   | 0.262252099298468   |
| AGIWUR35918                         |    |    |         |         |                |           |           |                     |

|                                                                         |    |    |         |         |                |          |          |                     |             |
|-------------------------------------------------------------------------|----|----|---------|---------|----------------|----------|----------|---------------------|-------------|
| N2                                                                      | CT | II | 2419472 | 2420794 | WBGene00018352 | fbxc-20  | F42G2.3  | -0.147420014136037  | AGIWUR7061  |
| N2                                                                      | CT | II | 2426372 | 2429944 | WBGene00018355 | ceh-86   | F42G2.6  | -0.279497102115041  | AGIWUR1758  |
| N2                                                                      | CT | II | 2443279 | 2451130 | WBGene00006882 | vab-19   | T22D2.1  | 0.0121659270562442  |             |
| AGIWUR22528;AGIWUR42638                                                 |    |    |         |         |                |          |          |                     |             |
| N2                                                                      | CT | II | 2452970 | 2458981 | WBGene00004129 | pqn-42   | F53G2.4  | -0.154501110780758  |             |
| AGIWUR2755;AGIWUR27831                                                  |    |    |         |         |                |          |          |                     |             |
| N2                                                                      | CT | II | 2460866 | 2472862 | WBGene00006647 | tsr-1    | F53G2.6  | 0.0602287437013658  | AGIWUR16260 |
| N2                                                                      | CT | II | 2480399 | 2481312 | WBGene00018768 | F53G2.3  | F53G2.3  | -0.129984092645492  | AGIWUR11911 |
| N2                                                                      | CT | II | 2481921 | 2485922 | WBGene00018767 | F53G2.2  | F53G2.2  | -0.0258505303281265 | AGIWUR37648 |
| N2                                                                      | CT | II | 2488754 | 2496641 | WBGene00018766 | F53G2.1  | F53G2.1  | 0                   | AGIWUR38040 |
| N2                                                                      | CT | II | 2504878 | 2514846 | WBGene00019130 | gbas-1   | F59H5.1  | 0.0755274387589004  | AGIWUR23587 |
| N2                                                                      | CT | II | 2514977 | 2516097 | WBGene00019131 | bath-12  | F59H5.3  | -0.0901423242852708 |             |
| AGIWUR865;AGIWUR4761;AGIWUR18764                                        |    |    |         |         |                |          |          |                     |             |
| N2                                                                      | CT | II | 2520965 | 2522044 | WBGene00018223 | bath-13  | F40B1.1  | 0.161688815300856   | AGIWUR15079 |
| N2                                                                      | CT | II | 2522628 | 2524475 | WBGene00018224 | bath-18  | F40B1.2  | -0.124547826069593  | AGIWUR28245 |
| N2                                                                      | CT | II | 2525220 | 2529255 | WBGene00019341 | K02F6.7  | K02F6.7  | -0.0639020714532315 | AGIWUR38714 |
| N2                                                                      | CT | II | 2530817 | 2531476 | WBGene00019340 | K02F6.6  | K02F6.6  | -0.764700534499188  | AGIWUR20611 |
| N2                                                                      | CT | II | 2546225 | 2553572 | WBGene00019337 | K02F6.3  | K02F6.3  | -0.0567324276249552 |             |
| AGIWUR13728;AGIWUR21707;AGIWUR42219                                     |    |    |         |         |                |          |          |                     |             |
| N2                                                                      | CT | II | 2553962 | 2556313 | WBGene00019335 | K02F6.1  | K02F6.1  | 0.0513080239040793  | AGIWUR16350 |
| N2                                                                      | CT | II | 2557781 | 2563677 | WBGene00019343 | nep-18   | K02F6.9  | -0.0420238867589564 |             |
| AGIWUR27404;AGIWUR31183;AGIWUR32099                                     |    |    |         |         |                |          |          |                     |             |
| N2                                                                      | CT | II | 2565275 | 2575930 | WBGene00017280 | usp-39   | F09D1.1  | -0.0202505023659842 | AGIWUR22184 |
| N2                                                                      | CT | II | 2578536 | 2579595 | WBGene00005587 | sri-75   | F33H12.3 | -0.0705389955254132 |             |
| AGIWUR5883                                                              |    |    |         |         |                |          |          |                     |             |
| N2                                                                      | CT | II | 2580901 | 2583346 | WBGene00005586 | sri-74   | F33H12.4 | 0.0152763351499328  |             |
| AGIWUR38546                                                             |    |    |         |         |                |          |          |                     |             |
| N2                                                                      | CT | II | 2583782 | 2585593 | WBGene00005548 | sri-36   | F33H12.5 | 0.82382924752706    |             |
| AGIWUR29515                                                             |    |    |         |         |                |          |          |                     |             |
| N2                                                                      | CT | II | 2586078 | 2586911 | WBGene00045457 | F33H12.7 | F33H12.7 | 1.83920913954545    |             |
| AGIWUR10211;AGIWUR11014;AGIWUR14494;AGIWUR20112;AGIWUR21173;AGIWUR27869 |    |    |         |         |                |          |          |                     |             |
| N2                                                                      | CT | II | 2587504 | 2589754 | WBGene00005551 | sri-39   | F33H12.2 | -0.10081991793893   |             |
| AGIWUR2569;AGIWUR9926                                                   |    |    |         |         |                |          |          |                     |             |
| N2                                                                      | CT | II | 2600553 | 2601779 | WBGene00018019 | F33H12.1 | F33H12.1 | -0.106668590228199  |             |
| AGIWUR33272                                                             |    |    |         |         |                |          |          |                     |             |
| N2                                                                      | CT | II | 2603208 | 2605419 | WBGene00005589 | sri-77   | D2062.9  | -0.202101790756014  | AGIWUR10343 |
| N2                                                                      | CT | II | 2610862 | 2612359 | WBGene00005550 | sri-38   | D2062.8  | -0.885590274902599  |             |
| AGIWUR18254;AGIWUR39361                                                 |    |    |         |         |                |          |          |                     |             |
| N2                                                                      | CT | II | 2616905 | 2617374 | WBGene00017059 | D2062.7  | D2062.7  | 0.16141289404705    | AGIWUR30414 |



|                                                                                                         |    |    |         |         |                |          |          |                      |             |
|---------------------------------------------------------------------------------------------------------|----|----|---------|---------|----------------|----------|----------|----------------------|-------------|
| N2                                                                                                      | CT | II | 2619419 | 2619789 | WBGene00017058 | D2062.6  | D2062.6  | 0.275904558674724    |             |
| AGIWUR152;AGIWUR6988;AGIWUR17021;AGIWUR28623;AGIWUR37201;AGIWUR42200                                    |    |    |         |         |                |          |          |                      |             |
| N2                                                                                                      | CT | II | 2623402 | 2624530 | WBGene00017056 | D2062.4  | D2062.4  | 0.184400781357871    |             |
| AGIWUR11959;AGIWUR21825;AGIWUR31235;AGIWUR43927                                                         |    |    |         |         |                |          |          |                      |             |
| N2                                                                                                      | CT | II | 2625092 | 2627070 | WBGene00044301 | lgc-28   | D2062.12 | -0.227258613528746   |             |
| AGIWUR30690;AGIWUR43966                                                                                 |    |    |         |         |                |          |          |                      |             |
| N2                                                                                                      | CT | II | 2627749 | 2629196 | WBGene00005583 | sri-71   | D2062.3  | 0.521665801538393    | AGIWUR35298 |
| N2                                                                                                      | CT | II | 2629570 | 2631231 | WBGene00005549 | sri-37   | D2062.2  | 0.0996501377438204   | AGIWUR17145 |
| N2                                                                                                      | CT | II | 2631473 | 2633054 | WBGene00017055 | D2062.1  | D2062.1  | 0.187275372264798    | AGIWUR15096 |
| N2                                                                                                      | CT | II | 2634210 | 2635321 | WBGene00005553 | sri-41   | F22E5.10 | 0.0106104305865946   |             |
| AGIWUR35927;AGIWUR43074                                                                                 |    |    |         |         |                |          |          |                      |             |
| N2                                                                                                      | CT | II | 2635360 | 2637608 | WBGene00044363 | F22E5.21 | F22E5.21 | -0.410598037631364   |             |
| AGIWUR6996;AGIWUR13791                                                                                  |    |    |         |         |                |          |          |                      |             |
| N2                                                                                                      | CT | II | 2638392 | 2639353 | WBGene00017708 | F22E5.9  | F22E5.9  | -0.276115860550032   | AGIWUR8605  |
| N2                                                                                                      | CT | II | 2640081 | 2641897 | WBGene00017707 | F22E5.8  | F22E5.8  | -0.425478957723917   | AGIWUR29034 |
| N2                                                                                                      | CT | II | 2642090 | 2642884 | WBGene00017706 | F22E5.7  | F22E5.7  | -0.126428250312867   | AGIWUR2135  |
| N2                                                                                                      | CT | II | 2643685 | 2645703 | WBGene00017709 | F22E5.11 | F22E5.11 |                      |             |
| -0.00137548428732259 AGIWUR16622                                                                        |    |    |         |         |                |          |          |                      |             |
| N2                                                                                                      | CT | II | 2647637 | 2649639 | WBGene00017711 | F22E5.13 | F22E5.13 | -0.190937440985413   |             |
| AGIWUR15725;AGIWUR33628                                                                                 |    |    |         |         |                |          |          |                      |             |
| N2                                                                                                      | CT | II | 2649870 | 2650715 | WBGene00017705 | F22E5.6  | F22E5.6  | 0.383185212168138    | AGIWUR39051 |
| N2                                                                                                      | CT | II | 2652841 | 2654464 | WBGene00005561 | sri-49   | F22E5.14 | -0.00653959117483982 |             |
| AGIWUR283;AGIWUR4661;AGIWUR8245;AGIWUR13251;AGIWUR28279;AGIWUR32069;AGIWUR33970;AGIWUR35353;AGIWUR37519 |    |    |         |         |                |          |          |                      |             |
| N2                                                                                                      | CT | II | 2659670 | 2665022 | WBGene00001546 | gcy-21   | F22E5.3  | -0.00473254550221291 | AGIWUR44744 |
| N2                                                                                                      | CT | II | 2666283 | 2668162 | WBGene00005567 | sri-55   | F22E5.15 | -0.106757169325287   |             |
| AGIWUR3285;AGIWUR11082                                                                                  |    |    |         |         |                |          |          |                      |             |
| N2                                                                                                      | CT | II | 2672632 | 2673634 | WBGene00017713 | F22E5.20 | F22E5.20 | -0.0680211286630517  |             |
| AGIWUR8172                                                                                              |    |    |         |         |                |          |          |                      |             |
| N2                                                                                                      | CT | II | 2673908 | 2677588 | WBGene00017703 | F22E5.1  | F22E5.1  | 0.369890390833801    | AGIWUR18331 |
| N2                                                                                                      | CT | II | 2678041 | 2679162 | WBGene00017712 | F22E5.17 | F22E5.17 | -0.17671677824092    |             |
| AGIWUR11407                                                                                             |    |    |         |         |                |          |          |                      |             |
| N2                                                                                                      | CT | II | 2679163 | 2681218 | WBGene00018021 | F34D6.1  | F34D6.1  | 0.0646644420721278   | AGIWUR32910 |
| N2                                                                                                      | CT | II | 2683329 | 2684308 | WBGene00018022 | ceh-87   | F34D6.2  | 0.15112731752275     | AGIWUR1083  |
| N2                                                                                                      | CT | II | 2684669 | 2686977 | WBGene00006318 | sup-9    | F34D6.3  | -0.28457145167164    | AGIWUR35930 |
| N2                                                                                                      | CT | II | 2688916 | 2689179 | WBGene00044365 | F34D6.8  | F34D6.8  | -0.632470583345606   |             |
| AGIWUR3570;AGIWUR14833;AGIWUR16546;AGIWUR25095;AGIWUR30598                                              |    |    |         |         |                |          |          |                      |             |
| N2                                                                                                      | CT | II | 2690472 | 2694311 | WBGene00018023 | set-11   | F34D6.4  | 0.0687344855772469   | AGIWUR35159 |
| N2                                                                                                      | CT | II | 2696939 | 2698478 | WBGene00005574 | sri-62   | F34D6.5  | -0.0902120562285678  | AGIWUR37243 |
| N2                                                                                                      | CT | II | 2698865 | 2700329 | WBGene00005573 | sri-61   | F34D6.6  | 0.147519830307496    | AGIWUR26167 |

|                                                             |    |    |         |         |                |           |           |                     |             |
|-------------------------------------------------------------|----|----|---------|---------|----------------|-----------|-----------|---------------------|-------------|
| N2                                                          | CT | II | 2701389 | 2702857 | WBGene00005572 | sri-60    | Y47G7B.3  | -0.295050054511917  |             |
| AGIWUR4730                                                  |    |    |         |         |                |           |           |                     |             |
| N2                                                          | CT | II | 2703371 | 2705316 | WBGene00005345 | srh-128   | Y47G7B.1  | 0.276737547863808   |             |
| AGIWUR42635                                                 |    |    |         |         |                |           |           |                     |             |
| N2                                                          | CT | II | 2705996 | 2707982 | WBGene00021654 | Y47G7B.2  | Y47G7B.2  | 0.0415790525017687  |             |
| AGIWUR5884                                                  |    |    |         |         |                |           |           |                     |             |
| N2                                                          | CT | II | 2708438 | 2710096 | WBGene00020227 | T05A8.1   | T05A8.1   | 0.520491758742306   | AGIWUR29682 |
| N2                                                          | CT | II | 2709942 | 2711019 | WBGene00020228 | T05A8.2   | T05A8.2   | 0.616170325812405   | AGIWUR23765 |
| N2                                                          | CT | II | 2714647 | 2717435 | WBGene00020229 | T05A8.3   | T05A8.3   | 0.129624857604973   |             |
| AGIWUR2639;AGIWUR12034                                      |    |    |         |         |                |           |           |                     |             |
| N2                                                          | CT | II | 2717522 | 2725541 | WBGene00020230 | nep-2     | T05A8.4   | 0.0810650186792472  | AGIWUR4193  |
| N2                                                          | CT | II | 2731319 | 2735250 | WBGene00020231 | T05A8.5   | T05A8.5   | 0.06026341282438    | AGIWUR33951 |
| N2                                                          | CT | II | 2736678 | 2737556 | WBGene00044367 | T05A8.8   | T05A8.8   | -0.0922346315408245 |             |
| AGIWUR6273;AGIWUR21950;AGIWUR29441;AGIWUR34602;AGIWUR42076  |    |    |         |         |                |           |           |                     |             |
| N2                                                          | CT | II | 2738523 | 2739642 | WBGene00020232 | T05A8.6   | T05A8.6   | -0.0684576172892459 | AGIWUR36070 |
| N2                                                          | CT | II | 2740403 | 2742341 | WBGene00020233 | T05A8.7   | T05A8.7   | -0.0588317815845656 | AGIWUR12867 |
| N2                                                          | CT | II | 2747393 | 2747728 | WBGene00017915 | F29A7.5   | F29A7.5   | -0.23423311498146   | AGIWUR5403  |
| N2                                                          | CT | II | 2748588 | 2751573 | WBGene00017914 | F29A7.4   | F29A7.4   | -0.265435390874719  | AGIWUR35213 |
| N2                                                          | CT | II | 2751741 | 2752611 | WBGene00017916 | F29A7.6   | F29A7.6   | -0.223333533274873  |             |
| AGIWUR1148;AGIWUR13132                                      |    |    |         |         |                |           |           |                     |             |
| N2                                                          | CT | II | 2753299 | 2754379 | WBGene00017913 | F29A7.3   | F29A7.3   | -0.0247617272228666 |             |
| AGIWUR10580;AGIWUR15672;AGIWUR31599;AGIWUR38911;AGIWUR39414 |    |    |         |         |                |           |           |                     |             |
| N2                                                          | CT | II | 2756021 | 2757018 | WBGene00017917 | cllec-120 | F29A7.7   | -0.207135874122187  |             |
| AGIWUR37125                                                 |    |    |         |         |                |           |           |                     |             |
| N2                                                          | CT | II | 2757147 | 2758054 | WBGene00017918 | F29A7.8   | F29A7.8   | 0.231872748546387   | AGIWUR26911 |
| N2                                                          | CT | II | 2758625 | 2761856 | WBGene00017912 | fbxb-107  | F29A7.2   | -0.118859823877056  |             |
| AGIWUR35880                                                 |    |    |         |         |                |           |           |                     |             |
| N2                                                          | CT | II | 2764964 | 2767230 | WBGene00017249 | fbxb-108  | F08D12.6  | -0.226152731432657  |             |
| AGIWUR27513                                                 |    |    |         |         |                |           |           |                     |             |
| N2                                                          | CT | II | 2767250 | 2769121 | WBGene00017250 | F08D12.7  | F08D12.7  | -0.173296094280452  |             |
| AGIWUR13638                                                 |    |    |         |         |                |           |           |                     |             |
| N2                                                          | CT | II | 2769670 | 2770888 | WBGene00017251 | fbxb-105  | F08D12.8  | 0.342349071314997   |             |
| AGIWUR32943                                                 |    |    |         |         |                |           |           |                     |             |
| N2                                                          | CT | II | 2771082 | 2772266 | WBGene00017252 | sdz-10    | F08D12.9  | -0.510004743198952  |             |
| AGIWUR22665                                                 |    |    |         |         |                |           |           |                     |             |
| N2                                                          | CT | II | 2772389 | 2773634 | WBGene00017253 | sdz-9     | F08D12.10 | -0.0642164232765232 |             |
| AGIWUR14124                                                 |    |    |         |         |                |           |           |                     |             |
| N2                                                          | CT | II | 2773954 | 2775042 | WBGene00017254 | fbxb-111  | F08D12.11 | -0.472468570002977  |             |
| AGIWUR23089                                                 |    |    |         |         |                |           |           |                     |             |

|                                                                        |    |    |         |         |                |            |            |                     |
|------------------------------------------------------------------------|----|----|---------|---------|----------------|------------|------------|---------------------|
| N2                                                                     | CT | II | 2778146 | 2779282 | WBGene00017248 | F08D12.4   | F08D12.4   | 0.183606512694574   |
| AGIWUR34662                                                            |    |    |         |         |                |            |            |                     |
| N2                                                                     | CT | II | 2779544 | 2780838 | WBGene00017247 | F08D12.3   | F08D12.3   | 0.166118062363116   |
| AGIWUR11622;AGIWUR14891;AGIWUR21016                                    |    |    |         |         |                |            |            |                     |
| N2                                                                     | CT | II | 2781628 | 2783083 | WBGene00017246 | F08D12.2   | F08D12.2   | 0.232620618007445   |
| AGIWUR20210                                                            |    |    |         |         |                |            |            |                     |
| N2                                                                     | CT | II | 2783102 | 2787089 | WBGene00017255 | F08D12.12  | F08D12.12  | -0.243864955015909  |
| AGIWUR24811                                                            |    |    |         |         |                |            |            |                     |
| N2                                                                     | CT | II | 2787481 | 2793471 | WBGene00017245 | srpa-72    | F08D12.1   | 0.00523330156151758 |
| AGIWUR36556                                                            |    |    |         |         |                |            |            |                     |
| N2                                                                     | CT | II | 2794974 | 2800600 | WBGene00003709 | nhr-119    | K12H6.1    | -0.0533356958880176 |
| AGIWUR24562;AGIWUR32874                                                |    |    |         |         |                |            |            |                     |
| N2                                                                     | CT | II | 2808167 | 2812860 | WBGene00019691 | K12H6.12   | K12H6.12   | -0.196283403597771  |
| AGIWUR21824                                                            |    |    |         |         |                |            |            |                     |
| N2                                                                     | CT | II | 2812872 | 2815544 | WBGene00019683 | K12H6.2    | K12H6.2    | -0.286444386704634  |
| AGIWUR31778                                                            |    |    |         |         |                |            |            |                     |
| N2                                                                     | CT | II | 2816976 | 2819123 | WBGene00019690 | set-13     | K12H6.11   | -0.0642791663616729 |
| AGIWUR6625                                                             |    |    |         |         |                |            |            |                     |
| N2                                                                     | CT | II | 2819435 | 2822490 | WBGene00001507 | fut-4      | K12H6.3    | -0.153149024113916  |
| AGIWUR42179                                                            |    |    |         |         |                |            |            |                     |
| N2                                                                     | CT | II | 2823707 | 2824269 | WBGene00019684 | K12H6.4    | K12H6.4    | -0.541240222281992  |
| AGIWUR42778                                                            |    |    |         |         |                |            |            |                     |
| N2                                                                     | CT | II | 2825662 | 2826598 | WBGene00019685 | K12H6.5    | K12H6.5    | -0.580666643623154  |
| AGIWUR12317                                                            |    |    |         |         |                |            |            |                     |
| N2                                                                     | CT | II | 2827897 | 2828603 | WBGene00019688 | K12H6.8    | K12H6.8    | -0.175883923190582  |
| AGIWUR35848                                                            |    |    |         |         |                |            |            |                     |
| N2                                                                     | CT | II | 2828594 | 2831233 | WBGene00019686 | K12H6.6    | K12H6.6    | 0.0256111035086519  |
| AGIWUR10125;AGIWUR17611                                                |    |    |         |         |                |            |            |                     |
| N2                                                                     | CT | II | 2834953 | 2836780 | WBGene00019687 | K12H6.7    | K12H6.7    | -0.0101883536087186 |
| AGIWUR41986                                                            |    |    |         |         |                |            |            |                     |
| N2                                                                     | CT | II | 2839304 | 2840386 | WBGene00022441 | Y110A2AL.4 | Y110A2AL.4 | -0.0450316482592537 |
| AGIWUR2788;AGIWUR19080;AGIWUR19398;AGIWUR38238                         |    |    |         |         |                |            |            |                     |
| N2                                                                     | CT | II | 2841010 | 2841629 | WBGene00022443 | Y110A2AL.6 | Y110A2AL.6 | -2.03966579815225   |
| AGIWUR18505                                                            |    |    |         |         |                |            |            |                     |
| N2                                                                     | CT | II | 2842608 | 2843188 | WBGene00022444 | Y110A2AL.7 | Y110A2AL.7 | -0.544084657757121  |
| AGIWUR361                                                              |    |    |         |         |                |            |            |                     |
| N2                                                                     | CT | II | 2845384 | 2852593 | WBGene00004210 | ptc-3      | Y110A2AL.8 | 0.10370221842702    |
| AGIWUR20873;AGIWUR36226;AGIWUR36414;AGIWUR44866                        |    |    |         |         |                |            |            |                     |
| N2                                                                     | CT | II | 2864529 | 2865363 | WBGene00022442 | Y110A2AL.5 | Y110A2AL.5 | 0.145759787356306   |
| AGIWUR26948                                                            |    |    |         |         |                |            |            |                     |
| N2                                                                     | CT | II | 2865971 | 2866655 | WBGene00022445 | Y110A2AL.9 | Y110A2AL.9 | -0.0545406170674507 |
| AGIWUR3686;AGIWUR15915;AGIWUR18333;AGIWUR20884;AGIWUR37977;AGIWUR39130 |    |    |         |         |                |            |            |                     |
| N2                                                                     | CT | II | 2867074 | 2867779 | WBGene00022440 | Y110A2AL.3 | Y110A2AL.3 | -0.292309120934817  |
| AGIWUR8722                                                             |    |    |         |         |                |            |            |                     |
| N2                                                                     | CT | II | 2867993 | 2870758 | WBGene00022439 | Y110A2AL.2 | Y110A2AL.2 | -0.122542688022202  |

|                                                                        |    |    |         |         |                |             |             |                     |             |
|------------------------------------------------------------------------|----|----|---------|---------|----------------|-------------|-------------|---------------------|-------------|
| AGIWUR5974;AGIWUR13320;AGIWUR16794;AGIWUR16833;AGIWUR30884             |    |    |         |         |                |             |             |                     |             |
| N2                                                                     | CT | II | 2871377 | 2871914 | WBGene00022446 | Y110A2AL.10 | Y110A2AL.10 | -0.135950996617284  |             |
| AGIWUR28531                                                            |    |    |         |         |                |             |             |                     |             |
| N2                                                                     | CT | II | 2875101 | 2876618 | WBGene00022438 | Y110A2AL.1  | Y110A2AL.1  | -0.205036226964339  |             |
| AGIWUR6925                                                             |    |    |         |         |                |             |             |                     |             |
| N2                                                                     | CT | II | 2878729 | 2884910 | WBGene00022447 | hpo-20      | Y110A2AL.12 | 0.0249107468940104  |             |
| AGIWUR1875;AGIWUR11336;AGIWUR14290;AGIWUR30668;AGIWUR40005;AGIWUR44573 |    |    |         |         |                |             |             |                     |             |
| N2                                                                     | CT | II | 2886317 | 2889016 | WBGene00022448 | pinn-1      | Y110A2AL.13 | -0.275039566140839  |             |
| AGIWUR13612                                                            |    |    |         |         |                |             |             |                     |             |
| N2                                                                     | CT | II | 2889104 | 2894395 | WBGene00005020 | sqv-2       | Y110A2AL.14 | -0.160448670885359  |             |
| AGIWUR42414                                                            |    |    |         |         |                |             |             |                     |             |
| N2                                                                     | CT | II | 2896737 | 2900348 | WBGene00022450 | ubc-26      | Y110A2AM.3  | -0.0974068561852794 |             |
| AGIWUR5889;AGIWUR23227;AGIWUR30571;AGIWUR38183;AGIWUR42075             |    |    |         |         |                |             |             |                     |             |
| N2                                                                     | CT | II | 2902962 | 2904001 | WBGene00022449 | Y110A2AM.1  | Y110A2AM.1  | 0.313651201458134   |             |
| AGIWUR17641                                                            |    |    |         |         |                |             |             |                     |             |
| N2                                                                     | CT | II | 2913705 | 2919314 | WBGene00022453 | Y110A2AR.3  | Y110A2AR.3  | 0.0484663511788028  |             |
| AGIWUR20065;AGIWUR38218;AGIWUR40062                                    |    |    |         |         |                |             |             |                     |             |
| N2                                                                     | CT | II | 2919710 | 2920904 | WBGene00022452 | Y110A2AR.1  | Y110A2AR.1  | -0.0615862578063435 |             |
| AGIWUR30954                                                            |    |    |         |         |                |             |             |                     |             |
| N2                                                                     | CT | II | 2923899 | 2926533 | WBGene00022712 | ZK355.2     | ZK355.2     | 0.290489376776295   |             |
| AGIWUR36579;AGIWUR38145                                                |    |    |         |         |                |             |             |                     |             |
| N2                                                                     | CT | II | 2927017 | 2927633 | WBGene00022713 | ZK355.3     | ZK355.3     | 0.425229497822945   | AGIWUR16281 |
| N2                                                                     | CT | II | 2928221 | 2930599 | WBGene00022714 | irld-64     | ZK355.4     | -0.305011719350426  | AGIWUR25390 |
| N2                                                                     | CT | II | 2930728 | 2933463 | WBGene00022711 | irld-63     | ZK355.1     | -0.0887827164487298 | AGIWUR574   |
| N2                                                                     | CT | II | 2933521 | 2934454 | WBGene00044369 | irld-67     | ZK355.7     | -0.169281834802357  |             |
| AGIWUR7665;AGIWUR17850;AGIWUR29654                                     |    |    |         |         |                |             |             |                     |             |
| N2                                                                     | CT | II | 2934805 | 2937952 | WBGene00022715 | irld-65     | ZK355.5     | -0.0252953104341112 | AGIWUR18946 |
| N2                                                                     | CT | II | 2938143 | 2940847 | WBGene00022716 | irld-66     | ZK355.6     | 0.0721769887135997  | AGIWUR36728 |
| N2                                                                     | CT | II | 2940996 | 2944077 | WBGene00020431 | irld-50     | T11F1.7     | -0.0379910417062819 | AGIWUR1396  |
| N2                                                                     | CT | II | 2944176 | 2946533 | WBGene00020430 | irld-49     | T11F1.6     | 0.196354640268091   | AGIWUR11744 |
| N2                                                                     | CT | II | 2946738 | 2948434 | WBGene00005826 | srw-79      | T11F1.5     | -0.0462850779575863 |             |
| AGIWUR11043;AGIWUR16519;AGIWUR19279;AGIWUR29750                        |    |    |         |         |                |             |             |                     |             |
| N2                                                                     | CT | II | 2948929 | 2952729 | WBGene00077759 | irld-51     | T11F1.9     | 0.0346620525487396  | AGIWUR3293  |
| N2                                                                     | CT | II | 2956065 | 2958191 | WBGene00020428 | irld-48     | T11F1.2     | 0.0289916431992401  | AGIWUR5921  |
| N2                                                                     | CT | II | 2958608 | 2961883 | WBGene00005807 | srw-60      | T11F1.1     | -0.0946570966986844 | AGIWUR20994 |
| N2                                                                     | CT | II | 2976639 | 2987023 | WBGene00003678 | nhr-88      | K08A2.5     | 0.1843505998166     |             |
| AGIWUR9908;AGIWUR25658;AGIWUR25973;AGIWUR31000;AGIWUR33208             |    |    |         |         |                |             |             |                     |             |
| N2                                                                     | CT | II | 2988307 | 2991238 | WBGene00019513 | K08A2.4     | K08A2.4     | -0.101490429826061  | AGIWUR23537 |
| N2                                                                     | CT | II | 2991613 | 2994313 | WBGene00019512 | K08A2.2     | K08A2.2     | -0.0109721784588892 | AGIWUR16689 |

|                                                                                                                                               |    |    |         |         |                |           |           |                     |             |
|-----------------------------------------------------------------------------------------------------------------------------------------------|----|----|---------|---------|----------------|-----------|-----------|---------------------|-------------|
| N2                                                                                                                                            | CT | II | 2997021 | 3000653 | WBGene00019511 | K08A2.1   | K08A2.1   | 0.0680290389279499  | AGIWUR37176 |
| N2                                                                                                                                            | CT | II | 3000768 | 3002411 | WBGene00016576 | C41H7.6   | C41H7.6   | -0.0737992434057393 | AGIWUR20719 |
| N2                                                                                                                                            | CT | II | 3002513 | 3003827 | WBGene00016575 | C41H7.5   | C41H7.5   | 0.666456795699546   | AGIWUR269   |
| N2                                                                                                                                            | CT | II | 3003969 | 3005573 | WBGene00016574 | C41H7.4   | C41H7.4   | -0.169341038433551  | AGIWUR2896  |
| N2                                                                                                                                            | CT | II | 3005799 | 3007506 | WBGene00016573 | C41H7.3   | C41H7.3   | -0.235189950585204  | AGIWUR27129 |
| N2                                                                                                                                            | CT | II | 3014835 | 3015961 | WBGene00016572 | C41H7.2   | C41H7.2   | -0.355499621730448  | AGIWUR19017 |
| N2                                                                                                                                            | CT | II | 3016068 | 3017471 | WBGene00016571 | C41H7.1   | C41H7.1   | 0.231531613922925   | AGIWUR18416 |
| N2                                                                                                                                            | CT | II | 3017482 | 3019907 | WBGene00016577 | cllec-3   | C41H7.7   | 0.348104094727486   | AGIWUR41295 |
| N2                                                                                                                                            | CT | II | 3032780 | 3036122 | WBGene00015197 | B0454.6   | B0454.6   | 0.100046113104908   | AGIWUR13089 |
| N2                                                                                                                                            | CT | II | 3038859 | 3040822 | WBGene00015196 | B0454.5   | B0454.5   | 0.0656275444227443  |             |
| AGIWUR14221;AGIWUR34522                                                                                                                       |    |    |         |         |                |           |           |                     |             |
| N2                                                                                                                                            | CT | II | 3040943 | 3043406 | WBGene00015199 | B0454.8   | B0454.8   | -0.136998089494329  |             |
| AGIWUR43750;AGIWUR44012;AGIWUR44391                                                                                                           |    |    |         |         |                |           |           |                     |             |
| N2                                                                                                                                            | CT | II | 3044323 | 3046115 | WBGene00005541 | sri-29    | B0454.4   | 0.300620441064477   | AGIWUR2475  |
| N2                                                                                                                                            | CT | II | 3046219 | 3048154 | WBGene00005542 | sri-30    | B0454.10  | 0.0500039809956174  |             |
| AGIWUR8463                                                                                                                                    |    |    |         |         |                |           |           |                     |             |
| N2                                                                                                                                            | CT | II | 3048678 | 3050435 | WBGene00005540 | sri-28    | B0454.3   | 0.109005538905942   | AGIWUR12561 |
| N2                                                                                                                                            | CT | II | 3051003 | 3052322 | WBGene00005543 | sri-31    | B0454.2   | -0.0906566850319761 | AGIWUR14825 |
| N2                                                                                                                                            | CT | II | 3052597 | 3054348 | WBGene00015200 | B0454.9   | B0454.9   | -0.0990153521953907 | AGIWUR25688 |
| N2                                                                                                                                            | CT | II | 3056822 | 3060207 | WBGene00002997 | lin-8     | B0454.1   | -0.114289818566688  | AGIWUR39951 |
| N2                                                                                                                                            | CT | II | 3061082 | 3062112 | WBGene00021293 | Y25C1A.6  | Y25C1A.6  | 0.18011445215005    |             |
| AGIWUR19149                                                                                                                                   |    |    |         |         |                |           |           |                     |             |
| N2                                                                                                                                            | CT | II | 3062542 | 3071381 | WBGene00021294 | Y25C1A.7  | Y25C1A.7  | 0.0290535735427051  |             |
| AGIWUR3099;AGIWUR9962;AGIWUR12918;AGIWUR14161;AGIWUR14668;AGIWUR18126;AGIWUR23317;AGIWUR23438;AGIWUR36817;AGIWUR38161;AGIWUR42714;AGIWUR43276 |    |    |         |         |                |           |           |                     |             |
| N2                                                                                                                                            | CT | II | 3071164 | 3076953 | WBGene00021295 | Y25C1A.8  | Y25C1A.8  | -0.0235952636358903 |             |
| AGIWUR29733                                                                                                                                   |    |    |         |         |                |           |           |                     |             |
| N2                                                                                                                                            | CT | II | 3078796 | 3087682 | WBGene00021292 | copb-1    | Y25C1A.5  | 0.120789072179429   |             |
| AGIWUR44602                                                                                                                                   |    |    |         |         |                |           |           |                     |             |
| N2                                                                                                                                            | CT | II | 3088474 | 3091296 | WBGene00005178 | srg-21    | Y25C1A.9  | 0.324608635321535   |             |
| AGIWUR38380                                                                                                                                   |    |    |         |         |                |           |           |                     |             |
| N2                                                                                                                                            | CT | II | 3091503 | 3093452 | WBGene00005179 | srg-22    | Y25C1A.10 | -0.182133790693002  |             |
| AGIWUR15037                                                                                                                                   |    |    |         |         |                |           |           |                     |             |
| N2                                                                                                                                            | CT | II | 3093902 | 3096160 | WBGene00005180 | srg-23    | Y25C1A.11 | -0.157933037493512  |             |
| AGIWUR11917                                                                                                                                   |    |    |         |         |                |           |           |                     |             |
| N2                                                                                                                                            | CT | II | 3098403 | 3100646 | WBGene00005181 | srg-24    | Y25C1A.12 | 0.0654432395175348  |             |
| AGIWUR14814                                                                                                                                   |    |    |         |         |                |           |           |                     |             |
| N2                                                                                                                                            | CT | II | 3102318 | 3104736 | WBGene00021291 | cllec-121 | Y25C1A.4  | 0.00299740747289334 |             |
| AGIWUR11656                                                                                                                                   |    |    |         |         |                |           |           |                     |             |

|                                                             |    |    |         |         |                |           |           |                     |             |
|-------------------------------------------------------------|----|----|---------|---------|----------------|-----------|-----------|---------------------|-------------|
| N2                                                          | CT | II | 3106065 | 3108032 | WBGene00021290 | cllec-122 | Y25C1A.3  | 0.0962525698194705  |             |
| AGIWUR39278                                                 |    |    |         |         |                |           |           |                     |             |
| N2                                                          | CT | II | 3109368 | 3111247 | WBGene00021296 | Y25C1A.13 | Y25C1A.13 | 0.0800047743510426  |             |
| AGIWUR14960;AGIWUR25497                                     |    |    |         |         |                |           |           |                     |             |
| N2                                                          | CT | II | 3112613 | 3113337 | WBGene00021289 | Y25C1A.2  | Y25C1A.2  | -0.0241381861961294 |             |
| AGIWUR33174                                                 |    |    |         |         |                |           |           |                     |             |
| N2                                                          | CT | II | 3114234 | 3116758 | WBGene00021288 | cllec-123 | Y25C1A.1  | 0.272217719244299   |             |
| AGIWUR10375                                                 |    |    |         |         |                |           |           |                     |             |
| N2                                                          | CT | II | 3117771 | 3118451 | WBGene00020409 | T10D4.7   | T10D4.7   | -0.136464938752458  | AGIWUR8077  |
| N2                                                          | CT | II | 3119332 | 3123192 | WBGene00020408 | T10D4.6   | T10D4.6   | -0.0905843421863963 | AGIWUR6156  |
| N2                                                          | CT | II | 3123506 | 3124899 | WBGene00005292 | srh-71    | T10D4.5   | 0.188685479109296   | AGIWUR36043 |
| N2                                                          | CT | II | 3126037 | 3126441 | WBGene00002102 | ins-19    | T10D4.13  | -0.0465196130168293 |             |
| AGIWUR11814;AGIWUR14823;AGIWUR29537;AGIWUR31712;AGIWUR36904 |    |    |         |         |                |           |           |                     |             |
| N2                                                          | CT | II | 3127041 | 3127790 | WBGene00002114 | ins-31    | T10D4.4   | 0.00586286530848046 |             |
| AGIWUR11011;AGIWUR28105;AGIWUR30924;AGIWUR31563;AGIWUR40948 |    |    |         |         |                |           |           |                     |             |
| N2                                                          | CT | II | 3129179 | 3131288 | WBGene00020407 | chil-24   | T10D4.3   | 0.0308326052045764  | AGIWUR34237 |
| N2                                                          | CT | II | 3134099 | 3135283 | WBGene00005568 | sri-56    | T10D4.2   | -0.203264954423767  |             |
| AGIWUR16953;AGIWUR32344                                     |    |    |         |         |                |           |           |                     |             |
| N2                                                          | CT | II | 3135581 | 3137904 | WBGene00005566 | sri-54    | T10D4.8   | 0.00548883292593949 | AGIWUR3261  |
| N2                                                          | CT | II | 3140918 | 3142955 | WBGene00005554 | sri-42    | T10D4.9   | -0.17506875717736   | AGIWUR31287 |
| N2                                                          | CT | II | 3143394 | 3144652 | WBGene00005555 | sri-43    | T10D4.10  | 0.0289607481120573  |             |
| AGIWUR8985                                                  |    |    |         |         |                |           |           |                     |             |
| N2                                                          | CT | II | 3146142 | 3146992 | WBGene00077522 | T10D4.15  | T10D4.15  | 0.0427100844170516  |             |
| AGIWUR19568;AGIWUR37353                                     |    |    |         |         |                |           |           |                     |             |
| N2                                                          | CT | II | 3148504 | 3149621 | WBGene00020410 | T10D4.11  | T10D4.11  | 0.172519430087785   |             |
| AGIWUR41738                                                 |    |    |         |         |                |           |           |                     |             |
| N2                                                          | CT | II | 3150140 | 3152575 | WBGene00020406 | T10D4.1   | T10D4.1   | 0.497674839492387   | AGIWUR10791 |
| N2                                                          | CT | II | 3153050 | 3154483 | WBGene00005544 | sri-32    | T10D4.12  | -0.0158653999405205 |             |
| AGIWUR39838                                                 |    |    |         |         |                |           |           |                     |             |
| N2                                                          | CT | II | 3155167 | 3156849 | WBGene00005545 | sri-33    | Y27F2A.4  | 0.0548039718350237  |             |
| AGIWUR38115                                                 |    |    |         |         |                |           |           |                     |             |
| N2                                                          | CT | II | 3157491 | 3159085 | WBGene00005546 | sri-34    | Y27F2A.7  | 0.127716727118482   |             |
| AGIWUR36938                                                 |    |    |         |         |                |           |           |                     |             |
| N2                                                          | CT | II | 3168767 | 3170189 | WBGene00021297 | fbxc-55   | Y27F2A.5  | -0.113689123426036  |             |
| AGIWUR9674                                                  |    |    |         |         |                |           |           |                     |             |
| N2                                                          | CT | II | 3171468 | 3172276 | WBGene00045303 | Y27F2A.10 | Y27F2A.10 | 0.0794536811886166  |             |
| AGIWUR17309;AGIWUR17803                                     |    |    |         |         |                |           |           |                     |             |
| N2                                                          | CT | II | 3177963 | 3180476 | WBGene00005552 | sri-40    | Y27F2A.3  | 0.227253646936896   |             |
| AGIWUR21152;AGIWUR38695                                     |    |    |         |         |                |           |           |                     |             |

|                                                                                  |    |    |         |         |                |          |          |                      |             |
|----------------------------------------------------------------------------------|----|----|---------|---------|----------------|----------|----------|----------------------|-------------|
| N2                                                                               | CT | II | 3180479 | 3182676 | WBGene00021298 | Y27F2A.6 | Y27F2A.6 | -0.36388212343077    |             |
| AGIWUR12463                                                                      |    |    |         |         |                |          |          |                      |             |
| N2                                                                               | CT | II | 3185158 | 3186790 | WBGene00005590 | sri-78   | Y27F2A.2 | 0.0191447489202154   |             |
| AGIWUR16945                                                                      |    |    |         |         |                |          |          |                      |             |
| N2                                                                               | CT | II | 3197613 | 3199098 | WBGene00005563 | sri-51   | ZC239.8  | -0.0440293934360003  | AGIWUR36077 |
| N2                                                                               | CT | II | 3206020 | 3206541 | WBGene00044371 | ZC239.20 | ZC239.20 | -0.242776325370134   |             |
| AGIWUR6160;AGIWUR8135;AGIWUR9712;AGIWUR18739;AGIWUR26353;AGIWUR35448;AGIWUR39029 |    |    |         |         |                |          |          |                      |             |
| N2                                                                               | CT | II | 3206939 | 3207388 | WBGene00044372 | ZC239.21 | ZC239.21 | -0.131228633015503   |             |
| AGIWUR7815;AGIWUR14066;AGIWUR22921                                               |    |    |         |         |                |          |          |                      |             |
| N2                                                                               | CT | II | 3207683 | 3208751 | WBGene00022570 | sdz-35   | ZC239.12 | 0.246431717860593    |             |
| AGIWUR30050                                                                      |    |    |         |         |                |          |          |                      |             |
| N2                                                                               | CT | II | 3209478 | 3211181 | WBGene00022569 | ZC239.6  | ZC239.6  | -0.0140526752609418  | AGIWUR1572  |
| N2                                                                               | CT | II | 3212371 | 3213208 | WBGene00022568 | ZC239.5  | ZC239.5  | -0.351104047804462   | AGIWUR27087 |
| N2                                                                               | CT | II | 3214452 | 3215565 | WBGene00022567 | ZC239.4  | ZC239.4  | 0.0991187362550843   |             |
| AGIWUR1430;AGIWUR11052;AGIWUR38797                                               |    |    |         |         |                |          |          |                      |             |
| N2                                                                               | CT | II | 3216081 | 3216600 | WBGene00022566 | ZC239.3  | ZC239.3  | -0.00168410423747911 | AGIWUR30364 |
| N2                                                                               | CT | II | 3217907 | 3218990 | WBGene00022565 | ZC239.2  | ZC239.2  | 0.163746375556556    | AGIWUR11486 |
| N2                                                                               | CT | II | 3221126 | 3222010 | WBGene00022572 | ZC239.14 | ZC239.14 | 0.694422130046027    |             |
| AGIWUR28231                                                                      |    |    |         |         |                |          |          |                      |             |
| N2                                                                               | CT | II | 3222406 | 3222827 | WBGene00022571 | ZC239.13 | ZC239.13 | -0.0014381948338027  |             |
| AGIWUR7714                                                                       |    |    |         |         |                |          |          |                      |             |
| N2                                                                               | CT | II | 3224770 | 3225285 | WBGene00022574 | ZC239.16 | ZC239.16 | -0.317279548696028   |             |
| AGIWUR28996                                                                      |    |    |         |         |                |          |          |                      |             |
| N2                                                                               | CT | II | 3225348 | 3225968 | WBGene00022575 | ZC239.17 | ZC239.17 | -0.0965981061566366  |             |
| AGIWUR8136                                                                       |    |    |         |         |                |          |          |                      |             |
| N2                                                                               | CT | II | 3228885 | 3230522 | WBGene00005501 | srh-297  | C17F4.4  | 0.00220299366492549  |             |
| AGIWUR26598;AGIWUR31997                                                          |    |    |         |         |                |          |          |                      |             |
| N2                                                                               | CT | II | 3230817 | 3234813 | WBGene00015914 | C17F4.8  | C17F4.8  | -0.216448132139737   | AGIWUR3081  |
| N2                                                                               | CT | II | 3235956 | 3237138 | WBGene00023479 | srz-67   | C17F4.10 | 0.00759223926402619  |             |
| AGIWUR21449;AGIWUR34302;AGIWUR41495                                              |    |    |         |         |                |          |          |                      |             |
| N2                                                                               | CT | II | 3237471 | 3238179 | WBGene00044373 | C17F4.11 | C17F4.11 | -0.0695295366318129  |             |
| AGIWUR8847;AGIWUR26875;AGIWUR29109                                               |    |    |         |         |                |          |          |                      |             |
| N2                                                                               | CT | II | 3238169 | 3240043 | WBGene00023480 | srz-68   | C17F4.9  | -0.137896572965177   | AGIWUR40543 |
| N2                                                                               | CT | II | 3240545 | 3241726 | WBGene00015911 | C17F4.3  | C17F4.3  | 0.0793472543058558   | AGIWUR13213 |
| N2                                                                               | CT | II | 3243676 | 3244162 | WBGene00044374 | C17F4.12 | C17F4.12 | -0.0711766651751375  |             |
| AGIWUR946;AGIWUR4095;AGIWUR14240;AGIWUR31293;AGIWUR35584                         |    |    |         |         |                |          |          |                      |             |
| N2                                                                               | CT | II | 3245087 | 3246015 | WBGene00015913 | C17F4.7  | C17F4.7  | 0.0857104285820718   | AGIWUR43953 |
| N2                                                                               | CT | II | 3246316 | 3248174 | WBGene00015912 | fbxc-50  | C17F4.5  | -0.299470045439742   | AGIWUR5090  |
| N2                                                                               | CT | II | 3248623 | 3249386 | WBGene00015910 | C17F4.2  | C17F4.2  | 0.0653545521170251   | AGIWUR23272 |

|                                                                       |    |    |         |         |                |          |          |                     |             |
|-----------------------------------------------------------------------|----|----|---------|---------|----------------|----------|----------|---------------------|-------------|
| N2                                                                    | CT | II | 3250313 | 3250856 | WBGene00015909 | clec-124 | C17F4.1  | -0.0113190245014652 |             |
| AGIWUR1933                                                            |    |    |         |         |                |          |          |                     |             |
| N2                                                                    | CT | II | 3250985 | 3259354 | WBGene00001544 | gcy-19   | C17F4.6  | -0.0298222053878909 | AGIWUR2396  |
| N2                                                                    | CT | II | 3267663 | 3271505 | WBGene00195073 | F02E11.7 | F02E11.7 | -0.238962821864416  |             |
| AGIWUR11844                                                           |    |    |         |         |                |          |          |                     |             |
| N2                                                                    | CT | II | 3272349 | 3275023 | WBGene00017181 | F02E11.3 | F02E11.3 | 0.120409658809356   |             |
| AGIWUR41749                                                           |    |    |         |         |                |          |          |                     |             |
| N2                                                                    | CT | II | 3276256 | 3277305 | WBGene00017182 | F02E11.4 | F02E11.4 | 0.0494186771254697  |             |
| AGIWUR37077                                                           |    |    |         |         |                |          |          |                     |             |
| N2                                                                    | CT | II | 3278987 | 3281686 | WBGene00017179 | wht-4    | F02E11.1 | 0.137773873334104   |             |
| AGIWUR987;AGIWUR15251;AGIWUR17304;AGIWUR24953;AGIWUR30539;AGIWUR35672 |    |    |         |         |                |          |          |                     |             |
| N2                                                                    | CT | II | 3282653 | 3287158 | WBGene00018196 | nep-13   | F39E9.4  | 0.362970415324543   | AGIWUR35454 |
| N2                                                                    | CT | II | 3287373 | 3289031 | WBGene00005575 | sri-63   | F39E9.3  | -0.147338494560732  | AGIWUR37501 |
| N2                                                                    | CT | II | 3290486 | 3290644 | WBGene00044375 | F39E9.14 | F39E9.14 | 0.0132214119435003  |             |
| AGIWUR1826                                                            |    |    |         |         |                |          |          |                     |             |
| N2                                                                    | CT | II | 3292264 | 3293472 | WBGene00023281 | F39E9.8  | F39E9.8  | 0.16058909432984    | AGIWUR33135 |
| N2                                                                    | CT | II | 3294021 | 3295068 | WBGene00023282 | F39E9.9  | F39E9.9  | 0.094304689621648   | AGIWUR28424 |
| N2                                                                    | CT | II | 3295414 | 3296582 | WBGene00018200 | btb-17   | F39E9.11 | 0.526550999466442   |             |
| AGIWUR14277;AGIWUR18377                                               |    |    |         |         |                |          |          |                     |             |
| N2                                                                    | CT | II | 3296908 | 3298027 | WBGene00018195 | btb-16   | F39E9.2  | 0.0483893411203784  | AGIWUR26250 |
| N2                                                                    | CT | II | 3299825 | 3300676 | WBGene00269387 | btb-22   | F39E9.27 | 0.0386715135140641  |             |
| AGIWUR3343                                                            |    |    |         |         |                |          |          |                     |             |
| N2                                                                    | CT | II | 3302761 | 3303750 | WBGene00023036 | F39E9.10 | F39E9.10 | 0.00249897098861407 |             |
| AGIWUR23026;AGIWUR23331;AGIWUR23832;AGIWUR27066;AGIWUR32012           |    |    |         |         |                |          |          |                     |             |
| N2                                                                    | CT | II | 3324021 | 3326431 | WBGene00021589 | Y46D2A.1 | Y46D2A.1 | -0.250081453342101  |             |
| AGIWUR28811                                                           |    |    |         |         |                |          |          |                     |             |
| N2                                                                    | CT | II | 3326492 | 3327197 | WBGene00021591 | Y46D2A.3 | Y46D2A.3 | -0.183036100454606  |             |
| AGIWUR26527                                                           |    |    |         |         |                |          |          |                     |             |
| N2                                                                    | CT | II | 3331889 | 3334205 | WBGene00077751 | ir1d-27  | F14D2.17 | 0.101915738386173   |             |
| AGIWUR2293                                                            |    |    |         |         |                |          |          |                     |             |
| N2                                                                    | CT | II | 3335422 | 3337139 | WBGene00206522 | F14D2.19 | F14D2.19 | 0.0705148004918374  |             |
| AGIWUR31445                                                           |    |    |         |         |                |          |          |                     |             |
| N2                                                                    | CT | II | 3340556 | 3341260 | WBGene00017453 | F14D2.5  | F14D2.5  | -0.129714210361614  | AGIWUR12906 |
| N2                                                                    | CT | II | 3341268 | 3342104 | WBGene00017459 | F14D2.11 | F14D2.11 | -0.307886147752184  |             |
| AGIWUR40910                                                           |    |    |         |         |                |          |          |                     |             |
| N2                                                                    | CT | II | 3343710 | 3344967 | WBGene00017461 | bath-28  | F14D2.13 | 0.0809563184205251  |             |
| AGIWUR23578;AGIWUR35439;AGIWUR38267;AGIWUR40583                       |    |    |         |         |                |          |          |                     |             |
| N2                                                                    | CT | II | 3345218 | 3346378 | WBGene00017460 | bath-30  | F14D2.12 | -0.122496754494547  |             |
| AGIWUR37539                                                           |    |    |         |         |                |          |          |                     |             |



|                                                            |    |    |         |         |                 |          |           |                     |
|------------------------------------------------------------|----|----|---------|---------|-----------------|----------|-----------|---------------------|
| N2                                                         | CT | II | 3346745 | 3347519 | WBGene00017462  | F14D2.14 | F14D2.14  | -0.636629502814303  |
| AGIWUR23383;AGIWUR28782;AGIWUR38077                        |    |    |         |         |                 |          |           |                     |
| N2                                                         | CT | II | 3347574 | 3349870 | WBGene00017456  | F14D2.8  | F14D2.8   | -0.475043765995341  |
| AGIWUR8496;AGIWUR16471;AGIWUR17696;AGIWUR37394;AGIWUR38928 |    |    |         |         |                 |          |           |                     |
| N2                                                         | CT | II | 3350252 | 3358981 | WBGene00017452  | bath-29  | F14D2.4   | -0.0897613517173177 |
| AGIWUR8805;AGIWUR22859;AGIWUR23701;AGIWUR25164;AGIWUR32290 |    |    |         |         |                 |          |           |                     |
| N2                                                         | CT | II | 3359139 | 3360255 | WBGene00017451  | F14D2.2  | F14D2.2   | -0.0204963216398077 |
| AGIWUR24777                                                |    |    |         |         |                 |          |           |                     |
| N2                                                         | CT | II | 3361899 | 3365961 | WBGene00021728  | Y49F6C.6 | Y49F6C.6  | -0.253961349124818  |
| AGIWUR8396                                                 |    |    |         |         |                 |          |           |                     |
| N2                                                         | CT | II | 3367258 | 3368197 | WBGene00021729  | Y49F6C.7 | Y49F6C.7  | 0.0681190532364289  |
| AGIWUR17291                                                |    |    |         |         |                 |          |           |                     |
| N2                                                         | CT | II | 3369175 | 3370111 | WBGene00021730  | Y49F6C.8 | Y49F6C.8  | -0.219570185865889  |
| AGIWUR7299;AGIWUR13872;AGIWUR34677                         |    |    |         |         |                 |          |           |                     |
| N2                                                         | CT | II | 3371310 | 3372145 | WBGene00021727  | bath-23  | Y49F6C.5  | -0.0767591455856476 |
| AGIWUR11832                                                |    |    |         |         |                 |          |           |                     |
| N2                                                         | CT | II | 3373169 | 3374185 | WBGene000219758 | linc-11  | Y49F6C.11 | 0.056823073889996   |
| AGIWUR23245;AGIWUR36507                                    |    |    |         |         |                 |          |           |                     |
| N2                                                         | CT | II | 3375079 | 3376714 | WBGene00021726  | bath-10  | Y49F6C.4  | -0.10849886394972   |
| AGIWUR38786                                                |    |    |         |         |                 |          |           |                     |
| N2                                                         | CT | II | 3377111 | 3378726 | WBGene00021725  | bath-9   | Y49F6C.3  | -0.442004455783852  |
| AGIWUR26956                                                |    |    |         |         |                 |          |           |                     |
| N2                                                         | CT | II | 3378575 | 3379551 | WBGene00021724  | Y49F6C.2 | Y49F6C.2  | -0.0371607238165215 |
| AGIWUR42499                                                |    |    |         |         |                 |          |           |                     |
| N2                                                         | CT | II | 3380288 | 3381403 | WBGene00021723  | bath-8   | Y49F6C.1  | 0.114009805551582   |
| AGIWUR16875;AGIWUR21492;AGIWUR35386                        |    |    |         |         |                 |          |           |                     |
| N2                                                         | CT | II | 3381836 | 3384017 | WBGene00020290  | T06D4.1  | T06D4.1   | -0.0969811402160499 |
| AGIWUR42268                                                |    |    |         |         |                 |          |           |                     |
| N2                                                         | CT | II | 3388280 | 3391586 | WBGene00020292  | nep-19   | T06D4.3   | -0.137861915486723  |
| AGIWUR35625                                                |    |    |         |         |                 |          |           |                     |
| N2                                                         | CT | II | 3392036 | 3395533 | WBGene00020293  | nep-20   | T06D4.4   | 0.0317227324398566  |
| AGIWUR13318                                                |    |    |         |         |                 |          |           |                     |
| N2                                                         | CT | II | 3395821 | 3399303 | WBGene00017554  | nep-9    | F18A12.5  | 0.0246639289076338  |
| AGIWUR32423;AGIWUR41571;AGIWUR43562                        |    |    |         |         |                 |          |           |                     |
| N2                                                         | CT | II | 3399754 | 3402925 | WBGene00017555  | nep-10   | F18A12.6  | 0.307173781367156   |
| AGIWUR28365                                                |    |    |         |         |                 |          |           |                     |
| N2                                                         | CT | II | 3403835 | 3406838 | WBGene00017553  | nep-8    | F18A12.4  | 0.238022750226664   |
| AGIWUR7990                                                 |    |    |         |         |                 |          |           |                     |
| N2                                                         | CT | II | 3406951 | 3409774 | WBGene00017552  | nep-7    | F18A12.3  | 0.0274452960490161  |
| AGIWUR5802;AGIWUR20138                                     |    |    |         |         |                 |          |           |                     |
| N2                                                         | CT | II | 3411425 | 3414469 | WBGene00017556  | F18A12.7 | F18A12.7  | 0.0750305543078422  |
| AGIWUR10742                                                |    |    |         |         |                 |          |           |                     |
| N2                                                         | CT | II | 3415005 | 3416250 | WBGene00017551  | F18A12.2 | F18A12.2  | 0.0372009765176777  |

|                                                                         |    |    |         |         |                |           |           |                     |             |
|-------------------------------------------------------------------------|----|----|---------|---------|----------------|-----------|-----------|---------------------|-------------|
| AGIWUR39979                                                             |    |    |         |         |                |           |           |                     |             |
| N2                                                                      | CT | II | 3416838 | 3420671 | WBGene00017550 | nep-6     | F18A12.1  | 0.0695347889778573  |             |
| AGIWUR29679;AGIWUR39896                                                 |    |    |         |         |                |           |           |                     |             |
| N2                                                                      | CT | II | 3420653 | 3425533 | WBGene00017557 | nep-11    | F18A12.8  | -0.149165402956993  |             |
| AGIWUR10985;AGIWUR21992                                                 |    |    |         |         |                |           |           |                     |             |
| N2                                                                      | CT | II | 3429406 | 3431303 | WBGene00015855 | C16C8.18  | C16C8.18  | 0.287274409129601   |             |
| AGIWUR10454                                                             |    |    |         |         |                |           |           |                     |             |
| N2                                                                      | CT | II | 3431286 | 3436512 | WBGene00015841 | skpo-2    | C16C8.2   | -0.208964831644891  | AGIWUR13637 |
| N2                                                                      | CT | II | 3440827 | 3442445 | WBGene00015854 | C16C8.17  | C16C8.17  | -0.0641382592623359 |             |
| AGIWUR17336                                                             |    |    |         |         |                |           |           |                     |             |
| N2                                                                      | CT | II | 3443488 | 3444380 | WBGene00015842 | C16C8.4   | C16C8.4   | -0.216439451029574  | AGIWUR11008 |
| N2                                                                      | CT | II | 3444689 | 3445381 | WBGene00015843 | C16C8.5   | C16C8.5   | -0.302881159300664  | AGIWUR10128 |
| N2                                                                      | CT | II | 3448206 | 3448759 | WBGene00195071 | C16C8.21  | C16C8.21  | -0.03670483345807   |             |
| AGIWUR6579                                                              |    |    |         |         |                |           |           |                     |             |
| N2                                                                      | CT | II | 3449562 | 3450994 | WBGene00015852 | C16C8.14  | C16C8.14  | 0.0968306394643399  |             |
| AGIWUR21154                                                             |    |    |         |         |                |           |           |                     |             |
| N2                                                                      | CT | II | 3452721 | 3453602 | WBGene00015850 | C16C8.12  | C16C8.12  | -0.134696389082283  |             |
| AGIWUR31623                                                             |    |    |         |         |                |           |           |                     |             |
| N2                                                                      | CT | II | 3453708 | 3454688 | WBGene00015849 | C16C8.11  | C16C8.11  | -0.277523236049028  |             |
| AGIWUR34563                                                             |    |    |         |         |                |           |           |                     |             |
| N2                                                                      | CT | II | 3458501 | 3459023 | WBGene00015856 | C16C8.19  | C16C8.19  | -0.303537844407834  |             |
| AGIWUR34765                                                             |    |    |         |         |                |           |           |                     |             |
| N2                                                                      | CT | II | 3459619 | 3460314 | WBGene00015845 | C16C8.7   | C16C8.7   | -0.505305419626527  | AGIWUR32514 |
| N2                                                                      | CT | II | 3461112 | 3461681 | WBGene00015846 | C16C8.8   | C16C8.8   | -0.457131658490826  | AGIWUR41834 |
| N2                                                                      | CT | II | 3462570 | 3463194 | WBGene00015847 | C16C8.9   | C16C8.9   | -0.601520986168667  | AGIWUR25088 |
| N2                                                                      | CT | II | 3464155 | 3464680 | WBGene00015848 | C16C8.10  | C16C8.10  | -0.16083836156386   |             |
| AGIWUR44392                                                             |    |    |         |         |                |           |           |                     |             |
| N2                                                                      | CT | II | 3470060 | 3471703 | WBGene00044377 | Y49F6B.13 | Y49F6B.13 | -0.137044192247716  |             |
| AGIWUR18112;AGIWUR21244;AGIWUR23083;AGIWUR31974;AGIWUR35691;AGIWUR36406 |    |    |         |         |                |           |           |                     |             |
| N2                                                                      | CT | II | 3472075 | 3472430 | WBGene00044376 | Y49F6B.12 | Y49F6B.12 | 0.201038214987358   |             |
| AGIWUR8840;AGIWUR19052;AGIWUR20133                                      |    |    |         |         |                |           |           |                     |             |
| N2                                                                      | CT | II | 3472879 | 3473289 | WBGene00021718 | Y49F6B.6  | Y49F6B.6  | -0.419267846308024  |             |
| AGIWUR26738                                                             |    |    |         |         |                |           |           |                     |             |
| N2                                                                      | CT | II | 3474050 | 3474729 | WBGene00021717 | sdz-32    | Y49F6B.5  | -0.141107362864235  |             |
| AGIWUR40496                                                             |    |    |         |         |                |           |           |                     |             |
| N2                                                                      | CT | II | 3475644 | 3477271 | WBGene00021719 | fbxb-104  | Y49F6B.7  | 0.176912719648484   |             |
| AGIWUR1658                                                              |    |    |         |         |                |           |           |                     |             |
| N2                                                                      | CT | II | 3479473 | 3481685 | WBGene00021720 | Y49F6B.8  | Y49F6B.8  | 0.28300482381961    |             |
| AGIWUR15937                                                             |    |    |         |         |                |           |           |                     |             |

|                                                                        |    |    |         |         |                |           |           |                     |
|------------------------------------------------------------------------|----|----|---------|---------|----------------|-----------|-----------|---------------------|
| N2                                                                     | CT | II | 3482408 | 3490143 | WBGene00004896 | smu-2     | Y49F6B.4  | 0.0373817227133548  |
| AGIWUR14962;AGIWUR16930;AGIWUR17405;AGIWUR39392                        |    |    |         |         |                |           |           |                     |
| N2                                                                     | CT | II | 3491179 | 3492881 | WBGene00021716 | fbxb-112  | Y49F6B.3  | -0.0882598088244499 |
| AGIWUR39175                                                            |    |    |         |         |                |           |           |                     |
| N2                                                                     | CT | II | 3493934 | 3499426 | WBGene00021721 | Y49F6B.9  | Y49F6B.9  | 0.209074833961565   |
| AGIWUR7086;AGIWUR11562;AGIWUR16713;AGIWUR26276;AGIWUR36914;AGIWUR39027 |    |    |         |         |                |           |           |                     |
| N2                                                                     | CT | II | 3500077 | 3502449 | WBGene00000647 | col-71    | Y49F6B.10 | 0.268214576389596   |
| AGIWUR4133                                                             |    |    |         |         |                |           |           |                     |
| N2                                                                     | CT | II | 3502968 | 3504910 | WBGene00021715 | Y49F6B.2  | Y49F6B.2  | -0.263199150394716  |
| AGIWUR6288                                                             |    |    |         |         |                |           |           |                     |
| N2                                                                     | CT | II | 3505017 | 3509956 | WBGene00021714 | cyh-1     | Y49F6B.1  | -0.175198336214251  |
| AGIWUR13832                                                            |    |    |         |         |                |           |           |                     |
| N2                                                                     | CT | II | 3512690 | 3514731 | WBGene00021722 | srz-5     | Y49F6B.11 | 0.26440849772318    |
| AGIWUR17341                                                            |    |    |         |         |                |           |           |                     |
| N2                                                                     | CT | II | 3514963 | 3515484 | WBGene00044378 | Y49F6B.14 | Y49F6B.14 | 0.0822599254425223  |
| AGIWUR5485;AGIWUR5867;AGIWUR23289                                      |    |    |         |         |                |           |           |                     |
| N2                                                                     | CT | II | 3516008 | 3518898 | WBGene00021118 | clec-125  | W09G10.6  | -0.277946310504461  |
| AGIWUR25512                                                            |    |    |         |         |                |           |           |                     |
| N2                                                                     | CT | II | 3519494 | 3520421 | WBGene00021117 | clec-126  | W09G10.5  | -0.302524228407833  |
| AGIWUR40239                                                            |    |    |         |         |                |           |           |                     |
| N2                                                                     | CT | II | 3520703 | 3524180 | WBGene00000648 | col-72    | W09G10.1  | -0.130689270507937  |
| AGIWUR26693                                                            |    |    |         |         |                |           |           |                     |
| N2                                                                     | CT | II | 3525172 | 3528516 | WBGene00021116 | ncs-6     | W09G10.3  | -0.191263855517865  |
| AGIWUR29131                                                            |    |    |         |         |                |           |           |                     |
| N2                                                                     | CT | II | 3532527 | 3546431 | WBGene00000162 | apd-3     | W09G10.4  | 0.140280656799224   |
| AGIWUR18273                                                            |    |    |         |         |                |           |           |                     |
| N2                                                                     | CT | II | 3550651 | 3553437 | WBGene00021148 | W10G11.19 | W10G11.19 | -0.0332279411556655 |
| AGIWUR32549                                                            |    |    |         |         |                |           |           |                     |
| N2                                                                     | CT | II | 3553724 | 3554618 | WBGene00021149 | dnc-3     | W10G11.20 | 0.10408225755004    |
| AGIWUR15212                                                            |    |    |         |         |                |           |           |                     |
| N2                                                                     | CT | II | 3557474 | 3567490 | WBGene00021146 | lgc-45    | W10G11.16 | 0.0320385344196463  |
| AGIWUR3670;AGIWUR23297;AGIWUR31206;AGIWUR38708                         |    |    |         |         |                |           |           |                     |
| N2                                                                     | CT | II | 3568117 | 3569218 | WBGene00021138 | clec-127  | W10G11.5  | -0.110960778970327  |
| AGIWUR29457                                                            |    |    |         |         |                |           |           |                     |
| N2                                                                     | CT | II | 3569430 | 3571027 | WBGene00021139 | clec-128  | W10G11.6  | -0.625271012860719  |
| AGIWUR17823                                                            |    |    |         |         |                |           |           |                     |
| N2                                                                     | CT | II | 3571491 | 3572883 | WBGene00021145 | clec-129  | W10G11.15 | -0.431029243620814  |
| AGIWUR20030                                                            |    |    |         |         |                |           |           |                     |
| N2                                                                     | CT | II | 3573556 | 3574652 | WBGene00021144 | clec-130  | W10G11.14 | -0.204554756915009  |

AGIWUR4511;AGIWUR10186;AGIWUR26533;AGIWUR28817

|                                    |    |    |         |         |                 |           |           |                      |
|------------------------------------|----|----|---------|---------|-----------------|-----------|-----------|----------------------|
| N2                                 | CT | II | 3574699 | 3576201 | WBGene00021140  | cllec-131 | W10G11.7  | 0.14632700435142     |
| AGIWUR21113                        |    |    |         |         |                 |           |           |                      |
| N2                                 | CT | II | 3577045 | 3578110 | WBGene00021143  | cllec-132 | W10G11.13 | -0.0671237361724355  |
| AGIWUR29293                        |    |    |         |         |                 |           |           |                      |
| N2                                 | CT | II | 3578421 | 3579031 | WBGene00021142  | cllec-133 | W10G11.12 | -0.465987594724202   |
| AGIWUR40246                        |    |    |         |         |                 |           |           |                      |
| N2                                 | CT | II | 3580083 | 3581433 | WBGene00021141  | cllec-134 | W10G11.11 | -0.170390928813348   |
| AGIWUR34394                        |    |    |         |         |                 |           |           |                      |
| N2                                 | CT | II | 3582052 | 3583505 | WBGene00005281  | srh-59    | W10G11.10 | 0.094587215927282    |
| AGIWUR25922                        |    |    |         |         |                 |           |           |                      |
| N2                                 | CT | II | 3583987 | 3586063 | WBGene00005282  | srh-60    | W10G11.9  | -0.00837830727862432 |
| AGIWUR8096                         |    |    |         |         |                 |           |           |                      |
| N2                                 | CT | II | 3603387 | 3607384 | WBGene00021711  | wago-11   | Y49F6A.1  | -0.1885249745782     |
| AGIWUR4569;AGIWUR22972;AGIWUR38323 |    |    |         |         |                 |           |           |                      |
| N2                                 | CT | II | 3607937 | 3609862 | WBGene00021713  | Y49F6A.5  | Y49F6A.5  | -0.136359244626694   |
| AGIWUR38967                        |    |    |         |         |                 |           |           |                      |
| N2                                 | CT | II | 3610409 | 3615352 | WBGene00018235  | F40E12.2  | F40E12.2  | 0.492375690982412    |
| AGIWUR15978                        |    |    |         |         |                 |           |           |                      |
| N2                                 | CT | II | 3617812 | 3618621 | WBGene00018234  | F40E12.1  | F40E12.1  | 0.0959178051894405   |
| AGIWUR20499                        |    |    |         |         |                 |           |           |                      |
| N2                                 | CT | II | 3624198 | 3626950 | WBGene00019796  | M151.4    | M151.4    | -0.124301275733732   |
| N2                                 | CT | II | 3629295 | 3630860 | WBGene000219238 | M151.9    | M151.9    | -0.52707650053271    |
| N2                                 | CT | II | 3631444 | 3633875 | WBGene00019794  | M151.2    | M151.2    | 0.0469806601576215   |
| N2                                 | CT | II | 3637811 | 3639338 | WBGene00019797  | fbxb-31   | M151.5    | -1.35492637668621    |
| N2                                 | CT | II | 3641500 | 3644082 | WBGene00019793  | M151.1    | M151.1    | 0.0791102978727611   |
| N2                                 | CT | II | 3645427 | 3646982 | WBGene00019798  | fbxb-32   | M151.6    | 0.228168846951183    |
| N2                                 | CT | II | 3647411 | 3648599 | WBGene00044314  | fbxb-33   | M151.8    | 0.0682848686124355   |
| N2                                 | CT | II | 3651256 | 3654276 | WBGene00017590  | F19B10.11 | F19B10.11 | 0.277423691204985    |
| AGIWUR19558                        |    |    |         |         |                 |           |           |                      |
| N2                                 | CT | II | 3655678 | 3657732 | WBGene00017587  | F19B10.5  | F19B10.5  | -0.0678236470391855  |
| AGIWUR136                          |    |    |         |         |                 |           |           |                      |
| N2                                 | CT | II | 3662204 | 3662618 | WBGene000194713 | F19B10.13 | F19B10.13 | 0.249948459456349    |
| AGIWUR21305                        |    |    |         |         |                 |           |           |                      |
| N2                                 | CT | II | 3663509 | 3663896 | WBGene00017588  | F19B10.6  | F19B10.6  | -0.0513036802847271  |
| AGIWUR32405                        |    |    |         |         |                 |           |           |                      |
| N2                                 | CT | II | 3664404 | 3665120 | WBGene00017585  | F19B10.3  | F19B10.3  | -0.0417386456012014  |
| AGIWUR9260                         |    |    |         |         |                 |           |           |                      |
| N2                                 | CT | II | 3667179 | 3668664 | WBGene00005988  | srx-97    | F19B10.7  | -0.134761425860404   |

|                                                                        |    |    |         |         |                |                     |                                  |
|------------------------------------------------------------------------|----|----|---------|---------|----------------|---------------------|----------------------------------|
| AGIWUR11010                                                            |    |    |         |         |                |                     |                                  |
| N2                                                                     | CT | II | 3669321 | 3671056 | WBGene00005989 | srx-98 F19B10.8     | -0.18180969591991                |
| AGIWUR27383                                                            |    |    |         |         |                |                     |                                  |
| N2                                                                     | CT | II | 3671908 | 3673593 | WBGene00004750 | sea-1 F19B10.9      | -0.325712284831159               |
| AGIWUR13545                                                            |    |    |         |         |                |                     |                                  |
| N2                                                                     | CT | II | 3675624 | 3676733 | WBGene00017584 | F19B10.2 F19B10.2   | -0.294518629460933               |
| AGIWUR1693;AGIWUR12007;AGIWUR13921;AGIWUR30059;AGIWUR30085;AGIWUR31919 |    |    |         |         |                |                     |                                  |
| N2                                                                     | CT | II | 3677535 | 3681415 | WBGene00017589 | F19B10.10 F19B10.10 | -0.0684297272218632              |
| AGIWUR2171                                                             |    |    |         |         |                |                     |                                  |
| N2                                                                     | CT | II | 3683177 | 3684996 | WBGene00017583 | F19B10.1 F19B10.1   | -0.0720043673554613              |
| AGIWUR4480;AGIWUR5713;AGIWUR20096                                      |    |    |         |         |                |                     |                                  |
| N2                                                                     | CT | II | 3685952 | 3687133 | WBGene00005990 | srx-99 F19B10.12    | -0.17025817976341                |
| AGIWUR110;AGIWUR17748                                                  |    |    |         |         |                |                     |                                  |
| N2                                                                     | CT | II | 3687791 | 3688691 | WBGene00044379 | F40H7.12 F40H7.12   | -0.0584324830423029              |
| AGIWUR26635                                                            |    |    |         |         |                |                     |                                  |
| N2                                                                     | CT | II | 3689467 | 3690746 | WBGene00005992 | srx-101 F40H7.4     | -0.0733661064014899              |
| AGIWUR24580;AGIWUR30666                                                |    |    |         |         |                |                     |                                  |
| N2                                                                     | CT | II | 3691784 | 3693231 | WBGene00005991 | srx-100 F40H7.3     | -0.0714942685289284 AGIWUR33715  |
| N2                                                                     | CT | II | 3693401 | 3694764 | WBGene00005993 | srx-102 F40H7.5     | -0.0723869420820851 AGIWUR22545  |
| N2                                                                     | CT | II | 3695383 | 3698162 | WBGene00005994 | srx-103 F40H7.11    | 0.111581677843428                |
| AGIWUR8577                                                             |    |    |         |         |                |                     |                                  |
| N2                                                                     | CT | II | 3698599 | 3699691 | WBGene00005995 | srx-104 F40H7.7     | -0.161739517129097               |
| AGIWUR19918;AGIWUR37276                                                |    |    |         |         |                |                     |                                  |
| N2                                                                     | CT | II | 3699834 | 3701405 | WBGene00005996 | srx-105 F40H7.8     | 0.0179574570619465 AGIWUR30107   |
| N2                                                                     | CT | II | 3701708 | 3703250 | WBGene00005997 | srx-106 F40H7.9     | -0.183664263778027 AGIWUR13997   |
| N2                                                                     | CT | II | 3703721 | 3704945 | WBGene00005998 | srx-107 F40H7.10    | -0.101234862080616               |
| AGIWUR31004                                                            |    |    |         |         |                |                     |                                  |
| N2                                                                     | CT | II | 3705620 | 3707065 | WBGene00005999 | srx-108 F40H7.2     | -0.00748357092769059 AGIWUR15821 |
| N2                                                                     | CT | II | 3707610 | 3709221 | WBGene00006000 | srx-109 F40H7.1     | -0.0560307446859123              |
| AGIWUR710;AGIWUR29482                                                  |    |    |         |         |                |                     |                                  |
| N2                                                                     | CT | II | 3709555 | 3710952 | WBGene00006001 | srx-110 C46E10.6    | 0.048081737831871                |
| AGIWUR33826                                                            |    |    |         |         |                |                     |                                  |
| N2                                                                     | CT | II | 3711293 | 3713048 | WBGene00016711 | fbxc-53 C46E10.5    | 0.416506635586593                |
| AGIWUR35329                                                            |    |    |         |         |                |                     |                                  |
| N2                                                                     | CT | II | 3713188 | 3714695 | WBGene00005319 | srh-100 C46E10.10   | -0.0247035967927314              |
| AGIWUR15850                                                            |    |    |         |         |                |                     |                                  |
| N2                                                                     | CT | II | 3715000 | 3716555 | WBGene00005318 | srh-99 C46E10.7     | 0.071697669934105                |
| AGIWUR7220                                                             |    |    |         |         |                |                     |                                  |
| N2                                                                     | CT | II | 3717138 | 3719768 | WBGene00016710 | fbxc-52 C46E10.4    | 0.0286831776878151               |

|                                                                         |    |    |         |         |                |                   |                     |
|-------------------------------------------------------------------------|----|----|---------|---------|----------------|-------------------|---------------------|
| AGIWUR29686;AGIWUR42598                                                 |    |    |         |         |                |                   |                     |
| N2                                                                      | CT | II | 3721316 | 3723084 | WBGene00016709 | C46E10.3          | 0.0582911926933107  |
| AGIWUR4335                                                              |    |    |         |         |                |                   |                     |
| N2                                                                      | CT | II | 3723378 | 3723896 | WBGene00016708 | C46E10.2          | 0.139719010467516   |
| AGIWUR1714                                                              |    |    |         |         |                |                   |                     |
| N2                                                                      | CT | II | 3724225 | 3725909 | WBGene00016707 | C46E10.1          | 0.157948884364629   |
| AGIWUR15609                                                             |    |    |         |         |                |                   |                     |
| N2                                                                      | CT | II | 3725906 | 3727479 | WBGene00016712 | C46E10.8          | -0.188442270375921  |
| AGIWUR300;AGIWUR7910;AGIWUR9883;AGIWUR13329;AGIWUR14299;AGIWUR34806     |    |    |         |         |                |                   |                     |
| N2                                                                      | CT | II | 3727690 | 3729707 | WBGene00016713 | C46E10.9          | -0.219655278283691  |
| AGIWUR9856                                                              |    |    |         |         |                |                   |                     |
| N2                                                                      | CT | II | 3730152 | 3731548 | WBGene00017406 | sdz-12 F12E12.5   | 0.430405629579896   |
| AGIWUR42036                                                             |    |    |         |         |                |                   |                     |
| N2                                                                      | CT | II | 3731973 | 3733203 | WBGene00017405 | bath-31 F12E12.4  | -0.102228319837726  |
| AGIWUR7461;AGIWUR23673;AGIWUR27896                                      |    |    |         |         |                |                   |                     |
| N2                                                                      | CT | II | 3735929 | 3736943 | WBGene00017407 | F12E12.6          | -0.203001188875185  |
| AGIWUR2208                                                              |    |    |         |         |                |                   |                     |
| N2                                                                      | CT | II | 3737334 | 3738282 | WBGene00017404 | F12E12.3          | -0.121264752100787  |
| AGIWUR1974                                                              |    |    |         |         |                |                   |                     |
| N2                                                                      | CT | II | 3739947 | 3740837 | WBGene00017403 | F12E12.2          | -0.0535060864367223 |
| AGIWUR28417                                                             |    |    |         |         |                |                   |                     |
| N2                                                                      | CT | II | 3741884 | 3742509 | WBGene00017402 | F12E12.1          | -0.321940657601612  |
| AGIWUR38937                                                             |    |    |         |         |                |                   |                     |
| N2                                                                      | CT | II | 3742465 | 3743819 | WBGene00044811 | F12E12.11         | -0.0751348372616754 |
| AGIWUR40004                                                             |    |    |         |         |                |                   |                     |
| N2                                                                      | CT | II | 3746474 | 3747459 | WBGene00044693 | fbxb-92 F12E12.9  | 0.0296489286052228  |
| AGIWUR35746                                                             |    |    |         |         |                |                   |                     |
| N2                                                                      | CT | II | 3747679 | 3748819 | WBGene00044694 | fbxb-90 F12E12.10 | 0.177274136401552   |
| AGIWUR34471                                                             |    |    |         |         |                |                   |                     |
| N2                                                                      | CT | II | 3749061 | 3750785 | WBGene00044692 | fbxb-91 F12E12.8  | 0.118050092444061   |
| AGIWUR19698;AGIWUR21274;AGIWUR30396;AGIWUR32964;AGIWUR40368;AGIWUR41591 |    |    |         |         |                |                   |                     |
| N2                                                                      | CT | II | 3751261 | 3752284 | WBGene00017408 | sdz-11 F12E12.7   | -0.017583295387916  |
| AGIWUR23637;AGIWUR41398                                                 |    |    |         |         |                |                   |                     |
| N2                                                                      | CT | II | 3753921 | 3757428 | WBGene00020774 | T24E12.5          | 2.23127931481232    |
| AGIWUR16825;AGIWUR41472                                                 |    |    |         |         |                |                   |                     |
| N2                                                                      | CT | II | 3757799 | 3759252 | WBGene00006002 | srx-111 T24E12.4  | 0.0822272500629673  |
| AGIWUR28133                                                             |    |    |         |         |                |                   |                     |
| N2                                                                      | CT | II | 3759581 | 3760036 | WBGene00044380 | T24E12.12         | 0.0674838745884614  |
| AGIWUR2239;AGIWUR5391;AGIWUR24035;AGIWUR25488;AGIWUR25844               |    |    |         |         |                |                   |                     |

|                                                                                     |    |    |         |         |                |           |           |                     |
|-------------------------------------------------------------------------------------|----|----|---------|---------|----------------|-----------|-----------|---------------------|
| N2                                                                                  | CT | II | 3760300 | 3761699 | WBGene00020775 | T24E12.6  | T24E12.6  | -0.0459555694557867 |
| AGIWUR13969;AGIWUR17251;AGIWUR23816;AGIWUR33656;AGIWUR36990;AGIWUR38176;AGIWUR40059 |    |    |         |         |                |           |           |                     |
| N2                                                                                  | CT | II | 3763447 | 3764586 | WBGene00006003 | srx-112   | T24E12.8  | 0.0875285193923339  |
| AGIWUR14156;AGIWUR23415                                                             |    |    |         |         |                |           |           |                     |
| N2                                                                                  | CT | II | 3765087 | 3773191 | WBGene00020777 | T24E12.10 | T24E12.10 | -0.0196597449363556 |
| AGIWUR10671;AGIWUR13962                                                             |    |    |         |         |                |           |           |                     |
| N2                                                                                  | CT | II | 3776019 | 3777459 | WBGene00020773 | T24E12.3  | T24E12.3  | 0.0701802641838229  |
| AGIWUR9708                                                                          |    |    |         |         |                |           |           |                     |
| N2                                                                                  | CT | II | 3778406 | 3779563 | WBGene00020778 | T24E12.11 | T24E12.11 | 0.0752685293733037  |
| AGIWUR41241                                                                         |    |    |         |         |                |           |           |                     |
| N2                                                                                  | CT | II | 3782950 | 3784156 | WBGene00020772 | T24E12.2  | T24E12.2  | 0.267201886119764   |
| AGIWUR44647                                                                         |    |    |         |         |                |           |           |                     |
| N2                                                                                  | CT | II | 3787451 | 3788479 | WBGene00195077 | T24E12.13 | T24E12.13 | -0.760118952239774  |
| AGIWUR25725                                                                         |    |    |         |         |                |           |           |                     |
| N2                                                                                  | CT | II | 3790750 | 3791395 | WBGene00021173 | Y8A9A.4   | Y8A9A.4   | -0.277028184839059  |
| AGIWUR33339                                                                         |    |    |         |         |                |           |           |                     |
| N2                                                                                  | CT | II | 3791534 | 3792102 | WBGene00021172 | Y8A9A.3   | Y8A9A.3   | 1.20883313116625    |
| AGIWUR18649                                                                         |    |    |         |         |                |           |           |                     |
| N2                                                                                  | CT | II | 3792524 | 3793425 | WBGene00021174 | fbxb-99   | Y8A9A.5   | -0.367927680386652  |
| AGIWUR23693                                                                         |    |    |         |         |                |           |           |                     |
| N2                                                                                  | CT | II | 3795623 | 3800608 | WBGene00021171 | Y8A9A.2   | Y8A9A.2   | -0.199226119434652  |
| AGIWUR2883                                                                          |    |    |         |         |                |           |           |                     |
| N2                                                                                  | CT | II | 3801171 | 3802589 | WBGene00005380 | srh-164   | Y8A9A.1   | -0.0561798491915608 |
| AGIWUR8919;AGIWUR15796                                                              |    |    |         |         |                |           |           |                     |
| N2                                                                                  | CT | II | 3802959 | 3803324 | WBGene00002115 | ins-32    | Y8A9A.6   | -0.0866699238156512 |
| AGIWUR20661                                                                         |    |    |         |         |                |           |           |                     |
| N2                                                                                  | CT | II | 3805493 | 3807053 | WBGene00018805 | F54D10.4  | F54D10.4  | 0.0380165987642438  |
| AGIWUR4615;AGIWUR13344;AGIWUR27279;AGIWUR40304                                      |    |    |         |         |                |           |           |                     |
| N2                                                                                  | CT | II | 3807096 | 3808223 | WBGene00018806 | F54D10.5  | F54D10.5  | -0.0993508921286548 |
| AGIWUR8260                                                                          |    |    |         |         |                |           |           |                     |
| N2                                                                                  | CT | II | 3812284 | 3813426 | WBGene00018804 | F54D10.3  | F54D10.3  | -0.589438473058237  |
| AGIWUR4759                                                                          |    |    |         |         |                |           |           |                     |
| N2                                                                                  | CT | II | 3814376 | 3815458 | WBGene00018807 | fbxa-146  | F54D10.6  | -0.0641720225688225 |
| AGIWUR5537;AGIWUR8359;AGIWUR25939                                                   |    |    |         |         |                |           |           |                     |
| N2                                                                                  | CT | II | 3816686 | 3818238 | WBGene00018803 | fbxa-24   | F54D10.2  | -0.154096899588444  |
| AGIWUR14133                                                                         |    |    |         |         |                |           |           |                     |
| N2                                                                                  | CT | II | 3820152 | 3821312 | WBGene00018808 | F54D10.7  | F54D10.7  | -0.121910709216428  |
| AGIWUR22587                                                                         |    |    |         |         |                |           |           |                     |
| N2                                                                                  | CT | II | 3824148 | 3825614 | WBGene00004821 | skr-15    | F54D10.1  | -0.17352638264487   |
| AGIWUR10492;AGIWUR17038;AGIWUR17734;AGIWUR27405;AGIWUR28048;AGIWUR29669             |    |    |         |         |                |           |           |                     |
| N2                                                                                  | CT | II | 3825661 | 3827879 | WBGene00018809 | F54D10.8  | F54D10.8  | -0.330459243558257  |
| AGIWUR13369                                                                         |    |    |         |         |                |           |           |                     |
| N2                                                                                  | CT | II | 3829584 | 3831914 | WBGene00018810 | F54D10.9  | F54D10.9  | -0.11159601103929   |
| AGIWUR17912                                                                         |    |    |         |         |                |           |           |                     |

|                                                                       |    |    |         |         |                |          |           |                     |             |
|-----------------------------------------------------------------------|----|----|---------|---------|----------------|----------|-----------|---------------------|-------------|
| N2                                                                    | CT | II | 3833250 | 3836015 | WBGene00015873 | oac-4    | C17A2.5   | -0.170723183278682  | AGIWUR26649 |
| N2                                                                    | CT | II | 3837338 | 3838948 | WBGene00015874 | C17A2.6  | C17A2.6   | -0.215062945578813  | AGIWUR38752 |
| N2                                                                    | CT | II | 3839862 | 3841272 | WBGene00015872 | C17A2.4  | C17A2.4   | -0.262203842015821  | AGIWUR34717 |
| N2                                                                    | CT | II | 3841914 | 3843405 | WBGene00015875 | C17A2.7  | C17A2.7   | 0.140305208677576   | AGIWUR18139 |
| N2                                                                    | CT | II | 3843609 | 3845509 | WBGene00015871 | C17A2.3  | C17A2.3   | -0.0718002257424093 | AGIWUR3940  |
| N2                                                                    | CT | II | 3846328 | 3848143 | WBGene00015870 | C17A2.2  | C17A2.2   | -0.0348356592825816 | AGIWUR43109 |
| N2                                                                    | CT | II | 3849053 | 3850725 | WBGene00003662 | nhr-72   | C17A2.8   | -0.285136220167823  | AGIWUR32794 |
| N2                                                                    | CT | II | 3852954 | 3854615 | WBGene00015869 | nhr-257  | C17A2.1   | 0.281494359985304   | AGIWUR8067  |
| N2                                                                    | CT | II | 3855921 | 3856588 | WBGene00016775 | C49D10.7 | C49D10.7  | 0.134734373466989   |             |
| AGIWUR8239                                                            |    |    |         |         |                |          |           |                     |             |
| N2                                                                    | CT | II | 3858142 | 3860926 | WBGene00016776 | oac-11   | C49D10.8  | -0.0107357340667233 |             |
| AGIWUR15000                                                           |    |    |         |         |                |          |           |                     |             |
| N2                                                                    | CT | II | 3863084 | 3864752 | WBGene00016777 | nhr-261  | C49D10.9  | 0.165327028066809   |             |
| AGIWUR1635                                                            |    |    |         |         |                |          |           |                     |             |
| N2                                                                    | CT | II | 3866798 | 3868243 | WBGene00003665 | nhr-75   | C49D10.6  | -0.2374041202316    |             |
| AGIWUR6203                                                            |    |    |         |         |                |          |           |                     |             |
| N2                                                                    | CT | II | 3869901 | 3873010 | WBGene00016773 | oac-10   | C49D10.4  | 0.0155441803536696  |             |
| AGIWUR323;AGIWUR3711;AGIWUR5110;AGIWUR38159                           |    |    |         |         |                |          |           |                     |             |
| N2                                                                    | CT | II | 3873541 | 3877227 | WBGene00016778 | nep-3    | C49D10.10 | -0.134413039848006  |             |
| AGIWUR25432;AGIWUR28939;AGIWUR31245                                   |    |    |         |         |                |          |           |                     |             |
| N2                                                                    | CT | II | 3877249 | 3877974 | WBGene00016779 | sdz-7    | C49D10.11 | -0.0794940365181862 |             |
| AGIWUR11675                                                           |    |    |         |         |                |          |           |                     |             |
| N2                                                                    | CT | II | 3878630 | 3879891 | WBGene00005456 | srh-250  | C49D10.3  | 0.0446763421485654  |             |
| AGIWUR11362                                                           |    |    |         |         |                |          |           |                     |             |
| N2                                                                    | CT | II | 3880245 | 3882182 | WBGene00016772 | nhr-166  | C49D10.2  | -0.0727355651493511 |             |
| AGIWUR42489                                                           |    |    |         |         |                |          |           |                     |             |
| N2                                                                    | CT | II | 3885032 | 3887995 | WBGene00005311 | srh-90   | F53C3.10  | 0.0164180235406919  |             |
| AGIWUR14811;AGIWUR30096;AGIWUR37788                                   |    |    |         |         |                |          |           |                     |             |
| N2                                                                    | CT | II | 3891424 | 3893574 | WBGene00018752 | F53C3.8  | F53C3.8   | -0.502079714708385  | AGIWUR22070 |
| N2                                                                    | CT | II | 3894841 | 3896239 | WBGene00018751 | F53C3.7  | F53C3.7   | -0.625375949532009  | AGIWUR24285 |
| N2                                                                    | CT | II | 3898142 | 3899663 | WBGene00018750 | F53C3.6  | F53C3.6   | 0.0594904060558776  |             |
| AGIWUR1696;AGIWUR34501                                                |    |    |         |         |                |          |           |                     |             |
| N2                                                                    | CT | II | 3899851 | 3900783 | WBGene00018749 | F53C3.5  | F53C3.5   | 0.13966783088408    | AGIWUR22853 |
| N2                                                                    | CT | II | 3900788 | 3902773 | WBGene00018748 | F53C3.4  | F53C3.4   | -0.0674598563729578 |             |
| AGIWUR7950;AGIWUR9230;AGIWUR14856;AGIWUR22223;AGIWUR35451;AGIWUR35695 |    |    |         |         |                |          |           |                     |             |
| N2                                                                    | CT | II | 3902860 | 3904794 | WBGene00018747 | F53C3.3  | F53C3.3   | 0.013092515702418   | AGIWUR37908 |
| N2                                                                    | CT | II | 3904816 | 3906620 | WBGene00018754 | F53C3.11 | F53C3.11  | -0.0675138347110202 |             |
| AGIWUR18190                                                           |    |    |         |         |                |          |           |                     |             |
| N2                                                                    | CT | II | 3907140 | 3908478 | WBGene00018746 | fbxb-103 | F53C3.2   | 0.0171537974148173  |             |



|                                                                                                                                                          |    |    |         |         |                |           |           |                     |             |
|----------------------------------------------------------------------------------------------------------------------------------------------------------|----|----|---------|---------|----------------|-----------|-----------|---------------------|-------------|
| AGIWUR2972                                                                                                                                               |    |    |         |         |                |           |           |                     |             |
| N2                                                                                                                                                       | CT | II | 3908491 | 3910837 | WBGene00018755 | bcmo-2    | F53C3.12  | -0.180010306202565  |             |
| AGIWUR28605                                                                                                                                              |    |    |         |         |                |           |           |                     |             |
| N2                                                                                                                                                       | CT | II | 3912003 | 3913385 | WBGene00018745 | F53C3.1   | F53C3.1   | 0.216636820173225   | AGIWUR32457 |
| N2                                                                                                                                                       | CT | II | 3919794 | 3927982 | WBGene00018756 | F53C3.13  | F53C3.13  | 0.203257572333262   |             |
| AGIWUR8437;AGIWUR8647;AGIWUR8821;AGIWUR10822;AGIWUR13228;AGIWUR16084;AGIWUR17645;AGIWUR19318;AGIWUR24545;AGIWUR27913;AGIWUR30509;AGIWUR33161;AGIWUR39802 |    |    |         |         |                |           |           |                     |             |
| N2                                                                                                                                                       | CT | II | 3932178 | 3933740 | WBGene00021192 | Y14H12B.2 | Y14H12B.2 | -0.0773556474935972 |             |
| AGIWUR14725                                                                                                                                              |    |    |         |         |                |           |           |                     |             |
| N2                                                                                                                                                       | CT | II | 3934451 | 3936008 | WBGene00021191 | Y14H12B.1 | Y14H12B.1 | -0.109417130340612  |             |
| AGIWUR6516;AGIWUR9325                                                                                                                                    |    |    |         |         |                |           |           |                     |             |
| N2                                                                                                                                                       | CT | II | 3950145 | 3972137 | WBGene00004751 | sea-2     | K10G6.3   | 0.328611990618249   |             |
| AGIWUR6369;AGIWUR29408                                                                                                                                   |    |    |         |         |                |           |           |                     |             |
| N2                                                                                                                                                       | CT | II | 3972820 | 3974968 | WBGene00019641 | K10G6.4   | K10G6.4   | -0.0502647699479777 | AGIWUR42914 |
| N2                                                                                                                                                       | CT | II | 3976246 | 3977969 | WBGene00019640 | dos-2     | K10G6.2   | -0.158346077112464  | AGIWUR16014 |
| N2                                                                                                                                                       | CT | II | 3982549 | 3986944 | WBGene00003017 | lin-31    | K10G6.1   | -0.0161036105625421 |             |
| AGIWUR37327;AGIWUR44727                                                                                                                                  |    |    |         |         |                |           |           |                     |             |
| N2                                                                                                                                                       | CT | II | 3987281 | 3988185 | WBGene00044381 | K10G6.5   | K10G6.5   | -0.0685531722464443 |             |
| AGIWUR15812;AGIWUR23686;AGIWUR40325                                                                                                                      |    |    |         |         |                |           |           |                     |             |
| N2                                                                                                                                                       | CT | II | 3988700 | 3989677 | WBGene00044382 | Y14H12A.2 | Y14H12A.2 | -0.05605319747177   |             |
| AGIWUR5795;AGIWUR13726;AGIWUR24093;AGIWUR28723;AGIWUR29110;AGIWUR34219;AGIWUR36017;AGIWUR38335;AGIWUR43600;AGIWUR45160                                   |    |    |         |         |                |           |           |                     |             |
| N2                                                                                                                                                       | CT | II | 3993210 | 3993887 | WBGene00021190 | Y14H12A.1 | Y14H12A.1 | -0.0710063326520043 |             |
| AGIWUR37602                                                                                                                                              |    |    |         |         |                |           |           |                     |             |
| N2                                                                                                                                                       | CT | II | 4004885 | 4016072 | WBGene00019487 | ephx-1    | K07D4.7   | 0.170111368679978   | AGIWUR1973  |
| N2                                                                                                                                                       | CT | II | 4016827 | 4018701 | WBGene00019486 | K07D4.6   | K07D4.6   | 0.0549748546030742  | AGIWUR37055 |
| N2                                                                                                                                                       | CT | II | 4020482 | 4025562 | WBGene00019485 | K07D4.5   | K07D4.5   | -0.0369510998436349 |             |
| AGIWUR4273;AGIWUR23840;AGIWUR27598;AGIWUR27867;AGIWUR39078                                                                                               |    |    |         |         |                |           |           |                     |             |
| N2                                                                                                                                                       | CT | II | 4028577 | 4029985 | WBGene00019488 | K07D4.9   | K07D4.9   | -0.261960365642699  | AGIWUR12587 |
| N2                                                                                                                                                       | CT | II | 4031214 | 4032387 | WBGene00019484 | K07D4.4   | K07D4.4   | -0.194415187972216  | AGIWUR27836 |
| N2                                                                                                                                                       | CT | II | 4038868 | 4043070 | WBGene00004135 | pqn-48    | K07D4.8   | 0.00482723579987443 | AGIWUR44569 |
| N2                                                                                                                                                       | CT | II | 4043059 | 4044330 | WBGene00004467 | rpn-11    | K07D4.3   | 0.166395652003835   |             |
| AGIWUR2574;AGIWUR13756;AGIWUR14661;AGIWUR25654;AGIWUR35845;AGIWUR37390                                                                                   |    |    |         |         |                |           |           |                     |             |
| N2                                                                                                                                                       | CT | II | 4044771 | 4047247 | WBGene00019483 | K07D4.2   | K07D4.2   | -0.611497343165865  | AGIWUR20974 |
| N2                                                                                                                                                       | CT | II | 4048525 | 4049129 | WBGene00023318 | K07D4.1   | K07D4.1   | -0.101771570630953  | AGIWUR22099 |
| N2                                                                                                                                                       | CT | II | 4055939 | 4057707 | WBGene00021055 | W06A11.4  | W06A11.4  | -0.182827281732532  |             |
| AGIWUR4127;AGIWUR22591;AGIWUR24503;AGIWUR43789                                                                                                           |    |    |         |         |                |           |           |                     |             |
| N2                                                                                                                                                       | CT | II | 4063008 | 4064057 | WBGene00021054 | fbxb-118  | W06A11.3  | -0.0394360094446089 |             |
| AGIWUR5599;AGIWUR16342;AGIWUR21363;AGIWUR28791                                                                                                           |    |    |         |         |                |           |           |                     |             |

|                                                                                    |    |    |         |         |                |          |          |                     |
|------------------------------------------------------------------------------------|----|----|---------|---------|----------------|----------|----------|---------------------|
| N2                                                                                 | CT | II | 4067558 | 4069771 | WBGene00021052 | W06A11.1 | W06A11.1 | -0.182710360155149  |
| AGIWUR2631;AGIWUR13752;AGIWUR14821                                                 |    |    |         |         |                |          |          |                     |
| N2                                                                                 | CT | II | 4070009 | 4072920 | WBGene00020009 | R11F4.3  | R11F4.3  | -0.0167654214943846 |
| AGIWUR29471;AGIWUR29931                                                            |    |    |         |         |                |          |          |                     |
| N2                                                                                 | CT | II | 4083065 | 4086226 | WBGene00020008 | R11F4.2  | R11F4.2  | 0.0804431828910306  |
| AGIWUR4756;AGIWUR10772;AGIWUR13044;AGIWUR25629;AGIWUR33062;AGIWUR35536             |    |    |         |         |                |          |          |                     |
| N2                                                                                 | CT | II | 4091837 | 4094349 | WBGene00020007 | R11F4.1  | R11F4.1  | 0.253348173835942   |
| AGIWUR5157;AGIWUR18910;AGIWUR23303;AGIWUR32277                                     |    |    |         |         |                |          |          |                     |
| N2                                                                                 | CT | II | 4100788 | 4127849 | WBGene00006476 | rhgf-2   | T08H4.1  | 0.0459847228910286  |
| AGIWUR5268;AGIWUR12668;AGIWUR13047;AGIWUR20456;AGIWUR23101;AGIWUR31904;AGIWUR40324 |    |    |         |         |                |          |          |                     |
| N2                                                                                 | CT | II | 4127848 | 4134867 | WBGene00020368 | ast-1    | T08H4.3  | 0.0773629970495531  |
| AGIWUR8003;AGIWUR11487                                                             |    |    |         |         |                |          |          |                     |
| N2                                                                                 | CT | II | 4140901 | 4141105 | WBGene00021822 | Y54C5A.1 | Y54C5A.1 | 0.252989498227707   |
| AGIWUR32585                                                                        |    |    |         |         |                |          |          |                     |
| N2                                                                                 | CT | II | 4142816 | 4149678 | WBGene00018969 | F56D3.1  | F56D3.1  | 0.0442927219440632  |
| AGIWUR37694                                                                        |    |    |         |         |                |          |          |                     |
| N2                                                                                 | CT | II | 4155773 | 4167368 | WBGene00019855 | R03H10.2 | R03H10.2 | -0.324729173231129  |
| AGIWUR7979                                                                         |    |    |         |         |                |          |          |                     |
| N2                                                                                 | CT | II | 4167555 | 4168500 | WBGene00019856 | R03H10.4 | R03H10.4 | -0.322361856553864  |
| AGIWUR36427                                                                        |    |    |         |         |                |          |          |                     |
| N2                                                                                 | CT | II | 4169723 | 4170608 | WBGene00019857 | R03H10.5 | R03H10.5 | 0.0636950224418724  |
| AGIWUR35423                                                                        |    |    |         |         |                |          |          |                     |
| N2                                                                                 | CT | II | 4171294 | 4173875 | WBGene00019858 | R03H10.6 | R03H10.6 | 0.100209379162465   |
| AGIWUR30977                                                                        |    |    |         |         |                |          |          |                     |
| N2                                                                                 | CT | II | 4180271 | 4183545 | WBGene00019854 | R03H10.1 | R03H10.1 | -0.0114600587735989 |
| AGIWUR32688                                                                        |    |    |         |         |                |          |          |                     |
| N2                                                                                 | CT | II | 4186666 | 4208499 | WBGene00006495 | cpna-1   | F31D5.3  | 0.0279263049085436  |
| AGIWUR1322;AGIWUR15868;AGIWUR24333                                                 |    |    |         |         |                |          |          |                     |
| N2                                                                                 | CT | II | 4211425 | 4213335 | WBGene00206414 | F31D5.7  | F31D5.7  | -0.138478802875924  |
| AGIWUR22076                                                                        |    |    |         |         |                |          |          |                     |
| N2                                                                                 | CT | II | 4215605 | 4218243 | WBGene00017945 | F31D5.2  | F31D5.2  | -0.251239846464859  |
| AGIWUR31542                                                                        |    |    |         |         |                |          |          |                     |
| N2                                                                                 | CT | II | 4223309 | 4226330 | WBGene00015818 | C16A11.5 | C16A11.5 | -0.112644311357739  |
| AGIWUR789;AGIWUR26752;AGIWUR44848                                                  |    |    |         |         |                |          |          |                     |
| N2                                                                                 | CT | II | 4227046 | 4229157 | WBGene00015817 | C16A11.4 | C16A11.4 | -0.0207465166846426 |
| AGIWUR4751;AGIWUR14422;AGIWUR22204;AGIWUR24954;AGIWUR35304;AGIWUR42962             |    |    |         |         |                |          |          |                     |
| N2                                                                                 | CT | II | 4234950 | 4235982 | WBGene00045297 | fbxc-43  | C16A11.9 | 0.17647780135561    |
| AGIWUR12352                                                                        |    |    |         |         |                |          |          |                     |
| N2                                                                                 | CT | II | 4236504 | 4237751 | WBGene00015819 | fbxc-44  | C16A11.6 | -0.0510841203692944 |
| AGIWUR11430;AGIWUR38404                                                            |    |    |         |         |                |          |          |                     |
| N2                                                                                 | CT | II | 4238159 | 4244830 | WBGene00015815 | C16A11.2 | C16A11.2 | 0.0130677946468847  |
| AGIWUR22166                                                                        |    |    |         |         |                |          |          |                     |

|                                     |    |    |         |         |                |          |          |                     |             |
|-------------------------------------|----|----|---------|---------|----------------|----------|----------|---------------------|-------------|
| N2                                  | CT | II | 4247197 | 4255281 | WBGene00001673 | gpa-11   | C16A11.1 | -0.0413998647397928 |             |
| AGIWUR6819                          |    |    |         |         |                |          |          |                     |             |
| N2                                  | CT | II | 4255848 | 4256989 | WBGene00015820 | C16A11.7 | C16A11.7 | 0.0430463981252309  |             |
| AGIWUR34626                         |    |    |         |         |                |          |          |                     |             |
| N2                                  | CT | II | 4257092 | 4258781 | WBGene00015821 | clec-135 | C16A11.8 | -0.0241926024412855 |             |
| AGIWUR36533                         |    |    |         |         |                |          |          |                     |             |
| N2                                  | CT | II | 4276209 | 4279268 | WBGene00015299 | C01F1.4  | C01F1.4  | -0.222137908198407  | AGIWUR35062 |
| N2                                  | CT | II | 4279424 | 4281967 | WBGene00015300 | C01F1.5  | C01F1.5  | -0.0349445804191877 | AGIWUR3406  |
| N2                                  | CT | II | 4282321 | 4288211 | WBGene00015301 | C01F1.6  | C01F1.6  | 0.402714849569628   | AGIWUR39703 |
| N2                                  | CT | II | 4295101 | 4299006 | WBGene00015298 | C01F1.3  | C01F1.3  | -0.105026002749458  | AGIWUR11357 |
| N2                                  | CT | II | 4299653 | 4300919 | WBGene00015297 | sco-1    | C01F1.2  | -0.159415138623141  | AGIWUR1126  |
| N2                                  | CT | II | 4301607 | 4305287 | WBGene00015296 | C01F1.1  | C01F1.1  | -0.0168846206734905 | AGIWUR3997  |
| N2                                  | CT | II | 4305262 | 4307004 | WBGene00021796 | Y52E8A.3 | Y52E8A.3 | -0.327423567114657  |             |
| AGIWUR25352                         |    |    |         |         |                |          |          |                     |             |
| N2                                  | CT | II | 4309725 | 4312215 | WBGene00021797 | plep-1   | Y52E8A.4 | -0.252166512290784  |             |
| AGIWUR31602                         |    |    |         |         |                |          |          |                     |             |
| N2                                  | CT | II | 4314417 | 4316111 | WBGene00005787 | srw-40   | Y52E8A.5 | -0.136883286176121  |             |
| AGIWUR31610                         |    |    |         |         |                |          |          |                     |             |
| N2                                  | CT | II | 4316629 | 4319969 | WBGene00021798 | Y52E8A.6 | Y52E8A.6 | -0.168838104021054  |             |
| AGIWUR8856                          |    |    |         |         |                |          |          |                     |             |
| N2                                  | CT | II | 4320836 | 4321654 | WBGene00021795 | Y52E8A.2 | Y52E8A.2 | -0.358915366985055  |             |
| AGIWUR13205                         |    |    |         |         |                |          |          |                     |             |
| N2                                  | CT | II | 4321663 | 4322616 | WBGene00021794 | Y52E8A.1 | Y52E8A.1 | -0.105559473276221  |             |
| AGIWUR2488                          |    |    |         |         |                |          |          |                     |             |
| N2                                  | CT | II | 4323256 | 4324187 | WBGene00019221 | H20J04.6 | H20J04.6 | -0.241358676485124  |             |
| AGIWUR29158                         |    |    |         |         |                |          |          |                     |             |
| N2                                  | CT | II | 4324361 | 4326089 | WBGene00003390 | mog-2    | H20J04.8 | -0.201385339935242  |             |
| AGIWUR24324;AGIWUR26270             |    |    |         |         |                |          |          |                     |             |
| N2                                  | CT | II | 4326720 | 4328284 | WBGene00019220 | pfd-2    | H20J04.5 | -0.115659960187891  |             |
| AGIWUR28829                         |    |    |         |         |                |          |          |                     |             |
| N2                                  | CT | II | 4329023 | 4334484 | WBGene00019219 | H20J04.4 | H20J04.4 | 0.0910485845050459  |             |
| AGIWUR12223;AGIWUR19295;AGIWUR19960 |    |    |         |         |                |          |          |                     |             |
| N2                                  | CT | II | 4335707 | 4338424 | WBGene00019218 | madf-3   | H20J04.3 | -0.264720105785607  |             |
| AGIWUR41477                         |    |    |         |         |                |          |          |                     |             |
| N2                                  | CT | II | 4340151 | 4350984 | WBGene00019217 | athp-2   | H20J04.2 | -0.0640955553778735 |             |
| AGIWUR13157                         |    |    |         |         |                |          |          |                     |             |
| N2                                  | CT | II | 4351188 | 4353159 | WBGene00044310 | H20J04.9 | H20J04.9 | -0.24392578577736   |             |
| AGIWUR27110;AGIWUR39688             |    |    |         |         |                |          |          |                     |             |
| N2                                  | CT | II | 4353221 | 4355317 | WBGene00019222 | H20J04.7 | H20J04.7 | 0.231462205834193   |             |

|                                                            |    |    |         |         |                |          |          |                                 |
|------------------------------------------------------------|----|----|---------|---------|----------------|----------|----------|---------------------------------|
| AGIWUR32453                                                |    |    |         |         |                |          |          |                                 |
| N2                                                         | CT | II | 4355633 | 4358844 | WBGene00019216 | H20J04.1 | H20J04.1 | 0.263732571494375               |
| AGIWUR42306                                                |    |    |         |         |                |          |          |                                 |
| N2                                                         | CT | II | 4359082 | 4368332 | WBGene00002252 | lat-2    | B0286.2  | -0.0356531110665905 AGIWUR17581 |
| N2                                                         | CT | II | 4368490 | 4369692 | WBGene00023425 | try-9    | B0286.6  | -0.36157047508877 AGIWUR47      |
| N2                                                         | CT | II | 4369625 | 4372597 | WBGene00015116 | pacs-1   | B0286.3  | -0.0547887251985077 AGIWUR37001 |
| N2                                                         | CT | II | 4372740 | 4376742 | WBGene00003825 | ntl-2    | B0286.4  | 0.0571281032218423              |
| AGIWUR9456;AGIWUR25085;AGIWUR30605;AGIWUR31866;AGIWUR32151 |    |    |         |         |                |          |          |                                 |
| N2                                                         | CT | II | 4375504 | 4386343 | WBGene00015115 | B0286.1  | B0286.1  | -0.085916492258729 AGIWUR29486  |
| N2                                                         | CT | II | 4392800 | 4404850 | WBGene00022743 | mlt-7    | ZK430.8  | -0.0231162639048659 AGIWUR39940 |
| N2                                                         | CT | II | 4405864 | 4416553 | WBGene00022741 | ZK430.5  | ZK430.5  | 0.47047963404852 AGIWUR214      |
| N2                                                         | CT | II | 4417683 | 4419131 | WBGene00007036 | sod-5    | ZK430.3  | 0.14234953315456 AGIWUR15490    |
| N2                                                         | CT | II | 4420255 | 4422319 | WBGene00044063 | bpnt-1   | ZK430.2  | -0.198399360628262 AGIWUR8553   |
| N2                                                         | CT | II | 4422463 | 4424902 | WBGene00022742 | ZK430.7  | ZK430.7  | 0.0449662478546351 AGIWUR22253  |
| N2                                                         | CT | II | 4425167 | 4432613 | WBGene00022739 | toe-1    | ZK430.1  | -0.180643470483766 AGIWUR7011   |
| N2                                                         | CT | II | 4433332 | 4435169 | WBGene00003699 | nhr-109  | T12C9.5  | 0.0466560118803834              |
| AGIWUR376;AGIWUR15168;AGIWUR17704;AGIWUR19399;AGIWUR35164  |    |    |         |         |                |          |          |                                 |
| N2                                                         | CT | II | 4435300 | 4436995 | WBGene00020460 | nhr-273  | T12C9.1  | -0.273450106625747 AGIWUR25363  |
| N2                                                         | CT | II | 4438867 | 4440867 | WBGene00003615 | nhr-16   | T12C9.6  | -0.32364406450357 AGIWUR908     |
| N2                                                         | CT | II | 4441265 | 4453151 | WBGene00006657 | twk-2    | T12C9.3  | 0.168024153688191               |
| AGIWUR27308;AGIWUR39529                                    |    |    |         |         |                |          |          |                                 |
| N2                                                         | CT | II | 4458263 | 4460404 | WBGene00020461 | T12C9.7  | T12C9.7  | 0.109778839055631               |
| AGIWUR2066;AGIWUR5575;AGIWUR24733                          |    |    |         |         |                |          |          |                                 |
| N2                                                         | CT | II | 4461130 | 4467895 | WBGene00021058 | vps-18   | W06B4.3  | -0.169371919338698 AGIWUR2565   |
| N2                                                         | CT | II | 4468169 | 4471038 | WBGene00021057 | W06B4.2  | W06B4.2  | -0.0652050241693765 AGIWUR716   |
| N2                                                         | CT | II | 4471401 | 4473553 | WBGene00021056 | W06B4.1  | W06B4.1  | -0.0513804496036165 AGIWUR16691 |
| N2                                                         | CT | II | 4478613 | 4480948 | WBGene00020248 | T05C1.1  | T05C1.1  | -0.125811963215799 AGIWUR5570   |
| N2                                                         | CT | II | 4481025 | 4483722 | WBGene00020249 | T05C1.2  | T05C1.2  | -0.062560517683127 AGIWUR6661   |
| N2                                                         | CT | II | 4487694 | 4489388 | WBGene00020250 | T05C1.3  | T05C1.3  | 0.124995378629682 AGIWUR7186    |
| N2                                                         | CT | II | 4490408 | 4490865 | WBGene00020252 | T05C1.5  | T05C1.5  | -0.21502020657411 AGIWUR15261   |
| N2                                                         | CT | II | 4491152 | 4505147 | WBGene00020251 | camt-1   | T05C1.4  | 0.20256917199422                |
| AGIWUR5533;AGIWUR37397;AGIWUR42799                         |    |    |         |         |                |          |          |                                 |
| N2                                                         | CT | II | 4512211 | 4516115 | WBGene00015135 | cyp-23A1 | B0304.3  | 0.220174274373253               |
| AGIWUR14628                                                |    |    |         |         |                |          |          |                                 |
| N2                                                         | CT | II | 4518560 | 4522523 | WBGene00001948 | hlh-1    | B0304.1  | 0.269718561952225               |
| AGIWUR17528;AGIWUR23856                                    |    |    |         |         |                |          |          |                                 |
| N2                                                         | CT | II | 4522465 | 4523222 | WBGene00015136 | B0304.4  | B0304.4  | -0.0679484693384964             |
| AGIWUR1375;AGIWUR6577;AGIWUR19962;AGIWUR37814              |    |    |         |         |                |          |          |                                 |
| N2                                                         | CT | II | 4523622 | 4524589 | WBGene00015134 | B0304.2  | B0304.2  | -0.0281764492379502 AGIWUR28156 |

|                                                                                    |    |    |         |         |                |           |           |                     |             |
|------------------------------------------------------------------------------------|----|----|---------|---------|----------------|-----------|-----------|---------------------|-------------|
| N2                                                                                 | CT | II | 4524634 | 4527900 | WBGene00005061 | sra-35    | B0304.8   | -0.129367886352277  |             |
| AGIWUR7786;AGIWUR36780;AGIWUR38769                                                 |    |    |         |         |                |           |           |                     |             |
| N2                                                                                 | CT | II | 4529636 | 4531964 | WBGene00005058 | sra-32    | B0304.5   | -0.149550134287288  | AGIWUR14583 |
| N2                                                                                 | CT | II | 4534742 | 4537241 | WBGene00005059 | sra-33    | B0304.6   | -0.050989002973024  | AGIWUR42367 |
| N2                                                                                 | CT | II | 4538988 | 4540731 | WBGene00005062 | sra-36    | B0304.9   | -0.0248841352240836 | AGIWUR37011 |
| N2                                                                                 | CT | II | 4541865 | 4543668 | WBGene00005060 | sra-34    | B0304.7   | -0.107403727035999  | AGIWUR11853 |
| N2                                                                                 | CT | II | 4550894 | 4552177 | WBGene00019489 | K07E1.1   | K07E1.1   | 0.205899154038697   |             |
| AGIWUR7894;AGIWUR11475;AGIWUR11642;AGIWUR17958;AGIWUR35065;AGIWUR35352;AGIWUR38739 |    |    |         |         |                |           |           |                     |             |
| N2                                                                                 | CT | II | 4557787 | 4559573 | WBGene00019746 | M03A1.3   | M03A1.3   | -0.147719247978005  |             |
| AGIWUR16157;AGIWUR20492                                                            |    |    |         |         |                |           |           |                     |             |
| N2                                                                                 | CT | II | 4560397 | 4562618 | WBGene00077490 | M03A1.8   | M03A1.8   | 0.0115886929641871  | AGIWUR33318 |
| N2                                                                                 | CT | II | 4562853 | 4563546 | WBGene00000928 | dao-2     | M03A1.7   | -0.243563623858082  | AGIWUR19408 |
| N2                                                                                 | CT | II | 4572000 | 4590970 | WBGene00006868 | vab-1     | M03A1.1   | 0.243773303326206   |             |
| AGIWUR14824;AGIWUR44039                                                            |    |    |         |         |                |           |           |                     |             |
| N2                                                                                 | CT | II | 4590952 | 4601354 | WBGene00019747 | ipla-1    | M03A1.6   | 0.089088008470247   |             |
| AGIWUR4878;AGIWUR35821                                                             |    |    |         |         |                |           |           |                     |             |
| N2                                                                                 | CT | II | 4601355 | 4602633 | WBGene00018046 | F35D11.5  | F35D11.5  | -0.214413461442945  |             |
| AGIWUR22207                                                                        |    |    |         |         |                |           |           |                     |             |
| N2                                                                                 | CT | II | 4603406 | 4604161 | WBGene00018045 | F35D11.4  | F35D11.4  | -0.253706571907617  |             |
| AGIWUR14130                                                                        |    |    |         |         |                |           |           |                     |             |
| N2                                                                                 | CT | II | 4608372 | 4612082 | WBGene00018044 | F35D11.3  | F35D11.3  | -0.10957090839424   |             |
| AGIWUR43345                                                                        |    |    |         |         |                |           |           |                     |             |
| N2                                                                                 | CT | II | 4612989 | 4626107 | WBGene00004122 | pqn-35    | F35D11.2  | 0.233436454149464   |             |
| AGIWUR28360                                                                        |    |    |         |         |                |           |           |                     |             |
| N2                                                                                 | CT | II | 4626906 | 4627805 | WBGene00018043 | F35D11.1  | F35D11.1  | 0.11728792455669    |             |
| AGIWUR1128                                                                         |    |    |         |         |                |           |           |                     |             |
| N2                                                                                 | CT | II | 4627811 | 4638384 | WBGene00018051 | che-10    | F35D11.11 | 0.236812233808697   |             |
| AGIWUR23841;AGIWUR35432                                                            |    |    |         |         |                |           |           |                     |             |
| N2                                                                                 | CT | II | 4649085 | 4653280 | WBGene00022283 | lgc-27    | Y74E4A.1  | 0.108847310468617   |             |
| AGIWUR12849;AGIWUR33651                                                            |    |    |         |         |                |           |           |                     |             |
| N2                                                                                 | CT | II | 4653189 | 4655934 | WBGene00020222 | fut-6     | T05A7.5   | -0.0488550163726051 |             |
| AGIWUR17270;AGIWUR39398                                                            |    |    |         |         |                |           |           |                     |             |
| N2                                                                                 | CT | II | 4665893 | 4667588 | WBGene00043986 | fut-5     | T05A7.10  | 0.0384967853001732  |             |
| AGIWUR9107;AGIWUR32803                                                             |    |    |         |         |                |           |           |                     |             |
| N2                                                                                 | CT | II | 4668644 | 4671774 | WBGene00020223 | T05A7.6   | T05A7.6   | 0.172377574685827   | AGIWUR15019 |
| N2                                                                                 | CT | II | 4672798 | 4673746 | WBGene00001976 | hmg-11    | T05A7.4   | -0.0160238598480742 |             |
| AGIWUR31120;AGIWUR38858                                                            |    |    |         |         |                |           |           |                     |             |
| N2                                                                                 | CT | II | 4674420 | 4675729 | WBGene00020220 | cllec-140 | T05A7.2   | 0.441031791102005   |             |
| AGIWUR14366                                                                        |    |    |         |         |                |           |           |                     |             |

|                                                                                   |    |    |         |         |                |          |          |                      |             |
|-----------------------------------------------------------------------------------|----|----|---------|---------|----------------|----------|----------|----------------------|-------------|
| N2                                                                                | CT | II | 4675779 | 4676250 | WBGene00020221 | T05A7.3  | T05A7.3  | 0.612777065408462    | AGIWUR18858 |
| N2                                                                                | CT | II | 4678026 | 4679638 | WBGene00020219 | T05A7.1  | T05A7.1  | -0.182404213172255   | AGIWUR40718 |
| N2                                                                                | CT | II | 4679667 | 4681324 | WBGene00020224 | T05A7.7  | T05A7.7  | 0.137293799073852    | AGIWUR18383 |
| N2                                                                                | CT | II | 4681764 | 4683728 | WBGene00020225 | sre-40   | T05A7.8  | -0.354276941580295   | AGIWUR18657 |
| N2                                                                                | CT | II | 4687241 | 4689392 | WBGene00017371 | sre-39   | F10G7.7  | 0.000347396244996467 |             |
| AGIWUR4968;AGIWUR29347                                                            |    |    |         |         |                |          |          |                      |             |
| N2                                                                                | CT | II | 4689777 | 4690484 | WBGene00044744 | F10G7.12 | F10G7.12 | 0.0426889236282921   |             |
| AGIWUR12475                                                                       |    |    |         |         |                |          |          |                      |             |
| N2                                                                                | CT | II | 4691227 | 4693075 | WBGene00017370 | F10G7.6  | F10G7.6  | 0.15878506185829     | AGIWUR6909  |
| N2                                                                                | CT | II | 4693414 | 4696408 | WBGene00017369 | F10G7.5  | F10G7.5  | -0.111218915412726   | AGIWUR25609 |
| N2                                                                                | CT | II | 4696419 | 4698427 | WBGene00004461 | rpn-5    | F10G7.8  | 0.16438239425654     | AGIWUR22904 |
| N2                                                                                | CT | II | 4698721 | 4700994 | WBGene00004737 | scc-1    | F10G7.4  | -0.0104808252216699  | AGIWUR4631  |
| N2                                                                                | CT | II | 4702069 | 4703219 | WBGene00006817 | unc-85   | F10G7.3  | -0.101903205334207   | AGIWUR32576 |
| N2                                                                                | CT | II | 4703254 | 4706498 | WBGene00017372 | F10G7.9  | F10G7.9  | 0.306857060720054    | AGIWUR38407 |
| N2                                                                                | CT | II | 4706821 | 4710052 | WBGene00006626 | tsn-1    | F10G7.2  | 0.537176533746601    | AGIWUR860   |
| N2                                                                                | CT | II | 4710277 | 4713690 | WBGene00006497 | tag-151  | F10G7.1  | 0.0712708931689754   |             |
| AGIWUR3622;AGIWUR3894;AGIWUR14759;AGIWUR19454;AGIWUR25721;AGIWUR34601;AGIWUR41035 |    |    |         |         |                |          |          |                      |             |
| N2                                                                                | CT | II | 4713674 | 4726264 | WBGene00017373 | F10G7.10 | F10G7.10 | -0.0507967946079928  |             |
| AGIWUR1239;AGIWUR33197                                                            |    |    |         |         |                |          |          |                      |             |
| N2                                                                                | CT | II | 4727326 | 4727869 | WBGene00017374 | ttr-41   | F10G7.11 | -0.167737332818261   |             |
| AGIWUR30715                                                                       |    |    |         |         |                |          |          |                      |             |
| N2                                                                                | CT | II | 4731178 | 4733949 | WBGene00018275 | F41C3.11 | F41C3.11 | 0.0491271786347731   |             |
| AGIWUR43633                                                                       |    |    |         |         |                |          |          |                      |             |
| N2                                                                                | CT | II | 4735113 | 4736850 | WBGene00018272 | F41C3.6  | F41C3.6  | 0.203893692055799    | AGIWUR15758 |
| N2                                                                                | CT | II | 4737617 | 4739906 | WBGene00018271 | F41C3.5  | F41C3.5  | 0.150676748355256    | AGIWUR38501 |
| N2                                                                                | CT | II | 4740412 | 4741616 | WBGene00018270 | F41C3.4  | F41C3.4  | -0.188813141750749   | AGIWUR32312 |
| N2                                                                                | CT | II | 4742128 | 4745280 | WBGene00018269 | acs-11   | F41C3.3  | -0.0886572741198499  | AGIWUR34073 |
| N2                                                                                | CT | II | 4749968 | 4751822 | WBGene00018268 | F41C3.2  | F41C3.2  | -0.322986077157303   |             |
| AGIWUR23211;AGIWUR35292;AGIWUR38772                                               |    |    |         |         |                |          |          |                      |             |
| N2                                                                                | CT | II | 4752388 | 4752942 | WBGene00018267 | F41C3.1  | F41C3.1  | -0.260243371673492   | AGIWUR4862  |
| N2                                                                                | CT | II | 4753413 | 4755595 | WBGene00016163 | C27D9.1  | C27D9.1  | 0.0638013843907395   | AGIWUR8054  |
| N2                                                                                | CT | II | 4755589 | 4756851 | WBGene00016164 | C27D9.2  | C27D9.2  | 0.0418429690645139   |             |
| AGIWUR26144;AGIWUR26845                                                           |    |    |         |         |                |          |          |                      |             |
| N2                                                                                | CT | II | 4758762 | 4759289 | WBGene00017839 | F26G1.3  | F26G1.3  | -0.163111233595186   | AGIWUR40801 |
| N2                                                                                | CT | II | 4763081 | 4764174 | WBGene00017838 | F26G1.2  | F26G1.2  | 0.095281258156696    |             |
| AGIWUR7212;AGIWUR31440;AGIWUR34452                                                |    |    |         |         |                |          |          |                      |             |
| N2                                                                                | CT | II | 4764159 | 4766384 | WBGene00017840 | ttm-2    | F26G1.4  | 0.229459555862817    | AGIWUR36669 |
| N2                                                                                | CT | II | 4770534 | 4771382 | WBGene00017841 | F26G1.5  | F26G1.5  | 0.125735242117035    | AGIWUR2996  |
| N2                                                                                | CT | II | 4772835 | 4773991 | WBGene00044662 | F26G1.9  | F26G1.9  | -0.018442828284484   |             |

|                                                                        |    |    |         |         |                |           |           |                     |             |
|------------------------------------------------------------------------|----|----|---------|---------|----------------|-----------|-----------|---------------------|-------------|
| AGIWUR6370;AGIWUR16681;AGIWUR26642;AGIWUR37047;AGIWUR37704;AGIWUR41281 |    |    |         |         |                |           |           |                     |             |
| N2                                                                     | CT | II | 4774382 | 4774883 | WBGene00044663 | F26G1.10  | F26G1.10  | 0.314944984984322   |             |
| AGIWUR6035;AGIWUR18054;AGIWUR22730;AGIWUR24550                         |    |    |         |         |                |           |           |                     |             |
| N2                                                                     | CT | II | 4775295 | 4781347 | WBGene00017842 | nep-12    | F26G1.6   | -0.0647578486768365 | AGIWUR16205 |
| N2                                                                     | CT | II | 4785861 | 4786316 | WBGene00003424 | msp-3     | F26G1.7   | 0.226207538055331   | AGIWUR39844 |
| N2                                                                     | CT | II | 4791620 | 4795643 | WBGene00017837 | F26G1.1   | F26G1.1   | 0.168605454380891   |             |
| AGIWUR6838;AGIWUR8224;AGIWUR11071;AGIWUR12821;AGIWUR17678;AGIWUR38146  |    |    |         |         |                |           |           |                     |             |
| N2                                                                     | CT | II | 4795761 | 4797216 | WBGene00016353 | C33F10.4  | C33F10.4  | -0.101349071281073  |             |
| AGIWUR2568;AGIWUR20383;AGIWUR20844;AGIWUR21310                         |    |    |         |         |                |           |           |                     |             |
| N2                                                                     | CT | II | 4797371 | 4798176 | WBGene00050941 | C33F10.14 | C33F10.14 | -0.0365990564812506 |             |
| AGIWUR4432                                                             |    |    |         |         |                |           |           |                     |             |
| N2                                                                     | CT | II | 4798154 | 4812136 | WBGene00016354 | rig-6     | C33F10.5  | -0.0382125856211619 |             |
| AGIWUR8328;AGIWUR10082;AGIWUR34741;AGIWUR37698;AGIWUR37741;AGIWUR40358 |    |    |         |         |                |           |           |                     |             |
| N2                                                                     | CT | II | 4818662 | 4821564 | WBGene00016355 | lact-5    | C33F10.7  | 0.0282376524574701  |             |
| AGIWUR440;AGIWUR17904;AGIWUR32830                                      |    |    |         |         |                |           |           |                     |             |
| N2                                                                     | CT | II | 4823381 | 4825196 | WBGene00016356 | C33F10.8  | C33F10.8  | 0.0250452264576531  |             |
| AGIWUR3888                                                             |    |    |         |         |                |           |           |                     |             |
| N2                                                                     | CT | II | 4826507 | 4827884 | WBGene00016359 | fbxb-88   | C33F10.13 | -0.101031546585349  |             |
| AGIWUR8862                                                             |    |    |         |         |                |           |           |                     |             |
| N2                                                                     | CT | II | 4828560 | 4832469 | WBGene00016352 | tbck-1    | C33F10.2  | -0.180279215533357  |             |
| AGIWUR11843                                                            |    |    |         |         |                |           |           |                     |             |
| N2                                                                     | CT | II | 4836304 | 4837759 | WBGene00016358 | C33F10.12 | C33F10.12 | 0.290483910462495   |             |
| AGIWUR20730                                                            |    |    |         |         |                |           |           |                     |             |
| N2                                                                     | CT | II | 4850185 | 4851441 | WBGene00044767 | T23B7.3   | T23B7.3   | -0.114918181453468  |             |
| AGIWUR18343;AGIWUR37964;AGIWUR43618                                    |    |    |         |         |                |           |           |                     |             |
| N2                                                                     | CT | II | 4852056 | 4857880 | WBGene00001027 | dnj-9     | F11G11.7  | 0.0330430782640043  |             |
| AGIWUR1344;AGIWUR27861                                                 |    |    |         |         |                |           |           |                     |             |
| N2                                                                     | CT | II | 4857923 | 4859185 | WBGene00017385 | F11G11.5  | F11G11.5  | -0.0351637058423488 |             |
| AGIWUR30732                                                            |    |    |         |         |                |           |           |                     |             |
| N2                                                                     | CT | II | 4860064 | 4860411 | WBGene00017386 | nspd-5    | F11G11.8  | -0.0155874758379646 |             |
| AGIWUR6006                                                             |    |    |         |         |                |           |           |                     |             |
| N2                                                                     | CT | II | 4860594 | 4861696 | WBGene00017384 | F11G11.4  | F11G11.4  | 0.177117193728819   |             |
| AGIWUR9900                                                             |    |    |         |         |                |           |           |                     |             |
| N2                                                                     | CT | II | 4862318 | 4863457 | WBGene00017387 | mpst-4    | F11G11.9  | 0.192428503459176   |             |
| AGIWUR35205                                                            |    |    |         |         |                |           |           |                     |             |
| N2                                                                     | CT | II | 4866436 | 4867576 | WBGene00000606 | col-17    | F11G11.10 | -0.0121932253239514 |             |
| AGIWUR20968                                                            |    |    |         |         |                |           |           |                     |             |
| N2                                                                     | CT | II | 4872098 | 4873127 | WBGene00000649 | col-73    | F11G11.12 | 0.0944490380147016  |             |
| AGIWUR5980                                                             |    |    |         |         |                |           |           |                     |             |

|                                                                                                                                              |    |    |         |         |                |           |           |                     |             |
|----------------------------------------------------------------------------------------------------------------------------------------------|----|----|---------|---------|----------------|-----------|-----------|---------------------|-------------|
| N2                                                                                                                                           | CT | II | 4875280 | 4875666 | WBGene00017388 | F11G11.13 | F11G11.13 | -0.0256336036081266 |             |
| AGIWUR13442;AGIWUR18299;AGIWUR24022;AGIWUR39742;AGIWUR43786;AGIWUR44698                                                                      |    |    |         |         |                |           |           |                     |             |
| N2                                                                                                                                           | CT | II | 4879885 | 4881105 | WBGene00001754 | gst-6     | F11G11.3  | -0.0274546203238692 |             |
| AGIWUR24152                                                                                                                                  |    |    |         |         |                |           |           |                     |             |
| N2                                                                                                                                           | CT | II | 4882062 | 4883358 | WBGene00001755 | gst-7     | F11G11.2  | -0.207582650721687  |             |
| AGIWUR29841                                                                                                                                  |    |    |         |         |                |           |           |                     |             |
| N2                                                                                                                                           | CT | II | 4883749 | 4884602 | WBGene00001756 | gst-8     | F11G11.1  | -0.191262719553826  |             |
| AGIWUR30738                                                                                                                                  |    |    |         |         |                |           |           |                     |             |
| N2                                                                                                                                           | CT | II | 4886276 | 4888211 | WBGene00019891 | R05F9.7   | R05F9.7   | -0.0250443989634732 | AGIWUR42366 |
| N2                                                                                                                                           | CT | II | 4889437 | 4891427 | WBGene00019890 | R05F9.6   | R05F9.6   | -0.0569268388895514 |             |
| AGIWUR15697;AGIWUR19070;AGIWUR25990;AGIWUR32241                                                                                              |    |    |         |         |                |           |           |                     |             |
| N2                                                                                                                                           | CT | II | 4891573 | 4893573 | WBGene00001757 | gst-9     | R05F9.5   | -0.341432886468654  | AGIWUR26662 |
| N2                                                                                                                                           | CT | II | 4899859 | 4902100 | WBGene00019892 | R05F9.9   | R05F9.9   | -0.143985534994647  |             |
| AGIWUR32806;AGIWUR38871                                                                                                                      |    |    |         |         |                |           |           |                     |             |
| N2                                                                                                                                           | CT | II | 4902288 | 4903796 | WBGene00019893 | sgt-1     | R05F9.10  | -0.137718231833205  |             |
| AGIWUR8466                                                                                                                                   |    |    |         |         |                |           |           |                     |             |
| N2                                                                                                                                           | CT | II | 4905008 | 4911835 | WBGene00019888 | btbd-10   | R05F9.1   | 0.146693505522011   |             |
| AGIWUR2401;AGIWUR8282;AGIWUR8547;AGIWUR11478;AGIWUR12754;AGIWUR16406;AGIWUR28362;AGIWUR33870;AGIWUR35150;AGIWUR36112;AGIWUR38514;AGIWUR44911 |    |    |         |         |                |           |           |                     |             |
| N2                                                                                                                                           | CT | II | 4911765 | 4914218 | WBGene00019894 | R05F9.11  | R05F9.11  | -0.24300017273678   |             |
| AGIWUR11820                                                                                                                                  |    |    |         |         |                |           |           |                     |             |
| N2                                                                                                                                           | CT | II | 4914494 | 4925248 | WBGene00019895 | aagr-2    | R05F9.12  | 0.0866270528835429  |             |
| AGIWUR6585;AGIWUR22779;AGIWUR27231                                                                                                           |    |    |         |         |                |           |           |                     |             |
| N2                                                                                                                                           | CT | II | 4930873 | 4932114 | WBGene00022763 | ZK546.7   | ZK546.7   | 0.433547803487678   | AGIWUR33470 |
| N2                                                                                                                                           | CT | II | 4932991 | 4933450 | WBGene00003470 | msp-152   | ZK546.6   | 0.124140219370396   | AGIWUR34259 |
| N2                                                                                                                                           | CT | II | 4933883 | 4935038 | WBGene00001778 | gst-30    | ZK546.11  | -0.031719004088453  |             |
| AGIWUR12388                                                                                                                                  |    |    |         |         |                |           |           |                     |             |
| N2                                                                                                                                           | CT | II | 4935563 | 4937956 | WBGene00022762 | ZK546.5   | ZK546.5   | -0.267768182435614  | AGIWUR12473 |
| N2                                                                                                                                           | CT | II | 4938004 | 4938602 | WBGene00022761 | ZK546.4   | ZK546.4   | 0.16511855032687    | AGIWUR18441 |
| N2                                                                                                                                           | CT | II | 4938599 | 4941150 | WBGene00022766 | cb1c-1    | ZK546.17  | -0.122969662589968  |             |
| AGIWUR34186;AGIWUR38869                                                                                                                      |    |    |         |         |                |           |           |                     |             |
| N2                                                                                                                                           | CT | II | 4944042 | 4945838 | WBGene00022765 | ZK546.14  | ZK546.14  | -0.0615144562787155 |             |
| AGIWUR6967;AGIWUR30274                                                                                                                       |    |    |         |         |                |           |           |                     |             |
| N2                                                                                                                                           | CT | II | 4946025 | 4948070 | WBGene00022759 | ZK546.2   | ZK546.2   | 0.0686087488218199  | AGIWUR28619 |
| N2                                                                                                                                           | CT | II | 4948154 | 4949527 | WBGene00006619 | try-1     | ZK546.15  | -0.141786542652065  |             |
| AGIWUR1091                                                                                                                                   |    |    |         |         |                |           |           |                     |             |
| N2                                                                                                                                           | CT | II | 4949902 | 4953488 | WBGene00006997 | zyg-12    | ZK546.1   | 0.0142694220895336  |             |
| AGIWUR32075;AGIWUR42593                                                                                                                      |    |    |         |         |                |           |           |                     |             |
| N2                                                                                                                                           | CT | II | 4953589 | 4954503 | WBGene00003580 | ndx-3     | Y38A8.1   | -0.134408497646113  | AGIWUR15903 |



|                                                                                                                                   |    |    |         |         |                |          |          |                     |             |
|-----------------------------------------------------------------------------------------------------------------------------------|----|----|---------|---------|----------------|----------|----------|---------------------|-------------|
| N2                                                                                                                                | CT | II | 4954480 | 4955427 | WBGene00003949 | pbs-3    | Y38A8.2  | -0.0689145343655095 |             |
| AGIWUR4506;AGIWUR7923                                                                                                             |    |    |         |         |                |          |          |                     |             |
| N2                                                                                                                                | CT | II | 4955646 | 4959876 | WBGene00006737 | ulp-2    | Y38A8.3  | 0.0670714924138203  | AGIWUR9197  |
| N2                                                                                                                                | CT | II | 4969186 | 4988934 | WBGene00020867 | shc-2    | T27F7.2  | 0.163207772304059   |             |
| AGIWUR4201;AGIWUR16312;AGIWUR17522;AGIWUR25678                                                                                    |    |    |         |         |                |          |          |                     |             |
| N2                                                                                                                                | CT | II | 4990831 | 4993580 | WBGene00020868 | eif-1    | T27F7.3  | -0.0581832582346626 |             |
| AGIWUR8012;AGIWUR8543;AGIWUR26232;AGIWUR26466                                                                                     |    |    |         |         |                |          |          |                     |             |
| N2                                                                                                                                | CT | II | 4994002 | 4995607 | WBGene00020866 | vps-24   | T27F7.1  | -0.0559410657662482 |             |
| AGIWUR197;AGIWUR18963;AGIWUR28840                                                                                                 |    |    |         |         |                |          |          |                     |             |
| N2                                                                                                                                | CT | II | 4995551 | 4998035 | WBGene00004382 | rnh-1.0  | F59A6.6  | -0.101586525824903  |             |
| AGIWUR10797;AGIWUR42154                                                                                                           |    |    |         |         |                |          |          |                     |             |
| N2                                                                                                                                | CT | II | 4998007 | 4998757 | WBGene00044664 | F59A6.11 | F59A6.11 | -0.106942252538925  |             |
| AGIWUR3207;AGIWUR22750;AGIWUR28950;AGIWUR37911;AGIWUR43828                                                                        |    |    |         |         |                |          |          |                     |             |
| N2                                                                                                                                | CT | II | 4999520 | 5003806 | WBGene00019087 | F59A6.5  | F59A6.5  | -0.117367011786893  | AGIWUR27627 |
| N2                                                                                                                                | CT | II | 5003960 | 5004849 | WBGene00044385 | F59A6.10 | F59A6.10 |                     |             |
| -0.00936423617389082                                                                                                              |    |    |         |         |                |          |          |                     |             |
| AGIWUR1690;AGIWUR3674;AGIWUR12293;AGIWUR17634;AGIWUR18276;AGIWUR24820;AGIWUR29279;AGIWUR29498;AGIWUR31744;AGIWUR32928;AGIWUR42515 |    |    |         |         |                |          |          |                     |             |
| N2                                                                                                                                | CT | II | 5005081 | 5008068 | WBGene00019086 | F59A6.4  | F59A6.4  | 0.154883211768976   | AGIWUR44174 |
| N2                                                                                                                                | CT | II | 5008341 | 5011179 | WBGene00019085 | F59A6.3  | F59A6.3  | 0.107856515090945   |             |
| AGIWUR14498;AGIWUR29885;AGIWUR44263                                                                                               |    |    |         |         |                |          |          |                     |             |
| N2                                                                                                                                | CT | II | 5011523 | 5012078 | WBGene00044665 | F59A6.12 | F59A6.12 | 0.00955746514977029 |             |
| AGIWUR6143;AGIWUR21365                                                                                                            |    |    |         |         |                |          |          |                     |             |
| N2                                                                                                                                | CT | II | 5014699 | 5015324 | WBGene00019084 | F59A6.2  | F59A6.2  | 0.257144366678062   | AGIWUR27186 |
| N2                                                                                                                                | CT | II | 5022764 | 5029982 | WBGene00003822 | nsy-1    | F59A6.1  | -0.020886262847613  | AGIWUR7127  |
| N2                                                                                                                                | CT | II | 5029942 | 5031712 | WBGene00018014 | F33G12.2 | F33G12.2 | -0.071668669110819  |             |
| AGIWUR1431;AGIWUR6223;AGIWUR12852;AGIWUR14295;AGIWUR14922;AGIWUR15737;AGIWUR24470;AGIWUR34893;AGIWUR41448;AGIWUR44513             |    |    |         |         |                |          |          |                     |             |
| N2                                                                                                                                | CT | II | 5031757 | 5034035 | WBGene00018015 | F33G12.3 | F33G12.3 | -0.0178183633786695 |             |
| AGIWUR559;AGIWUR909;AGIWUR6263;AGIWUR23996;AGIWUR37724                                                                            |    |    |         |         |                |          |          |                     |             |
| N2                                                                                                                                | CT | II | 5034142 | 5036439 | WBGene00018016 | lrr-1    | F33G12.4 | 0.139611728482485   |             |
| AGIWUR20211                                                                                                                       |    |    |         |         |                |          |          |                     |             |
| N2                                                                                                                                | CT | II | 5036561 | 5040196 | WBGene00018017 | golg-2   | F33G12.5 | 0.0263177462290454  |             |
| AGIWUR38302                                                                                                                       |    |    |         |         |                |          |          |                     |             |
| N2                                                                                                                                | CT | II | 5040208 | 5040681 | WBGene00044666 | F33G12.7 | F33G12.7 | -0.17490192581954   |             |
| AGIWUR11782;AGIWUR22608                                                                                                           |    |    |         |         |                |          |          |                     |             |
| N2                                                                                                                                | CT | II | 5049915 | 5053966 | WBGene00018018 | F33G12.6 | F33G12.6 | -0.0275968978110077 |             |
| AGIWUR7871;AGIWUR12854;AGIWUR35039;AGIWUR35780                                                                                    |    |    |         |         |                |          |          |                     |             |
| N2                                                                                                                                | CT | II | 5054084 | 5055338 | WBGene00002068 | ify-1    | C27A2.3  | 0.317565131352303   | AGIWUR37903 |

|                                                                                                |    |    |         |         |                |          |          |                      |             |
|------------------------------------------------------------------------------------------------|----|----|---------|---------|----------------|----------|----------|----------------------|-------------|
| N2                                                                                             | CT | II | 5055616 | 5056214 | WBGene00004434 | rp1-22   | C27A2.2  | -0.119988967980923   |             |
| AGIWUR8338;AGIWUR19216;AGIWUR25761;AGIWUR35665;AGIWUR36144;AGIWUR39113;AGIWUR39990;AGIWUR40550 |    |    |         |         |                |          |          |                      |             |
| N2                                                                                             | CT | II | 5056211 | 5058113 | WBGene00206373 | C27A2.12 | C27A2.12 | -0.270806161871142   |             |
| AGIWUR25367                                                                                    |    |    |         |         |                |          |          |                      |             |
| N2                                                                                             | CT | II | 5062129 | 5067116 | WBGene00016151 | smc-5    | C27A2.1  | 0.250234159338001    |             |
| AGIWUR13886;AGIWUR34831;AGIWUR36227                                                            |    |    |         |         |                |          |          |                      |             |
| N2                                                                                             | CT | II | 5067088 | 5067980 | WBGene00044387 | C27A2.8  | C27A2.8  | -0.242822036977882   |             |
| AGIWUR9687;AGIWUR23394;AGIWUR34194;AGIWUR44428                                                 |    |    |         |         |                |          |          |                      |             |
| N2                                                                                             | CT | II | 5068648 | 5069625 | WBGene00016153 | C27A2.5  | C27A2.5  | 0.118053020518102    | AGIWUR20299 |
| N2                                                                                             | CT | II | 5069764 | 5071365 | WBGene00044386 | C27A2.7  | C27A2.7  | -0.0905254433811855  |             |
| AGIWUR320;AGIWUR7549;AGIWUR32727                                                               |    |    |         |         |                |          |          |                      |             |
| N2                                                                                             | CT | II | 5078235 | 5081161 | WBGene00001102 | dsh-2    | C27A2.6  | -0.080675803741272   | AGIWUR6526  |
| N2                                                                                             | CT | II | 5081490 | 5083441 | WBGene00015454 | C04G6.4  | C04G6.4  | 0.00250732018032096  | AGIWUR13458 |
| N2                                                                                             | CT | II | 5083848 | 5091690 | WBGene00004040 | p1d-1    | C04G6.3  | 0.0570756644722028   |             |
| AGIWUR8787;AGIWUR15467                                                                         |    |    |         |         |                |          |          |                      |             |
| N2                                                                                             | CT | II | 5093214 | 5094263 | WBGene00015453 | C04G6.2  | C04G6.2  | 0.532715671243847    |             |
| AGIWUR3836;AGIWUR20839                                                                         |    |    |         |         |                |          |          |                      |             |
| N2                                                                                             | CT | II | 5094245 | 5095370 | WBGene00077489 | C04G6.13 | C04G6.13 | 0.205942619738488    |             |
| AGIWUR41830                                                                                    |    |    |         |         |                |          |          |                      |             |
| N2                                                                                             | CT | II | 5098770 | 5100242 | WBGene00015456 | C04G6.6  | C04G6.6  | 0.000112323224971789 | AGIWUR35921 |
| N2                                                                                             | CT | II | 5100412 | 5101801 | WBGene00015457 | C04G6.7  | C04G6.7  | 0.190604708000685    | AGIWUR1649  |
| N2                                                                                             | CT | II | 5103341 | 5103834 | WBGene00015459 | C04G6.11 | C04G6.11 | -0.115387436796      |             |
| AGIWUR4781                                                                                     |    |    |         |         |                |          |          |                      |             |
| N2                                                                                             | CT | II | 5104118 | 5108901 | WBGene00003402 | mpk-2    | C04G6.1  | -0.177608356698579   |             |
| AGIWUR2806;AGIWUR28220                                                                         |    |    |         |         |                |          |          |                      |             |
| N2                                                                                             | CT | II | 5110029 | 5112232 | WBGene00017277 | F09C12.2 | F09C12.2 |                      |             |
| 0.000949848930387631 AGIWUR15962                                                               |    |    |         |         |                |          |          |                      |             |
| N2                                                                                             | CT | II | 5112382 | 5114153 | WBGene00017279 | F09C12.8 | F09C12.8 | 0.188183627617722    |             |
| AGIWUR10339                                                                                    |    |    |         |         |                |          |          |                      |             |
| N2                                                                                             | CT | II | 5116033 | 5118276 | WBGene00017278 | F09C12.6 | F09C12.6 | 0.324410184891036    |             |
| AGIWUR25931                                                                                    |    |    |         |         |                |          |          |                      |             |
| N2                                                                                             | CT | II | 5130384 | 5133215 | WBGene00001588 | ggr-3    | F09C12.1 | -0.342234141904819   |             |
| AGIWUR28057                                                                                    |    |    |         |         |                |          |          |                      |             |
| N2                                                                                             | CT | II | 5136717 | 5138568 | WBGene00019023 | F58A6.2  | F58A6.2  | 0.00819855912899037  |             |
| AGIWUR11752;AGIWUR14733;AGIWUR23481;AGIWUR27769;AGIWUR37991                                    |    |    |         |         |                |          |          |                      |             |
| N2                                                                                             | CT | II | 5138648 | 5142036 | WBGene00003547 | nas-29   | F58A6.4  | 0.0970539676478368   |             |
| AGIWUR2730;AGIWUR7599;AGIWUR17429;AGIWUR25274;AGIWUR27316;AGIWUR34128                          |    |    |         |         |                |          |          |                      |             |
| N2                                                                                             | CT | II | 5142343 | 5144021 | WBGene00019022 | F58A6.1  | F58A6.1  | 0.264208226137315    | AGIWUR19021 |
| N2                                                                                             | CT | II | 5146967 | 5148465 | WBGene00019024 | F58A6.5  | F58A6.5  | 0.133526917190597    |             |

AGIWUR18647;AGIWUR28907;AGIWUR29036

|    |    |    |         |         |                |        |          |                   |             |
|----|----|----|---------|---------|----------------|--------|----------|-------------------|-------------|
| N2 | CT | II | 5148530 | 5150853 | WBGene00019025 | srb-16 | F58A6.6  | 0.218241173722061 | AGIWUR31347 |
| N2 | CT | II | 5153119 | 5154638 | WBGene00019027 | srb-12 | F58A6.10 | 0.219353719810434 |             |

AGIWUR35711

|    |    |    |         |         |                |        |          |                     |  |
|----|----|----|---------|---------|----------------|--------|----------|---------------------|--|
| N2 | CT | II | 5155436 | 5157625 | WBGene00019028 | srb-13 | F58A6.11 | -0.0423168970776473 |  |
|----|----|----|---------|---------|----------------|--------|----------|---------------------|--|

AGIWUR31294

|    |    |    |         |         |                |          |          |                   |             |
|----|----|----|---------|---------|----------------|----------|----------|-------------------|-------------|
| N2 | CT | II | 5158566 | 5158988 | WBGene00019026 | F58A6.9  | F58A6.9  | 0.173877307025887 | AGIWUR42574 |
| N2 | CT | II | 5159717 | 5161130 | WBGene00044388 | C27D6.11 | C27D6.11 | 0.383466628188863 |             |

AGIWUR40723

|    |    |    |         |         |                |       |          |                     |             |
|----|----|----|---------|---------|----------------|-------|----------|---------------------|-------------|
| N2 | CT | II | 5161995 | 5163383 | WBGene00005070 | srb-5 | C27D6.6  | 0.478484115319826   | AGIWUR40918 |
| N2 | CT | II | 5163868 | 5165020 | WBGene00005069 | srb-4 | C27D6.7  | 0.202057492916571   | AGIWUR34426 |
| N2 | CT | II | 5165315 | 5166838 | WBGene00005068 | srb-3 | C27D6.8  | -0.0567074106679293 | AGIWUR21541 |
| N2 | CT | II | 5168110 | 5169324 | WBGene00005067 | srb-2 | C27D6.9  | -0.597999475590875  | AGIWUR22739 |
| N2 | CT | II | 5169726 | 5171032 | WBGene00005066 | srb-1 | C27D6.10 | -0.0446063319150376 |             |

AGIWUR9291

|    |    |    |         |         |                |         |         |                       |            |
|----|----|----|---------|---------|----------------|---------|---------|-----------------------|------------|
| N2 | CT | II | 5171910 | 5177440 | WBGene00016160 | C27D6.1 | C27D6.1 | -0.000632615224464672 | AGIWUR9081 |
| N2 | CT | II | 5179034 | 5187569 | WBGene00016162 | crh-2   | C27D6.4 | 0.014242062614354     |            |

AGIWUR6531;AGIWUR9803;AGIWUR31953

|    |    |    |         |         |                |          |          |                   |  |
|----|----|----|---------|---------|----------------|----------|----------|-------------------|--|
| N2 | CT | II | 5195804 | 5199257 | WBGene00016416 | C34F11.5 | C34F11.5 | 0.175104437114882 |  |
|----|----|----|---------|---------|----------------|----------|----------|-------------------|--|

AGIWUR10404

|    |    |    |         |         |                |        |          |                   |  |
|----|----|----|---------|---------|----------------|--------|----------|-------------------|--|
| N2 | CT | II | 5199763 | 5200223 | WBGene00003443 | msp-50 | C34F11.4 | 0.383712986038649 |  |
|----|----|----|---------|---------|----------------|--------|----------|-------------------|--|

AGIWUR44471

|    |    |    |         |         |                |        |          |                   |  |
|----|----|----|---------|---------|----------------|--------|----------|-------------------|--|
| N2 | CT | II | 5203322 | 5209799 | WBGene00016415 | ampd-1 | C34F11.3 | 0.114596767399396 |  |
|----|----|----|---------|---------|----------------|--------|----------|-------------------|--|

AGIWUR3205;AGIWUR3377;AGIWUR8618;AGIWUR26632;AGIWUR28743;AGIWUR29238;AGIWUR30148

|    |    |    |         |         |                |          |          |                   |  |
|----|----|----|---------|---------|----------------|----------|----------|-------------------|--|
| N2 | CT | II | 5209780 | 5210978 | WBGene00016417 | C34F11.8 | C34F11.8 | 0.259879129596657 |  |
|----|----|----|---------|---------|----------------|----------|----------|-------------------|--|

AGIWUR22884

|    |    |    |         |         |                |          |          |                   |  |
|----|----|----|---------|---------|----------------|----------|----------|-------------------|--|
| N2 | CT | II | 5212270 | 5212789 | WBGene00016414 | C34F11.2 | C34F11.2 | 0.312866215975109 |  |
|----|----|----|---------|---------|----------------|----------|----------|-------------------|--|

AGIWUR12844

|    |    |    |         |         |                |          |          |                   |  |
|----|----|----|---------|---------|----------------|----------|----------|-------------------|--|
| N2 | CT | II | 5212932 | 5213932 | WBGene00016413 | C34F11.1 | C34F11.1 | 0.297897438407161 |  |
|----|----|----|---------|---------|----------------|----------|----------|-------------------|--|

AGIWUR34064

|    |    |    |         |         |                |       |          |                    |  |
|----|----|----|---------|---------|----------------|-------|----------|--------------------|--|
| N2 | CT | II | 5214441 | 5225377 | WBGene00001101 | dsh-1 | C34F11.9 | 0.0791757635793804 |  |
|----|----|----|---------|---------|----------------|-------|----------|--------------------|--|

AGIWUR2992;AGIWUR5381;AGIWUR18371;AGIWUR19496;AGIWUR37180;AGIWUR42341;AGIWUR43485;AGIWUR43880

|    |    |    |         |         |                |         |         |                    |             |
|----|----|----|---------|---------|----------------|---------|---------|--------------------|-------------|
| N2 | CT | II | 5230081 | 5230501 | WBGene00017148 | EGAP2.2 | EGAP2.2 | -0.136462800635517 | AGIWUR38655 |
|----|----|----|---------|---------|----------------|---------|---------|--------------------|-------------|

|    |    |    |         |         |                |         |         |                    |             |
|----|----|----|---------|---------|----------------|---------|---------|--------------------|-------------|
| N2 | CT | II | 5231424 | 5233273 | WBGene00017147 | EGAP2.1 | EGAP2.1 | -0.097314969653489 | AGIWUR19126 |
|----|----|----|---------|---------|----------------|---------|---------|--------------------|-------------|

|    |    |    |         |         |                |       |         |                     |             |
|----|----|----|---------|---------|----------------|-------|---------|---------------------|-------------|
| N2 | CT | II | 5233154 | 5235926 | WBGene00004020 | pho-1 | EGAP2.3 | -0.0532932193227413 | AGIWUR29936 |
|----|----|----|---------|---------|----------------|-------|---------|---------------------|-------------|

|    |    |    |         |         |                |       |         |                     |  |
|----|----|----|---------|---------|----------------|-------|---------|---------------------|--|
| N2 | CT | II | 5236258 | 5238514 | WBGene00004023 | pho-4 | T16D1.2 | -0.0571630939342365 |  |
|----|----|----|---------|---------|----------------|-------|---------|---------------------|--|

AGIWUR3712;AGIWUR12698;AGIWUR37571;AGIWUR39791

|    |    |    |         |         |                |         |         |                     |             |
|----|----|----|---------|---------|----------------|---------|---------|---------------------|-------------|
| N2 | CT | II | 5241233 | 5241660 | WBGene00020539 | T16D1.1 | T16D1.1 | -0.0887440784648303 | AGIWUR41030 |
|----|----|----|---------|---------|----------------|---------|---------|---------------------|-------------|

|    |    |    |         |         |                |       |          |                     |  |
|----|----|----|---------|---------|----------------|-------|----------|---------------------|--|
| N2 | CT | II | 5242452 | 5246837 | WBGene00004221 | ptr-6 | C54A12.1 | -0.0296031045888014 |  |
|----|----|----|---------|---------|----------------|-------|----------|---------------------|--|

AGIWUR4575;AGIWUR29782;AGIWUR33750;AGIWUR35269;AGIWUR36517;AGIWUR42135  
 N2 CT II 5251121 5255529 WBGene00016909 frpr-4 C54A12.2 -0.402801373921648  
 AGIWUR34619  
 N2 CT II 5270406 5271845 WBGene00016911 drn-1 C54A12.4 -0.0525197897817904  
 AGIWUR19420  
 N2 CT II 5278137 5282525 WBGene00022781 pmt-1 ZK622.3 0.0584873267720294  
 AGIWUR3942;AGIWUR11991;AGIWUR15724  
 N2 CT II 5285329 5288908 WBGene00001806 gur-5 ZK622.2 -0.11198450632663 AGIWUR8811  
 N2 CT II 5289442 5290326 WBGene00044667 ZK622.5 ZK622.5 -0.218770770541665  
 AGIWUR12678;AGIWUR42990  
 N2 CT II 5292683 5293306 WBGene00022782 ZK622.4 ZK622.4 0.0601679514943534  
 AGIWUR12395;AGIWUR36745;AGIWUR38572;AGIWUR41852  
 N2 CT II 5293800 5295612 WBGene00022780 ZK622.1 ZK622.1 0.0258353968702814 AGIWUR44091  
 N2 CT II 5312046 5319234 WBGene00001538 gcy-12 F08B1.2 0.0967480345894591  
 AGIWUR12960;AGIWUR42287  
 N2 CT II 5323005 5340826 WBGene00006923 vhp-1 F08B1.1 0.0768934768586131  
 AGIWUR5649;AGIWUR6552;AGIWUR7813;AGIWUR10624;AGIWUR11567;AGIWUR13821;AGIWUR15922;AGIWUR18468;AGIWUR20242;AG  
 IWUR21499;AGIWUR26859;AGIWUR29335;AGIWUR29995;AGIWUR38653;AGIWUR41812;AGIWUR42052;AGIWUR44227  
 N2 CT II 5342663 5344875 WBGene00017291 F09E5.14 F09E5.14 -0.140623559362492  
 AGIWUR32159  
 N2 CT II 5350669 5351993 WBGene00017286 F09E5.8 F09E5.8 -0.217769870723711 AGIWUR5675  
 N2 CT II 5352087 5353759 WBGene00017285 F09E5.7 F09E5.7 -0.0454927105064691 AGIWUR39499  
 N2 CT II 5355712 5357341 WBGene00005226 srg-69 F09E5.4 -0.0603610145410816 AGIWUR24261  
 N2 CT II 5357308 5358187 WBGene00017289 F09E5.11 F09E5.11 -0.289811892613237  
 AGIWUR3030  
 N2 CT II 5358695 5359469 WBGene00017293 bmy-1 F09E5.17 -0.238140913851311  
 AGIWUR7837  
 N2 CT II 5359552 5372122 WBGene00017284 sec-6 F09E5.5 -0.11285888147394 AGIWUR1999  
 N2 CT II 5371980 5373433 WBGene00000094 agt-2 F09E5.13 -0.32423231254462  
 AGIWUR5697  
 N2 CT II 5373997 5375177 WBGene00017283 F09E5.3 F09E5.3 -0.0586934845932969 AGIWUR233  
 N2 CT II 5375267 5377111 WBGene00017282 algn-2 F09E5.2 -0.149004066550107  
 AGIWUR12610;AGIWUR34310  
 N2 CT II 5378068 5379632 WBGene00006434 prdx-2 F09E5.15 -0.146469299446565  
 AGIWUR2121  
 N2 CT II 5380027 5384169 WBGene00004034 pkc-3 F09E5.1 -0.0822721396362383 AGIWUR11029  
 N2 CT II 5384137 5387317 WBGene00017136 ccpp-6 EEED8.6 -0.0601653875613133 AGIWUR7326  
 N2 CT II 5387411 5388830 WBGene00004701 rsp-4 EEED8.7 0.0467513959388608  
 AGIWUR14445;AGIWUR27407;AGIWUR28507

|                                                                       |    |    |         |         |                 |           |          |                      |             |
|-----------------------------------------------------------------------|----|----|---------|---------|-----------------|-----------|----------|----------------------|-------------|
| N2                                                                    | CT | II | 5388829 | 5390104 | WBGene00003583  | ndx-6     | EEED8.8  | -0.0883469375543058  |             |
| AGIWUR13822;AGIWUR15361;AGIWUR34198;AGIWUR39738                       |    |    |         |         |                 |           |          |                      |             |
| N2                                                                    | CT | II | 5390233 | 5393190 | WBGene00017144  | brap-2    | EEED8.16 | -0.101529661086524   |             |
| AGIWUR33548                                                           |    |    |         |         |                 |           |          |                      |             |
| N2                                                                    | CT | II | 5393293 | 5395694 | WBGene00017137  | pink-1    | EEED8.9  | -0.198671404504537   | AGIWUR43636 |
| N2                                                                    | CT | II | 5395889 | 5398902 | WBGene00017138  | EEED8.10  | EEED8.10 | -0.0907556675441583  |             |
| AGIWUR13646;AGIWUR29548;AGIWUR32140                                   |    |    |         |         |                 |           |          |                      |             |
| N2                                                                    | CT | II | 5399538 | 5405810 | WBGene00003393  | mog-5     | EEED8.5  | 0.171687431669206    | AGIWUR17482 |
| N2                                                                    | CT | II | 5405819 | 5407634 | WBGene00017139  | cllec-141 | EEED8.11 | 0.0402066316412277   |             |
| AGIWUR19066                                                           |    |    |         |         |                 |           |          |                      |             |
| N2                                                                    | CT | II | 5408260 | 5409024 | WBGene00017140  | EEED8.12  | EEED8.12 | 0.259499601168432    |             |
| AGIWUR11005                                                           |    |    |         |         |                 |           |          |                      |             |
| N2                                                                    | CT | II | 5410467 | 5411235 | WBGene00017135  | EEED8.4   | EEED8.4  | -0.202026724585561   | AGIWUR16324 |
| N2                                                                    | CT | II | 5411542 | 5412174 | WBGene00017141  | EEED8.13  | EEED8.13 | -0.272340523465457   |             |
| AGIWUR306                                                             |    |    |         |         |                 |           |          |                      |             |
| N2                                                                    | CT | II | 5412196 | 5412610 | WBGene000194696 | EEED8.18  | EEED8.18 | 0.086618216976138    |             |
| AGIWUR43040                                                           |    |    |         |         |                 |           |          |                      |             |
| N2                                                                    | CT | II | 5414207 | 5415580 | WBGene00017134  | EEED8.3   | EEED8.3  | -0.0986979947862796  | AGIWUR17225 |
| N2                                                                    | CT | II | 5416714 | 5418377 | WBGene00017133  | EEED8.2   | EEED8.2  | -0.480988869467464   | AGIWUR40222 |
| N2                                                                    | CT | II | 5419233 | 5421093 | WBGene00017143  | EEED8.15  | EEED8.15 | -0.116476680926517   |             |
| AGIWUR2513                                                            |    |    |         |         |                 |           |          |                      |             |
| N2                                                                    | CT | II | 5421248 | 5422737 | WBGene00017132  | tofu-6    | EEED8.1  | -0.0120908244977258  | AGIWUR23738 |
| N2                                                                    | CT | II | 5422735 | 5423858 | WBGene00017219  | F07F6.7   | F07F6.7  | -0.057563923021867   | AGIWUR20957 |
| N2                                                                    | CT | II | 5424141 | 5425733 | WBGene00017220  | F07F6.8   | F07F6.8  | 0.00207947324897617  | AGIWUR16885 |
| N2                                                                    | CT | II | 5425750 | 5429572 | WBGene00017217  | F07F6.4   | F07F6.4  | -0.00230654757295712 |             |
| AGIWUR4465;AGIWUR5507;AGIWUR9414;AGIWUR22035;AGIWUR28235;AGIWUR34889  |    |    |         |         |                 |           |          |                      |             |
| N2                                                                    | CT | II | 5430392 | 5431422 | WBGene00017216  | F07F6.2   | F07F6.2  | 0.122184453613738    |             |
| AGIWUR3809;AGIWUR9682;AGIWUR16521;AGIWUR28895;AGIWUR36864;AGIWUR42556 |    |    |         |         |                 |           |          |                      |             |
| N2                                                                    | CT | II | 5431476 | 5433048 | WBGene00006005  | srx-114   | F07F6.9  | -0.0440860836387094  | AGIWUR27966 |
| N2                                                                    | CT | II | 5435724 | 5436933 | WBGene00017218  | dct-5     | F07F6.5  | 0.105601399869363    |             |
| AGIWUR15543;AGIWUR21500;AGIWUR27471                                   |    |    |         |         |                 |           |          |                      |             |
| N2                                                                    | CT | II | 5437891 | 5440256 | WBGene00017215  | F07F6.1   | F07F6.1  | 0.282990691509568    | AGIWUR12415 |
| N2                                                                    | CT | II | 5440243 | 5446705 | WBGene00003774  | nmr-1     | F07F6.6  | 0.0841548011434003   | AGIWUR35436 |
| N2                                                                    | CT | II | 5447681 | 5448634 | WBGene00023407  | cex-1     | F56D1.6  | -0.0450803460423295  | AGIWUR41097 |
| N2                                                                    | CT | II | 5453847 | 5455977 | WBGene00000969  | dhs-5     | F56D1.5  | -0.0216284654728192  | AGIWUR3066  |
| N2                                                                    | CT | II | 5456305 | 5458609 | WBGene00000935  | daz-1     | F56D1.7  | -0.18146336672325    | AGIWUR29003 |
| N2                                                                    | CT | II | 5466363 | 5473812 | WBGene00000548  | clr-1     | F56D1.4  | 0.192899011034225    |             |
| AGIWUR15780;AGIWUR32701;AGIWUR40029                                   |    |    |         |         |                 |           |          |                      |             |
| N2                                                                    | CT | II | 5474373 | 5475475 | WBGene00018961  | mrps-16   | F56D1.3  | -0.186338478791471   |             |

AGIWUR20329;AGIWUR22842;AGIWUR30295

|    |    |    |         |         |                |        |         |                      |            |
|----|----|----|---------|---------|----------------|--------|---------|----------------------|------------|
| N2 | CT | II | 5475409 | 5478524 | WBGene00018960 | ilcr-2 | F56D1.2 | -0.00598892935247619 | AGIWUR3916 |
|----|----|----|---------|---------|----------------|--------|---------|----------------------|------------|

|    |    |    |         |         |                |         |         |                    |  |
|----|----|----|---------|---------|----------------|---------|---------|--------------------|--|
| N2 | CT | II | 5478578 | 5480490 | WBGene00018959 | F56D1.1 | F56D1.1 | -0.106285318868046 |  |
|----|----|----|---------|---------|----------------|---------|---------|--------------------|--|

AGIWUR12541;AGIWUR32062;AGIWUR39277

|    |    |    |         |         |                |       |          |                    |  |
|----|----|----|---------|---------|----------------|-------|----------|--------------------|--|
| N2 | CT | II | 5480591 | 5482041 | WBGene00017394 | cal-8 | F12A10.5 | -0.109821955700315 |  |
|----|----|----|---------|---------|----------------|-------|----------|--------------------|--|

AGIWUR35593

|    |    |    |         |         |                |       |          |                    |  |
|----|----|----|---------|---------|----------------|-------|----------|--------------------|--|
| N2 | CT | II | 5488151 | 5490606 | WBGene00017393 | nep-5 | F12A10.4 | 0.0378168484550114 |  |
|----|----|----|---------|---------|----------------|-------|----------|--------------------|--|

AGIWUR35809

|    |    |    |         |         |                |        |          |                   |  |
|----|----|----|---------|---------|----------------|--------|----------|-------------------|--|
| N2 | CT | II | 5491111 | 5493192 | WBGene00017392 | bas1-2 | F12A10.3 | 0.203861864789841 |  |
|----|----|----|---------|---------|----------------|--------|----------|-------------------|--|

AGIWUR23641

|    |    |    |         |         |                |          |          |                    |  |
|----|----|----|---------|---------|----------------|----------|----------|--------------------|--|
| N2 | CT | II | 5494085 | 5494505 | WBGene00017395 | F12A10.6 | F12A10.6 | -0.219739010385037 |  |
|----|----|----|---------|---------|----------------|----------|----------|--------------------|--|

AGIWUR41057

|    |    |    |         |         |                |          |          |                    |  |
|----|----|----|---------|---------|----------------|----------|----------|--------------------|--|
| N2 | CT | II | 5497285 | 5498256 | WBGene00017396 | F12A10.7 | F12A10.7 | 0.0131112919836829 |  |
|----|----|----|---------|---------|----------------|----------|----------|--------------------|--|

AGIWUR25210

|    |    |    |         |         |                |          |          |                    |  |
|----|----|----|---------|---------|----------------|----------|----------|--------------------|--|
| N2 | CT | II | 5498851 | 5501409 | WBGene00017397 | F12A10.8 | F12A10.8 | -0.148538012546789 |  |
|----|----|----|---------|---------|----------------|----------|----------|--------------------|--|

AGIWUR33792

|    |    |    |         |         |                |       |         |                    |            |
|----|----|----|---------|---------|----------------|-------|---------|--------------------|------------|
| N2 | CT | II | 5501633 | 5503908 | WBGene00001511 | fzy-1 | ZK177.6 | 0.0511015059638265 | AGIWUR9934 |
|----|----|----|---------|---------|----------------|-------|---------|--------------------|------------|

|    |    |    |         |         |                |          |         |                    |  |
|----|----|----|---------|---------|----------------|----------|---------|--------------------|--|
| N2 | CT | II | 5503966 | 5506115 | WBGene00000375 | cyp-44A1 | ZK177.5 | 0.0567584057741835 |  |
|----|----|----|---------|---------|----------------|----------|---------|--------------------|--|

AGIWUR8962;AGIWUR13879;AGIWUR35034;AGIWUR38693;AGIWUR43217

|    |    |    |         |         |                |         |         |                     |  |
|----|----|----|---------|---------|----------------|---------|---------|---------------------|--|
| N2 | CT | II | 5505870 | 5509056 | WBGene00022672 | ZK177.4 | ZK177.4 | -0.0783010755943252 |  |
|----|----|----|---------|---------|----------------|---------|---------|---------------------|--|

AGIWUR12615;AGIWUR36298

|    |    |    |         |         |                |         |         |                   |  |
|----|----|----|---------|---------|----------------|---------|---------|-------------------|--|
| N2 | CT | II | 5509028 | 5513775 | WBGene00022673 | ZK177.8 | ZK177.8 | 0.023812610663307 |  |
|----|----|----|---------|---------|----------------|---------|---------|-------------------|--|

AGIWUR15416;AGIWUR18492;AGIWUR22202;AGIWUR33128

|    |    |    |         |         |                |         |         |                   |             |
|----|----|----|---------|---------|----------------|---------|---------|-------------------|-------------|
| N2 | CT | II | 5515861 | 5517133 | WBGene00022671 | ZK177.3 | ZK177.3 | -1.51689312479028 | AGIWUR21731 |
|----|----|----|---------|---------|----------------|---------|---------|-------------------|-------------|

|    |    |    |         |         |                |         |         |                  |             |
|----|----|----|---------|---------|----------------|---------|---------|------------------|-------------|
| N2 | CT | II | 5517157 | 5517743 | WBGene00022674 | ZK177.9 | ZK177.9 | 1.30716929419231 | AGIWUR36184 |
|----|----|----|---------|---------|----------------|---------|---------|------------------|-------------|

|    |    |    |         |         |                |          |          |                    |  |
|----|----|----|---------|---------|----------------|----------|----------|--------------------|--|
| N2 | CT | II | 5522937 | 5523488 | WBGene00044390 | ZK177.11 | ZK177.11 | 0.0565159391995422 |  |
|----|----|----|---------|---------|----------------|----------|----------|--------------------|--|

AGIWUR11132;AGIWUR14057;AGIWUR25550;AGIWUR38479;AGIWUR44677

|    |    |    |         |         |                |        |          |                    |  |
|----|----|----|---------|---------|----------------|--------|----------|--------------------|--|
| N2 | CT | II | 5524200 | 5525379 | WBGene00006554 | tbx-35 | ZK177.10 | -0.186550004029736 |  |
|----|----|----|---------|---------|----------------|--------|----------|--------------------|--|

AGIWUR8139;AGIWUR44660

|    |    |    |         |         |                |         |         |                   |            |
|----|----|----|---------|---------|----------------|---------|---------|-------------------|------------|
| N2 | CT | II | 5528141 | 5529637 | WBGene00022669 | ZK177.1 | ZK177.1 | -0.23872651438468 | AGIWUR3590 |
|----|----|----|---------|---------|----------------|---------|---------|-------------------|------------|

|    |    |    |         |         |                |        |          |                     |  |
|----|----|----|---------|---------|----------------|--------|----------|---------------------|--|
| N2 | CT | II | 5530501 | 5530928 | WBGene00002121 | ins-38 | C17C3.20 | -0.0187544463177538 |  |
|----|----|----|---------|---------|----------------|--------|----------|---------------------|--|

AGIWUR10095;AGIWUR17770;AGIWUR24592;AGIWUR26179;AGIWUR31150

|    |    |    |         |         |                |         |         |                     |            |
|----|----|----|---------|---------|----------------|---------|---------|---------------------|------------|
| N2 | CT | II | 5531313 | 5532259 | WBGene00015892 | C17C3.9 | C17C3.9 | -0.0662389554998599 | AGIWUR3551 |
|----|----|----|---------|---------|----------------|---------|---------|---------------------|------------|

|    |    |    |         |         |                |        |         |                     |             |
|----|----|----|---------|---------|----------------|--------|---------|---------------------|-------------|
| N2 | CT | II | 5532857 | 5533738 | WBGene00001965 | hlh-26 | C17C3.8 | 0.00561908495280772 | AGIWUR33494 |
|----|----|----|---------|---------|----------------|--------|---------|---------------------|-------------|

|    |    |    |         |         |                |          |          |                    |  |
|----|----|----|---------|---------|----------------|----------|----------|--------------------|--|
| N2 | CT | II | 5537835 | 5539004 | WBGene00015893 | C17C3.11 | C17C3.11 | 0.0643513850372273 |  |
|----|----|----|---------|---------|----------------|----------|----------|--------------------|--|

AGIWUR2886

|    |    |    |         |         |                |        |          |                   |  |
|----|----|----|---------|---------|----------------|--------|----------|-------------------|--|
| N2 | CT | II | 5544585 | 5544851 | WBGene00002096 | ins-13 | C17C3.18 | 0.102095109840439 |  |
|----|----|----|---------|---------|----------------|--------|----------|-------------------|--|

AGIWUR11025;AGIWUR15472

|    |    |    |         |         |                |        |          |                   |  |
|----|----|----|---------|---------|----------------|--------|----------|-------------------|--|
| N2 | CT | II | 5544781 | 5547492 | WBGene00015894 | acdh-2 | C17C3.12 | 0.465209230492423 |  |
|----|----|----|---------|---------|----------------|--------|----------|-------------------|--|

AGIWUR10216;AGIWUR11158;AGIWUR11868;AGIWUR39769;AGIWUR44925  
 N2 CT II 5551833 5552335 WBGene00015890 C17C3.5 C17C3.5 0.0440033182649184 AGIWUR20466  
 N2 CT II 5554617 5555306 WBGene00002095 ins-12 C17C3.19 -0.235394784707214  
 AGIWUR1112;AGIWUR11658;AGIWUR22944;AGIWUR26429;AGIWUR44694  
 N2 CT II 5556761 5557088 WBGene00002094 ins-11 C17C3.4 -0.332051319068773 AGIWUR24660  
 N2 CT II 5561763 5563523 WBGene00015889 C17C3.3 C17C3.3 -0.0841749397239662 AGIWUR13473  
 N2 CT II 5570572 5574943 WBGene00015887 C17C3.1 C17C3.1 0.0178217248828965  
 AGIWUR655;AGIWUR1027;AGIWUR2276;AGIWUR3952;AGIWUR5419;AGIWUR9121;AGIWUR18932;AGIWUR33510;AGIWUR36819;AGIWUR  
 37926;AGIWUR38475;AGIWUR42256  
 N2 CT II 5578318 5579965 WBGene00020803 T25E4.1 T25E4.1 -0.0132234209247426  
 AGIWUR17629;AGIWUR39775  
 N2 CT II 5580125 5582409 WBGene00020804 T25E4.2 T25E4.2 0.468573586643902 AGIWUR34051  
 N2 CT II 5586165 5587651 WBGene00003097 lys-8 C17G10.5 -0.123617612389396  
 AGIWUR8095  
 N2 CT II 5587614 5589755 WBGene00270322 C17G10.13 C17G10.13 -0.151507722511344  
 AGIWUR40743  
 N2 CT II 5589186 5593628 WBGene00000383 cdc-14 C17G10.4 -0.00181664159115336  
 AGIWUR4060;AGIWUR6178;AGIWUR9427;AGIWUR23768;AGIWUR27886;AGIWUR37473;AGIWUR44066  
 N2 CT II 5594714 5596463 WBGene00015916 C17G10.2 C17G10.2 -0.23438903636702  
 AGIWUR5214  
 N2 CT II 5596547 5598449 WBGene00015915 C17G10.1 C17G10.1 -0.0517009805629787  
 AGIWUR10468;AGIWUR25020;AGIWUR29338  
 N2 CT II 5599930 5603294 WBGene00015918 C17G10.6 C17G10.6 -0.0883042489480781  
 AGIWUR4653;AGIWUR5160;AGIWUR9532;AGIWUR11414;AGIWUR33077;AGIWUR39820  
 N2 CT II 5606542 5607856 WBGene00015919 C17G10.7 C17G10.7 -0.191757182631195  
 AGIWUR34206  
 N2 CT II 5617122 5619319 WBGene00000970 dhs-6 C17G10.8 -0.196842322298663  
 AGIWUR41943  
 N2 CT II 5619590 5622483 WBGene00015920 eif-3.L C17G10.9 -0.128188573777328  
 AGIWUR6407  
 N2 CT II 5626316 5627263 WBGene00235269 F59E12.15 F59E12.15 -0.0670898848913453  
 AGIWUR35828  
 N2 CT II 5634528 5636926 WBGene00019123 F59E12.8 F59E12.8 -0.0380787684112889  
 AGIWUR11995  
 N2 CT II 5638381 5639752 WBGene00019119 F59E12.3 F59E12.3 -0.0915620445213117  
 AGIWUR18907;AGIWUR24208;AGIWUR40233;AGIWUR42077  
 N2 CT II 5640063 5647042 WBGene00019124 F59E12.9 F59E12.9 0.222430342460679  
 AGIWUR6420  
 N2 CT II 5647154 5647884 WBGene00019125 ddl-1 F59E12.10 -0.257364368903568

|                                                                                                                                                           |    |    |         |         |                |          |           |                     |
|-----------------------------------------------------------------------------------------------------------------------------------------------------------|----|----|---------|---------|----------------|----------|-----------|---------------------|
| AGIWUR42386                                                                                                                                               |    |    |         |         |                |          |           |                     |
| N2                                                                                                                                                        | CT | II | 5647986 | 5649472 | WBGene00019126 | sam-4    | F59E12.11 | 0.0037512383654974  |
| AGIWUR3369                                                                                                                                                |    |    |         |         |                |          |           |                     |
| N2                                                                                                                                                        | CT | II | 5649737 | 5654422 | WBGene00006988 | zyg-1    | F59E12.2  | -0.130171974333912  |
| AGIWUR21062                                                                                                                                               |    |    |         |         |                |          |           |                     |
| N2                                                                                                                                                        | CT | II | 5654515 | 5657371 | WBGene00019118 | F59E12.1 | F59E12.1  | 0.0929150932334952  |
| AGIWUR27965                                                                                                                                               |    |    |         |         |                |          |           |                     |
| N2                                                                                                                                                        | CT | II | 5657710 | 5659854 | WBGene00006402 | fut-3    | F59E12.13 | -0.0748596437240909 |
| AGIWUR857                                                                                                                                                 |    |    |         |         |                |          |           |                     |
| N2                                                                                                                                                        | CT | II | 5659937 | 5660786 | WBGene00016121 | C25H3.12 | C25H3.12  | -0.0822407040873987 |
| AGIWUR7009;AGIWUR11907;AGIWUR20481;AGIWUR34018                                                                                                            |    |    |         |         |                |          |           |                     |
| N2                                                                                                                                                        | CT | II | 5661167 | 5665243 | WBGene00016115 | mdt-26   | C25H3.6   | -0.0350227912063872 |
| AGIWUR1167;AGIWUR3321;AGIWUR12078;AGIWUR15580;AGIWUR22399;AGIWUR26846;AGIWUR31427;AGIWUR38315;AGIWUR40073;AGIWUR41078;AGIWUR41188;AGIWUR42279;AGIWUR44075 |    |    |         |         |                |          |           |                     |
| N2                                                                                                                                                        | CT | II | 5665408 | 5666278 | WBGene00044391 | C25H3.15 | C25H3.15  | 0.080312019779655   |
| AGIWUR31701;AGIWUR41371                                                                                                                                   |    |    |         |         |                |          |           |                     |
| N2                                                                                                                                                        | CT | II | 5666291 | 5666850 | WBGene00044392 | C25H3.16 | C25H3.16  | 0.0406045746501782  |
| AGIWUR1916;AGIWUR4138                                                                                                                                     |    |    |         |         |                |          |           |                     |
| N2                                                                                                                                                        | CT | II | 5666756 | 5668930 | WBGene00016116 | C25H3.7  | C25H3.7   | 0.094572077882356   |
| N2                                                                                                                                                        | CT | II | 5669788 | 5679276 | WBGene00016117 | C25H3.8  | C25H3.8   | 0.0677728208834312  |
| AGIWUR9610;AGIWUR19861;AGIWUR23395;AGIWUR35785;AGIWUR44190;AGIWUR44837                                                                                    |    |    |         |         |                |          |           |                     |
| N2                                                                                                                                                        | CT | II | 5680980 | 5682667 | WBGene00016114 | f1p-27   | C25H3.5   | -0.260746920767309  |
| N2                                                                                                                                                        | CT | II | 5684479 | 5689030 | WBGene00016120 | C25H3.11 | C25H3.11  | -0.148857858127306  |
| AGIWUR29501                                                                                                                                               |    |    |         |         |                |          |           |                     |
| N2                                                                                                                                                        | CT | II | 5690137 | 5691355 | WBGene00016118 | C25H3.9  | C25H3.9   | -0.0696055064683261 |
| AGIWUR1206;AGIWUR40397                                                                                                                                    |    |    |         |         |                |          |           |                     |
| N2                                                                                                                                                        | CT | II | 5691662 | 5693939 | WBGene00016113 | eif-2D   | C25H3.4   | -0.121361579578704  |
| N2                                                                                                                                                        | CT | II | 5694195 | 5695237 | WBGene00016112 | C25H3.3  | C25H3.3   | -0.0579167969051255 |
| N2                                                                                                                                                        | CT | II | 5695383 | 5696358 | WBGene00016123 | C25H3.14 | C25H3.14  | -0.0786263722794978 |
| AGIWUR41054                                                                                                                                               |    |    |         |         |                |          |           |                     |
| N2                                                                                                                                                        | CT | II | 5696585 | 5698969 | WBGene00016119 | C25H3.10 | C25H3.10  | -0.097601555636718  |
| AGIWUR16686                                                                                                                                               |    |    |         |         |                |          |           |                     |
| N2                                                                                                                                                        | CT | II | 5700170 | 5701408 | WBGene00016111 | C25H3.1  | C25H3.1   | 0.188980893290447   |
| AGIWUR34742;AGIWUR36546                                                                                                                                   |    |    |         |         |                |          |           |                     |
| N2                                                                                                                                                        | CT | II | 5707691 | 5712351 | WBGene00015942 | osta-2   | C18A3.4   | 0.0528442501606214  |
| AGIWUR3856;AGIWUR8859;AGIWUR9550;AGIWUR16022;AGIWUR17152;AGIWUR18066;AGIWUR25677;AGIWUR26532                                                              |    |    |         |         |                |          |           |                     |
| N2                                                                                                                                                        | CT | II | 5712351 | 5714823 | WBGene00015943 | tiar-1   | C18A3.5   | -0.0403748546199623 |
| AGIWUR9718;AGIWUR16952;AGIWUR31759;AGIWUR34523;AGIWUR37236                                                                                                |    |    |         |         |                |          |           |                     |
| N2                                                                                                                                                        | CT | II | 5714924 | 5716250 | WBGene00015945 | C18A3.9  | C18A3.9   | -0.113117201170081  |
| AGIWUR43356                                                                                                                                               |    |    |         |         |                |          |           |                     |



|                                                                                                                                                          |    |    |         |         |                |           |           |                      |             |
|----------------------------------------------------------------------------------------------------------------------------------------------------------|----|----|---------|---------|----------------|-----------|-----------|----------------------|-------------|
| N2                                                                                                                                                       | CT | II | 5716307 | 5718038 | WBGene00015941 | C18A3.3   | C18A3.3   | -0.173203207154163   | AGIWUR23308 |
| N2                                                                                                                                                       | CT | II | 5718129 | 5720052 | WBGene00015940 | zip-3     | C18A3.2   | -0.252433939366808   | AGIWUR30196 |
| N2                                                                                                                                                       | CT | II | 5720148 | 5721791 | WBGene00015939 | C18A3.1   | C18A3.1   | -0.161993562378468   |             |
| AGIWUR17352;AGIWUR27379;AGIWUR35544                                                                                                                      |    |    |         |         |                |           |           |                      |             |
| N2                                                                                                                                                       | CT | II | 5721791 | 5727651 | WBGene00004267 | rab-3     | C18A3.6   | 0.0343981095480324   |             |
| AGIWUR6991;AGIWUR23755;AGIWUR42885                                                                                                                       |    |    |         |         |                |           |           |                      |             |
| N2                                                                                                                                                       | CT | II | 5729597 | 5730443 | WBGene00015944 | C18A3.7   | C18A3.7   | 0.0845437906466326   | AGIWUR39731 |
| N2                                                                                                                                                       | CT | II | 5731033 | 5731741 | WBGene00044668 | C18A3.11  | C18A3.11  | 0.136825587137274    |             |
| AGIWUR3854;AGIWUR14342                                                                                                                                   |    |    |         |         |                |           |           |                      |             |
| N2                                                                                                                                                       | CT | II | 5737790 | 5738888 | WBGene00001958 | hlh-14    | C18A3.8   | 0.280848364712696    | AGIWUR37206 |
| N2                                                                                                                                                       | CT | II | 5742971 | 5745284 | WBGene00044296 | F10C1.9   | F10C1.9   | -0.112443783482012   |             |
| AGIWUR25000;AGIWUR40035                                                                                                                                  |    |    |         |         |                |           |           |                      |             |
| N2                                                                                                                                                       | CT | II | 5750190 | 5754140 | WBGene00002054 | ifb-2     | F10C1.7   | 0.154146100210976    |             |
| AGIWUR2064;AGIWUR4264;AGIWUR9690;AGIWUR16751;AGIWUR17005;AGIWUR20723;AGIWUR23981;AGIWUR25070;AGIWUR25591;AGIWUR32916;AGIWUR36312;AGIWUR36639;AGIWUR39866 |    |    |         |         |                |           |           |                      |             |
| N2                                                                                                                                                       | CT | II | 5754468 | 5756684 | WBGene00017327 | F10C1.8   | F10C1.8   | -0.101551072456028   |             |
| AGIWUR11828;AGIWUR20400;AGIWUR23510                                                                                                                      |    |    |         |         |                |           |           |                      |             |
| N2                                                                                                                                                       | CT | II | 5756891 | 5758421 | WBGene00017325 | F10C1.3   | F10C1.3   | 0.182747543931635    | AGIWUR28265 |
| N2                                                                                                                                                       | CT | II | 5765618 | 5772084 | WBGene00002053 | ifb-1     | F10C1.2   | 0.174517509433779    |             |
| AGIWUR3359;AGIWUR9541;AGIWUR22649;AGIWUR27085;AGIWUR32186;AGIWUR35412                                                                                    |    |    |         |         |                |           |           |                      |             |
| N2                                                                                                                                                       | CT | II | 5772065 | 5774220 | WBGene00017326 | dmd-5     | F10C1.5   | -0.236122970544477   | AGIWUR29796 |
| N2                                                                                                                                                       | CT | II | 5774229 | 5774420 | WBGene00017324 | F10C1.1   | F10C1.1   | 0.550804339983699    | AGIWUR41388 |
| N2                                                                                                                                                       | CT | II | 5782524 | 5787658 | WBGene00019408 | K05F1.6   | K05F1.6   | 0.140630290493053    | AGIWUR25660 |
| N2                                                                                                                                                       | CT | II | 5790726 | 5794402 | WBGene00019407 | lect-2    | K05F1.5   | -0.0133236010514928  | AGIWUR42763 |
| N2                                                                                                                                                       | CT | II | 5794495 | 5796185 | WBGene00019406 | acd-8     | K05F1.3   | 0.162845348447984    | AGIWUR44040 |
| N2                                                                                                                                                       | CT | II | 5797893 | 5798341 | WBGene00003469 | msp-142   | K05F1.2   | 0.522960204444351    | AGIWUR20776 |
| N2                                                                                                                                                       | CT | II | 5799321 | 5799642 | WBGene00019409 | K05F1.8   | K05F1.8   | 0.275181560400394    | AGIWUR38573 |
| N2                                                                                                                                                       | CT | II | 5800067 | 5801175 | WBGene00019410 | K05F1.9   | K05F1.9   | 0.343860913352142    | AGIWUR22440 |
| N2                                                                                                                                                       | CT | II | 5801382 | 5803680 | WBGene00019405 | K05F1.1   | K05F1.1   | 0.330458271395209    | AGIWUR16912 |
| N2                                                                                                                                                       | CT | II | 5804717 | 5805475 | WBGene00019411 | K05F1.10  | K05F1.10  |                      |             |
| -0.00287808591890837 AGIWUR32783                                                                                                                         |    |    |         |         |                |           |           |                      |             |
| N2                                                                                                                                                       | CT | II | 5810514 | 5811749 | WBGene00022876 | ZK1248.5  | ZK1248.5  | 0.221189059677855    |             |
| AGIWUR38632                                                                                                                                              |    |    |         |         |                |           |           |                      |             |
| N2                                                                                                                                                       | CT | II | 5812375 | 5815482 | WBGene00022877 | wago-5    | ZK1248.7  | -0.00414137370114531 |             |
| AGIWUR11337;AGIWUR33360;AGIWUR40670                                                                                                                      |    |    |         |         |                |           |           |                      |             |
| N2                                                                                                                                                       | CT | II | 5816573 | 5817306 | WBGene00044393 | ZK1248.20 | ZK1248.20 | 0.092934818215797    |             |
| AGIWUR2122;AGIWUR2856;AGIWUR13420;AGIWUR13878;AGIWUR19625                                                                                                |    |    |         |         |                |           |           |                      |             |
| N2                                                                                                                                                       | CT | II | 5820712 | 5823919 | WBGene00001224 | ehs-1     | ZK1248.3  | 0.0659545581006977   |             |
| AGIWUR724;AGIWUR6312;AGIWUR10853;AGIWUR12575;AGIWUR17892;AGIWUR33127;AGIWUR37745;AGIWUR37955;AGIWUR41914;AGIWUR                                          |    |    |         |         |                |           |           |                      |             |

|                                                                                                            |    |    |         |         |                |           |           |                                 |
|------------------------------------------------------------------------------------------------------------|----|----|---------|---------|----------------|-----------|-----------|---------------------------------|
| IWUR42738                                                                                                  |    |    |         |         |                |           |           |                                 |
| N2                                                                                                         | CT | II | 5827587 | 5828586 | WBGene00022881 | ZK1248.11 | ZK1248.11 | -0.15391156506402               |
| AGIWUR34944;AGIWUR43813                                                                                    |    |    |         |         |                |           |           |                                 |
| N2                                                                                                         | CT | II | 5828683 | 5833232 | WBGene00022882 | ZK1248.13 | ZK1248.13 | -0.1240185698686                |
| AGIWUR29446                                                                                                |    |    |         |         |                |           |           |                                 |
| N2                                                                                                         | CT | II | 5833328 | 5836203 | WBGene00001509 | fzo-1     | ZK1248.14 | 0.0547665400219497              |
| AGIWUR6222;AGIWUR26024;AGIWUR34210                                                                         |    |    |         |         |                |           |           |                                 |
| N2                                                                                                         | CT | II | 5836777 | 5838553 | WBGene00022883 | ZK1248.15 | ZK1248.15 | -0.124782345459472              |
| AGIWUR3262                                                                                                 |    |    |         |         |                |           |           |                                 |
| N2                                                                                                         | CT | II | 5838663 | 5839414 | WBGene00022885 | ZK1248.19 | ZK1248.19 | -0.215769140435253              |
| AGIWUR11421;AGIWUR22217;AGIWUR44302                                                                        |    |    |         |         |                |           |           |                                 |
| N2                                                                                                         | CT | II | 5839639 | 5841134 | WBGene00002268 | lec-5     | ZK1248.16 | -0.074807879422174              |
| AGIWUR24252                                                                                                |    |    |         |         |                |           |           |                                 |
| N2                                                                                                         | CT | II | 5842243 | 5844575 | WBGene00022874 | nep-25    | ZK1248.1  | -0.227627778829351              |
| AGIWUR2152                                                                                                 |    |    |         |         |                |           |           |                                 |
| N2                                                                                                         | CT | II | 5845254 | 5845541 | WBGene00022884 | ZK1248.17 | ZK1248.17 | 0.53879795197334                |
| AGIWUR39346                                                                                                |    |    |         |         |                |           |           |                                 |
| N2                                                                                                         | CT | II | 5845777 | 5850308 | WBGene00019270 | H41C03.3  | H41C03.3  | -0.179917206682553              |
| AGIWUR11954                                                                                                |    |    |         |         |                |           |           |                                 |
| N2                                                                                                         | CT | II | 5850362 | 5852038 | WBGene00019269 | H41C03.2  | H41C03.2  | -0.316838562053863              |
| AGIWUR25991                                                                                                |    |    |         |         |                |           |           |                                 |
| N2                                                                                                         | CT | II | 5854422 | 5857172 | WBGene00019268 | H41C03.1  | H41C03.1  | -0.0404843595500566             |
| AGIWUR44238                                                                                                |    |    |         |         |                |           |           |                                 |
| N2                                                                                                         | CT | II | 5857080 | 5858422 | WBGene00018871 | F55C12.4  | F55C12.4  | -0.322138987940567              |
| AGIWUR14984                                                                                                |    |    |         |         |                |           |           |                                 |
| N2                                                                                                         | CT | II | 5864182 | 5867041 | WBGene00018874 | tag-234   | F55C12.7  | 0.0401537632040858              |
| AGIWUR1948;AGIWUR3530;AGIWUR13556;AGIWUR25750;AGIWUR29295;AGIWUR32862;AGIWUR33273;AGIWUR35149              |    |    |         |         |                |           |           |                                 |
| N2                                                                                                         | CT | II | 5867268 | 5873614 | WBGene00018872 | F55C12.5  | F55C12.5  | -0.0123269796633743             |
| AGIWUR8048;AGIWUR12256;AGIWUR13416;AGIWUR22582;AGIWUR25368;AGIWUR29569;AGIWUR29585;AGIWUR32447;AGIWUR37960 |    |    |         |         |                |           |           |                                 |
| N2                                                                                                         | CT | II | 5874507 | 5876101 | WBGene00018873 | F55C12.6  | F55C12.6  | -0.0537809487764296             |
| AGIWUR10598                                                                                                |    |    |         |         |                |           |           |                                 |
| N2                                                                                                         | CT | II | 5884552 | 5892664 | WBGene00018869 | rfip-1    | F55C12.1  | 0.138846078846973               |
| AGIWUR14819;AGIWUR33856                                                                                    |    |    |         |         |                |           |           |                                 |
| N2                                                                                                         | CT | II | 5896170 | 5904588 | WBGene00019128 | F59G1.4   | F59G1.4   | 0.0773892360987598              |
| AGIWUR4397;AGIWUR8473;AGIWUR22602;AGIWUR24898;AGIWUR27600;AGIWUR29800;AGIWUR33108;AGIWUR36179              |    |    |         |         |                |           |           |                                 |
| N2                                                                                                         | CT | II | 5904552 | 5906308 | WBGene00006644 | tsp-18    | F59G1.2   | -0.0272601118040754 AGIWUR36316 |
| N2                                                                                                         | CT | II | 5906545 | 5907613 | WBGene00019129 | F59G1.8   | F59G1.8   | -0.19339959571489 AGIWUR13867   |
| N2                                                                                                         | CT | II | 5907794 | 5911222 | WBGene00006933 | vps-35    | F59G1.3   | -0.0514128746661928             |
| AGIWUR7216;AGIWUR8177;AGIWUR32419;AGIWUR39608                                                              |    |    |         |         |                |           |           |                                 |

|                                                                                                             |    |    |         |         |                |           |           |                      |             |
|-------------------------------------------------------------------------------------------------------------|----|----|---------|---------|----------------|-----------|-----------|----------------------|-------------|
| N2                                                                                                          | CT | II | 5911324 | 5916910 | WBGene00019127 | cgt-3     | F59G1.1   | 0.166432315180121    |             |
| AGIWUR12481;AGIWUR21844;AGIWUR24749;AGIWUR30188;AGIWUR36709;AGIWUR43677                                     |    |    |         |         |                |           |           |                      |             |
| N2                                                                                                          | CT | II | 5917422 | 5918564 | WBGene00001486 | frh-1     | F59G1.7   | -0.00855942447973312 | AGIWUR21616 |
| N2                                                                                                          | CT | II | 5918626 | 5921617 | WBGene00004214 | ptp-2     | F59G1.5   | 0.150066312244923    |             |
| AGIWUR4553;AGIWUR27592                                                                                      |    |    |         |         |                |           |           |                      |             |
| N2                                                                                                          | CT | II | 5921967 | 5924838 | WBGene00017895 | vrk-1     | F28B12.3  | 0.0636393786501017   |             |
| AGIWUR36435                                                                                                 |    |    |         |         |                |           |           |                      |             |
| N2                                                                                                          | CT | II | 5933493 | 5940815 | WBGene00001208 | egl-44    | F28B12.2  | -0.00244621797496336 |             |
| AGIWUR7961;AGIWUR17363;AGIWUR42207                                                                          |    |    |         |         |                |           |           |                      |             |
| N2                                                                                                          | CT | II | 5942927 | 5943990 | WBGene00017894 | F28B12.1  | F28B12.1  | 0.0253365456072707   |             |
| AGIWUR3006                                                                                                  |    |    |         |         |                |           |           |                      |             |
| N2                                                                                                          | CT | II | 5945418 | 5956683 | WBGene00000403 | casy-1    | B0034.3   | 0.147864800760478    |             |
| AGIWUR3914;AGIWUR14297;AGIWUR18652;AGIWUR18713;AGIWUR34228;AGIWUR37542;AGIWUR44343                          |    |    |         |         |                |           |           |                      |             |
| N2                                                                                                          | CT | II | 5961677 | 5962024 | WBGene00044394 | B0034.7   | B0034.7   | -0.0802222814219924  |             |
| AGIWUR5321;AGIWUR14988;AGIWUR15791;AGIWUR20321;AGIWUR43460                                                  |    |    |         |         |                |           |           |                      |             |
| N2                                                                                                          | CT | II | 5968079 | 5969058 | WBGene00015004 | B0034.4   | B0034.4   | 0.0523387787366651   | AGIWUR14408 |
| N2                                                                                                          | CT | II | 5970105 | 5972658 | WBGene00015002 | B0034.1   | B0034.1   | -0.067802738278079   | AGIWUR972   |
| N2                                                                                                          | CT | II | 5988526 | 5989394 | WBGene00002085 | ins-2     | ZK75.2    | -0.12581283273442    | AGIWUR17557 |
| N2                                                                                                          | CT | II | 5990103 | 5990818 | WBGene00002086 | ins-3     | ZK75.3    | -0.144230957994173   |             |
| AGIWUR17233;AGIWUR19321;AGIWUR27154;AGIWUR37216                                                             |    |    |         |         |                |           |           |                      |             |
| N2                                                                                                          | CT | II | 5996370 | 5997007 | WBGene00002087 | ins-4     | ZK75.1    | -0.144972708823015   | AGIWUR27264 |
| N2                                                                                                          | CT | II | 5997803 | 5999019 | WBGene00002088 | ins-5     | ZK84.3    | -0.0122457557898521  |             |
| AGIWUR3314;AGIWUR4383;AGIWUR12709;AGIWUR18430;AGIWUR32680;AGIWUR37567;AGIWUR41810                           |    |    |         |         |                |           |           |                      |             |
| N2                                                                                                          | CT | II | 6000421 | 6001009 | WBGene00002089 | ins-6     | ZK84.6    | -0.121857001282498   | AGIWUR2430  |
| N2                                                                                                          | CT | II | 6010844 | 6011321 | WBGene00002103 | ins-20    | ZK84.7    | -0.101053311958154   |             |
| AGIWUR16068;AGIWUR20676;AGIWUR23288;AGIWUR27852;AGIWUR27895;AGIWUR32162;AGIWUR38494;AGIWUR41736;AGIWUR44906 |    |    |         |         |                |           |           |                      |             |
| N2                                                                                                          | CT | II | 6014357 | 6015891 | WBGene00022650 | ZK84.2    | ZK84.2    | 0.106503683496886    | AGIWUR25039 |
| N2                                                                                                          | CT | II | 6016229 | 6016561 | WBGene00022652 | ZK84.5    | ZK84.5    | 0.0385603252496267   | AGIWUR12563 |
| N2                                                                                                          | CT | II | 6020653 | 6023349 | WBGene00022649 | ZK84.1    | ZK84.1    | 0.330391223812105    | AGIWUR20753 |
| N2                                                                                                          | CT | II | 6023323 | 6025035 | WBGene00020029 | R12C12.9  | R12C12.9  | -0.0356804950803991  |             |
| AGIWUR15643                                                                                                 |    |    |         |         |                |           |           |                      |             |
| N2                                                                                                          | CT | II | 6029514 | 6031206 | WBGene00020023 | frpr-16   | R12C12.3  | -0.317554177231442   |             |
| AGIWUR26305                                                                                                 |    |    |         |         |                |           |           |                      |             |
| N2                                                                                                          | CT | II | 6039344 | 6039650 | WBGene00020024 | R12C12.4  | R12C12.4  | 0.143547348184841    |             |
| AGIWUR16314                                                                                                 |    |    |         |         |                |           |           |                      |             |
| N2                                                                                                          | CT | II | 6042797 | 6043266 | WBGene00044395 | R12C12.10 | R12C12.10 | -0.270257178393734   |             |
| AGIWUR4656;AGIWUR11468;AGIWUR14971;AGIWUR28761;AGIWUR34529                                                  |    |    |         |         |                |           |           |                      |             |
| N2                                                                                                          | CT | II | 6044145 | 6045218 | WBGene00020025 | R12C12.5  | R12C12.5  | -0.244098768626149   |             |
| AGIWUR4312                                                                                                  |    |    |         |         |                |           |           |                      |             |

|                                                                        |    |    |                 |                |          |          |                      |
|------------------------------------------------------------------------|----|----|-----------------|----------------|----------|----------|----------------------|
| N2                                                                     | CT | II | 6046286 6047867 | WBGene00020026 | R12C12.6 | R12C12.6 | 0.221253580873813    |
| AGIWUR2250;AGIWUR7065;AGIWUR32439;AGIWUR39270                          |    |    |                 |                |          |          |                      |
| N2                                                                     | CT | II | 6048109 6049686 | WBGene00004306 | ran-5    | R12C12.2 | 0.108015250119934    |
| AGIWUR19265;AGIWUR21585;AGIWUR31081                                    |    |    |                 |                |          |          |                      |
| N2                                                                     | CT | II | 6050332 6054307 | WBGene00020022 | gldc-1   | R12C12.1 | 0.281512068373611    |
| AGIWUR2327;AGIWUR4982;AGIWUR19292;AGIWUR33072                          |    |    |                 |                |          |          |                      |
| N2                                                                     | CT | II | 6055039 6056388 | WBGene00020027 | R12C12.7 | R12C12.7 | -0.191666326870125   |
| AGIWUR16099                                                            |    |    |                 |                |          |          |                      |
| N2                                                                     | CT | II | 6057379 6061520 | WBGene00020028 | R12C12.8 | R12C12.8 | 0.00151717814865204  |
| AGIWUR4081;AGIWUR13422;AGIWUR28711;AGIWUR30011;AGIWUR31749;AGIWUR44325 |    |    |                 |                |          |          |                      |
| N2                                                                     | CT | II | 6061977 6067166 | WBGene00019190 | H12I13.1 | H12I13.1 | -0.00887081618901897 |
| AGIWUR31215;AGIWUR31279                                                |    |    |                 |                |          |          |                      |
| N2                                                                     | CT | II | 6071386 6073251 | WBGene00019192 | H12I13.3 | H12I13.3 | -0.0633948163143234  |
| AGIWUR33937                                                            |    |    |                 |                |          |          |                      |
| N2                                                                     | CT | II | 6077700 6078230 | WBGene00019193 | H12I13.5 | H12I13.5 | -0.182647471199751   |
| AGIWUR4388;AGIWUR15709;AGIWUR23079;AGIWUR35963;AGIWUR38074             |    |    |                 |                |          |          |                      |
| N2                                                                     | CT | II | 6077904 6078235 | WBGene00019194 | H12I13.6 | H12I13.6 | -0.0462144205037101  |
| AGIWUR13378                                                            |    |    |                 |                |          |          |                      |
| N2                                                                     | CT | II | 6078265 6080843 | WBGene00001401 | fbf-1    | H12I13.4 | -0.0465257754878543  |
| AGIWUR10379                                                            |    |    |                 |                |          |          |                      |
| N2                                                                     | CT | II | 6083060 6083232 | WBGene00201452 | F21H12.9 | F21H12.9 | 0.0521218100660885   |
| AGIWUR20248                                                            |    |    |                 |                |          |          |                      |
| N2                                                                     | CT | II | 6088008 6088202 | WBGene00017684 | F21H12.2 | F21H12.2 | -0.198758968461604   |
| AGIWUR3403                                                             |    |    |                 |                |          |          |                      |
| N2                                                                     | CT | II | 6088866 6091480 | WBGene00001402 | fbf-2    | F21H12.5 | 0.0498036632523249   |
| AGIWUR38480                                                            |    |    |                 |                |          |          |                      |
| N2                                                                     | CT | II | 6091820 6092789 | WBGene00044287 | F21H12.7 | F21H12.7 | -0.134548280144064   |
| AGIWUR13232;AGIWUR24259                                                |    |    |                 |                |          |          |                      |
| N2                                                                     | CT | II | 6092766 6097597 | WBGene00017686 | tpp-2    | F21H12.6 | -0.106118828426818   |
| AGIWUR1355;AGIWUR10802;AGIWUR13569;AGIWUR39948                         |    |    |                 |                |          |          |                      |
| N2                                                                     | CT | II | 6100060 6110122 | WBGene00004346 | rgs-3    | C29H12.3 | 0.0541280305714289   |
| AGIWUR13208;AGIWUR30201;AGIWUR31773;AGIWUR42877                        |    |    |                 |                |          |          |                      |
| N2                                                                     | CT | II | 6110452 6113194 | WBGene00016236 | cec-9    | C29H12.5 | -0.00764956211205714 |
| AGIWUR31509                                                            |    |    |                 |                |          |          |                      |
| N2                                                                     | CT | II | 6114423 6118263 | WBGene00016237 | C29H12.6 | C29H12.6 | -0.218781222908234   |
| AGIWUR19780                                                            |    |    |                 |                |          |          |                      |
| N2                                                                     | CT | II | 6123809 6125438 | WBGene00016235 | C29H12.2 | C29H12.2 | -0.0562945288066201  |
| AGIWUR7944;AGIWUR11819;AGIWUR29712;AGIWUR41243                         |    |    |                 |                |          |          |                      |
| N2                                                                     | CT | II | 6125559 6127942 | WBGene00004680 | rars-2   | C29H12.1 | -0.0151949486655187  |

|                                                                                                |    |    |         |         |                |          |          |                     |
|------------------------------------------------------------------------------------------------|----|----|---------|---------|----------------|----------|----------|---------------------|
| AGIWUR265                                                                                      |    |    |         |         |                |          |          |                     |
| N2                                                                                             | CT | II | 6136094 | 6157176 | WBGene00019018 | abts-3   | F57F10.1 | 0.48974817228496    |
| AGIWUR36284                                                                                    |    |    |         |         |                |          |          |                     |
| N2                                                                                             | CT | II | 6157167 | 6161094 | WBGene00001373 | exp-1    | H35N03.1 | 0.136479080101598   |
| AGIWUR28654                                                                                    |    |    |         |         |                |          |          |                     |
| N2                                                                                             | CT | II | 6165721 | 6169231 | WBGene00002030 | hst-3.1  | F40H3.5  | -0.0542510696722465 |
| AGIWUR1423;AGIWUR14920;AGIWUR33288;AGIWUR34425;AGIWUR35649;AGIWUR36354;AGIWUR38927;AGIWUR43602 |    |    |         |         |                |          |          |                     |
| N2                                                                                             | CT | II | 6171507 | 6173159 | WBGene00018251 | F40H3.3  | F40H3.3  | 0.0861646049243223  |
| N2                                                                                             | CT | II | 6173568 | 6174863 | WBGene00018250 | F40H3.2  | F40H3.2  | -0.0463694423120522 |
| N2                                                                                             | CT | II | 6179867 | 6184684 | WBGene00018249 | F40H3.1  | F40H3.1  | -0.083058493631496  |
| AGIWUR2525;AGIWUR3859;AGIWUR26674                                                              |    |    |         |         |                |          |          |                     |
| N2                                                                                             | CT | II | 6187010 | 6187722 | WBGene00018252 | F40H3.6  | F40H3.6  | 0.158959905342547   |
| N2                                                                                             | CT | II | 6189580 | 6191402 | WBGene00001440 | fkx-8    | F40H3.4  | 0.167625316267608   |
| N2                                                                                             | CT | II | 6192784 | 6195170 | WBGene00000771 | cpb-2    | C30B5.3  | -0.0256411819239393 |
| AGIWUR9692;AGIWUR28077;AGIWUR33384                                                             |    |    |         |         |                |          |          |                     |
| N2                                                                                             | CT | II | 6195813 | 6196959 | WBGene00016245 | C30B5.4  | C30B5.4  | 0.0130140782694532  |
| N2                                                                                             | CT | II | 6197180 | 6198308 | WBGene00016244 | C30B5.2  | C30B5.2  | -0.155093476746824  |
| AGIWUR1981;AGIWUR4452;AGIWUR6505;AGIWUR36902;AGIWUR41508;AGIWUR42485;AGIWUR43717               |    |    |         |         |                |          |          |                     |
| N2                                                                                             | CT | II | 6198696 | 6201628 | WBGene00077732 | szy-4    | C30B5.1  | 0.101818910886056   |
| N2                                                                                             | CT | II | 6219526 | 6222658 | WBGene00016247 | C30B5.6  | C30B5.6  | 0.141171072364115   |
| AGIWUR8793;AGIWUR34758;AGIWUR36628;AGIWUR38666                                                 |    |    |         |         |                |          |          |                     |
| N2                                                                                             | CT | II | 6224892 | 6227095 | WBGene00016248 | C30B5.7  | C30B5.7  | 0.0459656418238179  |
| N2                                                                                             | CT | II | 6234483 | 6244287 | WBGene00020784 | tat-4    | T24H7.5  | -0.126264008581614  |
| AGIWUR10956;AGIWUR15388;AGIWUR17815;AGIWUR27470;AGIWUR28746                                    |    |    |         |         |                |          |          |                     |
| N2                                                                                             | CT | II | 6245748 | 6246257 | WBGene00020783 | blos-4   | T24H7.4  | -0.257314013568253  |
| N2                                                                                             | CT | II | 6246354 | 6247334 | WBGene00020782 | T24H7.3  | T24H7.3  | 0.104727052343362   |
| AGIWUR2657;AGIWUR5181;AGIWUR13345;AGIWUR28033;AGIWUR30272                                      |    |    |         |         |                |          |          |                     |
| N2                                                                                             | CT | II | 6247311 | 6250841 | WBGene00020781 | T24H7.2  | T24H7.2  | -0.159288019322561  |
| AGIWUR14735;AGIWUR28910;AGIWUR33691                                                            |    |    |         |         |                |          |          |                     |
| N2                                                                                             | CT | II | 6251411 | 6252797 | WBGene00004015 | phb-2    | T24H7.1  | -0.102164884894098  |
| N2                                                                                             | CT | II | 6252774 | 6256124 | WBGene00017438 | F13H8.5  | F13H8.5  | 0.401038023192024   |
| N2                                                                                             | CT | II | 6257628 | 6260021 | WBGene00017443 | F13H8.11 | F13H8.11 | 0.215053173045757   |
| AGIWUR32496                                                                                    |    |    |         |         |                |          |          |                     |
| N2                                                                                             | CT | II | 6260857 | 6262524 | WBGene00017437 | nmgp-1   | F13H8.4  | 0.226276325290454   |
| N2                                                                                             | CT | II | 6262522 | 6263325 | WBGene00017444 | F13H8.12 | F13H8.12 | -0.110097927002074  |
| AGIWUR31676                                                                                    |    |    |         |         |                |          |          |                     |
| N2                                                                                             | CT | II | 6264050 | 6265502 | WBGene00017436 | F13H8.3  | F13H8.3  | -0.299814110793196  |
| N2                                                                                             | CT | II | 6265612 | 6268083 | WBGene00017441 | F13H8.8  | F13H8.8  | -0.135866334648259  |
| AGIWUR9280;AGIWUR18592;AGIWUR29470;AGIWUR42923                                                 |    |    |         |         |                |          |          |                     |

|                                                                         |    |    |         |         |                |          |          |                     |             |
|-------------------------------------------------------------------------|----|----|---------|---------|----------------|----------|----------|---------------------|-------------|
| N2                                                                      | CT | II | 6270370 | 6274005 | WBGene00017435 | F13H8.2  | F13H8.2  | -0.168768045731659  |             |
| AGIWUR6887;AGIWUR11903;AGIWUR22150;AGIWUR23635                          |    |    |         |         |                |          |          |                     |             |
| N2                                                                      | CT | II | 6274115 | 6279699 | WBGene00000259 | bp1-1    | F13H8.10 | -0.110729120366694  |             |
| AGIWUR5304;AGIWUR14955;AGIWUR24067;AGIWUR41077;AGIWUR44743              |    |    |         |         |                |          |          |                     |             |
| N2                                                                      | CT | II | 6279676 | 6281102 | WBGene00017442 | F13H8.9  | F13H8.9  | -0.187281023640505  | AGIWUR41405 |
| N2                                                                      | CT | II | 6283386 | 6284724 | WBGene00017434 | F13H8.1  | F13H8.1  | -0.123382468870605  | AGIWUR4875  |
| N2                                                                      | CT | II | 6284817 | 6286869 | WBGene00017439 | F13H8.6  | F13H8.6  | 0.0464451216316153  | AGIWUR37478 |
| N2                                                                      | CT | II | 6288413 | 6290097 | WBGene00017440 | upb-1    | F13H8.7  | 0.111390276549097   |             |
| AGIWUR9195;AGIWUR17843;AGIWUR21426;AGIWUR32208;AGIWUR41349;AGIWUR41634  |    |    |         |         |                |          |          |                     |             |
| N2                                                                      | CT | II | 6290652 | 6292524 | WBGene00016212 | C29F5.3  | C29F5.3  | 0.190970569078935   | AGIWUR44222 |
| N2                                                                      | CT | II | 6292652 | 6294356 | WBGene00003403 | mps-1    | C29F5.4  | 0.0273280279658676  | AGIWUR17874 |
| N2                                                                      | CT | II | 6297243 | 6298675 | WBGene00016213 | C29F5.5  | C29F5.5  | -0.0162285206084567 | AGIWUR11702 |
| N2                                                                      | CT | II | 6299502 | 6301398 | WBGene00016211 | sdz-3    | C29F5.2  | -0.0175368545708574 | AGIWUR5265  |
| N2                                                                      | CT | II | 6303424 | 6306283 | WBGene00016210 | C29F5.1  | C29F5.1  | -0.13099126021288   | AGIWUR39617 |
| N2                                                                      | CT | II | 6306429 | 6308073 | WBGene00044589 | C29F5.8  | C29F5.8  | -0.103777888517075  |             |
| AGIWUR12713;AGIWUR30405                                                 |    |    |         |         |                |          |          |                     |             |
| N2                                                                      | CT | II | 6308114 | 6309298 | WBGene00016215 | glb-10   | C29F5.7  | -0.0488876939967335 | AGIWUR22465 |
| N2                                                                      | CT | II | 6318087 | 6321159 | WBGene00016311 | C32D5.3  | C32D5.3  | -0.0886476715582925 |             |
| AGIWUR24680;AGIWUR44562                                                 |    |    |         |         |                |          |          |                     |             |
| N2                                                                      | CT | II | 6321340 | 6323079 | WBGene00016312 | C32D5.4  | C32D5.4  | 0.30193580846402    | AGIWUR36431 |
| N2                                                                      | CT | II | 6324484 | 6327355 | WBGene00004860 | sma-6    | C32D5.2  | -0.022413147318022  |             |
| AGIWUR49;AGIWUR39534                                                    |    |    |         |         |                |          |          |                     |             |
| N2                                                                      | CT | II | 6329850 | 6331341 | WBGene00016313 | set-4    | C32D5.5  | -0.0949138033326342 | AGIWUR32781 |
| N2                                                                      | CT | II | 6331899 | 6333987 | WBGene00016314 | C32D5.6  | C32D5.6  | -0.0818958368269218 | AGIWUR23810 |
| N2                                                                      | CT | II | 6335478 | 6336334 | WBGene00044755 | C32D5.14 | C32D5.14 | 0.0426924176839627  |             |
| AGIWUR1397;AGIWUR12037;AGIWUR13449;AGIWUR17048;AGIWUR39841              |    |    |         |         |                |          |          |                     |             |
| N2                                                                      | CT | II | 6336345 | 6339557 | WBGene00016315 | C32D5.7  | C32D5.7  | 0.244820801357811   | AGIWUR24724 |
| N2                                                                      | CT | II | 6343058 | 6345925 | WBGene00016316 | C32D5.8  | C32D5.8  | 0.237754669598222   |             |
| AGIWUR20118;AGIWUR36064;AGIWUR41359;AGIWUR41461                         |    |    |         |         |                |          |          |                     |             |
| N2                                                                      | CT | II | 6346960 | 6347719 | WBGene00002980 | lgg-1    | C32D5.9  | 0.0133417680002132  |             |
| AGIWUR21157;AGIWUR39449;AGIWUR39870                                     |    |    |         |         |                |          |          |                     |             |
| N2                                                                      | CT | II | 6349207 | 6351987 | WBGene00016317 | C32D5.10 | C32D5.10 | 0.18933621854767    |             |
| AGIWUR18554                                                             |    |    |         |         |                |          |          |                     |             |
| N2                                                                      | CT | II | 6352542 | 6355911 | WBGene00016318 | C32D5.11 | C32D5.11 | 0.301606355380151   |             |
| AGIWUR20770;AGIWUR26037;AGIWUR28595;AGIWUR31352;AGIWUR38108;AGIWUR38590 |    |    |         |         |                |          |          |                     |             |
| N2                                                                      | CT | II | 6356416 | 6359005 | WBGene00016319 | C32D5.12 | C32D5.12 | -0.339157408719936  |             |
| AGIWUR30696                                                             |    |    |         |         |                |          |          |                     |             |
| N2                                                                      | CT | II | 6360331 | 6360959 | WBGene00019607 | K10B2.4  | K10B2.4  | -0.188665765121726  | AGIWUR3646  |
| N2                                                                      | CT | II | 6361159 | 6365367 | WBGene00019608 | ani-2    | K10B2.5  | 0.320323863702548   | AGIWUR26224 |

|                                                                       |    |    |         |         |                |          |          |                      |             |
|-----------------------------------------------------------------------|----|----|---------|---------|----------------|----------|----------|----------------------|-------------|
| N2                                                                    | CT | II | 6365722 | 6367002 | WBGene00019606 | clec-88  | K10B2.3  | -0.145652128416135   |             |
| AGIWUR692;AGIWUR9567;AGIWUR33254;AGIWUR42994                          |    |    |         |         |                |          |          |                      |             |
| N2                                                                    | CT | II | 6366990 | 6369210 | WBGene00019605 | ctsa-1   | K10B2.2  | 0.00200073043206395  |             |
| AGIWUR12427;AGIWUR18699;AGIWUR19182;AGIWUR31523;AGIWUR41372           |    |    |         |         |                |          |          |                      |             |
| N2                                                                    | CT | II | 6371295 | 6374544 | WBGene00003009 | lin-23   | K10B2.1  | 0.132805759417961    | AGIWUR16062 |
| N2                                                                    | CT | II | 6383645 | 6384692 | WBGene00019061 | F58F12.1 | F58F12.1 | 0.0050561372678315   |             |
| AGIWUR9471;AGIWUR23871                                                |    |    |         |         |                |          |          |                      |             |
| N2                                                                    | CT | II | 6386767 | 6387568 | WBGene00044756 | F58F12.4 | F58F12.4 | -0.146015907112304   |             |
| AGIWUR4742;AGIWUR26851;AGIWUR28350                                    |    |    |         |         |                |          |          |                      |             |
| N2                                                                    | CT | II | 6387525 | 6388242 | WBGene00019062 | F58F12.2 | F58F12.2 | 0.131776057023886    |             |
| AGIWUR32553                                                           |    |    |         |         |                |          |          |                      |             |
| N2                                                                    | CT | II | 6389275 | 6391295 | WBGene00019063 | F58F12.3 | F58F12.3 | 0.182139750705005    |             |
| AGIWUR1198;AGIWUR7481;AGIWUR10443;AGIWUR30768;AGIWUR37971;AGIWUR43033 |    |    |         |         |                |          |          |                      |             |
| N2                                                                    | CT | II | 6398706 | 6400940 | WBGene00020800 | zig-10   | T25D10.2 | -0.00237546073125383 |             |
| AGIWUR4485;AGIWUR9846;AGIWUR26601;AGIWUR27441;AGIWUR36937             |    |    |         |         |                |          |          |                      |             |
| N2                                                                    | CT | II | 6401949 | 6403102 | WBGene00020802 | btb-2    | T25D10.5 | 0.229766465293613    |             |
| AGIWUR34805                                                           |    |    |         |         |                |          |          |                      |             |
| N2                                                                    | CT | II | 6403401 | 6405040 | WBGene00020799 | T25D10.1 | T25D10.1 | -0.189781255032106   |             |
| AGIWUR43640                                                           |    |    |         |         |                |          |          |                      |             |
| N2                                                                    | CT | II | 6405391 | 6407346 | WBGene00004996 | spp-11   | T25D10.3 | 0.0748544899895034   |             |
| AGIWUR32974                                                           |    |    |         |         |                |          |          |                      |             |
| N2                                                                    | CT | II | 6407537 | 6410281 | WBGene00020801 | T25D10.4 | T25D10.4 | 0.0241233361992936   |             |
| AGIWUR42618                                                           |    |    |         |         |                |          |          |                      |             |
| N2                                                                    | CT | II | 6423112 | 6424925 | WBGene00019372 | K03H9.3  | K03H9.3  | -0.123483011445827   | AGIWUR5579  |
| N2                                                                    | CT | II | 6426293 | 6427513 | WBGene00000651 | col-75   | K03H9.2  | -0.564896380160139   | AGIWUR25302 |
| N2                                                                    | CT | II | 6431261 | 6431875 | WBGene00019371 | K03H9.1  | K03H9.1  | -0.0378435379874649  | AGIWUR43614 |
| N2                                                                    | CT | II | 6441428 | 6443921 | WBGene00019426 | cutl-16  | K06A1.3  | -0.194022286376081   | AGIWUR25549 |
| N2                                                                    | CT | II | 6444010 | 6446134 | WBGene00019425 | K06A1.2  | K06A1.2  | 0.231785748260016    | AGIWUR15893 |
| N2                                                                    | CT | II | 6446079 | 6449819 | WBGene00003621 | nhr-22   | K06A1.4  | -0.0464188648353741  | AGIWUR30016 |
| N2                                                                    | CT | II | 6450889 | 6453391 | WBGene00019427 | atg-16.2 | K06A1.5  | -0.206560647725674   |             |
| AGIWUR13723;AGIWUR19569;AGIWUR29959;AGIWUR42434                       |    |    |         |         |                |          |          |                      |             |
| N2                                                                    | CT | II | 6454974 | 6456440 | WBGene00019424 | aptf-1   | K06A1.1  | 0.0669734721039692   | AGIWUR35064 |
| N2                                                                    | CT | II | 6456522 | 6467642 | WBGene00019428 | dgk-5    | K06A1.6  | -0.0885337114490401  | AGIWUR36916 |
| N2                                                                    | CT | II | 6470095 | 6470506 | WBGene00044669 | T28D9.12 | T28D9.12 | 0.0193646556100511   |             |
| AGIWUR1436;AGIWUR13032;AGIWUR16320;AGIWUR20238;AGIWUR35214            |    |    |         |         |                |          |          |                      |             |
| N2                                                                    | CT | II | 6474338 | 6482125 | WBGene00020897 | del-10   | T28D9.7  | 0.12685410466564     | AGIWUR19065 |
| N2                                                                    | CT | II | 6483953 | 6484967 | WBGene00020898 | T28D9.9  | T28D9.9  | 0.151472518122692    | AGIWUR13709 |
| N2                                                                    | CT | II | 6485677 | 6488861 | WBGene00020895 | T28D9.3  | T28D9.3  | 0.0820461320044643   |             |
| AGIWUR31909;AGIWUR38236;AGIWUR43877                                   |    |    |         |         |                |          |          |                      |             |

|                                                                                               |    |    |         |         |                |          |           |                     |             |
|-----------------------------------------------------------------------------------------------|----|----|---------|---------|----------------|----------|-----------|---------------------|-------------|
| N2                                                                                            | CT | II | 6488830 | 6489761 | WBGene00004916 | snr-3    | T28D9.10  | -0.0933024941317466 |             |
| AGIWUR4000;AGIWUR15440;AGIWUR22068;AGIWUR22293;AGIWUR29265;AGIWUR37787;AGIWUR42229            |    |    |         |         |                |          |           |                     |             |
| N2                                                                                            | CT | II | 6490158 | 6491340 | WBGene00004702 | rsp-5    | T28D9.2   | -0.175755577607401  |             |
| AGIWUR5146;AGIWUR5155;AGIWUR10143;AGIWUR12090;AGIWUR17860;AGIWUR27025;AGIWUR28242;AGIWUR40736 |    |    |         |         |                |          |           |                     |             |
| N2                                                                                            | CT | II | 6491469 | 6491993 | WBGene00020899 | T28D9.11 | T28D9.11  | -0.357356603309857  |             |
| AGIWUR21047;AGIWUR34760                                                                       |    |    |         |         |                |          |           |                     |             |
| N2                                                                                            | CT | II | 6492402 | 6493778 | WBGene00020894 | T28D9.1  | T28D9.1   | -0.0265051874454976 | AGIWUR5642  |
| N2                                                                                            | CT | II | 6493720 | 6498633 | WBGene00019904 | twk-49   | R05G9.2   | -0.140555251845184  | AGIWUR26459 |
| N2                                                                                            | CT | II | 6500397 | 6501520 | WBGene00019905 | R05G9.3  | R05G9.3   | -0.287963360256239  | AGIWUR11317 |
| N2                                                                                            | CT | II | 6503360 | 6526333 | WBGene00016970 | C56E6.2  | C56E6.2   | -0.223806449965597  |             |
| AGIWUR8020;AGIWUR8720;AGIWUR8781;AGIWUR28926                                                  |    |    |         |         |                |          |           |                     |             |
| N2                                                                                            | CT | II | 6526372 | 6528801 | WBGene00016972 | C56E6.4  | C56E6.4   | 0.013727789925432   |             |
| AGIWUR11683;AGIWUR17423;AGIWUR23906                                                           |    |    |         |         |                |          |           |                     |             |
| N2                                                                                            | CT | II | 6528933 | 6531610 | WBGene00016973 | abch-1   | C56E6.5   | -0.447513628440477  | AGIWUR23341 |
| N2                                                                                            | CT | II | 6536380 | 6554846 | WBGene00007050 | utp-20   | F18C5.3   | -0.0414886985836231 |             |
| AGIWUR10754;AGIWUR11524;AGIWUR42658;AGIWUR43051                                               |    |    |         |         |                |          |           |                     |             |
| N2                                                                                            | CT | II | 6554977 | 6559267 | WBGene00006944 | wrn-1    | F18C5.2   | -0.0579882880613756 | AGIWUR29106 |
| N2                                                                                            | CT | II | 6559258 | 6561583 | WBGene00017563 | F18C5.10 | F18C5.10  | 0.104476113364818   |             |
| AGIWUR207;AGIWUR5082;AGIWUR13583;AGIWUR14924;AGIWUR17027;AGIWUR27722;AGIWUR36568;AGIWUR37877  |    |    |         |         |                |          |           |                     |             |
| N2                                                                                            | CT | II | 6563796 | 6565154 | WBGene00017559 | mpz-3    | F18C5.4   | 0.211282023932075   | AGIWUR16305 |
| N2                                                                                            | CT | II | 6567134 | 6567870 | WBGene00017562 | F18C5.9  | F18C5.9   | -0.0420314604681984 | AGIWUR27361 |
| N2                                                                                            | CT | II | 6569014 | 6570434 | WBGene00005053 | sra-27   | F18C5.1   | -0.0550098499282878 | AGIWUR39606 |
| N2                                                                                            | CT | II | 6570547 | 6573777 | WBGene00005054 | sra-28   | F18C5.6   | -0.0493306524730555 | AGIWUR37994 |
| N2                                                                                            | CT | II | 6574378 | 6575747 | WBGene00005055 | sra-29   | F18C5.8   | -0.0254040344904425 | AGIWUR25113 |
| N2                                                                                            | CT | II | 6576974 | 6578478 | WBGene00005057 | sra-31   | C56C10.5  | -0.0269093065030841 |             |
| AGIWUR32720                                                                                   |    |    |         |         |                |          |           |                     |             |
| N2                                                                                            | CT | II | 6583039 | 6584514 | WBGene00016962 | C56C10.4 | C56C10.4  | -0.13550419331494   |             |
| AGIWUR12231                                                                                   |    |    |         |         |                |          |           |                     |             |
| N2                                                                                            | CT | II | 6584409 | 6587569 | WBGene00016964 | C56C10.7 | C56C10.7  | -0.12658355262932   |             |
| AGIWUR10789;AGIWUR13070;AGIWUR19595;AGIWUR43494;AGIWUR44239                                   |    |    |         |         |                |          |           |                     |             |
| N2                                                                                            | CT | II | 6587577 | 6588679 | WBGene00002045 | icd-1    | C56C10.8  | -0.0695072948625111 |             |
| AGIWUR11449;AGIWUR16844;AGIWUR16923;AGIWUR19543;AGIWUR37015;AGIWUR43221                       |    |    |         |         |                |          |           |                     |             |
| N2                                                                                            | CT | II | 6589290 | 6591081 | WBGene00016961 | vps-32.1 | C56C10.3  | 0.0748781827670886  |             |
| AGIWUR32474                                                                                   |    |    |         |         |                |          |           |                     |             |
| N2                                                                                            | CT | II | 6591048 | 6592351 | WBGene00016965 | C56C10.9 | C56C10.9  | -0.0280595604034879 |             |
| AGIWUR19535                                                                                   |    |    |         |         |                |          |           |                     |             |
| N2                                                                                            | CT | II | 6592440 | 6594251 | WBGene00016966 | aipr-1   | C56C10.10 | -0.221091046417754  |             |
| AGIWUR35463                                                                                   |    |    |         |         |                |          |           |                     |             |
| N2                                                                                            | CT | II | 6594382 | 6598080 | WBGene00001026 | dnj-8    | C56C10.13 | 0.123277022417783   |             |



|                                                                                   |    |    |         |         |                |           |           |                      |                     |
|-----------------------------------------------------------------------------------|----|----|---------|---------|----------------|-----------|-----------|----------------------|---------------------|
| AGIWUR18501                                                                       |    |    |         |         |                |           |           |                      |                     |
| N2                                                                                | CT | II | 6598349 | 6601119 | WBGene00016967 | C56C10.11 |           | C56C10.11            | 0.079519948216273   |
| AGIWUR37942                                                                       |    |    |         |         |                |           |           |                      |                     |
| N2                                                                                | CT | II | 6601216 | 6603449 | WBGene00016960 | vps-33.2  |           | C56C10.1             | -0.0459513519401504 |
| AGIWUR11698                                                                       |    |    |         |         |                |           |           |                      |                     |
| N2                                                                                | CT | II | 6603441 | 6609356 | WBGene00016968 | epg-5     | C56C10.12 | 0.105644359981774    |                     |
| AGIWUR42321                                                                       |    |    |         |         |                |           |           |                      |                     |
| N2                                                                                | CT | II | 6618218 | 6622168 | WBGene00003480 | klf-3     | F54H5.4   | 0.0890321137663044   | AGIWUR40709         |
| N2                                                                                | CT | II | 6622189 | 6623500 | WBGene00018840 | F54H5.3   | F54H5.3   | 0.0567162366764222   | AGIWUR32792         |
| N2                                                                                | CT | II | 6623423 | 6625389 | WBGene00255600 | F54H5.14  |           | F54H5.14             | 0.173331619908602   |
| AGIWUR17284                                                                       |    |    |         |         |                |           |           |                      |                     |
| N2                                                                                | CT | II | 6631105 | 6637099 | WBGene00020579 | T19D12.4  |           | T19D12.4             | 0.624234340570792   |
| AGIWUR31097;AGIWUR40733                                                           |    |    |         |         |                |           |           |                      |                     |
| N2                                                                                | CT | II | 6637093 | 6643117 | WBGene00020581 | T19D12.6  |           | T19D12.6             | -0.068910233765882  |
| AGIWUR5677;AGIWUR11762;AGIWUR34722;AGIWUR35376                                    |    |    |         |         |                |           |           |                      |                     |
| N2                                                                                | CT | II | 6647166 | 6649126 | WBGene00020582 | oig-8     | T19D12.7  |                      | 0.0735168458587339  |
| AGIWUR13576                                                                       |    |    |         |         |                |           |           |                      |                     |
| N2                                                                                | CT | II | 6649789 | 6651819 | WBGene00005052 | sra-26    | T19D12.8  |                      | -0.162016391312202  |
| AGIWUR43747                                                                       |    |    |         |         |                |           |           |                      |                     |
| N2                                                                                | CT | II | 6652339 | 6654384 | WBGene00020583 | T19D12.9  |           | T19D12.9             | -0.0387032412033825 |
| AGIWUR13667                                                                       |    |    |         |         |                |           |           |                      |                     |
| N2                                                                                | CT | II | 6655096 | 6658866 | WBGene00020584 | T19D12.10 |           | T19D12.10            | -0.149236230877797  |
| AGIWUR11924                                                                       |    |    |         |         |                |           |           |                      |                     |
| N2                                                                                | CT | II | 6660274 | 6660994 | WBGene00020578 | T19D12.3  |           | T19D12.3             | -0.0490877094455273 |
| AGIWUR14410                                                                       |    |    |         |         |                |           |           |                      |                     |
| N2                                                                                | CT | II | 6661335 | 6665206 | WBGene00020577 | T19D12.2  |           | T19D12.2             |                     |
| 0.000267628441561918                                                              |    |    |         |         |                |           |           |                      |                     |
| N2                                                                                | CT | II | 6666898 | 6673752 | WBGene00020576 | T19D12.1  |           | T19D12.1             | -0.133213829575293  |
| AGIWUR44211                                                                       |    |    |         |         |                |           |           |                      |                     |
| N2                                                                                | CT | II | 6674268 | 6679363 | WBGene00019273 | H43E16.1  |           | H43E16.1             | 0.26140195636318    |
| AGIWUR6136;AGIWUR30081                                                            |    |    |         |         |                |           |           |                      |                     |
| N2                                                                                | CT | II | 6679545 | 6682971 | WBGene00016005 | ift-74    | C18H9.8   | 0.000795734983523033 | AGIWUR238           |
| N2                                                                                | CT | II | 6684236 | 6691841 | WBGene00016002 | C18H9.3   | C18H9.3   | -0.0218638090837935  |                     |
| AGIWUR206;AGIWUR13368;AGIWUR18047;AGIWUR23125;AGIWUR37969;AGIWUR38975;AGIWUR41873 |    |    |         |         |                |           |           |                      |                     |
| N2                                                                                | CT | II | 6692748 | 6695566 | WBGene00016003 | C18H9.5   | C18H9.5   | 0.0263605312107789   |                     |
| AGIWUR4158;AGIWUR8718;AGIWUR38275                                                 |    |    |         |         |                |           |           |                      |                     |
| N2                                                                                | CT | II | 6699084 | 6700482 | WBGene00016000 | C18H9.1   | C18H9.1   | -0.0709783879689496  | AGIWUR2090          |
| N2                                                                                | CT | II | 6700660 | 6701625 | WBGene00016004 | C18H9.6   | C18H9.6   | 0.153487831328363    | AGIWUR41807         |
| N2                                                                                | CT | II | 6702233 | 6705643 | WBGene00004507 | rpv-1     | C18H9.7   | 0.0624682610355762   | AGIWUR37590         |

|                                                           |    |    |         |         |                |          |          |                      |             |
|-----------------------------------------------------------|----|----|---------|---------|----------------|----------|----------|----------------------|-------------|
| N2                                                        | CT | II | 6710156 | 6712931 | WBGene00001072 | dpy-10   | T14B4.7  | -0.0958973942807546  |             |
| AGIWUR5189;AGIWUR7679;AGIWUR8899;AGIWUR9246               |    |    |         |         |                |          |          |                      |             |
| N2                                                        | CT | II | 6714292 | 6715971 | WBGene00001064 | dpy-2    | T14B4.6  | -0.540920254732406   | AGIWUR7774  |
| N2                                                        | CT | II | 6716863 | 6717868 | WBGene00020501 | T14B4.5  | T14B4.5  | -0.264150224000899   | AGIWUR38846 |
| N2                                                        | CT | II | 6718532 | 6720294 | WBGene00006636 | tsp-10   | T14B4.4  | -0.19116513463171    | AGIWUR4910  |
| N2                                                        | CT | II | 6720177 | 6729302 | WBGene00020502 | T14B4.8  | T14B4.8  | -0.283689890702181   | AGIWUR25786 |
| N2                                                        | CT | II | 6730207 | 6733795 | WBGene00020503 | T14B4.9  | T14B4.9  | -0.00241960914106532 |             |
| AGIWUR6731;AGIWUR12919;AGIWUR20426                        |    |    |         |         |                |          |          |                      |             |
| N2                                                        | CT | II | 6734907 | 6736110 | WBGene00020500 | T14B4.3  | T14B4.3  | -0.0844831617538286  | AGIWUR16797 |
| N2                                                        | CT | II | 6736203 | 6736793 | WBGene00020499 | T14B4.2  | T14B4.2  | 0.121538422016968    | AGIWUR20086 |
| N2                                                        | CT | II | 6736904 | 6741482 | WBGene00020498 | T14B4.1  | T14B4.1  | 0.0694095633085681   |             |
| AGIWUR1770;AGIWUR25503;AGIWUR37363;AGIWUR39875            |    |    |         |         |                |          |          |                      |             |
| N2                                                        | CT | II | 6741663 | 6742819 | WBGene00018305 | exos-8   | F41G3.14 | -0.116950669763515   |             |
| AGIWUR34684                                               |    |    |         |         |                |          |          |                      |             |
| N2                                                        | CT | II | 6742914 | 6744267 | WBGene00018302 | F41G3.6  | F41G3.6  | 0.0134987030430818   | AGIWUR4505  |
| N2                                                        | CT | II | 6744339 | 6744735 | WBGene00002098 | ins-15   | F41G3.17 | -0.00483407178621942 |             |
| AGIWUR6727;AGIWUR34476;AGIWUR39415                        |    |    |         |         |                |          |          |                      |             |
| N2                                                        | CT | II | 6745435 | 6745960 | WBGene00002097 | ins-14   | F41G3.16 | -0.0730113723481063  |             |
| AGIWUR3224;AGIWUR9228;AGIWUR29224;AGIWUR40668;AGIWUR40844 |    |    |         |         |                |          |          |                      |             |
| N2                                                        | CT | II | 6746704 | 6748586 | WBGene00018301 | F41G3.5  | F41G3.5  | 0.0962789164761553   | AGIWUR8791  |
| N2                                                        | CT | II | 6748632 | 6749522 | WBGene00018303 | F41G3.10 | F41G3.10 | 0.0721749774172586   |             |
| AGIWUR22145                                               |    |    |         |         |                |          |          |                      |             |
| N2                                                        | CT | II | 6749793 | 6751029 | WBGene00044315 | F41G3.20 | F41G3.20 | -0.0193152460165376  |             |
| AGIWUR22149;AGIWUR35617                                   |    |    |         |         |                |          |          |                      |             |
| N2                                                        | CT | II | 6751624 | 6752127 | WBGene00044317 | F41G3.19 | F41G3.19 |                      |             |
| -0.00825576970447939 AGIWUR18381;AGIWUR41751              |    |    |         |         |                |          |          |                      |             |
| N2                                                        | CT | II | 6752352 | 6752950 | WBGene00044316 | F41G3.21 | F41G3.21 | 0.0312836379861494   |             |
| AGIWUR6402;AGIWUR13731;AGIWUR34977                        |    |    |         |         |                |          |          |                      |             |
| N2                                                        | CT | II | 6753126 | 6754774 | WBGene00005986 | srx-95   | F41G3.11 | 0.16594690398659     |             |
| AGIWUR36254                                               |    |    |         |         |                |          |          |                      |             |
| N2                                                        | CT | II | 6755136 | 6755965 | WBGene00001424 | fis-1    | F41G3.4  | 0.17082407020254     | AGIWUR36073 |
| N2                                                        | CT | II | 6756476 | 6758934 | WBGene00018300 | F41G3.3  | F41G3.3  | -0.112588083385019   | AGIWUR26073 |
| N2                                                        | CT | II | 6758885 | 6760385 | WBGene00018299 | F41G3.2  | F41G3.2  | 0.092271627593262    | AGIWUR26874 |
| N2                                                        | CT | II | 6760684 | 6775176 | WBGene00018304 | agr-1    | F41G3.12 | -0.0181974052140679  |             |
| AGIWUR11141;AGIWUR41695                                   |    |    |         |         |                |          |          |                      |             |
| N2                                                        | CT | II | 6777076 | 6777889 | WBGene00020480 | ssup-72  | T13C2.4  | -0.248091574190044   | AGIWUR39899 |
| N2                                                        | CT | II | 6779464 | 6781686 | WBGene00020482 | T13C2.7  | T13C2.7  | 0.050764135569568    | AGIWUR34416 |
| N2                                                        | CT | II | 6783427 | 6788255 | WBGene00020481 | T13C2.6  | T13C2.6  | 0.320351998280733    | AGIWUR25670 |
| N2                                                        | CT | II | 6789248 | 6791782 | WBGene00020479 | T13C2.3  | T13C2.3  | 0.152245786858106    | AGIWUR27932 |

|                                                                                     |    |    |         |         |                |          |          |                      |             |
|-------------------------------------------------------------------------------------|----|----|---------|---------|----------------|----------|----------|----------------------|-------------|
| N2                                                                                  | CT | II | 6799114 | 6800154 | WBGene00017954 | F31E8.4  | F31E8.4  | -0.218482389081544   | AGIWUR13901 |
| N2                                                                                  | CT | II | 6803758 | 6804863 | WBGene00006380 | tab-1    | F31E8.3  | -0.488643260152615   |             |
| AGIWUR2387;AGIWUR23684                                                              |    |    |         |         |                |          |          |                      |             |
| N2                                                                                  | CT | II | 6805022 | 6807262 | WBGene00017955 | F31E8.5  | F31E8.5  | 0.249407403008973    | AGIWUR41168 |
| N2                                                                                  | CT | II | 6810963 | 6816443 | WBGene00004921 | snt-1    | F31E8.2  | -0.0382486756526781  |             |
| AGIWUR14122;AGIWUR14322;AGIWUR16861;AGIWUR34583;AGIWUR41369                         |    |    |         |         |                |          |          |                      |             |
| N2                                                                                  | CT | II | 6817750 | 6819328 | WBGene00017956 | F31E8.6  | F31E8.6  | -0.0969325443133435  |             |
| AGIWUR2540;AGIWUR4379;AGIWUR9978;AGIWUR12041;AGIWUR20457;AGIWUR24482                |    |    |         |         |                |          |          |                      |             |
| N2                                                                                  | CT | II | 6828119 | 6830456 | WBGene00017953 | F31E8.1  | F31E8.1  | 0.175498115551827    | AGIWUR8839  |
| N2                                                                                  | CT | II | 6835021 | 6847906 | WBGene00001194 | egl-27   | C04A2.3  | 0.271829181803053    |             |
| AGIWUR11721;AGIWUR12570;AGIWUR20852;AGIWUR21383;AGIWUR35051;AGIWUR36106;AGIWUR43838 |    |    |         |         |                |          |          |                      |             |
| N2                                                                                  | CT | II | 6848060 | 6851531 | WBGene00015410 | tbc-6    | C04A2.1  | 0.0939659813433007   |             |
| AGIWUR21486;AGIWUR36834                                                             |    |    |         |         |                |          |          |                      |             |
| N2                                                                                  | CT | II | 6853464 | 6858298 | WBGene00001023 | dnj-5    | C04A2.7  | 0.122245296097853    |             |
| AGIWUR4098;AGIWUR14610;AGIWUR24347;AGIWUR32490;AGIWUR43650                          |    |    |         |         |                |          |          |                      |             |
| N2                                                                                  | CT | II | 6860582 | 6863752 | WBGene00016625 | aff-1    | C44B7.3  | -0.0941377615100762  | AGIWUR33412 |
| N2                                                                                  | CT | II | 6868946 | 6871039 | WBGene00016626 | clhm-1   | C44B7.4  | -0.00303007421288104 | AGIWUR13362 |
| N2                                                                                  | CT | II | 6871376 | 6872593 | WBGene00016627 | C44B7.5  | C44B7.5  | -0.166764842291133   | AGIWUR26083 |
| N2                                                                                  | CT | II | 6872829 | 6877089 | WBGene00016628 | slc-36.5 | C44B7.6  | -0.114349201792606   |             |
| AGIWUR8784;AGIWUR36690                                                              |    |    |         |         |                |          |          |                      |             |
| N2                                                                                  | CT | II | 6879185 | 6880180 | WBGene00016629 | C44B7.7  | C44B7.7  | -0.128267484561617   | AGIWUR28103 |
| N2                                                                                  | CT | II | 6880701 | 6883754 | WBGene00004058 | pmp-1    | C44B7.8  | 0.161481256934238    | AGIWUR27618 |
| N2                                                                                  | CT | II | 6884049 | 6887805 | WBGene00004059 | pmp-2    | C44B7.9  | 0.0599945227723886   |             |
| AGIWUR16453;AGIWUR17155;AGIWUR31533;AGIWUR41323                                     |    |    |         |         |                |          |          |                      |             |
| N2                                                                                  | CT | II | 6888553 | 6890418 | WBGene00016630 | acer-1   | C44B7.10 | -0.0623734925021857  |             |
| AGIWUR7035;AGIWUR9317;AGIWUR30334;AGIWUR34052;AGIWUR44700                           |    |    |         |         |                |          |          |                      |             |
| N2                                                                                  | CT | II | 6891709 | 6893639 | WBGene00016632 | C44B7.12 | C44B7.12 | -0.0206882337555783  |             |
| AGIWUR40790                                                                         |    |    |         |         |                |          |          |                      |             |
| N2                                                                                  | CT | II | 6894179 | 6897540 | WBGene00016631 | C44B7.11 | C44B7.11 | -0.0148149517099201  |             |
| AGIWUR3641;AGIWUR13332                                                              |    |    |         |         |                |          |          |                      |             |
| N2                                                                                  | CT | II | 6898736 | 6901792 | WBGene00016624 | C44B7.2  | C44B7.2  | -0.0406025069527214  |             |
| AGIWUR11113;AGIWUR17944;AGIWUR27708                                                 |    |    |         |         |                |          |          |                      |             |
| N2                                                                                  | CT | II | 6902095 | 6902937 | WBGene00016623 | psmd-9   | C44B7.1  | -0.348666610650728   | AGIWUR30804 |
| N2                                                                                  | CT | II | 6902853 | 6907757 | WBGene00015088 | B0252.3  | B0252.3  | 0.0716088959521843   |             |
| AGIWUR18014;AGIWUR18631;AGIWUR31815;AGIWUR42012                                     |    |    |         |         |                |          |          |                      |             |
| N2                                                                                  | CT | II | 6910031 | 6912697 | WBGene00000211 | asm-1    | B0252.2  | 0.153650036853129    | AGIWUR20342 |
| N2                                                                                  | CT | II | 6912543 | 6913365 | WBGene00000886 | cyn-10   | B0252.4  | -0.0997756964478391  | AGIWUR2938  |
| N2                                                                                  | CT | II | 6916110 | 6916963 | WBGene00044615 | B0252.8  | B0252.8  | -0.115897091660752   |             |
| AGIWUR6502;AGIWUR23113;AGIWUR26771;AGIWUR28445;AGIWUR32697                          |    |    |         |         |                |          |          |                      |             |

|                                                                                                                                 |    |    |         |         |                |             |          |                     |             |
|---------------------------------------------------------------------------------------------------------------------------------|----|----|---------|---------|----------------|-------------|----------|---------------------|-------------|
| N2                                                                                                                              | CT | II | 6917032 | 6918922 | WBGene00015089 | B0252.5     | B0252.5  | 0.170209153181851   | AGIWUR35704 |
| N2                                                                                                                              | CT | II | 6919680 | 6923665 | WBGene00015087 | B0252.1     | B0252.1  | 0.0505010200344476  | AGIWUR6212  |
| N2                                                                                                                              | CT | II | 6924115 | 6925951 | WBGene00017700 | F22D3.4     | F22D3.4  | -0.0636310222938965 |             |
| AGIWUR14957;AGIWUR25809;AGIWUR26039;AGIWUR30794                                                                                 |    |    |         |         |                |             |          |                     |             |
| N2                                                                                                                              | CT | II | 6928770 | 6947899 | WBGene00017699 | flcn-1      | F22D3.2  | 0.107125049527228   |             |
| AGIWUR26716;AGIWUR31344;AGIWUR32445;AGIWUR42782                                                                                 |    |    |         |         |                |             |          |                     |             |
| N2                                                                                                                              | CT | II | 6947855 | 6951300 | WBGene00017702 | F22D3.6     | F22D3.6  | -0.131717106316279  |             |
| AGIWUR15369;AGIWUR32339;AGIWUR36734;AGIWUR42314                                                                                 |    |    |         |         |                |             |          |                     |             |
| N2                                                                                                                              | CT | II | 6951640 | 6955381 | WBGene00000459 | ceh-38      | F22D3.1  | 0.18880272747753    | AGIWUR24803 |
| N2                                                                                                                              | CT | II | 6955402 | 6965687 | WBGene00006605 | tra-2       | C15F1.3  | -0.0143117773960952 |             |
| AGIWUR13352;AGIWUR31857                                                                                                         |    |    |         |         |                |             |          |                     |             |
| N2                                                                                                                              | CT | II | 6965800 | 6967648 | WBGene00004090 | eif-2Bgamma | C15F1.4  | 0.00670377991624349 |             |
| AGIWUR19676                                                                                                                     |    |    |         |         |                |             |          |                     |             |
| N2                                                                                                                              | CT | II | 6967900 | 6970615 | WBGene00015796 | C15F1.5     | C15F1.5  | 0.0373046552534326  | AGIWUR28615 |
| N2                                                                                                                              | CT | II | 6970668 | 6972235 | WBGene00000198 | art-1       | C15F1.6  | 0.0712473067528698  |             |
| AGIWUR4636;AGIWUR10000;AGIWUR14253;AGIWUR15413;AGIWUR17324;AGIWUR25159;AGIWUR31374;AGIWUR45180                                  |    |    |         |         |                |             |          |                     |             |
| N2                                                                                                                              | CT | II | 6972712 | 6973892 | WBGene00004930 | sod-1       | C15F1.7  | 0.0790906091525887  |             |
| AGIWUR2953;AGIWUR3132;AGIWUR7934;AGIWUR9931;AGIWUR10748;AGIWUR12065;AGIWUR14775;AGIWUR21755;AGIWUR23619;AGIWUR42900;AGIWUR44763 |    |    |         |         |                |             |          |                     |             |
| N2                                                                                                                              | CT | II | 6976031 | 6977790 | WBGene00015797 | C15F1.8     | C15F1.8  | -0.394948529689514  | AGIWUR9736  |
| N2                                                                                                                              | CT | II | 6979953 | 6988629 | WBGene00015795 | C15F1.2     | C15F1.2  | -0.295771114945785  | AGIWUR8419  |
| N2                                                                                                                              | CT | II | 6988778 | 6991797 | WBGene00015794 | C15F1.1     | C15F1.1  | 0.438131651926536   | AGIWUR39010 |
| N2                                                                                                                              | CT | II | 6994987 | 7010624 | WBGene00006831 | unc-104     | C52E12.2 | -0.112641803857215  |             |
| AGIWUR5540;AGIWUR13662;AGIWUR16843                                                                                              |    |    |         |         |                |             |          |                     |             |
| N2                                                                                                                              | CT | II | 7010798 | 7012690 | WBGene00005025 | sqv-7       | C52E12.3 | 0.0220986048619842  |             |
| AGIWUR39600                                                                                                                     |    |    |         |         |                |             |          |                     |             |
| N2                                                                                                                              | CT | II | 7012787 | 7022509 | WBGene00016889 | lst-6       | C52E12.4 | 0.12211457131016    |             |
| AGIWUR35200                                                                                                                     |    |    |         |         |                |             |          |                     |             |
| N2                                                                                                                              | CT | II | 7022913 | 7024930 | WBGene00016890 | lst-5       | C52E12.6 | 0.0728564804084186  |             |
| AGIWUR36634                                                                                                                     |    |    |         |         |                |             |          |                     |             |
| N2                                                                                                                              | CT | II | 7025802 | 7030152 | WBGene00016888 | C52E12.1    | C52E12.1 | -0.116981400321233  |             |
| AGIWUR28857                                                                                                                     |    |    |         |         |                |             |          |                     |             |
| N2                                                                                                                              | CT | II | 7038292 | 7041685 | WBGene00022854 | cin-4       | ZK1127.7 | 0.0293744967216867  |             |
| AGIWUR8703                                                                                                                      |    |    |         |         |                |             |          |                     |             |
| N2                                                                                                                              | CT | II | 7046041 | 7050071 | WBGene00022855 | tcer-1      | ZK1127.9 | -0.118009171874174  |             |
| AGIWUR38935                                                                                                                     |    |    |         |         |                |             |          |                     |             |
| N2                                                                                                                              | CT | II | 7050672 | 7052001 | WBGene00022852 | ZK1127.5    | ZK1127.5 | -0.184601814385688  |             |
| AGIWUR12643                                                                                                                     |    |    |         |         |                |             |          |                     |             |
| N2                                                                                                                              | CT | II | 7053949 | 7055208 | WBGene00022851 | ZK1127.4    | ZK1127.4 | -0.0248201406283322 |             |

|                                                                                                                                                                                 |    |    |         |         |                |          |           |                      |             |
|---------------------------------------------------------------------------------------------------------------------------------------------------------------------------------|----|----|---------|---------|----------------|----------|-----------|----------------------|-------------|
| AGIWUR22920                                                                                                                                                                     |    |    |         |         |                |          |           |                      |             |
| N2                                                                                                                                                                              | CT | II | 7055287 | 7056185 | WBGene00022850 | ZK1127.3 | ZK1127.3  | 0.193082389833696    |             |
| AGIWUR20341                                                                                                                                                                     |    |    |         |         |                |          |           |                      |             |
| N2                                                                                                                                                                              | CT | II | 7056173 | 7058014 | WBGene00022856 | cth-2    | ZK1127.10 | -0.105691313504071   |             |
| AGIWUR40731                                                                                                                                                                     |    |    |         |         |                |          |           |                      |             |
| N2                                                                                                                                                                              | CT | II | 7061999 | 7064777 | WBGene00022849 | acs-6    | ZK1127.2  | 0.189023284115189    |             |
| AGIWUR7902;AGIWUR26493;AGIWUR32029;AGIWUR35905                                                                                                                                  |    |    |         |         |                |          |           |                      |             |
| N2                                                                                                                                                                              | CT | II | 7065020 | 7069966 | WBGene00001872 | him-14   | ZK1127.11 | -0.0279904828540865  |             |
| AGIWUR32896                                                                                                                                                                     |    |    |         |         |                |          |           |                      |             |
| N2                                                                                                                                                                              | CT | II | 7070183 | 7072415 | WBGene00002238 | kars-1   | T02G5.9   | 0.0792287297571086   |             |
| AGIWUR8558;AGIWUR8762;AGIWUR9241;AGIWUR9623;AGIWUR14316;AGIWUR16111;AGIWUR16580;AGIWUR16967;AGIWUR17504;AGIWUR19670;AGIWUR19785;AGIWUR20560;AGIWUR24332;AGIWUR25804;AGIWUR29473 |    |    |         |         |                |          |           |                      |             |
| N2                                                                                                                                                                              | CT | II | 7073796 | 7075551 | WBGene00002183 | kat-1    | T02G5.8   | 0.0826312903362254   | AGIWUR30245 |
| N2                                                                                                                                                                              | CT | II | 7075614 | 7077188 | WBGene00020166 | T02G5.7  | T02G5.7   | 0.0822831908250699   | AGIWUR17844 |
| N2                                                                                                                                                                              | CT | II | 7089674 | 7093102 | WBGene00020170 | T02G5.14 | T02G5.14  | -1.21406359688124    |             |
| AGIWUR23431                                                                                                                                                                     |    |    |         |         |                |          |           |                      |             |
| N2                                                                                                                                                                              | CT | II | 7094159 | 7099348 | WBGene00020163 | T02G5.3  | T02G5.3   | 0.0805261916427078   |             |
| AGIWUR16849;AGIWUR21511;AGIWUR23413                                                                                                                                             |    |    |         |         |                |          |           |                      |             |
| N2                                                                                                                                                                              | CT | II | 7099587 | 7101163 | WBGene00020169 | mmaa-1   | T02G5.13  | -0.00925239958472091 |             |
| AGIWUR11168;AGIWUR18345;AGIWUR31200                                                                                                                                             |    |    |         |         |                |          |           |                      |             |
| N2                                                                                                                                                                              | CT | II | 7101218 | 7105030 | WBGene00017349 | far1-11  | F10E7.8   | 0.106849488899606    |             |
| AGIWUR11964;AGIWUR23533;AGIWUR42834                                                                                                                                             |    |    |         |         |                |          |           |                      |             |
| N2                                                                                                                                                                              | CT | II | 7105556 | 7106462 | WBGene00004447 | rp1-33   | F10E7.7   | -0.091911327988937   |             |
| AGIWUR11876;AGIWUR26736                                                                                                                                                         |    |    |         |         |                |          |           |                      |             |
| N2                                                                                                                                                                              | CT | II | 7106412 | 7110056 | WBGene00017350 | F10E7.9  | F10E7.9   | 0.00932599198650408  |             |
| AGIWUR16688;AGIWUR32795;AGIWUR33226                                                                                                                                             |    |    |         |         |                |          |           |                      |             |
| N2                                                                                                                                                                              | CT | II | 7111978 | 7112982 | WBGene00017347 | F10E7.5  | F10E7.5   | 0.050035703936425    |             |
| AGIWUR4400;AGIWUR7502;AGIWUR24469;AGIWUR42014                                                                                                                                   |    |    |         |         |                |          |           |                      |             |
| N2                                                                                                                                                                              | CT | II | 7113080 | 7113732 | WBGene00017348 | F10E7.6  | F10E7.6   | -0.127353371387247   |             |
| AGIWUR1488;AGIWUR7762;AGIWUR13851;AGIWUR26019;AGIWUR37859                                                                                                                       |    |    |         |         |                |          |           |                      |             |
| N2                                                                                                                                                                              | CT | II | 7113683 | 7115906 | WBGene00017351 | cut1-5   | F10E7.10  | 0.0201197333960517   |             |
| AGIWUR13722;AGIWUR22484                                                                                                                                                         |    |    |         |         |                |          |           |                      |             |
| N2                                                                                                                                                                              | CT | II | 7116557 | 7120558 | WBGene00006893 | spon-1   | F10E7.4   | 0.198261208585313    | AGIWUR20876 |
| N2                                                                                                                                                                              | CT | II | 7122242 | 7124386 | WBGene00017344 | F10E7.2  | F10E7.2   | 0.236596767771568    | AGIWUR15200 |
| N2                                                                                                                                                                              | CT | II | 7126757 | 7129015 | WBGene00017343 | F10E7.1  | F10E7.1   | 0.0327373040420529   | AGIWUR10452 |
| N2                                                                                                                                                                              | CT | II | 7132643 | 7137522 | WBGene00001597 | gld-3    | T07F8.3   | 0.0906450492115471   |             |
| AGIWUR22578;AGIWUR44550                                                                                                                                                         |    |    |         |         |                |          |           |                      |             |
| N2                                                                                                                                                                              | CT | II | 7144607 | 7147253 | WBGene00020319 | npr-31   | T07F8.2   | -0.0697608172303674  |             |
| AGIWUR9277;AGIWUR13635                                                                                                                                                          |    |    |         |         |                |          |           |                      |             |

|                                                                         |    |    |         |         |                |          |          |                     |             |
|-------------------------------------------------------------------------|----|----|---------|---------|----------------|----------|----------|---------------------|-------------|
| N2                                                                      | CT | II | 7149248 | 7151760 | WBGene00020318 | T07F8.1  | T07F8.1  | 0.00925967132730499 | AGIWUR36349 |
| N2                                                                      | CT | II | 7152566 | 7155474 | WBGene00016173 | fust-1   | C27H5.3  | 0.143018532988354   |             |
| AGIWUR14809;AGIWUR16435;AGIWUR22532;AGIWUR27041;AGIWUR27422;AGIWUR32056 |    |    |         |         |                |          |          |                     |             |
| N2                                                                      | CT | II | 7155581 | 7160950 | WBGene00016172 | C27H5.2  | C27H5.2  | -0.0235931880081495 |             |
| AGIWUR2348;AGIWUR28082;AGIWUR37493                                      |    |    |         |         |                |          |          |                     |             |
| N2                                                                      | CT | II | 7167513 | 7168662 | WBGene00000613 | col-36   | C27H5.5  | -0.0443652436450606 | AGIWUR24577 |
| N2                                                                      | CT | II | 7168817 | 7171355 | WBGene00001129 | dyf-13   | C27H5.7  | -0.293894438021066  | AGIWUR24706 |
| N2                                                                      | CT | II | 7172204 | 7174936 | WBGene00001594 | glc-4    | C27H5.8  | 0.0923598094317928  | AGIWUR4113  |
| N2                                                                      | CT | II | 7183806 | 7185192 | WBGene00003966 | pd1-1    | C27H5.1  | -0.0663694687893415 | AGIWUR41484 |
| N2                                                                      | CT | II | 7185277 | 7187210 | WBGene00016175 | C27H5.6  | C27H5.6  | 0.0595500090777126  | AGIWUR5202  |
| N2                                                                      | CT | II | 7189420 | 7192507 | WBGene00017124 | E04F6.4  | E04F6.4  | 0.109511309128093   | AGIWUR27694 |
| N2                                                                      | CT | II | 7192436 | 7194815 | WBGene00017125 | acdh-12  | E04F6.5  | -0.0910949675464838 |             |
| AGIWUR7890;AGIWUR8115                                                   |    |    |         |         |                |          |          |                     |             |
| N2                                                                      | CT | II | 7196276 | 7197495 | WBGene00017123 | maoc-1   | E04F6.3  | -0.0420668676877582 | AGIWUR36730 |
| N2                                                                      | CT | II | 7197415 | 7199565 | WBGene00017126 | E04F6.6  | E04F6.6  | -0.182617457810214  |             |
| AGIWUR3875;AGIWUR9971                                                   |    |    |         |         |                |          |          |                     |             |
| N2                                                                      | CT | II | 7200233 | 7200418 | WBGene00045095 | mrpr-1   | E04F6.16 | 0.252954378267419   |             |
| AGIWUR7702;AGIWUR18469;AGIWUR20475;AGIWUR43358;AGIWUR43666              |    |    |         |         |                |          |          |                     |             |
| N2                                                                      | CT | II | 7200611 | 7201880 | WBGene00017122 | pcrg-1   | E04F6.2  | -0.137811539889694  | AGIWUR38515 |
| N2                                                                      | CT | II | 7202016 | 7203210 | WBGene00005134 | srd-56   | E04F6.14 | 0.111913931447297   |             |
| AGIWUR7886                                                              |    |    |         |         |                |          |          |                     |             |
| N2                                                                      | CT | II | 7203911 | 7205051 | WBGene00005135 | srd-58   | E04F6.13 | -0.0538337043805406 |             |
| AGIWUR34211                                                             |    |    |         |         |                |          |          |                     |             |
| N2                                                                      | CT | II | 7205688 | 7206892 | WBGene00005136 | srd-59   | E04F6.1  | 0.0422628089510138  | AGIWUR2527  |
| N2                                                                      | CT | II | 7206990 | 7208460 | WBGene00000971 | dhs-7    | E04F6.7  | -0.299572278980516  | AGIWUR40494 |
| N2                                                                      | CT | II | 7208773 | 7210287 | WBGene00017131 | E04F6.15 | E04F6.15 | -0.0817183059464206 |             |
| AGIWUR13348                                                             |    |    |         |         |                |          |          |                     |             |
| N2                                                                      | CT | II | 7210731 | 7211380 | WBGene00017127 | E04F6.8  | E04F6.8  | -0.349864902036297  |             |
| AGIWUR14338;AGIWUR16369;AGIWUR26017;AGIWUR26803;AGIWUR27394;AGIWUR44297 |    |    |         |         |                |          |          |                     |             |
| N2                                                                      | CT | II | 7211625 | 7212159 | WBGene00017128 | E04F6.9  | E04F6.9  | -0.0463905483957276 |             |
| AGIWUR19581;AGIWUR30555;AGIWUR35295                                     |    |    |         |         |                |          |          |                     |             |
| N2                                                                      | CT | II | 7214055 | 7216957 | WBGene00017129 | E04F6.10 | E04F6.10 | -0.0885389458218033 |             |
| AGIWUR3141;AGIWUR7507;AGIWUR15684;AGIWUR26762                           |    |    |         |         |                |          |          |                     |             |
| N2                                                                      | CT | II | 7217076 | 7217478 | WBGene00017130 | E04F6.12 | E04F6.12 | 0.0868507787998416  |             |
| AGIWUR22286                                                             |    |    |         |         |                |          |          |                     |             |
| N2                                                                      | CT | II | 7217955 | 7225648 | WBGene00000530 | clh-3    | E04F6.11 | 0.158560871043096   |             |
| AGIWUR15731;AGIWUR24176;AGIWUR25909;AGIWUR41732                         |    |    |         |         |                |          |          |                     |             |
| N2                                                                      | CT | II | 7228784 | 7230616 | WBGene00017970 | F32A5.4  | F32A5.4  | -0.0384120392646548 |             |
| AGIWUR1286;AGIWUR8256;AGIWUR16085;AGIWUR39884                           |    |    |         |         |                |          |          |                     |             |

|                                                                      |    |    |         |         |                |          |          |                      |             |
|----------------------------------------------------------------------|----|----|---------|---------|----------------|----------|----------|----------------------|-------------|
| N2                                                                   | CT | II | 7232853 | 7235920 | WBGene00017969 | F32A5.3  | F32A5.3  | 0.276998867868401    |             |
| AGIWUR12121;AGIWUR13016;AGIWUR27135;AGIWUR36318                      |    |    |         |         |                |          |          |                      |             |
| N2                                                                   | CT | II | 7235834 | 7238349 | WBGene00000169 | aqp-1    | F32A5.5  | 0.0875495612072337   |             |
| AGIWUR4628;AGIWUR5582                                                |    |    |         |         |                |          |          |                      |             |
| N2                                                                   | CT | II | 7245876 | 7250181 | WBGene00017968 | skpo-3   | F32A5.2  | 0.185919990703407    |             |
| AGIWUR884;AGIWUR9594;AGIWUR11173;AGIWUR29384;AGIWUR34437;AGIWUR41351 |    |    |         |         |                |          |          |                      |             |
| N2                                                                   | CT | II | 7250151 | 7252010 | WBGene00004198 | prx-13   | F32A5.6  | 0.23803456882913     | AGIWUR18591 |
| N2                                                                   | CT | II | 7252259 | 7255735 | WBGene00017967 | ada-2    | F32A5.1  | 0.0381760237258888   | AGIWUR15959 |
| N2                                                                   | CT | II | 7256112 | 7258112 | WBGene00017971 | F32A5.8  | F32A5.8  | -0.00550859830308514 |             |
| AGIWUR24468;AGIWUR31093                                              |    |    |         |         |                |          |          |                      |             |
| N2                                                                   | CT | II | 7258389 | 7258829 | WBGene00023021 | F32A5.9  | F32A5.9  | 0.0154905788065243   |             |
| AGIWUR9798;AGIWUR18140;AGIWUR30385                                   |    |    |         |         |                |          |          |                      |             |
| N2                                                                   | CT | II | 7261648 | 7263654 | WBGene00016276 | C30G12.4 | C30G12.4 | -0.264873797727042   |             |
| AGIWUR13871;AGIWUR19260;AGIWUR31662;AGIWUR32334                      |    |    |         |         |                |          |          |                      |             |
| N2                                                                   | CT | II | 7274732 | 7277223 | WBGene00016275 | C30G12.3 | C30G12.3 | 0.113494066299994    |             |
| AGIWUR23627                                                          |    |    |         |         |                |          |          |                      |             |
| N2                                                                   | CT | II | 7290373 | 7291882 | WBGene00016274 | C30G12.2 | C30G12.2 | 0.789487205503567    |             |
| AGIWUR32700                                                          |    |    |         |         |                |          |          |                      |             |
| N2                                                                   | CT | II | 7292192 | 7296015 | WBGene00016277 | C30G12.6 | C30G12.6 | -0.0934809913546957  |             |
| AGIWUR13314                                                          |    |    |         |         |                |          |          |                      |             |
| N2                                                                   | CT | II | 7296110 | 7298247 | WBGene00004244 | puf-8    | C30G12.7 | 0.144645746151801    |             |
| AGIWUR29920;AGIWUR31561;AGIWUR36265                                  |    |    |         |         |                |          |          |                      |             |
| N2                                                                   | CT | II | 7299514 | 7301632 | WBGene00016273 | C30G12.1 | C30G12.1 | 0.143035798626823    |             |
| AGIWUR26118                                                          |    |    |         |         |                |          |          |                      |             |
| N2                                                                   | CT | II | 7302101 | 7305760 | WBGene00000839 | cul-4    | F45E12.3 | 0.0245500036928519   |             |
| AGIWUR495;AGIWUR13180;AGIWUR36169                                    |    |    |         |         |                |          |          |                      |             |
| N2                                                                   | CT | II | 7305861 | 7308738 | WBGene00000271 | brf-1    | F45E12.2 | 0.0222304975348635   |             |
| AGIWUR18584                                                          |    |    |         |         |                |          |          |                      |             |
| N2                                                                   | CT | II | 7308702 | 7310115 | WBGene00018475 | mrpl-14  | F45E12.5 | 0.0961292912183875   |             |
| AGIWUR11390;AGIWUR37904                                              |    |    |         |         |                |          |          |                      |             |
| N2                                                                   | CT | II | 7310348 | 7313787 | WBGene00018474 | cnep-1   | F45E12.1 | 0.0779046641281695   |             |
| AGIWUR35826                                                          |    |    |         |         |                |          |          |                      |             |
| N2                                                                   | CT | II | 7313774 | 7314181 | WBGene00018476 | F45E12.6 | F45E12.6 | -0.15467691548216    |             |
| AGIWUR27968                                                          |    |    |         |         |                |          |          |                      |             |
| N2                                                                   | CT | II | 7318684 | 7319153 | WBGene00017662 | F21D12.2 | F21D12.2 | -0.0650189959125314  |             |
| AGIWUR25324                                                          |    |    |         |         |                |          |          |                      |             |
| N2                                                                   | CT | II | 7319910 | 7323200 | WBGene00017663 | F21D12.3 | F21D12.3 | 0.260093651952513    |             |
| AGIWUR34329                                                          |    |    |         |         |                |          |          |                      |             |
| N2                                                                   | CT | II | 7328736 | 7331324 | WBGene00017664 | npax-1   | F21D12.5 | 0.0153452605825759   |             |

AGIWUR29093  
N2 CT II 7339229 7349124 WBGene00003620 nhr-21 F21D12.1 -0.0535089989334576  
AGIWUR32353;AGIWUR34044;AGIWUR38422  
N2 CT II 7350121 7352636 WBGene00002008 hsp-4 F43E2.8 -0.0497170668450337 AGIWUR16929  
N2 CT II 7353576 7356426 WBGene00001812 haf-2 F43E2.4 0.054592129449162 AGIWUR37462  
N2 CT II 7358913 7359504 WBGene00018396 F43E2.9 F43E2.9 0.0438400485474446 AGIWUR10546  
N2 CT II 7359961 7363247 WBGene00018392 insc-1 F43E2.3 -0.163745946259951 AGIWUR35459  
N2 CT II 7363216 7364107 WBGene00018393 msra-1 F43E2.5 -0.00613501429416274 AGIWUR8710  
N2 CT II 7366591 7369049 WBGene00018394 F43E2.6 F43E2.6 0.12540879326545  
AGIWUR14479;AGIWUR28754;AGIWUR30906;AGIWUR36753;AGIWUR37020  
N2 CT II 7369992 7371275 WBGene00018397 F43E2.11 F43E2.11 -0.206145109373288  
AGIWUR28564  
N2 CT II 7372594 7374172 WBGene00018395 mtch-1 F43E2.7 0.0111806041529663  
AGIWUR157;AGIWUR28677  
N2 CT II 7374501 7375237 WBGene00018391 rpb-4 F43E2.2 -0.20856928865577 AGIWUR21679  
N2 CT II 7379177 7379612 WBGene00044673 C07D10.6 C07D10.6 0.0262543577499184  
AGIWUR13270;AGIWUR14746;AGIWUR30620;AGIWUR31090;AGIWUR44996  
N2 CT II 7381561 7383499 WBGene00015569 C07D10.5 C07D10.5 -0.0660327367214819  
AGIWUR44000  
N2 CT II 7387162 7389142 WBGene00015568 sre-3 C07D10.3 0.0462908838816452  
AGIWUR45007  
N2 CT II 7394765 7397351 WBGene00015567 bath-44 C07D10.2 0.0325351584391562  
AGIWUR36096  
N2 CT II 7399012 7400540 WBGene00015566 C07D10.1 C07D10.1 -0.0647885133472741  
AGIWUR18473  
N2 CT II 7400544 7402724 WBGene00003526 nas-7 C07D10.4 -0.218621682916926  
AGIWUR3626;AGIWUR16232;AGIWUR39221  
N2 CT II 7408492 7410747 WBGene00005133 srd-55 K02A2.2 -0.0130548578601895 AGIWUR21751  
N2 CT II 7411075 7412030 WBGene00019290 K02A2.5 K02A2.5 0.0243781547244151  
AGIWUR3083;AGIWUR17628;AGIWUR20926  
N2 CT II 7425935 7431390 WBGene00019289 kcc-3 K02A2.3 -0.291117880877209 AGIWUR7656  
N2 CT II 7432696 7434216 WBGene00005132 srd-54 K02A2.7 -0.043341831418632  
AGIWUR9242;AGIWUR28397  
N2 CT II 7435852 7436999 WBGene00005130 srd-52 K02A2.4 0.0927733927017753  
AGIWUR5866;AGIWUR13963;AGIWUR24611;AGIWUR39878  
N2 CT II 7456242 7457380 WBGene00017023 D1022.4 D1022.4 -0.0774693252886607 AGIWUR19967  
N2 CT II 7457667 7458806 WBGene00017024 D1022.5 D1022.5 0.213814397955889  
AGIWUR30740;AGIWUR45185  
N2 CT II 7459531 7460076 WBGene00017021 D1022.2 D1022.2 -0.254247482039252 AGIWUR8681



|                                                                                              |    |    |         |         |                |           |           |                           |             |
|----------------------------------------------------------------------------------------------|----|----|---------|---------|----------------|-----------|-----------|---------------------------|-------------|
| N2                                                                                           | CT | II | 7460110 | 7463614 | WBGene00005641 | sro-1     | D1022.6   | 0.0702745368414632        | AGIWUR15307 |
| N2                                                                                           | CT | II | 7472729 | 7478959 | WBGene00000101 | aka-1     | D1022.7   | 0.1214985585712           |             |
| AGIWUR3114;AGIWUR3158;AGIWUR6829;AGIWUR12669;AGIWUR17212;AGIWUR18049;AGIWUR24183;AGIWUR40155 |    |    |         |         |                |           |           |                           |             |
| N2                                                                                           | CT | II | 7479064 | 7480713 | WBGene00006703 | ubc-6     | D1022.1   | -0.221244851322798        | AGIWUR40011 |
| N2                                                                                           | CT | II | 7480751 | 7483109 | WBGene00000280 | cah-2     | D1022.8   | -0.0491871726080859       | AGIWUR1356  |
| N2                                                                                           | CT | II | 7488242 | 7489661 | WBGene00044300 |           | D1022.9   | D1022.9 0.209170167720348 |             |
| AGIWUR33482;AGIWUR42517                                                                      |    |    |         |         |                |           |           |                           |             |
| N2                                                                                           | CT | II | 7491399 | 7493699 | WBGene00003542 | nas-23    | R10H1.5   | -0.00403562313762462      |             |
| AGIWUR4989;AGIWUR8815;AGIWUR12650;AGIWUR18219;AGIWUR22957;AGIWUR30287                        |    |    |         |         |                |           |           |                           |             |
| N2                                                                                           | CT | II | 7494460 | 7496174 | WBGene00019998 | R10H1.1   | R10H1.1   | -0.179060674726433        | AGIWUR6877  |
| N2                                                                                           | CT | II | 7496247 | 7497369 | WBGene00023416 | spi-1     | R10H1.4   | 0.0824096043655231        |             |
| AGIWUR2722;AGIWUR5494;AGIWUR8413;AGIWUR33980;AGIWUR34800;AGIWUR41809                         |    |    |         |         |                |           |           |                           |             |
| N2                                                                                           | CT | II | 7497286 | 7499475 | WBGene00019999 | srab-14   | R10H1.2   | -0.0932453789682421       |             |
| AGIWUR20225;AGIWUR41600                                                                      |    |    |         |         |                |           |           |                           |             |
| N2                                                                                           | CT | II | 7505351 | 7506595 | WBGene00016183 | C28F5.1   | C28F5.1   | 0.0250968066493744        | AGIWUR23368 |
| N2                                                                                           | CT | II | 7507319 | 7513975 | WBGene00016184 | glb-9     | C28F5.2   | 0.111708264456546         |             |
| AGIWUR3730;AGIWUR40072                                                                       |    |    |         |         |                |           |           |                           |             |
| N2                                                                                           | CT | II | 7519860 | 7523368 | WBGene00016185 | C28F5.4   | C28F5.4   | 0.106832396334962         | AGIWUR19483 |
| N2                                                                                           | CT | II | 7523581 | 7524421 | WBGene00044775 | ZK1290.15 | ZK1290.15 | -0.205341292109331        |             |
| AGIWUR634;AGIWUR9068;AGIWUR12802;AGIWUR26783;AGIWUR31840                                     |    |    |         |         |                |           |           |                           |             |
| N2                                                                                           | CT | II | 7524467 | 7525558 | WBGene00022889 | ZK1290.7  | ZK1290.7  | -0.231893983473606        |             |
| AGIWUR43100                                                                                  |    |    |         |         |                |           |           |                           |             |
| N2                                                                                           | CT | II | 7525738 | 7528241 | WBGene00022888 | rnh-1.1   | ZK1290.6  | 0.251343990657393         |             |
| AGIWUR18436                                                                                  |    |    |         |         |                |           |           |                           |             |
| N2                                                                                           | CT | II | 7529643 | 7530991 | WBGene00022887 | ZK1290.5  | ZK1290.5  | -0.444996827438427        |             |
| AGIWUR13403                                                                                  |    |    |         |         |                |           |           |                           |             |
| N2                                                                                           | CT | II | 7531145 | 7533246 | WBGene00006947 | wrt-1     | ZK1290.12 | -0.571677177390422        |             |
| AGIWUR18642                                                                                  |    |    |         |         |                |           |           |                           |             |
| N2                                                                                           | CT | II | 7533300 | 7534563 | WBGene00006956 | wrt-10    | ZK1290.8  | -0.342216039566307        |             |
| AGIWUR42222                                                                                  |    |    |         |         |                |           |           |                           |             |
| N2                                                                                           | CT | II | 7535006 | 7536989 | WBGene00022893 | ZK1290.13 | ZK1290.13 | -0.0585878681011431       |             |
| AGIWUR16643                                                                                  |    |    |         |         |                |           |           |                           |             |
| N2                                                                                           | CT | II | 7538187 | 7543000 | WBGene00003592 | nfi-1     | ZK1290.4  | 0.15654962466718          |             |
| AGIWUR3009;AGIWUR17692;AGIWUR20277;AGIWUR43039                                               |    |    |         |         |                |           |           |                           |             |
| N2                                                                                           | CT | II | 7544069 | 7545335 | WBGene00004398 | rol-8     | ZK1290.3  | -0.308736813197025        |             |
| AGIWUR40755;AGIWUR41897                                                                      |    |    |         |         |                |           |           |                           |             |
| N2                                                                                           | CT | II | 7546807 | 7548129 | WBGene00022890 | fbxa-224  | ZK1290.9  | 0.201616703029664         |             |
| AGIWUR8162;AGIWUR22574;AGIWUR33222                                                           |    |    |         |         |                |           |           |                           |             |
| N2                                                                                           | CT | II | 7549335 | 7551977 | WBGene00006600 | tph-1     | ZK1290.2  | -0.157579555209668        |             |

|                                                                                                                                     |    |    |         |         |                |           |           |                       |             |
|-------------------------------------------------------------------------------------------------------------------------------------|----|----|---------|---------|----------------|-----------|-----------|-----------------------|-------------|
| AGIWUR15624;AGIWUR34300;AGIWUR45200                                                                                                 |    |    |         |         |                |           |           |                       |             |
| N2                                                                                                                                  | CT | II | 7551951 | 7553906 | WBGene00022891 | ZK1290.10 | ZK1290.10 | -0.0423838114329982   |             |
| AGIWUR20209                                                                                                                         |    |    |         |         |                |           |           |                       |             |
| N2                                                                                                                                  | CT | II | 7554092 | 7554844 | WBGene00044396 | ZK1290.14 | ZK1290.14 | -0.217387648177176    |             |
| AGIWUR31327                                                                                                                         |    |    |         |         |                |           |           |                       |             |
| N2                                                                                                                                  | CT | II | 7560925 | 7561594 | WBGene00022892 | ZK1290.11 | ZK1290.11 | -0.424008934942174    |             |
| AGIWUR11550                                                                                                                         |    |    |         |         |                |           |           |                       |             |
| N2                                                                                                                                  | CT | II | 7561753 | 7562701 | WBGene00022886 | ZK1290.1  | ZK1290.1  | -0.336237561613245    |             |
| AGIWUR14827                                                                                                                         |    |    |         |         |                |           |           |                       |             |
| N2                                                                                                                                  | CT | II | 7570605 | 7572444 | WBGene00018041 | F35D2.3   | F35D2.3   | -0.293857800374335    | AGIWUR25303 |
| N2                                                                                                                                  | CT | II | 7574431 | 7575830 | WBGene00018040 | F35D2.2   | F35D2.2   | -0.416792235154832    | AGIWUR28100 |
| N2                                                                                                                                  | CT | II | 7577723 | 7580244 | WBGene00194916 | F35D2.6   | F35D2.6   | 0.203623814784128     | AGIWUR5613  |
| N2                                                                                                                                  | CT | II | 7580270 | 7583557 | WBGene00018042 | mks-3     | F35D2.4   | 0.0375641954771906    |             |
| AGIWUR1760;AGIWUR12494;AGIWUR15947                                                                                                  |    |    |         |         |                |           |           |                       |             |
| N2                                                                                                                                  | CT | II | 7585731 | 7594912 | WBGene00006363 | syd-1     | F35D2.5   | -0.258366917336237    |             |
| AGIWUR5413;AGIWUR13745;AGIWUR15444;AGIWUR20159;AGIWUR24267;AGIWUR33701                                                              |    |    |         |         |                |           |           |                       |             |
| N2                                                                                                                                  | CT | II | 7597545 | 7598752 | WBGene00019941 | pgam-5    | R07G3.5   | 0.014956000191388     |             |
| AGIWUR8443;AGIWUR16940;AGIWUR37105;AGIWUR38237                                                                                      |    |    |         |         |                |           |           |                       |             |
| N2                                                                                                                                  | CT | II | 7599657 | 7608014 | WBGene00019940 | npp-21    | R07G3.3   | 0.010461313905175     |             |
| AGIWUR8835;AGIWUR16750;AGIWUR44811                                                                                                  |    |    |         |         |                |           |           |                       |             |
| N2                                                                                                                                  | CT | II | 7608253 | 7610986 | WBGene00019939 | lips-17   | R07G3.2   | 0.0907228414172216    | AGIWUR37450 |
| N2                                                                                                                                  | CT | II | 7610986 | 7613730 | WBGene00019943 | R07G3.7   | R07G3.7   | -0.209356562114959    | AGIWUR29343 |
| N2                                                                                                                                  | CT | II | 7613541 | 7614434 | WBGene00043050 | oig-4     | R07G3.9   | -0.116830271874007    |             |
| AGIWUR43422;AGIWUR44530                                                                                                             |    |    |         |         |                |           |           |                       |             |
| N2                                                                                                                                  | CT | II | 7616452 | 7618245 | WBGene00000390 | cdc-42    | R07G3.1   | 0.189221516891756     |             |
| AGIWUR19545;AGIWUR38027                                                                                                             |    |    |         |         |                |           |           |                       |             |
| N2                                                                                                                                  | CT | II | 7618238 | 7620513 | WBGene00019944 | R07G3.8   | R07G3.8   | -0.228946441360959    |             |
| AGIWUR9490;AGIWUR14987;AGIWUR16684;AGIWUR38424                                                                                      |    |    |         |         |                |           |           |                       |             |
| N2                                                                                                                                  | CT | II | 7627250 | 7651295 | WBGene00020114 | pde-4     | R153.1    | -0.000852948168837742 |             |
| AGIWUR19305;AGIWUR24964;AGIWUR29067;AGIWUR34488;AGIWUR36443;AGIWUR36503;AGIWUR36847;AGIWUR39101;AGIWUR40129;AGIWUR40871;AGIWUR41328 |    |    |         |         |                |           |           |                       |             |
| N2                                                                                                                                  | CT | II | 7658324 | 7662522 | WBGene00017547 | alfa-1    | F18A1.6   | 0.0146053144364107    | AGIWUR39387 |
| N2                                                                                                                                  | CT | II | 7662706 | 7663754 | WBGene00017548 | F18A1.7   | F18A1.7   | -0.147715604615232    |             |
| AGIWUR4578;AGIWUR9651;AGIWUR31096                                                                                                   |    |    |         |         |                |           |           |                       |             |
| N2                                                                                                                                  | CT | II | 7664582 | 7667110 | WBGene00017546 | rpa-1     | F18A1.5   | -0.150416332377933    | AGIWUR6934  |
| N2                                                                                                                                  | CT | II | 7667993 | 7671905 | WBGene00003045 | lir-2     | F18A1.4   | -0.302094517960429    | AGIWUR26034 |
| N2                                                                                                                                  | CT | II | 7672010 | 7682359 | WBGene00003044 | lir-1     | F18A1.3   | 0.110162830025693     |             |
| AGIWUR17589;AGIWUR35849;AGIWUR42838                                                                                                 |    |    |         |         |                |           |           |                       |             |
| N2                                                                                                                                  | CT | II | 7682198 | 7684760 | WBGene00003012 | lin-26    | F18A1.2   | 0.191524941848421     |             |

AGIWUR3543;AGIWUR19668;AGIWUR28083;AGIWUR31105;AGIWUR32625  
 N2 CT II 7684889 7689689 WBGene00017545 F18A1.1 F18A1.1 -0.0912431226345465  
 AGIWUR23601;AGIWUR25978;AGIWUR40021  
 N2 CT II 7689710 7690572 WBGene00017549 pid-1 F18A1.8 0.0479475785423276 AGIWUR21471  
 N2 CT II 7690711 7693957 WBGene00003730 nhx-2 B0495.4 -0.196517885508573 AGIWUR12604  
 N2 CT II 7695935 7698506 WBGene00015204 B0495.5 B0495.5 -0.0763860853116576 AGIWUR31611  
 N2 CT II 7698613 7699046 WBGene00015205 moa-2 B0495.6 -0.12369562520653 AGIWUR24473  
 N2 CT II 7699254 7702012 WBGene00015203 cdk-11.1 B0495.2 0.0672810214071955  
 AGIWUR6112;AGIWUR35553;AGIWUR42351  
 N2 CT II 7701948 7705276 WBGene00015206 B0495.7 B0495.7 0.0270115349767721  
 AGIWUR15900;AGIWUR33473  
 N2 CT II 7705536 7707483 WBGene00015207 B0495.8 B0495.8 -0.0926420806574284  
 AGIWUR1814;AGIWUR6376;AGIWUR14232;AGIWUR18839;AGIWUR31518;AGIWUR45176  
 N2 CT II 7707586 7708725 WBGene00015208 B0495.9 B0495.9 0.0788053513271691 AGIWUR13090  
 N2 CT II 7709789 7711444 WBGene00005149 sre-1 B0495.1 -0.0312652606139467 AGIWUR10241  
 N2 CT II 7711871 7718591 WBGene00007044 cpna-5 B0495.10 0.137548102797556  
 AGIWUR11799;AGIWUR15380;AGIWUR25684  
 N2 CT II 7724903 7752715 WBGene00015061 cpna-2 B0228.4 0.0372629666102444  
 AGIWUR6619;AGIWUR9887;AGIWUR16731;AGIWUR25986;AGIWUR31582;AGIWUR34570;AGIWUR38002  
 N2 CT II 7752637 7753607 WBGene00015062 trx-1 B0228.5 0.0615549949588239  
 AGIWUR23893;AGIWUR30447;AGIWUR42639  
 N2 CT II 7754147 7755156 WBGene00015063 B0228.6 B0228.6 0.0305446612703033 AGIWUR23399  
 N2 CT II 7755997 7756907 WBGene00015059 B0228.1 B0228.1 0.0167462538870673  
 AGIWUR36033;AGIWUR39436;AGIWUR45163  
 N2 CT II 7757190 7758922 WBGene00015064 B0228.7 B0228.7 -0.120462957193403 AGIWUR30631  
 N2 CT II 7759710 7761540 WBGene00015065 B0228.8 B0228.8 -0.194373116403946 AGIWUR32882  
 N2 CT II 7762062 7763669 WBGene00015066 B0228.9 B0228.9 0.310324431556475  
 AGIWUR2478;AGIWUR10101  
 N2 CT II 7763937 7765516 WBGene00005262 srh-39 C06A8.7 -0.0848392446519757  
 AGIWUR17170;AGIWUR21579;AGIWUR36225  
 N2 CT II 7765545 7772017 WBGene00015517 C06A8.8 C06A8.8 0.10417925890924  
 AGIWUR13385;AGIWUR31560  
 N2 CT II 7772499 7773914 WBGene00015516 C06A8.6 C06A8.6 0.398463543875712 AGIWUR378  
 N2 CT II 7773880 7777827 WBGene00015512 mthf-1 C06A8.1 0.223753437077555 AGIWUR23482  
 N2 CT II 7779297 7781301 WBGene00015513 snpc-1.1 C06A8.2 -0.12146926462389  
 AGIWUR28830  
 N2 CT II 7781566 7783354 WBGene00015515 spd1-1 C06A8.5 0.00665317181005065 AGIWUR5128  
 N2 CT II 7783829 7784654 WBGene00004823 skr-17 C06A8.4 -0.207382361090163 AGIWUR37247  
 N2 CT II 7785100 7794319 WBGene00001615 glr-4 C06A8.9 0.00306634829123009

AGIWUR6451;AGIWUR19537;AGIWUR21410

|    |    |    |         |         |                |       |         |                   |             |
|----|----|----|---------|---------|----------------|-------|---------|-------------------|-------------|
| N2 | CT | II | 7811240 | 7812105 | WBGene00000516 | cki-1 | T05A6.1 | 0.176523129095742 | AGIWUR39862 |
| N2 | CT | II | 7816509 | 7820301 | WBGene00000517 | cki-2 | T05A6.2 | 0.210262671370989 |             |

AGIWUR15835;AGIWUR32206

|    |    |    |         |         |                |         |         |                     |             |
|----|----|----|---------|---------|----------------|---------|---------|---------------------|-------------|
| N2 | CT | II | 7820333 | 7822554 | WBGene00011458 | irld-47 | T05A6.4 | 0.206716761392628   | AGIWUR4446  |
| N2 | CT | II | 7822749 | 7825196 | WBGene00011459 | T05A6.5 | T05A6.5 | -0.0734631552981009 | AGIWUR10914 |
| N2 | CT | II | 7825407 | 7826694 | WBGene00005809 | srw-62  | T05A6.6 | 0.302605674593018   |             |

AGIWUR14075;AGIWUR40775

|    |    |    |         |         |                |          |          |                   |  |
|----|----|----|---------|---------|----------------|----------|----------|-------------------|--|
| N2 | CT | II | 7832391 | 7832668 | WBGene00011640 | T09A5.14 | T09A5.14 | 0.226264974095391 |  |
|----|----|----|---------|---------|----------------|----------|----------|-------------------|--|

AGIWUR35

|    |    |    |         |         |                |       |         |                     |             |
|----|----|----|---------|---------|----------------|-------|---------|---------------------|-------------|
| N2 | CT | II | 7832844 | 7835414 | WBGene00023408 | cex-2 | T09A5.1 | -0.0888487911801441 | AGIWUR34455 |
| N2 | CT | II | 7842353 | 7845653 | WBGene00002216 | k1p-3 | T09A5.2 | 0.0080643371966862  |             |

AGIWUR4382;AGIWUR20513;AGIWUR29273;AGIWUR36971

|    |    |    |         |         |                |          |          |                     |             |
|----|----|----|---------|---------|----------------|----------|----------|---------------------|-------------|
| N2 | CT | II | 7845662 | 7849797 | WBGene00000046 | acr-7    | T09A5.3  | -0.203958159548959  | AGIWUR3882  |
| N2 | CT | II | 7852821 | 7853779 | WBGene00011634 | T09A5.5  | T09A5.5  | -0.0396280156853699 | AGIWUR19073 |
| N2 | CT | II | 7853880 | 7855042 | WBGene00007014 | mdt-10   | T09A5.6  | -0.203549861178015  | AGIWUR41745 |
| N2 | CT | II | 7855135 | 7855719 | WBGene00011635 | T09A5.7  | T09A5.7  | -0.21140136495408   | AGIWUR7525  |
| N2 | CT | II | 7855814 | 7857600 | WBGene00011636 | cec-3    | T09A5.8  | 0.0204846793769509  | AGIWUR33974 |
| N2 | CT | II | 7857811 | 7858334 | WBGene00011641 | T09A5.15 | T09A5.15 | -0.207263413159085  |             |

AGIWUR23369

|    |    |    |         |         |                |        |         |                    |  |
|----|----|----|---------|---------|----------------|--------|---------|--------------------|--|
| N2 | CT | II | 7858401 | 7859781 | WBGene00011637 | sds-22 | T09A5.9 | -0.155313240902885 |  |
|----|----|----|---------|---------|----------------|--------|---------|--------------------|--|

AGIWUR24015;AGIWUR38639;AGIWUR40986

|    |    |    |         |         |                |       |          |                     |  |
|----|----|----|---------|---------|----------------|-------|----------|---------------------|--|
| N2 | CT | II | 7860574 | 7863563 | WBGene00002994 | lin-5 | T09A5.10 | -0.0535861959826214 |  |
|----|----|----|---------|---------|----------------|-------|----------|---------------------|--|

AGIWUR1605;AGIWUR16198;AGIWUR34726

|    |    |    |         |         |                |        |          |                   |  |
|----|----|----|---------|---------|----------------|--------|----------|-------------------|--|
| N2 | CT | II | 7864074 | 7866256 | WBGene00011638 | ostb-1 | T09A5.11 | 0.358845786037486 |  |
|----|----|----|---------|---------|----------------|--------|----------|-------------------|--|

AGIWUR20189;AGIWUR29057;AGIWUR41636

|    |    |    |         |         |                |        |          |                     |  |
|----|----|----|---------|---------|----------------|--------|----------|---------------------|--|
| N2 | CT | II | 7866256 | 7870162 | WBGene00011639 | ztf-17 | T09A5.12 | -0.0587301840125809 |  |
|----|----|----|---------|---------|----------------|--------|----------|---------------------|--|

AGIWUR4682;AGIWUR13291;AGIWUR19500;AGIWUR22289

|    |    |    |         |         |                |         |         |                    |             |
|----|----|----|---------|---------|----------------|---------|---------|--------------------|-------------|
| N2 | CT | II | 7870881 | 7873893 | WBGene00011349 | T01H3.3 | T01H3.3 | 0.0375257070380712 | AGIWUR23452 |
| N2 | CT | II | 7874242 | 7878097 | WBGene00011348 | T01H3.2 | T01H3.2 | 0.102186024303546  | AGIWUR24353 |
| N2 | CT | II | 7878083 | 7879406 | WBGene00006913 | vha-4   | T01H3.1 | 0.0370110943601869 |             |

AGIWUR1184;AGIWUR10620;AGIWUR20756;AGIWUR24307

|    |    |    |         |         |                |         |         |                     |             |
|----|----|----|---------|---------|----------------|---------|---------|---------------------|-------------|
| N2 | CT | II | 7879720 | 7880464 | WBGene00011351 | T01H3.5 | T01H3.5 | -0.131079297988677  | AGIWUR24996 |
| N2 | CT | II | 7880812 | 7882767 | WBGene00011350 | perm-1  | T01H3.4 | -0.0119754719527307 | AGIWUR7835  |
| N2 | CT | II | 7893229 | 7900510 | WBGene00004208 | ptc-1   | ZK675.1 | 0.0099992809520808  |             |

AGIWUR3463;AGIWUR7183;AGIWUR24141;AGIWUR37844;AGIWUR40130;AGIWUR41556

|    |    |    |         |         |                |         |         |                     |             |
|----|----|----|---------|---------|----------------|---------|---------|---------------------|-------------|
| N2 | CT | II | 7900647 | 7904636 | WBGene00014066 | rev-1   | ZK675.2 | -0.0859534390002867 | AGIWUR37852 |
| N2 | CT | II | 7904639 | 7907589 | WBGene00014989 | best-23 | ZK675.3 | -0.042024184036018  |             |

AGIWUR3527;AGIWUR8672;AGIWUR13711;AGIWUR14386;AGIWUR17626;AGIWUR32827;AGIWUR39001

|                                                                                            |    |    |         |         |                |          |          |                      |             |
|--------------------------------------------------------------------------------------------|----|----|---------|---------|----------------|----------|----------|----------------------|-------------|
| N2                                                                                         | CT | II | 7911323 | 7912113 | WBGene00014067 | ZK675.4  | ZK675.4  | -0.0600830216228108  | AGIWUR20932 |
| N2                                                                                         | CT | II | 7912093 | 7928694 | WBGene00014051 | spv-1    | ZK669.1  | -0.177460614320179   |             |
| AGIWUR26977;AGIWUR30516;AGIWUR36509                                                        |    |    |         |         |                |          |          |                      |             |
| N2                                                                                         | CT | II | 7936592 | 7938583 | WBGene00014052 | ZK669.2  | ZK669.2  | -0.202636898784359   | AGIWUR4723  |
| N2                                                                                         | CT | II | 7942463 | 7945206 | WBGene00014054 | dbt-1    | ZK669.4  | -0.0195606869628246  | AGIWUR37925 |
| N2                                                                                         | CT | II | 7945501 | 7946894 | WBGene00014055 | ZK669.5  | ZK669.5  | -0.00340656609464851 |             |
| AGIWUR4467;AGIWUR5732;AGIWUR27011;AGIWUR33319;AGIWUR33597                                  |    |    |         |         |                |          |          |                      |             |
| N2                                                                                         | CT | II | 7958844 | 7960237 | WBGene00007311 | C04H4.1  | C04H4.1  | -0.125154357299714   | AGIWUR17895 |
| N2                                                                                         | CT | II | 7976614 | 7994206 | WBGene00008438 | DH11.5   | DH11.5   | 0.0621945629966549   |             |
| AGIWUR8512;AGIWUR15852;AGIWUR17295;AGIWUR34568                                             |    |    |         |         |                |          |          |                      |             |
| N2                                                                                         | CT | II | 7995587 | 8003152 | WBGene00004005 | pgp-11   | DH11.3   | -0.149289467552915   | AGIWUR43425 |
| N2                                                                                         | CT | II | 8008619 | 8011633 | WBGene00008435 | glna-2   | DH11.1   | -0.187038947178019   | AGIWUR29345 |
| N2                                                                                         | CT | II | 8012816 | 8015264 | WBGene00008436 | DH11.2   | DH11.2   | 0.130686071287993    | AGIWUR42760 |
| N2                                                                                         | CT | II | 8017669 | 8020785 | WBGene00006996 | zyg-11   | C08B11.1 | 0.117846221694107    |             |
| AGIWUR3394;AGIWUR3850;AGIWUR10462;AGIWUR19652                                              |    |    |         |         |                |          |          |                      |             |
| N2                                                                                         | CT | II | 8020780 | 8022561 | WBGene00001835 | hda-2    | C08B11.2 | 0.00455555709677569  |             |
| AGIWUR26485                                                                                |    |    |         |         |                |          |          |                      |             |
| N2                                                                                         | CT | II | 8022649 | 8027756 | WBGene00007433 | swsn-7   | C08B11.3 | 0.12465276142265     |             |
| AGIWUR43476                                                                                |    |    |         |         |                |          |          |                      |             |
| N2                                                                                         | CT | II | 8028953 | 8032742 | WBGene00003813 | nrf-6    | C08B11.4 | -0.0991080604110621  |             |
| AGIWUR7101                                                                                 |    |    |         |         |                |          |          |                      |             |
| N2                                                                                         | CT | II | 8034250 | 8035767 | WBGene00004723 | sap-49   | C08B11.5 | 0.167555688285733    |             |
| AGIWUR2998;AGIWUR3824;AGIWUR4991;AGIWUR5242;AGIWUR6636;AGIWUR32094;AGIWUR42094;AGIWUR43153 |    |    |         |         |                |          |          |                      |             |
| N2                                                                                         | CT | II | 8035869 | 8037346 | WBGene00007434 | arp-6    | C08B11.6 | -0.0239869127694985  |             |
| AGIWUR5868;AGIWUR37186;AGIWUR38567;AGIWUR42177                                             |    |    |         |         |                |          |          |                      |             |
| N2                                                                                         | CT | II | 8037316 | 8038167 | WBGene00007436 | C08B11.9 | C08B11.9 | -0.0878290492311926  |             |
| AGIWUR14890                                                                                |    |    |         |         |                |          |          |                      |             |
| N2                                                                                         | CT | II | 8038271 | 8039597 | WBGene00006724 | ubh-4    | C08B11.7 | 0.154588974909744    |             |
| AGIWUR8971;AGIWUR33365;AGIWUR43766                                                         |    |    |         |         |                |          |          |                      |             |
| N2                                                                                         | CT | II | 8040006 | 8041732 | WBGene00007435 | C08B11.8 | C08B11.8 | -0.236883024547145   |             |
| AGIWUR31312                                                                                |    |    |         |         |                |          |          |                      |             |
| N2                                                                                         | CT | II | 8042589 | 8047452 | WBGene00011507 | T05H10.1 | T05H10.1 | 0.125662604532771    |             |
| AGIWUR7238;AGIWUR35900;AGIWUR42683                                                         |    |    |         |         |                |          |          |                      |             |
| N2                                                                                         | CT | II | 8047564 | 8049105 | WBGene00000151 | apn-1    | T05H10.2 | 0.0134815665163437   |             |
| AGIWUR5389;AGIWUR33387;AGIWUR40600                                                         |    |    |         |         |                |          |          |                      |             |
| N2                                                                                         | CT | II | 8049049 | 8050564 | WBGene00011508 | T05H10.3 | T05H10.3 | -0.399757040862621   |             |
| AGIWUR35674                                                                                |    |    |         |         |                |          |          |                      |             |
| N2                                                                                         | CT | II | 8053137 | 8054965 | WBGene00011509 | T05H10.4 | T05H10.4 | 0.0732086705275954   |             |
| AGIWUR18325                                                                                |    |    |         |         |                |          |          |                      |             |

|                                                                                     |    |    |         |         |                |           |           |                      |             |
|-------------------------------------------------------------------------------------|----|----|---------|---------|----------------|-----------|-----------|----------------------|-------------|
| N2                                                                                  | CT | II | 8059069 | 8061464 | WBGene00011512 | T05H10.8  | T05H10.8  | 0.163201464275094    |             |
| AGIWUR2912                                                                          |    |    |         |         |                |           |           |                      |             |
| N2                                                                                  | CT | II | 8062741 | 8066193 | WBGene00006734 | ufd-2     | T05H10.5  | -0.00624632525866176 |             |
| AGIWUR6799                                                                          |    |    |         |         |                |           |           |                      |             |
| N2                                                                                  | CT | II | 8066111 | 8068184 | WBGene00011510 | pdha-1    | T05H10.6  | 0.05713396624094     |             |
| AGIWUR31011                                                                         |    |    |         |         |                |           |           |                      |             |
| N2                                                                                  | CT | II | 8067990 | 8073372 | WBGene00011511 | gpcp-2    | T05H10.7  | 0.204972309643705    |             |
| AGIWUR983;AGIWUR13509;AGIWUR13688;AGIWUR15497                                       |    |    |         |         |                |           |           |                      |             |
| N2                                                                                  | CT | II | 8075760 | 8076836 | WBGene00010501 | K02C4.2   | K02C4.2   | -0.0785222701787811  |             |
| AGIWUR7423;AGIWUR23396;AGIWUR28188                                                  |    |    |         |         |                |           |           |                      |             |
| N2                                                                                  | CT | II | 8078457 | 8080847 | WBGene00010503 | K02C4.5   | K02C4.5   | 0.056928143431179    | AGIWUR17113 |
| N2                                                                                  | CT | II | 8080789 | 8086849 | WBGene00010502 | K02C4.3   | K02C4.3   | -0.181200552608539   |             |
| AGIWUR5833;AGIWUR12426;AGIWUR31499                                                  |    |    |         |         |                |           |           |                      |             |
| N2                                                                                  | CT | II | 8088427 | 8092754 | WBGene00003089 | ltd-1     | K02C4.4   | -0.00878826533072719 | AGIWUR7221  |
| N2                                                                                  | CT | II | 8100375 | 8102141 | WBGene00005150 | sre-2     | C41C4.2   | -0.0488866418843372  | AGIWUR22986 |
| N2                                                                                  | CT | II | 8102108 | 8105052 | WBGene00044049 | sfxn-5    | C41C4.10  | -0.0775945572892063  |             |
| AGIWUR5877;AGIWUR16602;AGIWUR26988                                                  |    |    |         |         |                |           |           |                      |             |
| N2                                                                                  | CT | II | 8105614 | 8106967 | WBGene00008050 | chst-1    | C41C4.1   | -0.00836269595101413 | AGIWUR7477  |
| N2                                                                                  | CT | II | 8107645 | 8108954 | WBGene00008054 | C41C4.9   | C41C4.9   | -0.0702407822654632  | AGIWUR16390 |
| N2                                                                                  | CT | II | 8108941 | 8112163 | WBGene00008051 | lron-4    | C41C4.3   | -0.0489975387779005  | AGIWUR2733  |
| N2                                                                                  | CT | II | 8112262 | 8124910 | WBGene00002147 | ire-1     | C41C4.4   | -0.0992149035992043  | AGIWUR29507 |
| N2                                                                                  | CT | II | 8129960 | 8134742 | WBGene00006739 | ulp-4     | C41C4.6   | -0.0952308295494726  |             |
| AGIWUR2044;AGIWUR6926                                                               |    |    |         |         |                |           |           |                      |             |
| N2                                                                                  | CT | II | 8134765 | 8136916 | WBGene00008052 | ctns-1    | C41C4.7   | -0.0171294542628946  |             |
| AGIWUR22871;AGIWUR30307;AGIWUR39329                                                 |    |    |         |         |                |           |           |                      |             |
| N2                                                                                  | CT | II | 8137880 | 8141276 | WBGene00008053 | cdc-48.2  | C41C4.8   | 0.00190015785993669  |             |
| AGIWUR22177;AGIWUR23786                                                             |    |    |         |         |                |           |           |                      |             |
| N2                                                                                  | CT | II | 8141213 | 8143478 | WBGene00008642 | F10B5.8   | F10B5.8   | -0.122154914496893   | AGIWUR42674 |
| N2                                                                                  | CT | II | 8143863 | 8144671 | WBGene00004421 | rp1-10    | F10B5.1   | -0.0302477326128461  |             |
| AGIWUR15626;AGIWUR19210;AGIWUR25935;AGIWUR27480;AGIWUR38463;AGIWUR42597;AGIWUR44548 |    |    |         |         |                |           |           |                      |             |
| N2                                                                                  | CT | II | 8144762 | 8147236 | WBGene00008639 | F10B5.2   | F10B5.2   | 0.108227668493367    | AGIWUR23843 |
| N2                                                                                  | CT | II | 8147190 | 8150030 | WBGene00008640 | F10B5.3   | F10B5.3   | -0.130296239328484   | AGIWUR14621 |
| N2                                                                                  | CT | II | 8154096 | 8156937 | WBGene00006655 | tub-1     | F10B5.4   | -0.00851720872162165 | AGIWUR23466 |
| N2                                                                                  | CT | II | 8157362 | 8158045 | WBGene00008643 | tmem-138  | F10B5.9   | 0.043674827413219    |             |
| AGIWUR3504                                                                          |    |    |         |         |                |           |           |                      |             |
| N2                                                                                  | CT | II | 8158349 | 8159925 | WBGene00008641 | pch-2     | F10B5.5   | -0.238068980571498   | AGIWUR2022  |
| N2                                                                                  | CT | II | 8159865 | 8162170 | WBGene00001281 | emb-27    | F10B5.6   | 0.122075057002704    | AGIWUR21615 |
| N2                                                                                  | CT | II | 8162465 | 8168644 | WBGene00004510 | rrf-3     | F10B5.7   | -0.0801189789012824  | AGIWUR12684 |
| N2                                                                                  | CT | II | 8168682 | 8170358 | WBGene00011473 | T05C12.11 | T05C12.11 | 0.212290271278158    |             |

|                                                                                    |    |    |         |         |                |          |           |                                 |
|------------------------------------------------------------------------------------|----|----|---------|---------|----------------|----------|-----------|---------------------------------|
| AGIWUR37097                                                                        |    |    |         |         |                |          |           |                                 |
| N2                                                                                 | CT | II | 8172229 | 8173562 | WBGene00011467 | decr-1.3 | T05C12.3  | 0.198231354605753               |
| AGIWUR7309                                                                         |    |    |         |         |                |          |           |                                 |
| N2                                                                                 | CT | II | 8173680 | 8174866 | WBGene00011466 | T05C12.1 | T05C12.1  | -0.0501159448313047             |
| AGIWUR8960;AGIWUR11009;AGIWUR38979                                                 |    |    |         |         |                |          |           |                                 |
| N2                                                                                 | CT | II | 8174845 | 8177195 | WBGene00000053 | acr-14   | T05C12.2  | 0.070264663917051               |
| AGIWUR222;AGIWUR34520;AGIWUR36830                                                  |    |    |         |         |                |          |           |                                 |
| N2                                                                                 | CT | II | 8177578 | 8180381 | WBGene00011468 | T05C12.4 | T05C12.4  | -0.0150258999546571             |
| AGIWUR8536                                                                         |    |    |         |         |                |          |           |                                 |
| N2                                                                                 | CT | II | 8181737 | 8182309 | WBGene00011469 | dylt-3   | T05C12.5  | 0.157807676441994               |
| AGIWUR19498                                                                        |    |    |         |         |                |          |           |                                 |
| N2                                                                                 | CT | II | 8182323 | 8185023 | WBGene00003241 | mig-5    | T05C12.6  | -0.0679108240092852             |
| AGIWUR41036                                                                        |    |    |         |         |                |          |           |                                 |
| N2                                                                                 | CT | II | 8185443 | 8187601 | WBGene00000377 | cct-1    | T05C12.7  | -0.0103251841712737             |
| AGIWUR2764;AGIWUR11724;AGIWUR14998;AGIWUR15680;AGIWUR20879;AGIWUR28442;AGIWUR29277 |    |    |         |         |                |          |           |                                 |
| N2                                                                                 | CT | II | 8187607 | 8190528 | WBGene00011471 | T05C12.8 | T05C12.8  | 0.0617140089479893              |
| AGIWUR13267                                                                        |    |    |         |         |                |          |           |                                 |
| N2                                                                                 | CT | II | 8191773 | 8193329 | WBGene00011472 | T05C12.9 | T05C12.9  | 0.180531539534869               |
| AGIWUR22375                                                                        |    |    |         |         |                |          |           |                                 |
| N2                                                                                 | CT | II | 8198803 | 8204001 | WBGene00004264 | qua-1    | T05C12.10 | -0.128228843335076              |
| AGIWUR18808                                                                        |    |    |         |         |                |          |           |                                 |
| N2                                                                                 | CT | II | 8204341 | 8207491 | WBGene00000652 | col-76   | M110.1    | -0.0905721372378494 AGIWUR5673  |
| N2                                                                                 | CT | II | 8208000 | 8209444 | WBGene00010916 | M110.8   | M110.8    | -0.974532517418718 AGIWUR18001  |
| N2                                                                                 | CT | II | 8210662 | 8212751 | WBGene00006658 | twk-3    | M110.2    | -0.0705001844800153 AGIWUR10521 |
| N2                                                                                 | CT | II | 8214575 | 8216616 | WBGene00010913 | M110.3   | M110.3    | 0.0797868690912829 AGIWUR23590  |
| N2                                                                                 | CT | II | 8217231 | 8222395 | WBGene00002066 | ifg-1    | M110.4    | -0.0698215671418971             |
| AGIWUR3842;AGIWUR23909;AGIWUR24055                                                 |    |    |         |         |                |          |           |                                 |
| N2                                                                                 | CT | II | 8226132 | 8229122 | WBGene00000894 | dab-1    | M110.5    | 0.086353763894008               |
| AGIWUR2336;AGIWUR6350;AGIWUR30204;AGIWUR38810                                      |    |    |         |         |                |          |           |                                 |
| N2                                                                                 | CT | II | 8231239 | 8232769 | WBGene00010917 | M110.9   | M110.9    | -0.123726906774234 AGIWUR35202  |
| N2                                                                                 | CT | II | 8232789 | 8237202 | WBGene00010915 | M110.7   | M110.7    | 0.159387406380182 AGIWUR27439   |
| N2                                                                                 | CT | II | 8238455 | 8243747 | WBGene00003743 | nlp-5    | F35C11.1  | -0.249144347102954              |
| AGIWUR18693                                                                        |    |    |         |         |                |          |           |                                 |
| N2                                                                                 | CT | II | 8246776 | 8248263 | WBGene00009402 | F35C11.3 | F35C11.3  | 0.244871909731732               |
| AGIWUR20539                                                                        |    |    |         |         |                |          |           |                                 |
| N2                                                                                 | CT | II | 8249879 | 8251980 | WBGene00009403 | F35C11.4 | F35C11.4  | 0.0748436458175936              |
| AGIWUR37143                                                                        |    |    |         |         |                |          |           |                                 |
| N2                                                                                 | CT | II | 8253740 | 8255319 | WBGene00009404 | F35C11.5 | F35C11.5  | -0.0757741814601047             |
| AGIWUR44340                                                                        |    |    |         |         |                |          |           |                                 |

|                                                                                   |    |    |         |         |                |           |           |                     |             |
|-----------------------------------------------------------------------------------|----|----|---------|---------|----------------|-----------|-----------|---------------------|-------------|
| N2                                                                                | CT | II | 8256313 | 8257605 | WBGene00009406 | F35C11.7  | F35C11.7  | -0.282361281702725  |             |
| AGIWUR7569                                                                        |    |    |         |         |                |           |           |                     |             |
| N2                                                                                | CT | II | 8258074 | 8259210 | WBGene00009405 | F35C11.6  | F35C11.6  | -0.278642468191633  |             |
| AGIWUR32766                                                                       |    |    |         |         |                |           |           |                     |             |
| N2                                                                                | CT | II | 8264661 | 8267360 | WBGene00010456 | K01C8.1   | K01C8.1   | -0.114020984101295  | AGIWUR25064 |
| N2                                                                                | CT | II | 8267253 | 8269914 | WBGene00010457 | K01C8.2   | K01C8.2   | -0.070698323544411  |             |
| AGIWUR195;AGIWUR41552                                                             |    |    |         |         |                |           |           |                     |             |
| N2                                                                                | CT | II | 8270567 | 8273611 | WBGene00006562 | tdc-1     | K01C8.3   | 0.0494154164455098  |             |
| AGIWUR2061;AGIWUR34794                                                            |    |    |         |         |                |           |           |                     |             |
| N2                                                                                | CT | II | 8273543 | 8276231 | WBGene00001571 | gei-14    | K01C8.5   | -0.0308616241700683 | AGIWUR1841  |
| N2                                                                                | CT | II | 8276298 | 8277611 | WBGene00010459 | slc-25A32 | K01C8.7   | -0.252131925196615  |             |
| AGIWUR8565;AGIWUR13542;AGIWUR37798;AGIWUR41814;AGIWUR44670                        |    |    |         |         |                |           |           |                     |             |
| N2                                                                                | CT | II | 8277531 | 8278515 | WBGene00010458 | mrpl-10   | K01C8.6   | -0.03434024252158   | AGIWUR38766 |
| N2                                                                                | CT | II | 8278686 | 8281035 | WBGene00010460 | clcc-142  | K01C8.8   | -0.0102161746812186 |             |
| AGIWUR9226;AGIWUR13203;AGIWUR43626                                                |    |    |         |         |                |           |           |                     |             |
| N2                                                                                | CT | II | 8280855 | 8283208 | WBGene00003821 | nst-1     | K01C8.9   | -0.123762552212753  | AGIWUR40653 |
| N2                                                                                | CT | II | 8283667 | 8285711 | WBGene00000379 | cct-4     | K01C8.10  | -0.123161063112558  |             |
| AGIWUR13181;AGIWUR32010                                                           |    |    |         |         |                |           |           |                     |             |
| N2                                                                                | CT | II | 8294829 | 8295396 | WBGene00008820 | nlp-55    | F14F11.2  | 0.0273769501327479  |             |
| AGIWUR1677                                                                        |    |    |         |         |                |           |           |                     |             |
| N2                                                                                | CT | II | 8305745 | 8321471 | WBGene00008819 | shw-1     | F14F11.1  | -0.218118653838877  |             |
| AGIWUR4986;AGIWUR9350;AGIWUR21060;AGIWUR29497;AGIWUR34911;AGIWUR42810;AGIWUR45012 |    |    |         |         |                |           |           |                     |             |
| N2                                                                                | CT | II | 8322612 | 8325052 | WBGene00004304 | ran-3     | C26D10.1  | 0.105684070136123   |             |
| AGIWUR40833                                                                       |    |    |         |         |                |           |           |                     |             |
| N2                                                                                | CT | II | 8325386 | 8329658 | WBGene00007744 | C26D10.3  | C26D10.3  | 0.0793883702141596  |             |
| AGIWUR19644                                                                       |    |    |         |         |                |           |           |                     |             |
| N2                                                                                | CT | II | 8329758 | 8333481 | WBGene00007745 | C26D10.4  | C26D10.4  | 0.0355832099709064  |             |
| AGIWUR16715;AGIWUR19903;AGIWUR40329;AGIWUR43871                                   |    |    |         |         |                |           |           |                     |             |
| N2                                                                                | CT | II | 8334094 | 8336503 | WBGene00023420 | C26D10.7  | C26D10.7  | 0.103484412257133   |             |
| AGIWUR16828                                                                       |    |    |         |         |                |           |           |                     |             |
| N2                                                                                | CT | II | 8346690 | 8350557 | WBGene00001159 | eff-1     | C26D10.5  | -0.0613134522183518 |             |
| AGIWUR22682;AGIWUR29270                                                           |    |    |         |         |                |           |           |                     |             |
| N2                                                                                | CT | II | 8350535 | 8354700 | WBGene00007746 | C26D10.6  | C26D10.6  | -0.042628381633639  |             |
| AGIWUR25563                                                                       |    |    |         |         |                |           |           |                     |             |
| N2                                                                                | CT | II | 8358228 | 8359381 | WBGene00000653 | col-77    | M195.1    | 0.596816491483153   | AGIWUR23505 |
| N2                                                                                | CT | II | 8359712 | 8363196 | WBGene00010948 | M195.2    | M195.2    | -0.277882872976733  | AGIWUR30560 |
| N2                                                                                | CT | II | 8363196 | 8369159 | WBGene00000135 | amt-3     | M195.3    | -0.0277553953373673 | AGIWUR26721 |
| N2                                                                                | CT | II | 8376611 | 8377357 | WBGene00010949 | M195.4    | M195.4    | -0.105977136799719  | AGIWUR139   |
| N2                                                                                | CT | II | 8381497 | 8383905 | WBGene00009904 | F49E12.12 | F49E12.12 | 0.13357573230254    |             |



|                                                                         |    |    |         |         |                |           |           |                     |             |
|-------------------------------------------------------------------------|----|----|---------|---------|----------------|-----------|-----------|---------------------|-------------|
| AGIWUR41004                                                             |    |    |         |         |                |           |           |                     |             |
| N2                                                                      | CT | II | 8388051 | 8389891 | WBGene00009902 | drd-1     | F49E12.9  | 0.380925939968471   |             |
| AGIWUR3152;AGIWUR16685;AGIWUR28016;AGIWUR44394                          |    |    |         |         |                |           |           |                     |             |
| N2                                                                      | CT | II | 8391088 | 8392281 | WBGene00009903 | F49E12.10 | F49E12.10 | 0.0516836917088721  |             |
| AGIWUR8922                                                              |    |    |         |         |                |           |           |                     |             |
| N2                                                                      | CT | II | 8392571 | 8394202 | WBGene00009901 | F49E12.8  | F49E12.8  | -0.0893284344052345 |             |
| AGIWUR7589                                                              |    |    |         |         |                |           |           |                     |             |
| N2                                                                      | CT | II | 8395276 | 8396141 | WBGene00009900 | F49E12.7  | F49E12.7  | 0.0538262472564739  |             |
| AGIWUR21880                                                             |    |    |         |         |                |           |           |                     |             |
| N2                                                                      | CT | II | 8398161 | 8399160 | WBGene00009898 | dod-23    | F49E12.2  | 0.771655436510773   |             |
| AGIWUR23090                                                             |    |    |         |         |                |           |           |                     |             |
| N2                                                                      | CT | II | 8400299 | 8404848 | WBGene00009897 | skpo-1    | F49E12.1  | -0.127457291498635  |             |
| AGIWUR22459                                                             |    |    |         |         |                |           |           |                     |             |
| N2                                                                      | CT | II | 8405603 | 8406924 | WBGene00006719 | ubc-24    | F49E12.4  | 0.158405127305976   |             |
| AGIWUR30944                                                             |    |    |         |         |                |           |           |                     |             |
| N2                                                                      | CT | II | 8407685 | 8409237 | WBGene00005039 | sra-13    | F49E12.5  | -0.0187628161848252 |             |
| AGIWUR5312;AGIWUR21380;AGIWUR38003                                      |    |    |         |         |                |           |           |                     |             |
| N2                                                                      | CT | II | 8412671 | 8416857 | WBGene00009899 | efl-3     | F49E12.6  | -0.0227058773966484 |             |
| AGIWUR13219;AGIWUR15145;AGIWUR32279;AGIWUR38296;AGIWUR43804;AGIWUR44927 |    |    |         |         |                |           |           |                     |             |
| N2                                                                      | CT | II | 8417618 | 8419758 | WBGene00008799 | F14E5.1   | F14E5.1   | -0.242608701175385  | AGIWUR18246 |
| N2                                                                      | CT | II | 8423951 | 8428855 | WBGene00008800 | F14E5.2   | F14E5.2   | -0.080205275301779  |             |
| AGIWUR3167;AGIWUR17171;AGIWUR35433                                      |    |    |         |         |                |           |           |                     |             |
| N2                                                                      | CT | II | 8429959 | 8432054 | WBGene00008802 | acp-2     | F14E5.4   | 0.0209518709905723  | AGIWUR23377 |
| N2                                                                      | CT | II | 8432773 | 8435105 | WBGene00008804 | acp-4     | F14E5.6   | -0.330796367687365  | AGIWUR21718 |
| N2                                                                      | CT | II | 8435347 | 8437135 | WBGene00008801 | acp-3     | F14E5.3   | 0.262366899676715   | AGIWUR26233 |
| N2                                                                      | CT | II | 8439118 | 8442151 | WBGene00008803 | lips-10   | F14E5.5   | 0.0201572869105426  | AGIWUR4094  |
| N2                                                                      | CT | II | 8442765 | 8444239 | WBGene00001230 | eif-3.G   | F22B5.2   | 0.0193723999384607  |             |
| AGIWUR9270;AGIWUR19095;AGIWUR24859;AGIWUR29721;AGIWUR29987;AGIWUR38375  |    |    |         |         |                |           |           |                     |             |
| N2                                                                      | CT | II | 8444307 | 8445177 | WBGene00001358 | evl-20    | F22B5.1   | -0.202006007885245  | AGIWUR34115 |
| N2                                                                      | CT | II | 8445168 | 8446831 | WBGene00009041 | cut-3     | F22B5.3   | 0.0276623991904454  | AGIWUR30519 |
| N2                                                                      | CT | II | 8449701 | 8452739 | WBGene00009042 | F22B5.4   | F22B5.4   | 0.211648191186473   | AGIWUR24088 |
| N2                                                                      | CT | II | 8453254 | 8454613 | WBGene00009043 | F22B5.5   | F22B5.5   | 0.220913813619903   | AGIWUR2516  |
| N2                                                                      | CT | II | 8454612 | 8456194 | WBGene00009044 | F22B5.6   | F22B5.6   | -0.238278068721197  | AGIWUR11320 |
| N2                                                                      | CT | II | 8457818 | 8464517 | WBGene00006994 | zyg-9     | F22B5.7   | 0.259544826641598   | AGIWUR36027 |
| N2                                                                      | CT | II | 8464848 | 8467072 | WBGene00001498 | fars-3    | F22B5.9   | -0.0273770265629647 | AGIWUR34112 |
| N2                                                                      | CT | II | 8467174 | 8468010 | WBGene00009045 | F22B5.10  | F22B5.10  | 0.140939268035854   |             |
| AGIWUR6122;AGIWUR11334;AGIWUR27711;AGIWUR28547                          |    |    |         |         |                |           |           |                     |             |
| N2                                                                      | CT | II | 8468109 | 8470162 | WBGene00010875 | M05D6.2   | M05D6.2   | -0.153789465815514  | AGIWUR31827 |
| N2                                                                      | CT | II | 8470079 | 8471217 | WBGene00010880 | M05D6.8   | M05D6.8   | -0.0207659420588202 | AGIWUR15604 |

|                                                                                                           |    |    |         |         |                |          |          |                     |             |
|-----------------------------------------------------------------------------------------------------------|----|----|---------|---------|----------------|----------|----------|---------------------|-------------|
| N2                                                                                                        | CT | II | 8471880 | 8473522 | WBGene00044168 | M05D6.10 | M05D6.10 | 0.0749730729743781  |             |
| AGIWUR11206;AGIWUR35547                                                                                   |    |    |         |         |                |          |          |                     |             |
| N2                                                                                                        | CT | II | 8473819 | 8475568 | WBGene00010874 | M05D6.1  | M05D6.1  | 0.0476399250401194  | AGIWUR35206 |
| N2                                                                                                        | CT | II | 8478010 | 8480478 | WBGene00010877 | lact-4   | M05D6.4  | -0.166138933324389  |             |
| AGIWUR13800;AGIWUR34952                                                                                   |    |    |         |         |                |          |          |                     |             |
| N2                                                                                                        | CT | II | 8480457 | 8482216 | WBGene00010878 | M05D6.5  | M05D6.5  | 0.0627024681649919  |             |
| AGIWUR3221;AGIWUR10469;AGIWUR10734;AGIWUR41286                                                            |    |    |         |         |                |          |          |                     |             |
| N2                                                                                                        | CT | II | 8482376 | 8483872 | WBGene00010879 | M05D6.6  | M05D6.6  | -0.238373395516621  | AGIWUR33291 |
| N2                                                                                                        | CT | II | 8485879 | 8487571 | WBGene00001523 | gbh-2    | M05D6.7  | 0.0207182124975116  |             |
| AGIWUR2809;AGIWUR14517;AGIWUR29356;AGIWUR29456;AGIWUR39469;AGIWUR39551                                    |    |    |         |         |                |          |          |                     |             |
| N2                                                                                                        | CT | II | 8487571 | 8509055 | WBGene00011755 | T13H5.1  | T13H5.1  | -0.0515511397288684 |             |
| AGIWUR6797;AGIWUR8690;AGIWUR15118;AGIWUR15740;AGIWUR16271;AGIWUR21225;AGIWUR27017;AGIWUR30143;AGIWUR33771 |    |    |         |         |                |          |          |                     |             |
| N2                                                                                                        | CT | II | 8514118 | 8516891 | WBGene00011756 | ctg-2    | T13H5.2  | 0.205617995802572   |             |
| AGIWUR9249;AGIWUR11176;AGIWUR25165;AGIWUR25634;AGIWUR26294;AGIWUR32840                                    |    |    |         |         |                |          |          |                     |             |
| N2                                                                                                        | CT | II | 8517150 | 8518412 | WBGene00004383 | rnh-2    | T13H5.7  | -0.166014457704417  | AGIWUR12815 |
| N2                                                                                                        | CT | II | 8518510 | 8520700 | WBGene00011761 | T13H5.8  | T13H5.8  | -0.0410413604169317 | AGIWUR1284  |
| N2                                                                                                        | CT | II | 8520905 | 8523490 | WBGene00011757 | cht-2    | T13H5.3  | -0.109982035016452  | AGIWUR8100  |
| N2                                                                                                        | CT | II | 8523494 | 8525396 | WBGene00011758 | T13H5.4  | T13H5.4  | -0.0512872788050052 |             |
| AGIWUR4164;AGIWUR25257;AGIWUR28277;AGIWUR39003                                                            |    |    |         |         |                |          |          |                     |             |
| N2                                                                                                        | CT | II | 8525685 | 8526804 | WBGene00011759 | mrps-18B | T13H5.5  | -0.169143931578205  |             |
| AGIWUR26447                                                                                               |    |    |         |         |                |          |          |                     |             |
| N2                                                                                                        | CT | II | 8526799 | 8531222 | WBGene00011760 | T13H5.6  | T13H5.6  | -0.159709007211728  | AGIWUR15371 |
| N2                                                                                                        | CT | II | 8533095 | 8534363 | WBGene00012175 | W01C9.1  | W01C9.1  | -0.174483249343964  | AGIWUR17469 |
| N2                                                                                                        | CT | II | 8536133 | 8538603 | WBGene00012176 | W01C9.2  | W01C9.2  | -0.283083853015975  | AGIWUR13147 |
| N2                                                                                                        | CT | II | 8540720 | 8545452 | WBGene00004155 | pqn-73   | W01C9.3  | -0.125496700332967  | AGIWUR70    |
| N2                                                                                                        | CT | II | 8545652 | 8546854 | WBGene00012177 | decr-1.2 | W01C9.4  | 0.220628554895448   |             |
| AGIWUR35156                                                                                               |    |    |         |         |                |          |          |                     |             |
| N2                                                                                                        | CT | II | 8547339 | 8556258 | WBGene00012178 | glb-27   | W01C9.5  | 0.153338705597085   | AGIWUR20195 |
| N2                                                                                                        | CT | II | 8559394 | 8561352 | WBGene00002065 | iff-2    | F54C9.1  | -0.0756303474627416 |             |
| AGIWUR1041;AGIWUR13119;AGIWUR18172;AGIWUR31956;AGIWUR34294;AGIWUR35827;AGIWUR38745                        |    |    |         |         |                |          |          |                     |             |
| N2                                                                                                        | CT | II | 8563714 | 8566139 | WBGene00006059 | stc-1    | F54C9.2  | 0.13573232762959    | AGIWUR27084 |
| N2                                                                                                        | CT | II | 8566508 | 8566857 | WBGene00010041 | F54C9.3  | F54C9.3  | -0.320053131239021  | AGIWUR35414 |
| N2                                                                                                        | CT | II | 8568035 | 8569089 | WBGene00000615 | col-38   | F54C9.4  | 0.255763249402957   | AGIWUR17395 |
| N2                                                                                                        | CT | II | 8569927 | 8571100 | WBGene00004416 | rpl-5    | F54C9.5  | 0.0389121154455179  |             |
| AGIWUR9145;AGIWUR16011;AGIWUR23458                                                                        |    |    |         |         |                |          |          |                     |             |
| N2                                                                                                        | CT | II | 8571085 | 8572904 | WBGene00010042 | bcs-1    | F54C9.6  | -0.213264937900623  |             |
| AGIWUR6986;AGIWUR16748;AGIWUR26834;AGIWUR38862                                                            |    |    |         |         |                |          |          |                     |             |
| N2                                                                                                        | CT | II | 8573355 | 8575045 | WBGene00010043 | F54C9.7  | F54C9.7  | -0.209919367634029  |             |
| AGIWUR42579;AGIWUR43932                                                                                   |    |    |         |         |                |          |          |                     |             |

|                                     |    |    |         |         |                |               |          |                     |             |
|-------------------------------------|----|----|---------|---------|----------------|---------------|----------|---------------------|-------------|
| N2                                  | CT | II | 8575541 | 8577732 | WBGene00004241 | puf-5         | F54C9.8  | 0.0329783681380995  | AGIWUR17244 |
| N2                                  | CT | II | 8578049 | 8581513 | WBGene00010044 | F54C9.9       | F54C9.9  | -0.169292191850296  |             |
| AGIWUR1419;AGIWUR4848;AGIWUR15723   |    |    |         |         |                |               |          |                     |             |
| N2                                  | CT | II | 8581945 | 8583080 | WBGene00000187 | arl-1         | F54C9.10 | 0.0908421301535967  |             |
| AGIWUR21476                         |    |    |         |         |                |               |          |                     |             |
| N2                                  | CT | II | 8583034 | 8585086 | WBGene00010045 | F54C9.11      | F54C9.11 | 0.0330646993757515  |             |
| AGIWUR34137                         |    |    |         |         |                |               |          |                     |             |
| N2                                  | CT | II | 8590984 | 8593010 | WBGene00009202 | aptf-4        | F28C6.1  | 0.289947865310081   |             |
| AGIWUR10388;AGIWUR16446;AGIWUR39555 |    |    |         |         |                |               |          |                     |             |
| N2                                  | CT | II | 8594190 | 8596294 | WBGene00009203 | aptf-3        | F28C6.2  | 0.0381271844278537  |             |
| AGIWUR12578;AGIWUR32441;AGIWUR42969 |    |    |         |         |                |               |          |                     |             |
| N2                                  | CT | II | 8596286 | 8600265 | WBGene00009204 | F28C6.4       | F28C6.4  | -0.0773536627715607 |             |
| AGIWUR10920;AGIWUR17476;AGIWUR38808 |    |    |         |         |                |               |          |                     |             |
| N2                                  | CT | II | 8599508 | 8600506 | WBGene00009205 | F28C6.5       | F28C6.5  | -0.155055939158942  | AGIWUR22408 |
| N2                                  | CT | II | 8600435 | 8602479 | WBGene00000773 | cpf-1         | F28C6.3  | -0.274864831951067  | AGIWUR30019 |
| N2                                  | CT | II | 8602787 | 8603581 | WBGene00004440 | rp1-26        | F28C6.7  | -0.0293234455207063 |             |
| AGIWUR22308;AGIWUR42774             |    |    |         |         |                |               |          |                     |             |
| N2                                  | CT | II | 8603846 | 8606744 | WBGene00006307 | suf-1         | F28C6.6  | -0.0641106382039371 |             |
| AGIWUR15406;AGIWUR42122;AGIWUR43954 |    |    |         |         |                |               |          |                     |             |
| N2                                  | CT | II | 8606849 | 8607749 | WBGene00009207 | F28C6.8       | F28C6.8  | 0.0657093374987916  | AGIWUR35865 |
| N2                                  | CT | II | 8607889 | 8608865 | WBGene00009209 | F28C6.10      | F28C6.10 | -0.430603637889764  |             |
| AGIWUR30551                         |    |    |         |         |                |               |          |                     |             |
| N2                                  | CT | II | 8608876 | 8610110 | WBGene00009208 | F28C6.9       | F28C6.9  | -0.197644730497561  | AGIWUR41437 |
| N2                                  | CT | II | 8612770 | 8614426 | WBGene00011922 | T22C8.1       | T22C8.1  | -0.12110038711087   | AGIWUR25354 |
| N2                                  | CT | II | 8614546 | 8617603 | WBGene00011923 | chhy-1        | T22C8.2  | -0.62625752670421   | AGIWUR21816 |
| N2                                  | CT | II | 8620397 | 8621978 | WBGene00011924 | T22C8.3       | T22C8.3  | -0.0414141896981786 | AGIWUR1762  |
| N2                                  | CT | II | 8622447 | 8624254 | WBGene00011925 | T22C8.4       | T22C8.4  | -0.191535066802851  |             |
| AGIWUR1196;AGIWUR12798;AGIWUR30886  |    |    |         |         |                |               |          |                     |             |
| N2                                  | CT | II | 8625728 | 8627620 | WBGene00011926 | sptf-2        | T22C8.5  | 0.158210816067451   | AGIWUR21226 |
| N2                                  | CT | II | 8627573 | 8630239 | WBGene00011927 | T22C8.6       | T22C8.6  | 0.217627597367921   | AGIWUR8779  |
| N2                                  | CT | II | 8630710 | 8634464 | WBGene00011928 | cutl-12       | T22C8.7  | 0.0432673771705852  |             |
| AGIWUR11556;AGIWUR39206             |    |    |         |         |                |               |          |                     |             |
| N2                                  | CT | II | 8636233 | 8637711 | WBGene00006875 | vab-9         | T22C8.8  | -0.0131179487323294 | AGIWUR25044 |
| N2                                  | CT | II | 8641381 | 8648227 | WBGene00008432 | D2085.7       | D2085.7  | -0.183464063262512  | AGIWUR40175 |
| N2                                  | CT | II | 8651109 | 8658808 | WBGene00004259 | pyr-1         | D2085.1  | 0.164515014107965   |             |
| AGIWUR22823;AGIWUR41113             |    |    |         |         |                |               |          |                     |             |
| N2                                  | CT | II | 8659135 | 8659800 | WBGene00008427 | atg-10        | D2085.2  | -0.289486440904145  | AGIWUR42128 |
| N2                                  | CT | II | 8659782 | 8661712 | WBGene00008431 | piga-1        | D2085.6  | -0.0730105582285834 | AGIWUR5013  |
| N2                                  | CT | II | 8661869 | 8664721 | WBGene00008428 | eif-2Bepsilon | D2085.3  | -0.363332410479904  |             |

|                                                                                                                                                                                                            |    |    |         |         |                |         |         |                       |             |
|------------------------------------------------------------------------------------------------------------------------------------------------------------------------------------------------------------|----|----|---------|---------|----------------|---------|---------|-----------------------|-------------|
| AGIWUR41224                                                                                                                                                                                                |    |    |         |         |                |         |         |                       |             |
| N2                                                                                                                                                                                                         | CT | II | 8664833 | 8669154 | WBGene00008429 | D2085.4 | D2085.4 | -0.0266485096971003   | AGIWUR36593 |
| N2                                                                                                                                                                                                         | CT | II | 8669133 | 8684897 | WBGene00008430 | hgap-2  | D2085.5 | -0.0683030417998789   |             |
| AGIWUR23447;AGIWUR45090                                                                                                                                                                                    |    |    |         |         |                |         |         |                       |             |
| N2                                                                                                                                                                                                         | CT | II | 8691789 | 8694180 | WBGene00007916 | C34C6.3 | C34C6.3 | 0.060247397462927     | AGIWUR9910  |
| N2                                                                                                                                                                                                         | CT | II | 8696591 | 8698928 | WBGene00007917 | C34C6.4 | C34C6.4 | -0.0464352774529733   | AGIWUR465   |
| N2                                                                                                                                                                                                         | CT | II | 8699045 | 8702193 | WBGene00007918 | sphk-1  | C34C6.5 | 0.119312077848524     |             |
| AGIWUR4466;AGIWUR18165;AGIWUR24595;AGIWUR30041                                                                                                                                                             |    |    |         |         |                |         |         |                       |             |
| N2                                                                                                                                                                                                         | CT | II | 8703368 | 8703829 | WBGene00000432 | ceh-7   | C34C6.8 | 0.071466017549179     | AGIWUR28771 |
| N2                                                                                                                                                                                                         | CT | II | 8704824 | 8706768 | WBGene00004194 | prx-5   | C34C6.6 | 0.0137124523522552    |             |
| AGIWUR1248;AGIWUR5786;AGIWUR10847;AGIWUR40056                                                                                                                                                              |    |    |         |         |                |         |         |                       |             |
| N2                                                                                                                                                                                                         | CT | II | 8707155 | 8708860 | WBGene00007919 | C34C6.7 | C34C6.7 | -0.299930085112479    | AGIWUR29170 |
| N2                                                                                                                                                                                                         | CT | II | 8709069 | 8710413 | WBGene00005172 | srg-15  | C34C6.1 | 0.00526285985105979   | AGIWUR33606 |
| N2                                                                                                                                                                                                         | CT | II | 8711589 | 8712035 | WBGene00014827 | T01B7.1 | T01B7.1 | -0.0514837179299423   |             |
| AGIWUR3554;AGIWUR8918;AGIWUR20861;AGIWUR27845;AGIWUR35574                                                                                                                                                  |    |    |         |         |                |         |         |                       |             |
| N2                                                                                                                                                                                                         | CT | II | 8712068 | 8713412 | WBGene00005175 | srg-18  | T01B7.2 | -0.0819802335556901   | AGIWUR21000 |
| N2                                                                                                                                                                                                         | CT | II | 8713992 | 8715013 | WBGene00004279 | rab-21  | T01B7.3 | -0.0433316091097176   | AGIWUR4900  |
| N2                                                                                                                                                                                                         | CT | II | 8715132 | 8716281 | WBGene00000887 | cyn-11  | T01B7.4 | -0.0786756159514752   | AGIWUR26435 |
| N2                                                                                                                                                                                                         | CT | II | 8716834 | 8721691 | WBGene00011311 | T01B7.5 | T01B7.5 | -0.0636160484248336   |             |
| AGIWUR20070;AGIWUR27309;AGIWUR31333;AGIWUR43034                                                                                                                                                            |    |    |         |         |                |         |         |                       |             |
| N2                                                                                                                                                                                                         | CT | II | 8722474 | 8725522 | WBGene00011312 | trcs-2  | T01B7.6 | 0.195239419622606     | AGIWUR22900 |
| N2                                                                                                                                                                                                         | CT | II | 8725533 | 8729777 | WBGene00011314 | T01B7.9 | T01B7.9 | -0.25033266822363     | AGIWUR6767  |
| N2                                                                                                                                                                                                         | CT | II | 8733050 | 8734314 | WBGene00004397 | rol-6   | T01B7.7 | -0.335590997611854    | AGIWUR25131 |
| N2                                                                                                                                                                                                         | CT | II | 8736726 | 8737556 | WBGene00011313 | T01B7.8 | T01B7.8 | 0.268902427759036     | AGIWUR14303 |
| N2                                                                                                                                                                                                         | CT | II | 8743725 | 8747234 | WBGene00010681 | mak-1   | K08F8.1 | 0.485430538419546     |             |
| AGIWUR4577;AGIWUR13470;AGIWUR14854;AGIWUR18734;AGIWUR19560;AGIWUR20333;AGIWUR20930;AGIWUR21944;AGIWUR22982;AGIWUR25100;AGIWUR30687;AGIWUR31970;AGIWUR32850;AGIWUR34735;AGIWUR37918;AGIWUR40571;AGIWUR42916 |    |    |         |         |                |         |         |                       |             |
| N2                                                                                                                                                                                                         | CT | II | 8751986 | 8753939 | WBGene00000220 | atf-2   | K08F8.2 | -0.000904958294844604 | AGIWUR24767 |
| N2                                                                                                                                                                                                         | CT | II | 8754113 | 8755248 | WBGene00010683 | K08F8.7 | K08F8.7 | -0.147353105173312    | AGIWUR32053 |
| N2                                                                                                                                                                                                         | CT | II | 8756291 | 8758723 | WBGene00001505 | fut-1   | K08F8.3 | -0.276060205777116    | AGIWUR29855 |
| N2                                                                                                                                                                                                         | CT | II | 8762668 | 8766922 | WBGene00000240 | pah-1   | K08F8.4 | 0.055879843724        |             |
| AGIWUR3575;AGIWUR4523;AGIWUR22284;AGIWUR29197;AGIWUR45094                                                                                                                                                  |    |    |         |         |                |         |         |                       |             |
| N2                                                                                                                                                                                                         | CT | II | 8767185 | 8769307 | WBGene00010682 | K08F8.5 | K08F8.5 | 0.0613812775681382    | AGIWUR39492 |
| N2                                                                                                                                                                                                         | CT | II | 8770975 | 8782020 | WBGene00002295 | let-19  | K08F8.6 | 0.0764373500041011    |             |
| AGIWUR4540;AGIWUR10212;AGIWUR18372;AGIWUR25471;AGIWUR28734;AGIWUR42522                                                                                                                                     |    |    |         |         |                |         |         |                       |             |
| N2                                                                                                                                                                                                         | CT | II | 8782029 | 8783670 | WBGene00004790 | sgn-1   | F07H5.2 | -0.099831084051182    | AGIWUR29530 |
| N2                                                                                                                                                                                                         | CT | II | 8784535 | 8785513 | WBGene00014307 | F07H5.3 | F07H5.3 | -0.123441700565078    | AGIWUR41665 |
| N2                                                                                                                                                                                                         | CT | II | 8786457 | 8787119 | WBGene00014308 | F07H5.4 | F07H5.4 | -0.0139538228043072   | AGIWUR18538 |
| N2                                                                                                                                                                                                         | CT | II | 8787770 | 8789716 | WBGene00014309 | F07H5.5 | F07H5.5 | 0.100788485907905     |             |

AGIWUR17372;AGIWUR24243;AGIWUR28524;AGIWUR32492;AGIWUR39338;AGIWUR44699  
 N2 CT II 8790558 8791318 WBGene00008563 F07H5.13 F07H5.13 -0.116670336614701  
 AGIWUR7414;AGIWUR39817  
 N2 CT II 8791927 8792740 WBGene00008557 F07H5.6 F07H5.6 0.0282010597149167  
 AGIWUR4059;AGIWUR10978;AGIWUR39366  
 N2 CT II 8792912 8794162 WBGene00008558 F07H5.7 F07H5.7 0.142224874364912 AGIWUR34161  
 N2 CT II 8801130 8804889 WBGene00008559 F07H5.8 F07H5.8 -0.0247737181389382  
 AGIWUR9599;AGIWUR12195;AGIWUR14389;AGIWUR26173;AGIWUR29115  
 N2 CT II 8804835 8807021 WBGene00008560 pho-13 F07H5.9 -0.0205327623888341 AGIWUR21693  
 N2 CT II 8807133 8808582 WBGene00008561 F07H5.10 F07H5.10 0.0319586312900828  
 AGIWUR28131  
 N2 CT II 8808636 8810729 WBGene00009784 F46C5.9 F46C5.9 -0.170738916978173 AGIWUR9698  
 N2 CT II 8811353 8812633 WBGene00009783 rer-1 F46C5.8 0.00119351593368222  
 AGIWUR2840;AGIWUR4345;AGIWUR39178  
 N2 CT II 8817593 8818426 WBGene00009785 F46C5.10 F46C5.10 -0.169636731816805  
 AGIWUR30007  
 N2 CT II 8820149 8821248 WBGene00009778 F46C5.1 F46C5.1 0.397525737675231 AGIWUR19741  
 N2 CT II 8826069 8828215 WBGene00003544 nas-25 F46C5.3 -0.0114137662160005  
 AGIWUR2053;AGIWUR14007;AGIWUR15314;AGIWUR18326;AGIWUR22006;AGIWUR25476  
 N2 CT II 8828196 8829287 WBGene00009779 F46C5.2 F46C5.2 0.0525420113361079 AGIWUR36211  
 N2 CT II 8836175 8839313 WBGene00009780 F46C5.4 F46C5.4 -0.122371305012323 AGIWUR4321  
 N2 CT II 8839325 8840243 WBGene00009782 F46C5.7 F46C5.7 0.181110777292 AGIWUR12915  
 N2 CT II 8840200 8844515 WBGene00009781 F46C5.6 F46C5.6 -0.371278621617833 AGIWUR15946  
 N2 CT II 8845598 8848902 WBGene00011767 agxt-1 T14D7.1 -0.144216164851494  
 AGIWUR23608;AGIWUR43545  
 N2 CT II 8848843 8852096 WBGene00011768 oac-46 T14D7.2 0.225574795953959  
 AGIWUR22936;AGIWUR29185;AGIWUR31496;AGIWUR34912;AGIWUR35792;AGIWUR37935  
 N2 CT II 8859074 8859696 WBGene00044062 snb-6 T14D7.3 -0.0160499857044609 AGIWUR10821  
 N2 CT II 8860913 8865173 WBGene00011578 npr-20 T07D4.1 -0.2697325621856 AGIWUR14786  
 N2 CT II 8869549 8874020 WBGene00011579 T07D4.2 T07D4.2 0.0438798080401099 AGIWUR34616  
 N2 CT II 8878496 8883659 WBGene00004355 rha-1 T07D4.3 0.0121066848614326 AGIWUR8834  
 N2 CT II 8883763 8884418 WBGene00045407 T07D4.5 T07D4.5 -0.410170587116473  
 AGIWUR2542;AGIWUR42808  
 N2 CT II 8884901 8889673 WBGene00011580 ddx-19 T07D4.4 0.101000644731631  
 AGIWUR1657;AGIWUR3284;AGIWUR7547  
 N2 CT II 8896841 8908666 WBGene00002251 lat-1 B0457.1 -0.0961079553908277  
 AGIWUR4436;AGIWUR10719;AGIWUR13483;AGIWUR16585;AGIWUR16626;AGIWUR21725;AGIWUR23036;AGIWUR29098;AGIWUR29801;  
 AGIWUR36610;AGIWUR38597;AGIWUR44924  
 N2 CT II 8909008 8909994 WBGene00014660 B0457.3 B0457.3 -0.138623531817288

AGIWUR20307;AGIWUR37158

|                                                                                                                                                                                  |    |    |         |         |                |          |          |                     |             |
|----------------------------------------------------------------------------------------------------------------------------------------------------------------------------------|----|----|---------|---------|----------------|----------|----------|---------------------|-------------|
| N2                                                                                                                                                                               | CT | II | 8910913 | 8912029 | WBGene00007179 | B0457.4  | B0457.4  | 0.110282225950348   | AGIWUR5875  |
| N2                                                                                                                                                                               | CT | II | 8922423 | 8924373 | WBGene00007180 | B0457.6  | B0457.6  | 0.0876133157640666  | AGIWUR30915 |
| N2                                                                                                                                                                               | CT | II | 8924572 | 8926678 | WBGene00007178 | B0457.2  | B0457.2  | 0.181937648083645   | AGIWUR32452 |
| N2                                                                                                                                                                               | CT | II | 8927741 | 8929820 | WBGene00000378 | cct-2    | T21B10.7 | 0.0417828488868155  |             |
| AGIWUR1976;AGIWUR8551;AGIWUR9167;AGIWUR14051;AGIWUR22008;AGIWUR22119;AGIWUR23132;AGIWUR25480;AGIWUR29685;AGIWUR30090;AGIWUR34863;AGIWUR35363;AGIWUR40687;AGIWUR42308;AGIWUR42836 |    |    |         |         |                |          |          |                     |             |
| N2                                                                                                                                                                               | CT | II | 8929841 | 8930937 | WBGene00011883 | mrp1-50  | T21B10.1 | -0.262191977671996  |             |
| AGIWUR14079                                                                                                                                                                      |    |    |         |         |                |          |          |                     |             |
| N2                                                                                                                                                                               | CT | II | 8930985 | 8933833 | WBGene00011884 | enol-1   | T21B10.2 | -0.0140667273639004 |             |
| AGIWUR5548;AGIWUR7435;AGIWUR9458;AGIWUR12492;AGIWUR12639;AGIWUR30121;AGIWUR31823                                                                                                 |    |    |         |         |                |          |          |                     |             |
| N2                                                                                                                                                                               | CT | II | 8934382 | 8939033 | WBGene00011885 | T21B10.3 | T21B10.3 | 0.21812740303135    |             |
| AGIWUR25642                                                                                                                                                                      |    |    |         |         |                |          |          |                     |             |
| N2                                                                                                                                                                               | CT | II | 8939204 | 8940488 | WBGene00011887 | set-17   | T21B10.5 | -0.0573094218289096 |             |
| AGIWUR5839                                                                                                                                                                       |    |    |         |         |                |          |          |                     |             |
| N2                                                                                                                                                                               | CT | II | 8940894 | 8942718 | WBGene00011886 | T21B10.4 | T21B10.4 | 0.126147926366791   |             |
| AGIWUR40409                                                                                                                                                                      |    |    |         |         |                |          |          |                     |             |
| N2                                                                                                                                                                               | CT | II | 8942674 | 8947688 | WBGene00011888 | cut1-15  | T21B10.6 | 0.0684637651965248  |             |
| AGIWUR8379;AGIWUR37786                                                                                                                                                           |    |    |         |         |                |          |          |                     |             |
| N2                                                                                                                                                                               | CT | II | 8955240 | 8964149 | WBGene00007690 | sftd-3   | C18E9.10 | 0.0856367575539263  |             |
| AGIWUR39676                                                                                                                                                                      |    |    |         |         |                |          |          |                     |             |
| N2                                                                                                                                                                               | CT | II | 8964238 | 8964901 | WBGene00007684 | C18E9.4  | C18E9.4  | -0.221808213991363  | AGIWUR2027  |
| N2                                                                                                                                                                               | CT | II | 8965006 | 8966919 | WBGene00007683 | C18E9.2  | C18E9.2  | 0.0680227690688326  | AGIWUR19427 |
| N2                                                                                                                                                                               | CT | II | 8966921 | 8969473 | WBGene00004105 | szy-20   | C18E9.3  | 0.192962356437825   | AGIWUR232   |
| N2                                                                                                                                                                               | CT | II | 8969980 | 8971967 | WBGene00007685 | C18E9.5  | C18E9.5  | 0.00624727985660201 | AGIWUR9657  |
| N2                                                                                                                                                                               | CT | II | 8971965 | 8973566 | WBGene00007686 | tomm-40  | C18E9.6  | 0.258825714921635   | AGIWUR15552 |
| N2                                                                                                                                                                               | CT | II | 8978475 | 8982678 | WBGene00007687 | C18E9.7  | C18E9.7  | 0.203161040194463   | AGIWUR29598 |
| N2                                                                                                                                                                               | CT | II | 8985900 | 8988062 | WBGene00007688 | C18E9.8  | C18E9.8  | 0.674958346870628   | AGIWUR27516 |
| N2                                                                                                                                                                               | CT | II | 8988359 | 8989544 | WBGene00007689 | C18E9.9  | C18E9.9  | 0.0573700859407626  | AGIWUR34240 |
| N2                                                                                                                                                                               | CT | II | 8993169 | 8994533 | WBGene00003870 | ooc-5    | C18E9.11 | 0.252201563207178   |             |
| AGIWUR34657                                                                                                                                                                      |    |    |         |         |                |          |          |                     |             |
| N2                                                                                                                                                                               | CT | II | 8994636 | 8996269 | WBGene00009711 | F44G4.1  | F44G4.1  | -0.0746255327071115 | AGIWUR36515 |
| N2                                                                                                                                                                               | CT | II | 8996364 | 8997037 | WBGene00009712 | F44G4.2  | F44G4.2  | 0.030741592022947   |             |
| AGIWUR26656;AGIWUR29476;AGIWUR37899                                                                                                                                              |    |    |         |         |                |          |          |                     |             |
| N2                                                                                                                                                                               | CT | II | 8997027 | 8997662 | WBGene00009713 | F44G4.3  | F44G4.3  | -0.113274850740765  | AGIWUR39850 |
| N2                                                                                                                                                                               | CT | II | 8997827 | 8999722 | WBGene00006514 | tdp-1    | F44G4.4  | -0.011502341810596  |             |
| AGIWUR6241;AGIWUR23305;AGIWUR31169;AGIWUR40138;AGIWUR43127;AGIWUR43210                                                                                                           |    |    |         |         |                |          |          |                     |             |
| N2                                                                                                                                                                               | CT | II | 8999727 | 9000431 | WBGene00009714 | F44G4.5  | F44G4.5  | 0.17374676255525    | AGIWUR28065 |
| N2                                                                                                                                                                               | CT | II | 9000872 | 9001793 | WBGene00009715 | F44G4.6  | F44G4.6  | -0.109501710503711  | AGIWUR23769 |

|                                                                                                 |    |    |         |         |                |          |          |                     |             |
|-------------------------------------------------------------------------------------------------|----|----|---------|---------|----------------|----------|----------|---------------------|-------------|
| N2                                                                                              | CT | II | 9002527 | 9005167 | WBGene00009716 | F44G4.7  | F44G4.7  | -0.0793868787277585 | AGIWUR41942 |
| N2                                                                                              | CT | II | 9005796 | 9019775 | WBGene00009717 | dep-1    | F44G4.8  | -0.0547550030830379 |             |
| AGIWUR4980;AGIWUR14304;AGIWUR27995                                                              |    |    |         |         |                |          |          |                     |             |
| N2                                                                                              | CT | II | 9026968 | 9029263 | WBGene00009504 | F37B12.1 | F37B12.1 | -0.284764414146794  |             |
| AGIWUR28129                                                                                     |    |    |         |         |                |          |          |                     |             |
| N2                                                                                              | CT | II | 9035562 | 9038301 | WBGene00001527 | gcs-1    | F37B12.2 | 0.0193666481251529  |             |
| AGIWUR36032;AGIWUR39622                                                                         |    |    |         |         |                |          |          |                     |             |
| N2                                                                                              | CT | II | 9039820 | 9041406 | WBGene00009505 | F37B12.3 | F37B12.3 | -0.215637988608956  |             |
| AGIWUR6571                                                                                      |    |    |         |         |                |          |          |                     |             |
| N2                                                                                              | CT | II | 9042180 | 9053824 | WBGene00011980 | T24B8.7  | T24B8.7  | -0.136499801679978  |             |
| AGIWUR3801;AGIWUR7738;AGIWUR38682                                                               |    |    |         |         |                |          |          |                     |             |
| N2                                                                                              | CT | II | 9054972 | 9056504 | WBGene00011976 | T24B8.2  | T24B8.2  | -0.098118361781605  | AGIWUR38510 |
| N2                                                                                              | CT | II | 9056499 | 9057111 | WBGene00004446 | rp1-32   | T24B8.1  | 0.352521763081488   |             |
| AGIWUR17408;AGIWUR18356;AGIWUR19434;AGIWUR19524;AGIWUR26213;AGIWUR26733;AGIWUR34869;AGIWUR36838 |    |    |         |         |                |          |          |                     |             |
| N2                                                                                              | CT | II | 9059389 | 9061138 | WBGene00011977 | T24B8.3  | T24B8.3  | 0.103036443202924   |             |
| AGIWUR8853;AGIWUR15171;AGIWUR15912;AGIWUR22651;AGIWUR28452;AGIWUR38847                          |    |    |         |         |                |          |          |                     |             |
| N2                                                                                              | CT | II | 9063687 | 9070904 | WBGene00011978 | T24B8.4  | T24B8.4  | 0.0805370361360573  |             |
| AGIWUR11315;AGIWUR11955;AGIWUR12228;AGIWUR35707                                                 |    |    |         |         |                |          |          |                     |             |
| N2                                                                                              | CT | II | 9082626 | 9083146 | WBGene00011979 | T24B8.5  | T24B8.5  | 0.685958100570477   |             |
| AGIWUR4785;AGIWUR5986;AGIWUR16640;AGIWUR24375;AGIWUR34447;AGIWUR40012                           |    |    |         |         |                |          |          |                     |             |
| N2                                                                                              | CT | II | 9086608 | 9087917 | WBGene00001950 | hlh-3    | T24B8.6  | -0.0865534414650551 | AGIWUR14966 |
| N2                                                                                              | CT | II | 9091109 | 9093696 | WBGene00007421 | C07H4.1  | C07H4.1  | -0.314315370189494  | AGIWUR20829 |
| N2                                                                                              | CT | II | 9094710 | 9098605 | WBGene00000532 | clh-5    | C07H4.2  | 0.0966455971906761  | AGIWUR9749  |
| N2                                                                                              | CT | II | 9099371 | 9100639 | WBGene00012000 | T24H10.1 | T24H10.1 | 0.690651386865637   |             |
| AGIWUR27507                                                                                     |    |    |         |         |                |          |          |                     |             |
| N2                                                                                              | CT | II | 9101098 | 9105451 | WBGene00012003 | T24H10.5 | T24H10.5 | 0.0937610464216343  |             |
| AGIWUR7016                                                                                      |    |    |         |         |                |          |          |                     |             |
| N2                                                                                              | CT | II | 9106515 | 9107145 | WBGene00012004 | dyrb-1   | T24H10.6 | -0.206246613296882  |             |
| AGIWUR14292                                                                                     |    |    |         |         |                |          |          |                     |             |
| N2                                                                                              | CT | II | 9107382 | 9108600 | WBGene00001041 | dnj-23   | T24H10.3 | -0.0644790448554176 |             |
| AGIWUR28826                                                                                     |    |    |         |         |                |          |          |                     |             |
| N2                                                                                              | CT | II | 9109534 | 9111240 | WBGene00012002 | T24H10.4 | T24H10.4 | 0.025019262615853   |             |
| AGIWUR39308                                                                                     |    |    |         |         |                |          |          |                     |             |
| N2                                                                                              | CT | II | 9113219 | 9132213 | WBGene00012005 | jun-1    | T24H10.7 | 0.0441418636164492  |             |
| AGIWUR15041;AGIWUR15175;AGIWUR39207;AGIWUR43228                                                 |    |    |         |         |                |          |          |                     |             |
| N2                                                                                              | CT | II | 9131663 | 9134543 | WBGene00007633 | C16D2.1  | C16D2.1  | 0.116450758959706   |             |
| AGIWUR3556;AGIWUR11436;AGIWUR25167;AGIWUR25792;AGIWUR35378;AGIWUR43292                          |    |    |         |         |                |          |          |                     |             |
| N2                                                                                              | CT | II | 9139651 | 9145352 | WBGene00012421 | Y9C2UA.1 | Y9C2UA.1 | 0.0713161343806599  |             |
| AGIWUR28136;AGIWUR44101                                                                         |    |    |         |         |                |          |          |                     |             |

|                                                                                    |    |    |         |         |                |          |          |                       |             |
|------------------------------------------------------------------------------------|----|----|---------|---------|----------------|----------|----------|-----------------------|-------------|
| N2                                                                                 | CT | II | 9146261 | 9146641 | WBGene00012422 | Y9C2UA.2 | Y9C2UA.2 | 1.14370270780481      |             |
| AGIWUR34874                                                                        |    |    |         |         |                |          |          |                       |             |
| N2                                                                                 | CT | II | 9148356 | 9152311 | WBGene00012322 | W07A12.4 | W07A12.4 | -0.0849313559419462   |             |
| AGIWUR14184                                                                        |    |    |         |         |                |          |          |                       |             |
| N2                                                                                 | CT | II | 9152531 | 9154310 | WBGene00000654 | col-78   | W07A12.5 | 0.240086688703771     |             |
| AGIWUR17535                                                                        |    |    |         |         |                |          |          |                       |             |
| N2                                                                                 | CT | II | 9158108 | 9159874 | WBGene00012323 | oac-54   | W07A12.6 | 0.225416529592582     |             |
| AGIWUR12447                                                                        |    |    |         |         |                |          |          |                       |             |
| N2                                                                                 | CT | II | 9161379 | 9163448 | WBGene00012324 | rhy-1    | W07A12.7 | 0.105624943599411     |             |
| AGIWUR26959                                                                        |    |    |         |         |                |          |          |                       |             |
| N2                                                                                 | CT | II | 9163368 | 9165800 | WBGene00012325 | W07A12.8 | W07A12.8 | 0.250352772537301     |             |
| AGIWUR12569                                                                        |    |    |         |         |                |          |          |                       |             |
| N2                                                                                 | CT | II | 9165929 | 9167830 | WBGene00011966 | T23G7.3  | T23G7.3  | 0.0862489421400241    | AGIWUR30241 |
| N2                                                                                 | CT | II | 9167933 | 9172991 | WBGene00011965 | T23G7.2  | T23G7.2  | -0.196808666336199    | AGIWUR12448 |
| N2                                                                                 | CT | II | 9173175 | 9177152 | WBGene00004752 | sec-5    | T23G7.4  | 0.0371351008814909    | AGIWUR6458  |
| N2                                                                                 | CT | II | 9177300 | 9178585 | WBGene00011967 | pir-1    | T23G7.5  | -0.114471928890111    |             |
| AGIWUR12789;AGIWUR28676;AGIWUR35975                                                |    |    |         |         |                |          |          |                       |             |
| N2                                                                                 | CT | II | 9178514 | 9188480 | WBGene00006367 | sym-2    | ZK1067.6 | -0.196696674426519    |             |
| AGIWUR16239                                                                        |    |    |         |         |                |          |          |                       |             |
| N2                                                                                 | CT | II | 9197518 | 9207210 | WBGene00002299 | let-23   | ZK1067.1 | -0.000444412235966141 |             |
| AGIWUR38958                                                                        |    |    |         |         |                |          |          |                       |             |
| N2                                                                                 | CT | II | 9210376 | 9213100 | WBGene00014210 | ZK1067.4 | ZK1067.4 |                       |             |
| -0.00498620656722792 AGIWUR18196                                                   |    |    |         |         |                |          |          |                       |             |
| N2                                                                                 | CT | II | 9213658 | 9222798 | WBGene00014208 | ZK1067.2 | ZK1067.2 | 0.0542742635867262    |             |
| AGIWUR280;AGIWUR30742;AGIWUR36429;AGIWUR38565                                      |    |    |         |         |                |          |          |                       |             |
| N2                                                                                 | CT | II | 9223269 | 9225176 | WBGene00014209 | ZK1067.3 | ZK1067.3 | -0.14627074603929     |             |
| AGIWUR11545                                                                        |    |    |         |         |                |          |          |                       |             |
| N2                                                                                 | CT | II | 9225186 | 9227261 | WBGene00004174 | abu-14   | ZK1067.7 | 0.142960586273229     |             |
| AGIWUR14252;AGIWUR36345;AGIWUR43716                                                |    |    |         |         |                |          |          |                       |             |
| N2                                                                                 | CT | II | 9231457 | 9232340 | WBGene00001761 | gst-13   | T26C5.1  | -0.0683139158314763   | AGIWUR6051  |
| N2                                                                                 | CT | II | 9233223 | 9236202 | WBGene00012032 | T26C5.2  | T26C5.2  | -0.0145922445453275   |             |
| AGIWUR22340;AGIWUR30572;AGIWUR39818                                                |    |    |         |         |                |          |          |                       |             |
| N2                                                                                 | CT | II | 9236583 | 9249123 | WBGene00012033 | T26C5.3  | T26C5.3  | 0.0745978503106848    | AGIWUR43937 |
| N2                                                                                 | CT | II | 9249048 | 9250522 | WBGene00012034 | T26C5.4  | T26C5.4  | -0.0998528500837637   | AGIWUR5499  |
| N2                                                                                 | CT | II | 9251788 | 9254312 | WBGene00044006 | H32K21.1 | H32K21.1 | -0.177248584610727    |             |
| AGIWUR9374;AGIWUR14634;AGIWUR29552;AGIWUR32187;AGIWUR33749                         |    |    |         |         |                |          |          |                       |             |
| N2                                                                                 | CT | II | 9258913 | 9261994 | WBGene00000170 | aqp-2    | C01G6.1  | 0.135558155203601     |             |
| AGIWUR6503;AGIWUR16119;AGIWUR16505;AGIWUR16669;AGIWUR38863;AGIWUR42186;AGIWUR43505 |    |    |         |         |                |          |          |                       |             |
| N2                                                                                 | CT | II | 9267336 | 9268303 | WBGene00007224 | C01G6.2  | C01G6.2  | -0.0811970531326338   | AGIWUR904   |



|                                                                                                                                  |    |    |         |         |                |          |          |                     |             |
|----------------------------------------------------------------------------------------------------------------------------------|----|----|---------|---------|----------------|----------|----------|---------------------|-------------|
| N2                                                                                                                               | CT | II | 9269888 | 9271267 | WBGene00007225 | C01G6.3  | C01G6.3  | -0.123707250038716  | AGIWUR10148 |
| N2                                                                                                                               | CT | II | 9271265 | 9273042 | WBGene00007226 | C01G6.4  | C01G6.4  | -0.0536013895126484 | AGIWUR4309  |
| N2                                                                                                                               | CT | II | 9275024 | 9280098 | WBGene00007227 | C01G6.5  | C01G6.5  | 0.170037166246752   |             |
| AGIWUR7512;AGIWUR15656;AGIWUR20663;AGIWUR34921                                                                                   |    |    |         |         |                |          |          |                     |             |
| N2                                                                                                                               | CT | II | 9285932 | 9289136 | WBGene00006510 | mtrr-1   | C01G6.6  | -0.0929185840070863 |             |
| AGIWUR4599;AGIWUR5472;AGIWUR6166;AGIWUR8083;AGIWUR10918;AGIWUR36993                                                              |    |    |         |         |                |          |          |                     |             |
| N2                                                                                                                               | CT | II | 9289506 | 9291539 | WBGene00014663 | C01G6.10 | C01G6.10 | -0.0571125938862576 |             |
| AGIWUR10768;AGIWUR33227                                                                                                          |    |    |         |         |                |          |          |                     |             |
| N2                                                                                                                               | CT | II | 9292017 | 9294050 | WBGene00007228 | acs-7    | C01G6.7  | -0.0991664459253814 |             |
| AGIWUR16134;AGIWUR20204;AGIWUR41951                                                                                              |    |    |         |         |                |          |          |                     |             |
| N2                                                                                                                               | CT | II | 9294029 | 9295753 | WBGene00007229 | C01G6.9  | C01G6.9  | -0.387344108139452  | AGIWUR9968  |
| N2                                                                                                                               | CT | II | 9295918 | 9310304 | WBGene00000289 | cam-1    | C01G6.8  | -0.182825121999384  | AGIWUR22200 |
| N2                                                                                                                               | CT | II | 9317551 | 9319627 | WBGene00008403 | csa-1    | D2013.3  | -0.240118660199236  | AGIWUR20055 |
| N2                                                                                                                               | CT | II | 9319865 | 9321888 | WBGene00008402 | wdfy-2   | D2013.2  | -0.12436442421361   | AGIWUR11794 |
| N2                                                                                                                               | CT | II | 9321858 | 9322916 | WBGene00004286 | rab-39   | D2013.1  | 0.098781194665488   | AGIWUR37896 |
| N2                                                                                                                               | CT | II | 9323955 | 9324873 | WBGene00006520 | tag-175  | D2013.10 | -0.0753712553272123 |             |
| AGIWUR7498;AGIWUR13845;AGIWUR37776                                                                                               |    |    |         |         |                |          |          |                     |             |
| N2                                                                                                                               | CT | II | 9324874 | 9329665 | WBGene00001134 | eat-3    | D2013.5  | -0.105396615140815  |             |
| AGIWUR5032;AGIWUR9059;AGIWUR14969                                                                                                |    |    |         |         |                |          |          |                     |             |
| N2                                                                                                                               | CT | II | 9329757 | 9331510 | WBGene00008404 | D2013.6  | D2013.6  | -0.03296649789187   | AGIWUR9103  |
| N2                                                                                                                               | CT | II | 9331643 | 9333925 | WBGene00001229 | eif-3.F  | D2013.7  | -0.158501954942381  | AGIWUR26638 |
| N2                                                                                                                               | CT | II | 9334014 | 9338896 | WBGene00004744 | scp-1    | D2013.8  | -0.254407953446208  | AGIWUR31494 |
| N2                                                                                                                               | CT | II | 9338890 | 9341394 | WBGene00008405 | ttll-12  | D2013.9  | 0.042312900866075   |             |
| AGIWUR4157;AGIWUR10715;AGIWUR42764                                                                                               |    |    |         |         |                |          |          |                     |             |
| N2                                                                                                                               | CT | II | 9341397 | 9346590 | WBGene00009626 | F42A8.1  | F42A8.1  | 0.145077783741094   | AGIWUR629   |
| N2                                                                                                                               | CT | II | 9350648 | 9352801 | WBGene00006433 | sdhb-1   | F42A8.2  | 0.154854649307326   |             |
| AGIWUR10676;AGIWUR41853                                                                                                          |    |    |         |         |                |          |          |                     |             |
| N2                                                                                                                               | CT | II | 9353000 | 9354327 | WBGene00009627 | F42A8.3  | F42A8.3  | -0.24606537680318   | AGIWUR6749  |
| N2                                                                                                                               | CT | II | 9358531 | 9369098 | WBGene00003196 | mel-11   | C06C3.1  | 0.0976575688358032  |             |
| AGIWUR488;AGIWUR8877;AGIWUR12482;AGIWUR18840;AGIWUR22152;AGIWUR27473;AGIWUR28945;AGIWUR31426;AGIWUR32983;AGIWUR35345;AGIWUR41789 |    |    |         |         |                |          |          |                     |             |
| N2                                                                                                                               | CT | II | 9369178 | 9372485 | WBGene00007374 | C06C3.3  | C06C3.3  | -0.0147639058112983 | AGIWUR42015 |
| N2                                                                                                                               | CT | II | 9375845 | 9377258 | WBGene00044169 | C06C3.10 | C06C3.10 | 0.0108955666578199  |             |
| AGIWUR7373;AGIWUR19914;AGIWUR21399;AGIWUR24535;AGIWUR35394;AGIWUR42353;AGIWUR44149                                               |    |    |         |         |                |          |          |                     |             |
| N2                                                                                                                               | CT | II | 9378557 | 9379596 | WBGene00045404 | C06C3.11 | C06C3.11 | -0.27815496524957   |             |
| AGIWUR14892;AGIWUR22768                                                                                                          |    |    |         |         |                |          |          |                     |             |
| N2                                                                                                                               | CT | II | 9380106 | 9381355 | WBGene00007376 | C06C3.5  | C06C3.5  | -0.163122383158403  |             |
| AGIWUR7789;AGIWUR43989                                                                                                           |    |    |         |         |                |          |          |                     |             |
| N2                                                                                                                               | CT | II | 9380822 | 9384995 | WBGene00005271 | srh-48   | C06C3.6  | 0.28328507993353    |             |

AGIWUR777;AGIWUR30993;AGIWUR41635

|    |    |    |         |         |                |          |         |                     |                    |
|----|----|----|---------|---------|----------------|----------|---------|---------------------|--------------------|
| N2 | CT | II | 9385541 | 9386537 | WBGene00007377 | C06C3.7  | C06C3.7 | -0.111802832573429  | AGIWUR9039         |
| N2 | CT | II | 9386584 | 9390900 | WBGene00007378 | C06C3.8  | C06C3.8 | -0.0592695129822332 | AGIWUR24997        |
| N2 | CT | II | 9395493 | 9397596 | WBGene00013091 | Y51B9A.9 |         | Y51B9A.9            | 0.0542206929441447 |

AGIWUR15463

|    |    |    |         |         |                |          |  |          |                     |
|----|----|----|---------|---------|----------------|----------|--|----------|---------------------|
| N2 | CT | II | 9398866 | 9399828 | WBGene00013090 | Y51B9A.8 |  | Y51B9A.8 | -0.0650991091150681 |
|----|----|----|---------|---------|----------------|----------|--|----------|---------------------|

AGIWUR38154

|    |    |    |         |         |                |          |  |          |                    |
|----|----|----|---------|---------|----------------|----------|--|----------|--------------------|
| N2 | CT | II | 9400053 | 9400567 | WBGene00013089 | Y51B9A.7 |  | Y51B9A.7 | 0.0559580539687818 |
|----|----|----|---------|---------|----------------|----------|--|----------|--------------------|

AGIWUR18686

|    |    |    |         |         |                |          |  |          |                   |
|----|----|----|---------|---------|----------------|----------|--|----------|-------------------|
| N2 | CT | II | 9400717 | 9403187 | WBGene00013088 | Y51B9A.6 |  | Y51B9A.6 | 0.176255923507378 |
|----|----|----|---------|---------|----------------|----------|--|----------|-------------------|

AGIWUR41585

|    |    |    |         |         |                |          |  |          |                   |
|----|----|----|---------|---------|----------------|----------|--|----------|-------------------|
| N2 | CT | II | 9404146 | 9404779 | WBGene00013087 | Y51B9A.5 |  | Y51B9A.5 | 0.104581896470338 |
|----|----|----|---------|---------|----------------|----------|--|----------|-------------------|

AGIWUR8521

|    |    |    |         |         |                |       |          |  |                     |
|----|----|----|---------|---------|----------------|-------|----------|--|---------------------|
| N2 | CT | II | 9405539 | 9407114 | WBGene00013085 | mpz-6 | Y51B9A.3 |  | -0.0317206863380015 |
|----|----|----|---------|---------|----------------|-------|----------|--|---------------------|

AGIWUR30524

|    |    |    |         |         |                |          |  |          |                    |
|----|----|----|---------|---------|----------------|----------|--|----------|--------------------|
| N2 | CT | II | 9407270 | 9407547 | WBGene00014909 | Y51B9A.2 |  | Y51B9A.2 | 0.0660395967651457 |
|----|----|----|---------|---------|----------------|----------|--|----------|--------------------|

AGIWUR27725

|    |    |    |         |         |                |        |          |  |                    |
|----|----|----|---------|---------|----------------|--------|----------|--|--------------------|
| N2 | CT | II | 9407769 | 9409017 | WBGene00013086 | arrd-2 | Y51B9A.4 |  | -0.115856447501651 |
|----|----|----|---------|---------|----------------|--------|----------|--|--------------------|

AGIWUR1161;AGIWUR16056;AGIWUR19379

|    |    |    |         |         |                |        |        |                   |  |
|----|----|----|---------|---------|----------------|--------|--------|-------------------|--|
| N2 | CT | II | 9409341 | 9411597 | WBGene00014813 | M176.9 | M176.9 | 0.186316825967657 |  |
|----|----|----|---------|---------|----------------|--------|--------|-------------------|--|

AGIWUR5800;AGIWUR17079;AGIWUR29430;AGIWUR30418;AGIWUR33537;AGIWUR38628;AGIWUR42401

|    |    |    |         |         |                |        |        |                   |             |
|----|----|----|---------|---------|----------------|--------|--------|-------------------|-------------|
| N2 | CT | II | 9412565 | 9414144 | WBGene00006429 | arrd-3 | M176.1 | 0.194287340340468 | AGIWUR39634 |
|----|----|----|---------|---------|----------------|--------|--------|-------------------|-------------|

|    |    |    |         |         |                |       |        |                   |  |
|----|----|----|---------|---------|----------------|-------|--------|-------------------|--|
| N2 | CT | II | 9414559 | 9416431 | WBGene00010941 | gss-1 | M176.2 | 0.175060665389432 |  |
|----|----|----|---------|---------|----------------|-------|--------|-------------------|--|

AGIWUR3744;AGIWUR7901;AGIWUR17536;AGIWUR39771

|    |    |    |         |         |                |        |        |                    |  |
|----|----|----|---------|---------|----------------|--------|--------|--------------------|--|
| N2 | CT | II | 9417013 | 9418316 | WBGene00010942 | chch-3 | M176.3 | -0.110391089598075 |  |
|----|----|----|---------|---------|----------------|--------|--------|--------------------|--|

AGIWUR14876;AGIWUR32165

|    |    |    |         |         |                |        |        |                   |             |
|----|----|----|---------|---------|----------------|--------|--------|-------------------|-------------|
| N2 | CT | II | 9420178 | 9422196 | WBGene00010943 | M176.4 | M176.4 | 0.121340750877096 | AGIWUR16670 |
|----|----|----|---------|---------|----------------|--------|--------|-------------------|-------------|

|    |    |    |         |         |                |         |         |                    |            |
|----|----|----|---------|---------|----------------|---------|---------|--------------------|------------|
| N2 | CT | II | 9422269 | 9423296 | WBGene00010947 | M176.11 | M176.11 | 0.0130841142816198 | AGIWUR6138 |
|----|----|----|---------|---------|----------------|---------|---------|--------------------|------------|

|    |    |    |         |         |                |         |         |                    |            |
|----|----|----|---------|---------|----------------|---------|---------|--------------------|------------|
| N2 | CT | II | 9423331 | 9426173 | WBGene00010946 | M176.10 | M176.10 | -0.388032624359063 | AGIWUR8173 |
|----|----|----|---------|---------|----------------|---------|---------|--------------------|------------|

|    |    |    |         |         |                |        |        |                    |           |
|----|----|----|---------|---------|----------------|--------|--------|--------------------|-----------|
| N2 | CT | II | 9426229 | 9427744 | WBGene00010944 | M176.5 | M176.5 | -0.190737904366372 | AGIWUR437 |
|----|----|----|---------|---------|----------------|--------|--------|--------------------|-----------|

|    |    |    |         |         |                |        |        |                    |            |
|----|----|----|---------|---------|----------------|--------|--------|--------------------|------------|
| N2 | CT | II | 9431383 | 9433709 | WBGene00002199 | kin-15 | M176.6 | -0.256493827555721 | AGIWUR9251 |
|----|----|----|---------|---------|----------------|--------|--------|--------------------|------------|

|    |    |    |         |         |                |        |        |                    |             |
|----|----|----|---------|---------|----------------|--------|--------|--------------------|-------------|
| N2 | CT | II | 9434021 | 9436120 | WBGene00002200 | kin-16 | M176.7 | -0.126856067755151 | AGIWUR37351 |
|----|----|----|---------|---------|----------------|--------|--------|--------------------|-------------|

|    |    |    |         |         |                |         |        |                     |  |
|----|----|----|---------|---------|----------------|---------|--------|---------------------|--|
| N2 | CT | II | 9436649 | 9438327 | WBGene00010945 | chil-13 | M176.8 | -0.0258266408904122 |  |
|----|----|----|---------|---------|----------------|---------|--------|---------------------|--|

AGIWUR14242;AGIWUR18118;AGIWUR20828;AGIWUR22939;AGIWUR39368

|    |    |    |         |         |                |         |         |                   |            |
|----|----|----|---------|---------|----------------|---------|---------|-------------------|------------|
| N2 | CT | II | 9438609 | 9440160 | WBGene00011159 | chil-17 | R09D1.3 | 0.275664054735662 | AGIWUR9661 |
|----|----|----|---------|---------|----------------|---------|---------|-------------------|------------|

|    |    |    |         |         |                |         |         |                     |             |
|----|----|----|---------|---------|----------------|---------|---------|---------------------|-------------|
| N2 | CT | II | 9440441 | 9441959 | WBGene00011158 | chil-16 | R09D1.2 | -0.0759590836505151 | AGIWUR12002 |
|----|----|----|---------|---------|----------------|---------|---------|---------------------|-------------|

|    |    |    |         |         |                |         |         |                    |             |
|----|----|----|---------|---------|----------------|---------|---------|--------------------|-------------|
| N2 | CT | II | 9442168 | 9443629 | WBGene00011157 | chil-15 | R09D1.1 | -0.134844116318924 | AGIWUR22130 |
|----|----|----|---------|---------|----------------|---------|---------|--------------------|-------------|

|    |    |    |         |         |                |          |  |          |                     |
|----|----|----|---------|---------|----------------|----------|--|----------|---------------------|
| N2 | CT | II | 9443827 | 9445468 | WBGene00011169 | R09D1.13 |  | R09D1.13 | -0.0561768291561968 |
|----|----|----|---------|---------|----------------|----------|--|----------|---------------------|

AGIWUR9592

|                                                                                                                      |    |    |         |         |                |          |          |                      |             |
|----------------------------------------------------------------------------------------------------------------------|----|----|---------|---------|----------------|----------|----------|----------------------|-------------|
| N2                                                                                                                   | CT | II | 9446090 | 9447705 | WBGene00011160 | R09D1.4  | R09D1.4  | 0.0652108057342655   | AGIWUR21760 |
| N2                                                                                                                   | CT | II | 9448273 | 9449726 | WBGene00011161 | chil-18  | R09D1.5  | -0.259064223815865   | AGIWUR17840 |
| N2                                                                                                                   | CT | II | 9450028 | 9452263 | WBGene00011168 | R09D1.12 | R09D1.12 | 0.0424846231191447   |             |
| AGIWUR2982;AGIWUR9608;AGIWUR10424;AGIWUR16494                                                                        |    |    |         |         |                |          |          |                      |             |
| N2                                                                                                                   | CT | II | 9455417 | 9456617 | WBGene00011163 | chil-20  | R09D1.7  | 0.00879588875846782  | AGIWUR41221 |
| N2                                                                                                                   | CT | II | 9462537 | 9464093 | WBGene00011165 | R09D1.9  | R09D1.9  | -0.276876714934652   |             |
| AGIWUR13346;AGIWUR21482;AGIWUR21719;AGIWUR24513                                                                      |    |    |         |         |                |          |          |                      |             |
| N2                                                                                                                   | CT | II | 9464470 | 9466195 | WBGene00011166 | chil-22  | R09D1.10 | -0.151693460785976   |             |
| AGIWUR31774                                                                                                          |    |    |         |         |                |          |          |                      |             |
| N2                                                                                                                   | CT | II | 9466960 | 9468477 | WBGene00011167 | chil-23  | R09D1.11 | -0.125964418561962   |             |
| AGIWUR22536                                                                                                          |    |    |         |         |                |          |          |                      |             |
| N2                                                                                                                   | CT | II | 9469119 | 9470082 | WBGene00044807 | T19H5.6  | T19H5.6  | -0.0757847320766469  | AGIWUR34993 |
| N2                                                                                                                   | CT | II | 9470521 | 9471924 | WBGene00044806 | T19H5.5  | T19H5.5  | 0.259743909490821    | AGIWUR44827 |
| N2                                                                                                                   | CT | II | 9472691 | 9474467 | WBGene00011846 | chil-25  | T19H5.1  | -0.079013050384714   |             |
| AGIWUR41436;AGIWUR41503                                                                                              |    |    |         |         |                |          |          |                      |             |
| N2                                                                                                                   | CT | II | 9475055 | 9476375 | WBGene00011847 | chil-26  | T19H5.2  | -0.073485960859573   | AGIWUR15275 |
| N2                                                                                                                   | CT | II | 9477867 | 9479536 | WBGene00011848 | chil-27  | T19H5.3  | -0.0751583435135466  | AGIWUR1801  |
| N2                                                                                                                   | CT | II | 9479641 | 9480106 | WBGene00045414 | T19H5.7  | T19H5.7  | -0.101243129312147   |             |
| AGIWUR267;AGIWUR4245;AGIWUR12414;AGIWUR16867;AGIWUR18186;AGIWUR18396;AGIWUR19091;AGIWUR23500;AGIWUR26261;AGIWUR36288 |    |    |         |         |                |          |          |                      |             |
| N2                                                                                                                   | CT | II | 9486377 | 9488260 | WBGene00011849 | T19H5.4  | T19H5.4  | -0.00161346927704464 | AGIWUR33194 |
| N2                                                                                                                   | CT | II | 9502757 | 9507281 | WBGene00001530 | gcy-3    | R134.1   | -0.0962956697486197  | AGIWUR20905 |
| N2                                                                                                                   | CT | II | 9507604 | 9512095 | WBGene00001529 | gcy-2    | R134.2   | 0.142220716623362    | AGIWUR21956 |
| N2                                                                                                                   | CT | II | 9512490 | 9516936 | WBGene00001528 | gcy-1    | AH6.1    | -0.194752041161599   | AGIWUR34842 |
| N2                                                                                                                   | CT | II | 9517567 | 9518876 | WBGene00007080 | sfxn-1.1 | AH6.2    | 0.183838562296732    |             |
| AGIWUR30366                                                                                                          |    |    |         |         |                |          |          |                      |             |
| N2                                                                                                                   | CT | II | 9519055 | 9520205 | WBGene00007081 | AH6.3    | AH6.3    | 0.201240971740415    | AGIWUR10180 |
| N2                                                                                                                   | CT | II | 9520200 | 9521670 | WBGene00005027 | sra-1    | AH6.4    | 0.437414485746639    | AGIWUR40761 |
| N2                                                                                                                   | CT | II | 9524174 | 9526390 | WBGene00003231 | mex-6    | AH6.5    | 0.0737740141859451   | AGIWUR26335 |
| N2                                                                                                                   | CT | II | 9527031 | 9528253 | WBGene00005041 | sra-15   | AH6.16   | -0.0205365061137357  |             |
| AGIWUR9384;AGIWUR33043;AGIWUR38123                                                                                   |    |    |         |         |                |          |          |                      |             |
| N2                                                                                                                   | CT | II | 9528780 | 9529862 | WBGene00005028 | sra-2    | AH6.6    | 0.146754313122218    | AGIWUR45064 |
| N2                                                                                                                   | CT | II | 9530517 | 9531253 | WBGene00005042 | sra-16   | AH6.13   | -0.00689330692856505 |             |
| AGIWUR12292;AGIWUR13397;AGIWUR19197;AGIWUR27224;AGIWUR30160;AGIWUR39965;AGIWUR43396;AGIWUR44805                      |    |    |         |         |                |          |          |                      |             |
| N2                                                                                                                   | CT | II | 9532299 | 9533974 | WBGene00005035 | sra-9    | AH6.14   | 0.0860543884386287   | AGIWUR20488 |
| N2                                                                                                                   | CT | II | 9537729 | 9539085 | WBGene00005034 | sra-8    | AH6.12   | -0.174570771322136   | AGIWUR26993 |
| N2                                                                                                                   | CT | II | 9539274 | 9540823 | WBGene00005029 | sra-3    | AH6.7    | -0.402929052964903   | AGIWUR22844 |
| N2                                                                                                                   | CT | II | 9541601 | 9542885 | WBGene00005030 | sra-4    | AH6.8    | -0.605161078815994   | AGIWUR22321 |
| N2                                                                                                                   | CT | II | 9544686 | 9546208 | WBGene00005033 | sra-7    | AH6.11   | 0.0344290350731367   | AGIWUR39696 |

|                                                                                 |    |    |         |         |                |          |          |                     |                     |
|---------------------------------------------------------------------------------|----|----|---------|---------|----------------|----------|----------|---------------------|---------------------|
| N2                                                                              | CT | II | 9546438 | 9547647 | WBGene00005031 | sra-5    | AH6.9    | -0.0505754533772613 |                     |
| AGIWUR15593;AGIWUR21584                                                         |    |    |         |         |                |          |          |                     |                     |
| N2                                                                              | CT | II | 9548405 | 9549698 | WBGene00005032 | sra-6    | AH6.10   | 0.264800284943321   | AGIWUR7915          |
| N2                                                                              | CT | II | 9552631 | 9553279 | WBGene00009446 | F35H8.1  | F35H8.1  | 0.204652638973313   |                     |
| AGIWUR10695;AGIWUR11849;AGIWUR16382                                             |    |    |         |         |                |          |          |                     |                     |
| N2                                                                              | CT | II | 9555503 | 9557532 | WBGene00009447 | F35H8.2  | F35H8.2  | -0.298871326887788  | AGIWUR43323         |
| N2                                                                              | CT | II | 9557646 | 9559516 | WBGene00009448 | zfp-2    | F35H8.3  | 0.0140477539460733  | AGIWUR44357         |
| N2                                                                              | CT | II | 9559497 | 9560029 | WBGene00009449 | F35H8.4  | F35H8.4  | 0.0358367563892141  | AGIWUR31921         |
| N2                                                                              | CT | II | 9575971 | 9581490 | WBGene00001368 | exc-7    | F35H8.5  | 0.148325736867404   |                     |
| AGIWUR723;AGIWUR8197;AGIWUR12981;AGIWUR13353;AGIWUR20665;AGIWUR38098            |    |    |         |         |                |          |          |                     |                     |
| N2                                                                              | CT | II | 9581756 | 9583548 | WBGene00006938 | wee-1.1  | F35H8.7  | -0.113167033637413  |                     |
| AGIWUR8384;AGIWUR24870;AGIWUR25452                                              |    |    |         |         |                |          |          |                     |                     |
| N2                                                                              | CT | II | 9584384 | 9586815 | WBGene00009450 | ugt-58   | F35H8.6  | -0.206895944874017  | AGIWUR29447         |
| N2                                                                              | CT | II | 9588212 | 9589767 | WBGene00008456 | E02H1.2  | E02H1.2  | -0.29421740730592   | AGIWUR5067          |
| N2                                                                              | CT | II | 9589865 | 9591221 | WBGene00008455 | E02H1.1  | E02H1.1  | -0.166532823461516  |                     |
| AGIWUR4770;AGIWUR6968;AGIWUR20250                                               |    |    |         |         |                |          |          |                     |                     |
| N2                                                                              | CT | II | 9591292 | 9592936 | WBGene00006473 | tag-124  | E02H1.3  | -0.229342373096046  | AGIWUR30273         |
| N2                                                                              | CT | II | 9593037 | 9595128 | WBGene00004050 | parp-2   | E02H1.4  | 0.0680580438319982  |                     |
| AGIWUR16193;AGIWUR17717;AGIWUR35231;AGIWUR43516                                 |    |    |         |         |                |          |          |                     |                     |
| N2                                                                              | CT | II | 9595224 | 9596598 | WBGene00008457 | E02H1.5  | E02H1.5  | -0.342128736495852  | AGIWUR4642          |
| N2                                                                              | CT | II | 9596701 | 9597528 | WBGene00008458 | E02H1.6  | E02H1.6  | -0.230902464536834  | AGIWUR24417         |
| N2                                                                              | CT | II | 9597622 | 9598201 | WBGene00008459 | mrpl-53  | E02H1.8  | -0.142760993186492  | AGIWUR10408         |
| N2                                                                              | CT | II | 9598197 | 9605526 | WBGene00003618 | nhr-19   | E02H1.7  | 0.0433729511641836  | AGIWUR17743         |
| N2                                                                              | CT | II | 9607533 | 9609396 | WBGene00011791 | T15H9.6  | T15H9.6  | -0.221836722120179  | AGIWUR2463          |
| N2                                                                              | CT | II | 9610678 | 9611372 | WBGene00011790 | T15H9.5  | T15H9.5  | 0.286104518480244   | AGIWUR29738         |
| N2                                                                              | CT | II | 9611873 | 9613403 | WBGene00011789 | T15H9.4  | T15H9.4  | 0.196210744400236   |                     |
| AGIWUR14684;AGIWUR16096;AGIWUR22993                                             |    |    |         |         |                |          |          |                     |                     |
| N2                                                                              | CT | II | 9613463 | 9614812 | WBGene00001952 | hlh-6    | T15H9.3  | -0.363473653022554  | AGIWUR7175          |
| N2                                                                              | CT | II | 9615800 | 9617125 | WBGene00011788 | T15H9.2  | T15H9.2  | -0.284003108136499  | AGIWUR40983         |
| N2                                                                              | CT | II | 9617426 | 9624176 | WBGene00001038 | dnj-20   | T15H9.7  | 0.0792438364676391  |                     |
| AGIWUR32249;AGIWUR37878;AGIWUR41905;AGIWUR44083                                 |    |    |         |         |                |          |          |                     |                     |
| N2                                                                              | CT | II | 9624590 | 9626641 | WBGene00014249 | ZK1307.8 |          | ZK1307.8            | -0.157526184363814  |
| AGIWUR2824                                                                      |    |    |         |         |                |          |          |                     |                     |
| N2                                                                              | CT | II | 9636628 | 9640170 | WBGene00014248 | ZK1307.7 |          | ZK1307.7            | -0.0141067510889625 |
| AGIWUR17502;AGIWUR21999;AGIWUR22593                                             |    |    |         |         |                |          |          |                     |                     |
| N2                                                                              | CT | II | 9640167 | 9644466 | WBGene00001510 | fzr-1    | ZK1307.6 |                     | 0.0474125349875525  |
| AGIWUR711;AGIWUR5820;AGIWUR6478;AGIWUR13776;AGIWUR16291;AGIWUR25244;AGIWUR44524 |    |    |         |         |                |          |          |                     |                     |
| N2                                                                              | CT | II | 9647887 | 9649367 | WBGene00005026 | sqv-8    | ZK1307.5 |                     | -0.0445640123376911 |
| AGIWUR27876                                                                     |    |    |         |         |                |          |          |                     |                     |

|                                                                       |    |    |         |         |                |            |            |                     |
|-----------------------------------------------------------------------|----|----|---------|---------|----------------|------------|------------|---------------------|
| N2                                                                    | CT | II | 9649491 | 9650959 | WBGene00014250 | ZK1307.9   | ZK1307.9   | -0.0993853992575975 |
| AGIWUR32506                                                           |    |    |         |         |                |            |            |                     |
| N2                                                                    | CT | II | 9652308 | 9653019 | WBGene00014246 | ZK1307.3   | ZK1307.3   | 0.156514232418303   |
| AGIWUR3583                                                            |    |    |         |         |                |            |            |                     |
| N2                                                                    | CT | II | 9653109 | 9653952 | WBGene00014245 | ZK1307.2   | ZK1307.2   | 0.0554942673351055  |
| AGIWUR13506;AGIWUR21858;AGIWUR23126;AGIWUR32393;AGIWUR33914           |    |    |         |         |                |            |            |                     |
| N2                                                                    | CT | II | 9654345 | 9655616 | WBGene00014244 | ZK1307.1   | ZK1307.1   | -0.115567406826553  |
| AGIWUR3698;AGIWUR8636;AGIWUR32380                                     |    |    |         |         |                |            |            |                     |
| N2                                                                    | CT | II | 9656689 | 9657719 | WBGene00014251 | gstk-1     | ZK1320.1   | 0.198355841834299   |
| AGIWUR2086;AGIWUR2871;AGIWUR24119;AGIWUR28278;AGIWUR28822;AGIWUR32853 |    |    |         |         |                |            |            |                     |
| N2                                                                    | CT | II | 9657876 | 9659002 | WBGene00014252 | ZK1320.2   | ZK1320.2   | 0.0663576213084909  |
| AGIWUR25137                                                           |    |    |         |         |                |            |            |                     |
| N2                                                                    | CT | II | 9659246 | 9660442 | WBGene00014253 | ZK1320.3   | ZK1320.3   | 0.19119405938633    |
| AGIWUR6554;AGIWUR24271;AGIWUR40507                                    |    |    |         |         |                |            |            |                     |
| N2                                                                    | CT | II | 9660839 | 9663007 | WBGene00014254 | cyp-13A10  | ZK1320.4   | 0.1829268013829     |
| AGIWUR16893                                                           |    |    |         |         |                |            |            |                     |
| N2                                                                    | CT | II | 9663616 | 9665664 | WBGene00014255 | ZK1320.5   | ZK1320.5   | -0.0186381515818255 |
| AGIWUR36576                                                           |    |    |         |         |                |            |            |                     |
| N2                                                                    | CT | II | 9667624 | 9668555 | WBGene00014259 | ZK1320.11  | ZK1320.11  |                     |
| -0.00868694071298748 AGIWUR41760                                      |    |    |         |         |                |            |            |                     |
| N2                                                                    | CT | II | 9669324 | 9671499 | WBGene00006390 | taf-8      | ZK1320.12  | -0.175218075558359  |
| AGIWUR7931                                                            |    |    |         |         |                |            |            |                     |
| N2                                                                    | CT | II | 9671608 | 9673263 | WBGene00014256 | ZK1320.7   | ZK1320.7   | -0.208579808242707  |
| AGIWUR28766                                                           |    |    |         |         |                |            |            |                     |
| N2                                                                    | CT | II | 9674978 | 9677210 | WBGene00000180 | arc-1      | ZK1320.6   | -0.073677507851702  |
| AGIWUR30528                                                           |    |    |         |         |                |            |            |                     |
| N2                                                                    | CT | II | 9680798 | 9683089 | WBGene00044007 | ZK1320.13  | ZK1320.13  | -0.163240468502874  |
| AGIWUR2819;AGIWUR11856;AGIWUR29269;AGIWUR29780;AGIWUR42776            |    |    |         |         |                |            |            |                     |
| N2                                                                    | CT | II | 9684088 | 9686713 | WBGene00014258 | ZK1320.9   | ZK1320.9   | 0.153346034693294   |
| AGIWUR8317;AGIWUR20469;AGIWUR20978;AGIWUR24292;AGIWUR33498            |    |    |         |         |                |            |            |                     |
| N2                                                                    | CT | II | 9689664 | 9691939 | WBGene00003749 | nlp-11     | ZK1320.10  | -0.0938996360861566 |
| AGIWUR11616                                                           |    |    |         |         |                |            |            |                     |
| N2                                                                    | CT | II | 9698281 | 9700463 | WBGene00044158 | Y53C12A.8  | Y53C12A.8  | 0.0471690838916201  |
| AGIWUR32060;AGIWUR36415                                               |    |    |         |         |                |            |            |                     |
| N2                                                                    | CT | II | 9700543 | 9701839 | WBGene00013142 | Y53C12A.7  | Y53C12A.7  | 0.0669878194711462  |
| AGIWUR2909                                                            |    |    |         |         |                |            |            |                     |
| N2                                                                    | CT | II | 9701402 | 9703732 | WBGene00013140 | mop-25.2   | Y53C12A.4  | 0.0107118050490556  |
| AGIWUR20398                                                           |    |    |         |         |                |            |            |                     |
| N2                                                                    | CT | II | 9703812 | 9704789 | WBGene00175030 | Y53C12A.10 | Y53C12A.10 | -0.26702956697298   |

|                                                                                                                                             |    |    |         |         |                |           |                                          |
|---------------------------------------------------------------------------------------------------------------------------------------------|----|----|---------|---------|----------------|-----------|------------------------------------------|
| AGIWUR40049                                                                                                                                 |    |    |         |         |                |           |                                          |
| N2                                                                                                                                          | CT | II | 9706483 | 9708885 | WBGene00001623 | glt-5     | Y53C12A.2 0.108003194889308              |
| AGIWUR40808                                                                                                                                 |    |    |         |         |                |           |                                          |
| N2                                                                                                                                          | CT | II | 9713737 | 9716467 | WBGene00006940 | wee-1.3   | Y53C12A.1 0.144944772951611              |
| AGIWUR7842;AGIWUR12273;AGIWUR14315;AGIWUR16110;AGIWUR25779;AGIWUR30829;AGIWUR39441                                                          |    |    |         |         |                |           |                                          |
| N2                                                                                                                                          | CT | II | 9717478 | 9717775 | WBGene00013141 | Y53C12A.6 | Y53C12A.6 -0.185590289635943             |
| AGIWUR20674                                                                                                                                 |    |    |         |         |                |           |                                          |
| N2                                                                                                                                          | CT | II | 9721828 | 9724526 | WBGene00013145 | cut1-2    | Y53C12B.6 -0.221906852131315             |
| AGIWUR17058                                                                                                                                 |    |    |         |         |                |           |                                          |
| N2                                                                                                                                          | CT | II | 9732137 | 9738035 | WBGene00003100 | mab-3     | Y53C12B.5 -0.0524061024587592            |
| AGIWUR19751;AGIWUR21247;AGIWUR42412                                                                                                         |    |    |         |         |                |           |                                          |
| N2                                                                                                                                          | CT | II | 9738982 | 9742884 | WBGene00013144 | Y53C12B.2 | Y53C12B.2 -0.0262803871012629            |
| AGIWUR29533                                                                                                                                 |    |    |         |         |                |           |                                          |
| N2                                                                                                                                          | CT | II | 9742982 | 9746074 | WBGene00013143 | Y53C12B.1 | Y53C12B.1 -0.0257191532578815            |
| AGIWUR19337                                                                                                                                 |    |    |         |         |                |           |                                          |
| N2                                                                                                                                          | CT | II | 9746316 | 9750454 | WBGene00003785 | nos-3     | Y53C12B.3 -0.0599383197136847            |
| AGIWUR1727;AGIWUR1776;AGIWUR3921;AGIWUR9435;AGIWUR15558;AGIWUR20432;AGIWUR20708;AGIWUR27214;AGIWUR31897;AGIWUR31923;AGIWUR37671;AGIWUR39396 |    |    |         |         |                |           |                                          |
| N2                                                                                                                                          | CT | II | 9750442 | 9752317 | WBGene00013146 | Y53C12B.7 | Y53C12B.7 -0.0257406563072955            |
| AGIWUR35367                                                                                                                                 |    |    |         |         |                |           |                                          |
| N2                                                                                                                                          | CT | II | 9754030 | 9754967 | WBGene00014260 | ZK1321.1  | ZK1321.1 0.0590571577281915              |
| AGIWUR35488                                                                                                                                 |    |    |         |         |                |           |                                          |
| N2                                                                                                                                          | CT | II | 9758234 | 9768265 | WBGene00014261 | shk-1     | ZK1321.2 0.025575390401297               |
| AGIWUR5056;AGIWUR8325;AGIWUR11748;AGIWUR15319;AGIWUR22352;AGIWUR25944;AGIWUR35532;AGIWUR37189;AGIWUR38830                                   |    |    |         |         |                |           |                                          |
| N2                                                                                                                                          | CT | II | 9768357 | 9769847 | WBGene00000178 | aqp-10    | ZK1321.3 0.124070481967972               |
| AGIWUR6508;AGIWUR9418;AGIWUR15485;AGIWUR21502;AGIWUR23911;AGIWUR30029;AGIWUR33320;AGIWUR44993                                               |    |    |         |         |                |           |                                          |
| N2                                                                                                                                          | CT | II | 9770759 | 9774292 | WBGene00014262 | ZK1321.4  | ZK1321.4 0.00994127784741217             |
| AGIWUR28204                                                                                                                                 |    |    |         |         |                |           |                                          |
| N2                                                                                                                                          | CT | II | 9775146 | 9775883 | WBGene00011678 | T10B9.9   | T10B9.9 -0.00999106221086077 AGIWUR43510 |
| N2                                                                                                                                          | CT | II | 9779182 | 9781950 | WBGene00011677 | cyp-13A1  | T10B9.8 -0.140359238230594               |
| AGIWUR10407                                                                                                                                 |    |    |         |         |                |           |                                          |
| N2                                                                                                                                          | CT | II | 9783403 | 9787419 | WBGene00011676 | cyp-13A2  | T10B9.7 -0.170478682429561               |
| AGIWUR9781;AGIWUR17049;AGIWUR32347                                                                                                          |    |    |         |         |                |           |                                          |
| N2                                                                                                                                          | CT | II | 9788801 | 9793284 | WBGene00011675 | cyp-13A3  | T10B9.5 -0.0874267358478145              |
| AGIWUR19245;AGIWUR23212;AGIWUR33620                                                                                                         |    |    |         |         |                |           |                                          |
| N2                                                                                                                                          | CT | II | 9793754 | 9795541 | WBGene00014838 | cyp-13A9  | T10B9.6 0.0261030772299278               |
| AGIWUR6915;AGIWUR29141                                                                                                                      |    |    |         |         |                |           |                                          |
| N2                                                                                                                                          | CT | II | 9795848 | 9797740 | WBGene00011671 | cyp-13A4  | T10B9.1 -0.136684539740864               |
| AGIWUR2689;AGIWUR6539                                                                                                                       |    |    |         |         |                |           |                                          |

|                                                                                                             |    |    |         |         |                |          |           |                      |             |
|-------------------------------------------------------------------------------------------------------------|----|----|---------|---------|----------------|----------|-----------|----------------------|-------------|
| N2                                                                                                          | CT | II | 9798277 | 9800363 | WBGene00011672 | cyp-13A5 | T10B9.2   | 0.0488472310461496   |             |
| AGIWUR2802;AGIWUR22628;AGIWUR37154                                                                          |    |    |         |         |                |          |           |                      |             |
| N2                                                                                                          | CT | II | 9800761 | 9802721 | WBGene00011673 | cyp-13A6 | T10B9.3   | 0.162247906213466    |             |
| AGIWUR22808                                                                                                 |    |    |         |         |                |          |           |                      |             |
| N2                                                                                                          | CT | II | 9803620 | 9805510 | WBGene00000372 | cyp-13A7 | T10B9.10  | 0.590131605808492    |             |
| AGIWUR29039                                                                                                 |    |    |         |         |                |          |           |                      |             |
| N2                                                                                                          | CT | II | 9805627 | 9807532 | WBGene00011674 | cyp-13A8 | T10B9.4   | 0.256516128527783    |             |
| AGIWUR14110                                                                                                 |    |    |         |         |                |          |           |                      |             |
| N2                                                                                                          | CT | II | 9826513 | 9827926 | WBGene00013147 | eyg-1    | Y53C12C.1 | 0.0171011436947772   |             |
| AGIWUR28836                                                                                                 |    |    |         |         |                |          |           |                      |             |
| N2                                                                                                          | CT | II | 9829408 | 9830753 | WBGene00014158 | ZK938.1  | ZK938.1   | 0.178190391807627    | AGIWUR42641 |
| N2                                                                                                          | CT | II | 9831648 | 9834364 | WBGene00014160 | ZK938.3  | ZK938.3   | 0.0511328860804845   | AGIWUR21525 |
| N2                                                                                                          | CT | II | 9835221 | 9836925 | WBGene00014161 | arrd-5   | ZK938.4   | -0.116076948437157   |             |
| AGIWUR12573;AGIWUR33602;AGIWUR41879                                                                         |    |    |         |         |                |          |           |                      |             |
| N2                                                                                                          | CT | II | 9837089 | 9838305 | WBGene00014159 | arrd-4   | ZK938.2   | 0.0116323213555294   | AGIWUR18357 |
| N2                                                                                                          | CT | II | 9839191 | 9840288 | WBGene00270290 | ZK938.11 | ZK938.11  | -0.11168582929499    |             |
| AGIWUR4886                                                                                                  |    |    |         |         |                |          |           |                      |             |
| N2                                                                                                          | CT | II | 9843380 | 9847006 | WBGene00014162 | chil-9   | ZK938.6   | -0.127414842575985   | AGIWUR32304 |
| N2                                                                                                          | CT | II | 9847483 | 9849597 | WBGene00003863 | old-2    | ZK938.5   | 0.0195405887035118   | AGIWUR2536  |
| N2                                                                                                          | CT | II | 9851471 | 9853394 | WBGene00007468 | C08H9.8  | C08H9.8   | -0.0648381025326605  | AGIWUR35968 |
| N2                                                                                                          | CT | II | 9855936 | 9857857 | WBGene00007471 | chil-6   | C08H9.12  | -0.11281123768413    |             |
| AGIWUR26676                                                                                                 |    |    |         |         |                |          |           |                      |             |
| N2                                                                                                          | CT | II | 9858110 | 9859639 | WBGene00007470 | chil-5   | C08H9.11  | -0.00270207602508421 |             |
| AGIWUR37372                                                                                                 |    |    |         |         |                |          |           |                      |             |
| N2                                                                                                          | CT | II | 9859784 | 9861473 | WBGene00007467 | chil-3   | C08H9.7   | -0.272816344881189   | AGIWUR7823  |
| N2                                                                                                          | CT | II | 9862431 | 9866404 | WBGene00007465 | chil-1   | C08H9.4   | 0.0769145857290088   |             |
| AGIWUR1457;AGIWUR28590;AGIWUR41487                                                                          |    |    |         |         |                |          |           |                      |             |
| N2                                                                                                          | CT | II | 9869456 | 9871172 | WBGene00007472 | chil-7   | C08H9.13  | -0.152251639284005   |             |
| AGIWUR8656                                                                                                  |    |    |         |         |                |          |           |                      |             |
| N2                                                                                                          | CT | II | 9871608 | 9872986 | WBGene00007473 | chil-8   | C08H9.14  | 0.181621880149326    |             |
| AGIWUR37468                                                                                                 |    |    |         |         |                |          |           |                      |             |
| N2                                                                                                          | CT | II | 9873249 | 9874521 | WBGene00007466 | chil-2   | C08H9.6   | -0.156742657185207   | AGIWUR604   |
| N2                                                                                                          | CT | II | 9875179 | 9878008 | WBGene00007462 | C08H9.1  | C08H9.1   | -0.0457093090409986  | AGIWUR39315 |
| N2                                                                                                          | CT | II | 9881193 | 9882530 | WBGene00007474 | C08H9.15 | C08H9.15  | 0.456932597507389    |             |
| AGIWUR35591                                                                                                 |    |    |         |         |                |          |           |                      |             |
| N2                                                                                                          | CT | II | 9882728 | 9886442 | WBGene00007464 | C08H9.3  | C08H9.3   | 0.0778950169596442   |             |
| AGIWUR38534;AGIWUR38815;AGIWUR42777                                                                         |    |    |         |         |                |          |           |                      |             |
| N2                                                                                                          | CT | II | 9886557 | 9891081 | WBGene00007463 | vgln-1   | C08H9.2   | 0.237913491059391    |             |
| AGIWUR2728;AGIWUR6936;AGIWUR12035;AGIWUR13504;AGIWUR14455;AGIWUR19542;AGIWUR20507;AGIWUR25206;AGIWUR25934;A |    |    |         |         |                |          |           |                      |             |

|                                                                                                                              |    |    |         |         |                |          |          |                      |             |
|------------------------------------------------------------------------------------------------------------------------------|----|----|---------|---------|----------------|----------|----------|----------------------|-------------|
| GIWUR32289;AGIWUR34288;AGIWUR34470;AGIWUR35940;AGIWUR40340;AGIWUR43517                                                       |    |    |         |         |                |          |          |                      |             |
| N2                                                                                                                           | CT | II | 9895538 | 9897351 | WBGene00009146 | F26C11.1 | F26C11.1 | -0.520599066023713   |             |
| AGIWUR8276                                                                                                                   |    |    |         |         |                |          |          |                      |             |
| N2                                                                                                                           | CT | II | 9897754 | 9900376 | WBGene00006744 | unc-4    | F26C11.2 | 0.0247806846156919   |             |
| AGIWUR19606;AGIWUR34527;AGIWUR35185                                                                                          |    |    |         |         |                |          |          |                      |             |
| N2                                                                                                                           | CT | II | 9903059 | 9915099 | WBGene00009147 | F26C11.3 | F26C11.3 | -0.213147089133976   |             |
| AGIWUR33285                                                                                                                  |    |    |         |         |                |          |          |                      |             |
| N2                                                                                                                           | CT | II | 9915438 | 9916289 | WBGene00044159 | F26C11.4 | F26C11.4 | -0.0866380102434903  |             |
| AGIWUR26120;AGIWUR28479;AGIWUR32920;AGIWUR35033                                                                              |    |    |         |         |                |          |          |                      |             |
| N2                                                                                                                           | CT | II | 9917122 | 9917943 | WBGene00086567 | C05C10.8 | C05C10.8 | -0.222659281545107   |             |
| AGIWUR38038                                                                                                                  |    |    |         |         |                |          |          |                      |             |
| N2                                                                                                                           | CT | II | 9922248 | 9930830 | WBGene00007329 | C05C10.2 | C05C10.2 | -0.190792995070115   |             |
| AGIWUR6878;AGIWUR29477;AGIWUR44420                                                                                           |    |    |         |         |                |          |          |                      |             |
| N2                                                                                                                           | CT | II | 9931845 | 9934443 | WBGene00007331 | pho-11   | C05C10.4 | 0.0706774856825163   |             |
| AGIWUR2532;AGIWUR6049;AGIWUR22087;AGIWUR30141;AGIWUR34634;AGIWUR34659;AGIWUR36019                                            |    |    |         |         |                |          |          |                      |             |
| N2                                                                                                                           | CT | II | 9934403 | 9936893 | WBGene00007330 | C05C10.3 | C05C10.3 | 0.158592548983002    |             |
| AGIWUR2054;AGIWUR3537;AGIWUR18491;AGIWUR21068;AGIWUR21521;AGIWUR25993;AGIWUR37963                                            |    |    |         |         |                |          |          |                      |             |
| N2                                                                                                                           | CT | II | 9938106 | 9938971 | WBGene00007334 | C05C10.7 | C05C10.7 | -0.246421644285054   |             |
| AGIWUR37632                                                                                                                  |    |    |         |         |                |          |          |                      |             |
| N2                                                                                                                           | CT | II | 9939040 | 9940432 | WBGene00007332 | C05C10.5 | C05C10.5 | -0.102029090662524   |             |
| AGIWUR22090;AGIWUR32414                                                                                                      |    |    |         |         |                |          |          |                      |             |
| N2                                                                                                                           | CT | II | 9940758 | 9944006 | WBGene00007333 | ufd-3    | C05C10.6 | 0.0186042368071684   |             |
| AGIWUR3612;AGIWUR5667;AGIWUR10944;AGIWUR24102;AGIWUR24734;AGIWUR35125;AGIWUR39205;AGIWUR41062;AGIWUR42078;AGIWUR42640        |    |    |         |         |                |          |          |                      |             |
| N2                                                                                                                           | CT | II | 9944026 | 9947121 | WBGene00011271 | flad-1   | R53.1    | 0.11081558005622     |             |
| AGIWUR12784;AGIWUR21392;AGIWUR30921;AGIWUR33515                                                                              |    |    |         |         |                |          |          |                      |             |
| N2                                                                                                                           | CT | II | 9955185 | 9962344 | WBGene00001207 | egl-43   | R53.3    | 0.0864646032075633   | AGIWUR28128 |
| N2                                                                                                                           | CT | II | 9962966 | 9967132 | WBGene00011272 | dtmk-1   | R53.2    | -0.031369884054981   |             |
| AGIWUR14400;AGIWUR44983                                                                                                      |    |    |         |         |                |          |          |                      |             |
| N2                                                                                                                           | CT | II | 9967277 | 9968049 | WBGene00011273 | R53.4    | R53.4    | 0.0768530676522694   |             |
| AGIWUR274;AGIWUR839;AGIWUR1651;AGIWUR2205;AGIWUR2273;AGIWUR19713;AGIWUR21938;AGIWUR30159;AGIWUR30299;AGIWUR30811;AGIWUR33954 |    |    |         |         |                |          |          |                      |             |
| N2                                                                                                                           | CT | II | 9968659 | 9969631 | WBGene00011275 | psf-1    | R53.6    | 0.262669814243317    |             |
| AGIWUR651;AGIWUR4183;AGIWUR19144;AGIWUR19922                                                                                 |    |    |         |         |                |          |          |                      |             |
| N2                                                                                                                           | CT | II | 9969620 | 9970515 | WBGene00011274 | R53.5    | R53.5    | -0.0894521311647889  | AGIWUR39788 |
| N2                                                                                                                           | CT | II | 9971035 | 9975125 | WBGene00011276 | aakg-5   | R53.7    | 0.217849666018264    | AGIWUR19477 |
| N2                                                                                                                           | CT | II | 9976705 | 9977877 | WBGene00011277 | R53.8    | R53.8    | -0.00892807960771158 | AGIWUR38025 |
| N2                                                                                                                           | CT | II | 9978765 | 9980076 | WBGene00014130 | ZK892.6  | ZK892.6  | -0.0441172334381248  | AGIWUR41533 |
| N2                                                                                                                           | CT | II | 9980886 | 9981752 | WBGene00014131 | sdz-38   | ZK892.7  | -0.10820522676708    | AGIWUR12129 |



|                                                                                    |    |    |          |          |                |         |         |                     |
|------------------------------------------------------------------------------------|----|----|----------|----------|----------------|---------|---------|---------------------|
| N2                                                                                 | CT | II | 9991160  | 10000350 | WBGene00002266 | lec-3   | ZK892.1 | 0.295769878873678   |
| AGIWUR8893;AGIWUR9049;AGIWUR11331;AGIWUR11760;AGIWUR36080                          |    |    |          |          |                |         |         |                     |
| N2                                                                                 | CT | II | 10000335 | 10001198 | WBGene00003773 | nlt-1   | ZK892.2 | 0.128390225625115   |
| AGIWUR9175;AGIWUR15509;AGIWUR22828;AGIWUR25447;AGIWUR39257;AGIWUR39674;AGIWUR42147 |    |    |          |          |                |         |         |                     |
| N2                                                                                 | CT | II | 10001846 | 10003987 | WBGene00014127 |         | ZK892.3 | 0.146656700704765   |
| AGIWUR26549                                                                        |    |    |          |          |                |         |         |                     |
| N2                                                                                 | CT | II | 10006111 | 10006535 | WBGene00044037 |         | ZK892.8 | -0.0719033155000588 |
| AGIWUR23204                                                                        |    |    |          |          |                |         |         |                     |
| N2                                                                                 | CT | II | 10006642 | 10008089 | WBGene00014128 |         | ZK892.4 | 0.158674716810748   |
| AGIWUR41562                                                                        |    |    |          |          |                |         |         |                     |
| N2                                                                                 | CT | II | 10008217 | 10009401 | WBGene00014129 |         | ZK892.5 | 0.066501634542842   |
| AGIWUR7848;AGIWUR20371;AGIWUR34857                                                 |    |    |          |          |                |         |         |                     |
| N2                                                                                 | CT | II | 10009608 | 10016183 | WBGene00002265 | lec-2   | F52H3.7 | 0.0941618413715046  |
| AGIWUR7658;AGIWUR10730;AGIWUR27476;AGIWUR34199                                     |    |    |          |          |                |         |         |                     |
| N2                                                                                 | CT | II | 10030195 | 10030970 | WBGene00009947 |         | F52H3.5 | -0.147509811638633  |
| AGIWUR26508                                                                        |    |    |          |          |                |         |         |                     |
| N2                                                                                 | CT | II | 10030895 | 10033213 | WBGene00009944 | mtcu-2  | F52H3.2 | -0.277057439740501  |
| AGIWUR8504                                                                         |    |    |          |          |                |         |         |                     |
| N2                                                                                 | CT | II | 10033309 | 10039980 | WBGene00002497 | let-268 | F52H3.1 | -0.175487969059294  |
| AGIWUR26464                                                                        |    |    |          |          |                |         |         |                     |
| N2                                                                                 | CT | II | 10041134 | 10042515 | WBGene00009946 |         | F52H3.4 | -0.181977803345404  |
| AGIWUR8233                                                                         |    |    |          |          |                |         |         |                     |
| N2                                                                                 | CT | II | 10042780 | 10045270 | WBGene00009945 | bath-38 | F52H3.3 | 0.0831177654242143  |
| AGIWUR38471                                                                        |    |    |          |          |                |         |         |                     |
| N2                                                                                 | CT | II | 10054623 | 10055594 | WBGene00001447 | flp-4   | C18D1.3 | -0.106382045024324  |
| AGIWUR27802                                                                        |    |    |          |          |                |         |         |                     |
| N2                                                                                 | CT | II | 10056311 | 10060582 | WBGene00007670 | stg-1   | C18D1.4 | -0.066680164655665  |
| AGIWUR14704                                                                        |    |    |          |          |                |         |         |                     |
| N2                                                                                 | CT | II | 10061287 | 10074443 | WBGene00000995 | die-1   | C18D1.1 | -0.0315394591102338 |
| AGIWUR1596;AGIWUR11535;AGIWUR23819;AGIWUR27718;AGIWUR27931;AGIWUR31103;AGIWUR42675 |    |    |          |          |                |         |         |                     |
| N2                                                                                 | CT | II | 10094873 | 10098785 | WBGene00014164 | lact-2  | ZK945.1 | 0.0349077625870677  |
| AGIWUR39450                                                                        |    |    |          |          |                |         |         |                     |
| N2                                                                                 | CT | II | 10098782 | 10099867 | WBGene00003928 | pas-7   | ZK945.2 |                     |
| -0.00488214151315169 AGIWUR12828;AGIWUR14425                                       |    |    |          |          |                |         |         |                     |
| N2                                                                                 | CT | II | 10100310 | 10103059 | WBGene00014165 | puf-12  | ZK945.3 | -0.164353001220682  |
| AGIWUR15434                                                                        |    |    |          |          |                |         |         |                     |
| N2                                                                                 | CT | II | 10102975 | 10105704 | WBGene00014166 |         | ZK945.4 | -0.0904930321694248 |
| AGIWUR3719;AGIWUR12972;AGIWUR17154;AGIWUR23722;AGIWUR35881                         |    |    |          |          |                |         |         |                     |
| N2                                                                                 | CT | II | 10106080 | 10106970 | WBGene00014168 |         | ZK945.6 |                     |

|                                                            |    |    |             |          |                |          |         |                     |
|------------------------------------------------------------|----|----|-------------|----------|----------------|----------|---------|---------------------|
| -0.00579616501599567                                       |    |    | AGIWUR30388 |          |                |          |         |                     |
| N2                                                         | CT | II | 10107473    | 10108477 | WBGene00014169 | ZK945.7  | ZK945.7 | 0.314330665886345   |
| AGIWUR37463                                                |    |    |             |          |                |          |         |                     |
| N2                                                         | CT | II | 10108702    | 10109081 | WBGene00014170 | ZK945.8  | ZK945.8 | 0.379243052116877   |
| AGIWUR37452                                                |    |    |             |          |                |          |         |                     |
| N2                                                         | CT | II | 10109279    | 10121825 | WBGene00003058 | lov-1    | ZK945.9 | 0.177362972475246   |
| AGIWUR1185                                                 |    |    |             |          |                |          |         |                     |
| N2                                                         | CT | II | 10122765    | 10125015 | WBGene00044035 | F27E5.7  | F27E5.7 | -0.165797303037923  |
| AGIWUR32500                                                |    |    |             |          |                |          |         |                     |
| N2                                                         | CT | II | 10125898    | 10127455 | WBGene00044027 | F27E5.8  | F27E5.8 | -0.482382541786999  |
| AGIWUR25811                                                |    |    |             |          |                |          |         |                     |
| N2                                                         | CT | II | 10128254    | 10131860 | WBGene00009194 | F27E5.5  | F27E5.5 | 0.250231261577852   |
| AGIWUR7390                                                 |    |    |             |          |                |          |         |                     |
| N2                                                         | CT | II | 10137658    | 10139216 | WBGene00004017 | phg-1    | F27E5.4 | 0.0386680905587635  |
| AGIWUR40529                                                |    |    |             |          |                |          |         |                     |
| N2                                                         | CT | II | 10139590    | 10141406 | WBGene00009192 | asah-2   | F27E5.1 | -0.0579055507148301 |
| AGIWUR18928;AGIWUR22197;AGIWUR33073                        |    |    |             |          |                |          |         |                     |
| N2                                                         | CT | II | 10141457    | 10144192 | WBGene00009193 | F27E5.3  | F27E5.3 | 0.21802384966022    |
| AGIWUR44100                                                |    |    |             |          |                |          |         |                     |
| N2                                                         | CT | II | 10146746    | 10152445 | WBGene00003939 | pax-3    | F27E5.2 | -0.962294468033411  |
| AGIWUR18917                                                |    |    |             |          |                |          |         |                     |
| N2                                                         | CT | II | 10155413    | 10156220 | WBGene00044028 | F33H1.6  | F33H1.6 | -0.245908900012918  |
| AGIWUR5814;AGIWUR10380;AGIWUR29406;AGIWUR40440;AGIWUR44519 |    |    |             |          |                |          |         |                     |
| N2                                                         | CT | II | 10157537    | 10169346 | WBGene00000914 | daf-19   | F33H1.1 | -0.219173263435064  |
| AGIWUR10712;AGIWUR11493;AGIWUR14380                        |    |    |             |          |                |          |         |                     |
| N2                                                         | CT | II | 10172923    | 10174346 | WBGene00009364 | F33H1.3  | F33H1.3 | -0.0166718630255218 |
| AGIWUR16485                                                |    |    |             |          |                |          |         |                     |
| N2                                                         | CT | II | 10174572    | 10180183 | WBGene00009365 | F33H1.4  | F33H1.4 | 0.0963284272875073  |
| AGIWUR21472;AGIWUR27653;AGIWUR34930                        |    |    |             |          |                |          |         |                     |
| N2                                                         | CT | II | 10180199    | 10182734 | WBGene00005079 | srd-1    | F33H1.5 | -0.266683946402773  |
| AGIWUR18723                                                |    |    |             |          |                |          |         |                     |
| N2                                                         | CT | II | 10185789    | 10187908 | WBGene00005080 | srd-2    | R05H5.1 | -0.283100196770599  |
| AGIWUR14572                                                |    |    |             |          |                |          |         |                     |
| N2                                                         | CT | II | 10188263    | 10189469 | WBGene00000389 | cdc-25.4 |         | R05H5.2             |
| 0.210960361412821                                          |    |    | AGIWUR15999 |          |                |          |         |                     |
| N2                                                         | CT | II | 10192529    | 10193451 | WBGene00011041 | R05H5.7  | R05H5.7 | 0.0220531550233063  |
| AGIWUR6013;AGIWUR11895;AGIWUR21955;AGIWUR26462             |    |    |             |          |                |          |         |                     |
| N2                                                         | CT | II | 10194905    | 10196835 | WBGene00005071 | srb-6    | R05H5.6 | -0.204505893435655  |
| AGIWUR32602                                                |    |    |             |          |                |          |         |                     |

|                                                                         |    |    |          |          |                |         |         |                     |
|-------------------------------------------------------------------------|----|----|----------|----------|----------------|---------|---------|---------------------|
| N2                                                                      | CT | II | 10197625 | 10198324 | WBGene00011038 | R05H5.3 | R05H5.3 | -0.129720717583657  |
| AGIWUR6581;AGIWUR9461;AGIWUR24214;AGIWUR29342;AGIWUR31178;AGIWUR37075   |    |    |          |          |                |         |         |                     |
| N2                                                                      | CT | II | 10198309 | 10199768 | WBGene00011039 | R05H5.4 | R05H5.4 | -0.0277110849639346 |
| AGIWUR10312                                                             |    |    |          |          |                |         |         |                     |
| N2                                                                      | CT | II | 10199810 | 10200819 | WBGene00011040 | R05H5.5 | R05H5.5 | -0.159013284975806  |
| AGIWUR12341                                                             |    |    |          |          |                |         |         |                     |
| N2                                                                      | CT | II | 10201125 | 10202230 | WBGene00006651 | tts-2   | R05H5.8 | 0.348706084441748   |
| AGIWUR23370                                                             |    |    |          |          |                |         |         |                     |
| N2                                                                      | CT | II | 10206715 | 10209391 | WBGene00011331 | T01E8.1 | T01E8.1 | -0.0946213753189262 |
| AGIWUR29024                                                             |    |    |          |          |                |         |         |                     |
| N2                                                                      | CT | II | 10218471 | 10220025 | WBGene00004334 | ref-1   | T01E8.2 | -0.178879943455781  |
| AGIWUR8907                                                              |    |    |          |          |                |         |         |                     |
| N2                                                                      | CT | II | 10222877 | 10229440 | WBGene00004038 | plc-3   | T01E8.3 | -0.0375258335872921 |
| AGIWUR14929;AGIWUR18912;AGIWUR22081;AGIWUR24082;AGIWUR28683;AGIWUR42469 |    |    |          |          |                |         |         |                     |
| N2                                                                      | CT | II | 10231272 | 10236014 | WBGene00011335 | T01E8.8 | T01E8.8 | 0.370804052101334   |
| AGIWUR33309                                                             |    |    |          |          |                |         |         |                     |
| N2                                                                      | CT | II | 10236936 | 10239695 | WBGene00003177 | mec-15  | T01E8.4 | -0.0558937551599206 |
| AGIWUR1407;AGIWUR9774;AGIWUR10357;AGIWUR34006                           |    |    |          |          |                |         |         |                     |
| N2                                                                      | CT | II | 10240277 | 10242490 | WBGene00011334 | mrps-14 | T01E8.6 | 0.160398524448237   |
| AGIWUR1632;AGIWUR18563;AGIWUR25105                                      |    |    |          |          |                |         |         |                     |
| N2                                                                      | CT | II | 10242595 | 10247638 | WBGene00011333 | nrde-2  | T01E8.5 | 0.12955046097637    |
| AGIWUR1484;AGIWUR28560                                                  |    |    |          |          |                |         |         |                     |
| N2                                                                      | CT | II | 10248991 | 10251165 | WBGene00010015 | atad-3  | F54B3.3 | -0.0316466473724102 |
| AGIWUR20261;AGIWUR36134;AGIWUR44377                                     |    |    |          |          |                |         |         |                     |
| N2                                                                      | CT | II | 10251266 | 10268168 | WBGene00010013 | F54B3.1 | F54B3.1 | -0.116954386023005  |
| AGIWUR11170;AGIWUR12967;AGIWUR28208                                     |    |    |          |          |                |         |         |                     |
| N2                                                                      | CT | II | 10268143 | 10270152 | WBGene00010014 | F54B3.2 | F54B3.2 | 0.380084177884605   |
| AGIWUR39268                                                             |    |    |          |          |                |         |         |                     |
| N2                                                                      | CT | II | 10278732 | 10280459 | WBGene00014175 | ZK971.1 | ZK971.1 | -0.208424267117874  |
| AGIWUR39627;AGIWUR39902                                                 |    |    |          |          |                |         |         |                     |
| N2                                                                      | CT | II | 10283466 | 10300132 | WBGene00014171 | nep-26  | ZK970.1 | 0.208710411342817   |
| AGIWUR41540                                                             |    |    |          |          |                |         |         |                     |
| N2                                                                      | CT | II | 10300789 | 10302859 | WBGene00014172 | clpp-1  | ZK970.2 | -0.0645485723550632 |
| AGIWUR39591                                                             |    |    |          |          |                |         |         |                     |
| N2                                                                      | CT | II | 10303007 | 10303713 | WBGene00006918 | vha-9   | ZK970.4 | -0.0841272273618934 |
| AGIWUR29615                                                             |    |    |          |          |                |         |         |                     |
| N2                                                                      | CT | II | 10304139 | 10308826 | WBGene00001531 | gcy-4   | ZK970.5 | -0.280625883750745  |
| AGIWUR24821                                                             |    |    |          |          |                |         |         |                     |
| N2                                                                      | CT | II | 10309418 | 10310068 | WBGene00014174 | ZK970.8 | ZK970.8 | 0.0274160245200825  |



|                                                                                  |    |    |          |          |                |           |          |                     |
|----------------------------------------------------------------------------------|----|----|----------|----------|----------------|-----------|----------|---------------------|
| N2                                                                               | CT | II | 10440286 | 10442515 | WBGene00008483 | E04D5.4   | E04D5.4  | 0.0238927033701195  |
| AGIWUR3398;AGIWUR37195;AGIWUR39288                                               |    |    |          |          |                |           |          |                     |
| N2                                                                               | CT | II | 10443327 | 10445233 | WBGene00014057 | ZK673.1   | ZK673.1  | 0.0697156175845741  |
| AGIWUR43812                                                                      |    |    |          |          |                |           |          |                     |
| N2                                                                               | CT | II | 10448266 | 10450222 | WBGene00014058 | ZK673.2   | ZK673.2  | -0.0619469783323794 |
| AGIWUR4328;AGIWUR10658;AGIWUR17853;AGIWUR37680                                   |    |    |          |          |                |           |          |                     |
| N2                                                                               | CT | II | 10450607 | 10452004 | WBGene00003038 | lin-56    | ZK673.3  | -0.446727406562392  |
| AGIWUR25094                                                                      |    |    |          |          |                |           |          |                     |
| N2                                                                               | CT | II | 10452920 | 10455200 | WBGene00014060 | ZK673.4   | ZK673.4  | -0.0742979060263842 |
| AGIWUR34906                                                                      |    |    |          |          |                |           |          |                     |
| N2                                                                               | CT | II | 10457786 | 10462672 | WBGene00014065 | ZK673.11  |          | ZK673.11            |
| -0.00657224749589158 AGIWUR1953                                                  |    |    |          |          |                |           |          |                     |
| N2                                                                               | CT | II | 10462870 | 10464330 | WBGene00014062 | ZK673.6   | ZK673.6  | -0.0435880352197309 |
| AGIWUR41397                                                                      |    |    |          |          |                |           |          |                     |
| N2                                                                               | CT | II | 10464870 | 10465298 | WBGene00014064 | sdz-37    | ZK673.10 |                     |
| 0.0273214615443838 AGIWUR36805                                                   |    |    |          |          |                |           |          |                     |
| N2                                                                               | CT | II | 10466852 | 10468344 | WBGene00006583 | tnc-2     | ZK673.7  | -0.0395432578792221 |
| AGIWUR23392                                                                      |    |    |          |          |                |           |          |                     |
| N2                                                                               | CT | II | 10468351 | 10470297 | WBGene00014063 | cllec-143 |          | ZK673.9             |
| 0.383211005996012 AGIWUR27744                                                    |    |    |          |          |                |           |          |                     |
| N2                                                                               | CT | II | 10470934 | 10471347 | WBGene00014041 | ZK666.1   | ZK666.1  | -0.0605861906751413 |
| AGIWUR24121                                                                      |    |    |          |          |                |           |          |                     |
| N2                                                                               | CT | II | 10471696 | 10471890 | WBGene00014042 | ZK666.2   | ZK666.2  | -0.0156189870197601 |
| AGIWUR4815;AGIWUR39373                                                           |    |    |          |          |                |           |          |                     |
| N2                                                                               | CT | II | 10472439 | 10473726 | WBGene00005520 | sri-8     | ZK666.10 |                     |
| 0.166025725507202 AGIWUR876;AGIWUR12313;AGIWUR40432                              |    |    |          |          |                |           |          |                     |
| N2                                                                               | CT | II | 10474221 | 10476139 | WBGene00014043 | cllec-58  | ZK666.3  |                     |
| -0.00937028996139677 AGIWUR14034;AGIWUR18180;AGIWUR26359                         |    |    |          |          |                |           |          |                     |
| N2                                                                               | CT | II | 10478022 | 10479448 | WBGene00014045 | cllec-59  | ZK666.5  | 0.116902771440629   |
| AGIWUR30540                                                                      |    |    |          |          |                |           |          |                     |
| N2                                                                               | CT | II | 10479920 | 10480081 | WBGene00044046 | ZK666.13  |          | ZK666.13            |
| -0.00807073429157601 AGIWUR12895;AGIWUR23306;AGIWUR31826;AGIWUR35627;AGIWUR39741 |    |    |          |          |                |           |          |                     |
| N2                                                                               | CT | II | 10480152 | 10481846 | WBGene00014046 | cllec-60  | ZK666.6  | -0.19928272796664   |
| AGIWUR2509;AGIWUR31381;AGIWUR35871                                               |    |    |          |          |                |           |          |                     |
| N2                                                                               | CT | II | 10488747 | 10490514 | WBGene00014047 | cllec-61  | ZK666.7  | -0.134429542572001  |
| AGIWUR38848                                                                      |    |    |          |          |                |           |          |                     |
| N2                                                                               | CT | II | 10491662 | 10493134 | WBGene00014048 | ZK666.8   | ZK666.8  | 0.019957231920289   |
| AGIWUR3288                                                                       |    |    |          |          |                |           |          |                     |
| N2                                                                               | CT | II | 10496212 | 10496703 | WBGene00014050 | ZK666.12  |          | ZK666.12            |

|                                                 |                                                                                     |          |                |          |          |                     |  |
|-------------------------------------------------|-------------------------------------------------------------------------------------|----------|----------------|----------|----------|---------------------|--|
| 0.212224631652504                               | AGIWUR8874                                                                          |          |                |          |          |                     |  |
| N2 CT II                                        | 10496987                                                                            | 10502541 | WBGene00004134 | myrf-1   | F59B10.1 |                     |  |
| 0.046962279482937                               | AGIWUR131                                                                           |          |                |          |          |                     |  |
| N2 CT II                                        | 10507269                                                                            | 10509932 | WBGene00010318 | F59B10.2 |          | F59B10.2            |  |
| 0.318408341061081                               | AGIWUR23868                                                                         |          |                |          |          |                     |  |
| N2 CT II                                        | 10510542                                                                            | 10512991 | WBGene00010319 | F59B10.3 |          | F59B10.3            |  |
| 0.136392799218267                               | AGIWUR38198                                                                         |          |                |          |          |                     |  |
| N2 CT II                                        | 10513827                                                                            | 10519108 | WBGene00010320 | F59B10.4 |          | F59B10.4            |  |
| 0.125188011904694                               | AGIWUR38327                                                                         |          |                |          |          |                     |  |
| N2 CT II                                        | 10521788                                                                            | 10523191 | WBGene00010321 | F59B10.5 |          | F59B10.5            |  |
| -0.409742552533839                              | AGIWUR6528                                                                          |          |                |          |          |                     |  |
| N2 CT II                                        | 10523274                                                                            | 10524474 | WBGene00010322 | F59B10.6 |          | F59B10.6            |  |
| -0.0360345121790528                             | AGIWUR5739;AGIWUR23280;AGIWUR29381;AGIWUR36335;AGIWUR40116;AGIWUR44732              |          |                |          |          |                     |  |
| N2 CT II                                        | 10528084                                                                            | 10533880 | WBGene00003107 | mab-10   | R166.1   | 0.0872509329714086  |  |
| AGIWUR1300                                      |                                                                                     |          |                |          |          |                     |  |
| N2 CT II                                        | 10534332                                                                            | 10537671 | WBGene00011302 | R166.2   | R166.2   | 0.0278889856432016  |  |
| AGIWUR39289                                     |                                                                                     |          |                |          |          |                     |  |
| N2 CT II                                        | 10537799                                                                            | 10539332 | WBGene00011303 | R166.3   | R166.3   | -0.188669391987329  |  |
| AGIWUR36948                                     |                                                                                     |          |                |          |          |                     |  |
| N2 CT II                                        | 10539438                                                                            | 10541996 | WBGene00004185 | pro-1    | R166.4   | -0.482352709340123  |  |
| AGIWUR31553                                     |                                                                                     |          |                |          |          |                     |  |
| N2 CT II                                        | 10542428                                                                            | 10555044 | WBGene00011304 | mnk-1    | R166.5   | 0.0938064357799391  |  |
| AGIWUR34539                                     |                                                                                     |          |                |          |          |                     |  |
| N2 CT II                                        | 10560018                                                                            | 10563407 | WBGene00007352 | cdc-48.1 |          | C06A1.1             |  |
| 0.147402745739427                               | AGIWUR11455;AGIWUR13116;AGIWUR21063;AGIWUR26985;AGIWUR43969                         |          |                |          |          |                     |  |
| N2 CT II                                        | 10570602                                                                            | 10572530 | WBGene00007353 | C06A1.2  | C06A1.2  | -0.054743768531786  |  |
| AGIWUR9060                                      |                                                                                     |          |                |          |          |                     |  |
| N2 CT II                                        | 10572247                                                                            | 10574067 | WBGene00007354 | C06A1.3  | C06A1.3  | 0.0537561780546838  |  |
| AGIWUR6893                                      |                                                                                     |          |                |          |          |                     |  |
| N2 CT II                                        | 10574842                                                                            | 10578193 | WBGene00014667 | C06A1.4  | C06A1.4  | 0.241905941877144   |  |
| AGIWUR25976;AGIWUR30602                         |                                                                                     |          |                |          |          |                     |  |
| N2 CT II                                        | 10579366                                                                            | 10579955 | WBGene00007355 | rpb-6    | C06A1.5  | -0.162950371382966  |  |
| AGIWUR5821                                      |                                                                                     |          |                |          |          |                     |  |
| N2 CT II                                        | 10579955                                                                            | 10581045 | WBGene00007555 | dohh-1   | C14A4.1  | -0.0457878080581722 |  |
| AGIWUR2970;AGIWUR7187;AGIWUR19048               |                                                                                     |          |                |          |          |                     |  |
| N2 CT II                                        | 10581133                                                                            | 10582519 | WBGene00000933 | dap-3    | C14A4.2  | -0.0478730457130254 |  |
| AGIWUR24770;AGIWUR27331;AGIWUR27823;AGIWUR32317 |                                                                                     |          |                |          |          |                     |  |
| N2 CT II                                        | 10582618                                                                            | 10584236 | WBGene00007564 | mrps-22  | C14A4.14 |                     |  |
| 0.020373304783222                               | AGIWUR11916;AGIWUR14585;AGIWUR17314;AGIWUR19277;AGIWUR22350;AGIWUR33834;AGIWUR36123 |          |                |          |          |                     |  |

|                                                                                    |    |    |          |          |                |          |          |                     |
|------------------------------------------------------------------------------------|----|----|----------|----------|----------------|----------|----------|---------------------|
| N2                                                                                 | CT | II | 10584336 | 10587928 | WBGene00007556 | C14A4.3  | C14A4.3  | -0.193423842516085  |
| AGIWUR41411                                                                        |    |    |          |          |                |          |          |                     |
| N2                                                                                 | CT | II | 10588042 | 10592652 | WBGene0000796  | crn-3    | C14A4.4  | -0.0863448989454527 |
| AGIWUR23554;AGIWUR44213                                                            |    |    |          |          |                |          |          |                     |
| N2                                                                                 | CT | II | 10592752 | 10593591 | WBGene0000798  | crn-5    | C14A4.5  | -0.0572558569329811 |
| AGIWUR22345;AGIWUR34177;AGIWUR35482                                                |    |    |          |          |                |          |          |                     |
| N2                                                                                 | CT | II | 10593529 | 10594776 | WBGene00007557 | C14A4.6  | C14A4.6  | 0.0388541962190905  |
| AGIWUR4051;AGIWUR21431;AGIWUR24456                                                 |    |    |          |          |                |          |          |                     |
| N2                                                                                 | CT | II | 10595266 | 10596562 | WBGene00007558 | C14A4.7  | C14A4.7  | -0.0613779016179121 |
| AGIWUR15049;AGIWUR25017;AGIWUR26477;AGIWUR39292                                    |    |    |          |          |                |          |          |                     |
| N2                                                                                 | CT | II | 10597174 | 10598100 | WBGene00007559 | C14A4.8  | C14A4.8  | 0.202422930735705   |
| AGIWUR22102                                                                        |    |    |          |          |                |          |          |                     |
| N2                                                                                 | CT | II | 10599337 | 10600529 | WBGene00007560 | C14A4.9  | C14A4.9  | -0.684276446869485  |
| AGIWUR25127                                                                        |    |    |          |          |                |          |          |                     |
| N2                                                                                 | CT | II | 10600599 | 10602276 | WBGene00005713 | srv-2    | C14A4.15 |                     |
| -0.436770159315767 AGIWUR22923                                                     |    |    |          |          |                |          |          |                     |
| N2                                                                                 | CT | II | 10605030 | 10605612 | WBGene00006397 | taf-13   | C14A4.10 |                     |
| 0.065128670548031 AGIWUR24634                                                      |    |    |          |          |                |          |          |                     |
| N2                                                                                 | CT | II | 10605717 | 10607275 | WBGene00007561 | ccm-3    | C14A4.11 |                     |
| 0.0693596655254911 AGIWUR27434                                                     |    |    |          |          |                |          |          |                     |
| N2                                                                                 | CT | II | 10613020 | 10618332 | WBGene00007562 | C14A4.12 | C14A4.12 | 0                   |
| AGIWUR29508                                                                        |    |    |          |          |                |          |          |                     |
| N2                                                                                 | CT | II | 10618471 | 10620503 | WBGene00007563 | C14A4.13 | C14A4.13 |                     |
| 0.12593691601721 AGIWUR32603                                                       |    |    |          |          |                |          |          |                     |
| N2                                                                                 | CT | II | 10622265 | 10625943 | WBGene00010893 | cutl-9   | M28.1    | -0.0693303833655579 |
| AGIWUR4593;AGIWUR17552;AGIWUR21126;AGIWUR23189;AGIWUR36371;AGIWUR36670;AGIWUR40197 |    |    |          |          |                |          |          |                     |
| N2                                                                                 | CT | II | 10628263 | 10633216 | WBGene00010899 | M28.8    | M28.8    | -0.264646165241725  |
| AGIWUR44648                                                                        |    |    |          |          |                |          |          |                     |
| N2                                                                                 | CT | II | 10633476 | 10639112 | WBGene00010894 | M28.2    | M28.2    | 0.051239645524265   |
| AGIWUR2316;AGIWUR15524;AGIWUR29354                                                 |    |    |          |          |                |          |          |                     |
| N2                                                                                 | CT | II | 10639410 | 10643536 | WBGene00010900 | M28.9    | M28.9    | -0.0206252254074428 |
| AGIWUR4478                                                                         |    |    |          |          |                |          |          |                     |
| N2                                                                                 | CT | II | 10643703 | 10646978 | WBGene00010895 | M28.4    | M28.4    | 0.260735480433112   |
| AGIWUR26377                                                                        |    |    |          |          |                |          |          |                     |
| N2                                                                                 | CT | II | 10647480 | 10648676 | WBGene00010901 | M28.10   | M28.10   | 0.223336842254882   |
| AGIWUR21717                                                                        |    |    |          |          |                |          |          |                     |
| N2                                                                                 | CT | II | 10648938 | 10652256 | WBGene00010898 | nphp-1   | M28.7    | -0.134117780845262  |
| AGIWUR6755                                                                         |    |    |          |          |                |          |          |                     |
| N2                                                                                 | CT | II | 10652353 | 10657841 | WBGene00010897 | lact-3   | M28.6    | 0.0815879761672615  |

|                                                                                                                                                                       |    |    |                    |                                                                      |                |          |          |                     |
|-----------------------------------------------------------------------------------------------------------------------------------------------------------------------|----|----|--------------------|----------------------------------------------------------------------|----------------|----------|----------|---------------------|
| AGIWUR25318                                                                                                                                                           |    |    |                    |                                                                      |                |          |          |                     |
| N2                                                                                                                                                                    | CT | II | 10658027           | 10658626                                                             | WBGene00010896 | M28.5    | M28.5    | -0.110489251424013  |
| AGIWUR25451;AGIWUR33760                                                                                                                                               |    |    |                    |                                                                      |                |          |          |                     |
| N2                                                                                                                                                                    | CT | II | 10659206           | 10662317                                                             | WBGene00004704 | rsp-7    | D2089.1  | -0.046751395938859  |
| AGIWUR4646;AGIWUR11930;AGIWUR13996;AGIWUR17240;AGIWUR21144;AGIWUR29901;AGIWUR38441;AGIWUR40407;AGIWUR43998                                                            |    |    |                    |                                                                      |                |          |          |                     |
| N2                                                                                                                                                                    | CT | II | 10662256           | 10665131                                                             | WBGene00008434 | D2089.3  | D2089.3  | -0.153652050267452  |
| AGIWUR26579;AGIWUR27148;AGIWUR28093;AGIWUR33867                                                                                                                       |    |    |                    |                                                                      |                |          |          |                     |
| N2                                                                                                                                                                    | CT | II | 10675602           | 10690271                                                             | WBGene00004207 | ptb-1    | D2089.4  | 0.173002131431828   |
| AGIWUR6285;AGIWUR12901;AGIWUR21246                                                                                                                                    |    |    |                    |                                                                      |                |          |          |                     |
| N2                                                                                                                                                                    | CT | II | 10690452           | 10693863                                                             | WBGene00001522 | gbh-1    | D2089.5  | -0.080211027630396  |
| AGIWUR19935                                                                                                                                                           |    |    |                    |                                                                      |                |          |          |                     |
| N2                                                                                                                                                                    | CT | II | 10695013           | 10702524                                                             | WBGene00001586 | ggr-1    | C09G5.1  | -0.130520441759743  |
| AGIWUR2899;AGIWUR11942                                                                                                                                                |    |    |                    |                                                                      |                |          |          |                     |
| N2                                                                                                                                                                    | CT | II | 10702509           | 10714297                                                             | WBGene00007488 | dph-2    | C09G5.2  | -0.0250674278201686 |
| AGIWUR23621                                                                                                                                                           |    |    |                    |                                                                      |                |          |          |                     |
| N2                                                                                                                                                                    | CT | II | 10714886           | 10716416                                                             | WBGene00007489 | C09G5.7  | C09G5.7  | 0.152859628294356   |
| AGIWUR23618                                                                                                                                                           |    |    |                    |                                                                      |                |          |          |                     |
| N2                                                                                                                                                                    | CT | II | 10720231           | 10729252                                                             | WBGene00007490 | mks-5    | C09G5.8  | -0.109171855127365  |
| AGIWUR34107                                                                                                                                                           |    |    |                    |                                                                      |                |          |          |                     |
| N2                                                                                                                                                                    | CT | II | 10729804           | 10731627                                                             | WBGene00008256 | glb-12   | C52A11.2 |                     |
|                                                                                                                                                                       |    |    | 0.882553002150333  | AGIWUR27689                                                          |                |          |          |                     |
| N2                                                                                                                                                                    | CT | II | 10737402           | 10738628                                                             | WBGene00008257 | C52A11.3 | C52A11.3 |                     |
|                                                                                                                                                                       |    |    | 0.272052789342686  | AGIWUR42803                                                          |                |          |          |                     |
| N2                                                                                                                                                                    | CT | II | 10738635           | 10775061                                                             | WBGene00003404 | mpz-1    | C52A11.4 |                     |
| 0.0328485127163285                                                                                                                                                    |    |    |                    |                                                                      |                |          |          |                     |
| AGIWUR6677;AGIWUR9212;AGIWUR16617;AGIWUR19487;AGIWUR20489;AGIWUR20775;AGIWUR25775;AGIWUR27445;AGIWUR28484;AGIWUR30306;AGIWUR32704;AGIWUR32857;AGIWUR39509;AGIWUR40262 |    |    |                    |                                                                      |                |          |          |                     |
| N2                                                                                                                                                                    | CT | II | 10778389           | 10783962                                                             | WBGene00002297 | ect-2    | T19E10.1 |                     |
|                                                                                                                                                                       |    |    | 0.286172171015967  | AGIWUR1328;AGIWUR5981;AGIWUR9727;AGIWUR21337;AGIWUR24688;AGIWUR44022 |                |          |          |                     |
| N2                                                                                                                                                                    | CT | II | 10785452           | 10787272                                                             | WBGene00000411 | cdl-1    | R06F6.1  | 0.0275547714401725  |
| AGIWUR1579;AGIWUR4225                                                                                                                                                 |    |    |                    |                                                                      |                |          |          |                     |
| N2                                                                                                                                                                    | CT | II | 10787312           | 10787914                                                             | WBGene00011072 | tag-209  | R06F6.11 |                     |
|                                                                                                                                                                       |    |    | -0.268949075873937 | AGIWUR5104                                                           |                |          |          |                     |
| N2                                                                                                                                                                    | CT | II | 10788106           | 10793493                                                             | WBGene00011067 | vps-11   | R06F6.2  | -0.0210078095131898 |
| AGIWUR9444                                                                                                                                                            |    |    |                    |                                                                      |                |          |          |                     |
| N2                                                                                                                                                                    | CT | II | 10793575           | 10796294                                                             | WBGene00011068 | set-14   | R06F6.4  | -0.0363461186014291 |
| AGIWUR9082                                                                                                                                                            |    |    |                    |                                                                      |                |          |          |                     |
| N2                                                                                                                                                                    | CT | II | 10796646           | 10798479                                                             | WBGene00003805 | npp-19   | R06F6.5  | 0.0285550211291694  |
| AGIWUR27834;AGIWUR30360                                                                                                                                               |    |    |                    |                                                                      |                |          |          |                     |



|    |    |    |                                                            |                                     |                |          |                             |
|----|----|----|------------------------------------------------------------|-------------------------------------|----------------|----------|-----------------------------|
| N2 | CT | II | 10809279                                                   | 10809847                            | WBGene00269421 | R06F6.14 | R06F6.14                    |
|    |    |    | -0.079206238291528                                         | AGIWUR20089                         |                |          |                             |
| N2 | CT | II | 10811016                                                   | 10812188                            | WBGene00011070 | R06F6.7  | R06F6.7 0.0765935295540121  |
|    |    |    | AGIWUR37319                                                |                                     |                |          |                             |
| N2 | CT | II | 10812949                                                   | 10819978                            | WBGene00011071 | R06F6.8  | R06F6.8 0.142592809908045   |
|    |    |    | AGIWUR13413                                                |                                     |                |          |                             |
| N2 | CT | II | 10821015                                                   | 10822443                            | WBGene00001153 | ech-4    | R06F6.9 -0.17833414143195   |
|    |    |    | AGIWUR32397                                                |                                     |                |          |                             |
| N2 | CT | II | 10822328                                                   | 10824081                            | WBGene00023418 | R06F6.12 | R06F6.12                    |
|    |    |    | -0.206899842476414                                         | AGIWUR23823                         |                |          |                             |
| N2 | CT | II | 10824294                                                   | 10841424                            | WBGene00003367 | mix-1    | M106.1 -0.0568442232166442  |
|    |    |    | AGIWUR7474;AGIWUR7521;AGIWUR30139;AGIWUR39827              |                                     |                |          |                             |
| N2 | CT | II | 10855642                                                   | 10857177                            | WBGene00044924 | M106.7   | M106.7 -0.134037500775666   |
|    |    |    | AGIWUR22794                                                |                                     |                |          |                             |
| N2 | CT | II | 10857473                                                   | 10860909                            | WBGene00010911 | M106.3   | M106.3 -0.21687937114875    |
|    |    |    | AGIWUR25515;AGIWUR38047                                    |                                     |                |          |                             |
| N2 | CT | II | 10863682                                                   | 10868714                            | WBGene00010912 | gmps-1   | M106.4 0.125963827907557    |
|    |    |    | AGIWUR4592;AGIWUR25800;AGIWUR26865;AGIWUR30939;AGIWUR33439 |                                     |                |          |                             |
| N2 | CT | II | 10869196                                                   | 10870827                            | WBGene00000293 | cap-2    | M106.5 -0.0232258970646368  |
|    |    |    | AGIWUR17286;AGIWUR17665;AGIWUR38899;AGIWUR40831            |                                     |                |          |                             |
| N2 | CT | II | 10870779                                                   | 10872611                            | WBGene00000880 | cyn-4    | F59E10.2                    |
|    |    |    | 0.0169342119113676                                         | AGIWUR17570;AGIWUR29891;AGIWUR33211 |                |          |                             |
| N2 | CT | II | 10872879                                                   | 10873796                            | WBGene00010333 | copz-1   | F59E10.3                    |
|    |    |    | -0.144411638836777                                         | AGIWUR33271                         |                |          |                             |
| N2 | CT | II | 10873931                                                   | 10877934                            | WBGene00003882 | orc-2    | F59E10.1                    |
|    |    |    | 0.127517734945044                                          | AGIWUR32871;AGIWUR40159             |                |          |                             |
| N2 | CT | II | 10880925                                                   | 10882427                            | WBGene00009700 | lurp-1   | F44F4.1 -0.207761604707605  |
|    |    |    | AGIWUR27458                                                |                                     |                |          |                             |
| N2 | CT | II | 10882408                                                   | 10884462                            | WBGene00009701 | egg-3    | F44F4.2 0.237195326996151   |
|    |    |    | AGIWUR20772                                                |                                     |                |          |                             |
| N2 | CT | II | 10884705                                                   | 10885878                            | WBGene00009702 | F44F4.3  | F44F4.3 0.105289185319879   |
|    |    |    | AGIWUR21067                                                |                                     |                |          |                             |
| N2 | CT | II | 10889279                                                   | 10893288                            | WBGene00004222 | ptr-8    | F44F4.4 -0.207463952044723  |
|    |    |    | AGIWUR37161                                                |                                     |                |          |                             |
| N2 | CT | II | 10893275                                                   | 10895088                            | WBGene00005036 | sra-10   | F44F4.5 -0.10501192462954   |
|    |    |    | AGIWUR12637                                                |                                     |                |          |                             |
| N2 | CT | II | 10900042                                                   | 10902204                            | WBGene00001626 | gly-1    | F44F4.6 -0.0151380825888321 |
|    |    |    | AGIWUR1846                                                 |                                     |                |          |                             |
| N2 | CT | II | 10902756                                                   | 10904479                            | WBGene00005038 | sra-12   | F44F4.7 -0.146547853362898  |

AGIWUR16841;AGIWUR26876

|                                                                       |    |    |          |          |                |          |          |                     |
|-----------------------------------------------------------------------|----|----|----------|----------|----------------|----------|----------|---------------------|
| N2                                                                    | CT | II | 10908808 | 10910319 | WBGene00005037 | sra-11   | F44F4.13 |                     |
| 0.0598365498457483 AGIWUR9493;AGIWUR17231;AGIWUR40553                 |    |    |          |          |                |          |          |                     |
| N2                                                                    | CT | II | 10915901 | 10917274 | WBGene00009705 | F44F4.10 |          | F44F4.10            |
| 0.00604989328037142 AGIWUR15150                                       |    |    |          |          |                |          |          |                     |
| N2                                                                    | CT | II | 10918706 | 10920202 | WBGene00006530 | tba-4    | F44F4.11 |                     |
| 0.184048026517454 AGIWUR1211;AGIWUR23556                              |    |    |          |          |                |          |          |                     |
| N2                                                                    | CT | II | 10922672 | 10922974 | WBGene00012489 | Y19D2B.1 |          | Y19D2B.1            |
| 0.067784420676297 AGIWUR43206                                         |    |    |          |          |                |          |          |                     |
| N2                                                                    | CT | II | 10923716 | 10924595 | WBGene00012490 | Y19D2B.2 |          | Y19D2B.2            |
| 0.308359740755272 AGIWUR25225                                         |    |    |          |          |                |          |          |                     |
| N2                                                                    | CT | II | 10926561 | 10931075 | WBGene00010988 | metr-1   | R03D7.1  | 0.157692531284019   |
| AGIWUR5757;AGIWUR6884;AGIWUR43211                                     |    |    |          |          |                |          |          |                     |
| N2                                                                    | CT | II | 10935726 | 10942198 | WBGene00014814 | R03D7.3  | R03D7.3  | 0.0154255505084229  |
| AGIWUR4633;AGIWUR35952                                                |    |    |          |          |                |          |          |                     |
| N2                                                                    | CT | II | 10943390 | 10945660 | WBGene00010990 | R03D7.4  | R03D7.4  | -0.126274214250847  |
| AGIWUR31576                                                           |    |    |          |          |                |          |          |                     |
| N2                                                                    | CT | II | 10947610 | 10949184 | WBGene00010991 | R03D7.5  | R03D7.5  | -0.0399135617988264 |
| AGIWUR30739                                                           |    |    |          |          |                |          |          |                     |
| N2                                                                    | CT | II | 10950350 | 10951604 | WBGene00001753 | gst-5    | R03D7.6  | -0.0519262444649211 |
| AGIWUR32044                                                           |    |    |          |          |                |          |          |                     |
| N2                                                                    | CT | II | 10951879 | 10953165 | WBGene00003783 | nos-1    | R03D7.7  | 0.252627138813782   |
| AGIWUR19424                                                           |    |    |          |          |                |          |          |                     |
| N2                                                                    | CT | II | 10953594 | 10956878 | WBGene00010992 | R03D7.8  | R03D7.8  | 0.154695896541396   |
| AGIWUR44506                                                           |    |    |          |          |                |          |          |                     |
| N2                                                                    | CT | II | 10968386 | 11012247 | WBGene00004215 | ptp-3    | C09D8.1  | 0.0198389734845579  |
| AGIWUR3429;AGIWUR6662;AGIWUR13959;AGIWUR34474;AGIWUR35314;AGIWUR37980 |    |    |          |          |                |          |          |                     |
| N2                                                                    | CT | II | 11012397 | 11013820 | WBGene00000657 | col-81   | F38A3.1  | 0.408624842693904   |
| AGIWUR3425                                                            |    |    |          |          |                |          |          |                     |
| N2                                                                    | CT | II | 11015588 | 11016881 | WBGene00004300 | ram-2    | F38A3.2  | -0.0419135694557298 |
| AGIWUR4854;AGIWUR6326;AGIWUR11647                                     |    |    |          |          |                |          |          |                     |
| N2                                                                    | CT | II | 11022370 | 11027909 | WBGene00002957 | let-858  | F33A8.1  | 0.0283860904026483  |
| AGIWUR12874;AGIWUR29582                                               |    |    |          |          |                |          |          |                     |
| N2                                                                    | CT | II | 11027962 | 11030404 | WBGene00003756 | nlp-18   | F33A8.2  | 0.0666891576765982  |
| AGIWUR5506;AGIWUR38400                                                |    |    |          |          |                |          |          |                     |
| N2                                                                    | CT | II | 11036074 | 11039471 | WBGene00009356 | F33A8.10 |          | F33A8.10            |
| -0.190710625810557 AGIWUR20869                                        |    |    |          |          |                |          |          |                     |
| N2                                                                    | CT | II | 11039348 | 11041206 | WBGene00000472 | cey-1    | F33A8.3  | 0.0126520290245686  |
| AGIWUR534;AGIWUR9013;AGIWUR15336;AGIWUR29341;AGIWUR30653              |    |    |          |          |                |          |          |                     |

|                                                                        |    |    |                     |                                     |                |           |          |                     |
|------------------------------------------------------------------------|----|----|---------------------|-------------------------------------|----------------|-----------|----------|---------------------|
| N2                                                                     | CT | II | 11044135            | 11045968                            | WBGene00000658 | col-83    | F33A8.9  | -0.0577907367543649 |
| AGIWUR40812                                                            |    |    |                     |                                     |                |           |          |                     |
| N2                                                                     | CT | II | 11045786            | 11049030                            | WBGene00009352 | F33A8.4   | F33A8.4  | -0.0277147675913234 |
| AGIWUR17337                                                            |    |    |                     |                                     |                |           |          |                     |
| N2                                                                     | CT | II | 11049144            | 11049913                            | WBGene00009353 | sdhd-1    | F33A8.5  | -0.127445310033181  |
| AGIWUR2216                                                             |    |    |                     |                                     |                |           |          |                     |
| N2                                                                     | CT | II | 11058096            | 11089456                            | WBGene00006788 | unc-53    | F45E10.1 |                     |
|                                                                        |    |    | 0.311566187624443   | AGIWUR14085                         |                |           |          |                     |
| N2                                                                     | CT | II | 11092713            | 11093871                            | WBGene00004455 | rpl-42    | C09H10.1 |                     |
|                                                                        |    |    | 0.265444153064667   | AGIWUR24645                         |                |           |          |                     |
| N2                                                                     | CT | II | 11095048            | 11096475                            | WBGene00007504 | C09H10.10 |          | C09H10.10           |
|                                                                        |    |    | -0.0933910030623686 | AGIWUR31480                         |                |           |          |                     |
| N2                                                                     | CT | II | 11096542            | 11097204                            | WBGene00004454 | rpl-36.A  |          | C09H10.2            |
|                                                                        |    |    | 0.180500331578305   | AGIWUR20646                         |                |           |          |                     |
| N2                                                                     | CT | II | 11097841            | 11100146                            | WBGene00003831 | nuo-1     | C09H10.3 |                     |
|                                                                        |    |    | 0.0785234607738943  | AGIWUR11037;AGIWUR44982             |                |           |          |                     |
| N2                                                                     | CT | II | 11100141            | 11100462                            | WBGene00043120 | C09H10.4  |          | C09H10.4            |
|                                                                        |    |    | 0.0673463542310309  | AGIWUR35898                         |                |           |          |                     |
| N2                                                                     | CT | II | 11100479            | 11103779                            | WBGene00007499 | C09H10.5  |          | C09H10.5            |
|                                                                        |    |    | -0.0810756839363247 | AGIWUR19231                         |                |           |          |                     |
| N2                                                                     | CT | II | 11104462            | 11106046                            | WBGene00007503 | C09H10.9  |          | C09H10.9            |
|                                                                        |    |    | 0.164905438273619   | AGIWUR20653                         |                |           |          |                     |
| N2                                                                     | CT | II | 11106616            | 11108070                            | WBGene00007500 | nasp-1    | C09H10.6 |                     |
|                                                                        |    |    | -0.239659411578009  | AGIWUR24585                         |                |           |          |                     |
| N2                                                                     | CT | II | 11108159            | 11109583                            | WBGene00007501 | apc-17    | C09H10.7 |                     |
|                                                                        |    |    | -0.151265904730032  | AGIWUR44608                         |                |           |          |                     |
| N2                                                                     | CT | II | 11109584            | 11111169                            | WBGene00007502 | glb-4     | C09H10.8 |                     |
|                                                                        |    |    | -0.140064795624629  | AGIWUR34694                         |                |           |          |                     |
| N2                                                                     | CT | II | 11112719            | 11120788                            | WBGene00003133 | mat-2     | W10C6.1  | 0.0675544246800466  |
| AGIWUR1142;AGIWUR11753;AGIWUR12091;AGIWUR12124;AGIWUR13946;AGIWUR26553 |    |    |                     |                                     |                |           |          |                     |
| N2                                                                     | CT | II | 11120882            | 11121900                            | WBGene00044160 | W10C6.2   | W10C6.2  | 0.0218904099163009  |
| AGIWUR3254;AGIWUR7000;AGIWUR13656;AGIWUR14327;AGIWUR41178              |    |    |                     |                                     |                |           |          |                     |
| N2                                                                     | CT | II | 11125371            | 11126362                            | WBGene00004478 | rps-9     | F40F8.10 |                     |
|                                                                        |    |    | -0.0617843049201952 | AGIWUR13095;AGIWUR27232;AGIWUR44243 |                |           |          |                     |
| N2                                                                     | CT | II | 11126932            | 11127530                            | WBGene00003076 | lsm-1     | F40F8.9  | -0.202127831673621  |
| AGIWUR21932                                                            |    |    |                     |                                     |                |           |          |                     |
| N2                                                                     | CT | II | 11127634            | 11129256                            | WBGene00009575 | F40F8.1   | F40F8.1  | -0.123880550600006  |
| AGIWUR30901                                                            |    |    |                     |                                     |                |           |          |                     |
| N2                                                                     | CT | II | 11129289            | 11130187                            | WBGene00009576 | F40F8.3   | F40F8.3  | -0.15906894812181   |

AGIWUR8310;AGIWUR20158;AGIWUR29689;AGIWUR34395;AGIWUR34689

|    |    |    |                                                                                 |          |                |          |                             |  |
|----|----|----|---------------------------------------------------------------------------------|----------|----------------|----------|-----------------------------|--|
| N2 | CT | II | 11130275                                                                        | 11130698 | WBGene00044917 | F40F8.12 | F40F8.12                    |  |
|    |    |    | 0.432993261032394 AGIWUR40447                                                   |          |                |          |                             |  |
| N2 | CT | II | 11130690                                                                        | 11132648 | WBGene00044916 | F40F8.11 | F40F8.11                    |  |
|    |    |    | -0.00529993459690026 AGIWUR7480;AGIWUR13537;AGIWUR13618;AGIWUR40789;AGIWUR42894 |          |                |          |                             |  |
| N2 | CT | II | 11132861                                                                        | 11135140 | WBGene00009578 | F40F8.5  | F40F8.5 -0.114203981245895  |  |
|    |    |    | AGIWUR4445;AGIWUR33682                                                          |          |                |          |                             |  |
| N2 | CT | II | 11139407                                                                        | 11140275 | WBGene00009577 | F40F8.4  | F40F8.4 0.197134729815066   |  |
|    |    |    | AGIWUR8970;AGIWUR28271;AGIWUR29838;AGIWUR35430                                  |          |                |          |                             |  |
| N2 | CT | II | 11142751                                                                        | 11150381 | WBGene00009579 | arrd-6   | F40F8.8 0.274686552324125   |  |
|    |    |    | AGIWUR36363                                                                     |          |                |          |                             |  |
| N2 | CT | II | 11150299                                                                        | 11152600 | WBGene00004096 | pqm-1    | F40F8.7 0.0792750062144165  |  |
|    |    |    | AGIWUR28055                                                                     |          |                |          |                             |  |
| N2 | CT | II | 11157094                                                                        | 11162481 | WBGene00004227 | ptr-13   | K07C10.1                    |  |
|    |    |    | -0.0898794311091544 AGIWUR42577                                                 |          |                |          |                             |  |
| N2 | CT | II | 11171446                                                                        | 11175479 | WBGene00009511 | F37H8.2  | F37H8.2 -0.279261032036029  |  |
|    |    |    | AGIWUR28562                                                                     |          |                |          |                             |  |
| N2 | CT | II | 11181654                                                                        | 11183147 | WBGene00009512 | F37H8.3  | F37H8.3 -0.139035155619691  |  |
|    |    |    | AGIWUR7905                                                                      |          |                |          |                             |  |
| N2 | CT | II | 11183075                                                                        | 11184807 | WBGene00003046 | lir-3    | F37H8.1 -0.284515570573834  |  |
|    |    |    | AGIWUR1936                                                                      |          |                |          |                             |  |
| N2 | CT | II | 11186028                                                                        | 11188080 | WBGene00009513 | sfxn-1.2 | F37H8.4                     |  |
|    |    |    | 0.247830726057374 AGIWUR24608                                                   |          |                |          |                             |  |
| N2 | CT | II | 11188206                                                                        | 11189437 | WBGene00009514 | F37H8.5  | F37H8.5 -0.0635706574947505 |  |
|    |    |    | AGIWUR7339                                                                      |          |                |          |                             |  |
| N2 | CT | II | 11203221                                                                        | 11220642 | WBGene00011522 | srp-1    | T06D8.1 0.233256944985227   |  |
|    |    |    | AGIWUR17063;AGIWUR23459;AGIWUR36933                                             |          |                |          |                             |  |
| N2 | CT | II | 11222305                                                                        | 11226548 | WBGene00011524 | T06D8.3  | T06D8.3 0.102385549502628   |  |
|    |    |    | AGIWUR21094                                                                     |          |                |          |                             |  |
| N2 | CT | II | 11226679                                                                        | 11232835 | WBGene00011523 | T06D8.2  | T06D8.2 -0.0935413841704795 |  |
|    |    |    | AGIWUR9844;AGIWUR12839;AGIWUR36573                                              |          |                |          |                             |  |
| N2 | CT | II | 11232756                                                                        | 11234952 | WBGene00011526 | cox-15   | T06D8.5 0.0212886118430013  |  |
|    |    |    | AGIWUR17356                                                                     |          |                |          |                             |  |
| N2 | CT | II | 11235053                                                                        | 11236450 | WBGene00011527 | cchl-1   | T06D8.6 0.073759739537854   |  |
|    |    |    | AGIWUR20738;AGIWUR29488                                                         |          |                |          |                             |  |
| N2 | CT | II | 11236624                                                                        | 11237323 | WBGene00011528 | T06D8.7  | T06D8.7 -0.109020880357214  |  |
|    |    |    | AGIWUR41769                                                                     |          |                |          |                             |  |
| N2 | CT | II | 11237447                                                                        | 11239092 | WBGene00004465 | rpn-9    | T06D8.8 -0.0297593616548291 |  |
|    |    |    | AGIWUR3086;AGIWUR16274                                                          |          |                |          |                             |  |

|                                                            |    |    |          |          |                |          |         |                     |
|------------------------------------------------------------|----|----|----------|----------|----------------|----------|---------|---------------------|
| N2                                                         | CT | II | 11239407 | 11240988 | WBGene00011529 | T06D8.9  | T06D8.9 | -0.113593708145106  |
| AGIWUR7515;AGIWUR38105                                     |    |    |          |          |                |          |         |                     |
| N2                                                         | CT | II | 11240932 | 11247514 | WBGene00011530 | T06D8.10 |         | T06D8.10            |
| 0.188073220241834 AGIWUR28942                              |    |    |          |          |                |          |         |                     |
| N2                                                         | CT | II | 11257081 | 11258506 | WBGene00011465 | T05B9.2  | T05B9.2 | -0.147990744381436  |
| AGIWUR1889;AGIWUR27281;AGIWUR29593;AGIWUR34102;AGIWUR38410 |    |    |          |          |                |          |         |                     |
| N2                                                         | CT | II | 11260087 | 11261256 | WBGene00011464 | T05B9.1  | T05B9.1 | -0.178695520594021  |
| AGIWUR5135                                                 |    |    |          |          |                |          |         |                     |
| N2                                                         | CT | II | 11269124 | 11271599 | WBGene00000851 | cut-1    |         | C47G2.1             |
| 0.000880477607494434 AGIWUR10983                           |    |    |          |          |                |          |         |                     |
| N2                                                         | CT | II | 11281986 | 11283953 | WBGene00006853 | unc-130  | C47G2.2 | -0.0763229224585285 |
| AGIWUR15293                                                |    |    |          |          |                |          |         |                     |
| N2                                                         | CT | II | 11288690 | 11290159 | WBGene00008164 | C47G2.3  | C47G2.3 | -0.0384814790691541 |
| AGIWUR4536;AGIWUR5872                                      |    |    |          |          |                |          |         |                     |
| N2                                                         | CT | II | 11290843 | 11293606 | WBGene00008165 | C47G2.4  | C47G2.4 | -0.068309299503138  |
| AGIWUR17801                                                |    |    |          |          |                |          |         |                     |
| N2                                                         | CT | II | 11293997 | 11294579 | WBGene00044038 | C47G2.6  | C47G2.6 | -0.14149895604405   |
| AGIWUR25886                                                |    |    |          |          |                |          |         |                     |
| N2                                                         | CT | II | 11295563 | 11296019 | WBGene00044039 | C47G2.7  | C47G2.7 | -0.0795336672809039 |
| AGIWUR23223                                                |    |    |          |          |                |          |         |                     |
| N2                                                         | CT | II | 11297700 | 11301254 | WBGene00008166 | saps-1   | C47G2.5 | 0.109406238508669   |
| AGIWUR26416;AGIWUR31317;AGIWUR39412                        |    |    |          |          |                |          |         |                     |
| N2                                                         | CT | II | 11301359 | 11302783 | WBGene00006414 | raga-1   | T24F1.1 | 0.116460534260259   |
| AGIWUR32876                                                |    |    |          |          |                |          |         |                     |
| N2                                                         | CT | II | 11302891 | 11305683 | WBGene00011994 | samp-1   | T24F1.2 | 0.180681551499964   |
| AGIWUR30                                                   |    |    |          |          |                |          |         |                     |
| N2                                                         | CT | II | 11306399 | 11311940 | WBGene00011995 | rsf-1    | T24F1.3 | 0.31632219721968    |
| AGIWUR16058                                                |    |    |          |          |                |          |         |                     |
| N2                                                         | CT | II | 11312460 | 11313346 | WBGene00011999 | T24F1.7  | T24F1.7 | 0.0135520380833487  |
| AGIWUR545                                                  |    |    |          |          |                |          |         |                     |
| N2                                                         | CT | II | 11313331 | 11314265 | WBGene00011996 | T24F1.4  | T24F1.4 | -0.23632949938381   |
| AGIWUR38428                                                |    |    |          |          |                |          |         |                     |
| N2                                                         | CT | II | 11319241 | 11319691 | WBGene00011997 | nlp-51   | T24F1.5 | -0.049536729665018  |
| AGIWUR32939                                                |    |    |          |          |                |          |         |                     |
| N2                                                         | CT | II | 11323051 | 11329429 | WBGene00007041 | tag-180  | T24F1.6 | 0.0449827091462627  |
| AGIWUR3735;AGIWUR11884;AGIWUR43713                         |    |    |          |          |                |          |         |                     |
| N2                                                         | CT | II | 11336693 | 11337837 | WBGene00005016 | sqt-1    | B0491.2 | -0.32656236558665   |
| AGIWUR5183                                                 |    |    |          |          |                |          |         |                     |
| N2                                                         | CT | II | 11338451 | 11339620 | WBGene00007190 | rmd-3    | B0491.3 | 0.240021984565018   |

|                                                 |    |    |          |          |                |            |            |                    |
|-------------------------------------------------|----|----|----------|----------|----------------|------------|------------|--------------------|
| AGIWUR3162;AGIWUR18812;AGIWUR39848              |    |    |          |          |                |            |            |                    |
| N2                                              | CT | II | 11340134 | 11343530 | WBGene00007191 | lgc-20     | B0491.4    | 0.228018801482419  |
| AGIWUR19561                                     |    |    |          |          |                |            |            |                    |
| N2                                              | CT | II | 11343716 | 11345743 | WBGene00007192 | B0491.5    | B0491.5    | -0.138616147545406 |
| AGIWUR6670;AGIWUR9367                           |    |    |          |          |                |            |            |                    |
| N2                                              | CT | II | 11345943 | 11348248 | WBGene00007193 | B0491.6    | B0491.6    | 0.0293956346343016 |
| AGIWUR12652                                     |    |    |          |          |                |            |            |                    |
| N2                                              | CT | II | 11348430 | 11349946 | WBGene00007189 | B0491.1    | B0491.1    | -0.15187496210395  |
| AGIWUR37232                                     |    |    |          |          |                |            |            |                    |
| N2                                              | CT | II | 11350192 | 11351373 | WBGene00007194 | B0491.7    | B0491.7    | -0.133447683456986 |
| AGIWUR41619                                     |    |    |          |          |                |            |            |                    |
| N2                                              | CT | II | 11358447 | 11370311 | WBGene00000529 | clh-2      | B0491.8    | -0.204456013190705 |
| AGIWUR16507;AGIWUR21676;AGIWUR31905;AGIWUR39721 |    |    |          |          |                |            |            |                    |
| N2                                              | CT | II | 11370315 | 11372145 | WBGene00007891 | C33B4.2    | C33B4.2    | -0.150039842934268 |
| AGIWUR36998                                     |    |    |          |          |                |            |            |                    |
| N2                                              | CT | II | 11375608 | 11376269 | WBGene00007892 | C33B4.4    | C33B4.4    | 0.0774565402716529 |
| AGIWUR17076                                     |    |    |          |          |                |            |            |                    |
| N2                                              | CT | II | 11383327 | 11384570 | WBGene00007893 | C33B4.5    | C33B4.5    | 0.0613446359974503 |
| AGIWUR19815                                     |    |    |          |          |                |            |            |                    |
| N2                                              | CT | II | 11384594 | 11390862 | WBGene00006444 | shn-1      | C33B4.3    | 0.0795163149361082 |
| AGIWUR34943                                     |    |    |          |          |                |            |            |                    |
| N2                                              | CT | II | 11410091 | 11412280 | WBGene00044029 | C05D12.7   |            | C05D12.7           |
| -0.0320929119266866                             |    |    |          |          |                |            |            |                    |
| N2                                              | CT | II | 11412232 | 11415820 | WBGene00007339 | C05D12.1   |            | C05D12.1           |
| 0.125874687995246                               |    |    |          |          |                |            |            |                    |
| N2                                              | CT | II | 11418314 | 11423393 | WBGene00007340 | C05D12.2   |            | C05D12.2           |
| 0.133059451186686                               |    |    |          |          |                |            |            |                    |
| N2                                              | CT | II | 11424830 | 11430607 | WBGene00014666 | C05D12.3   |            | C05D12.3           |
| 0.154719877416842                               |    |    |          |          |                |            |            |                    |
| N2                                              | CT | II | 11431709 | 11432766 | WBGene00007341 | C05D12.4   |            | C05D12.4           |
| -0.149506983861652                              |    |    |          |          |                |            |            |                    |
| N2                                              | CT | II | 11434221 | 11434958 | WBGene00007342 | C05D12.5   |            | C05D12.5           |
| -0.104565495676614                              |    |    |          |          |                |            |            |                    |
| N2                                              | CT | II | 11435212 | 11438464 | WBGene00006915 | vha-6      | VW02B12L.1 |                    |
| -0.144750522884028                              |    |    |          |          |                |            |            |                    |
| N2                                              | CT | II | 11439177 | 11439762 | WBGene00012155 | VW02B12L.2 |            | VW02B12L.2         |
| 0.163836375116811                               |    |    |          |          |                |            |            |                    |
| N2                                              | CT | II | 11442693 | 11444009 | WBGene00012156 | ebp-2      | VW02B12L.3 |                    |
| 0.108408766375805                               |    |    |          |          |                |            |            |                    |
| AGIWUR7374;AGIWUR30744                          |    |    |          |          |                |            |            |                    |

|                      |    |    |                                                            |          |                |           |                            |
|----------------------|----|----|------------------------------------------------------------|----------|----------------|-----------|----------------------------|
| N2                   | CT | II | 11444162                                                   | 11445255 | WBGene00012157 | adbp-1    | VW02B12L.4                 |
| -0.182279626391095   |    |    | AGIWUR1736                                                 |          |                |           |                            |
| N2                   | CT | II | 11445289                                                   | 11448895 | WBGene00043534 | W02B12.13 | W02B12.13                  |
| -0.117510106497315   |    |    | AGIWUR23311;AGIWUR26362;AGIWUR40669                        |          |                |           |                            |
| N2                   | CT | II | 11448965                                                   | 11451445 | WBGene00012201 | W02B12.1  | W02B12.1                   |
| -0.113140508406248   |    |    | AGIWUR3778                                                 |          |                |           |                            |
| N2                   | CT | II | 11451444                                                   | 11452955 | WBGene00004699 | rsp-2     | W02B12.2                   |
| 0.19645916177662     |    |    | AGIWUR7342;AGIWUR16886;AGIWUR19469;AGIWUR24287;AGIWUR28283 |          |                |           |                            |
| N2                   | CT | II | 11453362                                                   | 11455864 | WBGene00004698 | rsp-1     | W02B12.3                   |
| -0.177044886583218   |    |    | AGIWUR8808;AGIWUR19633;AGIWUR44613                         |          |                |           |                            |
| N2                   | CT | II | 11455759                                                   | 11459356 | WBGene00012202 | W02B12.4  | W02B12.4                   |
| -0.0242008439337154  |    |    | AGIWUR9639;AGIWUR25066;AGIWUR32512                         |          |                |           |                            |
| N2                   | CT | II | 11460215                                                   | 11464129 | WBGene00000196 | aars-1    | W02B12.6                   |
| -0.121041574396479   |    |    | AGIWUR42057                                                |          |                |           |                            |
| N2                   | CT | II | 11464892                                                   | 11468653 | WBGene00012203 | rga-1     | W02B12.8                   |
| 0.019493640890337    |    |    | AGIWUR9836;AGIWUR17737;AGIWUR20910;AGIWUR37766             |          |                |           |                            |
| N2                   | CT | II | 11468552                                                   | 11469624 | WBGene00044026 | cisd-1    | W02B12.15                  |
| -0.0207481339274782  |    |    | AGIWUR9645;AGIWUR11244;AGIWUR30877;AGIWUR36766;AGIWUR43387 |          |                |           |                            |
| N2                   | CT | II | 11470010                                                   | 11472033 | WBGene00012204 | mfn-1     | W02B12.9                   |
| -0.00754326754390622 |    |    | AGIWUR7193;AGIWUR40221                                     |          |                |           |                            |
| N2                   | CT | II | 11472135                                                   | 11473571 | WBGene00012205 | W02B12.10 | W02B12.10                  |
| 0.0263053282984007   |    |    | AGIWUR25960                                                |          |                |           |                            |
| N2                   | CT | II | 11473861                                                   | 11476019 | WBGene00012206 | W02B12.11 | W02B12.11                  |
| 0.0144459912901986   |    |    | AGIWUR16635;AGIWUR22977;AGIWUR44267                        |          |                |           |                            |
| N2                   | CT | II | 11476757                                                   | 11479176 | WBGene00012207 | W02B12.12 | W02B12.12                  |
| 0.349062331690883    |    |    | AGIWUR13834;AGIWUR34835;AGIWUR35852                        |          |                |           |                            |
| N2                   | CT | II | 11480432                                                   | 11482385 | WBGene00007147 | B0334.9   | B0334.9 -0.177024783139315 |
| AGIWUR3847           |    |    |                                                            |          |                |           |                            |
| N2                   | CT | II | 11483201                                                   | 11485359 | WBGene00006660 | twk-5     | B0334.2 -0.145600283877741 |
| AGIWUR24833          |    |    |                                                            |          |                |           |                            |
| N2                   | CT | II | 11485510                                                   | 11486774 | WBGene00007142 | ttr-18    | B0334.1 0.125476027689606  |
| AGIWUR35879          |    |    |                                                            |          |                |           |                            |
| N2                   | CT | II | 11488302                                                   | 11489619 | WBGene00007149 | B0334.13  | B0334.13                   |
| -0.172568348846331   |    |    | AGIWUR2411                                                 |          |                |           |                            |
| N2                   | CT | II | 11489605                                                   | 11493039 | WBGene00007143 | B0334.3   | B0334.3 0.103878900423091  |
| AGIWUR8770           |    |    |                                                            |          |                |           |                            |
| N2                   | CT | II | 11493231                                                   | 11495321 | WBGene00003868 | ooc-3     | B0334.11                   |
| -0.199233197208358   |    |    | AGIWUR41973                                                |          |                |           |                            |
| N2                   | CT | II | 11495692                                                   | 11496663 | WBGene00007144 | B0334.4   | B0334.4 -0.303155474132019 |

|                                     |    |    |                                                             |          |                |           |          |                     |
|-------------------------------------|----|----|-------------------------------------------------------------|----------|----------------|-----------|----------|---------------------|
| AGIWUR44324                         |    |    |                                                             |          |                |           |          |                     |
| N2                                  | CT | II | 11497665                                                    | 11499620 | WBGene00007145 | B0334.5   | B0334.5  | 0.107776476763462   |
| AGIWUR1708                          |    |    |                                                             |          |                |           |          |                     |
| N2                                  | CT | II | 11510673                                                    | 11513890 | WBGene00007146 | B0334.6   | B0334.6  | -0.0195094251936059 |
| AGIWUR18391                         |    |    |                                                             |          |                |           |          |                     |
| N2                                  | CT | II | 11515075                                                    | 11518154 | WBGene00005267 | srh-44    | B0334.7  | -0.0663883224092938 |
| AGIWUR18781                         |    |    |                                                             |          |                |           |          |                     |
| N2                                  | CT | II | 11519323                                                    | 11527062 | WBGene00000090 | age-1     | B0334.8  | 0.00132605852548551 |
| AGIWUR6065;AGIWUR20151;AGIWUR40421  |    |    |                                                             |          |                |           |          |                     |
| N2                                  | CT | II | 11527172                                                    | 11533814 | WBGene00007013 | mdt-8     | Y62F5A.1 |                     |
| 0.0141323081747666                  |    |    | AGIWUR10085;AGIWUR18350                                     |          |                |           |          |                     |
| N2                                  | CT | II | 11533925                                                    | 11534479 | WBGene00077453 | Y62F5A.12 |          | Y62F5A.12           |
| -0.0463214311365192                 |    |    | AGIWUR15635;AGIWUR22508;AGIWUR29852;AGIWUR30561;AGIWUR32531 |          |                |           |          |                     |
| N2                                  | CT | II | 11535165                                                    | 11538841 | WBGene00013387 | Y62F5A.9  |          | Y62F5A.9            |
| -0.243456466740804                  |    |    | AGIWUR2621                                                  |          |                |           |          |                     |
| N2                                  | CT | II | 11538904                                                    | 11540630 | WBGene00010055 | F54D5.12  |          | F54D5.12            |
| 0.316553917005425                   |    |    | AGIWUR4071;AGIWUR32091;AGIWUR43219                          |          |                |           |          |                     |
| N2                                  | CT | II | 11540772                                                    | 11542579 | WBGene00010054 | F54D5.11  |          | F54D5.11            |
| -0.192920463159059                  |    |    | AGIWUR23057                                                 |          |                |           |          |                     |
| N2                                  | CT | II | 11542636                                                    | 11544875 | WBGene00010053 | F54D5.9   | F54D5.9  | 0.179531361130662   |
| AGIWUR20809                         |    |    |                                                             |          |                |           |          |                     |
| N2                                  | CT | II | 11545563                                                    | 11547366 | WBGene00001031 | dnj-13    | F54D5.8  | -0.14328019744428   |
| AGIWUR32433                         |    |    |                                                             |          |                |           |          |                     |
| N2                                  | CT | II | 11547481                                                    | 11549313 | WBGene00010052 | F54D5.7   | F54D5.7  | -0.0530274813131051 |
| AGIWUR16917;AGIWUR18203             |    |    |                                                             |          |                |           |          |                     |
| N2                                  | CT | II | 11558715                                                    | 11564227 | WBGene00010057 | F54D5.15  |          | F54D5.15            |
| -0.32156494643395                   |    |    | AGIWUR23389                                                 |          |                |           |          |                     |
| N2                                  | CT | II | 11564385                                                    | 11567020 | WBGene00010051 | F54D5.5   | F54D5.5  | -0.13476966671969   |
| AGIWUR4180;AGIWUR8631               |    |    |                                                             |          |                |           |          |                     |
| N2                                  | CT | II | 11569818                                                    | 11571002 | WBGene00010050 | F54D5.4   | F54D5.4  | 0.0354511484412612  |
| AGIWUR25511;AGIWUR35726;AGIWUR43286 |    |    |                                                             |          |                |           |          |                     |
| N2                                  | CT | II | 11571805                                                    | 11573025 | WBGene00010049 | F54D5.3   | F54D5.3  | -0.105251144206365  |
| AGIWUR31038                         |    |    |                                                             |          |                |           |          |                     |
| N2                                  | CT | II | 11573180                                                    | 11575000 | WBGene00010048 | F54D5.2   | F54D5.2  | -0.0159806697155513 |
| AGIWUR14382                         |    |    |                                                             |          |                |           |          |                     |
| N2                                  | CT | II | 11574940                                                    | 11577258 | WBGene00003960 | pcs-1     | F54D5.1  | 0.160787979756471   |
| AGIWUR12093;AGIWUR26991;AGIWUR27917 |    |    |                                                             |          |                |           |          |                     |
| N2                                  | CT | II | 11578716                                                    | 11582758 | WBGene00010056 | smc-6     | F54D5.14 |                     |
| 0.105581797765415                   |    |    | AGIWUR9293;AGIWUR28985;AGIWUR42540                          |          |                |           |          |                     |



|                                                                                                                       |    |    |          |          |                |          |          |                     |
|-----------------------------------------------------------------------------------------------------------------------|----|----|----------|----------|----------------|----------|----------|---------------------|
| N2                                                                                                                    | CT | II | 11582849 | 11588536 | WBGene00008361 | D1043.1  | D1043.1  | -0.0329946480652019 |
| AGIWUR31695                                                                                                           |    |    |          |          |                |          |          |                     |
| N2                                                                                                                    | CT | II | 11588464 | 11592060 | WBGene00008545 | F07A11.1 |          | F07A11.1            |
| -0.0476550698413156                                                                                                   |    |    |          |          |                |          |          |                     |
| N2                                                                                                                    | CT | II | 11592392 | 11596590 | WBGene00008546 | gfat-1   | F07A11.2 |                     |
| 0.053348567312181                                                                                                     |    |    |          |          |                |          |          |                     |
| N2                                                                                                                    | CT | II | 11596767 | 11599809 | WBGene00003791 | npp-5    | F07A11.3 |                     |
| 0.0554300712925873                                                                                                    |    |    |          |          |                |          |          |                     |
| N2                                                                                                                    | CT | II | 11603956 | 11611532 | WBGene00008547 | F07A11.4 |          | F07A11.4            |
| 0.316860823751522                                                                                                     |    |    |          |          |                |          |          |                     |
| N2                                                                                                                    | CT | II | 11612257 | 11614391 | WBGene00008548 | F07A11.5 |          | F07A11.5            |
| 0.078660190329499                                                                                                     |    |    |          |          |                |          |          |                     |
| N2                                                                                                                    | CT | II | 11614636 | 11633609 | WBGene00008549 | din-1    | F07A11.6 |                     |
| 0.160548869937344                                                                                                     |    |    |          |          |                |          |          |                     |
| AGIWUR2384;AGIWUR5574;AGIWUR20351;AGIWUR26081;AGIWUR29000;AGIWUR30375;AGIWUR35211;AGIWUR35355;AGIWUR40727;AGIWUR42354 |    |    |          |          |                |          |          |                     |
| N2                                                                                                                    | CT | II | 11640454 | 11641778 | WBGene00002194 | kin-6    | ZK20.2   | -0.02270988885709   |
| AGIWUR20410                                                                                                           |    |    |          |          |                |          |          |                     |
| N2                                                                                                                    | CT | II | 11646747 | 11649139 | WBGene00013923 | ghi-1    | ZK20.1   | 0.215012329136801   |
| AGIWUR21946                                                                                                           |    |    |          |          |                |          |          |                     |
| N2                                                                                                                    | CT | II | 11649096 | 11651213 | WBGene00013925 | ZK20.4   | ZK20.4   | -0.368489763175679  |
| AGIWUR28663                                                                                                           |    |    |          |          |                |          |          |                     |
| N2                                                                                                                    | CT | II | 11651261 | 11652906 | WBGene00013924 | rad-23   | ZK20.3   | -0.0631660407479231 |
| AGIWUR7698;AGIWUR12477;AGIWUR32141;AGIWUR39417                                                                        |    |    |          |          |                |          |          |                     |
| N2                                                                                                                    | CT | II | 11653096 | 11654194 | WBGene00004468 | rpn-12   | ZK20.5   | 0.0571621994707634  |
| AGIWUR27674                                                                                                           |    |    |          |          |                |          |          |                     |
| N2                                                                                                                    | CT | II | 11654214 | 11657172 | WBGene00013926 | nep-1    | ZK20.6   | -0.0739126394581007 |
| AGIWUR2710                                                                                                            |    |    |          |          |                |          |          |                     |
| N2                                                                                                                    | CT | II | 11661583 | 11675927 | WBGene00007028 | trr-1    | C47D12.1 |                     |
| 0.00339349668680811                                                                                                   |    |    |          |          |                |          |          |                     |
| AGIWUR5325;AGIWUR12751;AGIWUR31535                                                                                    |    |    |          |          |                |          |          |                     |
| N2                                                                                                                    | CT | II | 11676306 | 11679197 | WBGene00008136 | C47D12.2 |          | C47D12.2            |
| -0.181446813621791                                                                                                    |    |    |          |          |                |          |          |                     |
| N2                                                                                                                    | CT | II | 11679091 | 11681068 | WBGene00008137 | sfxn-1.4 |          | C47D12.3            |
| 0.129525293567763                                                                                                     |    |    |          |          |                |          |          |                     |
| N2                                                                                                                    | CT | II | 11681825 | 11682881 | WBGene00008138 | C47D12.4 |          | C47D12.4            |
| -0.346717028259642                                                                                                    |    |    |          |          |                |          |          |                     |
| N2                                                                                                                    | CT | II | 11683479 | 11685289 | WBGene00008139 | C47D12.5 |          | C47D12.5            |
| -0.159413753397549                                                                                                    |    |    |          |          |                |          |          |                     |
| N2                                                                                                                    | CT | II | 11696171 | 11705371 | WBGene00008140 | xpf-1    | C47D12.8 |                     |

|                                                                                                                                                                                                                                                           |    |    |             |          |                |            |                             |
|-----------------------------------------------------------------------------------------------------------------------------------------------------------------------------------------------------------------------------------------------------------|----|----|-------------|----------|----------------|------------|-----------------------------|
| -0.0626831984536746                                                                                                                                                                                                                                       |    |    | AGIWUR41402 |          |                |            |                             |
| N2                                                                                                                                                                                                                                                        | CT | II | 11705989    | 11713610 | WBGene00012149 | VF13D12L.3 | VF13D12L.3                  |
| 0.0349503802930755                                                                                                                                                                                                                                        |    |    | AGIWUR3208  |          |                |            |                             |
| N2                                                                                                                                                                                                                                                        | CT | II | 11713721    | 11716785 | WBGene00008744 | F13D12.10  | F13D12.10                   |
| -0.133014166049902                                                                                                                                                                                                                                        |    |    | AGIWUR10883 |          |                |            |                             |
| N2                                                                                                                                                                                                                                                        | CT | II | 11720444    | 11722308 | WBGene00008739 | F13D12.3   | F13D12.3                    |
| -0.104536443246936                                                                                                                                                                                                                                        |    |    | AGIWUR43065 |          |                |            |                             |
| N2                                                                                                                                                                                                                                                        | CT | II | 11724204    | 11726533 | WBGene00002262 | ldh-1      | F13D12.2                    |
| -0.0237246349245055                                                                                                                                                                                                                                       |    |    | AGIWUR13529 |          |                |            |                             |
| N2                                                                                                                                                                                                                                                        | CT | II | 11726814    | 11728541 | WBGene00008740 | F13D12.5   | F13D12.5                    |
| -0.103557620496437                                                                                                                                                                                                                                        |    |    | AGIWUR26392 |          |                |            |                             |
| N2                                                                                                                                                                                                                                                        | CT | II | 11728949    | 11731226 | WBGene00000114 | alh-8      | F13D12.4                    |
| 0.205824583946546                                                                                                                                                                                                                                         |    |    |             |          |                |            |                             |
| AGIWUR1224;AGIWUR5891;AGIWUR12029;AGIWUR14165;AGIWUR15757;AGIWUR16773;AGIWUR17567;AGIWUR18235;AGIWUR20123;AGIWUR20401;AGIWUR22020;AGIWUR24172;AGIWUR24755;AGIWUR29296;AGIWUR34759;AGIWUR38206;AGIWUR41118;AGIWUR41506;AGIWUR42887;AGIWUR43612;AGIWUR44212 |    |    |             |          |                |            |                             |
| N2                                                                                                                                                                                                                                                        | CT | II | 11731165    | 11732594 | WBGene00008742 | F13D12.8   | F13D12.8                    |
| 0.00726471631246817                                                                                                                                                                                                                                       |    |    | AGIWUR8447  |          |                |            |                             |
| N2                                                                                                                                                                                                                                                        | CT | II | 11739456    | 11742876 | WBGene00008741 | F13D12.6   | F13D12.6                    |
| 3.5527136788005e-15                                                                                                                                                                                                                                       |    |    | AGIWUR13795 |          |                |            |                             |
| N2                                                                                                                                                                                                                                                        | CT | II | 11742814    | 11748611 | WBGene00001679 | gpb-1      | F13D12.7                    |
| -0.0664125331578238                                                                                                                                                                                                                                       |    |    |             |          |                |            |                             |
| AGIWUR1044;AGIWUR6942;AGIWUR12617;AGIWUR16349;AGIWUR22503;AGIWUR22766;AGIWUR27763;AGIWUR37448;AGIWUR38234;AGIWUR39837                                                                                                                                     |    |    |             |          |                |            |                             |
| N2                                                                                                                                                                                                                                                        | CT | II | 11762166    | 11765662 | WBGene00009690 | F44E5.3    | F44E5.3 0.126686320168924   |
| AGIWUR39880                                                                                                                                                                                                                                               |    |    |             |          |                |            |                             |
| N2                                                                                                                                                                                                                                                        | CT | II | 11771978    | 11774039 | WBGene00206377 | F44E5.15   | F44E5.15                    |
| 0.226600884405086                                                                                                                                                                                                                                         |    |    | AGIWUR4924  |          |                |            |                             |
| N2                                                                                                                                                                                                                                                        | CT | II | 11774144    | 11774559 | WBGene00009688 | F44E5.1    | F44E5.1 -0.22056023616684   |
| AGIWUR4219;AGIWUR6573;AGIWUR8599;AGIWUR12421;AGIWUR14398;AGIWUR25459;AGIWUR41823                                                                                                                                                                          |    |    |             |          |                |            |                             |
| N2                                                                                                                                                                                                                                                        | CT | II | 11774669    | 11777943 | WBGene00009661 | patr-1     | F43G6.9 0.125313357553289   |
| AGIWUR8301;AGIWUR9463;AGIWUR35105                                                                                                                                                                                                                         |    |    |             |          |                |            |                             |
| N2                                                                                                                                                                                                                                                        | CT | II | 11778435    | 11782231 | WBGene00001016 | dna-2      | F43G6.1 -0.0733130848557781 |
| AGIWUR42987                                                                                                                                                                                                                                               |    |    |             |          |                |            |                             |
| N2                                                                                                                                                                                                                                                        | CT | II | 11782987    | 11784086 | WBGene00009656 | F43G6.3    | F43G6.3 0.0408481513174124  |
| AGIWUR7939;AGIWUR9994;AGIWUR39798                                                                                                                                                                                                                         |    |    |             |          |                |            |                             |
| N2                                                                                                                                                                                                                                                        | CT | II | 11790759    | 11797322 | WBGene00009657 | F43G6.4    | F43G6.4 0.440686357858072   |
| AGIWUR3169;AGIWUR32275                                                                                                                                                                                                                                    |    |    |             |          |                |            |                             |
| N2                                                                                                                                                                                                                                                        | CT | II | 11806567    | 11808805 | WBGene00005013 | jmjd-1.1   | F43G6.6                     |

|                                   |                                                                                    |          |                |                 |                            |
|-----------------------------------|------------------------------------------------------------------------------------|----------|----------------|-----------------|----------------------------|
| 0.19066367542146                  | AGIWUR21925                                                                        |          |                |                 |                            |
| N2 CT II                          | 11812294                                                                           | 11814113 | WBGene00009660 | F43G6.8 F43G6.8 | -0.149222906974035         |
| AGIWUR840                         |                                                                                    |          |                |                 |                            |
| N2 CT II                          | 11814839                                                                           | 11816706 | WBGene00009658 | F43G6.5 F43G6.5 | 0.0229644159196383         |
| AGIWUR34108                       |                                                                                    |          |                |                 |                            |
| N2 CT II                          | 11818248                                                                           | 11819924 | WBGene00012396 | Y6D1A.2 Y6D1A.2 | 0.217486929400694          |
| AGIWUR3568                        |                                                                                    |          |                |                 |                            |
| N2 CT II                          | 11827933                                                                           | 11830020 | WBGene00003979 | pes-5           | T27D12.4                   |
| -0.322058907010195                | AGIWUR42789                                                                        |          |                |                 |                            |
| N2 CT II                          | 11831062                                                                           | 11832575 | WBGene00012086 | cllec-144       | T27D12.3                   |
| -0.0504366217975694               | AGIWUR3999                                                                         |          |                |                 |                            |
| N2 CT II                          | 11842617                                                                           | 11846026 | WBGene00012085 | T27D12.1        | T27D12.1                   |
| 0.201452058476178                 | AGIWUR43883                                                                        |          |                |                 |                            |
| N2 CT II                          | 11846508                                                                           | 11854743 | WBGene00000528 | clh-1           | T27D12.2                   |
| 0.146520022335817                 | AGIWUR11100;AGIWUR27732;AGIWUR44823                                                |          |                |                 |                            |
| N2 CT II                          | 11861029                                                                           | 11863420 | WBGene00010787 | K12D12.5        | K12D12.5                   |
| 0.313176232962842                 | AGIWUR27714                                                                        |          |                |                 |                            |
| N2 CT II                          | 11863525                                                                           | 11865506 | WBGene00010786 | K12D12.4        | K12D12.4                   |
| 0.229149877616017                 | AGIWUR32968                                                                        |          |                |                 |                            |
| N2 CT II                          | 11865523                                                                           | 11874702 | WBGene00003789 | npp-3           | K12D12.2                   |
| 0.0186829492830789                | AGIWUR28569                                                                        |          |                |                 |                            |
| N2 CT II                          | 11875145                                                                           | 11880588 | WBGene00010785 | top-2           | K12D12.1                   |
| -0.0856897394836214               | AGIWUR7051;AGIWUR16104;AGIWUR21962;AGIWUR37958;AGIWUR39538;AGIWUR40938;AGIWUR41350 |          |                |                 |                            |
| N2 CT II                          | 11882614                                                                           | 11883685 | WBGene00014155 | ZK930.5 ZK930.5 | -0.417714506338926         |
| AGIWUR19690                       |                                                                                    |          |                |                 |                            |
| N2 CT II                          | 11885588                                                                           | 11886601 | WBGene00014156 | ZK930.6 ZK930.6 | 0.242739072533659          |
| AGIWUR43651                       |                                                                                    |          |                |                 |                            |
| N2 CT II                          | 11890992                                                                           | 11893423 | WBGene00014152 | ZK930.2 ZK930.2 | -0.188076167022961         |
| AGIWUR42824                       |                                                                                    |          |                |                 |                            |
| N2 CT II                          | 11897365                                                                           | 11901210 | WBGene00014153 | vab-23          | ZK930.3 0.118014008519095  |
| AGIWUR3989;AGIWUR8215;AGIWUR15786 |                                                                                    |          |                |                 |                            |
| N2 CT II                          | 11906517                                                                           | 11908601 | WBGene00014154 | ZK930.4 ZK930.4 | 0.142735345789514          |
| AGIWUR34030                       |                                                                                    |          |                |                 |                            |
| N2 CT II                          | 11908714                                                                           | 11915852 | WBGene00014151 | vps-15          | ZK930.1 0.0163504355952746 |
| AGIWUR6792                        |                                                                                    |          |                |                 |                            |
| N2 CT II                          | 11916513                                                                           | 11917643 | WBGene00001977 | hmg-12          | Y17G7A.1                   |
| -0.0228495181583446               | AGIWUR3120;AGIWUR4269;AGIWUR7020;AGIWUR18198;AGIWUR21727;AGIWUR26983               |          |                |                 |                            |
| N2 CT II                          | 11917642                                                                           | 11935343 | WBGene00003015 | lin-29          | W03C9.4 0.171750767440491  |
| AGIWUR21089;AGIWUR27180           |                                                                                    |          |                |                 |                            |

|                                                                                                                   |    |    |          |          |                |           |          |                     |
|-------------------------------------------------------------------------------------------------------------------|----|----|----------|----------|----------------|-----------|----------|---------------------|
| N2                                                                                                                | CT | II | 11948727 | 11949474 | WBGene00012223 | W03C9.8   | W03C9.8  | 0.119001038512099   |
| AGIWUR29013                                                                                                       |    |    |          |          |                |           |          |                     |
| N2                                                                                                                | CT | II | 11953239 | 11960743 | WBGene00012222 | W03C9.6   | W03C9.6  | -0.158543862486665  |
| AGIWUR32907                                                                                                       |    |    |          |          |                |           |          |                     |
| N2                                                                                                                | CT | II | 11960989 | 11962128 | WBGene00012219 | W03C9.1   | W03C9.1  | -0.0349146841975667 |
| AGIWUR38306                                                                                                       |    |    |          |          |                |           |          |                     |
| N2                                                                                                                | CT | II | 11962111 | 11965258 | WBGene00012220 | W03C9.2   | W03C9.2  | -0.37904010536522   |
| AGIWUR29253                                                                                                       |    |    |          |          |                |           |          |                     |
| N2                                                                                                                | CT | II | 11965339 | 11966931 | WBGene00004271 | rab-7     | W03C9.3  | 0.060064829778133   |
| AGIWUR4192;AGIWUR4526;AGIWUR8098;AGIWUR17129;AGIWUR22447;AGIWUR23927;AGIWUR25730;AGIWUR33425                      |    |    |          |          |                |           |          |                     |
| N2                                                                                                                | CT | II | 11967048 | 11967533 | WBGene00012221 | W03C9.5   | W03C9.5  | 0.255384998823504   |
| AGIWUR2780;AGIWUR8954;AGIWUR14848;AGIWUR18824;AGIWUR24306;AGIWUR42497                                             |    |    |          |          |                |           |          |                     |
| N2                                                                                                                | CT | II | 11968637 | 11972334 | WBGene00003228 | mex-1     | W03C9.7  | 0.278860422588153   |
| AGIWUR43188                                                                                                       |    |    |          |          |                |           |          |                     |
| N2                                                                                                                | CT | II | 11972310 | 11973732 | WBGene00012457 | acbp-6    | Y17G7B.1 |                     |
| 0.12559921430906 AGIWUR920;AGIWUR15194;AGIWUR16203;AGIWUR37119;AGIWUR38415;AGIWUR39380                            |    |    |          |          |                |           |          |                     |
| N2                                                                                                                | CT | II | 11975190 | 11977659 | WBGene00012472 | Y17G7B.21 |          | Y17G7B.21           |
| 0.079929293033187 AGIWUR31694                                                                                     |    |    |          |          |                |           |          |                     |
| N2                                                                                                                | CT | II | 11977784 | 11979859 | WBGene00012471 | Y17G7B.20 |          | Y17G7B.20           |
| 0.0714092233467589 AGIWUR10903                                                                                    |    |    |          |          |                |           |          |                     |
| N2                                                                                                                | CT | II | 11979838 | 11989017 | WBGene00012458 | ash-2     | Y17G7B.2 |                     |
| -0.0570411285595078 AGIWUR10526;AGIWUR16389;AGIWUR28205;AGIWUR36922;AGIWUR39383                                   |    |    |          |          |                |           |          |                     |
| N2                                                                                                                | CT | II | 11989024 | 11992823 | WBGene00012459 | Y17G7B.3  |          | Y17G7B.3            |
| -0.24642306381747 AGIWUR1664                                                                                      |    |    |          |          |                |           |          |                     |
| N2                                                                                                                | CT | II | 11993001 | 11998009 | WBGene00012460 | dhps-1    | Y17G7B.4 |                     |
| -0.167597350837296 AGIWUR8348                                                                                     |    |    |          |          |                |           |          |                     |
| N2                                                                                                                | CT | II | 11999260 | 12001422 | WBGene00044030 | Y17G7B.23 |          | Y17G7B.23           |
| 0.0636494067385716 AGIWUR22822                                                                                    |    |    |          |          |                |           |          |                     |
| N2                                                                                                                | CT | II | 12001510 | 12006625 | WBGene00003154 | mcm-2     | Y17G7B.5 |                     |
| 0.0356634966089366 AGIWUR6431;AGIWUR14362;AGIWUR22034;AGIWUR22863;AGIWUR24320;AGIWUR27510;AGIWUR31581;AGIWUR43987 |    |    |          |          |                |           |          |                     |
| N2                                                                                                                | CT | II | 12009077 | 12023825 | WBGene00012461 | glb-29    | Y17G7B.6 |                     |
| 0.0109021631796988 AGIWUR14390;AGIWUR23983;AGIWUR25092;AGIWUR26552;AGIWUR34236;AGIWUR39129                        |    |    |          |          |                |           |          |                     |
| N2                                                                                                                | CT | II | 12023861 | 12025932 | WBGene00012465 | Y17G7B.12 |          | Y17G7B.12           |
| 0.103973573145268 AGIWUR29467                                                                                     |    |    |          |          |                |           |          |                     |
| N2                                                                                                                | CT | II | 12028763 | 12036742 | WBGene00000892 | cyn-16    | Y17G7B.9 |                     |
| -0.21541093876083 AGIWUR4024;AGIWUR23109                                                                          |    |    |          |          |                |           |          |                     |
| N2                                                                                                                | CT | II | 12036842 | 12039139 | WBGene00006601 | tpi-1     | Y17G7B.7 |                     |
| 0.0442316886623271 AGIWUR1217;AGIWUR2688;AGIWUR4294;AGIWUR7287;AGIWUR8391;AGIWUR11326                             |    |    |          |          |                |           |          |                     |

|                      |    |    |                                                                         |          |                |            |            |
|----------------------|----|----|-------------------------------------------------------------------------|----------|----------------|------------|------------|
| N2                   | CT | II | 12042910                                                                | 12049260 | WBGene00012466 | ippk-1     | Y17G7B.13  |
| 0.161339702005795    |    |    | AGIWUR17013;AGIWUR20129;AGIWUR22244;AGIWUR29786;AGIWUR35371;AGIWUR35857 |          |                |            |            |
| N2                   | CT | II | 12049583                                                                | 12059866 | WBGene00012463 | Y17G7B.10  | Y17G7B.10  |
| 0.0927250061726639   |    |    | AGIWUR3151;AGIWUR18392;AGIWUR21813;AGIWUR22929;AGIWUR30218;AGIWUR30266  |          |                |            |            |
| N2                   | CT | II | 12060228                                                                | 12062621 | WBGene00012464 | arrd-7     | Y17G7B.11  |
| -0.00248816942105812 |    |    | AGIWUR8573                                                              |          |                |            |            |
| N2                   | CT | II | 12065085                                                                | 12067568 | WBGene00012467 | arrd-8     | Y17G7B.14  |
| -0.0365830959248239  |    |    | AGIWUR8442                                                              |          |                |            |            |
| N2                   | CT | II | 12068099                                                                | 12070675 | WBGene00012473 | Y17G7B.22  | Y17G7B.22  |
| -0.0303992304357266  |    |    | AGIWUR5117;AGIWUR30056;AGIWUR39044                                      |          |                |            |            |
| N2                   | CT | II | 12072082                                                                | 12088868 | WBGene00000565 | cnt-1      | Y17G7B.15  |
| 0.469987979491998    |    |    | AGIWUR32973                                                             |          |                |            |            |
| N2                   | CT | II | 12092422                                                                | 12099989 | WBGene00012468 | Y17G7B.17  | Y17G7B.17  |
| 0.016440022546286    |    |    | AGIWUR39390                                                             |          |                |            |            |
| N2                   | CT | II | 12103331                                                                | 12107857 | WBGene00012469 | Y17G7B.18  | Y17G7B.18  |
| -0.128638813727742   |    |    | AGIWUR21167;AGIWUR32919                                                 |          |                |            |            |
| N2                   | CT | II | 12108273                                                                | 12112552 | WBGene00012470 | Y17G7B.19  | Y17G7B.19  |
| 0.195821218172252    |    |    | AGIWUR15320                                                             |          |                |            |            |
| N2                   | CT | II | 12114971                                                                | 12130968 | WBGene00012845 | set-24     | Y43F11A.5  |
| -0.184901576109178   |    |    | AGIWUR1402;AGIWUR10026;AGIWUR26909;AGIWUR33032;AGIWUR43098              |          |                |            |            |
| N2                   | CT | II | 12131530                                                                | 12132894 | WBGene00014576 | Y43F11A.6  | Y43F11A.6  |
| -0.034901957894395   |    |    | AGIWUR3471;AGIWUR10296                                                  |          |                |            |            |
| N2                   | CT | II | 12133535                                                                | 12147134 | WBGene00013246 | Y57A10A.1  | Y57A10A.1  |
| -0.182086486763161   |    |    | AGIWUR4370                                                              |          |                |            |            |
| N2                   | CT | II | 12147633                                                                | 12150216 | WBGene00013247 | Y57A10A.2  | Y57A10A.2  |
| -0.135025164017508   |    |    | AGIWUR26512                                                             |          |                |            |            |
| N2                   | CT | II | 12154486                                                                | 12156812 | WBGene00013250 | Y57A10A.5  | Y57A10A.5  |
| -0.0978685672295523  |    |    | AGIWUR27774                                                             |          |                |            |            |
| N2                   | CT | II | 12156940                                                                | 12159252 | WBGene00013251 | Y57A10A.6  | Y57A10A.6  |
| -0.0858211401816327  |    |    | AGIWUR7730                                                              |          |                |            |            |
| N2                   | CT | II | 12159472                                                                | 12162671 | WBGene00013252 | Y57A10A.7  | Y57A10A.7  |
| -0.194591491061788   |    |    | AGIWUR6939                                                              |          |                |            |            |
| N2                   | CT | II | 12164839                                                                | 12170762 | WBGene00013253 | Y57A10A.8  | Y57A10A.8  |
| -0.175680489737431   |    |    | AGIWUR22872                                                             |          |                |            |            |
| N2                   | CT | II | 12172571                                                                | 12176069 | WBGene00004394 | rol-1      | Y57A10A.11 |
| 0.0962708622770592   |    |    | AGIWUR34088                                                             |          |                |            |            |
| N2                   | CT | II | 12176880                                                                | 12184875 | WBGene00013256 | Y57A10A.13 | Y57A10A.13 |
| -0.098795493661056   |    |    | AGIWUR5797                                                              |          |                |            |            |
| N2                   | CT | II | 12186007                                                                | 12189265 | WBGene00013257 | Y57A10A.14 | Y57A10A.14 |

|                      |                                                             |          |                |            |            |
|----------------------|-------------------------------------------------------------|----------|----------------|------------|------------|
| -0.223795303819413   | AGIWUR43593                                                 |          |                |            |            |
| N2 CT II             | 12189795                                                    | 12199959 | WBGene00013258 | polg-1     | Y57A10A.15 |
| 0.00558305561621708  | AGIWUR23407                                                 |          |                |            |            |
| N2 CT II             | 12200607                                                    | 12202381 | WBGene00013259 | trpp-5     | Y57A10A.16 |
| -0.133728687264892   | AGIWUR40094                                                 |          |                |            |            |
| N2 CT II             | 12203309                                                    | 12209160 | WBGene00013272 | aqp-12     | Y57A10A.35 |
| 0.312178512101273    | AGIWUR11399                                                 |          |                |            |            |
| N2 CT II             | 12209228                                                    | 12225086 | WBGene00004167 | pqn-87     | Y57A10A.18 |
| 0.33047258819885     | AGIWUR40602                                                 |          |                |            |            |
| N2 CT II             | 12225356                                                    | 12227265 | WBGene00013260 | rsr-2      | Y57A10A.19 |
| -0.365123529174761   | AGIWUR30536                                                 |          |                |            |            |
| N2 CT II             | 12228305                                                    | 12237051 | WBGene00013261 | sinh-1     | Y57A10A.20 |
| -0.169631726651321   | AGIWUR11106;AGIWUR29352;AGIWUR30256;AGIWUR35620;AGIWUR42257 |          |                |            |            |
| N2 CT II             | 12240388                                                    | 12242567 | WBGene00013263 | Y57A10A.23 | Y57A10A.23 |
| 0.261967874857774    | AGIWUR11981                                                 |          |                |            |            |
| N2 CT II             | 12242946                                                    | 12247611 | WBGene00013264 | Y57A10A.24 | Y57A10A.24 |
| 0.0155079641716052   | AGIWUR40090                                                 |          |                |            |            |
| N2 CT II             | 12248125                                                    | 12249135 | WBGene00013254 | tag-276    | Y57A10A.9  |
| 0.303761115875444    | AGIWUR11305                                                 |          |                |            |            |
| N2 CT II             | 12251667                                                    | 12256628 | WBGene00013265 | parn-2     | Y57A10A.25 |
| 0.0619917453776093   | AGIWUR36791                                                 |          |                |            |            |
| N2 CT II             | 12256950                                                    | 12269706 | WBGene00013255 | Y57A10A.10 | Y57A10A.10 |
| -0.172753096526931   | AGIWUR16522                                                 |          |                |            |            |
| N2 CT II             | 12269815                                                    | 12275044 | WBGene00013267 | Y57A10A.27 | Y57A10A.27 |
| -0.176694109097735   | AGIWUR37762                                                 |          |                |            |            |
| N2 CT II             | 12275936                                                    | 12279383 | WBGene00013268 | Y57A10A.28 | Y57A10A.28 |
| -0.112522688421889   | AGIWUR8915                                                  |          |                |            |            |
| N2 CT II             | 12279561                                                    | 12280595 | WBGene00013269 | Y57A10A.29 | Y57A10A.29 |
| -0.236481929365349   | AGIWUR12646                                                 |          |                |            |            |
| N2 CT II             | 12280662                                                    | 12284133 | WBGene00002063 | ife-5      | Y57A10A.30 |
| -0.0805651908990264  | AGIWUR30348                                                 |          |                |            |            |
| N2 CT II             | 12289385                                                    | 12300573 | WBGene00013270 | Y57A10A.31 | Y57A10A.31 |
| -0.00783982664305904 | AGIWUR15857;AGIWUR44592                                     |          |                |            |            |
| N2 CT II             | 12301077                                                    | 12302429 | WBGene00016825 | C50E10.1   | C50E10.1   |
| 0.254330653201055    | AGIWUR13445                                                 |          |                |            |            |
| N2 CT II             | 12303525                                                    | 12305132 | WBGene00016834 | sre-50     | C50E10.11  |
| 0.0411972217437464   | AGIWUR26514                                                 |          |                |            |            |
| N2 CT II             | 12311860                                                    | 12313660 | WBGene00016833 | sre-51     | C50E10.10  |
| -0.0225705515986103  | AGIWUR26368                                                 |          |                |            |            |

|                                    |    |    |                                     |          |                |           |                            |
|------------------------------------|----|----|-------------------------------------|----------|----------------|-----------|----------------------------|
| N2                                 | CT | II | 12318841                            | 12321070 | WBGene00016832 | sre-49    | C50E10.9                   |
| 0.232179530752823                  |    |    | AGIWUR24431                         |          |                |           |                            |
| N2                                 | CT | II | 12321193                            | 12323405 | WBGene00016827 | sre-53    | C50E10.3                   |
| -0.0736437606337859                |    |    | AGIWUR15154                         |          |                |           |                            |
| N2                                 | CT | II | 12325544                            | 12327514 | WBGene00016831 | sre-56    | C50E10.8                   |
| 0.114303071541936                  |    |    | AGIWUR15130                         |          |                |           |                            |
| N2                                 | CT | II | 12329294                            | 12331122 | WBGene00016830 | sre-55    | C50E10.7                   |
| 0.00938606538635955                |    |    | AGIWUR35147                         |          |                |           |                            |
| N2                                 | CT | II | 12332924                            | 12335044 | WBGene00016829 | sre-54    | C50E10.6                   |
| -0.153763009008244                 |    |    | AGIWUR21803                         |          |                |           |                            |
| N2                                 | CT | II | 12335730                            | 12338093 | WBGene00016828 | sre-52    | C50E10.5                   |
| -0.269759394139173                 |    |    | AGIWUR10613                         |          |                |           |                            |
| N2                                 | CT | II | 12339944                            | 12344795 | WBGene00004945 | sop-2     | C50E10.4                   |
| -0.00219517952178272               |    |    | AGIWUR34187                         |          |                |           |                            |
| N2                                 | CT | II | 12345285                            | 12352243 | WBGene00004310 | ras-1     | C44C11.1                   |
| 0.0916696536806159                 |    |    | AGIWUR23461;AGIWUR41923             |          |                |           |                            |
| N2                                 | CT | II | 12358756                            | 12367023 | WBGene00013273 | marc-5    | Y57A10B.1                  |
| 0.168477090762842                  |    |    | AGIWUR22652                         |          |                |           |                            |
| N2                                 | CT | II | 12373522                            | 12379511 | WBGene00013274 | Y57A10B.2 | Y57A10B.2                  |
| -0.138231978925866                 |    |    | AGIWUR19618                         |          |                |           |                            |
| N2                                 | CT | II | 12383463                            | 12384692 | WBGene00013275 | btb-14    | Y57A10B.3                  |
| -0.121412664957495                 |    |    | AGIWUR16330;AGIWUR18091;AGIWUR33933 |          |                |           |                            |
| N2                                 | CT | II | 12384593                            | 12386881 | WBGene00013276 | sre-42    | Y57A10B.4                  |
| -0.097534258965684                 |    |    | AGIWUR5074                          |          |                |           |                            |
| N2                                 | CT | II | 12388293                            | 12389839 | WBGene00013277 | sre-41    | Y57A10B.5                  |
| 0.388818948887699                  |    |    | AGIWUR11779                         |          |                |           |                            |
| N2                                 | CT | II | 12390083                            | 12392662 | WBGene00013278 | Y57A10B.6 | Y57A10B.6                  |
| -0.208868156865666                 |    |    | AGIWUR7958                          |          |                |           |                            |
| N2                                 | CT | II | 12392701                            | 12393743 | WBGene00013279 | Y57A10B.7 | Y57A10B.7                  |
| 0.208297613021863                  |    |    | AGIWUR36071                         |          |                |           |                            |
| N2                                 | CT | II | 12394856                            | 12397756 | WBGene00044048 | F57G9.7   | F57G9.7 0.0869308974541974 |
| AGIWUR25016;AGIWUR42871            |    |    |                                     |          |                |           |                            |
| N2                                 | CT | II | 12399399                            | 12401891 | WBGene00010220 | sre-29    | F57G9.4 -0.144317309334854 |
| AGIWUR10397                        |    |    |                                     |          |                |           |                            |
| N2                                 | CT | II | 12402434                            | 12404887 | WBGene00044041 | F57G9.6   | F57G9.6 -0.147729001358697 |
| AGIWUR4855;AGIWUR19927;AGIWUR33180 |    |    |                                     |          |                |           |                            |
| N2                                 | CT | II | 12404951                            | 12406494 | WBGene00010218 | sre-30    | F57G9.2 -0.221375682201383 |
| AGIWUR12686                        |    |    |                                     |          |                |           |                            |
| N2                                 | CT | II | 12406822                            | 12408817 | WBGene00010217 | sre-31    | F57G9.1                    |

|                                     |                                                            |          |                |            |            |                     |
|-------------------------------------|------------------------------------------------------------|----------|----------------|------------|------------|---------------------|
| -0.00228235435515689                | AGIWUR19812                                                |          |                |            |            |                     |
| N2 CT II                            | 12409320                                                   | 12410207 | WBGene00010219 | F57G9.3    | F57G9.3    | 0.0159773263264391  |
| AGIWUR30827                         |                                                            |          |                |            |            |                     |
| N2 CT II                            | 12411622                                                   | 12412517 | WBGene00013280 | Y57A10C.1  | Y57A10C.1  |                     |
| -0.305989774712586                  | AGIWUR20533                                                |          |                |            |            |                     |
| N2 CT II                            | 12412723                                                   | 12412957 | WBGene00044052 | Y57A10C.12 | Y57A10C.12 |                     |
| 0.0661884790028688                  | AGIWUR4626;AGIWUR12188;AGIWUR26299;AGIWUR31376;AGIWUR36187 |          |                |            |            |                     |
| N2 CT II                            | 12414036                                                   | 12414905 | WBGene00044047 | Y57A10C.11 | Y57A10C.11 |                     |
| -0.00204882892728353                | AGIWUR3841;AGIWUR14115                                     |          |                |            |            |                     |
| N2 CT II                            | 12415527                                                   | 12417527 | WBGene00013281 | sre-27     | Y57A10C.3  |                     |
| 0.042471503323279                   | AGIWUR5752                                                 |          |                |            |            |                     |
| N2 CT II                            | 12419133                                                   | 12420586 | WBGene00013282 | sre-26     | Y57A10C.4  |                     |
| -0.0651368239989756                 | AGIWUR220                                                  |          |                |            |            |                     |
| N2 CT II                            | 12421204                                                   | 12422623 | WBGene00013283 | sre-25     | Y57A10C.5  |                     |
| 0.0118330955554349                  | AGIWUR38853                                                |          |                |            |            |                     |
| N2 CT II                            | 12423514                                                   | 12425694 | WBGene00013284 | daf-22     | Y57A10C.6  |                     |
| -0.091593795644263                  | AGIWUR5216                                                 |          |                |            |            |                     |
| N2 CT II                            | 12427986                                                   | 12429946 | WBGene00013286 | Y57A10C.8  | Y57A10C.8  |                     |
| 0.0144084901087451                  | AGIWUR24902                                                |          |                |            |            |                     |
| N2 CT II                            | 12430788                                                   | 12432311 | WBGene00013285 | dct-12     | Y57A10C.7  |                     |
| 0.0146746697603373                  | AGIWUR17519                                                |          |                |            |            |                     |
| N2 CT II                            | 12433608                                                   | 12435846 | WBGene00013287 | Y57A10C.9  | Y57A10C.9  |                     |
| -0.203084821470363                  | AGIWUR21893                                                |          |                |            |            |                     |
| N2 CT II                            | 12442142                                                   | 12442367 | WBGene00012284 | W05H5.2    | W05H5.2    | -0.613449268956935  |
| AGIWUR19090                         |                                                            |          |                |            |            |                     |
| N2 CT II                            | 12443119                                                   | 12444779 | WBGene00012283 | W05H5.1    | W05H5.1    | 0.083502578330755   |
| AGIWUR12242                         |                                                            |          |                |            |            |                     |
| N2 CT II                            | 12445332                                                   | 12447769 | WBGene00012285 | pit-6      | W05H5.3    | 0.0287147378612449  |
| AGIWUR13105;AGIWUR15362;AGIWUR30498 |                                                            |          |                |            |            |                     |
| N2 CT II                            | 12448541                                                   | 12449887 | WBGene00005250 | srh-27     | W05H5.4    | -0.19058643683383   |
| AGIWUR3233                          |                                                            |          |                |            |            |                     |
| N2 CT II                            | 12450149                                                   | 12451407 | WBGene00043058 | sre-34     | W05H5.8    | -0.107299759732157  |
| AGIWUR10523                         |                                                            |          |                |            |            |                     |
| N2 CT II                            | 12453302                                                   | 12454693 | WBGene00012287 | sre-33     | W05H5.6    | 0.0682384144727184  |
| AGIWUR3814                          |                                                            |          |                |            |            |                     |
| N2 CT II                            | 12454954                                                   | 12456733 | WBGene00012288 | sre-32     | W05H5.7    | 0.163471411639496   |
| AGIWUR4582                          |                                                            |          |                |            |            |                     |
| N2 CT II                            | 12457575                                                   | 12459510 | WBGene00008837 | sre-38     | F15A4.1    | -0.0244759946119784 |
| AGIWUR35287                         |                                                            |          |                |            |            |                     |



|                                   |    |    |                                                |          |                |          |          |                     |
|-----------------------------------|----|----|------------------------------------------------|----------|----------------|----------|----------|---------------------|
| N2                                | CT | II | 12459772                                       | 12460551 | WBGene00044323 | tag-281  | F15A4.11 |                     |
| -0.221648402269645                |    |    | AGIWUR7257;AGIWUR25748;AGIWUR28954;AGIWUR31949 |          |                |          |          |                     |
| N2                                | CT | II | 12460641                                       | 12461471 | WBGene00044322 | tag-280  | F15A4.12 |                     |
| -0.192038454211287                |    |    | AGIWUR18364                                    |          |                |          |          |                     |
| N2                                | CT | II | 12462418                                       | 12464078 | WBGene00008838 | F15A4.2  | F15A4.2  | -0.200228648535662  |
| AGIWUR36102                       |    |    |                                                |          |                |          |          |                     |
| N2                                | CT | II | 12465872                                       | 12467519 | WBGene00008839 | sre-37   | F15A4.3  | -0.354973791247531  |
| AGIWUR20272                       |    |    |                                                |          |                |          |          |                     |
| N2                                | CT | II | 12467732                                       | 12469369 | WBGene00005173 | srg-16   | F15A4.4  | -0.0208068280169549 |
| AGIWUR3092                        |    |    |                                                |          |                |          |          |                     |
| N2                                | CT | II | 12469374                                       | 12471211 | WBGene00008840 | F15A4.5  | F15A4.5  | -0.0161248609057338 |
| AGIWUR32638                       |    |    |                                                |          |                |          |          |                     |
| N2                                | CT | II | 12471805                                       | 12473084 | WBGene00008841 | F15A4.6  | F15A4.6  | -0.247772639036672  |
| AGIWUR44991                       |    |    |                                                |          |                |          |          |                     |
| N2                                | CT | II | 12473706                                       | 12475234 | WBGene00005174 | srg-17   | F15A4.7  | 0.0866533776591814  |
| AGIWUR23534                       |    |    |                                                |          |                |          |          |                     |
| N2                                | CT | II | 12475514                                       | 12478917 | WBGene00008842 | chil-28  | F15A4.8  | 0.0476261991406108  |
| AGIWUR2093;AGIWUR3251;AGIWUR33896 |    |    |                                                |          |                |          |          |                     |
| N2                                | CT | II | 12479590                                       | 12480910 | WBGene00008843 | arrd-9   | F15A4.9  | 0.0169984047503942  |
| AGIWUR34011                       |    |    |                                                |          |                |          |          |                     |
| N2                                | CT | II | 12482931                                       | 12484279 | WBGene00008847 | fbxb-102 |          | F15A4.13            |
| 0.23088508989323                  |    |    | AGIWUR8569                                     |          |                |          |          |                     |
| N2                                | CT | II | 12484544                                       | 12485160 | WBGene00008844 | F15A4.10 |          | F15A4.10            |
| -0.17019277852587                 |    |    | AGIWUR7846                                     |          |                |          |          |                     |
| N2                                | CT | II | 12490214                                       | 12491815 | WBGene00043054 | T21B4.15 |          | T21B4.15            |
| -0.113947811125087                |    |    | AGIWUR19166;AGIWUR22620;AGIWUR28953            |          |                |          |          |                     |
| N2                                | CT | II | 12492398                                       | 12493623 | WBGene00011876 | srz-6    | T21B4.1  | -0.143696682289692  |
| AGIWUR12887                       |    |    |                                                |          |                |          |          |                     |
| N2                                | CT | II | 12493800                                       | 12495106 | WBGene00000660 | col-85   | T21B4.2  | 0.312090283658289   |
| AGIWUR28426                       |    |    |                                                |          |                |          |          |                     |
| N2                                | CT | II | 12495487                                       | 12496387 | WBGene00011877 | T21B4.3  | T21B4.3  | 0.10820094485719    |
| AGIWUR379                         |    |    |                                                |          |                |          |          |                     |
| N2                                | CT | II | 12497217                                       | 12502878 | WBGene00011878 | ador-1   | T21B4.4  | 0.0663717224272315  |
| AGIWUR925;AGIWUR19024             |    |    |                                                |          |                |          |          |                     |
| N2                                | CT | II | 12507338                                       | 12508452 | WBGene00005289 | srh-68   | T21B4.5  | -0.328369578854609  |
| AGIWUR27004                       |    |    |                                                |          |                |          |          |                     |
| N2                                | CT | II | 12508950                                       | 12510135 | WBGene00005288 | srh-67   | T21B4.6  | -0.285852123181435  |
| AGIWUR19619                       |    |    |                                                |          |                |          |          |                     |
| N2                                | CT | II | 12510682                                       | 12511814 | WBGene00005287 | srh-66   | T21B4.10 |                     |

|                                                                                                                                                                   |                       |          |                |           |          |                     |
|-------------------------------------------------------------------------------------------------------------------------------------------------------------------|-----------------------|----------|----------------|-----------|----------|---------------------|
| -0.0159446680068722                                                                                                                                               | AGIWUR21685           |          |                |           |          |                     |
| N2 CT II                                                                                                                                                          | 12512166              | 12513316 | WBGene00005294 | srh-73    | T21B4.14 |                     |
| 0.135130990056412                                                                                                                                                 | AGIWUR29018           |          |                |           |          |                     |
| N2 CT II                                                                                                                                                          | 12513618              | 12514715 | WBGene00005290 | srh-69    | T21B4.7  | -0.158827177239006  |
| AGIWUR18370                                                                                                                                                       |                       |          |                |           |          |                     |
| N2 CT II                                                                                                                                                          | 12514972              | 12516413 | WBGene00005283 | srh-61    | T21B4.8  | -0.104747547246808  |
| AGIWUR32493                                                                                                                                                       |                       |          |                |           |          |                     |
| N2 CT II                                                                                                                                                          | 12516753              | 12517858 | WBGene00005291 | srh-70    | T21B4.9  | -0.130171314133891  |
| AGIWUR1997                                                                                                                                                        |                       |          |                |           |          |                     |
| N2 CT II                                                                                                                                                          | 12520004              | 12524478 | WBGene00044032 | ceh-99    | T21B4.17 |                     |
| -0.103848674415184                                                                                                                                                | AGIWUR22947           |          |                |           |          |                     |
| N2 CT II                                                                                                                                                          | 12525828              | 12527868 | WBGene00006009 | srx-118   | T21B4.12 |                     |
| -0.353341651641907                                                                                                                                                | AGIWUR15515           |          |                |           |          |                     |
| N2 CT II                                                                                                                                                          | 12528247              | 12529746 | WBGene00006010 | srx-119   | F49C5.1  | -0.020042478017392  |
| AGIWUR7947                                                                                                                                                        |                       |          |                |           |          |                     |
| N2 CT II                                                                                                                                                          | 12531258              | 12532977 | WBGene00006011 | srx-120   | F49C5.2  | 0.0981464879171305  |
| AGIWUR44058                                                                                                                                                       |                       |          |                |           |          |                     |
| N2 CT II                                                                                                                                                          | 12535760              | 12542569 | WBGene00009867 | F49C5.4   | F49C5.4  | 0.0611753618023907  |
| AGIWUR1250;AGIWUR15649;AGIWUR16749;AGIWUR42084                                                                                                                    |                       |          |                |           |          |                     |
| N2 CT II                                                                                                                                                          | 12542754              | 12544633 | WBGene00044031 | F49C5.9   | F49C5.9  | 0.120960082115505   |
| AGIWUR19466;AGIWUR27810                                                                                                                                           |                       |          |                |           |          |                     |
| N2 CT II                                                                                                                                                          | 12546030              | 12546513 | WBGene00009868 | F49C5.5   | F49C5.5  | 1.73735057983821    |
| AGIWUR5768                                                                                                                                                        |                       |          |                |           |          |                     |
| N2 CT II                                                                                                                                                          | 12546761              | 12548249 | WBGene00044162 | F49C5.10  |          | F49C5.10            |
| 0.115837320951627                                                                                                                                                 | AGIWUR8807;AGIWUR9074 |          |                |           |          |                     |
| N2 CT II                                                                                                                                                          | 12555884              | 12557129 | WBGene00044163 | F49C5.11  |          | F49C5.11            |
| -0.274917869553263                                                                                                                                                |                       |          |                |           |          |                     |
| AGIWUR1347;AGIWUR3489;AGIWUR3872;AGIWUR3883;AGIWUR6795;AGIWUR7306;AGIWUR11761;AGIWUR12963;AGIWUR20946;AGIWUR22899;AGIWUR26088;AGIWUR31262;AGIWUR39486;AGIWUR44001 |                       |          |                |           |          |                     |
| N2 CT II                                                                                                                                                          | 12564185              | 12565943 | WBGene00006254 | str-223   | F49C5.6  | 0.0439543255569657  |
| AGIWUR36858                                                                                                                                                       |                       |          |                |           |          |                     |
| N2 CT II                                                                                                                                                          | 12566165              | 12568297 | WBGene00009869 | F49C5.7   | F49C5.7  | -0.0208652518746719 |
| AGIWUR10009                                                                                                                                                       |                       |          |                |           |          |                     |
| N2 CT II                                                                                                                                                          | 12570198              | 12570623 | WBGene00012579 | Y38E10A.1 |          | Y38E10A.1           |
| -0.0281852159456353                                                                                                                                               | AGIWUR18619           |          |                |           |          |                     |
| N2 CT II                                                                                                                                                          | 12571572              | 12573529 | WBGene00012580 | Y38E10A.2 |          | Y38E10A.2           |
| 0.0139540998727936                                                                                                                                                | AGIWUR4355            |          |                |           |          |                     |
| N2 CT II                                                                                                                                                          | 12573940              | 12574768 | WBGene00012581 | Y38E10A.3 |          | Y38E10A.3           |
| -0.0947479402824616                                                                                                                                               | AGIWUR18800           |          |                |           |          |                     |

|                     |    |    |                                                                         |          |                |            |            |
|---------------------|----|----|-------------------------------------------------------------------------|----------|----------------|------------|------------|
| N2                  | CT | II | 12575691                                                                | 12577748 | WBGene00012582 | cllec-8    | Y38E10A.4  |
| 0.048649670661546   |    |    | AGIWUR5171;AGIWUR8397;AGIWUR26584;AGIWUR28388;AGIWUR36068;AGIWUR41478   |          |                |            |            |
| N2                  | CT | II | 12578356                                                                | 12581098 | WBGene00012583 | cllec-4    | Y38E10A.5  |
| 0.256344854931852   |    |    | AGIWUR23230                                                             |          |                |            |            |
| N2                  | CT | II | 12582179                                                                | 12603680 | WBGene00012584 | ceh-100    | Y38E10A.6  |
| 0.0492134531870221  |    |    | AGIWUR17963                                                             |          |                |            |            |
| N2                  | CT | II | 12605968                                                                | 12607027 | WBGene00012585 | lips-15    | Y38E10A.7  |
| 0.107751302564984   |    |    | AGIWUR14642;AGIWUR19800                                                 |          |                |            |            |
| N2                  | CT | II | 12607200                                                                | 12608788 | WBGene00012586 | Y38E10A.8  | Y38E10A.8  |
| 0.338172990333031   |    |    | AGIWUR40371                                                             |          |                |            |            |
| N2                  | CT | II | 12608953                                                                | 12609630 | WBGene00012587 | Y38E10A.9  | Y38E10A.9  |
| 0.335658655459046   |    |    | AGIWUR17764                                                             |          |                |            |            |
| N2                  | CT | II | 12610313                                                                | 12612357 | WBGene00012588 | lips-16    | Y38E10A.10 |
| -0.0688093124640261 |    |    | AGIWUR39472                                                             |          |                |            |            |
| N2                  | CT | II | 12613564                                                                | 12613939 | WBGene00012589 | nspe-4     | Y38E10A.11 |
| 0.232504397734036   |    |    | AGIWUR11054;AGIWUR13607;AGIWUR20167;AGIWUR22819;AGIWUR26536;AGIWUR41154 |          |                |            |            |
| N2                  | CT | II | 12615897                                                                | 12616166 | WBGene00012603 | nspe-6     | Y38E10A.25 |
| 0.246100459846529   |    |    | AGIWUR27393                                                             |          |                |            |            |
| N2                  | CT | II | 12617886                                                                | 12618209 | WBGene00012590 | nspe-3     | Y38E10A.12 |
| -1.23781691251574   |    |    | AGIWUR8742                                                              |          |                |            |            |
| N2                  | CT | II | 12620548                                                                | 12620888 | WBGene00012591 | nspe-1     | Y38E10A.13 |
| -1.67025478187694   |    |    | AGIWUR7082                                                              |          |                |            |            |
| N2                  | CT | II | 12623215                                                                | 12624506 | WBGene00012592 | Y38E10A.14 | Y38E10A.14 |
| -0.0510008209695823 |    |    | AGIWUR14522;AGIWUR18602;AGIWUR33881                                     |          |                |            |            |
| N2                  | CT | II | 12627187                                                                | 12627570 | WBGene00012593 | nspe-7     | Y38E10A.15 |
| -2.35329033683131   |    |    | AGIWUR13856                                                             |          |                |            |            |
| N2                  | CT | II | 12628936                                                                | 12629380 | WBGene00012594 | nspe-5     | Y38E10A.16 |
| -1.21941429974654   |    |    | AGIWUR8167                                                              |          |                |            |            |
| N2                  | CT | II | 12629687                                                                | 12631995 | WBGene00044034 | Y38E10A.28 | Y38E10A.28 |
| -0.124644389720232  |    |    | AGIWUR22063                                                             |          |                |            |            |
| N2                  | CT | II | 12632593                                                                | 12634799 | WBGene00012595 | Y38E10A.17 | Y38E10A.17 |
| 0.223474561210793   |    |    | AGIWUR10282                                                             |          |                |            |            |
| N2                  | CT | II | 12636699                                                                | 12638448 | WBGene00012596 | nhr-234    | Y38E10A.18 |
| 0.014658173263375   |    |    | AGIWUR6486;AGIWUR13527;AGIWUR40928                                      |          |                |            |            |
| N2                  | CT | II | 12640670                                                                | 12642740 | WBGene00012597 | nhr-235    | Y38E10A.19 |
| -0.250124966081767  |    |    | AGIWUR37120                                                             |          |                |            |            |
| N2                  | CT | II | 12662759                                                                | 12671920 | WBGene00004347 | rgs-4      | Y38E10A.21 |
| 0.0979437962739382  |    |    | AGIWUR13627                                                             |          |                |            |            |
| N2                  | CT | II | 12673166                                                                | 12677803 | WBGene00012600 | Y38E10A.22 | Y38E10A.22 |

|                     |                                                                        |                |                     |            |
|---------------------|------------------------------------------------------------------------|----------------|---------------------|------------|
| -0.369045643685326  | AGIWUR14395;AGIWUR15734                                                |                |                     |            |
| N2 CT II            | 12679035 12679413                                                      | WBGene00012602 | Y38E10A.24          | Y38E10A.24 |
| 0.148878501555805   | AGIWUR20712                                                            |                |                     |            |
| N2 CT II            | 12679954 12686713                                                      | WBGene00012895 | cox-10 Y46G5A.2     |            |
| -0.155610666204216  | AGIWUR34531                                                            |                |                     |            |
| N2 CT II            | 12694412 12725483                                                      | WBGene00012894 | tbc-17 Y46G5A.1     |            |
| 0.0359821331422907  | AGIWUR733;AGIWUR2958;AGIWUR13448                                       |                |                     |            |
| N2 CT II            | 12726963 12736910                                                      | WBGene00012896 | snrp-200 Y46G5A.4   |            |
| 0.168364401060416   | AGIWUR35032                                                            |                |                     |            |
| N2 CT II            | 12737032 12738334                                                      | WBGene00012897 | pisyl-1 Y46G5A.5    |            |
| 0.267548769421859   | AGIWUR12144                                                            |                |                     |            |
| N2 CT II            | 12742546 12744256                                                      | WBGene00077636 | Y46G5A.43 Y46G5A.43 |            |
| 0.0668482638423278  | AGIWUR35875                                                            |                |                     |            |
| N2 CT II            | 12752854 12753813                                                      | WBGene00044164 | Y46G5A.39 Y46G5A.39 |            |
| 0.0211572472998705  | AGIWUR7494;AGIWUR40442                                                 |                |                     |            |
| N2 CT II            | 12754610 12754877                                                      | WBGene00077634 | Y46G5A.41 Y46G5A.41 |            |
| -0.0307995201866742 | AGIWUR17785                                                            |                |                     |            |
| N2 CT II            | 12756353 12757677                                                      | WBGene00012900 | Y46G5A.8 Y46G5A.8   |            |
| -0.279055968931347  | AGIWUR8892                                                             |                |                     |            |
| N2 CT II            | 12760797 12767232                                                      | WBGene00012901 | cnpl-2 Y46G5A.10    |            |
| 0.208726576085155   | AGIWUR11892;AGIWUR14337                                                |                |                     |            |
| N2 CT II            | 12767221 12768217                                                      | WBGene00012903 | vps-2 Y46G5A.12     |            |
| -0.233762922574154  | AGIWUR25006                                                            |                |                     |            |
| N2 CT II            | 12768686 12773903                                                      | WBGene00012904 | tiar-2 Y46G5A.13    |            |
| -0.103399171640881  | AGIWUR40126                                                            |                |                     |            |
| N2 CT II            | 12774646 12781705                                                      | WBGene00012919 | Y46G5A.34 Y46G5A.34 |            |
| 0.0803405214109976  | AGIWUR34502                                                            |                |                     |            |
| N2 CT II            | 12782751 12785412                                                      | WBGene00012906 | Y46G5A.15 Y46G5A.15 |            |
| 0.0159615504463559  | AGIWUR19252                                                            |                |                     |            |
| N2 CT II            | 12786322 12788153                                                      | WBGene00012920 | Y46G5A.35 Y46G5A.35 |            |
| -0.174881436673092  | AGIWUR1477                                                             |                |                     |            |
| N2 CT II            | 12788252 12796452                                                      | WBGene00012907 | cpt-1 Y46G5A.17     |            |
| 0.0692834031132223  | AGIWUR9426;AGIWUR17814;AGIWUR24235;AGIWUR34373                         |                |                     |            |
| N2 CT II            | 12800449 12805383                                                      | WBGene00012908 | Y46G5A.18 Y46G5A.18 |            |
| 0.0755836861563379  | AGIWUR2765;AGIWUR7180;AGIWUR7666;AGIWUR13153;AGIWUR35086;AGIWUR44753   |                |                     |            |
| N2 CT II            | 12804862 12810872                                                      | WBGene00012909 | spds-1 Y46G5A.19    |            |
| -0.0312648849090849 | AGIWUR24011                                                            |                |                     |            |
| N2 CT II            | 12811009 12811934                                                      | WBGene00012910 | Y46G5A.20 Y46G5A.20 |            |
| 1.37453828564957    | AGIWUR1526;AGIWUR11175;AGIWUR20331;AGIWUR20731;AGIWUR23358;AGIWUR29839 |                |                     |            |

|                                                                                                          |    |    |          |          |                |           |                             |
|----------------------------------------------------------------------------------------------------------|----|----|----------|----------|----------------|-----------|-----------------------------|
| N2                                                                                                       | CT | II | 12811802 | 12816462 | WBGene00012911 | ac1-7     | Y46G5A.21                   |
| -0.227826050958786 AGIWUR8222                                                                            |    |    |          |          |                |           |                             |
| N2                                                                                                       | CT | II | 12816820 | 12818588 | WBGene00012912 | Y46G5A.22 | Y46G5A.22                   |
| 0.3782591034609 AGIWUR29260;AGIWUR39522                                                                  |    |    |          |          |                |           |                             |
| N2                                                                                                       | CT | II | 12823649 | 12824177 | WBGene00012921 | Y46G5A.36 | Y46G5A.36                   |
| 0.214727718027842 AGIWUR40412                                                                            |    |    |          |          |                |           |                             |
| N2                                                                                                       | CT | II | 12825546 | 12825833 | WBGene00044042 | Y46G5A.37 | Y46G5A.37                   |
| 0.115708642666931 AGIWUR4500;AGIWUR9007;AGIWUR9678;AGIWUR17026;AGIWUR33153                               |    |    |          |          |                |           |                             |
| N2                                                                                                       | CT | II | 12827032 | 12827519 | WBGene00044043 | Y46G5A.38 | Y46G5A.38                   |
| 0.0508674083634926 AGIWUR15102;AGIWUR25500;AGIWUR37081;AGIWUR40350;AGIWUR44577                           |    |    |          |          |                |           |                             |
| N2                                                                                                       | CT | II | 12830707 | 12832720 | WBGene00012914 | bcmo-1    | Y46G5A.24                   |
| 0.30679135554834 AGIWUR15666                                                                             |    |    |          |          |                |           |                             |
| N2                                                                                                       | CT | II | 12832915 | 12835824 | WBGene00004903 | snf-4     | Y46G5A.25                   |
| 0.0485476278773973 AGIWUR35822                                                                           |    |    |          |          |                |           |                             |
| N2                                                                                                       | CT | II | 12836548 | 12840157 | WBGene00012915 | lgc-35    | Y46G5A.26                   |
| -0.201622749515143 AGIWUR22436;AGIWUR38636                                                               |    |    |          |          |                |           |                             |
| N2                                                                                                       | CT | II | 12846203 | 12847836 | WBGene00003983 | pes-10    | Y46G5A.27                   |
| -0.223691177802575 AGIWUR14951                                                                           |    |    |          |          |                |           |                             |
| N2                                                                                                       | CT | II | 12856200 | 12862058 | WBGene00012917 | Y46G5A.29 | Y46G5A.29                   |
| -0.006607970746213 AGIWUR21330                                                                           |    |    |          |          |                |           |                             |
| N2                                                                                                       | CT | II | 12861963 | 12865883 | WBGene00004904 | snf-5     | Y46G5A.30                   |
| 0.304316929729934 AGIWUR7331                                                                             |    |    |          |          |                |           |                             |
| N2                                                                                                       | CT | II | 12866448 | 12878116 | WBGene00001793 | gsy-1     | Y46G5A.31                   |
| 0.362287387534458 AGIWUR37228                                                                            |    |    |          |          |                |           |                             |
| N2                                                                                                       | CT | II | 12880815 | 12881968 | WBGene00009390 | F35C5.1   | F35C5.1 0.0570982088025112  |
| AGIWUR36217                                                                                              |    |    |          |          |                |           |                             |
| N2                                                                                                       | CT | II | 12885276 | 12888606 | WBGene00005040 | sra-14    | F35C5.2                     |
| -0.00809007738005008 AGIWUR40027                                                                         |    |    |          |          |                |           |                             |
| N2                                                                                                       | CT | II | 12888762 | 12890460 | WBGene00009391 | F35C5.3   | F35C5.3 -0.341213035524414  |
| AGIWUR32174                                                                                              |    |    |          |          |                |           |                             |
| N2                                                                                                       | CT | II | 12890630 | 12892024 | WBGene00009392 | F35C5.4   | F35C5.4 -0.0892999163104333 |
| AGIWUR25875                                                                                              |    |    |          |          |                |           |                             |
| N2                                                                                                       | CT | II | 12893065 | 12895098 | WBGene00009393 | cllec-62  | F35C5.5 0.07839138573258    |
| AGIWUR31973                                                                                              |    |    |          |          |                |           |                             |
| N2                                                                                                       | CT | II | 12895638 | 12897462 | WBGene00009394 | cllec-63  | F35C5.6 0.105142870188773   |
| AGIWUR2709;AGIWUR9580;AGIWUR9637;AGIWUR12263;AGIWUR24969;AGIWUR26563;AGIWUR27914;AGIWUR39707;AGIWUR40319 |    |    |          |          |                |           |                             |
| N2                                                                                                       | CT | II | 12898242 | 12900435 | WBGene00009395 | cllec-64  | F35C5.7 -0.143183713942983  |
| AGIWUR25751                                                                                              |    |    |          |          |                |           |                             |
| N2                                                                                                       | CT | II | 12901264 | 12903336 | WBGene00009396 | cllec-65  | F35C5.8 0.272398904811691   |

|                         |    |    |                     |                                                                                 |                |                                   |                     |
|-------------------------|----|----|---------------------|---------------------------------------------------------------------------------|----------------|-----------------------------------|---------------------|
| AGIWUR13763             |    |    |                     |                                                                                 |                |                                   |                     |
| N2                      | CT | II | 12904398            | 12906686                                                                        | WBGene00009397 | clec-66 F35C5.9 0.233872748601306 |                     |
| AGIWUR15704;AGIWUR25952 |    |    |                     |                                                                                 |                |                                   |                     |
| N2                      | CT | II | 12907370            | 12907783                                                                        | WBGene00009398 | nspb-11 F35C5.10                  |                     |
|                         |    |    | 0.370248085689743   | AGIWUR40518                                                                     |                |                                   |                     |
| N2                      | CT | II | 12909079            | 12910334                                                                        | WBGene00009399 | F35C5.11                          | F35C5.11            |
|                         |    |    | -0.0342832497377126 | AGIWUR13730;AGIWUR21453;AGIWUR45080                                             |                |                                   |                     |
| N2                      | CT | II | 12910229            | 12914603                                                                        | WBGene00009400 | F35C5.12                          | F35C5.12            |
|                         |    |    | 0.218844556924511   | AGIWUR17427;AGIWUR23921;AGIWUR31371;AGIWUR33008                                 |                |                                   |                     |
| N2                      | CT | II | 12915417            | 12919018                                                                        | WBGene00010264 | F58G1.2 F58G1.2                   | 0.142524284517826   |
| AGIWUR4611              |    |    |                     |                                                                                 |                |                                   |                     |
| N2                      | CT | II | 12919551            | 12923377                                                                        | WBGene00010263 | wago-4 F58G1.1                    | 0.135466161506482   |
| AGIWUR13287;AGIWUR32641 |    |    |                     |                                                                                 |                |                                   |                     |
| N2                      | CT | II | 12924026            | 12925241                                                                        | WBGene00010271 | F58G1.9 F58G1.9                   | -0.0366118698695104 |
| AGIWUR28772             |    |    |                     |                                                                                 |                |                                   |                     |
| N2                      | CT | II | 12925304            | 12925602                                                                        | WBGene00010270 | F58G1.8 F58G1.8                   | -0.0623752932207964 |
| AGIWUR43158             |    |    |                     |                                                                                 |                |                                   |                     |
| N2                      | CT | II | 12925981            | 12928341                                                                        | WBGene00010265 | F58G1.3 F58G1.3                   | 0.202983373531151   |
| AGIWUR22297             |    |    |                     |                                                                                 |                |                                   |                     |
| N2                      | CT | II | 12931873            | 12933515                                                                        | WBGene00010266 | dct-18 F58G1.4                    | 0.0206815018045408  |
| AGIWUR44081             |    |    |                     |                                                                                 |                |                                   |                     |
| N2                      | CT | II | 12933854            | 12935362                                                                        | WBGene00010267 | lips-9 F58G1.5                    | 0.086801814385681   |
| AGIWUR25581             |    |    |                     |                                                                                 |                |                                   |                     |
| N2                      | CT | II | 12938869            | 12943867                                                                        | WBGene00010268 | arrd-10 F58G1.6                   | -0.158483032179513  |
| AGIWUR3865              |    |    |                     |                                                                                 |                |                                   |                     |
| N2                      | CT | II | 12943862            | 12948143                                                                        | WBGene00010269 | F58G1.7 F58G1.7                   | 0.0742392732420889  |
| AGIWUR3737              |    |    |                     |                                                                                 |                |                                   |                     |
| N2                      | CT | II | 12952490            | 12954832                                                                        | WBGene00012605 | Y38F1A.1                          | Y38F1A.1            |
|                         |    |    | 0.277852473828862   | AGIWUR25647                                                                     |                |                                   |                     |
| N2                      | CT | II | 12954962            | 12958018                                                                        | WBGene00012606 | Y38F1A.2                          | Y38F1A.2            |
|                         |    |    | 0.226047453965512   | AGIWUR36625                                                                     |                |                                   |                     |
| N2                      | CT | II | 12965546            | 12978168                                                                        | WBGene00004232 | ptr-18 Y38F1A.3                   |                     |
|                         |    |    | 0.108861163195272   | AGIWUR718                                                                       |                |                                   |                     |
| N2                      | CT | II | 12980591            | 12993118                                                                        | WBGene00000870 | cyd-1 Y38F1A.5                    |                     |
|                         |    |    | -0.14438765072429   | AGIWUR2519;AGIWUR4218;AGIWUR4651;AGIWUR8981;AGIWUR24138;AGIWUR33027;AGIWUR42526 |                |                                   |                     |
| N2                      | CT | II | 12994358            | 12996571                                                                        | WBGene00012608 | hphd-1 Y38F1A.6                   |                     |
|                         |    |    | -0.11610133584448   | AGIWUR17199;AGIWUR23064;AGIWUR41550                                             |                |                                   |                     |
| N2                      | CT | II | 12996921            | 12997804                                                                        | WBGene00012609 | Y38F1A.7                          | Y38F1A.7            |
|                         |    |    | -0.0854136569105179 | AGIWUR12368                                                                     |                |                                   |                     |

|                                 |    |    |                                                                         |          |                |          |                            |
|---------------------------------|----|----|-------------------------------------------------------------------------|----------|----------------|----------|----------------------------|
| N2                              | CT | II | 12997986                                                                | 13000853 | WBGene00012610 | Y38F1A.8 | Y38F1A.8                   |
| 0.0585149256403952              |    |    | AGIWUR15880                                                             |          |                |          |                            |
| N2                              | CT | II | 13006610                                                                | 13008164 | WBGene00003860 | oig-2    | Y38F1A.9                   |
| -0.176524157771926              |    |    | AGIWUR43827                                                             |          |                |          |                            |
| N2                              | CT | II | 13014331                                                                | 13025838 | WBGene00003144 | max-2    | Y38F1A.10                  |
| 0.0168641200108368              |    |    | AGIWUR11822;AGIWUR27909;AGIWUR29030;AGIWUR41651;AGIWUR42104             |          |                |          |                            |
| N2                              | CT | II | 13032778                                                                | 13036505 | WBGene00008929 | F18A11.2 | F18A11.2                   |
| -0.0768067790262288             |    |    | AGIWUR33087                                                             |          |                |          |                            |
| N2                              | CT | II | 13047941                                                                | 13050807 | WBGene00009641 | F42G4.2  | F42G4.2 0.354746461755429  |
| AGIWUR32122                     |    |    |                                                                         |          |                |          |                            |
| N2                              | CT | II | 13056814                                                                | 13071530 | WBGene00006999 | zyx-1    | F42G4.3                    |
| -0.00178199560956305            |    |    | AGIWUR13740;AGIWUR22966;AGIWUR35979;AGIWUR44121                         |          |                |          |                            |
| N2                              | CT | II | 13073493                                                                | 13076223 | WBGene00009642 | F42G4.5  | F42G4.5 0.0810240372727726 |
| AGIWUR61;AGIWUR9936;AGIWUR27632 |    |    |                                                                         |          |                |          |                            |
| N2                              | CT | II | 13081776                                                                | 13082322 | WBGene00195150 | Y81G3A.6 | Y81G3A.6                   |
| -0.180355620863082              |    |    | AGIWUR7372                                                              |          |                |          |                            |
| N2                              | CT | II | 13083989                                                                | 13091483 | WBGene00013591 | gcn-2    | Y81G3A.3                   |
| -0.0155796327440996             |    |    | AGIWUR1733;AGIWUR23403;AGIWUR36942                                      |          |                |          |                            |
| N2                              | CT | II | 13091587                                                                | 13094241 | WBGene00013592 | Y81G3A.4 | Y81G3A.4                   |
| 0.105116269882702               |    |    | AGIWUR27760                                                             |          |                |          |                            |
| N2                              | CT | II | 13096009                                                                | 13098275 | WBGene00000661 | col-86   | Y81G3A.5                   |
| 0.104467082984449               |    |    | AGIWUR17449                                                             |          |                |          |                            |
| N2                              | CT | II | 13098249                                                                | 13116806 | WBGene00009245 | rict-1   | F29C12.3                   |
| 0.099800188898616               |    |    | AGIWUR30701;AGIWUR40860                                                 |          |                |          |                            |
| N2                              | CT | II | 13117483                                                                | 13122085 | WBGene00009246 | gfm-1    | F29C12.4                   |
| -0.226644252333996              |    |    | AGIWUR22803                                                             |          |                |          |                            |
| N2                              | CT | II | 13123038                                                                | 13124789 | WBGene00009247 | bath-45  | F29C12.5                   |
| -0.0143326538412989             |    |    | AGIWUR30834                                                             |          |                |          |                            |
| N2                              | CT | II | 13129902                                                                | 13130189 | WBGene00009248 | F29C12.6 | F29C12.6                   |
| 0.198219658375372               |    |    | AGIWUR16796                                                             |          |                |          |                            |
| N2                              | CT | II | 13131009                                                                | 13134212 | WBGene00009310 | F32A11.5 | F32A11.5                   |
| 0.0697991586049596              |    |    | AGIWUR15642;AGIWUR20935;AGIWUR21948;AGIWUR22348;AGIWUR36357;AGIWUR36804 |          |                |          |                            |
| N2                              | CT | II | 13139465                                                                | 13145225 | WBGene00009311 | mltn-1   | F32A11.7                   |
| 0.129331370068837               |    |    | AGIWUR6903                                                              |          |                |          |                            |
| N2                              | CT | II | 13151459                                                                | 13153399 | WBGene00009308 | F32A11.3 | F32A11.3                   |
| 0.16054455126234                |    |    | AGIWUR807                                                               |          |                |          |                            |
| N2                              | CT | II | 13153461                                                                | 13157093 | WBGene00001998 | hpr-17   | F32A11.2                   |
| -0.285768992805776              |    |    | AGIWUR7794                                                              |          |                |          |                            |
| N2                              | CT | II | 13157333                                                                | 13160462 | WBGene00009307 | F32A11.1 | F32A11.1                   |

|                                                                                              |                                               |          |                |          |           |                     |
|----------------------------------------------------------------------------------------------|-----------------------------------------------|----------|----------------|----------|-----------|---------------------|
| 0.078684373331912                                                                            | AGIWUR31770                                   |          |                |          |           |                     |
| N2 CT II                                                                                     | 13160545                                      | 13165733 | WBGene00003388 | moe-3    | F32A11.6  |                     |
| -0.163098040845757                                                                           | AGIWUR6208                                    |          |                |          |           |                     |
| N2 CT II                                                                                     | 13175857                                      | 13181561 | WBGene00012372 | W09H1.1  | W09H1.1   | -0.226568039644378  |
| AGIWUR5978                                                                                   |                                               |          |                |          |           |                     |
| N2 CT II                                                                                     | 13183450                                      | 13183845 | WBGene00001947 | his-73   | W09H1.2   | 0.100706598892538   |
| AGIWUR31054                                                                                  |                                               |          |                |          |           |                     |
| N2 CT II                                                                                     | 13184429                                      | 13185023 | WBGene00012373 | W09H1.3  | W09H1.3   | 0.152124220807348   |
| AGIWUR24666                                                                                  |                                               |          |                |          |           |                     |
| N2 CT II                                                                                     | 13185092                                      | 13185914 | WBGene00012374 | W09H1.4  | W09H1.4   | -0.39625336653093   |
| AGIWUR21145                                                                                  |                                               |          |                |          |           |                     |
| N2 CT II                                                                                     | 13185987                                      | 13187351 | WBGene00012375 | mecr-1   | W09H1.5   | -0.24295414238337   |
| AGIWUR34282                                                                                  |                                               |          |                |          |           |                     |
| N2 CT II                                                                                     | 13195549                                      | 13199603 | WBGene00002264 | lec-1    | W09H1.6   | 0.328587283184262   |
| AGIWUR18206;AGIWUR41352;AGIWUR41572                                                          |                                               |          |                |          |           |                     |
| N2 CT II                                                                                     | 13200165                                      | 13215701 | WBGene00000274 | btbf-1   | F15D4.1   | 0.0612275004294567  |
| AGIWUR12208;AGIWUR39267                                                                      |                                               |          |                |          |           |                     |
| N2 CT II                                                                                     | 13216092                                      | 13216764 | WBGene00008859 | F15D4.2  | F15D4.2   | 0.135232615298955   |
| AGIWUR8652;AGIWUR29706;AGIWUR37514                                                           |                                               |          |                |          |           |                     |
| N2 CT II                                                                                     | 13235306                                      | 13237417 | WBGene00001459 | flp-16   | F15D4.8   | -0.007094809314379  |
| AGIWUR3652;AGIWUR16501;AGIWUR36244;AGIWUR39440                                               |                                               |          |                |          |           |                     |
| N2 CT II                                                                                     | 13239249                                      | 13243121 | WBGene00008861 | F15D4.4  | F15D4.4   | 0.131477031450456   |
| AGIWUR28570;AGIWUR37736                                                                      |                                               |          |                |          |           |                     |
| N2 CT II                                                                                     | 13245348                                      | 13247774 | WBGene00008862 | F15D4.5  | F15D4.5   | 0.00855910373423541 |
| AGIWUR1585                                                                                   |                                               |          |                |          |           |                     |
| N2 CT II                                                                                     | 13249189                                      | 13249895 | WBGene00008863 | F15D4.6  | F15D4.6   | 0.169895537168414   |
| AGIWUR859;AGIWUR4033;AGIWUR13762;AGIWUR13873;AGIWUR18842;AGIWUR26669;AGIWUR33094;AGIWUR43311 |                                               |          |                |          |           |                     |
| N2 CT II                                                                                     | 13260495                                      | 13261201 | WBGene00012985 | Y48C3A.1 |           | Y48C3A.1            |
| -0.236261546195532                                                                           | AGIWUR22693                                   |          |                |          |           |                     |
| N2 CT II                                                                                     | 13272634                                      | 13304229 | WBGene00012989 | Y48C3A.5 |           | Y48C3A.5            |
| 0.0697125178299167                                                                           | AGIWUR11657                                   |          |                |          |           |                     |
| N2 CT II                                                                                     | 13309290                                      | 13311488 | WBGene00012987 | Y48C3A.3 |           | Y48C3A.3            |
| -0.0911781737448933                                                                          | AGIWUR12236;AGIWUR12626;AGIWUR21275           |          |                |          |           |                     |
| N2 CT II                                                                                     | 13311459                                      | 13320911 | WBGene00003119 | mac-1    | Y48C3A.7  |                     |
| -0.0669105736324678                                                                          | AGIWUR9960;AGIWUR9979;AGIWUR21632;AGIWUR43284 |          |                |          |           |                     |
| N2 CT II                                                                                     | 13321954                                      | 13330825 | WBGene00012990 | sam-10   | Y48C3A.8  |                     |
| -0.182941018522698                                                                           | AGIWUR19200                                   |          |                |          |           |                     |
| N2 CT II                                                                                     | 13338281                                      | 13339961 | WBGene00012992 | mrpl-20  | Y48C3A.10 |                     |
| -0.189632949324263                                                                           | AGIWUR16972                                   |          |                |          |           |                     |



|                                                                       |    |    |                                                                                   |          |                |           |           |                     |
|-----------------------------------------------------------------------|----|----|-----------------------------------------------------------------------------------|----------|----------------|-----------|-----------|---------------------|
| N2                                                                    | CT | II | 13340644                                                                          | 13347884 | WBGene00012993 | dmsr-3    | Y48C3A.11 |                     |
| 0.0861256019763603                                                    |    |    | AGIWUR8773                                                                        |          |                |           |           |                     |
| N2                                                                    | CT | II | 13369607                                                                          | 13375290 | WBGene00012998 | Y48C3A.20 | Y48C3A.20 |                     |
| -0.179039586299179                                                    |    |    | AGIWUR6602;AGIWUR34545                                                            |          |                |           |           |                     |
| N2                                                                    | CT | II | 13376412                                                                          | 13388879 | WBGene00012994 | Y48C3A.12 | Y48C3A.12 |                     |
| -0.0080899285038436                                                   |    |    | AGIWUR4627;AGIWUR21344                                                            |          |                |           |           |                     |
| N2                                                                    | CT | II | 13389761                                                                          | 13401992 | WBGene00012995 | Y48C3A.14 | Y48C3A.14 |                     |
| -0.111968321701674                                                    |    |    | AGIWUR13908                                                                       |          |                |           |           |                     |
| N2                                                                    | CT | II | 13402980                                                                          | 13404629 | WBGene00012996 | pinn-4    | Y48C3A.16 |                     |
| 0.0284065843869037                                                    |    |    | AGIWUR26311                                                                       |          |                |           |           |                     |
| N2                                                                    | CT | II | 13406160                                                                          | 13411483 | WBGene00001162 | efl-2     | Y48C3A.17 |                     |
| -0.165125140477491                                                    |    |    | AGIWUR25742;AGIWUR26124;AGIWUR26605                                               |          |                |           |           |                     |
| N2                                                                    | CT | II | 13412635                                                                          | 13414906 | WBGene00012997 | Y48C3A.18 | Y48C3A.18 |                     |
| -0.187372460736422                                                    |    |    | AGIWUR8883;AGIWUR13097;AGIWUR13111;AGIWUR16520;AGIWUR24033;AGIWUR25801            |          |                |           |           |                     |
| N2                                                                    | CT | II | 13415024                                                                          | 13424446 | WBGene00013014 | Y48E1C.1  | Y48E1C.1  |                     |
| -0.0261936253721071                                                   |    |    | AGIWUR2649;AGIWUR5616;AGIWUR12338;AGIWUR16989;AGIWUR19071;AGIWUR32260;AGIWUR41231 |          |                |           |           |                     |
| N2                                                                    | CT | II | 13424506                                                                          | 13428970 | WBGene00013015 | Y48E1C.2  | Y48E1C.2  |                     |
| -0.190864885709182                                                    |    |    | AGIWUR13917                                                                       |          |                |           |           |                     |
| N2                                                                    | CT | II | 13433880                                                                          | 13436825 | WBGene00013017 | Y48E1C.4  | Y48E1C.4  |                     |
| -0.18673835845358                                                     |    |    | AGIWUR10395                                                                       |          |                |           |           |                     |
| N2                                                                    | CT | II | 13437579                                                                          | 13447593 | WBGene00008444 | tbx-14    | E01G4.1   | -0.137086724962238  |
| AGIWUR5556;AGIWUR44407                                                |    |    |                                                                                   |          |                |           |           |                     |
| N2                                                                    | CT | II | 13448835                                                                          | 13460642 | WBGene00004116 | pqn-27    | E01G4.4   | 0.0297271113466095  |
| AGIWUR25;AGIWUR10877;AGIWUR44806                                      |    |    |                                                                                   |          |                |           |           |                     |
| N2                                                                    | CT | II | 13460991                                                                          | 13469602 | WBGene00008446 | E01G4.3   | E01G4.3   | -0.0815944500499555 |
| AGIWUR10416;AGIWUR28784;AGIWUR33582;AGIWUR41256;AGIWUR44661           |    |    |                                                                                   |          |                |           |           |                     |
| N2                                                                    | CT | II | 13472401                                                                          | 13473995 | WBGene00008447 | E01G4.5   | E01G4.5   | -0.226404201782775  |
| AGIWUR4017;AGIWUR39799                                                |    |    |                                                                                   |          |                |           |           |                     |
| N2                                                                    | CT | II | 13477471                                                                          | 13478929 | WBGene00045410 | E01G4.7   | E01G4.7   | -0.144882873501741  |
| AGIWUR4005;AGIWUR8184;AGIWUR21131;AGIWUR27985;AGIWUR29964;AGIWUR39135 |    |    |                                                                                   |          |                |           |           |                     |
| N2                                                                    | CT | II | 13482405                                                                          | 13485780 | WBGene00008448 | E01G4.6   | E01G4.6   | 0.0265306456467034  |
| AGIWUR7121                                                            |    |    |                                                                                   |          |                |           |           |                     |
| N2                                                                    | CT | II | 13485792                                                                          | 13491786 | WBGene00000113 | alh-7     | F45H10.1  |                     |
| -0.0968453660148896                                                   |    |    | AGIWUR37785                                                                       |          |                |           |           |                     |
| N2                                                                    | CT | II | 13491803                                                                          | 13493050 | WBGene00009739 | F45H10.2  | F45H10.2  |                     |
| -0.0726720931861173                                                   |    |    | AGIWUR16910                                                                       |          |                |           |           |                     |
| N2                                                                    | CT | II | 13493181                                                                          | 13494600 | WBGene00009740 | F45H10.3  | F45H10.3  |                     |
| 0.241726378617393                                                     |    |    | AGIWUR19029;AGIWUR22747                                                           |          |                |           |           |                     |
| N2                                                                    | CT | II | 13495050                                                                          | 13495900 | WBGene00009741 | drr-1     | F45H10.4  |                     |

|                     |                                                                                                                                   |          |                |           |           |  |
|---------------------|-----------------------------------------------------------------------------------------------------------------------------------|----------|----------------|-----------|-----------|--|
| -0.0840462827960931 | AGIWUR8290                                                                                                                        |          |                |           |           |  |
| N2 CT II            | 13501877                                                                                                                          | 13503822 | WBGene00009742 | F45H10.5  | F45H10.5  |  |
| -0.10737230159786   | AGIWUR5292;AGIWUR9571;AGIWUR12387;AGIWUR12768;AGIWUR21572;AGIWUR25012;AGIWUR29346;AGIWUR34331;AGIWUR35280;AGIWUR39653;AGIWUR40900 |          |                |           |           |  |
| N2 CT II            | 13504082                                                                                                                          | 13506905 | WBGene00010069 | F54F11.1  | F54F11.1  |  |
| 0.0775106799010663  | AGIWUR34937                                                                                                                       |          |                |           |           |  |
| N2 CT II            | 13507806                                                                                                                          | 13516479 | WBGene00010070 | nep-17    | F54F11.2  |  |
| 0.251987704487927   | AGIWUR31258                                                                                                                       |          |                |           |           |  |
| N2 CT II            | 13517912                                                                                                                          | 13522925 | WBGene00010071 | sre-45    | F54F11.3  |  |
| -0.140776750757899  | AGIWUR27402                                                                                                                       |          |                |           |           |  |
| N2 CT II            | 13522919                                                                                                                          | 13531218 | WBGene00013011 | snx-14    | Y48E1B.14 |  |
| 0.0865045376885334  | AGIWUR11452;AGIWUR18223;AGIWUR20153;AGIWUR36079;AGIWUR41053                                                                       |          |                |           |           |  |
| N2 CT II            | 13533486                                                                                                                          | 13541084 | WBGene00013001 | Y48E1B.2  | Y48E1B.2  |  |
| -0.222620050528537  | AGIWUR24617;AGIWUR29266                                                                                                           |          |                |           |           |  |
| N2 CT II            | 13542007                                                                                                                          | 13547645 | WBGene00013000 | ddl-2     | Y48E1B.1  |  |
| 0.0501285520231534  | AGIWUR8887;AGIWUR16973                                                                                                            |          |                |           |           |  |
| N2 CT II            | 13547739                                                                                                                          | 13567999 | WBGene00013002 | Y48E1B.3  | Y48E1B.3  |  |
| 0.0856447276185284  | AGIWUR15123;AGIWUR19802;AGIWUR31063;AGIWUR31692;AGIWUR33404;AGIWUR34595;AGIWUR44162;AGIWUR44251                                   |          |                |           |           |  |
| N2 CT II            | 13568077                                                                                                                          | 13575068 | WBGene00013004 | mrp1-37   | Y48E1B.5  |  |
| -0.0634600846359969 | AGIWUR2143                                                                                                                        |          |                |           |           |  |
| N2 CT II            | 13575925                                                                                                                          | 13584732 | WBGene00013006 | lin-38    | Y48E1B.7  |  |
| -0.149050483230927  | AGIWUR2850;AGIWUR25413                                                                                                            |          |                |           |           |  |
| N2 CT II            | 13585705                                                                                                                          | 13589033 | WBGene00013007 | Y48E1B.8  | Y48E1B.8  |  |
| -0.16821642749284   | AGIWUR15064                                                                                                                       |          |                |           |           |  |
| N2 CT II            | 13589036                                                                                                                          | 13590552 | WBGene00013013 | cllec-145 | Y48E1B.16 |  |
| -0.0362925046310796 | AGIWUR7883                                                                                                                        |          |                |           |           |  |
| N2 CT II            | 13590640                                                                                                                          | 13593797 | WBGene00013008 | cllec-146 | Y48E1B.9  |  |
| -0.153696534747755  | AGIWUR7912;AGIWUR21835;AGIWUR41929                                                                                                |          |                |           |           |  |
| N2 CT II            | 13595006                                                                                                                          | 13596551 | WBGene00013009 | fbxc-23   | Y48E1B.11 |  |
| 0.126192240509754   | AGIWUR11623;AGIWUR14076;AGIWUR30753;AGIWUR33903;AGIWUR35723;AGIWUR38420;AGIWUR39312;AGIWUR42220                                   |          |                |           |           |  |
| N2 CT II            | 13596955                                                                                                                          | 13598068 | WBGene00000804 | csc-1     | Y48E1B.12 |  |
| 0.0215030266525593  | AGIWUR7181;AGIWUR27268                                                                                                            |          |                |           |           |  |
| N2 CT II            | 13601204                                                                                                                          | 13605057 | WBGene00000819 | csp-1     | Y48E1B.13 |  |
| -0.0853047201858175 | AGIWUR13033                                                                                                                       |          |                |           |           |  |
| N2 CT II            | 13608154                                                                                                                          | 13609824 | WBGene00001768 | gst-20    | Y48E1B.10 |  |
| -0.0589055051259741 | AGIWUR21650                                                                                                                       |          |                |           |           |  |

|                                                                       |    |    |                     |                         |                |          |           |                     |
|-----------------------------------------------------------------------|----|----|---------------------|-------------------------|----------------|----------|-----------|---------------------|
| N2                                                                    | CT | II | 13610443            | 13611349                | WBGene00001772 | gst-24   | F37B1.1   | -0.168912259098882  |
| AGIWUR15934                                                           |    |    |                     |                         |                |          |           |                     |
| N2                                                                    | CT | II | 13611771            | 13613196                | WBGene00001763 | gst-15   | F37B1.4   | -0.151164800976307  |
| AGIWUR43213                                                           |    |    |                     |                         |                |          |           |                     |
| N2                                                                    | CT | II | 13614788            | 13616100                | WBGene00001762 | gst-14   | F37B1.3   | -0.171609057946783  |
| AGIWUR27122                                                           |    |    |                     |                         |                |          |           |                     |
| N2                                                                    | CT | II | 13616685            | 13618061                | WBGene00001760 | gst-12   | F37B1.2   | -0.266992249094482  |
| AGIWUR11751                                                           |    |    |                     |                         |                |          |           |                     |
| N2                                                                    | CT | II | 13622967            | 13624502                | WBGene00001764 | gst-16   | F37B1.5   | -0.210281162238918  |
| AGIWUR31264                                                           |    |    |                     |                         |                |          |           |                     |
| N2                                                                    | CT | II | 13625544            | 13627141                | WBGene00001767 | gst-19   | F37B1.8   | 0.182593376604124   |
| AGIWUR3777;AGIWUR36800                                                |    |    |                     |                         |                |          |           |                     |
| N2                                                                    | CT | II | 13628017            | 13628774                | WBGene00001765 | gst-17   | F37B1.6   | -0.0923766564319548 |
| AGIWUR36475                                                           |    |    |                     |                         |                |          |           |                     |
| N2                                                                    | CT | II | 13629799            | 13630887                | WBGene00001766 | gst-18   | F37B1.7   | 0.115523179944011   |
| AGIWUR12330;AGIWUR24948;AGIWUR32902;AGIWUR38232;AGIWUR44742           |    |    |                     |                         |                |          |           |                     |
| N2                                                                    | CT | II | 13632655            | 13636986                | WBGene00006404 | tag-10   | C31C9.1   | 0.07099281423808    |
| AGIWUR37940                                                           |    |    |                     |                         |                |          |           |                     |
| N2                                                                    | CT | II | 13636929            | 13638480                | WBGene00007836 | C31C9.2  | C31C9.2   | -0.0491759150628059 |
| AGIWUR3095;AGIWUR8721;AGIWUR10783;AGIWUR21035;AGIWUR28229;AGIWUR36644 |    |    |                     |                         |                |          |           |                     |
| N2                                                                    | CT | II | 13641495            | 13643821                | WBGene00007837 | fbxa-167 |           | C31C9.3             |
|                                                                       |    |    | -0.250154161957687  | AGIWUR44122             |                |          |           |                     |
| N2                                                                    | CT | II | 13645781            | 13648850                | WBGene00007838 | fbxa-168 |           | C31C9.4             |
|                                                                       |    |    | -0.0468174449048302 | AGIWUR1946              |                |          |           |                     |
| N2                                                                    | CT | II | 13648530            | 13655347                | WBGene00045289 | fbxa-169 |           | C31C9.8             |
|                                                                       |    |    | 0.290168431241707   | AGIWUR7582              |                |          |           |                     |
| N2                                                                    | CT | II | 13669104            | 13669713                | WBGene00007841 | C31C9.7  | C31C9.7   | -0.0597303868832491 |
| AGIWUR36149                                                           |    |    |                     |                         |                |          |           |                     |
| N2                                                                    | CT | II | 13670633            | 13694787                | WBGene00012999 | rpoa-1   | Y48E1A.1  |                     |
|                                                                       |    |    | -0.0184446178209523 | AGIWUR5492;AGIWUR11083  |                |          |           |                     |
| N2                                                                    | CT | II | 13703877            | 13712911                | WBGene00002235 | kqt-3    | Y54G9A.3  |                     |
|                                                                       |    |    | 0.240722694154806   | AGIWUR17672;AGIWUR41149 |                |          |           |                     |
| N2                                                                    | CT | II | 13712921            | 13715893                | WBGene00013207 | zipt-2.3 |           | Y54G9A.4            |
|                                                                       |    |    | -0.402281260281892  | AGIWUR31247             |                |          |           |                     |
| N2                                                                    | CT | II | 13718185            | 13721318                | WBGene00044084 | sre-46   | Y54G9A.10 |                     |
|                                                                       |    |    | 0.0998076301074176  | AGIWUR9584;AGIWUR39918  |                |          |           |                     |
| N2                                                                    | CT | II | 13722964            | 13725037                | WBGene00013208 | Y54G9A.5 |           | Y54G9A.5            |
|                                                                       |    |    | -0.250935937829382  | AGIWUR38181             |                |          |           |                     |
| N2                                                                    | CT | II | 13724978            | 13725805                | WBGene00013210 | Y54G9A.7 |           | Y54G9A.7            |

|                                                            |                                                                                     |          |                |          |          |                    |
|------------------------------------------------------------|-------------------------------------------------------------------------------------|----------|----------------|----------|----------|--------------------|
| -0.182455485338885                                         | AGIWUR8650                                                                          |          |                |          |          |                    |
| N2 CT II                                                   | 13726062                                                                            | 13729610 | WBGene00013209 | bub-3    | Y54G9A.6 |                    |
| -0.093485979160441                                         | AGIWUR27299                                                                         |          |                |          |          |                    |
| N2 CT II                                                   | 13729716                                                                            | 13731543 | WBGene00013211 | Y54G9A.9 | Y54G9A.9 |                    |
| -0.547642259712969                                         | AGIWUR6367                                                                          |          |                |          |          |                    |
| N2 CT II                                                   | 13736349                                                                            | 13736933 | WBGene00011056 | R06B9.5  | R06B9.5  | 0.138801767784268  |
| AGIWUR29910                                                |                                                                                     |          |                |          |          |                    |
| N2 CT II                                                   | 13741742                                                                            | 13749983 | WBGene00003246 | mig-14   | R06B9.6  | 0.0289125057634134 |
| AGIWUR3974                                                 |                                                                                     |          |                |          |          |                    |
| N2 CT II                                                   | 13752316                                                                            | 13756267 | WBGene00011055 | arrd-14  | R06B9.4  | -0.104654645676634 |
| AGIWUR11577                                                |                                                                                     |          |                |          |          |                    |
| N2 CT II                                                   | 13758408                                                                            | 13761233 | WBGene00011054 | arrd-13  | R06B9.3  | 0.157386430605879  |
| AGIWUR21367                                                |                                                                                     |          |                |          |          |                    |
| N2 CT II                                                   | 13792229                                                                            | 13817398 | WBGene00013934 | ZK131.11 | ZK131.11 |                    |
| 0.121048790662276                                          | AGIWUR2862;AGIWUR10799                                                              |          |                |          |          |                    |
| N2 CT II                                                   | 13821778                                                                            | 13822333 | WBGene00001885 | his-11   | ZK131.5  | -0.112131358361479 |
| AGIWUR9952;AGIWUR15972;AGIWUR16772;AGIWUR23210;AGIWUR36528 |                                                                                     |          |                |          |          |                    |
| N2 CT II                                                   | 13828287                                                                            | 13828697 | WBGene00001916 | his-42   | F08G2.3  | -0.107789431838825 |
| AGIWUR34096                                                |                                                                                     |          |                |          |          |                    |
| N2 CT II                                                   | 13830592                                                                            | 13831213 | WBGene00008576 | F08G2.4  | F08G2.4  |                    |
| -0.00478885913192606                                       | AGIWUR31364                                                                         |          |                |          |          |                    |
| N2 CT II                                                   | 13832870                                                                            | 13833653 | WBGene00008577 | F08G2.5  | F08G2.5  | 0.218527929078572  |
| AGIWUR43189                                                |                                                                                     |          |                |          |          |                    |
| N2 CT II                                                   | 13835103                                                                            | 13835709 | WBGene00002120 | ins-37   | F08G2.6  | 0.35076435487189   |
| AGIWUR44380                                                |                                                                                     |          |                |          |          |                    |
| N2 CT II                                                   | 13836241                                                                            | 13841139 | WBGene00008578 | F08G2.7  | F08G2.7  | 0.118580187539941  |
| AGIWUR28240                                                |                                                                                     |          |                |          |          |                    |
| N2 CT II                                                   | 13852311                                                                            | 13855290 | WBGene00008579 | F08G2.8  | F08G2.8  | 0.0755860814338121 |
| AGIWUR5634                                                 |                                                                                     |          |                |          |          |                    |
| N2 CT II                                                   | 13855788                                                                            | 13872315 | WBGene00013093 | Y51H1A.2 | Y51H1A.2 |                    |
| 0.00782644602355731                                        | AGIWUR10118;AGIWUR12948;AGIWUR15961;AGIWUR23741;AGIWUR29105;AGIWUR32778;AGIWUR41195 |          |                |          |          |                    |
| N2 CT II                                                   | 13872869                                                                            | 13875423 | WBGene00013094 | Y51H1A.3 | Y51H1A.3 |                    |
| -0.10404064577569                                          | AGIWUR11740;AGIWUR14779;AGIWUR19083;AGIWUR23307;AGIWUR31503;AGIWUR38345;AGIWUR41980 |          |                |          |          |                    |
| N2 CT II                                                   | 13876034                                                                            | 13882585 | WBGene00013095 | ing-3    | Y51H1A.4 |                    |
| -0.0894662261742507                                        | AGIWUR539                                                                           |          |                |          |          |                    |
| N2 CT II                                                   | 13882705                                                                            | 13888031 | WBGene00001838 | hda-10   | Y51H1A.5 |                    |
| 0.0155101202918608                                         | AGIWUR33508                                                                         |          |                |          |          |                    |
| N2 CT II                                                   | 13888583                                                                            | 13898394 | WBGene00013096 | mcd-1    | Y51H1A.6 |                    |
| 0.135033586872126                                          | AGIWUR8763;AGIWUR38762                                                              |          |                |          |          |                    |

|                                                                                           |    |    |          |          |                |           |          |                     |
|-------------------------------------------------------------------------------------------|----|----|----------|----------|----------------|-----------|----------|---------------------|
| N2                                                                                        | CT | II | 13898366 | 13902114 | WBGene00012197 | W02B8.1   | W02B8.1  | 0.3272029295547     |
| AGIWUR36040                                                                               |    |    |          |          |                |           |          |                     |
| N2                                                                                        | CT | II | 13908921 | 13915254 | WBGene00012198 | W02B8.2   | W02B8.2  | 0.120376358539017   |
| AGIWUR13508                                                                               |    |    |          |          |                |           |          |                     |
| N2                                                                                        | CT | II | 13916340 | 13919838 | WBGene00012199 | mltn-3    | W02B8.3  | -0.0196396042060822 |
| AGIWUR4662;AGIWUR18634;AGIWUR35203                                                        |    |    |          |          |                |           |          |                     |
| N2                                                                                        | CT | II | 13920555 | 13924724 | WBGene00012200 | mltn-4    | W02B8.4  | 0.203834381916338   |
| AGIWUR36510;AGIWUR40714                                                                   |    |    |          |          |                |           |          |                     |
| N2                                                                                        | CT | II | 13925268 | 13930516 | WBGene00044074 | mltn-5    | W02B8.6  | -0.395281163502847  |
| AGIWUR39189                                                                               |    |    |          |          |                |           |          |                     |
| N2                                                                                        | CT | II | 13930648 | 13931997 | WBGene00001988 | hot-3     | W02B8.5  | -0.211734860854655  |
| AGIWUR31128;AGIWUR40137                                                                   |    |    |          |          |                |           |          |                     |
| N2                                                                                        | CT | II | 13937995 | 13939631 | WBGene00012328 | W07G1.1   | W07G1.1  | -0.0582275585552292 |
| AGIWUR33574                                                                               |    |    |          |          |                |           |          |                     |
| N2                                                                                        | CT | II | 13949590 | 13951869 | WBGene00012329 | sre-44    | W07G1.2  | -0.168397649679386  |
| AGIWUR23234;AGIWUR24414;AGIWUR34747                                                       |    |    |          |          |                |           |          |                     |
| N2                                                                                        | CT | II | 13951906 | 13957543 | WBGene00012330 | zip-3     | W07G1.3  | -0.0847865233533094 |
| AGIWUR18520;AGIWUR40639                                                                   |    |    |          |          |                |           |          |                     |
| N2                                                                                        | CT | II | 13959239 | 13962417 | WBGene00012332 | rpi-1     | W07G1.5  | -0.123859441726165  |
| AGIWUR29081;AGIWUR34293;AGIWUR44572                                                       |    |    |          |          |                |           |          |                     |
| N2                                                                                        | CT | II | 13964891 | 13966333 | WBGene00012334 | W07G1.7   | W07G1.7  | -0.192584975430064  |
| AGIWUR15265                                                                               |    |    |          |          |                |           |          |                     |
| N2                                                                                        | CT | II | 13966534 | 13969079 | WBGene00012333 | sre-43    | W07G1.6  | 0.137989350003215   |
| AGIWUR27997                                                                               |    |    |          |          |                |           |          |                     |
| N2                                                                                        | CT | II | 13970584 | 13972970 | WBGene00012722 | Y39G8B.1  |          | Y39G8B.1            |
| 0.0480263058434716 AGIWUR15112;AGIWUR16525                                                |    |    |          |          |                |           |          |                     |
| N2                                                                                        | CT | II | 13973690 | 13976221 | WBGene00012723 | Y39G8B.2  |          | Y39G8B.2            |
| -0.238374628412364 AGIWUR6405                                                             |    |    |          |          |                |           |          |                     |
| N2                                                                                        | CT | II | 13977164 | 13979883 | WBGene00012724 | sre-48    | Y39G8B.3 |                     |
| -0.901177946052835 AGIWUR23507                                                            |    |    |          |          |                |           |          |                     |
| N2                                                                                        | CT | II | 13981330 | 13981785 | WBGene00012728 | Y39G8B.9  |          | Y39G8B.9            |
| 0.0729046127586188 AGIWUR1280;AGIWUR18970;AGIWUR25187;AGIWUR37328;AGIWUR41482;AGIWUR44093 |    |    |          |          |                |           |          |                     |
| N2                                                                                        | CT | II | 13982048 | 13983115 | WBGene00012729 | Y39G8B.10 |          | Y39G8B.10           |
| 0.272031497709196 AGIWUR44923                                                             |    |    |          |          |                |           |          |                     |
| N2                                                                                        | CT | II | 13983397 | 13984651 | WBGene00012725 | sre-47    | Y39G8B.4 |                     |
| 0.138632726078354 AGIWUR14222                                                             |    |    |          |          |                |           |          |                     |
| N2                                                                                        | CT | II | 13987616 | 13991838 | WBGene00012726 | Y39G8B.5  |          | Y39G8B.5            |
| 0.618067196418982 AGIWUR5997;AGIWUR29173                                                  |    |    |          |          |                |           |          |                     |
| N2                                                                                        | CT | II | 13993009 | 13993527 | WBGene00014885 | Y39G8B.8  |          | Y39G8B.8            |

|                                                                        |                                                                      |          |                |                                     |
|------------------------------------------------------------------------|----------------------------------------------------------------------|----------|----------------|-------------------------------------|
| 0.0468147011496107                                                     | AGIWUR4346;AGIWUR37185;AGIWUR43820                                   |          |                |                                     |
| N2 CT II                                                               | 13994411                                                             | 13995045 | WBGene00012727 | Y39G8B.7 Y39G8B.7                   |
| 0.100316871028577                                                      | AGIWUR25154                                                          |          |                |                                     |
| N2 CT II                                                               | 13995401                                                             | 13995876 | WBGene00008501 | fbxa-177 F01D5.11                   |
| 0.0634563535293946                                                     | AGIWUR13019                                                          |          |                |                                     |
| N2 CT II                                                               | 13996958                                                             | 13997606 | WBGene00008492 | F01D5.1 F01D5.1 0.097627584253658   |
| AGIWUR10090                                                            |                                                                      |          |                |                                     |
| N2 CT II                                                               | 13998497                                                             | 13999064 | WBGene00008493 | F01D5.2 F01D5.2                     |
| -0.00988569905844017                                                   | AGIWUR45174                                                          |          |                |                                     |
| N2 CT II                                                               | 13999059                                                             | 14000144 | WBGene00008494 | F01D5.3 F01D5.3 0.0716736054108082  |
| AGIWUR16727                                                            |                                                                      |          |                |                                     |
| N2 CT II                                                               | 14001686                                                             | 14002306 | WBGene00008495 | F01D5.5 F01D5.5 0.313843413899553   |
| AGIWUR8659                                                             |                                                                      |          |                |                                     |
| N2 CT II                                                               | 14006511                                                             | 14008514 | WBGene00008496 | F01D5.6 F01D5.6 -0.116691024203165  |
| AGIWUR18402                                                            |                                                                      |          |                |                                     |
| N2 CT II                                                               | 14008666                                                             | 14010583 | WBGene00008497 | F01D5.7 F01D5.7 -0.0388275533489804 |
| AGIWUR41689                                                            |                                                                      |          |                |                                     |
| N2 CT II                                                               | 14010706                                                             | 14013826 | WBGene00008498 | F01D5.8 F01D5.8 0.256723678240778   |
| AGIWUR10871                                                            |                                                                      |          |                |                                     |
| N2 CT II                                                               | 14013825                                                             | 14016965 | WBGene00008499 | cyp-37A1 F01D5.9                    |
| -0.000814829445326737                                                  | AGIWUR11139;AGIWUR13421;AGIWUR31528;AGIWUR34500                      |          |                |                                     |
| N2 CT II                                                               | 14017839                                                             | 14021330 | WBGene00008500 | F01D5.10 F01D5.10                   |
| -0.137129860114062                                                     | AGIWUR9014                                                           |          |                |                                     |
| N2 CT II                                                               | 14031402                                                             | 14032644 | WBGene00014851 | W01G7.2 W01G7.2 -0.115660242553181  |
| AGIWUR33995                                                            |                                                                      |          |                |                                     |
| N2 CT II                                                               | 14033233                                                             | 14037721 | WBGene00000901 | daf-5 W01G7.1                       |
| -0.00208837299490083                                                   | AGIWUR2777;AGIWUR3143;AGIWUR4552;AGIWUR23271;AGIWUR42691;AGIWUR43981 |          |                |                                     |
| N2 CT II                                                               | 14060061                                                             | 14060624 | WBGene00012187 | rpb-11 W01G7.3 -0.164027399507322   |
| AGIWUR1799                                                             |                                                                      |          |                |                                     |
| N2 CT II                                                               | 14060739                                                             | 14062960 | WBGene00012188 | W01G7.4 W01G7.4 -0.0126274027123801 |
| AGIWUR6293;AGIWUR13407;AGIWUR25133;AGIWUR39814;AGIWUR41628;AGIWUR42037 |                                                                      |          |                |                                     |
| N2 CT II                                                               | 14063450                                                             | 14066170 | WBGene00002275 | lem-2 W01G7.5 -0.139432412201433    |
| AGIWUR36856                                                            |                                                                      |          |                |                                     |
| N2 CT II                                                               | 14068907                                                             | 14089119 | WBGene00012730 | xrn-1 Y39G8C.1                      |
| 0.00536954275316237                                                    | AGIWUR3029;AGIWUR27428                                               |          |                |                                     |
| N2 CT II                                                               | 14090075                                                             | 14094690 | WBGene00000662 | col-87 Y39G8C.4                     |
| 0.0831123316805922                                                     | AGIWUR21941                                                          |          |                |                                     |
| N2 CT II                                                               | 14095447                                                             | 14097390 | WBGene00012731 | Y39G8C.2 Y39G8C.2                   |
| 0.349628187783724                                                      | AGIWUR18523                                                          |          |                |                                     |

|                                                                                                                                                                       |    |    |          |          |                |           |          |                     |
|-----------------------------------------------------------------------------------------------------------------------------------------------------------------------|----|----|----------|----------|----------------|-----------|----------|---------------------|
| N2                                                                                                                                                                    | CT | II | 14101263 | 14102961 | WBGene00014569 | bkip-1    | Y39G8C.3 |                     |
| -0.31508485345787                                                                                                                                                     |    |    |          |          |                |           |          |                     |
| AGIWUR2676;AGIWUR3891;AGIWUR12056;AGIWUR14174;AGIWUR15841;AGIWUR15877;AGIWUR16335;AGIWUR23672;AGIWUR35130;AGIWUR37737;AGIWUR38371;AGIWUR40259;AGIWUR41719;AGIWUR43332 |    |    |          |          |                |           |          |                     |
| N2                                                                                                                                                                    | CT | II | 14104773 | 14108072 | WBGene00001805 | gur-4     | K09E4.5  | -0.211394261311479  |
| AGIWUR819                                                                                                                                                             |    |    |          |          |                |           |          |                     |
| N2                                                                                                                                                                    | CT | II | 14108016 | 14109635 | WBGene00010723 | cpg-7     | K09E4.6  | 0.241156790635802   |
| AGIWUR861                                                                                                                                                             |    |    |          |          |                |           |          |                     |
| N2                                                                                                                                                                    | CT | II | 14114213 | 14122165 | WBGene00010722 | K09E4.4   | K09E4.4  | -0.0340524490178566 |
| AGIWUR36499                                                                                                                                                           |    |    |          |          |                |           |          |                     |
| N2                                                                                                                                                                    | CT | II | 14123945 | 14126941 | WBGene00010721 | K09E4.3   | K09E4.3  | -0.276016064489895  |
| AGIWUR12853                                                                                                                                                           |    |    |          |          |                |           |          |                     |
| N2                                                                                                                                                                    | CT | II | 14127687 | 14132833 | WBGene00010720 | K09E4.2   | K09E4.2  | -0.290799461673856  |
| AGIWUR6171                                                                                                                                                            |    |    |          |          |                |           |          |                     |
| N2                                                                                                                                                                    | CT | II | 14133397 | 14142289 | WBGene00012230 | cacn-1    | W03H9.4  | -0.0137283842515927 |
| AGIWUR27840                                                                                                                                                           |    |    |          |          |                |           |          |                     |
| N2                                                                                                                                                                    | CT | II | 14142949 | 14143874 | WBGene00012228 | W03H9.2   | W03H9.2  | 0.0586698562987071  |
| AGIWUR7297;AGIWUR20495                                                                                                                                                |    |    |          |          |                |           |          |                     |
| N2                                                                                                                                                                    | CT | II | 14151040 | 14154373 | WBGene00012978 | Y48B6A.1  |          | Y48B6A.1            |
| 0.0190585983321609 AGIWUR7453;AGIWUR18959                                                                                                                             |    |    |          |          |                |           |          |                     |
| N2                                                                                                                                                                    | CT | II | 14155280 | 14155660 | WBGene00004456 | rp1-43    | Y48B6A.2 |                     |
| -0.0437184591418855                                                                                                                                                   |    |    |          |          |                |           |          |                     |
| AGIWUR3534;AGIWUR4568;AGIWUR11626;AGIWUR13510;AGIWUR21750;AGIWUR21886;AGIWUR26463;AGIWUR33415;AGIWUR36339;AGIWUR38880                                                 |    |    |          |          |                |           |          |                     |
| N2                                                                                                                                                                    | CT | II | 14155768 | 14166018 | WBGene00006964 | xrn-2     | Y48B6A.3 |                     |
| 0.228502770213831 AGIWUR40875                                                                                                                                         |    |    |          |          |                |           |          |                     |
| N2                                                                                                                                                                    | CT | II | 14172833 | 14175174 | WBGene00012979 | Y48B6A.5  |          | Y48B6A.5            |
| 0.0714367459090948 AGIWUR8342                                                                                                                                         |    |    |          |          |                |           |          |                     |
| N2                                                                                                                                                                    | CT | II | 14178814 | 14189917 | WBGene00012980 | efhd-1    | Y48B6A.6 |                     |
| -0.12081052420994 AGIWUR14476;AGIWUR16862;AGIWUR19411;AGIWUR21777                                                                                                     |    |    |          |          |                |           |          |                     |
| N2                                                                                                                                                                    | CT | II | 14205633 | 14210214 | WBGene00000037 | ace-3     | Y48B6A.8 |                     |
| -0.00828509799631405 AGIWUR33827                                                                                                                                      |    |    |          |          |                |           |          |                     |
| N2                                                                                                                                                                    | CT | II | 14211439 | 14213123 | WBGene00001992 | hot-7     | Y48B6A.9 |                     |
| -0.234251948808843 AGIWUR20114;AGIWUR22691                                                                                                                            |    |    |          |          |                |           |          |                     |
| N2                                                                                                                                                                    | CT | II | 14214409 | 14217139 | WBGene00012981 | Y48B6A.10 |          | Y48B6A.10           |
| -1.63904768797729 AGIWUR21643                                                                                                                                         |    |    |          |          |                |           |          |                     |
| N2                                                                                                                                                                    | CT | II | 14217107 | 14218064 | WBGene00050948 | Y48B6A.16 |          | Y48B6A.16           |
| -0.241697767214738 AGIWUR4514;AGIWUR21323;AGIWUR24184;AGIWUR35402;AGIWUR42266                                                                                         |    |    |          |          |                |           |          |                     |
| N2                                                                                                                                                                    | CT | II | 14220938 | 14226287 | WBGene00012984 | Y48B6A.13 |          | Y48B6A.13           |

|                                                                                                         |                                                                       |          |                |                 |                            |
|---------------------------------------------------------------------------------------------------------|-----------------------------------------------------------------------|----------|----------------|-----------------|----------------------------|
| -0.111265324057314                                                                                      | AGIWUR31036                                                           |          |                |                 |                            |
| N2 CT II                                                                                                | 14226377                                                              | 14234120 | WBGene00012983 | men-1           | Y48B6A.12                  |
| 0.301946449582427                                                                                       | AGIWUR33695                                                           |          |                |                 |                            |
| N2 CT II                                                                                                | 14234972                                                              | 14243603 | WBGene00012982 | jmjd-2          | Y48B6A.11                  |
| 0.067487735710543                                                                                       |                                                                       |          |                |                 |                            |
| AGIWUR484;AGIWUR4107;AGIWUR9451;AGIWUR12375;AGIWUR17242;AGIWUR26629;AGIWUR28009;AGIWUR35789;AGIWUR40210 |                                                                       |          |                |                 |                            |
| N2 CT II                                                                                                | 14250683                                                              | 14251448 | WBGene00001971 | hmg-1.1         | Y48B6A.14                  |
| 0.388085530046649                                                                                       | AGIWUR2307;AGIWUR6488;AGIWUR12701;AGIWUR18413;AGIWUR19350;AGIWUR40655 |          |                |                 |                            |
| N2 CT II                                                                                                | 14252357                                                              | 14255705 | WBGene00013213 | Y54G11A.2       | Y54G11A.2                  |
| -0.223248480314439                                                                                      | AGIWUR11933                                                           |          |                |                 |                            |
| N2 CT II                                                                                                | 14256610                                                              | 14256987 | WBGene00235256 | Y54G11A.19      | Y54G11A.19                 |
| 0.00615784942853814                                                                                     | AGIWUR5247                                                            |          |                |                 |                            |
| N2 CT II                                                                                                | 14276621                                                              | 14283973 | WBGene00013214 | Y54G11A.3       | Y54G11A.3                  |
| -0.0134939424003502                                                                                     | AGIWUR26523                                                           |          |                |                 |                            |
| N2 CT II                                                                                                | 14285780                                                              | 14287377 | WBGene00005264 | srh-41          | Y54G11A.12                 |
| -0.593098384616038                                                                                      | AGIWUR23858                                                           |          |                |                 |                            |
| N2 CT II                                                                                                | 14287632                                                              | 14289068 | WBGene00005265 | srh-42          | Y54G11A.15                 |
| -0.0232868539909825                                                                                     | AGIWUR36608                                                           |          |                |                 |                            |
| N2 CT II                                                                                                | 14289696                                                              | 14290875 | WBGene00005266 | srh-43          | Y54G11A.16                 |
| 0.17511620520103                                                                                        | AGIWUR8458                                                            |          |                |                 |                            |
| N2 CT II                                                                                                | 14292824                                                              | 14296055 | WBGene00013215 | Y54G11A.4       | Y54G11A.4                  |
| 0.215901989594024                                                                                       | AGIWUR27775                                                           |          |                |                 |                            |
| N2 CT II                                                                                                | 14297305                                                              | 14299633 | WBGene00013216 | Y54G11A.7       | Y54G11A.7                  |
| 0.0554974433442528                                                                                      | AGIWUR2686                                                            |          |                |                 |                            |
| N2 CT II                                                                                                | 14299553                                                              | 14302083 | WBGene00000831 | ctl-2           | Y54G11A.5                  |
| 0.0513559972081801                                                                                      | AGIWUR8751                                                            |          |                |                 |                            |
| N2 CT II                                                                                                | 14318158                                                              | 14320917 | WBGene00013221 | Y54G11A.14      | Y54G11A.14                 |
| -0.109227647123969                                                                                      | AGIWUR43300                                                           |          |                |                 |                            |
| N2 CT II                                                                                                | 14340068                                                              | 14344454 | WBGene00013217 | ddl-3           | Y54G11A.8                  |
| -0.0302086344676766                                                                                     | AGIWUR17300;AGIWUR32646                                               |          |                |                 |                            |
| N2 CT II                                                                                                | 14346877                                                              | 14348792 | WBGene00002996 | lin-7           | Y54G11A.10                 |
| -0.144961107331344                                                                                      | AGIWUR14816                                                           |          |                |                 |                            |
| N2 CT II                                                                                                | 14349783                                                              | 14350795 | WBGene00013219 | Y54G11A.11      | Y54G11A.11                 |
| 0.145864340511785                                                                                       | AGIWUR20166;AGIWUR32611                                               |          |                |                 |                            |
| N2 CT II                                                                                                | 14350719                                                              | 14358113 | WBGene00011050 | agl-1           | R06A4.8 0.144649706791794  |
| AGIWUR23864                                                                                             |                                                                       |          |                |                 |                            |
| N2 CT II                                                                                                | 14358366                                                              | 14361701 | WBGene00011051 | pfs-2           | R06A4.9 0.0638010121333963 |
| AGIWUR11966                                                                                             |                                                                       |          |                |                 |                            |
| N2 CT II                                                                                                | 14362019                                                              | 14365177 | WBGene00011047 | R06A4.2 R06A4.2 | 0.0144793575563877         |



|                                                                                                                                                                      |    |    |                      |                                                |                |          |                             |
|----------------------------------------------------------------------------------------------------------------------------------------------------------------------|----|----|----------------------|------------------------------------------------|----------------|----------|-----------------------------|
| AGIWUR31139                                                                                                                                                          |    |    |                      |                                                |                |          |                             |
| N2                                                                                                                                                                   | CT | II | 14365705             | 14373899                                       | WBGene00002076 | imb-2    | R06A4.4 -0.0607932021845983 |
| AGIWUR3727;AGIWUR8967;AGIWUR15087;AGIWUR16722;AGIWUR22315                                                                                                            |    |    |                      |                                                |                |          |                             |
| N2                                                                                                                                                                   | CT | II | 14373831             | 14377890                                       | WBGene00000059 | acr-20   | R06A4.10                    |
|                                                                                                                                                                      |    |    | -0.085289922829741   | AGIWUR3520                                     |                |          |                             |
| N2                                                                                                                                                                   | CT | II | 14381772             | 14383376                                       | WBGene00011049 | sdz-26   | R06A4.6 -0.373686422137816  |
| AGIWUR11439                                                                                                                                                          |    |    |                      |                                                |                |          |                             |
| N2                                                                                                                                                                   | CT | II | 14383973             | 14388454                                       | WBGene00003220 | mes-2    | R06A4.7 0.0346996653002876  |
| AGIWUR7454                                                                                                                                                           |    |    |                      |                                                |                |          |                             |
| N2                                                                                                                                                                   | CT | II | 14389236             | 14390116                                       | WBGene00009179 | kbp-3    | F26H11.1                    |
|                                                                                                                                                                      |    |    | -0.213055314543674   | AGIWUR37325                                    |                |          |                             |
| N2                                                                                                                                                                   | CT | II | 14390718             | 14407905                                       | WBGene00009180 | nurf-1   | F26H11.2                    |
| 0.0386592405613904                                                                                                                                                   |    |    |                      |                                                |                |          |                             |
| AGIWUR1055;AGIWUR3235;AGIWUR7486;AGIWUR10576;AGIWUR22291;AGIWUR22413;AGIWUR23878;AGIWUR26556;AGIWUR26933;AGIWUR27114;AGIWUR29545;AGIWUR33257;AGIWUR38259;AGIWUR40676 |    |    |                      |                                                |                |          |                             |
| N2                                                                                                                                                                   | CT | II | 14411095             | 14412218                                       | WBGene00194892 | dsb-2    | F26H11.6                    |
|                                                                                                                                                                      |    |    | -0.0471154476070801  | AGIWUR17446                                    |                |          |                             |
| N2                                                                                                                                                                   | CT | II | 14412201             | 14413516                                       | WBGene00001371 | exl-1    | F26H11.5                    |
|                                                                                                                                                                      |    |    | -0.191116164042834   | AGIWUR41988                                    |                |          |                             |
| N2                                                                                                                                                                   | CT | II | 14417889             | 14424891                                       | WBGene00004048 | plx-2    | K04B12.1                    |
|                                                                                                                                                                      |    |    | 0.176721034616749    | AGIWUR4508;AGIWUR33866;AGIWUR38759;AGIWUR44043 |                |          |                             |
| N2                                                                                                                                                                   | CT | II | 14434419             | 14438977                                       | WBGene00010550 | K04B12.2 | K04B12.2                    |
|                                                                                                                                                                      |    |    | 0.0221533148515363   | AGIWUR8514                                     |                |          |                             |
| N2                                                                                                                                                                   | CT | II | 14441409             | 14447219                                       | WBGene00010551 | smg-8    | K04B12.3                    |
|                                                                                                                                                                      |    |    | 0.16504169697607     | AGIWUR21796                                    |                |          |                             |
| N2                                                                                                                                                                   | CT | II | 14455632             | 14464911                                       | WBGene00013222 | dmsr-6   | Y54G11B.1                   |
|                                                                                                                                                                      |    |    | -0.112912006124914   | AGIWUR16816                                    |                |          |                             |
| N2                                                                                                                                                                   | CT | II | 14470371             | 14479627                                       | WBGene00007545 | C13B4.1  | C13B4.1                     |
|                                                                                                                                                                      |    |    | -0.00134453530229806 | AGIWUR7062                                     |                |          |                             |
| N2                                                                                                                                                                   | CT | II | 14485624             | 14488688                                       | WBGene00006856 | usp-14   | C13B4.2 0.008942462276055   |
| AGIWUR9141;AGIWUR11923;AGIWUR27616;AGIWUR28554;AGIWUR34325;AGIWUR36729;AGIWUR43933                                                                                   |    |    |                      |                                                |                |          |                             |
| N2                                                                                                                                                                   | CT | II | 14489802             | 14492901                                       | WBGene00010758 | vnut-1   | K10H10.1                    |
|                                                                                                                                                                      |    |    | -0.0051717870201955  | AGIWUR5410                                     |                |          |                             |
| N2                                                                                                                                                                   | CT | II | 14492826             | 14494514                                       | WBGene00010759 | cysl-2   | K10H10.2                    |
|                                                                                                                                                                      |    |    | -0.1746714923861     | AGIWUR25107                                    |                |          |                             |
| N2                                                                                                                                                                   | CT | II | 14498026             | 14499755                                       | WBGene00000972 | dhs-8    | K10H10.3                    |
|                                                                                                                                                                      |    |    | 0.201023063422443    | AGIWUR22194                                    |                |          |                             |
| N2                                                                                                                                                                   | CT | II | 14500422             | 14501663                                       | WBGene00010760 | K10H10.4 | K10H10.4                    |
|                                                                                                                                                                      |    |    | 0.0849255570217622   | AGIWUR44601                                    |                |          |                             |

|                                                                                                                     |    |    |                                                                     |                         |                |           |                             |
|---------------------------------------------------------------------------------------------------------------------|----|----|---------------------------------------------------------------------|-------------------------|----------------|-----------|-----------------------------|
| N2                                                                                                                  | CT | II | 14501747                                                            | 14502543                | WBGene00010761 | K10H10.5  | K10H10.5                    |
|                                                                                                                     |    |    | 0.249393536751581                                                   | AGIWUR33435             |                |           |                             |
| N2                                                                                                                  | CT | II | 14505015                                                            | 14506409                | WBGene00045403 | K10H10.12 | K10H10.12                   |
|                                                                                                                     |    |    | -0.0502076040223947                                                 |                         |                |           |                             |
| AGIWUR871;AGIWUR3702;AGIWUR4293;AGIWUR13405;AGIWUR18072;AGIWUR18318;AGIWUR20971;AGIWUR23433;AGIWUR28318;AGIWUR29134 |    |    |                                                                     |                         |                |           |                             |
| N2                                                                                                                  | CT | II | 14507092                                                            | 14507663                | WBGene00010763 | K10H10.7  | K10H10.7                    |
|                                                                                                                     |    |    | 0.242136430863582                                                   | AGIWUR17523             |                |           |                             |
| N2                                                                                                                  | CT | II | 14508068                                                            | 14510162                | WBGene00010765 | K10H10.10 | K10H10.10                   |
|                                                                                                                     |    |    | -0.0668167497135386                                                 | AGIWUR37841             |                |           |                             |
| N2                                                                                                                  | CT | II | 14513191                                                            | 14515117                | WBGene00010764 | K10H10.9  | K10H10.9                    |
|                                                                                                                     |    |    | -0.0414179769182796                                                 | AGIWUR826               |                |           |                             |
| N2                                                                                                                  | CT | II | 14524173                                                            | 14525112                | WBGene00010195 | pot-2     | F57C2.3 -0.284074081674973  |
|                                                                                                                     |    |    | AGIWUR14166                                                         |                         |                |           |                             |
| N2                                                                                                                  | CT | II | 14525312                                                            | 14526031                | WBGene00010196 | F57C2.4   | F57C2.4 -0.227446950837018  |
|                                                                                                                     |    |    | AGIWUR38942                                                         |                         |                |           |                             |
| N2                                                                                                                  | CT | II | 14526213                                                            | 14528296                | WBGene00010197 | F57C2.5   | F57C2.5 0.0422844010774153  |
|                                                                                                                     |    |    | AGIWUR20898                                                         |                         |                |           |                             |
| N2                                                                                                                  | CT | II | 14528754                                                            | 14534173                | WBGene00010198 | spat-1    | F57C2.6 0.0633240000546262  |
|                                                                                                                     |    |    | AGIWUR21485                                                         |                         |                |           |                             |
| N2                                                                                                                  | CT | II | 14534300                                                            | 14535365                | WBGene00007312 | C04H5.1   | C04H5.1 -0.0669112863389643 |
|                                                                                                                     |    |    | AGIWUR6314                                                          |                         |                |           |                             |
| N2                                                                                                                  | CT | II | 14535923                                                            | 14537579                | WBGene00007313 | clec-147  | C04H5.2                     |
|                                                                                                                     |    |    | -0.247321916588117                                                  | AGIWUR37021             |                |           |                             |
| N2                                                                                                                  | CT | II | 14537946                                                            | 14539162                | WBGene00007315 | C04H5.7   | C04H5.7 -0.236833437906679  |
|                                                                                                                     |    |    | AGIWUR11910;AGIWUR32330;AGIWUR41692;AGIWUR42941                     |                         |                |           |                             |
| N2                                                                                                                  | CT | II | 14540895                                                            | 14548791                | WBGene00007314 | gcy-29    | C04H5.3 0.0144477717744564  |
|                                                                                                                     |    |    | AGIWUR12134                                                         |                         |                |           |                             |
| N2                                                                                                                  | CT | II | 14550913                                                            | 14552476                | WBGene00007316 | nlp-41    | C04H5.8 -0.307517097396335  |
|                                                                                                                     |    |    | AGIWUR1866;AGIWUR5601;AGIWUR7581;AGIWUR9920;AGIWUR14170;AGIWUR37811 |                         |                |           |                             |
| N2                                                                                                                  | CT | II | 14552501                                                            | 14561599                | WBGene00003392 | mog-4     | C04H5.6 -0.186575436068129  |
|                                                                                                                     |    |    | AGIWUR18263                                                         |                         |                |           |                             |
| N2                                                                                                                  | CT | II | 14573615                                                            | 14576558                | WBGene00007242 | madf-5    | C01G12.1                    |
|                                                                                                                     |    |    | -0.305302527342981                                                  | AGIWUR44209             |                |           |                             |
| N2                                                                                                                  | CT | II | 14576957                                                            | 14578075                | WBGene00044333 | C01G12.13 | C01G12.13                   |
|                                                                                                                     |    |    | 0.109119923501284                                                   | AGIWUR14353;AGIWUR44551 |                |           |                             |
| N2                                                                                                                  | CT | II | 14579016                                                            | 14580124                | WBGene00007249 | C01G12.9  | C01G12.9                    |
|                                                                                                                     |    |    | 0.353163046009001                                                   | AGIWUR34770             |                |           |                             |
| N2                                                                                                                  | CT | II | 14580254                                                            | 14581043                | WBGene00007250 | nsph-8    | C01G12.10                   |

|                                                                         |    |    |                                    |          |                                                    |
|-------------------------------------------------------------------------|----|----|------------------------------------|----------|----------------------------------------------------|
| 0.468145780152165                                                       |    |    | AGIWUR8498;AGIWUR34778;AGIWUR36101 |          |                                                    |
| N2                                                                      | CT | II | 14581377                           | 14582361 | WBGene00007244 C01G12.3 C01G12.3                   |
| 0.0373164484014694                                                      |    |    | AGIWUR28563                        |          |                                                    |
| N2                                                                      | CT | II | 14583706                           | 14585733 | WBGene00006939 wee-1.2 C01G12.4                    |
| -0.111869018258689                                                      |    |    | AGIWUR12799;AGIWUR41845            |          |                                                    |
| N2                                                                      | CT | II | 14586527                           | 14587507 | WBGene00007245 C01G12.5 C01G12.5                   |
| -0.0173822932559409                                                     |    |    | AGIWUR21158                        |          |                                                    |
| N2                                                                      | CT | II | 14587957                           | 14588241 | WBGene00007246 nsps-10 C01G12.6                    |
| 0.481447263253497                                                       |    |    | AGIWUR22159                        |          |                                                    |
| N2                                                                      | CT | II | 14588621                           | 14591893 | WBGene00007247 C01G12.7 C01G12.7                   |
| 0.0735475301434603                                                      |    |    | AGIWUR6995                         |          |                                                    |
| N2                                                                      | CT | II | 14593581                           | 14597657 | WBGene00007248 catp-4 C01G12.8                     |
| 0.287585271213144                                                       |    |    | AGIWUR22850;AGIWUR29822            |          |                                                    |
| N2                                                                      | CT | II | 14600902                           | 14610554 | WBGene00006603 tps-2 F19H8.1 -0.0721007255049493   |
| AGIWUR35888                                                             |    |    |                                    |          |                                                    |
| N2                                                                      | CT | II | 14616068                           | 14622612 | WBGene00008964 mltn-9 F19H8.4 -0.0170007950090509  |
| AGIWUR22280                                                             |    |    |                                    |          |                                                    |
| N2                                                                      | CT | II | 14627630                           | 14630121 | WBGene00007999 tag-297 C38C6.6 -0.0306797556130043 |
| AGIWUR1156                                                              |    |    |                                    |          |                                                    |
| N2                                                                      | CT | II | 14630553                           | 14632636 | WBGene00007998 C38C6.5 C38C6.5 0.0030463055383767  |
| AGIWUR2409;AGIWUR16695                                                  |    |    |                                    |          |                                                    |
| N2                                                                      | CT | II | 14633123                           | 14634657 | WBGene00007996 C38C6.3 C38C6.3 -0.340246234094225  |
| AGIWUR29542                                                             |    |    |                                    |          |                                                    |
| N2                                                                      | CT | II | 14634656                           | 14636837 | WBGene00007997 sre-13 C38C6.4 0.0580941658848602   |
| AGIWUR30223                                                             |    |    |                                    |          |                                                    |
| N2                                                                      | CT | II | 14640096                           | 14644083 | WBGene00000225 atgp-2 C38C6.2 0.145048758126707    |
| AGIWUR3765;AGIWUR21389;AGIWUR21804;AGIWUR28905                          |    |    |                                    |          |                                                    |
| N2                                                                      | CT | II | 14647325                           | 14666943 | WBGene00006787 unc-52 ZC101.2 0.100890108545823    |
| AGIWUR18169;AGIWUR31295;AGIWUR36135                                     |    |    |                                    |          |                                                    |
| N2                                                                      | CT | II | 14675263                           | 14684296 | WBGene00013851 ZC101.1 ZC101.1 0.146867711267581   |
| AGIWUR35897                                                             |    |    |                                    |          |                                                    |
| N2                                                                      | CT | II | 14694192                           | 14695299 | WBGene00010491 K02B7.3 K02B7.3 -0.158596494921595  |
| AGIWUR13831;AGIWUR17035;AGIWUR22360;AGIWUR27365;AGIWUR31050;AGIWUR37046 |    |    |                                    |          |                                                    |
| N2                                                                      | CT | II | 14698701                           | 14699362 | WBGene00007478 C09F9.1 C09F9.1 -0.0331909128965329 |
| AGIWUR371                                                               |    |    |                                    |          |                                                    |
| N2                                                                      | CT | II | 14705512                           | 14712800 | WBGene00007479 C09F9.2 C09F9.2 -0.144835039504792  |
| AGIWUR3438                                                              |    |    |                                    |          |                                                    |
| N2                                                                      | CT | II | 14713340                           | 14718225 | WBGene00045322 C09F9.7 C09F9.7 0.0942279270987481  |
| AGIWUR30576                                                             |    |    |                                    |          |                                                    |

|                                                 |    |    |                                                            |          |                |           |           |                     |
|-------------------------------------------------|----|----|------------------------------------------------------------|----------|----------------|-----------|-----------|---------------------|
| N2                                              | CT | II | 14734410                                                   | 14739243 | WBGene00013187 | npr-34    | Y54E2A.1  |                     |
| 0.215330029211426                               |    |    | AGIWUR27662                                                |          |                |           |           |                     |
| N2                                              | CT | II | 14746890                                                   | 14752489 | WBGene00013188 | smg-9     | Y54E2A.2  |                     |
| 0.00172257218603278                             |    |    | AGIWUR8749;AGIWUR25196;AGIWUR38912                         |          |                |           |           |                     |
| N2                                              | CT | II | 14752891                                                   | 14753907 | WBGene00006381 | tac-1     | Y54E2A.3  |                     |
| 0.149377808397634                               |    |    | AGIWUR18103                                                |          |                |           |           |                     |
| N2                                              | CT | II | 14754622                                                   | 14778149 | WBGene00013189 | Y54E2A.4  | Y54E2A.4  |                     |
| 0.049129949565645                               |    |    | AGIWUR9156;AGIWUR23342                                     |          |                |           |           |                     |
| N2                                              | CT | II | 14778345                                                   | 14782723 | WBGene00013193 | Y54E2A.8  | Y54E2A.8  |                     |
| -0.0775964210012905                             |    |    | AGIWUR8170                                                 |          |                |           |           |                     |
| N2                                              | CT | II | 14785184                                                   | 14785995 | WBGene00013194 | Y54E2A.9  | Y54E2A.9  |                     |
| 0.270235156124862                               |    |    | AGIWUR1495                                                 |          |                |           |           |                     |
| N2                                              | CT | II | 14786198                                                   | 14786512 | WBGene00044171 | Y54E2A.13 | Y54E2A.13 |                     |
| 0.12445707276548                                |    |    | AGIWUR8457;AGIWUR19675;AGIWUR30747;AGIWUR37073;AGIWUR43089 |          |                |           |           |                     |
| N2                                              | CT | II | 14791101                                                   | 14792554 | WBGene00013195 | Y54E2A.10 | Y54E2A.10 |                     |
| 0.201851703648053                               |    |    | AGIWUR30769                                                |          |                |           |           |                     |
| N2                                              | CT | II | 14795404                                                   | 14798224 | WBGene00001225 | eif-3.B   | Y54E2A.11 |                     |
| 0.0294872099395356                              |    |    | AGIWUR3619;AGIWUR7825;AGIWUR11053;AGIWUR11745;AGIWUR15942  |          |                |           |           |                     |
| N2                                              | CT | II | 14798472                                                   | 14800971 | WBGene00013196 | tbc-20    | Y54E2A.12 |                     |
| -0.0152573382249876                             |    |    | AGIWUR13816;AGIWUR17503;AGIWUR33262                        |          |                |           |           |                     |
| N2                                              | CT | II | 14800918                                                   | 14804309 | WBGene00012180 | W01D2.3   | W01D2.3   | 0.166618681183975   |
| AGIWUR5729                                      |    |    |                                                            |          |                |           |           |                     |
| N2                                              | CT | II | 14805986                                                   | 14808087 | WBGene00012181 | srt-11    | W01D2.4   | -0.0432905392197052 |
| AGIWUR13564                                     |    |    |                                                            |          |                |           |           |                     |
| N2                                              | CT | II | 14808922                                                   | 14809204 | WBGene00012183 | W01D2.6   | W01D2.6   | -0.176679701551117  |
| AGIWUR19703                                     |    |    |                                                            |          |                |           |           |                     |
| N2                                              | CT | II | 14812182                                                   | 14814889 | WBGene00012182 | osta-3    | W01D2.5   | -0.0324691855550512 |
| AGIWUR28930                                     |    |    |                                                            |          |                |           |           |                     |
| N2                                              | CT | II | 14816136                                                   | 14840005 | WBGene00003651 | nhr-61    | W01D2.2   | -0.0928980172522644 |
| AGIWUR20157;AGIWUR25353;AGIWUR29518;AGIWUR30187 |    |    |                                                            |          |                |           |           |                     |
| N2                                              | CT | II | 14843177                                                   | 14850905 | WBGene00000399 | cdh-7     | R05H10.6  |                     |
| 0.0806318241606609                              |    |    | AGIWUR6629                                                 |          |                |           |           |                     |
| N2                                              | CT | II | 14852430                                                   | 14853594 | WBGene00011042 | R05H10.1  | R05H10.1  |                     |
| -0.127642560331282                              |    |    | AGIWUR42783                                                |          |                |           |           |                     |
| N2                                              | CT | II | 14855529                                                   | 14857010 | WBGene00011046 | R05H10.7  | R05H10.7  |                     |
| -0.53721329626501                               |    |    | AGIWUR24851                                                |          |                |           |           |                     |
| N2                                              | CT | II | 14857259                                                   | 14866636 | WBGene00011043 | rbm-28    | R05H10.2  |                     |
| -0.165168838765313                              |    |    | AGIWUR4595                                                 |          |                |           |           |                     |
| N2                                              | CT | II | 14866716                                                   | 14869577 | WBGene00011045 | gpx-2     | R05H10.5  |                     |

|                                                                                                                                 |                                                            |          |                |           |                             |
|---------------------------------------------------------------------------------------------------------------------------------|------------------------------------------------------------|----------|----------------|-----------|-----------------------------|
| -0.18080440793036                                                                                                               | AGIWUR24659                                                |          |                |           |                             |
| N2 CT II                                                                                                                        | 14869944                                                   | 14883054 | WBGene00011044 | R05H10.3  | R05H10.3                    |
| 0.10292852370196                                                                                                                | AGIWUR38905                                                |          |                |           |                             |
| N2 CT II                                                                                                                        | 14902493                                                   | 14907533 | WBGene00000584 | cog-1     | R03C1.3 -0.0840886768148508 |
| AGIWUR6298;AGIWUR13164;AGIWUR13360;AGIWUR13897;AGIWUR23597;AGIWUR32475                                                          |                                                            |          |                |           |                             |
| N2 CT II                                                                                                                        | 14907508                                                   | 14910405 | WBGene00010987 | R03C1.1   | R03C1.1 0.306011180648094   |
| AGIWUR36717;AGIWUR40106                                                                                                         |                                                            |          |                |           |                             |
| N2 CT II                                                                                                                        | 14919705                                                   | 14953312 | WBGene00008443 | pde-3     | E01F3.1 0.0511185649919526  |
| AGIWUR2735;AGIWUR5932;AGIWUR6278;AGIWUR7192;AGIWUR10161;AGIWUR10894;AGIWUR16006;AGIWUR25584;AGIWUR29713;AGIWUR40204;AGIWUR41494 |                                                            |          |                |           |                             |
| N2 CT II                                                                                                                        | 14954278                                                   | 14958189 | WBGene00013149 | Y53F4B.1  | Y53F4B.1                    |
| 0.0250635231888268                                                                                                              | AGIWUR36946                                                |          |                |           |                             |
| N2 CT II                                                                                                                        | 14959675                                                   | 14964108 | WBGene00001247 | elo-9     | Y53F4B.2                    |
| -0.16083014624257                                                                                                               | AGIWUR40927                                                |          |                |           |                             |
| N2 CT II                                                                                                                        | 14968633                                                   | 14969354 | WBGene00013150 | Y53F4B.3  | Y53F4B.3                    |
| -0.16186181476575                                                                                                               | AGIWUR40915                                                |          |                |           |                             |
| N2 CT II                                                                                                                        | 14969617                                                   | 14977005 | WBGene00013151 | nsun-5    | Y53F4B.4                    |
| -0.154203643634642                                                                                                              | AGIWUR13954;AGIWUR28834                                    |          |                |           |                             |
| N2 CT II                                                                                                                        | 14982592                                                   | 14984009 | WBGene00013152 | Y53F4B.5  | Y53F4B.5                    |
| 0.166222547614463                                                                                                               | AGIWUR25839                                                |          |                |           |                             |
| N2 CT II                                                                                                                        | 14985806                                                   | 14987225 | WBGene00013153 | Y53F4B.6  | Y53F4B.6                    |
| 0.15029424470246                                                                                                                | AGIWUR3788;AGIWUR23842;AGIWUR26105;AGIWUR36212;AGIWUR36748 |          |                |           |                             |
| N2 CT II                                                                                                                        | 14988471                                                   | 14992667 | WBGene00044726 | Y53F4B.43 | Y53F4B.43                   |
| 0.142641223665079                                                                                                               | AGIWUR13396;AGIWUR22421;AGIWUR27105                        |          |                |           |                             |
| N2 CT II                                                                                                                        | 14994197                                                   | 14997444 | WBGene00013155 | Y53F4B.8  | Y53F4B.8                    |
| 0.139855872044857                                                                                                               | AGIWUR38021                                                |          |                |           |                             |
| N2 CT II                                                                                                                        | 15001896                                                   | 15003510 | WBGene00013157 | Y53F4B.10 | Y53F4B.10                   |
| -0.161441215069797                                                                                                              | AGIWUR34468                                                |          |                |           |                             |
| N2 CT II                                                                                                                        | 15004869                                                   | 15010416 | WBGene00013156 | Y53F4B.9  | Y53F4B.9                    |
| 0.08180615697691                                                                                                                | AGIWUR36328                                                |          |                |           |                             |
| N2 CT II                                                                                                                        | 15010748                                                   | 15013408 | WBGene00013158 | Y53F4B.11 | Y53F4B.11                   |
| -0.227684382075854                                                                                                              | AGIWUR2609                                                 |          |                |           |                             |
| N2 CT II                                                                                                                        | 15019223                                                   | 15025768 | WBGene00013159 | Y53F4B.12 | Y53F4B.12                   |
| 0.0858289857389369                                                                                                              | AGIWUR38902                                                |          |                |           |                             |
| N2 CT II                                                                                                                        | 15026137                                                   | 15037807 | WBGene00013160 | Y53F4B.13 | Y53F4B.13                   |
| -0.0362498098175692                                                                                                             | AGIWUR26575                                                |          |                |           |                             |
| N2 CT II                                                                                                                        | 15037991                                                   | 15039297 | WBGene00013161 | Y53F4B.14 | Y53F4B.14                   |
| 0.0630711789171108                                                                                                              | AGIWUR12472;AGIWUR18353                                    |          |                |           |                             |
| N2 CT II                                                                                                                        | 15039404                                                   | 15048904 | WBGene00000208 | asc-1     | Y53F4B.15                   |

|                      |                                                            |                |                  |           |
|----------------------|------------------------------------------------------------|----------------|------------------|-----------|
| -0.136775491756515   | AGIWUR15313;AGIWUR41331;AGIWUR44728                        |                |                  |           |
| N2 CT II             | 15052085 15055718                                          | WBGene00013162 | Y53F4B.16        | Y53F4B.16 |
| 0.395677371929059    | AGIWUR16810                                                |                |                  |           |
| N2 CT II             | 15064267 15071671                                          | WBGene00013164 | Y53F4B.18        | Y53F4B.18 |
| 0.00969842545778121  | AGIWUR33080                                                |                |                  |           |
| N2 CT II             | 15077218 15079475                                          | WBGene00013165 | Y53F4B.19        | Y53F4B.19 |
| 0.0903416133120523   | AGIWUR8305;AGIWUR20252;AGIWUR43799                         |                |                  |           |
| N2 CT II             | 15084476 15089626                                          | WBGene00013166 | Y53F4B.20        | Y53F4B.20 |
| 0.0383278266038998   | AGIWUR10663                                                |                |                  |           |
| N2 CT II             | 15090172 15109042                                          | WBGene00013167 | Y53F4B.21        | Y53F4B.21 |
| -0.0954221616115358  | AGIWUR3656;AGIWUR23425;AGIWUR24369;AGIWUR38305;AGIWUR42729 |                |                  |           |
| N2 CT II             | 15110144 15116306                                          | WBGene00013176 | Y53F4B.39        | Y53F4B.39 |
| -0.0783267974399973  | AGIWUR38178                                                |                |                  |           |
| N2 CT II             | 15117686 15117963                                          | WBGene00044729 | Y53F4B.46        | Y53F4B.46 |
| 0.0162734340623647   | AGIWUR5825;AGIWUR8271;AGIWUR12857;AGIWUR33283;AGIWUR37234  |                |                  |           |
| N2 CT II             | 15118282 15118951                                          | WBGene00014920 | Y53F4B.38        | Y53F4B.38 |
| -0.0126846949879824  | AGIWUR17970;AGIWUR35908                                    |                |                  |           |
| N2 CT II             | 15120301 15123345                                          | WBGene00013168 | arp-1 Y53F4B.22  |           |
| 0.161121117017888    | AGIWUR3603                                                 |                |                  |           |
| N2 CT II             | 15124504 15126365                                          | WBGene00013169 | Y53F4B.23        | Y53F4B.23 |
| -0.101720028496594   | AGIWUR31793;AGIWUR32003                                    |                |                  |           |
| N2 CT II             | 15136186 15145370                                          | WBGene00013171 | Y53F4B.25        | Y53F4B.25 |
| -0.090759925114952   | AGIWUR5360                                                 |                |                  |           |
| N2 CT II             | 15145894 15151934                                          | WBGene00013173 | Y53F4B.27        | Y53F4B.27 |
| 0.13161544402363     | AGIWUR27560                                                |                |                  |           |
| N2 CT II             | 15158180 15163614                                          | WBGene00004234 | ptr-20 Y53F4B.28 |           |
| 0.167227278128333    | AGIWUR24814                                                |                |                  |           |
| N2 CT II             | 15163808 15164646                                          | WBGene00001774 | gst-26 Y53F4B.29 |           |
| -0.0556630924112262  | AGIWUR6018                                                 |                |                  |           |
| N2 CT II             | 15164890 15165731                                          | WBGene00001775 | gst-27 Y53F4B.30 |           |
| -0.31162667142139    | AGIWUR31989                                                |                |                  |           |
| N2 CT II             | 15166194 15167406                                          | WBGene00001776 | gst-28 Y53F4B.31 |           |
| 0.0911116592242909   | AGIWUR1127                                                 |                |                  |           |
| N2 CT II             | 15168538 15169860                                          | WBGene00001777 | gst-29 Y53F4B.32 |           |
| -0.178252764457199   | AGIWUR31465                                                |                |                  |           |
| N2 CT II             | 15171163 15171912                                          | WBGene00001787 | gst-39 Y53F4B.33 |           |
| -0.0702367078600847  | AGIWUR6423                                                 |                |                  |           |
| N2 CT II             | 15174271 15174965                                          | WBGene00001779 | gst-31 Y53F4B.35 |           |
| -0.00308612931113039 | AGIWUR37191                                                |                |                  |           |

|    |    |     |                                                                                                             |          |                        |            |                                         |  |
|----|----|-----|-------------------------------------------------------------------------------------------------------------|----------|------------------------|------------|-----------------------------------------|--|
| N2 | CT | II  | 15175943                                                                                                    | 15177271 | WBGene00013175         | Y53F4B.36  | Y53F4B.36                               |  |
|    |    |     | 0.110220062806864                                                                                           |          | AGIWUR4348;AGIWUR23408 |            |                                         |  |
| N2 | CT | II  | 15177372                                                                                                    | 15178594 | WBGene00001780         | gst-32     | Y53F4B.37                               |  |
|    |    |     | -0.258483358562458                                                                                          |          | AGIWUR32214            |            |                                         |  |
| N2 | CT | II  | 15179971                                                                                                    | 15183232 | WBGene00001782         | gst-34     | Y1H11.1 0.0859840533138874              |  |
|    |    |     | AGIWUR779;AGIWUR18828;AGIWUR37638                                                                           |          |                        |            |                                         |  |
| N2 | CT | II  | 15183801                                                                                                    | 15185385 | WBGene00001783         | gst-35     | Y1H11.2 0.112560906994801               |  |
|    |    |     | AGIWUR2855                                                                                                  |          |                        |            |                                         |  |
| N2 | CT | II  | 15196214                                                                                                    | 15198075 | WBGene00021598         | Y46E12BR.1 | Y46E12BR.1                              |  |
|    |    |     | 0.149977020951022                                                                                           |          | AGIWUR26873            |            |                                         |  |
| N2 | CT | II  | 15207443                                                                                                    | 15229725 | WBGene00021597         | spsb-1     | Y46E12BL.4                              |  |
|    |    |     | -0.505674744445569                                                                                          |          | AGIWUR15839            |            |                                         |  |
| N2 | CT | II  | 15230343                                                                                                    | 15232803 | WBGene00021596         | spsb-2     | Y46E12BL.3                              |  |
|    |    |     | -0.0142828245124207                                                                                         |          | AGIWUR17487            |            |                                         |  |
| N2 | CT | II  | 15233153                                                                                                    | 15244931 | WBGene00021595         | Y46E12BL.2 | Y46E12BL.2                              |  |
|    |    |     | -0.0915214335293122                                                                                         |          | AGIWUR12187            |            |                                         |  |
| N2 | CT | II  | 15268212                                                                                                    | 15275689 | WBGene00007064         | 2RSSE.1    | 2RSSE.1 -0.0236636126289045             |  |
|    |    |     | AGIWUR40832;AGIWUR43546                                                                                     |          |                        |            |                                         |  |
| N2 | CT | III | 1271                                                                                                        | 3092     | WBGene00008352         | fbxa-6     | cTel154X.1 0.0246391219308908           |  |
|    |    |     | AGIWUR922;AGIWUR23412;AGIWUR38130                                                                           |          |                        |            |                                         |  |
| N2 | CT | III | 3321                                                                                                        | 11940    | WBGene00019183         | npr-30     | H10E21.2 0.0547473094201187             |  |
|    |    |     | AGIWUR33824                                                                                                 |          |                        |            |                                         |  |
| N2 | CT | III | 12170                                                                                                       | 14869    | WBGene00003670         | nhr-80     | H10E21.3 0.0295750125226864             |  |
|    |    |     | AGIWUR301                                                                                                   |          |                        |            |                                         |  |
| N2 | CT | III | 15720                                                                                                       | 17332    | WBGene00019182         | H10E21.1   | H10E21.1 0.00352885658117152            |  |
|    |    |     | AGIWUR6087;AGIWUR27387                                                                                      |          |                        |            |                                         |  |
| N2 | CT | III | 17316                                                                                                       | 19675    | WBGene00019184         | H10E21.4   | H10E21.4 0.0794225630573058             |  |
|    |    |     | AGIWUR9512                                                                                                  |          |                        |            |                                         |  |
| N2 | CT | III | 20531                                                                                                       | 23962    | WBGene00019185         | H10E21.5   | H10E21.5 0.354088843378447              |  |
|    |    |     | AGIWUR42375                                                                                                 |          |                        |            |                                         |  |
| N2 | CT | III | 35454                                                                                                       | 39462    | WBGene00021041         | W05G11.4   | W05G11.4 -0.874832631968731             |  |
|    |    |     | AGIWUR21738                                                                                                 |          |                        |            |                                         |  |
| N2 | CT | III | 41061                                                                                                       | 42021    | WBGene00000663         | col-88     | W05G11.3 0.4544657380915 AGIWUR40441    |  |
| N2 | CT | III | 57702                                                                                                       | 58682    | WBGene00021040         | W05G11.2   | W05G11.2 -0.202241070790881             |  |
|    |    |     | AGIWUR3886                                                                                                  |          |                        |            |                                         |  |
| N2 | CT | III | 62888                                                                                                       | 66261    | WBGene00021043         | pck-1      | W05G11.6 -0.0028657745467191            |  |
|    |    |     | AGIWUR11857;AGIWUR14639;AGIWUR19103;AGIWUR23802;AGIWUR24065;AGIWUR25842;AGIWUR34655;AGIWUR38529;AGIWUR41918 |          |                        |            |                                         |  |
| N2 | CT | III | 69073                                                                                                       | 69817    | WBGene00005014         | spt-4      | F54C4.2 -0.0862567432602788 AGIWUR11937 |  |
| N2 | CT | III | 70442                                                                                                       | 86384    | WBGene00018794         | attf-3     | F54C4.3 -0.20996914615384 AGIWUR6291    |  |

|                                                                                  |    |     |        |        |                 |          |          |                     |             |
|----------------------------------------------------------------------------------|----|-----|--------|--------|-----------------|----------|----------|---------------------|-------------|
| N2                                                                               | CT | III | 86677  | 87381  | WBGene00018795  | F54C4.4  | F54C4.4  | -0.202292606843374  | AGIWUR11681 |
| N2                                                                               | CT | III | 87559  | 89243  | WBGene00018793  | mrp1-40  | F54C4.1  | -0.0286447940624122 | AGIWUR18193 |
| N2                                                                               | CT | III | 89453  | 94809  | WBGene00003931  | pat-4    | C29F9.7  | 0.217750808948704   | AGIWUR26748 |
| N2                                                                               | CT | III | 95394  | 97726  | WBGene00016222  | C29F9.8  | C29F9.8  | 0.126126998298375   | AGIWUR17287 |
| N2                                                                               | CT | III | 106824 | 107899 | WBGene00016224  | fbxa-57  | C29F9.10 | -0.247216951090218  |             |
| AGIWUR32662                                                                      |    |     |        |        |                 |          |          |                     |             |
| N2                                                                               | CT | III | 109322 | 110185 | WBGene00016225  | fbxa-58  | C29F9.11 | 0.00500138390531646 |             |
| AGIWUR32908                                                                      |    |     |        |        |                 |          |          |                     |             |
| N2                                                                               | CT | III | 114903 | 116619 | WBGene00016221  | C29F9.6  | C29F9.6  | -0.143613236907735  | AGIWUR41447 |
| N2                                                                               | CT | III | 117707 | 118767 | WBGene00016220  | C29F9.5  | C29F9.5  | 0.0817705204786918  | AGIWUR24053 |
| N2                                                                               | CT | III | 120492 | 124641 | WBGene00016219  | pals-24  | C29F9.4  | 0.283796185028818   |             |
| AGIWUR14875;AGIWUR40400                                                          |    |     |        |        |                 |          |          |                     |             |
| N2                                                                               | CT | III | 124778 | 126527 | WBGene00016218  | pals-23  | C29F9.3  | 0.282126797071735   |             |
| AGIWUR245;AGIWUR5444;AGIWUR26093;AGIWUR30406;AGIWUR30704;AGIWUR34729;AGIWUR34764 |    |     |        |        |                 |          |          |                     |             |
| N2                                                                               | CT | III | 130180 | 130750 | WBGene00016227  | nhr-280  | C29F9.13 | -0.0576292087193435 |             |
| AGIWUR8933;AGIWUR19189;AGIWUR27290;AGIWUR38196;AGIWUR39253                       |    |     |        |        |                 |          |          |                     |             |
| N2                                                                               | CT | III | 130947 | 131751 | WBGene00016217  | C29F9.2  | C29F9.2  | -0.0721847636766064 | AGIWUR9509  |
| N2                                                                               | CT | III | 132418 | 134401 | WBGene00016216  | pals-22  | C29F9.1  | -0.165300641018138  | AGIWUR40864 |
| N2                                                                               | CT | III | 134494 | 137975 | WBGene00020540  | pals-25  | T17A3.2  | -0.0670939416861955 | AGIWUR36367 |
| N2                                                                               | CT | III | 142121 | 143217 | WBGene00020542  | fbxb-82  | T17A3.4  | 0.00145836394379018 | AGIWUR11919 |
| N2                                                                               | CT | III | 143631 | 144792 | WBGene00020543  | fbxb-83  | T17A3.6  | -0.190605001182496  | AGIWUR12633 |
| N2                                                                               | CT | III | 144994 | 145299 | WBGene00020548  | T17A3.12 | T17A3.12 | -0.0347174467258178 |             |
| AGIWUR35103                                                                      |    |     |        |        |                 |          |          |                     |             |
| N2                                                                               | CT | III | 145360 | 146491 | WBGene00020544  | fbxb-84  | T17A3.7  | -0.0805546437534312 | AGIWUR4909  |
| N2                                                                               | CT | III | 146917 | 147607 | WBGene000269434 | sqst-5   | T17A3.13 | 0.0196868041133786  |             |
| AGIWUR8165;AGIWUR15973;AGIWUR24457                                               |    |     |        |        |                 |          |          |                     |             |
| N2                                                                               | CT | III | 150481 | 151805 | WBGene00020547  | srz-7    | T17A3.11 | 0.0292188315877882  |             |
| AGIWUR1435                                                                       |    |     |        |        |                 |          |          |                     |             |
| N2                                                                               | CT | III | 152572 | 153418 | WBGene00020545  | adbp-2   | T17A3.9  | 0.327564335710074   | AGIWUR16101 |
| N2                                                                               | CT | III | 154475 | 156674 | WBGene00020546  | T17A3.10 | T17A3.10 | -2.23910318022991   |             |
| AGIWUR19180                                                                      |    |     |        |        |                 |          |          |                     |             |
| N2                                                                               | CT | III | 156824 | 163542 | WBGene00006894  | ver-1    | T17A3.1  | -0.0478267308399065 | AGIWUR29063 |
| N2                                                                               | CT | III | 163598 | 164875 | WBGene00018244  | F40G9.8  | F40G9.8  | -0.083247197548225  | AGIWUR31936 |
| N2                                                                               | CT | III | 165690 | 166285 | WBGene00018243  | F40G9.7  | F40G9.7  | -0.441818376674875  | AGIWUR25649 |
| N2                                                                               | CT | III | 167385 | 169556 | WBGene00189954  | F40G9.18 | F40G9.18 | -0.383479873866442  |             |
| AGIWUR35541                                                                      |    |     |        |        |                 |          |          |                     |             |
| N2                                                                               | CT | III | 173797 | 174558 | WBGene00189955  | F40G9.19 | F40G9.19 | 0.0131847494791035  |             |
| AGIWUR17083                                                                      |    |     |        |        |                 |          |          |                     |             |
| N2                                                                               | CT | III | 174609 | 175833 | WBGene00018246  | clcc-148 | F40G9.10 | -0.12228984765388   |             |



|                                                                                           |    |     |        |        |                |           |           |                     |
|-------------------------------------------------------------------------------------------|----|-----|--------|--------|----------------|-----------|-----------|---------------------|
| AGIWUR4961                                                                                |    |     |        |        |                |           |           |                     |
| N2                                                                                        | CT | III | 176111 | 177815 | WBGene00018248 | F40G9.14  | F40G9.14  | 0.0776990888692275  |
| AGIWUR9016                                                                                |    |     |        |        |                |           |           |                     |
| N2                                                                                        | CT | III | 179542 | 180140 | WBGene00018242 | F40G9.6   | F40G9.6   | 0.171587275983477   |
| AGIWUR33631                                                                               |    |     |        |        |                |           |           |                     |
| N2                                                                                        | CT | III | 181561 | 182981 | WBGene00077531 | F40G9.15  | F40G9.15  | -0.221648749005309  |
| AGIWUR32497;AGIWUR36577;AGIWUR39549                                                       |    |     |        |        |                |           |           |                     |
| N2                                                                                        | CT | III | 183231 | 184915 | WBGene00018241 | F40G9.5   | F40G9.5   | 0.164522945531139   |
| AGIWUR37387                                                                               |    |     |        |        |                |           |           |                     |
| N2                                                                                        | CT | III | 185652 | 186922 | WBGene00001963 | btb-1     | F40G9.4   | -0.101327625668736  |
| AGIWUR9514                                                                                |    |     |        |        |                |           |           |                     |
| N2                                                                                        | CT | III | 186951 | 188131 | WBGene00003510 | mxl-2     | F40G9.11  | -0.0527075827744419 |
| AGIWUR14877                                                                               |    |     |        |        |                |           |           |                     |
| N2                                                                                        | CT | III | 188838 | 190974 | WBGene00006715 | ubc-20    | F40G9.3   | -0.158484368282789  |
| AGIWUR5501;AGIWUR11356;AGIWUR36186;AGIWUR37947;AGIWUR38131                                |    |     |        |        |                |           |           |                     |
| N2                                                                                        | CT | III | 190986 | 191981 | WBGene00018240 | cox-17    | F40G9.2   | -0.256652274871385  |
| AGIWUR31562                                                                               |    |     |        |        |                |           |           |                     |
| N2                                                                                        | CT | III | 194460 | 210063 | WBGene00185078 | F40G9.17  | F40G9.17  | 0.092600589098792   |
| AGIWUR33957                                                                               |    |     |        |        |                |           |           |                     |
| N2                                                                                        | CT | III | 209992 | 230450 | WBGene00002230 | k1p-20    | Y50D7A.6  | 0.069496652999522   |
| AGIWUR17698                                                                               |    |     |        |        |                |           |           |                     |
| N2                                                                                        | CT | III | 230429 | 235121 | WBGene00021755 | hpo-38    | Y50D7A.5  | 0.13561547320518    |
| AGIWUR10164                                                                               |    |     |        |        |                |           |           |                     |
| N2                                                                                        | CT | III | 235844 | 254067 | WBGene00021754 | hpo-29    | Y50D7A.4  | -0.174938630047215  |
| AGIWUR23049                                                                               |    |     |        |        |                |           |           |                     |
| N2                                                                                        | CT | III | 254535 | 264636 | WBGene00021753 | Y50D7A.3  | Y50D7A.3  | -0.285406641554687  |
| AGIWUR3020;AGIWUR32669;AGIWUR45172                                                        |    |     |        |        |                |           |           |                     |
| N2                                                                                        | CT | III | 265090 | 266593 | WBGene00021759 | Y50D7A.11 | Y50D7A.11 | 0.0153832745065428  |
| AGIWUR17396                                                                               |    |     |        |        |                |           |           |                     |
| N2                                                                                        | CT | III | 268458 | 283009 | WBGene00021752 | xpd-1     | Y50D7A.2  | -0.247486238901992  |
| AGIWUR16560                                                                               |    |     |        |        |                |           |           |                     |
| N2                                                                                        | CT | III | 284117 | 289444 | WBGene00021757 | taco-1    | Y50D7A.9  | -0.403184175558179  |
| AGIWUR6437                                                                                |    |     |        |        |                |           |           |                     |
| N2                                                                                        | CT | III | 292640 | 314266 | WBGene00021751 | Y50D7A.1  | Y50D7A.1  | -0.0832554410182613 |
| AGIWUR30024                                                                               |    |     |        |        |                |           |           |                     |
| N2                                                                                        | CT | III | 315460 | 321721 | WBGene00021758 | Y50D7A.10 | Y50D7A.10 | -0.104066005797836  |
| AGIWUR2997;AGIWUR9957;AGIWUR40637                                                         |    |     |        |        |                |           |           |                     |
| N2                                                                                        | CT | III | 335956 | 343241 | WBGene00021756 | Y50D7A.8  | Y50D7A.8  | 0.0643325439681668  |
| AGIWUR15243                                                                               |    |     |        |        |                |           |           |                     |
| N2                                                                                        | CT | III | 344307 | 378250 | WBGene00001561 | gei-4     | W07B3.2   | -0.0218928177890074 |
| AGIWUR34;AGIWUR2203;AGIWUR4322;AGIWUR9947;AGIWUR12564;AGIWUR37982;AGIWUR38490;AGIWUR43785 |    |     |        |        |                |           |           |                     |
| N2                                                                                        | CT | III | 378004 | 381298 | WBGene00019636 | gst0-3    | K10F12.4  | -0.0470712298127989 |
| AGIWUR38396                                                                               |    |     |        |        |                |           |           |                     |

|                                                                        |    |     |        |        |                |           |           |                                  |
|------------------------------------------------------------------------|----|-----|--------|--------|----------------|-----------|-----------|----------------------------------|
| N2                                                                     | CT | III | 381900 | 382570 | WBGene00019639 | K10F12.7  | K10F12.7  |                                  |
| -0.00676323932177514 AGIWUR31688                                       |    |     |        |        |                |           |           |                                  |
| N2                                                                     | CT | III | 383771 | 384827 | WBGene00023104 | K10F12.8  | K10F12.8  | 0.0594001977712741               |
| AGIWUR25628;AGIWUR32699;AGIWUR33484;AGIWUR37265;AGIWUR42159            |    |     |        |        |                |           |           |                                  |
| N2                                                                     | CT | III | 398730 | 399392 | WBGene00019638 | K10F12.6  | K10F12.6  | 0.261815517455565                |
| AGIWUR36075                                                            |    |     |        |        |                |           |           |                                  |
| N2                                                                     | CT | III | 402384 | 405589 | WBGene00021909 | Y55B1BL.1 | Y55B1BL.1 | -0.0692306777157023              |
| AGIWUR8894;AGIWUR10666;AGIWUR13026;AGIWUR20424                         |    |     |        |        |                |           |           |                                  |
| N2                                                                     | CT | III | 408094 | 418738 | WBGene00021910 | stim-1    | Y55B1BM.1 | -0.007610446880566               |
| AGIWUR37725                                                            |    |     |        |        |                |           |           |                                  |
| N2                                                                     | CT | III | 429300 | 431750 | WBGene00021913 | cec-8     | Y55B1BR.3 | 0.217067768547535                |
| AGIWUR21073                                                            |    |     |        |        |                |           |           |                                  |
| N2                                                                     | CT | III | 434891 | 440142 | WBGene00021912 | Y55B1BR.2 | Y55B1BR.2 | 0.360644898916883                |
| AGIWUR10365                                                            |    |     |        |        |                |           |           |                                  |
| N2                                                                     | CT | III | 453785 | 463811 | WBGene00044401 | Y55B1BR.6 | Y55B1BR.6 | -0.0708046319531279              |
| AGIWUR16016;AGIWUR19782;AGIWUR25028;AGIWUR28804;AGIWUR32799            |    |     |        |        |                |           |           |                                  |
| N2                                                                     | CT | III | 464715 | 471702 | WBGene00021914 | magu-1    | Y55B1BR.4 | -0.170662030722202               |
| AGIWUR9636;AGIWUR33177;AGIWUR35853                                     |    |     |        |        |                |           |           |                                  |
| N2                                                                     | CT | III | 472301 | 475349 | WBGene00017328 | F10C5.2   | F10C5.2   | 0.000818445061467443 AGIWUR41874 |
| N2                                                                     | CT | III | 475454 | 482322 | WBGene00003134 | mat-3     | F10C5.1   | -0.0120251180780642 AGIWUR30332  |
| N2                                                                     | CT | III | 486123 | 486547 | WBGene00003770 | nlp-32    | F30H5.2   | 0.339742633172519 AGIWUR5416     |
| N2                                                                     | CT | III | 488764 | 489452 | WBGene00044288 | F30H5.5   | F30H5.5   | -0.0703585441617345              |
| AGIWUR1090;AGIWUR12017;AGIWUR13475;AGIWUR25827                         |    |     |        |        |                |           |           |                                  |
| N2                                                                     | CT | III | 491547 | 502625 | WBGene00006781 | unc-45    | F30H5.1   | -0.079847836092922 AGIWUR15042   |
| N2                                                                     | CT | III | 505241 | 512217 | WBGene00017937 | F30H5.3   | F30H5.3   | -0.0187425330805935 AGIWUR28952  |
| N2                                                                     | CT | III | 513720 | 516614 | WBGene00020704 | T22F7.5   | T22F7.5   | 0.21895174162943 AGIWUR18109     |
| N2                                                                     | CT | III | 518356 | 524044 | WBGene00020702 | T22F7.3   | T22F7.3   | 0.235958558716163 AGIWUR35438    |
| N2                                                                     | CT | III | 525234 | 526924 | WBGene00020703 | T22F7.4   | T22F7.4   | -0.0387945513856494 AGIWUR20184  |
| N2                                                                     | CT | III | 542066 | 546537 | WBGene00020701 | T22F7.1   | T22F7.1   | -0.0116047928832472 AGIWUR2200   |
| N2                                                                     | CT | III | 557518 | 572137 | WBGene00015155 | B0353.1   | B0353.1   | 0.289122189056514                |
| AGIWUR21682;AGIWUR27532;AGIWUR33521                                    |    |     |        |        |                |           |           |                                  |
| N2                                                                     | CT | III | 573984 | 576447 | WBGene00021903 | Y55B1AL.1 | Y55B1AL.1 | -0.106616788202185               |
| AGIWUR5302                                                             |    |     |        |        |                |           |           |                                  |
| N2                                                                     | CT | III | 576956 | 577567 | WBGene00021904 | Y55B1AL.2 | Y55B1AL.2 | -0.0158008748082006              |
| AGIWUR5763;AGIWUR12164;AGIWUR16417;AGIWUR23626;AGIWUR25079;AGIWUR43817 |    |     |        |        |                |           |           |                                  |
| N2                                                                     | CT | III | 577684 | 587105 | WBGene00021905 | helq-1    | Y55B1AL.3 | -0.00644609649852868             |
| AGIWUR20903                                                            |    |     |        |        |                |           |           |                                  |
| N2                                                                     | CT | III | 587244 | 598117 | WBGene00021906 | Y55B1AR.2 | Y55B1AR.2 | 0.0343642925058223               |
| AGIWUR1743;AGIWUR21403;AGIWUR32389                                     |    |     |        |        |                |           |           |                                  |

|                                                                      |    |     |        |        |                |           |           |                     |             |
|----------------------------------------------------------------------|----|-----|--------|--------|----------------|-----------|-----------|---------------------|-------------|
| N2                                                                   | CT | III | 599509 | 600366 | WBGene00002269 | lec-6     | Y55B1AR.1 | 0.176929126775757   |             |
| AGIWUR670;AGIWUR6324;AGIWUR18866;AGIWUR21263;AGIWUR33575;AGIWUR43375 |    |     |        |        |                |           |           |                     |             |
| N2                                                                   | CT | III | 602708 | 603822 | WBGene00021907 | Y55B1AR.3 | Y55B1AR.3 | 0.0652627956547098  |             |
| AGIWUR22782                                                          |    |     |        |        |                |           |           |                     |             |
| N2                                                                   | CT | III | 604003 | 605515 | WBGene00021908 | Y55B1AR.4 | Y55B1AR.4 | -0.0406611519070506 |             |
| AGIWUR6153                                                           |    |     |        |        |                |           |           |                     |             |
| N2                                                                   | CT | III | 606004 | 606994 | WBGene00020566 | ttr-7     | T19C3.9   | 0.147942207217863   | AGIWUR12291 |
| N2                                                                   | CT | III | 607045 | 609973 | WBGene00020559 | best-17   | T19C3.1   | 0.34205279307308    | AGIWUR246   |
| N2                                                                   | CT | III | 610881 | 614547 | WBGene00020561 | T19C3.3   | T19C3.3   | 0.129389109034523   | AGIWUR28405 |
| N2                                                                   | CT | III | 614707 | 617447 | WBGene00020560 | T19C3.2   | T19C3.2   | -0.132582375670023  |             |
| AGIWUR27733;AGIWUR37800                                              |    |     |        |        |                |           |           |                     |             |
| N2                                                                   | CT | III | 618246 | 620254 | WBGene00020562 | T19C3.4   | T19C3.4   | 0.0322977848959454  | AGIWUR19194 |
| N2                                                                   | CT | III | 624607 | 627938 | WBGene00020563 | T19C3.5   | T19C3.5   | -0.107831400047719  | AGIWUR17749 |
| N2                                                                   | CT | III | 628175 | 630987 | WBGene00020564 | T19C3.6   | T19C3.6   | -0.0345800794212412 | AGIWUR11209 |
| N2                                                                   | CT | III | 631938 | 634645 | WBGene00001412 | fem-2     | T19C3.8   | -0.0260593793054582 | AGIWUR12509 |
| N2                                                                   | CT | III | 634893 | 636167 | WBGene00020565 | T19C3.7   | T19C3.7   | 0.497527070215813   | AGIWUR7024  |
| N2                                                                   | CT | III | 636479 | 638419 | WBGene00021063 | sbd5-1    | W06E11.4  | 0.0243884005418842  |             |
| AGIWUR37227                                                          |    |     |        |        |                |           |           |                     |             |
| N2                                                                   | CT | III | 638531 | 640226 | WBGene00044319 | tag-266   | W06E11.5  | 0.239457213003345   |             |
| AGIWUR19835;AGIWUR27606                                              |    |     |        |        |                |           |           |                     |             |
| N2                                                                   | CT | III | 640790 | 641625 | WBGene00044318 | tag-267   | W06E11.2  | -0.0421492111977031 |             |
| AGIWUR22516                                                          |    |     |        |        |                |           |           |                     |             |
| N2                                                                   | CT | III | 642059 | 645613 | WBGene00021061 | W06E11.1  | W06E11.1  | -0.0523291907422321 |             |
| AGIWUR14099;AGIWUR36340                                              |    |     |        |        |                |           |           |                     |             |
| N2                                                                   | CT | III | 646754 | 654463 | WBGene00015648 | orai-1    | C09F5.2   | 0.0670257575413959  |             |
| AGIWUR14468;AGIWUR23243                                              |    |     |        |        |                |           |           |                     |             |
| N2                                                                   | CT | III | 658709 | 662732 | WBGene00015647 | C09F5.1   | C09F5.1   | -0.159208513234198  | AGIWUR8004  |
| N2                                                                   | CT | III | 662847 | 666265 | WBGene00015649 | C09F5.3   | C09F5.3   | 0.0263703681663037  | AGIWUR9052  |
| N2                                                                   | CT | III | 668098 | 668433 | WBGene00020923 | W02B3.3   | W02B3.3   | -0.0288789637763553 | AGIWUR26697 |
| N2                                                                   | CT | III | 676122 | 680253 | WBGene00001709 | grk-2     | W02B3.2   | -0.104523170009485  |             |
| AGIWUR2530;AGIWUR28189                                               |    |     |        |        |                |           |           |                     |             |
| N2                                                                   | CT | III | 680634 | 683418 | WBGene00020924 | W02B3.4   | W02B3.4   | 0.0481575201611335  | AGIWUR42698 |
| N2                                                                   | CT | III | 686237 | 692033 | WBGene00020927 | W02B3.7   | W02B3.7   | 0.0608723246609753  | AGIWUR7724  |
| N2                                                                   | CT | III | 688739 | 715823 | WBGene00016029 | elf-1     | C24A1.2   | 0.0513207806805802  | AGIWUR13322 |
| N2                                                                   | CT | III | 725022 | 726155 | WBGene00016028 | flp-24    | C24A1.1   | -0.0712584842814303 |             |
| AGIWUR8330;AGIWUR16177                                               |    |     |        |        |                |           |           |                     |             |
| N2                                                                   | CT | III | 727211 | 752426 | WBGene00003936 | pat-12    | T17H7.4   | 0.214342766714628   |             |
| AGIWUR17747;AGIWUR24713;AGIWUR43935                                  |    |     |        |        |                |           |           |                     |             |
| N2                                                                   | CT | III | 755298 | 758080 | WBGene00020551 | T17H7.7   | T17H7.7   | 0.0740649835332299  | AGIWUR17028 |

|                                                                                    |    |     |        |        |                |          |          |                      |             |
|------------------------------------------------------------------------------------|----|-----|--------|--------|----------------|----------|----------|----------------------|-------------|
| N2                                                                                 | CT | III | 761779 | 762392 | WBGene00018363 | nlp-52   | F42G9.4  | -0.192590189798469   | AGIWUR13691 |
| N2                                                                                 | CT | III | 763810 | 771366 | WBGene00004212 | ptl-1    | F42G9.9  | -0.0704040526121608  |             |
| AGIWUR17260;AGIWUR23112;AGIWUR30034;AGIWUR30114;AGIWUR31642;AGIWUR43414            |    |     |        |        |                |          |          |                      |             |
| N2                                                                                 | CT | III | 771577 | 772819 | WBGene00018365 | tpst-2   | F42G9.8  | -0.184626281985084   | AGIWUR18955 |
| N2                                                                                 | CT | III | 773403 | 774159 | WBGene00000882 | cyn-6    | F42G9.2  | 0.176144080502752    |             |
| AGIWUR2632;AGIWUR7089;AGIWUR13686;AGIWUR21840;AGIWUR23853;AGIWUR42813              |    |     |        |        |                |          |          |                      |             |
| N2                                                                                 | CT | III | 774321 | 778871 | WBGene00000117 | alh-11   | F42G9.5  | 0.117425875673673    |             |
| AGIWUR25312;AGIWUR36861                                                            |    |     |        |        |                |          |          |                      |             |
| N2                                                                                 | CT | III | 783714 | 786092 | WBGene00018362 | F42G9.1  | F42G9.1  | -0.0562914185669783  |             |
| AGIWUR2021;AGIWUR26590;AGIWUR41729                                                 |    |     |        |        |                |          |          |                      |             |
| N2                                                                                 | CT | III | 786532 | 793733 | WBGene00004922 | snt-2    | F42G9.7  | -0.187782940903789   |             |
| AGIWUR6947;AGIWUR14223;AGIWUR27057;AGIWUR28596;AGIWUR35258;AGIWUR42534             |    |     |        |        |                |          |          |                      |             |
| N2                                                                                 | CT | III | 794300 | 795120 | WBGene00004498 | rps-29   | B0412.4  | -0.132782916187931   |             |
| AGIWUR4823;AGIWUR17511;AGIWUR19190;AGIWUR30443;AGIWUR33838;AGIWUR34596;AGIWUR44337 |    |     |        |        |                |          |          |                      |             |
| N2                                                                                 | CT | III | 795136 | 809439 | WBGene00015173 | trpp-11  | B0412.3  | 0.0378794120462356   | AGIWUR28634 |
| N2                                                                                 | CT | III | 811828 | 813773 | WBGene00000903 | daf-7    | B0412.2  | 0.287622839900962    | AGIWUR34983 |
| N2                                                                                 | CT | III | 816145 | 821730 | WBGene00000895 | dac-1    | B0412.1  | -0.00899720968612883 | AGIWUR21958 |
| N2                                                                                 | CT | III | 823222 | 826408 | WBGene00019328 | clcc-149 | K02F3.5  | -0.176169966975078   |             |
| AGIWUR8225;AGIWUR30863                                                             |    |     |        |        |                |          |          |                      |             |
| N2                                                                                 | CT | III | 828590 | 832277 | WBGene00019329 | ceeh-1   | K02F3.6  | -0.239176469182337   |             |
| AGIWUR5535;AGIWUR20354;AGIWUR29930;AGIWUR42060                                     |    |     |        |        |                |          |          |                      |             |
| N2                                                                                 | CT | III | 833858 | 835808 | WBGene00019327 | zip-2    | K02F3.4  | 0.5649262000506      | AGIWUR37051 |
| N2                                                                                 | CT | III | 835815 | 839591 | WBGene00019331 | dos-3    | K02F3.8  | 0.173859285123142    |             |
| AGIWUR14933;AGIWUR21593                                                            |    |     |        |        |                |          |          |                      |             |
| N2                                                                                 | CT | III | 840460 | 841366 | WBGene00019332 | K02F3.9  | K02F3.9  | -0.146214704188285   | AGIWUR30193 |
| N2                                                                                 | CT | III | 842935 | 843802 | WBGene00001392 | far-8    | K02F3.3  | -0.168177266132183   | AGIWUR16155 |
| N2                                                                                 | CT | III | 845842 | 850586 | WBGene00019326 | K02F3.2  | K02F3.2  | -0.103056796543179   | AGIWUR6966  |
| N2                                                                                 | CT | III | 851328 | 852396 | WBGene00019333 | moma-1   | K02F3.10 | -0.0831174732620212  |             |
| AGIWUR42016                                                                        |    |     |        |        |                |          |          |                      |             |
| N2                                                                                 | CT | III | 852801 | 853909 | WBGene00004388 | rnp-5    | K02F3.11 | 0.257717599698527    |             |
| AGIWUR17078                                                                        |    |     |        |        |                |          |          |                      |             |
| N2                                                                                 | CT | III | 854219 | 856535 | WBGene00006430 | tag-51   | K02F3.1  | -0.207184243331595   |             |
| AGIWUR1565;AGIWUR16267;AGIWUR32843                                                 |    |     |        |        |                |          |          |                      |             |
| N2                                                                                 | CT | III | 856560 | 860090 | WBGene00019334 | K02F3.12 | K02F3.12 | -0.0838084309557772  |             |
| AGIWUR15344;AGIWUR19706;AGIWUR40168                                                |    |     |        |        |                |          |          |                      |             |
| N2                                                                                 | CT | III | 860198 | 861324 | WBGene00000202 | exos-4.2 | Y6D11A.1 | 0.0655939896958513   |             |
| AGIWUR23712;AGIWUR35800                                                            |    |     |        |        |                |          |          |                      |             |
| N2                                                                                 | CT | III | 862306 | 865399 | WBGene00021170 | arx-4    | Y6D11A.2 | -0.0176535772521866  |             |
| AGIWUR30094                                                                        |    |     |        |        |                |          |          |                      |             |

|                                                                        |    |     |        |        |                |          |          |                     |             |
|------------------------------------------------------------------------|----|-----|--------|--------|----------------|----------|----------|---------------------|-------------|
| N2                                                                     | CT | III | 867512 | 869987 | WBGene00020758 | T24C4.2  | T24C4.2  | -0.0441493245925981 |             |
| AGIWUR25065;AGIWUR38112;AGIWUR42624                                    |    |     |        |        |                |          |          |                     |             |
| N2                                                                     | CT | III | 871783 | 872385 | WBGene00020759 | T24C4.3  | T24C4.3  | 0.0448307062267901  |             |
| AGIWUR14423;AGIWUR16344;AGIWUR41032;AGIWUR42660                        |    |     |        |        |                |          |          |                     |             |
| N2                                                                     | CT | III | 872622 | 873531 | WBGene00020760 | T24C4.4  | T24C4.4  | 0.280746720021835   |             |
| AGIWUR2930;AGIWUR34970;AGIWUR38120;AGIWUR39190                         |    |     |        |        |                |          |          |                     |             |
| N2                                                                     | CT | III | 874310 | 875325 | WBGene00044681 | T24C4.8  | T24C4.8  | -0.0247429384298847 |             |
| AGIWUR2329;AGIWUR6257;AGIWUR26491                                      |    |     |        |        |                |          |          |                     |             |
| N2                                                                     | CT | III | 877435 | 879734 | WBGene00020761 | T24C4.5  | T24C4.5  | -0.0990911927958873 | AGIWUR2668  |
| N2                                                                     | CT | III | 879860 | 881506 | WBGene00020757 | ucr-2.3  | T24C4.1  | -0.134390885682487  | AGIWUR35884 |
| N2                                                                     | CT | III | 881443 | 886789 | WBGene00020762 | zer-1    | T24C4.6  | 0.0748688366623425  |             |
| AGIWUR39357;AGIWUR44580                                                |    |     |        |        |                |          |          |                     |             |
| N2                                                                     | CT | III | 889955 | 895634 | WBGene00020763 | ztf-18   | T24C4.7  | -0.0250883858569493 |             |
| AGIWUR8590;AGIWUR22251;AGIWUR24829;AGIWUR30563;AGIWUR41360;AGIWUR43319 |    |     |        |        |                |          |          |                     |             |
| N2                                                                     | CT | III | 895786 | 900158 | WBGene00017758 | F23H11.2 | F23H11.2 | -0.0270605879609587 |             |
| AGIWUR11974                                                            |    |     |        |        |                |          |          |                     |             |
| N2                                                                     | CT | III | 900138 | 901444 | WBGene00017759 | suc1-2   | F23H11.3 | 0.116352606108808   |             |
| AGIWUR17484                                                            |    |     |        |        |                |          |          |                     |             |
| N2                                                                     | CT | III | 902151 | 907539 | WBGene00017760 | F23H11.4 | F23H11.4 | -0.0719668163162082 |             |
| AGIWUR6869;AGIWUR39276                                                 |    |     |        |        |                |          |          |                     |             |
| N2                                                                     | CT | III | 908328 | 909902 | WBGene00017763 | cr1s-1   | F23H11.9 | -0.075160425135369  |             |
| AGIWUR8468                                                             |    |     |        |        |                |          |          |                     |             |
| N2                                                                     | CT | III | 909957 | 910589 | WBGene00000263 | F23H11.5 | F23H11.5 | -0.0738494710865627 |             |
| AGIWUR6932;AGIWUR8088;AGIWUR33553;AGIWUR37413;AGIWUR37756;AGIWUR41694  |    |     |        |        |                |          |          |                     |             |
| N2                                                                     | CT | III | 911261 | 912243 | WBGene00017757 | bra-2    | F23H11.1 | 0.122068483438706   |             |
| AGIWUR1147                                                             |    |     |        |        |                |          |          |                     |             |
| N2                                                                     | CT | III | 913248 | 916997 | WBGene00017761 | F23H11.6 | F23H11.6 | 0.124559649101712   |             |
| AGIWUR33605                                                            |    |     |        |        |                |          |          |                     |             |
| N2                                                                     | CT | III | 917088 | 919422 | WBGene00017762 | F23H11.7 | F23H11.7 | -0.121209246163337  |             |
| AGIWUR13839                                                            |    |     |        |        |                |          |          |                     |             |
| N2                                                                     | CT | III | 919528 | 926314 | WBGene00003969 | pef-1    | F23H11.8 | 0.0731199251496952  |             |
| AGIWUR10891;AGIWUR36664                                                |    |     |        |        |                |          |          |                     |             |
| N2                                                                     | CT | III | 933585 | 936067 | WBGene00020453 | fbxa-55  | T12B5.6  | 0.0123299684720086  | AGIWUR1047  |
| N2                                                                     | CT | III | 937302 | 938061 | WBGene00020454 | fbxa-56  | T12B5.7  | -0.0818318229545758 | AGIWUR34001 |
| N2                                                                     | CT | III | 938869 | 939437 | WBGene00020452 | fbxa-22  | T12B5.5  | 0.0371082840758881  | AGIWUR25671 |
| N2                                                                     | CT | III | 940879 | 943469 | WBGene00020455 | fbxa-59  | T12B5.8  | -0.03107440834766   | AGIWUR41567 |
| N2                                                                     | CT | III | 944795 | 946298 | WBGene00020456 | fbxa-60  | T12B5.10 | -0.11214799265251   |             |
| AGIWUR20061                                                            |    |     |        |        |                |          |          |                     |             |
| N2                                                                     | CT | III | 947848 | 949092 | WBGene00020459 | fbxa-23  | T12B5.13 | -0.23376669067396   |             |

AGIWUR31728

|                                                                         |    |     |         |         |                |             |             |                    |             |
|-------------------------------------------------------------------------|----|-----|---------|---------|----------------|-------------|-------------|--------------------|-------------|
| N2                                                                      | CT | III | 950869  | 952264  | WBGene00020451 | fbxa-11     | T12B5.4     | -0.101836599637574 | AGIWUR23723 |
| N2                                                                      | CT | III | 952419  | 953803  | WBGene00020450 | fbxa-10     | T12B5.3     | 0.0762433071573962 | AGIWUR38989 |
| N2                                                                      | CT | III | 954291  | 954653  | WBGene00050914 | T12B5.15    | T12B5.15    | -0.219032967210056 |             |
| AGIWUR1132;AGIWUR1851;AGIWUR22450;AGIWUR38458;AGIWUR39446               |    |     |         |         |                |             |             |                    |             |
| N2                                                                      | CT | III | 954873  | 955295  | WBGene00050913 | T12B5.14    | T12B5.14    | 0.120473064589239  |             |
| AGIWUR18737;AGIWUR28984;AGIWUR31470;AGIWUR32166;AGIWUR41902             |    |     |         |         |                |             |             |                    |             |
| N2                                                                      | CT | III | 956334  | 957947  | WBGene00020449 | fbxa-54     | T12B5.2     | -0.179491903652373 | AGIWUR27557 |
| N2                                                                      | CT | III | 960268  | 961347  | WBGene00020458 | fbxa-70     | T12B5.12    | -0.795875692546128 |             |
| AGIWUR18579                                                             |    |     |         |         |                |             |             |                    |             |
| N2                                                                      | CT | III | 962304  | 963679  | WBGene00020448 | fbxa-51     | T12B5.1     | -0.419173974024038 | AGIWUR21655 |
| N2                                                                      | CT | III | 966654  | 972269  | WBGene00019912 | R06B10.1    | R06B10.1    | 0.443139105486495  |             |
| AGIWUR22141                                                             |    |     |         |         |                |             |             |                    |             |
| N2                                                                      | CT | III | 973311  | 980451  | WBGene00019913 | R06B10.2    | R06B10.2    | 0.230080001282234  |             |
| AGIWUR38698                                                             |    |     |         |         |                |             |             |                    |             |
| N2                                                                      | CT | III | 977386  | 988446  | WBGene00019915 | tbc-10      | R06B10.5    | 0.0760913749044398 |             |
| AGIWUR23747;AGIWUR27330;AGIWUR30813                                     |    |     |         |         |                |             |             |                    |             |
| N2                                                                      | CT | III | 991881  | 1001907 | WBGene00006615 | trp-2       | R06B10.4    | -0.153715188761014 |             |
| AGIWUR18580;AGIWUR36258                                                 |    |     |         |         |                |             |             |                    |             |
| N2                                                                      | CT | III | 1002707 | 1006298 | WBGene00019914 | clcc-150    | R06B10.3    | -0.193520561405609 |             |
| AGIWUR43057                                                             |    |     |         |         |                |             |             |                    |             |
| N2                                                                      | CT | III | 1010535 | 1011385 | WBGene00021337 | Y34F4.2     | Y34F4.2     | -0.254293822240882 | AGIWUR37101 |
| N2                                                                      | CT | III | 1015680 | 1016136 | WBGene00021338 | Y34F4.3     | Y34F4.3     | 0.171633073470624  | AGIWUR27784 |
| N2                                                                      | CT | III | 1020954 | 1021876 | WBGene00021336 | Y34F4.1     | Y34F4.1     | -0.094057326053937 |             |
| AGIWUR24935;AGIWUR25182                                                 |    |     |         |         |                |             |             |                    |             |
| N2                                                                      | CT | III | 1023221 | 1024561 | WBGene00021339 | Y34F4.4     | Y34F4.4     | 0.273870618397387  | AGIWUR4205  |
| N2                                                                      | CT | III | 1026916 | 1031065 | WBGene00021340 | Y34F4.5     | Y34F4.5     | 0.096178830252887  | AGIWUR17466 |
| N2                                                                      | CT | III | 1031324 | 1037212 | WBGene00015267 | chin-1      | BE0003N10.2 | -0.122629622497595 |             |
| AGIWUR40526                                                             |    |     |         |         |                |             |             |                    |             |
| N2                                                                      | CT | III | 1037492 | 1046261 | WBGene00015266 | BE0003N10.1 | BE0003N10.1 | 0.182631531883892  |             |
| AGIWUR20325;AGIWUR32995                                                 |    |     |         |         |                |             |             |                    |             |
| N2                                                                      | CT | III | 1045809 | 1053246 | WBGene00015268 | BE0003N10.3 | BE0003N10.3 | -0.026563105247587 |             |
| AGIWUR996                                                               |    |     |         |         |                |             |             |                    |             |
| N2                                                                      | CT | III | 1062793 | 1076555 | WBGene00006697 | uaf-1       | Y92C3B.2    | 0.30263047713488   |             |
| AGIWUR8964;AGIWUR25966                                                  |    |     |         |         |                |             |             |                    |             |
| N2                                                                      | CT | III | 1078150 | 1080775 | WBGene00004277 | rab-18      | Y92C3B.3    | -0.127897034166883 |             |
| AGIWUR11765;AGIWUR17720;AGIWUR21390;AGIWUR30018;AGIWUR33466;AGIWUR38575 |    |     |         |         |                |             |             |                    |             |
| N2                                                                      | CT | III | 1080901 | 1081300 | WBGene00022357 | kbp-4       | Y92C3B.1    | -0.271454589704735 |             |
| AGIWUR33018                                                             |    |     |         |         |                |             |             |                    |             |

|                                                                                    |    |     |         |         |                |            |            |                    |             |
|------------------------------------------------------------------------------------|----|-----|---------|---------|----------------|------------|------------|--------------------|-------------|
| N2                                                                                 | CT | III | 1081402 | 1095073 | WBGene00003917 | par-2      | F58B6.3    | -0.133274477613646 |             |
| AGIWUR17088;AGIWUR25963                                                            |    |     |         |         |                |            |            |                    |             |
| N2                                                                                 | CT | III | 1103224 | 1111923 | WBGene00019030 | exc-6      | F58B6.2    | 0.0427723547946037 | AGIWUR41199 |
| N2                                                                                 | CT | III | 1112279 | 1116374 | WBGene00019029 | F58B6.1    | F58B6.1    | -0.129061385387896 |             |
| AGIWUR6761;AGIWUR17185;AGIWUR25640;AGIWUR33066;AGIWUR42074                         |    |     |         |         |                |            |            |                    |             |
| N2                                                                                 | CT | III | 1116424 | 1142927 | WBGene00022104 | acsd-1     | Y71D11A.3  | -0.117093542915169 |             |
| AGIWUR10744                                                                        |    |     |         |         |                |            |            |                    |             |
| N2                                                                                 | CT | III | 1143172 | 1145211 | WBGene00004891 | smr-1      | Y71D11A.2  | -0.196611967185651 |             |
| AGIWUR35021;AGIWUR39134                                                            |    |     |         |         |                |            |            |                    |             |
| N2                                                                                 | CT | III | 1152044 | 1181137 | WBGene00022103 | cdh-12     | Y71D11A.1  | -0.174007321807188 |             |
| AGIWUR9139;AGIWUR11394;AGIWUR17116;AGIWUR32780;AGIWUR32922                         |    |     |         |         |                |            |            |                    |             |
| N2                                                                                 | CT | III | 1181990 | 1184942 | WBGene00022490 | Y119D3B.13 | Y119D3B.13 | -0.069658628465703 |             |
| AGIWUR31799                                                                        |    |     |         |         |                |            |            |                    |             |
| N2                                                                                 | CT | III | 1185248 | 1193812 | WBGene00022491 | Y119D3B.14 | Y119D3B.14 | -0.351087316093228 |             |
| AGIWUR26380                                                                        |    |     |         |         |                |            |            |                    |             |
| N2                                                                                 | CT | III | 1194367 | 1196292 | WBGene00022492 | dss-1      | Y119D3B.15 | 0.161694223322433  |             |
| AGIWUR8941                                                                         |    |     |         |         |                |            |            |                    |             |
| N2                                                                                 | CT | III | 1196560 | 1202008 | WBGene00022493 | mrpl-45    | Y119D3B.16 | -0.189316777951689 |             |
| AGIWUR3926                                                                         |    |     |         |         |                |            |            |                    |             |
| N2                                                                                 | CT | III | 1202548 | 1207346 | WBGene00022489 | Y119D3B.12 | Y119D3B.12 | -0.13486523983493  |             |
| AGIWUR3387;AGIWUR12866;AGIWUR16578;AGIWUR21705;AGIWUR27552;AGIWUR35374;AGIWUR36012 |    |     |         |         |                |            |            |                    |             |
| N2                                                                                 | CT | III | 1208104 | 1213650 | WBGene00022488 | orc-3      | Y119D3B.11 | -0.270570219848926 |             |
| AGIWUR15068                                                                        |    |     |         |         |                |            |            |                    |             |
| N2                                                                                 | CT | III | 1214951 | 1215293 | WBGene00022497 | Y119D3B.21 | Y119D3B.21 | 0.111293808077292  |             |
| AGIWUR32793                                                                        |    |     |         |         |                |            |            |                    |             |
| N2                                                                                 | CT | III | 1216116 | 1222072 | WBGene00003978 | pes-4      | Y119D3B.17 | 0.0440086252178595 |             |
| AGIWUR25541                                                                        |    |     |         |         |                |            |            |                    |             |
| N2                                                                                 | CT | III | 1225459 | 1226065 | WBGene00023205 | Y119D3B.10 | Y119D3B.10 | 0.0189686609234627 |             |
| AGIWUR12248                                                                        |    |     |         |         |                |            |            |                    |             |
| N2                                                                                 | CT | III | 1236015 | 1237142 | WBGene00022487 | fbxa-21    | Y119D3B.9  | -0.157382483709769 |             |
| AGIWUR39017                                                                        |    |     |         |         |                |            |            |                    |             |
| N2                                                                                 | CT | III | 1239260 | 1242780 | WBGene00022486 | fbxa-61    | Y119D3B.8  | 0.0909553686396229 |             |
| AGIWUR8976;AGIWUR34220;AGIWUR38464                                                 |    |     |         |         |                |            |            |                    |             |
| N2                                                                                 | CT | III | 1243513 | 1245283 | WBGene00022485 | fbxa-63    | Y119D3B.7  | -0.147571716849955 |             |
| AGIWUR29215                                                                        |    |     |         |         |                |            |            |                    |             |
| N2                                                                                 | CT | III | 1247618 | 1249153 | WBGene00044675 | fbxa-76    | Y119D3B.22 | -0.242889831561548 |             |
| AGIWUR7976;AGIWUR28206                                                             |    |     |         |         |                |            |            |                    |             |
| N2                                                                                 | CT | III | 1249493 | 1251838 | WBGene00022484 | fbxa-77    | Y119D3B.6  | -0.122530243451427 |             |
| AGIWUR5949                                                                         |    |     |         |         |                |            |            |                    |             |

|                       |    |     |         |         |                |            |            |                     |             |
|-----------------------|----|-----|---------|---------|----------------|------------|------------|---------------------|-------------|
| N2                    | CT | III | 1253384 | 1254401 | WBGene00022494 | fbxa-91    | Y119D3B.18 | -0.115896669708739  |             |
| AGIWUR20168           |    |     |         |         |                |            |            |                     |             |
| N2                    | CT | III | 1267338 | 1269256 | WBGene00013839 | fbxa-32    | ZC47.6     | -0.525451560599647  | AGIWUR6737  |
| N2                    | CT | III | 1269558 | 1271451 | WBGene00013838 | fbxa-31    | ZC47.5     | 0.0260729869012311  | AGIWUR2303  |
| N2                    | CT | III | 1272474 | 1273676 | WBGene00013836 | fbxa-29    | ZC47.3     | -0.281374351875685  | AGIWUR25699 |
| N2                    | CT | III | 1276249 | 1277360 | WBGene00014979 | ZC47.11    | ZC47.11    | 0.0539054432004704  | AGIWUR3704  |
| N2                    | CT | III | 1277960 | 1278991 | WBGene00014978 | ZC47.8     | ZC47.8     | -0.075917936562929  | AGIWUR7537  |
| N2                    | CT | III | 1279627 | 1281725 | WBGene00013841 | fbxa-33    | ZC47.9     | -0.142768044201222  | AGIWUR29339 |
| N2                    | CT | III | 1282401 | 1284144 | WBGene00013842 | fbxa-34    | ZC47.10    | 0.105693338646118   | AGIWUR33731 |
| N2                    | CT | III | 1285016 | 1287119 | WBGene00013845 | fbxa-37    | ZC47.14    | -0.085036554544347  | AGIWUR16699 |
| N2                    | CT | III | 1287299 | 1288523 | WBGene00013844 | fbxa-50    | ZC47.13    | -0.416913677189597  | AGIWUR40231 |
| N2                    | CT | III | 1289747 | 1290938 | WBGene00013843 | fbxa-49    | ZC47.12    | 0.108446998404204   | AGIWUR28291 |
| N2                    | CT | III | 1292051 | 1293215 | WBGene00022479 | fbxa-36    | Y119D3A.4  | -0.16083987861084   |             |
| AGIWUR23896           |    |     |         |         |                |            |            |                     |             |
| N2                    | CT | III | 1297904 | 1299484 | WBGene00022477 | fbxa-28    | Y119D3A.2  | -0.0248975620579373 |             |
| AGIWUR43481           |    |     |         |         |                |            |            |                     |             |
| N2                    | CT | III | 1303714 | 1305461 | WBGene00022476 | fbxa-75    | Y119D3A.1  | 1.89694458536047    |             |
| AGIWUR17956           |    |     |         |         |                |            |            |                     |             |
| N2                    | CT | III | 1305716 | 1308294 | WBGene00022329 | fbxa-79    | Y82E9BL.13 | -0.116937703758166  |             |
| AGIWUR43569           |    |     |         |         |                |            |            |                     |             |
| N2                    | CT | III | 1309187 | 1311226 | WBGene00022328 | Y82E9BL.12 | Y82E9BL.12 | -0.12096371111584   |             |
| AGIWUR33175           |    |     |         |         |                |            |            |                     |             |
| N2                    | CT | III | 1311228 | 1313148 | WBGene00022332 | fbxa-20    | Y82E9BL.16 | -0.0170252689575738 |             |
| AGIWUR37149           |    |     |         |         |                |            |            |                     |             |
| N2                    | CT | III | 1313297 | 1315229 | WBGene00022330 | fbxa-80    | Y82E9BL.14 | -0.155721981955537  |             |
| AGIWUR6535            |    |     |         |         |                |            |            |                     |             |
| N2                    | CT | III | 1315264 | 1316665 | WBGene00022331 | fbxa-19    | Y82E9BL.15 | 0.071928458027946   |             |
| AGIWUR35810           |    |     |         |         |                |            |            |                     |             |
| N2                    | CT | III | 1319016 | 1321671 | WBGene00022327 | fbxa-15    | Y82E9BL.11 | -0.136799940427187  |             |
| AGIWUR44682           |    |     |         |         |                |            |            |                     |             |
| N2                    | CT | III | 1322133 | 1324633 | WBGene00022326 | fbxa-14    | Y82E9BL.10 | -0.109726896176273  |             |
| AGIWUR6137            |    |     |         |         |                |            |            |                     |             |
| N2                    | CT | III | 1332016 | 1333708 | WBGene00194735 | Y82E9BL.19 | Y82E9BL.19 | 0.118165301674853   |             |
| AGIWUR2791;AGIWUR6751 |    |     |         |         |                |            |            |                     |             |
| N2                    | CT | III | 1333921 | 1335467 | WBGene00023395 | Y82E9BL.9  | Y82E9BL.9  |                     |             |
| -0.00316063874211459  |    |     |         |         |                |            |            |                     |             |
| AGIWUR32587           |    |     |         |         |                |            |            |                     |             |
| N2                    | CT | III | 1336707 | 1340333 | WBGene00022325 | fbxa-5     | Y82E9BL.8  | -0.0991402543102451 |             |
| AGIWUR16200           |    |     |         |         |                |            |            |                     |             |
| N2                    | CT | III | 1340597 | 1342494 | WBGene00022324 | fbxa-26    | Y82E9BL.7  | 0.147516551382889   |             |



|                                                            |     |         |         |                                                |                    |                     |                     |
|------------------------------------------------------------|-----|---------|---------|------------------------------------------------|--------------------|---------------------|---------------------|
| AGIWUR41167                                                |     |         |         |                                                |                    |                     |                     |
| N2 CT                                                      | III | 1342975 | 1344692 | WBGene00022333                                 | fbxa-27 Y82E9BL.17 | 0.466228013246182   |                     |
| AGIWUR35505                                                |     |         |         |                                                |                    |                     |                     |
| N2 CT                                                      | III | 1344874 | 1345794 | WBGene00022323                                 | Y82E9BL.6          | Y82E9BL.6           | 0.200466993129223   |
| AGIWUR17019                                                |     |         |         |                                                |                    |                     |                     |
| N2 CT                                                      | III | 1346315 | 1347128 | WBGene00022322                                 | Y82E9BL.5          | Y82E9BL.5           | -0.0912122556438977 |
| AGIWUR43463                                                |     |         |         |                                                |                    |                     |                     |
| N2 CT                                                      | III | 1347787 | 1349400 | WBGene00022321                                 | fbxa-25 Y82E9BL.4  | -0.248873995969507  |                     |
| AGIWUR40811                                                |     |         |         |                                                |                    |                     |                     |
| N2 CT                                                      | III | 1349752 | 1350836 | WBGene00022320                                 | Y82E9BL.3          | Y82E9BL.3           | 0.087786277286992   |
| AGIWUR12446                                                |     |         |         |                                                |                    |                     |                     |
| N2 CT                                                      | III | 1351216 | 1353371 | WBGene00022319                                 | Y82E9BL.2          | Y82E9BL.2           | 0.012732813256549   |
| AGIWUR708                                                  |     |         |         |                                                |                    |                     |                     |
| N2 CT                                                      | III | 1354997 | 1355420 | WBGene00022318                                 | Y82E9BL.1          | Y82E9BL.1           | 0.0753279546415886  |
| AGIWUR13081                                                |     |         |         |                                                |                    |                     |                     |
| N2 CT                                                      | III | 1357080 | 1359135 | WBGene00022341                                 | Y82E9BR.8          | Y82E9BR.8           | -0.0869528655772118 |
| AGIWUR34134                                                |     |         |         |                                                |                    |                     |                     |
| N2 CT                                                      | III | 1359254 | 1359769 | WBGene00022342                                 | Y82E9BR.9          | Y82E9BR.9           | 0.136204304034427   |
| AGIWUR2133                                                 |     |         |         |                                                |                    |                     |                     |
| N2 CT                                                      | III | 1360507 | 1362676 | WBGene00022340                                 | Y82E9BR.7          | Y82E9BR.7           | 0.0832577429705932  |
| AGIWUR31551                                                |     |         |         |                                                |                    |                     |                     |
| N2 CT                                                      | III | 1374152 | 1376542 | WBGene00022352                                 | Y82E9BR.20         | Y82E9BR.20          | 0.133466917012201   |
| AGIWUR2628;AGIWUR9977                                      |     |         |         |                                                |                    |                     |                     |
| N2 CT                                                      | III | 1376945 | 1378003 | WBGene00022344                                 | Y82E9BR.11         | Y82E9BR.11          | -0.31759112453611   |
| AGIWUR18767                                                |     |         |         |                                                |                    |                     |                     |
| N2 CT                                                      | III | 1379140 | 1380663 | WBGene00255597                                 | pals-21 Y82E9BR.32 | 0.194915478301728   |                     |
| AGIWUR43451                                                |     |         |         |                                                |                    |                     |                     |
| N2 CT                                                      | III | 1390450 | 1391852 | WBGene00022346                                 | pals-17 Y82E9BR.13 | 0.0509364408933255  |                     |
| AGIWUR19418                                                |     |         |         |                                                |                    |                     |                     |
| N2 CT                                                      | III | 1399972 | 1401305 | WBGene00022337                                 | pals-16 Y82E9BR.4  | 0.0716015455275461  |                     |
| AGIWUR19480;AGIWUR25923                                    |     |         |         |                                                |                    |                     |                     |
| N2 CT                                                      | III | 1401946 | 1403460 | WBGene00044761                                 | pals-19 Y82E9BR.23 | -0.0616216508512402 |                     |
| AGIWUR1993                                                 |     |         |         |                                                |                    |                     |                     |
| N2 CT                                                      | III | 1404792 | 1406230 | WBGene00022353                                 | pals-18 Y82E9BR.21 | -0.0609872220436731 |                     |
| AGIWUR7285                                                 |     |         |         |                                                |                    |                     |                     |
| N2 CT                                                      | III | 1406463 | 1409239 | WBGene00022354                                 | Y82E9BR.22         | Y82E9BR.22          | -0.185757544889283  |
| AGIWUR4189;AGIWUR14797;AGIWUR32752;AGIWUR42719;AGIWUR45183 |     |         |         |                                                |                    |                     |                     |
| N2 CT                                                      | III | 1409243 | 1414116 | WBGene00022347                                 | Y82E9BR.14         | Y82E9BR.14          |                     |
| -0.00139216607485526                                       |     |         |         | AGIWUR7123;AGIWUR10710;AGIWUR14676;AGIWUR29289 |                    |                     |                     |

|                                                                                                             |    |     |         |         |                |            |            |                     |             |
|-------------------------------------------------------------------------------------------------------------|----|-----|---------|---------|----------------|------------|------------|---------------------|-------------|
| N2                                                                                                          | CT | III | 1415152 | 1417188 | WBGene00001236 | e1c-1      | Y82E9BR.15 | -0.239883037443358  |             |
| AGIWUR1874                                                                                                  |    |     |         |         |                |            |            |                     |             |
| N2                                                                                                          | CT | III | 1419196 | 1419914 | WBGene00022336 | Y82E9BR.3  | Y82E9BR.3  | -0.0340502719142428 |             |
| AGIWUR2471;AGIWUR6917;AGIWUR26470;AGIWUR28885;AGIWUR32675;AGIWUR33117;AGIWUR38718                           |    |     |         |         |                |            |            |                     |             |
| N2                                                                                                          | CT | III | 1419863 | 1427228 | WBGene00022348 | Y82E9BR.16 | Y82E9BR.16 | 0.0473797202148241  |             |
| AGIWUR3732;AGIWUR21213;AGIWUR28839;AGIWUR29791;AGIWUR32813;AGIWUR36733;AGIWUR40929                          |    |     |         |         |                |            |            |                     |             |
| N2                                                                                                          | CT | III | 1438832 | 1443190 | WBGene00022335 | Y82E9BR.2  | Y82E9BR.2  | 0.0795845495529841  |             |
| AGIWUR14741                                                                                                 |    |     |         |         |                |            |            |                     |             |
| N2                                                                                                          | CT | III | 1447495 | 1455770 | WBGene00022349 | Y82E9BR.17 | Y82E9BR.17 | 0.177830806651523   |             |
| AGIWUR27623                                                                                                 |    |     |         |         |                |            |            |                     |             |
| N2                                                                                                          | CT | III | 1458536 | 1466732 | WBGene00022334 | Y82E9BR.1  | Y82E9BR.1  | 0.169364872690312   |             |
| AGIWUR31260                                                                                                 |    |     |         |         |                |            |            |                     |             |
| N2                                                                                                          | CT | III | 1467876 | 1483507 | WBGene00022350 | Y82E9BR.18 | Y82E9BR.18 | -0.0647580390291758 |             |
| AGIWUR44514                                                                                                 |    |     |         |         |                |            |            |                     |             |
| N2                                                                                                          | CT | III | 1468643 | 1517993 | WBGene00019716 | M01G5.3    | M01G5.3    | -0.117257632773491  | AGIWUR43524 |
| N2                                                                                                          | CT | III | 1520224 | 1532768 | WBGene00004905 | snf-6      | M01G5.5    | -0.0312905068851914 |             |
| AGIWUR10711;AGIWUR30660                                                                                     |    |     |         |         |                |            |            |                     |             |
| N2                                                                                                          | CT | III | 1533774 | 1538198 | WBGene00022054 | Y67D2.4    | Y67D2.4    | -0.171294859846218  |             |
| AGIWUR16840;AGIWUR18256;AGIWUR19412;AGIWUR33162;AGIWUR38801;AGIWUR39025                                     |    |     |         |         |                |            |            |                     |             |
| N2                                                                                                          | CT | III | 1538472 | 1540244 | WBGene00022055 | Y67D2.5    | Y67D2.5    | -0.266206958287224  |             |
| AGIWUR4238;AGIWUR4934;AGIWUR24164;AGIWUR41948                                                               |    |     |         |         |                |            |            |                     |             |
| N2                                                                                                          | CT | III | 1555395 | 1558529 | WBGene00022057 | Y67D2.7    | Y67D2.7    | -0.105689522267845  | AGIWUR7019  |
| N2                                                                                                          | CT | III | 1558800 | 1570129 | WBGene00022052 | Y67D2.2    | Y67D2.2    | -0.0472603364985709 | AGIWUR42933 |
| N2                                                                                                          | CT | III | 1570306 | 1576638 | WBGene00022051 | rep-1      | Y67D2.1    | -0.124415634028747  |             |
| AGIWUR13469;AGIWUR21879                                                                                     |    |     |         |         |                |            |            |                     |             |
| N2                                                                                                          | CT | III | 1576751 | 1580857 | WBGene00021246 | Y22D7AL.7  | Y22D7AL.7  | -0.210341264270864  |             |
| AGIWUR30553                                                                                                 |    |     |         |         |                |            |            |                     |             |
| N2                                                                                                          | CT | III | 1583155 | 1601140 | WBGene00004894 | sms-3      | Y22D7AL.8  | 0.111500952060414   |             |
| AGIWUR22781                                                                                                 |    |     |         |         |                |            |            |                     |             |
| N2                                                                                                          | CT | III | 1604955 | 1606850 | WBGene00021245 | Y22D7AL.6  | Y22D7AL.6  | 0.00366540149257677 |             |
| AGIWUR11587;AGIWUR13083                                                                                     |    |     |         |         |                |            |            |                     |             |
| N2                                                                                                          | CT | III | 1606829 | 1614033 | WBGene00021247 | Y22D7AL.9  | Y22D7AL.9  | -0.210257431808981  |             |
| AGIWUR10604;AGIWUR11815;AGIWUR13461;AGIWUR20754                                                             |    |     |         |         |                |            |            |                     |             |
| N2                                                                                                          | CT | III | 1617151 | 1618954 | WBGene00021248 | Y22D7AL.10 | Y22D7AL.10 | -0.176704393796348  |             |
| AGIWUR3499;AGIWUR30303                                                                                      |    |     |         |         |                |            |            |                     |             |
| N2                                                                                                          | CT | III | 1619742 | 1625797 | WBGene00002025 | hsp-60     | Y22D7AL.5  | 0.244439121069137   |             |
| AGIWUR10628;AGIWUR19794;AGIWUR20849;AGIWUR20967;AGIWUR21651;AGIWUR26390;AGIWUR33280;AGIWUR34824;AGIWUR42555 |    |     |         |         |                |            |            |                     |             |
| ;AGIWUR43856                                                                                                |    |     |         |         |                |            |            |                     |             |
| N2                                                                                                          | CT | III | 1626632 | 1637561 | WBGene00021244 | Y22D7AL.4  | Y22D7AL.4  | -0.10249048806855   |             |

|                                                                                                                                                           |    |     |         |         |                |                    |                                |
|-----------------------------------------------------------------------------------------------------------------------------------------------------------|----|-----|---------|---------|----------------|--------------------|--------------------------------|
| AGIWUR9679;AGIWUR24031                                                                                                                                    |    |     |         |         |                |                    |                                |
| N2                                                                                                                                                        | CT | III | 1641463 | 1641735 | WBGene00021243 | Y22D7AL.3          | Y22D7AL.3 -0.192067482067698   |
| AGIWUR6951                                                                                                                                                |    |     |         |         |                |                    |                                |
| N2                                                                                                                                                        | CT | III | 1642649 | 1644563 | WBGene00021250 | Y22D7AL.12         | Y22D7AL.12 -0.0262764989547719 |
| AGIWUR44260                                                                                                                                               |    |     |         |         |                |                    |                                |
| N2                                                                                                                                                        | CT | III | 1648621 | 1648806 | WBGene00021251 | Y22D7AL.13         | Y22D7AL.13 -0.101586756884046  |
| AGIWUR43504                                                                                                                                               |    |     |         |         |                |                    |                                |
| N2                                                                                                                                                        | CT | III | 1650302 | 1652669 | WBGene00021241 | Y22D7AL.1          | Y22D7AL.1 -0.140784355636689   |
| AGIWUR26222                                                                                                                                               |    |     |         |         |                |                    |                                |
| N2                                                                                                                                                        | CT | III | 1653731 | 1657480 | WBGene00021252 | cht-4 Y22D7AL.14   | 0.0416034853980314             |
| AGIWUR39024                                                                                                                                               |    |     |         |         |                |                    |                                |
| N2                                                                                                                                                        | CT | III | 1658207 | 1659863 | WBGene00021253 | Y22D7AL.15         | Y22D7AL.15 0.00932204907988776 |
| AGIWUR28095                                                                                                                                               |    |     |         |         |                |                    |                                |
| N2                                                                                                                                                        | CT | III | 1662104 | 1665152 | WBGene00021254 | Y22D7AL.16         | Y22D7AL.16 0.0495437488264017  |
| AGIWUR14048;AGIWUR28872;AGIWUR29282;AGIWUR35626;AGIWUR42920;AGIWUR43018                                                                                   |    |     |         |         |                |                    |                                |
| N2                                                                                                                                                        | CT | III | 1665493 | 1665793 | WBGene00021257 | Y22D7AR.3          | Y22D7AR.3 0.172496929689691    |
| AGIWUR37407                                                                                                                                               |    |     |         |         |                |                    |                                |
| N2                                                                                                                                                        | CT | III | 1665913 | 1668634 | WBGene00021259 | glb-30 Y22D7AR.5   | -0.00118251022815397           |
| AGIWUR3197;AGIWUR7436;AGIWUR12048;AGIWUR14806;AGIWUR16613;AGIWUR17397;AGIWUR19490;AGIWUR21379;AGIWUR26038;AGIWUR36213;AGIWUR38898;AGIWUR40232;AGIWUR41393 |    |     |         |         |                |                    |                                |
| N2                                                                                                                                                        | CT | III | 1672517 | 1676721 | WBGene00021260 | Y22D7AR.6          | Y22D7AR.6 -0.322895087324864   |
| AGIWUR542;AGIWUR6397                                                                                                                                      |    |     |         |         |                |                    |                                |
| N2                                                                                                                                                        | CT | III | 1683630 | 1688099 | WBGene00021261 | Y22D7AR.7          | Y22D7AR.7 0.143443580292711    |
| AGIWUR43214                                                                                                                                               |    |     |         |         |                |                    |                                |
| N2                                                                                                                                                        | CT | III | 1688144 | 1691770 | WBGene00021266 | Y22D7AR.14         | Y22D7AR.14 0.121296718602416   |
| AGIWUR43757                                                                                                                                               |    |     |         |         |                |                    |                                |
| N2                                                                                                                                                        | CT | III | 1692081 | 1695106 | WBGene00005141 | srd-64 Y22D7AR.8   | 0.3641041896538 AGIWUR1225     |
| N2                                                                                                                                                        | CT | III | 1697221 | 1698986 | WBGene00021262 | fbxa-74 Y22D7AR.9  | -0.0326945259259261            |
| AGIWUR2493                                                                                                                                                |    |     |         |         |                |                    |                                |
| N2                                                                                                                                                        | CT | III | 1701714 | 1702437 | WBGene00021263 | Y22D7AR.10         | Y22D7AR.10 -0.10237493272831   |
| AGIWUR35366                                                                                                                                               |    |     |         |         |                |                    |                                |
| N2                                                                                                                                                        | CT | III | 1703500 | 1705899 | WBGene00021264 | fbxa-13 Y22D7AR.11 | -0.342790705811264             |
| AGIWUR33164                                                                                                                                               |    |     |         |         |                |                    |                                |
| N2                                                                                                                                                        | CT | III | 1705946 | 1713729 | WBGene00021256 | Y22D7AR.2          | Y22D7AR.2 0.0263281651166567   |
| AGIWUR21273                                                                                                                                               |    |     |         |         |                |                    |                                |
| N2                                                                                                                                                        | CT | III | 1716527 | 1722605 | WBGene00021265 | Y22D7AR.12         | Y22D7AR.12 0.140367586933397   |
| AGIWUR30137                                                                                                                                               |    |     |         |         |                |                    |                                |
| N2                                                                                                                                                        | CT | III | 1723194 | 1733101 | WBGene00004779 | ser-4 Y22D7AR.13   | -0.0865707544913938            |
| AGIWUR29875;AGIWUR39631;AGIWUR41915                                                                                                                       |    |     |         |         |                |                    |                                |

|                         |    |     |         |         |                |           |           |                    |             |
|-------------------------|----|-----|---------|---------|----------------|-----------|-----------|--------------------|-------------|
| N2                      | CT | III | 1752183 | 1754942 | WBGene00021593 | Y46E12A.3 | Y46E12A.3 | 0.268585763832764  |             |
| AGIWUR10721             |    |     |         |         |                |           |           |                    |             |
| N2                      | CT | III | 1758721 | 1759783 | WBGene00021592 | Y46E12A.2 | Y46E12A.2 | -0.108281681432331 |             |
| AGIWUR26043             |    |     |         |         |                |           |           |                    |             |
| N2                      | CT | III | 1763524 | 1764836 | WBGene00000560 | cnc-6     | Y46E12A.1 | -0.261352978038255 |             |
| AGIWUR12088             |    |     |         |         |                |           |           |                    |             |
| N2                      | CT | III | 1765458 | 1770091 | WBGene00044798 | tbx-43    | Y46E12A.4 | 0.264032334137263  |             |
| AGIWUR9296;AGIWUR9677   |    |     |         |         |                |           |           |                    |             |
| N2                      | CT | III | 1772531 | 1778069 | WBGene00021442 | Y39A3CL.4 | Y39A3CL.4 | -0.206014073301134 |             |
| AGIWUR34744             |    |     |         |         |                |           |           |                    |             |
| N2                      | CT | III | 1777802 | 1778309 | WBGene00021441 | Y39A3CL.3 | Y39A3CL.3 | -0.124644327092293 |             |
| AGIWUR43170             |    |     |         |         |                |           |           |                    |             |
| N2                      | CT | III | 1789084 | 1806859 | WBGene00006513 | rimb-1    | Y39A3CL.2 | 0.0994088368086459 |             |
| AGIWUR16195             |    |     |         |         |                |           |           |                    |             |
| N2                      | CT | III | 1807740 | 1818323 | WBGene00000545 | clp-4     | Y39A3CL.5 | 0.0538484415541021 |             |
| AGIWUR8475;AGIWUR36088  |    |     |         |         |                |           |           |                    |             |
| N2                      | CT | III | 1821150 | 1824180 | WBGene00004249 | pvf-1     | Y39A3CL.6 | -0.223621834362946 |             |
| AGIWUR2416              |    |     |         |         |                |           |           |                    |             |
| N2                      | CT | III | 1824919 | 1834347 | WBGene00021443 | Y39A3CL.7 | Y39A3CL.7 | -0.140200420939399 |             |
| AGIWUR20246;AGIWUR32428 |    |     |         |         |                |           |           |                    |             |
| N2                      | CT | III | 1834513 | 1846758 | WBGene00021440 | Y39A3CL.1 | Y39A3CL.1 | -0.238372743229769 |             |
| AGIWUR36420             |    |     |         |         |                |           |           |                    |             |
| N2                      | CT | III | 1849047 | 1852902 | WBGene00004163 | pqn-82    | Y39A3CR.7 | 0.10249358652085   |             |
| AGIWUR18098             |    |     |         |         |                |           |           |                    |             |
| N2                      | CT | III | 1855390 | 1858884 | WBGene00021446 | hlh-33    | Y39A3CR.6 | -0.192150879955976 |             |
| AGIWUR4579              |    |     |         |         |                |           |           |                    |             |
| N2                      | CT | III | 1858913 | 1859569 | WBGene00021445 | Y39A3CR.5 | Y39A3CR.5 | -0.260831661433055 |             |
| AGIWUR25527             |    |     |         |         |                |           |           |                    |             |
| N2                      | CT | III | 1859888 | 1860381 | WBGene00000941 | ddp-1     | Y39A3CR.4 | -0.130156045266153 |             |
| AGIWUR11023;AGIWUR17766 |    |     |         |         |                |           |           |                    |             |
| N2                      | CT | III | 1860429 | 1877514 | WBGene00021444 | ttc-7     | Y39A3CR.3 | -0.1694930549834   |             |
| AGIWUR13456             |    |     |         |         |                |           |           |                    |             |
| N2                      | CT | III | 1878365 | 1880866 | WBGene00004886 | smi-1     | Y39A3CR.1 | -0.300883549702093 |             |
| AGIWUR12074;AGIWUR28726 |    |     |         |         |                |           |           |                    |             |
| N2                      | CT | III | 1881158 | 1883017 | WBGene00021447 | Y39A3CR.8 | Y39A3CR.8 | 0.416602607659364  |             |
| AGIWUR17516             |    |     |         |         |                |           |           |                    |             |
| N2                      | CT | III | 1883607 | 1886218 | WBGene00015243 | B0524.4   | B0524.4   | 0.0572680001376327 | AGIWUR13914 |
| N2                      | CT | III | 1887558 | 1889691 | WBGene00015242 | B0524.3   | B0524.3   | 0.208531317147829  | AGIWUR39402 |
| N2                      | CT | III | 1891383 | 1893842 | WBGene00015244 | B0524.5   | B0524.5   | 0.189630426737869  | AGIWUR13306 |

|                                                                                                                                                                    |    |     |         |         |                |          |          |                     |             |
|--------------------------------------------------------------------------------------------------------------------------------------------------------------------|----|-----|---------|---------|----------------|----------|----------|---------------------|-------------|
| N2                                                                                                                                                                 | CT | III | 1894057 | 1899856 | WBGene00015241 | B0524.2  | B0524.2  | 0.445413747566931   | AGIWUR35356 |
| N2                                                                                                                                                                 | CT | III | 1902193 | 1905640 | WBGene00015245 | B0524.6  | B0524.6  | -0.0306754965221536 | AGIWUR23257 |
| N2                                                                                                                                                                 | CT | III | 1905962 | 1939568 | WBGene00004128 | pqn-41   | F53A3.4  | 0.174316451337778   |             |
| AGIWUR1642;AGIWUR6490;AGIWUR7208;AGIWUR8911;AGIWUR9570;AGIWUR11776;AGIWUR13585;AGIWUR18268;AGIWUR19636;AGIWUR19977;AGIWUR22432;AGIWUR27099;AGIWUR34458;AGIWUR40424 |    |     |         |         |                |          |          |                     |             |
| N2                                                                                                                                                                 | CT | III | 1939546 | 1943653 | WBGene00018720 | F53A3.1  | F53A3.1  | -0.067709785370706  | AGIWUR44653 |
| N2                                                                                                                                                                 | CT | III | 1945058 | 1950270 | WBGene00018721 | polh-1   | F53A3.2  | -0.106886331626283  | AGIWUR34536 |
| N2                                                                                                                                                                 | CT | III | 1950492 | 1951426 | WBGene00004491 | rps-22   | F53A3.3  | 0.263053012579022   |             |
| AGIWUR12230;AGIWUR28690;AGIWUR34975;AGIWUR38589;AGIWUR39036;AGIWUR41473;AGIWUR43706                                                                                |    |     |         |         |                |          |          |                     |             |
| N2                                                                                                                                                                 | CT | III | 1951526 | 1952032 | WBGene00018723 | F53A3.7  | F53A3.7  | -0.0813744980662747 | AGIWUR7627  |
| N2                                                                                                                                                                 | CT | III | 1952014 | 1961945 | WBGene00020115 | mboa-6   | R155.1   | 0.0727455844457285  | AGIWUR26427 |
| N2                                                                                                                                                                 | CT | III | 1963566 | 1969902 | WBGene00020116 | moa-1    | R155.2   | 0.270311190799456   | AGIWUR40050 |
| N2                                                                                                                                                                 | CT | III | 1971182 | 1975709 | WBGene00020117 | R155.3   | R155.3   | 0.267549794113942   | AGIWUR28349 |
| N2                                                                                                                                                                 | CT | III | 1977315 | 1980462 | WBGene00020118 | R155.4   | R155.4   | -0.121619099994023  | AGIWUR10910 |
| N2                                                                                                                                                                 | CT | III | 1980823 | 1982647 | WBGene00005143 | srd-66   | Y39A3B.4 | -0.743848924276797  |             |
| AGIWUR24540                                                                                                                                                        |    |     |         |         |                |          |          |                     |             |
| N2                                                                                                                                                                 | CT | III | 1985109 | 1987466 | WBGene00021438 | Y39A3B.3 | Y39A3B.3 | 0.0825097501922336  |             |
| AGIWUR29085                                                                                                                                                        |    |     |         |         |                |          |          |                     |             |
| N2                                                                                                                                                                 | CT | III | 1997841 | 2002438 | WBGene00021437 | lgc-42   | Y39A3B.2 | -0.100775883114336  |             |
| AGIWUR39318                                                                                                                                                        |    |     |         |         |                |          |          |                     |             |
| N2                                                                                                                                                                 | CT | III | 2006029 | 2009196 | WBGene00021436 | Y39A3B.1 | Y39A3B.1 | 0.048309576603204   |             |
| AGIWUR42754                                                                                                                                                        |    |     |         |         |                |          |          |                     |             |
| N2                                                                                                                                                                 | CT | III | 2009302 | 2021589 | WBGene00021439 | ckr-2    | Y39A3B.5 | 0.219966843465554   |             |
| AGIWUR1930;AGIWUR17361;AGIWUR30236;AGIWUR38253;AGIWUR44531                                                                                                         |    |     |         |         |                |          |          |                     |             |
| N2                                                                                                                                                                 | CT | III | 2035036 | 2048007 | WBGene00001063 | dpy-1    | M01E10.2 | -0.78351773190606   |             |
| AGIWUR23010                                                                                                                                                        |    |     |         |         |                |          |          |                     |             |
| N2                                                                                                                                                                 | CT | III | 2053872 | 2054449 | WBGene00019709 | M01E10.3 | M01E10.3 | 0.102476016594357   |             |
| AGIWUR23384                                                                                                                                                        |    |     |         |         |                |          |          |                     |             |
| N2                                                                                                                                                                 | CT | III | 2056730 | 2057670 | WBGene00021433 | Y39A3A.2 | Y39A3A.2 | -1.92431914350093   |             |
| AGIWUR20632                                                                                                                                                        |    |     |         |         |                |          |          |                     |             |
| N2                                                                                                                                                                 | CT | III | 2060673 | 2060957 | WBGene00002099 | ins-16   | Y39A3A.5 | 0.224457682945307   |             |
| AGIWUR14112;AGIWUR31180;AGIWUR32785;AGIWUR34303;AGIWUR38456                                                                                                        |    |     |         |         |                |          |          |                     |             |
| N2                                                                                                                                                                 | CT | III | 2063442 | 2065855 | WBGene00023471 | srz-86   | Y39A3A.7 | -0.0794939603329521 |             |
| AGIWUR3884;AGIWUR32374                                                                                                                                             |    |     |         |         |                |          |          |                     |             |
| N2                                                                                                                                                                 | CT | III | 2066640 | 2068350 | WBGene00021434 | Y39A3A.3 | Y39A3A.3 | -0.0418406124074417 |             |
| AGIWUR13923                                                                                                                                                        |    |     |         |         |                |          |          |                     |             |
| N2                                                                                                                                                                 | CT | III | 2071513 | 2072347 | WBGene00023470 | srz-87   | Y39A3A.6 | -0.380583435764394  |             |
| AGIWUR7389;AGIWUR23252                                                                                                                                             |    |     |         |         |                |          |          |                     |             |
| N2                                                                                                                                                                 | CT | III | 2073009 | 2076520 | WBGene00021435 | Y39A3A.4 | Y39A3A.4 | 0.375638777057029   |             |

|                                                            |    |     |         |         |                |           |           |                      |             |
|------------------------------------------------------------|----|-----|---------|---------|----------------|-----------|-----------|----------------------|-------------|
| AGIWUR36719                                                |    |     |         |         |                |           |           |                      |             |
| N2                                                         | CT | III | 2082819 | 2088248 | WBGene00021703 | cpt-3     | Y48G9A.10 | 0.258702208852919    |             |
| AGIWUR30430                                                |    |     |         |         |                |           |           |                      |             |
| N2                                                         | CT | III | 2092709 | 2099881 | WBGene00021702 | Y48G9A.9  | Y48G9A.9  | 0.0944902637938334   |             |
| AGIWUR713                                                  |    |     |         |         |                |           |           |                      |             |
| N2                                                         | CT | III | 2102295 | 2107497 | WBGene00004088 | ppk-2     | Y48G9A.8  | 0.24835007956391     |             |
| AGIWUR28088                                                |    |     |         |         |                |           |           |                      |             |
| N2                                                         | CT | III | 2111802 | 2112427 | WBGene00021701 | Y48G9A.7  | Y48G9A.7  | -0.312609987826468   |             |
| AGIWUR5690                                                 |    |     |         |         |                |           |           |                      |             |
| N2                                                         | CT | III | 2112416 | 2116897 | WBGene00021704 | Y48G9A.11 | Y48G9A.11 | -0.221422426411705   |             |
| AGIWUR39784                                                |    |     |         |         |                |           |           |                      |             |
| N2                                                         | CT | III | 2117842 | 2119091 | WBGene00021700 | Y48G9A.6  | Y48G9A.6  | -0.229021573303866   |             |
| AGIWUR31978                                                |    |     |         |         |                |           |           |                      |             |
| N2                                                         | CT | III | 2124137 | 2151550 | WBGene00021698 | frl-1     | Y48G9A.4  | 0.0957128409591022   |             |
| AGIWUR33287                                                |    |     |         |         |                |           |           |                      |             |
| N2                                                         | CT | III | 2151968 | 2197908 | WBGene00021697 | gcn-1     | Y48G9A.3  | -0.0351751834429201  |             |
| AGIWUR2499;AGIWUR24890;AGIWUR39089                         |    |     |         |         |                |           |           |                      |             |
| N2                                                         | CT | III | 2198006 | 2206882 | WBGene00016524 | C39B5.6   | C39B5.6   | -0.0155476027122869  | AGIWUR32372 |
| N2                                                         | CT | III | 2211420 | 2217095 | WBGene00189950 | C39B5.14  | C39B5.14  | -0.359925746644064   |             |
| AGIWUR9309;AGIWUR17915;AGIWUR33312                         |    |     |         |         |                |           |           |                      |             |
| N2                                                         | CT | III | 2217173 | 2219494 | WBGene00016526 | fbxa-8    | C39B5.8   | -0.194883840191831   | AGIWUR33756 |
| N2                                                         | CT | III | 2219797 | 2222365 | WBGene00016525 | fbxa-12   | C39B5.7   | 0.673675686948252    | AGIWUR19075 |
| N2                                                         | CT | III | 2222438 | 2224000 | WBGene00005142 | srd-65    | C39B5.12  | -0.0149894220496352  |             |
| AGIWUR31417                                                |    |     |         |         |                |           |           |                      |             |
| N2                                                         | CT | III | 2224672 | 2227198 | WBGene00016522 | fbxa-38   | C39B5.4   | -0.00492583812899383 | AGIWUR24971 |
| N2                                                         | CT | III | 2227707 | 2229228 | WBGene00016521 | fbxa-62   | C39B5.3   | -0.0327354120170336  | AGIWUR15201 |
| N2                                                         | CT | III | 2229992 | 2232460 | WBGene00016527 | fbxa-47   | C39B5.9   | 0.215378191021127    | AGIWUR41580 |
| N2                                                         | CT | III | 2233888 | 2236987 | WBGene00016520 | C39B5.2   | C39B5.2   | -0.216252977988191   | AGIWUR33275 |
| N2                                                         | CT | III | 2238967 | 2240172 | WBGene00016528 | C39B5.10  | C39B5.10  | -0.429699187267989   |             |
| AGIWUR18177                                                |    |     |         |         |                |           |           |                      |             |
| N2                                                         | CT | III | 2240771 | 2243843 | WBGene00016519 | srz-56    | C39B5.1   | -0.29018790312626    | AGIWUR37544 |
| N2                                                         | CT | III | 2244165 | 2245827 | WBGene00005144 | srd-67    | C39B5.11  | -0.219990154205124   |             |
| AGIWUR34479                                                |    |     |         |         |                |           |           |                      |             |
| N2                                                         | CT | III | 2246016 | 2249404 | WBGene00020642 | T20H9.6   | T20H9.6   | 0.129358175023515    | AGIWUR25745 |
| N2                                                         | CT | III | 2249932 | 2251448 | WBGene00020637 | fbxa-7    | T20H9.1   | 0.337743675398579    | AGIWUR37127 |
| N2                                                         | CT | III | 2251957 | 2252989 | WBGene00020641 | fbxa-68   | T20H9.5   | -0.0595059924935066  | AGIWUR3648  |
| N2                                                         | CT | III | 2253449 | 2254783 | WBGene00020640 | fbxa-73   | T20H9.4   | -0.460401486077538   | AGIWUR32193 |
| N2                                                         | CT | III | 2257554 | 2258941 | WBGene00020638 | fbxa-43   | T20H9.2   | -0.022796430757051   |             |
| AGIWUR4357;AGIWUR25103;AGIWUR25937;AGIWUR41236;AGIWUR44639 |    |     |         |         |                |           |           |                      |             |

|                                                                                                       |    |     |         |         |                |             |             |                     |
|-------------------------------------------------------------------------------------------------------|----|-----|---------|---------|----------------|-------------|-------------|---------------------|
| N2                                                                                                    | CT | III | 2260004 | 2261445 | WBGene00044676 | fbxa-42     | Y54F10BL.1  | 0.126068304052118   |
| AGIWUR13364                                                                                           |    |     |         |         |                |             |             |                     |
| N2                                                                                                    | CT | III | 2266980 | 2272175 | WBGene00021862 | fbxa-48     | Y54F10BM.7  | 0.051199600877883   |
| AGIWUR4973                                                                                            |    |     |         |         |                |             |             |                     |
| N2                                                                                                    | CT | III | 2272453 | 2276965 | WBGene00021859 | fbxa-39     | Y54F10BM.4  | -0.21046089566482   |
| AGIWUR40392                                                                                           |    |     |         |         |                |             |             |                     |
| N2                                                                                                    | CT | III | 2277279 | 2289967 | WBGene00021858 | Y54F10BM.3  | Y54F10BM.3  | 0.286031171641433   |
| AGIWUR2267                                                                                            |    |     |         |         |                |             |             |                     |
| N2                                                                                                    | CT | III | 2291419 | 2294124 | WBGene00044403 | fbxa-219    | Y54F10BM.15 | -0.181548478639538  |
| AGIWUR28098                                                                                           |    |     |         |         |                |             |             |                     |
| N2                                                                                                    | CT | III | 2295344 | 2304920 | WBGene00021863 | Y54F10BM.9  | Y54F10BM.9  | -0.0509203354974712 |
| AGIWUR29475                                                                                           |    |     |         |         |                |             |             |                     |
| N2                                                                                                    | CT | III | 2305942 | 2308008 | WBGene00021864 | fbxa-1      | Y54F10BM.10 | -0.120654581527299  |
| AGIWUR24508                                                                                           |    |     |         |         |                |             |             |                     |
| N2                                                                                                    | CT | III | 2308256 | 2309744 | WBGene00206486 | Y54F10BM.20 | Y54F10BM.20 | -0.183211528893053  |
| AGIWUR32548                                                                                           |    |     |         |         |                |             |             |                     |
| N2                                                                                                    | CT | III | 2309924 | 2314073 | WBGene00021865 | fbxa-66     | Y54F10BM.11 | 0.248844597832518   |
| AGIWUR7609                                                                                            |    |     |         |         |                |             |             |                     |
| N2                                                                                                    | CT | III | 2314436 | 2326901 | WBGene00021857 | iffb-1      | Y54F10BM.2  | -0.0507493046497292 |
| AGIWUR5626;AGIWUR10411;AGIWUR23707                                                                    |    |     |         |         |                |             |             |                     |
| N2                                                                                                    | CT | III | 2326921 | 2329644 | WBGene00021866 | Y54F10BM.12 | Y54F10BM.12 | -0.215219763173245  |
| AGIWUR29344                                                                                           |    |     |         |         |                |             |             |                     |
| N2                                                                                                    | CT | III | 2329577 | 2331183 | WBGene00021867 | Y54F10BM.13 | Y54F10BM.13 | -0.053141812131396  |
| AGIWUR19905;AGIWUR36281                                                                               |    |     |         |         |                |             |             |                     |
| N2                                                                                                    | CT | III | 2331572 | 2342184 | WBGene00021856 | Y54F10BM.1  | Y54F10BM.1  | -0.0630649086130219 |
| AGIWUR20766                                                                                           |    |     |         |         |                |             |             |                     |
| N2                                                                                                    | CT | III | 2343573 | 2347329 | WBGene00004016 | phf-5       | Y54F10BM.14 | 0.0524445292675004  |
| AGIWUR869;AGIWUR3182;AGIWUR4589;AGIWUR5858;AGIWUR6693;AGIWUR10165;AGIWUR12970;AGIWUR22995;AGIWUR41822 |    |     |         |         |                |             |             |                     |
| N2                                                                                                    | CT | III | 2347591 | 2362056 | WBGene00001589 | gip-1       | H04J21.3    | 0.0307022236556591  |
| AGIWUR2869;AGIWUR12151;AGIWUR21514                                                                    |    |     |         |         |                |             |             |                     |
| N2                                                                                                    | CT | III | 2362948 | 2366278 | WBGene00005146 | srd-69      | H04J21.2    | -0.0632344060908103 |
| AGIWUR37224                                                                                           |    |     |         |         |                |             |             |                     |
| N2                                                                                                    | CT | III | 2366884 | 2372655 | WBGene00019150 | H04J21.1    | H04J21.1    | 0.0424234647663528  |
| AGIWUR14406                                                                                           |    |     |         |         |                |             |             |                     |
| N2                                                                                                    | CT | III | 2376193 | 2384840 | WBGene00019199 | H14E04.2    | H14E04.2    | -0.104136582978536  |
| AGIWUR2073;AGIWUR27203                                                                                |    |     |         |         |                |             |             |                     |
| N2                                                                                                    | CT | III | 2384892 | 2386579 | WBGene00019200 | H14E04.3    | H14E04.3    | -0.421471475823001  |
| AGIWUR20025                                                                                           |    |     |         |         |                |             |             |                     |
| N2                                                                                                    | CT | III | 2390203 | 2392116 | WBGene00019201 | H14E04.4    | H14E04.4    | 0.041092725295206   |

|                                                                                     |    |     |         |         |                |            |             |                      |             |
|-------------------------------------------------------------------------------------|----|-----|---------|---------|----------------|------------|-------------|----------------------|-------------|
| AGIWUR24047                                                                         |    |     |         |         |                |            |             |                      |             |
| N2                                                                                  | CT | III | 2394325 | 2401308 | WBGene00000506 | cic-1      | H14E04.5    | -0.0180398115720344  |             |
| AGIWUR12520                                                                         |    |     |         |         |                |            |             |                      |             |
| N2                                                                                  | CT | III | 2402070 | 2406332 | WBGene00019198 | strm-1     | H14E04.1    | -0.173174220591368   |             |
| AGIWUR40650                                                                         |    |     |         |         |                |            |             |                      |             |
| N2                                                                                  | CT | III | 2406308 | 2410985 | WBGene00021021 | mrpl-30    | W04B5.4     | -0.141760166599335   | AGIWUR43598 |
| N2                                                                                  | CT | III | 2411090 | 2418205 | WBGene00021022 | W04B5.5    | W04B5.5     | -0.336869285757601   | AGIWUR8262  |
| N2                                                                                  | CT | III | 2418345 | 2423912 | WBGene00021020 | W04B5.3    | W04B5.3     | 0.0157780008895436   |             |
| AGIWUR42343;AGIWUR43483                                                             |    |     |         |         |                |            |             |                      |             |
| N2                                                                                  | CT | III | 2424355 | 2427738 | WBGene00021019 | W04B5.2    | W04B5.2     | 0.0897923984960567   | AGIWUR18604 |
| N2                                                                                  | CT | III | 2436105 | 2442328 | WBGene00017104 | E02H9.6    | E02H9.6     | -0.01830228203558    | AGIWUR23811 |
| N2                                                                                  | CT | III | 2445228 | 2446142 | WBGene00017105 | E02H9.7    | E02H9.7     | -0.0183614868139621  |             |
| AGIWUR25516;AGIWUR35139;AGIWUR40542                                                 |    |     |         |         |                |            |             |                      |             |
| N2                                                                                  | CT | III | 2446223 | 2448696 | WBGene00017103 | klo-2      | E02H9.5     | -0.00859140215174836 |             |
| AGIWUR3705;AGIWUR22017;AGIWUR43846                                                  |    |     |         |         |                |            |             |                      |             |
| N2                                                                                  | CT | III | 2449382 | 2454949 | WBGene00003711 | nhr-121    | E02H9.8     | 0.204538121667731    | AGIWUR34209 |
| N2                                                                                  | CT | III | 2461911 | 2465079 | WBGene00017101 | E02H9.3    | E02H9.3     | 0.00121845029197942  | AGIWUR12571 |
| N2                                                                                  | CT | III | 2465474 | 2466800 | WBGene00017100 | E02H9.2    | E02H9.2     | 0.165027592630009    | AGIWUR12410 |
| N2                                                                                  | CT | III | 2467347 | 2468302 | WBGene00017106 | E02H9.9    | E02H9.9     | -0.102926365348309   | AGIWUR3644  |
| N2                                                                                  | CT | III | 2468486 | 2469443 | WBGene00017099 | E02H9.1    | E02H9.1     | -0.452787151289702   |             |
| AGIWUR672;AGIWUR6778;AGIWUR8337;AGIWUR36905                                         |    |     |         |         |                |            |             |                      |             |
| N2                                                                                  | CT | III | 2473868 | 2486620 | WBGene00004884 | smg-6      | Y54F10AL.2  | -0.104138950601778   |             |
| AGIWUR11295;AGIWUR20339;AGIWUR22367;AGIWUR22837;AGIWUR26612;AGIWUR28035;AGIWUR28767 |    |     |         |         |                |            |             |                      |             |
| N2                                                                                  | CT | III | 2487769 | 2494340 | WBGene00021847 | Y54F10AL.1 | Y54F10AL.1  | 0.0111690693152475   |             |
| AGIWUR905;AGIWUR13399;AGIWUR33083;AGIWUR33626;AGIWUR33848;AGIWUR42816               |    |     |         |         |                |            |             |                      |             |
| N2                                                                                  | CT | III | 2503448 | 2507972 | WBGene00021852 | Y54F10AM.8 | Y54F10AM.8  | 0.126938350757392    |             |
| AGIWUR2335;AGIWUR25672;AGIWUR32210;AGIWUR35648;AGIWUR36425                          |    |     |         |         |                |            |             |                      |             |
| N2                                                                                  | CT | III | 2508848 | 2511802 | WBGene00021850 | Y54F10AM.6 | Y54F10AM.6  | -0.277744692828154   |             |
| AGIWUR27666;AGIWUR38314                                                             |    |     |         |         |                |            |             |                      |             |
| N2                                                                                  | CT | III | 2512283 | 2528628 | WBGene00004314 | rbc-2      | Y54F10AM.10 | 0.0108142519316692   |             |
| AGIWUR29963;AGIWUR39097                                                             |    |     |         |         |                |            |             |                      |             |
| N2                                                                                  | CT | III | 2529063 | 2530502 | WBGene00021849 | Y54F10AM.5 | Y54F10AM.5  | 0.117042071736037    |             |
| AGIWUR19611                                                                         |    |     |         |         |                |            |             |                      |             |
| N2                                                                                  | CT | III | 2530615 | 2546420 | WBGene00000464 | ceh-44     | Y54F10AM.4  | -0.0321927590631255  |             |
| AGIWUR4705;AGIWUR16518;AGIWUR24433                                                  |    |     |         |         |                |            |             |                      |             |
| N2                                                                                  | CT | III | 2549927 | 2560684 | WBGene00001410 | feh-1      | Y54F10AM.2  | -0.0740646606215467  |             |
| AGIWUR4773                                                                          |    |     |         |         |                |            |             |                      |             |
| N2                                                                                  | CT | III | 2561710 | 2566589 | WBGene00021848 | nhr-239    | Y54F10AM.1  | 0.0905490896977952   |             |
| AGIWUR14239;AGIWUR19746;AGIWUR25060;AGIWUR30065                                     |    |     |         |         |                |            |             |                      |             |



|                                                                                                                                                |    |     |         |         |                |            |            |                     |
|------------------------------------------------------------------------------------------------------------------------------------------------|----|-----|---------|---------|----------------|------------|------------|---------------------|
| N2                                                                                                                                             | CT | III | 2567404 | 2571547 | WBGene00021855 | Y54F10AR.2 | Y54F10AR.2 | -0.0912484080311167 |
| AGIWUR40408                                                                                                                                    |    |     |         |         |                |            |            |                     |
| N2                                                                                                                                             | CT | III | 2572031 | 2575723 | WBGene00021854 | Y54F10AR.1 | Y54F10AR.1 | -0.067884971149347  |
| AGIWUR16208                                                                                                                                    |    |     |         |         |                |            |            |                     |
| N2                                                                                                                                             | CT | III | 2579314 | 2580664 | WBGene00022197 | Y71H2B.8   | Y71H2B.8   | -0.104925866833969  |
| AGIWUR12764                                                                                                                                    |    |     |         |         |                |            |            |                     |
| N2                                                                                                                                             | CT | III | 2583953 | 2597034 | WBGene00000160 | apb-1      | Y71H2B.10  | 0.193300465791956   |
| AGIWUR28860;AGIWUR38318                                                                                                                        |    |     |         |         |                |            |            |                     |
| N2                                                                                                                                             | CT | III | 2598057 | 2603299 | WBGene00007019 | mdt-19     | Y71H2B.6   | -0.14036948134688   |
| AGIWUR9849                                                                                                                                     |    |     |         |         |                |            |            |                     |
| N2                                                                                                                                             | CT | III | 2604236 | 2606541 | WBGene00022198 | Y71H2B.11  | Y71H2B.11  | -0.0949283731206627 |
| AGIWUR3768;AGIWUR39503                                                                                                                         |    |     |         |         |                |            |            |                     |
| N2                                                                                                                                             | CT | III | 2608017 | 2618856 | WBGene00022195 | Y71H2B.5   | Y71H2B.5   | -0.0561704574293689 |
| AGIWUR16225                                                                                                                                    |    |     |         |         |                |            |            |                     |
| N2                                                                                                                                             | CT | III | 2618963 | 2619375 | WBGene00022194 | Y71H2B.4   | Y71H2B.4   | -0.126725156060431  |
| AGIWUR6650                                                                                                                                     |    |     |         |         |                |            |            |                     |
| N2                                                                                                                                             | CT | III | 2619936 | 2622709 | WBGene00022193 | ppfr-4     | Y71H2B.3   | -0.187614835243791  |
| AGIWUR44844                                                                                                                                    |    |     |         |         |                |            |            |                     |
| N2                                                                                                                                             | CT | III | 2623170 | 2627771 | WBGene00022192 | Y71H2B.2   | Y71H2B.2   | -0.0819897092268498 |
| AGIWUR42251                                                                                                                                    |    |     |         |         |                |            |            |                     |
| N2                                                                                                                                             | CT | III | 2629013 | 2631439 | WBGene00022191 | Y71H2B.1   | Y71H2B.1   | -0.0450238396442435 |
| AGIWUR20164;AGIWUR34065;AGIWUR41211                                                                                                            |    |     |         |         |                |            |            |                     |
| N2                                                                                                                                             | CT | III | 2636405 | 2642848 | WBGene00019212 | zmp-2      | H19M22.3   | 0.0118225202379847  |
| AGIWUR10196;AGIWUR17797;AGIWUR22540;AGIWUR22981;AGIWUR30381;AGIWUR30911;AGIWUR35936;AGIWUR39133;AGIWUR42071                                    |    |     |         |         |                |            |            |                     |
| N2                                                                                                                                             | CT | III | 2650851 | 2651565 | WBGene00023084 | H19M22.4   | H19M22.4   | 0.0251084463222826  |
| AGIWUR7023;AGIWUR25650;AGIWUR36609;AGIWUR42415;AGIWUR43101                                                                                     |    |     |         |         |                |            |            |                     |
| N2                                                                                                                                             | CT | III | 2658083 | 2681112 | WBGene00002915 | let-805    | H19M22.2   | 0.270061373252254   |
| AGIWUR2534;AGIWUR15885;AGIWUR16395;AGIWUR16752;AGIWUR18969;AGIWUR21421;AGIWUR25034;AGIWUR30471;AGIWUR34160;AGIWUR35690;AGIWUR40260;AGIWUR42896 |    |     |         |         |                |            |            |                     |
| N2                                                                                                                                             | CT | III | 2681451 | 2686463 | WBGene00003941 | pbo-1      | Y71H2AL.1  | -0.0640372663723525 |
| AGIWUR16024                                                                                                                                    |    |     |         |         |                |            |            |                     |
| N2                                                                                                                                             | CT | III | 2686791 | 2688997 | WBGene00022165 | Y71H2AL.2  | Y71H2AL.2  | 0.049289480435009   |
| AGIWUR36616                                                                                                                                    |    |     |         |         |                |            |            |                     |
| N2                                                                                                                                             | CT | III | 2690160 | 2698817 | WBGene00022174 | Y71H2AM.9  | Y71H2AM.9  | -0.310245249726719  |
| AGIWUR44591                                                                                                                                    |    |     |         |         |                |            |            |                     |
| N2                                                                                                                                             | CT | III | 2700937 | 2707818 | WBGene00022173 | set-27     | Y71H2AM.8  | -0.100211053298318  |
| AGIWUR19608                                                                                                                                    |    |     |         |         |                |            |            |                     |
| N2                                                                                                                                             | CT | III | 2707737 | 2716447 | WBGene00022175 | Y71H2AM.10 | Y71H2AM.10 | 0.305285425370858   |
| AGIWUR31620                                                                                                                                    |    |     |         |         |                |            |            |                     |

|                                                                                   |    |     |         |         |                |            |            |                      |
|-----------------------------------------------------------------------------------|----|-----|---------|---------|----------------|------------|------------|----------------------|
| N2                                                                                | CT | III | 2718158 | 2725092 | WBGene00022176 | Y71H2AM.11 | Y71H2AM.11 |                      |
| 0.000860232913089121 AGIWUR34264                                                  |    |     |         |         |                |            |            |                      |
| N2                                                                                | CT | III | 2734080 | 2739531 | WBGene00022178 | Y71H2AM.13 | Y71H2AM.13 | -0.0159671591421393  |
| AGIWUR29754                                                                       |    |     |         |         |                |            |            |                      |
| N2                                                                                | CT | III | 2743719 | 2746653 | WBGene00022179 | Y71H2AM.14 | Y71H2AM.14 | 0.0110819816785872   |
| AGIWUR1759                                                                        |    |     |         |         |                |            |            |                      |
| N2                                                                                | CT | III | 2747130 | 2756512 | WBGene00022180 | Y71H2AM.15 | Y71H2AM.15 | 0.122987710323151    |
| AGIWUR14045                                                                       |    |     |         |         |                |            |            |                      |
| N2                                                                                | CT | III | 2757087 | 2760816 | WBGene00022181 | pho-9      | Y71H2AM.16 | -0.00951773209001416 |
| AGIWUR1582;AGIWUR7980;AGIWUR12398;AGIWUR14707;AGIWUR22714                         |    |     |         |         |                |            |            |                      |
| N2                                                                                | CT | III | 2764037 | 2768675 | WBGene00022182 | swsn-3     | Y71H2AM.17 | -0.0387402368388035  |
| AGIWUR22386;AGIWUR25232                                                           |    |     |         |         |                |            |            |                      |
| N2                                                                                | CT | III | 2769358 | 2779053 | WBGene00022244 | laf-1      | Y71H2AM.19 | 0.0748622989142866   |
| AGIWUR3116;AGIWUR3798;AGIWUR9004;AGIWUR23603;AGIWUR24974;AGIWUR25228;AGIWUR30455  |    |     |         |         |                |            |            |                      |
| N2                                                                                | CT | III | 2781039 | 2782817 | WBGene00022171 | Y71H2AM.6  | Y71H2AM.6  | 0.0887511501603804   |
| AGIWUR24357                                                                       |    |     |         |         |                |            |            |                      |
| N2                                                                                | CT | III | 2782733 | 2785993 | WBGene00022185 | Y71H2AM.20 | Y71H2AM.20 | 0.0851010299334991   |
| AGIWUR33509;AGIWUR38426                                                           |    |     |         |         |                |            |            |                      |
| N2                                                                                | CT | III | 2786117 | 2786859 | WBGene00022170 | Y71H2AM.5  | Y71H2AM.5  | -0.0759384592915318  |
| AGIWUR2693;AGIWUR6440;AGIWUR17716;AGIWUR32055;AGIWUR36884;AGIWUR38719;AGIWUR41121 |    |     |         |         |                |            |            |                      |
| N2                                                                                | CT | III | 2786854 | 2788028 | WBGene00022169 | Y71H2AM.4  | Y71H2AM.4  | -0.0749808694737428  |
| AGIWUR36947;AGIWUR43443                                                           |    |     |         |         |                |            |            |                      |
| N2                                                                                | CT | III | 2788441 | 2792973 | WBGene00044609 | tbcc-1     | Y71H2AM.24 | -0.231527556056239   |
| AGIWUR23229;AGIWUR33566                                                           |    |     |         |         |                |            |            |                      |
| N2                                                                                | CT | III | 2793323 | 2801900 | WBGene00006695 | twk-45     | Y71H2AM.22 | -0.0759519411991025  |
| AGIWUR3799;AGIWUR4712;AGIWUR14874;AGIWUR21233;AGIWUR27245;AGIWUR35937             |    |     |         |         |                |            |            |                      |
| N2                                                                                | CT | III | 2802450 | 2803681 | WBGene00044760 | Y71H2AM.25 | Y71H2AM.25 | -0.4019929997372     |
| AGIWUR36266                                                                       |    |     |         |         |                |            |            |                      |
| N2                                                                                | CT | III | 2805430 | 2811096 | WBGene00022168 | Y71H2AM.3  | Y71H2AM.3  | -0.229771845789337   |
| AGIWUR192                                                                         |    |     |         |         |                |            |            |                      |
| N2                                                                                | CT | III | 2811870 | 2814969 | WBGene00007000 | tufm-1     | Y71H2AM.23 | -0.183621998907501   |
| AGIWUR44719                                                                       |    |     |         |         |                |            |            |                      |
| N2                                                                                | CT | III | 2819280 | 2826153 | WBGene00022167 | Y71H2AM.2  | Y71H2AM.2  | -0.311534808694855   |
| AGIWUR9342                                                                        |    |     |         |         |                |            |            |                      |
| N2                                                                                | CT | III | 2827070 | 2833824 | WBGene00022166 | Y71H2AM.1  | Y71H2AM.1  | -0.187844651987194   |
| AGIWUR25268;AGIWUR25695                                                           |    |     |         |         |                |            |            |                      |
| N2                                                                                | CT | III | 2834663 | 2836261 | WBGene00022188 | Y71H2AR.1  | Y71H2AR.1  | -0.181912063032039   |
| AGIWUR8952                                                                        |    |     |         |         |                |            |            |                      |
| N2                                                                                | CT | III | 2836639 | 2838453 | WBGene00022190 | josd-1     | Y71H2AR.3  | -0.0570516771009464  |

|                                                                                    |    |     |         |         |                |           |           |                     |             |
|------------------------------------------------------------------------------------|----|-----|---------|---------|----------------|-----------|-----------|---------------------|-------------|
| AGIWUR10191;AGIWUR14524;AGIWUR20442;AGIWUR42988                                    |    |     |         |         |                |           |           |                     |             |
| N2                                                                                 | CT | III | 2838763 | 2840927 | WBGene00022189 | Y71H2AR.2 | Y71H2AR.2 | 0.151663490191191   |             |
| AGIWUR36642                                                                        |    |     |         |         |                |           |           |                     |             |
| N2                                                                                 | CT | III | 2842044 | 2845197 | WBGene00019261 | H34I24.2  | H34I24.2  | 0.156240880663365   |             |
| AGIWUR22219                                                                        |    |     |         |         |                |           |           |                     |             |
| N2                                                                                 | CT | III | 2847016 | 2848582 | WBGene00019260 | H34I24.1  | H34I24.1  | 0.286015425642313   |             |
| AGIWUR16301                                                                        |    |     |         |         |                |           |           |                     |             |
| N2                                                                                 | CT | III | 2849066 | 2855419 | WBGene00018992 | trp1-1    | F56F11.5  | 0.0548287168937014  |             |
| AGIWUR13328;AGIWUR37474;AGIWUR40427                                                |    |     |         |         |                |           |           |                     |             |
| N2                                                                                 | CT | III | 2855554 | 2865497 | WBGene00018991 | F56F11.4  | F56F11.4  | -0.233660779282097  |             |
| AGIWUR5816                                                                         |    |     |         |         |                |           |           |                     |             |
| N2                                                                                 | CT | III | 2874818 | 2880705 | WBGene00018990 | klf-1     | F56F11.3  | -0.125016824372371  |             |
| AGIWUR37613                                                                        |    |     |         |         |                |           |           |                     |             |
| N2                                                                                 | CT | III | 2882304 | 2884967 | WBGene00018989 | F56F11.2  | F56F11.2  | -0.325274634512287  |             |
| AGIWUR6833;AGIWUR13653;AGIWUR40840                                                 |    |     |         |         |                |           |           |                     |             |
| N2                                                                                 | CT | III | 2891762 | 2892613 | WBGene00018988 | F56F11.1  | F56F11.1  | 0.215624715896673   |             |
| AGIWUR13941                                                                        |    |     |         |         |                |           |           |                     |             |
| N2                                                                                 | CT | III | 2893433 | 2897183 | WBGene00020598 | T20B6.2   | T20B6.2   | 0.10451321390001    | AGIWUR17017 |
| N2                                                                                 | CT | III | 2897711 | 2898802 | WBGene00020597 | T20B6.1   | T20B6.1   | 0.0902172865736723  | AGIWUR19617 |
| N2                                                                                 | CT | III | 2899441 | 2900402 | WBGene00020599 | T20B6.3   | T20B6.3   | -0.0331631107327084 | AGIWUR28148 |
| N2                                                                                 | CT | III | 2910910 | 2935740 | WBGene00019994 | cdh-1     | R10F2.1   | 0.155130021880977   | AGIWUR5450  |
| N2                                                                                 | CT | III | 2937103 | 2944044 | WBGene00019997 | R10F2.6   | R10F2.6   | -0.128849154858004  | AGIWUR7457  |
| N2                                                                                 | CT | III | 2947091 | 2960574 | WBGene00019157 | H05C05.1  | H05C05.1  | -0.0267405654719735 |             |
| AGIWUR1750;AGIWUR25924                                                             |    |     |         |         |                |           |           |                     |             |
| N2                                                                                 | CT | III | 2962170 | 2965634 | WBGene00019158 | H05C05.2  | H05C05.2  | 0.00503149737668451 |             |
| AGIWUR33855;AGIWUR33898                                                            |    |     |         |         |                |           |           |                     |             |
| N2                                                                                 | CT | III | 2970677 | 2975785 | WBGene00021917 | Y55D5A.3  | Y55D5A.3  | -0.211636343305605  |             |
| AGIWUR1723                                                                         |    |     |         |         |                |           |           |                     |             |
| N2                                                                                 | CT | III | 2982414 | 2988150 | WBGene00021915 | Y55D5A.1  | Y55D5A.1  | 0.181718719728172   |             |
| AGIWUR10708;AGIWUR39069                                                            |    |     |         |         |                |           |           |                     |             |
| N2                                                                                 | CT | III | 2988081 | 2990057 | WBGene00021918 | Y55D5A.4  | Y55D5A.4  | -0.0312142263665161 |             |
| AGIWUR22699;AGIWUR34129                                                            |    |     |         |         |                |           |           |                     |             |
| N2                                                                                 | CT | III | 2995487 | 3040860 | WBGene00000898 | daf-2     | Y55D5A.5  | -0.0123701007026149 |             |
| AGIWUR7133;AGIWUR13223;AGIWUR19374;AGIWUR30665;AGIWUR30985;AGIWUR34221;AGIWUR38552 |    |     |         |         |                |           |           |                     |             |
| N2                                                                                 | CT | III | 3042726 | 3047125 | WBGene00021919 | cut1-25   | Y55D5A.6  | -0.0945232040305379 |             |
| AGIWUR4266                                                                         |    |     |         |         |                |           |           |                     |             |
| N2                                                                                 | CT | III | 3052916 | 3057550 | WBGene00019169 | H06I04.5  | H06I04.5  | 0.294116662247836   |             |
| AGIWUR17811                                                                        |    |     |         |         |                |           |           |                     |             |
| N2                                                                                 | CT | III | 3059598 | 3059943 | WBGene00019171 | fipr-29   | H06I04.7  | -0.0762564820037515 |             |

|                                                                                                |    |     |         |         |                |          |          |                      |             |
|------------------------------------------------------------------------------------------------|----|-----|---------|---------|----------------|----------|----------|----------------------|-------------|
| AGIWUR3286                                                                                     |    |     |         |         |                |          |          |                      |             |
| N2                                                                                             | CT | III | 3061192 | 3064328 | WBGene00019170 | H06I04.6 | H06I04.6 |                      |             |
| -0.000253940610968506 AGIWUR17697;AGIWUR28831                                                  |    |     |         |         |                |          |          |                      |             |
| N2                                                                                             | CT | III | 3068306 | 3069210 | WBGene00006725 | ubl-1    | H06I04.4 | -0.0698975807590578  |             |
| AGIWUR40097                                                                                    |    |     |         |         |                |          |          |                      |             |
| N2                                                                                             | CT | III | 3070523 | 3085268 | WBGene00019168 | H06I04.3 | H06I04.3 | 0.149502173254771    |             |
| AGIWUR19571;AGIWUR26916;AGIWUR43041;AGIWUR43553                                                |    |     |         |         |                |          |          |                      |             |
| N2                                                                                             | CT | III | 3086693 | 3091738 | WBGene00004787 | sft-1    | H06I04.2 | -0.00877381116900011 |             |
| AGIWUR34593                                                                                    |    |     |         |         |                |          |          |                      |             |
| N2                                                                                             | CT | III | 3091850 | 3100468 | WBGene00019167 | H06I04.1 | H06I04.1 | 0.0750920737300778   |             |
| AGIWUR8697;AGIWUR11825;AGIWUR19377;AGIWUR24950;AGIWUR25370;AGIWUR27115;AGIWUR30206;AGIWUR37893 |    |     |         |         |                |          |          |                      |             |
| N2                                                                                             | CT | III | 3101267 | 3103955 | WBGene00021818 | Y53G8B.2 | Y53G8B.2 | -0.190725997291405   |             |
| AGIWUR23098                                                                                    |    |     |         |         |                |          |          |                      |             |
| N2                                                                                             | CT | III | 3105668 | 3111828 | WBGene00021819 | Y53G8B.3 | Y53G8B.3 | -0.0387203815228023  |             |
| AGIWUR20240;AGIWUR39483                                                                        |    |     |         |         |                |          |          |                      |             |
| N2                                                                                             | CT | III | 3112428 | 3127124 | WBGene00021820 | nipa-1   | Y53G8B.4 | -0.0362004888463554  |             |
| AGIWUR13380;AGIWUR15191;AGIWUR20673;AGIWUR22382;AGIWUR27257;AGIWUR28555                        |    |     |         |         |                |          |          |                      |             |
| N2                                                                                             | CT | III | 3129277 | 3131399 | WBGene00021817 | Y53G8B.1 | Y53G8B.1 | -0.116734797996489   |             |
| AGIWUR8460                                                                                     |    |     |         |         |                |          |          |                      |             |
| N2                                                                                             | CT | III | 3131574 | 3139234 | WBGene00003175 | mec-12   | C44B11.3 | 0.0378829724784424   |             |
| AGIWUR9745                                                                                     |    |     |         |         |                |          |          |                      |             |
| N2                                                                                             | CT | III | 3142198 | 3143757 | WBGene00016634 | C44B11.4 | C44B11.4 | 0.175183640648147    |             |
| AGIWUR35263                                                                                    |    |     |         |         |                |          |          |                      |             |
| N2                                                                                             | CT | III | 3152722 | 3153471 | WBGene00016635 | C44B11.6 | C44B11.6 | -0.13365834462026    |             |
| AGIWUR35468                                                                                    |    |     |         |         |                |          |          |                      |             |
| N2                                                                                             | CT | III | 3155268 | 3158393 | WBGene00016633 | C44B11.1 | C44B11.1 | 0.0899621038146821   |             |
| AGIWUR38618                                                                                    |    |     |         |         |                |          |          |                      |             |
| N2                                                                                             | CT | III | 3166285 | 3171198 | WBGene00020104 | R148.5   | R148.5   | 0.138445079389152    |             |
| AGIWUR3695;AGIWUR8574;AGIWUR10518;AGIWUR10971;AGIWUR23515;AGIWUR35283;AGIWUR40568              |    |     |         |         |                |          |          |                      |             |
| N2                                                                                             | CT | III | 3171592 | 3174845 | WBGene00020103 | R148.4   | R148.4   | -0.011221147729696   |             |
| AGIWUR2853;AGIWUR12459;AGIWUR13273;AGIWUR20228;AGIWUR20610;AGIWUR30751;AGIWUR38883             |    |     |         |         |                |          |          |                      |             |
| N2                                                                                             | CT | III | 3175339 | 3183498 | WBGene00020102 | R148.3   | R148.3   | 0.0206570811523479   |             |
| AGIWUR12884;AGIWUR22527                                                                        |    |     |         |         |                |          |          |                      |             |
| N2                                                                                             | CT | III | 3183677 | 3185237 | WBGene00020101 | lmtr-5   | R148.2   | -0.16617456959266    |             |
| AGIWUR96;AGIWUR32957                                                                           |    |     |         |         |                |          |          |                      |             |
| N2                                                                                             | CT | III | 3186700 | 3192206 | WBGene00020100 | mks-1    | R148.1   | -0.239234908078891   |             |
| AGIWUR15590;AGIWUR23354                                                                        |    |     |         |         |                |          |          |                      |             |
| N2                                                                                             | CT | III | 3195561 | 3198407 | WBGene00020105 | R148.7   | R148.7   | 0.210807579109444    | AGIWUR42091 |
| N2                                                                                             | CT | III | 3198477 | 3199516 | WBGene00006452 | heh-1    | R148.6   | -0.103633525401705   | AGIWUR16994 |

|                                                                                                        |    |     |         |         |                |           |           |                     |
|--------------------------------------------------------------------------------------------------------|----|-----|---------|---------|----------------|-----------|-----------|---------------------|
| N2                                                                                                     | CT | III | 3200795 | 3219150 | WBGene00001494 | frm-8     | H09G03.2  | -0.0330302298632521 |
| AGIWUR6857                                                                                             |    |     |         |         |                |           |           |                     |
| N2                                                                                                     | CT | III | 3226352 | 3230652 | WBGene00019174 | H09G03.1  | H09G03.1  | 0.314422821618186   |
| AGIWUR20902;AGIWUR38539                                                                                |    |     |         |         |                |           |           |                     |
| N2                                                                                                     | CT | III | 3233102 | 3241263 | WBGene00021799 | Y53G8AL.1 | Y53G8AL.1 | -0.0438432774520621 |
| AGIWUR3746;AGIWUR9132;AGIWUR27505                                                                      |    |     |         |         |                |           |           |                     |
| N2                                                                                                     | CT | III | 3241717 | 3248575 | WBGene00021800 | Y53G8AL.2 | Y53G8AL.2 | -0.212028070259034  |
| AGIWUR11969                                                                                            |    |     |         |         |                |           |           |                     |
| N2                                                                                                     | CT | III | 3249346 | 3250538 | WBGene00050917 | Y53G8AL.4 | Y53G8AL.4 | -0.127175981320038  |
| AGIWUR98;AGIWUR2795;AGIWUR8581;AGIWUR11247;AGIWUR12880;AGIWUR27907;AGIWUR29640;AGIWUR31983;AGIWUR32616 |    |     |         |         |                |           |           |                     |
| N2                                                                                                     | CT | III | 3251461 | 3253143 | WBGene00021801 | Y53G8AL.3 | Y53G8AL.3 | 0.0720730279614212  |
| AGIWUR3567                                                                                             |    |     |         |         |                |           |           |                     |
| N2                                                                                                     | CT | III | 3253969 | 3255619 | WBGene00021804 | Y53G8AM.4 | Y53G8AM.4 | -0.0600079809288152 |
| AGIWUR11618;AGIWUR14433;AGIWUR15534                                                                    |    |     |         |         |                |           |           |                     |
| N2                                                                                                     | CT | III | 3256730 | 3258395 | WBGene00021805 | Y53G8AM.5 | Y53G8AM.5 | 0.187690361691239   |
| AGIWUR6953                                                                                             |    |     |         |         |                |           |           |                     |
| N2                                                                                                     | CT | III | 3259331 | 3260882 | WBGene00021806 | Y53G8AM.6 | Y53G8AM.6 | -0.0476127972361873 |
| AGIWUR37373                                                                                            |    |     |         |         |                |           |           |                     |
| N2                                                                                                     | CT | III | 3263682 | 3266608 | WBGene00021807 | Y53G8AM.7 | Y53G8AM.7 | 0.0270239817663906  |
| AGIWUR31082                                                                                            |    |     |         |         |                |           |           |                     |
| N2                                                                                                     | CT | III | 3267178 | 3278710 | WBGene00021808 | Y53G8AM.8 | Y53G8AM.8 | 0.168174022521425   |
| AGIWUR2613;AGIWUR10843                                                                                 |    |     |         |         |                |           |           |                     |
| N2                                                                                                     | CT | III | 3282308 | 3290215 | WBGene00021814 | Y53G8AR.7 | Y53G8AR.7 | 0.101001591585494   |
| AGIWUR17390;AGIWUR29595;AGIWUR30914                                                                    |    |     |         |         |                |           |           |                     |
| N2                                                                                                     | CT | III | 3290117 | 3294330 | WBGene00021815 | Y53G8AR.8 | Y53G8AR.8 | 0.119949595666515   |
| AGIWUR37995                                                                                            |    |     |         |         |                |           |           |                     |
| N2                                                                                                     | CT | III | 3294743 | 3297115 | WBGene00021813 | Y53G8AR.6 | Y53G8AR.6 | -0.11136358383664   |
| AGIWUR4561;AGIWUR24284;AGIWUR24788;AGIWUR38114                                                         |    |     |         |         |                |           |           |                     |
| N2                                                                                                     | CT | III | 3297454 | 3302151 | WBGene00021812 | Y53G8AR.5 | Y53G8AR.5 | -0.167854109466779  |
| AGIWUR41086                                                                                            |    |     |         |         |                |           |           |                     |
| N2                                                                                                     | CT | III | 3311423 | 3317713 | WBGene00021811 | ral-1     | Y53G8AR.3 | -0.143021979429587  |
| AGIWUR39100                                                                                            |    |     |         |         |                |           |           |                     |
| N2                                                                                                     | CT | III | 3317737 | 3321245 | WBGene00021816 | Y53G8AR.9 | Y53G8AR.9 | -0.0490102771174108 |
| AGIWUR331                                                                                              |    |     |         |         |                |           |           |                     |
| N2                                                                                                     | CT | III | 3322962 | 3331727 | WBGene00021810 | phf-15    | Y53G8AR.2 | 0.148728947439078   |
| AGIWUR35836                                                                                            |    |     |         |         |                |           |           |                     |
| N2                                                                                                     | CT | III | 3333036 | 3333957 | WBGene00021809 | Y53G8AR.1 | Y53G8AR.1 | 0.0959539914591518  |
| AGIWUR12431;AGIWUR18982;AGIWUR22098                                                                    |    |     |         |         |                |           |           |                     |
| N2                                                                                                     | CT | III | 3344875 | 3363409 | WBGene00001559 | gei-1     | F45H7.2   | -0.0314253163381584 |

AGIWUR6128;AGIWUR42668

|    |    |     |         |         |                |        |         |                     |             |
|----|----|-----|---------|---------|----------------|--------|---------|---------------------|-------------|
| N2 | CT | III | 3363668 | 3370209 | WBGene00004183 | prk-2  | F45H7.4 | -0.0267781360218571 | AGIWUR39213 |
| N2 | CT | III | 3377408 | 3389970 | WBGene00009738 | hecw-1 | F45H7.6 | -0.0942753696451639 |             |

AGIWUR2775;AGIWUR13999

|    |    |     |         |         |                |         |         |                  |             |
|----|----|-----|---------|---------|----------------|---------|---------|------------------|-------------|
| N2 | CT | III | 3389894 | 3392525 | WBGene00008348 | C56G7.3 | C56G7.3 | 0.13106094845571 | AGIWUR39672 |
| N2 | CT | III | 3392514 | 3393787 | WBGene00003372 | mlc-4   | C56G7.1 | 0.10363737811727 |             |

AGIWUR30999;AGIWUR42250;AGIWUR42527

|    |    |     |         |         |                |       |         |                    |  |
|----|----|-----|---------|---------|----------------|-------|---------|--------------------|--|
| N2 | CT | III | 3396585 | 3397675 | WBGene00010303 | cri-3 | F59A2.3 | -0.108848526120354 |  |
|----|----|-----|---------|---------|----------------|-------|---------|--------------------|--|

AGIWUR13117;AGIWUR25564;AGIWUR26708;AGIWUR37141;AGIWUR43589

|    |    |     |         |         |                |        |         |                     |             |
|----|----|-----|---------|---------|----------------|--------|---------|---------------------|-------------|
| N2 | CT | III | 3397743 | 3400644 | WBGene00010304 | clpf-1 | F59A2.4 | 0.00345156263226087 | AGIWUR17293 |
| N2 | CT | III | 3400644 | 3404479 | WBGene00003795 | npp-9  | F59A2.1 | 0.0584017145616755  |             |

AGIWUR8688;AGIWUR12216;AGIWUR18359;AGIWUR29274;AGIWUR32884;AGIWUR34620;AGIWUR35151

|    |    |     |         |         |                |          |          |                    |             |
|----|----|-----|---------|---------|----------------|----------|----------|--------------------|-------------|
| N2 | CT | III | 3404863 | 3405469 | WBGene00010305 | F59A2.5  | F59A2.5  | -0.196369330659621 | AGIWUR18938 |
| N2 | CT | III | 3405576 | 3411624 | WBGene00010302 | F59A2.2  | F59A2.2  | -0.297940070473184 | AGIWUR22160 |
| N2 | CT | III | 3415552 | 3425447 | WBGene00010306 | golg-4   | F59A2.6  | -0.16419923876796  | AGIWUR43196 |
| N2 | CT | III | 3425736 | 3428094 | WBGene00010450 | K01A11.2 | K01A11.2 | -0.187279154593197 |             |

AGIWUR41248

|    |    |     |         |         |                |          |          |                     |  |
|----|----|-----|---------|---------|----------------|----------|----------|---------------------|--|
| N2 | CT | III | 3428080 | 3431366 | WBGene00010449 | K01A11.1 | K01A11.1 | -0.0361464822307767 |  |
|----|----|-----|---------|---------|----------------|----------|----------|---------------------|--|

AGIWUR37728

|    |    |     |         |         |                |        |          |                   |  |
|----|----|-----|---------|---------|----------------|--------|----------|-------------------|--|
| N2 | CT | III | 3439023 | 3444207 | WBGene00004976 | spe-41 | K01A11.4 | 0.235916705988142 |  |
|----|----|-----|---------|---------|----------------|--------|----------|-------------------|--|

AGIWUR42753

|    |    |     |         |         |                |          |          |                     |  |
|----|----|-----|---------|---------|----------------|----------|----------|---------------------|--|
| N2 | CT | III | 3447140 | 3452613 | WBGene00010451 | K01A11.3 | K01A11.3 | -0.0720239501443096 |  |
|----|----|-----|---------|---------|----------------|----------|----------|---------------------|--|

AGIWUR12199

|    |    |     |         |         |                |          |          |                   |  |
|----|----|-----|---------|---------|----------------|----------|----------|-------------------|--|
| N2 | CT | III | 3454345 | 3455850 | WBGene00007920 | C34C12.1 | C34C12.1 | -0.11109787802068 |  |
|----|----|-----|---------|---------|----------------|----------|----------|-------------------|--|

AGIWUR8950

|    |    |     |         |         |                |          |          |                    |  |
|----|----|-----|---------|---------|----------------|----------|----------|--------------------|--|
| N2 | CT | III | 3456435 | 3460106 | WBGene00007921 | C34C12.2 | C34C12.2 | -0.254236918533058 |  |
|----|----|-----|---------|---------|----------------|----------|----------|--------------------|--|

AGIWUR33347

|    |    |     |         |         |                |          |          |                   |  |
|----|----|-----|---------|---------|----------------|----------|----------|-------------------|--|
| N2 | CT | III | 3460406 | 3461590 | WBGene00007927 | C34C12.8 | C34C12.8 | 0.186434033893009 |  |
|----|----|-----|---------|---------|----------------|----------|----------|-------------------|--|

AGIWUR23839

|    |    |     |         |         |                |       |          |                    |  |
|----|----|-----|---------|---------|----------------|-------|----------|--------------------|--|
| N2 | CT | III | 3461703 | 3467687 | WBGene00007922 | pph-6 | C34C12.3 | -0.011221249753202 |  |
|----|----|-----|---------|---------|----------------|-------|----------|--------------------|--|

AGIWUR15982

|    |    |     |         |         |                |          |          |                     |  |
|----|----|-----|---------|---------|----------------|----------|----------|---------------------|--|
| N2 | CT | III | 3467664 | 3469827 | WBGene00007923 | C34C12.4 | C34C12.4 | -0.0131864754494613 |  |
|----|----|-----|---------|---------|----------------|----------|----------|---------------------|--|

AGIWUR4591;AGIWUR11505;AGIWUR14624;AGIWUR27106;AGIWUR34870

|    |    |     |         |         |                |       |          |                   |  |
|----|----|-----|---------|---------|----------------|-------|----------|-------------------|--|
| N2 | CT | III | 3472003 | 3473718 | WBGene00007924 | rsu-1 | C34C12.5 | 0.157545204594712 |  |
|----|----|-----|---------|---------|----------------|-------|----------|-------------------|--|

AGIWUR68;AGIWUR4021;AGIWUR7201;AGIWUR8236;AGIWUR24702;AGIWUR27827;AGIWUR32997;AGIWUR37412;AGIWUR44729

|    |    |     |         |         |                |          |          |                     |  |
|----|----|-----|---------|---------|----------------|----------|----------|---------------------|--|
| N2 | CT | III | 3474019 | 3475450 | WBGene00007928 | C34C12.9 | C34C12.9 | -0.0152588478027225 |  |
|----|----|-----|---------|---------|----------------|----------|----------|---------------------|--|

AGIWUR12359

|    |    |     |         |         |                |          |          |                    |  |
|----|----|-----|---------|---------|----------------|----------|----------|--------------------|--|
| N2 | CT | III | 3482591 | 3484843 | WBGene00007925 | C34C12.6 | C34C12.6 | -0.269405506862887 |  |
|----|----|-----|---------|---------|----------------|----------|----------|--------------------|--|

AGIWUR31348

|                                                                                   |    |     |         |         |                |          |          |                     |             |
|-----------------------------------------------------------------------------------|----|-----|---------|---------|----------------|----------|----------|---------------------|-------------|
| N2                                                                                | CT | III | 3484813 | 3488341 | WBGene00007926 | C34C12.7 | C34C12.7 | -0.0599728932413299 |             |
| AGIWUR32822                                                                       |    |     |         |         |                |          |          |                     |             |
| N2                                                                                | CT | III | 3490363 | 3493234 | WBGene00001639 | gly-14   | M01F1.1  | -0.227256190892973  | AGIWUR22529 |
| N2                                                                                | CT | III | 3493811 | 3499057 | WBGene00010815 | M01F1.9  | M01F1.9  | -0.210789736125982  |             |
| AGIWUR15859;AGIWUR37865;AGIWUR43079                                               |    |     |         |         |                |          |          |                     |             |
| N2                                                                                | CT | III | 3499375 | 3502547 | WBGene00010814 | M01F1.8  | M01F1.8  | -0.023755578262989  | AGIWUR4692  |
| N2                                                                                | CT | III | 3502841 | 3503724 | WBGene00004428 | rpl-16   | M01F1.2  | 0.363296028247382   |             |
| AGIWUR5475;AGIWUR9044;AGIWUR10626;AGIWUR28475;AGIWUR28655;AGIWUR34090             |    |     |         |         |                |          |          |                     |             |
| N2                                                                                | CT | III | 3503710 | 3505355 | WBGene00010809 | M01F1.3  | M01F1.3  | -0.134052741494653  | AGIWUR14202 |
| N2                                                                                | CT | III | 3505649 | 3510033 | WBGene00010810 | M01F1.4  | M01F1.4  | -0.111935989393684  | AGIWUR40566 |
| N2                                                                                | CT | III | 3510237 | 3511011 | WBGene00010812 | mrpl-35  | M01F1.6  | -0.278534023612311  | AGIWUR6204  |
| N2                                                                                | CT | III | 3510964 | 3519607 | WBGene00010811 | hmit-1.3 | M01F1.5  | 0.00630731320362266 |             |
| AGIWUR26004                                                                       |    |     |         |         |                |          |          |                     |             |
| N2                                                                                | CT | III | 3521133 | 3529838 | WBGene00010813 | pitp-1   | M01F1.7  | 0.126492557283715   | AGIWUR42568 |
| N2                                                                                | CT | III | 3534660 | 3537496 | WBGene00008288 | C54C6.6  | C54C6.6  | -0.274944548703809  | AGIWUR25423 |
| N2                                                                                | CT | III | 3537688 | 3541628 | WBGene00000248 | ben-1    | C54C6.2  | 0.144284261615025   | AGIWUR19529 |
| N2                                                                                | CT | III | 3545740 | 3546419 | WBGene00044166 | C54C6.7  | C54C6.7  | 0.100617945397843   | AGIWUR16866 |
| N2                                                                                | CT | III | 3549410 | 3549850 | WBGene00008287 | C54C6.5  | C54C6.5  | -0.172457131971043  |             |
| AGIWUR3248;AGIWUR7930;AGIWUR11537;AGIWUR12523;AGIWUR12823;AGIWUR23202             |    |     |         |         |                |          |          |                     |             |
| N2                                                                                | CT | III | 3553649 | 3556627 | WBGene00008286 | C54C6.4  | C54C6.4  | -0.116008896530421  |             |
| AGIWUR2455;AGIWUR20439;AGIWUR35219                                                |    |     |         |         |                |          |          |                     |             |
| N2                                                                                | CT | III | 3573585 | 3578771 | WBGene00003605 | nhr-6    | C48D5.1  | 0.29491529534568    | AGIWUR30336 |
| N2                                                                                | CT | III | 3578716 | 3581736 | WBGene00008180 | C48D5.3  | C48D5.3  | -0.0608836643137662 | AGIWUR23414 |
| N2                                                                                | CT | III | 3590734 | 3611993 | WBGene00004213 | ptp-1    | C48D5.2  | 0.270313552180572   |             |
| AGIWUR6891;AGIWUR25035;AGIWUR35090                                                |    |     |         |         |                |          |          |                     |             |
| N2                                                                                | CT | III | 3612951 | 3627142 | WBGene00004765 | sel-8    | C32A3.1  | 0.156510320271908   | AGIWUR25533 |
| N2                                                                                | CT | III | 3627986 | 3630368 | WBGene00007859 | mrps-31  | C32A3.2  | -0.180776758052552  | AGIWUR2977  |
| N2                                                                                | CT | III | 3635876 | 3643670 | WBGene00007860 | rilp-1   | C32A3.3  | 0.173755458217896   | AGIWUR12909 |
| N2                                                                                | CT | III | 3644375 | 3648822 | WBGene00006822 | unc-93   | C46F11.1 | -0.0483759699352717 |             |
| AGIWUR19227                                                                       |    |     |         |         |                |          |          |                     |             |
| N2                                                                                | CT | III | 3648792 | 3650832 | WBGene00008118 | madf-8   | C46F11.3 | -0.0958317127591588 |             |
| AGIWUR4896                                                                        |    |     |         |         |                |          |          |                     |             |
| N2                                                                                | CT | III | 3650905 | 3652973 | WBGene00008117 | gsr-1    | C46F11.2 | 0.0991127024681848  |             |
| AGIWUR3922;AGIWUR4457;AGIWUR11413;AGIWUR16538;AGIWUR21036;AGIWUR25473;AGIWUR30459 |    |     |         |         |                |          |          |                     |             |
| N2                                                                                | CT | III | 3652866 | 3657602 | WBGene00008120 | C46F11.5 | C46F11.5 | -0.0514303701249368 |             |
| AGIWUR2103;AGIWUR17982;AGIWUR19818                                                |    |     |         |         |                |          |          |                     |             |
| N2                                                                                | CT | III | 3657716 | 3664494 | WBGene00008119 | C46F11.4 | C46F11.4 | -0.120995909955859  |             |
| AGIWUR9635                                                                        |    |     |         |         |                |          |          |                     |             |
| N2                                                                                | CT | III | 3667022 | 3670436 | WBGene00008121 | C46F11.6 | C46F11.6 | -0.0603450561281775 |             |

|                                                                                    |    |     |         |         |                |          |          |                      |             |
|------------------------------------------------------------------------------------|----|-----|---------|---------|----------------|----------|----------|----------------------|-------------|
| AGIWUR5194                                                                         |    |     |         |         |                |          |          |                      |             |
| N2                                                                                 | CT | III | 3683253 | 3685808 | WBGene00012084 | npr-15   | T27D1.3  | -0.00318115644552019 | AGIWUR45091 |
| N2                                                                                 | CT | III | 3697821 | 3699640 | WBGene00000885 | cyn-9    | T27D1.1  | -0.184741483133195   |             |
| AGIWUR5691;AGIWUR22866                                                             |    |     |         |         |                |          |          |                      |             |
| N2                                                                                 | CT | III | 3699740 | 3701476 | WBGene00003962 | pdi-1    | C14B1.1  | -0.0624323979291006  | AGIWUR26524 |
| N2                                                                                 | CT | III | 3702260 | 3703172 | WBGene00007573 | C14B1.2  | C14B1.2  | -0.140367941868847   | AGIWUR35229 |
| N2                                                                                 | CT | III | 3703564 | 3705046 | WBGene00007574 | C14B1.3  | C14B1.3  | 0.11541719098653     | AGIWUR36098 |
| N2                                                                                 | CT | III | 3705265 | 3706784 | WBGene00006474 | wdr-5.1  | C14B1.4  | -0.0843673345609517  | AGIWUR43195 |
| N2                                                                                 | CT | III | 3706886 | 3709225 | WBGene00007576 | dph-1    | C14B1.5  | -0.0825127348571701  | AGIWUR42170 |
| N2                                                                                 | CT | III | 3709330 | 3713282 | WBGene00007581 | alkb-8   | C14B1.10 | -0.253570988282828   |             |
| AGIWUR43295                                                                        |    |     |         |         |                |          |          |                      |             |
| N2                                                                                 | CT | III | 3713463 | 3718745 | WBGene00007577 | nrde-1   | C14B1.6  | -0.165060159155495   | AGIWUR30630 |
| N2                                                                                 | CT | III | 3718655 | 3719722 | WBGene00007579 | C14B1.8  | C14B1.8  | 0.0619869310269312   |             |
| AGIWUR1479;AGIWUR19965;AGIWUR23671;AGIWUR36535                                     |    |     |         |         |                |          |          |                      |             |
| N2                                                                                 | CT | III | 3719904 | 3723597 | WBGene00007578 | C14B1.7  | C14B1.7  | -0.0928996302313596  |             |
| AGIWUR3899;AGIWUR7683;AGIWUR11406;AGIWUR14763;AGIWUR18063;AGIWUR23634;AGIWUR27561  |    |     |         |         |                |          |          |                      |             |
| N2                                                                                 | CT | III | 3724222 | 3724980 | WBGene00184990 | C14B1.12 | C14B1.12 | -0.163024652598656   |             |
| AGIWUR40467                                                                        |    |     |         |         |                |          |          |                      |             |
| N2                                                                                 | CT | III | 3726683 | 3729570 | WBGene00045484 | F34D10.9 | F34D10.9 | 0.343963122295948    |             |
| AGIWUR26415                                                                        |    |     |         |         |                |          |          |                      |             |
| N2                                                                                 | CT | III | 3729493 | 3735039 | WBGene00009372 | evl-18   | F34D10.2 | -0.0107381266277873  |             |
| AGIWUR31255;AGIWUR41733                                                            |    |     |         |         |                |          |          |                      |             |
| N2                                                                                 | CT | III | 3736602 | 3739765 | WBGene00009374 | F34D10.4 | F34D10.4 | 0.021301266276982    |             |
| AGIWUR6706                                                                         |    |     |         |         |                |          |          |                      |             |
| N2                                                                                 | CT | III | 3745461 | 3747451 | WBGene00003033 | lin-48   | F34D10.5 | 0.162553407521256    |             |
| AGIWUR8297;AGIWUR33973                                                             |    |     |         |         |                |          |          |                      |             |
| N2                                                                                 | CT | III | 3747560 | 3759412 | WBGene00009375 | F34D10.6 | F34D10.6 | -0.0963986261061107  |             |
| AGIWUR24321;AGIWUR27132                                                            |    |     |         |         |                |          |          |                      |             |
| N2                                                                                 | CT | III | 3760378 | 3765556 | WBGene00008091 | C44F1.1  | C44F1.1  | -0.631429438649624   | AGIWUR34530 |
| N2                                                                                 | CT | III | 3768500 | 3770321 | WBGene00008092 | gmeb-3   | C44F1.2  | -0.181082408130909   |             |
| AGIWUR17407;AGIWUR28024;AGIWUR36161                                                |    |     |         |         |                |          |          |                      |             |
| N2                                                                                 | CT | III | 3771425 | 3773394 | WBGene00002267 | lec-4    | C44F1.3  | -0.172534193467438   | AGIWUR34709 |
| N2                                                                                 | CT | III | 3774896 | 3786640 | WBGene00000070 | acy-3    | C44F1.5  | 0.269303023494707    | AGIWUR26920 |
| N2                                                                                 | CT | III | 3789982 | 3800547 | WBGene00003476 | mtm-3    | T24A11.1 | -0.0317318503669846  |             |
| AGIWUR9591;AGIWUR13492                                                             |    |     |         |         |                |          |          |                      |             |
| N2                                                                                 | CT | III | 3802452 | 3804438 | WBGene00011974 | xbx-5    | T24A11.2 | -0.160795449946517   |             |
| AGIWUR16614;AGIWUR30028                                                            |    |     |         |         |                |          |          |                      |             |
| N2                                                                                 | CT | III | 3804772 | 3809030 | WBGene00006591 | toh-1    | T24A11.3 | 0.154475021979142    |             |
| AGIWUR2545;AGIWUR10073;AGIWUR17610;AGIWUR19116;AGIWUR29103;AGIWUR29370;AGIWUR36519 |    |     |         |         |                |          |          |                      |             |



|                                                                                                                                                                    |    |     |         |         |                |          |          |                      |             |
|--------------------------------------------------------------------------------------------------------------------------------------------------------------------|----|-----|---------|---------|----------------|----------|----------|----------------------|-------------|
| N2                                                                                                                                                                 | CT | III | 3813519 | 3819679 | WBGene00001086 | dpy-27   | R13G10.1 | -0.0715298124173032  |             |
| AGIWUR14664                                                                                                                                                        |    |     |         |         |                |          |          |                      |             |
| N2                                                                                                                                                                 | CT | III | 3822403 | 3826261 | WBGene00000137 | amx-1    | R13G10.2 | 0.0161662523592305   |             |
| AGIWUR18369                                                                                                                                                        |    |     |         |         |                |          |          |                      |             |
| N2                                                                                                                                                                 | CT | III | 3826378 | 3829205 | WBGene00011260 | cnm-5    | R13G10.4 | 0.322478556546871    |             |
| AGIWUR24264                                                                                                                                                        |    |     |         |         |                |          |          |                      |             |
| N2                                                                                                                                                                 | CT | III | 3832591 | 3834522 | WBGene00007963 | cyp-25A1 | C36A4.1  | -0.122395209927168   |             |
| AGIWUR27481;AGIWUR44867                                                                                                                                            |    |     |         |         |                |          |          |                      |             |
| N2                                                                                                                                                                 | CT | III | 3835221 | 3837211 | WBGene00007964 | cyp-25A2 | C36A4.2  | 0.0752573758710362   |             |
| AGIWUR18068                                                                                                                                                        |    |     |         |         |                |          |          |                      |             |
| N2                                                                                                                                                                 | CT | III | 3837551 | 3839477 | WBGene00014697 | cyp-25A3 | C36A4.3  | 0.335859990439818    |             |
| AGIWUR33808                                                                                                                                                        |    |     |         |         |                |          |          |                      |             |
| N2                                                                                                                                                                 | CT | III | 3841262 | 3843614 | WBGene00007965 | C36A4.4  | C36A4.4  | -0.0986161121149607  | AGIWUR21773 |
| N2                                                                                                                                                                 | CT | III | 3853026 | 3862958 | WBGene00000264 | brc-1    | C36A4.8  | 0.00604844763396528  | AGIWUR18213 |
| N2                                                                                                                                                                 | CT | III | 3864036 | 3867098 | WBGene00007969 | acs-19   | C36A4.9  | 0.163925094224878    |             |
| AGIWUR5743;AGIWUR8131;AGIWUR18162;AGIWUR24888;AGIWUR42768                                                                                                          |    |     |         |         |                |          |          |                      |             |
| N2                                                                                                                                                                 | CT | III | 3867852 | 3869587 | WBGene00004414 | rpl-3    | F13B10.2 | 0.000491874469975784 |             |
| AGIWUR4750;AGIWUR29310                                                                                                                                             |    |     |         |         |                |          |          |                      |             |
| N2                                                                                                                                                                 | CT | III | 3869591 | 3901466 | WBGene00006575 | tir-1    | F13B10.1 | 0.09355712497366     |             |
| AGIWUR2597;AGIWUR3084;AGIWUR3265;AGIWUR5178;AGIWUR9784;AGIWUR15222;AGIWUR19101;AGIWUR21064;AGIWUR30859;AGIWUR30875;AGIWUR34308;AGIWUR38888;AGIWUR39275;AGIWUR40787 |    |     |         |         |                |          |          |                      |             |
| N2                                                                                                                                                                 | CT | III | 3903114 | 3907687 | WBGene00014202 | mmcm-1   | ZK1058.1 | 0.169148287143421    |             |
| AGIWUR1795;AGIWUR2675;AGIWUR8381;AGIWUR12443;AGIWUR14231;AGIWUR16597;AGIWUR17881;AGIWUR33357;AGIWUR39146;AGIWUR41856                                               |    |     |         |         |                |          |          |                      |             |
| N2                                                                                                                                                                 | CT | III | 3908929 | 3914149 | WBGene00003930 | pat-3    | ZK1058.2 | -0.00693278290684063 |             |
| AGIWUR35961                                                                                                                                                        |    |     |         |         |                |          |          |                      |             |
| N2                                                                                                                                                                 | CT | III | 3916933 | 3918809 | WBGene00014204 | ccdc-47  | ZK1058.4 | -0.0822762052821275  |             |
| AGIWUR44755                                                                                                                                                        |    |     |         |         |                |          |          |                      |             |
| N2                                                                                                                                                                 | CT | III | 3918871 | 3920700 | WBGene00014203 | ZK1058.3 | ZK1058.3 | -0.093229607549576   |             |
| AGIWUR18587                                                                                                                                                        |    |     |         |         |                |          |          |                      |             |
| N2                                                                                                                                                                 | CT | III | 3920626 | 3921711 | WBGene00014205 | ZK1058.5 | ZK1058.5 | -0.127088935779785   |             |
| AGIWUR39458                                                                                                                                                        |    |     |         |         |                |          |          |                      |             |
| N2                                                                                                                                                                 | CT | III | 3922207 | 3923869 | WBGene00014206 | nit-1    | ZK1058.6 | -0.00613379822618754 |             |
| AGIWUR42259                                                                                                                                                        |    |     |         |         |                |          |          |                      |             |
| N2                                                                                                                                                                 | CT | III | 3923792 | 3926238 | WBGene00014207 | ZK1058.9 | ZK1058.9 | 0.335914055723498    |             |
| AGIWUR27933                                                                                                                                                        |    |     |         |         |                |          |          |                      |             |
| N2                                                                                                                                                                 | CT | III | 3929530 | 3931523 | WBGene00009502 | F37A8.2  | F37A8.2  | 0.154825513135961    | AGIWUR14427 |
| N2                                                                                                                                                                 | CT | III | 3933577 | 3935908 | WBGene00003748 | nlp-10   | F37A8.4  | -0.151756229900769   | AGIWUR40346 |
| N2                                                                                                                                                                 | CT | III | 3956624 | 3958161 | WBGene00009503 | F37A8.5  | F37A8.5  | 0.37701920684027     | AGIWUR6158  |

|                                                                                                                                                                      |    |     |         |         |                |          |          |                      |             |
|----------------------------------------------------------------------------------------------------------------------------------------------------------------------|----|-----|---------|---------|----------------|----------|----------|----------------------|-------------|
| N2                                                                                                                                                                   | CT | III | 3960258 | 3961825 | WBGene00011215 | R10E9.3  | R10E9.3  | -0.00241047603231515 | AGIWUR21427 |
| N2                                                                                                                                                                   | CT | III | 3962731 | 3964158 | WBGene00011214 | R10E9.2  | R10E9.2  | 0.532156677848644    | AGIWUR23439 |
| N2                                                                                                                                                                   | CT | III | 3964663 | 3976391 | WBGene00003423 | msi-1    | R10E9.1  | 0.165670756669194    |             |
| AGIWUR32590;AGIWUR33464                                                                                                                                              |    |     |         |         |                |          |          |                      |             |
| N2                                                                                                                                                                   | CT | III | 3984367 | 3984670 | WBGene00012380 | Y1A5A.2  | Y1A5A.2  | -0.190884994939553   | AGIWUR12504 |
| N2                                                                                                                                                                   | CT | III | 3985565 | 3986809 | WBGene00012379 | Y1A5A.1  | Y1A5A.1  | 0.184402878709474    |             |
| AGIWUR35450;AGIWUR37937                                                                                                                                              |    |     |         |         |                |          |          |                      |             |
| N2                                                                                                                                                                   | CT | III | 3988059 | 3988575 | WBGene00044230 | C36E8.6  | C36E8.6  | 0.243900601611593    | AGIWUR30001 |
| N2                                                                                                                                                                   | CT | III | 3989298 | 3992174 | WBGene00007981 | glb-11   | C36E8.2  | 0.0499374328808173   | AGIWUR33067 |
| N2                                                                                                                                                                   | CT | III | 3999286 | 4004143 | WBGene00007980 | C36E8.1  | C36E8.1  | 0.0074575687192997   |             |
| AGIWUR1345;AGIWUR21250;AGIWUR23164                                                                                                                                   |    |     |         |         |                |          |          |                      |             |
| N2                                                                                                                                                                   | CT | III | 4006142 | 4009960 | WBGene00007982 | pxd-1    | C36E8.3  | 0.0992469381619907   | AGIWUR29639 |
| N2                                                                                                                                                                   | CT | III | 4012336 | 4015763 | WBGene00007983 | C36E8.4  | C36E8.4  | -0.264482121214485   | AGIWUR41273 |
| N2                                                                                                                                                                   | CT | III | 4015769 | 4017643 | WBGene00006537 | tbb-2    | C36E8.5  | -0.0461586663902338  |             |
| AGIWUR668;AGIWUR1222;AGIWUR16069;AGIWUR18887;AGIWUR19179;AGIWUR42288                                                                                                 |    |     |         |         |                |          |          |                      |             |
| N2                                                                                                                                                                   | CT | III | 4020037 | 4021867 | WBGene00011367 | snpc-3.4 | T02C12.2 | -0.26752342848479    |             |
| AGIWUR24584                                                                                                                                                          |    |     |         |         |                |          |          |                      |             |
| N2                                                                                                                                                                   | CT | III | 4022166 | 4025658 | WBGene00011368 | tftc-5   | T02C12.3 | -0.0461905628148429  |             |
| AGIWUR29547                                                                                                                                                          |    |     |         |         |                |          |          |                      |             |
| N2                                                                                                                                                                   | CT | III | 4029115 | 4036840 | WBGene00002038 | hum-5    | T02C12.1 | 0.0486854226879618   |             |
| AGIWUR9502                                                                                                                                                           |    |     |         |         |                |          |          |                      |             |
| N2                                                                                                                                                                   | CT | III | 4052807 | 4057976 | WBGene00004322 | rcq-5    | E03A3.2  | 0.0415707605221485   |             |
| AGIWUR3697;AGIWUR26154;AGIWUR31769                                                                                                                                   |    |     |         |         |                |          |          |                      |             |
| N2                                                                                                                                                                   | CT | III | 4058272 | 4058743 | WBGene00001943 | his-69   | E03A3.3  | 0.0807893889501941   | AGIWUR40118 |
| N2                                                                                                                                                                   | CT | III | 4059647 | 4060172 | WBGene00001944 | his-70   | E03A3.4  | 0.402555970995259    | AGIWUR14280 |
| N2                                                                                                                                                                   | CT | III | 4060591 | 4062822 | WBGene00008465 | E03A3.5  | E03A3.5  | 0.0253041838882906   | AGIWUR14656 |
| N2                                                                                                                                                                   | CT | III | 4066717 | 4082794 | WBGene00006811 | unc-79   | E03A3.6  | 0.151523038643536    |             |
| AGIWUR4423;AGIWUR5142;AGIWUR15798;AGIWUR15963;AGIWUR18293;AGIWUR20493;AGIWUR28967;AGIWUR39605;AGIWUR41832                                                            |    |     |         |         |                |          |          |                      |             |
| N2                                                                                                                                                                   | CT | III | 4084003 | 4086636 | WBGene00002202 | kin-19   | C03C10.1 | 0.249492962019687    |             |
| AGIWUR1828;AGIWUR5712;AGIWUR8099;AGIWUR15304;AGIWUR16042;AGIWUR21790;AGIWUR22763;AGIWUR30118;AGIWUR32074;AGIWUR33100;AGIWUR34225;AGIWUR34996;AGIWUR37313;AGIWUR37347 |    |     |         |         |                |          |          |                      |             |
| N2                                                                                                                                                                   | CT | III | 4090291 | 4092120 | WBGene00007271 | C03C10.5 | C03C10.5 | -0.241054168190895   |             |
| AGIWUR25475                                                                                                                                                          |    |     |         |         |                |          |          |                      |             |
| N2                                                                                                                                                                   | CT | III | 4091126 | 4093311 | WBGene00007269 | C03C10.2 | C03C10.2 | 0.0801643875715126   |             |
| AGIWUR111                                                                                                                                                            |    |     |         |         |                |          |          |                      |             |
| N2                                                                                                                                                                   | CT | III | 4093306 | 4094921 | WBGene00004392 | rnr-2    | C03C10.3 | -0.164308003461165   |             |
| AGIWUR10602;AGIWUR20109;AGIWUR25130;AGIWUR33669;AGIWUR38097;AGIWUR44770                                                                                              |    |     |         |         |                |          |          |                      |             |
| N2                                                                                                                                                                   | CT | III | 4096045 | 4096915 | WBGene00007273 | C03C10.7 | C03C10.7 | -0.212193156699576   |             |
| AGIWUR44164                                                                                                                                                          |    |     |         |         |                |          |          |                      |             |

|                                                                                                           |    |     |         |         |                |           |           |                      |             |
|-----------------------------------------------------------------------------------------------------------|----|-----|---------|---------|----------------|-----------|-----------|----------------------|-------------|
| N2                                                                                                        | CT | III | 4096896 | 4098190 | WBGene00007270 | rei-1     | C03C10.4  | 0.0831200570270898   |             |
| AGIWUR20043                                                                                               |    |     |         |         |                |           |           |                      |             |
| N2                                                                                                        | CT | III | 4115226 | 4147255 | WBGene00006830 | unc-103   | C30D11.1  | -0.0349434367357953  |             |
| AGIWUR8148;AGIWUR9828;AGIWUR16874;AGIWUR24520;AGIWUR31702;AGIWUR35136;AGIWUR35765;AGIWUR38831;AGIWUR41941 |    |     |         |         |                |           |           |                      |             |
| N2                                                                                                        | CT | III | 4147425 | 4151598 | WBGene00007631 | wht-3     | C16C10.12 | 0.334273537963947    |             |
| AGIWUR39934                                                                                               |    |     |         |         |                |           |           |                      |             |
| N2                                                                                                        | CT | III | 4152054 | 4152915 | WBGene00007630 | har-1     | C16C10.11 | -0.00600007056092799 |             |
| AGIWUR2630;AGIWUR3696;AGIWUR4247;AGIWUR8756;AGIWUR24873;AGIWUR36702                                       |    |     |         |         |                |           |           |                      |             |
| N2                                                                                                        | CT | III | 4153599 | 4154650 | WBGene00006448 | glod-4    | C16C10.10 | -0.134642872932789   |             |
| AGIWUR16289                                                                                               |    |     |         |         |                |           |           |                      |             |
| N2                                                                                                        | CT | III | 4155388 | 4157394 | WBGene00007629 | C16C10.9  | C16C10.9  | 0.102165064378603    |             |
| AGIWUR38186                                                                                               |    |     |         |         |                |           |           |                      |             |
| N2                                                                                                        | CT | III | 4161951 | 4164171 | WBGene00007628 | C16C10.8  | C16C10.8  | -0.304539076924957   |             |
| AGIWUR15159                                                                                               |    |     |         |         |                |           |           |                      |             |
| N2                                                                                                        | CT | III | 4164275 | 4166845 | WBGene00004381 | rnf-5     | C16C10.7  | -0.194535474485445   |             |
| AGIWUR10393                                                                                               |    |     |         |         |                |           |           |                      |             |
| N2                                                                                                        | CT | III | 4166944 | 4168765 | WBGene00007627 | ccdc-55   | C16C10.6  | 0.00378474411614249  |             |
| AGIWUR21267                                                                                               |    |     |         |         |                |           |           |                      |             |
| N2                                                                                                        | CT | III | 4168797 | 4170949 | WBGene00007626 | rnf-121   | C16C10.5  | -0.119073530778168   |             |
| AGIWUR2199                                                                                                |    |     |         |         |                |           |           |                      |             |
| N2                                                                                                        | CT | III | 4171336 | 4172223 | WBGene00007625 | C16C10.4  | C16C10.4  | -0.0209531767400488  |             |
| AGIWUR17931                                                                                               |    |     |         |         |                |           |           |                      |             |
| N2                                                                                                        | CT | III | 4172337 | 4176159 | WBGene00007624 | hrde-1    | C16C10.3  | 0.174331292826796    |             |
| AGIWUR20823                                                                                               |    |     |         |         |                |           |           |                      |             |
| N2                                                                                                        | CT | III | 4176678 | 4177578 | WBGene00007632 | C16C10.13 | C16C10.13 | 0.0844365350152749   |             |
| AGIWUR1567                                                                                                |    |     |         |         |                |           |           |                      |             |
| N2                                                                                                        | CT | III | 4177532 | 4178664 | WBGene00007623 | C16C10.2  | C16C10.2  | -0.190293465521215   |             |
| AGIWUR10585;AGIWUR12996;AGIWUR21393;AGIWUR27638;AGIWUR30103                                               |    |     |         |         |                |           |           |                      |             |
| N2                                                                                                        | CT | III | 4178783 | 4181438 | WBGene00007622 | C16C10.1  | C16C10.1  | -0.174766631609829   |             |
| AGIWUR31291                                                                                               |    |     |         |         |                |           |           |                      |             |
| N2                                                                                                        | CT | III | 4181543 | 4186825 | WBGene00003073 | lars-1    | R74.1     | -0.28548909208925    | AGIWUR30809 |
| N2                                                                                                        | CT | III | 4188160 | 4189285 | WBGene00011278 | R74.2     | R74.2     | -0.16984387091       |             |
| AGIWUR27575;AGIWUR27987;AGIWUR31182;AGIWUR31227;AGIWUR43478                                               |    |     |         |         |                |           |           |                      |             |
| N2                                                                                                        | CT | III | 4189380 | 4190341 | WBGene00206525 | R74.10    | R74.10    | -0.145873025952747   | AGIWUR44068 |
| N2                                                                                                        | CT | III | 4191141 | 4193427 | WBGene00001034 | dnj-16    | R74.4     | 0.0875424705271559   |             |
| AGIWUR19228;AGIWUR30349                                                                                   |    |     |         |         |                |           |           |                      |             |
| N2                                                                                                        | CT | III | 4193809 | 4195358 | WBGene00006959 | xbp-1     | R74.3     | 0.0115120970153662   |             |
| AGIWUR16166;AGIWUR22379;AGIWUR37406                                                                       |    |     |         |         |                |           |           |                      |             |
| N2                                                                                                        | CT | III | 4197285 | 4202289 | WBGene00011279 | asd-1     | R74.5     | 0.0350783750804453   |             |

AGIWUR33402;AGIWUR35999

|                                                                        |    |     |         |         |                |          |          |                      |             |
|------------------------------------------------------------------------|----|-----|---------|---------|----------------|----------|----------|----------------------|-------------|
| N2                                                                     | CT | III | 4202253 | 4204269 | WBGene00011280 | R74.6    | R74.6    | -0.176777427865273   |             |
| AGIWUR1687;AGIWUR16800;AGIWUR35134                                     |    |     |         |         |                |          |          |                      |             |
| N2                                                                     | CT | III | 4204429 | 4205814 | WBGene00011281 | R74.7    | R74.7    | 0.0710650387223808   | AGIWUR28021 |
| N2                                                                     | CT | III | 4206253 | 4208265 | WBGene00011282 | R74.8    | R74.8    | 0.161231363717717    |             |
| AGIWUR5769;AGIWUR22059                                                 |    |     |         |         |                |          |          |                      |             |
| N2                                                                     | CT | III | 4210562 | 4216724 | WBGene00009647 | F43C1.1  | F43C1.1  | -0.0507575127777917  | AGIWUR35794 |
| N2                                                                     | CT | III | 4216764 | 4228108 | WBGene00003401 | mpk-1    | F43C1.2  | -0.0139043484532806  |             |
| AGIWUR1958;AGIWUR9733;AGIWUR14898;AGIWUR14905;AGIWUR17406;AGIWUR40763  |    |     |         |         |                |          |          |                      |             |
| N2                                                                     | CT | III | 4229141 | 4230427 | WBGene00009649 | F43C1.5  | F43C1.5  | -0.0639769831043555  | AGIWUR1306  |
| N2                                                                     | CT | III | 4230436 | 4233219 | WBGene00003619 | nhr-20   | F43C1.4  | -0.108287367574462   | AGIWUR42423 |
| N2                                                                     | CT | III | 4241477 | 4242593 | WBGene00023423 | F43C1.7  | F43C1.7  | 0.0432602251813794   |             |
| AGIWUR8452;AGIWUR19266;AGIWUR33069                                     |    |     |         |         |                |          |          |                      |             |
| N2                                                                     | CT | III | 4242672 | 4243561 | WBGene00023422 | mrpl-21  | F43C1.6  | -0.28519285086367    | AGIWUR5851  |
| N2                                                                     | CT | III | 4243674 | 4244385 | WBGene00009648 | zhit-2   | F43C1.3  | -0.0387832008405891  |             |
| AGIWUR3825;AGIWUR22128;AGIWUR36936;AGIWUR44159                         |    |     |         |         |                |          |          |                      |             |
| N2                                                                     | CT | III | 4244858 | 4247671 | WBGene00012858 | Y44F5A.1 | Y44F5A.1 | -0.297227035686591   |             |
| AGIWUR13909                                                            |    |     |         |         |                |          |          |                      |             |
| N2                                                                     | CT | III | 4248155 | 4263048 | WBGene00011604 | T08A11.1 | T08A11.1 | -0.0618721110142038  |             |
| AGIWUR8299;AGIWUR14489;AGIWUR20691;AGIWUR32732;AGIWUR33366;AGIWUR37156 |    |     |         |         |                |          |          |                      |             |
| N2                                                                     | CT | III | 4263785 | 4269270 | WBGene00011605 | sftb-1   | T08A11.2 | 0.204295216557414    |             |
| AGIWUR1553;AGIWUR11891;AGIWUR19820;AGIWUR25548                         |    |     |         |         |                |          |          |                      |             |
| N2                                                                     | CT | III | 4269743 | 4272506 | WBGene00011198 | R10E4.1  | R10E4.1  | -0.0303718400714885  |             |
| AGIWUR7076;AGIWUR9157;AGIWUR18471                                      |    |     |         |         |                |          |          |                      |             |
| N2                                                                     | CT | III | 4276266 | 4280217 | WBGene00006331 | sup-26   | R10E4.2  | 0.164120450176302    |             |
| AGIWUR6823;AGIWUR16442;AGIWUR16959;AGIWUR20757;AGIWUR24961;AGIWUR41251 |    |     |         |         |                |          |          |                      |             |
| N2                                                                     | CT | III | 4285861 | 4287472 | WBGene00011200 | R10E4.3  | R10E4.3  | 0.000182104367475233 | AGIWUR36049 |
| N2                                                                     | CT | III | 4288264 | 4291283 | WBGene00003157 | mcm-5    | R10E4.4  | -0.0722997942503003  |             |
| AGIWUR11433;AGIWUR14883;AGIWUR23176;AGIWUR25320;AGIWUR33448            |    |     |         |         |                |          |          |                      |             |
| N2                                                                     | CT | III | 4291543 | 4293413 | WBGene00011201 | nth-1    | R10E4.5  | -0.112275000138027   | AGIWUR25315 |
| N2                                                                     | CT | III | 4293408 | 4295142 | WBGene00011202 | R10E4.6  | R10E4.6  | -0.0694243943656314  | AGIWUR16345 |
| N2                                                                     | CT | III | 4295224 | 4296599 | WBGene00011203 | R10E4.7  | R10E4.7  | 0.444366126021789    | AGIWUR34301 |
| N2                                                                     | CT | III | 4297239 | 4301039 | WBGene00011206 | R10E4.11 | R10E4.11 | -0.143416965738368   |             |
| AGIWUR3790                                                             |    |     |         |         |                |          |          |                      |             |
| N2                                                                     | CT | III | 4301620 | 4302393 | WBGene00011205 | R10E4.9  | R10E4.9  | -0.118263749787161   | AGIWUR33427 |
| N2                                                                     | CT | III | 4303096 | 4313128 | WBGene00001352 | evl-14   | H38K22.1 | 0.0446414864467002   |             |
| AGIWUR33989                                                            |    |     |         |         |                |          |          |                      |             |
| N2                                                                     | CT | III | 4313927 | 4317608 | WBGene00010428 | dcn-1    | H38K22.2 | 0.0875944818515677   |             |
| AGIWUR30845                                                            |    |     |         |         |                |          |          |                      |             |

|                                                                                                             |    |     |         |         |                |          |          |                       |                    |
|-------------------------------------------------------------------------------------------------------------|----|-----|---------|---------|----------------|----------|----------|-----------------------|--------------------|
| N2                                                                                                          | CT | III | 4317702 | 4320341 | WBGene00006478 | tag-131  | H38K22.3 |                       | 0.22405348718671   |
| AGIWUR20634                                                                                                 |    |     |         |         |                |          |          |                       |                    |
| N2                                                                                                          | CT | III | 4320389 | 4321348 | WBGene00044911 | H38K22.6 | H38K22.6 |                       | 0.231042229045441  |
| AGIWUR13317;AGIWUR17809;AGIWUR26894;AGIWUR40933;AGIWUR41799                                                 |    |     |         |         |                |          |          |                       |                    |
| N2                                                                                                          | CT | III | 4321748 | 4322867 | WBGene00044912 | H38K22.7 | H38K22.7 |                       | 0.207507510145142  |
| AGIWUR917;AGIWUR9416;AGIWUR19948;AGIWUR20893;AGIWUR30626                                                    |    |     |         |         |                |          |          |                       |                    |
| N2                                                                                                          | CT | III | 4324280 | 4331227 | WBGene00001631 | gly-6    | H38K22.5 |                       | 0.116142479883986  |
| AGIWUR11179;AGIWUR26035;AGIWUR27415;AGIWUR29155;AGIWUR39994                                                 |    |     |         |         |                |          |          |                       |                    |
| N2                                                                                                          | CT | III | 4332996 | 4340464 | WBGene00007135 | cdk-12   | B0285.1  | 0.125384176262422     | AGIWUR15012        |
| N2                                                                                                          | CT | III | 4341983 | 4343336 | WBGene00007136 | B0285.3  | B0285.3  | -0.188882941685296    | AGIWUR31964        |
| N2                                                                                                          | CT | III | 4343446 | 4345366 | WBGene00007137 | B0285.4  | B0285.4  | -0.135436933345513    | AGIWUR9788         |
| N2                                                                                                          | CT | III | 4345339 | 4350079 | WBGene00002003 | hse-5    | B0285.5  | 0.0351845782787663    | AGIWUR25929        |
| N2                                                                                                          | CT | III | 4352246 | 4355888 | WBGene00007138 | B0285.6  | B0285.6  | -0.474846014290515    | AGIWUR18506        |
| N2                                                                                                          | CT | III | 4356539 | 4364974 | WBGene00007139 | mnp-1    | B0285.7  | -0.0372907102156717   | AGIWUR19898        |
| N2                                                                                                          | CT | III | 4365285 | 4367469 | WBGene00000511 | ckb-1    | B0285.8  | -0.052326105758878    | AGIWUR25566        |
| N2                                                                                                          | CT | III | 4367832 | 4370160 | WBGene00000512 | ckb-2    | B0285.9  | -0.00682787011744601  | AGIWUR19613        |
| N2                                                                                                          | CT | III | 4370885 | 4372820 | WBGene00000513 | ckb-3    | B0285.10 |                       | 0.186679819580875  |
| AGIWUR12272                                                                                                 |    |     |         |         |                |          |          |                       |                    |
| N2                                                                                                          | CT | III | 4373179 | 4375323 | WBGene00045188 | B0284.5  | B0284.5  | 0.101914965299491     |                    |
| AGIWUR6647;AGIWUR44597                                                                                      |    |     |         |         |                |          |          |                       |                    |
| N2                                                                                                          | CT | III | 4376503 | 4379200 | WBGene00007131 | pals-26  | B0284.1  | 0.97652801716479      |                    |
| AGIWUR659;AGIWUR34401                                                                                       |    |     |         |         |                |          |          |                       |                    |
| N2                                                                                                          | CT | III | 4379368 | 4381041 | WBGene00007133 | B0284.3  | B0284.3  | -0.0893513234819707   | AGIWUR22476        |
| N2                                                                                                          | CT | III | 4381739 | 4384141 | WBGene00007132 | pals-27  | B0284.2  | 1.67113723041891      | AGIWUR2667         |
| N2                                                                                                          | CT | III | 4384787 | 4387757 | WBGene00007134 | pals-28  | B0284.4  | 1.02462332333684      | AGIWUR31960        |
| N2                                                                                                          | CT | III | 4394796 | 4396617 | WBGene00011112 | R07E5.4  | R07E5.4  | 0.0432233990529429    | AGIWUR14612        |
| N2                                                                                                          | CT | III | 4397415 | 4398576 | WBGene00011113 | R07E5.5  | R07E5.5  | 0.118374250941327     | AGIWUR38210        |
| N2                                                                                                          | CT | III | 4398763 | 4400942 | WBGene00011114 | R07E5.6  | R07E5.6  | 0.337401777936808     | AGIWUR35081        |
| N2                                                                                                          | CT | III | 4401442 | 4402505 | WBGene00011120 | R07E5.15 | R07E5.15 |                       | 0.344105811515952  |
| AGIWUR37803                                                                                                 |    |     |         |         |                |          |          |                       |                    |
| N2                                                                                                          | CT | III | 4402595 | 4404436 | WBGene00011121 | R07E5.17 | R07E5.17 |                       | 0.076607574489306  |
| AGIWUR2552;AGIWUR38683                                                                                      |    |     |         |         |                |          |          |                       |                    |
| N2                                                                                                          | CT | III | 4404786 | 4406285 | WBGene00011111 | snfc-5   | R07E5.3  | -0.0351613132815967   |                    |
| AGIWUR11492;AGIWUR14649;AGIWUR22515;AGIWUR25831;AGIWUR28126;AGIWUR28837;AGIWUR29804;AGIWUR32754;AGIWUR35093 |    |     |         |         |                |          |          |                       |                    |
| N2                                                                                                          | CT | III | 4406286 | 4407326 | WBGene00004387 | rnp-4    | R07E5.14 |                       | -0.117235718305398 |
| AGIWUR11861;AGIWUR14460;AGIWUR19160;AGIWUR24049;AGIWUR25412;AGIWUR25790;AGIWUR27926                         |    |     |         |         |                |          |          |                       |                    |
| N2                                                                                                          | CT | III | 4407444 | 4408437 | WBGene00011110 | prdx-3   | R07E5.2  | -0.000999510771230838 |                    |
| AGIWUR25524;AGIWUR35814;AGIWUR37579;AGIWUR41024                                                             |    |     |         |         |                |          |          |                       |                    |
| N2                                                                                                          | CT | III | 4408551 | 4412149 | WBGene00011109 | R07E5.1  | R07E5.1  | -0.174319868623746    | AGIWUR8228         |

|                                                                                                                                   |    |     |         |         |                |          |          |                     |             |
|-----------------------------------------------------------------------------------------------------------------------------------|----|-----|---------|---------|----------------|----------|----------|---------------------|-------------|
| N2                                                                                                                                | CT | III | 4413457 | 4414748 | WBGene00011119 | mpc-1    | R07E5.13 | -0.10243304573255   |             |
| AGIWUR5754;AGIWUR9776;AGIWUR19771;AGIWUR33099;AGIWUR40240                                                                         |    |     |         |         |                |          |          |                     |             |
| N2                                                                                                                                | CT | III | 4414732 | 4415235 | WBGene00011117 | R07E5.11 | R07E5.11 | 0.0676494457815693  |             |
| AGIWUR32637                                                                                                                       |    |     |         |         |                |          |          |                     |             |
| N2                                                                                                                                | CT | III | 4415520 | 4418058 | WBGene00011116 | pdcd-2   | R07E5.10 | 0.029323923018179   |             |
| AGIWUR4236;AGIWUR6736;AGIWUR6974;AGIWUR15557;AGIWUR19842;AGIWUR20601;AGIWUR20807;AGIWUR36005;AGIWUR38031;AGIWUR38783              |    |     |         |         |                |          |          |                     |             |
| N2                                                                                                                                | CT | III | 4418343 | 4419167 | WBGene00011115 | R07E5.7  | R07E5.7  | -0.159850814076794  |             |
| AGIWUR1971;AGIWUR7078;AGIWUR8963;AGIWUR28166;AGIWUR32271                                                                          |    |     |         |         |                |          |          |                     |             |
| N2                                                                                                                                | CT | III | 4419848 | 4423368 | WBGene00000520 | cku-80   | R07E5.8  | -0.148066079030439  | AGIWUR29231 |
| N2                                                                                                                                | CT | III | 4423711 | 4429499 | WBGene00007791 | C28A5.6  | C28A5.6  | 0.288560623068403   | AGIWUR37808 |
| N2                                                                                                                                | CT | III | 4442081 | 4444237 | WBGene00003590 | nex-3    | C28A5.3  | 0.0591322731438062  | AGIWUR30120 |
| N2                                                                                                                                | CT | III | 4446637 | 4449943 | WBGene00000463 | ceh-43   | C28A5.4  | -0.0795004064840965 | AGIWUR11902 |
| N2                                                                                                                                | CT | III | 4462833 | 4467377 | WBGene00003577 | ndg-4    | F56F3.2  | 0.128590848442771   |             |
| AGIWUR18135;AGIWUR26646                                                                                                           |    |     |         |         |                |          |          |                     |             |
| N2                                                                                                                                | CT | III | 4468878 | 4470808 | WBGene00010155 | F56F3.4  | F56F3.4  | 0.231164071714815   | AGIWUR33529 |
| N2                                                                                                                                | CT | III | 4471407 | 4475150 | WBGene00004132 | ifet-1   | F56F3.1  | 0.108291976576444   |             |
| AGIWUR13827;AGIWUR40868;AGIWUR42975                                                                                               |    |     |         |         |                |          |          |                     |             |
| N2                                                                                                                                | CT | III | 4475918 | 4476887 | WBGene00004470 | rps-1    | F56F3.5  | -0.0228096080731621 |             |
| AGIWUR7578;AGIWUR16537;AGIWUR18534;AGIWUR24392;AGIWUR34321;AGIWUR36331                                                            |    |     |         |         |                |          |          |                     |             |
| N2                                                                                                                                | CT | III | 4476888 | 4477583 | WBGene00002100 | ins-17   | F56F3.6  | -0.168088729060297  |             |
| AGIWUR7314;AGIWUR9236;AGIWUR11108;AGIWUR13900;AGIWUR16963;AGIWUR24675                                                             |    |     |         |         |                |          |          |                     |             |
| N2                                                                                                                                | CT | III | 4489359 | 4491392 | WBGene00000465 | cpg-1    | C07G2.1  | -0.0183403655016008 |             |
| AGIWUR3126;AGIWUR4450;AGIWUR6962;AGIWUR9701;AGIWUR25056;AGIWUR28301;AGIWUR33939                                                   |    |     |         |         |                |          |          |                     |             |
| N2                                                                                                                                | CT | III | 4491627 | 4499043 | WBGene00000223 | atf-7    | C07G2.2  | 0.0763474086499194  |             |
| AGIWUR4927;AGIWUR5314;AGIWUR14974;AGIWUR20820;AGIWUR24837;AGIWUR29854;AGIWUR31507;AGIWUR34947;AGIWUR35619;AGIWUR37894;AGIWUR42736 |    |     |         |         |                |          |          |                     |             |
| N2                                                                                                                                | CT | III | 4499191 | 4508114 | WBGene00000380 | cct-5    | C07G2.3  | -0.107111718840415  |             |
| AGIWUR3833;AGIWUR4408;AGIWUR31324;AGIWUR40854                                                                                     |    |     |         |         |                |          |          |                     |             |
| N2                                                                                                                                | CT | III | 4508855 | 4512162 | WBGene00009115 | F25F2.1  | F25F2.1  | 0.246140513511346   | AGIWUR307   |
| N2                                                                                                                                | CT | III | 4520363 | 4536991 | WBGene00000396 | cdh-4    | F25F2.2  | 0.27786689960271    | AGIWUR20794 |
| N2                                                                                                                                | CT | III | 4537277 | 4540644 | WBGene00010904 | ugt-62   | M88.1    | -0.0315554345970277 | AGIWUR13910 |
| N2                                                                                                                                | CT | III | 4541326 | 4542452 | WBGene00010905 | mrps-34  | M88.2    | 0.195237470112714   | AGIWUR38242 |
| N2                                                                                                                                | CT | III | 4542881 | 4546025 | WBGene00010909 | cisd-3.1 | M88.7    | 0.0304881788142399  |             |
| AGIWUR21078                                                                                                                       |    |     |         |         |                |          |          |                     |             |
| N2                                                                                                                                | CT | III | 4549063 | 4551567 | WBGene00010907 | M88.4    | M88.4    | -0.04510438118667   | AGIWUR44096 |
| N2                                                                                                                                | CT | III | 4553618 | 4560350 | WBGene00010908 | zbp-1    | M88.5    | -0.138702568021088  |             |
| AGIWUR6561;AGIWUR6686;AGIWUR36835                                                                                                 |    |     |         |         |                |          |          |                     |             |
| N2                                                                                                                                | CT | III | 4562738 | 4566276 | WBGene00003915 | pan-1    | M88.6    | 0.0537766687457815  | AGIWUR26141 |

|                                                                                                |    |     |         |         |                |        |           |                      |                     |
|------------------------------------------------------------------------------------------------|----|-----|---------|---------|----------------|--------|-----------|----------------------|---------------------|
| N2                                                                                             | CT | III | 4566279 | 4568144 | WBGene00009439 | mlcd-1 | F35G12.1  | -0.114747560150279   |                     |
| AGIWUR2770;AGIWUR2817;AGIWUR13489;AGIWUR27496;AGIWUR33025;AGIWUR39632                          |    |     |         |         |                |        |           |                      |                     |
| N2                                                                                             | CT | III | 4567325 | 4571835 | WBGene00009440 | idhg-1 | F35G12.2  | 0.0810470448115126   |                     |
| AGIWUR3341;AGIWUR9882;AGIWUR23281                                                              |    |     |         |         |                |        |           |                      |                     |
| N2                                                                                             | CT | III | 4571753 | 4578437 | WBGene00004762 | sel-5  | F35G12.3  | -0.0375424172052035  |                     |
| AGIWUR4191;AGIWUR10977;AGIWUR11373;AGIWUR15605;AGIWUR17298;AGIWUR22658;AGIWUR30054;AGIWUR38843 |    |     |         |         |                |        |           |                      |                     |
| N2                                                                                             | CT | III | 4578855 | 4581696 | WBGene00009441 | wdr-48 | F35G12.4  | 0.153974588888401    |                     |
| AGIWUR16083;AGIWUR31303;AGIWUR33315                                                            |    |     |         |         |                |        |           |                      |                     |
| N2                                                                                             | CT | III | 4581795 | 4583893 | WBGene00009445 |        | F35G12.12 | F35G12.12            | 0.00891789358448314 |
| AGIWUR19409                                                                                    |    |     |         |         |                |        |           |                      |                     |
| N2                                                                                             | CT | III | 4584583 | 4586753 | WBGene00009442 |        | F35G12.5  | F35G12.5             | -0.146685955896391  |
| AGIWUR40495                                                                                    |    |     |         |         |                |        |           |                      |                     |
| N2                                                                                             | CT | III | 4586628 | 4587330 | WBGene00009443 |        | F35G12.7  | F35G12.7             | -0.15942535247077   |
| AGIWUR3544                                                                                     |    |     |         |         |                |        |           |                      |                     |
| N2                                                                                             | CT | III | 4587415 | 4593124 | WBGene00004874 | smc-4  | F35G12.8  | 0.0713856781286157   |                     |
| AGIWUR39484                                                                                    |    |     |         |         |                |        |           |                      |                     |
| N2                                                                                             | CT | III | 4593176 | 4593832 | WBGene00009444 |        | F35G12.11 | F35G12.11            | -0.133044606476396  |
| AGIWUR25108                                                                                    |    |     |         |         |                |        |           |                      |                     |
| N2                                                                                             | CT | III | 4593769 | 4594426 | WBGene00000145 | apc-11 | F35G12.9  | -0.143891928162272   |                     |
| AGIWUR11099                                                                                    |    |     |         |         |                |        |           |                      |                     |
| N2                                                                                             | CT | III | 4594543 | 4595944 | WBGene00000206 | asb-1  | F35G12.10 | -0.098464263531989   |                     |
| AGIWUR14757;AGIWUR15446;AGIWUR18553                                                            |    |     |         |         |                |        |           |                      |                     |
| N2                                                                                             | CT | III | 4596134 | 4612384 | WBGene00004760 | sel-2  | F10F2.1   | 0.0807662131047522   | AGIWUR7358          |
| N2                                                                                             | CT | III | 4616479 | 4618893 | WBGene00008655 | lips-3 | F10F2.3   | -0.0306514696467572  |                     |
| AGIWUR2515;AGIWUR12349;AGIWUR13166;AGIWUR21826;AGIWUR35962;AGIWUR38897                         |    |     |         |         |                |        |           |                      |                     |
| N2                                                                                             | CT | III | 4618853 | 4643305 | WBGene00008654 |        | F10F2.2   | F10F2.2              | -0.101279766999609  |
| AGIWUR33800                                                                                    |    |     |         |         |                |        |           |                      |                     |
| N2                                                                                             | CT | III | 4643999 | 4646346 | WBGene00004118 | pqn-29 | F10F2.9   | 0.209676061129167    | AGIWUR32867         |
| N2                                                                                             | CT | III | 4646507 | 4647854 | WBGene00011957 |        | T23F11.6  | T23F11.6             | 0.307268009596642   |
| AGIWUR29047                                                                                    |    |     |         |         |                |        |           |                      |                     |
| N2                                                                                             | CT | III | 4648591 | 4653929 | WBGene00011953 | ppm-2  | T23F11.1  | -0.00255023921511111 |                     |
| AGIWUR2592;AGIWUR7677;AGIWUR16510;AGIWUR23088;AGIWUR31765                                      |    |     |         |         |                |        |           |                      |                     |
| N2                                                                                             | CT | III | 4658739 | 4662697 | WBGene00011955 | cdka-1 | T23F11.3  | 0.0689093134851504   |                     |
| AGIWUR5542;AGIWUR14846;AGIWUR38432;AGIWUR39512                                                 |    |     |         |         |                |        |           |                      |                     |
| N2                                                                                             | CT | III | 4663185 | 4665368 | WBGene00011956 |        | T23F11.4  | T23F11.4             | -0.125292450587068  |
| AGIWUR1001                                                                                     |    |     |         |         |                |        |           |                      |                     |
| N2                                                                                             | CT | III | 4672249 | 4674207 | WBGene00005170 | srg-13 | T23F11.5  | -0.254949064172927   |                     |
| AGIWUR40917                                                                                    |    |     |         |         |                |        |           |                      |                     |
| N2                                                                                             | CT | III | 4677766 | 4679663 | WBGene00005168 | srg-10 | T04A8.1   | -0.0852645058842096  | AGIWUR27750         |
| N2                                                                                             | CT | III | 4680013 | 4681562 | WBGene00005169 | srg-11 | T04A8.2   | -0.0913786187700119  | AGIWUR13241         |

|                                                                                                             |    |     |         |         |                |           |          |                     |             |
|-------------------------------------------------------------------------------------------------------------|----|-----|---------|---------|----------------|-----------|----------|---------------------|-------------|
| N2                                                                                                          | CT | III | 4682774 | 4685533 | WBGene00011405 | cllec-155 | T04A8.3  | -0.0588424571051753 |             |
| AGIWUR11086                                                                                                 |    |     |         |         |                |           |          |                     |             |
| N2                                                                                                          | CT | III | 4686088 | 4688210 | WBGene00044078 | tag-243   | T04A8.4  | 0.0205204000912635  |             |
| AGIWUR18509;AGIWUR24487                                                                                     |    |     |         |         |                |           |          |                     |             |
| N2                                                                                                          | CT | III | 4689280 | 4692166 | WBGene00011407 | ppat-1    | T04A8.5  | -0.174242796931768  | AGIWUR40473 |
| N2                                                                                                          | CT | III | 4692098 | 4693303 | WBGene00011408 | T04A8.6   | T04A8.6  | -0.0721457309286997 | AGIWUR18609 |
| N2                                                                                                          | CT | III | 4694003 | 4695270 | WBGene00011410 | T04A8.8   | T04A8.8  | -0.136656295155237  | AGIWUR12099 |
| N2                                                                                                          | CT | III | 4695361 | 4698010 | WBGene00011409 | T04A8.7   | T04A8.7  | 0.176188974435761   |             |
| AGIWUR21833;AGIWUR25655;AGIWUR27695;AGIWUR37122                                                             |    |     |         |         |                |           |          |                     |             |
| N2                                                                                                          | CT | III | 4697987 | 4699453 | WBGene00001036 | dnj-18    | T04A8.9  | -0.184219945894002  |             |
| AGIWUR2611;AGIWUR38656;AGIWUR41916                                                                          |    |     |         |         |                |           |          |                     |             |
| N2                                                                                                          | CT | III | 4699407 | 4700224 | WBGene00011411 | sel-13    | T04A8.10 | -0.191107528734626  |             |
| AGIWUR32048                                                                                                 |    |     |         |         |                |           |          |                     |             |
| N2                                                                                                          | CT | III | 4700325 | 4704054 | WBGene00000543 | clp-2     | T04A8.16 | -0.12331145819973   |             |
| AGIWUR21921                                                                                                 |    |     |         |         |                |           |          |                     |             |
| N2                                                                                                          | CT | III | 4704404 | 4705404 | WBGene00011412 | mrpl-16   | T04A8.11 | -0.0904998195314768 |             |
| AGIWUR8495;AGIWUR22631;AGIWUR34099                                                                          |    |     |         |         |                |           |          |                     |             |
| N2                                                                                                          | CT | III | 4705413 | 4706949 | WBGene00007045 | tag-189   | T04A8.12 | -0.134878146725811  |             |
| AGIWUR964;AGIWUR10737;AGIWUR33930                                                                           |    |     |         |         |                |           |          |                     |             |
| N2                                                                                                          | CT | III | 4709248 | 4712547 | WBGene00119203 | T04A8.18  | T04A8.18 | -0.113962150293258  |             |
| AGIWUR29768                                                                                                 |    |     |         |         |                |           |          |                     |             |
| N2                                                                                                          | CT | III | 4712572 | 4715188 | WBGene00011415 | him-18    | T04A8.15 | -0.149791379125773  |             |
| AGIWUR14976                                                                                                 |    |     |         |         |                |           |          |                     |             |
| N2                                                                                                          | CT | III | 4715293 | 4720670 | WBGene00001259 | emb-5     | T04A8.14 | 0.207096641522441   |             |
| AGIWUR10332;AGIWUR10446;AGIWUR22030;AGIWUR23199;AGIWUR23677;AGIWUR30711;AGIWUR33433;AGIWUR34113;AGIWUR36496 |    |     |         |         |                |           |          |                     |             |
| N2                                                                                                          | CT | III | 4722126 | 4730919 | WBGene00000068 | acy-1     | F17C8.1  | 0.108431448900664   | AGIWUR11552 |
| N2                                                                                                          | CT | III | 4734356 | 4736065 | WBGene00185014 | F17C8.9   | F17C8.9  | 0.0528247126435071  |             |
| AGIWUR14597;AGIWUR41893                                                                                     |    |     |         |         |                |           |          |                     |             |
| N2                                                                                                          | CT | III | 4736050 | 4737258 | WBGene00008912 | F17C8.7   | F17C8.7  | -0.153797570658115  | AGIWUR19939 |
| N2                                                                                                          | CT | III | 4737589 | 4740075 | WBGene00004311 | ras-2     | F17C8.4  | -0.0204207685949891 |             |
| AGIWUR2834;AGIWUR17837;AGIWUR26706;AGIWUR32802                                                              |    |     |         |         |                |           |          |                     |             |
| N2                                                                                                          | CT | III | 4748127 | 4749164 | WBGene00000664 | col-89    | F17C8.2  | 0.393235013220593   | AGIWUR18994 |
| N2                                                                                                          | CT | III | 4752998 | 4754083 | WBGene00004469 | rps-0     | B0393.1  | -0.087270017833152  |             |
| AGIWUR193;AGIWUR6226;AGIWUR6783                                                                             |    |     |         |         |                |           |          |                     |             |
| N2                                                                                                          | CT | III | 4754432 | 4757017 | WBGene00007167 | rbg-3     | B0393.2  | 0.0520468996678076  | AGIWUR3240  |
| N2                                                                                                          | CT | III | 4757201 | 4759728 | WBGene00007168 | B0393.3   | B0393.3  | -0.190091194630121  | AGIWUR43498 |
| N2                                                                                                          | CT | III | 4759744 | 4763609 | WBGene00007169 | B0393.4   | B0393.4  | 0.0805375825442711  | AGIWUR6601  |
| N2                                                                                                          | CT | III | 4765833 | 4776342 | WBGene00007170 | B0393.5   | B0393.5  | -0.0592873926385291 | AGIWUR34080 |
| N2                                                                                                          | CT | III | 4776264 | 4778065 | WBGene00007172 | B0393.7   | B0393.7  | 0.264082156104331   | AGIWUR36678 |



|                                                                                               |    |     |         |         |                |           |          |                      |             |
|-----------------------------------------------------------------------------------------------|----|-----|---------|---------|----------------|-----------|----------|----------------------|-------------|
| N2                                                                                            | CT | III | 4778390 | 4780157 | WBGene00044636 | B0393.9   | B0393.9  | -0.0711949550076927  |             |
| AGIWUR1374;AGIWUR3283;AGIWUR40762                                                             |    |     |         |         |                |           |          |                      |             |
| N2                                                                                            | CT | III | 4780130 | 4781987 | WBGene00007171 | B0393.6   | B0393.6  | 0.0994773816471923   | AGIWUR45184 |
| N2                                                                                            | CT | III | 4786080 | 4792391 | WBGene00003210 | mel-28    | C38D4.3  | -0.00382815029270489 | AGIWUR40516 |
| N2                                                                                            | CT | III | 4793086 | 4795423 | WBGene00008005 | C38D4.4   | C38D4.4  | -0.192427759777814   | AGIWUR5766  |
| N2                                                                                            | CT | III | 4796839 | 4802907 | WBGene00008006 | tag-325   | C38D4.5  | -0.023154976678617   | AGIWUR17735 |
| N2                                                                                            | CT | III | 4803007 | 4804753 | WBGene00008008 | C38D4.9   | C38D4.9  | 0.219731525704361    |             |
| AGIWUR4922;AGIWUR26328;AGIWUR39586                                                            |    |     |         |         |                |           |          |                      |             |
| N2                                                                                            | CT | III | 4804708 | 4809489 | WBGene00003912 | pal-1     | C38D4.6  | -0.0298213527530633  |             |
| AGIWUR3503;AGIWUR8986;AGIWUR17483;AGIWUR25142;AGIWUR26070;AGIWUR26964;AGIWUR29813;AGIWUR34020 |    |     |         |         |                |           |          |                      |             |
| N2                                                                                            | CT | III | 4810031 | 4811162 | WBGene00008007 | C38D4.7   | C38D4.7  | -0.039771473035155   | AGIWUR275   |
| N2                                                                                            | CT | III | 4813309 | 4814814 | WBGene00000193 | arl-6     | C38D4.8  | -0.0699896722325093  | AGIWUR6297  |
| N2                                                                                            | CT | III | 4816040 | 4817078 | WBGene00017804 | F26A1.6   | F26A1.6  | 0.15261053165241     | AGIWUR20049 |
| N2                                                                                            | CT | III | 4818042 | 4819073 | WBGene00017803 | F26A1.4   | F26A1.4  | 0.207995166898869    | AGIWUR21527 |
| N2                                                                                            | CT | III | 4819328 | 4819943 | WBGene00017805 | F26A1.7   | F26A1.7  | -0.097602865910777   | AGIWUR34354 |
| N2                                                                                            | CT | III | 4820670 | 4822226 | WBGene00017806 | F26A1.8   | F26A1.8  | -0.13746941128192    | AGIWUR25170 |
| N2                                                                                            | CT | III | 4825345 | 4829509 | WBGene00017807 | F26A1.9   | F26A1.9  | -0.0426894451687918  | AGIWUR16711 |
| N2                                                                                            | CT | III | 4830010 | 4830349 | WBGene00017808 | nspd-9    | F26A1.10 | -0.0662163007444985  |             |
| AGIWUR5361                                                                                    |    |     |         |         |                |           |          |                      |             |
| N2                                                                                            | CT | III | 4837731 | 4839931 | WBGene00270319 | F26A1.19  | F26A1.19 | -0.155781565629848   |             |
| AGIWUR745                                                                                     |    |     |         |         |                |           |          |                      |             |
| N2                                                                                            | CT | III | 4840187 | 4841024 | WBGene00044603 | acbp-7    | F26A1.15 | -0.160469068805053   |             |
| AGIWUR8465;AGIWUR28608                                                                        |    |     |         |         |                |           |          |                      |             |
| N2                                                                                            | CT | III | 4841039 | 4842273 | WBGene00017809 | cllec-156 | F26A1.11 | 0.0541681617209209   |             |
| AGIWUR40380                                                                                   |    |     |         |         |                |           |          |                      |             |
| N2                                                                                            | CT | III | 4843493 | 4844410 | WBGene00017810 | cllec-157 | F26A1.12 | -0.0853296451473478  |             |
| AGIWUR41337                                                                                   |    |     |         |         |                |           |          |                      |             |
| N2                                                                                            | CT | III | 4844662 | 4846546 | WBGene00001437 | fkh-5     | F26A1.2  | 0.010153302216855    |             |
| AGIWUR10841;AGIWUR35894;AGIWUR40674                                                           |    |     |         |         |                |           |          |                      |             |
| N2                                                                                            | CT | III | 4847072 | 4848967 | WBGene00017811 | F26A1.13  | F26A1.13 | -0.112589369740296   |             |
| AGIWUR9823;AGIWUR14986;AGIWUR25874                                                            |    |     |         |         |                |           |          |                      |             |
| N2                                                                                            | CT | III | 4849266 | 4849850 | WBGene00017812 | F26A1.14  | F26A1.14 | -0.104166118675584   |             |
| AGIWUR21644;AGIWUR25758;AGIWUR38856                                                           |    |     |         |         |                |           |          |                      |             |
| N2                                                                                            | CT | III | 4850507 | 4851910 | WBGene00017801 | F26A1.1   | F26A1.1  | -0.19033277953274    | AGIWUR13881 |
| N2                                                                                            | CT | III | 4852313 | 4855177 | WBGene00000418 | ced-4     | C35D10.9 | -0.183178318643787   |             |
| AGIWUR5354;AGIWUR5654;AGIWUR41670                                                             |    |     |         |         |                |           |          |                      |             |
| N2                                                                                            | CT | III | 4855250 | 4856101 | WBGene00016445 | C35D10.8  | C35D10.8 | 0.0415345328138077   |             |
| AGIWUR5688                                                                                    |    |     |         |         |                |           |          |                      |             |
| N2                                                                                            | CT | III | 4856193 | 4859240 | WBGene00016444 | C35D10.7  | C35D10.7 | 0.0153039690555676   |             |

|                                                 |    |     |         |         |                |           |           |                     |
|-------------------------------------------------|----|-----|---------|---------|----------------|-----------|-----------|---------------------|
| AGIWUR24486;AGIWUR38743                         |    |     |         |         |                |           |           |                     |
| N2                                              | CT | III | 4859339 | 4860772 | WBGene00016443 | C35D10.6  | C35D10.6  | -0.374609835963652  |
| AGIWUR6719                                      |    |     |         |         |                |           |           |                     |
| N2                                              | CT | III | 4860669 | 4861794 | WBGene00016446 | C35D10.10 | C35D10.10 | -0.0573447152634987 |
| AGIWUR44106                                     |    |     |         |         |                |           |           |                     |
| N2                                              | CT | III | 4862351 | 4863426 | WBGene00016442 | C35D10.5  | C35D10.5  | -0.135305824048127  |
| AGIWUR10145;AGIWUR15024;AGIWUR19643;AGIWUR27288 |    |     |         |         |                |           |           |                     |
| N2                                              | CT | III | 4863427 | 4866949 | WBGene00000767 | coq-8     | C35D10.4  | -0.0911161650148582 |
| AGIWUR31304;AGIWUR41201;AGIWUR43913             |    |     |         |         |                |           |           |                     |
| N2                                              | CT | III | 4867062 | 4867469 | WBGene00016452 | C35D10.17 | C35D10.17 | -0.119041992252054  |
| AGIWUR26941                                     |    |     |         |         |                |           |           |                     |
| N2                                              | CT | III | 4868333 | 4868769 | WBGene00016447 | msd-4     | C35D10.11 | 0.187902623740394   |
| AGIWUR19153                                     |    |     |         |         |                |           |           |                     |
| N2                                              | CT | III | 4868921 | 4870106 | WBGene00016441 | C35D10.3  | C35D10.3  | -0.0105416065345452 |
| AGIWUR25259                                     |    |     |         |         |                |           |           |                     |
| N2                                              | CT | III | 4870762 | 4872046 | WBGene00016440 | gipc-1    | C35D10.2  | 0.354657314313711   |
| AGIWUR18831;AGIWUR36466                         |    |     |         |         |                |           |           |                     |
| N2                                              | CT | III | 4872501 | 4874751 | WBGene00016448 | C35D10.12 | C35D10.12 | -0.165473629653095  |
| AGIWUR21860                                     |    |     |         |         |                |           |           |                     |
| N2                                              | CT | III | 4877526 | 4878311 | WBGene00016449 | C35D10.13 | C35D10.13 | -0.0600823949823965 |
| AGIWUR28892                                     |    |     |         |         |                |           |           |                     |
| N2                                              | CT | III | 4878658 | 4879643 | WBGene00000204 | arx-6     | C35D10.16 | -0.0832114985196704 |
| AGIWUR41105                                     |    |     |         |         |                |           |           |                     |
| N2                                              | CT | III | 4879745 | 4881497 | WBGene00016439 | C35D10.1  | C35D10.1  | -0.170046622949527  |
| AGIWUR11893;AGIWUR14564                         |    |     |         |         |                |           |           |                     |
| N2                                              | CT | III | 4881909 | 4883606 | WBGene00016450 | cllec-5   | C35D10.14 | 0.184560557415818   |
| AGIWUR14533                                     |    |     |         |         |                |           |           |                     |
| N2                                              | CT | III | 4885697 | 4887442 | WBGene00016451 | cllec-6   | C35D10.15 | 0.0353496433204743  |
| AGIWUR7022                                      |    |     |         |         |                |           |           |                     |
| N2                                              | CT | III | 4887921 | 4891252 | WBGene00017827 | F26F4.5   | F26F4.5   | 0.277148207188342   |
| N2                                              | CT | III | 4891609 | 4893409 | WBGene00017828 | F26F4.6   | F26F4.6   | -0.108155301929603  |
| AGIWUR3837;AGIWUR40615                          |    |     |         |         |                |           |           |                     |
| N2                                              | CT | III | 4894647 | 4899085 | WBGene00003598 | nhl-2     | F26F4.7   | 0.437389380547689   |
| N2                                              | CT | III | 4900073 | 4903143 | WBGene00017826 | tag-340   | F26F4.4   | -0.0188032657952206 |
| N2                                              | CT | III | 4903177 | 4903884 | WBGene00017832 | kbp-2     | F26F4.13  | -0.0433308399932564 |
| AGIWUR33560                                     |    |     |         |         |                |           |           |                     |
| N2                                              | CT | III | 4903997 | 4905473 | WBGene00005011 | F26F4.8   | F26F4.8   | -0.0504536752956195 |
| N2                                              | CT | III | 4907217 | 4908968 | WBGene00004400 | rom-1     | F26F4.3   | -0.215925015431646  |
| N2                                              | CT | III | 4908960 | 4910038 | WBGene00017831 | F26F4.12  | F26F4.12  | -0.0609800215653884 |

AGIWUR21349;AGIWUR24383;AGIWUR27298;AGIWUR33398  
 N2 CT III 4910475 4912521 WBGene00017829 F26F4.9 F26F4.9 -0.115108211994762  
 AGIWUR42549;AGIWUR44256  
 N2 CT III 4912207 4914133 WBGene00017825 cee-1 F26F4.1 -0.154009351454267  
 AGIWUR2541;AGIWUR6238;AGIWUR9786;AGIWUR15199;AGIWUR42030  
 N2 CT III 4914096 4917129 WBGene00004679 rars-1 F26F4.10 0.102773758035335  
 AGIWUR12;AGIWUR6520;AGIWUR9621;AGIWUR21567;AGIWUR22168;AGIWUR24027;AGIWUR30044;AGIWUR36014;AGIWUR36740  
 N2 CT III 4917104 4918008 WBGene00017830 rpb-8 F26F4.11 0.100451519139353  
 AGIWUR18230;AGIWUR19441;AGIWUR25054;AGIWUR29048  
 N2 CT III 4918277 4920319 WBGene00006735 ula-1 C26E6.8 -0.0678621113471056  
 AGIWUR12372;AGIWUR16420;AGIWUR26326  
 N2 CT III 4920442 4921747 WBGene00016144 mmab-1 C26E6.11 -0.156175763251671  
 AGIWUR11339  
 N2 CT III 4922446 4930204 WBGene00004782 set-2 C26E6.9 0.0261108248593809  
 AGIWUR1720;AGIWUR9964;AGIWUR18640;AGIWUR33687;AGIWUR35092;AGIWUR36053  
 N2 CT III 4930602 4932253 WBGene00016145 C26E6.12 C26E6.12 -0.128624020825665  
 AGIWUR1262  
 N2 CT III 4932450 4934945 WBGene00016143 eri-9 C26E6.7 0.0296542009833747 AGIWUR36611  
 N2 CT III 4935578 4937223 WBGene00016142 mrps-18C C26E6.6 -0.0552335271470517  
 AGIWUR8152;AGIWUR10057;AGIWUR17312;AGIWUR26927;AGIWUR38877;AGIWUR40105  
 N2 CT III 4937322 4939453 WBGene00001499 fsn-1 C26E6.5 0.00967174451507979 AGIWUR21648  
 N2 CT III 4939567 4944404 WBGene00016140 rpb-2 C26E6.4 0.0693945553222761  
 AGIWUR1292;AGIWUR7484;AGIWUR13354;AGIWUR26461;AGIWUR26734;AGIWUR28828;AGIWUR31075;AGIWUR31332;AGIWUR34633;AGIWUR36394;AGIWUR38499  
 N2 CT III 4944513 4947317 WBGene00016139 ntl-9 C26E6.3 -0.0235493772264324  
 AGIWUR4765;AGIWUR6733;AGIWUR29362  
 N2 CT III 4952124 4955171 WBGene00016138 flh-2 C26E6.2 -0.0838823300626963  
 AGIWUR7622;AGIWUR8591;AGIWUR17173;AGIWUR26133;AGIWUR26422;AGIWUR33680  
 N2 CT III 4956891 4957539 WBGene00016137 C26E6.1 C26E6.1 0.25707542740291 AGIWUR6750  
 N2 CT III 4958329 4960305 WBGene00016166 C27F2.4 C27F2.4 -0.0847554050458932 AGIWUR5822  
 N2 CT III 4960390 4961715 WBGene00016167 vps-22 C27F2.5 0.134653678818937  
 AGIWUR27289;AGIWUR30151;AGIWUR37552  
 N2 CT III 4961817 4963092 WBGene00043156 C27F2.9 C27F2.9 -0.158828288396601  
 AGIWUR5606;AGIWUR22616;AGIWUR34511;AGIWUR35346;AGIWUR35703;AGIWUR36189  
 N2 CT III 4965571 4979729 WBGene00003558 nca-2 C27F2.2 -0.135991021754899 AGIWUR38222  
 N2 CT III 4979796 4980418 WBGene00016168 C27F2.6 C27F2.6 0.182486687291046 AGIWUR5107  
 N2 CT III 4980644 4984474 WBGene00016169 C27F2.7 C27F2.7 -0.155424223877121  
 AGIWUR3709;AGIWUR13500;AGIWUR26613;AGIWUR44036  
 N2 CT III 4985019 4986931 WBGene00016171 C27F2.10 C27F2.10 -0.130150190005601

|                                                            |    |     |         |         |                |          |          |                     |             |
|------------------------------------------------------------|----|-----|---------|---------|----------------|----------|----------|---------------------|-------------|
| AGIWUR8510                                                 |    |     |         |         |                |          |          |                     |             |
| N2                                                         | CT | III | 4987209 | 4991450 | WBGene00016165 | C27F2.1  | C27F2.1  | -0.0915749377014423 | AGIWUR8370  |
| N2                                                         | CT | III | 4991439 | 4998161 | WBGene00016170 | C27F2.8  | C27F2.8  | 0.022201553318645   |             |
| AGIWUR7004;AGIWUR15438;AGIWUR21077;AGIWUR22621;AGIWUR35360 |    |     |         |         |                |          |          |                     |             |
| N2                                                         | CT | III | 4999379 | 5001336 | WBGene00020095 | R144.5   | R144.5   | -0.151481810174616  | AGIWUR12094 |
| N2                                                         | CT | III | 5001297 | 5002331 | WBGene00020098 | R144.10  | R144.10  | -0.203165622074156  | AGIWUR808   |
| N2                                                         | CT | III | 5003197 | 5004721 | WBGene00020096 | R144.6   | R144.6   | 0.130739128253104   | AGIWUR16813 |
| N2                                                         | CT | III | 5004820 | 5006981 | WBGene00043060 | R144.12  | R144.12  | -0.119326605503726  | AGIWUR1049  |
| N2                                                         | CT | III | 5007100 | 5008830 | WBGene00020099 | R144.11  | R144.11  | -0.24834682951532   | AGIWUR11854 |
| N2                                                         | CT | III | 5008933 | 5017860 | WBGene00020097 | larp-1   | R144.7   | 0.0407888289208564  |             |
| AGIWUR5277;AGIWUR8701;AGIWUR34641                          |    |     |         |         |                |          |          |                     |             |
| N2                                                         | CT | III | 5018645 | 5021118 | WBGene00020094 | wip-1    | R144.4   | 0.399068031543987   |             |
| AGIWUR10954;AGIWUR22155;AGIWUR23908                        |    |     |         |         |                |          |          |                     |             |
| N2                                                         | CT | III | 5021224 | 5021910 | WBGene00007015 | mdt-11   | R144.9   | -0.211990397745494  | AGIWUR43452 |
| N2                                                         | CT | III | 5022047 | 5023200 | WBGene00020093 | R144.3   | R144.3   | -0.189094527873976  |             |
| AGIWUR20707;AGIWUR39793                                    |    |     |         |         |                |          |          |                     |             |
| N2                                                         | CT | III | 5023264 | 5024064 | WBGene00044648 | R144.13  | R144.13  | -0.240713865112495  | AGIWUR7341  |
| N2                                                         | CT | III | 5024966 | 5029540 | WBGene00020092 | pcf-11   | R144.2   | 0.00432573783812273 |             |
| AGIWUR6885;AGIWUR28587;AGIWUR41768                         |    |     |         |         |                |          |          |                     |             |
| N2                                                         | CT | III | 5030929 | 5036548 | WBGene00002218 | k1p-6    | R144.1   | -0.0517928137489729 |             |
| AGIWUR6002;AGIWUR10422;AGIWUR27584;AGIWUR31010             |    |     |         |         |                |          |          |                     |             |
| N2                                                         | CT | III | 5036381 | 5040413 | WBGene00016677 | C45G9.6  | C45G9.6  | -0.218944664341699  |             |
| AGIWUR2247;AGIWUR31234                                     |    |     |         |         |                |          |          |                     |             |
| N2                                                         | CT | III | 5042412 | 5044672 | WBGene00016684 | nlp-43   | C45G9.13 | -0.17676724902006   |             |
| AGIWUR41739                                                |    |     |         |         |                |          |          |                     |             |
| N2                                                         | CT | III | 5045009 | 5045667 | WBGene00044409 | C45G9.14 | C45G9.14 | -0.0317833744000144 |             |
| AGIWUR6835;AGIWUR12672;AGIWUR13383;AGIWUR37679             |    |     |         |         |                |          |          |                     |             |
| N2                                                         | CT | III | 5046170 | 5047161 | WBGene00016678 | C45G9.7  | C45G9.7  | -0.280932098856878  | AGIWUR3268  |
| N2                                                         | CT | III | 5048117 | 5050158 | WBGene00016676 | C45G9.5  | C45G9.5  | -0.0831203314891464 | AGIWUR13838 |
| N2                                                         | CT | III | 5050107 | 5052068 | WBGene00050919 | C45G9.15 | C45G9.15 | 0.0443020190818153  |             |
| AGIWUR35385                                                |    |     |         |         |                |          |          |                     |             |
| N2                                                         | CT | III | 5052529 | 5053341 | WBGene00016679 | C45G9.8  | C45G9.8  | 0.0148978110929807  |             |
| AGIWUR5777;AGIWUR13001;AGIWUR13513;AGIWUR30470;AGIWUR36583 |    |     |         |         |                |          |          |                     |             |
| N2                                                         | CT | III | 5056847 | 5061888 | WBGene00016681 | C45G9.10 | C45G9.10 | 0.0744437338154906  |             |
| AGIWUR12766                                                |    |     |         |         |                |          |          |                     |             |
| N2                                                         | CT | III | 5063993 | 5068725 | WBGene00016682 | C45G9.11 | C45G9.11 | -0.102167805768483  |             |
| AGIWUR36530                                                |    |     |         |         |                |          |          |                     |             |
| N2                                                         | CT | III | 5069001 | 5070418 | WBGene00016674 | C45G9.2  | C45G9.2  | -0.0697395673342553 |             |
| AGIWUR38185;AGIWUR39760                                    |    |     |         |         |                |          |          |                     |             |

|                                                                                          |    |     |         |         |                |          |          |                     |             |
|------------------------------------------------------------------------------------------|----|-----|---------|---------|----------------|----------|----------|---------------------|-------------|
| N2                                                                                       | CT | III | 5070431 | 5071597 | WBGene00016683 | C45G9.12 | C45G9.12 | 0.0892239128607315  |             |
| AGIWUR39034                                                                              |    |     |         |         |                |          |          |                     |             |
| N2                                                                                       | CT | III | 5074698 | 5075968 | WBGene00016673 | C45G9.1  | C45G9.1  | -0.143671573338685  | AGIWUR22776 |
| N2                                                                                       | CT | III | 5077765 | 5080665 | WBGene00000107 | alh-1    | F54D8.3  | 0.0132226857834121  |             |
| AGIWUR22754;AGIWUR36700                                                                  |    |     |         |         |                |          |          |                     |             |
| N2                                                                                       | CT | III | 5081726 | 5082995 | WBGene00006519 | tag-174  | F54D8.2  | -0.152411161415273  |             |
| AGIWUR58;AGIWUR4165;AGIWUR4356;AGIWUR6331;AGIWUR6584;AGIWUR26746;AGIWUR28653;AGIWUR34083 |    |     |         |         |                |          |          |                     |             |
| N2                                                                                       | CT | III | 5083206 | 5085289 | WBGene00000279 | cah-1    | F54D8.4  | 0.0337949408768825  | AGIWUR22257 |
| N2                                                                                       | CT | III | 5102991 | 5106955 | WBGene00018802 | F54D8.6  | F54D8.6  | -0.120736283847412  |             |
| AGIWUR15008;AGIWUR28987                                                                  |    |     |         |         |                |          |          |                     |             |
| N2                                                                                       | CT | III | 5107330 | 5108497 | WBGene00001076 | dpy-17   | F54D8.1  | -0.259320103975266  |             |
| AGIWUR26534;AGIWUR31818                                                                  |    |     |         |         |                |          |          |                     |             |
| N2                                                                                       | CT | III | 5109701 | 5130673 | WBGene00004728 | sax-2    | F21H11.2 | 0.0308715528352801  |             |
| AGIWUR6192;AGIWUR7162;AGIWUR12049;AGIWUR17202;AGIWUR32090                                |    |     |         |         |                |          |          |                     |             |
| N2                                                                                       | CT | III | 5130923 | 5136319 | WBGene00006543 | tbx-2    | F21H11.3 | 0.237485521455424   |             |
| AGIWUR14269                                                                              |    |     |         |         |                |          |          |                     |             |
| N2                                                                                       | CT | III | 5137252 | 5149578 | WBGene00021900 | Y54H5A.2 | Y54H5A.2 | -0.0539927380390601 |             |
| AGIWUR5297;AGIWUR36403;AGIWUR39420                                                       |    |     |         |         |                |          |          |                     |             |
| N2                                                                                       | CT | III | 5151907 | 5153229 | WBGene00021901 | tag-262  | Y54H5A.3 | -0.185670592987233  |             |
| AGIWUR36811                                                                              |    |     |         |         |                |          |          |                     |             |
| N2                                                                                       | CT | III | 5153406 | 5155465 | WBGene00021899 | Y54H5A.1 | Y54H5A.1 | 0.143168292426346   |             |
| AGIWUR27003                                                                              |    |     |         |         |                |          |          |                     |             |
| N2                                                                                       | CT | III | 5155472 | 5158774 | WBGene00021902 | oxy-4    | Y54H5A.4 | -0.255187445239784  |             |
| AGIWUR33031                                                                              |    |     |         |         |                |          |          |                     |             |
| N2                                                                                       | CT | III | 5158873 | 5159605 | WBGene00044604 | T10F2.5  | T10F2.5  | -0.307176084852067  |             |
| AGIWUR16189;AGIWUR34183;AGIWUR37130                                                      |    |     |         |         |                |          |          |                     |             |
| N2                                                                                       | CT | III | 5159729 | 5163627 | WBGene00001744 | gars-1   | T10F2.1  | -0.0692764284317944 |             |
| AGIWUR8674;AGIWUR17893                                                                   |    |     |         |         |                |          |          |                     |             |
| N2                                                                                       | CT | III | 5163766 | 5165311 | WBGene00020422 | T10F2.2  | T10F2.2  | -0.229232594573865  | AGIWUR5009  |
| N2                                                                                       | CT | III | 5165659 | 5169799 | WBGene00006736 | ulp-1    | T10F2.3  | 0.134145608050336   |             |
| AGIWUR17583;AGIWUR39466;AGIWUR39693                                                      |    |     |         |         |                |          |          |                     |             |
| N2                                                                                       | CT | III | 5169933 | 5172045 | WBGene00020423 | prp-19   | T10F2.4  | -0.0253793168672205 |             |
| AGIWUR8511;AGIWUR11498;AGIWUR12677;AGIWUR16041;AGIWUR16667;AGIWUR42332                   |    |     |         |         |                |          |          |                     |             |
| N2                                                                                       | CT | III | 5172720 | 5173338 | WBGene00019631 | K10D2.5  | K10D2.5  | -0.253966270201329  |             |
| AGIWUR12667;AGIWUR13199;AGIWUR17632;AGIWUR36997                                          |    |     |         |         |                |          |          |                     |             |
| N2                                                                                       | CT | III | 5173439 | 5173809 | WBGene00019630 | emb-1    | K10D2.4  | -0.246289631896715  | AGIWUR2253  |
| N2                                                                                       | CT | III | 5173922 | 5180507 | WBGene00019629 | cid-1    | K10D2.3  | 0.0568576370708609  | AGIWUR29111 |
| N2                                                                                       | CT | III | 5185920 | 5188646 | WBGene00019628 | pup-2    | K10D2.2  | 0.280793742318663   |             |
| AGIWUR6106;AGIWUR24493;AGIWUR28776;AGIWUR33868;AGIWUR45004;AGIWUR45089                   |    |     |         |         |                |          |          |                     |             |

|                                                                                  |    |     |         |         |                |           |           |                       |             |
|----------------------------------------------------------------------------------|----|-----|---------|---------|----------------|-----------|-----------|-----------------------|-------------|
| N2                                                                               | CT | III | 5191131 | 5196028 | WBGene00019627 | K10D2.1   | K10D2.1   | -0.0902946577712953   |             |
| AGIWUR535;AGIWUR40874                                                            |    |     |         |         |                |           |           |                       |             |
| N2                                                                               | CT | III | 5196027 | 5196709 | WBGene00019633 | K10D2.7   | K10D2.7   | -0.126492371931608    |             |
| AGIWUR525;AGIWUR7607;AGIWUR14899                                                 |    |     |         |         |                |           |           |                       |             |
| N2                                                                               | CT | III | 5196678 | 5199688 | WBGene00001262 | emb-8     | K10D2.6   | 0.236569344678593     |             |
| AGIWUR318;AGIWUR7707;AGIWUR14019;AGIWUR19026;AGIWUR23518;AGIWUR30421;AGIWUR38124 |    |     |         |         |                |           |           |                       |             |
| N2                                                                               | CT | III | 5203713 | 5206911 | WBGene00022531 | morc-1    | ZC155.3   | -0.19181540366626     | AGIWUR31982 |
| N2                                                                               | CT | III | 5207567 | 5209557 | WBGene00022534 | syx-16    | ZC155.7   | 0.109389176113526     |             |
| AGIWUR5863;AGIWUR22835;AGIWUR32681                                               |    |     |         |         |                |           |           |                       |             |
| N2                                                                               | CT | III | 5211781 | 5215512 | WBGene00022532 | ZC155.4   | ZC155.4   | -0.17795377059803     | AGIWUR17968 |
| N2                                                                               | CT | III | 5215949 | 5217604 | WBGene00022533 | cutl-19   | ZC155.5   | -0.113866884014311    | AGIWUR43291 |
| N2                                                                               | CT | III | 5219280 | 5220093 | WBGene00022530 | ZC155.2   | ZC155.2   | -0.000954257293344973 | AGIWUR24241 |
| N2                                                                               | CT | III | 5225621 | 5226801 | WBGene00003588 | nex-1     | ZC155.1   | 0.192738551974936     |             |
| AGIWUR20142;AGIWUR20359                                                          |    |     |         |         |                |           |           |                       |             |
| N2                                                                               | CT | III | 5226818 | 5227884 | WBGene00016411 | C34E10.10 | C34E10.10 | -0.257764437054357    |             |
| AGIWUR29112                                                                      |    |     |         |         |                |           |           |                       |             |
| N2                                                                               | CT | III | 5228417 | 5230536 | WBGene00000229 | atp-2     | C34E10.6  | 0.244416982843433     |             |
| AGIWUR5070;AGIWUR12032;AGIWUR19582;AGIWUR21091;AGIWUR26182;AGIWUR37558           |    |     |         |         |                |           |           |                       |             |
| N2                                                                               | CT | III | 5230555 | 5234530 | WBGene00016408 | prmt-5    | C34E10.5  | -0.0198860390263729   |             |
| AGIWUR31212;AGIWUR33990                                                          |    |     |         |         |                |           |           |                       |             |
| N2                                                                               | CT | III | 5234617 | 5236364 | WBGene00016412 | mrps-26   | C34E10.11 | -0.112718827298242    |             |
| AGIWUR42475                                                                      |    |     |         |         |                |           |           |                       |             |
| N2                                                                               | CT | III | 5236410 | 5240055 | WBGene00006946 | prx-10    | C34E10.4  | -0.124244204244249    |             |
| AGIWUR4880                                                                       |    |     |         |         |                |           |           |                       |             |
| N2                                                                               | CT | III | 5240593 | 5242108 | WBGene00000561 | cnd-1     | C34E10.7  | 0.189074257259412     |             |
| AGIWUR4625                                                                       |    |     |         |         |                |           |           |                       |             |
| N2                                                                               | CT | III | 5249075 | 5254187 | WBGene00016409 | sumv-1    | C34E10.8  | -0.0317086317319273   |             |
| AGIWUR6645                                                                       |    |     |         |         |                |           |           |                       |             |
| N2                                                                               | CT | III | 5254438 | 5258922 | WBGene00001660 | gop-1     | C34E10.3  | -0.107341603644137    |             |
| AGIWUR33981                                                                      |    |     |         |         |                |           |           |                       |             |
| N2                                                                               | CT | III | 5259023 | 5260512 | WBGene00001661 | gop-2     | C34E10.2  | 0.132911770123265     |             |
| AGIWUR3830;AGIWUR7839;AGIWUR12289;AGIWUR26150                                    |    |     |         |         |                |           |           |                       |             |
| N2                                                                               | CT | III | 5260693 | 5263837 | WBGene00001662 | gop-3     | C34E10.1  | -0.137576447008932    |             |
| AGIWUR3380;AGIWUR23142;AGIWUR26880                                               |    |     |         |         |                |           |           |                       |             |
| N2                                                                               | CT | III | 5263943 | 5264996 | WBGene00001823 | hap-1     | ZC395.7   | -0.200964792725795    | AGIWUR27062 |
| N2                                                                               | CT | III | 5265113 | 5267204 | WBGene00001740 | gro-1     | ZC395.6   | -0.131066351223048    | AGIWUR27294 |
| N2                                                                               | CT | III | 5267809 | 5268581 | WBGene00022597 | ZC395.5   | ZC395.5   | -0.297712392939411    | AGIWUR28768 |
| N2                                                                               | CT | III | 5268682 | 5273471 | WBGene00022598 | ztf-8     | ZC395.8   | -0.190297014114895    | AGIWUR13066 |
| N2                                                                               | CT | III | 5273800 | 5274787 | WBGene00022599 | ZC395.10  | ZC395.10  | -0.0737914640387745   |             |

AGIWUR16003;AGIWUR22790

|                                                                                    |    |     |         |         |                |           |           |                     |             |
|------------------------------------------------------------------------------------|----|-----|---------|---------|----------------|-----------|-----------|---------------------|-------------|
| N2                                                                                 | CT | III | 5275225 | 5277797 | WBGene00006590 | toc-1     | ZC395.3   | 0.197385807986262   | AGIWUR21186 |
| N2                                                                                 | CT | III | 5277894 | 5279344 | WBGene00000536 | clk-1     | ZC395.2   | -0.093420028525804  | AGIWUR12724 |
| N2                                                                                 | CT | III | 5286086 | 5286305 | WBGene00022600 | ZC395.11  | ZC395.11  | -0.0203951726322931 |             |
| AGIWUR24858                                                                        |    |     |         |         |                |           |           |                     |             |
| N2                                                                                 | CT | III | 5288180 | 5298361 | WBGene00020530 | T15B12.1  | T15B12.1  | 0.148121113438886   |             |
| AGIWUR295;AGIWUR35679                                                              |    |     |         |         |                |           |           |                     |             |
| N2                                                                                 | CT | III | 5300008 | 5301886 | WBGene00020531 | T15B12.2  | T15B12.2  | 0.418328344185295   |             |
| AGIWUR13248                                                                        |    |     |         |         |                |           |           |                     |             |
| N2                                                                                 | CT | III | 5302218 | 5306324 | WBGene00018675 | F52C9.5   | F52C9.5   | -0.0182067247897093 | AGIWUR11007 |
| N2                                                                                 | CT | III | 5308600 | 5311140 | WBGene00003391 | mog-3     | F52C9.7   | -0.152745099218265  | AGIWUR40263 |
| N2                                                                                 | CT | III | 5311246 | 5321732 | WBGene00004095 | pqe-1     | F52C9.8   | 0.114523524792273   |             |
| AGIWUR2071;AGIWUR19151;AGIWUR21084;AGIWUR30521;AGIWUR39453;AGIWUR40792;AGIWUR40889 |    |     |         |         |                |           |           |                     |             |
| N2                                                                                 | CT | III | 5321885 | 5326345 | WBGene00018674 | F52C9.3   | F52C9.3   | 0.00890342754274975 | AGIWUR18125 |
| N2                                                                                 | CT | III | 5326623 | 5333620 | WBGene00018672 | sorf-2    | F52C9.1   | 0.0403312209399402  |             |
| AGIWUR14541;AGIWUR27235;AGIWUR30565                                                |    |     |         |         |                |           |           |                     |             |
| N2                                                                                 | CT | III | 5341682 | 5344273 | WBGene00022664 | ZK121.2   | ZK121.2   | 0.229703258667314   |             |
| AGIWUR10875;AGIWUR28689;AGIWUR36103                                                |    |     |         |         |                |           |           |                     |             |
| N2                                                                                 | CT | III | 5345252 | 5346117 | WBGene00022663 | glrx-21   | ZK121.1   | -0.196177533272665  |             |
| AGIWUR4869;AGIWUR43468                                                             |    |     |         |         |                |           |           |                     |             |
| N2                                                                                 | CT | III | 5345982 | 5349401 | WBGene00021311 | Y32H12A.2 | Y32H12A.2 | -0.267938422656139  |             |
| AGIWUR28001                                                                        |    |     |         |         |                |           |           |                     |             |
| N2                                                                                 | CT | III | 5362209 | 5364372 | WBGene00021310 | Y32H12A.1 | Y32H12A.1 | -0.244418453458404  |             |
| AGIWUR5008                                                                         |    |     |         |         |                |           |           |                     |             |
| N2                                                                                 | CT | III | 5364512 | 5368045 | WBGene00000973 | dhs-9     | Y32H12A.3 | -0.129566288768432  |             |
| AGIWUR9949;AGIWUR33255                                                             |    |     |         |         |                |           |           |                     |             |
| N2                                                                                 | CT | III | 5368967 | 5371274 | WBGene00021312 | szy-2     | Y32H12A.4 | -0.101169503301763  |             |
| AGIWUR12268;AGIWUR40185                                                            |    |     |         |         |                |           |           |                     |             |
| N2                                                                                 | CT | III | 5375698 | 5379929 | WBGene00021313 | paqr-2    | Y32H12A.5 | 0.396066621427451   |             |
| AGIWUR28786                                                                        |    |     |         |         |                |           |           |                     |             |
| N2                                                                                 | CT | III | 5380906 | 5382173 | WBGene00021314 | Y32H12A.6 | Y32H12A.6 | -0.274542617358087  |             |
| AGIWUR12120                                                                        |    |     |         |         |                |           |           |                     |             |
| N2                                                                                 | CT | III | 5382288 | 5385415 | WBGene00021315 | Y32H12A.7 | Y32H12A.7 | -0.0845391074664086 |             |
| AGIWUR41756                                                                        |    |     |         |         |                |           |           |                     |             |
| N2                                                                                 | CT | III | 5385617 | 5406037 | WBGene00021316 | Y32H12A.8 | Y32H12A.8 | -0.224605786256852  |             |
| AGIWUR44435                                                                        |    |     |         |         |                |           |           |                     |             |
| N2                                                                                 | CT | III | 5406102 | 5407968 | WBGene00020967 | W03A5.2   | W03A5.2   | -0.206725315574264  | AGIWUR4501  |
| N2                                                                                 | CT | III | 5407888 | 5413177 | WBGene00020966 | W03A5.1   | W03A5.1   | 0.258113783467659   | AGIWUR1467  |
| N2                                                                                 | CT | III | 5413137 | 5413993 | WBGene00001731 | grl-22    | W03A5.3   | -0.168855964305596  | AGIWUR36919 |

|                                                                                     |    |     |         |         |                |          |          |                     |             |
|-------------------------------------------------------------------------------------|----|-----|---------|---------|----------------|----------|----------|---------------------|-------------|
| N2                                                                                  | CT | III | 5415556 | 5419565 | WBGene00001042 | dnj-24   | W03A5.7  | 0.311572238059499   |             |
| AGIWUR24399;AGIWUR33765                                                             |    |     |         |         |                |          |          |                     |             |
| N2                                                                                  | CT | III | 5431407 | 5434467 | WBGene00020968 | W03A5.4  | W03A5.4  | -0.0262041588972686 | AGIWUR14281 |
| N2                                                                                  | CT | III | 5438826 | 5440632 | WBGene00020970 | W03A5.6  | W03A5.6  | -0.0314044244719307 |             |
| AGIWUR6394;AGIWUR38349                                                              |    |     |         |         |                |          |          |                     |             |
| N2                                                                                  | CT | III | 5440862 | 5442761 | WBGene00020779 | T24G10.2 | T24G10.2 | 0.088528933837722   |             |
| AGIWUR29411                                                                         |    |     |         |         |                |          |          |                     |             |
| N2                                                                                  | CT | III | 5443167 | 5446506 | WBGene00018612 | dis1-2   | F48E8.6  | 0.185321626757641   |             |
| AGIWUR13480;AGIWUR16272;AGIWUR25335;AGIWUR32043                                     |    |     |         |         |                |          |          |                     |             |
| N2                                                                                  | CT | III | 5446510 | 5448419 | WBGene00018613 | skpt-1   | F48E8.7  | -0.0298960863166542 | AGIWUR12645 |
| N2                                                                                  | CT | III | 5448838 | 5449868 | WBGene00044410 | F48E8.8  | F48E8.8  | -0.200512034522926  |             |
| AGIWUR7055;AGIWUR24195;AGIWUR37290;AGIWUR42009                                      |    |     |         |         |                |          |          |                     |             |
| N2                                                                                  | CT | III | 5450106 | 5453137 | WBGene00003901 | paa-1    | F48E8.5  | 0.106986158111365   |             |
| AGIWUR21505;AGIWUR27982;AGIWUR29246                                                 |    |     |         |         |                |          |          |                     |             |
| N2                                                                                  | CT | III | 5453590 | 5459516 | WBGene00018611 | F48E8.4  | F48E8.4  | -0.0669445328322276 |             |
| AGIWUR12928;AGIWUR13899;AGIWUR38555                                                 |    |     |         |         |                |          |          |                     |             |
| N2                                                                                  | CT | III | 5461379 | 5464382 | WBGene00018610 | F48E8.3  | F48E8.3  | 0.0145649946094153  |             |
| AGIWUR5788;AGIWUR6747;AGIWUR21003;AGIWUR34646;AGIWUR36155;AGIWUR36413;AGIWUR40162   |    |     |         |         |                |          |          |                     |             |
| N2                                                                                  | CT | III | 5464381 | 5467992 | WBGene00018609 | F48E8.2  | F48E8.2  | 0.0405963207998665  |             |
| AGIWUR16941;AGIWUR22846                                                             |    |     |         |         |                |          |          |                     |             |
| N2                                                                                  | CT | III | 5474478 | 5478005 | WBGene00003055 | lon-1    | F48E8.1  | -0.19705042664082   | AGIWUR36140 |
| N2                                                                                  | CT | III | 5478682 | 5478924 | WBGene00019835 | R02F2.6  | R02F2.6  | 0.188485556186111   |             |
| AGIWUR13517;AGIWUR30140                                                             |    |     |         |         |                |          |          |                     |             |
| N2                                                                                  | CT | III | 5479318 | 5480278 | WBGene00019834 | R02F2.5  | R02F2.5  | -0.140249242164945  | AGIWUR23390 |
| N2                                                                                  | CT | III | 5480262 | 5483784 | WBGene00019836 | R02F2.7  | R02F2.7  | 0.0227096176199417  |             |
| AGIWUR16860;AGIWUR18493;AGIWUR20223;AGIWUR37735                                     |    |     |         |         |                |          |          |                     |             |
| N2                                                                                  | CT | III | 5484200 | 5486005 | WBGene00019833 | R02F2.4  | R02F2.4  | -0.0758274041882459 | AGIWUR13548 |
| N2                                                                                  | CT | III | 5487642 | 5498943 | WBGene00019832 | osg-1    | R02F2.2  | -0.0613837883288433 | AGIWUR4638  |
| N2                                                                                  | CT | III | 5499190 | 5499976 | WBGene00019838 | R02F2.9  | R02F2.9  | -0.167843305584004  | AGIWUR37966 |
| N2                                                                                  | CT | III | 5501861 | 5506392 | WBGene00019831 | R02F2.1  | R02F2.1  | 0.10377891240814    |             |
| AGIWUR11309;AGIWUR20593;AGIWUR33029;AGIWUR36550;AGIWUR37726;AGIWUR40000;AGIWUR40694 |    |     |         |         |                |          |          |                     |             |
| N2                                                                                  | CT | III | 5507050 | 5508738 | WBGene00017032 | D1044.7  | D1044.7  | -0.212618589955756  | AGIWUR24507 |
| N2                                                                                  | CT | III | 5512927 | 5517523 | WBGene00017033 | nek1-4   | D1044.8  | -0.135876863917298  | AGIWUR2553  |
| N2                                                                                  | CT | III | 5524181 | 5524439 | WBGene00017030 | D1044.5  | D1044.5  | 0.100405201672489   | AGIWUR8736  |
| N2                                                                                  | CT | III | 5526071 | 5535481 | WBGene00017028 | dex-1    | D1044.2  | -0.0834374199035324 |             |
| AGIWUR21827;AGIWUR23018;AGIWUR23267                                                 |    |     |         |         |                |          |          |                     |             |
| N2                                                                                  | CT | III | 5535660 | 5543218 | WBGene00017031 | D1044.6  | D1044.6  | 0.0893991060499513  | AGIWUR15083 |
| N2                                                                                  | CT | III | 5544304 | 5546287 | WBGene00017027 | D1044.1  | D1044.1  | -0.260663191020619  | AGIWUR40892 |
| N2                                                                                  | CT | III | 5546987 | 5551231 | WBGene00017302 | F09F7.5  | F09F7.5  | 0.00414134597855487 |             |



|                                                                                               |    |     |         |         |                |          |          |                     |             |
|-----------------------------------------------------------------------------------------------|----|-----|---------|---------|----------------|----------|----------|---------------------|-------------|
| AGIWUR4529;AGIWUR6227;AGIWUR12534;AGIWUR18161;AGIWUR23373;AGIWUR25157;AGIWUR35306;AGIWUR40309 |    |     |         |         |                |          |          |                     |             |
| N2                                                                                            | CT | III | 5551232 | 5552131 | WBGene00017303 | F09F7.6  | F09F7.6  | -0.11417928127528   | AGIWUR225   |
| N2                                                                                            | CT | III | 5553489 | 5554934 | WBGene00017304 | F09F7.7  | F09F7.7  | -0.195097843244135  |             |
| AGIWUR5737;AGIWUR9245;AGIWUR35372;AGIWUR35725                                                 |    |     |         |         |                |          |          |                     |             |
| N2                                                                                            | CT | III | 5555404 | 5557318 | WBGene00017301 | hach-1   | F09F7.4  | -0.0589379417146141 |             |
| AGIWUR605;AGIWUR4972;AGIWUR14052;AGIWUR26931                                                  |    |     |         |         |                |          |          |                     |             |
| N2                                                                                            | CT | III | 5557344 | 5564837 | WBGene00017300 | rpc-2    | F09F7.3  | 0.0110980984475675  |             |
| AGIWUR897;AGIWUR31854;AGIWUR34704;AGIWUR43566                                                 |    |     |         |         |                |          |          |                     |             |
| N2                                                                                            | CT | III | 5565025 | 5567382 | WBGene00003371 | mlc-3    | F09F7.2  | 0.00514845033802303 |             |
| AGIWUR3571;AGIWUR7969;AGIWUR9563;AGIWUR9855;AGIWUR23139;AGIWUR26212;AGIWUR31710               |    |     |         |         |                |          |          |                     |             |
| N2                                                                                            | CT | III | 5568213 | 5568779 | WBGene00017305 | nspb-12  | F09F7.8  | 0.525066138961982   | AGIWUR36124 |
| N2                                                                                            | CT | III | 5573994 | 5576684 | WBGene00017299 | mol-1    | F09F7.1  | 0.193074452707247   | AGIWUR5547  |
| N2                                                                                            | CT | III | 5578435 | 5581343 | WBGene00018966 | F56D2.5  | F56D2.5  | -0.028166535184857  | AGIWUR36564 |
| N2                                                                                            | CT | III | 5581582 | 5582411 | WBGene00018968 | F56D2.8  | F56D2.8  | -0.329445742598761  | AGIWUR43983 |
| N2                                                                                            | CT | III | 5583135 | 5584213 | WBGene00006731 | uev-2    | F56D2.4  | 0.156199399079068   | AGIWUR10384 |
| N2                                                                                            | CT | III | 5584687 | 5587110 | WBGene00018965 | F56D2.3  | F56D2.3  | -0.079882205247058  | AGIWUR32222 |
| N2                                                                                            | CT | III | 5587263 | 5589095 | WBGene00018964 | F56D2.2  | F56D2.2  | -0.153953899818284  |             |
| AGIWUR12096;AGIWUR16038;AGIWUR18564                                                           |    |     |         |         |                |          |          |                     |             |
| N2                                                                                            | CT | III | 5589036 | 5591718 | WBGene00018967 | ddx-15   | F56D2.6  | 0.245056847181616   |             |
| AGIWUR1234;AGIWUR6210;AGIWUR11625;AGIWUR28848;AGIWUR44724                                     |    |     |         |         |                |          |          |                     |             |
| N2                                                                                            | CT | III | 5592135 | 5594785 | WBGene00018963 | ucr-1    | F56D2.1  | -0.17771540580737   |             |
| AGIWUR396;AGIWUR17595;AGIWUR18618;AGIWUR33070;AGIWUR33417;AGIWUR39900                         |    |     |         |         |                |          |          |                     |             |
| N2                                                                                            | CT | III | 5595771 | 5598066 | WBGene00000420 | ced-6    | F56D2.7  | 0.268711985731954   |             |
| AGIWUR21338;AGIWUR38804                                                                       |    |     |         |         |                |          |          |                     |             |
| N2                                                                                            | CT | III | 5597947 | 5600058 | WBGene00015470 | C05D2.10 | C05D2.10 | 0.101113769544421   |             |
| AGIWUR30330                                                                                   |    |     |         |         |                |          |          |                     |             |
| N2                                                                                            | CT | III | 5600393 | 5603656 | WBGene00015468 | madf-11  | C05D2.6  | -0.11807359080629   | AGIWUR20578 |
| N2                                                                                            | CT | III | 5604460 | 5607549 | WBGene00001514 | xnd-1    | C05D2.5  | 0.121365939862258   | AGIWUR12205 |
| N2                                                                                            | CT | III | 5607509 | 5610346 | WBGene00015469 | C05D2.8  | C05D2.8  | -0.0991831977630238 | AGIWUR22365 |
| N2                                                                                            | CT | III | 5612274 | 5614700 | WBGene00000239 | bas-1    | C05D2.4  | 0.0741363741010304  |             |
| AGIWUR11865;AGIWUR22234;AGIWUR25155                                                           |    |     |         |         |                |          |          |                     |             |
| N2                                                                                            | CT | III | 5614972 | 5617257 | WBGene00015467 | basl-1   | C05D2.3  | 0.126766177419144   |             |
| AGIWUR5686;AGIWUR25855;AGIWUR41332;AGIWUR44004                                                |    |     |         |         |                |          |          |                     |             |
| N2                                                                                            | CT | III | 5625014 | 5632322 | WBGene00000900 | daf-4    | C05D2.1  | 0.00772260132488967 |             |
| AGIWUR741;AGIWUR4499;AGIWUR13629;AGIWUR26026;AGIWUR28955                                      |    |     |         |         |                |          |          |                     |             |
| N2                                                                                            | CT | III | 5635479 | 5654558 | WBGene00000518 | ckk-1    | C05H8.1  | -0.0245448292331334 |             |
| AGIWUR35270;AGIWUR44158                                                                       |    |     |         |         |                |          |          |                     |             |
| N2                                                                                            | CT | III | 5654984 | 5656994 | WBGene00018828 | sdz-21   | F54E7.5  | 0.0206202782800613  | AGIWUR8561  |
| N2                                                                                            | CT | III | 5659889 | 5661085 | WBGene00018829 | F54E7.6  | F54E7.6  | -0.30112003886109   | AGIWUR2470  |

|                                                                                                         |    |     |         |         |                |          |          |                      |             |
|---------------------------------------------------------------------------------------------------------|----|-----|---------|---------|----------------|----------|----------|----------------------|-------------|
| N2                                                                                                      | CT | III | 5664234 | 5676732 | WBGene00003918 | par-3    | F54E7.3  | 0.0554069471505105   |             |
| AGIWUR5765;AGIWUR39210                                                                                  |    |     |         |         |                |          |          |                      |             |
| N2                                                                                                      | CT | III | 5676612 | 5677890 | WBGene00018831 | F54E7.9  | F54E7.9  | -0.214504527552989   |             |
| AGIWUR7591;AGIWUR27414;AGIWUR31239;AGIWUR42631                                                          |    |     |         |         |                |          |          |                      |             |
| N2                                                                                                      | CT | III | 5677953 | 5679038 | WBGene00018830 | ska-3    | F54E7.8  | -0.0165429614117016  | AGIWUR242   |
| N2                                                                                                      | CT | III | 5679298 | 5680187 | WBGene00004481 | rps-12   | F54E7.2  | 0.292700739674128    | AGIWUR34405 |
| N2                                                                                                      | CT | III | 5680433 | 5682326 | WBGene00018827 | pst-2    | F54E7.1  | -0.0769463040460963  | AGIWUR2823  |
| N2                                                                                                      | CT | III | 5682310 | 5684098 | WBGene00004321 | rca-1    | F54E7.7  | 0.120342750379337    |             |
| AGIWUR2604;AGIWUR22461                                                                                  |    |     |         |         |                |          |          |                      |             |
| N2                                                                                                      | CT | III | 5690107 | 5692740 | WBGene00015146 | abi-1    | B0336.6  | 0.0561410504801216   | AGIWUR34075 |
| N2                                                                                                      | CT | III | 5692896 | 5693938 | WBGene00015145 | B0336.5  | B0336.5  | -0.0889280413459552  | AGIWUR40695 |
| N2                                                                                                      | CT | III | 5694036 | 5694784 | WBGene00015150 | B0336.13 | B0336.13 | -0.205381965125648   |             |
| AGIWUR6621                                                                                              |    |     |         |         |                |          |          |                      |             |
| N2                                                                                                      | CT | III | 5694735 | 5697366 | WBGene00015147 | B0336.7  | B0336.7  | -0.0841896149925363  |             |
| AGIWUR24198;AGIWUR34686                                                                                 |    |     |         |         |                |          |          |                      |             |
| N2                                                                                                      | CT | III | 5697477 | 5698013 | WBGene00002982 | lgg-3    | B0336.8  | -0.0760489123360166  | AGIWUR43374 |
| N2                                                                                                      | CT | III | 5698430 | 5702304 | WBGene00004348 | rgs-5    | B0336.4  | -0.139732540256404   |             |
| AGIWUR7851;AGIWUR7993;AGIWUR20937                                                                       |    |     |         |         |                |          |          |                      |             |
| N2                                                                                                      | CT | III | 5702248 | 5705464 | WBGene00006359 | swp-1    | B0336.9  | -0.00481336728294401 |             |
| AGIWUR12277;AGIWUR15861;AGIWUR22510;AGIWUR29765;AGIWUR33611;AGIWUR35913;AGIWUR40245                     |    |     |         |         |                |          |          |                      |             |
| N2                                                                                                      | CT | III | 5705521 | 5706129 | WBGene00004435 | rpl-23   | B0336.10 | -0.155633060628281   |             |
| AGIWUR5646;AGIWUR25265                                                                                  |    |     |         |         |                |          |          |                      |             |
| N2                                                                                                      | CT | III | 5706718 | 5709329 | WBGene00015148 | hpo-28   | B0336.11 | -0.0641879603160227  |             |
| AGIWUR204;AGIWUR5819;AGIWUR30382;AGIWUR44654                                                            |    |     |         |         |                |          |          |                      |             |
| N2                                                                                                      | CT | III | 5710062 | 5710509 | WBGene00015149 | B0336.12 | B0336.12 | 0.239738128545156    |             |
| AGIWUR43192                                                                                             |    |     |         |         |                |          |          |                      |             |
| N2                                                                                                      | CT | III | 5711548 | 5714846 | WBGene00015143 | B0336.3  | B0336.3  | -0.0410051406063605  | AGIWUR38024 |
| N2                                                                                                      | CT | III | 5714861 | 5717585 | WBGene00000182 | arf-1.2  | B0336.2  | 0.173506431961273    |             |
| AGIWUR6417;AGIWUR10593;AGIWUR23258;AGIWUR26259                                                          |    |     |         |         |                |          |          |                      |             |
| N2                                                                                                      | CT | III | 5722824 | 5727115 | WBGene00006943 | wrm-1    | B0336.1  | 0.0299198621136547   | AGIWUR16540 |
| N2                                                                                                      | CT | III | 5728180 | 5730159 | WBGene00015083 | egg-1    | B0244.8  | 0.115770182235002    |             |
| AGIWUR973;AGIWUR2213;AGIWUR8633;AGIWUR12270;AGIWUR15368;AGIWUR28877;AGIWUR30186;AGIWUR35008;AGIWUR44144 |    |     |         |         |                |          |          |                      |             |
| N2                                                                                                      | CT | III | 5730118 | 5731030 | WBGene00015084 | B0244.9  | B0244.9  | 0.448494785839738    | AGIWUR29575 |
| N2                                                                                                      | CT | III | 5731501 | 5732854 | WBGene00015082 | B0244.7  | B0244.7  | 0.0368823002226675   | AGIWUR27688 |
| N2                                                                                                      | CT | III | 5733997 | 5737481 | WBGene00015085 | B0244.10 | B0244.10 | 0.0155156631372124   |             |
| AGIWUR3640;AGIWUR11691;AGIWUR22636                                                                      |    |     |         |         |                |          |          |                      |             |
| N2                                                                                                      | CT | III | 5742556 | 5744820 | WBGene00206513 | B0244.15 | B0244.15 | -0.266712881229838   |             |
| AGIWUR27006                                                                                             |    |     |         |         |                |          |          |                      |             |
| N2                                                                                                      | CT | III | 5744870 | 5747195 | WBGene00015080 | B0244.5  | B0244.5  | 0.140405492485141    | AGIWUR35844 |

|                                                                        |    |     |         |         |                |           |           |                     |             |
|------------------------------------------------------------------------|----|-----|---------|---------|----------------|-----------|-----------|---------------------|-------------|
| N2                                                                     | CT | III | 5747485 | 5751637 | WBGene00015079 | B0244.4   | B0244.4   | -0.102019361314778  | AGIWUR28304 |
| N2                                                                     | CT | III | 5755496 | 5765815 | WBGene00002048 | ida-1     | B0244.2   | 0.174350161743885   | AGIWUR14657 |
| N2                                                                     | CT | III | 5767882 | 5768665 | WBGene00015086 | B0244.11  | B0244.11  | -0.0873121098978977 |             |
| AGIWUR6678                                                             |    |     |         |         |                |           |           |                     |             |
| N2                                                                     | CT | III | 5770185 | 5774703 | WBGene00021343 | cutl-23   | Y37B11A.1 | 0.265775404961504   |             |
| AGIWUR41663                                                            |    |     |         |         |                |           |           |                     |             |
| N2                                                                     | CT | III | 5774679 | 5790707 | WBGene00021344 | Y37B11A.2 | Y37B11A.2 | -0.237345313001448  |             |
| AGIWUR10288                                                            |    |     |         |         |                |           |           |                     |             |
| N2                                                                     | CT | III | 5791171 | 5803042 | WBGene00020964 | polq-1    | W03A3.2   | -0.122998357926465  |             |
| AGIWUR5084;AGIWUR19096                                                 |    |     |         |         |                |           |           |                     |             |
| N2                                                                     | CT | III | 5803260 | 5805112 | WBGene00001869 | him-10    | R12B2.4   | -0.132477971648145  | AGIWUR38298 |
| N2                                                                     | CT | III | 5805563 | 5806975 | WBGene00020019 | R12B2.3   | R12B2.3   | 0.0931258679838045  | AGIWUR18560 |
| N2                                                                     | CT | III | 5807052 | 5809206 | WBGene00020018 | R12B2.2   | R12B2.2   | -0.180876155700826  | AGIWUR31538 |
| N2                                                                     | CT | III | 5815045 | 5815513 | WBGene00020021 | R12B2.7   | R12B2.7   | -0.0763221289364076 | AGIWUR42938 |
| N2                                                                     | CT | III | 5816203 | 5820200 | WBGene00004858 | sma-4     | R12B2.1   | -0.0868225439783856 |             |
| AGIWUR15423;AGIWUR34046;AGIWUR34858;AGIWUR38559                        |    |     |         |         |                |           |           |                     |             |
| N2                                                                     | CT | III | 5823957 | 5828651 | WBGene00044411 | R12B2.8   | R12B2.8   | -0.145618137090345  |             |
| AGIWUR7783;AGIWUR23563;AGIWUR28200;AGIWUR28780;AGIWUR28810             |    |     |         |         |                |           |           |                     |             |
| N2                                                                     | CT | III | 5828603 | 5833745 | WBGene00007016 | mdt-15    | R12B2.5   | -0.036549435217001  | AGIWUR4471  |
| N2                                                                     | CT | III | 5834022 | 5835756 | WBGene00020020 | R12B2.6   | R12B2.6   | -0.274057897552697  | AGIWUR33024 |
| N2                                                                     | CT | III | 5836926 | 5837183 | WBGene00021029 | W04D12.1  | W04D12.1  | 0.344823874698559   |             |
| AGIWUR33001                                                            |    |     |         |         |                |           |           |                     |             |
| N2                                                                     | CT | III | 5848838 | 5853269 | WBGene00017162 | ddx-23    | F01F1.7   | 0.044414938451494   | AGIWUR17455 |
| N2                                                                     | CT | III | 5853532 | 5855687 | WBGene00000381 | cct-6     | F01F1.8   | -0.0268557576161532 |             |
| AGIWUR6023;AGIWUR22509;AGIWUR24670;AGIWUR31718;AGIWUR33596;AGIWUR43085 |    |     |         |         |                |           |           |                     |             |
| N2                                                                     | CT | III | 5856018 | 5859186 | WBGene00000115 | alh-9     | F01F1.6   | -0.110658126761058  |             |
| AGIWUR7791;AGIWUR17410;AGIWUR18827;AGIWUR41022;AGIWUR44087             |    |     |         |         |                |           |           |                     |             |
| N2                                                                     | CT | III | 5859308 | 5861907 | WBGene00001057 | dpr-4     | F01F1.5   | 0.1572897800335     |             |
| AGIWUR11864;AGIWUR27021;AGIWUR45153                                    |    |     |         |         |                |           |           |                     |             |
| N2                                                                     | CT | III | 5861855 | 5863546 | WBGene00017163 | dnpp-1    | F01F1.9   | 0.114288828445563   |             |
| AGIWUR4140;AGIWUR30765;AGIWUR43330                                     |    |     |         |         |                |           |           |                     |             |
| N2                                                                     | CT | III | 5864500 | 5866541 | WBGene00017161 | rabn-5    | F01F1.4   | -0.255387957774975  | AGIWUR7226  |
| N2                                                                     | CT | III | 5866495 | 5868501 | WBGene00017164 | eng-1     | F01F1.10  | -0.201790062306783  |             |
| AGIWUR8283                                                             |    |     |         |         |                |           |           |                     |             |
| N2                                                                     | CT | III | 5868587 | 5869620 | WBGene00017169 | F01F1.15  | F01F1.15  | -0.0090651913405857 |             |
| AGIWUR26321;AGIWUR33269                                                |    |     |         |         |                |           |           |                     |             |
| N2                                                                     | CT | III | 5869685 | 5872396 | WBGene00017165 | F01F1.11  | F01F1.11  | -0.126726619246682  |             |
| AGIWUR12560                                                            |    |     |         |         |                |           |           |                     |             |
| N2                                                                     | CT | III | 5873025 | 5874680 | WBGene00017160 | F01F1.3   | F01F1.3   | -0.262647094398979  | AGIWUR13608 |

|                                                                                                                                               |    |     |         |         |                |          |          |                     |             |
|-----------------------------------------------------------------------------------------------------------------------------------------------|----|-----|---------|---------|----------------|----------|----------|---------------------|-------------|
| N2                                                                                                                                            | CT | III | 5874672 | 5876625 | WBGene00017166 | aldo-2   | F01F1.12 | 0.0438841404541845  |             |
| AGIWUR12260;AGIWUR18058;AGIWUR25115;AGIWUR25603;AGIWUR31691;AGIWUR40498                                                                       |    |     |         |         |                |          |          |                     |             |
| N2                                                                                                                                            | CT | III | 5877020 | 5878419 | WBGene00003252 | mig-21   | F01F1.13 | 0.354317545797112   |             |
| AGIWUR44500                                                                                                                                   |    |     |         |         |                |          |          |                     |             |
| N2                                                                                                                                            | CT | III | 5878521 | 5879415 | WBGene00017159 | F01F1.2  | F01F1.2  | 0.0144939249955209  |             |
| AGIWUR400;AGIWUR17259;AGIWUR18227;AGIWUR28252;AGIWUR33591;AGIWUR38436                                                                         |    |     |         |         |                |          |          |                     |             |
| N2                                                                                                                                            | CT | III | 5879489 | 5882428 | WBGene00017158 | hpo-10   | F01F1.1  | -0.0635493941760821 |             |
| AGIWUR1028;AGIWUR18342;AGIWUR23790                                                                                                            |    |     |         |         |                |          |          |                     |             |
| N2                                                                                                                                            | CT | III | 5882319 | 5882923 | WBGene00017168 | F01F1.14 | F01F1.14 | -0.205364842170249  |             |
| AGIWUR11771                                                                                                                                   |    |     |         |         |                |          |          |                     |             |
| N2                                                                                                                                            | CT | III | 5884307 | 5885848 | WBGene00016196 | C28H8.5  | C28H8.5  | 0.0383095748831721  | AGIWUR19907 |
| N2                                                                                                                                            | CT | III | 5885847 | 5886956 | WBGene00016198 | C28H8.7  | C28H8.7  | 0.381594320599075   | AGIWUR7242  |
| N2                                                                                                                                            | CT | III | 5887104 | 5888775 | WBGene00016199 | C28H8.8  | C28H8.8  | -0.470810564970893  | AGIWUR21123 |
| N2                                                                                                                                            | CT | III | 5889721 | 5896013 | WBGene00016197 | pxl-1    | C28H8.6  | -0.135887417676347  |             |
| AGIWUR2647;AGIWUR6131;AGIWUR10300;AGIWUR12567;AGIWUR13793;AGIWUR15805;AGIWUR18173;AGIWUR21049;AGIWUR24758;AGIWUR30067;AGIWUR33589;AGIWUR42592 |    |     |         |         |                |          |          |                     |             |
| N2                                                                                                                                            | CT | III | 5903576 | 5906122 | WBGene00016200 | dpff-1   | C28H8.9  | -0.0231646154543146 |             |
| AGIWUR5400;AGIWUR12108;AGIWUR23801                                                                                                            |    |     |         |         |                |          |          |                     |             |
| N2                                                                                                                                            | CT | III | 5907044 | 5908457 | WBGene00016195 | C28H8.4  | C28H8.4  | -0.0535913448096004 |             |
| AGIWUR5053;AGIWUR10268;AGIWUR28529                                                                                                            |    |     |         |         |                |          |          |                     |             |
| N2                                                                                                                                            | CT | III | 5908700 | 5914734 | WBGene00016194 | C28H8.3  | C28H8.3  | -0.0386937084584731 |             |
| AGIWUR4907;AGIWUR5521;AGIWUR5753;AGIWUR8116;AGIWUR15977;AGIWUR18776;AGIWUR38328;AGIWUR38602;AGIWUR41317;AGIWUR44843                           |    |     |         |         |                |          |          |                     |             |
| N2                                                                                                                                            | CT | III | 5917628 | 5920086 | WBGene00016201 | tdo-2    | C28H8.11 | -0.0481654875835122 |             |
| AGIWUR189;AGIWUR9055;AGIWUR37615;AGIWUR44015                                                                                                  |    |     |         |         |                |          |          |                     |             |
| N2                                                                                                                                            | CT | III | 5923187 | 5924431 | WBGene00016193 | C28H8.2  | C28H8.2  | -0.29605615620617   | AGIWUR33140 |
| N2                                                                                                                                            | CT | III | 5924394 | 5925754 | WBGene00001018 | dnc-2    | C28H8.12 | 0.136206970731654   |             |
| AGIWUR7289;AGIWUR28714;AGIWUR32259                                                                                                            |    |     |         |         |                |          |          |                     |             |
| N2                                                                                                                                            | CT | III | 5926086 | 5926987 | WBGene00016192 | bcl-7    | C28H8.1  | -0.224015449812306  | AGIWUR14967 |
| N2                                                                                                                                            | CT | III | 5926898 | 5932953 | WBGene00006987 | zmp-1    | EGAP1.3  | -0.034030689634311  |             |
| AGIWUR7925;AGIWUR17769                                                                                                                        |    |     |         |         |                |          |          |                     |             |
| N2                                                                                                                                            | CT | III | 5935749 | 5937220 | WBGene00017146 | EGAP1.1  | EGAP1.1  | -0.309914678323651  | AGIWUR25306 |
| N2                                                                                                                                            | CT | III | 5940244 | 5943835 | WBGene00006727 | ubq-1    | F25B5.4  | -0.0013675737278227 |             |
| AGIWUR8687;AGIWUR12178;AGIWUR21911;AGIWUR22522;AGIWUR22721;AGIWUR23032;AGIWUR27981;AGIWUR32258;AGIWUR40838                                    |    |     |         |         |                |          |          |                     |             |
| N2                                                                                                                                            | CT | III | 5943833 | 5946124 | WBGene00017776 | F25B5.5  | F25B5.5  | -0.0031715825040699 | AGIWUR17556 |
| N2                                                                                                                                            | CT | III | 5946217 | 5948711 | WBGene00017777 | F25B5.6  | F25B5.6  | -0.0673887948097498 |             |
| AGIWUR4867;AGIWUR36391;AGIWUR42299                                                                                                            |    |     |         |         |                |          |          |                     |             |
| N2                                                                                                                                            | CT | III | 5948890 | 5953534 | WBGene00017775 | F25B5.3  | F25B5.3  | -0.0225424604520246 |             |
| AGIWUR1552;AGIWUR4298;AGIWUR15197;AGIWUR41985                                                                                                 |    |     |         |         |                |          |          |                     |             |

|                                                                                               |    |     |         |         |                |          |          |                      |             |
|-----------------------------------------------------------------------------------------------|----|-----|---------|---------|----------------|----------|----------|----------------------|-------------|
| N2                                                                                            | CT | III | 5953526 | 5958246 | WBGene00017778 | nono-1   | F25B5.7  | 0.0162257529068501   |             |
| AGIWUR5396;AGIWUR8117;AGIWUR13268;AGIWUR16611;AGIWUR18055;AGIWUR20561;AGIWUR37674;AGIWUR38427 |    |     |         |         |                |          |          |                      |             |
| N2                                                                                            | CT | III | 5958722 | 5962322 | WBGene00017774 | nop-1    | F25B5.2  | -0.10370700025722    | AGIWUR31282 |
| N2                                                                                            | CT | III | 5966413 | 5971510 | WBGene00017773 | dct-6    | F25B5.1  | -0.201209069125436   | AGIWUR14598 |
| N2                                                                                            | CT | III | 5971530 | 5973664 | WBGene00003375 | mlp-1    | T04C9.4  | -0.00908028013440854 |             |
| AGIWUR33014;AGIWUR37421                                                                       |    |     |         |         |                |          |          |                      |             |
| N2                                                                                            | CT | III | 5976781 | 5982126 | WBGene00001489 | frm-2    | T04C9.6  | -0.00827338459004068 | AGIWUR3828  |
| N2                                                                                            | CT | III | 5985640 | 5985858 | WBGene00020211 | T04C9.3  | T04C9.3  | -0.0172942560252123  | AGIWUR38664 |
| N2                                                                                            | CT | III | 5991880 | 5992230 | WBGene00020210 | T04C9.2  | T04C9.2  | 0.220301835864682    | AGIWUR36256 |
| N2                                                                                            | CT | III | 5993219 | 6006360 | WBGene00020209 | T04C9.1  | T04C9.1  | 0.197727792009386    |             |
| AGIWUR11458;AGIWUR16358;AGIWUR30105;AGIWUR35380;AGIWUR39302;AGIWUR42067                       |    |     |         |         |                |          |          |                      |             |
| N2                                                                                            | CT | III | 6006344 | 6009084 | WBGene00022694 | gcna-1   | ZK328.4  | -0.130989897001225   | AGIWUR18288 |
| N2                                                                                            | CT | III | 6009550 | 6012839 | WBGene00001166 | eftu-2   | ZK328.2  | 0.104712665705179    |             |
| AGIWUR1543;AGIWUR1621;AGIWUR23124;AGIWUR33224;AGIWUR33784;AGIWUR39115;AGIWUR42275             |    |     |         |         |                |          |          |                      |             |
| N2                                                                                            | CT | III | 6013536 | 6019562 | WBGene00003796 | npp-10   | ZK328.5  | 0.0964218199079898   |             |
| AGIWUR17451;AGIWUR18497;AGIWUR19359;AGIWUR19986;AGIWUR31346;AGIWUR35634;AGIWUR38716           |    |     |         |         |                |          |          |                      |             |
| N2                                                                                            | CT | III | 6020165 | 6024659 | WBGene00000874 | cyk-3    | ZK328.1  | -0.172216156309468   |             |
| AGIWUR587;AGIWUR7409                                                                          |    |     |         |         |                |          |          |                      |             |
| N2                                                                                            | CT | III | 6025090 | 6028532 | WBGene00006544 | tbx-7    | ZK328.8  | 0.159659935984457    | AGIWUR35350 |
| N2                                                                                            | CT | III | 6028790 | 6030583 | WBGene00022695 | ZK328.6  | ZK328.6  | -0.175863452314555   | AGIWUR13455 |
| N2                                                                                            | CT | III | 6032696 | 6039475 | WBGene00022696 | ZK328.7  | ZK328.7  | -0.134059344962362   |             |
| AGIWUR21256;AGIWUR23219                                                                       |    |     |         |         |                |          |          |                      |             |
| N2                                                                                            | CT | III | 6040334 | 6045125 | WBGene00018254 | F40H6.2  | F40H6.2  | 0.173406820374285    | AGIWUR42043 |
| N2                                                                                            | CT | III | 6045771 | 6046981 | WBGene00006547 | tbx-11   | F40H6.4  | 0.122852904800706    |             |
| AGIWUR31993;AGIWUR39421                                                                       |    |     |         |         |                |          |          |                      |             |
| N2                                                                                            | CT | III | 6049316 | 6055448 | WBGene00018255 | F40H6.5  | F40H6.5  | -0.0858711654125952  |             |
| AGIWUR16778;AGIWUR34353                                                                       |    |     |         |         |                |          |          |                      |             |
| N2                                                                                            | CT | III | 6057055 | 6058444 | WBGene00018253 | F40H6.1  | F40H6.1  | 0.106225924901603    | AGIWUR16150 |
| N2                                                                                            | CT | III | 6065139 | 6066217 | WBGene00044412 | F40H6.6  | F40H6.6  | -0.212208904067197   | AGIWUR6163  |
| N2                                                                                            | CT | III | 6067857 | 6072076 | WBGene00015478 | C05D10.2 | C05D10.2 | -0.069612734371681   |             |
| AGIWUR106;AGIWUR11939;AGIWUR23889;AGIWUR29361;AGIWUR43021                                     |    |     |         |         |                |          |          |                      |             |
| N2                                                                                            | CT | III | 6080563 | 6084748 | WBGene00015477 | attf-4   | C05D10.1 | 0.262528609180379    |             |
| AGIWUR35938                                                                                   |    |     |         |         |                |          |          |                      |             |
| N2                                                                                            | CT | III | 6084665 | 6087721 | WBGene00015479 | wht-1    | C05D10.3 | 0.0447162437218491   |             |
| AGIWUR18060                                                                                   |    |     |         |         |                |          |          |                      |             |
| N2                                                                                            | CT | III | 6088684 | 6102862 | WBGene00015480 | C05D10.4 | C05D10.4 | 0.0471185798122846   |             |
| AGIWUR2123;AGIWUR4314;AGIWUR4703;AGIWUR8809;AGIWUR10254;AGIWUR27781;AGIWUR42360               |    |     |         |         |                |          |          |                      |             |
| N2                                                                                            | CT | III | 6114482 | 6116331 | WBGene00020549 | nmt-1    | T17E9.2  | 0.27560264986386     |             |
| AGIWUR27138;AGIWUR31541;AGIWUR41341                                                           |    |     |         |         |                |          |          |                      |             |

|                                                                                    |    |     |         |         |                |          |          |                     |
|------------------------------------------------------------------------------------|----|-----|---------|---------|----------------|----------|----------|---------------------|
| N2                                                                                 | CT | III | 6118627 | 6124055 | WBGene00002201 | kin-18   | T17E9.1  | 0.0148348549554091  |
| AGIWUR1170;AGIWUR5256                                                              |    |     |         |         |                |          |          |                     |
| N2                                                                                 | CT | III | 6124184 | 6136276 | WBGene00021534 | mvk-1    | Y42G9A.4 | 0.0307057285351     |
| AGIWUR12699;AGIWUR40028                                                            |    |     |         |         |                |          |          |                     |
| N2                                                                                 | CT | III | 6142123 | 6149590 | WBGene00021535 | wht-7    | Y42G9A.6 | -0.128342166677211  |
| AGIWUR12629                                                                        |    |     |         |         |                |          |          |                     |
| N2                                                                                 | CT | III | 6149961 | 6154933 | WBGene00021531 | Y42G9A.1 | Y42G9A.1 | 0.00328931551173817 |
| AGIWUR36020                                                                        |    |     |         |         |                |          |          |                     |
| N2                                                                                 | CT | III | 6154844 | 6157758 | WBGene00018340 | anmt-2   | F42A10.3 | 0.210924793199153   |
| AGIWUR34997                                                                        |    |     |         |         |                |          |          |                     |
| N2                                                                                 | CT | III | 6159842 | 6164588 | WBGene00003593 | nfm-1    | F42A10.2 | 0.0514996720555656  |
| AGIWUR1316;AGIWUR1497;AGIWUR7359;AGIWUR41587                                       |    |     |         |         |                |          |          |                     |
| N2                                                                                 | CT | III | 6164645 | 6171165 | WBGene00023489 | F42A10.9 | F42A10.9 | -0.0824617217361867 |
| AGIWUR19772;AGIWUR40858                                                            |    |     |         |         |                |          |          |                     |
| N2                                                                                 | CT | III | 6171147 | 6172800 | WBGene00018341 | F42A10.5 | F42A10.5 | -0.0230229410195273 |
| AGIWUR24355;AGIWUR30556                                                            |    |     |         |         |                |          |          |                     |
| N2                                                                                 | CT | III | 6173305 | 6176171 | WBGene00018339 | abcf-3   | F42A10.1 | -0.0879806315853138 |
| AGIWUR32812                                                                        |    |     |         |         |                |          |          |                     |
| N2                                                                                 | CT | III | 6176148 | 6176861 | WBGene00018342 | F42A10.6 | F42A10.6 | -0.221340048876451  |
| AGIWUR14546                                                                        |    |     |         |         |                |          |          |                     |
| N2                                                                                 | CT | III | 6177916 | 6178686 | WBGene00018343 | F42A10.7 | F42A10.7 | 0.103806841460084   |
| AGIWUR20743;AGIWUR44549                                                            |    |     |         |         |                |          |          |                     |
| N2                                                                                 | CT | III | 6181078 | 6183218 | WBGene00003546 | nas-28   | F42A10.8 | 0.1395638554701     |
| AGIWUR10042;AGIWUR38272                                                            |    |     |         |         |                |          |          |                     |
| N2                                                                                 | CT | III | 6191110 | 6192081 | WBGene00016012 | C23G10.5 | C23G10.5 | -0.130780121531462  |
| AGIWUR42032                                                                        |    |     |         |         |                |          |          |                     |
| N2                                                                                 | CT | III | 6192116 | 6194580 | WBGene00016013 | C23G10.6 | C23G10.6 | -0.349986346940568  |
| AGIWUR42473                                                                        |    |     |         |         |                |          |          |                     |
| N2                                                                                 | CT | III | 6195984 | 6198414 | WBGene00016014 | C23G10.7 | C23G10.7 | -0.0836162828168714 |
| AGIWUR1598;AGIWUR10377;AGIWUR17777;AGIWUR19282                                     |    |     |         |         |                |          |          |                     |
| N2                                                                                 | CT | III | 6198902 | 6202594 | WBGene00004459 | rpn-2    | C23G10.4 | 0.0463437119932486  |
| AGIWUR2174;AGIWUR13729;AGIWUR23688;AGIWUR24196;AGIWUR24746;AGIWUR38535;AGIWUR43344 |    |     |         |         |                |          |          |                     |
| N2                                                                                 | CT | III | 6202619 | 6206211 | WBGene00016015 | C23G10.8 | C23G10.8 | -0.105626859437582  |
| AGIWUR39422                                                                        |    |     |         |         |                |          |          |                     |
| N2                                                                                 | CT | III | 6206803 | 6207971 | WBGene00004472 | rps-3    | C23G10.3 | -0.078744313278305  |
| AGIWUR7661;AGIWUR40667                                                             |    |     |         |         |                |          |          |                     |
| N2                                                                                 | CT | III | 6208064 | 6209140 | WBGene00016011 | C23G10.2 | C23G10.2 | -0.30335476406359   |
| AGIWUR31032                                                                        |    |     |         |         |                |          |          |                     |
| N2                                                                                 | CT | III | 6209284 | 6212904 | WBGene00016010 | C23G10.1 | C23G10.1 | 0.269104970827838   |

|                                                                                                                                                |    |     |         |         |                |                  |                                |
|------------------------------------------------------------------------------------------------------------------------------------------------|----|-----|---------|---------|----------------|------------------|--------------------------------|
| AGIWUR19899                                                                                                                                    |    |     |         |         |                |                  |                                |
| N2                                                                                                                                             | CT | III | 6213112 | 6213923 | WBGene00016016 | C23G10.10        | C23G10.10 -0.110111513911217   |
| AGIWUR15153                                                                                                                                    |    |     |         |         |                |                  |                                |
| N2                                                                                                                                             | CT | III | 6215164 | 6215576 | WBGene00016017 | C23G10.11        | C23G10.11 -0.214733541225305   |
| AGIWUR44734                                                                                                                                    |    |     |         |         |                |                  |                                |
| N2                                                                                                                                             | CT | III | 6220537 | 6224451 | WBGene00001989 | hot-4 T12A2.16   | 0.0466592244163149             |
| AGIWUR4554;AGIWUR11038;AGIWUR14225;AGIWUR34548;AGIWUR41379                                                                                     |    |     |         |         |                |                  |                                |
| N2                                                                                                                                             | CT | III | 6224491 | 6229403 | WBGene00020443 | esyt-2 T12A2.15  | -0.165023768263156             |
| AGIWUR11091;AGIWUR17234;AGIWUR18813;AGIWUR22069;AGIWUR27544                                                                                    |    |     |         |         |                |                  |                                |
| N2                                                                                                                                             | CT | III | 6233718 | 6239336 | WBGene00020439 | T12A2.5 T12A2.5  | 0.0265845990519562 AGIWUR41851 |
| N2                                                                                                                                             | CT | III | 6240775 | 6241581 | WBGene00020438 | T12A2.3 T12A2.3  | -0.0882535408202796            |
| AGIWUR17752;AGIWUR29138;AGIWUR37203;AGIWUR43278                                                                                                |    |     |         |         |                |                  |                                |
| N2                                                                                                                                             | CT | III | 6241850 | 6244383 | WBGene00020440 | T12A2.6 T12A2.6  | 0.0196068112008838             |
| AGIWUR10318;AGIWUR21837;AGIWUR24481                                                                                                            |    |     |         |         |                |                  |                                |
| N2                                                                                                                                             | CT | III | 6244672 | 6246039 | WBGene00020441 | T12A2.7 T12A2.7  | 0.0796939839150301 AGIWUR27093 |
| N2                                                                                                                                             | CT | III | 6245932 | 6248234 | WBGene00020442 | gen-1 T12A2.8    | -0.137201762320544             |
| AGIWUR5759;AGIWUR14650;AGIWUR23445                                                                                                             |    |     |         |         |                |                  |                                |
| N2                                                                                                                                             | CT | III | 6248317 | 6251607 | WBGene00020437 | stt-3 T12A2.2    | 0.166088900343208              |
| AGIWUR3513;AGIWUR9746;AGIWUR13447;AGIWUR19992;AGIWUR22561;AGIWUR28326;AGIWUR35902;AGIWUR38028;AGIWUR39066;AGIWUR41574                          |    |     |         |         |                |                  |                                |
| N2                                                                                                                                             | CT | III | 6251811 | 6271282 | WBGene00020436 | T12A2.1 T12A2.1  | -0.201519014525804 AGIWUR4320  |
| N2                                                                                                                                             | CT | III | 6271561 | 6272959 | WBGene00015979 | C18F10.9         | C18F10.9 -0.074178616305689    |
| AGIWUR9386                                                                                                                                     |    |     |         |         |                |                  |                                |
| N2                                                                                                                                             | CT | III | 6273160 | 6276016 | WBGene00015977 | C18F10.2         | C18F10.2 -0.0757643254406295   |
| AGIWUR41470                                                                                                                                    |    |     |         |         |                |                  |                                |
| N2                                                                                                                                             | CT | III | 6276048 | 6278351 | WBGene00015978 | C18F10.7         | C18F10.7 0.00647575891326024   |
| AGIWUR5641;AGIWUR11223;AGIWUR19375;AGIWUR26373;AGIWUR27221;AGIWUR27295;AGIWUR29666;AGIWUR29857;AGIWUR30170;AGIWUR32153;AGIWUR36457;AGIWUR40713 |    |     |         |         |                |                  |                                |
| N2                                                                                                                                             | CT | III | 6280380 | 6282411 | WBGene00001972 | hmg-1.2 F47D12.4 | 0.0579587144695397             |
| AGIWUR26400;AGIWUR26979                                                                                                                        |    |     |         |         |                |                  |                                |
| N2                                                                                                                                             | CT | III | 6282444 | 6286231 | WBGene00018561 | gadr-3 F47D12.5  | -0.0816200641843681            |
| AGIWUR26317                                                                                                                                    |    |     |         |         |                |                  |                                |
| N2                                                                                                                                             | CT | III | 6286629 | 6287293 | WBGene00018562 | F47D12.6         | F47D12.6 -0.105475898325896    |
| AGIWUR17571                                                                                                                                    |    |     |         |         |                |                  |                                |
| N2                                                                                                                                             | CT | III | 6293247 | 6296022 | WBGene00018563 | F47D12.7         | F47D12.7 0.342465927884174     |
| AGIWUR28697                                                                                                                                    |    |     |         |         |                |                  |                                |
| N2                                                                                                                                             | CT | III | 6298461 | 6299338 | WBGene00018560 | F47D12.3         | F47D12.3 -0.110709405282755    |
| AGIWUR29555                                                                                                                                    |    |     |         |         |                |                  |                                |
| N2                                                                                                                                             | CT | III | 6299331 | 6303217 | WBGene00018564 | F47D12.9         | F47D12.9 0.024931985760789     |

AGIWUR6888;AGIWUR10228;AGIWUR20703;AGIWUR25146;AGIWUR30129;AGIWUR30161  
 N2 CT III 6309378 6320872 WBGene00001518 gar-2 F47D12.1 0.0903741669747102  
 AGIWUR3654;AGIWUR4396;AGIWUR18671;AGIWUR18967;AGIWUR29649;AGIWUR38247;AGIWUR38822  
 N2 CT III 6321176 6324239 WBGene00016980 C56G2.5 C56G2.5 -0.0502014185837023  
 AGIWUR2514;AGIWUR14213;AGIWUR15494;AGIWUR37144;AGIWUR40562;AGIWUR43714  
 N2 CT III 6331732 6335829 WBGene00016979 C56G2.4 C56G2.4 -0.023418145512883 AGIWUR28406  
 N2 CT III 6338508 6340228 WBGene00002891 let-767 C56G2.6 -0.224820269347065  
 AGIWUR23719;AGIWUR39408  
 N2 CT III 6342481 6343287 WBGene00016982 C56G2.9 C56G2.9 0.00255047492727378 AGIWUR27081  
 N2 CT III 6346285 6348121 WBGene00016978 C56G2.3 C56G2.3 -0.193108492332406 AGIWUR7248  
 N2 CT III 6353384 6366660 WBGene00016977 akap-1 C56G2.1 0.125970629587536  
 AGIWUR630;AGIWUR2907;AGIWUR8486;AGIWUR8983;AGIWUR15005;AGIWUR20081;AGIWUR29898;AGIWUR38741  
 N2 CT III 6366582 6367899 WBGene00016983 C56G2.15 C56G2.15 -0.130581091585741  
 AGIWUR37593  
 N2 CT III 6368042 6373904 WBGene00015813 thoc-2 C16A3.8 -0.068262770500473 AGIWUR35223  
 N2 CT III 6374048 6374997 WBGene00004482 rps-13 C16A3.9 -0.0994136445736586  
 AGIWUR19240;AGIWUR42951  
 N2 CT III 6375379 6379190 WBGene00007048 nfx-1 C16A3.7 -0.0178021888631417 AGIWUR32264  
 N2 CT III 6379449 6380671 WBGene00015811 C16A3.6 C16A3.6 -0.103909772549244  
 AGIWUR10740;AGIWUR41642  
 N2 CT III 6380695 6381517 WBGene00015810 C16A3.5 C16A3.5 -0.0811323811194935 AGIWUR18873  
 N2 CT III 6381634 6383024 WBGene00015809 C16A3.4 C16A3.4 -0.0377041769143354 AGIWUR8037  
 N2 CT III 6383552 6389401 WBGene00002850 let-716 C16A3.3 -0.0116992746322335 AGIWUR5062  
 N2 CT III 6389833 6390841 WBGene00015807 C16A3.2 C16A3.2 -0.299263578663208 AGIWUR37881  
 N2 CT III 6390946 6393843 WBGene00015806 smrc-1 C16A3.1 0.00907185563962187  
 AGIWUR10053;AGIWUR20541;AGIWUR34378  
 N2 CT III 6394223 6396182 WBGene00015814 oatr-1 C16A3.10 -0.0934893400230905  
 AGIWUR29129;AGIWUR41871;AGIWUR42636  
 N2 CT III 6407129 6410018 WBGene00002881 let-756 C05D11.4 -0.0532207489377079  
 AGIWUR36676;AGIWUR40092;AGIWUR44667  
 N2 CT III 6410033 6412014 WBGene00015483 C05D11.5 C05D11.5 0.158845248389989  
 AGIWUR25683;AGIWUR32018;AGIWUR33469;AGIWUR36116  
 N2 CT III 6411816 6414993 WBGene00003523 nas-4 C05D11.6 0.141106393025385  
 AGIWUR26546;AGIWUR27915;AGIWUR35771  
 N2 CT III 6415774 6421885 WBGene00015484 atgl-1 C05D11.7 0.0290224658401961  
 AGIWUR16740;AGIWUR21361;AGIWUR28752  
 N2 CT III 6422459 6427305 WBGene00015485 C05D11.8 C05D11.8 -0.186444739658138  
 AGIWUR13966  
 N2 CT III 6427529 6430934 WBGene00015486 C05D11.9 C05D11.9 -0.193384593781598



|                                                |    |     |         |         |                |           |           |                     |                    |
|------------------------------------------------|----|-----|---------|---------|----------------|-----------|-----------|---------------------|--------------------|
| AGIWUR7701                                     |    |     |         |         |                |           |           |                     |                    |
| N2                                             | CT | III | 6431153 | 6431792 | WBGene00015487 | mrps-17   | C05D11.10 |                     | -0.260344597776996 |
| AGIWUR30900                                    |    |     |         |         |                |           |           |                     |                    |
| N2                                             | CT | III | 6432178 | 6433145 | WBGene00006515 | txdc-9    | C05D11.3  |                     | -0.165586011745507 |
| AGIWUR13727                                    |    |     |         |         |                |           |           |                     |                    |
| N2                                             | CT | III | 6433239 | 6436502 | WBGene00006516 | vps-16    | C05D11.2  |                     | -0.146931761364943 |
| AGIWUR12562                                    |    |     |         |         |                |           |           |                     |                    |
| N2                                             | CT | III | 6436608 | 6439959 | WBGene00015481 | C05D11.1  | C05D11.1  |                     | 0.180056689561019  |
| AGIWUR20542;AGIWUR28535                        |    |     |         |         |                |           |           |                     |                    |
| N2                                             | CT | III | 6440145 | 6443000 | WBGene00003214 | mel-32    | C05D11.11 |                     | 0.0578133607434355 |
| AGIWUR4122;AGIWUR20891;AGIWUR29394;AGIWUR41655 |    |     |         |         |                |           |           |                     |                    |
| N2                                             | CT | III | 6443044 | 6444079 | WBGene00015488 | C05D11.13 | C05D11.13 |                     | -0.298884581908169 |
| AGIWUR6024                                     |    |     |         |         |                |           |           |                     |                    |
| N2                                             | CT | III | 6444693 | 6446943 | WBGene00002855 | let-721   | C05D11.12 |                     | 0.0205553062839989 |
| AGIWUR6107;AGIWUR19355;AGIWUR41545             |    |     |         |         |                |           |           |                     |                    |
| N2                                             | CT | III | 6448075 | 6450696 | WBGene00020822 | T26A5.6   | T26A5.6   | 0.0232283974816063  | AGIWUR16995        |
| N2                                             | CT | III | 6454483 | 6460014 | WBGene00020821 | jhd-1     | T26A5.5   | -0.0181914905479541 |                    |
| AGIWUR22295;AGIWUR37371                        |    |     |         |         |                |           |           |                     |                    |
| N2                                             | CT | III | 6460120 | 6462222 | WBGene00020820 | algn-1    | T26A5.4   | -0.187725682048249  | AGIWUR10349        |
| N2                                             | CT | III | 6462216 | 6462856 | WBGene00020823 | T26A5.8   | T26A5.8   | -0.0546034059151488 | AGIWUR29912        |
| N2                                             | CT | III | 6462907 | 6463801 | WBGene00001005 | d1c-1     | T26A5.9   | -0.0334790772432649 |                    |
| AGIWUR2065;AGIWUR7456;AGIWUR14904;AGIWUR27849  |    |     |         |         |                |           |           |                     |                    |
| N2                                             | CT | III | 6465157 | 6467208 | WBGene00006463 | nduf-2.2  | T26A5.3   | 0.0252668588513245  |                    |
| AGIWUR33657                                    |    |     |         |         |                |           |           |                     |                    |
| N2                                             | CT | III | 6467382 | 6471510 | WBGene00020819 | T26A5.2   | T26A5.2   | -0.0373946729364114 | AGIWUR11165        |
| N2                                             | CT | III | 6471720 | 6475246 | WBGene00007060 | wht-6     | T26A5.1   | 0.159003269113516   | AGIWUR31046        |
| N2                                             | CT | III | 6478961 | 6481226 | WBGene00017755 | zip-8     | F23F12.9  | 0.191757524877973   |                    |
| AGIWUR18229;AGIWUR25746                        |    |     |         |         |                |           |           |                     |                    |
| N2                                             | CT | III | 6483218 | 6488875 | WBGene00017754 | F23F12.8  | F23F12.8  | -0.0958628725254309 |                    |
| AGIWUR7260;AGIWUR7807;AGIWUR20366              |    |     |         |         |                |           |           |                     |                    |
| N2                                             | CT | III | 6489793 | 6491282 | WBGene00004503 | rpt-3     | F23F12.6  | -0.0364705290253262 |                    |
| AGIWUR5122;AGIWUR30499;AGIWUR41391             |    |     |         |         |                |           |           |                     |                    |
| N2                                             | CT | III | 6491368 | 6492907 | WBGene00005076 | srb-11    | F23F12.10 | 0.0699675557663912  |                    |
| AGIWUR30246                                    |    |     |         |         |                |           |           |                     |                    |
| N2                                             | CT | III | 6493553 | 6494781 | WBGene00005075 | srb-10    | F23F12.11 | 0.160480167448804   |                    |
| AGIWUR24014                                    |    |     |         |         |                |           |           |                     |                    |
| N2                                             | CT | III | 6495677 | 6498198 | WBGene00044455 | F23F12.13 | F23F12.13 | -0.191370409383816  |                    |
| AGIWUR33864;AGIWUR45117                        |    |     |         |         |                |           |           |                     |                    |
| N2                                             | CT | III | 6498476 | 6500023 | WBGene00017752 | sdz-15    | F23F12.4  | -0.190312962666287  |                    |

|                                                                       |    |     |         |         |                |           |           |                     |             |
|-----------------------------------------------------------------------|----|-----|---------|---------|----------------|-----------|-----------|---------------------|-------------|
| AGIWUR867;AGIWUR22937;AGIWUR25799                                     |    |     |         |         |                |           |           |                     |             |
| N2                                                                    | CT | III | 6500514 | 6507717 | WBGene00017751 | F23F12.3  | F23F12.3  | 0.00250064932564964 |             |
| AGIWUR12746;AGIWUR22390;AGIWUR33264;AGIWUR43307                       |    |     |         |         |                |           |           |                     |             |
| N2                                                                    | CT | III | 6508132 | 6509499 | WBGene00017756 | F23F12.12 | F23F12.12 | -0.45775535732523   |             |
| AGIWUR24827                                                           |    |     |         |         |                |           |           |                     |             |
| N2                                                                    | CT | III | 6509699 | 6514768 | WBGene00000044 | acr-5     | K03F8.2   | 0.00519856713490219 |             |
| AGIWUR945;AGIWUR2385;AGIWUR14698;AGIWUR31814                          |    |     |         |         |                |           |           |                     |             |
| N2                                                                    | CT | III | 6518714 | 6520049 | WBGene00044295 | C09E7.10  | C09E7.10  | -0.0135433354148127 |             |
| AGIWUR9196;AGIWUR10502;AGIWUR25243                                    |    |     |         |         |                |           |           |                     |             |
| N2                                                                    | CT | III | 6524051 | 6525660 | WBGene00003859 | oig-1     | C09E7.3   | -0.312653404960113  | AGIWUR44575 |
| N2                                                                    | CT | III | 6528202 | 6532088 | WBGene00004102 | pqn-10    | C09E7.2   | 0.177544800976344   | AGIWUR41366 |
| N2                                                                    | CT | III | 6532560 | 6533819 | WBGene00015637 | srxa-5    | C09E7.1   | -0.10907110574488   | AGIWUR26008 |
| N2                                                                    | CT | III | 6534467 | 6536995 | WBGene00015638 | C09E7.4   | C09E7.4   | -0.356476135056587  | AGIWUR8849  |
| N2                                                                    | CT | III | 6538101 | 6541312 | WBGene00015639 | C09E7.5   | C09E7.5   | 0.161653496084853   | AGIWUR9379  |
| N2                                                                    | CT | III | 6541550 | 6546425 | WBGene00015640 | C09E7.6   | C09E7.6   | -0.130942643229895  |             |
| AGIWUR1061;AGIWUR30995                                                |    |     |         |         |                |           |           |                     |             |
| N2                                                                    | CT | III | 6553575 | 6558575 | WBGene00015642 | C09E7.8   | C09E7.8   | -0.0834903193972707 | AGIWUR2078  |
| N2                                                                    | CT | III | 6559097 | 6563666 | WBGene00017849 | F27B3.7   | F27B3.7   | -0.230191356575425  | AGIWUR40502 |
| N2                                                                    | CT | III | 6577827 | 6578584 | WBGene00017848 | F27B3.6   | F27B3.6   | -0.173360306422552  | AGIWUR29969 |
| N2                                                                    | CT | III | 6579698 | 6579877 | WBGene00044454 | F27B3.8   | F27B3.8   | 0.0402294100349119  | AGIWUR13094 |
| N2                                                                    | CT | III | 6583461 | 6585617 | WBGene00000060 | acr-21    | F27B3.2   | -0.101700128008501  | AGIWUR28720 |
| N2                                                                    | CT | III | 6587864 | 6589398 | WBGene00017648 | ddo-3     | F20H11.5  | -0.0290004989817625 |             |
| AGIWUR24363;AGIWUR41686                                               |    |     |         |         |                |           |           |                     |             |
| N2                                                                    | CT | III | 6589377 | 6592175 | WBGene00017646 | F20H11.1  | F20H11.1  |                     |             |
| -0.000255069064259317 AGIWUR29171                                     |    |     |         |         |                |           |           |                     |             |
| N2                                                                    | CT | III | 6592567 | 6601171 | WBGene00002889 | let-765   | F20H11.2  | 0.131802448934682   |             |
| AGIWUR17640;AGIWUR25140;AGIWUR27253;AGIWUR43209                       |    |     |         |         |                |           |           |                     |             |
| N2                                                                    | CT | III | 6606247 | 6608106 | WBGene00003162 | mdh-2     | F20H11.3  | 0.0701251623013421  |             |
| AGIWUR5742;AGIWUR9105;AGIWUR11499;AGIWUR32191;AGIWUR32225;AGIWUR43317 |    |     |         |         |                |           |           |                     |             |
| N2                                                                    | CT | III | 6608622 | 6610455 | WBGene00017647 | F20H11.4  | F20H11.4  | 0.042097269284767   |             |
| AGIWUR25769                                                           |    |     |         |         |                |           |           |                     |             |
| N2                                                                    | CT | III | 6610822 | 6612263 | WBGene00005263 | srh-40    | Y40D12A.3 | -0.178205896997008  |             |
| AGIWUR28492                                                           |    |     |         |         |                |           |           |                     |             |
| N2                                                                    | CT | III | 6612516 | 6615134 | WBGene00021503 | ctsa-2    | Y40D12A.2 | -0.0525809151979839 |             |
| AGIWUR11341                                                           |    |     |         |         |                |           |           |                     |             |
| N2                                                                    | CT | III | 6615414 | 6620051 | WBGene00021502 | Y40D12A.1 | Y40D12A.1 | -0.122908907490402  |             |
| AGIWUR14140;AGIWUR35368;AGIWUR38777                                   |    |     |         |         |                |           |           |                     |             |
| N2                                                                    | CT | III | 6620254 | 6622265 | WBGene00015733 | C13B9.2   | C13B9.2   | -0.235027917548265  | AGIWUR32233 |
| N2                                                                    | CT | III | 6622676 | 6624972 | WBGene00015734 | copd-1    | C13B9.3   | 0.00821420726273914 | AGIWUR24038 |

|                                                                         |    |     |         |         |                |          |          |                     |             |
|-------------------------------------------------------------------------|----|-----|---------|---------|----------------|----------|----------|---------------------|-------------|
| N2                                                                      | CT | III | 6632841 | 6652083 | WBGene00015735 | pdf-1    | C13B9.4  | 0.0878253059820331  |             |
| AGIWUR2877;AGIWUR3657;AGIWUR9278;AGIWUR12756;AGIWUR39212                |    |     |         |         |                |          |          |                     |             |
| N2                                                                      | CT | III | 6664960 | 6665374 | WBGene00019714 | M01G4.1  | M01G4.1  | 0.0569205855828478  | AGIWUR17124 |
| N2                                                                      | CT | III | 6675801 | 6703974 | WBGene00004316 | rbf-1    | F37A4.7  | 0.0499405143497338  |             |
| AGIWUR809;AGIWUR10220;AGIWUR21533;AGIWUR33340;AGIWUR35132               |    |     |         |         |                |          |          |                     |             |
| N2                                                                      | CT | III | 6703993 | 6710084 | WBGene00002169 | isw-1    | F37A4.8  | 0.462796903279251   |             |
| AGIWUR21624;AGIWUR25898;AGIWUR35837;AGIWUR38143                         |    |     |         |         |                |          |          |                     |             |
| N2                                                                      | CT | III | 6711869 | 6713191 | WBGene00018135 | F37A4.5  | F37A4.5  | 0.283446707911514   | AGIWUR10785 |
| N2                                                                      | CT | III | 6713583 | 6718022 | WBGene00018134 | F37A4.4  | F37A4.4  | 0.297630511416589   | AGIWUR38765 |
| N2                                                                      | CT | III | 6718570 | 6720487 | WBGene00018133 | F37A4.3  | F37A4.3  | 0.0620656601987211  | AGIWUR28310 |
| N2                                                                      | CT | III | 6720415 | 6722258 | WBGene00018137 | bath-41  | F37A4.9  | -0.14624651406608   | AGIWUR38646 |
| N2                                                                      | CT | III | 6722454 | 6723284 | WBGene00018132 | F37A4.2  | F37A4.2  | -0.155970730850724  | AGIWUR15914 |
| N2                                                                      | CT | III | 6723389 | 6725711 | WBGene00018131 | F37A4.1  | F37A4.1  | -0.138407797332167  | AGIWUR31813 |
| N2                                                                      | CT | III | 6725789 | 6728058 | WBGene00022420 | wdr-4    | Y102E9.2 | 0.151277022758993   |             |
| AGIWUR29143                                                             |    |     |         |         |                |          |          |                     |             |
| N2                                                                      | CT | III | 6728155 | 6730170 | WBGene00044452 | Y102E9.5 | Y102E9.5 | 0.0555427882836579  |             |
| AGIWUR3681;AGIWUR14452                                                  |    |     |         |         |                |          |          |                     |             |
| N2                                                                      | CT | III | 6730781 | 6733935 | WBGene00003851 | odr-4    | Y102E9.1 | -0.0477285638521483 |             |
| AGIWUR7032;AGIWUR24539;AGIWUR26097;AGIWUR33738                          |    |     |         |         |                |          |          |                     |             |
| N2                                                                      | CT | III | 6733992 | 6734520 | WBGene00022421 | Y102E9.3 | Y102E9.3 | 0.00913958924221348 |             |
| AGIWUR36461                                                             |    |     |         |         |                |          |          |                     |             |
| N2                                                                      | CT | III | 6735968 | 6736642 | WBGene00044453 | Y102E9.6 | Y102E9.6 | -0.0722778898835035 |             |
| AGIWUR2619;AGIWUR10795;AGIWUR16286;AGIWUR21903;AGIWUR28604              |    |     |         |         |                |          |          |                     |             |
| N2                                                                      | CT | III | 6737271 | 6737783 | WBGene00019501 | K07E12.2 | K07E12.2 | 0.178525495926388   |             |
| AGIWUR36836                                                             |    |     |         |         |                |          |          |                     |             |
| N2                                                                      | CT | III | 6746308 | 6794764 | WBGene00000998 | dig-1    | K07E12.1 | 0.00675872774981556 |             |
| AGIWUR27360                                                             |    |     |         |         |                |          |          |                     |             |
| N2                                                                      | CT | III | 6795626 | 6797774 | WBGene00019907 | R05H11.1 | R05H11.1 | 0.0578139450815156  |             |
| AGIWUR12904;AGIWUR43298                                                 |    |     |         |         |                |          |          |                     |             |
| N2                                                                      | CT | III | 6798299 | 6800489 | WBGene00019908 | R05H11.2 | R05H11.2 | 0.240553370747325   |             |
| AGIWUR9915                                                              |    |     |         |         |                |          |          |                     |             |
| N2                                                                      | CT | III | 6802788 | 6816132 | WBGene00017904 | lim-8    | F28F5.3  | 0.273158608284157   |             |
| AGIWUR16870;AGIWUR44041                                                 |    |     |         |         |                |          |          |                     |             |
| N2                                                                      | CT | III | 6816643 | 6816880 | WBGene00043297 | F28F5.4  | F28F5.4  | 0.127499047896791   |             |
| AGIWUR16112;AGIWUR20630;AGIWUR25870;AGIWUR27417;AGIWUR29321;AGIWUR35286 |    |     |         |         |                |          |          |                     |             |
| N2                                                                      | CT | III | 6817316 | 6819372 | WBGene00017905 | F28F5.6  | F28F5.6  | -0.383400146106034  | AGIWUR24831 |
| N2                                                                      | CT | III | 6820935 | 6847283 | WBGene00006498 | ten-1    | R13F6.4  | -0.0136654111005186 |             |
| AGIWUR35629;AGIWUR38757;AGIWUR41531                                     |    |     |         |         |                |          |          |                     |             |
| N2                                                                      | CT | III | 6847390 | 6849055 | WBGene00020066 | dhhc-5   | R13F6.5  | 0.133757353315129   | AGIWUR6886  |

|                                                                                                             |    |     |         |         |                |          |          |                      |             |
|-------------------------------------------------------------------------------------------------------------|----|-----|---------|---------|----------------|----------|----------|----------------------|-------------|
| N2                                                                                                          | CT | III | 6851254 | 6853130 | WBGene00005712 | srv-1    | R13F6.3  | 0.00408574536563933  | AGIWUR24472 |
| N2                                                                                                          | CT | III | 6853113 | 6856804 | WBGene00006971 | zak-1    | R13F6.6  | 0.155680723691059    | AGIWUR29484 |
| N2                                                                                                          | CT | III | 6858793 | 6859571 | WBGene00020067 | clcc-158 | R13F6.8  | -0.395458318392311   |             |
| AGIWUR19949;AGIWUR39355                                                                                     |    |     |         |         |                |          |          |                      |             |
| N2                                                                                                          | CT | III | 6859863 | 6860786 | WBGene00020065 | clcc-159 | R13F6.2  | -0.32115560840253    |             |
| AGIWUR5341                                                                                                  |    |     |         |         |                |          |          |                      |             |
| N2                                                                                                          | CT | III | 6860939 | 6863968 | WBGene00004857 | sma-3    | R13F6.9  | -0.135457518845932   | AGIWUR29198 |
| N2                                                                                                          | CT | III | 6865207 | 6869460 | WBGene00020068 | cra-1    | R13F6.10 | -0.0115404695873185  |             |
| AGIWUR6115                                                                                                  |    |     |         |         |                |          |          |                      |             |
| N2                                                                                                          | CT | III | 6869634 | 6870298 | WBGene00020064 | kbp-1    | R13F6.1  | -0.152311295423743   | AGIWUR9178  |
| N2                                                                                                          | CT | III | 6870296 | 6871171 | WBGene00044312 | K04C2.8  | K04C2.8  | 0.0992018146866993   |             |
| AGIWUR8796;AGIWUR11686;AGIWUR12275;AGIWUR21315;AGIWUR28990;AGIWUR41699;AGIWUR44588                          |    |     |         |         |                |          |          |                      |             |
| N2                                                                                                          | CT | III | 6873048 | 6873729 | WBGene00019381 | K04C2.3  | K04C2.3  | -0.00394741744795724 |             |
| AGIWUR13400;AGIWUR14947;AGIWUR25514;AGIWUR26287;AGIWUR31355;AGIWUR34016;AGIWUR34276;AGIWUR34672;AGIWUR40758 |    |     |         |         |                |          |          |                      |             |
| N2                                                                                                          | CT | III | 6880947 | 6883853 | WBGene00044311 | K04C2.7  | K04C2.7  | -0.0333342480997398  |             |
| AGIWUR7543;AGIWUR16799;AGIWUR39321                                                                          |    |     |         |         |                |          |          |                      |             |
| N2                                                                                                          | CT | III | 6885204 | 6889523 | WBGene00000265 | brd-1    | K04C2.4  | -0.220775979988769   | AGIWUR29695 |
| N2                                                                                                          | CT | III | 6889749 | 6895089 | WBGene00019380 | K04C2.2  | K04C2.2  | -0.162579851198203   | AGIWUR9457  |
| N2                                                                                                          | CT | III | 6898016 | 6900605 | WBGene00020315 | T07E3.4  | T07E3.4  | 0.0655913321484558   | AGIWUR17150 |
| N2                                                                                                          | CT | III | 6900568 | 6903106 | WBGene00020316 | brc-2    | T07E3.5  | 0.0793051505514413   | AGIWUR23409 |
| N2                                                                                                          | CT | III | 6903895 | 6905170 | WBGene00020314 | T07E3.3  | T07E3.3  | 0.00164047347751595  |             |
| AGIWUR6606;AGIWUR7386                                                                                       |    |     |         |         |                |          |          |                      |             |
| N2                                                                                                          | CT | III | 6907441 | 6908012 | WBGene00020313 | T07E3.2  | T07E3.2  | 0.0527589803439561   | AGIWUR40870 |
| N2                                                                                                          | CT | III | 6909438 | 6912481 | WBGene00020317 | pdf-1    | T07E3.6  | 0.0080763537755395   | AGIWUR21194 |
| N2                                                                                                          | CT | III | 6924097 | 6928817 | WBGene00018998 | flap-1   | F57B9.7  | -0.220336361355205   | AGIWUR38961 |
| N2                                                                                                          | CT | III | 6930039 | 6931953 | WBGene00002083 | inf-1    | F57B9.6  | 0.102295443978353    | AGIWUR32955 |
| N2                                                                                                          | CT | III | 6932001 | 6935862 | WBGene00000276 | byn-1    | F57B9.5  | 0.104129970349131    |             |
| AGIWUR2887;AGIWUR9859;AGIWUR13290                                                                           |    |     |         |         |                |          |          |                      |             |
| N2                                                                                                          | CT | III | 6935967 | 6939443 | WBGene00000762 | coq-2    | F57B9.4  | -0.0596234136747347  |             |
| AGIWUR7144;AGIWUR9523;AGIWUR12892;AGIWUR31473;AGIWUR38173;AGIWUR43114                                       |    |     |         |         |                |          |          |                      |             |
| N2                                                                                                          | CT | III | 6939888 | 6941736 | WBGene00018997 | F57B9.3  | F57B9.3  | 0.0483265384855995   |             |
| AGIWUR23882;AGIWUR25698;AGIWUR38042                                                                         |    |     |         |         |                |          |          |                      |             |
| N2                                                                                                          | CT | III | 6941889 | 6945895 | WBGene00004133 | abu-13   | F57B9.9  | -0.150815175790685   | AGIWUR40209 |
| N2                                                                                                          | CT | III | 6946718 | 6958882 | WBGene00002845 | let-711  | F57B9.2  | -0.0105023804902267  | AGIWUR10152 |
| N2                                                                                                          | CT | III | 6959110 | 6962027 | WBGene00004462 | rpn-6.1  | F57B9.10 | 0.0336336491254681   |             |
| AGIWUR2602;AGIWUR16836;AGIWUR22959                                                                          |    |     |         |         |                |          |          |                      |             |
| N2                                                                                                          | CT | III | 6962090 | 6963319 | WBGene00018996 | F57B9.1  | F57B9.1  | 0.00315360927586461  | AGIWUR37456 |
| N2                                                                                                          | CT | III | 6963620 | 6968130 | WBGene00017951 | pan1-2   | F31E3.4  | 0.0367429996709028   | AGIWUR3878  |
| N2                                                                                                          | CT | III | 6970026 | 6972003 | WBGene00001168 | eef-1A.1 | F31E3.5  | 0                    |             |

AGIWUR14568;AGIWUR18769;AGIWUR22122;AGIWUR25445;AGIWUR25772;AGIWUR41301;AGIWUR42112  
 N2 CT III 6972210 6973717 WBGene00004340 rfc-4 F31E3.3 0.0168981260740644 AGIWUR37637  
 N2 CT III 6974338 6978025 WBGene00017950 F31E3.2 F31E3.2 -0.0511293016555161  
 AGIWUR6472;AGIWUR9830;AGIWUR20256;AGIWUR21734;AGIWUR27342;AGIWUR35926;AGIWUR37116;AGIWUR37915;AGIWUR39344  
 N2 CT III 6979884 6981785 WBGene00000443 ceh-20 F31E3.1 0.0309742665546224 AGIWUR8244  
 N2 CT III 6990168 7002310 WBGene00004182 prk-1 C06E8.3 -0.171809288234994  
 AGIWUR1009;AGIWUR20404;AGIWUR20919;AGIWUR43839  
 N2 CT III 7002301 7005450 WBGene00015544 C06E8.5 C06E8.5 0.188328260015613 AGIWUR44652  
 N2 CT III 7009136 7019574 WBGene00017389 lgc-38 F11H8.2 0.0516506550578781  
 AGIWUR127;AGIWUR44935  
 N2 CT III 7019583 7020600 WBGene00000597 col-8 F11H8.3 -0.09017225023468 AGIWUR25771  
 N2 CT III 7021167 7023652 WBGene00004341 rfl-1 F11H8.1 -0.0742848630789581 AGIWUR25920  
 N2 CT III 7023642 7029203 WBGene00000872 cyk-1 F11H8.4 -0.0218725850530905  
 AGIWUR2929;AGIWUR7188;AGIWUR9447;AGIWUR31305;AGIWUR34755;AGIWUR36247  
 N2 CT III 7035432 7045724 WBGene00023414 R01H2.7 R01H2.7 0.0118454478263095  
 AGIWUR10603;AGIWUR22901;AGIWUR23233;AGIWUR41509  
 N2 CT III 7056541 7058526 WBGene00019810 R01H2.2 R01H2.2 0.325718213248704  
 AGIWUR6400;AGIWUR27609;AGIWUR33698  
 N2 CT III 7058516 7060597 WBGene00019811 egg-2 R01H2.3 -0.0262448209813844 AGIWUR39983  
 N2 CT III 7061111 7064275 WBGene00019812 R01H2.4 R01H2.4 0.0532323110522626 AGIWUR17584  
 N2 CT III 7065439 7067477 WBGene00019813 ger-1 R01H2.5 -0.0256291048696724  
 AGIWUR8609;AGIWUR22100;AGIWUR34387  
 N2 CT III 7067686 7068570 WBGene00006713 ubc-18 R01H2.6 0.0432685506006401  
 AGIWUR20704;AGIWUR29116;AGIWUR36145;AGIWUR38951  
 N2 CT III 7069103 7069580 WBGene00045190 R01H2.8 R01H2.8 -0.293145430472036  
 AGIWUR613;AGIWUR4684;AGIWUR11900;AGIWUR31809;AGIWUR39639  
 N2 CT III 7070800 7072552 WBGene00003022 lin-37 ZK418.4 -0.2065241966923 AGIWUR4353  
 N2 CT III 7072613 7073851 WBGene00022734 ZK418.5 ZK418.5 -0.0297439401417297 AGIWUR5961  
 N2 CT III 7074250 7076349 WBGene000220259 ZK418.13 ZK418.13 0.0646411637650193  
 AGIWUR31633;AGIWUR36398;AGIWUR37087  
 N2 CT III 7079077 7080789 WBGene00022736 ZK418.7 ZK418.7 -0.184471660756898  
 AGIWUR15775;AGIWUR28330;AGIWUR32337  
 N2 CT III 7083684 7085088 WBGene00022737 tofu-7 ZK418.8 -0.0218454446498448 AGIWUR1384  
 N2 CT III 7085197 7087741 WBGene00022738 ZK418.9 ZK418.9 -0.0299287541107418  
 AGIWUR5350;AGIWUR11967;AGIWUR12779;AGIWUR22635;AGIWUR44900  
 N2 CT III 7088644 7090132 WBGene00044353 ZK418.10 ZK418.10 0.20464852124399  
 AGIWUR33945  
 N2 CT III 7091330 7093408 WBGene00022732 ZK418.2 ZK418.2 0.0436356691352415  
 AGIWUR26774;AGIWUR38970;AGIWUR43419

|                                                                                               |    |     |         |         |                |          |           |                     |             |
|-----------------------------------------------------------------------------------------------|----|-----|---------|---------|----------------|----------|-----------|---------------------|-------------|
| N2                                                                                            | CT | III | 7095553 | 7097079 | WBGene00003608 | nhr-9    | ZK418.1   | 0.0608248634951156  | AGIWUR40203 |
| N2                                                                                            | CT | III | 7100482 | 7102033 | WBGene00044354 | ZK418.11 | ZK418.11  | 0.256965110883179   |             |
| AGIWUR12692;AGIWUR40894                                                                       |    |     |         |         |                |          |           |                     |             |
| N2                                                                                            | CT | III | 7102086 | 7103990 | WBGene00015102 | cpg-2    | B0280.5   | 0.0895113626819235  |             |
| AGIWUR14788;AGIWUR26818                                                                       |    |     |         |         |                |          |           |                     |             |
| N2                                                                                            | CT | III | 7108322 | 7109741 | WBGene00003845 | odd-1    | B0280.4   | -0.0960798715441928 | AGIWUR21681 |
| N2                                                                                            | CT | III | 7110302 | 7111893 | WBGene00015103 | B0280.7  | B0280.7   | -0.166862458482932  | AGIWUR8179  |
| N2                                                                                            | CT | III | 7112300 | 7115438 | WBGene00003609 | nhr-10   | B0280.8   | -0.150894887834722  | AGIWUR15057 |
| N2                                                                                            | CT | III | 7120905 | 7122895 | WBGene00015104 | B0280.9  | B0280.9   | 0.0206725283309357  | AGIWUR38406 |
| N2                                                                                            | CT | III | 7123128 | 7124329 | WBGene00015101 | rpia-1   | B0280.3   | -0.113270339561396  |             |
| AGIWUR24377;AGIWUR29690;AGIWUR34957;AGIWUR43357                                               |    |     |         |         |                |          |           |                     |             |
| N2                                                                                            | CT | III | 7132038 | 7133674 | WBGene00015105 | pot-1    | B0280.10  | 0.040604755433522   |             |
| AGIWUR17608                                                                                   |    |     |         |         |                |          |           |                     |             |
| N2                                                                                            | CT | III | 7133766 | 7136460 | WBGene00015099 | ggtb-1   | B0280.1   | -0.122183423739425  |             |
| AGIWUR26;AGIWUR16425;AGIWUR21558;AGIWUR29845                                                  |    |     |         |         |                |          |           |                     |             |
| N2                                                                                            | CT | III | 7136510 | 7138278 | WBGene00015106 | B0280.11 | B0280.11  | 0.233729899439592   |             |
| AGIWUR27947;AGIWUR34409                                                                       |    |     |         |         |                |          |           |                     |             |
| N2                                                                                            | CT | III | 7138683 | 7144832 | WBGene00001613 | glr-2    | B0280.12  | 0.140052045878451   |             |
| AGIWUR21369                                                                                   |    |     |         |         |                |          |           |                     |             |
| N2                                                                                            | CT | III | 7145816 | 7153795 | WBGene00003858 | ogt-1    | K04G7.3   | 0.0874737027906525  |             |
| AGIWUR5550;AGIWUR36960                                                                        |    |     |         |         |                |          |           |                     |             |
| N2                                                                                            | CT | III | 7156032 | 7158809 | WBGene00019401 | nuo-4    | K04G7.4   | 0.0627305554197113  |             |
| AGIWUR1349;AGIWUR3103;AGIWUR11949;AGIWUR15549;AGIWUR17066;AGIWUR21918;AGIWUR42710;AGIWUR44306 |    |     |         |         |                |          |           |                     |             |
| N2                                                                                            | CT | III | 7158912 | 7161157 | WBGene00004390 | rnp-7    | K04G7.10  | -0.191242112205913  |             |
| AGIWUR27127                                                                                   |    |     |         |         |                |          |           |                     |             |
| N2                                                                                            | CT | III | 7161157 | 7162115 | WBGene00019402 | K04G7.11 | K04G7.11  | -0.0847387193229281 |             |
| AGIWUR41126                                                                                   |    |     |         |         |                |          |           |                     |             |
| N2                                                                                            | CT | III | 7162694 | 7165261 | WBGene00019400 | K04G7.1  | K04G7.1   | -0.0781929977715592 | AGIWUR11536 |
| N2                                                                                            | CT | III | 7167838 | 7170990 | WBGene00018152 | acs-4    | F37C12.7  | 0.132115130832698   |             |
| AGIWUR33729;AGIWUR35716                                                                       |    |     |         |         |                |          |           |                     |             |
| N2                                                                                            | CT | III | 7177530 | 7178853 | WBGene00005072 | srb-7    | F37C12.17 | -0.080717977960127  |             |
| AGIWUR8880                                                                                    |    |     |         |         |                |          |           |                     |             |
| N2                                                                                            | CT | III | 7178984 | 7179606 | WBGene00004483 | rps-14   | F37C12.9  | 0.148500789429077   |             |
| AGIWUR2374;AGIWUR32041                                                                        |    |     |         |         |                |          |           |                     |             |
| N2                                                                                            | CT | III | 7180249 | 7180677 | WBGene00004450 | rp1-36   | F37C12.4  | -0.13496253248546   |             |
| AGIWUR3760;AGIWUR5590;AGIWUR25437                                                             |    |     |         |         |                |          |           |                     |             |
| N2                                                                                            | CT | III | 7180730 | 7181925 | WBGene00018151 | F37C12.3 | F37C12.3  | -0.110962346870122  |             |
| AGIWUR5900;AGIWUR21081                                                                        |    |     |         |         |                |          |           |                     |             |
| N2                                                                                            | CT | III | 7181970 | 7184049 | WBGene00018150 | epg-4    | F37C12.2  | -0.0789530417025901 |             |

|                                                                      |    |     |         |         |                |                  |                                 |
|----------------------------------------------------------------------|----|-----|---------|---------|----------------|------------------|---------------------------------|
| AGIWUR42197                                                          |    |     |         |         |                |                  |                                 |
| N2                                                                   | CT | III | 7184348 | 7187868 | WBGene00018149 | F37C12.1         | F37C12.1 -0.158628229629382     |
| AGIWUR4488                                                           |    |     |         |         |                |                  |                                 |
| N2                                                                   | CT | III | 7187841 | 7188430 | WBGene00018153 | F37C12.10        | F37C12.10 -0.0641663192819451   |
| AGIWUR22078                                                          |    |     |         |         |                |                  |                                 |
| N2                                                                   | CT | III | 7189142 | 7189631 | WBGene00004490 | rps-21 F37C12.11 | -0.131058460578419              |
| AGIWUR12006;AGIWUR31276;AGIWUR34444                                  |    |     |         |         |                |                  |                                 |
| N2                                                                   | CT | III | 7190207 | 7192992 | WBGene00003176 | mec-14 F37C12.12 | 0.126949660006546               |
| AGIWUR9445;AGIWUR17804;AGIWUR28649;AGIWUR39147                       |    |     |         |         |                |                  |                                 |
| N2                                                                   | CT | III | 7194094 | 7195425 | WBGene00044005 | F37C12.18        | F37C12.18 0.119796572845416     |
| AGIWUR11612                                                          |    |     |         |         |                |                  |                                 |
| N2                                                                   | CT | III | 7196225 | 7232172 | WBGene00018154 | exos-9 F37C12.13 | -0.0159970907616476             |
| AGIWUR7392;AGIWUR7814;AGIWUR20734;AGIWUR21953;AGIWUR33274            |    |     |         |         |                |                  |                                 |
| N2                                                                   | CT | III | 7232926 | 7234202 | WBGene00020636 | T20H4.5 T20H4.5  | 0.154930995038466               |
| AGIWUR19610;AGIWUR21920;AGIWUR24242;AGIWUR33423                      |    |     |         |         |                |                  |                                 |
| N2                                                                   | CT | III | 7238607 | 7241284 | WBGene00004189 | pars-1 T20H4.3   | 0.231165896747804               |
| AGIWUR4343;AGIWUR9909;AGIWUR36586                                    |    |     |         |         |                |                  |                                 |
| N2                                                                   | CT | III | 7241365 | 7242950 | WBGene00020635 | T20H4.2 T20H4.2  | 0.067810443181969 AGIWUR15565   |
| N2                                                                   | CT | III | 7243305 | 7245743 | WBGene00003890 | osm-10 T20H4.1   | -0.0361498309667239 AGIWUR39413 |
| N2                                                                   | CT | III | 7245703 | 7247937 | WBGene00020646 | zmp-6 T21D11.1   | -0.0418413096031998             |
| AGIWUR9527                                                           |    |     |         |         |                |                  |                                 |
| N2                                                                   | CT | III | 7268414 | 7275396 | WBGene00015159 | psd-1 B0361.5    | 0.0755989598236511              |
| AGIWUR9371;AGIWUR25166                                               |    |     |         |         |                |                  |                                 |
| N2                                                                   | CT | III | 7275502 | 7277274 | WBGene00015160 | B0361.6 B0361.6  | -0.184130445042713 AGIWUR42062  |
| N2                                                                   | CT | III | 7277604 | 7281217 | WBGene00015165 | B0361.11         | B0361.11 0.247418503755455      |
| AGIWUR44378                                                          |    |     |         |         |                |                  |                                 |
| N2                                                                   | CT | III | 7281377 | 7283959 | WBGene00015157 | B0361.3 B0361.3  | -0.114005365160402 AGIWUR22638  |
| N2                                                                   | CT | III | 7283915 | 7285883 | WBGene00015161 | pho-5 B0361.7    | 0.118811152926691               |
| AGIWUR4284;AGIWUR4841;AGIWUR6453;AGIWUR19407;AGIWUR27150;AGIWUR32167 |    |     |         |         |                |                  |                                 |
| N2                                                                   | CT | III | 7285983 | 7287603 | WBGene00015164 | ykt-6 B0361.10   | 0.00679492211876287             |
| AGIWUR22374                                                          |    |     |         |         |                |                  |                                 |
| N2                                                                   | CT | III | 7287848 | 7290562 | WBGene00015162 | algn-11 B0361.8  | 0.104108615400619 AGIWUR25298   |
| N2                                                                   | CT | III | 7293632 | 7308364 | WBGene00015156 | B0361.2 B0361.2  | -0.0872580547393014 AGIWUR464   |
| N2                                                                   | CT | III | 7308354 | 7308975 | WBGene00018949 | acbp-4 F56C9.5   | 0.0323288104795605 AGIWUR42872  |
| N2                                                                   | CT | III | 7308998 | 7310773 | WBGene00018950 | F56C9.6 F56C9.6  | -0.0237180433731581 AGIWUR36977 |
| N2                                                                   | CT | III | 7311290 | 7313195 | WBGene00018948 | F56C9.3 F56C9.3  | 0.111582998245073 AGIWUR2658    |
| N2                                                                   | CT | III | 7313149 | 7314977 | WBGene00018951 | F56C9.7 F56C9.7  | 0.00530167006381177 AGIWUR21582 |
| N2                                                                   | CT | III | 7315903 | 7319595 | WBGene00018952 | F56C9.8 F56C9.8  | 0.0719906099334997 AGIWUR35334  |
| N2                                                                   | CT | III | 7324940 | 7329649 | WBGene00018954 | F56C9.11         | F56C9.11 -0.160610379277589     |

AGIWUR145  
N2 CT III 7329714 7335316 WBGene00018953 F56C9.10 F56C9.10 0.0249802989540555  
AGIWUR4974;AGIWUR6930;AGIWUR7997;AGIWUR15213;AGIWUR25399;AGIWUR25573;AGIWUR40411;AGIWUR43493;AGIWUR43851  
N2 CT III 7336587 7338765 WBGene00001748 gsp-2 F56C9.1 0.0345333803896324 AGIWUR26543  
N2 CT III 7339001 7343626 WBGene00002182 kap-1 F08F8.3 -0.0436425015517705  
AGIWUR23181;AGIWUR29263  
N2 CT III 7343675 7345855 WBGene00017271 F08F8.6 F08F8.6 0.248294270913257 AGIWUR6914  
N2 CT III 7345861 7347149 WBGene00017272 F08F8.7 F08F8.7 -0.125867132325559  
AGIWUR3256;AGIWUR12445;AGIWUR15029;AGIWUR17210;AGIWUR17376;AGIWUR43081  
N2 CT III 7347237 7349175 WBGene00017273 gos-28 F08F8.8 -0.124067188839639 AGIWUR19819  
N2 CT III 7349291 7354090 WBGene00017274 F08F8.9 F08F8.9 -0.119005415611419  
AGIWUR6831;AGIWUR31117;AGIWUR42085  
N2 CT III 7354159 7357395 WBGene00017275 F08F8.10 F08F8.10 -0.107976131410265  
AGIWUR3820  
N2 CT III 7357663 7359183 WBGene00017269 F08F8.4 F08F8.4 -0.271755438391923 AGIWUR6271  
N2 CT III 7359498 7362132 WBGene00017268 hmgr-1 F08F8.2 0.0761982700313455  
AGIWUR15001;AGIWUR25419;AGIWUR25776  
N2 CT III 7365902 7366448 WBGene00269381 F08F8.11 F08F8.11 -0.200224455555951  
AGIWUR5929  
N2 CT III 7366717 7367112 WBGene00020603 T20B12.5 T20B12.5 -0.11082505649147  
AGIWUR45073  
N2 CT III 7367710 7369538 WBGene00020602 T20B12.4 T20B12.4 -0.113130946507741  
AGIWUR29818  
N2 CT III 7370131 7374731 WBGene00003378 mml-1 T20B12.6 -0.107549600259484  
AGIWUR277;AGIWUR27528;AGIWUR27964  
N2 CT III 7377854 7379045 WBGene00020604 T20B12.7 T20B12.7 0.0681711777765766  
AGIWUR17909;AGIWUR18286;AGIWUR31122;AGIWUR35623;AGIWUR36772;AGIWUR43617  
N2 CT III 7379143 7381609 WBGene00001974 hmg-4 T20B12.8 -0.136812779675092  
AGIWUR13021;AGIWUR13254;AGIWUR15814;AGIWUR16997;AGIWUR37862  
N2 CT III 7382115 7383906 WBGene00020601 T20B12.3 T20B12.3 0.0149748940821119  
AGIWUR22514  
N2 CT III 7384033 7386132 WBGene00006542 tbp-1 T20B12.2 0.185881567134182  
AGIWUR1258;AGIWUR1790;AGIWUR12732;AGIWUR19590;AGIWUR40034  
N2 CT III 7386229 7391135 WBGene00020600 trd-1 T20B12.1 0.196114108690714  
AGIWUR24657;AGIWUR32413;AGIWUR36042  
N2 CT III 7391482 7395454 WBGene00020605 lgc-50 T20B12.9 -0.0103862058924982  
AGIWUR5207  
N2 CT III 7454012 7455980 WBGene00000118 alh-12 Y69F12A.2 -0.0876707368856371  
AGIWUR29059;AGIWUR34442



|                                                                                                                               |    |     |         |         |                |           |           |                      |             |
|-------------------------------------------------------------------------------------------------------------------------------|----|-----|---------|---------|----------------|-----------|-----------|----------------------|-------------|
| N2                                                                                                                            | CT | III | 7456734 | 7458544 | WBGene00022102 | Y69F12A.1 | Y69F12A.1 | 0.330545282608082    |             |
| AGIWUR11528;AGIWUR13958;AGIWUR44146                                                                                           |    |     |         |         |                |           |           |                      |             |
| N2                                                                                                                            | CT | III | 7460341 | 7461931 | WBGene00003376 | mls-1     | H14A12.4  | 0.16724473586931     |             |
| AGIWUR13598                                                                                                                   |    |     |         |         |                |           |           |                      |             |
| N2                                                                                                                            | CT | III | 7463797 | 7465238 | WBGene00019196 | H14A12.3  | H14A12.3  | 0.0562806192548848   |             |
| AGIWUR2821                                                                                                                    |    |     |         |         |                |           |           |                      |             |
| N2                                                                                                                            | CT | III | 7465605 | 7467633 | WBGene00001503 | fum-1     | H14A12.2  | 0.216949714694544    |             |
| AGIWUR21960;AGIWUR44920                                                                                                       |    |     |         |         |                |           |           |                      |             |
| N2                                                                                                                            | CT | III | 7467574 | 7468676 | WBGene00019197 | H14A12.5  | H14A12.5  | -0.213356726235791   |             |
| AGIWUR34074                                                                                                                   |    |     |         |         |                |           |           |                      |             |
| N2                                                                                                                            | CT | III | 7479680 | 7489075 | WBGene00003497 | mup-4     | K07D8.1   | 0.0855873672852496   | AGIWUR31451 |
| N2                                                                                                                            | CT | III | 7495320 | 7497832 | WBGene00000479 | cgh-1     | C07H6.5   | 0.308727489359116    |             |
| AGIWUR3774;AGIWUR4099;AGIWUR15533;AGIWUR16780;AGIWUR28635;AGIWUR38324;AGIWUR42561                                             |    |     |         |         |                |           |           |                      |             |
| N2                                                                                                                            | CT | III | 7498819 | 7499447 | WBGene00015582 | C07H6.9   | C07H6.9   | 0.0340976673594895   | AGIWUR10743 |
| N2                                                                                                                            | CT | III | 7499677 | 7503241 | WBGene00015581 | C07H6.4   | C07H6.4   | 0.0914778806971732   |             |
| AGIWUR706;AGIWUR875;AGIWUR5973;AGIWUR7898;AGIWUR15254;AGIWUR15464;AGIWUR21636;AGIWUR23127;AGIWUR33052;AGIWUR33165;AGIWUR38055 |    |     |         |         |                |           |           |                      |             |
| N2                                                                                                                            | CT | III | 7508178 | 7515285 | WBGene00015580 | cls-1     | C07H6.3   | 0.100351608243413    |             |
| AGIWUR6187;AGIWUR26175;AGIWUR28060;AGIWUR38483                                                                                |    |     |         |         |                |           |           |                      |             |
| N2                                                                                                                            | CT | III | 7515223 | 7518524 | WBGene00000537 | clk-2     | C07H6.6   | 0.0106463302334108   |             |
| AGIWUR5586;AGIWUR7836                                                                                                         |    |     |         |         |                |           |           |                      |             |
| N2                                                                                                                            | CT | III | 7518628 | 7520845 | WBGene00000854 | cux-7     | C07H6.8   | -0.109655142397358   |             |
| AGIWUR12788;AGIWUR23553;AGIWUR39468;AGIWUR43244                                                                               |    |     |         |         |                |           |           |                      |             |
| N2                                                                                                                            | CT | III | 7521004 | 7524836 | WBGene00002986 | lig-4     | C07H6.1   | -0.0171749131992769  | AGIWUR12502 |
| N2                                                                                                                            | CT | III | 7528641 | 7536632 | WBGene00003024 | lin-39    | C07H6.7   | -0.258425373858223   | AGIWUR2784  |
| N2                                                                                                                            | CT | III | 7555617 | 7558208 | WBGene00000437 | ceh-13    | R13A5.5   | 0.118510619476819    | AGIWUR6653  |
| N2                                                                                                                            | CT | III | 7562172 | 7564529 | WBGene00020048 | lgc-12    | R13A5.4   | -0.112099085832295   | AGIWUR22283 |
| N2                                                                                                                            | CT | III | 7564500 | 7565347 | WBGene00020049 | ttr-8     | R13A5.6   | -0.130697372895254   | AGIWUR10718 |
| N2                                                                                                                            | CT | III | 7566411 | 7567486 | WBGene00020047 | ttr-32    | R13A5.3   | -0.00179522376614472 | AGIWUR44767 |
| N2                                                                                                                            | CT | III | 7567475 | 7570133 | WBGene00020050 | R13A5.7   | R13A5.7   | -0.123754021447933   | AGIWUR8137  |
| N2                                                                                                                            | CT | III | 7572105 | 7572831 | WBGene00004420 | rpl-9     | R13A5.8   | -0.0212058045939827  | AGIWUR14686 |
| N2                                                                                                                            | CT | III | 7573350 | 7575263 | WBGene00003063 | lpd-7     | R13A5.12  | -0.0534262603772877  |             |
| AGIWUR3802;AGIWUR36129;AGIWUR45192                                                                                            |    |     |         |         |                |           |           |                      |             |
| N2                                                                                                                            | CT | III | 7575274 | 7579411 | WBGene00020051 | R13A5.9   | R13A5.9   | -0.0699075881587774  | AGIWUR25499 |
| N2                                                                                                                            | CT | III | 7582033 | 7582999 | WBGene00020052 | R13A5.10  | R13A5.10  | 0.0181424574619182   |             |
| AGIWUR14155                                                                                                                   |    |     |         |         |                |           |           |                      |             |
| N2                                                                                                                            | CT | III | 7584181 | 7591570 | WBGene00000846 | cup-5     | R13A5.1   | -0.128989318933298   |             |
| AGIWUR8333;AGIWUR37240                                                                                                        |    |     |         |         |                |           |           |                      |             |
| N2                                                                                                                            | CT | III | 7605949 | 7608290 | WBGene00020202 | T04A6.3   | T04A6.3   | 0.252836778961134    | AGIWUR19994 |

|                                                                                   |    |     |         |         |                 |         |         |                      |             |
|-----------------------------------------------------------------------------------|----|-----|---------|---------|-----------------|---------|---------|----------------------|-------------|
| N2                                                                                | CT | III | 7614862 | 7615699 | WBGene00020201  | T04A6.2 | T04A6.2 | 0.0418348062934628   |             |
| AGIWUR4917;AGIWUR9169;AGIWUR22596;AGIWUR28490                                     |    |     |         |         |                 |         |         |                      |             |
| N2                                                                                | CT | III | 7616528 | 7617590 | WBGene00020200  | T04A6.1 | T04A6.1 | -0.0248751042488546  |             |
| AGIWUR22210;AGIWUR23187;AGIWUR23913;AGIWUR27973                                   |    |     |         |         |                 |         |         |                      |             |
| N2                                                                                | CT | III | 7625376 | 7641053 | WBGene00022816  | fbn-1   | ZK783.1 | 0.0553552868290694   |             |
| AGIWUR3202;AGIWUR4339;AGIWUR28751;AGIWUR30718;AGIWUR36180;AGIWUR43017             |    |     |         |         |                 |         |         |                      |             |
| N2                                                                                | CT | III | 7641034 | 7643101 | WBGene00022817  | upp-1   | ZK783.2 | -0.0890859226107814  |             |
| AGIWUR33056;AGIWUR36827;AGIWUR44756;AGIWUR44950                                   |    |     |         |         |                 |         |         |                      |             |
| N2                                                                                | CT | III | 7648788 | 7650005 | WBGene00044448  | ZK783.6 | ZK783.6 | 0.0920585769718691   | AGIWUR41156 |
| N2                                                                                | CT | III | 7650549 | 7656032 | WBGene00001470  | baz-2   | ZK783.4 | -0.00369300279928275 | AGIWUR33055 |
| N2                                                                                | CT | III | 7662428 | 7672153 | WBGene00015988  | C18H2.1 | C18H2.1 | -0.183003088356541   | AGIWUR27375 |
| N2                                                                                | CT | III | 7684357 | 7688917 | WBGene00015990  | C18H2.3 | C18H2.3 | 0.45314557112734     | AGIWUR18472 |
| N2                                                                                | CT | III | 7689356 | 7694398 | WBGene00015992  | C18H2.5 | C18H2.5 | 0.269420880081846    | AGIWUR36085 |
| N2                                                                                | CT | III | 7694554 | 7700381 | WBGene00015991  | C18H2.4 | C18H2.4 | 0.35158085343413     | AGIWUR28887 |
| N2                                                                                | CT | III | 7700338 | 7709491 | WBGene00003002  | lin-13  | C03B8.4 | 0.0537383190014715   |             |
| AGIWUR1136;AGIWUR13351;AGIWUR42089                                                |    |     |         |         |                 |         |         |                      |             |
| N2                                                                                | CT | III | 7712309 | 7717314 | WBGene00015386  | C03B8.3 | C03B8.3 | 0.157198879482053    |             |
| AGIWUR4334;AGIWUR7654;AGIWUR10933;AGIWUR12045;AGIWUR13588;AGIWUR22325;AGIWUR26403 |    |     |         |         |                 |         |         |                      |             |
| N2                                                                                | CT | III | 7719791 | 7738105 | WBGene00003559  | nc1-1   | ZK112.2 | -0.0775385589439876  |             |
| AGIWUR29632;AGIWUR30707;AGIWUR44134                                               |    |     |         |         |                 |         |         |                      |             |
| N2                                                                                | CT | III | 7738085 | 7739656 | WBGene00022661  | ZK112.5 | ZK112.5 | -0.268681265798844   | AGIWUR8890  |
| N2                                                                                | CT | III | 7739855 | 7740541 | WBGene00022662  | ZK112.6 | ZK112.6 | 0.334747426005087    | AGIWUR34004 |
| N2                                                                                | CT | III | 7741326 | 7754448 | WBGene00000395  | cdh-3   | ZK112.7 | -0.0466043502443796  | AGIWUR26163 |
| N2                                                                                | CT | III | 7758730 | 7761273 | WBGene000003956 | pcp-1   | ZK112.1 | -0.139838720717844   | AGIWUR32149 |
| N2                                                                                | CT | III | 7761977 | 7763603 | WBGene00022516  | mtx-2   | ZC97.1  | 0.0717765540390545   | AGIWUR33978 |
| N2                                                                                | CT | III | 7763698 | 7766052 | WBGene00022792  | ZK686.2 | ZK686.2 | -0.105173552586194   | AGIWUR29287 |
| N2                                                                                | CT | III | 7766389 | 7767515 | WBGene00022795  | ZK686.5 | ZK686.5 | 0.0241543275784153   | AGIWUR15013 |
| N2                                                                                | CT | III | 7767571 | 7769063 | WBGene00022793  | ZK686.3 | ZK686.3 | -0.0382316546085093  |             |
| AGIWUR1330;AGIWUR17964                                                            |    |     |         |         |                 |         |         |                      |             |
| N2                                                                                | CT | III | 7769165 | 7770149 | WBGene00022794  | snu-23  | ZK686.4 | -0.350852072240878   |             |
| AGIWUR31585;AGIWUR44773                                                           |    |     |         |         |                 |         |         |                      |             |
| N2                                                                                | CT | III | 7771591 | 7772559 | WBGene00044799  | ZK686.6 | ZK686.6 | 0.125212447863874    |             |
| AGIWUR10543;AGIWUR38278                                                           |    |     |         |         |                 |         |         |                      |             |
| N2                                                                                | CT | III | 7773134 | 7773849 | WBGene00022791  | ZK686.1 | ZK686.1 | 0.0600990585854788   |             |
| AGIWUR3542;AGIWUR27040;AGIWUR33797                                                |    |     |         |         |                 |         |         |                      |             |
| N2                                                                                | CT | III | 7774778 | 7776039 | WBGene00015590  | bath-15 | C08C3.2 | -0.0614440385636623  | AGIWUR30918 |
| N2                                                                                | CT | III | 7776835 | 7783454 | WBGene00003102  | mab-5   | C08C3.3 | -0.0239601636229088  | AGIWUR524   |
| N2                                                                                | CT | III | 7793446 | 7795409 | WBGene00015591  | cyk-7   | C08C3.4 | 0.0357228353188734   | AGIWUR39828 |
| N2                                                                                | CT | III | 7814380 | 7817127 | WBGene00001174  | egl-5   | C08C3.1 | 0.122772196314568    |             |

AGIWUR9619;AGIWUR10136;AGIWUR23410;AGIWUR31673;AGIWUR34828;AGIWUR41220  
 N2 CT III 7824377 7828626 WBGene00001209 egl-45 C27D11.1 -0.152202895769179  
 AGIWUR16837  
 N2 CT III 7829411 7832503 WBGene00022785 ZK652.6 ZK652.6 -0.202877046760456  
 AGIWUR22114;AGIWUR26296;AGIWUR34734  
 N2 CT III 7839594 7841491 WBGene00000446 ceh-23 ZK652.5 -0.0194798173802297 AGIWUR4590  
 N2 CT III 7842381 7843636 WBGene00022786 ZK652.8 ZK652.8 -0.137997046997905 AGIWUR21230  
 N2 CT III 7855118 7855680 WBGene00004449 rpl-35 ZK652.4 0.142945147419329  
 AGIWUR1318;AGIWUR7271;AGIWUR13592;AGIWUR15530;AGIWUR19789;AGIWUR21396;AGIWUR22629;AGIWUR23860;AGIWUR27111;A  
 GIWUR36006;AGIWUR41499  
 N2 CT III 7855840 7857242 WBGene00022787 tag-307 ZK652.10 -0.289394417904107  
 AGIWUR7350  
 N2 CT III 7857315 7858457 WBGene00000765 coq-5 ZK652.9 -0.110041569541689 AGIWUR16679  
 N2 CT III 7858979 7859512 WBGene00044324 ufm-1 ZK652.3 -0.0479695630695076  
 AGIWUR7099;AGIWUR15272  
 N2 CT III 7859613 7860159 WBGene00022783 tomm-7 ZK652.2 -0.141476542963732  
 AGIWUR10295;AGIWUR25626;AGIWUR26385;AGIWUR36387;AGIWUR38431;AGIWUR41648  
 N2 CT III 7860466 7861004 WBGene00000835 cuc-1 ZK652.11 0.0529648134901279  
 AGIWUR21223  
 N2 CT III 7862070 7862577 WBGene00004918 snr-5 ZK652.1 -0.186475508144829  
 AGIWUR7207;AGIWUR8160;AGIWUR18084;AGIWUR22192;AGIWUR27998;AGIWUR30639  
 N2 CT III 7862583 7865306 WBGene00015333 slc-17.3 C02C2.4 -0.36748024710387  
 AGIWUR31202  
 N2 CT III 7866509 7868732 WBGene00000845 cup-4 C02C2.3 0.0183451289858638 AGIWUR37722  
 N2 CT III 7873781 7877194 WBGene00015332 tyr-1 C02C2.1 -0.138313166434646 AGIWUR41080  
 N2 CT III 7877176 7878839 WBGene00015334 sup-18 C02C2.5 -0.0904683851492827 AGIWUR39722  
 N2 CT III 7881113 7883003 WBGene00022803 ZK688.9 ZK688.9 -0.215225708190857 AGIWUR43699  
 N2 CT III 7883574 7884963 WBGene00044762 ZK688.11 ZK688.11 0.0130657492432391  
 AGIWUR19621;AGIWUR27683  
 N2 CT III 7885088 7891615 WBGene00022800 ZK688.5 ZK688.5 -0.0140989290539872  
 AGIWUR14059;AGIWUR42115  
 N2 CT III 7892256 7894625 WBGene00022798 fahd-1 ZK688.3 -0.104353663826672 AGIWUR9390  
 N2 CT III 7895024 7895270 WBGene00022799 ZK688.4 ZK688.4 0.128042782462998  
 AGIWUR13823;AGIWUR16019;AGIWUR16901;AGIWUR19883;AGIWUR19970;AGIWUR22563;AGIWUR28504;AGIWUR37484;AGIWUR37746  
 ;AGIWUR38268;AGIWUR40686  
 N2 CT III 7895752 7897025 WBGene00044447 ZK688.10 ZK688.10 0.306259551244051  
 AGIWUR2695;AGIWUR9783  
 N2 CT III 7901033 7904473 WBGene00022797 best-24 ZK688.2 -0.0610661775115942  
 AGIWUR3194;AGIWUR10548;AGIWUR22051

|                                                                                                           |    |     |         |         |                |          |          |                     |             |
|-----------------------------------------------------------------------------------------------------------|----|-----|---------|---------|----------------|----------|----------|---------------------|-------------|
| N2                                                                                                        | CT | III | 7904945 | 7907843 | WBGene00022801 | pcp-5    | ZK688.6  | 0.143514810256328   | AGIWUR20771 |
| N2                                                                                                        | CT | III | 7909563 | 7910758 | WBGene00022796 | ZK688.1  | ZK688.1  | -0.0793237672979092 | AGIWUR6214  |
| N2                                                                                                        | CT | III | 7910798 | 7911630 | WBGene00022802 | ZK688.7  | ZK688.7  | -0.215374924347193  | AGIWUR42017 |
| N2                                                                                                        | CT | III | 7912698 | 7913600 | WBGene00044763 | ZK688.12 | ZK688.12 | 0.106992036894404   |             |
| AGIWUR36930;AGIWUR43391;AGIWUR44954                                                                       |    |     |         |         |                |          |          |                     |             |
| N2                                                                                                        | CT | III | 7914314 | 7917767 | WBGene00001628 | gly-3    | ZK688.8  | 0.00361925543965746 |             |
| AGIWUR13062;AGIWUR36778;AGIWUR36892                                                                       |    |     |         |         |                |          |          |                     |             |
| N2                                                                                                        | CT | III | 7917987 | 7924917 | WBGene00016203 | tag-250  | C29E4.5  | -0.0910755532047078 |             |
| AGIWUR16151;AGIWUR24388;AGIWUR44595;AGIWUR44893                                                           |    |     |         |         |                |          |          |                     |             |
| N2                                                                                                        | CT | III | 7926999 | 7928734 | WBGene00043051 | C29E4.13 | C29E4.13 | -0.323044410883164  |             |
| AGIWUR727;AGIWUR15228                                                                                     |    |     |         |         |                |          |          |                     |             |
| N2                                                                                                        | CT | III | 7929013 | 7932993 | WBGene00003801 | npp-15   | C29E4.4  | -0.250132315925661  | AGIWUR31543 |
| N2                                                                                                        | CT | III | 7933535 | 7937708 | WBGene00004303 | ran-2    | C29E4.3  | 0.00840905887617893 | AGIWUR24556 |
| N2                                                                                                        | CT | III | 7937827 | 7940931 | WBGene00016207 | C29E4.10 | C29E4.10 | -0.0305847425628354 |             |
| AGIWUR39117                                                                                               |    |     |         |         |                |          |          |                     |             |
| N2                                                                                                        | CT | III | 7941057 | 7941614 | WBGene00016209 | C29E4.12 | C29E4.12 | -0.32756476380451   |             |
| AGIWUR10229                                                                                               |    |     |         |         |                |          |          |                     |             |
| N2                                                                                                        | CT | III | 7941717 | 7945593 | WBGene00016202 | kle-2    | C29E4.2  | -0.139020590126396  | AGIWUR24070 |
| N2                                                                                                        | CT | III | 7945544 | 7947018 | WBGene00016204 | gsto-1   | C29E4.7  | -0.0776262243495864 | AGIWUR31884 |
| N2                                                                                                        | CT | III | 7948838 | 7950068 | WBGene00000665 | col-90   | C29E4.1  | -0.119212571637176  |             |
| AGIWUR12003;AGIWUR43808                                                                                   |    |     |         |         |                |          |          |                     |             |
| N2                                                                                                        | CT | III | 7949975 | 7951915 | WBGene00002879 | let-754  | C29E4.8  | 0.0577569685489046  |             |
| AGIWUR3078;AGIWUR6977;AGIWUR16207;AGIWUR24532                                                             |    |     |         |         |                |          |          |                     |             |
| N2                                                                                                        | CT | III | 7952623 | 7955816 | WBGene00045246 | C29E4.15 | C29E4.15 | -0.290132538641977  |             |
| AGIWUR7251;AGIWUR10062;AGIWUR39986                                                                        |    |     |         |         |                |          |          |                     |             |
| N2                                                                                                        | CT | III | 7955828 | 7958105 | WBGene00016206 | C29E4.9  | C29E4.9  | -0.162070872084547  |             |
| AGIWUR3333;AGIWUR5912;AGIWUR14429;AGIWUR23987;AGIWUR24372;AGIWUR27083;AGIWUR27187;AGIWUR37254;AGIWUR40677 |    |     |         |         |                |          |          |                     |             |
| N2                                                                                                        | CT | III | 7961596 | 7962741 | WBGene00018844 | F54H12.4 | F54H12.4 | 0.0412830639220072  |             |
| AGIWUR22335                                                                                               |    |     |         |         |                |          |          |                     |             |
| N2                                                                                                        | CT | III | 7966601 | 7969221 | WBGene00045247 | F54H12.8 | F54H12.8 | 0.103350643463205   |             |
| AGIWUR229                                                                                                 |    |     |         |         |                |          |          |                     |             |
| N2                                                                                                        | CT | III | 7969319 | 7970283 | WBGene00044633 | F54H12.7 | F54H12.7 | 0.109193920731908   |             |
| AGIWUR4710;AGIWUR17387;AGIWUR38904                                                                        |    |     |         |         |                |          |          |                     |             |
| N2                                                                                                        | CT | III | 7970263 | 7972161 | WBGene00018845 | F54H12.5 | F54H12.5 | -0.42912197328803   |             |
| AGIWUR34607                                                                                               |    |     |         |         |                |          |          |                     |             |
| N2                                                                                                        | CT | III | 7972382 | 7973386 | WBGene00018846 | eef-1B.1 | F54H12.6 | 0.0406596224473414  |             |
| AGIWUR27194;AGIWUR33538                                                                                   |    |     |         |         |                |          |          |                     |             |
| N2                                                                                                        | CT | III | 7973717 | 7977355 | WBGene00000041 | aco-2    | F54H12.1 | -0.0781468805754946 |             |
| AGIWUR550;AGIWUR666;AGIWUR7264;AGIWUR7765;AGIWUR11526;AGIWUR32513;AGIWUR33054;AGIWUR39786                 |    |     |         |         |                |          |          |                     |             |

|                                                                                     |    |     |         |         |                |          |          |                      |             |
|-------------------------------------------------------------------------------------|----|-----|---------|---------|----------------|----------|----------|----------------------|-------------|
| N2                                                                                  | CT | III | 7977216 | 7977803 | WBGene00015558 | C06G4.4  | C06G4.4  | 0.276064969758699    |             |
| AGIWUR12183;AGIWUR18220;AGIWUR45108                                                 |    |     |         |         |                |          |          |                      |             |
| N2                                                                                  | CT | III | 7980913 | 7986327 | WBGene00000542 | clp-1    | C06G4.2  | 0.115589632471149    |             |
| AGIWUR2782;AGIWUR10623;AGIWUR24515                                                  |    |     |         |         |                |          |          |                      |             |
| N2                                                                                  | CT | III | 7987121 | 7990613 | WBGene00015557 | C06G4.1  | C06G4.1  | 0.12278315347146     | AGIWUR11719 |
| N2                                                                                  | CT | III | 7990789 | 7996438 | WBGene00015559 | npr-17   | C06G4.5  | -0.183716112047133   | AGIWUR34939 |
| N2                                                                                  | CT | III | 8004397 | 8005887 | WBGene00044446 | C06G4.6  | C06G4.6  | -0.267212704543108   | AGIWUR299   |
| N2                                                                                  | CT | III | 8005935 | 8009821 | WBGene00000507 | cit-1.1  | F44B9.4  | 0.0202031966433545   |             |
| AGIWUR4816;AGIWUR18943;AGIWUR28638                                                  |    |     |         |         |                |          |          |                      |             |
| N2                                                                                  | CT | III | 8010778 | 8013774 | WBGene00000508 | cit-1.2  | F44B9.3  | 0.0514773231690855   |             |
| AGIWUR8542;AGIWUR15822;AGIWUR17269                                                  |    |     |         |         |                |          |          |                      |             |
| N2                                                                                  | CT | III | 8013753 | 8016538 | WBGene00018408 | F44B9.5  | F44B9.5  | -0.0409019429398896  | AGIWUR17897 |
| N2                                                                                  | CT | III | 8016648 | 8020873 | WBGene00003021 | lin-36   | F44B9.6  | 0.310839900555748    |             |
| AGIWUR12990;AGIWUR14761;AGIWUR20035;AGIWUR29449;AGIWUR36188;AGIWUR44489;AGIWUR45031 |    |     |         |         |                |          |          |                      |             |
| N2                                                                                  | CT | III | 8022463 | 8025195 | WBGene00018407 | F44B9.2  | F44B9.2  | -0.00888939781621723 | AGIWUR33109 |
| N2                                                                                  | CT | III | 8025210 | 8028042 | WBGene00004125 | mdt-30   | F44B9.7  | 0.0606612821283612   | AGIWUR34503 |
| N2                                                                                  | CT | III | 8028133 | 8029649 | WBGene00018409 | F44B9.8  | F44B9.8  | -0.124554706695681   |             |
| AGIWUR1353;AGIWUR8841;AGIWUR14148;AGIWUR15772                                       |    |     |         |         |                |          |          |                      |             |
| N2                                                                                  | CT | III | 8029858 | 8031063 | WBGene00018410 | F44B9.9  | F44B9.9  | 0.0172458087880107   | AGIWUR21414 |
| N2                                                                                  | CT | III | 8031413 | 8033727 | WBGene00018411 | F44B9.10 | F44B9.10 | -0.245578380853667   |             |
| AGIWUR27975                                                                         |    |     |         |         |                |          |          |                      |             |
| N2                                                                                  | CT | III | 8038241 | 8041374 | WBGene00001059 | dpf-6    | F44B9.1  | 0.0631448740542302   |             |
| AGIWUR786;AGIWUR7937;AGIWUR10600;AGIWUR12968;AGIWUR15899;AGIWUR39780                |    |     |         |         |                |          |          |                      |             |
| N2                                                                                  | CT | III | 8042577 | 8042875 | WBGene00019681 | K12H4.6  | K12H4.6  | 0.13637511773732     | AGIWUR27362 |
| N2                                                                                  | CT | III | 8044481 | 8044916 | WBGene00019680 | K12H4.5  | K12H4.5  | 0.0459178379688563   | AGIWUR19414 |
| N2                                                                                  | CT | III | 8045017 | 8045931 | WBGene00019679 | K12H4.4  | K12H4.4  | 0.0860814408077424   | AGIWUR20073 |
| N2                                                                                  | CT | III | 8046034 | 8047612 | WBGene00019678 | K12H4.3  | K12H4.3  | -0.170585063848147   | AGIWUR25530 |
| N2                                                                                  | CT | III | 8047712 | 8048461 | WBGene00019677 | K12H4.2  | K12H4.2  | -0.0871968609994127  | AGIWUR20148 |
| N2                                                                                  | CT | III | 8048424 | 8051155 | WBGene00019682 | K12H4.7  | K12H4.7  | -0.0220246640942783  |             |
| AGIWUR10819;AGIWUR15259;AGIWUR34223                                                 |    |     |         |         |                |          |          |                      |             |
| N2                                                                                  | CT | III | 8067289 | 8071455 | WBGene00000448 | pros-1   | K12H4.1  | -0.153611684893752   | AGIWUR34802 |
| N2                                                                                  | CT | III | 8071916 | 8080281 | WBGene00000939 | dcr-1    | K12H4.8  | -0.071261012981731   | AGIWUR15164 |
| N2                                                                                  | CT | III | 8080570 | 8083701 | WBGene00000143 | apc-2    | K06H7.6  | -0.248553285173653   | AGIWUR44183 |
| N2                                                                                  | CT | III | 8083692 | 8085538 | WBGene00019458 | K06H7.7  | K06H7.7  | -0.265874737586714   | AGIWUR13531 |
| N2                                                                                  | CT | III | 8085705 | 8088449 | WBGene00001743 | grp-1    | K06H7.4  | -0.171280307647791   |             |
| AGIWUR12843;AGIWUR21602;AGIWUR32200                                                 |    |     |         |         |                |          |          |                      |             |
| N2                                                                                  | CT | III | 8088482 | 8091730 | WBGene00019457 | vms-1    | K06H7.3  | 0.00379958012420722  | AGIWUR34576 |
| N2                                                                                  | CT | III | 8091708 | 8093042 | WBGene00019460 | idi-1    | K06H7.9  | -0.119151996711095   | AGIWUR11791 |
| N2                                                                                  | CT | III | 8093570 | 8096311 | WBGene00019456 | K06H7.2  | K06H7.2  | -0.168732987334208   | AGIWUR11874 |

|                                                                        |    |     |         |         |                |          |          |                      |             |
|------------------------------------------------------------------------|----|-----|---------|---------|----------------|----------|----------|----------------------|-------------|
| N2                                                                     | CT | III | 8096736 | 8098216 | WBGene00019459 | K06H7.8  | K06H7.8  | 0.0580987005690403   | AGIWUR25434 |
| N2                                                                     | CT | III | 8099327 | 8100638 | WBGene00019455 | K06H7.1  | K06H7.1  | 0.0500668549850545   | AGIWUR23564 |
| N2                                                                     | CT | III | 8101348 | 8104076 | WBGene00004042 | plk-1    | C14B9.4  | 0.0207547184881927   |             |
| AGIWUR7884;AGIWUR22550                                                 |    |     |         |         |                |          |          |                      |             |
| N2                                                                     | CT | III | 8108703 | 8111245 | WBGene00015753 | C14B9.3  | C14B9.3  | 0.0998125349977226   |             |
| AGIWUR5914;AGIWUR11983;AGIWUR39945;AGIWUR43369;AGIWUR44024;AGIWUR44415 |    |     |         |         |                |          |          |                      |             |
| N2                                                                     | CT | III | 8111166 | 8126222 | WBGene00001565 | gei-8    | C14B9.6  | 0.0496471738455568   |             |
| AGIWUR22239;AGIWUR29182;AGIWUR35088                                    |    |     |         |         |                |          |          |                      |             |
| N2                                                                     | CT | III | 8129551 | 8130227 | WBGene00004433 | rp1-21   | C14B9.7  | -0.0877238311293951  | AGIWUR13555 |
| N2                                                                     | CT | III | 8130852 | 8132436 | WBGene00015755 | C14B9.10 | C14B9.10 | -0.235028113105919   |             |
| AGIWUR9726;AGIWUR20003;AGIWUR24913;AGIWUR25956;AGIWUR27149;AGIWUR34179 |    |     |         |         |                |          |          |                      |             |
| N2                                                                     | CT | III | 8133665 | 8136649 | WBGene00015752 | C14B9.2  | C14B9.2  | 0.0760475744847486   |             |
| AGIWUR8508;AGIWUR11821;AGIWUR19513;AGIWUR30168;AGIWUR41633             |    |     |         |         |                |          |          |                      |             |
| N2                                                                     | CT | III | 8138090 | 8139645 | WBGene00002011 | hsp-12.2 | C14B9.1  | 0.0594896898951864   |             |
| AGIWUR13046;AGIWUR29749                                                |    |     |         |         |                |          |          |                      |             |
| N2                                                                     | CT | III | 8139610 | 8144629 | WBGene00015754 | C14B9.8  | C14B9.8  | -0.00957993397429568 | AGIWUR1876  |
| N2                                                                     | CT | III | 8145015 | 8145974 | WBGene00017044 | mrpl-18  | D2007.4  | -0.00366093089800046 |             |
| AGIWUR3327;AGIWUR16310;AGIWUR26805                                     |    |     |         |         |                |          |          |                      |             |
| N2                                                                     | CT | III | 8148967 | 8154619 | WBGene00017042 | D2007.2  | D2007.2  | 0.175969168239072    |             |
| AGIWUR24883;AGIWUR30242                                                |    |     |         |         |                |          |          |                      |             |
| N2                                                                     | CT | III | 8155470 | 8155989 | WBGene00017041 | D2007.1  | D2007.1  | 0.0965880863213684   | AGIWUR34639 |
| N2                                                                     | CT | III | 8155928 | 8158245 | WBGene00017045 | atg-13   | D2007.5  | -0.169802479307641   | AGIWUR4063  |
| N2                                                                     | CT | III | 8159155 | 8161338 | WBGene00086546 | cil-1    | C50C3.7  | -0.15846764239754    | AGIWUR24538 |
| N2                                                                     | CT | III | 8161449 | 8163383 | WBGene00016803 | bath-42  | C50C3.8  | 0.0338267698608887   |             |
| AGIWUR3146;AGIWUR20862;AGIWUR21544;AGIWUR34384                         |    |     |         |         |                |          |          |                      |             |
| N2                                                                     | CT | III | 8164373 | 8172702 | WBGene00004187 | prp-8    | C50C3.6  | 0.348588788065687    |             |
| AGIWUR12014;AGIWUR25090;AGIWUR31758                                    |    |     |         |         |                |          |          |                      |             |
| N2                                                                     | CT | III | 8176484 | 8177243 | WBGene00016804 | C50C3.12 | C50C3.12 | 0.0239371894642089   |             |
| AGIWUR1160;AGIWUR13818;AGIWUR27621                                     |    |     |         |         |                |          |          |                      |             |
| N2                                                                     | CT | III | 8179224 | 8180549 | WBGene00016801 | C50C3.5  | C50C3.5  | -0.232879552340938   |             |
| AGIWUR2594;AGIWUR18155;AGIWUR27487                                     |    |     |         |         |                |          |          |                      |             |
| N2                                                                     | CT | III | 8181881 | 8189372 | WBGene00016800 | C50C3.2  | C50C3.2  | 0.119636724064767    | AGIWUR16251 |
| N2                                                                     | CT | III | 8191817 | 8193847 | WBGene00016799 | C50C3.1  | C50C3.1  | -0.0322332519375266  | AGIWUR10522 |
| N2                                                                     | CT | III | 8193844 | 8201206 | WBGene00006772 | unc-36   | C50C3.9  | 0.100768997365059    |             |
| AGIWUR10266;AGIWUR11145;AGIWUR18480                                    |    |     |         |         |                |          |          |                      |             |
| N2                                                                     | CT | III | 8205124 | 8209945 | WBGene00016242 | C30A5.10 | C30A5.10 | 0.00191470401159677  |             |
| AGIWUR5775;AGIWUR37751;AGIWUR40981                                     |    |     |         |         |                |          |          |                      |             |
| N2                                                                     | CT | III | 8212750 | 8216336 | WBGene00006818 | unc-86   | C30A5.7  | -0.0156257793637717  | AGIWUR37956 |
| N2                                                                     | CT | III | 8225097 | 8226386 | WBGene00016238 | C30A5.3  | C30A5.3  | -0.00263258039843439 |             |

AGIWUR1588;AGIWUR5145;AGIWUR13733;AGIWUR20984;AGIWUR34110;AGIWUR39012  
 N2 CT III 8226478 8227650 WBGene00004342 rfs-1 C30A5.2 -0.101472869099819 AGIWUR40272  
 N2 CT III 8227362 8232660 WBGene00015350 fbx1-1 C02F5.7 0.11233129310727  
 AGIWUR32117;AGIWUR40156;AGIWUR40691;AGIWUR41092  
 N2 CT III 8232651 8234591 WBGene00015349 henn-1 C02F5.6 -0.019835037432042  
 AGIWUR13862;AGIWUR17509;AGIWUR20220;AGIWUR33609;AGIWUR35010  
 N2 CT III 8234526 8235543 WBGene00044445 C02F5.14 C02F5.14 -0.217874525204651  
 AGIWUR3399;AGIWUR8250;AGIWUR16249;AGIWUR19857;AGIWUR33544;AGIWUR37801  
 N2 CT III 8236126 8236908 WBGene00015348 C02F5.5 C02F5.5 0.402702933334602 AGIWUR24696  
 N2 CT III 8236984 8237881 WBGene00006628 tsp-2 C02F5.11 -0.0140592473811165  
 AGIWUR37744;AGIWUR39045  
 N2 CT III 8237995 8239423 WBGene00006627 tsp-1 C02F5.8 -0.0235438240518882 AGIWUR1230  
 N2 CT III 8240872 8243029 WBGene00015352 C02F5.12 C02F5.12 -0.100027515847527  
 AGIWUR8531  
 N2 CT III 8243122 8244092 WBGene00003952 pbs-6 C02F5.9 0.00730072248977187  
 AGIWUR1154;AGIWUR35929  
 N2 CT III 8244445 8245794 WBGene00015347 cids-1 C02F5.4 -0.162031531946383 AGIWUR42649  
 N2 CT III 8245891 8247258 WBGene00015346 C02F5.3 C02F5.3 -0.0650842618260619 AGIWUR2618  
 N2 CT III 8247351 8248814 WBGene00015353 C02F5.13 C02F5.13 -0.139088741791637  
 AGIWUR12182  
 N2 CT III 8248685 8249512 WBGene00015351 C02F5.10 C02F5.10 0.182984669349626  
 AGIWUR11304  
 N2 CT III 8249619 8250193 WBGene00015345 C02F5.2 C02F5.2 0.0425968278259692  
 AGIWUR134;AGIWUR4847;AGIWUR16620;AGIWUR19511;AGIWUR28543;AGIWUR31316  
 N2 CT III 8250636 8254286 WBGene00002231 kn1-1 C02F5.1 0.1034563192347 AGIWUR21785  
 N2 CT III 8254975 8257638 WBGene00017320 F09G8.5 F09G8.5 -0.384359787388409 AGIWUR1808  
 N2 CT III 8258345 8265805 WBGene00003562 ncr-2 F09G8.4 0.237396599742635 AGIWUR10674  
 N2 CT III 8266062 8267841 WBGene00017319 mrps-9 F09G8.3 -0.0714980872707045 AGIWUR33013  
 N2 CT III 8267921 8268355 WBGene00017321 F09G8.7 F09G8.7 0.161831815409773  
 AGIWUR5913;AGIWUR16944;AGIWUR22226;AGIWUR22263;AGIWUR22551;AGIWUR34486  
 N2 CT III 8268609 8270680 WBGene00007056 crn-7 F09G8.2 -0.136816203838579 AGIWUR29025  
 N2 CT III 8272960 8275971 WBGene00017322 clec-160 F09G8.8 0.118819866571016  
 AGIWUR31776  
 N2 CT III 8279108 8305832 WBGene00003243 mig-10 F10E9.6 0.152339744145456  
 AGIWUR9097;AGIWUR10503;AGIWUR26773  
 N2 CT III 8305733 8326818 WBGene00017358 F10E9.7 F10E9.7 -0.306064874722722 AGIWUR4437  
 N2 CT III 8326516 8330947 WBGene00022580 ig1r-2 ZC262.3 -0.0743426751275216  
 AGIWUR8953;AGIWUR24237;AGIWUR26998  
 N2 CT III 8331047 8331919 WBGene00022583 mrps-18A ZC262.8 -0.211655868584556

|                                                                                                             |    |     |         |         |                |          |          |                     |             |
|-------------------------------------------------------------------------------------------------------------|----|-----|---------|---------|----------------|----------|----------|---------------------|-------------|
| AGIWUR27397                                                                                                 |    |     |         |         |                |          |          |                     |             |
| N2                                                                                                          | CT | III | 8332223 | 8333572 | WBGene00022579 | ZC262.2  | ZC262.2  | -0.0601499597538817 |             |
| AGIWUR6868;AGIWUR9361;AGIWUR12810;AGIWUR18704;AGIWUR34135;AGIWUR42356                                       |    |     |         |         |                |          |          |                     |             |
| N2                                                                                                          | CT | III | 8333663 | 8334233 | WBGene00022581 | ZC262.4  | ZC262.4  | 0.137251628230988   | AGIWUR15636 |
| N2                                                                                                          | CT | III | 8351249 | 8355174 | WBGene00006840 | unc-116  | R05D3.7  | 0.0775039139179876  |             |
| AGIWUR1060;AGIWUR21329                                                                                      |    |     |         |         |                |          |          |                     |             |
| N2                                                                                                          | CT | III | 8356887 | 8358844 | WBGene00019881 | R05D3.8  | R05D3.8  | -0.0165193659079295 |             |
| AGIWUR1460;AGIWUR10567                                                                                      |    |     |         |         |                |          |          |                     |             |
| N2                                                                                                          | CT | III | 8358625 | 8362496 | WBGene00007008 | rfp-1    | R05D3.4  | 0.215456791347711   | AGIWUR37669 |
| N2                                                                                                          | CT | III | 8362408 | 8368848 | WBGene00019882 | R05D3.9  | R05D3.9  | 0.104110996582779   |             |
| AGIWUR23033;AGIWUR30286                                                                                     |    |     |         |         |                |          |          |                     |             |
| N2                                                                                                          | CT | III | 8372255 | 8375175 | WBGene00019877 | R05D3.2  | R05D3.2  | 0.0324248774598335  |             |
| AGIWUR4020;AGIWUR13106;AGIWUR43656                                                                          |    |     |         |         |                |          |          |                     |             |
| N2                                                                                                          | CT | III | 8375300 | 8380833 | WBGene00019883 | met-2    | R05D3.11 | -0.0318973525643464 |             |
| AGIWUR27065                                                                                                 |    |     |         |         |                |          |          |                     |             |
| N2                                                                                                          | CT | III | 8380943 | 8387529 | WBGene00019884 | R05D3.12 | R05D3.12 | -0.120575700342047  |             |
| AGIWUR9424;AGIWUR40415                                                                                      |    |     |         |         |                |          |          |                     |             |
| N2                                                                                                          | CT | III | 8388466 | 8389639 | WBGene00022700 | ZK353.4  | ZK353.4  | 0.133887982825531   | AGIWUR10980 |
| N2                                                                                                          | CT | III | 8389882 | 8394424 | WBGene00044677 | ZK353.10 | ZK353.10 | -0.0818415017437886 |             |
| AGIWUR43758                                                                                                 |    |     |         |         |                |          |          |                     |             |
| N2                                                                                                          | CT | III | 8395985 | 8396727 | WBGene00022699 | ZK353.3  | ZK353.3  | 0.0794231780370414  |             |
| AGIWUR7042;AGIWUR10899;AGIWUR11298;AGIWUR16527;AGIWUR22949                                                  |    |     |         |         |                |          |          |                     |             |
| N2                                                                                                          | CT | III | 8398711 | 8399240 | WBGene00022698 | ZK353.2  | ZK353.2  | -0.0890956387549853 | AGIWUR43243 |
| N2                                                                                                          | CT | III | 8399190 | 8401928 | WBGene00002249 | lap-1    | ZK353.6  | 0.250809437384009   |             |
| AGIWUR19824;AGIWUR21981;AGIWUR31549                                                                         |    |     |         |         |                |          |          |                     |             |
| N2                                                                                                          | CT | III | 8402049 | 8403607 | WBGene00022702 | cutc-1   | ZK353.7  | -0.0659742187042216 |             |
| AGIWUR11611;AGIWUR15249;AGIWUR19716;AGIWUR22359;AGIWUR28520;AGIWUR30902;AGIWUR34334;AGIWUR35842;AGIWUR37404 |    |     |         |         |                |          |          |                     |             |
| N2                                                                                                          | CT | III | 8403715 | 8405562 | WBGene00022703 | ubxn-4   | ZK353.8  | 0.046689278953151   | AGIWUR17659 |
| N2                                                                                                          | CT | III | 8405874 | 8409406 | WBGene00022697 | cyy-1    | ZK353.1  | -0.082951170805555  |             |
| AGIWUR158;AGIWUR1847;AGIWUR4594;AGIWUR6679;AGIWUR26066;AGIWUR33796                                          |    |     |         |         |                |          |          |                     |             |
| N2                                                                                                          | CT | III | 8409496 | 8412017 | WBGene00022704 | ZK353.9  | ZK353.9  | -0.164827329044135  | AGIWUR9955  |
| N2                                                                                                          | CT | III | 8416227 | 8422650 | WBGene00023405 | sor-1    | ZK1236.3 | -0.0679920345363012 |             |
| AGIWUR14064                                                                                                 |    |     |         |         |                |          |          |                     |             |
| N2                                                                                                          | CT | III | 8426334 | 8428583 | WBGene00000414 | cec-1    | ZK1236.2 | 0.0898682228212238  |             |
| AGIWUR35155                                                                                                 |    |     |         |         |                |          |          |                     |             |
| N2                                                                                                          | CT | III | 8429307 | 8431586 | WBGene00022862 | ZK1236.1 | ZK1236.1 | -0.230164654313285  |             |
| AGIWUR10904                                                                                                 |    |     |         |         |                |          |          |                     |             |
| N2                                                                                                          | CT | III | 8431552 | 8432214 | WBGene00022864 | ZK1236.5 | ZK1236.5 | -0.165355596019365  |             |
| AGIWUR44607                                                                                                 |    |     |         |         |                |          |          |                     |             |



|                                                                                 |    |     |         |         |                |          |          |                     |             |
|---------------------------------------------------------------------------------|----|-----|---------|---------|----------------|----------|----------|---------------------|-------------|
| N2                                                                              | CT | III | 8432469 | 8435174 | WBGene00044588 | ZK1236.9 | ZK1236.9 | -0.2216382757146    |             |
| AGIWUR16787;AGIWUR29697                                                         |    |     |         |         |                |          |          |                     |             |
| N2                                                                              | CT | III | 8436700 | 8437811 | WBGene00023223 | ZK1236.8 | ZK1236.8 |                     |             |
| -0.00610365557800208 AGIWUR5337;AGIWUR11160;AGIWUR24137;AGIWUR26002;AGIWUR37523 |    |     |         |         |                |          |          |                     |             |
| N2                                                                              | CT | III | 8438061 | 8439412 | WBGene00004175 | pqn-96   | ZK1236.6 | 0.0271453996644198  |             |
| AGIWUR25763                                                                     |    |     |         |         |                |          |          |                     |             |
| N2                                                                              | CT | III | 8439468 | 8443607 | WBGene00022865 | ufbp-1   | ZK1236.7 | -0.126150949495088  |             |
| AGIWUR21809;AGIWUR40300;AGIWUR43834                                             |    |     |         |         |                |          |          |                     |             |
| N2                                                                              | CT | III | 8443917 | 8446920 | WBGene00016250 | hsp-110  | C30C11.4 | 0.220975619513996   |             |
| AGIWUR13298;AGIWUR24695;AGIWUR24876                                             |    |     |         |         |                |          |          |                     |             |
| N2                                                                              | CT | III | 8447353 | 8449346 | WBGene00004460 | rpn-3    | C30C11.2 | -0.111565465084178  |             |
| AGIWUR40229                                                                     |    |     |         |         |                |          |          |                     |             |
| N2                                                                              | CT | III | 8449757 | 8450519 | WBGene00016249 | mrp1-32  | C30C11.1 | -0.244731591722509  |             |
| AGIWUR42312                                                                     |    |     |         |         |                |          |          |                     |             |
| N2                                                                              | CT | III | 8467035 | 8478377 | WBGene00018369 | mig-39   | F42H10.5 | -0.335165179499294  |             |
| AGIWUR20369                                                                     |    |     |         |         |                |          |          |                     |             |
| N2                                                                              | CT | III | 8478382 | 8480455 | WBGene00018370 | F42H10.6 | F42H10.6 | -0.0964672731593872 |             |
| AGIWUR13388                                                                     |    |     |         |         |                |          |          |                     |             |
| N2                                                                              | CT | III | 8484153 | 8488365 | WBGene00018367 | F42H10.3 | F42H10.3 | 0.105661925512599   |             |
| AGIWUR11127;AGIWUR40428                                                         |    |     |         |         |                |          |          |                     |             |
| N2                                                                              | CT | III | 8488344 | 8490347 | WBGene00018371 | ess-2    | F42H10.7 | 0.0782152660502682  |             |
| AGIWUR20825                                                                     |    |     |         |         |                |          |          |                     |             |
| N2                                                                              | CT | III | 8490624 | 8491097 | WBGene00018366 | F42H10.2 | F42H10.2 | -0.177309864517659  |             |
| AGIWUR6373                                                                      |    |     |         |         |                |          |          |                     |             |
| N2                                                                              | CT | III | 8493878 | 8518879 | WBGene00015418 | pac-1    | C04D8.1  | 0.124352006289053   |             |
| AGIWUR8499;AGIWUR21807                                                          |    |     |         |         |                |          |          |                     |             |
| N2                                                                              | CT | III | 8518904 | 8519945 | WBGene00022507 | ZC21.8   | ZC21.8   | 0.228102475444942   | AGIWUR36373 |
| N2                                                                              | CT | III | 8525073 | 8528650 | WBGene00022505 | ZC21.3   | ZC21.3   | 0.0658386330943035  |             |
| AGIWUR6744;AGIWUR18379;AGIWUR21048;AGIWUR26702;AGIWUR33777;AGIWUR41319          |    |     |         |         |                |          |          |                     |             |
| N2                                                                              | CT | III | 8530077 | 8531123 | WBGene00044443 | ZC21.10  | ZC21.10  | -0.107609789332139  |             |
| AGIWUR25900;AGIWUR30228;AGIWUR41931                                             |    |     |         |         |                |          |          |                     |             |
| N2                                                                              | CT | III | 8535131 | 8542748 | WBGene00006614 | trp-1    | ZC21.2   | -0.0335908302630266 | AGIWUR12908 |
| N2                                                                              | CT | III | 8542952 | 8545608 | WBGene00022506 | ZC21.6   | ZC21.6   | 0.0629555571658535  | AGIWUR43550 |
| N2                                                                              | CT | III | 8552555 | 8553839 | WBGene00043097 | C02D5.4  | C02D5.4  | -0.0327063607551388 |             |
| AGIWUR11444;AGIWUR40140;AGIWUR42459                                             |    |     |         |         |                |          |          |                     |             |
| N2                                                                              | CT | III | 8554772 | 8555821 | WBGene00015337 | gst-2    | C02D5.3  | 0.0537736745401656  |             |
| AGIWUR16755;AGIWUR36587;AGIWUR38455                                             |    |     |         |         |                |          |          |                     |             |
| N2                                                                              | CT | III | 8557335 | 8559194 | WBGene00015336 | C02D5.2  | C02D5.2  | 0.0845526979978644  | AGIWUR27961 |
| N2                                                                              | CT | III | 8561136 | 8563026 | WBGene00015335 | acd-6    | C02D5.1  | 0.0379191645770547  | AGIWUR2682  |

|                                                                                                             |    |     |         |         |                |          |          |                       |             |
|-------------------------------------------------------------------------------------------------------------|----|-----|---------|---------|----------------|----------|----------|-----------------------|-------------|
| N2                                                                                                          | CT | III | 8581102 | 8583928 | WBGene00015519 | doxa-1   | C06E1.3  | -0.0269937439150514   | AGIWUR20889 |
| N2                                                                                                          | CT | III | 8584186 | 8588642 | WBGene00001612 | glr-1    | C06E1.4  | -8.50720038521047e-05 | AGIWUR5066  |
| N2                                                                                                          | CT | III | 8589336 | 8589488 | WBGene00015520 | fip-3    | C06E1.5  | 0.128065973037362     | AGIWUR5323  |
| N2                                                                                                          | CT | III | 8590833 | 8590982 | WBGene00015521 | fipr-16  | C06E1.6  | -0.0196993461944874   |             |
| AGIWUR15253;AGIWUR15387;AGIWUR16496;AGIWUR18026;AGIWUR21580;AGIWUR34124                                     |    |     |         |         |                |          |          |                       |             |
| N2                                                                                                          | CT | III | 8591239 | 8593720 | WBGene00015522 | C06E1.7  | C06E1.7  | 0.224234378247115     | AGIWUR10879 |
| N2                                                                                                          | CT | III | 8595339 | 8597870 | WBGene00015523 | ztf-30   | C06E1.8  | 0.139029768414006     | AGIWUR16028 |
| N2                                                                                                          | CT | III | 8605832 | 8606622 | WBGene00015518 | C06E1.1  | C06E1.1  | -0.100068042804097    |             |
| AGIWUR2461;AGIWUR14714;AGIWUR20169;AGIWUR35713                                                              |    |     |         |         |                |          |          |                       |             |
| N2                                                                                                          | CT | III | 8609882 | 8614569 | WBGene00015525 | rha-2    | C06E1.10 | -0.0895853931745876   |             |
| AGIWUR2692;AGIWUR15564;AGIWUR31321                                                                          |    |     |         |         |                |          |          |                       |             |
| N2                                                                                                          | CT | III | 8614762 | 8616381 | WBGene00015526 | C06E1.11 | C06E1.11 | -0.359946302489434    |             |
| AGIWUR14844                                                                                                 |    |     |         |         |                |          |          |                       |             |
| N2                                                                                                          | CT | III | 8616781 | 8626917 | WBGene00015747 | C13G5.2  | C13G5.2  | -0.120002923060746    | AGIWUR17169 |
| N2                                                                                                          | CT | III | 8626291 | 8628571 | WBGene00017696 | polk-1   | F22B7.6  | -0.0522527264018642   |             |
| AGIWUR4510;AGIWUR37658;AGIWUR39072                                                                          |    |     |         |         |                |          |          |                       |             |
| N2                                                                                                          | CT | III | 8631165 | 8633549 | WBGene00001028 | dnj-10   | F22B7.5  | -0.172661475086512    |             |
| AGIWUR815;AGIWUR6507;AGIWUR26820;AGIWUR28613                                                                |    |     |         |         |                |          |          |                       |             |
| N2                                                                                                          | CT | III | 8634078 | 8643739 | WBGene00006662 | twk-7    | F22B7.7  | -0.0213947784529704   |             |
| AGIWUR395;AGIWUR39525                                                                                       |    |     |         |         |                |          |          |                       |             |
| N2                                                                                                          | CT | III | 8648889 | 8649477 | WBGene00017694 | F22B7.3  | F22B7.3  | -0.0254631758539432   | AGIWUR43782 |
| N2                                                                                                          | CT | III | 8650764 | 8652190 | WBGene00017693 | f1p-23   | F22B7.2  | 0.125741612575304     |             |
| AGIWUR4182;AGIWUR16416;AGIWUR16449;AGIWUR17359;AGIWUR25271;AGIWUR29653;AGIWUR30956;AGIWUR37005;AGIWUR42211; |    |     |         |         |                |          |          |                       |             |
| AGIWUR43285                                                                                                 |    |     |         |         |                |          |          |                       |             |
| N2                                                                                                          | CT | III | 8652578 | 8653925 | WBGene00017698 | F22B7.9  | F22B7.9  | 0.0428437338044785    |             |
| AGIWUR3277;AGIWUR19821;AGIWUR23277;AGIWUR25110;AGIWUR27887;AGIWUR28497                                      |    |     |         |         |                |          |          |                       |             |
| N2                                                                                                          | CT | III | 8659872 | 8667482 | WBGene00001078 | dpy-19   | F22B7.10 | -0.237304837849246    |             |
| AGIWUR34986                                                                                                 |    |     |         |         |                |          |          |                       |             |
| N2                                                                                                          | CT | III | 8670543 | 8675051 | WBGene00003993 | pgl-2    | B0523.3  | -0.0142507374507819   | AGIWUR18234 |
| N2                                                                                                          | CT | III | 8675297 | 8683732 | WBGene00001443 | fli-1    | B0523.5  | -0.187967664832016    |             |
| AGIWUR4414;AGIWUR25594;AGIWUR32485                                                                          |    |     |         |         |                |          |          |                       |             |
| N2                                                                                                          | CT | III | 8686118 | 8688457 | WBGene00015125 | B0303.3  | B0303.3  | -0.00876573775113432  |             |
| AGIWUR2262;AGIWUR10093;AGIWUR21243;AGIWUR36276                                                              |    |     |         |         |                |          |          |                       |             |
| N2                                                                                                          | CT | III | 8689850 | 8693473 | WBGene00015126 | B0303.4  | B0303.4  | 0.110340605981811     | AGIWUR16137 |
| N2                                                                                                          | CT | III | 8693638 | 8699497 | WBGene00015128 | B0303.7  | B0303.7  | -0.108972760378474    | AGIWUR39808 |
| N2                                                                                                          | CT | III | 8699481 | 8700333 | WBGene00015129 | sdz-1    | B0303.8  | -0.171614593477605    | AGIWUR26442 |
| N2                                                                                                          | CT | III | 8700927 | 8703341 | WBGene00015130 | vps-33.1 | B0303.9  | 0.039883515362213     |             |
| AGIWUR13675                                                                                                 |    |     |         |         |                |          |          |                       |             |
| N2                                                                                                          | CT | III | 8703300 | 8710410 | WBGene00015131 | B0303.11 | B0303.11 | 0.0486038270719042    |             |

|                                                                                              |    |     |         |         |                |          |          |                     |             |
|----------------------------------------------------------------------------------------------|----|-----|---------|---------|----------------|----------|----------|---------------------|-------------|
| AGIWUR39482                                                                                  |    |     |         |         |                |          |          |                     |             |
| N2                                                                                           | CT | III | 8713993 | 8716184 | WBGene00015132 | B0303.14 | B0303.14 | -0.331689327155818  |             |
| AGIWUR29492                                                                                  |    |     |         |         |                |          |          |                     |             |
| N2                                                                                           | CT | III | 8717644 | 8718567 | WBGene00015133 | mrpl-11  | B0303.15 | -0.0507830703464549 |             |
| AGIWUR38117;AGIWUR41229                                                                      |    |     |         |         |                |          |          |                     |             |
| N2                                                                                           | CT | III | 8720201 | 8725334 | WBGene00022717 | hipr-1   | ZK370.3  | 0.0355365194996544  | AGIWUR1623  |
| N2                                                                                           | CT | III | 8725323 | 8731373 | WBGene00022718 | ZK370.4  | ZK370.4  | 0.304853872214886   |             |
| AGIWUR393;AGIWUR13330;AGIWUR23503;AGIWUR25689;AGIWUR29681;AGIWUR34771;AGIWUR35829            |    |     |         |         |                |          |          |                     |             |
| N2                                                                                           | CT | III | 8737686 | 8741412 | WBGene00022719 | pdhk-2   | ZK370.5  | -0.0632571606329222 | AGIWUR9815  |
| N2                                                                                           | CT | III | 8742007 | 8743842 | WBGene00022720 | ZK370.6  | ZK370.6  | -0.0349539351901376 | AGIWUR11574 |
| N2                                                                                           | CT | III | 8746216 | 8748701 | WBGene00022721 | ugtp-1   | ZK370.7  | 0.046061296882316   | AGIWUR25896 |
| N2                                                                                           | CT | III | 8749763 | 8757069 | WBGene00004856 | sma-2    | ZK370.2  | -0.243176960278857  | AGIWUR33081 |
| N2                                                                                           | CT | III | 8756995 | 8761101 | WBGene00019801 | aak-1    | PAR2.3   | -0.136076772512846  |             |
| AGIWUR5774;AGIWUR7517;AGIWUR34094                                                            |    |     |         |         |                |          |          |                     |             |
| N2                                                                                           | CT | III | 8763291 | 8767342 | WBGene00003253 | mig-22   | PAR2.4   | -0.136941802772148  |             |
| AGIWUR7118;AGIWUR40525                                                                       |    |     |         |         |                |          |          |                     |             |
| N2                                                                                           | CT | III | 8768311 | 8769252 | WBGene00019800 | mtss-1   | PAR2.1   | -0.164522776454572  | AGIWUR33250 |
| N2                                                                                           | CT | III | 8769502 | 8776141 | WBGene00019301 | K02D10.1 | K02D10.1 | 0.0787769415652289  |             |
| AGIWUR3144;AGIWUR5099;AGIWUR7470;AGIWUR11325;AGIWUR18329;AGIWUR25715;AGIWUR39553;AGIWUR42939 |    |     |         |         |                |          |          |                     |             |
| N2                                                                                           | CT | III | 8776183 | 8777895 | WBGene00019305 | snap-29  | K02D10.5 | -0.0188564203320656 |             |
| AGIWUR2012                                                                                   |    |     |         |         |                |          |          |                     |             |
| N2                                                                                           | CT | III | 8777890 | 8780012 | WBGene00019304 | K02D10.4 | K02D10.4 | -0.0886283377741677 |             |
| AGIWUR11635;AGIWUR12464;AGIWUR16357                                                          |    |     |         |         |                |          |          |                     |             |
| N2                                                                                           | CT | III | 8787092 | 8792346 | WBGene00018833 | ztf-1    | F54F2.5  | -0.045906273832272  |             |
| AGIWUR12987;AGIWUR35878                                                                      |    |     |         |         |                |          |          |                     |             |
| N2                                                                                           | CT | III | 8792847 | 8806305 | WBGene00006975 | zfp-1    | F54F2.2  | 0.159063464440523   |             |
| AGIWUR16269;AGIWUR28175                                                                      |    |     |         |         |                |          |          |                     |             |
| N2                                                                                           | CT | III | 8806231 | 8807346 | WBGene00018835 | F54F2.7  | F54F2.7  | -0.320956594197675  | AGIWUR45086 |
| N2                                                                                           | CT | III | 8807482 | 8809329 | WBGene00004201 | prx-19   | F54F2.8  | 0.0820084663758713  | AGIWUR28794 |
| N2                                                                                           | CT | III | 8818899 | 8825270 | WBGene00003929 | pat-2    | F54F2.1  | 0.0943205015638515  | AGIWUR44985 |
| N2                                                                                           | CT | III | 8825243 | 8827228 | WBGene00018836 | F54F2.9  | F54F2.9  | 0.0210809754341277  | AGIWUR21876 |
| N2                                                                                           | CT | III | 8827358 | 8829305 | WBGene00018417 | F44E2.3  | F44E2.3  | 0.0169846395846909  |             |
| AGIWUR13313;AGIWUR22083                                                                      |    |     |         |         |                |          |          |                     |             |
| N2                                                                                           | CT | III | 8829493 | 8831109 | WBGene00018423 | F44E2.10 | F44E2.10 | -0.260258242537331  |             |
| AGIWUR14243                                                                                  |    |     |         |         |                |          |          |                     |             |
| N2                                                                                           | CT | III | 8832479 | 8838424 | WBGene00018418 | F44E2.4  | F44E2.4  | -0.0493251096058822 | AGIWUR21160 |
| N2                                                                                           | CT | III | 8844494 | 8845214 | WBGene00018419 | F44E2.6  | F44E2.6  | -0.223935744395171  |             |
| AGIWUR15400;AGIWUR16092;AGIWUR16254;AGIWUR16985;AGIWUR34165;AGIWUR38620                      |    |     |         |         |                |          |          |                     |             |
| N2                                                                                           | CT | III | 8845856 | 8848486 | WBGene00018420 | F44E2.7  | F44E2.7  | -0.0167594483392186 |             |

AGIWUR16197;AGIWUR37883;AGIWUR40627

|    |    |     |         |         |                |         |          |                     |             |
|----|----|-----|---------|---------|----------------|---------|----------|---------------------|-------------|
| N2 | CT | III | 8848582 | 8849877 | WBGene00018421 | F44E2.8 | F44E2.8  | -0.0598847224991559 | AGIWUR26871 |
| N2 | CT | III | 8849994 | 8850532 | WBGene00018422 | F44E2.9 | F44E2.9  | -0.373264527181984  | AGIWUR30697 |
| N2 | CT | III | 8852264 | 8864451 | WBGene00004041 | plg-1   | F44E2.11 | 0.0193691427288929  |             |

AGIWUR5095;AGIWUR10027;AGIWUR20923;AGIWUR36446

|    |    |     |         |         |                |         |         |                     |             |
|----|----|-----|---------|---------|----------------|---------|---------|---------------------|-------------|
| N2 | CT | III | 8870099 | 8877128 | WBGene00010475 | K01F9.2 | K01F9.2 | 0.0818023745619438  | AGIWUR30346 |
| N2 | CT | III | 8882707 | 8885482 | WBGene00014021 | svop-1  | ZK637.1 | -0.230827514560186  | AGIWUR11249 |
| N2 | CT | III | 8887751 | 8890143 | WBGene00014022 | ZK637.2 | ZK637.2 | -0.0233692222366582 | AGIWUR45186 |
| N2 | CT | III | 8890231 | 8894208 | WBGene00014023 | lnkn-1  | ZK637.3 | -0.123148443682556  | AGIWUR10243 |
| N2 | CT | III | 8894209 | 8894691 | WBGene00014024 | ZK637.4 | ZK637.4 | -0.221876239184981  | AGIWUR37235 |
| N2 | CT | III | 8895082 | 8896654 | WBGene00014025 | asna-1  | ZK637.5 | 0.0220982680683903  | AGIWUR17798 |
| N2 | CT | III | 8898622 | 8899530 | WBGene00014987 | ZK637.6 | ZK637.6 | -0.105398016463615  |             |

AGIWUR11772;AGIWUR16118

|    |    |     |         |         |                |       |         |                    |  |
|----|----|-----|---------|---------|----------------|-------|---------|--------------------|--|
| N2 | CT | III | 8900237 | 8904160 | WBGene00002998 | lin-9 | ZK637.7 | -0.065757914351229 |  |
|----|----|-----|---------|---------|----------------|-------|---------|--------------------|--|

AGIWUR7682;AGIWUR11606;AGIWUR14623

|    |    |     |         |         |                |        |         |                   |  |
|----|----|-----|---------|---------|----------------|--------|---------|-------------------|--|
| N2 | CT | III | 8905615 | 8911749 | WBGene00006768 | unc-32 | ZK637.8 | 0.181362127995421 |  |
|----|----|-----|---------|---------|----------------|--------|---------|-------------------|--|

AGIWUR30237;AGIWUR33688;AGIWUR37194

|    |    |     |         |         |                |       |         |                    |  |
|----|----|-----|---------|---------|----------------|-------|---------|--------------------|--|
| N2 | CT | III | 8912144 | 8913632 | WBGene00014027 | tpk-1 | ZK637.9 | -0.107313078486738 |  |
|----|----|-----|---------|---------|----------------|-------|---------|--------------------|--|

AGIWUR23783;AGIWUR40284;AGIWUR42847

|    |    |     |         |         |                |        |          |                    |  |
|----|----|-----|---------|---------|----------------|--------|----------|--------------------|--|
| N2 | CT | III | 8913769 | 8916450 | WBGene00014028 | trxr-2 | ZK637.10 | -0.164743032757158 |  |
|----|----|-----|---------|---------|----------------|--------|----------|--------------------|--|

AGIWUR2437

|    |    |     |         |         |                |          |          |                    |  |
|----|----|-----|---------|---------|----------------|----------|----------|--------------------|--|
| N2 | CT | III | 8916351 | 8917929 | WBGene00000388 | cdc-25.3 | ZK637.11 | -0.208569874665049 |  |
|----|----|-----|---------|---------|----------------|----------|----------|--------------------|--|

AGIWUR1926

|    |    |     |         |         |                |          |          |                   |  |
|----|----|-----|---------|---------|----------------|----------|----------|-------------------|--|
| N2 | CT | III | 8922292 | 8925302 | WBGene00014029 | ZK637.12 | ZK637.12 | 0.287353366489359 |  |
|----|----|-----|---------|---------|----------------|----------|----------|-------------------|--|

AGIWUR11063

|    |    |     |         |         |                |         |         |                    |             |
|----|----|-----|---------|---------|----------------|---------|---------|--------------------|-------------|
| N2 | CT | III | 8925607 | 8926529 | WBGene00014038 | ZK643.7 | ZK643.7 | 0.0326166820102358 | AGIWUR30593 |
|----|----|-----|---------|---------|----------------|---------|---------|--------------------|-------------|

|    |    |     |         |         |                |         |         |                     |            |
|----|----|-----|---------|---------|----------------|---------|---------|---------------------|------------|
| N2 | CT | III | 8930036 | 8936682 | WBGene00014033 | arrd-15 | ZK643.1 | -0.0983624559140797 | AGIWUR3131 |
|----|----|-----|---------|---------|----------------|---------|---------|---------------------|------------|

|    |    |     |         |         |                |       |         |                   |  |
|----|----|-----|---------|---------|----------------|-------|---------|-------------------|--|
| N2 | CT | III | 8944686 | 8952953 | WBGene00014035 | seb-2 | ZK643.3 | 0.106313456178897 |  |
|----|----|-----|---------|---------|----------------|-------|---------|-------------------|--|

AGIWUR21977;AGIWUR41246;AGIWUR42198

|    |    |     |         |         |                |         |         |                   |            |
|----|----|-----|---------|---------|----------------|---------|---------|-------------------|------------|
| N2 | CT | III | 8952886 | 8956216 | WBGene00014036 | ZK643.5 | ZK643.5 | -0.20393140499136 | AGIWUR1264 |
|----|----|-----|---------|---------|----------------|---------|---------|-------------------|------------|

|    |    |     |         |         |                |         |         |                    |            |
|----|----|-----|---------|---------|----------------|---------|---------|--------------------|------------|
| N2 | CT | III | 8956459 | 8957731 | WBGene00014034 | ZK643.2 | ZK643.2 | -0.291013590111838 | AGIWUR7832 |
|----|----|-----|---------|---------|----------------|---------|---------|--------------------|------------|

|    |    |     |         |         |                |         |         |                   |             |
|----|----|-----|---------|---------|----------------|---------|---------|-------------------|-------------|
| N2 | CT | III | 8957704 | 8960693 | WBGene00014037 | ZK643.6 | ZK643.6 | -1.11994659195076 | AGIWUR15236 |
|----|----|-----|---------|---------|----------------|---------|---------|-------------------|-------------|

|    |    |     |         |         |                |        |         |                    |             |
|----|----|-----|---------|---------|----------------|--------|---------|--------------------|-------------|
| N2 | CT | III | 8962295 | 8965638 | WBGene00001734 | grl-25 | ZK643.8 | -0.275471296073242 | AGIWUR45029 |
|----|----|-----|---------|---------|----------------|--------|---------|--------------------|-------------|

|    |    |     |         |         |                |         |         |                    |             |
|----|----|-----|---------|---------|----------------|---------|---------|--------------------|-------------|
| N2 | CT | III | 8966022 | 8967727 | WBGene00011142 | R08D7.1 | R08D7.1 | -0.232203554431051 | AGIWUR42741 |
|----|----|-----|---------|---------|----------------|---------|---------|--------------------|-------------|

|    |    |     |         |         |                |         |         |                    |            |
|----|----|-----|---------|---------|----------------|---------|---------|--------------------|------------|
| N2 | CT | III | 8967917 | 8969658 | WBGene00011143 | R08D7.2 | R08D7.2 | -0.218204076482564 | AGIWUR1150 |
|----|----|-----|---------|---------|----------------|---------|---------|--------------------|------------|

|    |    |     |         |         |                |         |         |                   |  |
|----|----|-----|---------|---------|----------------|---------|---------|-------------------|--|
| N2 | CT | III | 8969638 | 8971578 | WBGene00001227 | eif-3.D | R08D7.3 | 0.220008325651562 |  |
|----|----|-----|---------|---------|----------------|---------|---------|-------------------|--|

AGIWUR1208;AGIWUR4378;AGIWUR22575;AGIWUR33307;AGIWUR34559;AGIWUR43455

|    |    |     |         |         |                |         |         |                    |  |
|----|----|-----|---------|---------|----------------|---------|---------|--------------------|--|
| N2 | CT | III | 8971892 | 8973672 | WBGene00011144 | R08D7.4 | R08D7.4 | -0.250152459078498 |  |
|----|----|-----|---------|---------|----------------|---------|---------|--------------------|--|

AGIWUR13868;AGIWUR41913

|                                                                                            |    |     |         |         |                |          |         |                     |                    |
|--------------------------------------------------------------------------------------------|----|-----|---------|---------|----------------|----------|---------|---------------------|--------------------|
| N2                                                                                         | CT | III | 8974126 | 8975061 | WBGene00011145 | R08D7.5  | R08D7.5 | -0.080631152342157  | AGIWUR41124        |
| N2                                                                                         | CT | III | 8975070 | 8981897 | WBGene00011146 | pde-2    | R08D7.6 | -0.0419985052336642 |                    |
| AGIWUR20156;AGIWUR22060;AGIWUR24440;AGIWUR33393                                            |    |     |         |         |                |          |         |                     |                    |
| N2                                                                                         | CT | III | 8992205 | 8994827 | WBGene00011147 | R08D7.7  | R08D7.7 | -0.0471691524791122 | AGIWUR24736        |
| N2                                                                                         | CT | III | 8996418 | 8999785 | WBGene00010308 | F59B2.3  | F59B2.3 | 0.146691696826232   |                    |
| AGIWUR2749;AGIWUR3789;AGIWUR8329;AGIWUR22566;AGIWUR25535;AGIWUR35192                       |    |     |         |         |                |          |         |                     |                    |
| N2                                                                                         | CT | III | 8999828 | 9001973 | WBGene00010309 | rpn-6.2  | F59B2.5 | -0.0199786857248796 | AGIWUR44151        |
| N2                                                                                         | CT | III | 9002779 | 9004839 | WBGene00006977 | zif-1    | F59B2.6 | -0.0655031960614387 | AGIWUR43029        |
| N2                                                                                         | CT | III | 9004821 | 9005955 | WBGene00004269 | rab-6.1  | F59B2.7 | -0.186532161426459  |                    |
| AGIWUR5493;AGIWUR6537;AGIWUR18805;AGIWUR36400;AGIWUR44152                                  |    |     |         |         |                |          |         |                     |                    |
| N2                                                                                         | CT | III | 9007974 | 9010121 | WBGene00010310 | F59B2.8  | F59B2.8 | -0.0717656732341734 | AGIWUR43386        |
| N2                                                                                         | CT | III | 9010676 | 9012409 | WBGene00010311 | F59B2.9  | F59B2.9 | -0.017054024885093  |                    |
| AGIWUR8241;AGIWUR25616;AGIWUR28441                                                         |    |     |         |         |                |          |         |                     |                    |
| N2                                                                                         | CT | III | 9013003 | 9016961 | WBGene00010313 | F59B2.11 |         | F59B2.11            |                    |
| -0.00350307014419293 AGIWUR5273;AGIWUR14502;AGIWUR15535                                    |    |     |         |         |                |          |         |                     |                    |
| N2                                                                                         | CT | III | 9017607 | 9020960 | WBGene00010314 | F59B2.12 |         | F59B2.12            | -0.366257661052092 |
| AGIWUR35085                                                                                |    |     |         |         |                |          |         |                     |                    |
| N2                                                                                         | CT | III | 9021370 | 9022635 | WBGene00050931 | F59B2.14 |         | F59B2.14            | 0.319374076594676  |
| AGIWUR25458;AGIWUR30439;AGIWUR39247                                                        |    |     |         |         |                |          |         |                     |                    |
| N2                                                                                         | CT | III | 9023964 | 9027044 | WBGene00010315 | F59B2.13 |         | F59B2.13            | 0.0833963622066918 |
| AGIWUR39438                                                                                |    |     |         |         |                |          |         |                     |                    |
| N2                                                                                         | CT | III | 9038779 | 9043300 | WBGene00003518 | nac-2    | R107.1  | -0.0581637051913582 | AGIWUR17074        |
| N2                                                                                         | CT | III | 9043886 | 9045938 | WBGene00011298 | R107.2   | R107.2  | -0.237225514270342  | AGIWUR29941        |
| N2                                                                                         | CT | III | 9046055 | 9050693 | WBGene00011299 | ikke-1   | R107.4  | 0.0607364095881255  |                    |
| AGIWUR24852;AGIWUR26951                                                                    |    |     |         |         |                |          |         |                     |                    |
| N2                                                                                         | CT | III | 9051592 | 9053793 | WBGene00011300 | R107.5   | R107.5  | -0.0880647656353215 |                    |
| AGIWUR19646;AGIWUR26520                                                                    |    |     |         |         |                |          |         |                     |                    |
| N2                                                                                         | CT | III | 9055052 | 9058882 | WBGene00000549 | cls-2    | R107.6  | 0.178414718520568   | AGIWUR39897        |
| N2                                                                                         | CT | III | 9059314 | 9060181 | WBGene00001749 | gst-1    | R107.7  | -0.0762729782247753 | AGIWUR24754        |
| N2                                                                                         | CT | III | 9060096 | 9071760 | WBGene00003001 | lin-12   | R107.8  | -0.0359546429473134 | AGIWUR31911        |
| N2                                                                                         | CT | III | 9074872 | 9075639 | WBGene00044406 | F02A9.7  | F02A9.7 | -0.0162698407483095 | AGIWUR800          |
| N2                                                                                         | CT | III | 9075726 | 9077804 | WBGene00008513 | F02A9.1  | F02A9.1 | -0.192740806757887  |                    |
| AGIWUR6275;AGIWUR14081;AGIWUR19721;AGIWUR31244;AGIWUR37134                                 |    |     |         |         |                |          |         |                     |                    |
| N2                                                                                         | CT | III | 9080371 | 9081179 | WBGene00001385 | far-1    | F02A9.2 | 0.0342217686622455  |                    |
| AGIWUR9075;AGIWUR11257;AGIWUR19678;AGIWUR20921;AGIWUR23169;AGIWUR26703;AGIWUR42791         |    |     |         |         |                |          |         |                     |                    |
| N2                                                                                         | CT | III | 9081679 | 9082511 | WBGene00001386 | far-2    | F02A9.3 | -0.0298645103370863 |                    |
| AGIWUR6957;AGIWUR13264;AGIWUR15268;AGIWUR31229                                             |    |     |         |         |                |          |         |                     |                    |
| N2                                                                                         | CT | III | 9084306 | 9089386 | WBGene00008514 | F02A9.4  | F02A9.4 | 0.13872721735739    |                    |
| AGIWUR2606;AGIWUR4621;AGIWUR4931;AGIWUR5859;AGIWUR8562;AGIWUR27392;AGIWUR31943;AGIWUR43479 |    |     |         |         |                |          |         |                     |                    |

|                                                |    |     |         |         |                |          |          |                      |             |
|------------------------------------------------|----|-----|---------|---------|----------------|----------|----------|----------------------|-------------|
| N2                                             | CT | III | 9092241 | 9099698 | WBGene00001609 | glp-1    | F02A9.6  | 0.0826837621231924   | AGIWUR41673 |
| N2                                             | CT | III | 9101367 | 9103095 | WBGene00013979 | ZK507.3  | ZK507.3  | 0.157369693602465    | AGIWUR8624  |
| N2                                             | CT | III | 9103943 | 9106805 | WBGene00013980 | dos-1    | ZK507.4  | -0.105371805159358   |             |
| AGIWUR121;AGIWUR22323;AGIWUR25063              |    |     |         |         |                |          |          |                      |             |
| N2                                             | CT | III | 9106702 | 9109272 | WBGene00000863 | cya-1    | ZK507.6  | 0.166289947033846    | AGIWUR31862 |
| N2                                             | CT | III | 9115082 | 9117270 | WBGene00013982 | ZK512.1  | ZK512.1  | -0.400640267468226   | AGIWUR11510 |
| N2                                             | CT | III | 9117349 | 9118364 | WBGene00001720 | grl-11   | ZK512.9  | 0.0412939273706616   | AGIWUR20150 |
| N2                                             | CT | III | 9119559 | 9125153 | WBGene00000425 | ced-11   | ZK512.3  | -0.144134163715353   | AGIWUR9162  |
| N2                                             | CT | III | 9125641 | 9130807 | WBGene00013985 | sec-16   | ZK512.5  | 0.151542059297125    |             |
| AGIWUR8065;AGIWUR12160;AGIWUR25926;AGIWUR42645 |    |     |         |         |                |          |          |                      |             |
| N2                                             | CT | III | 9130844 | 9131360 | WBGene00013988 | ZK512.10 | ZK512.10 | 0.184218985795383    |             |
| AGIWUR14773                                    |    |     |         |         |                |          |          |                      |             |
| N2                                             | CT | III | 9136916 | 9141822 | WBGene00001135 | eat-4    | ZK512.6  | 0.0307414157201062   | AGIWUR15306 |
| N2                                             | CT | III | 9141789 | 9144794 | WBGene00013983 | ZK512.2  | ZK512.2  | 0.151631711936103    |             |
| AGIWUR2192;AGIWUR3650;AGIWUR7066               |    |     |         |         |                |          |          |                      |             |
| N2                                             | CT | III | 9145325 | 9145976 | WBGene00013984 | ZK512.4  | ZK512.4  | -0.25908796912476    | AGIWUR25270 |
| N2                                             | CT | III | 9146031 | 9147411 | WBGene00013987 | ZK512.8  | ZK512.8  | 0.220227516276514    | AGIWUR44998 |
| N2                                             | CT | III | 9147395 | 9153909 | WBGene00003597 | nhl-1    | F54G8.4  | 0.234805564798002    | AGIWUR7367  |
| N2                                             | CT | III | 9155116 | 9157165 | WBGene00010074 | irld-34  | F54G8.1  | -0.231543842411513   | AGIWUR18148 |
| N2                                             | CT | III | 9157243 | 9161653 | WBGene00004223 | ptr-9    | F54G8.5  | 0.189697477741314    | AGIWUR15185 |
| N2                                             | CT | III | 9163077 | 9168027 | WBGene00000960 | dgk-3    | F54G8.2  | 0.165664340604049    | AGIWUR30352 |
| N2                                             | CT | III | 9168040 | 9172802 | WBGene00002081 | ina-1    | F54G8.3  | -0.0492814207186889  | AGIWUR3362  |
| N2                                             | CT | III | 9181550 | 9185649 | WBGene00006526 | tax-4    | ZC84.2   | -0.0780815036197975  | AGIWUR15160 |
| N2                                             | CT | III | 9186077 | 9192951 | WBGene00013850 | ZC84.7   | ZC84.7   | -0.106480125958187   | AGIWUR31325 |
| N2                                             | CT | III | 9192983 | 9199507 | WBGene00013849 | ZC84.6   | ZC84.6   | -0.183433705819763   | AGIWUR6565  |
| N2                                             | CT | III | 9199450 | 9206285 | WBGene00013846 | ZC84.1   | ZC84.1   | 0.0162191485786365   |             |
| AGIWUR1559;AGIWUR10301;AGIWUR12527;AGIWUR22077 |    |     |         |         |                |          |          |                      |             |
| N2                                             | CT | III | 9206966 | 9207854 | WBGene00014980 | ZC84.5   | ZC84.5   | -0.0636913314969609  | AGIWUR15239 |
| N2                                             | CT | III | 9208288 | 9215440 | WBGene00013848 | npr-29   | ZC84.4   | -0.0819556678596882  | AGIWUR25356 |
| N2                                             | CT | III | 9225374 | 9228786 | WBGene00004391 | rnr-1    | T23G5.1  | -0.0930041135584467  |             |
| AGIWUR21235;AGIWUR28652;AGIWUR34624            |    |     |         |         |                |          |          |                      |             |
| N2                                             | CT | III | 9229235 | 9231210 | WBGene00011963 | T23G5.3  | T23G5.3  | 0.028868281629121    | AGIWUR12934 |
| N2                                             | CT | III | 9231421 | 9236322 | WBGene00011962 | T23G5.2  | T23G5.2  | -0.0759108723094037  |             |
| AGIWUR21176;AGIWUR33460;AGIWUR36304            |    |     |         |         |                |          |          |                      |             |
| N2                                             | CT | III | 9240337 | 9242514 | WBGene00011964 | saeg-2   | T23G5.6  | -0.072179850510528   |             |
| AGIWUR6898;AGIWUR13321;AGIWUR38443             |    |     |         |         |                |          |          |                      |             |
| N2                                             | CT | III | 9242914 | 9246802 | WBGene00000934 | dat-1    | T23G5.5  | -0.00709344499577291 | AGIWUR22310 |
| N2                                             | CT | III | 9247422 | 9248618 | WBGene00011365 | T02C1.1  | T02C1.1  | -0.232395578315266   | AGIWUR26963 |
| N2                                             | CT | III | 9251029 | 9253126 | WBGene00011366 | T02C1.2  | T02C1.2  | 0.0898785486410745   | AGIWUR13854 |

|                                                                                                             |    |     |         |         |                |          |          |                      |             |
|-------------------------------------------------------------------------------------------------------------|----|-----|---------|---------|----------------|----------|----------|----------------------|-------------|
| N2                                                                                                          | CT | III | 9257259 | 9260222 | WBGene00010795 | M01A8.1  | M01A8.1  | 0.0408236374057513   |             |
| AGIWUR13143;AGIWUR15928;AGIWUR16043;AGIWUR38473;AGIWUR38524;AGIWUR45013                                     |    |     |         |         |                |          |          |                      |             |
| N2                                                                                                          | CT | III | 9260191 | 9269062 | WBGene00010796 | clip-1   | M01A8.2  | -0.0768744456015993  |             |
| AGIWUR9838;AGIWUR11840;AGIWUR19871                                                                          |    |     |         |         |                |          |          |                      |             |
| N2                                                                                                          | CT | III | 9281785 | 9296668 | WBGene00010453 | fozi-1   | K01B6.1  | 0.000670237826911446 | AGIWUR1508  |
| N2                                                                                                          | CT | III | 9296627 | 9297394 | WBGene00010455 | K01B6.4  | K01B6.4  | 0.000262057203647359 | AGIWUR5362  |
| N2                                                                                                          | CT | III | 9300219 | 9303928 | WBGene00010454 | K01B6.3  | K01B6.3  | -0.0288290710466939  | AGIWUR27244 |
| N2                                                                                                          | CT | III | 9304034 | 9306696 | WBGene00005936 | srx-45   | K01B6.2  | -0.155325859143535   |             |
| AGIWUR8476;AGIWUR18281;AGIWUR39530                                                                          |    |     |         |         |                |          |          |                      |             |
| N2                                                                                                          | CT | III | 9314714 | 9317365 | WBGene00008043 | C40H1.8  | C40H1.8  | -0.0452396847047103  | AGIWUR23496 |
| N2                                                                                                          | CT | III | 9318044 | 9319271 | WBGene00008038 | C40H1.2  | C40H1.2  | 0.117280774500014    | AGIWUR40443 |
| N2                                                                                                          | CT | III | 9320040 | 9321663 | WBGene00008044 | C40H1.9  | C40H1.9  | -0.115777756460304   | AGIWUR14266 |
| N2                                                                                                          | CT | III | 9322316 | 9324733 | WBGene00000770 | cpb-1    | C40H1.1  | 0.132429281555105    | AGIWUR13573 |
| N2                                                                                                          | CT | III | 9325048 | 9327031 | WBGene00008042 | C40H1.7  | C40H1.7  | -0.0636699013144479  | AGIWUR16820 |
| N2                                                                                                          | CT | III | 9327307 | 9329366 | WBGene00008039 | C40H1.3  | C40H1.3  | 0.111630802474925    | AGIWUR27686 |
| N2                                                                                                          | CT | III | 9330316 | 9330928 | WBGene00008040 | ttr-5    | C40H1.5  | -0.108874493787953   | AGIWUR40524 |
| N2                                                                                                          | CT | III | 9331514 | 9332284 | WBGene00008041 | ufc-1    | C40H1.6  | -0.203854952910437   | AGIWUR41584 |
| N2                                                                                                          | CT | III | 9332269 | 9334274 | WBGene00001242 | elo-4    | C40H1.4  | -0.0733966588943069  | AGIWUR23388 |
| N2                                                                                                          | CT | III | 9336881 | 9344447 | WBGene00001263 | emb-9    | K04H4.1  | 0.203248423088176    |             |
| AGIWUR9539;AGIWUR9984                                                                                       |    |     |         |         |                |          |          |                      |             |
| N2                                                                                                          | CT | III | 9347714 | 9355480 | WBGene00010573 | K04H4.2  | K04H4.2  | -0.00320177768003127 |             |
| AGIWUR7753;AGIWUR12418;AGIWUR14842;AGIWUR21373;AGIWUR22356;AGIWUR23321;AGIWUR25593;AGIWUR36790;AGIWUR39493; |    |     |         |         |                |          |          |                      |             |
| AGIWUR40643;AGIWUR41480;AGIWUR42869;AGIWUR43596                                                             |    |     |         |         |                |          |          |                      |             |
| N2                                                                                                          | CT | III | 9360269 | 9361333 | WBGene00010574 | K04H4.5  | K04H4.5  | 0.21692311810037     | AGIWUR28137 |
| N2                                                                                                          | CT | III | 9361528 | 9365380 | WBGene00010575 | flp-25   | K04H4.7  | -0.087914969527632   |             |
| AGIWUR2661;AGIWUR28217;AGIWUR28904;AGIWUR38699                                                              |    |     |         |         |                |          |          |                      |             |
| N2                                                                                                          | CT | III | 9367238 | 9370385 | WBGene00000799 | crn-6    | K04H4.6  | 0.0124391651459499   |             |
| AGIWUR3728;AGIWUR24581                                                                                      |    |     |         |         |                |          |          |                      |             |
| N2                                                                                                          | CT | III | 9383796 | 9387605 | WBGene00006576 | tkr-1    | C38C10.1 | -0.301412227287059   |             |
| AGIWUR1367                                                                                                  |    |     |         |         |                |          |          |                      |             |
| N2                                                                                                          | CT | III | 9387601 | 9390107 | WBGene00008000 | slc-17.2 | C38C10.2 | 0.159114970673334    |             |
| AGIWUR8053;AGIWUR12304;AGIWUR18680;AGIWUR21362;AGIWUR22003;AGIWUR28566                                      |    |     |         |         |                |          |          |                      |             |
| N2                                                                                                          | CT | III | 9393981 | 9404532 | WBGene00004343 | rgr-1    | C38C10.5 | 0.170329696003808    |             |
| AGIWUR31939                                                                                                 |    |     |         |         |                |          |          |                      |             |
| N2                                                                                                          | CT | III | 9404484 | 9406641 | WBGene00012059 | T26G10.1 | T26G10.1 | -0.043633107499776   |             |
| AGIWUR39909                                                                                                 |    |     |         |         |                |          |          |                      |             |
| N2                                                                                                          | CT | III | 9412854 | 9413440 | WBGene00012060 | T26G10.3 | T26G10.3 | 0.371086083884405    |             |
| AGIWUR18817                                                                                                 |    |     |         |         |                |          |          |                      |             |
| N2                                                                                                          | CT | III | 9420531 | 9421574 | WBGene00012061 | T26G10.4 | T26G10.4 | 0.0896551776475478   |             |

|                                                                                                                                 |    |     |         |         |                |          |          |                      |             |
|---------------------------------------------------------------------------------------------------------------------------------|----|-----|---------|---------|----------------|----------|----------|----------------------|-------------|
| AGIWUR40905                                                                                                                     |    |     |         |         |                |          |          |                      |             |
| N2                                                                                                                              | CT | III | 9425536 | 9426674 | WBGene00012062 | T26G10.5 | T26G10.5 | -0.059456154890853   |             |
| AGIWUR17340                                                                                                                     |    |     |         |         |                |          |          |                      |             |
| N2                                                                                                                              | CT | III | 9434057 | 9435100 | WBGene00010036 | cpar-1   | F54C8.2  | -0.250047012775275   | AGIWUR14509 |
| N2                                                                                                                              | CT | III | 9435083 | 9441539 | WBGene00001284 | emb-30   | F54C8.3  | -0.184772818182165   |             |
| AGIWUR12925;AGIWUR43849                                                                                                         |    |     |         |         |                |          |          |                      |             |
| N2                                                                                                                              | CT | III | 9441557 | 9443634 | WBGene00010037 | F54C8.4  | F54C8.4  | 0.0514582123274723   |             |
| AGIWUR12673;AGIWUR18539;AGIWUR19722;AGIWUR26404                                                                                 |    |     |         |         |                |          |          |                      |             |
| N2                                                                                                                              | CT | III | 9444360 | 9449931 | WBGene00010039 | F54C8.6  | F54C8.6  | -0.215505974417536   | AGIWUR35169 |
| N2                                                                                                                              | CT | III | 9451595 | 9454062 | WBGene00010040 | F54C8.7  | F54C8.7  | -0.0844912451813826  | AGIWUR30464 |
| N2                                                                                                                              | CT | III | 9454163 | 9456030 | WBGene00010038 | rheb-1   | F54C8.5  | -0.0524988042890602  | AGIWUR34422 |
| N2                                                                                                                              | CT | III | 9456563 | 9463004 | WBGene00004980 | spk-1    | B0464.5  | 0.13158502472054     |             |
| AGIWUR2559;AGIWUR3910;AGIWUR29612                                                                                               |    |     |         |         |                |          |          |                      |             |
| N2                                                                                                                              | CT | III | 9462989 | 9465965 | WBGene00007186 | B0464.6  | B0464.6  | 0.0309620271604727   |             |
| AGIWUR956;AGIWUR34359                                                                                                           |    |     |         |         |                |          |          |                      |             |
| N2                                                                                                                              | CT | III | 9465767 | 9467177 | WBGene00007188 | B0464.9  | B0464.9  | -0.0892553417204454  | AGIWUR10494 |
| N2                                                                                                                              | CT | III | 9467464 | 9468058 | WBGene00000235 | baf-1    | B0464.7  | 0.0194533399842562   |             |
| AGIWUR652;AGIWUR2228;AGIWUR3386;AGIWUR20361;AGIWUR21114;AGIWUR22416;AGIWUR27119;AGIWUR28155;AGIWUR29069;AGIWUR31986;AGIWUR33673 |    |     |         |         |                |          |          |                      |             |
| N2                                                                                                                              | CT | III | 9468157 | 9469899 | WBGene00007187 | tag-342  | B0464.8  | -0.120281153907858   |             |
| AGIWUR1236;AGIWUR26705                                                                                                          |    |     |         |         |                |          |          |                      |             |
| N2                                                                                                                              | CT | III | 9469920 | 9485451 | WBGene00000268 | bre-3    | B0464.4  | 0.0970038577472518   | AGIWUR9948  |
| N2                                                                                                                              | CT | III | 9488731 | 9489188 | WBGene00007185 | nlp-36   | B0464.3  | -0.102245007827005   | AGIWUR14705 |
| N2                                                                                                                              | CT | III | 9489176 | 9491236 | WBGene00001094 | dars-1   | B0464.1  | 0.0895550549381312   |             |
| AGIWUR10366;AGIWUR28818;AGIWUR37587                                                                                             |    |     |         |         |                |          |          |                      |             |
| N2                                                                                                                              | CT | III | 9491640 | 9497044 | WBGene00007184 | ctr-9    | B0464.2  | 0.0630979964087599   |             |
| AGIWUR4327;AGIWUR4818;AGIWUR5388;AGIWUR16073;AGIWUR26585;AGIWUR26624                                                            |    |     |         |         |                |          |          |                      |             |
| N2                                                                                                                              | CT | III | 9497019 | 9500202 | WBGene00004933 | sod-4    | F55H2.1  | -0.113301038806462   |             |
| AGIWUR16498;AGIWUR25425;AGIWUR32411;AGIWUR40264;AGIWUR40842                                                                     |    |     |         |         |                |          |          |                      |             |
| N2                                                                                                                              | CT | III | 9504764 | 9507081 | WBGene00003067 | lrg-1    | F55H2.4  | 0.431820580735172    |             |
| AGIWUR20208;AGIWUR34899                                                                                                         |    |     |         |         |                |          |          |                      |             |
| N2                                                                                                                              | CT | III | 9508074 | 9509806 | WBGene00010130 | vha-14   | F55H2.2  | 0.0504727912666247   |             |
| AGIWUR3972;AGIWUR25785;AGIWUR39739                                                                                              |    |     |         |         |                |          |          |                      |             |
| N2                                                                                                                              | CT | III | 9511470 | 9513375 | WBGene00010131 | F55H2.5  | F55H2.5  | -0.00917566146187454 |             |
| AGIWUR15384;AGIWUR16468;AGIWUR17057;AGIWUR18183;AGIWUR21757;AGIWUR32281;AGIWUR39797                                             |    |     |         |         |                |          |          |                      |             |
| N2                                                                                                                              | CT | III | 9513348 | 9516248 | WBGene00010132 | F55H2.7  | F55H2.7  | 0.0214439043611474   | AGIWUR21357 |
| N2                                                                                                                              | CT | III | 9516631 | 9521460 | WBGene00000550 | clu-1    | F55H2.6  | -0.0721282558964722  |             |
| AGIWUR6012;AGIWUR12781;AGIWUR24985;AGIWUR25703                                                                                  |    |     |         |         |                |          |          |                      |             |
| N2                                                                                                                              | CT | III | 9522075 | 9525437 | WBGene00014218 | ZK1098.1 | ZK1098.1 | -0.249868635517506   |             |



|                                                 |    |     |         |         |                |             |           |                      |             |
|-------------------------------------------------|----|-----|---------|---------|----------------|-------------|-----------|----------------------|-------------|
| AGIWUR40242                                     |    |     |         |         |                |             |           |                      |             |
| N2                                              | CT | III | 9525552 | 9527068 | WBGene00014222 | trpp-3      | ZK1098.5  | 0.186302388172092    |             |
| AGIWUR27234;AGIWUR28384;AGIWUR35407;AGIWUR36975 |    |     |         |         |                |             |           |                      |             |
| N2                                              | CT | III | 9527151 | 9528689 | WBGene00014223 | ZK1098.6    | ZK1098.6  | -0.0940049749125285  |             |
| AGIWUR23405                                     |    |     |         |         |                |             |           |                      |             |
| N2                                              | CT | III | 9529166 | 9531888 | WBGene00014219 | ZK1098.2    | ZK1098.2  | -0.104109789001974   |             |
| AGIWUR25200                                     |    |     |         |         |                |             |           |                      |             |
| N2                                              | CT | III | 9532427 | 9538700 | WBGene00014220 | ZK1098.3    | ZK1098.3  | 0.0227621391928512   |             |
| AGIWUR7676;AGIWUR9497;AGIWUR42452               |    |     |         |         |                |             |           |                      |             |
| N2                                              | CT | III | 9539031 | 9542380 | WBGene00003504 | mut-7       | ZK1098.8  | -0.00513440542073695 |             |
| AGIWUR25701                                     |    |     |         |         |                |             |           |                      |             |
| N2                                              | CT | III | 9543069 | 9544404 | WBGene00014221 | eif-2Balpha | ZK1098.4  | -0.0148772835756805  |             |
| AGIWUR18997                                     |    |     |         |         |                |             |           |                      |             |
| N2                                              | CT | III | 9545120 | 9545897 | WBGene00194691 | ZK1098.12   | ZK1098.12 | 0.116575528964164    |             |
| AGIWUR12008                                     |    |     |         |         |                |             |           |                      |             |
| N2                                              | CT | III | 9546258 | 9556514 | WBGene00006755 | unc-16      | ZK1098.10 | 0.00825841863989574  |             |
| AGIWUR5621;AGIWUR33196;AGIWUR42349              |    |     |         |         |                |             |           |                      |             |
| N2                                              | CT | III | 9556507 | 9557454 | WBGene00014226 | ZK1098.11   | ZK1098.11 | -0.208669410491119   |             |
| AGIWUR25774                                     |    |     |         |         |                |             |           |                      |             |
| N2                                              | CT | III | 9557448 | 9558563 | WBGene00008169 | C48B4.6     | C48B4.6   | 0.0361049840211738   | AGIWUR1145  |
| N2                                              | CT | III | 9558669 | 9559427 | WBGene00008170 | C48B4.7     | C48B4.7   | -0.193817562332031   | AGIWUR8640  |
| N2                                              | CT | III | 9559831 | 9561258 | WBGene00008171 | C48B4.8     | C48B4.8   | -0.0219954334352259  | AGIWUR29752 |
| N2                                              | CT | III | 9562336 | 9563335 | WBGene00008172 | C48B4.9     | C48B4.9   | -0.139686516553811   | AGIWUR12846 |
| N2                                              | CT | III | 9563437 | 9564510 | WBGene00008173 | C48B4.10    | C48B4.10  | -0.240368262073838   |             |
| AGIWUR29101                                     |    |     |         |         |                |             |           |                      |             |
| N2                                              | CT | III | 9564605 | 9566115 | WBGene00008174 | C48B4.11    | C48B4.11  |                      |             |
| -0.00391219516658126 AGIWUR9676                 |    |     |         |         |                |             |           |                      |             |
| N2                                              | CT | III | 9568751 | 9570460 | WBGene00008176 | C48B4.13    | C48B4.13  | 0.022950479851322    |             |
| AGIWUR5852                                      |    |     |         |         |                |             |           |                      |             |
| N2                                              | CT | III | 9570394 | 9580081 | WBGene00000421 | ced-7       | C48B4.4   | -0.155485900533561   |             |
| AGIWUR15134;AGIWUR15652;AGIWUR41526             |    |     |         |         |                |             |           |                      |             |
| N2                                              | CT | III | 9581220 | 9582361 | WBGene00008168 | C48B4.3     | C48B4.3   | -0.186931150810711   | AGIWUR39224 |
| N2                                              | CT | III | 9586617 | 9592192 | WBGene00008167 | acox-1.5    | C48B4.1   | 0.176784699429323    |             |
| AGIWUR40965                                     |    |     |         |         |                |             |           |                      |             |
| N2                                              | CT | III | 9592282 | 9595667 | WBGene00004401 | rom-2       | C48B4.2   | -0.649015400548954   | AGIWUR30006 |
| N2                                              | CT | III | 9597359 | 9598361 | WBGene00008175 | C48B4.12    | C48B4.12  | -0.506498133583555   |             |
| AGIWUR33971                                     |    |     |         |         |                |             |           |                      |             |
| N2                                              | CT | III | 9598475 | 9600049 | WBGene00010226 | F58A4.1     | F58A4.1   | -0.31509362024785    | AGIWUR44129 |
| N2                                              | CT | III | 9600038 | 9600745 | WBGene00010227 | F58A4.2     | F58A4.2   | -0.00187174274356039 | AGIWUR17790 |

|                                                                                                          |    |     |         |         |                |           |          |                     |             |
|----------------------------------------------------------------------------------------------------------|----|-----|---------|---------|----------------|-----------|----------|---------------------|-------------|
| N2                                                                                                       | CT | III | 9603030 | 9608688 | WBGene00010228 | cllec-161 | F58A4.5  | 0.116226436148354   |             |
| AGIWUR38854                                                                                              |    |     |         |         |                |           |          |                     |             |
| N2                                                                                                       | CT | III | 9609568 | 9612191 | WBGene00043992 | bbs-4     | F58A4.14 | -0.0611040377076635 |             |
| AGIWUR13700;AGIWUR30878                                                                                  |    |     |         |         |                |           |          |                     |             |
| N2                                                                                                       | CT | III | 9614425 | 9615332 | WBGene00010229 | F58A4.6   | F58A4.6  | -0.0722261255230912 | AGIWUR11369 |
| N2                                                                                                       | CT | III | 9615306 | 9616470 | WBGene00001831 | hcp-3     | F58A4.3  | -0.125071173339581  | AGIWUR41202 |
| N2                                                                                                       | CT | III | 9619711 | 9626537 | WBGene00001955 | hlh-11    | F58A4.7  | 0.110070265310579   |             |
| AGIWUR1204;AGIWUR18661;AGIWUR29302                                                                       |    |     |         |         |                |           |          |                     |             |
| N2                                                                                                       | CT | III | 9626532 | 9629154 | WBGene00006540 | tbg-1     | F58A4.8  | 0.134092843943455   |             |
| AGIWUR5583;AGIWUR6671;AGIWUR8319;AGIWUR23541;AGIWUR24863;AGIWUR27460;AGIWUR31856;AGIWUR39229;AGIWUR39539 |    |     |         |         |                |           |          |                     |             |
| N2                                                                                                       | CT | III | 9629246 | 9629917 | WBGene00010230 | rpac-19   | F58A4.9  | -0.0612550451086085 |             |
| AGIWUR15916;AGIWUR37629                                                                                  |    |     |         |         |                |           |          |                     |             |
| N2                                                                                                       | CT | III | 9630085 | 9631167 | WBGene00006704 | ubc-7     | F58A4.10 | -0.0895254708925082 |             |
| AGIWUR18406;AGIWUR20044;AGIWUR40951;AGIWUR43784                                                          |    |     |         |         |                |           |          |                     |             |
| N2                                                                                                       | CT | III | 9631994 | 9637116 | WBGene00001570 | gei-13    | F58A4.11 | -0.198204487200558  |             |
| AGIWUR30688                                                                                              |    |     |         |         |                |           |          |                     |             |
| N2                                                                                                       | CT | III | 9650422 | 9651971 | WBGene00007610 | C15H7.3   | C15H7.3  | 0.0735341204962516  | AGIWUR41659 |
| N2                                                                                                       | CT | III | 9652313 | 9653641 | WBGene00014678 | C15H7.2   | C15H7.2  | 0.202651719322834   | AGIWUR3998  |
| N2                                                                                                       | CT | III | 9654409 | 9655859 | WBGene00007611 | C15H7.4   | C15H7.4  | 0.0264886162060805  | AGIWUR12873 |
| N2                                                                                                       | CT | III | 9663290 | 9667640 | WBGene00007405 | C07A9.9   | C07A9.9  | 0.244561655005813   |             |
| AGIWUR2793;AGIWUR21425;AGIWUR40053;AGIWUR40663                                                           |    |     |         |         |                |           |          |                     |             |
| N2                                                                                                       | CT | III | 9676320 | 9679051 | WBGene00007402 | ugt-60    | C07A9.6  | -0.18581094591989   | AGIWUR2544  |
| N2                                                                                                       | CT | III | 9679698 | 9681269 | WBGene00044227 | C07A9.13  | C07A9.13 | 0.108811593953341   |             |
| AGIWUR9129                                                                                               |    |     |         |         |                |           |          |                     |             |
| N2                                                                                                       | CT | III | 9681524 | 9682829 | WBGene00007401 | C07A9.5   | C07A9.5  | 0.135814368104637   |             |
| AGIWUR35061;AGIWUR41297                                                                                  |    |     |         |         |                |           |          |                     |             |
| N2                                                                                                       | CT | III | 9686990 | 9690253 | WBGene00007404 | best-5    | C07A9.8  | 0.0225441153294703  | AGIWUR16656 |
| N2                                                                                                       | CT | III | 9691030 | 9694572 | WBGene00007403 | set-3     | C07A9.7  | -0.0950429737077334 |             |
| AGIWUR6874;AGIWUR16066                                                                                   |    |     |         |         |                |           |          |                     |             |
| N2                                                                                                       | CT | III | 9694668 | 9696517 | WBGene00007400 | C07A9.2   | C07A9.2  | -0.22854465103425   |             |
| AGIWUR2106;AGIWUR8528;AGIWUR23710;AGIWUR30448;AGIWUR44233                                                |    |     |         |         |                |           |          |                     |             |
| N2                                                                                                       | CT | III | 9699876 | 9710268 | WBGene00006579 | tlk-1     | C07A9.3  | 0.627793642489287   |             |
| AGIWUR28026;AGIWUR28045;AGIWUR37049                                                                      |    |     |         |         |                |           |          |                     |             |
| N2                                                                                                       | CT | III | 9710312 | 9713928 | WBGene00003571 | ncx-6     | C07A9.4  | -0.39882752961848   | AGIWUR5692  |
| N2                                                                                                       | CT | III | 9715883 | 9720291 | WBGene00003572 | ncx-7     | C07A9.11 | 0.0758097208877544  |             |
| AGIWUR41131                                                                                              |    |     |         |         |                |           |          |                     |             |
| N2                                                                                                       | CT | III | 9723282 | 9725214 | WBGene00007399 | cllec-162 | C07A9.1  | 0.107045224342976   |             |
| AGIWUR18;AGIWUR21283;AGIWUR43658                                                                         |    |     |         |         |                |           |          |                     |             |
| N2                                                                                                       | CT | III | 9725285 | 9727539 | WBGene00043994 | C07A9.12  | C07A9.12 | -0.0698538516071916 |             |

AGIWUR23015;AGIWUR42131  
N2 CT III 9735265 9736057 WBGene00000932 dao-6 T05G5.12 -0.219719645245803  
AGIWUR8538;AGIWUR16163;AGIWUR36321  
N2 CT III 9736030 9736869 WBGene00004097 pqm-96 T05G5.11 -0.0245886450142079  
AGIWUR4087;AGIWUR11001;AGIWUR19161;AGIWUR25569;AGIWUR34670  
N2 CT III 9737469 9738839 WBGene00001951 h1h-4 T05G5.2 -0.100618665244501 AGIWUR41294  
N2 CT III 9745864 9747193 WBGene00002064 iff-1 T05G5.10 -0.214473710825253  
AGIWUR21180  
N2 CT III 9747432 9748852 WBGene00000405 cdk-1 T05G5.3 -0.00713885210887888  
AGIWUR18204;AGIWUR25840;AGIWUR26140  
N2 CT III 9748863 9749673 WBGene00011499 T05G5.4 T05G5.4 0.0591931451890151 AGIWUR44760  
N2 CT III 9751440 9752922 WBGene00001155 ech-6 T05G5.6 0.0510745685964515  
AGIWUR4728;AGIWUR22276;AGIWUR32179;AGIWUR36972;AGIWUR39062  
N2 CT III 9753672 9757514 WBGene00011502 vps-53 T05G5.8 -0.0764806249154386 AGIWUR12730  
N2 CT III 9757616 9762143 WBGene00011503 gcc-2 T05G5.9 -0.0656717026171894 AGIWUR26271  
N2 CT III 9766516 9774825 WBGene00000366 cbp-1 R10E11.1 0.0172057652403632  
AGIWUR3680;AGIWUR20510;AGIWUR23302;AGIWUR36765  
N2 CT III 9776532 9778850 WBGene00011216 usp-46 R10E11.3 -0.231333089305471  
AGIWUR828;AGIWUR9155;AGIWUR27956;AGIWUR35299  
N2 CT III 9778782 9780350 WBGene00005021 sqv-3 R10E11.4 -0.156735888873385  
AGIWUR4791  
N2 CT III 9781243 9782057 WBGene00006910 vha-1 R10E11.8 0.0483636508252943  
AGIWUR12283;AGIWUR14952;AGIWUR20193;AGIWUR21407;AGIWUR26765;AGIWUR32083  
N2 CT III 9782164 9783212 WBGene00006911 vha-2 R10E11.2 0.0894002301156576  
AGIWUR28465  
N2 CT III 9783325 9786038 WBGene00011218 R10E11.6 R10E11.6 -0.215448977397687  
AGIWUR4535;AGIWUR8860  
N2 CT III 9785957 9789657 WBGene00011217 R10E11.5 R10E11.5 -0.0968683127869658  
AGIWUR32181;AGIWUR38562;AGIWUR42235  
N2 CT III 9792548 9793642 WBGene00011220 R10E11.9 R10E11.9 -0.0578941005956279  
AGIWUR44902  
N2 CT III 9794367 9798643 WBGene00003158 mcm-6 ZK632.1 0.0365675634153604  
AGIWUR3400;AGIWUR44759  
N2 CT III 9799107 9802333 WBGene00014011 ZK632.2 ZK632.2 -0.185698993136269 AGIWUR31557  
N2 CT III 9802354 9805093 WBGene00014012 riok-3 ZK632.3 0.231071738593698 AGIWUR17835  
N2 CT III 9805515 9807454 WBGene00014013 ZK632.4 ZK632.4 -0.18955328510361 AGIWUR36478  
N2 CT III 9808544 9812639 WBGene00014014 ZK632.5 ZK632.5 -0.191661359591013 AGIWUR40919  
N2 CT III 9813446 9814424 WBGene00014020 ZK632.14 ZK632.14 0.0573760209296306  
AGIWUR10501;AGIWUR29646;AGIWUR30662;AGIWUR44427

|                                                                                                                       |    |     |         |         |                |          |          |                      |             |
|-----------------------------------------------------------------------------------------------------------------------|----|-----|---------|---------|----------------|----------|----------|----------------------|-------------|
| N2                                                                                                                    | CT | III | 9814364 | 9817137 | WBGene00000567 | cnx-1    | ZK632.6  | -0.108565284419905   | AGIWUR9035  |
| N2                                                                                                                    | CT | III | 9819294 | 9823120 | WBGene00014015 | pan1-3   | ZK632.7  | 0.185711328007823    | AGIWUR30337 |
| N2                                                                                                                    | CT | III | 9823242 | 9824132 | WBGene00000189 | ar1-5    | ZK632.8  | -0.0309678072032895  | AGIWUR25912 |
| N2                                                                                                                    | CT | III | 9824877 | 9825445 | WBGene00014016 | ZK632.9  | ZK632.9  | -0.0368028724740634  |             |
| AGIWUR16999;AGIWUR17140;AGIWUR17442;AGIWUR20289;AGIWUR29675;AGIWUR30283                                               |    |     |         |         |                |          |          |                      |             |
| N2                                                                                                                    | CT | III | 9826130 | 9827178 | WBGene00014017 | ZK632.10 | ZK632.10 | 0.0956928010562965   |             |
| AGIWUR30752                                                                                                           |    |     |         |         |                |          |          |                      |             |
| N2                                                                                                                    | CT | III | 9827915 | 9829719 | WBGene00014018 | ZK632.11 | ZK632.11 | -0.286863190368948   |             |
| AGIWUR24674                                                                                                           |    |     |         |         |                |          |          |                      |             |
| N2                                                                                                                    | CT | III | 9830792 | 9832430 | WBGene00014019 | ZK632.12 | ZK632.12 | -0.224924056531634   |             |
| AGIWUR42050                                                                                                           |    |     |         |         |                |          |          |                      |             |
| N2                                                                                                                    | CT | III | 9835192 | 9838311 | WBGene00185002 | K11H3.8  | K11H3.8  | 0.0438616376574341   | AGIWUR26726 |
| N2                                                                                                                    | CT | III | 9843782 | 9845733 | WBGene00010782 | K11H3.5  | K11H3.5  | 0.0257973126257269   | AGIWUR35882 |
| N2                                                                                                                    | CT | III | 9846393 | 9847521 | WBGene00010779 | K11H3.2  | K11H3.2  | 0.0864713224944307   | AGIWUR4923  |
| N2                                                                                                                    | CT | III | 9847626 | 9848116 | WBGene00010783 | mrp1-36  | K11H3.6  | -0.118658405489271   | AGIWUR40294 |
| N2                                                                                                                    | CT | III | 9851854 | 9854102 | WBGene00010780 | K11H3.3  | K11H3.3  | -0.0580523180217085  | AGIWUR32929 |
| N2                                                                                                                    | CT | III | 9854077 | 9859183 | WBGene00010778 | gpdh-2   | K11H3.1  | -0.00625806345441493 |             |
| AGIWUR18384;AGIWUR23070                                                                                               |    |     |         |         |                |          |          |                      |             |
| N2                                                                                                                    | CT | III | 9860730 | 9863302 | WBGene00010784 | twk-48   | K11H3.7  | -0.0769006508763432  |             |
| AGIWUR9189;AGIWUR22564;AGIWUR37335                                                                                    |    |     |         |         |                |          |          |                      |             |
| N2                                                                                                                    | CT | III | 9863251 | 9867786 | WBGene00014075 | dhhc-4   | ZK757.4  | -0.0268717029771599  |             |
| AGIWUR2140;AGIWUR3995;AGIWUR20382;AGIWUR33633                                                                         |    |     |         |         |                |          |          |                      |             |
| N2                                                                                                                    | CT | III | 9868594 | 9871124 | WBGene00014073 | ZK757.1  | ZK757.1  | -0.0626681505463749  | AGIWUR24918 |
| N2                                                                                                                    | CT | III | 9874142 | 9877476 | WBGene00014074 | ZK757.2  | ZK757.2  | -0.06804529718341    | AGIWUR40144 |
| N2                                                                                                                    | CT | III | 9887210 | 9891458 | WBGene00006449 | alg-4    | ZK757.3  | 0.34227783223116     |             |
| AGIWUR21301;AGIWUR22137                                                                                               |    |     |         |         |                |          |          |                      |             |
| N2                                                                                                                    | CT | III | 9893155 | 9898426 | WBGene00009593 | mam-7    | F40F12.4 | -0.501946964681855   |             |
| AGIWUR30722                                                                                                           |    |     |         |         |                |          |          |                      |             |
| N2                                                                                                                    | CT | III | 9898602 | 9910658 | WBGene00009594 | cyl1d-1  | F40F12.5 | 0.167378780575751    |             |
| AGIWUR11679;AGIWUR20472                                                                                               |    |     |         |         |                |          |          |                      |             |
| N2                                                                                                                    | CT | III | 9913021 | 9914075 | WBGene00043995 | F40F12.9 | F40F12.9 | -0.0787295764952174  |             |
| AGIWUR3535;AGIWUR7077;AGIWUR10893;AGIWUR13925;AGIWUR16426;AGIWUR21462;AGIWUR23195;AGIWUR30134;AGIWUR31059;AGIWUR34499 |    |     |         |         |                |          |          |                      |             |
| N2                                                                                                                    | CT | III | 9918645 | 9920864 | WBGene00009592 | F40F12.3 | F40F12.3 | -0.63315208958535    |             |
| AGIWUR20178                                                                                                           |    |     |         |         |                |          |          |                      |             |
| N2                                                                                                                    | CT | III | 9921200 | 9921892 | WBGene00014755 | F40F12.8 | F40F12.8 | 0.340035868561852    |             |
| AGIWUR19378                                                                                                           |    |     |         |         |                |          |          |                      |             |
| N2                                                                                                                    | CT | III | 9923174 | 9925443 | WBGene00010545 | cbp-2    | K03H1.10 | 0.0667314407063664   |             |
| AGIWUR37099                                                                                                           |    |     |         |         |                |          |          |                      |             |

|                                                                         |    |     |          |          |                |          |          |                      |             |
|-------------------------------------------------------------------------|----|-----|----------|----------|----------------|----------|----------|----------------------|-------------|
| N2                                                                      | CT | III | 9927732  | 9929004  | WBGene00010539 | ttr-2    | K03H1.4  | -0.221646203791902   | AGIWUR29522 |
| N2                                                                      | CT | III | 9929058  | 9930413  | WBGene00010541 | ttr-1    | K03H1.6  | 0.0075550828435631   |             |
| AGIWUR9772;AGIWUR14636;AGIWUR19049;AGIWUR34888                          |    |     |          |          |                |          |          |                      |             |
| N2                                                                      | CT | III | 9932398  | 9939712  | WBGene00010540 | K03H1.5  | K03H1.5  | -0.00934560808725848 | AGIWUR34316 |
| N2                                                                      | CT | III | 9940771  | 9941464  | WBGene00010544 | K03H1.9  | K03H1.9  | 0.222024831682223    | AGIWUR31829 |
| N2                                                                      | CT | III | 9941624  | 9942345  | WBGene00010547 | K03H1.12 | K03H1.12 | 0.152547444460879    |             |
| AGIWUR11705                                                             |    |     |          |          |                |          |          |                      |             |
| N2                                                                      | CT | III | 9943243  | 9944823  | WBGene00001603 | gln-2    | K03H1.1  | 0.203972470195243    | AGIWUR42968 |
| N2                                                                      | CT | III | 9945395  | 9946663  | WBGene00010543 | K03H1.8  | K03H1.8  | 0.161154631478173    | AGIWUR23294 |
| N2                                                                      | CT | III | 9950381  | 9951964  | WBGene00010546 | K03H1.11 | K03H1.11 | -0.150432156902733   |             |
| AGIWUR27779;AGIWUR29848;AGIWUR39811                                     |    |     |          |          |                |          |          |                      |             |
| N2                                                                      | CT | III | 9952056  | 9956271  | WBGene00003389 | mog-1    | K03H1.2  | -0.028305592298743   | AGIWUR16381 |
| N2                                                                      | CT | III | 9957357  | 9963171  | WBGene00007010 | alx-1    | R10E12.1 | 0.148777310048631    |             |
| AGIWUR17080;AGIWUR21528;AGIWUR23807;AGIWUR38367;AGIWUR41652;AGIWUR44473 |    |     |          |          |                |          |          |                      |             |
| N2                                                                      | CT | III | 9963121  | 9973865  | WBGene00011221 | R10E12.2 | R10E12.2 | -0.11488415084631    |             |
| AGIWUR40690                                                             |    |     |          |          |                |          |          |                      |             |
| N2                                                                      | CT | III | 9987367  | 9987728  | WBGene00194886 | C05B5.12 | C05B5.12 | -0.112619063692489   |             |
| AGIWUR29906                                                             |    |     |          |          |                |          |          |                      |             |
| N2                                                                      | CT | III | 9993885  | 9996235  | WBGene00007321 | C05B5.4  | C05B5.4  | -0.0444805146831131  | AGIWUR11599 |
| N2                                                                      | CT | III | 9996205  | 9997955  | WBGene00004100 | pqn-8    | C05B5.3  | -0.0439510155143701  | AGIWUR38225 |
| N2                                                                      | CT | III | 9998542  | 9999335  | WBGene00219314 | C05B5.17 | C05B5.17 |                      |             |
| -0.00432469194150276 AGIWUR44836                                        |    |     |          |          |                |          |          |                      |             |
| N2                                                                      | CT | III | 9999819  | 10000528 | WBGene00007320 | C05B5.2  | C05B5.2  | 0.394342239619304    |             |
| AGIWUR23685                                                             |    |     |          |          |                |          |          |                      |             |
| N2                                                                      | CT | III | 10001400 | 10003856 | WBGene00007322 | C05B5.5  | C05B5.5  | 0.0300871480333988   |             |
| AGIWUR28548                                                             |    |     |          |          |                |          |          |                      |             |
| N2                                                                      | CT | III | 10005459 | 10006784 | WBGene00007324 | C05B5.8  | C05B5.8  | 0.167612776218279    |             |
| AGIWUR10471;AGIWUR21687;AGIWUR31806                                     |    |     |          |          |                |          |          |                      |             |
| N2                                                                      | CT | III | 10007966 | 10010177 | WBGene00007323 | fbxa-155 | C05B5.6  |                      |             |
| -0.126336225893846 AGIWUR33096                                          |    |     |          |          |                |          |          |                      |             |
| N2                                                                      | CT | III | 10010843 | 10011065 | WBGene00044130 | C05B5.10 | C05B5.10 |                      |             |
| -0.396134170764894 AGIWUR30379                                          |    |     |          |          |                |          |          |                      |             |
| N2                                                                      | CT | III | 10014188 | 10016558 | WBGene00004344 | rgs-1    | C05B5.7  | -0.152709037907639   |             |
| AGIWUR23156                                                             |    |     |          |          |                |          |          |                      |             |
| N2                                                                      | CT | III | 10023804 | 10024120 | WBGene00002104 | ins-21   | M04D8.1  | 0.112206995202083    |             |
| AGIWUR44786                                                             |    |     |          |          |                |          |          |                      |             |
| N2                                                                      | CT | III | 10026289 | 10026673 | WBGene00002105 | ins-22   | M04D8.2  | -0.250757621141943   |             |
| AGIWUR4200                                                              |    |     |          |          |                |          |          |                      |             |
| N2                                                                      | CT | III | 10028247 | 10028600 | WBGene00002106 | ins-23   | M04D8.3  | -0.162993881733745   |             |

|                                                        |    |     |          |          |                |                                     |
|--------------------------------------------------------|----|-----|----------|----------|----------------|-------------------------------------|
| AGIWUR37017                                            |    |     |          |          |                |                                     |
| N2                                                     | CT | III | 10029991 | 10030600 | WBGene00010862 | M04D8.4 M04D8.4 -0.0600859050917943 |
| AGIWUR2895                                             |    |     |          |          |                |                                     |
| N2                                                     | CT | III | 10032344 | 10033313 | WBGene00010863 | M04D8.5 M04D8.5 -0.132329129095534  |
| AGIWUR3713;AGIWUR20119;AGIWUR22864;AGIWUR36190         |    |     |          |          |                |                                     |
| N2                                                     | CT | III | 10034181 | 10035102 | WBGene00010866 | M04D8.8 M04D8.8 -0.102969871596127  |
| AGIWUR36738                                            |    |     |          |          |                |                                     |
| N2                                                     | CT | III | 10036004 | 10036796 | WBGene00010864 | xbx-3 M04D8.6 0.00822419926171669   |
| AGIWUR28393                                            |    |     |          |          |                |                                     |
| N2                                                     | CT | III | 10037450 | 10038247 | WBGene00010865 | M04D8.7 M04D8.7 -0.116489088480783  |
| AGIWUR9287                                             |    |     |          |          |                |                                     |
| N2                                                     | CT | III | 10038458 | 10040113 | WBGene00011808 | T16G12.7 T16G12.7                   |
| 0.0939750979510814 AGIWUR12066;AGIWUR16783;AGIWUR24474 |    |     |          |          |                |                                     |
| N2                                                     | CT | III | 10040191 | 10049857 | WBGene00011803 | T16G12.1 T16G12.1                   |
| 0.251212543688045 AGIWUR9573;AGIWUR22085;AGIWUR24630   |    |     |          |          |                |                                     |
| N2                                                     | CT | III | 10055604 | 10056133 | WBGene00044222 | T16G12.10 T16G12.10                 |
| -0.509302519493607 AGIWUR15645;AGIWUR32508             |    |     |          |          |                |                                     |
| N2                                                     | CT | III | 10057822 | 10058684 | WBGene00011805 | T16G12.4 T16G12.4                   |
| -0.185533568873314 AGIWUR43984                         |    |     |          |          |                |                                     |
| N2                                                     | CT | III | 10059302 | 10061982 | WBGene00011809 | T16G12.8 T16G12.8                   |
| -0.118158552701292 AGIWUR26835                         |    |     |          |          |                |                                     |
| N2                                                     | CT | III | 10064337 | 10069201 | WBGene00011806 | ekl-6 T16G12.5                      |
| 0.207048312116079 AGIWUR57                             |    |     |          |          |                |                                     |
| N2                                                     | CT | III | 10069564 | 10075995 | WBGene00011807 | T16G12.6 T16G12.6                   |
| 0.125918105219963 AGIWUR23002                          |    |     |          |          |                |                                     |
| N2                                                     | CT | III | 10076387 | 10078707 | WBGene00011810 | T16G12.9 T16G12.9                   |
| -0.14246769010224 AGIWUR25375                          |    |     |          |          |                |                                     |
| N2                                                     | CT | III | 10081443 | 10083286 | WBGene00011813 | T16H12.3 T16H12.3                   |
| -0.143263863477317 AGIWUR17981                         |    |     |          |          |                |                                     |
| N2                                                     | CT | III | 10085403 | 10086064 | WBGene00194725 | T16H12.13 T16H12.13                 |
| 0.119961154462889 AGIWUR21108                          |    |     |          |          |                |                                     |
| N2                                                     | CT | III | 10086303 | 10087171 | WBGene00011812 | T16H12.2 T16H12.2                   |
| -0.129284592681913 AGIWUR2932                          |    |     |          |          |                |                                     |
| N2                                                     | CT | III | 10087223 | 10088673 | WBGene00011819 | hal-2 T16H12.11                     |
| -0.166880888905974 AGIWUR1595;AGIWUR7708;AGIWUR15104   |    |     |          |          |                |                                     |
| N2                                                     | CT | III | 10088757 | 10090800 | WBGene00011814 | T16H12.4 T16H12.4                   |
| 0.102338134366214 AGIWUR28361;AGIWUR38433              |    |     |          |          |                |                                     |
| N2                                                     | CT | III | 10090862 | 10098081 | WBGene00011815 | bath-43 T16H12.5                    |
| 0.259408911876919 AGIWUR20784                          |    |     |          |          |                |                                     |

|    |    |     |                                                 |          |                |          |          |                     |
|----|----|-----|-------------------------------------------------|----------|----------------|----------|----------|---------------------|
| N2 | CT | III | 10098469                                        | 10101608 | WBGene00002186 | kel-10   | T16H12.6 |                     |
|    |    |     | AGIWUR6246;AGIWUR10107;AGIWUR40683              |          |                |          |          |                     |
| N2 | CT | III | 10104841                                        | 10106490 | WBGene00011816 | srt-55   | T16H12.8 |                     |
|    |    |     | AGIWUR16209                                     |          |                |          |          |                     |
| N2 | CT | III | 10109423                                        | 10112108 | WBGene00011817 | T16H12.9 |          | T16H12.9            |
|    |    |     | AGIWUR24769;AGIWUR33645;AGIWUR40685             |          |                |          |          |                     |
| N2 | CT | III | 10112100                                        | 10113046 | WBGene00014234 | vps-29   | ZK1128.8 |                     |
|    |    |     | AGIWUR6205;AGIWUR11659                          |          |                |          |          |                     |
| N2 | CT | III | 10113146                                        | 10114826 | WBGene00014227 | ZK1128.1 |          | ZK1128.1            |
|    |    |     | AGIWUR23994;AGIWUR27881;AGIWUR29799             |          |                |          |          |                     |
| N2 | CT | III | 10115042                                        | 10116760 | WBGene00014228 | mett-10  | ZK1128.2 |                     |
|    |    |     | AGIWUR25608                                     |          |                |          |          |                     |
| N2 | CT | III | 10116967                                        | 10118918 | WBGene00014229 | ZK1128.3 |          | ZK1128.3            |
|    |    |     | AGIWUR10949;AGIWUR26661;AGIWUR29008             |          |                |          |          |                     |
| N2 | CT | III | 10118961                                        | 10120148 | WBGene00014230 | ZK1128.4 |          | ZK1128.4            |
|    |    |     | AGIWUR26863                                     |          |                |          |          |                     |
| N2 | CT | III | 10120781                                        | 10122928 | WBGene00044072 | ham-3    | ZK1128.5 |                     |
|    |    |     | AGIWUR31504                                     |          |                |          |          |                     |
| N2 | CT | III | 10124183                                        | 10132411 | WBGene00014232 | ttl1-4   | ZK1128.6 |                     |
|    |    |     | AGIWUR8363;AGIWUR19920;AGIWUR35531              |          |                |          |          |                     |
| N2 | CT | III | 10136982                                        | 10139241 | WBGene00014233 | ZK1128.7 |          | ZK1128.7            |
|    |    |     | AGIWUR2705;AGIWUR17993;AGIWUR31730              |          |                |          |          |                     |
| N2 | CT | III | 10141573                                        | 10146801 | WBGene00014801 | K08E5.1  | K08E5.1  | 0.0344888973270407  |
|    |    |     | AGIWUR5036                                      |          |                |          |          |                     |
| N2 | CT | III | 10152795                                        | 10157923 | WBGene00003519 | nac-3    | K08E5.2  | 0.293892371793009   |
|    |    |     | AGIWUR13516;AGIWUR34351                         |          |                |          |          |                     |
| N2 | CT | III | 10159027                                        | 10160482 | WBGene00077703 | K08E5.5  | K08E5.5  | -0.0733012911550439 |
|    |    |     | AGIWUR38527;AGIWUR38946;AGIWUR39699             |          |                |          |          |                     |
| N2 | CT | III | 10160697                                        | 10183529 | WBGene00003482 | mua-3    | K08E5.3  |                     |
|    |    |     | AGIWUR10672                                     |          |                |          |          |                     |
| N2 | CT | III | 10183794                                        | 10186390 | WBGene00006783 | unc-47   | T20G5.6  | 0.00482142622573001 |
|    |    |     | AGIWUR12361                                     |          |                |          |          |                     |
| N2 | CT | III | 10189218                                        | 10195399 | WBGene00004255 | epac-1   | T20G5.5  | -0.201116283148879  |
|    |    |     | AGIWUR25467                                     |          |                |          |          |                     |
| N2 | CT | III | 10197716                                        | 10198352 | WBGene00011869 | dod-6    | T20G5.7  | 0.15856187585557    |
|    |    |     | AGIWUR14195;AGIWUR22878;AGIWUR26343;AGIWUR29516 |          |                |          |          |                     |
| N2 | CT | III | 10199337                                        | 10199859 | WBGene00011870 | T20G5.8  | T20G5.8  | 0.347138033269136   |
|    |    |     | AGIWUR6691;AGIWUR18399;AGIWUR22022;AGIWUR40445  |          |                |          |          |                     |
| N2 | CT | III | 10199894                                        | 10201326 | WBGene00011874 | T20G5.13 |          | T20G5.13            |

|                                                            |                                                                                    |                |                 |                    |
|------------------------------------------------------------|------------------------------------------------------------------------------------|----------------|-----------------|--------------------|
| 0.0732889870161828                                         | AGIWUR48;AGIWUR21088                                                               |                |                 |                    |
| N2 CT III                                                  | 10201623 10202528                                                                  | WBGene00011873 | T20G5.12        | T20G5.12           |
| -0.154243180872137                                         | AGIWUR37044                                                                        |                |                 |                    |
| N2 CT III                                                  | 10203821 10209704                                                                  | WBGene00011867 | chc-1 T20G5.1   | 0.269089429652208  |
| AGIWUR23019;AGIWUR39562;AGIWUR40241                        |                                                                                    |                |                 |                    |
| N2 CT III                                                  | 10209840 10211093                                                                  | WBGene00011871 | T20G5.9 T20G5.9 | -0.135542880414112 |
| AGIWUR1557                                                 |                                                                                    |                |                 |                    |
| N2 CT III                                                  | 10211041 10211946                                                                  | WBGene00011872 | blos-1 T20G5.10 |                    |
| -0.0771937760181238                                        | AGIWUR28631                                                                        |                |                 |                    |
| N2 CT III                                                  | 10212396 10214825                                                                  | WBGene00011868 | best-18 T20G5.4 |                    |
| -0.00436231138499732                                       | AGIWUR1668;AGIWUR12462;AGIWUR19724;AGIWUR27812;AGIWUR32888;AGIWUR33217;AGIWUR41702 |                |                 |                    |
| N2 CT III                                                  | 10214814 10216635                                                                  | WBGene00000833 | cts-1 T20G5.2   | 0.146168509909121  |
| AGIWUR6067;AGIWUR20186;AGIWUR25038;AGIWUR27140;AGIWUR44892 |                                                                                    |                |                 |                    |
| N2 CT III                                                  | 10217302 10218646                                                                  | WBGene00004326 | rde-4 T20G5.11  |                    |
| -0.178837195096264                                         | AGIWUR1070                                                                         |                |                 |                    |
| N2 CT III                                                  | 10218943 10222935                                                                  | WBGene00011875 | T20G5.14        | T20G5.14           |
| 0.0997225243747817                                         | AGIWUR13544;AGIWUR16763;AGIWUR17186;AGIWUR21489;AGIWUR33131                        |                |                 |                    |
| N2 CT III                                                  | 10223524 10224162                                                                  | WBGene00014946 | Y70G10A.1       | Y70G10A.1          |
| 0.00762153379680619                                        | AGIWUR14372                                                                        |                |                 |                    |
| N2 CT III                                                  | 10228164 10234079                                                                  | WBGene00013498 | Y70G10A.2       | Y70G10A.2          |
| -0.021218237702497                                         | AGIWUR17841;AGIWUR20918;AGIWUR22136;AGIWUR38703;AGIWUR41816                        |                |                 |                    |
| N2 CT III                                                  | 10238672 10244810                                                                  | WBGene00013499 | Y70G10A.3       | Y70G10A.3          |
| -0.207034360356959                                         | AGIWUR42684                                                                        |                |                 |                    |
| N2 CT III                                                  | 10245056 10248905                                                                  | WBGene00001002 | div-1 R01H10.1  |                    |
| 0.145581690883306                                          | AGIWUR32960                                                                        |                |                 |                    |
| N2 CT III                                                  | 10249111 10254709                                                                  | WBGene00000768 | cor-1 R01H10.3  |                    |
| -0.102409801717402                                         | AGIWUR4531;AGIWUR25414;AGIWUR37845;AGIWUR40559                                     |                |                 |                    |
| N2 CT III                                                  | 10254800 10257221                                                                  | WBGene00010972 | R01H10.4        | R01H10.4           |
| -0.0770129870581648                                        | AGIWUR39750                                                                        |                |                 |                    |
| N2 CT III                                                  | 10257181 10258736                                                                  | WBGene00010973 | rip-1 R01H10.5  |                    |
| -0.0469250757935944                                        | AGIWUR2959;AGIWUR5367;AGIWUR14748;AGIWUR29061;AGIWUR36636;AGIWUR38963              |                |                 |                    |
| N2 CT III                                                  | 10258856 10261679                                                                  | WBGene00010974 | bbs-5 R01H10.6  |                    |
| -0.197075556940749                                         | AGIWUR28666;AGIWUR30482                                                            |                |                 |                    |
| N2 CT III                                                  | 10261799 10267381                                                                  | WBGene00010975 | R01H10.7        | R01H10.7           |
| 0.00692148524544578                                        | AGIWUR23476                                                                        |                |                 |                    |
| N2 CT III                                                  | 10271257 10278579                                                                  | WBGene00000564 | cnk-1 R01H10.8  |                    |
| 0.0515226613286881                                         | AGIWUR31863                                                                        |                |                 |                    |
| N2 CT III                                                  | 10279127 10281476                                                                  | WBGene00010757 | pad-2 K10G9.3   | -0.303155156770499 |
| AGIWUR15507                                                |                                                                                    |                |                 |                    |



|                                                                       |    |     |          |          |                |          |         |                     |
|-----------------------------------------------------------------------|----|-----|----------|----------|----------------|----------|---------|---------------------|
| N2                                                                    | CT | III | 10285923 | 10288621 | WBGene00010756 | K10G9.2  | K10G9.2 | 0.102861066466492   |
| AGIWUR11899                                                           |    |     |          |          |                |          |         |                     |
| N2                                                                    | CT | III | 10295137 | 10298687 | WBGene00010755 | vglu-2   | K10G9.1 | 0.060993147702229   |
| AGIWUR9593                                                            |    |     |          |          |                |          |         |                     |
| N2                                                                    | CT | III | 10299164 | 10299949 | WBGene00011557 | ostf-4   | T07A5.4 | 0.269862474421673   |
| AGIWUR24598                                                           |    |     |          |          |                |          |         |                     |
| N2                                                                    | CT | III | 10300293 | 10303423 | WBGene00011556 | vglu-3   | T07A5.3 | 0.0812308430693278  |
| AGIWUR19587                                                           |    |     |          |          |                |          |         |                     |
| N2                                                                    | CT | III | 10303368 | 10306188 | WBGene00011554 | T07A5.1  | T07A5.1 | 0.271003115641646   |
| AGIWUR10153                                                           |    |     |          |          |                |          |         |                     |
| N2                                                                    | CT | III | 10306756 | 10311100 | WBGene00045475 | T07A5.7  | T07A5.7 | 0.197049275857688   |
| AGIWUR11178;AGIWUR39351;AGIWUR42277;AGIWUR43222                       |    |     |          |          |                |          |         |                     |
| N2                                                                    | CT | III | 10314490 | 10318162 | WBGene00006785 | unc-50   | T07A5.2 | -0.186162300627885  |
| AGIWUR8024;AGIWUR9434;AGIWUR11973;AGIWUR25507;AGIWUR29014;AGIWUR32340 |    |     |          |          |                |          |         |                     |
| N2                                                                    | CT | III | 10318939 | 10320021 | WBGene00006802 | unc-69   | T07A5.6 | -0.0182817723271009 |
| AGIWUR30280;AGIWUR32788;AGIWUR33203;AGIWUR41320                       |    |     |          |          |                |          |         |                     |
| N2                                                                    | CT | III | 10321019 | 10325675 | WBGene00011562 | T07C4.10 |         | T07C4.10            |
| -0.229380917940802 AGIWUR29783                                        |    |     |          |          |                |          |         |                     |
| N2                                                                    | CT | III | 10325613 | 10330422 | WBGene00003589 | nex-2    | T07C4.9 | 0.0141383332245768  |
| AGIWUR2964;AGIWUR5102;AGIWUR5328;AGIWUR10659;AGIWUR41869;AGIWUR42232  |    |     |          |          |                |          |         |                     |
| N2                                                                    | CT | III | 10331551 | 10332480 | WBGene00044891 | T07C4.12 |         | T07C4.12            |
| -0.121837030914723 AGIWUR11953                                        |    |     |          |          |                |          |         |                     |
| N2                                                                    | CT | III | 10334267 | 10335171 | WBGene00003225 | mev-1    | T07C4.7 | 0.183246531110744   |
| AGIWUR10210;AGIWUR33889                                               |    |     |          |          |                |          |         |                     |
| N2                                                                    | CT | III | 10335172 | 10337536 | WBGene00000423 | ced-9    | T07C4.8 | 0.184682785120957   |
| AGIWUR286;AGIWUR6854;AGIWUR9572;AGIWUR16216;AGIWUR23511;AGIWUR33329   |    |     |          |          |                |          |         |                     |
| N2                                                                    | CT | III | 10337840 | 10339440 | WBGene00011561 | ttr-15   | T07C4.5 | 0.191502114109417   |
| AGIWUR12663                                                           |    |     |          |          |                |          |         |                     |
| N2                                                                    | CT | III | 10339984 | 10341858 | WBGene00006546 | tbx-9    | T07C4.6 | -0.20126390323504   |
| AGIWUR5722                                                            |    |     |          |          |                |          |         |                     |
| N2                                                                    | CT | III | 10347575 | 10349740 | WBGene00006545 | tbx-8    | T07C4.2 | 0.01839535183775    |
| AGIWUR29064                                                           |    |     |          |          |                |          |         |                     |
| N2                                                                    | CT | III | 10352157 | 10355117 | WBGene00011560 | T07C4.3  | T07C4.3 | 0.142696332679123   |
| AGIWUR20793;AGIWUR29934;AGIWUR31453;AGIWUR31839                       |    |     |          |          |                |          |         |                     |
| N2                                                                    | CT | III | 10355122 | 10355982 | WBGene00004986 | spp-1    | T07C4.4 | -0.246901595457048  |
| AGIWUR237;AGIWUR7718;AGIWUR8291;AGIWUR10149;AGIWUR21291;AGIWUR35483   |    |     |          |          |                |          |         |                     |
| N2                                                                    | CT | III | 10355799 | 10357761 | WBGene00011559 | umps-1   | T07C4.1 | -0.017288389242037  |
| AGIWUR7994;AGIWUR33842                                                |    |     |          |          |                |          |         |                     |
| N2                                                                    | CT | III | 10364951 | 10373231 | WBGene00008018 | tbc-8    | C38H2.1 | -0.011362271891004  |

|                                                                         |    |     |          |          |                |          |          |                     |
|-------------------------------------------------------------------------|----|-----|----------|----------|----------------|----------|----------|---------------------|
| AGIWUR4274;AGIWUR22656;AGIWUR25009;AGIWUR35189;AGIWUR38326;AGIWUR43448  |    |     |          |          |                |          |          |                     |
| N2                                                                      | CT | III | 10381740 | 10385335 | WBGene00008019 | C38H2.2  | C38H2.2  | -0.0842707341764157 |
| AGIWUR1650;AGIWUR12814;AGIWUR18659;AGIWUR32985;AGIWUR34960;AGIWUR36869  |    |     |          |          |                |          |          |                     |
| N2                                                                      | CT | III | 10385313 | 10386572 | WBGene00008020 | C38H2.3  | C38H2.3  | 0.0934821754731754  |
| AGIWUR33304                                                             |    |     |          |          |                |          |          |                     |
| N2                                                                      | CT | III | 10393389 | 10396081 | WBGene00010838 | M03C11.1 |          | M03C11.1            |
| 0.1841349736316 AGIWUR36458                                             |    |     |          |          |                |          |          |                     |
| N2                                                                      | CT | III | 10399174 | 10405240 | WBGene00010839 | chl-1    | M03C11.2 |                     |
| -0.0398786849781949 AGIWUR44839                                         |    |     |          |          |                |          |          |                     |
| N2                                                                      | CT | III | 10405070 | 10415150 | WBGene00010840 | M03C11.3 |          | M03C11.3            |
| -0.265497840324759 AGIWUR3706                                           |    |     |          |          |                |          |          |                     |
| N2                                                                      | CT | III | 10416069 | 10421785 | WBGene00010842 | ymel-1   | M03C11.5 |                     |
| 0.00565569974611879 AGIWUR16409;AGIWUR23999                             |    |     |          |          |                |          |          |                     |
| N2                                                                      | CT | III | 10421781 | 10424006 | WBGene00010843 | M03C11.6 |          | M03C11.6            |
| -0.0188118122430048 AGIWUR23661                                         |    |     |          |          |                |          |          |                     |
| N2                                                                      | CT | III | 10424112 | 10427982 | WBGene00010844 | prp-3    | M03C11.7 |                     |
| -0.0378386856395094 AGIWUR586;AGIWUR12218                               |    |     |          |          |                |          |          |                     |
| N2                                                                      | CT | III | 10428334 | 10435988 | WBGene00010845 | M03C11.8 |          | M03C11.8            |
| -0.152299430736127 AGIWUR27739                                          |    |     |          |          |                |          |          |                     |
| N2                                                                      | CT | III | 10445805 | 10451112 | WBGene00010365 | H04D03.4 |          | H04D03.4            |
| 0.0899209718902494 AGIWUR7036                                           |    |     |          |          |                |          |          |                     |
| N2                                                                      | CT | III | 10461389 | 10468051 | WBGene00000231 | atx-2    | D2045.1  | -0.0819784370485044 |
| AGIWUR11012;AGIWUR23942;AGIWUR24350;AGIWUR38378;AGIWUR40827;AGIWUR43539 |    |     |          |          |                |          |          |                     |
| N2                                                                      | CT | III | 10471237 | 10475245 | WBGene00000836 | cul-1    | D2045.6  | -0.188114821319161  |
| AGIWUR42378                                                             |    |     |          |          |                |          |          |                     |
| N2                                                                      | CT | III | 10475245 | 10479758 | WBGene00008426 | D2045.9  | D2045.9  | 0.196414349152752   |
| AGIWUR4407;AGIWUR25018;AGIWUR30597;AGIWUR35709;AGIWUR36584;AGIWUR39005  |    |     |          |          |                |          |          |                     |
| N2                                                                      | CT | III | 10479807 | 10482285 | WBGene00008424 | D2045.7  | D2045.7  | 0.242540667110699   |
| AGIWUR14104                                                             |    |     |          |          |                |          |          |                     |
| N2                                                                      | CT | III | 10482288 | 10483926 | WBGene00008425 | D2045.8  | D2045.8  | -0.193993857705832  |
| AGIWUR39626                                                             |    |     |          |          |                |          |          |                     |
| N2                                                                      | CT | III | 10488128 | 10500267 | WBGene00009653 | F43D9.1  | F43D9.1  | 0.0817963111514022  |
| AGIWUR22640                                                             |    |     |          |          |                |          |          |                     |
| N2                                                                      | CT | III | 10500284 | 10503853 | WBGene00004283 | rab-33   | F43D9.2  | -0.14099046476728   |
| AGIWUR9622;AGIWUR24413;AGIWUR29010;AGIWUR31447;AGIWUR32558;AGIWUR42267  |    |     |          |          |                |          |          |                     |
| N2                                                                      | CT | III | 10503965 | 10505250 | WBGene00006395 | taf-11.3 |          | F43D9.5             |
| -0.0836926875736275 AGIWUR20041                                         |    |     |          |          |                |          |          |                     |
| N2                                                                      | CT | III | 10506106 | 10506801 | WBGene00004798 | sip-1    | F43D9.4  | 0.00614290181589539 |
| AGIWUR7686;AGIWUR13613;AGIWUR38909                                      |    |     |          |          |                |          |          |                     |

|                                                                                                                                                                                            |    |     |          |          |                |          |          |                    |
|--------------------------------------------------------------------------------------------------------------------------------------------------------------------------------------------|----|-----|----------|----------|----------------|----------|----------|--------------------|
| N2                                                                                                                                                                                         | CT | III | 10507058 | 10518391 | WBGene00009654 | sly-1    | F43D9.3  | -0.052094855203197 |
| AGIWUR8732;AGIWUR19708;AGIWUR29661;AGIWUR35705                                                                                                                                             |    |     |          |          |                |          |          |                    |
| N2                                                                                                                                                                                         | CT | III | 10520676 | 10532705 | WBGene00006784 | unc-49   | T21C12.1 |                    |
| -0.032006495704846                                                                                                                                                                         |    |     |          |          |                |          |          |                    |
| AGIWUR1626;AGIWUR2943;AGIWUR6217;AGIWUR7139;AGIWUR8761;AGIWUR13176;AGIWUR14305;AGIWUR15017;AGIWUR15943;AGIWUR16705;AGIWUR21882;AGIWUR26074;AGIWUR26395;AGIWUR29204;AGIWUR33200;AGIWUR36268 |    |     |          |          |                |          |          |                    |
| N2                                                                                                                                                                                         | CT | III | 10535526 | 10537682 | WBGene00001993 | hpd-1    | T21C12.2 |                    |
| -0.021483778483411 AGIWUR15910;AGIWUR42722;AGIWUR43555                                                                                                                                     |    |     |          |          |                |          |          |                    |
| N2                                                                                                                                                                                         | CT | III | 10538081 | 10539163 | WBGene00011899 | T21C12.3 |          | T21C12.3           |
| 0.268621173111498 AGIWUR24461;AGIWUR33959;AGIWUR35118;AGIWUR39927                                                                                                                          |    |     |          |          |                |          |          |                    |
| N2                                                                                                                                                                                         | CT | III | 10551102 | 10552955 | WBGene00043998 | T21C12.8 |          | T21C12.8           |
| 0.00909108089142929                                                                                                                                                                        |    |     |          |          |                |          |          |                    |
| AGIWUR4565;AGIWUR7449;AGIWUR8399;AGIWUR15232;AGIWUR17836;AGIWUR21442;AGIWUR42310;AGIWUR43489;AGIWUR44757                                                                                   |    |     |          |          |                |          |          |                    |
| N2                                                                                                                                                                                         | CT | III | 10553005 | 10558009 | WBGene00011900 | T21C12.4 |          | T21C12.4           |
| 0.0514001544877454 AGIWUR7867;AGIWUR22646;AGIWUR32575                                                                                                                                      |    |     |          |          |                |          |          |                    |
| N2                                                                                                                                                                                         | CT | III | 10558189 | 10561948 | WBGene00012859 | Y45F3A.1 |          | Y45F3A.1           |
| -0.201894753305851 AGIWUR32679                                                                                                                                                             |    |     |          |          |                |          |          |                    |
| N2                                                                                                                                                                                         | CT | III | 10563026 | 10565603 | WBGene00004282 | rab-30   | Y45F3A.2 |                    |
| -0.198149681784618 AGIWUR1388;AGIWUR2446;AGIWUR25760;AGIWUR28411;AGIWUR29148;AGIWUR37905                                                                                                   |    |     |          |          |                |          |          |                    |
| N2                                                                                                                                                                                         | CT | III | 10566181 | 10571606 | WBGene00012860 | acdH-11  | Y45F3A.3 |                    |
| 0.0538953360481287 AGIWUR23517                                                                                                                                                             |    |     |          |          |                |          |          |                    |
| N2                                                                                                                                                                                         | CT | III | 10572475 | 10575420 | WBGene00012861 | Y45F3A.4 |          | Y45F3A.4           |
| 0.164435268488965 AGIWUR20000;AGIWUR21324;AGIWUR36197                                                                                                                                      |    |     |          |          |                |          |          |                    |
| N2                                                                                                                                                                                         | CT | III | 10585848 | 10586343 | WBGene00012862 | Y45F3A.5 |          | Y45F3A.5           |
| -0.145017547393072 AGIWUR39377                                                                                                                                                             |    |     |          |          |                |          |          |                    |
| N2                                                                                                                                                                                         | CT | III | 10586407 | 10587706 | WBGene00014898 | Y45F3A.6 |          | Y45F3A.6           |
| -0.272538507744271 AGIWUR12638                                                                                                                                                             |    |     |          |          |                |          |          |                    |
| N2                                                                                                                                                                                         | CT | III | 10589865 | 10592801 | WBGene00012863 | Y45F3A.8 |          | Y45F3A.8           |
| 0.130771864416867 AGIWUR28002                                                                                                                                                              |    |     |          |          |                |          |          |                    |
| N2                                                                                                                                                                                         | CT | III | 10592754 | 10595166 | WBGene00012864 | Y45F3A.9 |          | Y45F3A.9           |
| -0.0442529918644929 AGIWUR12357                                                                                                                                                            |    |     |          |          |                |          |          |                    |
| N2                                                                                                                                                                                         | CT | III | 10595258 | 10596487 | WBGene00012643 | Y39A1A.3 |          | Y39A1A.3           |
| -0.0614282681584459 AGIWUR113                                                                                                                                                              |    |     |          |          |                |          |          |                    |
| N2                                                                                                                                                                                         | CT | III | 10596615 | 10600184 | WBGene00012641 | epg-6    | Y39A1A.1 |                    |
| -0.174890209815825 AGIWUR29369                                                                                                                                                             |    |     |          |          |                |          |          |                    |
| N2                                                                                                                                                                                         | CT | III | 10601905 | 10603566 | WBGene00012642 | Y39A1A.2 |          | Y39A1A.2           |
| 0.0650577936472443 AGIWUR308;AGIWUR29627;AGIWUR38468;AGIWUR41990                                                                                                                           |    |     |          |          |                |          |          |                    |
| N2                                                                                                                                                                                         | CT | III | 10605349 | 10613294 | WBGene00012644 | rabx-5   | Y39A1A.5 |                    |
| -0.126354073891617 AGIWUR5300                                                                                                                                                              |    |     |          |          |                |          |          |                    |

|                      |    |     |                                                |          |                |           |           |
|----------------------|----|-----|------------------------------------------------|----------|----------------|-----------|-----------|
| N2                   | CT | III | 10613567                                       | 10614931 | WBGene00012660 | Y39A1A.24 | Y39A1A.24 |
| -0.102362006735593   |    |     | AGIWUR9172                                     |          |                |           |           |
| N2                   | CT | III | 10615466                                       | 10617862 | WBGene00012645 | mrp1-22   | Y39A1A.6  |
| -0.281089869149737   |    |     | AGIWUR27121                                    |          |                |           |           |
| N2                   | CT | III | 10617863                                       | 10621369 | WBGene00012646 | Iron-10   | Y39A1A.7  |
| -0.00985769076436238 |    |     | AGIWUR6665;AGIWUR11602;AGIWUR35533;AGIWUR39777 |          |                |           |           |
| N2                   | CT | III | 10630070                                       | 10633501 | WBGene00012648 | Y39A1A.9  | Y39A1A.9  |
| 0.274408348507157    |    |     | AGIWUR11161                                    |          |                |           |           |
| N2                   | CT | III | 10640828                                       | 10642872 | WBGene00000974 | dhs-11    | Y39A1A.11 |
| -0.258375708343658   |    |     | AGIWUR10943                                    |          |                |           |           |
| N2                   | CT | III | 10643002                                       | 10646107 | WBGene00012650 | orc-1     | Y39A1A.12 |
| -0.370550147570009   |    |     | AGIWUR7399                                     |          |                |           |           |
| N2                   | CT | III | 10646170                                       | 10648861 | WBGene00012651 | orc-4     | Y39A1A.13 |
| -0.160395207058083   |    |     | AGIWUR18023;AGIWUR45072                        |          |                |           |           |
| N2                   | CT | III | 10649519                                       | 10650908 | WBGene00012652 | Y39A1A.14 | Y39A1A.14 |
| -0.246665496729552   |    |     | AGIWUR5717                                     |          |                |           |           |
| N2                   | CT | III | 10655018                                       | 10677521 | WBGene00000566 | cnt-2     | Y39A1A.15 |
| 0.0214141350667747   |    |     | AGIWUR9480;AGIWUR11595;AGIWUR17227;AGIWUR22673 |          |                |           |           |
| N2                   | CT | III | 10679474                                       | 10682212 | WBGene00012654 | Y39A1A.16 | Y39A1A.16 |
| -0.284862047304634   |    |     | AGIWUR3345                                     |          |                |           |           |
| N2                   | CT | III | 10687127                                       | 10691101 | WBGene00012655 | Y39A1A.17 | Y39A1A.17 |
| 0.0605720325069177   |    |     | AGIWUR3054                                     |          |                |           |           |
| N2                   | CT | III | 10692221                                       | 10694391 | WBGene00012656 | Y39A1A.18 | Y39A1A.18 |
| -0.156028408338987   |    |     | AGIWUR6126                                     |          |                |           |           |
| N2                   | CT | III | 10694590                                       | 10698861 | WBGene00001478 | fmo-3     | Y39A1A.19 |
| -0.267373962771384   |    |     | AGIWUR32081                                    |          |                |           |           |
| N2                   | CT | III | 10699216                                       | 10700560 | WBGene00012657 | Y39A1A.20 | Y39A1A.20 |
| -0.149744757611426   |    |     | AGIWUR2587                                     |          |                |           |           |
| N2                   | CT | III | 10700652                                       | 10707024 | WBGene00012658 | Y39A1A.21 | Y39A1A.21 |
| -0.144492804224804   |    |     | AGIWUR23804;AGIWUR30508;AGIWUR38450            |          |                |           |           |
| N2                   | CT | III | 10707761                                       | 10708518 | WBGene00012361 | mrp1-12   | W09D10.3  |
| -0.161462366435124   |    |     | AGIWUR11263;AGIWUR27960;AGIWUR37422            |          |                |           |           |
| N2                   | CT | III | 10708484                                       | 10711527 | WBGene00012363 | W09D10.5  | W09D10.5  |
| 0.0670115888033358   |    |     | AGIWUR24376                                    |          |                |           |           |
| N2                   | CT | III | 10711724                                       | 10716191 | WBGene00012362 | W09D10.4  | W09D10.4  |
| 0.021436463051149    |    |     | AGIWUR23890                                    |          |                |           |           |
| N2                   | CT | III | 10722148                                       | 10730705 | WBGene00012360 | tat-3     | W09D10.2  |
| 0.0650167658496041   |    |     | AGIWUR23128                                    |          |                |           |           |
| N2                   | CT | III | 10736893                                       | 10739824 | WBGene00012359 | W09D10.1  | W09D10.1  |

|                                                                                                       |            |     |          |          |                |          |          |                     |
|-------------------------------------------------------------------------------------------------------|------------|-----|----------|----------|----------------|----------|----------|---------------------|
| -0.0390049002990995                                                                                   | AGIWUR9099 |     |          |          |                |          |          |                     |
| N2                                                                                                    | CT         | III | 10740280 | 10740772 | WBGene00010479 | K01G5.8  | K01G5.8  | 0.122149451071358   |
| AGIWUR1395;AGIWUR8920;AGIWUR21836;AGIWUR27800;AGIWUR30550;AGIWUR36735;AGIWUR42856                     |            |     |          |          |                |          |          |                     |
| N2                                                                                                    | CT         | III | 10740868 | 10742461 | WBGene00006536 | tbb-1    | K01G5.7  | 0.112646941981224   |
| AGIWUR12340;AGIWUR24533                                                                               |            |     |          |          |                |          |          |                     |
| N2                                                                                                    | CT         | III | 10742777 | 10746675 | WBGene00004361 | rib-2    | K01G5.6  | 0.0282609964509852  |
| AGIWUR18008                                                                                           |            |     |          |          |                |          |          |                     |
| N2                                                                                                    | CT         | III | 10746581 | 10747728 | WBGene00004302 | ran-1    | K01G5.4  | -0.0388688917633075 |
| AGIWUR4222;AGIWUR5342;AGIWUR31873;AGIWUR37645;AGIWUR37954;AGIWUR44185                                 |            |     |          |          |                |          |          |                     |
| N2                                                                                                    | CT         | III | 10748429 | 10750080 | WBGene00010478 | K01G5.5  | K01G5.5  | -0.0384778713820069 |
| AGIWUR2813                                                                                            |            |     |          |          |                |          |          |                     |
| N2                                                                                                    | CT         | III | 10752254 | 10755523 | WBGene00001996 | hpl-2    | K01G5.2  | -0.0111157845262166 |
| AGIWUR26193                                                                                           |            |     |          |          |                |          |          |                     |
| N2                                                                                                    | CT         | III | 10755624 | 10757640 | WBGene00010476 | rnf-113  | K01G5.1  | -0.0881482868364145 |
| AGIWUR5623;AGIWUR16936;AGIWUR23877;AGIWUR30190;AGIWUR33377                                            |            |     |          |          |                |          |          |                     |
| N2                                                                                                    | CT         | III | 10757641 | 10758522 | WBGene00010481 | K01G5.10 | K01G5.10 |                     |
| -0.173834710970663 AGIWUR42363                                                                        |            |     |          |          |                |          |          |                     |
| N2                                                                                                    | CT         | III | 10759290 | 10763006 | WBGene00010480 | K01G5.9  | K01G5.9  | -0.186209021364613  |
| AGIWUR2342;AGIWUR26214;AGIWUR43246                                                                    |            |     |          |          |                |          |          |                     |
| N2                                                                                                    | CT         | III | 10763131 | 10777343 | WBGene00001087 | dpy-28   | Y39A1B.3 |                     |
| 0.040261592778954 AGIWUR19814;AGIWUR31824;AGIWUR37311;AGIWUR39594;AGIWUR42588;AGIWUR44785;AGIWUR44913 |            |     |          |          |                |          |          |                     |
| N2                                                                                                    | CT         | III | 10781853 | 10791252 | WBGene00004233 | ptr-19   | Y39A1B.2 |                     |
| -0.00733343769483241 AGIWUR2310                                                                       |            |     |          |          |                |          |          |                     |
| N2                                                                                                    | CT         | III | 10794349 | 10796369 | WBGene00012661 | clec-163 | Y39A1B.1 |                     |
| 0.0241769627460382 AGIWUR4091;AGIWUR16942;AGIWUR30849                                                 |            |     |          |          |                |          |          |                     |
| N2                                                                                                    | CT         | III | 10796711 | 10802212 | WBGene00010772 | K11D9.3  | K11D9.3  | -0.0142853971687238 |
| AGIWUR43139                                                                                           |            |     |          |          |                |          |          |                     |
| N2                                                                                                    | CT         | III | 10805930 | 10810999 | WBGene00002219 | k1p-7    | K11D9.1  | 0.227838115080543   |
| AGIWUR11370;AGIWUR12933;AGIWUR13168;AGIWUR23162;AGIWUR34095;AGIWUR34776;AGIWUR35301                   |            |     |          |          |                |          |          |                     |
| N2                                                                                                    | CT         | III | 10811906 | 10816844 | WBGene00004736 | sca-1    | K11D9.2  | 0.329516711616904   |
| AGIWUR12804;AGIWUR13224;AGIWUR18711;AGIWUR22264;AGIWUR22479;AGIWUR26781;AGIWUR32116;AGIWUR40601       |            |     |          |          |                |          |          |                     |
| N2                                                                                                    | CT         | III | 10832936 | 10839451 | WBGene00011269 | R17.3    | R17.3    | 0.390477996383966   |
| AGIWUR22883                                                                                           |            |     |          |          |                |          |          |                     |
| N2                                                                                                    | CT         | III | 10840023 | 10845020 | WBGene00011268 | pde-12   | R17.2    | -0.173356730058909  |
| AGIWUR23043                                                                                           |            |     |          |          |                |          |          |                     |
| N2                                                                                                    | CT         | III | 10847619 | 10848670 | WBGene00011267 | fbxb-85  | R17.1    | 0.244405730763091   |
| AGIWUR2734                                                                                            |            |     |          |          |                |          |          |                     |
| N2                                                                                                    | CT         | III | 10849222 | 10854561 | WBGene00012663 | hex-3    | Y39A1C.4 |                     |
| -0.174703183004354 AGIWUR15260;AGIWUR27664;AGIWUR37209                                                |            |     |          |          |                |          |          |                     |

|                                                 |    |     |                                                                         |          |                |          |                             |
|-------------------------------------------------|----|-----|-------------------------------------------------------------------------|----------|----------------|----------|-----------------------------|
| N2                                              | CT | III | 10856776                                                                | 10858186 | WBGene00012662 | Y39A1C.1 | Y39A1C.1                    |
| -0.0879720124388257                             |    |     | AGIWUR27789                                                             |          |                |          |                             |
| N2                                              | CT | III | 10858284                                                                | 10866994 | WBGene00003898 | oxi-1    | Y39A1C.2                    |
| -0.160721213137922                              |    |     | AGIWUR24661                                                             |          |                |          |                             |
| N2                                              | CT | III | 10866870                                                                | 10868727 | WBGene00000475 | cey-4    | Y39A1C.3                    |
| -0.0542357740088173                             |    |     | AGIWUR12140;AGIWUR16283;AGIWUR18401;AGIWUR22576;AGIWUR38439;AGIWUR42063 |          |                |          |                             |
| N2                                              | CT | III | 10869193                                                                | 10874528 | WBGene00008078 | vps-50   | C44B9.1 -0.277045628875888  |
| AGIWUR35718                                     |    |     |                                                                         |          |                |          |                             |
| N2                                              | CT | III | 10875459                                                                | 10878061 | WBGene00008079 | C44B9.2  | C44B9.2 0.13482614564151    |
| AGIWUR32805                                     |    |     |                                                                         |          |                |          |                             |
| N2                                              | CT | III | 10878191                                                                | 10880183 | WBGene00008080 | C44B9.3  | C44B9.3 -0.10693788265727   |
| AGIWUR18192                                     |    |     |                                                                         |          |                |          |                             |
| N2                                              | CT | III | 10882345                                                                | 10893672 | WBGene00008081 | athp-1   | C44B9.4 0.196509761749216   |
| AGIWUR37057                                     |    |     |                                                                         |          |                |          |                             |
| N2                                              | CT | III | 10894520                                                                | 10895732 | WBGene00043996 | fbxb-87  | C44B9.6 -0.227205870089733  |
| AGIWUR31035;AGIWUR40977                         |    |     |                                                                         |          |                |          |                             |
| N2                                              | CT | III | 10896363                                                                | 10901836 | WBGene00008082 | com-1    | C44B9.5 0.102556698655338   |
| AGIWUR17334;AGIWUR29610;AGIWUR37809             |    |     |                                                                         |          |                |          |                             |
| N2                                              | CT | III | 10902648                                                                | 10908927 | WBGene00006843 | unc-119  | M142.1 -0.166931202659887   |
| AGIWUR42584                                     |    |     |                                                                         |          |                |          |                             |
| N2                                              | CT | III | 10911460                                                                | 10916567 | WBGene00000853 | cut-6    | M142.2 0.00680363155109065  |
| AGIWUR20219;AGIWUR21209;AGIWUR27188;AGIWUR37502 |    |     |                                                                         |          |                |          |                             |
| N2                                              | CT | III | 10920336                                                                | 10926041 | WBGene00006873 | vab-7    | M142.4 -0.0516956795695194  |
| AGIWUR44250                                     |    |     |                                                                         |          |                |          |                             |
| N2                                              | CT | III | 10927093                                                                | 10928909 | WBGene00014809 | M142.3   | M142.3 -0.254217646939724   |
| AGIWUR38763                                     |    |     |                                                                         |          |                |          |                             |
| N2                                              | CT | III | 10931208                                                                | 10932226 | WBGene00010922 | M142.5   | M142.5 -0.127936506327393   |
| AGIWUR29358                                     |    |     |                                                                         |          |                |          |                             |
| N2                                              | CT | III | 10933631                                                                | 10936129 | WBGene00043057 | M142.8   | M142.8 -0.0936939743307672  |
| AGIWUR36829                                     |    |     |                                                                         |          |                |          |                             |
| N2                                              | CT | III | 10936246                                                                | 10946834 | WBGene00010923 | rle-1    | M142.6 -0.145694704529415   |
| AGIWUR4139                                      |    |     |                                                                         |          |                |          |                             |
| N2                                              | CT | III | 10947446                                                                | 10951169 | WBGene00013132 | strd-1   | Y52D3.1 -0.0455013107311633 |
| AGIWUR11800;AGIWUR26861;AGIWUR34611             |    |     |                                                                         |          |                |          |                             |
| N2                                              | CT | III | 10951225                                                                | 10953505 | WBGene00006982 | zig-5    | Y48A6A.1                    |
| -0.089907885557297                              |    |     | AGIWUR7315;AGIWUR13367;AGIWUR16414;AGIWUR26225;AGIWUR43305              |          |                |          |                             |
| N2                                              | CT | III | 10960243                                                                | 10966996 | WBGene00012271 | W05B2.2  | W05B2.2 -0.0300638846946613 |
| AGIWUR10851;AGIWUR17598                         |    |     |                                                                         |          |                |          |                             |
| N2                                              | CT | III | 10967779                                                                | 10969472 | WBGene00014854 | W05B2.3  | W05B2.3 0.139452746759693   |

|                                                                                                          |    |     |          |          |                |          |           |                    |
|----------------------------------------------------------------------------------------------------------|----|-----|----------|----------|----------------|----------|-----------|--------------------|
| AGIWUR18948                                                                                              |    |     |          |          |                |          |           |                    |
| N2                                                                                                       | CT | III | 10969944 | 10981848 | WBGene00012272 | dhc-4    | W05B2.4   | 0.0795228931155405 |
| AGIWUR14770                                                                                              |    |     |          |          |                |          |           |                    |
| N2                                                                                                       | CT | III | 10982166 | 10983253 | WBGene00000667 | col-92   | W05B2.6   | 0.202167450529808  |
| AGIWUR6521                                                                                               |    |     |          |          |                |          |           |                    |
| N2                                                                                                       | CT | III | 10988133 | 10991912 | WBGene00012273 | W05B2.7  | W05B2.7   |                    |
| -0.00412800541095759                                                                                     |    |     |          |          |                |          |           |                    |
| AGIWUR7734;AGIWUR9067;AGIWUR9729;AGIWUR17657;AGIWUR26332;AGIWUR29538;AGIWUR33745;AGIWUR37673;AGIWUR38793 |    |     |          |          |                |          |           |                    |
| N2                                                                                                       | CT | III | 10992129 | 10995237 | WBGene00012962 | dmsr-5   | Y48A6B.1  |                    |
| 0.0049519255884789                                                                                       |    |     |          |          |                |          |           |                    |
| N2                                                                                                       | CT | III | 11007415 | 11007620 | WBGene00012965 | fipr-17  | Y48A6B.4  |                    |
| -0.549407192337581                                                                                       |    |     |          |          |                |          |           |                    |
| N2                                                                                                       | CT | III | 11008222 | 11008934 | WBGene00012964 | Y48A6B.3 | Y48A6B.3  |                    |
| -0.17981177436164                                                                                        |    |     |          |          |                |          |           |                    |
| N2                                                                                                       | CT | III | 11009043 | 11010595 | WBGene00012966 | exos-1   | Y48A6B.5  |                    |
| -0.270057441254711                                                                                       |    |     |          |          |                |          |           |                    |
| N2                                                                                                       | CT | III | 11012566 | 11025292 | WBGene00012967 | kvs-4    | Y48A6B.6  |                    |
| -0.26718407934096                                                                                        |    |     |          |          |                |          |           |                    |
| N2                                                                                                       | CT | III | 11033172 | 11036080 | WBGene00012970 | Y48A6B.9 | Y48A6B.9  |                    |
| -0.106078703484512                                                                                       |    |     |          |          |                |          |           |                    |
| N2                                                                                                       | CT | III | 11036943 | 11063027 | WBGene00012973 | spat-2   | Y48A6B.13 |                    |
| 0.13709766583933                                                                                         |    |     |          |          |                |          |           |                    |
| N2                                                                                                       | CT | III | 11063479 | 11068753 | WBGene00012972 | rsa-2    | Y48A6B.11 |                    |
| -0.021682360682588                                                                                       |    |     |          |          |                |          |           |                    |
| N2                                                                                                       | CT | III | 11068858 | 11072981 | WBGene00012356 | W09D6.1  | W09D6.1   | 0.130352042006781  |
| AGIWUR7033                                                                                               |    |     |          |          |                |          |           |                    |
| N2                                                                                                       | CT | III | 11074536 | 11077494 | WBGene00006287 | str-261  | W09D6.2   | -0.14352316460481  |
| AGIWUR26409                                                                                              |    |     |          |          |                |          |           |                    |
| N2                                                                                                       | CT | III | 11077704 | 11079446 | WBGene00006273 | str-246  | W09D6.3   | 0.0240537729426666 |
| AGIWUR13621                                                                                              |    |     |          |          |                |          |           |                    |
| N2                                                                                                       | CT | III | 11079745 | 11080413 | WBGene00012357 | W09D6.4  | W09D6.4   | 0.262647568256105  |
| AGIWUR2936                                                                                               |    |     |          |          |                |          |           |                    |
| N2                                                                                                       | CT | III | 11088487 | 11091616 | WBGene00012358 | W09D6.5  | W09D6.5   | 0.159483797513486  |
| AGIWUR27195                                                                                              |    |     |          |          |                |          |           |                    |
| N2                                                                                                       | CT | III | 11091548 | 11099964 | WBGene00001815 | hmt-1    | W09D6.6   | -0.181296356093361 |
| AGIWUR10993;AGIWUR34799;AGIWUR37401                                                                      |    |     |          |          |                |          |           |                    |
| N2                                                                                                       | CT | III | 11101268 | 11107206 | WBGene00012974 | Y48A6C.1 | Y48A6C.1  |                    |
| 0.0234232040301414                                                                                       |    |     |          |          |                |          |           |                    |
| N2                                                                                                       | CT | III | 11116994 | 11119222 | WBGene00012976 | sup-35   | Y48A6C.3  |                    |

|                                                                                               |                                   |          |                |           |           |  |
|-----------------------------------------------------------------------------------------------|-----------------------------------|----------|----------------|-----------|-----------|--|
| -0.258554394817793                                                                            | AGIWUR22107                       |          |                |           |           |  |
| N2 CT III                                                                                     | 11131775                          | 11136380 | WBGene00004010 | pha-1     | Y48A6C.5  |  |
| -0.168691520411759                                                                            | AGIWUR37170                       |          |                |           |           |  |
| N2 CT III                                                                                     | 11136802                          | 11138905 | WBGene00012923 | fbxa-128  | Y47D3A.2  |  |
| -0.416264255919595                                                                            | AGIWUR43741                       |          |                |           |           |  |
| N2 CT III                                                                                     | 11139241                          | 11141825 | WBGene00012922 | Y47D3A.1  | Y47D3A.1  |  |
| -0.147328700967208                                                                            | AGIWUR18483                       |          |                |           |           |  |
| N2 CT III                                                                                     | 11142448                          | 11154287 | WBGene00012936 | Y47D3A.29 | Y47D3A.29 |  |
| -0.0601191569389368                                                                           | AGIWUR2112                        |          |                |           |           |  |
| N2 CT III                                                                                     | 11154827                          | 11168820 | WBGene00000519 | cku-70    | Y47D3A.4  |  |
| -0.0404640130346898                                                                           | AGIWUR31521                       |          |                |           |           |  |
| N2 CT III                                                                                     | 11168923                          | 11170865 | WBGene00012924 | Y47D3A.5  | Y47D3A.5  |  |
| 0.221134746746148                                                                             | AGIWUR42591                       |          |                |           |           |  |
| N2 CT III                                                                                     | 11170889                          | 11195207 | WBGene00006604 | tra-1     | Y47D3A.6  |  |
| -0.189826252696555                                                                            |                                   |          |                |           |           |  |
| AGIWUR1689;AGIWUR2672;AGIWUR17668;AGIWUR22313;AGIWUR25374;AGIWUR29878;AGIWUR35190;AGIWUR38829 |                                   |          |                |           |           |  |
| N2 CT III                                                                                     | 11216398                          | 11218260 | WBGene00006553 | tbx-34    | Y47D3A.10 |  |
| 0.267183775303693                                                                             | AGIWUR45039                       |          |                |           |           |  |
| N2 CT III                                                                                     | 11218797                          | 11222666 | WBGene00012925 | wht-8     | Y47D3A.11 |  |
| 0.049734312992161                                                                             | AGIWUR5856;AGIWUR6471;AGIWUR18518 |          |                |           |           |  |
| N2 CT III                                                                                     | 11223439                          | 11224106 | WBGene00012926 | Y47D3A.13 | Y47D3A.13 |  |
| 0.152219457445058                                                                             | AGIWUR20032;AGIWUR22061           |          |                |           |           |  |
| N2 CT III                                                                                     | 11224800                          | 11227125 | WBGene00006556 | tbx-37    | Y47D3A.12 |  |
| 0.00986921620827097                                                                           | AGIWUR19564                       |          |                |           |           |  |
| N2 CT III                                                                                     | 11235581                          | 11236868 | WBGene00012927 | Y47D3A.14 | Y47D3A.14 |  |
| 0.136778672366114                                                                             | AGIWUR18209;AGIWUR21353           |          |                |           |           |  |
| N2 CT III                                                                                     | 11237149                          | 11238252 | WBGene00012928 | aakb-2    | Y47D3A.15 |  |
| -0.186893341225698                                                                            | AGIWUR26897                       |          |                |           |           |  |
| N2 CT III                                                                                     | 11245120                          | 11252281 | WBGene00012929 | rsks-1    | Y47D3A.16 |  |
| 0.170361545468677                                                                             | AGIWUR17817;AGIWUR19720           |          |                |           |           |  |
| N2 CT III                                                                                     | 11252391                          | 11256646 | WBGene00012938 | Y47D3A.32 | Y47D3A.32 |  |
| -0.202139823849652                                                                            | AGIWUR9222                        |          |                |           |           |  |
| N2 CT III                                                                                     | 11257307                          | 11270875 | WBGene00012930 | obr-1     | Y47D3A.17 |  |
| 0.0172677701371384                                                                            | AGIWUR4034                        |          |                |           |           |  |
| N2 CT III                                                                                     | 11274901                          | 11276032 | WBGene00012931 | Y47D3A.20 | Y47D3A.20 |  |
| 0.000268906393683821                                                                          | AGIWUR17656                       |          |                |           |           |  |
| N2 CT III                                                                                     | 11276292                          | 11278917 | WBGene00012932 | Y47D3A.21 | Y47D3A.21 |  |
| -0.105069358967016                                                                            | AGIWUR43113                       |          |                |           |           |  |
| N2 CT III                                                                                     | 11279021                          | 11290580 | WBGene00012934 | gly-9     | Y47D3A.23 |  |



|                                                                       |                                                                                  |          |                |           |           |                    |
|-----------------------------------------------------------------------|----------------------------------------------------------------------------------|----------|----------------|-----------|-----------|--------------------|
| -0.240621305921554                                                    | AGIWUR10346                                                                      |          |                |           |           |                    |
| N2 CT III                                                             | 11290911                                                                         | 11306145 | WBGene00004873 | smc-3     | Y47D3A.26 |                    |
| 0.378031245000047                                                     | AGIWUR11729                                                                      |          |                |           |           |                    |
| N2 CT III                                                             | 11306560                                                                         | 11311566 | WBGene00004284 | rab-35    | Y47D3A.25 |                    |
| 0.0295259530123344                                                    | AGIWUR2957;AGIWUR6937;AGIWUR24812;AGIWUR25485;AGIWUR28738;AGIWUR36629            |          |                |           |           |                    |
| N2 CT III                                                             | 11312251                                                                         | 11317055 | WBGene00006563 | teg-1     | Y47D3A.27 |                    |
| -0.00683626434337725                                                  | AGIWUR30380                                                                      |          |                |           |           |                    |
| N2 CT III                                                             | 11317570                                                                         | 11326664 | WBGene00012935 | mcm-10    | Y47D3A.28 |                    |
| -0.10028384380001                                                     | AGIWUR37595                                                                      |          |                |           |           |                    |
| N2 CT III                                                             | 11326654                                                                         | 11343108 | WBGene00012126 | T28D6.6   | T28D6.6   | -0.185359917892196 |
| AGIWUR8625                                                            |                                                                                  |          |                |           |           |                    |
| N2 CT III                                                             | 11343272                                                                         | 11344147 | WBGene00003975 | pen-2     | T28D6.9   | -0.160292607761978 |
| AGIWUR8411                                                            |                                                                                  |          |                |           |           |                    |
| N2 CT III                                                             | 11344255                                                                         | 11346789 | WBGene00012127 | T28D6.7   | T28D6.7   | -0.161138725838741 |
| AGIWUR10769                                                           |                                                                                  |          |                |           |           |                    |
| N2 CT III                                                             | 11360456                                                                         | 11366214 | WBGene00012124 | T28D6.4   | T28D6.4   | -0.12964492299745  |
| AGIWUR36605                                                           |                                                                                  |          |                |           |           |                    |
| N2 CT III                                                             | 11366618                                                                         | 11368435 | WBGene00012123 | T28D6.3   | T28D6.3   | 0.470144652292534  |
| AGIWUR3710;AGIWUR7468;AGIWUR14018;AGIWUR35762;AGIWUR40316;AGIWUR41376 |                                                                                  |          |                |           |           |                    |
| N2 CT III                                                             | 11368415                                                                         | 11371775 | WBGene00006533 | tba-7     | T28D6.2   | 0.0505891478939935 |
| AGIWUR715;AGIWUR5371;AGIWUR29133;AGIWUR32168;AGIWUR42111              |                                                                                  |          |                |           |           |                    |
| N2 CT III                                                             | 11372886                                                                         | 11377980 | WBGene00001077 | dpy-18    | Y47D3B.10 |                    |
| -0.0698074973302862                                                   | AGIWUR12436;AGIWUR13772                                                          |          |                |           |           |                    |
| N2 CT III                                                             | 11382222                                                                         | 11388669 | WBGene00012939 | Y47D3B.1  | Y47D3B.1  |                    |
| -0.0178872122299101                                                   | AGIWUR1218;AGIWUR5068;AGIWUR16542                                                |          |                |           |           |                    |
| N2 CT III                                                             | 11388606                                                                         | 11393261 | WBGene00003759 | nlp-21    | Y47D3B.2  |                    |
| -0.0954922672076854                                                   | AGIWUR821;AGIWUR1951;AGIWUR3467;AGIWUR16106;AGIWUR18641;AGIWUR34936;AGIWUR40877  |          |                |           |           |                    |
| N2 CT III                                                             | 11403017                                                                         | 11404197 | WBGene00185055 | Y47D3B.12 | Y47D3B.12 |                    |
| -0.282263697492143                                                    | AGIWUR10572;AGIWUR15106;AGIWUR27216                                              |          |                |           |           |                    |
| N2 CT III                                                             | 11405361                                                                         | 11409425 | WBGene00012941 | Y47D3B.4  | Y47D3B.4  |                    |
| -0.0583189948010405                                                   | AGIWUR6626;AGIWUR12982;AGIWUR13920;AGIWUR22355;AGIWUR36034                       |          |                |           |           |                    |
| N2 CT III                                                             | 11410712                                                                         | 11424655 | WBGene00006683 | twk-31    | Y47D3B.5  |                    |
| 0.117350577602222                                                     | AGIWUR26655                                                                      |          |                |           |           |                    |
| N2 CT III                                                             | 11427135                                                                         | 11428414 | WBGene00012942 | Y47D3B.6  | Y47D3B.6  |                    |
| 0.242855854985066                                                     | AGIWUR2691;AGIWUR6711;AGIWUR8090;AGIWUR16063;AGIWUR19274;AGIWUR21033;AGIWUR42739 |          |                |           |           |                    |
| N2 CT III                                                             | 11428367                                                                         | 11442566 | WBGene00004735 | sbp-1     | Y47D3B.7  |                    |
| 0.0103650366738286                                                    | AGIWUR35305                                                                      |          |                |           |           |                    |
| N2 CT III                                                             | 11456877                                                                         | 11462897 | WBGene00023404 | plr-1     | Y47D3B.11 |                    |
| 0.0819829993064403                                                    | AGIWUR38850                                                                      |          |                |           |           |                    |

|                     |    |     |                                    |          |                |            |            |
|---------------------|----|-----|------------------------------------|----------|----------------|------------|------------|
| N2                  | CT | III | 11463665                           | 11470805 | WBGene00012943 | bed-2      | Y47D3B.9   |
| 0.207403654005844   |    |     | AGIWUR34421                        |          |                |            |            |
| N2                  | CT | III | 11482603                           | 11484244 | WBGene00013421 | fbxa-220   | Y66A7A.1   |
| -0.0590406673390556 |    |     | AGIWUR9425                         |          |                |            |            |
| N2                  | CT | III | 11485474                           | 11487345 | WBGene00013422 | Y66A7A.2   | Y66A7A.2   |
| -0.323494615013011  |    |     | AGIWUR6555                         |          |                |            |            |
| N2                  | CT | III | 11488355                           | 11500747 | WBGene00013447 | nars-2     | Y66D12A.23 |
| -0.327788200691376  |    |     | AGIWUR8032;AGIWUR18572;AGIWUR36913 |          |                |            |            |
| N2                  | CT | III | 11500867                           | 11502852 | WBGene00006573 | tin-10     | Y66D12A.22 |
| -0.180289533062757  |    |     | AGIWUR23071                        |          |                |            |            |
| N2                  | CT | III | 11502963                           | 11505291 | WBGene00013446 | Y66D12A.21 | Y66D12A.21 |
| -0.152354042744113  |    |     | AGIWUR236;AGIWUR33308              |          |                |            |            |
| N2                  | CT | III | 11505535                           | 11508919 | WBGene00004960 | spe-6      | Y66D12A.20 |
| 0.121505412712041   |    |     | AGIWUR19592                        |          |                |            |            |
| N2                  | CT | III | 11509081                           | 11511467 | WBGene00013445 | Y66D12A.19 | Y66D12A.19 |
| -0.0650005736706181 |    |     | AGIWUR6432;AGIWUR11711             |          |                |            |            |
| N2                  | CT | III | 11512860                           | 11523759 | WBGene00013443 | such-1     | Y66D12A.17 |
| -0.0342074193213229 |    |     | AGIWUR42355                        |          |                |            |            |
| N2                  | CT | III | 11524322                           | 11526564 | WBGene00013442 | Y66D12A.16 | Y66D12A.16 |
| 0.0973691124030971  |    |     | AGIWUR24201                        |          |                |            |            |
| N2                  | CT | III | 11526372                           | 11534595 | WBGene00013441 | xpb-1      | Y66D12A.15 |
| 0.00112182762514657 |    |     | AGIWUR3323                         |          |                |            |            |
| N2                  | CT | III | 11534674                           | 11546669 | WBGene00013440 | nrps-1     | Y66D12A.14 |
| -0.118150464483282  |    |     | AGIWUR32086                        |          |                |            |            |
| N2                  | CT | III | 11548377                           | 11552398 | WBGene00013439 | Y66D12A.13 | Y66D12A.13 |
| -0.0456920239025607 |    |     | AGIWUR43703                        |          |                |            |            |
| N2                  | CT | III | 11561152                           | 11562655 | WBGene00013438 | ztf-29     | Y66D12A.12 |
| -0.145850819483657  |    |     | AGIWUR30629                        |          |                |            |            |
| N2                  | CT | III | 11563467                           | 11565536 | WBGene00013437 | Y66D12A.11 | Y66D12A.11 |
| 0.0948567416890391  |    |     | AGIWUR7037;AGIWUR9963;AGIWUR19649  |          |                |            |            |
| N2                  | CT | III | 11565833                           | 11568007 | WBGene00013436 | Y66D12A.10 | Y66D12A.10 |
| -0.0970959571961298 |    |     | AGIWUR19129                        |          |                |            |            |
| N2                  | CT | III | 11568137                           | 11573343 | WBGene00013435 | Y66D12A.9  | Y66D12A.9  |
| -0.107175709608663  |    |     | AGIWUR11078                        |          |                |            |            |
| N2                  | CT | III | 11574221                           | 11578752 | WBGene00013434 | Y66D12A.8  | Y66D12A.8  |
| 0.0465646995863698  |    |     | AGIWUR27440;AGIWUR44945            |          |                |            |            |
| N2                  | CT | III | 11579265                           | 11580478 | WBGene00013433 | Y66D12A.7  | Y66D12A.7  |
| -0.249000782977287  |    |     | AGIWUR7522                         |          |                |            |            |
| N2                  | CT | III | 11580694                           | 11581402 | WBGene00013432 | Y66D12A.6  | Y66D12A.6  |

|                                                                                                                                                                                 |                                                                      |          |                |           |           |  |
|---------------------------------------------------------------------------------------------------------------------------------------------------------------------------------|----------------------------------------------------------------------|----------|----------------|-----------|-----------|--|
| -0.300078788976966                                                                                                                                                              | AGIWUR18421                                                          |          |                |           |           |  |
| N2 CT III                                                                                                                                                                       | 11581600                                                             | 11589133 | WBGene00013431 | ceh-92    | Y66D12A.5 |  |
| 0.240286035981681                                                                                                                                                               | AGIWUR8014;AGIWUR41570                                               |          |                |           |           |  |
| N2 CT III                                                                                                                                                                       | 11589211                                                             | 11592837 | WBGene00013429 | Y66D12A.3 | Y66D12A.3 |  |
| 0.1913627349081                                                                                                                                                                 | AGIWUR32063                                                          |          |                |           |           |  |
| N2 CT III                                                                                                                                                                       | 11608170                                                             | 11609082 | WBGene00013427 | Y66D12A.1 | Y66D12A.1 |  |
| 0.240093191599138                                                                                                                                                               | AGIWUR31529                                                          |          |                |           |           |  |
| N2 CT III                                                                                                                                                                       | 11612607                                                             | 11615707 | WBGene00013424 | Y66A7A.4  | Y66A7A.4  |  |
| -0.0954921957113868                                                                                                                                                             | AGIWUR22804                                                          |          |                |           |           |  |
| N2 CT III                                                                                                                                                                       | 11616758                                                             | 11623991 | WBGene00013425 | ceh-91    | Y66A7A.5  |  |
| -0.122237746282838                                                                                                                                                              | AGIWUR26537                                                          |          |                |           |           |  |
| N2 CT III                                                                                                                                                                       | 11624991                                                             | 11628238 | WBGene00001633 | gly-8     | Y66A7A.6  |  |
| -0.076426162175391                                                                                                                                                              | AGIWUR39593                                                          |          |                |           |           |  |
| N2 CT III                                                                                                                                                                       | 11628386                                                             | 11631014 | WBGene00013426 | Y66A7A.7  | Y66A7A.7  |  |
| -0.00856740769416398                                                                                                                                                            | AGIWUR39184                                                          |          |                |           |           |  |
| N2 CT III                                                                                                                                                                       | 11633216                                                             | 11636840 | WBGene00006552 | tbx-33    | Y66A7A.8  |  |
| -0.154561953949349                                                                                                                                                              | AGIWUR1180                                                           |          |                |           |           |  |
| N2 CT III                                                                                                                                                                       | 11641461                                                             | 11641861 | WBGene00012760 | Y41C4A.17 | Y41C4A.17 |  |
| -0.0593132883865177                                                                                                                                                             | AGIWUR15250;AGIWUR16680;AGIWUR23606;AGIWUR24686;AGIWUR39423          |          |                |           |           |  |
| N2 CT III                                                                                                                                                                       | 11647769                                                             | 11649893 | WBGene00012749 | Y41C4A.1  | Y41C4A.1  |  |
| 0.113943977868386                                                                                                                                                               | AGIWUR15681                                                          |          |                |           |           |  |
| N2 CT III                                                                                                                                                                       | 11650471                                                             | 11656185 | WBGene00012750 | faah-6    | Y41C4A.2  |  |
| -0.015681085895741                                                                                                                                                              | AGIWUR17139                                                          |          |                |           |           |  |
| N2 CT III                                                                                                                                                                       | 11657738                                                             | 11693837 | WBGene00000793 | crh-1     | Y41C4A.4  |  |
| -0.0473416288713562                                                                                                                                                             |                                                                      |          |                |           |           |  |
| AGIWUR743;AGIWUR3806;AGIWUR4913;AGIWUR12286;AGIWUR22855;AGIWUR24059;AGIWUR26704;AGIWUR27210;AGIWUR28416;AGIWUR33693;AGIWUR35499;AGIWUR40809;AGIWUR41451;AGIWUR42718;AGIWUR43847 |                                                                      |          |                |           |           |  |
| N2 CT III                                                                                                                                                                       | 11696599                                                             | 11698306 | WBGene00012753 | Y41C4A.6  | Y41C4A.6  |  |
| -0.0843154446126491                                                                                                                                                             | AGIWUR279;AGIWUR8193;AGIWUR16575;AGIWUR27230;AGIWUR37467;AGIWUR44508 |          |                |           |           |  |
| N2 CT III                                                                                                                                                                       | 11698869                                                             | 11700087 | WBGene00012754 | Y41C4A.7  | Y41C4A.7  |  |
| 0.255137673699494                                                                                                                                                               | AGIWUR34332                                                          |          |                |           |           |  |
| N2 CT III                                                                                                                                                                       | 11700285                                                             | 11702856 | WBGene00004165 | pqn-84    | Y41C4A.5  |  |
| -0.194567504937005                                                                                                                                                              | AGIWUR28537                                                          |          |                |           |           |  |
| N2 CT III                                                                                                                                                                       | 11703885                                                             | 11705091 | WBGene00000670 | col-95    | Y41C4A.16 |  |
| -0.17766040638455                                                                                                                                                               | AGIWUR43392                                                          |          |                |           |           |  |
| N2 CT III                                                                                                                                                                       | 11705713                                                             | 11706644 | WBGene00000671 | col-96    | Y41C4A.19 |  |
| 0.449911462810102                                                                                                                                                               | AGIWUR15044                                                          |          |                |           |           |  |
| N2 CT III                                                                                                                                                                       | 11706969                                                             | 11708820 | WBGene00012755 | Y41C4A.8  | Y41C4A.8  |  |
| -0.0489208909519867                                                                                                                                                             | AGIWUR314                                                            |          |                |           |           |  |

|                     |    |     |                                                                        |          |                |           |           |
|---------------------|----|-----|------------------------------------------------------------------------|----------|----------------|-----------|-----------|
| N2                  | CT | III | 11710827                                                               | 11718741 | WBGene00012756 | Y41C4A.9  | Y41C4A.9  |
| -0.0107302932883684 |    |     | AGIWUR36806                                                            |          |                |           |           |
| N2                  | CT | III | 11718834                                                               | 11719450 | WBGene00001235 | elb-1     | Y41C4A.10 |
| -0.088553611746633  |    |     | AGIWUR44409                                                            |          |                |           |           |
| N2                  | CT | III | 11721706                                                               | 11723602 | WBGene00270321 | Y41C4A.32 | Y41C4A.32 |
| 0.445628431001687   |    |     | AGIWUR18044                                                            |          |                |           |           |
| N2                  | CT | III | 11724038                                                               | 11726690 | WBGene00012758 | Y41C4A.12 | Y41C4A.12 |
| -0.21181121257952   |    |     | AGIWUR11342;AGIWUR37933                                                |          |                |           |           |
| N2                  | CT | III | 11730612                                                               | 11731305 | WBGene00012761 | Y41C4A.18 | Y41C4A.18 |
| 0.15957831557586    |    |     | AGIWUR22498                                                            |          |                |           |           |
| N2                  | CT | III | 11733346                                                               | 11737627 | WBGene00012759 | sup-1     | Y41C4A.13 |
| -0.26576798890866   |    |     | AGIWUR24400                                                            |          |                |           |           |
| N2                  | CT | III | 11747042                                                               | 11750160 | WBGene00003417 | mrt-2     | Y41C4A.14 |
| -0.172990977809281  |    |     | AGIWUR6066                                                             |          |                |           |           |
| N2                  | CT | III | 11751320                                                               | 11773681 | WBGene00007703 | gbf-1     | C24H11.7  |
| 0.0399397913033539  |    |     | AGIWUR21724                                                            |          |                |           |           |
| N2                  | CT | III | 11774950                                                               | 11776675 | WBGene00007021 | immp-1    | C24H11.6  |
| -0.293062394162879  |    |     | AGIWUR14285;AGIWUR14709;AGIWUR24365;AGIWUR28971;AGIWUR37179            |          |                |           |           |
| N2                  | CT | III | 11777625                                                               | 11779629 | WBGene00007704 | mdt-21    | C24H11.9  |
| -0.264471490410475  |    |     | AGIWUR15738                                                            |          |                |           |           |
| N2                  | CT | III | 11780235                                                               | 11781035 | WBGene00007702 | C24H11.5  | C24H11.5  |
| -0.195334970333278  |    |     | AGIWUR9878;AGIWUR11324;AGIWUR14573;AGIWUR14995;AGIWUR23570;AGIWUR25385 |          |                |           |           |
| N2                  | CT | III | 11782112                                                               | 11784074 | WBGene00007701 | srd-74    | C24H11.4  |
| 0.144537988019901   |    |     | AGIWUR22266                                                            |          |                |           |           |
| N2                  | CT | III | 11784147                                                               | 11786052 | WBGene00006557 | tbx-38    | C24H11.3  |
| -0.0369508084158738 |    |     | AGIWUR8227                                                             |          |                |           |           |
| N2                  | CT | III | 11795748                                                               | 11803243 | WBGene00006690 | twk-39    | C24H11.8  |
| -0.0932471352148587 |    |     | AGIWUR3472;AGIWUR15834                                                 |          |                |           |           |
| N2                  | CT | III | 11804547                                                               | 11806795 | WBGene00044232 | C18D11.7  | C18D11.7  |
| -0.170102450849356  |    |     | AGIWUR6793;AGIWUR14078                                                 |          |                |           |           |
| N2                  | CT | III | 11809118                                                               | 11809561 | WBGene00045211 | C18D11.9  | C18D11.9  |
| -0.124975594881306  |    |     | AGIWUR1937;AGIWUR17901;AGIWUR26015;AGIWUR27348                         |          |                |           |           |
| N2                  | CT | III | 11810556                                                               | 11811046 | WBGene00007682 | C18D11.6  | C18D11.6  |
| 0.0412147745704061  |    |     | AGIWUR24374;AGIWUR28866                                                |          |                |           |           |
| N2                  | CT | III | 11816569                                                               | 11819806 | WBGene00007679 | C18D11.1  | C18D11.1  |
| 0.022927498382149   |    |     | AGIWUR30952                                                            |          |                |           |           |
| N2                  | CT | III | 11819745                                                               | 11822526 | WBGene00007680 | maa-1     | C18D11.2  |
| 0.168952189710225   |    |     | AGIWUR10358;AGIWUR12232;AGIWUR27929                                    |          |                |           |           |
| N2                  | CT | III | 11823327                                                               | 11824975 | WBGene00007681 | C18D11.3  | C18D11.3  |

|                                                                                                                                              |                                     |          |                |           |           |
|----------------------------------------------------------------------------------------------------------------------------------------------|-------------------------------------|----------|----------------|-----------|-----------|
| -0.115167247651097                                                                                                                           | AGIWUR37930                         |          |                |           |           |
| N2 CT III                                                                                                                                    | 11826215                            | 11830996 | WBGene00004705 | rsp-8     | C18D11.4  |
| 0.0103025996819923                                                                                                                           | AGIWUR491;AGIWUR962                 |          |                |           |           |
| N2 CT III                                                                                                                                    | 11831008                            | 11846465 | WBGene00003826 | ntl-3     | Y56A3A.1  |
| 0.238327007340155                                                                                                                            | AGIWUR15901;AGIWUR41835             |          |                |           |           |
| N2 CT III                                                                                                                                    | 11848152                            | 11849522 | WBGene00003234 | mif-1     | Y56A3A.3  |
| -0.0871942486658135                                                                                                                          | AGIWUR51                            |          |                |           |           |
| N2 CT III                                                                                                                                    | 11849951                            | 11862249 | WBGene00013225 | Y56A3A.2  | Y56A3A.2  |
| -0.134269244361009                                                                                                                           | AGIWUR6842;AGIWUR31751              |          |                |           |           |
| N2 CT III                                                                                                                                    | 11862393                            | 11869281 | WBGene00006396 | taf-12    | Y56A3A.4  |
| 0.0892698439676129                                                                                                                           | AGIWUR32671;AGIWUR32932             |          |                |           |           |
| N2 CT III                                                                                                                                    | 11871252                            | 11878889 | WBGene00013227 | Y56A3A.6  | Y56A3A.6  |
| 0.0357736064285419                                                                                                                           | AGIWUR9530                          |          |                |           |           |
| N2 CT III                                                                                                                                    | 11886485                            | 11891435 | WBGene00013226 | faah-5    | Y56A3A.5  |
| -0.51118170848426                                                                                                                            | AGIWUR23762                         |          |                |           |           |
| N2 CT III                                                                                                                                    | 11894784                            | 11898269 | WBGene00013231 | tsen-2    | Y56A3A.11 |
| -0.269500575737464                                                                                                                           | AGIWUR30976;AGIWUR31534;AGIWUR41043 |          |                |           |           |
| N2 CT III                                                                                                                                    | 11899337                            | 11907387 | WBGene00013232 | faah-4    | Y56A3A.12 |
| -0.134097136158005                                                                                                                           | AGIWUR22557                         |          |                |           |           |
| N2 CT III                                                                                                                                    | 11907477                            | 11908474 | WBGene00013233 | sdz-33    | Y56A3A.14 |
| -0.0284878914037918                                                                                                                          | AGIWUR5241                          |          |                |           |           |
| N2 CT III                                                                                                                                    | 11915151                            | 11915712 | WBGene00013237 | Y56A3A.19 | Y56A3A.19 |
| -0.280658864407112                                                                                                                           | AGIWUR10004;AGIWUR20598;AGIWUR30622 |          |                |           |           |
| N2 CT III                                                                                                                                    | 11915891                            | 11917876 | WBGene00003802 | npp-16    | Y56A3A.17 |
| 0.00339603266412869                                                                                                                          |                                     |          |                |           |           |
| AGIWUR6396;AGIWUR6847;AGIWUR9066;AGIWUR15726;AGIWUR16215;AGIWUR18214;AGIWUR27133;AGIWUR28029;AGIWUR29924;AGIWUR30267;AGIWUR33353;AGIWUR41005 |                                     |          |                |           |           |
| N2 CT III                                                                                                                                    | 11918828                            | 11920237 | WBGene00000369 | ccf-1     | Y56A3A.20 |
| -0.18037777379828                                                                                                                            |                                     |          |                |           |           |
| AGIWUR3851;AGIWUR4029;AGIWUR6652;AGIWUR15305;AGIWUR22050;AGIWUR33330;AGIWUR35362;AGIWUR41944                                                 |                                     |          |                |           |           |
| N2 CT III                                                                                                                                    | 11920716                            | 11921590 | WBGene00013238 | trap-4    | Y56A3A.21 |
| 0.037554833541801                                                                                                                            | AGIWUR42080                         |          |                |           |           |
| N2 CT III                                                                                                                                    | 11921692                            | 11923825 | WBGene00013239 | Y56A3A.22 | Y56A3A.22 |
| 0.0995644401889564                                                                                                                           | AGIWUR24269                         |          |                |           |           |
| N2 CT III                                                                                                                                    | 11923886                            | 11929376 | WBGene00003594 | nft-1     | Y56A3A.13 |
| -0.0320125167539302                                                                                                                          | AGIWUR21699                         |          |                |           |           |
| N2 CT III                                                                                                                                    | 11929889                            | 11933639 | WBGene00044233 | Y56A3A.36 | Y56A3A.36 |
| -0.178548918127257                                                                                                                           | AGIWUR5818;AGIWUR35337;AGIWUR37064  |          |                |           |           |
| N2 CT III                                                                                                                                    | 11934002                            | 11947017 | WBGene00013228 | Y56A3A.7  | Y56A3A.7  |

|                     |                                                                                 |                |           |           |
|---------------------|---------------------------------------------------------------------------------|----------------|-----------|-----------|
| -0.0912205779397883 | AGIWUR6563;AGIWUR12033                                                          |                |           |           |
| N2 CT III           | 11949918 11960180                                                               | WBGene00006596 | top-3     | Y56A3A.27 |
| -0.235230033937825  | AGIWUR2678                                                                      |                |           |           |
| N2 CT III           | 11961470 11971367                                                               | WBGene00013240 | Y56A3A.28 | Y56A3A.28 |
| -0.138096085653376  | AGIWUR1138;AGIWUR8487                                                           |                |           |           |
| N2 CT III           | 11971461 11974092                                                               | WBGene00013241 | ung-1     | Y56A3A.29 |
| -0.112478360463221  | AGIWUR5152;AGIWUR6264;AGIWUR7720                                                |                |           |           |
| N2 CT III           | 11974077 11979065                                                               | WBGene00013242 | Y56A3A.30 | Y56A3A.30 |
| -0.119120996349011  | AGIWUR1081                                                                      |                |           |           |
| N2 CT III           | 11974477 11989885                                                               | WBGene00013243 | Y56A3A.31 | Y56A3A.31 |
| -0.176704324577864  | AGIWUR3812                                                                      |                |           |           |
| N2 CT III           | 11990167 11999552                                                               | WBGene00006937 | wah-1     | Y56A3A.32 |
| -0.1908712365552    | AGIWUR2501;AGIWUR3631;AGIWUR34419;AGIWUR35517;AGIWUR35901;AGIWUR45018           |                |           |           |
| N2 CT III           | 11999497 12002950                                                               | WBGene00013244 | Y56A3A.33 | Y56A3A.33 |
| 0.182027422340408   | AGIWUR10400;AGIWUR17573;AGIWUR27018                                             |                |           |           |
| N2 CT III           | 12020552 12025325                                                               | WBGene00000273 | brp-1     | Y79H2A.1  |
| 0.181089639424442   | AGIWUR20615                                                                     |                |           |           |
| N2 CT III           | 12025559 12028811                                                               | WBGene00043997 | Y79H2A.12 | Y79H2A.12 |
| 0.044578219833419   | AGIWUR31274;AGIWUR37681                                                         |                |           |           |
| N2 CT III           | 12028969 12030769                                                               | WBGene00013579 | Y79H2A.2  | Y79H2A.2  |
| 0.0461925648912871  | AGIWUR21385;AGIWUR43928                                                         |                |           |           |
| N2 CT III           | 12031516 12052303                                                               | WBGene00013580 | Y79H2A.3  | Y79H2A.3  |
| 0.0262034699900457  | AGIWUR3496;AGIWUR4375;AGIWUR5043;AGIWUR7222;AGIWUR15628;AGIWUR20046;AGIWUR38151 |                |           |           |
| N2 CT III           | 12052424 12058458                                                               | WBGene00000201 | arx-3     | Y79H2A.6  |
| 0.125138430807878   | AGIWUR26668                                                                     |                |           |           |
| N2 CT III           | 12058844 12072293                                                               | WBGene00006993 | zyg-8     | Y79H2A.11 |
| 0.465060244723885   | AGIWUR36623;AGIWUR44842                                                         |                |           |           |
| N2 CT III           | 12074290 12077556                                                               | WBGene00004024 | php-3     | Y75B8A.1  |
| 0.0762995912218258  | AGIWUR9119                                                                      |                |           |           |
| N2 CT III           | 12077788 12084320                                                               | WBGene00003779 | nob-1     | Y75B8A.2  |
| 0.0605536820521646  | AGIWUR2669;AGIWUR13194                                                          |                |           |           |
| N2 CT III           | 12101810 12106597                                                               | WBGene00013540 | Y75B8A.3  | Y75B8A.3  |
| 0.305352666277678   | AGIWUR41000                                                                     |                |           |           |
| N2 CT III           | 12107774 12113471                                                               | WBGene00013541 | lonp-2    | Y75B8A.4  |
| -0.100432263072907  | AGIWUR44655                                                                     |                |           |           |
| N2 CT III           | 12114577 12118470                                                               | WBGene00013542 | lron-12   | Y75B8A.5  |
| 0.0772537092606935  | AGIWUR24439                                                                     |                |           |           |
| N2 CT III           | 12123881 12130352                                                               | WBGene00013543 | Y75B8A.6  | Y75B8A.6  |
| -0.0963463266870335 | AGIWUR12891                                                                     |                |           |           |

|                     |    |     |                                                                        |          |                |           |           |
|---------------------|----|-----|------------------------------------------------------------------------|----------|----------------|-----------|-----------|
| N2                  | CT | III | 12152899                                                               | 12160100 | WBGene00013544 | Y75B8A.7  | Y75B8A.7  |
| -0.0622369033639778 |    |     | AGIWUR40081                                                            |          |                |           |           |
| N2                  | CT | III | 12160758                                                               | 12171356 | WBGene00013545 | Y75B8A.8  | Y75B8A.8  |
| -0.0822133898733775 |    |     | AGIWUR8629                                                             |          |                |           |           |
| N2                  | CT | III | 12171353                                                               | 12177245 | WBGene00001636 | gly-11    | Y75B8A.9  |
| -0.0848756987723691 |    |     | AGIWUR185;AGIWUR4639;AGIWUR34343;AGIWUR43642                           |          |                |           |           |
| N2                  | CT | III | 12180960                                                               | 12183013 | WBGene00013547 | Y75B8A.10 | Y75B8A.10 |
| 0.126760174323755   |    |     | AGIWUR41582                                                            |          |                |           |           |
| N2                  | CT | III | 12186411                                                               | 12190116 | WBGene00013548 | Y75B8A.11 | Y75B8A.11 |
| 0.0474411366035499  |    |     | AGIWUR9380                                                             |          |                |           |           |
| N2                  | CT | III | 12191056                                                               | 12202450 | WBGene00003892 | osm-12    | Y75B8A.12 |
| -0.0862721329020051 |    |     | AGIWUR1812;AGIWUR18881;AGIWUR24126                                     |          |                |           |           |
| N2                  | CT | III | 12203822                                                               | 12215686 | WBGene00013549 | Y75B8A.13 | Y75B8A.13 |
| -0.0468146177774758 |    |     | AGIWUR19945;AGIWUR20922;AGIWUR30232;AGIWUR36978                        |          |                |           |           |
| N2                  | CT | III | 12216779                                                               | 12218634 | WBGene00013550 | Y75B8A.14 | Y75B8A.14 |
| -0.200181727896233  |    |     | AGIWUR9294                                                             |          |                |           |           |
| N2                  | CT | III | 12218990                                                               | 12223934 | WBGene00013551 | Y75B8A.16 | Y75B8A.16 |
| -0.138468924342371  |    |     | AGIWUR33754                                                            |          |                |           |           |
| N2                  | CT | III | 12224487                                                               | 12225331 | WBGene00013552 | gmn-1     | Y75B8A.17 |
| -0.0412262250840367 |    |     | AGIWUR1240;AGIWUR23735;AGIWUR30289;AGIWUR30706;AGIWUR31045;AGIWUR33207 |          |                |           |           |
| N2                  | CT | III | 12225638                                                               | 12226267 | WBGene00013553 | Y75B8A.18 | Y75B8A.18 |
| -0.137318062401881  |    |     | AGIWUR31363                                                            |          |                |           |           |
| N2                  | CT | III | 12226632                                                               | 12232241 | WBGene00013554 | Y75B8A.19 | Y75B8A.19 |
| 0.0725316774457703  |    |     | AGIWUR15908;AGIWUR16398;AGIWUR29200                                    |          |                |           |           |
| N2                  | CT | III | 12232632                                                               | 12235711 | WBGene00001724 | grl-15    | Y75B8A.20 |
| -0.344971376218974  |    |     | AGIWUR20943                                                            |          |                |           |           |
| N2                  | CT | III | 12240367                                                               | 12250164 | WBGene00006571 | tim-1     | Y75B8A.22 |
| -0.105040335508992  |    |     | AGIWUR1647;AGIWUR6048;AGIWUR11763                                      |          |                |           |           |
| N2                  | CT | III | 12250602                                                               | 12251009 | WBGene00013556 | Y75B8A.23 | Y75B8A.23 |
| -0.156384109909041  |    |     | AGIWUR30023                                                            |          |                |           |           |
| N2                  | CT | III | 12251492                                                               | 12273692 | WBGene00013557 | Y75B8A.24 | Y75B8A.24 |
| 0.0938308645384183  |    |     | AGIWUR17796                                                            |          |                |           |           |
| N2                  | CT | III | 12274040                                                               | 12282221 | WBGene00013558 | Y75B8A.25 | Y75B8A.25 |
| 0.0659464890303916  |    |     | AGIWUR29151                                                            |          |                |           |           |
| N2                  | CT | III | 12283208                                                               | 12303216 | WBGene00003414 | mrp-8     | Y75B8A.26 |
| 0.147160604714983   |    |     | AGIWUR6025;AGIWUR14868;AGIWUR30937;AGIWUR39033                         |          |                |           |           |
| N2                  | CT | III | 12307771                                                               | 12311924 | WBGene00004172 | pqn-92    | Y75B8A.27 |
| -0.0425160271635185 |    |     | AGIWUR41336                                                            |          |                |           |           |
| N2                  | CT | III | 12313287                                                               | 12314403 | WBGene00023483 | Y75B8A.39 | Y75B8A.39 |

|                                                                                               |                                                             |          |                |                   |           |
|-----------------------------------------------------------------------------------------------|-------------------------------------------------------------|----------|----------------|-------------------|-----------|
| 2.27864356452543                                                                              | AGIWUR2361                                                  |          |                |                   |           |
| N2 CT III                                                                                     | 12315479                                                    | 12315857 | WBGene00013565 | Y75B8A.37         | Y75B8A.37 |
| 0.0680142296124195                                                                            | AGIWUR38393                                                 |          |                |                   |           |
| N2 CT III                                                                                     | 12319108                                                    | 12323771 | WBGene00013559 | Y75B8A.28         | Y75B8A.28 |
| -0.158682912226514                                                                            | AGIWUR24263                                                 |          |                |                   |           |
| N2 CT III                                                                                     | 12327667                                                    | 12332274 | WBGene00013560 | zip-12 Y75B8A.29  |           |
| -0.251824620330904                                                                            | AGIWUR20625                                                 |          |                |                   |           |
| N2 CT III                                                                                     | 12333745                                                    | 12345347 | WBGene00006986 | zip-1 Y75B8A.35   |           |
| -0.0444228228452506                                                                           | AGIWUR10170                                                 |          |                |                   |           |
| N2 CT III                                                                                     | 12345323                                                    | 12351336 | WBGene00004085 | pph-4.1 Y75B8A.30 |           |
| 0.114987972126119                                                                             | AGIWUR12115                                                 |          |                |                   |           |
| N2 CT III                                                                                     | 12351642                                                    | 12354925 | WBGene00013561 | Y75B8A.31         | Y75B8A.31 |
| -0.202475468358914                                                                            | AGIWUR12456                                                 |          |                |                   |           |
| N2 CT III                                                                                     | 12354944                                                    | 12358561 | WBGene00013562 | Y75B8A.32         | Y75B8A.32 |
| 0.137369215320515                                                                             | AGIWUR36648                                                 |          |                |                   |           |
| N2 CT III                                                                                     | 12359565                                                    | 12361248 | WBGene00013564 | Y75B8A.34         | Y75B8A.34 |
| -0.108089916935683                                                                            | AGIWUR19352;AGIWUR29568;AGIWUR38384                         |          |                |                   |           |
| N2 CT III                                                                                     | 12361859                                                    | 12367373 | WBGene00013563 | Y75B8A.33         | Y75B8A.33 |
| 0.0671447505799376                                                                            | AGIWUR20947;AGIWUR37137;AGIWUR37178                         |          |                |                   |           |
| N2 CT III                                                                                     | 12367474                                                    | 12369050 | WBGene00001946 | his-72 Y49E10.6   |           |
| 0.0364213729676166                                                                            | AGIWUR13672;AGIWUR22973;AGIWUR24494;AGIWUR28018;AGIWUR42852 |          |                |                   |           |
| N2 CT III                                                                                     | 12370456                                                    | 12372625 | WBGene00004506 | rpt-6 Y49E10.1    |           |
| 0.139512048222233                                                                             | AGIWUR41530                                                 |          |                |                   |           |
| N2 CT III                                                                                     | 12372583                                                    | 12373857 | WBGene00013029 | glrx-5 Y49E10.2   |           |
| -0.195801597874658                                                                            | AGIWUR36243                                                 |          |                |                   |           |
| N2 CT III                                                                                     | 12374126                                                    | 12377248 | WBGene00004086 | pph-4.2 Y49E10.3  |           |
| -0.0714243885706729                                                                           |                                                             |          |                |                   |           |
| AGIWUR6473;AGIWUR7787;AGIWUR15115;AGIWUR24606;AGIWUR27782;AGIWUR33390;AGIWUR42004;AGIWUR43090 |                                                             |          |                |                   |           |
| N2 CT III                                                                                     | 12377731                                                    | 12378829 | WBGene00013031 | Y49E10.7          | Y49E10.7  |
| 0.0684396856979514                                                                            | AGIWUR33767                                                 |          |                |                   |           |
| N2 CT III                                                                                     | 12378724                                                    | 12380647 | WBGene00013030 | Y49E10.4          | Y49E10.4  |
| 0.125905228617942                                                                             | AGIWUR12131;AGIWUR22301;AGIWUR32211;AGIWUR38930             |          |                |                   |           |
| N2 CT III                                                                                     | 12387891                                                    | 12388985 | WBGene00014904 | Y49E10.26         | Y49E10.26 |
| -0.131271758754668                                                                            | AGIWUR30780                                                 |          |                |                   |           |
| N2 CT III                                                                                     | 12389885                                                    | 12390556 | WBGene00014903 | Y49E10.8          | Y49E10.8  |
| 0.102007274131747                                                                             | AGIWUR24628                                                 |          |                |                   |           |
| N2 CT III                                                                                     | 12398901                                                    | 12421570 | WBGene00013034 | tat-1 Y49E10.11   |           |
| 0.154539410705063                                                                             | AGIWUR15617;AGIWUR18057;AGIWUR27355;AGIWUR34118             |          |                |                   |           |
| N2 CT III                                                                                     | 12426862                                                    | 12429195 | WBGene00004027 | pie-1 Y49E10.14   |           |



|                     |                                                                         |                |            |            |
|---------------------|-------------------------------------------------------------------------|----------------|------------|------------|
| 0.0878538068313288  | AGIWUR4842;AGIWUR43801                                                  |                |            |            |
| N2 CT III           | 12429172 12429630                                                       | WBGene00004919 | snr-6      | Y49E10.15  |
| -0.15112220472672   | AGIWUR43554                                                             |                |            |            |
| N2 CT III           | 12430430 12433892                                                       | WBGene00013035 | Y49E10.16  | Y49E10.16  |
| -0.0986246664226744 | AGIWUR15845;AGIWUR27141;AGIWUR43362                                     |                |            |            |
| N2 CT III           | 12436552 12441056                                                       | WBGene00013036 | fbxa-218   | Y49E10.17  |
| 0.179358628627984   | AGIWUR23422                                                             |                |            |            |
| N2 CT III           | 12442630 12446145                                                       | WBGene00013037 | Y49E10.18  | Y49E10.18  |
| -0.206173838508594  | AGIWUR10529;AGIWUR24845;AGIWUR26960;AGIWUR29787;AGIWUR32268;AGIWUR34014 |                |            |            |
| N2 CT III           | 12446353 12453202                                                       | WBGene00013038 | ani-1      | Y49E10.19  |
| 0.084210140926757   | AGIWUR4746                                                              |                |            |            |
| N2 CT III           | 12453588 12456850                                                       | WBGene00013039 | scav-3     | Y49E10.20  |
| -0.255672396337732  | AGIWUR22103;AGIWUR31816;AGIWUR37790;AGIWUR43918                         |                |            |            |
| N2 CT III           | 12457599 12465821                                                       | WBGene00013040 | Y49E10.21  | Y49E10.21  |
| -0.244663037480024  | AGIWUR105;AGIWUR15140;AGIWUR38802                                       |                |            |            |
| N2 CT III           | 12466610 12468277                                                       | WBGene00013041 | pstk-1     | Y49E10.22  |
| -0.262663874431702  | AGIWUR13994                                                             |                |            |            |
| N2 CT III           | 12469169 12472541                                                       | WBGene00045239 | Y49E10.29  | Y49E10.29  |
| 0.187036142785725   | AGIWUR11208;AGIWUR22942;AGIWUR28929;AGIWUR33709;AGIWUR34350;AGIWUR38560 |                |            |            |
| N2 CT III           | 12472868 12484651                                                       | WBGene00013042 | cccp-1     | Y49E10.23  |
| 0.0152236010617948  | AGIWUR13894                                                             |                |            |            |
| N2 CT III           | 12484732 12488339                                                       | WBGene00013043 | arrd-16    | Y49E10.24  |
| -0.0772780565997682 | AGIWUR7495;AGIWUR21391;AGIWUR42175                                      |                |            |            |
| N2 CT III           | 12488679 12492084                                                       | WBGene00013044 | Y49E10.25  | Y49E10.25  |
| -1.12102603980501   | AGIWUR10386                                                             |                |            |            |
| N2 CT III           | 12492793 12495640                                                       | WBGene00013727 | Y111B2A.1  | Y111B2A.1  |
| -0.186618998113154  | AGIWUR15820                                                             |                |            |            |
| N2 CT III           | 12496538 12499352                                                       | WBGene00013729 | Y111B2A.3  | Y111B2A.3  |
| -0.0583563970904812 | AGIWUR8789                                                              |                |            |            |
| N2 CT III           | 12499557 12527924                                                       | WBGene00013730 | sql-1      | Y111B2A.4  |
| -0.0854037596179431 | AGIWUR4403;AGIWUR5215;AGIWUR17830;AGIWUR26217;AGIWUR27811               |                |            |            |
| N2 CT III           | 12528287 12536848                                                       | WBGene00014613 | Y111B2A.25 | Y111B2A.25 |
| -0.0763153936065848 | AGIWUR5020;AGIWUR7629;AGIWUR17399;AGIWUR32936;AGIWUR37551               |                |            |            |
| N2 CT III           | 12538664 12575401                                                       | WBGene00013732 | aakg-1     | Y111B2A.8  |
| 0.0607796134486378  | AGIWUR17518;AGIWUR19289;AGIWUR39040;AGIWUR41104;AGIWUR42689             |                |            |            |
| N2 CT III           | 12595994 12598604                                                       | WBGene00013734 | Y111B2A.10 | Y111B2A.10 |
| 0.156066685718065   | AGIWUR31114;AGIWUR32437                                                 |                |            |            |
| N2 CT III           | 12599304 12608604                                                       | WBGene00007030 | epc-1      | Y111B2A.11 |
| 0.131027777473367   | AGIWUR24947                                                             |                |            |            |

|    |    |     |                                                                                           |          |                |            |                             |
|----|----|-----|-------------------------------------------------------------------------------------------|----------|----------------|------------|-----------------------------|
| N2 | CT | III | 12609289                                                                                  | 12623740 | WBGene00013735 | Y111B2A.12 | Y111B2A.12                  |
|    |    |     | -0.121422118385599 AGIWUR1326;AGIWUR15735;AGIWUR23494;AGIWUR25188;AGIWUR27817;AGIWUR29975 |          |                |            |                             |
| N2 | CT | III | 12624766                                                                                  | 12625890 | WBGene00013736 | Y111B2A.13 | Y111B2A.13                  |
|    |    |     | -0.0557080319279528 AGIWUR7917;AGIWUR20589;AGIWUR21701;AGIWUR22852;AGIWUR24926            |          |                |            |                             |
| N2 | CT | III | 12626568                                                                                  | 12651757 | WBGene00004161 | pqn-80     | Y111B2A.14                  |
|    |    |     | -0.0400034045061695 AGIWUR3950;AGIWUR19275;AGIWUR36462;AGIWUR45159                        |          |                |            |                             |
| N2 | CT | III | 12652344                                                                                  | 12662286 | WBGene00013737 | tpst-1     | Y111B2A.15                  |
|    |    |     | 0.146606585327689 AGIWUR30331                                                             |          |                |            |                             |
| N2 | CT | III | 12671307                                                                                  | 12673421 | WBGene00006389 | taf-7.2    | Y111B2A.16                  |
|    |    |     | -0.0387193170336424 AGIWUR31423                                                           |          |                |            |                             |
| N2 | CT | III | 12673633                                                                                  | 12686230 | WBGene00013738 | elpc-2     | Y111B2A.17                  |
|    |    |     | -0.112114530244931 AGIWUR37084                                                            |          |                |            |                             |
| N2 | CT | III | 12686243                                                                                  | 12687916 | WBGene00004700 | rsp-3      | Y111B2A.18                  |
|    |    |     | -0.0139423692098166 AGIWUR5188;AGIWUR13561;AGIWUR19588                                    |          |                |            |                             |
| N2 | CT | III | 12699494                                                                                  | 12710888 | WBGene00013742 | sas-1      | Y111B2A.24                  |
|    |    |     | -0.110118524428014 AGIWUR24021                                                            |          |                |            |                             |
| N2 | CT | III | 12711506                                                                                  | 12713874 | WBGene00013740 | hut-1      | Y111B2A.20                  |
|    |    |     | -0.117227594837846 AGIWUR14912                                                            |          |                |            |                             |
| N2 | CT | III | 12714566                                                                                  | 12743929 | WBGene00007027 | ssl-1      | Y111B2A.22                  |
|    |    |     | 0.0268364896502291 AGIWUR15732;AGIWUR31590;AGIWUR43765                                    |          |                |            |                             |
| N2 | CT | III | 12746450                                                                                  | 12747621 | WBGene00013741 | Y111B2A.21 | Y111B2A.21                  |
|    |    |     | -0.138415871879843 AGIWUR15341                                                            |          |                |            |                             |
| N2 | CT | III | 12747899                                                                                  | 12750927 | WBGene00013911 | irld-60    | ZC482.2 -0.0946246266160982 |
|    |    |     | AGIWUR8989                                                                                |          |                |            |                             |
| N2 | CT | III | 12751109                                                                                  | 12753634 | WBGene00013915 | irld-20    | ZC482.7 0.159797827693995   |
|    |    |     | AGIWUR6282                                                                                |          |                |            |                             |
| N2 | CT | III | 12755348                                                                                  | 12756613 | WBGene00005757 | srw-10     | ZC482.6 -0.0249900621140879 |
|    |    |     | AGIWUR3866;AGIWUR16156;AGIWUR34190                                                        |          |                |            |                             |
| N2 | CT | III | 12757667                                                                                  | 12759619 | WBGene00005756 | srw-9      | ZC482.8 -0.0302139968463919 |
|    |    |     | AGIWUR4324                                                                                |          |                |            |                             |
| N2 | CT | III | 12760684                                                                                  | 12764341 | WBGene00013912 | irld-19    | ZC482.3 -0.474826985856955  |
|    |    |     | AGIWUR17913                                                                               |          |                |            |                             |
| N2 | CT | III | 12764553                                                                                  | 12769048 | WBGene00013913 | irld-61    | ZC482.4 0.140540080378357   |
|    |    |     | AGIWUR489;AGIWUR22473;AGIWUR34972                                                         |          |                |            |                             |
| N2 | CT | III | 12769564                                                                                  | 12771594 | WBGene00005752 | srw-5      | ZC482.9 0.0245636318246611  |
|    |    |     | AGIWUR1998;AGIWUR30084                                                                    |          |                |            |                             |
| N2 | CT | III | 12771878                                                                                  | 12779726 | WBGene00001512 | gab-1      | ZC482.1 -0.128418590840891  |
|    |    |     | AGIWUR28927;AGIWUR31006;AGIWUR38849                                                       |          |                |            |                             |
| N2 | CT | III | 12785154                                                                                  | 12793128 | WBGene00013914 | lgc-37     | ZC482.5 -0.0633495405879798 |

|                                                                                              |    |     |          |          |                |           |           |                     |
|----------------------------------------------------------------------------------------------|----|-----|----------|----------|----------------|-----------|-----------|---------------------|
| AGIWUR454;AGIWUR11920;AGIWUR37953;AGIWUR45122                                                |    |     |          |          |                |           |           |                     |
| N2                                                                                           | CT | III | 12793386 | 12798157 | WBGene00007210 | agmo-1    | BE10.2    | -0.0667867121836281 |
| AGIWUR5835;AGIWUR38227                                                                       |    |     |          |          |                |           |           |                     |
| N2                                                                                           | CT | III | 12804599 | 12804761 | WBGene00044128 | BE10.6    | BE10.6    | -0.150705726824302  |
| AGIWUR12532                                                                                  |    |     |          |          |                |           |           |                     |
| N2                                                                                           | CT | III | 12806175 | 12806855 | WBGene00044127 | BE10.5    | BE10.5    | 0.035519963120052   |
| AGIWUR6016;AGIWUR6428;AGIWUR33191;AGIWUR37207;AGIWUR42255                                    |    |     |          |          |                |           |           |                     |
| N2                                                                                           | CT | III | 12813541 | 12816798 | WBGene00007212 | BE10.4    | BE10.4    | -0.0642128109331601 |
| AGIWUR5283;AGIWUR14355;AGIWUR17624;AGIWUR23051                                               |    |     |          |          |                |           |           |                     |
| N2                                                                                           | CT | III | 12816789 | 12818100 | WBGene00000203 | arx-5     | Y37D8A.1  |                     |
| 0.0560764486700176 AGIWUR8540;AGIWUR16491;AGIWUR26323;AGIWUR42562                            |    |     |          |          |                |           |           |                     |
| N2                                                                                           | CT | III | 12818658 | 12820252 | WBGene00012560 | Y37D8A.25 |           | Y37D8A.25           |
| -0.288449967397636 AGIWUR1537                                                                |    |     |          |          |                |           |           |                     |
| N2                                                                                           | CT | III | 12820141 | 12825651 | WBGene00012544 | Y37D8A.2  |           | Y37D8A.2            |
| -0.0936852676536617 AGIWUR281                                                                |    |     |          |          |                |           |           |                     |
| N2                                                                                           | CT | III | 12829368 | 12837274 | WBGene00012545 | Y37D8A.3  |           | Y37D8A.3            |
| -0.0466796386820576 AGIWUR42989                                                              |    |     |          |          |                |           |           |                     |
| N2                                                                                           | CT | III | 12837189 | 12838959 | WBGene00012546 | Y37D8A.4  |           | Y37D8A.4            |
| -0.0512966331846378 AGIWUR26272                                                              |    |     |          |          |                |           |           |                     |
| N2                                                                                           | CT | III | 12854051 | 12855315 | WBGene00012547 | Y37D8A.5  |           | Y37D8A.5            |
| 0.270836320099125 AGIWUR12221                                                                |    |     |          |          |                |           |           |                     |
| N2                                                                                           | CT | III | 12855844 | 12856728 | WBGene00012561 | Y37D8A.26 |           | Y37D8A.26           |
| -0.0282578704854846 AGIWUR29792                                                              |    |     |          |          |                |           |           |                     |
| N2                                                                                           | CT | III | 12856833 | 12857911 | WBGene00012548 | Y37D8A.6  |           | Y37D8A.6            |
| 0.0273420557329711 AGIWUR19054                                                               |    |     |          |          |                |           |           |                     |
| N2                                                                                           | CT | III | 12864948 | 12867591 | WBGene00012549 | Y37D8A.8  |           | Y37D8A.8            |
| 0.10295039216407 AGIWUR42474                                                                 |    |     |          |          |                |           |           |                     |
| N2                                                                                           | CT | III | 12871195 | 12874654 | WBGene00003406 | mrg-1     | Y37D8A.9  |                     |
| 0.0233036211044819 AGIWUR13050;AGIWUR24765;AGIWUR32619                                       |    |     |          |          |                |           |           |                     |
| N2                                                                                           | CT | III | 12875007 | 12875831 | WBGene00012550 | hpo-21    | Y37D8A.10 |                     |
| 0.0681918764868534 AGIWUR36621                                                               |    |     |          |          |                |           |           |                     |
| N2                                                                                           | CT | III | 12875771 | 12877577 | WBGene00012551 | cec-7     | Y37D8A.11 |                     |
| 0.10908098084947 AGIWUR21609                                                                 |    |     |          |          |                |           |           |                     |
| N2                                                                                           | CT | III | 12881037 | 12891738 | WBGene00006804 | unc-71    | Y37D8A.13 |                     |
| 0.25340312879233 AGIWUR35864                                                                 |    |     |          |          |                |           |           |                     |
| N2                                                                                           | CT | III | 12905491 | 12906619 | WBGene00012553 | cco-2     | Y37D8A.14 |                     |
| -0.0182775241116371                                                                          |    |     |          |          |                |           |           |                     |
| AGIWUR611;AGIWUR5718;AGIWUR11609;AGIWUR18775;AGIWUR29351;AGIWUR29790;AGIWUR39376;AGIWUR42144 |    |     |          |          |                |           |           |                     |
| N2                                                                                           | CT | III | 12910510 | 12914930 | WBGene00001457 | flp-14    | Y37D8A.15 |                     |

|                     |                                                                      |          |                |           |                            |
|---------------------|----------------------------------------------------------------------|----------|----------------|-----------|----------------------------|
| -0.193955373774537  | AGIWUR36571                                                          |          |                |           |                            |
| N2 CT III           | 12915118                                                             | 12918675 | WBGene00012554 | Y37D8A.16 | Y37D8A.16                  |
| -0.088337925552068  | AGIWUR1963;AGIWUR9465;AGIWUR12505;AGIWUR19886                        |          |                |           |                            |
| N2 CT III           | 12921282                                                             | 12925997 | WBGene00012555 | Y37D8A.17 | Y37D8A.17                  |
| -0.0601436081530657 | AGIWUR34460                                                          |          |                |           |                            |
| N2 CT III           | 12926557                                                             | 12927886 | WBGene00012556 | mrps-10   | Y37D8A.18                  |
| -0.133793395243639  | AGIWUR32331                                                          |          |                |           |                            |
| N2 CT III           | 12928370                                                             | 12931867 | WBGene00012558 | Y37D8A.21 | Y37D8A.21                  |
| -0.148494575860624  | AGIWUR8071                                                           |          |                |           |                            |
| N2 CT III           | 12934717                                                             | 12941069 | WBGene00012559 | epg-3     | Y37D8A.22                  |
| -0.0674596992080119 | AGIWUR15032                                                          |          |                |           |                            |
| N2 CT III           | 12942617                                                             | 12949899 | WBGene00006762 | unc-25    | Y37D8A.23                  |
| -0.0310698479102154 | AGIWUR1644;AGIWUR15904;AGIWUR33380                                   |          |                |           |                            |
| N2 CT III           | 12951429                                                             | 12952342 | WBGene00012711 | Y39E4A.1  | Y39E4A.1                   |
| 0.345130546548985   | AGIWUR25309                                                          |          |                |           |                            |
| N2 CT III           | 12952969                                                             | 12966995 | WBGene00012712 | ttm-1     | Y39E4A.2                   |
| 0.0554182194783728  | AGIWUR32890                                                          |          |                |           |                            |
| N2 CT III           | 12967898                                                             | 12972498 | WBGene00012713 | bckd-1A   | Y39E4A.3                   |
| 0.0797710538665601  | AGIWUR27070;AGIWUR27757;AGIWUR28392;AGIWUR44309                      |          |                |           |                            |
| N2 CT III           | 12975068                                                             | 12977862 | WBGene00014176 | ZK1010.2  | ZK1010.2                   |
| 0.0300912106349429  | AGIWUR29594                                                          |          |                |           |                            |
| N2 CT III           | 12977910                                                             | 12978523 | WBGene00006728 | ubq-2     | ZK1010.1                   |
| 0.16759240389859    | AGIWUR20435;AGIWUR37225                                              |          |                |           |                            |
| N2 CT III           | 12979162                                                             | 12980163 | WBGene00014177 | frg-1     | ZK1010.3                   |
| -0.200211032114364  | AGIWUR3936;AGIWUR5758;AGIWUR6372;AGIWUR13721;AGIWUR15815;AGIWUR41903 |          |                |           |                            |
| N2 CT III           | 12981070                                                             | 12984423 | WBGene00014178 | ZK1010.4  | ZK1010.4                   |
| -0.203616371961289  | AGIWUR27206                                                          |          |                |           |                            |
| N2 CT III           | 12984493                                                             | 12987542 | WBGene00014179 | ZK1010.5  | ZK1010.5                   |
| 0.333685419360787   | AGIWUR17826                                                          |          |                |           |                            |
| N2 CT III           | 12987672                                                             | 12992492 | WBGene00014180 | ZK1010.6  | ZK1010.6                   |
| 0.0248644742287247  | AGIWUR37174                                                          |          |                |           |                            |
| N2 CT III           | 12992405                                                             | 12993707 | WBGene00000672 | col-97    | ZK1010.7                   |
| 0.344883066887167   | AGIWUR142;AGIWUR14870;AGIWUR16747;AGIWUR17138;AGIWUR42663            |          |                |           |                            |
| N2 CT III           | 12995738                                                             | 13000670 | WBGene00014181 | ZK1010.8  | ZK1010.8                   |
| 0.00318927211753994 | AGIWUR29793                                                          |          |                |           |                            |
| N2 CT III           | 13005461                                                             | 13011130 | WBGene00004906 | snf-7     | ZK1010.9                   |
| 0.0234624940821568  | AGIWUR16387                                                          |          |                |           |                            |
| N2 CT III           | 13018935                                                             | 13020226 | WBGene00000673 | col-98    | F14F7.1 -0.109882334582331 |
| AGIWUR16447         |                                                                      |          |                |           |                            |

|                                                                                            |    |     |                                                                        |          |                |           |                            |
|--------------------------------------------------------------------------------------------|----|-----|------------------------------------------------------------------------|----------|----------------|-----------|----------------------------|
| N2                                                                                         | CT | III | 13021009                                                               | 13023949 | WBGene00008809 | cyp-13A11 | F14F7.2                    |
| 0.164703206141236                                                                          |    |     | AGIWUR22639                                                            |          |                |           |                            |
| N2                                                                                         | CT | III | 13024547                                                               | 13028012 | WBGene00008810 | cyp-13A12 | F14F7.3                    |
| 0.27374486866885                                                                           |    |     | AGIWUR44517                                                            |          |                |           |                            |
| N2                                                                                         | CT | III | 13028393                                                               | 13029708 | WBGene00008811 | F14F7.4   | F14F7.4 0.10194771442271   |
| AGIWUR6007                                                                                 |    |     |                                                                        |          |                |           |                            |
| N2                                                                                         | CT | III | 13032001                                                               | 13036344 | WBGene00008812 | F14F7.5   | F14F7.5 0.0614175020208965 |
| AGIWUR42336                                                                                |    |     |                                                                        |          |                |           |                            |
| N2                                                                                         | CT | III | 13040100                                                               | 13049434 | WBGene00010073 | F54F12.2  | F54F12.2                   |
| 0.0060249712782765                                                                         |    |     | AGIWUR36521                                                            |          |                |           |                            |
| N2                                                                                         | CT | III | 13049588                                                               | 13055485 | WBGene00010072 | F54F12.1  | F54F12.1                   |
| 0.211385132313695                                                                          |    |     | AGIWUR38600                                                            |          |                |           |                            |
| N2                                                                                         | CT | III | 13070756                                                               | 13074697 | WBGene00012717 | Y39E4B.6  | Y39E4B.6                   |
| 0.106954861357166                                                                          |    |     |                                                                        |          |                |           |                            |
| AGIWUR1705;AGIWUR3123;AGIWUR5764;AGIWUR6739;AGIWUR9897;AGIWUR11950;AGIWUR14953;AGIWUR16922 |    |     |                                                                        |          |                |           |                            |
| N2                                                                                         | CT | III | 13087479                                                               | 13099455 | WBGene00004164 | pqn-83    | Y39E4B.3                   |
| 0.0424514705927299                                                                         |    |     | AGIWUR3211;AGIWUR22318                                                 |          |                |           |                            |
| N2                                                                                         | CT | III | 13107607                                                               | 13119042 | WBGene00012718 | dhhc-8    | Y39E4B.7                   |
| 0.0927839463989439                                                                         |    |     | AGIWUR17580;AGIWUR37080;AGIWUR41866                                    |          |                |           |                            |
| N2                                                                                         | CT | III | 13119820                                                               | 13133938 | WBGene00006985 | zig-8     | Y39E4B.8                   |
| -0.126579736827336                                                                         |    |     | AGIWUR17456                                                            |          |                |           |                            |
| N2                                                                                         | CT | III | 13134014                                                               | 13139614 | WBGene00000267 | bre-2     | Y39E4B.9                   |
| -0.249033030430601                                                                         |    |     | AGIWUR38640                                                            |          |                |           |                            |
| N2                                                                                         | CT | III | 13143373                                                               | 13152858 | WBGene00012719 | Y39E4B.10 | Y39E4B.10                  |
| -0.0696339415294656                                                                        |    |     | AGIWUR33059                                                            |          |                |           |                            |
| N2                                                                                         | CT | III | 13153817                                                               | 13160284 | WBGene00012714 | abce-1    | Y39E4B.1                   |
| -0.0743923482374811                                                                        |    |     | AGIWUR6306                                                             |          |                |           |                            |
| N2                                                                                         | CT | III | 13162475                                                               | 13164864 | WBGene00014884 | Y39E4B.14 | Y39E4B.14                  |
| 0.179135229493479                                                                          |    |     | AGIWUR12326;AGIWUR36130;AGIWUR36504                                    |          |                |           |                            |
| N2                                                                                         | CT | III | 13165659                                                               | 13169520 | WBGene00012715 | snpc-1.2  | Y39E4B.2                   |
| -0.0673205916110113                                                                        |    |     | AGIWUR31060                                                            |          |                |           |                            |
| N2                                                                                         | CT | III | 13169916                                                               | 13173106 | WBGene00012716 | Y39E4B.5  | Y39E4B.5                   |
| 0.0404079186010229                                                                         |    |     | AGIWUR43541                                                            |          |                |           |                            |
| N2                                                                                         | CT | III | 13187392                                                               | 13204897 | WBGene00001630 | gly-5     | Y39E4B.12                  |
| -0.153778824530415                                                                         |    |     | AGIWUR9158;AGIWUR10483;AGIWUR11255;AGIWUR15746;AGIWUR16404;AGIWUR18625 |          |                |           |                            |
| N2                                                                                         | CT | III | 13204982                                                               | 13207393 | WBGene00012720 | Y39E4B.11 | Y39E4B.11                  |
| 0.183917165643287                                                                          |    |     | AGIWUR445;AGIWUR13620;AGIWUR31679                                      |          |                |           |                            |
| N2                                                                                         | CT | III | 13212666                                                               | 13214371 | WBGene00006629 | tsp-3     | Y39E4B.4                   |
| -0.245193920825304                                                                         |    |     | AGIWUR20275;AGIWUR27390;AGIWUR42535                                    |          |                |           |                            |

|                                                                                                             |    |     |          |          |                |           |                             |
|-------------------------------------------------------------------------------------------------------------|----|-----|----------|----------|----------------|-----------|-----------------------------|
| N2                                                                                                          | CT | III | 13223072 | 13229465 | WBGene00012796 | Y43F4A.1  | Y43F4A.1                    |
| -0.0321376550293193 AGIWUR3573;AGIWUR8389;AGIWUR13912;AGIWUR15547;AGIWUR19301;AGIWUR23348;AGIWUR38773       |    |     |          |          |                |           |                             |
| N2                                                                                                          | CT | III | 13254675 | 13256456 | WBGene00185001 | F56A8.9   | F56A8.9 -0.233079647922747  |
| AGIWUR12170                                                                                                 |    |     |          |          |                |           |                             |
| N2                                                                                                          | CT | III | 13256878 | 13262905 | WBGene00010139 | F56A8.3   | F56A8.3 0.230689242101308   |
| AGIWUR10753;AGIWUR11459;AGIWUR13812;AGIWUR14851;AGIWUR20482;AGIWUR33389;AGIWUR34133;AGIWUR35104;AGIWUR37135 |    |     |          |          |                |           |                             |
| ;AGIWUR37646                                                                                                |    |     |          |          |                |           |                             |
| N2                                                                                                          | CT | III | 13263268 | 13265038 | WBGene00010140 | F56A8.4   | F56A8.4                     |
| -0.00652997082519136 AGIWUR38160                                                                            |    |     |          |          |                |           |                             |
| N2                                                                                                          | CT | III | 13265866 | 13266932 | WBGene00010141 | F56A8.5   | F56A8.5 -0.251624133921167  |
| AGIWUR4737                                                                                                  |    |     |          |          |                |           |                             |
| N2                                                                                                          | CT | III | 13266874 | 13268897 | WBGene00000774 | cpf-2     | F56A8.6 -0.0317551787500534 |
| AGIWUR820;AGIWUR36539;AGIWUR44328                                                                           |    |     |          |          |                |           |                             |
| N2                                                                                                          | CT | III | 13277261 | 13283883 | WBGene00006798 | unc-64    | F56A8.7 -0.0450720965611495 |
| AGIWUR4899;AGIWUR14105;AGIWUR27209;AGIWUR27682;AGIWUR28092;AGIWUR28579;AGIWUR30962;AGIWUR34538;AGIWUR37059  |    |     |          |          |                |           |                             |
| N2                                                                                                          | CT | III | 13283892 | 13293088 | WBGene00012802 | set-25    | Y43F4B.3                    |
| 0.240475509213083                                                                                           |    |     |          |          |                |           |                             |
| AGIWUR6872;AGIWUR10552;AGIWUR11103;AGIWUR20458;AGIWUR33492;AGIWUR35107;AGIWUR37662;AGIWUR39018              |    |     |          |          |                |           |                             |
| N2                                                                                                          | CT | III | 13296853 | 13299122 | WBGene00003804 | npp-18    | Y43F4B.4                    |
| -0.00516456562365697 AGIWUR1607;AGIWUR7364                                                                  |    |     |          |          |                |           |                             |
| N2                                                                                                          | CT | III | 13299378 | 13302760 | WBGene00012803 | Y43F4B.5  | Y43F4B.5                    |
| -0.0656879779279169 AGIWUR12941;AGIWUR17119;AGIWUR18458;AGIWUR30210                                         |    |     |          |          |                |           |                             |
| N2                                                                                                          | CT | III | 13302743 | 13307259 | WBGene00002229 | k1p-19    | Y43F4B.6                    |
| -0.101803888326259 AGIWUR17050;AGIWUR26586;AGIWUR31738;AGIWUR38118;AGIWUR39195;AGIWUR39404                  |    |     |          |          |                |           |                             |
| N2                                                                                                          | CT | III | 13307502 | 13313389 | WBGene00012804 | Y43F4B.7  | Y43F4B.7                    |
| -0.200192359990222 AGIWUR45165                                                                              |    |     |          |          |                |           |                             |
| N2                                                                                                          | CT | III | 13314011 | 13314721 | WBGene00012807 | Y43F4B.10 | Y43F4B.10                   |
| -0.160392990896611 AGIWUR3272                                                                               |    |     |          |          |                |           |                             |
| N2                                                                                                          | CT | III | 13315088 | 13318597 | WBGene00012806 | Y43F4B.9  | Y43F4B.9                    |
| -0.241176407336287 AGIWUR2346;AGIWUR5832;AGIWUR10132;AGIWUR20720;AGIWUR31478;AGIWUR32629                    |    |     |          |          |                |           |                             |
| N2                                                                                                          | CT | III | 13319265 | 13321892 | WBGene00194870 | F53A2.11  | F53A2.11                    |
| 0.190117039657562 AGIWUR27265                                                                               |    |     |          |          |                |           |                             |
| N2                                                                                                          | CT | III | 13334600 | 13336422 | WBGene00009950 | sdz-20    | F53A2.2 0.197110478300909   |
| AGIWUR36368                                                                                                 |    |     |          |          |                |           |                             |
| N2                                                                                                          | CT | III | 13336940 | 13339768 | WBGene00009951 | F53A2.3   | F53A2.3 -0.250754948822186  |
| AGIWUR1393                                                                                                  |    |     |          |          |                |           |                             |
| N2                                                                                                          | CT | III | 13341527 | 13342607 | WBGene00003829 | nud-1     | F53A2.4 -0.0119731152653073 |
| AGIWUR7935;AGIWUR15431;AGIWUR29058;AGIWUR34024;AGIWUR35551;AGIWUR45037                                      |    |     |          |          |                |           |                             |
| N2                                                                                                          | CT | III | 13342684 | 13343337 | WBGene00001092 | dro-1     | F53A2.5 0.00412173969707474 |

|                                                                                               |    |     |          |          |                |          |         |                     |  |
|-----------------------------------------------------------------------------------------------|----|-----|----------|----------|----------------|----------|---------|---------------------|--|
| AGIWUR18467                                                                                   |    |     |          |          |                |          |         |                     |  |
| N2                                                                                            | CT | III | 13343574 | 13344616 | WBGene00002059 | ife-1    | F53A2.6 | 0.0146498614083015  |  |
| AGIWUR10155;AGIWUR12605;AGIWUR23772;AGIWUR29803;AGIWUR38165                                   |    |     |          |          |                |          |         |                     |  |
| N2                                                                                            | CT | III | 13344917 | 13346866 | WBGene00009952 | acaa-2   | F53A2.7 | -0.0638893407333683 |  |
| AGIWUR17228;AGIWUR29233;AGIWUR44741                                                           |    |     |          |          |                |          |         |                     |  |
| N2                                                                                            | CT | III | 13347085 | 13355683 | WBGene00003478 | mtm-6    | F53A2.8 | 0.101299867947716   |  |
| AGIWUR13022;AGIWUR20098;AGIWUR41009;AGIWUR43895                                               |    |     |          |          |                |          |         |                     |  |
| N2                                                                                            | CT | III | 13356610 | 13359354 | WBGene00009953 | F53A2.9  | F53A2.9 | -0.313341833864127  |  |
| AGIWUR15428                                                                                   |    |     |          |          |                |          |         |                     |  |
| N2                                                                                            | CT | III | 13361299 | 13364765 | WBGene00044229 | T03F6.8  | T03F6.8 | 0.194693135739592   |  |
| AGIWUR5376;AGIWUR39849                                                                        |    |     |          |          |                |          |         |                     |  |
| N2                                                                                            | CT | III | 13365425 | 13367747 | WBGene00044228 | T03F6.7  | T03F6.7 | 0.355054545649213   |  |
| AGIWUR7179;AGIWUR21758                                                                        |    |     |          |          |                |          |         |                     |  |
| N2                                                                                            | CT | III | 13368087 | 13371072 | WBGene00045482 | T03F6.9  | T03F6.9 | -0.237390233321662  |  |
| AGIWUR31129;AGIWUR33220;AGIWUR43152                                                           |    |     |          |          |                |          |         |                     |  |
| N2                                                                                            | CT | III | 13371175 | 13376710 | WBGene00003047 | lis-1    | T03F6.5 | 0.291667920796897   |  |
| AGIWUR9723                                                                                    |    |     |          |          |                |          |         |                     |  |
| N2                                                                                            | CT | III | 13377830 | 13378342 | WBGene00185005 | T03F6.10 |         | T03F6.10            |  |
| -0.137690743357019 AGIWUR20586                                                                |    |     |          |          |                |          |         |                     |  |
| N2                                                                                            | CT | III | 13386150 | 13388353 | WBGene00011400 | T03F6.4  | T03F6.4 | -0.130384190704957  |  |
| AGIWUR11909;AGIWUR29629                                                                       |    |     |          |          |                |          |         |                     |  |
| N2                                                                                            | CT | III | 13389399 | 13390857 | WBGene00011399 | T03F6.3  | T03F6.3 | 0.139583673231591   |  |
| AGIWUR5191;AGIWUR9832;AGIWUR24981;AGIWUR25586;AGIWUR32831;AGIWUR41743                         |    |     |          |          |                |          |         |                     |  |
| N2                                                                                            | CT | III | 13390850 | 13393339 | WBGene00001035 | dnj-17   | T03F6.2 | -0.168966377251227  |  |
| AGIWUR42653                                                                                   |    |     |          |          |                |          |         |                     |  |
| N2                                                                                            | CT | III | 13393910 | 13394979 | WBGene00011398 | qdpr-1   | T03F6.1 | -0.0324663503260698 |  |
| AGIWUR43190                                                                                   |    |     |          |          |                |          |         |                     |  |
| N2                                                                                            | CT | III | 13395633 | 13400563 | WBGene00008714 | F11F1.1  | F11F1.1 | -0.150661500048312  |  |
| AGIWUR36166                                                                                   |    |     |          |          |                |          |         |                     |  |
| N2                                                                                            | CT | III | 13400962 | 13401773 | WBGene00008716 | F11F1.4  | F11F1.4 | 0.0396542682388814  |  |
| AGIWUR45038                                                                                   |    |     |          |          |                |          |         |                     |  |
| N2                                                                                            | CT | III | 13403234 | 13404514 | WBGene00003249 | mig-18   | F11F1.6 | -0.287522263571933  |  |
| AGIWUR34265                                                                                   |    |     |          |          |                |          |         |                     |  |
| N2                                                                                            | CT | III | 13404737 | 13405645 | WBGene00008719 | ttr-52   | F11F1.7 | 0.0071377061055431  |  |
| AGIWUR4329;AGIWUR6840;AGIWUR26823;AGIWUR27520;AGIWUR33186;AGIWUR34462;AGIWUR38554;AGIWUR45068 |    |     |          |          |                |          |         |                     |  |
| N2                                                                                            | CT | III | 13405965 | 13409292 | WBGene00003520 | nas-1    | F45G2.1 | 0.157971213041263   |  |
| AGIWUR7337                                                                                    |    |     |          |          |                |          |         |                     |  |
| N2                                                                                            | CT | III | 13409895 | 13423537 | WBGene00009730 | myo-6    | F45G2.2 | 0.00825137363353434 |  |
| AGIWUR9322                                                                                    |    |     |          |          |                |          |         |                     |  |

|                                                                                                                                                |    |     |          |          |                |          |          |                     |
|------------------------------------------------------------------------------------------------------------------------------------------------|----|-----|----------|----------|----------------|----------|----------|---------------------|
| N2                                                                                                                                             | CT | III | 13423514 | 13426204 | WBGene00009731 | exo-1    | F45G2.3  | -0.0366374154472329 |
| AGIWUR34496                                                                                                                                    |    |     |          |          |                |          |          |                     |
| N2                                                                                                                                             | CT | III | 13426100 | 13427715 | WBGene00009732 | cope-1   | F45G2.4  | -0.0577460378248702 |
| AGIWUR20389                                                                                                                                    |    |     |          |          |                |          |          |                     |
| N2                                                                                                                                             | CT | III | 13427642 | 13429713 | WBGene00000255 | bli-5    | F45G2.5  | -0.246936486981351  |
| AGIWUR30064                                                                                                                                    |    |     |          |          |                |          |          |                     |
| N2                                                                                                                                             | CT | III | 13430462 | 13433394 | WBGene00006612 | trf-1    | F45G2.6  | 0.0947600546149321  |
| AGIWUR18199                                                                                                                                    |    |     |          |          |                |          |          |                     |
| N2                                                                                                                                             | CT | III | 13433447 | 13434504 | WBGene00009733 | F45G2.7  | F45G2.7  | -0.227250543439908  |
| AGIWUR31301                                                                                                                                    |    |     |          |          |                |          |          |                     |
| N2                                                                                                                                             | CT | III | 13434861 | 13435670 | WBGene00009734 | F45G2.8  | F45G2.8  | -0.275797972687133  |
| AGIWUR8725                                                                                                                                     |    |     |          |          |                |          |          |                     |
| N2                                                                                                                                             | CT | III | 13435771 | 13436943 | WBGene00009735 | F45G2.9  | F45G2.9  | 0.00759885380036884 |
| AGIWUR15689;AGIWUR32039;AGIWUR40076                                                                                                            |    |     |          |          |                |          |          |                     |
| N2                                                                                                                                             | CT | III | 13437054 | 13439586 | WBGene00009736 | F45G2.10 | F45G2.10 |                     |
| -0.158163301873635 AGIWUR41087                                                                                                                 |    |     |          |          |                |          |          |                     |
| N2                                                                                                                                             | CT | III | 13439730 | 13455307 | WBGene00000834 | cua-1    | Y76A2A.2 |                     |
| 0.00514850650042931 AGIWUR21350                                                                                                                |    |     |          |          |                |          |          |                     |
| N2                                                                                                                                             | CT | III | 13457687 | 13462238 | WBGene00012097 | abcf-2   | T27E9.7  | 0.0204775103314923  |
| AGIWUR9395;AGIWUR15925;AGIWUR26658;AGIWUR29496;AGIWUR39154                                                                                     |    |     |          |          |                |          |          |                     |
| N2                                                                                                                                             | CT | III | 13462239 | 13462594 | WBGene00012094 | T27E9.2  | T27E9.2  | -0.254044043086797  |
| AGIWUR44257                                                                                                                                    |    |     |          |          |                |          |          |                     |
| N2                                                                                                                                             | CT | III | 13463163 | 13464657 | WBGene00006439 | ant-1.1  | T27E9.1  | 0.00269901821932184 |
| AGIWUR9898;AGIWUR15073;AGIWUR22154;AGIWUR23463;AGIWUR23557;AGIWUR24064;AGIWUR24262;AGIWUR24722;AGIWUR25282;AGIWUR26293;AGIWUR27044;AGIWUR30394 |    |     |          |          |                |          |          |                     |
| N2                                                                                                                                             | CT | III | 13464829 | 13471348 | WBGene00002185 | kel-3    | T27E9.4  | -0.0738720478627535 |
| AGIWUR39681                                                                                                                                    |    |     |          |          |                |          |          |                     |
| N2                                                                                                                                             | CT | III | 13471708 | 13475385 | WBGene00012095 | pssy-2   | T27E9.5  | 0.306852883634454   |
| AGIWUR30488                                                                                                                                    |    |     |          |          |                |          |          |                     |
| N2                                                                                                                                             | CT | III | 13475406 | 13476107 | WBGene00012096 | T27E9.6  | T27E9.6  | -0.254622334675451  |
| AGIWUR32016                                                                                                                                    |    |     |          |          |                |          |          |                     |
| N2                                                                                                                                             | CT | III | 13478561 | 13479629 | WBGene00012098 | fbxb-86  | T27E9.8  | 0.0413427782833633  |
| AGIWUR728                                                                                                                                      |    |     |          |          |                |          |          |                     |
| N2                                                                                                                                             | CT | III | 13480665 | 13484155 | WBGene00012099 | acc-4    | T27E9.9  | -0.126591969417813  |
| AGIWUR43609                                                                                                                                    |    |     |          |          |                |          |          |                     |
| N2                                                                                                                                             | CT | III | 13486643 | 13492430 | WBGene00006691 | twk-40   | T28A8.1  | -0.109065977715217  |
| AGIWUR11101;AGIWUR18718;AGIWUR21352                                                                                                            |    |     |          |          |                |          |          |                     |
| N2                                                                                                                                             | CT | III | 13493892 | 13495671 | WBGene00012108 | T28A8.2  | T28A8.2  | -0.101468718517009  |
| AGIWUR17099                                                                                                                                    |    |     |          |          |                |          |          |                     |



|                                                                                                     |    |     |          |          |                |          |          |                     |
|-----------------------------------------------------------------------------------------------------|----|-----|----------|----------|----------------|----------|----------|---------------------|
| N2                                                                                                  | CT | III | 13499199 | 13501510 | WBGene00012112 | T28A8.6  | T28A8.6  | -0.102142550399437  |
| AGIWUR4827;AGIWUR27619;AGIWUR28503                                                                  |    |     |          |          |                |          |          |                     |
| N2                                                                                                  | CT | III | 13502813 | 13503578 | WBGene00194852 | T28A8.8  | T28A8.8  | -0.133790434112431  |
| AGIWUR5587                                                                                          |    |     |          |          |                |          |          |                     |
| N2                                                                                                  | CT | III | 13503679 | 13505536 | WBGene00012110 | T28A8.4  | T28A8.4  | -0.141816440590631  |
| AGIWUR32059                                                                                         |    |     |          |          |                |          |          |                     |
| N2                                                                                                  | CT | III | 13506018 | 13508650 | WBGene00012109 | T28A8.3  | T28A8.3  | -0.124261199016171  |
| AGIWUR27068                                                                                         |    |     |          |          |                |          |          |                     |
| N2                                                                                                  | CT | III | 13509301 | 13514570 | WBGene00003373 | mlh-1    | T28A8.7  | -0.190619742703699  |
| AGIWUR32352                                                                                         |    |     |          |          |                |          |          |                     |
| N2                                                                                                  | CT | III | 13514945 | 13524110 | WBGene00004075 | pod-1    | Y76A2B.1 |                     |
| 0.0711181449723801 AGIWUR15436;AGIWUR24420;AGIWUR33016;AGIWUR34472;AGIWUR37115;AGIWUR43659          |    |     |          |          |                |          |          |                     |
| N2                                                                                                  | CT | III | 13527438 | 13539971 | WBGene00013574 | lron-13  | Y76A2B.2 |                     |
| -0.222150820080808 AGIWUR25269                                                                      |    |     |          |          |                |          |          |                     |
| N2                                                                                                  | CT | III | 13540139 | 13543534 | WBGene00013575 | acs-5    | Y76A2B.3 |                     |
| 0.172350293218239 AGIWUR9452;AGIWUR9888;AGIWUR28530;AGIWUR31495;AGIWUR36463;AGIWUR43869;AGIWUR44980 |    |     |          |          |                |          |          |                     |
| N2                                                                                                  | CT | III | 13545245 | 13546777 | WBGene00013576 | Y76A2B.4 |          | Y76A2B.4            |
| -0.0207145310488244 AGIWUR28901                                                                     |    |     |          |          |                |          |          |                     |
| N2                                                                                                  | CT | III | 13546889 | 13549020 | WBGene00013577 | Y76A2B.5 |          | Y76A2B.5            |
| -0.081963443477008 AGIWUR2571                                                                       |    |     |          |          |                |          |          |                     |
| N2                                                                                                  | CT | III | 13550699 | 13555334 | WBGene00013578 | scav-2   | Y76A2B.6 |                     |
| -0.182180479988386 AGIWUR3260                                                                       |    |     |          |          |                |          |          |                     |
| N2                                                                                                  | CT | III | 13561729 | 13563082 | WBGene00011475 | T05D4.2  | T05D4.2  | 0.298402420975791   |
| AGIWUR7893                                                                                          |    |     |          |          |                |          |          |                     |
| N2                                                                                                  | CT | III | 13563346 | 13564990 | WBGene00011474 | aldo-1   | T05D4.1  | 0.130650018319928   |
| AGIWUR4857;AGIWUR14566                                                                              |    |     |          |          |                |          |          |                     |
| N2                                                                                                  | CT | III | 13566874 | 13570447 | WBGene00011476 | T05D4.3  | T05D4.3  |                     |
| -0.00702962566515986 AGIWUR23312                                                                    |    |     |          |          |                |          |          |                     |
| N2                                                                                                  | CT | III | 13576188 | 13580662 | WBGene00003887 | osm-7    | T05D4.4  | 0.281199359972147   |
| AGIWUR27770                                                                                         |    |     |          |          |                |          |          |                     |
| N2                                                                                                  | CT | III | 13580850 | 13583589 | WBGene00011478 | T05D4.5  | T05D4.5  | 0.141198724679185   |
| AGIWUR33116                                                                                         |    |     |          |          |                |          |          |                     |
| N2                                                                                                  | CT | III | 13601760 | 13603156 | WBGene00001605 | gln-4    | T25C8.3  | 0.140675925141464   |
| AGIWUR11582                                                                                         |    |     |          |          |                |          |          |                     |
| N2                                                                                                  | CT | III | 13604339 | 13606067 | WBGene00000067 | act-5    | T25C8.2  | 0.188942385382267   |
| AGIWUR17983;AGIWUR31487;AGIWUR45107                                                                 |    |     |          |          |                |          |          |                     |
| N2                                                                                                  | CT | III | 13608072 | 13614704 | WBGene00012017 | T25C8.1  | T25C8.1  | 0.0902147452355901  |
| AGIWUR34341                                                                                         |    |     |          |          |                |          |          |                     |
| N2                                                                                                  | CT | III | 13614699 | 13622489 | WBGene00011735 | hip-1    | T12D8.8  | -0.0993716043320285 |

|                                                                                                                    |    |     |          |          |                |          |          |                     |  |
|--------------------------------------------------------------------------------------------------------------------|----|-----|----------|----------|----------------|----------|----------|---------------------|--|
| AGIWUR3805;AGIWUR19795;AGIWUR30111;AGIWUR38096                                                                     |    |     |          |          |                |          |          |                     |  |
| N2                                                                                                                 | CT | III | 13623279 | 13624172 | WBGene00011734 | m1c-5    | T12D8.6  | -0.0135055136286955 |  |
| AGIWUR11723                                                                                                        |    |     |          |          |                |          |          |                     |  |
| N2                                                                                                                 | CT | III | 13624195 | 13626007 | WBGene00006391 | taf-9    | T12D8.7  | 0.0698402087693353  |  |
| AGIWUR19328                                                                                                        |    |     |          |          |                |          |          |                     |  |
| N2                                                                                                                 | CT | III | 13625968 | 13626750 | WBGene00011733 | T12D8.5  | T12D8.5  | -0.0597448527817868 |  |
| AGIWUR44006                                                                                                        |    |     |          |          |                |          |          |                     |  |
| N2                                                                                                                 | CT | III | 13626994 | 13630808 | WBGene00011732 | arrd-17  | T12D8.4  | 0.0421618954922618  |  |
| AGIWUR9273;AGIWUR23751;AGIWUR25808;AGIWUR30362                                                                     |    |     |          |          |                |          |          |                     |  |
| N2                                                                                                                 | CT | III | 13639893 | 13641688 | WBGene00011731 | acbp-5   | T12D8.3  | 0.0330174901892653  |  |
| AGIWUR15630;AGIWUR23888;AGIWUR25272;AGIWUR27449;AGIWUR38615;AGIWUR39949                                            |    |     |          |          |                |          |          |                     |  |
| N2                                                                                                                 | CT | III | 13641795 | 13642327 | WBGene00023450 | T12D8.10 |          | T12D8.10            |  |
| -0.295558149123767 AGIWUR44933                                                                                     |    |     |          |          |                |          |          |                     |  |
| N2                                                                                                                 | CT | III | 13642420 | 13643570 | WBGene00011730 | drd-2    | T12D8.2  | 0.160360262099686   |  |
| AGIWUR27572;AGIWUR36635                                                                                            |    |     |          |          |                |          |          |                     |  |
| N2                                                                                                                 | CT | III | 13643916 | 13656637 | WBGene00011729 | set-16   | T12D8.1  | 0.0134879651293467  |  |
| AGIWUR27385;AGIWUR40824                                                                                            |    |     |          |          |                |          |          |                     |  |
| N2                                                                                                                 | CT | III | 13663400 | 13667839 | WBGene00001458 | flp-15   | ZK525.1  | -0.106457414830775  |  |
| AGIWUR11195                                                                                                        |    |     |          |          |                |          |          |                     |  |
| N2                                                                                                                 | CT | III | 13673280 | 13674746 | WBGene00000179 | aqp-11   | ZK525.2  | 0.0357191849826179  |  |
| AGIWUR16789                                                                                                        |    |     |          |          |                |          |          |                     |  |
| N2                                                                                                                 | CT | III | 13674917 | 13686445 | WBGene00001118 | dyf-2    | ZK520.3  | -0.192575615938456  |  |
| AGIWUR11571                                                                                                        |    |     |          |          |                |          |          |                     |  |
| N2                                                                                                                 | CT | III | 13687199 | 13692683 | WBGene00000837 | cul-2    | ZK520.4  | 0.0497633806373816  |  |
| AGIWUR20;AGIWUR1441;AGIWUR1540;AGIWUR13518;AGIWUR13995;AGIWUR14723;AGIWUR23792;AGIWUR28327;AGIWUR41222;AGIWUR42608 |    |     |          |          |                |          |          |                     |  |
| N2                                                                                                                 | CT | III | 13692668 | 13693811 | WBGene00000878 | cyn-2    | ZK520.5  | 0.195145984495435   |  |
| AGIWUR39498                                                                                                        |    |     |          |          |                |          |          |                     |  |
| N2                                                                                                                 | CT | III | 13701993 | 13724401 | WBGene00003048 | lit-1    | W06F12.1 |                     |  |
| 0.0403003651717135 AGIWUR6941;AGIWUR12354;AGIWUR32350                                                              |    |     |          |          |                |          |          |                     |  |
| N2                                                                                                                 | CT | III | 13726641 | 13731679 | WBGene00012306 | W06F12.2 |          | W06F12.2            |  |
| 0.10646003548605 AGIWUR33882;AGIWUR37683;AGIWUR40574                                                               |    |     |          |          |                |          |          |                     |  |
| N2                                                                                                                 | CT | III | 13735071 | 13736541 | WBGene00012307 | W06F12.3 |          | W06F12.3            |  |
| 0.0911442375444764 AGIWUR25203                                                                                     |    |     |          |          |                |          |          |                     |  |
| N2                                                                                                                 | CT | III | 13744222 | 13747287 | WBGene00010661 | tyr-2    | K08E3.1  | 0.33406219644794    |  |
| AGIWUR5503                                                                                                         |    |     |          |          |                |          |          |                     |  |
| N2                                                                                                                 | CT | III | 13747472 | 13748686 | WBGene00010662 | K08E3.2  | K08E3.2  | 0.268140257923598   |  |
| AGIWUR9724                                                                                                         |    |     |          |          |                |          |          |                     |  |
| N2                                                                                                                 | CT | III | 13752406 | 13755861 | WBGene00023451 | m1c-7    | K08E3.10 |                     |  |

|                                                                                                             |    |                                                |          |          |                |           |           |                      |             |
|-------------------------------------------------------------------------------------------------------------|----|------------------------------------------------|----------|----------|----------------|-----------|-----------|----------------------|-------------|
| 0.0384712022021407                                                                                          |    | AGIWUR4778;AGIWUR24245;AGIWUR35195;AGIWUR44855 |          |          |                |           |           |                      |             |
| N2                                                                                                          | CT | III                                            | 13755896 | 13759434 | WBGene00010663 | toca-2    | K08E3.3   | -0.0782470085610782  |             |
| AGIWUR13679;AGIWUR25876;AGIWUR25927;AGIWUR33111                                                             |    |                                                |          |          |                |           |           |                      |             |
| N2                                                                                                          | CT | III                                            | 13759444 | 13762069 | WBGene00010664 | dbn-1     | K08E3.4   | 0.137684779371041    |             |
| AGIWUR34377                                                                                                 |    |                                                |          |          |                |           |           |                      |             |
| N2                                                                                                          | CT | III                                            | 13764030 | 13768092 | WBGene00010665 | K08E3.5   | K08E3.5   | 0.095633331091352    |             |
| AGIWUR9559;AGIWUR16248;AGIWUR17000;AGIWUR18925;AGIWUR25456;AGIWUR26080;AGIWUR27983;AGIWUR30514              |    |                                                |          |          |                |           |           |                      |             |
| N2                                                                                                          | CT | III                                            | 13768541 | 13771242 | WBGene00000875 | cyk-4     | K08E3.6   | 0.208097352154837    |             |
| AGIWUR11676;AGIWUR19991;AGIWUR24305;AGIWUR25234                                                             |    |                                                |          |          |                |           |           |                      |             |
| N2                                                                                                          | CT | III                                            | 13771448 | 13773348 | WBGene00003967 | pdr-1     | K08E3.7   | 0.0621206529203935   |             |
| AGIWUR30328                                                                                                 |    |                                                |          |          |                |           |           |                      |             |
| N2                                                                                                          | CT | III                                            | 13773456 | 13778896 | WBGene00007025 | mdt-29    | K08E3.8   | -0.0598121343065952  |             |
| AGIWUR9180;AGIWUR10608                                                                                      |    |                                                |          |          |                |           |           |                      |             |
| N2                                                                                                          | CT | III                                            | 13780220 | 13781133 | WBGene00007065 | pot-3     | 3R5.1     | -0.26437410968423    |             |
| AGIWUR9200                                                                                                  |    |                                                |          |          |                |           |           |                      |             |
| N2                                                                                                          | CT | IV                                             | 32481    | 48880    | WBGene00001492 | frm-5.1   | Y38C1AB.8 | -0.00171889348417187 |             |
| AGIWUR11307;AGIWUR23830                                                                                     |    |                                                |          |          |                |           |           |                      |             |
| N2                                                                                                          | CT | IV                                             | 86890    | 90082    | WBGene00015246 | sc1-23    | B0545.3   | 0.155400514051619    | AGIWUR11368 |
| N2                                                                                                          | CT | IV                                             | 112408   | 118629   | WBGene00001111 | duo-2     | F29C4.5   | 0.00297074042962464  | AGIWUR31597 |
| N2                                                                                                          | CT | IV                                             | 119272   | 121707   | WBGene00017928 | tut-1     | F29C4.6   | -0.0528499106931708  |             |
| AGIWUR33251;AGIWUR36931                                                                                     |    |                                                |          |          |                |           |           |                      |             |
| N2                                                                                                          | CT | IV                                             | 121797   | 126225   | WBGene00017929 | gr1d-1    | F29C4.7   | 0.0878461890699143   |             |
| AGIWUR23201;AGIWUR26391                                                                                     |    |                                                |          |          |                |           |           |                      |             |
| N2                                                                                                          | CT | IV                                             | 126731   | 127640   | WBGene00017926 | F29C4.2   | F29C4.2   | -0.0971179799018884  |             |
| AGIWUR6362;AGIWUR10252;AGIWUR12097;AGIWUR12529;AGIWUR16172;AGIWUR23544;AGIWUR27558;AGIWUR31184;AGIWUR37211; |    |                                                |          |          |                |           |           |                      |             |
| AGIWUR37885;AGIWUR40280                                                                                     |    |                                                |          |          |                |           |           |                      |             |
| N2                                                                                                          | CT | IV                                             | 132416   | 138076   | WBGene00000897 | daf-1     | F29C4.1   | 0.0834965553141132   | AGIWUR34627 |
| N2                                                                                                          | CT | IV                                             | 138346   | 147919   | WBGene00000674 | col-99    | F29C4.8   | 0.0595411890777591   |             |
| AGIWUR2432;AGIWUR9402                                                                                       |    |                                                |          |          |                |           |           |                      |             |
| N2                                                                                                          | CT | IV                                             | 156071   | 157901   | WBGene00021400 | Y38C1AA.9 | Y38C1AA.9 | 0.0677114548168625   |             |
| AGIWUR3829                                                                                                  |    |                                                |          |          |                |           |           |                      |             |
| N2                                                                                                          | CT | IV                                             | 158962   | 159836   | WBGene00021398 | Y38C1AA.7 | Y38C1AA.7 | 0.378060980025861    |             |
| AGIWUR10389;AGIWUR17218;AGIWUR26513;AGIWUR30309;AGIWUR31337;AGIWUR38359                                     |    |                                                |          |          |                |           |           |                      |             |
| N2                                                                                                          | CT | IV                                             | 162830   | 164814   | WBGene00021397 | Y38C1AA.6 | Y38C1AA.6 | -0.156943887877601   |             |
| AGIWUR38082                                                                                                 |    |                                                |          |          |                |           |           |                      |             |
| N2                                                                                                          | CT | IV                                             | 165077   | 169980   | WBGene00021396 | cut1-24   | Y38C1AA.5 | 0.215965761028139    |             |
| AGIWUR7334;AGIWUR11652;AGIWUR32978                                                                          |    |                                                |          |          |                |           |           |                      |             |
| N2                                                                                                          | CT | IV                                             | 179008   | 183261   | WBGene00006561 | tc1-2     | Y38C1AA.4 | -0.0536656934084139  |             |
| AGIWUR34449                                                                                                 |    |                                                |          |          |                |           |           |                      |             |

|                                                                         |    |    |        |        |                |            |            |                      |             |
|-------------------------------------------------------------------------|----|----|--------|--------|----------------|------------|------------|----------------------|-------------|
| N2                                                                      | CT | IV | 184554 | 192151 | WBGene00021395 | pnc-1      | Y38C1AA.3  | -0.162577590804924   |             |
| AGIWUR1594;AGIWUR5204                                                   |    |    |        |        |                |            |            |                      |             |
| N2                                                                      | CT | IV | 192256 | 194745 | WBGene00021402 | Y38C1AA.12 | Y38C1AA.12 | 0.0917155477420706   |             |
| AGIWUR6999;AGIWUR31095                                                  |    |    |        |        |                |            |            |                      |             |
| N2                                                                      | CT | IV | 194745 | 202586 | WBGene00000815 | csn-3      | Y38C1AA.2  | -0.172383221765266   |             |
| AGIWUR42984                                                             |    |    |        |        |                |            |            |                      |             |
| N2                                                                      | CT | IV | 205239 | 208049 | WBGene00195063 | Y38C1AA.14 | Y38C1AA.14 | -0.343226917865914   |             |
| AGIWUR12592;AGIWUR34861                                                 |    |    |        |        |                |            |            |                      |             |
| N2                                                                      | CT | IV | 208189 | 217390 | WBGene00021394 | Y38C1AA.1  | Y38C1AA.1  | -0.0400641322303894  |             |
| AGIWUR10055;AGIWUR19059;AGIWUR22478;AGIWUR30888;AGIWUR35437;AGIWUR44502 |    |    |        |        |                |            |            |                      |             |
| N2                                                                      | CT | IV | 218551 | 220854 | WBGene00021401 | prdx-6     | Y38C1AA.11 | -0.00905153636176337 |             |
| AGIWUR8871;AGIWUR23470;AGIWUR26757                                      |    |    |        |        |                |            |            |                      |             |
| N2                                                                      | CT | IV | 225439 | 231773 | WBGene00019821 | R02D3.3    | R02D3.3    | -0.152054082129453   | AGIWUR3185  |
| N2                                                                      | CT | IV | 232473 | 237450 | WBGene00019822 | R02D3.4    | R02D3.4    | 0.0222841456602296   | AGIWUR39185 |
| N2                                                                      | CT | IV | 237591 | 240307 | WBGene00019823 | fnta-1     | R02D3.5    | 0.0524111849543827   |             |
| AGIWUR5534;AGIWUR12653;AGIWUR22990;AGIWUR24412;AGIWUR29214;AGIWUR29389  |    |    |        |        |                |            |            |                      |             |
| N2                                                                      | CT | IV | 240451 | 244129 | WBGene00019820 | cogc-8     | R02D3.2    | -0.00283898120451376 | AGIWUR1137  |
| N2                                                                      | CT | IV | 245114 | 251925 | WBGene00019819 | R02D3.1    | R02D3.1    | 0.0689598710031465   |             |
| AGIWUR3486;AGIWUR11047;AGIWUR27639;AGIWUR30392;AGIWUR39481              |    |    |        |        |                |            |            |                      |             |
| N2                                                                      | CT | IV | 251970 | 252554 | WBGene00001728 | grl-19     | R02D3.6    | 0.0792799767101933   |             |
| AGIWUR9545;AGIWUR9685;AGIWUR13103;AGIWUR30596;AGIWUR32729;AGIWUR41213   |    |    |        |        |                |            |            |                      |             |
| N2                                                                      | CT | IV | 253571 | 255429 | WBGene00019824 | R02D3.7    | R02D3.7    | 0.131944848283245    | AGIWUR39002 |
| N2                                                                      | CT | IV | 255966 | 257199 | WBGene00019825 | R02D3.8    | R02D3.8    | 0.0541092309973301   | AGIWUR22427 |
| N2                                                                      | CT | IV | 257384 | 259204 | WBGene00001071 | dpy-9      | T21D12.2   | -0.0327707259314955  |             |
| AGIWUR18790;AGIWUR27258                                                 |    |    |        |        |                |            |            |                      |             |
| N2                                                                      | CT | IV | 261886 | 264232 | WBGene00003932 | pat-6      | T21D12.4   | -0.228962494006437   |             |
| AGIWUR43224                                                             |    |    |        |        |                |            |            |                      |             |
| N2                                                                      | CT | IV | 266448 | 268322 | WBGene00020651 | T21D12.12  | T21D12.12  |                      |             |
| -0.00491327150238696 AGIWUR14769;AGIWUR43154;AGIWUR43734                |    |    |        |        |                |            |            |                      |             |
| N2                                                                      | CT | IV | 269407 | 272099 | WBGene00020650 | T21D12.11  | T21D12.11  | 0.188213962405334    |             |
| AGIWUR37598                                                             |    |    |        |        |                |            |            |                      |             |
| N2                                                                      | CT | IV | 272315 | 273263 | WBGene00005487 | srh-282    | T21D12.5   | 0.0506564685822681   |             |
| AGIWUR7137                                                              |    |    |        |        |                |            |            |                      |             |
| N2                                                                      | CT | IV | 274570 | 279940 | WBGene00020649 | sma-10     | T21D12.9   | -0.0635289267898593  |             |
| AGIWUR15332;AGIWUR23401;AGIWUR28389;AGIWUR36460                         |    |    |        |        |                |            |            |                      |             |
| N2                                                                      | CT | IV | 283647 | 287212 | WBGene00206487 | best-19    | T21D12.15  | -0.309020115051476   |             |
| AGIWUR28322                                                             |    |    |        |        |                |            |            |                      |             |
| N2                                                                      | CT | IV | 287305 | 288127 | WBGene00045177 | T21D12.14  | T21D12.14  | -0.135585310616525   |             |
| AGIWUR14474                                                             |    |    |        |        |                |            |            |                      |             |

|                                                                                                                                                           |    |    |        |        |                |          |          |                     |             |
|-----------------------------------------------------------------------------------------------------------------------------------------------------------|----|----|--------|--------|----------------|----------|----------|---------------------|-------------|
| N2                                                                                                                                                        | CT | IV | 288803 | 291456 | WBGene00020648 | T21D12.7 | T21D12.7 | -0.0602738592685297 |             |
| AGIWUR8323;AGIWUR24804                                                                                                                                    |    |    |        |        |                |          |          |                     |             |
| N2                                                                                                                                                        | CT | IV | 292429 | 298280 | WBGene00019298 | K02D7.1  | K02D7.1  | 0.357365549584234   | AGIWUR22001 |
| N2                                                                                                                                                        | CT | IV | 307505 | 311232 | WBGene00019300 | swt-1    | K02D7.5  | 0.0396423609283785  | AGIWUR44079 |
| N2                                                                                                                                                        | CT | IV | 311512 | 313697 | WBGene00019299 | snai-1   | K02D7.2  | 0.0652639853559656  | AGIWUR5231  |
| N2                                                                                                                                                        | CT | IV | 315056 | 320605 | WBGene00001099 | dsc-4    | K02D7.4  | 0.276583001282743   | AGIWUR35592 |
| N2                                                                                                                                                        | CT | IV | 321571 | 323022 | WBGene00001735 | grl-26   | K02D7.6  | -0.0620199067694287 | AGIWUR36277 |
| N2                                                                                                                                                        | CT | IV | 325063 | 330631 | WBGene00017578 | dr1-1    | F18F11.5 | -0.0535068047849627 |             |
| AGIWUR15146                                                                                                                                               |    |    |        |        |                |          |          |                     |             |
| N2                                                                                                                                                        | CT | IV | 330823 | 334385 | WBGene00017577 | F18F11.4 | F18F11.4 | -0.044368678870057  |             |
| AGIWUR18816;AGIWUR18855;AGIWUR32242;AGIWUR34618                                                                                                           |    |    |        |        |                |          |          |                     |             |
| N2                                                                                                                                                        | CT | IV | 334809 | 337178 | WBGene00017574 | F18F11.1 | F18F11.1 | -0.0824495639093019 |             |
| AGIWUR39978                                                                                                                                               |    |    |        |        |                |          |          |                     |             |
| N2                                                                                                                                                        | CT | IV | 339629 | 358976 | WBGene00017576 | cdh-8    | F18F11.3 | 0.226372648113203   |             |
| AGIWUR3867;AGIWUR7444;AGIWUR27378                                                                                                                         |    |    |        |        |                |          |          |                     |             |
| N2                                                                                                                                                        | CT | IV | 359204 | 376062 | WBGene00022048 | f1n-1    | Y66H1B.2 | 0.0499683200700183  |             |
| AGIWUR6229;AGIWUR12057;AGIWUR34969                                                                                                                        |    |    |        |        |                |          |          |                     |             |
| N2                                                                                                                                                        | CT | IV | 379898 | 383185 | WBGene00004981 | sp1-1    | Y66H1B.4 | -0.0787796522498123 |             |
| AGIWUR14485                                                                                                                                               |    |    |        |        |                |          |          |                     |             |
| N2                                                                                                                                                        | CT | IV | 385894 | 386607 | WBGene00004493 | rps-24   | T07A9.11 | 0.0166490627545848  |             |
| AGIWUR18988                                                                                                                                               |    |    |        |        |                |          |          |                     |             |
| N2                                                                                                                                                        | CT | IV | 386699 | 387949 | WBGene00044789 | T07A9.14 | T07A9.14 | 0.35106078742195    |             |
| AGIWUR18205                                                                                                                                               |    |    |        |        |                |          |          |                     |             |
| N2                                                                                                                                                        | CT | IV | 388084 | 388733 | WBGene00020300 | tag-261  | T07A9.13 | -0.100088963613416  |             |
| AGIWUR1038                                                                                                                                                |    |    |        |        |                |          |          |                     |             |
| N2                                                                                                                                                        | CT | IV | 388686 | 390468 | WBGene00001338 | ears-2   | T07A9.2  | -0.418222820119444  | AGIWUR4672  |
| N2                                                                                                                                                        | CT | IV | 390512 | 393158 | WBGene00020298 | T07A9.10 | T07A9.10 | 0.17991147073559    |             |
| AGIWUR8392;AGIWUR29528;AGIWUR35867                                                                                                                        |    |    |        |        |                |          |          |                     |             |
| N2                                                                                                                                                        | CT | IV | 393156 | 393546 | WBGene00045249 | T07A9.15 | T07A9.15 | -0.193631415425115  |             |
| AGIWUR8754;AGIWUR11842;AGIWUR20015;AGIWUR22125;AGIWUR24642;AGIWUR30586;AGIWUR31937;AGIWUR33298;AGIWUR34076                                                |    |    |        |        |                |          |          |                     |             |
| N2                                                                                                                                                        | CT | IV | 393880 | 396554 | WBGene00020297 | nog-1    | T07A9.9  | 0.119804142546455   |             |
| AGIWUR8931;AGIWUR9531;AGIWUR16928;AGIWUR20629;AGIWUR28111;AGIWUR30284;AGIWUR32858;AGIWUR34292;AGIWUR35408;AGIWUR39296;AGIWUR40218;AGIWUR41675;AGIWUR44447 |    |    |        |        |                |          |          |                     |             |
| N2                                                                                                                                                        | CT | IV | 396545 | 399095 | WBGene00020296 | T07A9.8  | T07A9.8  | -0.269159029624866  | AGIWUR13100 |
| N2                                                                                                                                                        | CT | IV | 401695 | 405346 | WBGene00001666 | gpa-4    | T07A9.7  | 0.0272387498314552  |             |
| AGIWUR11240;AGIWUR23437;AGIWUR40058                                                                                                                       |    |    |        |        |                |          |          |                     |             |
| N2                                                                                                                                                        | CT | IV | 405621 | 410033 | WBGene00002187 | kbg-1    | T07A9.3  | -0.38538752277797   | AGIWUR7146  |
| N2                                                                                                                                                        | CT | IV | 410831 | 415615 | WBGene00020299 | T07A9.12 | T07A9.12 | -0.217269430002935  |             |
| AGIWUR10654;AGIWUR20490;AGIWUR28756;AGIWUR37082                                                                                                           |    |    |        |        |                |          |          |                     |             |

|                                                                                    |    |    |        |        |                |          |          |                     |             |
|------------------------------------------------------------------------------------|----|----|--------|--------|----------------|----------|----------|---------------------|-------------|
| N2                                                                                 | CT | IV | 415635 | 419958 | WBGene00001332 | eri-1    | T07A9.5  | -0.179612506381002  |             |
| AGIWUR3022;AGIWUR3334;AGIWUR17888;AGIWUR20131;AGIWUR41811                          |    |    |        |        |                |          |          |                     |             |
| N2                                                                                 | CT | IV | 419938 | 425181 | WBGene00000913 | daf-18   | T07A9.6  | 0.0953740178029951  |             |
| AGIWUR2814;AGIWUR14949;AGIWUR15080;AGIWUR23347;AGIWUR28679;AGIWUR32747;AGIWUR39915 |    |    |        |        |                |          |          |                     |             |
| N2                                                                                 | CT | IV | 425972 | 427204 | WBGene00022046 | Y66H1A.4 | Y66H1A.4 | -0.0396260471281842 |             |
| AGIWUR14850                                                                        |    |    |        |        |                |          |          |                     |             |
| N2                                                                                 | CT | IV | 428070 | 429133 | WBGene00022047 | Y66H1A.5 | Y66H1A.5 | 0.10237460599409    |             |
| AGIWUR29648                                                                        |    |    |        |        |                |          |          |                     |             |
| N2                                                                                 | CT | IV | 429214 | 440554 | WBGene00002041 | hum-8    | Y66H1A.6 | -0.0441137187051446 |             |
| AGIWUR34330                                                                        |    |    |        |        |                |          |          |                     |             |
| N2                                                                                 | CT | IV | 443985 | 444783 | WBGene00022045 | mrp1-55  | Y66H1A.3 | -0.0149697230060717 |             |
| AGIWUR35396                                                                        |    |    |        |        |                |          |          |                     |             |
| N2                                                                                 | CT | IV | 445677 | 448439 | WBGene00022044 | dpm-1    | Y66H1A.2 | -0.176768231843042  |             |
| AGIWUR39955                                                                        |    |    |        |        |                |          |          |                     |             |
| N2                                                                                 | CT | IV | 455726 | 457099 | WBGene00019772 | M04G7.1  | M04G7.1  | 0.0382505426093136  | AGIWUR737   |
| N2                                                                                 | CT | IV | 458032 | 461029 | WBGene00019773 | M04G7.2  | M04G7.2  | 0.0791410581165444  | AGIWUR13061 |
| N2                                                                                 | CT | IV | 461292 | 481167 | WBGene00019774 | M04G7.3  | M04G7.3  | 0.137961992610098   | AGIWUR16593 |
| N2                                                                                 | CT | IV | 505069 | 506600 | WBGene00021011 | W03G1.5  | W03G1.5  | 0.00295851859690188 | AGIWUR7800  |
| N2                                                                                 | CT | IV | 506737 | 519457 | WBGene00021012 | pig-1    | W03G1.6  | -0.0395286085951234 |             |
| AGIWUR1369;AGIWUR2867;AGIWUR7710;AGIWUR12794;AGIWUR15026;AGIWUR38661;AGIWUR43168   |    |    |        |        |                |          |          |                     |             |
| N2                                                                                 | CT | IV | 520214 | 523809 | WBGene00000213 | asm-3    | W03G1.7  | -0.409537292326661  |             |
| AGIWUR17779;AGIWUR43469                                                            |    |    |        |        |                |          |          |                     |             |
| N2                                                                                 | CT | IV | 524652 | 526479 | WBGene00021010 | W03G1.2  | W03G1.2  | 0.171312077765123   | AGIWUR7043  |
| N2                                                                                 | CT | IV | 527379 | 528583 | WBGene00021013 | W03G1.8  | W03G1.8  | 0.111601645628032   | AGIWUR8211  |
| N2                                                                                 | CT | IV | 532135 | 535703 | WBGene00001625 | glt-7    | W03G1.1  | 0.0662332951030153  | AGIWUR40008 |
| N2                                                                                 | CT | IV | 543231 | 544086 | WBGene00017276 | F09C11.1 | F09C11.1 | -0.0837741734461943 |             |
| AGIWUR1852                                                                         |    |    |        |        |                |          |          |                     |             |
| N2                                                                                 | CT | IV | 548302 | 553231 | WBGene00018924 | F56A11.4 | F56A11.4 | -0.118277624776041  |             |
| AGIWUR5465                                                                         |    |    |        |        |                |          |          |                     |             |
| N2                                                                                 | CT | IV | 559234 | 568076 | WBGene00001165 | efn-4    | F56A11.3 | -0.175195586912034  |             |
| AGIWUR31786                                                                        |    |    |        |        |                |          |          |                     |             |
| N2                                                                                 | CT | IV | 568372 | 570875 | WBGene00018925 | F56A11.5 | F56A11.5 | 0.00582900595867031 |             |
| AGIWUR35066                                                                        |    |    |        |        |                |          |          |                     |             |
| N2                                                                                 | CT | IV | 572723 | 583577 | WBGene00001579 | gex-2    | F56A11.1 | 0.0768915135046164  |             |
| AGIWUR20233                                                                        |    |    |        |        |                |          |          |                     |             |
| N2                                                                                 | CT | IV | 583813 | 587829 | WBGene00189987 | C18H7.12 | C18H7.12 | 0.161331889432525   |             |
| AGIWUR4609                                                                         |    |    |        |        |                |          |          |                     |             |
| N2                                                                                 | CT | IV | 589030 | 592485 | WBGene00015996 | C18H7.6  | C18H7.6  | 0.0643331322103275  | AGIWUR16736 |
| N2                                                                                 | CT | IV | 593329 | 595233 | WBGene00015994 | C18H7.4  | C18H7.4  | 0.177164874281065   | AGIWUR16422 |

|                                                             |    |    |        |        |                |           |           |                      |             |
|-------------------------------------------------------------|----|----|--------|--------|----------------|-----------|-----------|----------------------|-------------|
| N2                                                          | CT | IV | 595722 | 596419 | WBGene00015997 | C18H7.7   | C18H7.7   | 0.323122615123083    |             |
| AGIWUR12555;AGIWUR23432;AGIWUR33157;AGIWUR40236             |    |    |        |        |                |           |           |                      |             |
| N2                                                          | CT | IV | 596864 | 598771 | WBGene00044457 | C18H7.11  | C18H7.11  | 0.150019642687898    |             |
| AGIWUR26978                                                 |    |    |        |        |                |           |           |                      |             |
| N2                                                          | CT | IV | 599449 | 601695 | WBGene00015998 | srt-59    | C18H7.8   | -0.0145137246439919  | AGIWUR38612 |
| N2                                                          | CT | IV | 602991 | 603643 | WBGene00015999 | prmt-4    | C18H7.9   | -0.66966413921081    | AGIWUR21044 |
| N2                                                          | CT | IV | 604444 | 605876 | WBGene00000676 | col-102   | C18H7.3   | 0.460308489066621    | AGIWUR16403 |
| N2                                                          | CT | IV | 606355 | 614021 | WBGene00002140 | inx-18    | C18H7.2   | -0.0931312618602975  | AGIWUR28351 |
| N2                                                          | CT | IV | 615544 | 620925 | WBGene00015993 | C18H7.1   | C18H7.1   | -0.00232257431977523 | AGIWUR4760  |
| N2                                                          | CT | IV | 627537 | 633954 | WBGene00015497 | nhr-76    | C05G6.1   | 0.0757708422137586   |             |
| AGIWUR2051;AGIWUR7810                                       |    |    |        |        |                |           |           |                      |             |
| N2                                                          | CT | IV | 649665 | 651994 | WBGene00019665 | K11H12.9  | K11H12.9  | -0.331038540145741   |             |
| AGIWUR23645                                                 |    |    |        |        |                |           |           |                      |             |
| N2                                                          | CT | IV | 652130 | 653421 | WBGene00019658 | K11H12.1  | K11H12.1  | -0.161544279351018   |             |
| AGIWUR13212                                                 |    |    |        |        |                |           |           |                      |             |
| N2                                                          | CT | IV | 653436 | 654576 | WBGene00004427 | rp1-15    | K11H12.2  | 0.0689770445697535   |             |
| AGIWUR18481;AGIWUR24381                                     |    |    |        |        |                |           |           |                      |             |
| N2                                                          | CT | IV | 655353 | 658604 | WBGene00019664 | K11H12.8  | K11H12.8  | 0.0758034662807248   |             |
| AGIWUR33789;AGIWUR35461                                     |    |    |        |        |                |           |           |                      |             |
| N2                                                          | CT | IV | 665525 | 666917 | WBGene00019663 | K11H12.7  | K11H12.7  | 0.231578180639694    |             |
| AGIWUR16784;AGIWUR20600;AGIWUR28935;AGIWUR34976;AGIWUR35464 |    |    |        |        |                |           |           |                      |             |
| N2                                                          | CT | IV | 667291 | 668556 | WBGene00019662 | K11H12.6  | K11H12.6  | 0.280142089458327    |             |
| AGIWUR21661                                                 |    |    |        |        |                |           |           |                      |             |
| N2                                                          | CT | IV | 668962 | 670555 | WBGene00044723 | K11H12.11 | K11H12.11 | -0.104573921673494   |             |
| AGIWUR4530;AGIWUR41020                                      |    |    |        |        |                |           |           |                      |             |
| N2                                                          | CT | IV | 674036 | 675883 | WBGene00019660 | K11H12.4  | K11H12.4  | 0.276241134033514    |             |
| AGIWUR12851                                                 |    |    |        |        |                |           |           |                      |             |
| N2                                                          | CT | IV | 676075 | 676687 | WBGene00044458 | K11H12.10 | K11H12.10 | 0.236901358948488    |             |
| AGIWUR22675                                                 |    |    |        |        |                |           |           |                      |             |
| N2                                                          | CT | IV | 677616 | 679171 | WBGene00019661 | K11H12.5  | K11H12.5  | 0.0207315919706073   |             |
| AGIWUR26759                                                 |    |    |        |        |                |           |           |                      |             |
| N2                                                          | CT | IV | 684497 | 688336 | WBGene00018256 | cut1-28   | F41A4.1   | -0.131191139081889   | AGIWUR7323  |
| N2                                                          | CT | IV | 698761 | 707719 | WBGene00021950 | cut1-26   | Y55F3C.7  | 0.0181034023236961   |             |
| AGIWUR3838                                                  |    |    |        |        |                |           |           |                      |             |
| N2                                                          | CT | IV | 717925 | 719451 | WBGene00044460 | Y55F3C.10 | Y55F3C.10 | 0.0430465417980779   |             |
| AGIWUR29659                                                 |    |    |        |        |                |           |           |                      |             |
| N2                                                          | CT | IV | 719766 | 727481 | WBGene00044459 | Y55F3C.9  | Y55F3C.9  | -0.209340230217657   |             |
| AGIWUR3147;AGIWUR17197                                      |    |    |        |        |                |           |           |                      |             |
| N2                                                          | CT | IV | 728500 | 731037 | WBGene00021951 | srt-24    | Y55F3C.8  | 0.115906200698776    |             |

|                                                                                     |    |    |        |        |                |            |            |                      |             |
|-------------------------------------------------------------------------------------|----|----|--------|--------|----------------|------------|------------|----------------------|-------------|
| AGIWUR31555;AGIWUR35044                                                             |    |    |        |        |                |            |            |                      |             |
| N2                                                                                  | CT | IV | 736675 | 753316 | WBGene00021948 | kvs-5      | Y55F3C.3   | -0.107749623213484   |             |
| AGIWUR4683;AGIWUR4981;AGIWUR12075;AGIWUR25624                                       |    |    |        |        |                |            |            |                      |             |
| N2                                                                                  | CT | IV | 756721 | 759084 | WBGene00021947 | srt-23     | Y55F3C.2   | -0.0700182584178055  |             |
| AGIWUR19631;AGIWUR28671                                                             |    |    |        |        |                |            |            |                      |             |
| N2                                                                                  | CT | IV | 760610 | 762342 | WBGene00001788 | gst-40     | F56B3.10   | -0.194647752056985   |             |
| AGIWUR6114                                                                          |    |    |        |        |                |            |            |                      |             |
| N2                                                                                  | CT | IV | 762416 | 763680 | WBGene00000677 | col-103    | F56B3.1    | -0.00896422610559178 |             |
| AGIWUR8934;AGIWUR12460                                                              |    |    |        |        |                |            |            |                      |             |
| N2                                                                                  | CT | IV | 764078 | 768584 | WBGene00018928 | F56B3.2    | F56B3.2    | 0.0479227416628856   | AGIWUR34465 |
| N2                                                                                  | CT | IV | 773228 | 776655 | WBGene00018932 | mrp1-2     | F56B3.8    | -0.149410374322212   | AGIWUR13207 |
| N2                                                                                  | CT | IV | 778784 | 784182 | WBGene00018931 | ugt-52     | F56B3.7    | -0.381757403927073   | AGIWUR43381 |
| N2                                                                                  | CT | IV | 786234 | 794326 | WBGene00004824 | F56B3.4    | F56B3.4    | -0.449198080761404   | AGIWUR4977  |
| N2                                                                                  | CT | IV | 794632 | 795689 | WBGene00018935 | skr-18     | F56B3.12   | 0.00856737904034688  |             |
| AGIWUR20815                                                                         |    |    |        |        |                |            |            |                      |             |
| N2                                                                                  | CT | IV | 795755 | 796567 | WBGene00018934 | F56B3.11   | F56B3.11   | 0.0768685247411725   |             |
| AGIWUR10110;AGIWUR20027;AGIWUR22185;AGIWUR26451;AGIWUR30559;AGIWUR37301;AGIWUR43312 |    |    |        |        |                |            |            |                      |             |
| N2                                                                                  | CT | IV | 797023 | 799922 | WBGene00001154 | ech-5      | F56B3.5    | -0.0842194884656955  | AGIWUR22304 |
| N2                                                                                  | CT | IV | 805102 | 806236 | WBGene00185088 | Y55F3BL.4  | Y55F3BL.4  | -0.284610448918762   |             |
| AGIWUR21165                                                                         |    |    |        |        |                |            |            |                      |             |
| N2                                                                                  | CT | IV | 807439 | 824954 | WBGene00021936 | zip1-20    | Y55F3BL.2  | -0.0152908620230061  |             |
| AGIWUR5347;AGIWUR13156;AGIWUR14357                                                  |    |    |        |        |                |            |            |                      |             |
| N2                                                                                  | CT | IV | 830359 | 831896 | WBGene00021942 | madf-1     | Y55F3BR.5  | -0.0825206741941624  |             |
| AGIWUR35663                                                                         |    |    |        |        |                |            |            |                      |             |
| N2                                                                                  | CT | IV | 832362 | 833329 | WBGene00044742 | Y55F3BR.10 | Y55F3BR.10 | -0.302597192512296   |             |
| AGIWUR13482;AGIWUR20780;AGIWUR28506;AGIWUR42338                                     |    |    |        |        |                |            |            |                      |             |
| N2                                                                                  | CT | IV | 835033 | 842126 | WBGene00021943 | Y55F3BR.6  | Y55F3BR.6  | 0.19126850424802     |             |
| AGIWUR15121;AGIWUR42889                                                             |    |    |        |        |                |            |            |                      |             |
| N2                                                                                  | CT | IV | 845881 | 848850 | WBGene00021941 | lgc-33     | Y55F3BR.4  | 0.0874637686830528   |             |
| AGIWUR12929                                                                         |    |    |        |        |                |            |            |                      |             |
| N2                                                                                  | CT | IV | 849269 | 854780 | WBGene00021945 | lem-4      | Y55F3BR.8  | -0.108824318710543   |             |
| AGIWUR6239                                                                          |    |    |        |        |                |            |            |                      |             |
| N2                                                                                  | CT | IV | 857327 | 874724 | WBGene00021939 | Y55F3BR.2  | Y55F3BR.2  | 0.0873368196093498   |             |
| AGIWUR2219;AGIWUR14690;AGIWUR43144                                                  |    |    |        |        |                |            |            |                      |             |
| N2                                                                                  | CT | IV | 874791 | 881910 | WBGene00021938 | Y55F3BR.1  | Y55F3BR.1  | -0.187635740403081   |             |
| AGIWUR8321                                                                          |    |    |        |        |                |            |            |                      |             |
| N2                                                                                  | CT | IV | 885346 | 890200 | WBGene00007007 | mak-2      | C44C8.6    | -0.0623837198562884  |             |
| AGIWUR5736;AGIWUR10731;AGIWUR10982;AGIWUR40813                                      |    |    |        |        |                |            |            |                      |             |
| N2                                                                                  | CT | IV | 919990 | 920808 | WBGene00019070 | F58H7.5    | F58H7.5    | 0.168347559015802    | AGIWUR34903 |



|                                                                                     |    |    |         |         |                |            |            |                     |             |
|-------------------------------------------------------------------------------------|----|----|---------|---------|----------------|------------|------------|---------------------|-------------|
| N2                                                                                  | CT | IV | 924936  | 939667  | WBGene00019069 | lgc-30     | F58H7.3    | -0.10444765870332   | AGIWUR10043 |
| N2                                                                                  | CT | IV | 940017  | 945653  | WBGene00019068 | faah-3     | F58H7.2    | -0.0201766478715903 | AGIWUR10182 |
| N2                                                                                  | CT | IV | 959452  | 984392  | WBGene00004047 | plx-1      | Y55F3AL.1  | -0.190563239733457  |             |
| AGIWUR24475                                                                         |    |    |         |         |                |            |            |                     |             |
| N2                                                                                  | CT | IV | 984405  | 990521  | WBGene00043705 | egrh-2     | Y55F3AM.7  | -0.0608948211431795 |             |
| AGIWUR6981                                                                          |    |    |         |         |                |            |            |                     |             |
| N2                                                                                  | CT | IV | 992240  | 998348  | WBGene00021924 | Y55F3AM.6  | Y55F3AM.6  | -0.241395647919968  |             |
| AGIWUR12792;AGIWUR15312;AGIWUR16365;AGIWUR19661                                     |    |    |         |         |                |            |            |                     |             |
| N2                                                                                  | CT | IV | 999214  | 1003639 | WBGene00021923 | Y55F3AM.5  | Y55F3AM.5  | -0.110204393120931  |             |
| AGIWUR1547;AGIWUR20689;AGIWUR44614                                                  |    |    |         |         |                |            |            |                     |             |
| N2                                                                                  | CT | IV | 1003600 | 1005864 | WBGene00021925 | immp-2     | Y55F3AM.8  | -0.182224773019996  |             |
| AGIWUR9588                                                                          |    |    |         |         |                |            |            |                     |             |
| N2                                                                                  | CT | IV | 1006083 | 1009734 | WBGene00021926 | Y55F3AM.9  | Y55F3AM.9  | -0.162170269383786  |             |
| AGIWUR35970                                                                         |    |    |         |         |                |            |            |                     |             |
| N2                                                                                  | CT | IV | 1010054 | 1012502 | WBGene00021922 | atg-3      | Y55F3AM.4  | -0.233469418699794  |             |
| AGIWUR44533                                                                         |    |    |         |         |                |            |            |                     |             |
| N2                                                                                  | CT | IV | 1012624 | 1019558 | WBGene00021921 | Y55F3AM.3  | Y55F3AM.3  | 0.203839985931175   |             |
| AGIWUR19334;AGIWUR19775;AGIWUR20515;AGIWUR20761;AGIWUR24236;AGIWUR37138;AGIWUR42157 |    |    |         |         |                |            |            |                     |             |
| N2                                                                                  | CT | IV | 1027787 | 1030024 | WBGene00021927 | abhd-14    | Y55F3AM.10 | -0.101134191290612  |             |
| AGIWUR26712                                                                         |    |    |         |         |                |            |            |                     |             |
| N2                                                                                  | CT | IV | 1038671 | 1041008 | WBGene00021928 | Y55F3AM.11 | Y55F3AM.11 | -0.302521717330022  |             |
| AGIWUR19979                                                                         |    |    |         |         |                |            |            |                     |             |
| N2                                                                                  | CT | IV | 1045983 | 1049506 | WBGene00005903 | srx-12     | Y55F3AM.2  | 0.183952066308506   |             |
| AGIWUR42547                                                                         |    |    |         |         |                |            |            |                     |             |
| N2                                                                                  | CT | IV | 1052524 | 1054794 | WBGene00021929 | dcap-1     | Y55F3AM.12 | 0.0601552329500095  |             |
| AGIWUR13844;AGIWUR14536;AGIWUR15020;AGIWUR20920;AGIWUR35100;AGIWUR36637             |    |    |         |         |                |            |            |                     |             |
| N2                                                                                  | CT | IV | 1056890 | 1057620 | WBGene00021920 | mrps-25    | Y55F3AM.1  | -0.256120214221305  |             |
| AGIWUR31309                                                                         |    |    |         |         |                |            |            |                     |             |
| N2                                                                                  | CT | IV | 1058695 | 1067525 | WBGene00021931 | Y55F3AM.14 | Y55F3AM.14 | 0.268473357779428   |             |
| AGIWUR14109                                                                         |    |    |         |         |                |            |            |                     |             |
| N2                                                                                  | CT | IV | 1077463 | 1087013 | WBGene00000816 | csn-4      | Y55F3AM.15 | -0.157807224467727  |             |
| AGIWUR14506;AGIWUR35063;AGIWUR36445;AGIWUR38851                                     |    |    |         |         |                |            |            |                     |             |
| N2                                                                                  | CT | IV | 1087095 | 1093920 | WBGene00021934 | cct-8      | Y55F3AR.3  | -0.358424447354819  |             |
| AGIWUR7621                                                                          |    |    |         |         |                |            |            |                     |             |
| N2                                                                                  | CT | IV | 1094545 | 1096723 | WBGene00021933 | Y55F3AR.2  | Y55F3AR.2  | -0.144719711682178  |             |
| AGIWUR7254                                                                          |    |    |         |         |                |            |            |                     |             |
| N2                                                                                  | CT | IV | 1097453 | 1102980 | WBGene00021932 | Y55F3AR.1  | Y55F3AR.1  | -0.157136562164521  |             |
| AGIWUR2526                                                                          |    |    |         |         |                |            |            |                     |             |
| N2                                                                                  | CT | IV | 1103541 | 1104609 | WBGene00044462 | C44B12.9   | C44B12.9   | -0.505241756776872  |             |

|                                                                                 |    |    |         |         |                |            |            |                     |                     |
|---------------------------------------------------------------------------------|----|----|---------|---------|----------------|------------|------------|---------------------|---------------------|
| AGIWUR13870;AGIWUR22722;AGIWUR29440;AGIWUR34768;AGIWUR38469                     |    |    |         |         |                |            |            |                     |                     |
| N2                                                                              | CT | IV | 1107396 | 1110856 | WBGene00003893 | ost-1      | C44B12.2   |                     | -0.0314168885431094 |
| AGIWUR35036;AGIWUR44237                                                         |    |    |         |         |                |            |            |                     |                     |
| N2                                                                              | CT | IV | 1111462 | 1114820 | WBGene00005905 | srx-14     | C44B12.8   |                     | -0.0432890789369953 |
| AGIWUR3271                                                                      |    |    |         |         |                |            |            |                     |                     |
| N2                                                                              | CT | IV | 1114969 | 1118666 | WBGene00005904 | srx-13     | C44B12.4   |                     | 0.179853931506809   |
| AGIWUR26071                                                                     |    |    |         |         |                |            |            |                     |                     |
| N2                                                                              | CT | IV | 1121457 | 1125107 | WBGene00016638 | perm-4     | C44B12.5   |                     | 0.199017930325351   |
| AGIWUR36087                                                                     |    |    |         |         |                |            |            |                     |                     |
| N2                                                                              | CT | IV | 1126790 | 1128848 | WBGene00016636 | perm-2     | C44B12.1   |                     | 0.147552858159337   |
| AGIWUR12455;AGIWUR35647                                                         |    |    |         |         |                |            |            |                     |                     |
| N2                                                                              | CT | IV | 1128964 | 1136947 | WBGene00016639 | C44B12.6   | C44B12.6   |                     | -0.0715178965820336 |
| AGIWUR17771                                                                     |    |    |         |         |                |            |            |                     |                     |
| N2                                                                              | CT | IV | 1145681 | 1158028 | WBGene00016797 | C50A2.3    | C50A2.3    | -0.472667096258888  | AGIWUR22624         |
| N2                                                                              | CT | IV | 1159637 | 1160484 | WBGene00016798 | ets-8      | C50A2.4    | -0.0597758046160024 | AGIWUR6703          |
| N2                                                                              | CT | IV | 1170672 | 1177776 | WBGene00016796 | cec-2      | C50A2.2    | -0.147802551040931  | AGIWUR29859         |
| N2                                                                              | CT | IV | 1178022 | 1182837 | WBGene00022426 | Y104H12D.2 | Y104H12D.2 |                     | -0.0687272208987029 |
| AGIWUR25304                                                                     |    |    |         |         |                |            |            |                     |                     |
| N2                                                                              | CT | IV | 1182592 | 1186604 | WBGene00022428 | Y104H12D.4 | Y104H12D.4 |                     | -0.309539068859134  |
| AGIWUR14593                                                                     |    |    |         |         |                |            |            |                     |                     |
| N2                                                                              | CT | IV | 1187799 | 1192977 | WBGene00007020 | mdt-20     | Y104H12D.1 |                     | -0.324209229199276  |
| AGIWUR13101                                                                     |    |    |         |         |                |            |            |                     |                     |
| N2                                                                              | CT | IV | 1193065 | 1201846 | WBGene00022427 | Y104H12D.3 | Y104H12D.3 |                     | 0.0692971377340346  |
| AGIWUR34307                                                                     |    |    |         |         |                |            |            |                     |                     |
| N2                                                                              | CT | IV | 1202651 | 1204970 | WBGene00001104 | ds1-2      | W09G12.1   |                     | -0.201812248415671  |
| AGIWUR13919                                                                     |    |    |         |         |                |            |            |                     |                     |
| N2                                                                              | CT | IV | 1205868 | 1206377 | WBGene00023163 | W09G12.3   | W09G12.3   |                     | 0.0718425229717741  |
| AGIWUR8237;AGIWUR25731;AGIWUR35019;AGIWUR42511                                  |    |    |         |         |                |            |            |                     |                     |
| N2                                                                              | CT | IV | 1207255 | 1208102 | WBGene00001103 | ds1-1      | W09G12.4   |                     | -0.0999918594565994 |
| AGIWUR14118                                                                     |    |    |         |         |                |            |            |                     |                     |
| N2                                                                              | CT | IV | 1216590 | 1218527 | WBGene00021123 | W09G12.9   | W09G12.9   |                     | 0.042777809081084   |
| AGIWUR34992                                                                     |    |    |         |         |                |            |            |                     |                     |
| N2                                                                              | CT | IV | 1219333 | 1221287 | WBGene00044463 | W09G12.10  | W09G12.10  |                     |                     |
| -0.00735605456279842 AGIWUR6676;AGIWUR24423;AGIWUR28632;AGIWUR31254;AGIWUR40883 |    |    |         |         |                |            |            |                     |                     |
| N2                                                                              | CT | IV | 1226182 | 1227668 | WBGene00021122 | W09G12.8   | W09G12.8   |                     | 0.00917461169433231 |
| AGIWUR26633                                                                     |    |    |         |         |                |            |            |                     |                     |
| N2                                                                              | CT | IV | 1229080 | 1230789 | WBGene00021121 | W09G12.7   | W09G12.7   |                     | -0.0705800704168027 |
| AGIWUR44787                                                                     |    |    |         |         |                |            |            |                     |                     |
| N2                                                                              | CT | IV | 1231897 | 1232812 | WBGene00021120 | W09G12.6   | W09G12.6   |                     | -0.402500460632442  |

|                                                                                                                       |    |    |         |         |                |          |             |                     |             |
|-----------------------------------------------------------------------------------------------------------------------|----|----|---------|---------|----------------|----------|-------------|---------------------|-------------|
| AGIWUR15970                                                                                                           |    |    |         |         |                |          |             |                     |             |
| N2                                                                                                                    | CT | IV | 1232872 | 1239852 | WBGene00009521 | F38A1.8  | F38A1.8     | -0.113928390123219  |             |
| AGIWUR1399;AGIWUR42823                                                                                                |    |    |         |         |                |          |             |                     |             |
| N2                                                                                                                    | CT | IV | 1241332 | 1243402 | WBGene00044908 | F38A1.15 | F38A1.15    | 0.0440710955165446  |             |
| AGIWUR6368                                                                                                            |    |    |         |         |                |          |             |                     |             |
| N2                                                                                                                    | CT | IV | 1244247 | 1245344 | WBGene00009522 | F38A1.9  | F38A1.9     | -0.0799898238053576 | AGIWUR39998 |
| N2                                                                                                                    | CT | IV | 1245399 | 1246886 | WBGene00009523 | clec-165 | F38A1.10    | -0.381066885306897  |             |
| AGIWUR18756                                                                                                           |    |    |         |         |                |          |             |                     |             |
| N2                                                                                                                    | CT | IV | 1247386 | 1249025 | WBGene00009524 | F38A1.11 | F38A1.11    | 0.402904636832663   |             |
| AGIWUR15217                                                                                                           |    |    |         |         |                |          |             |                     |             |
| N2                                                                                                                    | CT | IV | 1249018 | 1251366 | WBGene00009518 | clec-166 | F38A1.5     | 0.188002280582314   |             |
| AGIWUR3404                                                                                                            |    |    |         |         |                |          |             |                     |             |
| N2                                                                                                                    | CT | IV | 1251861 | 1252470 | WBGene00009519 | F38A1.6  | F38A1.6     | 0.101913563821685   | AGIWUR39698 |
| N2                                                                                                                    | CT | IV | 1253137 | 1255732 | WBGene00009517 | clec-167 | F38A1.4     | 0.228795156917393   |             |
| AGIWUR32291                                                                                                           |    |    |         |         |                |          |             |                     |             |
| N2                                                                                                                    | CT | IV | 1256956 | 1259344 | WBGene00009520 | clec-168 | F38A1.7     | 0.272090621918705   |             |
| AGIWUR22643                                                                                                           |    |    |         |         |                |          |             |                     |             |
| N2                                                                                                                    | CT | IV | 1261272 | 1264622 | WBGene00009526 | clec-169 | F38A1.14    | 0.247300947493175   |             |
| AGIWUR1769                                                                                                            |    |    |         |         |                |          |             |                     |             |
| N2                                                                                                                    | CT | IV | 1265228 | 1265848 | WBGene00009525 | F38A1.13 | F38A1.13    | 0.0697064924812647  |             |
| AGIWUR34868                                                                                                           |    |    |         |         |                |          |             |                     |             |
| N2                                                                                                                    | CT | IV | 1266866 | 1274425 | WBGene00009515 | clec-170 | F38A1.1     | -0.0429985340321291 |             |
| AGIWUR120;AGIWUR3055;AGIWUR12336;AGIWUR18316;AGIWUR25656;AGIWUR28250;AGIWUR29831;AGIWUR31041;AGIWUR35445;AGIWUR35831  |    |    |         |         |                |          |             |                     |             |
| N2                                                                                                                    | CT | IV | 1275865 | 1277091 | WBGene00007476 | C09E9.1  | C09E9.1     | -0.297693283422487  |             |
| AGIWUR1226;AGIWUR23153;AGIWUR24526;AGIWUR25781;AGIWUR28437;AGIWUR38895                                                |    |    |         |         |                |          |             |                     |             |
| N2                                                                                                                    | CT | IV | 1289627 | 1296897 | WBGene00022425 | plst-1   | Y104H12BR.1 | -0.0597930135409097 |             |
| AGIWUR6341;AGIWUR8186;AGIWUR19456;AGIWUR20224;AGIWUR30101;AGIWUR30260;AGIWUR33915;AGIWUR35453;AGIWUR36595;AGIWUR41949 |    |    |         |         |                |          |             |                     |             |
| N2                                                                                                                    | CT | IV | 1297222 | 1309652 | WBGene00018776 | F53H1.1  | F53H1.1     | 0.0475334003699359  | AGIWUR7687  |
| N2                                                                                                                    | CT | IV | 1310166 | 1328241 | WBGene00018778 | F53H1.4  | F53H1.4     | -0.113468885472275  |             |
| AGIWUR7608;AGIWUR20200;AGIWUR20748;AGIWUR22712                                                                        |    |    |         |         |                |          |             |                     |             |
| N2                                                                                                                    | CT | IV | 1329162 | 1339376 | WBGene00018777 | F53H1.3  | F53H1.3     | -0.0378745341025173 | AGIWUR16858 |
| N2                                                                                                                    | CT | IV | 1347316 | 1352977 | WBGene00004338 | rfc-2    | F58F6.4     | -0.0924040942981055 | AGIWUR19510 |
| N2                                                                                                                    | CT | IV | 1353636 | 1355305 | WBGene00000678 | col-104  | F58F6.1     | 0.221986817505741   | AGIWUR9061  |
| N2                                                                                                                    | CT | IV | 1357816 | 1359225 | WBGene00000679 | col-105  | F58F6.2     | 0.0304171778142361  | AGIWUR12554 |
| N2                                                                                                                    | CT | IV | 1375369 | 1376563 | WBGene00019052 | F58F6.3  | F58F6.3     | 0.0854596904201195  | AGIWUR5879  |
| N2                                                                                                                    | CT | IV | 1386045 | 1399538 | WBGene00022423 | nhr-41   | Y104H12A.1  | -0.0437335815743216 |             |
| AGIWUR7746;AGIWUR10431;AGIWUR12457;AGIWUR30123                                                                        |    |    |         |         |                |          |             |                     |             |

|                                                                                                       |    |    |         |         |                |            |            |                       |
|-------------------------------------------------------------------------------------------------------|----|----|---------|---------|----------------|------------|------------|-----------------------|
| N2                                                                                                    | CT | IV | 1406542 | 1408131 | WBGene00022314 | Y77E11A.14 | Y77E11A.14 | -0.0707216402497206   |
| AGIWUR40359                                                                                           |    |    |         |         |                |            |            |                       |
| N2                                                                                                    | CT | IV | 1408582 | 1410041 | WBGene00022309 | rpc-11     | Y77E11A.6  | 0.0829226734829369    |
| AGIWUR12229                                                                                           |    |    |         |         |                |            |            |                       |
| N2                                                                                                    | CT | IV | 1410786 | 1419847 | WBGene00022310 | Y77E11A.7  | Y77E11A.7  | -0.09696735383111     |
| AGIWUR268;AGIWUR9813;AGIWUR11788;AGIWUR15813;AGIWUR17418;AGIWUR22112;AGIWUR22493;AGIWUR34355          |    |    |         |         |                |            |            |                       |
| N2                                                                                                    | CT | IV | 1420929 | 1421770 | WBGene00002180 | jtr-1      | Y77E11A.4  | -0.0462013976175761   |
| AGIWUR20279                                                                                           |    |    |         |         |                |            |            |                       |
| N2                                                                                                    | CT | IV | 1425482 | 1426887 | WBGene00022312 | cllec-171  | Y77E11A.9  | -0.0468104533653584   |
| AGIWUR15284;AGIWUR26848;AGIWUR35309                                                                   |    |    |         |         |                |            |            |                       |
| N2                                                                                                    | CT | IV | 1429041 | 1430367 | WBGene00235267 | Y77E11A.23 | Y77E11A.23 | -0.000799297528024212 |
| AGIWUR20360                                                                                           |    |    |         |         |                |            |            |                       |
| N2                                                                                                    | CT | IV | 1435465 | 1446182 | WBGene00000547 | clp-7      | Y77E11A.11 | 0.00832476835287821   |
| AGIWUR14913                                                                                           |    |    |         |         |                |            |            |                       |
| N2                                                                                                    | CT | IV | 1447594 | 1448316 | WBGene00022308 | Y77E11A.3  | Y77E11A.3  | -0.346614180936021    |
| AGIWUR17454                                                                                           |    |    |         |         |                |            |            |                       |
| N2                                                                                                    | CT | IV | 1457075 | 1459521 | WBGene00022307 | Y77E11A.2  | Y77E11A.2  | 0.254042810572898     |
| AGIWUR20302                                                                                           |    |    |         |         |                |            |            |                       |
| N2                                                                                                    | CT | IV | 1459866 | 1460786 | WBGene00000680 | col-106    | Y77E11A.15 | 0.206088224466541     |
| AGIWUR30247                                                                                           |    |    |         |         |                |            |            |                       |
| N2                                                                                                    | CT | IV | 1461899 | 1475109 | WBGene00022313 | Y77E11A.12 | Y77E11A.12 | -0.239227329486067    |
| AGIWUR10496                                                                                           |    |    |         |         |                |            |            |                       |
| N2                                                                                                    | CT | IV | 1485286 | 1489762 | WBGene00044464 | Y77E11A.16 | Y77E11A.16 | -0.142989302882882    |
| AGIWUR7338                                                                                            |    |    |         |         |                |            |            |                       |
| N2                                                                                                    | CT | IV | 1490653 | 1496022 | WBGene00003806 | npp-20     | Y77E11A.13 | -0.05176411365915     |
| AGIWUR4990;AGIWUR24613;AGIWUR40679                                                                    |    |    |         |         |                |            |            |                       |
| N2                                                                                                    | CT | IV | 1497630 | 1509965 | WBGene00022306 | hxx-3      | Y77E11A.1  | -0.165675248688824    |
| AGIWUR29596                                                                                           |    |    |         |         |                |            |            |                       |
| N2                                                                                                    | CT | IV | 1510546 | 1515251 | WBGene00019368 | K03H6.2    | K03H6.2    | -0.174304988645446    |
| AGIWUR12991                                                                                           |    |    |         |         |                |            |            |                       |
| N2                                                                                                    | CT | IV | 1515510 | 1516627 | WBGene00044719 | cllec-172  | K03H6.7    | -0.119245781481178    |
| AGIWUR18366                                                                                           |    |    |         |         |                |            |            |                       |
| N2                                                                                                    | CT | IV | 1517969 | 1521324 | WBGene00019369 | K03H6.4    | K03H6.4    | -0.231106385558031    |
| AGIWUR24843;AGIWUR40141                                                                               |    |    |         |         |                |            |            |                       |
| N2                                                                                                    | CT | IV | 1523718 | 1526599 | WBGene00019367 | K03H6.1    | K03H6.1    | 0.0372822122407168    |
| AGIWUR37618                                                                                           |    |    |         |         |                |            |            |                       |
| N2                                                                                                    | CT | IV | 1527221 | 1536398 | WBGene00019370 | K03H6.5    | K03H6.5    | 0.0396352392286872    |
| AGIWUR25528;AGIWUR39670                                                                               |    |    |         |         |                |            |            |                       |
| N2                                                                                                    | CT | IV | 1545296 | 1566192 | WBGene00016427 | C34H4.5    | C34H4.5    | -0.120796981391102    |
| AGIWUR13;AGIWUR480;AGIWUR7571;AGIWUR10154;AGIWUR15441;AGIWUR21312;AGIWUR36966;AGIWUR38213;AGIWUR44132 |    |    |         |         |                |            |            |                       |
| N2                                                                                                    | CT | IV | 1567921 | 1595824 | WBGene00003794 | npp-8      | Y41D4B.19  | 0.186916627981244     |

AGIWUR451;AGIWUR7749;AGIWUR13128;AGIWUR14605;AGIWUR16223;AGIWUR17183;AGIWUR19609;AGIWUR27086;AGIWUR33432;AGIWUR35153;AGIWUR37403;AGIWUR38651;AGIWUR42141

N2 CT IV 1597316 1601620 WBGene00000416 ced-2 Y41D4B.13 0.0122911222426936

AGIWUR16139

N2 CT IV 1602985 1605609 WBGene00021515 set-23 Y41D4B.12 -0.20803543327172

AGIWUR12103

N2 CT IV 1605712 1608901 WBGene00021514 Y41D4B.11 Y41D4B.11 -0.139923397861576

AGIWUR41173

N2 CT IV 1610236 1612915 WBGene00001105 ds1-3 Y41D4B.10 0.0652065665403612

AGIWUR20853

N2 CT IV 1613897 1616766 WBGene00003712 nhr-122 Y41D4B.9 -0.107811537676312

AGIWUR37999

N2 CT IV 1626973 1630756 WBGene00045255 nhr-146 Y41D4B.27 -0.0718110871266049

AGIWUR21898;AGIWUR30984;AGIWUR32578;AGIWUR38940;AGIWUR43528

N2 CT IV 1631951 1633257 WBGene00021525 Y41D4B.26 Y41D4B.26 0.237154917515603

AGIWUR36375

N2 CT IV 1633772 1637367 WBGene00021513 Y41D4B.6 Y41D4B.6 -0.137687248428048

AGIWUR39537

N2 CT IV 1659691 1660011 WBGene00004497 rps-28 Y41D4B.5 -0.0786385841104078

AGIWUR42056

N2 CT IV 1660112 1669707 WBGene00021512 Y41D4B.4 Y41D4B.4 -0.12226309256668

AGIWUR30269

N2 CT IV 1672706 1676209 WBGene00021511 Y41D4B.1 Y41D4B.1 0.176850754464207

AGIWUR2885

N2 CT IV 1676720 1682159 WBGene00021524 Y41D4B.24 Y41D4B.24 -0.133858808910482

AGIWUR572;AGIWUR2148;AGIWUR10477;AGIWUR11515;AGIWUR12627;AGIWUR16482;AGIWUR19697;AGIWUR25338;AGIWUR29364;AGIWUR30172;AGIWUR38879

N2 CT IV 1699899 1702820 WBGene00044618 bus-2 K08D12.5 -0.269249903881088

AGIWUR6907

N2 CT IV 1707296 1708691 WBGene00019538 K08D12.4 K08D12.4 0.218954362592773

AGIWUR41649

N2 CT IV 1708804 1709745 WBGene00003947 pbs-1 K08D12.1 0.104495073195686

AGIWUR526

N2 CT IV 1710265 1711127 WBGene00019537 K08D12.3 K08D12.3 0.0383406332616794

AGIWUR1281;AGIWUR4072;AGIWUR7432;AGIWUR7623;AGIWUR10035;AGIWUR15285;AGIWUR19577;AGIWUR24436;AGIWUR25955;AGIWUR29099;AGIWUR32333;AGIWUR32915;AGIWUR33849;AGIWUR36200;AGIWUR42283

N2 CT IV 1711279 1714179 WBGene00019536 rpi-2 K08D12.2 -0.0614278525100378

AGIWUR9019

N2 CT IV 1720790 1723067 WBGene00019540 K08D12.6 K08D12.6 0.1216814361314

AGIWUR1415;AGIWUR2340;AGIWUR41859;AGIWUR42751

|                                                                                                                                                                                  |    |    |         |         |                |           |           |                     |
|----------------------------------------------------------------------------------------------------------------------------------------------------------------------------------|----|----|---------|---------|----------------|-----------|-----------|---------------------|
| N2                                                                                                                                                                               | CT | IV | 1723199 | 1724143 | WBGene00044293 | K08D12.7  | K08D12.7  | -0.170411559858586  |
| AGIWUR27413                                                                                                                                                                      |    |    |         |         |                |           |           |                     |
| N2                                                                                                                                                                               | CT | IV | 1727438 | 1737884 | WBGene00021507 | Y41D4A.5  | Y41D4A.5  |                     |
| -0.00401540914510079 AGIWUR8940                                                                                                                                                  |    |    |         |         |                |           |           |                     |
| N2                                                                                                                                                                               | CT | IV | 1740921 | 1745587 | WBGene00021508 | Y41D4A.6  | Y41D4A.6  | -0.226284071333378  |
| AGIWUR11580                                                                                                                                                                      |    |    |         |         |                |           |           |                     |
| N2                                                                                                                                                                               | CT | IV | 1745875 | 1751633 | WBGene00021506 | Y41D4A.4  | Y41D4A.4  | 0.172171400899623   |
| AGIWUR9031;AGIWUR10979;AGIWUR20429                                                                                                                                               |    |    |         |         |                |           |           |                     |
| N2                                                                                                                                                                               | CT | IV | 1752270 | 1761647 | WBGene00021509 | Y41D4A.7  | Y41D4A.7  | 0.193413194779888   |
| AGIWUR14956                                                                                                                                                                      |    |    |         |         |                |           |           |                     |
| N2                                                                                                                                                                               | CT | IV | 1768621 | 1769667 | WBGene00000682 | col-108   | Y41D4A.2  | 0.0181982043891153  |
| AGIWUR23691                                                                                                                                                                      |    |    |         |         |                |           |           |                     |
| N2                                                                                                                                                                               | CT | IV | 1772144 | 1774695 | WBGene00021504 | Y41D4A.1  | Y41D4A.1  | -0.103153621532094  |
| AGIWUR38771                                                                                                                                                                      |    |    |         |         |                |           |           |                     |
| N2                                                                                                                                                                               | CT | IV | 1775277 | 1781562 | WBGene00021510 | frpr-19   | Y41D4A.8  | 0.476969505646952   |
| AGIWUR8492                                                                                                                                                                       |    |    |         |         |                |           |           |                     |
| N2                                                                                                                                                                               | CT | IV | 1802026 | 1803982 | WBGene00021410 | Y38C1BA.1 | Y38C1BA.1 | -0.0588852965845206 |
| AGIWUR12252                                                                                                                                                                      |    |    |         |         |                |           |           |                     |
| N2                                                                                                                                                                               | CT | IV | 1805037 | 1815099 | WBGene00004913 | snn-1     | Y38C1BA.2 | -0.0485455019958039 |
| AGIWUR9737                                                                                                                                                                       |    |    |         |         |                |           |           |                     |
| N2                                                                                                                                                                               | CT | IV | 1817311 | 1820253 | WBGene00000683 | col-109   | Y38C1BA.3 | 0.198854023813841   |
| AGIWUR41439                                                                                                                                                                      |    |    |         |         |                |           |           |                     |
| N2                                                                                                                                                                               | CT | IV | 1824481 | 1834029 | WBGene00000553 | cmk-1     | K07A9.2   | 0.212354821887613   |
| AGIWUR6980;AGIWUR44640                                                                                                                                                           |    |    |         |         |                |           |           |                     |
| N2                                                                                                                                                                               | CT | IV | 1834628 | 1847336 | WBGene00019462 | K07A9.3   | K07A9.3   | 0.0533663516865399  |
| AGIWUR8587;AGIWUR9835;AGIWUR41314                                                                                                                                                |    |    |         |         |                |           |           |                     |
| N2                                                                                                                                                                               | CT | IV | 1847968 | 1880587 | WBGene00001173 | egl-4     | F55A8.2   | -0.0239002067703176 |
| AGIWUR6005;AGIWUR7284;AGIWUR8769;AGIWUR10842;AGIWUR11592;AGIWUR11699;AGIWUR19320;AGIWUR20152;AGIWUR29949;AGIWUR30504;AGIWUR34266;AGIWUR36671;AGIWUR37765;AGIWUR44393;AGIWUR44568 |    |    |         |         |                |           |           |                     |
| N2                                                                                                                                                                               | CT | IV | 1902323 | 1917841 | WBGene00001186 | egl-18    | F55A8.1   | 0.194446061689158   |
| AGIWUR5983;AGIWUR11851;AGIWUR22220;AGIWUR24154;AGIWUR26660;AGIWUR35388                                                                                                           |    |    |         |         |                |           |           |                     |
| N2                                                                                                                                                                               | CT | IV | 1917854 | 1921644 | WBGene00001253 | elt-6     | F52C12.5  | 0.45397948816819    |
| AGIWUR35073                                                                                                                                                                      |    |    |         |         |                |           |           |                     |
| N2                                                                                                                                                                               | CT | IV | 1923939 | 1948040 | WBGene00018681 | denn-4    | F52C12.4  | 0.0259769787806174  |
| AGIWUR27710                                                                                                                                                                      |    |    |         |         |                |           |           |                     |
| N2                                                                                                                                                                               | CT | IV | 1948191 | 1953322 | WBGene00018680 | tsen-54   | F52C12.3  | 0.0745240456655161  |
| AGIWUR15719                                                                                                                                                                      |    |    |         |         |                |           |           |                     |
| N2                                                                                                                                                                               | CT | IV | 1953579 | 1956704 | WBGene00018679 | F52C12.2  | F52C12.2  | -0.138726836757375  |

AGIWUR30822;AGIWUR41330  
N2 CT IV 1956711 1959749 WBGene000138717 F52C12.6 F52C12.6 -0.0408814682915217  
AGIWUR10670;AGIWUR13703;AGIWUR23756;AGIWUR30117;AGIWUR37019  
N2 CT IV 1959854 1963240 WBGene00018678 F52C12.1 F52C12.1 -0.124970646888546  
AGIWUR20817  
N2 CT IV 1963191 1964724 WBGene00006738 ulp-3 Y48A5A.2 0.0493460073666316  
AGIWUR12318  
N2 CT IV 1965481 1969650 WBGene00021655 Y48A5A.1 Y48A5A.1 0.151964822082933  
AGIWUR7982;AGIWUR29240  
N2 CT IV 1969737 1970280 WBGene00044466 Y48A5A.3 Y48A5A.3 -0.148144066316735  
AGIWUR18424;AGIWUR25118;AGIWUR36764;AGIWUR37110;AGIWUR39187  
N2 CT IV 1970734 1972977 WBGene00022298 Y76B12C.4 Y76B12C.4 0.117026452156534  
AGIWUR11644  
N2 CT IV 1973702 1975677 WBGene00022297 Y76B12C.3 Y76B12C.3 -0.11850857049965  
AGIWUR39977  
N2 CT IV 1979988 1980363 WBGene00022302 Y76B12C.8 Y76B12C.8 -0.176711527758744  
AGIWUR19264  
N2 CT IV 1981406 1992966 WBGene00022300 Y76B12C.6 Y76B12C.6 -0.158445865931081  
AGIWUR11393;AGIWUR23683;AGIWUR35565  
N2 CT IV 1993089 2008993 WBGene00022296 xpc-1 Y76B12C.2 -0.0967074491876012  
AGIWUR4472  
N2 CT IV 2009038 2032998 WBGene00022301 cpsf-1 Y76B12C.7 -0.206765444805219  
AGIWUR32546  
N2 CT IV 2034982 2035986 WBGene00022303 Y76B12C.9 Y76B12C.9 0.0431713401362792  
AGIWUR6069  
N2 CT IV 2037191 2043191 WBGene00022295 cng-2 Y76B12C.1 0.1365995206131 AGIWUR30761  
N2 CT IV 2051500 2057079 WBGene00044467 R05C11.4 R05C11.4 -0.0111325858237592  
AGIWUR7195  
N2 CT IV 2057878 2059111 WBGene00019874 R05C11.2 R05C11.2 -0.208759201621807  
AGIWUR26095  
N2 CT IV 2066200 2071741 WBGene00019873 arrd-26 R05C11.1 -0.411667610411992  
AGIWUR33154  
N2 CT IV 2084034 2091931 WBGene00019875 mca-2 R05C11.3 -0.00936296664315339  
AGIWUR11098;AGIWUR19693;AGIWUR30452;AGIWUR43035  
N2 CT IV 2091929 2099890 WBGene00044649 C23H5.11 C23H5.11 -0.0706545733228925  
AGIWUR6993  
N2 CT IV 2104056 2111605 WBGene00000487 che-6 C23H5.7 0.0764436857216984 AGIWUR31703  
N2 CT IV 2111894 2113422 WBGene00016027 C23H5.8 C23H5.8 -0.0829360312309957  
AGIWUR13732;AGIWUR14068;AGIWUR24032;AGIWUR24904;AGIWUR36120;AGIWUR42627

|                                                                                                                       |    |    |         |         |                |            |            |                     |             |
|-----------------------------------------------------------------------------------------------------------------------|----|----|---------|---------|----------------|------------|------------|---------------------|-------------|
| N2                                                                                                                    | CT | IV | 2114626 | 2115625 | WBGene00016025 | xbx-4      | C23H5.3    | -0.0955207361200325 |             |
| AGIWUR4935;AGIWUR5289;AGIWUR12000;AGIWUR18510;AGIWUR36867;AGIWUR37752                                                 |    |    |         |         |                |            |            |                     |             |
| N2                                                                                                                    | CT | IV | 2122797 | 2126038 | WBGene00016024 | glb-7      | C23H5.2    | 0.0434773404330109  | AGIWUR1915  |
| N2                                                                                                                    | CT | IV | 2126145 | 2128852 | WBGene00001729 | grl-20     | C23H5.9    | -0.0345095568528242 |             |
| AGIWUR3649;AGIWUR24293;AGIWUR25291;AGIWUR31492;AGIWUR35279;AGIWUR40828                                                |    |    |         |         |                |            |            |                     |             |
| N2                                                                                                                    | CT | IV | 2130965 | 2133025 | WBGene00016023 | prmt-6     | C23H5.1    | -0.133294615056194  |             |
| AGIWUR5424;AGIWUR17274                                                                                                |    |    |         |         |                |            |            |                     |             |
| N2                                                                                                                    | CT | IV | 2133481 | 2134708 | WBGene00077523 | C23H5.12   | C23H5.12   | -0.0179500358202134 |             |
| AGIWUR6775                                                                                                            |    |    |         |         |                |            |            |                     |             |
| N2                                                                                                                    | CT | IV | 2136895 | 2146461 | WBGene00016918 | test-1     | C54E4.2    | -0.0358393403920871 |             |
| AGIWUR1237;AGIWUR8185                                                                                                 |    |    |         |         |                |            |            |                     |             |
| N2                                                                                                                    | CT | IV | 2146672 | 2149297 | WBGene00016920 | C54E4.5    | C54E4.5    | 0.177611319436989   | AGIWUR24380 |
| N2                                                                                                                    | CT | IV | 2150650 | 2159162 | WBGene00001557 | gcy-37     | C54E4.3    | 0.0834938167521138  | AGIWUR40786 |
| N2                                                                                                                    | CT | IV | 2161252 | 2168626 | WBGene00016919 | C54E4.4    | C54E4.4    | 0.302921178079228   | AGIWUR28881 |
| N2                                                                                                                    | CT | IV | 2175606 | 2177579 | WBGene00016917 | C54E4.1    | C54E4.1    | -0.217337368735846  | AGIWUR7652  |
| N2                                                                                                                    | CT | IV | 2177900 | 2198871 | WBGene00022134 | Y71G10AL.1 | Y71G10AL.1 | -0.0271677798470371 |             |
| AGIWUR6949;AGIWUR10218;AGIWUR16899;AGIWUR23265;AGIWUR37024;AGIWUR38505;AGIWUR43268                                    |    |    |         |         |                |            |            |                     |             |
| N2                                                                                                                    | CT | IV | 2199041 | 2209051 | WBGene00044650 | Y71G10AR.4 | Y71G10AR.4 | -0.165534352015781  |             |
| AGIWUR10691;AGIWUR30628;AGIWUR30812                                                                                   |    |    |         |         |                |            |            |                     |             |
| N2                                                                                                                    | CT | IV | 2222828 | 2235795 | WBGene00020208 | T04C4.1    | T04C4.1    | -0.0414397131266817 |             |
| AGIWUR5060;AGIWUR9922;AGIWUR18558;AGIWUR18666;AGIWUR22407;AGIWUR24849;AGIWUR26201;AGIWUR34832;AGIWUR35575;AGIWUR38382 |    |    |         |         |                |            |            |                     |             |
| N2                                                                                                                    | CT | IV | 2237663 | 2242449 | WBGene00019785 | M70.3      | M70.3      | 0.353228904722972   | AGIWUR21308 |
| N2                                                                                                                    | CT | IV | 2243060 | 2243699 | WBGene00019784 | M70.2      | M70.2      | 0.0337846834101505  | AGIWUR43594 |
| N2                                                                                                                    | CT | IV | 2245874 | 2252370 | WBGene00019783 | M70.1      | M70.1      | 0.317008017890021   | AGIWUR44404 |
| N2                                                                                                                    | CT | IV | 2253004 | 2263704 | WBGene00019786 | M70.4      | M70.4      | -0.0572469740088248 | AGIWUR8671  |
| N2                                                                                                                    | CT | IV | 2264309 | 2275622 | WBGene00019787 | M70.5      | M70.5      | -0.10645199735556   | AGIWUR41044 |
| N2                                                                                                                    | CT | IV | 2275864 | 2300351 | WBGene00002990 | lin-1      | C37F5.1    | 0.0900054038872162  |             |
| AGIWUR2520;AGIWUR11089;AGIWUR14119;AGIWUR19872;AGIWUR40161;AGIWUR43471                                                |    |    |         |         |                |            |            |                     |             |
| N2                                                                                                                    | CT | IV | 2304446 | 2306540 | WBGene00021416 | mksr-2     | Y38F2AL.2  | -0.0118778334875556 |             |
| AGIWUR19462                                                                                                           |    |    |         |         |                |            |            |                     |             |
| N2                                                                                                                    | CT | IV | 2307819 | 2314567 | WBGene00006920 | vha-11     | Y38F2AL.3  | -0.0978269341241838 |             |
| AGIWUR5573;AGIWUR21184;AGIWUR35616;AGIWUR38366                                                                        |    |    |         |         |                |            |            |                     |             |
| N2                                                                                                                    | CT | IV | 2314589 | 2315990 | WBGene00006912 | vha-3      | Y38F2AL.4  | -0.126690862907315  |             |
| AGIWUR8240                                                                                                            |    |    |         |         |                |            |            |                     |             |
| N2                                                                                                                    | CT | IV | 2324058 | 2326739 | WBGene00021415 | nsy-4      | Y38F2AL.1  | 0.252294166675442   |             |
| AGIWUR35241                                                                                                           |    |    |         |         |                |            |            |                     |             |
| N2                                                                                                                    | CT | IV | 2327126 | 2329640 | WBGene00021417 | nhr-236    | Y38F2AL.5  | -0.0768345481788382 |             |
| AGIWUR33118                                                                                                           |    |    |         |         |                |            |            |                     |             |



|                                                           |    |    |         |         |                |            |            |                      |             |
|-----------------------------------------------------------|----|----|---------|---------|----------------|------------|------------|----------------------|-------------|
| N2                                                        | CT | IV | 2330193 | 2331009 | WBGene00021418 | Y38F2AL.6  | Y38F2AL.6  | -0.0481491671316805  |             |
| AGIWUR12369;AGIWUR40782                                   |    |    |         |         |                |            |            |                      |             |
| N2                                                        | CT | IV | 2333837 | 2348912 | WBGene00021425 | ppgn-1     | Y38F2AR.7  | 0.000415370027823769 |             |
| AGIWUR27269;AGIWUR34081                                   |    |    |         |         |                |            |            |                      |             |
| N2                                                        | CT | IV | 2349271 | 2382171 | WBGene00021423 | tftc-1     | Y38F2AR.5  | -0.0656273568919907  |             |
| AGIWUR2694;AGIWUR40174                                    |    |    |         |         |                |            |            |                      |             |
| N2                                                        | CT | IV | 2384013 | 2388089 | WBGene00021421 | Y38F2AR.3  | Y38F2AR.3  | -0.0941602257333685  |             |
| AGIWUR26768;AGIWUR29181;AGIWUR34184                       |    |    |         |         |                |            |            |                      |             |
| N2                                                        | CT | IV | 2388195 | 2388675 | WBGene00021427 | Y38F2AR.9  | Y38F2AR.9  | 0.0241878910661661   |             |
| AGIWUR23976;AGIWUR42445                                   |    |    |         |         |                |            |            |                      |             |
| N2                                                        | CT | IV | 2389445 | 2390386 | WBGene00021420 | trap-3     | Y38F2AR.2  | 0.229533131113879    |             |
| AGIWUR18279                                               |    |    |         |         |                |            |            |                      |             |
| N2                                                        | CT | IV | 2390821 | 2396263 | WBGene00021419 | eri-5      | Y38F2AR.1  | -0.162290282544181   |             |
| AGIWUR30757                                               |    |    |         |         |                |            |            |                      |             |
| N2                                                        | CT | IV | 2396257 | 2399420 | WBGene00021428 | Y38F2AR.10 | Y38F2AR.10 |                      |             |
| -0.00890562625345481 AGIWUR17742                          |    |    |         |         |                |            |            |                      |             |
| N2                                                        | CT | IV | 2399515 | 2412410 | WBGene00021430 | Y38F2AR.12 | Y38F2AR.12 | -0.061246849581043   |             |
| AGIWUR8407;AGIWUR30068                                    |    |    |         |         |                |            |            |                      |             |
| N2                                                        | CT | IV | 2432993 | 2436472 | WBGene00016671 | C45G7.4    | C45G7.4    | -0.0363898387344346  | AGIWUR18077 |
| N2                                                        | CT | IV | 2436505 | 2463405 | WBGene00000402 | cdh-10     | C45G7.5    | 0.155139678518884    |             |
| AGIWUR32982;AGIWUR37797                                   |    |    |         |         |                |            |            |                      |             |
| N2                                                        | CT | IV | 2464456 | 2465401 | WBGene00016670 | ilys-3     | C45G7.3    | -0.156823509112318   | AGIWUR18202 |
| N2                                                        | CT | IV | 2467681 | 2468810 | WBGene00016669 | ilys-2     | C45G7.2    | -0.0184151740135263  | AGIWUR12281 |
| N2                                                        | CT | IV | 2470414 | 2471449 | WBGene00016668 | ilys-1     | C45G7.1    | -0.192524663397212   | AGIWUR12322 |
| N2                                                        | CT | IV | 2476700 | 2480218 | WBGene00001705 | grd-16     | Y69A2AL.1  | -0.283693580740161   |             |
| AGIWUR28070                                               |    |    |         |         |                |            |            |                      |             |
| N2                                                        | CT | IV | 2482255 | 2484218 | WBGene00044468 | Y69A2AL.2  | Y69A2AL.2  | -0.166789366755076   |             |
| AGIWUR4846;AGIWUR10333;AGIWUR22619                        |    |    |         |         |                |            |            |                      |             |
| N2                                                        | CT | IV | 2488820 | 2494135 | WBGene00022090 | Y69A2AR.19 | Y69A2AR.19 | 0.360862217576475    |             |
| AGIWUR32158                                               |    |    |         |         |                |            |            |                      |             |
| N2                                                        | CT | IV | 2494513 | 2495174 | WBGene00022092 | Y69A2AR.21 | Y69A2AR.21 | -0.144301812530992   |             |
| AGIWUR3459;AGIWUR6118;AGIWUR16638;AGIWUR29487;AGIWUR29613 |    |    |         |         |                |            |            |                      |             |
| N2                                                        | CT | IV | 2495735 | 2497683 | WBGene00022089 | Y69A2AR.18 | Y69A2AR.18 | 0.0557599628517398   |             |
| AGIWUR4576;AGIWUR29217;AGIWUR34804                        |    |    |         |         |                |            |            |                      |             |
| N2                                                        | CT | IV | 2497801 | 2530296 | WBGene00022087 | Y69A2AR.16 | Y69A2AR.16 | -0.031109744674612   |             |
| AGIWUR8327;AGIWUR23283;AGIWUR27495;AGIWUR40391            |    |    |         |         |                |            |            |                      |             |
| N2                                                        | CT | IV | 2542326 | 2548719 | WBGene00022086 | spr-3      | Y69A2AR.15 | -0.00183283832179004 |             |
| AGIWUR36441                                               |    |    |         |         |                |            |            |                      |             |
| N2                                                        | CT | IV | 2549926 | 2551697 | WBGene00022094 | Y69A2AR.23 | Y69A2AR.23 | 0.162431836684484    |             |



|                                                                         |    |    |         |         |                 |           |           |                     |
|-------------------------------------------------------------------------|----|----|---------|---------|-----------------|-----------|-----------|---------------------|
| N2                                                                      | CT | IV | 2680098 | 2688808 | WBGene00044651  | egrh-3    | Y94H6A.11 | -0.0307068212114863 |
| AGIWUR18045;AGIWUR18215                                                 |    |    |         |         |                 |           |           |                     |
| N2                                                                      | CT | IV | 2688947 | 2703977 | WBGene00022378  | Y94H6A.5  | Y94H6A.5  | -0.054681293005185  |
| AGIWUR39570                                                             |    |    |         |         |                 |           |           |                     |
| N2                                                                      | CT | IV | 2704693 | 2707231 | WBGene00006705  | ubc-8     | Y94H6A.6  | 0.0655821101672505  |
| AGIWUR17647                                                             |    |    |         |         |                 |           |           |                     |
| N2                                                                      | CT | IV | 2709942 | 2711374 | WBGene00022382  | Y94H6A.10 | Y94H6A.10 | -0.306733999820988  |
| AGIWUR41705                                                             |    |    |         |         |                 |           |           |                     |
| N2                                                                      | CT | IV | 2711939 | 2713035 | WBGene00050885  | Y94H6A.12 | Y94H6A.12 | -0.37705527079239   |
| AGIWUR4052                                                              |    |    |         |         |                 |           |           |                     |
| N2                                                                      | CT | IV | 2713907 | 2716574 | WBGene00022379  | Y94H6A.7  | Y94H6A.7  | -0.133037389029917  |
| AGIWUR2447;AGIWUR5357;AGIWUR6386;AGIWUR7246                             |    |    |         |         |                 |           |           |                     |
| N2                                                                      | CT | IV | 2716661 | 2719834 | WBGene00022380  | Y94H6A.8  | Y94H6A.8  | -0.226342371894274  |
| AGIWUR29445                                                             |    |    |         |         |                 |           |           |                     |
| N2                                                                      | CT | IV | 2720323 | 2725858 | WBGene00022381  | ubxn-2    | Y94H6A.9  | 0.0878644689932706  |
| AGIWUR14157;AGIWUR22376;AGIWUR23767;AGIWUR25071;AGIWUR28469;AGIWUR30699 |    |    |         |         |                 |           |           |                     |
| N2                                                                      | CT | IV | 2730252 | 2732404 | WBGene00022375  | Y94H6A.2  | Y94H6A.2  | 1.32264740563312    |
| AGIWUR29436                                                             |    |    |         |         |                 |           |           |                     |
| N2                                                                      | CT | IV | 2743007 | 2747476 | WBGene00022374  | nhr-277   | Y94H6A.1  | 0.161449478159735   |
| AGIWUR28763                                                             |    |    |         |         |                 |           |           |                     |
| N2                                                                      | CT | IV | 2751868 | 2753461 | WBGene00044485  | Y54G2A.41 | Y54G2A.41 | 0.0510315800181829  |
| AGIWUR14592;AGIWUR15871;AGIWUR18786;AGIWUR23658;AGIWUR44244             |    |    |         |         |                 |           |           |                     |
| N2                                                                      | CT | IV | 2762680 | 2765612 | WBGene000235350 | Y54G2A.77 | Y54G2A.77 | -0.145251561355288  |
| AGIWUR18732                                                             |    |    |         |         |                 |           |           |                     |
| N2                                                                      | CT | IV | 2765719 | 2771790 | WBGene00021876  | Y54G2A.11 | Y54G2A.11 | 0.0474520046714639  |
| AGIWUR7881;AGIWUR8693;AGIWUR10151;AGIWUR12762;AGIWUR13973;AGIWUR16616   |    |    |         |         |                 |           |           |                     |
| N2                                                                      | CT | IV | 2777232 | 2782843 | WBGene00021877  | Y54G2A.12 | Y54G2A.12 | -0.135738815300971  |
| AGIWUR4693;AGIWUR23522                                                  |    |    |         |         |                 |           |           |                     |
| N2                                                                      | CT | IV | 2788692 | 2796805 | WBGene00021868  | atln-1    | Y54G2A.2  | 0.145190839058987   |
| AGIWUR33912                                                             |    |    |         |         |                 |           |           |                     |
| N2                                                                      | CT | IV | 2797061 | 2798573 | WBGene00045397  | Y54G2A.52 | Y54G2A.52 | -0.0798441337388525 |
| AGIWUR10865;AGIWUR18487;AGIWUR25860;AGIWUR31076;AGIWUR40561;AGIWUR45067 |    |    |         |         |                 |           |           |                     |
| N2                                                                      | CT | IV | 2799689 | 2801039 | WBGene00021875  | Y54G2A.10 | Y54G2A.10 | -0.040400609384017  |
| AGIWUR7140;AGIWUR12331;AGIWUR26440                                      |    |    |         |         |                 |           |           |                     |
| N2                                                                      | CT | IV | 2801902 | 2803240 | WBGene00044487  | Y54G2A.44 | Y54G2A.44 | 0.105651928752544   |
| AGIWUR24750;AGIWUR34109                                                 |    |    |         |         |                 |           |           |                     |
| N2                                                                      | CT | IV | 2803589 | 2804916 | WBGene00021894  | Y54G2A.32 | Y54G2A.32 | -0.195356270356173  |
| AGIWUR13210                                                             |    |    |         |         |                 |           |           |                     |
| N2                                                                      | CT | IV | 2805839 | 2809504 | WBGene00044488  | Y54G2A.45 | Y54G2A.45 | -0.0470857529572699 |

|                                                                                                                       |    |    |         |         |                |                   |                               |
|-----------------------------------------------------------------------------------------------------------------------|----|----|---------|---------|----------------|-------------------|-------------------------------|
| AGIWUR7243;AGIWUR20787                                                                                                |    |    |         |         |                |                   |                               |
| N2                                                                                                                    | CT | IV | 2814568 | 2819733 | WBGene00021878 | Y54G2A.13         | Y54G2A.13 0.275464658258507   |
| AGIWUR42785                                                                                                           |    |    |         |         |                |                   |                               |
| N2                                                                                                                    | CT | IV | 2823746 | 2828069 | WBGene00043062 | clec-80 Y54G2A.39 | 0.0642289331669694            |
| AGIWUR35552                                                                                                           |    |    |         |         |                |                   |                               |
| N2                                                                                                                    | CT | IV | 2831477 | 2832687 | WBGene00044491 | Y54G2A.48         | Y54G2A.48 -0.168270158349195  |
| AGIWUR2292;AGIWUR8308;AGIWUR23599;AGIWUR35331;AGIWUR36640                                                             |    |    |         |         |                |                   |                               |
| N2                                                                                                                    | CT | IV | 2832877 | 2833480 | WBGene00044489 | pudl-1 Y54G2A.46  | 0.0584038424294375            |
| AGIWUR15460;AGIWUR22792                                                                                               |    |    |         |         |                |                   |                               |
| N2                                                                                                                    | CT | IV | 2834816 | 2835357 | WBGene00044490 | pudl-2 Y54G2A.47  | 0.126853759947286             |
| AGIWUR3206;AGIWUR12409;AGIWUR21422                                                                                    |    |    |         |         |                |                   |                               |
| N2                                                                                                                    | CT | IV | 2835664 | 2838583 | WBGene00021873 | clec-82 Y54G2A.8  | -0.171273328495191            |
| AGIWUR28251                                                                                                           |    |    |         |         |                |                   |                               |
| N2                                                                                                                    | CT | IV | 2838608 | 2839422 | WBGene00043702 | Y54G2A.7          | Y54G2A.7 0.0165109993527324   |
| AGIWUR6401;AGIWUR8166;AGIWUR14841;AGIWUR23759;AGIWUR31835;AGIWUR32286;AGIWUR34675;AGIWUR36900;AGIWUR37090;AGIWUR40142 |    |    |         |         |                |                   |                               |
| N2                                                                                                                    | CT | IV | 2839375 | 2841434 | WBGene00021879 | clec-83 Y54G2A.14 | 0.130866582058047             |
| AGIWUR41939                                                                                                           |    |    |         |         |                |                   |                               |
| N2                                                                                                                    | CT | IV | 2842474 | 2845604 | WBGene00021895 | clec-84 Y54G2A.33 | -0.137606594644385            |
| AGIWUR29146                                                                                                           |    |    |         |         |                |                   |                               |
| N2                                                                                                                    | CT | IV | 2846476 | 2851282 | WBGene00044495 | Y54G2A.40         | Y54G2A.40 -0.157355074682732  |
| AGIWUR3193;AGIWUR17597                                                                                                |    |    |         |         |                |                   |                               |
| N2                                                                                                                    | CT | IV | 2851691 | 2854293 | WBGene00044492 | Y54G2A.49         | Y54G2A.49 0.0121907660914253  |
| AGIWUR13172;AGIWUR17819;AGIWUR31750;AGIWUR41764;AGIWUR42281                                                           |    |    |         |         |                |                   |                               |
| N2                                                                                                                    | CT | IV | 2854339 | 2855456 | WBGene00021872 | clec-85 Y54G2A.6  | 0.451395911558006             |
| AGIWUR3905                                                                                                            |    |    |         |         |                |                   |                               |
| N2                                                                                                                    | CT | IV | 2855607 | 2864843 | WBGene00021881 | Y54G2A.16         | Y54G2A.16 0.0848270444362313  |
| AGIWUR29314                                                                                                           |    |    |         |         |                |                   |                               |
| N2                                                                                                                    | CT | IV | 2872050 | 2890449 | WBGene00021882 | nprrt-1 Y54G2A.17 | 0.177175406824932             |
| AGIWUR2046;AGIWUR6560;AGIWUR18981;AGIWUR41129                                                                         |    |    |         |         |                |                   |                               |
| N2                                                                                                                    | CT | IV | 2890888 | 2891636 | WBGene00235102 | Y54G2A.75         | Y54G2A.75 -0.156754502964041  |
| AGIWUR32909                                                                                                           |    |    |         |         |                |                   |                               |
| N2                                                                                                                    | CT | IV | 2891560 | 2892495 | WBGene00021883 | Y54G2A.18         | Y54G2A.18 0.0309857641698557  |
| AGIWUR14241;AGIWUR28071                                                                                               |    |    |         |         |                |                   |                               |
| N2                                                                                                                    | CT | IV | 2893819 | 2894730 | WBGene00021884 | Y54G2A.19         | Y54G2A.19 0.016749236253311   |
| AGIWUR2785                                                                                                            |    |    |         |         |                |                   |                               |
| N2                                                                                                                    | CT | IV | 2896968 | 2900638 | WBGene00021885 | Y54G2A.20         | Y54G2A.20 -0.223270831043337  |
| AGIWUR17990                                                                                                           |    |    |         |         |                |                   |                               |
| N2                                                                                                                    | CT | IV | 2902436 | 2914816 | WBGene00021886 | Y54G2A.21         | Y54G2A.21 0.00765084363500179 |

AGIWUR473;AGIWUR4090;AGIWUR6409;AGIWUR28153  
N2 CT IV 2918441 2919780 WBGene00044493 Y54G2A.50 Y54G2A.50 0.161530756274789  
AGIWUR14616;AGIWUR16703  
N2 CT IV 2919826 2922251 WBGene00021887 fbxc-45 Y54G2A.22 -0.0507779622295725  
AGIWUR4439  
N2 CT IV 2922591 2925691 WBGene00006708 ubc-13 Y54G2A.31 0.01881832855398  
AGIWUR3658  
N2 CT IV 2927515 2928421 WBGene00021888 Y54G2A.23 Y54G2A.23 0.27112588787778  
AGIWUR8295  
N2 CT IV 2931403 2936843 WBGene00021870 samt-1 Y54G2A.4 0.0986169619135868  
AGIWUR10505  
N2 CT IV 2937990 2939862 WBGene00021889 Y54G2A.24 Y54G2A.24 -0.149617275012139  
AGIWUR20311  
N2 CT IV 2960123 2964395 WBGene00021897 ser-6 Y54G2A.35 -0.0826490529824611  
AGIWUR7278  
N2 CT IV 2964365 2978461 WBGene00002243 lad-2 Y54G2A.25 -0.0205566230342988  
AGIWUR29465;AGIWUR35601;AGIWUR41610  
N2 CT IV 2986104 2995573 WBGene00021890 Y54G2A.26 Y54G2A.26 0.0610802708424885  
AGIWUR29419;AGIWUR31009;AGIWUR39038  
N2 CT IV 2998877 2999485 WBGene00021891 Y54G2A.27 Y54G2A.27 0.235432234556644  
AGIWUR32480  
N2 CT IV 3000541 3008892 WBGene000219425 Y54G2A.73 Y54G2A.73 -0.0799098619862333  
AGIWUR14853;AGIWUR19329;AGIWUR28296;AGIWUR28643;AGIWUR37339  
N2 CT IV 3012587 3014440 WBGene00021869 vrp-1 Y54G2A.3 -0.27161889460298  
AGIWUR26458  
N2 CT IV 3019738 3022315 WBGene00003008 lin-22 Y54G2A.1 0.0522503205943057  
AGIWUR15555;AGIWUR17357;AGIWUR23870  
N2 CT IV 3023403 3028942 WBGene00021893 ndnf-1 Y54G2A.29 0.0201993565743157  
AGIWUR24891  
N2 CT IV 3032578 3050102 WBGene00022069 eel-1 Y67D8C.5 0.0137481519017175  
AGIWUR9265;AGIWUR12793;AGIWUR16370;AGIWUR19875;AGIWUR25410;AGIWUR32832;AGIWUR34877;AGIWUR36944  
N2 CT IV 3053730 3062053 WBGene00022067 Y67D8C.3 Y67D8C.3 0.0295141598454443  
AGIWUR20090;AGIWUR34714  
N2 CT IV 3062524 3063366 WBGene00022070 Y67D8C.6 Y67D8C.6 -0.0512895441429135  
AGIWUR18899  
N2 CT IV 3065568 3066934 WBGene00022071 Y67D8C.7 Y67D8C.7 0.270125357146417  
AGIWUR3480;AGIWUR14950;AGIWUR36360  
N2 CT IV 3067848 3069876 WBGene00022072 cpq-9 Y67D8C.8 0.0896241309357775  
AGIWUR798;AGIWUR6063;AGIWUR12656;AGIWUR20171;AGIWUR23004;AGIWUR23055;AGIWUR23636;AGIWUR24578;AGIWUR25102;AG

IWUR33268;AGIWUR38111;AGIWUR39434

|    |    |    |         |         |                 |           |           |                    |
|----|----|----|---------|---------|-----------------|-----------|-----------|--------------------|
| N2 | CT | IV | 3070134 | 3076307 | WBGene000235279 | Y67D8C.22 | Y67D8C.22 | 0.0106517606833219 |
|----|----|----|---------|---------|-----------------|-----------|-----------|--------------------|

AGIWUR11754

|    |    |    |         |         |                |          |          |                     |
|----|----|----|---------|---------|----------------|----------|----------|---------------------|
| N2 | CT | IV | 3077466 | 3086923 | WBGene00022073 | Y67D8C.9 | Y67D8C.9 | -0.0837250789434822 |
|----|----|----|---------|---------|----------------|----------|----------|---------------------|

AGIWUR128;AGIWUR18909;AGIWUR22466;AGIWUR23929;AGIWUR24530;AGIWUR24619;AGIWUR26816;AGIWUR34605;AGIWUR35226;AGIWUR38622;AGIWUR39640

|    |    |    |         |         |                |       |           |                   |
|----|----|----|---------|---------|----------------|-------|-----------|-------------------|
| N2 | CT | IV | 3103157 | 3133147 | WBGene00003153 | mca-3 | Y67D8C.10 | 0.348700640064948 |
|----|----|----|---------|---------|----------------|-------|-----------|-------------------|

AGIWUR13343;AGIWUR25220

|    |    |    |         |         |                |         |         |                    |
|----|----|----|---------|---------|----------------|---------|---------|--------------------|
| N2 | CT | IV | 3139833 | 3146723 | WBGene00020729 | T23E1.2 | T23E1.2 | -0.109534881776774 |
|----|----|----|---------|---------|----------------|---------|---------|--------------------|

AGIWUR8351;AGIWUR39712

|    |    |    |         |         |                |         |         |                    |
|----|----|----|---------|---------|----------------|---------|---------|--------------------|
| N2 | CT | IV | 3146894 | 3148882 | WBGene00020730 | T23E1.3 | T23E1.3 | 0.0276181776126645 |
|----|----|----|---------|---------|----------------|---------|---------|--------------------|

AGIWUR38188

|    |    |    |         |         |                |         |         |                     |
|----|----|----|---------|---------|----------------|---------|---------|---------------------|
| N2 | CT | IV | 3151361 | 3155987 | WBGene00020728 | T23E1.1 | T23E1.1 | -0.0178089394295942 |
|----|----|----|---------|---------|----------------|---------|---------|---------------------|

AGIWUR1768;AGIWUR6637;AGIWUR10515;AGIWUR12603;AGIWUR17243;AGIWUR18643;AGIWUR19244;AGIWUR27038;AGIWUR33531;AGIWUR33996;AGIWUR38671

|    |    |    |         |         |                |          |          |                    |
|----|----|----|---------|---------|----------------|----------|----------|--------------------|
| N2 | CT | IV | 3169946 | 3172610 | WBGene00022061 | Y67D8B.1 | Y67D8B.1 | -0.074912906628068 |
|----|----|----|---------|---------|----------------|----------|----------|--------------------|

AGIWUR30463

|    |    |    |         |         |                |          |          |                   |
|----|----|----|---------|---------|----------------|----------|----------|-------------------|
| N2 | CT | IV | 3173550 | 3176115 | WBGene00022063 | Y67D8B.4 | Y67D8B.4 | 0.104188694754956 |
|----|----|----|---------|---------|----------------|----------|----------|-------------------|

AGIWUR12437;AGIWUR15848;AGIWUR18862;AGIWUR23118;AGIWUR31340;AGIWUR32394;AGIWUR33681;AGIWUR36083;AGIWUR39191

|    |    |    |         |         |                |          |          |                    |
|----|----|----|---------|---------|----------------|----------|----------|--------------------|
| N2 | CT | IV | 3186080 | 3191562 | WBGene00022062 | Y67D8B.2 | Y67D8B.2 | 0.0941789152638264 |
|----|----|----|---------|---------|----------------|----------|----------|--------------------|

AGIWUR9123;AGIWUR35608

|    |    |    |         |         |                |          |          |                   |
|----|----|----|---------|---------|----------------|----------|----------|-------------------|
| N2 | CT | IV | 3202333 | 3203861 | WBGene00022064 | Y67D8B.5 | Y67D8B.5 | 0.317140110779963 |
|----|----|----|---------|---------|----------------|----------|----------|-------------------|

AGIWUR29258

|    |    |    |         |         |                |       |      |                    |
|----|----|----|---------|---------|----------------|-------|------|--------------------|
| N2 | CT | IV | 3204559 | 3210582 | WBGene00004240 | puf-4 | M4.2 | -0.188747620329137 |
|----|----|----|---------|---------|----------------|-------|------|--------------------|

AGIWUR19536

|    |    |    |         |         |                |      |      |                    |
|----|----|----|---------|---------|----------------|------|------|--------------------|
| N2 | CT | IV | 3213764 | 3219825 | WBGene00019766 | M4.1 | M4.1 | -0.179974377183633 |
|----|----|----|---------|---------|----------------|------|------|--------------------|

AGIWUR39578

|    |    |    |         |         |                |          |          |                   |
|----|----|----|---------|---------|----------------|----------|----------|-------------------|
| N2 | CT | IV | 3222440 | 3252601 | WBGene00022059 | Y67D8A.2 | Y67D8A.2 | 0.022035336955089 |
|----|----|----|---------|---------|----------------|----------|----------|-------------------|

AGIWUR4774;AGIWUR19074;AGIWUR21542;AGIWUR25290

|    |    |    |         |         |                |       |          |                   |
|----|----|----|---------|---------|----------------|-------|----------|-------------------|
| N2 | CT | IV | 3253263 | 3254543 | WBGene00022060 | dmd-9 | Y67D8A.3 | 0.170962667295612 |
|----|----|----|---------|---------|----------------|-------|----------|-------------------|

AGIWUR7989

|    |    |    |         |         |                |          |          |                   |
|----|----|----|---------|---------|----------------|----------|----------|-------------------|
| N2 | CT | IV | 3258910 | 3263489 | WBGene00020831 | T26C12.1 | T26C12.1 | -0.03712835702202 |
|----|----|----|---------|---------|----------------|----------|----------|-------------------|

AGIWUR7690;AGIWUR10912;AGIWUR32472

|    |    |    |         |         |                |          |          |                     |
|----|----|----|---------|---------|----------------|----------|----------|---------------------|
| N2 | CT | IV | 3263851 | 3265372 | WBGene00020832 | T26C12.2 | T26C12.2 | -0.0925838556045804 |
|----|----|----|---------|---------|----------------|----------|----------|---------------------|

AGIWUR6073

|    |    |    |         |         |                |          |          |                    |
|----|----|----|---------|---------|----------------|----------|----------|--------------------|
| N2 | CT | IV | 3266404 | 3267677 | WBGene00044469 | clcc-173 | T26C12.6 | 0.0310432214551462 |
|----|----|----|---------|---------|----------------|----------|----------|--------------------|

AGIWUR20423

|    |    |    |         |         |                |          |          |                    |
|----|----|----|---------|---------|----------------|----------|----------|--------------------|
| N2 | CT | IV | 3269527 | 3273397 | WBGene00020833 | T26C12.3 | T26C12.3 | -0.171400286967125 |
|----|----|----|---------|---------|----------------|----------|----------|--------------------|

AGIWUR1492;AGIWUR16675;AGIWUR27212;AGIWUR38075

|    |    |    |         |         |                |        |          |                   |
|----|----|----|---------|---------|----------------|--------|----------|-------------------|
| N2 | CT | IV | 3282885 | 3289337 | WBGene00001548 | gcy-23 | T26C12.4 | 0.329391020156077 |
|----|----|----|---------|---------|----------------|--------|----------|-------------------|

AGIWUR42079

|    |    |    |         |         |                |          |          |                   |
|----|----|----|---------|---------|----------------|----------|----------|-------------------|
| N2 | CT | IV | 3292120 | 3294633 | WBGene00021089 | W08E12.8 | W08E12.8 | 0.460629817885774 |
|----|----|----|---------|---------|----------------|----------|----------|-------------------|

|                                                                                                             |    |    |         |         |                 |           |           |                     |
|-------------------------------------------------------------------------------------------------------------|----|----|---------|---------|-----------------|-----------|-----------|---------------------|
| AGIWUR25114                                                                                                 |    |    |         |         |                 |           |           |                     |
| N2                                                                                                          | CT | IV | 3295135 | 3297225 | WBGene00021088  | W08E12.7  | W08E12.7  | 0.149743029645029   |
| AGIWUR209;AGIWUR14640                                                                                       |    |    |         |         |                 |           |           |                     |
| N2                                                                                                          | CT | IV | 3298629 | 3299687 | WBGene00021087  | W08E12.6  | W08E12.6  | 0.237296982962905   |
| AGIWUR36833                                                                                                 |    |    |         |         |                 |           |           |                     |
| N2                                                                                                          | CT | IV | 3305898 | 3306541 | WBGene00021083  | W08E12.2  | W08E12.2  | -0.832013744660198  |
| AGIWUR27318                                                                                                 |    |    |         |         |                 |           |           |                     |
| N2                                                                                                          | CT | IV | 3306664 | 3307563 | WBGene00021090  | W08E12.9  | W08E12.9  | 0.0267820587526426  |
| AGIWUR887                                                                                                   |    |    |         |         |                 |           |           |                     |
| N2                                                                                                          | CT | IV | 3311276 | 3313180 | WBGene00021082  | zip-11    | W08E12.1  | 0.0182445304590857  |
| AGIWUR24069                                                                                                 |    |    |         |         |                 |           |           |                     |
| N2                                                                                                          | CT | IV | 3320013 | 3324950 | WBGene00018325  | F42A6.3   | F42A6.3   | 0.121594591462092   |
| N2                                                                                                          | CT | IV | 3334042 | 3336868 | WBGene00018328  | F42A6.6   | F42A6.6   | -0.113792035523435  |
| N2                                                                                                          | CT | IV | 3336927 | 3338867 | WBGene00001999  | hrp-1     | F42A6.7   | 0.050394886211544   |
| AGIWUR11495;AGIWUR13108;AGIWUR16261;AGIWUR18729;AGIWUR24759;AGIWUR30889;AGIWUR35196;AGIWUR42971;AGIWUR43704 |    |    |         |         |                 |           |           |                     |
| N2                                                                                                          | CT | IV | 3339792 | 3340953 | WBGene00018329  | fbxa-130  | F42A6.8   | 0.0219429486824936  |
| AGIWUR41895                                                                                                 |    |    |         |         |                 |           |           |                     |
| N2                                                                                                          | CT | IV | 3341470 | 3341939 | WBGene00018324  | F42A6.2   | F42A6.2   | -0.187324907776805  |
| N2                                                                                                          | CT | IV | 3342519 | 3350027 | WBGene00018330  | elks-1    | F42A6.9   | 0.103321884130678   |
| N2                                                                                                          | CT | IV | 3363553 | 3366079 | WBGene00021953  | Y55H10A.2 | Y55H10A.2 |                     |
| -0.00927766378024053                                                                                        |    |    |         |         |                 |           |           |                     |
| N2                                                                                                          | CT | IV | 3369197 | 3373467 | WBGene00021952  | vha-19    | Y55H10A.1 | -0.0655352406813954 |
| AGIWUR27642                                                                                                 |    |    |         |         |                 |           |           |                     |
| N2                                                                                                          | CT | IV | 3373387 | 3378130 | WBGene00015249  | otub-4    | B0546.2   | 0.128187933392823   |
| AGIWUR36668;AGIWUR40143                                                                                     |    |    |         |         |                 |           |           |                     |
| N2                                                                                                          | CT | IV | 3382949 | 3384147 | WBGene00015251  | B0546.4   | B0546.4   | -0.147778408304983  |
| N2                                                                                                          | CT | IV | 3385903 | 3386904 | WBGene00015248  | mai-2     | B0546.1   | 0.157676495511328   |
| N2                                                                                                          | CT | IV | 3396581 | 3399123 | WBGene00001119  | dyf-3     | C04C3.5   | -0.263254427060634  |
| N2                                                                                                          | CT | IV | 3399672 | 3403904 | WBGene00015413  | pdhb-1    | C04C3.3   | 0.128984316298959   |
| AGIWUR9048;AGIWUR21733                                                                                      |    |    |         |         |                 |           |           |                     |
| N2                                                                                                          | CT | IV | 3415683 | 3419234 | WBGene00015412  | lgc-9     | C04C3.2   | -0.0795097188267029 |
| N2                                                                                                          | CT | IV | 3419813 | 3422607 | WBGene00015416  | C04C3.6   | C04C3.6   | -0.218753912360802  |
| AGIWUR7655;AGIWUR10839;AGIWUR23041                                                                          |    |    |         |         |                 |           |           |                     |
| N2                                                                                                          | CT | IV | 3428900 | 3430327 | WBGene00015411  | srz-60    | C04C3.1   | 0.433100419985399   |
| N2                                                                                                          | CT | IV | 3430310 | 3432470 | WBGene000219646 | linc-89   | C04C3.15  | 0.00308283722438585 |
| AGIWUR39779                                                                                                 |    |    |         |         |                 |           |           |                     |
| N2                                                                                                          | CT | IV | 3436319 | 3437878 | WBGene00021033  | srz-32    | W05E7.2   | -0.0519862536829123 |
| AGIWUR8896;AGIWUR37518;AGIWUR39643                                                                          |    |    |         |         |                 |           |           |                     |
| N2                                                                                                          | CT | IV | 3438312 | 3439503 | WBGene00001702  | grd-13    | W05E7.3   | -0.0696013957379265 |
| AGIWUR1917                                                                                                  |    |    |         |         |                 |           |           |                     |

|                                               |    |    |         |         |                |          |           |                     |             |
|-----------------------------------------------|----|----|---------|---------|----------------|----------|-----------|---------------------|-------------|
| N2                                            | CT | IV | 3439655 | 3440453 | WBGene00001692 | grd-3    | W05E7.1   | 0.295816636200307   |             |
| AGIWUR6630;AGIWUR31335                        |    |    |         |         |                |          |           |                     |             |
| N2                                            | CT | IV | 3441055 | 3441770 | WBGene00001699 | grd-10   | F09D12.1  | 0.194249342257439   |             |
| AGIWUR27659                                   |    |    |         |         |                |          |           |                     |             |
| N2                                            | CT | IV | 3442303 | 3444201 | WBGene00017281 | F09D12.2 | F09D12.2  | 0.481781760826673   |             |
| AGIWUR38734                                   |    |    |         |         |                |          |           |                     |             |
| N2                                            | CT | IV | 3444914 | 3446528 | WBGene00019049 | F58E2.5  | F58E2.5   | -0.0130575871925753 | AGIWUR34019 |
| N2                                            | CT | IV | 3447216 | 3448708 | WBGene00023302 | F58E2.6  | F58E2.6   | -0.0759281556754328 | AGIWUR18347 |
| N2                                            | CT | IV | 3453608 | 3454788 | WBGene00019051 | srz-23   | F58E2.9   | -0.157244436884028  | AGIWUR34738 |
| N2                                            | CT | IV | 3455893 | 3457113 | WBGene00019050 | srz-88   | F58E2.7   | 0.00485606811394401 |             |
| AGIWUR19533;AGIWUR37029                       |    |    |         |         |                |          |           |                     |             |
| N2                                            | CT | IV | 3458600 | 3460440 | WBGene00023481 | srz-22   | F58E2.10  | -0.0997818668891375 |             |
| AGIWUR42395                                   |    |    |         |         |                |          |           |                     |             |
| N2                                            | CT | IV | 3462027 | 3462929 | WBGene00023303 | F58E2.8  | F58E2.8   | -0.0322148281500088 | AGIWUR12004 |
| N2                                            | CT | IV | 3463567 | 3466276 | WBGene00019048 | F58E2.4  | F58E2.4   | -0.158290733114453  |             |
| AGIWUR16957;AGIWUR18621;AGIWUR27185           |    |    |         |         |                |          |           |                     |             |
| N2                                            | CT | IV | 3467430 | 3469828 | WBGene00019047 | F58E2.3  | F58E2.3   | 0.0554189711386526  | AGIWUR6323  |
| N2                                            | CT | IV | 3470042 | 3470711 | WBGene00019046 | F58E2.2  | F58E2.2   | 0.171485590892801   | AGIWUR15414 |
| N2                                            | CT | IV | 3471563 | 3473584 | WBGene00023301 | F58E2.1  | F58E2.1   | -0.0208149790959782 |             |
| AGIWUR9201;AGIWUR12704                        |    |    |         |         |                |          |           |                     |             |
| N2                                            | CT | IV | 3477392 | 3479011 | WBGene00015656 | srz-70   | C09G12.6  | 0.110492241910546   |             |
| AGIWUR23116                                   |    |    |         |         |                |          |           |                     |             |
| N2                                            | CT | IV | 3479335 | 3479730 | WBGene00015655 | C09G12.5 | C09G12.5  | -0.305124542683302  |             |
| AGIWUR37214                                   |    |    |         |         |                |          |           |                     |             |
| N2                                            | CT | IV | 3480011 | 3481860 | WBGene00023474 | srz-37   | C09G12.16 | -0.0126867290817136 |             |
| AGIWUR18826;AGIWUR38245                       |    |    |         |         |                |          |           |                     |             |
| N2                                            | CT | IV | 3482112 | 3482565 | WBGene00023476 | srz-55   | C09G12.14 | -0.0376971362035468 |             |
| AGIWUR278;AGIWUR16470;AGIWUR33376;AGIWUR34469 |    |    |         |         |                |          |           |                     |             |
| N2                                            | CT | IV | 3482895 | 3484706 | WBGene00023463 | srz-82   | C09G12.11 | 0.168210518387196   |             |
| AGIWUR5025;AGIWUR33887                        |    |    |         |         |                |          |           |                     |             |
| N2                                            | CT | IV | 3485316 | 3487105 | WBGene00023465 | srz-81   | C09G12.13 | -0.0104651934033759 |             |
| AGIWUR5334;AGIWUR17762                        |    |    |         |         |                |          |           |                     |             |
| N2                                            | CT | IV | 3487524 | 3489089 | WBGene00015654 | srz-77   | C09G12.4  | 0.282613087555877   |             |
| AGIWUR30868                                   |    |    |         |         |                |          |           |                     |             |
| N2                                            | CT | IV | 3489858 | 3491519 | WBGene00023464 | srz-80   | C09G12.12 | 0.161295244399145   |             |
| AGIWUR1603                                    |    |    |         |         |                |          |           |                     |             |
| N2                                            | CT | IV | 3491777 | 3493216 | WBGene00015653 | srz-78   | C09G12.3  | 0.0870669441898997  |             |
| AGIWUR40657                                   |    |    |         |         |                |          |           |                     |             |
| N2                                            | CT | IV | 3493610 | 3495179 | WBGene00015652 | srz-79   | C09G12.2  | -0.210975438402322  |             |



|                                                                       |    |    |         |         |                |            |            |                     |             |
|-----------------------------------------------------------------------|----|----|---------|---------|----------------|------------|------------|---------------------|-------------|
| AGIWUR2191                                                            |    |    |         |         |                |            |            |                     |             |
| N2                                                                    | CT | IV | 3495296 | 3496440 | WBGene00044470 | C09G12.17  | C09G12.17  | 0.108523010595231   |             |
| AGIWUR671;AGIWUR27248;AGIWUR36976;AGIWUR39683;AGIWUR40123             |    |    |         |         |                |            |            |                     |             |
| N2                                                                    | CT | IV | 3498218 | 3503912 | WBGene00015651 | ceh-53     | C09G12.1   | -0.0608266843214889 |             |
| AGIWUR21847                                                           |    |    |         |         |                |            |            |                     |             |
| N2                                                                    | CT | IV | 3504444 | 3506115 | WBGene00023462 | srz-83     | C09G12.10  | -0.011265864973836  |             |
| AGIWUR26431;AGIWUR37625                                               |    |    |         |         |                |            |            |                     |             |
| N2                                                                    | CT | IV | 3506328 | 3509527 | WBGene00000424 | ced-10     | C09G12.8   | -0.146361404763831  |             |
| AGIWUR21339;AGIWUR26580;AGIWUR27559                                   |    |    |         |         |                |            |            |                     |             |
| N2                                                                    | CT | IV | 3510046 | 3514572 | WBGene00015658 | tsg-101    | C09G12.9   | -0.154948729160777  |             |
| AGIWUR3762;AGIWUR5733;AGIWUR14214                                     |    |    |         |         |                |            |            |                     |             |
| N2                                                                    | CT | IV | 3516819 | 3526602 | WBGene00006769 | unc-33     | Y37E11C.1  | -0.0219613719275511 |             |
| AGIWUR33833                                                           |    |    |         |         |                |            |            |                     |             |
| N2                                                                    | CT | IV | 3527354 | 3532521 | WBGene00019778 | M57.2      | M57.2      | 0.0149972715621036  | AGIWUR38368 |
| N2                                                                    | CT | IV | 3543628 | 3547600 | WBGene00015038 | nstp-6     | B0212.4    | 0.13176278131936    | AGIWUR32216 |
| N2                                                                    | CT | IV | 3551090 | 3557431 | WBGene00003889 | osm-9      | B0212.5    | -0.0578340286973651 | AGIWUR16919 |
| N2                                                                    | CT | IV | 3565201 | 3567814 | WBGene00015036 | sre-5      | B0212.2    | -0.226086693214205  | AGIWUR39523 |
| N2                                                                    | CT | IV | 3568979 | 3577630 | WBGene00015035 | otpl-1     | B0212.1    | -0.133570736700316  |             |
| AGIWUR6709;AGIWUR25191                                                |    |    |         |         |                |            |            |                     |             |
| N2                                                                    | CT | IV | 3578937 | 3581020 | WBGene00021374 | Y37E11B.1  | Y37E11B.1  | -0.22715807488758   |             |
| AGIWUR42712                                                           |    |    |         |         |                |            |            |                     |             |
| N2                                                                    | CT | IV | 3580970 | 3582909 | WBGene00021376 | blos-7     | Y37E11B.3  | 0.0650974507542408  |             |
| AGIWUR24972                                                           |    |    |         |         |                |            |            |                     |             |
| N2                                                                    | CT | IV | 3584314 | 3593615 | WBGene00006383 | taf-2      | Y37E11B.4  | -0.0895257409876926 |             |
| AGIWUR40540                                                           |    |    |         |         |                |            |            |                     |             |
| N2                                                                    | CT | IV | 3593960 | 3598552 | WBGene00021377 | Y37E11B.5  | Y37E11B.5  | -0.261762499309273  |             |
| AGIWUR27479;AGIWUR36703                                               |    |    |         |         |                |            |            |                     |             |
| N2                                                                    | CT | IV | 3598656 | 3599299 | WBGene00021378 | Y37E11B.6  | Y37E11B.6  | -0.062089546725737  |             |
| AGIWUR32299                                                           |    |    |         |         |                |            |            |                     |             |
| N2                                                                    | CT | IV | 3599497 | 3600164 | WBGene00021379 | Y37E11B.7  | Y37E11B.7  | 0.109063790942221   |             |
| AGIWUR1502;AGIWUR9722;AGIWUR10223;AGIWUR10260;AGIWUR10569;AGIWUR32668 |    |    |         |         |                |            |            |                     |             |
| N2                                                                    | CT | IV | 3601735 | 3603401 | WBGene00021380 | Y37E11B.9  | Y37E11B.9  | 0.150494242599025   |             |
| AGIWUR23524                                                           |    |    |         |         |                |            |            |                     |             |
| N2                                                                    | CT | IV | 3603550 | 3606466 | WBGene00021381 | Y37E11B.10 | Y37E11B.10 | 0.147858898716545   |             |
| AGIWUR4295;AGIWUR39675                                                |    |    |         |         |                |            |            |                     |             |
| N2                                                                    | CT | IV | 3606784 | 3609229 | WBGene00002188 | kgb-2      | ZC416.4    | 0.344496477251751   | AGIWUR24635 |
| N2                                                                    | CT | IV | 3609218 | 3613072 | WBGene00022610 | ZC416.6    | ZC416.6    | 0.0384060137045541  | AGIWUR9980  |
| N2                                                                    | CT | IV | 3613934 | 3624697 | WBGene00000481 | cha-1      | ZC416.8    | 0.179530966703199   | AGIWUR11212 |
| N2                                                                    | CT | IV | 3633619 | 3635472 | WBGene00022609 | ZC416.2    | ZC416.2    | -0.127344029575062  | AGIWUR44932 |

|                                              |    |    |         |         |                |            |            |                     |             |
|----------------------------------------------|----|----|---------|---------|----------------|------------|------------|---------------------|-------------|
| N2                                           | CT | IV | 3637079 | 3640265 | WBGene00022608 | madf-9     | ZC416.1    | 0.213913593292819   |             |
| AGIWUR25395;AGIWUR25919                      |    |    |         |         |                |            |            |                     |             |
| N2                                           | CT | IV | 3645166 | 3648684 | WBGene00016987 | CC8.2      | CC8.2      | 0.254838004553168   | AGIWUR24618 |
| N2                                           | CT | IV | 3658877 | 3668703 | WBGene00021362 | Y37E11AL.6 | Y37E11AL.6 | 0.175471347839474   |             |
| AGIWUR14654;AGIWUR28359                      |    |    |         |         |                |            |            |                     |             |
| N2                                           | CT | IV | 3683537 | 3686865 | WBGene00003129 | map-1      | Y37E11AL.7 | -0.186510923166061  |             |
| AGIWUR16605                                  |    |    |         |         |                |            |            |                     |             |
| N2                                           | CT | IV | 3687565 | 3694837 | WBGene00021363 | taf-6.2    | Y37E11AL.8 | -0.0185539512341393 |             |
| AGIWUR18124                                  |    |    |         |         |                |            |            |                     |             |
| N2                                           | CT | IV | 3694905 | 3698436 | WBGene00021359 | Y37E11AL.3 | Y37E11AL.3 | -0.0245452553570917 |             |
| AGIWUR8174;AGIWUR10767;AGIWUR17784           |    |    |         |         |                |            |            |                     |             |
| N2                                           | CT | IV | 3698501 | 3699722 | WBGene00021358 | Y37E11AL.2 | Y37E11AL.2 | 0.21590704977104    |             |
| AGIWUR187                                    |    |    |         |         |                |            |            |                     |             |
| N2                                           | CT | IV | 3699804 | 3700654 | WBGene00021364 | Y37E11AL.9 | Y37E11AL.9 | 0.0272505107122791  |             |
| AGIWUR38046                                  |    |    |         |         |                |            |            |                     |             |
| N2                                           | CT | IV | 3709515 | 3715381 | WBGene00021357 | Y37E11AL.1 | Y37E11AL.1 | 0.0443448745487194  |             |
| AGIWUR20687                                  |    |    |         |         |                |            |            |                     |             |
| N2                                           | CT | IV | 3715782 | 3722790 | WBGene00021367 | Y37E11AM.3 | Y37E11AM.3 | -0.140166928620879  |             |
| AGIWUR3608;AGIWUR8546;AGIWUR9320;AGIWUR16402 |    |    |         |         |                |            |            |                     |             |
| N2                                           | CT | IV | 3722886 | 3725461 | WBGene00021366 | Y37E11AM.2 | Y37E11AM.2 | -0.176711525576643  |             |
| AGIWUR29009                                  |    |    |         |         |                |            |            |                     |             |
| N2                                           | CT | IV | 3726112 | 3735495 | WBGene00021365 | smg1-2     | Y37E11AM.1 | -0.102287013588624  |             |
| AGIWUR41488                                  |    |    |         |         |                |            |            |                     |             |
| N2                                           | CT | IV | 3735845 | 3738917 | WBGene00021370 | nape-2     | Y37E11AR.3 | -0.0157053513720928 |             |
| AGIWUR1805;AGIWUR6459                        |    |    |         |         |                |            |            |                     |             |
| N2                                           | CT | IV | 3739524 | 3740876 | WBGene00021371 | nape-1     | Y37E11AR.4 | 0.0457704968686912  |             |
| AGIWUR1499;AGIWUR10188                       |    |    |         |         |                |            |            |                     |             |
| N2                                           | CT | IV | 3744048 | 3747655 | WBGene00021369 | siah-1     | Y37E11AR.2 | 0.186863114833791   |             |
| AGIWUR32287                                  |    |    |         |         |                |            |            |                     |             |
| N2                                           | CT | IV | 3748210 | 3751101 | WBGene00021372 | ugt-45     | Y37E11AR.5 | -0.160764587516557  |             |
| AGIWUR35655                                  |    |    |         |         |                |            |            |                     |             |
| N2                                           | CT | IV | 3752612 | 3755419 | WBGene00021373 | Y37E11AR.7 | Y37E11AR.7 | 0.175304258161663   |             |
| AGIWUR15651                                  |    |    |         |         |                |            |            |                     |             |
| N2                                           | CT | IV | 3756242 | 3759910 | WBGene00021368 | best-20    | Y37E11AR.1 | -0.12177495253621   |             |
| AGIWUR14000                                  |    |    |         |         |                |            |            |                     |             |
| N2                                           | CT | IV | 3761192 | 3766826 | WBGene00006869 | vab-2      | Y37E11AR.6 | -0.035634238836872  |             |
| AGIWUR5528                                   |    |    |         |         |                |            |            |                     |             |
| N2                                           | CT | IV | 3784358 | 3794044 | WBGene00019546 | glct-6     | W07G9.2    | 0.220833838063658   |             |
| AGIWUR20512;AGIWUR38088                      |    |    |         |         |                |            |            |                     |             |

|                                                                                   |    |    |         |         |                |          |          |                      |             |
|-----------------------------------------------------------------------------------|----|----|---------|---------|----------------|----------|----------|----------------------|-------------|
| N2                                                                                | CT | IV | 3794767 | 3796267 | WBGene00019545 | K09B3.1  | K09B3.1  | -0.0138280417550751  |             |
| AGIWUR2928;AGIWUR10590;AGIWUR15949;AGIWUR18365;AGIWUR32674;AGIWUR43271            |    |    |         |         |                |          |          |                      |             |
| N2                                                                                | CT | IV | 3796306 | 3800461 | WBGene00003884 | osm-3    | M02B7.3  | 0.0429697907791482   | AGIWUR1662  |
| N2                                                                                | CT | IV | 3801864 | 3803426 | WBGene00019725 | algn-14  | M02B7.4  | -0.227667958486894   | AGIWUR4303  |
| N2                                                                                | CT | IV | 3803581 | 3804949 | WBGene00019724 | M02B7.2  | M02B7.2  | -0.140872473144733   |             |
| AGIWUR13365;AGIWUR36768                                                           |    |    |         |         |                |          |          |                      |             |
| N2                                                                                | CT | IV | 3806703 | 3807190 | WBGene00044690 | M02B7.7  | M02B7.7  | -0.265611898438724   | AGIWUR2282  |
| N2                                                                                | CT | IV | 3807870 | 3819328 | WBGene00019726 | bris-1   | M02B7.5  | 0.254194768050123    |             |
| AGIWUR3769;AGIWUR15598;AGIWUR33890                                                |    |    |         |         |                |          |          |                      |             |
| N2                                                                                | CT | IV | 3839720 | 3841628 | WBGene00017906 | F28F9.2  | F28F9.2  | -0.0989173902051892  | AGIWUR21998 |
| N2                                                                                | CT | IV | 3855843 | 3861552 | WBGene00006970 | zag-1    | F28F9.1  | 0.00213384191783916  | AGIWUR16716 |
| N2                                                                                | CT | IV | 3862129 | 3865042 | WBGene00000009 | aat-8    | F28F9.4  | -0.00583809279865299 | AGIWUR6881  |
| N2                                                                                | CT | IV | 3867147 | 3871842 | WBGene00018144 | F37C4.4  | F37C4.4  | -0.20402677432471    |             |
| AGIWUR1949;AGIWUR44847                                                            |    |    |         |         |                |          |          |                      |             |
| N2                                                                                | CT | IV | 3871829 | 3874416 | WBGene00018145 | F37C4.5  | F37C4.5  | -0.00118985256977311 |             |
| AGIWUR4389;AGIWUR8043;AGIWUR22760;AGIWUR31925;AGIWUR35017;AGIWUR38139;AGIWUR42284 |    |    |         |         |                |          |          |                      |             |
| N2                                                                                | CT | IV | 3875410 | 3878372 | WBGene00018146 | F37C4.6  | F37C4.6  | 0.0738635975817488   | AGIWUR24044 |
| N2                                                                                | CT | IV | 3878547 | 3881187 | WBGene00018148 | F37C4.8  | F37C4.8  | 0.147677732916581    |             |
| AGIWUR10242;AGIWUR16117                                                           |    |    |         |         |                |          |          |                      |             |
| N2                                                                                | CT | IV | 3881852 | 3884683 | WBGene00018143 | oac-23   | F37C4.3  | 0.042729331180305    | AGIWUR37307 |
| N2                                                                                | CT | IV | 3885665 | 3888836 | WBGene00018142 | oac-22   | F37C4.2  | 0.129494329178587    | AGIWUR8307  |
| N2                                                                                | CT | IV | 3889263 | 3892563 | WBGene00018141 | oac-21   | F37C4.1  | 0.383460222595472    | AGIWUR40823 |
| N2                                                                                | CT | IV | 3892998 | 3893283 | WBGene00044471 | F56D6.9  | F56D6.9  | 0.416109247637225    | AGIWUR9848  |
| N2                                                                                | CT | IV | 3894058 | 3894430 | WBGene00044292 | F56D6.8  | F56D6.8  | 0.328024875731458    | AGIWUR20004 |
| N2                                                                                | CT | IV | 3895070 | 3895506 | WBGene00044472 | dct-8    | F56D6.10 | 0.251958255451376    |             |
| AGIWUR2226                                                                        |    |    |         |         |                |          |          |                      |             |
| N2                                                                                | CT | IV | 3895963 | 3897997 | WBGene00219307 | F56D6.17 | F56D6.17 | -0.104544622988326   |             |
| AGIWUR26987;AGIWUR37616                                                           |    |    |         |         |                |          |          |                      |             |
| N2                                                                                | CT | IV | 3898478 | 3899806 | WBGene00219304 | F56D6.16 | F56D6.16 | 0.00247129533590318  |             |
| AGIWUR30419                                                                       |    |    |         |         |                |          |          |                      |             |
| N2                                                                                | CT | IV | 3900571 | 3902326 | WBGene00023478 | srz-62   | F56D6.7  | 0.132382290493861    |             |
| AGIWUR2650;AGIWUR24689                                                            |    |    |         |         |                |          |          |                      |             |
| N2                                                                                | CT | IV | 3906113 | 3906493 | WBGene00044473 | F56D6.11 | F56D6.11 | 0.0523994293052326   |             |
| AGIWUR10325;AGIWUR14565;AGIWUR22261;AGIWUR29588                                   |    |    |         |         |                |          |          |                      |             |
| N2                                                                                | CT | IV | 3908107 | 3908509 | WBGene00044474 | F56D6.12 | F56D6.12 | 0.147207643530269    |             |
| AGIWUR39239                                                                       |    |    |         |         |                |          |          |                      |             |
| N2                                                                                | CT | IV | 3909381 | 3909799 | WBGene00044475 | F56D6.13 | F56D6.13 | 0.0440613709924378   |             |
| AGIWUR35300                                                                       |    |    |         |         |                |          |          |                      |             |
| N2                                                                                | CT | IV | 3915610 | 3916901 | WBGene00018973 | srz-20   | F56D6.5  | -0.0949111993484042  | AGIWUR43400 |

|                                                             |    |    |         |         |                |          |           |                      |
|-------------------------------------------------------------|----|----|---------|---------|----------------|----------|-----------|----------------------|
| N2                                                          | CT | IV | 3917679 | 3918056 | WBGene00044476 | F56D6.14 | F56D6.14  | 0.144750981726862    |
| AGIWUR7218;AGIWUR7742;AGIWUR31197;AGIWUR39159;AGIWUR42565   |    |    |         |         |                |          |           |                      |
| N2                                                          | CT | IV | 3919806 | 3921613 | WBGene00018972 | srz-19   | F56D6.4   | -0.00395221811015745 |
| N2                                                          | CT | IV | 3926417 | 3929024 | WBGene00018970 | clec-68  | F56D6.1   | -0.0765990289851208  |
| AGIWUR28660;AGIWUR41001                                     |    |    |         |         |                |          |           |                      |
| N2                                                          | CT | IV | 3932733 | 3936238 | WBGene00021581 | clec-70  | Y46C8AL.3 | -0.19808413202311    |
| AGIWUR30235                                                 |    |    |         |         |                |          |           |                      |
| N2                                                          | CT | IV | 3937464 | 3939924 | WBGene00021582 | clec-71  | Y46C8AL.4 | 0.158808136617864    |
| AGIWUR21185                                                 |    |    |         |         |                |          |           |                      |
| N2                                                          | CT | IV | 3940259 | 3941702 | WBGene00021580 | clec-174 | Y46C8AL.2 | -0.148554560295635   |
| AGIWUR33517                                                 |    |    |         |         |                |          |           |                      |
| N2                                                          | CT | IV | 3944816 | 3947364 | WBGene00021583 | clec-72  | Y46C8AL.5 | -0.113872505344734   |
| AGIWUR25323                                                 |    |    |         |         |                |          |           |                      |
| N2                                                          | CT | IV | 3953935 | 3956210 | WBGene00021579 | clec-73  | Y46C8AL.1 | 0.187309768286628    |
| AGIWUR38603                                                 |    |    |         |         |                |          |           |                      |
| N2                                                          | CT | IV | 3957005 | 3960139 | WBGene00021585 | clec-74  | Y46C8AL.8 | -0.0223492845348003  |
| AGIWUR2330;AGIWUR6622;AGIWUR11329                           |    |    |         |         |                |          |           |                      |
| N2                                                          | CT | IV | 3960734 | 3964657 | WBGene00021586 | clec-75  | Y46C8AL.9 | 0.0536632466832954   |
| AGIWUR14291;AGIWUR22989;AGIWUR29616;AGIWUR30729;AGIWUR31166 |    |    |         |         |                |          |           |                      |
| N2                                                          | CT | IV | 3965246 | 3969025 | WBGene00021587 | clec-76  | Y46C8AR.1 | 0.0654076952687097   |
| AGIWUR23862                                                 |    |    |         |         |                |          |           |                      |
| N2                                                          | CT | IV | 3969931 | 3972616 | WBGene00044343 | clec-77  | Y46C8AR.3 | 0.0253794297522756   |
| AGIWUR31568                                                 |    |    |         |         |                |          |           |                      |
| N2                                                          | CT | IV | 3973349 | 3975721 | WBGene00018548 | clec-79  | F47C12.4  | 0.00225356016000511  |
| AGIWUR4310;AGIWUR7539;AGIWUR26372                           |    |    |         |         |                |          |           |                      |
| N2                                                          | CT | IV | 3976429 | 3978015 | WBGene00005430 | srh-220  | F47C12.5  | -0.904618254272138   |
| AGIWUR20619                                                 |    |    |         |         |                |          |           |                      |
| N2                                                          | CT | IV | 3979825 | 3981205 | WBGene00005432 | srh-222  | F47C12.10 | 0.0875492254350201   |
| AGIWUR24878;AGIWUR41002;AGIWUR42461                         |    |    |         |         |                |          |           |                      |
| N2                                                          | CT | IV | 3981901 | 3983609 | WBGene00005433 | srh-223  | F47C12.3  | -0.0955006645716416  |
| AGIWUR17687                                                 |    |    |         |         |                |          |           |                      |
| N2                                                          | CT | IV | 3989102 | 4014195 | WBGene00018547 | clec-78  | F47C12.2  | 0.204921981525678    |
| AGIWUR12467;AGIWUR29123;AGIWUR35382                         |    |    |         |         |                |          |           |                      |
| N2                                                          | CT | IV | 4014799 | 4028127 | WBGene00020930 | hlh-30   | W02C12.3  | 0.120294578227353    |
| AGIWUR12568;AGIWUR14682;AGIWUR22585                         |    |    |         |         |                |          |           |                      |
| N2                                                          | CT | IV | 4040308 | 4041532 | WBGene00018065 | F35F11.2 | F35F11.2  | 0.0673862638919296   |
| AGIWUR4078;AGIWUR9316;AGIWUR38890                           |    |    |         |         |                |          |           |                      |
| N2                                                          | CT | IV | 4042575 | 4047786 | WBGene00018064 | cdc-73   | F35F11.1  | -0.0969699532327279  |
| AGIWUR4520;AGIWUR41674                                      |    |    |         |         |                |          |           |                      |

|                                                                         |    |    |         |         |                 |          |          |                      |             |
|-------------------------------------------------------------------------|----|----|---------|---------|-----------------|----------|----------|----------------------|-------------|
| N2                                                                      | CT | IV | 4047937 | 4049448 | WBGene00003955  | pcn-1    | W03D2.4  | -0.00721718733256171 |             |
| AGIWUR1229;AGIWUR1452;AGIWUR10565;AGIWUR13258;AGIWUR27822;AGIWUR40277   |    |    |         |         |                 |          |          |                      |             |
| N2                                                                      | CT | IV | 4050049 | 4051639 | WBGene00006951  | wrt-5    | W03D2.5  | -0.0820133801668312  | AGIWUR29565 |
| N2                                                                      | CT | IV | 4056586 | 4058243 | WBGene00020981  | W03D2.6  | W03D2.6  | 0.0101812176773208   | AGIWUR34941 |
| N2                                                                      | CT | IV | 4062567 | 4063673 | WBGene00020982  | ilys-6   | W03D2.7  | -0.116561617363301   | AGIWUR15927 |
| N2                                                                      | CT | IV | 4065905 | 4068412 | WBGene00006173  | str-122  | W03D2.10 | -0.116120360878416   |             |
| AGIWUR12209                                                             |    |    |         |         |                 |          |          |                      |             |
| N2                                                                      | CT | IV | 4068780 | 4069548 | WBGene00020979  | fbxb-55  | W03D2.2  | 0.137345792285064    | AGIWUR30957 |
| N2                                                                      | CT | IV | 4072327 | 4077644 | WBGene00004157  | pqn-75   | W03D2.1  | -0.0775156556310108  | AGIWUR43269 |
| N2                                                                      | CT | IV | 4077671 | 4078953 | WBGene00016437  | C35B1.8  | C35B1.8  | -0.107331217290475   |             |
| AGIWUR13784;AGIWUR23914;AGIWUR29188;AGIWUR29380;AGIWUR30138;AGIWUR44411 |    |    |         |         |                 |          |          |                      |             |
| N2                                                                      | CT | IV | 4079804 | 4080207 | WBGene00016434  | C35B1.4  | C35B1.4  | 0.20819002369543     | AGIWUR17839 |
| N2                                                                      | CT | IV | 4081136 | 4081348 | WBGene00016433  | C35B1.3  | C35B1.3  | -0.425126467953573   |             |
| AGIWUR12609;AGIWUR19585;AGIWUR39717                                     |    |    |         |         |                 |          |          |                      |             |
| N2                                                                      | CT | IV | 4083603 | 4084209 | WBGene00016435  | C35B1.5  | C35B1.5  | 0.0106314924825952   | AGIWUR696   |
| N2                                                                      | CT | IV | 4086212 | 4102907 | WBGene00016432  | C35B1.2  | C35B1.2  | -0.266778568549864   |             |
| AGIWUR34404;AGIWUR40227                                                 |    |    |         |         |                 |          |          |                      |             |
| N2                                                                      | CT | IV | 4103020 | 4106220 | WBGene00006701  | ubc-1    | C35B1.1  | -0.0862963842898914  |             |
| AGIWUR11827;AGIWUR34071                                                 |    |    |         |         |                 |          |          |                      |             |
| N2                                                                      | CT | IV | 4109067 | 4110471 | WBGene00016436  | C35B1.7  | C35B1.7  | -0.138465830512272   | AGIWUR19562 |
| N2                                                                      | CT | IV | 4110544 | 4112487 | WBGene00044477  | F49F1.14 | F49F1.14 | 0.175946038991718    |             |
| AGIWUR17789;AGIWUR24698;AGIWUR25509;AGIWUR28648                         |    |    |         |         |                 |          |          |                      |             |
| N2                                                                      | CT | IV | 4117732 | 4119179 | WBGene00018643  | drd-50   | F49F1.1  | -0.195708568181459   | AGIWUR14882 |
| N2                                                                      | CT | IV | 4119460 | 4120399 | WBGene00018645  | F49F1.5  | F49F1.5  | -0.240875589393845   | AGIWUR27910 |
| N2                                                                      | CT | IV | 4121342 | 4123166 | WBGene00018646  | mul-1    | F49F1.6  | 0.249714625032516    |             |
| AGIWUR37789;AGIWUR40067                                                 |    |    |         |         |                 |          |          |                      |             |
| N2                                                                      | CT | IV | 4123525 | 4125757 | WBGene00018647  | F49F1.7  | F49F1.7  | 0.347955395638493    | AGIWUR4538  |
| N2                                                                      | CT | IV | 4130503 | 4134631 | WBGene00018648  | F49F1.8  | F49F1.8  | -0.133506035571542   |             |
| AGIWUR23704;AGIWUR29660                                                 |    |    |         |         |                 |          |          |                      |             |
| N2                                                                      | CT | IV | 4138408 | 4139122 | WBGene00018650  | F49F1.10 | F49F1.10 | -0.0941221647868016  |             |
| AGIWUR29551                                                             |    |    |         |         |                 |          |          |                      |             |
| N2                                                                      | CT | IV | 4139685 | 4140363 | WBGene000235368 | F49F1.18 | F49F1.18 | -0.343874635288891   |             |
| AGIWUR21703                                                             |    |    |         |         |                 |          |          |                      |             |
| N2                                                                      | CT | IV | 4141734 | 4143019 | WBGene00018652  | F49F1.12 | F49F1.12 | 0.243534593828858    |             |
| AGIWUR15653;AGIWUR25495                                                 |    |    |         |         |                 |          |          |                      |             |
| N2                                                                      | CT | IV | 4145084 | 4147064 | WBGene00019933  | R07C12.3 | R07C12.3 | -0.118870189303433   |             |
| AGIWUR35115                                                             |    |    |         |         |                 |          |          |                      |             |
| N2                                                                      | CT | IV | 4148141 | 4150055 | WBGene00019932  | R07C12.2 | R07C12.2 | 0.187190054173305    |             |
| AGIWUR2270                                                              |    |    |         |         |                 |          |          |                      |             |

|                                                           |    |    |         |         |                |           |           |                      |
|-----------------------------------------------------------|----|----|---------|---------|----------------|-----------|-----------|----------------------|
| N2                                                        | CT | IV | 4152547 | 4154029 | WBGene00019931 | R07C12.1  | R07C12.1  | 0.217234387008607    |
| AGIWUR36113                                               |    |    |         |         |                |           |           |                      |
| N2                                                        | CT | IV | 4155273 | 4157185 | WBGene00219216 | K08D10.14 | K08D10.14 | 0.21877509569229     |
| AGIWUR27539                                               |    |    |         |         |                |           |           |                      |
| N2                                                        | CT | IV | 4157634 | 4161789 | WBGene00019532 | K08D10.9  | K08D10.9  | 0.302348084420622    |
| AGIWUR39171                                               |    |    |         |         |                |           |           |                      |
| N2                                                        | CT | IV | 4162517 | 4164481 | WBGene00019531 | scrm-5    | K08D10.8  | 0.185856733580847    |
| AGIWUR3106                                                |    |    |         |         |                |           |           |                      |
| N2                                                        | CT | IV | 4164692 | 4166230 | WBGene00019530 | scrm-8    | K08D10.7  | 0.266121290649586    |
| AGIWUR9450                                                |    |    |         |         |                |           |           |                      |
| N2                                                        | CT | IV | 4166541 | 4168120 | WBGene00235369 | K08D10.18 | K08D10.18 | 0.173394401796979    |
| AGIWUR35321                                               |    |    |         |         |                |           |           |                      |
| N2                                                        | CT | IV | 4168038 | 4169891 | WBGene00019529 | K08D10.5  | K08D10.5  | -0.156459329170586   |
| AGIWUR13883                                               |    |    |         |         |                |           |           |                      |
| N2                                                        | CT | IV | 4172076 | 4173988 | WBGene00004385 | rnp-2     | K08D10.4  | -0.13391405581574    |
| AGIWUR23011                                               |    |    |         |         |                |           |           |                      |
| N2                                                        | CT | IV | 4174089 | 4176279 | WBGene00004386 | rnp-3     | K08D10.3  | -0.191383884868467   |
| AGIWUR32748                                               |    |    |         |         |                |           |           |                      |
| N2                                                        | CT | IV | 4176388 | 4178364 | WBGene00001033 | dnj-15    | K08D10.2  | -0.165591573723148   |
| AGIWUR41604                                               |    |    |         |         |                |           |           |                      |
| N2                                                        | CT | IV | 4178463 | 4179531 | WBGene00019535 | tsen-34   | K08D10.12 | 0.0720760597639707   |
| AGIWUR8924;AGIWUR19233;AGIWUR22445                        |    |    |         |         |                |           |           |                      |
| N2                                                        | CT | IV | 4196173 | 4196695 | WBGene00044478 | K06B9.6   | K06B9.6   | -0.230638720835186   |
| AGIWUR1235;AGIWUR5457;AGIWUR15755;AGIWUR17854;AGIWUR29162 |    |    |         |         |                |           |           |                      |
| N2                                                        | CT | IV | 4199501 | 4204375 | WBGene00003938 | pax-2     | K06B9.5   | -0.0297540111665713  |
| AGIWUR38588                                               |    |    |         |         |                |           |           |                      |
| N2                                                        | CT | IV | 4205975 | 4218259 | WBGene00017934 | F30B5.4   | F30B5.4   | -0.0656787294176908  |
| AGIWUR34612                                               |    |    |         |         |                |           |           |                      |
| N2                                                        | CT | IV | 4219271 | 4220083 | WBGene00235371 | F30B5.11  | F30B5.11  | 0.275440400651568    |
| AGIWUR18478                                               |    |    |         |         |                |           |           |                      |
| N2                                                        | CT | IV | 4222183 | 4223140 | WBGene00044093 | srbc-72   | F30B5.9   | -0.00856526261097201 |
| AGIWUR5787;AGIWUR27677;AGIWUR41288                        |    |    |         |         |                |           |           |                      |
| N2                                                        | CT | IV | 4223857 | 4225946 | WBGene00044092 | srbc-71   | F30B5.8   | 0.113949905952069    |
| AGIWUR25867;AGIWUR30376                                   |    |    |         |         |                |           |           |                      |
| N2                                                        | CT | IV | 4226858 | 4228017 | WBGene00017935 | srbc-70   | F30B5.6   | -0.172599294695185   |
| AGIWUR22342                                               |    |    |         |         |                |           |           |                      |
| N2                                                        | CT | IV | 4229195 | 4231861 | WBGene00017936 | zipt-2.2  | F30B5.7   | -0.0925777665780387  |
| AGIWUR42862                                               |    |    |         |         |                |           |           |                      |
| N2                                                        | CT | IV | 4235614 | 4236710 | WBGene00001074 | dpy-13    | F30B5.1   | 0.0232384436480428   |
| AGIWUR16246;AGIWUR43234                                   |    |    |         |         |                |           |           |                      |
| N2                                                        | CT | IV | 4239853 | 4240855 | WBGene00023279 | F36A4.9   | F36A4.9   | -0.0925051285416898  |
| AGIWUR6068;AGIWUR29161                                    |    |    |         |         |                |           |           |                      |

|                                                                         |    |    |         |         |                |          |          |                     |                     |             |
|-------------------------------------------------------------------------|----|----|---------|---------|----------------|----------|----------|---------------------|---------------------|-------------|
| N2                                                                      | CT | IV | 4243548 | 4244610 | WBGene00000611 | col-34   | F36A4.10 |                     | 0.0806311394442201  |             |
| AGIWUR6058                                                              |    |    |         |         |                |          |          |                     |                     |             |
| N2                                                                      | CT | IV | 4244956 | 4245620 | WBGene00018086 | F36A4.11 | F36A4.11 |                     | -0.347265453355905  |             |
| AGIWUR22161                                                             |    |    |         |         |                |          |          |                     |                     |             |
| N2                                                                      | CT | IV | 4246760 | 4247486 | WBGene00018085 | ttr-20   | F36A4.8  | -0.0984487507800615 |                     | AGIWUR31794 |
| N2                                                                      | CT | IV | 4248020 | 4258173 | WBGene00000123 | ama-1    | F36A4.7  | 0.0462811501012643  |                     |             |
| AGIWUR3117;AGIWUR13557;AGIWUR21122;AGIWUR27884;AGIWUR30437;AGIWUR40528  |    |    |         |         |                |          |          |                     |                     |             |
| N2                                                                      | CT | IV | 4263293 | 4265202 | WBGene00000610 | col-33   | F36A4.6  | 0.198304894283499   |                     | AGIWUR7365  |
| N2                                                                      | CT | IV | 4265524 | 4266598 | WBGene00018084 | F36A4.5  | F36A4.5  | -0.0663724135805523 |                     | AGIWUR32046 |
| N2                                                                      | CT | IV | 4267582 | 4268236 | WBGene00018083 | F36A4.4  | F36A4.4  | 0.0481854674310291  |                     | AGIWUR41627 |
| N2                                                                      | CT | IV | 4269608 | 4270186 | WBGene00018082 | F36A4.3  | F36A4.3  | 0.168729078403457   |                     | AGIWUR2033  |
| N2                                                                      | CT | IV | 4271215 | 4271820 | WBGene00018081 | F36A4.2  | F36A4.2  | 0.252086550999088   |                     |             |
| AGIWUR6627;AGIWUR15954;AGIWUR37357                                      |    |    |         |         |                |          |          |                     |                     |             |
| N2                                                                      | CT | IV | 4272473 | 4272899 | WBGene00018080 | F36A4.1  | F36A4.1  | 0.0100194522577439  |                     | AGIWUR37819 |
| N2                                                                      | CT | IV | 4274341 | 4277875 | WBGene00003668 | nhr-78   | F36A4.14 |                     | -0.223025887641151  |             |
| AGIWUR11194                                                             |    |    |         |         |                |          |          |                     |                     |             |
| N2                                                                      | CT | IV | 4278825 | 4284120 | WBGene00017487 | F15E6.6  | F15E6.6  | 0.202804971410078   |                     | AGIWUR27430 |
| N2                                                                      | CT | IV | 4285403 | 4288432 | WBGene00005715 | srv-4    | F15E6.7  | 0.194917377900821   |                     |             |
| AGIWUR4587;AGIWUR9840;AGIWUR33733                                       |    |    |         |         |                |          |          |                     |                     |             |
| N2                                                                      | CT | IV | 4289567 | 4290061 | WBGene00017486 | F15E6.5  | F15E6.5  | 0.263844486529345   |                     | AGIWUR24506 |
| N2                                                                      | CT | IV | 4290189 | 4290703 | WBGene00017488 | dct-7    | F15E6.8  | 0.129521988541802   |                     | AGIWUR18791 |
| N2                                                                      | CT | IV | 4291467 | 4291872 | WBGene00017485 | F15E6.4  | F15E6.4  | 0.303968183124555   |                     |             |
| AGIWUR10390;AGIWUR18519;AGIWUR29557;AGIWUR30230;AGIWUR37617;AGIWUR43915 |    |    |         |         |                |          |          |                     |                     |             |
| N2                                                                      | CT | IV | 4292869 | 4293611 | WBGene00044479 | F15E6.10 | F15E6.10 |                     | 0.023779724973803   |             |
| AGIWUR14420;AGIWUR18856;AGIWUR23310;AGIWUR31892;AGIWUR36814             |    |    |         |         |                |          |          |                     |                     |             |
| N2                                                                      | CT | IV | 4293620 | 4299083 | WBGene00017489 | F15E6.9  | F15E6.9  | -0.0754541669688713 |                     | AGIWUR4362  |
| N2                                                                      | CT | IV | 4301308 | 4304437 | WBGene00017483 | lgc-22   | F15E6.2  | 0.0976614015107913  |                     | AGIWUR23008 |
| N2                                                                      | CT | IV | 4326656 | 4332018 | WBGene00020972 | trp1-2   | W03B1.2  | 0.0492423674702742  |                     | AGIWUR25968 |
| N2                                                                      | CT | IV | 4332692 | 4335372 | WBGene00020973 | W03B1.3  | W03B1.3  | 0.096343195492369   |                     | AGIWUR32449 |
| N2                                                                      | CT | IV | 4336834 | 4341304 | WBGene00020976 | oac-51   | W03B1.7  | -0.0719353701671204 |                     |             |
| AGIWUR63;AGIWUR4276                                                     |    |    |         |         |                |          |          |                     |                     |             |
| N2                                                                      | CT | IV | 4342357 | 4346558 | WBGene00020977 | oac-52   | W03B1.8  | -0.0851631878654704 |                     | AGIWUR14080 |
| N2                                                                      | CT | IV | 4357631 | 4359936 | WBGene00005662 | sars-2   | W03B1.4  | -0.0539603694512092 |                     |             |
| AGIWUR1886;AGIWUR40320;AGIWUR44856                                      |    |    |         |         |                |          |          |                     |                     |             |
| N2                                                                      | CT | IV | 4359953 | 4360657 | WBGene00050916 | F55F10.3 | F55F10.3 |                     | 0.312199507830539   |             |
| AGIWUR16657;AGIWUR29416;AGIWUR41260                                     |    |    |         |         |                |          |          |                     |                     |             |
| N2                                                                      | CT | IV | 4360837 | 4386533 | WBGene00018898 | F55F10.1 | F55F10.1 |                     | -0.0718045953942443 |             |
| AGIWUR28847                                                             |    |    |         |         |                |          |          |                     |                     |             |
| N2                                                                      | CT | IV | 4386630 | 4388878 | WBGene00021286 | tal-d-1  | Y24D9A.8 |                     | 0.0319591391327334  |             |

AGIWUR1068;AGIWUR23705  
N2 CT IV 4389135 4390649 WBGene00004419 rpl-7A Y24D9A.4 -0.11274983489287  
AGIWUR8205  
N2 CT IV 4390848 4393403 WBGene00021282 set-21 Y24D9A.2 0.0983730775792218  
AGIWUR34746  
N2 CT IV 4394410 4415622 WBGene00021281 ell-1 Y24D9A.1 0.11096367273345  
AGIWUR632;AGIWUR12116  
N2 CT IV 4422339 4426566 WBGene00019950 clec-175 R08C7.6 0.102186752817236  
AGIWUR5192;AGIWUR14417;AGIWUR21071  
N2 CT IV 4427713 4429782 WBGene00006228 str-185 R08C7.7 0.10590137092395 AGIWUR27  
N2 CT IV 4433049 4434541 WBGene00019951 R08C7.8 R08C7.8 0.242305988125828 AGIWUR24643  
N2 CT IV 4435127 4437318 WBGene00019948 R08C7.4 R08C7.4 0.0121156538808709 AGIWUR1608  
N2 CT IV 4437786 4439290 WBGene00019952 fbx-74 R08C7.9 0.0745870992592375  
AGIWUR6404;AGIWUR13245;AGIWUR18904;AGIWUR24042;AGIWUR27521;AGIWUR30324  
N2 CT IV 4442399 4445876 WBGene00019953 wap-1 R08C7.10 -0.0780484099637606  
AGIWUR3049;AGIWUR3502;AGIWUR5857;AGIWUR6345;AGIWUR8110;AGIWUR14201;AGIWUR16332;AGIWUR20448;AGIWUR45027  
N2 CT IV 4445990 4446997 WBGene00019947 htz-1 R08C7.3 -0.0596746340624117  
AGIWUR35276;AGIWUR40345  
N2 CT IV 4447299 4449897 WBGene00019946 chat-1 R08C7.2 0.0462343202702247  
AGIWUR23617;AGIWUR24421  
N2 CT IV 4450000 4460027 WBGene00019955 R08C7.12 R08C7.12 0.0344420386244177  
AGIWUR26172;AGIWUR28842;AGIWUR31454;AGIWUR40599;AGIWUR43621  
N2 CT IV 4460179 4462061 WBGene00019718 M01H9.2 M01H9.2 0.0818146382263443 AGIWUR8857  
N2 CT IV 4465484 4468509 WBGene00019721 M01H9.5 M01H9.5 -0.20709383388942 AGIWUR11586  
N2 CT IV 4468505 4477059 WBGene00019719 M01H9.3 M01H9.3 0.172850799464083  
AGIWUR3461;AGIWUR16506;AGIWUR18811;AGIWUR37123;AGIWUR42973  
N2 CT IV 4479693 4482764 WBGene00019720 M01H9.4 M01H9.4 -0.213160523083359  
AGIWUR1939;AGIWUR17950;AGIWUR22449;AGIWUR29216;AGIWUR30278;AGIWUR36545  
N2 CT IV 4487028 4489000 WBGene00019717 trx-3 M01H9.1 -0.104719979077865 AGIWUR33279  
N2 CT IV 4489012 4506708 WBGene00022675 gbb-2 ZK180.1 0.0108107586263957  
AGIWUR3783;AGIWUR5291;AGIWUR12774;AGIWUR13601;AGIWUR20036;AGIWUR29856;AGIWUR31024;AGIWUR31657;AGIWUR32763;AGIWUR33247;AGIWUR33381;AGIWUR33807;AGIWUR35502;AGIWUR41532;AGIWUR42433  
N2 CT IV 4508499 4511320 WBGene00022677 ZK180.3 ZK180.3 -0.174132486413693  
AGIWUR25175;AGIWUR32103  
N2 CT IV 4511896 4513319 WBGene00022678 sar-1 ZK180.4 0.339835453573366 AGIWUR17236  
N2 CT IV 4515044 4517169 WBGene00022679 ZK180.5 ZK180.5 0.314050449217377  
AGIWUR13104;AGIWUR17731;AGIWUR25887;AGIWUR38271  
N2 CT IV 4520181 4525043 WBGene00022680 ZK180.6 ZK180.6 0.413206192346776 AGIWUR1519  
N2 CT IV 4528730 4530382 WBGene00022683 ZK185.3 ZK185.3 -0.0668015289235555 AGIWUR18708



|                                                                                                            |    |    |         |         |                |          |          |                     |             |
|------------------------------------------------------------------------------------------------------------|----|----|---------|---------|----------------|----------|----------|---------------------|-------------|
| N2                                                                                                         | CT | IV | 4531222 | 4533121 | WBGene00044480 | ZK185.4  | ZK185.4  | -0.417756601245052  |             |
| AGIWUR32050;AGIWUR33234                                                                                    |    |    |         |         |                |          |          |                     |             |
| N2                                                                                                         | CT | IV | 4536553 | 4541771 | WBGene00022682 | ZK185.2  | ZK185.2  | -0.113703316577299  | AGIWUR38270 |
| N2                                                                                                         | CT | IV | 4541769 | 4545918 | WBGene00044481 | ZK185.5  | ZK185.5  | -0.166104477855231  |             |
| AGIWUR5901;AGIWUR10425                                                                                     |    |    |         |         |                |          |          |                     |             |
| N2                                                                                                         | CT | IV | 4548553 | 4552742 | WBGene00022681 | ZK185.1  | ZK185.1  | -0.252590393371647  | AGIWUR11021 |
| N2                                                                                                         | CT | IV | 4562654 | 4565674 | WBGene00017901 | igeg-1   | F28E10.2 | -0.229823244414234  |             |
| AGIWUR35893                                                                                                |    |    |         |         |                |          |          |                     |             |
| N2                                                                                                         | CT | IV | 4566018 | 4567443 | WBGene00017902 | F28E10.4 | F28E10.4 | -0.0219330537758395 |             |
| AGIWUR500;AGIWUR10120;AGIWUR31071;AGIWUR32695;AGIWUR32757;AGIWUR32829                                      |    |    |         |         |                |          |          |                     |             |
| N2                                                                                                         | CT | IV | 4568841 | 4590297 | WBGene00017900 | F28E10.1 | F28E10.1 | -0.0158754298428216 |             |
| AGIWUR450;AGIWUR3642;AGIWUR15545;AGIWUR26942;AGIWUR33923;AGIWUR35572;AGIWUR36232;AGIWUR41759               |    |    |         |         |                |          |          |                     |             |
| N2                                                                                                         | CT | IV | 4595052 | 4595530 | WBGene00017596 | F19C7.6  | F19C7.6  | -0.132424067042978  | AGIWUR35427 |
| N2                                                                                                         | CT | IV | 4595958 | 4596732 | WBGene00017595 | F19C7.5  | F19C7.5  | 0.01217067076192    | AGIWUR33005 |
| N2                                                                                                         | CT | IV | 4605786 | 4608216 | WBGene00017591 | F19C7.1  | F19C7.1  | 0.110195690902547   | AGIWUR43965 |
| N2                                                                                                         | CT | IV | 4608201 | 4609679 | WBGene00000684 | col-110  | F19C7.7  | -0.120984345591342  |             |
| AGIWUR14499;AGIWUR24835                                                                                    |    |    |         |         |                |          |          |                     |             |
| N2                                                                                                         | CT | IV | 4610576 | 4638095 | WBGene00017597 | F19C7.8  | F19C7.8  | -0.0193768732033579 |             |
| AGIWUR16659;AGIWUR19393;AGIWUR23800;AGIWUR28813;AGIWUR29521                                                |    |    |         |         |                |          |          |                     |             |
| N2                                                                                                         | CT | IV | 4647202 | 4649743 | WBGene00017923 | F29B9.8  | F29B9.8  | 0.239809351777469   | AGIWUR11048 |
| N2                                                                                                         | CT | IV | 4649744 | 4650654 | WBGene00017922 | F29B9.7  | F29B9.7  | 0.220840002338592   | AGIWUR18836 |
| N2                                                                                                         | CT | IV | 4651044 | 4652468 | WBGene00006706 | ubc-9    | F29B9.6  | -0.0874552534216626 |             |
| AGIWUR18958;AGIWUR43174                                                                                    |    |    |         |         |                |          |          |                     |             |
| N2                                                                                                         | CT | IV | 4652459 | 4653159 | WBGene00017921 | F29B9.5  | F29B9.5  | -0.151842443292812  | AGIWUR26617 |
| N2                                                                                                         | CT | IV | 4653293 | 4655848 | WBGene00004205 | psr-1    | F29B9.4  | 0.0798492174826464  | AGIWUR21294 |
| N2                                                                                                         | CT | IV | 4655776 | 4657783 | WBGene00000685 | col-111  | F29B9.9  | 0.0688993465443799  |             |
| AGIWUR4023;AGIWUR27103;AGIWUR31068;AGIWUR31841;AGIWUR33074;AGIWUR37890;AGIWUR38286;AGIWUR39857;AGIWUR41390 |    |    |         |         |                |          |          |                     |             |
| N2                                                                                                         | CT | IV | 4659049 | 4659517 | WBGene00017924 | mrps-21  | F29B9.10 | -0.286196737779044  |             |
| AGIWUR3956                                                                                                 |    |    |         |         |                |          |          |                     |             |
| N2                                                                                                         | CT | IV | 4659521 | 4660203 | WBGene00017925 | F29B9.11 | F29B9.11 | -0.0502309209407228 |             |
| AGIWUR3042;AGIWUR27108;AGIWUR33457;AGIWUR35521;AGIWUR41724;AGIWUR43364                                     |    |    |         |         |                |          |          |                     |             |
| N2                                                                                                         | CT | IV | 4660991 | 4665204 | WBGene00017920 | jmjd-1.2 | F29B9.2  | -0.0846477262241603 |             |
| AGIWUR352;AGIWUR20412;AGIWUR21912                                                                          |    |    |         |         |                |          |          |                     |             |
| N2                                                                                                         | CT | IV | 4665251 | 4667293 | WBGene00017919 | F29B9.1  | F29B9.1  | 0.614326030604426   | AGIWUR28303 |
| N2                                                                                                         | CT | IV | 4669529 | 4671992 | WBGene00044482 | F29B9.12 | F29B9.12 | 0.158186523136836   |             |
| AGIWUR10537                                                                                                |    |    |         |         |                |          |          |                     |             |
| N2                                                                                                         | CT | IV | 4679018 | 4685168 | WBGene00020678 | T22B11.4 | T22B11.4 | 0.0446701577025337  |             |
| AGIWUR181;AGIWUR5515;AGIWUR9417;AGIWUR13970;AGIWUR23451;AGIWUR32601;AGIWUR33091                            |    |    |         |         |                |          |          |                     |             |
| N2                                                                                                         | CT | IV | 4688269 | 4691936 | WBGene00044620 | bus-4    | T22B11.2 | 0.139307260397213   |             |

|                                                                                                                                   |    |    |         |         |                |             |          |                     |             |
|-----------------------------------------------------------------------------------------------------------------------------------|----|----|---------|---------|----------------|-------------|----------|---------------------|-------------|
| AGIWUR34594                                                                                                                       |    |    |         |         |                |             |          |                     |             |
| N2                                                                                                                                | CT | IV | 4692793 | 4696826 | WBGene00020675 | T22B11.1    | T22B11.1 | -0.0423552013948774 |             |
| AGIWUR44942                                                                                                                       |    |    |         |         |                |             |          |                     |             |
| N2                                                                                                                                | CT | IV | 4696982 | 4704011 | WBGene00020679 | ogdh-1      | T22B11.5 | 0.345904271140584   |             |
| AGIWUR20048;AGIWUR28410                                                                                                           |    |    |         |         |                |             |          |                     |             |
| N2                                                                                                                                | CT | IV | 4706777 | 4710755 | WBGene00019543 | cif-1       | K08F11.3 | 0.0736445815198321  |             |
| AGIWUR36907;AGIWUR44735                                                                                                           |    |    |         |         |                |             |          |                     |             |
| N2                                                                                                                                | CT | IV | 4710861 | 4712624 | WBGene00006968 | yars-2      | K08F11.4 | -0.0063296988967938 |             |
| AGIWUR1336;AGIWUR23561;AGIWUR33150                                                                                                |    |    |         |         |                |             |          |                     |             |
| N2                                                                                                                                | CT | IV | 4712825 | 4715807 | WBGene00019544 | miro-1      | K08F11.5 | -0.0214360776497013 |             |
| AGIWUR13942;AGIWUR43333                                                                                                           |    |    |         |         |                |             |          |                     |             |
| N2                                                                                                                                | CT | IV | 4724862 | 4725332 | WBGene00019541 | K08F11.1    | K08F11.1 | -0.0947767729743703 |             |
| AGIWUR16904                                                                                                                       |    |    |         |         |                |             |          |                     |             |
| N2                                                                                                                                | CT | IV | 4730636 | 4732750 | WBGene00017118 | E04A4.3     | E04A4.3  | 0.028488236190789   | AGIWUR23548 |
| N2                                                                                                                                | CT | IV | 4734305 | 4735876 | WBGene00017117 | fbxb-80     | E04A4.2  | -0.358789278133347  | AGIWUR35293 |
| N2                                                                                                                                | CT | IV | 4737558 | 4738734 | WBGene00017116 | fbxb-78     | E04A4.1  | 0.247301594600274   | AGIWUR23218 |
| N2                                                                                                                                | CT | IV | 4739490 | 4744269 | WBGene00001983 | hoe-1       | E04A4.4  | 0.0877137658883349  | AGIWUR18753 |
| N2                                                                                                                                | CT | IV | 4744377 | 4745492 | WBGene00017119 | timmm-17B.1 | E04A4.5  | 0.055134856756009   |             |
| AGIWUR16514                                                                                                                       |    |    |         |         |                |             |          |                     |             |
| N2                                                                                                                                | CT | IV | 4745825 | 4747832 | WBGene00017120 | tctn-1      | E04A4.6  | -0.167597840014462  | AGIWUR11344 |
| N2                                                                                                                                | CT | IV | 4747901 | 4749113 | WBGene00017121 | cyc-2.1     | E04A4.7  | -0.118768642505444  |             |
| AGIWUR322;AGIWUR10063;AGIWUR11494;AGIWUR16074;AGIWUR24498;AGIWUR26130;AGIWUR28305;AGIWUR30014;AGIWUR36824;AGIWUR38385;AGIWUR43982 |    |    |         |         |                |             |          |                     |             |
| N2                                                                                                                                | CT | IV | 4749012 | 4749778 | WBGene00004432 | rp1-20      | E04A4.8  | 0.0959350027874351  |             |
| AGIWUR2616;AGIWUR4332;AGIWUR15631;AGIWUR18334;AGIWUR27175;AGIWUR37198                                                             |    |    |         |         |                |             |          |                     |             |
| N2                                                                                                                                | CT | IV | 4750240 | 4751491 | WBGene00021202 | Y17G9B.5    | Y17G9B.5 | -0.231604077143221  |             |
| AGIWUR26981                                                                                                                       |    |    |         |         |                |             |          |                     |             |
| N2                                                                                                                                | CT | IV | 4752119 | 4753163 | WBGene00021201 | Y17G9B.4    | Y17G9B.4 | 0.178241940091166   |             |
| AGIWUR20135                                                                                                                       |    |    |         |         |                |             |          |                     |             |
| N2                                                                                                                                | CT | IV | 4754199 | 4756157 | WBGene00021204 | fbxb-77     | Y17G9B.7 | -0.156218770919676  |             |
| AGIWUR5085;AGIWUR28574                                                                                                            |    |    |         |         |                |             |          |                     |             |
| N2                                                                                                                                | CT | IV | 4757179 | 4758840 | WBGene00021205 | Y17G9B.8    | Y17G9B.8 | -0.105226140278468  |             |
| AGIWUR17568                                                                                                                       |    |    |         |         |                |             |          |                     |             |
| N2                                                                                                                                | CT | IV | 4758982 | 4760428 | WBGene00003216 | memi-1      | Y17G9B.9 | -0.0579908900702026 |             |
| AGIWUR30173                                                                                                                       |    |    |         |         |                |             |          |                     |             |
| N2                                                                                                                                | CT | IV | 4761049 | 4762856 | WBGene00021200 | cyp-31A3    | Y17G9B.3 | 0.062697306012911   |             |
| AGIWUR18877                                                                                                                       |    |    |         |         |                |             |          |                     |             |
| N2                                                                                                                                | CT | IV | 4764182 | 4764602 | WBGene00021199 | Y17G9B.2    | Y17G9B.2 | -0.318817820748333  |             |
| AGIWUR35670                                                                                                                       |    |    |         |         |                |             |          |                     |             |

|                                                 |    |    |         |         |                 |           |           |                     |
|-------------------------------------------------|----|----|---------|---------|-----------------|-----------|-----------|---------------------|
| N2                                              | CT | IV | 4764748 | 4767839 | WBGene00021198  | Y17G9B.1  | Y17G9B.1  | 0.128032782004604   |
| AGIWUR6283;AGIWUR20407;AGIWUR41861              |    |    |         |         |                 |           |           |                     |
| N2                                              | CT | IV | 4772092 | 4775133 | WBGene00020004  | R11E3.2   | R11E3.2   | -0.0378597413040165 |
| N2                                              | CT | IV | 4775242 | 4776096 | WBGene000235374 | R11E3.19  | R11E3.19  | -0.385483998782119  |
| AGIWUR17262                                     |    |    |         |         |                 |           |           |                     |
| N2                                              | CT | IV | 4784233 | 4788692 | WBGene00003694  | nhr-104   | R11E3.5   | -0.0521297407405603 |
| AGIWUR26636;AGIWUR33735                         |    |    |         |         |                 |           |           |                     |
| N2                                              | CT | IV | 4789503 | 4791983 | WBGene00020003  | R11E3.1   | R11E3.1   | 0.200066596629648   |
| AGIWUR18867;AGIWUR23382                         |    |    |         |         |                 |           |           |                     |
| N2                                              | CT | IV | 4793202 | 4799378 | WBGene00001324  | eor-1     | R11E3.6   | 0.151391631598678   |
| AGIWUR23443;AGIWUR36822                         |    |    |         |         |                 |           |           |                     |
| N2                                              | CT | IV | 4799388 | 4802592 | WBGene00001060  | dpf-7     | R11E3.7   | -0.0469226361097084 |
| AGIWUR20072;AGIWUR31018                         |    |    |         |         |                 |           |           |                     |
| N2                                              | CT | IV | 4802702 | 4806586 | WBGene00001058  | dpf-5     | R11E3.8   | 0.229699953210769   |
| AGIWUR4930;AGIWUR6015;AGIWUR20859;AGIWUR21375   |    |    |         |         |                 |           |           |                     |
| N2                                              | CT | IV | 4806697 | 4807319 | WBGene00044483  | H06H21.11 | H06H21.11 |                     |
| -0.00182356434093833 AGIWUR21364                |    |    |         |         |                 |           |           |                     |
| N2                                              | CT | IV | 4807426 | 4809976 | WBGene00019163  | ubxn-6    | H06H21.6  | -0.146357551722001  |
| AGIWUR12053;AGIWUR32125;AGIWUR41983;AGIWUR43407 |    |    |         |         |                 |           |           |                     |
| N2                                              | CT | IV | 4810934 | 4811983 | WBGene00019162  | eif-1.A   | H06H21.3  | 0.134146797886403   |
| AGIWUR17674                                     |    |    |         |         |                 |           |           |                     |
| N2                                              | CT | IV | 4812075 | 4814029 | WBGene00005842  | srw-95    | H06H21.2  | 0.167238089387173   |
| AGIWUR17290                                     |    |    |         |         |                 |           |           |                     |
| N2                                              | CT | IV | 4817388 | 4821131 | WBGene00019164  | H06H21.8  | H06H21.8  | -0.196313013996233  |
| AGIWUR3945;AGIWUR19556                          |    |    |         |         |                 |           |           |                     |
| N2                                              | CT | IV | 4825488 | 4827281 | WBGene00019165  | mpz-4     | H06H21.9  | 0.221008003274449   |
| AGIWUR14973                                     |    |    |         |         |                 |           |           |                     |
| N2                                              | CT | IV | 4827853 | 4846893 | WBGene00019166  | tat-2     | H06H21.10 | 0.037900239330229   |
| AGIWUR3450                                      |    |    |         |         |                 |           |           |                     |
| N2                                              | CT | IV | 4854394 | 4856287 | WBGene00021195  | Y17G9A.2  | Y17G9A.2  | -0.0757568903410579 |
| AGIWUR6330;AGIWUR26489;AGIWUR39776              |    |    |         |         |                 |           |           |                     |
| N2                                              | CT | IV | 4859255 | 4860255 | WBGene000235375 | Y17G9A.91 | Y17G9A.91 | 0.183385338371253   |
| AGIWUR30819                                     |    |    |         |         |                 |           |           |                     |
| N2                                              | CT | IV | 4862185 | 4864141 | WBGene00006217  | str-173   | Y17G9A.1  | -0.157078582076075  |
| AGIWUR43543                                     |    |    |         |         |                 |           |           |                     |
| N2                                              | CT | IV | 4864978 | 4867659 | WBGene00006216  | str-172   | Y17G9A.5  | -0.267556920220484  |
| AGIWUR33017                                     |    |    |         |         |                 |           |           |                     |
| N2                                              | CT | IV | 4872267 | 4874703 | WBGene00006218  | str-174   | Y17G9A.7  | -0.396963454464602  |
| AGIWUR26745                                     |    |    |         |         |                 |           |           |                     |

|                                                            |    |    |         |         |                |          |          |                     |             |
|------------------------------------------------------------|----|----|---------|---------|----------------|----------|----------|---------------------|-------------|
| N2                                                         | CT | IV | 4877402 | 4880315 | WBGene00006214 | str-170  | T08B6.7  | -0.168979731886392  | AGIWUR41481 |
| N2                                                         | CT | IV | 4884296 | 4886897 | WBGene00006211 | str-166  | T08B6.6  | 0.0272830413318665  | AGIWUR31779 |
| N2                                                         | CT | IV | 4886885 | 4887358 | WBGene00020351 | T08B6.1  | T08B6.1  | 0.126674681653179   | AGIWUR34344 |
| N2                                                         | CT | IV | 4889918 | 4890672 | WBGene00020354 | T08B6.5  | T08B6.5  | 0.0593638621819963  | AGIWUR30916 |
| N2                                                         | CT | IV | 4890843 | 4894085 | WBGene00020356 | T08B6.9  | T08B6.9  | 0.534316884938377   | AGIWUR3587  |
| N2                                                         | CT | IV | 4894370 | 4897043 | WBGene00020352 | T08B6.2  | T08B6.2  | -0.228619226691896  | AGIWUR36141 |
| N2                                                         | CT | IV | 4902422 | 4904061 | WBGene00006206 | str-161  | T08B6.3  | -0.0916477437433283 | AGIWUR22867 |
| N2                                                         | CT | IV | 4905658 | 4908498 | WBGene00020353 | T08B6.4  | T08B6.4  | 0.297391668516333   | AGIWUR25964 |
| N2                                                         | CT | IV | 4909339 | 4910962 | WBGene00006204 | str-159  | Y9C9A.18 | 0.0696248397946557  |             |
| AGIWUR10470;AGIWUR14777                                    |    |    |         |         |                |          |          |                     |             |
| N2                                                         | CT | IV | 4911320 | 4912780 | WBGene00021184 | Y9C9A.17 | Y9C9A.17 | 0.106008818789546   |             |
| AGIWUR25700                                                |    |    |         |         |                |          |          |                     |             |
| N2                                                         | CT | IV | 4915989 | 4917553 | WBGene00006201 | str-155  | Y9C9A.10 | 0.0830541762100765  |             |
| AGIWUR21959                                                |    |    |         |         |                |          |          |                     |             |
| N2                                                         | CT | IV | 4918074 | 4919632 | WBGene00006203 | str-158  | Y9C9A.9  | -0.173946416106255  |             |
| AGIWUR11250;AGIWUR15567;AGIWUR22659                        |    |    |         |         |                |          |          |                     |             |
| N2                                                         | CT | IV | 4930365 | 4932217 | WBGene00021178 | Y9C9A.8  | Y9C9A.8  | -0.150013048981661  | AGIWUR14229 |
| N2                                                         | CT | IV | 4934414 | 4936643 | WBGene00006199 | str-153  | Y9C9A.7  | 0.0235646490185832  | AGIWUR15918 |
| N2                                                         | CT | IV | 4936655 | 4938011 | WBGene00021179 | fbxa-86  | Y9C9A.12 | 0.457149773969409   |             |
| AGIWUR44600                                                |    |    |         |         |                |          |          |                     |             |
| N2                                                         | CT | IV | 4939315 | 4941506 | WBGene00006212 | str-168  | Y9C9A.6  | 0.184425461971459   |             |
| AGIWUR1074;AGIWUR27267;AGIWUR41906                         |    |    |         |         |                |          |          |                     |             |
| N2                                                         | CT | IV | 4941981 | 4944588 | WBGene00021177 | Y9C9A.5  | Y9C9A.5  | 0.101707630175598   | AGIWUR25885 |
| N2                                                         | CT | IV | 4946105 | 4948518 | WBGene00006213 | str-169  | Y9C9A.4  | -0.0959434957141529 |             |
| AGIWUR13121;AGIWUR15955                                    |    |    |         |         |                |          |          |                     |             |
| N2                                                         | CT | IV | 4954187 | 4958206 | WBGene00006208 | str-163  | Y9C9A.3  | -0.0805188617078159 |             |
| AGIWUR3410;AGIWUR26106;AGIWUR29004                         |    |    |         |         |                |          |          |                     |             |
| N2                                                         | CT | IV | 4960735 | 4963147 | WBGene00006209 | str-164  | Y9C9A.2  | 0.0867664432261197  | AGIWUR26339 |
| N2                                                         | CT | IV | 4963883 | 4965369 | WBGene00021176 | Y9C9A.1  | Y9C9A.1  | -0.112783764268993  | AGIWUR19033 |
| N2                                                         | CT | IV | 4966097 | 4969540 | WBGene00021180 | Y9C9A.13 | Y9C9A.13 | -0.148511131480227  |             |
| AGIWUR32536                                                |    |    |         |         |                |          |          |                     |             |
| N2                                                         | CT | IV | 4969840 | 4971145 | WBGene00021181 | srz-27   | Y9C9A.14 | -3.2074885019089    |             |
| AGIWUR18744                                                |    |    |         |         |                |          |          |                     |             |
| N2                                                         | CT | IV | 4971671 | 4973203 | WBGene00021182 | srz-28   | Y9C9A.15 | -0.255647879337994  |             |
| AGIWUR11092                                                |    |    |         |         |                |          |          |                     |             |
| N2                                                         | CT | IV | 4973622 | 4976089 | WBGene00021183 | Y9C9A.16 | Y9C9A.16 | 0.105466837698197   |             |
| AGIWUR10233;AGIWUR14926;AGIWUR24909                        |    |    |         |         |                |          |          |                     |             |
| N2                                                         | CT | IV | 4977201 | 4978084 | WBGene00017112 | E03H12.5 | E03H12.5 | 0.417749801567638   |             |
| AGIWUR2197;AGIWUR17016;AGIWUR28451;AGIWUR35167;AGIWUR38500 |    |    |         |         |                |          |          |                     |             |

|                                                             |    |    |         |         |                |          |          |                     |             |
|-------------------------------------------------------------|----|----|---------|---------|----------------|----------|----------|---------------------|-------------|
| N2                                                          | CT | IV | 4979789 | 4981127 | WBGene00017113 | srz-24   | E03H12.6 | 0.0886008457337359  |             |
| AGIWUR17310;AGIWUR19064;AGIWUR20580                         |    |    |         |         |                |          |          |                     |             |
| N2                                                          | CT | IV | 4982596 | 4983892 | WBGene00017111 | E03H12.4 | E03H12.4 | -0.341459128181927  |             |
| AGIWUR11663                                                 |    |    |         |         |                |          |          |                     |             |
| N2                                                          | CT | IV | 4984046 | 4985375 | WBGene00017110 | clcc-176 | E03H12.3 | -0.0248847226973972 |             |
| AGIWUR27091                                                 |    |    |         |         |                |          |          |                     |             |
| N2                                                          | CT | IV | 4986546 | 4987725 | WBGene00017109 | clcc-177 | E03H12.2 | -0.0492848957829217 |             |
| AGIWUR12062                                                 |    |    |         |         |                |          |          |                     |             |
| N2                                                          | CT | IV | 4987702 | 4988642 | WBGene00017114 | E03H12.7 | E03H12.7 | 0.192483470733297   |             |
| AGIWUR45032                                                 |    |    |         |         |                |          |          |                     |             |
| N2                                                          | CT | IV | 4989065 | 4989717 | WBGene00023265 | E03H12.8 | E03H12.8 | 0.0193434364340108  |             |
| AGIWUR18233;AGIWUR28268;AGIWUR31646;AGIWUR32544;AGIWUR39099 |    |    |         |         |                |          |          |                     |             |
| N2                                                          | CT | IV | 4990255 | 4991433 | WBGene00017115 | E03H12.9 | E03H12.9 | 0.00419506693405047 |             |
| AGIWUR469                                                   |    |    |         |         |                |          |          |                     |             |
| N2                                                          | CT | IV | 4992389 | 4993857 | WBGene00006207 | str-162  | E03H12.1 | 0.105226023857952   |             |
| AGIWUR15331                                                 |    |    |         |         |                |          |          |                     |             |
| N2                                                          | CT | IV | 4996142 | 4997559 | WBGene00006051 | ssq-2    | T28H11.5 | 0.210452235680687   |             |
| AGIWUR44466                                                 |    |    |         |         |                |          |          |                     |             |
| N2                                                          | CT | IV | 4999434 | 4999853 | WBGene00006040 | ssp-11   | T28H11.6 | 0.0794581031710369  |             |
| AGIWUR6740                                                  |    |    |         |         |                |          |          |                     |             |
| N2                                                          | CT | IV | 5002752 | 5005418 | WBGene00003976 | pes-1    | T28H11.4 | -0.0798664849715376 |             |
| AGIWUR30072                                                 |    |    |         |         |                |          |          |                     |             |
| N2                                                          | CT | IV | 5008678 | 5010789 | WBGene00005639 | srm-2    | T28H11.3 | -0.314347516315703  |             |
| AGIWUR22655                                                 |    |    |         |         |                |          |          |                     |             |
| N2                                                          | CT | IV | 5012549 | 5014604 | WBGene00005638 | srm-1    | T28H11.2 | -0.113481457283926  |             |
| AGIWUR3163                                                  |    |    |         |         |                |          |          |                     |             |
| N2                                                          | CT | IV | 5017989 | 5020654 | WBGene00020906 | T28H11.8 | T28H11.8 | 0.281297560360956   |             |
| AGIWUR17781                                                 |    |    |         |         |                |          |          |                     |             |
| N2                                                          | CT | IV | 5021188 | 5025746 | WBGene00220250 | C09B9.85 | C09B9.85 | 0.135728075145566   |             |
| AGIWUR21248;AGIWUR39960                                     |    |    |         |         |                |          |          |                     |             |
| N2                                                          | CT | IV | 5029250 | 5031046 | WBGene00015627 | C09B9.2  | C09B9.2  | 0.234472576725755   | AGIWUR33878 |
| N2                                                          | CT | IV | 5031596 | 5033395 | WBGene00015629 | C09B9.4  | C09B9.4  | 0.183105277842758   | AGIWUR41775 |
| N2                                                          | CT | IV | 5037815 | 5040495 | WBGene00015626 | C09B9.1  | C09B9.1  | -0.0988695317287931 |             |
| AGIWUR7046;AGIWUR28974;AGIWUR34100                          |    |    |         |         |                |          |          |                     |             |
| N2                                                          | CT | IV | 5040859 | 5045485 | WBGene00044484 | hot-9    | C09B9.8  | 0.0927157137125842  |             |
| AGIWUR33253;AGIWUR38760                                     |    |    |         |         |                |          |          |                     |             |
| N2                                                          | CT | IV | 5056973 | 5061012 | WBGene00015630 | C09B9.7  | C09B9.7  | -0.110402882362797  | AGIWUR22172 |
| N2                                                          | CT | IV | 5083303 | 5086887 | WBGene00015330 | C02B10.5 | C02B10.5 | 0.0953266369127546  |             |
| AGIWUR12136;AGIWUR16791;AGIWUR30192                         |    |    |         |         |                |          |          |                     |             |

|                                                                                                                               |    |    |         |         |                |            |            |                     |             |
|-------------------------------------------------------------------------------------------------------------------------------|----|----|---------|---------|----------------|------------|------------|---------------------|-------------|
| N2                                                                                                                            | CT | IV | 5086839 | 5088883 | WBGene00015326 | ivd-1      | C02B10.1   | 0.282766569032495   |             |
| AGIWUR9354;AGIWUR17617;AGIWUR18265;AGIWUR20484;AGIWUR26324;AGIWUR27425;AGIWUR35957;AGIWUR42479                                |    |    |         |         |                |            |            |                     |             |
| N2                                                                                                                            | CT | IV | 5090243 | 5091043 | WBGene00015327 | snpn-1     | C02B10.2   | -0.184161293775038  |             |
| AGIWUR16347                                                                                                                   |    |    |         |         |                |            |            |                     |             |
| N2                                                                                                                            | CT | IV | 5091586 | 5092807 | WBGene00015329 | C02B10.4   | C02B10.4   | -0.135093540611406  |             |
| AGIWUR7850;AGIWUR23239;AGIWUR33462                                                                                            |    |    |         |         |                |            |            |                     |             |
| N2                                                                                                                            | CT | IV | 5092823 | 5103279 | WBGene00015328 | C02B10.3   | C02B10.3   | -0.0748507905429765 |             |
| AGIWUR17458;AGIWUR21441;AGIWUR22579;AGIWUR29397;AGIWUR32557;AGIWUR37173                                                       |    |    |         |         |                |            |            |                     |             |
| N2                                                                                                                            | CT | IV | 5111839 | 5112917 | WBGene00014997 | AC7.3      | AC7.3      | -0.082156051011224  | AGIWUR5318  |
| N2                                                                                                                            | CT | IV | 5112929 | 5122019 | WBGene00006428 | tkr-3      | AC7.1      | 0.106585602868453   | AGIWUR3307  |
| N2                                                                                                                            | CT | IV | 5127006 | 5152485 | WBGene00004929 | soc-2      | AC7.2      | 0.00146737522699425 |             |
| AGIWUR7562;AGIWUR17527;AGIWUR17969;AGIWUR20865;AGIWUR22829;AGIWUR24095;AGIWUR29132                                            |    |    |         |         |                |            |            |                     |             |
| N2                                                                                                                            | CT | IV | 5159427 | 5160248 | WBGene00016057 | C24D10.6   | C24D10.6   | -0.176370165152653  |             |
| AGIWUR2577                                                                                                                    |    |    |         |         |                |            |            |                     |             |
| N2                                                                                                                            | CT | IV | 5160522 | 5161388 | WBGene00016055 | C24D10.4   | C24D10.4   | -0.145249637903143  |             |
| AGIWUR2286                                                                                                                    |    |    |         |         |                |            |            |                     |             |
| N2                                                                                                                            | CT | IV | 5162223 | 5162712 | WBGene00023243 | C24D10.3   | C24D10.3   | -0.552206144228435  |             |
| AGIWUR38800                                                                                                                   |    |    |         |         |                |            |            |                     |             |
| N2                                                                                                                            | CT | IV | 5162743 | 5163074 | WBGene00016058 | nspd-3     | C24D10.7   | 0.14835681584934    |             |
| AGIWUR5468                                                                                                                    |    |    |         |         |                |            |            |                     |             |
| N2                                                                                                                            | CT | IV | 5163293 | 5164351 | WBGene00016054 | C24D10.2   | C24D10.2   | 0.112999620730136   |             |
| AGIWUR653;AGIWUR1095;AGIWUR1370;AGIWUR2640;AGIWUR5782;AGIWUR12706;AGIWUR23865;AGIWUR26333;AGIWUR30473;AGIWUR31756;AGIWUR34688 |    |    |         |         |                |            |            |                     |             |
| N2                                                                                                                            | CT | IV | 5166330 | 5168427 | WBGene00016053 | C24D10.1   | C24D10.1   | 0.194655879232187   |             |
| AGIWUR4016                                                                                                                    |    |    |         |         |                |            |            |                     |             |
| N2                                                                                                                            | CT | IV | 5173280 | 5183708 | WBGene00002247 | lam-1      | W03F8.5    | 0.0158574836923364  |             |
| AGIWUR8912;AGIWUR20019;AGIWUR22298;AGIWUR26640;AGIWUR31449;AGIWUR36076;AGIWUR42853;AGIWUR43042                                |    |    |         |         |                |            |            |                     |             |
| N2                                                                                                                            | CT | IV | 5184123 | 5185240 | WBGene00020994 | W03F8.4    | W03F8.4    | -0.0309753039992344 | AGIWUR5806  |
| N2                                                                                                                            | CT | IV | 5185333 | 5189096 | WBGene00020993 | W03F8.3    | W03F8.3    | -0.209025137025272  | AGIWUR31727 |
| N2                                                                                                                            | CT | IV | 5189042 | 5195627 | WBGene00020997 | gpa-18     | W03F8.9    | -0.138670671868851  |             |
| AGIWUR32817;AGIWUR45125                                                                                                       |    |    |         |         |                |            |            |                     |             |
| N2                                                                                                                            | CT | IV | 5204591 | 5207138 | WBGene00006586 | tni-4      | W03F8.1    | 0.199523253836618   |             |
| AGIWUR13736;AGIWUR40275                                                                                                       |    |    |         |         |                |            |            |                     |             |
| N2                                                                                                                            | CT | IV | 5207109 | 5209481 | WBGene00195093 | Y59E9AL.36 | Y59E9AL.36 | -0.113896427799213  |             |
| AGIWUR6575;AGIWUR10992                                                                                                        |    |    |         |         |                |            |            |                     |             |
| N2                                                                                                                            | CT | IV | 5209501 | 5210690 | WBGene00043064 | nbet-1     | Y59E9AL.7  | -0.259002784056023  |             |
| AGIWUR26374                                                                                                                   |    |    |         |         |                |            |            |                     |             |
| N2                                                                                                                            | CT | IV | 5221284 | 5222133 | WBGene00021995 | Y59E9AL.5  | Y59E9AL.5  | 0.336507391095189   |             |
| AGIWUR35112                                                                                                                   |    |    |         |         |                |            |            |                     |             |

|                                                                                                |    |    |         |         |                |           |           |                      |             |
|------------------------------------------------------------------------------------------------|----|----|---------|---------|----------------|-----------|-----------|----------------------|-------------|
| N2                                                                                             | CT | IV | 5223237 | 5224172 | WBGene00044346 | Y59E9AL.8 | Y59E9AL.8 | -0.134367234850626   |             |
| AGIWUR20183;AGIWUR32714                                                                        |    |    |         |         |                |           |           |                      |             |
| N2                                                                                             | CT | IV | 5224899 | 5225772 | WBGene00021996 | Y59E9AL.6 | Y59E9AL.6 | 0.179626859552984    |             |
| AGIWUR7006;AGIWUR23221                                                                         |    |    |         |         |                |           |           |                      |             |
| N2                                                                                             | CT | IV | 5228919 | 5230083 | WBGene00021992 | thn-6     | Y59E9AL.1 | -0.16727194424146    |             |
| AGIWUR7330                                                                                     |    |    |         |         |                |           |           |                      |             |
| N2                                                                                             | CT | IV | 5230830 | 5232479 | WBGene00021999 | thn-5     | Y59E9AR.4 | 6.23703286386501e-05 |             |
| AGIWUR38274                                                                                    |    |    |         |         |                |           |           |                      |             |
| N2                                                                                             | CT | IV | 5241364 | 5241794 | WBGene00022002 | Y59E9AR.7 | Y59E9AR.7 | 0.104261137891704    |             |
| AGIWUR31205                                                                                    |    |    |         |         |                |           |           |                      |             |
| N2                                                                                             | CT | IV | 5262786 | 5264433 | WBGene00018127 | F36H12.14 | F36H12.14 | 0.128305468074011    |             |
| AGIWUR3951;AGIWUR14943;AGIWUR16218;AGIWUR19616;AGIWUR23777;AGIWUR30541;AGIWUR36641;AGIWUR44470 |    |    |         |         |                |           |           |                      |             |
| N2                                                                                             | CT | IV | 5268049 | 5278070 | WBGene00018130 | F36H12.17 | F36H12.17 | -0.0751957689767657  |             |
| AGIWUR29954;AGIWUR36873;AGIWUR44131                                                            |    |    |         |         |                |           |           |                      |             |
| N2                                                                                             | CT | IV | 5290847 | 5293689 | WBGene00018117 | nlp-47    | F36H12.1  | -0.189432372172938   |             |
| AGIWUR9348                                                                                     |    |    |         |         |                |           |           |                      |             |
| N2                                                                                             | CT | IV | 5295931 | 5297487 | WBGene00022707 | ZK354.6   | ZK354.6   | 0.180875736724841    | AGIWUR43447 |
| N2                                                                                             | CT | IV | 5302141 | 5303078 | WBGene00022708 | ZK354.7   | ZK354.7   | 0.122906018199235    | AGIWUR14632 |
| N2                                                                                             | CT | IV | 5304021 | 5306140 | WBGene00022709 | ZK354.8   | ZK354.8   | 0.295319508440787    | AGIWUR16814 |
| N2                                                                                             | CT | IV | 5310042 | 5311445 | WBGene00022706 | ZK354.3   | ZK354.3   | 0.291633518077402    | AGIWUR4701  |
| N2                                                                                             | CT | IV | 5313405 | 5315525 | WBGene00022705 | ZK354.2   | ZK354.2   | 0.276843789525726    |             |
| AGIWUR1753;AGIWUR19004                                                                         |    |    |         |         |                |           |           |                      |             |
| N2                                                                                             | CT | IV | 5319253 | 5325033 | WBGene00021159 | Y4C6B.5   | Y4C6B.5   | -0.161458563816224   | AGIWUR27808 |
| N2                                                                                             | CT | IV | 5326444 | 5329640 | WBGene00021158 | Y4C6B.4   | Y4C6B.4   | -0.0303216899321868  |             |
| AGIWUR21358;AGIWUR34632                                                                        |    |    |         |         |                |           |           |                      |             |
| N2                                                                                             | CT | IV | 5332478 | 5336827 | WBGene00021157 | Y4C6B.3   | Y4C6B.3   | -0.0876090067826309  | AGIWUR25646 |
| N2                                                                                             | CT | IV | 5340890 | 5344204 | WBGene00021156 | Y4C6B.2   | Y4C6B.2   | 0.488953252802769    | AGIWUR21116 |
| N2                                                                                             | CT | IV | 5344592 | 5350947 | WBGene00021160 | gba-4     | Y4C6B.6   | -0.11237139684698    |             |
| AGIWUR20362;AGIWUR23005;AGIWUR28435;AGIWUR39463                                                |    |    |         |         |                |           |           |                      |             |
| N2                                                                                             | CT | IV | 5351420 | 5353464 | WBGene00021161 | Y4C6B.7   | Y4C6B.7   | 0.128467806940926    |             |
| AGIWUR1244;AGIWUR12051;AGIWUR17871;AGIWUR26058;AGIWUR41428;AGIWUR41479                         |    |    |         |         |                |           |           |                      |             |
| N2                                                                                             | CT | IV | 5354488 | 5356539 | WBGene00021155 | Y4C6B.1   | Y4C6B.1   | 0.0725448150828178   | AGIWUR23550 |
| N2                                                                                             | CT | IV | 5356538 | 5364306 | WBGene00018319 | hda-6     | F41H10.6  | -0.0414570005545798  |             |
| AGIWUR3721;AGIWUR16258;AGIWUR17382;AGIWUR27562                                                 |    |    |         |         |                |           |           |                      |             |
| N2                                                                                             | CT | IV | 5364559 | 5366751 | WBGene00018317 | F41H10.4  | F41H10.4  | -0.142939591579859   |             |
| AGIWUR8752                                                                                     |    |    |         |         |                |           |           |                      |             |
| N2                                                                                             | CT | IV | 5366867 | 5368866 | WBGene00018321 | sand-1    | F41H10.11 | 0.52564880643167     |             |
| AGIWUR18778;AGIWUR36540;AGIWUR44444                                                            |    |    |         |         |                |           |           |                      |             |
| N2                                                                                             | CT | IV | 5369797 | 5374673 | WBGene00018316 | F41H10.3  | F41H10.3  | 0.116460519408743    |             |

AGIWUR28505;AGIWUR32473;AGIWUR39991;AGIWUR42589

N2 CT IV 5374598 5377275 WBGene00001243 elo-5 F41H10.7 0.0753091698000112

AGIWUR38049

N2 CT IV 5381634 5382470 WBGene00018315 F41H10.2 F41H10.2 0.0310502628563221

AGIWUR10409

N2 CT IV 5385320 5386080 WBGene00018322 F41H10.12 F41H10.12 -0.104741905597577

AGIWUR27702

N2 CT IV 5386629 5388559 WBGene00001244 elo-6 F41H10.8 0.0619347499837568

AGIWUR12198;AGIWUR38050

N2 CT IV 5390184 5391557 WBGene00002032 htp-1 F41H10.10 -0.0478705691712804

AGIWUR17040

N2 CT IV 5391912 5393572 WBGene00022775 ZK616.5 ZK616.5 0.202716933833742 AGIWUR17545

N2 CT IV 5393843 5394849 WBGene00022776 perm-3 ZK616.6 0.178469130120307

AGIWUR3289;AGIWUR10280;AGIWUR14230;AGIWUR37025;AGIWUR37266;AGIWUR42327

N2 CT IV 5394962 5396966 WBGene00022774 swsn-6 ZK616.4 0.0670852323287399 AGIWUR19887

N2 CT IV 5397069 5397694 WBGene00022773 ZK616.3 ZK616.3 -0.43823665779683 AGIWUR16868

N2 CT IV 5397839 5398591 WBGene00022772 ZK616.2 ZK616.2 -0.122554454230617 AGIWUR16916

N2 CT IV 5405645 5407375 WBGene00194816 ZK616.61 ZK616.61 0.0814143327783192

AGIWUR8298

N2 CT IV 5408426 5411166 WBGene00235383 ZK616.65 ZK616.65 0.0834224769609477

AGIWUR31061

N2 CT IV 5412827 5415771 WBGene00004992 spp-7 ZK616.9 0.183621039511852 AGIWUR2110

N2 CT IV 5416906 5419195 WBGene00001223 ehn-3 ZK616.10 0.260122194698212

AGIWUR26234

N2 CT IV 5423576 5450802 WBGene00021152 mgl-3 Y4C6A.2 -0.14607193111189

AGIWUR24178;AGIWUR32618

N2 CT IV 5450993 5452455 WBGene00021153 Y4C6A.3 Y4C6A.3 -0.0509696692715735 AGIWUR10331

N2 CT IV 5452967 5453640 WBGene00021154 Y4C6A.4 Y4C6A.4 0.0166472677430987 AGIWUR8178

N2 CT IV 5458767 5460735 WBGene00021151 Y4C6A.1 Y4C6A.1 0.416635338120826

AGIWUR37588;AGIWUR42972

N2 CT IV 5462501 5464448 WBGene00021793 Y52D5A.2 Y52D5A.2 0.122473508433929

AGIWUR31886

N2 CT IV 5467393 5469134 WBGene00021792 Y52D5A.1 Y52D5A.1 -0.201396519043648

AGIWUR17822

N2 CT IV 5469961 5473174 WBGene00004374 rme-2 T11F8.3 -0.130101972140899 AGIWUR29033

N2 CT IV 5474162 5476568 WBGene00020435 T11F8.4 T11F8.4 0.216490949306829 AGIWUR40747

N2 CT IV 5477214 5478708 WBGene00020434 T11F8.2 T11F8.2 -0.00830183075883273

AGIWUR8500;AGIWUR20411;AGIWUR27745;AGIWUR38023

N2 CT IV 5479589 5480644 WBGene00020433 T11F8.1 T11F8.1 -0.281752104377389 AGIWUR14895



|                                                                                     |    |    |         |         |                |          |          |                     |             |
|-------------------------------------------------------------------------------------|----|----|---------|---------|----------------|----------|----------|---------------------|-------------|
| N2                                                                                  | CT | IV | 5493992 | 5495252 | WBGene00015097 | B0273.1  | B0273.1  | -0.0106275427332747 | AGIWUR31928 |
| N2                                                                                  | CT | IV | 5495666 | 5528338 | WBGene00006745 | unc-5    | B0273.4  | -0.145909158186713  | AGIWUR31044 |
| N2                                                                                  | CT | IV | 5533142 | 5537992 | WBGene00001411 | fem-1    | F35D6.1  | -0.0601614543258329 |             |
| AGIWUR3074;AGIWUR5563;AGIWUR31665;AGIWUR31934;AGIWUR33987;AGIWUR37509;AGIWUR44674   |    |    |         |         |                |          |          |                     |             |
| N2                                                                                  | CT | IV | 5537981 | 5541365 | WBGene00001093 | drp-1    | T12E12.4 | 0.0346277241419823  |             |
| AGIWUR7638;AGIWUR8632;AGIWUR21497;AGIWUR26100;AGIWUR26830;AGIWUR27798               |    |    |         |         |                |          |          |                     |             |
| N2                                                                                  | CT | IV | 5541607 | 5544765 | WBGene00020464 | T12E12.3 | T12E12.3 | 0.0637096341552752  |             |
| AGIWUR16529                                                                         |    |    |         |         |                |          |          |                     |             |
| N2                                                                                  | CT | IV | 5544860 | 5548459 | WBGene00020463 | cec-6    | T12E12.2 | -0.0154405514136915 |             |
| AGIWUR35802                                                                         |    |    |         |         |                |          |          |                     |             |
| N2                                                                                  | CT | IV | 5551134 | 5558820 | WBGene00020462 | T12E12.1 | T12E12.1 | 0.0446153677357968  |             |
| AGIWUR4873;AGIWUR8315;AGIWUR18358;AGIWUR20163;AGIWUR28072;AGIWUR31360               |    |    |         |         |                |          |          |                     |             |
| N2                                                                                  | CT | IV | 5567020 | 5574133 | WBGene00020465 | T12E12.6 | T12E12.6 | -0.0215605921786102 |             |
| AGIWUR22199;AGIWUR35240;AGIWUR35383                                                 |    |    |         |         |                |          |          |                     |             |
| N2                                                                                  | CT | IV | 5584661 | 5610368 | WBGene00001439 | fkx-7    | F26D12.1 | 0.00884006702362683 |             |
| AGIWUR21093;AGIWUR25106;AGIWUR27035;AGIWUR32201;AGIWUR38013;AGIWUR38887;AGIWUR42087 |    |    |         |         |                |          |          |                     |             |
| N2                                                                                  | CT | IV | 5611950 | 5614608 | WBGene00016542 | C39H7.4  | C39H7.4  | 0.0204548421830779  | AGIWUR23749 |
| N2                                                                                  | CT | IV | 5615522 | 5619685 | WBGene00044125 | srsx-16  | C39H7.9  | 0.0781078731299769  |             |
| AGIWUR32633;AGIWUR34370                                                             |    |    |         |         |                |          |          |                     |             |
| N2                                                                                  | CT | IV | 5622063 | 5623818 | WBGene00044124 | srsx-15  | C39H7.8  | -0.149942412347722  |             |
| AGIWUR25141;AGIWUR35563;AGIWUR45008                                                 |    |    |         |         |                |          |          |                     |             |
| N2                                                                                  | CT | IV | 5624855 | 5627156 | WBGene00016543 | srsx-14  | C39H7.5  | 0.140338616145918   | AGIWUR22984 |
| N2                                                                                  | CT | IV | 5628792 | 5630239 | WBGene00005090 | srd-12   | C39H7.6  | 0.263250135131377   | AGIWUR14655 |
| N2                                                                                  | CT | IV | 5633818 | 5635651 | WBGene00005091 | srd-13   | C39H7.7  | 0.0189934820331921  | AGIWUR33901 |
| N2                                                                                  | CT | IV | 5637835 | 5640190 | WBGene00005092 | srd-14   | B0547.3  | -0.256438438095577  |             |
| AGIWUR37068;AGIWUR42849                                                             |    |    |         |         |                |          |          |                     |             |
| N2                                                                                  | CT | IV | 5643252 | 5645614 | WBGene00005086 | srd-8    | B0547.4  | 0.00520239528377964 | AGIWUR13315 |
| N2                                                                                  | CT | IV | 5645831 | 5646233 | WBGene00015253 | B0547.2  | B0547.2  | 0.224925176667281   | AGIWUR4167  |
| N2                                                                                  | CT | IV | 5647432 | 5648910 | WBGene00005084 | srd-6    | B0547.5  | -0.0748178858661106 |             |
| AGIWUR15071;AGIWUR24916                                                             |    |    |         |         |                |          |          |                     |             |
| N2                                                                                  | CT | IV | 5649533 | 5651079 | WBGene00000817 | csn-5    | B0547.1  | -0.106426078512191  |             |
| AGIWUR15023;AGIWUR26838;AGIWUR30038;AGIWUR44781                                     |    |    |         |         |                |          |          |                     |             |
| N2                                                                                  | CT | IV | 5651087 | 5660523 | WBGene00004804 | skn-1    | T19E7.2  | 0.0783440885385289  |             |
| AGIWUR1037;AGIWUR1729;AGIWUR7018;AGIWUR30483                                        |    |    |         |         |                |          |          |                     |             |
| N2                                                                                  | CT | IV | 5661141 | 5664425 | WBGene00000247 | bec-1    | T19E7.3  | -0.231125932969618  | AGIWUR28646 |
| N2                                                                                  | CT | IV | 5667525 | 5669583 | WBGene00044500 | T19E7.6  | T19E7.6  | 0.00909459843514071 |             |
| AGIWUR1961;AGIWUR7360;AGIWUR13107;AGIWUR18108;AGIWUR28425;AGIWUR31204;AGIWUR37038   |    |    |         |         |                |          |          |                     |             |
| N2                                                                                  | CT | IV | 5672633 | 5674542 | WBGene00005083 | srd-5    | T19E7.5  | 0.0567619690455698  |             |
| AGIWUR18363;AGIWUR21112;AGIWUR40940                                                 |    |    |         |         |                |          |          |                     |             |

|                                                             |    |    |         |         |                |          |          |                     |             |
|-------------------------------------------------------------|----|----|---------|---------|----------------|----------|----------|---------------------|-------------|
| N2                                                          | CT | IV | 5676212 | 5678144 | WBGene00016954 | C55C3.4  | C55C3.4  | 0.271209259864644   | AGIWUR31025 |
| N2                                                          | CT | IV | 5678847 | 5682639 | WBGene00043065 | C55C3.7  | C55C3.7  | -0.0697938172408179 |             |
| AGIWUR20678;AGIWUR31895;AGIWUR44145                         |    |    |         |         |                |          |          |                     |             |
| N2                                                          | CT | IV | 5683184 | 5684672 | WBGene00016956 | C55C3.6  | C55C3.6  | 0.122786015313312   |             |
| AGIWUR3247;AGIWUR44402                                      |    |    |         |         |                |          |          |                     |             |
| N2                                                          | CT | IV | 5685287 | 5688273 | WBGene00016953 | C55C3.3  | C55C3.3  | 0.0505900993013313  | AGIWUR31711 |
| N2                                                          | CT | IV | 5691030 | 5694646 | WBGene00044501 | C55C3.8  | C55C3.8  | 0.199605369046465   |             |
| AGIWUR11565;AGIWUR14365;AGIWUR41535                         |    |    |         |         |                |          |          |                     |             |
| N2                                                          | CT | IV | 5695777 | 5703468 | WBGene00016955 | perm-5   | C55C3.5  | 0.212217298470398   |             |
| AGIWUR2558;AGIWUR12926;AGIWUR13869                          |    |    |         |         |                |          |          |                     |             |
| N2                                                          | CT | IV | 5709096 | 5714336 | WBGene00016951 | C55C3.1  | C55C3.1  | 0.137236756980335   | AGIWUR33858 |
| N2                                                          | CT | IV | 5725600 | 5729727 | WBGene00019263 | H35B03.1 | H35B03.1 | 0.0477075445031794  |             |
| AGIWUR12168;AGIWUR15462;AGIWUR16089;AGIWUR21515;AGIWUR42466 |    |    |         |         |                |          |          |                     |             |
| N2                                                          | CT | IV | 5729658 | 5732636 | WBGene00019264 | H35B03.2 | H35B03.2 | -0.118821022002536  |             |
| AGIWUR20162;AGIWUR24408;AGIWUR43047;AGIWUR44813             |    |    |         |         |                |          |          |                     |             |
| N2                                                          | CT | IV | 5735019 | 5737106 | WBGene00016667 | C45E5.4  | C45E5.4  | -0.258731775696297  | AGIWUR28686 |
| N2                                                          | CT | IV | 5744336 | 5747110 | WBGene00016664 | C45E5.1  | C45E5.1  | 0.162407957420576   |             |
| AGIWUR3135;AGIWUR7956;AGIWUR37449                           |    |    |         |         |                |          |          |                     |             |
| N2                                                          | CT | IV | 5747376 | 5757862 | WBGene00003636 | nhr-46   | C45E5.6  | -0.098240606967348  |             |
| AGIWUR3975;AGIWUR15663;AGIWUR18429;AGIWUR27946;AGIWUR29904  |    |    |         |         |                |          |          |                     |             |
| N2                                                          | CT | IV | 5791296 | 5793457 | WBGene00016287 | C31H1.2  | C31H1.2  | 0.0102348036878865  |             |
| AGIWUR7772;AGIWUR9298;AGIWUR24041                           |    |    |         |         |                |          |          |                     |             |
| N2                                                          | CT | IV | 5794932 | 5796825 | WBGene00016288 | C31H1.5  | C31H1.5  | 0.468829587205885   | AGIWUR15801 |
| N2                                                          | CT | IV | 5797453 | 5800233 | WBGene00016286 | C31H1.1  | C31H1.1  | 0.279909384683531   | AGIWUR44740 |
| N2                                                          | CT | IV | 5800336 | 5807093 | WBGene00016289 | Int1-1   | C31H1.6  | 0.00810416113084766 |             |
| AGIWUR1036;AGIWUR26901                                      |    |    |         |         |                |          |          |                     |             |
| N2                                                          | CT | IV | 5811583 | 5814142 | WBGene00016291 | C31H1.8  | C31H1.8  | -0.148858796682834  | AGIWUR28224 |
| N2                                                          | CT | IV | 5820370 | 5830199 | WBGene00015680 | egal-1   | C10G6.1  | -0.208061629332018  |             |
| AGIWUR11282;AGIWUR38980                                     |    |    |         |         |                |          |          |                     |             |
| N2                                                          | CT | IV | 5839387 | 5844004 | WBGene00015539 | C06E7.2  | C06E7.2  | 0.0220805636970045  | AGIWUR16132 |
| N2                                                          | CT | IV | 5843890 | 5846398 | WBGene00015540 | sams-4   | C06E7.3  | 0.236342066062488   | AGIWUR33922 |
| N2                                                          | CT | IV | 5848657 | 5850845 | WBGene00015538 | sams-3   | C06E7.1  | 0.202388472907394   | AGIWUR8961  |
| N2                                                          | CT | IV | 5850826 | 5859976 | WBGene00015541 | C06E7.4  | C06E7.4  | -0.218909130065079  | AGIWUR4608  |
| N2                                                          | CT | IV | 5864529 | 5865918 | WBGene00004973 | spe-27   | C06E7.6  | 0.197832036685391   | AGIWUR7261  |
| N2                                                          | CT | IV | 5867689 | 5870172 | WBGene00005728 | srv-17   | C06E7.7  | -0.143591329480364  | AGIWUR11136 |
| N2                                                          | CT | IV | 5871143 | 5871737 | WBGene00005729 | srv-18   | H04M03.5 | -0.119823125040976  |             |
| AGIWUR72;AGIWUR9244;AGIWUR19701;AGIWUR19952;AGIWUR27219     |    |    |         |         |                |          |          |                     |             |
| N2                                                          | CT | IV | 5871976 | 5874081 | WBGene00005730 | srv-19   | H04M03.6 | 0.00911709940398708 |             |
| AGIWUR30456                                                 |    |    |         |         |                |          |          |                     |             |

|                                                                                                                                                                                                           |    |    |         |         |                |           |           |                     |             |
|-----------------------------------------------------------------------------------------------------------------------------------------------------------------------------------------------------------|----|----|---------|---------|----------------|-----------|-----------|---------------------|-------------|
| N2                                                                                                                                                                                                        | CT | IV | 5874559 | 5875659 | WBGene00005731 | srv-20    | H04M03.7  | -0.0167122867712104 |             |
| AGIWUR1978;AGIWUR4326;AGIWUR7692;AGIWUR11512;AGIWUR32527                                                                                                                                                  |    |    |         |         |                |           |           |                     |             |
| N2                                                                                                                                                                                                        | CT | IV | 5876092 | 5877346 | WBGene00005732 | srv-21    | H04M03.8  | -0.0338595666156145 |             |
| AGIWUR15833                                                                                                                                                                                               |    |    |         |         |                |           |           |                     |             |
| N2                                                                                                                                                                                                        | CT | IV | 5878470 | 5879953 | WBGene00005733 | srv-22    | H04M03.9  | -0.311051555838453  |             |
| AGIWUR31893                                                                                                                                                                                               |    |    |         |         |                |           |           |                     |             |
| N2                                                                                                                                                                                                        | CT | IV | 5882707 | 5884529 | WBGene00019155 | H04M03.11 | H04M03.11 | 0.157587505976791   |             |
| AGIWUR17441                                                                                                                                                                                               |    |    |         |         |                |           |           |                     |             |
| N2                                                                                                                                                                                                        | CT | IV | 5885835 | 5889821 | WBGene00019154 | glf-1     | H04M03.4  | -0.527502246117832  |             |
| AGIWUR44615                                                                                                                                                                                               |    |    |         |         |                |           |           |                     |             |
| N2                                                                                                                                                                                                        | CT | IV | 5891565 | 5893329 | WBGene00019153 | H04M03.3  | H04M03.3  | -0.283471295551044  |             |
| AGIWUR27890                                                                                                                                                                                               |    |    |         |         |                |           |           |                     |             |
| N2                                                                                                                                                                                                        | CT | IV | 5895490 | 5895888 | WBGene00019152 | nspb-6    | H04M03.2  | 0.357359009565458   |             |
| AGIWUR11992                                                                                                                                                                                               |    |    |         |         |                |           |           |                     |             |
| N2                                                                                                                                                                                                        | CT | IV | 5896623 | 5899112 | WBGene00019151 | pck-3     | H04M03.1  | 0.115764225794816   |             |
| AGIWUR8619                                                                                                                                                                                                |    |    |         |         |                |           |           |                     |             |
| N2                                                                                                                                                                                                        | CT | IV | 5899586 | 5903355 | WBGene00019156 | H04M03.12 | H04M03.12 | 0.0303000405204887  |             |
| AGIWUR14194                                                                                                                                                                                               |    |    |         |         |                |           |           |                     |             |
| N2                                                                                                                                                                                                        | CT | IV | 5917326 | 5921446 | WBGene00019257 | dhhc-13   | H32C10.3  | 0.233798311814132   |             |
| AGIWUR33658                                                                                                                                                                                               |    |    |         |         |                |           |           |                     |             |
| N2                                                                                                                                                                                                        | CT | IV | 5930645 | 5933326 | WBGene00003019 | lin-33    | H32C10.2  | 0.0132045007055694  |             |
| AGIWUR31530                                                                                                                                                                                               |    |    |         |         |                |           |           |                     |             |
| N2                                                                                                                                                                                                        | CT | IV | 5934346 | 5937497 | WBGene00019255 | H32C10.1  | H32C10.1  | 0.198351965062086   |             |
| AGIWUR5965;AGIWUR20503;AGIWUR32526                                                                                                                                                                        |    |    |         |         |                |           |           |                     |             |
| N2                                                                                                                                                                                                        | CT | IV | 5937445 | 5939230 | WBGene00019296 | mcu-1     | K02B2.3   | 0.257413693483638   |             |
| AGIWUR5511;AGIWUR16477;AGIWUR17572                                                                                                                                                                        |    |    |         |         |                |           |           |                     |             |
| N2                                                                                                                                                                                                        | CT | IV | 5941926 | 5943998 | WBGene00019295 | pfkb-1.2  | K02B2.1   | 0.0135237272545257  |             |
| AGIWUR3026;AGIWUR7954                                                                                                                                                                                     |    |    |         |         |                |           |           |                     |             |
| N2                                                                                                                                                                                                        | CT | IV | 5943981 | 5946754 | WBGene00002129 | inx-7     | K02B2.4   | -0.0573692773044225 | AGIWUR7168  |
| N2                                                                                                                                                                                                        | CT | IV | 5947036 | 5947607 | WBGene00004494 | rps-25    | K02B2.5   | 0.357759905936428   |             |
| AGIWUR37136;AGIWUR39980                                                                                                                                                                                   |    |    |         |         |                |           |           |                     |             |
| N2                                                                                                                                                                                                        | CT | IV | 5961690 | 5962132 | WBGene00019297 | K02B2.6   | K02B2.6   | -0.231192805992267  | AGIWUR24823 |
| N2                                                                                                                                                                                                        | CT | IV | 5966656 | 6004857 | WBGene00006780 | unc-44    | B0350.2   | 0.125644771222245   |             |
| AGIWUR7735;AGIWUR8509;AGIWUR10238;AGIWUR12013;AGIWUR12342;AGIWUR14441;AGIWUR17621;AGIWUR19110;AGIWUR25248;AGIWUR27550;AGIWUR27667;AGIWUR29096;AGIWUR32226;AGIWUR35643;AGIWUR38125;AGIWUR39293;AGIWUR44581 |    |    |         |         |                |           |           |                     |             |
| N2                                                                                                                                                                                                        | CT | IV | 6010352 | 6011645 | WBGene00044502 | C46G7.5   | C46G7.5   | 0.0913682624287215  | AGIWUR17759 |
| N2                                                                                                                                                                                                        | CT | IV | 6015195 | 6017803 | WBGene00016722 | C46G7.2   | C46G7.2   | 0.162316254909834   | AGIWUR4371  |
| N2                                                                                                                                                                                                        | CT | IV | 6018003 | 6019713 | WBGene00016721 | C46G7.1   | C46G7.1   | -0.0943922335702219 | AGIWUR8440  |
| N2                                                                                                                                                                                                        | CT | IV | 6019705 | 6033639 | WBGene00004112 | pqn-22    | C46G7.4   | 0.145610436215422   | AGIWUR19188 |

|                                                                                                                                                                                                                                           |    |    |         |         |                |          |          |                      |             |
|-------------------------------------------------------------------------------------------------------------------------------------------------------------------------------------------------------------------------------------------|----|----|---------|---------|----------------|----------|----------|----------------------|-------------|
| N2                                                                                                                                                                                                                                        | CT | IV | 6040976 | 6074507 | WBGene00019205 | kcc-2    | H16014.1 | -0.0228708355767142  |             |
| AGIWUR1911;AGIWUR2231;AGIWUR5271;AGIWUR6446;AGIWUR7025;AGIWUR8507;AGIWUR13439;AGIWUR13842;AGIWUR14139;AGIWUR15302;AGIWUR17542;AGIWUR19667;AGIWUR21985;AGIWUR26651;AGIWUR27097;AGIWUR28020;AGIWUR29762;AGIWUR34185;AGIWUR42611;AGIWUR42648 |    |    |         |         |                |          |          |                      |             |
| N2                                                                                                                                                                                                                                        | CT | IV | 6075301 | 6076157 | WBGene00019514 | K08B4.2  | K08B4.2  | -0.16492472298895    | AGIWUR42732 |
| N2                                                                                                                                                                                                                                        | CT | IV | 6076692 | 6079945 | WBGene00019515 | ugt-19   | K08B4.3  | 0.105122380325451    | AGIWUR11886 |
| N2                                                                                                                                                                                                                                        | CT | IV | 6080907 | 6083592 | WBGene00019516 | ugt-20   | K08B4.4  | 0.0976358321420108   | AGIWUR914   |
| N2                                                                                                                                                                                                                                        | CT | IV | 6086350 | 6089404 | WBGene00019517 | K08B4.5  | K08B4.5  | -0.269844298483113   | AGIWUR15458 |
| N2                                                                                                                                                                                                                                        | CT | IV | 6091536 | 6092413 | WBGene00023486 | K08B4.7  | K08B4.7  | -0.267832384915911   |             |
| AGIWUR5558;AGIWUR16663;AGIWUR19385                                                                                                                                                                                                        |    |    |         |         |                |          |          |                      |             |
| N2                                                                                                                                                                                                                                        | CT | IV | 6095411 | 6110639 | WBGene00002245 | lag-1    | K08B4.1  | 0.130637144300898    |             |
| AGIWUR1113;AGIWUR12391;AGIWUR34040                                                                                                                                                                                                        |    |    |         |         |                |          |          |                      |             |
| N2                                                                                                                                                                                                                                        | CT | IV | 6110651 | 6112391 | WBGene00019750 | M03D4.3  | M03D4.3  | -0.295335948905352   | AGIWUR34204 |
| N2                                                                                                                                                                                                                                        | CT | IV | 6118219 | 6121775 | WBGene00006974 | zen-4    | M03D4.1  | -0.0806066185356791  |             |
| AGIWUR6721;AGIWUR7368;AGIWUR10759;AGIWUR19300;AGIWUR31924                                                                                                                                                                                 |    |    |         |         |                |          |          |                      |             |
| N2                                                                                                                                                                                                                                        | CT | IV | 6143183 | 6149923 | WBGene00019176 | H10D12.2 | H10D12.2 | -0.0410752355445241  |             |
| AGIWUR2783;AGIWUR6943;AGIWUR11080;AGIWUR17501;AGIWUR23031;AGIWUR44002                                                                                                                                                                     |    |    |         |         |                |          |          |                      |             |
| N2                                                                                                                                                                                                                                        | CT | IV | 6152437 | 6154623 | WBGene00015701 | C11D2.3  | C11D2.3  | -0.0528855491873932  | AGIWUR2737  |
| N2                                                                                                                                                                                                                                        | CT | IV | 6154558 | 6155396 | WBGene00015703 | C11D2.7  | C11D2.7  | -0.0518791956156175  | AGIWUR26177 |
| N2                                                                                                                                                                                                                                        | CT | IV | 6155492 | 6156960 | WBGene00015702 | C11D2.4  | C11D2.4  | 0.239583565938561    |             |
| AGIWUR9202;AGIWUR10951;AGIWUR18099;AGIWUR20572                                                                                                                                                                                            |    |    |         |         |                |          |          |                      |             |
| N2                                                                                                                                                                                                                                        | CT | IV | 6157310 | 6183857 | WBGene00006809 | unc-77   | C11D2.6  | -0.135337549848446   |             |
| AGIWUR18031;AGIWUR29623;AGIWUR40642;AGIWUR43664                                                                                                                                                                                           |    |    |         |         |                |          |          |                      |             |
| N2                                                                                                                                                                                                                                        | CT | IV | 6185888 | 6189205 | WBGene00015700 | asp-9    | C11D2.2  | -0.0893324063944125  |             |
| AGIWUR3747;AGIWUR12177                                                                                                                                                                                                                    |    |    |         |         |                |          |          |                      |             |
| N2                                                                                                                                                                                                                                        | CT | IV | 6202080 | 6205703 | WBGene00016761 | tkr-2    | C49A9.7  | -0.206636452305482   | AGIWUR14708 |
| N2                                                                                                                                                                                                                                        | CT | IV | 6205793 | 6206344 | WBGene00016764 | C49A9.10 | C49A9.10 | -0.116692264707034   |             |
| AGIWUR23758                                                                                                                                                                                                                               |    |    |         |         |                |          |          |                      |             |
| N2                                                                                                                                                                                                                                        | CT | IV | 6206843 | 6209527 | WBGene00016762 | ugt-24   | C49A9.8  | 0.19025670279861     | AGIWUR14772 |
| N2                                                                                                                                                                                                                                        | CT | IV | 6210936 | 6213181 | WBGene00016760 | C49A9.6  | C49A9.6  | -0.307210089298399   | AGIWUR38078 |
| N2                                                                                                                                                                                                                                        | CT | IV | 6213822 | 6216371 | WBGene00016759 | C49A9.5  | C49A9.5  | -0.314137718081428   | AGIWUR8070  |
| N2                                                                                                                                                                                                                                        | CT | IV | 6217349 | 6219449 | WBGene00016763 | C49A9.9  | C49A9.9  | -0.00746130259994704 |             |
| AGIWUR1773;AGIWUR15196                                                                                                                                                                                                                    |    |    |         |         |                |          |          |                      |             |
| N2                                                                                                                                                                                                                                        | CT | IV | 6219604 | 6222346 | WBGene00016758 | C49A9.4  | C49A9.4  | 0.00272171380764519  | AGIWUR12726 |
| N2                                                                                                                                                                                                                                        | CT | IV | 6222089 | 6225009 | WBGene00016757 | C49A9.3  | C49A9.3  | 0.024030379917658    | AGIWUR37712 |
| N2                                                                                                                                                                                                                                        | CT | IV | 6225443 | 6228046 | WBGene00016756 | C49A9.2  | C49A9.2  | -0.136187090832692   | AGIWUR23748 |
| N2                                                                                                                                                                                                                                        | CT | IV | 6228203 | 6230025 | WBGene00016755 | C49A9.1  | C49A9.1  | -0.18916775038441    | AGIWUR3139  |
| N2                                                                                                                                                                                                                                        | CT | IV | 6231023 | 6232607 | WBGene00019058 | F58F9.4  | F58F9.4  | -0.187470522740137   | AGIWUR41348 |
| N2                                                                                                                                                                                                                                        | CT | IV | 6233246 | 6235666 | WBGene00019057 | F58F9.3  | F58F9.3  | -0.250857148745376   |             |

|                                                            |    |    |         |         |                |          |            |                     |             |
|------------------------------------------------------------|----|----|---------|---------|----------------|----------|------------|---------------------|-------------|
| AGIWUR7538;AGIWUR20237                                     |    |    |         |         |                |          |            |                     |             |
| N2                                                         | CT | IV | 6235977 | 6237543 | WBGene00019059 | F58F9.6  | F58F9.6    | -0.644968625066415  | AGIWUR19018 |
| N2                                                         | CT | IV | 6238192 | 6239437 | WBGene00044306 | F58F9.8  | F58F9.8    | -0.208804689202283  |             |
| AGIWUR9116;AGIWUR24570                                     |    |    |         |         |                |          |            |                     |             |
| N2                                                         | CT | IV | 6240306 | 6241389 | WBGene00044307 | F58F9.9  | F58F9.9    | -1.00231883110325   |             |
| AGIWUR18241;AGIWUR29280                                    |    |    |         |         |                |          |            |                     |             |
| N2                                                         | CT | IV | 6241855 | 6242795 | WBGene00044308 | F58F9.10 | F58F9.10   | 0.00661480593290786 |             |
| AGIWUR26484;AGIWUR38991                                    |    |    |         |         |                |          |            |                     |             |
| N2                                                         | CT | IV | 6243382 | 6244374 | WBGene00044309 | F58F9.11 | F58F9.11   | 0.167975376038932   |             |
| AGIWUR17345                                                |    |    |         |         |                |          |            |                     |             |
| N2                                                         | CT | IV | 6245341 | 6248492 | WBGene00019060 | acox-3   | F58F9.7    | 0.298041429161099   | AGIWUR24700 |
| N2                                                         | CT | IV | 6249874 | 6253083 | WBGene00019055 | F58F9.1  | F58F9.1    | 0.189082643900791   | AGIWUR12407 |
| N2                                                         | CT | IV | 6255071 | 6259858 | WBGene00003754 | nlp-16   | T13A10.5   | 0.129277543764318   |             |
| AGIWUR21097;AGIWUR24636                                    |    |    |         |         |                |          |            |                     |             |
| N2                                                         | CT | IV | 6261058 | 6263344 | WBGene00005739 | srv-28   | T13A10.14  | 0.0561727754575818  |             |
| AGIWUR7801                                                 |    |    |         |         |                |          |            |                     |             |
| N2                                                         | CT | IV | 6267457 | 6269446 | WBGene00005741 | srv-30   | T13A10.7   | 0.0301109148292955  |             |
| AGIWUR37058                                                |    |    |         |         |                |          |            |                     |             |
| N2                                                         | CT | IV | 6269773 | 6272023 | WBGene00005742 | srv-31   | T13A10.9   | 0.165876800512936   |             |
| AGIWUR40378                                                |    |    |         |         |                |          |            |                     |             |
| N2                                                         | CT | IV | 6272529 | 6275713 | WBGene00000005 | aat-4    | T13A10.10  | -0.151313974285516  |             |
| AGIWUR15818                                                |    |    |         |         |                |          |            |                     |             |
| N2                                                         | CT | IV | 6277435 | 6279572 | WBGene00006416 | sams-5   | T13A10.11  | 0.187598291562363   |             |
| AGIWUR3761;AGIWUR11823;AGIWUR19459;AGIWUR20660;AGIWUR41960 |    |    |         |         |                |          |            |                     |             |
| N2                                                         | CT | IV | 6280147 | 6282243 | WBGene00005743 | srv-32   | T13A10.12  | -0.810863355214389  |             |
| AGIWUR18255                                                |    |    |         |         |                |          |            |                     |             |
| N2                                                         | CT | IV | 6282931 | 6284387 | WBGene00005744 | ops-1    | T13A10.13  | -0.105939800887025  |             |
| AGIWUR33785                                                |    |    |         |         |                |          |            |                     |             |
| N2                                                         | CT | IV | 6288364 | 6290841 | WBGene00005735 | srv-24   | Y73B6BL.10 | -0.0953654352402546 |             |
| AGIWUR42294                                                |    |    |         |         |                |          |            |                     |             |
| N2                                                         | CT | IV | 6294234 | 6295219 | WBGene00001853 | hil-2    | Y73B6BL.9  | 0.0920668054993072  |             |
| AGIWUR18626                                                |    |    |         |         |                |          |            |                     |             |
| N2                                                         | CT | IV | 6296279 | 6298347 | WBGene00005738 | srv-27   | Y73B6BL.41 | 0.00347030027161654 |             |
| AGIWUR7755;AGIWUR37612;AGIWUR39406                         |    |    |         |         |                |          |            |                     |             |
| N2                                                         | CT | IV | 6299273 | 6301864 | WBGene00005737 | srv-26   | Y73B6BL.40 | -0.799035335693265  |             |
| AGIWUR22999                                                |    |    |         |         |                |          |            |                     |             |
| N2                                                         | CT | IV | 6302159 | 6303742 | WBGene00005736 | srv-25   | Y73B6BL.11 | 0.194157770867826   |             |
| AGIWUR2146                                                 |    |    |         |         |                |          |            |                     |             |
| N2                                                         | CT | IV | 6307739 | 6315719 | WBGene00000820 | csp-2    | Y73B6BL.7  | 0.212096658993241   |             |

|                                                                         |    |    |         |         |                |            |            |                      |
|-------------------------------------------------------------------------|----|----|---------|---------|----------------|------------|------------|----------------------|
| AGIWUR27137;AGIWUR37601                                                 |    |    |         |         |                |            |            |                      |
| N2                                                                      | CT | IV | 6321948 | 6323562 | WBGene00022250 | Y73B6BL.29 | Y73B6BL.29 | -0.363597422194218   |
| AGIWUR43135                                                             |    |    |         |         |                |            |            |                      |
| N2                                                                      | CT | IV | 6323979 | 6326421 | WBGene00022235 | sqd-1      | Y73B6BL.6  | 0.00805774952587734  |
| AGIWUR5530;AGIWUR6062;AGIWUR6714;AGIWUR9941;AGIWUR10169;AGIWUR30227     |    |    |         |         |                |            |            |                      |
| N2                                                                      | CT | IV | 6326526 | 6329461 | WBGene00003082 | lsm-8      | Y73B6BL.32 | 0.0302411019738109   |
| AGIWUR39819                                                             |    |    |         |         |                |            |            |                      |
| N2                                                                      | CT | IV | 6329578 | 6333554 | WBGene00004783 | seu-1      | Y73B6BL.5  | -0.0788585578434571  |
| AGIWUR2395;AGIWUR9149;AGIWUR33136;AGIWUR35630;AGIWUR41727               |    |    |         |         |                |            |            |                      |
| N2                                                                      | CT | IV | 6334215 | 6335168 | WBGene00022251 | blos-2     | Y73B6BL.30 | -0.10708057756985    |
| AGIWUR34101                                                             |    |    |         |         |                |            |            |                      |
| N2                                                                      | CT | IV | 6335249 | 6335994 | WBGene00003237 | mif-4      | Y73B6BL.13 | -0.016139825288386   |
| AGIWUR43599                                                             |    |    |         |         |                |            |            |                      |
| N2                                                                      | CT | IV | 6337653 | 6340098 | WBGene00022233 | ipla-6     | Y73B6BL.4  | 0.3194013552212      |
| AGIWUR9142;AGIWUR19157;AGIWUR25759;AGIWUR35569                          |    |    |         |         |                |            |            |                      |
| N2                                                                      | CT | IV | 6342471 | 6342976 | WBGene00022237 | Y73B6BL.14 | Y73B6BL.14 | -0.010421238386277   |
| AGIWUR15623                                                             |    |    |         |         |                |            |            |                      |
| N2                                                                      | CT | IV | 6373162 | 6376523 | WBGene00022253 | hrpf-2     | Y73B6BL.33 | -0.118940573769553   |
| AGIWUR15470                                                             |    |    |         |         |                |            |            |                      |
| N2                                                                      | CT | IV | 6377065 | 6378195 | WBGene00000256 | bli-6      | Y73B6BL.34 | 0.326760520283772    |
| AGIWUR43023                                                             |    |    |         |         |                |            |            |                      |
| N2                                                                      | CT | IV | 6378594 | 6384070 | WBGene00022240 | shl-1      | Y73B6BL.19 | 0.25531332137658     |
| AGIWUR18216                                                             |    |    |         |         |                |            |            |                      |
| N2                                                                      | CT | IV | 6396582 | 6402458 | WBGene00022242 | sfrp-1     | Y73B6BL.21 | 0.00651361523054739  |
| AGIWUR5050                                                              |    |    |         |         |                |            |            |                      |
| N2                                                                      | CT | IV | 6405176 | 6408236 | WBGene00005724 | srv-13     | Y73B6BL.39 | -0.0575403535392969  |
| AGIWUR3601                                                              |    |    |         |         |                |            |            |                      |
| N2                                                                      | CT | IV | 6409557 | 6413566 | WBGene00022254 | Y73B6BL.35 | Y73B6BL.35 | -0.498689789439301   |
| AGIWUR21204;AGIWUR23050;AGIWUR23340;AGIWUR26890;AGIWUR29462;AGIWUR40052 |    |    |         |         |                |            |            |                      |
| N2                                                                      | CT | IV | 6415478 | 6417457 | WBGene00022232 | exos-2     | Y73B6BL.3  | -0.166017492336865   |
| AGIWUR10655                                                             |    |    |         |         |                |            |            |                      |
| N2                                                                      | CT | IV | 6417696 | 6419078 | WBGene00022244 | Y73B6BL.23 | Y73B6BL.23 | -0.00921132420841708 |
| AGIWUR3816;AGIWUR6155;AGIWUR11951;AGIWUR28586;AGIWUR40745               |    |    |         |         |                |            |            |                      |
| N2                                                                      | CT | IV | 6419500 | 6420898 | WBGene00002033 | htp-2      | Y73B6BL.2  | 0.00863106992602169  |
| AGIWUR10934                                                             |    |    |         |         |                |            |            |                      |
| N2                                                                      | CT | IV | 6421036 | 6421200 | WBGene00044752 | Y73B6BL.45 | Y73B6BL.45 | -0.0738358823272147  |
| AGIWUR9734                                                              |    |    |         |         |                |            |            |                      |
| N2                                                                      | CT | IV | 6421589 | 6423489 | WBGene00022257 | puf-11     | Y73B6BL.38 | -0.0418906743851561  |
| AGIWUR28069                                                             |    |    |         |         |                |            |            |                      |

|                                                            |    |    |         |         |                |            |            |                      |             |
|------------------------------------------------------------|----|----|---------|---------|----------------|------------|------------|----------------------|-------------|
| N2                                                         | CT | IV | 6424600 | 6426139 | WBGene00022245 | acp-6      | Y73B6BL.24 | -0.0437909470207885  |             |
| AGIWUR5531;AGIWUR20296;AGIWUR22193                         |    |    |         |         |                |            |            |                      |             |
| N2                                                         | CT | IV | 6428305 | 6431707 | WBGene00022246 | acp-7      | Y73B6BL.25 | 0.154372096976422    |             |
| AGIWUR31201                                                |    |    |         |         |                |            |            |                      |             |
| N2                                                         | CT | IV | 6438223 | 6440032 | WBGene00043067 | d1c-5      | Y73B6BL.43 | -0.0270335712201959  |             |
| AGIWUR5344;AGIWUR7316;AGIWUR16502;AGIWUR29630              |    |    |         |         |                |            |            |                      |             |
| N2                                                         | CT | IV | 6442229 | 6446532 | WBGene00022252 | Y73B6BL.31 | Y73B6BL.31 | 0.260126179916295    |             |
| AGIWUR10068;AGIWUR14224;AGIWUR30990                        |    |    |         |         |                |            |            |                      |             |
| N2                                                         | CT | IV | 6446573 | 6457543 | WBGene00022247 | lgc-10     | Y73B6BL.26 | -0.401632979090448   |             |
| AGIWUR18076                                                |    |    |         |         |                |            |            |                      |             |
| N2                                                         | CT | IV | 6464352 | 6468327 | WBGene00043066 | acr-25     | Y73B6BL.42 | 0.0870493596702264   |             |
| AGIWUR38243                                                |    |    |         |         |                |            |            |                      |             |
| N2                                                         | CT | IV | 6469955 | 6471384 | WBGene00022255 | Y73B6BL.36 | Y73B6BL.36 | -0.0352858851398379  |             |
| AGIWUR11423;AGIWUR14886                                    |    |    |         |         |                |            |            |                      |             |
| N2                                                         | CT | IV | 6472155 | 6473235 | WBGene00022248 | Y73B6BL.27 | Y73B6BL.27 | -0.191990326463365   |             |
| AGIWUR42102                                                |    |    |         |         |                |            |            |                      |             |
| N2                                                         | CT | IV | 6480521 | 6486971 | WBGene00022231 | tyr-6      | Y73B6BL.1  | 0.00762644035365057  |             |
| AGIWUR1895                                                 |    |    |         |         |                |            |            |                      |             |
| N2                                                         | CT | IV | 6487347 | 6489090 | WBGene00022256 | Y73B6BL.37 | Y73B6BL.37 | -0.230389319560214   |             |
| AGIWUR12748                                                |    |    |         |         |                |            |            |                      |             |
| N2                                                         | CT | IV | 6493599 | 6497378 | WBGene00044350 | Y73B6BL.44 | Y73B6BL.44 | -0.318640389137836   |             |
| AGIWUR1321;AGIWUR8689                                      |    |    |         |         |                |            |            |                      |             |
| N2                                                         | CT | IV | 6506726 | 6511042 | WBGene00004169 | pqn-89     | Y73B6BR.1  | -0.0412412398533197  |             |
| AGIWUR2166;AGIWUR18201;AGIWUR33782;AGIWUR35889;AGIWUR41226 |    |    |         |         |                |            |            |                      |             |
| N2                                                         | CT | IV | 6518174 | 6519502 | WBGene00015309 | C01G5.7    | C01G5.7    | -0.075760049562752   | AGIWUR30933 |
| N2                                                         | CT | IV | 6519926 | 6522242 | WBGene00015311 | C01G5.9    | C01G5.9    | -0.219729984446457   | AGIWUR16070 |
| N2                                                         | CT | IV | 6522874 | 6524568 | WBGene00015308 | ddi-1      | C01G5.6    | -0.188663567867206   | AGIWUR695   |
| N2                                                         | CT | IV | 6524610 | 6526524 | WBGene00015307 | C01G5.5    | C01G5.5    | -0.155552485987627   | AGIWUR13057 |
| N2                                                         | CT | IV | 6526729 | 6529802 | WBGene00004179 | prg-2      | C01G5.2    | 0.346067379071329    |             |
| AGIWUR19766;AGIWUR25037;AGIWUR35662                        |    |    |         |         |                |            |            |                      |             |
| N2                                                         | CT | IV | 6531750 | 6535677 | WBGene00015306 | C01G5.4    | C01G5.4    | 0.07034566215955     | AGIWUR12939 |
| N2                                                         | CT | IV | 6548818 | 6552511 | WBGene00015310 | fan-1      | C01G5.8    | -0.048074886524784   | AGIWUR30930 |
| N2                                                         | CT | IV | 6552479 | 6555920 | WBGene00016610 | paqr-1     | C43G2.1    | 0.346671680681932    |             |
| AGIWUR6337;AGIWUR20140;AGIWUR39059                         |    |    |         |         |                |            |            |                      |             |
| N2                                                         | CT | IV | 6557171 | 6560881 | WBGene00006621 | try-3      | C43G2.5    | -0.285523148183572   | AGIWUR22974 |
| N2                                                         | CT | IV | 6560736 | 6565261 | WBGene00016613 | best-9     | C43G2.4    | 0.0947916215834486   | AGIWUR27424 |
| N2                                                         | CT | IV | 6565384 | 6572338 | WBGene00016611 | bicd-1     | C43G2.2    | -0.00838722569548533 | AGIWUR13162 |
| N2                                                         | CT | IV | 6578197 | 6579402 | WBGene00016612 | C43G2.3    | C43G2.3    | 0.136643315183129    | AGIWUR21928 |
| N2                                                         | CT | IV | 6579840 | 6582676 | WBGene00018160 | odr-8      | F38A5.1    | 0.0232125286589593   |             |

AGIWUR2601;AGIWUR3004;AGIWUR4843;AGIWUR31954;AGIWUR33472;AGIWUR34492;AGIWUR44384  
 N2 CT IV 6582703 6585571 WBGene00018161 F38A5.2 F38A5.2 0.208007194548308  
 AGIWUR1637;AGIWUR1880;AGIWUR26971;AGIWUR31257;AGIWUR33703;AGIWUR41277;AGIWUR42545  
 N2 CT IV 6585871 6588186 WBGene00001029 dnj-11 F38A5.13 -0.0932492604397011  
 AGIWUR26044;AGIWUR32851;AGIWUR33015;AGIWUR41606  
 N2 CT IV 6588184 6590307 WBGene00002274 lec-11 F38A5.3 0.00353551963081067  
 AGIWUR6492;AGIWUR16105;AGIWUR16475;AGIWUR27350  
 N2 CT IV 6592666 6594529 WBGene00018168 irld-7 F38A5.11 0.295813461711253  
 AGIWUR3776  
 N2 CT IV 6596108 6597398 WBGene00018163 F38A5.6 F38A5.6 0.0416917222696958 AGIWUR30197  
 N2 CT IV 6599882 6600491 WBGene00018165 F38A5.8 F38A5.8 0.262387661093936 AGIWUR19468  
 N2 CT IV 6601678 6602443 WBGene00018164 sup-36 F38A5.7 0.157813941530389 AGIWUR35277  
 N2 CT IV 6602680 6603966 WBGene00017481 F15B10.3 F15B10.3 -0.0473074783761511  
 AGIWUR29802  
 N2 CT IV 6604001 6606188 WBGene00017480 nstp-2 F15B10.1 -0.0378495177760705  
 AGIWUR9501  
 N2 CT IV 6607376 6613353 WBGene00001090 drh-1 F15B10.2 -0.203524637251046  
 AGIWUR1034;AGIWUR9440;AGIWUR42915  
 N2 CT IV 6613918 6618498 WBGene00001091 drh-2 C01B10.1 -0.169517279996779  
 AGIWUR7926;AGIWUR18407  
 N2 CT IV 6619468 6621352 WBGene00015278 C01B10.3 C01B10.3 -0.239538270300178  
 AGIWUR34609  
 N2 CT IV 6624528 6627992 WBGene00015284 C01B10.10 C01B10.10 -0.101528995322469  
 AGIWUR10607;AGIWUR34060  
 N2 CT IV 6628366 6631745 WBGene00015279 C01B10.4 C01B10.4 -0.281853723359312  
 AGIWUR31155  
 N2 CT IV 6632222 6634986 WBGene00015283 C01B10.9 C01B10.9 -0.14429067659243  
 AGIWUR27315  
 N2 CT IV 6635039 6638155 WBGene00015282 C01B10.8 C01B10.8 0.0373611615193461  
 AGIWUR40431  
 N2 CT IV 6638556 6639271 WBGene00015281 C01B10.7 C01B10.7 0.0219198276381452  
 AGIWUR44495  
 N2 CT IV 6640161 6645352 WBGene00015280 C01B10.6 C01B10.6 0.1535861630335  
 AGIWUR35272;AGIWUR40404;AGIWUR42883  
 N2 CT IV 6646034 6646936 WBGene00001858 hil-7 C01B10.5 -0.72027586921109  
 AGIWUR1319;AGIWUR11770;AGIWUR16609;AGIWUR22740;AGIWUR24965;AGIWUR25043;AGIWUR29174;AGIWUR31187;AGIWUR40020;  
 AGIWUR42223  
 N2 CT IV 6657981 6660434 WBGene00044294 C01B10.11 C01B10.11 -0.7703582595403  
 AGIWUR27716



|                                                                                              |    |    |         |         |                |           |           |                     |
|----------------------------------------------------------------------------------------------|----|----|---------|---------|----------------|-----------|-----------|---------------------|
| N2                                                                                           | CT | IV | 6661234 | 6668054 | WBGene00022228 | Y73B6A.1  | Y73B6A.1  | -0.0938156499142888 |
| AGIWUR26914                                                                                  |    |    |         |         |                |           |           |                     |
| N2                                                                                           | CT | IV | 6704925 | 6707052 | WBGene00044503 | Y73B6A.6  | Y73B6A.6  | 0.00980174585266091 |
| AGIWUR2811;AGIWUR15743;AGIWUR23600                                                           |    |    |         |         |                |           |           |                     |
| N2                                                                                           | CT | IV | 6732980 | 6736110 | WBGene00022229 | Y73B6A.2  | Y73B6A.2  | -0.172134867077255  |
| AGIWUR33883                                                                                  |    |    |         |         |                |           |           |                     |
| N2                                                                                           | CT | IV | 6738727 | 6740374 | WBGene00022230 | Y73B6A.3  | Y73B6A.3  | -0.37944732885693   |
| AGIWUR7831                                                                                   |    |    |         |         |                |           |           |                     |
| N2                                                                                           | CT | IV | 6740496 | 6742443 | WBGene00004885 | smg-7     | Y73B6A.4  | -0.206884901547387  |
| AGIWUR5239                                                                                   |    |    |         |         |                |           |           |                     |
| N2                                                                                           | CT | IV | 6742538 | 6748424 | WBGene00003030 | lin-45    | Y73B6A.5  | -0.0872653329737911 |
| AGIWUR561;AGIWUR3602;AGIWUR11674;AGIWUR12654;AGIWUR18197;AGIWUR21509;AGIWUR22879;AGIWUR32207 |    |    |         |         |                |           |           |                     |
| N2                                                                                           | CT | IV | 6757311 | 6762609 | WBGene00019259 | H34C03.2  | H34C03.2  | -0.0503418348395499 |
| AGIWUR4690;AGIWUR5240;AGIWUR6955;AGIWUR32986;AGIWUR33475                                     |    |    |         |         |                |           |           |                     |
| N2                                                                                           | CT | IV | 6762716 | 6765200 | WBGene00004954 | spd-3     | H34C03.1  | -0.231252064577808  |
| AGIWUR42614                                                                                  |    |    |         |         |                |           |           |                     |
| N2                                                                                           | CT | IV | 6770810 | 6779859 | WBGene00015938 | anat-1    | C17H12.13 | -0.0963182134325731 |
| AGIWUR5446;AGIWUR28862;AGIWUR30020;AGIWUR40363                                               |    |    |         |         |                |           |           |                     |
| N2                                                                                           | CT | IV | 6779848 | 6784340 | WBGene00015927 | dyci-1    | C17H12.1  | 0.196394979177661   |
| AGIWUR20301                                                                                  |    |    |         |         |                |           |           |                     |
| N2                                                                                           | CT | IV | 6786858 | 6789644 | WBGene00015928 | C17H12.2  | C17H12.2  | -0.151453515837943  |
| AGIWUR4069                                                                                   |    |    |         |         |                |           |           |                     |
| N2                                                                                           | CT | IV | 6791074 | 6792629 | WBGene00006917 | vha-8     | C17H12.14 | 0.234992330367447   |
| AGIWUR10144;AGIWUR10801;AGIWUR12310;AGIWUR12618;AGIWUR34885                                  |    |    |         |         |                |           |           |                     |
| N2                                                                                           | CT | IV | 6793912 | 6795629 | WBGene00015929 | C17H12.3  | C17H12.3  | 0.276325745695868   |
| AGIWUR18330                                                                                  |    |    |         |         |                |           |           |                     |
| N2                                                                                           | CT | IV | 6795913 | 6798789 | WBGene00015937 | C17H12.12 | C17H12.12 | 0.375708639629149   |
| AGIWUR20007                                                                                  |    |    |         |         |                |           |           |                     |
| N2                                                                                           | CT | IV | 6798921 | 6802337 | WBGene00015930 | C17H12.4  | C17H12.4  | -0.272507514447257  |
| AGIWUR24155;AGIWUR26596                                                                      |    |    |         |         |                |           |           |                     |
| N2                                                                                           | CT | IV | 6805115 | 6805908 | WBGene00236786 | C17H12.37 | C17H12.37 | -0.0046309091023069 |
| AGIWUR25400                                                                                  |    |    |         |         |                |           |           |                     |
| N2                                                                                           | CT | IV | 6806810 | 6809630 | WBGene00015935 | C17H12.10 | C17H12.10 | -0.102212253448425  |
| AGIWUR32645                                                                                  |    |    |         |         |                |           |           |                     |
| N2                                                                                           | CT | IV | 6812108 | 6815607 | WBGene00015934 | ceh-48    | C17H12.9  | -0.244995525534384  |
| AGIWUR28941                                                                                  |    |    |         |         |                |           |           |                     |
| N2                                                                                           | CT | IV | 6815912 | 6817654 | WBGene00015931 | C17H12.5  | C17H12.5  | 0.153173030160168   |
| AGIWUR15237;AGIWUR24685;AGIWUR36468                                                          |    |    |         |         |                |           |           |                     |
| N2                                                                                           | CT | IV | 6818606 | 6820643 | WBGene00015933 | C17H12.8  | C17H12.8  | 0.467054933330497   |

|                                                            |    |    |         |         |                |                 |                                |
|------------------------------------------------------------|----|----|---------|---------|----------------|-----------------|--------------------------------|
| AGIWUR24325                                                |    |    |         |         |                |                 |                                |
| N2                                                         | CT | IV | 6821077 | 6822506 | WBGene00015932 | C17H12.6        | 0.317392044324786              |
| AGIWUR28820                                                |    |    |         |         |                |                 |                                |
| N2                                                         | CT | IV | 6824894 | 6826763 | WBGene00019215 | H20E11.3        | -0.252487738726504             |
| AGIWUR43547                                                |    |    |         |         |                |                 |                                |
| N2                                                         | CT | IV | 6827777 | 6829490 | WBGene00019214 | H20E11.2        | 0.289113645771851              |
| AGIWUR41422                                                |    |    |         |         |                |                 |                                |
| N2                                                         | CT | IV | 6830145 | 6833464 | WBGene00019213 | H20E11.1        | 0.00627198797788608            |
| AGIWUR1515;AGIWUR24083;AGIWUR24257;AGIWUR26117;AGIWUR34547 |    |    |         |         |                |                 |                                |
| N2                                                         | CT | IV | 6839064 | 6839199 | WBGene00202332 | C05B10.21       | 0.116043154142094              |
| AGIWUR14375;AGIWUR36755                                    |    |    |         |         |                |                 |                                |
| N2                                                         | CT | IV | 6841485 | 6841609 | WBGene00202097 | C05B10.20       |                                |
| -0.00726668130056751 AGIWUR28691                           |    |    |         |         |                |                 |                                |
| N2                                                         | CT | IV | 6842964 | 6845805 | WBGene00003043 | lip-1 C05B10.1  | -0.454738139204911             |
| AGIWUR28238                                                |    |    |         |         |                |                 |                                |
| N2                                                         | CT | IV | 6846129 | 6859370 | WBGene00020069 | R13H7.2 R13H7.2 | 0.178763009355578              |
| AGIWUR6354;AGIWUR17959;AGIWUR26946                         |    |    |         |         |                |                 |                                |
| N2                                                         | CT | IV | 6868091 | 6869137 | WBGene00005911 | srx-20 R13H7.1  | -0.370899256079469 AGIWUR15324 |
| N2                                                         | CT | IV | 6873258 | 6874774 | WBGene00005910 | srx-19 T05A12.1 | -0.0421119088572328            |
| AGIWUR25873;AGIWUR26519                                    |    |    |         |         |                |                 |                                |
| N2                                                         | CT | IV | 6876737 | 6883461 | WBGene00006608 | tre-2 T05A12.2  | -0.0123284651235149            |
| AGIWUR3771;AGIWUR16934;AGIWUR34702;AGIWUR35029;AGIWUR37513 |    |    |         |         |                |                 |                                |
| N2                                                         | CT | IV | 6883576 | 6887662 | WBGene00020234 | T05A12.3        | -0.0965644435375026            |
| AGIWUR16023                                                |    |    |         |         |                |                 |                                |
| N2                                                         | CT | IV | 6887948 | 6897777 | WBGene00020235 | T05A12.4        | 0.0732324902452488             |
| AGIWUR17582;AGIWUR23680;AGIWUR36204                        |    |    |         |         |                |                 |                                |
| N2                                                         | CT | IV | 6899519 | 6900056 | WBGene00020685 | T22D1.6 T22D1.6 | -0.879742005508441 AGIWUR24019 |
| N2                                                         | CT | IV | 6900326 | 6903624 | WBGene00020686 | T22D1.8 T22D1.8 | 0.0495139209162758             |
| AGIWUR7978;AGIWUR22377;AGIWUR36253                         |    |    |         |         |                |                 |                                |
| N2                                                         | CT | IV | 6903950 | 6905546 | WBGene00020684 | T22D1.5 T22D1.5 | -0.191433163756276 AGIWUR28419 |
| N2                                                         | CT | IV | 6906415 | 6909913 | WBGene00004458 | rpn-1 T22D1.9   | 0.14765098231873 AGIWUR2624    |
| N2                                                         | CT | IV | 6910683 | 6912865 | WBGene00020683 | ribo-1 T22D1.4  | 0.0990240117819212 AGIWUR17258 |
| N2                                                         | CT | IV | 6913536 | 6917110 | WBGene00020682 | T22D1.3 T22D1.3 | 0.0718500716881962             |
| AGIWUR30821;AGIWUR45070                                    |    |    |         |         |                |                 |                                |
| N2                                                         | CT | IV | 6917111 | 6919454 | WBGene00020687 | ruvb-2 T22D1.10 | 0.117759737666166              |
| AGIWUR21494                                                |    |    |         |         |                |                 |                                |
| N2                                                         | CT | IV | 6921855 | 6922852 | WBGene00020681 | T22D1.2 T22D1.2 | 0.235104540026148 AGIWUR30873  |
| N2                                                         | CT | IV | 6926140 | 6928517 | WBGene00020688 | T22D1.11        | -0.0655524457683896            |
| AGIWUR32365                                                |    |    |         |         |                |                 |                                |

|                                                                         |    |    |         |         |                |            |            |                     |             |
|-------------------------------------------------------------------------|----|----|---------|---------|----------------|------------|------------|---------------------|-------------|
| N2                                                                      | CT | IV | 6928942 | 6937713 | WBGene00020689 | npr-12     | T22D1.12   | -0.0200044738035681 |             |
| AGIWUR16564                                                             |    |    |         |         |                |            |            |                     |             |
| N2                                                                      | CT | IV | 6957641 | 6963716 | WBGene00002178 | jnk-1      | B0478.1    | -0.0100813574717309 |             |
| AGIWUR5169;AGIWUR22314                                                  |    |    |         |         |                |            |            |                     |             |
| N2                                                                      | CT | IV | 6963716 | 6964654 | WBGene00015202 | B0478.3    | B0478.3    | -0.0320321123279985 | AGIWUR3282  |
| N2                                                                      | CT | IV | 6965492 | 6967806 | WBGene00022725 | ZK381.2    | ZK381.2    | -0.136694971176949  |             |
| AGIWUR31292;AGIWUR35750                                                 |    |    |         |         |                |            |            |                     |             |
| N2                                                                      | CT | IV | 6968209 | 6970280 | WBGene00044352 | ZK381.8    | ZK381.8    | -0.716439971295741  |             |
| AGIWUR21041;AGIWUR21905                                                 |    |    |         |         |                |            |            |                     |             |
| N2                                                                      | CT | IV | 6971898 | 6972527 | WBGene00022726 | nhr-249    | ZK381.3    | -0.156352563411424  | AGIWUR41593 |
| N2                                                                      | CT | IV | 6974401 | 6977318 | WBGene00003992 | pgl-1      | ZK381.4    | 0.128124145055219   | AGIWUR9053  |
| N2                                                                      | CT | IV | 6977517 | 6978943 | WBGene00001862 | him-3      | ZK381.1    | -0.207628967628889  | AGIWUR7115  |
| N2                                                                      | CT | IV | 6978775 | 6986935 | WBGene00022727 | prkl-1     | ZK381.5    | 0.161475458221567   |             |
| AGIWUR33041;AGIWUR40133                                                 |    |    |         |         |                |            |            |                     |             |
| N2                                                                      | CT | IV | 6999557 | 7001493 | WBGene00016085 | C25A8.5    | C25A8.5    | 0.102703549355191   | AGIWUR40307 |
| N2                                                                      | CT | IV | 7003623 | 7009268 | WBGene00016084 | cht-3      | C25A8.4    | -0.347660075156455  | AGIWUR32990 |
| N2                                                                      | CT | IV | 7009841 | 7010744 | WBGene00016083 | C25A8.2    | C25A8.2    | 0.262573873812349   |             |
| AGIWUR4076;AGIWUR20082                                                  |    |    |         |         |                |            |            |                     |             |
| N2                                                                      | CT | IV | 7011960 | 7016542 | WBGene00015553 | trxr-1     | C06G3.7    | -0.285826619052276  | AGIWUR31747 |
| N2                                                                      | CT | IV | 7017626 | 7020210 | WBGene00015552 | C06G3.6    | C06G3.6    | -0.184551755295674  |             |
| AGIWUR7736;AGIWUR28620;AGIWUR44593                                      |    |    |         |         |                |            |            |                     |             |
| N2                                                                      | CT | IV | 7024211 | 7028144 | WBGene00015551 | C06G3.5    | C06G3.5    | 0.274293362609738   |             |
| AGIWUR30316;AGIWUR36250;AGIWUR38569                                     |    |    |         |         |                |            |            |                     |             |
| N2                                                                      | CT | IV | 7028173 | 7030967 | WBGene00015550 | C06G3.4    | C06G3.4    | 0.0168219116328858  | AGIWUR44247 |
| N2                                                                      | CT | IV | 7031298 | 7032559 | WBGene00015554 | C06G3.8    | C06G3.8    | -0.0324825702643263 | AGIWUR5950  |
| N2                                                                      | CT | IV | 7032716 | 7036982 | WBGene00015555 | ufl-1      | C06G3.9    | 0.00318005162502999 | AGIWUR13922 |
| N2                                                                      | CT | IV | 7036960 | 7039580 | WBGene00000585 | cogc-2     | C06G3.10   | -0.107166197298319  |             |
| AGIWUR23147                                                             |    |    |         |         |                |            |            |                     |             |
| N2                                                                      | CT | IV | 7040211 | 7043694 | WBGene00002228 | k1p-18     | C06G3.2    | 0.228927572635789   |             |
| AGIWUR14117;AGIWUR15370;AGIWUR19879;AGIWUR28610;AGIWUR31615;AGIWUR38249 |    |    |         |         |                |            |            |                     |             |
| N2                                                                      | CT | IV | 7043935 | 7044604 | WBGene00006572 | tin-9.1    | C06G3.11   | -0.135130823367223  |             |
| AGIWUR17497;AGIWUR24565;AGIWUR36287;AGIWUR41579                         |    |    |         |         |                |            |            |                     |             |
| N2                                                                      | CT | IV | 7049954 | 7053450 | WBGene00003695 | nhr-105    | C06G3.1    | 0.184400893898811   |             |
| AGIWUR8408;AGIWUR25401;AGIWUR27613;AGIWUR38972;AGIWUR39864              |    |    |         |         |                |            |            |                     |             |
| N2                                                                      | CT | IV | 7057977 | 7059911 | WBGene00005941 | srx-50     | Y43B11AL.2 | -0.0896451567958891 |             |
| AGIWUR10633                                                             |    |    |         |         |                |            |            |                     |             |
| N2                                                                      | CT | IV | 7060192 | 7061778 | WBGene00005811 | srw-64     | Y43B11AL.3 | 0.0897806368004619  |             |
| AGIWUR25631;AGIWUR29248;AGIWUR34284;AGIWUR38179                         |    |    |         |         |                |            |            |                     |             |
| N2                                                                      | CT | IV | 7065322 | 7068035 | WBGene00021542 | Y43B11AL.1 | Y43B11AL.1 | 0.03967481374037    |             |

|                                                 |    |    |         |         |                |            |            |                                |
|-------------------------------------------------|----|----|---------|---------|----------------|------------|------------|--------------------------------|
| AGIWUR28733                                     |    |    |         |         |                |            |            |                                |
| N2                                              | CT | IV | 7070858 | 7071736 | WBGene00005206 | srg-49     | Y43B11AR.6 | 0.195628861097628              |
| AGIWUR28710                                     |    |    |         |         |                |            |            |                                |
| N2                                              | CT | IV | 7072410 | 7073625 | WBGene00005205 | srg-48     | Y43B11AR.5 | 0.115254605346442              |
| AGIWUR9062                                      |    |    |         |         |                |            |            |                                |
| N2                                              | CT | IV | 7074030 | 7075163 | WBGene00005207 | srg-50     | Y43B11AR.2 | -0.425041501119332             |
| AGIWUR25216                                     |    |    |         |         |                |            |            |                                |
| N2                                              | CT | IV | 7081514 | 7082266 | WBGene00021543 | Y43B11AR.1 | Y43B11AR.1 | 0.193550947011353              |
| AGIWUR4163                                      |    |    |         |         |                |            |            |                                |
| N2                                              | CT | IV | 7082220 | 7083716 | WBGene00021544 | Y43B11AR.3 | Y43B11AR.3 | -0.270258257294561             |
| AGIWUR16252                                     |    |    |         |         |                |            |            |                                |
| N2                                              | CT | IV | 7083694 | 7084682 | WBGene00004473 | rps-4      | Y43B11AR.4 | -0.0172475282051305            |
| AGIWUR360;AGIWUR10099                           |    |    |         |         |                |            |            |                                |
| N2                                              | CT | IV | 7085216 | 7094364 | WBGene00000942 | deb-1      | ZC477.9    | 0.0474712410878286             |
| AGIWUR22512;AGIWUR25757;AGIWUR32217;AGIWUR32771 |    |    |         |         |                |            |            |                                |
| N2                                              | CT | IV | 7101375 | 7103261 | WBGene00022620 | rde-8      | ZC477.5    | 0.0381982518227275 AGIWUR23519 |
| N2                                              | CT | IV | 7103492 | 7105096 | WBGene00022618 | ZC477.3    | ZC477.3    | -0.0390481755215237            |
| AGIWUR6342;AGIWUR8916;AGIWUR23991;AGIWUR24712   |    |    |         |         |                |            |            |                                |
| N2                                              | CT | IV | 7105169 | 7107733 | WBGene00022622 | ZC477.10   | ZC477.10   | 0.0205556693696716             |
| AGIWUR38280                                     |    |    |         |         |                |            |            |                                |
| N2                                              | CT | IV | 7108221 | 7109912 | WBGene00022617 | ZC477.2    | ZC477.2    | 0.145415195563208 AGIWUR23545  |
| N2                                              | CT | IV | 7114899 | 7119926 | WBGene00003527 | nas-8      | C34D4.9    | 0.00937592452155656 AGIWUR2427 |
| N2                                              | CT | IV | 7119918 | 7121413 | WBGene00016402 | C34D4.10   | C34D4.10   | -0.107735178244631             |
| AGIWUR17282                                     |    |    |         |         |                |            |            |                                |
| N2                                              | CT | IV | 7122194 | 7123947 | WBGene00006113 | str-48     | C34D4.8    | -0.000688131639691392          |
| AGIWUR19828;AGIWUR35417;AGIWUR42209             |    |    |         |         |                |            |            |                                |
| N2                                              | CT | IV | 7124481 | 7125516 | WBGene00006114 | str-49     | C34D4.7    | -0.229178545732932 AGIWUR31208 |
| N2                                              | CT | IV | 7127683 | 7130462 | WBGene00006115 | str-50     | C34D4.16   | -0.00557268663805566           |
| AGIWUR42325                                     |    |    |         |         |                |            |            |                                |
| N2                                              | CT | IV | 7130701 | 7131928 | WBGene00016403 | grsp-3     | C34D4.11   | 0.213686955612566              |
| AGIWUR9753                                      |    |    |         |         |                |            |            |                                |
| N2                                              | CT | IV | 7132132 | 7133217 | WBGene00000888 | cyn-12     | C34D4.12   | -0.117044435953893             |
| AGIWUR701                                       |    |    |         |         |                |            |            |                                |
| N2                                              | CT | IV | 7133448 | 7134083 | WBGene00016404 | mutd-1     | C34D4.13   | -0.280011245039407             |
| AGIWUR16341                                     |    |    |         |         |                |            |            |                                |
| N2                                              | CT | IV | 7134347 | 7144898 | WBGene00016405 | hecd-1     | C34D4.14   | 0.593534602745379              |
| AGIWUR20390                                     |    |    |         |         |                |            |            |                                |
| N2                                              | CT | IV | 7149361 | 7150692 | WBGene00016400 | C34D4.4    | C34D4.4    | -0.0651744827420337 AGIWUR3381 |
| N2                                              | CT | IV | 7150663 | 7152501 | WBGene00000687 | col-113    | C34D4.15   | -0.0296125565809398            |

## AGIWUR33931

|    |    |    |         |         |                |         |          |                     |             |
|----|----|----|---------|---------|----------------|---------|----------|---------------------|-------------|
| N2 | CT | IV | 7153623 | 7154193 | WBGene00016399 | C34D4.3 | C34D4.3  | -0.0510546076745761 | AGIWUR8606  |
| N2 | CT | IV | 7154656 | 7156010 | WBGene00016398 | C34D4.2 | C34D4.2  | 0.116720106437117   | AGIWUR28894 |
| N2 | CT | IV | 7156900 | 7160109 | WBGene00016397 | maph-9  | C34D4.1  | -0.0878791001398893 | AGIWUR21448 |
| N2 | CT | IV | 7160135 | 7165748 | WBGene00004411 | rpc-1   | C42D4.8  | -0.190642287906044  | AGIWUR40633 |
| N2 | CT | IV | 7168710 | 7169346 | WBGene00004822 | skr-16  | C42D4.6  | -0.251771252066714  | AGIWUR44191 |
| N2 | CT | IV | 7169931 | 7171322 | WBGene00006251 | str-220 | C42D4.9  | -0.0597524413183406 | AGIWUR13622 |
| N2 | CT | IV | 7171489 | 7172691 | WBGene00006250 | str-219 | C42D4.10 | 0.133154713846904   |             |

## AGIWUR984;AGIWUR38838

|    |    |    |         |         |                |          |          |                     |             |
|----|----|----|---------|---------|----------------|----------|----------|---------------------|-------------|
| N2 | CT | IV | 7173789 | 7175008 | WBGene00006069 | str-1    | C42D4.5  | -0.0324096437370311 | AGIWUR28880 |
| N2 | CT | IV | 7177187 | 7178423 | WBGene00006109 | str-44   | C42D4.4  | 0.154401446502699   | AGIWUR8855  |
| N2 | CT | IV | 7179239 | 7180484 | WBGene00016596 | C42D4.3  | C42D4.3  | 0.15842572756282    | AGIWUR3239  |
| N2 | CT | IV | 7180535 | 7182993 | WBGene00016595 | C42D4.2  | C42D4.2  | -0.288096091342204  | AGIWUR26269 |
| N2 | CT | IV | 7183412 | 7184697 | WBGene00016597 | clcc-179 | C42D4.11 | 0.269017878434189   |             |

## AGIWUR42822

|    |    |    |         |         |                |         |          |                     |  |
|----|----|----|---------|---------|----------------|---------|----------|---------------------|--|
| N2 | CT | IV | 7185283 | 7186856 | WBGene00006276 | str-249 | C42D4.12 | -0.0648453877360082 |  |
|----|----|----|---------|---------|----------------|---------|----------|---------------------|--|

## AGIWUR22230;AGIWUR41333

|    |    |    |         |         |                |          |          |                   |  |
|----|----|----|---------|---------|----------------|----------|----------|-------------------|--|
| N2 | CT | IV | 7187189 | 7188130 | WBGene00016598 | C42D4.13 | C42D4.13 | 0.023411630926903 |  |
|----|----|----|---------|---------|----------------|----------|----------|-------------------|--|

## AGIWUR12548

|    |    |    |         |         |                |         |         |                     |             |
|----|----|----|---------|---------|----------------|---------|---------|---------------------|-------------|
| N2 | CT | IV | 7189191 | 7190331 | WBGene00016594 | C42D4.1 | C42D4.1 | 0.00667145368628752 | AGIWUR18620 |
| N2 | CT | IV | 7191076 | 7191841 | WBGene00020043 | R13A1.5 | R13A1.5 | -0.14844726477966   | AGIWUR28017 |
| N2 | CT | IV | 7193520 | 7195834 | WBGene00020046 | best-16 | R13A1.9 | -0.0320768734488954 | AGIWUR33813 |
| N2 | CT | IV | 7197153 | 7203643 | WBGene00006748 | unc-8   | R13A1.4 | -0.132144874386894  | AGIWUR37063 |
| N2 | CT | IV | 7206246 | 7218000 | WBGene00006504 | kcc-1   | R13A1.2 | 0.0972704311530146  |             |

## AGIWUR8066;AGIWUR11215;AGIWUR19432;AGIWUR21562;AGIWUR24569;AGIWUR25696;AGIWUR27820;AGIWUR29249

|    |    |    |         |         |                |          |          |                    |             |
|----|----|----|---------|---------|----------------|----------|----------|--------------------|-------------|
| N2 | CT | IV | 7218049 | 7219485 | WBGene00020045 | glb-23   | R13A1.8  | 0.0716984027082805 | AGIWUR17701 |
| N2 | CT | IV | 7220104 | 7220607 | WBGene00020041 | R13A1.1  | R13A1.1  | 0.0313972907729489 | AGIWUR17265 |
| N2 | CT | IV | 7225416 | 7227172 | WBGene00044504 | R13A1.10 | R13A1.10 | -0.22098404628909  |             |

## AGIWUR11055;AGIWUR15267

|    |    |    |         |         |                |         |         |                   |  |
|----|----|----|---------|---------|----------------|---------|---------|-------------------|--|
| N2 | CT | IV | 7227274 | 7228306 | WBGene00017053 | D2024.5 | D2024.5 | 0.113879596390431 |  |
|----|----|----|---------|---------|----------------|---------|---------|-------------------|--|

## AGIWUR23426;AGIWUR37950

|    |    |    |         |         |                |         |         |                    |             |
|----|----|----|---------|---------|----------------|---------|---------|--------------------|-------------|
| N2 | CT | IV | 7228403 | 7230223 | WBGene00000292 | cap-1   | D2024.6 | -0.143319511213329 | AGIWUR37009 |
| N2 | CT | IV | 7231235 | 7232822 | WBGene00017052 | D2024.4 | D2024.4 | 0.0206600344144547 |             |

## AGIWUR13170;AGIWUR14444;AGIWUR40395

|    |    |    |         |         |                |        |         |                      |             |
|----|----|----|---------|---------|----------------|--------|---------|----------------------|-------------|
| N2 | CT | IV | 7237722 | 7239976 | WBGene00001241 | elo-3  | D2024.3 | 0.116145714805935    | AGIWUR10615 |
| N2 | CT | IV | 7240445 | 7242270 | WBGene00017054 | gstk-2 | D2024.7 | -0.00455741082653205 | AGIWUR35947 |
| N2 | CT | IV | 7244208 | 7245502 | WBGene00017051 | afmd-1 | D2024.2 | -0.112652943081482   |             |

## AGIWUR4942;AGIWUR16746

|    |    |    |         |         |                |         |         |                     |             |
|----|----|----|---------|---------|----------------|---------|---------|---------------------|-------------|
| N2 | CT | IV | 7247543 | 7249437 | WBGene00017050 | D2024.1 | D2024.1 | -0.0332367733382535 | AGIWUR40720 |
|----|----|----|---------|---------|----------------|---------|---------|---------------------|-------------|

|                                                                                 |    |    |         |         |                |          |          |                     |             |
|---------------------------------------------------------------------------------|----|----|---------|---------|----------------|----------|----------|---------------------|-------------|
| N2                                                                              | CT | IV | 7254990 | 7255909 | WBGene00015534 | C06E4.5  | C06E4.5  | 0.131712717362873   | AGIWUR6487  |
| N2                                                                              | CT | IV | 7257217 | 7258248 | WBGene00015535 | C06E4.6  | C06E4.6  | 0.23742967295617    | AGIWUR40975 |
| N2                                                                              | CT | IV | 7258653 | 7259622 | WBGene00015533 | C06E4.4  | C06E4.4  | 0.0795437081868346  | AGIWUR32146 |
| N2                                                                              | CT | IV | 7260875 | 7262132 | WBGene00015532 | C06E4.3  | C06E4.3  | -0.147892157763934  | AGIWUR15367 |
| N2                                                                              | CT | IV | 7262237 | 7263237 | WBGene00015536 | glb-2    | C06E4.7  | 0.192087097250473   | AGIWUR22556 |
| N2                                                                              | CT | IV | 7276961 | 7283086 | WBGene00015531 | C06E4.2  | C06E4.2  | -0.129779344672838  | AGIWUR4170  |
| N2                                                                              | CT | IV | 7283257 | 7283871 | WBGene00015530 | C06E4.1  | C06E4.1  | -0.128351906511256  | AGIWUR38303 |
| N2                                                                              | CT | IV | 7284219 | 7285873 | WBGene00015537 | C06E4.8  | C06E4.8  | -0.851349917132292  | AGIWUR19169 |
| N2                                                                              | CT | IV | 7286182 | 7287526 | WBGene00018345 | F42C5.3  | F42C5.3  | 2.73608011366018    | AGIWUR36799 |
| N2                                                                              | CT | IV | 7288074 | 7292127 | WBGene00018346 | F42C5.4  | F42C5.4  | -0.194992156564774  | AGIWUR22927 |
| N2                                                                              | CT | IV | 7292536 | 7294221 | WBGene00018347 | F42C5.5  | F42C5.5  | 0.169222139732865   | AGIWUR27276 |
| N2                                                                              | CT | IV | 7305628 | 7308350 | WBGene00018344 | npr-27   | F42C5.2  | -0.0168280165748218 | AGIWUR10249 |
| N2                                                                              | CT | IV | 7308486 | 7309057 | WBGene00018348 | F42C5.6  | F42C5.6  | -0.21105940199041   | AGIWUR32176 |
| N2                                                                              | CT | IV | 7309838 | 7310760 | WBGene00001713 | grl-4    | F42C5.7  | 0.177829844636321   | AGIWUR17540 |
| N2                                                                              | CT | IV | 7312981 | 7313864 | WBGene00004477 | rps-8    | F42C5.8  | 0.308359810782802   |             |
| AGIWUR14443;AGIWUR25098;AGIWUR29580;AGIWUR41164;AGIWUR41234;AGIWUR43049         |    |    |         |         |                |          |          |                     |             |
| N2                                                                              | CT | IV | 7314371 | 7317163 | WBGene00018349 | F42C5.9  | F42C5.9  | -0.0904199433272979 |             |
| AGIWUR6426;AGIWUR34872                                                          |    |    |         |         |                |          |          |                     |             |
| N2                                                                              | CT | IV | 7320734 | 7326663 | WBGene00018350 | ifo-1    | F42C5.10 | 0.199193245914856   |             |
| AGIWUR19909                                                                     |    |    |         |         |                |          |          |                     |             |
| N2                                                                              | CT | IV | 7327110 | 7329108 | WBGene00021495 | sqst-2   | Y40C5A.1 | -0.207205491396511  |             |
| AGIWUR16543                                                                     |    |    |         |         |                |          |          |                     |             |
| N2                                                                              | CT | IV | 7329620 | 7332811 | WBGene00003841 | ocr-4    | Y40C5A.2 | -0.760312424999749  |             |
| AGIWUR23250                                                                     |    |    |         |         |                |          |          |                     |             |
| N2                                                                              | CT | IV | 7349283 | 7365111 | WBGene00021497 | Y40C5A.4 | Y40C5A.4 | -0.054038994298049  |             |
| AGIWUR41795;AGIWUR44488                                                         |    |    |         |         |                |          |          |                     |             |
| N2                                                                              | CT | IV | 7375147 | 7376635 | WBGene00020446 | T12B3.3  | T12B3.3  | -0.158939972735205  | AGIWUR11785 |
| N2                                                                              | CT | IV | 7376811 | 7378906 | WBGene00020445 | T12B3.2  | T12B3.2  | -0.12650494495465   | AGIWUR26548 |
| N2                                                                              | CT | IV | 7382415 | 7384752 | WBGene00020444 | T12B3.1  | T12B3.1  | 0.234120015392683   |             |
| AGIWUR11306;AGIWUR19404;AGIWUR43250                                             |    |    |         |         |                |          |          |                     |             |
| N2                                                                              | CT | IV | 7384756 | 7388943 | WBGene00020447 | T12B3.4  | T12B3.4  | -0.118209401150729  | AGIWUR28778 |
| N2                                                                              | CT | IV | 7393221 | 7397555 | WBGene00016739 | pitr-1   | C48A7.2  | -0.182731956134703  | AGIWUR21517 |
| N2                                                                              | CT | IV | 7405460 | 7418733 | WBGene00001187 | egl-19   | C48A7.1  | 0.0931292839825559  |             |
| AGIWUR364;AGIWUR4859;AGIWUR5340;AGIWUR16650;AGIWUR17147;AGIWUR31639;AGIWUR43178 |    |    |         |         |                |          |          |                     |             |
| N2                                                                              | CT | IV | 7419118 | 7419971 | WBGene00015215 | B0496.6  | B0496.6  | 0.0778574840516102  | AGIWUR8028  |
| N2                                                                              | CT | IV | 7420958 | 7422671 | WBGene00015214 | srtx-1   | B0496.5  | 0.15902619148763    |             |
| AGIWUR6765;AGIWUR18892;AGIWUR42651                                              |    |    |         |         |                |          |          |                     |             |
| N2                                                                              | CT | IV | 7424498 | 7444660 | WBGene00006814 | unc-82   | B0496.3  | 0.0770580616701926  |             |
| AGIWUR29816;AGIWUR33821                                                         |    |    |         |         |                |          |          |                     |             |

|                                                                                                                                               |    |    |         |         |                |          |          |                      |             |
|-----------------------------------------------------------------------------------------------------------------------------------------------|----|----|---------|---------|----------------|----------|----------|----------------------|-------------|
| N2                                                                                                                                            | CT | IV | 7444639 | 7445432 | WBGene00015216 | valv-1   | B0496.7  | 0.160697584295026    | AGIWUR490   |
| N2                                                                                                                                            | CT | IV | 7446390 | 7447466 | WBGene00015210 | B0496.1  | B0496.1  | -0.285070172053127   | AGIWUR23905 |
| N2                                                                                                                                            | CT | IV | 7447856 | 7449169 | WBGene00015211 | B0496.2  | B0496.2  | -0.0266868049837381  |             |
| AGIWUR6296;AGIWUR8092;AGIWUR26012                                                                                                             |    |    |         |         |                |          |          |                      |             |
| N2                                                                                                                                            | CT | IV | 7449067 | 7451445 | WBGene00015217 | tes-1    | B0496.8  | 0.0473650138963571   | AGIWUR15116 |
| N2                                                                                                                                            | CT | IV | 7456525 | 7458214 | WBGene00017416 | F13B6.1  | F13B6.1  | 0.0165663852459179   |             |
| AGIWUR11830;AGIWUR14383;AGIWUR42047                                                                                                           |    |    |         |         |                |          |          |                      |             |
| N2                                                                                                                                            | CT | IV | 7458836 | 7460424 | WBGene00017417 | F13B6.2  | F13B6.2  | -0.0305860631539634  | AGIWUR26063 |
| N2                                                                                                                                            | CT | IV | 7461966 | 7465957 | WBGene00017418 | F13B6.3  | F13B6.3  | 0.1912052621249      | AGIWUR17248 |
| N2                                                                                                                                            | CT | IV | 7466702 | 7469832 | WBGene00018903 | F55G1.7  | F55G1.7  | -0.0743830686928524  | AGIWUR216   |
| N2                                                                                                                                            | CT | IV | 7470860 | 7473340 | WBGene00004044 | plk-3    | F55G1.8  | 0.0532580752797358   |             |
| AGIWUR16334;AGIWUR37685                                                                                                                       |    |    |         |         |                |          |          |                      |             |
| N2                                                                                                                                            | CT | IV | 7473476 | 7474957 | WBGene00018902 | F55G1.6  | F55G1.6  | -0.00613117680135566 | AGIWUR23448 |
| N2                                                                                                                                            | CT | IV | 7475041 | 7476215 | WBGene00018901 | F55G1.5  | F55G1.5  | -0.226711072364004   | AGIWUR31696 |
| N2                                                                                                                                            | CT | IV | 7476171 | 7477344 | WBGene00018904 | F55G1.9  | F55G1.9  | 0.00898393043386037  | AGIWUR9261  |
| N2                                                                                                                                            | CT | IV | 7478171 | 7485523 | WBGene00018900 | rod-1    | F55G1.4  | -0.124376883875733   | AGIWUR3348  |
| N2                                                                                                                                            | CT | IV | 7486519 | 7486962 | WBGene00001936 | his-62   | F55G1.3  | 0.108583602057951    | AGIWUR11523 |
| N2                                                                                                                                            | CT | IV | 7487560 | 7488025 | WBGene00001934 | his-60   | F55G1.11 | 0.0252278759484952   |             |
| AGIWUR12606;AGIWUR26290                                                                                                                       |    |    |         |         |                |          |          |                      |             |
| N2                                                                                                                                            | CT | IV | 7488216 | 7488956 | WBGene00001933 | his-59   | F55G1.2  | -0.0516494159728929  | AGIWUR33079 |
| N2                                                                                                                                            | CT | IV | 7491771 | 7493764 | WBGene00018899 | F55G1.1  | F55G1.1  | 0.215530619081874    | AGIWUR18883 |
| N2                                                                                                                                            | CT | IV | 7493843 | 7497850 | WBGene00018906 | egas-4   | F55G1.13 | 0.151676820893206    |             |
| AGIWUR4429;AGIWUR13990                                                                                                                        |    |    |         |         |                |          |          |                      |             |
| N2                                                                                                                                            | CT | IV | 7498129 | 7501437 | WBGene00018907 | F55G1.15 | F55G1.15 | -0.413286040256233   |             |
| AGIWUR15014                                                                                                                                   |    |    |         |         |                |          |          |                      |             |
| N2                                                                                                                                            | CT | IV | 7503622 | 7506447 | WBGene00001624 | glt-6    | R05G6.6  | 0.0498552880104128   | AGIWUR44783 |
| N2                                                                                                                                            | CT | IV | 7506425 | 7507891 | WBGene00019900 | vdac-1   | R05G6.7  | 0.0140763295404458   |             |
| AGIWUR7516;AGIWUR13358;AGIWUR26690;AGIWUR34696                                                                                                |    |    |         |         |                |          |          |                      |             |
| N2                                                                                                                                            | CT | IV | 7508514 | 7509475 | WBGene00019899 | R05G6.5  | R05G6.5  | -0.144163038171733   | AGIWUR24234 |
| N2                                                                                                                                            | CT | IV | 7509479 | 7512667 | WBGene00004039 | plc-4    | R05G6.8  | 0.111173449529816    |             |
| AGIWUR15511;AGIWUR15657;AGIWUR38392                                                                                                           |    |    |         |         |                |          |          |                      |             |
| N2                                                                                                                                            | CT | IV | 7513233 | 7514459 | WBGene00019898 | R05G6.4  | R05G6.4  | -0.283482720847385   | AGIWUR24319 |
| N2                                                                                                                                            | CT | IV | 7514366 | 7516267 | WBGene00019901 | R05G6.9  | R05G6.9  | -0.0126587534285969  | AGIWUR43722 |
| N2                                                                                                                                            | CT | IV | 7516585 | 7517035 | WBGene00043466 | R05G6.3  | R05G6.3  | -0.17874876604516    | AGIWUR30281 |
| N2                                                                                                                                            | CT | IV | 7517445 | 7542535 | WBGene00019902 | R05G6.10 | R05G6.10 | 0.11260668142658     |             |
| AGIWUR4083;AGIWUR9586;AGIWUR17594;AGIWUR19402;AGIWUR21095;AGIWUR22162;AGIWUR23598;AGIWUR30608;AGIWUR35767;AGIWUR37498;AGIWUR39891;AGIWUR44953 |    |    |         |         |                |          |          |                      |             |
| N2                                                                                                                                            | CT | IV | 7543984 | 7550812 | WBGene00003914 | pam-1    | F49E8.3  | -0.128778318521142   |             |
| AGIWUR2787;AGIWUR8214;AGIWUR17602;AGIWUR18876;AGIWUR23932                                                                                     |    |    |         |         |                |          |          |                      |             |

|                                                                                                                                  |    |    |         |         |                |          |          |                       |             |
|----------------------------------------------------------------------------------------------------------------------------------|----|----|---------|---------|----------------|----------|----------|-----------------------|-------------|
| N2                                                                                                                               | CT | IV | 7548417 | 7551511 | WBGene00018636 | F49E8.2  | F49E8.2  | -0.021091103717561    | AGIWUR43872 |
| N2                                                                                                                               | CT | IV | 7551550 | 7553008 | WBGene00000996 | dif-1    | F49E8.5  | -0.142640413505327    |             |
| AGIWUR12711;AGIWUR41882                                                                                                          |    |    |         |         |                |          |          |                       |             |
| N2                                                                                                                               | CT | IV | 7553532 | 7554488 | WBGene00018637 | F49E8.6  | F49E8.6  | -0.0135621099408656   | AGIWUR10807 |
| N2                                                                                                                               | CT | IV | 7554489 | 7556447 | WBGene00018638 | F49E8.7  | F49E8.7  | 0.184934615192018     | AGIWUR26569 |
| N2                                                                                                                               | CT | IV | 7556637 | 7558759 | WBGene00018635 | npr1-2   | F49E8.1  | -0.229849564378721    |             |
| AGIWUR6442;AGIWUR23027;AGIWUR37510                                                                                               |    |    |         |         |                |          |          |                       |             |
| N2                                                                                                                               | CT | IV | 7558726 | 7561664 | WBGene00002074 | ima-3    | F32E10.4 | 0.193240798925537     |             |
| AGIWUR4573;AGIWUR43964                                                                                                           |    |    |         |         |                |          |          |                       |             |
| N2                                                                                                                               | CT | IV | 7562220 | 7563724 | WBGene00043068 | F32E10.9 | F32E10.9 | 0.0527946761785909    |             |
| AGIWUR22062                                                                                                                      |    |    |         |         |                |          |          |                       |             |
| N2                                                                                                                               | CT | IV | 7567607 | 7568507 | WBGene00017995 | F32E10.8 | F32E10.8 | -0.0218766521283298   |             |
| AGIWUR42705                                                                                                                      |    |    |         |         |                |          |          |                       |             |
| N2                                                                                                                               | CT | IV | 7568893 | 7573761 | WBGene00017991 | clac-180 | F32E10.3 | -0.490951978681661    |             |
| AGIWUR7560                                                                                                                       |    |    |         |         |                |          |          |                       |             |
| N2                                                                                                                               | CT | IV | 7574355 | 7578381 | WBGene00017992 | F32E10.5 | F32E10.5 | -0.151491158921951    |             |
| AGIWUR30292                                                                                                                      |    |    |         |         |                |          |          |                       |             |
| N2                                                                                                                               | CT | IV | 7578501 | 7580269 | WBGene00017993 | cec-5    | F32E10.6 | -0.000986656029004607 |             |
| AGIWUR26501;AGIWUR38094                                                                                                          |    |    |         |         |                |          |          |                       |             |
| N2                                                                                                                               | CT | IV | 7580597 | 7583726 | WBGene00017989 | nol-10   | F32E10.1 | -0.110619307603457    |             |
| AGIWUR40007                                                                                                                      |    |    |         |         |                |          |          |                       |             |
| N2                                                                                                                               | CT | IV | 7588931 | 7628234 | WBGene00018468 | tag-80   | F45E4.3  | -0.0733221175234244   |             |
| AGIWUR2833;AGIWUR3482;AGIWUR15919;AGIWUR21429;AGIWUR30093;AGIWUR30681;AGIWUR33742;AGIWUR34251                                    |    |    |         |         |                |          |          |                       |             |
| N2                                                                                                                               | CT | IV | 7628206 | 7629042 | WBGene00018470 | F45E4.5  | F45E4.5  | 0.0209817400249896    |             |
| AGIWUR1969;AGIWUR7378;AGIWUR9519;AGIWUR11474;AGIWUR13230;AGIWUR18375;AGIWUR19195;AGIWUR20605;AGIWUR22249;AGIWUR35994;AGIWUR42005 |    |    |         |         |                |          |          |                       |             |
| N2                                                                                                                               | CT | IV | 7633360 | 7634657 | WBGene00004046 | plp-1    | F45E4.2  | -0.141557395504248    |             |
| AGIWUR13584;AGIWUR15669                                                                                                          |    |    |         |         |                |          |          |                       |             |
| N2                                                                                                                               | CT | IV | 7634786 | 7635710 | WBGene00000190 | arf-1.1  | F45E4.1  | 0.237182389234597     |             |
| AGIWUR9982;AGIWUR29192                                                                                                           |    |    |         |         |                |          |          |                       |             |
| N2                                                                                                                               | CT | IV | 7635655 | 7641925 | WBGene00018472 | nep-16   | F45E4.7  | 0.0280862987090367    |             |
| AGIWUR10429;AGIWUR19799;AGIWUR25987;AGIWUR37128;AGIWUR37568;AGIWUR39304                                                          |    |    |         |         |                |          |          |                       |             |
| N2                                                                                                                               | CT | IV | 7642052 | 7643096 | WBGene00003758 | nlp-20   | F45E4.8  | -0.196464089259967    | AGIWUR31298 |
| N2                                                                                                                               | CT | IV | 7644895 | 7646219 | WBGene00001975 | hmg-5    | F45E4.9  | 0.168969684123425     | AGIWUR23274 |
| N2                                                                                                                               | CT | IV | 7646200 | 7654230 | WBGene00001584 | nrde-4   | F45E4.10 | -0.0639235058347136   |             |
| AGIWUR36051                                                                                                                      |    |    |         |         |                |          |          |                       |             |
| N2                                                                                                                               | CT | IV | 7658734 | 7664166 | WBGene00015619 | C08G9.1  | C08G9.1  | -0.0836562983303768   |             |
| AGIWUR8284;AGIWUR21343;AGIWUR34698                                                                                               |    |    |         |         |                |          |          |                       |             |
| N2                                                                                                                               | CT | IV | 7664157 | 7672972 | WBGene00015620 | C08G9.2  | C08G9.2  | -0.0465990511430316   |             |



AGIWUR12102;AGIWUR35330;AGIWUR39246;AGIWUR40267;AGIWUR44579  
N2 CT IV 7675174 7696923 WBGene00002173 itr-1 F33D4.2 0.0475560462316369  
AGIWUR1811;AGIWUR9866;AGIWUR11333;AGIWUR16479;AGIWUR20010;AGIWUR24951;AGIWUR24980;AGIWUR25962;AGIWUR27452;AGIWUR27554;AGIWUR31844;AGIWUR40796  
N2 CT IV 7696932 7698420 WBGene00001456 flp-13 F33D4.3 -0.020794488865846 AGIWUR40385  
N2 CT IV 7703873 7706905 WBGene00017996 F33D4.4 F33D4.4 0.0740564888152129 AGIWUR40904  
N2 CT IV 7707575 7709084 WBGene00017997 mrp1-1 F33D4.5 -0.261165576232695  
AGIWUR23551;AGIWUR40906;AGIWUR40985  
N2 CT IV 7709192 7709736 WBGene00017999 emc-6 F33D4.7 -0.213528166526377 AGIWUR3453  
N2 CT IV 7710045 7710826 WBGene00023487 mrps-24 F33D4.8 0.167980091488032  
AGIWUR1782;AGIWUR18029;AGIWUR24110;AGIWUR41310  
N2 CT IV 7710975 7714198 WBGene00003607 nhr-8 F33D4.1 0.0759282894272602  
AGIWUR9043;AGIWUR11051;AGIWUR20855;AGIWUR37299  
N2 CT IV 7714164 7718009 WBGene00017998 F33D4.6 F33D4.6 -0.141913741895377  
AGIWUR2259;AGIWUR4489;AGIWUR4741;AGIWUR6491;AGIWUR20721;AGIWUR21072;AGIWUR30717;AGIWUR34578;AGIWUR41364  
N2 CT IV 7720566 7723199 WBGene00016846 C50F7.6 C50F7.6 -0.0481142814258266 AGIWUR29864  
N2 CT IV 7726718 7727951 WBGene00016845 C50F7.5 C50F7.5 -0.149188355815976  
AGIWUR5278;AGIWUR18042;AGIWUR42280  
N2 CT IV 7728913 7730645 WBGene00016844 sucg-1 C50F7.4 -0.121200407966928 AGIWUR31058  
N2 CT IV 7730669 7732060 WBGene00016847 C50F7.9 C50F7.9 0.184959510300033 AGIWUR29923  
N2 CT IV 7732329 7734210 WBGene00016843 C50F7.3 C50F7.3 0.0312641416387685 AGIWUR22357  
N2 CT IV 7734647 7736409 WBGene00000551 clx-1 C50F7.2 0.0463274462979477 AGIWUR36592  
N2 CT IV 7743906 7746074 WBGene00016842 npr-35 C50F7.1 -0.0878480280625373  
AGIWUR5063;AGIWUR17132;AGIWUR28609  
N2 CT IV 7745979 7748225 WBGene00016848 klo-1 C50F7.10 -0.0386060694651071  
AGIWUR5356  
N2 CT IV 7748157 7757358 WBGene00016700 C46A5.4 C46A5.4 -0.127682377044337 AGIWUR5385  
N2 CT IV 7757513 7759627 WBGene00016701 C46A5.5 C46A5.5 0.0725646858540951 AGIWUR36380  
N2 CT IV 7760000 7763848 WBGene00016702 C46A5.6 C46A5.6 -0.137504915717301 AGIWUR4718  
N2 CT IV 7763931 7767094 WBGene00016698 C46A5.1 C46A5.1 0.212714453775706 AGIWUR10952  
N2 CT IV 7768395 7770025 WBGene00016703 rd1-1 C46A5.8 0.0455991146414245 AGIWUR19222  
N2 CT IV 7770770 7774275 WBGene00001827 hcf-1 C46A5.9 0.0306512490052029  
AGIWUR14670;AGIWUR29125;AGIWUR34534  
N2 CT IV 7774411 7775956 WBGene00016374 swd-2.2 C33H5.7 -0.230300094815739 AGIWUR13567  
N2 CT IV 7776025 7778022 WBGene00016373 swd-2.1 C33H5.6 -0.0341330578202044 AGIWUR4839  
N2 CT IV 7779379 7782499 WBGene00016376 sec-10 C33H5.9 -0.0896761272121012  
AGIWUR24432;AGIWUR29650;AGIWUR29677;AGIWUR35758;AGIWUR37825  
N2 CT IV 7782599 7783851 WBGene00044325 tag-321 C33H5.19 -0.10445438858968  
AGIWUR8294

|                                                                                                             |    |    |         |         |                |          |          |                     |             |
|-------------------------------------------------------------------------------------------------------------|----|----|---------|---------|----------------|----------|----------|---------------------|-------------|
| N2                                                                                                          | CT | IV | 7783970 | 7785556 | WBGene00044326 | tag-322  | C33H5.10 | -0.11349733492386   |             |
| AGIWUR5860                                                                                                  |    |    |         |         |                |          |          |                     |             |
| N2                                                                                                          | CT | IV | 7786000 | 7789613 | WBGene00016378 | imp-3    | C33H5.11 | -0.0974786900407665 |             |
| AGIWUR351;AGIWUR4509;AGIWUR18679;AGIWUR19177;AGIWUR28518                                                    |    |    |         |         |                |          |          |                     |             |
| N2                                                                                                          | CT | IV | 7789847 | 7791229 | WBGene00004703 | rsp-6    | C33H5.12 | 0.139903799888513   |             |
| AGIWUR2502;AGIWUR3624;AGIWUR21741;AGIWUR27504;AGIWUR32559;AGIWUR34162;AGIWUR37983;AGIWUR38089               |    |    |         |         |                |          |          |                     |             |
| N2                                                                                                          | CT | IV | 7791704 | 7792263 | WBGene00016379 | C33H5.13 | C33H5.13 | -0.122731506217383  |             |
| AGIWUR285;AGIWUR2593;AGIWUR16455;AGIWUR20732;AGIWUR31399;AGIWUR41305                                        |    |    |         |         |                |          |          |                     |             |
| N2                                                                                                          | CT | IV | 7792349 | 7794809 | WBGene00016380 | ntp-1    | C33H5.14 | 0.0614129328185271  |             |
| AGIWUR738;AGIWUR12371;AGIWUR31554                                                                           |    |    |         |         |                |          |          |                     |             |
| N2                                                                                                          | CT | IV | 7794871 | 7796376 | WBGene00016381 | sgo-1    | C33H5.15 | -0.0502037100583586 |             |
| AGIWUR36220                                                                                                 |    |    |         |         |                |          |          |                     |             |
| N2                                                                                                          | CT | IV | 7797192 | 7800252 | WBGene00002221 | k1p-10   | C33H5.4  | 0.0914750474989177  |             |
| AGIWUR403;AGIWUR20408;AGIWUR24076;AGIWUR44025                                                               |    |    |         |         |                |          |          |                     |             |
| N2                                                                                                          | CT | IV | 7801916 | 7803350 | WBGene00016382 | C33H5.16 | C33H5.16 | 0.38343003401498    |             |
| AGIWUR39505                                                                                                 |    |    |         |         |                |          |          |                     |             |
| N2                                                                                                          | CT | IV | 7805040 | 7807948 | WBGene00016371 | C33H5.2  | C33H5.2  | -0.604857025053947  | AGIWUR22667 |
| N2                                                                                                          | CT | IV | 7808912 | 7810681 | WBGene00016370 | C33H5.1  | C33H5.1  | 0.019079079810016   | AGIWUR4459  |
| N2                                                                                                          | CT | IV | 7811157 | 7812809 | WBGene00016383 | zgpa-1   | C33H5.17 | -0.40330931705393   |             |
| AGIWUR8182                                                                                                  |    |    |         |         |                |          |          |                     |             |
| N2                                                                                                          | CT | IV | 7812770 | 7815733 | WBGene00016384 | cdgs-1   | C33H5.18 | 0.0204683698175461  |             |
| AGIWUR10278;AGIWUR14325;AGIWUR20433;AGIWUR20750;AGIWUR21303;AGIWUR21397;AGIWUR25679;AGIWUR28313;AGIWUR28334 |    |    |         |         |                |          |          |                     |             |
| ;AGIWUR29500;AGIWUR30310;AGIWUR36176;AGIWUR39157;AGIWUR44187                                                |    |    |         |         |                |          |          |                     |             |
| N2                                                                                                          | CT | IV | 7818251 | 7821195 | WBGene00004363 | ric-3    | T14A8.1  | -0.196999942624281  | AGIWUR12936 |
| N2                                                                                                          | CT | IV | 7821673 | 7822700 | WBGene00020497 | T14A8.2  | T14A8.2  | 0.019213180337168   | AGIWUR21984 |
| N2                                                                                                          | CT | IV | 7826334 | 7829301 | WBGene00015509 | C06A6.4  | C06A6.4  | 0.155423002500928   | AGIWUR17848 |
| N2                                                                                                          | CT | IV | 7830525 | 7832401 | WBGene00015508 | mvb-12   | C06A6.3  | -0.0429668607915872 | AGIWUR28526 |
| N2                                                                                                          | CT | IV | 7832344 | 7834675 | WBGene00015510 | C06A6.5  | C06A6.5  | -0.079421095549538  | AGIWUR44246 |
| N2                                                                                                          | CT | IV | 7837350 | 7838548 | WBGene00015511 | C06A6.7  | C06A6.7  | 0.00870885856607551 |             |
| AGIWUR1094;AGIWUR1440;AGIWUR43137                                                                           |    |    |         |         |                |          |          |                     |             |
| N2                                                                                                          | CT | IV | 7846630 | 7854224 | WBGene00015507 | C06A6.2  | C06A6.2  | -0.16918878136622   | AGIWUR3948  |
| N2                                                                                                          | CT | IV | 7868907 | 7870100 | WBGene00001453 | flp-10   | T06C10.4 | 0.111782740794788   |             |
| AGIWUR12836;AGIWUR17073;AGIWUR17722;AGIWUR20675;AGIWUR29234                                                 |    |    |         |         |                |          |          |                     |             |
| N2                                                                                                          | CT | IV | 7870865 | 7873034 | WBGene00020289 | T06C10.3 | T06C10.3 | 0.145436361296676   |             |
| AGIWUR11575                                                                                                 |    |    |         |         |                |          |          |                     |             |
| N2                                                                                                          | CT | IV | 7875727 | 7877881 | WBGene00002208 | kin-26   | T06C10.6 | 0.0750312177035966  |             |
| AGIWUR12261                                                                                                 |    |    |         |         |                |          |          |                     |             |
| N2                                                                                                          | CT | IV | 7879317 | 7881034 | WBGene00020288 | srt-73   | T06C10.2 | 0.0626369487984846  |             |
| AGIWUR1450                                                                                                  |    |    |         |         |                |          |          |                     |             |

|                                                                                |    |    |         |         |                |          |          |                      |             |
|--------------------------------------------------------------------------------|----|----|---------|---------|----------------|----------|----------|----------------------|-------------|
| N2                                                                             | CT | IV | 7882028 | 7900247 | WBGene00016957 | atic-1   | C55F2.1  | -0.13700358514041    |             |
| AGIWUR11020;AGIWUR15539;AGIWUR31631;AGIWUR40721                                |    |    |         |         |                |          |          |                      |             |
| N2                                                                             | CT | IV | 7900200 | 7902271 | WBGene00016793 | arp-11   | C49H3.8  | 0.378365595166803    |             |
| AGIWUR22789;AGIWUR27681;AGIWUR41817                                            |    |    |         |         |                |          |          |                      |             |
| N2                                                                             | CT | IV | 7903740 | 7907083 | WBGene00016792 | C49H3.6  | C49H3.6  | -0.0171024482108226  | AGIWUR35959 |
| N2                                                                             | CT | IV | 7907093 | 7909474 | WBGene00016794 | C49H3.9  | C49H3.9  | -0.111702432794052   |             |
| AGIWUR7966;AGIWUR10533;AGIWUR33949                                             |    |    |         |         |                |          |          |                      |             |
| N2                                                                             | CT | IV | 7910575 | 7915184 | WBGene00003827 | ntl-4    | C49H3.5  | -0.118803456554051   |             |
| AGIWUR1118;AGIWUR2358;AGIWUR7312;AGIWUR8161;AGIWUR8439;AGIWUR19950;AGIWUR23304 |    |    |         |         |                |          |          |                      |             |
| N2                                                                             | CT | IV | 7915291 | 7916711 | WBGene00016791 | C49H3.4  | C49H3.4  | 0.0278082259479451   |             |
| AGIWUR3522;AGIWUR10447;AGIWUR11519;AGIWUR14805                                 |    |    |         |         |                |          |          |                      |             |
| N2                                                                             | CT | IV | 7916699 | 7924129 | WBGene00002080 | xpo-3    | C49H3.10 | 0.275308288490779    |             |
| AGIWUR39598                                                                    |    |    |         |         |                |          |          |                      |             |
| N2                                                                             | CT | IV | 7924350 | 7924968 | WBGene00016790 | C49H3.3  | C49H3.3  | -0.225111848241584   | AGIWUR2622  |
| N2                                                                             | CT | IV | 7925298 | 7926391 | WBGene00004471 | rps-2    | C49H3.11 | -0.0710051629015673  |             |
| AGIWUR7606;AGIWUR9077                                                          |    |    |         |         |                |          |          |                      |             |
| N2                                                                             | CT | IV | 7926748 | 7927315 | WBGene00016795 | C49H3.12 | C49H3.12 | -0.130852096883189   |             |
| AGIWUR44761                                                                    |    |    |         |         |                |          |          |                      |             |
| N2                                                                             | CT | IV | 7928159 | 7933775 | WBGene00001535 | gcy-8    | C49H3.1  | -0.00507866879395635 | AGIWUR30693 |
| N2                                                                             | CT | IV | 7934097 | 7937746 | WBGene00000242 | bbs-2    | F20D12.3 | -0.116710144770176   |             |
| AGIWUR5162                                                                     |    |    |         |         |                |          |          |                      |             |
| N2                                                                             | CT | IV | 7937959 | 7938934 | WBGene00017645 | F20D12.7 | F20D12.7 | 0.122044538715302    |             |
| AGIWUR12975                                                                    |    |    |         |         |                |          |          |                      |             |
| N2                                                                             | CT | IV | 7939812 | 7941064 | WBGene00017644 | exc-9    | F20D12.5 | 0.212400738231533    |             |
| AGIWUR36421                                                                    |    |    |         |         |                |          |          |                      |             |
| N2                                                                             | CT | IV | 7943617 | 7946819 | WBGene00017643 | czw-1    | F20D12.4 | -0.240409974329108   |             |
| AGIWUR16838;AGIWUR18511;AGIWUR27746;AGIWUR30226                                |    |    |         |         |                |          |          |                      |             |
| N2                                                                             | CT | IV | 7948643 | 7953548 | WBGene00017642 | F20D12.2 | F20D12.2 | -0.124870077240804   |             |
| AGIWUR4597                                                                     |    |    |         |         |                |          |          |                      |             |
| N2                                                                             | CT | IV | 7953509 | 7955898 | WBGene00000442 | ceh-19   | F20D12.6 | -0.105985240093902   |             |
| AGIWUR15960;AGIWUR38313                                                        |    |    |         |         |                |          |          |                      |             |
| N2                                                                             | CT | IV | 7957580 | 7962129 | WBGene00017641 | csr-1    | F20D12.1 | 0.133581888785423    |             |
| AGIWUR32004                                                                    |    |    |         |         |                |          |          |                      |             |
| N2                                                                             | CT | IV | 7967363 | 7969600 | WBGene00019020 | F57H12.5 | F57H12.5 |                      |             |
| -0.00904485485798823 AGIWUR37274                                               |    |    |         |         |                |          |          |                      |             |
| N2                                                                             | CT | IV | 7970525 | 7973363 | WBGene00019019 | frpr-10  | F57H12.4 | -0.147240222193691   |             |
| AGIWUR12162                                                                    |    |    |         |         |                |          |          |                      |             |
| N2                                                                             | CT | IV | 7975430 | 7976406 | WBGene00019021 | F57H12.6 | F57H12.6 | -0.304299036686523   |             |
| AGIWUR23322                                                                    |    |    |         |         |                |          |          |                      |             |

|                                                                                   |    |    |         |         |                |           |           |                     |             |
|-----------------------------------------------------------------------------------|----|----|---------|---------|----------------|-----------|-----------|---------------------|-------------|
| N2                                                                                | CT | IV | 7977836 | 7979014 | WBGene00003879 | ora-1     | F57H12.3  | 0.578609157830949   |             |
| AGIWUR273                                                                         |    |    |         |         |                |           |           |                     |             |
| N2                                                                                | CT | IV | 7979823 | 7982005 | WBGene00006761 | unc-24    | F57H12.2  | -0.0710649434698611 |             |
| AGIWUR28958                                                                       |    |    |         |         |                |           |           |                     |             |
| N2                                                                                | CT | IV | 7982526 | 7983919 | WBGene00000183 | arf-3     | F57H12.1  | 0.00788506352429863 |             |
| AGIWUR17772                                                                       |    |    |         |         |                |           |           |                     |             |
| N2                                                                                | CT | IV | 7983854 | 7987183 | WBGene00003178 | mec-17    | F57H12.7  | 0.00146736750483889 |             |
| AGIWUR6494                                                                        |    |    |         |         |                |           |           |                     |             |
| N2                                                                                | CT | IV | 7988685 | 7991425 | WBGene00000689 | col-115   | Y42H9B.1  | 0.33487719060895    |             |
| AGIWUR29817                                                                       |    |    |         |         |                |           |           |                     |             |
| N2                                                                                | CT | IV | 7991410 | 8004136 | WBGene00004371 | rig-4     | Y42H9B.2  | -0.0321743170276463 |             |
| AGIWUR2109                                                                        |    |    |         |         |                |           |           |                     |             |
| N2                                                                                | CT | IV | 8011031 | 8012430 | WBGene00021541 | Y42H9B.3  | Y42H9B.3  | -0.238281072266521  |             |
| AGIWUR16920                                                                       |    |    |         |         |                |           |           |                     |             |
| N2                                                                                | CT | IV | 8014149 | 8015722 | WBGene00016130 | C26B2.8   | C26B2.8   | -0.170503564305823  |             |
| AGIWUR8660;AGIWUR13048;AGIWUR25460                                                |    |    |         |         |                |           |           |                     |             |
| N2                                                                                | CT | IV | 8016153 | 8016882 | WBGene00016129 | C26B2.7   | C26B2.7   | -0.234311648459338  |             |
| AGIWUR10974;AGIWUR14635;AGIWUR23376;AGIWUR29971                                   |    |    |         |         |                |           |           |                     |             |
| N2                                                                                | CT | IV | 8016994 | 8018221 | WBGene00016128 | elpc-4    | C26B2.6   | -0.042085059694104  | AGIWUR32454 |
| N2                                                                                | CT | IV | 8018130 | 8019808 | WBGene00016124 | dnc-4     | C26B2.1   | 0.280374115225293   |             |
| AGIWUR7415;AGIWUR34884;AGIWUR41679;AGIWUR42082;AGIWUR42711                        |    |    |         |         |                |           |           |                     |             |
| N2                                                                                | CT | IV | 8021146 | 8022122 | WBGene00016125 | C26B2.2   | C26B2.2   | 0.214603276673538   | AGIWUR33968 |
| N2                                                                                | CT | IV | 8022656 | 8029513 | WBGene00003625 | nhr-31    | C26B2.3   | -0.0616701619475277 |             |
| AGIWUR5390;AGIWUR12112;AGIWUR24589;AGIWUR24612;AGIWUR28272;AGIWUR38754            |    |    |         |         |                |           |           |                     |             |
| N2                                                                                | CT | IV | 8045045 | 8047363 | WBGene00016126 | nhr-258   | C26B2.4   | -0.347499938312396  | AGIWUR15286 |
| N2                                                                                | CT | IV | 8062669 | 8084087 | WBGene00004732 | sax-7     | C18F3.2   | -0.102850410968529  |             |
| AGIWUR1466;AGIWUR9755;AGIWUR15045;AGIWUR23315;AGIWUR30426;AGIWUR32779;AGIWUR34494 |    |    |         |         |                |           |           |                     |             |
| N2                                                                                | CT | IV | 8099918 | 8101424 | WBGene00021537 | Y42H9AR.2 | Y42H9AR.2 | -0.091900167318169  |             |
| AGIWUR33662                                                                       |    |    |         |         |                |           |           |                     |             |
| N2                                                                                | CT | IV | 8102501 | 8104323 | WBGene00021540 | Y42H9AR.5 | Y42H9AR.5 |                     |             |
| -0.00240653536762636 AGIWUR18854;AGIWUR21863;AGIWUR44955                          |    |    |         |         |                |           |           |                     |             |
| N2                                                                                | CT | IV | 8104287 | 8107600 | WBGene00021538 | rabs-5    | Y42H9AR.3 | 0.0274673445622078  |             |
| AGIWUR18906                                                                       |    |    |         |         |                |           |           |                     |             |
| N2                                                                                | CT | IV | 8107766 | 8112241 | WBGene00021539 | Y42H9AR.4 | Y42H9AR.4 | 0.131661391932634   |             |
| AGIWUR1965;AGIWUR5037;AGIWUR6631;AGIWUR23066;AGIWUR30445;AGIWUR33465              |    |    |         |         |                |           |           |                     |             |
| N2                                                                                | CT | IV | 8113384 | 8115670 | WBGene00021536 | Y42H9AR.1 | Y42H9AR.1 | 0.32423371212851    |             |
| AGIWUR31877                                                                       |    |    |         |         |                |           |           |                     |             |
| N2                                                                                | CT | IV | 8115762 | 8118445 | WBGene00018360 | irld-8    | F42G8.9   | 0.143118731979538   | AGIWUR18758 |
| N2                                                                                | CT | IV | 8121908 | 8122240 | WBGene00249816 | F42G8.18  | F42G8.18  | 0.00231725319727261 |             |

|                                                                                    |    |    |         |         |                |          |                                           |
|------------------------------------------------------------------------------------|----|----|---------|---------|----------------|----------|-------------------------------------------|
| AGIWUR20867                                                                        |    |    |         |         |                |          |                                           |
| N2                                                                                 | CT | IV | 8127734 | 8128909 | WBGene00249817 | F42G8.19 | F42G8.19 -0.107658030009905               |
| AGIWUR34512                                                                        |    |    |         |         |                |          |                                           |
| N2                                                                                 | CT | IV | 8128940 | 8130256 | WBGene00018361 | F42G8.10 | F42G8.10 -0.23150151452252                |
| AGIWUR2781;AGIWUR14396;AGIWUR19987;AGIWUR20573;AGIWUR25865;AGIWUR33090;AGIWUR34700 |    |    |         |         |                |          |                                           |
| N2                                                                                 | CT | IV | 8130561 | 8132213 | WBGene00018357 | moc-3    | F42G8.6 -0.278573417864514 AGIWUR33514    |
| N2                                                                                 | CT | IV | 8132175 | 8133692 | WBGene00004979 | sph-1    | F42G8.11 -0.0121396700570227              |
| AGIWUR35585                                                                        |    |    |         |         |                |          |                                           |
| N2                                                                                 | CT | IV | 8133789 | 8136055 | WBGene00002162 | isp-1    | F42G8.12 0.0652743927799486               |
| AGIWUR2986;AGIWUR42505                                                             |    |    |         |         |                |          |                                           |
| N2                                                                                 | CT | IV | 8136325 | 8139087 | WBGene00018356 | islo-1   | F42G8.5 0.0180882579878818                |
| AGIWUR16021;AGIWUR21631;AGIWUR44443;AGIWUR44737                                    |    |    |         |         |                |          |                                           |
| N2                                                                                 | CT | IV | 8139219 | 8143151 | WBGene00004057 | pmk-3    | F42G8.4 0.373511474598612 AGIWUR35419     |
| N2                                                                                 | CT | IV | 8143500 | 8148647 | WBGene00004056 | pmk-2    | F42G8.3 -0.0648459582252841               |
| AGIWUR24;AGIWUR6567;AGIWUR11118;AGIWUR28986;AGIWUR30474;AGIWUR41777;AGIWUR42922    |    |    |         |         |                |          |                                           |
| N2                                                                                 | CT | IV | 8148794 | 8151156 | WBGene00004055 | pmk-1    | B0218.3 -0.0973633894461043               |
| AGIWUR2001;AGIWUR5179;AGIWUR10399;AGIWUR20441;AGIWUR23734;AGIWUR34850;AGIWUR36924  |    |    |         |         |                |          |                                           |
| N2                                                                                 | CT | IV | 8152445 | 8154857 | WBGene00015048 | faah-2   | B0218.2 -0.000105372049429064 AGIWUR16601 |
| N2                                                                                 | CT | IV | 8155211 | 8156587 | WBGene00015049 | B0218.5  | B0218.5 0.189577191348485 AGIWUR3420      |
| N2                                                                                 | CT | IV | 8159358 | 8162042 | WBGene00015047 | faah-1   | B0218.1 0.157350564144778 AGIWUR22394     |
| N2                                                                                 | CT | IV | 8161967 | 8163795 | WBGene00015050 | clcc-51  | B0218.6 -0.000312874326877655             |
| AGIWUR5196;AGIWUR44442                                                             |    |    |         |         |                |          |                                           |
| N2                                                                                 | CT | IV | 8164590 | 8166050 | WBGene00015051 | B0218.7  | B0218.7 0.154869925838058 AGIWUR5993      |
| N2                                                                                 | CT | IV | 8167164 | 8168813 | WBGene00015052 | clcc-52  | B0218.8 0.0167176227006465 AGIWUR921      |
| N2                                                                                 | CT | IV | 8176479 | 8188879 | WBGene00003961 | pct-1    | C07G1.3 -0.0723914750378434               |
| AGIWUR35135;AGIWUR38001                                                            |    |    |         |         |                |          |                                           |
| N2                                                                                 | CT | IV | 8188904 | 8198951 | WBGene00006957 | wsp-1    | C07G1.4 -0.0198783174204866               |
| AGIWUR1941;AGIWUR4372;AGIWUR9072;AGIWUR9845;AGIWUR15505;AGIWUR19474;AGIWUR41409    |    |    |         |         |                |          |                                           |
| N2                                                                                 | CT | IV | 8200604 | 8201233 | WBGene00044608 | glrx-22  | C07G1.8 -0.160803079238477                |
| AGIWUR2696;AGIWUR10561;AGIWUR19689;AGIWUR27723;AGIWUR33581                         |    |    |         |         |                |          |                                           |
| N2                                                                                 | CT | IV | 8201378 | 8206048 | WBGene00004101 | hgrs-1   | C07G1.5 -0.0674553157165825 AGIWUR13098   |
| N2                                                                                 | CT | IV | 8206614 | 8213723 | WBGene00006620 | svh-1    | C07G1.1 0.102881824600031                 |
| AGIWUR22767;AGIWUR25262                                                            |    |    |         |         |                |          |                                           |
| N2                                                                                 | CT | IV | 8213826 | 8220036 | WBGene00003839 | ocr-2    | T09A12.3 0.0131953870461032               |
| AGIWUR7008                                                                         |    |    |         |         |                |          |                                           |
| N2                                                                                 | CT | IV | 8222202 | 8223459 | WBGene00020373 | gpx-6    | T09A12.2 -0.1468023376593                 |
| AGIWUR5259;AGIWUR30035                                                             |    |    |         |         |                |          |                                           |
| N2                                                                                 | CT | IV | 8225674 | 8226366 | WBGene00020374 | T09A12.5 | T09A12.5 0.00354070616326574              |
| AGIWUR19944                                                                        |    |    |         |         |                |          |                                           |

|                                                                                    |    |    |         |         |                |           |           |                      |             |
|------------------------------------------------------------------------------------|----|----|---------|---------|----------------|-----------|-----------|----------------------|-------------|
| N2                                                                                 | CT | IV | 8226337 | 8236602 | WBGene00003656 | nhp-66    | T09A12.4  | -0.039231683889863   |             |
| AGIWUR5339;AGIWUR18857;AGIWUR19208;AGIWUR25358;AGIWUR26631;AGIWUR30253;AGIWUR43015 |    |    |         |         |                |           |           |                      |             |
| N2                                                                                 | CT | IV | 8259248 | 8259979 | WBGene00019507 | K07H8.7   | K07H8.7   | -0.183213600282607   |             |
| AGIWUR3973;AGIWUR19600                                                             |    |    |         |         |                |           |           |                      |             |
| N2                                                                                 | CT | IV | 8261134 | 8266462 | WBGene00006930 | vit-6     | K07H8.6   | -0.0581147304427283  |             |
| AGIWUR8837;AGIWUR35220                                                             |    |    |         |         |                |           |           |                      |             |
| N2                                                                                 | CT | IV | 8266752 | 8268435 | WBGene00019508 | K07H8.8   | K07H8.8   | -0.177874462946622   | AGIWUR19784 |
| N2                                                                                 | CT | IV | 8273226 | 8275332 | WBGene00044510 | K07H8.11  | K07H8.11  | -0.229435515050447   |             |
| AGIWUR24203;AGIWUR36263                                                            |    |    |         |         |                |           |           |                      |             |
| N2                                                                                 | CT | IV | 8275621 | 8276709 | WBGene00044509 | K07H8.12  | K07H8.12  | 0.0368149994056148   |             |
| AGIWUR17978;AGIWUR27697;AGIWUR31520;AGIWUR37850;AGIWUR38264                        |    |    |         |         |                |           |           |                      |             |
| N2                                                                                 | CT | IV | 8285175 | 8286566 | WBGene00019509 | K07H8.9   | K07H8.9   | 0.0865396821362054   | AGIWUR36215 |
| N2                                                                                 | CT | IV | 8286587 | 8289531 | WBGene00019510 | K07H8.10  | K07H8.10  | 0.196847924447273    |             |
| AGIWUR657;AGIWUR2486;AGIWUR8519;AGIWUR15273;AGIWUR22002;AGIWUR26379;AGIWUR28977    |    |    |         |         |                |           |           |                      |             |
| N2                                                                                 | CT | IV | 8290273 | 8291496 | WBGene00000923 | daf-31    | K07H8.3   | 0.130269821830103    | AGIWUR20212 |
| N2                                                                                 | CT | IV | 8291515 | 8294596 | WBGene00019504 | K07H8.2   | K07H8.2   | -0.147322364459174   |             |
| AGIWUR2279;AGIWUR6071;AGIWUR17654;AGIWUR26947                                      |    |    |         |         |                |           |           |                      |             |
| N2                                                                                 | CT | IV | 8294690 | 8297283 | WBGene00019503 | tbce-1    | K07H8.1   | -0.139463139050633   | AGIWUR15141 |
| N2                                                                                 | CT | IV | 8297197 | 8299843 | WBGene00018072 | nprl-3    | F35H10.7  | -0.0206489180024034  |             |
| AGIWUR4422;AGIWUR42532                                                             |    |    |         |         |                |           |           |                      |             |
| N2                                                                                 | CT | IV | 8299936 | 8300647 | WBGene00018071 | F35H10.6  | F35H10.6  | 0.103685379607089    |             |
| AGIWUR17331                                                                        |    |    |         |         |                |           |           |                      |             |
| N2                                                                                 | CT | IV | 8300755 | 8301165 | WBGene00018070 | F35H10.5  | F35H10.5  | -0.188859575224999   |             |
| AGIWUR44449                                                                        |    |    |         |         |                |           |           |                      |             |
| N2                                                                                 | CT | IV | 8303968 | 8307369 | WBGene00006914 | vha-5     | F35H10.4  | -0.00384238318002872 |             |
| AGIWUR21901;AGIWUR30912;AGIWUR35131                                                |    |    |         |         |                |           |           |                      |             |
| N2                                                                                 | CT | IV | 8307294 | 8312946 | WBGene00018073 | F35H10.10 | F35H10.10 | 0.328633547148739    |             |
| AGIWUR17187                                                                        |    |    |         |         |                |           |           |                      |             |
| N2                                                                                 | CT | IV | 8325967 | 8327062 | WBGene00018069 | F35H10.3  | F35H10.3  | -0.207483941389311   |             |
| AGIWUR9334                                                                         |    |    |         |         |                |           |           |                      |             |
| N2                                                                                 | CT | IV | 8329205 | 8329956 | WBGene00018068 | F35H10.2  | F35H10.2  | -0.0468886863736309  |             |
| AGIWUR36343                                                                        |    |    |         |         |                |           |           |                      |             |
| N2                                                                                 | CT | IV | 8332826 | 8333559 | WBGene00003099 | lys-10    | F17E9.11  | -0.699924650440053   |             |
| AGIWUR42956                                                                        |    |    |         |         |                |           |           |                      |             |
| N2                                                                                 | CT | IV | 8333557 | 8334021 | WBGene00001905 | his-31    | F17E9.12  | -0.154003033825429   |             |
| AGIWUR22692                                                                        |    |    |         |         |                |           |           |                      |             |
| N2                                                                                 | CT | IV | 8334298 | 8334862 | WBGene00001906 | his-32    | F17E9.10  | -0.0393032293013178  |             |
| AGIWUR5672;AGIWUR14633;AGIWUR15754;AGIWUR21832;AGIWUR32746                         |    |    |         |         |                |           |           |                      |             |
| N2                                                                                 | CT | IV | 8336807 | 8338172 | WBGene00023270 | F17E9.14  | F17E9.14  | 0.00184549768780418  |             |

AGIWUR44242

|    |    |    |         |         |                |          |         |                             |             |
|----|----|----|---------|---------|----------------|----------|---------|-----------------------------|-------------|
| N2 | CT | IV | 8342685 | 8344485 | WBGene00017543 | lgc-5    | F17E9.7 | 0.0212222895040108          | AGIWUR8436  |
| N2 | CT | IV | 8345818 | 8346546 | WBGene00017542 | F17E9.5  | F17E9.5 | 0.136961598188549           | AGIWUR38365 |
| N2 | CT | IV | 8348373 | 8349169 | WBGene00017541 | F17E9.4  | F17E9.4 | -0.105205284755751          | AGIWUR2460  |
| N2 | CT | IV | 8354874 | 8355433 | WBGene00017540 | F17E9.3  | F17E9.3 | -0.600359478872726          | AGIWUR9498  |
| N2 | CT | IV | 8355892 | 8356503 | WBGene00017539 | F17E9.2  | F17E9.2 | -0.0424902788296588         | AGIWUR27596 |
| N2 | CT | IV | 8356776 | 8357854 | WBGene00000690 | col-116  | F17E9.1 | -0.113560747158402          | AGIWUR39272 |
| N2 | CT | IV | 8357938 | 8358592 | WBGene00044953 | D2096.13 |         | D2096.13 0.0335104981808625 |             |

AGIWUR4484;AGIWUR9578;AGIWUR10373;AGIWUR22490

|    |    |    |         |         |                |         |         |                    |             |
|----|----|----|---------|---------|----------------|---------|---------|--------------------|-------------|
| N2 | CT | IV | 8359165 | 8359716 | WBGene00017072 | D2096.5 | D2096.5 | -0.438697796473936 | AGIWUR14138 |
| N2 | CT | IV | 8361089 | 8363370 | WBGene00005019 | sqv-1   | D2096.4 | -0.177491014274452 |             |

AGIWUR5412;AGIWUR24328;AGIWUR41399

|    |    |    |         |         |                |          |  |                              |  |
|----|----|----|---------|---------|----------------|----------|--|------------------------------|--|
| N2 | CT | IV | 8363463 | 8366376 | WBGene00017079 | D2096.12 |  | D2096.12 -0.0961289058688006 |  |
|----|----|----|---------|---------|----------------|----------|--|------------------------------|--|

AGIWUR8270

|    |    |    |         |         |                |         |         |                    |             |
|----|----|----|---------|---------|----------------|---------|---------|--------------------|-------------|
| N2 | CT | IV | 8366539 | 8375371 | WBGene00017071 | aagr-1  | D2096.3 | -0.258999495511505 | AGIWUR12328 |
| N2 | CT | IV | 8375720 | 8377698 | WBGene00017074 | D2096.7 | D2096.7 | -0.176982344571297 |             |

AGIWUR3581;AGIWUR8824;AGIWUR12898;AGIWUR41238

|    |    |    |         |         |                |        |         |                     |             |
|----|----|----|---------|---------|----------------|--------|---------|---------------------|-------------|
| N2 | CT | IV | 8377703 | 8379319 | WBGene00017075 | nap-1  | D2096.8 | 0.222630975873905   | AGIWUR22992 |
| N2 | CT | IV | 8379984 | 8381925 | WBGene00017070 | praf-3 | D2096.2 | 0.00684208340863623 |             |

AGIWUR9038;AGIWUR18527;AGIWUR31847;AGIWUR40100

|    |    |    |         |         |                |          |         |                            |            |
|----|----|----|---------|---------|----------------|----------|---------|----------------------------|------------|
| N2 | CT | IV | 8381922 | 8382814 | WBGene00017076 | D2096.9  | D2096.9 | -0.342422759351958         | AGIWUR3892 |
| N2 | CT | IV | 8387626 | 8389239 | WBGene00017077 | D2096.10 |         | D2096.10 0.180737525352299 |            |

AGIWUR19057

|    |    |    |         |         |                |        |         |                     |             |
|----|----|----|---------|---------|----------------|--------|---------|---------------------|-------------|
| N2 | CT | IV | 8398923 | 8399762 | WBGene00019789 | M116.2 | M116.2  | -0.0983523408524505 | AGIWUR34103 |
| N2 | CT | IV | 8414293 | 8421061 | WBGene00019792 | M116.5 | M116.5  | 0.0751321071115356  | AGIWUR4969  |
| N2 | CT | IV | 8422053 | 8424146 | WBGene00023488 | srz-84 | T26A8.5 | 0.121710557585421   |             |

AGIWUR7668;AGIWUR26211;AGIWUR32005;AGIWUR37031;AGIWUR38715;AGIWUR44688

|    |    |    |         |         |                |          |  |                            |  |
|----|----|----|---------|---------|----------------|----------|--|----------------------------|--|
| N2 | CT | IV | 8424278 | 8428512 | WBGene00020825 | tmem-231 |  | T26A8.2 0.0441383476951778 |  |
|----|----|----|---------|---------|----------------|----------|--|----------------------------|--|

AGIWUR2333

|    |    |    |         |         |                |          |         |                             |             |
|----|----|----|---------|---------|----------------|----------|---------|-----------------------------|-------------|
| N2 | CT | IV | 8428961 | 8431493 | WBGene00020827 | T26A8.4  | T26A8.4 | -0.151892454285791          | AGIWUR31550 |
| N2 | CT | IV | 8433038 | 8438004 | WBGene00020824 | T26A8.1  | T26A8.1 | 0.0210189937311043          | AGIWUR25557 |
| N2 | CT | IV | 8447204 | 8449048 | WBGene00020138 | T01B11.1 |         | T01B11.1 -0.132219911057997 |             |

AGIWUR23119

|    |    |    |         |         |                |          |  |                            |  |
|----|----|----|---------|---------|----------------|----------|--|----------------------------|--|
| N2 | CT | IV | 8449353 | 8451771 | WBGene00020139 | T01B11.2 |  | T01B11.2 0.232226686726474 |  |
|----|----|----|---------|---------|----------------|----------|--|----------------------------|--|

AGIWUR1975;AGIWUR23355;AGIWUR24343;AGIWUR27969;AGIWUR37585

|    |    |    |         |         |                |       |          |  |                   |
|----|----|----|---------|---------|----------------|-------|----------|--|-------------------|
| N2 | CT | IV | 8457280 | 8458933 | WBGene00006374 | syx-4 | T01B11.3 |  | 0.109625524309809 |
|----|----|----|---------|---------|----------------|-------|----------|--|-------------------|

AGIWUR12060

|    |    |    |         |         |                |         |          |  |                   |
|----|----|----|---------|---------|----------------|---------|----------|--|-------------------|
| N2 | CT | IV | 8459178 | 8460327 | WBGene00020140 | ant-1.4 | T01B11.4 |  | 0.151873595832023 |
|----|----|----|---------|---------|----------------|---------|----------|--|-------------------|

AGIWUR8471;AGIWUR23208

|                                                                                              |    |    |         |         |                |            |            |                     |             |
|----------------------------------------------------------------------------------------------|----|----|---------|---------|----------------|------------|------------|---------------------|-------------|
| N2                                                                                           | CT | IV | 8460999 | 8463816 | WBGene00006220 | str-176    | T01B11.5   | 0.0149467369646423  |             |
| AGIWUR2743;AGIWUR7347;AGIWUR17297;AGIWUR25379;AGIWUR28348                                    |    |    |         |         |                |            |            |                     |             |
| N2                                                                                           | CT | IV | 8464752 | 8472605 | WBGene00003837 | oat-1      | T01B11.7   | -0.0248492093969652 |             |
| AGIWUR1624;AGIWUR6649;AGIWUR13136                                                            |    |    |         |         |                |            |            |                     |             |
| N2                                                                                           | CT | IV | 8474056 | 8475278 | WBGene00016181 | C28C12.11  | C28C12.11  | 0.159108176799226   |             |
| AGIWUR8444                                                                                   |    |    |         |         |                |            |            |                     |             |
| N2                                                                                           | CT | IV | 8477182 | 8480656 | WBGene00004995 | spp-10     | C28C12.7   | -0.0798817713797924 |             |
| AGIWUR10234;AGIWUR13523;AGIWUR23082;AGIWUR44161                                              |    |    |         |         |                |            |            |                     |             |
| N2                                                                                           | CT | IV | 8481664 | 8483710 | WBGene00004993 | spp-8      | C28C12.5   | 0.0223404392396862  |             |
| AGIWUR19253                                                                                  |    |    |         |         |                |            |            |                     |             |
| N2                                                                                           | CT | IV | 8487497 | 8488481 | WBGene00016180 | C28C12.4   | C28C12.4   | -0.183131494269803  |             |
| AGIWUR31231                                                                                  |    |    |         |         |                |            |            |                     |             |
| N2                                                                                           | CT | IV | 8490221 | 8490857 | WBGene00016179 | C28C12.3   | C28C12.3   | 0.484840278481474   |             |
| AGIWUR40139                                                                                  |    |    |         |         |                |            |            |                     |             |
| N2                                                                                           | CT | IV | 8492542 | 8494487 | WBGene00005670 | sru-7      | C28C12.13  | 0.1742127320778     | AGIWUR1844  |
| N2                                                                                           | CT | IV | 8494550 | 8496363 | WBGene00016182 | C28C12.12  | C28C12.12  | -0.0366653084627595 |             |
| AGIWUR5702;AGIWUR6603;AGIWUR6924;AGIWUR25765;AGIWUR26275;AGIWUR26545;AGIWUR29922;AGIWUR41298 |    |    |         |         |                |            |            |                     |             |
| N2                                                                                           | CT | IV | 8496486 | 8498871 | WBGene00001566 | acdH-13    | C28C12.9   | -0.102051062262685  |             |
| AGIWUR33202                                                                                  |    |    |         |         |                |            |            |                     |             |
| N2                                                                                           | CT | IV | 8499310 | 8500076 | WBGene00016178 | mesp-1     | C28C12.2   | -0.0981291135511846 |             |
| AGIWUR28639                                                                                  |    |    |         |         |                |            |            |                     |             |
| N2                                                                                           | CT | IV | 8501479 | 8502983 | WBGene00016177 | C28C12.1   | C28C12.1   | 0.169454663669296   |             |
| AGIWUR1654;AGIWUR16632;AGIWUR31146;AGIWUR32280;AGIWUR34091;AGIWUR39245                       |    |    |         |         |                |            |            |                     |             |
| N2                                                                                           | CT | IV | 8503493 | 8510559 | WBGene00006450 | tag-77     | C28C12.10  | 0.0634189152835809  |             |
| AGIWUR11253;AGIWUR18212;AGIWUR32240;AGIWUR36697                                              |    |    |         |         |                |            |            |                     |             |
| N2                                                                                           | CT | IV | 8513205 | 8513916 | WBGene00044001 | C09G4.4    | C09G4.4    | 0.0414517326758723  |             |
| AGIWUR28241;AGIWUR42704                                                                      |    |    |         |         |                |            |            |                     |             |
| N2                                                                                           | CT | IV | 8513919 | 8514725 | WBGene00001051 | cks-1      | C09G4.3    | 0.0163519118930857  | AGIWUR43376 |
| N2                                                                                           | CT | IV | 8520894 | 8538182 | WBGene00015650 | pkg-2      | C09G4.2    | 0.0440597901090687  |             |
| AGIWUR4010;AGIWUR11603;AGIWUR13590;AGIWUR16392;AGIWUR23473;AGIWUR31328;AGIWUR39930           |    |    |         |         |                |            |            |                     |             |
| N2                                                                                           | CT | IV | 8539123 | 8544403 | WBGene00002043 | hyl-1      | C09G4.1    | -0.0363229497553377 |             |
| AGIWUR19450;AGIWUR23662;AGIWUR38311                                                          |    |    |         |         |                |            |            |                     |             |
| N2                                                                                           | CT | IV | 8559434 | 8563159 | WBGene00022004 | npr-22     | Y59H11AL.1 | 0.00210030255079108 |             |
| AGIWUR20346;AGIWUR29725                                                                      |    |    |         |         |                |            |            |                     |             |
| N2                                                                                           | CT | IV | 8569144 | 8570353 | WBGene00022008 | Y59H11AM.4 | Y59H11AM.4 | 0.33018449024793    |             |
| AGIWUR21150                                                                                  |    |    |         |         |                |            |            |                     |             |
| N2                                                                                           | CT | IV | 8571438 | 8571821 | WBGene00022005 | Y59H11AM.1 | Y59H11AM.1 | 0.402232625380755   |             |
| AGIWUR27952                                                                                  |    |    |         |         |                |            |            |                     |             |
| N2                                                                                           | CT | IV | 8585516 | 8594613 | WBGene00022010 | catp-7     | Y59H11AR.2 | 0.137113882704194   |             |



|                                                                        |    |    |         |         |                |            |            |                      |
|------------------------------------------------------------------------|----|----|---------|---------|----------------|------------|------------|----------------------|
| AGIWUR26104                                                            |    |    |         |         |                |            |            |                      |
| N2                                                                     | CT | IV | 8594871 | 8595417 | WBGene00022011 | Y59H11AR.3 | Y59H11AR.3 | 0.123663228228845    |
| AGIWUR27882                                                            |    |    |         |         |                |            |            |                      |
| N2                                                                     | CT | IV | 8596067 | 8596943 | WBGene00044511 | clec-181   | Y59H11AR.5 | -0.201613218198579   |
| AGIWUR10135;AGIWUR12743;AGIWUR39931                                    |    |    |         |         |                |            |            |                      |
| N2                                                                     | CT | IV | 8597762 | 8598727 | WBGene00077437 | Y59H11AR.6 | Y59H11AR.6 | -0.280300630067872   |
| AGIWUR1141;AGIWUR20626;AGIWUR26591;AGIWUR30910;AGIWUR39286;AGIWUR45101 |    |    |         |         |                |            |            |                      |
| N2                                                                     | CT | IV | 8598739 | 8600742 | WBGene00022012 | Y59H11AR.4 | Y59H11AR.4 | -0.300831884015001   |
| AGIWUR9861;AGIWUR14711                                                 |    |    |         |         |                |            |            |                      |
| N2                                                                     | CT | IV | 8609239 | 8611595 | WBGene00018335 | F42A9.6    | F42A9.6    | -0.196971441838558   |
| N2                                                                     | CT | IV | 8612363 | 8614683 | WBGene00018334 | cyp-33E2   | F42A9.5    | -0.123698718604652   |
| AGIWUR4458                                                             |    |    |         |         |                |            |            |                      |
| N2                                                                     | CT | IV | 8616006 | 8617147 | WBGene00018336 | F42A9.7    | F42A9.7    | 0.278460253400914    |
| N2                                                                     | CT | IV | 8617285 | 8618153 | WBGene00018332 | F42A9.3    | F42A9.3    | 0.368255905276641    |
| N2                                                                     | CT | IV | 8618244 | 8618788 | WBGene00018337 | F42A9.8    | F42A9.8    | -0.0504691309131999  |
| N2                                                                     | CT | IV | 8620683 | 8626149 | WBGene00003034 | lin-49     | F42A9.2    | 0.0253929572941587   |
| N2                                                                     | CT | IV | 8631334 | 8644019 | WBGene00006483 | dgk-4      | F42A9.1    | 0.0259953111088702   |
| N2                                                                     | CT | IV | 8644732 | 8645345 | WBGene00016767 | C49C8.3    | C49C8.3    | -0.258664022329043   |
| N2                                                                     | CT | IV | 8645521 | 8648429 | WBGene00016768 | cyp-33E1   | C49C8.4    | 0.120711372976569    |
| AGIWUR34645                                                            |    |    |         |         |                |            |            |                      |
| N2                                                                     | CT | IV | 8648596 | 8653677 | WBGene00016769 | C49C8.5    | C49C8.5    | -0.448933679688734   |
| N2                                                                     | CT | IV | 8654604 | 8656829 | WBGene00016765 | C49C8.1    | C49C8.1    | -0.165285294098483   |
| N2                                                                     | CT | IV | 8657455 | 8658184 | WBGene00016770 | C49C8.6    | C49C8.6    | -0.22690357142157    |
| N2                                                                     | CT | IV | 8666252 | 8667177 | WBGene00017235 | F08B4.3    | F08B4.3    | -0.00912992257511291 |
| N2                                                                     | CT | IV | 8668941 | 8676542 | WBGene00000397 | cdh-5      | F08B4.2    | 0.187358540259826    |
| AGIWUR11543;AGIWUR30314;AGIWUR32142                                    |    |    |         |         |                |            |            |                      |
| N2                                                                     | CT | IV | 8677590 | 8678019 | WBGene00255375 | F08B4.8    | F08B4.8    | 0.142120514968408    |
| N2                                                                     | CT | IV | 8678695 | 8679325 | WBGene00017236 | F08B4.4    | F08B4.4    | -0.128421114246358   |
| N2                                                                     | CT | IV | 8682239 | 8686610 | WBGene00017237 | pole-2     | F08B4.5    | 0.149880772694493    |
| AGIWUR19783;AGIWUR31958                                                |    |    |         |         |                |            |            |                      |
| N2                                                                     | CT | IV | 8686756 | 8687810 | WBGene00017238 | F08B4.7    | F08B4.7    | -0.218586665006046   |
| AGIWUR1268;AGIWUR30177                                                 |    |    |         |         |                |            |            |                      |
| N2                                                                     | CT | IV | 8688273 | 8691513 | WBGene00002028 | hst-1      | F08B4.6    | -0.306979837128647   |
| N2                                                                     | CT | IV | 8692086 | 8696553 | WBGene00000994 | dic-1      | F08B4.1    | -0.271573077154441   |
| AGIWUR9759;AGIWUR35715                                                 |    |    |         |         |                |            |            |                      |
| N2                                                                     | CT | IV | 8697736 | 8702699 | WBGene00019230 | ttl1-11    | H23L24.3   | 0.132098567312284    |
| AGIWUR37576                                                            |    |    |         |         |                |            |            |                      |
| N2                                                                     | CT | IV | 8703043 | 8705606 | WBGene00019231 | H23L24.4   | H23L24.4   | 0.10985470658168     |
| AGIWUR33495                                                            |    |    |         |         |                |            |            |                      |

|                                                                        |    |    |         |         |                |          |          |                     |             |
|------------------------------------------------------------------------|----|----|---------|---------|----------------|----------|----------|---------------------|-------------|
| N2                                                                     | CT | IV | 8712635 | 8715027 | WBGene00004052 | parg-2   | H23L24.5 | 0.313496226884448   |             |
| AGIWUR20011                                                            |    |    |         |         |                |          |          |                     |             |
| N2                                                                     | CT | IV | 8715247 | 8717881 | WBGene00019229 | ipla-5   | H23L24.2 | -0.10191579757335   |             |
| AGIWUR35798                                                            |    |    |         |         |                |          |          |                     |             |
| N2                                                                     | CT | IV | 8724020 | 8724876 | WBGene00009014 | F21D5.9  | F21D5.9  | -0.0913418536576938 | AGIWUR22252 |
| N2                                                                     | CT | IV | 8725722 | 8728060 | WBGene00009006 | F21D5.1  | F21D5.1  | 0.209449771283473   |             |
| AGIWUR5139;AGIWUR23171;AGIWUR26887;AGIWUR27754;AGIWUR34703;AGIWUR36880 |    |    |         |         |                |          |          |                     |             |
| N2                                                                     | CT | IV | 8728139 | 8730510 | WBGene00009007 | otub-3   | F21D5.2  | -0.120304152270382  |             |
| AGIWUR5723;AGIWUR5991;AGIWUR13125;AGIWUR18617;AGIWUR25556              |    |    |         |         |                |          |          |                     |             |
| N2                                                                     | CT | IV | 8730721 | 8735686 | WBGene00009008 | F21D5.3  | F21D5.3  | 0.0964860740758624  | AGIWUR19369 |
| N2                                                                     | CT | IV | 8735695 | 8739394 | WBGene00009010 | F21D5.5  | F21D5.5  | -0.105293128010025  | AGIWUR8645  |
| N2                                                                     | CT | IV | 8739504 | 8740026 | WBGene00009013 | mrps-33  | F21D5.8  | -0.234332864310925  | AGIWUR26351 |
| N2                                                                     | CT | IV | 8740140 | 8741388 | WBGene00009011 | F21D5.6  | F21D5.6  | -0.0577008328269955 | AGIWUR32885 |
| N2                                                                     | CT | IV | 8741383 | 8743704 | WBGene00009012 | F21D5.7  | F21D5.7  | -0.134955083959312  |             |
| AGIWUR448;AGIWUR7143;AGIWUR44082                                       |    |    |         |         |                |          |          |                     |             |
| N2                                                                     | CT | IV | 8744411 | 8745691 | WBGene00008972 | F20C5.7  | F20C5.7  | -0.034330906300033  | AGIWUR17508 |
| N2                                                                     | CT | IV | 8746252 | 8752676 | WBGene00004051 | parg-1   | F20C5.1  | -0.0772517765098009 |             |
| AGIWUR4893;AGIWUR38395;AGIWUR43587                                     |    |    |         |         |                |          |          |                     |             |
| N2                                                                     | CT | IV | 8753195 | 8754823 | WBGene00008968 | F20C5.3  | F20C5.3  | -0.264192454619787  | AGIWUR12683 |
| N2                                                                     | CT | IV | 8755038 | 8762057 | WBGene00002222 | k1p-11   | F20C5.2  | -0.0549500706368757 |             |
| AGIWUR5353;AGIWUR17348;AGIWUR26051;AGIWUR27395                         |    |    |         |         |                |          |          |                     |             |
| N2                                                                     | CT | IV | 8764867 | 8767450 | WBGene00008969 | F20C5.4  | F20C5.4  | -0.128289466024739  | AGIWUR25943 |
| N2                                                                     | CT | IV | 8767688 | 8770092 | WBGene00008970 | F20C5.5  | F20C5.5  | 0.0551771387433728  | AGIWUR33556 |
| N2                                                                     | CT | IV | 8771558 | 8773206 | WBGene00008971 | F20C5.6  | F20C5.6  | -0.230179831857633  |             |
| AGIWUR25050;AGIWUR31933;AGIWUR40251                                    |    |    |         |         |                |          |          |                     |             |
| N2                                                                     | CT | IV | 8773977 | 8778145 | WBGene00007900 | C33D9.6  | C33D9.6  | -0.0473690579262076 |             |
| AGIWUR13080;AGIWUR24131;AGIWUR35116;AGIWUR41899;AGIWUR42317            |    |    |         |         |                |          |          |                     |             |
| N2                                                                     | CT | IV | 8778721 | 8780872 | WBGene00007899 | C33D9.5  | C33D9.5  | -0.288891217188219  | AGIWUR13505 |
| N2                                                                     | CT | IV | 8783271 | 8785254 | WBGene00194651 | C33D9.13 | C33D9.13 | -0.140921721982195  |             |
| AGIWUR30795                                                            |    |    |         |         |                |          |          |                     |             |
| N2                                                                     | CT | IV | 8787459 | 8788057 | WBGene00044239 | C33D9.10 | C33D9.10 | -0.159517811467959  |             |
| AGIWUR14289;AGIWUR29107;AGIWUR29938;AGIWUR33034;AGIWUR38129            |    |    |         |         |                |          |          |                     |             |
| N2                                                                     | CT | IV | 8788449 | 8790244 | WBGene00005698 | sru-35   | C33D9.4  | 0.0419682466464044  | AGIWUR3912  |
| N2                                                                     | CT | IV | 8790742 | 8793294 | WBGene00007898 | C33D9.3  | C33D9.3  | 0.0878236776489727  | AGIWUR40327 |
| N2                                                                     | CT | IV | 8796881 | 8798355 | WBGene00007897 | c1ec-182 | C33D9.2  | 0.116242380539703   |             |
| AGIWUR38966                                                            |    |    |         |         |                |          |          |                     |             |
| N2                                                                     | CT | IV | 8799089 | 8813539 | WBGene00001366 | exc-5    | C33D9.1  | 0.00987483030737479 |             |
| AGIWUR702;AGIWUR39104                                                  |    |    |         |         |                |          |          |                     |             |
| N2                                                                     | CT | IV | 8816335 | 8818525 | WBGene00012118 | grsp-2   | T28C6.1  | 0.0338592894842211  |             |

AGIWUR5776;AGIWUR8431;AGIWUR8780;AGIWUR11470;AGIWUR29223;AGIWUR29771;AGIWUR34493  
N2 CT IV 8818555 8819158 WBGene00045183 T28C6.10 T28C6.10 0.247256562596418  
AGIWUR2357;AGIWUR9034;AGIWUR27977;AGIWUR30031;AGIWUR41136  
N2 CT IV 8820356 8821265 WBGene00012119 T28C6.3 T28C6.3 -0.35265448276132 AGIWUR3511  
N2 CT IV 8821447 8822874 WBGene00012120 T28C6.5 T28C6.5 0.241771926813415 AGIWUR23333  
N2 CT IV 8840725 8842805 WBGene00011706 T11B7.1 T11B7.1 -0.0509860226411707 AGIWUR462  
N2 CT IV 8843621 8844491 WBGene00011707 T11B7.2 T11B7.2 0.318339505391382 AGIWUR18714  
N2 CT IV 8848182 8849673 WBGene00000692 col-118 T11B7.3 0.184638637709254  
AGIWUR9680;AGIWUR43006  
N2 CT IV 8850865 8851127 WBGene00044914 T11B7.6 T11B7.6 -0.0830446710886648 AGIWUR38341  
N2 CT IV 8852500 8862228 WBGene00001132 alp-1 T11B7.4 0.110844215062318  
AGIWUR1301;AGIWUR11637;AGIWUR14354;AGIWUR16309  
N2 CT IV 8862173 8865483 WBGene00007492 C09G9.1 C09G9.1 -0.170487131411042  
AGIWUR6290;AGIWUR24125;AGIWUR40398  
N2 CT IV 8868036 8869679 WBGene00007493 npp-23 C09G9.2 -0.251532688358413 AGIWUR42471  
N2 CT IV 8869962 8873057 WBGene00007494 C09G9.3 C09G9.3 -0.0263402169172315  
AGIWUR10147;AGIWUR37282  
N2 CT IV 8873820 8874007 WBGene00045323 C09G9.9 C09G9.9 -0.0558832292073532  
AGIWUR13666;AGIWUR14560;AGIWUR17102;AGIWUR28067;AGIWUR33063  
N2 CT IV 8874129 8877022 WBGene00006409 hd1-2 C09G9.4 0.126270085621835 AGIWUR18595  
N2 CT IV 8877553 8879910 WBGene00007496 npax-4 C09G9.7 -0.0781115443317493 AGIWUR3477  
N2 CT IV 8881481 8882240 WBGene00007497 C09G9.8 C09G9.8 0.0663159442781653 AGIWUR35470  
N2 CT IV 8886528 8888602 WBGene00007495 C09G9.5 C09G9.5 0.321615302753222  
AGIWUR1804;AGIWUR30771  
N2 CT IV 8888976 8890999 WBGene00003864 oma-1 C09G9.6 0.0724467035923695 AGIWUR35807  
N2 CT IV 8891466 8892747 WBGene00005007 spr-2 C27B7.1 -0.250082348363384  
AGIWUR5937;AGIWUR16694  
N2 CT IV 8892858 8893854 WBGene00007760 C27B7.2 C27B7.2 0.0132777178313859 AGIWUR23338  
N2 CT IV 8894083 8901386 WBGene00007761 rad-26 C27B7.4 -0.0105552285565009  
AGIWUR14504;AGIWUR17257;AGIWUR21870;AGIWUR23761;AGIWUR27573;AGIWUR42108  
N2 CT IV 8901646 8903177 WBGene00007762 C27B7.5 C27B7.5 -0.0984476829413961 AGIWUR23632  
N2 CT IV 8903222 8906205 WBGene00007763 C27B7.6 C27B7.6 0.237491237939699 AGIWUR44147  
N2 CT IV 8907047 8915383 WBGene00007764 C27B7.7 C27B7.7 -0.255890684270572 AGIWUR44416  
N2 CT IV 8915472 8916110 WBGene00007765 C27B7.9 C27B7.9 -0.450826269182626 AGIWUR39920  
N2 CT IV 8916408 8918890 WBGene00004307 rap-1 C27B7.8 0.366861890675141  
AGIWUR9710;AGIWUR16339;AGIWUR18115;AGIWUR32787;AGIWUR38012;AGIWUR39863  
N2 CT IV 8924161 8926112 WBGene00008363 D1046.2 D1046.2 -0.144714617474285  
AGIWUR2947;AGIWUR32878  
N2 CT IV 8926335 8930315 WBGene00008362 cfim-2 D1046.1 -0.110044234091902 AGIWUR43416

|                                                                       |    |    |         |         |                |           |          |                      |             |
|-----------------------------------------------------------------------|----|----|---------|---------|----------------|-----------|----------|----------------------|-------------|
| N2                                                                    | CT | IV | 8930442 | 8932791 | WBGene00008364 | slc-25A26 | D1046.3  | 0.161502899613453    |             |
| AGIWUR37641                                                           |    |    |         |         |                |           |          |                      |             |
| N2                                                                    | CT | IV | 8933997 | 8937400 | WBGene00008365 | D1046.4   | D1046.4  | -0.235440912073177   |             |
| AGIWUR4421;AGIWUR21306;AGIWUR29332                                    |    |    |         |         |                |           |          |                      |             |
| N2                                                                    | CT | IV | 8956489 | 8965534 | WBGene00008366 | tpa-1     | D1046.5  | -0.0612404244749207  | AGIWUR13759 |
| N2                                                                    | CT | IV | 8966133 | 8967903 | WBGene00008272 | C53B4.2   | C53B4.2  | 0.0528845662925583   | AGIWUR12201 |
| N2                                                                    | CT | IV | 8968290 | 8970565 | WBGene00008271 | C53B4.1   | C53B4.1  | -0.0638986385022289  | AGIWUR35347 |
| N2                                                                    | CT | IV | 8970868 | 8973707 | WBGene00008273 | C53B4.3   | C53B4.3  | 0.186516327249228    | AGIWUR18768 |
| N2                                                                    | CT | IV | 8975532 | 8984706 | WBGene00008274 | C53B4.4   | C53B4.4  | 0.143885344629506    | AGIWUR9423  |
| N2                                                                    | CT | IV | 8984866 | 8986774 | WBGene00008275 | nstp-1    | C53B4.6  | -0.139387883283508   | AGIWUR16097 |
| N2                                                                    | CT | IV | 8987130 | 8990444 | WBGene00000266 | bre-1     | C53B4.7  | 0.0120828339815562   |             |
| AGIWUR2014;AGIWUR6820;AGIWUR10995;AGIWUR14717;AGIWUR21811;AGIWUR33573 |    |    |         |         |                |           |          |                      |             |
| N2                                                                    | CT | IV | 8993086 | 9000774 | WBGene00008277 | mltn-12   | C53B4.8  | -0.218469390960987   | AGIWUR43232 |
| N2                                                                    | CT | IV | 9001145 | 9002734 | WBGene00008285 | C53D6.8   | C53D6.8  | 0.086965063332137    | AGIWUR36472 |
| N2                                                                    | CT | IV | 9002837 | 9005410 | WBGene00006852 | unc-129   | C53D6.2  | -0.0919888066978665  | AGIWUR24153 |
| N2                                                                    | CT | IV | 9010584 | 9012339 | WBGene00044241 | C53D6.11  | C53D6.11 | -0.212399662375658   |             |
| AGIWUR9918;AGIWUR38669                                                |    |    |         |         |                |           |          |                      |             |
| N2                                                                    | CT | IV | 9016788 | 9019101 | WBGene00008280 | acc-2     | C53D6.3  | -0.00108861022395246 |             |
| AGIWUR5422;AGIWUR31435;AGIWUR43909                                    |    |    |         |         |                |           |          |                      |             |
| N2                                                                    | CT | IV | 9019175 | 9020940 | WBGene00008281 | C53D6.4   | C53D6.4  | 0.10981308499623     | AGIWUR14521 |
| N2                                                                    | CT | IV | 9021515 | 9023607 | WBGene00005906 | srx-15    | C53D6.9  | 0.0924377564931538   |             |
| AGIWUR17975;AGIWUR34822                                               |    |    |         |         |                |           |          |                      |             |
| N2                                                                    | CT | IV | 9024738 | 9027598 | WBGene00008282 | C53D6.5   | C53D6.5  | -0.00608136560869088 | AGIWUR44862 |
| N2                                                                    | CT | IV | 9027686 | 9032659 | WBGene00008283 | C53D6.6   | C53D6.6  | -0.165376523453423   | AGIWUR17419 |
| N2                                                                    | CT | IV | 9033576 | 9034440 | WBGene00023424 | C53D6.10  | C53D6.10 | 0.0863736103328137   |             |
| AGIWUR7408                                                            |    |    |         |         |                |           |          |                      |             |
| N2                                                                    | CT | IV | 9034845 | 9037163 | WBGene00008284 | C53D6.7   | C53D6.7  | -0.151040846758629   | AGIWUR3673  |
| N2                                                                    | CT | IV | 9039575 | 9040504 | WBGene00013516 | Y73F4A.3  | Y73F4A.3 | 0.121450052004143    |             |
| AGIWUR10887                                                           |    |    |         |         |                |           |          |                      |             |
| N2                                                                    | CT | IV | 9042387 | 9043347 | WBGene00013515 | Y73F4A.2  | Y73F4A.2 | 0.0841010579102974   |             |
| AGIWUR3643                                                            |    |    |         |         |                |           |          |                      |             |
| N2                                                                    | CT | IV | 9043938 | 9045369 | WBGene00013514 | Y73F4A.1  | Y73F4A.1 | -0.128994868678774   |             |
| AGIWUR9218                                                            |    |    |         |         |                |           |          |                      |             |
| N2                                                                    | CT | IV | 9070010 | 9073622 | WBGene00003610 | nhr-11    | ZC410.1  | -0.0539003897623949  |             |
| AGIWUR7171;AGIWUR11583;AGIWUR23108;AGIWUR39961                        |    |    |         |         |                |           |          |                      |             |
| N2                                                                    | CT | IV | 9074673 | 9076571 | WBGene00013880 | mppb-1    | ZC410.2  | 0.0464544237901698   | AGIWUR19324 |
| N2                                                                    | CT | IV | 9076501 | 9078807 | WBGene00013881 | mans-4    | ZC410.3  | 0.288282760917941    |             |
| AGIWUR9478;AGIWUR18890;AGIWUR19559                                    |    |    |         |         |                |           |          |                      |             |
| N2                                                                    | CT | IV | 9082361 | 9087554 | WBGene00006663 | twk-8     | ZC410.4  | -0.111097590092464   |             |

AGIWUR23492;AGIWUR23900  
 N2 CT IV 9088594 9092193 WBGene00013882 msa-1 ZC410.5 0.0502809278417788  
 AGIWUR3044;AGIWUR5696;AGIWUR19247;AGIWUR31771  
 N2 CT IV 9092217 9094468 WBGene00003066 lp1-1 ZC410.7 -0.0692894925149581  
 AGIWUR13244;AGIWUR23652;AGIWUR27179  
 N2 CT IV 9094541 9095653 WBGene00002046 icln-1 C01F6.8 -0.168801736526428  
 AGIWUR3303;AGIWUR13660  
 N2 CT IV 9095754 9096231 WBGene00007223 C01F6.9 C01F6.9 -0.102244167879473  
 AGIWUR1398;AGIWUR29038  
 N2 CT IV 9096842 9099364 WBGene00007221 cpna-3 C01F6.1 0.257082783763131  
 AGIWUR2412;AGIWUR10869;AGIWUR24822  
 N2 CT IV 9099242 9101592 WBGene00007222 C01F6.2 C01F6.2 -0.0912315194296287 AGIWUR12163  
 N2 CT IV 9101773 9103851 WBGene00000374 cyp-31A1 C01F6.3 0.0979369882381294  
 AGIWUR3245  
 N2 CT IV 9104966 9107609 WBGene00001413 fem-3 C01F6.4 -0.127122460452915 AGIWUR43635  
 N2 CT IV 9108931 9109753 WBGene00000120 aly-1 C01F6.5 -0.248782305754347 AGIWUR13547  
 N2 CT IV 9119098 9130378 WBGene00006438 nrfl-1 C01F6.6 0.141734955540095  
 AGIWUR548;AGIWUR8424;AGIWUR27484;AGIWUR31768;AGIWUR33238;AGIWUR34798;AGIWUR37061  
 N2 CT IV 9132600 9135477 WBGene00009073 delm-1 F23B2.3 0.110583735491595  
 AGIWUR2991;AGIWUR25145;AGIWUR25402  
 N2 CT IV 9136933 9146210 WBGene00000906 daf-10 F23B2.4 0.202495301794749 AGIWUR2652  
 N2 CT IV 9146337 9146869 WBGene00009078 rpb-12 F23B2.13 -0.0801453372814791  
 AGIWUR18561  
 N2 CT IV 9147468 9148579 WBGene00000121 aly-2 F23B2.6 -0.227894544634269 AGIWUR995  
 N2 CT IV 9148949 9149297 WBGene00043283 F23B2.9 F23B2.9 -0.1202238889905 AGIWUR32127  
 N2 CT IV 9150491 9152043 WBGene00009075 F23B2.7 F23B2.7 0.144694140205941 AGIWUR26059  
 N2 CT IV 9152819 9154320 WBGene00009077 F23B2.10 F23B2.10 0.549823740903764  
 AGIWUR26346;AGIWUR39763  
 N2 CT IV 9155079 9159019 WBGene00003958 pcp-3 F23B2.11 0.0352296022371235  
 AGIWUR14667  
 N2 CT IV 9160640 9165127 WBGene00003957 pcp-2 F23B2.12 0.254290452128815  
 AGIWUR25329  
 N2 CT IV 9185064 9186023 WBGene00007411 C07C7.1 C07C7.1 -0.357989657074316 AGIWUR28190  
 N2 CT IV 9186815 9191122 WBGene00008112 C46C2.4 C46C2.4 0.0125159256330321 AGIWUR34546  
 N2 CT IV 9191639 9192622 WBGene00008113 C46C2.5 C46C2.5 -0.290963140155114 AGIWUR15595  
 N2 CT IV 9200102 9212235 WBGene00006941 wnk-1 C46C2.1 0.422258396915318 AGIWUR29399  
 N2 CT IV 9212375 9214236 WBGene00008114 C46C2.6 C46C2.6 0.0330620081633137  
 AGIWUR1073;AGIWUR10519;AGIWUR11852;AGIWUR15701;AGIWUR29304;AGIWUR30848  
 N2 CT IV 9216952 9220397 WBGene00008110 C46C2.2 C46C2.2 0.109403316755715 AGIWUR14022

|                                     |    |    |         |         |                |           |           |                      |             |
|-------------------------------------|----|----|---------|---------|----------------|-----------|-----------|----------------------|-------------|
| N2                                  | CT | IV | 9225125 | 9227781 | WBGene00008111 | C46C2.3   | C46C2.3   | 0.340281665130235    | AGIWUR26119 |
| N2                                  | CT | IV | 9228277 | 9231051 | WBGene00012426 | Y11D7A.1  | Y11D7A.1  | -0.0286984808228015  |             |
| AGIWUR3515;AGIWUR25965              |    |    |         |         |                |           |           |                      |             |
| N2                                  | CT | IV | 9233028 | 9241387 | WBGene00012428 | Y11D7A.3  | Y11D7A.3  | 0.0105096111204688   |             |
| AGIWUR29448                         |    |    |         |         |                |           |           |                      |             |
| N2                                  | CT | IV | 9242225 | 9243999 | WBGene00004281 | rab-28    | Y11D7A.4  | -0.00381240912890135 |             |
| AGIWUR8803                          |    |    |         |         |                |           |           |                      |             |
| N2                                  | CT | IV | 9244520 | 9245523 | WBGene00012429 | Y11D7A.5  | Y11D7A.5  | 0.128113386363122    |             |
| AGIWUR33747;AGIWUR38826             |    |    |         |         |                |           |           |                      |             |
| N2                                  | CT | IV | 9247156 | 9248088 | WBGene00014863 | Y11D7A.16 | Y11D7A.16 | 0.0739372195053485   |             |
| AGIWUR12333;AGIWUR24561             |    |    |         |         |                |           |           |                      |             |
| N2                                  | CT | IV | 9251379 | 9253913 | WBGene00012432 | Y11D7A.8  | Y11D7A.8  | 0.22478533861061     |             |
| AGIWUR23676;AGIWUR37799;AGIWUR40803 |    |    |         |         |                |           |           |                      |             |
| N2                                  | CT | IV | 9253979 | 9256117 | WBGene00012433 | Y11D7A.9  | Y11D7A.9  | 0.0467668432799435   |             |
| AGIWUR1652                          |    |    |         |         |                |           |           |                      |             |
| N2                                  | CT | IV | 9258913 | 9259764 | WBGene00012434 | Y11D7A.10 | Y11D7A.10 | 0.0224102330573093   |             |
| AGIWUR39649                         |    |    |         |         |                |           |           |                      |             |
| N2                                  | CT | IV | 9260610 | 9261787 | WBGene00000694 | col-120   | Y11D7A.11 | 0.24580529739845     |             |
| AGIWUR34720                         |    |    |         |         |                |           |           |                      |             |
| N2                                  | CT | IV | 9261808 | 9264265 | WBGene00012435 | flh-1     | Y11D7A.12 | -0.158204875426787   |             |
| AGIWUR26190                         |    |    |         |         |                |           |           |                      |             |
| N2                                  | CT | IV | 9270096 | 9271935 | WBGene00012436 | flh-3     | Y11D7A.13 | -0.175148984333898   |             |
| AGIWUR12856                         |    |    |         |         |                |           |           |                      |             |
| N2                                  | CT | IV | 9272582 | 9273639 | WBGene00045309 | srg-52    | Y11D7A.18 | 0.0494027670073018   |             |
| AGIWUR14678;AGIWUR16760             |    |    |         |         |                |           |           |                      |             |
| N2                                  | CT | IV | 9274416 | 9283113 | WBGene00012437 | hum-9     | Y11D7A.14 | -0.102788686386853   |             |
| AGIWUR20979                         |    |    |         |         |                |           |           |                      |             |
| N2                                  | CT | IV | 9292296 | 9293925 | WBGene00008778 | nhr-264   | F14A5.1   | 0.100546868390217    | AGIWUR42246 |
| N2                                  | CT | IV | 9294899 | 9296406 | WBGene00009871 | F49C12.1  | F49C12.1  | 0.0414107545356952   |             |
| AGIWUR18302                         |    |    |         |         |                |           |           |                      |             |
| N2                                  | CT | IV | 9298024 | 9299220 | WBGene00009872 | F49C12.2  | F49C12.2  | -0.179099108089307   |             |
| AGIWUR7653                          |    |    |         |         |                |           |           |                      |             |
| N2                                  | CT | IV | 9300427 | 9301951 | WBGene00009873 | F49C12.3  | F49C12.3  | -0.0277546479529329  |             |
| AGIWUR10306                         |    |    |         |         |                |           |           |                      |             |
| N2                                  | CT | IV | 9302665 | 9304094 | WBGene00009874 | F49C12.4  | F49C12.4  | 0.18380015019037     |             |
| AGIWUR44441                         |    |    |         |         |                |           |           |                      |             |
| N2                                  | CT | IV | 9304917 | 9307165 | WBGene00009875 | F49C12.5  | F49C12.5  | 0.222401264973522    |             |
| AGIWUR36045                         |    |    |         |         |                |           |           |                      |             |
| N2                                  | CT | IV | 9307338 | 9309109 | WBGene00009876 | F49C12.6  | F49C12.6  | 0.130646084060189    |             |

|                                                                                  |    |    |         |         |                |           |           |                     |
|----------------------------------------------------------------------------------|----|----|---------|---------|----------------|-----------|-----------|---------------------|
| AGIWUR22142                                                                      |    |    |         |         |                |           |           |                     |
| N2                                                                               | CT | IV | 9309108 | 9312927 | WBGene00009877 | F49C12.7  | F49C12.7  | -0.121890733032933  |
| AGIWUR25176                                                                      |    |    |         |         |                |           |           |                     |
| N2                                                                               | CT | IV | 9314810 | 9316215 | WBGene00009878 | F49C12.9  | F49C12.9  | 0.0379080700346588  |
| AGIWUR30770                                                                      |    |    |         |         |                |           |           |                     |
| N2                                                                               | CT | IV | 9316639 | 9318632 | WBGene00004463 | rpn-7     | F49C12.8  | 0.151529394165662   |
| AGIWUR30692;AGIWUR41894                                                          |    |    |         |         |                |           |           |                     |
| N2                                                                               | CT | IV | 9319380 | 9320143 | WBGene00009880 | F49C12.11 | F49C12.11 | -0.146103983451063  |
| AGIWUR5414                                                                       |    |    |         |         |                |           |           |                     |
| N2                                                                               | CT | IV | 9320122 | 9321089 | WBGene00009881 | F49C12.12 | F49C12.12 | -0.216351500138607  |
| AGIWUR29619                                                                      |    |    |         |         |                |           |           |                     |
| N2                                                                               | CT | IV | 9321801 | 9322528 | WBGene00009882 | vha-17    | F49C12.13 | -0.0485857044046103 |
| AGIWUR10460;AGIWUR33594                                                          |    |    |         |         |                |           |           |                     |
| N2                                                                               | CT | IV | 9324435 | 9327516 | WBGene00009884 | F49C12.15 | F49C12.15 | 0.210797565421812   |
| AGIWUR1749                                                                       |    |    |         |         |                |           |           |                     |
| N2                                                                               | CT | IV | 9328010 | 9328745 | WBGene00011855 | cllec-183 | T20D3.1   | -0.205380127597518  |
| AGIWUR27131                                                                      |    |    |         |         |                |           |           |                     |
| N2                                                                               | CT | IV | 9328973 | 9330855 | WBGene00011856 | T20D3.2   | T20D3.2   | 0.175754766030003   |
| AGIWUR37376;AGIWUR43822                                                          |    |    |         |         |                |           |           |                     |
| N2                                                                               | CT | IV | 9333342 | 9335916 | WBGene00011857 | T20D3.3   | T20D3.3   | -0.082472862571743  |
| AGIWUR640;AGIWUR2173;AGIWUR11482;AGIWUR21374;AGIWUR24100;AGIWUR25036;AGIWUR34649 |    |    |         |         |                |           |           |                     |
| N2                                                                               | CT | IV | 9337044 | 9338567 | WBGene00011858 | T20D3.5   | T20D3.5   | -0.18290361985024   |
| AGIWUR6055;AGIWUR15510;AGIWUR24330                                               |    |    |         |         |                |           |           |                     |
| N2                                                                               | CT | IV | 9338587 | 9339305 | WBGene00011859 | T20D3.6   | T20D3.6   | -0.149247208549848  |
| N2                                                                               | CT | IV | 9339403 | 9341790 | WBGene00006931 | vps-26    | T20D3.7   | 0.0767478328477793  |
| N2                                                                               | CT | IV | 9341964 | 9343152 | WBGene00011860 | T20D3.8   | T20D3.8   | -0.174281045081305  |
| N2                                                                               | CT | IV | 9343358 | 9366506 | WBGene00007505 | pezo-1    | C10C5.1   | 0.0440435092574507  |
| AGIWUR3741;AGIWUR15461;AGIWUR19565;AGIWUR37952                                   |    |    |         |         |                |           |           |                     |
| N2                                                                               | CT | IV | 9371508 | 9373636 | WBGene00007506 | C10C5.2   | C10C5.2   | 0.509900342599703   |
| AGIWUR14726;AGIWUR25513                                                          |    |    |         |         |                |           |           |                     |
| N2                                                                               | CT | IV | 9374733 | 9376492 | WBGene00007507 | C10C5.3   | C10C5.3   | 0.0618658093637876  |
| N2                                                                               | CT | IV | 9378552 | 9380450 | WBGene00007508 | C10C5.4   | C10C5.4   | 0.0167788882827669  |
| N2                                                                               | CT | IV | 9381515 | 9383115 | WBGene00007509 | C10C5.5   | C10C5.5   | 0.0398300593701357  |
| N2                                                                               | CT | IV | 9385126 | 9385713 | WBGene00007511 | C10C5.7   | C10C5.7   | 0.00634569263700335 |
| N2                                                                               | CT | IV | 9386208 | 9394930 | WBGene00000911 | daf-15    | C10C5.6   | 0.128198040849915   |
| AGIWUR15043;AGIWUR24389                                                          |    |    |         |         |                |           |           |                     |
| N2                                                                               | CT | IV | 9394934 | 9396218 | WBGene00000695 | col-121   | F56D5.1   | -0.375704091929125  |
| N2                                                                               | CT | IV | 9396920 | 9398603 | WBGene00010147 | F56D5.2   | F56D5.2   | 0.395110610845222   |
| N2                                                                               | CT | IV | 9399653 | 9401293 | WBGene00010148 | F56D5.3   | F56D5.3   | -0.15155677438101   |

AGIWUR10001

AGIWUR22148

AGIWUR6522

AGIWUR3415

AGIWUR32390

AGIWUR3133

AGIWUR28883

AGIWUR43719

AGIWUR29719

AGIWUR947

|                                                                        |    |    |         |         |                |           |           |                     |             |
|------------------------------------------------------------------------|----|----|---------|---------|----------------|-----------|-----------|---------------------|-------------|
| N2                                                                     | CT | IV | 9401922 | 9412653 | WBGene00010150 | F56D5.6   | F56D5.6   | 0.0992370848711737  | AGIWUR16853 |
| N2                                                                     | CT | IV | 9418432 | 9422506 | WBGene00010152 | F56D5.9   | F56D5.9   | -0.0116104446165579 | AGIWUR9437  |
| N2                                                                     | CT | IV | 9423395 | 9424415 | WBGene00010153 | srxa-2    | F56D5.10  | 0.015199225284821   |             |
| AGIWUR11246                                                            |    |    |         |         |                |           |           |                     |             |
| N2                                                                     | CT | IV | 9428259 | 9439077 | WBGene00010316 | F59B8.1   | F59B8.1   | -0.121976861603855  |             |
| AGIWUR9633;AGIWUR25189;AGIWUR27633                                     |    |    |         |         |                |           |           |                     |             |
| N2                                                                     | CT | IV | 9439043 | 9440893 | WBGene00010317 | idh-1     | F59B8.2   | 0.200082419129153   | AGIWUR21726 |
| N2                                                                     | CT | IV | 9442877 | 9444516 | WBGene00009544 | F38E11.9  | F38E11.9  | -0.366785841797094  |             |
| AGIWUR6817                                                             |    |    |         |         |                |           |           |                     |             |
| N2                                                                     | CT | IV | 9444791 | 9445507 | WBGene00002012 | hsp-12.3  | F38E11.1  | -0.0269199187127436 |             |
| AGIWUR5661;AGIWUR7122;AGIWUR9794;AGIWUR13490;AGIWUR20005;AGIWUR20124   |    |    |         |         |                |           |           |                     |             |
| N2                                                                     | CT | IV | 9446385 | 9446884 | WBGene00002013 | hsp-12.6  | F38E11.2  | -0.0376173356702418 |             |
| AGIWUR6281;AGIWUR11904;AGIWUR17211;AGIWUR25673;AGIWUR30513;AGIWUR35348 |    |    |         |         |                |           |           |                     |             |
| N2                                                                     | CT | IV | 9449473 | 9457501 | WBGene00009541 | cutl-17   | F38E11.4  | 0.0114198446002165  |             |
| AGIWUR12258;AGIWUR20388;AGIWUR31001;AGIWUR36293                        |    |    |         |         |                |           |           |                     |             |
| N2                                                                     | CT | IV | 9459731 | 9463998 | WBGene00009542 | copb-2    | F38E11.5  | -0.0969126922379751 |             |
| AGIWUR4755;AGIWUR16599;AGIWUR26454;AGIWUR34313;AGIWUR34549;AGIWUR40798 |    |    |         |         |                |           |           |                     |             |
| N2                                                                     | CT | IV | 9463951 | 9467518 | WBGene00009543 | F38E11.6  | F38E11.6  | 0.203265548401602   |             |
| AGIWUR2349                                                             |    |    |         |         |                |           |           |                     |             |
| N2                                                                     | CT | IV | 9473680 | 9475365 | WBGene00014752 | F38E11.8  | F38E11.8  | 0.0538280169569934  |             |
| AGIWUR40862                                                            |    |    |         |         |                |           |           |                     |             |
| N2                                                                     | CT | IV | 9475863 | 9477446 | WBGene00006949 | wrt-3     | F38E11.7  | -0.0621113023438529 |             |
| AGIWUR3094;AGIWUR9220;AGIWUR33893;AGIWUR39063                          |    |    |         |         |                |           |           |                     |             |
| N2                                                                     | CT | IV | 9482053 | 9485140 | WBGene00007887 | gadr-2    | C33A12.12 | 0.169447901834529   |             |
| AGIWUR36875                                                            |    |    |         |         |                |           |           |                     |             |
| N2                                                                     | CT | IV | 9486272 | 9487631 | WBGene00005665 | sru-2     | C33A12.13 | 0.13901700154562    |             |
| AGIWUR3401;AGIWUR6766;AGIWUR23330                                      |    |    |         |         |                |           |           |                     |             |
| N2                                                                     | CT | IV | 9488670 | 9490194 | WBGene00005664 | sru-1     | C33A12.14 | -0.229061813843648  |             |
| AGIWUR1098                                                             |    |    |         |         |                |           |           |                     |             |
| N2                                                                     | CT | IV | 9490620 | 9491991 | WBGene00005669 | sru-6     | C33A12.8  | 0.0445803759966257  |             |
| AGIWUR6449                                                             |    |    |         |         |                |           |           |                     |             |
| N2                                                                     | CT | IV | 9492576 | 9493220 | WBGene00014693 | C33A12.18 | C33A12.18 | 0.0692888781694148  |             |
| AGIWUR3246;AGIWUR34967                                                 |    |    |         |         |                |           |           |                     |             |
| N2                                                                     | CT | IV | 9494032 | 9495519 | WBGene00005668 | sru-5     | C33A12.9  | 0.0243944733646697  |             |
| AGIWUR15262;AGIWUR38061                                                |    |    |         |         |                |           |           |                     |             |
| N2                                                                     | CT | IV | 9496606 | 9497888 | WBGene00005666 | sru-3     | C33A12.11 | -0.0810099000628366 |             |
| AGIWUR19248                                                            |    |    |         |         |                |           |           |                     |             |
| N2                                                                     | CT | IV | 9498388 | 9499588 | WBGene00005667 | sru-4     | C33A12.10 | 0.141313817347314   |             |
| AGIWUR18393                                                            |    |    |         |         |                |           |           |                     |             |



|                                                                        |    |    |         |         |                |           |           |                     |             |
|------------------------------------------------------------------------|----|----|---------|---------|----------------|-----------|-----------|---------------------|-------------|
| N2                                                                     | CT | IV | 9500311 | 9502568 | WBGene00007885 | ugt-21    | C33A12.6  | 0.16803814985562    |             |
| AGIWUR7536;AGIWUR29751                                                 |    |    |         |         |                |           |           |                     |             |
| N2                                                                     | CT | IV | 9502572 | 9505292 | WBGene00007889 | C33A12.16 | C33A12.16 | 0.0290165458525635  |             |
| AGIWUR21842;AGIWUR26855;AGIWUR30931                                    |    |    |         |         |                |           |           |                     |             |
| N2                                                                     | CT | IV | 9505615 | 9506326 | WBGene00007888 | ttr-9     | C33A12.15 | 0.118559146428666   |             |
| AGIWUR33075                                                            |    |    |         |         |                |           |           |                     |             |
| N2                                                                     | CT | IV | 9506936 | 9508779 | WBGene00007886 | ethe-1    | C33A12.7  | -0.239135897667648  |             |
| AGIWUR27815                                                            |    |    |         |         |                |           |           |                     |             |
| N2                                                                     | CT | IV | 9510055 | 9510594 | WBGene00007883 | C33A12.4  | C33A12.4  | -0.139458114393939  |             |
| AGIWUR14783                                                            |    |    |         |         |                |           |           |                     |             |
| N2                                                                     | CT | IV | 9510748 | 9513002 | WBGene00007882 | C33A12.3  | C33A12.3  | -0.105561099479072  |             |
| AGIWUR38679                                                            |    |    |         |         |                |           |           |                     |             |
| N2                                                                     | CT | IV | 9516992 | 9518410 | WBGene00007890 | C33A12.19 | C33A12.19 | -0.211521471744955  |             |
| AGIWUR12496                                                            |    |    |         |         |                |           |           |                     |             |
| N2                                                                     | CT | IV | 9518367 | 9518927 | WBGene00007881 | nlp-35    | C33A12.2  | -0.342807224958431  |             |
| AGIWUR14739                                                            |    |    |         |         |                |           |           |                     |             |
| N2                                                                     | CT | IV | 9523764 | 9524895 | WBGene00007880 | C33A12.1  | C33A12.1  | -0.175021430006149  |             |
| AGIWUR15621                                                            |    |    |         |         |                |           |           |                     |             |
| N2                                                                     | CT | IV | 9526359 | 9528350 | WBGene00001239 | elo-1     | F56H11.4  | 0.172843112670659   |             |
| AGIWUR19591;AGIWUR20671;AGIWUR26778                                    |    |    |         |         |                |           |           |                     |             |
| N2                                                                     | CT | IV | 9528355 | 9529569 | WBGene00010176 | F56H11.6  | F56H11.6  | 0.231066712424607   |             |
| AGIWUR44359                                                            |    |    |         |         |                |           |           |                     |             |
| N2                                                                     | CT | IV | 9529947 | 9531378 | WBGene00001245 | elo-7     | F56H11.3  | 0.205559461671502   |             |
| AGIWUR10588;AGIWUR38339;AGIWUR44859                                    |    |    |         |         |                |           |           |                     |             |
| N2                                                                     | CT | IV | 9531357 | 9533171 | WBGene00010175 | F56H11.2  | F56H11.2  | 0.538534636024094   |             |
| AGIWUR38244                                                            |    |    |         |         |                |           |           |                     |             |
| N2                                                                     | CT | IV | 9540808 | 9546250 | WBGene00001403 | fb1-1     | F56H11.1  | -0.120286743426083  |             |
| AGIWUR3088;AGIWUR21630;AGIWUR27626;AGIWUR31406;AGIWUR35333;AGIWUR35815 |    |    |         |         |                |           |           |                     |             |
| N2                                                                     | CT | IV | 9546286 | 9560428 | WBGene00011456 | T05A1.5   | T05A1.5   | 0.0538820603601238  |             |
| AGIWUR30574;AGIWUR36667;AGIWUR36862                                    |    |    |         |         |                |           |           |                     |             |
| N2                                                                     | CT | IV | 9568828 | 9580071 | WBGene00003808 | npr-2     | T05A1.1   | -0.063862367906582  | AGIWUR9649  |
| N2                                                                     | CT | IV | 9587100 | 9588834 | WBGene00009186 | trcs-1    | F27C8.6   | -0.179302944454069  |             |
| AGIWUR23993;AGIWUR24542;AGIWUR43108                                    |    |    |         |         |                |           |           |                     |             |
| N2                                                                     | CT | IV | 9589795 | 9592529 | WBGene00009185 | F27C8.5   | F27C8.5   | 0.275389777260322   | AGIWUR25567 |
| N2                                                                     | CT | IV | 9593667 | 9594425 | WBGene00005003 | spp-18    | F27C8.4   | 0.0607205484272502  | AGIWUR21130 |
| N2                                                                     | CT | IV | 9595088 | 9595933 | WBGene00009184 | F27C8.3   | F27C8.3   | 0.0806814038238999  |             |
| AGIWUR17532;AGIWUR18902;AGIWUR31320;AGIWUR33452;AGIWUR35776            |    |    |         |         |                |           |           |                     |             |
| N2                                                                     | CT | IV | 9596497 | 9599081 | WBGene00009183 | F27C8.2   | F27C8.2   | -0.0746818878597444 |             |
| AGIWUR11750;AGIWUR19540;AGIWUR21046;AGIWUR26418                        |    |    |         |         |                |           |           |                     |             |

|                                                                                              |    |    |         |         |                 |          |           |                     |             |
|----------------------------------------------------------------------------------------------|----|----|---------|---------|-----------------|----------|-----------|---------------------|-------------|
| N2                                                                                           | CT | IV | 9598986 | 9601695 | WBGene000000002 | aat-1    | F27C8.1   | 0.10336082891329    | AGIWUR12999 |
| N2                                                                                           | CT | IV | 9614970 | 9620140 | WBGene000001249 | elt-1    | W09C2.1   | 0.146935269886669   | AGIWUR18559 |
| N2                                                                                           | CT | IV | 9625910 | 9634948 | WBGene000003151 | mca-1    | W09C2.3   | 0.202468322258641   |             |
| AGIWUR8635;AGIWUR13889;AGIWUR15173;AGIWUR23235;AGIWUR27015;AGIWUR29670                       |    |    |         |         |                 |          |           |                     |             |
| N2                                                                                           | CT | IV | 9636980 | 9642003 | WBGene000000953 | del-2    | F58G6.6   | -0.134179971472662  | AGIWUR33261 |
| N2                                                                                           | CT | IV | 9643422 | 9644268 | WBGene00010278  | F58G6.8  | F58G6.8   | 0.111299733302016   | AGIWUR25483 |
| N2                                                                                           | CT | IV | 9644245 | 9647934 | WBGene00010272  | amph-1   | F58G6.1   | -0.0322801969579718 |             |
| AGIWUR8192;AGIWUR9748;AGIWUR15924;AGIWUR32381;AGIWUR43634                                    |    |    |         |         |                 |          |           |                     |             |
| N2                                                                                           | CT | IV | 9649043 | 9650490 | WBGene00010273  | srm-3    | F58G6.2   | -0.145875664721839  |             |
| AGIWUR28922;AGIWUR39645                                                                      |    |    |         |         |                 |          |           |                     |             |
| N2                                                                                           | CT | IV | 9651394 | 9652484 | WBGene00044107  | F58G6.9  | F58G6.9   | 0.0492440374298218  |             |
| AGIWUR735;AGIWUR3220;AGIWUR14260;AGIWUR23851;AGIWUR29022                                     |    |    |         |         |                 |          |           |                     |             |
| N2                                                                                           | CT | IV | 9653535 | 9654175 | WBGene00010274  | F58G6.3  | F58G6.3   | -0.345528973256211  | AGIWUR40504 |
| N2                                                                                           | CT | IV | 9654317 | 9655588 | WBGene00010277  | F58G6.7  | F58G6.7   | -0.254336951114176  | AGIWUR22873 |
| N2                                                                                           | CT | IV | 9658053 | 9663941 | WBGene00010275  | acc-1    | F58G6.4   | -0.171706212470137  | AGIWUR29262 |
| N2                                                                                           | CT | IV | 9664365 | 9675672 | WBGene00003627  | nhr-34   | F58G6.5   | -0.0225343471014385 |             |
| AGIWUR3607;AGIWUR9087;AGIWUR9865;AGIWUR17700;AGIWUR20213;AGIWUR38487;AGIWUR39401;AGIWUR43484 |    |    |         |         |                 |          |           |                     |             |
| N2                                                                                           | CT | IV | 9680387 | 9680941 | WBGene00002091  | ins-8    | ZK1251.11 | -0.0539521394085156 |             |
| AGIWUR12964                                                                                  |    |    |         |         |                 |          |           |                     |             |
| N2                                                                                           | CT | IV | 9682013 | 9682826 | WBGene00002090  | ins-7    | ZK1251.2  | 0.378255391246048   |             |
| AGIWUR35925                                                                                  |    |    |         |         |                 |          |           |                     |             |
| N2                                                                                           | CT | IV | 9682984 | 9683533 | WBGene00014240  | htas-1   | ZK1251.1  | 0.364174814135573   |             |
| AGIWUR13934                                                                                  |    |    |         |         |                 |          |           |                     |             |
| N2                                                                                           | CT | IV | 9683617 | 9684473 | WBGene00014241  | ZK1251.3 | ZK1251.3  | 0.232009132537608   |             |
| AGIWUR19628                                                                                  |    |    |         |         |                 |          |           |                     |             |
| N2                                                                                           | CT | IV | 9687049 | 9688392 | WBGene00014996  | ZK1251.5 | ZK1251.5  | 0.27160598224513    |             |
| AGIWUR16631;AGIWUR36524                                                                      |    |    |         |         |                 |          |           |                     |             |
| N2                                                                                           | CT | IV | 9690932 | 9691465 | WBGene00014242  | sdz-36   | ZK1251.7  | -0.35052702591434   |             |
| AGIWUR42072                                                                                  |    |    |         |         |                 |          |           |                     |             |
| N2                                                                                           | CT | IV | 9693202 | 9697005 | WBGene00006664  | twk-9    | ZK1251.8  | -0.109814407204194  |             |
| AGIWUR5316;AGIWUR12010;AGIWUR41514                                                           |    |    |         |         |                 |          |           |                     |             |
| N2                                                                                           | CT | IV | 9696989 | 9706723 | WBGene00014243  | dcaf-1   | ZK1251.9  | 0.141586525883266   |             |
| AGIWUR40370                                                                                  |    |    |         |         |                 |          |           |                     |             |
| N2                                                                                           | CT | IV | 9707148 | 9707764 | WBGene00010484  | dph-3    | K01H12.1  | -0.254769871548128  |             |
| AGIWUR11984;AGIWUR15311;AGIWUR21907;AGIWUR29882;AGIWUR39442;AGIWUR44342                      |    |    |         |         |                 |          |           |                     |             |
| N2                                                                                           | CT | IV | 9708170 | 9709305 | WBGene00010485  | ant-1.3  | K01H12.2  | 0.272324170652814   |             |
| AGIWUR22865                                                                                  |    |    |         |         |                 |          |           |                     |             |
| N2                                                                                           | CT | IV | 9710202 | 9712419 | WBGene00003629  | nhr-38   | K01H12.3  | -0.106072460790053  |             |
| AGIWUR15627;AGIWUR30641;AGIWUR42905                                                          |    |    |         |         |                 |          |           |                     |             |

|                                                             |    |    |         |         |                |          |          |                      |             |
|-------------------------------------------------------------|----|----|---------|---------|----------------|----------|----------|----------------------|-------------|
| N2                                                          | CT | IV | 9713082 | 9714886 | WBGene00010486 | K01H12.4 | K01H12.4 | -0.0307360385011339  |             |
| AGIWUR42932                                                 |    |    |         |         |                |          |          |                      |             |
| N2                                                          | CT | IV | 9725251 | 9728576 | WBGene00003728 | nhr-138  | C28D4.9  | 0.000224081614472738 | AGIWUR5703  |
| N2                                                          | CT | IV | 9728676 | 9731314 | WBGene00003690 | nhr-100  | C28D4.1  | -0.0291790747207177  | AGIWUR14259 |
| N2                                                          | CT | IV | 9731737 | 9737621 | WBGene00000509 | cka-1    | C28D4.2  | 0.198377026852311    | AGIWUR39127 |
| N2                                                          | CT | IV | 9738510 | 9739220 | WBGene00007796 | C28D4.10 | C28D4.10 | -0.0949760548929559  |             |
| AGIWUR28516                                                 |    |    |         |         |                |          |          |                      |             |
| N2                                                          | CT | IV | 9739219 | 9740908 | WBGene00001607 | gln-6    | C28D4.3  | -0.0470563498161027  |             |
| AGIWUR8252;AGIWUR27183;AGIWUR32269                          |    |    |         |         |                |          |          |                      |             |
| N2                                                          | CT | IV | 9741875 | 9743147 | WBGene00007794 | C28D4.7  | C28D4.7  | 0.119511113453349    | AGIWUR7363  |
| N2                                                          | CT | IV | 9743765 | 9745003 | WBGene00007792 | C28D4.4  | C28D4.4  | 0.176340733147549    | AGIWUR43339 |
| N2                                                          | CT | IV | 9745555 | 9746862 | WBGene00007793 | C28D4.5  | C28D4.5  | 0.284562808583601    |             |
| AGIWUR8420;AGIWUR34963                                      |    |    |         |         |                |          |          |                      |             |
| N2                                                          | CT | IV | 9757648 | 9764494 | WBGene00003687 | nhr-97   | H27C11.1 | -0.115991127791423   |             |
| AGIWUR10437;AGIWUR25208;AGIWUR26811;AGIWUR42455;AGIWUR44637 |    |    |         |         |                |          |          |                      |             |
| N2                                                          | CT | IV | 9765669 | 9766436 | WBGene00011749 | ssp-36   | T13F2.12 | 0.165187127714928    |             |
| AGIWUR11597                                                 |    |    |         |         |                |          |          |                      |             |
| N2                                                          | CT | IV | 9772510 | 9773470 | WBGene00000301 | cav-1    | T13F2.8  | -0.0290727919885807  |             |
| AGIWUR3025;AGIWUR6303;AGIWUR17426;AGIWUR24603;AGIWUR43155   |    |    |         |         |                |          |          |                      |             |
| N2                                                          | CT | IV | 9774563 | 9777634 | WBGene00011747 | sna-2    | T13F2.7  | -0.0661133466597121  | AGIWUR32315 |
| N2                                                          | CT | IV | 9778288 | 9781203 | WBGene00011746 | T13F2.6  | T13F2.6  | 0.103364347806675    | AGIWUR39516 |
| N2                                                          | CT | IV | 9789808 | 9791917 | WBGene00011744 | T13F2.4  | T13F2.4  | -0.0197786678838394  | AGIWUR39540 |
| N2                                                          | CT | IV | 9791945 | 9796592 | WBGene00004031 | pis-1    | T13F2.3  | 0.0525939593108085   | AGIWUR17460 |
| N2                                                          | CT | IV | 9796688 | 9797354 | WBGene00011743 | T13F2.2  | T13F2.2  | 0.135521275178553    |             |
| AGIWUR2648;AGIWUR40457                                      |    |    |         |         |                |          |          |                      |             |
| N2                                                          | CT | IV | 9799429 | 9802638 | WBGene00001396 | fat-4    | T13F2.1  | 0.0200874670024049   |             |
| AGIWUR13144;AGIWUR23506;AGIWUR33115                         |    |    |         |         |                |          |          |                      |             |
| N2                                                          | CT | IV | 9803023 | 9806119 | WBGene00001395 | fat-3    | W08D2.4  | 0.0962967995253337   | AGIWUR19711 |
| N2                                                          | CT | IV | 9806416 | 9810733 | WBGene00012340 | dct-15   | W08D2.3  | -0.186919038384857   | AGIWUR20257 |
| N2                                                          | CT | IV | 9812444 | 9815526 | WBGene00001188 | egl-20   | W08D2.1  | -0.0264988217355535  |             |
| AGIWUR16385;AGIWUR23531;AGIWUR27673;AGIWUR33623             |    |    |         |         |                |          |          |                      |             |
| N2                                                          | CT | IV | 9817412 | 9824632 | WBGene00012341 | catp-6   | W08D2.5  | 0.19828253474595     |             |
| AGIWUR6997;AGIWUR17095;AGIWUR22958;AGIWUR43986              |    |    |         |         |                |          |          |                      |             |
| N2                                                          | CT | IV | 9825694 | 9830620 | WBGene00012342 | mtr-4    | W08D2.7  | 0.0232742397288295   | AGIWUR36980 |
| N2                                                          | CT | IV | 9832935 | 9834822 | WBGene00002204 | kin-21   | W08D2.8  | 0.15232090330794     | AGIWUR37340 |
| N2                                                          | CT | IV | 9839057 | 9841084 | WBGene00002206 | kin-24   | K07F5.4  | 0.183246172678547    | AGIWUR26938 |
| N2                                                          | CT | IV | 9842371 | 9842992 | WBGene00045180 | K07F5.17 | K07F5.17 | 0.106991196772304    |             |
| AGIWUR7217;AGIWUR9095;AGIWUR18583                           |    |    |         |         |                |          |          |                      |             |
| N2                                                          | CT | IV | 9844014 | 9844344 | WBGene00010633 | nspd-2   | K07F5.5  | 0.497048045846363    | AGIWUR17317 |

|                                                                         |    |    |         |         |                |          |          |                      |             |
|-------------------------------------------------------------------------|----|----|---------|---------|----------------|----------|----------|----------------------|-------------|
| N2                                                                      | CT | IV | 9844989 | 9846674 | WBGene00010634 | K07F5.6  | K07F5.6  | 0.297750524750279    | AGIWUR23014 |
| N2                                                                      | CT | IV | 9847724 | 9848175 | WBGene00010635 | K07F5.7  | K07F5.7  | -0.132916377066437   | AGIWUR25972 |
| N2                                                                      | CT | IV | 9848491 | 9849796 | WBGene00010636 | K07F5.8  | K07F5.8  | 0.140679765333839    |             |
| AGIWUR2188;AGIWUR2399;AGIWUR24222                                       |    |    |         |         |                |          |          |                      |             |
| N2                                                                      | CT | IV | 9852550 | 9853609 | WBGene00006050 | ssq-1    | K07F5.11 | 0.150066155000333    |             |
| AGIWUR10720                                                             |    |    |         |         |                |          |          |                      |             |
| N2                                                                      | CT | IV | 9856012 | 9858067 | WBGene00010637 | K07F5.12 | K07F5.12 | -0.321939660643038   |             |
| AGIWUR15523;AGIWUR22601                                                 |    |    |         |         |                |          |          |                      |             |
| N2                                                                      | CT | IV | 9858488 | 9862118 | WBGene00003787 | npp-1    | K07F5.13 | -0.146442216426719   |             |
| AGIWUR8201;AGIWUR16295;AGIWUR35932                                      |    |    |         |         |                |          |          |                      |             |
| N2                                                                      | CT | IV | 9862221 | 9864076 | WBGene00010638 | K07F5.14 | K07F5.14 | -0.360017371349766   |             |
| AGIWUR39713                                                             |    |    |         |         |                |          |          |                      |             |
| N2                                                                      | CT | IV | 9864179 | 9864954 | WBGene00010640 | K07F5.16 | K07F5.16 | -0.361241750219206   |             |
| AGIWUR43013                                                             |    |    |         |         |                |          |          |                      |             |
| N2                                                                      | CT | IV | 9865078 | 9866163 | WBGene00010639 | K07F5.15 | K07F5.15 | -0.151330270583191   |             |
| AGIWUR2940;AGIWUR3047;AGIWUR17907;AGIWUR19206;AGIWUR41539               |    |    |         |         |                |          |          |                      |             |
| N2                                                                      | CT | IV | 9879329 | 9882152 | WBGene00003603 | nhr-4    | F32B6.1  | -0.292500453162674   | AGIWUR40095 |
| N2                                                                      | CT | IV | 9882132 | 9884383 | WBGene00009320 | F32B6.3  | F32B6.3  | -0.114217355780198   | AGIWUR38724 |
| N2                                                                      | CT | IV | 9884556 | 9887150 | WBGene00009319 | mccc-1   | F32B6.2  | -0.0429694880793967  |             |
| AGIWUR14175;AGIWUR25051;AGIWUR30913;AGIWUR44689                         |    |    |         |         |                |          |          |                      |             |
| N2                                                                      | CT | IV | 9887190 | 9889929 | WBGene00009324 | F32B6.10 | F32B6.10 | 0.074528726903635    |             |
| AGIWUR12556                                                             |    |    |         |         |                |          |          |                      |             |
| N2                                                                      | CT | IV | 9890585 | 9892038 | WBGene00009321 | F32B6.4  | F32B6.4  | 0.111987802947672    | AGIWUR10939 |
| N2                                                                      | CT | IV | 9892739 | 9893779 | WBGene00006056 | sss-1    | F32B6.5  | 0.289904966520531    | AGIWUR38254 |
| N2                                                                      | CT | IV | 9895388 | 9896147 | WBGene00006049 | ssp-32   | F32B6.7  | 0.125867792558379    | AGIWUR1266  |
| N2                                                                      | CT | IV | 9899012 | 9902513 | WBGene00009322 | tbc-3    | F32B6.8  | 0.234910990975965    | AGIWUR19284 |
| N2                                                                      | CT | IV | 9903908 | 9905903 | WBGene00009323 | best-13  | F32B6.9  | 0.0632012532156434   | AGIWUR3199  |
| N2                                                                      | CT | IV | 9916530 | 9921996 | WBGene00009133 | bed-3    | F25H8.6  | -0.00929610542312886 | AGIWUR41049 |
| N2                                                                      | CT | IV | 9921955 | 9928223 | WBGene00001113 | dur-1    | F25H8.5  | 0.131446786886302    |             |
| AGIWUR18088;AGIWUR37175;AGIWUR44758                                     |    |    |         |         |                |          |          |                      |             |
| N2                                                                      | CT | IV | 9930899 | 9932240 | WBGene00009131 | F25H8.1  | F25H8.1  | 0.351495107647491    |             |
| AGIWUR3558;AGIWUR13798;AGIWUR38273                                      |    |    |         |         |                |          |          |                      |             |
| N2                                                                      | CT | IV | 9932235 | 9933879 | WBGene00009132 | F25H8.2  | F25H8.2  | 0.168327421112915    | AGIWUR23509 |
| N2                                                                      | CT | IV | 9933910 | 9934285 | WBGene00004974 | spe-29   | F25H8.7  | 0.0354433221561665   |             |
| AGIWUR12135;AGIWUR14054;AGIWUR16647;AGIWUR19696;AGIWUR25093;AGIWUR25417 |    |    |         |         |                |          |          |                      |             |
| N2                                                                      | CT | IV | 9934767 | 9953433 | WBGene00001650 | gon-1    | F25H8.3  | -0.0331194464073992  |             |
| AGIWUR15816;AGIWUR29887;AGIWUR40536                                     |    |    |         |         |                |          |          |                      |             |
| N2                                                                      | CT | IV | 9964245 | 9966630 | WBGene00011762 | T13H10.2 | T13H10.2 | -0.0227306949935757  |             |
| AGIWUR3038;AGIWUR9024;AGIWUR17513;AGIWUR18569                           |    |    |         |         |                |          |          |                      |             |

|                                                                                                                         |    |    |          |          |                |           |           |                      |
|-------------------------------------------------------------------------------------------------------------------------|----|----|----------|----------|----------------|-----------|-----------|----------------------|
| N2                                                                                                                      | CT | IV | 9967095  | 9969181  | WBGene00002193 | kin-5     | T13H10.1  | -0.0291080456568631  |
| AGIWUR4224                                                                                                              |    |    |          |          |                |           |           |                      |
| N2                                                                                                                      | CT | IV | 9969400  | 9971200  | WBGene00008154 | C47E12.11 | C47E12.11 | 0.0629217561150632   |
| AGIWUR13467                                                                                                             |    |    |          |          |                |           |           |                      |
| N2                                                                                                                      | CT | IV | 9972037  | 9972652  | WBGene00008155 | C47E12.12 | C47E12.12 | 0.186068431900154    |
| AGIWUR27207                                                                                                             |    |    |          |          |                |           |           |                      |
| N2                                                                                                                      | CT | IV | 9972800  | 9973984  | WBGene00008153 | C47E12.10 | C47E12.10 | 0 AGIWUR34366        |
| N2                                                                                                                      | CT | IV | 9974672  | 9975484  | WBGene00008152 | C47E12.9  | C47E12.9  | -0.181184163254464   |
| AGIWUR29301                                                                                                             |    |    |          |          |                |           |           |                      |
| N2                                                                                                                      | CT | IV | 9975496  | 9976384  | WBGene00044240 | C47E12.14 | C47E12.14 | 0.0402772139573191   |
| AGIWUR30214;AGIWUR33392;AGIWUR34516                                                                                     |    |    |          |          |                |           |           |                      |
| N2                                                                                                                      | CT | IV | 9978122  | 9980770  | WBGene00000964 | dhp-2     | C47E12.8  | -0.0122245021823755  |
| AGIWUR34299                                                                                                             |    |    |          |          |                |           |           |                      |
| N2                                                                                                                      | CT | IV | 9980724  | 9982276  | WBGene00008151 | C47E12.7  | C47E12.7  | -0.0128474462476618  |
| AGIWUR18656                                                                                                             |    |    |          |          |                |           |           |                      |
| N2                                                                                                                      | CT | IV | 9983195  | 9989678  | WBGene00008150 | mam-2     | C47E12.6  | -0.00451372224280533 |
| AGIWUR29556                                                                                                             |    |    |          |          |                |           |           |                      |
| N2                                                                                                                      | CT | IV | 9989670  | 9995034  | WBGene00006699 | uba-1     | C47E12.5  | 0.229872191219475    |
| AGIWUR10534;AGIWUR11941;AGIWUR17729;AGIWUR18720;AGIWUR28621;AGIWUR29207;AGIWUR32686;AGIWUR34505;AGIWUR35578;AGIWUR41605 |    |    |          |          |                |           |           |                      |
| N2                                                                                                                      | CT | IV | 9995472  | 9999032  | WBGene00008149 | pyp-1     | C47E12.4  | 0.0235621357849025   |
| AGIWUR3161;AGIWUR26414                                                                                                  |    |    |          |          |                |           |           |                      |
| N2                                                                                                                      | CT | IV | 9999047  | 10001846 | WBGene00008148 | C47E12.3  | C47E12.3  |                      |
| 0.144993148868396 AGIWUR23502                                                                                           |    |    |          |          |                |           |           |                      |
| N2                                                                                                                      | CT | IV | 10001972 | 10003534 | WBGene00008147 | C47E12.2  | C47E12.2  |                      |
| -0.193719779412266 AGIWUR44403                                                                                          |    |    |          |          |                |           |           |                      |
| N2                                                                                                                      | CT | IV | 10003726 | 10005599 | WBGene00005663 | sars-1    | C47E12.1  |                      |
| -0.0433478288238627 AGIWUR1796;AGIWUR5322;AGIWUR11890;AGIWUR31242                                                       |    |    |          |          |                |           |           |                      |
| N2                                                                                                                      | CT | IV | 10009354 | 10014187 | WBGene00009678 | magu-4    | F44D12.1  |                      |
| -0.0539757006516126 AGIWUR3382                                                                                          |    |    |          |          |                |           |           |                      |
| N2                                                                                                                      | CT | IV | 10013958 | 10016398 | WBGene00009679 | F44D12.2  | F44D12.2  |                      |
| 0.0822433393769586 AGIWUR6307                                                                                           |    |    |          |          |                |           |           |                      |
| N2                                                                                                                      | CT | IV | 10017425 | 10021286 | WBGene00009686 | ent-7     | F44D12.9  |                      |
| 0.10093369381824 AGIWUR21559                                                                                            |    |    |          |          |                |           |           |                      |
| N2                                                                                                                      | CT | IV | 10023291 | 10025226 | WBGene00009685 | F44D12.8  | F44D12.8  |                      |
| 0.359822581097387 AGIWUR19688                                                                                           |    |    |          |          |                |           |           |                      |
| N2                                                                                                                      | CT | IV | 10026413 | 10027666 | WBGene00009681 | gipc-2    | F44D12.4  |                      |
| 0.297939375330973 AGIWUR34255                                                                                           |    |    |          |          |                |           |           |                      |
| N2                                                                                                                      | CT | IV | 10032972 | 10033155 | WBGene00045002 | F44D12.12 | F44D12.12 |                      |

|                                                                                               |                                                                                                                                   |          |                |                 |                     |  |
|-----------------------------------------------------------------------------------------------|-----------------------------------------------------------------------------------------------------------------------------------|----------|----------------|-----------------|---------------------|--|
| -0.680917250038963                                                                            | AGIWUR20102                                                                                                                       |          |                |                 |                     |  |
| N2 CT IV                                                                                      | 10033363                                                                                                                          | 10034820 | WBGene00009683 | F44D12.6        | F44D12.6            |  |
| 0.0898015995131765                                                                            | AGIWUR8676;AGIWUR30156;AGIWUR38109                                                                                                |          |                |                 |                     |  |
| N2 CT IV                                                                                      | 10036627                                                                                                                          | 10037066 | WBGene00009687 | F44D12.10       | F44D12.10           |  |
| -0.0884665855935127                                                                           | AGIWUR7081;AGIWUR7294;AGIWUR15394;AGIWUR18459;AGIWUR19867;AGIWUR22633;AGIWUR27241;AGIWUR33146;AGIWUR34661;AGIWUR40121;AGIWUR40462 |          |                |                 |                     |  |
| N2 CT IV                                                                                      | 10037452                                                                                                                          | 10039043 | WBGene00014375 | F44D12.11       | F44D12.11           |  |
| 0.235067680890237                                                                             | AGIWUR25592                                                                                                                       |          |                |                 |                     |  |
| N2 CT IV                                                                                      | 10039773                                                                                                                          | 10040903 | WBGene00011424 | dhs-31 T04B2.6  | -0.203874151052855  |  |
| AGIWUR19849;AGIWUR41560                                                                       |                                                                                                                                   |          |                |                 |                     |  |
| N2 CT IV                                                                                      | 10041130                                                                                                                          | 10042432 | WBGene00011421 | T04B2.1 T04B2.1 | -0.151822637274015  |  |
| AGIWUR7713;AGIWUR10342;AGIWUR36383;AGIWUR38194                                                |                                                                                                                                   |          |                |                 |                     |  |
| N2 CT IV                                                                                      | 10043183                                                                                                                          | 10045739 | WBGene00001487 | frk-1 T04B2.2   | 0.0357922460047142  |  |
| AGIWUR40759                                                                                   |                                                                                                                                   |          |                |                 |                     |  |
| N2 CT IV                                                                                      | 10047408                                                                                                                          | 10050554 | WBGene00011422 | T04B2.3 T04B2.3 | 0.107036071142764   |  |
| AGIWUR18224                                                                                   |                                                                                                                                   |          |                |                 |                     |  |
| N2 CT IV                                                                                      | 10050581                                                                                                                          | 10051188 | WBGene00044018 | T04B2.8 T04B2.8 | -0.0355201619337935 |  |
| AGIWUR4874;AGIWUR8285;AGIWUR24191;AGIWUR35191;AGIWUR38908                                     |                                                                                                                                   |          |                |                 |                     |  |
| N2 CT IV                                                                                      | 10051286                                                                                                                          | 10053650 | WBGene00005723 | srv-12 T04B2.4  | -0.147209775492711  |  |
| AGIWUR15022                                                                                   |                                                                                                                                   |          |                |                 |                     |  |
| N2 CT IV                                                                                      | 10054036                                                                                                                          | 10056250 | WBGene00011425 | T04B2.7 T04B2.7 | 0.047716430305087   |  |
| AGIWUR36502                                                                                   |                                                                                                                                   |          |                |                 |                     |  |
| N2 CT IV                                                                                      | 10056591                                                                                                                          | 10062849 | WBGene00011423 | ipla-7 T04B2.5  | 0.123916756658823   |  |
| AGIWUR712;AGIWUR11375;AGIWUR21307;AGIWUR21939;AGIWUR30091;AGIWUR33006;AGIWUR41031;AGIWUR44901 |                                                                                                                                   |          |                |                 |                     |  |
| N2 CT IV                                                                                      | 10067824                                                                                                                          | 10070251 | WBGene00000858 | cwn-2 W01B6.1   | -0.0682500574548417 |  |
| AGIWUR9085;AGIWUR12598;AGIWUR15419;AGIWUR28973;AGIWUR37317                                    |                                                                                                                                   |          |                |                 |                     |  |
| N2 CT IV                                                                                      | 10070270                                                                                                                          | 10072626 | WBGene00012170 | W01B6.3 W01B6.3 | -0.0208052851263796 |  |
| AGIWUR22414                                                                                   |                                                                                                                                   |          |                |                 |                     |  |
| N2 CT IV                                                                                      | 10075414                                                                                                                          | 10075775 | WBGene00012171 | W01B6.4 W01B6.4 | 0.0526677919695127  |  |
| AGIWUR5168                                                                                    |                                                                                                                                   |          |                |                 |                     |  |
| N2 CT IV                                                                                      | 10076325                                                                                                                          | 10078705 | WBGene00012172 | W01B6.5 W01B6.5 | 0.158035412854186   |  |
| AGIWUR27903                                                                                   |                                                                                                                                   |          |                |                 |                     |  |
| N2 CT IV                                                                                      | 10081155                                                                                                                          | 10082610 | WBGene00012173 | W01B6.6 W01B6.6 | 0.140208435747105   |  |
| AGIWUR5015;AGIWUR41383                                                                        |                                                                                                                                   |          |                |                 |                     |  |
| N2 CT IV                                                                                      | 10082867                                                                                                                          | 10082962 | WBGene00045182 | W01B6.10        | W01B6.10            |  |
| 0.201983145276831                                                                             | AGIWUR29759                                                                                                                       |          |                |                 |                     |  |
| N2 CT IV                                                                                      | 10083491                                                                                                                          | 10084440 | WBGene00012174 | W01B6.8 W01B6.8 | 0.0984186409323993  |  |
| AGIWUR34753                                                                                   |                                                                                                                                   |          |                |                 |                     |  |

|                                              |    |    |          |          |                |          |          |                     |
|----------------------------------------------|----|----|----------|----------|----------------|----------|----------|---------------------|
| N2                                           | CT | IV | 10084454 | 10085438 | WBGene00000593 | col-2    | W01B6.7  | 0.236525734983817   |
| AGIWUR30833                                  |    |    |          |          |                |          |          |                     |
| N2                                           | CT | IV | 10086137 | 10088437 | WBGene00003576 | ndc-80   | W01B6.9  | 0.0158391235970807  |
| AGIWUR293;AGIWUR3177;AGIWUR28049             |    |    |          |          |                |          |          |                     |
| N2                                           | CT | IV | 10088367 | 10089894 | WBGene00007304 | ttr-39   | C04G2.1  | 0.00818957392037234 |
| AGIWUR35819                                  |    |    |          |          |                |          |          |                     |
| N2                                           | CT | IV | 10090658 | 10092379 | WBGene00007305 | C04G2.2  | C04G2.2  | 0.208437007483855   |
| AGIWUR3541                                   |    |    |          |          |                |          |          |                     |
| N2                                           | CT | IV | 10094198 | 10095259 | WBGene00007306 | C04G2.5  | C04G2.5  | 0.0776576478516233  |
| AGIWUR33346                                  |    |    |          |          |                |          |          |                     |
| N2                                           | CT | IV | 10097196 | 10106556 | WBGene00001001 | dis-3    | C04G2.6  | 0.127149344556157   |
| AGIWUR33485                                  |    |    |          |          |                |          |          |                     |
| N2                                           | CT | IV | 10106917 | 10110412 | WBGene00001204 | egl-38   | C04G2.7  | 0.13535525449441    |
| AGIWUR43499                                  |    |    |          |          |                |          |          |                     |
| N2                                           | CT | IV | 10110347 | 10111577 | WBGene00007307 | spch-1   | C04G2.8  | 0.184775560542523   |
| AGIWUR2944                                   |    |    |          |          |                |          |          |                     |
| N2                                           | CT | IV | 10111721 | 10112028 | WBGene00045104 | C04G2.12 |          | C04G2.12            |
| 0.0645778379476791 AGIWUR10102;AGIWUR30391   |    |    |          |          |                |          |          |                     |
| N2                                           | CT | IV | 10112870 | 10114287 | WBGene00007308 | C04G2.9  | C04G2.9  | 0.265840128052194   |
| AGIWUR3561                                   |    |    |          |          |                |          |          |                     |
| N2                                           | CT | IV | 10115389 | 10118084 | WBGene00007309 | C04G2.10 |          | C04G2.10            |
| 0.0175645145585719 AGIWUR41110               |    |    |          |          |                |          |          |                     |
| N2                                           | CT | IV | 10119460 | 10122305 | WBGene00007310 | irld-21  | C04G2.11 |                     |
| 0.0121596621356836 AGIWUR43001               |    |    |          |          |                |          |          |                     |
| N2                                           | CT | IV | 10122120 | 10126675 | WBGene00010676 | K08F4.1  | K08F4.1  | -0.0776304206756038 |
| AGIWUR6421;AGIWUR24373;AGIWUR44754           |    |    |          |          |                |          |          |                     |
| N2                                           | CT | IV | 10126749 | 10128956 | WBGene00010677 | gtbp-1   | K08F4.2  | 0.140217459719625   |
| AGIWUR444;AGIWUR1140;AGIWUR31820;AGIWUR42248 |    |    |          |          |                |          |          |                     |
| N2                                           | CT | IV | 10129257 | 10130244 | WBGene00010678 | K08F4.3  | K08F4.3  | -0.212884205985583  |
| AGIWUR6612                                   |    |    |          |          |                |          |          |                     |
| N2                                           | CT | IV | 10130257 | 10133283 | WBGene00001621 | glt-3    | K08F4.4  |                     |
| 0.000502007025755091 AGIWUR13198             |    |    |          |          |                |          |          |                     |
| N2                                           | CT | IV | 10134932 | 10135887 | WBGene00010679 | K08F4.5  | K08F4.5  | 0.204942257842509   |
| AGIWUR28659                                  |    |    |          |          |                |          |          |                     |
| N2                                           | CT | IV | 10138124 | 10139104 | WBGene00010680 | K08F4.12 |          | K08F4.12            |
| 0.030640550821138 AGIWUR43473                |    |    |          |          |                |          |          |                     |
| N2                                           | CT | IV | 10139380 | 10140285 | WBGene00001751 | gst-3    | K08F4.11 |                     |
| -0.102802447404473 AGIWUR15799               |    |    |          |          |                |          |          |                     |
| N2                                           | CT | IV | 10145249 | 10146222 | WBGene00000975 | dhs-12   | K08F4.9  | -0.0314814090740212 |

|                                                                                                |    |    |                                                             |          |                |          |                             |
|------------------------------------------------------------------------------------------------|----|----|-------------------------------------------------------------|----------|----------------|----------|-----------------------------|
| AGIWUR15183;AGIWUR15296;AGIWUR17821;AGIWUR17973                                                |    |    |                                                             |          |                |          |                             |
| N2                                                                                             | CT | IV | 10146226                                                    | 10147105 | WBGene00011777 | T14G10.8 | T14G10.8                    |
| 0.263245490216732                                                                              |    |    | AGIWUR34844                                                 |          |                |          |                             |
| N2                                                                                             | CT | IV | 10147031                                                    | 10149038 | WBGene00011776 | hpo-5    | T14G10.7                    |
| -0.129728853399364                                                                             |    |    | AGIWUR43385                                                 |          |                |          |                             |
| N2                                                                                             | CT | IV | 10149166                                                    | 10150602 | WBGene00006638 | tsp-12   | T14G10.6                    |
| -0.0563103775252074                                                                            |    |    | AGIWUR33375                                                 |          |                |          |                             |
| N2                                                                                             | CT | IV | 10151949                                                    | 10155636 | WBGene00011775 | T14G10.5 | T14G10.5                    |
| 0.0104806652491032                                                                             |    |    | AGIWUR16222;AGIWUR42213;AGIWUR44173                         |          |                |          |                             |
| N2                                                                                             | CT | IV | 10155775                                                    | 10156771 | WBGene00011774 | ttr-54   | T14G10.4                    |
| -0.131148947585423                                                                             |    |    | AGIWUR25565                                                 |          |                |          |                             |
| N2                                                                                             | CT | IV | 10158038                                                    | 10159243 | WBGene00011773 | ttr-53   | T14G10.3                    |
| -0.179797792384992                                                                             |    |    | AGIWUR43146                                                 |          |                |          |                             |
| N2                                                                                             | CT | IV | 10162008                                                    | 10164390 | WBGene00004091 | pps-1    | T14G10.1                    |
| -0.15047688105917                                                                              |    |    | AGIWUR14039                                                 |          |                |          |                             |
| N2                                                                                             | CT | IV | 10164331                                                    | 10174341 | WBGene00004254 | pxf-1    | T14G10.2                    |
| 0.171208165189739                                                                              |    |    | AGIWUR18067;AGIWUR19827;AGIWUR21600;AGIWUR27870;AGIWUR36386 |          |                |          |                             |
| N2                                                                                             | CT | IV | 10176680                                                    | 10178099 | WBGene00010556 | rack-1   | K04D7.1 -0.0497369673089905 |
| AGIWUR2243;AGIWUR11655;AGIWUR14450;AGIWUR16648;AGIWUR24842;AGIWUR43131                         |    |    |                                                             |          |                |          |                             |
| N2                                                                                             | CT | IV | 10177968                                                    | 10180304 | WBGene00010557 | mspn-1   | K04D7.2 0.0268762346435354  |
| AGIWUR29722;AGIWUR30885                                                                        |    |    |                                                             |          |                |          |                             |
| N2                                                                                             | CT | IV | 10180660                                                    | 10183939 | WBGene00001794 | gta-1    | K04D7.3 0.184335995727855   |
| AGIWUR3779;AGIWUR5118;AGIWUR12585                                                              |    |    |                                                             |          |                |          |                             |
| N2                                                                                             | CT | IV | 10183851                                                    | 10194424 | WBGene00010558 | ptp-4    | K04D7.4 0.0212583833086279  |
| AGIWUR7030;AGIWUR11134;AGIWUR22388;AGIWUR24476;AGIWUR27283;AGIWUR40206;AGIWUR41498;AGIWUR42425 |    |    |                                                             |          |                |          |                             |
| N2                                                                                             | CT | IV | 10197820                                                    | 10202993 | WBGene00001653 | gon-4    | K04D7.5 0.0719777939492872  |
| AGIWUR17084                                                                                    |    |    |                                                             |          |                |          |                             |
| N2                                                                                             | CT | IV | 10203729                                                    | 10203964 | WBGene00045022 | K04D7.7  | K04D7.7 -0.082655077225037  |
| AGIWUR28428;AGIWUR30611                                                                        |    |    |                                                             |          |                |          |                             |
| N2                                                                                             | CT | IV | 10204185                                                    | 10206073 | WBGene00010559 | K04D7.6  | K04D7.6 -0.109511991331677  |
| AGIWUR27252;AGIWUR44586                                                                        |    |    |                                                             |          |                |          |                             |
| N2                                                                                             | CT | IV | 10206189                                                    | 10214911 | WBGene00000019 | abt-1    | C24F3.5 0.178964958830729   |
| AGIWUR25441                                                                                    |    |    |                                                             |          |                |          |                             |
| N2                                                                                             | CT | IV | 10214986                                                    | 10219308 | WBGene00007698 | qns-1    | C24F3.4 0.352620582507311   |
| AGIWUR200;AGIWUR9742;AGIWUR16857;AGIWUR29306                                                   |    |    |                                                             |          |                |          |                             |
| N2                                                                                             | CT | IV | 10219373                                                    | 10221281 | WBGene00007696 | tram-1   | C24F3.1 0.178387435643554   |
| AGIWUR296;AGIWUR3729;AGIWUR4771;AGIWUR13767;AGIWUR14881;AGIWUR20042;AGIWUR32443;AGIWUR32814    |    |    |                                                             |          |                |          |                             |
| N2                                                                                             | CT | IV | 10222472                                                    | 10223745 | WBGene00007697 | C24F3.2  | C24F3.2 0.151606954871818   |
| AGIWUR16729                                                                                    |    |    |                                                             |          |                |          |                             |



|                                                                        |    |    |                     |                                                           |                |           |          |                    |
|------------------------------------------------------------------------|----|----|---------------------|-----------------------------------------------------------|----------------|-----------|----------|--------------------|
| N2                                                                     | CT | IV | 10224023            | 10226342                                                  | WBGene00003531 | nas-12    | C24F3.3  | 0.0323425173620109 |
| AGIWUR9183;AGIWUR18486;AGIWUR23887;AGIWUR39103;AGIWUR42188;AGIWUR44445 |    |    |                     |                                                           |                |           |          |                    |
| N2                                                                     | CT | IV | 10226334            | 10227639                                                  | WBGene00008509 | F01G10.6  |          | F01G10.6           |
|                                                                        |    |    | 0.133145139916083   | AGIWUR38080                                               |                |           |          |                    |
| N2                                                                     | CT | IV | 10227987            | 10231060                                                  | WBGene00008508 | F01G10.5  |          | F01G10.5           |
|                                                                        |    |    | 0.111899591529466   | AGIWUR18121                                               |                |           |          |                    |
| N2                                                                     | CT | IV | 10231375            | 10232552                                                  | WBGene00008507 | F01G10.4  |          | F01G10.4           |
|                                                                        |    |    | 1.07497134133818    | AGIWUR16428                                               |                |           |          |                    |
| N2                                                                     | CT | IV | 10233321            | 10235329                                                  | WBGene00001158 | ech-9     | F01G10.3 |                    |
|                                                                        |    |    | -0.15399024515682   | AGIWUR33647                                               |                |           |          |                    |
| N2                                                                     | CT | IV | 10236626            | 10239176                                                  | WBGene00001157 | ech-8     | F01G10.2 |                    |
|                                                                        |    |    | -0.172347546546577  | AGIWUR30960                                               |                |           |          |                    |
| N2                                                                     | CT | IV | 10239278            | 10241859                                                  | WBGene00008510 | lip1-7    | F01G10.7 |                    |
|                                                                        |    |    | -0.189217455229459  | AGIWUR3315;AGIWUR11327                                    |                |           |          |                    |
| N2                                                                     | CT | IV | 10243591            | 10245752                                                  | WBGene00008506 | tk1-1     | F01G10.1 |                    |
|                                                                        |    |    | 0.0829188324745562  | AGIWUR22815;AGIWUR24020;AGIWUR41119;AGIWUR43337           |                |           |          |                    |
| N2                                                                     | CT | IV | 10246160            | 10249785                                                  | WBGene00008512 | F01G10.10 |          | F01G10.10          |
|                                                                        |    |    | -0.115993669005899  | AGIWUR10003                                               |                |           |          |                    |
| N2                                                                     | CT | IV | 10250646            | 10255844                                                  | WBGene00000910 | daf-14    | F01G10.8 |                    |
|                                                                        |    |    | 0.0907506741059372  | AGIWUR20358                                               |                |           |          |                    |
| N2                                                                     | CT | IV | 10255755            | 10259657                                                  | WBGene00008511 | F01G10.9  |          | F01G10.9           |
|                                                                        |    |    | 0.163598834397956   | AGIWUR6188;AGIWUR9546;AGIWUR10240;AGIWUR14914;AGIWUR44928 |                |           |          |                    |
| N2                                                                     | CT | IV | 10268882            | 10269228                                                  | WBGene00012781 | nspd-7    | Y43C5A.1 |                    |
|                                                                        |    |    | 0.0701322355762599  | AGIWUR14919                                               |                |           |          |                    |
| N2                                                                     | CT | IV | 10269883            | 10272691                                                  | WBGene00012782 | Y43C5A.2  |          | Y43C5A.2           |
|                                                                        |    |    | -0.0168114996734685 | AGIWUR16256;AGIWUR17505;AGIWUR22870;AGIWUR44812           |                |           |          |                    |
| N2                                                                     | CT | IV | 10274036            | 10275411                                                  | WBGene00012783 | Y43C5A.3  |          | Y43C5A.3           |
|                                                                        |    |    | -0.280871866384292  | AGIWUR4497;AGIWUR10434;AGIWUR13683                        |                |           |          |                    |
| N2                                                                     | CT | IV | 10277264            | 10277918                                                  | WBGene00044922 | Y43C5A.7  |          | Y43C5A.7           |
|                                                                        |    |    | 0.0672442687884391  | AGIWUR34336                                               |                |           |          |                    |
| N2                                                                     | CT | IV | 10277989            | 10279501                                                  | WBGene00012784 | Y43C5A.4  |          | Y43C5A.4           |
|                                                                        |    |    | 0.0411818895618072  | AGIWUR28573                                               |                |           |          |                    |
| N2                                                                     | CT | IV | 10279457            | 10281582                                                  | WBGene00006568 | thk-1     | Y43C5A.5 |                    |
|                                                                        |    |    | -0.140516180687712  | AGIWUR5016                                                |                |           |          |                    |
| N2                                                                     | CT | IV | 10281637            | 10284244                                                  | WBGene00004297 | rad-51    | Y43C5A.6 |                    |
|                                                                        |    |    | 0.202190237047111   | AGIWUR18645;AGIWUR33535;AGIWUR36015                       |                |           |          |                    |
| N2                                                                     | CT | IV | 10286955            | 10293013                                                  | WBGene00004140 | ebax-1    | R09E10.7 |                    |
|                                                                        |    |    | -0.0824782503423265 | AGIWUR43680                                               |                |           |          |                    |
| N2                                                                     | CT | IV | 10292928            | 10294130                                                  | WBGene00011176 | R09E10.6  |          | R09E10.6           |

|                                                                                                                                                                                                                                          |    |    |                                     |          |                |           |          |                     |
|------------------------------------------------------------------------------------------------------------------------------------------------------------------------------------------------------------------------------------------|----|----|-------------------------------------|----------|----------------|-----------|----------|---------------------|
| 0.356628727966093                                                                                                                                                                                                                        |    |    | AGIWUR21841                         |          |                |           |          |                     |
| N2                                                                                                                                                                                                                                       | CT | IV | 10296046                            | 10302310 | WBGene00011175 | R09E10.5  |          | R09E10.5            |
| -0.25215216620964                                                                                                                                                                                                                        |    |    | AGIWUR27517                         |          |                |           |          |                     |
| N2                                                                                                                                                                                                                                       | CT | IV | 10304845                            | 10307880 | WBGene00011174 | acs-23    | R09E10.4 |                     |
| 0.002100954956191                                                                                                                                                                                                                        |    |    | AGIWUR1309;AGIWUR21443;AGIWUR21599  |          |                |           |          |                     |
| N2                                                                                                                                                                                                                                       | CT | IV | 10310116                            | 10310429 | WBGene00011177 | R09E10.8  |          | R09E10.8            |
| -0.130922534802396                                                                                                                                                                                                                       |    |    | AGIWUR29195                         |          |                |           |          |                     |
| N2                                                                                                                                                                                                                                       | CT | IV | 10310772                            | 10313670 | WBGene00011173 | acs-18    | R09E10.3 |                     |
| 0.0760197073933515                                                                                                                                                                                                                       |    |    | AGIWUR13284                         |          |                |           |          |                     |
| N2                                                                                                                                                                                                                                       | CT | IV | 10314139                            | 10314576 | WBGene00044254 | R09E10.10 |          | R09E10.10           |
| 0.0209380820947294                                                                                                                                                                                                                       |    |    | AGIWUR31311;AGIWUR33716;AGIWUR36979 |          |                |           |          |                     |
| N2                                                                                                                                                                                                                                       | CT | IV | 10314989                            | 10317377 | WBGene00011178 | R09E10.9  |          | R09E10.9            |
| 0.184327757527885                                                                                                                                                                                                                        |    |    | AGIWUR3962                          |          |                |           |          |                     |
| N2                                                                                                                                                                                                                                       | CT | IV | 10317558                            | 10318293 | WBGene00011172 | R09E10.2  |          | R09E10.2            |
| 0.20175512409873                                                                                                                                                                                                                         |    |    | AGIWUR38681                         |          |                |           |          |                     |
| N2                                                                                                                                                                                                                                       | CT | IV | 10319351                            | 10321170 | WBGene00011171 | R09E10.1  |          | R09E10.1            |
| 0.108033009351304                                                                                                                                                                                                                        |    |    | AGIWUR35003                         |          |                |           |          |                     |
| N2                                                                                                                                                                                                                                       | CT | IV | 10324255                            | 10350217 | WBGene00006779 | unc-43    | K11E8.1  | 0.103425365269277   |
| AGIWUR4340;AGIWUR6349;AGIWUR7878;AGIWUR7921;AGIWUR8651;AGIWUR9769;AGIWUR9871;AGIWUR10142;AGIWUR10176;AGIWUR11503;AGIWUR12155;AGIWUR18114;AGIWUR20811;AGIWUR30344;AGIWUR37623;AGIWUR39280;AGIWUR39753;AGIWUR41763;AGIWUR42419;AGIWUR44510 |    |    |                                     |          |                |           |          |                     |
| N2                                                                                                                                                                                                                                       | CT | IV | 10351445                            | 10352343 | WBGene00012785 | Y43C5B.2  |          | Y43C5B.2            |
| -0.0717047342111403                                                                                                                                                                                                                      |    |    | AGIWUR22600                         |          |                |           |          |                     |
| N2                                                                                                                                                                                                                                       | CT | IV | 10353167                            | 10355120 | WBGene00012786 | Y43C5B.3  |          | Y43C5B.3            |
| 0.294127954561525                                                                                                                                                                                                                        |    |    | AGIWUR29043                         |          |                |           |          |                     |
| N2                                                                                                                                                                                                                                       | CT | IV | 10355046                            | 10357170 | WBGene00011236 | R11A8.1   | R11A8.1  | 0.122711705992078   |
| AGIWUR20547                                                                                                                                                                                                                              |    |    |                                     |          |                |           |          |                     |
| N2                                                                                                                                                                                                                                       | CT | IV | 10358141                            | 10360219 | WBGene00011237 | gkow-1    | R11A8.2  | -0.179279197383659  |
| AGIWUR16364                                                                                                                                                                                                                              |    |    |                                     |          |                |           |          |                     |
| N2                                                                                                                                                                                                                                       | CT | IV | 10360800                            | 10363331 | WBGene00011238 | ugt-59    | R11A8.3  | -0.0453975634962918 |
| AGIWUR31384                                                                                                                                                                                                                              |    |    |                                     |          |                |           |          |                     |
| N2                                                                                                                                                                                                                                       | CT | IV | 10366333                            | 10367790 | WBGene00011239 | pges-2    | R11A8.5  | -0.115100492359545  |
| AGIWUR18136                                                                                                                                                                                                                              |    |    |                                     |          |                |           |          |                     |
| N2                                                                                                                                                                                                                                       | CT | IV | 10368607                            | 10373136 | WBGene00002152 | iars-1    | R11A8.6  | -0.0248661653242728 |
| AGIWUR822;AGIWUR2745;AGIWUR7114                                                                                                                                                                                                          |    |    |                                     |          |                |           |          |                     |
| N2                                                                                                                                                                                                                                       | CT | IV | 10372638                            | 10373821 | WBGene00011241 | mpz-5     | R11A8.8  | 0.0153593128699083  |
| AGIWUR16355;AGIWUR25461                                                                                                                                                                                                                  |    |    |                                     |          |                |           |          |                     |
| N2                                                                                                                                                                                                                                       | CT | IV | 10374905                            | 10387318 | WBGene00011240 | R11A8.7   | R11A8.7  | 0.0297236605905749  |
| AGIWUR902;AGIWUR3127;AGIWUR9042;AGIWUR10806;AGIWUR18248;AGIWUR18961;AGIWUR24502;AGIWUR29166;AGIWUR43502                                                                                                                                  |    |    |                                     |          |                |           |          |                     |

|                                                                       |    |    |                                     |          |                |          |          |                     |
|-----------------------------------------------------------------------|----|----|-------------------------------------|----------|----------------|----------|----------|---------------------|
| N2                                                                    | CT | IV | 10387413                            | 10388345 | WBGene00003064 | lpd-8    | R10H10.1 |                     |
| 0.082758010060795                                                     |    |    | AGIWUR20350                         |          |                |          |          |                     |
| N2                                                                    | CT | IV | 10388483                            | 10393294 | WBGene00011222 | R10H10.3 |          | R10H10.3            |
| -0.0207984494532756                                                   |    |    | AGIWUR6660;AGIWUR15226;AGIWUR31267  |          |                |          |          |                     |
| N2                                                                    | CT | IV | 10394591                            | 10394958 | WBGene00011223 | R10H10.4 |          | R10H10.4            |
| -0.035855028291202                                                    |    |    | AGIWUR22287                         |          |                |          |          |                     |
| N2                                                                    | CT | IV | 10404012                            | 10408530 | WBGene00001669 | gpa-7    | R10H10.5 |                     |
| -0.238080301792847                                                    |    |    | AGIWUR26769                         |          |                |          |          |                     |
| N2                                                                    | CT | IV | 10408703                            | 10409477 | WBGene00011224 | R10H10.6 |          | R10H10.6            |
| -0.172435502581827                                                    |    |    | AGIWUR6359                          |          |                |          |          |                     |
| N2                                                                    | CT | IV | 10409985                            | 10413928 | WBGene00011225 | R10H10.7 |          | R10H10.7            |
| -0.155938526652806                                                    |    |    | AGIWUR12860                         |          |                |          |          |                     |
| N2                                                                    | CT | IV | 10414030                            | 10417881 | WBGene00008733 | F13B12.6 |          | F13B12.6            |
| -0.192760663758683                                                    |    |    | AGIWUR8525;AGIWUR10975;AGIWUR19192  |          |                |          |          |                     |
| N2                                                                    | CT | IV | 10422610                            | 10424635 | WBGene00008729 | F13B12.1 |          | F13B12.1            |
| -0.0307419082766334                                                   |    |    | AGIWUR21607;AGIWUR33993;AGIWUR37529 |          |                |          |          |                     |
| N2                                                                    | CT | IV | 10426231                            | 10429110 | WBGene00008730 | F13B12.2 |          | F13B12.2            |
| -0.0600680963596014                                                   |    |    | AGIWUR28816;AGIWUR37040;AGIWUR38086 |          |                |          |          |                     |
| N2                                                                    | CT | IV | 10436708                            | 10438410 | WBGene00002084 | ins-1    | F13B12.5 |                     |
| 0.0113182425781755                                                    |    |    | AGIWUR33522;AGIWUR34508;AGIWUR37691 |          |                |          |          |                     |
| N2                                                                    | CT | IV | 10439123                            | 10443819 | WBGene00008731 | F13B12.3 |          | F13B12.3            |
| -0.115592642521651                                                    |    |    | AGIWUR6185;AGIWUR43439              |          |                |          |          |                     |
| N2                                                                    | CT | IV | 10444094                            | 10444584 | WBGene00008734 | F13B12.7 |          | F13B12.7            |
| -0.142403131820213                                                    |    |    | AGIWUR41881                         |          |                |          |          |                     |
| N2                                                                    | CT | IV | 10444583                            | 10449899 | WBGene00008732 | F13B12.4 |          | F13B12.4            |
| -0.0844511973982112                                                   |    |    | AGIWUR16795                         |          |                |          |          |                     |
| N2                                                                    | CT | IV | 10450802                            | 10453098 | WBGene00008490 | F01D4.8  | F01D4.8  | -0.28720964547222   |
| AGIWUR41212                                                           |    |    |                                     |          |                |          |          |                     |
| N2                                                                    | CT | IV | 10454432                            | 10457237 | WBGene00008489 | srb-17   | F01D4.7  | 0.0550215215187695  |
| AGIWUR4263;AGIWUR34342;AGIWUR35770                                    |    |    |                                     |          |                |          |          |                     |
| N2                                                                    | CT | IV | 10458863                            | 10461766 | WBGene00003167 | mec-3    | F01D4.6  | -0.0429226331555626 |
| AGIWUR1570;AGIWUR4280;AGIWUR9851;AGIWUR12694                          |    |    |                                     |          |                |          |          |                     |
| N2                                                                    | CT | IV | 10464588                            | 10467240 | WBGene00008485 | ugt-43   | F01D4.1  | 0.11139037153124    |
| AGIWUR3944;AGIWUR9096;AGIWUR16273;AGIWUR17471;AGIWUR27317;AGIWUR30495 |    |    |                                     |          |                |          |          |                     |
| N2                                                                    | CT | IV | 10469741                            | 10471899 | WBGene00008486 | ugt-44   | F01D4.2  | -0.461337727153493  |
| AGIWUR4885                                                            |    |    |                                     |          |                |          |          |                     |
| N2                                                                    | CT | IV | 10472778                            | 10478168 | WBGene00008491 | bgnt-1.1 |          | F01D4.9             |
| -0.0682390445939562                                                   |    |    | AGIWUR42817                         |          |                |          |          |                     |
| N2                                                                    | CT | IV | 10478450                            | 10481844 | WBGene00001189 | egl-21   | F01D4.4  | 0.0611093090452295  |

|                                                                                           |    |    |          |          |                |          |           |                     |  |
|-------------------------------------------------------------------------------------------|----|----|----------|----------|----------------|----------|-----------|---------------------|--|
| AGIWUR782;AGIWUR10945;AGIWUR21638;AGIWUR30012                                             |    |    |          |          |                |          |           |                     |  |
| N2                                                                                        | CT | IV | 10482629 | 10483655 | WBGene00008488 | F01D4.5  | F01D4.5   | -0.25359623473234   |  |
| AGIWUR31233;AGIWUR39452                                                                   |    |    |          |          |                |          |           |                     |  |
| N2                                                                                        | CT | IV | 10484110 | 10492952 | WBGene00000419 | ced-5    | C02F4.1   | 0.155850515822775   |  |
| AGIWUR14004;AGIWUR17614;AGIWUR20229;AGIWUR21408;AGIWUR36560;AGIWUR37218                   |    |    |          |          |                |          |           |                     |  |
| N2                                                                                        | CT | IV | 10493071 | 10501599 | WBGene00006527 | tax-6    | C02F4.2   | 0.154821282916017   |  |
| AGIWUR16185;AGIWUR24485                                                                   |    |    |          |          |                |          |           |                     |  |
| N2                                                                                        | CT | IV | 10513887 | 10515228 | WBGene00007264 | C02F4.4  | C02F4.4   | -0.0706019366035608 |  |
| AGIWUR24466                                                                               |    |    |          |          |                |          |           |                     |  |
| N2                                                                                        | CT | IV | 10521422 | 10530597 | WBGene00000288 | cal-4    | T07G12.1  |                     |  |
| -0.0225227100540595 AGIWUR9574;AGIWUR15671;AGIWUR30680                                    |    |    |          |          |                |          |           |                     |  |
| N2                                                                                        | CT | IV | 10533943 | 10536442 | WBGene00011594 | T07G12.3 |           | T07G12.3            |  |
| -0.101784357016399 AGIWUR2713                                                             |    |    |          |          |                |          |           |                     |  |
| N2                                                                                        | CT | IV | 10541495 | 10545091 | WBGene00011596 | T07G12.5 |           | T07G12.5            |  |
| -0.0672668136869907 AGIWUR14244                                                           |    |    |          |          |                |          |           |                     |  |
| N2                                                                                        | CT | IV | 10547088 | 10555442 | WBGene00011597 | zim-1    | T07G12.6  |                     |  |
| -0.0383815488785562 AGIWUR9315;AGIWUR9412;AGIWUR20517;AGIWUR36426;AGIWUR43050;AGIWUR45065 |    |    |          |          |                |          |           |                     |  |
| N2                                                                                        | CT | IV | 10555247 | 10558221 | WBGene00011600 | zim-2    | T07G12.10 |                     |  |
| 0.0428140886648158 AGIWUR17323                                                            |    |    |          |          |                |          |           |                     |  |
| N2                                                                                        | CT | IV | 10558721 | 10561130 | WBGene00011601 | zim-3    | T07G12.11 |                     |  |
| -0.09181107363713 AGIWUR20579                                                             |    |    |          |          |                |          |           |                     |  |
| N2                                                                                        | CT | IV | 10561905 | 10563947 | WBGene00001867 | him-8    | T07G12.12 |                     |  |
| -0.0281806040352066 AGIWUR11669;AGIWUR17932;AGIWUR29184                                   |    |    |          |          |                |          |           |                     |  |
| N2                                                                                        | CT | IV | 10576350 | 10578288 | WBGene00001163 | efn-2    | C43F9.8   | -0.201848462427245  |  |
| AGIWUR576                                                                                 |    |    |          |          |                |          |           |                     |  |
| N2                                                                                        | CT | IV | 10578667 | 10581786 | WBGene00008076 | lgc-43   | C43F9.9   | 0.0135655665898025  |  |
| AGIWUR35328                                                                               |    |    |          |          |                |          |           |                     |  |
| N2                                                                                        | CT | IV | 10584537 | 10587400 | WBGene00008077 | oac-8    | C43F9.10  |                     |  |
| -0.170231036563973 AGIWUR11560                                                            |    |    |          |          |                |          |           |                     |  |
| N2                                                                                        | CT | IV | 10587553 | 10589147 | WBGene00008072 | C43F9.4  | C43F9.4   | -0.168365871035737  |  |
| AGIWUR21238;AGIWUR31087;AGIWUR37630                                                       |    |    |          |          |                |          |           |                     |  |
| N2                                                                                        | CT | IV | 10589294 | 10590749 | WBGene00008073 | C43F9.5  | C43F9.5   | 0.216403914183841   |  |
| AGIWUR26479                                                                               |    |    |          |          |                |          |           |                     |  |
| N2                                                                                        | CT | IV | 10590925 | 10593042 | WBGene00008074 | nkb-2    | C43F9.6   | 0.0619997846344766  |  |
| AGIWUR40207                                                                               |    |    |          |          |                |          |           |                     |  |
| N2                                                                                        | CT | IV | 10593068 | 10593575 | WBGene00008075 | C43F9.7  | C43F9.7   | 0.0775081127664663  |  |
| AGIWUR30846                                                                               |    |    |          |          |                |          |           |                     |  |
| N2                                                                                        | CT | IV | 10596805 | 10600030 | WBGene00045024 | C43F9.11 |           | C43F9.11            |  |
| -0.0378088650337172                                                                       |    |    |          |          |                |          |           |                     |  |

AGIWUR2244;AGIWUR3422;AGIWUR3911;AGIWUR5466;AGIWUR11308;AGIWUR17380;AGIWUR17551;AGIWUR20450;AGIWUR20607;AGIWUR29357;AGIWUR34540;AGIWUR36202;AGIWUR36488;AGIWUR40584

|    |    |    |                                                                       |                                    |                |          |                             |
|----|----|----|-----------------------------------------------------------------------|------------------------------------|----------------|----------|-----------------------------|
| N2 | CT | IV | 10600314                                                              | 10601852                           | WBGene00011179 | R09H10.1 | R09H10.1                    |
|    |    |    | -0.0599878955170077                                                   | AGIWUR43641                        |                |          |                             |
| N2 | CT | IV | 10602944                                                              | 10606894                           | WBGene00011180 | R09H10.2 | R09H10.2                    |
|    |    |    | -0.0912990890785199                                                   | AGIWUR447                          |                |          |                             |
| N2 | CT | IV | 10606902                                                              | 10608861                           | WBGene00011181 | R09H10.3 | R09H10.3                    |
|    |    |    | -0.0373385172098555                                                   | AGIWUR27996                        |                |          |                             |
| N2 | CT | IV | 10608575                                                              | 10609744                           | WBGene00011183 | R09H10.6 | R09H10.6                    |
|    |    |    | -0.0812772885866879                                                   | AGIWUR20822                        |                |          |                             |
| N2 | CT | IV | 10615427                                                              | 10620958                           | WBGene00004228 | ptr-14   | R09H10.4                    |
|    |    |    | 0.235181042234249                                                     | AGIWUR26151                        |                |          |                             |
| N2 | CT | IV | 10621111                                                              | 10621832                           | WBGene00011184 | R09H10.7 | R09H10.7                    |
|    |    |    | 0.131035453328941                                                     | AGIWUR33527                        |                |          |                             |
| N2 | CT | IV | 10621684                                                              | 10628861                           | WBGene00011182 | R09H10.5 | R09H10.5                    |
|    |    |    | 0.0411493006576995                                                    | AGIWUR7981;AGIWUR11151;AGIWUR18797 |                |          |                             |
| N2 | CT | IV | 10629431                                                              | 10631245                           | WBGene00044977 | F56C4.4  | F56C4.4 -0.105470006112121  |
|    |    |    | AGIWUR4833;AGIWUR11064;AGIWUR20553;AGIWUR32137                        |                                    |                |          |                             |
| N2 | CT | IV | 10637060                                                              | 10639213                           | WBGene00010144 | F56C4.1  | F56C4.1                     |
|    |    |    | -0.00897947449288061                                                  | AGIWUR2736                         |                |          |                             |
| N2 | CT | IV | 10639277                                                              | 10642690                           | WBGene00010145 | F56C4.2  | F56C4.2 -0.0300961477066082 |
|    |    |    | AGIWUR21153                                                           |                                    |                |          |                             |
| N2 | CT | IV | 10642912                                                              | 10654147                           | WBGene00010146 | glb-19   | F56C4.3 -0.165393208835329  |
|    |    |    | AGIWUR12731                                                           |                                    |                |          |                             |
| N2 | CT | IV | 10656874                                                              | 10660774                           | WBGene00010646 | K08C7.1  | K08C7.1 -0.0433760127780296 |
|    |    |    | AGIWUR7095                                                            |                                    |                |          |                             |
| N2 | CT | IV | 10661857                                                              | 10664404                           | WBGene00001476 | fmo-1    | K08C7.2 -0.201365145095274  |
|    |    |    | AGIWUR44143                                                           |                                    |                |          |                             |
| N2 | CT | IV | 10664412                                                              | 10665685                           | WBGene00010649 | K08C7.7  | K08C7.7 -0.117110327382356  |
|    |    |    | AGIWUR3375                                                            |                                    |                |          |                             |
| N2 | CT | IV | 10666827                                                              | 10679289                           | WBGene00001328 | epi-1    | K08C7.3 0.0140619611950328  |
|    |    |    | AGIWUR26700                                                           |                                    |                |          |                             |
| N2 | CT | IV | 10679383                                                              | 10680475                           | WBGene00010647 | K08C7.4  | K08C7.4 -0.118051712403369  |
|    |    |    | AGIWUR4296;AGIWUR4337;AGIWUR23573;AGIWUR30664;AGIWUR41434;AGIWUR43000 |                                    |                |          |                             |
| N2 | CT | IV | 10682524                                                              | 10684385                           | WBGene00001477 | fmo-2    | K08C7.5 0.335128422694779   |
|    |    |    | AGIWUR10619;AGIWUR14319                                               |                                    |                |          |                             |
| N2 | CT | IV | 10684432                                                              | 10685894                           | WBGene00010648 | K08C7.6  | K08C7.6 -0.0935345652309341 |
|    |    |    | AGIWUR34138                                                           |                                    |                |          |                             |
| N2 | CT | IV | 10687592                                                              | 10688135                           | WBGene00011289 | R102.2   | R102.2 0.00426038678545027  |

|                                                                                |    |    |          |          |                |          |          |                     |
|--------------------------------------------------------------------------------|----|----|----------|----------|----------------|----------|----------|---------------------|
| AGIWUR40102                                                                    |    |    |          |          |                |          |          |                     |
| N2                                                                             | CT | IV | 10689640 | 10690309 | WBGene00194984 | R102.15  | R102.15  | 0.225165864971536   |
| AGIWUR2156;AGIWUR35917;AGIWUR40196                                             |    |    |          |          |                |          |          |                     |
| N2                                                                             | CT | IV | 10690444 | 10691789 | WBGene00011290 | R102.3   | R102.3   | -0.178705140323093  |
| AGIWUR24495;AGIWUR25359;AGIWUR30903                                            |    |    |          |          |                |          |          |                     |
| N2                                                                             | CT | IV | 10691991 | 10695303 | WBGene00011291 | R102.4   | R102.4   | 0.220122754698972   |
| AGIWUR37470                                                                    |    |    |          |          |                |          |          |                     |
| N2                                                                             | CT | IV | 10695309 | 10697071 | WBGene00011292 | R102.5   | R102.5   | -0.053829572850697  |
| AGIWUR29945                                                                    |    |    |          |          |                |          |          |                     |
| N2                                                                             | CT | IV | 10705463 | 10707313 | WBGene00011297 | R102.10  | R102.10  | 0.264567128789658   |
| AGIWUR149                                                                      |    |    |          |          |                |          |          |                     |
| N2                                                                             | CT | IV | 10710057 | 10711794 | WBGene00011296 | glb-21   | R102.9   | 0.0553748905439093  |
| AGIWUR23699                                                                    |    |    |          |          |                |          |          |                     |
| N2                                                                             | CT | IV | 10716648 | 10721755 | WBGene00003568 | ncx-3    | ZC168.1  | -0.314354855301325  |
| AGIWUR15067                                                                    |    |    |          |          |                |          |          |                     |
| N2                                                                             | CT | IV | 10728572 | 10729003 | WBGene00013856 | ZC168.2  | ZC168.2  | -0.0325151263043217 |
| AGIWUR30191                                                                    |    |    |          |          |                |          |          |                     |
| N2                                                                             | CT | IV | 10732832 | 10734632 | WBGene00013857 | orc-5    | ZC168.3  | -0.148663641276052  |
| AGIWUR27343                                                                    |    |    |          |          |                |          |          |                     |
| N2                                                                             | CT | IV | 10735259 | 10737177 | WBGene00000865 | cyb-1    | ZC168.4  |                     |
| -0.00530356989325043 AGIWUR26407                                               |    |    |          |          |                |          |          |                     |
| N2                                                                             | CT | IV | 10737474 | 10738189 | WBGene00001730 | grl-21   | ZC168.5  | 0.576781272271273   |
| AGIWUR10750;AGIWUR29076;AGIWUR30387;AGIWUR33665;AGIWUR33768                    |    |    |          |          |                |          |          |                     |
| N2                                                                             | CT | IV | 10738204 | 10738658 | WBGene00013858 | ssp-34   | ZC168.6  | 0.12266613183748    |
| AGIWUR33627                                                                    |    |    |          |          |                |          |          |                     |
| N2                                                                             | CT | IV | 10744779 | 10748275 | WBGene00012009 | T25B9.3  | T25B9.3  | -0.161785985862485  |
| AGIWUR11156                                                                    |    |    |          |          |                |          |          |                     |
| N2                                                                             | CT | IV | 10748385 | 10750153 | WBGene00012007 | T25B9.1  | T25B9.1  | 0.0227862499680036  |
| AGIWUR23959                                                                    |    |    |          |          |                |          |          |                     |
| N2                                                                             | CT | IV | 10755760 | 10757716 | WBGene00012010 | T25B9.4  | T25B9.4  | 0.344749882168319   |
| AGIWUR34909                                                                    |    |    |          |          |                |          |          |                     |
| N2                                                                             | CT | IV | 10758126 | 10760795 | WBGene00012012 | T25B9.6  | T25B9.6  | 0.213517602643812   |
| AGIWUR38356                                                                    |    |    |          |          |                |          |          |                     |
| N2                                                                             | CT | IV | 10761597 | 10764496 | WBGene00012013 | ugt-54   | T25B9.7  | -0.0499407511379388 |
| AGIWUR36767                                                                    |    |    |          |          |                |          |          |                     |
| N2                                                                             | CT | IV | 10764520 | 10765297 | WBGene00044990 | T25B9.11 | T25B9.11 |                     |
| -0.0762208309983103 AGIWUR1346;AGIWUR13843;AGIWUR27155;AGIWUR34391;AGIWUR44154 |    |    |          |          |                |          |          |                     |
| N2                                                                             | CT | IV | 10765441 | 10766067 | WBGene00044991 | T25B9.12 | T25B9.12 |                     |
| -0.170290422421287 AGIWUR9993;AGIWUR39829;AGIWUR41583;AGIWUR42368;AGIWUR44664  |    |    |          |          |                |          |          |                     |

|                                                                                   |    |    |          |          |                |          |         |                     |
|-----------------------------------------------------------------------------------|----|----|----------|----------|----------------|----------|---------|---------------------|
| N2                                                                                | CT | IV | 10766481 | 10768429 | WBGene00012014 | T25B9.8  | T25B9.8 | -0.141081592318635  |
| AGIWUR21253                                                                       |    |    |          |          |                |          |         |                     |
| N2                                                                                | CT | IV | 10769653 | 10777755 | WBGene00012015 | T25B9.9  | T25B9.9 | 0.271160285318439   |
| AGIWUR19060                                                                       |    |    |          |          |                |          |         |                     |
| N2                                                                                | CT | IV | 10778985 | 10780711 | WBGene00007384 | swt-3    | C06G8.1 | -0.514965515200663  |
| AGIWUR12296;AGIWUR16026;AGIWUR27123                                               |    |    |          |          |                |          |         |                     |
| N2                                                                                | CT | IV | 10785024 | 10786831 | WBGene00005085 | srd-7    | C06G8.4 | -0.144320442291841  |
| AGIWUR8806;AGIWUR11850;AGIWUR19272;AGIWUR35602                                    |    |    |          |          |                |          |         |                     |
| N2                                                                                | CT | IV | 10790598 | 10794597 | WBGene00003876 | pept-2   | C06G8.2 | 0.0349322344108227  |
| AGIWUR6846;AGIWUR24610;AGIWUR25825                                                |    |    |          |          |                |          |         |                     |
| N2                                                                                | CT | IV | 10799614 | 10802250 | WBGene00014669 | zipt-2.1 |         | C06G8.3             |
| 0.0172346423871943 AGIWUR20694;AGIWUR24626;AGIWUR26420                            |    |    |          |          |                |          |         |                     |
| N2                                                                                | CT | IV | 10812409 | 10825953 | WBGene00011259 | miz-1    | R13.4   | 0.0482659507313095  |
| AGIWUR2408;AGIWUR6546;AGIWUR11507;AGIWUR15807;AGIWUR19435;AGIWUR19882;AGIWUR41489 |    |    |          |          |                |          |         |                     |
| N2                                                                                | CT | IV | 10826028 | 10828021 | WBGene00011257 | npax-3   | R13.2   | -0.0576217617381811 |
| AGIWUR30327                                                                       |    |    |          |          |                |          |         |                     |
| N2                                                                                | CT | IV | 10829549 | 10832248 | WBGene00011258 | best-15  | R13.3   | 0.0565935927129786  |
| AGIWUR38177                                                                       |    |    |          |          |                |          |         |                     |
| N2                                                                                | CT | IV | 10834363 | 10835130 | WBGene00014825 | R13.5    | R13.5   | -0.151876086919794  |
| AGIWUR1203;AGIWUR28576;AGIWUR40220                                                |    |    |          |          |                |          |         |                     |
| N2                                                                                | CT | IV | 10844594 | 10845620 | WBGene00011721 | T11G6.7  | T11G6.7 | -0.159465115682509  |
| AGIWUR499                                                                         |    |    |          |          |                |          |         |                     |
| N2                                                                                | CT | IV | 10849749 | 10851933 | WBGene00011719 | T11G6.4  | T11G6.4 | -0.147096107689663  |
| AGIWUR11558                                                                       |    |    |          |          |                |          |         |                     |
| N2                                                                                | CT | IV | 10852669 | 10855366 | WBGene00011718 | T11G6.3  | T11G6.3 | 0.399804086999188   |
| AGIWUR28703                                                                       |    |    |          |          |                |          |         |                     |
| N2                                                                                | CT | IV | 10855485 | 10858559 | WBGene00011717 | T11G6.2  | T11G6.2 | -0.140904481859065  |
| AGIWUR12551                                                                       |    |    |          |          |                |          |         |                     |
| N2                                                                                | CT | IV | 10858957 | 10861295 | WBGene00002001 | hars-1   | T11G6.1 | 0.0357686819170979  |
| AGIWUR14510;AGIWUR14542;AGIWUR22495                                               |    |    |          |          |                |          |         |                     |
| N2                                                                                | CT | IV | 10861402 | 10864232 | WBGene00011722 | T11G6.8  | T11G6.8 | -0.0266476355003409 |
| AGIWUR34117                                                                       |    |    |          |          |                |          |         |                     |
| N2                                                                                | CT | IV | 10864331 | 10873632 | WBGene00008750 | F13E9.1  | F13E9.1 | -0.162566515067414  |
| AGIWUR12104;AGIWUR13811;AGIWUR16606                                               |    |    |          |          |                |          |         |                     |
| N2                                                                                | CT | IV | 10873673 | 10874627 | WBGene00008761 | F13E9.12 |         | F13E9.12            |
| -0.141448624814795 AGIWUR31437                                                    |    |    |          |          |                |          |         |                     |
| N2                                                                                | CT | IV | 10877144 | 10877296 | WBGene00008751 | fipr-14  | F13E9.2 | 0.38645705469262    |
| AGIWUR28316                                                                       |    |    |          |          |                |          |         |                     |
| N2                                                                                | CT | IV | 10877836 | 10879727 | WBGene00008755 | sdz-13   | F13E9.6 | -0.0728175615607674 |

|                                                                                                           |    |    |                                   |          |                |                 |                     |
|-----------------------------------------------------------------------------------------------------------|----|----|-----------------------------------|----------|----------------|-----------------|---------------------|
| AGIWUR10549                                                                                               |    |    |                                   |          |                |                 |                     |
| N2                                                                                                        | CT | IV | 10881549                          | 10882523 | WBGene00044797 | F13E9.13        | F13E9.13            |
| -0.403516375323822                                                                                        |    |    | AGIWUR13634                       |          |                |                 |                     |
| N2                                                                                                        | CT | IV | 10882972                          | 10884363 | WBGene00008754 | F13E9.5 F13E9.5 | 0.0146435014064714  |
| AGIWUR4319                                                                                                |    |    |                                   |          |                |                 |                     |
| N2                                                                                                        | CT | IV | 10885238                          | 10886015 | WBGene00008759 | F13E9.10        | F13E9.10            |
| -0.227868127840591                                                                                        |    |    | AGIWUR20583                       |          |                |                 |                     |
| N2                                                                                                        | CT | IV | 10889471                          | 10889878 | WBGene00045208 | F13E9.15        | F13E9.15            |
| 0.258551608370816                                                                                         |    |    | AGIWUR34664                       |          |                |                 |                     |
| N2                                                                                                        | CT | IV | 10891333                          | 10892093 | WBGene00045207 | F13E9.14        | F13E9.14            |
| -0.331698926872097                                                                                        |    |    | AGIWUR7566;AGIWUR9516;AGIWUR42487 |          |                |                 |                     |
| N2                                                                                                        | CT | IV | 10893648                          | 10894355 | WBGene00008757 | F13E9.8 F13E9.8 | -1.2187693859971    |
| AGIWUR24368                                                                                               |    |    |                                   |          |                |                 |                     |
| N2                                                                                                        | CT | IV | 10895225                          | 10896612 | WBGene00008753 | F13E9.4 F13E9.4 | -0.259518345960839  |
| AGIWUR12837                                                                                               |    |    |                                   |          |                |                 |                     |
| N2                                                                                                        | CT | IV | 10897655                          | 10899180 | WBGene00008758 | F13E9.9 F13E9.9 | -0.283172532317787  |
| AGIWUR22978                                                                                               |    |    |                                   |          |                |                 |                     |
| N2                                                                                                        | CT | IV | 10900370                          | 10901386 | WBGene00014006 | ZK596.1 ZK596.1 | -0.137389285283726  |
| AGIWUR11142                                                                                               |    |    |                                   |          |                |                 |                     |
| N2                                                                                                        | CT | IV | 10901913                          | 10904382 | WBGene00014008 | ZK596.3 ZK596.3 | -0.015047792879086  |
| AGIWUR13858                                                                                               |    |    |                                   |          |                |                 |                     |
| N2                                                                                                        | CT | IV | 10908131                          | 10909306 | WBGene00014007 | ZK596.2 ZK596.2 | 0.193214003458717   |
| AGIWUR43993                                                                                               |    |    |                                   |          |                |                 |                     |
| N2                                                                                                        | CT | IV | 10909915                          | 10913078 | WBGene00014001 | pyk-2 ZK593.1   |                     |
| -0.000439662806458685                                                                                     |    |    | AGIWUR19204                       |          |                |                 |                     |
| N2                                                                                                        | CT | IV | 10913361                          | 10914582 | WBGene00014002 | ZK593.2 ZK593.2 | -0.0724471314422832 |
| AGIWUR208                                                                                                 |    |    |                                   |          |                |                 |                     |
| N2                                                                                                        | CT | IV | 10916597                          | 10917718 | WBGene00014003 | ZK593.3 ZK593.3 | 0.0490167719108889  |
| AGIWUR15333                                                                                               |    |    |                                   |          |                |                 |                     |
| N2                                                                                                        | CT | IV | 10920075                          | 10926807 | WBGene00004319 | rbr-2 ZK593.4   | -0.0658224559470604 |
| AGIWUR10324;AGIWUR33503                                                                                   |    |    |                                   |          |                |                 |                     |
| N2                                                                                                        | CT | IV | 10926730                          | 10933203 | WBGene00001017 | dnc-1 ZK593.5   | -0.0394068784816657 |
| AGIWUR4036;AGIWUR15883;AGIWUR30150                                                                        |    |    |                                   |          |                |                 |                     |
| N2                                                                                                        | CT | IV | 10933502                          | 10934200 | WBGene00003081 | lsm-7 ZK593.7   | -0.254236392118823  |
| AGIWUR7816                                                                                                |    |    |                                   |          |                |                 |                     |
| N2                                                                                                        | CT | IV | 10934186                          | 10935914 | WBGene00002981 | lgg-2 ZK593.6   | -0.010653271232318  |
| AGIWUR5996;AGIWUR9128;AGIWUR16430;AGIWUR18825;AGIWUR28298;AGIWUR28809;AGIWUR32345;AGIWUR36092;AGIWUR37432 |    |    |                                   |          |                |                 |                     |
| N2                                                                                                        | CT | IV | 10937454                          | 10939935 | WBGene00014004 | fic-1 ZK593.8   | -0.141612471838807  |
| AGIWUR10636                                                                                               |    |    |                                   |          |                |                 |                     |



|                                                                             |    |    |          |          |                |           |          |                     |
|-----------------------------------------------------------------------------|----|----|----------|----------|----------------|-----------|----------|---------------------|
| N2                                                                          | CT | IV | 10940959 | 10942869 | WBGene00014005 | ZK593.9   | ZK593.9  | 0.224825934036719   |
| AGIWUR27344                                                                 |    |    |          |          |                |           |          |                     |
| N2                                                                          | CT | IV | 10949767 | 10951133 | WBGene00013474 | Y69E1A.2  |          | Y69E1A.2            |
| 0.116180754893023 AGIWUR34021                                               |    |    |          |          |                |           |          |                     |
| N2                                                                          | CT | IV | 10956863 | 10957698 | WBGene00013477 | Y69E1A.5  |          | Y69E1A.5            |
| -0.0304999338806393 AGIWUR15234                                             |    |    |          |          |                |           |          |                     |
| N2                                                                          | CT | IV | 10958372 | 10961208 | WBGene00005531 | sri-19    | Y69E1A.6 |                     |
| -0.278038912016609 AGIWUR24828;AGIWUR40891                                  |    |    |          |          |                |           |          |                     |
| N2                                                                          | CT | IV | 10961355 | 10966459 | WBGene00000171 | aqp-3     | Y69E1A.7 |                     |
| -0.00743825912204787 AGIWUR16033                                            |    |    |          |          |                |           |          |                     |
| N2                                                                          | CT | IV | 10966590 | 10968166 | WBGene00013478 | Y69E1A.8  |          | Y69E1A.8            |
| 0.237221172059065 AGIWUR36844                                               |    |    |          |          |                |           |          |                     |
| N2                                                                          | CT | IV | 10982068 | 10985030 | WBGene00012794 | Y43E12A.2 |          | Y43E12A.2           |
| 0.237936402421634 AGIWUR19508;AGIWUR21438                                   |    |    |          |          |                |           |          |                     |
| N2                                                                          | CT | IV | 10990999 | 10994137 | WBGene00008776 | F13H10.5  |          | F13H10.5            |
| -0.0911901253807432 AGIWUR23815;AGIWUR29827;AGIWUR37699                     |    |    |          |          |                |           |          |                     |
| N2                                                                          | CT | IV | 11002119 | 11003801 | WBGene00045056 | F13H10.9  |          | F13H10.9            |
| -0.404248795601075 AGIWUR837;AGIWUR25734;AGIWUR43446                        |    |    |          |          |                |           |          |                     |
| N2                                                                          | CT | IV | 11004573 | 11005070 | WBGene00008773 | F13H10.1  |          | F13H10.1            |
| 0.0413185725982714 AGIWUR8767                                               |    |    |          |          |                |           |          |                     |
| N2                                                                          | CT | IV | 11009296 | 11010103 | WBGene00008777 | F13H10.6  |          | F13H10.6            |
| 0.100200714765439 AGIWUR18010                                               |    |    |          |          |                |           |          |                     |
| N2                                                                          | CT | IV | 11009981 | 11012020 | WBGene00003586 | ndx-9     | F13H10.2 |                     |
| 0.00428745065906533 AGIWUR43255                                             |    |    |          |          |                |           |          |                     |
| N2                                                                          | CT | IV | 11012119 | 11015883 | WBGene00008774 | F13H10.3  |          | F13H10.3            |
| -0.108980053058634 AGIWUR736                                                |    |    |          |          |                |           |          |                     |
| N2                                                                          | CT | IV | 11016229 | 11021902 | WBGene00008775 | mogs-1    | F13H10.4 |                     |
| 0.301386138656231 AGIWUR8586;AGIWUR8727;AGIWUR15668;AGIWUR24442;AGIWUR44599 |    |    |          |          |                |           |          |                     |
| N2                                                                          | CT | IV | 11022603 | 11025870 | WBGene00000109 | alh-3     | F36H1.6  | 0.0057316046274174  |
| AGIWUR5136;AGIWUR12312;AGIWUR17773;AGIWUR30861;AGIWUR35885;AGIWUR37536      |    |    |          |          |                |           |          |                     |
| N2                                                                          | CT | IV | 11028477 | 11029105 | WBGene00009494 | hrg-5     | F36H1.9  | -0.0516864580667287 |
| AGIWUR23826                                                                 |    |    |          |          |                |           |          |                     |
| N2                                                                          | CT | IV | 11030160 | 11031082 | WBGene00009493 | hrg-4     | F36H1.5  | -0.190473838775073  |
| AGIWUR2400                                                                  |    |    |          |          |                |           |          |                     |
| N2                                                                          | CT | IV | 11031171 | 11033581 | WBGene00009495 | hrg-6     | F36H1.10 |                     |
| -0.182361138416686 AGIWUR18494                                              |    |    |          |          |                |           |          |                     |
| N2                                                                          | CT | IV | 11036548 | 11038148 | WBGene00001426 | fkf-1     | F36H1.1  | 0.00831215196818658 |
| AGIWUR3040;AGIWUR12315;AGIWUR21537;AGIWUR37162                              |    |    |          |          |                |           |          |                     |
| N2                                                                          | CT | IV | 11038662 | 11047422 | WBGene00006490 | kdin-1    | F36H1.2  | -0.015465363175819  |

AGIWUR7040;AGIWUR17878;AGIWUR22372;AGIWUR28170;AGIWUR36853;AGIWUR43480  
N2 CT IV 11049171 11049632 WBGene00009496 F36H1.11 F36H1.11  
0.234942657938355 AGIWUR32032  
N2 CT IV 11050128 11052430 WBGene00009492 F36H1.3 F36H1.3 -0.0531828845809947  
AGIWUR19348  
N2 CT IV 11052816 11053634 WBGene00009497 F36H1.12 F36H1.12  
-0.238190860031143 AGIWUR34392  
N2 CT IV 11054308 11063613 WBGene00002992 lin-3 F36H1.4 0.122025278349863  
AGIWUR54;AGIWUR748;AGIWUR2711;AGIWUR5458;AGIWUR5804;AGIWUR6726;AGIWUR7349;AGIWUR8580;AGIWUR16415;AGIWUR2604  
7;AGIWUR26767;AGIWUR40552;AGIWUR42101  
N2 CT IV 11063512 11064152 WBGene00012382 ttr-16 Y5F2A.1 0.0838638751342771  
AGIWUR35777  
N2 CT IV 11066018 11067072 WBGene00012383 ttr-17 Y5F2A.2 0.0207766808456089  
AGIWUR20365;AGIWUR35910;AGIWUR38875  
N2 CT IV 11069387 11070950 WBGene00012384 Y5F2A.3 Y5F2A.3 -0.0831713429918577  
AGIWUR8611;AGIWUR10963;AGIWUR19805;AGIWUR20173;AGIWUR21012;AGIWUR29326;AGIWUR35458;AGIWUR43963  
N2 CT IV 11076085 11078582 WBGene00012385 Y5F2A.4 Y5F2A.4 -0.188841357379838  
AGIWUR43902  
N2 CT IV 11078677 11081055 WBGene00010882 atg-7 M7.5 -0.184256326781695  
AGIWUR36657;AGIWUR43525  
N2 CT IV 11080989 11082253 WBGene00002344 let-70 M7.1 0.0922962253705464  
AGIWUR11476;AGIWUR18418;AGIWUR19817;AGIWUR24836;AGIWUR40767;AGIWUR43507  
N2 CT IV 11083735 11086050 WBGene00002214 klc-1 M7.2 0.111791153906338  
AGIWUR2976;AGIWUR21767;AGIWUR40967;AGIWUR41854  
N2 CT IV 11086074 11092552 WBGene00000246 bcc-1 M7.3 -0.037186167066956  
AGIWUR38663  
N2 CT IV 11093843 11095085 WBGene00010884 M7.8 M7.8 -0.123440307779001  
AGIWUR42600  
N2 CT IV 11096724 11097982 WBGene00010887 M7.12 M7.12 -0.438064098459803  
AGIWUR32734  
N2 CT IV 11098448 11100371 WBGene00006071 str-3 M7.13 -0.149812208410237  
AGIWUR28180  
N2 CT IV 11100631 11101478 WBGene00010885 M7.9 M7.9 -0.61338312430957  
AGIWUR41741  
N2 CT IV 11101962 11102695 WBGene00010886 M7.10 M7.10 1.00137991514853  
AGIWUR13450  
N2 CT IV 11103255 11104262 WBGene00011483 T05E11.7 T05E11.7  
0.0318704920283803 AGIWUR19919  
N2 CT IV 11104743 11105820 WBGene00011484 T05E11.8 T05E11.8

|                                                                                                                                                       |                         |          |                |          |          |                     |  |
|-------------------------------------------------------------------------------------------------------------------------------------------------------|-------------------------|----------|----------------|----------|----------|---------------------|--|
| -0.00176170844484247                                                                                                                                  | AGIWUR34023             |          |                |          |          |                     |  |
| N2 CT IV                                                                                                                                              | 11108494                | 11110017 | WBGene00011482 | hpo-4    | T05E11.6 |                     |  |
| -0.167829528018119                                                                                                                                    | AGIWUR2772              |          |                |          |          |                     |  |
| N2 CT IV                                                                                                                                              | 11110102                | 11111045 | WBGene00004474 | rps-5    | T05E11.1 |                     |  |
| -0.0898396014772374                                                                                                                                   | AGIWUR15009;AGIWUR19637 |          |                |          |          |                     |  |
| N2 CT IV                                                                                                                                              | 11112999                | 11116754 | WBGene00011479 | T05E11.2 | T05E11.2 |                     |  |
| -0.124006172571832                                                                                                                                    | AGIWUR5936              |          |                |          |          |                     |  |
| N2 CT IV                                                                                                                                              | 11116732                | 11118887 | WBGene00011481 | imp-2    | T05E11.5 |                     |  |
| -0.0434386164083662                                                                                                                                   | AGIWUR34176             |          |                |          |          |                     |  |
| N2 CT IV                                                                                                                                              | 11119298                | 11123155 | WBGene00011480 | enpl-1   | T05E11.3 |                     |  |
| -0.0513010303030015                                                                                                                                   | AGIWUR8786              |          |                |          |          |                     |  |
| N2 CT IV                                                                                                                                              | 11123133                | 11124862 | WBGene00004985 | spo-11   | T05E11.4 |                     |  |
| -0.208968919076488                                                                                                                                    | AGIWUR29114             |          |                |          |          |                     |  |
| N2 CT IV                                                                                                                                              | 11126024                | 11131162 | WBGene00004204 | swsn-4   | F01G4.1  | 0.12684186350295    |  |
| AGIWUR11401;AGIWUR19740;AGIWUR26530;AGIWUR29970;AGIWUR39043;AGIWUR39371                                                                               |                         |          |                |          |          |                     |  |
| N2 CT IV                                                                                                                                              | 11131279                | 11133785 | WBGene00000181 | ard-1    | F01G4.2  | -0.0194899952966168 |  |
| AGIWUR9929;AGIWUR40487;AGIWUR41787                                                                                                                    |                         |          |                |          |          |                     |  |
| N2 CT IV                                                                                                                                              | 11135566                | 11142360 | WBGene00008502 | skih-2   | F01G4.3  | 0.0202968397527528  |  |
| AGIWUR33640                                                                                                                                           |                         |          |                |          |          |                     |  |
| N2 CT IV                                                                                                                                              | 11143345                | 11145923 | WBGene00008503 | F01G4.4  | F01G4.4  | 0.241273929107788   |  |
| AGIWUR41438                                                                                                                                           |                         |          |                |          |          |                     |  |
| N2 CT IV                                                                                                                                              | 11146106                | 11147247 | WBGene00008504 | F01G4.5  | F01G4.5  | -0.136959023967464  |  |
| AGIWUR42508                                                                                                                                           |                         |          |                |          |          |                     |  |
| N2 CT IV                                                                                                                                              | 11146940                | 11149504 | WBGene00008505 | F01G4.6  | F01G4.6  | 0.260603380239825   |  |
| AGIWUR886;AGIWUR1602;AGIWUR3823;AGIWUR7003;AGIWUR7501;AGIWUR15287;AGIWUR15503;AGIWUR17652;AGIWUR23154;AGIWUR25021;AGIWUR29635;AGIWUR34643;AGIWUR36572 |                         |          |                |          |          |                     |  |
| N2 CT IV                                                                                                                                              | 11149189                | 11154334 | WBGene00007444 | C08F8.2  | C08F8.2  | -0.0604913825312554 |  |
| AGIWUR32022                                                                                                                                           |                         |          |                |          |          |                     |  |
| N2 CT IV                                                                                                                                              | 11155029                | 11156634 | WBGene00007445 | C08F8.3  | C08F8.3  | 0.0649000643514892  |  |
| AGIWUR20028                                                                                                                                           |                         |          |                |          |          |                     |  |
| N2 CT IV                                                                                                                                              | 11157102                | 11159492 | WBGene00007446 | mboa-4   | C08F8.4  | 0.395869449916432   |  |
| AGIWUR35424                                                                                                                                           |                         |          |                |          |          |                     |  |
| N2 CT IV                                                                                                                                              | 11159570                | 11160807 | WBGene00219217 | C08F8.15 | C08F8.15 |                     |  |
| 0.20191563908957                                                                                                                                      | AGIWUR36439             |          |                |          |          |                     |  |
| N2 CT IV                                                                                                                                              | 11162768                | 11164622 | WBGene00007448 | C08F8.6  | C08F8.6  | 0.165298883626575   |  |
| AGIWUR10293                                                                                                                                           |                         |          |                |          |          |                     |  |
| N2 CT IV                                                                                                                                              | 11169834                | 11174783 | WBGene00003657 | nhr-67   | C08F8.8  | 0.201653188661793   |  |
| AGIWUR32104                                                                                                                                           |                         |          |                |          |          |                     |  |
| N2 CT IV                                                                                                                                              | 11177286                | 11178200 | WBGene00004309 | rap-3    | C08F8.7  | -0.200709622053086  |  |



|    |    |    |                                                            |                                              |                |          |          |                     |
|----|----|----|------------------------------------------------------------|----------------------------------------------|----------------|----------|----------|---------------------|
| N2 | CT | IV | 11295074                                                   | 11296887                                     | WBGene00007114 | mttu-1   | B0035.16 |                     |
|    |    |    | -0.182068366637585                                         | AGIWUR8709                                   |                |          |          |                     |
| N2 | CT | IV | 11296952                                                   | 11298388                                     | WBGene00007113 | B0035.15 |          | B0035.15            |
|    |    |    | -0.129952158195172                                         | AGIWUR19989                                  |                |          |          |                     |
| N2 | CT | IV | 11299008                                                   | 11304789                                     | WBGene00001019 | dnj-1    | B0035.14 |                     |
|    |    |    | -0.030390301707758                                         | AGIWUR32054;AGIWUR41709                      |                |          |          |                     |
| N2 | CT | IV | 11304721                                                   | 11306762                                     | WBGene00007112 | B0035.13 |          | B0035.13            |
|    |    |    | 0.173244497211012                                          | AGIWUR33214;AGIWUR41564;AGIWUR42935          |                |          |          |                     |
| N2 | CT | IV | 11310972                                                   | 11312515                                     | WBGene00007105 | B0035.1  | B0035.1  | 0.153134871948772   |
|    |    |    | AGIWUR6910;AGIWUR24062;AGIWUR36481;AGIWUR37302             |                                              |                |          |          |                     |
| N2 | CT | IV | 11312437                                                   | 11313980                                     | WBGene00001020 | dnj-2    | B0035.2  | -0.340446500769643  |
|    |    |    | AGIWUR39962                                                |                                              |                |          |          |                     |
| N2 | CT | IV | 11314078                                                   | 11315116                                     | WBGene00007106 | B0035.3  | B0035.3  | -0.331826801978172  |
|    |    |    | AGIWUR7573                                                 |                                              |                |          |          |                     |
| N2 | CT | IV | 11315142                                                   | 11315877                                     | WBGene00007107 | pfd-4    | B0035.4  | -0.300827018454681  |
|    |    |    | AGIWUR34374;AGIWUR43014;AGIWUR44476                        |                                              |                |          |          |                     |
| N2 | CT | IV | 11317419                                                   | 11319951                                     | WBGene00007108 | gsdpd-1  | B0035.5  | 0.41101016473783    |
|    |    |    | AGIWUR239;AGIWUR15655;AGIWUR34155                          |                                              |                |          |          |                     |
| N2 | CT | IV | 11320320                                                   | 11320697                                     | WBGene00044290 | B0035.18 |          | B0035.18            |
|    |    |    | -0.119341077669887                                         | AGIWUR42866                                  |                |          |          |                     |
| N2 | CT | IV | 11320800                                                   | 11323634                                     | WBGene00007109 | B0035.6  | B0035.6  | 0.0385953769926068  |
|    |    |    | AGIWUR28931                                                |                                              |                |          |          |                     |
| N2 | CT | IV | 11323885                                                   | 11324470                                     | WBGene00001921 | his-47   | B0035.7  | -0.106832052814974  |
|    |    |    | AGIWUR2738;AGIWUR21949;AGIWUR27672;AGIWUR30476;AGIWUR39690 |                                              |                |          |          |                     |
| N2 | CT | IV | 11327356                                                   | 11327569                                     | WBGene00235095 | B0035.21 |          | B0035.21            |
|    |    |    | -0.210237786437551                                         | AGIWUR7626                                   |                |          |          |                     |
| N2 | CT | IV | 11327576                                                   | 11329369                                     | WBGene00007110 | leo-1    | B0035.11 |                     |
|    |    |    | -0.0656130313374179                                        | AGIWUR878;AGIWUR4853;AGIWUR30506;AGIWUR39319 |                |          |          |                     |
| N2 | CT | IV | 11329466                                                   | 11332969                                     | WBGene00007111 | sart-3   | B0035.12 |                     |
|    |    |    | 0.0930196147615447                                         | AGIWUR40276                                  |                |          |          |                     |
| N2 | CT | IV | 11333079                                                   | 11337184                                     | WBGene00010061 | F54E12.2 |          | F54E12.2            |
|    |    |    | 0.00428696493416592                                        | AGIWUR14228;AGIWUR28750                      |                |          |          |                     |
| N2 | CT | IV | 11341325                                                   | 11359863                                     | WBGene00002223 | k1p-12   | T01G1.1  | -0.0112160983786671 |
|    |    |    | AGIWUR4114;AGIWUR19671;AGIWUR23903                         |                                              |                |          |          |                     |
| N2 | CT | IV | 11359864                                                   | 11361509                                     | WBGene00044025 | T01G1.4  | T01G1.4  | -0.136955125275922  |
|    |    |    | AGIWUR18422                                                |                                              |                |          |          |                     |
| N2 | CT | IV | 11365605                                                   | 11371836                                     | WBGene00011338 | sec-31   | T01G1.3  | -0.0809587579521072 |
|    |    |    | AGIWUR30781                                                |                                              |                |          |          |                     |
| N2 | CT | IV | 11372991                                                   | 11377627                                     | WBGene00010351 | cbd-1    | H02I12.1 |                     |

|                                                                                                        |    |                                                                        |          |          |                |                                    |
|--------------------------------------------------------------------------------------------------------|----|------------------------------------------------------------------------|----------|----------|----------------|------------------------------------|
| 0.043434897307975                                                                                      |    | AGIWUR1977                                                             |          |          |                |                                    |
| N2                                                                                                     | CT | IV                                                                     | 11378174 | 11379348 | WBGene00010352 | fbxb-76 H02I12.2                   |
| -0.404652093926223                                                                                     |    | AGIWUR41180                                                            |          |          |                |                                    |
| N2                                                                                                     | CT | IV                                                                     | 11394543 | 11396728 | WBGene00006459 | tag-89 H02I12.3                    |
| -0.0936312719671317                                                                                    |    | AGIWUR8649;AGIWUR21996;AGIWUR42002                                     |          |          |                |                                    |
| N2                                                                                                     | CT | IV                                                                     | 11396788 | 11398317 | WBGene00001108 | dsl-6 H02I12.4                     |
| -0.211894808929994                                                                                     |    | AGIWUR3759                                                             |          |          |                |                                    |
| N2                                                                                                     | CT | IV                                                                     | 11401884 | 11403338 | WBGene00010353 | memi-3 H02I12.5                    |
| -0.0474729253595463                                                                                    |    | AGIWUR44329                                                            |          |          |                |                                    |
| N2                                                                                                     | CT | IV                                                                     | 11403961 | 11406066 | WBGene00010354 | cyp-31A2 H02I12.8                  |
| -0.139479690784913                                                                                     |    | AGIWUR1332                                                             |          |          |                |                                    |
| N2                                                                                                     | CT | IV                                                                     | 11410228 | 11413001 | WBGene00009035 | gfat-2 F22B3.4 0.0916867182161063  |
| AGIWUR910;AGIWUR3963;AGIWUR6608;AGIWUR8102;AGIWUR15198;AGIWUR18863;AGIWUR32594;AGIWUR40623;AGIWUR43992 |    |                                                                        |          |          |                |                                    |
| N2                                                                                                     | CT | IV                                                                     | 11413208 | 11415020 | WBGene00045122 | F22B3.10 F22B3.10                  |
| 0.0156824929004697                                                                                     |    | AGIWUR37720                                                            |          |          |                |                                    |
| N2                                                                                                     | CT | IV                                                                     | 11415598 | 11416824 | WBGene00009036 | F22B3.5 F22B3.5 -0.146938958017835 |
| AGIWUR8998;AGIWUR21522;AGIWUR32760;AGIWUR38677                                                         |    |                                                                        |          |          |                |                                    |
| N2                                                                                                     | CT | IV                                                                     | 11417581 | 11421796 | WBGene00009038 | F22B3.7 F22B3.7 0.0756913712726064 |
| AGIWUR44684                                                                                            |    |                                                                        |          |          |                |                                    |
| N2                                                                                                     | CT | IV                                                                     | 11422711 | 11425251 | WBGene00009039 | F22B3.8 F22B3.8 0.299713598924282  |
| AGIWUR9347;AGIWUR15133;AGIWUR19339;AGIWUR27538                                                         |    |                                                                        |          |          |                |                                    |
| N2                                                                                                     | CT | IV                                                                     | 11425742 | 11447060 | WBGene00002192 | kin-4 C10C6.1 0.0805613918406936   |
| AGIWUR13495;AGIWUR36397                                                                                |    |                                                                        |          |          |                |                                    |
| N2                                                                                                     | CT | IV                                                                     | 11459984 | 11463195 | WBGene00007006 | npr-3 C10C6.2 -0.0373078069864077  |
| AGIWUR4533                                                                                             |    |                                                                        |          |          |                |                                    |
| N2                                                                                                     | CT | IV                                                                     | 11463609 | 11465189 | WBGene00007512 | C10C6.3 C10C6.3 0.242613331746321  |
| AGIWUR17673;AGIWUR28120                                                                                |    |                                                                        |          |          |                |                                    |
| N2                                                                                                     | CT | IV                                                                     | 11465433 | 11467239 | WBGene00007515 | C10C6.7 C10C6.7                    |
| -0.00636139297379401                                                                                   |    | AGIWUR1267;AGIWUR1584;AGIWUR20291                                      |          |          |                |                                    |
| N2                                                                                                     | CT | IV                                                                     | 11470185 | 11473419 | WBGene00007513 | wht-2 C10C6.5 0.102233820775172    |
| AGIWUR1848;AGIWUR11284;AGIWUR22623;AGIWUR29007;AGIWUR39331;AGIWUR45150                                 |    |                                                                        |          |          |                |                                    |
| N2                                                                                                     | CT | IV                                                                     | 11473363 | 11479251 | WBGene00007514 | catp-8 C10C6.6 0.289368982334148   |
| AGIWUR10656;AGIWUR17810;AGIWUR31938                                                                    |    |                                                                        |          |          |                |                                    |
| N2                                                                                                     | CT | IV                                                                     | 11479358 | 11480369 | WBGene00003148 | mbf-1 H21P03.1                     |
| -0.0641568606805656                                                                                    |    | AGIWUR28512                                                            |          |          |                |                                    |
| N2                                                                                                     | CT | IV                                                                     | 11480846 | 11482437 | WBGene00010409 | H21P03.2 H21P03.2                  |
| -0.0325373033624761                                                                                    |    | AGIWUR27589                                                            |          |          |                |                                    |
| N2                                                                                                     | CT | IV                                                                     | 11482668 | 11498167 | WBGene00004892 | sms-1 H21P03.3                     |
| -0.0258963010377888                                                                                    |    | AGIWUR6928;AGIWUR20047;AGIWUR27142;AGIWUR32836;AGIWUR41669;AGIWUR44350 |          |          |                |                                    |

|                                                                                |    |    |          |          |                |          |           |                    |
|--------------------------------------------------------------------------------|----|----|----------|----------|----------------|----------|-----------|--------------------|
| N2                                                                             | CT | IV | 11504716 | 11509723 | WBGene00006678 | twk-25   | M04B2.5   | -0.197072614470098 |
| AGIWUR24160                                                                    |    |    |          |          |                |          |           |                    |
| N2                                                                             | CT | IV | 11509726 | 11510764 | WBGene00010848 | M04B2.6  | M04B2.6   |                    |
| -0.000451005868802312 AGIWUR43084                                              |    |    |          |          |                |          |           |                    |
| N2                                                                             | CT | IV | 11517186 | 11517620 | WBGene00045319 | M04B2.8  | M04B2.8   | 0.125747753154775  |
| AGIWUR8716;AGIWUR25069;AGIWUR38609;AGIWUR40846                                 |    |    |          |          |                |          |           |                    |
| N2                                                                             | CT | IV | 11518422 | 11521031 | WBGene00010847 | M04B2.4  | M04B2.4   | -0.299668704850045 |
| AGIWUR40957                                                                    |    |    |          |          |                |          |           |                    |
| N2                                                                             | CT | IV | 11521290 | 11522214 | WBGene00001585 | gfl-1    | M04B2.3   | -0.209444088209537 |
| AGIWUR38859                                                                    |    |    |          |          |                |          |           |                    |
| N2                                                                             | CT | IV | 11524642 | 11527954 | WBGene00003218 | mep-1    | M04B2.1   | 0.278279552041939  |
| AGIWUR26739                                                                    |    |    |          |          |                |          |           |                    |
| N2                                                                             | CT | IV | 11528052 | 11530715 | WBGene00010846 | M04B2.2  | M04B2.2   | -0.232983647692651 |
| AGIWUR2719                                                                     |    |    |          |          |                |          |           |                    |
| N2                                                                             | CT | IV | 11530650 | 11548586 | WBGene00010849 | M04B2.7  | M04B2.7   | -0.163045581306331 |
| AGIWUR40341                                                                    |    |    |          |          |                |          |           |                    |
| N2                                                                             | CT | IV | 11550002 | 11551987 | WBGene00000702 | col-128  | F12F6.9   | -0.143543388732344 |
| AGIWUR26388                                                                    |    |    |          |          |                |          |           |                    |
| N2                                                                             | CT | IV | 11554489 | 11558261 | WBGene00008723 | F12F6.8  | F12F6.8   | -0.106959487763894 |
| AGIWUR31855                                                                    |    |    |          |          |                |          |           |                    |
| N2                                                                             | CT | IV | 11558737 | 11561891 | WBGene00008722 | F12F6.7  | F12F6.7   | 0.0295495777814558 |
| AGIWUR18979                                                                    |    |    |          |          |                |          |           |                    |
| N2                                                                             | CT | IV | 11561986 | 11566194 | WBGene00004755 | sec-24.1 |           | F12F6.6            |
| 0.0441117918244984 AGIWUR11185;AGIWUR12547;AGIWUR14071;AGIWUR40393             |    |    |          |          |                |          |           |                    |
| N2                                                                             | CT | IV | 11570500 | 11578699 | WBGene00006406 | srgp-1   | F12F6.5   | 0.145333723473133  |
| AGIWUR5747                                                                     |    |    |          |          |                |          |           |                    |
| N2                                                                             | CT | IV | 11578757 | 11584066 | WBGene00004360 | rib-1    | F12F6.3   | 0.183827757760019  |
| AGIWUR21192;AGIWUR34748                                                        |    |    |          |          |                |          |           |                    |
| N2                                                                             | CT | IV | 11585224 | 11588321 | WBGene00008720 | F12F6.1  | F12F6.1   | -0.136817962581693 |
| AGIWUR20751                                                                    |    |    |          |          |                |          |           |                    |
| N2                                                                             | CT | IV | 11588263 | 11592240 | WBGene00009589 | F40F11.4 |           | F40F11.4           |
| 0.00344564877184261 AGIWUR22717                                                |    |    |          |          |                |          |           |                    |
| N2                                                                             | CT | IV | 11592351 | 11594003 | WBGene00009588 | F40F11.3 |           | F40F11.3           |
| -0.299122787836865 AGIWUR10426                                                 |    |    |          |          |                |          |           |                    |
| N2                                                                             | CT | IV | 11594244 | 11601695 | WBGene00009587 | mig-38   | F40F11.2  |                    |
| 0.236987274223271 AGIWUR15204                                                  |    |    |          |          |                |          |           |                    |
| N2                                                                             | CT | IV | 11602641 | 11603283 | WBGene00004480 | rps-11   | F40F11.1  |                    |
| -0.0483294470274913 AGIWUR3267;AGIWUR24771;AGIWUR29833;AGIWUR41945;AGIWUR42716 |    |    |          |          |                |          |           |                    |
| N2                                                                             | CT | IV | 11603613 | 11604927 | WBGene00012497 | ragc-1   | Y24F12A.2 |                    |

|                                                 |             |          |                |           |           |                     |
|-------------------------------------------------|-------------|----------|----------------|-----------|-----------|---------------------|
| -0.165347584398473                              | AGIWUR10140 |          |                |           |           |                     |
| N2 CT IV                                        | 11605254    | 11607457 | WBGene00012496 | Y24F12A.1 | Y24F12A.1 |                     |
| -0.112069380772862                              | AGIWUR38440 |          |                |           |           |                     |
| N2 CT IV                                        | 11619502    | 11620938 | WBGene00001107 | ds1-5     | F58B3.8   | 0.0335925352568855  |
| AGIWUR547;AGIWUR15690                           |             |          |                |           |           |                     |
| N2 CT IV                                        | 11621443    | 11623174 | WBGene00003093 | lys-4     | F58B3.1   | 0.0061369519124419  |
| AGIWUR39966                                     |             |          |                |           |           |                     |
| N2 CT IV                                        | 11624255    | 11625582 | WBGene00003094 | lys-5     | F58B3.2   | 0.0909791683276389  |
| AGIWUR19394                                     |             |          |                |           |           |                     |
| N2 CT IV                                        | 11626910    | 11627947 | WBGene00003095 | lys-6     | F58B3.3   | -0.133742667975278  |
| AGIWUR36906                                     |             |          |                |           |           |                     |
| N2 CT IV                                        | 11628757    | 11631850 | WBGene00010231 | F58B3.4   | F58B3.4   | -0.12211708502609   |
| AGIWUR6455                                      |             |          |                |           |           |                     |
| N2 CT IV                                        | 11631941    | 11635487 | WBGene00003415 | mars-1    | F58B3.5   | -0.146348002178227  |
| AGIWUR12127;AGIWUR12383;AGIWUR19727             |             |          |                |           |           |                     |
| N2 CT IV                                        | 11636648    | 11638208 | WBGene00010232 | F58B3.6   | F58B3.6   | 0.00610411620300155 |
| AGIWUR1821;AGIWUR13189;AGIWUR24826              |             |          |                |           |           |                     |
| N2 CT IV                                        | 11638316    | 11640097 | WBGene00010233 | F58B3.7   | F58B3.7   | -0.0676208893782935 |
| AGIWUR25433                                     |             |          |                |           |           |                     |
| N2 CT IV                                        | 11640047    | 11641015 | WBGene00010234 | ttr-50    | F58B3.9   | -0.148111465061289  |
| AGIWUR38959                                     |             |          |                |           |           |                     |
| N2 CT IV                                        | 11645597    | 11648893 | WBGene00014088 | ZK809.8   | ZK809.8   | -0.120298206196251  |
| AGIWUR6247                                      |             |          |                |           |           |                     |
| N2 CT IV                                        | 11650715    | 11652033 | WBGene00006491 | ac1-3     | ZK809.2   | -0.209233510963236  |
| AGIWUR44861                                     |             |          |                |           |           |                     |
| N2 CT IV                                        | 11652403    | 11653461 | WBGene00014086 | ZK809.3   | ZK809.3   | 0.06821572912256    |
| AGIWUR10668;AGIWUR32126;AGIWUR34914;AGIWUR37719 |             |          |                |           |           |                     |
| N2 CT IV                                        | 11653422    | 11655470 | WBGene00001320 | ent-1     | ZK809.4   | 0.149559690203695   |
| AGIWUR14683                                     |             |          |                |           |           |                     |
| N2 CT IV                                        | 11656730    | 11659425 | WBGene00014087 | ZK809.5   | ZK809.5   | -0.0182630665371626 |
| AGIWUR4363                                      |             |          |                |           |           |                     |
| N2 CT IV                                        | 11659800    | 11665203 | WBGene00014076 | ZK792.1   | ZK792.1   | -0.232317260153486  |
| AGIWUR15773                                     |             |          |                |           |           |                     |
| N2 CT IV                                        | 11665310    | 11667989 | WBGene00194934 | ZK809.9   | ZK809.9   | -0.226680613520647  |
| AGIWUR32942                                     |             |          |                |           |           |                     |
| N2 CT IV                                        | 11668024    | 11671505 | WBGene00014080 | atg-4.2   | ZK792.8   | -0.120165679507473  |
| AGIWUR33183                                     |             |          |                |           |           |                     |
| N2 CT IV                                        | 11673816    | 11675635 | WBGene00002130 | inx-8     | ZK792.2   | -0.123218840635408  |
| AGIWUR42581                                     |             |          |                |           |           |                     |



|                                                                                    |    |    |          |          |                |          |         |                     |
|------------------------------------------------------------------------------------|----|----|----------|----------|----------------|----------|---------|---------------------|
| N2                                                                                 | CT | IV | 11676354 | 11678497 | WBGene00002131 | inx-9    | ZK792.3 | -0.0890206336589294 |
| AGIWUR16911                                                                        |    |    |          |          |                |          |         |                     |
| N2                                                                                 | CT | IV | 11678440 | 11682005 | WBGene00014077 | ZK792.4  | ZK792.4 | 0.0913541376290308  |
| AGIWUR14826                                                                        |    |    |          |          |                |          |         |                     |
| N2                                                                                 | CT | IV | 11684975 | 11688118 | WBGene00014078 | ZK792.5  | ZK792.5 | 0.0840185333436558  |
| AGIWUR21899                                                                        |    |    |          |          |                |          |         |                     |
| N2                                                                                 | CT | IV | 11688227 | 11691088 | WBGene00002335 | let-60   | ZK792.6 | 0.328157112115647   |
| AGIWUR34480                                                                        |    |    |          |          |                |          |         |                     |
| N2                                                                                 | CT | IV | 11694359 | 11696464 | WBGene00014079 | ZK792.7  | ZK792.7 | -0.322024632239732  |
| AGIWUR44766                                                                        |    |    |          |          |                |          |         |                     |
| N2                                                                                 | CT | IV | 11696443 | 11699895 | WBGene00001079 | dpy-20   | T22B3.1 | 0.0461541221705861  |
| AGIWUR28561                                                                        |    |    |          |          |                |          |         |                     |
| N2                                                                                 | CT | IV | 11703185 | 11704016 | WBGene00011911 | T22B3.3  | T22B3.3 | 0.174396681678605   |
| AGIWUR45199                                                                        |    |    |          |          |                |          |         |                     |
| N2                                                                                 | CT | IV | 11704246 | 11708264 | WBGene00011910 | alg-3    | T22B3.2 | 0.274494567708322   |
| AGIWUR42929                                                                        |    |    |          |          |                |          |         |                     |
| N2                                                                                 | CT | IV | 11715039 | 11729276 | WBGene00010444 | magi-1   | K01A6.2 | 0.198380151480041   |
| AGIWUR7822;AGIWUR13519;AGIWUR17756;AGIWUR24742;AGIWUR27030;AGIWUR34487;AGIWUR43990 |    |    |          |          |                |          |         |                     |
| N2                                                                                 | CT | IV | 11735325 | 11742305 | WBGene00010448 | K01A6.6  | K01A6.6 | 0.00313787276991029 |
| AGIWUR29459                                                                        |    |    |          |          |                |          |         |                     |
| N2                                                                                 | CT | IV | 11742706 | 11743789 | WBGene00010447 | K01A6.5  | K01A6.5 | 0.209351256103476   |
| AGIWUR16888                                                                        |    |    |          |          |                |          |         |                     |
| N2                                                                                 | CT | IV | 11745640 | 11748640 | WBGene00001577 | gem-4    | T12A7.1 | -0.286446560761046  |
| AGIWUR14415                                                                        |    |    |          |          |                |          |         |                     |
| N2                                                                                 | CT | IV | 11749154 | 11751074 | WBGene00011727 | T12A7.6  | T12A7.6 | -0.126668648804867  |
| AGIWUR14379                                                                        |    |    |          |          |                |          |         |                     |
| N2                                                                                 | CT | IV | 11751872 | 11752945 | WBGene00011728 | T12A7.7  | T12A7.7 | 0.186231755858515   |
| AGIWUR3767                                                                         |    |    |          |          |                |          |         |                     |
| N2                                                                                 | CT | IV | 11752987 | 11754387 | WBGene00011724 | sc1-18   | T12A7.3 | -0.156289913603064  |
| AGIWUR26905                                                                        |    |    |          |          |                |          |         |                     |
| N2                                                                                 | CT | IV | 11755274 | 11755970 | WBGene00185100 | T12A7.9  | T12A7.9 | 0.0883882594570586  |
| AGIWUR37943                                                                        |    |    |          |          |                |          |         |                     |
| N2                                                                                 | CT | IV | 11756381 | 11761064 | WBGene00011723 | T12A7.2  | T12A7.2 | -0.0927768983113886 |
| AGIWUR3478;AGIWUR5238;AGIWUR7874;AGIWUR16576;AGIWUR22434;AGIWUR34793;AGIWUR37106   |    |    |          |          |                |          |         |                     |
| N2                                                                                 | CT | IV | 11768639 | 11773742 | WBGene00011725 | lips-5   | T12A7.4 | 0.0761085287323899  |
| AGIWUR10418;AGIWUR26358;AGIWUR39694                                                |    |    |          |          |                |          |         |                     |
| N2                                                                                 | CT | IV | 11779216 | 11786969 | WBGene00011726 | lpr-2    | T12A7.5 | -0.0866657144072764 |
| AGIWUR8854;AGIWUR12875                                                             |    |    |          |          |                |          |         |                     |
| N2                                                                                 | CT | IV | 11783941 | 11792593 | WBGene00010350 | H01G02.3 |         | H01G02.3            |

|                                                                     |                                               |          |                |          |          |                     |  |
|---------------------------------------------------------------------|-----------------------------------------------|----------|----------------|----------|----------|---------------------|--|
| -0.00500946344499731                                                | AGIWUR13502;AGIWUR21251;AGIWUR40362           |          |                |          |          |                     |  |
| N2 CT IV                                                            | 11798667                                      | 11801088 | WBGene00010349 | dyf-18   | H01G02.2 |                     |  |
| -0.108315777176299                                                  | AGIWUR32927                                   |          |                |          |          |                     |  |
| N2 CT IV                                                            | 11801697                                      | 11803144 | WBGene00045108 | H01G02.4 |          | H01G02.4            |  |
| 0.082587321383123                                                   | AGIWUR9688;AGIWUR24665                        |          |                |          |          |                     |  |
| N2 CT IV                                                            | 11803273                                      | 11804152 | WBGene00010348 | H01G02.1 |          | H01G02.1            |  |
| 0.082674892542987                                                   | AGIWUR1707;AGIWUR8257;AGIWUR23953;AGIWUR25577 |          |                |          |          |                     |  |
| N2 CT IV                                                            | 11814247                                      | 11819612 | WBGene00010918 | M117.1   | M117.1   | 0.0311335108455175  |  |
| AGIWUR3124                                                          |                                               |          |                |          |          |                     |  |
| N2 CT IV                                                            | 11820505                                      | 11821917 | WBGene00003920 | par-5    | M117.2   | -0.0724726201794308 |  |
| AGIWUR5263;AGIWUR5896;AGIWUR26028;AGIWUR34257                       |                                               |          |                |          |          |                     |  |
| N2 CT IV                                                            | 11823516                                      | 11823938 | WBGene00010919 | M117.3   | M117.3   | 0.243020327278987   |  |
| AGIWUR43702                                                         |                                               |          |                |          |          |                     |  |
| N2 CT IV                                                            | 11828973                                      | 11830446 | WBGene00010921 | fbxb-4   | M117.5   | 0.119122329468993   |  |
| AGIWUR5287;AGIWUR17122;AGIWUR27546                                  |                                               |          |                |          |          |                     |  |
| N2 CT IV                                                            | 11830799                                      | 11833556 | WBGene00010920 | M117.4   | M117.4   | -0.0806840558015445 |  |
| AGIWUR6805                                                          |                                               |          |                |          |          |                     |  |
| N2 CT IV                                                            | 11834390                                      | 11836020 | WBGene00044768 | M117.7   | M117.7   | 0.188596371498883   |  |
| AGIWUR38728                                                         |                                               |          |                |          |          |                     |  |
| N2 CT IV                                                            | 11838980                                      | 11840423 | WBGene00009546 | fbxb-3   | F38H4.2  | 0.239019972175347   |  |
| AGIWUR38113                                                         |                                               |          |                |          |          |                     |  |
| N2 CT IV                                                            | 11842421                                      | 11846350 | WBGene00009547 | F38H4.3  | F38H4.3  | -0.123309464126297  |  |
| AGIWUR6905                                                          |                                               |          |                |          |          |                     |  |
| N2 CT IV                                                            | 11847009                                      | 11847871 | WBGene00009550 | F38H4.6  | F38H4.6  | 0.244969413107697   |  |
| AGIWUR21232                                                         |                                               |          |                |          |          |                     |  |
| N2 CT IV                                                            | 11848232                                      | 11850309 | WBGene00009548 | F38H4.4  | F38H4.4  | 0.215661618183551   |  |
| AGIWUR3661                                                          |                                               |          |                |          |          |                     |  |
| N2 CT IV                                                            | 11850950                                      | 11855159 | WBGene00006415 | tag-30   | F38H4.7  | -0.0503695677111509 |  |
| AGIWUR2752                                                          |                                               |          |                |          |          |                     |  |
| N2 CT IV                                                            | 11854828                                      | 11856376 | WBGene00001151 | ech-2    | F38H4.8  | 0.245153976840914   |  |
| AGIWUR23837                                                         |                                               |          |                |          |          |                     |  |
| N2 CT IV                                                            | 11856629                                      | 11860460 | WBGene00002363 | let-92   | F38H4.9  | 0.163973080821762   |  |
| AGIWUR5253;AGIWUR5272;AGIWUR5474;AGIWUR5480;AGIWUR11755;AGIWUR36054 |                                               |          |                |          |          |                     |  |
| N2 CT IV                                                            | 11860555                                      | 11862498 | WBGene00009551 | F38H4.10 |          | F38H4.10            |  |
| -0.250434947645113                                                  | AGIWUR7377                                    |          |                |          |          |                     |  |
| N2 CT IV                                                            | 11864532                                      | 11875738 | WBGene00007801 | trpa-1   | C29E6.2  | 0.0322717514792727  |  |
| AGIWUR16343;AGIWUR19719;AGIWUR26134;AGIWUR40717                     |                                               |          |                |          |          |                     |  |
| N2 CT IV                                                            | 11878549                                      | 11883407 | WBGene00007802 | cutl-27  | C29E6.4  | -0.107101524667208  |  |
| AGIWUR40702                                                         |                                               |          |                |          |          |                     |  |

|                                                            |    |    |                     |                                     |                |           |           |                     |
|------------------------------------------------------------|----|----|---------------------|-------------------------------------|----------------|-----------|-----------|---------------------|
| N2                                                         | CT | IV | 11885530            | 11891081                            | WBGene00002827 | let-653   | C29E6.1   | 0.0716504818495665  |
| AGIWUR20827                                                |    |    |                     |                                     |                |           |           |                     |
| N2                                                         | CT | IV | 11899683            | 11902910                            | WBGene00003633 | nhr-43    | C29E6.5   | -0.134150811615957  |
| AGIWUR3447                                                 |    |    |                     |                                     |                |           |           |                     |
| N2                                                         | CT | IV | 11912005            | 11913245                            | WBGene00012163 | VZK822L.2 | VZK822L.2 |                     |
|                                                            |    |    | -0.0623096114667767 | AGIWUR895                           |                |           |           |                     |
| N2                                                         | CT | IV | 11913691            | 11915796                            | WBGene00001398 | fat-6     | VZK822L.1 |                     |
|                                                            |    |    | -0.11430991089847   | AGIWUR11968;AGIWUR32999;AGIWUR39182 |                |           |           |                     |
| N2                                                         | CT | IV | 11922358            | 11923174                            | WBGene00014090 | ZK822.2   | ZK822.2   | -0.186695199452203  |
| AGIWUR13802                                                |    |    |                     |                                     |                |           |           |                     |
| N2                                                         | CT | IV | 11924685            | 11925397                            | WBGene00044009 | ZK822.6   | ZK822.6   | -0.112869303338428  |
| AGIWUR16060;AGIWUR25195;AGIWUR36482                        |    |    |                     |                                     |                |           |           |                     |
| N2                                                         | CT | IV | 11926023            | 11928415                            | WBGene00014091 | ZK822.4   | ZK822.4   | -0.10150298542321   |
| AGIWUR4838                                                 |    |    |                     |                                     |                |           |           |                     |
| N2                                                         | CT | IV | 11930872            | 11935718                            | WBGene00003736 | nhx-9     | ZK822.3   | -0.0175541507677366 |
| AGIWUR30705;AGIWUR32431;AGIWUR41714                        |    |    |                     |                                     |                |           |           |                     |
| N2                                                         | CT | IV | 11937384            | 11940604                            | WBGene00014092 | ZK822.5   | ZK822.5   | 0.00766900686570793 |
| AGIWUR14263;AGIWUR25076;AGIWUR28171                        |    |    |                     |                                     |                |           |           |                     |
| N2                                                         | CT | IV | 11940603            | 11942385                            | WBGene00014093 | ZK829.1   | ZK829.1   | -0.233402764559909  |
| AGIWUR980;AGIWUR26330;AGIWUR43730                          |    |    |                     |                                     |                |           |           |                     |
| N2                                                         | CT | IV | 11943314            | 11945721                            | WBGene00014094 | ZK829.3   | ZK829.3   | 0.103692440578849   |
| AGIWUR18368                                                |    |    |                     |                                     |                |           |           |                     |
| N2                                                         | CT | IV | 11946106            | 11949817                            | WBGene00001839 | hdl-1     | ZK829.2   | 0.21167617637969    |
| AGIWUR17660                                                |    |    |                     |                                     |                |           |           |                     |
| N2                                                         | CT | IV | 11950570            | 11952208                            | WBGene00006555 | tbx-36    | ZK829.5   | 0.0364872137495986  |
| AGIWUR30920                                                |    |    |                     |                                     |                |           |           |                     |
| N2                                                         | CT | IV | 11953249            | 11955541                            | WBGene00014095 | gdh-1     | ZK829.4   | 0.284623905380235   |
| AGIWUR3935;AGIWUR10461;AGIWUR14208;AGIWUR20797;AGIWUR40982 |    |    |                     |                                     |                |           |           |                     |
| N2                                                         | CT | IV | 11957547            | 11959804                            | WBGene00006566 | tgt-1     | ZK829.6   | -0.282875716342492  |
| AGIWUR1767                                                 |    |    |                     |                                     |                |           |           |                     |
| N2                                                         | CT | IV | 11959823            | 11961535                            | WBGene00014096 | ZK829.7   | ZK829.7   | -0.0331473959429971 |
| AGIWUR14518                                                |    |    |                     |                                     |                |           |           |                     |
| N2                                                         | CT | IV | 11963910            | 11965427                            | WBGene00005591 | srj-1     | ZK829.8   | -0.244521543762947  |
| AGIWUR2300                                                 |    |    |                     |                                     |                |           |           |                     |
| N2                                                         | CT | IV | 11965665            | 11968703                            | WBGene00004907 | snf-8     | ZK829.10  |                     |
|                                                            |    |    | 0.182860087914397   | AGIWUR38948                         |                |           |           |                     |
| N2                                                         | CT | IV | 11970534            | 11972789                            | WBGene00014097 | ZK829.9   | ZK829.9   | -0.166076487267278  |
| AGIWUR8490                                                 |    |    |                     |                                     |                |           |           |                     |
| N2                                                         | CT | IV | 11972697            | 12011007                            | WBGene00006759 | unc-22    | ZK617.1   | 0.0370416579531012  |

|                                                                        |    |    |          |          |                |         |          |                     |  |
|------------------------------------------------------------------------|----|----|----------|----------|----------------|---------|----------|---------------------|--|
| AGIWUR3562;AGIWUR13699;AGIWUR28418;AGIWUR39579                         |    |    |          |          |                |         |          |                     |  |
| N2                                                                     | CT | IV | 12013420 | 12014045 | WBGene00004971 | spe-17  | ZK617.3  | 0.131491479860129   |  |
| AGIWUR42758                                                            |    |    |          |          |                |         |          |                     |  |
| N2                                                                     | CT | IV | 12014189 | 12015686 | WBGene00014009 | lips-6  | ZK617.2  | -0.249457216792971  |  |
| AGIWUR5897                                                             |    |    |          |          |                |         |          |                     |  |
| N2                                                                     | CT | IV | 12026882 | 12029174 | WBGene00011742 | tnn-38  | T12G3.7  | 0.0531591737644801  |  |
| AGIWUR3714;AGIWUR14906;AGIWUR17093;AGIWUR20016;AGIWUR24430;AGIWUR44919 |    |    |          |          |                |         |          |                     |  |
| N2                                                                     | CT | IV | 12030047 | 12031271 | WBGene00011741 | T12G3.6 | T12G3.6  | -0.201361517329481  |  |
| AGIWUR28845                                                            |    |    |          |          |                |         |          |                     |  |
| N2                                                                     | CT | IV | 12031314 | 12032154 | WBGene00011740 | mrpl-51 | T12G3.5  | -0.219371310908191  |  |
| AGIWUR4307;AGIWUR6927;AGIWUR43099                                      |    |    |          |          |                |         |          |                     |  |
| N2                                                                     | CT | IV | 12034252 | 12037051 | WBGene00011737 | sqst-1  | T12G3.1  | 0.209166044369818   |  |
| AGIWUR1200                                                             |    |    |          |          |                |         |          |                     |  |
| N2                                                                     | CT | IV | 12038985 | 12046967 | WBGene00011738 | T12G3.2 | T12G3.2  | 0.261369862688944   |  |
| AGIWUR16765;AGIWUR33601;AGIWUR44249                                    |    |    |          |          |                |         |          |                     |  |
| N2                                                                     | CT | IV | 12048256 | 12049943 | WBGene00011739 | T12G3.4 | T12G3.4  | -0.108845017983846  |  |
| AGIWUR36660                                                            |    |    |          |          |                |         |          |                     |  |
| N2                                                                     | CT | IV | 12049862 | 12051226 | WBGene00000270 | bre-5   | T12G3.8  | -0.374160365440291  |  |
| AGIWUR24329                                                            |    |    |          |          |                |         |          |                     |  |
| N2                                                                     | CT | IV | 12051484 | 12055785 | WBGene00005015 | spt-5   | K08E4.1  | -0.150535717157855  |  |
| AGIWUR6774                                                             |    |    |          |          |                |         |          |                     |  |
| N2                                                                     | CT | IV | 12055670 | 12056656 | WBGene00010666 | K08E4.2 | K08E4.2  | -0.0364525635768889 |  |
| AGIWUR24105                                                            |    |    |          |          |                |         |          |                     |  |
| N2                                                                     | CT | IV | 12057626 | 12059951 | WBGene00010667 | K08E4.3 | K08E4.3  | -0.121037800263675  |  |
| AGIWUR26770                                                            |    |    |          |          |                |         |          |                     |  |
| N2                                                                     | CT | IV | 12060397 | 12061329 | WBGene00045283 | K08E4.8 | K08E4.8  | 0.196267450097982   |  |
| AGIWUR35311;AGIWUR41068                                                |    |    |          |          |                |         |          |                     |  |
| N2                                                                     | CT | IV | 12066572 | 12066884 | WBGene00010668 | K08E4.4 | K08E4.4  | -0.206818728777687  |  |
| AGIWUR16321                                                            |    |    |          |          |                |         |          |                     |  |
| N2                                                                     | CT | IV | 12068890 | 12074914 | WBGene00010669 | bath-37 | K08E4.5  | -0.257376946592554  |  |
| AGIWUR5644;AGIWUR10958                                                 |    |    |          |          |                |         |          |                     |  |
| N2                                                                     | CT | IV | 12075744 | 12076950 | WBGene00045036 | K08E4.7 | K08E4.7  | 0.00156956705497002 |  |
| AGIWUR10309                                                            |    |    |          |          |                |         |          |                     |  |
| N2                                                                     | CT | IV | 12077107 | 12078162 | WBGene00010670 | K08E4.6 | K08E4.6  | 0.0602332021073924  |  |
| AGIWUR20378                                                            |    |    |          |          |                |         |          |                     |  |
| N2                                                                     | CT | IV | 12079463 | 12084362 | WBGene00008682 | lex-1   | F11A10.1 |                     |  |
| 0.0475292236693168                                                     |    |    |          |          |                |         |          |                     |  |
| AGIWUR18425;AGIWUR36995                                                |    |    |          |          |                |         |          |                     |  |
| N2                                                                     | CT | IV | 12084478 | 12085320 | WBGene00008683 | repo-1  | F11A10.2 |                     |  |
| -0.0698519980106642                                                    |    |    |          |          |                |         |          |                     |  |
| AGIWUR23785                                                            |    |    |          |          |                |         |          |                     |  |

|                                     |    |    |                                     |          |                |          |                             |
|-------------------------------------|----|----|-------------------------------------|----------|----------------|----------|-----------------------------|
| N2                                  | CT | IV | 12085423                            | 12087060 | WBGene00008688 | F11A10.7 | F11A10.7                    |
| 0.0789462417609172                  |    |    | AGIWUR34296                         |          |                |          |                             |
| N2                                  | CT | IV | 12087017                            | 12089095 | WBGene00008687 | F11A10.6 | F11A10.6                    |
| -0.0998381742665444                 |    |    | AGIWUR28237                         |          |                |          |                             |
| N2                                  | CT | IV | 12089247                            | 12092213 | WBGene00008684 | mig-32   | F11A10.3                    |
| -0.0452432107881364                 |    |    | AGIWUR38996                         |          |                |          |                             |
| N2                                  | CT | IV | 12092322                            | 12093472 | WBGene00044329 | cpsf-4   | F11A10.8                    |
| 0.0572032147666306                  |    |    | AGIWUR15808;AGIWUR22988             |          |                |          |                             |
| N2                                  | CT | IV | 12094372                            | 12096692 | WBGene00008686 | F11A10.5 | F11A10.5                    |
| -0.057916098351285                  |    |    | AGIWUR17214                         |          |                |          |                             |
| N2                                  | CT | IV | 12096779                            | 12105762 | WBGene00008685 | mon-2    | F11A10.4                    |
| 0.0974303088007122                  |    |    | AGIWUR9219;AGIWUR38240;AGIWUR38547  |          |                |          |                             |
| N2                                  | CT | IV | 12105858                            | 12108388 | WBGene00010889 | M18.3    | M18.3 -0.217310407242703    |
| AGIWUR41362                         |    |    |                                     |          |                |          |                             |
| N2                                  | CT | IV | 12108672                            | 12110275 | WBGene00000703 | col-129  | M18.1 0.20474649892676      |
| AGIWUR8374                          |    |    |                                     |          |                |          |                             |
| N2                                  | CT | IV | 12110586                            | 12111577 | WBGene00010888 | dlc-2    | M18.2 -0.0540751742165817   |
| AGIWUR14688;AGIWUR15276;AGIWUR15586 |    |    |                                     |          |                |          |                             |
| N2                                  | CT | IV | 12114810                            | 12121183 | WBGene00010890 | ddb-1    | M18.5 -0.0724820779158684   |
| AGIWUR10292                         |    |    |                                     |          |                |          |                             |
| N2                                  | CT | IV | 12121266                            | 12122881 | WBGene00010891 | M18.6    | M18.6 -0.0306166311515081   |
| AGIWUR34671;AGIWUR40569;AGIWUR42513 |    |    |                                     |          |                |          |                             |
| N2                                  | CT | IV | 12123155                            | 12124807 | WBGene00000122 | aly-3    | M18.7 0.195110951735591     |
| AGIWUR20179;AGIWUR27251             |    |    |                                     |          |                |          |                             |
| N2                                  | CT | IV | 12124952                            | 12126785 | WBGene00010892 | dhhc-6   | M18.8 0.116107514663931     |
| AGIWUR26917                         |    |    |                                     |          |                |          |                             |
| N2                                  | CT | IV | 12129504                            | 12135096 | WBGene00003010 | lin-24   | B0001.1                     |
| -0.00580017686637468                |    |    | AGIWUR998                           |          |                |          |                             |
| N2                                  | CT | IV | 12135074                            | 12138193 | WBGene00007089 | B0001.4  | B0001.4                     |
| -0.00210520258249858                |    |    | AGIWUR34195                         |          |                |          |                             |
| N2                                  | CT | IV | 12138847                            | 12141057 | WBGene00007093 | B0001.8  | B0001.8 -0.16543121757195   |
| AGIWUR38687                         |    |    |                                     |          |                |          |                             |
| N2                                  | CT | IV | 12141161                            | 12143331 | WBGene00007090 | B0001.5  | B0001.5 0.133879896509193   |
| AGIWUR38103                         |    |    |                                     |          |                |          |                             |
| N2                                  | CT | IV | 12143431                            | 12145731 | WBGene00007088 | B0001.3  | B0001.3                     |
| -0.00964367711265268                |    |    | AGIWUR14977;AGIWUR37338;AGIWUR44425 |          |                |          |                             |
| N2                                  | CT | IV | 12146486                            | 12150975 | WBGene00007087 | B0001.2  | B0001.2 -0.0983294323457358 |
| AGIWUR25713                         |    |    |                                     |          |                |          |                             |
| N2                                  | CT | IV | 12151170                            | 12154245 | WBGene00007092 | B0001.7  | B0001.7 -0.0605884267411447 |

|                                                                               |    |    |          |          |                |            |           |                     |  |
|-------------------------------------------------------------------------------|----|----|----------|----------|----------------|------------|-----------|---------------------|--|
| AGIWUR41334                                                                   |    |    |          |          |                |            |           |                     |  |
| N2                                                                            | CT | IV | 12156838 | 12164266 | WBGene00007091 | eri-12     | B0001.6   | -0.0218741255937438 |  |
| AGIWUR36393                                                                   |    |    |          |          |                |            |           |                     |  |
| N2                                                                            | CT | IV | 12168244 | 12169216 | WBGene00008967 | F20B10.3   |           | F20B10.3            |  |
| 0.0593701598499505 AGIWUR43417                                                |    |    |          |          |                |            |           |                     |  |
| N2                                                                            | CT | IV | 12170824 | 12178335 | WBGene00003772 | nlr-1      | F20B10.1  |                     |  |
| -0.214467504418948 AGIWUR2056                                                 |    |    |          |          |                |            |           |                     |  |
| N2                                                                            | CT | IV | 12200978 | 12207956 | WBGene00009435 | F35G2.1    | F35G2.1   | 0.35853946256929    |  |
| AGIWUR2732;AGIWUR28383;AGIWUR39547                                            |    |    |          |          |                |            |           |                     |  |
| N2                                                                            | CT | IV | 12208192 | 12209010 | WBGene00009436 | marb-1     | F35G2.2   | 0.0209799714988339  |  |
| AGIWUR18307;AGIWUR25328;AGIWUR26517;AGIWUR34553;AGIWUR42977                   |    |    |          |          |                |            |           |                     |  |
| N2                                                                            | CT | IV | 12209708 | 12210737 | WBGene00009437 | F35G2.3    | F35G2.3   | -0.211084297336393  |  |
| AGIWUR26562                                                                   |    |    |          |          |                |            |           |                     |  |
| N2                                                                            | CT | IV | 12211098 | 12215987 | WBGene00004025 | phy-2      | F35G2.4   | -0.218371347205917  |  |
| AGIWUR7106                                                                    |    |    |          |          |                |            |           |                     |  |
| N2                                                                            | CT | IV | 12219609 | 12222889 | WBGene00009438 | F35G2.5    | F35G2.5   | 0.0637568729859046  |  |
| AGIWUR10427;AGIWUR24979;AGIWUR25805                                           |    |    |          |          |                |            |           |                     |  |
| N2                                                                            | CT | IV | 12222872 | 12227112 | WBGene00012704 | mlt-3      | Y39C12A.1 |                     |  |
| -0.268082524989003 AGIWUR25518                                                |    |    |          |          |                |            |           |                     |  |
| N2                                                                            | CT | IV | 12227910 | 12229779 | WBGene00012705 | sre-18     | Y39C12A.3 |                     |  |
| -0.253709510263756 AGIWUR22014                                                |    |    |          |          |                |            |           |                     |  |
| N2                                                                            | CT | IV | 12231310 | 12231631 | WBGene00045314 | Y39C12A.10 |           | Y39C12A.10          |  |
| 0.0107604733801736 AGIWUR4014;AGIWUR15890;AGIWUR23137;AGIWUR25704;AGIWUR38992 |    |    |          |          |                |            |           |                     |  |
| N2                                                                            | CT | IV | 12232489 | 12233408 | WBGene00012706 | sre-17     | Y39C12A.4 |                     |  |
| 0.0198809243412983 AGIWUR6305;AGIWUR6896                                      |    |    |          |          |                |            |           |                     |  |
| N2                                                                            | CT | IV | 12234139 | 12236111 | WBGene00012707 | sre-16     | Y39C12A.5 |                     |  |
| -0.11114326191694 AGIWUR7617;AGIWUR22914;AGIWUR39281                          |    |    |          |          |                |            |           |                     |  |
| N2                                                                            | CT | IV | 12237175 | 12238951 | WBGene00012708 | sre-19     | Y39C12A.6 |                     |  |
| -0.168235172631021 AGIWUR11239                                                |    |    |          |          |                |            |           |                     |  |
| N2                                                                            | CT | IV | 12241363 | 12244806 | WBGene00012709 | sre-15     | Y39C12A.7 |                     |  |
| 0.310221973492433 AGIWUR8094                                                  |    |    |          |          |                |            |           |                     |  |
| N2                                                                            | CT | IV | 12251111 | 12252663 | WBGene00001044 | dnj-26     | Y39C12A.8 |                     |  |
| -0.369741915692396 AGIWUR15323                                                |    |    |          |          |                |            |           |                     |  |
| N2                                                                            | CT | IV | 12257637 | 12259192 | WBGene00012710 | Y39C12A.9  |           | Y39C12A.9           |  |
| -0.222888041041482 AGIWUR9675                                                 |    |    |          |          |                |            |           |                     |  |
| N2                                                                            | CT | IV | 12259797 | 12261449 | WBGene00016579 | sre-14     | C42C1.1   | -0.0606361815392367 |  |
| AGIWUR9188                                                                    |    |    |          |          |                |            |           |                     |  |
| N2                                                                            | CT | IV | 12265526 | 12268306 | WBGene00016580 | C42C1.2    | C42C1.2   | 0.442394761190691   |  |
| AGIWUR27865                                                                   |    |    |          |          |                |            |           |                     |  |

|                                                                                   |    |    |                                                                                    |          |                |          |                             |
|-----------------------------------------------------------------------------------|----|----|------------------------------------------------------------------------------------|----------|----------------|----------|-----------------------------|
| N2                                                                                | CT | IV | 12268995                                                                           | 12269533 | WBGene00004448 | rp1-34   | C42C1.14                    |
| -0.0827345350027713                                                               |    |    | AGIWUR8628                                                                         |          |                |          |                             |
| N2                                                                                | CT | IV | 12269594                                                                           | 12270492 | WBGene00016581 | C42C1.3  | C42C1.3 0.00764819958780016 |
| AGIWUR17440                                                                       |    |    |                                                                                    |          |                |          |                             |
| N2                                                                                | CT | IV | 12270490                                                                           | 12275992 | WBGene00016582 | C42C1.4  | C42C1.4 0.0733893134711625  |
| AGIWUR1169                                                                        |    |    |                                                                                    |          |                |          |                             |
| N2                                                                                | CT | IV | 12276083                                                                           | 12278059 | WBGene00016583 | tag-335  | C42C1.5 -0.0572986294346745 |
| AGIWUR1600                                                                        |    |    |                                                                                    |          |                |          |                             |
| N2                                                                                | CT | IV | 12278729                                                                           | 12279546 | WBGene00016591 | C42C1.13 | C42C1.13                    |
| -0.165908702187771                                                                |    |    | AGIWUR38119                                                                        |          |                |          |                             |
| N2                                                                                | CT | IV | 12279659                                                                           | 12281917 | WBGene00016589 | C42C1.11 | C42C1.11                    |
| 0.052247477308478                                                                 |    |    | AGIWUR9093;AGIWUR25940;AGIWUR37458;AGIWUR41625                                     |          |                |          |                             |
| N2                                                                                | CT | IV | 12282739                                                                           | 12287820 | WBGene00016588 | hpo-12   | C42C1.10                    |
| -0.0882213016949756                                                               |    |    | AGIWUR12191;AGIWUR14023;AGIWUR25224;AGIWUR43531                                    |          |                |          |                             |
| N2                                                                                | CT | IV | 12287928                                                                           | 12289392 | WBGene00016592 | er1-1    | C42C1.15                    |
| -0.201294822010968                                                                |    |    | AGIWUR8866                                                                         |          |                |          |                             |
| N2                                                                                | CT | IV | 12289449                                                                           | 12290994 | WBGene00016587 | C42C1.9  | C42C1.9 0.0377830373125789  |
| AGIWUR18105                                                                       |    |    |                                                                                    |          |                |          |                             |
| N2                                                                                | CT | IV | 12291046                                                                           | 12293317 | WBGene00016586 | C42C1.8  | C42C1.8 0.0156378152988452  |
| AGIWUR41507                                                                       |    |    |                                                                                    |          |                |          |                             |
| N2                                                                                | CT | IV | 12293234                                                                           | 12301280 | WBGene00016585 | oac-59   | C42C1.7 -0.0470265683457143 |
| AGIWUR32855;AGIWUR37511                                                           |    |    |                                                                                    |          |                |          |                             |
| N2                                                                                | CT | IV | 12304462                                                                           | 12307820 | WBGene00019579 | oac-57   | K09E10.1                    |
| -0.265882830618017                                                                |    |    | AGIWUR4366                                                                         |          |                |          |                             |
| N2                                                                                | CT | IV | 12308293                                                                           | 12311606 | WBGene00019580 | oac-58   | K09E10.2                    |
| -0.070674157217737                                                                |    |    | AGIWUR12521;AGIWUR19198                                                            |          |                |          |                             |
| N2                                                                                | CT | IV | 12327190                                                                           | 12328718 | WBGene00008949 | F19B6.3  | F19B6.3 0.163404056092536   |
| AGIWUR9173                                                                        |    |    |                                                                                    |          |                |          |                             |
| N2                                                                                | CT | IV | 12329407                                                                           | 12331054 | WBGene00006733 | ufd-1    | F19B6.2 -0.0283012950181369 |
| AGIWUR14233;AGIWUR22664                                                           |    |    |                                                                                    |          |                |          |                             |
| N2                                                                                | CT | IV | 12330984                                                                           | 12336041 | WBGene00008948 | F19B6.1  | F19B6.1 0.00535836562062819 |
| AGIWUR7069;AGIWUR8219;AGIWUR16393;AGIWUR19254;AGIWUR20477;AGIWUR24504;AGIWUR37312 |    |    |                                                                                    |          |                |          |                             |
| N2                                                                                | CT | IV | 12337577                                                                           | 12340436 | WBGene00008950 | wht-5    | F19B6.4 0.138262854537469   |
| AGIWUR16742                                                                       |    |    |                                                                                    |          |                |          |                             |
| N2                                                                                | CT | IV | 12349946                                                                           | 12355724 | WBGene00013921 | best-22  | ZC518.1                     |
| -0.00449049945352975                                                              |    |    | AGIWUR7513;AGIWUR23782;AGIWUR28936;AGIWUR30454;AGIWUR37902;AGIWUR39697;AGIWUR40257 |          |                |          |                             |
| N2                                                                                | CT | IV | 12355604                                                                           | 12360792 | WBGene00004756 | sec-24.2 | ZC518.2                     |
| 0.0150473999673633                                                                |    |    | AGIWUR2099;AGIWUR8661                                                              |          |                |          |                             |
| N2                                                                                | CT | IV | 12361542                                                                           | 12371852 | WBGene00000376 | ccr-4    | ZC518.3 0.112562220172613   |

|                                                                                          |    |    |          |          |                |           |          |                     |  |
|------------------------------------------------------------------------------------------|----|----|----------|----------|----------------|-----------|----------|---------------------|--|
| AGIWUR10657;AGIWUR14172;AGIWUR15335;AGIWUR16124;AGIWUR26381;AGIWUR34290;AGIWUR39356      |    |    |          |          |                |           |          |                     |  |
| N2                                                                                       | CT | IV | 12372253 | 12374908 | WBGene00009211 | wdr-46    | F28D1.1  | 0.00684213253149935 |  |
| AGIWUR3214;AGIWUR10643;AGIWUR30836;AGIWUR37610;AGIWUR39901                               |    |    |          |          |                |           |          |                     |  |
| N2                                                                                       | CT | IV | 12374709 | 12376121 | WBGene00009212 | F28D1.2   | F28D1.2  |                     |  |
| -0.00416079451254303 AGIWUR1712;AGIWUR9248;AGIWUR12535;AGIWUR43721                       |    |    |          |          |                |           |          |                     |  |
| N2                                                                                       | CT | IV | 12376869 | 12378050 | WBGene00044285 | thn-8     | F28D1.12 |                     |  |
| 0.0316807592591393 AGIWUR7166;AGIWUR25211                                                |    |    |          |          |                |           |          |                     |  |
| N2                                                                                       | CT | IV | 12380104 | 12380857 | WBGene00009213 | thn-1     | F28D1.3  | -0.178511489279831  |  |
| AGIWUR40381                                                                              |    |    |          |          |                |           |          |                     |  |
| N2                                                                                       | CT | IV | 12381592 | 12382339 | WBGene00009214 | thn-3     | F28D1.4  | -0.388839296973846  |  |
| AGIWUR32234                                                                              |    |    |          |          |                |           |          |                     |  |
| N2                                                                                       | CT | IV | 12383170 | 12384019 | WBGene00009215 | thn-2     | F28D1.5  | -0.237641483319024  |  |
| AGIWUR9895                                                                               |    |    |          |          |                |           |          |                     |  |
| N2                                                                                       | CT | IV | 12384507 | 12385161 | WBGene00009216 | F28D1.6   | F28D1.6  | -0.182353819308974  |  |
| AGIWUR43733                                                                              |    |    |          |          |                |           |          |                     |  |
| N2                                                                                       | CT | IV | 12387720 | 12390095 | WBGene00009217 | spe-45    | F28D1.8  | 0.0114387613995435  |  |
| AGIWUR28423                                                                              |    |    |          |          |                |           |          |                     |  |
| N2                                                                                       | CT | IV | 12390264 | 12391396 | WBGene00004492 | rps-23    | F28D1.7  | -0.0901732955453642 |  |
| AGIWUR15756;AGIWUR39218                                                                  |    |    |          |          |                |           |          |                     |  |
| N2                                                                                       | CT | IV | 12391591 | 12392120 | WBGene00009219 | dpm-3     | F28D1.11 |                     |  |
| 0.0238067130188702 AGIWUR3122;AGIWUR6771;AGIWUR17201;AGIWUR23209;AGIWUR32254;AGIWUR34150 |    |    |          |          |                |           |          |                     |  |
| N2                                                                                       | CT | IV | 12392121 | 12398706 | WBGene00009218 | acs-20    | F28D1.9  | 0.202930164216998   |  |
| AGIWUR6360;AGIWUR11480;AGIWUR27506;AGIWUR34666;AGIWUR37887;AGIWUR43532                   |    |    |          |          |                |           |          |                     |  |
| N2                                                                                       | CT | IV | 12404374 | 12408697 | WBGene00001580 | gex-3     | F28D1.10 |                     |  |
| 0.061295273760436 AGIWUR23995;AGIWUR30797;AGIWUR40839                                    |    |    |          |          |                |           |          |                     |  |
| N2                                                                                       | CT | IV | 12408895 | 12410468 | WBGene00008580 | dsb-1     | F08G5.1  | 0.00656878169397146 |  |
| AGIWUR7802                                                                               |    |    |          |          |                |           |          |                     |  |
| N2                                                                                       | CT | IV | 12410467 | 12412219 | WBGene00008581 | ac1-13    | F08G5.2  |                     |  |
| -0.000422547584287614 AGIWUR15747                                                        |    |    |          |          |                |           |          |                     |  |
| N2                                                                                       | CT | IV | 12412923 | 12417582 | WBGene00008582 | F08G5.3   | F08G5.3  | -0.135211740952202  |  |
| AGIWUR1489;AGIWUR11150;AGIWUR22785;AGIWUR39630                                           |    |    |          |          |                |           |          |                     |  |
| N2                                                                                       | CT | IV | 12425217 | 12432533 | WBGene00008583 | ugt-65    | F08G5.5  | -0.0229035918058491 |  |
| AGIWUR12087;AGIWUR17157;AGIWUR24039;AGIWUR37416                                          |    |    |          |          |                |           |          |                     |  |
| N2                                                                                       | CT | IV | 12432640 | 12435001 | WBGene00023502 | cllec-184 | F08G5.7  |                     |  |
| -0.0731087648424822 AGIWUR18437                                                          |    |    |          |          |                |           |          |                     |  |
| N2                                                                                       | CT | IV | 12435802 | 12438274 | WBGene00008584 | irg-4     | F08G5.6  | 0.247107448441621   |  |
| AGIWUR38591                                                                              |    |    |          |          |                |           |          |                     |  |
| N2                                                                                       | CT | IV | 12442068 | 12443035 | WBGene00255469 | C25G4.17  | C25G4.17 |                     |  |
| 0.242421932628827 AGIWUR25856                                                            |    |    |          |          |                |           |          |                     |  |



|                                    |    |    |          |          |                |           |           |                     |
|------------------------------------|----|----|----------|----------|----------------|-----------|-----------|---------------------|
| N2                                 | CT | IV | 12443236 | 12444046 | WBGene00007730 | C25G4.2   | C25G4.2   | -0.0194521006927566 |
| AGIWUR13600                        |    |    |          |          |                |           |           |                     |
| N2                                 | CT | IV | 12444450 | 12445884 | WBGene00007731 | C25G4.3   | C25G4.3   | -0.288129594370524  |
| AGIWUR12772                        |    |    |          |          |                |           |           |                     |
| N2                                 | CT | IV | 12445801 | 12451299 | WBGene00001085 | dpy-26    | C25G4.5   | 0.0614486332394808  |
| AGIWUR4086;AGIWUR33667;AGIWUR34816 |    |    |          |          |                |           |           |                     |
| N2                                 | CT | IV | 12452066 | 12454215 | WBGene00007732 | spe-44    | C25G4.4   | -0.113263058824337  |
| AGIWUR9240                         |    |    |          |          |                |           |           |                     |
| N2                                 | CT | IV | 12455097 | 12456175 | WBGene00007733 | smz-1     | C25G4.6   | 0.54179990866275    |
| AGIWUR21117                        |    |    |          |          |                |           |           |                     |
| N2                                 | CT | IV | 12456913 | 12458561 | WBGene00007734 | C25G4.7   | C25G4.7   | 0.117085674256736   |
| AGIWUR28094                        |    |    |          |          |                |           |           |                     |
| N2                                 | CT | IV | 12459819 | 12463412 | WBGene00007735 | C25G4.8   | C25G4.8   | 0.102597222952473   |
| AGIWUR12518;AGIWUR34070            |    |    |          |          |                |           |           |                     |
| N2                                 | CT | IV | 12468658 | 12474889 | WBGene00007736 | igdb-2    | C25G4.10  |                     |
| -0.102746881959291 AGIWUR26780     |    |    |          |          |                |           |           |                     |
| N2                                 | CT | IV | 12487579 | 12489721 | WBGene00005689 | sru-26    | T04A11.12 |                     |
| -0.0118484389209916 AGIWUR37757    |    |    |          |          |                |           |           |                     |
| N2                                 | CT | IV | 12490791 | 12495298 | WBGene00001865 | him-6     | T04A11.6  |                     |
| 0.0371074826721713 AGIWUR44976     |    |    |          |          |                |           |           |                     |
| N2                                 | CT | IV | 12496065 | 12497844 | WBGene00005683 | sru-20    | T04A11.7  |                     |
| -0.240851218412708 AGIWUR43611     |    |    |          |          |                |           |           |                     |
| N2                                 | CT | IV | 12498538 | 12500413 | WBGene00005682 | sru-19    | T04A11.8  |                     |
| 0.13959432387338 AGIWUR38884       |    |    |          |          |                |           |           |                     |
| N2                                 | CT | IV | 12502256 | 12504055 | WBGene00005681 | sru-18    | T04A11.9  |                     |
| 0.00311418256842266 AGIWUR22213    |    |    |          |          |                |           |           |                     |
| N2                                 | CT | IV | 12507409 | 12507566 | WBGene00045131 | T04A11.14 | T04A11.14 |                     |
| 0.507622964994432 AGIWUR14695      |    |    |          |          |                |           |           |                     |
| N2                                 | CT | IV | 12517110 | 12518128 | WBGene00009954 | F53B2.1   | F53B2.1   | -0.261505798683551  |
| AGIWUR10830                        |    |    |          |          |                |           |           |                     |
| N2                                 | CT | IV | 12521239 | 12522621 | WBGene00005676 | sru-13    | F53B2.4   | -0.194075045579603  |
| AGIWUR38780                        |    |    |          |          |                |           |           |                     |
| N2                                 | CT | IV | 12524478 | 12525509 | WBGene00009955 | eak-4     | F53B2.3   | -0.128600421458005  |
| AGIWUR40563                        |    |    |          |          |                |           |           |                     |
| N2                                 | CT | IV | 12526260 | 12527339 | WBGene00009957 | F53B2.8   | F53B2.8   | 0.784027738414064   |
| AGIWUR11000                        |    |    |          |          |                |           |           |                     |
| N2                                 | CT | IV | 12528529 | 12531166 | WBGene00009956 | F53B2.5   | F53B2.5   | 0.200146548999625   |
| AGIWUR2861;AGIWUR19916;AGIWUR28988 |    |    |          |          |                |           |           |                     |
| N2                                 | CT | IV | 12542034 | 12545729 | WBGene00001820 | ham-1     | F53B2.6   |                     |

-0.00800506116918243

AGIWUR1006;AGIWUR4237;AGIWUR6168;AGIWUR14548;AGIWUR16905;AGIWUR17346;AGIWUR23386;AGIWUR25307;AGIWUR33707;AGIWUR34203;AGIWUR41967

|                                                                                                                     |    |    |          |          |                |          |          |                     |
|---------------------------------------------------------------------------------------------------------------------|----|----|----------|----------|----------------|----------|----------|---------------------|
| N2                                                                                                                  | CT | IV | 12548129 | 12554681 | WBGene00014081 | ZK795.1  | ZK795.1  | -0.069556235751886  |
| AGIWUR38827                                                                                                         |    |    |          |          |                |          |          |                     |
| N2                                                                                                                  | CT | IV | 12557072 | 12558975 | WBGene00014082 | ZK795.2  | ZK795.2  | 0.070631699903358   |
| AGIWUR8412;AGIWUR17586;AGIWUR33634                                                                                  |    |    |          |          |                |          |          |                     |
| N2                                                                                                                  | CT | IV | 12559365 | 12560719 | WBGene00014083 | ZK795.3  | ZK795.3  | -0.0352482109492858 |
| AGIWUR11867                                                                                                         |    |    |          |          |                |          |          |                     |
| N2                                                                                                                  | CT | IV | 12560749 | 12561201 | WBGene00014084 | snb-7    | ZK795.4  | 0.0391195733499545  |
| AGIWUR15016;AGIWUR39153                                                                                             |    |    |          |          |                |          |          |                     |
| N2                                                                                                                  | CT | IV | 12563775 | 12566111 | WBGene00010671 | eak-7    | K08E7.1  | 0.00222778487814068 |
| AGIWUR8409                                                                                                          |    |    |          |          |                |          |          |                     |
| N2                                                                                                                  | CT | IV | 12565983 | 12567226 | WBGene00002002 | hsb-1    | K08E7.2  | -0.214781537639183  |
| AGIWUR9703                                                                                                          |    |    |          |          |                |          |          |                     |
| N2                                                                                                                  | CT | IV | 12567842 | 12570622 | WBGene00002368 | let-99   | K08E7.3  | -0.0255772970225987 |
| AGIWUR12809                                                                                                         |    |    |          |          |                |          |          |                     |
| N2                                                                                                                  | CT | IV | 12573370 | 12578870 | WBGene00010673 | K08E7.5  | K08E7.5  | -0.120872928134238  |
| AGIWUR8564;AGIWUR19836;AGIWUR31015;AGIWUR31638;AGIWUR38386;AGIWUR39800;AGIWUR40401                                  |    |    |          |          |                |          |          |                     |
| N2                                                                                                                  | CT | IV | 12579055 | 12581128 | WBGene00010674 | K08E7.6  | K08E7.6  | -0.433391435063337  |
| AGIWUR39385                                                                                                         |    |    |          |          |                |          |          |                     |
| N2                                                                                                                  | CT | IV | 12585192 | 12586216 | WBGene00010675 | K08E7.8  | K08E7.8  | -0.186282859217972  |
| AGIWUR21419                                                                                                         |    |    |          |          |                |          |          |                     |
| N2                                                                                                                  | CT | IV | 12586511 | 12590428 | WBGene00000841 | cul-6    | K08E7.7  | 0.755853357016825   |
| AGIWUR28440                                                                                                         |    |    |          |          |                |          |          |                     |
| N2                                                                                                                  | CT | IV | 12591697 | 12599169 | WBGene00003995 | pgp-1    | K08E7.9  | 0.536092324781166   |
| AGIWUR12495                                                                                                         |    |    |          |          |                |          |          |                     |
| N2                                                                                                                  | CT | IV | 12601126 | 12605425 | WBGene00013224 | Y55D9A.2 |          | Y55D9A.2            |
| -0.00764938974897778 AGIWUR8804;AGIWUR26146                                                                         |    |    |          |          |                |          |          |                     |
| N2                                                                                                                  | CT | IV | 12605700 | 12614723 | WBGene00013223 | efa-6    | Y55D9A.1 |                     |
| 0.0733112330344285                                                                                                  |    |    |          |          |                |          |          |                     |
| AGIWUR231;AGIWUR5658;AGIWUR8719;AGIWUR14800;AGIWUR29089;AGIWUR32656;AGIWUR33205;AGIWUR34962;AGIWUR36389;AGIWUR45118 |    |    |          |          |                |          |          |                     |
| N2                                                                                                                  | CT | IV | 12622093 | 12631022 | WBGene00000186 | ark-1    | C01C7.1  | -0.219201096001944  |
| AGIWUR6011                                                                                                          |    |    |          |          |                |          |          |                     |
| N2                                                                                                                  | CT | IV | 12640447 | 12650652 | WBGene00006916 | vha-7    | C26H9A.1 |                     |
| 0.350615873777878 AGIWUR10849;AGIWUR20516;AGIWUR33193;AGIWUR40517;AGIWUR43760                                       |    |    |          |          |                |          |          |                     |
| N2                                                                                                                  | CT | IV | 12653403 | 12674773 | WBGene00007752 | wdfy-3   | C26H9A.2 |                     |
| -0.0592940664046262 AGIWUR6728;AGIWUR14116;AGIWUR23638;AGIWUR41522;AGIWUR41680                                      |    |    |          |          |                |          |          |                     |

|                                                                                                            |    |    |          |          |                |         |         |                     |
|------------------------------------------------------------------------------------------------------------|----|----|----------|----------|----------------|---------|---------|---------------------|
| N2                                                                                                         | CT | IV | 12675207 | 12676000 | WBGene00011941 | T23B5.4 | T23B5.4 | -0.156281170035733  |
| AGIWUR7224                                                                                                 |    |    |          |          |                |         |         |                     |
| N2                                                                                                         | CT | IV | 12677398 | 12684378 | WBGene00011939 | prmt-9  | T23B5.1 | 0.0126911573043742  |
| AGIWUR15729;AGIWUR21183;AGIWUR36147                                                                        |    |    |          |          |                |         |         |                     |
| N2                                                                                                         | CT | IV | 12688655 | 12703991 | WBGene00011940 | T23B5.3 | T23B5.3 | 0.156838495308232   |
| AGIWUR2290;AGIWUR2511;AGIWUR8373;AGIWUR17180;AGIWUR29168;AGIWUR32930;AGIWUR32938                           |    |    |          |          |                |         |         |                     |
| N2                                                                                                         | CT | IV | 12704111 | 12706755 | WBGene00007780 | C27D8.4 | C27D8.4 | -0.139575137927336  |
| AGIWUR3968                                                                                                 |    |    |          |          |                |         |         |                     |
| N2                                                                                                         | CT | IV | 12706714 | 12711744 | WBGene00007779 | C27D8.3 | C27D8.3 | -0.0225033644330175 |
| AGIWUR7885                                                                                                 |    |    |          |          |                |         |         |                     |
| N2                                                                                                         | CT | IV | 12712765 | 12714771 | WBGene00007778 | C27D8.2 | C27D8.2 | 0.479088609807206   |
| AGIWUR37386                                                                                                |    |    |          |          |                |         |         |                     |
| N2                                                                                                         | CT | IV | 12717831 | 12719391 | WBGene00007777 | C27D8.1 | C27D8.1 | 0.228791275065483   |
| AGIWUR19597                                                                                                |    |    |          |          |                |         |         |                     |
| N2                                                                                                         | CT | IV | 12719960 | 12720997 | WBGene00011949 | T23F6.1 | T23F6.1 | -0.0685664587599382 |
| AGIWUR555;AGIWUR21553;AGIWUR25722;AGIWUR27233;AGIWUR42033;AGIWUR44778                                      |    |    |          |          |                |         |         |                     |
| N2                                                                                                         | CT | IV | 12721356 | 12723015 | WBGene00011950 | T23F6.2 | T23F6.2 | 0.0340967990442405  |
| AGIWUR6919                                                                                                 |    |    |          |          |                |         |         |                     |
| N2                                                                                                         | CT | IV | 12723103 | 12724651 | WBGene00011951 | T23F6.3 | T23F6.3 | 0.134544968306304   |
| AGIWUR6892                                                                                                 |    |    |          |          |                |         |         |                     |
| N2                                                                                                         | CT | IV | 12724948 | 12730095 | WBGene00004315 | rbd-1   | T23F6.4 | 0.0862927330199827  |
| AGIWUR7447;AGIWUR20940;AGIWUR22173;AGIWUR25199;AGIWUR27648;AGIWUR29331;AGIWUR34066;AGIWUR35698;AGIWUR39765 |    |    |          |          |                |         |         |                     |
| N2                                                                                                         | CT | IV | 12734262 | 12734895 | WBGene00045184 | T23F6.7 | T23F6.7 | -0.159222214696543  |
| AGIWUR9615;AGIWUR15641;AGIWUR31164;AGIWUR31497;AGIWUR33297                                                 |    |    |          |          |                |         |         |                     |
| N2                                                                                                         | CT | IV | 12735187 | 12741523 | WBGene00011952 | T23F6.5 | T23F6.5 | -0.0475866588744278 |
| AGIWUR36912                                                                                                |    |    |          |          |                |         |         |                     |
| N2                                                                                                         | CT | IV | 12743039 | 12744813 | WBGene00007987 | C36H8.1 | C36H8.1 | 0.304794810883578   |
| AGIWUR11471;AGIWUR16086;AGIWUR26266                                                                        |    |    |          |          |                |         |         |                     |
| N2                                                                                                         | CT | IV | 12746584 | 12749721 | WBGene00002128 | inx-6   | C36H8.2 | -0.184016253644034  |
| AGIWUR8891;AGIWUR37533;AGIWUR44695                                                                         |    |    |          |          |                |         |         |                     |
| N2                                                                                                         | CT | IV | 12754558 | 12757673 | WBGene00001452 | flp-9   | C36H8.3 | 0.116573338558253   |
| AGIWUR15622;AGIWUR17526;AGIWUR21930;AGIWUR25621;AGIWUR28951;AGIWUR31273;AGIWUR34191;AGIWUR34712            |    |    |          |          |                |         |         |                     |
| N2                                                                                                         | CT | IV | 12773862 | 12787513 | WBGene00006767 | unc-31  | ZK897.1 | -0.0832765009680436 |
| AGIWUR40041                                                                                                |    |    |          |          |                |         |         |                     |
| N2                                                                                                         | CT | IV | 12789041 | 12790512 | WBGene00008554 | F07C6.3 | F07C6.3 | -0.0579815992749584 |
| AGIWUR872                                                                                                  |    |    |          |          |                |         |         |                     |
| N2                                                                                                         | CT | IV | 12791171 | 12791685 | WBGene00008553 | F07C6.2 | F07C6.2 | -0.171443406678979  |
| AGIWUR329;AGIWUR28099;AGIWUR28140;AGIWUR32182;AGIWUR39821                                                  |    |    |          |          |                |         |         |                     |
| N2                                                                                                         | CT | IV | 12792795 | 12793274 | WBGene00045067 | F07C6.6 | F07C6.6 | -0.26413656946311   |

|                                                                               |    |    |          |          |                 |           |          |                     |  |
|-------------------------------------------------------------------------------|----|----|----------|----------|-----------------|-----------|----------|---------------------|--|
| AGIWUR17651;AGIWUR27327;AGIWUR27461;AGIWUR32761;AGIWUR42888                   |    |    |          |          |                 |           |          |                     |  |
| N2                                                                            | CT | IV | 12793816 | 12796164 | WBGene00004030  | pin-2     | F07C6.1  | -0.402843450848815  |  |
| AGIWUR12942                                                                   |    |    |          |          |                 |           |          |                     |  |
| N2                                                                            | CT | IV | 12805931 | 12830112 | WBGene00008555  | F07C6.4   | F07C6.4  | -0.0275299561346434 |  |
| AGIWUR5109;AGIWUR10157;AGIWUR13724;AGIWUR35786                                |    |    |          |          |                 |           |          |                     |  |
| N2                                                                            | CT | IV | 12836510 | 12840674 | WBGene00010828  | M02B1.3   | M02B1.3  | 0.0611914195166534  |  |
| AGIWUR28765;AGIWUR40819;AGIWUR42206                                           |    |    |          |          |                 |           |          |                     |  |
| N2                                                                            | CT | IV | 12845696 | 12848428 | WBGene00010827  | M02B1.2   | M02B1.2  |                     |  |
| -0.00664872491676682 AGIWUR34338                                              |    |    |          |          |                 |           |          |                     |  |
| N2                                                                            | CT | IV | 12849506 | 12854408 | WBGene00005153  | srf-3     | M02B1.1  | -0.255840021338312  |  |
| AGIWUR41492                                                                   |    |    |          |          |                 |           |          |                     |  |
| N2                                                                            | CT | IV | 12855549 | 12859928 | WBGene00014139  | nstp-5    | ZK896.9  | 0.119803963989463   |  |
| AGIWUR18936                                                                   |    |    |          |          |                 |           |          |                     |  |
| N2                                                                            | CT | IV | 12860137 | 12865935 | WBGene00001543  | gcy-18    | ZK896.8  | -0.182866158220392  |  |
| AGIWUR29403                                                                   |    |    |          |          |                 |           |          |                     |  |
| N2                                                                            | CT | IV | 12869270 | 12871513 | WBGene00014137  | cllec-187 |          | ZK896.6             |  |
| 0.0804796412704079 AGIWUR9398                                                 |    |    |          |          |                 |           |          |                     |  |
| N2                                                                            | CT | IV | 12872829 | 12875360 | WBGene00014132  | ZK896.1   | ZK896.1  | 0.239975418456085   |  |
| AGIWUR32204                                                                   |    |    |          |          |                 |           |          |                     |  |
| N2                                                                            | CT | IV | 12876965 | 12879667 | WBGene00014136  | ZK896.5   | ZK896.5  | 0.424687619553062   |  |
| AGIWUR21817                                                                   |    |    |          |          |                 |           |          |                     |  |
| N2                                                                            | CT | IV | 12880634 | 12883146 | WBGene00014135  | ZK896.4   | ZK896.4  | 0.235948412771121   |  |
| AGIWUR34775                                                                   |    |    |          |          |                 |           |          |                     |  |
| N2                                                                            | CT | IV | 12883505 | 12886127 | WBGene00014134  | ZK896.3   | ZK896.3  | -0.0564055796360705 |  |
| AGIWUR4993;AGIWUR16444;AGIWUR24848                                            |    |    |          |          |                 |           |          |                     |  |
| N2                                                                            | CT | IV | 12887102 | 12890508 | WBGene00010660  | K08D8.6   | K08D8.6  | 0.00992461759437369 |  |
| AGIWUR3610;AGIWUR16326;AGIWUR20149;AGIWUR20866;AGIWUR21444                    |    |    |          |          |                 |           |          |                     |  |
| N2                                                                            | CT | IV | 12892513 | 12893283 | WBGene00010655  | K08D8.1   | K08D8.1  | -0.267506898437831  |  |
| AGIWUR25160;AGIWUR34928;AGIWUR42392;AGIWUR43870;AGIWUR44833                   |    |    |          |          |                 |           |          |                     |  |
| N2                                                                            | CT | IV | 12893773 | 12894724 | WBGene000194926 | K08D8.12  |          | K08D8.12            |  |
| 0.870525897141597 AGIWUR11140;AGIWUR27285;AGIWUR30099;AGIWUR39581;AGIWUR39736 |    |    |          |          |                 |           |          |                     |  |
| N2                                                                            | CT | IV | 12903785 | 12906659 | WBGene00010657  | K08D8.3   | K08D8.3  | -0.0650234303728556 |  |
| AGIWUR5630                                                                    |    |    |          |          |                 |           |          |                     |  |
| N2                                                                            | CT | IV | 12907469 | 12909998 | WBGene00010658  | K08D8.4   | K08D8.4  | 0.427989684791715   |  |
| AGIWUR633;AGIWUR4055;AGIWUR20476                                              |    |    |          |          |                 |           |          |                     |  |
| N2                                                                            | CT | IV | 12910647 | 12912145 | WBGene00010659  | K08D8.5   | K08D8.5  | 0.0236956047504968  |  |
| AGIWUR5854;AGIWUR9526;AGIWUR32040;AGIWUR33244;AGIWUR40070                     |    |    |          |          |                 |           |          |                     |  |
| N2                                                                            | CT | IV | 12912790 | 12914969 | WBGene00007864  | irg-6     | C32H11.1 |                     |  |
| 0.070836752567069 AGIWUR10713;AGIWUR12335;AGIWUR31481                         |    |    |          |          |                 |           |          |                     |  |

|                      |    |    |                                                                        |          |                |          |           |
|----------------------|----|----|------------------------------------------------------------------------|----------|----------------|----------|-----------|
| N2                   | CT | IV | 12916043                                                               | 12917293 | WBGene00007865 | srz-15   | C32H11.2  |
| 0.0376323121563411   |    |    | AGIWUR4336                                                             |          |                |          |           |
| N2                   | CT | IV | 12918611                                                               | 12920393 | WBGene00007866 | C32H11.3 | C32H11.3  |
| -0.0812536794372196  |    |    | AGIWUR563                                                              |          |                |          |           |
| N2                   | CT | IV | 12921264                                                               | 12923288 | WBGene00007867 | C32H11.4 | C32H11.4  |
| -0.0888940698746516  |    |    | AGIWUR12257                                                            |          |                |          |           |
| N2                   | CT | IV | 12923525                                                               | 12924432 | WBGene00007868 | C32H11.5 | C32H11.5  |
| 0.0171268236052304   |    |    | AGIWUR971;AGIWUR25407                                                  |          |                |          |           |
| N2                   | CT | IV | 12925866                                                               | 12926805 | WBGene00007869 | C32H11.6 | C32H11.6  |
| -0.00860446625764855 |    |    | AGIWUR15139                                                            |          |                |          |           |
| N2                   | CT | IV | 12930707                                                               | 12931514 | WBGene00007870 | C32H11.7 | C32H11.7  |
| -0.245529124771792   |    |    | AGIWUR18444                                                            |          |                |          |           |
| N2                   | CT | IV | 12940106                                                               | 12941405 | WBGene00007875 | dod-24   | C32H11.12 |
| 0.251283541974207    |    |    | AGIWUR33110                                                            |          |                |          |           |
| N2                   | CT | IV | 12942933                                                               | 12944526 | WBGene00007876 | dct-19   | C32H11.13 |
| -0.14941268661987    |    |    | AGIWUR9992                                                             |          |                |          |           |
| N2                   | CT | IV | 12944887                                                               | 12946577 | WBGene00010122 | F55G11.1 | F55G11.1  |
| 0.117641773019839    |    |    | AGIWUR12449                                                            |          |                |          |           |
| N2                   | CT | IV | 12950315                                                               | 12957128 | WBGene00000021 | abt-3    | F55G11.9  |
| 0.0734487968724631   |    |    | AGIWUR38787                                                            |          |                |          |           |
| N2                   | CT | IV | 12958030                                                               | 12959594 | WBGene00010126 | F55G11.6 | F55G11.6  |
| -0.336436998311709   |    |    | AGIWUR8760                                                             |          |                |          |           |
| N2                   | CT | IV | 12960436                                                               | 12962120 | WBGene00010127 | F55G11.7 | F55G11.7  |
| -0.196847726591479   |    |    | AGIWUR9714                                                             |          |                |          |           |
| N2                   | CT | IV | 12962808                                                               | 12964625 | WBGene00010128 | F55G11.8 | F55G11.8  |
| 0.141176653009634    |    |    | AGIWUR22605                                                            |          |                |          |           |
| N2                   | CT | IV | 12965387                                                               | 12967318 | WBGene00010125 | dod-22   | F55G11.5  |
| 0.580943276884003    |    |    | AGIWUR25463                                                            |          |                |          |           |
| N2                   | CT | IV | 12967448                                                               | 12969289 | WBGene00010123 | F55G11.2 | F55G11.2  |
| 0.249739040536795    |    |    | AGIWUR27920                                                            |          |                |          |           |
| N2                   | CT | IV | 12970270                                                               | 12971974 | WBGene00014771 | F55G11.3 | F55G11.3  |
| 0.0440493718372501   |    |    | AGIWUR2906;AGIWUR28495;AGIWUR33446;AGIWUR34281;AGIWUR34577;AGIWUR40510 |          |                |          |           |
| N2                   | CT | IV | 12973624                                                               | 12975591 | WBGene00010124 | F55G11.4 | F55G11.4  |
| -0.0339056941779283  |    |    | AGIWUR16709                                                            |          |                |          |           |
| N2                   | CT | IV | 12976231                                                               | 12978343 | WBGene00010745 | dod-17   | K10D11.1  |
| 0.38377535963069     |    |    | AGIWUR40735                                                            |          |                |          |           |
| N2                   | CT | IV | 12979017                                                               | 12981940 | WBGene00010746 | K10D11.2 | K10D11.2  |
| 0.53618062112467     |    |    | AGIWUR16720;AGIWUR27060                                                |          |                |          |           |
| N2                   | CT | IV | 12982119                                                               | 12986088 | WBGene00010747 | K10D11.3 | K10D11.3  |

|                                                                                                                                                                                                                                                                                                                                                                |                                                            |          |                |          |                             |
|----------------------------------------------------------------------------------------------------------------------------------------------------------------------------------------------------------------------------------------------------------------------------------------------------------------------------------------------------------------|------------------------------------------------------------|----------|----------------|----------|-----------------------------|
| 0.0316863890298631                                                                                                                                                                                                                                                                                                                                             | AGIWUR375                                                  |          |                |          |                             |
| N2 CT IV                                                                                                                                                                                                                                                                                                                                                       | 12986726                                                   | 12989455 | WBGene00010750 | K10D11.6 | K10D11.6                    |
| 0.0115782277269174                                                                                                                                                                                                                                                                                                                                             | AGIWUR38923                                                |          |                |          |                             |
| N2 CT IV                                                                                                                                                                                                                                                                                                                                                       | 12989685                                                   | 12991843 | WBGene00010749 | K10D11.5 | K10D11.5                    |
| 0.0414355739720698                                                                                                                                                                                                                                                                                                                                             | AGIWUR32026                                                |          |                |          |                             |
| N2 CT IV                                                                                                                                                                                                                                                                                                                                                       | 12992157                                                   | 12994462 | WBGene00010748 | K10D11.4 | K10D11.4                    |
| -0.494658097021643                                                                                                                                                                                                                                                                                                                                             | AGIWUR23605                                                |          |                |          |                             |
| N2 CT IV                                                                                                                                                                                                                                                                                                                                                       | 12994676                                                   | 12995924 | WBGene00045198 | K10D11.7 | K10D11.7                    |
| 0.0129479451529386                                                                                                                                                                                                                                                                                                                                             | AGIWUR9382;AGIWUR15214;AGIWUR16890;AGIWUR33905;AGIWUR34781 |          |                |          |                             |
| N2 CT IV                                                                                                                                                                                                                                                                                                                                                       | 13009116                                                   | 13035955 | WBGene00003150 | mbk-2    | F49E11.1                    |
| 0.0883525590147061                                                                                                                                                                                                                                                                                                                                             |                                                            |          |                |          |                             |
| AGIWUR1792;AGIWUR5161;AGIWUR6014;AGIWUR7031;AGIWUR7450;AGIWUR7488;AGIWUR8472;AGIWUR8614;AGIWUR9221;AGIWUR11544;AGIWUR14795;AGIWUR17676;AGIWUR17802;AGIWUR18717;AGIWUR18810;AGIWUR19747;AGIWUR20031;AGIWUR20460;AGIWUR21573;AGIWUR21792;AGIWUR22205;AGIWUR25369;AGIWUR26815;AGIWUR28415;AGIWUR30531;AGIWUR31681;AGIWUR33258;AGIWUR34682;AGIWUR35026;AGIWUR44228 |                                                            |          |                |          |                             |
| N2 CT IV                                                                                                                                                                                                                                                                                                                                                       | 13035956                                                   | 13039021 | WBGene00009889 | F49E11.2 | F49E11.2                    |
| -0.0782406051199049                                                                                                                                                                                                                                                                                                                                            | AGIWUR885;AGIWUR18578;AGIWUR28259;AGIWUR32335              |          |                |          |                             |
| N2 CT IV                                                                                                                                                                                                                                                                                                                                                       | 13042391                                                   | 13046858 | WBGene00000134 | amt-2    | F49E11.3                    |
| -0.0396360218399252                                                                                                                                                                                                                                                                                                                                            | AGIWUR13890                                                |          |                |          |                             |
| N2 CT IV                                                                                                                                                                                                                                                                                                                                                       | 13047197                                                   | 13048262 | WBGene00009890 | sc1-9    | F49E11.4                    |
| -0.423506306137403                                                                                                                                                                                                                                                                                                                                             | AGIWUR5966                                                 |          |                |          |                             |
| N2 CT IV                                                                                                                                                                                                                                                                                                                                                       | 13048457                                                   | 13049835 | WBGene00009891 | sc1-10   | F49E11.5                    |
| -0.480358868005028                                                                                                                                                                                                                                                                                                                                             | AGIWUR31865                                                |          |                |          |                             |
| N2 CT IV                                                                                                                                                                                                                                                                                                                                                       | 13051377                                                   | 13052149 | WBGene00009892 | sc1-11   | F49E11.6                    |
| -0.202479771360582                                                                                                                                                                                                                                                                                                                                             | AGIWUR843                                                  |          |                |          |                             |
| N2 CT IV                                                                                                                                                                                                                                                                                                                                                       | 13053297                                                   | 13055154 | WBGene00009893 | F49E11.7 | F49E11.7                    |
| 0.243153929216978                                                                                                                                                                                                                                                                                                                                              | AGIWUR44526                                                |          |                |          |                             |
| N2 CT IV                                                                                                                                                                                                                                                                                                                                                       | 13055357                                                   | 13055768 | WBGene00009894 | F49E11.8 | F49E11.8                    |
| 0.187426774729051                                                                                                                                                                                                                                                                                                                                              | AGIWUR30147                                                |          |                |          |                             |
| N2 CT IV                                                                                                                                                                                                                                                                                                                                                       | 13056376                                                   | 13057271 | WBGene00004742 | sc1-1    | F49E11.9                    |
| -0.00139149596317001                                                                                                                                                                                                                                                                                                                                           | AGIWUR25578                                                |          |                |          |                             |
| N2 CT IV                                                                                                                                                                                                                                                                                                                                                       | 13057678                                                   | 13059085 | WBGene00009895 | sc1-2    | F49E11.10                   |
| 0.161941482535122                                                                                                                                                                                                                                                                                                                                              | AGIWUR22496                                                |          |                |          |                             |
| N2 CT IV                                                                                                                                                                                                                                                                                                                                                       | 13059618                                                   | 13060695 | WBGene00009896 | sc1-3    | F49E11.11                   |
| 0.198781586849586                                                                                                                                                                                                                                                                                                                                              | AGIWUR1835                                                 |          |                |          |                             |
| N2 CT IV                                                                                                                                                                                                                                                                                                                                                       | 13061774                                                   | 13063205 | WBGene00008026 | sc1-4    | C39E9.1 0.238385479063417   |
| AGIWUR40780                                                                                                                                                                                                                                                                                                                                                    |                                                            |          |                |          |                             |
| N2 CT IV                                                                                                                                                                                                                                                                                                                                                       | 13064003                                                   | 13065159 | WBGene00008027 | sc1-5    | C39E9.2 -0.0888945638729588 |
| AGIWUR16531                                                                                                                                                                                                                                                                                                                                                    |                                                            |          |                |          |                             |

|                                                                                         |    |    |          |          |                |          |          |                     |
|-----------------------------------------------------------------------------------------|----|----|----------|----------|----------------|----------|----------|---------------------|
| N2                                                                                      | CT | IV | 13065766 | 13067300 | WBGene00000705 | col-131  | C39E9.3  | 0.0521038076825011  |
| AGIWUR12644                                                                             |    |    |          |          |                |          |          |                     |
| N2                                                                                      | CT | IV | 13068751 | 13070290 | WBGene00008028 | sc1-6    | C39E9.4  | 0.176329508217989   |
| AGIWUR458                                                                               |    |    |          |          |                |          |          |                     |
| N2                                                                                      | CT | IV | 13070479 | 13071221 | WBGene00008029 | sc1-7    | C39E9.5  | -0.463896926660885  |
| AGIWUR12072                                                                             |    |    |          |          |                |          |          |                     |
| N2                                                                                      | CT | IV | 13071754 | 13072478 | WBGene00008030 | sc1-8    | C39E9.6  | -0.261436797487821  |
| AGIWUR44929                                                                             |    |    |          |          |                |          |          |                     |
| N2                                                                                      | CT | IV | 13072660 | 13076720 | WBGene00008031 | C39E9.7  | C39E9.7  | 0.0599474540385998  |
| AGIWUR36436                                                                             |    |    |          |          |                |          |          |                     |
| N2                                                                                      | CT | IV | 13079446 | 13082781 | WBGene00008032 | C39E9.8  | C39E9.8  | -0.07811451166131   |
| AGIWUR612;AGIWUR22734                                                                   |    |    |          |          |                |          |          |                     |
| N2                                                                                      | CT | IV | 13087005 | 13089619 | WBGene00008033 | spin-2   | C39E9.10 |                     |
| -0.0914115611040511 AGIWUR29849                                                         |    |    |          |          |                |          |          |                     |
| N2                                                                                      | CT | IV | 13089578 | 13091067 | WBGene00000706 | col-132  | C39E9.9  | -0.220244362407721  |
| AGIWUR15066                                                                             |    |    |          |          |                |          |          |                     |
| N2                                                                                      | CT | IV | 13091187 | 13093853 | WBGene00008034 | C39E9.11 |          | C39E9.11            |
| -0.0322954808177531 AGIWUR17054                                                         |    |    |          |          |                |          |          |                     |
| N2                                                                                      | CT | IV | 13094007 | 13095490 | WBGene00008035 | C39E9.12 |          | C39E9.12            |
| -0.26745557949646 AGIWUR24925                                                           |    |    |          |          |                |          |          |                     |
| N2                                                                                      | CT | IV | 13095762 | 13097065 | WBGene00004339 | rfc-3    | C39E9.13 |                     |
| -0.117193612541632 AGIWUR144;AGIWUR10555;AGIWUR13424;AGIWUR40682                        |    |    |          |          |                |          |          |                     |
| N2                                                                                      | CT | IV | 13096958 | 13098836 | WBGene00001007 | dli-1    | C39E9.14 |                     |
| 0.00237230653284559 AGIWUR3418;AGIWUR7426;AGIWUR35722;AGIWUR37928                       |    |    |          |          |                |          |          |                     |
| N2                                                                                      | CT | IV | 13099378 | 13100608 | WBGene00007201 | exos-4.1 |          | B0564.1             |
| -0.149311989997078 AGIWUR27813;AGIWUR33869                                              |    |    |          |          |                |          |          |                     |
| N2                                                                                      | CT | IV | 13100715 | 13104641 | WBGene00007207 | B0564.7  | B0564.7  | -0.145813597685951  |
| AGIWUR2841                                                                              |    |    |          |          |                |          |          |                     |
| N2                                                                                      | CT | IV | 13105323 | 13106927 | WBGene00023421 | rde-11   | B0564.11 |                     |
| 0.0771721686850562 AGIWUR1580                                                           |    |    |          |          |                |          |          |                     |
| N2                                                                                      | CT | IV | 13107659 | 13111500 | WBGene00007202 | B0564.2  | B0564.2  | -0.0266040422330462 |
| AGIWUR9047;AGIWUR11732                                                                  |    |    |          |          |                |          |          |                     |
| N2                                                                                      | CT | IV | 13119096 | 13124387 | WBGene00006766 | unc-30   | B0564.10 |                     |
| 0.270505104374703 AGIWUR1590;AGIWUR3331;AGIWUR27447;AGIWUR33252;AGIWUR35405;AGIWUR36465 |    |    |          |          |                |          |          |                     |
| N2                                                                                      | CT | IV | 13138991 | 13142354 | WBGene00008623 | F09E8.1  | F09E8.1  | 0.364103268947395   |
| AGIWUR42795                                                                             |    |    |          |          |                |          |          |                     |
| N2                                                                                      | CT | IV | 13149576 | 13150569 | WBGene00008626 | F09E8.8  | F09E8.8  | 0.143049972987232   |
| AGIWUR38329                                                                             |    |    |          |          |                |          |          |                     |
| N2                                                                                      | CT | IV | 13150552 | 13154441 | WBGene00008624 | F09E8.2  | F09E8.2  | -0.104091284014391  |

|                                                                                          |    |    |          |          |                |         |         |                     |  |
|------------------------------------------------------------------------------------------|----|----|----------|----------|----------------|---------|---------|---------------------|--|
| AGIWUR3879;AGIWUR41374;AGIWUR44977                                                       |    |    |          |          |                |         |         |                     |  |
| N2                                                                                       | CT | IV | 13155228 | 13164056 | WBGene00003421 | msh-5   | F09E8.3 | -0.133019405655222  |  |
| AGIWUR6808;AGIWUR7907;AGIWUR22916                                                        |    |    |          |          |                |         |         |                     |  |
| N2                                                                                       | CT | IV | 13165516 | 13166815 | WBGene00008625 | sc1-14  | F09E8.5 | -0.185111074800033  |  |
| AGIWUR19778;AGIWUR27818                                                                  |    |    |          |          |                |         |         |                     |  |
| N2                                                                                       | CT | IV | 13170544 | 13173694 | WBGene00003533 | nas-14  | F09E8.6 | -0.153010451539422  |  |
| AGIWUR5805;AGIWUR19870;AGIWUR28940                                                       |    |    |          |          |                |         |         |                     |  |
| N2                                                                                       | CT | IV | 13174157 | 13179457 | WBGene00002974 | lev-1   | F09E8.7 | 0.00901991580071204 |  |
| AGIWUR20176                                                                              |    |    |          |          |                |         |         |                     |  |
| N2                                                                                       | CT | IV | 13180179 | 13180911 | WBGene00044978 | F58D2.3 | F58D2.3 | -0.182889911586878  |  |
| AGIWUR31280                                                                              |    |    |          |          |                |         |         |                     |  |
| N2                                                                                       | CT | IV | 13183072 | 13186984 | WBGene00010240 | gadr-1  | F58D2.1 | 0.0710910597724332  |  |
| AGIWUR28122                                                                              |    |    |          |          |                |         |         |                     |  |
| N2                                                                                       | CT | IV | 13193563 | 13197382 | WBGene00008177 | C48D1.1 | C48D1.1 | -0.182322873345472  |  |
| AGIWUR2280                                                                               |    |    |          |          |                |         |         |                     |  |
| N2                                                                                       | CT | IV | 13206783 | 13207278 | WBGene00044909 | C48D1.7 | C48D1.7 | 0.172360446961497   |  |
| AGIWUR16247;AGIWUR19522;AGIWUR20384;AGIWUR37541;AGIWUR42217                              |    |    |          |          |                |         |         |                     |  |
| N2                                                                                       | CT | IV | 13209729 | 13214566 | WBGene00000501 | cho-1   | C48D1.3 | -0.0182178611492585 |  |
| AGIWUR26521                                                                              |    |    |          |          |                |         |         |                     |  |
| N2                                                                                       | CT | IV | 13221961 | 13232974 | WBGene00008178 | C48D1.5 | C48D1.5 | 0.0153075232489144  |  |
| AGIWUR9021;AGIWUR9601;AGIWUR33314                                                        |    |    |          |          |                |         |         |                     |  |
| N2                                                                                       | CT | IV | 13232943 | 13236585 | WBGene00010435 | JC8.2   | JC8.2   | 0.0450772219415949  |  |
| AGIWUR24175                                                                              |    |    |          |          |                |         |         |                     |  |
| N2                                                                                       | CT | IV | 13237281 | 13239441 | WBGene00006466 | tag-115 | JC8.13  | -0.230533702839001  |  |
| AGIWUR9056                                                                               |    |    |          |          |                |         |         |                     |  |
| N2                                                                                       | CT | IV | 13239588 | 13240651 | WBGene00004424 | rp1-12  | JC8.3   |                     |  |
| -0.00675638506099752 AGIWUR4632;AGIWUR6964;AGIWUR7060;AGIWUR9613;AGIWUR11217;AGIWUR13131 |    |    |          |          |                |         |         |                     |  |
| N2                                                                                       | CT | IV | 13241051 | 13243401 | WBGene00003037 | lin-54  | JC8.6   | 0.202386580839796   |  |
| AGIWUR35358                                                                              |    |    |          |          |                |         |         |                     |  |
| N2                                                                                       | CT | IV | 13243673 | 13244296 | WBGene00010436 | JC8.4   | JC8.4   | -0.179220800571528  |  |
| AGIWUR18188                                                                              |    |    |          |          |                |         |         |                     |  |
| N2                                                                                       | CT | IV | 13244324 | 13247160 | WBGene00010437 | cox-11  | JC8.5   | -0.244956286334544  |  |
| AGIWUR39629                                                                              |    |    |          |          |                |         |         |                     |  |
| N2                                                                                       | CT | IV | 13247261 | 13250699 | WBGene00010439 | JC8.7   | JC8.7   | -0.0745911970226629 |  |
| AGIWUR3986;AGIWUR23796;AGIWUR29016                                                       |    |    |          |          |                |         |         |                     |  |
| N2                                                                                       | CT | IV | 13250648 | 13252311 | WBGene00010440 | ttr-51  | JC8.8   | -0.141818957344278  |  |
| AGIWUR1763;AGIWUR9407;AGIWUR17465;AGIWUR24987;AGIWUR39926;AGIWUR40897                    |    |    |          |          |                |         |         |                     |  |
| N2                                                                                       | CT | IV | 13254225 | 13255538 | WBGene00044737 | ttr-45  | JC8.14  | -0.0320646881767424 |  |
| AGIWUR7141;AGIWUR15386;AGIWUR23834;AGIWUR25802;AGIWUR36581                               |    |    |          |          |                |         |         |                     |  |



|                                                                                           |    |    |          |          |                |           |           |                     |
|-------------------------------------------------------------------------------------------|----|----|----------|----------|----------------|-----------|-----------|---------------------|
| N2                                                                                        | CT | IV | 13256051 | 13259076 | WBGene00010442 | bus-12    | JC8.12    | 0.0766072276593643  |
| AGIWUR24223                                                                               |    |    |          |          |                |           |           |                     |
| N2                                                                                        | CT | IV | 13261556 | 13272514 | WBGene00006763 | unc-26    | JC8.10    | -0.208539500386798  |
| AGIWUR3166;AGIWUR31782;AGIWUR33371                                                        |    |    |          |          |                |           |           |                     |
| N2                                                                                        | CT | IV | 13273911 | 13282878 | WBGene00013460 | cpsf-3    | Y67H2A.1  |                     |
| 0.0142890672928075 AGIWUR210                                                              |    |    |          |          |                |           |           |                     |
| N2                                                                                        | CT | IV | 13283002 | 13289536 | WBGene00013465 | Y67H2A.10 | Y67H2A.10 |                     |
| 0.35245438532386 AGIWUR36969                                                              |    |    |          |          |                |           |           |                     |
| N2                                                                                        | CT | IV | 13289776 | 13297869 | WBGene00013461 | Y67H2A.2  | Y67H2A.2  |                     |
| -0.173342223503221 AGIWUR41344                                                            |    |    |          |          |                |           |           |                     |
| N2                                                                                        | CT | IV | 13297926 | 13300066 | WBGene00013462 | micu-1    | Y67H2A.4  |                     |
| -0.226069908097314 AGIWUR5915;AGIWUR6075                                                  |    |    |          |          |                |           |           |                     |
| N2                                                                                        | CT | IV | 13300179 | 13300720 | WBGene00013463 | kdp-1     | Y67H2A.5  |                     |
| -0.0511385655475181 AGIWUR747                                                             |    |    |          |          |                |           |           |                     |
| N2                                                                                        | CT | IV | 13300828 | 13304145 | WBGene00000818 | csn-6     | Y67H2A.6  |                     |
| -0.0792116604175739 AGIWUR12038                                                           |    |    |          |          |                |           |           |                     |
| N2                                                                                        | CT | IV | 13303746 | 13310818 | WBGene00013464 | Y67H2A.7  | Y67H2A.7  |                     |
| 0.0516971327095384 AGIWUR15280                                                            |    |    |          |          |                |           |           |                     |
| N2                                                                                        | CT | IV | 13315644 | 13318811 | WBGene00001393 | fat-1     | Y67H2A.8  |                     |
| 0.0818346866147159 AGIWUR12237;AGIWUR36063                                                |    |    |          |          |                |           |           |                     |
| N2                                                                                        | CT | IV | 13320158 | 13321831 | WBGene00014941 | Y67H2A.9  | Y67H2A.9  |                     |
| -0.0713171059280766 AGIWUR1097;AGIWUR1417;AGIWUR12240;AGIWUR18964;AGIWUR22391;AGIWUR43346 |    |    |          |          |                |           |           |                     |
| N2                                                                                        | CT | IV | 13323850 | 13326394 | WBGene00001394 | fat-2     | W02A2.1   | -0.0116696594731955 |
| AGIWUR34363                                                                               |    |    |          |          |                |           |           |                     |
| N2                                                                                        | CT | IV | 13328359 | 13329497 | WBGene00001390 | far-6     | W02A2.2   | -0.0363328687258946 |
| AGIWUR29425                                                                               |    |    |          |          |                |           |           |                     |
| N2                                                                                        | CT | IV | 13329508 | 13331406 | WBGene00004156 | pqn-74    | W02A2.3   | 0.305822601872883   |
| AGIWUR7098                                                                                |    |    |          |          |                |           |           |                     |
| N2                                                                                        | CT | IV | 13342858 | 13346189 | WBGene00012190 | W02A2.5   | W02A2.5   | 0.159289386333456   |
| AGIWUR2236;AGIWUR38536                                                                    |    |    |          |          |                |           |           |                     |
| N2                                                                                        | CT | IV | 13347665 | 13348599 | WBGene00044280 | W02A2.9   | W02A2.9   | 0.179227328942989   |
| AGIWUR39519                                                                               |    |    |          |          |                |           |           |                     |
| N2                                                                                        | CT | IV | 13348870 | 13353193 | WBGene00004333 | rec-8     | W02A2.6   | 0.0359933305159554  |
| AGIWUR6839                                                                                |    |    |          |          |                |           |           |                     |
| N2                                                                                        | CT | IV | 13353723 | 13356104 | WBGene00003230 | mex-5     | W02A2.7   | 0.481302075828266   |
| AGIWUR24629                                                                               |    |    |          |          |                |           |           |                     |
| N2                                                                                        | CT | IV | 13356113 | 13358601 | WBGene00012191 | W02A2.8   | W02A2.8   | 0.278300686646963   |
| AGIWUR29239                                                                               |    |    |          |          |                |           |           |                     |
| N2                                                                                        | CT | IV | 13365169 | 13368435 | WBGene00013375 | srsx-25   | Y62E10A.4 |                     |

|                                                                                               |    |    |                                                                                     |          |                |                       |
|-----------------------------------------------------------------------------------------------|----|----|-------------------------------------------------------------------------------------|----------|----------------|-----------------------|
| -0.441973835671389                                                                            |    |    | AGIWUR37939                                                                         |          |                |                       |
| N2                                                                                            | CT | IV | 13368368                                                                            | 13369417 | WBGene00000093 | agt-1 Y62E10A.5       |
| -0.186543431875027                                                                            |    |    | AGIWUR14160;AGIWUR35728;AGIWUR37488                                                 |          |                |                       |
| N2                                                                                            | CT | IV | 13369424                                                                            | 13370285 | WBGene00004410 | rla-2 Y62E10A.1       |
| -0.131478597087167                                                                            |    |    | AGIWUR9256;AGIWUR30171;AGIWUR41654                                                  |          |                |                       |
| N2                                                                                            | CT | IV | 13370653                                                                            | 13371613 | WBGene00013373 | Y62E10A.2 Y62E10A.2   |
| -0.242594791131332                                                                            |    |    | AGIWUR32819                                                                         |          |                |                       |
| N2                                                                                            | CT | IV | 13371999                                                                            | 13377383 | WBGene00013376 | Y62E10A.6 Y62E10A.6   |
| -0.509930789408076                                                                            |    |    | AGIWUR36222                                                                         |          |                |                       |
| N2                                                                                            | CT | IV | 13378016                                                                            | 13380407 | WBGene00003142 | mau-8 Y62E10A.8       |
| -0.116576993308364                                                                            |    |    | AGIWUR11971                                                                         |          |                |                       |
| N2                                                                                            | CT | IV | 13380387                                                                            | 13381923 | WBGene00013378 | emc-3 Y62E10A.10      |
| -0.200742194607662                                                                            |    |    | AGIWUR43645                                                                         |          |                |                       |
| N2                                                                                            | CT | IV | 13382055                                                                            | 13384316 | WBGene00004278 | rab-19 Y62E10A.9      |
| -0.151136599691045                                                                            |    |    | AGIWUR22027;AGIWUR43076;AGIWUR44348                                                 |          |                |                       |
| N2                                                                                            | CT | IV | 13383905                                                                            | 13386091 | WBGene00044745 | Y62E10A.20 Y62E10A.20 |
| -0.175652934692402                                                                            |    |    | AGIWUR15148;AGIWUR29097                                                             |          |                |                       |
| N2                                                                                            | CT | IV | 13386294                                                                            | 13387358 | WBGene00014938 | mdt-9 Y62E10A.11      |
| 0.0340982744734326                                                                            |    |    | AGIWUR19242;AGIWUR26065                                                             |          |                |                       |
| N2                                                                                            | CT | IV | 13387469                                                                            | 13389209 | WBGene00003077 | lsm-3 Y62E10A.12      |
| -0.17646777395126                                                                             |    |    | AGIWUR5031;AGIWUR29539;AGIWUR33021;AGIWUR35748;AGIWUR38348;AGIWUR40337              |          |                |                       |
| N2                                                                                            | CT | IV | 13389146                                                                            | 13398799 | WBGene00013379 | Y62E10A.13 Y62E10A.13 |
| -0.0437333981213204                                                                           |    |    |                                                                                     |          |                |                       |
| AGIWUR1459;AGIWUR1661;AGIWUR21061;AGIWUR32539;AGIWUR32818;AGIWUR34098;AGIWUR35714;AGIWUR43565 |    |    |                                                                                     |          |                |                       |
| N2                                                                                            | CT | IV | 13399068                                                                            | 13400506 | WBGene00013380 | memi-2 Y62E10A.14     |
| -0.0423041959559347                                                                           |    |    | AGIWUR5865;AGIWUR34235                                                              |          |                |                       |
| N2                                                                                            | CT | IV | 13401306                                                                            | 13403831 | WBGene00013381 | cyp-31A5 Y62E10A.15   |
| -0.0898082618646256                                                                           |    |    | AGIWUR28184                                                                         |          |                |                       |
| N2                                                                                            | CT | IV | 13403769                                                                            | 13408306 | WBGene00013385 | Y62E10A.19 Y62E10A.19 |
| -0.248649502412313                                                                            |    |    | AGIWUR10040;AGIWUR18675;AGIWUR20403;AGIWUR23523;AGIWUR39058;AGIWUR42855;AGIWUR44771 |          |                |                       |
| N2                                                                                            | CT | IV | 13408606                                                                            | 13412895 | WBGene00013382 | gcl-1 Y62E10A.16      |
| -0.0468885304932964                                                                           |    |    | AGIWUR39074                                                                         |          |                |                       |
| N2                                                                                            | CT | IV | 13413560                                                                            | 13415954 | WBGene00013383 | aptf-2 Y62E10A.17     |
| -0.129281835295584                                                                            |    |    | AGIWUR2952;AGIWUR10679                                                              |          |                |                       |
| N2                                                                                            | CT | IV | 13416041                                                                            | 13421927 | WBGene00004029 | pik-1 K09B11.1        |
| -0.0800252647000494                                                                           |    |    | AGIWUR40481                                                                         |          |                |                       |
| N2                                                                                            | CT | IV | 13422500                                                                            | 13429379 | WBGene00010709 | noi-9 K09B11.2        |
| -0.24082055597648                                                                             |    |    | AGIWUR32343                                                                         |          |                |                       |
| N2                                                                                            | CT | IV | 13431288                                                                            | 13434068 | WBGene00010712 | K09B11.5 K09B11.5     |

|                                     |                                                                        |                |                 |                            |  |
|-------------------------------------|------------------------------------------------------------------------|----------------|-----------------|----------------------------|--|
| 0.350512106728932                   | AGIWUR1133;AGIWUR37524                                                 |                |                 |                            |  |
| N2 CT IV                            | 13434188 13445375                                                      | WBGene00010714 | mam-3           | K09B11.10                  |  |
| -0.167667908197348                  | AGIWUR34784                                                            |                |                 |                            |  |
| N2 CT IV                            | 13445819 13454954                                                      | WBGene00010713 | uso-1           | K09B11.9                   |  |
| 0.0258679502101486                  | AGIWUR22969                                                            |                |                 |                            |  |
| N2 CT IV                            | 13456976 13458841                                                      | WBGene00045062 | Y38H8A.8        | Y38H8A.8                   |  |
| 0.278745998237655                   | AGIWUR24056                                                            |                |                 |                            |  |
| N2 CT IV                            | 13466139 13469402                                                      | WBGene00012639 | fezf-1          | Y38H8A.5                   |  |
| -0.0730991515945396                 | AGIWUR31080                                                            |                |                 |                            |  |
| N2 CT IV                            | 13474432 13476225                                                      | WBGene00012636 | Y38H8A.2        | Y38H8A.2                   |  |
| 0.0970501334052747                  | AGIWUR3266;AGIWUR12111;AGIWUR37091;AGIWUR38610;AGIWUR44125;AGIWUR44481 |                |                 |                            |  |
| N2 CT IV                            | 13476935 13502852                                                      | WBGene00012868 | tbc-9           | Y45F10A.6                  |  |
| -0.118304185908773                  | AGIWUR31457                                                            |                |                 |                            |  |
| N2 CT IV                            | 13505270 13505762                                                      | WBGene00003755 | nlp-17          | Y45F10A.5                  |  |
| -0.180284710900456                  | AGIWUR8556;AGIWUR23648                                                 |                |                 |                            |  |
| N2 CT IV                            | 13506079 13509225                                                      | WBGene00012867 | seld-1          | Y45F10A.4                  |  |
| -0.036494134555511                  | AGIWUR10820                                                            |                |                 |                            |  |
| N2 CT IV                            | 13509224 13513426                                                      | WBGene00012866 | afmd-2          | Y45F10A.3                  |  |
| -0.0633432435052796                 | AGIWUR33223                                                            |                |                 |                            |  |
| N2 CT IV                            | 13513369 13521870                                                      | WBGene00003582 | dcap-2          | F52G2.1 -0.125192194301587 |  |
| AGIWUR14135;AGIWUR28797;AGIWUR33187 |                                                                        |                |                 |                            |  |
| N2 CT IV                            | 13521970 13540271                                                      | WBGene00004681 | rsd-2           | F52G2.2 0.0895042513602515 |  |
| AGIWUR42570                         |                                                                        |                |                 |                            |  |
| N2 CT IV                            | 13543402 13548230                                                      | WBGene00009943 | F52G2.3 F52G2.3 | 0.00267716123039996        |  |
| AGIWUR43070                         |                                                                        |                |                 |                            |  |
| N2 CT IV                            | 13549605 13561729                                                      | WBGene00012875 | Y45F10B.13      | Y45F10B.13                 |  |
| 0.000987268315317813                | AGIWUR1433;AGIWUR1775;AGIWUR16615;AGIWUR37079                          |                |                 |                            |  |
| N2 CT IV                            | 13561861 13574440                                                      | WBGene00004265 | qui-1           | Y45F10B.10                 |  |
| -0.0889134762227064                 | AGIWUR414;AGIWUR5539;AGIWUR38295                                       |                |                 |                            |  |
| N2 CT IV                            | 13575058 13576740                                                      | WBGene00005088 | srd-10          | Y45F10B.14                 |  |
| -0.201486288791273                  | AGIWUR31343                                                            |                |                 |                            |  |
| N2 CT IV                            | 13579253 13582112                                                      | WBGene00005679 | sru-16          | Y45F10B.4                  |  |
| 0.0112493395855378                  | AGIWUR16693;AGIWUR38014                                                |                |                 |                            |  |
| N2 CT IV                            | 13583209 13584479                                                      | WBGene00005675 | sru-12          | Y45F10B.5                  |  |
| 0.176099655309137                   | AGIWUR43576                                                            |                |                 |                            |  |
| N2 CT IV                            | 13584946 13587288                                                      | WBGene00005674 | sru-11          | Y45F10B.6                  |  |
| -0.000472776452147272               | AGIWUR21838                                                            |                |                 |                            |  |
| N2 CT IV                            | 13587475 13588237                                                      | WBGene00012874 | Y45F10B.12      | Y45F10B.12                 |  |
| -0.225043513772512                  | AGIWUR35600                                                            |                |                 |                            |  |

|                     |    |    |                                                            |          |                |            |            |   |
|---------------------|----|----|------------------------------------------------------------|----------|----------------|------------|------------|---|
| N2                  | CT | IV | 13588993                                                   | 13590337 | WBGene00005672 | sru-9      | Y45F10B.11 |   |
| -0.329921222821151  |    |    | AGIWUR34417                                                |          |                |            |            |   |
| N2                  | CT | IV | 13594517                                                   | 13596279 | WBGene00012870 | Y45F10B.2  | Y45F10B.2  |   |
| 0.211728436496945   |    |    | AGIWUR36105;AGIWUR41860                                    |          |                |            |            |   |
| N2                  | CT | IV | 13598755                                                   | 13600436 | WBGene00045045 | Y45F10B.17 | Y45F10B.17 |   |
| -0.372315440028977  |    |    | AGIWUR21237                                                |          |                |            |            |   |
| N2                  | CT | IV | 13603549                                                   | 13604197 | WBGene00012876 | Y45F10B.15 | Y45F10B.15 |   |
| 0.0353000707257412  |    |    | AGIWUR4125                                                 |          |                |            |            |   |
| N2                  | CT | IV | 13604969                                                   | 13607263 | WBGene00045059 | Y45F10B.18 | Y45F10B.18 |   |
| 0.0916522170636647  |    |    | AGIWUR6109;AGIWUR28546                                     |          |                |            |            |   |
| N2                  | CT | IV | 13607436                                                   | 13609892 | WBGene00007460 | C08F11.13  | C08F11.13  |   |
| 0.0153603060545424  |    |    | AGIWUR8724;AGIWUR37159                                     |          |                |            |            |   |
| N2                  | CT | IV | 13611328                                                   | 13611579 | WBGene00045286 | C08F11.19  | C08F11.19  |   |
| 0.0696524534141485  |    |    | AGIWUR5449;AGIWUR14418;AGIWUR21976;AGIWUR24286;AGIWUR27726 |          |                |            |            |   |
| N2                  | CT | IV | 13611812                                                   | 13612210 | WBGene00045285 | C08F11.18  | C08F11.18  |   |
| -0.189290059709843  |    |    | AGIWUR5645;AGIWUR11696;AGIWUR15085;AGIWUR23111;AGIWUR33000 |          |                |            |            |   |
| N2                  | CT | IV | 13612805                                                   | 13618061 | WBGene00007461 | C08F11.14  | C08F11.14  |   |
| 0.1741067569846     |    |    | AGIWUR961                                                  |          |                |            |            |   |
| N2                  | CT | IV | 13619508                                                   | 13621513 | WBGene00007452 | C08F11.3   | C08F11.3   |   |
| -0.138625712859301  |    |    | AGIWUR13220;AGIWUR13316;AGIWUR20736;AGIWUR33351            |          |                |            |            |   |
| N2                  | CT | IV | 13621987                                                   | 13623134 | WBGene00007451 | C08F11.2   | C08F11.2   |   |
| -0.0335593753287702 |    |    | AGIWUR638;AGIWUR12018;AGIWUR15459;AGIWUR39370              |          |                |            |            |   |
| N2                  | CT | IV | 13633499                                                   | 13635179 | WBGene00007453 | fbxa-98    | C08F11.5   |   |
| 0.0164659263836313  |    |    | AGIWUR5958                                                 |          |                |            |            |   |
| N2                  | CT | IV | 13637288                                                   | 13638525 | WBGene00007454 | C08F11.7   | C08F11.7   |   |
| -0.2693871381977    |    |    | AGIWUR19769                                                |          |                |            |            |   |
| N2                  | CT | IV | 13639260                                                   | 13644402 | WBGene00007455 | ugt-22     | C08F11.8   |   |
| -0.0570503218641711 |    |    | AGIWUR2529                                                 |          |                |            |            |   |
| N2                  | CT | IV | 13644463                                                   | 13645923 | WBGene00007456 | srz-29     | C08F11.9   |   |
| 0.189669017354418   |    |    | AGIWUR41021                                                |          |                |            |            |   |
| N2                  | CT | IV | 13646735                                                   | 13647658 | WBGene00007458 | ule-4      | C08F11.11  | 0 |
| AGIWUR11720         |    |    |                                                            |          |                |            |            |   |
| N2                  | CT | IV | 13648039                                                   | 13649335 | WBGene00007457 | C08F11.10  | C08F11.10  |   |
| 0.19723687770772    |    |    | AGIWUR11031                                                |          |                |            |            |   |
| N2                  | CT | IV | 13649836                                                   | 13650338 | WBGene00045069 | C08F11.17  | C08F11.17  |   |
| 0.0246114252961807  |    |    | AGIWUR16107;AGIWUR16421;AGIWUR19761;AGIWUR37431            |          |                |            |            |   |
| N2                  | CT | IV | 13651014                                                   | 13651512 | WBGene00007459 | C08F11.12  | C08F11.12  |   |
| -0.292372616659746  |    |    | AGIWUR9420                                                 |          |                |            |            |   |
| N2                  | CT | IV | 13653955                                                   | 13655851 | WBGene00044256 | Y45F10C.6  | Y45F10C.6  |   |

|                                     |                                                                     |          |                |                   |                     |
|-------------------------------------|---------------------------------------------------------------------|----------|----------------|-------------------|---------------------|
| -0.55595638790582                   | AGIWUR23085                                                         |          |                |                   |                     |
| N2 CT IV                            | 13662116                                                            | 13662671 | WBGene00012878 | Y45F10C.2         | Y45F10C.2           |
| -0.276260160019175                  | AGIWUR37828                                                         |          |                |                   |                     |
| N2 CT IV                            | 13663398                                                            | 13664190 | WBGene00012880 | Y45F10C.4         | Y45F10C.4           |
| 0.109153923903932                   | AGIWUR23361                                                         |          |                |                   |                     |
| N2 CT IV                            | 13665345                                                            | 13666909 | WBGene00012879 | fbxa-215          | Y45F10C.3           |
| -0.113542478407041                  | AGIWUR42106                                                         |          |                |                   |                     |
| N2 CT IV                            | 13673804                                                            | 13677823 | WBGene00011960 | oac-48 T23G4.4    | -0.0287172837029228 |
| AGIWUR10707;AGIWUR24857;AGIWUR40749 |                                                                     |          |                |                   |                     |
| N2 CT IV                            | 13678951                                                            | 13680333 | WBGene00011961 | T23G4.5 T23G4.5   | 0.0270511297446472  |
| AGIWUR35188                         |                                                                     |          |                |                   |                     |
| N2 CT IV                            | 13685076                                                            | 13687016 | WBGene00011959 | nyn-1 T23G4.3     | -0.274905873535269  |
| AGIWUR1504                          |                                                                     |          |                |                   |                     |
| N2 CT IV                            | 13688324                                                            | 13689131 | WBGene00011958 | T23G4.2 T23G4.2   | 0.226206303248305   |
| AGIWUR41972                         |                                                                     |          |                |                   |                     |
| N2 CT IV                            | 13701240                                                            | 13704082 | WBGene00006580 | tlp-1 T23G4.1     | -0.0441872759597643 |
| AGIWUR28090                         |                                                                     |          |                |                   |                     |
| N2 CT IV                            | 13726930                                                            | 13732829 | WBGene00008123 | ent-4 C47A4.2     | 0.230824596093195   |
| AGIWUR21058                         |                                                                     |          |                |                   |                     |
| N2 CT IV                            | 13740951                                                            | 13742344 | WBGene00008124 | C47A4.3 C47A4.3   | 0.184266560255752   |
| AGIWUR42090                         |                                                                     |          |                |                   |                     |
| N2 CT IV                            | 13742550                                                            | 13742985 | WBGene00045287 | C47A4.7 C47A4.7   | 0.0236231181283371  |
| AGIWUR25662                         |                                                                     |          |                |                   |                     |
| N2 CT IV                            | 13744155                                                            | 13744988 | WBGene00014703 | C47A4.4 C47A4.4   | 0.056754721799078   |
| AGIWUR17605                         |                                                                     |          |                |                   |                     |
| N2 CT IV                            | 13745709                                                            | 13745967 | WBGene00008125 | C47A4.5 C47A4.5   | 0.379347415009928   |
| AGIWUR36297                         |                                                                     |          |                |                   |                     |
| N2 CT IV                            | 13750334                                                            | 13770495 | WBGene00012891 | sorb-1 Y45F10D.13 |                     |
| -0.193687729469978                  | AGIWUR13231;AGIWUR15599;AGIWUR20295;AGIWUR24204;AGIWUR26844         |          |                |                   |                     |
| N2 CT IV                            | 13773548                                                            | 13774678 | WBGene00012883 | Y45F10D.2         | Y45F10D.2           |
| 0.131606778170029                   | AGIWUR13053                                                         |          |                |                   |                     |
| N2 CT IV                            | 13776415                                                            | 13777149 | WBGene00044257 | Y45F10D.16        | Y45F10D.16          |
| -0.123691024465987                  | AGIWUR729;AGIWUR6269;AGIWUR9214                                     |          |                |                   |                     |
| N2 CT IV                            | 13777808                                                            | 13778812 | WBGene00004430 | rp1-18 Y45F10D.12 |                     |
| -0.0458788092969424                 | AGIWUR319;AGIWUR4112;AGIWUR9238;AGIWUR37931;AGIWUR41838;AGIWUR44465 |          |                |                   |                     |
| N2 CT IV                            | 13778866                                                            | 13782396 | WBGene00001635 | gly-10 Y45F10D.3  |                     |
| -0.156649474503721                  | AGIWUR9113                                                          |          |                |                   |                     |
| N2 CT IV                            | 13782385                                                            | 13785646 | WBGene00012890 | lact-9 Y45F10D.11 |                     |
| -0.219826388747013                  | AGIWUR40217                                                         |          |                |                   |                     |

|                                                                                    |    |    |                                                                                                                                                           |          |                |            |                             |
|------------------------------------------------------------------------------------|----|----|-----------------------------------------------------------------------------------------------------------------------------------------------------------|----------|----------------|------------|-----------------------------|
| N2                                                                                 | CT | IV | 13785743                                                                                                                                                  | 13786961 | WBGene00012889 | Y45F10D.10 | Y45F10D.10                  |
| -0.225696882435276                                                                 |    |    | AGIWUR23138;AGIWUR33058;AGIWUR36898;AGIWUR39358                                                                                                           |          |                |            |                             |
| N2                                                                                 | CT | IV | 13786945                                                                                                                                                  | 13788727 | WBGene00012888 | sas-6      | Y45F10D.9                   |
| -0.140096922193532                                                                 |    |    | AGIWUR12327                                                                                                                                               |          |                |            |                             |
| N2                                                                                 | CT | IV | 13788936                                                                                                                                                  | 13796224 | WBGene00012887 | Y45F10D.7  | Y45F10D.7                   |
| -0.219950206373571                                                                 |    |    | AGIWUR26040                                                                                                                                               |          |                |            |                             |
| N2                                                                                 | CT | IV | 13796255                                                                                                                                                  | 13797904 | WBGene00012886 | Y45F10D.6  | Y45F10D.6                   |
| -0.116124871492868                                                                 |    |    | AGIWUR33489                                                                                                                                               |          |                |            |                             |
| N2                                                                                 | CT | IV | 13804206                                                                                                                                                  | 13807777 | WBGene00012892 | Y45F10D.14 | Y45F10D.14                  |
| -0.189689707257169                                                                 |    |    | AGIWUR25961                                                                                                                                               |          |                |            |                             |
| N2                                                                                 | CT | IV | 13817487                                                                                                                                                  | 13820962 | WBGene00012893 | Y45F10D.15 | Y45F10D.15                  |
| -0.148024573890345                                                                 |    |    | AGIWUR3598                                                                                                                                                |          |                |            |                             |
| N2                                                                                 | CT | IV | 13827886                                                                                                                                                  | 13844997 | WBGene00010374 | rga-5      | H08M01.2                    |
| -0.113017955055181                                                                 |    |    | AGIWUR1256;AGIWUR6570;AGIWUR6804;AGIWUR16603;AGIWUR18694;AGIWUR19134;AGIWUR25806;AGIWUR34783;AGIWUR35545;AGIWUR39495;AGIWUR43718;AGIWUR44172              |          |                |            |                             |
| N2                                                                                 | CT | IV | 13847777                                                                                                                                                  | 13852712 | WBGene00007199 | B0513.7    | B0513.7 -0.0896008647300324 |
| AGIWUR5510;AGIWUR40527                                                             |    |    |                                                                                                                                                           |          |                |            |                             |
| N2                                                                                 | CT | IV | 13880138                                                                                                                                                  | 13881546 | WBGene00007196 | B0513.4    | B0513.4 -0.19682876011993   |
| AGIWUR10382                                                                        |    |    |                                                                                                                                                           |          |                |            |                             |
| N2                                                                                 | CT | IV | 13882225                                                                                                                                                  | 13882620 | WBGene00004443 | rp1-29     | B0513.3 -0.0523774093835883 |
| AGIWUR3930;AGIWUR14691;AGIWUR15375;AGIWUR30112;AGIWUR30805;AGIWUR35741;AGIWUR42921 |    |    |                                                                                                                                                           |          |                |            |                             |
| N2                                                                                 | CT | IV | 13882734                                                                                                                                                  | 13884177 | WBGene00007195 | B0513.2    | B0513.2 0.0567895588967597  |
| AGIWUR4762;AGIWUR15258;AGIWUR30424;AGIWUR32810                                     |    |    |                                                                                                                                                           |          |                |            |                             |
| N2                                                                                 | CT | IV | 13888089                                                                                                                                                  | 13893985 | WBGene00001562 | lin-66     | B0513.1 0.109290245843888   |
| AGIWUR19479;AGIWUR20559;AGIWUR42857;AGIWUR43601                                    |    |    |                                                                                                                                                           |          |                |            |                             |
| N2                                                                                 | CT | IV | 13897817                                                                                                                                                  | 13902874 | WBGene00012536 | Y37A1A.3   | Y37A1A.3                    |
| -0.0489940902278914                                                                |    |    | AGIWUR7072                                                                                                                                                |          |                |            |                             |
| N2                                                                                 | CT | IV | 13905991                                                                                                                                                  | 13912297 | WBGene00012535 | Y37A1A.2   | Y37A1A.2                    |
| -0.027168555476198                                                                 |    |    | AGIWUR23675;AGIWUR39180;AGIWUR42520                                                                                                                       |          |                |            |                             |
| N2                                                                                 | CT | IV | 13934445                                                                                                                                                  | 13964001 | WBGene00045063 | Y37A1A.4   | Y37A1A.4                    |
| -0.00102950879123132                                                               |    |    | AGIWUR6496;AGIWUR7639;AGIWUR12903;AGIWUR16192;AGIWUR20473;AGIWUR20664;AGIWUR21287;AGIWUR22079;AGIWUR26424;AGIWUR28173;AGIWUR29843;AGIWUR38442;AGIWUR38689 |          |                |            |                             |
| N2                                                                                 | CT | IV | 13964359                                                                                                                                                  | 13979847 | WBGene00044989 | Y37A1B.17  | Y37A1B.17                   |
| 0.069592782367927                                                                  |    |    | AGIWUR3355;AGIWUR8863;AGIWUR21633;AGIWUR27631;AGIWUR29167                                                                                                 |          |                |            |                             |
| N2                                                                                 | CT | IV | 13981087                                                                                                                                                  | 13982525 | WBGene00001575 | gei-18     | Y37A1B.15                   |
| 0.0375309034922831                                                                 |    |    | AGIWUR19287;AGIWUR27437                                                                                                                                   |          |                |            |                             |
| N2                                                                                 | CT | IV | 13982636                                                                                                                                                  | 13984141 | WBGene00006598 | tor-2      | Y37A1B.13                   |

|                     |                                                                        |          |                |          |           |
|---------------------|------------------------------------------------------------------------|----------|----------------|----------|-----------|
| -0.853938572577435  | AGIWUR21555                                                            |          |                |          |           |
| N2 CT IV            | 13989094                                                               | 14012026 | WBGene00001190 | egl-23   | Y37A1B.11 |
| 0.0108584720547391  | AGIWUR25296                                                            |          |                |          |           |
| N2 CT IV            | 14014024                                                               | 14015944 | WBGene00005810 | srw-63   | Y37A1B.10 |
| -0.0459567815556063 | AGIWUR34340                                                            |          |                |          |           |
| N2 CT IV            | 14016099                                                               | 14019983 | WBGene00012542 | irld-56  | Y37A1B.9  |
| 0.00155097819980909 | AGIWUR18144                                                            |          |                |          |           |
| N2 CT IV            | 14020198                                                               | 14024628 | WBGene00012541 | irld-55  | Y37A1B.8  |
| 0.0232116664449356  | AGIWUR38811                                                            |          |                |          |           |
| N2 CT IV            | 14042595                                                               | 14043780 | WBGene00012540 | Y37A1B.7 | Y37A1B.7  |
| -0.507094115245195  | AGIWUR38138                                                            |          |                |          |           |
| N2 CT IV            | 14051200                                                               | 14056676 | WBGene00012538 | Y37A1B.5 | Y37A1B.5  |
| 0.0917522224257148  | AGIWUR6852;AGIWUR40734                                                 |          |                |          |           |
| N2 CT IV            | 14059551                                                               | 14060712 | WBGene00012537 | Y37A1B.4 | Y37A1B.4  |
| 0.14886954990379    | AGIWUR1505;AGIWUR10911;AGIWUR16676;AGIWUR44769                         |          |                |          |           |
| N2 CT IV            | 14061005                                                               | 14069854 | WBGene00003086 | lst-4    | Y37A1B.2  |
| 0.147666469440644   | AGIWUR3964;AGIWUR20485;AGIWUR37987                                     |          |                |          |           |
| N2 CT IV            | 14071503                                                               | 14076743 | WBGene00003085 | ccar-1   | Y37A1B.1  |
| 0.146088473508245   | AGIWUR19476;AGIWUR27341                                                |          |                |          |           |
| N2 CT IV            | 14077441                                                               | 14083559 | WBGene00009924 | cfp-1    | F52B11.1  |
| -0.0596289165481725 | AGIWUR34871                                                            |          |                |          |           |
| N2 CT IV            | 14083318                                                               | 14084695 | WBGene00009925 | F52B11.2 | F52B11.2  |
| -0.181706614887984  | AGIWUR6410                                                             |          |                |          |           |
| N2 CT IV            | 14091254                                                               | 14096617 | WBGene00009926 | noah-2   | F52B11.3  |
| -0.390551552088491  | AGIWUR42435                                                            |          |                |          |           |
| N2 CT IV            | 14098325                                                               | 14099368 | WBGene00000707 | col-133  | F52B11.4  |
| 0.604300074125483   | AGIWUR23056                                                            |          |                |          |           |
| N2 CT IV            | 14102095                                                               | 14103231 | WBGene00009927 | F52B11.5 | F52B11.5  |
| -0.163513034199052  | AGIWUR2614;AGIWUR25317;AGIWUR39751                                     |          |                |          |           |
| N2 CT IV            | 14106584                                                               | 14107715 | WBGene00002117 | ins-34   | F52B11.6  |
| -0.162905059422824  | AGIWUR41432                                                            |          |                |          |           |
| N2 CT IV            | 14107721                                                               | 14116034 | WBGene00012543 | nkcc-1   | Y37A1C.1  |
| -0.0979579007036584 | AGIWUR2790;AGIWUR15781;AGIWUR21124;AGIWUR37379;AGIWUR39725             |          |                |          |           |
| N2 CT IV            | 14129391                                                               | 14131061 | WBGene00010388 | srz-42   | H12I19.1  |
| -0.230422234967159  | AGIWUR30887                                                            |          |                |          |           |
| N2 CT IV            | 14132070                                                               | 14134330 | WBGene00010394 | srz-59   | H12I19.7  |
| -0.317249609604021  | AGIWUR36275                                                            |          |                |          |           |
| N2 CT IV            | 14142081                                                               | 14143873 | WBGene00010390 | srz-30   | H12I19.3  |
| -0.0494672415700146 | AGIWUR3130;AGIWUR15872;AGIWUR25242;AGIWUR29676;AGIWUR32133;AGIWUR42099 |          |                |          |           |

|                                                 |    |    |          |          |                |           |          |                    |
|-------------------------------------------------|----|----|----------|----------|----------------|-----------|----------|--------------------|
| N2                                              | CT | IV | 14145665 | 14148869 | WBGene00010391 | oac-37    | H12I19.4 |                    |
| -0.0309065190863436 AGIWUR12381                 |    |    |          |          |                |           |          |                    |
| N2                                              | CT | IV | 14150331 | 14153361 | WBGene00010392 | oac-38    | H12I19.5 |                    |
| -0.16150390360432 AGIWUR26448                   |    |    |          |          |                |           |          |                    |
| N2                                              | CT | IV | 14154511 | 14154913 | WBGene00010395 | H12I19.8  |          | H12I19.8           |
| -0.0491298387296339 AGIWUR15654                 |    |    |          |          |                |           |          |                    |
| N2                                              | CT | IV | 14155270 | 14158048 | WBGene00011025 | R05A10.8  |          | R05A10.8           |
| -0.237138679997441 AGIWUR20126;AGIWUR41257      |    |    |          |          |                |           |          |                    |
| N2                                              | CT | IV | 14160354 | 14162872 | WBGene00011024 | R05A10.7  |          | R05A10.7           |
| 0.508893561250414 AGIWUR13597                   |    |    |          |          |                |           |          |                    |
| N2                                              | CT | IV | 14165776 | 14168487 | WBGene00011023 | R05A10.6  |          | R05A10.6           |
| 0.212542398692193 AGIWUR7296                    |    |    |          |          |                |           |          |                    |
| N2                                              | CT | IV | 14168906 | 14170838 | WBGene00011022 | R05A10.5  |          | R05A10.5           |
| -0.0382554235823349 AGIWUR17174                 |    |    |          |          |                |           |          |                    |
| N2                                              | CT | IV | 14172481 | 14173216 | WBGene00011021 | R05A10.4  |          | R05A10.4           |
| -0.258943123762062 AGIWUR13880                  |    |    |          |          |                |           |          |                    |
| N2                                              | CT | IV | 14173642 | 14176473 | WBGene00011020 | R05A10.3  |          | R05A10.3           |
| -0.288924959298496 AGIWUR1079                   |    |    |          |          |                |           |          |                    |
| N2                                              | CT | IV | 14177200 | 14178940 | WBGene00011019 | R05A10.2  |          | R05A10.2           |
| -0.154528942455459 AGIWUR9589                   |    |    |          |          |                |           |          |                    |
| N2                                              | CT | IV | 14182377 | 14192674 | WBGene00011018 | R05A10.1  |          | R05A10.1           |
| -0.13725626107449 AGIWUR11624;AGIWUR43235       |    |    |          |          |                |           |          |                    |
| N2                                              | CT | IV | 14193430 | 14195989 | WBGene00010483 | K01G12.3  |          | K01G12.3           |
| -0.362949420843537 AGIWUR23314;AGIWUR30947      |    |    |          |          |                |           |          |                    |
| N2                                              | CT | IV | 14196440 | 14198824 | WBGene00008535 | F02H6.2   | F02H6.2  | -0.141076817731046 |
| AGIWUR3140;AGIWUR7706                           |    |    |          |          |                |           |          |                    |
| N2                                              | CT | IV | 14199263 | 14201780 | WBGene00008534 | F02H6.1   | F02H6.1  | -0.405274747042059 |
| AGIWUR21214                                     |    |    |          |          |                |           |          |                    |
| N2                                              | CT | IV | 14203427 | 14205357 | WBGene00008536 | F02H6.3   | F02H6.3  | -0.235815769186969 |
| AGIWUR10428;AGIWUR21966;AGIWUR28377;AGIWUR31985 |    |    |          |          |                |           |          |                    |
| N2                                              | CT | IV | 14207564 | 14219159 | WBGene00008537 | F02H6.4   | F02H6.4  | 0.361576084772049  |
| AGIWUR12439                                     |    |    |          |          |                |           |          |                    |
| N2                                              | CT | IV | 14219871 | 14224439 | WBGene00008538 | sqrd-1    | F02H6.5  | 0.106375013911123  |
| AGIWUR17864                                     |    |    |          |          |                |           |          |                    |
| N2                                              | CT | IV | 14225918 | 14228169 | WBGene00008540 | F02H6.7   | F02H6.7  | 0.212331471533085  |
| AGIWUR14179                                     |    |    |          |          |                |           |          |                    |
| N2                                              | CT | IV | 14229336 | 14230899 | WBGene00008539 | F02H6.6   | F02H6.6  | -0.149219234772759 |
| AGIWUR2933;AGIWUR31731;AGIWUR36044              |    |    |          |          |                |           |          |                    |
| N2                                              | CT | IV | 14234341 | 14239076 | WBGene00013411 | Y64G10A.1 |          | Y64G10A.1          |



|                     |                                                                         |          |                |                       |
|---------------------|-------------------------------------------------------------------------|----------|----------------|-----------------------|
| 0.0156990122074321  | AGIWUR24728                                                             |          |                |                       |
| N2 CT IV            | 14245439                                                                | 14250213 | WBGene00013417 | srab-24 Y64G10A.8     |
| -0.0342736084556154 | AGIWUR31275;AGIWUR33166;AGIWUR42828                                     |          |                |                       |
| N2 CT IV            | 14276466                                                                | 14285523 | WBGene00013415 | ilcr-1 Y64G10A.6      |
| 0.00518018483622384 | AGIWUR37644                                                             |          |                |                       |
| N2 CT IV            | 14291901                                                                | 14319564 | WBGene00013416 | Y64G10A.7 Y64G10A.7   |
| 0.484676503278343   | AGIWUR16745;AGIWUR24103;AGIWUR27809;AGIWUR41358;AGIWUR41377;AGIWUR42644 |          |                |                       |
| N2 CT IV            | 14319834                                                                | 14321755 | WBGene00013454 | fbxa-126 Y67A10A.5    |
| 0.222683995692663   | AGIWUR8515                                                              |          |                |                       |
| N2 CT IV            | 14323244                                                                | 14325665 | WBGene00013453 | fbxa-83 Y67A10A.4     |
| -0.484128420996559  | AGIWUR15944                                                             |          |                |                       |
| N2 CT IV            | 14328995                                                                | 14334459 | WBGene00013452 | Y67A10A.3 Y67A10A.3   |
| 0.206034197496864   | AGIWUR42727                                                             |          |                |                       |
| N2 CT IV            | 14335194                                                                | 14336491 | WBGene00045099 | Y67A10A.13 Y67A10A.13 |
| 0.0864582296427816  | AGIWUR19281;AGIWUR37071                                                 |          |                |                       |
| N2 CT IV            | 14338057                                                                | 14339279 | WBGene00013451 | Y67A10A.2 Y67A10A.2   |
| 0.151102118168396   | AGIWUR26715;AGIWUR40793                                                 |          |                |                       |
| N2 CT IV            | 14339968                                                                | 14342112 | WBGene00044906 | Y67A10A.11 Y67A10A.11 |
| -0.216553437813332  | AGIWUR5989                                                              |          |                |                       |
| N2 CT IV            | 14342660                                                                | 14343856 | WBGene00013459 | Y67A10A.10 Y67A10A.10 |
| -0.0836425886377778 | AGIWUR41956                                                             |          |                |                       |
| N2 CT IV            | 14345435                                                                | 14350751 | WBGene00013450 | oac-56 Y67A10A.1      |
| 0.0471014506775207  | AGIWUR22040                                                             |          |                |                       |
| N2 CT IV            | 14374114                                                                | 14379643 | WBGene00013456 | Y67A10A.7 Y67A10A.7   |
| -0.0380196892762301 | AGIWUR10747;AGIWUR41785                                                 |          |                |                       |
| N2 CT IV            | 14379953                                                                | 14383701 | WBGene00013457 | paqr-3 Y67A10A.8      |
| 0.111355305457556   | AGIWUR12238                                                             |          |                |                       |
| N2 CT IV            | 14394138                                                                | 14400368 | WBGene00013458 | Y67A10A.9 Y67A10A.9   |
| 0.0766852128145068  | AGIWUR35244                                                             |          |                |                       |
| N2 CT IV            | 14419711                                                                | 14422038 | WBGene00045060 | F55B11.7 F55B11.7     |
| 0.0211929898308614  | AGIWUR20609;AGIWUR37396                                                 |          |                |                       |
| N2 CT IV            | 14422268                                                                | 14423294 | WBGene00010084 | F55B11.2 F55B11.2     |
| -0.241271263231736  | AGIWUR9340                                                              |          |                |                       |
| N2 CT IV            | 14424693                                                                | 14425859 | WBGene00010085 | F55B11.3 F55B11.3     |
| -0.0787289364602834 | AGIWUR26421                                                             |          |                |                       |
| N2 CT IV            | 14427695                                                                | 14428464 | WBGene00010087 | F55B11.5 F55B11.5     |
| -0.249388718167227  | AGIWUR37102                                                             |          |                |                       |
| N2 CT IV            | 14429574                                                                | 14430920 | WBGene00010086 | F55B11.4 F55B11.4     |
| 0.0639438213224564  | AGIWUR5871;AGIWUR7295;AGIWUR13797;AGIWUR39876;AGIWUR41646               |          |                |                       |

|                                                      |    |    |          |          |                |           |           |                     |
|------------------------------------------------------|----|----|----------|----------|----------------|-----------|-----------|---------------------|
| N2                                                   | CT | IV | 14436367 | 14444183 | WBGene00006606 | tra-3     | LLC1.1    | -0.143252927379477  |
| AGIWUR18748                                          |    |    |          |          |                |           |           |                     |
| N2                                                   | CT | IV | 14456900 | 14464098 | WBGene00010793 | LLC1.2    | LLC1.2    | -0.0870640485352183 |
| AGIWUR19648                                          |    |    |          |          |                |           |           |                     |
| N2                                                   | CT | IV | 14464517 | 14469136 | WBGene00010794 | dld-1     | LLC1.3    | 0.133395099306878   |
| AGIWUR1832;AGIWUR15974;AGIWUR42021                   |    |    |          |          |                |           |           |                     |
| N2                                                   | CT | IV | 14482334 | 14486439 | WBGene00013292 | Y57G11A.4 |           | Y57G11A.4           |
| -0.185476826603935 AGIWUR25101                       |    |    |          |          |                |           |           |                     |
| N2                                                   | CT | IV | 14487086 | 14505166 | WBGene00013289 | tag-273   | Y57G11A.1 |                     |
| -0.137530375357432 AGIWUR3903;AGIWUR7605;AGIWUR27692 |    |    |          |          |                |           |           |                     |
| N2                                                   | CT | IV | 14511884 | 14512505 | WBGene00013293 | Y57G11A.5 |           | Y57G11A.5           |
| 0.0518326679091787 AGIWUR30207                       |    |    |          |          |                |           |           |                     |
| N2                                                   | CT | IV | 14514376 | 14515118 | WBGene00044097 | srh-64    | Y57G11A.6 |                     |
| 0.0174488367516403 AGIWUR28692                       |    |    |          |          |                |           |           |                     |
| N2                                                   | CT | IV | 14517022 | 14519539 | WBGene00013290 | Y57G11A.2 |           | Y57G11A.2           |
| 0.41656945874826 AGIWUR16288                         |    |    |          |          |                |           |           |                     |
| N2                                                   | CT | IV | 14519759 | 14520999 | WBGene00012087 | T27E7.1   | T27E7.1   | 0.387744639544877   |
| AGIWUR4550                                           |    |    |          |          |                |           |           |                     |
| N2                                                   | CT | IV | 14522464 | 14523677 | WBGene00005286 | srh-65    | T27E7.2   | 0.133039369410804   |
| AGIWUR5005                                           |    |    |          |          |                |           |           |                     |
| N2                                                   | CT | IV | 14523868 | 14525197 | WBGene00005285 | srh-63    | T27E7.8   | -0.965133331188859  |
| AGIWUR20602                                          |    |    |          |          |                |           |           |                     |
| N2                                                   | CT | IV | 14527093 | 14527343 | WBGene00045313 | T27E7.12  |           | T27E7.12            |
| -0.0946998447468363 AGIWUR32313                      |    |    |          |          |                |           |           |                     |
| N2                                                   | CT | IV | 14529018 | 14530809 | WBGene00012088 | T27E7.3   | T27E7.3   | -0.278394254803537  |
| AGIWUR32906                                          |    |    |          |          |                |           |           |                     |
| N2                                                   | CT | IV | 14531180 | 14531646 | WBGene00044268 | T27E7.10  |           | T27E7.10            |
| 0.0677307925418118 AGIWUR17144;AGIWUR40545           |    |    |          |          |                |           |           |                     |
| N2                                                   | CT | IV | 14533518 | 14535067 | WBGene00012089 | T27E7.4   | T27E7.4   | -0.272125274605653  |
| AGIWUR36082                                          |    |    |          |          |                |           |           |                     |
| N2                                                   | CT | IV | 14537163 | 14538325 | WBGene00012090 | T27E7.5   | T27E7.5   | 0.198697589672467   |
| AGIWUR17253                                          |    |    |          |          |                |           |           |                     |
| N2                                                   | CT | IV | 14539762 | 14542602 | WBGene00012091 | pals-29   | T27E7.6   | 1.91435381660872    |
| AGIWUR2847;AGIWUR6198;AGIWUR10921                    |    |    |          |          |                |           |           |                     |
| N2                                                   | CT | IV | 14546933 | 14549386 | WBGene00012093 | T27E7.9   | T27E7.9   | 0.119695607590048   |
| AGIWUR33290                                          |    |    |          |          |                |           |           |                     |
| N2                                                   | CT | IV | 14549827 | 14551957 | WBGene00013294 | pals-30   | Y57G11B.1 |                     |
| 0.707937877744314 AGIWUR43995                        |    |    |          |          |                |           |           |                     |
| N2                                                   | CT | IV | 14553598 | 14554883 | WBGene00013298 | Y57G11B.6 |           | Y57G11B.6           |

|                     |                                    |          |                |                   |             |
|---------------------|------------------------------------|----------|----------------|-------------------|-------------|
| 0.0695378046269139  | AGIWUR21498                        |          |                |                   |             |
| N2 CT IV            | 14565330                           | 14567331 | WBGene00013295 | Y57G11B.2         | Y57G11B.2   |
| 0.128457322604102   | AGIWUR36699                        |          |                |                   |             |
| N2 CT IV            | 14570160                           | 14572721 | WBGene00077763 | Y57G11B.97        | Y57G11B.97  |
| 0.269816944618844   | AGIWUR12079;AGIWUR37121            |          |                |                   |             |
| N2 CT IV            | 14574819                           | 14576580 | WBGene00013297 | Y57G11B.5         | Y57G11B.5   |
| -0.270952872776427  | AGIWUR33753                        |          |                |                   |             |
| N2 CT IV            | 14577004                           | 14577273 | WBGene00255522 | Y57G11B.223       | Y57G11B.223 |
| -0.0892273804907298 | AGIWUR36876                        |          |                |                   |             |
| N2 CT IV            | 14616603                           | 14623961 | WBGene00007058 | dmd-6 F13G11.1    |             |
| 0.205030390936731   | AGIWUR18122;AGIWUR41975            |          |                |                   |             |
| N2 CT IV            | 14633099                           | 14634405 | WBGene00008772 | irld-4 F13G11.2   |             |
| 0.24404157741558    | AGIWUR19940                        |          |                |                   |             |
| N2 CT IV            | 14635126                           | 14636051 | WBGene00045038 | ule-2 F13G11.3    |             |
| -0.117265870453176  | AGIWUR16361                        |          |                |                   |             |
| N2 CT IV            | 14637751                           | 14641229 | WBGene00013328 | Y57G11C.39        | Y57G11C.39  |
| 0.334047193132776   | AGIWUR36645                        |          |                |                   |             |
| N2 CT IV            | 14643025                           | 14653376 | WBGene00013322 | Y57G11C.32        | Y57G11C.32  |
| -0.0622751189619306 | AGIWUR13955                        |          |                |                   |             |
| N2 CT IV            | 14655535                           | 14655916 | WBGene00045282 | Y57G11C.56        | Y57G11C.56  |
| 0.180911605632534   | AGIWUR27072;AGIWUR40230            |          |                |                   |             |
| N2 CT IV            | 14657081                           | 14658165 | WBGene00013323 | Y57G11C.33        | Y57G11C.33  |
| -0.190855108320783  | AGIWUR11773;AGIWUR31272            |          |                |                   |             |
| N2 CT IV            | 14658319                           | 14675141 | WBGene00013326 | anoh-2 Y57G11C.37 |             |
| -0.0932645564904755 | AGIWUR43237                        |          |                |                   |             |
| N2 CT IV            | 14683043                           | 14687405 | WBGene00013321 | Y57G11C.31        | Y57G11C.31  |
| 0.0901140859193674  | AGIWUR12323                        |          |                |                   |             |
| N2 CT IV            | 14694032                           | 14699940 | WBGene00001818 | haf-8 Y57G11C.1   |             |
| -0.0512769970066156 | AGIWUR32154                        |          |                |                   |             |
| N2 CT IV            | 14703209                           | 14704255 | WBGene00013329 | Y57G11C.40        | Y57G11C.40  |
| -0.283495116477305  | AGIWUR30195                        |          |                |                   |             |
| N2 CT IV            | 14705536                           | 14706402 | WBGene00013330 | Y57G11C.41        | Y57G11C.41  |
| 0.0195242942131619  | AGIWUR28191                        |          |                |                   |             |
| N2 CT IV            | 14728534                           | 14745676 | WBGene00013331 | Y57G11C.42        | Y57G11C.42  |
| 0.100378898381141   | AGIWUR6177;AGIWUR42172;AGIWUR44605 |          |                |                   |             |
| N2 CT IV            | 14754089                           | 14754969 | WBGene00077762 | Y57G11C.499       | Y57G11C.499 |
| 0.0633475612452568  | AGIWUR36923                        |          |                |                   |             |
| N2 CT IV            | 14758362                           | 14760945 | WBGene00013304 | Y57G11C.6         | Y57G11C.6   |
| 0.114982777305532   | AGIWUR5415;AGIWUR6344              |          |                |                   |             |

|                                                                                                                                  |    |    |                                                                        |          |                |              |              |
|----------------------------------------------------------------------------------------------------------------------------------|----|----|------------------------------------------------------------------------|----------|----------------|--------------|--------------|
| N2                                                                                                                               | CT | IV | 14761818                                                               | 14765434 | WBGene00013303 | Y57G11C.5    | Y57G11C.5    |
| 0.341792583344002                                                                                                                |    |    | AGIWUR557                                                              |          |                |              |              |
| N2                                                                                                                               | CT | IV | 14765629                                                               | 14766665 | WBGene00013302 | vti-1        | Y57G11C.4    |
| 0.0152215690120645                                                                                                               |    |    | AGIWUR18568                                                            |          |                |              |              |
| N2                                                                                                                               | CT | IV | 14766773                                                               | 14767730 | WBGene00013324 | mrps-7       | Y57G11C.34   |
| -0.186190063632061                                                                                                               |    |    | AGIWUR41282                                                            |          |                |              |              |
| N2                                                                                                                               | CT | IV | 14768155                                                               | 14769282 | WBGene00013301 | Y57G11C.3    | Y57G11C.3    |
| -0.0448006873760711                                                                                                              |    |    | AGIWUR1560;AGIWUR3449;AGIWUR5876                                       |          |                |              |              |
| N2                                                                                                                               | CT | IV | 14769441                                                               | 14770719 | WBGene00013332 | Y57G11C.43   | Y57G11C.43   |
| -0.210856698824951                                                                                                               |    |    | AGIWUR11667                                                            |          |                |              |              |
| N2                                                                                                                               | CT | IV | 14770654                                                               | 14771425 | WBGene00013333 | Y57G11C.44   | Y57G11C.44   |
| -0.203310593016321                                                                                                               |    |    | AGIWUR25285                                                            |          |                |              |              |
| N2                                                                                                                               | CT | IV | 14771419                                                               | 14773535 | WBGene00013325 | Y57G11C.36   | Y57G11C.36   |
| 0.0372276101121223                                                                                                               |    |    | AGIWUR44730                                                            |          |                |              |              |
| N2                                                                                                                               | CT | IV | 14773598                                                               | 14774634 | WBGene00044258 | Y57G11C.51   | Y57G11C.51   |
| 0.189841993944704                                                                                                                |    |    | AGIWUR44818                                                            |          |                |              |              |
| N2                                                                                                                               | CT | IV | 14780940                                                               | 14781266 | WBGene00045311 | Y57G11C.57   | Y57G11C.57   |
| 0.431346046669757                                                                                                                |    |    | AGIWUR23356                                                            |          |                |              |              |
| N2                                                                                                                               | CT | IV | 14782644                                                               | 14783342 | WBGene00194649 | Y57G11C.1130 | Y57G11C.1130 |
| -0.0912454045389985                                                                                                              |    |    | AGIWUR29716                                                            |          |                |              |              |
| N2                                                                                                                               | CT | IV | 14783341                                                               | 14784252 | WBGene00013334 | nlp-56       | Y57G11C.45   |
| -0.0461941606526821                                                                                                              |    |    | AGIWUR32710                                                            |          |                |              |              |
| N2                                                                                                                               | CT | IV | 14787168                                                               | 14790843 | WBGene00013307 | Y57G11C.9    | Y57G11C.9    |
| 0.0223416909829686                                                                                                               |    |    |                                                                        |          |                |              |              |
| AGIWUR12676;AGIWUR14588;AGIWUR17507;AGIWUR18185;AGIWUR18687;AGIWUR32905;AGIWUR40587;AGIWUR43681                                  |    |    |                                                                        |          |                |              |              |
| N2                                                                                                                               | CT | IV | 14790818                                                               | 14792887 | WBGene00001558 | gdi-1        | Y57G11C.10   |
| 0.141211360108862                                                                                                                |    |    | AGIWUR20763;AGIWUR35736;AGIWUR44186                                    |          |                |              |              |
| N2                                                                                                                               | CT | IV | 14793119                                                               | 14796375 | WBGene00000763 | coq-3        | Y57G11C.11   |
| -0.139100598080066                                                                                                               |    |    | AGIWUR3632;AGIWUR32574;AGIWUR39151;AGIWUR42391;AGIWUR43225             |          |                |              |              |
| N2                                                                                                                               | CT | IV | 14796417                                                               | 14797544 | WBGene00013308 | nuo-3        | Y57G11C.12   |
| -0.00443115696505103                                                                                                             |    |    |                                                                        |          |                |              |              |
| AGIWUR900;AGIWUR4845;AGIWUR13485;AGIWUR14053;AGIWUR19896;AGIWUR20504;AGIWUR26997;AGIWUR35472;AGIWUR38753;AGIWUR41292;AGIWUR42681 |    |    |                                                                        |          |                |              |              |
| N2                                                                                                                               | CT | IV | 14798149                                                               | 14799229 | WBGene00000192 | arl-8        | Y57G11C.13   |
| -0.205025298090188                                                                                                               |    |    | AGIWUR2999;AGIWUR15427;AGIWUR15779;AGIWUR17064;AGIWUR28321;AGIWUR41048 |          |                |              |              |
| N2                                                                                                                               | CT | IV | 14799311                                                               | 14801063 | WBGene00013310 | Y57G11C.14   | Y57G11C.14   |
| -0.267955627626225                                                                                                               |    |    | AGIWUR26615                                                            |          |                |              |              |
| N2                                                                                                                               | CT | IV | 14803103                                                               | 14803480 | WBGene00045029 | Y57G11C.54   | Y57G11C.54   |
| -0.0671236677412823                                                                                                              |    |    | AGIWUR4085;AGIWUR6020;AGIWUR12212;AGIWUR20576;AGIWUR28328              |          |                |              |              |

|                      |    |    |                                                            |          |                |            |            |                     |
|----------------------|----|----|------------------------------------------------------------|----------|----------------|------------|------------|---------------------|
| N2                   | CT | IV | 14807189                                                   | 14809958 | WBGene00023520 | oig-5      | Y57G11C.50 |                     |
| 0.0525240951333945   |    |    | AGIWUR17302;AGIWUR29275                                    |          |                |            |            |                     |
| N2                   | CT | IV | 14822540                                                   | 14825264 | WBGene00013311 | sec-61     | Y57G11C.15 |                     |
| 0.358791664398325    |    |    | AGIWUR26320                                                |          |                |            |            |                     |
| N2                   | CT | IV | 14825679                                                   | 14826448 | WBGene00004487 | rps-18     | Y57G11C.16 |                     |
| -0.00183465764174251 |    |    | AGIWUR31968;AGIWUR37362                                    |          |                |            |            |                     |
| N2                   | CT | IV | 14826449                                                   | 14829115 | WBGene00013312 | hhat-2     | Y57G11C.17 |                     |
| -0.0861397544576636  |    |    | AGIWUR33555                                                |          |                |            |            |                     |
| N2                   | CT | IV | 14837112                                                   | 14853662 | WBGene00013317 | Y57G11C.22 | Y57G11C.22 |                     |
| 0.266411217862224    |    |    | AGIWUR3328;AGIWUR9873                                      |          |                |            |            |                     |
| N2                   | CT | IV | 14854003                                                   | 14854426 | WBGene00044741 | Y57G11C.52 | Y57G11C.52 |                     |
| 0.119701240738234    |    |    | AGIWUR2076;AGIWUR10413;AGIWUR32636;AGIWUR36749;AGIWUR37684 |          |                |            |            |                     |
| N2                   | CT | IV | 14855331                                                   | 14861791 | WBGene00013318 | Y57G11C.23 | Y57G11C.23 |                     |
| 0.313216967852869    |    |    | AGIWUR4719                                                 |          |                |            |            |                     |
| N2                   | CT | IV | 14862447                                                   | 14869951 | WBGene00013327 | Y57G11C.38 | Y57G11C.38 |                     |
| -0.0457313641857553  |    |    | AGIWUR15936                                                |          |                |            |            |                     |
| N2                   | CT | IV | 14879490                                                   | 14900652 | WBGene00001330 | eps-8      | Y57G11C.24 |                     |
| 0.100795046676389    |    |    | AGIWUR641;AGIWUR27191;AGIWUR32076;AGIWUR35401;AGIWUR36433  |          |                |            |            |                     |
| N2                   | CT | IV | 14904994                                                   | 14909686 | WBGene00013336 | pnc-2      | Y57G11C.47 |                     |
| -0.260212088763206   |    |    | AGIWUR24181                                                |          |                |            |            |                     |
| N2                   | CT | IV | 14919610                                                   | 14920421 | WBGene00013319 | ccch-5     | Y57G11C.25 |                     |
| 0.0396710892598886   |    |    | AGIWUR21538                                                |          |                |            |            |                     |
| N2                   | CT | IV | 14924444                                                   | 14926046 | WBGene00014923 | Y57G11C.26 | Y57G11C.26 |                     |
| -0.147173254382996   |    |    | AGIWUR14344;AGIWUR26021                                    |          |                |            |            |                     |
| N2                   | CT | IV | 14927059                                                   | 14928623 | WBGene00014925 | Y57G11C.29 | Y57G11C.29 |                     |
| -0.0929993871275858  |    |    | AGIWUR7530;AGIWUR39249                                     |          |                |            |            |                     |
| N2                   | CT | IV | 14929721                                                   | 14931931 | WBGene00014924 | Y57G11C.28 | Y57G11C.28 |                     |
| 0.0368977249419302   |    |    | AGIWUR40086                                                |          |                |            |            |                     |
| N2                   | CT | IV | 14938896                                                   | 14941898 | WBGene00014926 | Y57G11C.30 | Y57G11C.30 |                     |
| 0.170029677497205    |    |    | AGIWUR37285                                                |          |                |            |            |                     |
| N2                   | CT | IV | 14942286                                                   | 14945328 | WBGene00013337 | Y57G11C.48 | Y57G11C.48 |                     |
| 0.142333034796747    |    |    | AGIWUR33033                                                |          |                |            |            |                     |
| N2                   | CT | IV | 14950652                                                   | 14954226 | WBGene00045146 | Y41E3.22   | Y41E3.22   |                     |
| -0.0931369949595569  |    |    | AGIWUR11004;AGIWUR13696;AGIWUR31781;AGIWUR44633            |          |                |            |            |                     |
| N2                   | CT | IV | 14954206                                                   | 14958914 | WBGene00012762 | Y41E3.1    | Y41E3.1    | 0.0402844666066748  |
| AGIWUR33798          |    |    |                                                            |          |                |            |            |                     |
| N2                   | CT | IV | 14974292                                                   | 14974561 | WBGene00045000 | Y41E3.20   | Y41E3.20   |                     |
| -0.0629201925681757  |    |    | AGIWUR5211                                                 |          |                |            |            |                     |
| N2                   | CT | IV | 14981609                                                   | 14996306 | WBGene00012763 | atln-2     | Y41E3.3    | -0.0846047146462041 |

|                                                                                          |    |    |          |          |                |          |                             |
|------------------------------------------------------------------------------------------|----|----|----------|----------|----------------|----------|-----------------------------|
| AGIWUR39088                                                                              |    |    |          |          |                |          |                             |
| N2                                                                                       | CT | IV | 15008503 | 15013183 | WBGene00001336 | qars-1   | Y41E3.4 -0.013755779327699  |
| AGIWUR33851                                                                              |    |    |          |          |                |          |                             |
| N2                                                                                       | CT | IV | 15014042 | 15025513 | WBGene00012765 | Y41E3.7  | Y41E3.7 -0.15912598594037   |
| AGIWUR7796;AGIWUR32310;AGIWUR32659;AGIWUR37732                                           |    |    |          |          |                |          |                             |
| N2                                                                                       | CT | IV | 15025710 | 15037036 | WBGene00012767 | fcd-2    | Y41E3.9 -0.0162321995798607 |
| AGIWUR24036                                                                              |    |    |          |          |                |          |                             |
| N2                                                                                       | CT | IV | 15037321 | 15039551 | WBGene00012768 | eef-1B.2 | Y41E3.10                    |
| -0.0418922512278463 AGIWUR22719;AGIWUR28123;AGIWUR37620                                  |    |    |          |          |                |          |                             |
| N2                                                                                       | CT | IV | 15039619 | 15049273 | WBGene00012769 | Y41E3.11 | Y41E3.11                    |
| 0.175287930912639 AGIWUR7425;AGIWUR12350;AGIWUR28909;AGIWUR36823                         |    |    |          |          |                |          |                             |
| N2                                                                                       | CT | IV | 15049411 | 15053371 | WBGene00012770 | srt-47   | Y41E3.12                    |
| -0.0229811580025228 AGIWUR5695                                                           |    |    |          |          |                |          |                             |
| N2                                                                                       | CT | IV | 15056131 | 15057889 | WBGene00044979 | Y41E3.19 | Y41E3.19                    |
| 0.27572492978279 AGIWUR38414                                                             |    |    |          |          |                |          |                             |
| N2                                                                                       | CT | IV | 15058294 | 15058694 | WBGene00012771 | Y41E3.13 | Y41E3.13                    |
| -0.162838053905196 AGIWUR39152                                                           |    |    |          |          |                |          |                             |
| N2                                                                                       | CT | IV | 15061929 | 15065748 | WBGene00044003 | Y41E3.18 | Y41E3.18                    |
| 0.232129202834175 AGIWUR10034;AGIWUR15352                                                |    |    |          |          |                |          |                             |
| N2                                                                                       | CT | IV | 15065866 | 15068918 | WBGene00012773 | srt-48   | Y41E3.15                    |
| -0.0223856047150246 AGIWUR37577;AGIWUR44448                                              |    |    |          |          |                |          |                             |
| N2                                                                                       | CT | IV | 15074692 | 15088581 | WBGene00012775 | srt-50   | Y41E3.17                    |
| 0.0419547026310387 AGIWUR4268;AGIWUR5689;AGIWUR13957;AGIWUR21801;AGIWUR28319;AGIWUR36582 |    |    |          |          |                |          |                             |
| N2                                                                                       | CT | IV | 15092881 | 15098376 | WBGene00012772 | srt-49   | Y41E3.14                    |
| -0.217030418862635 AGIWUR25669                                                           |    |    |          |          |                |          |                             |
| N2                                                                                       | CT | IV | 15103629 | 15106483 | WBGene00010950 | srt-44   | M199.1 -0.124429004285746   |
| AGIWUR28281                                                                              |    |    |          |          |                |          |                             |
| N2                                                                                       | CT | IV | 15108775 | 15110915 | WBGene00010951 | M199.2   | M199.2 -0.407877959649722   |
| AGIWUR10267                                                                              |    |    |          |          |                |          |                             |
| N2                                                                                       | CT | IV | 15115569 | 15117823 | WBGene00010952 | clec-188 | M199.3                      |
| 0.04425719675897 AGIWUR27564                                                             |    |    |          |          |                |          |                             |
| N2                                                                                       | CT | IV | 15120519 | 15122548 | WBGene00010954 | clec-189 | M199.6                      |
| -0.0807103332959844 AGIWUR32713                                                          |    |    |          |          |                |          |                             |
| N2                                                                                       | CT | IV | 15123182 | 15124393 | WBGene00010955 | M199.7   | M199.7 0.457679397661306    |
| AGIWUR22985                                                                              |    |    |          |          |                |          |                             |
| N2                                                                                       | CT | IV | 15124931 | 15126122 | WBGene00010953 | clec-190 | M199.4                      |
| 0.00406984878429739 AGIWUR10019                                                          |    |    |          |          |                |          |                             |
| N2                                                                                       | CT | IV | 15127491 | 15127794 | WBGene00044998 | M199.9   | M199.9 -0.141486730583244   |
| AGIWUR14687;AGIWUR16889;AGIWUR27904;AGIWUR31600;AGIWUR42202                              |    |    |          |          |                |          |                             |

|                                                                                                |    |    |                     |                                                             |                |           |           |                    |
|------------------------------------------------------------------------------------------------|----|----|---------------------|-------------------------------------------------------------|----------------|-----------|-----------|--------------------|
| N2                                                                                             | CT | IV | 15129666            | 15131797                                                    | WBGene00000708 | col-135   | M199.5    | -0.107626847757576 |
| AGIWUR42402                                                                                    |    |    |                     |                                                             |                |           |           |                    |
| N2                                                                                             | CT | IV | 15139101            | 15140932                                                    | WBGene00005208 | srg-51    | Y40H7A.8  |                    |
|                                                                                                |    |    | -0.066755548455256  | AGIWUR28884                                                 |                |           |           |                    |
| N2                                                                                             | CT | IV | 15143773            | 15147204                                                    | WBGene00006138 | str-78    | Y40H7A.1  |                    |
|                                                                                                |    |    | -0.14428671829902   | AGIWUR5149                                                  |                |           |           |                    |
| N2                                                                                             | CT | IV | 15167800            | 15175536                                                    | WBGene00012744 | Y40H7A.4  |           | Y40H7A.4           |
|                                                                                                |    |    | 0.0679277707776436  |                                                             |                |           |           |                    |
| AGIWUR1824;AGIWUR18651;AGIWUR20328;AGIWUR20976;AGIWUR27625;AGIWUR34304;AGIWUR40849;AGIWUR41662 |    |    |                     |                                                             |                |           |           |                    |
| N2                                                                                             | CT | IV | 15179922            | 15182953                                                    | WBGene00005101 | srd-23    | Y40H7A.5  |                    |
|                                                                                                |    |    | -0.0615270303659772 | AGIWUR6509                                                  |                |           |           |                    |
| N2                                                                                             | CT | IV | 15192299            | 15203023                                                    | WBGene00005056 | sra-30    | Y40H7A.6  |                    |
|                                                                                                |    |    | 0.226118926694229   | AGIWUR24500                                                 |                |           |           |                    |
| N2                                                                                             | CT | IV | 15207593            | 15209522                                                    | WBGene00012746 | Y40H7A.9  |           | Y40H7A.9           |
|                                                                                                |    |    | -0.500873654534349  | AGIWUR21815                                                 |                |           |           |                    |
| N2                                                                                             | CT | IV | 15210123            | 15215626                                                    | WBGene00012747 | Y40H7A.10 |           | Y40H7A.10          |
|                                                                                                |    |    | -0.18660603380939   | AGIWUR12949                                                 |                |           |           |                    |
| N2                                                                                             | CT | IV | 15219686            | 15220346                                                    | WBGene00012748 | Y40H7A.11 |           | Y40H7A.11          |
|                                                                                                |    |    | 0.00225577672120458 | AGIWUR36967                                                 |                |           |           |                    |
| N2                                                                                             | CT | IV | 15236251            | 15243675                                                    | WBGene00013517 | lgc-52    | Y73F8A.2  |                    |
|                                                                                                |    |    | -0.0216919761660019 | AGIWUR9569                                                  |                |           |           |                    |
| N2                                                                                             | CT | IV | 15245955            | 15246371                                                    | WBGene00044259 | Y73F8A.36 |           | Y73F8A.36          |
|                                                                                                |    |    | -0.193984520314769  | AGIWUR13828;AGIWUR18916;AGIWUR29753;AGIWUR30089;AGIWUR40751 |                |           |           |                    |
| N2                                                                                             | CT | IV | 15250152            | 15252257                                                    | WBGene00005625 | srj-42    | Y73F8A.3  |                    |
|                                                                                                |    |    | 0.0688718477645924  | AGIWUR32614;AGIWUR37734;AGIWUR41029                         |                |           |           |                    |
| N2                                                                                             | CT | IV | 15255690            | 15257628                                                    | WBGene00014948 | Y73F8A.4  |           | Y73F8A.4           |
|                                                                                                |    |    | -0.321673924445692  | AGIWUR6659;AGIWUR23773                                      |                |           |           |                    |
| N2                                                                                             | CT | IV | 15259879            | 15269045                                                    | WBGene00013518 | Y73F8A.5  |           | Y73F8A.5           |
|                                                                                                |    |    | 0.156749834008775   | AGIWUR5580                                                  |                |           |           |                    |
| N2                                                                                             | CT | IV | 15270160            | 15275835                                                    | WBGene00000370 | ccg-1     | Y73F8A.6  |                    |
|                                                                                                |    |    | -0.182436250041828  | AGIWUR40979                                                 |                |           |           |                    |
| N2                                                                                             | CT | IV | 15288019            | 15289505                                                    | WBGene00006079 | str-11    | Y73F8A.7  |                    |
|                                                                                                |    |    | -0.176863387296044  | AGIWUR13196;AGIWUR43672                                     |                |           |           |                    |
| N2                                                                                             | CT | IV | 15294340            | 15295297                                                    | WBGene00013519 | Y73F8A.10 |           | Y73F8A.10          |
|                                                                                                |    |    | -0.0333770756510798 | AGIWUR2474                                                  |                |           |           |                    |
| N2                                                                                             | CT | IV | 15302421            | 15309408                                                    | WBGene00013520 | best-21   | Y73F8A.11 |                    |
|                                                                                                |    |    | 0.20683693328596    | AGIWUR25474                                                 |                |           |           |                    |
| N2                                                                                             | CT | IV | 15312247            | 15313982                                                    | WBGene00013522 | Y73F8A.13 |           | Y73F8A.13          |
|                                                                                                |    |    | -0.148386429778881  | AGIWUR16964                                                 |                |           |           |                    |

|                                                                                                                                   |    |    |                                                                                    |          |                |            |            |
|-----------------------------------------------------------------------------------------------------------------------------------|----|----|------------------------------------------------------------------------------------|----------|----------------|------------|------------|
| N2                                                                                                                                | CT | IV | 15321579                                                                           | 15322183 | WBGene00013524 | Y73F8A.15  | Y73F8A.15  |
| 0.0941388156826974                                                                                                                |    |    | AGIWUR25245                                                                        |          |                |            |            |
| N2                                                                                                                                | CT | IV | 15323893                                                                           | 15325189 | WBGene00006558 | tbx-39     | Y73F8A.16  |
| 0.019986958638051                                                                                                                 |    |    | AGIWUR40555                                                                        |          |                |            |            |
| N2                                                                                                                                | CT | IV | 15326939                                                                           | 15328186 | WBGene00006559 | tbx-40     | Y73F8A.17  |
| 0.10764789778991                                                                                                                  |    |    | AGIWUR22353                                                                        |          |                |            |            |
| N2                                                                                                                                | CT | IV | 15337078                                                                           | 15339821 | WBGene00013525 | ir1d-59    | Y73F8A.18  |
| 0.000250026517421453                                                                                                              |    |    | AGIWUR27948                                                                        |          |                |            |            |
| N2                                                                                                                                | CT | IV | 15361555                                                                           | 15368260 | WBGene00006441 | cpna-4     | Y73F8A.19  |
| 0.265029466641256                                                                                                                 |    |    | AGIWUR10706                                                                        |          |                |            |            |
| N2                                                                                                                                | CT | IV | 15378460                                                                           | 15381686 | WBGene00013526 | Y73F8A.20  | Y73F8A.20  |
| -0.140404036431596                                                                                                                |    |    | AGIWUR35971                                                                        |          |                |            |            |
| N2                                                                                                                                | CT | IV | 15423920                                                                           | 15424366 | WBGene00045025 | Y73F8A.39  | Y73F8A.39  |
| 0.185373858083372                                                                                                                 |    |    | AGIWUR8018;AGIWUR20983;AGIWUR30345;AGIWUR42566;AGIWUR43731                         |          |                |            |            |
| N2                                                                                                                                | CT | IV | 15442960                                                                           | 15444581 | WBGene00013528 | Y73F8A.23  | Y73F8A.23  |
| 0.284186761219248                                                                                                                 |    |    | AGIWUR39226                                                                        |          |                |            |            |
| N2                                                                                                                                | CT | IV | 15445368                                                                           | 15453187 | WBGene00013529 | Y73F8A.24  | Y73F8A.24  |
| 0.00844840435949656                                                                                                               |    |    | AGIWUR6088                                                                         |          |                |            |            |
| N2                                                                                                                                | CT | IV | 15455137                                                                           | 15471488 | WBGene00013530 | ntl-11     | Y73F8A.25  |
| -0.0708148031531728                                                                                                               |    |    |                                                                                    |          |                |            |            |
| AGIWUR1774;AGIWUR2229;AGIWUR11645;AGIWUR12402;AGIWUR18303;AGIWUR25732;AGIWUR28053;AGIWUR29737;AGIWUR35606;AGIWUR37418;AGIWUR42623 |    |    |                                                                                    |          |                |            |            |
| N2                                                                                                                                | CT | IV | 15472809                                                                           | 15473682 | WBGene00013532 | Y73F8A.27  | Y73F8A.27  |
| 0.0556287579660233                                                                                                                |    |    | AGIWUR8366;AGIWUR15188;AGIWUR20529;AGIWUR21845;AGIWUR23023;AGIWUR31382             |          |                |            |            |
| N2                                                                                                                                | CT | IV | 15473660                                                                           | 15477512 | WBGene00013531 | Y73F8A.26  | Y73F8A.26  |
| -0.0485197033608351                                                                                                               |    |    | AGIWUR6318;AGIWUR34926                                                             |          |                |            |            |
| N2                                                                                                                                | CT | IV | 15497567                                                                           | 15510980 | WBGene00013534 | acr-24     | Y73F8A.30  |
| 0.173316914644445                                                                                                                 |    |    | AGIWUR3707                                                                         |          |                |            |            |
| N2                                                                                                                                | CT | IV | 15513786                                                                           | 15514464 | WBGene00013535 | gyg-3      | Y73F8A.31  |
| -0.157792192963819                                                                                                                |    |    | AGIWUR1385;AGIWUR8902;AGIWUR21518;AGIWUR34407                                      |          |                |            |            |
| N2                                                                                                                                | CT | IV | 15514537                                                                           | 15521258 | WBGene00013536 | Y73F8A.32  | Y73F8A.32  |
| 0.0239419008605224                                                                                                                |    |    | AGIWUR2334;AGIWUR33625                                                             |          |                |            |            |
| N2                                                                                                                                | CT | IV | 15533167                                                                           | 15539959 | WBGene00013539 | Y73F8A.35  | Y73F8A.35  |
| 0.181038643593647                                                                                                                 |    |    | AGIWUR42953                                                                        |          |                |            |            |
| N2                                                                                                                                | CT | IV | 15550854                                                                           | 15554721 | WBGene00013632 | Y105C5A.1  | Y105C5A.1  |
| 0.019275362220494                                                                                                                 |    |    | AGIWUR3354;AGIWUR13296;AGIWUR13372;AGIWUR23799;AGIWUR23986;AGIWUR28284;AGIWUR43025 |          |                |            |            |
| N2                                                                                                                                | CT | IV | 15591973                                                                           | 15592386 | WBGene00045016 | Y105C5A.30 | Y105C5A.30 |
| 0.0833973135740305                                                                                                                |    |    | AGIWUR25604;AGIWUR37634;AGIWUR39230                                                |          |                |            |            |
| N2                                                                                                                                | CT | IV | 15612768                                                                           | 15617087 | WBGene00013633 | Y105C5A.8  | Y105C5A.8  |



|                     |                                                            |          |                |                   |              |
|---------------------|------------------------------------------------------------|----------|----------------|-------------------|--------------|
| 0.0344173324391512  | AGIWUR28785                                                |          |                |                   |              |
| N2 CT IV            | 15646031                                                   | 15646433 | WBGene00185102 | Y105C5A.1268      | Y105C5A.1268 |
| -0.407899105958382  | AGIWUR29947                                                |          |                |                   |              |
| N2 CT IV            | 15689201                                                   | 15722267 | WBGene00013639 | Y105C5A.15        | Y105C5A.15   |
| 0.107290892737119   | AGIWUR7273;AGIWUR15147;AGIWUR15364;AGIWUR16294;AGIWUR25313 |          |                |                   |              |
| N2 CT IV            | 15820059                                                   | 15825617 | WBGene00013642 | daf-38 Y105C5A.23 |              |
| -0.603712979192775  | AGIWUR18586                                                |          |                |                   |              |
| N2 CT IV            | 15849875                                                   | 15852905 | WBGene00013643 | Y105C5A.24        | Y105C5A.24   |
| -0.0638097462096283 | AGIWUR15451                                                |          |                |                   |              |
| N2 CT IV            | 15860221                                                   | 15861442 | WBGene00013644 | Y105C5A.25        | Y105C5A.25   |
| -0.0390646504238417 | AGIWUR14488                                                |          |                |                   |              |
| N2 CT IV            | 15870643                                                   | 15872221 | WBGene00013645 | Y105C5B.1         | Y105C5B.1    |
| -0.221174584710726  | AGIWUR22250                                                |          |                |                   |              |
| N2 CT IV            | 15872933                                                   | 15882377 | WBGene00001549 | gcy-25 Y105C5B.2  |              |
| -0.0590928756870639 | AGIWUR4121;AGIWUR28709                                     |          |                |                   |              |
| N2 CT IV            | 15899935                                                   | 15901225 | WBGene00013647 | Y105C5B.5         | Y105C5B.5    |
| -0.0585700547869301 | AGIWUR10199                                                |          |                |                   |              |
| N2 CT IV            | 15906582                                                   | 15910091 | WBGene00005726 | srv-15 Y105C5B.6  |              |
| 0.114286488415894   | AGIWUR43627                                                |          |                |                   |              |
| N2 CT IV            | 15914997                                                   | 15919234 | WBGene00013648 | Y105C5B.7         | Y105C5B.7    |
| 0.0310636815789023  | AGIWUR5491                                                 |          |                |                   |              |
| N2 CT IV            | 15930581                                                   | 15931813 | WBGene00013650 | Y105C5B.9         | Y105C5B.9    |
| -0.13180700069565   | AGIWUR9620                                                 |          |                |                   |              |
| N2 CT IV            | 15937112                                                   | 15941491 | WBGene00013651 | Y105C5B.11        | Y105C5B.11   |
| 0.0837200979661077  | AGIWUR4903;AGIWUR15594;AGIWUR21513                         |          |                |                   |              |
| N2 CT IV            | 15942535                                                   | 15944430 | WBGene00013652 | sams-2 Y105C5B.12 |              |
| 0.18551360444615    | AGIWUR43488                                                |          |                |                   |              |
| N2 CT IV            | 15946784                                                   | 15947438 | WBGene00004816 | skr-10 Y105C5B.13 |              |
| -0.0204333297704782 | AGIWUR4957                                                 |          |                |                   |              |
| N2 CT IV            | 15949725                                                   | 15950861 | WBGene00013653 | Y105C5B.14        | Y105C5B.14   |
| -0.0646110711456878 | AGIWUR42421                                                |          |                |                   |              |
| N2 CT IV            | 15951909                                                   | 15954836 | WBGene00013654 | Y105C5B.15        | Y105C5B.15   |
| 0.0331959263662736  | AGIWUR569                                                  |          |                |                   |              |
| N2 CT IV            | 15956571                                                   | 15962712 | WBGene00013655 | lgc-19 Y105C5B.16 |              |
| -0.163898377465475  | AGIWUR44188                                                |          |                |                   |              |
| N2 CT IV            | 15963124                                                   | 15964425 | WBGene00013656 | Y105C5B.17        | Y105C5B.17   |
| 0.276337434768358   | AGIWUR25817                                                |          |                |                   |              |
| N2 CT IV            | 15964640                                                   | 15965679 | WBGene00013657 | Y105C5B.18        | Y105C5B.18   |
| -0.0594251517371607 | AGIWUR24962;AGIWUR28919;AGIWUR31362;AGIWUR33863            |          |                |                   |              |

|                     |    |    |                                                                                    |          |                |              |                            |
|---------------------|----|----|------------------------------------------------------------------------------------|----------|----------------|--------------|----------------------------|
| N2                  | CT | IV | 15981575                                                                           | 15983970 | WBGene00013658 | Y105C5B.19   | Y105C5B.19                 |
| -0.207523043310367  |    |    | AGIWUR13191                                                                        |          |                |              |                            |
| N2                  | CT | IV | 15993454                                                                           | 15994605 | WBGene00013659 | Y105C5B.20   | Y105C5B.20                 |
| -0.162430456840045  |    |    | AGIWUR44271                                                                        |          |                |              |                            |
| N2                  | CT | IV | 15997858                                                                           | 16026847 | WBGene00002175 | jac-1        | Y105C5B.21                 |
| 0.204176926234853   |    |    | AGIWUR19039;AGIWUR20231                                                            |          |                |              |                            |
| N2                  | CT | IV | 16057283                                                                           | 16061358 | WBGene00013661 | Y105C5B.23   | Y105C5B.23                 |
| -0.0375543610953475 |    |    | AGIWUR25871                                                                        |          |                |              |                            |
| N2                  | CT | IV | 16063326                                                                           | 16064132 | WBGene00005220 | srg-63       | Y105C5B.24                 |
| -0.152843857445405  |    |    | AGIWUR7527;AGIWUR22419;AGIWUR32294;AGIWUR38092                                     |          |                |              |                            |
| N2                  | CT | IV | 16090484                                                                           | 16091939 | WBGene00044085 | Y105C5B.30   | Y105C5B.30                 |
| 0.40442819693232    |    |    | AGIWUR13023;AGIWUR28227                                                            |          |                |              |                            |
| N2                  | CT | IV | 16132464                                                                           | 16134179 | WBGene00013665 | hlh-32       | Y105C5B.29                 |
| -0.0990379365440575 |    |    | AGIWUR21888                                                                        |          |                |              |                            |
| N2                  | CT | IV | 16142544                                                                           | 16147155 | WBGene00013662 | Y105C5B.25   | Y105C5B.25                 |
| 0.0380033626056377  |    |    | AGIWUR6295                                                                         |          |                |              |                            |
| N2                  | CT | IV | 16156908                                                                           | 16165267 | WBGene00220260 | Y105C5B.1420 | Y105C5B.1420               |
| -0.0537660610053208 |    |    | AGIWUR30234;AGIWUR35772                                                            |          |                |              |                            |
| N2                  | CT | IV | 16167785                                                                           | 16170859 | WBGene00001604 | gln-3        | Y105C5B.28                 |
| -0.0413121965002325 |    |    | AGIWUR3320;AGIWUR11501;AGIWUR13974;AGIWUR21293;AGIWUR27036;AGIWUR32466;AGIWUR38304 |          |                |              |                            |
| N2                  | CT | IV | 16197048                                                                           | 16201417 | WBGene00012416 | Y7A9A.1      | Y7A9A.1 0.0858180253242118 |
| AGIWUR22558         |    |    |                                                                                    |          |                |              |                            |
| N2                  | CT | IV | 16202374                                                                           | 16205321 | WBGene00010411 | H25K10.1     | H25K10.1                   |
| 0.0236015952355126  |    |    | AGIWUR28701;AGIWUR41997                                                            |          |                |              |                            |
| N2                  | CT | IV | 16210723                                                                           | 16211013 | WBGene00010412 | H25K10.2     | H25K10.2                   |
| 0.277952702466367   |    |    | AGIWUR41059                                                                        |          |                |              |                            |
| N2                  | CT | IV | 16219652                                                                           | 16221659 | WBGene00005722 | srv-11       | H25K10.3                   |
| 0.100273459576985   |    |    | AGIWUR41993                                                                        |          |                |              |                            |
| N2                  | CT | IV | 16226047                                                                           | 16227122 | WBGene00010413 | H25K10.4     | H25K10.4                   |
| -0.0448816522380131 |    |    | AGIWUR19112                                                                        |          |                |              |                            |
| N2                  | CT | IV | 16230452                                                                           | 16233128 | WBGene00010414 | hpa-1        | H25K10.5                   |
| 0.262241822458765   |    |    | AGIWUR1004                                                                         |          |                |              |                            |
| N2                  | CT | IV | 16233148                                                                           | 16236555 | WBGene00010415 | irld-39      | H25K10.6                   |
| -0.0493967000458984 |    |    | AGIWUR12877                                                                        |          |                |              |                            |
| N2                  | CT | IV | 16236732                                                                           | 16238655 | WBGene00005808 | srw-61       | H25K10.7                   |
| -0.287315360173132  |    |    | AGIWUR20698                                                                        |          |                |              |                            |
| N2                  | CT | IV | 16247431                                                                           | 16251790 | WBGene00009535 | F38C2.1      | F38C2.1 0.173128905453612  |
| AGIWUR1967          |    |    |                                                                                    |          |                |              |                            |
| N2                  | CT | IV | 16254764                                                                           | 16256274 | WBGene00001961 | hlh-17       | F38C2.2 -0.396215035258393 |

|                                                             |    |    |                                                             |          |                |           |          |                     |
|-------------------------------------------------------------|----|----|-------------------------------------------------------------|----------|----------------|-----------|----------|---------------------|
| AGIWUR39384                                                 |    |    |                                                             |          |                |           |          |                     |
| N2                                                          | CT | IV | 16257668                                                    | 16259417 | WBGene00009540 | h1h-31    | F38C2.8  | -0.155632431939843  |
| AGIWUR14645;AGIWUR37847                                     |    |    |                                                             |          |                |           |          |                     |
| N2                                                          | CT | IV | 16271263                                                    | 16273187 | WBGene00009536 | F38C2.4   | F38C2.4  | -0.202697260458175  |
| AGIWUR16881                                                 |    |    |                                                             |          |                |           |          |                     |
| N2                                                          | CT | IV | 16276647                                                    | 16277391 | WBGene00009539 | F38C2.7   | F38C2.7  | -0.115065787206563  |
| AGIWUR36786                                                 |    |    |                                                             |          |                |           |          |                     |
| N2                                                          | CT | IV | 16278202                                                    | 16279018 | WBGene00009537 | ccch-2    | F38C2.5  | -0.146483976539553  |
| AGIWUR2753                                                  |    |    |                                                             |          |                |           |          |                     |
| N2                                                          | CT | IV | 16279634                                                    | 16280714 | WBGene00009538 | cllec-191 | F38C2.6  |                     |
| 0.00167242970697679                                         |    |    | AGIWUR43506                                                 |          |                |           |          |                     |
| N2                                                          | CT | IV | 16281520                                                    | 16283423 | WBGene00045026 | Y7A9C.10  | Y7A9C.10 |                     |
| 0.0941824900298585                                          |    |    | AGIWUR25908                                                 |          |                |           |          |                     |
| N2                                                          | CT | IV | 16286655                                                    | 16287825 | WBGene00023517 | srz-75    | Y7A9C.9  | -0.128483953863157  |
| AGIWUR5516;AGIWUR11469                                      |    |    |                                                             |          |                |           |          |                     |
| N2                                                          | CT | IV | 16288113                                                    | 16289310 | WBGene00023518 | srz-76    | Y7A9C.8  | 0.188499403110562   |
| AGIWUR29943                                                 |    |    |                                                             |          |                |           |          |                     |
| N2                                                          | CT | IV | 16289558                                                    | 16290835 | WBGene00012419 | srz-73    | Y7A9C.3  | 0.0152222205411903  |
| AGIWUR4987;AGIWUR29474;AGIWUR31684                          |    |    |                                                             |          |                |           |          |                     |
| N2                                                          | CT | IV | 16291988                                                    | 16293070 | WBGene00023510 | srz-40    | Y7A9C.5  | 0.312284986724592   |
| AGIWUR3818                                                  |    |    |                                                             |          |                |           |          |                     |
| N2                                                          | CT | IV | 16293199                                                    | 16293482 | WBGene00045105 | Y7A9C.11  | Y7A9C.11 |                     |
| 0.348081035269669                                           |    |    | AGIWUR1833                                                  |          |                |           |          |                     |
| N2                                                          | CT | IV | 16293619                                                    | 16293923 | WBGene00045106 | Y7A9C.12  | Y7A9C.12 |                     |
| -0.0586582962674562                                         |    |    | AGIWUR18794;AGIWUR27829;AGIWUR41685                         |          |                |           |          |                     |
| N2                                                          | CT | IV | 16294154                                                    | 16298479 | WBGene00012418 | Y7A9C.1   | Y7A9C.1  | 0.0584588751244262  |
| AGIWUR10327;AGIWUR12900;AGIWUR29256;AGIWUR40799;AGIWUR44868 |    |    |                                                             |          |                |           |          |                     |
| N2                                                          | CT | IV | 16298813                                                    | 16299012 | WBGene00045107 | Y7A9C.13  | Y7A9C.13 |                     |
| 0.0719158212139916                                          |    |    | AGIWUR10892;AGIWUR11887;AGIWUR12721;AGIWUR22530;AGIWUR23429 |          |                |           |          |                     |
| N2                                                          | CT | IV | 16299151                                                    | 16300272 | WBGene00023514 | srz-72    | Y7A9C.7  | 0.0409662822059649  |
| AGIWUR953;AGIWUR34466                                       |    |    |                                                             |          |                |           |          |                     |
| N2                                                          | CT | IV | 16300588                                                    | 16301746 | WBGene00023511 | srz-41    | Y7A9C.6  | 0.0297537723239722  |
| AGIWUR22366;AGIWUR29053                                     |    |    |                                                             |          |                |           |          |                     |
| N2                                                          | CT | IV | 16303614                                                    | 16306235 | WBGene00014862 | Y7A9C.2   | Y7A9C.2  | 0.0282784866385448  |
| AGIWUR2421;AGIWUR8717                                       |    |    |                                                             |          |                |           |          |                     |
| N2                                                          | CT | IV | 16306312                                                    | 16306839 | WBGene00023509 | srz-39    | Y7A9C.4  | -0.0647331657872394 |
| AGIWUR19605;AGIWUR25345;AGIWUR35351;AGIWUR39465;AGIWUR42243 |    |    |                                                             |          |                |           |          |                     |
| N2                                                          | CT | IV | 16308225                                                    | 16309829 | WBGene00004287 | rac-2     | K03D3.10 |                     |
| 0.0271819356878726                                          |    |    | AGIWUR1338                                                  |          |                |           |          |                     |

|                                                                              |    |    |          |          |                |          |          |                     |
|------------------------------------------------------------------------------|----|----|----------|----------|----------------|----------|----------|---------------------|
| N2                                                                           | CT | IV | 16311079 | 16319703 | WBGene00044670 | rac-3    | K03D3.13 |                     |
| -0.0233754459271673 AGIWUR12250;AGIWUR12813;AGIWUR35498;AGIWUR44020          |    |    |          |          |                |          |          |                     |
| N2                                                                           | CT | IV | 16320139 | 16320506 | WBGene00010531 | K03D3.5  | K03D3.5  | -0.852890804623993  |
| AGIWUR6101                                                                   |    |    |          |          |                |          |          |                     |
| N2                                                                           | CT | IV | 16321166 | 16323195 | WBGene00010530 | srz-61   | K03D3.4  | 0.0195577395919444  |
| AGIWUR38770;AGIWUR43421                                                      |    |    |          |          |                |          |          |                     |
| N2                                                                           | CT | IV | 16323673 | 16324973 | WBGene00043052 | srz-104  | K03D3.11 |                     |
| 0.0259455798005241 AGIWUR19731                                               |    |    |          |          |                |          |          |                     |
| N2                                                                           | CT | IV | 16325172 | 16326601 | WBGene00044587 | srz-105  | K03D3.12 |                     |
| -0.117120054612481 AGIWUR40134                                               |    |    |          |          |                |          |          |                     |
| N2                                                                           | CT | IV | 16326718 | 16327965 | WBGene00010529 | srz-21   | K03D3.3  | 0.0537767961416078  |
| AGIWUR40769                                                                  |    |    |          |          |                |          |          |                     |
| N2                                                                           | CT | IV | 16328135 | 16328614 | WBGene00010528 | K03D3.2  | K03D3.2  | 0.0986787165415501  |
| AGIWUR13565                                                                  |    |    |          |          |                |          |          |                     |
| N2                                                                           | CT | IV | 16329459 | 16331059 | WBGene00010527 | srz-74   | K03D3.1  | -0.157787528825533  |
| AGIWUR13697                                                                  |    |    |          |          |                |          |          |                     |
| N2                                                                           | CT | IV | 16331365 | 16332611 | WBGene00045100 | K03D3.14 |          | K03D3.14            |
| 0.23024879511974 AGIWUR7604                                                  |    |    |          |          |                |          |          |                     |
| N2                                                                           | CT | IV | 16332885 | 16334461 | WBGene00023513 | srz-71   | C35D6.10 |                     |
| -0.283192391064182 AGIWUR20690                                               |    |    |          |          |                |          |          |                     |
| N2                                                                           | CT | IV | 16335337 | 16336503 | WBGene00023508 | srz-38   | C35D6.9  | -0.0284820823643934 |
| AGIWUR21322;AGIWUR27500                                                      |    |    |          |          |                |          |          |                     |
| N2                                                                           | CT | IV | 16337021 | 16338502 | WBGene00045101 | C35D6.13 |          | C35D6.13            |
| -0.0733721736229245 AGIWUR22054;AGIWUR25308                                  |    |    |          |          |                |          |          |                     |
| N2                                                                           | CT | IV | 16338562 | 16339098 | WBGene00045040 | C35D6.12 |          | C35D6.12            |
| -0.0139392926397379 AGIWUR33321                                              |    |    |          |          |                |          |          |                     |
| N2                                                                           | CT | IV | 16341625 | 16345442 | WBGene00005434 | srh-224  | C35D6.8  | -0.0421188549433396 |
| AGIWUR7329;AGIWUR13640                                                       |    |    |          |          |                |          |          |                     |
| N2                                                                           | CT | IV | 16347168 | 16347430 | WBGene00007960 | C35D6.3  | C35D6.3  | 0.166394906464244   |
| AGIWUR40446                                                                  |    |    |          |          |                |          |          |                     |
| N2                                                                           | CT | IV | 16348409 | 16348751 | WBGene00045028 | C35D6.11 |          | C35D6.11            |
| -0.113106153842441 AGIWUR2973;AGIWUR5282;AGIWUR16135;AGIWUR20681;AGIWUR36159 |    |    |          |          |                |          |          |                     |
| N2                                                                           | CT | IV | 16350990 | 16351601 | WBGene00007961 | C35D6.4  | C35D6.4  | -0.130042703140429  |
| AGIWUR5086                                                                   |    |    |          |          |                |          |          |                     |
| N2                                                                           | CT | IV | 16366996 | 16368943 | WBGene00007962 | C35D6.5  | C35D6.5  | -0.0633877727293557 |
| AGIWUR5610                                                                   |    |    |          |          |                |          |          |                     |
| N2                                                                           | CT | IV | 16381378 | 16382235 | WBGene00012420 | Y7A9D.1  | Y7A9D.1  | -0.0236160386388278 |
| AGIWUR32721;AGIWUR33229;AGIWUR37237;AGIWUR41776;AGIWUR43445;AGIWUR45148      |    |    |          |          |                |          |          |                     |
| N2                                                                           | CT | IV | 16398839 | 16399875 | WBGene00013418 | Y65A5A.1 |          | Y65A5A.1            |

|                     |                                                             |          |                |                   |            |
|---------------------|-------------------------------------------------------------|----------|----------------|-------------------|------------|
| 0.187219114381504   | AGIWUR30411                                                 |          |                |                   |            |
| N2 CT IV            | 16412020                                                    | 16416808 | WBGene00013419 | Y65A5A.2          | Y65A5A.2   |
| -0.0652639383898581 | AGIWUR26456                                                 |          |                |                   |            |
| N2 CT IV            | 16424637                                                    | 16429895 | WBGene00012423 | Y10G11A.1         | Y10G11A.1  |
| -0.0275362459039981 | AGIWUR5130;AGIWUR7085                                       |          |                |                   |            |
| N2 CT IV            | 16432231                                                    | 16437953 | WBGene00012424 | d1c-3 Y10G11A.2   |            |
| -0.40770668630436   | AGIWUR19845                                                 |          |                |                   |            |
| N2 CT IV            | 16443263                                                    | 16446683 | WBGene00012425 | d1c-4 Y10G11A.3   |            |
| 0.307003895768908   | AGIWUR23539                                                 |          |                |                   |            |
| N2 CT IV            | 16454270                                                    | 16454579 | WBGene00045185 | VY10G11R.4        | VY10G11R.4 |
| 0.0224326858446409  | AGIWUR10617;AGIWUR13766;AGIWUR19304;AGIWUR37200;AGIWUR40802 |          |                |                   |            |
| N2 CT IV            | 16468723                                                    | 16469064 | WBGene00045097 | VY10G11R.2        | VY10G11R.2 |
| 0.327923493877096   | AGIWUR6952;AGIWUR14946;AGIWUR15445;AGIWUR29398;AGIWUR36369  |          |                |                   |            |
| N2 CT IV            | 16469580                                                    | 16470881 | WBGene00012159 | VY10G11R.1        | VY10G11R.1 |
| 0.249117484241975   | AGIWUR4731                                                  |          |                |                   |            |
| N2 CT IV            | 16474044                                                    | 16477192 | WBGene00013098 | Y51H4A.1          | Y51H4A.1   |
| 0.588600840239318   | AGIWUR13939                                                 |          |                |                   |            |
| N2 CT IV            | 16482784                                                    | 16489021 | WBGene00004357 | rho-1 Y51H4A.3    |            |
| 0.164749766902856   | AGIWUR2147;AGIWUR39259                                      |          |                |                   |            |
| N2 CT IV            | 16493428                                                    | 16494510 | WBGene00013099 | Y51H4A.2          | Y51H4A.2   |
| -0.767498235530523  | AGIWUR5454                                                  |          |                |                   |            |
| N2 CT IV            | 16503249                                                    | 16505682 | WBGene00013100 | zip-7 Y51H4A.4    |            |
| -0.273322519665559  | AGIWUR8385;AGIWUR41524                                      |          |                |                   |            |
| N2 CT IV            | 16522529                                                    | 16526132 | WBGene00013101 | Y51H4A.5          | Y51H4A.5   |
| -0.383564070660766  | AGIWUR31950                                                 |          |                |                   |            |
| N2 CT IV            | 16533661                                                    | 16533962 | WBGene00013102 | Y51H4A.6          | Y51H4A.6   |
| 0.0612272135725913  | AGIWUR42976                                                 |          |                |                   |            |
| N2 CT IV            | 16535730                                                    | 16542894 | WBGene00013103 | Y51H4A.7          | Y51H4A.7   |
| -0.0102971337819255 | AGIWUR18320                                                 |          |                |                   |            |
| N2 CT IV            | 16551492                                                    | 16554348 | WBGene00000709 | col-136 Y51H4A.28 |            |
| 0.376971038628078   | AGIWUR28306;AGIWUR33242                                     |          |                |                   |            |
| N2 CT IV            | 16575102                                                    | 16578549 | WBGene00013104 | Y51H4A.8          | Y51H4A.8   |
| -0.300421758324521  | AGIWUR43151                                                 |          |                |                   |            |
| N2 CT IV            | 16601480                                                    | 16602776 | WBGene00000710 | col-137 Y51H4A.9  |            |
| 0.280177432656156   | AGIWUR17787                                                 |          |                |                   |            |
| N2 CT IV            | 16627976                                                    | 16628441 | WBGene00013120 | fipr-28 Y51H4A.26 |            |
| -0.403872784410106  | AGIWUR12842                                                 |          |                |                   |            |
| N2 CT IV            | 16656613                                                    | 16657359 | WBGene00013109 | Y51H4A.15         | Y51H4A.15  |
| -0.086134376296453  | AGIWUR26764                                                 |          |                |                   |            |

|                                                                                             |    |    |          |          |                |            |            |
|---------------------------------------------------------------------------------------------|----|----|----------|----------|----------------|------------|------------|
| N2                                                                                          | CT | IV | 16664320 | 16671467 | WBGene00013111 | sta-1      | Y51H4A.17  |
| 0.102155820425483                                                                           |    |    |          |          |                |            |            |
| AGIWUR1252;AGIWUR2004;AGIWUR3505;AGIWUR5230;AGIWUR21787;AGIWUR22093;AGIWUR26957;AGIWUR34933 |    |    |          |          |                |            |            |
| N2                                                                                          | CT | IV | 16720715 | 16722736 | WBGene00013116 | Y51H4A.22  | Y51H4A.22  |
| 0.518655054522043                                                                           |    |    |          |          |                |            |            |
| AGIWUR3435                                                                                  |    |    |          |          |                |            |            |
| N2                                                                                          | CT | IV | 16722916 | 16723892 | WBGene00013117 | Y51H4A.23  | Y51H4A.23  |
| 0.448859918533426                                                                           |    |    |          |          |                |            |            |
| AGIWUR39803                                                                                 |    |    |          |          |                |            |            |
| N2                                                                                          | CT | IV | 16736329 | 16743178 | WBGene00013119 | Y51H4A.25  | Y51H4A.25  |
| -0.0510071323673627                                                                         |    |    |          |          |                |            |            |
| AGIWUR25777;AGIWUR38342                                                                     |    |    |          |          |                |            |            |
| N2                                                                                          | CT | IV | 16758420 | 16758769 | WBGene00045321 | Y43D4A.10  | Y43D4A.10  |
| 0.0890028274004537                                                                          |    |    |          |          |                |            |            |
| AGIWUR15417;AGIWUR20545;AGIWUR31612;AGIWUR34955                                             |    |    |          |          |                |            |            |
| N2                                                                                          | CT | IV | 16775827 | 16785172 | WBGene00012791 | Y43D4A.5   | Y43D4A.5   |
| -0.575530460555814                                                                          |    |    |          |          |                |            |            |
| AGIWUR9735                                                                                  |    |    |          |          |                |            |            |
| N2                                                                                          | CT | IV | 16787327 | 16788510 | WBGene00012792 | Y43D4A.6   | Y43D4A.6   |
| 0.00169013231202531                                                                         |    |    |          |          |                |            |            |
| AGIWUR21279;AGIWUR36471;AGIWUR42890                                                         |    |    |          |          |                |            |            |
| N2                                                                                          | CT | IV | 16826324 | 16828020 | WBGene00013776 | Y116A8A.6  | Y116A8A.6  |
| 0.161218374814348                                                                           |    |    |          |          |                |            |            |
| AGIWUR7119                                                                                  |    |    |          |          |                |            |            |
| N2                                                                                          | CT | IV | 16831666 | 16832984 | WBGene00013778 | cllec-194  | Y116A8A.8  |
| -0.121842500634949                                                                          |    |    |          |          |                |            |            |
| AGIWUR35391                                                                                 |    |    |          |          |                |            |            |
| N2                                                                                          | CT | IV | 16847829 | 16854943 | WBGene00003130 | map-2      | Y116A8A.9  |
| -0.0102543017909813                                                                         |    |    |          |          |                |            |            |
| AGIWUR9535                                                                                  |    |    |          |          |                |            |            |
| N2                                                                                          | CT | IV | 16855044 | 16863443 | WBGene00020284 | mel-46     | T06A10.1   |
| 0.0984367594882087                                                                          |    |    |          |          |                |            |            |
| AGIWUR38585                                                                                 |    |    |          |          |                |            |            |
| N2                                                                                          | CT | IV | 16862396 | 16865479 | WBGene00020287 | lsy-13     | T06A10.4   |
| 0.112879004372459                                                                           |    |    |          |          |                |            |            |
| AGIWUR21297                                                                                 |    |    |          |          |                |            |            |
| N2                                                                                          | CT | IV | 16865838 | 16866504 | WBGene00020286 | T06A10.3   | T06A10.3   |
| -0.0465057315973159                                                                         |    |    |          |          |                |            |            |
| AGIWUR18852                                                                                 |    |    |          |          |                |            |            |
| N2                                                                                          | CT | IV | 16920341 | 16924071 | WBGene00013785 | nep-23     | Y116A8C.4  |
| 0.303507300693351                                                                           |    |    |          |          |                |            |            |
| AGIWUR7228                                                                                  |    |    |          |          |                |            |            |
| N2                                                                                          | CT | IV | 16928334 | 16929067 | WBGene00014976 | Y116A8C.7  | Y116A8C.7  |
| -0.017943358321606                                                                          |    |    |          |          |                |            |            |
| AGIWUR6180;AGIWUR11548;AGIWUR21776;AGIWUR22996;AGIWUR37782                                  |    |    |          |          |                |            |            |
| N2                                                                                          | CT | IV | 16930837 | 16931177 | WBGene00045128 | Y116A8C.49 | Y116A8C.49 |
| -0.0822559600841286                                                                         |    |    |          |          |                |            |            |
| AGIWUR4096                                                                                  |    |    |          |          |                |            |            |
| N2                                                                                          | CT | IV | 16931990 | 16933113 | WBGene00013788 | Y116A8C.8  | Y116A8C.8  |
| -0.0151177935145057                                                                         |    |    |          |          |                |            |            |
| AGIWUR929;AGIWUR9903                                                                        |    |    |          |          |                |            |            |
| N2                                                                                          | CT | IV | 16934266 | 16939111 | WBGene00013790 | Y116A8C.10 | Y116A8C.10 |
| 0.0431281886305968                                                                          |    |    |          |          |                |            |            |
| AGIWUR1366;AGIWUR8901;AGIWUR28542;AGIWUR34521;AGIWUR40850;AGIWUR42572;AGIWUR44503           |    |    |          |          |                |            |            |
| N2                                                                                          | CT | IV | 16939804 | 16946910 | WBGene00013789 | Y116A8C.9  | Y116A8C.9  |
| -0.0930566970068796                                                                         |    |    |          |          |                |            |            |
| AGIWUR37459                                                                                 |    |    |          |          |                |            |            |

|                     |    |    |                                                                                               |          |                |            |            |
|---------------------|----|----|-----------------------------------------------------------------------------------------------|----------|----------------|------------|------------|
| N2                  | CT | IV | 16947120                                                                                      | 16949734 | WBGene00000184 | arf-6      | Y116A8C.12 |
| -0.0767281514346152 |    |    | AGIWUR22709                                                                                   |          |                |            |            |
| N2                  | CT | IV | 16950065                                                                                      | 16962868 | WBGene00013792 | Y116A8C.13 | Y116A8C.13 |
| -0.208148492358614  |    |    | AGIWUR12465                                                                                   |          |                |            |            |
| N2                  | CT | IV | 16965284                                                                                      | 16970490 | WBGene00004402 | rom-3      | Y116A8C.14 |
| 0.36560076953021    |    |    | AGIWUR10932                                                                                   |          |                |            |            |
| N2                  | CT | IV | 16988828                                                                                      | 16989771 | WBGene00013791 | Y116A8C.11 | Y116A8C.11 |
| 0.144504151602634   |    |    | AGIWUR673;AGIWUR30500;AGIWUR33757;AGIWUR38152;AGIWUR41182;AGIWUR42358                         |          |                |            |            |
| N2                  | CT | IV | 16995777                                                                                      | 17014953 | WBGene00004403 | rom-4      | Y116A8C.16 |
| 0.0405843128197638  |    |    | AGIWUR5163;AGIWUR22741;AGIWUR30005                                                            |          |                |            |            |
| N2                  | CT | IV | 17022990                                                                                      | 17023922 | WBGene00045315 | Y116A8C.52 | Y116A8C.52 |
| 0.151610081716323   |    |    | AGIWUR38540                                                                                   |          |                |            |            |
| N2                  | CT | IV | 17024318                                                                                      | 17025132 | WBGene00013794 | dct-13     | Y116A8C.17 |
| 0.0199077469107936  |    |    | AGIWUR4796                                                                                    |          |                |            |            |
| N2                  | CT | IV | 17028931                                                                                      | 17030594 | WBGene00013795 | nhr-229    | Y116A8C.18 |
| 0.0465460683418626  |    |    | AGIWUR8246;AGIWUR27868                                                                        |          |                |            |            |
| N2                  | CT | IV | 17038923                                                                                      | 17039667 | WBGene00013796 | Y116A8C.19 | Y116A8C.19 |
| 0.105640629010805   |    |    | AGIWUR10845                                                                                   |          |                |            |            |
| N2                  | CT | IV | 17040913                                                                                      | 17041523 | WBGene00013797 | Y116A8C.20 | Y116A8C.20 |
| -0.221514872954616  |    |    | AGIWUR14834                                                                                   |          |                |            |            |
| N2                  | CT | IV | 17046470                                                                                      | 17048357 | WBGene00013799 | athp-3     | Y116A8C.22 |
| -0.181870120242117  |    |    | AGIWUR26399                                                                                   |          |                |            |            |
| N2                  | CT | IV | 17053594                                                                                      | 17055513 | WBGene00013800 | Y116A8C.23 | Y116A8C.23 |
| 0.229230233851531   |    |    | AGIWUR13331                                                                                   |          |                |            |            |
| N2                  | CT | IV | 17056746                                                                                      | 17057831 | WBGene00045280 | Y116A8C.51 | Y116A8C.51 |
| -0.067395596851739  |    |    | AGIWUR4143;AGIWUR15519;AGIWUR36264                                                            |          |                |            |            |
| N2                  | CT | IV | 17068795                                                                                      | 17070903 | WBGene00013801 | Y116A8C.24 | Y116A8C.24 |
| 0.173818846291748   |    |    | AGIWUR12026                                                                                   |          |                |            |            |
| N2                  | CT | IV | 17079606                                                                                      | 17087438 | WBGene00013803 | snx-13     | Y116A8C.26 |
| -0.118076429118941  |    |    | AGIWUR1253;AGIWUR16582;AGIWUR22196;AGIWUR30792;AGIWUR39567;AGIWUR41148                        |          |                |            |            |
| N2                  | CT | IV | 17088058                                                                                      | 17088834 | WBGene00004914 | snr-1      | Y116A8C.42 |
| -0.0811361294698694 |    |    | AGIWUR2910;AGIWUR2945;AGIWUR15577;AGIWUR21296;AGIWUR22559;AGIWUR27398;AGIWUR34517;AGIWUR40521 |          |                |            |            |
| N2                  | CT | IV | 17088851                                                                                      | 17090646 | WBGene00013814 | Y116A8C.43 | Y116A8C.43 |
| -0.0135813526730004 |    |    | AGIWUR9877                                                                                    |          |                |            |            |
| N2                  | CT | IV | 17090630                                                                                      | 17096286 | WBGene00013804 | Y116A8C.27 | Y116A8C.27 |
| -0.109081774089098  |    |    | AGIWUR14712                                                                                   |          |                |            |            |
| N2                  | CT | IV | 17096386                                                                                      | 17100246 | WBGene00013805 | bca-2      | Y116A8C.28 |
| -0.0448961360606432 |    |    | AGIWUR8202;AGIWUR34891                                                                        |          |                |            |            |

|                                     |    |    |                                                                       |          |                |            |                             |
|-------------------------------------|----|----|-----------------------------------------------------------------------|----------|----------------|------------|-----------------------------|
| N2                                  | CT | IV | 17100225                                                              | 17103715 | WBGene00013807 | Y116A8C.30 | Y116A8C.30                  |
| -0.315876858469442                  |    |    | AGIWUR15694                                                           |          |                |            |                             |
| N2                                  | CT | IV | 17104179                                                              | 17110982 | WBGene00013808 | sfa-1      | Y116A8C.32                  |
| -0.228697686233833                  |    |    | AGIWUR19437                                                           |          |                |            |                             |
| N2                                  | CT | IV | 17111082                                                              | 17116666 | WBGene00000889 | cyn-13     | Y116A8C.34                  |
| 0.0238917620063095                  |    |    | AGIWUR20202                                                           |          |                |            |                             |
| N2                                  | CT | IV | 17116763                                                              | 17118760 | WBGene00006698 | uaf-2      | Y116A8C.35                  |
| 0.133887935946747                   |    |    | AGIWUR22742                                                           |          |                |            |                             |
| N2                                  | CT | IV | 17119684                                                              | 17126266 | WBGene00006405 | itsn-1     | Y116A8C.36                  |
| 0.0495376664662466                  |    |    | AGIWUR25288;AGIWUR26969;AGIWUR31401;AGIWUR32319                       |          |                |            |                             |
| N2                                  | CT | IV | 17130066                                                              | 17131075 | WBGene00013810 | Y116A8C.37 | Y116A8C.37                  |
| -0.117447386564796                  |    |    | AGIWUR9715                                                            |          |                |            |                             |
| N2                                  | CT | IV | 17137348                                                              | 17142989 | WBGene00045043 | Y116A8C.48 | Y116A8C.48                  |
| 0.0864554393593888                  |    |    | AGIWUR3839;AGIWUR13359;AGIWUR17919;AGIWUR22945                        |          |                |            |                             |
| N2                                  | CT | IV | 17144355                                                              | 17150971 | WBGene00013812 | Y116A8C.40 | Y116A8C.40                  |
| 0.00926346681826384                 |    |    | AGIWUR9796;AGIWUR10092                                                |          |                |            |                             |
| N2                                  | CT | IV | 17162024                                                              | 17162634 | WBGene00004819 | skr-13     | C52D10.8                    |
| -0.120497996335448                  |    |    | AGIWUR30480                                                           |          |                |            |                             |
| N2                                  | CT | IV | 17163554                                                              | 17164226 | WBGene00004815 | skr-9      | C52D10.7                    |
| 0.0248800449865119                  |    |    | AGIWUR42025                                                           |          |                |            |                             |
| N2                                  | CT | IV | 17167253                                                              | 17168051 | WBGene00004818 | skr-12     | C52D10.6                    |
| -0.136594236029961                  |    |    | AGIWUR11514                                                           |          |                |            |                             |
| N2                                  | CT | IV | 17176477                                                              | 17189805 | WBGene00016877 | C52D10.3   | C52D10.3                    |
| 0.25433044648276                    |    |    | AGIWUR28085;AGIWUR36872;AGIWUR39260                                   |          |                |            |                             |
| N2                                  | CT | IV | 17190177                                                              | 17191891 | WBGene00001460 | flp-17     | C52D10.11                   |
| -0.0702354710795383                 |    |    | AGIWUR23495                                                           |          |                |            |                             |
| N2                                  | CT | IV | 17197905                                                              | 17206845 | WBGene00016879 | cnm-1      | C52D10.12                   |
| 0.190276766062972                   |    |    | AGIWUR25040                                                           |          |                |            |                             |
| N2                                  | CT | IV | 17216333                                                              | 17217368 | WBGene00013779 | Y116A8B.1  | Y116A8B.1                   |
| -0.118776171731417                  |    |    | AGIWUR6796                                                            |          |                |            |                             |
| N2                                  | CT | IV | 17223774                                                              | 17225019 | WBGene00013781 | Y116A8B.4  | Y116A8B.4                   |
| -0.0384031852936415                 |    |    | AGIWUR5030;AGIWUR6033;AGIWUR28449;AGIWUR32021;AGIWUR35102;AGIWUR37333 |          |                |            |                             |
| N2                                  | CT | IV | 17226014                                                              | 17231056 | WBGene00013782 | npr-32     | Y116A8B.5                   |
| 0.0250216858364212                  |    |    | AGIWUR8559                                                            |          |                |            |                             |
| N2                                  | CT | IV | 17239941                                                              | 17243212 | WBGene00013995 | mboa-5     | ZK550.1 -0.0189395232998733 |
| AGIWUR11027;AGIWUR21565;AGIWUR26813 |    |    |                                                                       |          |                |            |                             |
| N2                                  | CT | IV | 17245584                                                              | 17249750 | WBGene00013996 | ZK550.2    | ZK550.2 0.245924865524154   |
| AGIWUR37560                         |    |    |                                                                       |          |                |            |                             |
| N2                                  | CT | IV | 17250131                                                              | 17254964 | WBGene00013997 | ZK550.3    | ZK550.3 0.00617518437990938 |



|                                                                                                                                    |    |    |          |          |                |                                     |
|------------------------------------------------------------------------------------------------------------------------------------|----|----|----------|----------|----------------|-------------------------------------|
| AGIWUR13238                                                                                                                        |    |    |          |          |                |                                     |
| N2                                                                                                                                 | CT | IV | 17255301 | 17257562 | WBGene00013998 | ZK550.4 ZK550.4 -0.0524562415379703 |
| AGIWUR2456;AGIWUR42569                                                                                                             |    |    |          |          |                |                                     |
| N2                                                                                                                                 | CT | IV | 17257504 | 17259410 | WBGene00013999 | ZK550.5 ZK550.5 0.285435956118857   |
| AGIWUR2165;AGIWUR11834;AGIWUR37733                                                                                                 |    |    |          |          |                |                                     |
| N2                                                                                                                                 | CT | IV | 17260307 | 17262485 | WBGene00014000 | ZK550.6 ZK550.6 -0.1762858333333739 |
| AGIWUR2507;AGIWUR7827                                                                                                              |    |    |          |          |                |                                     |
| N2                                                                                                                                 | CT | IV | 17264297 | 17264814 | WBGene00044244 | F26D10.13 F26D10.13                 |
| -0.49421514250195 AGIWUR8280;AGIWUR10704;AGIWUR24795;AGIWUR25868                                                                   |    |    |          |          |                |                                     |
| N2                                                                                                                                 | CT | IV | 17265579 | 17266926 | WBGene00006229 | str-187 F26D10.8                    |
| -0.168932510219493 AGIWUR1710                                                                                                      |    |    |          |          |                |                                     |
| N2                                                                                                                                 | CT | IV | 17269342 | 17272183 | WBGene00000224 | atgp-1 F26D10.9                     |
| 0.000882216011833137 AGIWUR31914                                                                                                   |    |    |          |          |                |                                     |
| N2                                                                                                                                 | CT | IV | 17272231 | 17273652 | WBGene00001606 | gln-5 F26D10.10                     |
| -0.148417820299226 AGIWUR34181                                                                                                     |    |    |          |          |                |                                     |
| N2                                                                                                                                 | CT | IV | 17275581 | 17276864 | WBGene00009155 | lhfp-4 F26D10.11                    |
| 0.123408909405417 AGIWUR42728                                                                                                      |    |    |          |          |                |                                     |
| N2                                                                                                                                 | CT | IV | 17276956 | 17277748 | WBGene00009156 | cllec-196 F26D10.12                 |
| 0.0931930414938709 AGIWUR7487                                                                                                      |    |    |          |          |                |                                     |
| N2                                                                                                                                 | CT | IV | 17278959 | 17281330 | WBGene00002005 | hsp-1 F26D10.3                      |
| 0.0821665509784815                                                                                                                 |    |    |          |          |                |                                     |
| AGIWUR6894;AGIWUR15751;AGIWUR17478;AGIWUR18500;AGIWUR21587;AGIWUR23964;AGIWUR26492;AGIWUR28010;AGIWUR33671;AGIWUR41303;AGIWUR41534 |    |    |          |          |                |                                     |
| N2                                                                                                                                 | CT | IV | 17281456 | 17284199 | WBGene00012128 | nra-1 T28F3.1 -0.12943851468232     |
| AGIWUR2747                                                                                                                         |    |    |          |          |                |                                     |
| N2                                                                                                                                 | CT | IV | 17285733 | 17287454 | WBGene00044067 | zipt-7.1 T28F3.3                    |
| -0.000797754914977133 AGIWUR20648                                                                                                  |    |    |          |          |                |                                     |
| N2                                                                                                                                 | CT | IV | 17288171 | 17291733 | WBGene00012130 | slc-17.4 T28F3.4                    |
| 0.298885467681167 AGIWUR18244;AGIWUR18531                                                                                          |    |    |          |          |                |                                     |
| N2                                                                                                                                 | CT | IV | 17294793 | 17300629 | WBGene00012131 | T28F3.5 T28F3.5 0.0244635170894245  |
| AGIWUR41791                                                                                                                        |    |    |          |          |                |                                     |
| N2                                                                                                                                 | CT | IV | 17300809 | 17302033 | WBGene00012132 | ifta-2 T28F3.6 -0.327258071709712   |
| AGIWUR19088                                                                                                                        |    |    |          |          |                |                                     |
| N2                                                                                                                                 | CT | IV | 17302242 | 17304370 | WBGene00012133 | T28F3.7 T28F3.7 0.415558118949994   |
| AGIWUR43806                                                                                                                        |    |    |          |          |                |                                     |
| N2                                                                                                                                 | CT | IV | 17308525 | 17311695 | WBGene00012135 | T28F3.9 T28F3.9 -0.0911913675615548 |
| AGIWUR31439                                                                                                                        |    |    |          |          |                |                                     |
| N2                                                                                                                                 | CT | IV | 17312141 | 17315462 | WBGene00004908 | snf-9 C49C3.1 -0.168797581854028    |
| AGIWUR27569                                                                                                                        |    |    |          |          |                |                                     |

|                                                                      |    |    |          |          |                |          |          |                     |
|----------------------------------------------------------------------|----|----|----------|----------|----------------|----------|----------|---------------------|
| N2                                                                   | CT | IV | 17316710 | 17318246 | WBGene00008192 | C49C3.2  | C49C3.2  | 0.376971726261695   |
| AGIWUR38738                                                          |    |    |          |          |                |          |          |                     |
| N2                                                                   | CT | IV | 17319353 | 17320027 | WBGene00008193 | C49C3.3  | C49C3.3  | 0.0189681501190311  |
| AGIWUR29862;AGIWUR35793                                              |    |    |          |          |                |          |          |                     |
| N2                                                                   | CT | IV | 17320795 | 17328662 | WBGene00008194 | C49C3.4  | C49C3.4  | -0.0793636149402985 |
| AGIWUR38518                                                          |    |    |          |          |                |          |          |                     |
| N2                                                                   | CT | IV | 17329192 | 17330737 | WBGene00008195 | ceh-88   | C49C3.5  | -0.301574944794384  |
| AGIWUR8331;AGIWUR13535;AGIWUR24087;AGIWUR35702                       |    |    |          |          |                |          |          |                     |
| N2                                                                   | CT | IV | 17331527 | 17332447 | WBGene00008196 | C49C3.6  | C49C3.6  | -0.278206115314191  |
| AGIWUR10924                                                          |    |    |          |          |                |          |          |                     |
| N2                                                                   | CT | IV | 17332573 | 17333645 | WBGene00008197 | C49C3.7  | C49C3.7  | -0.14039328074934   |
| AGIWUR42814                                                          |    |    |          |          |                |          |          |                     |
| N2                                                                   | CT | IV | 17334193 | 17335094 | WBGene00008204 | C49C3.15 |          | C49C3.15            |
| -0.133703902571865 AGIWUR31876;AGIWUR40425                           |    |    |          |          |                |          |          |                     |
| N2                                                                   | CT | IV | 17335203 | 17336681 | WBGene00008198 | C49C3.8  | C49C3.8  | -0.248792630117167  |
| AGIWUR42771                                                          |    |    |          |          |                |          |          |                     |
| N2                                                                   | CT | IV | 17336800 | 17338984 | WBGene00008200 | C49C3.10 |          | C49C3.10            |
| -0.181740790204872 AGIWUR30175                                       |    |    |          |          |                |          |          |                     |
| N2                                                                   | CT | IV | 17339640 | 17342314 | WBGene00008199 | C49C3.9  | C49C3.9  | 0.266792873297831   |
| AGIWUR35239                                                          |    |    |          |          |                |          |          |                     |
| N2                                                                   | CT | IV | 17343782 | 17344805 | WBGene00008201 | C49C3.11 |          | C49C3.11            |
| -0.417954615864502 AGIWUR37871                                       |    |    |          |          |                |          |          |                     |
| N2                                                                   | CT | IV | 17345568 | 17346695 | WBGene00008202 | clec-197 |          | C49C3.12            |
| -0.648738073151137 AGIWUR31392                                       |    |    |          |          |                |          |          |                     |
| N2                                                                   | CT | IV | 17347168 | 17351076 | WBGene00008203 | clec-198 |          | C49C3.13            |
| 0.0847697039892497 AGIWUR33042                                       |    |    |          |          |                |          |          |                     |
| N2                                                                   | CT | IV | 17351886 | 17357895 | WBGene00007820 | clec-199 |          | C30H6.1             |
| -0.0148725964353957 AGIWUR19025;AGIWUR33156                          |    |    |          |          |                |          |          |                     |
| N2                                                                   | CT | IV | 17358139 | 17360635 | WBGene00007821 | clec-201 |          | C30H6.3             |
| -0.260487568457961 AGIWUR43767                                       |    |    |          |          |                |          |          |                     |
| N2                                                                   | CT | IV | 17361443 | 17364583 | WBGene00007822 | clec-202 |          | C30H6.4             |
| -0.0205317153740872 AGIWUR8247                                       |    |    |          |          |                |          |          |                     |
| N2                                                                   | CT | IV | 17364791 | 17366491 | WBGene00006487 | zipt-22  | C30H6.2  | 0.203584431751938   |
| AGIWUR20952                                                          |    |    |          |          |                |          |          |                     |
| N2                                                                   | CT | IV | 17368592 | 17370618 | WBGene00007827 | nlp-54   | C30H6.10 |                     |
| -0.00675272173176955 AGIWUR11946;AGIWUR16831;AGIWUR19598;AGIWUR29665 |    |    |          |          |                |          |          |                     |
| N2                                                                   | CT | IV | 17371769 | 17375638 | WBGene00007823 | C30H6.5  | C30H6.5  | 0.0203262217246447  |
| AGIWUR18277;AGIWUR21420;AGIWUR21814                                  |    |    |          |          |                |          |          |                     |
| N2                                                                   | CT | IV | 17376427 | 17379317 | WBGene00001811 | haf-1    | C30H6.6  | 0.0684319975262184  |

|                                                                             |    |    |          |          |                |          |          |                     |  |
|-----------------------------------------------------------------------------|----|----|----------|----------|----------------|----------|----------|---------------------|--|
| AGIWUR2043;AGIWUR5177;AGIWUR21139                                           |    |    |          |          |                |          |          |                     |  |
| N2                                                                          | CT | IV | 17379247 | 17380188 | WBGene00007826 | C30H6.9  | C30H6.9  | -0.133901110634751  |  |
| AGIWUR21945                                                                 |    |    |          |          |                |          |          |                     |  |
| N2                                                                          | CT | IV | 17380626 | 17382225 | WBGene00007824 | dlat-2   | C30H6.7  | 0.124990900353069   |  |
| AGIWUR33786                                                                 |    |    |          |          |                |          |          |                     |  |
| N2                                                                          | CT | IV | 17382298 | 17383087 | WBGene00007825 | C30H6.8  | C30H6.8  | 0.0292376322154588  |  |
| AGIWUR8005;AGIWUR25239;AGIWUR26763;AGIWUR40999                              |    |    |          |          |                |          |          |                     |  |
| N2                                                                          | CT | IV | 17383370 | 17386783 | WBGene00044238 | C30H6.12 | C30H6.12 |                     |  |
| -0.140900290337015 AGIWUR303;AGIWUR4607;AGIWUR11706;AGIWUR32487;AGIWUR34320 |    |    |          |          |                |          |          |                     |  |
| N2                                                                          | CT | IV | 17386763 | 17387492 | WBGene00011374 | T02D1.8  | T02D1.8  | -0.10847363854475   |  |
| AGIWUR20749;AGIWUR36007;AGIWUR36236                                         |    |    |          |          |                |          |          |                     |  |
| N2                                                                          | CT | IV | 17393974 | 17395333 | WBGene00005677 | sru-14   | T02D1.2  | 0.00979730805140022 |  |
| AGIWUR1863;AGIWUR12530                                                      |    |    |          |          |                |          |          |                     |  |
| N2                                                                          | CT | IV | 17396210 | 17397491 | WBGene00005678 | sru-15   | T02D1.3  | -0.282907414928085  |  |
| AGIWUR43037                                                                 |    |    |          |          |                |          |          |                     |  |
| N2                                                                          | CT | IV | 17399776 | 17402336 | WBGene00011371 | T02D1.4  | T02D1.4  | 0.178083304870754   |  |
| AGIWUR37043                                                                 |    |    |          |          |                |          |          |                     |  |
| N2                                                                          | CT | IV | 17402463 | 17405630 | WBGene00004061 | pmp-4    | T02D1.5  | 0.151941657076469   |  |
| AGIWUR9352;AGIWUR13782;AGIWUR30490;AGIWUR37445                              |    |    |          |          |                |          |          |                     |  |
| N2                                                                          | CT | IV | 17408231 | 17417794 | WBGene00011372 | npr-26   | T02D1.6  | -0.112905553880626  |  |
| AGIWUR6871                                                                  |    |    |          |          |                |          |          |                     |  |
| N2                                                                          | CT | IV | 17427717 | 17429602 | WBGene00007357 | C06A12.3 | C06A12.3 |                     |  |
| -0.177468435851004 AGIWUR31400                                              |    |    |          |          |                |          |          |                     |  |
| N2                                                                          | CT | IV | 17429637 | 17431968 | WBGene00007358 | lact-6   | C06A12.5 |                     |  |
| -0.0839343459479309 AGIWUR4456;AGIWUR12935                                  |    |    |          |          |                |          |          |                     |  |
| N2                                                                          | CT | IV | 17432977 | 17436652 | WBGene00001550 | gcy-27   | C06A12.4 |                     |  |
| -0.16280959605483 AGIWUR31564                                               |    |    |          |          |                |          |          |                     |  |
| N2                                                                          | CT | IV | 17437338 | 17438155 | WBGene00007359 | C06A12.8 | C06A12.8 |                     |  |
| -0.137430697598174 AGIWUR32750                                              |    |    |          |          |                |          |          |                     |  |
| N2                                                                          | CT | IV | 17440642 | 17442125 | WBGene00045013 | F08A7.1  | F08A7.1  | 0.17077353059692    |  |
| AGIWUR6277;AGIWUR17924;AGIWUR26032;AGIWUR39716;AGIWUR45208                  |    |    |          |          |                |          |          |                     |  |
| N2                                                                          | CT | IV | 17442827 | 17443738 | WBGene00023501 | F11E6.11 | F11E6.11 |                     |  |
| -0.0472139336866135 AGIWUR41389                                             |    |    |          |          |                |          |          |                     |  |
| N2                                                                          | CT | IV | 17444125 | 17450543 | WBGene00008711 | F11E6.8  | F11E6.8  | -0.0192336295894115 |  |
| AGIWUR924                                                                   |    |    |          |          |                |          |          |                     |  |
| N2                                                                          | CT | IV | 17457834 | 17461272 | WBGene00008710 | F11E6.7  | F11E6.7  | -0.095921098483803  |  |
| AGIWUR37764                                                                 |    |    |          |          |                |          |          |                     |  |
| N2                                                                          | CT | IV | 17461909 | 17463158 | WBGene00008713 | F11E6.10 | F11E6.10 |                     |  |
| -0.0710694944219536 AGIWUR15528;AGIWUR19371;AGIWUR28688                     |    |    |          |          |                |          |          |                     |  |

|                                                                                    |    |       |          |       |          |                |         |         |                     |
|------------------------------------------------------------------------------------|----|-------|----------|-------|----------|----------------|---------|---------|---------------------|
| N2                                                                                 | CT | IV    | 17464451 |       | 17465986 | WBGene00008709 | F11E6.6 | F11E6.6 | 0.0113404564855077  |
| AGIWUR38814                                                                        |    |       |          |       |          |                |         |         |                     |
| N2                                                                                 | CT | IV    | 17466060 |       | 17467408 | WBGene00001240 | elo-2   | F11E6.5 | 0.234629084936962   |
| AGIWUR15442                                                                        |    |       |          |       |          |                |         |         |                     |
| N2                                                                                 | CT | IV    | 17469347 |       | 17470387 | WBGene00008708 | F11E6.4 | F11E6.4 | 0.0444159268753506  |
| AGIWUR25207                                                                        |    |       |          |       |          |                |         |         |                     |
| N2                                                                                 | CT | IV    | 17470510 |       | 17472025 | WBGene00008707 | F11E6.3 | F11E6.3 | 0.0589349434294189  |
| AGIWUR753;AGIWUR11490                                                              |    |       |          |       |          |                |         |         |                     |
| N2                                                                                 | CT | IV    | 17473334 |       | 17479397 | WBGene00008706 | gba-3   | F11E6.1 | -0.118814093560318  |
| AGIWUR26597;AGIWUR26714                                                            |    |       |          |       |          |                |         |         |                     |
| N2                                                                                 | CT | IV    | 17480396 |       | 17483332 | WBGene00007067 | 4R79.2  | 4R79.2  | 0.169880489668715   |
| AGIWUR14144                                                                        |    |       |          |       |          |                |         |         |                     |
| N2                                                                                 | CT | IV    | 17486871 |       | 17490779 | WBGene00003525 | nas-6   | 4R79.1  | -0.192009516747294  |
| AGIWUR30655                                                                        |    |       |          |       |          |                |         |         |                     |
| N2                                                                                 | CT | MtDNA | 113      | 549   |          | WBGene00010957 | nduo-6  | MTCE.3  | -0.0159835575465621 |
| AGIWUR24989;AGIWUR35041                                                            |    |       |          |       |          |                |         |         |                     |
| N2                                                                                 | CT | MtDNA | 549      | 783   |          | WBGene00010958 | ndf1-4  | MTCE.4  | -0.0209003058538979 |
| AGIWUR23526;AGIWUR34575                                                            |    |       |          |       |          |                |         |         |                     |
| N2                                                                                 | CT | MtDNA | 898      | 1593  |          | WBGene00014454 | MTCE.7  | MTCE.7  | -0.0992280016535414 |
| AGIWUR7913;AGIWUR13747;AGIWUR22917;AGIWUR36868;AGIWUR41384                         |    |       |          |       |          |                |         |         |                     |
| N2                                                                                 | CT | MtDNA | 1763     | 2635  |          | WBGene00010959 | nduo-1  | MTCE.11 | -0.0399364165302512 |
| AGIWUR28777;AGIWUR31173                                                            |    |       |          |       |          |                |         |         |                     |
| N2                                                                                 | CT | MtDNA | 2634     | 3235  |          | WBGene00010960 | atp-6   | MTCE.12 | 0.0298320918148267  |
| AGIWUR4315;AGIWUR23319                                                             |    |       |          |       |          |                |         |         |                     |
| N2                                                                                 | CT | MtDNA | 3389     | 4269  |          | WBGene00010961 | nduo-2  | MTCE.16 | -0.0827315521189966 |
| AGIWUR13582;AGIWUR27453;AGIWUR34174                                                |    |       |          |       |          |                |         |         |                     |
| N2                                                                                 | CT | MtDNA | 4504     | 5621  |          | WBGene00000829 | ctb-1   | MTCE.21 | 0.278941895568549   |
| AGIWUR13075;AGIWUR32293                                                            |    |       |          |       |          |                |         |         |                     |
| N2                                                                                 | CT | MtDNA | 5678     | 6449  |          | WBGene00010962 | ctc-3   | MTCE.23 | 0.204320921114308   |
| AGIWUR16275;AGIWUR21151;AGIWUR33004                                                |    |       |          |       |          |                |         |         |                     |
| N2                                                                                 | CT | MtDNA | 6506     | 7808  |          | WBGene00010963 | nduo-4  | MTCE.25 | 0.236716601251832   |
| AGIWUR2185;AGIWUR25147;AGIWUR28528;AGIWUR32111;AGIWUR33776;AGIWUR38430;AGIWUR43128 |    |       |          |       |          |                |         |         |                     |
| N2                                                                                 | CT | MtDNA | 7827     | 9428  |          | WBGene00010964 | ctc-1   | MTCE.26 | 0.0813471622578774  |
| AGIWUR14543;AGIWUR27788;AGIWUR34673;AGIWUR38561;AGIWUR40016                        |    |       |          |       |          |                |         |         |                     |
| N2                                                                                 | CT | MtDNA | 9649     | 10348 |          | WBGene00010965 | ctc-2   | MTCE.31 | 0.102777570898557   |
| AGIWUR3817;AGIWUR15036                                                             |    |       |          |       |          |                |         |         |                     |
| N2                                                                                 | CT | MtDNA | 10403    | 11354 |          | WBGene00014472 | MTCE.33 | MTCE.33 | 0.0806281770307828  |
| AGIWUR35310;AGIWUR39867                                                            |    |       |          |       |          |                |         |         |                     |
| N2                                                                                 | CT | MtDNA | 11356    | 11691 |          | WBGene00010966 | nduo-3  | MTCE.34 | 0.00581957363460273 |

AGIWUR35958;AGIWUR36046

N2 CT MtDNA 11691 13272 WBGene00010967 nduo-5 MTCE.35 -0.142354597013814

AGIWUR5384;AGIWUR5608;AGIWUR6469;AGIWUR27940;AGIWUR29535;AGIWUR34029

N2 CT V 1663 6632 WBGene00015153 B0348.5 B0348.5 -0.154156984909345 AGIWUR43464

N2 CT V 6588 7822 WBGene00002061 ife-3 B0348.6 -0.00496269961324192

AGIWUR1089;AGIWUR2583;AGIWUR3915;AGIWUR15574;AGIWUR31428;AGIWUR34420;AGIWUR35684;AGIWUR40770

N2 CT V 20825 43697 WBGene00001177 eg1-8 B0348.4 -0.0430768471221121

AGIWUR27169;AGIWUR28430;AGIWUR43926

N2 CT V 45310 46916 WBGene00015152 B0348.2 B0348.2 0.315391319667585 AGIWUR29175

N2 CT V 48922 49619 WBGene00015151 B0348.1 B0348.1 -0.132768084229137

AGIWUR7437;AGIWUR12945;AGIWUR15241;AGIWUR19933;AGIWUR38670;AGIWUR42802

N2 CT V 49956 56046 WBGene00021413 srt-52 Y38C9B.2 0.0416998819740506

AGIWUR8074

N2 CT V 59239 63509 WBGene00021412 cyp-29A3 Y38C9B.1 -0.228594485510623

AGIWUR1490

N2 CT V 63726 64503 WBGene00021414 Y38C9B.3 Y38C9B.3 0.00931616020256421

AGIWUR15767

N2 CT V 64564 83831 WBGene00018976 daam-1 F56E10.2 -0.0312516266027933

AGIWUR12745;AGIWUR21333

N2 CT V 103394 104064 WBGene00004496 rps-27 F56E10.4 -0.142898614154149

AGIWUR15986

N2 CT V 104826 118188 WBGene00018975 F56E10.1 F56E10.1 -0.0559606819398377

AGIWUR30224;AGIWUR37479

N2 CT V 118043 122966 WBGene00000480 cgp-1 Y38C9A.2 -0.0307973588608768

AGIWUR7387;AGIWUR17842;AGIWUR23609

N2 CT V 124010 126758 WBGene00020999 W03F9.1 W03F9.1 -0.218897998420909 AGIWUR40968

N2 CT V 127000 128034 WBGene00021000 W03F9.2 W03F9.2 -0.0484544071466741

AGIWUR413;AGIWUR3259;AGIWUR9935;AGIWUR38374

N2 CT V 128237 131754 WBGene00021004 sftb-2 W03F9.10 -0.00220708574830386

AGIWUR1576;AGIWUR40301

N2 CT V 132450 134993 WBGene00021001 W03F9.3 W03F9.3 0.0916392530089958 AGIWUR9969

N2 CT V 137177 141370 WBGene00044512 W03F9.11 W03F9.11

-0.00887167780472442

AGIWUR452

N2 CT V 142449 142799 WBGene00023356 W03F9.8 W03F9.8 -0.0358650006835948

AGIWUR15929;AGIWUR34727

N2 CT V 143047 144617 WBGene00005302 srh-81 W03F9.7 0.0598858980805392

AGIWUR8210;AGIWUR27656;AGIWUR28230

N2 CT V 145194 146931 WBGene00005303 srh-82 W03F9.6 0.140349136024533 AGIWUR27502

N2 CT V 147538 152104 WBGene00021002 W03F9.4 W03F9.4 0.182824243289794 AGIWUR22684

|                                                                       |    |   |        |        |                |          |            |                      |             |
|-----------------------------------------------------------------------|----|---|--------|--------|----------------|----------|------------|----------------------|-------------|
| N2                                                                    | CT | V | 156825 | 166866 | WBGene00006648 | ttb-1    | W03F9.5    | 0.144829363795445    | AGIWUR17082 |
| N2                                                                    | CT | V | 177421 | 184966 | WBGene00000838 | cul-3    | Y108G3AL.1 | -0.0185256085999548  |             |
| AGIWUR7760;AGIWUR19520;AGIWUR25925;AGIWUR29443;AGIWUR44731            |    |   |        |        |                |          |            |                      |             |
| N2                                                                    | CT | V | 186169 | 200777 | WBGene00044689 | arid-1   | Y108G3AL.7 | 0.100298000453461    |             |
| AGIWUR8634;AGIWUR41275                                                |    |   |        |        |                |          |            |                      |             |
| N2                                                                    | CT | V | 201600 | 204279 | WBGene00077643 | trpp-1   | DC2.8      | -0.00488209296690201 | AGIWUR13239 |
| N2                                                                    | CT | V | 204382 | 209758 | WBGene00017080 | lec-12   | DC2.3      | 0.160068338449934    | AGIWUR11135 |
| N2                                                                    | CT | V | 210148 | 212787 | WBGene00017082 | DC2.5    | DC2.5      | -0.337564964607864   | AGIWUR26784 |
| N2                                                                    | CT | V | 217154 | 219473 | WBGene00005299 | srh-78   | DC2.2      | 0.244908055445236    | AGIWUR34036 |
| N2                                                                    | CT | V | 219932 | 222776 | WBGene00005301 | srh-80   | DC2.1      | -0.231994763062288   | AGIWUR15830 |
| N2                                                                    | CT | V | 222995 | 226947 | WBGene00005298 | srh-77   | DC2.6      | -0.268340237757215   | AGIWUR24387 |
| N2                                                                    | CT | V | 228858 | 234672 | WBGene00017083 | kin-33   | DC2.7      | 0.0703790056538525   |             |
| AGIWUR2580;AGIWUR6254;AGIWUR15785;AGIWUR20620                         |    |   |        |        |                |          |            |                      |             |
| N2                                                                    | CT | V | 236750 | 238192 | WBGene00019814 | R02C2.1  | R02C2.1    | -1.45818492681782    | AGIWUR19767 |
| N2                                                                    | CT | V | 238963 | 240362 | WBGene00019817 | R02C2.6  | R02C2.6    | -0.135800746159929   | AGIWUR5843  |
| N2                                                                    | CT | V | 241326 | 242618 | WBGene00019818 | R02C2.7  | R02C2.7    | -0.435303307443744   | AGIWUR28807 |
| N2                                                                    | CT | V | 244469 | 245846 | WBGene00019815 | kin-34   | R02C2.2    | -0.170620225156052   | AGIWUR21942 |
| N2                                                                    | CT | V | 246618 | 251756 | WBGene00006419 | oac-39   | R02C2.3    | -3.31198232534542    | AGIWUR18420 |
| N2                                                                    | CT | V | 252364 | 254691 | WBGene00006172 | str-121  | R02C2.5    | -0.0914943715723133  | AGIWUR29847 |
| N2                                                                    | CT | V | 254912 | 257992 | WBGene00019816 | nhr-204  | R02C2.4    | -0.125159069049761   | AGIWUR43394 |
| N2                                                                    | CT | V | 268238 | 271419 | WBGene00021981 | lgc-26   | Y58G8A.1   | 0.0175802944633308   |             |
| AGIWUR1175                                                            |    |   |        |        |                |          |            |                      |             |
| N2                                                                    | CT | V | 271984 | 272937 | WBGene00044513 | Y58G8A.5 | Y58G8A.5   | -0.257344327735731   |             |
| AGIWUR3273;AGIWUR7079;AGIWUR9802;AGIWUR25645;AGIWUR36238              |    |   |        |        |                |          |            |                      |             |
| N2                                                                    | CT | V | 276989 | 281716 | WBGene00021983 | npr-5    | Y58G8A.4   | 0.0803198344855716   |             |
| AGIWUR6860;AGIWUR37723;AGIWUR42426                                    |    |   |        |        |                |          |            |                      |             |
| N2                                                                    | CT | V | 297949 | 300005 | WBGene00018010 | F33E11.2 | F33E11.2   | 0.28374530974699     |             |
| AGIWUR15878                                                           |    |   |        |        |                |          |            |                      |             |
| N2                                                                    | CT | V | 300015 | 304713 | WBGene00018011 | F33E11.3 | F33E11.3   | -0.165993045638238   |             |
| AGIWUR16662                                                           |    |   |        |        |                |          |            |                      |             |
| N2                                                                    | CT | V | 305457 | 311565 | WBGene00018013 | phf-10   | F33E11.6   | 0.141263225396837    |             |
| AGIWUR7995;AGIWUR39428                                                |    |   |        |        |                |          |            |                      |             |
| N2                                                                    | CT | V | 320204 | 323647 | WBGene00003614 | nhr-15   | F33E11.1   | -0.114142027598746   |             |
| AGIWUR9738;AGIWUR22028;AGIWUR23891;AGIWUR36943;AGIWUR43837            |    |   |        |        |                |          |            |                      |             |
| N2                                                                    | CT | V | 323774 | 330725 | WBGene00000022 | abt-4    | Y39D8C.1   | 0.147339447064665    |             |
| AGIWUR5072                                                            |    |   |        |        |                |          |            |                      |             |
| N2                                                                    | CT | V | 334646 | 336861 | WBGene00020708 | dmd-8    | T22H9.4    | -0.210342493066092   | AGIWUR27406 |
| N2                                                                    | CT | V | 343428 | 347623 | WBGene00020707 | wago-10  | T22H9.3    | 0.0657252921959417   |             |
| AGIWUR2687;AGIWUR8699;AGIWUR10606;AGIWUR26893;AGIWUR28965;AGIWUR40430 |    |   |        |        |                |          |            |                      |             |

|                                                                                                                      |    |   |        |        |                |          |          |                     |             |
|----------------------------------------------------------------------------------------------------------------------|----|---|--------|--------|----------------|----------|----------|---------------------|-------------|
| N2                                                                                                                   | CT | V | 349374 | 359016 | WBGene00020706 | atg-9    | T22H9.2  | 0.00346410777520312 |             |
| AGIWUR12285;AGIWUR27158                                                                                              |    |   |        |        |                |          |          |                     |             |
| N2                                                                                                                   | CT | V | 359766 | 363705 | WBGene00020705 | T22H9.1  | T22H9.1  | 0.038104219064607   | AGIWUR40024 |
| N2                                                                                                                   | CT | V | 364950 | 369088 | WBGene00021450 | mltn-6   | Y39D8B.2 | -0.0253669399767231 |             |
| AGIWUR25789                                                                                                          |    |   |        |        |                |          |          |                     |             |
| N2                                                                                                                   | CT | V | 374408 | 379672 | WBGene00021451 | mltn-8   | Y39D8B.3 | 0.512982805902657   |             |
| AGIWUR24991                                                                                                          |    |   |        |        |                |          |          |                     |             |
| N2                                                                                                                   | CT | V | 381901 | 384688 | WBGene00022643 | ZK6.8    | ZK6.8    | 0.0240777062902691  | AGIWUR3417  |
| N2                                                                                                                   | CT | V | 385713 | 388090 | WBGene00022642 | lip1-5   | ZK6.7    | 0.101958794810209   | AGIWUR40960 |
| N2                                                                                                                   | CT | V | 388697 | 391598 | WBGene00022641 | ZK6.6    | ZK6.6    | 0.13737337861329    | AGIWUR42231 |
| N2                                                                                                                   | CT | V | 392628 | 395117 | WBGene00022640 | nhr-254  | ZK6.5    | 0.143697191604113   | AGIWUR28089 |
| N2                                                                                                                   | CT | V | 396827 | 398756 | WBGene00022639 | nhr-253  | ZK6.4    | -0.218580933579006  | AGIWUR19862 |
| N2                                                                                                                   | CT | V | 400192 | 401602 | WBGene00022638 | sc1-27   | ZK6.3    | -0.100616601870765  | AGIWUR22678 |
| N2                                                                                                                   | CT | V | 401688 | 403128 | WBGene00005284 | srh-62   | ZK6.9    | -0.319690133999686  | AGIWUR9555  |
| N2                                                                                                                   | CT | V | 404619 | 405997 | WBGene00022637 | nhr-252  | ZK6.2    | 0.587410458392175   | AGIWUR27857 |
| N2                                                                                                                   | CT | V | 408265 | 410080 | WBGene00022636 | nhr-278  | ZK6.1    | 0.11115583585629    | AGIWUR41645 |
| N2                                                                                                                   | CT | V | 411782 | 414760 | WBGene00022644 | dod-19   | ZK6.10   | 0.56974237231392    | AGIWUR35435 |
| N2                                                                                                                   | CT | V | 415713 | 417708 | WBGene00022645 | ZK6.11   | ZK6.11   | 0.292953293552149   | AGIWUR21388 |
| N2                                                                                                                   | CT | V | 419435 | 421839 | WBGene00021448 | Y39D8A.1 | Y39D8A.1 | 0.0052485153423123  |             |
| AGIWUR327;AGIWUR8494;AGIWUR13402;AGIWUR17855;AGIWUR18239;AGIWUR18452;AGIWUR22056;AGIWUR35812;AGIWUR41891;AGIWUR43529 |    |   |        |        |                |          |          |                     |             |
| N2                                                                                                                   | CT | V | 422498 | 424064 | WBGene00015259 | dod-20   | B0554.6  | -0.0530636688553603 | AGIWUR38983 |
| N2                                                                                                                   | CT | V | 424440 | 426560 | WBGene00015258 | B0554.5  | B0554.5  | 0.0926816888214983  | AGIWUR9976  |
| N2                                                                                                                   | CT | V | 429144 | 433574 | WBGene00015257 | B0554.4  | B0554.4  | -0.292789498879977  |             |
| AGIWUR2740;AGIWUR5771;AGIWUR24531                                                                                    |    |   |        |        |                |          |          |                     |             |
| N2                                                                                                                   | CT | V | 434198 | 436726 | WBGene00015255 | B0554.2  | B0554.2  | -0.123864903846044  |             |
| AGIWUR11783;AGIWUR41253                                                                                              |    |   |        |        |                |          |          |                     |             |
| N2                                                                                                                   | CT | V | 437576 | 441023 | WBGene00015260 | B0554.7  | B0554.7  | -0.0819411257662743 | AGIWUR16317 |
| N2                                                                                                                   | CT | V | 441820 | 443293 | WBGene00005256 | srh-33   | M02H5.9  | -0.324148848514373  | AGIWUR7920  |
| N2                                                                                                                   | CT | V | 444893 | 446674 | WBGene00005257 | srh-34   | M02H5.10 | 0.0259211216928144  |             |
| AGIWUR28651                                                                                                          |    |   |        |        |                |          |          |                     |             |
| N2                                                                                                                   | CT | V | 447569 | 449230 | WBGene00005258 | srh-35   | M02H5.11 | -0.247380226724818  |             |
| AGIWUR18900                                                                                                          |    |   |        |        |                |          |          |                     |             |
| N2                                                                                                                   | CT | V | 449915 | 450438 | WBGene00019744 | M02H5.8  | M02H5.8  | 0.084825124852987   | AGIWUR37280 |
| N2                                                                                                                   | CT | V | 451451 | 453746 | WBGene00003713 | nhr-123  | M02H5.7  | -0.263675546518966  | AGIWUR38106 |
| N2                                                                                                                   | CT | V | 454009 | 456772 | WBGene00003688 | nhr-98   | M02H5.6  | -0.228378044924892  | AGIWUR11409 |
| N2                                                                                                                   | CT | V | 459734 | 461899 | WBGene00019743 | nhr-203  | M02H5.5  | -0.0974869108973415 | AGIWUR39587 |
| N2                                                                                                                   | CT | V | 462600 | 464963 | WBGene00019742 | nhr-202  | M02H5.4  | -0.215835597841366  | AGIWUR16331 |
| N2                                                                                                                   | CT | V | 465757 | 467491 | WBGene00019741 | nhr-201  | M02H5.3  | 0.197834767298378   | AGIWUR3037  |

|                                     |    |   |        |        |                |          |           |                     |             |
|-------------------------------------|----|---|--------|--------|----------------|----------|-----------|---------------------|-------------|
| N2                                  | CT | V | 467567 | 468560 | WBGene00019745 | srbc-57  | M02H5.12  | 0.0281734099194164  |             |
| AGIWUR15097                         |    |   |        |        |                |          |           |                     |             |
| N2                                  | CT | V | 472889 | 474631 | WBGene00019740 | srt-31   | M02H5.2   | -0.053420840662362  | AGIWUR43022 |
| N2                                  | CT | V | 474791 | 477150 | WBGene00003689 | nhr-99   | M02H5.1   | 0.0709491196156993  |             |
| AGIWUR14192;AGIWUR23003;AGIWUR43277 |    |   |        |        |                |          |           |                     |             |
| N2                                  | CT | V | 478162 | 480710 | WBGene00003645 | nhr-55   | T01G6.7   | 0.131463308521127   | AGIWUR25933 |
| N2                                  | CT | V | 480811 | 483355 | WBGene00003720 | nhr-130  | T01G6.8   | -0.0428464569810103 | AGIWUR34491 |
| N2                                  | CT | V | 484901 | 486895 | WBGene00020153 | nhr-212  | T01G6.6   | -0.204762461161424  | AGIWUR23170 |
| N2                                  | CT | V | 486990 | 489104 | WBGene00020152 | nhr-211  | T01G6.5   | 0.020705622202061   |             |
| AGIWUR16625;AGIWUR39859;AGIWUR39924 |    |   |        |        |                |          |           |                     |             |
| N2                                  | CT | V | 489647 | 491430 | WBGene00003696 | nhr-106  | T01G6.4   | 0.059219586380177   | AGIWUR18097 |
| N2                                  | CT | V | 491732 | 493641 | WBGene00006233 | str-196  | T01G6.3   | 0.223718413698665   | AGIWUR30475 |
| N2                                  | CT | V | 494499 | 497287 | WBGene00003721 | nhr-131  | T01G6.2   | -0.123214273073554  | AGIWUR5940  |
| N2                                  | CT | V | 497839 | 498943 | WBGene00020151 | T01G6.1  | T01G6.1   | 0.30366287890538    | AGIWUR24893 |
| N2                                  | CT | V | 499770 | 501330 | WBGene00006282 | str-256  | T01G6.9   | -0.0283552166556227 | AGIWUR27783 |
| N2                                  | CT | V | 502142 | 503223 | WBGene00020154 | T01G6.10 | T01G6.10  | 0.00428873206493741 |             |
| AGIWUR4126;AGIWUR17221;AGIWUR38447  |    |   |        |        |                |          |           |                     |             |
| N2                                  | CT | V | 504028 | 504616 | WBGene00004144 | pqn-60   | R11G11.7  | 0.0678061904759097  |             |
| AGIWUR13341                         |    |   |        |        |                |          |           |                     |             |
| N2                                  | CT | V | 505491 | 506068 | WBGene00020014 | R11G11.6 | R11G11.6  | 0.124200202377855   |             |
| AGIWUR21543                         |    |   |        |        |                |          |           |                     |             |
| N2                                  | CT | V | 508112 | 509803 | WBGene00005851 | srw-104  | R11G11.8  | -0.0649177558133687 |             |
| AGIWUR15163;AGIWUR43712             |    |   |        |        |                |          |           |                     |             |
| N2                                  | CT | V | 511194 | 512520 | WBGene00005260 | srh-37   | R11G11.9  | 0.12169815270128    |             |
| AGIWUR6632                          |    |   |        |        |                |          |           |                     |             |
| N2                                  | CT | V | 513390 | 515226 | WBGene00005852 | srw-105  | R11G11.10 | 0.284212285309479   |             |
| AGIWUR41200                         |    |   |        |        |                |          |           |                     |             |
| N2                                  | CT | V | 515787 | 517388 | WBGene00005853 | srw-106  | R11G11.11 | -0.0915250677733095 |             |
| AGIWUR15100                         |    |   |        |        |                |          |           |                     |             |
| N2                                  | CT | V | 519852 | 521617 | WBGene00005854 | srw-107  | R11G11.13 | 0.0379269869999312  |             |
| AGIWUR24048                         |    |   |        |        |                |          |           |                     |             |
| N2                                  | CT | V | 521702 | 524218 | WBGene00020016 | lip1-3   | R11G11.14 | -0.12769818238815   |             |
| AGIWUR43454                         |    |   |        |        |                |          |           |                     |             |
| N2                                  | CT | V | 525666 | 526691 | WBGene00006119 | str-54   | R11G11.15 | -0.182866802862418  |             |
| AGIWUR10962;AGIWUR38855             |    |   |        |        |                |          |           |                     |             |
| N2                                  | CT | V | 527902 | 528869 | WBGene00005855 | srw-108  | R11G11.5  | -0.047347515607667  |             |
| AGIWUR42181                         |    |   |        |        |                |          |           |                     |             |
| N2                                  | CT | V | 529277 | 530557 | WBGene00005600 | srj-12   | R11G11.4  | -0.0745371864937834 |             |
| AGIWUR9716;AGIWUR30691              |    |   |        |        |                |          |           |                     |             |



|                         |    |   |        |        |                |          |          |                      |             |
|-------------------------|----|---|--------|--------|----------------|----------|----------|----------------------|-------------|
| N2                      | CT | V | 530799 | 532024 | WBGene00020013 | R11G11.3 | R11G11.3 | 0.259324080346884    |             |
| AGIWUR39705             |    |   |        |        |                |          |          |                      |             |
| N2                      | CT | V | 532290 | 534064 | WBGene00003648 | nhr-58   | R11G11.2 | 0.02284819760012     |             |
| AGIWUR814;AGIWUR43924   |    |   |        |        |                |          |          |                      |             |
| N2                      | CT | V | 534446 | 536226 | WBGene00003722 | nhr-132  | R11G11.1 | -0.369363922301542   |             |
| AGIWUR30967             |    |   |        |        |                |          |          |                      |             |
| N2                      | CT | V | 536628 | 537418 | WBGene00015759 | C14C6.5  | C14C6.5  | -0.0502600688785897  |             |
| AGIWUR33256;AGIWUR33998 |    |   |        |        |                |          |          |                      |             |
| N2                      | CT | V | 539460 | 541485 | WBGene00015758 | nhr-155  | C14C6.4  | -0.0853818555294659  | AGIWUR27454 |
| N2                      | CT | V | 543469 | 545359 | WBGene00015757 | C14C6.3  | C14C6.3  | 0.339036382072604    | AGIWUR38250 |
| N2                      | CT | V | 545844 | 548080 | WBGene00015760 | C14C6.6  | C14C6.6  | 0.138407436214795    | AGIWUR30450 |
| N2                      | CT | V | 548713 | 550619 | WBGene00015761 | C14C6.7  | C14C6.7  | -0.0855176273995761  | AGIWUR41855 |
| N2                      | CT | V | 554374 | 556155 | WBGene00005899 | srx-8    | C14C6.9  | -0.201732710398622   | AGIWUR30075 |
| N2                      | CT | V | 560195 | 562956 | WBGene00005898 | srx-7    | C14C6.1  | -0.215744317541906   | AGIWUR985   |
| N2                      | CT | V | 563134 | 564446 | WBGene00015756 | C14C6.2  | C14C6.2  | -0.0365433106150341  | AGIWUR44552 |
| N2                      | CT | V | 564391 | 566084 | WBGene00005585 | sri-73   | C14C6.10 | 0.0348118825600023   |             |
| AGIWUR19650             |    |   |        |        |                |          |          |                      |             |
| N2                      | CT | V | 566719 | 568205 | WBGene00005584 | sri-72   | C14C6.11 | 0.589706758865986    |             |
| AGIWUR20755             |    |   |        |        |                |          |          |                      |             |
| N2                      | CT | V | 570571 | 571205 | WBGene00015763 | C14C6.12 | C14C6.12 | -0.26097070681842    |             |
| AGIWUR2344              |    |   |        |        |                |          |          |                      |             |
| N2                      | CT | V | 572031 | 574739 | WBGene00015764 | C14C6.13 | C14C6.13 | -0.0294044326228562  |             |
| AGIWUR20391             |    |   |        |        |                |          |          |                      |             |
| N2                      | CT | V | 576370 | 578428 | WBGene00019453 | K06H6.5  | K06H6.5  | -0.0994905400776398  | AGIWUR27993 |
| N2                      | CT | V | 581916 | 583431 | WBGene00019451 | nstp-7   | K06H6.3  | 0.0705419968089203   | AGIWUR29404 |
| N2                      | CT | V | 583801 | 585308 | WBGene00019454 | K06H6.6  | K06H6.6  | 0.194681069193914    | AGIWUR29139 |
| N2                      | CT | V | 585848 | 587250 | WBGene00019450 | K06H6.2  | K06H6.2  | -0.00546802901647681 | AGIWUR32952 |
| N2                      | CT | V | 588135 | 589646 | WBGene00019449 | K06H6.1  | K06H6.1  | 0.129267023883999    | AGIWUR36953 |
| N2                      | CT | V | 590482 | 592463 | WBGene00022758 | ZK488.6  | ZK488.6  | 0.0913589408182034   | AGIWUR10298 |
| N2                      | CT | V | 593259 | 595677 | WBGene00022757 | ZK488.5  | ZK488.5  | 0.178616212066673    | AGIWUR11121 |
| N2                      | CT | V | 600595 | 602482 | WBGene00022756 | nhr-251  | ZK488.4  | -0.0662347199299562  | AGIWUR21345 |
| N2                      | CT | V | 603665 | 604205 | WBGene00004177 | pqn-98   | ZK488.7  | 0.23617197549031     | AGIWUR12119 |
| N2                      | CT | V | 604723 | 606183 | WBGene00005857 | srw-110  | ZK488.8  | -0.0299453155092619  |             |
| AGIWUR4227;AGIWUR21610  |    |   |        |        |                |          |          |                      |             |
| N2                      | CT | V | 606781 | 608944 | WBGene00005856 | srw-109  | ZK488.9  | -0.0887573094258283  | AGIWUR43361 |
| N2                      | CT | V | 609144 | 609726 | WBGene00004176 | pqn-97   | ZK488.10 | -0.418388310151365   |             |
| AGIWUR11417             |    |   |        |        |                |          |          |                      |             |
| N2                      | CT | V | 610445 | 612513 | WBGene00003680 | nhr-90   | ZK488.2  | -0.126636645445991   | AGIWUR33832 |
| N2                      | CT | V | 612781 | 614908 | WBGene00022755 | nhr-250  | ZK488.1  | -0.096382782976483   | AGIWUR20154 |

|                                                          |    |   |        |        |                |          |          |                     |             |
|----------------------------------------------------------|----|---|--------|--------|----------------|----------|----------|---------------------|-------------|
| N2                                                       | CT | V | 615576 | 616728 | WBGene00018624 | F48G7.13 | F48G7.13 | 0.0180383946034937  |             |
| AGIWUR8576                                               |    |   |        |        |                |          |          |                     |             |
| N2                                                       | CT | V | 619434 | 621679 | WBGene00018615 | F48G7.4  | F48G7.4  | -0.150635597627676  | AGIWUR43563 |
| N2                                                       | CT | V | 622170 | 622951 | WBGene00018616 | F48G7.5  | F48G7.5  | 0.213668200463495   | AGIWUR20604 |
| N2                                                       | CT | V | 623298 | 625022 | WBGene00018617 | srt-17   | F48G7.6  | -0.465291947266636  | AGIWUR22569 |
| N2                                                       | CT | V | 625752 | 626390 | WBGene00018618 | F48G7.7  | F48G7.7  | -0.0409822243264557 | AGIWUR42807 |
| N2                                                       | CT | V | 627095 | 627650 | WBGene00018619 | F48G7.8  | F48G7.8  | -0.209266637632943  | AGIWUR25428 |
| N2                                                       | CT | V | 628059 | 628623 | WBGene00018620 | F48G7.9  | F48G7.9  | -0.551543978583096  | AGIWUR23150 |
| N2                                                       | CT | V | 634142 | 634893 | WBGene00018621 | F48G7.10 | F48G7.10 | 0.389871846944748   |             |
| AGIWUR39400                                              |    |   |        |        |                |          |          |                     |             |
| N2                                                       | CT | V | 636587 | 637501 | WBGene00018614 | pals-31  | F48G7.2  | 0.205240521988305   | AGIWUR42892 |
| N2                                                       | CT | V | 638628 | 639928 | WBGene00005621 | srj-37   | F48G7.1  | 0.365209205178093   | AGIWUR42858 |
| N2                                                       | CT | V | 640799 | 642893 | WBGene00018622 | nhr-190  | F48G7.11 | -0.0892284403207455 |             |
| AGIWUR20655                                              |    |   |        |        |                |          |          |                     |             |
| N2                                                       | CT | V | 643762 | 646199 | WBGene00018623 | F48G7.12 | F48G7.12 | -0.419154549892925  |             |
| AGIWUR5201                                               |    |   |        |        |                |          |          |                     |             |
| N2                                                       | CT | V | 647188 | 649741 | WBGene00017959 | ugt-42   | F31F4.7  | 0.129506514500278   | AGIWUR22094 |
| N2                                                       | CT | V | 651837 | 653040 | WBGene00005593 | srj-5    | F31F4.16 | -0.0806520523244245 |             |
| AGIWUR33839                                              |    |   |        |        |                |          |          |                     |             |
| N2                                                       | CT | V | 653303 | 654502 | WBGene00005594 | srj-6    | F31F4.8  | 0.106315896592314   | AGIWUR31845 |
| N2                                                       | CT | V | 654727 | 655923 | WBGene00005451 | srh-245  | F31F4.9  | -0.119863280145445  | AGIWUR1794  |
| N2                                                       | CT | V | 656499 | 657778 | WBGene00005452 | srh-246  | F31F4.18 | -0.0948058209006843 |             |
| AGIWUR12239                                              |    |   |        |        |                |          |          |                     |             |
| N2                                                       | CT | V | 658476 | 660310 | WBGene00017963 | F31F4.17 | F31F4.17 | 0.219256985846766   |             |
| AGIWUR26694                                              |    |   |        |        |                |          |          |                     |             |
| N2                                                       | CT | V | 660681 | 661954 | WBGene00005320 | srh-101  | F31F4.10 | -0.295752639550765  |             |
| AGIWUR14309;AGIWUR23039                                  |    |   |        |        |                |          |          |                     |             |
| N2                                                       | CT | V | 662479 | 664443 | WBGene00017960 | F31F4.11 | F31F4.11 | -0.0677899583048536 |             |
| AGIWUR28684                                              |    |   |        |        |                |          |          |                     |             |
| N2                                                       | CT | V | 664797 | 665923 | WBGene00005472 | srh-266  | F31F4.6  | 0.489398941371391   | AGIWUR12540 |
| N2                                                       | CT | V | 665919 | 667494 | WBGene00017961 | nhr-180  | F31F4.12 | -0.10572377056552   |             |
| AGIWUR13553;AGIWUR38977;AGIWUR39200                      |    |   |        |        |                |          |          |                     |             |
| N2                                                       | CT | V | 667896 | 671442 | WBGene00005687 | sru-24   | F31F4.13 | -0.125141676498981  |             |
| AGIWUR1691;AGIWUR6096;AGIWUR7045;AGIWUR16318;AGIWUR18111 |    |   |        |        |                |          |          |                     |             |
| N2                                                       | CT | V | 672245 | 674313 | WBGene00005688 | sru-25   | F31F4.14 | 0.0411479326225139  |             |
| AGIWUR29944                                              |    |   |        |        |                |          |          |                     |             |
| N2                                                       | CT | V | 674911 | 676754 | WBGene00017962 | fbxa-72  | F31F4.15 | 0.197550895280798   |             |
| AGIWUR29718                                              |    |   |        |        |                |          |          |                     |             |
| N2                                                       | CT | V | 677034 | 678920 | WBGene00005912 | srx-21   | F31F4.4  | -0.369286343998835  | AGIWUR21802 |

|                                                                                                |    |   |        |        |                |           |          |                      |             |
|------------------------------------------------------------------------------------------------|----|---|--------|--------|----------------|-----------|----------|----------------------|-------------|
| N2                                                                                             | CT | V | 679963 | 681465 | WBGene00005913 | srx-22    | F31F4.3  | -0.0870431651538057  |             |
| AGIWUR42097;AGIWUR43628                                                                        |    |   |        |        |                |           |          |                      |             |
| N2                                                                                             | CT | V | 682331 | 683970 | WBGene00005914 | srx-23    | F31F4.2  | -0.129264368423323   | AGIWUR41650 |
| N2                                                                                             | CT | V | 684060 | 686289 | WBGene00017957 | F31F4.1   | F31F4.1  | -0.266422283070138   | AGIWUR15879 |
| N2                                                                                             | CT | V | 687684 | 690004 | WBGene00019244 | H25P19.1  | H25P19.1 | -0.247997173833873   |             |
| AGIWUR40390                                                                                    |    |   |        |        |                |           |          |                      |             |
| N2                                                                                             | CT | V | 690875 | 692770 | WBGene00005895 | srx-4     | Y49C4A.5 | -0.0646179758573115  |             |
| AGIWUR19415                                                                                    |    |   |        |        |                |           |          |                      |             |
| N2                                                                                             | CT | V | 696523 | 699614 | WBGene00021709 | ugt-29    | Y49C4A.8 | 0.134726351434145    |             |
| AGIWUR1072;AGIWUR38841                                                                         |    |   |        |        |                |           |          |                      |             |
| N2                                                                                             | CT | V | 700079 | 701669 | WBGene00005896 | srx-5     | Y49C4A.4 | -0.00478316711726023 |             |
| AGIWUR28320                                                                                    |    |   |        |        |                |           |          |                      |             |
| N2                                                                                             | CT | V | 702560 | 703745 | WBGene00021708 | srbc-37   | Y49C4A.3 | -0.0597153935909849  |             |
| AGIWUR3871;AGIWUR30163                                                                         |    |   |        |        |                |           |          |                      |             |
| N2                                                                                             | CT | V | 707218 | 708453 | WBGene00021707 | srbc-38   | Y49C4A.2 | -0.135326676681762   |             |
| AGIWUR5061;AGIWUR12514;AGIWUR28023                                                             |    |   |        |        |                |           |          |                      |             |
| N2                                                                                             | CT | V | 709108 | 710566 | WBGene00021706 | srbc-39   | Y49C4A.1 | -0.171918061360016   |             |
| AGIWUR2939                                                                                     |    |   |        |        |                |           |          |                      |             |
| N2                                                                                             | CT | V | 710642 | 712921 | WBGene00021710 | cyp-33C11 | Y49C4A.9 | 0.0310552360704106   |             |
| AGIWUR24386                                                                                    |    |   |        |        |                |           |          |                      |             |
| N2                                                                                             | CT | V | 715833 | 719831 | WBGene00019242 | srbc-40   | H24009.1 | 0.420100197423713    |             |
| AGIWUR36794                                                                                    |    |   |        |        |                |           |          |                      |             |
| N2                                                                                             | CT | V | 722695 | 723827 | WBGene00019243 | fbxb-72   | H24009.2 | 0.280258676865744    |             |
| AGIWUR15315                                                                                    |    |   |        |        |                |           |          |                      |             |
| N2                                                                                             | CT | V | 724207 | 728103 | WBGene00001564 | icl-1     | C05E4.9  | 0.391933065079506    |             |
| AGIWUR3072;AGIWUR10341;AGIWUR12073;AGIWUR15664;AGIWUR16363;AGIWUR22644;AGIWUR33040;AGIWUR42667 |    |   |        |        |                |           |          |                      |             |
| N2                                                                                             | CT | V | 728312 | 734279 | WBGene00005228 | srh-2     | C05E4.14 | 0.148042642900506    |             |
| AGIWUR538;AGIWUR4676;AGIWUR34038                                                               |    |   |        |        |                |           |          |                      |             |
| N2                                                                                             | CT | V | 734420 | 736271 | WBGene00005613 | srj-25    | C05E4.10 | 0.261921899018587    |             |
| AGIWUR37614                                                                                    |    |   |        |        |                |           |          |                      |             |
| N2                                                                                             | CT | V | 736803 | 738870 | WBGene00005612 | srj-24    | C05E4.11 | 0.173492014174861    |             |
| AGIWUR42876                                                                                    |    |   |        |        |                |           |          |                      |             |
| N2                                                                                             | CT | V | 742120 | 743273 | WBGene00015489 | C05E4.7   | C05E4.7  | -0.104328354749266   | AGIWUR5225  |
| N2                                                                                             | CT | V | 743648 | 745475 | WBGene00006182 | str-134   | C05E4.6  | 0.1639037622798      | AGIWUR31792 |
| N2                                                                                             | CT | V | 746397 | 747649 | WBGene00006181 | str-133   | C05E4.5  | -0.328747938723112   | AGIWUR2230  |
| N2                                                                                             | CT | V | 748344 | 750467 | WBGene00005516 | sri-4     | C05E4.4  | 0.110869520436887    | AGIWUR39397 |
| N2                                                                                             | CT | V | 751326 | 752779 | WBGene00006288 | str-262   | C05E4.13 | -0.289670799202584   |             |
| AGIWUR34956                                                                                    |    |   |        |        |                |           |          |                      |             |
| N2                                                                                             | CT | V | 753283 | 755124 | WBGene00005642 | srp-1     | C05E4.3  | -0.0750277566852482  | AGIWUR27054 |

|                                     |    |   |        |        |                |          |          |                      |             |
|-------------------------------------|----|---|--------|--------|----------------|----------|----------|----------------------|-------------|
| N2                                  | CT | V | 756469 | 757892 | WBGene00006087 | str-20   | C05E4.2  | -0.11310916448287    | AGIWUR33476 |
| N2                                  | CT | V | 762734 | 764593 | WBGene00005643 | srp-2    | C05E4.1  | -0.100652228922169   | AGIWUR41978 |
| N2                                  | CT | V | 765032 | 772585 | WBGene00006266 | str-238  | R09E12.4 | -0.0891973555304499  |             |
| AGIWUR4387                          |    |   |        |        |                |          |          |                      |             |
| N2                                  | CT | V | 773518 | 774854 | WBGene00019983 | sti-1    | R09E12.3 | 0.308566325314057    |             |
| AGIWUR10844;AGIWUR12820             |    |   |        |        |                |          |          |                      |             |
| N2                                  | CT | V | 774995 | 777272 | WBGene00019982 | srbc-58  | R09E12.2 | -0.228688671518407   |             |
| AGIWUR39807                         |    |   |        |        |                |          |          |                      |             |
| N2                                  | CT | V | 777571 | 778235 | WBGene00044514 | R09E12.9 | R09E12.9 | -0.258978212706026   |             |
| AGIWUR2083;AGIWUR5324;AGIWUR43324   |    |   |        |        |                |          |          |                      |             |
| N2                                  | CT | V | 778639 | 780223 | WBGene00019981 | srbc-59  | R09E12.1 | -0.00381330100077859 |             |
| AGIWUR13673;AGIWUR16438             |    |   |        |        |                |          |          |                      |             |
| N2                                  | CT | V | 780299 | 781803 | WBGene00044091 | srbc-60  | R09E12.8 | 0.0967879815257318   |             |
| AGIWUR11174                         |    |   |        |        |                |          |          |                      |             |
| N2                                  | CT | V | 782732 | 784763 | WBGene00020060 | srab-16  | R13D11.6 | 0.0163474371448826   |             |
| AGIWUR39334                         |    |   |        |        |                |          |          |                      |             |
| N2                                  | CT | V | 787431 | 789888 | WBGene00020059 | srab-15  | R13D11.5 | 0.239554639806881    |             |
| AGIWUR26822;AGIWUR31101;AGIWUR41356 |    |   |        |        |                |          |          |                      |             |
| N2                                  | CT | V | 802550 | 804741 | WBGene00020062 | nhr-270  | R13D11.8 | -0.156405914398579   |             |
| AGIWUR7489                          |    |   |        |        |                |          |          |                      |             |
| N2                                  | CT | V | 810793 | 814726 | WBGene00020058 | R13D11.4 | R13D11.4 | -0.114319238116767   |             |
| AGIWUR25263                         |    |   |        |        |                |          |          |                      |             |
| N2                                  | CT | V | 815016 | 816873 | WBGene00020057 | R13D11.3 | R13D11.3 | -0.0843170292998838  |             |
| AGIWUR20422                         |    |   |        |        |                |          |          |                      |             |
| N2                                  | CT | V | 817482 | 818733 | WBGene00020056 | R13D11.1 | R13D11.1 | 0.2867559265498      |             |
| AGIWUR27687                         |    |   |        |        |                |          |          |                      |             |
| N2                                  | CT | V | 823156 | 824972 | WBGene00005921 | srx-30   | F41H8.3  | 0.0143506376762583   |             |
| AGIWUR13632;AGIWUR38148             |    |   |        |        |                |          |          |                      |             |
| N2                                  | CT | V | 826411 | 828761 | WBGene00018313 | F41H8.2  | F41H8.2  | -0.1083872151011     | AGIWUR34562 |
| N2                                  | CT | V | 833668 | 835463 | WBGene00018312 | F41H8.1  | F41H8.1  | -0.0517140678158734  | AGIWUR32946 |
| N2                                  | CT | V | 839421 | 839934 | WBGene00044778 | K09C6.10 | K09C6.10 | 0.148183248552087    |             |
| AGIWUR2115                          |    |   |        |        |                |          |          |                      |             |
| N2                                  | CT | V | 844450 | 845373 | WBGene00019560 | K09C6.6  | K09C6.6  | 0.170711446832959    | AGIWUR19380 |
| N2                                  | CT | V | 846715 | 848858 | WBGene00019559 | srbc-13  | K09C6.5  | 0.0664277066210248   | AGIWUR23450 |
| N2                                  | CT | V | 849499 | 851332 | WBGene00019558 | srbc-12  | K09C6.4  | -0.421730044802554   | AGIWUR39150 |
| N2                                  | CT | V | 852484 | 853126 | WBGene00019557 | K09C6.3  | K09C6.3  | -0.0696030726029928  | AGIWUR19218 |
| N2                                  | CT | V | 853436 | 855082 | WBGene00019563 | K09C6.9  | K09C6.9  | -0.152669855739346   | AGIWUR1931  |
| N2                                  | CT | V | 856849 | 862061 | WBGene00019556 | K09C6.2  | K09C6.2  | -0.0165920763449776  |             |
| AGIWUR23309;AGIWUR31796             |    |   |        |        |                |          |          |                      |             |

|                                                                                                           |    |   |         |         |                |          |          |                               |
|-----------------------------------------------------------------------------------------------------------|----|---|---------|---------|----------------|----------|----------|-------------------------------|
| N2                                                                                                        | CT | V | 865074  | 866829  | WBGene00020155 | T02B11.3 | T02B11.3 | 0.10505330883809              |
| AGIWUR9089;AGIWUR9821;AGIWUR16661;AGIWUR23990;AGIWUR26089;AGIWUR29584;AGIWUR40374;AGIWUR41779;AGIWUR44136 |    |   |         |         |                |          |          |                               |
| N2                                                                                                        | CT | V | 869481  | 871129  | WBGene00020156 | T02B11.4 | T02B11.4 | -0.109955916009524            |
| AGIWUR4354;AGIWUR20286;AGIWUR37778                                                                        |    |   |         |         |                |          |          |                               |
| N2                                                                                                        | CT | V | 874008  | 875728  | WBGene00006118 | str-53   | T02B11.2 | 0.0236216961799327            |
| AGIWUR25762;AGIWUR42040                                                                                   |    |   |         |         |                |          |          |                               |
| N2                                                                                                        | CT | V | 876245  | 877265  | WBGene00044777 | T02B11.9 | T02B11.9 | 0.252590575407574             |
| AGIWUR7027;AGIWUR16432;AGIWUR24052                                                                        |    |   |         |         |                |          |          |                               |
| N2                                                                                                        | CT | V | 877530  | 878667  | WBGene00044776 | T02B11.8 | T02B11.8 | 0.00788201074674078           |
| AGIWUR5303;AGIWUR25999;AGIWUR31851;AGIWUR40465;AGIWUR41074                                                |    |   |         |         |                |          |          |                               |
| N2                                                                                                        | CT | V | 879793  | 881574  | WBGene00005210 | srg-53   | T02B11.1 | 0.147693465462027             |
| AGIWUR879                                                                                                 |    |   |         |         |                |          |          |                               |
| N2                                                                                                        | CT | V | 882176  | 884424  | WBGene00005622 | srj-38   | T02B11.5 | -0.0963402837423466           |
| AGIWUR650                                                                                                 |    |   |         |         |                |          |          |                               |
| N2                                                                                                        | CT | V | 884881  | 889274  | WBGene00020157 | T02B11.6 | T02B11.6 |                               |
| -0.00699867303013946 AGIWUR2914;AGIWUR43173                                                               |    |   |         |         |                |          |          |                               |
| N2                                                                                                        | CT | V | 894930  | 899187  | WBGene00003550 | nas-32   | T02B11.7 | 0.0225127299246726            |
| AGIWUR18338;AGIWUR20939;AGIWUR32505;AGIWUR38638;AGIWUR39727;AGIWUR42992                                   |    |   |         |         |                |          |          |                               |
| N2                                                                                                        | CT | V | 899310  | 903665  | WBGene00001480 | fmo-5    | H24K24.5 | -0.0523709867648066           |
| AGIWUR16238                                                                                               |    |   |         |         |                |          |          |                               |
| N2                                                                                                        | CT | V | 904950  | 911214  | WBGene00019241 | H24K24.4 | H24K24.4 | -0.0726757545864896           |
| AGIWUR38390                                                                                               |    |   |         |         |                |          |          |                               |
| N2                                                                                                        | CT | V | 911776  | 916315  | WBGene00019240 | H24K24.3 | H24K24.3 | -0.105343060805962            |
| AGIWUR3416;AGIWUR23565                                                                                    |    |   |         |         |                |          |          |                               |
| N2                                                                                                        | CT | V | 917817  | 925945  | WBGene00019239 | H24K24.2 | H24K24.2 | -0.0563289128112707           |
| AGIWUR26433                                                                                               |    |   |         |         |                |          |          |                               |
| N2                                                                                                        | CT | V | 936464  | 939228  | WBGene00021747 | Y50D4C.2 | Y50D4C.2 | 0.0757946210576836            |
| AGIWUR14286                                                                                               |    |   |         |         |                |          |          |                               |
| N2                                                                                                        | CT | V | 939391  | 945244  | WBGene00021748 | Y50D4C.3 | Y50D4C.3 | 0.278624170339508             |
| AGIWUR37729                                                                                               |    |   |         |         |                |          |          |                               |
| N2                                                                                                        | CT | V | 946732  | 949860  | WBGene00021750 | Y50D4C.6 | Y50D4C.6 | -0.262958080184806            |
| AGIWUR25709                                                                                               |    |   |         |         |                |          |          |                               |
| N2                                                                                                        | CT | V | 951454  | 964800  | WBGene00005024 | sqv-6    | Y50D4C.4 | -0.302892474251211            |
| AGIWUR5529                                                                                                |    |   |         |         |                |          |          |                               |
| N2                                                                                                        | CT | V | 982534  | 996207  | WBGene00006770 | unc-34   | Y50D4C.1 | 0.11995875781222              |
| AGIWUR16552;AGIWUR41806                                                                                   |    |   |         |         |                |          |          |                               |
| N2                                                                                                        | CT | V | 998289  | 1003753 | WBGene00021749 | Y50D4C.5 | Y50D4C.5 | -0.0991558284671665           |
| AGIWUR35566                                                                                               |    |   |         |         |                |          |          |                               |
| N2                                                                                                        | CT | V | 1008803 | 1018350 | WBGene00019971 | ergo-1   | R09A1.1  | 0.176059250582137 AGIWUR24215 |

|                                                                                               |    |   |         |         |                |          |          |                      |                     |
|-----------------------------------------------------------------------------------------------|----|---|---------|---------|----------------|----------|----------|----------------------|---------------------|
| N2                                                                                            | CT | V | 1018337 | 1023144 | WBGene00019972 | R09A1.2  | R09A1.2  | 0.210096456060132    | AGIWUR32045         |
| N2                                                                                            | CT | V | 1023782 | 1027073 | WBGene00019973 | R09A1.3  | R09A1.3  | 0.0219627074339002   | AGIWUR40489         |
| N2                                                                                            | CT | V | 1027904 | 1033385 | WBGene00019975 | flp-34   | R09A1.5  | -0.113124266360389   |                     |
| AGIWUR18884;AGIWUR30787                                                                       |    |   |         |         |                |          |          |                      |                     |
| N2                                                                                            | CT | V | 1042692 | 1048580 | WBGene00015344 | nra-4    | C02E11.1 | 0.0639365274354828   |                     |
| AGIWUR11453;AGIWUR24900;AGIWUR31213;AGIWUR39654                                               |    |   |         |         |                |          |          |                      |                     |
| N2                                                                                            | CT | V | 1050126 | 1053014 | WBGene00019625 | K10C9.4  | K10C9.4  | 0.152744167795076    | AGIWUR13036         |
| N2                                                                                            | CT | V | 1054602 | 1055773 | WBGene00044515 | K10C9.9  | K10C9.9  | -0.269095439233094   |                     |
| AGIWUR16400;AGIWUR22203;AGIWUR27064;AGIWUR31901;AGIWUR40912                                   |    |   |         |         |                |          |          |                      |                     |
| N2                                                                                            | CT | V | 1056548 | 1058987 | WBGene00006255 | str-224  | K10C9.8  | -0.0403418689939752  | AGIWUR16313         |
| N2                                                                                            | CT | V | 1061595 | 1067908 | WBGene00019624 | K10C9.3  | K10C9.3  | -0.20647887666851    |                     |
| AGIWUR40890;AGIWUR44492                                                                       |    |   |         |         |                |          |          |                      |                     |
| N2                                                                                            | CT | V | 1075200 | 1079597 | WBGene00019623 | K10C9.1  | K10C9.1  | -0.229796882998982   |                     |
| AGIWUR25743;AGIWUR26540;AGIWUR29157;AGIWUR32093;AGIWUR32144;AGIWUR38999                       |    |   |         |         |                |          |          |                      |                     |
| N2                                                                                            | CT | V | 1081483 | 1082372 | WBGene00268189 | Y50D4B.9 |          | Y50D4B.9             | 0.0960818601204574  |
| AGIWUR36491                                                                                   |    |   |         |         |                |          |          |                      |                     |
| N2                                                                                            | CT | V | 1084316 | 1087272 | WBGene00021745 | Y50D4B.6 |          | Y50D4B.6             | -0.0586110719419271 |
| AGIWUR26156                                                                                   |    |   |         |         |                |          |          |                      |                     |
| N2                                                                                            | CT | V | 1088283 | 1089891 | WBGene00021744 | clcc-203 |          | Y50D4B.5             | 0.020644160992406   |
| AGIWUR24505                                                                                   |    |   |         |         |                |          |          |                      |                     |
| N2                                                                                            | CT | V | 1092657 | 1098951 | WBGene00021743 | Y50D4B.4 |          | Y50D4B.4             | -0.147491584566293  |
| AGIWUR42320;AGIWUR44641                                                                       |    |   |         |         |                |          |          |                      |                     |
| N2                                                                                            | CT | V | 1101186 | 1104046 | WBGene00021741 | Y50D4B.2 |          | Y50D4B.2             | -0.0976065072858958 |
| AGIWUR11172                                                                                   |    |   |         |         |                |          |          |                      |                     |
| N2                                                                                            | CT | V | 1112933 | 1129360 | WBGene00021740 | Y50D4B.1 |          | Y50D4B.1             | -0.215922534047163  |
| AGIWUR41609;AGIWUR44635                                                                       |    |   |         |         |                |          |          |                      |                     |
| N2                                                                                            | CT | V | 1130088 | 1131942 | WBGene00021072 | W07B8.4  | W07B8.4  | 0.141121524823504    | AGIWUR31431         |
| N2                                                                                            | CT | V | 1132598 | 1134036 | WBGene00000785 | cpr-5    | W07B8.5  | 0.079793708191179    |                     |
| AGIWUR9037;AGIWUR27737;AGIWUR39996                                                            |    |   |         |         |                |          |          |                      |                     |
| N2                                                                                            | CT | V | 1134485 | 1139172 | WBGene00021070 | cpr-8    | W07B8.1  | -0.00519730449574674 | AGIWUR5094          |
| N2                                                                                            | CT | V | 1141770 | 1146498 | WBGene00020663 | cutl-22  | T21H3.4  | -0.337375092187656   | AGIWUR17117         |
| N2                                                                                            | CT | V | 1156271 | 1158174 | WBGene00000552 | cmd-1    | T21H3.3  | 0.0456278378238935   |                     |
| AGIWUR2590;AGIWUR9349;AGIWUR13292;AGIWUR33879;AGIWUR34932;AGIWUR37455;AGIWUR40916;AGIWUR45191 |    |   |         |         |                |          |          |                      |                     |
| N2                                                                                            | CT | V | 1165673 | 1174969 | WBGene00004230 | ptr-16   | T21H3.2  | 0.0533188656872632   | AGIWUR7971          |
| N2                                                                                            | CT | V | 1176724 | 1178864 | WBGene00020662 | T21H3.1  | T21H3.1  | -0.0863042331432844  |                     |
| AGIWUR5708;AGIWUR6366;AGIWUR13610;AGIWUR28256;AGIWUR28832;AGIWUR36759                         |    |   |         |         |                |          |          |                      |                     |
| N2                                                                                            | CT | V | 1179604 | 1181548 | WBGene00017764 | F25A2.1  | F25A2.1  | 0.136728630739735    |                     |
| AGIWUR19707;AGIWUR22186;AGIWUR32036;AGIWUR37356                                               |    |   |         |         |                |          |          |                      |                     |
| N2                                                                                            | CT | V | 1182806 | 1184644 | WBGene00021737 | Y50D4A.3 |          | Y50D4A.3             | 0.345366077125552   |

|                                                                                                                                             |    |   |         |         |                |           |           |                     |             |
|---------------------------------------------------------------------------------------------------------------------------------------------|----|---|---------|---------|----------------|-----------|-----------|---------------------|-------------|
| AGIWUR37975                                                                                                                                 |    |   |         |         |                |           |           |                     |             |
| N2                                                                                                                                          | CT | V | 1196072 | 1207792 | WBGene00021736 | wrb-1     | Y50D4A.2  | -0.133445747401389  |             |
| AGIWUR29205                                                                                                                                 |    |   |         |         |                |           |           |                     |             |
| N2                                                                                                                                          | CT | V | 1207889 | 1219874 | WBGene00021735 | Y50D4A.1  | Y50D4A.1  | 0.159829821282113   |             |
| AGIWUR17146                                                                                                                                 |    |   |         |         |                |           |           |                     |             |
| N2                                                                                                                                          | CT | V | 1223901 | 1235445 | WBGene00016539 | madd-2    | C39F7.2   | 0.0568716716283415  | AGIWUR12478 |
| N2                                                                                                                                          | CT | V | 1260465 | 1262616 | WBGene00016538 | C39F7.1   | C39F7.1   | 0.20866603647019    | AGIWUR27762 |
| N2                                                                                                                                          | CT | V | 1262628 | 1263989 | WBGene00004266 | rab-1     | C39F7.4   | 0.129519683798469   |             |
| AGIWUR8106;AGIWUR10175;AGIWUR15670;AGIWUR20977;AGIWUR30892;AGIWUR40582;AGIWUR43515                                                          |    |   |         |         |                |           |           |                     |             |
| N2                                                                                                                                          | CT | V | 1264773 | 1270160 | WBGene00016540 | C39F7.5   | C39F7.5   | 0.171860054784046   | AGIWUR14855 |
| N2                                                                                                                                          | CT | V | 1270911 | 1273043 | WBGene00022288 | Y75B7B.1  | Y75B7B.1  | 0.177971236235964   |             |
| AGIWUR43411                                                                                                                                 |    |   |         |         |                |           |           |                     |             |
| N2                                                                                                                                          | CT | V | 1274210 | 1276006 | WBGene00022289 | Y75B7B.2  | Y75B7B.2  | 0.00784538041042016 |             |
| AGIWUR15950                                                                                                                                 |    |   |         |         |                |           |           |                     |             |
| N2                                                                                                                                          | CT | V | 1276420 | 1285700 | WBGene00004053 | tank-1    | ZK1005.1  | -0.0012084771697829 |             |
| AGIWUR2481;AGIWUR29658;AGIWUR32914                                                                                                          |    |   |         |         |                |           |           |                     |             |
| N2                                                                                                                                          | CT | V | 1288841 | 1299332 | WBGene00001171 | egl-2     | F16B3.1   | 0.0671532942626447  | AGIWUR41827 |
| N2                                                                                                                                          | CT | V | 1315105 | 1315524 | WBGene00017502 | F16B3.2   | F16B3.2   | 0.0809995409221083  | AGIWUR34396 |
| N2                                                                                                                                          | CT | V | 1315643 | 1317919 | WBGene00044774 | F16B3.3   | F16B3.3   | -0.0784931140476388 |             |
| AGIWUR2659;AGIWUR2880;AGIWUR5172;AGIWUR5984;AGIWUR14866;AGIWUR18012;AGIWUR23552;AGIWUR24334;AGIWUR24824;AGIWUR30074;AGIWUR33277;AGIWUR37172 |    |   |         |         |                |           |           |                     |             |
| N2                                                                                                                                          | CT | V | 1332275 | 1358164 | WBGene00022285 | Y75B7AL.2 | Y75B7AL.2 | 0.0733761606812728  |             |
| AGIWUR8365;AGIWUR16645;AGIWUR25866;AGIWUR41586                                                                                              |    |   |         |         |                |           |           |                     |             |
| N2                                                                                                                                          | CT | V | 1373120 | 1383254 | WBGene00022286 | rga-4     | Y75B7AL.4 | 0.280290023348376   |             |
| AGIWUR36713                                                                                                                                 |    |   |         |         |                |           |           |                     |             |
| N2                                                                                                                                          | CT | V | 1391163 | 1392103 | WBGene00022287 | Y75B7AR.1 | Y75B7AR.1 | -0.12206066397858   |             |
| AGIWUR8594                                                                                                                                  |    |   |         |         |                |           |           |                     |             |
| N2                                                                                                                                          | CT | V | 1393112 | 1411616 | WBGene00004925 | snt-5     | R12A1.2   | -0.0999789510861486 |             |
| AGIWUR15426;AGIWUR26619;AGIWUR28167                                                                                                         |    |   |         |         |                |           |           |                     |             |
| N2                                                                                                                                          | CT | V | 1422796 | 1425794 | WBGene00020017 | R12A1.3   | R12A1.3   | 0.207948626392235   |             |
| AGIWUR1907;AGIWUR36237                                                                                                                      |    |   |         |         |                |           |           |                     |             |
| N2                                                                                                                                          | CT | V | 1427653 | 1432137 | WBGene00001578 | ges-1     | R12A1.4   | 0.0674741184274303  | AGIWUR39263 |
| N2                                                                                                                                          | CT | V | 1434339 | 1435804 | WBGene00019976 | fbxa-195  | R09B5.1   | -0.0634848352386026 |             |
| AGIWUR15706                                                                                                                                 |    |   |         |         |                |           |           |                     |             |
| N2                                                                                                                                          | CT | V | 1439179 | 1441871 | WBGene00019979 | R09B5.11  | R09B5.11  | 0.00207838297692753 |             |
| AGIWUR21597                                                                                                                                 |    |   |         |         |                |           |           |                     |             |
| N2                                                                                                                                          | CT | V | 1442588 | 1442876 | WBGene00044900 | cnc-11    | R09B5.13  | 0.0117190399080762  |             |
| AGIWUR2922;AGIWUR7262;AGIWUR9640;AGIWUR41712;AGIWUR43465                                                                                    |    |   |         |         |                |           |           |                     |             |
| N2                                                                                                                                          | CT | V | 1444044 | 1444280 | WBGene00000555 | cnc-1     | R09B5.2   | -0.0213263023852015 | AGIWUR36656 |

|                                                                                                                                                       |    |   |         |         |                |          |          |                     |             |
|-------------------------------------------------------------------------------------------------------------------------------------------------------|----|---|---------|---------|----------------|----------|----------|---------------------|-------------|
| N2                                                                                                                                                    | CT | V | 1445381 | 1445832 | WBGene00000559 | cnc-5    | R09B5.10 | 0.120737059261613   |             |
| AGIWUR14026                                                                                                                                           |    |   |         |         |                |          |          |                     |             |
| N2                                                                                                                                                    | CT | V | 1447195 | 1447707 | WBGene00000558 | cnc-4    | R09B5.9  | 0.0121753024940965  | AGIWUR28592 |
| N2                                                                                                                                                    | CT | V | 1448004 | 1448790 | WBGene00000557 | cnc-3    | R09B5.8  | -0.332854273192384  | AGIWUR39532 |
| N2                                                                                                                                                    | CT | V | 1449665 | 1450189 | WBGene00000556 | cnc-2    | R09B5.3  | -0.254917073094976  |             |
| AGIWUR1432;AGIWUR12946;AGIWUR14737;AGIWUR38057;AGIWUR40413;AGIWUR45034                                                                                |    |   |         |         |                |          |          |                     |             |
| N2                                                                                                                                                    | CT | V | 1451634 | 1454340 | WBGene00005611 | srj-23   | R09B5.7  | -0.0136178912232179 |             |
| AGIWUR498;AGIWUR28473;AGIWUR36052                                                                                                                     |    |   |         |         |                |          |          |                     |             |
| N2                                                                                                                                                    | CT | V | 1455062 | 1456646 | WBGene00019980 | chil-14  | R09B5.12 | 0.0440395986724997  |             |
| AGIWUR44056                                                                                                                                           |    |   |         |         |                |          |          |                     |             |
| N2                                                                                                                                                    | CT | V | 1460369 | 1461613 | WBGene00019978 | hacd-1   | R09B5.6  | -0.0332311310492965 |             |
| AGIWUR5379;AGIWUR19041;AGIWUR34145                                                                                                                    |    |   |         |         |                |          |          |                     |             |
| N2                                                                                                                                                    | CT | V | 1462063 | 1464699 | WBGene00019977 | fpn-1.2  | R09B5.4  | 0.109321222261272   | AGIWUR31821 |
| N2                                                                                                                                                    | CT | V | 1464990 | 1466360 | WBGene00004139 | pqn-54   | R09B5.5  | 0.140250888331238   | AGIWUR41618 |
| N2                                                                                                                                                    | CT | V | 1467744 | 1471105 | WBGene00018757 | tag-304  | F53E2.1  | 0.114582319857798   | AGIWUR29558 |
| N2                                                                                                                                                    | CT | V | 1475072 | 1479576 | WBGene00006794 | unc-60   | C38C3.5  | 0.0688722515232953  |             |
| AGIWUR324;AGIWUR2449;AGIWUR2803;AGIWUR4564;AGIWUR7681;AGIWUR10222;AGIWUR18543;AGIWUR20925;AGIWUR26152;AGIWUR28373;AGIWUR29218;AGIWUR39824;AGIWUR42409 |    |   |         |         |                |          |          |                     |             |
| N2                                                                                                                                                    | CT | V | 1482042 | 1484015 | WBGene00016513 | C38C3.4  | C38C3.4  | -0.0492075345016616 |             |
| AGIWUR1850;AGIWUR9335;AGIWUR14308                                                                                                                     |    |   |         |         |                |          |          |                     |             |
| N2                                                                                                                                                    | CT | V | 1484828 | 1491604 | WBGene00016514 | C38C3.6  | C38C3.6  | -0.20459384067416   | AGIWUR43075 |
| N2                                                                                                                                                    | CT | V | 1494769 | 1495453 | WBGene00045390 | C38C3.10 | C38C3.10 | -0.0548302629397233 |             |
| AGIWUR32515                                                                                                                                           |    |   |         |         |                |          |          |                     |             |
| N2                                                                                                                                                    | CT | V | 1495634 | 1497985 | WBGene00016512 | C38C3.3  | C38C3.3  | 0.283473678501654   | AGIWUR42559 |
| N2                                                                                                                                                    | CT | V | 1499440 | 1500687 | WBGene00005690 | sru-27   | C38C3.2  | -0.0244354115954959 | AGIWUR29744 |
| N2                                                                                                                                                    | CT | V | 1501420 | 1505310 | WBGene00016516 | C38C3.8  | C38C3.8  | 0.324886336748248   |             |
| AGIWUR29041;AGIWUR31012                                                                                                                               |    |   |         |         |                |          |          |                     |             |
| N2                                                                                                                                                    | CT | V | 1510024 | 1511630 | WBGene00016517 | nhr-260  | C38C3.9  | 0.0598523953671837  | AGIWUR14282 |
| N2                                                                                                                                                    | CT | V | 1518736 | 1519807 | WBGene00023317 | K02H11.8 | K02H11.8 | -0.115511609436073  |             |
| AGIWUR4057                                                                                                                                            |    |   |         |         |                |          |          |                     |             |
| N2                                                                                                                                                    | CT | V | 1520463 | 1521945 | WBGene00006268 | str-240  | K02H11.2 | -0.408037801673462  |             |
| AGIWUR41821                                                                                                                                           |    |   |         |         |                |          |          |                     |             |
| N2                                                                                                                                                    | CT | V | 1522785 | 1524224 | WBGene00006270 | str-243  | K02H11.7 | 0.15051749066956    |             |
| AGIWUR35522                                                                                                                                           |    |   |         |         |                |          |          |                     |             |
| N2                                                                                                                                                    | CT | V | 1524502 | 1525687 | WBGene00006267 | str-239  | K02H11.1 | 0.0743063179279577  |             |
| AGIWUR17216;AGIWUR44671                                                                                                                               |    |   |         |         |                |          |          |                     |             |
| N2                                                                                                                                                    | CT | V | 1526467 | 1528085 | WBGene00006265 | str-236  | K02H11.3 | 0.243216132679834   |             |
| AGIWUR25872                                                                                                                                           |    |   |         |         |                |          |          |                     |             |
| N2                                                                                                                                                    | CT | V | 1528824 | 1531259 | WBGene00019348 | K02H11.4 | K02H11.4 | 0.196682634726667   |             |



|                                                                         |    |   |         |         |                |          |          |  |                     |
|-------------------------------------------------------------------------|----|---|---------|---------|----------------|----------|----------|--|---------------------|
| AGIWUR31621                                                             |    |   |         |         |                |          |          |  |                     |
| N2                                                                      | CT | V | 1532030 | 1533304 | WBGene00006248 | str-216  | K02H11.5 |  | 0.0511997585194708  |
| AGIWUR16290;AGIWUR33379                                                 |    |   |         |         |                |          |          |  |                     |
| N2                                                                      | CT | V | 1533892 | 1534415 | WBGene00019349 | trx-5    | K02H11.6 |  | 0.542404820769865   |
| AGIWUR5711                                                              |    |   |         |         |                |          |          |  |                     |
| N2                                                                      | CT | V | 1535224 | 1537079 | WBGene00019350 | K02H11.9 | K02H11.9 |  | -0.181502803610735  |
| AGIWUR7169                                                              |    |   |         |         |                |          |          |  |                     |
| N2                                                                      | CT | V | 1538364 | 1541824 | WBGene00018707 | oac-31   | F52F10.3 |  | -0.0219978274474695 |
| AGIWUR3780                                                              |    |   |         |         |                |          |          |  |                     |
| N2                                                                      | CT | V | 1542517 | 1545791 | WBGene00018708 | oac-32   | F52F10.4 |  | 0.325043654271977   |
| AGIWUR37337                                                             |    |   |         |         |                |          |          |  |                     |
| N2                                                                      | CT | V | 1548143 | 1550701 | WBGene00018706 | F52F10.2 | F52F10.2 |  | -0.248744011650228  |
| AGIWUR30363                                                             |    |   |         |         |                |          |          |  |                     |
| N2                                                                      | CT | V | 1551044 | 1553102 | WBGene00018709 | srsx-8   | F52F10.5 |  | -0.0121527613281183 |
| AGIWUR4739                                                              |    |   |         |         |                |          |          |  |                     |
| N2                                                                      | CT | V | 1567076 | 1585532 | WBGene00000387 | cdc-25.2 | F16B4.8  |  | -0.0783798272592442 |
| AGIWUR22718;AGIWUR23475;AGIWUR34143;AGIWUR38017;AGIWUR40845             |    |   |         |         |                |          |          |  |                     |
| N2                                                                      | CT | V | 1585722 | 1586028 | WBGene00017509 | F16B4.7  | F16B4.7  |  | 0.0642922019805505  |
| AGIWUR2074;AGIWUR36242                                                  |    |   |         |         |                |          |          |  |                     |
| N2                                                                      | CT | V | 1588548 | 1591727 | WBGene00017507 | F16B4.5  | F16B4.5  |  | -0.153073003617527  |
| AGIWUR22275;AGIWUR23024;AGIWUR35644                                     |    |   |         |         |                |          |          |  |                     |
| N2                                                                      | CT | V | 1594019 | 1594665 | WBGene00017506 | F16B4.4  | F16B4.4  |  | 0.478420660601074   |
| AGIWUR14436;AGIWUR21983;AGIWUR24255;AGIWUR25347;AGIWUR31339;AGIWUR42496 |    |   |         |         |                |          |          |  |                     |
| N2                                                                      | CT | V | 1596144 | 1598689 | WBGene00017505 | F16B4.3  | F16B4.3  |  | -0.159859254529824  |
| N2                                                                      | CT | V | 1601038 | 1603916 | WBGene00017504 | F16B4.2  | F16B4.2  |  | -0.139538028857416  |
| N2                                                                      | CT | V | 1603934 | 1607846 | WBGene00017510 | nhr-178  | F16B4.9  |  | 0.0807620426558326  |
| N2                                                                      | CT | V | 1610263 | 1612747 | WBGene00017503 | nhr-177  | F16B4.1  |  | -0.32407992688616   |
| N2                                                                      | CT | V | 1612803 | 1614826 | WBGene00017511 | srbc-41  | F16B4.10 |  | 0.398276731408315   |
| AGIWUR42512                                                             |    |   |         |         |                |          |          |  |                     |
| N2                                                                      | CT | V | 1615723 | 1618072 | WBGene00017512 | nhr-179  | F16B4.11 |  | -0.177690956141141  |
| AGIWUR12425                                                             |    |   |         |         |                |          |          |  |                     |
| N2                                                                      | CT | V | 1619194 | 1621536 | WBGene00003707 | nhr-117  | F16B4.12 |  | -0.364210399448767  |
| AGIWUR11701;AGIWUR28007;AGIWUR41153;AGIWUR42311                         |    |   |         |         |                |          |          |  |                     |
| N2                                                                      | CT | V | 1622636 | 1624433 | WBGene00003700 | nhr-110  | Y46H3D.5 |  | -0.0141155274649272 |
| AGIWUR16766                                                             |    |   |         |         |                |          |          |  |                     |
| N2                                                                      | CT | V | 1625225 | 1626818 | WBGene00021610 | nhr-237  | Y46H3D.6 |  | -0.29441716037285   |
| AGIWUR3104                                                              |    |   |         |         |                |          |          |  |                     |
| N2                                                                      | CT | V | 1628106 | 1629432 | WBGene00021611 | nhr-238  | Y46H3D.7 |  | 0.154449532817562   |
| AGIWUR1379                                                              |    |   |         |         |                |          |          |  |                     |

|                                                                                    |    |   |         |         |                |          |          |                     |
|------------------------------------------------------------------------------------|----|---|---------|---------|----------------|----------|----------|---------------------|
| N2                                                                                 | CT | V | 1630309 | 1631248 | WBGene00021612 | Y46H3D.8 | Y46H3D.8 | 0.350996819941063   |
| AGIWUR27368                                                                        |    |   |         |         |                |          |          |                     |
| N2                                                                                 | CT | V | 1632017 | 1635883 | WBGene00021609 | irld-17  | Y46H3D.4 | -0.0588602382847352 |
| AGIWUR27296                                                                        |    |   |         |         |                |          |          |                     |
| N2                                                                                 | CT | V | 1636159 | 1639281 | WBGene00006253 | str-222  | Y46H3D.3 | -1.07601543050705   |
| AGIWUR13494;AGIWUR21212;AGIWUR21818                                                |    |   |         |         |                |          |          |                     |
| N2                                                                                 | CT | V | 1640308 | 1642287 | WBGene00006252 | str-221  | Y46H3D.2 | -0.0935980005004442 |
| AGIWUR10629;AGIWUR12769;AGIWUR24631                                                |    |   |         |         |                |          |          |                     |
| N2                                                                                 | CT | V | 1642499 | 1643121 | WBGene00021608 | Y46H3D.1 | Y46H3D.1 | 0.10356684988961    |
| AGIWUR2223;AGIWUR11726;AGIWUR13295;AGIWUR14828;AGIWUR29088;AGIWUR32631;AGIWUR39494 |    |   |         |         |                |          |          |                     |
| N2                                                                                 | CT | V | 1644169 | 1647728 | WBGene00000108 | alh-2    | K04F1.15 | -0.306424218513273  |
| AGIWUR6897                                                                         |    |   |         |         |                |          |          |                     |
| N2                                                                                 | CT | V | 1648300 | 1651143 | WBGene00019393 | irld-45  | K04F1.14 | 0.177990058215736   |
| AGIWUR7514                                                                         |    |   |         |         |                |          |          |                     |
| N2                                                                                 | CT | V | 1651345 | 1654444 | WBGene00019392 | irld-44  | K04F1.13 | 0.330825664099297   |
| AGIWUR8683                                                                         |    |   |         |         |                |          |          |                     |
| N2                                                                                 | CT | V | 1655090 | 1657364 | WBGene00019391 | irld-11  | K04F1.12 | 0.0966942162029731  |
| AGIWUR2258                                                                         |    |   |         |         |                |          |          |                     |
| N2                                                                                 | CT | V | 1658072 | 1659636 | WBGene00019384 | K04F1.1  | K04F1.1  | -0.252251041779047  |
| AGIWUR27851                                                                        |    |   |         |         |                |          |          |                     |
| N2                                                                                 | CT | V | 1660297 | 1662150 | WBGene00019390 | irld-43  | K04F1.11 | -0.186278530403616  |
| AGIWUR17985;AGIWUR42790                                                            |    |   |         |         |                |          |          |                     |
| N2                                                                                 | CT | V | 1662570 | 1664503 | WBGene00019389 | irld-40  | K04F1.10 | 0.0664700471988127  |
| AGIWUR26847                                                                        |    |   |         |         |                |          |          |                     |
| N2                                                                                 | CT | V | 1664650 | 1665950 | WBGene00019388 | K04F1.9  | K04F1.9  | -0.556894953259382  |
| AGIWUR20834                                                                        |    |   |         |         |                |          |          |                     |
| N2                                                                                 | CT | V | 1667204 | 1667813 | WBGene00019387 | K04F1.8  | K04F1.8  | -0.0519391047952977 |
| AGIWUR38947                                                                        |    |   |         |         |                |          |          |                     |
| N2                                                                                 | CT | V | 1668516 | 1670630 | WBGene00019386 | irld-42  | K04F1.7  | -0.0240322442456335 |
| AGIWUR31674                                                                        |    |   |         |         |                |          |          |                     |
| N2                                                                                 | CT | V | 1670973 | 1673439 | WBGene00019385 | irld-41  | K04F1.6  | -0.0907768265359516 |
| AGIWUR21923                                                                        |    |   |         |         |                |          |          |                     |
| N2                                                                                 | CT | V | 1673543 | 1675613 | WBGene00005843 | srw-96   | K04F1.2  | -0.144917882581439  |
| AGIWUR42752                                                                        |    |   |         |         |                |          |          |                     |
| N2                                                                                 | CT | V | 1676474 | 1678328 | WBGene00005845 | srw-98   | K04F1.3  | 0.0775937862568119  |
| AGIWUR42917                                                                        |    |   |         |         |                |          |          |                     |
| N2                                                                                 | CT | V | 1679208 | 1680870 | WBGene00005838 | srw-91   | K04F1.4  | -0.424555131620786  |
| AGIWUR23336                                                                        |    |   |         |         |                |          |          |                     |
| N2                                                                                 | CT | V | 1682579 | 1685089 | WBGene00005229 | srh-3    | K04F1.5  | 0.369504866737259   |
| AGIWUR13668                                                                        |    |   |         |         |                |          |          |                     |
| N2                                                                                 | CT | V | 1685628 | 1686864 | WBGene00005231 | srh-5    | K04F1.16 | -0.049844019325274  |
| AGIWUR20402                                                                        |    |   |         |         |                |          |          |                     |
| N2                                                                                 | CT | V | 1687495 | 1689687 | WBGene00021604 | Y46H3C.4 | Y46H3C.4 | -0.928175203465487  |
| AGIWUR18415                                                                        |    |   |         |         |                |          |          |                     |
| N2                                                                                 | CT | V | 1691029 | 1692052 | WBGene00021605 | Y46H3C.5 | Y46H3C.5 | -0.0805448957902009 |
| AGIWUR3831                                                                         |    |   |         |         |                |          |          |                     |
| N2                                                                                 | CT | V | 1697889 | 1701617 | WBGene00021606 | Y46H3C.6 | Y46H3C.6 | 0.0659016097073035  |
| AGIWUR43236                                                                        |    |   |         |         |                |          |          |                     |

|                                                                         |    |   |         |         |                |          |          |                       |             |
|-------------------------------------------------------------------------|----|---|---------|---------|----------------|----------|----------|-----------------------|-------------|
| N2                                                                      | CT | V | 1702051 | 1704053 | WBGene00005837 | srw-90   | Y46H3C.3 | -0.141002062810046    |             |
| AGIWUR9837                                                              |    |   |         |         |                |          |          |                       |             |
| N2                                                                      | CT | V | 1708741 | 1710663 | WBGene00005846 | srw-99   | Y46H3C.2 | -0.178541807808228    |             |
| AGIWUR13161                                                             |    |   |         |         |                |          |          |                       |             |
| N2                                                                      | CT | V | 1711209 | 1715399 | WBGene00005847 | srw-100  | Y46H3C.1 | 0.124483269816328     |             |
| AGIWUR25705                                                             |    |   |         |         |                |          |          |                       |             |
| N2                                                                      | CT | V | 1717243 | 1719464 | WBGene00005850 | srw-103  | ZK697.5  | -0.000459661137410805 | AGIWUR13701 |
| N2                                                                      | CT | V | 1720227 | 1721973 | WBGene00005849 | srw-102  | ZK697.12 | -0.0965348578072875   |             |
| AGIWUR23406                                                             |    |   |         |         |                |          |          |                       |             |
| N2                                                                      | CT | V | 1722266 | 1725261 | WBGene00005848 | srw-101  | ZK697.13 | 0.0385527562283183    |             |
| AGIWUR6004                                                              |    |   |         |         |                |          |          |                       |             |
| N2                                                                      | CT | V | 1725653 | 1727632 | WBGene00005539 | sri-27   | ZK697.4  | 0.258996016402163     | AGIWUR23655 |
| N2                                                                      | CT | V | 1729116 | 1730649 | WBGene00022806 | ZK697.3  | ZK697.3  | -0.190042018293912    | AGIWUR32139 |
| N2                                                                      | CT | V | 1730759 | 1732000 | WBGene00001769 | gst-21   | ZK697.6  | 0.22079642194287      | AGIWUR36708 |
| N2                                                                      | CT | V | 1734869 | 1736767 | WBGene00006205 | str-160  | ZK697.10 | 0.0866698094220144    |             |
| AGIWUR1209                                                              |    |   |         |         |                |          |          |                       |             |
| N2                                                                      | CT | V | 1738927 | 1741157 | WBGene00022807 | srab-25  | ZK697.7  | -0.295633229419389    | AGIWUR16633 |
| N2                                                                      | CT | V | 1743771 | 1747969 | WBGene00022805 | nhr-256  | ZK697.2  | -0.0911203884443434   |             |
| AGIWUR7017;AGIWUR8600;AGIWUR28647                                       |    |   |         |         |                |          |          |                       |             |
| N2                                                                      | CT | V | 1748432 | 1749153 | WBGene00022808 | ZK697.8  | ZK697.8  | -0.134854982480126    |             |
| AGIWUR17448;AGIWUR25011;AGIWUR27665;AGIWUR31649                         |    |   |         |         |                |          |          |                       |             |
| N2                                                                      | CT | V | 1750001 | 1751549 | WBGene00005410 | srh-199  | ZK697.11 | -0.105961475677741    |             |
| AGIWUR10138;AGIWUR40344;AGIWUR44497                                     |    |   |         |         |                |          |          |                       |             |
| N2                                                                      | CT | V | 1752796 | 1753856 | WBGene00022804 | ZK697.1  | ZK697.1  | 0.258185643749536     | AGIWUR8405  |
| N2                                                                      | CT | V | 1754238 | 1755689 | WBGene00022809 | ZK697.14 | ZK697.14 | -0.225655367798575    |             |
| AGIWUR31379                                                             |    |   |         |         |                |          |          |                       |             |
| N2                                                                      | CT | V | 1760861 | 1765305 | WBGene00021602 | clac-205 | Y46H3B.1 | -0.0227260433980359   |             |
| AGIWUR8341                                                              |    |   |         |         |                |          |          |                       |             |
| N2                                                                      | CT | V | 1765311 | 1771734 | WBGene00000976 | dhs-13   | F36H9.3  | -0.0142160063753289   |             |
| AGIWUR16906;AGIWUR23989;AGIWUR24571;AGIWUR29221;AGIWUR33084;AGIWUR37543 |    |   |         |         |                |          |          |                       |             |
| N2                                                                      | CT | V | 1773826 | 1774918 | WBGene00018115 | F36H9.7  | F36H9.7  | -0.195895047339489    |             |
| AGIWUR6284;AGIWUR24760;AGIWUR25424;AGIWUR26480                          |    |   |         |         |                |          |          |                       |             |
| N2                                                                      | CT | V | 1779657 | 1782022 | WBGene00018113 | F36H9.5  | F36H9.5  | -0.118065094649332    | AGIWUR32450 |
| N2                                                                      | CT | V | 1788511 | 1793250 | WBGene00018111 | F36H9.2  | F36H9.2  | 0.246627409990986     | AGIWUR7637  |
| N2                                                                      | CT | V | 1798200 | 1799694 | WBGene00268194 | F36H9.10 | F36H9.10 | 0.246991278080142     |             |
| AGIWUR33123                                                             |    |   |         |         |                |          |          |                       |             |
| N2                                                                      | CT | V | 1799726 | 1803143 | WBGene00018114 | srt-41   | F36H9.6  | -0.161290069329038    |             |
| AGIWUR1923;AGIWUR21739;AGIWUR39411                                      |    |   |         |         |                |          |          |                       |             |
| N2                                                                      | CT | V | 1804334 | 1804971 | WBGene00002016 | hsp-16.2 | Y46H3A.3 | 0.0562592653471619    |             |

|                                                                        |    |   |         |         |                |           |           |                      |             |
|------------------------------------------------------------------------|----|---|---------|---------|----------------|-----------|-----------|----------------------|-------------|
| AGIWUR33481                                                            |    |   |         |         |                |           |           |                      |             |
| N2                                                                     | CT | V | 1805178 | 1805875 | WBGene00002018 | hsp-16.41 | Y46H3A.2  | -0.369209981190108   |             |
| AGIWUR5399;AGIWUR40972                                                 |    |   |         |         |                |           |           |                      |             |
| N2                                                                     | CT | V | 1807450 | 1809468 | WBGene00021599 | srt-42    | Y46H3A.1  | 0.26552872447261     |             |
| AGIWUR28255;AGIWUR43360                                                |    |   |         |         |                |           |           |                      |             |
| N2                                                                     | CT | V | 1809560 | 1811135 | WBGene00021600 | Y46H3A.4  | Y46H3A.4  | -0.161441128961389   |             |
| AGIWUR20038                                                            |    |   |         |         |                |           |           |                      |             |
| N2                                                                     | CT | V | 1811423 | 1814116 | WBGene00021601 | Y46H3A.5  | Y46H3A.5  | 0.0662801807469395   |             |
| AGIWUR26944;AGIWUR42495                                                |    |   |         |         |                |           |           |                      |             |
| N2                                                                     | CT | V | 1815852 | 1821323 | WBGene00001632 | gly-7     | Y46H3A.6  | -0.0478112713434342  |             |
| AGIWUR9988                                                             |    |   |         |         |                |           |           |                      |             |
| N2                                                                     | CT | V | 1821579 | 1823096 | WBGene00044344 | mrp1-39   | Y46H3A.7  | 0.152083242651901    |             |
| AGIWUR20002                                                            |    |   |         |         |                |           |           |                      |             |
| N2                                                                     | CT | V | 1823077 | 1830073 | WBGene00021309 | Y32G9B.1  | Y32G9B.1  | -0.0711335103762192  |             |
| AGIWUR23123                                                            |    |   |         |         |                |           |           |                      |             |
| N2                                                                     | CT | V | 1842044 | 1844807 | WBGene00020394 | T10B5.8   | T10B5.8   | -0.0512350590097785  |             |
| AGIWUR20519;AGIWUR29587                                                |    |   |         |         |                |           |           |                      |             |
| N2                                                                     | CT | V | 1846201 | 1848015 | WBGene00020393 | T10B5.7   | T10B5.7   | 0.038315448852579    | AGIWUR22131 |
| N2                                                                     | CT | V | 1848073 | 1851445 | WBGene00020388 | T10B5.2   | T10B5.2   | -0.109925572723938   | AGIWUR27215 |
| N2                                                                     | CT | V | 1852449 | 1856276 | WBGene00020396 | T10B5.10  | T10B5.10  | -0.178846090173202   |             |
| AGIWUR30645                                                            |    |   |         |         |                |           |           |                      |             |
| N2                                                                     | CT | V | 1864181 | 1868571 | WBGene00020389 | T10B5.3   | T10B5.3   | -0.0927530849102283  |             |
| AGIWUR38;AGIWUR4999;AGIWUR9987;AGIWUR31559                             |    |   |         |         |                |           |           |                      |             |
| N2                                                                     | CT | V | 1869213 | 1870558 | WBGene00020392 | kn1-3     | T10B5.6   | -0.133464241317363   | AGIWUR5520  |
| N2                                                                     | CT | V | 1870421 | 1871789 | WBGene00020390 | T10B5.4   | T10B5.4   | 0.0536730126388818   | AGIWUR20357 |
| N2                                                                     | CT | V | 1872246 | 1875526 | WBGene00020391 | cct-7     | T10B5.5   | 0.106696936864378    |             |
| AGIWUR3536;AGIWUR13115;AGIWUR17600;AGIWUR24679;AGIWUR37923             |    |   |         |         |                |           |           |                      |             |
| N2                                                                     | CT | V | 1875478 | 1882265 | WBGene00021305 | zig-11    | Y32G9A.8  | -0.00924051401377568 |             |
| AGIWUR22727                                                            |    |   |         |         |                |           |           |                      |             |
| N2                                                                     | CT | V | 1895797 | 1906560 | WBGene00021304 | nphp-2    | Y32G9A.6  | -0.0668987971061945  |             |
| AGIWUR40867                                                            |    |   |         |         |                |           |           |                      |             |
| N2                                                                     | CT | V | 1907654 | 1908528 | WBGene00021303 | Y32G9A.5  | Y32G9A.5  | 0.461733407525655    |             |
| AGIWUR12249                                                            |    |   |         |         |                |           |           |                      |             |
| N2                                                                     | CT | V | 1908855 | 1910692 | WBGene00005644 | srp-3     | Y32G9A.4  | -0.209194535736007   |             |
| AGIWUR13979                                                            |    |   |         |         |                |           |           |                      |             |
| N2                                                                     | CT | V | 1911402 | 1913572 | WBGene00021302 | Y32G9A.3  | Y32G9A.3  | 0.0401589923859964   |             |
| AGIWUR15769                                                            |    |   |         |         |                |           |           |                      |             |
| N2                                                                     | CT | V | 1913627 | 1917986 | WBGene00044517 | Y32G9A.13 | Y32G9A.13 | -0.224823229112899   |             |
| AGIWUR6335;AGIWUR14178;AGIWUR20443;AGIWUR22055;AGIWUR33726;AGIWUR37482 |    |   |         |         |                |           |           |                      |             |

|                                                                                                                                |    |   |         |         |                |           |           |                      |             |
|--------------------------------------------------------------------------------------------------------------------------------|----|---|---------|---------|----------------|-----------|-----------|----------------------|-------------|
| N2                                                                                                                             | CT | V | 1918539 | 1921029 | WBGene00021301 | Y32G9A.2  | Y32G9A.2  | 0.0622114814763979   |             |
| AGIWUR19923                                                                                                                    |    |   |         |         |                |           |           |                      |             |
| N2                                                                                                                             | CT | V | 1921621 | 1922381 | WBGene00001785 | gst-37    | Y32G9A.1  | 0.111928597855948    |             |
| AGIWUR4468;AGIWUR15840                                                                                                         |    |   |         |         |                |           |           |                      |             |
| N2                                                                                                                             | CT | V | 1923116 | 1925565 | WBGene00020277 | T06A1.1   | T06A1.1   | 0.176106993406556    | AGIWUR34808 |
| N2                                                                                                                             | CT | V | 1927223 | 1931413 | WBGene00020280 | T06A1.5   | T06A1.5   | -0.162123197777763   | AGIWUR21341 |
| N2                                                                                                                             | CT | V | 1944955 | 1953349 | WBGene00020279 | glb-25    | T06A1.4   | -0.0899276840537446  |             |
| AGIWUR627;AGIWUR1111;AGIWUR4223;AGIWUR7808;AGIWUR17908;AGIWUR20988;AGIWUR21891;AGIWUR23733;AGIWUR24723;AGIWUR37834;AGIWUR45105 |    |   |         |         |                |           |           |                      |             |
| N2                                                                                                                             | CT | V | 1953912 | 1956560 | WBGene00005604 | srj-16    | T06A1.2   | -0.282331546699471   | AGIWUR33567 |
| N2                                                                                                                             | CT | V | 1957417 | 1957932 | WBGene00044518 | fipr-25   | T06A1.7   | 0.0201107575512625   |             |
| AGIWUR1522;AGIWUR16811;AGIWUR24089;AGIWUR29190;AGIWUR41979                                                                     |    |   |         |         |                |           |           |                      |             |
| N2                                                                                                                             | CT | V | 1960137 | 1961403 | WBGene00021494 | Y40B10B.1 | Y40B10B.1 | 0.0692423653793899   |             |
| AGIWUR15579                                                                                                                    |    |   |         |         |                |           |           |                      |             |
| N2                                                                                                                             | CT | V | 1962815 | 1964906 | WBGene00005603 | srj-15    | Y40B10B.2 | 0.0773059673909096   |             |
| AGIWUR9421;AGIWUR25828                                                                                                         |    |   |         |         |                |           |           |                      |             |
| N2                                                                                                                             | CT | V | 1969528 | 1974514 | WBGene00020343 | acs-3     | T08B1.6   | 0.12512707153429     | AGIWUR39853 |
| N2                                                                                                                             | CT | V | 1975418 | 1977261 | WBGene00020342 | fbxa-201  | T08B1.5   | 0.0243404956533544   |             |
| AGIWUR23246;AGIWUR29026;AGIWUR35886                                                                                            |    |   |         |         |                |           |           |                      |             |
| N2                                                                                                                             | CT | V | 1979435 | 1982664 | WBGene00020341 | T08B1.4   | T08B1.4   | -0.00405232917789267 |             |
| AGIWUR13175;AGIWUR14799;AGIWUR20161;AGIWUR27409;AGIWUR38153;AGIWUR43363                                                        |    |   |         |         |                |           |           |                      |             |
| N2                                                                                                                             | CT | V | 1982631 | 1987045 | WBGene00020340 | T08B1.1   | T08B1.1   | 0.316106665029418    | AGIWUR23266 |
| N2                                                                                                                             | CT | V | 1989476 | 1992918 | WBGene00006589 | tnt-4     | T08B1.2   | 0.191187997010412    |             |
| AGIWUR21520;AGIWUR45074                                                                                                        |    |   |         |         |                |           |           |                      |             |
| N2                                                                                                                             | CT | V | 1996100 | 1999581 | WBGene00000111 | alh-5     | T08B1.3   | -0.0928575689247264  | AGIWUR37322 |
| N2                                                                                                                             | CT | V | 2000418 | 2004329 | WBGene00019089 | clec-206  | F59A7.1   | -0.219192198153712   |             |
| AGIWUR8715                                                                                                                     |    |   |         |         |                |           |           |                      |             |
| N2                                                                                                                             | CT | V | 2005057 | 2006804 | WBGene00019096 | cys1-4    | F59A7.9   | 0.18097498093883     | AGIWUR38987 |
| N2                                                                                                                             | CT | V | 2007360 | 2007709 | WBGene00023306 | F59A7.10  | F59A7.10  | 0.273298346414606    |             |
| AGIWUR28358                                                                                                                    |    |   |         |         |                |           |           |                      |             |
| N2                                                                                                                             | CT | V | 2008609 | 2011620 | WBGene00019095 | F59A7.8   | F59A7.8   | 0.240074461436357    | AGIWUR11972 |
| N2                                                                                                                             | CT | V | 2013418 | 2013860 | WBGene00044519 | F59A7.11  | F59A7.11  | -0.53156701192761    |             |
| AGIWUR11090;AGIWUR18576                                                                                                        |    |   |         |         |                |           |           |                      |             |
| N2                                                                                                                             | CT | V | 2015836 | 2016541 | WBGene00019090 | F59A7.2   | F59A7.2   | -0.0179775061347787  |             |
| AGIWUR3374;AGIWUR38564                                                                                                         |    |   |         |         |                |           |           |                      |             |
| N2                                                                                                                             | CT | V | 2022674 | 2024710 | WBGene00019092 | F59A7.5   | F59A7.5   | -0.183095687306852   |             |
| AGIWUR8988;AGIWUR21220                                                                                                         |    |   |         |         |                |           |           |                      |             |
| N2                                                                                                                             | CT | V | 2030177 | 2030407 | WBGene00044520 | F59A7.12  | F59A7.12  | -0.320451354500669   |             |
| AGIWUR13534                                                                                                                    |    |   |         |         |                |           |           |                      |             |

|                                                                                                                                                           |    |   |         |         |                |           |           |                     |             |
|-----------------------------------------------------------------------------------------------------------------------------------------------------------|----|---|---------|---------|----------------|-----------|-----------|---------------------|-------------|
| N2                                                                                                                                                        | CT | V | 2030619 | 2031475 | WBGene00001857 | hil-6     | F59A7.4   | 0.213690107270359   |             |
| AGIWUR4410;AGIWUR41283                                                                                                                                    |    |   |         |         |                |           |           |                     |             |
| N2                                                                                                                                                        | CT | V | 2033792 | 2035645 | WBGene00021488 | srab-23   | Y40B10A.3 | 0.196288442731991   |             |
| AGIWUR34938;AGIWUR35892;AGIWUR36570                                                                                                                       |    |   |         |         |                |           |           |                     |             |
| N2                                                                                                                                                        | CT | V | 2038193 | 2042359 | WBGene00021489 | Y40B10A.4 | Y40B10A.4 | -0.18902518967996   |             |
| AGIWUR1482                                                                                                                                                |    |   |         |         |                |           |           |                     |             |
| N2                                                                                                                                                        | CT | V | 2043352 | 2046253 | WBGene00021490 | Y40B10A.5 | Y40B10A.5 | 0.00672941150050832 |             |
| AGIWUR16333                                                                                                                                               |    |   |         |         |                |           |           |                     |             |
| N2                                                                                                                                                        | CT | V | 2049223 | 2050172 | WBGene00021491 | comt-4    | Y40B10A.6 | -0.0960711648943375 |             |
| AGIWUR40501                                                                                                                                               |    |   |         |         |                |           |           |                     |             |
| N2                                                                                                                                                        | CT | V | 2052231 | 2053600 | WBGene00021492 | comt-5    | Y40B10A.7 | -0.0766242739024907 |             |
| AGIWUR41205                                                                                                                                               |    |   |         |         |                |           |           |                     |             |
| N2                                                                                                                                                        | CT | V | 2057537 | 2061129 | WBGene00021487 | comt-3    | Y40B10A.2 | -0.262975320962244  |             |
| AGIWUR4448                                                                                                                                                |    |   |         |         |                |           |           |                     |             |
| N2                                                                                                                                                        | CT | V | 2061111 | 2066844 | WBGene00003676 | nhr-86    | Y40B10A.8 | -0.0106832494740843 |             |
| AGIWUR16383                                                                                                                                               |    |   |         |         |                |           |           |                     |             |
| N2                                                                                                                                                        | CT | V | 2068449 | 2069143 | WBGene00021486 | lbp-9     | Y40B10A.1 | -0.0710327729559879 |             |
| AGIWUR759;AGIWUR42829                                                                                                                                     |    |   |         |         |                |           |           |                     |             |
| N2                                                                                                                                                        | CT | V | 2069207 | 2072896 | WBGene00021493 | Y40B10A.9 | Y40B10A.9 | -0.151381077457181  |             |
| AGIWUR9779                                                                                                                                                |    |   |         |         |                |           |           |                     |             |
| N2                                                                                                                                                        | CT | V | 2086279 | 2089819 | WBGene00018094 | F36F12.3  | F36F12.3  | -0.250022015837462  |             |
| AGIWUR2494;AGIWUR8943;AGIWUR11717;AGIWUR13195;AGIWUR14727;AGIWUR15308;AGIWUR15958;AGIWUR17370;AGIWUR21645;AGIWUR21769;AGIWUR24549;AGIWUR30250;AGIWUR30745 |    |   |         |         |                |           |           |                     |             |
| N2                                                                                                                                                        | CT | V | 2090669 | 2091735 | WBGene00018099 | ztf-28    | F36F12.8  | 0.267390627412372   |             |
| AGIWUR35689                                                                                                                                               |    |   |         |         |                |           |           |                     |             |
| N2                                                                                                                                                        | CT | V | 2096072 | 2097257 | WBGene00018096 | cllec-207 | F36F12.5  | -0.524934148220262  |             |
| AGIWUR13902                                                                                                                                               |    |   |         |         |                |           |           |                     |             |
| N2                                                                                                                                                        | CT | V | 2097953 | 2099153 | WBGene00018097 | cllec-208 | F36F12.6  | -0.499206756951781  |             |
| AGIWUR17623                                                                                                                                               |    |   |         |         |                |           |           |                     |             |
| N2                                                                                                                                                        | CT | V | 2099349 | 2100051 | WBGene00018098 | F36F12.7  | F36F12.7  | 0.448809062730264   |             |
| AGIWUR13503                                                                                                                                               |    |   |         |         |                |           |           |                     |             |
| N2                                                                                                                                                        | CT | V | 2100062 | 2103218 | WBGene00018092 | F36F12.1  | F36F12.1  | -0.0847899077324987 |             |
| AGIWUR13743                                                                                                                                               |    |   |         |         |                |           |           |                     |             |
| N2                                                                                                                                                        | CT | V | 2103658 | 2106076 | WBGene00017722 | F22F7.4   | F22F7.4   | -0.182721783832473  | AGIWUR23521 |
| N2                                                                                                                                                        | CT | V | 2106398 | 2109418 | WBGene00000514 | ckb-4     | F22F7.5   | 0.0268811567402398  |             |
| AGIWUR17305;AGIWUR28551;AGIWUR34233                                                                                                                       |    |   |         |         |                |           |           |                     |             |
| N2                                                                                                                                                        | CT | V | 2115490 | 2118644 | WBGene00017723 | bgnt-1.2  | F22F7.6   | 0.0918094340871827  |             |
| AGIWUR5028                                                                                                                                                |    |   |         |         |                |           |           |                     |             |
| N2                                                                                                                                                        | CT | V | 2122866 | 2127299 | WBGene00017720 | F22F7.2   | F22F7.2   | 0.0138674251954525  |             |

AGIWUR13725;AGIWUR30695

|    |    |   |         |         |                |          |          |                     |             |
|----|----|---|---------|---------|----------------|----------|----------|---------------------|-------------|
| N2 | CT | V | 2127535 | 2130100 | WBGene00017719 | ldp-1    | F22F7.1  | -0.0181649361800567 | AGIWUR26701 |
| N2 | CT | V | 2131476 | 2140042 | WBGene00017724 | F22F7.7  | F22F7.7  | 0.335698107522941   | AGIWUR38755 |
| N2 | CT | V | 2144020 | 2144508 | WBGene00268198 | F22F7.12 | F22F7.12 | -0.0306591252136172 |             |

AGIWUR29493

|    |    |   |         |         |                |         |          |                     |  |
|----|----|---|---------|---------|----------------|---------|----------|---------------------|--|
| N2 | CT | V | 2147095 | 2148626 | WBGene00016693 | srbc-20 | C45H4.11 | -0.0991774891821429 |  |
|----|----|---|---------|---------|----------------|---------|----------|---------------------|--|

AGIWUR11502

|    |    |   |         |         |                |         |          |                   |  |
|----|----|---|---------|---------|----------------|---------|----------|-------------------|--|
| N2 | CT | V | 2151762 | 2153010 | WBGene00016692 | srbc-24 | C45H4.10 | 0.116588597107658 |  |
|----|----|---|---------|---------|----------------|---------|----------|-------------------|--|

AGIWUR29865

|    |    |   |         |         |                |         |         |                   |             |
|----|----|---|---------|---------|----------------|---------|---------|-------------------|-------------|
| N2 | CT | V | 2153574 | 2155112 | WBGene00016691 | srbc-23 | C45H4.9 | 0.011562643051132 | AGIWUR35642 |
|----|----|---|---------|---------|----------------|---------|---------|-------------------|-------------|

|    |    |   |         |         |                |         |         |                    |            |
|----|----|---|---------|---------|----------------|---------|---------|--------------------|------------|
| N2 | CT | V | 2155532 | 2156635 | WBGene00016689 | srbc-21 | C45H4.7 | 0.0237376787096766 | AGIWUR9672 |
|----|----|---|---------|---------|----------------|---------|---------|--------------------|------------|

|    |    |   |         |         |                |         |         |                   |             |
|----|----|---|---------|---------|----------------|---------|---------|-------------------|-------------|
| N2 | CT | V | 2157130 | 2158274 | WBGene00016690 | srbc-22 | C45H4.8 | 0.036312059714926 | AGIWUR18608 |
|----|----|---|---------|---------|----------------|---------|---------|-------------------|-------------|

|    |    |   |         |         |                |          |          |                    |  |
|----|----|---|---------|---------|----------------|----------|----------|--------------------|--|
| N2 | CT | V | 2158674 | 2159427 | WBGene00016695 | C45H4.14 | C45H4.14 | -0.338812589478191 |  |
|----|----|---|---------|---------|----------------|----------|----------|--------------------|--|

AGIWUR5246;AGIWUR27391;AGIWUR40317

|    |    |   |         |         |                |         |          |                    |  |
|----|----|---|---------|---------|----------------|---------|----------|--------------------|--|
| N2 | CT | V | 2161500 | 2163835 | WBGene00006281 | str-255 | C45H4.15 | -0.394148319870282 |  |
|----|----|---|---------|---------|----------------|---------|----------|--------------------|--|

AGIWUR39636

|    |    |   |         |         |                |         |          |                     |  |
|----|----|---|---------|---------|----------------|---------|----------|---------------------|--|
| N2 | CT | V | 2164826 | 2166779 | WBGene00016696 | srbc-19 | C45H4.16 | -0.0919743968191575 |  |
|----|----|---|---------|---------|----------------|---------|----------|---------------------|--|

AGIWUR16474;AGIWUR35248;AGIWUR37129

|    |    |   |         |         |                |         |         |                    |             |
|----|----|---|---------|---------|----------------|---------|---------|--------------------|-------------|
| N2 | CT | V | 2169306 | 2170668 | WBGene00016688 | srbc-18 | C45H4.6 | -0.113849165518161 | AGIWUR30026 |
|----|----|---|---------|---------|----------------|---------|---------|--------------------|-------------|

|    |    |   |         |         |                |        |         |                    |             |
|----|----|---|---------|---------|----------------|--------|---------|--------------------|-------------|
| N2 | CT | V | 2171418 | 2174412 | WBGene00005709 | sru-46 | C45H4.5 | -0.112800445345191 | AGIWUR11450 |
|----|----|---|---------|---------|----------------|--------|---------|--------------------|-------------|

|    |    |   |         |         |                |          |          |                   |  |
|----|----|---|---------|---------|----------------|----------|----------|-------------------|--|
| N2 | CT | V | 2175542 | 2177503 | WBGene00044087 | C45H4.18 | C45H4.18 | 0.138107205083665 |  |
|----|----|---|---------|---------|----------------|----------|----------|-------------------|--|

AGIWUR4518;AGIWUR36492

|    |    |   |         |         |                |         |         |                   |             |
|----|----|---|---------|---------|----------------|---------|---------|-------------------|-------------|
| N2 | CT | V | 2177714 | 2179116 | WBGene00016687 | srbc-17 | C45H4.3 | 0.114980940093282 | AGIWUR32870 |
|----|----|---|---------|---------|----------------|---------|---------|-------------------|-------------|

|    |    |   |         |         |                |          |         |                    |  |
|----|----|---|---------|---------|----------------|----------|---------|--------------------|--|
| N2 | CT | V | 2179586 | 2181759 | WBGene00016686 | cyp-33C1 | C45H4.2 | 0.0218685766023849 |  |
|----|----|---|---------|---------|----------------|----------|---------|--------------------|--|

AGIWUR43067

|    |    |   |         |         |                |         |         |                     |             |
|----|----|---|---------|---------|----------------|---------|---------|---------------------|-------------|
| N2 | CT | V | 2182038 | 2183191 | WBGene00016685 | srbc-16 | C45H4.1 | -0.0999309492894778 | AGIWUR28585 |
|----|----|---|---------|---------|----------------|---------|---------|---------------------|-------------|

|    |    |   |         |         |                |          |          |                    |  |
|----|----|---|---------|---------|----------------|----------|----------|--------------------|--|
| N2 | CT | V | 2183521 | 2186535 | WBGene00016697 | cyp-33C2 | C45H4.17 | -0.787278659978151 |  |
|----|----|---|---------|---------|----------------|----------|----------|--------------------|--|

AGIWUR13520

|    |    |   |         |         |                |         |         |                   |             |
|----|----|---|---------|---------|----------------|---------|---------|-------------------|-------------|
| N2 | CT | V | 2188280 | 2189062 | WBGene00021165 | Y5H2B.3 | Y5H2B.3 | 0.358577678629715 | AGIWUR30403 |
|----|----|---|---------|---------|----------------|---------|---------|-------------------|-------------|

|    |    |   |         |         |                |         |         |                    |             |
|----|----|---|---------|---------|----------------|---------|---------|--------------------|-------------|
| N2 | CT | V | 2189586 | 2191222 | WBGene00021166 | srbc-42 | Y5H2B.4 | 0.0424055574320246 | AGIWUR16020 |
|----|----|---|---------|---------|----------------|---------|---------|--------------------|-------------|

|    |    |   |         |         |                |        |         |                    |             |
|----|----|---|---------|---------|----------------|--------|---------|--------------------|-------------|
| N2 | CT | V | 2192477 | 2196823 | WBGene00003612 | nhr-13 | Y5H2B.2 | -0.166536626924259 | AGIWUR31918 |
|----|----|---|---------|---------|----------------|--------|---------|--------------------|-------------|

|    |    |   |         |         |                |          |         |                    |  |
|----|----|---|---------|---------|----------------|----------|---------|--------------------|--|
| N2 | CT | V | 2198059 | 2201415 | WBGene00021167 | cyp-32B1 | Y5H2B.5 | -0.221488017206042 |  |
|----|----|---|---------|---------|----------------|----------|---------|--------------------|--|

AGIWUR20546

|    |    |   |         |         |                |           |         |                    |  |
|----|----|---|---------|---------|----------------|-----------|---------|--------------------|--|
| N2 | CT | V | 2201581 | 2204397 | WBGene00021168 | cyp-33C12 | Y5H2B.6 | 0.0942879964110555 |  |
|----|----|---|---------|---------|----------------|-----------|---------|--------------------|--|

AGIWUR27493

|    |    |   |         |         |                |        |         |                   |  |
|----|----|---|---------|---------|----------------|--------|---------|-------------------|--|
| N2 | CT | V | 2205030 | 2206281 | WBGene00021169 | srt-40 | Y5H2B.7 | 0.137556079429294 |  |
|----|----|---|---------|---------|----------------|--------|---------|-------------------|--|

AGIWUR17162;AGIWUR26968;AGIWUR27794

|    |    |   |         |         |                |         |         |                    |             |
|----|----|---|---------|---------|----------------|---------|---------|--------------------|-------------|
| N2 | CT | V | 2207180 | 2210209 | WBGene00021164 | Y5H2B.1 | Y5H2B.1 | -0.535687014702815 | AGIWUR20260 |
|----|----|---|---------|---------|----------------|---------|---------|--------------------|-------------|

|    |    |   |         |         |                |         |         |                   |             |
|----|----|---|---------|---------|----------------|---------|---------|-------------------|-------------|
| N2 | CT | V | 2210516 | 2212114 | WBGene00003723 | nhr-133 | F44C8.8 | 0.113098052100778 | AGIWUR22577 |
|----|----|---|---------|---------|----------------|---------|---------|-------------------|-------------|

|                                                             |    |   |         |         |                |          |          |                     |             |
|-------------------------------------------------------------|----|---|---------|---------|----------------|----------|----------|---------------------|-------------|
| N2                                                          | CT | V | 2212899 | 2214460 | WBGene00018415 | nhr-184  | F44C8.9  | -0.0635030857612442 |             |
| AGIWUR15480;AGIWUR20409;AGIWUR32815;AGIWUR32949;AGIWUR33909 |    |   |         |         |                |          |          |                     |             |
| N2                                                          | CT | V | 2215724 | 2218091 | WBGene00018414 | nstp-8   | F44C8.7  | 0.124977235320055   | AGIWUR5605  |
| N2                                                          | CT | V | 2219004 | 2221305 | WBGene00003646 | nhr-56   | F44C8.6  | -0.208140334969038  | AGIWUR16627 |
| N2                                                          | CT | V | 2221948 | 2225296 | WBGene00003718 | nhr-128  | F44C8.5  | -0.139831532885384  |             |
| AGIWUR14749;AGIWUR18311;AGIWUR25768;AGIWUR26935             |    |   |         |         |                |          |          |                     |             |
| N2                                                          | CT | V | 2225430 | 2227042 | WBGene00003693 | nhr-103  | F44C8.4  | -0.0659458791900107 | AGIWUR14265 |
| N2                                                          | CT | V | 2227203 | 2228981 | WBGene00003617 | nhr-18   | F44C8.3  | -0.112215958780361  | AGIWUR23493 |
| N2                                                          | CT | V | 2229081 | 2230984 | WBGene00003716 | nhr-126  | F44C8.10 | 0.0184490357155855  |             |
| AGIWUR3148;AGIWUR9146;AGIWUR11153;AGIWUR13084               |    |   |         |         |                |          |          |                     |             |
| N2                                                          | CT | V | 2231124 | 2233381 | WBGene00003724 | nhr-134  | F44C8.2  | -0.0243184147184721 | AGIWUR787   |
| N2                                                          | CT | V | 2233482 | 2235138 | WBGene00003686 | nhr-96   | F44C8.11 | -0.287460674301819  |             |
| AGIWUR29784                                                 |    |   |         |         |                |          |          |                     |             |
| N2                                                          | CT | V | 2236162 | 2237937 | WBGene00018413 | cyp-33C4 | F44C8.1  | -0.115759432885808  |             |
| AGIWUR1806;AGIWUR8637                                       |    |   |         |         |                |          |          |                     |             |
| N2                                                          | CT | V | 2242196 | 2242772 | WBGene00023039 | F41B5.11 | F41B5.11 | 0.0870843052344901  |             |
| AGIWUR16567                                                 |    |   |         |         |                |          |          |                     |             |
| N2                                                          | CT | V | 2242778 | 2244871 | WBGene00018262 | cyp-33C3 | F41B5.4  | -0.0357572027889432 |             |
| AGIWUR43831                                                 |    |   |         |         |                |          |          |                     |             |
| N2                                                          | CT | V | 2245015 | 2247015 | WBGene00018261 | cyp-33C5 | F41B5.3  | -0.0177778303448317 |             |
| AGIWUR42271                                                 |    |   |         |         |                |          |          |                     |             |
| N2                                                          | CT | V | 2247472 | 2249335 | WBGene00018264 | cyp-33C6 | F41B5.7  | -0.0824117449891819 |             |
| AGIWUR36205                                                 |    |   |         |         |                |          |          |                     |             |
| N2                                                          | CT | V | 2250545 | 2252553 | WBGene00018260 | cyp-33C7 | F41B5.2  | -0.108476426354803  |             |
| AGIWUR39759                                                 |    |   |         |         |                |          |          |                     |             |
| N2                                                          | CT | V | 2252804 | 2254603 | WBGene00006279 | str-253  | F41B5.8  | 0.0484125499197106  | AGIWUR43104 |
| N2                                                          | CT | V | 2255533 | 2256658 | WBGene00023284 | F41B5.1  | F41B5.1  | -0.0726919105227282 | AGIWUR11202 |
| N2                                                          | CT | V | 2257420 | 2259913 | WBGene00018265 | nhr-182  | F41B5.9  | -0.0728052355996081 | AGIWUR41433 |
| N2                                                          | CT | V | 2262489 | 2264634 | WBGene00018266 | nhr-183  | F41B5.10 | 0.217628684231888   |             |
| AGIWUR34818;AGIWUR34908                                     |    |   |         |         |                |          |          |                     |             |
| N2                                                          | CT | V | 2264909 | 2267058 | WBGene00021163 | nhr-275  | Y5H2A.2  | 0.13524788677704    | AGIWUR10872 |
| N2                                                          | CT | V | 2271175 | 2271861 | WBGene00021162 | Y5H2A.1  | Y5H2A.1  | 0.0883651352225101  | AGIWUR20420 |
| N2                                                          | CT | V | 2272441 | 2274353 | WBGene00044521 | Y5H2A.4  | Y5H2A.4  | 0.449779051733151   | AGIWUR553   |
| N2                                                          | CT | V | 2274842 | 2275977 | WBGene00000027 | abu-4    | Y5H2A.3  | 0.0316222113705535  | AGIWUR11350 |
| N2                                                          | CT | V | 2276018 | 2278246 | WBGene00003649 | nhr-59   | T27B7.1  | 0.0967272257355756  | AGIWUR5243  |
| N2                                                          | CT | V | 2278826 | 2281387 | WBGene00020853 | fbxa-137 | T27B7.7  | -0.0911715378584699 |             |
| AGIWUR29600                                                 |    |   |         |         |                |          |          |                     |             |
| N2                                                          | CT | V | 2281828 | 2284963 | WBGene00020852 | nhr-228  | T27B7.6  | -0.132647828392191  | AGIWUR36659 |
| N2                                                          | CT | V | 2285279 | 2287520 | WBGene00020851 | nhr-227  | T27B7.5  | 0.265136636829757   | AGIWUR14453 |



|                                                                                     |    |   |         |         |                |           |            |                     |             |
|-------------------------------------------------------------------------------------|----|---|---------|---------|----------------|-----------|------------|---------------------|-------------|
| N2                                                                                  | CT | V | 2288328 | 2290468 | WBGene00020849 | nhr-225   | T27B7.2    | 0.0422971166976875  | AGIWUR19641 |
| N2                                                                                  | CT | V | 2288487 | 2294798 | WBGene00003705 | nhr-115   | T27B7.4    | -0.0541501538427083 | AGIWUR29278 |
| N2                                                                                  | CT | V | 2294822 | 2296967 | WBGene00020850 | nhr-226   | T27B7.3    | 0.148915653097722   | AGIWUR5248  |
| N2                                                                                  | CT | V | 2298945 | 2301005 | WBGene00235117 | Y19D10B.8 | Y19D10B.8  | 0.118984085291835   |             |
| AGIWUR33818                                                                         |    |   |         |         |                |           |            |                     |             |
| N2                                                                                  | CT | V | 2301743 | 2303868 | WBGene00021232 | irld-15   | Y19D10B.3  | 0.136561101269179   |             |
| AGIWUR1695                                                                          |    |   |         |         |                |           |            |                     |             |
| N2                                                                                  | CT | V | 2304355 | 2309159 | WBGene00021233 | Y19D10B.4 | Y19D10B.4  | 0.0815139596330194  |             |
| AGIWUR30881                                                                         |    |   |         |         |                |           |            |                     |             |
| N2                                                                                  | CT | V | 2311291 | 2313809 | WBGene00021230 | Y19D10B.1 | Y19D10B.1  | -0.699284179243969  |             |
| AGIWUR23689                                                                         |    |   |         |         |                |           |            |                     |             |
| N2                                                                                  | CT | V | 2313962 | 2318163 | WBGene00021234 | irld-16   | Y19D10B.5  | 0.12899231578106    |             |
| AGIWUR19389                                                                         |    |   |         |         |                |           |            |                     |             |
| N2                                                                                  | CT | V | 2324510 | 2326827 | WBGene00017501 | pud-3     | F15E11.15  | -0.456679761863613  |             |
| AGIWUR26728                                                                         |    |   |         |         |                |           |            |                     |             |
| N2                                                                                  | CT | V | 2326678 | 2327262 | WBGene00017498 | pud-4     | F15E11.12  | -0.580622767670963  |             |
| AGIWUR26194                                                                         |    |   |         |         |                |           |            |                     |             |
| N2                                                                                  | CT | V | 2339567 | 2341408 | WBGene00017493 | irld-30   | F15E11.4   | -0.216472316299349  |             |
| AGIWUR10991                                                                         |    |   |         |         |                |           |            |                     |             |
| N2                                                                                  | CT | V | 2342016 | 2344508 | WBGene00017494 | irld-31   | F15E11.5   | 0.430353108475815   |             |
| AGIWUR16975                                                                         |    |   |         |         |                |           |            |                     |             |
| N2                                                                                  | CT | V | 2453414 | 2456147 | WBGene00018911 | F56A4.3   | F56A4.3    | 0.0991526178594269  | AGIWUR27891 |
| N2                                                                                  | CT | V | 2561690 | 2564701 | WBGene00001758 | gst-10    | Y45G12C.2  | -0.130788175873589  |             |
| AGIWUR3108;AGIWUR12703;AGIWUR23562;AGIWUR42382                                      |    |   |         |         |                |           |            |                     |             |
| N2                                                                                  | CT | V | 2565683 | 2568878 | WBGene00021565 | Y45G12C.1 | Y45G12C.1  | -0.359823803386627  |             |
| AGIWUR33496                                                                         |    |   |         |         |                |           |            |                     |             |
| N2                                                                                  | CT | V | 2568876 | 2570743 | WBGene00005607 | srj-19    | Y45G12C.14 | -0.0782322626801681 |             |
| AGIWUR27902;AGIWUR41936                                                             |    |   |         |         |                |           |            |                     |             |
| N2                                                                                  | CT | V | 2571527 | 2573208 | WBGene00005608 | srj-20    | Y45G12C.15 | -0.290672414880928  |             |
| AGIWUR27705                                                                         |    |   |         |         |                |           |            |                     |             |
| N2                                                                                  | CT | V | 2577903 | 2579816 | WBGene00016232 | srt-4     | C29G2.4    | -0.368762371563763  | AGIWUR20535 |
| N2                                                                                  | CT | V | 2580872 | 2582939 | WBGene00016231 | C29G2.3   | C29G2.3    | -0.081304755313786  | AGIWUR37256 |
| N2                                                                                  | CT | V | 2582867 | 2585908 | WBGene00016234 | C29G2.6   | C29G2.6    | 0.185867720561502   | AGIWUR28534 |
| N2                                                                                  | CT | V | 2590393 | 2591758 | WBGene00016230 | C29G2.2   | C29G2.2    | 0.00282887117728503 |             |
| AGIWUR19539;AGIWUR20711;AGIWUR24384;AGIWUR28086;AGIWUR35312;AGIWUR36193;AGIWUR41857 |    |   |         |         |                |           |            |                     |             |
| N2                                                                                  | CT | V | 2592487 | 2595062 | WBGene00018760 | irg-3     | F53E10.4   | 0.117924171135311   |             |
| AGIWUR34840                                                                         |    |   |         |         |                |           |            |                     |             |
| N2                                                                                  | CT | V | 2596020 | 2598930 | WBGene00018761 | F53E10.5  | F53E10.5   | 0.453393852061255   |             |
| AGIWUR19102                                                                         |    |   |         |         |                |           |            |                     |             |

|                                                                                               |    |   |         |         |                |           |           |                     |             |
|-----------------------------------------------------------------------------------------------|----|---|---------|---------|----------------|-----------|-----------|---------------------|-------------|
| N2                                                                                            | CT | V | 2602153 | 2603063 | WBGene00018762 | F53E10.6  | F53E10.6  | -0.26505178537176   |             |
| AGIWUR3618                                                                                    |    |   |         |         |                |           |           |                     |             |
| N2                                                                                            | CT | V | 2608656 | 2615247 | WBGene00000056 | acr-17    | F53E10.2  | -0.213475735715053  |             |
| AGIWUR21260                                                                                   |    |   |         |         |                |           |           |                     |             |
| N2                                                                                            | CT | V | 2615790 | 2618554 | WBGene00018758 | F53E10.1  | F53E10.1  | -0.181484967747371  |             |
| AGIWUR8011;AGIWUR15797                                                                        |    |   |         |         |                |           |           |                     |             |
| N2                                                                                            | CT | V | 2618999 | 2620714 | WBGene00005477 | srh-271   | W02H5.6   | -0.135756852803299  |             |
| AGIWUR10433;AGIWUR18408;AGIWUR35984                                                           |    |   |         |         |                |           |           |                     |             |
| N2                                                                                            | CT | V | 2638843 | 2646620 | WBGene00020957 | W02H5.2   | W02H5.2   | -0.0137198111883237 |             |
| AGIWUR11330;AGIWUR17167;AGIWUR19063                                                           |    |   |         |         |                |           |           |                     |             |
| N2                                                                                            | CT | V | 2647037 | 2652712 | WBGene00020962 | W02H5.8   | W02H5.8   | 0.179547418628994   | AGIWUR17071 |
| N2                                                                                            | CT | V | 2653079 | 2662655 | WBGene00020955 | angl-1    | W02G9.5   | 0.00547501184520538 | AGIWUR10994 |
| N2                                                                                            | CT | V | 2662964 | 2665003 | WBGene00003579 | ndx-2     | W02G9.1   | 0.193749225042311   | AGIWUR24002 |
| N2                                                                                            | CT | V | 2666866 | 2670234 | WBGene00020954 | W02G9.4   | W02G9.4   | 0.319513866646307   | AGIWUR29410 |
| N2                                                                                            | CT | V | 2671464 | 2688500 | WBGene00020952 | kel-8     | W02G9.2   | 0.0840046136453183  |             |
| AGIWUR3574;AGIWUR4374;AGIWUR14073;AGIWUR18975;AGIWUR23190;AGIWUR25226;AGIWUR30569;AGIWUR37100 |    |   |         |         |                |           |           |                     |             |
| N2                                                                                            | CT | V | 2688461 | 2694430 | WBGene00021564 | Y45G12B.3 | Y45G12B.3 | 0.290365530176603   |             |
| AGIWUR43901                                                                                   |    |   |         |         |                |           |           |                     |             |
| N2                                                                                            | CT | V | 2694768 | 2698864 | WBGene00021563 | Y45G12B.2 | Y45G12B.2 | -0.0914871012477927 |             |
| AGIWUR18287;AGIWUR25218                                                                       |    |   |         |         |                |           |           |                     |             |
| N2                                                                                            | CT | V | 2698972 | 2707024 | WBGene00021562 | nuo-5     | Y45G12B.1 | 0.0759611310671007  |             |
| AGIWUR20241;AGIWUR25712;AGIWUR38658;AGIWUR42997                                               |    |   |         |         |                |           |           |                     |             |
| N2                                                                                            | CT | V | 2706781 | 2711599 | WBGene00016048 | C24B9.3   | C24B9.3   | 0.130971830344116   |             |
| AGIWUR966;AGIWUR17192;AGIWUR41142;AGIWUR41995                                                 |    |   |         |         |                |           |           |                     |             |
| N2                                                                                            | CT | V | 2712034 | 2713632 | WBGene00016049 | srt-28    | C24B9.4   | 0.142868653552936   | AGIWUR19236 |
| N2                                                                                            | CT | V | 2715274 | 2717000 | WBGene00016047 | srt-26    | C24B9.2   | 0.08311070257745    | AGIWUR15766 |
| N2                                                                                            | CT | V | 2717395 | 2719135 | WBGene00016050 | srt-29    | C24B9.5   | 0.104830398200614   | AGIWUR16487 |
| N2                                                                                            | CT | V | 2719696 | 2720863 | WBGene00016051 | srt-27    | C24B9.6   | 0.137741729123688   | AGIWUR9939  |
| N2                                                                                            | CT | V | 2721290 | 2722655 | WBGene00005217 | srg-60    | C24B9.15  | 0.213712687194032   |             |
| AGIWUR14062                                                                                   |    |   |         |         |                |           |           |                     |             |
| N2                                                                                            | CT | V | 2722903 | 2725325 | WBGene00005216 | srg-59    | C24B9.7   | 0.247361309067655   | AGIWUR30333 |
| N2                                                                                            | CT | V | 2725902 | 2727201 | WBGene00006081 | str-13    | C24B9.8   | -0.0347008526956607 | AGIWUR5432  |
| N2                                                                                            | CT | V | 2728536 | 2730243 | WBGene00006099 | str-33    | C24B9.1   | -0.0422097410185227 | AGIWUR17470 |
| N2                                                                                            | CT | V | 2730594 | 2731098 | WBGene00016052 | dod-3     | C24B9.9   | -0.367863179877883  | AGIWUR30647 |
| N2                                                                                            | CT | V | 2732177 | 2734460 | WBGene00005214 | srg-57    | C24B9.14  | 0.331368742607848   |             |
| AGIWUR28096                                                                                   |    |   |         |         |                |           |           |                     |             |
| N2                                                                                            | CT | V | 2735531 | 2738274 | WBGene00005213 | srg-56    | C24B9.10  | 0.0440372912471521  |             |
| AGIWUR39080                                                                                   |    |   |         |         |                |           |           |                     |             |
| N2                                                                                            | CT | V | 2740444 | 2744326 | WBGene00005219 | srg-62    | C24B9.12  | 0.182995250324647   |             |

|                                                                                   |    |   |         |         |                |          |          |                      |             |
|-----------------------------------------------------------------------------------|----|---|---------|---------|----------------|----------|----------|----------------------|-------------|
| AGIWUR2554                                                                        |    |   |         |         |                |          |          |                      |             |
| N2                                                                                | CT | V | 2745013 | 2746947 | WBGene00005916 | srx-25   | C24B9.13 | 0.0577244119492466   |             |
| AGIWUR10481                                                                       |    |   |         |         |                |          |          |                      |             |
| N2                                                                                | CT | V | 2748152 | 2750106 | WBGene00005915 | srx-24   | C24B9.16 | -0.187562443990429   |             |
| AGIWUR13684                                                                       |    |   |         |         |                |          |          |                      |             |
| N2                                                                                | CT | V | 2751256 | 2753107 | WBGene00005917 | srx-26   | R05D8.4  | 0.277793362215673    | AGIWUR33456 |
| N2                                                                                | CT | V | 2753306 | 2755158 | WBGene00005918 | srx-27   | R05D8.12 | -0.0764754100378315  |             |
| AGIWUR5205;AGIWUR11166;AGIWUR30165                                                |    |   |         |         |                |          |          |                      |             |
| N2                                                                                | CT | V | 2755701 | 2757276 | WBGene00005919 | srx-28   | R05D8.5  | -0.29028250145094    | AGIWUR31039 |
| N2                                                                                | CT | V | 2758174 | 2759556 | WBGene00005215 | srg-58   | R05D8.6  | 0.0112475680641957   | AGIWUR6399  |
| N2                                                                                | CT | V | 2761825 | 2763208 | WBGene00019885 | R05D8.7  | R05D8.7  | 0.204546487674211    | AGIWUR20612 |
| N2                                                                                | CT | V | 2763981 | 2765274 | WBGene00000977 | dhs-14   | R05D8.8  | -0.0293090901290034  |             |
| AGIWUR14412;AGIWUR30446                                                           |    |   |         |         |                |          |          |                      |             |
| N2                                                                                | CT | V | 2766271 | 2767503 | WBGene00019886 | R05D8.9  | R05D8.9  | -0.96205996446907    | AGIWUR42273 |
| N2                                                                                | CT | V | 2768419 | 2769854 | WBGene00000978 | dhs-15   | R05D8.10 | 0.160897434572513    |             |
| AGIWUR36965                                                                       |    |   |         |         |                |          |          |                      |             |
| N2                                                                                | CT | V | 2771860 | 2773519 | WBGene00005279 | srh-56   | R05D8.3  | -0.00537243608081539 |             |
| AGIWUR17184;AGIWUR31165;AGIWUR34838                                               |    |   |         |         |                |          |          |                      |             |
| N2                                                                                | CT | V | 2774342 | 2776258 | WBGene00005606 | srj-18   | R05D8.2  | -0.0271443875823731  |             |
| AGIWUR22116;AGIWUR30340;AGIWUR37772                                               |    |   |         |         |                |          |          |                      |             |
| N2                                                                                | CT | V | 2776442 | 2779233 | WBGene00005605 | srj-17   | R05D8.1  | 0.123192833006259    |             |
| AGIWUR18696;AGIWUR37375                                                           |    |   |         |         |                |          |          |                      |             |
| N2                                                                                | CT | V | 2779384 | 2780845 | WBGene00019887 | R05D8.11 | R05D8.11 | -0.139412630247234   |             |
| AGIWUR37072                                                                       |    |   |         |         |                |          |          |                      |             |
| N2                                                                                | CT | V | 2781943 | 2807934 | WBGene00004130 | ketn-1   | F54E2.3  | 0.0177517072604312   |             |
| AGIWUR1666;AGIWUR8340;AGIWUR14563;AGIWUR30694;AGIWUR35122;AGIWUR39274;AGIWUR40581 |    |   |         |         |                |          |          |                      |             |
| N2                                                                                | CT | V | 2810398 | 2812017 | WBGene00018823 | F54E2.1  | F54E2.1  | 0.158880388955737    | AGIWUR29760 |
| N2                                                                                | CT | V | 2812531 | 2813948 | WBGene00268206 | F54E2.9  | F54E2.9  | -0.284311115381832   | AGIWUR14121 |
| N2                                                                                | CT | V | 2816883 | 2818217 | WBGene00018826 | srt-34   | F54E2.6  | 0.0789589348492745   | AGIWUR25520 |
| N2                                                                                | CT | V | 2819581 | 2821668 | WBGene00005259 | srh-36   | T03D3.4  | 0.0326850407335844   |             |
| AGIWUR3593;AGIWUR4361;AGIWUR7859                                                  |    |   |         |         |                |          |          |                      |             |
| N2                                                                                | CT | V | 2823806 | 2826831 | WBGene00020183 | T03D3.5  | T03D3.5  | -0.188814392470331   | AGIWUR3087  |
| N2                                                                                | CT | V | 2832966 | 2834921 | WBGene00005629 | srj-50   | T03D3.2  | 0.0588842628220734   | AGIWUR22775 |
| N2                                                                                | CT | V | 2835411 | 2836601 | WBGene00005627 | srj-45   | T03D3.6  | -0.310349216671265   | AGIWUR33727 |
| N2                                                                                | CT | V | 2837634 | 2838805 | WBGene00023335 | T03D3.7  | T03D3.7  | 0.023397354524163    | AGIWUR15810 |
| N2                                                                                | CT | V | 2839154 | 2840318 | WBGene00023336 | T03D3.8  | T03D3.8  | 0.00302360064676943  | AGIWUR29605 |
| N2                                                                                | CT | V | 2841018 | 2842241 | WBGene00023337 | T03D3.9  | T03D3.9  | -0.37596383534231    |             |
| AGIWUR19942;AGIWUR44223                                                           |    |   |         |         |                |          |          |                      |             |
| N2                                                                                | CT | V | 2842946 | 2844240 | WBGene00023338 | T03D3.10 | T03D3.10 |                      |             |

|                                                                                               |    |   |                         |         |                |          |           |                     |
|-----------------------------------------------------------------------------------------------|----|---|-------------------------|---------|----------------|----------|-----------|---------------------|
| -0.00506183780398128                                                                          |    |   | AGIWUR12011;AGIWUR26145 |         |                |          |           |                     |
| N2                                                                                            | CT | V | 2844563                 | 2845871 | WBGene00005626 | srj-44   | T03D3.11  | -0.174273527020215  |
| AGIWUR10080                                                                                   |    |   |                         |         |                |          |           |                     |
| N2                                                                                            | CT | V | 2846250                 | 2848340 | WBGene00005628 | srj-49   | T03D3.12  | 0.155364528920453   |
| AGIWUR8827                                                                                    |    |   |                         |         |                |          |           |                     |
| N2                                                                                            | CT | V | 2849343                 | 2852031 | WBGene00020182 | ugt-53   | T03D3.1   | -0.295266126430828  |
| N2                                                                                            | CT | V | 2852425                 | 2853605 | WBGene00023339 | T03D3.13 | T03D3.13  | 0.343118714379399   |
| AGIWUR40784                                                                                   |    |   |                         |         |                |          |           |                     |
| N2                                                                                            | CT | V | 2854393                 | 2855573 | WBGene00005635 | srj-57   | T03D3.14  | -0.0504616501503055 |
| AGIWUR481                                                                                     |    |   |                         |         |                |          |           |                     |
| N2                                                                                            | CT | V | 2856082                 | 2857942 | WBGene00005634 | srj-55   | Y45G12A.1 | 0.0123793114821709  |
| AGIWUR42694                                                                                   |    |   |                         |         |                |          |           |                     |
| N2                                                                                            | CT | V | 2858660                 | 2859838 | WBGene00005633 | srj-54   | F37B4.11  | -0.0375887645992385 |
| AGIWUR8532                                                                                    |    |   |                         |         |                |          |           |                     |
| N2                                                                                            | CT | V | 2860130                 | 2861605 | WBGene00005476 | srh-270  | F37B4.5   | -0.0199481624818958 |
| N2                                                                                            | CT | V | 2863333                 | 2865001 | WBGene00005478 | srh-272  | F37B4.4   | 0.0165396061948666  |
| N2                                                                                            | CT | V | 2865199                 | 2867284 | WBGene00005447 | srh-240  | F37B4.13  | 0.166428470812151   |
| AGIWUR1223                                                                                    |    |   |                         |         |                |          |           |                     |
| N2                                                                                            | CT | V | 2867792                 | 2869603 | WBGene00005448 | srh-241  | F37B4.6   | -0.159500146857184  |
| N2                                                                                            | CT | V | 2870427                 | 2872106 | WBGene00005449 | srh-243  | F37B4.3   | 0.0614505940985142  |
| N2                                                                                            | CT | V | 2872465                 | 2875600 | WBGene00018138 | folr-2   | F37B4.7   | 0.274345735659414   |
| AGIWUR5700;AGIWUR9537;AGIWUR14965;AGIWUR15205;AGIWUR27435;AGIWUR30621;AGIWUR32404;AGIWUR43045 |    |   |                         |         |                |          |           |                     |
| N2                                                                                            | CT | V | 2875734                 | 2877609 | WBGene00018140 | F37B4.10 | F37B4.10  | -0.181362793188649  |
| AGIWUR38144                                                                                   |    |   |                         |         |                |          |           |                     |
| N2                                                                                            | CT | V | 2877804                 | 2879901 | WBGene00006104 | str-39   | F37B4.12  | -0.202548244686737  |
| AGIWUR16037                                                                                   |    |   |                         |         |                |          |           |                     |
| N2                                                                                            | CT | V | 2881393                 | 2883753 | WBGene00002055 | ifc-1    | F37B4.2   | 0.447203415843759   |
| N2                                                                                            | CT | V | 2884711                 | 2886425 | WBGene00018139 | sre-24   | F37B4.9   | 0.0379402579335411  |
| N2                                                                                            | CT | V | 2887191                 | 2888781 | WBGene00005751 | srw-4    | F37B4.8   | -0.127085740690012  |
| N2                                                                                            | CT | V | 2889302                 | 2890029 | WBGene00044523 | F37B4.14 | F37B4.14  | -0.0434929951360683 |
| AGIWUR7633;AGIWUR13078;AGIWUR13575;AGIWUR31735                                                |    |   |                         |         |                |          |           |                     |
| N2                                                                                            | CT | V | 2893276                 | 2895584 | WBGene00005344 | srh-127  | F37B4.1   | 0.0149754052029527  |
| N2                                                                                            | CT | V | 2896637                 | 2898434 | WBGene00016281 | pals-32  | C31B8.4   | 1.30511761175052    |
| AGIWUR7768;AGIWUR16666;AGIWUR29442                                                            |    |   |                         |         |                |          |           |                     |
| N2                                                                                            | CT | V | 2898436                 | 2899967 | WBGene00006111 | str-46   | C31B8.6   | 0.0696724625361478  |
| N2                                                                                            | CT | V | 2900448                 | 2903355 | WBGene00016282 | C31B8.7  | C31B8.7   | 0.0288809878214646  |
| N2                                                                                            | CT | V | 2905767                 | 2909698 | WBGene00016283 | zmp-3    | C31B8.8   | 0.20880675770719    |
| N2                                                                                            | CT | V | 2911082                 | 2913001 | WBGene00016284 | C31B8.9  | C31B8.9   | -0.138269752334561  |
| N2                                                                                            | CT | V | 2914248                 | 2916172 | WBGene00005362 | srh-146  | C31B8.3   | -0.0188806044143988 |

AGIWUR10530;AGIWUR20427;AGIWUR23935;AGIWUR23968;AGIWUR32765  
N2 CT V 2916523 2918034 WBGene00016280 C31B8.2 C31B8.2 0.00902975159058528  
AGIWUR4147;AGIWUR9281;AGIWUR9646;AGIWUR12282;AGIWUR15923;AGIWUR18521;AGIWUR19038;AGIWUR43160  
N2 CT V 2918830 2920008 WBGene00005630 srj-51 C31B8.10 -0.0269654369066226  
AGIWUR20464;AGIWUR28135;AGIWUR28956;AGIWUR32501;AGIWUR33894  
N2 CT V 2920600 2922694 WBGene00005261 srh-38 C31B8.11 -0.031087152780751  
AGIWUR43647  
N2 CT V 2925193 2927722 WBGene00016285 C31B8.12 C31B8.12 0.184404627404804  
AGIWUR15874  
N2 CT V 2930053 2931170 WBGene00044602 C31B8.16 C31B8.16 0.0454495594616398  
AGIWUR3699;AGIWUR42580  
N2 CT V 2931552 2932988 WBGene00016279 C31B8.1 C31B8.1 0.245864740117317 AGIWUR38619  
N2 CT V 2933143 2934175 WBGene00005453 srh-247 C31B8.13 -0.0370860547114455  
AGIWUR18435  
N2 CT V 2935178 2936199 WBGene00005455 srh-249 C31B8.14 -0.455199610106886  
AGIWUR23607  
N2 CT V 2937311 2938597 WBGene00005888 srw-141 H27D07.2 0.0552213628182372  
AGIWUR4724;AGIWUR39410  
N2 CT V 2939603 2941505 WBGene00005890 srw-143 H27D07.3 0.14221748821914  
AGIWUR2779  
N2 CT V 2942571 2943959 WBGene00005884 srw-137 H27D07.4 0.166616819878173  
AGIWUR8026  
N2 CT V 2944379 2945682 WBGene00005308 srh-87 H27D07.6 0.160387488840311  
AGIWUR13211  
N2 CT V 2946813 2948416 WBGene00005875 srw-128 H27D07.1 -0.209025600438816  
AGIWUR26758  
N2 CT V 2950712 2952202 WBGene00005869 srw-122 H27D07.5 -0.27774539379171  
AGIWUR25472  
N2 CT V 2953193 2954289 WBGene00005873 srw-126 H05B21.1 0.219965529430682  
AGIWUR1897;AGIWUR37067  
N2 CT V 2954404 2955442 WBGene00005454 srh-248 H05B21.2 -0.266058361306692  
AGIWUR39328  
N2 CT V 2957016 2958302 WBGene00005889 srw-142 H05B21.3 0.0993087910210839  
AGIWUR29592  
N2 CT V 2961632 2963060 WBGene00005885 srw-138 C44C3.3 -0.0251547764765547 AGIWUR39049  
N2 CT V 2965422 2966702 WBGene00005863 srw-116 C44C3.10 0.154376450688319  
AGIWUR13677;AGIWUR28717  
N2 CT V 2969349 2971164 WBGene00005307 srh-86 C44C3.4 0.0375826650425433  
AGIWUR9864;AGIWUR24809

|                                    |    |   |         |         |                |          |          |                     |             |
|------------------------------------|----|---|---------|---------|----------------|----------|----------|---------------------|-------------|
| N2                                 | CT | V | 2971949 | 2973485 | WBGene00005876 | srw-129  | C44C3.2  | -0.0367761352957405 | AGIWUR12878 |
| N2                                 | CT | V | 2974029 | 2975385 | WBGene00005870 | srw-123  | C44C3.11 | -0.157314814392207  |             |
| AGIWUR33523                        |    |   |         |         |                |          |          |                     |             |
| N2                                 | CT | V | 2976587 | 2977886 | WBGene00005871 | srw-124  | C44C3.1  | -0.0838542768792712 | AGIWUR15851 |
| N2                                 | CT | V | 2978760 | 2980078 | WBGene00005865 | srw-118  | C44C3.5  | -0.150884979424186  | AGIWUR29350 |
| N2                                 | CT | V | 2982152 | 2983451 | WBGene00005864 | srw-117  | C44C3.6  | 0.00170361057933555 | AGIWUR23329 |
| N2                                 | CT | V | 2984077 | 2985409 | WBGene00005886 | srw-139  | C44C3.7  | -0.0522963971255495 |             |
| AGIWUR23695;AGIWUR44571            |    |   |         |         |                |          |          |                     |             |
| N2                                 | CT | V | 2986192 | 2987507 | WBGene00005306 | srh-85   | C44C3.8  | 0.023784710175315   | AGIWUR31725 |
| N2                                 | CT | V | 2988460 | 2990091 | WBGene00005305 | srh-84   | K12D9.2  | -0.165281021546519  |             |
| AGIWUR2561;AGIWUR25386;AGIWUR32591 |    |   |         |         |                |          |          |                     |             |
| N2                                 | CT | V | 2990313 | 2991585 | WBGene00005868 | srw-121  | K12D9.3  | 0.888560284467665   | AGIWUR8427  |
| N2                                 | CT | V | 2992622 | 2993916 | WBGene00005862 | srw-115  | K12D9.4  | -0.0581952517657198 | AGIWUR18613 |
| N2                                 | CT | V | 2994899 | 2996205 | WBGene00005867 | srw-120  | K12D9.5  | -0.0163726987438038 | AGIWUR28704 |
| N2                                 | CT | V | 2997092 | 2997917 | WBGene00005872 | srw-125  | K12D9.6  | 0.0768787586086823  | AGIWUR18143 |
| N2                                 | CT | V | 2998542 | 2999836 | WBGene00005866 | srw-119  | K12D9.7  | -0.558368747293462  | AGIWUR20695 |
| N2                                 | CT | V | 3000426 | 3002016 | WBGene00005861 | srw-114  | K12D9.8  | -0.0382131888458095 |             |
| AGIWUR11996;AGIWUR30855            |    |   |         |         |                |          |          |                     |             |
| N2                                 | CT | V | 3004141 | 3006064 | WBGene00005859 | srw-112  | K12D9.9  | -0.0654751582394404 | AGIWUR21370 |
| N2                                 | CT | V | 3006728 | 3008123 | WBGene00005878 | srw-131  | K12D9.13 | 0.0808261045632701  |             |
| AGIWUR23697;AGIWUR25350            |    |   |         |         |                |          |          |                     |             |
| N2                                 | CT | V | 3008907 | 3010568 | WBGene00005883 | srw-136  | K12D9.10 | 0.0269698622516348  |             |
| AGIWUR6161                         |    |   |         |         |                |          |          |                     |             |
| N2                                 | CT | V | 3010927 | 3011671 | WBGene00005882 | srw-135  | K12D9.11 | 0.22854525387428    |             |
| AGIWUR15455;AGIWUR35172            |    |   |         |         |                |          |          |                     |             |
| N2                                 | CT | V | 3014485 | 3016034 | WBGene00019675 | K12D9.1  | K12D9.1  | 0.0988924609580444  | AGIWUR7110  |
| N2                                 | CT | V | 3018361 | 3021406 | WBGene00077758 | irld-12  | K12D9.14 | 0.21224826711595    |             |
| AGIWUR16081                        |    |   |         |         |                |          |          |                     |             |
| N2                                 | CT | V | 3024520 | 3027931 | WBGene00019105 | asp-8    | F59D6.3  | 0.0300317448785918  | AGIWUR35580 |
| N2                                 | CT | V | 3028294 | 3029583 | WBGene00019104 | asp-7    | F59D6.2  | 0.0504680415925414  | AGIWUR31111 |
| N2                                 | CT | V | 3029655 | 3032443 | WBGene00019106 | irld-38  | F59D6.4  | -0.132515204569684  | AGIWUR24135 |
| N2                                 | CT | V | 3032578 | 3034336 | WBGene00005755 | srw-8    | F59D6.5  | -0.0856316207895986 | AGIWUR2680  |
| N2                                 | CT | V | 3035130 | 3037689 | WBGene00019107 | irld-10  | F59D6.6  | -0.133376377340023  | AGIWUR22111 |
| N2                                 | CT | V | 3037812 | 3039382 | WBGene00019108 | chpf-2   | F59D6.7  | 0.032576790286285   | AGIWUR34475 |
| N2                                 | CT | V | 3045144 | 3052149 | WBGene00019103 | F59D6.1  | F59D6.1  | -0.223564739557728  | AGIWUR3414  |
| N2                                 | CT | V | 3054553 | 3055667 | WBGene00016855 | C50H11.8 | C50H11.8 | -0.069154523290667  |             |
| AGIWUR27749                        |    |   |         |         |                |          |          |                     |             |
| N2                                 | CT | V | 3057699 | 3059096 | WBGene00006271 | str-244  | C50H11.9 | -0.0827301841060741 |             |
| AGIWUR750                          |    |   |         |         |                |          |          |                     |             |

|                                               |    |   |         |         |                |           |           |                     |
|-----------------------------------------------|----|---|---------|---------|----------------|-----------|-----------|---------------------|
| N2                                            | CT | V | 3059640 | 3062178 | WBGene00016856 | srt-15    | C50H11.10 | 0.0298462261088446  |
| AGIWUR24385                                   |    |   |         |         |                |           |           |                     |
| N2                                            | CT | V | 3063160 | 3064518 | WBGene00016857 | srt-16    | C50H11.11 | 0.126407505156141   |
| AGIWUR21675                                   |    |   |         |         |                |           |           |                     |
| N2                                            | CT | V | 3066228 | 3067497 | WBGene00005400 | srh-185   | C50H11.7  | -0.242148223694145  |
| AGIWUR8079                                    |    |   |         |         |                |           |           |                     |
| N2                                            | CT | V | 3068135 | 3069201 | WBGene00006105 | str-40    | C50H11.12 | 0.0397445899985627  |
| AGIWUR10195                                   |    |   |         |         |                |           |           |                     |
| N2                                            | CT | V | 3069898 | 3071648 | WBGene00016858 | C50H11.13 | C50H11.13 | -0.0549151722501207 |
| AGIWUR5643;AGIWUR9917;AGIWUR18242;AGIWUR24776 |    |   |         |         |                |           |           |                     |
| N2                                            | CT | V | 3075407 | 3077173 | WBGene00016854 | srt-10    | C50H11.6  | -0.0485823096452513 |
| AGIWUR36442                                   |    |   |         |         |                |           |           |                     |
| N2                                            | CT | V | 3078072 | 3079300 | WBGene00016853 | srt-9     | C50H11.5  | 0.0930201923372076  |
| AGIWUR7906                                    |    |   |         |         |                |           |           |                     |
| N2                                            | CT | V | 3079449 | 3080892 | WBGene00016859 | srt-5     | C50H11.14 | 0.0775228833677151  |
| AGIWUR35025                                   |    |   |         |         |                |           |           |                     |
| N2                                            | CT | V | 3081771 | 3083027 | WBGene00016852 | srt-7     | C50H11.4  | 0.0209073759989149  |
| AGIWUR42233                                   |    |   |         |         |                |           |           |                     |
| N2                                            | CT | V | 3083645 | 3085127 | WBGene00016851 | srt-71    | C50H11.3  | -0.0715668325550425 |
| AGIWUR15342;AGIWUR18706                       |    |   |         |         |                |           |           |                     |
| N2                                            | CT | V | 3086560 | 3087986 | WBGene00016850 | srt-8     | C50H11.2  | -0.194755264002812  |
| AGIWUR25845                                   |    |   |         |         |                |           |           |                     |
| N2                                            | CT | V | 3089074 | 3091351 | WBGene00016849 | acs-21    | C50H11.1  | -0.173620545771795  |
| AGIWUR12607;AGIWUR13127;AGIWUR34615           |    |   |         |         |                |           |           |                     |
| N2                                            | CT | V | 3091815 | 3094501 | WBGene00016860 | cyp-33C9  | C50H11.15 | -0.0664221800245013 |
| AGIWUR35734                                   |    |   |         |         |                |           |           |                     |
| N2                                            | CT | V | 3095090 | 3096177 | WBGene00006132 | str-70    | C50H11.16 | 0.0811135602467861  |
| AGIWUR12740;AGIWUR36852                       |    |   |         |         |                |           |           |                     |
| N2                                            | CT | V | 3097130 | 3098688 | WBGene00016861 | C50H11.17 | C50H11.17 | -0.0319039244756922 |
| AGIWUR26203                                   |    |   |         |         |                |           |           |                     |
| N2                                            | CT | V | 3103128 | 3104234 | WBGene00006128 | str-66    | Y73C8C.5  | 0.00328876326097216 |
| AGIWUR21799                                   |    |   |         |         |                |           |           |                     |
| N2                                            | CT | V | 3104790 | 3105910 | WBGene00006131 | str-69    | Y73C8C.11 | -0.128274693019547  |
| AGIWUR16419                                   |    |   |         |         |                |           |           |                     |
| N2                                            | CT | V | 3106228 | 3107550 | WBGene00006130 | str-68    | Y73C8C.6  | 0.0222739219603634  |
| AGIWUR38915                                   |    |   |         |         |                |           |           |                     |
| N2                                            | CT | V | 3107792 | 3109664 | WBGene00022264 | sdz-34    | Y73C8C.7  | -0.0434907285206183 |
| AGIWUR9429                                    |    |   |         |         |                |           |           |                     |
| N2                                            | CT | V | 3110089 | 3113851 | WBGene00022265 | Y73C8C.8  | Y73C8C.8  | -0.0695553677931473 |

|                                                            |    |   |         |         |                |                  |                                 |
|------------------------------------------------------------|----|---|---------|---------|----------------|------------------|---------------------------------|
| AGIWUR8522                                                 |    |   |         |         |                |                  |                                 |
| N2                                                         | CT | V | 3115303 | 3118128 | WBGene00022262 | Y73C8C.3         | Y73C8C.3 0.187815168714052      |
| AGIWUR20824                                                |    |   |         |         |                |                  |                                 |
| N2                                                         | CT | V | 3118377 | 3120323 | WBGene00022261 | clec-210         | Y73C8C.2 -0.366416332686919     |
| AGIWUR326                                                  |    |   |         |         |                |                  |                                 |
| N2                                                         | CT | V | 3122969 | 3124222 | WBGene00006269 | str-242 Y73C8C.1 | 0.0753947768658954              |
| AGIWUR33082;AGIWUR37993                                    |    |   |         |         |                |                  |                                 |
| N2                                                         | CT | V | 3125212 | 3125469 | WBGene00044524 | Y73C8C.12        | Y73C8C.12 -0.0513278709138243   |
| AGIWUR1216;AGIWUR12325;AGIWUR26265;AGIWUR28602;AGIWUR39102 |    |   |         |         |                |                  |                                 |
| N2                                                         | CT | V | 3125566 | 3127770 | WBGene00022267 | Y73C8C.10        | Y73C8C.10 0.0482024476554681    |
| AGIWUR10724;AGIWUR12344;AGIWUR40970                        |    |   |         |         |                |                  |                                 |
| N2                                                         | CT | V | 3129125 | 3133406 | WBGene00017174 | tat-6 F02C9.3    | -0.455632097851939              |
| AGIWUR38702;AGIWUR40033;AGIWUR44141                        |    |   |         |         |                |                  |                                 |
| N2                                                         | CT | V | 3133705 | 3137382 | WBGene00017173 | F02C9.2 F02C9.2  | -0.0442504565191761             |
| AGIWUR2321;AGIWUR4262;AGIWUR29080                          |    |   |         |         |                |                  |                                 |
| N2                                                         | CT | V | 3137431 | 3138588 | WBGene00017175 | ir1d-3 F02C9.4   | 0.259412583568052 AGIWUR39610   |
| N2                                                         | CT | V | 3138703 | 3139090 | WBGene00017172 | F02C9.1 F02C9.1  | 0.100585633815916 AGIWUR34685   |
| N2                                                         | CT | V | 3139931 | 3141290 | WBGene00016475 | srab-9 C36C5.6   | -0.0903589093086525             |
| AGIWUR11504;AGIWUR26115;AGIWUR32463                        |    |   |         |         |                |                  |                                 |
| N2                                                         | CT | V | 3143094 | 3144597 | WBGene00016476 | srab-10 C36C5.7  | -0.104999392823837 AGIWUR23471  |
| N2                                                         | CT | V | 3145203 | 3147032 | WBGene00016477 | srab-11 C36C5.8  | 0.0967543160828246 AGIWUR35579  |
| N2                                                         | CT | V | 3148215 | 3149489 | WBGene00016478 | srt-72 C36C5.9   | -0.494692409300805 AGIWUR19941  |
| N2                                                         | CT | V | 3150488 | 3151962 | WBGene00016479 | srab-6 C36C5.10  | -0.250842933533706              |
| AGIWUR37693                                                |    |   |         |         |                |                  |                                 |
| N2                                                         | CT | V | 3153485 | 3155172 | WBGene00016480 | srab-7 C36C5.11  | 0.31387278455223                |
| AGIWUR42020                                                |    |   |         |         |                |                  |                                 |
| N2                                                         | CT | V | 3157077 | 3157870 | WBGene00016474 | C36C5.5 C36C5.5  | -0.0829703959025778 AGIWUR24051 |
| N2                                                         | CT | V | 3158406 | 3159165 | WBGene00016481 | C36C5.12         | C36C5.12 -0.1902037467057       |
| AGIWUR4426                                                 |    |   |         |         |                |                  |                                 |
| N2                                                         | CT | V | 3166560 | 3167268 | WBGene00016473 | C36C5.4 C36C5.4  | 0.131281988099985 AGIWUR29268   |
| N2                                                         | CT | V | 3167968 | 3168750 | WBGene00016484 | C36C5.15         | C36C5.15 -0.400891475284133     |
| AGIWUR21646                                                |    |   |         |         |                |                  |                                 |
| N2                                                         | CT | V | 3170138 | 3171408 | WBGene00016472 | srbc-6 C36C5.3   | -3.22915168975963 AGIWUR19765   |
| N2                                                         | CT | V | 3176461 | 3177978 | WBGene00016471 | srab-8 C36C5.2   | 0.505944415853278 AGIWUR31318   |
| N2                                                         | CT | V | 3179527 | 3181064 | WBGene00016470 | srab-5 C36C5.1   | -1.02929392271172 AGIWUR38960   |
| N2                                                         | CT | V | 3188350 | 3189841 | WBGene00002246 | lag-2 Y73C8B.4   | -0.101124652965757              |
| AGIWUR4259                                                 |    |   |         |         |                |                  |                                 |
| N2                                                         | CT | V | 3191302 | 3193233 | WBGene00022260 | Y73C8B.3         | Y73C8B.3 -0.133116834569833     |
| AGIWUR26298                                                |    |   |         |         |                |                  |                                 |



|                                                                        |    |   |         |         |                |           |           |                     |
|------------------------------------------------------------------------|----|---|---------|---------|----------------|-----------|-----------|---------------------|
| N2                                                                     | CT | V | 3193394 | 3195002 | WBGene00022259 | Y73C8B.2  | Y73C8B.2  | -0.0813218597896856 |
| AGIWUR43261                                                            |    |   |         |         |                |           |           |                     |
| N2                                                                     | CT | V | 3197268 | 3198333 | WBGene00044525 | Y73C8B.5  | Y73C8B.5  | 0.0738916804079812  |
| AGIWUR5299;AGIWUR26367;AGIWUR32194;AGIWUR34388;AGIWUR40466             |    |   |         |         |                |           |           |                     |
| N2                                                                     | CT | V | 3210189 | 3223218 | WBGene00000168 | apx-1     | K08D9.3   | 0.165050169694382   |
| AGIWUR37888                                                            |    |   |         |         |                |           |           |                     |
| N2                                                                     | CT | V | 3223612 | 3227058 | WBGene00019526 | K08D9.5   | K08D9.5   | 0.051222450885732   |
| AGIWUR6970;AGIWUR8617;AGIWUR19552;AGIWUR20987                          |    |   |         |         |                |           |           |                     |
| N2                                                                     | CT | V | 3227796 | 3230128 | WBGene00019524 | K08D9.2   | K08D9.2   | -0.2506249866388    |
| AGIWUR21368                                                            |    |   |         |         |                |           |           |                     |
| N2                                                                     | CT | V | 3231398 | 3234987 | WBGene00019527 | K08D9.6   | K08D9.6   | -0.0581990829677235 |
| AGIWUR23029                                                            |    |   |         |         |                |           |           |                     |
| N2                                                                     | CT | V | 3236874 | 3240436 | WBGene00006084 | str-16    | Y73C8A.1  | 0.0151025095740174  |
| AGIWUR24411;AGIWUR28177                                                |    |   |         |         |                |           |           |                     |
| N2                                                                     | CT | V | 3241424 | 3242636 | WBGene00005599 | srj-11    | T28A11.12 | 0.136757208055034   |
| AGIWUR41289                                                            |    |   |         |         |                |           |           |                     |
| N2                                                                     | CT | V | 3243287 | 3244495 | WBGene00001771 | gst-23    | T28A11.11 | -0.168899595301071  |
| AGIWUR10803;AGIWUR16486;AGIWUR36289;AGIWUR37107                        |    |   |         |         |                |           |           |                     |
| N2                                                                     | CT | V | 3245003 | 3246722 | WBGene00005595 | srj-7     | T28A11.10 | -0.737571055166471  |
| AGIWUR19781                                                            |    |   |         |         |                |           |           |                     |
| N2                                                                     | CT | V | 3247815 | 3249140 | WBGene00005596 | srj-8     | T28A11.9  | 0.127711980942219   |
| AGIWUR41430                                                            |    |   |         |         |                |           |           |                     |
| N2                                                                     | CT | V | 3249743 | 3250205 | WBGene00020875 | T28A11.13 | T28A11.13 | 0.332706833867363   |
| AGIWUR12351                                                            |    |   |         |         |                |           |           |                     |
| N2                                                                     | CT | V | 3253469 | 3254590 | WBGene00006123 | str-58    | T28A11.8  | 0.0553518230405516  |
| AGIWUR28675;AGIWUR34848                                                |    |   |         |         |                |           |           |                     |
| N2                                                                     | CT | V | 3254602 | 3256151 | WBGene00020877 | srt-63    | T28A11.15 | 0.0390191610897421  |
| AGIWUR20639                                                            |    |   |         |         |                |           |           |                     |
| N2                                                                     | CT | V | 3257577 | 3258289 | WBGene00044526 | T28A11.22 | T28A11.22 | -0.316722018297311  |
| AGIWUR8845;AGIWUR24114;AGIWUR31464;AGIWUR39416                         |    |   |         |         |                |           |           |                     |
| N2                                                                     | CT | V | 3258372 | 3259218 | WBGene00020878 | T28A11.16 | T28A11.16 | -0.298284683090079  |
| AGIWUR33578                                                            |    |   |         |         |                |           |           |                     |
| N2                                                                     | CT | V | 3260375 | 3262082 | WBGene00020874 | srbc-5    | T28A11.7  | -0.0792480554977466 |
| AGIWUR12723                                                            |    |   |         |         |                |           |           |                     |
| N2                                                                     | CT | V | 3262571 | 3263235 | WBGene00020873 | T28A11.6  | T28A11.6  | 0.0596354178982121  |
| AGIWUR7694;AGIWUR29877;AGIWUR32742;AGIWUR38034;AGIWUR40987;AGIWUR44557 |    |   |         |         |                |           |           |                     |
| N2                                                                     | CT | V | 3266828 | 3268050 | WBGene00020880 | T28A11.18 | T28A11.18 | 0.129763452957016   |
| AGIWUR38778                                                            |    |   |         |         |                |           |           |                     |
| N2                                                                     | CT | V | 3268809 | 3269510 | WBGene00020881 | T28A11.19 | T28A11.19 | -0.286362773692237  |
| AGIWUR7073                                                             |    |   |         |         |                |           |           |                     |
| N2                                                                     | CT | V | 3270553 | 3271242 | WBGene00020872 | T28A11.5  | T28A11.5  | -1.22601061865957   |
| AGIWUR18249;AGIWUR35583                                                |    |   |         |         |                |           |           |                     |

|                                                           |    |   |         |         |                |           |           |                      |             |
|-----------------------------------------------------------|----|---|---------|---------|----------------|-----------|-----------|----------------------|-------------|
| N2                                                        | CT | V | 3271395 | 3273256 | WBGene00020882 | T28A11.20 | T28A11.20 | 0.130508086442971    |             |
| AGIWUR17791                                               |    |   |         |         |                |           |           |                      |             |
| N2                                                        | CT | V | 3274054 | 3274374 | WBGene00020871 | T28A11.4  | T28A11.4  | 0.115145656885591    |             |
| AGIWUR24975                                               |    |   |         |         |                |           |           |                      |             |
| N2                                                        | CT | V | 3275333 | 3276110 | WBGene00020870 | T28A11.3  | T28A11.3  | -0.115932941048101   |             |
| AGIWUR35661                                               |    |   |         |         |                |           |           |                      |             |
| N2                                                        | CT | V | 3276956 | 3278147 | WBGene00020883 | fbxa-64   | T28A11.21 | -0.0852759187128509  |             |
| AGIWUR21947                                               |    |   |         |         |                |           |           |                      |             |
| N2                                                        | CT | V | 3280379 | 3281169 | WBGene00020869 | T28A11.2  | T28A11.2  | -0.174433026989375   |             |
| AGIWUR45206                                               |    |   |         |         |                |           |           |                      |             |
| N2                                                        | CT | V | 3281828 | 3282704 | WBGene00269355 | T28A11.25 | T28A11.25 | -0.481129326191146   |             |
| AGIWUR7972                                                |    |   |         |         |                |           |           |                      |             |
| N2                                                        | CT | V | 3283257 | 3284930 | WBGene00006127 | str-64    | T28A11.1  | 0.101613428947407    |             |
| AGIWUR3736;AGIWUR6694                                     |    |   |         |         |                |           |           |                      |             |
| N2                                                        | CT | V | 3286432 | 3287460 | WBGene00018057 | F35F10.7  | F35F10.7  | -0.183208785057457   |             |
| AGIWUR4804                                                |    |   |         |         |                |           |           |                      |             |
| N2                                                        | CT | V | 3287995 | 3289385 | WBGene00018056 | F35F10.6  | F35F10.6  | -0.281476547763859   |             |
| AGIWUR20667                                               |    |   |         |         |                |           |           |                      |             |
| N2                                                        | CT | V | 3289635 | 3293435 | WBGene00018054 | F35F10.4  | F35F10.4  | 0.0727987628915336   |             |
| AGIWUR4521;AGIWUR5943;AGIWUR14466;AGIWUR23650;AGIWUR36797 |    |   |         |         |                |           |           |                      |             |
| N2                                                        | CT | V | 3296108 | 3297864 | WBGene00006013 | srx-122   | F35F10.8  | -0.00257695949187209 |             |
| AGIWUR6060                                                |    |   |         |         |                |           |           |                      |             |
| N2                                                        | CT | V | 3298885 | 3301998 | WBGene00018058 | srbc-1    | F35F10.9  | -0.0634978924062244  |             |
| AGIWUR12295                                               |    |   |         |         |                |           |           |                      |             |
| N2                                                        | CT | V | 3302415 | 3307363 | WBGene00018059 | F35F10.10 | F35F10.10 | 0.156407293512363    |             |
| AGIWUR44417                                               |    |   |         |         |                |           |           |                      |             |
| N2                                                        | CT | V | 3308469 | 3309689 | WBGene00018053 | srbc-3    | F35F10.2  | -0.199507249608565   |             |
| AGIWUR20747                                               |    |   |         |         |                |           |           |                      |             |
| N2                                                        | CT | V | 3310123 | 3312117 | WBGene00018060 | arrd-18   | F35F10.11 | 0.281226540329719    |             |
| AGIWUR34169                                               |    |   |         |         |                |           |           |                      |             |
| N2                                                        | CT | V | 3313286 | 3315516 | WBGene00018061 | arrd-19   | F35F10.12 | 0.076079343925608    |             |
| AGIWUR3862;AGIWUR22827                                    |    |   |         |         |                |           |           |                      |             |
| N2                                                        | CT | V | 3320720 | 3324279 | WBGene00015882 | C17B7.8   | C17B7.8   | 0.17949851910877     | AGIWUR4566  |
| N2                                                        | CT | V | 3330915 | 3332113 | WBGene00015883 | C17B7.9   | C17B7.9   | 0.0210197378214172   | AGIWUR42983 |
| N2                                                        | CT | V | 3333635 | 3339070 | WBGene00015879 | C17B7.5   | C17B7.5   | 0.0506562845391976   | AGIWUR30643 |
| N2                                                        | CT | V | 3339348 | 3340092 | WBGene00015878 | C17B7.4   | C17B7.4   | -0.222488520102496   |             |
| AGIWUR14925;AGIWUR28398                                   |    |   |         |         |                |           |           |                      |             |
| N2                                                        | CT | V | 3340179 | 3342006 | WBGene00015884 | C17B7.10  | C17B7.10  | 0.0133510629856159   |             |
| AGIWUR25791                                               |    |   |         |         |                |           |           |                      |             |

|                                                |    |   |         |         |                |           |           |                      |             |
|------------------------------------------------|----|---|---------|---------|----------------|-----------|-----------|----------------------|-------------|
| N2                                             | CT | V | 3345307 | 3346484 | WBGene00015885 | fbxa-65   | C17B7.11  | 0.00568599066752462  |             |
| AGIWUR19694                                    |    |   |         |         |                |           |           |                      |             |
| N2                                             | CT | V | 3350177 | 3350967 | WBGene00268213 | C17B7.15  | C17B7.15  | -0.136208990665667   |             |
| AGIWUR5840                                     |    |   |         |         |                |           |           |                      |             |
| N2                                             | CT | V | 3354667 | 3355513 | WBGene00015436 | C04E12.6  | C04E12.6  | -0.235170867984367   |             |
| AGIWUR22660                                    |    |   |         |         |                |           |           |                      |             |
| N2                                             | CT | V | 3355848 | 3357193 | WBGene00015437 | scrm-3    | C04E12.7  | 0.127387799349874    |             |
| AGIWUR284;AGIWUR27159;AGIWUR40065              |    |   |         |         |                |           |           |                      |             |
| N2                                             | CT | V | 3358567 | 3361093 | WBGene00015435 | C04E12.5  | C04E12.5  | -0.110172651733306   |             |
| AGIWUR14815                                    |    |   |         |         |                |           |           |                      |             |
| N2                                             | CT | V | 3362775 | 3368340 | WBGene00015434 | C04E12.4  | C04E12.4  |                      |             |
| -0.00823176350660049 AGIWUR40921               |    |   |         |         |                |           |           |                      |             |
| N2                                             | CT | V | 3370942 | 3372773 | WBGene00006012 | srx-121   | C04E12.8  | 0.154709172462771    |             |
| AGIWUR41071                                    |    |   |         |         |                |           |           |                      |             |
| N2                                             | CT | V | 3374362 | 3377073 | WBGene00015438 | srbc-2    | C04E12.9  | 0.100570381886905    |             |
| AGIWUR9314;AGIWUR10084;AGIWUR15107;AGIWUR26825 |    |   |         |         |                |           |           |                      |             |
| N2                                             | CT | V | 3377536 | 3382850 | WBGene00015439 | C04E12.10 | C04E12.10 | -0.221251982531773   |             |
| AGIWUR28568                                    |    |   |         |         |                |           |           |                      |             |
| N2                                             | CT | V | 3385695 | 3388156 | WBGene00015440 | arrd-20   | C04E12.11 | 0.0119487498122126   |             |
| AGIWUR9441                                     |    |   |         |         |                |           |           |                      |             |
| N2                                             | CT | V | 3392111 | 3393296 | WBGene00020619 | T20D4.13  | T20D4.13  | -0.137315383422683   |             |
| AGIWUR32543;AGIWUR44356;AGIWUR44364            |    |   |         |         |                |           |           |                      |             |
| N2                                             | CT | V | 3393478 | 3394688 | WBGene00020620 | T20D4.15  | T20D4.15  | 0.0102218865520403   |             |
| AGIWUR13888;AGIWUR26446;AGIWUR32049            |    |   |         |         |                |           |           |                      |             |
| N2                                             | CT | V | 3395275 | 3395966 | WBGene00020622 | T20D4.17  | T20D4.17  | 0.0428748685076386   |             |
| AGIWUR9905                                     |    |   |         |         |                |           |           |                      |             |
| N2                                             | CT | V | 3397065 | 3397800 | WBGene00020618 | T20D4.12  | T20D4.12  | -0.169528023155825   |             |
| AGIWUR10809                                    |    |   |         |         |                |           |           |                      |             |
| N2                                             | CT | V | 3398690 | 3399640 | WBGene00020617 | T20D4.11  | T20D4.11  | -0.179301603661374   |             |
| AGIWUR32038                                    |    |   |         |         |                |           |           |                      |             |
| N2                                             | CT | V | 3400252 | 3401063 | WBGene00020616 | T20D4.10  | T20D4.10  | -0.0527699179237917  |             |
| AGIWUR23484                                    |    |   |         |         |                |           |           |                      |             |
| N2                                             | CT | V | 3401645 | 3402356 | WBGene00044718 | T20D4.20  | T20D4.20  | 0.032842099868641    |             |
| AGIWUR29094                                    |    |   |         |         |                |           |           |                      |             |
| N2                                             | CT | V | 3405709 | 3407893 | WBGene00020614 | T20D4.8   | T20D4.8   | -0.0122966996642262  | AGIWUR34715 |
| N2                                             | CT | V | 3408912 | 3409519 | WBGene00020613 | T20D4.7   | T20D4.7   | -0.00431703551552687 | AGIWUR41765 |
| N2                                             | CT | V | 3410520 | 3412858 | WBGene00020612 | arrd-22   | T20D4.6   | 0.1123024003093      | AGIWUR24818 |
| N2                                             | CT | V | 3413344 | 3417770 | WBGene00020611 | T20D4.5   | T20D4.5   | 0.173571134509229    |             |
| AGIWUR18362;AGIWUR36984                        |    |   |         |         |                |           |           |                      |             |

|                                                                                  |    |   |         |         |                |          |           |                     |             |
|----------------------------------------------------------------------------------|----|---|---------|---------|----------------|----------|-----------|---------------------|-------------|
| N2                                                                               | CT | V | 3418263 | 3422733 | WBGene00020609 | T20D4.3  | T20D4.3   | 0.197993447421466   |             |
| AGIWUR14715;AGIWUR23453                                                          |    |   |         |         |                |          |           |                     |             |
| N2                                                                               | CT | V | 3422949 | 3424441 | WBGene00020623 | srab-21  | T20D4.18  | -0.456809139043637  |             |
| AGIWUR23103                                                                      |    |   |         |         |                |          |           |                     |             |
| N2                                                                               | CT | V | 3426376 | 3427733 | WBGene00020608 | srab-22  | T20D4.2   | -0.0686251702650296 | AGIWUR42868 |
| N2                                                                               | CT | V | 3428999 | 3430408 | WBGene00020607 | srab-20  | T20D4.1   | 0.146177274813317   | AGIWUR3585  |
| N2                                                                               | CT | V | 3430669 | 3431446 | WBGene00020624 | T20D4.19 | T20D4.19  | -0.0459895448140264 |             |
| AGIWUR15291                                                                      |    |   |         |         |                |          |           |                     |             |
| N2                                                                               | CT | V | 3432259 | 3433658 | WBGene00005597 | srj-9    | T20C4.1   | 0.0486934303817836  | AGIWUR11391 |
| N2                                                                               | CT | V | 3441504 | 3444877 | WBGene00000478 | cfz-2    | F27E11.3  | 0.192372750604859   |             |
| AGIWUR757;AGIWUR7380;AGIWUR10239;AGIWUR15707;AGIWUR27031;AGIWUR28201;AGIWUR30282 |    |   |         |         |                |          |           |                     |             |
| N2                                                                               | CT | V | 3459740 | 3463071 | WBGene00017868 | slc-28.2 | F27E11.2  |                     |             |
| -0.00452894876958254 AGIWUR6289                                                  |    |   |         |         |                |          |           |                     |             |
| N2                                                                               | CT | V | 3463814 | 3466150 | WBGene00017867 | slc-28.1 | F27E11.1  | -0.0327237286331448 |             |
| AGIWUR29163                                                                      |    |   |         |         |                |          |           |                     |             |
| N2                                                                               | CT | V | 3467453 | 3468545 | WBGene00001781 | gst-33   | C02A12.1  | -0.111478068747452  |             |
| AGIWUR37263                                                                      |    |   |         |         |                |          |           |                     |             |
| N2                                                                               | CT | V | 3469445 | 3470882 | WBGene00015315 | srbc-29  | C02A12.2  | 0.19913276714315    |             |
| AGIWUR20182                                                                      |    |   |         |         |                |          |           |                     |             |
| N2                                                                               | CT | V | 3471870 | 3475121 | WBGene00044088 | oac-2    | C02A12.8  | 0.0910358358403736  |             |
| AGIWUR9707;AGIWUR37879                                                           |    |   |         |         |                |          |           |                     |             |
| N2                                                                               | CT | V | 3476405 | 3477596 | WBGene00044089 | srbc-31  | C02A12.9  | -0.055608030529422  |             |
| AGIWUR25970                                                                      |    |   |         |         |                |          |           |                     |             |
| N2                                                                               | CT | V | 3478031 | 3480446 | WBGene00015316 | srbc-30  | C02A12.3  | -0.0813769281668995 |             |
| AGIWUR22138;AGIWUR22731                                                          |    |   |         |         |                |          |           |                     |             |
| N2                                                                               | CT | V | 3481421 | 3482600 | WBGene00003096 | lys-7    | C02A12.4  | -0.0674755280626336 |             |
| AGIWUR21327                                                                      |    |   |         |         |                |          |           |                     |             |
| N2                                                                               | CT | V | 3483091 | 3484781 | WBGene00044090 | srbc-33  | C02A12.10 | -0.100269198017877  |             |
| AGIWUR15981                                                                      |    |   |         |         |                |          |           |                     |             |
| N2                                                                               | CT | V | 3485549 | 3486957 | WBGene00015317 | srbc-32  | C02A12.5  | -0.0642430813251393 |             |
| AGIWUR13444;AGIWUR26033                                                          |    |   |         |         |                |          |           |                     |             |
| N2                                                                               | CT | V | 3489228 | 3490535 | WBGene00015318 | srbc-36  | C02A12.6  | -0.0444011040436045 |             |
| AGIWUR44918                                                                      |    |   |         |         |                |          |           |                     |             |
| N2                                                                               | CT | V | 3491361 | 3492598 | WBGene00015575 | srbc-35  | C07G3.7   | -0.0420154070053247 | AGIWUR14490 |
| N2                                                                               | CT | V | 3493637 | 3496943 | WBGene00269378 | C07G3.15 | C07G3.15  | 0.02160562995806    |             |
| AGIWUR44418                                                                      |    |   |         |         |                |          |           |                     |             |
| N2                                                                               | CT | V | 3502307 | 3503077 | WBGene00015578 | C07G3.10 | C07G3.10  | 0.121061109491974   |             |
| AGIWUR38399                                                                      |    |   |         |         |                |          |           |                     |             |
| N2                                                                               | CT | V | 3503130 | 3506352 | WBGene00015577 | ugt-64   | C07G3.9   | 0.0504444251169875  |             |

AGIWUR4206;AGIWUR16194;AGIWUR27047

|    |    |   |         |         |                |         |          |                     |             |
|----|----|---|---------|---------|----------------|---------|----------|---------------------|-------------|
| N2 | CT | V | 3507822 | 3509251 | WBGene00006256 | str-225 | C07G3.6  | 0.127891958980593   | AGIWUR1173  |
| N2 | CT | V | 3510178 | 3512038 | WBGene00006259 | str-228 | C07G3.5  | -0.0251275948837293 | AGIWUR27547 |
| N2 | CT | V | 3512681 | 3514343 | WBGene00006257 | str-226 | C07G3.4  | -0.194152136198719  | AGIWUR29424 |
| N2 | CT | V | 3518189 | 3519801 | WBGene00006258 | str-227 | C07G3.3  | -0.321174879138564  | AGIWUR20857 |
| N2 | CT | V | 3522496 | 3523373 | WBGene00044119 | srh-191 | C07G3.11 | -0.241247420177409  |             |

AGIWUR3466;AGIWUR20550

|    |    |   |         |         |                |       |         |                   |  |
|----|----|---|---------|---------|----------------|-------|---------|-------------------|--|
| N2 | CT | V | 3523587 | 3524575 | WBGene00015574 | irg-1 | C07G3.2 | 0.624209662042031 |  |
|----|----|---|---------|---------|----------------|-------|---------|-------------------|--|

AGIWUR3896;AGIWUR15501;AGIWUR26755;AGIWUR27297;AGIWUR35590;AGIWUR39514

|    |    |   |         |         |                |         |         |                     |             |
|----|----|---|---------|---------|----------------|---------|---------|---------------------|-------------|
| N2 | CT | V | 3525274 | 3526178 | WBGene00020747 | T24A6.7 | T24A6.7 | 0.213012873444283   | AGIWUR2091  |
| N2 | CT | V | 3527182 | 3530413 | WBGene00006286 | str-260 | T24A6.6 | 0.00356521739408411 | AGIWUR17196 |
| N2 | CT | V | 3530703 | 3532380 | WBGene00020746 | srbc-66 | T24A6.5 | -0.0931564015373763 | AGIWUR11780 |
| N2 | CT | V | 3533003 | 3535235 | WBGene00020748 | nhr-221 | T24A6.8 | -0.1254230093083    | AGIWUR27511 |
| N2 | CT | V | 3536196 | 3538407 | WBGene00003683 | nhr-93  | T24A6.9 | -0.0528269273623772 |             |

AGIWUR14893;AGIWUR35485

|    |    |   |         |         |                |         |          |                   |  |
|----|----|---|---------|---------|----------------|---------|----------|-------------------|--|
| N2 | CT | V | 3538929 | 3540329 | WBGene00020749 | srbc-67 | T24A6.10 | -0.16196326796615 |  |
|----|----|---|---------|---------|----------------|---------|----------|-------------------|--|

AGIWUR29858

|    |    |   |         |         |                |         |          |                      |  |
|----|----|---|---------|---------|----------------|---------|----------|----------------------|--|
| N2 | CT | V | 3541586 | 3543444 | WBGene00020750 | nhr-222 | T24A6.11 | -0.00406740242145354 |  |
|----|----|---|---------|---------|----------------|---------|----------|----------------------|--|

AGIWUR45167

|    |    |   |         |         |                |         |          |                    |  |
|----|----|---|---------|---------|----------------|---------|----------|--------------------|--|
| N2 | CT | V | 3544081 | 3544969 | WBGene00020751 | srbc-69 | T24A6.12 | 0.0695205852654865 |  |
|----|----|---|---------|---------|----------------|---------|----------|--------------------|--|

AGIWUR18305

|    |    |   |         |         |                |         |          |                     |  |
|----|----|---|---------|---------|----------------|---------|----------|---------------------|--|
| N2 | CT | V | 3545677 | 3546617 | WBGene00020752 | srbc-68 | T24A6.13 | -0.0399507507771721 |  |
|----|----|---|---------|---------|----------------|---------|----------|---------------------|--|

AGIWUR22134

|    |    |   |         |         |                |         |          |                    |  |
|----|----|---|---------|---------|----------------|---------|----------|--------------------|--|
| N2 | CT | V | 3546969 | 3549685 | WBGene00005877 | srw-130 | T24A6.14 | 0.0737135223009684 |  |
|----|----|---|---------|---------|----------------|---------|----------|--------------------|--|

AGIWUR40579

|    |    |   |         |         |                |        |         |                   |             |
|----|----|---|---------|---------|----------------|--------|---------|-------------------|-------------|
| N2 | CT | V | 3549853 | 3551269 | WBGene00005533 | sri-21 | T24A6.4 | -0.16525282750445 | AGIWUR24721 |
|----|----|---|---------|---------|----------------|--------|---------|-------------------|-------------|

|    |    |   |         |         |                |        |          |                   |  |
|----|----|---|---------|---------|----------------|--------|----------|-------------------|--|
| N2 | CT | V | 3551346 | 3551865 | WBGene00001737 | gr1-28 | T24A6.15 | -0.18361959150895 |  |
|----|----|---|---------|---------|----------------|--------|----------|-------------------|--|

AGIWUR25251

|    |    |   |         |         |                |          |          |                   |  |
|----|----|---|---------|---------|----------------|----------|----------|-------------------|--|
| N2 | CT | V | 3553134 | 3554568 | WBGene00020756 | T24A6.20 | T24A6.20 | 0.132762625242565 |  |
|----|----|---|---------|---------|----------------|----------|----------|-------------------|--|

AGIWUR993;AGIWUR6754;AGIWUR17149;AGIWUR29084

|    |    |   |         |         |                |        |          |                     |  |
|----|----|---|---------|---------|----------------|--------|----------|---------------------|--|
| N2 | CT | V | 3554611 | 3555236 | WBGene00001738 | gr1-29 | T24A6.18 | -0.0475472909932977 |  |
|----|----|---|---------|---------|----------------|--------|----------|---------------------|--|

AGIWUR36854

|    |    |   |         |         |                |        |         |                    |  |
|----|----|---|---------|---------|----------------|--------|---------|--------------------|--|
| N2 | CT | V | 3556286 | 3556804 | WBGene00001739 | gr1-30 | T24A6.3 | 0.0342905913724465 |  |
|----|----|---|---------|---------|----------------|--------|---------|--------------------|--|

AGIWUR11277;AGIWUR13308;AGIWUR16687;AGIWUR26402;AGIWUR30986;AGIWUR32654;AGIWUR40692;AGIWUR44446

|    |    |   |         |         |                |        |          |                    |  |
|----|----|---|---------|---------|----------------|--------|----------|--------------------|--|
| N2 | CT | V | 3557206 | 3557778 | WBGene00020755 | gr1-31 | T24A6.19 | 0.0755557031422303 |  |
|----|----|---|---------|---------|----------------|--------|----------|--------------------|--|

AGIWUR44762

|    |    |   |         |         |                |        |         |                   |             |
|----|----|---|---------|---------|----------------|--------|---------|-------------------|-------------|
| N2 | CT | V | 3575055 | 3575874 | WBGene00001736 | gr1-27 | F40C5.3 | 0.612472969891663 | AGIWUR25823 |
|----|----|---|---------|---------|----------------|--------|---------|-------------------|-------------|

|    |    |   |         |         |                |         |         |                   |  |
|----|----|---|---------|---------|----------------|---------|---------|-------------------|--|
| N2 | CT | V | 3579023 | 3585042 | WBGene00020696 | T22F3.3 | T22F3.3 | 0.111245322671088 |  |
|----|----|---|---------|---------|----------------|---------|---------|-------------------|--|

AGIWUR8623;AGIWUR10935

|                                                                                    |    |   |         |         |                |           |           |                      |             |
|------------------------------------------------------------------------------------|----|---|---------|---------|----------------|-----------|-----------|----------------------|-------------|
| N2                                                                                 | CT | V | 3585313 | 3586064 | WBGene00004422 | rp1-11.1  | T22F3.4   | -0.126868911329399   |             |
| AGIWUR6406;AGIWUR22697;AGIWUR26264                                                 |    |   |         |         |                |           |           |                      |             |
| N2                                                                                 | CT | V | 3586639 | 3589015 | WBGene00020695 | T22F3.2   | T22F3.2   | 0.197095669973988    | AGIWUR7830  |
| N2                                                                                 | CT | V | 3589029 | 3592199 | WBGene00044705 | T22F3.12  | T22F3.12  | -0.148836975021922   |             |
| AGIWUR15774;AGIWUR32295                                                            |    |   |         |         |                |           |           |                      |             |
| N2                                                                                 | CT | V | 3592768 | 3594973 | WBGene00005423 | srh-213   | T22F3.5   | -0.270162161315939   | AGIWUR3939  |
| N2                                                                                 | CT | V | 3595191 | 3597152 | WBGene00005422 | srh-212   | T22F3.6   | -0.187698484966679   | AGIWUR13236 |
| N2                                                                                 | CT | V | 3597753 | 3601021 | WBGene00020697 | T22F3.7   | T22F3.7   | -0.319168076536406   | AGIWUR44509 |
| N2                                                                                 | CT | V | 3602052 | 3605425 | WBGene00020698 | T22F3.8   | T22F3.8   | 0.104757119551236    | AGIWUR21890 |
| N2                                                                                 | CT | V | 3606818 | 3610927 | WBGene00020699 | T22F3.10  | T22F3.10  |                      |             |
| -0.00829203110065713 AGIWUR38785                                                   |    |   |         |         |                |           |           |                      |             |
| N2                                                                                 | CT | V | 3612173 | 3614551 | WBGene00020700 | T22F3.11  | T22F3.11  | 0.444333741797126    |             |
| AGIWUR707;AGIWUR22769                                                              |    |   |         |         |                |           |           |                      |             |
| N2                                                                                 | CT | V | 3622382 | 3623698 | WBGene00005985 | srx-94    | F59B1.5   | -0.45330340172894    | AGIWUR22337 |
| N2                                                                                 | CT | V | 3625022 | 3627044 | WBGene00019098 | F59B1.4   | F59B1.4   | -0.18169830407272    | AGIWUR36888 |
| N2                                                                                 | CT | V | 3629473 | 3631691 | WBGene00019099 | F59B1.6   | F59B1.6   | -1.22047160431137    | AGIWUR21295 |
| N2                                                                                 | CT | V | 3633341 | 3634683 | WBGene00019097 | F59B1.2   | F59B1.2   | -0.0365963725446061  |             |
| AGIWUR6873;AGIWUR19168;AGIWUR41274;AGIWUR41970;AGIWUR43406                         |    |   |         |         |                |           |           |                      |             |
| N2                                                                                 | CT | V | 3634688 | 3637173 | WBGene00005932 | srx-41    | F59B1.7   | 0.035973882170067    | AGIWUR40658 |
| N2                                                                                 | CT | V | 3641858 | 3644243 | WBGene00019100 | F59B1.8   | F59B1.8   | -0.101685071262727   | AGIWUR25579 |
| N2                                                                                 | CT | V | 3644745 | 3647954 | WBGene00019101 | F59B1.10  | F59B1.10  | -0.210217259842214   |             |
| AGIWUR11522                                                                        |    |   |         |         |                |           |           |                      |             |
| N2                                                                                 | CT | V | 3649773 | 3651457 | WBGene00006165 | str-114   | F59B1.1   | 0.0763371837296498   | AGIWUR26857 |
| N2                                                                                 | CT | V | 3651686 | 3659499 | WBGene00000062 | acr-23    | F59B1.9   | -0.0747058633899282  | AGIWUR24298 |
| N2                                                                                 | CT | V | 3664871 | 3666987 | WBGene00006164 | str-113   | Y39H10B.1 | -0.00263935583551334 |             |
| AGIWUR42664                                                                        |    |   |         |         |                |           |           |                      |             |
| N2                                                                                 | CT | V | 3668728 | 3670631 | WBGene00044527 | Y39H10B.2 | Y39H10B.2 | -0.119750701821348   |             |
| AGIWUR1568;AGIWUR10702                                                             |    |   |         |         |                |           |           |                      |             |
| N2                                                                                 | CT | V | 3673380 | 3676632 | WBGene00021081 | pals-33   | W08A12.4  | 1.76105013662323     |             |
| AGIWUR25982                                                                        |    |   |         |         |                |           |           |                      |             |
| N2                                                                                 | CT | V | 3682853 | 3686474 | WBGene00021080 | W08A12.3  | W08A12.3  | -0.207758167998685   |             |
| AGIWUR23717                                                                        |    |   |         |         |                |           |           |                      |             |
| N2                                                                                 | CT | V | 3687110 | 3701864 | WBGene00021078 | unc-132   | W08A12.1  | 0.543408967832956    |             |
| AGIWUR10957                                                                        |    |   |         |         |                |           |           |                      |             |
| N2                                                                                 | CT | V | 3704988 | 3712796 | WBGene00003025 | lin-40    | T27C4.4   | 0.205256837376053    |             |
| AGIWUR6346;AGIWUR11359;AGIWUR19273;AGIWUR20650;AGIWUR24147;AGIWUR30880;AGIWUR43792 |    |   |         |         |                |           |           |                      |             |
| N2                                                                                 | CT | V | 3712779 | 3715969 | WBGene00020854 | T27C4.1   | T27C4.1   | -0.0788033301007962  |             |
| AGIWUR5398;AGIWUR38936;AGIWUR42805;AGIWUR44078                                     |    |   |         |         |                |           |           |                      |             |
| N2                                                                                 | CT | V | 3725072 | 3726775 | WBGene00006096 | str-30    | T27C4.3   | 0.180883151925623    | AGIWUR43466 |

|                                                            |    |   |         |         |                |           |           |                      |             |
|------------------------------------------------------------|----|---|---------|---------|----------------|-----------|-----------|----------------------|-------------|
| N2                                                         | CT | V | 3727482 | 3739398 | WBGene00020855 | hpo-36    | T27C4.2   | 0.0879603085914891   |             |
| AGIWUR10356;AGIWUR40347;AGIWUR42612                        |    |   |         |         |                |           |           |                      |             |
| N2                                                         | CT | V | 3743576 | 3749401 | WBGene00003479 | mtm-9     | Y39H10A.3 | 0.0664120283126586   |             |
| AGIWUR25442;AGIWUR36850;AGIWUR39616                        |    |   |         |         |                |           |           |                      |             |
| N2                                                         | CT | V | 3749494 | 3757074 | WBGene00021482 | Y39H10A.6 | Y39H10A.6 | -0.171144575686235   |             |
| AGIWUR15606                                                |    |   |         |         |                |           |           |                      |             |
| N2                                                         | CT | V | 3757047 | 3759469 | WBGene00000498 | chk-1     | Y39H10A.7 | -0.0895070153002457  |             |
| AGIWUR1558;AGIWUR23006;AGIWUR31592;AGIWUR32015;AGIWUR42878 |    |   |         |         |                |           |           |                      |             |
| N2                                                         | CT | V | 3761139 | 3766306 | WBGene00021479 | oac-55    | Y39H10A.2 | -0.00477684530211064 |             |
| AGIWUR21286                                                |    |   |         |         |                |           |           |                      |             |
| N2                                                         | CT | V | 3767204 | 3767734 | WBGene00021478 | Y39H10A.1 | Y39H10A.1 | -0.0925711635962214  |             |
| AGIWUR30517                                                |    |   |         |         |                |           |           |                      |             |
| N2                                                         | CT | V | 3768570 | 3769776 | WBGene00019964 | R08E5.4   | R08E5.4   | -0.997661128780575   | AGIWUR19614 |
| N2                                                         | CT | V | 3769801 | 3771518 | WBGene00019961 | R08E5.1   | R08E5.1   | 0.258532979288765    |             |
| AGIWUR22836;AGIWUR35303;AGIWUR37563                        |    |   |         |         |                |           |           |                      |             |
| N2                                                         | CT | V | 3772021 | 3775546 | WBGene00019963 | R08E5.3   | R08E5.3   | 0.335811844294307    | AGIWUR19259 |
| N2                                                         | CT | V | 3774533 | 3776136 | WBGene00019962 | cys1-3    | R08E5.2   | -0.191113999095295   |             |
| AGIWUR7833;AGIWUR18152;AGIWUR20551;AGIWUR20799             |    |   |         |         |                |           |           |                      |             |
| N2                                                         | CT | V | 3777553 | 3784213 | WBGene00019965 | R08F11.1  | R08F11.1  | -0.133018130732372   |             |
| AGIWUR4405                                                 |    |   |         |         |                |           |           |                      |             |
| N2                                                         | CT | V | 3790133 | 3793766 | WBGene00019970 | R08F11.7  | R08F11.7  | -0.228378309283402   |             |
| AGIWUR24390                                                |    |   |         |         |                |           |           |                      |             |
| N2                                                         | CT | V | 3794733 | 3798587 | WBGene00019969 | fpn-1.3   | R08F11.6  | 0.182388340316654    |             |
| AGIWUR18782                                                |    |   |         |         |                |           |           |                      |             |
| N2                                                         | CT | V | 3798605 | 3800478 | WBGene00019966 | srt-30    | R08F11.2  | -0.0849649097475123  |             |
| AGIWUR24318                                                |    |   |         |         |                |           |           |                      |             |
| N2                                                         | CT | V | 3800782 | 3803531 | WBGene00019967 | cyp-33C8  | R08F11.3  | 0.286803641694641    |             |
| AGIWUR2301                                                 |    |   |         |         |                |           |           |                      |             |
| N2                                                         | CT | V | 3803845 | 3805531 | WBGene00019968 | R08F11.4  | R08F11.4  | 0.193064666740289    |             |
| AGIWUR3076                                                 |    |   |         |         |                |           |           |                      |             |
| N2                                                         | CT | V | 3806261 | 3807752 | WBGene00005754 | srw-7     | R08F11.5  | 0.102187173146037    |             |
| AGIWUR27147                                                |    |   |         |         |                |           |           |                      |             |
| N2                                                         | CT | V | 3808636 | 3810708 | WBGene00005753 | srw-6     | H10D18.3  | -0.141734621555905   |             |
| AGIWUR12194                                                |    |   |         |         |                |           |           |                      |             |
| N2                                                         | CT | V | 3810786 | 3811634 | WBGene00019179 | sc1-13    | H10D18.4  | 0.134848520658259    |             |
| AGIWUR5987                                                 |    |   |         |         |                |           |           |                      |             |
| N2                                                         | CT | V | 3812596 | 3813363 | WBGene00019178 | sc1-12    | H10D18.2  | 0.159700215638619    |             |
| AGIWUR34033                                                |    |   |         |         |                |           |           |                      |             |
| N2                                                         | CT | V | 3813737 | 3831659 | WBGene00019180 | H10D18.5  | H10D18.5  |                      |             |

|                                              |                                                                        |
|----------------------------------------------|------------------------------------------------------------------------|
| -0.00307702475745453                         | AGIWUR1798;AGIWUR17439;AGIWUR39972;AGIWUR40273;AGIWUR42309;AGIWUR43558 |
| N2 CT V 3841859 3844007 WBGene00018543       | ugt-32 F47C10.6 0.0102776814787191                                     |
| AGIWUR43683                                  |                                                                        |
| N2 CT V 3844645 3847151 WBGene00018539       | nhr-185 F47C10.1 -0.806106521011329                                    |
| AGIWUR24112                                  |                                                                        |
| N2 CT V 3850127 3851796 WBGene00018540       | btb-21 F47C10.2 0.214850165065933                                      |
| AGIWUR37295                                  |                                                                        |
| N2 CT V 3852286 3854947 WBGene00018541       | nhr-186 F47C10.3 -0.186981163263731                                    |
| AGIWUR37709                                  |                                                                        |
| N2 CT V 3856329 3857861 WBGene00018544       | nhr-188 F47C10.7 -0.33043163849217                                     |
| AGIWUR32751                                  |                                                                        |
| N2 CT V 3858461 3860243 WBGene00018545       | nhr-189 F47C10.8 -0.132532283831742                                    |
| AGIWUR23666                                  |                                                                        |
| N2 CT V 3861089 3862933 WBGene00018542       | nhr-187 F47C10.4 0.00266206450109596                                   |
| AGIWUR31141                                  |                                                                        |
| N2 CT V 3866556 3869005 WBGene00015900       | nhr-157 C17E7.5 0.0894681174189813 AGIWUR31162                         |
| N2 CT V 3871174 3873216 WBGene00015901       | nhr-158 C17E7.6 0.02206679256272 AGIWUR18937                           |
| N2 CT V 3875245 3878382 WBGene00015902       | nhr-159 C17E7.7 0.280374381785458 AGIWUR34504                          |
| N2 CT V 3880798 3886204 WBGene00003714       | nhr-124 C17E7.8 -0.0510314716502549 AGIWUR12597                        |
| N2 CT V 3887750 3889286 WBGene00015906       | C17E7.13 C17E7.13 -0.171199512632257                                   |
| AGIWUR26604                                  |                                                                        |
| N2 CT V 3889287 3890861 WBGene00015903       | C17E7.9 C17E7.9 -0.138210868072047 AGIWUR10808                         |
| N2 CT V 3890968 3892026 WBGene00015905       | C17E7.12 C17E7.12 -0.0522055303471589                                  |
| AGIWUR20122                                  |                                                                        |
| N2 CT V 3892856 3894573 WBGene00015899       | C17E7.4 C17E7.4 -0.139252404792542 AGIWUR36235                         |
| N2 CT V 3894961 3898208 WBGene00015898       | sre-9 C17E7.3 -0.152504115029483                                       |
| AGIWUR1726;AGIWUR23776;AGIWUR40013           |                                                                        |
| N2 CT V 3898800 3900202 WBGene00015904       | irld-22 C17E7.10 0.0867975697624601                                    |
| AGIWUR29385                                  |                                                                        |
| N2 CT V 3900497 3902558 WBGene00006260       | str-229 C17E7.11 0.26999005027166                                      |
| AGIWUR39812                                  |                                                                        |
| N2 CT V 3903107 3904545 WBGene00005404       | srh-190 C17E7.2 -0.0328106957457184 AGIWUR3000                         |
| N2 CT V 3906141 3908435 WBGene00015897       | nhr-156 C17E7.1 -0.167016644404952                                     |
| AGIWUR558;AGIWUR5994;AGIWUR33341;AGIWUR41453 |                                                                        |
| N2 CT V 3909098 3910945 WBGene00005952       | srx-61 T20C7.1 0.224668295590389 AGIWUR14959                           |
| N2 CT V 3912772 3914597 WBGene00005959       | srx-68 K07C6.11 -0.0573342980438145                                    |
| AGIWUR25156                                  |                                                                        |
| N2 CT V 3916839 3918446 WBGene00005958       | srx-67 K07C6.10 0.0485111762172847                                     |
| AGIWUR12123                                  |                                                                        |



|                                                                                   |    |   |         |         |                |           |          |                     |             |
|-----------------------------------------------------------------------------------|----|---|---------|---------|----------------|-----------|----------|---------------------|-------------|
| N2                                                                                | CT | V | 3919589 | 3920825 | WBGene00005957 | srx-66    | K07C6.9  | 0.0428322834553665  | AGIWUR27346 |
| N2                                                                                | CT | V | 3921935 | 3922964 | WBGene00005956 | srx-65    | K07C6.8  | 0.222531186165162   | AGIWUR41357 |
| N2                                                                                | CT | V | 3923376 | 3926642 | WBGene00005960 | srx-69    | K07C6.13 | 0.0714542349595373  |             |
| AGIWUR20121                                                                       |    |   |         |         |                |           |          |                     |             |
| N2                                                                                | CT | V | 3929399 | 3930678 | WBGene00005955 | srx-64    | K07C6.7  | -0.0116972057652731 | AGIWUR27079 |
| N2                                                                                | CT | V | 3931626 | 3933394 | WBGene00005954 | srx-63    | K07C6.6  | -0.033589414454295  |             |
| AGIWUR24551;AGIWUR26628                                                           |    |   |         |         |                |           |          |                     |             |
| N2                                                                                | CT | V | 3933960 | 3934950 | WBGene00005961 | srx-70    | K07C6.15 | -0.0777237170129603 |             |
| AGIWUR30774;AGIWUR36074                                                           |    |   |         |         |                |           |          |                     |             |
| N2                                                                                | CT | V | 3936326 | 3938496 | WBGene00019473 | cyp-35A5  | K07C6.5  | 0.0777240015274296  |             |
| AGIWUR1573;AGIWUR21781;AGIWUR22277;AGIWUR42606                                    |    |   |         |         |                |           |          |                     |             |
| N2                                                                                | CT | V | 3939032 | 3941235 | WBGene00019472 | cyp-35B1  | K07C6.4  | -0.301717650505754  |             |
| AGIWUR32263                                                                       |    |   |         |         |                |           |          |                     |             |
| N2                                                                                | CT | V | 3942215 | 3944457 | WBGene00019471 | cyp-35B2  | K07C6.3  | -0.290063742620707  |             |
| AGIWUR11302                                                                       |    |   |         |         |                |           |          |                     |             |
| N2                                                                                | CT | V | 3945353 | 3947044 | WBGene00019470 | cyp-35B3  | K07C6.2  | 0.218418588542606   |             |
| AGIWUR44312                                                                       |    |   |         |         |                |           |          |                     |             |
| N2                                                                                | CT | V | 3947365 | 3948952 | WBGene00019469 | srz-89    | K07C6.1  | -0.0436210084130408 | AGIWUR17566 |
| N2                                                                                | CT | V | 3950027 | 3952097 | WBGene00020386 | cyp-34A4  | T09H2.1  | -0.0976640823042381 |             |
| AGIWUR16851                                                                       |    |   |         |         |                |           |          |                     |             |
| N2                                                                                | CT | V | 3954039 | 3955460 | WBGene00006274 | str-247   | B0213.9  | 0.00737499836758371 |             |
| AGIWUR29066;AGIWUR30225;AGIWUR30460                                               |    |   |         |         |                |           |          |                     |             |
| N2                                                                                | CT | V | 3955766 | 3957715 | WBGene00015040 | cyp-34A5  | B0213.10 | -0.0572078014147497 |             |
| AGIWUR2873;AGIWUR4685;AGIWUR10311;AGIWUR11935;AGIWUR17491;AGIWUR28198;AGIWUR39604 |    |   |         |         |                |           |          |                     |             |
| N2                                                                                | CT | V | 3958160 | 3961358 | WBGene00015041 | cyp-34A6  | B0213.11 | -0.320712130547218  |             |
| AGIWUR10465                                                                       |    |   |         |         |                |           |          |                     |             |
| N2                                                                                | CT | V | 3961760 | 3963815 | WBGene00015042 | cyp-34A7  | B0213.12 | -0.13937621560954   |             |
| AGIWUR36195                                                                       |    |   |         |         |                |           |          |                     |             |
| N2                                                                                | CT | V | 3964779 | 3967880 | WBGene00015043 | cyp-34A8  | B0213.14 | -0.0939008584745906 |             |
| AGIWUR14373                                                                       |    |   |         |         |                |           |          |                     |             |
| N2                                                                                | CT | V | 3968134 | 3970514 | WBGene00015044 | cyp-34A9  | B0213.15 | -0.136218571297798  |             |
| AGIWUR2584;AGIWUR10028;AGIWUR10829;AGIWUR16241;AGIWUR18901;AGIWUR23794            |    |   |         |         |                |           |          |                     |             |
| N2                                                                                | CT | V | 3970712 | 3973001 | WBGene00015045 | cyp-34A10 | B0213.16 | 0.14083805561941    |             |
| AGIWUR35138                                                                       |    |   |         |         |                |           |          |                     |             |
| N2                                                                                | CT | V | 3974661 | 3976264 | WBGene00006141 | str-82    | B0213.8  | 0.191858932489251   | AGIWUR36544 |
| N2                                                                                | CT | V | 3977264 | 3978811 | WBGene00006142 | str-83    | B0213.7  | 0.0197804964996351  | AGIWUR26623 |
| N2                                                                                | CT | V | 3978836 | 3979134 | WBGene00015046 | nlp-34    | B0213.17 | -0.475745034060935  |             |
| AGIWUR5401                                                                        |    |   |         |         |                |           |          |                     |             |
| N2                                                                                | CT | V | 3980055 | 3980622 | WBGene00003769 | nlp-31    | B0213.6  | 0.0926429115374301  | AGIWUR18556 |

|                                                                                                                      |    |   |         |         |                |          |          |                     |             |
|----------------------------------------------------------------------------------------------------------------------|----|---|---------|---------|----------------|----------|----------|---------------------|-------------|
| N2                                                                                                                   | CT | V | 3981980 | 3982741 | WBGene00003768 | nlp-30   | B0213.5  | -0.0326078394393967 | AGIWUR27472 |
| N2                                                                                                                   | CT | V | 3984413 | 3984847 | WBGene00003767 | nlp-29   | B0213.4  | -0.083924487966696  |             |
| AGIWUR3874;AGIWUR24246;AGIWUR25364;AGIWUR35635;AGIWUR36359                                                           |    |   |         |         |                |          |          |                     |             |
| N2                                                                                                                   | CT | V | 3987900 | 3988312 | WBGene00003766 | nlp-28   | B0213.3  | -0.394516166770392  |             |
| AGIWUR1823;AGIWUR3034;AGIWUR3079;AGIWUR11292;AGIWUR12737;AGIWUR20737;AGIWUR31288;AGIWUR32617;AGIWUR33370;AGIWUR33926 |    |   |         |         |                |          |          |                     |             |
| N2                                                                                                                   | CT | V | 3989377 | 3989770 | WBGene00003765 | nlp-27   | B0213.2  | -0.0575225441003866 |             |
| AGIWUR23726;AGIWUR25464                                                                                              |    |   |         |         |                |          |          |                     |             |
| N2                                                                                                                   | CT | V | 3992655 | 3994180 | WBGene00019567 | K09D9.9  | K09D9.9  | 0.117960913995898   | AGIWUR20835 |
| N2                                                                                                                   | CT | V | 3994780 | 3995938 | WBGene00005953 | srx-62   | K09D9.10 | -0.255682813242723  |             |
| AGIWUR14251                                                                                                          |    |   |         |         |                |          |          |                     |             |
| N2                                                                                                                   | CT | V | 3997124 | 4001465 | WBGene00019568 | K09D9.11 | K09D9.11 | 0.0931597408718829  |             |
| AGIWUR4967                                                                                                           |    |   |         |         |                |          |          |                     |             |
| N2                                                                                                                   | CT | V | 4002327 | 4004309 | WBGene00019569 | K09D9.12 | K09D9.12 | -0.149260512557635  |             |
| AGIWUR11640                                                                                                          |    |   |         |         |                |          |          |                     |             |
| N2                                                                                                                   | CT | V | 4005567 | 4007517 | WBGene00005234 | srh-8    | K09D9.8  | 0.129999673729552   | AGIWUR42726 |
| N2                                                                                                                   | CT | V | 4008227 | 4009818 | WBGene00005233 | srh-7    | K09D9.7  | 0.182210741341438   | AGIWUR28976 |
| N2                                                                                                                   | CT | V | 4010470 | 4011966 | WBGene00005230 | srh-4    | K09D9.6  | 0.397897356447761   | AGIWUR42420 |
| N2                                                                                                                   | CT | V | 4013021 | 4014628 | WBGene00006107 | str-42   | K09D9.5  | 0.0661067101346249  |             |
| AGIWUR22127;AGIWUR24418                                                                                              |    |   |         |         |                |          |          |                     |             |
| N2                                                                                                                   | CT | V | 4015587 | 4016938 | WBGene00005232 | srh-6    | K09D9.4  | 0.0428425510445321  |             |
| AGIWUR28540;AGIWUR41631                                                                                              |    |   |         |         |                |          |          |                     |             |
| N2                                                                                                                   | CT | V | 4017080 | 4019026 | WBGene00005836 | srw-89   | K09D9.13 | 0.110919503983493   |             |
| AGIWUR9432                                                                                                           |    |   |         |         |                |          |          |                     |             |
| N2                                                                                                                   | CT | V | 4019488 | 4020601 | WBGene00019566 | K09D9.3  | K09D9.3  | 0.0472457742796832  | AGIWUR17366 |
| N2                                                                                                                   | CT | V | 4022609 | 4024475 | WBGene00019565 | cyp-35A3 | K09D9.2  | -0.0299966305003685 |             |
| AGIWUR21092;AGIWUR23742;AGIWUR29860;AGIWUR40665                                                                      |    |   |         |         |                |          |          |                     |             |
| N2                                                                                                                   | CT | V | 4025091 | 4026212 | WBGene00019564 | K09D9.1  | K09D9.1  | 0.208902045470589   | AGIWUR30594 |
| N2                                                                                                                   | CT | V | 4031619 | 4033446 | WBGene00016786 | cyp-35A4 | C49G7.8  | -0.233440217987196  |             |
| AGIWUR16323;AGIWUR38020;AGIWUR39215                                                                                  |    |   |         |         |                |          |          |                     |             |
| N2                                                                                                                   | CT | V | 4038821 | 4039934 | WBGene00077593 | C49G7.12 | C49G7.12 | 0.406815167762545   |             |
| AGIWUR1545                                                                                                           |    |   |         |         |                |          |          |                     |             |
| N2                                                                                                                   | CT | V | 4040409 | 4042004 | WBGene00016788 | C49G7.10 | C49G7.10 | 0.0737492606657444  |             |
| AGIWUR1228;AGIWUR4669;AGIWUR11163;AGIWUR13514;AGIWUR28269;AGIWUR31558;AGIWUR39242                                    |    |   |         |         |                |          |          |                     |             |
| N2                                                                                                                   | CT | V | 4042404 | 4043599 | WBGene00016783 | irg-2    | C49G7.5  | -0.218071268596891  | AGIWUR19682 |
| N2                                                                                                                   | CT | V | 4047841 | 4049354 | WBGene00005385 | srh-169  | C49G7.2  | -0.114383448614612  | AGIWUR21978 |
| N2                                                                                                                   | CT | V | 4054191 | 4055109 | WBGene00016789 | djr-1.2  | C49G7.11 | 0.0601747888120521  |             |
| AGIWUR30122                                                                                                          |    |   |         |         |                |          |          |                     |             |
| N2                                                                                                                   | CT | V | 4056165 | 4062184 | WBGene00017035 | D1065.3  | D1065.3  | 0.0471682708457615  |             |

AGIWUR9655;AGIWUR15863;AGIWUR37113;AGIWUR40042

|    |    |   |         |         |                |          |          |                    |             |
|----|----|---|---------|---------|----------------|----------|----------|--------------------|-------------|
| N2 | CT | V | 4062497 | 4068573 | WBGene00023264 | D1065.2  | D1065.2  | 0.125696167771022  | AGIWUR24744 |
| N2 | CT | V | 4069424 | 4071542 | WBGene00005420 | srh-210  | D1065.4  | -0.164786273419036 | AGIWUR36401 |
| N2 | CT | V | 4073755 | 4077548 | WBGene00017034 | otpl-2   | D1065.1  | 0.112803640019018  | AGIWUR30779 |
| N2 | CT | V | 4078061 | 4079813 | WBGene00005421 | srh-211  | D1065.5  | 0.344926934140963  | AGIWUR12980 |
| N2 | CT | V | 4081228 | 4083052 | WBGene00018190 | F38H12.5 | F38H12.5 | -0.113495836833621 |             |

AGIWUR6655;AGIWUR32282;AGIWUR40051

|    |    |   |         |         |                |         |          |                     |  |
|----|----|---|---------|---------|----------------|---------|----------|---------------------|--|
| N2 | CT | V | 4095040 | 4100541 | WBGene00018189 | nhr-181 | F38H12.3 | -0.0802841030937742 |  |
|----|----|---|---------|---------|----------------|---------|----------|---------------------|--|

AGIWUR23566

|    |    |   |         |         |                |        |          |                   |  |
|----|----|---|---------|---------|----------------|--------|----------|-------------------|--|
| N2 | CT | V | 4101867 | 4103893 | WBGene00005624 | srj-40 | F38H12.2 | 0.272649279781122 |  |
|----|----|---|---------|---------|----------------|--------|----------|-------------------|--|

AGIWUR1960

|    |    |   |         |         |                |        |          |                     |  |
|----|----|---|---------|---------|----------------|--------|----------|---------------------|--|
| N2 | CT | V | 4104598 | 4106244 | WBGene00005623 | srj-39 | F38H12.1 | -0.0753265040421205 |  |
|----|----|---|---------|---------|----------------|--------|----------|---------------------|--|

AGIWUR19120

|    |    |   |         |         |                |          |          |                     |             |
|----|----|---|---------|---------|----------------|----------|----------|---------------------|-------------|
| N2 | CT | V | 4106373 | 4108138 | WBGene00005879 | srw-132  | T05B4.5  | 0.134268839616004   | AGIWUR44738 |
| N2 | CT | V | 4110634 | 4112616 | WBGene00005881 | srw-134  | T05B4.7  | -0.262904676562157  | AGIWUR38922 |
| N2 | CT | V | 4113335 | 4114727 | WBGene00005880 | srw-133  | T05B4.6  | 0.213751705193508   | AGIWUR11913 |
| N2 | CT | V | 4117585 | 4118432 | WBGene00020240 | T05B4.9  | T05B4.9  | -0.0143754799095648 | AGIWUR20216 |
| N2 | CT | V | 4119890 | 4120729 | WBGene00020241 | T05B4.10 | T05B4.10 | 0.201359664532657   |             |

AGIWUR25881

|    |    |   |         |         |                |        |          |                    |  |
|----|----|---|---------|---------|----------------|--------|----------|--------------------|--|
| N2 | CT | V | 4121489 | 4122517 | WBGene00020242 | phat-5 | T05B4.11 | -0.194238387242627 |  |
|----|----|---|---------|---------|----------------|--------|----------|--------------------|--|

AGIWUR8147;AGIWUR9076;AGIWUR14271;AGIWUR30063;AGIWUR41290;AGIWUR44095

|    |    |   |         |         |                |          |          |                   |  |
|----|----|---|---------|---------|----------------|----------|----------|-------------------|--|
| N2 | CT | V | 4123329 | 4124862 | WBGene00020243 | T05B4.12 | T05B4.12 | 0.157098847378368 |  |
|----|----|---|---------|---------|----------------|----------|----------|-------------------|--|

AGIWUR35874

|    |    |   |         |         |                |          |          |                    |  |
|----|----|---|---------|---------|----------------|----------|----------|--------------------|--|
| N2 | CT | V | 4126319 | 4127535 | WBGene00020244 | T05B4.13 | T05B4.13 | 0.0704145718423721 |  |
|----|----|---|---------|---------|----------------|----------|----------|--------------------|--|

AGIWUR21784

|    |    |   |         |         |                |         |         |                    |             |
|----|----|---|---------|---------|----------------|---------|---------|--------------------|-------------|
| N2 | CT | V | 4127868 | 4129602 | WBGene00020238 | T05B4.4 | T05B4.4 | 0.019111816628925  | AGIWUR27590 |
| N2 | CT | V | 4129904 | 4130909 | WBGene00020237 | phat-4  | T05B4.3 | -0.420208316917121 |             |

AGIWUR24108;AGIWUR28429

|    |    |   |         |         |                |        |         |                     |  |
|----|----|---|---------|---------|----------------|--------|---------|---------------------|--|
| N2 | CT | V | 4131925 | 4134981 | WBGene00003647 | nhr-57 | T05B4.2 | -0.0377977855323337 |  |
|----|----|---|---------|---------|----------------|--------|---------|---------------------|--|

AGIWUR4984;AGIWUR6609;AGIWUR9301;AGIWUR10813;AGIWUR15809;AGIWUR19457;AGIWUR36903

|    |    |   |         |         |                |       |         |                   |  |
|----|----|---|---------|---------|----------------|-------|---------|-------------------|--|
| N2 | CT | V | 4134968 | 4138825 | WBGene00020236 | lgc-1 | T05B4.1 | -0.12829237459197 |  |
|----|----|---|---------|---------|----------------|-------|---------|-------------------|--|

AGIWUR12300;AGIWUR14909

|    |    |   |         |         |                |        |           |                    |  |
|----|----|---|---------|---------|----------------|--------|-----------|--------------------|--|
| N2 | CT | V | 4139008 | 4143120 | WBGene00044528 | lgc-29 | Y45G5AL.2 | 0.0403626852194137 |  |
|----|----|---|---------|---------|----------------|--------|-----------|--------------------|--|

AGIWUR6685;AGIWUR40865

|    |    |   |         |         |                |           |           |                     |  |
|----|----|---|---------|---------|----------------|-----------|-----------|---------------------|--|
| N2 | CT | V | 4144505 | 4147571 | WBGene00021554 | Y45G5AL.1 | Y45G5AL.1 | -0.0801637213238102 |  |
|----|----|---|---------|---------|----------------|-----------|-----------|---------------------|--|

AGIWUR44946

|    |    |   |         |         |                |           |           |                    |  |
|----|----|---|---------|---------|----------------|-----------|-----------|--------------------|--|
| N2 | CT | V | 4147550 | 4152296 | WBGene00021558 | Y45G5AM.6 | Y45G5AM.6 | 0.0501681739192037 |  |
|----|----|---|---------|---------|----------------|-----------|-----------|--------------------|--|

AGIWUR15909

|    |    |   |         |         |                |           |           |                   |  |
|----|----|---|---------|---------|----------------|-----------|-----------|-------------------|--|
| N2 | CT | V | 4160383 | 4160889 | WBGene00021557 | Y45G5AM.5 | Y45G5AM.5 | 0.139865291300623 |  |
|----|----|---|---------|---------|----------------|-----------|-----------|-------------------|--|

|                                                |    |   |         |         |                |                  |                                        |
|------------------------------------------------|----|---|---------|---------|----------------|------------------|----------------------------------------|
| AGIWUR43106                                    |    |   |         |         |                |                  |                                        |
| N2                                             | CT | V | 4163222 | 4163611 | WBGene00043666 | Y45G5AM.4        | Y45G5AM.4 0.00473962048235688          |
| AGIWUR36153                                    |    |   |         |         |                |                  |                                        |
| N2                                             | CT | V | 4164554 | 4166825 | WBGene00021556 | Y45G5AM.3        | Y45G5AM.3 0.0380629945203736           |
| AGIWUR26169                                    |    |   |         |         |                |                  |                                        |
| N2                                             | CT | V | 4166796 | 4169837 | WBGene00021559 | Y45G5AM.7        | Y45G5AM.7 -0.106452417860449           |
| AGIWUR22011                                    |    |   |         |         |                |                  |                                        |
| N2                                             | CT | V | 4175882 | 4181357 | WBGene00021555 | Y45G5AM.2        | Y45G5AM.2 0.0317539366689594           |
| AGIWUR12069                                    |    |   |         |         |                |                  |                                        |
| N2                                             | CT | V | 4181332 | 4191515 | WBGene00021561 | Y45G5AM.9        | Y45G5AM.9 -0.20206453008592            |
| AGIWUR11428;AGIWUR18622;AGIWUR43252            |    |   |         |         |                |                  |                                        |
| N2                                             | CT | V | 4195577 | 4199399 | WBGene00019276 | H43I07.3         | H43I07.3 0.121726114523961             |
| AGIWUR27848                                    |    |   |         |         |                |                  |                                        |
| N2                                             | CT | V | 4199485 | 4203696 | WBGene00019275 | rpac-40 H43I07.2 | -0.243538989200868                     |
| AGIWUR7057                                     |    |   |         |         |                |                  |                                        |
| N2                                             | CT | V | 4204721 | 4209303 | WBGene00019274 | H43I07.1         | H43I07.1 -0.108244779185656            |
| AGIWUR18443                                    |    |   |         |         |                |                  |                                        |
| N2                                             | CT | V | 4219643 | 4222197 | WBGene00003747 | nlp-9 E03D2.2    | -0.142622703831851 AGIWUR39554         |
| N2                                             | CT | V | 4236418 | 4238056 | WBGene00003751 | nlp-13 E03D2.1   | 0.0151146074855966 AGIWUR6822          |
| N2                                             | CT | V | 4239150 | 4240392 | WBGene00005415 | srh-204 E03D2.3  | -0.293113804509474 AGIWUR34830         |
| N2                                             | CT | V | 4240952 | 4242531 | WBGene00017107 | srt-12 E03D2.4   | 0.15163223713295 AGIWUR44820           |
| N2                                             | CT | V | 4247969 | 4250147 | WBGene00022528 | srt-13 ZC142.1   | -0.200880562453278 AGIWUR2916          |
| N2                                             | CT | V | 4253502 | 4256574 | WBGene00022529 | srt-14 ZC142.2   | -0.201460397294765 AGIWUR28474         |
| N2                                             | CT | V | 4257957 | 4260190 | WBGene00018554 | srt-3 F47D2.3    | -0.00494443876498352 AGIWUR40923       |
| N2                                             | CT | V | 4261485 | 4264616 | WBGene00018555 | srt-35 F47D2.4   | 0.149597419862539 AGIWUR26325          |
| N2                                             | CT | V | 4269486 | 4271358 | WBGene00018557 | srt-38 F47D2.6   | -0.0189527140304646 AGIWUR30244        |
| N2                                             | CT | V | 4288412 | 4290193 | WBGene00005406 | srh-193 F47D2.9  | -0.170383198540186 AGIWUR36547         |
| N2                                             | CT | V | 4291836 | 4293525 | WBGene00005407 | srh-194 F47D2.10 | 0.0226403526631653                     |
| AGIWUR29375                                    |    |   |         |         |                |                  |                                        |
| N2                                             | CT | V | 4296721 | 4298089 | WBGene00269432 | ZC132.11         | ZC132.11 -0.150719710499228            |
| AGIWUR1308;AGIWUR24756;AGIWUR30767;AGIWUR35418 |    |   |         |         |                |                  |                                        |
| N2                                             | CT | V | 4300626 | 4311784 | WBGene00022521 | ZC132.2          | ZC132.2 -0.14836474324612              |
| AGIWUR3578;AGIWUR5811;AGIWUR38417              |    |   |         |         |                |                  |                                        |
| N2                                             | CT | V | 4311993 | 4315157 | WBGene00005405 | srh-192 ZC132.7  | -0.231057076928238 AGIWUR31160         |
| N2                                             | CT | V | 4315725 | 4317713 | WBGene00022526 | ZC132.8          | ZC132.8 0.0888447113699051 AGIWUR24614 |
| N2                                             | CT | V | 4317920 | 4320001 | WBGene00022527 | ZC132.9          | ZC132.9 0.0831624462548568 AGIWUR4580  |
| N2                                             | CT | V | 4320460 | 4322218 | WBGene00235310 | R02D1.2          | R02D1.2 -0.308275617293813             |
| AGIWUR24861;AGIWUR42264                        |    |   |         |         |                |                  |                                        |
| N2                                             | CT | V | 4327121 | 4328736 | WBGene00017060 | D2063.1          | D2063.1 -0.11159420465585              |

AGIWUR2289;AGIWUR6390;AGIWUR22124;AGIWUR40360

|    |    |   |         |         |                |        |         |                    |            |
|----|----|---|---------|---------|----------------|--------|---------|--------------------|------------|
| N2 | CT | V | 4329039 | 4332550 | WBGene00017061 | oac-12 | D2063.2 | -0.137096951713447 | AGIWUR6604 |
| N2 | CT | V | 4336762 | 4338925 | WBGene00044529 | irld-1 | D2063.4 | 0.188586490629564  |            |

AGIWUR17360;AGIWUR26355

|    |    |   |         |         |                |        |         |                     |             |
|----|----|---|---------|---------|----------------|--------|---------|---------------------|-------------|
| N2 | CT | V | 4338854 | 4341308 | WBGene00017062 | glrx-3 | D2063.3 | -0.0789503166425405 | AGIWUR5206  |
| N2 | CT | V | 4341443 | 4346050 | WBGene00017981 | figl-1 | F32D1.1 | -0.167069567974252  | AGIWUR37838 |
| N2 | CT | V | 4346089 | 4346425 | WBGene00017982 | hpo-18 | F32D1.2 | -0.0327302835146774 |             |

AGIWUR18888;AGIWUR34489

|    |    |   |         |         |                |       |          |                     |  |
|----|----|---|---------|---------|----------------|-------|----------|---------------------|--|
| N2 | CT | V | 4347166 | 4349768 | WBGene00003159 | mcm-7 | F32D1.10 | -0.0523773040431639 |  |
|----|----|---|---------|---------|----------------|-------|----------|---------------------|--|

AGIWUR26538;AGIWUR27545

|    |    |   |         |         |                |          |          |                     |             |
|----|----|---|---------|---------|----------------|----------|----------|---------------------|-------------|
| N2 | CT | V | 4349774 | 4361552 | WBGene00017983 | F32D1.3  | F32D1.3  | 0.206047775248138   | AGIWUR39251 |
| N2 | CT | V | 4362722 | 4364650 | WBGene00001722 | grl-13   | F32D1.4  | 0.00375388698072854 | AGIWUR27074 |
| N2 | CT | V | 4365447 | 4366483 | WBGene00044530 | F32D1.11 | F32D1.11 | -0.131694945018483  |             |

AGIWUR14449;AGIWUR19290;AGIWUR22820

|    |    |   |         |         |                |         |         |                    |  |
|----|----|---|---------|---------|----------------|---------|---------|--------------------|--|
| N2 | CT | V | 4369351 | 4371383 | WBGene00017984 | F32D1.5 | F32D1.5 | 0.0332414622419783 |  |
|----|----|---|---------|---------|----------------|---------|---------|--------------------|--|

AGIWUR12479;AGIWUR18525;AGIWUR24068

|    |    |   |         |         |                |         |         |                     |             |
|----|----|---|---------|---------|----------------|---------|---------|---------------------|-------------|
| N2 | CT | V | 4371807 | 4373811 | WBGene00017988 | fipp-1  | F32D1.9 | 0.0430264230755846  | AGIWUR17104 |
| N2 | CT | V | 4373760 | 4374874 | WBGene00017985 | neg-1   | F32D1.6 | -0.0225713677626267 | AGIWUR35653 |
| N2 | CT | V | 4374974 | 4376173 | WBGene00017986 | F32D1.7 | F32D1.7 | -0.0406612923312402 | AGIWUR15298 |
| N2 | CT | V | 4376619 | 4377722 | WBGene00017987 | F32D1.8 | F32D1.8 | 0.0577118071327476  |             |

AGIWUR9211;AGIWUR17294;AGIWUR17529;AGIWUR23378;AGIWUR26753

|    |    |   |         |         |                |          |          |                    |  |
|----|----|---|---------|---------|----------------|----------|----------|--------------------|--|
| N2 | CT | V | 4379643 | 4381592 | WBGene00269436 | F13A2.14 | F13A2.14 | -0.175457068044454 |  |
|----|----|---|---------|---------|----------------|----------|----------|--------------------|--|

AGIWUR4194

|    |    |   |         |         |                |         |         |                     |            |
|----|----|---|---------|---------|----------------|---------|---------|---------------------|------------|
| N2 | CT | V | 4382916 | 4385242 | WBGene00017411 | F13A2.2 | F13A2.2 | 0.289138816422302   | AGIWUR6317 |
| N2 | CT | V | 4386808 | 4387502 | WBGene00044531 | F13A2.9 | F13A2.9 | -0.0854368361986086 |            |

AGIWUR12461;AGIWUR18733;AGIWUR36382;AGIWUR40455;AGIWUR41304

|    |    |   |         |         |                |         |         |                    |             |
|----|----|---|---------|---------|----------------|---------|---------|--------------------|-------------|
| N2 | CT | V | 4393540 | 4396357 | WBGene00017412 | F13A2.3 | F13A2.3 | -0.213232550327439 | AGIWUR8025  |
| N2 | CT | V | 4398635 | 4400218 | WBGene00017413 | F13A2.4 | F13A2.4 | -0.286150813163417 | AGIWUR7096  |
| N2 | CT | V | 4401298 | 4401940 | WBGene00017414 | F13A2.5 | F13A2.5 | 0.266862762787122  | AGIWUR2818  |
| N2 | CT | V | 4402749 | 4404530 | WBGene00017415 | F13A2.6 | F13A2.6 | -0.124825966242741 | AGIWUR43256 |
| N2 | CT | V | 4407819 | 4410280 | WBGene00003708 | nhr-118 | F13A2.8 | -0.221254625775593 |             |

AGIWUR5659;AGIWUR18832;AGIWUR26406;AGIWUR33940;AGIWUR39095

|    |    |   |         |         |                |          |          |                    |  |
|----|----|---|---------|---------|----------------|----------|----------|--------------------|--|
| N2 | CT | V | 4410943 | 4412401 | WBGene00021617 | Y47D7A.3 | Y47D7A.3 | 0.0841511038287868 |  |
|----|----|---|---------|---------|----------------|----------|----------|--------------------|--|

AGIWUR407

|    |    |   |         |         |                |       |          |                    |  |
|----|----|---|---------|---------|----------------|-------|----------|--------------------|--|
| N2 | CT | V | 4412748 | 4414663 | WBGene00001714 | grl-5 | Y47D7A.5 | -0.252229853858571 |  |
|----|----|---|---------|---------|----------------|-------|----------|--------------------|--|

AGIWUR456

|    |    |   |         |         |                |           |           |                    |  |
|----|----|---|---------|---------|----------------|-----------|-----------|--------------------|--|
| N2 | CT | V | 4416022 | 4416814 | WBGene00235165 | Y47D7A.18 | Y47D7A.18 | -0.128790903085882 |  |
|----|----|---|---------|---------|----------------|-----------|-----------|--------------------|--|

AGIWUR35916

|    |    |   |         |         |                |          |          |                  |  |
|----|----|---|---------|---------|----------------|----------|----------|------------------|--|
| N2 | CT | V | 4419454 | 4419867 | WBGene00021620 | Y47D7A.7 | Y47D7A.7 | 0.02850492570676 |  |
|----|----|---|---------|---------|----------------|----------|----------|------------------|--|

|                                                                                                                                     |    |   |         |         |                |                 |                      |
|-------------------------------------------------------------------------------------------------------------------------------------|----|---|---------|---------|----------------|-----------------|----------------------|
| AGIWUR9054                                                                                                                          |    |   |         |         |                |                 |                      |
| N2                                                                                                                                  | CT | V | 4420275 | 4420746 | WBGene00021616 | Y47D7A.2        | -0.0344997805700507  |
| AGIWUR14377                                                                                                                         |    |   |         |         |                |                 |                      |
| N2                                                                                                                                  | CT | V | 4420997 | 4421596 | WBGene00004820 | skr-14 Y47D7A.8 | -0.155338690003235   |
| AGIWUR20702                                                                                                                         |    |   |         |         |                |                 |                      |
| N2                                                                                                                                  | CT | V | 4422406 | 4423065 | WBGene00004813 | skr-7 Y47D7A.1  | -0.0266294795763145  |
| AGIWUR38009                                                                                                                         |    |   |         |         |                |                 |                      |
| N2                                                                                                                                  | CT | V | 4423609 | 4423968 | WBGene00021621 | Y47D7A.9        | 0.173663667160032    |
| AGIWUR12979                                                                                                                         |    |   |         |         |                |                 |                      |
| N2                                                                                                                                  | CT | V | 4427769 | 4428302 | WBGene00021623 | Y47D7A.11       | -0.116832426926052   |
| AGIWUR626;AGIWUR1575;AGIWUR3659;AGIWUR6144;AGIWUR8714;AGIWUR19752;AGIWUR36378;AGIWUR38334;AGIWUR38504;AGIWUR43833                   |    |   |         |         |                |                 |                      |
| N2                                                                                                                                  | CT | V | 4428950 | 4429676 | WBGene00021624 | Y47D7A.12       | -0.0488158801273642  |
| AGIWUR3137                                                                                                                          |    |   |         |         |                |                 |                      |
| N2                                                                                                                                  | CT | V | 4431791 | 4433185 | WBGene00021627 | Y47D7A.15       | 0.333785170324781    |
| AGIWUR1754;AGIWUR7726;AGIWUR11111;AGIWUR23580;AGIWUR27475                                                                           |    |   |         |         |                |                 |                      |
| N2                                                                                                                                  | CT | V | 4434883 | 4435928 | WBGene00021625 | Y47D7A.13       | 0.234832623776974    |
| AGIWUR10566                                                                                                                         |    |   |         |         |                |                 |                      |
| N2                                                                                                                                  | CT | V | 4438932 | 4443223 | WBGene00044637 | rft-1 Y47D7A.16 | -0.00946013915837352 |
| AGIWUR20975;AGIWUR25736                                                                                                             |    |   |         |         |                |                 |                      |
| N2                                                                                                                                  | CT | V | 4443110 | 4450555 | WBGene00021626 | rft-2 Y47D7A.14 | 0.0200098684644026   |
| AGIWUR10755;AGIWUR11742;AGIWUR12084;AGIWUR23538;AGIWUR28386;AGIWUR30389;AGIWUR33218;AGIWUR39710                                     |    |   |         |         |                |                 |                      |
| N2                                                                                                                                  | CT | V | 4451049 | 4454734 | WBGene00019224 | gnrr-5 H22D07.1 | -0.1907109837292     |
| AGIWUR44776                                                                                                                         |    |   |         |         |                |                 |                      |
| N2                                                                                                                                  | CT | V | 4471365 | 4473602 | WBGene00020370 | T08H10.3        | 0.087998041343087    |
| AGIWUR30288                                                                                                                         |    |   |         |         |                |                 |                      |
| N2                                                                                                                                  | CT | V | 4474843 | 4476996 | WBGene00006101 | str-35 T08H10.2 | -0.0590379591768424  |
| AGIWUR27901;AGIWUR32256                                                                                                             |    |   |         |         |                |                 |                      |
| N2                                                                                                                                  | CT | V | 4477561 | 4479191 | WBGene00006100 | str-34 T08H10.5 | -0.230167790244176   |
| AGIWUR19786                                                                                                                         |    |   |         |         |                |                 |                      |
| N2                                                                                                                                  | CT | V | 4480680 | 4481546 | WBGene00020371 | T08H10.4        | -0.0647514105409197  |
| AGIWUR43086                                                                                                                         |    |   |         |         |                |                 |                      |
| N2                                                                                                                                  | CT | V | 4483459 | 4486543 | WBGene00020369 | T08H10.1        | -0.11076197353896    |
| AGIWUR990                                                                                                                           |    |   |         |         |                |                 |                      |
| N2                                                                                                                                  | CT | V | 4497463 | 4511449 | WBGene00006796 | unc-62 T28F12.2 | 0.134756712746508    |
| AGIWUR15699;AGIWUR16484;AGIWUR18052;AGIWUR21053;AGIWUR21660;AGIWUR22015;AGIWUR25612;AGIWUR26913;AGIWUR30675;AGIWUR35589;AGIWUR41385 |    |   |         |         |                |                 |                      |
| N2                                                                                                                                  | CT | V | 4511977 | 4516947 | WBGene00020904 | T28F12.1        | 0.199761731812526    |
| AGIWUR17708                                                                                                                         |    |   |         |         |                |                 |                      |

|                                                                                     |    |   |         |         |                |            |            |                     |             |
|-------------------------------------------------------------------------------------|----|---|---------|---------|----------------|------------|------------|---------------------|-------------|
| N2                                                                                  | CT | V | 4517643 | 4549291 | WBGene00004947 | sos-1      | T28F12.3   | 0.240989218899234   |             |
| AGIWUR4204                                                                          |    |   |         |         |                |            |            |                     |             |
| N2                                                                                  | CT | V | 4556055 | 4557114 | WBGene00022017 | Y61A9LA.5  | Y61A9LA.5  | 0.0862961183793871  |             |
| AGIWUR15931                                                                         |    |   |         |         |                |            |            |                     |             |
| N2                                                                                  | CT | V | 4558318 | 4559801 | WBGene00022018 | Y61A9LA.7  | Y61A9LA.7  | -0.215657531956166  |             |
| AGIWUR8198;AGIWUR13524;AGIWUR17992;AGIWUR19357;AGIWUR39108;AGIWUR41819              |    |   |         |         |                |            |            |                     |             |
| N2                                                                                  | CT | V | 4562215 | 4570043 | WBGene00022019 | sut-2      | Y61A9LA.8  | 0.00732413694841938 |             |
| AGIWUR20263;AGIWUR29703;AGIWUR34769;AGIWUR39327;AGIWUR39758;AGIWUR44236;AGIWUR45069 |    |   |         |         |                |            |            |                     |             |
| N2                                                                                  | CT | V | 4571143 | 4585167 | WBGene00022015 | Y61A9LA.3  | Y61A9LA.3  | -0.103695680160122  |             |
| AGIWUR3402;AGIWUR4011;AGIWUR10244;AGIWUR10368                                       |    |   |         |         |                |            |            |                     |             |
| N2                                                                                  | CT | V | 4592838 | 4602014 | WBGene00022014 | Y61A9LA.1  | Y61A9LA.1  | 0.0748852347822968  |             |
| AGIWUR28333                                                                         |    |   |         |         |                |            |            |                     |             |
| N2                                                                                  | CT | V | 4605004 | 4606926 | WBGene00022022 | Y61A9LA.11 | Y61A9LA.11 | -0.0522537133470991 |             |
| AGIWUR34478                                                                         |    |   |         |         |                |            |            |                     |             |
| N2                                                                                  | CT | V | 4607039 | 4615817 | WBGene00022021 | Y61A9LA.10 | Y61A9LA.10 | 0.00812056319189836 |             |
| AGIWUR16782                                                                         |    |   |         |         |                |            |            |                     |             |
| N2                                                                                  | CT | V | 4616156 | 4617766 | WBGene00018814 | F54D11.4   | F54D11.4   | 0.278051935898265   |             |
| AGIWUR40577                                                                         |    |   |         |         |                |            |            |                     |             |
| N2                                                                                  | CT | V | 4617938 | 4628510 | WBGene00018812 | sumv-2     | F54D11.2   | -0.0049417000223686 |             |
| AGIWUR7205;AGIWUR11926;AGIWUR16823;AGIWUR22271;AGIWUR34312;AGIWUR35666              |    |   |         |         |                |            |            |                     |             |
| N2                                                                                  | CT | V | 4628580 | 4635263 | WBGene00018811 | pmt-2      | F54D11.1   | 0.0385191083088445  |             |
| AGIWUR42429;AGIWUR44478                                                             |    |   |         |         |                |            |            |                     |             |
| N2                                                                                  | CT | V | 4635327 | 4637145 | WBGene00018813 | F54D11.3   | F54D11.3   | -0.154316978657668  |             |
| AGIWUR10374                                                                         |    |   |         |         |                |            |            |                     |             |
| N2                                                                                  | CT | V | 4642952 | 4646931 | WBGene00004928 | soc-1      | F41F3.2    | 0.116884935156918   | AGIWUR29213 |
| N2                                                                                  | CT | V | 4647665 | 4648241 | WBGene00018297 | F41F3.3    | F41F3.3    | 0.149109704684633   | AGIWUR8735  |
| N2                                                                                  | CT | V | 4648832 | 4650726 | WBGene00044533 | F41F3.8    | F41F3.8    | 0.12033089551336    |             |
| AGIWUR3540;AGIWUR11934;AGIWUR30905;AGIWUR34907;AGIWUR43347                          |    |   |         |         |                |            |            |                     |             |
| N2                                                                                  | CT | V | 4652863 | 4654007 | WBGene00000712 | col-139    | F41F3.4    | 0.387021009958389   | AGIWUR17250 |
| N2                                                                                  | CT | V | 4655475 | 4655786 | WBGene00269385 | F41F3.9    | F41F3.9    | -1.79109751449013   | AGIWUR18253 |
| N2                                                                                  | CT | V | 4656158 | 4657812 | WBGene00005966 | srx-75     | F41F3.5    | 0.0723610265261545  | AGIWUR38791 |
| N2                                                                                  | CT | V | 4658949 | 4662500 | WBGene00005965 | srx-74     | F41F3.6    | 0.190434879239302   | AGIWUR37537 |
| N2                                                                                  | CT | V | 4663616 | 4665751 | WBGene00005964 | srx-73     | F41F3.7    | -0.0326443719026708 | AGIWUR39489 |
| N2                                                                                  | CT | V | 4666745 | 4668736 | WBGene00005968 | srx-77     | K03B4.5    | 0.212003411242517   | AGIWUR36430 |
| N2                                                                                  | CT | V | 4671030 | 4672610 | WBGene00219236 | K03B4.9    | K03B4.9    | -0.13815402487524   | AGIWUR10250 |
| N2                                                                                  | CT | V | 4681975 | 4685110 | WBGene00019355 | K03B4.4    | K03B4.4    | 0.00227993499019163 | AGIWUR20172 |
| N2                                                                                  | CT | V | 4687107 | 4688028 | WBGene00006392 | taf-10     | K03B4.3    | -0.138885955478241  | AGIWUR45166 |
| N2                                                                                  | CT | V | 4687974 | 4689231 | WBGene00019354 | K03B4.2    | K03B4.2    | -0.0336445012277391 | AGIWUR5490  |
| N2                                                                                  | CT | V | 4689330 | 4691611 | WBGene00019353 | K03B4.1    | K03B4.1    | -0.146620976313809  | AGIWUR43290 |

|                                                                                  |    |   |         |         |                |          |          |                     |             |
|----------------------------------------------------------------------------------|----|---|---------|---------|----------------|----------|----------|---------------------|-------------|
| N2                                                                               | CT | V | 4691605 | 4692433 | WBGene00019357 | cpg-8    | K03B4.7  | -0.102376007835689  |             |
| AGIWUR20437;AGIWUR38950                                                          |    |   |         |         |                |          |          |                     |             |
| N2                                                                               | CT | V | 4694974 | 4700289 | WBGene00022584 | ZC266.1  | ZC266.1  | -0.154979232013625  |             |
| AGIWUR1042;AGIWUR25299                                                           |    |   |         |         |                |          |          |                     |             |
| N2                                                                               | CT | V | 4710764 | 4714911 | WBGene00018211 | oac-24   | F39G3.6  | 0.137436199622591   | AGIWUR31878 |
| N2                                                                               | CT | V | 4715388 | 4720148 | WBGene00004195 | prx-6    | F39G3.7  | -0.20171017346631   | AGIWUR44604 |
| N2                                                                               | CT | V | 4722618 | 4724621 | WBGene00018210 | F39G3.5  | F39G3.5  | -0.0666991554617731 | AGIWUR29741 |
| N2                                                                               | CT | V | 4724663 | 4726726 | WBGene00018209 | F39G3.4  | F39G3.4  | 0.179659396627826   | AGIWUR3506  |
| N2                                                                               | CT | V | 4726721 | 4730234 | WBGene00006570 | tig-2    | F39G3.8  | -0.17351272876626   | AGIWUR18954 |
| N2                                                                               | CT | V | 4731911 | 4734723 | WBGene00018208 | F39G3.3  | F39G3.3  | -0.084268003087475  |             |
| AGIWUR460;AGIWUR10436;AGIWUR41800                                                |    |   |         |         |                |          |          |                     |             |
| N2                                                                               | CT | V | 4737834 | 4741169 | WBGene00018207 | F39G3.2  | F39G3.2  | -0.173433113281305  | AGIWUR7231  |
| N2                                                                               | CT | V | 4742427 | 4745373 | WBGene00018206 | ugt-61   | F39G3.1  | -0.0241895617874697 | AGIWUR3749  |
| N2                                                                               | CT | V | 4745569 | 4748089 | WBGene00015985 | C18G1.7  | C18G1.7  | 0.378777072497956   | AGIWUR40127 |
| N2                                                                               | CT | V | 4750580 | 4753808 | WBGene00015984 | C18G1.6  | C18G1.6  | 0.171757238907622   | AGIWUR27193 |
| N2                                                                               | CT | V | 4754313 | 4755469 | WBGene00001855 | hil-4    | C18G1.5  | 0.0012557530437789  |             |
| AGIWUR2414;AGIWUR12114;AGIWUR20399;AGIWUR21732;AGIWUR40557;AGIWUR42531           |    |   |         |         |                |          |          |                     |             |
| N2                                                                               | CT | V | 4755985 | 4758584 | WBGene00003994 | pgl-3    | C18G1.4  | 0.0665644133418724  | AGIWUR829   |
| N2                                                                               | CT | V | 4760974 | 4764179 | WBGene00015982 | bgnt-1.4 | C18G1.3  | 0.0219146850458545  |             |
| AGIWUR39744                                                                      |    |   |         |         |                |          |          |                     |             |
| N2                                                                               | CT | V | 4764266 | 4766601 | WBGene00015986 | C18G1.8  | C18G1.8  | 0.054440158144752   | AGIWUR16977 |
| N2                                                                               | CT | V | 4767886 | 4769753 | WBGene00015987 | C18G1.9  | C18G1.9  | 0.324730930499735   | AGIWUR27591 |
| N2                                                                               | CT | V | 4770670 | 4773091 | WBGene00015981 | elt-7    | C18G1.2  | 0.0147894691906334  | AGIWUR25029 |
| N2                                                                               | CT | V | 4777960 | 4780019 | WBGene00015980 | C18G1.1  | C18G1.1  | -0.140492159344785  | AGIWUR10156 |
| N2                                                                               | CT | V | 4783613 | 4786140 | WBGene00022013 | Y60C6A.1 | Y60C6A.1 | -0.0129673458755235 |             |
| AGIWUR16948                                                                      |    |   |         |         |                |          |          |                     |             |
| N2                                                                               | CT | V | 4794599 | 4796996 | WBGene00019840 | R02F11.2 | R02F11.2 | -0.0131065466479603 |             |
| AGIWUR2726;AGIWUR5721;AGIWUR23238;AGIWUR35491                                    |    |   |         |         |                |          |          |                     |             |
| N2                                                                               | CT | V | 4801094 | 4802626 | WBGene00019839 | R02F11.1 | R02F11.1 | 0.186874869084221   |             |
| AGIWUR29210                                                                      |    |   |         |         |                |          |          |                     |             |
| N2                                                                               | CT | V | 4802647 | 4805947 | WBGene00019841 | R02F11.3 | R02F11.3 | 0.212809977470942   |             |
| AGIWUR17799;AGIWUR29564                                                          |    |   |         |         |                |          |          |                     |             |
| N2                                                                               | CT | V | 4810865 | 4818663 | WBGene00019842 | R02F11.4 | R02F11.4 | 0.0547521052021249  |             |
| AGIWUR17550                                                                      |    |   |         |         |                |          |          |                     |             |
| N2                                                                               | CT | V | 4818701 | 4823344 | WBGene00016509 | adss-1   | C37H5.6  | 0.117259900039745   |             |
| AGIWUR3440;AGIWUR8948;AGIWUR9961;AGIWUR22132;AGIWUR22362;AGIWUR36251;AGIWUR36473 |    |   |         |         |                |          |          |                     |             |
| N2                                                                               | CT | V | 4824130 | 4826760 | WBGene00002010 | hsp-6    | C37H5.8  | 0.15067637336934    |             |
| AGIWUR10444;AGIWUR26791                                                          |    |   |         |         |                |          |          |                     |             |
| N2                                                                               | CT | V | 4827360 | 4836025 | WBGene00016508 | C37H5.5  | C37H5.5  | -0.108434905009851  | AGIWUR32683 |



|                                                                                  |    |   |         |         |                |           |           |                     |             |
|----------------------------------------------------------------------------------|----|---|---------|---------|----------------|-----------|-----------|---------------------|-------------|
| N2                                                                               | CT | V | 4836027 | 4840010 | WBGene00003528 | nas-9     | C37H5.9   | -0.258150722419611  | AGIWUR7821  |
| N2                                                                               | CT | V | 4840619 | 4841269 | WBGene00000859 | cwp-1     | C37H5.10  | 0.0308711887414397  |             |
| AGIWUR10874                                                                      |    |   |         |         |                |           |           |                     |             |
| N2                                                                               | CT | V | 4841940 | 4842567 | WBGene00000860 | cwp-2     | C37H5.11  | -0.133801893373859  |             |
| AGIWUR292                                                                        |    |   |         |         |                |           |           |                     |             |
| N2                                                                               | CT | V | 4842836 | 4843845 | WBGene00000861 | cwp-3     | C37H5.4   | 0.260900200024634   | AGIWUR2144  |
| N2                                                                               | CT | V | 4844685 | 4846984 | WBGene00016507 | abhd-5.2  | C37H5.3   | 0.115139260652374   |             |
| AGIWUR26648;AGIWUR36638                                                          |    |   |         |         |                |           |           |                     |             |
| N2                                                                               | CT | V | 4847653 | 4849838 | WBGene00016506 | abhd-5.1  | C37H5.2   | 0.0842884299365796  |             |
| AGIWUR25974                                                                      |    |   |         |         |                |           |           |                     |             |
| N2                                                                               | CT | V | 4851472 | 4857260 | WBGene00003591 | nex-4     | C37H5.1   | 0.0492347915269704  | AGIWUR22444 |
| N2                                                                               | CT | V | 4857149 | 4862965 | WBGene00016511 | C37H5.13  | C37H5.13  | 0.170753809785879   |             |
| AGIWUR894;AGIWUR6151;AGIWUR15127;AGIWUR17736;AGIWUR20020;AGIWUR22385;AGIWUR27555 |    |   |         |         |                |           |           |                     |             |
| N2                                                                               | CT | V | 4865648 | 4870355 | WBGene00005110 | srd-32    | T19H12.5  | -0.302588462623862  |             |
| AGIWUR40248                                                                      |    |   |         |         |                |           |           |                     |             |
| N2                                                                               | CT | V | 4872303 | 4874200 | WBGene00005111 | srd-33    | T19H12.4  | -0.106137125707287  |             |
| AGIWUR15862                                                                      |    |   |         |         |                |           |           |                     |             |
| N2                                                                               | CT | V | 4874923 | 4879319 | WBGene00020590 | T19H12.6  | T19H12.6  | 0.262576949294984   |             |
| AGIWUR28964                                                                      |    |   |         |         |                |           |           |                     |             |
| N2                                                                               | CT | V | 4879945 | 4881477 | WBGene00006098 | str-32    | T19H12.7  | -0.0874872743299342 |             |
| AGIWUR24416                                                                      |    |   |         |         |                |           |           |                     |             |
| N2                                                                               | CT | V | 4882178 | 4884319 | WBGene00020591 | nhr-220   | T19H12.8  | 0.247200146558599   |             |
| AGIWUR21627                                                                      |    |   |         |         |                |           |           |                     |             |
| N2                                                                               | CT | V | 4884790 | 4885420 | WBGene00044282 | T19H12.12 | T19H12.12 | 0.147389049271281   |             |
| AGIWUR7237                                                                       |    |   |         |         |                |           |           |                     |             |
| N2                                                                               | CT | V | 4885672 | 4886809 | WBGene00020589 | T19H12.3  | T19H12.3  | 0.116598392728942   |             |
| AGIWUR21961                                                                      |    |   |         |         |                |           |           |                     |             |
| N2                                                                               | CT | V | 4887187 | 4889629 | WBGene00020592 | ugt-12    | T19H12.9  | -0.126388501491963  |             |
| AGIWUR26207                                                                      |    |   |         |         |                |           |           |                     |             |
| N2                                                                               | CT | V | 4890429 | 4891422 | WBGene00020588 | T19H12.2  | T19H12.2  | 0.00179886483523006 |             |
| AGIWUR8639;AGIWUR8820                                                            |    |   |         |         |                |           |           |                     |             |
| N2                                                                               | CT | V | 4892588 | 4895071 | WBGene00020593 | ugt-11    | T19H12.10 | -0.197401912221391  |             |
| AGIWUR33007                                                                      |    |   |         |         |                |           |           |                     |             |
| N2                                                                               | CT | V | 4896028 | 4897969 | WBGene00020587 | ugt-9     | T19H12.1  | -0.411519158664046  |             |
| AGIWUR1830                                                                       |    |   |         |         |                |           |           |                     |             |
| N2                                                                               | CT | V | 4898217 | 4900082 | WBGene00020594 | ugt-10    | T19H12.11 | -0.334491829820825  |             |
| AGIWUR2113                                                                       |    |   |         |         |                |           |           |                     |             |
| N2                                                                               | CT | V | 4901374 | 4903010 | WBGene00019235 | H23N18.4  | H23N18.4  | 0.0216022968247778  |             |
| AGIWUR15965;AGIWUR37437;AGIWUR41886                                              |    |   |         |         |                |           |           |                     |             |

|                                                                                    |    |   |         |         |                |          |          |                     |             |
|------------------------------------------------------------------------------------|----|---|---------|---------|----------------|----------|----------|---------------------|-------------|
| N2                                                                                 | CT | V | 4903930 | 4905918 | WBGene00019234 | ugt-8    | H23N18.3 | 0.0166070184604052  |             |
| AGIWUR35284                                                                        |    |   |         |         |                |          |          |                     |             |
| N2                                                                                 | CT | V | 4906253 | 4908258 | WBGene00019233 | ugt-14   | H23N18.2 | -0.0854925449000863 |             |
| AGIWUR1674                                                                         |    |   |         |         |                |          |          |                     |             |
| N2                                                                                 | CT | V | 4908868 | 4911399 | WBGene00019232 | ugt-13   | H23N18.1 | -0.160185789631278  |             |
| AGIWUR10867;AGIWUR24424;AGIWUR29728                                                |    |   |         |         |                |          |          |                     |             |
| N2                                                                                 | CT | V | 4911712 | 4912381 | WBGene00019236 | H23N18.5 | H23N18.5 | 0.225699058347768   |             |
| AGIWUR19342                                                                        |    |   |         |         |                |          |          |                     |             |
| N2                                                                                 | CT | V | 4913061 | 4915079 | WBGene00044534 | H23N18.6 | H23N18.6 | 0.0491742284558097  |             |
| AGIWUR26450;AGIWUR31107;AGIWUR36453                                                |    |   |         |         |                |          |          |                     |             |
| N2                                                                                 | CT | V | 4918154 | 4918585 | WBGene00015340 | C02E7.7  | C02E7.7  | -0.275872893344673  | AGIWUR24668 |
| N2                                                                                 | CT | V | 4919207 | 4919586 | WBGene00015339 | C02E7.6  | C02E7.6  | 0.295407972515742   |             |
| AGIWUR2706;AGIWUR4643;AGIWUR16815;AGIWUR18589;AGIWUR20623;AGIWUR37703;AGIWUR43853  |    |   |         |         |                |          |          |                     |             |
| N2                                                                                 | CT | V | 4920342 | 4920790 | WBGene00015341 | C02E7.8  | C02E7.8  | -0.0876513668760301 | AGIWUR11061 |
| N2                                                                                 | CT | V | 4921102 | 4922616 | WBGene00005248 | srh-23   | C02E7.5  | -0.831689579381074  | AGIWUR18669 |
| N2                                                                                 | CT | V | 4923292 | 4924594 | WBGene00005247 | srh-22   | C02E7.4  | 0.219001582772664   | AGIWUR33717 |
| N2                                                                                 | CT | V | 4924918 | 4926224 | WBGene00005245 | srh-20   | C02E7.3  | 0.0103238820746139  | AGIWUR34535 |
| N2                                                                                 | CT | V | 4926671 | 4928181 | WBGene00005246 | srh-21   | C02E7.2  | 0.231186551677354   | AGIWUR37003 |
| N2                                                                                 | CT | V | 4928278 | 4929942 | WBGene00006238 | str-205  | C02E7.9  | 0.057500824960381   | AGIWUR22281 |
| N2                                                                                 | CT | V | 4930817 | 4933027 | WBGene00015342 | C02E7.10 | C02E7.10 | 0.100344455323002   |             |
| AGIWUR2084                                                                         |    |   |         |         |                |          |          |                     |             |
| N2                                                                                 | CT | V | 4934706 | 4939085 | WBGene00015338 | catp-2   | C02E7.1  | -0.0234759701321874 | AGIWUR11404 |
| N2                                                                                 | CT | V | 4939260 | 4940641 | WBGene00006246 | str-213  | C02E7.11 | -0.0851810165878373 |             |
| AGIWUR9176                                                                         |    |   |         |         |                |          |          |                     |             |
| N2                                                                                 | CT | V | 4941196 | 4942414 | WBGene00006245 | str-212  | C02E7.12 | -0.163380730515443  |             |
| AGIWUR13654;AGIWUR26919                                                            |    |   |         |         |                |          |          |                     |             |
| N2                                                                                 | CT | V | 4943116 | 4944319 | WBGene00006244 | str-211  | C02E7.13 | 0.0246666533411837  |             |
| AGIWUR19419                                                                        |    |   |         |         |                |          |          |                     |             |
| N2                                                                                 | CT | V | 4945662 | 4948299 | WBGene00006243 | str-210  | F26G5.11 | -0.0701293053102061 |             |
| AGIWUR5249;AGIWUR20666                                                             |    |   |         |         |                |          |          |                     |             |
| N2                                                                                 | CT | V | 4948935 | 4951024 | WBGene00006242 | str-209  | F26G5.5  | 0.0864723268946666  | AGIWUR31438 |
| N2                                                                                 | CT | V | 4951734 | 4953035 | WBGene00006240 | str-207  | F26G5.4  | -0.15502546907568   | AGIWUR2049  |
| N2                                                                                 | CT | V | 4954250 | 4955989 | WBGene00005100 | srd-22   | F26G5.3  | -0.0013257047952262 | AGIWUR12411 |
| N2                                                                                 | CT | V | 4956829 | 4958572 | WBGene00006241 | str-208  | F26G5.2  | 0.0930733630412055  | AGIWUR12648 |
| N2                                                                                 | CT | V | 4958603 | 4963098 | WBGene00006523 | tam-1    | F26G5.9  | 0.148282165795263   |             |
| AGIWUR8886;AGIWUR16292;AGIWUR16850;AGIWUR17900;AGIWUR35397;AGIWUR35895;AGIWUR38065 |    |   |         |         |                |          |          |                     |             |
| N2                                                                                 | CT | V | 4971770 | 4973043 | WBGene00017845 | srsx-9   | F26G5.10 | -0.177267701513543  |             |
| AGIWUR35069                                                                        |    |   |         |         |                |          |          |                     |             |
| N2                                                                                 | CT | V | 4973314 | 4974777 | WBGene00044117 | srsx-10  | F26G5.12 | 0.149028610482339   |             |

AGIWUR29835;AGIWUR29983

|    |    |   |         |         |                |         |         |                    |             |
|----|----|---|---------|---------|----------------|---------|---------|--------------------|-------------|
| N2 | CT | V | 4975485 | 4977502 | WBGene00017843 | F26G5.1 | F26G5.1 | 0.0562995750810664 | AGIWUR21735 |
| N2 | CT | V | 4977934 | 4979160 | WBGene00015736 | srsx-11 | C13D9.4 | 0.165044782378552  |             |

AGIWUR6710;AGIWUR18113

|    |    |   |         |         |                |         |         |                    |             |
|----|----|---|---------|---------|----------------|---------|---------|--------------------|-------------|
| N2 | CT | V | 4979947 | 4980973 | WBGene00015737 | srsx-12 | C13D9.5 | 0.239503132434114  | AGIWUR26886 |
| N2 | CT | V | 4981809 | 4983191 | WBGene00015738 | srsx-13 | C13D9.6 | -0.163396963786791 | AGIWUR42234 |
| N2 | CT | V | 4983748 | 4987197 | WBGene00003573 | ncx-8   | C13D9.7 | 0.0366904922439666 |             |

AGIWUR6415;AGIWUR24815;AGIWUR31203

|    |    |   |         |         |                |       |          |                    |             |
|----|----|---|---------|---------|----------------|-------|----------|--------------------|-------------|
| N2 | CT | V | 4991505 | 4995064 | WBGene00003574 | ncx-9 | C13D9.8  | -0.447678975389829 | AGIWUR19023 |
| N2 | CT | V | 4997048 | 5000558 | WBGene00015739 | ugt-7 | C13D9.9  | -0.114891764433583 | AGIWUR21056 |
| N2 | CT | V | 5001686 | 5003414 | WBGene00005659 | srr-8 | C13D9.3  | 0.0431145833523647 | AGIWUR3691  |
| N2 | CT | V | 5007229 | 5011702 | WBGene00005656 | srr-5 | C13D9.2  | -0.107091433500247 | AGIWUR31596 |
| N2 | CT | V | 5012994 | 5015059 | WBGene00005657 | srr-6 | C13D9.1  | -0.350373903875154 | AGIWUR19957 |
| N2 | CT | V | 5019224 | 5022369 | WBGene00005655 | srr-4 | K11D12.3 | 0.0396236904344764 |             |

AGIWUR16882

|    |    |   |         |         |                |       |          |                    |  |
|----|----|---|---------|---------|----------------|-------|----------|--------------------|--|
| N2 | CT | V | 5023706 | 5027723 | WBGene00019644 | cpt-4 | K11D12.4 | -0.424567353879651 |  |
|----|----|---|---------|---------|----------------|-------|----------|--------------------|--|

AGIWUR10491

|    |    |   |         |         |                |       |          |                   |  |
|----|----|---|---------|---------|----------------|-------|----------|-------------------|--|
| N2 | CT | V | 5029324 | 5030811 | WBGene00019645 | swt-7 | K11D12.5 | 0.014400887831556 |  |
|----|----|---|---------|---------|----------------|-------|----------|-------------------|--|

AGIWUR6855

|    |    |   |         |         |                |           |           |                    |  |
|----|----|---|---------|---------|----------------|-----------|-----------|--------------------|--|
| N2 | CT | V | 5033398 | 5034171 | WBGene00044535 | K11D12.13 | K11D12.13 | -0.191330266201458 |  |
|----|----|---|---------|---------|----------------|-----------|-----------|--------------------|--|

AGIWUR6605;AGIWUR23117;AGIWUR31448

|    |    |   |         |         |                |          |          |                    |  |
|----|----|---|---------|---------|----------------|----------|----------|--------------------|--|
| N2 | CT | V | 5034528 | 5035169 | WBGene00019646 | K11D12.6 | K11D12.6 | -0.472402646584065 |  |
|----|----|---|---------|---------|----------------|----------|----------|--------------------|--|

AGIWUR6484

|    |    |   |         |         |                |          |          |                    |  |
|----|----|---|---------|---------|----------------|----------|----------|--------------------|--|
| N2 | CT | V | 5035252 | 5036464 | WBGene00019647 | K11D12.7 | K11D12.7 | -0.268843642214552 |  |
|----|----|---|---------|---------|----------------|----------|----------|--------------------|--|

AGIWUR25453

|    |    |   |         |         |                |           |           |                     |  |
|----|----|---|---------|---------|----------------|-----------|-----------|---------------------|--|
| N2 | CT | V | 5036572 | 5038658 | WBGene00019650 | K11D12.11 | K11D12.11 | -0.0718618132829008 |  |
|----|----|---|---------|---------|----------------|-----------|-----------|---------------------|--|

AGIWUR11290

|    |    |   |         |         |                |          |          |                    |  |
|----|----|---|---------|---------|----------------|----------|----------|--------------------|--|
| N2 | CT | V | 5039669 | 5041003 | WBGene00019648 | K11D12.8 | K11D12.8 | -0.205768426783022 |  |
|----|----|---|---------|---------|----------------|----------|----------|--------------------|--|

AGIWUR31955

|    |    |   |         |         |                |          |          |                     |  |
|----|----|---|---------|---------|----------------|----------|----------|---------------------|--|
| N2 | CT | V | 5042408 | 5046203 | WBGene00019649 | K11D12.9 | K11D12.9 | -0.0320863626969246 |  |
|----|----|---|---------|---------|----------------|----------|----------|---------------------|--|

AGIWUR32970

|    |    |   |         |         |                |        |          |                    |  |
|----|----|---|---------|---------|----------------|--------|----------|--------------------|--|
| N2 | CT | V | 5049541 | 5052214 | WBGene00004136 | pqn-51 | K11D12.2 | 0.0709577990545087 |  |
|----|----|---|---------|---------|----------------|--------|----------|--------------------|--|

AGIWUR12989;AGIWUR15695;AGIWUR15696;AGIWUR25674;AGIWUR31797

|    |    |   |         |         |                |           |           |                    |  |
|----|----|---|---------|---------|----------------|-----------|-----------|--------------------|--|
| N2 | CT | V | 5052261 | 5053490 | WBGene00019651 | K11D12.12 | K11D12.12 | -0.207699266755217 |  |
|----|----|---|---------|---------|----------------|-----------|-----------|--------------------|--|

AGIWUR37796

|    |    |   |         |         |                |       |          |                    |  |
|----|----|---|---------|---------|----------------|-------|----------|--------------------|--|
| N2 | CT | V | 5053619 | 5056473 | WBGene00000862 | cwp-4 | K11D12.1 | -0.470523310014419 |  |
|----|----|---|---------|---------|----------------|-------|----------|--------------------|--|

AGIWUR40515

|    |    |   |         |         |                |       |           |                   |  |
|----|----|---|---------|---------|----------------|-------|-----------|-------------------|--|
| N2 | CT | V | 5056378 | 5064803 | WBGene00003374 | mlk-1 | K11D12.10 | 0.126124043514926 |  |
|----|----|---|---------|---------|----------------|-------|-----------|-------------------|--|

AGIWUR16397;AGIWUR31783;AGIWUR32510

|                                                                                                        |    |   |         |         |                |          |          |                     |             |
|--------------------------------------------------------------------------------------------------------|----|---|---------|---------|----------------|----------|----------|---------------------|-------------|
| N2                                                                                                     | CT | V | 5067637 | 5069665 | WBGene00021975 | Y58A7A.1 | Y58A7A.1 | 0.0011686132110178  |             |
| AGIWUR8433                                                                                             |    |   |         |         |                |          |          |                     |             |
| N2                                                                                                     | CT | V | 5071695 | 5072231 | WBGene00021976 | Y58A7A.2 | Y58A7A.2 | -0.248250330516503  |             |
| AGIWUR32706                                                                                            |    |   |         |         |                |          |          |                     |             |
| N2                                                                                                     | CT | V | 5077849 | 5080903 | WBGene00021977 | Y58A7A.3 | Y58A7A.3 | 0.012140439038272   |             |
| AGIWUR2789;AGIWUR17112;AGIWUR33812;AGIWUR39349                                                         |    |   |         |         |                |          |          |                     |             |
| N2                                                                                                     | CT | V | 5082002 | 5085007 | WBGene00021978 | Y58A7A.4 | Y58A7A.4 | 0.748363446203411   |             |
| AGIWUR35117                                                                                            |    |   |         |         |                |          |          |                     |             |
| N2                                                                                                     | CT | V | 5085886 | 5087121 | WBGene00021979 | Y58A7A.5 | Y58A7A.5 | 0.90764824402557    |             |
| AGIWUR37032                                                                                            |    |   |         |         |                |          |          |                     |             |
| N2                                                                                                     | CT | V | 5087601 | 5089484 | WBGene00021980 | glb-32   | Y58A7A.6 | -0.126269586244115  |             |
| AGIWUR16777                                                                                            |    |   |         |         |                |          |          |                     |             |
| N2                                                                                                     | CT | V | 5093715 | 5096277 | WBGene00015444 | C04F5.2  | C04F5.2  | -0.141264624424252  | AGIWUR36566 |
| N2                                                                                                     | CT | V | 5097150 | 5098907 | WBGene00006782 | unc-46   | C04F5.3  | 0.00326750905701578 |             |
| AGIWUR3171;AGIWUR5049;AGIWUR16856;AGIWUR35187                                                          |    |   |         |         |                |          |          |                     |             |
| N2                                                                                                     | CT | V | 5100098 | 5102117 | WBGene00015446 | srab-1   | C04F5.4  | -0.0564185804432986 | AGIWUR42529 |
| N2                                                                                                     | CT | V | 5103042 | 5105034 | WBGene00015447 | srab-2   | C04F5.5  | -0.121190550202851  | AGIWUR4344  |
| N2                                                                                                     | CT | V | 5105764 | 5107916 | WBGene00015448 | srab-3   | C04F5.6  | -0.202515756381727  | AGIWUR1011  |
| N2                                                                                                     | CT | V | 5108180 | 5110791 | WBGene00015449 | ugt-63   | C04F5.7  | -0.0852835864814225 |             |
| AGIWUR27307;AGIWUR28572;AGIWUR30566;AGIWUR40417                                                        |    |   |         |         |                |          |          |                     |             |
| N2                                                                                                     | CT | V | 5111518 | 5113754 | WBGene00015450 | C04F5.8  | C04F5.8  | -0.0289312546137062 | AGIWUR35055 |
| N2                                                                                                     | CT | V | 5114749 | 5119209 | WBGene00015451 | C04F5.9  | C04F5.9  | -0.377350462860331  | AGIWUR31490 |
| N2                                                                                                     | CT | V | 5119939 | 5126916 | WBGene00004795 | sid-1    | C04F5.1  | 0.301775811041146   | AGIWUR24735 |
| N2                                                                                                     | CT | V | 5127055 | 5130076 | WBGene00017468 | F14F9.5  | F14F9.5  | 0.255903414394044   | AGIWUR36714 |
| N2                                                                                                     | CT | V | 5130318 | 5131538 | WBGene00044536 | F14F9.8  | F14F9.8  | -0.0961681636525427 |             |
| AGIWUR74;AGIWUR1622;AGIWUR6008;AGIWUR25330;AGIWUR26386;AGIWUR29636;AGIWUR32108;AGIWUR40651;AGIWUR45182 |    |   |         |         |                |          |          |                     |             |
| N2                                                                                                     | CT | V | 5132741 | 5137100 | WBGene00017467 | F14F9.4  | F14F9.4  | 0.333890230838609   | AGIWUR4813  |
| N2                                                                                                     | CT | V | 5142300 | 5143798 | WBGene00005346 | srh-129  | F14F9.7  | 0.190894122906535   | AGIWUR36675 |
| N2                                                                                                     | CT | V | 5144831 | 5145781 | WBGene00017465 | F14F9.2  | F14F9.2  | 0.188679877315454   | AGIWUR10319 |
| N2                                                                                                     | CT | V | 5146179 | 5150464 | WBGene00017469 | F14F9.6  | F14F9.6  | 0.243400981113153   | AGIWUR44128 |
| N2                                                                                                     | CT | V | 5151180 | 5152982 | WBGene00005347 | srh-130  | F14F9.1  | 0.0823323119858195  |             |
| AGIWUR15975;AGIWUR23770;AGIWUR45119                                                                    |    |   |         |         |                |          |          |                     |             |
| N2                                                                                                     | CT | V | 5154057 | 5155516 | WBGene00005929 | srx-38   | C03A7.5  | -0.227541869498781  | AGIWUR24941 |
| N2                                                                                                     | CT | V | 5156653 | 5157760 | WBGene00005930 | srx-39   | C03A7.6  | -0.033742080938667  |             |
| AGIWUR7660;AGIWUR15660                                                                                 |    |   |         |         |                |          |          |                     |             |
| N2                                                                                                     | CT | V | 5163269 | 5194608 | WBGene00000031 | abu-8    | C03A7.14 | 0.0569438532211812  |             |
| AGIWUR5374;AGIWUR13664;AGIWUR21378;AGIWUR26006;AGIWUR37231;AGIWUR39433;AGIWUR43459                     |    |   |         |         |                |          |          |                     |             |
| N2                                                                                                     | CT | V | 5195926 | 5198340 | WBGene00021614 | Y47A7.2  | Y47A7.2  | 0.180065946719781   | AGIWUR32030 |
| N2                                                                                                     | CT | V | 5204481 | 5213468 | WBGene00021613 | Y47A7.1  | Y47A7.1  | -0.0284289709301984 | AGIWUR43172 |

|                                                                        |    |   |         |         |                |          |          |                      |             |
|------------------------------------------------------------------------|----|---|---------|---------|----------------|----------|----------|----------------------|-------------|
| N2                                                                     | CT | V | 5223423 | 5230471 | WBGene00021732 | Y49G5B.1 | Y49G5B.1 | 0.0811320156378681   |             |
| AGIWUR10915;AGIWUR30491;AGIWUR42762                                    |    |   |         |         |                |          |          |                      |             |
| N2                                                                     | CT | V | 5230475 | 5233891 | WBGene00016862 | C52A10.1 | C52A10.1 | -0.185313186798432   |             |
| AGIWUR38429                                                            |    |   |         |         |                |          |          |                      |             |
| N2                                                                     | CT | V | 5237417 | 5239440 | WBGene00016864 | C52A10.3 | C52A10.3 | -0.116550919284373   |             |
| AGIWUR9942;AGIWUR17072;AGIWUR18741;AGIWUR27518;AGIWUR32753;AGIWUR35543 |    |   |         |         |                |          |          |                      |             |
| N2                                                                     | CT | V | 5240203 | 5240451 | WBGene00044537 | B0238.15 | B0238.15 | -0.10578534969747    |             |
| AGIWUR20789                                                            |    |   |         |         |                |          |          |                      |             |
| N2                                                                     | CT | V | 5240768 | 5243136 | WBGene00015067 | B0238.1  | B0238.1  | -0.135544581737458   | AGIWUR23849 |
| N2                                                                     | CT | V | 5243815 | 5248021 | WBGene00015077 | B0238.13 | B0238.13 | 0.048594995118906    |             |
| AGIWUR7988;AGIWUR21729;AGIWUR22553;AGIWUR24752;AGIWUR44017             |    |   |         |         |                |          |          |                      |             |
| N2                                                                     | CT | V | 5249037 | 5249873 | WBGene00015078 | srt-66   | B0238.14 | -0.223266240613837   |             |
| AGIWUR4331                                                             |    |   |         |         |                |          |          |                      |             |
| N2                                                                     | CT | V | 5250604 | 5252116 | WBGene00015068 | srt-68   | B0238.3  | 0.0644755188450077   |             |
| AGIWUR6333;AGIWUR7946;AGIWUR27879                                      |    |   |         |         |                |          |          |                      |             |
| N2                                                                     | CT | V | 5256142 | 5257458 | WBGene00015069 | srt-67   | B0238.5  | -0.00241951749027702 | AGIWUR13781 |
| N2                                                                     | CT | V | 5258036 | 5259548 | WBGene00015070 | srt-70   | B0238.6  | 0.00398531067835739  |             |
| AGIWUR7541;AGIWUR44643                                                 |    |   |         |         |                |          |          |                      |             |
| N2                                                                     | CT | V | 5260332 | 5263099 | WBGene00015071 | B0238.7  | B0238.7  | 0.0423213790393975   |             |
| AGIWUR18267;AGIWUR28110                                                |    |   |         |         |                |          |          |                      |             |
| N2                                                                     | CT | V | 5263951 | 5265776 | WBGene00015072 | srt-69   | B0238.8  | -0.0913505052346872  | AGIWUR1864  |
| N2                                                                     | CT | V | 5267822 | 5268823 | WBGene00015076 | B0238.12 | B0238.12 | -0.0232318591378649  |             |
| AGIWUR2000;AGIWUR4711;AGIWUR8300;AGIWUR10378;AGIWUR21191;AGIWUR31864   |    |   |         |         |                |          |          |                      |             |
| N2                                                                     | CT | V | 5269485 | 5270744 | WBGene00015075 | B0238.11 | B0238.11 | -0.0871214662245183  |             |
| AGIWUR5198;AGIWUR8055;AGIWUR32992                                      |    |   |         |         |                |          |          |                      |             |
| N2                                                                     | CT | V | 5274074 | 5275615 | WBGene00015074 | natc-2   | B0238.10 | 0.187990806449999    |             |
| AGIWUR18864                                                            |    |   |         |         |                |          |          |                      |             |
| N2                                                                     | CT | V | 5275554 | 5278101 | WBGene00015073 | B0238.9  | B0238.9  | 0.191186914023913    | AGIWUR26181 |
| N2                                                                     | CT | V | 5286407 | 5287360 | WBGene00021731 | Y49G5A.1 | Y49G5A.1 | -0.206605688553189   |             |
| AGIWUR10627                                                            |    |   |         |         |                |          |          |                      |             |
| N2                                                                     | CT | V | 5303689 | 5311246 | WBGene00003567 | ncx-2    | C10G8.5  | 0.0917145141306075   |             |
| AGIWUR16673;AGIWUR28589;AGIWUR39724;AGIWUR40302                        |    |   |         |         |                |          |          |                      |             |
| N2                                                                     | CT | V | 5311935 | 5312349 | WBGene00015683 | C10G8.4  | C10G8.4  | -0.0695243142231234  |             |
| AGIWUR16031;AGIWUR16827;AGIWUR17490                                    |    |   |         |         |                |          |          |                      |             |
| N2                                                                     | CT | V | 5312890 | 5314289 | WBGene00015682 | C10G8.3  | C10G8.3  | -0.185267475097014   | AGIWUR6462  |
| N2                                                                     | CT | V | 5314404 | 5315589 | WBGene00015681 | C10G8.2  | C10G8.2  | -0.0603565807599971  | AGIWUR37429 |
| N2                                                                     | CT | V | 5315513 | 5319577 | WBGene00000455 | ceh-34   | C10G8.6  | -0.187844571095722   | AGIWUR37117 |
| N2                                                                     | CT | V | 5323204 | 5324616 | WBGene00000454 | ceh-33   | C10G8.7  | -0.0146784427407169  | AGIWUR5584  |
| N2                                                                     | CT | V | 5324806 | 5328470 | WBGene00015684 | C10G8.8  | C10G8.8  | -0.0858646271940078  |             |

AGIWUR1144;AGIWUR21620

|    |    |   |         |         |                |         |         |                     |             |
|----|----|---|---------|---------|----------------|---------|---------|---------------------|-------------|
| N2 | CT | V | 5331267 | 5333055 | WBGene00005183 | srg-26  | C10G8.1 | 0.0072442616635735  | AGIWUR38452 |
| N2 | CT | V | 5334888 | 5336329 | WBGene00005185 | srg-28  | T09D3.2 | 0.17293067432522    | AGIWUR7914  |
| N2 | CT | V | 5337184 | 5339013 | WBGene00005186 | srg-29  | T09D3.6 | 0.192592202511129   | AGIWUR18570 |
| N2 | CT | V | 5339797 | 5341309 | WBGene00005184 | srg-27  | T09D3.7 | -0.338052608989556  | AGIWUR20874 |
| N2 | CT | V | 5342139 | 5344365 | WBGene00005182 | srg-25  | T09D3.5 | -0.0579171130947076 | AGIWUR33862 |
| N2 | CT | V | 5346619 | 5349571 | WBGene00020384 | T09D3.3 | T09D3.3 | -0.686541383113656  | AGIWUR21034 |
| N2 | CT | V | 5351783 | 5353067 | WBGene00005087 | srd-9   | T09D3.1 | 0.26164810154105    | AGIWUR34801 |
| N2 | CT | V | 5354062 | 5358225 | WBGene00020385 | nhr-216 | T09D3.4 | -0.0440091585550402 | AGIWUR17754 |
| N2 | CT | V | 5365163 | 5366792 | WBGene00044538 | T09D3.8 | T09D3.8 | 0.0400068932337572  |             |

AGIWUR11112;AGIWUR28461;AGIWUR31607

|             |    |   |         |         |                |          |          |                     |             |
|-------------|----|---|---------|---------|----------------|----------|----------|---------------------|-------------|
| N2          | CT | V | 5372418 | 5377500 | WBGene00016430 | C35A11.3 | C35A11.3 | 0.103384531540726   |             |
| AGIWUR6176  |    |   |         |         |                |          |          |                     |             |
| N2          | CT | V | 5386110 | 5389409 | WBGene00016429 | C35A11.2 | C35A11.2 | -0.0295368592720298 |             |
| AGIWUR35099 |    |   |         |         |                |          |          |                     |             |
| N2          | CT | V | 5389480 | 5393148 | WBGene00016431 | C35A11.4 | C35A11.4 | 0.0694921198321516  |             |
| AGIWUR5955  |    |   |         |         |                |          |          |                     |             |
| N2          | CT | V | 5405358 | 5408386 | WBGene00016428 | dmsr-7   | C35A11.1 | -0.0038853392843512 |             |
| AGIWUR31595 |    |   |         |         |                |          |          |                     |             |
| N2          | CT | V | 5410955 | 5413001 | WBGene00017262 | F08F3.4  | F08F3.4  | 0.116657171787747   | AGIWUR23133 |
| N2          | CT | V | 5413320 | 5415073 | WBGene00017266 | F08F3.10 | F08F3.10 | -0.0508910551954695 |             |

AGIWUR16702

|    |    |   |         |         |                |         |         |                    |  |
|----|----|---|---------|---------|----------------|---------|---------|--------------------|--|
| N2 | CT | V | 5418044 | 5420067 | WBGene00017263 | F08F3.6 | F08F3.6 | -0.163813734426217 |  |
|----|----|---|---------|---------|----------------|---------|---------|--------------------|--|

AGIWUR143;AGIWUR10790;AGIWUR29581

|    |    |   |         |         |                |          |         |                    |  |
|----|----|---|---------|---------|----------------|----------|---------|--------------------|--|
| N2 | CT | V | 5421018 | 5423488 | WBGene00000373 | cyp-14A5 | F08F3.7 | 0.0453580620376908 |  |
|----|----|---|---------|---------|----------------|----------|---------|--------------------|--|

AGIWUR43753

|    |    |   |         |         |                |       |         |                   |  |
|----|----|---|---------|---------|----------------|-------|---------|-------------------|--|
| N2 | CT | V | 5428160 | 5430431 | WBGene00004358 | rhr-1 | F08F3.3 | 0.099637791649827 |  |
|----|----|---|---------|---------|----------------|-------|---------|-------------------|--|

AGIWUR15061;AGIWUR22455;AGIWUR28598;AGIWUR30549;AGIWUR31196;AGIWUR43016

|    |    |   |         |         |                |          |         |                    |             |
|----|----|---|---------|---------|----------------|----------|---------|--------------------|-------------|
| N2 | CT | V | 5431316 | 5432557 | WBGene00017264 | F08F3.8  | F08F3.8 | 0.0259133904378688 | AGIWUR15174 |
| N2 | CT | V | 5433392 | 5437066 | WBGene00017261 | ac1-6    | F08F3.2 | -0.161136198865712 | AGIWUR43644 |
| N2 | CT | V | 5437084 | 5439161 | WBGene00017265 | snpc-1.3 | F08F3.9 | -0.215345993562588 |             |

AGIWUR14435

|    |    |   |         |         |                |         |         |                    |  |
|----|----|---|---------|---------|----------------|---------|---------|--------------------|--|
| N2 | CT | V | 5446138 | 5448721 | WBGene00017260 | F08F3.1 | F08F3.1 | -0.164173442062091 |  |
|----|----|---|---------|---------|----------------|---------|---------|--------------------|--|

AGIWUR13926;AGIWUR43486

|    |    |   |         |         |                |         |         |                     |             |
|----|----|---|---------|---------|----------------|---------|---------|---------------------|-------------|
| N2 | CT | V | 5449287 | 5453715 | WBGene00001593 | glc-3   | ZC317.3 | -0.0745345550324554 | AGIWUR2075  |
| N2 | CT | V | 5460106 | 5461438 | WBGene00022588 | ZC317.2 | ZC317.2 | -0.38591708109071   | AGIWUR27671 |
| N2 | CT | V | 5461528 | 5462994 | WBGene00005224 | srg-67  | ZC317.4 | 0.0517168695097965  | AGIWUR10677 |
| N2 | CT | V | 5463791 | 5465435 | WBGene00005225 | srg-68  | ZC317.5 | 0.0442570683132129  | AGIWUR23244 |
| N2 | CT | V | 5471779 | 5473144 | WBGene00022587 | ZC317.1 | ZC317.1 | -0.229323802249346  | AGIWUR23867 |

|                                                                        |    |   |         |         |                |         |          |                      |             |
|------------------------------------------------------------------------|----|---|---------|---------|----------------|---------|----------|----------------------|-------------|
| N2                                                                     | CT | V | 5480750 | 5482415 | WBGene00005223 | srg-66  | T05C3.7  | 0.174790295783052    | AGIWUR30145 |
| N2                                                                     | CT | V | 5483086 | 5484966 | WBGene00005222 | srg-65  | T05C3.8  | 0.0266626307866193   | AGIWUR24244 |
| N2                                                                     | CT | V | 5485697 | 5488866 | WBGene00001727 | grl-18  | T05C3.4  | -0.086329757602039   | AGIWUR3326  |
| N2                                                                     | CT | V | 5490370 | 5493646 | WBGene00020256 | T05C3.6 | T05C3.6  | -0.0958891485609463  | AGIWUR20647 |
| N2                                                                     | CT | V | 5493747 | 5503010 | WBGene00020254 | T05C3.2 | T05C3.2  | -0.155392125308033   | AGIWUR30515 |
| N2                                                                     | CT | V | 5503033 | 5504856 | WBGene00001037 | dnj-19  | T05C3.5  | -0.115171824580246   |             |
| AGIWUR6756;AGIWUR15692;AGIWUR18960;AGIWUR39985;AGIWUR40578;AGIWUR44931 |    |   |         |         |                |         |          |                      |             |
| N2                                                                     | CT | V | 5505253 | 5509956 | WBGene00003637 | nhr-47  | C24G6.4  | -0.00288690985579043 |             |
| AGIWUR39007;AGIWUR40807                                                |    |   |         |         |                |         |          |                      |             |
| N2                                                                     | CT | V | 5509934 | 5513830 | WBGene00016061 | hpo-15  | C24G6.6  | 0.123782511902096    |             |
| AGIWUR5425;AGIWUR7430;AGIWUR10964                                      |    |   |         |         |                |         |          |                      |             |
| N2                                                                     | CT | V | 5514348 | 5520458 | WBGene00016060 | mms-19  | C24G6.3  | -0.253345983267844   | AGIWUR12501 |
| N2                                                                     | CT | V | 5523727 | 5530733 | WBGene00016059 | C24G6.2 | C24G6.2  | -0.0765041530529196  | AGIWUR41996 |
| N2                                                                     | CT | V | 5530725 | 5533845 | WBGene00001710 | grl-1   | C24G6.7  | 0.0423122439396968   | AGIWUR32944 |
| N2                                                                     | CT | V | 5534101 | 5536243 | WBGene00016062 | C24G6.8 | C24G6.8  | -0.160468046916998   |             |
| AGIWUR4807;AGIWUR34241;AGIWUR34262                                     |    |   |         |         |                |         |          |                      |             |
| N2                                                                     | CT | V | 5536681 | 5537713 | WBGene00006376 | syp-2   | C24G6.1  | -0.208684761316313   | AGIWUR15027 |
| N2                                                                     | CT | V | 5538800 | 5545766 | WBGene00000477 | cft-1   | C18C4.2  | 0.0442997391292348   | AGIWUR14907 |
| N2                                                                     | CT | V | 5545669 | 5548073 | WBGene00015965 | ugt-48  | C18C4.3  | 0.0984567484070915   |             |
| AGIWUR1728;AGIWUR19654;AGIWUR22191                                     |    |   |         |         |                |         |          |                      |             |
| N2                                                                     | CT | V | 5550315 | 5557281 | WBGene00015966 | C18C4.5 | C18C4.5  | 0.0120757156640288   | AGIWUR35146 |
| N2                                                                     | CT | V | 5558890 | 5564298 | WBGene00015964 | glb-5   | C18C4.1  | 0.0451115731408809   | AGIWUR36782 |
| N2                                                                     | CT | V | 5564306 | 5567219 | WBGene00015968 | C18C4.7 | C18C4.7  | 0.0841081849620511   |             |
| AGIWUR6245;AGIWUR44207                                                 |    |   |         |         |                |         |          |                      |             |
| N2                                                                     | CT | V | 5568209 | 5570533 | WBGene00015969 | glb-6   | C18C4.9  | -0.0310654806114625  |             |
| AGIWUR5075;AGIWUR34571;AGIWUR42521                                     |    |   |         |         |                |         |          |                      |             |
| N2                                                                     | CT | V | 5575410 | 5581713 | WBGene00002215 | klc-2   | C18C4.10 | -0.0561123232008827  |             |
| AGIWUR16149;AGIWUR18996;AGIWUR28335;AGIWUR33837                        |    |   |         |         |                |         |          |                      |             |
| N2                                                                     | CT | V | 5583161 | 5584343 | WBGene00003927 | pas-6   | CD4.6    | 0.25818772095862     | AGIWUR23093 |
| N2                                                                     | CT | V | 5585182 | 5586500 | WBGene00044542 | CD4.11  | CD4.11   | -0.025590144419156   | AGIWUR10838 |
| N2                                                                     | CT | V | 5589652 | 5591838 | WBGene00016991 | CD4.5   | CD4.5    | -0.43634646768213    | AGIWUR15443 |
| N2                                                                     | CT | V | 5592685 | 5593612 | WBGene00016990 | vps-37  | CD4.4    | -0.180475502086294   | AGIWUR41592 |
| N2                                                                     | CT | V | 5593706 | 5594499 | WBGene00016989 | CD4.3   | CD4.3    | 0.0666300776274147   |             |
| AGIWUR5478;AGIWUR13375                                                 |    |   |         |         |                |         |          |                      |             |
| N2                                                                     | CT | V | 5594615 | 5595842 | WBGene00000795 | crn-2   | CD4.2    | -0.0739956034799754  | AGIWUR2005  |
| N2                                                                     | CT | V | 5595653 | 5596551 | WBGene00016992 | zhit-1  | CD4.7    | -0.0168383929571387  |             |
| AGIWUR26205;AGIWUR29405;AGIWUR29560                                    |    |   |         |         |                |         |          |                      |             |
| N2                                                                     | CT | V | 5597061 | 5597450 | WBGene00022970 | CD4.10  | CD4.10   | -0.00668629369501694 |             |
| AGIWUR2884;AGIWUR10510;AGIWUR37326;AGIWUR37399;AGIWUR38444             |    |   |         |         |                |         |          |                      |             |

|                                                                        |    |   |         |         |                |          |          |                     |             |
|------------------------------------------------------------------------|----|---|---------|---------|----------------|----------|----------|---------------------|-------------|
| N2                                                                     | CT | V | 5606555 | 5609368 | WBGene00016988 | CD4.1    | CD4.1    | -0.0697198727800368 |             |
| AGIWUR3887;AGIWUR12184;AGIWUR16190;AGIWUR22946                         |    |   |         |         |                |          |          |                     |             |
| N2                                                                     | CT | V | 5609414 | 5613219 | WBGene00019756 | M03E7.4  | M03E7.4  | 0.170385876382195   |             |
| AGIWUR1269;AGIWUR7806;AGIWUR36925                                      |    |   |         |         |                |          |          |                     |             |
| N2                                                                     | CT | V | 5617601 | 5618319 | WBGene00019754 | M03E7.2  | M03E7.2  | 0.48417160785309    | AGIWUR15374 |
| N2                                                                     | CT | V | 5618291 | 5620140 | WBGene00019757 | memb-2   | M03E7.5  | -0.0541616837288039 | AGIWUR23665 |
| N2                                                                     | CT | V | 5623642 | 5624637 | WBGene00019753 | M03E7.1  | M03E7.1  | 0.029107105515175   | AGIWUR18874 |
| N2                                                                     | CT | V | 5624727 | 5630892 | WBGene00000071 | acy-4    | T01C2.1  | -0.0467923024806396 | AGIWUR6301  |
| N2                                                                     | CT | V | 5644487 | 5646231 | WBGene00006008 | srx-117  | C14C11.5 | -0.0432308179102172 |             |
| AGIWUR26107;AGIWUR33030;AGIWUR41327                                    |    |   |         |         |                |          |          |                     |             |
| N2                                                                     | CT | V | 5647564 | 5651040 | WBGene00015768 | C14C11.4 | C14C11.4 | -0.0874871413982596 |             |
| AGIWUR5796                                                             |    |   |         |         |                |          |          |                     |             |
| N2                                                                     | CT | V | 5654449 | 5658699 | WBGene00015767 | hex-2    | C14C11.3 | -0.0624503575898707 |             |
| AGIWUR28993                                                            |    |   |         |         |                |          |          |                     |             |
| N2                                                                     | CT | V | 5658713 | 5660704 | WBGene00003507 | mut-14   | C14C11.6 | 0.125041590220428   |             |
| AGIWUR17638                                                            |    |   |         |         |                |          |          |                     |             |
| N2                                                                     | CT | V | 5665242 | 5666082 | WBGene00015769 | C14C11.7 | C14C11.7 | -0.154879627065029  |             |
| AGIWUR15135                                                            |    |   |         |         |                |          |          |                     |             |
| N2                                                                     | CT | V | 5669611 | 5676111 | WBGene00004104 | pqn-13   | C14C11.8 | 0.0991221528575936  |             |
| AGIWUR30520                                                            |    |   |         |         |                |          |          |                     |             |
| N2                                                                     | CT | V | 5678600 | 5682630 | WBGene00017768 | F25B4.5  | F25B4.5  | 0.103571986966642   | AGIWUR37076 |
| N2                                                                     | CT | V | 5682721 | 5684589 | WBGene00017769 | hmg-1    | F25B4.6  | -0.262472485053312  | AGIWUR30393 |
| N2                                                                     | CT | V | 5684875 | 5685728 | WBGene00017767 | F25B4.4  | F25B4.4  | -0.0905941584331771 | AGIWUR17106 |
| N2                                                                     | CT | V | 5685726 | 5687381 | WBGene00017770 | F25B4.7  | F25B4.7  | -0.349403289727308  |             |
| AGIWUR7148;AGIWUR16812;AGIWUR20659;AGIWUR31628;AGIWUR32518;AGIWUR34484 |    |   |         |         |                |          |          |                     |             |
| N2                                                                     | CT | V | 5690103 | 5691715 | WBGene00017771 | F25B4.8  | F25B4.8  | -0.0291263548232799 |             |
| AGIWUR8731;AGIWUR13190;AGIWUR19738;AGIWUR20436;AGIWUR21867;AGIWUR31668 |    |   |         |         |                |          |          |                     |             |
| N2                                                                     | CT | V | 5700010 | 5701080 | WBGene00017772 | cllec-1  | F25B4.9  | -0.136170758997848  | AGIWUR31369 |
| N2                                                                     | CT | V | 5709418 | 5712335 | WBGene00017766 | pel-1    | F25B4.2  | -0.160755283263287  |             |
| AGIWUR7805;AGIWUR31214                                                 |    |   |         |         |                |          |          |                     |             |
| N2                                                                     | CT | V | 5712818 | 5714756 | WBGene00017765 | gcst-1   | F25B4.1  | -0.0571431395403152 |             |
| AGIWUR11264;AGIWUR16183;AGIWUR16623                                    |    |   |         |         |                |          |          |                     |             |
| N2                                                                     | CT | V | 5714760 | 5716581 | WBGene00044539 | K09H11.9 | K09H11.9 | -0.248928368012076  |             |
| AGIWUR370;AGIWUR8555;AGIWUR16863                                       |    |   |         |         |                |          |          |                     |             |
| N2                                                                     | CT | V | 5723079 | 5726545 | WBGene00019601 | K09H11.4 | K09H11.4 | 0.0903348116461435  |             |
| AGIWUR37085                                                            |    |   |         |         |                |          |          |                     |             |
| N2                                                                     | CT | V | 5727290 | 5729593 | WBGene00006015 | srx-124  | K09H11.8 | 0.0377512302254512  |             |
| AGIWUR20319                                                            |    |   |         |         |                |          |          |                     |             |
| N2                                                                     | CT | V | 5731312 | 5734595 | WBGene00006014 | srx-123  | K09H11.2 | 0.0524460800452315  |             |



|                                                                                             |    |   |         |         |                |                   |                                  |
|---------------------------------------------------------------------------------------------|----|---|---------|---------|----------------|-------------------|----------------------------------|
| AGIWUR35596                                                                                 |    |   |         |         |                |                   |                                  |
| N2                                                                                          | CT | V | 5734844 | 5735984 | WBGene00019603 | K09H11.6          | K09H11.6 -0.0591101399617129     |
| AGIWUR198;AGIWUR28113                                                                       |    |   |         |         |                |                   |                                  |
| N2                                                                                          | CT | V | 5747723 | 5752033 | WBGene00019599 | K09H11.1          | K09H11.1 -0.0597250130274656     |
| AGIWUR6658;AGIWUR25254;AGIWUR40166                                                          |    |   |         |         |                |                   |                                  |
| N2                                                                                          | CT | V | 5754670 | 5755558 | WBGene00044541 | K09H11.11         | K09H11.11 0.0760280480506124     |
| AGIWUR3096;AGIWUR11398;AGIWUR36361;AGIWUR37461;AGIWUR41423                                  |    |   |         |         |                |                   |                                  |
| N2                                                                                          | CT | V | 5758224 | 5760232 | WBGene00016891 | C53A3.1 C53A3.1   | -0.0856726888762935              |
| AGIWUR3869;AGIWUR8455;AGIWUR10857                                                           |    |   |         |         |                |                   |                                  |
| N2                                                                                          | CT | V | 5770456 | 5771767 | WBGene00018424 | F44E7.2 F44E7.2   | 0.0559174650136347               |
| AGIWUR39531;AGIWUR43941                                                                     |    |   |         |         |                |                   |                                  |
| N2                                                                                          | CT | V | 5771945 | 5772497 | WBGene00018425 | F44E7.3 F44E7.3   | -0.00439682522212692 AGIWUR27519 |
| N2                                                                                          | CT | V | 5772831 | 5777034 | WBGene00018426 | F44E7.4 F44E7.4   | 0.0116516308547521               |
| AGIWUR6258;AGIWUR7214;AGIWUR10257;AGIWUR17718;AGIWUR37927                                   |    |   |         |         |                |                   |                                  |
| N2                                                                                          | CT | V | 5778818 | 5780947 | WBGene00018427 | F44E7.5 F44E7.5   | 0.220865620155419                |
| AGIWUR4722;AGIWUR5044;AGIWUR5808;AGIWUR15449;AGIWUR16199;AGIWUR28981                        |    |   |         |         |                |                   |                                  |
| N2                                                                                          | CT | V | 5781317 | 5782787 | WBGene00018428 | fbxa-183 F44E7.6  | -0.0714315724274686              |
| AGIWUR22543                                                                                 |    |   |         |         |                |                   |                                  |
| N2                                                                                          | CT | V | 5782893 | 5785648 | WBGene00018429 | F44E7.7 F44E7.7   | -0.31335003974643 AGIWUR13903    |
| N2                                                                                          | CT | V | 5785959 | 5790066 | WBGene00018430 | nhr-142 F44E7.8   | 0.0930179833114555               |
| AGIWUR35477;AGIWUR37111                                                                     |    |   |         |         |                |                   |                                  |
| N2                                                                                          | CT | V | 5791230 | 5792122 | WBGene00018431 | F44E7.9 F44E7.9   | -0.131028202216752 AGIWUR43388   |
| N2                                                                                          | CT | V | 5792331 | 5794857 | WBGene00022576 | ZC250.2 ZC250.2   | 0.0349004504225814 AGIWUR34319   |
| N2                                                                                          | CT | V | 5794688 | 5798232 | WBGene00022577 | nstp-3 ZC250.3    | -0.18498580074842 AGIWUR3913     |
| N2                                                                                          | CT | V | 5799673 | 5805666 | WBGene00000893 | cyn-17 ZC250.1    | -0.154356753737815               |
| AGIWUR16547;AGIWUR26654                                                                     |    |   |         |         |                |                   |                                  |
| N2                                                                                          | CT | V | 5805767 | 5807532 | WBGene00045306 | ZC250.5 ZC250.5   | 0.307335996760981 AGIWUR35199    |
| N2                                                                                          | CT | V | 5812316 | 5813157 | WBGene00045305 | ZC250.4 ZC250.4   | 0.215666146844368                |
| AGIWUR1578;AGIWUR13681;AGIWUR26046;AGIWUR43378                                              |    |   |         |         |                |                   |                                  |
| N2                                                                                          | CT | V | 5826833 | 5832866 | WBGene00002637 | let-418 F26F12.7  | 0.144115296542751                |
| AGIWUR6725;AGIWUR13247;AGIWUR14742;AGIWUR30477;AGIWUR34699;AGIWUR43629                      |    |   |         |         |                |                   |                                  |
| N2                                                                                          | CT | V | 5833831 | 5835183 | WBGene00005297 | srh-76 F26F12.6   | -0.00277354409272501             |
| AGIWUR2120                                                                                  |    |   |         |         |                |                   |                                  |
| N2                                                                                          | CT | V | 5835855 | 5836871 | WBGene00000713 | col-140 F26F12.1  | 0.652132678544774                |
| AGIWUR18993                                                                                 |    |   |         |         |                |                   |                                  |
| N2                                                                                          | CT | V | 5837572 | 5838613 | WBGene00017833 | F26F12.2 F26F12.2 | 0.0494656774149131               |
| AGIWUR15256                                                                                 |    |   |         |         |                |                   |                                  |
| N2                                                                                          | CT | V | 5838960 | 5845739 | WBGene00017834 | F26F12.3 F26F12.3 | -0.0388843121343734              |
| AGIWUR290;AGIWUR8936;AGIWUR9237;AGIWUR16429;AGIWUR17239;AGIWUR19312;AGIWUR28755;AGIWUR42064 |    |   |         |         |                |                   |                                  |

|                                                                                                |    |   |         |         |                |          |          |                      |             |
|------------------------------------------------------------------------------------------------|----|---|---------|---------|----------------|----------|----------|----------------------|-------------|
| N2                                                                                             | CT | V | 5854848 | 5856414 | WBGene00044544 | F26F12.8 | F26F12.8 | -0.146943752560947   |             |
| AGIWUR1899;AGIWUR8610;AGIWUR12476;AGIWUR24453;AGIWUR34690                                      |    |   |         |         |                |          |          |                      |             |
| N2                                                                                             | CT | V | 5863984 | 5865149 | WBGene00017836 | F26F12.5 | F26F12.5 | 0.0148158099955999   |             |
| AGIWUR289;AGIWUR1983;AGIWUR2375;AGIWUR2704;AGIWUR33158                                         |    |   |         |         |                |          |          |                      |             |
| N2                                                                                             | CT | V | 5866134 | 5867952 | WBGene00017835 | F26F12.4 | F26F12.4 | -0.133087546108182   |             |
| AGIWUR9893                                                                                     |    |   |         |         |                |          |          |                      |             |
| N2                                                                                             | CT | V | 5872084 | 5874914 | WBGene00015360 | C02G6.2  | C02G6.2  | 0.0684735622866053   |             |
| AGIWUR18549;AGIWUR32969;AGIWUR35538;AGIWUR39767                                                |    |   |         |         |                |          |          |                      |             |
| N2                                                                                             | CT | V | 5876370 | 5879942 | WBGene00015359 | C02G6.1  | C02G6.1  | 0.167379383472669    | AGIWUR15967 |
| N2                                                                                             | CT | V | 5881052 | 5882450 | WBGene00044803 | C02G6.3  | C02G6.3  | -0.0872567364128782  |             |
| AGIWUR3176;AGIWUR25574;AGIWUR28650                                                             |    |   |         |         |                |          |          |                      |             |
| N2                                                                                             | CT | V | 5882665 | 5883835 | WBGene00015424 | C04E6.8  | C04E6.8  | 0.0147314212588272   |             |
| AGIWUR2858;AGIWUR5076;AGIWUR11028;AGIWUR19894;AGIWUR31647;AGIWUR40369                          |    |   |         |         |                |          |          |                      |             |
| N2                                                                                             | CT | V | 5893312 | 5895208 | WBGene00015423 | C04E6.7  | C04E6.7  | 0.0408942148204829   |             |
| AGIWUR2831;AGIWUR4042;AGIWUR17377                                                              |    |   |         |         |                |          |          |                      |             |
| N2                                                                                             | CT | V | 5895388 | 5898602 | WBGene00001698 | grd-9    | C04E6.6  | 0.337523130484929    | AGIWUR37827 |
| N2                                                                                             | CT | V | 5902133 | 5904831 | WBGene00015422 | C04E6.5  | C04E6.5  | 0.116985593137041    | AGIWUR16915 |
| N2                                                                                             | CT | V | 5904917 | 5906352 | WBGene00005093 | srd-15   | C04E6.10 | 0.0555179085292821   |             |
| AGIWUR25561                                                                                    |    |   |         |         |                |          |          |                      |             |
| N2                                                                                             | CT | V | 5907408 | 5909620 | WBGene00015421 | C04E6.4  | C04E6.4  | -0.00445203482247258 | AGIWUR38659 |
| N2                                                                                             | CT | V | 5912726 | 5913757 | WBGene00015427 | C04E6.13 | C04E6.13 | -0.345989787778985   |             |
| AGIWUR30644                                                                                    |    |   |         |         |                |          |          |                      |             |
| N2                                                                                             | CT | V | 5914097 | 5917891 | WBGene00015425 | C04E6.11 | C04E6.11 | 0.172025700164369    |             |
| AGIWUR4820;AGIWUR13300;AGIWUR16133;AGIWUR18878;AGIWUR25001;AGIWUR33865;AGIWUR34856;AGIWUR41339 |    |   |         |         |                |          |          |                      |             |
| N2                                                                                             | CT | V | 5918062 | 5919835 | WBGene00015426 | C04E6.12 | C04E6.12 | -0.578056477566003   |             |
| AGIWUR19866                                                                                    |    |   |         |         |                |          |          |                      |             |
| N2                                                                                             | CT | V | 5920121 | 5920395 | WBGene00015420 | C04E6.3  | C04E6.3  | -0.0497879557549918  |             |
| AGIWUR4955;AGIWUR10644;AGIWUR19172;AGIWUR27814;AGIWUR40512                                     |    |   |         |         |                |          |          |                      |             |
| N2                                                                                             | CT | V | 5922545 | 5924297 | WBGene00015419 | srsx-18  | C04E6.2  | -0.103787334434642   | AGIWUR18814 |
| N2                                                                                             | CT | V | 5927647 | 5930417 | WBGene00019032 | srsx-17  | F58D7.1  | -0.0988944647124379  | AGIWUR41420 |
| N2                                                                                             | CT | V | 5930847 | 5933435 | WBGene00019763 | galt-1   | M03F8.4  | -0.160075320580648   |             |
| AGIWUR21765;AGIWUR37492                                                                        |    |   |         |         |                |          |          |                      |             |
| N2                                                                                             | CT | V | 5933662 | 5936791 | WBGene00019764 | M03F8.5  | M03F8.5  | 0.0381253010583276   | AGIWUR31881 |
| N2                                                                                             | CT | V | 5940024 | 5943362 | WBGene00019762 | M03F8.3  | M03F8.3  | -0.0228718499517333  |             |
| AGIWUR17052;AGIWUR27293                                                                        |    |   |         |         |                |          |          |                      |             |
| N2                                                                                             | CT | V | 5943474 | 5950991 | WBGene00004206 | pst-1    | M03F8.2  | 0.288003464421869    |             |
| AGIWUR2524;AGIWUR6470;AGIWUR8666;AGIWUR11767;AGIWUR17252;AGIWUR22609                           |    |   |         |         |                |          |          |                      |             |
| N2                                                                                             | CT | V | 5951433 | 5953872 | WBGene00019761 | M03F8.1  | M03F8.1  | -0.0209166901513385  | AGIWUR14350 |
| N2                                                                                             | CT | V | 5953831 | 5954840 | WBGene00019765 | M03F8.6  | M03F8.6  | -0.0229788983485326  |             |

AGIWUR29423;AGIWUR41081

|    |    |   |         |         |                |       |         |                    |  |
|----|----|---|---------|---------|----------------|-------|---------|--------------------|--|
| N2 | CT | V | 5960585 | 5963882 | WBGene00003954 | pcm-1 | C10F3.5 | -0.143795726606871 |  |
|----|----|---|---------|---------|----------------|-------|---------|--------------------|--|

AGIWUR9721;AGIWUR22533;AGIWUR32790;AGIWUR39510

|    |    |   |         |         |                |         |         |                     |             |
|----|----|---|---------|---------|----------------|---------|---------|---------------------|-------------|
| N2 | CT | V | 5961813 | 5969175 | WBGene00015678 | mcp-1   | C10F3.4 | -0.159684171936057  | AGIWUR6540  |
| N2 | CT | V | 5976029 | 5981513 | WBGene00000069 | acy-2   | C10F3.3 | -0.242928419236941  | AGIWUR29420 |
| N2 | CT | V | 5983745 | 5985473 | WBGene00000979 | dhs-16  | C10F3.2 | -0.120334950964281  | AGIWUR25144 |
| N2 | CT | V | 5985440 | 5986855 | WBGene00015679 | C10F3.7 | C10F3.7 | 0.0627968184862997  | AGIWUR30945 |
| N2 | CT | V | 5987003 | 5990252 | WBGene00001508 | fut-8   | C10F3.6 | -0.250887561334325  | AGIWUR8362  |
| N2 | CT | V | 5996323 | 5999344 | WBGene00015677 | cpg-4   | C10F3.1 | -0.0108852347464587 | AGIWUR29999 |
| N2 | CT | V | 6003601 | 6016087 | WBGene00001345 | fos-1   | F29G9.4 | 0.323023200681661   | AGIWUR34164 |
| N2 | CT | V | 6016049 | 6017669 | WBGene00004502 | rpt-2   | F29G9.5 | -0.0306118590706994 | AGIWUR8467  |
| N2 | CT | V | 6017970 | 6018886 | WBGene00000159 | aps-1   | F29G9.3 | 0.16714560298743    |             |

AGIWUR5131;AGIWUR10646;AGIWUR26206

|    |    |   |         |         |                |        |         |                   |  |
|----|----|---|---------|---------|----------------|--------|---------|-------------------|--|
| N2 | CT | V | 6018994 | 6026337 | WBGene00017931 | picc-1 | F29G9.2 | 0.537435455994429 |  |
|----|----|---|---------|---------|----------------|--------|---------|-------------------|--|

AGIWUR14915;AGIWUR30183;AGIWUR39248

|    |    |   |         |         |                |          |          |                    |            |
|----|----|---|---------|---------|----------------|----------|----------|--------------------|------------|
| N2 | CT | V | 6026330 | 6034923 | WBGene00000980 | dhs-17   | F29G9.6  | -0.111187668225723 | AGIWUR9125 |
| N2 | CT | V | 6041196 | 6043185 | WBGene00019804 | R01B10.2 | R01B10.2 | 0.373437761538664  |            |

AGIWUR39768

|    |    |   |         |         |                |       |          |                    |  |
|----|----|---|---------|---------|----------------|-------|----------|--------------------|--|
| N2 | CT | V | 6044028 | 6045671 | WBGene00000534 | cpi-2 | R01B10.1 | 0.0726347207302314 |  |
|----|----|---|---------|---------|----------------|-------|----------|--------------------|--|

AGIWUR363;AGIWUR9475;AGIWUR13614;AGIWUR15479;AGIWUR17723;AGIWUR37763;AGIWUR40451;AGIWUR43366

|    |    |   |         |         |                |          |          |                    |  |
|----|----|---|---------|---------|----------------|----------|----------|--------------------|--|
| N2 | CT | V | 6045640 | 6047908 | WBGene00019806 | R01B10.4 | R01B10.4 | -0.294922436898485 |  |
|----|----|---|---------|---------|----------------|----------|----------|--------------------|--|

AGIWUR5448

|    |    |   |         |         |                |        |          |                    |  |
|----|----|---|---------|---------|----------------|--------|----------|--------------------|--|
| N2 | CT | V | 6047922 | 6051259 | WBGene00019807 | jamp-1 | R01B10.5 | 0.0194516765475949 |  |
|----|----|---|---------|---------|----------------|--------|----------|--------------------|--|

AGIWUR6308;AGIWUR24410;AGIWUR39284;AGIWUR42295

|    |    |   |         |         |                |        |           |                   |  |
|----|----|---|---------|---------|----------------|--------|-----------|-------------------|--|
| N2 | CT | V | 6055589 | 6056743 | WBGene00005098 | srd-20 | Y38A10A.1 | 0.121566829259013 |  |
|----|----|---|---------|---------|----------------|--------|-----------|-------------------|--|

AGIWUR5427

|    |    |   |         |         |                |           |           |                    |  |
|----|----|---|---------|---------|----------------|-----------|-----------|--------------------|--|
| N2 | CT | V | 6057366 | 6063430 | WBGene00021389 | Y38A10A.2 | Y38A10A.2 | 0.0157342373417908 |  |
|----|----|---|---------|---------|----------------|-----------|-----------|--------------------|--|

AGIWUR24984

|    |    |   |         |         |                |        |           |                    |  |
|----|----|---|---------|---------|----------------|--------|-----------|--------------------|--|
| N2 | CT | V | 6065507 | 6067089 | WBGene00005236 | srh-10 | Y38A10A.3 | 0.0934140056217281 |  |
|----|----|---|---------|---------|----------------|--------|-----------|--------------------|--|

AGIWUR32924

|    |    |   |         |         |                |          |           |                     |  |
|----|----|---|---------|---------|----------------|----------|-----------|---------------------|--|
| N2 | CT | V | 6067811 | 6070068 | WBGene00021390 | fbxa-214 | Y38A10A.4 | -0.0500691663828485 |  |
|----|----|---|---------|---------|----------------|----------|-----------|---------------------|--|

AGIWUR4835;AGIWUR25614;AGIWUR35294

|    |    |   |         |         |                |           |           |                    |  |
|----|----|---|---------|---------|----------------|-----------|-----------|--------------------|--|
| N2 | CT | V | 6096028 | 6096903 | WBGene00021392 | Y38A10A.7 | Y38A10A.7 | -0.126945194672734 |  |
|----|----|---|---------|---------|----------------|-----------|-----------|--------------------|--|

AGIWUR40565

|    |    |   |         |         |                |        |           |                    |  |
|----|----|---|---------|---------|----------------|--------|-----------|--------------------|--|
| N2 | CT | V | 6097105 | 6099083 | WBGene00021391 | smut-1 | Y38A10A.6 | 0.0858790406316423 |  |
|----|----|---|---------|---------|----------------|--------|-----------|--------------------|--|

AGIWUR34126

|    |    |   |         |         |                |       |           |                   |  |
|----|----|---|---------|---------|----------------|-------|-----------|-------------------|--|
| N2 | CT | V | 6098993 | 6100553 | WBGene00000802 | crt-1 | Y38A10A.5 | 0.242292997882618 |  |
|----|----|---|---------|---------|----------------|-------|-----------|-------------------|--|

AGIWUR5761;AGIWUR21954;AGIWUR27741;AGIWUR42525;AGIWUR42873

|    |    |   |         |         |                |       |         |                    |            |
|----|----|---|---------|---------|----------------|-------|---------|--------------------|------------|
| N2 | CT | V | 6105607 | 6107530 | WBGene00017535 | atf-8 | F17A9.3 | -0.545923663106664 | AGIWUR8129 |
|----|----|---|---------|---------|----------------|-------|---------|--------------------|------------|

|                                                                                                                                                                                  |    |   |         |         |                |          |          |                             |                    |
|----------------------------------------------------------------------------------------------------------------------------------------------------------------------------------|----|---|---------|---------|----------------|----------|----------|-----------------------------|--------------------|
| N2                                                                                                                                                                               | CT | V | 6107828 | 6114856 | WBGene00017534 | F17A9.2  | F17A9.2  | -0.121955152213721          | AGIWUR1903         |
| N2                                                                                                                                                                               | CT | V | 6116521 | 6117849 | WBGene00017533 | fbxa-178 |          | F17A9.1 -0.0125856002591931 |                    |
| AGIWUR12696;AGIWUR27014;AGIWUR43258                                                                                                                                              |    |   |         |         |                |          |          |                             |                    |
| N2                                                                                                                                                                               | CT | V | 6118332 | 6120206 | WBGene00017538 | ceh-49   | F17A9.6  | -0.158075646900251          | AGIWUR6485         |
| N2                                                                                                                                                                               | CT | V | 6120909 | 6202626 | WBGene00006436 | ttn-1    | W06H8.8  | 0.0139807065842206          |                    |
| AGIWUR467;AGIWUR2055;AGIWUR18482;AGIWUR20833;AGIWUR24654;AGIWUR27263;AGIWUR27556;AGIWUR28812;AGIWUR29196;AGIWUR30343;AGIWUR31761;AGIWUR35868;AGIWUR38312;AGIWUR39023;AGIWUR40449 |    |   |         |         |                |          |          |                             |                    |
| N2                                                                                                                                                                               | CT | V | 6204875 | 6206134 | WBGene00021067 | W06H8.4  | W06H8.4  | -0.055665815804506          | AGIWUR32308        |
| N2                                                                                                                                                                               | CT | V | 6206755 | 6208551 | WBGene00021066 | W06H8.2  | W06H8.2  | 0.390917827581001           | AGIWUR36532        |
| N2                                                                                                                                                                               | CT | V | 6208840 | 6217647 | WBGene00004373 | rme-1    | W06H8.1  | 0.0454162714235062          |                    |
| AGIWUR7403;AGIWUR21968;AGIWUR28544;AGIWUR35361;AGIWUR35611;AGIWUR40187                                                                                                           |    |   |         |         |                |          |          |                             |                    |
| N2                                                                                                                                                                               | CT | V | 6218134 | 6219562 | WBGene00006239 | str-206  | W06H8.7  | 0.0548866606519889          | AGIWUR20590        |
| N2                                                                                                                                                                               | CT | V | 6221249 | 6227047 | WBGene00021068 | W06H8.6  | W06H8.6  | 0.14571782787611            | AGIWUR39330        |
| N2                                                                                                                                                                               | CT | V | 6235176 | 6237807 | WBGene00019522 | K08B12.3 | K08B12.3 | -0.31521579271768           |                    |
| AGIWUR32080                                                                                                                                                                      |    |   |         |         |                |          |          |                             |                    |
| N2                                                                                                                                                                               | CT | V | 6249172 | 6252453 | WBGene00019521 | dmd-7    | K08B12.2 | 0.240128674038996           |                    |
| AGIWUR4928;AGIWUR11191;AGIWUR24510;AGIWUR30182;AGIWUR41338                                                                                                                       |    |   |         |         |                |          |          |                             |                    |
| N2                                                                                                                                                                               | CT | V | 6268565 | 6270481 | WBGene00017966 | F31F7.3  | F31F7.3  | 0.205949905412679           | AGIWUR14173        |
| N2                                                                                                                                                                               | CT | V | 6270852 | 6274911 | WBGene00017965 | F31F7.2  | F31F7.2  | 0.265087161632179           | AGIWUR26123        |
| N2                                                                                                                                                                               | CT | V | 6276439 | 6278160 | WBGene00017964 | F31F7.1  | F31F7.1  | 0                           |                    |
| AGIWUR7941;AGIWUR24895;AGIWUR30996                                                                                                                                               |    |   |         |         |                |          |          |                             |                    |
| N2                                                                                                                                                                               | CT | V | 6279005 | 6280146 | WBGene00019668 | fil-2    | K12B6.3  | -0.542324326626671          | AGIWUR22934        |
| N2                                                                                                                                                                               | CT | V | 6280380 | 6281136 | WBGene00019669 | K12B6.4  | K12B6.4  | 0.111288231761857           | AGIWUR1920         |
| N2                                                                                                                                                                               | CT | V | 6281359 | 6284865 | WBGene00019667 | K12B6.2  | K12B6.2  | 0.105972013458368           |                    |
| AGIWUR5809;AGIWUR7245;AGIWUR34843                                                                                                                                                |    |   |         |         |                |          |          |                             |                    |
| N2                                                                                                                                                                               | CT | V | 6284920 | 6286434 | WBGene00005640 | srn-1    | K12B6.5  | -0.0796141171236311         | AGIWUR6389         |
| N2                                                                                                                                                                               | CT | V | 6291390 | 6292666 | WBGene00023432 | K12B6.9  | K12B6.9  | -0.104262319216932          |                    |
| AGIWUR4049;AGIWUR4367;AGIWUR38219                                                                                                                                                |    |   |         |         |                |          |          |                             |                    |
| N2                                                                                                                                                                               | CT | V | 6293920 | 6294342 | WBGene00019670 | K12B6.6  | K12B6.6  | 0.0562103818983255          | AGIWUR36632        |
| N2                                                                                                                                                                               | CT | V | 6303771 | 6308337 | WBGene00019666 | sago-1   | K12B6.1  | -0.0759749701954071         | AGIWUR3629         |
| N2                                                                                                                                                                               | CT | V | 6308811 | 6312001 | WBGene00019672 | K12B6.8  | K12B6.8  | -0.0544371795094243         |                    |
| AGIWUR2931;AGIWUR42737                                                                                                                                                           |    |   |         |         |                |          |          |                             |                    |
| N2                                                                                                                                                                               | CT | V | 6314176 | 6316467 | WBGene00020892 | T28C12.5 |          | T28C12.5                    | 0.103408246120994  |
| AGIWUR9229                                                                                                                                                                       |    |   |         |         |                |          |          |                             |                    |
| N2                                                                                                                                                                               | CT | V | 6316932 | 6326390 | WBGene00020891 | T28C12.4 |          | T28C12.4                    | 0.154588802777633  |
| AGIWUR30512                                                                                                                                                                      |    |   |         |         |                |          |          |                             |                    |
| N2                                                                                                                                                                               | CT | V | 6327223 | 6328865 | WBGene00020890 | fbxa-202 |          | T28C12.3                    | 0.0485038505003139 |
| AGIWUR33622                                                                                                                                                                      |    |   |         |         |                |          |          |                             |                    |
| N2                                                                                                                                                                               | CT | V | 6329197 | 6331074 | WBGene00020889 | T28C12.2 |          | T28C12.2                    | 0.192340580937792  |

|                                                                                 |    |   |         |         |                |          |          |                     |             |
|---------------------------------------------------------------------------------|----|---|---------|---------|----------------|----------|----------|---------------------|-------------|
| AGIWUR3720                                                                      |    |   |         |         |                |          |          |                     |             |
| N2                                                                              | CT | V | 6331907 | 6334008 | WBGene00020888 | T28C12.1 | T28C12.1 | -0.316831374481501  |             |
| AGIWUR19956                                                                     |    |   |         |         |                |          |          |                     |             |
| N2                                                                              | CT | V | 6334014 | 6336119 | WBGene00020893 | T28C12.6 | T28C12.6 | 0.213870418921309   |             |
| AGIWUR4707                                                                      |    |   |         |         |                |          |          |                     |             |
| N2                                                                              | CT | V | 6356025 | 6362997 | WBGene00017430 | bcl-11   | F13H6.1  | 0.221328749858364   |             |
| AGIWUR5640;AGIWUR13167;AGIWUR19155;AGIWUR27208;AGIWUR28028                      |    |   |         |         |                |          |          |                     |             |
| N2                                                                              | CT | V | 6363408 | 6365671 | WBGene00017431 | F13H6.3  | F13H6.3  | -0.122051088721356  | AGIWUR2859  |
| N2                                                                              | CT | V | 6366433 | 6368533 | WBGene00017432 | F13H6.4  | F13H6.4  | -0.0558424131631146 | AGIWUR19816 |
| N2                                                                              | CT | V | 6372114 | 6374933 | WBGene00017433 | F13H6.5  | F13H6.5  | -0.127486541729673  | AGIWUR29519 |
| N2                                                                              | CT | V | 6386550 | 6389734 | WBGene00019016 | F57F4.2  | F57F4.2  | 0.1152751607097     | AGIWUR38900 |
| N2                                                                              | CT | V | 6390463 | 6392523 | WBGene00019015 | F57F4.1  | F57F4.1  | 0.0602636238445449  |             |
| AGIWUR39573;AGIWUR44431                                                         |    |   |         |         |                |          |          |                     |             |
| N2                                                                              | CT | V | 6414993 | 6417494 | WBGene00020270 | T05H4.7  | T05H4.7  | 0.188598093032004   |             |
| AGIWUR11848;AGIWUR13753;AGIWUR27899                                             |    |   |         |         |                |          |          |                     |             |
| N2                                                                              | CT | V | 6417495 | 6424155 | WBGene00020273 | T05H4.10 | T05H4.10 | -0.0771182073701455 |             |
| AGIWUR14056;AGIWUR28336                                                         |    |   |         |         |                |          |          |                     |             |
| N2                                                                              | CT | V | 6424252 | 6425952 | WBGene00020274 | T05H4.11 | T05H4.11 | 0.00700038245471291 |             |
| AGIWUR4559                                                                      |    |   |         |         |                |          |          |                     |             |
| N2                                                                              | CT | V | 6426193 | 6427112 | WBGene00020275 | atp-4    | T05H4.12 | 0.232637680998561   |             |
| AGIWUR11354;AGIWUR39237                                                         |    |   |         |         |                |          |          |                     |             |
| N2                                                                              | CT | V | 6427212 | 6429927 | WBGene00000110 | alh-4    | T05H4.13 | 0.0342099903123767  |             |
| AGIWUR2450;AGIWUR15252;AGIWUR16978;AGIWUR26494;AGIWUR42388                      |    |   |         |         |                |          |          |                     |             |
| N2                                                                              | CT | V | 6431331 | 6433496 | WBGene00001513 | gad-1    | T05H4.14 | 0.0523990133420291  |             |
| AGIWUR27490                                                                     |    |   |         |         |                |          |          |                     |             |
| N2                                                                              | CT | V | 6434130 | 6436401 | WBGene00020269 | erfa-1   | T05H4.6  | 0.0528008370437716  |             |
| AGIWUR19051;AGIWUR41329                                                         |    |   |         |         |                |          |          |                     |             |
| N2                                                                              | CT | V | 6436578 | 6437884 | WBGene00020268 | hpo-19   | T05H4.5  | 0.00514669891418151 |             |
| AGIWUR2866;AGIWUR12634;AGIWUR23152;AGIWUR29714;AGIWUR29872                      |    |   |         |         |                |          |          |                     |             |
| N2                                                                              | CT | V | 6438913 | 6440036 | WBGene00020267 | T05H4.4  | T05H4.4  | 0.080863608891601   | AGIWUR7136  |
| N2                                                                              | CT | V | 6440202 | 6441711 | WBGene00020276 | T05H4.15 | T05H4.15 | -0.0672741679490487 |             |
| AGIWUR9764;AGIWUR14615;AGIWUR31804                                              |    |   |         |         |                |          |          |                     |             |
| N2                                                                              | CT | V | 6442337 | 6447556 | WBGene00020266 | T05H4.3  | T05H4.3  | -0.0124290011572299 | AGIWUR10846 |
| N2                                                                              | CT | V | 6448656 | 6450217 | WBGene00020265 | fbxa-196 | T05H4.2  | 0.236009418996151   |             |
| AGIWUR11813                                                                     |    |   |         |         |                |          |          |                     |             |
| N2                                                                              | CT | V | 6450898 | 6452231 | WBGene00020264 | ac1-8    | T05H4.1  | 0.278917345143391   | AGIWUR9693  |
| N2                                                                              | CT | V | 6453196 | 6454973 | WBGene00022646 | ac1-9    | ZK40.1   | 0.142908827582493   |             |
| AGIWUR1627;AGIWUR3340;AGIWUR5728;AGIWUR8126;AGIWUR14958;AGIWUR27729;AGIWUR36534 |    |   |         |         |                |          |          |                     |             |
| N2                                                                              | CT | V | 6465065 | 6487880 | WBGene00006815 | unc-83   | W01A11.3 | 0.0907623070592667  |             |

|                                                             |    |   |         |         |                |          |           |                     |             |
|-------------------------------------------------------------|----|---|---------|---------|----------------|----------|-----------|---------------------|-------------|
| AGIWUR16191;AGIWUR27240;AGIWUR35896;AGIWUR39953             |    |   |         |         |                |          |           |                     |             |
| N2                                                          | CT | V | 6488203 | 6489120 | WBGene00002273 | lec-10   | W01A11.4  | 0.256303882025904   |             |
| AGIWUR24405                                                 |    |   |         |         |                |          |           |                     |             |
| N2                                                          | CT | V | 6490068 | 6493921 | WBGene00020911 | cpt-6    | W01A11.5  | -0.37379837145205   |             |
| AGIWUR6635                                                  |    |   |         |         |                |          |           |                     |             |
| N2                                                          | CT | V | 6497110 | 6498484 | WBGene00020910 | dgtr-1   | W01A11.2  | -0.0873878607085459 |             |
| AGIWUR41901                                                 |    |   |         |         |                |          |           |                     |             |
| N2                                                          | CT | V | 6499224 | 6502428 | WBGene00020909 | W01A11.1 | W01A11.1  | 0.0887591551411422  |             |
| AGIWUR19791                                                 |    |   |         |         |                |          |           |                     |             |
| N2                                                          | CT | V | 6502369 | 6504181 | WBGene00003385 | moc-2    | W01A11.6  | -0.0931528633571581 |             |
| AGIWUR8181;AGIWUR17085                                      |    |   |         |         |                |          |           |                     |             |
| N2                                                          | CT | V | 6504538 | 6505500 | WBGene00020912 | W01A11.7 | W01A11.7  | -0.0806261251870786 |             |
| AGIWUR9030;AGIWUR22292                                      |    |   |         |         |                |          |           |                     |             |
| N2                                                          | CT | V | 6506752 | 6508803 | WBGene00006723 | ubh-3    | Y40G12A.1 | 0.0301997918526276  |             |
| AGIWUR32889                                                 |    |   |         |         |                |          |           |                     |             |
| N2                                                          | CT | V | 6508831 | 6509884 | WBGene00006722 | ubh-2    | Y40G12A.2 | -0.133573469421085  |             |
| AGIWUR21082                                                 |    |   |         |         |                |          |           |                     |             |
| N2                                                          | CT | V | 6509910 | 6511409 | WBGene00006721 | ubh-1    | F46E10.8  | -0.211470275310463  |             |
| AGIWUR1295;AGIWUR2582;AGIWUR31493                           |    |   |         |         |                |          |           |                     |             |
| N2                                                          | CT | V | 6511588 | 6515240 | WBGene00001073 | dpy-11   | F46E10.9  | 0.116683829955676   |             |
| AGIWUR4187;AGIWUR9323;AGIWUR27533                           |    |   |         |         |                |          |           |                     |             |
| N2                                                          | CT | V | 6515276 | 6516526 | WBGene00018491 | mdh-1    | F46E10.10 | 0.0723481239034029  |             |
| AGIWUR17671;AGIWUR18530;AGIWUR23213;AGIWUR25558             |    |   |         |         |                |          |           |                     |             |
| N2                                                          | CT | V | 6520435 | 6521099 | WBGene00018489 | F46E10.2 | F46E10.2  | -0.106836968790779  |             |
| AGIWUR21257;AGIWUR44482                                     |    |   |         |         |                |          |           |                     |             |
| N2                                                          | CT | V | 6524989 | 6532089 | WBGene00018488 | acs-1    | F46E10.1  | 0.325786703570414   |             |
| AGIWUR5838;AGIWUR11960;AGIWUR12542;AGIWUR35496;AGIWUR41551  |    |   |         |         |                |          |           |                     |             |
| N2                                                          | CT | V | 6532071 | 6533074 | WBGene00018492 | hpo-26   | F46E10.11 | 0.339290557288731   |             |
| AGIWUR13002                                                 |    |   |         |         |                |          |           |                     |             |
| N2                                                          | CT | V | 6533614 | 6546491 | WBGene00001089 | dre-1    | K04A8.6   | -0.11956385315519   | AGIWUR39647 |
| N2                                                          | CT | V | 6550171 | 6551817 | WBGene00019376 | lip1-4   | K04A8.5   | 0.0147802935761607  | AGIWUR28247 |
| N2                                                          | CT | V | 6552348 | 6560196 | WBGene00006665 | twk-10   | K04A8.4   | 0.112991600096544   |             |
| AGIWUR20906;AGIWUR24464;AGIWUR32424;AGIWUR34785;AGIWUR35009 |    |   |         |         |                |          |           |                     |             |
| N2                                                          | CT | V | 6562048 | 6564181 | WBGene00019374 | K04A8.2  | K04A8.2   | -0.139048563307016  | AGIWUR12303 |
| N2                                                          | CT | V | 6566336 | 6568747 | WBGene00019373 | K04A8.1  | K04A8.1   | -0.215390016597352  | AGIWUR25697 |
| N2                                                          | CT | V | 6573983 | 6575797 | WBGene00001506 | fut-2    | EGAP9.2   | 0.19108102420103    | AGIWUR15948 |
| N2                                                          | CT | V | 6576867 | 6577541 | WBGene00044545 | EGAP9.4  | EGAP9.4   | 0.01782711312209    | AGIWUR3584  |
| N2                                                          | CT | V | 6578185 | 6580182 | WBGene00017151 | EGAP9.3  | EGAP9.3   | -0.0827868583608584 | AGIWUR32024 |
| N2                                                          | CT | V | 6580843 | 6584390 | WBGene00022846 | ZK1055.5 | ZK1055.5  | 0.123018170378435   |             |

|                                                            |    |   |         |         |                |                 |                                 |
|------------------------------------------------------------|----|---|---------|---------|----------------|-----------------|---------------------------------|
| AGIWUR17780                                                |    |   |         |         |                |                 |                                 |
| N2                                                         | CT | V | 6585632 | 6587421 | WBGene00022845 | ZK1055.4        | ZK1055.4 0.273220796762154      |
| AGIWUR17432                                                |    |   |         |         |                |                 |                                 |
| N2                                                         | CT | V | 6590583 | 6593634 | WBGene00022843 | ZK1055.2        | ZK1055.2 0.0524133470645283     |
| AGIWUR3803;AGIWUR37365                                     |    |   |         |         |                |                 |                                 |
| N2                                                         | CT | V | 6594194 | 6599208 | WBGene00001829 | hcp-1 ZK1055.1  | 0.107546472454811               |
| AGIWUR35243                                                |    |   |         |         |                |                 |                                 |
| N2                                                         | CT | V | 6599190 | 6602604 | WBGene00022847 | ZK1055.6        | ZK1055.6 -0.0127819834855325    |
| AGIWUR6987;AGIWUR12831;AGIWUR22387;AGIWUR34246             |    |   |         |         |                |                 |                                 |
| N2                                                         | CT | V | 6602728 | 6605375 | WBGene00022848 | ZK1055.7        | ZK1055.7 0.117212111838345      |
| AGIWUR2670                                                 |    |   |         |         |                |                 |                                 |
| N2                                                         | CT | V | 6606439 | 6611158 | WBGene00002148 | gon-14 F44C4.4  | 0.0515031995076978              |
| AGIWUR14569;AGIWUR23270                                    |    |   |         |         |                |                 |                                 |
| N2                                                         | CT | V | 6614674 | 6615845 | WBGene00000784 | cpr-4 F44C4.3   | -0.00344010157442298 AGIWUR3924 |
| N2                                                         | CT | V | 6622268 | 6624694 | WBGene00018412 | nhr-37 F44C4.2  | -0.0969076657728349 AGIWUR9206  |
| N2                                                         | CT | V | 6624702 | 6626344 | WBGene00004092 | ppt-1 F44C4.5   | -0.0473944412472669             |
| AGIWUR1731;AGIWUR34415;AGIWUR35478                         |    |   |         |         |                |                 |                                 |
| N2                                                         | CT | V | 6633269 | 6639665 | WBGene00004740 | scd-2 T10H9.2   | 0.210197334128788 AGIWUR40660   |
| N2                                                         | CT | V | 6649617 | 6652050 | WBGene00020424 | T10H9.1 T10H9.1 | 0.0374276841927674 AGIWUR5182   |
| N2                                                         | CT | V | 6652353 | 6653742 | WBGene00044779 | T10H9.8 T10H9.8 | 0.0251910715617516              |
| AGIWUR8114;AGIWUR33853;AGIWUR35324;AGIWUR44021             |    |   |         |         |                |                 |                                 |
| N2                                                         | CT | V | 6653613 | 6655449 | WBGene00020425 | syx-18 T10H9.3  | -0.100223792364265 AGIWUR31028  |
| N2                                                         | CT | V | 6655562 | 6656501 | WBGene00004897 | snb-1 T10H9.4   | -0.0266717553810736 AGIWUR27645 |
| N2                                                         | CT | V | 6662191 | 6665813 | WBGene00004062 | pmp-5 T10H9.5   | 0.148062335532268               |
| AGIWUR4313;AGIWUR10836;AGIWUR26677;AGIWUR39783             |    |   |         |         |                |                 |                                 |
| N2                                                         | CT | V | 6667400 | 6668841 | WBGene00006224 | str-180 T10H9.6 | -0.131072308076589 AGIWUR37919  |
| N2                                                         | CT | V | 6669823 | 6672036 | WBGene00019654 | K11G9.3 K11G9.3 | -0.337314828481972 AGIWUR27046  |
| N2                                                         | CT | V | 6674267 | 6676426 | WBGene00019653 | K11G9.2 K11G9.2 | -0.280418407387258              |
| AGIWUR7173;AGIWUR12294;AGIWUR20235                         |    |   |         |         |                |                 |                                 |
| N2                                                         | CT | V | 6676799 | 6679072 | WBGene00019652 | K11G9.1 K11G9.1 | 0.0518860423158918 AGIWUR25997  |
| N2                                                         | CT | V | 6679317 | 6681573 | WBGene00001210 | egl-46 K11G9.4  | 0.0800216271967042              |
| AGIWUR43254;AGIWUR44810                                    |    |   |         |         |                |                 |                                 |
| N2                                                         | CT | V | 6685807 | 6688492 | WBGene00019655 | K11G9.5 K11G9.5 | -0.22286221601717 AGIWUR27658   |
| N2                                                         | CT | V | 6691371 | 6691863 | WBGene00003473 | mtl-1 K11G9.6   | -0.0439064513798932 AGIWUR30106 |
| N2                                                         | CT | V | 6692247 | 6694768 | WBGene00175027 | W02F12.8        | W02F12.8 -0.0119678953469773    |
| AGIWUR7094;AGIWUR16478;AGIWUR25256;AGIWUR25915;AGIWUR27056 |    |   |         |         |                |                 |                                 |
| N2                                                         | CT | V | 6695147 | 6697652 | WBGene00020947 | W02F12.2        | W02F12.2 -0.0783126309585738    |
| AGIWUR16259;AGIWUR29622                                    |    |   |         |         |                |                 |                                 |
| N2                                                         | CT | V | 6703057 | 6704573 | WBGene00020948 | era-1 W02F12.3  | 0.185680048752848               |

AGIWUR2317;AGIWUR14785  
N2 CT V 6704551 6706932 WBGene00020949 W02F12.4 W02F12.4 -0.0772872759374392  
AGIWUR4588;AGIWUR5119;AGIWUR7662;AGIWUR14147;AGIWUR32770;AGIWUR42348;AGIWUR43423;AGIWUR44413  
N2 CT V 6707058 6709101 WBGene00020950 dlst-1 W02F12.5 0.120525548375296  
AGIWUR25914;AGIWUR28729;AGIWUR41820  
N2 CT V 6709579 6710679 WBGene00020951 sna-1 W02F12.6 -0.0428495195096836  
AGIWUR32989  
N2 CT V 6714990 6716302 WBGene00023355 W02F12.1 W02F12.1 -0.0433280026093037  
AGIWUR37104  
N2 CT V 6716855 6718297 WBGene00005187 srg-30 W02F12.7 -0.0567647759437473  
AGIWUR4155;AGIWUR7870  
N2 CT V 6720397 6723005 WBGene00022624 ZC487.2 ZC487.2 -0.801394506241512 AGIWUR22572  
N2 CT V 6723466 6723764 WBGene00022625 ZC487.3 ZC487.3 0.184114760048776 AGIWUR39508  
N2 CT V 6727812 6730262 WBGene00022623 ZC487.1 ZC487.1 -0.121911309966057  
AGIWUR2837;AGIWUR31367;AGIWUR40962  
N2 CT V 6730281 6731694 WBGene00001718 gr1-9 ZC487.4 -0.0434546682042223 AGIWUR23579  
N2 CT V 6731831 6733092 WBGene00001717 gr1-8 ZC487.5 -0.105626887909477 AGIWUR7134  
N2 CT V 6745039 6748613 WBGene00020806 T25F10.3 T25F10.3 0.123824712567306  
AGIWUR8750  
N2 CT V 6758135 6760418 WBGene00000936 dbl-1 T25F10.2 0.0990997935395281  
AGIWUR23643;AGIWUR28633  
N2 CT V 6760442 6762461 WBGene00020807 T25F10.4 T25F10.4  
-0.000782749859071785 AGIWUR39846  
N2 CT V 6762476 6765072 WBGene00000244 bbs-8 T25F10.5 -0.0502012792741597  
AGIWUR14361  
N2 CT V 6765560 6768732 WBGene00020808 clik-1 T25F10.6 0.0942510974147019  
AGIWUR2591;AGIWUR4800;AGIWUR6940;AGIWUR20249;AGIWUR35744;AGIWUR37233;AGIWUR37861  
N2 CT V 6768429 6768788 WBGene00020805 T25F10.1 T25F10.1 -0.054209724525375  
AGIWUR11123  
N2 CT V 6769662 6771704 WBGene00005253 srh-30 ZC404.12 -0.0789577882844812  
AGIWUR35108  
N2 CT V 6774351 6776196 WBGene00005251 srh-28 ZC404.5 -0.0213280868421588  
AGIWUR20842;AGIWUR25637;AGIWUR33788  
N2 CT V 6778551 6779700 WBGene00022602 ZC404.7 ZC404.7 -0.103426106907744 AGIWUR31102  
N2 CT V 6783187 6784922 WBGene00004984 spn-4 ZC404.8 -0.0828582334324004 AGIWUR39701  
N2 CT V 6785457 6787866 WBGene00004975 spe-39 ZC404.3 -0.102655793814931  
AGIWUR16328;AGIWUR19002;AGIWUR26551  
N2 CT V 6788449 6792665 WBGene00022603 gck-2 ZC404.9 0.063841521517503 AGIWUR1270  
N2 CT V 6793936 6795130 WBGene00022601 ZC404.1 ZC404.1 -0.0204749317351345 AGIWUR30969



|                                                 |    |   |         |         |                |          |          |                     |             |
|-------------------------------------------------|----|---|---------|---------|----------------|----------|----------|---------------------|-------------|
| N2                                              | CT | V | 6798151 | 6799664 | WBGene00022606 | dmsr-9   | ZC404.13 | -0.112505074319621  |             |
| AGIWUR43059                                     |    |   |         |         |                |          |          |                     |             |
| N2                                              | CT | V | 6800724 | 6801950 | WBGene00022604 | dmsr-10  | ZC404.10 | 0.0587704089135377  |             |
| AGIWUR16456                                     |    |   |         |         |                |          |          |                     |             |
| N2                                              | CT | V | 6802412 | 6804096 | WBGene00022605 | dmsr-11  | ZC404.11 | -1.05241087629562   |             |
| AGIWUR11218                                     |    |   |         |         |                |          |          |                     |             |
| N2                                              | CT | V | 6804512 | 6806440 | WBGene00019262 | dmsr-12  | H34P18.1 | -1.95898572106946   |             |
| AGIWUR24451                                     |    |   |         |         |                |          |          |                     |             |
| N2                                              | CT | V | 6810421 | 6813449 | WBGene00020522 | T15B7.10 | T15B7.10 | -0.123835770042385  |             |
| AGIWUR30507                                     |    |   |         |         |                |          |          |                     |             |
| N2                                              | CT | V | 6813700 | 6815016 | WBGene00020529 | T15B7.17 | T15B7.17 | -0.121834298344542  |             |
| AGIWUR1853                                      |    |   |         |         |                |          |          |                     |             |
| N2                                              | CT | V | 6815666 | 6817284 | WBGene00020523 | dmsr-14  | T15B7.11 | 0.0825744857192996  |             |
| AGIWUR43501                                     |    |   |         |         |                |          |          |                     |             |
| N2                                              | CT | V | 6817890 | 6819912 | WBGene00020524 | dmsr-13  | T15B7.12 | 0.0445719649784575  |             |
| AGIWUR552                                       |    |   |         |         |                |          |          |                     |             |
| N2                                              | CT | V | 6821809 | 6826872 | WBGene00020520 | T15B7.8  | T15B7.8  | 0.280040967773721   |             |
| AGIWUR2448;AGIWUR29808;AGIWUR37151              |    |   |         |         |                |          |          |                     |             |
| N2                                              | CT | V | 6827146 | 6828886 | WBGene00020525 | dmsr-15  | T15B7.13 | -0.134862100708688  |             |
| AGIWUR34598                                     |    |   |         |         |                |          |          |                     |             |
| N2                                              | CT | V | 6829666 | 6830721 | WBGene00000714 | col-141  | T15B7.5  | 0.340962765190193   | AGIWUR38706 |
| N2                                              | CT | V | 6831163 | 6832256 | WBGene00000715 | col-142  | T15B7.4  | 0.0321734938634961  | AGIWUR2207  |
| N2                                              | CT | V | 6832290 | 6835342 | WBGene00020526 | T15B7.14 | T15B7.14 | -0.0283520110998792 |             |
| AGIWUR1085                                      |    |   |         |         |                |          |          |                     |             |
| N2                                              | CT | V | 6835635 | 6836700 | WBGene00000716 | col-143  | T15B7.3  | 0.031133613698322   |             |
| AGIWUR14313;AGIWUR35443                         |    |   |         |         |                |          |          |                     |             |
| N2                                              | CT | V | 6836725 | 6838630 | WBGene00020527 | T15B7.15 | T15B7.15 | 0.0241404513020838  |             |
| AGIWUR28460                                     |    |   |         |         |                |          |          |                     |             |
| N2                                              | CT | V | 6839256 | 6840254 | WBGene00020517 | hpo-8    | T15B7.2  | 0.0602060707667764  |             |
| AGIWUR8620;AGIWUR16296;AGIWUR22235              |    |   |         |         |                |          |          |                     |             |
| N2                                              | CT | V | 6840217 | 6842970 | WBGene00020528 | lgc-54   | T15B7.16 | 0.252816922624191   |             |
| AGIWUR22007                                     |    |   |         |         |                |          |          |                     |             |
| N2                                              | CT | V | 6842737 | 6846652 | WBGene00020516 | T15B7.1  | T15B7.1  | 0.0578374791352214  |             |
| AGIWUR1514;AGIWUR38289                          |    |   |         |         |                |          |          |                     |             |
| N2                                              | CT | V | 6850538 | 6851900 | WBGene00016959 | C55H1.1  | C55H1.1  | -0.0793228293889898 | AGIWUR44315 |
| N2                                              | CT | V | 6852568 | 6854803 | WBGene00001672 | gpa-10   | C55H1.2  | -0.191748250695264  | AGIWUR35673 |
| N2                                              | CT | V | 6870304 | 6873809 | WBGene00020586 | frpr-18  | T19F4.1  | 0.0961929637052612  |             |
| AGIWUR16517;AGIWUR27580;AGIWUR38008;AGIWUR43783 |    |   |         |         |                |          |          |                     |             |
| N2                                              | CT | V | 6881340 | 6891836 | WBGene00006803 | unc-70   | K11C4.3  | -0.1110276296698    |             |

AGIWUR18280;AGIWUR30869

|    |    |   |         |         |                |         |         |                     |             |
|----|----|---|---------|---------|----------------|---------|---------|---------------------|-------------|
| N2 | CT | V | 6895078 | 6896922 | WBGene00019643 | K11C4.2 | K11C4.2 | -0.261780557993612  | AGIWUR8851  |
| N2 | CT | V | 6896999 | 6898497 | WBGene00019642 | K11C4.1 | K11C4.1 | 0.0393105492361556  | AGIWUR38868 |
| N2 | CT | V | 6898540 | 6900223 | WBGene00003844 | odc-1   | K11C4.4 | -0.0471869079108576 |             |

AGIWUR2487;AGIWUR11379

|    |    |   |         |         |                |        |         |                   |  |
|----|----|---|---------|---------|----------------|--------|---------|-------------------|--|
| N2 | CT | V | 6901697 | 6929038 | WBGene00006801 | unc-68 | K11C4.5 | 0.186553054789183 |  |
|----|----|---|---------|---------|----------------|--------|---------|-------------------|--|

AGIWUR14992;AGIWUR39287

|    |    |   |         |         |                |        |           |                     |  |
|----|----|---|---------|---------|----------------|--------|-----------|---------------------|--|
| N2 | CT | V | 6931539 | 6934288 | WBGene00021963 | lip1-6 | Y57E12B.3 | -0.0312433406157435 |  |
|----|----|---|---------|---------|----------------|--------|-----------|---------------------|--|

AGIWUR4700

|    |    |   |         |         |                |           |           |                    |  |
|----|----|---|---------|---------|----------------|-----------|-----------|--------------------|--|
| N2 | CT | V | 6945711 | 6947547 | WBGene00021964 | Y57E12B.4 | Y57E12B.4 | 0.0331429793717781 |  |
|----|----|---|---------|---------|----------------|-----------|-----------|--------------------|--|

AGIWUR1238;AGIWUR29950;AGIWUR43060

|    |    |   |         |         |                |           |           |                  |  |
|----|----|---|---------|---------|----------------|-----------|-----------|------------------|--|
| N2 | CT | V | 6948543 | 6948831 | WBGene00021961 | Y57E12B.1 | Y57E12B.1 | 0.36688712622548 |  |
|----|----|---|---------|---------|----------------|-----------|-----------|------------------|--|

AGIWUR26340

|    |    |   |         |         |                |        |         |                    |             |
|----|----|---|---------|---------|----------------|--------|---------|--------------------|-------------|
| N2 | CT | V | 6950835 | 6953897 | WBGene00005188 | srg-31 | T07H8.5 | -0.133538572640986 | AGIWUR25906 |
|----|----|---|---------|---------|----------------|--------|---------|--------------------|-------------|

|    |    |   |         |         |                |       |         |                    |  |
|----|----|---|---------|---------|----------------|-------|---------|--------------------|--|
| N2 | CT | V | 6956537 | 6966422 | WBGene00003165 | mec-1 | T07H8.4 | 0.0178466875901884 |  |
|----|----|---|---------|---------|----------------|-------|---------|--------------------|--|

AGIWUR183;AGIWUR1152;AGIWUR1352;AGIWUR1406;AGIWUR2128;AGIWUR2365;AGIWUR3217;AGIWUR3635;AGIWUR4131;AGIWUR4455;AGIWUR4803;AGIWUR5260;AGIWUR5262;AGIWUR5882;AGIWUR6045;AGIWUR6798;AGIWUR6876;AGIWUR7189;AGIWUR7519;AGIWUR7826;AGIWUR8269;AGIWUR8453;AGIWUR10141;AGIWUR10410;AGIWUR10495;AGIWUR11070;AGIWUR12307;AGIWUR13928;AGIWUR14095;AGIWUR14680;AGIWUR15177;AGIWUR15278;AGIWUR15432;AGIWUR15854;AGIWUR16054;AGIWUR16955;AGIWUR17421;AGIWUR17962;AGIWUR17979;AGIWUR18581;AGIWUR19416;AGIWUR19924;AGIWUR23324;AGIWUR24879;AGIWUR25606;AGIWUR25850;AGIWUR25949;AGIWUR26192;AGIWUR26221;AGIWUR26245;AGIWUR26710;AGIWUR26836;AGIWUR26958;AGIWUR28366;AGIWUR28379;AGIWUR28699;AGIWUR28906;AGIWUR29899;AGIWUR29988;AGIWUR30069;AGIWUR32078;AGIWUR32276;AGIWUR32477;AGIWUR32711;AGIWUR33705;AGIWUR34629;AGIWUR34984;AGIWUR37874;AGIWUR38167;AGIWUR38861;AGIWUR39597;AGIWUR39601;AGIWUR39607;AGIWUR40195;AGIWUR41223;AGIWUR41367;AGIWUR41615;AGIWUR42408;AGIWUR42450;AGIWUR43092;AGIWUR43763;AGIWUR43791;AGIWUR45104;AGIWUR45161

|    |    |   |         |         |                |        |         |                   |             |
|----|----|---|---------|---------|----------------|--------|---------|-------------------|-------------|
| N2 | CT | V | 6966396 | 6970127 | WBGene00004229 | ptr-15 | T07H8.6 | 0.103410383330605 | AGIWUR38294 |
|----|----|---|---------|---------|----------------|--------|---------|-------------------|-------------|

|    |    |   |         |         |                |        |         |                  |            |
|----|----|---|---------|---------|----------------|--------|---------|------------------|------------|
| N2 | CT | V | 6971867 | 6973149 | WBGene00005950 | srx-59 | T07H8.3 | -0.1171756580478 | AGIWUR9812 |
|----|----|---|---------|---------|----------------|--------|---------|------------------|------------|

|    |    |   |         |         |                |         |         |                     |  |
|----|----|---|---------|---------|----------------|---------|---------|---------------------|--|
| N2 | CT | V | 6973523 | 6974832 | WBGene00006029 | srx-138 | T07H8.2 | -0.0632396007475755 |  |
|----|----|---|---------|---------|----------------|---------|---------|---------------------|--|

AGIWUR5395;AGIWUR15714;AGIWUR23100;AGIWUR38964;AGIWUR40330

|    |    |   |         |         |                |        |         |                   |  |
|----|----|---|---------|---------|----------------|--------|---------|-------------------|--|
| N2 | CT | V | 6976347 | 6977387 | WBGene00005907 | srx-16 | T07H8.1 | 0.182649792227603 |  |
|----|----|---|---------|---------|----------------|--------|---------|-------------------|--|

AGIWUR3703;AGIWUR34635

|    |    |   |         |         |                |        |         |                   |             |
|----|----|---|---------|---------|----------------|--------|---------|-------------------|-------------|
| N2 | CT | V | 6977754 | 6979116 | WBGene00020333 | sre-12 | T07H8.7 | 0.259612546578457 | AGIWUR40082 |
|----|----|---|---------|---------|----------------|--------|---------|-------------------|-------------|

|    |    |   |         |         |                |         |         |                     |             |
|----|----|---|---------|---------|----------------|---------|---------|---------------------|-------------|
| N2 | CT | V | 6980595 | 6982913 | WBGene00016364 | nhr-161 | C33G8.7 | 0.00468385140458327 | AGIWUR40108 |
|----|----|---|---------|---------|----------------|---------|---------|---------------------|-------------|

|    |    |   |         |         |                |         |          |                    |  |
|----|----|---|---------|---------|----------------|---------|----------|--------------------|--|
| N2 | CT | V | 6983411 | 6986043 | WBGene00016368 | nhr-163 | C33G8.12 | -0.118126117241266 |  |
|----|----|---|---------|---------|----------------|---------|----------|--------------------|--|

AGIWUR12632

|    |    |   |         |         |                |         |         |                    |             |
|----|----|---|---------|---------|----------------|---------|---------|--------------------|-------------|
| N2 | CT | V | 6986141 | 6987773 | WBGene00016365 | nhr-139 | C33G8.8 | -0.327958495790301 | AGIWUR32935 |
|----|----|---|---------|---------|----------------|---------|---------|--------------------|-------------|

|    |    |   |         |         |                |         |         |                    |             |
|----|----|---|---------|---------|----------------|---------|---------|--------------------|-------------|
| N2 | CT | V | 6987864 | 6989676 | WBGene00016366 | nhr-140 | C33G8.9 | -0.155240124074878 | AGIWUR40078 |
|----|----|---|---------|---------|----------------|---------|---------|--------------------|-------------|

|    |    |   |         |         |                |         |          |                   |  |
|----|----|---|---------|---------|----------------|---------|----------|-------------------|--|
| N2 | CT | V | 6990148 | 6991863 | WBGene00016367 | nhr-162 | C33G8.10 | -0.33673008437205 |  |
|----|----|---|---------|---------|----------------|---------|----------|-------------------|--|

AGIWUR9428

|                                                                                                |    |   |         |         |                |            |            |                     |             |
|------------------------------------------------------------------------------------------------|----|---|---------|---------|----------------|------------|------------|---------------------|-------------|
| N2                                                                                             | CT | V | 6995215 | 6997123 | WBGene00003697 | nhr-107    | C33G8.11   | -0.051717492105908  |             |
| AGIWUR39250                                                                                    |    |   |         |         |                |            |            |                     |             |
| N2                                                                                             | CT | V | 6998819 | 7000651 | WBGene00003632 | nhr-42     | C33G8.6    | -0.241798327916843  | AGIWUR147   |
| N2                                                                                             | CT | V | 7004150 | 7005825 | WBGene00016363 | srab-4     | C33G8.5    | 0.0992468749062079  | AGIWUR23745 |
| N2                                                                                             | CT | V | 7006264 | 7006818 | WBGene00016362 | C33G8.4    | C33G8.4    | -0.108160141727639  | AGIWUR4418  |
| N2                                                                                             | CT | V | 7009761 | 7012244 | WBGene00016360 | C33G8.2    | C33G8.2    | 0.164555908530481   | AGIWUR21137 |
| N2                                                                                             | CT | V | 7012917 | 7014412 | WBGene00005874 | srw-127    | C33G8.1    | -0.279432133819608  | AGIWUR16566 |
| N2                                                                                             | CT | V | 7014462 | 7015972 | WBGene00016369 | C33G8.13   | C33G8.13   | 0.0922531707094887  |             |
| AGIWUR31072                                                                                    |    |   |         |         |                |            |            |                     |             |
| N2                                                                                             | CT | V | 7017359 | 7018851 | WBGene00017615 | srsx-32    | F20A1.3    | -0.0534101401828933 | AGIWUR30545 |
| N2                                                                                             | CT | V | 7018901 | 7021803 | WBGene00017616 | F20A1.4    | F20A1.4    | -0.0802984699716465 |             |
| AGIWUR24840;AGIWUR41280                                                                        |    |   |         |         |                |            |            |                     |             |
| N2                                                                                             | CT | V | 7024632 | 7027083 | WBGene00017618 | F20A1.6    | F20A1.6    | -0.0777576570722043 |             |
| AGIWUR12474;AGIWUR24968                                                                        |    |   |         |         |                |            |            |                     |             |
| N2                                                                                             | CT | V | 7028329 | 7036570 | WBGene00006666 | twk-11     | F20A1.7    | -0.125393514842828  |             |
| AGIWUR1314;AGIWUR5939;AGIWUR10417;AGIWUR31941                                                  |    |   |         |         |                |            |            |                     |             |
| N2                                                                                             | CT | V | 7046312 | 7049250 | WBGene00017614 | F20A1.2    | F20A1.2    | -0.0237241180729963 | AGIWUR26504 |
| N2                                                                                             | CT | V | 7049434 | 7051311 | WBGene00017620 | tofu-2     | F20A1.9    | -0.178653825356569  | AGIWUR11374 |
| N2                                                                                             | CT | V | 7051679 | 7052179 | WBGene00017613 | F20A1.1    | F20A1.1    | 0.0802294416142804  | AGIWUR18795 |
| N2                                                                                             | CT | V | 7052717 | 7053200 | WBGene00017621 | F20A1.10   | F20A1.10   | 0.0953101763738005  |             |
| AGIWUR22725                                                                                    |    |   |         |         |                |            |            |                     |             |
| N2                                                                                             | CT | V | 7054738 | 7055410 | WBGene00021958 | Y57E12AL.4 | Y57E12AL.4 | 0.0713111428553557  |             |
| AGIWUR14197                                                                                    |    |   |         |         |                |            |            |                     |             |
| N2                                                                                             | CT | V | 7058095 | 7058507 | WBGene00021957 | Y57E12AL.2 | Y57E12AL.2 | 0.146868181576629   |             |
| AGIWUR14838                                                                                    |    |   |         |         |                |            |            |                     |             |
| N2                                                                                             | CT | V | 7058547 | 7059624 | WBGene00003164 | mdt-6      | Y57E12AL.5 | -0.202837613208215  |             |
| AGIWUR41027                                                                                    |    |   |         |         |                |            |            |                     |             |
| N2                                                                                             | CT | V | 7059698 | 7060470 | WBGene00021959 | Y57E12AL.6 | Y57E12AL.6 | -0.0834172954356163 |             |
| AGIWUR8481                                                                                     |    |   |         |         |                |            |            |                     |             |
| N2                                                                                             | CT | V | 7060811 | 7062695 | WBGene00021956 | Y57E12AL.1 | Y57E12AL.1 | 0.137222529466573   |             |
| AGIWUR34298                                                                                    |    |   |         |         |                |            |            |                     |             |
| N2                                                                                             | CT | V | 7063174 | 7063718 | WBGene00021960 | Y57E12AM.1 | Y57E12AM.1 | -0.0393074461363847 |             |
| AGIWUR2965;AGIWUR29220;AGIWUR31548;AGIWUR36754;AGIWUR39340;AGIWUR40810                         |    |   |         |         |                |            |            |                     |             |
| N2                                                                                             | CT | V | 7063703 | 7065322 | WBGene00044612 | Y57E12AR.1 | Y57E12AR.1 | -0.166960575299649  |             |
| AGIWUR20069;AGIWUR42428;AGIWUR45178                                                            |    |   |         |         |                |            |            |                     |             |
| N2                                                                                             | CT | V | 7072585 | 7075835 | WBGene00017850 | F27B10.1   | F27B10.1   | -0.157584124619849  |             |
| AGIWUR41140                                                                                    |    |   |         |         |                |            |            |                     |             |
| N2                                                                                             | CT | V | 7075877 | 7081569 | WBGene00003786 | npa-1      | VC5.3      | -0.0943971019179433 |             |
| AGIWUR3667;AGIWUR14589;AGIWUR16472;AGIWUR29431;AGIWUR32224;AGIWUR34728;AGIWUR35446;AGIWUR36991 |    |   |         |         |                |            |            |                     |             |

|                                                                        |    |   |         |         |                 |          |          |                      |             |
|------------------------------------------------------------------------|----|---|---------|---------|-----------------|----------|----------|----------------------|-------------|
| N2                                                                     | CT | V | 7081537 | 7084662 | WBGene00007029  | mys-1    | VC5.4    | -0.0415869214073989  | AGIWUR13192 |
| N2                                                                     | CT | V | 7085916 | 7088854 | WBGene00020908  | VC5.2    | VC5.2    | 0.241327903973653    | AGIWUR24342 |
| N2                                                                     | CT | V | 7089498 | 7091601 | WBGene00044699  | nhr-286  | VC5.6    | 0.013590574490717    | AGIWUR9847  |
| N2                                                                     | CT | V | 7091714 | 7093770 | WBGene00003725  | nhr-135  | VC5.5    | -0.243057221171517   | AGIWUR10215 |
| N2                                                                     | CT | V | 7102478 | 7103442 | WBGene00020907  | VC5.1    | VC5.1    | 0.144243348281193    | AGIWUR22964 |
| N2                                                                     | CT | V | 7103697 | 7114436 | WBGene00003849  | odr-2    | T01C4.2  | -0.0449424289264559  |             |
| AGIWUR17952;AGIWUR24443;AGIWUR32476                                    |    |   |         |         |                 |          |          |                      |             |
| N2                                                                     | CT | V | 7117452 | 7118896 | WBGene00005924  | srx-33   | T01C4.3  | -0.0695012853069485  | AGIWUR29466 |
| N2                                                                     | CT | V | 7119063 | 7120268 | WBGene00005925  | srx-34   | T01C4.4  | 0.130794603003574    | AGIWUR11889 |
| N2                                                                     | CT | V | 7120717 | 7122495 | WBGene00005926  | srx-35   | T01C4.5  | -0.0100512254009448  | AGIWUR12316 |
| N2                                                                     | CT | V | 7123658 | 7128890 | WBGene00020141  | lmd-5    | T01C4.1  | 0.447706935480509    | AGIWUR29072 |
| N2                                                                     | CT | V | 7129146 | 7129560 | WBGene00044546  | T01C4.8  | T01C4.8  | -0.0876334636196479  | AGIWUR22183 |
| N2                                                                     | CT | V | 7129707 | 7131074 | WBGene00005927  | srx-36   | T01C4.6  | 0.107977949680254    | AGIWUR30051 |
| N2                                                                     | CT | V | 7131595 | 7132324 | WBGene00005928  | srx-37   | T01C4.7  | 0.12468171206757     |             |
| AGIWUR38511;AGIWUR40716                                                |    |   |         |         |                 |          |          |                      |             |
| N2                                                                     | CT | V | 7134263 | 7135682 | WBGene000271437 | F10D2.16 | F10D2.16 | -0.206085680828088   |             |
| AGIWUR25074                                                            |    |   |         |         |                 |          |          |                      |             |
| N2                                                                     | CT | V | 7136277 | 7138417 | WBGene00006163  | str-112  | F10D2.4  | 0.00603573992259143  | AGIWUR35411 |
| N2                                                                     | CT | V | 7139477 | 7141964 | WBGene00017331  | ugt-40   | F10D2.5  | -0.882689005280211   | AGIWUR19001 |
| N2                                                                     | CT | V | 7141942 | 7145318 | WBGene00017332  | ugt-37   | F10D2.6  | -0.0520880729398261  | AGIWUR35557 |
| N2                                                                     | CT | V | 7145656 | 7147470 | WBGene00017333  | ugt-38   | F10D2.7  | -0.145935689046775   | AGIWUR35761 |
| N2                                                                     | CT | V | 7148688 | 7150692 | WBGene00017334  | F10D2.8  | F10D2.8  | -0.0861409465296687  |             |
| AGIWUR20425;AGIWUR31721                                                |    |   |         |         |                 |          |          |                      |             |
| N2                                                                     | CT | V | 7151353 | 7153146 | WBGene00001399  | fat-7    | F10D2.9  | 0.281681011523341    | AGIWUR40290 |
| N2                                                                     | CT | V | 7154503 | 7156224 | WBGene00017335  | F10D2.10 | F10D2.10 | 0.307407331370893    |             |
| AGIWUR33513                                                            |    |   |         |         |                 |          |          |                      |             |
| N2                                                                     | CT | V | 7157142 | 7159190 | WBGene00017329  | ugt-39   | F10D2.2  | -0.228458356183413   |             |
| AGIWUR8332;AGIWUR25276;AGIWUR40193                                     |    |   |         |         |                 |          |          |                      |             |
| N2                                                                     | CT | V | 7159691 | 7161016 | WBGene00006237  | str-204  | F10D2.1  | 0.330531389324037    | AGIWUR22344 |
| N2                                                                     | CT | V | 7161068 | 7163595 | WBGene00017336  | ugt-41   | F10D2.11 | -0.0510666489888809  |             |
| AGIWUR39992                                                            |    |   |         |         |                 |          |          |                      |             |
| N2                                                                     | CT | V | 7164510 | 7165895 | WBGene00005304  | srh-83   | F09G2.7  | 0.0983827730273381   | AGIWUR25097 |
| N2                                                                     | CT | V | 7167009 | 7169281 | WBGene00017315  | ugt-36   | F09G2.6  | -0.0726675253947091  | AGIWUR43649 |
| N2                                                                     | CT | V | 7175501 | 7178783 | WBGene00017314  | lgc-39   | F09G2.5  | -0.22482573475083    | AGIWUR13218 |
| N2                                                                     | CT | V | 7179172 | 7182853 | WBGene00017313  | cpsf-2   | F09G2.4  | -0.155470958285839   | AGIWUR10595 |
| N2                                                                     | CT | V | 7184910 | 7188483 | WBGene00017312  | pitr-5   | F09G2.3  | -0.00859229924471094 | AGIWUR38058 |
| N2                                                                     | CT | V | 7188332 | 7193662 | WBGene00017316  | F09G2.8  | F09G2.8  | -0.18955259441767    | AGIWUR31237 |
| N2                                                                     | CT | V | 7193766 | 7196137 | WBGene00017317  | attf-2   | F09G2.9  | -0.0035293579232647  |             |
| AGIWUR9026;AGIWUR17703;AGIWUR19961;AGIWUR24522;AGIWUR29842;AGIWUR38507 |    |   |         |         |                 |          |          |                      |             |

|                                                                       |    |   |         |         |                |          |          |                     |             |
|-----------------------------------------------------------------------|----|---|---------|---------|----------------|----------|----------|---------------------|-------------|
| N2                                                                    | CT | V | 7196916 | 7198437 | WBGene00017311 | F09G2.2  | F09G2.2  | 0.395101579833064   | AGIWUR36789 |
| N2                                                                    | CT | V | 7200224 | 7205609 | WBGene00017310 | F09G2.1  | F09G2.1  | -0.0965252929934124 | AGIWUR11948 |
| N2                                                                    | CT | V | 7205626 | 7214903 | WBGene00015743 | soap-1   | C13F10.4 | -0.0138772135852445 |             |
| AGIWUR35914                                                           |    |   |         |         |                |          |          |                     |             |
| N2                                                                    | CT | V | 7215010 | 7219088 | WBGene00015744 | C13F10.5 | C13F10.5 | -0.0687220390581551 |             |
| AGIWUR4255;AGIWUR25008;AGIWUR34248;AGIWUR38845                        |    |   |         |         |                |          |          |                     |             |
| N2                                                                    | CT | V | 7219054 | 7221039 | WBGene00015745 | C13F10.6 | C13F10.6 | -0.0327203989076992 |             |
| AGIWUR13009;AGIWUR21878;AGIWUR40522                                   |    |   |         |         |                |          |          |                     |             |
| N2                                                                    | CT | V | 7221473 | 7222156 | WBGene00015742 | kxd-1    | C13F10.2 | -0.321517760830016  |             |
| AGIWUR14508                                                           |    |   |         |         |                |          |          |                     |             |
| N2                                                                    | CT | V | 7222049 | 7223279 | WBGene00015746 | C13F10.7 | C13F10.7 | -0.0993961068083049 |             |
| AGIWUR38641                                                           |    |   |         |         |                |          |          |                     |             |
| N2                                                                    | CT | V | 7224078 | 7225204 | WBGene00015741 | C13F10.1 | C13F10.1 | -0.166868839608426  |             |
| AGIWUR38607;AGIWUR42008                                               |    |   |         |         |                |          |          |                     |             |
| N2                                                                    | CT | V | 7225223 | 7226320 | WBGene00001428 | fkf-3    | C05C8.3  | -0.136102016137841  | AGIWUR9907  |
| N2                                                                    | CT | V | 7226376 | 7230848 | WBGene00001563 | gei-6    | C05C8.4  | 0.0906151650389475  | AGIWUR15203 |
| N2                                                                    | CT | V | 7232434 | 7234826 | WBGene00015462 | C05C8.5  | C05C8.5  | -0.294810713608095  | AGIWUR31801 |
| N2                                                                    | CT | V | 7234922 | 7237130 | WBGene00015463 | hpo-9    | C05C8.6  | -0.050650434746192  |             |
| AGIWUR2698;AGIWUR3991;AGIWUR12483;AGIWUR16790                         |    |   |         |         |                |          |          |                     |             |
| N2                                                                    | CT | V | 7237381 | 7239658 | WBGene00015466 | hys-1    | C05C8.9  | -0.246000658632664  |             |
| AGIWUR11456;AGIWUR25540;AGIWUR31894;AGIWUR37578                       |    |   |         |         |                |          |          |                     |             |
| N2                                                                    | CT | V | 7239771 | 7241366 | WBGene00015460 | C05C8.1  | C05C8.1  | -0.10206268711144   | AGIWUR26908 |
| N2                                                                    | CT | V | 7242907 | 7247321 | WBGene00015464 | C05C8.7  | C05C8.7  | 0.06788973307762    |             |
| AGIWUR1752;AGIWUR8368;AGIWUR16592;AGIWUR22581;AGIWUR36915;AGIWUR40208 |    |   |         |         |                |          |          |                     |             |
| N2                                                                    | CT | V | 7252325 | 7255157 | WBGene00015465 | C05C8.8  | C05C8.8  | -0.25181210058064   | AGIWUR39223 |
| N2                                                                    | CT | V | 7258808 | 7260157 | WBGene00044547 | C13A2.12 | C13A2.12 | 0.0659766128474053  |             |
| AGIWUR12736;AGIWUR45175                                               |    |   |         |         |                |          |          |                     |             |
| N2                                                                    | CT | V | 7262565 | 7264148 | WBGene00015725 | C13A2.9  | C13A2.9  | 0.231097625745189   | AGIWUR21866 |
| N2                                                                    | CT | V | 7264576 | 7265377 | WBGene00023235 | C13A2.8  | C13A2.8  | -0.0186773743547057 |             |
| AGIWUR1246;AGIWUR26717;AGIWUR31889;AGIWUR33907;AGIWUR43367            |    |   |         |         |                |          |          |                     |             |
| N2                                                                    | CT | V | 7266353 | 7268806 | WBGene00015724 | C13A2.7  | C13A2.7  | -0.0409815853624265 |             |
| AGIWUR13134;AGIWUR23165;AGIWUR32284                                   |    |   |         |         |                |          |          |                     |             |
| N2                                                                    | CT | V | 7269731 | 7272787 | WBGene00015723 | C13A2.6  | C13A2.6  | -0.0505942111683151 | AGIWUR4210  |
| N2                                                                    | CT | V | 7275791 | 7278472 | WBGene00015722 | C13A2.5  | C13A2.5  | 0.288984286955005   | AGIWUR16539 |
| N2                                                                    | CT | V | 7279310 | 7280530 | WBGene00015721 | C13A2.4  | C13A2.4  | -2.53904566359338   | AGIWUR20014 |
| N2                                                                    | CT | V | 7282337 | 7284667 | WBGene00015720 | C13A2.3  | C13A2.3  | 0.277940414609104   | AGIWUR37246 |
| N2                                                                    | CT | V | 7286185 | 7287399 | WBGene00015719 | C13A2.2  | C13A2.2  | 0.119752467491141   | AGIWUR24599 |
| N2                                                                    | CT | V | 7289027 | 7291831 | WBGene00015718 | C13A2.1  | C13A2.1  | -0.0223295372826637 | AGIWUR21997 |
| N2                                                                    | CT | V | 7292754 | 7295381 | WBGene00017231 | F07G11.4 | F07G11.4 | -0.251947380228337  |             |

|                                    |    |   |         |         |                |          |          |                      |             |
|------------------------------------|----|---|---------|---------|----------------|----------|----------|----------------------|-------------|
| AGIWUR33430                        |    |   |         |         |                |          |          |                      |             |
| N2                                 | CT | V | 7296300 | 7297363 | WBGene00005617 | srj-32   | F07G11.5 | 0.315294895445479    |             |
| AGIWUR2894                         |    |   |         |         |                |          |          |                      |             |
| N2                                 | CT | V | 7298771 | 7301472 | WBGene00017230 | F07G11.3 | F07G11.3 |                      |             |
| -0.000143082145527273 AGIWUR25605  |    |   |         |         |                |          |          |                      |             |
| N2                                 | CT | V | 7307389 | 7309556 | WBGene00017228 | F07G11.1 | F07G11.1 | 0.216470076758945    |             |
| AGIWUR9956                         |    |   |         |         |                |          |          |                      |             |
| N2                                 | CT | V | 7311726 | 7313333 | WBGene00005897 | srx-6    | F07G11.8 | -0.210197430798065   |             |
| AGIWUR38568                        |    |   |         |         |                |          |          |                      |             |
| N2                                 | CT | V | 7314136 | 7321009 | WBGene00017233 | lmd-4    | F07G11.9 | -0.0799509141888679  |             |
| AGIWUR7636                         |    |   |         |         |                |          |          |                      |             |
| N2                                 | CT | V | 7324038 | 7325385 | WBGene00005983 | srx-92   | F10G2.6  | -0.225020870719908   | AGIWUR32095 |
| N2                                 | CT | V | 7327135 | 7327755 | WBGene00017365 | F10G2.4  | F10G2.4  | -0.286454110057022   | AGIWUR43997 |
| N2                                 | CT | V | 7328392 | 7330001 | WBGene00017364 | clcc-7   | F10G2.3  | -0.00460597778283578 | AGIWUR26607 |
| N2                                 | CT | V | 7331168 | 7331779 | WBGene00017363 | F10G2.2  | F10G2.2  | -0.198161840248327   | AGIWUR45026 |
| N2                                 | CT | V | 7332562 | 7333424 | WBGene00017362 | F10G2.1  | F10G2.1  | -0.161710820954879   | AGIWUR5849  |
| N2                                 | CT | V | 7333774 | 7337168 | WBGene00017366 | F10G2.7  | F10G2.7  | -0.0197854807618496  | AGIWUR18051 |
| N2                                 | CT | V | 7338633 | 7339831 | WBGene00005402 | srh-187  | F10G2.8  | -0.0359417890221918  | AGIWUR19069 |
| N2                                 | CT | V | 7340436 | 7341484 | WBGene00017367 | nhr-263  | F10G2.9  | 0.0064851567893327   |             |
| AGIWUR27218;AGIWUR32274            |    |   |         |         |                |          |          |                      |             |
| N2                                 | CT | V | 7342156 | 7343838 | WBGene00015396 | nhr-148  | C03G6.10 | -0.220421808670595   |             |
| AGIWUR1793                         |    |   |         |         |                |          |          |                      |             |
| N2                                 | CT | V | 7344061 | 7345234 | WBGene00005450 | srh-244  | C03G6.9  | 0.125409905040075    | AGIWUR1764  |
| N2                                 | CT | V | 7346301 | 7348135 | WBGene00015395 | nhr-147  | C03G6.8  | -0.251819249882452   |             |
| AGIWUR6976;AGIWUR17637;AGIWUR20992 |    |   |         |         |                |          |          |                      |             |
| N2                                 | CT | V | 7348211 | 7349664 | WBGene00015397 | nhr-149  | C03G6.12 | 0.0734898438851879   |             |
| AGIWUR44680                        |    |   |         |         |                |          |          |                      |             |
| N2                                 | CT | V | 7350881 | 7352236 | WBGene00005439 | srh-231  | C03G6.11 | -0.103716949975355   |             |
| AGIWUR34403                        |    |   |         |         |                |          |          |                      |             |
| N2                                 | CT | V | 7353040 | 7354254 | WBGene00005480 | srh-275  | C03G6.7  | -0.178271036786528   | AGIWUR3671  |
| N2                                 | CT | V | 7354445 | 7355510 | WBGene00015398 | tag-293  | C03G6.13 | 0.219290254360768    |             |
| AGIWUR31359                        |    |   |         |         |                |          |          |                      |             |
| N2                                 | CT | V | 7357451 | 7358882 | WBGene00015394 | C03G6.6  | C03G6.6  | 0.0180216063307244   | AGIWUR4749  |
| N2                                 | CT | V | 7359997 | 7361773 | WBGene00015399 | cyp-35A1 | C03G6.14 | -0.0183178273677429  |             |
| AGIWUR26541;AGIWUR41697            |    |   |         |         |                |          |          |                      |             |
| N2                                 | CT | V | 7365251 | 7366204 | WBGene00015393 | C03G6.5  | C03G6.5  | -0.258326020338136   | AGIWUR1692  |
| N2                                 | CT | V | 7366534 | 7367619 | WBGene00005403 | srh-189  | C03G6.20 | 0.157940314240036    |             |
| AGIWUR5041;AGIWUR36294             |    |   |         |         |                |          |          |                      |             |
| N2                                 | CT | V | 7369759 | 7372131 | WBGene00005602 | srj-14   | C03G6.3  | -0.0613984330542854  |             |

AGIWUR3412;AGIWUR3516;AGIWUR34953

|    |    |   |         |         |                |        |         |                    |  |
|----|----|---|---------|---------|----------------|--------|---------|--------------------|--|
| N2 | CT | V | 7374390 | 7375594 | WBGene00005947 | srx-56 | C03G6.2 | -0.109829482511098 |  |
|----|----|---|---------|---------|----------------|--------|---------|--------------------|--|

AGIWUR5407;AGIWUR32097

|    |    |   |         |         |                |        |         |                    |             |
|----|----|---|---------|---------|----------------|--------|---------|--------------------|-------------|
| N2 | CT | V | 7376409 | 7377742 | WBGene00005948 | srx-57 | C03G6.1 | -0.547061745667545 | AGIWUR19687 |
|----|----|---|---------|---------|----------------|--------|---------|--------------------|-------------|

|    |    |   |         |         |                |         |          |                    |  |
|----|----|---|---------|---------|----------------|---------|----------|--------------------|--|
| N2 | CT | V | 7377897 | 7379484 | WBGene00015401 | srsx-24 | C03G6.16 | -0.413135395473239 |  |
|----|----|---|---------|---------|----------------|---------|----------|--------------------|--|

AGIWUR31434

|    |    |   |         |         |                |          |          |                    |  |
|----|----|---|---------|---------|----------------|----------|----------|--------------------|--|
| N2 | CT | V | 7379745 | 7381069 | WBGene00015402 | C03G6.17 | C03G6.17 | -0.171603134987771 |  |
|----|----|---|---------|---------|----------------|----------|----------|--------------------|--|

AGIWUR32749

|    |    |   |         |         |                |       |          |                    |  |
|----|----|---|---------|---------|----------------|-------|----------|--------------------|--|
| N2 | CT | V | 7382021 | 7383309 | WBGene00005646 | srp-5 | C03G6.18 | -0.141839743841787 |  |
|----|----|---|---------|---------|----------------|-------|----------|--------------------|--|

AGIWUR4547

|    |    |   |         |         |                |       |          |                     |  |
|----|----|---|---------|---------|----------------|-------|----------|---------------------|--|
| N2 | CT | V | 7384232 | 7386173 | WBGene00005647 | srp-6 | C03G6.19 | 0.00433876603081984 |  |
|----|----|---|---------|---------|----------------|-------|----------|---------------------|--|

AGIWUR1521

|    |    |   |         |         |                |         |         |                     |             |
|----|----|---|---------|---------|----------------|---------|---------|---------------------|-------------|
| N2 | CT | V | 7388390 | 7389871 | WBGene00015361 | C02H6.1 | C02H6.1 | -0.0288734509209947 | AGIWUR15685 |
|----|----|---|---------|---------|----------------|---------|---------|---------------------|-------------|

|    |    |   |         |         |                |          |         |                    |  |
|----|----|---|---------|---------|----------------|----------|---------|--------------------|--|
| N2 | CT | V | 7390529 | 7392111 | WBGene00015362 | fbxa-105 | C02H6.2 | -0.267795733588729 |  |
|----|----|---|---------|---------|----------------|----------|---------|--------------------|--|

AGIWUR44525

|    |    |   |         |         |                |       |         |                   |             |
|----|----|---|---------|---------|----------------|-------|---------|-------------------|-------------|
| N2 | CT | V | 7393550 | 7395459 | WBGene00005900 | srx-9 | R13D7.6 | 0.030482767251673 | AGIWUR37970 |
|----|----|---|---------|---------|----------------|-------|---------|-------------------|-------------|

|    |    |   |         |         |                |        |         |                   |             |
|----|----|---|---------|---------|----------------|--------|---------|-------------------|-------------|
| N2 | CT | V | 7398390 | 7399302 | WBGene00001789 | gst-41 | R13D7.7 | 0.058689464764587 | AGIWUR42946 |
|----|----|---|---------|---------|----------------|--------|---------|-------------------|-------------|

|    |    |   |         |         |                |       |          |                     |  |
|----|----|---|---------|---------|----------------|-------|----------|---------------------|--|
| N2 | CT | V | 7399904 | 7400199 | WBGene00044548 | cnc-9 | R13D7.11 | -0.0115071650670195 |  |
|----|----|---|---------|---------|----------------|-------|----------|---------------------|--|

AGIWUR6901;AGIWUR8643;AGIWUR11457

|    |    |   |         |         |                |        |         |                   |             |
|----|----|---|---------|---------|----------------|--------|---------|-------------------|-------------|
| N2 | CT | V | 7400888 | 7402192 | WBGene00005951 | srx-60 | R13D7.4 | -0.24259618222422 | AGIWUR37472 |
|----|----|---|---------|---------|----------------|--------|---------|-------------------|-------------|

|    |    |   |         |         |                |        |         |                    |             |
|----|----|---|---------|---------|----------------|--------|---------|--------------------|-------------|
| N2 | CT | V | 7402655 | 7403910 | WBGene00005601 | srj-13 | R13D7.3 | 0.0734278580672285 | AGIWUR29550 |
|----|----|---|---------|---------|----------------|--------|---------|--------------------|-------------|

|    |    |   |         |         |                |        |         |                    |  |
|----|----|---|---------|---------|----------------|--------|---------|--------------------|--|
| N2 | CT | V | 7404821 | 7405871 | WBGene00006091 | str-24 | R13D7.9 | 0.0425554613045844 |  |
|----|----|---|---------|---------|----------------|--------|---------|--------------------|--|

AGIWUR4229;AGIWUR12780

|    |    |   |         |         |                |       |          |                      |  |
|----|----|---|---------|---------|----------------|-------|----------|----------------------|--|
| N2 | CT | V | 7407547 | 7408814 | WBGene00020055 | srt-6 | R13D7.10 | -0.00353139078697673 |  |
|----|----|---|---------|---------|----------------|-------|----------|----------------------|--|

AGIWUR18133

|    |    |   |         |         |                |         |         |                     |             |
|----|----|---|---------|---------|----------------|---------|---------|---------------------|-------------|
| N2 | CT | V | 7409899 | 7411253 | WBGene00020054 | R13D7.2 | R13D7.2 | -0.0598485343329909 | AGIWUR23364 |
|----|----|---|---------|---------|----------------|---------|---------|---------------------|-------------|

|    |    |   |         |         |                |        |         |                     |             |
|----|----|---|---------|---------|----------------|--------|---------|---------------------|-------------|
| N2 | CT | V | 7411995 | 7413059 | WBGene00006106 | str-41 | R13D7.1 | -0.0418566337105197 | AGIWUR39155 |
|----|----|---|---------|---------|----------------|--------|---------|---------------------|-------------|

|    |    |   |         |         |                |          |          |                    |  |
|----|----|---|---------|---------|----------------|----------|----------|--------------------|--|
| N2 | CT | V | 7413437 | 7413840 | WBGene00017567 | F18E3.11 | F18E3.11 | -0.107884849108935 |  |
|----|----|---|---------|---------|----------------|----------|----------|--------------------|--|

AGIWUR16027;AGIWUR28494

|    |    |   |         |         |                |          |          |                    |  |
|----|----|---|---------|---------|----------------|----------|----------|--------------------|--|
| N2 | CT | V | 7414941 | 7415344 | WBGene00045275 | F18E3.12 | F18E3.12 | -0.292785992207938 |  |
|----|----|---|---------|---------|----------------|----------|----------|--------------------|--|

AGIWUR26393;AGIWUR34940

|    |    |   |         |         |                |          |          |                     |  |
|----|----|---|---------|---------|----------------|----------|----------|---------------------|--|
| N2 | CT | V | 7416116 | 7416628 | WBGene00045276 | F18E3.13 | F18E3.13 | -0.0438920104872267 |  |
|----|----|---|---------|---------|----------------|----------|----------|---------------------|--|

AGIWUR790

|    |    |   |         |         |                |        |         |                     |             |
|----|----|---|---------|---------|----------------|--------|---------|---------------------|-------------|
| N2 | CT | V | 7417660 | 7419828 | WBGene00005814 | srw-67 | F18E3.2 | -0.0162940980288324 | AGIWUR22042 |
|----|----|---|---------|---------|----------------|--------|---------|---------------------|-------------|

|    |    |   |         |         |                |         |         |                     |             |
|----|----|---|---------|---------|----------------|---------|---------|---------------------|-------------|
| N2 | CT | V | 7420462 | 7421713 | WBGene00017564 | srx-a-4 | F18E3.1 | 0.00305384153305255 | AGIWUR22088 |
|----|----|---|---------|---------|----------------|---------|---------|---------------------|-------------|

|    |    |   |         |         |                |         |         |                     |  |
|----|----|---|---------|---------|----------------|---------|---------|---------------------|--|
| N2 | CT | V | 7421855 | 7422937 | WBGene00005343 | srh-126 | F18E3.3 | -0.0568034774346868 |  |
|----|----|---|---------|---------|----------------|---------|---------|---------------------|--|

AGIWUR3174;AGIWUR10542;AGIWUR11741;AGIWUR22896;AGIWUR25510;AGIWUR35121;AGIWUR39022

|    |    |   |         |         |                |          |          |  |  |
|----|----|---|---------|---------|----------------|----------|----------|--|--|
| N2 | CT | V | 7423573 | 7424578 | WBGene00017566 | F18E3.10 | F18E3.10 |  |  |
|----|----|---|---------|---------|----------------|----------|----------|--|--|

-0.00282515842612163 AGIWUR24955

|                                                                                  |    |   |         |         |                |          |          |                       |             |
|----------------------------------------------------------------------------------|----|---|---------|---------|----------------|----------|----------|-----------------------|-------------|
| N2                                                                               | CT | V | 7425259 | 7426694 | WBGene00005815 | srw-68   | F18E3.4  | -0.0299196823384884   | AGIWUR25357 |
| N2                                                                               | CT | V | 7427326 | 7428980 | WBGene00005816 | srw-69   | F18E3.5  | 0.0590612451306587    | AGIWUR18382 |
| N2                                                                               | CT | V | 7429684 | 7431116 | WBGene00005818 | srw-71   | F18E3.6  | 0.0388717928926727    | AGIWUR31118 |
| N2                                                                               | CT | V | 7431822 | 7433160 | WBGene00005825 | srw-78   | F18E3.9  | 0.0542353987836766    |             |
| AGIWUR1755;AGIWUR3992;AGIWUR8503;AGIWUR12691;AGIWUR15111;AGIWUR29806;AGIWUR31635 |    |   |         |         |                |          |          |                       |             |
| N2                                                                               | CT | V | 7433401 | 7435650 | WBGene00017565 | ddo-2    | F18E3.7  | -0.14637937859665     |             |
| AGIWUR31689;AGIWUR40261;AGIWUR42918;AGIWUR43676                                  |    |   |         |         |                |          |          |                       |             |
| N2                                                                               | CT | V | 7435413 | 7436962 | WBGene00017789 | F25E5.8  | F25E5.8  | -0.149567817748981    |             |
| AGIWUR5670;AGIWUR27478;AGIWUR29340;AGIWUR42027                                   |    |   |         |         |                |          |          |                       |             |
| N2                                                                               | CT | V | 7437506 | 7437919 | WBGene00017790 | F25E5.9  | F25E5.9  | 0.551504365951112     |             |
| AGIWUR4161;AGIWUR18222;AGIWUR20571;AGIWUR21570;AGIWUR30302;AGIWUR35467           |    |   |         |         |                |          |          |                       |             |
| N2                                                                               | CT | V | 7438285 | 7439933 | WBGene00017792 | F25E5.16 | F25E5.16 | -0.201002565811745    |             |
| AGIWUR26187                                                                      |    |   |         |         |                |          |          |                       |             |
| N2                                                                               | CT | V | 7440107 | 7441483 | WBGene00017788 | F25E5.7  | F25E5.7  | -0.259028858623755    | AGIWUR16933 |
| N2                                                                               | CT | V | 7445065 | 7446712 | WBGene00017787 | nhr-141  | F25E5.6  | -0.948203902313453    | AGIWUR40405 |
| N2                                                                               | CT | V | 7447273 | 7448884 | WBGene00017786 | F25E5.5  | F25E5.5  | -0.0439290350664869   |             |
| AGIWUR3591;AGIWUR4736;AGIWUR41263                                                |    |   |         |         |                |          |          |                       |             |
| N2                                                                               | CT | V | 7449353 | 7451149 | WBGene00017785 | F25E5.4  | F25E5.4  | -0.0812629686097317   | AGIWUR3460  |
| N2                                                                               | CT | V | 7451721 | 7452899 | WBGene00017784 | F25E5.3  | F25E5.3  | -0.255925870853192    | AGIWUR44505 |
| N2                                                                               | CT | V | 7452946 | 7454318 | WBGene00017791 | try-8    | F25E5.10 | -0.561973014946242    |             |
| AGIWUR13538                                                                      |    |   |         |         |                |          |          |                       |             |
| N2                                                                               | CT | V | 7455819 | 7457597 | WBGene00017783 | F25E5.2  | F25E5.2  | -0.168046706270795    | AGIWUR35524 |
| N2                                                                               | CT | V | 7458252 | 7459150 | WBGene00005314 | srh-93   | F25E5.15 | 0.0548929974299668    |             |
| AGIWUR42344                                                                      |    |   |         |         |                |          |          |                       |             |
| N2                                                                               | CT | V | 7459685 | 7460998 | WBGene00005313 | srh-92   | F25E5.13 | 0.0355404155114805    |             |
| AGIWUR8682                                                                       |    |   |         |         |                |          |          |                       |             |
| N2                                                                               | CT | V | 7461750 | 7462949 | WBGene00005312 | srh-91   | F25E5.11 | 0.173810742588532     |             |
| AGIWUR5456;AGIWUR11180                                                           |    |   |         |         |                |          |          |                       |             |
| N2                                                                               | CT | V | 7465889 | 7471223 | WBGene00017782 | F25E5.1  | F25E5.1  | 0.0467947153145722    | AGIWUR4137  |
| N2                                                                               | CT | V | 7471651 | 7472915 | WBGene00006094 | str-28   | F25E5.12 | -0.0468369357096865   |             |
| AGIWUR9253                                                                       |    |   |         |         |                |          |          |                       |             |
| N2                                                                               | CT | V | 7473299 | 7475013 | WBGene00006095 | str-29   | C18B10.9 | -0.000841379198602166 |             |
| AGIWUR4836;AGIWUR23362                                                           |    |   |         |         |                |          |          |                       |             |
| N2                                                                               | CT | V | 7475626 | 7476866 | WBGene00005342 | srh-125  | C18B10.8 | 0.00561799003507701   |             |
| AGIWUR21451                                                                      |    |   |         |         |                |          |          |                       |             |
| N2                                                                               | CT | V | 7477241 | 7478504 | WBGene00006231 | str-190  | C18B10.7 | -0.012454830358239    |             |
| AGIWUR10689                                                                      |    |   |         |         |                |          |          |                       |             |
| N2                                                                               | CT | V | 7479217 | 7481049 | WBGene00015963 | C18B10.6 | C18B10.6 |                       |             |
| -0.00685702227533724 AGIWUR838;AGIWUR10121;AGIWUR43551                           |    |   |         |         |                |          |          |                       |             |



|                                                            |    |   |         |         |                |          |           |                      |             |
|------------------------------------------------------------|----|---|---------|---------|----------------|----------|-----------|----------------------|-------------|
| N2                                                         | CT | V | 7481868 | 7483171 | WBGene00006285 | str-259  | C18B10.10 | -0.0915304870326801  |             |
| AGIWUR6434;AGIWUR33505                                     |    |   |         |         |                |          |           |                      |             |
| N2                                                         | CT | V | 7483316 | 7485100 | WBGene00015962 | srbc-8   | C18B10.5  | -0.107840441057761   |             |
| AGIWUR2319;AGIWUR21711                                     |    |   |         |         |                |          |           |                      |             |
| N2                                                         | CT | V | 7486131 | 7487618 | WBGene00015961 | srbc-7   | C18B10.4  | -0.252575574831953   |             |
| AGIWUR18606                                                |    |   |         |         |                |          |           |                      |             |
| N2                                                         | CT | V | 7489134 | 7490440 | WBGene00015960 | srbc-9   | C18B10.3  | -0.0526469269861924  |             |
| AGIWUR15347;AGIWUR27013                                    |    |   |         |         |                |          |           |                      |             |
| N2                                                         | CT | V | 7491875 | 7493024 | WBGene00015959 | srbc-10  | C18B10.2  | -0.0525134924962121  |             |
| AGIWUR44235                                                |    |   |         |         |                |          |           |                      |             |
| N2                                                         | CT | V | 7493880 | 7495289 | WBGene00015958 | srbc-11  | C18B10.1  | -0.00552777210965694 |             |
| AGIWUR38818                                                |    |   |         |         |                |          |           |                      |             |
| N2                                                         | CT | V | 7497740 | 7499055 | WBGene00005300 | srh-79   | C04F2.1   | 0.031696464555333    | AGIWUR34383 |
| N2                                                         | CT | V | 7499652 | 7500958 | WBGene00005431 | srh-221  | C04F2.2   | -0.303558900507488   |             |
| AGIWUR22231;AGIWUR40815                                    |    |   |         |         |                |          |           |                      |             |
| N2                                                         | CT | V | 7501534 | 7502673 | WBGene00005438 | srh-230  | C04F2.3   | 0.0115069113564648   |             |
| AGIWUR36299;AGIWUR42880                                    |    |   |         |         |                |          |           |                      |             |
| N2                                                         | CT | V | 7502840 | 7504371 | WBGene00005437 | srh-229  | C04F2.4   | -0.100415041494594   |             |
| AGIWUR4123;AGIWUR13226;AGIWUR20592                         |    |   |         |         |                |          |           |                      |             |
| N2                                                         | CT | V | 7504653 | 7505945 | WBGene00005473 | srh-267  | C04F2.5   | -0.492821230144961   |             |
| AGIWUR12092;AGIWUR19173                                    |    |   |         |         |                |          |           |                      |             |
| N2                                                         | CT | V | 7506914 | 7508265 | WBGene00006097 | str-31   | C54F6.10  | 0.27600129815435     |             |
| AGIWUR37093                                                |    |   |         |         |                |          |           |                      |             |
| N2                                                         | CT | V | 7508994 | 7510602 | WBGene00016927 | nhr-172  | C54F6.9   | -0.205856152320655   | AGIWUR8052  |
| N2                                                         | CT | V | 7511765 | 7513684 | WBGene00016926 | nhr-171  | C54F6.8   | -0.00725432819885619 | AGIWUR21182 |
| N2                                                         | CT | V | 7515245 | 7517307 | WBGene00016925 | srb-18   | C54F6.7   | -0.0836005671607518  | AGIWUR22330 |
| N2                                                         | CT | V | 7517685 | 7520177 | WBGene00016928 | srb-19   | C54F6.11  | -0.0542458581706793  |             |
| AGIWUR6103                                                 |    |   |         |         |                |          |           |                      |             |
| N2                                                         | CT | V | 7522032 | 7522364 | WBGene00044113 | C54F6.15 | C54F6.15  | -0.194949937190239   |             |
| AGIWUR3238;AGIWUR29620;AGIWUR37411;AGIWUR39092;AGIWUR40472 |    |   |         |         |                |          |           |                      |             |
| N2                                                         | CT | V | 7523692 | 7525421 | WBGene00016924 | C54F6.6  | C54F6.6   | -0.174721508892382   | AGIWUR42339 |
| N2                                                         | CT | V | 7529116 | 7529450 | WBGene00016923 | C54F6.5  | C54F6.5   | -0.34195367652055    | AGIWUR8243  |
| N2                                                         | CT | V | 7530261 | 7531463 | WBGene00016922 | swt-2    | C54F6.4   | -0.0828480485425729  | AGIWUR34665 |
| N2                                                         | CT | V | 7533247 | 7535074 | WBGene00016921 | C54F6.3  | C54F6.3   | -0.65240374823568    | AGIWUR10479 |
| N2                                                         | CT | V | 7536919 | 7537909 | WBGene00016929 | C54F6.12 | C54F6.12  | -0.132863981493557   |             |
| AGIWUR901                                                  |    |   |         |         |                |          |           |                      |             |
| N2                                                         | CT | V | 7539315 | 7540891 | WBGene00005474 | srh-268  | C54F6.1   | -0.0265638164800714  | AGIWUR38594 |
| N2                                                         | CT | V | 7540890 | 7544838 | WBGene00003731 | nhx-3    | C54F6.13  | 0.0872099926911254   |             |
| AGIWUR24901                                                |    |   |         |         |                |          |           |                      |             |

|                                                                     |    |   |         |         |                |           |           |                     |             |
|---------------------------------------------------------------------|----|---|---------|---------|----------------|-----------|-----------|---------------------|-------------|
| N2                                                                  | CT | V | 7546468 | 7548012 | WBGene00001500 | ftn-1     | C54F6.14  | 0.163600156657728   |             |
| AGIWUR4104;AGIWUR10941;AGIWUR19302;AGIWUR25571                      |    |   |         |         |                |           |           |                     |             |
| N2                                                                  | CT | V | 7552121 | 7552708 | WBGene00017599 | F19F10.3  | F19F10.3  | -0.0581986388656315 |             |
| AGIWUR17858                                                         |    |   |         |         |                |           |           |                     |             |
| N2                                                                  | CT | V | 7552756 | 7553923 | WBGene00017600 | ttr-10    | F19F10.4  | -0.0405109429764678 |             |
| AGIWUR205                                                           |    |   |         |         |                |           |           |                     |             |
| N2                                                                  | CT | V | 7555810 | 7557387 | WBGene00005534 | sri-22    | F19F10.2  | 0.0734854921093975  |             |
| AGIWUR26691;AGIWUR41410                                             |    |   |         |         |                |           |           |                     |             |
| N2                                                                  | CT | V | 7557541 | 7558783 | WBGene00017601 | ets-7     | F19F10.5  | 0.226220796520984   |             |
| AGIWUR4260                                                          |    |   |         |         |                |           |           |                     |             |
| N2                                                                  | CT | V | 7560252 | 7561615 | WBGene00017602 | cllec-211 | F19F10.6  | 0.339715391039475   |             |
| AGIWUR30534                                                         |    |   |         |         |                |           |           |                     |             |
| N2                                                                  | CT | V | 7562714 | 7564245 | WBGene00017598 | F19F10.1  | F19F10.1  |                     |             |
| 0.000477551311729663 AGIWUR44088                                    |    |   |         |         |                |           |           |                     |             |
| N2                                                                  | CT | V | 7566232 | 7567059 | WBGene00017603 | cllec-212 | F19F10.7  | -0.17793357934173   |             |
| AGIWUR868                                                           |    |   |         |         |                |           |           |                     |             |
| N2                                                                  | CT | V | 7569696 | 7570390 | WBGene00017604 | F19F10.8  | F19F10.8  | 0.0802416130039454  |             |
| AGIWUR12944;AGIWUR17120;AGIWUR21096;AGIWUR29979                     |    |   |         |         |                |           |           |                     |             |
| N2                                                                  | CT | V | 7571950 | 7575715 | WBGene00017605 | F19F10.9  | F19F10.9  | -0.0395075179582651 |             |
| AGIWUR36257                                                         |    |   |         |         |                |           |           |                     |             |
| N2                                                                  | CT | V | 7575750 | 7581532 | WBGene00017608 | F19F10.12 | F19F10.12 | 0.155987804749608   |             |
| AGIWUR21931;AGIWUR36890;AGIWUR40367                                 |    |   |         |         |                |           |           |                     |             |
| N2                                                                  | CT | V | 7581473 | 7587698 | WBGene00017607 | F19F10.11 | F19F10.11 | -0.0273197703344561 |             |
| AGIWUR22956;AGIWUR25815                                             |    |   |         |         |                |           |           |                     |             |
| N2                                                                  | CT | V | 7587996 | 7594740 | WBGene00016816 | C50E3.5   | C50E3.5   | 0.38656066754206    | AGIWUR38076 |
| N2                                                                  | CT | V | 7594875 | 7596409 | WBGene00016818 | C50E3.7   | C50E3.7   | 0.126051126662418   | AGIWUR27300 |
| N2                                                                  | CT | V | 7598029 | 7598369 | WBGene00016819 | C50E3.8   | C50E3.8   | 0.103592176716619   | AGIWUR20841 |
| N2                                                                  | CT | V | 7599257 | 7600424 | WBGene00016820 | C50E3.9   | C50E3.9   | 0.206089698680328   | AGIWUR37388 |
| N2                                                                  | CT | V | 7600609 | 7601543 | WBGene00016821 | sc1-26    | C50E3.10  | 0.061499859942459   |             |
| AGIWUR39347                                                         |    |   |         |         |                |           |           |                     |             |
| N2                                                                  | CT | V | 7602213 | 7603486 | WBGene00016822 | C50E3.11  | C50E3.11  | -0.224242997141663  |             |
| AGIWUR3880;AGIWUR6076;AGIWUR9166;AGIWUR9454;AGIWUR18332;AGIWUR20959 |    |   |         |         |                |           |           |                     |             |
| N2                                                                  | CT | V | 7603806 | 7609946 | WBGene00044738 | fol1-3    | C50E3.16  | -0.130619379634544  |             |
| AGIWUR7594;AGIWUR28960                                              |    |   |         |         |                |           |           |                     |             |
| N2                                                                  | CT | V | 7610370 | 7610963 | WBGene00016814 | C50E3.2   | C50E3.2   | 0.0588269278947671  | AGIWUR43867 |
| N2                                                                  | CT | V | 7611267 | 7611905 | WBGene00016813 | cllec-214 | C50E3.1   | -0.175682308071771  |             |
| AGIWUR9667                                                          |    |   |         |         |                |           |           |                     |             |
| N2                                                                  | CT | V | 7612344 | 7615648 | WBGene00044549 | cllec-215 | C50E3.14  | 0.136035448925523   |             |
| AGIWUR7336;AGIWUR28371                                              |    |   |         |         |                |           |           |                     |             |

|                                                                         |    |   |         |         |                |          |          |                                 |
|-------------------------------------------------------------------------|----|---|---------|---------|----------------|----------|----------|---------------------------------|
| N2                                                                      | CT | V | 7618414 | 7620349 | WBGene00044550 | C50E3.15 | C50E3.15 | 0.0863351146659737              |
| AGIWUR35919;AGIWUR36118                                                 |    |   |         |         |                |          |          |                                 |
| N2                                                                      | CT | V | 7620504 | 7622061 | WBGene00016823 | C50E3.12 | C50E3.12 | -0.0506485516161561             |
| AGIWUR7090;AGIWUR16388;AGIWUR17311                                      |    |   |         |         |                |          |          |                                 |
| N2                                                                      | CT | V | 7622335 | 7624252 | WBGene00016824 | C50E3.13 | C50E3.13 | -0.177203162866604              |
| AGIWUR29608                                                             |    |   |         |         |                |          |          |                                 |
| N2                                                                      | CT | V | 7624952 | 7626453 | WBGene00017201 | grsp-4   | F07C4.7  | -0.112193246831648 AGIWUR10100  |
| N2                                                                      | CT | V | 7626850 | 7627780 | WBGene00017200 | F07C4.6  | F07C4.6  | 0.344154480246539 AGIWUR39813   |
| N2                                                                      | CT | V | 7629804 | 7631298 | WBGene00005108 | srd-30   | F07C4.5  | 0.0778846776863773 AGIWUR14520  |
| N2                                                                      | CT | V | 7632032 | 7633172 | WBGene00005103 | srd-25   | F07C4.4  | -0.0826875517326915 AGIWUR30077 |
| N2                                                                      | CT | V | 7633399 | 7634757 | WBGene00005109 | srd-31   | F07C4.8  | 0.141425438095541 AGIWUR41386   |
| N2                                                                      | CT | V | 7635769 | 7636882 | WBGene00005107 | srd-29   | F07C4.3  | -0.0136770322483191 AGIWUR1831  |
| N2                                                                      | CT | V | 7637277 | 7637792 | WBGene00017202 | clec-46  | F07C4.9  | 0.4683330240338 AGIWUR9953      |
| N2                                                                      | CT | V | 7638105 | 7638622 | WBGene00017199 | clec-45  | F07C4.2  | 0.0438332990082682 AGIWUR24928  |
| N2                                                                      | CT | V | 7638944 | 7639869 | WBGene00017203 | F07C4.10 | F07C4.10 | -0.527176852755477              |
| AGIWUR22824                                                             |    |   |         |         |                |          |          |                                 |
| N2                                                                      | CT | V | 7642558 | 7643516 | WBGene00017204 | F07C4.11 | F07C4.11 | 0.10486190656221                |
| AGIWUR37360                                                             |    |   |         |         |                |          |          |                                 |
| N2                                                                      | CT | V | 7645754 | 7647069 | WBGene00006112 | str-47   | F07C4.1  | -0.030054204288823 AGIWUR28091  |
| N2                                                                      | CT | V | 7647836 | 7649817 | WBGene00017205 | F07C4.12 | F07C4.12 | 0.224550789866606               |
| AGIWUR14177;AGIWUR21706                                                 |    |   |         |         |                |          |          |                                 |
| N2                                                                      | CT | V | 7650242 | 7651857 | WBGene00005441 | srh-234  | F07C4.14 | 0.0146792050792381              |
| AGIWUR30304                                                             |    |   |         |         |                |          |          |                                 |
| N2                                                                      | CT | V | 7652338 | 7653667 | WBGene00005411 | srh-200  | F07C4.13 | 0.112140970459325               |
| AGIWUR44692                                                             |    |   |         |         |                |          |          |                                 |
| N2                                                                      | CT | V | 7668240 | 7669000 | WBGene00015708 | C12D5.5  | C12D5.5  | 0.243854767985026 AGIWUR34402   |
| N2                                                                      | CT | V | 7672089 | 7673253 | WBGene00015707 | C12D5.4  | C12D5.4  | -0.0518128717299096             |
| AGIWUR2897;AGIWUR42966;AGIWUR44218                                      |    |   |         |         |                |          |          |                                 |
| N2                                                                      | CT | V | 7676204 | 7676965 | WBGene00015706 | C12D5.3  | C12D5.3  | -0.176859342335233 AGIWUR1116   |
| N2                                                                      | CT | V | 7679314 | 7681615 | WBGene00015709 | cyp-33A1 | C12D5.7  | -0.0657949518327001             |
| AGIWUR36221                                                             |    |   |         |         |                |          |          |                                 |
| N2                                                                      | CT | V | 7681820 | 7683957 | WBGene00015712 | sre-11   | C12D5.11 | 0.193369697110731               |
| AGIWUR29774                                                             |    |   |         |         |                |          |          |                                 |
| N2                                                                      | CT | V | 7684363 | 7686335 | WBGene00003684 | nhr-94   | C12D5.8  | -0.123866738876565              |
| AGIWUR17409;AGIWUR18470;AGIWUR24192;AGIWUR38643;AGIWUR40479;AGIWUR43922 |    |   |         |         |                |          |          |                                 |
| N2                                                                      | CT | V | 7686350 | 7688228 | WBGene00015705 | nhr-152  | C12D5.2  | -0.365361072194155 AGIWUR41171  |
| N2                                                                      | CT | V | 7688237 | 7689988 | WBGene00015710 | C12D5.9  | C12D5.9  | -0.0571387396751817 AGIWUR41038 |
| N2                                                                      | CT | V | 7690594 | 7692043 | WBGene00006194 | str-147  | C12D5.1  | -0.144941983574601              |
| AGIWUR29458;AGIWUR43240                                                 |    |   |         |         |                |          |          |                                 |

|                                                                                    |    |   |         |         |                |           |           |                     |             |
|------------------------------------------------------------------------------------|----|---|---------|---------|----------------|-----------|-----------|---------------------|-------------|
| N2                                                                                 | CT | V | 7692071 | 7693488 | WBGene00015711 | C12D5.10  | C12D5.10  | 0.0293562018853777  |             |
| AGIWUR4130;AGIWUR17148;AGIWUR35652                                                 |    |   |         |         |                |           |           |                     |             |
| N2                                                                                 | CT | V | 7697142 | 7700760 | WBGene00022654 | ZK105.3   | ZK105.3   | 0.0970871747307198  | AGIWUR26366 |
| N2                                                                                 | CT | V | 7701048 | 7703636 | WBGene00022655 | srsx-40   | ZK105.4   | 0.0491536247440898  | AGIWUR24681 |
| N2                                                                                 | CT | V | 7705616 | 7706955 | WBGene00005750 | srw-3     | ZK105.2   | -0.18072160967592   | AGIWUR44099 |
| N2                                                                                 | CT | V | 7709050 | 7710037 | WBGene00022658 | srh-188   | ZK105.7   | -0.186502406410841  |             |
| AGIWUR17472;AGIWUR35760                                                            |    |   |         |         |                |           |           |                     |             |
| N2                                                                                 | CT | V | 7712239 | 7713168 | WBGene00235114 | ZK105.13  | ZK105.13  | -0.409001555161977  |             |
| AGIWUR5750                                                                         |    |   |         |         |                |           |           |                     |             |
| N2                                                                                 | CT | V | 7713990 | 7714698 | WBGene00022653 | ZK105.1   | ZK105.1   | -0.320385243529598  | AGIWUR5908  |
| N2                                                                                 | CT | V | 7721181 | 7724065 | WBGene00022657 | ZK105.6   | ZK105.6   | 0.19137598109721    | AGIWUR40107 |
| N2                                                                                 | CT | V | 7724494 | 7726110 | WBGene00044551 | ZK105.8   | ZK105.8   | -0.157848803106258  |             |
| AGIWUR6482;AGIWUR39137;AGIWUR42851                                                 |    |   |         |         |                |           |           |                     |             |
| N2                                                                                 | CT | V | 7728813 | 7730317 | WBGene00022410 | Y97E10C.1 | Y97E10C.1 | 0.422006282952822   |             |
| AGIWUR23151                                                                        |    |   |         |         |                |           |           |                     |             |
| N2                                                                                 | CT | V | 7731839 | 7733495 | WBGene00044342 | T05B11.7  | T05B11.7  | 0.168451487740934   |             |
| AGIWUR3311;AGIWUR35193                                                             |    |   |         |         |                |           |           |                     |             |
| N2                                                                                 | CT | V | 7735619 | 7737024 | WBGene00005661 | srr-10    | T05B11.6  | -0.0387637250340029 |             |
| AGIWUR44351                                                                        |    |   |         |         |                |           |           |                     |             |
| N2                                                                                 | CT | V | 7738010 | 7739596 | WBGene00005660 | srr-9     | T05B11.2  | 0.0495272513018818  |             |
| AGIWUR42129                                                                        |    |   |         |         |                |           |           |                     |             |
| N2                                                                                 | CT | V | 7748863 | 7751368 | WBGene00020245 | T05B11.1  | T05B11.1  | -0.123635076877449  |             |
| AGIWUR26544                                                                        |    |   |         |         |                |           |           |                     |             |
| N2                                                                                 | CT | V | 7751901 | 7754139 | WBGene00020247 | T05B11.4  | T05B11.4  | -0.135753284808281  |             |
| AGIWUR36773                                                                        |    |   |         |         |                |           |           |                     |             |
| N2                                                                                 | CT | V | 7756749 | 7757854 | WBGene00023340 | T05B11.5  | T05B11.5  | 0.0550538336118143  |             |
| AGIWUR12624;AGIWUR27525;AGIWUR40406                                                |    |   |         |         |                |           |           |                     |             |
| N2                                                                                 | CT | V | 7760474 | 7761633 | WBGene00016150 | hint-3    | C26F1.7   | 0.174507889501328   | AGIWUR28712 |
| N2                                                                                 | CT | V | 7771328 | 7773273 | WBGene00016149 | frpr-3    | C26F1.6   | -0.818451055319621  | AGIWUR21381 |
| N2                                                                                 | CT | V | 7774441 | 7775759 | WBGene00001719 | grl-10    | C26F1.5   | -0.0717864603933087 | AGIWUR700   |
| N2                                                                                 | CT | V | 7775742 | 7776079 | WBGene00004453 | rpl-39    | C26F1.9   | -0.0390940491467866 | AGIWUR17213 |
| N2                                                                                 | CT | V | 7776576 | 7777236 | WBGene00004499 | rps-30    | C26F1.4   | -0.0942401330274087 |             |
| AGIWUR2827;AGIWUR13715;AGIWUR20076;AGIWUR25322;AGIWUR32322;AGIWUR33401;AGIWUR40641 |    |   |         |         |                |           |           |                     |             |
| N2                                                                                 | CT | V | 7777300 | 7778985 | WBGene00016148 | C26F1.3   | C26F1.3   | -0.0864140279493313 |             |
| AGIWUR60;AGIWUR12951;AGIWUR33169;AGIWUR36881                                       |    |   |         |         |                |           |           |                     |             |
| N2                                                                                 | CT | V | 7781811 | 7784595 | WBGene00016147 | cyp-32A1  | C26F1.2   | -0.16628631066448   |             |
| AGIWUR44527                                                                        |    |   |         |         |                |           |           |                     |             |
| N2                                                                                 | CT | V | 7785417 | 7787712 | WBGene00016146 | C26F1.1   | C26F1.1   | 0.160410280451734   |             |
| AGIWUR6041;AGIWUR11348;AGIWUR18024;AGIWUR29985;AGIWUR33124;AGIWUR33236             |    |   |         |         |                |           |           |                     |             |

|                                                                                                                                                         |    |   |         |         |                |          |           |                     |             |
|---------------------------------------------------------------------------------------------------------------------------------------------------------|----|---|---------|---------|----------------|----------|-----------|---------------------|-------------|
| N2                                                                                                                                                      | CT | V | 7793367 | 7794025 | WBGene00001464 | flp-21   | C26F1.10  | -0.238871567738993  |             |
| AGIWUR8251                                                                                                                                              |    |   |         |         |                |          |           |                     |             |
| N2                                                                                                                                                      | CT | V | 7801518 | 7803727 | WBGene00022812 | uvs-1    | ZK742.2   | -0.172055819955865  | AGIWUR34269 |
| N2                                                                                                                                                      | CT | V | 7805064 | 7814656 | WBGene00002078 | xpo-1    | ZK742.1   | 0.0919607748614375  |             |
| AGIWUR721;AGIWUR1219;AGIWUR5682;AGIWUR11323;AGIWUR14384;AGIWUR15800;AGIWUR23048;AGIWUR23160;AGIWUR26928;AGIWUR28172;AGIWUR34718;AGIWUR39925;AGIWUR40454 |    |   |         |         |                |          |           |                     |             |
| N2                                                                                                                                                      | CT | V | 7820578 | 7821477 | WBGene00002256 | lbp-4    | ZK742.5   | -0.257605307130715  | AGIWUR42605 |
| N2                                                                                                                                                      | CT | V | 7827201 | 7842388 | WBGene00003242 | mig-6    | C37C3.6   | 0.196125235026649   |             |
| AGIWUR27540;AGIWUR30637;AGIWUR44675                                                                                                                     |    |   |         |         |                |          |           |                     |             |
| N2                                                                                                                                                      | CT | V | 7842543 | 7844299 | WBGene00001697 | grd-8    | C37C3.4   | -0.120243324502169  | AGIWUR13235 |
| N2                                                                                                                                                      | CT | V | 7844343 | 7847164 | WBGene00016500 | memo-1   | C37C3.8   | -0.260094255789681  |             |
| AGIWUR21318;AGIWUR38933;AGIWUR42472;AGIWUR43233                                                                                                         |    |   |         |         |                |          |           |                     |             |
| N2                                                                                                                                                      | CT | V | 7849984 | 7851029 | WBGene00016497 | vps-32.2 | C37C3.3   | 0.0916050744808992  |             |
| AGIWUR16738                                                                                                                                             |    |   |         |         |                |          |           |                     |             |
| N2                                                                                                                                                      | CT | V | 7852286 | 7853975 | WBGene00016501 | C37C3.9  | C37C3.9   | -0.106320609438475  | AGIWUR18544 |
| N2                                                                                                                                                      | CT | V | 7854991 | 7857925 | WBGene00016496 | C37C3.2  | C37C3.2   | -0.0511611551897682 |             |
| AGIWUR10421;AGIWUR15189;AGIWUR29926;AGIWUR38035                                                                                                         |    |   |         |         |                |          |           |                     |             |
| N2                                                                                                                                                      | CT | V | 7857963 | 7859909 | WBGene00016495 | C37C3.1  | C37C3.1   | -0.0375841925410221 | AGIWUR30764 |
| N2                                                                                                                                                      | CT | V | 7862275 | 7863070 | WBGene00016502 | C37C3.10 | C37C3.10  | 0.0376655275276505  |             |
| AGIWUR21569                                                                                                                                             |    |   |         |         |                |          |           |                     |             |
| N2                                                                                                                                                      | CT | V | 7863458 | 7864731 | WBGene00016503 | C37C3.11 | C37C3.11  | -0.18317304969629   |             |
| AGIWUR13987                                                                                                                                             |    |   |         |         |                |          |           |                     |             |
| N2                                                                                                                                                      | CT | V | 7868470 | 7870807 | WBGene00077712 | nipi-4   | F40A3.5   | -0.203968875540181  | AGIWUR32728 |
| N2                                                                                                                                                      | CT | V | 7875756 | 7876789 | WBGene00018219 | F40A3.4  | F40A3.4   | -0.0269622830149743 |             |
| AGIWUR390;AGIWUR13174;AGIWUR23869                                                                                                                       |    |   |         |         |                |          |           |                     |             |
| N2                                                                                                                                                      | CT | V | 7877490 | 7878514 | WBGene00018218 | F40A3.3  | F40A3.3   | -0.153589795902283  | AGIWUR4725  |
| N2                                                                                                                                                      | CT | V | 7878914 | 7881403 | WBGene00018217 | F40A3.2  | F40A3.2   | -0.0811115777050269 | AGIWUR10577 |
| N2                                                                                                                                                      | CT | V | 7891530 | 7895518 | WBGene00018216 | F40A3.1  | F40A3.1   | 0.124602424566801   | AGIWUR36055 |
| N2                                                                                                                                                      | CT | V | 7895465 | 7899861 | WBGene00018222 | F40A3.7  | F40A3.7   | -0.083029193083572  | AGIWUR45014 |
| N2                                                                                                                                                      | CT | V | 7914420 | 7915728 | WBGene00005902 | srx-11   | Y97E10B.6 | -0.295572794501542  |             |
| AGIWUR27174                                                                                                                                             |    |   |         |         |                |          |           |                     |             |
| N2                                                                                                                                                      | CT | V | 7925783 | 7926756 | WBGene00022406 | srsx-7   | Y97E10B.4 | -0.0732223543664592 |             |
| AGIWUR17411                                                                                                                                             |    |   |         |         |                |          |           |                     |             |
| N2                                                                                                                                                      | CT | V | 7927084 | 7928451 | WBGene00022405 | srsx-6   | Y97E10B.3 | -0.476802058943743  |             |
| AGIWUR18933                                                                                                                                             |    |   |         |         |                |          |           |                     |             |
| N2                                                                                                                                                      | CT | V | 7928960 | 7930337 | WBGene00022404 | srsx-5   | Y97E10B.2 | 0.0423557141537207  |             |
| AGIWUR15793                                                                                                                                             |    |   |         |         |                |          |           |                     |             |
| N2                                                                                                                                                      | CT | V | 7930475 | 7933098 | WBGene00003575 | ncx-10   | Y97E10B.7 | -0.144907930029479  |             |
| AGIWUR25969                                                                                                                                             |    |   |         |         |                |          |           |                     |             |

|                                                                        |    |   |         |         |                |            |            |                      |
|------------------------------------------------------------------------|----|---|---------|---------|----------------|------------|------------|----------------------|
| N2                                                                     | CT | V | 7934457 | 7935113 | WBGene00022407 | srsx-4     | Y97E10B.8  | -0.00596662210738153 |
| AGIWUR8695                                                             |    |   |         |         |                |            |            |                      |
| N2                                                                     | CT | V | 7936144 | 7937252 | WBGene00022408 | srsx-3     | Y97E10B.9  | 0.129776444442747    |
| AGIWUR41183                                                            |    |   |         |         |                |            |            |                      |
| N2                                                                     | CT | V | 7938605 | 7940383 | WBGene00022409 | srt-53     | Y97E10B.10 | -0.0801267532551613  |
| AGIWUR12412;AGIWUR36109;AGIWUR44229                                    |    |   |         |         |                |            |            |                      |
| N2                                                                     | CT | V | 7943868 | 7946857 | WBGene00022403 | Y97E10B.1  | Y97E10B.1  | -0.300596065103941   |
| AGIWUR9706                                                             |    |   |         |         |                |            |            |                      |
| N2                                                                     | CT | V | 7947231 | 7948615 | WBGene00017821 | F26D11.4   | F26D11.4   | -0.0195218843517146  |
| AGIWUR33936                                                            |    |   |         |         |                |            |            |                      |
| N2                                                                     | CT | V | 7951625 | 7952955 | WBGene00017822 | clec-216   | F26D11.5   | -0.042212410835444   |
| AGIWUR19386;AGIWUR35862;AGIWUR41728                                    |    |   |         |         |                |            |            |                      |
| N2                                                                     | CT | V | 7953354 | 7954652 | WBGene00045393 | F26D11.13  | F26D11.13  | 1.30415326780237     |
| AGIWUR5740                                                             |    |   |         |         |                |            |            |                      |
| N2                                                                     | CT | V | 7954793 | 7955363 | WBGene00045392 | pals-35    | F26D11.12  | -0.297214466644117   |
| AGIWUR21854                                                            |    |   |         |         |                |            |            |                      |
| N2                                                                     | CT | V | 7955404 | 7956497 | WBGene00017823 | pals-34    | F26D11.6   | -0.0645261918366518  |
| AGIWUR4877;AGIWUR18296                                                 |    |   |         |         |                |            |            |                      |
| N2                                                                     | CT | V | 7957277 | 7958840 | WBGene00017824 | clec-217   | F26D11.9   | -0.125589485462321   |
| AGIWUR38445                                                            |    |   |         |         |                |            |            |                      |
| N2                                                                     | CT | V | 7959270 | 7960958 | WBGene00017819 | F26D11.2   | F26D11.2   | 0.124366717307119    |
| AGIWUR14036                                                            |    |   |         |         |                |            |            |                      |
| N2                                                                     | CT | V | 7961539 | 7968899 | WBGene00000488 | che-7      | F26D11.10  | -0.0776076719337766  |
| AGIWUR33539                                                            |    |   |         |         |                |            |            |                      |
| N2                                                                     | CT | V | 7972924 | 7977774 | WBGene00002632 | let-413    | F26D11.11  | -0.195003367893816   |
| AGIWUR7383;AGIWUR44679                                                 |    |   |         |         |                |            |            |                      |
| N2                                                                     | CT | V | 7981545 | 7982662 | WBGene00017818 | F26D11.1   | F26D11.1   | -0.115198472042549   |
| AGIWUR42437                                                            |    |   |         |         |                |            |            |                      |
| N2                                                                     | CT | V | 7982656 | 7983431 | WBGene00022394 | Y97E10AL.3 | Y97E10AL.3 | -0.261672209681496   |
| AGIWUR7366                                                             |    |   |         |         |                |            |            |                      |
| N2                                                                     | CT | V | 7983849 | 7985954 | WBGene00022393 | abhd-12    | Y97E10AL.2 | -0.00124565302167667 |
| AGIWUR23178                                                            |    |   |         |         |                |            |            |                      |
| N2                                                                     | CT | V | 7993789 | 7994666 | WBGene00022395 | ceh-76     | Y97E10AM.1 | -0.259951211148677   |
| AGIWUR36575                                                            |    |   |         |         |                |            |            |                      |
| N2                                                                     | CT | V | 7996178 | 8000233 | WBGene00022397 | Y97E10AR.2 | Y97E10AR.2 | -0.174897815238634   |
| AGIWUR41368                                                            |    |   |         |         |                |            |            |                      |
| N2                                                                     | CT | V | 8001451 | 8004690 | WBGene00022396 | Y97E10AR.1 | Y97E10AR.1 | -0.0106848501777619  |
| AGIWUR6325;AGIWUR21011;AGIWUR26692;AGIWUR31456;AGIWUR38523;AGIWUR39332 |    |   |         |         |                |            |            |                      |
| N2                                                                     | CT | V | 8005326 | 8005692 | WBGene00044552 | Y97E10AR.8 | Y97E10AR.8 | 0.00155290919741802  |

|                                                             |    |   |         |         |                |            |            |                     |             |
|-------------------------------------------------------------|----|---|---------|---------|----------------|------------|------------|---------------------|-------------|
| AGIWUR24477;AGIWUR28438;AGIWUR30489;AGIWUR37606;AGIWUR41982 |    |   |         |         |                |            |            |                     |             |
| N2                                                          | CT | V | 8006179 | 8007510 | WBGene00022398 | Y97E10AR.3 | Y97E10AR.3 | -0.0806175082063412 |             |
| AGIWUR4548                                                  |    |   |         |         |                |            |            |                     |             |
| N2                                                          | CT | V | 8008028 | 8010443 | WBGene00022399 | Y97E10AR.4 | Y97E10AR.4 | -0.334827610976228  |             |
| AGIWUR31544                                                 |    |   |         |         |                |            |            |                     |             |
| N2                                                          | CT | V | 8010475 | 8011108 | WBGene00022402 | lmtr-2     | Y97E10AR.7 | -0.250232133517923  |             |
| AGIWUR44898                                                 |    |   |         |         |                |            |            |                     |             |
| N2                                                          | CT | V | 8011219 | 8012345 | WBGene00022400 | rpb-9      | Y97E10AR.5 | -0.105983460071547  |             |
| AGIWUR14983                                                 |    |   |         |         |                |            |            |                     |             |
| N2                                                          | CT | V | 8012401 | 8014182 | WBGene00022401 | Y97E10AR.6 | Y97E10AR.6 | 0.0525105605132268  |             |
| AGIWUR2712                                                  |    |   |         |         |                |            |            |                     |             |
| N2                                                          | CT | V | 8017947 | 8021715 | WBGene00018398 | spt1-2     | F43H9.2    | 0.259364617916916   |             |
| AGIWUR12380;AGIWUR16581;AGIWUR21967;AGIWUR31278             |    |   |         |         |                |            |            |                     |             |
| N2                                                          | CT | V | 8022218 | 8023308 | WBGene00001152 | ech-3      | F43H9.1    | -0.10046708742588   | AGIWUR38133 |
| N2                                                          | CT | V | 8023195 | 8024940 | WBGene00018399 | F43H9.3    | F43H9.3    | -0.135265358070559  | AGIWUR30800 |
| N2                                                          | CT | V | 8026691 | 8028789 | WBGene00018400 | F43H9.4    | F43H9.4    | 0.0251554665966118  | AGIWUR2161  |
| N2                                                          | CT | V | 8029439 | 8031214 | WBGene00003865 | oma-2      | ZC513.6    | 0.0179861632868814  | AGIWUR10685 |
| N2                                                          | CT | V | 8031411 | 8035014 | WBGene00006935 | vars-1     | ZC513.4    | -0.171327954418024  |             |
| AGIWUR21496;AGIWUR24632;AGIWUR29054;AGIWUR39461             |    |   |         |         |                |            |            |                     |             |
| N2                                                          | CT | V | 8035111 | 8039506 | WBGene00022629 | ZC513.5    | ZC513.5    | -0.360365803711559  | AGIWUR6084  |
| N2                                                          | CT | V | 8039469 | 8040387 | WBGene00023209 | ZC513.7    | ZC513.7    | 0.358562043921161   |             |
| AGIWUR11496;AGIWUR17404;AGIWUR38696                         |    |   |         |         |                |            |            |                     |             |
| N2                                                          | CT | V | 8047044 | 8049528 | WBGene00022628 | ZC513.3    | ZC513.3    | 0.0402940663328852  | AGIWUR33455 |
| N2                                                          | CT | V | 8049744 | 8050893 | WBGene00000620 | col-43     | ZC513.8    | 0.00207239039480811 | AGIWUR957   |
| N2                                                          | CT | V | 8052137 | 8053730 | WBGene00006060 | sth-1      | ZC513.12   | -0.0794588057297272 |             |
| AGIWUR27227                                                 |    |   |         |         |                |            |            |                     |             |
| N2                                                          | CT | V | 8054430 | 8057558 | WBGene00022627 | ZC513.2    | ZC513.2    | 0.110974360854097   |             |
| AGIWUR27743;AGIWUR44063                                     |    |   |         |         |                |            |            |                     |             |
| N2                                                          | CT | V | 8058659 | 8060317 | WBGene00006187 | str-138    | ZC513.11   | -0.180630266378196  |             |
| AGIWUR36260                                                 |    |   |         |         |                |            |            |                     |             |
| N2                                                          | CT | V | 8060873 | 8062174 | WBGene00006186 | str-139    | ZC513.9    | -0.0237124205991845 | AGIWUR8996  |
| N2                                                          | CT | V | 8063247 | 8065079 | WBGene00022630 | fbxa-223   | ZC513.10   | -0.0775596528952534 |             |
| AGIWUR41957                                                 |    |   |         |         |                |            |            |                     |             |
| N2                                                          | CT | V | 8065780 | 8067900 | WBGene00006188 | str-140    | C09H5.3    | -0.359018365930551  | AGIWUR12899 |
| N2                                                          | CT | V | 8068152 | 8069737 | WBGene00006190 | str-143    | C09H5.4    | 0.128952746154622   | AGIWUR22797 |
| N2                                                          | CT | V | 8070643 | 8072266 | WBGene00006191 | str-144    | C09H5.5    | 0.384004492005559   | AGIWUR24395 |
| N2                                                          | CT | V | 8076012 | 8079914 | WBGene00015660 | catp-3     | C09H5.2    | -0.0204878431111704 |             |
| AGIWUR20050;AGIWUR41311                                     |    |   |         |         |                |            |            |                     |             |
| N2                                                          | CT | V | 8080367 | 8081678 | WBGene00006180 | str-131    | C09H5.6    | -0.0154367942150886 | AGIWUR14503 |

|                                                 |    |   |         |         |                |          |          |                      |             |
|-------------------------------------------------|----|---|---------|---------|----------------|----------|----------|----------------------|-------------|
| N2                                              | CT | V | 8082367 | 8082767 | WBGene00015659 | C09H5.1  | C09H5.1  | 0.0295192590775661   | AGIWUR15945 |
| N2                                              | CT | V | 8084120 | 8085241 | WBGene00015661 | C09H5.7  | C09H5.7  | 0.217038699890402    | AGIWUR19755 |
| N2                                              | CT | V | 8085884 | 8087283 | WBGene00006177 | str-128  | C09H5.8  | -0.0598982320013821  | AGIWUR39552 |
| N2                                              | CT | V | 8089319 | 8090695 | WBGene00006179 | str-130  | C09H5.9  | -0.972626664217941   | AGIWUR20800 |
| N2                                              | CT | V | 8090973 | 8092485 | WBGene00006178 | str-129  | F58G4.5  | 0.133653387151067    | AGIWUR24912 |
| N2                                              | CT | V | 8093335 | 8095468 | WBGene00006193 | str-146  | F58G4.6  | -0.00132416635262267 | AGIWUR34556 |
| N2                                              | CT | V | 8096394 | 8098339 | WBGene00006192 | str-145  | F58G4.7  | -0.0163509685998431  | AGIWUR31757 |
| N2                                              | CT | V | 8099621 | 8100484 | WBGene00019066 | sdz-23   | F58G4.4  | -0.254331690497986   | AGIWUR33239 |
| N2                                              | CT | V | 8102484 | 8106905 | WBGene00006149 | str-90   | F58G4.2  | 0.178525485434854    | AGIWUR24341 |
| N2                                              | CT | V | 8108970 | 8118131 | WBGene00019064 | myo-5    | F58G4.1  | 0.191872339897728    | AGIWUR42109 |
| N2                                              | CT | V | 8118264 | 8120351 | WBGene00017020 | D1014.7  | D1014.7  | 0.0460861289418784   | AGIWUR28183 |
| N2                                              | CT | V | 8121168 | 8123470 | WBGene00017019 | D1014.6  | D1014.6  | -0.0958965329871617  | AGIWUR10069 |
| N2                                              | CT | V | 8123684 | 8126710 | WBGene00017018 | D1014.5  | D1014.5  | -0.553165256767153   | AGIWUR26747 |
| N2                                              | CT | V | 8126663 | 8129352 | WBGene00005006 | spr-1    | D1014.8  | -0.142157181465571   |             |
| AGIWUR2032;AGIWUR11463;AGIWUR13038              |    |   |         |         |                |          |          |                      |             |
| N2                                              | CT | V | 8130388 | 8133329 | WBGene00017016 | snap-1   | D1014.3  | 0.13555120955904     | AGIWUR11044 |
| N2                                              | CT | V | 8133432 | 8134985 | WBGene00017017 | D1014.4  | D1014.4  | -0.173833870750963   |             |
| AGIWUR1511;AGIWUR18218;AGIWUR39125;AGIWUR39914  |    |   |         |         |                |          |          |                      |             |
| N2                                              | CT | V | 8143761 | 8147782 | WBGene00017015 | D1014.2  | D1014.2  | 0.188398972591541    | AGIWUR18107 |
| N2                                              | CT | V | 8157746 | 8159844 | WBGene00006309 | sul-2    | D1014.1  | 0.107600128056056    | AGIWUR14310 |
| N2                                              | CT | V | 8159929 | 8161643 | WBGene00017636 | F20D6.6  | F20D6.6  | 0.142835652435608    | AGIWUR12077 |
| N2                                              | CT | V | 8177093 | 8177449 | WBGene00017638 | F20D6.9  | F20D6.9  | -0.096946501268679   | AGIWUR25233 |
| N2                                              | CT | V | 8179131 | 8183442 | WBGene00005648 | srp-7    | F20D6.4  | -0.132952298996361   |             |
| AGIWUR10926;AGIWUR15736;AGIWUR41757             |    |   |         |         |                |          |          |                      |             |
| N2                                              | CT | V | 8183730 | 8185772 | WBGene00005649 | srp-8    | F20D6.3  | 0.0150349018129585   |             |
| AGIWUR14471;AGIWUR14902;AGIWUR23568;AGIWUR43404 |    |   |         |         |                |          |          |                      |             |
| N2                                              | CT | V | 8186039 | 8187319 | WBGene00017634 | F20D6.2  | F20D6.2  | -0.00960459029222882 | AGIWUR9313  |
| N2                                              | CT | V | 8187803 | 8190116 | WBGene00043069 | F20D6.12 | F20D6.12 | 0.0694441365245515   |             |
| AGIWUR12284                                     |    |   |         |         |                |          |          |                      |             |
| N2                                              | CT | V | 8190699 | 8192050 | WBGene00017633 | F20D6.1  | F20D6.1  | -0.111850236491813   | AGIWUR6718  |
| N2                                              | CT | V | 8192060 | 8195937 | WBGene00017639 | F20D6.10 | F20D6.10 | -0.25082553324366    |             |
| AGIWUR8103                                      |    |   |         |         |                |          |          |                      |             |
| N2                                              | CT | V | 8196774 | 8199094 | WBGene00017640 | F20D6.11 | F20D6.11 | -0.0673762987361073  |             |
| AGIWUR5525                                      |    |   |         |         |                |          |          |                      |             |
| N2                                              | CT | V | 8201808 | 8202546 | WBGene00019478 | cri-2    | K07C11.5 | -0.165918968944993   |             |
| AGIWUR42010                                     |    |   |         |         |                |          |          |                      |             |
| N2                                              | CT | V | 8203379 | 8205986 | WBGene00019477 | K07C11.4 | K07C11.4 | 0.305167814092384    |             |
| AGIWUR17869                                     |    |   |         |         |                |          |          |                      |             |
| N2                                              | CT | V | 8207235 | 8208013 | WBGene00019476 | K07C11.3 | K07C11.3 | -0.133209920004131   |             |



|                                                                                                            |    |   |         |         |                |           |           |                      |             |
|------------------------------------------------------------------------------------------------------------|----|---|---------|---------|----------------|-----------|-----------|----------------------|-------------|
| AGIWUR5481                                                                                                 |    |   |         |         |                |           |           |                      |             |
| N2                                                                                                         | CT | V | 8207930 | 8213968 | WBGene00019479 | K07C11.7  | K07C11.7  | -0.0627822746262776  |             |
| AGIWUR1879;AGIWUR11564;AGIWUR41258                                                                         |    |   |         |         |                |           |           |                      |             |
| N2                                                                                                         | CT | V | 8215534 | 8217884 | WBGene00019480 | K07C11.8  | K07C11.8  | -0.0541008722999585  |             |
| AGIWUR703                                                                                                  |    |   |         |         |                |           |           |                      |             |
| N2                                                                                                         | CT | V | 8218279 | 8221316 | WBGene00019481 | cogc-6    | K07C11.9  | -0.2140657254698     |             |
| AGIWUR44423                                                                                                |    |   |         |         |                |           |           |                      |             |
| N2                                                                                                         | CT | V | 8221410 | 8223587 | WBGene00000098 | air-1     | K07C11.2  | 0.120823605073214    |             |
| AGIWUR1464;AGIWUR10508;AGIWUR24452                                                                         |    |   |         |         |                |           |           |                      |             |
| N2                                                                                                         | CT | V | 8224965 | 8226037 | WBGene00003937 | pax-1     | K07C11.1  | 0.123429628374458    |             |
| AGIWUR6074                                                                                                 |    |   |         |         |                |           |           |                      |             |
| N2                                                                                                         | CT | V | 8226061 | 8226852 | WBGene00019482 | K07C11.10 | K07C11.10 | 0.0382906752238839   |             |
| AGIWUR23380                                                                                                |    |   |         |         |                |           |           |                      |             |
| N2                                                                                                         | CT | V | 8228300 | 8238409 | WBGene00004395 | rol-3     | C16D9.2   | 0.214710891207476    |             |
| AGIWUR28970;AGIWUR41147                                                                                    |    |   |         |         |                |           |           |                      |             |
| N2                                                                                                         | CT | V | 8238959 | 8240021 | WBGene00015858 | C16D9.3   | C16D9.3   | 0.0155585548214878   |             |
| AGIWUR2918;AGIWUR12819;AGIWUR13836;AGIWUR22036;AGIWUR25212;AGIWUR26109;AGIWUR37663;AGIWUR40907;AGIWUR41937 |    |   |         |         |                |           |           |                      |             |
| N2                                                                                                         | CT | V | 8240928 | 8242898 | WBGene00015859 | C16D9.4   | C16D9.4   | 0.0242028671368022   | AGIWUR39886 |
| N2                                                                                                         | CT | V | 8243709 | 8245400 | WBGene00015860 | C16D9.5   | C16D9.5   | -0.218612441023854   |             |
| AGIWUR7962;AGIWUR25590;AGIWUR41064                                                                         |    |   |         |         |                |           |           |                      |             |
| N2                                                                                                         | CT | V | 8248123 | 8250289 | WBGene00015861 | C16D9.6   | C16D9.6   | -0.150351740883771   | AGIWUR15092 |
| N2                                                                                                         | CT | V | 8256831 | 8258076 | WBGene00015862 | srt-25    | C16D9.7   | -0.0190914822833737  | AGIWUR9495  |
| N2                                                                                                         | CT | V | 8259316 | 8261315 | WBGene00015857 | C16D9.1   | C16D9.1   | 0.262160836252269    | AGIWUR16555 |
| N2                                                                                                         | CT | V | 8261390 | 8263566 | WBGene00015863 | C16D9.8   | C16D9.8   | -0.0476999100763926  | AGIWUR11845 |
| N2                                                                                                         | CT | V | 8264241 | 8264663 | WBGene00015864 | C16D9.9   | C16D9.9   | 0.349607170324497    | AGIWUR40396 |
| N2                                                                                                         | CT | V | 8265202 | 8266385 | WBGene00017679 | F21F8.5   | F21F8.5   | 0.0553637702527237   | AGIWUR890   |
| N2                                                                                                         | CT | V | 8267511 | 8268937 | WBGene00000219 | asp-6     | F21F8.7   | 0.0124659591325766   | AGIWUR29921 |
| N2                                                                                                         | CT | V | 8269254 | 8272058 | WBGene00017678 | asp-12    | F21F8.4   | -0.00257881971797325 | AGIWUR24711 |
| N2                                                                                                         | CT | V | 8272375 | 8274046 | WBGene00000218 | asp-5     | F21F8.3   | -0.016141290602258   |             |
| AGIWUR5560;AGIWUR23001;AGIWUR28611;AGIWUR31817                                                             |    |   |         |         |                |           |           |                      |             |
| N2                                                                                                         | CT | V | 8274353 | 8275757 | WBGene00017677 | asp-11    | F21F8.2   | -0.0703681846345328  | AGIWUR24174 |
| N2                                                                                                         | CT | V | 8275898 | 8277041 | WBGene00006185 | str-137   | F21F8.8   | -1.10792542987937    |             |
| AGIWUR20524;AGIWUR37534                                                                                    |    |   |         |         |                |           |           |                      |             |
| N2                                                                                                         | CT | V | 8277516 | 8278930 | WBGene00006184 | str-136   | F21F8.9   | 0.0841471776614959   | AGIWUR42835 |
| N2                                                                                                         | CT | V | 8279375 | 8282167 | WBGene00006183 | str-135   | F21F8.10  | -0.186679909028853   |             |
| AGIWUR22082                                                                                                |    |   |         |         |                |           |           |                      |             |
| N2                                                                                                         | CT | V | 8282333 | 8284900 | WBGene00017681 | slc-17.5  | F21F8.11  | 0.0914231656076598   |             |
| AGIWUR9561                                                                                                 |    |   |         |         |                |           |           |                      |             |
| N2                                                                                                         | CT | V | 8292064 | 8293516 | WBGene00005190 | srg-33    | F21F8.1   | -0.150658350654619   | AGIWUR38187 |

|                                                                               |    |   |         |         |                |           |          |                     |             |
|-------------------------------------------------------------------------------|----|---|---------|---------|----------------|-----------|----------|---------------------|-------------|
| N2                                                                            | CT | V | 8293809 | 8294900 | WBGene00020939 | W02D7.3   | W02D7.3  | -0.0568317074695734 | AGIWUR37768 |
| N2                                                                            | CT | V | 8296558 | 8297604 | WBGene00020940 | W02D7.4   | W02D7.4  | -0.209622447503385  | AGIWUR7250  |
| N2                                                                            | CT | V | 8297700 | 8299244 | WBGene00020941 | W02D7.5   | W02D7.5  | -0.198117949305642  | AGIWUR41016 |
| N2                                                                            | CT | V | 8299753 | 8301507 | WBGene00020942 | W02D7.6   | W02D7.6  | -0.145894532460972  | AGIWUR2754  |
| N2                                                                            | CT | V | 8301490 | 8302580 | WBGene00004766 | sel-9     | W02D7.7  | -0.0424830265158196 |             |
| AGIWUR305;AGIWUR3250;AGIWUR5175;AGIWUR6945;AGIWUR8272;AGIWUR17351;AGIWUR19473 |    |   |         |         |                |           |          |                     |             |
| N2                                                                            | CT | V | 8302887 | 8304469 | WBGene00020946 | W02D7.11  | W02D7.11 | -0.114670231303897  |             |
| AGIWUR13639                                                                   |    |   |         |         |                |           |          |                     |             |
| N2                                                                            | CT | V | 8305120 | 8306460 | WBGene00020943 | W02D7.8   | W02D7.8  | 0.0238976529763946  | AGIWUR28197 |
| N2                                                                            | CT | V | 8307942 | 8310766 | WBGene00020938 | cllec-218 | W02D7.2  | -0.237425353037772  |             |
| AGIWUR39060;AGIWUR41065                                                       |    |   |         |         |                |           |          |                     |             |
| N2                                                                            | CT | V | 8311510 | 8312041 | WBGene00044356 | W02D7.12  | W02D7.12 | -0.244524558294737  |             |
| AGIWUR27526                                                                   |    |   |         |         |                |           |          |                     |             |
| N2                                                                            | CT | V | 8318435 | 8322863 | WBGene00020945 | cllec-219 | W02D7.10 | -0.501905003720246  |             |
| AGIWUR25784                                                                   |    |   |         |         |                |           |          |                     |             |
| N2                                                                            | CT | V | 8323426 | 8323885 | WBGene00023354 | W02D7.1   | W02D7.1  | -0.126120064618847  |             |
| AGIWUR5151;AGIWUR11873;AGIWUR23778;AGIWUR28332                                |    |   |         |         |                |           |          |                     |             |
| N2                                                                            | CT | V | 8326191 | 8326514 | WBGene00020944 | W02D7.9   | W02D7.9  | -0.0164317703348242 | AGIWUR41935 |
| N2                                                                            | CT | V | 8336658 | 8340675 | WBGene00006582 | tmd-2     | C08D8.2  | 0.0199304388950576  |             |
| AGIWUR24109;AGIWUR37546                                                       |    |   |         |         |                |           |          |                     |             |
| N2                                                                            | CT | V | 8345759 | 8349909 | WBGene00015592 | C08D8.1   | C08D8.1  | -0.270062926364687  | AGIWUR31565 |
| N2                                                                            | CT | V | 8351671 | 8353085 | WBGene00018180 | srsx-22   | F38E1.8  | 0.0158260341585477  | AGIWUR42326 |
| N2                                                                            | CT | V | 8353793 | 8355008 | WBGene00044126 | srsx-23   | F38E1.12 | 0.106438470295458   |             |
| AGIWUR32398;AGIWUR33303                                                       |    |   |         |         |                |           |          |                     |             |
| N2                                                                            | CT | V | 8355953 | 8358185 | WBGene00003395 | mom-2     | F38E1.7  | 0.090789115206972   |             |
| AGIWUR9372;AGIWUR18335;AGIWUR22584;AGIWUR36859;AGIWUR40063                    |    |   |         |         |                |           |          |                     |             |
| N2                                                                            | CT | V | 8358203 | 8359163 | WBGene00018181 | F38E1.9   | F38E1.9  | 0.0975328083409241  |             |
| AGIWUR17431;AGIWUR24194                                                       |    |   |         |         |                |           |          |                     |             |
| N2                                                                            | CT | V | 8359818 | 8361394 | WBGene00018179 | F38E1.6   | F38E1.6  | -0.0329399454900541 | AGIWUR11093 |
| N2                                                                            | CT | V | 8371014 | 8374027 | WBGene00001664 | gpa-2     | F38E1.5  | -0.215866423297663  | AGIWUR29092 |
| N2                                                                            | CT | V | 8374027 | 8375474 | WBGene00018182 | F38E1.10  | F38E1.10 | 0.148672539042614   |             |
| AGIWUR12738                                                                   |    |   |         |         |                |           |          |                     |             |
| N2                                                                            | CT | V | 8376117 | 8377944 | WBGene00018178 | F38E1.3   | F38E1.3  | 0.250612570801053   | AGIWUR6638  |
| N2                                                                            | CT | V | 8378903 | 8379925 | WBGene00018183 | F38E1.11  | F38E1.11 | 0.285436462538664   |             |
| AGIWUR34757                                                                   |    |   |         |         |                |           |          |                     |             |
| N2                                                                            | CT | V | 8379474 | 8383747 | WBGene00018694 | F52E1.5   | F52E1.5  | -0.0324982156332112 |             |
| AGIWUR9540;AGIWUR37783                                                        |    |   |         |         |                |           |          |                     |             |
| N2                                                                            | CT | V | 8383922 | 8384867 | WBGene00044696 | F52E1.14  | F52E1.14 | 0.20528015030203    |             |
| AGIWUR8044;AGIWUR9472;AGIWUR17987;AGIWUR34787;AGIWUR37989;AGIWUR42621         |    |   |         |         |                |           |          |                     |             |

|                                                                        |    |   |         |         |                |           |           |                     |             |
|------------------------------------------------------------------------|----|---|---------|---------|----------------|-----------|-----------|---------------------|-------------|
| N2                                                                     | CT | V | 8384774 | 8386268 | WBGene00002021 | hsp-17    | F52E1.7   | -0.156081635169585  | AGIWUR43590 |
| N2                                                                     | CT | V | 8387356 | 8392324 | WBGene00001534 | gcy-7     | F52E1.4   | 0.169556295686325   | AGIWUR37358 |
| N2                                                                     | CT | V | 8392357 | 8394383 | WBGene00018696 | pho-6     | F52E1.8   | -0.0200959357429351 | AGIWUR24061 |
| N2                                                                     | CT | V | 8394800 | 8396344 | WBGene00018693 | F52E1.3   | F52E1.3   | 0.0262364841437313  | AGIWUR42980 |
| N2                                                                     | CT | V | 8398145 | 8402669 | WBGene00018697 | F52E1.9   | F52E1.9   | 0.0221016915156786  | AGIWUR32593 |
| N2                                                                     | CT | V | 8410595 | 8411831 | WBGene00018692 | F52E1.2   | F52E1.2   | -0.16095009425236   | AGIWUR18541 |
| N2                                                                     | CT | V | 8411775 | 8413513 | WBGene00018698 | vha-18    | F52E1.10  | 0.0598633104573416  |             |
| AGIWUR24887                                                            |    |   |         |         |                |           |           |                     |             |
| N2                                                                     | CT | V | 8414085 | 8415254 | WBGene00004078 | pos-1     | F52E1.1   | -0.198498404596215  | AGIWUR7897  |
| N2                                                                     | CT | V | 8415687 | 8444773 | WBGene00018700 | lmd-3     | F52E1.13  | 0.152222204379272   |             |
| AGIWUR2888;AGIWUR29288;AGIWUR40480;AGIWUR43671                         |    |   |         |         |                |           |           |                     |             |
| N2                                                                     | CT | V | 8446608 | 8448009 | WBGene00020720 | T23B12.5  | T23B12.5  | 0.114970192883323   |             |
| AGIWUR43508                                                            |    |   |         |         |                |           |           |                     |             |
| N2                                                                     | CT | V | 8455396 | 8457606 | WBGene00044553 | T23B12.11 | T23B12.11 | -0.15153420947535   |             |
| AGIWUR21695;AGIWUR33424                                                |    |   |         |         |                |           |           |                     |             |
| N2                                                                     | CT | V | 8457616 | 8460419 | WBGene00020721 | T23B12.6  | T23B12.6  | -0.0207515160464098 |             |
| AGIWUR33383;AGIWUR39766;AGIWUR45189                                    |    |   |         |         |                |           |           |                     |             |
| N2                                                                     | CT | V | 8461096 | 8462116 | WBGene00001040 | dnj-22    | T23B12.7  | -0.235058322990058  |             |
| AGIWUR4124                                                             |    |   |         |         |                |           |           |                     |             |
| N2                                                                     | CT | V | 8462327 | 8465569 | WBGene00020719 | natc-1    | T23B12.4  | -0.0689245194161359 |             |
| AGIWUR41325                                                            |    |   |         |         |                |           |           |                     |             |
| N2                                                                     | CT | V | 8465617 | 8467159 | WBGene00020718 | mrps-2    | T23B12.3  | -0.238606788440984  |             |
| AGIWUR42622                                                            |    |   |         |         |                |           |           |                     |             |
| N2                                                                     | CT | V | 8467265 | 8468943 | WBGene00020717 | mrpl-4    | T23B12.2  | -0.0641092884343433 |             |
| AGIWUR1921;AGIWUR3134;AGIWUR8568;AGIWUR26621                           |    |   |         |         |                |           |           |                     |             |
| N2                                                                     | CT | V | 8469040 | 8470072 | WBGene00020716 | phf-30    | T23B12.1  | -0.173259832908222  |             |
| AGIWUR4944;AGIWUR7828;AGIWUR43934                                      |    |   |         |         |                |           |           |                     |             |
| N2                                                                     | CT | V | 8470013 | 8471244 | WBGene00020722 | T23B12.8  | T23B12.8  | -0.242694262265601  |             |
| AGIWUR3007;AGIWUR8513                                                  |    |   |         |         |                |           |           |                     |             |
| N2                                                                     | CT | V | 8494889 | 8502336 | WBGene00004256 | pxn-1     | ZK994.3   | 0.122798701319923   |             |
| AGIWUR29049;AGIWUR39160                                                |    |   |         |         |                |           |           |                     |             |
| N2                                                                     | CT | V | 8502591 | 8504591 | WBGene00022842 | ZK994.6   | ZK994.6   | 0.136321879508833   | AGIWUR38282 |
| N2                                                                     | CT | V | 8510237 | 8512663 | WBGene00022840 | ZK994.1   | ZK994.1   | -0.0137264707186482 | AGIWUR26288 |
| N2                                                                     | CT | V | 8512689 | 8513463 | WBGene00018481 | F45F2.9   | F45F2.9   | -0.0702209303302617 |             |
| AGIWUR3538;AGIWUR12227;AGIWUR14370;AGIWUR18337;AGIWUR30838;AGIWUR37139 |    |   |         |         |                |           |           |                     |             |
| N2                                                                     | CT | V | 8513577 | 8518764 | WBGene00018482 | F45F2.10  | F45F2.10  | 0.28797701969042    |             |
| AGIWUR20897                                                            |    |   |         |         |                |           |           |                     |             |
| N2                                                                     | CT | V | 8519346 | 8520896 | WBGene00018483 | F45F2.11  | F45F2.11  | 0.0815142405383895  |             |
| AGIWUR34803                                                            |    |   |         |         |                |           |           |                     |             |

|                                                                                                                      |    |   |         |         |                |          |          |                     |             |
|----------------------------------------------------------------------------------------------------------------------|----|---|---------|---------|----------------|----------|----------|---------------------|-------------|
| N2                                                                                                                   | CT | V | 8521503 | 8524555 | WBGene00018480 | otpl-7   | F45F2.7  | 0.0937418974994531  | AGIWUR1825  |
| N2                                                                                                                   | CT | V | 8525908 | 8528580 | WBGene00018479 | otpl-6   | F45F2.6  | 0.118333316500661   | AGIWUR1512  |
| N2                                                                                                                   | CT | V | 8529519 | 8532465 | WBGene00018478 | otpl-5   | F45F2.5  | -0.0179161639078194 | AGIWUR999   |
| N2                                                                                                                   | CT | V | 8537331 | 8539614 | WBGene00018477 | otpl-4   | F45F2.1  | 0.0122059456553201  | AGIWUR5463  |
| N2                                                                                                                   | CT | V | 8539728 | 8545566 | WBGene00017798 | slc-17.8 | F25G6.7  | 0.651763863776351   |             |
| AGIWUR40015                                                                                                          |    |   |         |         |                |          |          |                     |             |
| N2                                                                                                                   | CT | V | 8546128 | 8548880 | WBGene00003816 | asns-1   | F25G6.6  | 0.322320191675161   | AGIWUR24276 |
| N2                                                                                                                   | CT | V | 8549289 | 8551165 | WBGene00006435 | stdh-4   | F25G6.5  | -0.0415677125068665 | AGIWUR23729 |
| N2                                                                                                                   | CT | V | 8552695 | 8555388 | WBGene00000054 | acr-15   | F25G6.4  | -0.0593694864792607 | AGIWUR44252 |
| N2                                                                                                                   | CT | V | 8561216 | 8564345 | WBGene00000055 | acr-16   | F25G6.3  | 0.121987725903665   |             |
| AGIWUR16589;AGIWUR21014;AGIWUR42576                                                                                  |    |   |         |         |                |          |          |                     |             |
| N2                                                                                                                   | CT | V | 8564303 | 8565175 | WBGene00017799 | F25G6.8  | F25G6.8  | -0.127952242736395  | AGIWUR39719 |
| N2                                                                                                                   | CT | V | 8565275 | 8570077 | WBGene00017800 | F25G6.9  | F25G6.9  | -0.0729516035645936 | AGIWUR11988 |
| N2                                                                                                                   | CT | V | 8570311 | 8581397 | WBGene00017797 | symk-1   | F25G6.2  | 0.0765780904872853  |             |
| AGIWUR4549;AGIWUR20084                                                                                               |    |   |         |         |                |          |          |                     |             |
| N2                                                                                                                   | CT | V | 8581261 | 8583576 | WBGene00015670 | C10B5.1  | C10B5.1  | -0.156542804273318  | AGIWUR36163 |
| N2                                                                                                                   | CT | V | 8583553 | 8584554 | WBGene00015671 | C10B5.3  | C10B5.3  | 0.0315050686922014  | AGIWUR28344 |
| N2                                                                                                                   | CT | V | 8594914 | 8597500 | WBGene00007055 | tag-196  | F41E6.6  | 0.0725376864065588  | AGIWUR30420 |
| N2                                                                                                                   | CT | V | 8597851 | 8599292 | WBGene00018288 | F41E6.7  | F41E6.7  | -0.340894597272041  | AGIWUR17625 |
| N2                                                                                                                   | CT | V | 8599584 | 8601412 | WBGene00018289 | F41E6.8  | F41E6.8  | -0.120346487022923  | AGIWUR31859 |
| N2                                                                                                                   | CT | V | 8602084 | 8602825 | WBGene00044554 | F41E6.15 | F41E6.15 | -0.0834340248231946 |             |
| AGIWUR12689;AGIWUR20045;AGIWUR24139;AGIWUR36787;AGIWUR37343                                                          |    |   |         |         |                |          |          |                     |             |
| N2                                                                                                                   | CT | V | 8603480 | 8605469 | WBGene00018286 | F41E6.5  | F41E6.5  | -0.0541270754501255 | AGIWUR16835 |
| N2                                                                                                                   | CT | V | 8607800 | 8615841 | WBGene00018285 | smk-1    | F41E6.4  | 0.122451524272691   |             |
| AGIWUR654;AGIWUR5459;AGIWUR13596;AGIWUR14276;AGIWUR14346;AGIWUR15894;AGIWUR18138;AGIWUR18721;AGIWUR22723;AGIWUR22728 |    |   |         |         |                |          |          |                     |             |
| N2                                                                                                                   | CT | V | 8619032 | 8619869 | WBGene00001694 | grd-5    | F41E6.2  | 0.204302041737899   | AGIWUR25134 |
| N2                                                                                                                   | CT | V | 8619925 | 8621348 | WBGene00018292 | F41E6.11 | F41E6.11 | 0.138913110159359   |             |
| AGIWUR16678                                                                                                          |    |   |         |         |                |          |          |                     |             |
| N2                                                                                                                   | CT | V | 8626900 | 8629129 | WBGene00018293 | F41E6.12 | F41E6.12 | -0.0553614193644414 |             |
| AGIWUR31874                                                                                                          |    |   |         |         |                |          |          |                     |             |
| N2                                                                                                                   | CT | V | 8629223 | 8631325 | WBGene00018294 | atg-18   | F41E6.13 | 0.124850666248584   |             |
| AGIWUR9216;AGIWUR10459;AGIWUR27595                                                                                   |    |   |         |         |                |          |          |                     |             |
| N2                                                                                                                   | CT | V | 8631871 | 8635675 | WBGene00018295 | oac-29   | F41E6.14 | 0.0890363541803723  |             |
| AGIWUR6170                                                                                                           |    |   |         |         |                |          |          |                     |             |
| N2                                                                                                                   | CT | V | 8635820 | 8637006 | WBGene00001721 | grl-12   | F28A12.2 | -0.383100185827398  |             |
| AGIWUR39621                                                                                                          |    |   |         |         |                |          |          |                     |             |
| N2                                                                                                                   | CT | V | 8638237 | 8640585 | WBGene00017879 | acd-4    | F28A12.1 | -0.495155904187742  |             |
| AGIWUR23065                                                                                                          |    |   |         |         |                |          |          |                     |             |

|                                     |    |   |         |         |                |          |          |                     |             |
|-------------------------------------|----|---|---------|---------|----------------|----------|----------|---------------------|-------------|
| N2                                  | CT | V | 8640596 | 8641344 | WBGene00017880 | F28A12.3 | F28A12.3 | 0.0473191948391687  |             |
| AGIWUR39240                         |    |   |         |         |                |          |          |                     |             |
| N2                                  | CT | V | 8641491 | 8643225 | WBGene00017881 | asp-13   | F28A12.4 | -0.0627291791596942 |             |
| AGIWUR6336                          |    |   |         |         |                |          |          |                     |             |
| N2                                  | CT | V | 8666065 | 8671680 | WBGene00022538 | ZC190.4  | ZC190.4  | -0.293888621940065  | AGIWUR3159  |
| N2                                  | CT | V | 8674602 | 8677293 | WBGene00022540 | ZC190.6  | ZC190.6  | 0.213515982386198   | AGIWUR4434  |
| N2                                  | CT | V | 8681350 | 8682939 | WBGene00022537 | ZC190.2  | ZC190.2  | -0.0390246617046213 | AGIWUR22064 |
| N2                                  | CT | V | 8682955 | 8686160 | WBGene00000541 | cIn-3.3  | ZC190.1  | -0.0833165908065929 | AGIWUR40054 |
| N2                                  | CT | V | 8686071 | 8686864 | WBGene00022541 | ZC190.7  | ZC190.7  | 0.421259604000824   | AGIWUR30409 |
| N2                                  | CT | V | 8686958 | 8688435 | WBGene00022542 | ZC190.8  | ZC190.8  | 0.191007794992435   | AGIWUR41198 |
| N2                                  | CT | V | 8694329 | 8696507 | WBGene00022544 | ZC190.10 | ZC190.10 | -0.0836522785921048 |             |
| AGIWUR30061                         |    |   |         |         |                |          |          |                     |             |
| N2                                  | CT | V | 8701432 | 8703060 | WBGene00022535 | ZC178.1  | ZC178.1  | 0.0116514023361347  | AGIWUR35182 |
| N2                                  | CT | V | 8705437 | 8709880 | WBGene00022536 | ZC178.2  | ZC178.2  | -0.461371576576695  | AGIWUR19531 |
| N2                                  | CT | V | 8716495 | 8720893 | WBGene00001616 | glr-5    | ZC196.7  | 0.069159352863287   |             |
| AGIWUR8923;AGIWUR33190              |    |   |         |         |                |          |          |                     |             |
| N2                                  | CT | V | 8721198 | 8722260 | WBGene00022551 | ZC196.8  | ZC196.8  | -0.165492787319403  | AGIWUR10032 |
| N2                                  | CT | V | 8726516 | 8728894 | WBGene00022550 | droe-8   | ZC196.6  | 1.28125014294782    |             |
| AGIWUR16914;AGIWUR36682;AGIWUR37378 |    |   |         |         |                |          |          |                     |             |
| N2                                  | CT | V | 8729458 | 8732789 | WBGene00022549 | ZC196.5  | ZC196.5  | -0.419774913749464  | AGIWUR34777 |
| N2                                  | CT | V | 8733106 | 8735781 | WBGene00022548 | ZC196.4  | ZC196.4  | 0.104128257044163   | AGIWUR8712  |
| N2                                  | CT | V | 8736674 | 8738437 | WBGene00022547 | ZC196.3  | ZC196.3  | 0.602292293070678   | AGIWUR38070 |
| N2                                  | CT | V | 8739437 | 8742259 | WBGene00022546 | ZC196.2  | ZC196.2  | 0.0164629758419199  | AGIWUR26730 |
| N2                                  | CT | V | 8742804 | 8745045 | WBGene00022545 | ZC196.1  | ZC196.1  | 0.378088908983887   |             |
| AGIWUR21259;AGIWUR38916;AGIWUR39614 |    |   |         |         |                |          |          |                     |             |
| N2                                  | CT | V | 8753695 | 8754873 | WBGene00015222 | B0507.5  | B0507.5  | -0.211897530631736  | AGIWUR12863 |
| N2                                  | CT | V | 8754970 | 8755759 | WBGene00015221 | B0507.4  | B0507.4  | 0.02002173039343    | AGIWUR44217 |
| N2                                  | CT | V | 8755897 | 8757098 | WBGene00235307 | B0507.17 | B0507.17 | -0.0562156886818634 |             |
| AGIWUR20645                         |    |   |         |         |                |          |          |                     |             |
| N2                                  | CT | V | 8760687 | 8763194 | WBGene00015225 | B0507.8  | B0507.8  | 3.43583370839757    | AGIWUR2410  |
| N2                                  | CT | V | 8764888 | 8766038 | WBGene00015226 | B0507.9  | B0507.9  | 0.4174691882135     | AGIWUR25026 |
| N2                                  | CT | V | 8768909 | 8770876 | WBGene00015220 | B0507.3  | B0507.3  | 0.875424386407143   | AGIWUR10104 |
| N2                                  | CT | V | 8771899 | 8773781 | WBGene00006006 | srx-115  | B0507.11 | -0.130877496603131  |             |
| AGIWUR14341;AGIWUR19285             |    |   |         |         |                |          |          |                     |             |
| N2                                  | CT | V | 8774332 | 8776630 | WBGene00015219 | B0507.2  | B0507.2  | 0.0526115351305023  | AGIWUR12931 |
| N2                                  | CT | V | 8776570 | 8779318 | WBGene00015218 | B0507.1  | B0507.1  | -0.134669772106614  | AGIWUR10922 |
| N2                                  | CT | V | 8783422 | 8784165 | WBGene00015275 | C01B7.3  | C01B7.3  | 0.163348700735833   | AGIWUR6935  |
| N2                                  | CT | V | 8786551 | 8792771 | WBGene00006342 | sup-37   | C01B7.1  | -0.0659419824901013 |             |
| AGIWUR12890;AGIWUR24197;AGIWUR33572 |    |   |         |         |                |          |          |                     |             |

|                                                                                    |    |   |         |         |                |           |           |                     |             |
|------------------------------------------------------------------------------------|----|---|---------|---------|----------------|-----------|-----------|---------------------|-------------|
| N2                                                                                 | CT | V | 8792696 | 8795567 | WBGene00006467 | magu-2    | C01B7.4   | 0.0342497047968271  |             |
| AGIWUR6705;AGIWUR7116;AGIWUR29311                                                  |    |   |         |         |                |           |           |                     |             |
| N2                                                                                 | CT | V | 8800151 | 8800996 | WBGene00015276 | C01B7.5   | C01B7.5   | -0.126808609833088  | AGIWUR31037 |
| N2                                                                                 | CT | V | 8805416 | 8819955 | WBGene00004457 | rpm-1     | C01B7.6   | -0.168965518247624  | AGIWUR13055 |
| N2                                                                                 | CT | V | 8865351 | 8867297 | WBGene00017192 | F07B7.14  | F07B7.14  | -0.171797573377333  |             |
| AGIWUR21155                                                                        |    |   |         |         |                |           |           |                     |             |
| N2                                                                                 | CT | V | 8876035 | 8877015 | WBGene00017152 | EGAP798.1 | EGAP798.1 | 0.356318704272443   |             |
| AGIWUR42453                                                                        |    |   |         |         |                |           |           |                     |             |
| N2                                                                                 | CT | V | 8898195 | 8898645 | WBGene00001892 | his-18    | K06C4.10  | -0.0580177855946458 |             |
| AGIWUR14430                                                                        |    |   |         |         |                |           |           |                     |             |
| N2                                                                                 | CT | V | 8899276 | 8902221 | WBGene00019448 | frpr-13   | K06C4.17  | -0.0792620481748418 |             |
| AGIWUR41740                                                                        |    |   |         |         |                |           |           |                     |             |
| N2                                                                                 | CT | V | 8902339 | 8905364 | WBGene00019445 | frpr-12   | K06C4.9   | -0.0886733928980652 | AGIWUR17925 |
| N2                                                                                 | CT | V | 8907629 | 8909442 | WBGene00019444 | frpr-11   | K06C4.8   | 0.032084293919219   | AGIWUR7490  |
| N2                                                                                 | CT | V | 8909725 | 8914033 | WBGene00003386 | mod-1     | K06C4.6   | -0.169806002568724  |             |
| AGIWUR19981;AGIWUR24514;AGIWUR44071                                                |    |   |         |         |                |           |           |                     |             |
| N2                                                                                 | CT | V | 8914915 | 8916795 | WBGene00019443 | K06C4.7   | K06C4.7   | -0.192632865727573  | AGIWUR14865 |
| N2                                                                                 | CT | V | 8923088 | 8923936 | WBGene00019203 | ttr-47    | H14N18.3  | -0.291143515127338  |             |
| AGIWUR16282                                                                        |    |   |         |         |                |           |           |                     |             |
| N2                                                                                 | CT | V | 8923900 | 8928938 | WBGene00019204 | H14N18.4  | H14N18.4  | 0.0856816916909553  |             |
| AGIWUR4412;AGIWUR22862;AGIWUR24807;AGIWUR27204;AGIWUR33845;AGIWUR35410             |    |   |         |         |                |           |           |                     |             |
| N2                                                                                 | CT | V | 8932618 | 8934265 | WBGene00019202 | H14N18.2  | H14N18.2  | -1.34284507181693   |             |
| AGIWUR19763                                                                        |    |   |         |         |                |           |           |                     |             |
| N2                                                                                 | CT | V | 8936359 | 8939676 | WBGene00006760 | unc-23    | H14N18.1  | 0.0166668331706816  |             |
| AGIWUR36885                                                                        |    |   |         |         |                |           |           |                     |             |
| N2                                                                                 | CT | V | 8939592 | 8944063 | WBGene00020554 | T19A5.3   | T19A5.3   | 0.0858818256023088  |             |
| AGIWUR9403;AGIWUR21691;AGIWUR24644;AGIWUR24708;AGIWUR26711;AGIWUR39995;AGIWUR40351 |    |   |         |         |                |           |           |                     |             |
| N2                                                                                 | CT | V | 8947799 | 8956294 | WBGene00001526 | gck-1     | T19A5.2   | -0.129770978206247  |             |
| AGIWUR7524;AGIWUR14367;AGIWUR20465;AGIWUR25186;AGIWUR39460;AGIWUR40989             |    |   |         |         |                |           |           |                     |             |
| N2                                                                                 | CT | V | 8957045 | 8961935 | WBGene00020553 | T19A5.1   | T19A5.1   | 0.0140380387595158  | AGIWUR27563 |
| N2                                                                                 | CT | V | 8961915 | 8964099 | WBGene00003634 | nhr-44    | T19A5.4   | 0.0238125641773834  | AGIWUR18736 |
| N2                                                                                 | CT | V | 8964711 | 8968406 | WBGene00020555 | nhr-219   | T19A5.5   | -0.0113599569782101 | AGIWUR15634 |
| N2                                                                                 | CT | V | 8968737 | 8969955 | WBGene00019114 | nhr-194   | F59E11.8  | -0.233002468413197  |             |
| AGIWUR42742                                                                        |    |   |         |         |                |           |           |                     |             |
| N2                                                                                 | CT | V | 8970744 | 8972364 | WBGene00019115 | nhr-195   | F59E11.10 | 0.224532829247327   |             |
| AGIWUR42909                                                                        |    |   |         |         |                |           |           |                     |             |
| N2                                                                                 | CT | V | 8973182 | 8974943 | WBGene00019116 | nhr-143   | F59E11.11 | 0.222082434118745   |             |
| AGIWUR26665                                                                        |    |   |         |         |                |           |           |                     |             |
| N2                                                                                 | CT | V | 8975698 | 8977465 | WBGene00019117 | nhr-144   | F59E11.12 | -0.019704465518442  |             |

AGIWUR2070;AGIWUR5823;AGIWUR7596;AGIWUR21861;AGIWUR25053;AGIWUR41239  
N2 CT V 8979522 8980929 WBGene00006143 str-84 F59E11.13 -0.124544899774802  
AGIWUR27796  
N2 CT V 8982387 8983689 WBGene00006145 str-86 F59E11.14 0.0857263030860018  
AGIWUR12913  
N2 CT V 8984525 8985840 WBGene00006144 str-85 F59E11.15 0.00859941036883871  
AGIWUR44467  
N2 CT V 8986694 8987965 WBGene00006146 str-87 F59E11.16 -0.0559272086140794  
AGIWUR3731  
N2 CT V 8990244 8991664 WBGene00019113 F59E11.7 F59E11.7 0.0171828178720004  
AGIWUR3934;AGIWUR7034;AGIWUR9590;AGIWUR10453;AGIWUR16102;AGIWUR30847  
N2 CT V 8991789 8993142 WBGene00019112 F59E11.6 F59E11.6 0.023826707993388  
AGIWUR14515  
N2 CT V 8995101 8996664 WBGene00019111 F59E11.5 F59E11.5 0.177431591811434  
AGIWUR21952  
N2 CT V 8998599 9001352 WBGene00005535 sri-23 F59E11.3 0.107542539908075  
AGIWUR44649  
N2 CT V 9001475 9003100 WBGene00019109 F59E11.2 F59E11.2 0.0129985039602003  
AGIWUR9207;AGIWUR11718;AGIWUR41284  
N2 CT V 9003709 9004967 WBGene00005892 srx-1 F59E11.1 -0.354948730133501  
AGIWUR9999  
N2 CT V 9005543 9006931 WBGene00005894 srx-3 R03H4.3 0.0611455308700108 AGIWUR26052  
N2 CT V 9009475 9010788 WBGene00005893 srx-2 R03H4.2 0.207821384806246 AGIWUR9140  
N2 CT V 9011244 9011565 WBGene00023327 R03H4.8 R03H4.8 -0.128387544203612  
AGIWUR7761;AGIWUR13453;AGIWUR19516;AGIWUR25492;AGIWUR37990  
N2 CT V 9012199 9013865 WBGene00005412 srh-201 R03H4.9 -0.155741955254276 AGIWUR3855  
N2 CT V 9014408 9015640 WBGene00019850 srt-18 R03H4.4 -0.0854585402126791 AGIWUR6053  
N2 CT V 9016864 9019318 WBGene00019849 oac-40 R03H4.1 0.243430028251538 AGIWUR14055  
N2 CT V 9019595 9022178 WBGene00019851 oac-41 R03H4.5 -0.0525941780682917 AGIWUR13765  
N2 CT V 9022361 9024806 WBGene00044617 bus-1 R03H4.6 -0.00737892401911866  
AGIWUR6644;AGIWUR9344  
N2 CT V 9025513 9026540 WBGene00019853 srsx-20 R03H4.7 -0.151013724993487  
AGIWUR2800;AGIWUR18747;AGIWUR30131;AGIWUR35466  
N2 CT V 9030548 9032593 WBGene00016095 C25E10.5 C25E10.5 -0.113591305180716  
AGIWUR32429  
N2 CT V 9033567 9035605 WBGene00016094 C25E10.4 C25E10.4 -0.254441623595305  
AGIWUR5021  
N2 CT V 9036236 9040289 WBGene00016093 srsx-34 C25E10.3 -0.060750590036724  
AGIWUR14246;AGIWUR22371;AGIWUR42503;AGIWUR42809

|                                                                       |    |   |         |         |                |           |           |                     |             |
|-----------------------------------------------------------------------|----|---|---------|---------|----------------|-----------|-----------|---------------------|-------------|
| N2                                                                    | CT | V | 9041330 | 9043677 | WBGene00016092 | cyp-33B1  | C25E10.2  | -0.0445767989379222 |             |
| AGIWUR816;AGIWUR6140;AGIWUR39399                                      |    |   |         |         |                |           |           |                     |             |
| N2                                                                    | CT | V | 9045171 | 9046967 | WBGene00016091 | nhr-30    | C25E10.1  | 0.116796114378269   |             |
| AGIWUR17500                                                           |    |   |         |         |                |           |           |                     |             |
| N2                                                                    | CT | V | 9050102 | 9051191 | WBGene00016096 |           | C25E10.7  | 0.111975948894403   |             |
| AGIWUR44248                                                           |    |   |         |         |                |           |           |                     |             |
| N2                                                                    | CT | V | 9053322 | 9053995 | WBGene00016097 |           | C25E10.8  | -0.0661600130492914 |             |
| AGIWUR386;AGIWUR11321;AGIWUR12719;AGIWUR26576                         |    |   |         |         |                |           |           |                     |             |
| N2                                                                    | CT | V | 9054268 | 9054844 | WBGene00023417 | swm-1     | C25E10.9  | -0.150827091002056  |             |
| AGIWUR435;AGIWUR3111;AGIWUR11880;AGIWUR15292                          |    |   |         |         |                |           |           |                     |             |
| N2                                                                    | CT | V | 9055326 | 9056392 | WBGene00016099 |           | C25E10.10 | -0.126589769757985  |             |
| AGIWUR16698                                                           |    |   |         |         |                |           |           |                     |             |
| N2                                                                    | CT | V | 9057543 | 9058332 | WBGene00016100 |           | C25E10.11 | 0.219505890372494   |             |
| AGIWUR35724                                                           |    |   |         |         |                |           |           |                     |             |
| N2                                                                    | CT | V | 9059750 | 9060481 | WBGene00023431 |           | C25E10.13 | -0.0758985630046487 |             |
| AGIWUR10531;AGIWUR28693;AGIWUR31323;AGIWUR40791;AGIWUR41640           |    |   |         |         |                |           |           |                     |             |
| N2                                                                    | CT | V | 9060494 | 9062441 | WBGene00016101 |           | C25E10.12 | 0.134359880908256   |             |
| AGIWUR18021                                                           |    |   |         |         |                |           |           |                     |             |
| N2                                                                    | CT | V | 9067976 | 9068390 | WBGene00020862 | fip-2     | T27E4.4   | 0.16521202786873    | AGIWUR28034 |
| N2                                                                    | CT | V | 9068368 | 9069694 | WBGene00020863 | T27E4.5   | T27E4.5   | -0.0827888058202872 |             |
| AGIWUR1035;AGIWUR8082;AGIWUR15817;AGIWUR22970                         |    |   |         |         |                |           |           |                     |             |
| N2                                                                    | CT | V | 9069865 | 9073528 | WBGene00020864 | oac-50    | T27E4.6   | 0.204895678786588   | AGIWUR36336 |
| N2                                                                    | CT | V | 9074784 | 9076322 | WBGene00020865 | T27E4.7   | T27E4.7   | -0.046313831251398  |             |
| AGIWUR34270;AGIWUR35657;AGIWUR37836                                   |    |   |         |         |                |           |           |                     |             |
| N2                                                                    | CT | V | 9092345 | 9094345 | WBGene00020861 | T27E4.1   | T27E4.1   | -0.0370376229090503 |             |
| AGIWUR639;AGIWUR19829;AGIWUR29731                                     |    |   |         |         |                |           |           |                     |             |
| N2                                                                    | CT | V | 9096007 | 9097233 | WBGene00017659 | F21C10.10 | F21C10.10 | -0.249944174611384  |             |
| AGIWUR25059                                                           |    |   |         |         |                |           |           |                     |             |
| N2                                                                    | CT | V | 9097121 | 9098696 | WBGene00017658 | F21C10.9  | F21C10.9  | 0.0783517374218681  |             |
| AGIWUR7021;AGIWUR8613;AGIWUR11231;AGIWUR12515;AGIWUR12623;AGIWUR44908 |    |   |         |         |                |           |           |                     |             |
| N2                                                                    | CT | V | 9099638 | 9101133 | WBGene00017661 | frpr-6    | F21C10.12 | 0.0986963609486686  |             |
| AGIWUR11739                                                           |    |   |         |         |                |           |           |                     |             |
| N2                                                                    | CT | V | 9109584 | 9111013 | WBGene00004119 | pqn-31    | F21C10.8  | 0.0435987869883157  |             |
| AGIWUR10968                                                           |    |   |         |         |                |           |           |                     |             |
| N2                                                                    | CT | V | 9112767 | 9122180 | WBGene00017657 | F21C10.7  | F21C10.7  | -0.068590323886168  |             |
| AGIWUR43657                                                           |    |   |         |         |                |           |           |                     |             |
| N2                                                                    | CT | V | 9123489 | 9123809 | WBGene00017660 | F21C10.11 | F21C10.11 | -0.046443296998453  |             |
| AGIWUR1058;AGIWUR5369;AGIWUR7951;AGIWUR8268;AGIWUR14237;AGIWUR24278   |    |   |         |         |                |           |           |                     |             |
| N2                                                                    | CT | V | 9124480 | 9124994 | WBGene00017656 | F21C10.6  | F21C10.6  | 0.15109063038432    |             |



|                                                                         |    |   |         |         |                |          |          |                                  |
|-------------------------------------------------------------------------|----|---|---------|---------|----------------|----------|----------|----------------------------------|
| AGIWUR43227                                                             |    |   |         |         |                |          |          |                                  |
| N2                                                                      | CT | V | 9125645 | 9126006 | WBGene00017655 | F21C10.5 | F21C10.5 |                                  |
| -0.000898322790757078 AGIWUR34079                                       |    |   |         |         |                |          |          |                                  |
| N2                                                                      | CT | V | 9126679 | 9127593 | WBGene00017654 | F21C10.4 | F21C10.4 | 0.0728933376483223               |
| AGIWUR25641                                                             |    |   |         |         |                |          |          |                                  |
| N2                                                                      | CT | V | 9128710 | 9130943 | WBGene00017653 | F21C10.3 | F21C10.3 | 0.0351503042997336               |
| AGIWUR3740                                                              |    |   |         |         |                |          |          |                                  |
| N2                                                                      | CT | V | 9132384 | 9133275 | WBGene00017652 | F21C10.1 | F21C10.1 | -0.0573798910782575              |
| AGIWUR35855                                                             |    |   |         |         |                |          |          |                                  |
| N2                                                                      | CT | V | 9134255 | 9135347 | WBGene00015053 | B0222.1  | B0222.1  | 0.0562757690962936 AGIWUR14873   |
| N2                                                                      | CT | V | 9135656 | 9137718 | WBGene00015054 | pitr-2   | B0222.2  | 0.0268291975557506 AGIWUR11677   |
| N2                                                                      | CT | V | 9138946 | 9141397 | WBGene00015055 | pitr-3   | B0222.3  | 0.0109250715945528               |
| AGIWUR12154;AGIWUR17374;AGIWUR25525;AGIWUR26220                         |    |   |         |         |                |          |          |                                  |
| N2                                                                      | CT | V | 9144630 | 9146899 | WBGene00006418 | tag-38   | B0222.4  | 0.470116097402169 AGIWUR12107    |
| N2                                                                      | CT | V | 9152321 | 9154872 | WBGene00015056 | B0222.5  | B0222.5  | 0.102714642457236 AGIWUR11803    |
| N2                                                                      | CT | V | 9162051 | 9163005 | WBGene00000718 | col-145  | B0222.7  | 0.304309301411521 AGIWUR11578    |
| N2                                                                      | CT | V | 9164297 | 9165307 | WBGene00000599 | col-10   | B0222.8  | 0.2688026037683 AGIWUR33641      |
| N2                                                                      | CT | V | 9165820 | 9168041 | WBGene00044582 | B0222.11 | B0222.11 | -0.125962555644596               |
| AGIWUR15091;AGIWUR20798                                                 |    |   |         |         |                |          |          |                                  |
| N2                                                                      | CT | V | 9168393 | 9173024 | WBGene00015057 | gad-3    | B0222.9  | -0.105512878991117 AGIWUR35004   |
| N2                                                                      | CT | V | 9174089 | 9175250 | WBGene00004107 | pqn-16   | C24B5.5  | 0.0850387294037827 AGIWUR31890   |
| N2                                                                      | CT | V | 9175798 | 9177997 | WBGene00016045 | spas-1   | C24B5.2  | 0.0197561199978504               |
| AGIWUR5281;AGIWUR20143                                                  |    |   |         |         |                |          |          |                                  |
| N2                                                                      | CT | V | 9177949 | 9181719 | WBGene00004216 | ptr-1    | C24B5.3  | 0.243030262787178 AGIWUR9758     |
| N2                                                                      | CT | V | 9191617 | 9195877 | WBGene00016044 | C24B5.1  | C24B5.1  | -0.122246934908969 AGIWUR35120   |
| N2                                                                      | CT | V | 9195821 | 9197326 | WBGene00016046 | C24B5.4  | C24B5.4  | 0.0751117064901798 AGIWUR28612   |
| N2                                                                      | CT | V | 9197751 | 9198987 | WBGene00006221 | str-177  | T18H9.4  | 0.00601974810073136              |
| AGIWUR2394;AGIWUR11610;AGIWUR18614;AGIWUR33614                          |    |   |         |         |                |          |          |                                  |
| N2                                                                      | CT | V | 9199680 | 9204734 | WBGene00000215 | asp-2    | T18H9.2  | -0.00772678896873913 AGIWUR17206 |
| N2                                                                      | CT | V | 9204703 | 9207467 | WBGene00002132 | inx-10   | T18H9.5  | 0.230860823748801                |
| AGIWUR9782;AGIWUR15209;AGIWUR34590                                      |    |   |         |         |                |          |          |                                  |
| N2                                                                      | CT | V | 9209463 | 9213654 | WBGene00007023 | mdt-27   | T18H9.6  | 0.0390727659570427 AGIWUR33734   |
| N2                                                                      | CT | V | 9213746 | 9217243 | WBGene00044077 | tag-232  | T18H9.7  | 0.16610023024341 AGIWUR15379     |
| N2                                                                      | CT | V | 9221866 | 9224354 | WBGene00001695 | grd-6    | T18H9.1  | 0.124572633461725 AGIWUR8669     |
| N2                                                                      | CT | V | 9226094 | 9227523 | WBGene00017193 | F07C3.2  | F07C3.2  | -0.208514884931148 AGIWUR28489   |
| N2                                                                      | CT | V | 9227710 | 9232396 | WBGene00017194 | F07C3.3  | F07C3.3  | -0.142385218013504 AGIWUR2492    |
| N2                                                                      | CT | V | 9234610 | 9243221 | WBGene00017195 | glo-4    | F07C3.4  | 0.176107825209944                |
| AGIWUR18442;AGIWUR21236;AGIWUR30949;AGIWUR33447;AGIWUR35250;AGIWUR39020 |    |   |         |         |                |          |          |                                  |
| N2                                                                      | CT | V | 9244402 | 9246360 | WBGene00000003 | aat-2    | F07C3.7  | -0.0319248645342354              |

AGIWUR8898;AGIWUR30371;AGIWUR33955;AGIWUR43403

|    |    |   |         |         |                |         |          |                     |             |
|----|----|---|---------|---------|----------------|---------|----------|---------------------|-------------|
| N2 | CT | V | 9250275 | 9254223 | WBGene00004211 | ptd-2   | F07C3.1  | -0.0841539151927604 | AGIWUR19663 |
| N2 | CT | V | 9254219 | 9254632 | WBGene00017197 | F07C3.9 | F07C3.9  | -0.482142166668227  | AGIWUR36578 |
| N2 | CT | V | 9256864 | 9261124 | WBGene00017198 | nhr-36  | F07C3.10 | -0.184456904087821  |             |

AGIWUR5452

|    |    |   |         |         |                |          |         |                    |  |
|----|----|---|---------|---------|----------------|----------|---------|--------------------|--|
| N2 | CT | V | 9263800 | 9266499 | WBGene00022788 | slc-17.7 | ZK682.2 | -0.292899761331279 |  |
|----|----|---|---------|---------|----------------|----------|---------|--------------------|--|

AGIWUR27401

|    |    |   |         |         |                |         |         |                    |            |
|----|----|---|---------|---------|----------------|---------|---------|--------------------|------------|
| N2 | CT | V | 9280702 | 9282154 | WBGene00001954 | hlh-10  | ZK682.4 | -0.272739940181487 | AGIWUR4665 |
| N2 | CT | V | 9284129 | 9287617 | WBGene00022789 | lron-2  | ZK682.5 | 0.062847387677806  | AGIWUR4188 |
| N2 | CT | V | 9290683 | 9292118 | WBGene00022790 | ZK682.7 | ZK682.7 | -0.261520663393518 | AGIWUR7624 |
| N2 | CT | V | 9297632 | 9302158 | WBGene00018405 | F44A2.5 | F44A2.5 | 0.0468939511314197 |            |

AGIWUR10464;AGIWUR10630;AGIWUR43500

|    |    |   |         |         |                |         |         |                    |             |
|----|----|---|---------|---------|----------------|---------|---------|--------------------|-------------|
| N2 | CT | V | 9303326 | 9304622 | WBGene00018404 | nhr-39  | F44A2.4 | -0.309206361530791 | AGIWUR25387 |
| N2 | CT | V | 9305416 | 9310926 | WBGene00018403 | F44A2.3 | F44A2.3 | -0.293383644807674 | AGIWUR5487  |
| N2 | CT | V | 9318311 | 9320995 | WBGene00018402 | kvs-3   | F44A2.2 | 0.0505979661069738 | AGIWUR34457 |
| N2 | CT | V | 9321503 | 9322905 | WBGene00018406 | F44A2.7 | F44A2.7 | -0.275844499842318 | AGIWUR39794 |
| N2 | CT | V | 9323085 | 9327209 | WBGene00006499 | tag-153 | F44A2.1 | 0.0822471861324887 |             |

AGIWUR3118;AGIWUR11728;AGIWUR21919;AGIWUR31459;AGIWUR34827;AGIWUR41537

|    |    |   |         |         |                |        |         |                     |  |
|----|----|---|---------|---------|----------------|--------|---------|---------------------|--|
| N2 | CT | V | 9327145 | 9333062 | WBGene00019465 | ac1-14 | K07B1.5 | -0.0432461302397487 |  |
|----|----|---|---------|---------|----------------|--------|---------|---------------------|--|

AGIWUR5902;AGIWUR21744;AGIWUR42125

|    |    |   |         |         |                |       |         |                     |             |
|----|----|---|---------|---------|----------------|-------|---------|---------------------|-------------|
| N2 | CT | V | 9334773 | 9336668 | WBGene00006729 | ucp-4 | K07B1.3 | -0.0632928690882899 | AGIWUR23287 |
| N2 | CT | V | 9336762 | 9338858 | WBGene00000766 | coq-6 | K07B1.2 | 0.0827582937557416  | AGIWUR24967 |
| N2 | CT | V | 9338859 | 9344218 | WBGene00019466 | tos-1 | K07B1.6 | -0.0117676992572999 |             |

AGIWUR7103;AGIWUR19971;AGIWUR23532;AGIWUR25576;AGIWUR27157;AGIWUR29383;AGIWUR30086;AGIWUR30658;AGIWUR33209;AGIWUR36988

|    |    |   |         |         |                |         |         |                    |  |
|----|----|---|---------|---------|----------------|---------|---------|--------------------|--|
| N2 | CT | V | 9345022 | 9346962 | WBGene00019467 | K07B1.7 | K07B1.7 | -0.124100759954612 |  |
|----|----|---|---------|---------|----------------|---------|---------|--------------------|--|

AGIWUR11067;AGIWUR29876

|    |    |   |         |         |                |        |          |                     |             |
|----|----|---|---------|---------|----------------|--------|----------|---------------------|-------------|
| N2 | CT | V | 9345772 | 9348687 | WBGene00006623 | try-5  | K07B1.1  | 0.233767007578621   | AGIWUR40119 |
| N2 | CT | V | 9349987 | 9351332 | WBGene00005938 | srx-47 | E02C12.3 | -0.0436607721564153 |             |

AGIWUR30857

|    |    |   |         |         |                |        |          |                     |  |
|----|----|---|---------|---------|----------------|--------|----------|---------------------|--|
| N2 | CT | V | 9353247 | 9354497 | WBGene00005937 | srx-46 | E02C12.2 | -0.0641556911641956 |  |
|----|----|---|---------|---------|----------------|--------|----------|---------------------|--|

AGIWUR39729

|    |    |   |         |         |                |        |          |                     |  |
|----|----|---|---------|---------|----------------|--------|----------|---------------------|--|
| N2 | CT | V | 9354512 | 9355471 | WBGene00017091 | ttr-40 | E02C12.4 | -0.0681528026811762 |  |
|----|----|---|---------|---------|----------------|--------|----------|---------------------|--|

AGIWUR41676

|    |    |   |         |         |                |        |           |                    |  |
|----|----|---|---------|---------|----------------|--------|-----------|--------------------|--|
| N2 | CT | V | 9355505 | 9356541 | WBGene00023485 | ttr-49 | E02C12.13 | -0.389256725127726 |  |
|----|----|---|---------|---------|----------------|--------|-----------|--------------------|--|

AGIWUR9606;AGIWUR10008;AGIWUR23715

|    |    |   |         |         |                |       |          |                     |  |
|----|----|---|---------|---------|----------------|-------|----------|---------------------|--|
| N2 | CT | V | 9356750 | 9359774 | WBGene00001665 | gpa-3 | E02C12.5 | -0.0229686640317208 |  |
|----|----|---|---------|---------|----------------|-------|----------|---------------------|--|

AGIWUR30793

|    |    |   |         |         |                |          |          |                     |  |
|----|----|---|---------|---------|----------------|----------|----------|---------------------|--|
| N2 | CT | V | 9369549 | 9371086 | WBGene00017092 | E02C12.6 | E02C12.6 | -0.0204250197069573 |  |
|----|----|---|---------|---------|----------------|----------|----------|---------------------|--|

|                                                                                              |    |   |         |         |                |             |           |                      |
|----------------------------------------------------------------------------------------------|----|---|---------|---------|----------------|-------------|-----------|----------------------|
| AGIWUR25049                                                                                  |    |   |         |         |                |             |           |                      |
| N2                                                                                           | CT | V | 9371620 | 9373613 | WBGene00017093 | E02C12.8    | E02C12.8  | 0.15702050882362     |
| AGIWUR16233;AGIWUR41103                                                                      |    |   |         |         |                |             |           |                      |
| N2                                                                                           | CT | V | 9373954 | 9374842 | WBGene00017094 | E02C12.9    | E02C12.9  | -0.176628474596281   |
| AGIWUR5285                                                                                   |    |   |         |         |                |             |           |                      |
| N2                                                                                           | CT | V | 9375099 | 9378404 | WBGene00017095 | E02C12.10   | E02C12.10 | 0.0802538913575823   |
| AGIWUR5101                                                                                   |    |   |         |         |                |             |           |                      |
| N2                                                                                           | CT | V | 9379435 | 9379908 | WBGene00017096 | E02C12.11   | E02C12.11 | -0.1501076108921     |
| AGIWUR34551                                                                                  |    |   |         |         |                |             |           |                      |
| N2                                                                                           | CT | V | 9386179 | 9400062 | WBGene00002036 | hum-2       | F36D4.3   | 0.0945290053276295   |
| AGIWUR15165;AGIWUR16315;AGIWUR25547                                                          |    |   |         |         |                |             |           |                      |
| N2                                                                                           | CT | V | 9400327 | 9401855 | WBGene00018088 | trpp-4      | F36D4.2   | -0.0496439328112377  |
| N2                                                                                           | CT | V | 9401805 | 9406360 | WBGene00018089 | F36D4.4     | F36D4.4   | 0.0148007835482602   |
| N2                                                                                           | CT | V | 9417056 | 9419298 | WBGene00018087 | F36D4.1     | F36D4.1   | 0.519609496449188    |
| N2                                                                                           | CT | V | 9419292 | 9425762 | WBGene00018090 | F36D4.5     | F36D4.5   | 0.173558340376194    |
| AGIWUR6465;AGIWUR6807;AGIWUR7542;AGIWUR11462;AGIWUR23487;AGIWUR27935;AGIWUR35955;AGIWUR39168 |    |   |         |         |                |             |           |                      |
| N2                                                                                           | CT | V | 9426852 | 9427523 | WBGene00018091 | F36D4.6     | F36D4.6   | -0.106873315704911   |
| N2                                                                                           | CT | V | 9444050 | 9460639 | WBGene00019237 | H24G06.1    | H24G06.1  | 0.0523103027050826   |
| AGIWUR8707;AGIWUR38127;AGIWUR44261                                                           |    |   |         |         |                |             |           |                      |
| N2                                                                                           | CT | V | 9460686 | 9462705 | WBGene00008556 | F07D3.3     | F07D3.3   | 0.129597217799496    |
| N2                                                                                           | CT | V | 9471975 | 9473796 | WBGene00001449 | flp-6       | F07D3.2   | -0.173595288078644   |
| N2                                                                                           | CT | V | 9478163 | 9479601 | WBGene00003522 | nas-3       | K06A4.1   | -0.698445156333372   |
| AGIWUR1048;AGIWUR7670;AGIWUR13476;AGIWUR13931;AGIWUR17705;AGIWUR33871                        |    |   |         |         |                |             |           |                      |
| N2                                                                                           | CT | V | 9484206 | 9489033 | WBGene00010592 | K06A4.2     | K06A4.2   | -0.175106766980115   |
| N2                                                                                           | CT | V | 9490028 | 9491715 | WBGene00010597 | K06A4.7     | K06A4.7   | 0.0469165802811968   |
| N2                                                                                           | CT | V | 9497042 | 9499372 | WBGene00010593 | gsn1-1      | K06A4.3   | -0.140713299678863   |
| N2                                                                                           | CT | V | 9501401 | 9504580 | WBGene00010594 | swt-5       | K06A4.4   | -0.00832591260848492 |
| N2                                                                                           | CT | V | 9505603 | 9507049 | WBGene00010595 | haao-1      | K06A4.5   | -0.171528015487885   |
| N2                                                                                           | CT | V | 9508079 | 9510476 | WBGene00008669 | acs-14      | F11A3.1   | 0.0555226451150865   |
| N2                                                                                           | CT | V | 9510406 | 9510719 | WBGene00077496 | F11A3.4     | F11A3.4   | -0.221510706968012   |
| N2                                                                                           | CT | V | 9512506 | 9513466 | WBGene00014734 | F11A3.3     | F11A3.3   | 0.0498517426242002   |
| AGIWUR5652;AGIWUR23491                                                                       |    |   |         |         |                |             |           |                      |
| N2                                                                                           | CT | V | 9513824 | 9517585 | WBGene00008670 | eif-2Bdelta | F11A3.2   | -0.206892313008156   |
| AGIWUR6022                                                                                   |    |   |         |         |                |             |           |                      |
| N2                                                                                           | CT | V | 9517519 | 9518933 | WBGene00008233 | C50F4.8     | C50F4.8   | -0.171842644156794   |
| N2                                                                                           | CT | V | 9521676 | 9523036 | WBGene00014711 | C50F4.15    | C50F4.15  | 0.111630123964272    |
| AGIWUR4792;AGIWUR8304                                                                        |    |   |         |         |                |             |           |                      |
| N2                                                                                           | CT | V | 9523167 | 9524199 | WBGene00008234 | C50F4.9     | C50F4.9   | -0.171578081829046   |
| N2                                                                                           | CT | V | 9526698 | 9529259 | WBGene00008229 | C50F4.1     | C50F4.1   | -0.257491222140567   |

|                                                                         |    |   |         |         |                |          |          |                     |             |
|-------------------------------------------------------------------------|----|---|---------|---------|----------------|----------|----------|---------------------|-------------|
| N2                                                                      | CT | V | 9529951 | 9531577 | WBGene00008235 | C50F4.10 | C50F4.10 | 0.21783536683002    |             |
| AGIWUR42661                                                             |    |   |         |         |                |          |          |                     |             |
| N2                                                                      | CT | V | 9531819 | 9534537 | WBGene00008230 | pfk-1.2  | C50F4.2  | 0.315428209723576   | AGIWUR26495 |
| N2                                                                      | CT | V | 9534926 | 9536404 | WBGene00008231 | tag-329  | C50F4.3  | -0.392214613237869  |             |
| AGIWUR15122;AGIWUR19502;AGIWUR39574                                     |    |   |         |         |                |          |          |                     |             |
| N2                                                                      | CT | V | 9536771 | 9537769 | WBGene00008232 | C50F4.4  | C50F4.4  | -0.186005946872514  | AGIWUR16123 |
| N2                                                                      | CT | V | 9537672 | 9539738 | WBGene00008236 | C50F4.12 | C50F4.12 | 0.246558987408561   |             |
| AGIWUR24897;AGIWUR34125;AGIWUR34467;AGIWUR37554                         |    |   |         |         |                |          |          |                     |             |
| N2                                                                      | CT | V | 9539844 | 9541606 | WBGene00008238 | C50F4.16 | C50F4.16 | -0.138026432893218  |             |
| AGIWUR2870                                                              |    |   |         |         |                |          |          |                     |             |
| N2                                                                      | CT | V | 9541782 | 9544226 | WBGene00003160 | mdf-1    | C50F4.11 | -0.115122065471002  |             |
| AGIWUR2261                                                              |    |   |         |         |                |          |          |                     |             |
| N2                                                                      | CT | V | 9544611 | 9545398 | WBGene00001909 | his-35   | C50F4.13 | -0.254472036351808  |             |
| AGIWUR5006;AGIWUR6688;AGIWUR9765;AGIWUR19176;AGIWUR25348;AGIWUR38982    |    |   |         |         |                |          |          |                     |             |
| N2                                                                      | CT | V | 9546092 | 9546838 | WBGene00001910 | C50F4.6  | C50F4.6  | -0.149143044678111  | AGIWUR818   |
| N2                                                                      | CT | V | 9547083 | 9547607 | WBGene00001911 | his-37   | C50F4.7  | -0.199165367382107  |             |
| AGIWUR5363;AGIWUR6028                                                   |    |   |         |         |                |          |          |                     |             |
| N2                                                                      | CT | V | 9547606 | 9549836 | WBGene00008237 | nstp-10  | C50F4.14 | -0.102015917170268  |             |
| AGIWUR10756;AGIWUR24316;AGIWUR40160                                     |    |   |         |         |                |          |          |                     |             |
| N2                                                                      | CT | V | 9550644 | 9556064 | WBGene00009098 | ehbp-1   | F25B3.1  | -0.0361719242443357 | AGIWUR7819  |
| N2                                                                      | CT | V | 9556226 | 9561643 | WBGene00009100 | rgef-1   | F25B3.3  | -0.146196739995482  |             |
| AGIWUR23351;AGIWUR35083;AGIWUR44618                                     |    |   |         |         |                |          |          |                     |             |
| N2                                                                      | CT | V | 9568749 | 9570295 | WBGene00009102 | F25B3.5  | F25B3.5  | -0.0665737240161253 | AGIWUR39474 |
| N2                                                                      | CT | V | 9577128 | 9579946 | WBGene00009099 | F25B3.2  | F25B3.2  | -0.319529085673473  | AGIWUR27474 |
| N2                                                                      | CT | V | 9580041 | 9582644 | WBGene00009103 | rtfo-1   | F25B3.6  | -0.0568985099516759 | AGIWUR32432 |
| N2                                                                      | CT | V | 9583545 | 9590523 | WBGene00010727 | K09G1.1  | K09G1.1  | 0.275459760781773   |             |
| AGIWUR9171;AGIWUR25494;AGIWUR35434                                      |    |   |         |         |                |          |          |                     |             |
| N2                                                                      | CT | V | 9590617 | 9591255 | WBGene00010728 | K09G1.2  | K09G1.2  | 0.390998431660964   | AGIWUR21454 |
| N2                                                                      | CT | V | 9597351 | 9597566 | WBGene00010729 | K09G1.3  | K09G1.3  | 0.17952161676669    | AGIWUR34774 |
| N2                                                                      | CT | V | 9608562 | 9614942 | WBGene00001053 | dop-2    | K09G1.4  | -0.0290537488745919 | AGIWUR40950 |
| N2                                                                      | CT | V | 9616031 | 9617654 | WBGene00004146 | pqn-63   | T06E4.11 | 0.143702630081536   |             |
| AGIWUR39956                                                             |    |   |         |         |                |          |          |                     |             |
| N2                                                                      | CT | V | 9618233 | 9619019 | WBGene00011537 | T06E4.10 | T06E4.10 | 0.153244142671468   |             |
| AGIWUR42536                                                             |    |   |         |         |                |          |          |                     |             |
| N2                                                                      | CT | V | 9620150 | 9621036 | WBGene00011536 | T06E4.9  | T06E4.9  | 0.358814856487577   |             |
| AGIWUR17247;AGIWUR19509;AGIWUR27759;AGIWUR36271;AGIWUR41455;AGIWUR43957 |    |   |         |         |                |          |          |                     |             |
| N2                                                                      | CT | V | 9622105 | 9622934 | WBGene00011535 | T06E4.8  | T06E4.8  | 0.36664757165309    |             |
| AGIWUR5829;AGIWUR8168;AGIWUR9243;AGIWUR10103;AGIWUR31043                |    |   |         |         |                |          |          |                     |             |
| N2                                                                      | CT | V | 9626404 | 9628143 | WBGene00011534 | T06E4.7  | T06E4.7  | 0.00807309860286498 | AGIWUR9548  |

|                                                                                                                      |    |   |         |         |                |          |          |                     |             |
|----------------------------------------------------------------------------------------------------------------------|----|---|---------|---------|----------------|----------|----------|---------------------|-------------|
| N2                                                                                                                   | CT | V | 9628314 | 9629110 | WBGene00044011 | T06E4.12 | T06E4.12 | 0.282773848202536   |             |
| AGIWUR411;AGIWUR3675;AGIWUR14554;AGIWUR26188;AGIWUR31848                                                             |    |   |         |         |                |          |          |                     |             |
| N2                                                                                                                   | CT | V | 9629943 | 9631012 | WBGene00000719 | col-146  | T06E4.6  | 0.6257105933928     |             |
| AGIWUR823;AGIWUR3653;AGIWUR6351;AGIWUR15529;AGIWUR28793                                                              |    |   |         |         |                |          |          |                     |             |
| N2                                                                                                                   | CT | V | 9632029 | 9633338 | WBGene00000720 | col-147  | T06E4.4  | 0.526459216034784   | AGIWUR7879  |
| N2                                                                                                                   | CT | V | 9634861 | 9645595 | WBGene00000226 | atl-1    | T06E4.3  | -0.174996737550142  |             |
| AGIWUR10638;AGIWUR18456;AGIWUR41912                                                                                  |    |   |         |         |                |          |          |                     |             |
| N2                                                                                                                   | CT | V | 9645746 | 9650297 | WBGene00001830 | hcp-2    | T06E4.1  | 0.0743563946824963  |             |
| AGIWUR1535;AGIWUR38072                                                                                               |    |   |         |         |                |          |          |                     |             |
| N2                                                                                                                   | CT | V | 9654755 | 9657975 | WBGene00007140 | cyp-29A4 | B0331.1  | -0.0304458284371742 |             |
| AGIWUR26929                                                                                                          |    |   |         |         |                |          |          |                     |             |
| N2                                                                                                                   | CT | V | 9658931 | 9661614 | WBGene00007141 | pitr-4   | B0331.2  | 0.0304558607343015  | AGIWUR21848 |
| N2                                                                                                                   | CT | V | 9666700 | 9670050 | WBGene00013962 | ZK287.1  | ZK287.1  | 0.0154293119885534  | AGIWUR5092  |
| N2                                                                                                                   | CT | V | 9670028 | 9673630 | WBGene00013963 | sulp-8   | ZK287.2  | -0.229879336495196  | AGIWUR23963 |
| N2                                                                                                                   | CT | V | 9678277 | 9679302 | WBGene00013964 | ZK287.3  | ZK287.3  | -0.289673046210376  | AGIWUR14407 |
| N2                                                                                                                   | CT | V | 9679357 | 9680215 | WBGene00013968 | ZK287.9  | ZK287.9  | -0.0150301186528976 |             |
| AGIWUR3299;AGIWUR3857;AGIWUR4248;AGIWUR19258;AGIWUR24574;AGIWUR26804;AGIWUR27249;AGIWUR30486;AGIWUR31680;AGIWUR37264 |    |   |         |         |                |          |          |                     |             |
| N2                                                                                                                   | CT | V | 9680173 | 9685715 | WBGene00013965 | ZK287.4  | ZK287.4  | -0.0482336545787749 | AGIWUR8288  |
| N2                                                                                                                   | CT | V | 9689686 | 9690615 | WBGene00004320 | rbx-1    | ZK287.5  | -0.0407997835881817 |             |
| AGIWUR1130;AGIWUR15983;AGIWUR18688;AGIWUR21768;AGIWUR27088;AGIWUR41715                                               |    |   |         |         |                |          |          |                     |             |
| N2                                                                                                                   | CT | V | 9691039 | 9692159 | WBGene00013966 | ztf-9    | ZK287.6  | -0.179879697412329  |             |
| AGIWUR11148;AGIWUR11795;AGIWUR15603;AGIWUR16629                                                                      |    |   |         |         |                |          |          |                     |             |
| N2                                                                                                                   | CT | V | 9692899 | 9694785 | WBGene00013967 | ZK287.7  | ZK287.7  | -0.146397547851851  | AGIWUR43503 |
| N2                                                                                                                   | CT | V | 9697129 | 9701552 | WBGene00001842 | her-1    | ZK287.8  | -0.105716989466423  |             |
| AGIWUR2045;AGIWUR11114;AGIWUR12264;AGIWUR22029;AGIWUR33994;AGIWUR34851                                               |    |   |         |         |                |          |          |                     |             |
| N2                                                                                                                   | CT | V | 9711447 | 9713632 | WBGene00009586 | F40F9.10 | F40F9.10 | 0.067494792455701   |             |
| AGIWUR3196                                                                                                           |    |   |         |         |                |          |          |                     |             |
| N2                                                                                                                   | CT | V | 9715209 | 9716380 | WBGene00009581 | F40F9.3  | F40F9.3  | 0.239322276801349   |             |
| AGIWUR3237;AGIWUR12679;AGIWUR24727;AGIWUR42854                                                                       |    |   |         |         |                |          |          |                     |             |
| N2                                                                                                                   | CT | V | 9716697 | 9718051 | WBGene00006230 | str-188  | F40F9.4  | 0.233532637639541   | AGIWUR9381  |
| N2                                                                                                                   | CT | V | 9718462 | 9719724 | WBGene00014754 | F40F9.11 | F40F9.11 | -0.0798741755620984 |             |
| AGIWUR367;AGIWUR4670;AGIWUR8858;AGIWUR8900;AGIWUR17425;AGIWUR30807;AGIWUR40618                                       |    |   |         |         |                |          |          |                     |             |
| N2                                                                                                                   | CT | V | 9719743 | 9724118 | WBGene00009582 | F40F9.5  | F40F9.5  | -0.0565572367142657 | AGIWUR12858 |
| N2                                                                                                                   | CT | V | 9725972 | 9729510 | WBGene00009583 | aagr-3   | F40F9.6  | -0.0838746629908353 | AGIWUR8286  |
| N2                                                                                                                   | CT | V | 9730110 | 9734022 | WBGene00009584 | drap-1   | F40F9.7  | 0.0879633448621444  |             |
| AGIWUR6724;AGIWUR11997;AGIWUR15401;AGIWUR15476;AGIWUR22214;AGIWUR34305                                               |    |   |         |         |                |          |          |                     |             |
| N2                                                                                                                   | CT | V | 9734103 | 9735316 | WBGene00009585 | cal-7    | F40F9.8  | 0.155780309243571   | AGIWUR40235 |
| N2                                                                                                                   | CT | V | 9737556 | 9739740 | WBGene00000172 | aqp-4    | F40F9.9  | 0.0686150475668352  | AGIWUR18766 |

|                                                                                                                                                                                                        |    |   |         |         |                |          |          |                     |             |
|--------------------------------------------------------------------------------------------------------------------------------------------------------------------------------------------------------|----|---|---------|---------|----------------|----------|----------|---------------------|-------------|
| N2                                                                                                                                                                                                     | CT | V | 9741206 | 9744326 | WBGene00010251 | sta-2    | F58E6.1  | -0.214902603479682  |             |
| AGIWUR6189;AGIWUR14897;AGIWUR16493;AGIWUR18977;AGIWUR39584;AGIWUR43036                                                                                                                                 |    |   |         |         |                |          |          |                     |             |
| N2                                                                                                                                                                                                     | CT | V | 9745240 | 9749228 | WBGene00077697 | F58E6.13 | F58E6.13 | 0.0210056690678959  |             |
| AGIWUR2338;AGIWUR12430                                                                                                                                                                                 |    |   |         |         |                |          |          |                     |             |
| N2                                                                                                                                                                                                     | CT | V | 9749971 | 9750408 | WBGene00010253 | F58E6.4  | F58E6.4  | 0.137669302270466   | AGIWUR1069  |
| N2                                                                                                                                                                                                     | CT | V | 9752076 | 9752861 | WBGene00010255 | F58E6.6  | F58E6.6  | 0.382506005113219   | AGIWUR24247 |
| N2                                                                                                                                                                                                     | CT | V | 9753423 | 9754581 | WBGene00010254 | F58E6.5  | F58E6.5  | 0.349131828341822   | AGIWUR18939 |
| N2                                                                                                                                                                                                     | CT | V | 9755076 | 9755808 | WBGene00010257 | F58E6.8  | F58E6.8  | -0.0434559910615846 |             |
| AGIWUR2576;AGIWUR16776;AGIWUR17087;AGIWUR36175                                                                                                                                                         |    |   |         |         |                |          |          |                     |             |
| N2                                                                                                                                                                                                     | CT | V | 9756954 | 9757984 | WBGene00010258 | F58E6.11 | F58E6.11 | -0.049474964196607  |             |
| AGIWUR10045                                                                                                                                                                                            |    |   |         |         |                |          |          |                     |             |
| N2                                                                                                                                                                                                     | CT | V | 9764645 | 9769361 | WBGene00006778 | unc-42   | F58E6.10 | -0.0280732327302573 |             |
| AGIWUR40416                                                                                                                                                                                            |    |   |         |         |                |          |          |                     |             |
| N2                                                                                                                                                                                                     | CT | V | 9772430 | 9774881 | WBGene00009768 | F46B6.2  | F46B6.2  | -0.204203101544482  | AGIWUR14437 |
| N2                                                                                                                                                                                                     | CT | V | 9774897 | 9775834 | WBGene00009776 | F46B6.12 | F46B6.12 | -0.195265753046844  |             |
| AGIWUR24747;AGIWUR42292                                                                                                                                                                                |    |   |         |         |                |          |          |                     |             |
| N2                                                                                                                                                                                                     | CT | V | 9775935 | 9777743 | WBGene00004882 | smg-4    | F46B6.3  | -0.0293261844773838 |             |
| AGIWUR15546;AGIWUR24438;AGIWUR29576;AGIWUR35194;AGIWUR44130                                                                                                                                            |    |   |         |         |                |          |          |                     |             |
| N2                                                                                                                                                                                                     | CT | V | 9777863 | 9779518 | WBGene00009769 | F46B6.4  | F46B6.4  | -0.35765173134314   | AGIWUR28824 |
| N2                                                                                                                                                                                                     | CT | V | 9779550 | 9783062 | WBGene00009770 | F46B6.5  | F46B6.5  | 0.341606271866886   |             |
| AGIWUR3043;AGIWUR9088;AGIWUR12125;AGIWUR22800;AGIWUR24084;AGIWUR24726;AGIWUR29962;AGIWUR31112;AGIWUR32190                                                                                              |    |   |         |         |                |          |          |                     |             |
| N2                                                                                                                                                                                                     | CT | V | 9783167 | 9786868 | WBGene00009771 | F46B6.6  | F46B6.6  | -0.115983814079435  | AGIWUR17683 |
| N2                                                                                                                                                                                                     | CT | V | 9786949 | 9789707 | WBGene00009772 | ztf-7    | F46B6.7  | 0.131033629979751   |             |
| AGIWUR2863;AGIWUR4966;AGIWUR6956;AGIWUR7130;AGIWUR9529;AGIWUR10038;AGIWUR14760;AGIWUR15597;AGIWUR19058;AGIWUR23791;AGIWUR25977;AGIWUR29172;AGIWUR29972;AGIWUR31314;AGIWUR33929;AGIWUR35152;AGIWUR40593 |    |   |         |         |                |          |          |                     |             |
| N2                                                                                                                                                                                                     | CT | V | 9791567 | 9793234 | WBGene00009773 | lip1-2   | F46B6.8  | -0.189500888178555  | AGIWUR21540 |
| N2                                                                                                                                                                                                     | CT | V | 9796862 | 9798270 | WBGene00009774 | F46B6.9  | F46B6.9  | -0.158633852272677  |             |
| AGIWUR4462;AGIWUR18178                                                                                                                                                                                 |    |   |         |         |                |          |          |                     |             |
| N2                                                                                                                                                                                                     | CT | V | 9798926 | 9799179 | WBGene00044192 | F46B6.13 | F46B6.13 | -0.516981890097249  |             |
| AGIWUR313;AGIWUR12061;AGIWUR17444;AGIWUR18951;AGIWUR39217                                                                                                                                              |    |   |         |         |                |          |          |                     |             |
| N2                                                                                                                                                                                                     | CT | V | 9801463 | 9802028 | WBGene00009775 | F46B6.10 | F46B6.10 | 0.229299333231776   |             |
| AGIWUR5952;AGIWUR39386                                                                                                                                                                                 |    |   |         |         |                |          |          |                     |             |
| N2                                                                                                                                                                                                     | CT | V | 9803476 | 9804607 | WBGene00005702 | sru-39   | F46B6.11 | 0.306864864254944   |             |
| AGIWUR39929                                                                                                                                                                                            |    |   |         |         |                |          |          |                     |             |
| N2                                                                                                                                                                                                     | CT | V | 9805461 | 9806600 | WBGene00005700 | sru-37   | C50C10.1 | -0.0375524761174617 |             |
| AGIWUR24732                                                                                                                                                                                            |    |   |         |         |                |          |          |                     |             |
| N2                                                                                                                                                                                                     | CT | V | 9807635 | 9809432 | WBGene00005696 | sru-33   | C50C10.8 | 0.0781780498147686  |             |
| AGIWUR25941                                                                                                                                                                                            |    |   |         |         |                |          |          |                     |             |
| N2                                                                                                                                                                                                     | CT | V | 9811461 | 9812619 | WBGene00005692 | sru-29   | C50C10.2 | 0.107730180910536   |             |

|                                                                                                            |    |   |         |         |                |         |          |                      |             |
|------------------------------------------------------------------------------------------------------------|----|---|---------|---------|----------------|---------|----------|----------------------|-------------|
| AGIWUR7544                                                                                                 |    |   |         |         |                |         |          |                      |             |
| N2                                                                                                         | CT | V | 9813838 | 9815007 | WBGene00005693 | sru-30  | C50C10.3 | 0.471574647444232    |             |
| AGIWUR36392                                                                                                |    |   |         |         |                |         |          |                      |             |
| N2                                                                                                         | CT | V | 9816690 | 9817862 | WBGene00005694 | sru-31  | C50C10.4 | -0.0352828966473702  |             |
| AGIWUR12905                                                                                                |    |   |         |         |                |         |          |                      |             |
| N2                                                                                                         | CT | V | 9819279 | 9820210 | WBGene00005695 | sru-32  | C50C10.5 | -0.0254487177511447  |             |
| AGIWUR7644;AGIWUR12393;AGIWUR12687;AGIWUR13938;AGIWUR24740;AGIWUR24921;AGIWUR28299;AGIWUR38405;AGIWUR44059 |    |   |         |         |                |         |          |                      |             |
| N2                                                                                                         | CT | V | 9820554 | 9821824 | WBGene00006232 | str-193 | C50C10.6 | 0.0122782178217937   |             |
| AGIWUR6862                                                                                                 |    |   |         |         |                |         |          |                      |             |
| N2                                                                                                         | CT | V | 9822619 | 9824249 | WBGene00006070 | str-2   | C50C10.7 | 0.763075469789968    |             |
| AGIWUR28381                                                                                                |    |   |         |         |                |         |          |                      |             |
| N2                                                                                                         | CT | V | 9827156 | 9828401 | WBGene00005697 | sru-34  | C50C10.9 | 0.0464998811675512   |             |
| AGIWUR1612;AGIWUR26289                                                                                     |    |   |         |         |                |         |          |                      |             |
| N2                                                                                                         | CT | V | 9829068 | 9830444 | WBGene00014817 | R07B5.1 | R07B5.1  | -0.208124893650084   |             |
| AGIWUR5180;AGIWUR9324                                                                                      |    |   |         |         |                |         |          |                      |             |
| N2                                                                                                         | CT | V | 9830978 | 9831908 | WBGene00014818 | R07B5.2 | R07B5.2  | 0.0944209568925207   |             |
| AGIWUR5210;AGIWUR38357                                                                                     |    |   |         |         |                |         |          |                      |             |
| N2                                                                                                         | CT | V | 9832742 | 9834000 | WBGene00005703 | sru-40  | R07B5.3  | 0.0536116186687794   | AGIWUR10727 |
| N2                                                                                                         | CT | V | 9834463 | 9836088 | WBGene00005701 | sru-38  | R07B5.4  | 0.281240579522363    | AGIWUR15518 |
| N2                                                                                                         | CT | V | 9837979 | 9839588 | WBGene00011084 | srsx-21 | R07B5.5  | -0.0332275488213458  | AGIWUR25575 |
| N2                                                                                                         | CT | V | 9841676 | 9843179 | WBGene00005699 | sru-36  | R07B5.6  | 0.180345842820081    | AGIWUR8930  |
| N2                                                                                                         | CT | V | 9843866 | 9846161 | WBGene00005671 | sru-8   | R07B5.7  | 0.206946103150894    | AGIWUR21957 |
| N2                                                                                                         | CT | V | 9846158 | 9859963 | WBGene00045419 | lsy-12  | R07B5.9  | 0.00541707307068329  |             |
| AGIWUR7788;AGIWUR14451;AGIWUR18405;AGIWUR18991;AGIWUR21009;AGIWUR22924;AGIWUR27328;AGIWUR30577             |    |   |         |         |                |         |          |                      |             |
| N2                                                                                                         | CT | V | 9866628 | 9868411 | WBGene00011701 | srab-17 | T11A5.2  | -0.00506739852839821 |             |
| AGIWUR26966;AGIWUR29976;AGIWUR37974                                                                        |    |   |         |         |                |         |          |                      |             |
| N2                                                                                                         | CT | V | 9869887 | 9871439 | WBGene00011702 | srab-18 | T11A5.3  | 0.0557439664991488   | AGIWUR44934 |
| N2                                                                                                         | CT | V | 9874009 | 9875899 | WBGene00011703 | srab-19 | T11A5.4  | -0.177938655777362   | AGIWUR44659 |
| N2                                                                                                         | CT | V | 9876687 | 9879504 | WBGene00043059 | srab-26 | T11A5.7  | 0.180776419174441    |             |
| AGIWUR12889;AGIWUR32842                                                                                    |    |   |         |         |                |         |          |                      |             |
| N2                                                                                                         | CT | V | 9880114 | 9881181 | WBGene00011704 | sdz-31  | T11A5.5  | 0.0328686065813404   | AGIWUR30501 |
| N2                                                                                                         | CT | V | 9882034 | 9885960 | WBGene00011705 | T11A5.6 | T11A5.6  | -0.00178692100416988 |             |
| AGIWUR4479;AGIWUR12299;AGIWUR17100;AGIWUR20013;AGIWUR22364                                                 |    |   |         |         |                |         |          |                      |             |
| N2                                                                                                         | CT | V | 9889839 | 9894849 | WBGene00008239 | fshr-1  | C50H2.1  | 0.0562387537006135   |             |
| AGIWUR15231;AGIWUR21400;AGIWUR23775                                                                        |    |   |         |         |                |         |          |                      |             |
| N2                                                                                                         | CT | V | 9899587 | 9907644 | WBGene00001211 | egl-47  | C50H2.2  | 0.0580375477037345   |             |
| AGIWUR1630;AGIWUR25213                                                                                     |    |   |         |         |                |         |          |                      |             |
| N2                                                                                                         | CT | V | 9907632 | 9915103 | WBGene00003173 | mec-9   | C50H2.3  | -0.222000592679735   |             |
| AGIWUR8109;AGIWUR20278                                                                                     |    |   |         |         |                |         |          |                      |             |

|                                                                         |    |   |         |         |                |           |           |                      |             |
|-------------------------------------------------------------------------|----|---|---------|---------|----------------|-----------|-----------|----------------------|-------------|
| N2                                                                      | CT | V | 9916975 | 9919167 | WBGene00008240 | C50H2.4   | C50H2.4   | 0.190217135180215    |             |
| AGIWUR6240;AGIWUR13906;AGIWUR34958                                      |    |   |         |         |                |           |           |                      |             |
| N2                                                                      | CT | V | 9918770 | 9919790 | WBGene00008241 | C50H2.5   | C50H2.5   | 0.0249411234291106   | AGIWUR4106  |
| N2                                                                      | CT | V | 9921337 | 9922194 | WBGene00008242 | ceh-75    | C50H2.6   | 0.417491175403256    | AGIWUR44098 |
| N2                                                                      | CT | V | 9923285 | 9923936 | WBGene00008243 | C50H2.7   | C50H2.7   | -0.0556230578392096  | AGIWUR26387 |
| N2                                                                      | CT | V | 9926544 | 9927884 | WBGene00008246 | C50H2.13  | C50H2.13  | -0.27417149143742    |             |
| AGIWUR37920                                                             |    |   |         |         |                |           |           |                      |             |
| N2                                                                      | CT | V | 9927782 | 9930775 | WBGene00011576 | rmh-2     | T07C12.12 | 0.0464833894041057   |             |
| AGIWUR26741                                                             |    |   |         |         |                |           |           |                      |             |
| N2                                                                      | CT | V | 9931019 | 9932368 | WBGene00044204 | suds-3    | T07C12.14 | -0.0536807776126587  |             |
| AGIWUR11628;AGIWUR14798;AGIWUR38926                                     |    |   |         |         |                |           |           |                      |             |
| N2                                                                      | CT | V | 9935548 | 9937535 | WBGene00005618 | srj-33    | T07C12.1  | -0.00949133096347499 |             |
| AGIWUR9624                                                              |    |   |         |         |                |           |           |                      |             |
| N2                                                                      | CT | V | 9937804 | 9940885 | WBGene00014833 | T07C12.4  | T07C12.4  | -0.03679218966702    |             |
| AGIWUR12419;AGIWUR17109;AGIWUR34432                                     |    |   |         |         |                |           |           |                      |             |
| N2                                                                      | CT | V | 9941691 | 9942999 | WBGene00005619 | srj-34    | T07C12.5  | 0.0441000869423336   |             |
| AGIWUR30726;AGIWUR40882                                                 |    |   |         |         |                |           |           |                      |             |
| N2                                                                      | CT | V | 9944393 | 9945895 | WBGene00011570 | sre-28    | T07C12.6  | -0.180455671360918   |             |
| AGIWUR27875                                                             |    |   |         |         |                |           |           |                      |             |
| N2                                                                      | CT | V | 9951233 | 9952182 | WBGene00011571 | ttr-46    | T07C12.7  | 0.126606300651859    |             |
| AGIWUR3342;AGIWUR14268                                                  |    |   |         |         |                |           |           |                      |             |
| N2                                                                      | CT | V | 9952699 | 9956883 | WBGene00011572 | mam-5     | T07C12.8  | -0.0539360988849138  |             |
| AGIWUR5217                                                              |    |   |         |         |                |           |           |                      |             |
| N2                                                                      | CT | V | 9956879 | 9958331 | WBGene00011573 | anmt-3    | T07C12.9  | -0.347063707108131   |             |
| AGIWUR20955;AGIWUR23694;AGIWUR38361                                     |    |   |         |         |                |           |           |                      |             |
| N2                                                                      | CT | V | 9959997 | 9960337 | WBGene00011574 | T07C12.10 | T07C12.10 | -0.215493488357033   |             |
| AGIWUR36362                                                             |    |   |         |         |                |           |           |                      |             |
| N2                                                                      | CT | V | 9966404 | 9976226 | WBGene00006777 | unc-41    | C27H6.1   | -0.021652625558394   |             |
| AGIWUR15466;AGIWUR44126                                                 |    |   |         |         |                |           |           |                      |             |
| N2                                                                      | CT | V | 9978791 | 9980802 | WBGene00007784 | ruvb-1    | C27H6.2   | 0.318229869457205    |             |
| AGIWUR21285;AGIWUR38782                                                 |    |   |         |         |                |           |           |                      |             |
| N2                                                                      | CT | V | 9981249 | 9982766 | WBGene00007785 | tofu-1    | C27H6.3   | -0.182127273857907   |             |
| AGIWUR8036;AGIWUR34372                                                  |    |   |         |         |                |           |           |                      |             |
| N2                                                                      | CT | V | 9982868 | 9983932 | WBGene00077500 | C27H6.9   | C27H6.9   | -0.198170568005446   |             |
| AGIWUR8798;AGIWUR30656;AGIWUR37688                                      |    |   |         |         |                |           |           |                      |             |
| N2                                                                      | CT | V | 9983924 | 9986277 | WBGene00007786 | rmd-2     | C27H6.4   | 0.0491319236731425   | AGIWUR2085  |
| N2                                                                      | CT | V | 9986330 | 9987788 | WBGene00007787 | C27H6.8   | C27H6.8   | 0.0443006264608954   |             |
| AGIWUR23276;AGIWUR30527;AGIWUR31051;AGIWUR31999;AGIWUR35154;AGIWUR37913 |    |   |         |         |                |           |           |                      |             |
| N2                                                                      | CT | V | 9987916 | 9991642 | WBGene00004323 | rde-1     | K08H10.7  | -0.0697748542088981  |             |



|                                                |    |   |          |          |                |           |                             |
|------------------------------------------------|----|---|----------|----------|----------------|-----------|-----------------------------|
| AGIWUR8121                                     |    |   |          |          |                |           |                             |
| N2                                             | CT | V | 9991812  | 9992792  | WBGene00010699 | trpp-6    | K08H10.9 -0.140886862817151 |
| AGIWUR41394                                    |    |   |          |          |                |           |                             |
| N2                                             | CT | V | 9993732  | 9995883  | WBGene00010698 | K08H10.6  | K08H10.6 -0.125093881931702 |
| AGIWUR583                                      |    |   |          |          |                |           |                             |
| N2                                             | CT | V | 9997094  | 9998481  | WBGene00014805 | K08H10.5  | K08H10.5 0.0345945467795179 |
| AGIWUR9000                                     |    |   |          |          |                |           |                             |
| N2                                             | CT | V | 10001118 | 10002766 | WBGene00077491 | K08H10.10 | K08H10.10                   |
| -0.108530755543452                             |    |   |          |          |                |           |                             |
| N2                                             | CT | V | 10004755 | 10007482 | WBGene00010697 | uda-1     | K08H10.4                    |
| 0.0882391502498638                             |    |   |          |          |                |           |                             |
| N2                                             | CT | V | 10011871 | 10028158 | WBGene00002263 | lea-1     | K08H10.1                    |
| 0.130072275158998                              |    |   |          |          |                |           |                             |
| N2                                             | CT | V | 10028150 | 10031094 | WBGene00011543 | acl-2     | T06E8.1 0.232907293736609   |
| AGIWUR9552;AGIWUR14141;AGIWUR39235             |    |   |          |          |                |           |                             |
| N2                                             | CT | V | 10035746 | 10036413 | WBGene00011544 | T06E8.2   | T06E8.2 0.0132053786142077  |
| AGIWUR36746                                    |    |   |          |          |                |           |                             |
| N2                                             | CT | V | 10037340 | 10048726 | WBGene00010177 | F57A8.1   | F57A8.1 0.0243919855720676  |
| AGIWUR9377;AGIWUR19620;AGIWUR26218;AGIWUR41504 |    |   |          |          |                |           |                             |
| N2                                             | CT | V | 10050047 | 10054913 | WBGene00010178 | yif-1     | F57A8.2 -0.127734659605424  |
| AGIWUR4863;AGIWUR17667                         |    |   |          |          |                |           |                             |
| N2                                             | CT | V | 10064503 | 10064939 | WBGene00010183 | fipr-13   | F57A8.8 0.0960168802776007  |
| AGIWUR19773                                    |    |   |          |          |                |           |                             |
| N2                                             | CT | V | 10067087 | 10068818 | WBGene00010179 | F57A8.4   | F57A8.4 -0.331763362228127  |
| AGIWUR12584                                    |    |   |          |          |                |           |                             |
| N2                                             | CT | V | 10069369 | 10070641 | WBGene00010180 | nhr-192   | F57A8.5 -0.2196330656007    |
| AGIWUR13885                                    |    |   |          |          |                |           |                             |
| N2                                             | CT | V | 10071945 | 10073893 | WBGene00010181 | F57A8.6   | F57A8.6 0.226625200910995   |
| AGIWUR33295;AGIWUR38993;AGIWUR44089            |    |   |          |          |                |           |                             |
| N2                                             | CT | V | 10075749 | 10077804 | WBGene00010182 | F57A8.7   | F57A8.7 0.0781207560503798  |
| AGIWUR23052                                    |    |   |          |          |                |           |                             |
| N2                                             | CT | V | 10077905 | 10078344 | WBGene00011001 | R04B5.1   | R04B5.1 0.0630992342873515  |
| AGIWUR39091                                    |    |   |          |          |                |           |                             |
| N2                                             | CT | V | 10080119 | 10081739 | WBGene00011002 | nhr-205   | R04B5.3 -0.180438774779795  |
| AGIWUR10466                                    |    |   |          |          |                |           |                             |
| N2                                             | CT | V | 10082141 | 10084043 | WBGene00003611 | nhr-12    | R04B5.4 0.143918508907081   |
| AGIWUR27082                                    |    |   |          |          |                |           |                             |
| N2                                             | CT | V | 10085281 | 10087313 | WBGene00011004 | R04B5.6   | R04B5.6 0.102602403493734   |
| AGIWUR21782                                    |    |   |          |          |                |           |                             |

|                                                                              |    |   |          |          |                |          |          |                     |
|------------------------------------------------------------------------------|----|---|----------|----------|----------------|----------|----------|---------------------|
| N2                                                                           | CT | V | 10087480 | 10088998 | WBGene00011003 | R04B5.5  | R04B5.5  | -0.121543694123179  |
| AGIWUR21261                                                                  |    |   |          |          |                |          |          |                     |
| N2                                                                           | CT | V | 10089157 | 10090561 | WBGene00011005 | R04B5.7  | R04B5.7  | 0.102914712239343   |
| AGIWUR30661                                                                  |    |   |          |          |                |          |          |                     |
| N2                                                                           | CT | V | 10090688 | 10091252 | WBGene00011008 | R04B5.11 |          | R04B5.11            |
| 0.14910429040159 AGIWUR5081;AGIWUR6922;AGIWUR16433;AGIWUR19085;AGIWUR42467   |    |   |          |          |                |          |          |                     |
| N2                                                                           | CT | V | 10094720 | 10096311 | WBGene00005127 | srd-49   | R04B5.8  | 0.111902158887721   |
| AGIWUR15531                                                                  |    |   |          |          |                |          |          |                     |
| N2                                                                           | CT | V | 10096305 | 10098597 | WBGene00011006 | ugt-47   | R04B5.9  |                     |
| -0.00909037582188432 AGIWUR42833                                             |    |   |          |          |                |          |          |                     |
| N2                                                                           | CT | V | 10098904 | 10099205 | WBGene00011007 | R04B5.10 |          | R04B5.10            |
| -0.187992124886861 AGIWUR5592                                                |    |   |          |          |                |          |          |                     |
| N2                                                                           | CT | V | 10100156 | 10102016 | WBGene00044044 | C08B6.14 |          | C08B6.14            |
| 0.178686062115793 AGIWUR23984                                                |    |   |          |          |                |          |          |                     |
| N2                                                                           | CT | V | 10102592 | 10104946 | WBGene00007422 | ugt-17   | C08B6.1  | 0.0794435812125158  |
| AGIWUR16806                                                                  |    |   |          |          |                |          |          |                     |
| N2                                                                           | CT | V | 10107684 | 10109905 | WBGene00007431 | C08B6.11 |          | C08B6.11            |
| -0.0824762402088162 AGIWUR13572                                              |    |   |          |          |                |          |          |                     |
| N2                                                                           | CT | V | 10109872 | 10112287 | WBGene00007424 | C08B6.3  | C08B6.3  | -0.0832002713815392 |
| AGIWUR37592                                                                  |    |   |          |          |                |          |          |                     |
| N2                                                                           | CT | V | 10117765 | 10119688 | WBGene00007426 | C08B6.5  | C08B6.5  | -0.157768645282055  |
| AGIWUR14625                                                                  |    |   |          |          |                |          |          |                     |
| N2                                                                           | CT | V | 10119574 | 10120986 | WBGene00007432 | srxa-18  | C08B6.12 |                     |
| -0.0454244526203356 AGIWUR36957                                              |    |   |          |          |                |          |          |                     |
| N2                                                                           | CT | V | 10121134 | 10122770 | WBGene00044012 | srxa-19  | C08B6.13 |                     |
| -0.230292967271713 AGIWUR27566;AGIWUR44831                                   |    |   |          |          |                |          |          |                     |
| N2                                                                           | CT | V | 10123638 | 10124689 | WBGene00007427 | C08B6.6  | C08B6.6  | 0.239115487332741   |
| AGIWUR8597                                                                   |    |   |          |          |                |          |          |                     |
| N2                                                                           | CT | V | 10125052 | 10127570 | WBGene00007430 | C08B6.10 |          | C08B6.10            |
| -0.0849140639379034 AGIWUR6529                                               |    |   |          |          |                |          |          |                     |
| N2                                                                           | CT | V | 10127492 | 10130295 | WBGene00000142 | aos-1    | C08B6.9  | -0.178622454835056  |
| AGIWUR24404;AGIWUR32403;AGIWUR35539;AGIWUR38336                              |    |   |          |          |                |          |          |                     |
| N2                                                                           | CT | V | 10130405 | 10134148 | WBGene00007428 | wdr-20   | C08B6.7  | 0.028871176394782   |
| AGIWUR4283;AGIWUR10640;AGIWUR12917;AGIWUR19139;AGIWUR20882;AGIWUR24602       |    |   |          |          |                |          |          |                     |
| N2                                                                           | CT | V | 10134643 | 10143081 | WBGene00007429 | C08B6.8  | C08B6.8  | -0.0458879530051659 |
| AGIWUR20990;AGIWUR33580                                                      |    |   |          |          |                |          |          |                     |
| N2                                                                           | CT | V | 10143936 | 10144192 | WBGene00077449 | C08B6.15 |          | C08B6.15            |
| -0.0270253638669065 AGIWUR717;AGIWUR3577;AGIWUR20236;AGIWUR38212;AGIWUR43073 |    |   |          |          |                |          |          |                     |
| N2                                                                           | CT | V | 10144408 | 10145251 | WBGene00008253 | C51E3.8  | C51E3.8  | -0.0310194222329034 |

|                                                       |    |   |          |          |                |          |          |                     |
|-------------------------------------------------------|----|---|----------|----------|----------------|----------|----------|---------------------|
| AGIWUR30989                                           |    |   |          |          |                |          |          |                     |
| N2                                                    | CT | V | 10145905 | 10148977 | WBGene00008254 | C51E3.9  | C51E3.9  | 0.16440149850234    |
| AGIWUR22043                                           |    |   |          |          |                |          |          |                     |
| N2                                                    | CT | V | 10150066 | 10152159 | WBGene00008248 | srsx-27  | C51E3.2  | -0.122711476367223  |
| AGIWUR23884;AGIWUR25522                               |    |   |          |          |                |          |          |                     |
| N2                                                    | CT | V | 10152583 | 10154756 | WBGene00008249 | srsx-28  | C51E3.3  | 0.0478948361581182  |
| AGIWUR10539;AGIWUR19267;AGIWUR25349                   |    |   |          |          |                |          |          |                     |
| N2                                                    | CT | V | 10154998 | 10156381 | WBGene00008250 | srsx-29  | C51E3.4  | 0.167657700667315   |
| AGIWUR5433                                            |    |   |          |          |                |          |          |                     |
| N2                                                    | CT | V | 10158833 | 10160297 | WBGene00008251 | srsx-30  | C51E3.5  | 0.267653298463709   |
| AGIWUR13139;AGIWUR18898                               |    |   |          |          |                |          |          |                     |
| N2                                                    | CT | V | 10160439 | 10161161 | WBGene00008255 | C51E3.10 |          | C51E3.10            |
| 0.0806963876227691 AGIWUR5502                         |    |   |          |          |                |          |          |                     |
| N2                                                    | CT | V | 10164135 | 10166463 | WBGene00008252 | C51E3.6  | C51E3.6  | -0.0968875470620603 |
| AGIWUR15393;AGIWUR33155;AGIWUR38537                   |    |   |          |          |                |          |          |                     |
| N2                                                    | CT | V | 10169197 | 10173753 | WBGene00001172 | egl-3    | C51E3.7  | 0.16797161627621    |
| AGIWUR1410;AGIWUR10673;AGIWUR10823;AGIWUR32937        |    |   |          |          |                |          |          |                     |
| N2                                                    | CT | V | 10179535 | 10183154 | WBGene00000840 | cul-5    | ZK856.1  | -0.0887933666731548 |
| AGIWUR10749                                           |    |   |          |          |                |          |          |                     |
| N2                                                    | CT | V | 10183284 | 10184446 | WBGene00014105 | ZK856.4  | ZK856.4  |                     |
| -0.00442001278703774 AGIWUR1992                       |    |   |          |          |                |          |          |                     |
| N2                                                    | CT | V | 10184689 | 10186007 | WBGene00194912 | ZK856.18 |          | ZK856.18            |
| 0.411425774504469 AGIWUR11214                         |    |   |          |          |                |          |          |                     |
| N2                                                    | CT | V | 10198704 | 10199942 | WBGene00014107 | ZK856.6  | ZK856.6  | -0.0568823005011927 |
| AGIWUR24559                                           |    |   |          |          |                |          |          |                     |
| N2                                                    | CT | V | 10201856 | 10202610 | WBGene00014108 | ZK856.7  | ZK856.7  | -0.18092170436022   |
| AGIWUR4691;AGIWUR21535;AGIWUR29202;AGIWUR31126        |    |   |          |          |                |          |          |                     |
| N2                                                    | CT | V | 10202538 | 10203485 | WBGene00014109 | chpf-1   | ZK856.8  | -0.112540392921501  |
| AGIWUR8017;AGIWUR29777;AGIWUR42156;AGIWUR44854        |    |   |          |          |                |          |          |                     |
| N2                                                    | CT | V | 10203772 | 10205587 | WBGene00014112 | ZK856.11 |          | ZK856.11            |
| 0.287774942863887 AGIWUR11220                         |    |   |          |          |                |          |          |                     |
| N2                                                    | CT | V | 10205683 | 10206602 | WBGene00014111 | rpc-25   | ZK856.10 |                     |
| -0.340757983217113 AGIWUR35370                        |    |   |          |          |                |          |          |                     |
| N2                                                    | CT | V | 10206619 | 10210344 | WBGene00014114 | tftc-3   | ZK856.13 |                     |
| -0.0120197340055288 AGIWUR11722                       |    |   |          |          |                |          |          |                     |
| N2                                                    | CT | V | 10210444 | 10212127 | WBGene00006489 | zhit-3   | ZK856.9  | -0.195814770842142  |
| AGIWUR41962                                           |    |   |          |          |                |          |          |                     |
| N2                                                    | CT | V | 10212929 | 10216305 | WBGene00014113 | hpo-40   | ZK856.12 |                     |
| 0.240096433436307 AGIWUR20340;AGIWUR26577;AGIWUR37582 |    |   |          |          |                |          |          |                     |

|                                                                                                                      |    |   |                                                                         |          |                |          |                             |
|----------------------------------------------------------------------------------------------------------------------|----|---|-------------------------------------------------------------------------|----------|----------------|----------|-----------------------------|
| N2                                                                                                                   | CT | V | 10217079                                                                | 10219022 | WBGene00044020 | ZK856.14 | ZK856.14                    |
| -0.111797411455688                                                                                                   |    |   | AGIWUR1092;AGIWUR14205;AGIWUR31390                                      |          |                |          |                             |
| N2                                                                                                                   | CT | V | 10219455                                                                | 10220470 | WBGene00007540 | C12D8.13 | C12D8.13                    |
| -0.137342677023113                                                                                                   |    |   | AGIWUR15994                                                             |          |                |          |                             |
| N2                                                                                                                   | CT | V | 10223513                                                                | 10225760 | WBGene00007536 | daf-36   | C12D8.5 -0.209639204019794  |
| AGIWUR24683                                                                                                          |    |   |                                                                         |          |                |          |                             |
| N2                                                                                                                   | CT | V | 10226885                                                                | 10227434 | WBGene00007535 | ttr-19   | C12D8.4 -0.551007469256836  |
| AGIWUR25644                                                                                                          |    |   |                                                                         |          |                |          |                             |
| N2                                                                                                                   | CT | V | 10228043                                                                | 10228460 | WBGene00007541 | fipr-4   | C12D8.14                    |
| 0.424459235618849                                                                                                    |    |   | AGIWUR16878                                                             |          |                |          |                             |
| N2                                                                                                                   | CT | V | 10228641                                                                | 10229322 | WBGene00007542 | C12D8.15 | C12D8.15                    |
| -0.101762503937978                                                                                                   |    |   | AGIWUR24231                                                             |          |                |          |                             |
| N2                                                                                                                   | CT | V | 10231821                                                                | 10233430 | WBGene00006226 | str-182  | C12D8.12                    |
| 0.011454845054125                                                                                                    |    |   | AGIWUR41878                                                             |          |                |          |                             |
| N2                                                                                                                   | CT | V | 10236160                                                                | 10238902 | WBGene00007534 | C12D8.1  | C12D8.1 0.133610730457915   |
| AGIWUR1056;AGIWUR7083;AGIWUR9511;AGIWUR14024;AGIWUR18462;AGIWUR22716;AGIWUR25429;AGIWUR27421;AGIWUR35675;AGIWUR39350 |    |   |                                                                         |          |                |          |                             |
| N2                                                                                                                   | CT | V | 10240573                                                                | 10241188 | WBGene00195157 | C12D8.21 | C12D8.21                    |
| 0.162450150644908                                                                                                    |    |   | AGIWUR15826                                                             |          |                |          |                             |
| N2                                                                                                                   | CT | V | 10241784                                                                | 10242718 | WBGene00000721 | col-148  | C12D8.8 -0.0631320385673035 |
| AGIWUR13025                                                                                                          |    |   |                                                                         |          |                |          |                             |
| N2                                                                                                                   | CT | V | 10242787                                                                | 10243205 | WBGene00007538 | C12D8.9  | C12D8.9 -0.119852209499541  |
| AGIWUR8119                                                                                                           |    |   |                                                                         |          |                |          |                             |
| N2                                                                                                                   | CT | V | 10248907                                                                | 10252895 | WBGene00000102 | akt-1    | C12D8.10                    |
| 0.10354441922779                                                                                                     |    |   | AGIWUR3065;AGIWUR5113;AGIWUR14046;AGIWUR43925                           |          |                |          |                             |
| N2                                                                                                                   | CT | V | 10252821                                                                | 10255055 | WBGene00004405 | rop-1    | C12D8.11                    |
| 0.108262140820628                                                                                                    |    |   | AGIWUR2067;AGIWUR16535;AGIWUR21656                                      |          |                |          |                             |
| N2                                                                                                                   | CT | V | 10256360                                                                | 10258654 | WBGene00012494 | nhr-232  | Y22F5A.1                    |
| -0.183474566405599                                                                                                   |    |   | AGIWUR2700                                                              |          |                |          |                             |
| N2                                                                                                                   | CT | V | 10258661                                                                | 10260554 | WBGene00005530 | sri-18   | Y22F5A.2                    |
| 0.0608006665829022                                                                                                   |    |   | AGIWUR12538                                                             |          |                |          |                             |
| N2                                                                                                                   | CT | V | 10261131                                                                | 10270314 | WBGene00004364 | ric-4    | Y22F5A.3                    |
| 0.126832020200023                                                                                                    |    |   | AGIWUR13824;AGIWUR14867;AGIWUR17495;AGIWUR21980                         |          |                |          |                             |
| N2                                                                                                                   | CT | V | 10277827                                                                | 10279127 | WBGene00003090 | lys-1    | Y22F5A.4                    |
| 0.352418263225944                                                                                                    |    |   | AGIWUR13848;AGIWUR17373;AGIWUR20455;AGIWUR29828;AGIWUR30263;AGIWUR33540 |          |                |          |                             |
| N2                                                                                                                   | CT | V | 10280310                                                                | 10281474 | WBGene00003091 | lys-2    | Y22F5A.5                    |
| 0.495269838288694                                                                                                    |    |   | AGIWUR37008                                                             |          |                |          |                             |
| N2                                                                                                                   | CT | V | 10282204                                                                | 10283544 | WBGene00003092 | lys-3    | Y22F5A.6                    |
| 0.203361598515455                                                                                                    |    |   | AGIWUR44748                                                             |          |                |          |                             |

|                                                                                           |    |   |          |          |                |          |          |                     |
|-------------------------------------------------------------------------------------------|----|---|----------|----------|----------------|----------|----------|---------------------|
| N2                                                                                        | CT | V | 10287564 | 10289272 | WBGene00007096 | B0024.3  | B0024.3  | -0.48667533356817   |
| AGIWUR8921                                                                                |    |   |          |          |                |          |          |                     |
| N2                                                                                        | CT | V | 10289721 | 10291710 | WBGene00007104 | B0024.15 |          | B0024.15            |
| 0.177967552933312 AGIWUR36356                                                             |    |   |          |          |                |          |          |                     |
| N2                                                                                        | CT | V | 10291697 | 10292869 | WBGene00000722 | col-149  | B0024.1  | 0.564541669054455   |
| AGIWUR37769                                                                               |    |   |          |          |                |          |          |                     |
| N2                                                                                        | CT | V | 10293563 | 10294623 | WBGene00000723 | col-150  | B0024.2  | 0.0975186485586619  |
| AGIWUR37941                                                                               |    |   |          |          |                |          |          |                     |
| N2                                                                                        | CT | V | 10297399 | 10298865 | WBGene00007097 | B0024.4  | B0024.4  | 1.27912966523031    |
| AGIWUR44276                                                                               |    |   |          |          |                |          |          |                     |
| N2                                                                                        | CT | V | 10299473 | 10307354 | WBGene00000491 | che-12   | B0024.8  | -0.118784060089155  |
| AGIWUR3900                                                                                |    |   |          |          |                |          |          |                     |
| N2                                                                                        | CT | V | 10308291 | 10314053 | WBGene00001533 | gcy-6    | B0024.6  | -0.419222447436104  |
| AGIWUR18920                                                                               |    |   |          |          |                |          |          |                     |
| N2                                                                                        | CT | V | 10314641 | 10315304 | WBGene00007099 | trx-2    | B0024.9  | 0.0511282630079251  |
| AGIWUR37553                                                                               |    |   |          |          |                |          |          |                     |
| N2                                                                                        | CT | V | 10315245 | 10317394 | WBGene00007100 | B0024.10 |          | B0024.10            |
| -0.0719945845442673 AGIWUR4937                                                            |    |   |          |          |                |          |          |                     |
| N2                                                                                        | CT | V | 10317490 | 10319534 | WBGene00007101 | B0024.11 |          | B0024.11            |
| -0.059663246831132 AGIWUR40598                                                            |    |   |          |          |                |          |          |                     |
| N2                                                                                        | CT | V | 10319535 | 10320158 | WBGene00001646 | gna-1    | B0024.12 |                     |
| -0.264101339225663 AGIWUR36410                                                            |    |   |          |          |                |          |          |                     |
| N2                                                                                        | CT | V | 10320715 | 10322304 | WBGene00007102 | B0024.13 |          | B0024.13            |
| 0.217967646962837 AGIWUR19097;AGIWUR26092;AGIWUR29028;AGIWUR32735                         |    |   |          |          |                |          |          |                     |
| N2                                                                                        | CT | V | 10322288 | 10332112 | WBGene00007103 | crm-1    | B0024.14 |                     |
| 0.0630020088071586 AGIWUR4802;AGIWUR12222;AGIWUR14025;AGIWUR21491;AGIWUR22518;AGIWUR40898 |    |   |          |          |                |          |          |                     |
| N2                                                                                        | CT | V | 10335443 | 10338355 | WBGene00000200 | arx-2    | K07C5.1  | 0.265890146901956   |
| AGIWUR20870                                                                               |    |   |          |          |                |          |          |                     |
| N2                                                                                        | CT | V | 10339500 | 10340971 | WBGene00010625 | K07C5.2  | K07C5.2  | -0.175051568975988  |
| AGIWUR5598                                                                                |    |   |          |          |                |          |          |                     |
| N2                                                                                        | CT | V | 10343032 | 10345489 | WBGene00010626 | K07C5.3  | K07C5.3  | -0.19822617309044   |
| AGIWUR28656                                                                               |    |   |          |          |                |          |          |                     |
| N2                                                                                        | CT | V | 10346662 | 10350154 | WBGene00010632 | K07C5.9  | K07C5.9  | -0.183143519787237  |
| AGIWUR3318;AGIWUR7900;AGIWUR14780;AGIWUR17856;AGIWUR27080                                 |    |   |          |          |                |          |          |                     |
| N2                                                                                        | CT | V | 10350471 | 10352978 | WBGene00010627 | K07C5.4  | K07C5.4  | 0.158729124099537   |
| AGIWUR11758;AGIWUR13751;AGIWUR31089;AGIWUR36058                                           |    |   |          |          |                |          |          |                     |
| N2                                                                                        | CT | V | 10353584 | 10355837 | WBGene00010629 | K07C5.6  | K07C5.6  | -0.0642101827800765 |
| AGIWUR35576                                                                               |    |   |          |          |                |          |          |                     |
| N2                                                                                        | CT | V | 10356285 | 10357903 | WBGene00010628 | ceeh-2   | K07C5.5  | 0.263527338956702   |

|                                                                      |    |   |          |          |                |           |          |                     |
|----------------------------------------------------------------------|----|---|----------|----------|----------------|-----------|----------|---------------------|
| AGIWUR2367;AGIWUR11689;AGIWUR43744                                   |    |   |          |          |                |           |          |                     |
| N2                                                                   | CT | V | 10358544 | 10361430 | WBGene00010630 | ttl1-15   | K07C5.7  | -0.220810399190682  |
| AGIWUR2920                                                           |    |   |          |          |                |           |          |                     |
| N2                                                                   | CT | V | 10362261 | 10366014 | WBGene00010631 | cash-1    | K07C5.8  | -0.162252479357345  |
| AGIWUR7634;AGIWUR18426;AGIWUR20669                                   |    |   |          |          |                |           |          |                     |
| N2                                                                   | CT | V | 10368556 | 10369868 | WBGene00005532 | sri-20    | AC3.1    | 0.0263320661468027  |
| AGIWUR10661                                                          |    |   |          |          |                |           |          |                     |
| N2                                                                   | CT | V | 10372325 | 10374245 | WBGene00007070 | ugt-49    | AC3.2    | -0.0768228688386188 |
| AGIWUR29691                                                          |    |   |          |          |                |           |          |                     |
| N2                                                                   | CT | V | 10374851 | 10376884 | WBGene00044022 | AC3.9     | AC3.9    | -0.137841422083331  |
| AGIWUR28600                                                          |    |   |          |          |                |           |          |                     |
| N2                                                                   | CT | V | 10376985 | 10377317 | WBGene00077502 | AC3.11    | AC3.11   | -0.0200604886572933 |
| AGIWUR6781;AGIWUR26582;AGIWUR29815;AGIWUR32777;AGIWUR40707           |    |   |          |          |                |           |          |                     |
| N2                                                                   | CT | V | 10378982 | 10379364 | WBGene00077503 | AC3.12    | AC3.12   | 0.193577122577393   |
| AGIWUR3223;AGIWUR15051;AGIWUR27034;AGIWUR43064;AGIWUR43093           |    |   |          |          |                |           |          |                     |
| N2                                                                   | CT | V | 10384157 | 10385711 | WBGene00004964 | spe-10    | AC3.10   | 0.20575298448215    |
| AGIWUR21504                                                          |    |   |          |          |                |           |          |                     |
| N2                                                                   | CT | V | 10388402 | 10393504 | WBGene00007071 | AC3.5     | AC3.5    | 0.0646796677129462  |
| AGIWUR3186;AGIWUR10575;AGIWUR24403;AGIWUR35180                       |    |   |          |          |                |           |          |                     |
| N2                                                                   | CT | V | 10393531 | 10395232 | WBGene00000724 | col-151   | AC3.6    | -0.14897428132263   |
| AGIWUR37545                                                          |    |   |          |          |                |           |          |                     |
| N2                                                                   | CT | V | 10395663 | 10397817 | WBGene00007072 | ugt-1     | AC3.7    | -0.0480270318114862 |
| AGIWUR6758                                                           |    |   |          |          |                |           |          |                     |
| N2                                                                   | CT | V | 10398717 | 10401307 | WBGene00007073 | ugt-2     | AC3.8    | 0.062739570054628   |
| AGIWUR24429                                                          |    |   |          |          |                |           |          |                     |
| N2                                                                   | CT | V | 10401447 | 10402904 | WBGene00008875 | F15H10.8  |          | F15H10.8            |
| 0.0865318943712858                                                   |    |   |          |          |                |           |          |                     |
| AGIWUR3582;AGIWUR4498;AGIWUR5126;AGIWUR15892;AGIWUR20758;AGIWUR39123 |    |   |          |          |                |           |          |                     |
| N2                                                                   | CT | V | 10403184 | 10406424 | WBGene00008874 | F15H10.7  |          | F15H10.7            |
| 0.00957297836541038                                                  |    |   |          |          |                |           |          |                     |
| AGIWUR6174                                                           |    |   |          |          |                |           |          |                     |
| N2                                                                   | CT | V | 10410240 | 10412149 | WBGene00008873 | F15H10.6  |          | F15H10.6            |
| 0.125949046012716                                                    |    |   |          |          |                |           |          |                     |
| AGIWUR40937                                                          |    |   |          |          |                |           |          |                     |
| N2                                                                   | CT | V | 10413332 | 10414692 | WBGene00044013 | F15H10.9  |          | F15H10.9            |
| 0.0197347666230634                                                   |    |   |          |          |                |           |          |                     |
| AGIWUR2037                                                           |    |   |          |          |                |           |          |                     |
| N2                                                                   | CT | V | 10415734 | 10417025 | WBGene00044014 | F15H10.10 |          | F15H10.10           |
| 0.731775701921909                                                    |    |   |          |          |                |           |          |                     |
| AGIWUR29823;AGIWUR44691                                              |    |   |          |          |                |           |          |                     |
| N2                                                                   | CT | V | 10417617 | 10419053 | WBGene00008872 | F15H10.5  |          | F15H10.5            |
| -0.0700370593120812                                                  |    |   |          |          |                |           |          |                     |
| AGIWUR4994;AGIWUR14497                                               |    |   |          |          |                |           |          |                     |
| N2                                                                   | CT | V | 10423907 | 10425092 | WBGene00000601 | col-12    | F15H10.1 |                     |
| 0.471730443773339                                                    |    |   |          |          |                |           |          |                     |
| AGIWUR4286                                                           |    |   |          |          |                |           |          |                     |

|                                                                                                                                    |    |   |                                                                         |          |                |          |                            |
|------------------------------------------------------------------------------------------------------------------------------------|----|---|-------------------------------------------------------------------------|----------|----------------|----------|----------------------------|
| N2                                                                                                                                 | CT | V | 10425362                                                                | 10426399 | WBGene00000144 | apc-10   | F15H10.3                   |
| -0.0416437942415984                                                                                                                |    |   | AGIWUR26869;AGIWUR44725                                                 |          |                |          |                            |
| N2                                                                                                                                 | CT | V | 10426633                                                                | 10428731 | WBGene00008871 | tag-314  | F15H10.4                   |
| 0.147890591135536                                                                                                                  |    |   | AGIWUR40256                                                             |          |                |          |                            |
| N2                                                                                                                                 | CT | V | 10428726                                                                | 10433604 | WBGene00012529 | Y32F6A.4 | Y32F6A.4                   |
| 0.296128713474161                                                                                                                  |    |   | AGIWUR11049;AGIWUR15338;AGIWUR22164;AGIWUR27644;AGIWUR28480;AGIWUR32635 |          |                |          |                            |
| N2                                                                                                                                 | CT | V | 10436912                                                                | 10441149 | WBGene00012527 | set-22   | Y32F6A.1                   |
| -0.1164050111060744                                                                                                                |    |   | AGIWUR21850                                                             |          |                |          |                            |
| N2                                                                                                                                 | CT | V | 10441979                                                                | 10446459 | WBGene00012528 | pap-1    | Y32F6A.3                   |
| 0.103078056639688                                                                                                                  |    |   | AGIWUR12613;AGIWUR17884                                                 |          |                |          |                            |
| N2                                                                                                                                 | CT | V | 10446534                                                                | 10453781 | WBGene00012530 | Y32F6A.5 | Y32F6A.5                   |
| -0.106278464611098                                                                                                                 |    |   | AGIWUR31672                                                             |          |                |          |                            |
| N2                                                                                                                                 | CT | V | 10453748                                                                | 10457347 | WBGene00009058 | F22E12.1 | F22E12.1                   |
| -0.162299141750609                                                                                                                 |    |   | AGIWUR3370                                                              |          |                |          |                            |
| N2                                                                                                                                 | CT | V | 10459188                                                                | 10463364 | WBGene00009060 | F22E12.3 | F22E12.3                   |
| -0.10058762371861                                                                                                                  |    |   | AGIWUR16080                                                             |          |                |          |                            |
| N2                                                                                                                                 | CT | V | 10462282                                                                | 10464660 | WBGene00009059 | chw-1    | F22E12.2                   |
| 0.0165791530549981                                                                                                                 |    |   | AGIWUR32911                                                             |          |                |          |                            |
| N2                                                                                                                                 | CT | V | 10468411                                                                | 10476952 | WBGene00001178 | egl-9    | F22E12.4                   |
| 0.0366102165535604                                                                                                                 |    |   |                                                                         |          |                |          |                            |
| AGIWUR8432;AGIWUR12790;AGIWUR13943;AGIWUR16371;AGIWUR18187;AGIWUR21119;AGIWUR21574;AGIWUR31407;AGIWUR33133;AGIWUR36086;AGIWUR36899 |    |   |                                                                         |          |                |          |                            |
| N2                                                                                                                                 | CT | V | 10478566                                                                | 10480963 | WBGene00012532 | crp-1    | Y32F6B.3                   |
| 0.00093577493971253                                                                                                                |    |   | AGIWUR5221                                                              |          |                |          |                            |
| N2                                                                                                                                 | CT | V | 10480949                                                                | 10484740 | WBGene00012531 | Y32F6B.1 | Y32F6B.1                   |
| -0.105289381660892                                                                                                                 |    |   | AGIWUR41958                                                             |          |                |          |                            |
| N2                                                                                                                                 | CT | V | 10486473                                                                | 10490048 | WBGene00003570 | ncx-5    | Y32F6B.2                   |
| -0.29081947324077                                                                                                                  |    |   | AGIWUR33541                                                             |          |                |          |                            |
| N2                                                                                                                                 | CT | V | 10491743                                                                | 10493268 | WBGene00000173 | aqp-5    | C35A5.1 -0.189533149694862 |
| AGIWUR18028                                                                                                                        |    |   |                                                                         |          |                |          |                            |
| N2                                                                                                                                 | CT | V | 10493406                                                                | 10496477 | WBGene00007946 | ugt-33   | C35A5.2 -0.281387184071326 |
| AGIWUR25829                                                                                                                        |    |   |                                                                         |          |                |          |                            |
| N2                                                                                                                                 | CT | V | 10497059                                                                | 10499324 | WBGene00007948 | C35A5.4  | C35A5.4 0.162339317612437  |
| AGIWUR30625                                                                                                                        |    |   |                                                                         |          |                |          |                            |
| N2                                                                                                                                 | CT | V | 10499355                                                                | 10501395 | WBGene00007947 | C35A5.3  | C35A5.3 0.0762418103775957 |
| AGIWUR12046;AGIWUR35018;AGIWUR44995                                                                                                |    |   |                                                                         |          |                |          |                            |
| N2                                                                                                                                 | CT | V | 10502116                                                                | 10503111 | WBGene00044024 | C35A5.11 | C35A5.11                   |
| -0.292376466844684                                                                                                                 |    |   | AGIWUR730;AGIWUR7265;AGIWUR11026;AGIWUR30955                            |          |                |          |                            |
| N2                                                                                                                                 | CT | V | 10504193                                                                | 10505401 | WBGene00044016 | C35A5.10 | C35A5.10                   |





|                                                                                             |    |   |          |          |                |          |          |                     |
|---------------------------------------------------------------------------------------------|----|---|----------|----------|----------------|----------|----------|---------------------|
| N2                                                                                          | CT | V | 10578428 | 10579141 | WBGene00011892 | T21C9.4  | T21C9.4  | -0.0600944057958053 |
| AGIWUR13694                                                                                 |    |   |          |          |                |          |          |                     |
| N2                                                                                          | CT | V | 10579309 | 10580693 | WBGene00003065 | lpd-9    | T21C9.5  | -0.118287994963715  |
| AGIWUR30951                                                                                 |    |   |          |          |                |          |          |                     |
| N2                                                                                          | CT | V | 10581887 | 10587164 | WBGene00011893 | T21C9.6  | T21C9.6  | -0.193195322884922  |
| AGIWUR12083                                                                                 |    |   |          |          |                |          |          |                     |
| N2                                                                                          | CT | V | 10587167 | 10588794 | WBGene00005189 | srg-32   | T21C9.7  | -0.15944017241798   |
| AGIWUR6145                                                                                  |    |   |          |          |                |          |          |                     |
| N2                                                                                          | CT | V | 10590548 | 10592653 | WBGene00011895 | T21C9.9  | T21C9.9  | -0.196040213635555  |
| AGIWUR34880                                                                                 |    |   |          |          |                |          |          |                     |
| N2                                                                                          | CT | V | 10593936 | 10594906 | WBGene00011896 | T21C9.11 |          | T21C9.11            |
| -0.248989465235663 AGIWUR32886                                                              |    |   |          |          |                |          |          |                     |
| N2                                                                                          | CT | V | 10597266 | 10598666 | WBGene00011898 | T21C9.13 |          | T21C9.13            |
| 0.107441007609248 AGIWUR14188                                                               |    |   |          |          |                |          |          |                     |
| N2                                                                                          | CT | V | 10599105 | 10602147 | WBGene00011897 | scpl-4   | T21C9.12 |                     |
| 0.00457494016580107 AGIWUR10563                                                             |    |   |          |          |                |          |          |                     |
| N2                                                                                          | CT | V | 10602458 | 10605568 | WBGene00010418 | H27A22.1 |          | H27A22.1            |
| -0.0198739382144293 AGIWUR33284                                                             |    |   |          |          |                |          |          |                     |
| N2                                                                                          | CT | V | 10612926 | 10615511 | WBGene00010375 | H09F14.1 |          | H09F14.1            |
| 0.143451529222167 AGIWUR24872                                                               |    |   |          |          |                |          |          |                     |
| N2                                                                                          | CT | V | 10633058 | 10635411 | WBGene00003114 | mab-23   | C32C4.5  | -0.101769727168977  |
| AGIWUR21001;AGIWUR26989;AGIWUR29956;AGIWUR34519;AGIWUR44313;AGIWUR44808                     |    |   |          |          |                |          |          |                     |
| N2                                                                                          | CT | V | 10636022 | 10645135 | WBGene00007862 | C32C4.1  | C32C4.1  | -0.0356575582984142 |
| AGIWUR36603                                                                                 |    |   |          |          |                |          |          |                     |
| N2                                                                                          | CT | V | 10645020 | 10646963 | WBGene00007863 | C32C4.3  | C32C4.3  | 0.131837284657323   |
| AGIWUR5767;AGIWUR27045                                                                      |    |   |          |          |                |          |          |                     |
| N2                                                                                          | CT | V | 10648446 | 10651952 | WBGene00000174 | aqp-6    | C32C4.2  | -0.167006162787324  |
| AGIWUR9151                                                                                  |    |   |          |          |                |          |          |                     |
| N2                                                                                          | CT | V | 10651995 | 10654265 | WBGene00044286 | ugt-35   | C32C4.7  | 0.160000224361641   |
| AGIWUR29194                                                                                 |    |   |          |          |                |          |          |                     |
| N2                                                                                          | CT | V | 10654417 | 10656976 | WBGene00009255 | ugt-34   | F29F11.2 |                     |
| 0.083030587391046 AGIWUR34667;AGIWUR40200                                                   |    |   |          |          |                |          |          |                     |
| N2                                                                                          | CT | V | 10658194 | 10659658 | WBGene00009256 | tut-2    | F29F11.3 |                     |
| -0.0692465557249058 AGIWUR33697                                                             |    |   |          |          |                |          |          |                     |
| N2                                                                                          | CT | V | 10659635 | 10661467 | WBGene00005022 | sqv-4    | F29F11.1 |                     |
| -0.0401091757338969 AGIWUR17812;AGIWUR20431;AGIWUR22370;AGIWUR37842;AGIWUR39068;AGIWUR41179 |    |   |          |          |                |          |          |                     |
| N2                                                                                          | CT | V | 10667586 | 10670860 | WBGene00006667 | twk-12   | F29F11.4 |                     |
| 0.11212256541746 AGIWUR24447                                                                |    |   |          |          |                |          |          |                     |
| N2                                                                                          | CT | V | 10672459 | 10675644 | WBGene00000445 | ceh-22   | F29F11.5 |                     |

|                                                            |                                     |          |                |          |                             |
|------------------------------------------------------------|-------------------------------------|----------|----------------|----------|-----------------------------|
| 0.0965416451432963                                         | AGIWUR12965;AGIWUR20993;AGIWUR30917 |          |                |          |                             |
| N2 CT V                                                    | 10682422                            | 10686537 | WBGene00001747 | gsp-1    | F29F11.6                    |
| 0.249990677855056                                          | AGIWUR17355                         |          |                |          |                             |
| N2 CT V                                                    | 10702549                            | 10704906 | WBGene00004083 | pph-1    | C05A2.1 -0.026197302608395  |
| AGIWUR9032;AGIWUR15633;AGIWUR16147;AGIWUR22418;AGIWUR24808 |                                     |          |                |          |                             |
| N2 CT V                                                    | 10712165                            | 10732507 | WBGene00012117 | T28B11.1 | T28B11.1                    |
| 0.154662611515698                                          | AGIWUR585;AGIWUR14500;AGIWUR41017   |          |                |          |                             |
| N2 CT V                                                    | 10733931                            | 10736892 | WBGene00003405 | mre-11   | ZC302.1                     |
| -0.00675827785019223                                       | AGIWUR33458                         |          |                |          |                             |
| N2 CT V                                                    | 10737116                            | 10739350 | WBGene00013862 | wdr-5.3  | ZC302.2 -0.073026770228374  |
| AGIWUR14638                                                |                                     |          |                |          |                             |
| N2 CT V                                                    | 10742466                            | 10743749 | WBGene00005610 | srj-22   | F28H7.1 -0.0430872837433363 |
| AGIWUR40243                                                |                                     |          |                |          |                             |
| N2 CT V                                                    | 10744642                            | 10746469 | WBGene00005609 | srj-21   | F28H7.11                    |
| -0.0320619797288106                                        | AGIWUR12071                         |          |                |          |                             |
| N2 CT V                                                    | 10746548                            | 10747337 | WBGene00009238 | selt-1.2 | F28H7.4                     |
| -0.173035865178812                                         | AGIWUR38788                         |          |                |          |                             |
| N2 CT V                                                    | 10747944                            | 10748938 | WBGene00009236 | F28H7.2  | F28H7.2 -0.212132509573998  |
| AGIWUR3011                                                 |                                     |          |                |          |                             |
| N2 CT V                                                    | 10749607                            | 10750788 | WBGene00009237 | F28H7.3  | F28H7.3 0.00848427635897586 |
| AGIWUR35986                                                |                                     |          |                |          |                             |
| N2 CT V                                                    | 10751057                            | 10754147 | WBGene00009240 | F28H7.7  | F28H7.7 0.0345596836394026  |
| AGIWUR2905                                                 |                                     |          |                |          |                             |
| N2 CT V                                                    | 10754469                            | 10756664 | WBGene00009239 | irld-6   | F28H7.6 0.0306351779972314  |
| AGIWUR1059                                                 |                                     |          |                |          |                             |
| N2 CT V                                                    | 10758958                            | 10760663 | WBGene00009241 | F28H7.8  | F28H7.8 -0.234088719181688  |
| AGIWUR9083                                                 |                                     |          |                |          |                             |
| N2 CT V                                                    | 10760658                            | 10762790 | WBGene00009242 | sre-6    | F28H7.9 -0.251818024546762  |
| AGIWUR41255;AGIWUR42176                                    |                                     |          |                |          |                             |
| N2 CT V                                                    | 10764366                            | 10768454 | WBGene00003838 | ocr-1    | F28H7.10                    |
| 0.165040249344207                                          | AGIWUR35218                         |          |                |          |                             |
| N2 CT V                                                    | 10768465                            | 10770217 | WBGene00008370 | D1054.1  | D1054.1 -0.201355179486566  |
| AGIWUR44989                                                |                                     |          |                |          |                             |
| N2 CT V                                                    | 10770321                            | 10771351 | WBGene00003923 | pas-2    | D1054.2 0.229617279118983   |
| AGIWUR20271;AGIWUR21995;AGIWUR34386;AGIWUR40199            |                                     |          |                |          |                             |
| N2 CT V                                                    | 10771451                            | 10772832 | WBGene00008371 | D1054.3  | D1054.3 0.227918295438295   |
| AGIWUR3336;AGIWUR4673;AGIWUR15639;AGIWUR16549              |                                     |          |                |          |                             |
| N2 CT V                                                    | 10772819                            | 10776578 | WBGene00008372 | D1054.5  | D1054.5 -0.123940228567061  |
| AGIWUR41456                                                |                                     |          |                |          |                             |

|                                                                                                             |    |   |          |          |                |          |         |                    |
|-------------------------------------------------------------------------------------------------------------|----|---|----------|----------|----------------|----------|---------|--------------------|
| N2                                                                                                          | CT | V | 10778475 | 10780019 | WBGene00008373 | D1054.6  | D1054.6 | 0.0434404611698938 |
| AGIWUR39343                                                                                                 |    |   |          |          |                |          |         |                    |
| N2                                                                                                          | CT | V | 10781459 | 10783380 | WBGene00008374 | clec-220 |         | D1054.7            |
| 0.199911501464674 AGIWUR32354;AGIWUR38925                                                                   |    |   |          |          |                |          |         |                    |
| N2                                                                                                          | CT | V | 10784236 | 10785367 | WBGene00008375 | D1054.8  | D1054.8 | 0.041190861676192  |
| AGIWUR20991                                                                                                 |    |   |          |          |                |          |         |                    |
| N2                                                                                                          | CT | V | 10785801 | 10791057 | WBGene00008376 | D1054.9  | D1054.9 | -0.379001595144651 |
| AGIWUR3559;AGIWUR5305;AGIWUR10996;AGIWUR13468;AGIWUR13746;AGIWUR19183;AGIWUR28311;AGIWUR34506               |    |   |          |          |                |          |         |                    |
| N2                                                                                                          | CT | V | 10791975 | 10792830 | WBGene00008377 | D1054.10 |         | D1054.10           |
| -0.157906554065189 AGIWUR31296                                                                              |    |   |          |          |                |          |         |                    |
| N2                                                                                                          | CT | V | 10793793 | 10794924 | WBGene00008378 | ule-3    |         | D1054.11           |
| -0.0781006074615256 AGIWUR7075                                                                              |    |   |          |          |                |          |         |                    |
| N2                                                                                                          | CT | V | 10796863 | 10798157 | WBGene00005399 | srh-184  |         | D1054.12           |
| -0.0534915944129146 AGIWUR26639                                                                             |    |   |          |          |                |          |         |                    |
| N2                                                                                                          | CT | V | 10798360 | 10799475 | WBGene00005379 | srh-163  |         | D1054.16           |
| 0.0062340440723796 AGIWUR15060;AGIWUR25635                                                                  |    |   |          |          |                |          |         |                    |
| N2                                                                                                          | CT | V | 10802336 | 10804474 | WBGene00008379 | secs-1   |         | D1054.13           |
| -0.180478251600595 AGIWUR31281                                                                              |    |   |          |          |                |          |         |                    |
| N2                                                                                                          | CT | V | 10804721 | 10806034 | WBGene00008380 | prp-38   |         | D1054.14           |
| -0.0338594266062406 AGIWUR30839;AGIWUR36917                                                                 |    |   |          |          |                |          |         |                    |
| N2                                                                                                          | CT | V | 10806131 | 10807973 | WBGene00006481 | plrg-1   |         | D1054.15           |
| 0.156477897291357 AGIWUR34148                                                                               |    |   |          |          |                |          |         |                    |
| N2                                                                                                          | CT | V | 10812343 | 10813487 | WBGene00007797 | C29A12.1 |         | C29A12.1           |
| -0.106083957830487 AGIWUR4242                                                                               |    |   |          |          |                |          |         |                    |
| N2                                                                                                          | CT | V | 10814113 | 10816718 | WBGene00002985 | lig-1    |         | C29A12.3           |
| -0.17810197732924 AGIWUR1609;AGIWUR22411                                                                    |    |   |          |          |                |          |         |                    |
| N2                                                                                                          | CT | V | 10825012 | 10846695 | WBGene00007799 | nrx-1    |         | C29A12.4           |
| 0.0742917178061715                                                                                          |    |   |          |          |                |          |         |                    |
| AGIWUR9816;AGIWUR10025;AGIWUR14320;AGIWUR17861;AGIWUR18536;AGIWUR19055;AGIWUR36206;AGIWUR36484;AGIWUR37045; |    |   |          |          |                |          |         |                    |
| AGIWUR38337;AGIWUR38411;AGIWUR41061;AGIWUR43338                                                             |    |   |          |          |                |          |         |                    |
| N2                                                                                                          | CT | V | 10847193 | 10852502 | WBGene00007800 | C29A12.6 |         | C29A12.6           |
| 0.141371786561852 AGIWUR7641                                                                                |    |   |          |          |                |          |         |                    |
| N2                                                                                                          | CT | V | 10852519 | 10865792 | WBGene00010012 | saeg-1   |         | F53H10.2           |
| 0.130041099812626 AGIWUR15318;AGIWUR22336;AGIWUR24998;AGIWUR35859;AGIWUR37415                               |    |   |          |          |                |          |         |                    |
| N2                                                                                                          | CT | V | 10880837 | 10883399 | WBGene00009326 | F32D8.1  | F32D8.1 | -0.280331915241357 |
| AGIWUR7811                                                                                                  |    |   |          |          |                |          |         |                    |
| N2                                                                                                          | CT | V | 10883778 | 10886102 | WBGene00009327 | F32D8.2  | F32D8.2 | -0.197584627147242 |
| AGIWUR40386                                                                                                 |    |   |          |          |                |          |         |                    |
| N2                                                                                                          | CT | V | 10886837 | 10887965 | WBGene00009328 | F32D8.3  | F32D8.3 | -0.208624605865976 |

|                                                                        |    |   |                                                            |          |                |                                     |
|------------------------------------------------------------------------|----|---|------------------------------------------------------------|----------|----------------|-------------------------------------|
| AGIWUR42274                                                            |    |   |                                                            |          |                |                                     |
| N2                                                                     | CT | V | 10887873                                                   | 10889004 | WBGene00043302 | F32D8.11 F32D8.11                   |
| 0.0292094324600054                                                     |    |   | AGIWUR2373;AGIWUR10990;AGIWUR29778;AGIWUR42702;AGIWUR45151 |          |                |                                     |
| N2                                                                     | CT | V | 10888572                                                   | 10891030 | WBGene00009334 | F32D8.12 F32D8.12                   |
| 0.374101861607413                                                      |    |   | AGIWUR31365;AGIWUR36246                                    |          |                |                                     |
| N2                                                                     | CT | V | 10891338                                                   | 10893560 | WBGene00009329 | F32D8.4 F32D8.4 -0.27613696366531   |
| AGIWUR39233                                                            |    |   |                                                            |          |                |                                     |
| N2                                                                     | CT | V | 10893649                                                   | 10894788 | WBGene00009336 | F32D8.14 F32D8.14                   |
| -0.22226164506499                                                      |    |   | AGIWUR4301;AGIWUR30461                                     |          |                |                                     |
| N2                                                                     | CT | V | 10896658                                                   | 10897143 | WBGene00001303 | emo-1 F32D8.6 0.0135338215711407    |
| AGIWUR34849                                                            |    |   |                                                            |          |                |                                     |
| N2                                                                     | CT | V | 10898435                                                   | 10900701 | WBGene00009331 | F32D8.7 F32D8.7 -0.0647259735238679 |
| AGIWUR27643                                                            |    |   |                                                            |          |                |                                     |
| N2                                                                     | CT | V | 10900563                                                   | 10901303 | WBGene00005001 | spp-16 F32D8.9 -0.0102644732414525  |
| AGIWUR36125                                                            |    |   |                                                            |          |                |                                     |
| N2                                                                     | CT | V | 10901480                                                   | 10902782 | WBGene00009332 | F32D8.8 F32D8.8 -0.0624849179273745 |
| AGIWUR44171                                                            |    |   |                                                            |          |                |                                     |
| N2                                                                     | CT | V | 10904059                                                   | 10906774 | WBGene00009325 | F32D8.15 F32D8.15                   |
| 0.000378020200378693                                                   |    |   | AGIWUR5514                                                 |          |                |                                     |
| N2                                                                     | CT | V | 10906755                                                   | 10909171 | WBGene00009333 | F32D8.10 F32D8.10                   |
| -0.0720842255316789                                                    |    |   | AGIWUR1368                                                 |          |                |                                     |
| N2                                                                     | CT | V | 10917648                                                   | 10918401 | WBGene00010235 | F58B4.2 F58B4.2 -0.148108449574595  |
| AGIWUR12490                                                            |    |   |                                                            |          |                |                                     |
| N2                                                                     | CT | V | 10918861                                                   | 10921847 | WBGene00003549 | nas-31 F58B4.1 0.116700266713051    |
| AGIWUR9906;AGIWUR11402;AGIWUR21749;AGIWUR23262;AGIWUR23820;AGIWUR40710 |    |   |                                                            |          |                |                                     |
| N2                                                                     | CT | V | 10925322                                                   | 10926796 | WBGene00010239 | F58B4.6 F58B4.6 -0.212243679054147  |
| AGIWUR8914                                                             |    |   |                                                            |          |                |                                     |
| N2                                                                     | CT | V | 10929811                                                   | 10930774 | WBGene00010236 | F58B4.3 F58B4.3 0.0488883970844594  |
| AGIWUR359                                                              |    |   |                                                            |          |                |                                     |
| N2                                                                     | CT | V | 10930778                                                   | 10931289 | WBGene00010237 | scvp-1 F58B4.4 -0.117921459828823   |
| AGIWUR33317                                                            |    |   |                                                            |          |                |                                     |
| N2                                                                     | CT | V | 10932647                                                   | 10934245 | WBGene00010238 | F58B4.5 F58B4.5 0.0155120841197203  |
| AGIWUR16464                                                            |    |   |                                                            |          |                |                                     |
| N2                                                                     | CT | V | 10934228                                                   | 10936920 | WBGene00008923 | F17C11.12 F17C11.12                 |
| -0.227855143224662                                                     |    |   | AGIWUR4805                                                 |          |                |                                     |
| N2                                                                     | CT | V | 10937633                                                   | 10938849 | WBGene00008922 | F17C11.11 F17C11.11                 |
| -0.399923252048566                                                     |    |   | AGIWUR8176                                                 |          |                |                                     |
| N2                                                                     | CT | V | 10939245                                                   | 10939612 | WBGene00050890 | F17C11.16 F17C11.16                 |
| 0.189585056063123                                                      |    |   | AGIWUR4887;AGIWUR9224;AGIWUR13452;AGIWUR13645;AGIWUR41559  |          |                |                                     |

|                                                |    |   |                                                                                   |          |                |           |                             |
|------------------------------------------------|----|---|-----------------------------------------------------------------------------------|----------|----------------|-----------|-----------------------------|
| N2                                             | CT | V | 10941450                                                                          | 10944302 | WBGene00077761 | zip-9     | F17C11.17                   |
| 0.0912855103943198                             |    |   | AGIWUR2242;AGIWUR6734;AGIWUR25942;AGIWUR34136;AGIWUR38340;AGIWUR38704;AGIWUR39056 |          |                |           |                             |
| N2                                             | CT | V | 10948212                                                                          | 10949129 | WBGene00008914 | F17C11.2  | F17C11.2                    |
| -0.0505138927590281                            |    |   | AGIWUR20468                                                                       |          |                |           |                             |
| N2                                             | CT | V | 10949857                                                                          | 10951821 | WBGene00000726 | col-153   | F17C11.3                    |
| 0.187108554601938                              |    |   | AGIWUR22834                                                                       |          |                |           |                             |
| N2                                             | CT | V | 10951818                                                                          | 10953472 | WBGene00008915 | F17C11.4  | F17C11.4                    |
| 0.168118699723754                              |    |   | AGIWUR37270                                                                       |          |                |           |                             |
| N2                                             | CT | V | 10953501                                                                          | 10954434 | WBGene00008916 | cllec-221 | F17C11.5                    |
| -0.329323182510633                             |    |   | AGIWUR11860                                                                       |          |                |           |                             |
| N2                                             | CT | V | 10955091                                                                          | 10955952 | WBGene00008917 | F17C11.6  | F17C11.6                    |
| -0.315948396716838                             |    |   | AGIWUR7977;AGIWUR14608;AGIWUR23095                                                |          |                |           |                             |
| N2                                             | CT | V | 10955923                                                                          | 10957020 | WBGene00023503 | F17C11.13 | F17C11.13                   |
| -0.0441450302815838                            |    |   | AGIWUR13427                                                                       |          |                |           |                             |
| N2                                             | CT | V | 10956910                                                                          | 10958821 | WBGene00008918 | F17C11.7  | F17C11.7                    |
| -0.151941504886557                             |    |   | AGIWUR13347;AGIWUR36662                                                           |          |                |           |                             |
| N2                                             | CT | V | 10958928                                                                          | 10960919 | WBGene00008919 | vps-36    | F17C11.8                    |
| 0.376467090515638                              |    |   | AGIWUR5553;AGIWUR23059;AGIWUR28557;AGIWUR40486                                    |          |                |           |                             |
| N2                                             | CT | V | 10961722                                                                          | 10965562 | WBGene00008921 | F17C11.10 | F17C11.10                   |
| -0.0444421679209981                            |    |   | AGIWUR6666;AGIWUR29011;AGIWUR36798                                                |          |                |           |                             |
| N2                                             | CT | V | 10965675                                                                          | 10968070 | WBGene00008920 | eef-1G    | F17C11.9                    |
| -0.00888689874047444                           |    |   | AGIWUR5607;AGIWUR10732;AGIWUR16495;AGIWUR20982;AGIWUR42601                        |          |                |           |                             |
| N2                                             | CT | V | 10970399                                                                          | 10981213 | WBGene00009968 | fig-1     | F53B7.5 -0.0427755523253506 |
| AGIWUR14199                                    |    |   |                                                                                   |          |                |           |                             |
| N2                                             | CT | V | 10992099                                                                          | 10994817 | WBGene00009965 | frpr-9    | F53B7.2                     |
| -0.00457136834081062                           |    |   | AGIWUR38039                                                                       |          |                |           |                             |
| N2                                             | CT | V | 10999102                                                                          | 10999642 | WBGene00009969 | F53B7.7   | F53B7.7 -0.324750388470799  |
| AGIWUR29607                                    |    |   |                                                                                   |          |                |           |                             |
| N2                                             | CT | V | 10999658                                                                          | 11000713 | WBGene00009966 | F53B7.3   | F53B7.3 -0.340964798590843  |
| AGIWUR31116                                    |    |   |                                                                                   |          |                |           |                             |
| N2                                             | CT | V | 11000957                                                                          | 11002534 | WBGene00009967 | F53B7.4   | F53B7.4 0.0425780036614798  |
| AGIWUR15378;AGIWUR32446                        |    |   |                                                                                   |          |                |           |                             |
| N2                                             | CT | V | 11011589                                                                          | 11012465 | WBGene00007553 | C13G3.1   | C13G3.1 -0.054670824703317  |
| AGIWUR5612                                     |    |   |                                                                                   |          |                |           |                             |
| N2                                             | CT | V | 11021069                                                                          | 11022884 | WBGene00001991 | hot-6     | C13G3.2 -0.0962175916261376 |
| AGIWUR35399                                    |    |   |                                                                                   |          |                |           |                             |
| N2                                             | CT | V | 11027153                                                                          | 11030845 | WBGene00007554 | pptr-2    | C13G3.3 0.0704486089544574  |
| AGIWUR6753;AGIWUR10456;AGIWUR15563;AGIWUR23456 |    |   |                                                                                   |          |                |           |                             |
| N2                                             | CT | V | 11036462                                                                          | 11039425 | WBGene00006443 | pak-2     | C45B11.1                    |

|                      |                                                                         |                |                 |           |
|----------------------|-------------------------------------------------------------------------|----------------|-----------------|-----------|
| -0.272824300202982   | AGIWUR4837;AGIWUR12671                                                  |                |                 |           |
| N2 CT V              | 11041824 11042301                                                       | WBGene00008106 | C45B11.5        | C45B11.5  |
| 0.178564692344668    | AGIWUR45002                                                             |                |                 |           |
| N2 CT V              | 11042817 11043855                                                       | WBGene00008105 | C45B11.2        | C45B11.2  |
| 0.42620901736733     | AGIWUR2224;AGIWUR5947                                                   |                |                 |           |
| N2 CT V              | 11044067 11045734                                                       | WBGene00045379 | C45B11.6        | C45B11.6  |
| -0.0266241953017587  | AGIWUR9924;AGIWUR28606;AGIWUR30898;AGIWUR32180;AGIWUR37183;AGIWUR43770  |                |                 |           |
| N2 CT V              | 11045696 11046899                                                       | WBGene00000981 | dhs-18 C45B11.3 |           |
| 0.0695443986803141   | AGIWUR38705                                                             |                |                 |           |
| N2 CT V              | 11047227 11048744                                                       | WBGene00005295 | srh-74 C45B11.4 |           |
| -0.00716923036103401 | AGIWUR14311;AGIWUR26356                                                 |                |                 |           |
| N2 CT V              | 11052457 11053107                                                       | WBGene00271444 | T04C12.33       | T04C12.33 |
| -0.0519751634202956  | AGIWUR36779                                                             |                |                 |           |
| N2 CT V              | 11054127 11055142                                                       | WBGene00011429 | T04C12.7        | T04C12.7  |
| -0.112727452388679   | AGIWUR19762                                                             |                |                 |           |
| N2 CT V              | 11055306 11057143                                                       | WBGene00005296 | srh-75 T04C12.2 |           |
| -0.0279111781123884  | AGIWUR13499                                                             |                |                 |           |
| N2 CT V              | 11058649 11059264                                                       | WBGene00011427 | T04C12.1        | T04C12.1  |
| -0.196741386174379   | AGIWUR14776;AGIWUR18085;AGIWUR19163;AGIWUR26042;AGIWUR26550;AGIWUR38351 |                |                 |           |
| N2 CT V              | 11062439 11063245                                                       | WBGene00050889 | T04C12.9        | T04C12.9  |
| -0.216533842137224   | AGIWUR2246;AGIWUR4116;AGIWUR21052;AGIWUR38044;AGIWUR42482               |                |                 |           |
| N2 CT V              | 11064954 11065634                                                       | WBGene00011428 | T04C12.3        | T04C12.3  |
| -0.187902961647944   | AGIWUR5731;AGIWUR6696;AGIWUR6992;AGIWUR24917;AGIWUR28081;AGIWUR40873    |                |                 |           |
| N2 CT V              | 11068069 11069358                                                       | WBGene00011430 | T04C12.8        | T04C12.8  |
| -0.0102287609755001  | AGIWUR42678                                                             |                |                 |           |
| N2 CT V              | 11071690 11074498                                                       | WBGene00000065 | act-3 T04C12.4  |           |
| 0.162083988590613    | AGIWUR13229;AGIWUR23078;AGIWUR29810;AGIWUR42315                         |                |                 |           |
| N2 CT V              | 11076723 11078168                                                       | WBGene00000064 | act-2 T04C12.5  |           |
| -0.151195330186461   | AGIWUR9001                                                              |                |                 |           |
| N2 CT V              | 11079167 11082497                                                       | WBGene00000063 | act-1 T04C12.6  |           |
| -0.00674694694997768 | AGIWUR9269                                                              |                |                 |           |
| N2 CT V              | 11088154 11097970                                                       | WBGene00012776 | Y42A5A.1        | Y42A5A.1  |
| 0.0479886074013081   | AGIWUR16408                                                             |                |                 |           |
| N2 CT V              | 11098950 11107288                                                       | WBGene00012779 | cdk1-1 Y42A5A.4 |           |
| 0.0488101854789189   | AGIWUR22818                                                             |                |                 |           |
| N2 CT V              | 11107535 11109747                                                       | WBGene00012780 | Y42A5A.5        | Y42A5A.5  |
| -0.0789241254993822  | AGIWUR31100                                                             |                |                 |           |
| N2 CT V              | 11110063 11113103                                                       | WBGene00010405 | erfa-3 H19N07.1 |           |
| 0.177100245870905    | AGIWUR16557                                                             |                |                 |           |

|                                                                         |    |   |                         |          |                |          |           |                     |
|-------------------------------------------------------------------------|----|---|-------------------------|----------|----------------|----------|-----------|---------------------|
| N2                                                                      | CT | V | 11113914                | 11118818 | WBGene00010406 | math-33  | H19N07.2  |                     |
| 0.20738274766844                                                        |    |   | AGIWUR9079;AGIWUR13855  |          |                |          |           |                     |
| N2                                                                      | CT | V | 11118721                | 11119730 | WBGene00010407 | H19N07.3 | H19N07.3  |                     |
| -0.0551100625701206                                                     |    |   | AGIWUR9792              |          |                |          |           |                     |
| N2                                                                      | CT | V | 11119813                | 11122579 | WBGene00010408 | mboa-2   | H19N07.4  |                     |
| -0.188440840950216                                                      |    |   | AGIWUR25266             |          |                |          |           |                     |
| N2                                                                      | CT | V | 11122820                | 11123867 | WBGene00007385 | atp-5    | C06H2.1   | -0.0369084299823603 |
| AGIWUR18502;AGIWUR24548;AGIWUR30030;AGIWUR39039;AGIWUR39317;AGIWUR40026 |    |   |                         |          |                |          |           |                     |
| N2                                                                      | CT | V | 11124303                | 11125053 | WBGene00007390 | lmtr-3   | C06H2.6   | 0.229540810624637   |
| AGIWUR18923;AGIWUR20009                                                 |    |   |                         |          |                |          |           |                     |
| N2                                                                      | CT | V | 11125222                | 11127306 | WBGene00007386 | C06H2.2  | C06H2.2   | -0.165064197972091  |
| AGIWUR30603                                                             |    |   |                         |          |                |          |           |                     |
| N2                                                                      | CT | V | 11127497                | 11130085 | WBGene00007387 | jmjd-5   | C06H2.3   | -0.186559675923426  |
| AGIWUR9255                                                              |    |   |                         |          |                |          |           |                     |
| N2                                                                      | CT | V | 11134609                | 11140323 | WBGene00007389 | glb-3    | C06H2.5   | 0.162179886051593   |
| AGIWUR780                                                               |    |   |                         |          |                |          |           |                     |
| N2                                                                      | CT | V | 11141498                | 11143121 | WBGene00007388 | folr-1   | C06H2.4   | 0.0799741888840941  |
| AGIWUR43335                                                             |    |   |                         |          |                |          |           |                     |
| N2                                                                      | CT | V | 11143062                | 11144758 | WBGene00007391 | C06H2.7  | C06H2.7   | -0.132788209824406  |
| AGIWUR29570                                                             |    |   |                         |          |                |          |           |                     |
| N2                                                                      | CT | V | 11149705                | 11151309 | WBGene00011838 | T19C4.1  | T19C4.1   | 0.195365799510832   |
| AGIWUR8258                                                              |    |   |                         |          |                |          |           |                     |
| N2                                                                      | CT | V | 11151339                | 11152430 | WBGene00005196 | srg-39   | T19C4.2   | 0.254087441630306   |
| AGIWUR13750                                                             |    |   |                         |          |                |          |           |                     |
| N2                                                                      | CT | V | 11152575                | 11155653 | WBGene00005195 | srg-38   | T19C4.8   | 0.13611187197861    |
| AGIWUR26785                                                             |    |   |                         |          |                |          |           |                     |
| N2                                                                      | CT | V | 11157090                | 11158706 | WBGene00005199 | srg-42   | T19C4.9   | -0.0873512340796481 |
| AGIWUR13312                                                             |    |   |                         |          |                |          |           |                     |
| N2                                                                      | CT | V | 11160452                | 11161891 | WBGene00005198 | srg-41   | T19C4.3   | 0.220856550850479   |
| AGIWUR30808                                                             |    |   |                         |          |                |          |           |                     |
| N2                                                                      | CT | V | 11163036                | 11164575 | WBGene00005197 | srg-40   | T19C4.4   | -0.11084637417669   |
| AGIWUR38932                                                             |    |   |                         |          |                |          |           |                     |
| N2                                                                      | CT | V | 11165853                | 11167640 | WBGene00014841 | T19C4.10 | T19C4.10  |                     |
| -0.0314027361956466                                                     |    |   | AGIWUR28571;AGIWUR44720 |          |                |          |           |                     |
| N2                                                                      | CT | V | 11172215                | 11174452 | WBGene00011839 | T19C4.5  | T19C4.5   | 0.0341754784165236  |
| AGIWUR44772                                                             |    |   |                         |          |                |          |           |                     |
| N2                                                                      | CT | V | 11174567                | 11177559 | WBGene00001663 | gpa-1    | T19C4.6   | -0.311603297870951  |
| AGIWUR42384                                                             |    |   |                         |          |                |          |           |                     |
| N2                                                                      | CT | V | 11183224                | 11183643 | WBGene00012152 | cnc-10   | VK10D6R.1 |                     |

|                                                             |                                                                        |          |                |           |          |                    |
|-------------------------------------------------------------|------------------------------------------------------------------------|----------|----------------|-----------|----------|--------------------|
| -0.355210636963154                                          | AGIWUR4385                                                             |          |                |           |          |                    |
| N2 CT V                                                     | 11191283                                                               | 11193638 | WBGene00010741 | lgc-49    | K10D6.1  | -0.197496002994981 |
| AGIWUR8747                                                  |                                                                        |          |                |           |          |                    |
| N2 CT V                                                     | 11193733                                                               | 11196010 | WBGene00010742 | K10D6.2   | K10D6.2  | -0.104097698462319 |
| AGIWUR9438;AGIWUR26231;AGIWUR43418                          |                                                                        |          |                |           |          |                    |
| N2 CT V                                                     | 11200665                                                               | 11201392 | WBGene00010743 | K10D6.3   | K10D6.3  | 0.34610479967864   |
| AGIWUR15976;AGIWUR19250;AGIWUR20801;AGIWUR22472;AGIWUR38353 |                                                                        |          |                |           |          |                    |
| N2 CT V                                                     | 11201905                                                               | 11216774 | WBGene00010744 | K10D6.4   | K10D6.4  | 0.0615767421963156 |
| AGIWUR23468                                                 |                                                                        |          |                |           |          |                    |
| N2 CT V                                                     | 11217583                                                               | 11219902 | WBGene00011830 | cyp-29A2  |          | T19B10.1           |
| -0.133170101404161                                          | AGIWUR36091                                                            |          |                |           |          |                    |
| N2 CT V                                                     | 11221302                                                               | 11222834 | WBGene00011831 | T19B10.2  |          | T19B10.2           |
| -0.0559789513943132                                         | AGIWUR3115;AGIWUR10805;AGIWUR11521;AGIWUR25739;AGIWUR29837;AGIWUR39360 |          |                |           |          |                    |
| N2 CT V                                                     | 11222772                                                               | 11226018 | WBGene00011832 | bga1-1    |          | T19B10.3           |
| -0.0347479511137188                                         | AGIWUR14003;AGIWUR17301;AGIWUR27843                                    |          |                |           |          |                    |
| N2 CT V                                                     | 11226314                                                               | 11228703 | WBGene00004152 | pqn-70    |          | T19B10.4           |
| -0.101557714595031                                          | AGIWUR3150;AGIWUR23106                                                 |          |                |           |          |                    |
| N2 CT V                                                     | 11234650                                                               | 11237428 | WBGene00011833 | T19B10.5  |          | T19B10.5           |
| 0.0283221019793896                                          | AGIWUR22092                                                            |          |                |           |          |                    |
| N2 CT V                                                     | 11237438                                                               | 11239331 | WBGene00011834 | dvc-1     |          | T19B10.6           |
| -0.0263765829870124                                         | AGIWUR13415;AGIWUR15411;AGIWUR41047                                    |          |                |           |          |                    |
| N2 CT V                                                     | 11239675                                                               | 11241780 | WBGene00002072 | ima-1     |          | T19B10.7           |
| -0.102260394957465                                          | AGIWUR5907;AGIWUR8615;AGIWUR15144                                      |          |                |           |          |                    |
| N2 CT V                                                     | 11241879                                                               | 11244726 | WBGene00011835 | T19B10.8  |          | T19B10.8           |
| 0.15729139260144                                            | AGIWUR7678;AGIWUR38740                                                 |          |                |           |          |                    |
| N2 CT V                                                     | 11244839                                                               | 11245927 | WBGene00003509 | mx1-1     |          | T19B10.11          |
| -0.106053431697417                                          | AGIWUR42940                                                            |          |                |           |          |                    |
| N2 CT V                                                     | 11248146                                                               | 11250866 | WBGene00011836 | mam-4     |          | T19B10.9           |
| 0.0605965828047661                                          | AGIWUR1265;AGIWUR8663;AGIWUR13972;AGIWUR22475;AGIWUR23365;AGIWUR31468  |          |                |           |          |                    |
| N2 CT V                                                     | 11251035                                                               | 11251211 | WBGene00050898 | T19B10.12 |          | T19B10.12          |
| -0.293257518528126                                          | AGIWUR487;AGIWUR6099;AGIWUR24637;AGIWUR29982;AGIWUR40878               |          |                |           |          |                    |
| N2 CT V                                                     | 11251415                                                               | 11252529 | WBGene00011837 | srsx-33   |          | T19B10.10          |
| 0.211820852479235                                           | AGIWUR40610                                                            |          |                |           |          |                    |
| N2 CT V                                                     | 11254013                                                               | 11255080 | WBGene00008552 | srsx-31   | F07B10.6 |                    |
| -0.0412227174777851                                         | AGIWUR24817;AGIWUR36194                                                |          |                |           |          |                    |
| N2 CT V                                                     | 11256521                                                               | 11258996 | WBGene00008551 | lgc-36    | F07B10.5 |                    |
| 0.0896783194301927                                          | AGIWUR12869                                                            |          |                |           |          |                    |
| N2 CT V                                                     | 11259312                                                               | 11260722 | WBGene00077514 | F07B10.7  |          | F07B10.7           |
| -0.508383704827591                                          | AGIWUR17989                                                            |          |                |           |          |                    |



|                                                           |    |   |                                     |          |                |           |                             |
|-----------------------------------------------------------|----|---|-------------------------------------|----------|----------------|-----------|-----------------------------|
| N2                                                        | CT | V | 11261264                            | 11263116 | WBGene00008550 | F07B10.4  | F07B10.4                    |
| -0.115677756927232                                        |    |   | AGIWUR18448;AGIWUR26396             |          |                |           |                             |
| N2                                                        | CT | V | 11263523                            | 11265711 | WBGene00000539 | cln-3.1   | F07B10.1                    |
| -0.243811209979803                                        |    |   | AGIWUR23122                         |          |                |           |                             |
| N2                                                        | CT | V | 11266981                            | 11268323 | WBGene00006167 | str-116   | F07B10.2                    |
| -0.0596381044958481                                       |    |   | AGIWUR32627                         |          |                |           |                             |
| N2                                                        | CT | V | 11269091                            | 11270426 | WBGene00006166 | str-115   | F07B10.3                    |
| -0.200686465698306                                        |    |   | AGIWUR8426                          |          |                |           |                             |
| N2                                                        | CT | V | 11271351                            | 11272467 | WBGene00007283 | cllec-222 | C03E10.6                    |
| -0.304966666950911                                        |    |   | AGIWUR34617                         |          |                |           |                             |
| N2                                                        | CT | V | 11273148                            | 11278161 | WBGene00007282 | cllec-223 | C03E10.5                    |
| 0.030552750878023                                         |    |   | AGIWUR34212                         |          |                |           |                             |
| N2                                                        | CT | V | 11282572                            | 11286039 | WBGene00001645 | gly-20    | C03E10.4                    |
| 0.0499484729540516                                        |    |   | AGIWUR10498;AGIWUR14558;AGIWUR31763 |          |                |           |                             |
| N2                                                        | CT | V | 11286602                            | 11288412 | WBGene00007281 | C03E10.3  | C03E10.3                    |
| 0.0567657690296732                                        |    |   | AGIWUR22175;AGIWUR35237;AGIWUR43907 |          |                |           |                             |
| N2                                                        | CT | V | 11291188                            | 11292569 | WBGene00007279 | C03E10.1  | C03E10.1                    |
| -0.217108555544072                                        |    |   | AGIWUR31775                         |          |                |           |                             |
| N2                                                        | CT | V | 11294693                            | 11296562 | WBGene00011403 | T03F7.6   | T03F7.6 0.274071213907819   |
| AGIWUR30648                                               |    |   |                                     |          |                |           |                             |
| N2                                                        | CT | V | 11296696                            | 11298732 | WBGene00011402 | T03F7.5   | T03F7.5 -0.0373539995932255 |
| AGIWUR25048                                               |    |   |                                     |          |                |           |                             |
| N2                                                        | CT | V | 11299373                            | 11300639 | WBGene00005270 | srh-47    | T03F7.4 -0.124838188445868  |
| AGIWUR8046;AGIWUR39403                                    |    |   |                                     |          |                |           |                             |
| N2                                                        | CT | V | 11301607                            | 11302886 | WBGene00005269 | srh-46    | T03F7.3 -0.128835372996674  |
| AGIWUR18968                                               |    |   |                                     |          |                |           |                             |
| N2                                                        | CT | V | 11303651                            | 11304979 | WBGene00005268 | srh-45    | T03F7.2 0.0130685603061207  |
| AGIWUR15350;AGIWUR19467                                   |    |   |                                     |          |                |           |                             |
| N2                                                        | CT | V | 11305070                            | 11308446 | WBGene00004910 | snf-11    | T03F7.1 0.246870071496677   |
| AGIWUR20858                                               |    |   |                                     |          |                |           |                             |
| N2                                                        | CT | V | 11311456                            | 11313445 | WBGene00011404 | T03F7.7   | T03F7.7 0.06778275452481    |
| AGIWUR17896;AGIWUR18547                                   |    |   |                                     |          |                |           |                             |
| N2                                                        | CT | V | 11313400                            | 11316901 | WBGene00009830 | cutl-18   | F47G9.3 -0.383807669039603  |
| AGIWUR31545                                               |    |   |                                     |          |                |           |                             |
| N2                                                        | CT | V | 11317214                            | 11321786 | WBGene00009831 | F47G9.4   | F47G9.4 -0.0354945782864036 |
| AGIWUR4717;AGIWUR9709;AGIWUR14335;AGIWUR21384;AGIWUR42673 |    |   |                                     |          |                |           |                             |
| N2                                                        | CT | V | 11322322                            | 11323820 | WBGene00006189 | str-141   | F47G9.2 0.219664907831503   |
| AGIWUR9795                                                |    |   |                                     |          |                |           |                             |
| N2                                                        | CT | V | 11323965                            | 11326964 | WBGene00009829 | F47G9.1   | F47G9.1 0.0463174575457135  |

|                                                                                  |    |   |          |          |                |          |          |                     |  |
|----------------------------------------------------------------------------------|----|---|----------|----------|----------------|----------|----------|---------------------|--|
| AGIWUR8533;AGIWUR11906;AGIWUR24323                                               |    |   |          |          |                |          |          |                     |  |
| N2                                                                               | CT | V | 11329400 | 11330775 | WBGene00009833 | F47G9.6  | F47G9.6  | -0.0330661970141897 |  |
| AGIWUR24729                                                                      |    |   |          |          |                |          |          |                     |  |
| N2                                                                               | CT | V | 11332987 | 11334293 | WBGene00044203 | T02E9.6  | T02E9.6  | -0.121158005491557  |  |
| AGIWUR1151;AGIWUR30893                                                           |    |   |          |          |                |          |          |                     |  |
| N2                                                                               | CT | V | 11342233 | 11344773 | WBGene00011383 | T02E9.5  | T02E9.5  | 0.0365921260471529  |  |
| AGIWUR4132;AGIWUR6704;AGIWUR13819;AGIWUR22708;AGIWUR22756;AGIWUR24772            |    |   |          |          |                |          |          |                     |  |
| N2                                                                               | CT | V | 11344831 | 11347012 | WBGene00001716 | gr1-7    | T02E9.2  | -0.413294648782088  |  |
| AGIWUR14923;AGIWUR42462                                                          |    |   |          |          |                |          |          |                     |  |
| N2                                                                               | CT | V | 11349310 | 11352993 | WBGene00011381 | npr-25   | T02E9.1  | -0.0015368512066356 |  |
| AGIWUR27897                                                                      |    |   |          |          |                |          |          |                     |  |
| N2                                                                               | CT | V | 11362453 | 11366221 | WBGene00011382 | dop-5    | T02E9.3  | -0.0570605655120087 |  |
| AGIWUR6998                                                                       |    |   |          |          |                |          |          |                     |  |
| N2                                                                               | CT | V | 11375742 | 11377990 | WBGene00000554 | cnb-1    | F55C10.1 |                     |  |
| 0.0740521048721732 AGIWUR15966                                                   |    |   |          |          |                |          |          |                     |  |
| N2                                                                               | CT | V | 11383105 | 11384353 | WBGene00010109 | F55C10.5 |          | F55C10.5            |  |
| -0.0548778548634026 AGIWUR28132                                                  |    |   |          |          |                |          |          |                     |  |
| N2                                                                               | CT | V | 11385360 | 11386529 | WBGene00000727 | col-154  | F55C10.2 |                     |  |
| 0.358210649843965 AGIWUR18601                                                    |    |   |          |          |                |          |          |                     |  |
| N2                                                                               | CT | V | 11386698 | 11388678 | WBGene00010108 | F55C10.4 |          | F55C10.4            |  |
| 0.0961051163328941 AGIWUR44361                                                   |    |   |          |          |                |          |          |                     |  |
| N2                                                                               | CT | V | 11390273 | 11390494 | WBGene00010526 | K03B8.11 |          | K03B8.11            |  |
| -0.24862491245991 AGIWUR10764                                                    |    |   |          |          |                |          |          |                     |  |
| N2                                                                               | CT | V | 11392320 | 11393508 | WBGene00003535 | nas-16   | K03B8.1  | -0.0110816334489927 |  |
| AGIWUR5158;AGIWUR9549                                                            |    |   |          |          |                |          |          |                     |  |
| N2                                                                               | CT | V | 11398916 | 11400528 | WBGene00003536 | nas-17   | K03B8.2  | -0.394467262774919  |  |
| AGIWUR16781                                                                      |    |   |          |          |                |          |          |                     |  |
| N2                                                                               | CT | V | 11401195 | 11402690 | WBGene00003538 | nas-19   | K03B8.5  | -0.160635216916697  |  |
| AGIWUR2377                                                                       |    |   |          |          |                |          |          |                     |  |
| N2                                                                               | CT | V | 11407523 | 11409543 | WBGene00010524 | K03B8.6  | K03B8.6  | 0.00920875454212933 |  |
| AGIWUR9809;AGIWUR37619                                                           |    |   |          |          |                |          |          |                     |  |
| N2                                                                               | CT | V | 11409467 | 11411019 | WBGene00010525 | K03B8.8  | K03B8.8  | 0.0516301471271188  |  |
| AGIWUR796;AGIWUR8221;AGIWUR10078;AGIWUR13769;AGIWUR34518;AGIWUR40338;AGIWUR44676 |    |   |          |          |                |          |          |                     |  |
| N2                                                                               | CT | V | 11411511 | 11412769 | WBGene00001712 | gr1-3    | K03B8.7  | 0.191165672050106   |  |
| AGIWUR3545                                                                       |    |   |          |          |                |          |          |                     |  |
| N2                                                                               | CT | V | 11412870 | 11415159 | WBGene00000951 | deg-3    | K03B8.9  | -0.18958809324652   |  |
| AGIWUR33003                                                                      |    |   |          |          |                |          |          |                     |  |
| N2                                                                               | CT | V | 11415342 | 11420293 | WBGene00000955 | des-2    | T26H10.1 |                     |  |
| -0.180779575927316 AGIWUR24189                                                   |    |   |          |          |                |          |          |                     |  |

|                                                                                              |    |   |          |          |                |          |          |                     |
|----------------------------------------------------------------------------------------------|----|---|----------|----------|----------------|----------|----------|---------------------|
| N2                                                                                           | CT | V | 11438770 | 11441618 | WBGene00010191 | dmsr-1   | F57B7.1  | -0.122201171582229  |
| AGIWUR10396;AGIWUR16007                                                                      |    |   |          |          |                |          |          |                     |
| N2                                                                                           | CT | V | 11441925 | 11443603 | WBGene00010192 | F57B7.2  | F57B7.2  | -0.0388190680104952 |
| AGIWUR12817                                                                                  |    |   |          |          |                |          |          |                     |
| N2                                                                                           | CT | V | 11446633 | 11449245 | WBGene00003248 | mig-17   | F57B7.4  | -0.342900509787587  |
| AGIWUR40715                                                                                  |    |   |          |          |                |          |          |                     |
| N2                                                                                           | CT | V | 11449223 | 11450357 | WBGene00000729 | col-156  | F57B7.3  | 0.258010815020318   |
| AGIWUR10540                                                                                  |    |   |          |          |                |          |          |                     |
| N2                                                                                           | CT | V | 11462999 | 11466770 | WBGene00006486 | zipt-21  | T11F9.2  | 0.0242712942884111  |
| AGIWUR1480                                                                                   |    |   |          |          |                |          |          |                     |
| N2                                                                                           | CT | V | 11466844 | 11470663 | WBGene00000007 | aat-6    | T11F9.4  | 0.322251598624407   |
| AGIWUR20033                                                                                  |    |   |          |          |                |          |          |                     |
| N2                                                                                           | CT | V | 11470868 | 11472349 | WBGene00003539 | nas-20   | T11F9.3  | -0.0933912267773582 |
| AGIWUR1380;AGIWUR5186;AGIWUR11424;AGIWUR18119                                                |    |   |          |          |                |          |          |                     |
| N2                                                                                           | CT | V | 11472561 | 11473973 | WBGene00003540 | nas-21   | T11F9.5  | 0.148197669362382   |
| AGIWUR4677;AGIWUR5223;AGIWUR9699;AGIWUR11738;AGIWUR12453;AGIWUR17204;AGIWUR18508;AGIWUR43832 |    |   |          |          |                |          |          |                     |
| N2                                                                                           | CT | V | 11474699 | 11477951 | WBGene00003541 | nas-22   | T11F9.6  | 0.163680116780304   |
| AGIWUR3819;AGIWUR8826;AGIWUR9112;AGIWUR26329;AGIWUR36117;AGIWUR37505;AGIWUR42006             |    |   |          |          |                |          |          |                     |
| N2                                                                                           | CT | V | 11478413 | 11479243 | WBGene00005235 | srh-9    | T11F9.17 |                     |
| -0.105672850657806 AGIWUR24741;AGIWUR43754;AGIWUR44860                                       |    |   |          |          |                |          |          |                     |
| N2                                                                                           | CT | V | 11485858 | 11487266 | WBGene00005227 | srh-1    | T11F9.18 |                     |
| -0.106045763982804 AGIWUR24579                                                               |    |   |          |          |                |          |          |                     |
| N2                                                                                           | CT | V | 11487152 | 11488275 | WBGene00011712 | T11F9.10 |          | T11F9.10            |
| 0.0456717010353431 AGIWUR16276                                                               |    |   |          |          |                |          |          |                     |
| N2                                                                                           | CT | V | 11489050 | 11490328 | WBGene00000982 | dhs-19   | T11F9.11 |                     |
| -0.154693451296602 AGIWUR39451                                                               |    |   |          |          |                |          |          |                     |
| N2                                                                                           | CT | V | 11491829 | 11492590 | WBGene00011716 | T11F9.19 |          | T11F9.19            |
| 0.14288745435357 AGIWUR31163                                                                 |    |   |          |          |                |          |          |                     |
| N2                                                                                           | CT | V | 11493556 | 11496379 | WBGene00011713 | T11F9.12 |          | T11F9.12            |
| 0.109782900438418 AGIWUR14163                                                                |    |   |          |          |                |          |          |                     |
| N2                                                                                           | CT | V | 11501444 | 11503127 | WBGene00044019 | C55A6.12 |          | C55A6.12            |
| -0.120439592950881 AGIWUR10900                                                               |    |   |          |          |                |          |          |                     |
| N2                                                                                           | CT | V | 11503811 | 11504884 | WBGene00008330 | C55A6.1  | C55A6.1  | -0.209552604050739  |
| AGIWUR2304;AGIWUR41867                                                                       |    |   |          |          |                |          |          |                     |
| N2                                                                                           | CT | V | 11505352 | 11508271 | WBGene00008339 | C55A6.10 |          | C55A6.10            |
| 0.0582604666645103 AGIWUR2761                                                                |    |   |          |          |                |          |          |                     |
| N2                                                                                           | CT | V | 11509068 | 11512318 | WBGene00008331 | ttl1-5   | C55A6.2  | -0.134018466590185  |
| AGIWUR31123;AGIWUR43920                                                                      |    |   |          |          |                |          |          |                     |
| N2                                                                                           | CT | V | 11512313 | 11513436 | WBGene00008332 | C55A6.3  | C55A6.3  | 0.208826011600312   |

|                                                                                    |    |   |                                     |          |                |          |          |                     |
|------------------------------------------------------------------------------------|----|---|-------------------------------------|----------|----------------|----------|----------|---------------------|
| AGIWUR30062                                                                        |    |   |                                     |          |                |          |          |                     |
| N2                                                                                 | CT | V | 11513665                            | 11514737 | WBGene00008335 | C55A6.6  | C55A6.6  | -0.124742074829516  |
| AGIWUR7253                                                                         |    |   |                                     |          |                |          |          |                     |
| N2                                                                                 | CT | V | 11515084                            | 11516191 | WBGene00008334 | sdz-8    | C55A6.5  | -0.0543043528806813 |
| AGIWUR44215                                                                        |    |   |                                     |          |                |          |          |                     |
| N2                                                                                 | CT | V | 11516445                            | 11517889 | WBGene00008333 | C55A6.4  | C55A6.4  | -0.065545896685709  |
| AGIWUR12044                                                                        |    |   |                                     |          |                |          |          |                     |
| N2                                                                                 | CT | V | 11518100                            | 11518702 | WBGene00008337 | C55A6.8  | C55A6.8  | 0.0684123194429365  |
| AGIWUR3620;AGIWUR12782;AGIWUR19330                                                 |    |   |                                     |          |                |          |          |                     |
| N2                                                                                 | CT | V | 11519335                            | 11520530 | WBGene00008336 | C55A6.7  | C55A6.7  | 0.164724637975427   |
| AGIWUR4983;AGIWUR10473;AGIWUR12082;AGIWUR43879                                     |    |   |                                     |          |                |          |          |                     |
| N2                                                                                 | CT | V | 11520515                            | 11521554 | WBGene00008340 | C55A6.11 | C55A6.11 |                     |
| 0.0725831801805796                                                                 |    |   | AGIWUR17876                         |          |                |          |          |                     |
| N2                                                                                 | CT | V | 11521653                            | 11523384 | WBGene00008338 | pafo-1   | C55A6.9  | -0.129077415019044  |
| AGIWUR4256                                                                         |    |   |                                     |          |                |          |          |                     |
| N2                                                                                 | CT | V | 11527831                            | 11541219 | WBGene00009532 | ccch-1   | F38B7.1  | 0.0462267753867494  |
| AGIWUR1888;AGIWUR15184;AGIWUR18653;AGIWUR21592;AGIWUR31708;AGIWUR35392;AGIWUR38363 |    |   |                                     |          |                |          |          |                     |
| N2                                                                                 | CT | V | 11543857                            | 11545290 | WBGene00009533 | F38B7.2  | F38B7.2  | 0.0833233074242177  |
| AGIWUR5222;AGIWUR12757;AGIWUR16809;AGIWUR30377;AGIWUR33388                         |    |   |                                     |          |                |          |          |                     |
| N2                                                                                 | CT | V | 11545536                            | 11546376 | WBGene00077536 | F38B7.10 | F38B7.10 |                     |
| 0.183822854033308                                                                  |    |   | AGIWUR1421;AGIWUR14756;AGIWUR33638  |          |                |          |          |                     |
| N2                                                                                 | CT | V | 11549107                            | 11551560 | WBGene00009534 | F38B7.3  | F38B7.3  | 0.0684655762838844  |
| AGIWUR33781                                                                        |    |   |                                     |          |                |          |          |                     |
| N2                                                                                 | CT | V | 11552679                            | 11554222 | WBGene00005976 | srx-85   | F38B7.4  | -0.0246516691508916 |
| AGIWUR36588                                                                        |    |   |                                     |          |                |          |          |                     |
| N2                                                                                 | CT | V | 11554635                            | 11558127 | WBGene00001110 | duo-1    | F38B7.5  | -0.0848320545486381 |
| AGIWUR6255;AGIWUR23547;AGIWUR41872                                                 |    |   |                                     |          |                |          |          |                     |
| N2                                                                                 | CT | V | 11558319                            | 11559881 | WBGene00005962 | srx-71   | F38B7.6  | -0.0980579569911768 |
| AGIWUR33725                                                                        |    |   |                                     |          |                |          |          |                     |
| N2                                                                                 | CT | V | 11560078                            | 11561650 | WBGene00005963 | srx-72   | F38B7.9  | -0.0563236823035043 |
| AGIWUR5244;AGIWUR41450                                                             |    |   |                                     |          |                |          |          |                     |
| N2                                                                                 | CT | V | 11562943                            | 11564508 | WBGene00005977 | srx-86   | F38B7.7  | -0.0726349511991553 |
| AGIWUR22026;AGIWUR22798                                                            |    |   |                                     |          |                |          |          |                     |
| N2                                                                                 | CT | V | 11564873                            | 11566771 | WBGene00005978 | srx-87   | F38B7.8  | -0.143650253477241  |
| AGIWUR5096;AGIWUR11440;AGIWUR14755                                                 |    |   |                                     |          |                |          |          |                     |
| N2                                                                                 | CT | V | 11566804                            | 11573091 | WBGene00004064 | pms-2    | H12C20.2 |                     |
| 0.0402313006858783                                                                 |    |   | AGIWUR22401;AGIWUR36857;AGIWUR38193 |          |                |          |          |                     |
| N2                                                                                 | CT | V | 11573440                            | 11575709 | WBGene00003658 | nhr-68   | H12C20.3 |                     |
| -0.0312310908848126                                                                |    |   | AGIWUR12727                         |          |                |          |          |                     |

|                      |    |   |                                                                        |          |                |           |          |                     |
|----------------------|----|---|------------------------------------------------------------------------|----------|----------------|-----------|----------|---------------------|
| N2                   | CT | V | 11576631                                                               | 11577911 | WBGene00005982 | srx-91    | H12C20.4 |                     |
| 0.0680846669559543   |    |   | AGIWUR1007;AGIWUR11759;AGIWUR22109;AGIWUR31195;AGIWUR31842             |          |                |           |          |                     |
| N2                   | CT | V | 11581126                                                               | 11582458 | WBGene00005981 | srx-90    | H12C20.5 |                     |
| -0.224151062030893   |    |   | AGIWUR28808                                                            |          |                |           |          |                     |
| N2                   | CT | V | 11583512                                                               | 11585115 | WBGene00005979 | srx-88    | F43A11.1 |                     |
| -0.420854390391302   |    |   | AGIWUR12245                                                            |          |                |           |          |                     |
| N2                   | CT | V | 11586259                                                               | 11588133 | WBGene00005980 | srx-89    | F43A11.3 |                     |
| -0.0978628570247353  |    |   | AGIWUR8733;AGIWUR29031;AGIWUR33331;AGIWUR35615                         |          |                |           |          |                     |
| N2                   | CT | V | 11589733                                                               | 11592931 | WBGene00005973 | srx-82    | F43A11.6 |                     |
| 0.0710347866741978   |    |   | AGIWUR5392;AGIWUR12579                                                 |          |                |           |          |                     |
| N2                   | CT | V | 11593727                                                               | 11594971 | WBGene00005971 | srx-80    | F43A11.4 |                     |
| -0.190669255873938   |    |   | AGIWUR26018                                                            |          |                |           |          |                     |
| N2                   | CT | V | 11595919                                                               | 11597096 | WBGene00005972 | srx-81    | F43A11.5 |                     |
| 0.0651827571563377   |    |   | AGIWUR1854;AGIWUR40726                                                 |          |                |           |          |                     |
| N2                   | CT | V | 11597346                                                               | 11598897 | WBGene00005974 | srx-83    | F43A11.7 |                     |
| 0.0147685985716812   |    |   | AGIWUR31700                                                            |          |                |           |          |                     |
| N2                   | CT | V | 11599107                                                               | 11600628 | WBGene00005975 | srx-84    | F35B12.1 |                     |
| 0.0272574094376301   |    |   | AGIWUR17845;AGIWUR35416                                                |          |                |           |          |                     |
| N2                   | CT | V | 11601119                                                               | 11602358 | WBGene00009388 | F35B12.9  |          | F35B12.9            |
| 0.0895677820694312   |    |   | AGIWUR1481;AGIWUR14629;AGIWUR18779;AGIWUR43752                         |          |                |           |          |                     |
| N2                   | CT | V | 11602294                                                               | 11604563 | WBGene00000983 | dhs-20    | F35B12.2 |                     |
| -0.00874869775047493 |    |   | AGIWUR1985                                                             |          |                |           |          |                     |
| N2                   | CT | V | 11609096                                                               | 11610149 | WBGene00009384 | piit-1    | F35B12.4 |                     |
| -0.162057665928899   |    |   | AGIWUR44326                                                            |          |                |           |          |                     |
| N2                   | CT | V | 11610708                                                               | 11613054 | WBGene00009385 | sas-5     | F35B12.5 |                     |
| -0.189864931511207   |    |   | AGIWUR12489                                                            |          |                |           |          |                     |
| N2                   | CT | V | 11613307                                                               | 11614888 | WBGene00009386 | tag-290   | F35B12.6 |                     |
| 0.0744019542938403   |    |   | AGIWUR13593                                                            |          |                |           |          |                     |
| N2                   | CT | V | 11616283                                                               | 11616829 | WBGene00003762 | nlp-24    | F35B12.7 |                     |
| -0.026895179998303   |    |   | AGIWUR2533;AGIWUR13008;AGIWUR22163;AGIWUR24238;AGIWUR32188;AGIWUR39141 |          |                |           |          |                     |
| N2                   | CT | V | 11616812                                                               | 11618266 | WBGene00009387 | glb-15    | F35B12.8 |                     |
| -0.299693055622534   |    |   | AGIWUR37261                                                            |          |                |           |          |                     |
| N2                   | CT | V | 11625954                                                               | 11629322 | WBGene00009389 | F35B12.10 |          | F35B12.10           |
| 0.203896337888416    |    |   | AGIWUR31419                                                            |          |                |           |          |                     |
| N2                   | CT | V | 11631434                                                               | 11637291 | WBGene00012100 | sipa-1    | T27F2.2  | 0.134482608954057   |
| AGIWUR40216          |    |   |                                                                        |          |                |           |          |                     |
| N2                   | CT | V | 11644760                                                               | 11645370 | WBGene00000249 | bir-1     | T27F2.3  | -0.123705453446187  |
| AGIWUR10307          |    |   |                                                                        |          |                |           |          |                     |
| N2                   | CT | V | 11645481                                                               | 11650090 | WBGene00004806 | skp-1     | T27F2.1  | -0.0703568635196401 |

|                                                                                                |    |   |          |          |                |          |          |                     |
|------------------------------------------------------------------------------------------------|----|---|----------|----------|----------------|----------|----------|---------------------|
| AGIWUR2641                                                                                     |    |   |          |          |                |          |          |                     |
| N2                                                                                             | CT | V | 11650079 | 11650774 | WBGene00012101 | zip-10   | T27F2.4  | 0.301846386606752   |
| AGIWUR6110;AGIWUR19171;AGIWUR21334;AGIWUR34172                                                 |    |   |          |          |                |          |          |                     |
| N2                                                                                             | CT | V | 11661670 | 11665085 | WBGene00000449 | ceh-27   | F46F3.1  | 0.0326748842792259  |
| AGIWUR17161                                                                                    |    |   |          |          |                |          |          |                     |
| N2                                                                                             | CT | V | 11667476 | 11669390 | WBGene00009791 | F46F3.3  | F46F3.3  | -0.0294922517976213 |
| AGIWUR8266;AGIWUR11650;AGIWUR14168;AGIWUR16448;AGIWUR26148;AGIWUR36536;AGIWUR42656;AGIWUR42960 |    |   |          |          |                |          |          |                     |
| N2                                                                                             | CT | V | 11669348 | 11672594 | WBGene00009790 | lgc-44   | F46F3.2  | -0.252938643437709  |
| AGIWUR7570                                                                                     |    |   |          |          |                |          |          |                     |
| N2                                                                                             | CT | V | 11675942 | 11685268 | WBGene00000146 | ape-1    | F46F3.4  | 0.0223375695165853  |
| AGIWUR2585                                                                                     |    |   |          |          |                |          |          |                     |
| N2                                                                                             | CT | V | 11687426 | 11689174 | WBGene00012281 | W05E10.2 |          | W05E10.2            |
| -0.0460995770502262 AGIWUR16303                                                                |    |   |          |          |                |          |          |                     |
| N2                                                                                             | CT | V | 11689413 | 11691691 | WBGene00012280 | W05E10.1 |          | W05E10.1            |
| 0.00538994332556797 AGIWUR31908                                                                |    |   |          |          |                |          |          |                     |
| N2                                                                                             | CT | V | 11693188 | 11695697 | WBGene00012282 | W05E10.5 |          | W05E10.5            |
| -0.0225334698574784 AGIWUR304                                                                  |    |   |          |          |                |          |          |                     |
| N2                                                                                             | CT | V | 11701764 | 11705400 | WBGene00000453 | ceh-32   | W05E10.3 |                     |
| -0.0910034353276803 AGIWUR16411;AGIWUR39527;AGIWUR43749                                        |    |   |          |          |                |          |          |                     |
| N2                                                                                             | CT | V | 11709775 | 11715903 | WBGene00006609 | tre-3    | W05E10.4 |                     |
| -0.0337093093123784 AGIWUR17988;AGIWUR19737;AGIWUR37150                                        |    |   |          |          |                |          |          |                     |
| N2                                                                                             | CT | V | 11718089 | 11725652 | WBGene00000907 | daf-11   | B0240.3  | 0.308306024583668   |
| AGIWUR23822                                                                                    |    |   |          |          |                |          |          |                     |
| N2                                                                                             | CT | V | 11727900 | 11730160 | WBGene00004359 | rhr-2    | B0240.1  | -0.0905510828917855 |
| AGIWUR10193                                                                                    |    |   |          |          |                |          |          |                     |
| N2                                                                                             | CT | V | 11731120 | 11733472 | WBGene00007118 | npp-22   | B0240.4  | -0.0459203258059873 |
| AGIWUR10766                                                                                    |    |   |          |          |                |          |          |                     |
| N2                                                                                             | CT | V | 11733733 | 11736968 | WBGene00007117 | spe-42   | B0240.2  | 0.251207141380502   |
| AGIWUR9063                                                                                     |    |   |          |          |                |          |          |                     |
| N2                                                                                             | CT | V | 11740065 | 11754109 | WBGene00011436 | T04F3.1  | T04F3.1  | 0.475756224645407   |
| AGIWUR37668                                                                                    |    |   |          |          |                |          |          |                     |
| N2                                                                                             | CT | V | 11757668 | 11758598 | WBGene00011437 | T04F3.2  | T04F3.2  | -0.0466837803506666 |
| AGIWUR37822                                                                                    |    |   |          |          |                |          |          |                     |
| N2                                                                                             | CT | V | 11758935 | 11760570 | WBGene00011438 | T04F3.3  | T04F3.3  | 0.10733801173356    |
| AGIWUR2595;AGIWUR18129;AGIWUR40947                                                             |    |   |          |          |                |          |          |                     |
| N2                                                                                             | CT | V | 11760671 | 11761894 | WBGene00077538 | T04F3.5  | T04F3.5  | -0.129263664048931  |
| AGIWUR8529                                                                                     |    |   |          |          |                |          |          |                     |
| N2                                                                                             | CT | V | 11761893 | 11763152 | WBGene00011439 | T04F3.4  | T04F3.4  | -0.117930979492746  |
| AGIWUR40120                                                                                    |    |   |          |          |                |          |          |                     |

|                                                                                                                                                                                           |    |   |          |          |                |           |                             |
|-------------------------------------------------------------------------------------------------------------------------------------------------------------------------------------------|----|---|----------|----------|----------------|-----------|-----------------------------|
| N2                                                                                                                                                                                        | CT | V | 11763140 | 11764382 | WBGene00010075 | F55A11.1  | F55A11.1                    |
| -0.0153555276480812 AGIWUR6498                                                                                                                                                            |    |   |          |          |                |           |                             |
| N2                                                                                                                                                                                        | CT | V | 11764904 | 11767222 | WBGene00006373 | syx-5     | F55A11.2                    |
| -0.223386054636627 AGIWUR44160                                                                                                                                                            |    |   |          |          |                |           |                             |
| N2                                                                                                                                                                                        | CT | V | 11767328 | 11769899 | WBGene00004768 | sel-11    | F55A11.3                    |
| -0.0228280282353808 AGIWUR15843                                                                                                                                                           |    |   |          |          |                |           |                             |
| N2                                                                                                                                                                                        | CT | V | 11770456 | 11773495 | WBGene00010077 | F55A11.4  | F55A11.4                    |
| 0.129604983750466 AGIWUR5298;AGIWUR7111;AGIWUR18868                                                                                                                                       |    |   |          |          |                |           |                             |
| N2                                                                                                                                                                                        | CT | V | 11773720 | 11776631 | WBGene00044631 | bus-18    | F55A11.5                    |
| -0.156764403593073 AGIWUR15849;AGIWUR24966;AGIWUR28370;AGIWUR28599;AGIWUR31508                                                                                                            |    |   |          |          |                |           |                             |
| N2                                                                                                                                                                                        | CT | V | 11776838 | 11783422 | WBGene00010079 | F55A11.6  | F55A11.6                    |
| -0.261130653749209 AGIWUR34008                                                                                                                                                            |    |   |          |          |                |           |                             |
| N2                                                                                                                                                                                        | CT | V | 11783340 | 11784616 | WBGene00010082 | F55A11.11 | F55A11.11                   |
| 0.177419400259136 AGIWUR13045                                                                                                                                                             |    |   |          |          |                |           |                             |
| N2                                                                                                                                                                                        | CT | V | 11784573 | 11787443 | WBGene00010080 | F55A11.7  | F55A11.7                    |
| -0.00168160099284975 AGIWUR11196                                                                                                                                                          |    |   |          |          |                |           |                             |
| N2                                                                                                                                                                                        | CT | V | 11788157 | 11789121 | WBGene00010081 | F55A11.8  | F55A11.8                    |
| -0.0842222722598507 AGIWUR34175                                                                                                                                                           |    |   |          |          |                |           |                             |
| N2                                                                                                                                                                                        | CT | V | 11789550 | 11800544 | WBGene00014300 | D2023.1   | D2023.1 -0.0978471292838803 |
| AGIWUR536;AGIWUR3337;AGIWUR6597;AGIWUR7176;AGIWUR7685;AGIWUR12399;AGIWUR14258;AGIWUR20071;AGIWUR22319;AGIWUR22876;AGIWUR27785;AGIWUR29680;AGIWUR30851;AGIWUR30970;AGIWUR37689;AGIWUR41203 |    |   |          |          |                |           |                             |
| N2                                                                                                                                                                                        | CT | V | 11802105 | 11811943 | WBGene00008407 | D2023.3   | D2023.3 -0.0945782490000378 |
| AGIWUR13552                                                                                                                                                                               |    |   |          |          |                |           |                             |
| N2                                                                                                                                                                                        | CT | V | 11817783 | 11822529 | WBGene00004258 | pyc-1     | D2023.2 0.0513754624744278  |
| AGIWUR3941;AGIWUR5430;AGIWUR24488;AGIWUR26160;AGIWUR38320;AGIWUR39419                                                                                                                     |    |   |          |          |                |           |                             |
| N2                                                                                                                                                                                        | CT | V | 11825033 | 11825762 | WBGene00008408 | D2023.4   | D2023.4 -0.305390543876202  |
| AGIWUR28004                                                                                                                                                                               |    |   |          |          |                |           |                             |
| N2                                                                                                                                                                                        | CT | V | 11825897 | 11827067 | WBGene00008409 | mpst-1    | D2023.5 -0.234900308915003  |
| AGIWUR2371                                                                                                                                                                                |    |   |          |          |                |           |                             |
| N2                                                                                                                                                                                        | CT | V | 11827306 | 11829370 | WBGene00008410 | D2023.6   | D2023.6 -0.251332218139527  |
| AGIWUR39106                                                                                                                                                                               |    |   |          |          |                |           |                             |
| N2                                                                                                                                                                                        | CT | V | 11829582 | 11831220 | WBGene00000731 | col-158   | D2023.7 -0.0137399907883342 |
| AGIWUR34847                                                                                                                                                                               |    |   |          |          |                |           |                             |
| N2                                                                                                                                                                                        | CT | V | 11831203 | 11843625 | WBGene00011261 | nphp-4    | R13H4.1 0.259789032247635   |
| AGIWUR34994                                                                                                                                                                               |    |   |          |          |                |           |                             |
| N2                                                                                                                                                                                        | CT | V | 11845877 | 11852165 | WBGene00001978 | hmp-1     | R13H4.4 0.0491302259493334  |
| AGIWUR6777;AGIWUR24555                                                                                                                                                                    |    |   |          |          |                |           |                             |
| N2                                                                                                                                                                                        | CT | V | 11860675 | 11862289 | WBGene00011263 | R13H4.5   | R13H4.5 -0.176791075874771  |
| AGIWUR27117                                                                                                                                                                               |    |   |          |          |                |           |                             |

|                                                                         |    |   |          |          |                |          |          |                     |
|-------------------------------------------------------------------------|----|---|----------|----------|----------------|----------|----------|---------------------|
| N2                                                                      | CT | V | 11863117 | 11864913 | WBGene00011264 | R13H4.6  | R13H4.6  | -0.140065451216721  |
| AGIWUR14613                                                             |    |   |          |          |                |          |          |                     |
| N2                                                                      | CT | V | 11866438 | 11868234 | WBGene00011265 | R13H4.7  | R13H4.7  | 0.125868417182335   |
| AGIWUR35907                                                             |    |   |          |          |                |          |          |                     |
| N2                                                                      | CT | V | 11875360 | 11879141 | WBGene00010788 | sulp-4   | K12G11.1 |                     |
| 0.00324372011958651 AGIWUR43811                                         |    |   |          |          |                |          |          |                     |
| N2                                                                      | CT | V | 11880068 | 11883160 | WBGene00010789 | sulp-5   | K12G11.2 |                     |
| -0.190232204385136 AGIWUR10275;AGIWUR28603;AGIWUR33364                  |    |   |          |          |                |          |          |                     |
| N2                                                                      | CT | V | 11888236 | 11889634 | WBGene00010790 | sodh-1   | K12G11.3 |                     |
| -0.0539817977872898 AGIWUR19293;AGIWUR22729                             |    |   |          |          |                |          |          |                     |
| N2                                                                      | CT | V | 11889719 | 11891194 | WBGene00010791 | sodh-2   | K12G11.4 |                     |
| 0.185725994147335 AGIWUR7398                                            |    |   |          |          |                |          |          |                     |
| N2                                                                      | CT | V | 11891812 | 11893451 | WBGene00005967 | srx-76   | K12G11.5 |                     |
| 0.131531536647826 AGIWUR22594;AGIWUR37306;AGIWUR41361                   |    |   |          |          |                |          |          |                     |
| N2                                                                      | CT | V | 11894331 | 11895808 | WBGene00010792 | K12G11.6 |          | K12G11.6            |
| 0.162535191097083 AGIWUR7419                                            |    |   |          |          |                |          |          |                     |
| N2                                                                      | CT | V | 11899072 | 11916623 | WBGene00004855 | sma-1    | R31.1    | 0.167478286071998   |
| AGIWUR10020;AGIWUR22705;AGIWUR35546;AGIWUR37626;AGIWUR42804;AGIWUR45024 |    |   |          |          |                |          |          |                     |
| N2                                                                      | CT | V | 11917564 | 11924654 | WBGene00011270 | R31.2    | R31.2    | 0.123367112445922   |
| AGIWUR240;AGIWUR32724                                                   |    |   |          |          |                |          |          |                     |
| N2                                                                      | CT | V | 11924632 | 11927406 | WBGene00003886 | osm-6    | R31.3    | -0.0832831858600542 |
| AGIWUR28117                                                             |    |   |          |          |                |          |          |                     |
| N2                                                                      | CT | V | 11927661 | 11933246 | WBGene00010284 | aman-2   | F58H1.1  | 0.370857455611658   |
| AGIWUR18036;AGIWUR33704;AGIWUR35490                                     |    |   |          |          |                |          |          |                     |
| N2                                                                      | CT | V | 11933881 | 11935052 | WBGene00010286 | F58H1.3  | F58H1.3  | -0.0549521398354491 |
| AGIWUR9064;AGIWUR15551;AGIWUR22696;AGIWUR33803                          |    |   |          |          |                |          |          |                     |
| N2                                                                      | CT | V | 11935148 | 11936528 | WBGene00138720 | F58H1.8  | F58H1.8  | -0.0216577966349814 |
| AGIWUR9603                                                              |    |   |          |          |                |          |          |                     |
| N2                                                                      | CT | V | 11936505 | 11937794 | WBGene00001466 | f1r-2    | F58H1.4  | -0.0760815015831882 |
| AGIWUR5295;AGIWUR13263;AGIWUR24230;AGIWUR38451                          |    |   |          |          |                |          |          |                     |
| N2                                                                      | CT | V | 11942625 | 11944656 | WBGene00010289 | F58H1.6  | F58H1.6  | 0.159762904336517   |
| AGIWUR2655;AGIWUR8435;AGIWUR29734                                       |    |   |          |          |                |          |          |                     |
| N2                                                                      | CT | V | 11958393 | 11962699 | WBGene00010288 | F58H1.5  | F58H1.5  | 0.0702601986117237  |
| AGIWUR13260;AGIWUR22778;AGIWUR23737                                     |    |   |          |          |                |          |          |                     |
| N2                                                                      | CT | V | 11963007 | 11964821 | WBGene00010290 | F58H1.7  | F58H1.7  | -0.172828881322315  |
| AGIWUR2934;AGIWUR9376;AGIWUR13051;AGIWUR13113;AGIWUR19170;AGIWUR20927   |    |   |          |          |                |          |          |                     |
| N2                                                                      | CT | V | 11975515 | 11976756 | WBGene00000781 | cpr-1    | C52E4.1  | 0.0562843229051504  |
| AGIWUR38171;AGIWUR44556                                                 |    |   |          |          |                |          |          |                     |
| N2                                                                      | CT | V | 11976777 | 11978459 | WBGene00003235 | mif-2    | C52E4.2  | -0.0242730839458929 |



|                                                                        |    |   |          |          |                |         |         |                     |  |
|------------------------------------------------------------------------|----|---|----------|----------|----------------|---------|---------|---------------------|--|
| AGIWUR17960                                                            |    |   |          |          |                |         |         |                     |  |
| N2                                                                     | CT | V | 11978518 | 11979970 | WBGene00004917 | snr-4   | C52E4.3 | -0.0093376114406869 |  |
| AGIWUR9177                                                             |    |   |          |          |                |         |         |                     |  |
| N2                                                                     | CT | V | 11980502 | 11982450 | WBGene00004501 | rpt-1   | C52E4.4 | 0.105091788261268   |  |
| AGIWUR64;AGIWUR28575;AGIWUR40117                                       |    |   |          |          |                |         |         |                     |  |
| N2                                                                     | CT | V | 11982901 | 11986115 | WBGene00008258 | mans-2  | C52E4.5 | 0.00921104797724048 |  |
| AGIWUR8557                                                             |    |   |          |          |                |         |         |                     |  |
| N2                                                                     | CT | V | 11991011 | 11993767 | WBGene00000876 | cyl-1   | C52E4.6 | -0.0322152772206099 |  |
| AGIWUR19976;AGIWUR44208                                                |    |   |          |          |                |         |         |                     |  |
| N2                                                                     | CT | V | 11994295 | 11995858 | WBGene00008259 | C52E4.7 | C52E4.7 | 0.182277861130778   |  |
| AGIWUR33143                                                            |    |   |          |          |                |         |         |                     |  |
| N2                                                                     | CT | V | 11995868 | 12001965 | WBGene00001553 | gcy-33  | F57F5.2 |                     |  |
| -0.00949017794389206 AGIWUR6682                                        |    |   |          |          |                |         |         |                     |  |
| N2                                                                     | CT | V | 12003028 | 12004600 | WBGene00010204 | F57F5.1 | F57F5.1 | 0.0565163877957175  |  |
| AGIWUR12276;AGIWUR20040;AGIWUR32898                                    |    |   |          |          |                |         |         |                     |  |
| N2                                                                     | CT | V | 12004616 | 12006605 | WBGene00010205 | F57F5.3 | F57F5.3 | -0.0347429404557316 |  |
| AGIWUR39013                                                            |    |   |          |          |                |         |         |                     |  |
| N2                                                                     | CT | V | 12009537 | 12013605 | WBGene00000073 | add-2   | F57F5.4 | -0.0557557634043135 |  |
| AGIWUR9329;AGIWUR31353;AGIWUR39004                                     |    |   |          |          |                |         |         |                     |  |
| N2                                                                     | CT | V | 12014385 | 12032131 | WBGene00004032 | pkc-1   | F57F5.5 | -0.0572282124969696 |  |
| AGIWUR8741;AGIWUR15869;AGIWUR21697;AGIWUR35101;AGIWUR39298;AGIWUR41185 |    |   |          |          |                |         |         |                     |  |
| N2                                                                     | CT | V | 12032257 | 12040873 | WBGene00002241 | kup-1   | F10C2.2 | -0.11093767905129   |  |
| AGIWUR7433                                                             |    |   |          |          |                |         |         |                     |  |
| N2                                                                     | CT | V | 12041556 | 12045347 | WBGene00008645 | F10C2.4 | F10C2.4 | -0.0876666497119842 |  |
| AGIWUR15408                                                            |    |   |          |          |                |         |         |                     |  |
| N2                                                                     | CT | V | 12045432 | 12048631 | WBGene00008646 | F10C2.5 | F10C2.5 | -0.0724089336173535 |  |
| AGIWUR42690                                                            |    |   |          |          |                |         |         |                     |  |
| N2                                                                     | CT | V | 12048745 | 12052182 | WBGene00001095 | dars-2  | F10C2.6 | -0.105687501629962  |  |
| AGIWUR15266;AGIWUR20285;AGIWUR42451                                    |    |   |          |          |                |         |         |                     |  |
| N2                                                                     | CT | V | 12053952 | 12056320 | WBGene00008647 | F10C2.7 | F10C2.7 | -0.227602943519978  |  |
| AGIWUR18774                                                            |    |   |          |          |                |         |         |                     |  |
| N2                                                                     | CT | V | 12056575 | 12059747 | WBGene00011087 | R07B7.2 | R07B7.2 | -0.199279801309078  |  |
| AGIWUR41963                                                            |    |   |          |          |                |         |         |                     |  |
| N2                                                                     | CT | V | 12060234 | 12063368 | WBGene00000533 | clh-6   | R07B7.1 | -0.155499552386974  |  |
| AGIWUR25470;AGIWUR40237;AGIWUR43301                                    |    |   |          |          |                |         |         |                     |  |
| N2                                                                     | CT | V | 12063432 | 12065391 | WBGene00004138 | pqn-53  | R07B7.3 | 0.204465072362433   |  |
| AGIWUR27696                                                            |    |   |          |          |                |         |         |                     |  |
| N2                                                                     | CT | V | 12065960 | 12067957 | WBGene00011088 | kmo-2   | R07B7.4 | -0.220452065175001  |  |
| AGIWUR13702;AGIWUR15063;AGIWUR19014                                    |    |   |          |          |                |         |         |                     |  |

|                                                      |    |   |          |          |                |          |          |                     |
|------------------------------------------------------|----|---|----------|----------|----------------|----------|----------|---------------------|
| N2                                                   | CT | V | 12068725 | 12070519 | WBGene00011089 | kmo-1    | R07B7.5  | -0.183980603348147  |
| AGIWUR3864                                           |    |   |          |          |                |          |          |                     |
| N2                                                   | CT | V | 12072862 | 12074986 | WBGene00011090 | R07B7.6  | R07B7.6  | -0.0183000701856617 |
| AGIWUR10108;AGIWUR27116;AGIWUR33997;AGIWUR35278      |    |   |          |          |                |          |          |                     |
| N2                                                   | CT | V | 12078044 | 12080374 | WBGene00011093 | R07B7.9  | R07B7.9  | -0.0964077232103353 |
| AGIWUR14262                                          |    |   |          |          |                |          |          |                     |
| N2                                                   | CT | V | 12081089 | 12084316 | WBGene00011092 | R07B7.8  | R07B7.8  | -0.42739935519236   |
| AGIWUR7397                                           |    |   |          |          |                |          |          |                     |
| N2                                                   | CT | V | 12084186 | 12086460 | WBGene00011094 | R07B7.10 |          | R07B7.10            |
| -0.26443291278132 AGIWUR4600                         |    |   |          |          |                |          |          |                     |
| N2                                                   | CT | V | 12087234 | 12088931 | WBGene00011095 | gana-1   | R07B7.11 |                     |
| -0.0760448755857084 AGIWUR1945                       |    |   |          |          |                |          |          |                     |
| N2                                                   | CT | V | 12089073 | 12091812 | WBGene00011096 | R07B7.12 |          | R07B7.12            |
| -0.0859550331262682 AGIWUR15;AGIWUR15650;AGIWUR17447 |    |   |          |          |                |          |          |                     |
| N2                                                   | CT | V | 12092006 | 12093862 | WBGene00011097 | nhr-206  | R07B7.13 |                     |
| -0.133597432656306 AGIWUR31961                       |    |   |          |          |                |          |          |                     |
| N2                                                   | CT | V | 12094374 | 12095947 | WBGene00011099 | nhr-208  | R07B7.15 |                     |
| 0.000328944362921746 AGIWUR15985                     |    |   |          |          |                |          |          |                     |
| N2                                                   | CT | V | 12096234 | 12097845 | WBGene00011098 | nhr-207  | R07B7.14 |                     |
| 0.648663430259019 AGIWUR6595                         |    |   |          |          |                |          |          |                     |
| N2                                                   | CT | V | 12098149 | 12100111 | WBGene00011100 | nhr-209  | R07B7.16 |                     |
| 0.0955537060123284 AGIWUR29309                       |    |   |          |          |                |          |          |                     |
| N2                                                   | CT | V | 12101293 | 12103286 | WBGene00007547 | nhr-154  | C13C4.2  | -0.256332778970503  |
| AGIWUR8400                                           |    |   |          |          |                |          |          |                     |
| N2                                                   | CT | V | 12104273 | 12106507 | WBGene00007546 | nhr-153  | C13C4.1  | -0.125080462123341  |
| AGIWUR39908                                          |    |   |          |          |                |          |          |                     |
| N2                                                   | CT | V | 12107142 | 12109201 | WBGene00003726 | nhr-136  | C13C4.3  | -0.109253938530714  |
| AGIWUR39836                                          |    |   |          |          |                |          |          |                     |
| N2                                                   | CT | V | 12109168 | 12110978 | WBGene00007548 | C13C4.4  | C13C4.4  | 0.206262064035521   |
| AGIWUR37050                                          |    |   |          |          |                |          |          |                     |
| N2                                                   | CT | V | 12114993 | 12117443 | WBGene00007549 | spin-1   | C13C4.5  | 0.0341599365058478  |
| AGIWUR16171                                          |    |   |          |          |                |          |          |                     |
| N2                                                   | CT | V | 12118828 | 12120814 | WBGene00007551 | C13C4.7  | C13C4.7  | -0.379463107761723  |
| AGIWUR3454                                           |    |   |          |          |                |          |          |                     |
| N2                                                   | CT | V | 12121587 | 12125096 | WBGene00007550 | C13C4.6  | C13C4.6  | -0.0661515926958582 |
| AGIWUR31466                                          |    |   |          |          |                |          |          |                     |
| N2                                                   | CT | V | 12124850 | 12130788 | WBGene00007757 | C27A7.6  | C27A7.6  | 0.0274591821901033  |
| AGIWUR40902                                          |    |   |          |          |                |          |          |                     |
| N2                                                   | CT | V | 12131442 | 12137395 | WBGene00007753 | C27A7.1  | C27A7.1  | 0.080933036983744   |



|                                                            |    |   |          |          |                |          |          |                     |
|------------------------------------------------------------|----|---|----------|----------|----------------|----------|----------|---------------------|
| N2                                                         | CT | V | 12226816 | 12234343 | WBGene00003515 | myo-3    | K12F2.1  | 0.108837258515567   |
| AGIWUR39311                                                |    |   |          |          |                |          |          |                     |
| N2                                                         | CT | V | 12236895 | 12238599 | WBGene00011448 | tag-348  | T04H1.1  | 0.0324586278706516  |
| AGIWUR7345                                                 |    |   |          |          |                |          |          |                     |
| N2                                                         | CT | V | 12238938 | 12240316 | WBGene00005827 | srw-80   | T04H1.10 |                     |
| 0.602978012459108 AGIWUR21658                              |    |   |          |          |                |          |          |                     |
| N2                                                         | CT | V | 12241409 | 12241945 | WBGene00011450 | ttr-22   | T04H1.3  | -0.144365044869019  |
| AGIWUR3349;AGIWUR4769;AGIWUR13278;AGIWUR25891              |    |   |          |          |                |          |          |                     |
| N2                                                         | CT | V | 12241962 | 12245059 | WBGene00011449 | T04H1.2  | T04H1.2  | 0.324754767489624   |
| AGIWUR2792;AGIWUR12771;AGIWUR16025;AGIWUR31410;AGIWUR38140 |    |   |          |          |                |          |          |                     |
| N2                                                         | CT | V | 12245594 | 12251246 | WBGene00004296 | rad-50   | T04H1.4  | 0.021455410403842   |
| AGIWUR21464                                                |    |   |          |          |                |          |          |                     |
| N2                                                         | CT | V | 12251341 | 12252407 | WBGene00011451 | T04H1.5  | T04H1.5  | -0.241616081223066  |
| AGIWUR10392                                                |    |   |          |          |                |          |          |                     |
| N2                                                         | CT | V | 12252623 | 12255450 | WBGene00003075 | lrx-1    | T04H1.6  | -0.039564181701877  |
| AGIWUR1303                                                 |    |   |          |          |                |          |          |                     |
| N2                                                         | CT | V | 12255547 | 12258804 | WBGene00011452 | ugt-55   | T04H1.7  | -0.248751791553259  |
| AGIWUR11839                                                |    |   |          |          |                |          |          |                     |
| N2                                                         | CT | V | 12258982 | 12261205 | WBGene00011453 | ugt-56   | T04H1.8  | -0.141576442563441  |
| AGIWUR34483;AGIWUR37835                                    |    |   |          |          |                |          |          |                     |
| N2                                                         | CT | V | 12261804 | 12263368 | WBGene00006539 | tbb-6    | T04H1.9  | -0.0262440621385682 |
| AGIWUR44382                                                |    |   |          |          |                |          |          |                     |
| N2                                                         | CT | V | 12263369 | 12263896 | WBGene00010091 | ssp-35   | F55C5.1  | 0.167682230516693   |
| AGIWUR39324                                                |    |   |          |          |                |          |          |                     |
| N2                                                         | CT | V | 12264002 | 12265492 | WBGene00010092 | F55C5.2  | F55C5.2  | -0.15038466646729   |
| AGIWUR41701                                                |    |   |          |          |                |          |          |                     |
| N2                                                         | CT | V | 12265707 | 12269549 | WBGene00006677 | twk-24   | F55C5.3  | -0.0972558249365854 |
| AGIWUR23192                                                |    |   |          |          |                |          |          |                     |
| N2                                                         | CT | V | 12270271 | 12271551 | WBGene00010094 | tsfm-1   | F55C5.5  | 0.244337076546696   |
| AGIWUR2050;AGIWUR9824;AGIWUR31526                          |    |   |          |          |                |          |          |                     |
| N2                                                         | CT | V | 12271873 | 12275676 | WBGene00010093 | capg-2   | F55C5.4  | -0.0502874478505344 |
| AGIWUR40113                                                |    |   |          |          |                |          |          |                     |
| N2                                                         | CT | V | 12275625 | 12277046 | WBGene00044791 | bnc-1    | F55C5.11 |                     |
| 0.198834133362597 AGIWUR24922                              |    |   |          |          |                |          |          |                     |
| N2                                                         | CT | V | 12279506 | 12281461 | WBGene00010095 | F55C5.6  | F55C5.6  | 0.0278795591217555  |
| AGIWUR36761                                                |    |   |          |          |                |          |          |                     |
| N2                                                         | CT | V | 12283487 | 12283999 | WBGene00010098 | F55C5.10 | F55C5.10 |                     |
| -0.0579015708503396 AGIWUR24288                            |    |   |          |          |                |          |          |                     |
| N2                                                         | CT | V | 12284060 | 12288615 | WBGene00010096 | rskd-1   | F55C5.7  | 0.15035748619853    |

|                                                                                                         |    |   |          |          |                                                  |
|---------------------------------------------------------------------------------------------------------|----|---|----------|----------|--------------------------------------------------|
| AGIWUR20265;AGIWUR20565;AGIWUR36910;AGIWUR40876                                                         |    |   |          |          |                                                  |
| N2                                                                                                      | CT | V | 12288922 | 12291658 | WBGene00010097 srpa-68 F55C5.8 0.264788564238925 |
| AGIWUR4738;AGIWUR11042;AGIWUR28005;AGIWUR30627;AGIWUR33642;AGIWUR44914                                  |    |   |          |          |                                                  |
| N2                                                                                                      | CT | V | 12292214 | 12293802 | WBGene00005241 srh-16 F55C5.9 0.01967046100477   |
| AGIWUR30040                                                                                             |    |   |          |          |                                                  |
| N2                                                                                                      | CT | V | 12302484 | 12306978 | WBGene00001493 frm-7 C51F7.1 0.0505714129895196  |
| AGIWUR18582                                                                                             |    |   |          |          |                                                  |
| N2                                                                                                      | CT | V | 12307490 | 12308658 | WBGene00005202 srg-45 C51F7.2 -0.198913039602193 |
| AGIWUR10609                                                                                             |    |   |          |          |                                                  |
| N2                                                                                                      | CT | V | 12308849 | 12310342 | WBGene00011014 hpo-30 R04F11.1                   |
| -0.0208719295318112 AGIWUR27617                                                                         |    |   |          |          |                                                  |
| N2                                                                                                      | CT | V | 12314919 | 12317180 | WBGene00011016 R04F11.3 R04F11.3                 |
| 0.0665609122863486 AGIWUR28374                                                                          |    |   |          |          |                                                  |
| N2                                                                                                      | CT | V | 12317278 | 12318019 | WBGene00011017 R04F11.5 R04F11.5                 |
| -0.25304767380622 AGIWUR26518                                                                           |    |   |          |          |                                                  |
| N2                                                                                                      | CT | V | 12318385 | 12320229 | WBGene00011015 R04F11.2 R04F11.2                 |
| -0.10282290547903 AGIWUR549;AGIWUR9276;AGIWUR21822;AGIWUR24633;AGIWUR37581;AGIWUR41818                  |    |   |          |          |                                                  |
| N2                                                                                                      | CT | V | 12320187 | 12337744 | WBGene00006668 twk-13 R04F11.4                   |
| -0.0186687314073364 AGIWUR28680;AGIWUR39921;AGIWUR40661                                                 |    |   |          |          |                                                  |
| N2                                                                                                      | CT | V | 12342314 | 12343469 | WBGene00009092 tomm-20 F23H12.2                  |
| 0.12608951516137 AGIWUR10782                                                                            |    |   |          |          |                                                  |
| N2                                                                                                      | CT | V | 12344188 | 12345919 | WBGene00004898 snb-2 F23H12.1                    |
| -0.0440350794633737 AGIWUR13735;AGIWUR22688;AGIWUR24346;AGIWUR26228;AGIWUR32107;AGIWUR39035;AGIWUR41382 |    |   |          |          |                                                  |
| N2                                                                                                      | CT | V | 12345935 | 12350451 | WBGene00009093 F23H12.3 F23H12.3                 |
| -0.0316187961860983 AGIWUR18327                                                                         |    |   |          |          |                                                  |
| N2                                                                                                      | CT | V | 12352994 | 12354314 | WBGene00005018 sqt-3 F23H12.4                    |
| -0.0242496108311077 AGIWUR30261;AGIWUR42458                                                             |    |   |          |          |                                                  |
| N2                                                                                                      | CT | V | 12356256 | 12357309 | WBGene00050938 F23H12.11 F23H12.11               |
| 0.0384271486176293 AGIWUR12590;AGIWUR34990                                                              |    |   |          |          |                                                  |
| N2                                                                                                      | CT | V | 12358647 | 12363691 | WBGene00009094 F23H12.5 F23H12.5                 |
| 0.133452076824101 AGIWUR40074                                                                           |    |   |          |          |                                                  |
| N2                                                                                                      | CT | V | 12363754 | 12369537 | WBGene00001539 gcy-13 F23H12.6                   |
| -0.0424325103252405 AGIWUR26383                                                                         |    |   |          |          |                                                  |
| N2                                                                                                      | CT | V | 12371730 | 12372870 | WBGene00009095 F23H12.7 F23H12.7                 |
| -0.0907211704653061 AGIWUR33584                                                                         |    |   |          |          |                                                  |
| N2                                                                                                      | CT | V | 12377556 | 12378832 | WBGene00010461 K01D12.1 K01D12.1                 |
| 0.107806628863562 AGIWUR30600                                                                           |    |   |          |          |                                                  |
| N2                                                                                                      | CT | V | 12381254 | 12385623 | WBGene00010463 K01D12.3 K01D12.3                 |
| 0.163295330697933 AGIWUR38470                                                                           |    |   |          |          |                                                  |

|                    |    |   |                                                             |          |                |           |           |
|--------------------|----|---|-------------------------------------------------------------|----------|----------------|-----------|-----------|
| N2                 | CT | V | 12387041                                                    | 12395706 | WBGene00006669 | twk-14    | K01D12.4  |
| -0.116478925901395 |    |   | AGIWUR11110;AGIWUR24894;AGIWUR31992                         |          |                |           |           |
| N2                 | CT | V | 12397845                                                    | 12398783 | WBGene00010464 | K01D12.5  | K01D12.5  |
| 0.104484875270083  |    |   | AGIWUR7580                                                  |          |                |           |           |
| N2                 | CT | V | 12398759                                                    | 12400859 | WBGene00010465 | K01D12.6  | K01D12.6  |
| 0.104043737873111  |    |   | AGIWUR951;AGIWUR1257;AGIWUR19449;AGIWUR39885                |          |                |           |           |
| N2                 | CT | V | 12402655                                                    | 12403234 | WBGene00010467 | K01D12.8  | K01D12.8  |
| 0.139952179887734  |    |   | AGIWUR5069;AGIWUR9752;AGIWUR18695;AGIWUR44052               |          |                |           |           |
| N2                 | CT | V | 12403942                                                    | 12404651 | WBGene00010468 | K01D12.9  | K01D12.9  |
| 0.385074736935957  |    |   | AGIWUR35425                                                 |          |                |           |           |
| N2                 | CT | V | 12406229                                                    | 12407017 | WBGene00010469 | K01D12.10 | K01D12.10 |
| 0.323626962081016  |    |   | AGIWUR443                                                   |          |                |           |           |
| N2                 | CT | V | 12407428                                                    | 12408592 | WBGene00010470 | cdr-4     | K01D12.11 |
| -0.121231907664251 |    |   | AGIWUR3045                                                  |          |                |           |           |
| N2                 | CT | V | 12409369                                                    | 12410513 | WBGene00010473 | hrg-2     | K01D12.14 |
| 0.131110544849227  |    |   | AGIWUR26565                                                 |          |                |           |           |
| N2                 | CT | V | 12410879                                                    | 12412091 | WBGene00010472 | cdr-7     | K01D12.13 |
| -0.183628211332168 |    |   | AGIWUR13221                                                 |          |                |           |           |
| N2                 | CT | V | 12412506                                                    | 12413698 | WBGene00010471 | cdr-6     | K01D12.12 |
| -0.245402159848302 |    |   | AGIWUR43496                                                 |          |                |           |           |
| N2                 | CT | V | 12414640                                                    | 12415709 | WBGene00008296 | cdr-2     | C54D10.1  |
| 0.0712919695838607 |    |   | AGIWUR22071                                                 |          |                |           |           |
| N2                 | CT | V | 12416358                                                    | 12417377 | WBGene00008297 | cdr-3     | C54D10.2  |
| -0.205799427348351 |    |   | AGIWUR40901                                                 |          |                |           |           |
| N2                 | CT | V | 12418592                                                    | 12419428 | WBGene00008298 | C54D10.3  | C54D10.3  |
| 0.159262169209459  |    |   | AGIWUR16125;AGIWUR29602;AGIWUR33587;AGIWUR35265;AGIWUR38616 |          |                |           |           |
| N2                 | CT | V | 12419492                                                    | 12420944 | WBGene00008299 | C54D10.4  | C54D10.4  |
| 0.118684601676243  |    |   | AGIWUR12106                                                 |          |                |           |           |
| N2                 | CT | V | 12429357                                                    | 12431196 | WBGene00008300 | C54D10.5  | C54D10.5  |
| 0.0688053058743074 |    |   | AGIWUR5470                                                  |          |                |           |           |
| N2                 | CT | V | 12431368                                                    | 12432289 | WBGene00045400 | C54D10.13 | C54D10.13 |
| 0.0115932197677715 |    |   | AGIWUR3457                                                  |          |                |           |           |
| N2                 | CT | V | 12432365                                                    | 12433817 | WBGene00005249 | srh-25    | C54D10.6  |
| 0.100878893644655  |    |   | AGIWUR17191                                                 |          |                |           |           |
| N2                 | CT | V | 12434361                                                    | 12436952 | WBGene00044787 | pals-36   | C54D10.12 |
| 0.0640715704566688 |    |   | AGIWUR21228                                                 |          |                |           |           |
| N2                 | CT | V | 12437499                                                    | 12441266 | WBGene00138721 | pals-37   | C54D10.14 |
| 2.48924790423408   |    |   | AGIWUR22417                                                 |          |                |           |           |
| N2                 | CT | V | 12445184                                                    | 12446956 | WBGene00008302 | pals-38   | C54D10.8  |

|                                                                        |                                                             |          |                |                 |                     |
|------------------------------------------------------------------------|-------------------------------------------------------------|----------|----------------|-----------------|---------------------|
| 0.450831805235556                                                      | AGIWUR44320                                                 |          |                |                 |                     |
| N2 CT V                                                                | 12447499                                                    | 12448661 | WBGene00008303 | C54D10.9        | C54D10.9            |
| -0.0681837292543133                                                    | AGIWUR2442                                                  |          |                |                 |                     |
| N2 CT V                                                                | 12448685                                                    | 12450002 | WBGene00008304 | C54D10.10       | C54D10.10           |
| 0.298929108733224                                                      | AGIWUR21029                                                 |          |                |                 |                     |
| N2 CT V                                                                | 12450807                                                    | 12453336 | WBGene00009200 | F28C1.1 F28C1.1 | -0.0170064285923548 |
| AGIWUR34773                                                            |                                                             |          |                |                 |                     |
| N2 CT V                                                                | 12453955                                                    | 12463008 | WBGene00001179 | egl-10 F28C1.2  | -0.084394233512441  |
| AGIWUR5517;AGIWUR14567;AGIWUR19931;AGIWUR28668;AGIWUR29452;AGIWUR33579 |                                                             |          |                |                 |                     |
| N2 CT V                                                                | 12468683                                                    | 12473533 | WBGene00009201 | F28C1.3 F28C1.3 | 0.0102731576885127  |
| AGIWUR4004;AGIWUR7132;AGIWUR13049;AGIWUR17663;AGIWUR36408              |                                                             |          |                |                 |                     |
| N2 CT V                                                                | 12478413                                                    | 12484442 | WBGene00000228 | atn-1 W04D2.1   | 0.0551344379132308  |
| AGIWUR26457;AGIWUR30926                                                |                                                             |          |                |                 |                     |
| N2 CT V                                                                | 12484885                                                    | 12486068 | WBGene00012242 | srt-39 W04D2.2  | 0.151504608739757   |
| AGIWUR42463                                                            |                                                             |          |                |                 |                     |
| N2 CT V                                                                | 12487266                                                    | 12493264 | WBGene00002133 | inx-11 W04D2.3  | 0.00221960911264141 |
| AGIWUR21702                                                            |                                                             |          |                |                 |                     |
| N2 CT V                                                                | 12493239                                                    | 12494622 | WBGene00012244 | mrps-11 W04D2.5 | -0.136500075028662  |
| AGIWUR5065;AGIWUR13820;AGIWUR15166                                     |                                                             |          |                |                 |                     |
| N2 CT V                                                                | 12494728                                                    | 12497755 | WBGene00012243 | W04D2.4 W04D2.4 | -0.263483892637932  |
| AGIWUR26542                                                            |                                                             |          |                |                 |                     |
| N2 CT V                                                                | 12498213                                                    | 12503738 | WBGene00012245 | W04D2.6 W04D2.6 | -0.257084511752608  |
| AGIWUR19864;AGIWUR37066                                                |                                                             |          |                |                 |                     |
| N2 CT V                                                                | 12505244                                                    | 12506260 | WBGene00012145 | nlp-46 T28H10.4 |                     |
| -0.164901827827211                                                     | AGIWUR16141                                                 |          |                |                 |                     |
| N2 CT V                                                                | 12510645                                                    | 12512201 | WBGene00012143 | T28H10.2        | T28H10.2            |
| 0.187240455741911                                                      | AGIWUR10112;AGIWUR28923;AGIWUR29056;AGIWUR36962             |          |                |                 |                     |
| N2 CT V                                                                | 12512986                                                    | 12514941 | WBGene00012144 | T28H10.3        | T28H10.3            |
| 0.134487654395526                                                      | AGIWUR15495;AGIWUR21042;AGIWUR21714;AGIWUR33773;AGIWUR42383 |          |                |                 |                     |
| N2 CT V                                                                | 12514875                                                    | 12517205 | WBGene00000285 | cal-1 C13C12.1  |                     |
| -0.167781912881335                                                     | AGIWUR31413                                                 |          |                |                 |                     |
| N2 CT V                                                                | 12523647                                                    | 12525656 | WBGene00007552 | C13C12.2        | C13C12.2            |
| -0.128282579503084                                                     | AGIWUR2397;AGIWUR13466;AGIWUR39611                          |          |                |                 |                     |
| N2 CT V                                                                | 12527058                                                    | 12528023 | WBGene00009721 | F45D3.1 F45D3.1 | 0.214356264021067   |
| AGIWUR12145                                                            |                                                             |          |                |                 |                     |
| N2 CT V                                                                | 12541040                                                    | 12542973 | WBGene00009722 | F45D3.2 F45D3.2 | -0.193808095029201  |
| AGIWUR13978                                                            |                                                             |          |                |                 |                     |
| N2 CT V                                                                | 12549216                                                    | 12550385 | WBGene00009723 | F45D3.3 F45D3.3 | 0.433121529862394   |
| AGIWUR7531                                                             |                                                             |          |                |                 |                     |

|                                                                                             |    |   |          |          |                |          |          |                     |
|---------------------------------------------------------------------------------------------|----|---|----------|----------|----------------|----------|----------|---------------------|
| N2                                                                                          | CT | V | 12552211 | 12553301 | WBGene00009724 | F45D3.4  | F45D3.4  | 0.311281136378086   |
| AGIWUR10584;AGIWUR22383                                                                     |    |   |          |          |                |          |          |                     |
| N2                                                                                          | CT | V | 12560710 | 12563383 | WBGene00004759 | sel-1    | F45D3.5  | 0.233146845945699   |
| AGIWUR12278;AGIWUR20293;AGIWUR29900                                                         |    |   |          |          |                |          |          |                     |
| N2                                                                                          | CT | V | 12563487 | 12565785 | WBGene00008452 | mrps-5   | E02A10.1 |                     |
| -0.0479224462605039 AGIWUR14293                                                             |    |   |          |          |                |          |          |                     |
| N2                                                                                          | CT | V | 12566016 | 12567951 | WBGene00008454 | E02A10.4 |          | E02A10.4            |
| -0.117718121846812 AGIWUR21249                                                              |    |   |          |          |                |          |          |                     |
| N2                                                                                          | CT | V | 12575308 | 12576895 | WBGene00001732 | grl-23   | E02A10.2 |                     |
| -0.0502441791317629 AGIWUR35126                                                             |    |   |          |          |                |          |          |                     |
| N2                                                                                          | CT | V | 12583726 | 12587991 | WBGene00008453 | E02A10.3 |          | E02A10.3            |
| -0.168078215293557 AGIWUR1496;AGIWUR3722;AGIWUR18897                                        |    |   |          |          |                |          |          |                     |
| N2                                                                                          | CT | V | 12588309 | 12589644 | WBGene00007584 | C14C10.1 |          | C14C10.1            |
| 0.200580486052466 AGIWUR2794                                                                |    |   |          |          |                |          |          |                     |
| N2                                                                                          | CT | V | 12589633 | 12590717 | WBGene00007590 | ttr-43   | C14C10.7 |                     |
| -0.202732894646592 AGIWUR29794                                                              |    |   |          |          |                |          |          |                     |
| N2                                                                                          | CT | V | 12590979 | 12592477 | WBGene00007585 | C14C10.2 |          | C14C10.2            |
| 0.110201295170758 AGIWUR2163;AGIWUR9585;AGIWUR29812;AGIWUR36093;AGIWUR40434;AGIWUR44127     |    |   |          |          |                |          |          |                     |
| N2                                                                                          | CT | V | 12592568 | 12596296 | WBGene00007587 | mma-1    | C14C10.4 |                     |
| -0.31011764257495 AGIWUR23046                                                               |    |   |          |          |                |          |          |                     |
| N2                                                                                          | CT | V | 12596393 | 12599151 | WBGene00007586 | ril-2    | C14C10.3 |                     |
| -0.159575922777472 AGIWUR6809;AGIWUR15074;AGIWUR31193;AGIWUR31739                           |    |   |          |          |                |          |          |                     |
| N2                                                                                          | CT | V | 12600192 | 12607304 | WBGene00007588 | C14C10.5 |          | C14C10.5            |
| 0.215139645783928 AGIWUR13491;AGIWUR21045;AGIWUR34022;AGIWUR39851                           |    |   |          |          |                |          |          |                     |
| N2                                                                                          | CT | V | 12607413 | 12608107 | WBGene00007589 | erg-28   | C14C10.6 |                     |
| -0.0611416560194016 AGIWUR24094                                                             |    |   |          |          |                |          |          |                     |
| N2                                                                                          | CT | V | 12609826 | 12610857 | WBGene00013853 | ZC116.1  | ZC116.1  | 0.133502888203195   |
| AGIWUR38261                                                                                 |    |   |          |          |                |          |          |                     |
| N2                                                                                          | CT | V | 12611329 | 12628738 | WBGene00013855 | ZC116.3  | ZC116.3  | -0.0238075842945005 |
| AGIWUR14;AGIWUR5873;AGIWUR10800;AGIWUR12287;AGIWUR13102;AGIWUR21054;AGIWUR30097;AGIWUR30478 |    |   |          |          |                |          |          |                     |
| N2                                                                                          | CT | V | 12628957 | 12629905 | WBGene00044198 | F56H9.6  | F56H9.6  | -0.0614618654474661 |
| AGIWUR33770                                                                                 |    |   |          |          |                |          |          |                     |
| N2                                                                                          | CT | V | 12630170 | 12632148 | WBGene00006004 | srx-113  | F56H9.1  | 0.0245731978820865  |
| AGIWUR6265;AGIWUR43399                                                                      |    |   |          |          |                |          |          |                     |
| N2                                                                                          | CT | V | 12632490 | 12633638 | WBGene00050977 | F56H9.7  | F56H9.7  | -0.0599834649171473 |
| AGIWUR8350;AGIWUR11631;AGIWUR21197                                                          |    |   |          |          |                |          |          |                     |
| N2                                                                                          | CT | V | 12637663 | 12638237 | WBGene00010174 | F56H9.2  | F56H9.2  | -0.263701351910751  |
| AGIWUR42483                                                                                 |    |   |          |          |                |          |          |                     |
| N2                                                                                          | CT | V | 12638852 | 12640470 | WBGene00001670 | gpa-8    | F56H9.3  | -0.106152099574528  |





|                                                                                |    |   |          |          |                |          |                             |
|--------------------------------------------------------------------------------|----|---|----------|----------|----------------|----------|-----------------------------|
| N2                                                                             | CT | V | 12724562 | 12725993 | WBGene00045336 | R11D1.12 | R11D1.12                    |
| -0.166118369129342 AGIWUR14180;AGIWUR14693;AGIWUR16055;AGIWUR24942;AGIWUR26376 |    |   |          |          |                |          |                             |
| N2                                                                             | CT | V | 12727171 | 12727621 | WBGene00045517 | R11D1.13 | R11D1.13                    |
| -0.132755901808897 AGIWUR16530;AGIWUR29414;AGIWUR33362;AGIWUR36100             |    |   |          |          |                |          |                             |
| N2                                                                             | CT | V | 12727593 | 12728112 | WBGene00044442 | rp1-28   | R11D1.8 -0.0742974136551631 |
| AGIWUR32903;AGIWUR35759                                                        |    |   |          |          |                |          |                             |
| N2                                                                             | CT | V | 12728631 | 12729416 | WBGene00011247 | mrp1-49  | R11D1.9 0.14670181196335    |
| AGIWUR19366;AGIWUR34528;AGIWUR44439                                            |    |   |          |          |                |          |                             |
| N2                                                                             | CT | V | 12729520 | 12731801 | WBGene00011248 | R11D1.10 | R11D1.10                    |
| -0.00455953906316253 AGIWUR18000                                               |    |   |          |          |                |          |                             |
| N2                                                                             | CT | V | 12731772 | 12733645 | WBGene00000984 | dhs-21   | R11D1.11                    |
| 0.0656810112381159 AGIWUR471;AGIWUR5236;AGIWUR10383                            |    |   |          |          |                |          |                             |
| N2                                                                             | CT | V | 12734183 | 12736041 | WBGene00007604 | xbx-9    | C15C8.1 0.00466360208229943 |
| AGIWUR42554                                                                    |    |   |          |          |                |          |                             |
| N2                                                                             | CT | V | 12736703 | 12741211 | WBGene00000521 | cky-1    | C15C8.2 -0.0203815955206714 |
| AGIWUR14255;AGIWUR27971;AGIWUR29840                                            |    |   |          |          |                |          |                             |
| N2                                                                             | CT | V | 12742041 | 12744207 | WBGene00007605 | asp-10   | C15C8.3 0.105440134959434   |
| AGIWUR21210                                                                    |    |   |          |          |                |          |                             |
| N2                                                                             | CT | V | 12745201 | 12747463 | WBGene00007606 | C15C8.4  | C15C8.4 -0.0610589888299273 |
| AGIWUR16153;AGIWUR25403;AGIWUR26667                                            |    |   |          |          |                |          |                             |
| N2                                                                             | CT | V | 12748292 | 12749963 | WBGene00007607 | C15C8.5  | C15C8.5 -0.269882057221404  |
| AGIWUR10751                                                                    |    |   |          |          |                |          |                             |
| N2                                                                             | CT | V | 12750030 | 12751545 | WBGene00007608 | C15C8.6  | C15C8.6 -0.0345994958380089 |
| AGIWUR26274                                                                    |    |   |          |          |                |          |                             |
| N2                                                                             | CT | V | 12751603 | 12752507 | WBGene00045460 | C15C8.8  | C15C8.8 -0.0327994422005267 |
| AGIWUR4939;AGIWUR8729;AGIWUR13587;AGIWUR39928;AGIWUR40646                      |    |   |          |          |                |          |                             |
| N2                                                                             | CT | V | 12752762 | 12754893 | WBGene00001675 | gpa-13   | F18E2.5 -0.140845235355254  |
| AGIWUR35469                                                                    |    |   |          |          |                |          |                             |
| N2                                                                             | CT | V | 12757591 | 12760227 | WBGene00008936 | pap1-1   | F18E2.1 -0.0530282985623334 |
| AGIWUR19152                                                                    |    |   |          |          |                |          |                             |
| N2                                                                             | CT | V | 12761044 | 12763375 | WBGene00006512 | abcf-1   | F18E2.2 -0.0919438010011042 |
| AGIWUR107;AGIWUR5368;AGIWUR41006;AGIWUR43678                                   |    |   |          |          |                |          |                             |
| N2                                                                             | CT | V | 12763945 | 12767933 | WBGene00004738 | scc-3    | F18E2.3 0.371097424740654   |
| AGIWUR20773                                                                    |    |   |          |          |                |          |                             |
| N2                                                                             | CT | V | 12769268 | 12770845 | WBGene00008937 | srt-43   | F18E2.4 0.233144349911703   |
| AGIWUR45016                                                                    |    |   |          |          |                |          |                             |
| N2                                                                             | CT | V | 12773522 | 12783063 | WBGene00013902 | ZC455.1  | ZC455.1 -0.0303329676723889 |
| AGIWUR5386;AGIWUR43768                                                         |    |   |          |          |                |          |                             |
| N2                                                                             | CT | V | 12783222 | 12784864 | WBGene00013907 | sre-20   | ZC455.7 -1.31011824058462   |

|                                                                             |    |   |          |          |                |         |                             |
|-----------------------------------------------------------------------------|----|---|----------|----------|----------------|---------|-----------------------------|
| AGIWUR19270                                                                 |    |   |          |          |                |         |                             |
| N2                                                                          | CT | V | 12785154 | 12787126 | WBGene00001429 | fkf-4   | ZC455.10                    |
| 0.0348077589506044 AGIWUR2842                                               |    |   |          |          |                |         |                             |
| N2                                                                          | CT | V | 12787269 | 12788551 | WBGene00013909 | srbc-44 | ZC455.9 -0.251238814141978  |
| AGIWUR23977                                                                 |    |   |          |          |                |         |                             |
| N2                                                                          | CT | V | 12789197 | 12790518 | WBGene00013908 | srbc-43 | ZC455.8 0.0785171614640134  |
| AGIWUR31402                                                                 |    |   |          |          |                |         |                             |
| N2                                                                          | CT | V | 12790698 | 12792965 | WBGene00013906 | ugt-5   | ZC455.6 -0.236689549730073  |
| AGIWUR26588;AGIWUR32844;AGIWUR35067;AGIWUR35571;AGIWUR42083;AGIWUR44576     |    |   |          |          |                |         |                             |
| N2                                                                          | CT | V | 12793020 | 12795336 | WBGene00013905 | ugt-4   | ZC455.5                     |
| -0.00557737235643607 AGIWUR17590;AGIWUR32025;AGIWUR37226;AGIWUR44616        |    |   |          |          |                |         |                             |
| N2                                                                          | CT | V | 12795484 | 12798154 | WBGene00013904 | ugt-6   | ZC455.4 -0.279687347079395  |
| AGIWUR2287                                                                  |    |   |          |          |                |         |                             |
| N2                                                                          | CT | V | 12798327 | 12800193 | WBGene00013903 | ugt-3   | ZC455.3 -0.607932851567481  |
| AGIWUR23933                                                                 |    |   |          |          |                |         |                             |
| N2                                                                          | CT | V | 12803574 | 12804550 | WBGene00013910 | srbc-45 | ZC455.11                    |
| 0.11442710099743 AGIWUR5861;AGIWUR24206;AGIWUR34533;AGIWUR37594;AGIWUR41557 |    |   |          |          |                |         |                             |
| N2                                                                          | CT | V | 12805149 | 12806128 | WBGene00044102 | srbc-46 | ZC455.12                    |
| 0.493649029041025 AGIWUR5830                                                |    |   |          |          |                |         |                             |
| N2                                                                          | CT | V | 12806490 | 12808277 | WBGene00077562 | ZC443.7 | ZC443.7 0.158136593835509   |
| AGIWUR3475;AGIWUR31113                                                      |    |   |          |          |                |         |                             |
| N2                                                                          | CT | V | 12808422 | 12810080 | WBGene00013896 | ZC443.1 | ZC443.1 -0.0752062567982854 |
| AGIWUR20062                                                                 |    |   |          |          |                |         |                             |
| N2                                                                          | CT | V | 12812258 | 12814122 | WBGene00013898 | ZC443.3 | ZC443.3 0.0705891851234526  |
| AGIWUR17607                                                                 |    |   |          |          |                |         |                             |
| N2                                                                          | CT | V | 12816912 | 12819545 | WBGene00013899 | ZC443.4 | ZC443.4 0.072174947313778   |
| AGIWUR34599                                                                 |    |   |          |          |                |         |                             |
| N2                                                                          | CT | V | 12820265 | 12822758 | WBGene00013900 | ugt-18  | ZC443.5 0.0565800537380161  |
| AGIWUR10265                                                                 |    |   |          |          |                |         |                             |
| N2                                                                          | CT | V | 12825024 | 12827432 | WBGene00013901 | ugt-16  | ZC443.6 0.285703473115099   |
| AGIWUR4668                                                                  |    |   |          |          |                |         |                             |
| N2                                                                          | CT | V | 12827770 | 12830109 | WBGene00008097 | ugt-15  | C44H9.1 0.00916332674536324 |
| AGIWUR39382                                                                 |    |   |          |          |                |         |                             |
| N2                                                                          | CT | V | 12830804 | 12834438 | WBGene00008098 | C44H9.2 | C44H9.2 0.153278223277868   |
| AGIWUR13206                                                                 |    |   |          |          |                |         |                             |
| N2                                                                          | CT | V | 12835708 | 12839783 | WBGene00008099 | C44H9.4 | C44H9.4 -0.22623830903207   |
| AGIWUR41365                                                                 |    |   |          |          |                |         |                             |
| N2                                                                          | CT | V | 12842494 | 12845330 | WBGene00008101 | C44H9.6 | C44H9.6 -0.0937456521843529 |
| AGIWUR44468                                                                 |    |   |          |          |                |         |                             |

|                                                                                        |    |   |          |          |                |          |          |                     |
|----------------------------------------------------------------------------------------|----|---|----------|----------|----------------|----------|----------|---------------------|
| N2                                                                                     | CT | V | 12846721 | 12849864 | WBGene00008100 | C44H9.5  | C44H9.5  | 0.0234286746156647  |
| AGIWUR12662;AGIWUR43467                                                                |    |   |          |          |                |          |          |                     |
| N2                                                                                     | CT | V | 12853015 | 12854839 | WBGene00008102 | C44H9.7  | C44H9.7  | -0.149452650819355  |
| AGIWUR18702;AGIWUR19111;AGIWUR29062                                                    |    |   |          |          |                |          |          |                     |
| N2                                                                                     | CT | V | 12859381 | 12863833 | WBGene00011587 | T07F10.1 |          | T07F10.1            |
| -0.002829608457521 AGIWUR12497                                                         |    |   |          |          |                |          |          |                     |
| N2                                                                                     | CT | V | 12868026 | 12870035 | WBGene00011589 | T07F10.3 |          | T07F10.3            |
| 0.179103979752641 AGIWUR5418;AGIWUR8235;AGIWUR9659;AGIWUR10901;AGIWUR13177;AGIWUR33700 |    |   |          |          |                |          |          |                     |
| N2                                                                                     | CT | V | 12872053 | 12882108 | WBGene00011590 | bus-19   | T07F10.4 |                     |
| -0.0419826934622183 AGIWUR573;AGIWUR18516;AGIWUR42616                                  |    |   |          |          |                |          |          |                     |
| N2                                                                                     | CT | V | 12882078 | 12885960 | WBGene00011287 | glb-24   | R90.5    | 0.0710339550433412  |
| AGIWUR12824;AGIWUR18804;AGIWUR38495                                                    |    |   |          |          |                |          |          |                     |
| N2                                                                                     | CT | V | 12891523 | 12895872 | WBGene00011283 | R90.1    | R90.1    | -0.0264639497507204 |
| AGIWUR14152;AGIWUR38711                                                                |    |   |          |          |                |          |          |                     |
| N2                                                                                     | CT | V | 12903551 | 12904160 | WBGene00011284 | ttr-27   | R90.2    | 0.0304965346290054  |
| AGIWUR18386                                                                            |    |   |          |          |                |          |          |                     |
| N2                                                                                     | CT | V | 12904213 | 12905168 | WBGene00011285 | ttr-28   | R90.3    | 0.0205482691925765  |
| AGIWUR1453                                                                             |    |   |          |          |                |          |          |                     |
| N2                                                                                     | CT | V | 12906131 | 12906746 | WBGene00011286 | ttr-29   | R90.4    | 0.0294054218757651  |
| AGIWUR25178                                                                            |    |   |          |          |                |          |          |                     |
| N2                                                                                     | CT | V | 12910113 | 12917198 | WBGene00003738 | nid-1    | F54F3.1  | 0.0132736621260214  |
| AGIWUR44234                                                                            |    |   |          |          |                |          |          |                     |
| N2                                                                                     | CT | V | 12917450 | 12918902 | WBGene00014770 | F54F3.2  | F54F3.2  | -0.357997622119036  |
| AGIWUR20453;AGIWUR24291                                                                |    |   |          |          |                |          |          |                     |
| N2                                                                                     | CT | V | 12919952 | 12921692 | WBGene00010062 | lipl-1   | F54F3.3  | -0.631987820556072  |
| AGIWUR44387                                                                            |    |   |          |          |                |          |          |                     |
| N2                                                                                     | CT | V | 12922608 | 12924156 | WBGene00010063 | dhfs-4   | F54F3.4  | -0.0864090485381386 |
| AGIWUR2741                                                                             |    |   |          |          |                |          |          |                     |
| N2                                                                                     | CT | V | 12924441 | 12928173 | WBGene00004150 | pqn-67   | T16G1.1  | 0.204221154068984   |
| AGIWUR806;AGIWUR25408;AGIWUR26872                                                      |    |   |          |          |                |          |          |                     |
| N2                                                                                     | CT | V | 12929478 | 12932966 | WBGene00011796 | T16G1.2  | T16G1.2  | 0.102699293044552   |
| AGIWUR33                                                                               |    |   |          |          |                |          |          |                     |
| N2                                                                                     | CT | V | 12932941 | 12935112 | WBGene00011801 | T16G1.7  | T16G1.7  | -0.183979695048141  |
| AGIWUR18524                                                                            |    |   |          |          |                |          |          |                     |
| N2                                                                                     | CT | V | 12935538 | 12937263 | WBGene00011800 | T16G1.6  | T16G1.6  | -0.117996793478971  |
| AGIWUR22206;AGIWUR22875;AGIWUR25143                                                    |    |   |          |          |                |          |          |                     |
| N2                                                                                     | CT | V | 12937654 | 12939506 | WBGene00011799 | T16G1.5  | T16G1.5  | 0.0288686005975789  |
| AGIWUR22764                                                                            |    |   |          |          |                |          |          |                     |
| N2                                                                                     | CT | V | 12940038 | 12941847 | WBGene00011798 | T16G1.4  | T16G1.4  | -0.0943114080787826 |

|                                                                                                            |    |   |          |          |                |         |          |                     |  |
|------------------------------------------------------------------------------------------------------------|----|---|----------|----------|----------------|---------|----------|---------------------|--|
| AGIWUR4039;AGIWUR26972;AGIWUR30778                                                                         |    |   |          |          |                |         |          |                     |  |
| N2                                                                                                         | CT | V | 12942365 | 12944329 | WBGene00011797 | T16G1.3 | T16G1.3  | 0.226702035834441   |  |
| AGIWUR9650                                                                                                 |    |   |          |          |                |         |          |                     |  |
| N2                                                                                                         | CT | V | 12944861 | 12946853 | WBGene00001711 | grl-2   | T16G1.8  | -0.290610018087604  |  |
| AGIWUR39625                                                                                                |    |   |          |          |                |         |          |                     |  |
| N2                                                                                                         | CT | V | 12946815 | 12950658 | WBGene00011802 | T16G1.9 | T16G1.9  | 0.0867547184373016  |  |
| AGIWUR42413                                                                                                |    |   |          |          |                |         |          |                     |  |
| N2                                                                                                         | CT | V | 12952636 | 12953208 | WBGene00004151 | pqn-68  | T16G1.10 |                     |  |
| -0.192048875548741                                                                                         |    |   |          |          |                |         |          |                     |  |
| AGIWUR24781                                                                                                |    |   |          |          |                |         |          |                     |  |
| N2                                                                                                         | CT | V | 12954002 | 12955229 | WBGene00001233 | eif-3.K | T16G1.11 |                     |  |
| 0.0101588460204063                                                                                         |    |   |          |          |                |         |          |                     |  |
| AGIWUR12786;AGIWUR16029;AGIWUR16352                                                                        |    |   |          |          |                |         |          |                     |  |
| N2                                                                                                         | CT | V | 12955203 | 12961149 | WBGene00011307 | mpst-7  | R186.6   | -0.150706155766759  |  |
| AGIWUR36157                                                                                                |    |   |          |          |                |         |          |                     |  |
| N2                                                                                                         | CT | V | 12961474 | 12963336 | WBGene00011305 | R186.1  | R186.1   | -0.0131352087268386 |  |
| AGIWUR27464                                                                                                |    |   |          |          |                |         |          |                     |  |
| N2                                                                                                         | CT | V | 12964376 | 12966022 | WBGene00005113 | srd-35  | R186.2   |                     |  |
| -0.00335302141086213                                                                                       |    |   |          |          |                |         |          |                     |  |
| AGIWUR7784;AGIWUR33653;AGIWUR35769;AGIWUR44051;AGIWUR45110                                                 |    |   |          |          |                |         |          |                     |  |
| N2                                                                                                         | CT | V | 12966000 | 12967210 | WBGene00011306 | R186.3  | R186.3   | -0.0565399149563959 |  |
| AGIWUR12413                                                                                                |    |   |          |          |                |         |          |                     |  |
| N2                                                                                                         | CT | V | 12967309 | 12967982 | WBGene00011309 | R186.8  | R186.8   | -0.0462349378291407 |  |
| AGIWUR8865;AGIWUR11438;AGIWUR14545;AGIWUR19202;AGIWUR28961;AGIWUR29160;AGIWUR36476;AGIWUR40001;AGIWUR43571 |    |   |          |          |                |         |          |                     |  |
| N2                                                                                                         | CT | V | 12968855 | 12970730 | WBGene00003031 | lin-46  | R186.4   | -0.259934631481686  |  |
| AGIWUR25766                                                                                                |    |   |          |          |                |         |          |                     |  |
| N2                                                                                                         | CT | V | 12971110 | 12973282 | WBGene00011308 | R186.7  | R186.7   | 0.101011807350286   |  |
| AGIWUR34982                                                                                                |    |   |          |          |                |         |          |                     |  |
| N2                                                                                                         | CT | V | 12973261 | 12976704 | WBGene00004793 | shw-3   | R186.5   | -0.188992545413603  |  |
| AGIWUR30708                                                                                                |    |   |          |          |                |         |          |                     |  |
| N2                                                                                                         | CT | V | 12988543 | 12992185 | WBGene00008851 | F15B9.8 | F15B9.8  | 0.0831168377634492  |  |
| AGIWUR9286;AGIWUR19700;AGIWUR20843                                                                         |    |   |          |          |                |         |          |                     |  |
| N2                                                                                                         | CT | V | 12993180 | 12994822 | WBGene00001109 | dsl-7   | F15B9.9  | 0.170811415059818   |  |
| AGIWUR34207                                                                                                |    |   |          |          |                |         |          |                     |  |
| N2                                                                                                         | CT | V | 12995569 | 12996836 | WBGene00001389 | far-5   | F15B9.3  | 0.0678386761903624  |  |
| AGIWUR5382;AGIWUR7263;AGIWUR41491;AGIWUR45201                                                              |    |   |          |          |                |         |          |                     |  |
| N2                                                                                                         | CT | V | 12996787 | 12997524 | WBGene00001387 | far-3   | F15B9.1  | -0.0933244028128701 |  |
| AGIWUR34379                                                                                                |    |   |          |          |                |         |          |                     |  |
| N2                                                                                                         | CT | V | 12998427 | 12999659 | WBGene00001388 | far-4   | F15B9.2  | -0.0451184866842773 |  |
| AGIWUR39090                                                                                                |    |   |          |          |                |         |          |                     |  |
| N2                                                                                                         | CT | V | 13002317 | 13006987 | WBGene00008848 | inft-2  | F15B9.4  | 0.0402847470894585  |  |
| AGIWUR36918                                                                                                |    |   |          |          |                |         |          |                     |  |

|                                                                                          |    |   |          |          |                |          |                             |
|------------------------------------------------------------------------------------------|----|---|----------|----------|----------------|----------|-----------------------------|
| N2                                                                                       | CT | V | 13006981 | 13008925 | WBGene00045418 | F15B9.10 | F15B9.10                    |
| -0.0316645727630949 AGIWUR7185                                                           |    |   |          |          |                |          |                             |
| N2                                                                                       | CT | V | 13014144 | 13016641 | WBGene00008850 | F15B9.6  | F15B9.6 0.296134240531217   |
| AGIWUR13550                                                                              |    |   |          |          |                |          |                             |
| N2                                                                                       | CT | V | 13019068 | 13033373 | WBGene00001475 | fmi-1    | F15B9.7 0.0342091720933233  |
| AGIWUR21662;AGIWUR42470;AGIWUR43120                                                      |    |   |          |          |                |          |                             |
| N2                                                                                       | CT | V | 13033529 | 13034164 | WBGene00012335 | W07G4.1  | W07G4.1                     |
| -0.00852174148237195 AGIWUR6064;AGIWUR28273                                              |    |   |          |          |                |          |                             |
| N2                                                                                       | CT | V | 13034267 | 13034704 | WBGene00077565 | W07G4.7  | W07G4.7 0.318036769616899   |
| AGIWUR11268                                                                              |    |   |          |          |                |          |                             |
| N2                                                                                       | CT | V | 13036996 | 13041879 | WBGene00012337 | W07G4.3  | W07G4.3 -0.0353132077022735 |
| AGIWUR1071;AGIWUR12298;AGIWUR14469;AGIWUR14495;AGIWUR31800;AGIWUR32655;AGIWUR43836       |    |   |          |          |                |          |                             |
| N2                                                                                       | CT | V | 13043712 | 13046355 | WBGene00002250 | lap-2    | W07G4.4 0.0323866914681723  |
| AGIWUR38316                                                                              |    |   |          |          |                |          |                             |
| N2                                                                                       | CT | V | 13047980 | 13049238 | WBGene00012339 | W07G4.5  | W07G4.5 -0.24858689408342   |
| AGIWUR3319                                                                               |    |   |          |          |                |          |                             |
| N2                                                                                       | CT | V | 13049730 | 13053910 | WBGene00005652 | srr-1    | W07G4.6 -0.0558609647572865 |
| AGIWUR30904                                                                              |    |   |          |          |                |          |                             |
| N2                                                                                       | CT | V | 13065461 | 13065794 | WBGene00009631 | F42E8.2  | F42E8.2 0.175346608731147   |
| AGIWUR41554                                                                              |    |   |          |          |                |          |                             |
| N2                                                                                       | CT | V | 13066640 | 13071152 | WBGene00007908 | C34B4.3  | C34B4.3 -0.121657671840306  |
| AGIWUR9410;AGIWUR40112                                                                   |    |   |          |          |                |          |                             |
| N2                                                                                       | CT | V | 13083055 | 13090260 | WBGene00007907 | C34B4.2  | C34B4.2 -0.0499385826854351 |
| AGIWUR14470;AGIWUR23901;AGIWUR38007                                                      |    |   |          |          |                |          |                             |
| N2                                                                                       | CT | V | 13089803 | 13092512 | WBGene00007909 | C34B4.4  | C34B4.4 0.00746975954878737 |
| AGIWUR26382;AGIWUR37670                                                                  |    |   |          |          |                |          |                             |
| N2                                                                                       | CT | V | 13092666 | 13094446 | WBGene00077698 | lurp-4   | C34B4.7 -0.382113011622733  |
| AGIWUR5631;AGIWUR11097                                                                   |    |   |          |          |                |          |                             |
| N2                                                                                       | CT | V | 13095954 | 13097457 | WBGene00007910 | C34B4.5  | C34B4.5 0.270402896594513   |
| AGIWUR38581                                                                              |    |   |          |          |                |          |                             |
| N2                                                                                       | CT | V | 13098910 | 13110337 | WBGene00003143 | max-1    | C34B4.1 -0.0191840290035294 |
| AGIWUR39031                                                                              |    |   |          |          |                |          |                             |
| N2                                                                                       | CT | V | 13116488 | 13120167 | WBGene00007150 | acly-2   | B0365.1 -0.07523101740885   |
| AGIWUR4217                                                                               |    |   |          |          |                |          |                             |
| N2                                                                                       | CT | V | 13120676 | 13123421 | WBGene00007151 | B0365.2  | B0365.2 -0.2203833320116    |
| AGIWUR14820                                                                              |    |   |          |          |                |          |                             |
| N2                                                                                       | CT | V | 13126414 | 13129995 | WBGene00001137 | eat-6    | B0365.3 0.231657092134022   |
| AGIWUR190;AGIWUR311;AGIWUR2417;AGIWUR3481;AGIWUR3982;AGIWUR25633;AGIWUR27717;AGIWUR33762 |    |   |          |          |                |          |                             |
| N2                                                                                       | CT | V | 13131873 | 13133565 | WBGene00219208 | B0365.9  | B0365.9 -0.459040101470851  |

|                                                                                              |    |   |          |          |                |         |         |                     |  |
|----------------------------------------------------------------------------------------------|----|---|----------|----------|----------------|---------|---------|---------------------|--|
| AGIWUR34951                                                                                  |    |   |          |          |                |         |         |                     |  |
| N2                                                                                           | CT | V | 13134965 | 13138101 | WBGene00007153 | clec-41 | B0365.6 | 0.309319371661683   |  |
| AGIWUR3662;AGIWUR18488;AGIWUR26592;AGIWUR36559;AGIWUR44784                                   |    |   |          |          |                |         |         |                     |  |
| N2                                                                                           | CT | V | 13138981 | 13152466 | WBGene00007154 | dhc-3   | B0365.7 | 0.0215772092742639  |  |
| AGIWUR24444;AGIWUR29005                                                                      |    |   |          |          |                |         |         |                     |  |
| N2                                                                                           | CT | V | 13152894 | 13176111 | WBGene00011647 | noca-1  | T09E8.1 | 0.174375898728737   |  |
| AGIWUR2137;AGIWUR2843;AGIWUR4645;AGIWUR19230;AGIWUR24927;AGIWUR34375;AGIWUR42573;AGIWUR43631 |    |   |          |          |                |         |         |                     |  |
| N2                                                                                           | CT | V | 13176711 | 13180189 | WBGene00001874 | him-17  | T09E8.2 | -0.0059137575367032 |  |
| AGIWUR42908                                                                                  |    |   |          |          |                |         |         |                     |  |
| N2                                                                                           | CT | V | 13180330 | 13181534 | WBGene00011648 | cni-1   | T09E8.3 | 0.0287145878572925  |  |
| AGIWUR7422;AGIWUR16265;AGIWUR18132;AGIWUR37833                                               |    |   |          |          |                |         |         |                     |  |
| N2                                                                                           | CT | V | 13181580 | 13184237 | WBGene00011649 | T09E8.4 | T09E8.4 | -0.183562056700683  |  |
| AGIWUR146                                                                                    |    |   |          |          |                |         |         |                     |  |
| N2                                                                                           | CT | V | 13185684 | 13187428 | WBGene00005518 | sri-6   | T09E8.5 | 0.0373120518621874  |  |
| AGIWUR29710                                                                                  |    |   |          |          |                |         |         |                     |  |
| N2                                                                                           | CT | V | 13188025 | 13189406 | WBGene00044199 | F57B1.8 | F57B1.8 | 0.0244625063684447  |  |
| AGIWUR1263;AGIWUR10046;AGIWUR29953                                                           |    |   |          |          |                |         |         |                     |  |
| N2                                                                                           | CT | V | 13191707 | 13193538 | WBGene00006311 | sun-1   | F57B1.2 | -0.0443540727660849 |  |
| AGIWUR36486                                                                                  |    |   |          |          |                |         |         |                     |  |
| N2                                                                                           | CT | V | 13193933 | 13195648 | WBGene00010187 | F57B1.1 | F57B1.1 |                     |  |
| -0.00276184138345847 AGIWUR12797;AGIWUR18184;AGIWUR21634;AGIWUR24778;AGIWUR26707;AGIWUR39169 |    |   |          |          |                |         |         |                     |  |
| N2                                                                                           | CT | V | 13196088 | 13197923 | WBGene00045488 | F57B1.9 | F57B1.9 | -0.115369138208652  |  |
| AGIWUR11389;AGIWUR18594;AGIWUR29360;AGIWUR32520;AGIWUR36306;AGIWUR38732                      |    |   |          |          |                |         |         |                     |  |
| N2                                                                                           | CT | V | 13200982 | 13202192 | WBGene00000733 | col-160 | F57B1.4 | 0.0231976027433909  |  |
| AGIWUR7499                                                                                   |    |   |          |          |                |         |         |                     |  |
| N2                                                                                           | CT | V | 13207763 | 13208762 | WBGene00010188 | F57B1.5 | F57B1.5 | -0.125303911601014  |  |
| AGIWUR35756                                                                                  |    |   |          |          |                |         |         |                     |  |
| N2                                                                                           | CT | V | 13209645 | 13213462 | WBGene00010189 | F57B1.6 | F57B1.6 | -0.576086183410867  |  |
| AGIWUR3188                                                                                   |    |   |          |          |                |         |         |                     |  |
| N2                                                                                           | CT | V | 13222620 | 13225941 | WBGene00007929 | dmd-10  | C34D1.1 | 0.091564416421031   |  |
| AGIWUR28168;AGIWUR36450                                                                      |    |   |          |          |                |         |         |                     |  |
| N2                                                                                           | CT | V | 13236171 | 13236604 | WBGene00007930 | dmd-11  | C34D1.2 | 0.116743154757069   |  |
| AGIWUR25121                                                                                  |    |   |          |          |                |         |         |                     |  |
| N2                                                                                           | CT | V | 13246591 | 13249536 | WBGene00003850 | odr-3   | C34D1.3 | -0.0605351055967205 |  |
| AGIWUR520                                                                                    |    |   |          |          |                |         |         |                     |  |
| N2                                                                                           | CT | V | 13257097 | 13259311 | WBGene00007931 | C34D1.4 | C34D1.4 | 0.0104013280134048  |  |
| AGIWUR26252                                                                                  |    |   |          |          |                |         |         |                     |  |
| N2                                                                                           | CT | V | 13264546 | 13269820 | WBGene00007932 | zip-5   | C34D1.5 | -0.0402995306470579 |  |
| AGIWUR12576                                                                                  |    |   |          |          |                |         |         |                     |  |

|                                                                                                           |    |   |          |          |                |          |          |                     |
|-----------------------------------------------------------------------------------------------------------|----|---|----------|----------|----------------|----------|----------|---------------------|
| N2                                                                                                        | CT | V | 13273153 | 13295978 | WBGene00009337 | uig-1    | F32F2.1  | 0.0534398397170186  |
| AGIWUR6427;AGIWUR10081;AGIWUR10403;AGIWUR16513;AGIWUR18628;AGIWUR19651;AGIWUR21862;AGIWUR43746            |    |   |          |          |                |          |          |                     |
| N2                                                                                                        | CT | V | 13297520 | 13298050 | WBGene00007747 | C26E1.1  | C26E1.1  | -0.0856644962988202 |
| AGIWUR35253                                                                                               |    |   |          |          |                |          |          |                     |
| N2                                                                                                        | CT | V | 13301652 | 13304785 | WBGene00007749 | ceh-79   | C26E1.3  | -0.124149986486266  |
| AGIWUR27287                                                                                               |    |   |          |          |                |          |          |                     |
| N2                                                                                                        | CT | V | 13305138 | 13307271 | WBGene00007748 | C26E1.2  | C26E1.2  | 0.00325363835118075 |
| AGIWUR24177                                                                                               |    |   |          |          |                |          |          |                     |
| N2                                                                                                        | CT | V | 13308916 | 13309423 | WBGene00008217 | C50B6.1  | C50B6.1  | 0.112637814533823   |
| AGIWUR2180;AGIWUR7650;AGIWUR34812;AGIWUR42323                                                             |    |   |          |          |                |          |          |                     |
| N2                                                                                                        | CT | V | 13310186 | 13312260 | WBGene00008218 | nasp-2   | C50B6.2  | -0.146864193456892  |
| AGIWUR1780                                                                                                |    |   |          |          |                |          |          |                     |
| N2                                                                                                        | CT | V | 13313575 | 13315812 | WBGene00008219 | C50B6.3  | C50B6.3  | -0.121409218073563  |
| AGIWUR28232                                                                                               |    |   |          |          |                |          |          |                     |
| N2                                                                                                        | CT | V | 13318464 | 13320080 | WBGene00005243 | srh-18   | C50B6.5  | -0.0647263778822076 |
| AGIWUR26672                                                                                               |    |   |          |          |                |          |          |                     |
| N2                                                                                                        | CT | V | 13320984 | 13322355 | WBGene00005240 | srh-15   | C50B6.6  | 0.32880338876646    |
| AGIWUR9319                                                                                                |    |   |          |          |                |          |          |                     |
| N2                                                                                                        | CT | V | 13322369 | 13324979 | WBGene00008220 | C50B6.7  | C50B6.7  | 0.0527983762586643  |
| AGIWUR37223                                                                                               |    |   |          |          |                |          |          |                     |
| N2                                                                                                        | CT | V | 13326339 | 13327634 | WBGene00014710 | C50B6.13 | C50B6.13 |                     |
| -0.498330657203471 AGIWUR9436;AGIWUR21227                                                                 |    |   |          |          |                |          |          |                     |
| N2                                                                                                        | CT | V | 13327763 | 13328866 | WBGene00006102 | str-37   | C50B6.12 |                     |
| -0.225412487190134 AGIWUR41798                                                                            |    |   |          |          |                |          |          |                     |
| N2                                                                                                        | CT | V | 13329193 | 13331019 | WBGene00003719 | nhr-129  | C50B6.14 |                     |
| -0.297729551861159 AGIWUR41684                                                                            |    |   |          |          |                |          |          |                     |
| N2                                                                                                        | CT | V | 13331117 | 13333871 | WBGene00008221 | nhr-168  | C50B6.8  | 0.224209449509823   |
| AGIWUR18922                                                                                               |    |   |          |          |                |          |          |                     |
| N2                                                                                                        | CT | V | 13336369 | 13337957 | WBGene00008222 | C50B6.9  | C50B6.9  | -0.142280643223637  |
| AGIWUR40384                                                                                               |    |   |          |          |                |          |          |                     |
| N2                                                                                                        | CT | V | 13337991 | 13339718 | WBGene00006072 | str-4    | C50B6.10 |                     |
| 0.0911069127340296 AGIWUR7313;AGIWUR29755;AGIWUR35114                                                     |    |   |          |          |                |          |          |                     |
| N2                                                                                                        | CT | V | 13340240 | 13343040 | WBGene00008223 | lgc-48   | C50B6.11 |                     |
| -0.171195323093769 AGIWUR4680                                                                             |    |   |          |          |                |          |          |                     |
| N2                                                                                                        | CT | V | 13346278 | 13356101 | WBGene00006693 | twk-43   | F32H5.7  | 0.0261253853645016  |
| AGIWUR1564;AGIWUR6551;AGIWUR16179;AGIWUR26578;AGIWUR32931;AGIWUR33454;AGIWUR35141;AGIWUR37747;AGIWUR40696 |    |   |          |          |                |          |          |                     |
| N2                                                                                                        | CT | V | 13356101 | 13358079 | WBGene00009347 | F32H5.1  | F32H5.1  | -0.111660865910462  |
| AGIWUR3189                                                                                                |    |   |          |          |                |          |          |                     |
| N2                                                                                                        | CT | V | 13359334 | 13360024 | WBGene00009349 | F32H5.3  | F32H5.3  | -0.0892791522265366 |



|                                                                       |    |   |          |          |                |         |          |                     |  |
|-----------------------------------------------------------------------|----|---|----------|----------|----------------|---------|----------|---------------------|--|
| AGIWUR33526;AGIWUR33920                                               |    |   |          |          |                |         |          |                     |  |
| N2                                                                    | CT | V | 13361203 | 13363357 | WBGene00009350 | F32H5.4 | F32H5.4  | -0.0965141047906322 |  |
| AGIWUR693;AGIWUR24348;AGIWUR36416                                     |    |   |          |          |                |         |          |                     |  |
| N2                                                                    | CT | V | 13363715 | 13364728 | WBGene00005203 | srg-46  | F32H5.5  | -0.114597484684811  |  |
| AGIWUR23784                                                           |    |   |          |          |                |         |          |                     |  |
| N2                                                                    | CT | V | 13367252 | 13369990 | WBGene00006016 | srx-125 | F32H5.6  | -0.290415935094577  |  |
| AGIWUR7412;AGIWUR9295;AGIWUR12807;AGIWUR17136;AGIWUR28275;AGIWUR43239 |    |   |          |          |                |         |          |                     |  |
| N2                                                                    | CT | V | 13370083 | 13380262 | WBGene00010867 | tag-260 | M04G12.1 |                     |  |
| 0.194759614137487 AGIWUR22793                                         |    |   |          |          |                |         |          |                     |  |
| N2                                                                    | CT | V | 13381189 | 13383077 | WBGene00000789 | cpz-2   | M04G12.2 |                     |  |
| 0.0379145450316898 AGIWUR646;AGIWUR7308;AGIWUR35528                   |    |   |          |          |                |         |          |                     |  |
| N2                                                                    | CT | V | 13383019 | 13385898 | WBGene00001554 | gcy-34  | M04G12.3 |                     |  |
| -0.199682590477236 AGIWUR44723                                        |    |   |          |          |                |         |          |                     |  |
| N2                                                                    | CT | V | 13386065 | 13391393 | WBGene00010868 | somi-1  | M04G12.4 |                     |  |
| 0.350477651784604 AGIWUR33719;AGIWUR38576                             |    |   |          |          |                |         |          |                     |  |
| N2                                                                    | CT | V | 13404031 | 13406014 | WBGene00009979 | cutl-1  | F53F1.1  | 0.231847676055187   |  |
| AGIWUR27799                                                           |    |   |          |          |                |         |          |                     |  |
| N2                                                                    | CT | V | 13406816 | 13408265 | WBGene00009980 | F53F1.2 | F53F1.2  | -0.0777903052406046 |  |
| AGIWUR5471                                                            |    |   |          |          |                |         |          |                     |  |
| N2                                                                    | CT | V | 13408242 | 13409832 | WBGene00009981 | F53F1.3 | F53F1.3  | -0.0602228092663584 |  |
| AGIWUR392                                                             |    |   |          |          |                |         |          |                     |  |
| N2                                                                    | CT | V | 13411077 | 13411717 | WBGene00009982 | F53F1.4 | F53F1.4  | -0.175795695650628  |  |
| AGIWUR6086;AGIWUR23571                                                |    |   |          |          |                |         |          |                     |  |
| N2                                                                    | CT | V | 13414902 | 13416121 | WBGene00009983 | cut-2   | F53F1.5  | 0.393097196521389   |  |
| AGIWUR19257                                                           |    |   |          |          |                |         |          |                     |  |
| N2                                                                    | CT | V | 13416103 | 13417604 | WBGene00009984 | F53F1.6 | F53F1.6  | 0.0373372750057364  |  |
| AGIWUR40851                                                           |    |   |          |          |                |         |          |                     |  |
| N2                                                                    | CT | V | 13419217 | 13420740 | WBGene00005719 | srv-8   | F53F1.7  | -0.272609367245957  |  |
| AGIWUR23144                                                           |    |   |          |          |                |         |          |                     |  |
| N2                                                                    | CT | V | 13421140 | 13423147 | WBGene00005720 | srv-9   | F53F1.8  | 0.0403757868337582  |  |
| AGIWUR31461                                                           |    |   |          |          |                |         |          |                     |  |
| N2                                                                    | CT | V | 13423908 | 13425266 | WBGene00005721 | srv-10  | F53F1.9  | 0.0194346756223114  |  |
| AGIWUR11420                                                           |    |   |          |          |                |         |          |                     |  |
| N2                                                                    | CT | V | 13425572 | 13426882 | WBGene00005096 | srd-18  | F53F1.10 |                     |  |
| 0.276451418276602 AGIWUR9433                                          |    |   |          |          |                |         |          |                     |  |
| N2                                                                    | CT | V | 13430651 | 13432714 | WBGene00005095 | srd-17  | Y2H9A.2  | -0.451900032144993  |  |
| AGIWUR19936;AGIWUR39164                                               |    |   |          |          |                |         |          |                     |  |
| N2                                                                    | CT | V | 13433050 | 13437545 | WBGene00003222 | mes-4   | Y2H9A.1  | -0.222791658841166  |  |
| AGIWUR3310;AGIWUR3946;AGIWUR40132                                     |    |   |          |          |                |         |          |                     |  |

|                                                                                                |    |   |          |          |                |          |          |                     |
|------------------------------------------------------------------------------------------------|----|---|----------|----------|----------------|----------|----------|---------------------|
| N2                                                                                             | CT | V | 13445745 | 13448815 | WBGene00012381 | Y2H9A.4  | Y2H9A.4  | 0.212378612050424   |
| AGIWUR16927                                                                                    |    |   |          |          |                |          |          |                     |
| N2                                                                                             | CT | V | 13451197 | 13452968 | WBGene00014744 | F25H9.9  | F25H9.9  | -0.0717865717410024 |
| AGIWUR18861;AGIWUR19729                                                                        |    |   |          |          |                |          |          |                     |
| N2                                                                                             | CT | V | 13453634 | 13455447 | WBGene00009134 | lurp-2   | F25H9.1  | 0.151517489191259   |
| AGIWUR10925                                                                                    |    |   |          |          |                |          |          |                     |
| N2                                                                                             | CT | V | 13455748 | 13457506 | WBGene00009136 | lurp-3   | F25H9.3  | -0.201899145463285  |
| AGIWUR12404                                                                                    |    |   |          |          |                |          |          |                     |
| N2                                                                                             | CT | V | 13458083 | 13459504 | WBGene00009135 | F25H9.2  | F25H9.2  | -0.154001549035177  |
| AGIWUR44437                                                                                    |    |   |          |          |                |          |          |                     |
| N2                                                                                             | CT | V | 13459525 | 13461803 | WBGene00009137 | bath-39  | F25H9.4  | -0.398904198330397  |
| AGIWUR26645;AGIWUR30359;AGIWUR38033                                                            |    |   |          |          |                |          |          |                     |
| N2                                                                                             | CT | V | 13463128 | 13467131 | WBGene00001496 | frm-10   | F25H9.5  | -0.0576735494120637 |
| AGIWUR33216                                                                                    |    |   |          |          |                |          |          |                     |
| N2                                                                                             | CT | V | 13466924 | 13468361 | WBGene00009138 | F25H9.6  | F25H9.6  | -0.157962613794782  |
| AGIWUR32693                                                                                    |    |   |          |          |                |          |          |                     |
| N2                                                                                             | CT | V | 13468376 | 13469087 | WBGene00009139 | F25H9.7  | F25H9.7  | -0.104835088964268  |
| AGIWUR43654                                                                                    |    |   |          |          |                |          |          |                     |
| N2                                                                                             | CT | V | 13469066 | 13473679 | WBGene00011692 | T10G3.1  | T10G3.1  | 0.00780087310241395 |
| AGIWUR7241                                                                                     |    |   |          |          |                |          |          |                     |
| N2                                                                                             | CT | V | 13474228 | 13476382 | WBGene00045340 | T10G3.8  | T10G3.8  | -0.145322830845156  |
| AGIWUR14677;AGIWUR41060                                                                        |    |   |          |          |                |          |          |                     |
| N2                                                                                             | CT | V | 13477384 | 13479858 | WBGene00011693 | T10G3.2  | T10G3.2  | 0.0777071303859556  |
| AGIWUR8086;AGIWUR22954                                                                         |    |   |          |          |                |          |          |                     |
| N2                                                                                             | CT | V | 13482075 | 13484435 | WBGene00011695 | T10G3.4  | T10G3.4  | 0.252215861127949   |
| AGIWUR35537                                                                                    |    |   |          |          |                |          |          |                     |
| N2                                                                                             | CT | V | 13487026 | 13489626 | WBGene00011694 | T10G3.3  | T10G3.3  | -0.432429163540553  |
| AGIWUR26800                                                                                    |    |   |          |          |                |          |          |                     |
| N2                                                                                             | CT | V | 13491068 | 13497372 | WBGene00011696 | eea-1    | T10G3.5  | 0.0877190734888416  |
| AGIWUR8015;AGIWUR12733;AGIWUR12749;AGIWUR19148;AGIWUR20934;AGIWUR24622;AGIWUR29618;AGIWUR33391 |    |   |          |          |                |          |          |                     |
| N2                                                                                             | CT | V | 13497690 | 13498819 | WBGene00001808 | gut-2    | T10G3.6  | -0.210768108283157  |
| AGIWUR7892;AGIWUR22967;AGIWUR32644;AGIWUR40313;AGIWUR43259;AGIWUR44390                         |    |   |          |          |                |          |          |                     |
| N2                                                                                             | CT | V | 13498786 | 13511718 | WBGene00000233 | avr-15   | R11G10.1 |                     |
| -0.102465542426625 AGIWUR30125;AGIWUR36531;AGIWUR42208                                         |    |   |          |          |                |          |          |                     |
| N2                                                                                             | CT | V | 13511905 | 13515215 | WBGene00011249 | R11G10.2 |          | R11G10.2            |
| 0.0648615404086996 AGIWUR5998;AGIWUR9152;AGIWUR37805                                           |    |   |          |          |                |          |          |                     |
| N2                                                                                             | CT | V | 13523530 | 13529658 | WBGene00044045 | R11G10.3 |          | R11G10.3            |
| 0.0562967108341503 AGIWUR15842;AGIWUR24465                                                     |    |   |          |          |                |          |          |                     |
| N2                                                                                             | CT | V | 13529562 | 13530744 | WBGene00008341 | ttr-44   | C56A3.2  | 0.243476892443777   |



|                                                                                                          |    |   |                     |                                                                                    |                |          |          |                    |
|----------------------------------------------------------------------------------------------------------|----|---|---------------------|------------------------------------------------------------------------------------|----------------|----------|----------|--------------------|
| N2                                                                                                       | CT | V | 13603276            | 13606701                                                                           | WBGene00001479 | fmo-4    | F53F4.5  | 0.0115647801184515 |
| AGIWUR8267;AGIWUR11593;AGIWUR14457;AGIWUR15870;AGIWUR23166;AGIWUR32253                                   |    |   |                     |                                                                                    |                |          |          |                    |
| N2                                                                                                       | CT | V | 13611337            | 13611888                                                                           | WBGene00009995 | F53F4.13 | F53F4.13 |                    |
|                                                                                                          |    |   | -0.13669304228959   | AGIWUR23892                                                                        |                |          |          |                    |
| N2                                                                                                       | CT | V | 13612439            | 13613979                                                                           | WBGene00009990 | F53F4.7  | F53F4.7  | 0.0190283756728133 |
| AGIWUR7953;AGIWUR24081;AGIWUR27468;AGIWUR28108;AGIWUR31833;AGIWUR33916                                   |    |   |                     |                                                                                    |                |          |          |                    |
| N2                                                                                                       | CT | V | 13614236            | 13617723                                                                           | WBGene00009991 | F53F4.8  | F53F4.8  | 0.084306604351374  |
| AGIWUR14887                                                                                              |    |   |                     |                                                                                    |                |          |          |                    |
| N2                                                                                                       | CT | V | 13617851            | 13619686                                                                           | WBGene00005089 | srd-11   | F53F4.9  | 0.0199644375569985 |
| AGIWUR30493                                                                                              |    |   |                     |                                                                                    |                |          |          |                    |
| N2                                                                                                       | CT | V | 13620976            | 13621459                                                                           | WBGene00009997 | F53F4.15 | F53F4.15 |                    |
|                                                                                                          |    |   | -0.0218869463194142 | AGIWUR2105                                                                         |                |          |          |                    |
| N2                                                                                                       | CT | V | 13621371            | 13621820                                                                           | WBGene00023419 | F53F4.16 | F53F4.16 |                    |
|                                                                                                          |    |   | -0.108553528959654  | AGIWUR33852;AGIWUR39333                                                            |                |          |          |                    |
| N2                                                                                                       | CT | V | 13622107            | 13624525                                                                           | WBGene00009993 | F53F4.11 | F53F4.11 |                    |
|                                                                                                          |    |   | 0.149674971622417   | AGIWUR5780                                                                         |                |          |          |                    |
| N2                                                                                                       | CT | V | 13626031            | 13627482                                                                           | WBGene00009994 | F53F4.12 | F53F4.12 |                    |
|                                                                                                          |    |   | -0.089024803607451  | AGIWUR9467                                                                         |                |          |          |                    |
| N2                                                                                                       | CT | V | 13627573            | 13629831                                                                           | WBGene00009996 | F53F4.14 | F53F4.14 |                    |
|                                                                                                          |    |   | -0.267179190348564  | AGIWUR9184                                                                         |                |          |          |                    |
| N2                                                                                                       | CT | V | 13629798            | 13634220                                                                           | WBGene00010426 | H37A05.2 | H37A05.2 |                    |
|                                                                                                          |    |   | 0.0676483696765864  | AGIWUR38170                                                                        |                |          |          |                    |
| N2                                                                                                       | CT | V | 13646884            | 13648397                                                                           | WBGene00044200 | H37A05.4 | H37A05.4 |                    |
|                                                                                                          |    |   | -0.166438719770429  | AGIWUR575;AGIWUR1900;AGIWUR15836;AGIWUR21231;AGIWUR35946;AGIWUR38688;AGIWUR44826   |                |          |          |                    |
| N2                                                                                                       | CT | V | 13650262            | 13654129                                                                           | WBGene00010425 | lpin-1   | H37A05.1 |                    |
| 0.0840482767456319                                                                                       |    |   |                     |                                                                                    |                |          |          |                    |
| AGIWUR2643;AGIWUR4507;AGIWUR9267;AGIWUR16504;AGIWUR18966;AGIWUR23328;AGIWUR29667;AGIWUR30580;AGIWUR31663 |    |   |                     |                                                                                    |                |          |          |                    |
| N2                                                                                                       | CT | V | 13661261            | 13664233                                                                           | WBGene00010279 | letm-1   | F58G11.1 |                    |
|                                                                                                          |    |   | -0.0624098985586059 | AGIWUR2941                                                                         |                |          |          |                    |
| N2                                                                                                       | CT | V | 13665397            | 13669292                                                                           | WBGene00010280 | rde-12   | F58G11.2 |                    |
|                                                                                                          |    |   | -0.0519586488427812 | AGIWUR4244;AGIWUR13280;AGIWUR18784;AGIWUR25411;AGIWUR28193;AGIWUR32694;AGIWUR43200 |                |          |          |                    |
| N2                                                                                                       | CT | V | 13669353            | 13671958                                                                           | WBGene00010281 | F58G11.3 | F58G11.3 |                    |
|                                                                                                          |    |   | 0.0221013390260296  | AGIWUR7764                                                                         |                |          |          |                    |
| N2                                                                                                       | CT | V | 13672597            | 13676024                                                                           | WBGene00010282 | F58G11.4 | F58G11.4 |                    |
|                                                                                                          |    |   | -0.0148795238526089 | AGIWUR45194                                                                        |                |          |          |                    |
| N2                                                                                                       | CT | V | 13675988            | 13678598                                                                           | WBGene00006442 | tag-65   | F58G11.5 |                    |
|                                                                                                          |    |   | -0.114940549863833  | AGIWUR25787;AGIWUR34042;AGIWUR42886                                                |                |          |          |                    |
| N2                                                                                                       | CT | V | 13678875            | 13681539                                                                           | WBGene00010283 | ccz-1    | F58G11.6 |                    |
|                                                                                                          |    |   | -0.0556910045292032 | AGIWUR38090                                                                        |                |          |          |                    |

|                                                                         |    |   |          |          |                |           |          |                     |
|-------------------------------------------------------------------------|----|---|----------|----------|----------------|-----------|----------|---------------------|
| N2                                                                      | CT | V | 13689892 | 13703330 | WBGene00011326 | T01D3.1   | T01D3.1  | -0.103660366028354  |
| AGIWUR6558;AGIWUR11831;AGIWUR40023                                      |    |   |          |          |                |           |          |                     |
| N2                                                                      | CT | V | 13704929 | 13711085 | WBGene00011328 | T01D3.3   | T01D3.3  | 0.0762774592082582  |
| AGIWUR15077;AGIWUR42302                                                 |    |   |          |          |                |           |          |                     |
| N2                                                                      | CT | V | 13712854 | 13716624 | WBGene00011329 | zipt-9    | T01D3.5  | 0.0825908644269333  |
| AGIWUR16842;AGIWUR19607                                                 |    |   |          |          |                |           |          |                     |
| N2                                                                      | CT | V | 13716824 | 13720402 | WBGene00011330 | T01D3.6   | T01D3.6  | 0.139377178412714   |
| AGIWUR15921;AGIWUR25854;AGIWUR27027;AGIWUR29108;AGIWUR29892;AGIWUR30923 |    |   |          |          |                |           |          |                     |
| N2                                                                      | CT | V | 13721249 | 13722196 | WBGene00009425 | sc1-16    | F35E12.1 |                     |
| -0.241449658883457 AGIWUR6100                                           |    |   |          |          |                |           |          |                     |
| N2                                                                      | CT | V | 13722254 | 13724881 | WBGene00009426 | F35E12.2  |          | F35E12.2            |
| -0.267272702428971 AGIWUR16340                                          |    |   |          |          |                |           |          |                     |
| N2                                                                      | CT | V | 13725905 | 13727014 | WBGene00009427 | fbxa-181  |          | F35E12.3            |
| -0.357945137908597 AGIWUR28078                                          |    |   |          |          |                |           |          |                     |
| N2                                                                      | CT | V | 13727763 | 13730776 | WBGene00009431 | dct-17    | F35E12.7 |                     |
| -0.0626461372704465 AGIWUR32743                                         |    |   |          |          |                |           |          |                     |
| N2                                                                      | CT | V | 13731506 | 13733387 | WBGene00009428 | F35E12.4  |          | F35E12.4            |
| 0.530313694772516 AGIWUR23886                                           |    |   |          |          |                |           |          |                     |
| N2                                                                      | CT | V | 13734118 | 13736247 | WBGene00009430 | F35E12.6  |          | F35E12.6            |
| -0.0284599997687351 AGIWUR2036                                          |    |   |          |          |                |           |          |                     |
| N2                                                                      | CT | V | 13737007 | 13738474 | WBGene00009429 | irg-5     | F35E12.5 |                     |
| -0.0131665556287075 AGIWUR30275                                         |    |   |          |          |                |           |          |                     |
| N2                                                                      | CT | V | 13741321 | 13745127 | WBGene00009433 | F35E12.9  |          | F35E12.9            |
| 0.0282663811124815 AGIWUR35609;AGIWUR36025                              |    |   |          |          |                |           |          |                     |
| N2                                                                      | CT | V | 13745696 | 13748758 | WBGene00009434 | F35E12.10 |          | F35E12.10           |
| -0.0877791684676339 AGIWUR6787                                          |    |   |          |          |                |           |          |                     |
| N2                                                                      | CT | V | 13749181 | 13751972 | WBGene00009432 | cld-9     | F35E12.8 |                     |
| 0.126086289691704 AGIWUR25822                                           |    |   |          |          |                |           |          |                     |
| N2                                                                      | CT | V | 13755011 | 13756409 | WBGene00008986 | F20G2.2   | F20G2.2  | -0.016421540041712  |
| AGIWUR38701                                                             |    |   |          |          |                |           |          |                     |
| N2                                                                      | CT | V | 13758090 | 13759945 | WBGene00044920 | F20G2.7   | F20G2.7  | -0.0105395317132997 |
| AGIWUR6299;AGIWUR17995;AGIWUR22254;AGIWUR33333;AGIWUR37779;AGIWUR44262  |    |   |          |          |                |           |          |                     |
| N2                                                                      | CT | V | 13763077 | 13765980 | WBGene00008989 | F20G2.6   | F20G2.6  | 0.0599303116025922  |
| AGIWUR30925                                                             |    |   |          |          |                |           |          |                     |
| N2                                                                      | CT | V | 13765926 | 13768552 | WBGene00008987 | F20G2.3   | F20G2.3  | -0.0548290926114454 |
| AGIWUR23110                                                             |    |   |          |          |                |           |          |                     |
| N2                                                                      | CT | V | 13769669 | 13771279 | WBGene00003543 | nas-24    | F20G2.4  | -0.456579290881428  |
| AGIWUR9822                                                              |    |   |          |          |                |           |          |                     |
| N2                                                                      | CT | V | 13771508 | 13773695 | WBGene00008988 | F20G2.5   | F20G2.5  | 0.133225561021741   |

AGIWUR967;AGIWUR2052;AGIWUR2758;AGIWUR5251;AGIWUR8818;AGIWUR31389;AGIWUR32219;AGIWUR33248;AGIWUR34200;AGIWUR38036

|                      |    |   |                                                                                 |          |                |           |           |
|----------------------|----|---|---------------------------------------------------------------------------------|----------|----------------|-----------|-----------|
| N2                   | CT | V | 13775751                                                                        | 13777767 | WBGene00009971 | F53C11.1  | F53C11.1  |
| 0.190750426512395    |    |   | AGIWUR41401                                                                     |          |                |           |           |
| N2                   | CT | V | 13778015                                                                        | 13778592 | WBGene00044921 | F53C11.9  | F53C11.9  |
| -0.183829134551576   |    |   | AGIWUR658;AGIWUR7729;AGIWUR17506                                                |          |                |           |           |
| N2                   | CT | V | 13778633                                                                        | 13781625 | WBGene00009972 | oac-33    | F53C11.2  |
| 0.178798447555804    |    |   | AGIWUR43622                                                                     |          |                |           |           |
| N2                   | CT | V | 13782399                                                                        | 13784102 | WBGene00009973 | F53C11.3  | F53C11.3  |
| 0.134291337009936    |    |   | AGIWUR21156                                                                     |          |                |           |           |
| N2                   | CT | V | 13784095                                                                        | 13787712 | WBGene00009974 | F53C11.4  | F53C11.4  |
| -0.00997977941863049 |    |   | AGIWUR6856;AGIWUR16078;AGIWUR17928                                              |          |                |           |           |
| N2                   | CT | V | 13787536                                                                        | 13796254 | WBGene00009975 | F53C11.5  | F53C11.5  |
| 0.0559382194046893   |    |   | AGIWUR14374                                                                     |          |                |           |           |
| N2                   | CT | V | 13796641                                                                        | 13800577 | WBGene00006684 | twk-32    | F53C11.6  |
| -0.00370811065027699 |    |   | AGIWUR19031                                                                     |          |                |           |           |
| N2                   | CT | V | 13800976                                                                        | 13804282 | WBGene00009976 | swan-2    | F53C11.7  |
| -0.0548856139777918  |    |   | AGIWUR2857                                                                      |          |                |           |           |
| N2                   | CT | V | 13804395                                                                        | 13807237 | WBGene00009977 | swan-1    | F53C11.8  |
| -0.0276058443108802  |    |   | AGIWUR2829;AGIWUR14332;AGIWUR14646;AGIWUR26673;AGIWUR34285;AGIWUR41780          |          |                |           |           |
| N2                   | CT | V | 13813309                                                                        | 13815272 | WBGene00000447 | ceh-24    | F55B12.1  |
| 0.508329486075645    |    |   | AGIWUR29993                                                                     |          |                |           |           |
| N2                   | CT | V | 13815374                                                                        | 13816977 | WBGene00010088 | F55B12.2  | F55B12.2  |
| 0.102709827231558    |    |   | AGIWUR6477                                                                      |          |                |           |           |
| N2                   | CT | V | 13818132                                                                        | 13822980 | WBGene00004767 | sel-10    | F55B12.3  |
| 0.0317807559489811   |    |   | AGIWUR41;AGIWUR9842;AGIWUR13814;AGIWUR27608;AGIWUR34431;AGIWUR37471;AGIWUR39533 |          |                |           |           |
| N2                   | CT | V | 13823052                                                                        | 13825222 | WBGene00010089 | hpo-31    | F55B12.4  |
| -0.130230990865774   |    |   | AGIWUR17921;AGIWUR28404;AGIWUR28902;AGIWUR39706                                 |          |                |           |           |
| N2                   | CT | V | 13828208                                                                        | 13831040 | WBGene00003812 | nr-f-5    | F55B12.5  |
| 0.00307750243402793  |    |   | AGIWUR14186                                                                     |          |                |           |           |
| N2                   | CT | V | 13831113                                                                        | 13832905 | WBGene00006210 | str-165   | F55B12.6  |
| 0.0788310183110905   |    |   | AGIWUR23102                                                                     |          |                |           |           |
| N2                   | CT | V | 13834251                                                                        | 13836581 | WBGene00006020 | srx-129   | F55B12.9  |
| -0.026597996031593   |    |   | AGIWUR19811;AGIWUR37331                                                         |          |                |           |           |
| N2                   | CT | V | 13837473                                                                        | 13838682 | WBGene00006019 | srx-128   | F55B12.7  |
| -0.266249443318459   |    |   | AGIWUR22941                                                                     |          |                |           |           |
| N2                   | CT | V | 13839769                                                                        | 13840281 | WBGene00077439 | F55B12.10 | F55B12.10 |
| -0.117503666021529   |    |   | AGIWUR14927;AGIWUR31593;AGIWUR32913;AGIWUR36567;AGIWUR37092                     |          |                |           |           |
| N2                   | CT | V | 13840741                                                                        | 13842187 | WBGene00005908 | srx-17    | F55B12.8  |

|                                                             |                                     |          |                |         |                             |
|-------------------------------------------------------------|-------------------------------------|----------|----------------|---------|-----------------------------|
| -0.0205302631229927                                         | AGIWUR16351                         |          |                |         |                             |
| N2 CT V                                                     | 13843447                            | 13844962 | WBGene00006021 | srx-130 | F09F3.1 0.0360035950970614  |
| AGIWUR12608;AGIWUR12670;AGIWUR20875;AGIWUR44651             |                                     |          |                |         |                             |
| N2 CT V                                                     | 13845436                            | 13846727 | WBGene00006022 | srx-131 | F09F3.2 0.112314989669779   |
| AGIWUR14507                                                 |                                     |          |                |         |                             |
| N2 CT V                                                     | 13847230                            | 13848414 | WBGene00006023 | srx-132 | F09F3.3 -0.0122996422043062 |
| AGIWUR7957                                                  |                                     |          |                |         |                             |
| N2 CT V                                                     | 13848679                            | 13849969 | WBGene00006024 | srx-133 | F09F3.4 0.0028711001161561  |
| AGIWUR2081                                                  |                                     |          |                |         |                             |
| N2 CT V                                                     | 13850470                            | 13853199 | WBGene00008627 | F09F3.5 | F09F3.5 -0.0740155416208133 |
| AGIWUR16921                                                 |                                     |          |                |         |                             |
| N2 CT V                                                     | 13853834                            | 13855260 | WBGene00008628 | ttr-21  | F09F3.6 0.0699207317014814  |
| AGIWUR29376;AGIWUR31698;AGIWUR33752;AGIWUR34397;AGIWUR39923 |                                     |          |                |         |                             |
| N2 CT V                                                     | 13854878                            | 13856476 | WBGene00006025 | srx-134 | F09F3.7 0.153128909587325   |
| AGIWUR3077                                                  |                                     |          |                |         |                             |
| N2 CT V                                                     | 13857448                            | 13858942 | WBGene00006027 | srx-136 | F09F3.12                    |
| 0.0371970197922762                                          | AGIWUR12174;AGIWUR19548;AGIWUR37830 |          |                |         |                             |
| N2 CT V                                                     | 13859301                            | 13861321 | WBGene00006026 | srx-135 | F09F3.11                    |
| -0.744465482262264                                          | AGIWUR21897                         |          |                |         |                             |
| N2 CT V                                                     | 13862805                            | 13864110 | WBGene00006028 | srx-137 | F09F3.13                    |
| 0.0392367613532709                                          | AGIWUR21439                         |          |                |         |                             |
| N2 CT V                                                     | 13866706                            | 13868473 | WBGene00008630 | nhr-175 | F09F3.10                    |
| -0.00216362506226453                                        | AGIWUR37589                         |          |                |         |                             |
| N2 CT V                                                     | 13869888                            | 13872529 | WBGene00014732 | F09F3.8 | F09F3.8 0.388704145481412   |
| AGIWUR18228                                                 |                                     |          |                |         |                             |
| N2 CT V                                                     | 13873153                            | 13875891 | WBGene00008629 | cpt-5   | F09F3.9 -0.107275223685484  |
| AGIWUR27803                                                 |                                     |          |                |         |                             |
| N2 CT V                                                     | 13876837                            | 13877949 | WBGene00011929 | T22G5.1 | T22G5.1 -0.21679123809013   |
| AGIWUR38579                                                 |                                     |          |                |         |                             |
| N2 CT V                                                     | 13879552                            | 13880213 | WBGene00002259 | lbp-7   | T22G5.2 -0.0624197010348126 |
| AGIWUR5469                                                  |                                     |          |                |         |                             |
| N2 CT V                                                     | 13880908                            | 13883937 | WBGene00011930 | T22G5.3 | T22G5.3 -0.188670616378625  |
| AGIWUR10007                                                 |                                     |          |                |         |                             |
| N2 CT V                                                     | 13887658                            | 13889458 | WBGene00011931 | srsx-19 | T22G5.4 0.480852860056988   |
| AGIWUR39026                                                 |                                     |          |                |         |                             |
| N2 CT V                                                     | 13889918                            | 13890295 | WBGene00004997 | spp-12  | T22G5.7 -0.380070757414551  |
| AGIWUR10860                                                 |                                     |          |                |         |                             |
| N2 CT V                                                     | 13890679                            | 13891364 | WBGene00002260 | lbp-8   | T22G5.6 -0.11727828270871   |
| AGIWUR7757;AGIWUR22889                                      |                                     |          |                |         |                             |

|                                                         |    |   |          |          |                |          |           |                     |
|---------------------------------------------------------|----|---|----------|----------|----------------|----------|-----------|---------------------|
| N2                                                      | CT | V | 13893325 | 13896405 | WBGene00011932 | spt1-3   | T22G5.5   | 0.107457451192683   |
| AGIWUR2196;AGIWUR2376;AGIWUR4449;AGIWUR23193            |    |   |          |          |                |          |           |                     |
| N2                                                      | CT | V | 13896663 | 13898488 | WBGene00007362 | cyp-35C1 |           | C06B3.3             |
| -0.0984017426693971 AGIWUR23062                         |    |   |          |          |                |          |           |                     |
| N2                                                      | CT | V | 13899513 | 13902653 | WBGene00007361 | oac-3    | C06B3.2   | -0.0536123361922325 |
| AGIWUR19326;AGIWUR20418;AGIWUR25380                     |    |   |          |          |                |          |           |                     |
| N2                                                      | CT | V | 13902795 | 13903886 | WBGene00007360 | C06B3.1  | C06B3.1   | 0.219743173492036   |
| AGIWUR38921                                             |    |   |          |          |                |          |           |                     |
| N2                                                      | CT | V | 13904611 | 13905996 | WBGene00007364 | stdh-3   | C06B3.5   | 0.0229960145953498  |
| AGIWUR33232                                             |    |   |          |          |                |          |           |                     |
| N2                                                      | CT | V | 13906492 | 13908135 | WBGene00007363 | stdh-1   | C06B3.4   | -0.289167592850543  |
| AGIWUR6267                                              |    |   |          |          |                |          |           |                     |
| N2                                                      | CT | V | 13908133 | 13909513 | WBGene00007365 | C06B3.6  | C06B3.6   | -0.0355109074101634 |
| AGIWUR1890                                              |    |   |          |          |                |          |           |                     |
| N2                                                      | CT | V | 13909686 | 13911524 | WBGene00007366 | C06B3.7  | C06B3.7   | 0.24612191881269    |
| AGIWUR10558                                             |    |   |          |          |                |          |           |                     |
| N2                                                      | CT | V | 13912080 | 13915436 | WBGene00001552 | gcy-32   | C06B3.8   | -0.107179233574203  |
| AGIWUR43888                                             |    |   |          |          |                |          |           |                     |
| N2                                                      | CT | V | 13916496 | 13918051 | WBGene00006278 | str-252  | C06B3.9   | -0.146562514169887  |
| AGIWUR25893                                             |    |   |          |          |                |          |           |                     |
| N2                                                      | CT | V | 13918641 | 13920032 | WBGene00006277 | str-250  | C06B3.10  |                     |
| -0.0484972346889183 AGIWUR13257                         |    |   |          |          |                |          |           |                     |
| N2                                                      | CT | V | 13921030 | 13922404 | WBGene00005933 | srx-42   | C06B3.11  |                     |
| -1.35154084739932 AGIWUR21430;AGIWUR25384               |    |   |          |          |                |          |           |                     |
| N2                                                      | CT | V | 13924151 | 13925807 | WBGene00044114 | srxa-11  | C06B3.12  |                     |
| 0.0616159150447468 AGIWUR25293;AGIWUR27699              |    |   |          |          |                |          |           |                     |
| N2                                                      | CT | V | 13926698 | 13929320 | WBGene00044115 | srxa-12  | C06B3.13  |                     |
| -0.0855524859706804 AGIWUR29606;AGIWUR36139;AGIWUR41790 |    |   |          |          |                |          |           |                     |
| N2                                                      | CT | V | 13929803 | 13931252 | WBGene00044116 | srxa-13  | C06B3.14  |                     |
| -0.0250645250573482 AGIWUR11485;AGIWUR26810             |    |   |          |          |                |          |           |                     |
| N2                                                      | CT | V | 13931525 | 13932198 | WBGene00189947 | C06B3.16 |           | C06B3.16            |
| 0.044977475762602 AGIWUR3507                            |    |   |          |          |                |          |           |                     |
| N2                                                      | CT | V | 13932575 | 13934645 | WBGene00011185 | R10D12.1 |           | R10D12.1            |
| 0.151612624667781 AGIWUR1456                            |    |   |          |          |                |          |           |                     |
| N2                                                      | CT | V | 13937223 | 13939602 | WBGene00011197 | srw-145  | R10D12.17 |                     |
| 0.00244441380607974 AGIWUR27930                         |    |   |          |          |                |          |           |                     |
| N2                                                      | CT | V | 13940139 | 13942182 | WBGene00001062 | dpr-1    | R10D12.2  |                     |
| 0.0439887914666475 AGIWUR18986                          |    |   |          |          |                |          |           |                     |
| N2                                                      | CT | V | 13943462 | 13944589 | WBGene00006018 | srx-127  | R10D12.3  |                     |



|                                                                                                 |                                                            |          |                |           |                            |  |
|-------------------------------------------------------------------------------------------------|------------------------------------------------------------|----------|----------------|-----------|----------------------------|--|
| -0.0609854559661933                                                                             | AGIWUR28843                                                |          |                |           |                            |  |
| N2 CT V                                                                                         | 13945248                                                   | 13946485 | WBGene00005901 | srx-10    | R10D12.4                   |  |
| -0.138682181703866                                                                              | AGIWUR36137                                                |          |                |           |                            |  |
| N2 CT V                                                                                         | 13946969                                                   | 13948799 | WBGene00011186 | clec-226  | R10D12.5                   |  |
| -0.280299750759664                                                                              | AGIWUR14296                                                |          |                |           |                            |  |
| N2 CT V                                                                                         | 13949319                                                   | 13949640 | WBGene00011187 | R10D12.6  | R10D12.6                   |  |
| 0.158197569530957                                                                               | AGIWUR31172                                                |          |                |           |                            |  |
| N2 CT V                                                                                         | 13950066                                                   | 13950394 | WBGene00011188 | R10D12.7  | R10D12.7                   |  |
| -0.120957626412451                                                                              | AGIWUR23207                                                |          |                |           |                            |  |
| N2 CT V                                                                                         | 13950733                                                   | 13953291 | WBGene00011189 | R10D12.8  | R10D12.8                   |  |
| -0.352065529734357                                                                              | AGIWUR6538                                                 |          |                |           |                            |  |
| N2 CT V                                                                                         | 13954277                                                   | 13956176 | WBGene00011190 | swt-6     | R10D12.9                   |  |
| 0.471763893895178                                                                               | AGIWUR4056;AGIWUR12190;AGIWUR26090                         |          |                |           |                            |  |
| N2 CT V                                                                                         | 13956161                                                   | 13958347 | WBGene00011191 | R10D12.10 | R10D12.10                  |  |
| 0.198626087343792                                                                               | AGIWUR7758;AGIWUR23659                                     |          |                |           |                            |  |
| N2 CT V                                                                                         | 13958746                                                   | 13961016 | WBGene00011192 | srh-24    | R10D12.11                  |  |
| -0.075107252745819                                                                              | AGIWUR2603;AGIWUR4584;AGIWUR9879                           |          |                |           |                            |  |
| N2 CT V                                                                                         | 13961265                                                   | 13961977 | WBGene00011193 | algn-13   | R10D12.12                  |  |
| -0.261822125829287                                                                              | AGIWUR1988                                                 |          |                |           |                            |  |
| N2 CT V                                                                                         | 13962417                                                   | 13963840 | WBGene00011194 | R10D12.13 | R10D12.13                  |  |
| -0.0999284678142218                                                                             | AGIWUR9954;AGIWUR10705;AGIWUR18062;AGIWUR43283             |          |                |           |                            |  |
| N2 CT V                                                                                         | 13963734                                                   | 13965797 | WBGene00011195 | sao-1     | R10D12.14                  |  |
| 0.356035822954863                                                                               | AGIWUR18990;AGIWUR31397;AGIWUR34082;AGIWUR39963            |          |                |           |                            |  |
| N2 CT V                                                                                         | 13979571                                                   | 13980907 | WBGene00045401 | eol-1     | T26F2.3 4.37684925811548   |  |
| AGIWUR22948                                                                                     |                                                            |          |                |           |                            |  |
| N2 CT V                                                                                         | 13981568                                                   | 13982971 | WBGene00012058 | T26F2.2   | T26F2.2 -0.245457229571217 |  |
| AGIWUR15010                                                                                     |                                                            |          |                |           |                            |  |
| N2 CT V                                                                                         | 13985137                                                   | 13987072 | WBGene00001310 | end-1     | F58E10.2                   |  |
| 0.384682214496126                                                                               | AGIWUR8175                                                 |          |                |           |                            |  |
| N2 CT V                                                                                         | 13987166                                                   | 14006079 | WBGene00010259 | ric-7     | F58E10.1                   |  |
| 0.0891612037939691                                                                              |                                                            |          |                |           |                            |  |
| AGIWUR11260;AGIWUR19271;AGIWUR22169;AGIWUR22854;AGIWUR33583;AGIWUR34027;AGIWUR36597;AGIWUR42820 |                                                            |          |                |           |                            |  |
| N2 CT V                                                                                         | 14008768                                                   | 14012218 | WBGene00010260 | ddx-17    | F58E10.3                   |  |
| 0.0397799384990822                                                                              | AGIWUR7766;AGIWUR10134;AGIWUR28864;AGIWUR33511;AGIWUR38214 |          |                |           |                            |  |
| N2 CT V                                                                                         | 14012333                                                   | 14013644 | WBGene00000097 | aip-1     | F58E10.4                   |  |
| -0.214399909876189                                                                              | AGIWUR42494                                                |          |                |           |                            |  |
| N2 CT V                                                                                         | 14014701                                                   | 14015850 | WBGene00001311 | end-3     | F58E10.5                   |  |
| 0.0317880911452644                                                                              | AGIWUR20810                                                |          |                |           |                            |  |
| N2 CT V                                                                                         | 14015978                                                   | 14017576 | WBGene00010261 | srh-308   | F58E10.6                   |  |

|                                                            |                                                            |          |                |          |                             |
|------------------------------------------------------------|------------------------------------------------------------|----------|----------------|----------|-----------------------------|
| -0.0122005536237868                                        | AGIWUR22290                                                |          |                |          |                             |
| N2 CT V                                                    | 14018270                                                   | 14018673 | WBGene00003474 | mtl-2    | T08G5.10                    |
| -0.267825988886784                                         | AGIWUR31900                                                |          |                |          |                             |
| N2 CT V                                                    | 14018766                                                   | 14020332 | WBGene00011622 | T08G5.1  | T08G5.1 0.348340453367968   |
| AGIWUR41045                                                |                                                            |          |                |          |                             |
| N2 CT V                                                    | 14020628                                                   | 14021737 | WBGene00077572 | T08G5.14 | T08G5.14                    |
| -0.0819536624985338                                        | AGIWUR39576                                                |          |                |          |                             |
| N2 CT V                                                    | 14026336                                                   | 14027484 | WBGene00011624 | T08G5.3  | T08G5.3                     |
| 0.000510560926380244                                       | AGIWUR99;AGIWUR1082;AGIWUR19837;AGIWUR20924;AGIWUR35998    |          |                |          |                             |
| N2 CT V                                                    | 14030184                                                   | 14032584 | WBGene00014834 | T08G5.4  | T08G5.4 -0.187744695509043  |
| AGIWUR9751;AGIWUR42190                                     |                                                            |          |                |          |                             |
| N2 CT V                                                    | 14033950                                                   | 14034393 | WBGene00002093 | ins-10   | T08G5.12                    |
| -0.0699162240191136                                        | AGIWUR40111                                                |          |                |          |                             |
| N2 CT V                                                    | 14034323                                                   | 14038372 | WBGene00011625 | vps-39   | T08G5.5 0.101862523886204   |
| AGIWUR2812;AGIWUR16018;AGIWUR25794;AGIWUR38233;AGIWUR44385 |                                                            |          |                |          |                             |
| N2 CT V                                                    | 14038896                                                   | 14040234 | WBGene00050930 | T08G5.13 | T08G5.13                    |
| 0.107265276167889                                          | AGIWUR11059;AGIWUR16384;AGIWUR30398                        |          |                |          |                             |
| N2 CT V                                                    | 14057840                                                   | 14064529 | WBGene00010250 | F58D12.3 | F58D12.3                    |
| 0.0371120109885696                                         | AGIWUR1597;AGIWUR31940;AGIWUR35221;AGIWUR43868             |          |                |          |                             |
| N2 CT V                                                    | 14067819                                                   | 14071215 | WBGene00045355 | D1086.17 | D1086.17                    |
| 0.147553521149757                                          | AGIWUR12879;AGIWUR16108;AGIWUR34946;AGIWUR35308            |          |                |          |                             |
| N2 CT V                                                    | 14071646                                                   | 14073719 | WBGene00077448 | D1086.20 | D1086.20                    |
| -0.139405398772449                                         | AGIWUR546;AGIWUR21272                                      |          |                |          |                             |
| N2 CT V                                                    | 14074456                                                   | 14076725 | WBGene00044081 | D1086.11 | D1086.11                    |
| -0.130380079876436                                         | AGIWUR9110;AGIWUR31787                                     |          |                |          |                             |
| N2 CT V                                                    | 14079801                                                   | 14081766 | WBGene00008393 | D1086.6  | D1086.6 -0.0311847261432669 |
| AGIWUR6916;AGIWUR27761                                     |                                                            |          |                |          |                             |
| N2 CT V                                                    | 14082753                                                   | 14083584 | WBGene00044080 | D1086.10 | D1086.10                    |
| 0.105169221455302                                          | AGIWUR5549                                                 |          |                |          |                             |
| N2 CT V                                                    | 14084270                                                   | 14085811 | WBGene00008394 | D1086.7  | D1086.7 -0.0389602917096248 |
| AGIWUR3028;AGIWUR13342                                     |                                                            |          |                |          |                             |
| N2 CT V                                                    | 14085889                                                   | 14087169 | WBGene00045405 | D1086.18 | D1086.18                    |
| 0.207307394608698                                          | AGIWUR34218                                                |          |                |          |                             |
| N2 CT V                                                    | 14088351                                                   | 14088704 | WBGene00045406 | D1086.19 | D1086.19                    |
| -0.204944856666692                                         | AGIWUR8143;AGIWUR14209;AGIWUR16516;AGIWUR22654;AGIWUR29990 |          |                |          |                             |
| N2 CT V                                                    | 14088893                                                   | 14090359 | WBGene00008392 | D1086.5  | D1086.5 -0.155020850006707  |
| AGIWUR23610                                                |                                                            |          |                |          |                             |
| N2 CT V                                                    | 14090719                                                   | 14092435 | WBGene00001864 | him-5    | D1086.4 -0.224834922283065  |
| AGIWUR44490                                                |                                                            |          |                |          |                             |

|                                                                                                     |    |   |          |          |                |          |         |                    |
|-----------------------------------------------------------------------------------------------------|----|---|----------|----------|----------------|----------|---------|--------------------|
| N2                                                                                                  | CT | V | 14092792 | 14093986 | WBGene00008390 | D1086.3  | D1086.3 | 0.014893922686527  |
| AGIWUR14700                                                                                         |    |   |          |          |                |          |         |                    |
| N2                                                                                                  | CT | V | 14094105 | 14097088 | WBGene00008395 | D1086.8  | D1086.8 | -0.03691458383339  |
| AGIWUR12365                                                                                         |    |   |          |          |                |          |         |                    |
| N2                                                                                                  | CT | V | 14097038 | 14098668 | WBGene00008389 | D1086.2  | D1086.2 | -0.192322940467649 |
| AGIWUR4031                                                                                          |    |   |          |          |                |          |         |                    |
| N2                                                                                                  | CT | V | 14098858 | 14100390 | WBGene00008388 | D1086.1  | D1086.1 | -0.201479640672758 |
| AGIWUR34537                                                                                         |    |   |          |          |                |          |         |                    |
| N2                                                                                                  | CT | V | 14101186 | 14102821 | WBGene00044082 | D1086.12 |         | D1086.12           |
| 0.142778222661025 AGIWUR36541                                                                       |    |   |          |          |                |          |         |                    |
| N2                                                                                                  | CT | V | 14104270 | 14106416 | WBGene00008396 | D1086.9  | D1086.9 | -0.131170160337812 |
| AGIWUR22373;AGIWUR29291                                                                             |    |   |          |          |                |          |         |                    |
| N2                                                                                                  | CT | V | 14107811 | 14110151 | WBGene00044201 | H39E23.3 |         | H39E23.3           |
| -0.0456564686510914 AGIWUR7418;AGIWUR8050;AGIWUR9150;AGIWUR9268;AGIWUR17164;AGIWUR29655;AGIWUR40848 |    |   |          |          |                |          |         |                    |
| N2                                                                                                  | CT | V | 14110361 | 14112027 | WBGene00010432 | H39E23.2 |         | H39E23.2           |
| 0.0837484583567356 AGIWUR10876                                                                      |    |   |          |          |                |          |         |                    |
| N2                                                                                                  | CT | V | 14112039 | 14141119 | WBGene00003916 | par-1    |         | H39E23.1           |
| 0.386166301045217 AGIWUR16278;AGIWUR16410;AGIWUR19436;AGIWUR27928;AGIWUR32541;AGIWUR41271           |    |   |          |          |                |          |         |                    |
| N2                                                                                                  | CT | V | 14144030 | 14145411 | WBGene00007084 | AH10.3   | AH10.3  | 0.0606379340984997 |
| AGIWUR30614                                                                                         |    |   |          |          |                |          |         |                    |
| N2                                                                                                  | CT | V | 14146499 | 14148784 | WBGene00007082 | acs-10   | AH10.1  | 0.183048630977201  |
| AGIWUR12516                                                                                         |    |   |          |          |                |          |         |                    |
| N2                                                                                                  | CT | V | 14156831 | 14157622 | WBGene00007083 | AH10.2   | AH10.2  | 0.26467761895983   |
| AGIWUR34461                                                                                         |    |   |          |          |                |          |         |                    |
| N2                                                                                                  | CT | V | 14157663 | 14160862 | WBGene00011364 | T02B5.3  | T02B5.3 | -0.387162832718806 |
| AGIWUR26497                                                                                         |    |   |          |          |                |          |         |                    |
| N2                                                                                                  | CT | V | 14161551 | 14162841 | WBGene00005104 | srd-26   | T02B5.4 | 0.0184489956038982 |
| AGIWUR8800                                                                                          |    |   |          |          |                |          |         |                    |
| N2                                                                                                  | CT | V | 14163260 | 14166730 | WBGene00011362 | T02B5.1  | T02B5.1 | -0.13565315611982  |
| AGIWUR16187                                                                                         |    |   |          |          |                |          |         |                    |
| N2                                                                                                  | CT | V | 14167228 | 14167729 | WBGene00011363 | ocam-1   | T02B5.2 | 0.111461065851572  |
| AGIWUR27567                                                                                         |    |   |          |          |                |          |         |                    |
| N2                                                                                                  | CT | V | 14168362 | 14171481 | WBGene00013875 | ZC376.3  | ZC376.3 | -0.22765830446601  |
| AGIWUR44554                                                                                         |    |   |          |          |                |          |         |                    |
| N2                                                                                                  | CT | V | 14171645 | 14175355 | WBGene00013874 | ZC376.2  | ZC376.2 | -0.101551418687164 |
| AGIWUR25072                                                                                         |    |   |          |          |                |          |         |                    |
| N2                                                                                                  | CT | V | 14175517 | 14182960 | WBGene00013873 | ZC376.1  | ZC376.1 | -0.237341508659892 |
| AGIWUR25901                                                                                         |    |   |          |          |                |          |         |                    |
| N2                                                                                                  | CT | V | 14183124 | 14185667 | WBGene00006613 | trm-1    | ZC376.5 | 0.077808789339155  |

|                                  |    |   |                                                |          |                |           |          |                     |
|----------------------------------|----|---|------------------------------------------------|----------|----------------|-----------|----------|---------------------|
| AGIWUR20951                      |    |   |                                                |          |                |           |          |                     |
| N2                               | CT | V | 14185691                                       | 14192156 | WBGene00013877 | ZC376.6   | ZC376.6  | -0.0117304068800443 |
| AGIWUR30098                      |    |   |                                                |          |                |           |          |                     |
| N2                               | CT | V | 14193685                                       | 14197695 | WBGene00013878 | atfs-1    | ZC376.7  | -0.147075224496707  |
| AGIWUR14731                      |    |   |                                                |          |                |           |          |                     |
| N2                               | CT | V | 14205776                                       | 14209010 | WBGene00011793 | T16A9.3   | T16A9.3  | -0.0898955134984334 |
| AGIWUR801;AGIWUR8622;AGIWUR32892 |    |   |                                                |          |                |           |          |                     |
| N2                               | CT | V | 14209170                                       | 14210873 | WBGene00006261 | str-230   | T16A9.2  | 0.190808808671567   |
| AGIWUR11289                      |    |   |                                                |          |                |           |          |                     |
| N2                               | CT | V | 14215343                                       | 14220730 | WBGene00011794 | nep-21    | T16A9.4  | -0.0760676238923761 |
| AGIWUR27727                      |    |   |                                                |          |                |           |          |                     |
| N2                               | CT | V | 14225397                                       | 14226414 | WBGene00050975 | K02E11.11 |          | K02E11.11           |
| 0.143278649542801                |    |   | AGIWUR642;AGIWUR3294;AGIWUR20831               |          |                |           |          |                     |
| N2                               | CT | V | 14232281                                       | 14236076 | WBGene00010510 | ent-3     | K02E11.1 |                     |
| 0.301718537389936                |    |   | AGIWUR24207                                    |          |                |           |          |                     |
| N2                               | CT | V | 14239942                                       | 14241151 | WBGene00044109 | K02E11.10 |          | K02E11.10           |
| 0.0512115907785162               |    |   | AGIWUR33374                                    |          |                |           |          |                     |
| N2                               | CT | V | 14244204                                       | 14246104 | WBGene00010511 | sre-7     | K02E11.2 |                     |
| -0.637482421759733               |    |   | AGIWUR19699                                    |          |                |           |          |                     |
| N2                               | CT | V | 14246276                                       | 14246909 | WBGene00010512 | K02E11.3  |          | K02E11.3            |
| -0.260014197301647               |    |   | AGIWUR42262                                    |          |                |           |          |                     |
| N2                               | CT | V | 14247476                                       | 14248137 | WBGene00010513 | K02E11.4  |          | K02E11.4            |
| -0.199294748878757               |    |   | AGIWUR8828;AGIWUR19022;AGIWUR19695;AGIWUR20713 |          |                |           |          |                     |
| N2                               | CT | V | 14250627                                       | 14251510 | WBGene00010515 | K02E11.6  |          | K02E11.6            |
| -0.212458225954006               |    |   | AGIWUR8194;AGIWUR14347;AGIWUR17081             |          |                |           |          |                     |
| N2                               | CT | V | 14253488                                       | 14254321 | WBGene00010516 | K02E11.7  |          | K02E11.7            |
| -0.145916659739108               |    |   | AGIWUR15018                                    |          |                |           |          |                     |
| N2                               | CT | V | 14257107                                       | 14259231 | WBGene00009596 | sre-8     | F40G12.1 |                     |
| 0.313228180343653                |    |   | AGIWUR44907                                    |          |                |           |          |                     |
| N2                               | CT | V | 14259544                                       | 14260931 | WBGene00009597 | F40G12.2  |          | F40G12.2            |
| 0.0822342013843258               |    |   | AGIWUR20587                                    |          |                |           |          |                     |
| N2                               | CT | V | 14261990                                       | 14267317 | WBGene00009598 | F40G12.3  |          | F40G12.3            |
| -0.0799257864720389              |    |   | AGIWUR8470                                     |          |                |           |          |                     |
| N2                               | CT | V | 14267761                                       | 14268639 | WBGene00009599 | F40G12.4  |          | F40G12.4            |
| 0.321653014582115                |    |   | AGIWUR13152                                    |          |                |           |          |                     |
| N2                               | CT | V | 14269182                                       | 14270636 | WBGene00009600 | F40G12.5  |          | F40G12.5            |
| 0.102530133235993                |    |   | AGIWUR14463                                    |          |                |           |          |                     |
| N2                               | CT | V | 14271143                                       | 14273047 | WBGene00009601 | F40G12.6  |          | F40G12.6            |
| 0.0376343933209657               |    |   | AGIWUR11143                                    |          |                |           |          |                     |

|                                   |    |   |                                                            |          |                |           |                             |
|-----------------------------------|----|---|------------------------------------------------------------|----------|----------------|-----------|-----------------------------|
| N2                                | CT | V | 14275669                                                   | 14276343 | WBGene00009602 | F40G12.7  | F40G12.7                    |
| 0.521873373745143                 |    |   | AGIWUR28116                                                |          |                |           |                             |
| N2                                | CT | V | 14278312                                                   | 14279877 | WBGene00009603 | srt-33    | F40G12.8                    |
| -0.156191619475731                |    |   | AGIWUR32323                                                |          |                |           |                             |
| N2                                | CT | V | 14281120                                                   | 14282322 | WBGene00044002 | srt-74    | F40G12.15                   |
| 0.168065335733933                 |    |   | AGIWUR10878;AGIWUR27270                                    |          |                |           |                             |
| N2                                | CT | V | 14282482                                                   | 14282997 | WBGene00009604 | F40G12.9  | F40G12.9                    |
| -0.45195367679076                 |    |   | AGIWUR13071                                                |          |                |           |                             |
| N2                                | CT | V | 14283528                                                   | 14285327 | WBGene00009605 | F40G12.10 | F40G12.10                   |
| -0.0592862461272254               |    |   | AGIWUR42439                                                |          |                |           |                             |
| N2                                | CT | V | 14286171                                                   | 14288056 | WBGene00009606 | F40G12.11 | F40G12.11                   |
| 0.144321827835689                 |    |   | AGIWUR11643                                                |          |                |           |                             |
| N2                                | CT | V | 14288733                                                   | 14289718 | WBGene00008788 | F14D7.1   | F14D7.1 0.170794720736786   |
| AGIWUR224;AGIWUR11807;AGIWUR17635 |    |   |                                                            |          |                |           |                             |
| N2                                | CT | V | 14291910                                                   | 14293712 | WBGene00008789 | F14D7.2   | F14D7.2 -0.0492440111239851 |
| AGIWUR29824                       |    |   |                                                            |          |                |           |                             |
| N2                                | CT | V | 14295828                                                   | 14298132 | WBGene00008791 | F14D7.4   | F14D7.4 0.0285935525784975  |
| AGIWUR2077;AGIWUR35633            |    |   |                                                            |          |                |           |                             |
| N2                                | CT | V | 14299180                                                   | 14299642 | WBGene00008792 | F14D7.5   | F14D7.5 0.00484272321244639 |
| AGIWUR1779                        |    |   |                                                            |          |                |           |                             |
| N2                                | CT | V | 14300014                                                   | 14300561 | WBGene00045331 | F14D7.12  | F14D7.12                    |
| -0.345240505239394                |    |   | AGIWUR7767;AGIWUR25853;AGIWUR35920;AGIWUR36552;AGIWUR37897 |          |                |           |                             |
| N2                                | CT | V | 14301413                                                   | 14306444 | WBGene00008793 | F14D7.6   | F14D7.6 0.212547811994352   |
| AGIWUR15208                       |    |   |                                                            |          |                |           |                             |
| N2                                | CT | V | 14310389                                                   | 14311236 | WBGene00008798 | F14D7.11  | F14D7.11                    |
| -0.178922851750217                |    |   | AGIWUR2201                                                 |          |                |           |                             |
| N2                                | CT | V | 14311882                                                   | 14312788 | WBGene00008795 | F14D7.8   | F14D7.8 -0.0626457349875702 |
| AGIWUR10018                       |    |   |                                                            |          |                |           |                             |
| N2                                | CT | V | 14313759                                                   | 14314333 | WBGene00009802 | F47B8.1   | F47B8.1 0.173466967235038   |
| AGIWUR30750                       |    |   |                                                            |          |                |           |                             |
| N2                                | CT | V | 14315859                                                   | 14316625 | WBGene00009803 | F47B8.2   | F47B8.2 0.00822871298957395 |
| AGIWUR41770                       |    |   |                                                            |          |                |           |                             |
| N2                                | CT | V | 14320546                                                   | 14321313 | WBGene00044194 | F47B8.14  | F47B8.14                    |
| 0.00816161459283649               |    |   | AGIWUR7504;AGIWUR9913;AGIWUR32975;AGIWUR38665;AGIWUR41324  |          |                |           |                             |
| N2                                | CT | V | 14329069                                                   | 14330080 | WBGene00009807 | pepm-1    | F47B8.6 0.142618992673542   |
| AGIWUR10391                       |    |   |                                                            |          |                |           |                             |
| N2                                | CT | V | 14331674                                                   | 14332667 | WBGene00009809 | F47B8.8   | F47B8.8 -0.118329705144181  |
| AGIWUR38545                       |    |   |                                                            |          |                |           |                             |
| N2                                | CT | V | 14333416                                                   | 14334803 | WBGene00009808 | srm-4     | F47B8.7 0.0556138055335325  |

|                                                                                                                                             |    |   |          |          |                |                                 |
|---------------------------------------------------------------------------------------------------------------------------------------------|----|---|----------|----------|----------------|---------------------------------|
| AGIWUR33260                                                                                                                                 |    |   |          |          |                |                                 |
| N2                                                                                                                                          | CT | V | 14337049 | 14338808 | WBGene00009810 | srm-6 F47B8.9 0.193885955424793 |
| AGIWUR8149;AGIWUR29529                                                                                                                      |    |   |          |          |                |                                 |
| N2                                                                                                                                          | CT | V | 14343068 | 14346964 | WBGene00009811 | F47B8.10 F47B8.10               |
| 0.0911113926057983 AGIWUR30997                                                                                                              |    |   |          |          |                |                                 |
| N2                                                                                                                                          | CT | V | 14347731 | 14350776 | WBGene00013024 | cept-2 Y49A3A.1                 |
| -0.207347954702286 AGIWUR16913;AGIWUR33405;AGIWUR42443                                                                                      |    |   |          |          |                |                                 |
| N2                                                                                                                                          | CT | V | 14351207 | 14354421 | WBGene00013025 | vha-13 Y49A3A.2                 |
| 0.0829462442766093                                                                                                                          |    |   |          |          |                |                                 |
| AGIWUR2828;AGIWUR4109;AGIWUR6352;AGIWUR7215;AGIWUR12423;AGIWUR12812;AGIWUR18412;AGIWUR19376;AGIWUR33598;AGIWUR33706;AGIWUR38557;AGIWUR44816 |    |   |          |          |                |                                 |
| N2                                                                                                                                          | CT | V | 14354410 | 14355754 | WBGene00013026 | Y49A3A.3 Y49A3A.3               |
| -0.232243014082496 AGIWUR9557                                                                                                               |    |   |          |          |                |                                 |
| N2                                                                                                                                          | CT | V | 14356076 | 14356823 | WBGene00000877 | cyn-1 Y49A3A.5                  |
| 0.121567354122682 AGIWUR2731;AGIWUR19749;AGIWUR22880;AGIWUR24716;AGIWUR26930;AGIWUR32649                                                    |    |   |          |          |                |                                 |
| N2                                                                                                                                          | CT | V | 14356900 | 14358390 | WBGene00013027 | Y49A3A.4 Y49A3A.4               |
| 0.157242732653442 AGIWUR38068                                                                                                               |    |   |          |          |                |                                 |
| N2                                                                                                                                          | CT | V | 14373389 | 14375799 | WBGene00006775 | unc-39 F56A12.1                 |
| 0.0298168319979233 AGIWUR35843                                                                                                              |    |   |          |          |                |                                 |
| N2                                                                                                                                          | CT | V | 14376099 | 14379066 | WBGene00010143 | F56A12.2 F56A12.2               |
| 0.477105254460753 AGIWUR35255                                                                                                               |    |   |          |          |                |                                 |
| N2                                                                                                                                          | CT | V | 14392240 | 14392772 | WBGene00007618 | C15H11.10 C15H11.10             |
| 0.18645054049585 AGIWUR28622                                                                                                                |    |   |          |          |                |                                 |
| N2                                                                                                                                          | CT | V | 14395070 | 14395749 | WBGene00077576 | C15H11.13 C15H11.13             |
| 0.0704341397770554 AGIWUR2315                                                                                                               |    |   |          |          |                |                                 |
| N2                                                                                                                                          | CT | V | 14409078 | 14411986 | WBGene00007614 | gnrr-2 C15H11.2                 |
| -0.0370400931082688 AGIWUR36691                                                                                                             |    |   |          |          |                |                                 |
| N2                                                                                                                                          | CT | V | 14412400 | 14415792 | WBGene00003834 | nxf-1 C15H11.3                  |
| -0.23921780669107 AGIWUR12693                                                                                                               |    |   |          |          |                |                                 |
| N2                                                                                                                                          | CT | V | 14415814 | 14416176 | WBGene00007619 | C15H11.11 C15H11.11             |
| -0.114147409285266 AGIWUR30610                                                                                                              |    |   |          |          |                |                                 |
| N2                                                                                                                                          | CT | V | 14416067 | 14417835 | WBGene00003835 | nxf-2 C15H11.6                  |
| 0.0268092306674745 AGIWUR19959                                                                                                              |    |   |          |          |                |                                 |
| N2                                                                                                                                          | CT | V | 14417903 | 14420096 | WBGene00007615 | set-31 C15H11.5                 |
| 0.145314266512386 AGIWUR27949                                                                                                               |    |   |          |          |                |                                 |
| N2                                                                                                                                          | CT | V | 14420071 | 14421450 | WBGene00000985 | dhs-22 C15H11.4                 |
| 0.0612712062902867 AGIWUR10213;AGIWUR15538;AGIWUR27388;AGIWUR40728                                                                          |    |   |          |          |                |                                 |
| N2                                                                                                                                          | CT | V | 14421566 | 14422618 | WBGene00003922 | pas-1 C15H11.7                  |
| -0.0419255393427846 AGIWUR30109;AGIWUR43121;AGIWUR44076                                                                                     |    |   |          |          |                |                                 |

|                                                                                   |    |   |                                                |          |                |           |                             |
|-----------------------------------------------------------------------------------|----|---|------------------------------------------------|----------|----------------|-----------|-----------------------------|
| N2                                                                                | CT | V | 14422720                                       | 14423383 | WBGene00007616 | rpoa-12   | C15H11.8                    |
| 0.0815219174259845                                                                |    |   | AGIWUR9582;AGIWUR11619;AGIWUR13169             |          |                |           |                             |
| N2                                                                                | CT | V | 14423776                                       | 14425008 | WBGene00007617 | rrbs-1    | C15H11.9                    |
| 0.132082410939069                                                                 |    |   | AGIWUR2187;AGIWUR22700;AGIWUR35444;AGIWUR37023 |          |                |           |                             |
| N2                                                                                | CT | V | 14429165                                       | 14430500 | WBGene00009079 | F23B12.1  | F23B12.1                    |
| 0.262366005641844                                                                 |    |   | AGIWUR17727                                    |          |                |           |                             |
| N2                                                                                | CT | V | 14431310                                       | 14432359 | WBGene00001170 | egl-1     | F23B12.9                    |
| -0.184375727399887                                                                |    |   | AGIWUR33982                                    |          |                |           |                             |
| N2                                                                                | CT | V | 14434563                                       | 14435743 | WBGene00005706 | sru-43    | F23B12.2                    |
| 0.0516196122647208                                                                |    |   | AGIWUR30624;AGIWUR42345                        |          |                |           |                             |
| N2                                                                                | CT | V | 14441057                                       | 14445346 | WBGene00009081 | F23B12.4  | F23B12.4                    |
| 0.223602624457518                                                                 |    |   | AGIWUR26802;AGIWUR27323;AGIWUR44559            |          |                |           |                             |
| N2                                                                                | CT | V | 14445324                                       | 14447608 | WBGene00009082 | dlat-1    | F23B12.5                    |
| 0.0892533139885074                                                                |    |   | AGIWUR13860                                    |          |                |           |                             |
| N2                                                                                | CT | V | 14447629                                       | 14449587 | WBGene00006465 | fntb-1    | F23B12.6                    |
| -0.0391505180467036                                                               |    |   | AGIWUR6698;AGIWUR21483;AGIWUR30837             |          |                |           |                             |
| N2                                                                                | CT | V | 14449697                                       | 14452971 | WBGene00009084 | F23B12.7  | F23B12.7                    |
| -0.0951903036002744                                                               |    |   | AGIWUR4829;AGIWUR35599                         |          |                |           |                             |
| N2                                                                                | CT | V | 14453305                                       | 14456998 | WBGene00000257 | bmk-1     | F23B12.8                    |
| 0.157936430420089                                                                 |    |   | AGIWUR3443;AGIWUR36706                         |          |                |           |                             |
| N2                                                                                | CT | V | 14460624                                       | 14461132 | WBGene00008590 | F08H9.2   | F08H9.2 0.214158543655852   |
| AGIWUR5738;AGIWUR9504;AGIWUR13305;AGIWUR15895;AGIWUR18011;AGIWUR38364;AGIWUR39285 |    |   |                                                |          |                |           |                             |
| N2                                                                                | CT | V | 14461943                                       | 14462809 | WBGene00008591 | F08H9.3   | F08H9.3 -0.167830086197094  |
| AGIWUR42607                                                                       |    |   |                                                |          |                |           |                             |
| N2                                                                                | CT | V | 14463588                                       | 14464428 | WBGene00008592 | F08H9.4   | F08H9.4 -0.0916329450258786 |
| AGIWUR12207                                                                       |    |   |                                                |          |                |           |                             |
| N2                                                                                | CT | V | 14465095                                       | 14468246 | WBGene00023515 | srz-97    | F08H9.12                    |
| 0.0298785056341551                                                                |    |   | AGIWUR16877;AGIWUR39019;AGIWUR43230            |          |                |           |                             |
| N2                                                                                | CT | V | 14469191                                       | 14472448 | WBGene00008594 | cllec-57  | F08H9.6 0.0734705186712254  |
| AGIWUR25819;AGIWUR26410                                                           |    |   |                                                |          |                |           |                             |
| N2                                                                                | CT | V | 14472529                                       | 14474374 | WBGene00008593 | cllec-227 | F08H9.5                     |
| 0.0149083236209595                                                                |    |   | AGIWUR12601;AGIWUR28943;AGIWUR34139            |          |                |           |                             |
| N2                                                                                | CT | V | 14474399                                       | 14476794 | WBGene00008595 | cllec-56  | F08H9.7 -0.2595755902429    |
| AGIWUR8691                                                                        |    |   |                                                |          |                |           |                             |
| N2                                                                                | CT | V | 14476903                                       | 14479003 | WBGene00008596 | cllec-54  | F08H9.8 -0.344928917013902  |
| AGIWUR43177                                                                       |    |   |                                                |          |                |           |                             |
| N2                                                                                | CT | V | 14479284                                       | 14482195 | WBGene00008597 | cllec-55  | F08H9.9 -0.0535838190209788 |
| AGIWUR30079                                                                       |    |   |                                                |          |                |           |                             |
| N2                                                                                | CT | V | 14482287                                       | 14482836 | WBGene00194788 | R02D5.10  | R02D5.10                    |

|                                                                       |                                                                                   |          |                |                   |                     |
|-----------------------------------------------------------------------|-----------------------------------------------------------------------------------|----------|----------------|-------------------|---------------------|
| -0.0644829960350197                                                   | AGIWUR13960;AGIWUR22681;AGIWUR27498;AGIWUR31073;AGIWUR40594                       |          |                |                   |                     |
| N2 CT V                                                               | 14483160                                                                          | 14484346 | WBGene00010977 | R02D5.3 R02D5.3   | -0.0759835742153481 |
| AGIWUR16897                                                           |                                                                                   |          |                |                   |                     |
| N2 CT V                                                               | 14508249                                                                          | 14509655 | WBGene00010976 | R02D5.1 R02D5.1   | 0.0688626517706528  |
| AGIWUR12339;AGIWUR42123                                               |                                                                                   |          |                |                   |                     |
| N2 CT V                                                               | 14509738                                                                          | 14511123 | WBGene00077577 | R02D5.9 R02D5.9   | -0.0951585166266353 |
| AGIWUR21673                                                           |                                                                                   |          |                |                   |                     |
| N2 CT V                                                               | 14518351                                                                          | 14519368 | WBGene00050937 | R02D5.8 R02D5.8   | -0.146117527007513  |
| AGIWUR38956                                                           |                                                                                   |          |                |                   |                     |
| N2 CT V                                                               | 14519371                                                                          | 14521100 | WBGene00194707 | C53A5.17 C53A5.17 |                     |
| -0.0952617529897211                                                   | AGIWUR3775;AGIWUR8040;AGIWUR11708;AGIWUR13521;AGIWUR25149;AGIWUR25297;AGIWUR29485 |          |                |                   |                     |
| N2 CT V                                                               | 14523329                                                                          | 14524129 | WBGene00008262 | ril-1 C53A5.1     | -0.110516300341947  |
| AGIWUR2119;AGIWUR4729;AGIWUR20901;AGIWUR21355;AGIWUR42930;AGIWUR43238 |                                                                                   |          |                |                   |                     |
| N2 CT V                                                               | 14525389                                                                          | 14527411 | WBGene00001834 | hda-1 C53A5.3     | 0.229697101265007   |
| AGIWUR5903                                                            |                                                                                   |          |                |                   |                     |
| N2 CT V                                                               | 14531115                                                                          | 14542893 | WBGene00008265 | kcn1-4 C53A5.5    | -0.117561100888716  |
| AGIWUR4093                                                            |                                                                                   |          |                |                   |                     |
| N2 CT V                                                               | 14543588                                                                          | 14545866 | WBGene00008266 | C53A5.6 C53A5.6   | -0.160319203897231  |
| AGIWUR12806                                                           |                                                                                   |          |                |                   |                     |
| N2 CT V                                                               | 14546873                                                                          | 14554546 | WBGene00008270 | C53A5.13 C53A5.13 |                     |
| 0.064883535012056                                                     | AGIWUR22437                                                                       |          |                |                   |                     |
| N2 CT V                                                               | 14554980                                                                          | 14556287 | WBGene00005204 | srg-47 C53A5.8    | -0.0636856990377046 |
| AGIWUR29829                                                           |                                                                                   |          |                |                   |                     |
| N2 CT V                                                               | 14557038                                                                          | 14558866 | WBGene00008267 | C53A5.9 C53A5.9   | 0.86031102976624    |
| AGIWUR3180                                                            |                                                                                   |          |                |                   |                     |
| N2 CT V                                                               | 14559612                                                                          | 14561293 | WBGene00008268 | srt-32 C53A5.10   |                     |
| -0.0238081896705182                                                   | AGIWUR6672                                                                        |          |                |                   |                     |
| N2 CT V                                                               | 14562565                                                                          | 14564639 | WBGene00008269 | C53A5.11 C53A5.11 |                     |
| 2.67326750714489                                                      | AGIWUR19518                                                                       |          |                |                   |                     |
| N2 CT V                                                               | 14564752                                                                          | 14579719 | WBGene00001519 | gar-3 Y40H4A.1    |                     |
| -0.0545466685494951                                                   | AGIWUR19736;AGIWUR36424;AGIWUR39730                                               |          |                |                   |                     |
| N2 CT V                                                               | 14583306                                                                          | 14585451 | WBGene00012741 | Y40H4A.2 Y40H4A.2 |                     |
| 0.159766715482354                                                     | AGIWUR37624                                                                       |          |                |                   |                     |
| N2 CT V                                                               | 14591474                                                                          | 14593642 | WBGene00014822 | R11H6.6 R11H6.6   | 0.172296061657896   |
| AGIWUR37957                                                           |                                                                                   |          |                |                   |                     |
| N2 CT V                                                               | 14595268                                                                          | 14597067 | WBGene00003982 | pes-9 R11H6.1     | 0.208357467304214   |
| AGIWUR912;AGIWUR12621;AGIWUR13853;AGIWUR21199;AGIWUR22229             |                                                                                   |          |                |                   |                     |
| N2 CT V                                                               | 14597939                                                                          | 14600092 | WBGene00011250 | R11H6.2 R11H6.2   | -0.0213775076777409 |
| AGIWUR26564                                                           |                                                                                   |          |                |                   |                     |



|                                                                                                                                                                                |    |   |          |          |                |           |          |                     |
|--------------------------------------------------------------------------------------------------------------------------------------------------------------------------------|----|---|----------|----------|----------------|-----------|----------|---------------------|
| N2                                                                                                                                                                             | CT | V | 14600272 | 14606535 | WBGene00011251 | glb-22    | R11H6.3  | 0.0658719284049845  |
| AGIWUR38644                                                                                                                                                                    |    |   |          |          |                |           |          |                     |
| N2                                                                                                                                                                             | CT | V | 14609943 | 14610705 | WBGene00011252 | R11H6.4   | R11H6.4  | 0.00611944581169865 |
| AGIWUR28376                                                                                                                                                                    |    |   |          |          |                |           |          |                     |
| N2                                                                                                                                                                             | CT | V | 14610734 | 14612222 | WBGene00011253 | R11H6.5   | R11H6.5  | 0.114494088648225   |
| AGIWUR40698                                                                                                                                                                    |    |   |          |          |                |           |          |                     |
| N2                                                                                                                                                                             | CT | V | 14612432 | 14613706 | WBGene00009650 | ccnk-1    | F43D2.1  | -0.120126034843016  |
| AGIWUR32184                                                                                                                                                                    |    |   |          |          |                |           |          |                     |
| N2                                                                                                                                                                             | CT | V | 14621135 | 14629384 | WBGene00001986 | hot-1     | F43D2.4  | 0.169399971774789   |
| AGIWUR27200                                                                                                                                                                    |    |   |          |          |                |           |          |                     |
| N2                                                                                                                                                                             | CT | V | 14629377 | 14635180 | WBGene00044191 | F43D2.6   | F43D2.6  | -0.102297029607705  |
| AGIWUR23;AGIWUR4702;AGIWUR8799;AGIWUR11684;AGIWUR13617;AGIWUR14871;AGIWUR23346;AGIWUR30060;AGIWUR30678;AGIWUR30858;AGIWUR31003;AGIWUR31315;AGIWUR31350;AGIWUR32612;AGIWUR34854 |    |   |          |          |                |           |          |                     |
| N2                                                                                                                                                                             | CT | V | 14635582 | 14637751 | WBGene00009651 | F43D2.2   | F43D2.2  | -0.254509388663198  |
| AGIWUR14791                                                                                                                                                                    |    |   |          |          |                |           |          |                     |
| N2                                                                                                                                                                             | CT | V | 14638945 | 14640015 | WBGene00045516 | F43D2.7   | F43D2.7  | -0.106985550219497  |
| AGIWUR20996;AGIWUR22378;AGIWUR28161;AGIWUR31836;AGIWUR40482                                                                                                                    |    |   |          |          |                |           |          |                     |
| N2                                                                                                                                                                             | CT | V | 14641101 | 14641382 | WBGene00008319 | C54G10.1  |          | C54G10.1            |
| 0.252325146211977 AGIWUR16483                                                                                                                                                  |    |   |          |          |                |           |          |                     |
| N2                                                                                                                                                                             | CT | V | 14642739 | 14645979 | WBGene00004337 | rfc-1     | C54G10.2 |                     |
| -0.0932976758019297 AGIWUR2489;AGIWUR8541;AGIWUR9916;AGIWUR13984;AGIWUR27850;AGIWUR37721                                                                                       |    |   |          |          |                |           |          |                     |
| N2                                                                                                                                                                             | CT | V | 14646739 | 14653464 | WBGene00004060 | pmp-3     | C54G10.3 |                     |
| 0.0576075552151387 AGIWUR27604                                                                                                                                                 |    |   |          |          |                |           |          |                     |
| N2                                                                                                                                                                             | CT | V | 14653491 | 14658174 | WBGene00008320 | slc-25A29 |          | C54G10.4            |
| -0.189324799865098                                                                                                                                                             |    |   |          |          |                |           |          |                     |
| AGIWUR4735;AGIWUR15437;AGIWUR24609;AGIWUR28968;AGIWUR33112;AGIWUR38903;AGIWUR39305;AGIWUR40437;AGIWUR40699                                                                     |    |   |          |          |                |           |          |                     |
| N2                                                                                                                                                                             | CT | V | 14661305 | 14662928 | WBGene00005242 | srh-17    | C47E8.2  | 0.113317254938375   |
| AGIWUR38401                                                                                                                                                                    |    |   |          |          |                |           |          |                     |
| N2                                                                                                                                                                             | CT | V | 14663306 | 14665927 | WBGene00008146 | C47E8.9   | C47E8.9  | 0.00188204876477549 |
| AGIWUR16984;AGIWUR29136;AGIWUR33718                                                                                                                                            |    |   |          |          |                |           |          |                     |
| N2                                                                                                                                                                             | CT | V | 14666005 | 14667158 | WBGene00008141 | C47E8.1   | C47E8.1  | 0.188095036425638   |
| AGIWUR3716;AGIWUR6200;AGIWUR12161;AGIWUR42797                                                                                                                                  |    |   |          |          |                |           |          |                     |
| N2                                                                                                                                                                             | CT | V | 14667897 | 14668743 | WBGene00044216 | C47E8.10  |          | C47E8.10            |
| 0.118224069956899 AGIWUR377;AGIWUR3153;AGIWUR17976;AGIWUR22180;AGIWUR31385                                                                                                     |    |   |          |          |                |           |          |                     |
| N2                                                                                                                                                                             | CT | V | 14680314 | 14683751 | WBGene00008142 | C47E8.3   | C47E8.3  | -0.0535302382393104 |
| AGIWUR16754                                                                                                                                                                    |    |   |          |          |                |           |          |                     |
| N2                                                                                                                                                                             | CT | V | 14683706 | 14685528 | WBGene00008143 | C47E8.4   | C47E8.4  | -0.195725753019397  |
| AGIWUR36395                                                                                                                                                                    |    |   |          |          |                |           |          |                     |
| N2                                                                                                                                                                             | CT | V | 14684918 | 14688543 | WBGene00000915 | daf-21    | C47E8.5  | 0.040231777416385   |

AGIWUR9991;AGIWUR14975;AGIWUR21712;AGIWUR29884;AGIWUR30998;AGIWUR37657  
 N2 CT V 14688616 14688959 WBGene00044180 C47E8.11 C47E8.11  
 0.049511693125293 AGIWUR297;AGIWUR6077;AGIWUR42319;AGIWUR42457;AGIWUR43490  
 N2 CT V 14689154 14691861 WBGene00008144 gasr-8 C47E8.6 -0.0657331210342393  
 AGIWUR32623  
 N2 CT V 14691854 14697107 WBGene00006836 unc-112 C47E8.7 -0.0113133214124534  
 AGIWUR188;AGIWUR26949;AGIWUR36523  
 N2 CT V 14698957 14707601 WBGene00008145 set-5 C47E8.8  
 -0.00911598340565689 AGIWUR23099  
 N2 CT V 14711949 14712296 WBGene00014819 R08A2.6 R08A2.6 0.0148171158144432  
 AGIWUR8279;AGIWUR14356;AGIWUR25788;AGIWUR32369;AGIWUR34440  
 N2 CT V 14712663 14714072 WBGene00011136 R08A2.5 R08A2.5 -0.0251939519302367  
 AGIWUR32248  
 N2 CT V 14714207 14715720 WBGene00011133 R08A2.2 R08A2.2 0.174820775837119  
 AGIWUR28225;AGIWUR36004  
 N2 CT V 14718601 14719591 WBGene00011132 R08A2.1 R08A2.1 0.0291478841706549  
 AGIWUR23398  
 N2 CT V 14723324 14724766 WBGene00011137 R08A2.7 R08A2.7 -0.0639624007294941  
 AGIWUR11484  
 N2 CT V 14726907 14727328 WBGene00013046 Y50E8A.1 Y50E8A.1  
 -0.0750349292761481 AGIWUR10947  
 N2 CT V 14728441 14728854 WBGene00013047 Y50E8A.2 Y50E8A.2  
 0.144458568832343 AGIWUR18648  
 N2 CT V 14729643 14731129 WBGene00003861 oig-3 Y50E8A.3  
 0.00792282382637843 AGIWUR18726  
 N2 CT V 14731095 14734237 WBGene00006795 unc-61 Y50E8A.4  
 0.232158354503317 AGIWUR12148;AGIWUR21715;AGIWUR34974;AGIWUR39479  
 N2 CT V 14734660 14736169 WBGene00013048 Y50E8A.5 Y50E8A.5  
 -0.0348368390898806 AGIWUR25169  
 N2 CT V 14738542 14741326 WBGene00013049 Y50E8A.6 Y50E8A.6  
 0.125745447812853 AGIWUR24930  
 N2 CT V 14745684 14748708 WBGene00013050 lip1-8 Y50E8A.7  
 0.0115917833271455 AGIWUR39197  
 N2 CT V 14758785 14765831 WBGene00013056 Y50E8A.14 Y50E8A.14  
 -0.0165126402350175 AGIWUR27161;AGIWUR30646  
 N2 CT V 14773258 14777697 WBGene00001817 haf-7 Y50E8A.16  
 -0.0156819401974655 AGIWUR43772  
 N2 CT V 14778336 14779714 WBGene00013052 scrm-7 Y50E8A.9  
 0.339667275028628 AGIWUR24090

|                                                                       |    |   |                                                                      |          |                |           |                             |
|-----------------------------------------------------------------------|----|---|----------------------------------------------------------------------|----------|----------------|-----------|-----------------------------|
| N2                                                                    | CT | V | 14779996                                                             | 14781078 | WBGene00013053 | Y50E8A.10 | Y50E8A.10                   |
| 0.130283520957692                                                     |    |   | AGIWUR40189                                                          |          |                |           |                             |
| N2                                                                    | CT | V | 14781493                                                             | 14782209 | WBGene00013054 | Y50E8A.11 | Y50E8A.11                   |
| -0.182084023043209                                                    |    |   | AGIWUR3125;AGIWUR4148;AGIWUR20735;AGIWUR22683                        |          |                |           |                             |
| N2                                                                    | CT | V | 14782658                                                             | 14784065 | WBGene00013055 | Y50E8A.12 | Y50E8A.12                   |
| -0.155360836455124                                                    |    |   | AGIWUR9036                                                           |          |                |           |                             |
| N2                                                                    | CT | V | 14784167                                                             | 14815659 | WBGene00008183 | rin-1     | C48G7.3 -0.261749254385348  |
| AGIWUR11451;AGIWUR18250;AGIWUR32306                                   |    |   |                                                                      |          |                |           |                             |
| N2                                                                    | CT | V | 14821853                                                             | 14824453 | WBGene00012291 | W06A7.2   | W06A7.2 -0.0884895406948161 |
| AGIWUR26273                                                           |    |   |                                                                      |          |                |           |                             |
| N2                                                                    | CT | V | 14824664                                                             | 14829533 | WBGene00012293 | W06A7.4   | W06A7.4 -0.0954930393182085 |
| AGIWUR11198                                                           |    |   |                                                                      |          |                |           |                             |
| N2                                                                    | CT | V | 14829177                                                             | 14847413 | WBGene00004336 | ret-1     | W06A7.3 -0.0669084808342872 |
| AGIWUR4614;AGIWUR9051;AGIWUR32940;AGIWUR33542;AGIWUR39865;AGIWUR43561 |    |   |                                                                      |          |                |           |                             |
| N2                                                                    | CT | V | 14852826                                                             | 14858596 | WBGene00013883 | npr-13    | ZC412.1 -0.278144880564412  |
| AGIWUR24587                                                           |    |   |                                                                      |          |                |           |                             |
| N2                                                                    | CT | V | 14863168                                                             | 14867992 | WBGene00001540 | gcy-14    | ZC412.2 -0.147796812307817  |
| AGIWUR25373                                                           |    |   |                                                                      |          |                |           |                             |
| N2                                                                    | CT | V | 14868645                                                             | 14871547 | WBGene00013884 | ZC412.3   | ZC412.3 -0.187243237409374  |
| AGIWUR22737;AGIWUR26775;AGIWUR32462;AGIWUR32846;AGIWUR41774           |    |   |                                                                      |          |                |           |                             |
| N2                                                                    | CT | V | 14874198                                                             | 14875470 | WBGene00013886 | ZC412.5   | ZC412.5 0.328638845201576   |
| AGIWUR9631                                                            |    |   |                                                                      |          |                |           |                             |
| N2                                                                    | CT | V | 14875945                                                             | 14876824 | WBGene00050943 | ZC412.10  | ZC412.10                    |
| 0.190790394241928                                                     |    |   | AGIWUR19669;AGIWUR20199;AGIWUR25392;AGIWUR38413;AGIWUR41778          |          |                |           |                             |
| N2                                                                    | CT | V | 14884585                                                             | 14884880 | WBGene00044272 | nspa-4    | H12D21.13                   |
| 0.112584306347207                                                     |    |   | AGIWUR1631;AGIWUR9028;AGIWUR23094;AGIWUR23657;AGIWUR31671            |          |                |           |                             |
| N2                                                                    | CT | V | 14891450                                                             | 14893435 | WBGene00010380 | mpst-2    | H12D21.4                    |
| -0.209533787414276                                                    |    |   | AGIWUR3938                                                           |          |                |           |                             |
| N2                                                                    | CT | V | 14894053                                                             | 14894798 | WBGene00010381 | H12D21.5  | H12D21.5                    |
| 0.226924158553186                                                     |    |   | AGIWUR18903;AGIWUR37094;AGIWUR42491                                  |          |                |           |                             |
| N2                                                                    | CT | V | 14895647                                                             | 14899013 | WBGene00010383 | mpst-3    | H12D21.7                    |
| -0.0453435628562637                                                   |    |   | AGIWUR7967                                                           |          |                |           |                             |
| N2                                                                    | CT | V | 14899791                                                             | 14911929 | WBGene00010386 | H12D21.10 | H12D21.10                   |
| 0.0420263396996097                                                    |    |   | AGIWUR4311;AGIWUR6332;AGIWUR9362;AGIWUR10420;AGIWUR32434;AGIWUR38707 |          |                |           |                             |
| N2                                                                    | CT | V | 14915906                                                             | 14917682 | WBGene00010387 | H12D21.11 | H12D21.11                   |
| -0.0501636570325505                                                   |    |   | AGIWUR28713                                                          |          |                |           |                             |
| N2                                                                    | CT | V | 14917735                                                             | 14921609 | WBGene00012364 | zmp-4     | W09D12.1                    |
| 0.0388798514504209                                                    |    |   | AGIWUR31014                                                          |          |                |           |                             |
| N2                                                                    | CT | V | 14921988                                                             | 14924204 | WBGene00005211 | srg-54    | W09D12.3                    |

|                                                             |                                     |          |                |          |                             |
|-------------------------------------------------------------|-------------------------------------|----------|----------------|----------|-----------------------------|
| -0.103169980801857                                          | AGIWUR10044;AGIWUR13039;AGIWUR19865 |          |                |          |                             |
| N2 CT V                                                     | 14926710                            | 14928342 | WBGene00005212 | srg-55   | W09D12.2                    |
| -0.337708647055826                                          | AGIWUR15180                         |          |                |          |                             |
| N2 CT V                                                     | 14936898                            | 14939367 | WBGene00044176 | C30G7.2  | C30G7.2 -0.0592167897508133 |
| AGIWUR15345;AGIWUR19514;AGIWUR20514;AGIWUR20840;AGIWUR40778 |                                     |          |                |          |                             |
| N2 CT V                                                     | 14942137                            | 14945704 | WBGene00044177 | C30G7.3  | C30G7.3 0.28746839480895    |
| AGIWUR41197                                                 |                                     |          |                |          |                             |
| N2 CT V                                                     | 14946622                            | 14947229 | WBGene00044178 | C30G7.4  | C30G7.4 -0.0804082700994684 |
| AGIWUR30727;AGIWUR32223;AGIWUR44853                         |                                     |          |                |          |                             |
| N2 CT V                                                     | 14949777                            | 14952796 | WBGene00001852 | hil-1    | C30G7.1 0.131347506140964   |
| AGIWUR6850                                                  |                                     |          |                |          |                             |
| N2 CT V                                                     | 14953115                            | 14954733 | WBGene00044179 | C30G7.5  | C30G7.5 -0.175140255574357  |
| AGIWUR13663;AGIWUR24010                                     |                                     |          |                |          |                             |
| N2 CT V                                                     | 14971436                            | 14972419 | WBGene00008522 | F02D8.5  | F02D8.5 -0.177735614018367  |
| AGIWUR7448                                                  |                                     |          |                |          |                             |
| N2 CT V                                                     | 14972907                            | 14978779 | WBGene00008520 | F02D8.1  | F02D8.1 -0.121402603421929  |
| AGIWUR14274                                                 |                                     |          |                |          |                             |
| N2 CT V                                                     | 14978505                            | 14980159 | WBGene00001701 | grd-12   | F02D8.2 0.0400841830449306  |
| AGIWUR8753                                                  |                                     |          |                |          |                             |
| N2 CT V                                                     | 14980354                            | 14982626 | WBGene00006960 | xbx-1    | F02D8.3 -0.100515642099545  |
| AGIWUR25693                                                 |                                     |          |                |          |                             |
| N2 CT V                                                     | 14984893                            | 14987571 | WBGene00008521 | F02D8.4  | F02D8.4 0.0270655417476426  |
| AGIWUR34606                                                 |                                     |          |                |          |                             |
| N2 CT V                                                     | 14987556                            | 14991024 | WBGene00011318 | cdt-2    | T01C3.1 0.0292702983654429  |
| AGIWUR15169                                                 |                                     |          |                |          |                             |
| N2 CT V                                                     | 14991168                            | 14991649 | WBGene00011319 | T01C3.2  | T01C3.2 -0.245058564886341  |
| AGIWUR38466                                                 |                                     |          |                |          |                             |
| N2 CT V                                                     | 14991707                            | 14992677 | WBGene00011320 | T01C3.3  | T01C3.3 -0.190788265516268  |
| AGIWUR20486                                                 |                                     |          |                |          |                             |
| N2 CT V                                                     | 14993838                            | 14995201 | WBGene00011321 | fil-1    | T01C3.4 -0.487836533552872  |
| AGIWUR31420                                                 |                                     |          |                |          |                             |
| N2 CT V                                                     | 14996536                            | 14998121 | WBGene00011322 | irld-14  | T01C3.5 0.158047328708996   |
| AGIWUR1135                                                  |                                     |          |                |          |                             |
| N2 CT V                                                     | 14998991                            | 15000029 | WBGene00011325 | T01C3.11 | T01C3.11                    |
| 0.0722916531970377                                          | AGIWUR35806                         |          |                |          |                             |
| N2 CT V                                                     | 15000011                            | 15000594 | WBGene00004485 | rps-16   | T01C3.6 -0.0806845511760326 |
| AGIWUR8459;AGIWUR18895                                      |                                     |          |                |          |                             |
| N2 CT V                                                     | 15000653                            | 15002273 | WBGene00001423 | fib-1    | T01C3.7 0.256775183192136   |
| AGIWUR20438;AGIWUR21536;AGIWUR25217                         |                                     |          |                |          |                             |

|                                                                             |    |   |          |          |                |           |           |                     |
|-----------------------------------------------------------------------------|----|---|----------|----------|----------------|-----------|-----------|---------------------|
| N2                                                                          | CT | V | 15002543 | 15005055 | WBGene00011323 | mut-15    | T01C3.8   | -0.146203623744301  |
| AGIWUR16375                                                                 |    |   |          |          |                |           |           |                     |
| N2                                                                          | CT | V | 15005100 | 15006400 | WBGene00011324 | T01C3.9   | T01C3.9   | 0.00135776083842032 |
| AGIWUR28084                                                                 |    |   |          |          |                |           |           |                     |
| N2                                                                          | CT | V | 15006412 | 15011660 | WBGene00003775 | nmr-2     | T01C3.10  |                     |
| 0.168608102255541 AGIWUR2690;AGIWUR21972                                    |    |   |          |          |                |           |           |                     |
| N2                                                                          | CT | V | 15011870 | 15014222 | WBGene00008832 | obr-2     | F14H8.1   | -0.0742479103012954 |
| AGIWUR36992                                                                 |    |   |          |          |                |           |           |                     |
| N2                                                                          | CT | V | 15019224 | 15020325 | WBGene00008833 | F14H8.2   | F14H8.2   | -0.0242559776894495 |
| AGIWUR22268                                                                 |    |   |          |          |                |           |           |                     |
| N2                                                                          | CT | V | 15021032 | 15022049 | WBGene00008835 | F14H8.5   | F14H8.5   | 0.08136378656903    |
| AGIWUR36821                                                                 |    |   |          |          |                |           |           |                     |
| N2                                                                          | CT | V | 15023844 | 15025150 | WBGene00008834 | F14H8.4   | F14H8.4   | -0.394701042895227  |
| AGIWUR23604                                                                 |    |   |          |          |                |           |           |                     |
| N2                                                                          | CT | V | 15025740 | 15031473 | WBGene00000562 | cng-1     | F14H8.6   |                     |
| -0.00122901949901433 AGIWUR33769                                            |    |   |          |          |                |           |           |                     |
| N2                                                                          | CT | V | 15039152 | 15048207 | WBGene00004747 | sdc-3     | C25D7.3   | -0.0449946004572013 |
| AGIWUR2845                                                                  |    |   |          |          |                |           |           |                     |
| N2                                                                          | CT | V | 15051011 | 15052530 | WBGene00007716 | fbxa-82   | C25D7.4   | -0.322835727811303  |
| AGIWUR10372                                                                 |    |   |          |          |                |           |           |                     |
| N2                                                                          | CT | V | 15053765 | 15056280 | WBGene00007717 | C25D7.5   | C25D7.5   | -0.104463536885325  |
| AGIWUR24839                                                                 |    |   |          |          |                |           |           |                     |
| N2                                                                          | CT | V | 15056289 | 15056744 | WBGene00050940 | C25D7.16  |           | C25D7.16            |
| 0.189839343467403 AGIWUR9975                                                |    |   |          |          |                |           |           |                     |
| N2                                                                          | CT | V | 15056719 | 15059599 | WBGene00003155 | mcm-3     | C25D7.6   | 0.164699580195646   |
| AGIWUR8062;AGIWUR8850;AGIWUR19068;AGIWUR40939;AGIWUR41661;AGIWUR43165       |    |   |          |          |                |           |           |                     |
| N2                                                                          | CT | V | 15060249 | 15061530 | WBGene00007722 | C25D7.15  |           | C25D7.15            |
| -0.0799870410798516 AGIWUR122;AGIWUR3050;AGIWUR3052;AGIWUR26496;AGIWUR34917 |    |   |          |          |                |           |           |                     |
| N2                                                                          | CT | V | 15061488 | 15064087 | WBGene00004308 | rap-2     | C25D7.7   | -0.0601521446782698 |
| AGIWUR28629                                                                 |    |   |          |          |                |           |           |                     |
| N2                                                                          | CT | V | 15066298 | 15067464 | WBGene00007718 | otub-1    | C25D7.8   | 0.190449209442477   |
| AGIWUR22406                                                                 |    |   |          |          |                |           |           |                     |
| N2                                                                          | CT | V | 15067465 | 15068581 | WBGene00007720 | C25D7.10  |           | C25D7.10            |
| -0.201340417905747 AGIWUR30033                                              |    |   |          |          |                |           |           |                     |
| N2                                                                          | CT | V | 15068678 | 15069504 | WBGene00001021 | dnj-3     | C01G10.12 |                     |
| -0.11493634048475 AGIWUR17693                                               |    |   |          |          |                |           |           |                     |
| N2                                                                          | CT | V | 15071748 | 15080152 | WBGene00006808 | unc-76    | C01G10.11 |                     |
| 0.170588873203793 AGIWUR3430;AGIWUR13249;AGIWUR13398;AGIWUR42081            |    |   |          |          |                |           |           |                     |
| N2                                                                          | CT | V | 15080134 | 15082533 | WBGene00007237 | C01G10.10 |           | C01G10.10           |

|                     |                                                             |          |                |                 |                    |
|---------------------|-------------------------------------------------------------|----------|----------------|-----------------|--------------------|
| -0.184574941564215  | AGIWUR17288                                                 |          |                |                 |                    |
| N2 CT V             | 15082530                                                    | 15084139 | WBGene00007236 | C01G10.9        | C01G10.9           |
| -0.118274023845583  | AGIWUR42749                                                 |          |                |                 |                    |
| N2 CT V             | 15084059                                                    | 15085382 | WBGene00007235 | C01G10.8        | C01G10.8           |
| 0.0135532504346356  | AGIWUR24212;AGIWUR27098;AGIWUR27860;AGIWUR40458;AGIWUR43962 |          |                |                 |                    |
| N2 CT V             | 15085747                                                    | 15087064 | WBGene00007234 | C01G10.7        | C01G10.7           |
| -0.0715647975456619 | AGIWUR22086                                                 |          |                |                 |                    |
| N2 CT V             | 15087656                                                    | 15088336 | WBGene00007233 | C01G10.6        | C01G10.6           |
| 0.439636618032623   | AGIWUR21700                                                 |          |                |                 |                    |
| N2 CT V             | 15088427                                                    | 15088699 | WBGene00077583 | C01G10.18       | C01G10.18          |
| -0.105900261501107  | AGIWUR32231                                                 |          |                |                 |                    |
| N2 CT V             | 15090757                                                    | 15091062 | WBGene00044658 | C01G10.17       | C01G10.17          |
| -0.213483436485827  | AGIWUR31764                                                 |          |                |                 |                    |
| N2 CT V             | 15092966                                                    | 15094338 | WBGene00007241 | C01G10.16       | C01G10.16          |
| 0.0606750197941075  | AGIWUR38976                                                 |          |                |                 |                    |
| N2 CT V             | 15095049                                                    | 15097452 | WBGene00005969 | srx-78 C01G10.3 |                    |
| 0.0615170858471163  | AGIWUR38301                                                 |          |                |                 |                    |
| N2 CT V             | 15097674                                                    | 15099554 | WBGene00005970 | srx-79 C01G10.2 |                    |
| 0.189749350880684   | AGIWUR43742                                                 |          |                |                 |                    |
| N2 CT V             | 15099747                                                    | 15104389 | WBGene00007230 | C01G10.1        | C01G10.1           |
| 0.13942181101014    | AGIWUR43126                                                 |          |                |                 |                    |
| N2 CT V             | 15104724                                                    | 15105197 | WBGene00077584 | C01G10.19       | C01G10.19          |
| -0.144310803750475  | AGIWUR22856                                                 |          |                |                 |                    |
| N2 CT V             | 15106094                                                    | 15106473 | WBGene00007238 | C01G10.13       | C01G10.13          |
| -0.0661641888051383 | AGIWUR36941                                                 |          |                |                 |                    |
| N2 CT V             | 15109577                                                    | 15110345 | WBGene00013566 | Y75B12A.2       | Y75B12A.2          |
| -0.138449167535974  | AGIWUR5674                                                  |          |                |                 |                    |
| N2 CT V             | 15111960                                                    | 15113628 | WBGene00011342 | T01G5.7 T01G5.7 | -0.221486126144406 |
| AGIWUR41464         |                                                             |          |                |                 |                    |
| N2 CT V             | 15113781                                                    | 15114092 | WBGene00011341 | T01G5.6 T01G5.6 | 0.241659725689187  |
| AGIWUR38981         |                                                             |          |                |                 |                    |
| N2 CT V             | 15116844                                                    | 15119617 | WBGene00011339 | T01G5.1 T01G5.1 | 0.0510550978513642 |
| AGIWUR32926         |                                                             |          |                |                 |                    |
| N2 CT V             | 15121729                                                    | 15125228 | WBGene00011340 | ugt-30 T01G5.2  | -0.192346639282288 |
| AGIWUR40589         |                                                             |          |                |                 |                    |
| N2 CT V             | 15126212                                                    | 15127513 | WBGene00005615 | srj-27 T01G5.3  | 0.0379981562281575 |
| AGIWUR27734         |                                                             |          |                |                 |                    |
| N2 CT V             | 15128171                                                    | 15129986 | WBGene00005658 | srr-7 T01G5.4   | 0.0538638174933377 |
| AGIWUR30840         |                                                             |          |                |                 |                    |

|                                                                                                                       |    |   |          |          |                |          |          |                     |
|-----------------------------------------------------------------------------------------------------------------------|----|---|----------|----------|----------------|----------|----------|---------------------|
| N2                                                                                                                    | CT | V | 15130497 | 15132516 | WBGene00006215 | str-171  | T01G5.5  | 0.115928431136084   |
| AGIWUR9632                                                                                                            |    |   |          |          |                |          |          |                     |
| N2                                                                                                                    | CT | V | 15134188 | 15136801 | WBGene00010685 | aip1-1   | K08F9.2  | -0.173691093950573  |
| AGIWUR12725                                                                                                           |    |   |          |          |                |          |          |                     |
| N2                                                                                                                    | CT | V | 15137273 | 15139888 | WBGene00010684 | K08F9.1  | K08F9.1  | 0.20105522207076    |
| AGIWUR31121;AGIWUR34826;AGIWUR37417                                                                                   |    |   |          |          |                |          |          |                     |
| N2                                                                                                                    | CT | V | 15140547 | 15143923 | WBGene00010686 | K08F9.3  | K08F9.3  | 0.156489257518625   |
| AGIWUR44170                                                                                                           |    |   |          |          |                |          |          |                     |
| N2                                                                                                                    | CT | V | 15144019 | 15146435 | WBGene00010687 | K08F9.4  | K08F9.4  | -0.21797168590761   |
| AGIWUR30773                                                                                                           |    |   |          |          |                |          |          |                     |
| N2                                                                                                                    | CT | V | 15149046 | 15150733 | WBGene00011665 | T09F5.1  | T09F5.1  | -0.248770436754517  |
| AGIWUR35738                                                                                                           |    |   |          |          |                |          |          |                     |
| N2                                                                                                                    | CT | V | 15150961 | 15151638 | WBGene00011666 | T09F5.2  | T09F5.2  | -0.158750731916379  |
| AGIWUR18789                                                                                                           |    |   |          |          |                |          |          |                     |
| N2                                                                                                                    | CT | V | 15151845 | 15153369 | WBGene00005276 | srh-53   | T09F5.15 |                     |
| -0.0483925662674842 AGIWUR21704;AGIWUR30575                                                                           |    |   |          |          |                |          |          |                     |
| N2                                                                                                                    | CT | V | 15153577 | 15154994 | WBGene00005278 | srh-55   | T09F5.5  | -0.03970040475388   |
| AGIWUR37126                                                                                                           |    |   |          |          |                |          |          |                     |
| N2                                                                                                                    | CT | V | 15155139 | 15156457 | WBGene00005277 | srh-54   | T09F5.6  | -0.118788602722337  |
| AGIWUR1667;AGIWUR34644                                                                                                |    |   |          |          |                |          |          |                     |
| N2                                                                                                                    | CT | V | 15158991 | 15160546 | WBGene00006110 | str-45   | T09F5.3  | 0.0328720878449777  |
| AGIWUR6042                                                                                                            |    |   |          |          |                |          |          |                     |
| N2                                                                                                                    | CT | V | 15161003 | 15162433 | WBGene00014835 | T09F5.4  | T09F5.4  | -0.0915945734336239 |
| AGIWUR19205;AGIWUR21794                                                                                               |    |   |          |          |                |          |          |                     |
| N2                                                                                                                    | CT | V | 15163082 | 15164518 | WBGene00023506 | srz-11   | T09F5.16 |                     |
| 0.0746407003643159 AGIWUR12429;AGIWUR40422                                                                            |    |   |          |          |                |          |          |                     |
| N2                                                                                                                    | CT | V | 15164743 | 15166318 | WBGene00014836 | T09F5.12 |          | T09F5.12            |
| -0.0395651837017406                                                                                                   |    |   |          |          |                |          |          |                     |
| AGIWUR5187;AGIWUR9932;AGIWUR16230;AGIWUR23997;AGIWUR25680;AGIWUR25747;AGIWUR31915;AGIWUR37507;AGIWUR37916;AGIWUR44722 |    |   |          |          |                |          |          |                     |
| N2                                                                                                                    | CT | V | 15170462 | 15171642 | WBGene00005483 | srh-278  | T09F5.8  | -0.0343195741119837 |
| AGIWUR30203                                                                                                           |    |   |          |          |                |          |          |                     |
| N2                                                                                                                    | CT | V | 15173635 | 15174856 | WBGene00014837 | T09F5.13 |          | T09F5.13            |
| 0.029419161865115 AGIWUR15078                                                                                         |    |   |          |          |                |          |          |                     |
| N2                                                                                                                    | CT | V | 15175673 | 15176324 | WBGene00011668 | clcc-47  | T09F5.9  | 0.15062055206071    |
| AGIWUR4783;AGIWUR31179;AGIWUR31331                                                                                    |    |   |          |          |                |          |          |                     |
| N2                                                                                                                    | CT | V | 15176768 | 15179484 | WBGene00005772 | srw-25   | T09F5.14 |                     |
| 0.133289179985825 AGIWUR23703;AGIWUR41505                                                                             |    |   |          |          |                |          |          |                     |
| N2                                                                                                                    | CT | V | 15180057 | 15181785 | WBGene00011669 | T09F5.10 |          | T09F5.10            |

|                     |                                                                        |          |                |                                    |
|---------------------|------------------------------------------------------------------------|----------|----------------|------------------------------------|
| 0.102386132242755   | AGIWUR27301                                                            |          |                |                                    |
| N2 CT V             | 15182440                                                               | 15184125 | WBGene00011670 | fbxa-84 T09F5.11                   |
| -0.140470707333911  | AGIWUR34280                                                            |          |                |                                    |
| N2 CT V             | 15184706                                                               | 15185878 | WBGene00013567 | Y75B12B.1 Y75B12B.1                |
| -0.0315616890324275 | AGIWUR7998;AGIWUR34678                                                 |          |                |                                    |
| N2 CT V             | 15185891                                                               | 15186300 | WBGene00013568 | Y75B12B.3 Y75B12B.3                |
| 0.0600991889896454  | AGIWUR7577;AGIWUR19953;AGIWUR29967;AGIWUR31867;AGIWUR38866;AGIWUR41247 |          |                |                                    |
| N2 CT V             | 15186582                                                               | 15187787 | WBGene00000883 | cyn-7 Y75B12B.2                    |
| 0.155761466216788   | AGIWUR14782;AGIWUR26242                                                |          |                |                                    |
| N2 CT V             | 15187989                                                               | 15189588 | WBGene00013569 | bath-36 Y75B12B.4                  |
| -0.351089291682348  | AGIWUR4808                                                             |          |                |                                    |
| N2 CT V             | 15189927                                                               | 15190926 | WBGene00000879 | cyn-3 Y75B12B.5                    |
| 0.00702069442383646 | AGIWUR29379;AGIWUR29942                                                |          |                |                                    |
| N2 CT V             | 15191296                                                               | 15191836 | WBGene00013573 | Y75B12B.11 Y75B12B.11              |
| 0.0164924988513082  | AGIWUR1882;AGIWUR21973;AGIWUR35511;AGIWUR36041;AGIWUR40308             |          |                |                                    |
| N2 CT V             | 15192572                                                               | 15197661 | WBGene00004037 | plc-2 Y75B12B.6                    |
| 0.0413006581820241  | AGIWUR37464                                                            |          |                |                                    |
| N2 CT V             | 15198255                                                               | 15199396 | WBGene00005748 | srw-1 Y75B12B.7                    |
| -0.0846889668726742 | AGIWUR11483                                                            |          |                |                                    |
| N2 CT V             | 15205095                                                               | 15206552 | WBGene00077440 | Y75B12B.14 Y75B12B.14              |
| 0.0411676702797652  | AGIWUR4002;AGIWUR4181                                                  |          |                |                                    |
| N2 CT V             | 15212169                                                               | 15213706 | WBGene00005536 | sri-24 C41G6.11                    |
| 0.150817248226566   | AGIWUR30590                                                            |          |                |                                    |
| N2 CT V             | 15215475                                                               | 15216889 | WBGene00005538 | sri-26 C41G6.14                    |
| -0.0167018576295668 | AGIWUR34017                                                            |          |                |                                    |
| N2 CT V             | 15217005                                                               | 15219320 | WBGene00005537 | sri-25 C41G6.10                    |
| -0.0683816165135251 | AGIWUR41083                                                            |          |                |                                    |
| N2 CT V             | 15219946                                                               | 15221377 | WBGene00005381 | srh-165 C41G6.9 -0.088894459276192 |
| AGIWUR17371         |                                                                        |          |                |                                    |
| N2 CT V             | 15221682                                                               | 15223114 | WBGene00008057 | irld-25 C41G6.6 0.31366603540997   |
| AGIWUR10550         |                                                                        |          |                |                                    |
| N2 CT V             | 15223968                                                               | 15225359 | WBGene00005771 | srw-24 C41G6.7 0.0690068151031262  |
| AGIWUR35860         |                                                                        |          |                |                                    |
| N2 CT V             | 15225950                                                               | 15227472 | WBGene00005761 | srw-14 C41G6.8 -0.289391961685633  |
| AGIWUR17235         |                                                                        |          |                |                                    |
| N2 CT V             | 15228092                                                               | 15230075 | WBGene00008055 | cyp-34A3 C41G6.1                   |
| 0.161780587419314   | AGIWUR27581                                                            |          |                |                                    |
| N2 CT V             | 15230543                                                               | 15231893 | WBGene00005762 | srw-15 C41G6.3 -0.0696139478301809 |
| AGIWUR7178          |                                                                        |          |                |                                    |



|                                             |    |   |          |          |                |          |          |                     |
|---------------------------------------------|----|---|----------|----------|----------------|----------|----------|---------------------|
| N2                                          | CT | V | 15232500 | 15233844 | WBGene00005760 | srw-13   | C41G6.15 |                     |
| -0.0130349905390217 AGIWUR17125             |    |   |          |          |                |          |          |                     |
| N2                                          | CT | V | 15233894 | 15235761 | WBGene00008056 | nhr-164  | C41G6.5  | 0.10327563094921    |
| AGIWUR41753                                 |    |   |          |          |                |          |          |                     |
| N2                                          | CT | V | 15237334 | 15238650 | WBGene00005759 | srw-12   | C41G6.2  | 0.0945713724497654  |
| AGIWUR1197                                  |    |   |          |          |                |          |          |                     |
| N2                                          | CT | V | 15239070 | 15240315 | WBGene00005758 | srw-11   | M01B2.11 |                     |
| -0.0776538072587947 AGIWUR1583              |    |   |          |          |                |          |          |                     |
| N2                                          | CT | V | 15241584 | 15243943 | WBGene00010799 | chil-12  | M01B2.6  | -0.291195565131963  |
| AGIWUR28079                                 |    |   |          |          |                |          |          |                     |
| N2                                          | CT | V | 15244756 | 15247707 | WBGene00002211 | kin-30   | M01B2.1  | 0.0743756387357104  |
| AGIWUR2872;AGIWUR26412;AGIWUR37435          |    |   |          |          |                |          |          |                     |
| N2                                          | CT | V | 15252382 | 15253291 | WBGene00010798 | srbc-76  | M01B2.4  | 0.0215788624588527  |
| AGIWUR28878                                 |    |   |          |          |                |          |          |                     |
| N2                                          | CT | V | 15253829 | 15254805 | WBGene00010797 | srbc-75  | M01B2.3  | 0.0628680747259107  |
| AGIWUR7779                                  |    |   |          |          |                |          |          |                     |
| N2                                          | CT | V | 15257581 | 15259149 | WBGene00010800 | srsx-37  | M01B2.7  | -0.296758681105661  |
| AGIWUR25045                                 |    |   |          |          |                |          |          |                     |
| N2                                          | CT | V | 15260238 | 15260786 | WBGene00010801 | M01B2.8  | M01B2.8  | -0.0608068267469841 |
| AGIWUR34144                                 |    |   |          |          |                |          |          |                     |
| N2                                          | CT | V | 15260890 | 15262244 | WBGene00010803 | M01B2.10 |          | M01B2.10            |
| -0.169992023212128 AGIWUR12440              |    |   |          |          |                |          |          |                     |
| N2                                          | CT | V | 15263005 | 15264231 | WBGene00045337 | M01B2.12 |          | M01B2.12            |
| -0.0634001101704227 AGIWUR23366;AGIWUR39919 |    |   |          |          |                |          |          |                     |
| N2                                          | CT | V | 15264653 | 15265786 | WBGene00045338 | M01B2.13 |          | M01B2.13            |
| 0.6539865393495 AGIWUR22195;AGIWUR36262     |    |   |          |          |                |          |          |                     |
| N2                                          | CT | V | 15266436 | 15267505 | WBGene00045339 | T10H4.13 |          | T10H4.13            |
| -0.290969603976214 AGIWUR15224;AGIWUR29329  |    |   |          |          |                |          |          |                     |
| N2                                          | CT | V | 15270147 | 15272363 | WBGene00011697 | T10H4.4  | T10H4.4  | -0.35932912994103   |
| AGIWUR11665                                 |    |   |          |          |                |          |          |                     |
| N2                                          | CT | V | 15273383 | 15274857 | WBGene00005763 | srw-16   | T10H4.5  | 0.119204191864636   |
| AGIWUR21435;AGIWUR32739;AGIWUR38813         |    |   |          |          |                |          |          |                     |
| N2                                          | CT | V | 15275443 | 15276900 | WBGene00005764 | srw-17   | T10H4.6  | -0.0658625147035581 |
| AGIWUR36781                                 |    |   |          |          |                |          |          |                     |
| N2                                          | CT | V | 15277612 | 15278972 | WBGene00005765 | srw-18   | T10H4.7  | 0.107137136961707   |
| AGIWUR40153;AGIWUR42041                     |    |   |          |          |                |          |          |                     |
| N2                                          | CT | V | 15279782 | 15281395 | WBGene00005766 | srw-19   | T10H4.8  | 0.287538395532593   |
| AGIWUR25938                                 |    |   |          |          |                |          |          |                     |
| N2                                          | CT | V | 15281899 | 15283562 | WBGene00005942 | srx-51   | T10H4.9  | -0.273156058806082  |

|                                                           |    |   |          |          |                |           |         |                     |
|-----------------------------------------------------------|----|---|----------|----------|----------------|-----------|---------|---------------------|
| AGIWUR5846;AGIWUR18176;AGIWUR22189;AGIWUR23255            |    |   |          |          |                |           |         |                     |
| N2                                                        | CT | V | 15284242 | 15285551 | WBGene00014839 | T10H4.1   | T10H4.1 | 0.040591576384414   |
| AGIWUR20134;AGIWUR27880                                   |    |   |          |          |                |           |         |                     |
| N2                                                        | CT | V | 15285605 | 15287925 | WBGene00011698 | cyp-34A1  |         | T10H4.10            |
| -0.123623783373117                                        |    |   |          |          |                |           |         |                     |
| AGIWUR34196;AGIWUR36752                                   |    |   |          |          |                |           |         |                     |
| N2                                                        | CT | V | 15288924 | 15291107 | WBGene00011699 | cyp-34A2  |         | T10H4.11            |
| 0.18013373237041                                          |    |   |          |          |                |           |         |                     |
| AGIWUR9841;AGIWUR12717;AGIWUR25983;AGIWUR37300            |    |   |          |          |                |           |         |                     |
| N2                                                        | CT | V | 15292490 | 15293965 | WBGene00006153 | str-96    | T10H4.2 | 0.00537334082264884 |
| AGIWUR28458                                               |    |   |          |          |                |           |         |                     |
| N2                                                        | CT | V | 15296853 | 15298700 | WBGene00000783 | cpr-3     |         | T10H4.12            |
| 0.206988867354831                                         |    |   |          |          |                |           |         |                     |
| AGIWUR17997                                               |    |   |          |          |                |           |         |                     |
| N2                                                        | CT | V | 15299190 | 15301890 | WBGene00005940 | srx-49    | T26H8.3 | 0.108982265077472   |
| AGIWUR10126                                               |    |   |          |          |                |           |         |                     |
| N2                                                        | CT | V | 15302371 | 15303725 | WBGene00005939 | srx-48    | T26H8.2 | -0.233533534404457  |
| AGIWUR31605                                               |    |   |          |          |                |           |         |                     |
| N2                                                        | CT | V | 15304607 | 15305602 | WBGene00077588 | T26H8.5   | T26H8.5 | -0.0416101906185684 |
| AGIWUR36665                                               |    |   |          |          |                |           |         |                     |
| N2                                                        | CT | V | 15307562 | 15309063 | WBGene00014195 | srz-10    |         | ZK1037.11           |
| -0.233550834039914                                        |    |   |          |          |                |           |         |                     |
| AGIWUR35045                                               |    |   |          |          |                |           |         |                     |
| N2                                                        | CT | V | 15310120 | 15310437 | WBGene00045514 | ZK1037.12 |         | ZK1037.12           |
| -0.0370975190272453                                       |    |   |          |          |                |           |         |                     |
| AGIWUR3212;AGIWUR5803;AGIWUR13301;AGIWUR18102;AGIWUR41748 |    |   |          |          |                |           |         |                     |
| N2                                                        | CT | V | 15311080 | 15312536 | WBGene00014190 | ir1d-62   |         | ZK1037.1            |
| 0.0689551775902695                                        |    |   |          |          |                |           |         |                     |
| AGIWUR1413;AGIWUR6378;AGIWUR44594                         |    |   |          |          |                |           |         |                     |
| N2                                                        | CT | V | 15312982 | 15314230 | WBGene00014993 | ZK1037.2  |         | ZK1037.2            |
| -0.866065408854975                                        |    |   |          |          |                |           |         |                     |
| AGIWUR24023;AGIWUR27900                                   |    |   |          |          |                |           |         |                     |
| N2                                                        | CT | V | 15314668 | 15315927 | WBGene00014191 | srt-22    |         | ZK1037.3            |
| -0.041776903993652                                        |    |   |          |          |                |           |         |                     |
| AGIWUR27698                                               |    |   |          |          |                |           |         |                     |
| N2                                                        | CT | V | 15316497 | 15318425 | WBGene00014192 | nhr-246   |         | ZK1037.4            |
| 0.0421329941670292                                        |    |   |          |          |                |           |         |                     |
| AGIWUR12217                                               |    |   |          |          |                |           |         |                     |
| N2                                                        | CT | V | 15318961 | 15320553 | WBGene00045515 | ZK1037.13 |         | ZK1037.13           |
| 0.0893912176030049                                        |    |   |          |          |                |           |         |                     |
| AGIWUR28286                                               |    |   |          |          |                |           |         |                     |
| N2                                                        | CT | V | 15323853 | 15325351 | WBGene00014193 | nhr-247   |         | ZK1037.5            |
| -0.0912438698800155                                       |    |   |          |          |                |           |         |                     |
| AGIWUR3093                                                |    |   |          |          |                |           |         |                     |
| N2                                                        | CT | V | 15325822 | 15327795 | WBGene00014194 | ZK1037.6  |         | ZK1037.6            |
| -0.313510635225386                                        |    |   |          |          |                |           |         |                     |
| AGIWUR30444                                               |    |   |          |          |                |           |         |                     |
| N2                                                        | CT | V | 15328656 | 15330064 | WBGene00005817 | srw-70    |         | ZK1037.7            |
| -0.119758225754284                                        |    |   |          |          |                |           |         |                     |
| AGIWUR1333                                                |    |   |          |          |                |           |         |                     |
| N2                                                        | CT | V | 15330614 | 15332774 | WBGene00005499 | srh-295   |         | ZK1037.8            |
| -0.0933653823470317                                       |    |   |          |          |                |           |         |                     |
| AGIWUR8748                                                |    |   |          |          |                |           |         |                     |

|                      |    |   |                                                                       |          |                |           |                             |
|----------------------|----|---|-----------------------------------------------------------------------|----------|----------------|-----------|-----------------------------|
| N2                   | CT | V | 15333151                                                              | 15334571 | WBGene00005860 | srw-113   | ZK1037.9                    |
| -0.00325282342619815 |    |   | AGIWUR28439                                                           |          |                |           |                             |
| N2                   | CT | V | 15334782                                                              | 15337505 | WBGene00006953 | wrt-7     | ZK1037.10                   |
| 0.284592149914054    |    |   | AGIWUR34552                                                           |          |                |           |                             |
| N2                   | CT | V | 15338569                                                              | 15339482 | WBGene00044086 | cllec-228 | H02K04.2                    |
| 0.205066567339971    |    |   | AGIWUR23656                                                           |          |                |           |                             |
| N2                   | CT | V | 15340136                                                              | 15341446 | WBGene00010355 | cllec-229 | H02K04.1                    |
| 0.168419449222714    |    |   | AGIWUR13041                                                           |          |                |           |                             |
| N2                   | CT | V | 15342056                                                              | 15344572 | WBGene00006954 | wrt-8     | C29F3.2 0.366983086355766   |
| AGIWUR24077          |    |   |                                                                       |          |                |           |                             |
| N2                   | CT | V | 15346674                                                              | 15347411 | WBGene00007804 | C29F3.3   | C29F3.3 -0.220000842784158  |
| AGIWUR15493          |    |   |                                                                       |          |                |           |                             |
| N2                   | CT | V | 15347847                                                              | 15349144 | WBGene00007806 | cllec-230 | C29F3.5                     |
| -0.203309032196287   |    |   | AGIWUR153;AGIWUR19005;AGIWUR25227;AGIWUR32717;AGIWUR41233;AGIWUR45193 |          |                |           |                             |
| N2                   | CT | V | 15349449                                                              | 15350662 | WBGene00007805 | cllec-231 | C29F3.4                     |
| -0.0824223278670377  |    |   | AGIWUR37420                                                           |          |                |           |                             |
| N2                   | CT | V | 15352574                                                              | 15353862 | WBGene00005949 | srx-58    | C29F3.6 -0.177164686867494  |
| AGIWUR41130          |    |   |                                                                       |          |                |           |                             |
| N2                   | CT | V | 15354833                                                              | 15357572 | WBGene00007807 | C29F3.7   | C29F3.7 0.0839122740175675  |
| AGIWUR39682          |    |   |                                                                       |          |                |           |                             |
| N2                   | CT | V | 15357696                                                              | 15360738 | WBGene00001150 | ech-1.1   | C29F3.1 0.168500136290799   |
| AGIWUR34719          |    |   |                                                                       |          |                |           |                             |
| N2                   | CT | V | 15363604                                                              | 15365013 | WBGene00005325 | srh-106   | R08H2.14                    |
| 0.119017973338573    |    |   | AGIWUR529;AGIWUR43325                                                 |          |                |           |                             |
| N2                   | CT | V | 15365298                                                              | 15366825 | WBGene00005326 | srh-107   | R08H2.12                    |
| 0.154766792535322    |    |   | AGIWUR8881;AGIWUR12553;AGIWUR26384;AGIWUR26419;AGIWUR33182            |          |                |           |                             |
| N2                   | CT | V | 15367159                                                              | 15368289 | WBGene00005327 | srh-108   | R08H2.11                    |
| 0.0277310938214601   |    |   | AGIWUR6959;AGIWUR10639;AGIWUR15625                                    |          |                |           |                             |
| N2                   | CT | V | 15368470                                                              | 15370215 | WBGene00011150 | nhr-269   | R08H2.9 -0.173191464579892  |
| AGIWUR22961          |    |   |                                                                       |          |                |           |                             |
| N2                   | CT | V | 15370867                                                              | 15372950 | WBGene00011149 | R08H2.8   | R08H2.8 -0.0329811220866176 |
| AGIWUR35406          |    |   |                                                                       |          |                |           |                             |
| N2                   | CT | V | 15373676                                                              | 15374113 | WBGene00011151 | R08H2.10  | R08H2.10                    |
| -0.218679694618522   |    |   | AGIWUR37438                                                           |          |                |           |                             |
| N2                   | CT | V | 15374900                                                              | 15376323 | WBGene00005275 | srh-52    | R08H2.7 -0.126194620452971  |
| AGIWUR25436          |    |   |                                                                       |          |                |           |                             |
| N2                   | CT | V | 15376501                                                              | 15378003 | WBGene00005340 | srh-122   | R08H2.5 0.130008465294192   |
| AGIWUR24573          |    |   |                                                                       |          |                |           |                             |
| N2                   | CT | V | 15378367                                                              | 15379917 | WBGene00005457 | srh-251   | R08H2.4 -0.183806102809893  |

|                                                                                                 |    |   |                                                            |          |                |          |          |                     |
|-------------------------------------------------------------------------------------------------|----|---|------------------------------------------------------------|----------|----------------|----------|----------|---------------------|
| AGIWUR18065                                                                                     |    |   |                                                            |          |                |          |          |                     |
| N2                                                                                              | CT | V | 15381097                                                   | 15382305 | WBGene00000986 | dhs-23   | R08H2.1  | -0.221139903154825  |
| AGIWUR35197                                                                                     |    |   |                                                            |          |                |          |          |                     |
| N2                                                                                              | CT | V | 15382439                                                   | 15383839 | WBGene00006147 | str-88   | R08H2.2  | -0.0116039860635366 |
| AGIWUR2182                                                                                      |    |   |                                                            |          |                |          |          |                     |
| N2                                                                                              | CT | V | 15385033                                                   | 15386653 | WBGene00006157 | str-102  | R08H2.13 |                     |
| -0.132292119695883                                                                              |    |   | AGIWUR25002                                                |          |                |          |          |                     |
| N2                                                                                              | CT | V | 15386923                                                   | 15388870 | WBGene00005386 | srh-170  | R08H2.3  | -0.113433040493103  |
| AGIWUR34041                                                                                     |    |   |                                                            |          |                |          |          |                     |
| N2                                                                                              | CT | V | 15393108                                                   | 15394957 | WBGene00011538 | T06E6.1  | T06E6.1  | -0.180336803945853  |
| AGIWUR3213                                                                                      |    |   |                                                            |          |                |          |          |                     |
| N2                                                                                              | CT | V | 15395696                                                   | 15397348 | WBGene00000868 | cyb-3    | T06E6.2  | 0.140905370976602   |
| AGIWUR10457;AGIWUR11193;AGIWUR18348;AGIWUR18947;AGIWUR19045;AGIWUR22627;AGIWUR36099;AGIWUR44565 |    |   |                                                            |          |                |          |          |                     |
| N2                                                                                              | CT | V | 15397385                                                   | 15398828 | WBGene00005931 | fbxa-199 |          | T06E6.3             |
| 0.415945838165315                                                                               |    |   | AGIWUR8885                                                 |          |                |          |          |                     |
| N2                                                                                              | CT | V | 15398939                                                   | 15399791 | WBGene00044759 | T06E6.15 |          | T06E6.15            |
| 0.161124778341419                                                                               |    |   | AGIWUR14475;AGIWUR43886                                    |          |                |          |          |                     |
| N2                                                                                              | CT | V | 15400327                                                   | 15401820 | WBGene00005519 | sri-7    | T06E6.4  | -0.0424035694092533 |
| AGIWUR28308;AGIWUR32085;AGIWUR44685                                                             |    |   |                                                            |          |                |          |          |                     |
| N2                                                                                              | CT | V | 15402277                                                   | 15404385 | WBGene00011539 | fbxa-135 |          | T06E6.5             |
| 0.538269947855452                                                                               |    |   | AGIWUR9210;AGIWUR29642;AGIWUR36860;AGIWUR41930             |          |                |          |          |                     |
| N2                                                                                              | CT | V | 15405159                                                   | 15406760 | WBGene00005464 | srh-258  | T06E6.7  | 0.106486811108342   |
| AGIWUR3933                                                                                      |    |   |                                                            |          |                |          |          |                     |
| N2                                                                                              | CT | V | 15407228                                                   | 15411380 | WBGene00005463 | srh-257  | T06E6.6  | 0.0029352765497066  |
| AGIWUR5150;AGIWUR6121;AGIWUR9002                                                                |    |   |                                                            |          |                |          |          |                     |
| N2                                                                                              | CT | V | 15411433                                                   | 15412725 | WBGene00011541 | srbc-63  | T06E6.11 |                     |
| 0.196350170743222                                                                               |    |   | AGIWUR20907                                                |          |                |          |          |                     |
| N2                                                                                              | CT | V | 15414147                                                   | 15415349 | WBGene00005470 | srh-264  | T06E6.8  | -0.0880491341275871 |
| AGIWUR11829                                                                                     |    |   |                                                            |          |                |          |          |                     |
| N2                                                                                              | CT | V | 15416251                                                   | 15417616 | WBGene00005471 | srh-265  | T06E6.9  | -0.05114218585146   |
| AGIWUR37761                                                                                     |    |   |                                                            |          |                |          |          |                     |
| N2                                                                                              | CT | V | 15418131                                                   | 15419395 | WBGene00011540 | T06E6.10 |          | T06E6.10            |
| -0.099106332177719                                                                              |    |   | AGIWUR40932                                                |          |                |          |          |                     |
| N2                                                                                              | CT | V | 15419820                                                   | 15421506 | WBGene00005469 | srh-263  | T06E6.12 |                     |
| 0.052820954134039                                                                               |    |   | AGIWUR8797;AGIWUR27731;AGIWUR36405;AGIWUR37131;AGIWUR40154 |          |                |          |          |                     |
| N2                                                                                              | CT | V | 15421673                                                   | 15423658 | WBGene00011542 | fbxa-104 |          | T06E6.13            |
| 0.185862036715429                                                                               |    |   | AGIWUR21268                                                |          |                |          |          |                     |
| N2                                                                                              | CT | V | 15423746                                                   | 15425498 | WBGene00012533 | fbxa-209 |          | Y36E3A.1            |
| 0.0263265680660885                                                                              |    |   | AGIWUR5589                                                 |          |                |          |          |                     |

|                                                                   |    |   |          |          |                |          |          |                    |
|-------------------------------------------------------------------|----|---|----------|----------|----------------|----------|----------|--------------------|
| N2                                                                | CT | V | 15427305 | 15432722 | WBGene00012070 | T26H5.8  | T26H5.8  | -0.205575706686519 |
| AGIWUR3269;AGIWUR13122;AGIWUR17414                                |    |   |          |          |                |          |          |                    |
| N2                                                                | CT | V | 15437132 | 15438673 | WBGene00006168 | str-117  | T26H5.7  | 0.184255333880698  |
| AGIWUR24354;AGIWUR35605                                           |    |   |          |          |                |          |          |                    |
| N2                                                                | CT | V | 15438798 | 15440332 | WBGene00014846 | T26H5.6  | T26H5.6  | 0.0859343040233642 |
| AGIWUR38172;AGIWUR43959                                           |    |   |          |          |                |          |          |                    |
| N2                                                                | CT | V | 15441324 | 15442979 | WBGene00005460 | srh-254  | T26H5.1  | -0.264634399909198 |
| AGIWUR12876;AGIWUR23679;AGIWUR28403;AGIWUR35260;AGIWUR39764       |    |   |          |          |                |          |          |                    |
| N2                                                                | CT | V | 15443401 | 15443808 | WBGene00044783 | T26H5.10 |          | T26H5.10           |
| 0.0664892081257928 AGIWUR7855;AGIWUR21215;AGIWUR29464;AGIWUR32228 |    |   |          |          |                |          |          |                    |
| N2                                                                | CT | V | 15444916 | 15445420 | WBGene00044206 | T26H5.9  | T26H5.9  | 0.311689030067299  |
| AGIWUR669;AGIWUR10973;AGIWUR15693;AGIWUR34140;AGIWUR43316         |    |   |          |          |                |          |          |                    |
| N2                                                                | CT | V | 15445853 | 15447282 | WBGene00005446 | srh-239  | T26H5.3  | -0.15448495972151  |
| AGIWUR29286                                                       |    |   |          |          |                |          |          |                    |
| N2                                                                | CT | V | 15447640 | 15448138 | WBGene00012069 | T26H5.4  | T26H5.4  | 0.0623950650144751 |
| AGIWUR22733                                                       |    |   |          |          |                |          |          |                    |
| N2                                                                | CT | V | 15449631 | 15451521 | WBGene00005780 | srw-33   | T26H5.5  | -0.25940199068953  |
| AGIWUR16165                                                       |    |   |          |          |                |          |          |                    |
| N2                                                                | CT | V | 15452333 | 15455840 | WBGene00005445 | srh-238  | T23F1.1  | 0.19268722622606   |
| AGIWUR7147;AGIWUR42643                                            |    |   |          |          |                |          |          |                    |
| N2                                                                | CT | V | 15456066 | 15457445 | WBGene00011947 | T23F1.3  | T23F1.3  | 0.136445367509253  |
| AGIWUR25858                                                       |    |   |          |          |                |          |          |                    |
| N2                                                                | CT | V | 15457815 | 15459188 | WBGene00006133 | str-71   | T23F1.4  | 0.157374761206773  |
| AGIWUR32145                                                       |    |   |          |          |                |          |          |                    |
| N2                                                                | CT | V | 15459413 | 15464425 | WBGene00011948 | T23F1.5  | T23F1.5  | -0.562684970796586 |
| AGIWUR18005                                                       |    |   |          |          |                |          |          |                    |
| N2                                                                | CT | V | 15465677 | 15467099 | WBGene00004153 | pqn-71   | T23F1.6  | 0.31911927079174   |
| AGIWUR41589                                                       |    |   |          |          |                |          |          |                    |
| N2                                                                | CT | V | 15471335 | 15476122 | WBGene00001054 | dpr-1    | T23F1.7  | -0.183586681964234 |
| AGIWUR42365                                                       |    |   |          |          |                |          |          |                    |
| N2                                                                | CT | V | 15476086 | 15478566 | WBGene00007368 | C06B8.2  | C06B8.2  | -0.336819692561405 |
| AGIWUR19011;AGIWUR28409                                           |    |   |          |          |                |          |          |                    |
| N2                                                                | CT | V | 15479398 | 15481677 | WBGene00007367 | nhr-150  | C06B8.1  | 0.073622378649759  |
| AGIWUR11858                                                       |    |   |          |          |                |          |          |                    |
| N2                                                                | CT | V | 15482149 | 15483665 | WBGene00077594 | nhr-151  | C06B8.12 |                    |
| 0.0398454836091755 AGIWUR37535                                    |    |   |          |          |                |          |          |                    |
| N2                                                                | CT | V | 15486388 | 15487118 | WBGene00007373 | C06B8.11 |          | C06B8.11           |
| -0.218917004484999 AGIWUR19586                                    |    |   |          |          |                |          |          |                    |
| N2                                                                | CT | V | 15488064 | 15489401 | WBGene00005768 | srw-21   | C06B8.9  | -0.602622410693926 |

|                                                                                                |    |   |             |          |                |          |          |                     |
|------------------------------------------------------------------------------------------------|----|---|-------------|----------|----------------|----------|----------|---------------------|
| AGIWUR22410                                                                                    |    |   |             |          |                |          |          |                     |
| N2                                                                                             | CT | V | 15491003    | 15492770 | WBGene00007370 | str-264  | C06B8.4  | -0.0697272347298803 |
| AGIWUR6224                                                                                     |    |   |             |          |                |          |          |                     |
| N2                                                                                             | CT | V | 15493980    | 15495761 | WBGene00005428 | srh-218  | C06B8.10 |                     |
| -0.442488326020616                                                                             |    |   | AGIWUR17980 |          |                |          |          |                     |
| N2                                                                                             | CT | V | 15496269    | 15497567 | WBGene00005429 | srh-219  | C06B8.6  | 0.173699698321122   |
| AGIWUR42051                                                                                    |    |   |             |          |                |          |          |                     |
| N2                                                                                             | CT | V | 15498743    | 15511421 | WBGene00007372 | C06B8.7  | C06B8.7  | -0.0783768319067306 |
| AGIWUR30713                                                                                    |    |   |             |          |                |          |          |                     |
| N2                                                                                             | CT | V | 15512166    | 15512780 | WBGene00004452 | rp1-38   | C06B8.8  | 0.0908803603360404  |
| AGIWUR2954;AGIWUR10276;AGIWUR18225;AGIWUR19497;AGIWUR29421;AGIWUR36954;AGIWUR39941             |    |   |             |          |                |          |          |                     |
| N2                                                                                             | CT | V | 15512765    | 15522020 | WBGene00008997 | lgc-31   | F21A3.7  | 0.0308318685770672  |
| AGIWUR2141;AGIWUR5441;AGIWUR11882;AGIWUR22753;AGIWUR25835;AGIWUR32893;AGIWUR35667;AGIWUR43072  |    |   |             |          |                |          |          |                     |
| N2                                                                                             | CT | V | 15529369    | 15530767 | WBGene00005481 | srh-276  | F21A3.1  | -0.0185680973259776 |
| AGIWUR14696                                                                                    |    |   |             |          |                |          |          |                     |
| N2                                                                                             | CT | V | 15530783    | 15533251 | WBGene00219316 | F21A3.11 |          | F21A3.11            |
| -0.0866512924213758                                                                            |    |   | AGIWUR7750  |          |                |          |          |                     |
| N2                                                                                             | CT | V | 15536620    | 15537986 | WBGene00008994 | F21A3.4  | F21A3.4  | 0.0314163803553065  |
| AGIWUR18374                                                                                    |    |   |             |          |                |          |          |                     |
| N2                                                                                             | CT | V | 15538244    | 15547020 | WBGene00008995 | prde-1   | F21A3.5  | -0.203683133691103  |
| AGIWUR27874;AGIWUR36842                                                                        |    |   |             |          |                |          |          |                     |
| N2                                                                                             | CT | V | 15551155    | 15559147 | WBGene00000057 | acr-18   | F28F8.1  | 0.0410161877407855  |
| AGIWUR12480                                                                                    |    |   |             |          |                |          |          |                     |
| N2                                                                                             | CT | V | 15567394    | 15569889 | WBGene00009221 | acs-2    | F28F8.2  | 0.0897681028068282  |
| AGIWUR7908;AGIWUR28624;AGIWUR29438;AGIWUR30410;AGIWUR38477;AGIWUR41007;AGIWUR42897;AGIWUR44518 |    |   |             |          |                |          |          |                     |
| N2                                                                                             | CT | V | 15569935    | 15570742 | WBGene00003079 | lsm-5    | F28F8.3  | -0.136075478252531  |
| AGIWUR4058;AGIWUR18048;AGIWUR26535;AGIWUR35988;AGIWUR37591;AGIWUR38266;AGIWUR42575             |    |   |             |          |                |          |          |                     |
| N2                                                                                             | CT | V | 15571490    | 15574106 | WBGene00009225 | fbxa-94  | F28F8.8  | -0.343020276646438  |
| AGIWUR41240                                                                                    |    |   |             |          |                |          |          |                     |
| N2                                                                                             | CT | V | 15574098    | 15575403 | WBGene00009223 | mdt-28   | F28F8.5  | -0.0739245592976765 |
| AGIWUR1213                                                                                     |    |   |             |          |                |          |          |                     |
| N2                                                                                             | CT | V | 15575498    | 15577443 | WBGene00006446 | atx-3    | F28F8.6  | -0.124085141380975  |
| AGIWUR34792                                                                                    |    |   |             |          |                |          |          |                     |
| N2                                                                                             | CT | V | 15577569    | 15578486 | WBGene00044188 | F28F8.9  | F28F8.9  | -0.133173170271679  |
| AGIWUR6762;AGIWUR33145;AGIWUR41510                                                             |    |   |             |          |                |          |          |                     |
| N2                                                                                             | CT | V | 15578984    | 15590617 | WBGene00009224 | F28F8.7  | F28F8.7  | -0.249401615365864  |
| AGIWUR39186                                                                                    |    |   |             |          |                |          |          |                     |
| N2                                                                                             | CT | V | 15585067    | 15593185 | WBGene00007165 | B0391.10 |          | B0391.10            |
| -0.121360328495819                                                                             |    |   | AGIWUR10516 |          |                |          |          |                     |

|                      |    |   |                                                                                 |          |                |          |                             |
|----------------------|----|---|---------------------------------------------------------------------------------|----------|----------------|----------|-----------------------------|
| N2                   | CT | V | 15593462                                                                        | 15593799 | WBGene00007164 | fbxa-139 | B0391.9                     |
| -0.0182460866021126  |    |   | AGIWUR119;AGIWUR1454;AGIWUR3371;AGIWUR16116;AGIWUR19563;AGIWUR27242;AGIWUR42247 |          |                |          |                             |
| N2                   | CT | V | 15595055                                                                        | 15596466 | WBGene00014643 | B0391.8  | B0391.8 -0.0412578453586407 |
| AGIWUR37846          |    |   |                                                                                 |          |                |          |                             |
| N2                   | CT | V | 15600400                                                                        | 15602345 | WBGene00007166 | fbxa-152 | B0391.11                    |
| -0.0176584183834931  |    |   | AGIWUR35465                                                                     |          |                |          |                             |
| N2                   | CT | V | 15605673                                                                        | 15610384 | WBGene00007162 | fbxa-153 | B0391.5                     |
| -0.200466303691025   |    |   | AGIWUR17241;AGIWUR31489;AGIWUR37968                                             |          |                |          |                             |
| N2                   | CT | V | 15610890                                                                        | 15612591 | WBGene00006080 | str-12   | B0391.4 0.452312472743057   |
| AGIWUR35912          |    |   |                                                                                 |          |                |          |                             |
| N2                   | CT | V | 15613186                                                                        | 15614968 | WBGene00006289 | str-263  | B0391.12                    |
| -0.215088256617611   |    |   | AGIWUR28380                                                                     |          |                |          |                             |
| N2                   | CT | V | 15614937                                                                        | 15617611 | WBGene00007161 | B0391.3  | B0391.3 -0.151760574386854  |
| AGIWUR24303          |    |   |                                                                                 |          |                |          |                             |
| N2                   | CT | V | 15618180                                                                        | 15619395 | WBGene00007160 | B0391.1  | B0391.1 0.0907729675579603  |
| AGIWUR23157          |    |   |                                                                                 |          |                |          |                             |
| N2                   | CT | V | 15620022                                                                        | 15621232 | WBGene00014722 | C55A1.13 | C55A1.13                    |
| -0.123328507517829   |    |   | AGIWUR18236;AGIWUR31370                                                         |          |                |          |                             |
| N2                   | CT | V | 15621818                                                                        | 15623077 | WBGene00008321 | C55A1.1  | C55A1.1 -0.0973160013719401 |
| AGIWUR8124           |    |   |                                                                                 |          |                |          |                             |
| N2                   | CT | V | 15624355                                                                        | 15625515 | WBGene00005192 | srg-35   | C55A1.2                     |
| -0.00566244214463918 |    |   | AGIWUR14553;AGIWUR44396                                                         |          |                |          |                             |
| N2                   | CT | V | 15625861                                                                        | 15626223 | WBGene00008326 | C55A1.11 | C55A1.11                    |
| 0.399000299382966    |    |   | AGIWUR13748                                                                     |          |                |          |                             |
| N2                   | CT | V | 15626452                                                                        | 15627238 | WBGene00008325 | C55A1.9  | C55A1.9 0.236965079237225   |
| AGIWUR21342          |    |   |                                                                                 |          |                |          |                             |
| N2                   | CT | V | 15628125                                                                        | 15629643 | WBGene00006275 | str-248  | C55A1.3 -0.126961703761669  |
| AGIWUR32115          |    |   |                                                                                 |          |                |          |                             |
| N2                   | CT | V | 15630204                                                                        | 15631509 | WBGene00014723 | srz-49   | C55A1.16                    |
| -0.941318579897428   |    |   | AGIWUR19030;AGIWUR20618                                                         |          |                |          |                             |
| N2                   | CT | V | 15632718                                                                        | 15635277 | WBGene00008329 | C55A1.15 | C55A1.15                    |
| -0.0252369466872979  |    |   | AGIWUR3100;AGIWUR4333;AGIWUR30124;AGIWUR38191;AGIWUR40753                       |          |                |          |                             |
| N2                   | CT | V | 15635565                                                                        | 15637240 | WBGene00008328 | srz-43   | C55A1.14                    |
| -0.133555650993034   |    |   | AGIWUR7007;AGIWUR13658                                                          |          |                |          |                             |
| N2                   | CT | V | 15637416                                                                        | 15638953 | WBGene00008327 | srz-44   | C55A1.12                    |
| 0.376607430839368    |    |   | AGIWUR40530                                                                     |          |                |          |                             |
| N2                   | CT | V | 15639678                                                                        | 15642499 | WBGene00005384 | srh-168  | C55A1.10                    |
| 0.142477588621307    |    |   | AGIWUR4275;AGIWUR44912                                                          |          |                |          |                             |
| N2                   | CT | V | 15644875                                                                        | 15646478 | WBGene00006090 | str-23   | C55A1.5 0.0087336078612239  |

|                                                                                |    |   |          |          |                |          |          |                     |  |
|--------------------------------------------------------------------------------|----|---|----------|----------|----------------|----------|----------|---------------------|--|
| AGIWUR20741                                                                    |    |   |          |          |                |          |          |                     |  |
| N2                                                                             | CT | V | 15648102 | 15648848 | WBGene00008323 | C55A1.6  | C55A1.6  | 0.120970907039404   |  |
| AGIWUR2288;AGIWUR7298;AGIWUR18106;AGIWUR26132;AGIWUR32979;AGIWUR38974          |    |   |          |          |                |          |          |                     |  |
| N2                                                                             | CT | V | 15650467 | 15652413 | WBGene00005705 | sru-42   | C55A1.8  | 0.122179054927119   |  |
| AGIWUR38344                                                                    |    |   |          |          |                |          |          |                     |  |
| N2                                                                             | CT | V | 15652438 | 15659079 | WBGene00009978 | F53E4.1  | F53E4.1  | -0.0116534747041239 |  |
| AGIWUR625;AGIWUR1120;AGIWUR7353;AGIWUR9791;AGIWUR17711;AGIWUR31888;AGIWUR32784 |    |   |          |          |                |          |          |                     |  |
| N2                                                                             | CT | V | 15669170 | 15670091 | WBGene00010599 | K06B4.4  | K06B4.4  | -0.102003469976166  |  |
| AGIWUR1472;AGIWUR14005                                                         |    |   |          |          |                |          |          |                     |  |
| N2                                                                             | CT | V | 15670472 | 15671784 | WBGene00077450 | K06B4.15 |          | K06B4.15            |  |
| 0.43562478802156 AGIWUR31005                                                   |    |   |          |          |                |          |          |                     |  |
| N2                                                                             | CT | V | 15672666 | 15673236 | WBGene00010598 | K06B4.3  | K06B4.3  | 0.366335046162059   |  |
| AGIWUR27844                                                                    |    |   |          |          |                |          |          |                     |  |
| N2                                                                             | CT | V | 15674026 | 15675620 | WBGene00003641 | nhr-51   | K06B4.1  | -0.287554388156119  |  |
| AGIWUR10709;AGIWUR13389                                                        |    |   |          |          |                |          |          |                     |  |
| N2                                                                             | CT | V | 15677582 | 15680074 | WBGene00003642 | nhr-52   | K06B4.2  | -0.217931133641144  |  |
| AGIWUR33467                                                                    |    |   |          |          |                |          |          |                     |  |
| N2                                                                             | CT | V | 15686090 | 15687590 | WBGene00010600 | nhr-196  | K06B4.5  | -0.336097309293857  |  |
| AGIWUR20684                                                                    |    |   |          |          |                |          |          |                     |  |
| N2                                                                             | CT | V | 15687960 | 15689759 | WBGene00010602 | nhr-197  | K06B4.7  | -3.20048113253982   |  |
| AGIWUR18830                                                                    |    |   |          |          |                |          |          |                     |  |
| N2                                                                             | CT | V | 15690204 | 15691606 | WBGene00010601 | nhr-268  | K06B4.6  | 0.0099026571291656  |  |
| AGIWUR26445                                                                    |    |   |          |          |                |          |          |                     |  |
| N2                                                                             | CT | V | 15691999 | 15693161 | WBGene00014800 | nhr-200  | K06B4.13 |                     |  |
| -0.00484976199148246 AGIWUR15076                                               |    |   |          |          |                |          |          |                     |  |
| N2                                                                             | CT | V | 15693994 | 15696217 | WBGene00010603 | nhr-198  | K06B4.8  | -0.143940662666074  |  |
| AGIWUR7936                                                                     |    |   |          |          |                |          |          |                     |  |
| N2                                                                             | CT | V | 15696785 | 15698199 | WBGene00005920 | srx-29   | K06B4.9  | 0.0948534529781808  |  |
| AGIWUR3617                                                                     |    |   |          |          |                |          |          |                     |  |
| N2                                                                             | CT | V | 15698528 | 15699899 | WBGene00010604 | nhr-199  | K06B4.10 |                     |  |
| 0.0748940032407148 AGIWUR6613                                                  |    |   |          |          |                |          |          |                     |  |
| N2                                                                             | CT | V | 15700606 | 15702363 | WBGene00003643 | nhr-53   | K06B4.11 |                     |  |
| 0.0830321529182321 AGIWUR42551                                                 |    |   |          |          |                |          |          |                     |  |
| N2                                                                             | CT | V | 15704960 | 15709528 | WBGene00006686 | twk-34   | K06B4.12 |                     |  |
| -0.0846724461981294 AGIWUR42155                                                |    |   |          |          |                |          |          |                     |  |
| N2                                                                             | CT | V | 15709578 | 15710501 | WBGene00012397 | Y6E2A.1  | Y6E2A.1  | -2.23813493881345   |  |
| AGIWUR21730                                                                    |    |   |          |          |                |          |          |                     |  |
| N2                                                                             | CT | V | 15710787 | 15711998 | WBGene00006156 | str-101  | Y6E2A.2  | 0.0510227626942221  |  |
| AGIWUR2563                                                                     |    |   |          |          |                |          |          |                     |  |



|                                                                                 |    |   |          |          |                |          |          |                     |
|---------------------------------------------------------------------------------|----|---|----------|----------|----------------|----------|----------|---------------------|
| N2                                                                              | CT | V | 15712248 | 15715644 | WBGene00012398 | Y6E2A.4  | Y6E2A.4  | 0.177802728343539   |
| AGIWUR2462                                                                      |    |   |          |          |                |          |          |                     |
| N2                                                                              | CT | V | 15716419 | 15718660 | WBGene00012399 | Y6E2A.5  | Y6E2A.5  | 0.30188993438003    |
| AGIWUR3329;AGIWUR44726;AGIWUR44897                                              |    |   |          |          |                |          |          |                     |
| N2                                                                              | CT | V | 15719870 | 15721292 | WBGene00012400 | Y6E2A.7  | Y6E2A.7  | -0.602158843459507  |
| AGIWUR23084                                                                     |    |   |          |          |                |          |          |                     |
| N2                                                                              | CT | V | 15722188 | 15723999 | WBGene00005357 | srh-140  | Y6E2A.6  | 0.337926031814383   |
| AGIWUR44528                                                                     |    |   |          |          |                |          |          |                     |
| N2                                                                              | CT | V | 15724849 | 15726702 | WBGene00012401 | irld-57  | Y6E2A.8  | 0.477271936119116   |
| AGIWUR40186                                                                     |    |   |          |          |                |          |          |                     |
| N2                                                                              | CT | V | 15726841 | 15728353 | WBGene00012402 | sfxn-1.3 |          | Y6E2A.9             |
| 0.042191689199079 AGIWUR26428;AGIWUR29355;AGIWUR41643                           |    |   |          |          |                |          |          |                     |
| N2                                                                              | CT | V | 15729238 | 15730532 | WBGene00050915 | Y6E2A.10 |          | Y6E2A.10            |
| 0.13085151356966 AGIWUR40704                                                    |    |   |          |          |                |          |          |                     |
| N2                                                                              | CT | V | 15730779 | 15732309 | WBGene00006103 | str-38   | T23D5.2  | 0.0700216522410964  |
| AGIWUR24345;AGIWUR36279;AGIWUR40640                                             |    |   |          |          |                |          |          |                     |
| N2                                                                              | CT | V | 15732863 | 15733668 | WBGene00011942 | T23D5.3  | T23D5.3  | -0.16935135599164   |
| AGIWUR3432                                                                      |    |   |          |          |                |          |          |                     |
| N2                                                                              | CT | V | 15734023 | 15735820 | WBGene00006093 | str-27   | T23D5.1  | 0.0127109929201241  |
| AGIWUR28342                                                                     |    |   |          |          |                |          |          |                     |
| N2                                                                              | CT | V | 15737020 | 15739659 | WBGene00014844 | T23D5.5  | T23D5.5  | -0.127152749994669  |
| AGIWUR19384                                                                     |    |   |          |          |                |          |          |                     |
| N2                                                                              | CT | V | 15740517 | 15741951 | WBGene00006085 | str-18   | T23D5.6  | -0.282820999053072  |
| AGIWUR32407                                                                     |    |   |          |          |                |          |          |                     |
| N2                                                                              | CT | V | 15743260 | 15744478 | WBGene00006086 | str-19   | T23D5.7  | 0.1536118335795     |
| AGIWUR17721;AGIWUR43854                                                         |    |   |          |          |                |          |          |                     |
| N2                                                                              | CT | V | 15745404 | 15745652 | WBGene00077456 | T23D5.14 |          | T23D5.14            |
| -0.0433322431809167 AGIWUR24664;AGIWUR26354;AGIWUR26713;AGIWUR29651;AGIWUR44216 |    |   |          |          |                |          |          |                     |
| N2                                                                              | CT | V | 15750932 | 15752149 | WBGene00006108 | str-43   | T23D5.9  | 0.09444403561126013 |
| AGIWUR15500                                                                     |    |   |          |          |                |          |          |                     |
| N2                                                                              | CT | V | 15755031 | 15756394 | WBGene00006076 | str-8    | T23D5.11 |                     |
| -0.240091731680597 AGIWUR21147                                                  |    |   |          |          |                |          |          |                     |
| N2                                                                              | CT | V | 15758749 | 15760417 | WBGene00006077 | str-9    | F57A10.1 |                     |
| 0.154174279315454 AGIWUR18310                                                   |    |   |          |          |                |          |          |                     |
| N2                                                                              | CT | V | 15760426 | 15766172 | WBGene00001813 | haf-3    | F57A10.3 |                     |
| 0.0662516024510484 AGIWUR38570                                                  |    |   |          |          |                |          |          |                     |
| N2                                                                              | CT | V | 15766575 | 15767272 | WBGene00010184 | F57A10.2 |          | F57A10.2            |
| -0.218058620995384 AGIWUR45066                                                  |    |   |          |          |                |          |          |                     |
| N2                                                                              | CT | V | 15769438 | 15770371 | WBGene00010185 | F57A10.4 |          | F57A10.4            |

|                                                                                                                                   |                         |          |                |         |                             |
|-----------------------------------------------------------------------------------------------------------------------------------|-------------------------|----------|----------------|---------|-----------------------------|
| -0.220457779394625                                                                                                                | AGIWUR19566             |          |                |         |                             |
| N2 CT V                                                                                                                           | 15770302                | 15773239 | WBGene00003650 | nhr-60  | F57A10.5                    |
| 0.00791366690178563                                                                                                               | AGIWUR31604             |          |                |         |                             |
| N2 CT V                                                                                                                           | 15774946                | 15776676 | WBGene00010186 | nhr-283 | F57A10.6                    |
| -0.567394916751333                                                                                                                | AGIWUR22663             |          |                |         |                             |
| N2 CT V                                                                                                                           | 15777718                | 15779247 | WBGene00012056 | nhr-285 | T26E4.16                    |
| -0.113577338898796                                                                                                                | AGIWUR25482             |          |                |         |                             |
| N2 CT V                                                                                                                           | 15779693                | 15781082 | WBGene00012043 | irld-52 | T26E4.1 0.13778560393191    |
| AGIWUR19642                                                                                                                       |                         |          |                |         |                             |
| N2 CT V                                                                                                                           | 15781401                | 15782011 | WBGene00012044 | T26E4.2 | T26E4.2 0.193630284119338   |
| AGIWUR39816                                                                                                                       |                         |          |                |         |                             |
| N2 CT V                                                                                                                           | 15782794                | 15784470 | WBGene00012045 | T26E4.3 | T26E4.3 -0.203735230779306  |
| AGIWUR44007                                                                                                                       |                         |          |                |         |                             |
| N2 CT V                                                                                                                           | 15784929                | 15786597 | WBGene00012048 | srxa-17 | T26E4.6 -0.170084956877258  |
| AGIWUR8380                                                                                                                        |                         |          |                |         |                             |
| N2 CT V                                                                                                                           | 15790476                | 15792583 | WBGene00012046 | T26E4.4 | T26E4.4 -0.0387037506828425 |
| AGIWUR1297;AGIWUR22296                                                                                                            |                         |          |                |         |                             |
| N2 CT V                                                                                                                           | 15793570                | 15795194 | WBGene00012049 | T26E4.7 | T26E4.7 0.213940872434462   |
| AGIWUR39128                                                                                                                       |                         |          |                |         |                             |
| N2 CT V                                                                                                                           | 15799212                | 15802723 | WBGene00012051 | T26E4.9 | T26E4.9                     |
| -0.00145647471502208                                                                                                              | AGIWUR16925             |          |                |         |                             |
| N2 CT V                                                                                                                           | 15804843                | 15805750 | WBGene00012053 | srbc-74 | T26E4.13                    |
| 0.229666734451802                                                                                                                 | AGIWUR8264              |          |                |         |                             |
| N2 CT V                                                                                                                           | 15808119                | 15810036 | WBGene00012055 | srsx-36 | T26E4.15                    |
| -0.266076725094956                                                                                                                | AGIWUR23418             |          |                |         |                             |
| N2 CT V                                                                                                                           | 15810784                | 15811330 | WBGene00010016 | F54B8.1 | F54B8.1 0.80837407512052    |
| AGIWUR958                                                                                                                         |                         |          |                |         |                             |
| N2 CT V                                                                                                                           | 15814237                | 15815659 | WBGene00010018 | fbxa-69 | F54B8.3 -0.203010370087991  |
| AGIWUR21915                                                                                                                       |                         |          |                |         |                             |
| N2 CT V                                                                                                                           | 15816464                | 15817143 | WBGene00010019 | F54B8.4 | F54B8.4 0.15258849565155    |
| AGIWUR1221;AGIWUR1619;AGIWUR11144;AGIWUR22397;AGIWUR31675;AGIWUR33561;AGIWUR33604;AGIWUR35475;AGIWUR38821;AGIWUR40872;AGIWUR44858 |                         |          |                |         |                             |
| N2 CT V                                                                                                                           | 15817410                | 15817846 | WBGene00000014 | abf-3   | F54B8.5 -0.166282688277228  |
| AGIWUR35529                                                                                                                       |                         |          |                |         |                             |
| N2 CT V                                                                                                                           | 15818427                | 15819827 | WBGene00044103 | srbc-47 | F54B8.14                    |
| -0.107021270627358                                                                                                                | AGIWUR16708;AGIWUR36182 |          |                |         |                             |
| N2 CT V                                                                                                                           | 15820283                | 15821383 | WBGene00010020 | srbc-48 | F54B8.6 -0.128360162613334  |
| AGIWUR42422                                                                                                                       |                         |          |                |         |                             |
| N2 CT V                                                                                                                           | 15821698                | 15822884 | WBGene00010021 | srbc-49 | F54B8.7 -0.684889433690772  |

|                      |    |   |          |          |                |          |          |                     |
|----------------------|----|---|----------|----------|----------------|----------|----------|---------------------|
| AGIWUR20962          |    |   |          |          |                |          |          |                     |
| N2                   | CT | V | 15823898 | 15824966 | WBGene00010022 | srbc-50  | F54B8.8  | -0.097523026414823  |
| AGIWUR7657           |    |   |          |          |                |          |          |                     |
| N2                   | CT | V | 15826410 | 15827429 | WBGene00010023 | srbc-51  | F54B8.9  | -0.221918811449653  |
| AGIWUR31717          |    |   |          |          |                |          |          |                     |
| N2                   | CT | V | 15827823 | 15828882 | WBGene00010024 | srbc-52  | F54B8.10 |                     |
| 0.00960375612742048  |    |   |          |          |                |          |          |                     |
| N2                   | CT | V | 15829022 | 15830007 | WBGene00044105 | srbc-55  | F54B8.16 |                     |
| 0.0238922226734521   |    |   |          |          |                |          |          |                     |
| N2                   | CT | V | 15830586 | 15831686 | WBGene00010026 | srbc-56  | F54B8.12 |                     |
| -0.0420394079636437  |    |   |          |          |                |          |          |                     |
| N2                   | CT | V | 15832436 | 15833722 | WBGene00010025 | srbc-54  | F54B8.11 |                     |
| 0.000362394422063872 |    |   |          |          |                |          |          |                     |
| N2                   | CT | V | 15834745 | 15837403 | WBGene00044104 | srbc-53  | F54B8.15 |                     |
| -0.0903221552397744  |    |   |          |          |                |          |          |                     |
| N2                   | CT | V | 15837524 | 15839522 | WBGene00003556 | nas-40   | F54B8.13 |                     |
| -0.0388905294381221  |    |   |          |          |                |          |          |                     |
| N2                   | CT | V | 15839967 | 15841195 | WBGene00005365 | srh-149  | K08G2.13 |                     |
| -0.232629877496597   |    |   |          |          |                |          |          |                     |
| N2                   | CT | V | 15841837 | 15844214 | WBGene00005368 | srh-152  | K08G2.3  | 0.0878642748684024  |
| AGIWUR23740          |    |   |          |          |                |          |          |                     |
| N2                   | CT | V | 15844453 | 15844768 | WBGene00050949 | K08G2.16 |          | K08G2.16            |
| -0.12467177955382    |    |   |          |          |                |          |          |                     |
| N2                   | CT | V | 15845931 | 15847306 | WBGene00005366 | srh-150  | K08G2.2  | -0.0751801623131501 |
| AGIWUR38885          |    |   |          |          |                |          |          |                     |
| N2                   | CT | V | 15855012 | 15856148 | WBGene00005369 | srh-153  | K08G2.11 |                     |
| -0.153548468673024   |    |   |          |          |                |          |          |                     |
| N2                   | CT | V | 15858838 | 15859227 | WBGene00014803 | K08G2.14 |          | K08G2.14            |
| 0.0337809289025457   |    |   |          |          |                |          |          |                     |
| N2                   | CT | V | 15859960 | 15860985 | WBGene00005367 | srh-151  | K08G2.6  |                     |
| -0.00914376523782146 |    |   |          |          |                |          |          |                     |
| N2                   | CT | V | 15861452 | 15862699 | WBGene00010688 | srz-12   | K08G2.7  | -0.0370456911316612 |
| AGIWUR2579           |    |   |          |          |                |          |          |                     |
| N2                   | CT | V | 15863342 | 15864458 | WBGene00005503 | srh-299  | K08G2.9  | -0.0704279465354896 |
| AGIWUR22771          |    |   |          |          |                |          |          |                     |
| N2                   | CT | V | 15865088 | 15865811 | WBGene00005498 | srh-294  | K08G2.10 |                     |
| -0.0224005335776285  |    |   |          |          |                |          |          |                     |
| N2                   | CT | V | 15866139 | 15867333 | WBGene00005497 | srh-293  | K08G2.8  | 0.0704893021393929  |
| AGIWUR25448          |    |   |          |          |                |          |          |                     |

|                         |    |   |                                     |          |                |           |                             |
|-------------------------|----|---|-------------------------------------|----------|----------------|-----------|-----------------------------|
| N2                      | CT | V | 15867683                            | 15869051 | WBGene00011513 | fbxa-197  | T06C12.4                    |
| -0.297358136080739      |    |   | AGIWUR25587                         |          |                |           |                             |
| N2                      | CT | V | 15869311                            | 15870636 | WBGene00011514 | fbxa-198  | T06C12.5                    |
| -0.211670542776602      |    |   | AGIWUR22215;AGIWUR24784;AGIWUR35646 |          |                |           |                             |
| N2                      | CT | V | 15871170                            | 15872351 | WBGene00006122 | str-57    | T06C12.2                    |
| 0.202839192699214       |    |   | AGIWUR3263                          |          |                |           |                             |
| N2                      | CT | V | 15872573                            | 15873770 | WBGene00006121 | str-56    | T06C12.3                    |
| -0.18738117435026       |    |   | AGIWUR4744                          |          |                |           |                             |
| N2                      | CT | V | 15874093                            | 15876408 | WBGene00003692 | nhr-102   | T06C12.6                    |
| -0.118144885387052      |    |   | AGIWUR17090                         |          |                |           |                             |
| N2                      | CT | V | 15876732                            | 15879619 | WBGene00003674 | nhr-84    | T06C12.7                    |
| -0.150727917360957      |    |   | AGIWUR11870                         |          |                |           |                             |
| N2                      | CT | V | 15885662                            | 15886059 | WBGene00011516 | T06C12.9  | T06C12.9                    |
| -0.0552356761182073     |    |   | AGIWUR29957                         |          |                |           |                             |
| N2                      | CT | V | 15886719                            | 15888851 | WBGene00011517 | cgt-1     | T06C12.10                   |
| -0.132611714763318      |    |   | AGIWUR26795                         |          |                |           |                             |
| N2                      | CT | V | 15892061                            | 15892520 | WBGene00011519 | T06C12.12 | T06C12.12                   |
| 0.0169722577377831      |    |   | AGIWUR22023                         |          |                |           |                             |
| N2                      | CT | V | 15892996                            | 15894160 | WBGene00011518 | T06C12.11 | T06C12.11                   |
| 0.267389413131792       |    |   | AGIWUR41573                         |          |                |           |                             |
| N2                      | CT | V | 15894454                            | 15896765 | WBGene00011520 | nhr-213   | T06C12.13                   |
| 0.103282292520392       |    |   | AGIWUR5439                          |          |                |           |                             |
| N2                      | CT | V | 15897996                            | 15899415 | WBGene00006124 | str-60    | T06C12.1                    |
| -0.0530906758843877     |    |   | AGIWUR44430                         |          |                |           |                             |
| N2                      | CT | V | 15899996                            | 15900900 | WBGene00011521 | T06C12.14 | T06C12.14                   |
| 0.14921149350395        |    |   | AGIWUR9101                          |          |                |           |                             |
| N2                      | CT | V | 15901142                            | 15902166 | WBGene00014832 | srab-27   | T06C12.15                   |
| -0.180157736116827      |    |   | AGIWUR14272;AGIWUR26824             |          |                |           |                             |
| N2                      | CT | V | 15905620                            | 15907032 | WBGene00009418 | F35E8.2   | F35E8.2 0.148251074530733   |
| AGIWUR12319;AGIWUR42594 |    |   |                                     |          |                |           |                             |
| N2                      | CT | V | 15912148                            | 15913056 | WBGene00009420 | F35E8.6   | F35E8.6 0.129590896753269   |
| AGIWUR6094              |    |   |                                     |          |                |           |                             |
| N2                      | CT | V | 15914014                            | 15915142 | WBGene00009421 | F35E8.7   | F35E8.7 -0.0337273498520965 |
| AGIWUR36084             |    |   |                                     |          |                |           |                             |
| N2                      | CT | V | 15915216                            | 15916079 | WBGene00001786 | gst-38    | F35E8.8 0.24298541623298    |
| AGIWUR4624              |    |   |                                     |          |                |           |                             |
| N2                      | CT | V | 15916334                            | 15917558 | WBGene00009422 | F35E8.9   | F35E8.9 -0.131085069702591  |
| AGIWUR3483              |    |   |                                     |          |                |           |                             |
| N2                      | CT | V | 15921309                            | 15922818 | WBGene00000412 | cdr-1     | F35E8.11                    |

|                     |                                     |          |                |         |                             |
|---------------------|-------------------------------------|----------|----------------|---------|-----------------------------|
| -0.0199770794316638 | AGIWUR32534                         |          |                |         |                             |
| N2 CT V             | 15922939                            | 15924471 | WBGene00003698 | nhr-108 | F35E8.12                    |
| -0.258617208729349  | AGIWUR15760                         |          |                |         |                             |
| N2 CT V             | 15926425                            | 15928425 | WBGene00011505 | pzf-1   | T05G11.1                    |
| 0.067839179617291   | AGIWUR19186                         |          |                |         |                             |
| N2 CT V             | 15930182                            | 15931084 | WBGene00011506 | srbc-77 | T05G11.2                    |
| -0.037307342262987  | AGIWUR5982                          |          |                |         |                             |
| N2 CT V             | 15931292                            | 15932490 | WBGene00005773 | srw-26  | T05G11.3                    |
| -0.130056741909746  | AGIWUR30587                         |          |                |         |                             |
| N2 CT V             | 15933267                            | 15934976 | WBGene00005774 | srw-27  | T05G11.4                    |
| -0.0685584413027618 | AGIWUR37244                         |          |                |         |                             |
| N2 CT V             | 15935948                            | 15937110 | WBGene00005775 | srw-28  | T05G11.5                    |
| 0.0739310517859755  | AGIWUR36679;AGIWUR39032             |          |                |         |                             |
| N2 CT V             | 15937194                            | 15938538 | WBGene00005799 | srw-52  | T05G11.8                    |
| 0.042129665891558   | AGIWUR4369                          |          |                |         |                             |
| N2 CT V             | 15938776                            | 15940354 | WBGene00005802 | srw-55  | T05G11.6                    |
| 0.281892561316496   | AGIWUR4347                          |          |                |         |                             |
| N2 CT V             | 15943425                            | 15944854 | WBGene00005800 | srw-53  | T05G11.7                    |
| -0.305475405576765  | AGIWUR16562                         |          |                |         |                             |
| N2 CT V             | 15947299                            | 15948461 | WBGene00005805 | srw-58  | H24D24.2                    |
| -0.0740048688747983 | AGIWUR27357                         |          |                |         |                             |
| N2 CT V             | 15949716                            | 15951003 | WBGene00005806 | srw-59  | H24D24.1                    |
| 0.0643423606392171  | AGIWUR21694                         |          |                |         |                             |
| N2 CT V             | 15951432                            | 15952862 | WBGene00005803 | srw-56  | F36G9.16                    |
| 0.0150184499255825  | AGIWUR36809                         |          |                |         |                             |
| N2 CT V             | 15953595                            | 15955032 | WBGene00005804 | srw-57  | F36G9.1 -0.0899580215955718 |
| AGIWUR34845         |                                     |          |                |         |                             |
| N2 CT V             | 15955797                            | 15957028 | WBGene00005401 | srh-186 | F36G9.2 -0.0519000018489812 |
| AGIWUR8604          |                                     |          |                |         |                             |
| N2 CT V             | 15957406                            | 15959554 | WBGene00009485 | F36G9.3 | F36G9.3 0.13802105028957    |
| AGIWUR19685         |                                     |          |                |         |                             |
| N2 CT V             | 15959808                            | 15961915 | WBGene00014751 | F36G9.4 | F36G9.4 0.186354585093267   |
| AGIWUR31171         |                                     |          |                |         |                             |
| N2 CT V             | 15962086                            | 15963232 | WBGene00005515 | sri-3   | F36G9.10                    |
| 0.0919077864561082  | AGIWUR15677;AGIWUR17012;AGIWUR28051 |          |                |         |                             |
| N2 CT V             | 15963849                            | 15965212 | WBGene00005514 | sri-2   | F36G9.9 0.158049106994433   |
| AGIWUR1372          |                                     |          |                |         |                             |
| N2 CT V             | 15966245                            | 15967642 | WBGene00005513 | sri-1   | F36G9.8 -0.0881465025295984 |
| AGIWUR26153         |                                     |          |                |         |                             |

|                                            |    |   |          |          |                |          |          |                     |
|--------------------------------------------|----|---|----------|----------|----------------|----------|----------|---------------------|
| N2                                         | CT | V | 15968474 | 15969753 | WBGene00009486 | F36G9.7  | F36G9.7  | 0.0437146291567476  |
| AGIWUR35022                                |    |   |          |          |                |          |          |                     |
| N2                                         | CT | V | 15970433 | 15972579 | WBGene00005686 | sru-23   | F36G9.6  | -1.02735870330934   |
| AGIWUR22156                                |    |   |          |          |                |          |          |                     |
| N2                                         | CT | V | 15972907 | 15974936 | WBGene00005685 | sru-22   | F36G9.5  | 0.138310420425736   |
| AGIWUR28181                                |    |   |          |          |                |          |          |                     |
| N2                                         | CT | V | 15978714 | 15981666 | WBGene00009488 | oac-20   | F36G9.12 |                     |
| 0.306686075465757 AGIWUR23069              |    |   |          |          |                |          |          |                     |
| N2                                         | CT | V | 15981691 | 15982854 | WBGene00009490 | fbxa-99  | F36G9.14 |                     |
| 0.0317463884162965 AGIWUR27467             |    |   |          |          |                |          |          |                     |
| N2                                         | CT | V | 15983294 | 15986640 | WBGene00009489 | F36G9.13 |          | F36G9.13            |
| 0.285997640011784 AGIWUR30823              |    |   |          |          |                |          |          |                     |
| N2                                         | CT | V | 15987494 | 15988174 | WBGene00009491 | F36G9.15 |          | F36G9.15            |
| 0.0818068069918212 AGIWUR25824;AGIWUR39952 |    |   |          |          |                |          |          |                     |
| N2                                         | CT | V | 15988754 | 15991607 | WBGene00007380 | C06C6.6  | C06C6.6  | 0.156946965670638   |
| AGIWUR5010                                 |    |   |          |          |                |          |          |                     |
| N2                                         | CT | V | 15992150 | 15995607 | WBGene00007381 | C06C6.7  | C06C6.7  | 0.45576430947848    |
| AGIWUR11685                                |    |   |          |          |                |          |          |                     |
| N2                                         | CT | V | 15996214 | 15996745 | WBGene00007383 | C06C6.9  | C06C6.9  | 0.0638363693153217  |
| AGIWUR44824                                |    |   |          |          |                |          |          |                     |
| N2                                         | CT | V | 15997136 | 15997768 | WBGene00007382 | C06C6.8  | C06C6.8  | -0.191377906265279  |
| AGIWUR6150                                 |    |   |          |          |                |          |          |                     |
| N2                                         | CT | V | 15997761 | 16000653 | WBGene00003640 | nhr-50   | C06C6.5  | 0.0416654062190478  |
| AGIWUR4454;AGIWUR26657;AGIWUR29520         |    |   |          |          |                |          |          |                     |
| N2                                         | CT | V | 16002588 | 16004728 | WBGene00003653 | nhr-63   | C06C6.4  | -0.191345181227354  |
| AGIWUR17261                                |    |   |          |          |                |          |          |                     |
| N2                                         | CT | V | 16006304 | 16007605 | WBGene00006262 | str-231  | C06C6.3  | -0.0214989362598708 |
| AGIWUR41558                                |    |   |          |          |                |          |          |                     |
| N2                                         | CT | V | 16008332 | 16009664 | WBGene00006264 | str-233  | C06C6.2  | -0.769784238792008  |
| AGIWUR18585                                |    |   |          |          |                |          |          |                     |
| N2                                         | CT | V | 16010710 | 16012112 | WBGene00007379 | C06C6.1  | C06C6.1  | 0.226782162969114   |
| AGIWUR45005                                |    |   |          |          |                |          |          |                     |
| N2                                         | CT | V | 16012537 | 16014226 | WBGene00011686 | T10C6.2  | T10C6.2  | 0.0631088587679631  |
| AGIWUR29743                                |    |   |          |          |                |          |          |                     |
| N2                                         | CT | V | 16014509 | 16015752 | WBGene00006263 | str-232  | T10C6.1  | 0.171213955055984   |
| AGIWUR21772                                |    |   |          |          |                |          |          |                     |
| N2                                         | CT | V | 16017971 | 16019862 | WBGene00005934 | srx-43   | T10C6.3  | 0.0712710948155113  |
| AGIWUR6572;AGIWUR7974                      |    |   |          |          |                |          |          |                     |
| N2                                         | CT | V | 16020342 | 16022652 | WBGene00005935 | srx-44   | T10C6.4  | -0.33837106630416   |

|                                                        |    |   |          |          |                |                                     |
|--------------------------------------------------------|----|---|----------|----------|----------------|-------------------------------------|
| AGIWUR22415                                            |    |   |          |          |                |                                     |
| N2                                                     | CT | V | 16023351 | 16024185 | WBGene00011687 | T10C6.5 T10C6.5 -0.168041518715906  |
| AGIWUR13803;AGIWUR29687                                |    |   |          |          |                |                                     |
| N2                                                     | CT | V | 16024326 | 16027454 | WBGene00011688 | T10C6.6 T10C6.6 -0.0994461717637822 |
| AGIWUR11648;AGIWUR33048                                |    |   |          |          |                |                                     |
| N2                                                     | CT | V | 16027449 | 16031713 | WBGene00011689 | T10C6.7 T10C6.7 -0.0497760669989713 |
| AGIWUR38717                                            |    |   |          |          |                |                                     |
| N2                                                     | CT | V | 16036413 | 16038293 | WBGene00011691 | T10C6.10 T10C6.10                   |
| -0.0190027606512997 AGIWUR7120;AGIWUR17168;AGIWUR30370 |    |   |          |          |                |                                     |
| N2                                                     | CT | V | 16041828 | 16042283 | WBGene00001876 | his-2 T10C6.13                      |
| 0.1563460085973 AGIWUR18145                            |    |   |          |          |                |                                     |
| N2                                                     | CT | V | 16044296 | 16045874 | WBGene00050899 | T10C6.15 T10C6.15                   |
| 1.00551506234416 AGIWUR44157                           |    |   |          |          |                |                                     |
| N2                                                     | CT | V | 16046873 | 16047446 | WBGene00013961 | ZK285.2 ZK285.2 0.219456153157817   |
| AGIWUR44047                                            |    |   |          |          |                |                                     |
| N2                                                     | CT | V | 16047808 | 16049147 | WBGene00006234 | str-198 ZK285.1 -0.0451385475587145 |
| AGIWUR35495                                            |    |   |          |          |                |                                     |
| N2                                                     | CT | V | 16049492 | 16051554 | WBGene00008821 | best-12 F14H3.2 0.141815870653887   |
| AGIWUR39204                                            |    |   |          |          |                |                                     |
| N2                                                     | CT | V | 16051923 | 16053510 | WBGene00008822 | F14H3.3 F14H3.3 -0.146772477444312  |
| AGIWUR44849                                            |    |   |          |          |                |                                     |
| N2                                                     | CT | V | 16053900 | 16055072 | WBGene00008823 | F14H3.4 F14H3.4 -0.239806414427861  |
| AGIWUR3490                                             |    |   |          |          |                |                                     |
| N2                                                     | CT | V | 16055806 | 16057054 | WBGene00008824 | F14H3.5 F14H3.5 -0.238211022455079  |
| AGIWUR2701                                             |    |   |          |          |                |                                     |
| N2                                                     | CT | V | 16057322 | 16058892 | WBGene00008825 | F14H3.6 F14H3.6 -0.252500607998554  |
| AGIWUR24313                                            |    |   |          |          |                |                                     |
| N2                                                     | CT | V | 16059781 | 16060235 | WBGene00219414 | F14H3.15 F14H3.15                   |
| 0.291021029742264 AGIWUR36744                          |    |   |          |          |                |                                     |
| N2                                                     | CT | V | 16063551 | 16064108 | WBGene00014735 | cyp-35D2 F14H3.13                   |
| -0.045011038666261 AGIWUR43917                         |    |   |          |          |                |                                     |
| N2                                                     | CT | V | 16064447 | 16067002 | WBGene00008827 | F14H3.8 F14H3.8 -0.0165127412303709 |
| AGIWUR4110                                             |    |   |          |          |                |                                     |
| N2                                                     | CT | V | 16067949 | 16068763 | WBGene00008828 | F14H3.9 F14H3.9 0.160586804403139   |
| AGIWUR20501                                            |    |   |          |          |                |                                     |
| N2                                                     | CT | V | 16069238 | 16071301 | WBGene00008829 | cyp-35D1 F14H3.10                   |
| 0.239505244766178 AGIWUR18064                          |    |   |          |          |                |                                     |
| N2                                                     | CT | V | 16071325 | 16072738 | WBGene00008830 | nhr-176 F14H3.11                    |
| -0.194880910473016 AGIWUR13486;AGIWUR17452             |    |   |          |          |                |                                     |

|                                                           |    |   |          |          |                |          |          |                     |
|-----------------------------------------------------------|----|---|----------|----------|----------------|----------|----------|---------------------|
| N2                                                        | CT | V | 16072765 | 16073956 | WBGene00005598 | srj-10   | F14H3.1  | -0.0474681864962516 |
| AGIWUR29645                                               |    |   |          |          |                |          |          |                     |
| N2                                                        | CT | V | 16074113 | 16075323 | WBGene00008831 | F14H3.12 | F14H3.12 |                     |
| -0.218504855632677 AGIWUR2204                             |    |   |          |          |                |          |          |                     |
| N2                                                        | CT | V | 16075659 | 16077308 | WBGene00005616 | srj-29   | F22B8.1  | 0.169146038871583   |
| AGIWUR36282                                               |    |   |          |          |                |          |          |                     |
| N2                                                        | CT | V | 16077979 | 16079234 | WBGene00014741 | F22B8.2  | F22B8.2  | -0.041650621525422  |
| AGIWUR15244                                               |    |   |          |          |                |          |          |                     |
| N2                                                        | CT | V | 16086572 | 16088217 | WBGene00009047 | F22B8.4  | F22B8.4  | -0.143735448563515  |
| AGIWUR44672                                               |    |   |          |          |                |          |          |                     |
| N2                                                        | CT | V | 16090985 | 16092117 | WBGene00009046 | F22B8.3  | F22B8.3  | 0.0818384971879631  |
| AGIWUR21008                                               |    |   |          |          |                |          |          |                     |
| N2                                                        | CT | V | 16094584 | 16097320 | WBGene00009049 | F22B8.7  | F22B8.7  | -0.0229598223555953 |
| AGIWUR15062                                               |    |   |          |          |                |          |          |                     |
| N2                                                        | CT | V | 16097985 | 16100209 | WBGene00006075 | str-7    | F22B8.5  |                     |
| -0.00453466222145771 AGIWUR15383;AGIWUR19926;AGIWUR42258  |    |   |          |          |                |          |          |                     |
| N2                                                        | CT | V | 16100627 | 16102750 | WBGene00009048 | cth-1    | F22B8.6  | 0.133003651535301   |
| AGIWUR9763;AGIWUR36127;AGIWUR42001                        |    |   |          |          |                |          |          |                     |
| N2                                                        | CT | V | 16103894 | 16105950 | WBGene00009706 | argk-1   | F44G3.2  | 0.214923908695503   |
| AGIWUR1153;AGIWUR5200;AGIWUR18061;AGIWUR18759;AGIWUR36128 |    |   |          |          |                |          |          |                     |
| N2                                                        | CT | V | 16112237 | 16112968 | WBGene00014757 | F44G3.4  | F44G3.4  | 0.110412221671531   |
| AGIWUR14212;AGIWUR36160                                   |    |   |          |          |                |          |          |                     |
| N2                                                        | CT | V | 16112992 | 16114337 | WBGene00009707 | srxa-16  | F44G3.5  | 0.096407477416002   |
| AGIWUR36396                                               |    |   |          |          |                |          |          |                     |
| N2                                                        | CT | V | 16115681 | 16116897 | WBGene00006092 | str-25   | F44G3.11 |                     |
| -0.0302941503059788 AGIWUR7233                            |    |   |          |          |                |          |          |                     |
| N2                                                        | CT | V | 16117363 | 16118701 | WBGene00006158 | str-103  | F44G3.1  | -0.115330482596221  |
| AGIWUR41093                                               |    |   |          |          |                |          |          |                     |
| N2                                                        | CT | V | 16121824 | 16122648 | WBGene00004809 | skr-3    | F44G3.6  | 0.145694431769005   |
| AGIWUR29757                                               |    |   |          |          |                |          |          |                     |
| N2                                                        | CT | V | 16125811 | 16127497 | WBGene00044661 | fbxa-143 | F44G3.14 |                     |
| -0.452360118746195 AGIWUR21812                            |    |   |          |          |                |          |          |                     |
| N2                                                        | CT | V | 16128131 | 16129089 | WBGene00044660 | fbxa-87  | F44G3.13 |                     |
| -0.375309374765955 AGIWUR7460;AGIWUR29772                 |    |   |          |          |                |          |          |                     |
| N2                                                        | CT | V | 16129409 | 16130979 | WBGene00044659 | fbxa-142 | F44G3.12 |                     |
| -0.125427523320787 AGIWUR14461                            |    |   |          |          |                |          |          |                     |
| N2                                                        | CT | V | 16131180 | 16133283 | WBGene00009709 | fbxa-144 | F44G3.8  |                     |
| 0.163449305058615 AGIWUR29526;AGIWUR33518                 |    |   |          |          |                |          |          |                     |
| N2                                                        | CT | V | 16133781 | 16137143 | WBGene00009708 | F44G3.7  | F44G3.7  | 0.0940472621225332  |



|                                     |    |   |                                                 |          |                |                                     |
|-------------------------------------|----|---|-------------------------------------------------|----------|----------------|-------------------------------------|
| AGIWUR25611                         |    |   |                                                 |          |                |                                     |
| N2                                  | CT | V | 16138846                                        | 16139627 | WBGene00009710 | F44G3.10 F44G3.10                   |
| 0.0922403611798046                  |    |   | AGIWUR7611;AGIWUR37760;AGIWUR40817              |          |                |                                     |
| N2                                  | CT | V | 16140314                                        | 16141164 | WBGene00008631 | F10A3.1 F10A3.1 -0.24066974559635   |
| AGIWUR34865                         |    |   |                                                 |          |                |                                     |
| N2                                  | CT | V | 16142008                                        | 16143116 | WBGene00008632 | fbxa-88 F10A3.2 -0.0429566808431652 |
| AGIWUR31979                         |    |   |                                                 |          |                |                                     |
| N2                                  | CT | V | 16143615                                        | 16144653 | WBGene00008633 | fbxa-18 F10A3.3 -0.0846914374675549 |
| AGIWUR10313                         |    |   |                                                 |          |                |                                     |
| N2                                  | CT | V | 16144986                                        | 16146263 | WBGene00008638 | F10A3.16 F10A3.16                   |
| 0.358342411263521                   |    |   | AGIWUR14428                                     |          |                |                                     |
| N2                                  | CT | V | 16147039                                        | 16148327 | WBGene00014733 | F10A3.10 F10A3.10                   |
| -0.0876579717738029                 |    |   | AGIWUR582                                       |          |                |                                     |
| N2                                  | CT | V | 16149125                                        | 16151870 | WBGene00008634 | F10A3.4 F10A3.4 0.0256897719917362  |
| AGIWUR18361                         |    |   |                                                 |          |                |                                     |
| N2                                  | CT | V | 16151978                                        | 16153475 | WBGene00006280 | str-254 F10A3.9 -0.071789518699843  |
| AGIWUR7211;AGIWUR44010              |    |   |                                                 |          |                |                                     |
| N2                                  | CT | V | 16153855                                        | 16155211 | WBGene00006154 | str-97 F10A3.8 -0.0256562520108101  |
| AGIWUR13410;AGIWUR25754;AGIWUR37364 |    |   |                                                 |          |                |                                     |
| N2                                  | CT | V | 16155451                                        | 16156722 | WBGene00008635 | F10A3.7 F10A3.7 -0.279089459390233  |
| AGIWUR32120                         |    |   |                                                 |          |                |                                     |
| N2                                  | CT | V | 16157335                                        | 16158491 | WBGene00006155 | str-99 F10A3.6 0.247470058801238    |
| AGIWUR1542                          |    |   |                                                 |          |                |                                     |
| N2                                  | CT | V | 16158679                                        | 16159694 | WBGene00045507 | F10A3.17 F10A3.17                   |
| -0.0237572263324548                 |    |   | AGIWUR32356                                     |          |                |                                     |
| N2                                  | CT | V | 16160685                                        | 16162224 | WBGene00006161 | str-109 F10A3.5 0.105646071466936   |
| AGIWUR3013                          |    |   |                                                 |          |                |                                     |
| N2                                  | CT | V | 16162685                                        | 16163795 | WBGene00008636 | F10A3.11 F10A3.11                   |
| 0.160465609128069                   |    |   | AGIWUR12243                                     |          |                |                                     |
| N2                                  | CT | V | 16164019                                        | 16165473 | WBGene00008637 | F10A3.12 F10A3.12                   |
| -0.112887221036647                  |    |   | AGIWUR37426                                     |          |                |                                     |
| N2                                  | CT | V | 16166236                                        | 16167409 | WBGene00006160 | str-108 F10A3.13                    |
| -0.0927264953590718                 |    |   | AGIWUR15968                                     |          |                |                                     |
| N2                                  | CT | V | 16167875                                        | 16169126 | WBGene00006162 | str-111 F10A3.15                    |
| -0.0110053728472721                 |    |   | AGIWUR15156                                     |          |                |                                     |
| N2                                  | CT | V | 16173743                                        | 16175857 | WBGene00010589 | cyp-33D1 K05D4.4                    |
| 0.0326375257381835                  |    |   | AGIWUR15132;AGIWUR26937;AGIWUR28056;AGIWUR32245 |          |                |                                     |
| N2                                  | CT | V | 16176287                                        | 16177491 | WBGene00014799 | K05D4.5 K05D4.5 -0.112048806181651  |
| AGIWUR19570;AGIWUR25619;AGIWUR36956 |    |   |                                                 |          |                |                                     |

|                                                                    |    |   |          |          |                |          |          |                     |
|--------------------------------------------------------------------|----|---|----------|----------|----------------|----------|----------|---------------------|
| N2                                                                 | CT | V | 16178532 | 16179966 | WBGene00014798 | K05D4.1  | K05D4.1  | -0.0519319253919717 |
| AGIWUR13418;AGIWUR22857                                            |    |   |          |          |                |          |          |                     |
| N2                                                                 | CT | V | 16180650 | 16181861 | WBGene00006159 | str-106  | K05D4.2  | 0.120783400513724   |
| AGIWUR36320                                                        |    |   |          |          |                |          |          |                     |
| N2                                                                 | CT | V | 16182410 | 16183540 | WBGene00010590 | srz-13   | K05D4.8  | -0.132165875425083  |
| AGIWUR9886                                                         |    |   |          |          |                |          |          |                     |
| N2                                                                 | CT | V | 16185403 | 16186920 | WBGene00005482 | srh-277  | K05D4.6  | -0.0224513711222958 |
| AGIWUR114;AGIWUR2111;AGIWUR2913;AGIWUR7866;AGIWUR39691             |    |   |          |          |                |          |          |                     |
| N2                                                                 | CT | V | 16187728 | 16189129 | WBGene00005485 | srh-280  | K05D4.7  | -0.0706778111188529 |
| AGIWUR4413;AGIWUR6895;AGIWUR19136;AGIWUR25620                      |    |   |          |          |                |          |          |                     |
| N2                                                                 | CT | V | 16190785 | 16192262 | WBGene00005486 | srh-281  | F11A5.1  | 0.0447168177949049  |
| AGIWUR15987                                                        |    |   |          |          |                |          |          |                     |
| N2                                                                 | CT | V | 16193356 | 16194581 | WBGene00005484 | srh-279  | F11A5.2  | -0.124630270070225  |
| AGIWUR40342                                                        |    |   |          |          |                |          |          |                     |
| N2                                                                 | CT | V | 16194939 | 16195544 | WBGene00008671 | F11A5.3  | F11A5.3  | -0.0267287448628384 |
| AGIWUR28861                                                        |    |   |          |          |                |          |          |                     |
| N2                                                                 | CT | V | 16195679 | 16196290 | WBGene00008672 | F11A5.4  | F11A5.4  |                     |
| -0.00774668381013655 AGIWUR37086                                   |    |   |          |          |                |          |          |                     |
| N2                                                                 | CT | V | 16198379 | 16201045 | WBGene00008673 | F11A5.5  | F11A5.5  | -0.411214905264556  |
| AGIWUR44997                                                        |    |   |          |          |                |          |          |                     |
| N2                                                                 | CT | V | 16202030 | 16202740 | WBGene00045510 | F11A5.17 |          | F11A5.17            |
| -0.20843089502496 AGIWUR5781;AGIWUR36739;AGIWUR40497               |    |   |          |          |                |          |          |                     |
| N2                                                                 | CT | V | 16202809 | 16204862 | WBGene00045511 | F11A5.18 |          | F11A5.18            |
| -0.246921750725246 AGIWUR12498;AGIWUR15612;AGIWUR25301;AGIWUR40184 |    |   |          |          |                |          |          |                     |
| N2                                                                 | CT | V | 16205188 | 16206818 | WBGene00008675 | irld-26  | F11A5.7  | 0.0776237017249635  |
| AGIWUR991                                                          |    |   |          |          |                |          |          |                     |
| N2                                                                 | CT | V | 16206943 | 16209916 | WBGene00008676 | oac-15   | F11A5.8  | 0.367996759621157   |
| AGIWUR43379                                                        |    |   |          |          |                |          |          |                     |
| N2                                                                 | CT | V | 16210952 | 16211454 | WBGene00044184 | F11A5.16 |          | F11A5.16            |
| 0.0418676017417305 AGIWUR13277;AGIWUR19353;AGIWUR36561;AGIWUR43875 |    |   |          |          |                |          |          |                     |
| N2                                                                 | CT | V | 16214890 | 16217706 | WBGene00008677 | F11A5.9  | F11A5.9  | 0.246085904237784   |
| AGIWUR17833                                                        |    |   |          |          |                |          |          |                     |
| N2                                                                 | CT | V | 16217701 | 16218605 | WBGene00008680 | F11A5.15 |          | F11A5.15            |
| -0.458356847727145 AGIWUR37713                                     |    |   |          |          |                |          |          |                     |
| N2                                                                 | CT | V | 16219541 | 16221948 | WBGene00001591 | glc-1    | F11A5.10 |                     |
| -0.249811018203452 AGIWUR29186                                     |    |   |          |          |                |          |          |                     |
| N2                                                                 | CT | V | 16222323 | 16223415 | WBGene00005547 | sri-35   | F11A5.11 |                     |
| 0.0751336926450543 AGIWUR6562;AGIWUR31026;AGIWUR32138              |    |   |          |          |                |          |          |                     |
| N2                                                                 | CT | V | 16224327 | 16225540 | WBGene00008678 | stdh-2   | F11A5.12 |                     |

|                                                                        |                                     |          |                |                  |                     |
|------------------------------------------------------------------------|-------------------------------------|----------|----------------|------------------|---------------------|
| -0.265255576225361                                                     | AGIWUR16829                         |          |                |                  |                     |
| N2 CT V                                                                | 16225701                            | 16225887 | WBGene00014322 | F11A5.14         | F11A5.14            |
| -0.207934112458267                                                     | AGIWUR15158                         |          |                |                  |                     |
| N2 CT V                                                                | 16226013                            | 16226681 | WBGene00008679 | F11A5.13         | F11A5.13            |
| 0.220150345076593                                                      | AGIWUR21002                         |          |                |                  |                     |
| N2 CT V                                                                | 16227127                            | 16229893 | WBGene00009028 | F21H7.2 F21H7.2  | 0.376382699248314   |
| AGIWUR23420                                                            |                                     |          |                |                  |                     |
| N2 CT V                                                                | 16230203                            | 16231043 | WBGene00009033 | F21H7.12         | F21H7.12            |
| 0.00820636400425201                                                    | AGIWUR43397                         |          |                |                  |                     |
| N2 CT V                                                                | 16231032                            | 16232317 | WBGene00001770 | gst-22 F21H7.1   | 0.0593114861927599  |
| AGIWUR20527                                                            |                                     |          |                |                  |                     |
| N2 CT V                                                                | 16232652                            | 16233335 | WBGene00009029 | F21H7.3 F21H7.3  | -0.352965584044382  |
| AGIWUR18667                                                            |                                     |          |                |                  |                     |
| N2 CT V                                                                | 16233924                            | 16234896 | WBGene00009030 | cllec-233        | F21H7.4             |
| 0.104855106903845                                                      | AGIWUR23753                         |          |                |                  |                     |
| N2 CT V                                                                | 16235171                            | 16235747 | WBGene00005317 | srh-98 F21H7.14  |                     |
| -0.0224280430133081                                                    | AGIWUR15119                         |          |                |                  |                     |
| N2 CT V                                                                | 16237523                            | 16238824 | WBGene00009031 | F21H7.5 F21H7.5  | 0.437771405040129   |
| AGIWUR30066                                                            |                                     |          |                |                  |                     |
| N2 CT V                                                                | 16239333                            | 16240447 | WBGene00014740 | F21H7.6 F21H7.6  | 0.0598460864372869  |
| AGIWUR22044;AGIWUR35030                                                |                                     |          |                |                  |                     |
| N2 CT V                                                                | 16241217                            | 16242445 | WBGene00005322 | srh-103 F21H7.13 |                     |
| 0.134359393521212                                                      | AGIWUR7209                          |          |                |                  |                     |
| N2 CT V                                                                | 16242818                            | 16244178 | WBGene00005323 | srh-104 F21H7.7  | 0.0822265495923968  |
| AGIWUR26850                                                            |                                     |          |                |                  |                     |
| N2 CT V                                                                | 16246879                            | 16248455 | WBGene00005315 | srh-95 F21H7.11  |                     |
| 0.0312856958635006                                                     | AGIWUR10690;AGIWUR27139;AGIWUR34427 |          |                |                  |                     |
| N2 CT V                                                                | 16248583                            | 16253787 | WBGene00001545 | gcy-20 F21H7.9   | 0.0604306689422689  |
| AGIWUR34558                                                            |                                     |          |                |                  |                     |
| N2 CT V                                                                | 16254301                            | 16256398 | WBGene00009032 | bgnt-1.3         | F21H7.10            |
| -0.100441356043337                                                     | AGIWUR37791                         |          |                |                  |                     |
| N2 CT V                                                                | 16258442                            | 16260686 | WBGene00011750 | nhr-218 T13F3.2  | 0.10398762877819    |
| AGIWUR988                                                              |                                     |          |                |                  |                     |
| N2 CT V                                                                | 16261647                            | 16263953 | WBGene00003717 | nhr-127 T13F3.3  | 0.291723564221584   |
| AGIWUR40703                                                            |                                     |          |                |                  |                     |
| N2 CT V                                                                | 16265097                            | 16265607 | WBGene00011751 | T13F3.4 T13F3.4  | -0.0927364082025761 |
| AGIWUR9411;AGIWUR16759;AGIWUR18945;AGIWUR27431;AGIWUR29628;AGIWUR35257 |                                     |          |                |                  |                     |
| N2 CT V                                                                | 16266765                            | 16268150 | WBGene00044653 | T13F3.9 T13F3.9  | 0.0521809117639869  |
| AGIWUR23129;AGIWUR24605;AGIWUR40089                                    |                                     |          |                |                  |                     |

|                                             |    |   |          |          |                |          |           |                     |
|---------------------------------------------|----|---|----------|----------|----------------|----------|-----------|---------------------|
| N2                                          | CT | V | 16268335 | 16269567 | WBGene00011752 | fbxa-2   | T13F3.5   | -0.147095850253282  |
| AGIWUR17354;AGIWUR22932;AGIWUR34541         |    |   |          |          |                |          |           |                     |
| N2                                          | CT | V | 16270216 | 16271223 | WBGene00011753 | T13F3.6  | T13F3.6   | 0.227217837606236   |
| AGIWUR20125;AGIWUR21281                     |    |   |          |          |                |          |           |                     |
| N2                                          | CT | V | 16271536 | 16272498 | WBGene00044205 | T13F3.8  | T13F3.8   |                     |
| 0.000296248812313493 AGIWUR12595            |    |   |          |          |                |          |           |                     |
| N2                                          | CT | V | 16272686 | 16275410 | WBGene00011754 | T13F3.7  | T13F3.7   | -0.157234689638146  |
| AGIWUR11446                                 |    |   |          |          |                |          |           |                     |
| N2                                          | CT | V | 16275913 | 16277698 | WBGene00006227 | str-183  | T13F3.1   | -0.151220781104721  |
| AGIWUR17043                                 |    |   |          |          |                |          |           |                     |
| N2                                          | CT | V | 16278191 | 16280612 | WBGene00009226 | cyp-37B1 |           | F28G4.1             |
| -0.696525168636564 AGIWUR38767              |    |   |          |          |                |          |           |                     |
| N2                                          | CT | V | 16280602 | 16282321 | WBGene00009227 | F28G4.2  | F28G4.2   | -0.0236654165748265 |
| AGIWUR29795                                 |    |   |          |          |                |          |           |                     |
| N2                                          | CT | V | 16283018 | 16285894 | WBGene00009229 | F28G4.4  | F28G4.4   | -0.150458178913285  |
| AGIWUR15182;AGIWUR16824;AGIWUR27000         |    |   |          |          |                |          |           |                     |
| N2                                          | CT | V | 16286151 | 16287719 | WBGene00009228 | F28G4.3  | F28G4.3   | -0.11830999020487   |
| AGIWUR37528                                 |    |   |          |          |                |          |           |                     |
| N2                                          | CT | V | 16288788 | 16292154 | WBGene00009230 | oac-18   | F28G4.5   | -0.979931053235112  |
| AGIWUR32845                                 |    |   |          |          |                |          |           |                     |
| N2                                          | CT | V | 16292709 | 16295600 | WBGene00007829 | oac-5    | C31A11.1  |                     |
| 0.01737254949101 AGIWUR27043                |    |   |          |          |                |          |           |                     |
| N2                                          | CT | V | 16297370 | 16298278 | WBGene00007831 | srbc-83  | C31A11.3  |                     |
| -0.0266358340896939 AGIWUR11713;AGIWUR17091 |    |   |          |          |                |          |           |                     |
| N2                                          | CT | V | 16298969 | 16299862 | WBGene00044106 | srbc-84  | C31A11.10 |                     |
| 0.145285770820529 AGIWUR7876                |    |   |          |          |                |          |           |                     |
| N2                                          | CT | V | 16300576 | 16301478 | WBGene00007832 | srbc-82  | C31A11.4  |                     |
| -0.201229966440848 AGIWUR27488              |    |   |          |          |                |          |           |                     |
| N2                                          | CT | V | 16302717 | 16306156 | WBGene00007833 | oac-6    | C31A11.5  |                     |
| -0.173796931420412 AGIWUR21759              |    |   |          |          |                |          |           |                     |
| N2                                          | CT | V | 16307682 | 16309623 | WBGene00007834 | srxa-7   | C31A11.6  |                     |
| -0.022201176237159 AGIWUR6387               |    |   |          |          |                |          |           |                     |
| N2                                          | CT | V | 16309805 | 16314752 | WBGene00007835 | oac-7    | C31A11.7  |                     |
| 0.0163122356471828 AGIWUR45204              |    |   |          |          |                |          |           |                     |
| N2                                          | CT | V | 16315304 | 16317226 | WBGene00006247 | str-214  | C31A11.9  |                     |
| -0.0746862343573298 AGIWUR32118             |    |   |          |          |                |          |           |                     |
| N2                                          | CT | V | 16317567 | 16318805 | WBGene00005395 | srh-180  | F57G8.1   | 0.0237018237921935  |
| AGIWUR7163                                  |    |   |          |          |                |          |           |                     |
| N2                                          | CT | V | 16320797 | 16327477 | WBGene00005747 | srv-36   | F57G8.8   | -0.322700850027394  |

|                                                                                          |    |   |          |          |                |          |          |                     |
|------------------------------------------------------------------------------------------|----|---|----------|----------|----------------|----------|----------|---------------------|
| AGIWUR662;AGIWUR19347;AGIWUR23944                                                        |    |   |          |          |                |          |          |                     |
| N2                                                                                       | CT | V | 16329370 | 16330242 | WBGene00010216 | F57G8.7  | F57G8.7  | -0.0485321618361478 |
| AGIWUR2979                                                                               |    |   |          |          |                |          |          |                     |
| N2                                                                                       | CT | V | 16333712 | 16335063 | WBGene00005383 | srh-167  | F57G8.3  | -0.0221002037533111 |
| AGIWUR21109                                                                              |    |   |          |          |                |          |          |                     |
| N2                                                                                       | CT | V | 16336626 | 16338277 | WBGene00005834 | srw-87   | F57G8.4  | 0.0885189664532042  |
| AGIWUR11621                                                                              |    |   |          |          |                |          |          |                     |
| N2                                                                                       | CT | V | 16339024 | 16341536 | WBGene00010214 | F57G8.5  | F57G8.5  | 0.10595497018377    |
| AGIWUR2510;AGIWUR10277;AGIWUR21099                                                       |    |   |          |          |                |          |          |                     |
| N2                                                                                       | CT | V | 16342497 | 16344272 | WBGene00010215 | nhr-193  | F57G8.6  | -0.0978832765861934 |
| AGIWUR30592                                                                              |    |   |          |          |                |          |          |                     |
| N2                                                                                       | CT | V | 16344375 | 16346506 | WBGene00012349 | W08G11.5 |          | W08G11.5            |
| 0.45027353464198 AGIWUR40666                                                             |    |   |          |          |                |          |          |                     |
| N2                                                                                       | CT | V | 16347060 | 16349833 | WBGene00012346 | W08G11.1 |          | W08G11.1            |
| -0.0518012106536707 AGIWUR24072                                                          |    |   |          |          |                |          |          |                     |
| N2                                                                                       | CT | V | 16357521 | 16367574 | WBGene00012348 | pptr-1   | W08G11.4 |                     |
| 0.14529669628835 AGIWUR15748;AGIWUR23092;AGIWUR23926;AGIWUR30777;AGIWUR42165;AGIWUR43390 |    |   |          |          |                |          |          |                     |
| N2                                                                                       | CT | V | 16367681 | 16372097 | WBGene00012347 | W08G11.3 |          | W08G11.3            |
| -0.166504740333387 AGIWUR18074                                                           |    |   |          |          |                |          |          |                     |
| N2                                                                                       | CT | V | 16372417 | 16374776 | WBGene00005745 | srv-34   | F13A7.3  | 0.118154349719028   |
| AGIWUR3625                                                                               |    |   |          |          |                |          |          |                     |
| N2                                                                                       | CT | V | 16376239 | 16377949 | WBGene00008724 | F13A7.1  | F13A7.1  | 0.39056526681269    |
| AGIWUR36448                                                                              |    |   |          |          |                |          |          |                     |
| N2                                                                                       | CT | V | 16378892 | 16380488 | WBGene00005746 | srv-35   | F13A7.4  | -0.336274355546986  |
| AGIWUR1064;AGIWUR24283                                                                   |    |   |          |          |                |          |          |                     |
| N2                                                                                       | CT | V | 16382167 | 16383829 | WBGene00008725 | F13A7.7  | F13A7.7  | 0.228070155832033   |
| AGIWUR8127                                                                               |    |   |          |          |                |          |          |                     |
| N2                                                                                       | CT | V | 16384490 | 16386136 | WBGene00005576 | sri-64   | F13A7.6  | 0.0453420801853337  |
| AGIWUR9997;AGIWUR25215;AGIWUR29874                                                       |    |   |          |          |                |          |          |                     |
| N2                                                                                       | CT | V | 16386662 | 16388368 | WBGene00005577 | sri-65   | F13A7.8  | -0.145040637702539  |
| AGIWUR25201                                                                              |    |   |          |          |                |          |          |                     |
| N2                                                                                       | CT | V | 16389241 | 16389865 | WBGene00004817 | skr-11   | F13A7.9  | 0.0435472158012296  |
| AGIWUR11715                                                                              |    |   |          |          |                |          |          |                     |
| N2                                                                                       | CT | V | 16390891 | 16392406 | WBGene00001792 | gst-44   | F13A7.10 |                     |
| -0.267940676591891 AGIWUR3708                                                            |    |   |          |          |                |          |          |                     |
| N2                                                                                       | CT | V | 16392482 | 16393828 | WBGene00005140 | srd-63   | F13A7.2  | 0.0429361256834424  |
| AGIWUR2129;AGIWUR23449;AGIWUR32161;AGIWUR33690                                           |    |   |          |          |                |          |          |                     |
| N2                                                                                       | CT | V | 16394015 | 16395075 | WBGene00008726 | F13A7.11 |          | F13A7.11            |
| 0.0283395845917127 AGIWUR19640                                                           |    |   |          |          |                |          |          |                     |

|                                                                                                       |    |   |          |          |                |          |                             |
|-------------------------------------------------------------------------------------------------------|----|---|----------|----------|----------------|----------|-----------------------------|
| N2                                                                                                    | CT | V | 16396359 | 16398502 | WBGene00008727 | F13A7.12 | F13A7.12                    |
| -0.108904039976238 AGIWUR39641                                                                        |    |   |          |          |                |          |                             |
| N2                                                                                                    | CT | V | 16399688 | 16401625 | WBGene00008728 | sre-36   | F13A7.13                    |
| -0.129312543982397 AGIWUR14743                                                                        |    |   |          |          |                |          |                             |
| N2                                                                                                    | CT | V | 16405751 | 16407699 | WBGene00006375 | syp-1    | F26D2.2 -0.0667820161009081 |
| AGIWUR3001;AGIWUR12902                                                                                |    |   |          |          |                |          |                             |
| N2                                                                                                    | CT | V | 16407963 | 16410270 | WBGene00009148 | F26D2.3  | F26D2.3 0.224780024834843   |
| AGIWUR1510;AGIWUR11211;AGIWUR21865;AGIWUR24161;AGIWUR27772;AGIWUR40093;AGIWUR44150                    |    |   |          |          |                |          |                             |
| N2                                                                                                    | CT | V | 16410713 | 16411843 | WBGene00005361 | srh-145  | F26D2.4 0.166280343323968   |
| AGIWUR9297                                                                                            |    |   |          |          |                |          |                             |
| N2                                                                                                    | CT | V | 16412687 | 16413786 | WBGene00005360 | srh-144  | F26D2.5 0.0989881974449238  |
| AGIWUR45095                                                                                           |    |   |          |          |                |          |                             |
| N2                                                                                                    | CT | V | 16414068 | 16415247 | WBGene00014745 | F26D2.8  | F26D2.8 0.127994970013534   |
| AGIWUR44;AGIWUR27522                                                                                  |    |   |          |          |                |          |                             |
| N2                                                                                                    | CT | V | 16415694 | 16417114 | WBGene00006120 | str-55   | F26D2.7 0.249804025403213   |
| AGIWUR2221                                                                                            |    |   |          |          |                |          |                             |
| N2                                                                                                    | CT | V | 16418433 | 16420425 | WBGene00009154 | F26D2.16 | F26D2.16                    |
| -0.343001703559048 AGIWUR32894                                                                        |    |   |          |          |                |          |                             |
| N2                                                                                                    | CT | V | 16420996 | 16422774 | WBGene00005795 | srw-48   | F26D2.9 -0.170972989040516  |
| AGIWUR28331                                                                                           |    |   |          |          |                |          |                             |
| N2                                                                                                    | CT | V | 16423099 | 16424507 | WBGene00005776 | srw-29   | F26D2.11                    |
| -0.120547588254375 AGIWUR31643                                                                        |    |   |          |          |                |          |                             |
| N2                                                                                                    | CT | V | 16424854 | 16429603 | WBGene00009149 | F26D2.10 | F26D2.10                    |
| 0.225338233903154 AGIWUR6760;AGIWUR29245;AGIWUR41595                                                  |    |   |          |          |                |          |                             |
| N2                                                                                                    | CT | V | 16430240 | 16431861 | WBGene00006134 | str-73   | F26D2.1 -0.0822209730318288 |
| AGIWUR22361                                                                                           |    |   |          |          |                |          |                             |
| N2                                                                                                    | CT | V | 16432009 | 16433572 | WBGene00009150 | clcc-234 | F26D2.12                    |
| 0.0763763923329677 AGIWUR7612;AGIWUR16991;AGIWUR24649;AGIWUR26856;AGIWUR27037;AGIWUR33724;AGIWUR44070 |    |   |          |          |                |          |                             |
| N2                                                                                                    | CT | V | 16434722 | 16435610 | WBGene00009151 | F26D2.13 | F26D2.13                    |
| -0.322892027402352 AGIWUR22570                                                                        |    |   |          |          |                |          |                             |
| N2                                                                                                    | CT | V | 16435855 | 16436736 | WBGene00009152 | F26D2.14 | F26D2.14                    |
| 0.0279024968080694 AGIWUR11473;AGIWUR14643                                                            |    |   |          |          |                |          |                             |
| N2                                                                                                    | CT | V | 16437846 | 16438934 | WBGene00009153 | F26D2.15 | F26D2.15                    |
| -0.0826392770766686 AGIWUR15745                                                                       |    |   |          |          |                |          |                             |
| N2                                                                                                    | CT | V | 16439667 | 16442450 | WBGene00011617 | T08G3.4  | T08G3.4 0.149745299860436   |
| AGIWUR1245;AGIWUR13961;AGIWUR18166                                                                    |    |   |          |          |                |          |                             |
| N2                                                                                                    | CT | V | 16443926 | 16445734 | WBGene00005358 | srh-141  | T08G3.5 -0.289060046146488  |
| AGIWUR13063                                                                                           |    |   |          |          |                |          |                             |
| N2                                                                                                    | CT | V | 16445976 | 16447165 | WBGene00011618 | T08G3.6  | T08G3.6 0.243045799269634   |

|                     |                                                                                    |          |                |                   |                     |  |
|---------------------|------------------------------------------------------------------------------------|----------|----------------|-------------------|---------------------|--|
| AGIWUR25599         |                                                                                    |          |                |                   |                     |  |
| N2 CT V             | 16448035                                                                           | 16449344 | WBGene00011621 | T08G3.13          | T08G3.13            |  |
| 0.140816448362804   | AGIWUR15610                                                                        |          |                |                   |                     |  |
| N2 CT V             | 16457269                                                                           | 16458814 | WBGene00006083 | str-15 T08G3.1    | -0.0925452227518218 |  |
| AGIWUR34333         |                                                                                    |          |                |                   |                     |  |
| N2 CT V             | 16459388                                                                           | 16460965 | WBGene00005359 | srh-142 T08G3.3   | 0.292232093814212   |  |
| AGIWUR21874         |                                                                                    |          |                |                   |                     |  |
| N2 CT V             | 16462438                                                                           | 16466357 | WBGene00011619 | T08G3.7 T08G3.7   | -0.144130607657804  |  |
| AGIWUR15711         |                                                                                    |          |                |                   |                     |  |
| N2 CT V             | 16466466                                                                           | 16467940 | WBGene00005707 | sru-44 T08G3.8    | -0.221225395896472  |  |
| AGIWUR20001         |                                                                                    |          |                |                   |                     |  |
| N2 CT V             | 16469367                                                                           | 16471016 | WBGene00005355 | srh-138 T08G3.12  |                     |  |
| 0.0262316436104681  | AGIWUR37531                                                                        |          |                |                   |                     |  |
| N2 CT V             | 16471442                                                                           | 16473397 | WBGene00005782 | srw-35 T08G3.10   |                     |  |
| 0.119601626175321   | AGIWUR13977                                                                        |          |                |                   |                     |  |
| N2 CT V             | 16475677                                                                           | 16476825 | WBGene00006017 | srx-126 T08G3.9   | 0.0346193909902777  |  |
| AGIWUR32135         |                                                                                    |          |                |                   |                     |  |
| N2 CT V             | 16478698                                                                           | 16479375 | WBGene00011620 | T08G3.11          | T08G3.11            |  |
| 0.0462769198194977  | AGIWUR43715                                                                        |          |                |                   |                     |  |
| N2 CT V             | 16481580                                                                           | 16482000 | WBGene00010202 | F57E7.1 F57E7.1   | -0.114000043857873  |  |
| AGIWUR31789         |                                                                                    |          |                |                   |                     |  |
| N2 CT V             | 16482420                                                                           | 16483144 | WBGene00010203 | F57E7.2 F57E7.2   | 0.168627279580004   |  |
| AGIWUR13259         |                                                                                    |          |                |                   |                     |  |
| N2 CT V             | 16483981                                                                           | 16485382 | WBGene00005356 | srh-139 F57E7.3   | -0.0445697170097841 |  |
| AGIWUR15646         |                                                                                    |          |                |                   |                     |  |
| N2 CT V             | 16486978                                                                           | 16487574 | WBGene00012520 | Y32B12A.5         | Y32B12A.5           |  |
| 0.179433962439539   | AGIWUR3890                                                                         |          |                |                   |                     |  |
| N2 CT V             | 16488472                                                                           | 16489104 | WBGene00012516 | sqst-4 Y32B12A.1  |                     |  |
| -0.157374088858653  | AGIWUR20316                                                                        |          |                |                   |                     |  |
| N2 CT V             | 16489531                                                                           | 16490520 | WBGene00012517 | srbc-73 Y32B12A.2 |                     |  |
| 0.136747670812985   | AGIWUR22720                                                                        |          |                |                   |                     |  |
| N2 CT V             | 16490760                                                                           | 16491547 | WBGene00005465 | srh-259 Y32B12A.6 |                     |  |
| -0.0978585168491097 | AGIWUR4254;AGIWUR15269;AGIWUR20175                                                 |          |                |                   |                     |  |
| N2 CT V             | 16492170                                                                           | 16493458 | WBGene00005466 | srh-260 Y32B12A.7 |                     |  |
| 0.116632119645953   | AGIWUR3405;AGIWUR29973                                                             |          |                |                   |                     |  |
| N2 CT V             | 16493655                                                                           | 16494449 | WBGene00012518 | comt-2 Y32B12A.3  |                     |  |
| 0.0163670995837037  | AGIWUR3690;AGIWUR15142;AGIWUR25810;AGIWUR27894;AGIWUR28027;AGIWUR28665;AGIWUR35500 |          |                |                   |                     |  |
| N2 CT V             | 16494730                                                                           | 16495227 | WBGene00012519 | Y32B12A.4         | Y32B12A.4           |  |
| 0.223122994890307   | AGIWUR16079                                                                        |          |                |                   |                     |  |

|                                                                              |    |   |          |          |                |           |           |                     |
|------------------------------------------------------------------------------|----|---|----------|----------|----------------|-----------|-----------|---------------------|
| N2                                                                           | CT | V | 16495994 | 16497596 | WBGene00005353 | srh-136   | F36D3.6   | -0.168109313332597  |
| AGIWUR4040                                                                   |    |   |          |          |                |           |           |                     |
| N2                                                                           | CT | V | 16499352 | 16502879 | WBGene00009469 | F36D3.1   | F36D3.1   | -0.175739006495245  |
| AGIWUR15881                                                                  |    |   |          |          |                |           |           |                     |
| N2                                                                           | CT | V | 16502947 | 16503282 | WBGene00044189 | F36D3.14  | F36D3.14  |                     |
| -0.0929202175004651 AGIWUR1797;AGIWUR4391;AGIWUR5212;AGIWUR34875;AGIWUR41228 |    |   |          |          |                |           |           |                     |
| N2                                                                           | CT | V | 16503947 | 16505917 | WBGene00003644 | nhr-54    | F36D3.2   | -0.125769673600269  |
| AGIWUR18110                                                                  |    |   |          |          |                |           |           |                     |
| N2                                                                           | CT | V | 16506897 | 16508705 | WBGene00005654 | srr-3     | F36D3.3   | -0.102758087388651  |
| AGIWUR21200;AGIWUR30737;AGIWUR35699                                          |    |   |          |          |                |           |           |                     |
| N2                                                                           | CT | V | 16516472 | 16517719 | WBGene00009470 | F36D3.4   | F36D3.4   | 0.287973421388681   |
| AGIWUR14766                                                                  |    |   |          |          |                |           |           |                     |
| N2                                                                           | CT | V | 16518183 | 16520245 | WBGene00009472 | F36D3.7   | F36D3.7   | -0.0987669626005014 |
| AGIWUR10953;AGIWUR12499;AGIWUR23247;AGIWUR34317                              |    |   |          |          |                |           |           |                     |
| N2                                                                           | CT | V | 16520600 | 16522270 | WBGene00005781 | srw-34    | F36D3.13  |                     |
| 0.270143339520431 AGIWUR4748                                                 |    |   |          |          |                |           |           |                     |
| N2                                                                           | CT | V | 16528935 | 16530213 | WBGene00219326 | F36D3.16  | F36D3.16  |                     |
| 0.223097124551348 AGIWUR3090                                                 |    |   |          |          |                |           |           |                     |
| N2                                                                           | CT | V | 16531373 | 16532690 | WBGene00009474 | cllec-235 | F36D3.10  |                     |
| -0.210241207008698 AGIWUR22246;AGIWUR34028                                   |    |   |          |          |                |           |           |                     |
| N2                                                                           | CT | V | 16533004 | 16534110 | WBGene00000782 | cpr-2     | F36D3.9   | 0.0571312722528692  |
| AGIWUR7124                                                                   |    |   |          |          |                |           |           |                     |
| N2                                                                           | CT | V | 16537001 | 16537771 | WBGene00012521 | Y32B12B.1 | Y32B12B.1 |                     |
| -0.0112807575081204 AGIWUR43482                                              |    |   |          |          |                |           |           |                     |
| N2                                                                           | CT | V | 16538396 | 16549854 | WBGene00012522 | Y32B12B.2 | Y32B12B.2 |                     |
| -0.201567054542738 AGIWUR11254;AGIWUR41877                                   |    |   |          |          |                |           |           |                     |
| N2                                                                           | CT | V | 16550980 | 16552282 | WBGene00012523 | srbc-65   | Y32B12B.3 |                     |
| -0.0193952195739708 AGIWUR27274                                              |    |   |          |          |                |           |           |                     |
| N2                                                                           | CT | V | 16553327 | 16563504 | WBGene00012524 | Y32B12B.4 | Y32B12B.4 |                     |
| 0.089584603882459 AGIWUR28882                                                |    |   |          |          |                |           |           |                     |
| N2                                                                           | CT | V | 16565939 | 16567572 | WBGene00005708 | sru-45    | Y32B12B.7 |                     |
| 0.194305907433637 AGIWUR43428                                                |    |   |          |          |                |           |           |                     |
| N2                                                                           | CT | V | 16569387 | 16571340 | WBGene00006471 | nhr-233   | Y32B12B.6 |                     |
| -0.0637991900229382 AGIWUR8446                                               |    |   |          |          |                |           |           |                     |
| N2                                                                           | CT | V | 16573468 | 16574952 | WBGene00006196 | str-149   | Y32B12B.5 |                     |
| -0.159287332335533 AGIWUR31136                                               |    |   |          |          |                |           |           |                     |
| N2                                                                           | CT | V | 16578459 | 16580524 | WBGene00011396 | nhr-271   | T03E6.3   | -0.0741454786047893 |
| AGIWUR4028                                                                   |    |   |          |          |                |           |           |                     |
| N2                                                                           | CT | V | 16581037 | 16583175 | WBGene00011395 | T03E6.2   | T03E6.2   | -0.780674551500573  |



|                                    |    |   |                                                             |          |                |           |                             |
|------------------------------------|----|---|-------------------------------------------------------------|----------|----------------|-----------|-----------------------------|
| AGIWUR20782                        |    |   |                                                             |          |                |           |                             |
| N2                                 | CT | V | 16586742                                                    | 16588528 | WBGene00005820 | srw-73    | T03E6.6 0.00440134634882661 |
| AGIWUR1802                         |    |   |                                                             |          |                |           |                             |
| N2                                 | CT | V | 16590101                                                    | 16592042 | WBGene00005475 | srh-269   | T03E6.5 -0.150626530389099  |
| AGIWUR38015                        |    |   |                                                             |          |                |           |                             |
| N2                                 | CT | V | 16592572                                                    | 16595346 | WBGene00000776 | cp1-1     | T03E6.7 -0.047752553664246  |
| AGIWUR4698;AGIWUR43048;AGIWUR43652 |    |   |                                                             |          |                |           |                             |
| N2                                 | CT | V | 16598989                                                    | 16600723 | WBGene00045356 | T03E6.9   | T03E6.9 -0.490338100563297  |
| AGIWUR18668;AGIWUR41414            |    |   |                                                             |          |                |           |                             |
| N2                                 | CT | V | 16600567                                                    | 16603369 | WBGene00011397 | T03E6.8   | T03E6.8 0.156899745294694   |
| AGIWUR22270                        |    |   |                                                             |          |                |           |                             |
| N2                                 | CT | V | 16603529                                                    | 16610952 | WBGene00194769 | Y32B12C.5 | Y32B12C.5                   |
| -0.0848384295507167                |    |   | AGIWUR1181;AGIWUR25930;AGIWUR32738;AGIWUR38459              |          |                |           |                             |
| N2                                 | CT | V | 16612792                                                    | 16614767 | WBGene00012526 | Y32B12C.3 | Y32B12C.3                   |
| 0.188440275283602                  |    |   | AGIWUR23808                                                 |          |                |           |                             |
| N2                                 | CT | V | 16618341                                                    | 16620908 | WBGene00050904 | Y70C5A.3  | Y70C5A.3                    |
| -0.14932780919974                  |    |   | AGIWUR31825                                                 |          |                |           |                             |
| N2                                 | CT | V | 16621396                                                    | 16623211 | WBGene00013490 | Y70C5A.2  | Y70C5A.2                    |
| 0.232291129225219                  |    |   | AGIWUR12702;AGIWUR30116                                     |          |                |           |                             |
| N2                                 | CT | V | 16624008                                                    | 16627970 | WBGene00012308 | oac-53    | W06G6.1 -0.206155508000482  |
| AGIWUR25651                        |    |   |                                                             |          |                |           |                             |
| N2                                 | CT | V | 16629291                                                    | 16629648 | WBGene00012309 | W06G6.2   | W06G6.2 -0.0783672226494128 |
| AGIWUR17424                        |    |   |                                                             |          |                |           |                             |
| N2                                 | CT | V | 16629900                                                    | 16631155 | WBGene00005099 | srd-21    | W06G6.3 0.442938570164136   |
| AGIWUR13478                        |    |   |                                                             |          |                |           |                             |
| N2                                 | CT | V | 16632737                                                    | 16634085 | WBGene00005102 | srd-24    | W06G6.4 0.0890864393662363  |
| AGIWUR8474;AGIWUR44750             |    |   |                                                             |          |                |           |                             |
| N2                                 | CT | V | 16634252                                                    | 16635619 | WBGene00005822 | srw-75    | W06G6.13                    |
| 0.140185074586956                  |    |   | AGIWUR19212                                                 |          |                |           |                             |
| N2                                 | CT | V | 16645997                                                    | 16646481 | WBGene00012311 | W06G6.9   | W06G6.9 -0.0506518829196843 |
| AGIWUR42180                        |    |   |                                                             |          |                |           |                             |
| N2                                 | CT | V | 16646791                                                    | 16647193 | WBGene00012312 | W06G6.10  | W06G6.10                    |
| 0.138887674012372                  |    |   | AGIWUR9521                                                  |          |                |           |                             |
| N2                                 | CT | V | 16648027                                                    | 16648480 | WBGene00219308 | W06G6.20  | W06G6.20                    |
| -0.436246921210222                 |    |   | AGIWUR3552;AGIWUR17521;AGIWUR40622;AGIWUR43972;AGIWUR44176  |          |                |           |                             |
| N2                                 | CT | V | 16666340                                                    | 16666747 | WBGene00044185 | F14F8.14  | F14F8.14                    |
| -0.083048795295408                 |    |   | AGIWUR10328;AGIWUR15648;AGIWUR18851;AGIWUR42476;AGIWUR44067 |          |                |           |                             |
| N2                                 | CT | V | 16667691                                                    | 16668573 | WBGene00008817 | F14F8.9   | F14F8.9 -0.045438725539559  |
| AGIWUR22108                        |    |   |                                                             |          |                |           |                             |

|                                                       |    |   |          |          |                |          |           |                     |
|-------------------------------------------------------|----|---|----------|----------|----------------|----------|-----------|---------------------|
| N2                                                    | CT | V | 16669339 | 16671290 | WBGene00006125 | str-61   | F14F8.1   | 0.122110059688324   |
| AGIWUR39904                                           |    |   |          |          |                |          |           |                     |
| N2                                                    | CT | V | 16671622 | 16672186 | WBGene00008816 | F14F8.8  | F14F8.8   | -0.455789252401672  |
| AGIWUR4826                                            |    |   |          |          |                |          |           |                     |
| N2                                                    | CT | V | 16673423 | 16674690 | WBGene00008813 | srz-2    | F14F8.2   | 0.00988762747369343 |
| AGIWUR6690                                            |    |   |          |          |                |          |           |                     |
| N2                                                    | CT | V | 16675853 | 16677551 | WBGene00008814 | srz-1    | F14F8.3   | 0.0923183626704969  |
| AGIWUR21849                                           |    |   |          |          |                |          |           |                     |
| N2                                                    | CT | V | 16677623 | 16679337 | WBGene00008815 | srz-103  | F14F8.4   | 0.421859950944798   |
| AGIWUR41520                                           |    |   |          |          |                |          |           |                     |
| N2                                                    | CT | V | 16680281 | 16682656 | WBGene00005791 | srw-44   | F14F8.6   | -0.0895831458873655 |
| AGIWUR104                                             |    |   |          |          |                |          |           |                     |
| N2                                                    | CT | V | 16683186 | 16684878 | WBGene00005783 | srw-36   | F14F8.7   | 0.0791045779797654  |
| AGIWUR29070                                           |    |   |          |          |                |          |           |                     |
| N2                                                    | CT | V | 16686025 | 16687083 | WBGene00005790 | srw-43   | F14F8.5   | -0.0143901110619975 |
| AGIWUR29683                                           |    |   |          |          |                |          |           |                     |
| N2                                                    | CT | V | 16687527 | 16689866 | WBGene00023505 | srz-102  | F14F8.13  |                     |
| -0.0541172881915397 AGIWUR497                         |    |   |          |          |                |          |           |                     |
| N2                                                    | CT | V | 16692125 | 16693832 | WBGene00005789 | srw-42   | F14F8.11  |                     |
| -0.269100280294128 AGIWUR30032                        |    |   |          |          |                |          |           |                     |
| N2                                                    | CT | V | 16697478 | 16699773 | WBGene00005788 | srw-41   | F14F8.10  |                     |
| 0.00501442327038326 AGIWUR37516                       |    |   |          |          |                |          |           |                     |
| N2                                                    | CT | V | 16700199 | 16704409 | WBGene00013492 | Y70C5C.1 | Y70C5C.1  |                     |
| -0.197918288706717 AGIWUR21778                        |    |   |          |          |                |          |           |                     |
| N2                                                    | CT | V | 16705082 | 16706647 | WBGene00013493 | clec-9   | Y70C5C.2  |                     |
| 0.0812051212686331 AGIWUR39973                        |    |   |          |          |                |          |           |                     |
| N2                                                    | CT | V | 16709977 | 16710778 | WBGene00023516 | srz-98   | Y70C5C.7  |                     |
| 0.119614951997026 AGIWUR22402;AGIWUR26467;AGIWUR31812 |    |   |          |          |                |          |           |                     |
| N2                                                    | CT | V | 16713449 | 16715195 | WBGene00013494 | ir1d-58  | Y70C5C.3  |                     |
| 0.224141027866821 AGIWUR6228                          |    |   |          |          |                |          |           |                     |
| N2                                                    | CT | V | 16715480 | 16716718 | WBGene00005354 | srh-137  | Y70C5C.4  |                     |
| 0.0207013683554278 AGIWUR13217                        |    |   |          |          |                |          |           |                     |
| N2                                                    | CT | V | 16718418 | 16721993 | WBGene00013495 | clec-236 | Y70C5C.5  |                     |
| 0.130569014839892 AGIWUR15366;AGIWUR24547;AGIWUR25863 |    |   |          |          |                |          |           |                     |
| N2                                                    | CT | V | 16722061 | 16723844 | WBGene00003702 | nhr-112  | Y70C5C.6  |                     |
| -0.23282570595002 AGIWUR4411;AGIWUR17712;AGIWUR18788  |    |   |          |          |                |          |           |                     |
| N2                                                    | CT | V | 16728731 | 16729960 | WBGene00012027 | fbxa-127 | T25E12.12 |                     |
| -0.232800989518429 AGIWUR42116                        |    |   |          |          |                |          |           |                     |
| N2                                                    | CT | V | 16733901 | 16735594 | WBGene00012025 | clec-38  | T25E12.10 |                     |

|                                                                      |                                               |          |                |          |                             |
|----------------------------------------------------------------------|-----------------------------------------------|----------|----------------|----------|-----------------------------|
| -0.136545019231847                                                   | AGIWUR6517                                    |          |                |          |                             |
| N2 CT V                                                              | 16735765                                      | 16737404 | WBGene00012023 | clec-34  | T25E12.8                    |
| 0.0760757439770878                                                   | AGIWUR1485;AGIWUR8334;AGIWUR32502;AGIWUR34931 |          |                |          |                             |
| N2 CT V                                                              | 16737673                                      | 16739200 | WBGene00012024 | clec-29  | T25E12.9                    |
| 0.205932464735379                                                    | AGIWUR41772                                   |          |                |          |                             |
| N2 CT V                                                              | 16739268                                      | 16741588 | WBGene00012022 | clec-39  | T25E12.7                    |
| 0.201818547336889                                                    | AGIWUR32712                                   |          |                |          |                             |
| N2 CT V                                                              | 16742423                                      | 16744881 | WBGene00012021 | T25E12.6 | T25E12.6                    |
| 0.265506613921563                                                    | AGIWUR36964                                   |          |                |          |                             |
| N2 CT V                                                              | 16745080                                      | 16746258 | WBGene00012020 | gyg-2    | T25E12.5                    |
| 0.0374474628882027                                                   | AGIWUR36841                                   |          |                |          |                             |
| N2 CT V                                                              | 16747559                                      | 16788435 | WBGene00012019 | dkf-2    | T25E12.4                    |
| 0.0545055112453792                                                   | AGIWUR6610;AGIWUR31450;AGIWUR31584            |          |                |          |                             |
| N2 CT V                                                              | 16789267                                      | 16792771 | WBGene00012315 | immt-2   | W06H3.1 0.207642583886268   |
| AGIWUR148;AGIWUR3517;AGIWUR15542;AGIWUR21222;AGIWUR38953;AGIWUR41677 |                                               |          |                |          |                             |
| N2 CT V                                                              | 16792764                                      | 16795007 | WBGene00004248 | pus-1    | W06H3.2 0.11122247653336    |
| AGIWUR19463                                                          |                                               |          |                |          |                             |
| N2 CT V                                                              | 16794878                                      | 16802004 | WBGene00012316 | ctps-1   | W06H3.3 -0.0375052519517975 |
| AGIWUR41343                                                          |                                               |          |                |          |                             |
| N2 CT V                                                              | 16802874                                      | 16814563 | WBGene00013606 | cand-1   | Y102A5A.1                   |
| 0.116851102231214                                                    | AGIWUR30164                                   |          |                |          |                             |
| N2 CT V                                                              | 16815567                                      | 16820712 | WBGene00011850 | T20B3.1  | T20B3.1 -0.0509813896469247 |
| AGIWUR33326                                                          |                                               |          |                |          |                             |
| N2 CT V                                                              | 16825290                                      | 16827592 | WBGene00005426 | srh-216  | T20B3.5 -0.0882164642456198 |
| AGIWUR7258                                                           |                                               |          |                |          |                             |
| N2 CT V                                                              | 16828235                                      | 16829755 | WBGene00005424 | srh-214  | T20B3.4 -0.127302186975525  |
| AGIWUR12153                                                          |                                               |          |                |          |                             |
| N2 CT V                                                              | 16830557                                      | 16832021 | WBGene00005425 | srh-215  | T20B3.3 0.147433992117064   |
| AGIWUR25568                                                          |                                               |          |                |          |                             |
| N2 CT V                                                              | 16833316                                      | 16839141 | WBGene00004026 | phy-3    | T20B3.7 0.485882287532995   |
| AGIWUR19081                                                          |                                               |          |                |          |                             |
| N2 CT V                                                              | 16839145                                      | 16841061 | WBGene00011853 | clec-40  | T20B3.13                    |
| 0.0649473674775294                                                   | AGIWUR29336                                   |          |                |          |                             |
| N2 CT V                                                              | 16841459                                      | 16842863 | WBGene00011851 | clec-23  | T20B3.8 -0.198648481026078  |
| AGIWUR14153                                                          |                                               |          |                |          |                             |
| N2 CT V                                                              | 16843241                                      | 16844696 | WBGene00044331 | clec-25  | T20B3.15                    |
| -0.163398807354885                                                   | AGIWUR32341                                   |          |                |          |                             |
| N2 CT V                                                              | 16846867                                      | 16848466 | WBGene00044332 | clec-36  | T20B3.16                    |
| -0.0207632182744342                                                  | AGIWUR9285;AGIWUR17755                        |          |                |          |                             |

|                                    |    |   |                                                             |          |                |          |                             |
|------------------------------------|----|---|-------------------------------------------------------------|----------|----------------|----------|-----------------------------|
| N2                                 | CT | V | 16848611                                                    | 16850130 | WBGene00011852 | clec-26  | T20B3.12                    |
| -0.117823951866907                 |    |   | AGIWUR13391                                                 |          |                |          |                             |
| N2                                 | CT | V | 16850394                                                    | 16852095 | WBGene00013609 | clec-37  | Y102A5B.3                   |
| -0.0438977027571639                |    |   | AGIWUR37056                                                 |          |                |          |                             |
| N2                                 | CT | V | 16852291                                                    | 16854053 | WBGene00013608 | clec-35  | Y102A5B.2                   |
| 0.142960734542652                  |    |   | AGIWUR14364;AGIWUR34707                                     |          |                |          |                             |
| N2                                 | CT | V | 16854646                                                    | 16856152 | WBGene00013607 | clec-27  | Y102A5B.1                   |
| 0.0726300974627012                 |    |   | AGIWUR5046                                                  |          |                |          |                             |
| N2                                 | CT | V | 16856437                                                    | 16858077 | WBGene00009854 | clec-31  | F49A5.2 -0.0409160977208671 |
| AGIWUR16982                        |    |   |                                                             |          |                |          |                             |
| N2                                 | CT | V | 16858429                                                    | 16860040 | WBGene00009855 | clec-22  | F49A5.3 0.0201325032730839  |
| AGIWUR1555;AGIWUR6322;AGIWUR16586  |    |   |                                                             |          |                |          |                             |
| N2                                 | CT | V | 16860228                                                    | 16861869 | WBGene00009860 | clec-32  | F49A5.9 0.0585737217437412  |
| AGIWUR25174                        |    |   |                                                             |          |                |          |                             |
| N2                                 | CT | V | 16862012                                                    | 16863890 | WBGene00009856 | clec-24  | F49A5.4 0.0417888470727688  |
| AGIWUR7771;AGIWUR14539;AGIWUR16880 |    |   |                                                             |          |                |          |                             |
| N2                                 | CT | V | 16865704                                                    | 16867226 | WBGene00009857 | clec-28  | F49A5.5 0.0401409909586032  |
| AGIWUR34482                        |    |   |                                                             |          |                |          |                             |
| N2                                 | CT | V | 16867678                                                    | 16869845 | WBGene00009859 | clec-33  | F49A5.7 -0.0321966114882581 |
| AGIWUR45121                        |    |   |                                                             |          |                |          |                             |
| N2                                 | CT | V | 16870742                                                    | 16871487 | WBGene00009858 | thn-4    | F49A5.6 -0.0546079099313381 |
| AGIWUR2062                         |    |   |                                                             |          |                |          |                             |
| N2                                 | CT | V | 16873942                                                    | 16875455 | WBGene00005770 | srw-23   | F49A5.8 0.259259815725994   |
| AGIWUR9227                         |    |   |                                                             |          |                |          |                             |
| N2                                 | CT | V | 16875877                                                    | 16876144 | WBGene00044195 | F49A5.10 | F49A5.10                    |
| 0.14529840621672                   |    |   | AGIWUR17436;AGIWUR22208;AGIWUR28545;AGIWUR29932;AGIWUR43591 |          |                |          |                             |
| N2                                 | CT | V | 16878724                                                    | 16880154 | WBGene00008617 | F09C6.3  | F09C6.3 0.153563635567449   |
| AGIWUR41965                        |    |   |                                                             |          |                |          |                             |
| N2                                 | CT | V | 16880994                                                    | 16881336 | WBGene00044278 | F09C6.14 | F09C6.14                    |
| 0.394446182922007                  |    |   | AGIWUR11479;AGIWUR13626;AGIWUR22926;AGIWUR26443;AGIWUR44638 |          |                |          |                             |
| N2                                 | CT | V | 16881901                                                    | 16882310 | WBGene00044181 | F09C6.11 | F09C6.11                    |
| 0.187124461460678                  |    |   | AGIWUR19891;AGIWUR21290;AGIWUR38265;AGIWUR43218;AGIWUR43793 |          |                |          |                             |
| N2                                 | CT | V | 16882878                                                    | 16883142 | WBGene00044182 | F09C6.12 | F09C6.12                    |
| -0.14545807024127                  |    |   | AGIWUR10485;AGIWUR20232;AGIWUR31606;AGIWUR41910;AGIWUR44596 |          |                |          |                             |
| N2                                 | CT | V | 16885075                                                    | 16885403 | WBGene00044183 | F09C6.13 | F09C6.13                    |
| -0.236548429622141                 |    |   | AGIWUR5166;AGIWUR14599;AGIWUR14672;AGIWUR24787;AGIWUR27503  |          |                |          |                             |
| N2                                 | CT | V | 16887413                                                    | 16888479 | WBGene00008615 | F09C6.1  | F09C6.1 -0.0490086853353562 |
| AGIWUR43328                        |    |   |                                                             |          |                |          |                             |
| N2                                 | CT | V | 16889275                                                    | 16890749 | WBGene00008616 | fbxa-44  | F09C6.2 -0.0406951333554213 |

AGIWUR3276;AGIWUR8021;AGIWUR37377

|                                                                               |    |   |          |          |                |            |                            |
|-------------------------------------------------------------------------------|----|---|----------|----------|----------------|------------|----------------------------|
| N2                                                                            | CT | V | 16893740 | 16894107 | WBGene00077492 | F09C6.15   | F09C6.15                   |
| -0.947601355268533 AGIWUR1114;AGIWUR25469                                     |    |   |          |          |                |            |                            |
| N2                                                                            | CT | V | 16894230 | 16895553 | WBGene00005650 | srp-9      | F09C6.5 -0.237736199868771 |
| AGIWUR21568;AGIWUR41911                                                       |    |   |          |          |                |            |                            |
| N2                                                                            | CT | V | 16896358 | 16897728 | WBGene00005651 | srp-10     | F09C6.4 0.151913864973507  |
| AGIWUR4775                                                                    |    |   |          |          |                |            |                            |
| N2                                                                            | CT | V | 16898457 | 16899455 | WBGene00008618 | fbxa-45    | F09C6.6 -0.255132385315818 |
| AGIWUR45116                                                                   |    |   |          |          |                |            |                            |
| N2                                                                            | CT | V | 16901215 | 16902826 | WBGene00005145 | srd-68     | F09C6.7 0.562058567605205  |
| AGIWUR9408                                                                    |    |   |          |          |                |            |                            |
| N2                                                                            | CT | V | 16907969 | 16909971 | WBGene00077493 | F09C6.16   | F09C6.16                   |
| -0.0446765312182551 AGIWUR3518;AGIWUR14063                                    |    |   |          |          |                |            |                            |
| N2                                                                            | CT | V | 16912234 | 16915350 | WBGene00003706 | nhr-116    | F09C6.9 -0.171801550790713 |
| AGIWUR10178                                                                   |    |   |          |          |                |            |                            |
| N2                                                                            | CT | V | 16915373 | 16916179 | WBGene00008620 | F09C6.10   | F09C6.10                   |
| -0.529793424031672 AGIWUR4409;AGIWUR11154;AGIWUR21121;AGIWUR38731;AGIWUR40439 |    |   |          |          |                |            |                            |
| N2                                                                            | CT | V | 16917196 | 16918478 | WBGene00013610 | fbxa-206   | Y102A5C.1                  |
| -0.288409162424124 AGIWUR32733                                                |    |   |          |          |                |            |                            |
| N2                                                                            | CT | V | 16918782 | 16919784 | WBGene00013611 | Y102A5C.2  | Y102A5C.2                  |
| -0.140326353895706 AGIWUR16511;AGIWUR35854;AGIWUR38293;AGIWUR44018            |    |   |          |          |                |            |                            |
| N2                                                                            | CT | V | 16919780 | 16921323 | WBGene00013612 | fbxa-207   | Y102A5C.3                  |
| -0.273188436873722 AGIWUR4834;AGIWUR21721;AGIWUR23457;AGIWUR42510             |    |   |          |          |                |            |                            |
| N2                                                                            | CT | V | 16922252 | 16924258 | WBGene00013613 | Y102A5C.4  | Y102A5C.4                  |
| -0.224950646288629 AGIWUR2578                                                 |    |   |          |          |                |            |                            |
| N2                                                                            | CT | V | 16924985 | 16926125 | WBGene00044220 | Y102A5C.35 | Y102A5C.35                 |
| 0.166304261160882 AGIWUR8646                                                  |    |   |          |          |                |            |                            |
| N2                                                                            | CT | V | 16926920 | 16927445 | WBGene00044213 | Y102A5C.36 | Y102A5C.36                 |
| -0.0751003205010541 AGIWUR1655                                                |    |   |          |          |                |            |                            |
| N2                                                                            | CT | V | 16928328 | 16928999 | WBGene00014954 | Y102A5C.5  | Y102A5C.5                  |
| 0.0663671944754416 AGIWUR7475;AGIWUR7938;AGIWUR18033                          |    |   |          |          |                |            |                            |
| N2                                                                            | CT | V | 16929167 | 16930063 | WBGene00014955 | Y102A5C.6  | Y102A5C.6                  |
| 0.0684370819258486 AGIWUR5552;AGIWUR6206;AGIWUR31531                          |    |   |          |          |                |            |                            |
| N2                                                                            | CT | V | 16943191 | 16943836 | WBGene00014956 | Y102A5C.11 | Y102A5C.11                 |
| -0.00753677055993762 AGIWUR11429;AGIWUR21276;AGIWUR30634                      |    |   |          |          |                |            |                            |
| N2                                                                            | CT | V | 16947158 | 16948111 | WBGene00013619 | fbxa-112   | Y102A5C.13                 |
| 0.00362155966921485 AGIWUR24401                                               |    |   |          |          |                |            |                            |
| N2                                                                            | CT | V | 16956529 | 16957991 | WBGene00013621 | cllec-239  | Y102A5C.16                 |
| -0.33718667671968 AGIWUR5509                                                  |    |   |          |          |                |            |                            |

|                     |    |   |                         |          |                |            |            |
|---------------------|----|---|-------------------------|----------|----------------|------------|------------|
| N2                  | CT | V | 16958657                | 16965675 | WBGene00001161 | efl-1      | Y102A5C.18 |
| -0.0258985584632838 |    |   | AGIWUR31042;AGIWUR35577 |          |                |            |            |
| N2                  | CT | V | 16966814                | 16968586 | WBGene00013623 | fbxa-90    | Y102A5C.19 |
| -0.172629856648786  |    |   | AGIWUR14527             |          |                |            |            |
| N2                  | CT | V | 16969039                | 16970965 | WBGene00013624 | srbc-80    | Y102A5C.20 |
| -0.152891891955625  |    |   | AGIWUR36434             |          |                |            |            |
| N2                  | CT | V | 16972434                | 16974088 | WBGene00005338 | srh-119    | Y102A5C.21 |
| -0.111065385534749  |    |   | AGIWUR31546             |          |                |            |            |
| N2                  | CT | V | 16975219                | 16976717 | WBGene00005945 | srx-54     | Y102A5C.22 |
| -1.44937519972143   |    |   | AGIWUR19658;AGIWUR21218 |          |                |            |            |
| N2                  | CT | V | 16977191                | 16978408 | WBGene00013625 | srz-53     | Y102A5C.23 |
| -0.399684061451161  |    |   | AGIWUR26238             |          |                |            |            |
| N2                  | CT | V | 16979010                | 16980244 | WBGene00005946 | srx-55     | Y102A5C.24 |
| 0.0615912311794098  |    |   | AGIWUR36283             |          |                |            |            |
| N2                  | CT | V | 16984044                | 16985395 | WBGene00013627 | srz-52     | Y102A5C.26 |
| -0.762152652780595  |    |   | AGIWUR19574             |          |                |            |            |
| N2                  | CT | V | 16986460                | 16987135 | WBGene00077624 | Y102A5C.40 | Y102A5C.40 |
| 0.371222069868843   |    |   | AGIWUR40450             |          |                |            |            |
| N2                  | CT | V | 16990810                | 16991459 | WBGene00001706 | grd-17     | Y102A5C.34 |
| -0.134118473754665  |    |   | AGIWUR18992;AGIWUR41502 |          |                |            |            |
| N2                  | CT | V | 16992034                | 16993910 | WBGene00013629 | srz-95     | Y102A5C.33 |
| -0.175343492857269  |    |   | AGIWUR22065             |          |                |            |            |
| N2                  | CT | V | 16998933                | 17000304 | WBGene00006249 | str-217    | Y102A5C.28 |
| 0.277822222810297   |    |   | AGIWUR10775             |          |                |            |            |
| N2                  | CT | V | 17001467                | 17003587 | WBGene00005521 | sri-9      | Y102A5C.29 |
| 0.0161250652610274  |    |   | AGIWUR34695             |          |                |            |            |
| N2                  | CT | V | 17003980                | 17005066 | WBGene00014957 | Y102A5C.30 | Y102A5C.30 |
| 0.357134692036316   |    |   | AGIWUR3275              |          |                |            |            |
| N2                  | CT | V | 17005489                | 17006753 | WBGene00005348 | srh-131    | Y102A5C.31 |
| 0.00400091055069218 |    |   | AGIWUR42747             |          |                |            |            |
| N2                  | CT | V | 17007232                | 17008402 | WBGene00005581 | sri-69     | Y102A5C.32 |
| 0.0879527256689396  |    |   | AGIWUR40373             |          |                |            |            |
| N2                  | CT | V | 17008673                | 17009388 | WBGene00009914 | F49H6.13   | F49H6.13   |
| 0.262267927631804   |    |   | AGIWUR35282             |          |                |            |            |
| N2                  | CT | V | 17010062                | 17011849 | WBGene00009905 | cllec-240  | F49H6.1    |
| -0.0258052140365281 |    |   | AGIWUR7659              |          |                |            |            |
| N2                  | CT | V | 17012127                | 17013332 | WBGene00009906 | cllec-241  | F49H6.2    |
| 0.22906037137512    |    |   | AGIWUR41928             |          |                |            |            |
| N2                  | CT | V | 17013646                | 17013861 | WBGene00050928 | F49H6.16   | F49H6.16   |

|                                                                                  |    |   |                                                                         |          |                |          |                             |
|----------------------------------------------------------------------------------|----|---|-------------------------------------------------------------------------|----------|----------------|----------|-----------------------------|
| 0.0787399668610087                                                               |    |   | AGIWUR11947;AGIWUR12220;AGIWUR29541;AGIWUR36769;AGIWUR39561             |          |                |          |                             |
| N2                                                                               | CT | V | 17014408                                                                | 17015326 | WBGene00009907 | F49H6.3  | F49H6.3 0.234596076136276   |
| AGIWUR44169                                                                      |    |   |                                                                         |          |                |          |                             |
| N2                                                                               | CT | V | 17016175                                                                | 17016446 | WBGene00045502 | F49H6.14 | F49H6.14                    |
| 0.0134333920073746                                                               |    |   | AGIWUR9144;AGIWUR19042;AGIWUR28769;AGIWUR39378                          |          |                |          |                             |
| N2                                                                               | CT | V | 17017087                                                                | 17019800 | WBGene00005316 | srh-97   | F49H6.4 -0.113278029146429  |
| AGIWUR4678                                                                       |    |   |                                                                         |          |                |          |                             |
| N2                                                                               | CT | V | 17019990                                                                | 17020226 | WBGene00050965 | F49H6.17 | F49H6.17                    |
| -0.0106198215007653                                                              |    |   | AGIWUR21780;AGIWUR22613;AGIWUR30372;AGIWUR35838;AGIWUR43274;AGIWUR43610 |          |                |          |                             |
| N2                                                                               | CT | V | 17020907                                                                | 17021461 | WBGene00009913 | F49H6.12 | F49H6.12                    |
| 0.0565447480707864                                                               |    |   | AGIWUR15422;AGIWUR21659;AGIWUR24462;AGIWUR27313;AGIWUR32570             |          |                |          |                             |
| N2                                                                               | CT | V | 17023473                                                                | 17025347 | WBGene00009908 | F49H6.5  | F49H6.5 -0.314993593239134  |
| AGIWUR21039                                                                      |    |   |                                                                         |          |                |          |                             |
| N2                                                                               | CT | V | 17027255                                                                | 17028374 | WBGene00014768 | F49H6.6  | F49H6.6 0.016165369746699   |
| AGIWUR12196;AGIWUR15561                                                          |    |   |                                                                         |          |                |          |                             |
| N2                                                                               | CT | V | 17028884                                                                | 17030448 | WBGene00005784 | srw-37   | F49H6.7 -0.0183830149035566 |
| AGIWUR28075                                                                      |    |   |                                                                         |          |                |          |                             |
| N2                                                                               | CT | V | 17030738                                                                | 17032772 | WBGene00009910 | srz-92   | F49H6.9 -0.0621534310360907 |
| AGIWUR2313;AGIWUR2642;AGIWUR5170;AGIWUR16949;AGIWUR30126;AGIWUR32196;AGIWUR34131 |    |   |                                                                         |          |                |          |                             |
| N2                                                                               | CT | V | 17033218                                                                | 17035950 | WBGene00009912 | srz-94   | F49H6.11                    |
| -0.038305793026141                                                               |    |   | AGIWUR37649                                                             |          |                |          |                             |
| N2                                                                               | CT | V | 17036410                                                                | 17037862 | WBGene00009911 | srz-93   | F49H6.10                    |
| 0.0493223631860662                                                               |    |   | AGIWUR6095                                                              |          |                |          |                             |
| N2                                                                               | CT | V | 17040739                                                                | 17041961 | WBGene00050976 | F28B1.11 | F28B1.11                    |
| 0.195627512827087                                                                |    |   | AGIWUR3533                                                              |          |                |          |                             |
| N2                                                                               | CT | V | 17042592                                                                | 17043783 | WBGene00009195 | hpo-33   | F28B1.1 0.013638546509287   |
| AGIWUR21710                                                                      |    |   |                                                                         |          |                |          |                             |
| N2                                                                               | CT | V | 17044786                                                                | 17049822 | WBGene00009196 | F28B1.2  | F28B1.2 0.153749991281684   |
| AGIWUR29073                                                                      |    |   |                                                                         |          |                |          |                             |
| N2                                                                               | CT | V | 17051015                                                                | 17051617 | WBGene00077494 | F28B1.12 | F28B1.12                    |
| -0.0959157752784705                                                              |    |   | AGIWUR29490                                                             |          |                |          |                             |
| N2                                                                               | CT | V | 17052004                                                                | 17055349 | WBGene00009197 | F28B1.3  | F28B1.3 -0.114275486689982  |
| AGIWUR32415                                                                      |    |   |                                                                         |          |                |          |                             |
| N2                                                                               | CT | V | 17055431                                                                | 17057052 | WBGene00009198 | F28B1.4  | F28B1.4 -0.162256296909115  |
| AGIWUR43815                                                                      |    |   |                                                                         |          |                |          |                             |
| N2                                                                               | CT | V | 17057135                                                                | 17059919 | WBGene00009199 | F28B1.5  | F28B1.5 0.343777813576397   |
| AGIWUR27451                                                                      |    |   |                                                                         |          |                |          |                             |
| N2                                                                               | CT | V | 17060287                                                                | 17061675 | WBGene00005578 | sri-66   | F28B1.6 0.304303885214136   |
| AGIWUR5923                                                                       |    |   |                                                                         |          |                |          |                             |

|                                                                                 |    |   |          |          |                |          |          |                    |
|---------------------------------------------------------------------------------|----|---|----------|----------|----------------|----------|----------|--------------------|
| N2                                                                              | CT | V | 17061889 | 17063095 | WBGene00045381 | F28B1.9  | F28B1.9  | -0.182451034468128 |
| AGIWUR26072;AGIWUR42486                                                         |    |   |          |          |                |          |          |                    |
| N2                                                                              | CT | V | 17063417 | 17064823 | WBGene00005462 | srh-256  | F28B1.7  | 0.097585936089343  |
| AGIWUR1913;AGIWUR35236                                                          |    |   |          |          |                |          |          |                    |
| N2                                                                              | CT | V | 17064976 | 17066471 | WBGene00005461 | srh-255  | F28B1.8  | -0.160120612282853 |
| AGIWUR23182                                                                     |    |   |          |          |                |          |          |                    |
| N2                                                                              | CT | V | 17067146 | 17067854 | WBGene00050958 | F28B1.10 |          | F28B1.10           |
| 0.236762709338699 AGIWUR36506                                                   |    |   |          |          |                |          |          |                    |
| N2                                                                              | CT | V | 17068627 | 17069533 | WBGene00045382 | T05E12.8 |          | T05E12.8           |
| -0.166994822060337 AGIWUR15678                                                  |    |   |          |          |                |          |          |                    |
| N2                                                                              | CT | V | 17070527 | 17071678 | WBGene00011485 | srbc-14  | T05E12.2 |                    |
| -0.0401783235883251 AGIWUR39008                                                 |    |   |          |          |                |          |          |                    |
| N2                                                                              | CT | V | 17074290 | 17076000 | WBGene00006176 | str-125  | T05E12.1 |                    |
| 0.415208761818968 AGIWUR38712                                                   |    |   |          |          |                |          |          |                    |
| N2                                                                              | CT | V | 17076874 | 17077989 | WBGene00011486 | T05E12.3 |          | T05E12.3           |
| 0.108183803754706 AGIWUR29382                                                   |    |   |          |          |                |          |          |                    |
| N2                                                                              | CT | V | 17078257 | 17079895 | WBGene00005767 | srw-20   | T05E12.4 |                    |
| 0.104484724868779 AGIWUR43453                                                   |    |   |          |          |                |          |          |                    |
| N2                                                                              | CT | V | 17080492 | 17082818 | WBGene00045500 | T05E12.9 |          | T05E12.9           |
| 0.293866310338859 AGIWUR39435;AGIWUR41395                                       |    |   |          |          |                |          |          |                    |
| N2                                                                              | CT | V | 17085002 | 17090023 | WBGene00011487 | T05E12.6 |          | T05E12.6           |
| 0.104339818359566 AGIWUR6518;AGIWUR14154;AGIWUR29463;AGIWUR40326;AGIWUR42300    |    |   |          |          |                |          |          |                    |
| N2                                                                              | CT | V | 17090362 | 17091693 | WBGene00005444 | srh-237  | T05E12.7 |                    |
| -0.131957967106707 AGIWUR6479;AGIWUR19438;AGIWUR36456                           |    |   |          |          |                |          |          |                    |
| N2                                                                              | CT | V | 17092570 | 17093420 | WBGene00013935 | ZK218.1  | ZK218.1  | 0.0612087106569472 |
| AGIWUR24739                                                                     |    |   |          |          |                |          |          |                    |
| N2                                                                              | CT | V | 17094180 | 17094485 | WBGene00050963 | ZK218.15 |          | ZK218.15           |
| -0.0189359110992831 AGIWUR14594;AGIWUR24596;AGIWUR27095;AGIWUR36385;AGIWUR36538 |    |   |          |          |                |          |          |                    |
| N2                                                                              | CT | V | 17097927 | 17098766 | WBGene00013937 | ZK218.3  | ZK218.3  | 0.0569715540061644 |
| AGIWUR6219                                                                      |    |   |          |          |                |          |          |                    |
| N2                                                                              | CT | V | 17099347 | 17100364 | WBGene00013938 | ZK218.4  | ZK218.4  | 0.181198270088312  |
| AGIWUR32987                                                                     |    |   |          |          |                |          |          |                    |
| N2                                                                              | CT | V | 17101132 | 17102017 | WBGene00013939 | ZK218.5  | ZK218.5  | 0.0862848571315764 |
| AGIWUR2008                                                                      |    |   |          |          |                |          |          |                    |
| N2                                                                              | CT | V | 17103410 | 17104627 | WBGene00013940 | nhr-248  | ZK218.6  | 0.170136239839936  |
| AGIWUR1901                                                                      |    |   |          |          |                |          |          |                    |
| N2                                                                              | CT | V | 17105783 | 17106656 | WBGene00013941 | ZK218.7  | ZK218.7  | 0.0354621435084921 |
| AGIWUR24098                                                                     |    |   |          |          |                |          |          |                    |
| N2                                                                              | CT | V | 17107530 | 17108418 | WBGene00013943 | ZK218.11 |          | ZK218.11           |



|                                                            |                                     |          |                |          |           |                     |
|------------------------------------------------------------|-------------------------------------|----------|----------------|----------|-----------|---------------------|
| -0.0726473011374411                                        | AGIWUR2994                          |          |                |          |           |                     |
| N2 CT V                                                    | 17109684                            | 17110448 | WBGene00045492 | ZK218.14 | ZK218.14  |                     |
| -0.00118918424179526                                       | AGIWUR3949;AGIWUR7949;AGIWUR33943   |          |                |          |           |                     |
| N2 CT V                                                    | 17114540                            | 17114887 | WBGene00014981 | ZK218.9  | ZK218.9   | -0.0153593079670831 |
| AGIWUR2424;AGIWUR15452;AGIWUR22073;AGIWUR28343;AGIWUR39661 |                                     |          |                |          |           |                     |
| N2 CT V                                                    | 17116026                            | 17117009 | WBGene00013942 | ZK218.8  | ZK218.8   | -0.545419767246866  |
| AGIWUR24794                                                |                                     |          |                |          |           |                     |
| N2 CT V                                                    | 17146825                            | 17153266 | WBGene00014753 | F40D4.14 | F40D4.14  |                     |
| -0.153833594648793                                         | AGIWUR3920;AGIWUR28464              |          |                |          |           |                     |
| N2 CT V                                                    | 17159874                            | 17162621 | WBGene00009571 | F40D4.12 | F40D4.12  |                     |
| 0.0272141961923644                                         | AGIWUR14728;AGIWUR30832;AGIWUR31537 |          |                |          |           |                     |
| N2 CT V                                                    | 17162900                            | 17165509 | WBGene00005321 | srh-102  | F40D4.11  |                     |
| 0.0888771986379595                                         | AGIWUR38142                         |          |                |          |           |                     |
| N2 CT V                                                    | 17166028                            | 17167557 | WBGene00009569 | srz-66   | F40D4.9   | 0.0744805107358371  |
| AGIWUR28911                                                |                                     |          |                |          |           |                     |
| N2 CT V                                                    | 17167833                            | 17169279 | WBGene00009570 | srz-65   | F40D4.10  |                     |
| -0.145386820361412                                         | AGIWUR21917                         |          |                |          |           |                     |
| N2 CT V                                                    | 17169442                            | 17170922 | WBGene00005798 | srw-51   | F40D4.8   | 0.0844827227680307  |
| AGIWUR10986                                                |                                     |          |                |          |           |                     |
| N2 CT V                                                    | 17171851                            | 17173313 | WBGene00009568 | srbc-26  | F40D4.7   | -0.0698622549799968 |
| AGIWUR43279                                                |                                     |          |                |          |           |                     |
| N2 CT V                                                    | 17174038                            | 17175530 | WBGene00009567 | srbc-25  | F40D4.6   | -0.0801158133486934 |
| AGIWUR151;AGIWUR44899                                      |                                     |          |                |          |           |                     |
| N2 CT V                                                    | 17176716                            | 17178067 | WBGene00009566 | srsx-1   | F40D4.5   | 0.186731922514309   |
| AGIWUR9027                                                 |                                     |          |                |          |           |                     |
| N2 CT V                                                    | 17178757                            | 17180002 | WBGene00005390 | srh-174  | F40D4.1   | -0.241580575842784  |
| AGIWUR20313;AGIWUR44339                                    |                                     |          |                |          |           |                     |
| N2 CT V                                                    | 17184396                            | 17186082 | WBGene00005378 | srh-162  | F40D4.4   | -0.0367046298199143 |
| AGIWUR6806;AGIWUR34277                                     |                                     |          |                |          |           |                     |
| N2 CT V                                                    | 17186873                            | 17188680 | WBGene00005413 | srh-202  | Y68A4A.1  |                     |
| -0.286139851808713                                         | AGIWUR18682                         |          |                |          |           |                     |
| N2 CT V                                                    | 17189186                            | 17190499 | WBGene00006235 | str-199  | Y68A4A.3  |                     |
| 0.0216624166115977                                         | AGIWUR34565                         |          |                |          |           |                     |
| N2 CT V                                                    | 17193031                            | 17199003 | WBGene00013467 | Y68A4A.5 | Y68A4A.5  |                     |
| 0.0814430091882685                                         | AGIWUR14113;AGIWUR28008             |          |                |          |           |                     |
| N2 CT V                                                    | 17199418                            | 17201736 | WBGene00013468 | srz-96   | Y68A4A.6  |                     |
| -0.155011630185655                                         | AGIWUR40306                         |          |                |          |           |                     |
| N2 CT V                                                    | 17205641                            | 17207160 | WBGene00005821 | srw-74   | Y68A4A.11 | 0                   |
| AGIWUR40920                                                |                                     |          |                |          |           |                     |

|                                                            |    |   |                                                            |          |                |           |                             |
|------------------------------------------------------------|----|---|------------------------------------------------------------|----------|----------------|-----------|-----------------------------|
| N2                                                         | CT | V | 17209065                                                   | 17209955 | WBGene00014944 | Y68A4A.12 | Y68A4A.12                   |
| 0.0808709457477761                                         |    |   | AGIWUR43560                                                |          |                |           |                             |
| N2                                                         | CT | V | 17210716                                                   | 17212039 | WBGene00005443 | srh-236   | Y68A4A.9                    |
| 0.153151308156625                                          |    |   | AGIWUR6236                                                 |          |                |           |                             |
| N2                                                         | CT | V | 17213043                                                   | 17214212 | WBGene00005332 | srh-113   | Y68A4A.7                    |
| 0.281081452703129                                          |    |   | AGIWUR42610                                                |          |                |           |                             |
| N2                                                         | CT | V | 17215066                                                   | 17216751 | WBGene00014943 | Y68A4A.8  | Y68A4A.8                    |
| 0.0970671225922715                                         |    |   | AGIWUR5679                                                 |          |                |           |                             |
| N2                                                         | CT | V | 17217990                                                   | 17219004 | WBGene00011840 | srbc-62   | T19C9.1 0.0640964675289588  |
| AGIWUR32160                                                |    |   |                                                            |          |                |           |                             |
| N2                                                         | CT | V | 17219253                                                   | 17220445 | WBGene00005328 | srh-109   | T19C9.4 0.227132767058582   |
| AGIWUR39083                                                |    |   |                                                            |          |                |           |                             |
| N2                                                         | CT | V | 17222386                                                   | 17223405 | WBGene00005458 | srh-252   | T19C9.3 0.193276665141136   |
| AGIWUR15804                                                |    |   |                                                            |          |                |           |                             |
| N2                                                         | CT | V | 17225086                                                   | 17226219 | WBGene00005331 | srh-112   | T19C9.2 -0.0452076746033443 |
| AGIWUR41950                                                |    |   |                                                            |          |                |           |                             |
| N2                                                         | CT | V | 17229555                                                   | 17229990 | WBGene00011842 | T19C9.6   | T19C9.6 -0.0266729448069141 |
| AGIWUR28;AGIWUR1422;AGIWUR14042;AGIWUR17957;AGIWUR25905    |    |   |                                                            |          |                |           |                             |
| N2                                                         | CT | V | 17234329                                                   | 17234630 | WBGene00050933 | T19C9.9   | T19C9.9 0.0312185876649558  |
| AGIWUR4141;AGIWUR19550;AGIWUR26952;AGIWUR34168;AGIWUR36985 |    |   |                                                            |          |                |           |                             |
| N2                                                         | CT | V | 17236592                                                   | 17238097 | WBGene00050934 | T19C9.10  | T19C9.10                    |
| -0.0453871128298671                                        |    |   | AGIWUR4377;AGIWUR19269;AGIWUR26611;AGIWUR41291;AGIWUR42252 |          |                |           |                             |
| N2                                                         | CT | V | 17239097                                                   | 17240656 | WBGene00011844 | T19C9.8   | T19C9.8 -0.0941824440530912 |
| AGIWUR39193                                                |    |   |                                                            |          |                |           |                             |
| N2                                                         | CT | V | 17241708                                                   | 17242652 | WBGene00013472 | Y68A4B.3  | Y68A4B.3                    |
| 0.123283797617003                                          |    |   | AGIWUR4089;AGIWUR12735                                     |          |                |           |                             |
| N2                                                         | CT | V | 17243767                                                   | 17245506 | WBGene00013471 | cllec-242 | Y68A4B.2                    |
| -0.162718839302999                                         |    |   | AGIWUR41908                                                |          |                |           |                             |
| N2                                                         | CT | V | 17247325                                                   | 17249015 | WBGene00013470 | cllec-243 | Y68A4B.1                    |
| 0.267569174531435                                          |    |   | AGIWUR4918                                                 |          |                |           |                             |
| N2                                                         | CT | V | 17251911                                                   | 17252309 | WBGene00219383 | Y61B8A.6  | Y61B8A.6                    |
| 0.0107093752104159                                         |    |   | AGIWUR9858;AGIWUR38279                                     |          |                |           |                             |
| N2                                                         | CT | V | 17252931                                                   | 17255128 | WBGene00005335 | srh-116   | Y61B8A.1                    |
| -0.517927600784799                                         |    |   | AGIWUR22833                                                |          |                |           |                             |
| N2                                                         | CT | V | 17255754                                                   | 17257194 | WBGene00005334 | srh-115   | Y61B8A.2                    |
| -0.0445372684587024                                        |    |   | AGIWUR27892                                                |          |                |           |                             |
| N2                                                         | CT | V | 17259173                                                   | 17260534 | WBGene00044654 | fbxa-85   | Y61B8A.4                    |
| -0.0131624296309099                                        |    |   | AGIWUR32797                                                |          |                |           |                             |
| N2                                                         | CT | V | 17260674                                                   | 17262325 | WBGene00005794 | srw-47    | K10G4.2 -0.157914679081934  |

|                                                                                                                    |    |   |                                                |          |                |          |          |                     |
|--------------------------------------------------------------------------------------------------------------------|----|---|------------------------------------------------|----------|----------------|----------|----------|---------------------|
| AGIWUR42524                                                                                                        |    |   |                                                |          |                |          |          |                     |
| N2                                                                                                                 | CT | V | 17264066                                       | 17264955 | WBGene00010752 | K10G4.3  | K10G4.3  | 0.336040529526358   |
| AGIWUR19495                                                                                                        |    |   |                                                |          |                |          |          |                     |
| N2                                                                                                                 | CT | V | 17271730                                       | 17272888 | WBGene00005336 | srh-117  | K10G4.6  | -0.0125200280778346 |
| AGIWUR10777                                                                                                        |    |   |                                                |          |                |          |          |                     |
| N2                                                                                                                 | CT | V | 17273524                                       | 17275059 | WBGene00044202 | K10G4.10 |          | K10G4.10            |
| 0.0335896610016024                                                                                                 |    |   | AGIWUR17927;AGIWUR27492                        |          |                |          |          |                     |
| N2                                                                                                                 | CT | V | 17278367                                       | 17285169 | WBGene00010753 | K10G4.4  | K10G4.4  | -0.337502099924739  |
| AGIWUR19573                                                                                                        |    |   |                                                |          |                |          |          |                     |
| N2                                                                                                                 | CT | V | 17292214                                       | 17293729 | WBGene00005793 | srw-46   | K10G4.8  | 0.138331271925439   |
| AGIWUR874                                                                                                          |    |   |                                                |          |                |          |          |                     |
| N2                                                                                                                 | CT | V | 17294413                                       | 17297359 | WBGene00077629 | K10G4.13 |          | K10G4.13            |
| 0.568147109008697                                                                                                  |    |   | AGIWUR4790                                     |          |                |          |          |                     |
| N2                                                                                                                 | CT | V | 17303054                                       | 17304438 | WBGene00005582 | sri-70   | Y61B8B.1 |                     |
| -0.00421462685456486                                                                                               |    |   | AGIWUR10381                                    |          |                |          |          |                     |
| N2                                                                                                                 | CT | V | 17316351                                       | 17317719 | WBGene00023507 | srz-26   | F31E9.7  | 0.228852949889747   |
| AGIWUR29264                                                                                                        |    |   |                                                |          |                |          |          |                     |
| N2                                                                                                                 | CT | V | 17318147                                       | 17319515 | WBGene00009298 | srz-58   | F31E9.5  | 0.115932584404192   |
| AGIWUR38599                                                                                                        |    |   |                                                |          |                |          |          |                     |
| N2                                                                                                                 | CT | V | 17319596                                       | 17322444 | WBGene00009295 | fbxa-180 |          | F31E9.1             |
| -0.428017618628047                                                                                                 |    |   | AGIWUR31899                                    |          |                |          |          |                     |
| N2                                                                                                                 | CT | V | 17322615                                       | 17324518 | WBGene00009296 | F31E9.3  | F31E9.3  | -0.110784264905188  |
| AGIWUR2504;AGIWUR3170;AGIWUR4495;AGIWUR7491;AGIWUR7699;AGIWUR16129;AGIWUR18574;AGIWUR30010;AGIWUR39662;AGIWUR44275 |    |   |                                                |          |                |          |          |                     |
| N2                                                                                                                 | CT | V | 17324907                                       | 17326168 | WBGene00045408 | F31E9.8  | F31E9.8  | 0.077167255355663   |
| AGIWUR388                                                                                                          |    |   |                                                |          |                |          |          |                     |
| N2                                                                                                                 | CT | V | 17326453                                       | 17327967 | WBGene00009297 | sdz-16   | F31E9.4  | 0.191154996470119   |
| AGIWUR6249;AGIWUR25089                                                                                             |    |   |                                                |          |                |          |          |                     |
| N2                                                                                                                 | CT | V | 17331570                                       | 17335546 | WBGene00009836 | fbxa-185 |          | F47H4.4             |
| -0.0237718701675647                                                                                                |    |   | AGIWUR4082;AGIWUR14040;AGIWUR14183;AGIWUR28850 |          |                |          |          |                     |
| N2                                                                                                                 | CT | V | 17336138                                       | 17338335 | WBGene00009837 | fbxa-186 |          | F47H4.6             |
| -0.0315742820430307                                                                                                |    |   | AGIWUR43890                                    |          |                |          |          |                     |
| N2                                                                                                                 | CT | V | 17339084                                       | 17342780 | WBGene00009838 | fbxa-187 |          | F47H4.7             |
| -0.0708378954912146                                                                                                |    |   | AGIWUR34510                                    |          |                |          |          |                     |
| N2                                                                                                                 | CT | V | 17347922                                       | 17348625 | WBGene00004811 | skr-5    | F47H4.10 |                     |
| 0.734240732117051                                                                                                  |    |   | AGIWUR3296                                     |          |                |          |          |                     |
| N2                                                                                                                 | CT | V | 17348665                                       | 17350180 | WBGene00009834 | lsy-27   | F47H4.1  | -0.0751349602998257 |
| AGIWUR2966                                                                                                         |    |   |                                                |          |                |          |          |                     |
| N2                                                                                                                 | CT | V | 17350387                                       | 17352870 | WBGene00009841 | fbxa-134 |          | F47H4.11            |

|                      |                                     |          |                |                                     |
|----------------------|-------------------------------------|----------|----------------|-------------------------------------|
| 0.333124147456973    | AGIWUR726                           |          |                |                                     |
| N2 CT V              | 17353325                            | 17360212 | WBGene00009835 | F47H4.2 F47H4.2 0.216502074380243   |
| AGIWUR31591          |                                     |          |                |                                     |
| N2 CT V              | 17369715                            | 17371468 | WBGene00014764 | srz-46 F47H4.3 0.257586932154643    |
| AGIWUR5100           |                                     |          |                |                                     |
| N2 CT V              | 17371544                            | 17376745 | WBGene00012491 | Y20C6A.1 Y20C6A.1                   |
| -0.0719287043687746  | AGIWUR12193                         |          |                |                                     |
| N2 CT V              | 17377406                            | 17379226 | WBGene00012492 | fbxb-7 Y20C6A.2                     |
| -0.198385894241564   | AGIWUR14771                         |          |                |                                     |
| N2 CT V              | 17380232                            | 17381119 | WBGene00077495 | Y20C6A.4 Y20C6A.4                   |
| 0.436635531214799    | AGIWUR4613                          |          |                |                                     |
| N2 CT V              | 17382090                            | 17383373 | WBGene00012493 | Y20C6A.3 Y20C6A.3                   |
| 0.088298670588328    | AGIWUR36562                         |          |                |                                     |
| N2 CT V              | 17395674                            | 17398034 | WBGene00005339 | srh-120 T27C5.1 0.0699477181621715  |
| AGIWUR25062          |                                     |          |                |                                     |
| N2 CT V              | 17400123                            | 17401774 | WBGene00005944 | srx-53 T27C5.2                      |
| -0.00163897721840378 | AGIWUR2034                          |          |                |                                     |
| N2 CT V              | 17404611                            | 17405823 | WBGene00023512 | srz-51 T27C5.11                     |
| -0.011506944874526   | AGIWUR11238                         |          |                |                                     |
| N2 CT V              | 17406306                            | 17407503 | WBGene00012078 | srz-50 T27C5.4 -0.105274127373896   |
| AGIWUR42655          |                                     |          |                |                                     |
| N2 CT V              | 17410255                            | 17411705 | WBGene00005349 | srh-132 T27C5.5 -0.0802345861008646 |
| AGIWUR27579          |                                     |          |                |                                     |
| N2 CT V              | 17412602                            | 17413098 | WBGene00012079 | T27C5.6 T27C5.6 -0.0126892109749415 |
| AGIWUR37517          |                                     |          |                |                                     |
| N2 CT V              | 17413546                            | 17414749 | WBGene00012080 | cllec-244 T27C5.7                   |
| -0.00159941134235808 | AGIWUR27963;AGIWUR29663;AGIWUR32941 |          |                |                                     |
| N2 CT V              | 17415278                            | 17416743 | WBGene00044059 | T27C5.12 T27C5.12                   |
| -0.672364009964364   | AGIWUR25726                         |          |                |                                     |
| N2 CT V              | 17417133                            | 17418391 | WBGene00012081 | T27C5.8 T27C5.8 0.397343282809734   |
| AGIWUR37095          |                                     |          |                |                                     |
| N2 CT V              | 17419156                            | 17420298 | WBGene00044096 | srh-96 T27C5.14                     |
| 0.0448243916256814   | AGIWUR40955                         |          |                |                                     |
| N2 CT V              | 17429701                            | 17430166 | WBGene00012083 | T27C5.10 T27C5.10                   |
| -0.0761576058457996  | AGIWUR4231;AGIWUR13140;AGIWUR38544  |          |                |                                     |
| N2 CT V              | 17431203                            | 17432501 | WBGene00044100 | srbc-27 F20E11.15                   |
| 0.201821439270623    | AGIWUR43044                         |          |                |                                     |
| N2 CT V              | 17432993                            | 17435209 | WBGene00044101 | srbc-28 F20E11.16                   |
| 0.0204578354204603   | AGIWUR5255                          |          |                |                                     |

|                      |    |   |                         |          |                |           |                             |
|----------------------|----|---|-------------------------|----------|----------------|-----------|-----------------------------|
| N2                   | CT | V | 17435678                | 17436592 | WBGene00206495 | F20E11.18 | F20E11.18                   |
| 0.216636077516402    |    |   | AGIWUR14662             |          |                |           |                             |
| N2                   | CT | V | 17436985                | 17438417 | WBGene00008982 | srsx-2    | F20E11.2                    |
| 0.12851673199448     |    |   | AGIWUR3063              |          |                |           |                             |
| N2                   | CT | V | 17442581                | 17445668 | WBGene00005374 | srh-158   | F20E11.13                   |
| 0.0412492662086086   |    |   | AGIWUR14378;AGIWUR40459 |          |                |           |                             |
| N2                   | CT | V | 17446348                | 17447636 | WBGene00005376 | srh-160   | F20E11.3                    |
| -0.0412820645526724  |    |   | AGIWUR21027             |          |                |           |                             |
| N2                   | CT | V | 17448332                | 17449590 | WBGene00005373 | srh-157   | F20E11.8                    |
| -0.0520208942937179  |    |   | AGIWUR8991;AGIWUR31658  |          |                |           |                             |
| N2                   | CT | V | 17452676                | 17453805 | WBGene00005377 | srh-161   | F20E11.14                   |
| -0.194230926347618   |    |   | AGIWUR10052             |          |                |           |                             |
| N2                   | CT | V | 17458533                | 17460161 | WBGene00008981 | srz-48    | F20E11.1                    |
| 0.0706530234374227   |    |   | AGIWUR1569              |          |                |           |                             |
| N2                   | CT | V | 17460813                | 17462432 | WBGene00008983 | F20E11.5  | F20E11.5                    |
| 0.0657996316028173   |    |   | AGIWUR25782             |          |                |           |                             |
| N2                   | CT | V | 17464578                | 17466730 | WBGene00008984 | F20E11.7  | F20E11.7                    |
| -0.237098714215855   |    |   | AGIWUR36820             |          |                |           |                             |
| N2                   | CT | V | 17472319                | 17473481 | WBGene00005333 | srh-114   | F08E10.8                    |
| -0.177161213120428   |    |   | AGIWUR23613             |          |                |           |                             |
| N2                   | CT | V | 17473999                | 17475471 | WBGene00005341 | srh-123   | F08E10.3                    |
| -0.0261757902218189  |    |   | AGIWUR43710             |          |                |           |                             |
| N2                   | CT | V | 17476790                | 17478108 | WBGene00008574 | srbc-61   | F08E10.2                    |
| -0.0855926784425103  |    |   | AGIWUR37212             |          |                |           |                             |
| N2                   | CT | V | 17478333                | 17479386 | WBGene00005329 | srh-110   | F08E10.4                    |
| -0.109035093836407   |    |   | AGIWUR5026              |          |                |           |                             |
| N2                   | CT | V | 17480851                | 17481855 | WBGene00005459 | srh-253   | F08E10.5                    |
| 0.0770389609604809   |    |   | AGIWUR44105             |          |                |           |                             |
| N2                   | CT | V | 17487346                | 17488833 | WBGene00010536 | K03D7.9   | K03D7.9 -0.184157662248134  |
| AGIWUR27680          |    |   |                         |          |                |           |                             |
| N2                   | CT | V | 17489502                | 17491609 | WBGene00010535 | K03D7.8   | K03D7.8 0.144681367928829   |
| AGIWUR35923          |    |   |                         |          |                |           |                             |
| N2                   | CT | V | 17492077                | 17493832 | WBGene00010534 | fbxa-102  | K03D7.7                     |
| -0.00941226387310401 |    |   | AGIWUR25951             |          |                |           |                             |
| N2                   | CT | V | 17494306                | 17496171 | WBGene00005337 | srh-118   | K03D7.6 -0.0914100625001195 |
| AGIWUR33420          |    |   |                         |          |                |           |                             |
| N2                   | CT | V | 17499044                | 17505021 | WBGene00014796 | K03D7.3   | K03D7.3 -0.312977855069343  |
| AGIWUR22757          |    |   |                         |          |                |           |                             |
| N2                   | CT | V | 17508793                | 17510214 | WBGene00005779 | srw-32    | K03D7.11                    |

|                         |                                                           |          |                |          |                             |
|-------------------------|-----------------------------------------------------------|----------|----------------|----------|-----------------------------|
| 0.000907848951899659    | AGIWUR28798                                               |          |                |          |                             |
| N2 CT V                 | 17511533                                                  | 17519857 | WBGene00005792 | srw-45   | K03D7.10                    |
| -0.103498950102239      | AGIWUR3827;AGIWUR5632;AGIWUR10237;AGIWUR11287;AGIWUR42706 |          |                |          |                             |
| N2 CT V                 | 17521037                                                  | 17527479 | WBGene00007672 | fbxa-136 | C18D4.2                     |
| 0.131028853804458       | AGIWUR23664;AGIWUR26139                                   |          |                |          |                             |
| N2 CT V                 | 17528029                                                  | 17529910 | WBGene00007678 | srz-90   | C18D4.9 -0.052589277694234  |
| AGIWUR27577             |                                                           |          |                |          |                             |
| N2 CT V                 | 17530303                                                  | 17530714 | WBGene00219493 | C18D4.12 | C18D4.12                    |
| 0.326681601580916       | AGIWUR10696                                               |          |                |          |                             |
| N2 CT V                 | 17530813                                                  | 17531510 | WBGene00007674 | C18D4.4  | C18D4.4 0.0994771299065249  |
| AGIWUR29903             |                                                           |          |                |          |                             |
| N2 CT V                 | 17532353                                                  | 17532786 | WBGene00007673 | C18D4.3  | C18D4.3 -0.0702641827627151 |
| AGIWUR30181             |                                                           |          |                |          |                             |
| N2 CT V                 | 17535615                                                  | 17538373 | WBGene00007675 | C18D4.6  | C18D4.6 -0.104842584531932  |
| AGIWUR10351;AGIWUR42998 |                                                           |          |                |          |                             |
| N2 CT V                 | 17540595                                                  | 17542272 | WBGene00014679 | srz-25   | C18D4.5 0.15243669323334    |
| AGIWUR13682             |                                                           |          |                |          |                             |
| N2 CT V                 | 17542719                                                  | 17544108 | WBGene00007676 | srz-57   | C18D4.7 -0.116051144432447  |
| AGIWUR32653             |                                                           |          |                |          |                             |
| N2 CT V                 | 17544175                                                  | 17546974 | WBGene00007677 | C18D4.8  | C18D4.8 -0.22221374388943   |
| AGIWUR41632             |                                                           |          |                |          |                             |
| N2 CT V                 | 17547383                                                  | 17549288 | WBGene00045293 | fbxa-175 | C38D9.12                    |
| 0.121949354985594       | AGIWUR34376                                               |          |                |          |                             |
| N2 CT V                 | 17549675                                                  | 17551196 | WBGene00008017 | fbxa-176 | C38D9.9                     |
| -0.094287373318414      | AGIWUR14301                                               |          |                |          |                             |
| N2 CT V                 | 17555854                                                  | 17558477 | WBGene00008015 | fbxa-174 | C38D9.7                     |
| -0.652672648900019      | AGIWUR20461                                               |          |                |          |                             |
| N2 CT V                 | 17563171                                                  | 17566003 | WBGene00008009 | fbxa-171 | C38D9.1                     |
| 0.28726668750414        | AGIWUR22354                                               |          |                |          |                             |
| N2 CT V                 | 17567513                                                  | 17571603 | WBGene00008010 | C38D9.2  | C38D9.2 -0.375705855728603  |
| AGIWUR10796             |                                                           |          |                |          |                             |
| N2 CT V                 | 17584793                                                  | 17585876 | WBGene00008012 | fbxa-133 | C38D9.4                     |
| -0.0941669797146609     | AGIWUR24992                                               |          |                |          |                             |
| N2 CT V                 | 17592387                                                  | 17594243 | WBGene00012403 | srz-45   | Y6G8.1 -1.55053381999044    |
| AGIWUR24279             |                                                           |          |                |          |                             |
| N2 CT V                 | 17594349                                                  | 17598971 | WBGene00012404 | Y6G8.2   | Y6G8.2 0.137668047539981    |
| AGIWUR37650             |                                                           |          |                |          |                             |
| N2 CT V                 | 17599978                                                  | 17600872 | WBGene00050974 | Y6G8.9   | Y6G8.9 0.19420352180299     |
| AGIWUR2079;AGIWUR23739  |                                                           |          |                |          |                             |

|                                                                                                                                              |    |   |          |          |                |          |          |                     |
|----------------------------------------------------------------------------------------------------------------------------------------------|----|---|----------|----------|----------------|----------|----------|---------------------|
| N2                                                                                                                                           | CT | V | 17601820 | 17602954 | WBGene00012405 | ztf-25   | Y6G8.3   | 0.0216351766883474  |
| AGIWUR37324                                                                                                                                  |    |   |          |          |                |          |          |                     |
| N2                                                                                                                                           | CT | V | 17603185 | 17603945 | WBGene00077459 | Y6G8.10  | Y6G8.10  | -0.221597854216318  |
| AGIWUR11426                                                                                                                                  |    |   |          |          |                |          |          |                     |
| N2                                                                                                                                           | CT | V | 17607379 | 17607690 | WBGene00077460 | Y6G8.11  | Y6G8.11  | -0.0855478365428803 |
| AGIWUR1681;AGIWUR13086;AGIWUR21320;AGIWUR33835;AGIWUR39121                                                                                   |    |   |          |          |                |          |          |                     |
| N2                                                                                                                                           | CT | V | 17608097 | 17609597 | WBGene00012406 | srz-91   | Y6G8.4   | -0.186054065355433  |
| AGIWUR13792                                                                                                                                  |    |   |          |          |                |          |          |                     |
| N2                                                                                                                                           | CT | V | 17613792 | 17614357 | WBGene00138715 | Y6G8.14  | Y6G8.14  | -0.214842100597011  |
| AGIWUR18983;AGIWUR32925                                                                                                                      |    |   |          |          |                |          |          |                     |
| N2                                                                                                                                           | CT | V | 17616473 | 17616921 | WBGene00044208 | Y6G8.6   | Y6G8.6   | 0.108203285976649   |
| AGIWUR4430;AGIWUR5423;AGIWUR16001;AGIWUR40934;AGIWUR41144                                                                                    |    |   |          |          |                |          |          |                     |
| N2                                                                                                                                           | CT | V | 17620194 | 17622750 | WBGene00045501 | Y6G8.8   | Y6G8.8   | -0.122511856822213  |
| AGIWUR7206;AGIWUR18354                                                                                                                       |    |   |          |          |                |          |          |                     |
| N2                                                                                                                                           | CT | V | 17625127 | 17627598 | WBGene00195165 | F57G4.11 |          | F57G4.11            |
| 1.19411473392801 AGIWUR30502                                                                                                                 |    |   |          |          |                |          |          |                     |
| N2                                                                                                                                           | CT | V | 17628866 | 17630215 | WBGene00045506 | F57G4.10 |          | F57G4.10            |
| 0.0035848519379944 AGIWUR2368;AGIWUR2435;AGIWUR18799;AGIWUR20217                                                                             |    |   |          |          |                |          |          |                     |
| N2                                                                                                                                           | CT | V | 17637982 | 17640042 | WBGene00010209 | fbxa-191 |          | F57G4.4             |
| 0.573906342269419 AGIWUR34789                                                                                                                |    |   |          |          |                |          |          |                     |
| N2                                                                                                                                           | CT | V | 17640672 | 17650527 | WBGene00010212 | fbxa-192 |          | F57G4.8             |
| -0.0938000658375953                                                                                                                          |    |   |          |          |                |          |          |                     |
| AGIWUR4316;AGIWUR4368;AGIWUR7320;AGIWUR14928;AGIWUR17320;AGIWUR20534;AGIWUR22976;AGIWUR25735;AGIWUR27646;AGIWUR31741;AGIWUR41603;AGIWUR42867 |    |   |          |          |                |          |          |                     |
| N2                                                                                                                                           | CT | V | 17653482 | 17655281 | WBGene00010295 | fbxa-193 |          | F59A1.9             |
| -0.242570976059287 AGIWUR276                                                                                                                 |    |   |          |          |                |          |          |                     |
| N2                                                                                                                                           | CT | V | 17655581 | 17656654 | WBGene00010294 | fbxa-129 |          | F59A1.8             |
| -0.0975178296797732 AGIWUR9387;AGIWUR44072                                                                                                   |    |   |          |          |                |          |          |                     |
| N2                                                                                                                                           | CT | V | 17656892 | 17658198 | WBGene00010293 | fbxa-108 |          | F59A1.7             |
| -0.2315723903675 AGIWUR17141;AGIWUR41177                                                                                                     |    |   |          |          |                |          |          |                     |
| N2                                                                                                                                           | CT | V | 17660303 | 17661810 | WBGene00010296 | dgat-2   | F59A1.10 |                     |
| -0.217579022189938 AGIWUR3725                                                                                                                |    |   |          |          |                |          |          |                     |
| N2                                                                                                                                           | CT | V | 17661802 | 17665475 | WBGene00010297 | F59A1.11 |          | F59A1.11            |
| -0.0229429780117698 AGIWUR4003                                                                                                               |    |   |          |          |                |          |          |                     |
| N2                                                                                                                                           | CT | V | 17668882 | 17671330 | WBGene00006148 | str-89   | F59A1.4  | 0.0528501228126999  |
| AGIWUR22398                                                                                                                                  |    |   |          |          |                |          |          |                     |
| N2                                                                                                                                           | CT | V | 17671700 | 17673443 | WBGene00006151 | str-93   | F59A1.14 |                     |
| 0.104701602682555 AGIWUR15703                                                                                                                |    |   |          |          |                |          |          |                     |
| N2                                                                                                                                           | CT | V | 17674946 | 17676653 | WBGene00006150 | str-92   | F59A1.3  | -0.285366206409636  |

|                                                                   |    |   |          |          |                |          |                             |  |
|-------------------------------------------------------------------|----|---|----------|----------|----------------|----------|-----------------------------|--|
| AGIWUR33147                                                       |    |   |          |          |                |          |                             |  |
| N2                                                                | CT | V | 17678358 | 17680208 | WBGene00014779 | F59A1.2  | F59A1.2 -0.0751602959963531 |  |
| AGIWUR24205;AGIWUR27684                                           |    |   |          |          |                |          |                             |  |
| N2                                                                | CT | V | 17680661 | 17683907 | WBGene00010300 | F59A1.15 | F59A1.15                    |  |
| 0.263101599327951 AGIWUR40297                                     |    |   |          |          |                |          |                             |  |
| N2                                                                | CT | V | 17684149 | 17684968 | WBGene00010301 | F59A1.16 | F59A1.16                    |  |
| -0.515283786077 AGIWUR20039                                       |    |   |          |          |                |          |                             |  |
| N2                                                                | CT | V | 17685192 | 17686074 | WBGene00010292 | F59A1.6  | F59A1.6 -0.460467462810385  |  |
| AGIWUR24435                                                       |    |   |          |          |                |          |                             |  |
| N2                                                                | CT | V | 17687211 | 17690994 | WBGene00010299 | F59A1.13 | F59A1.13                    |  |
| 0.000246626777693493 AGIWUR39181                                  |    |   |          |          |                |          |                             |  |
| N2                                                                | CT | V | 17692502 | 17695827 | WBGene00012515 | Y26G10.1 | Y26G10.1                    |  |
| 0.327212196958024 AGIWUR5760                                      |    |   |          |          |                |          |                             |  |
| N2                                                                | CT | V | 17701212 | 17703285 | WBGene00005255 | srh-32   | Y26G10.2                    |  |
| 0.128039160112516 AGIWUR10909                                     |    |   |          |          |                |          |                             |  |
| N2                                                                | CT | V | 17704362 | 17706117 | WBGene00050973 | Y26G10.3 | Y26G10.3                    |  |
| 0.185047175640995 AGIWUR22451;AGIWUR38578                         |    |   |          |          |                |          |                             |  |
| N2                                                                | CT | V | 17706114 | 17706875 | WBGene00012305 | W06D12.6 | W06D12.6                    |  |
| -0.120208544634491 AGIWUR29688                                    |    |   |          |          |                |          |                             |  |
| N2                                                                | CT | V | 17707184 | 17709823 | WBGene00005254 | srh-31   | W06D12.7                    |  |
| 0.169420680826805 AGIWUR7156                                      |    |   |          |          |                |          |                             |  |
| N2                                                                | CT | V | 17710040 | 17714377 | WBGene00006685 | twk-33   | W06D12.5                    |  |
| 0.200660001629723 AGIWUR23332;AGIWUR39569;AGIWUR43456             |    |   |          |          |                |          |                             |  |
| N2                                                                | CT | V | 17718947 | 17721293 | WBGene00006137 | str-77   | W06D12.4                    |  |
| 0.132060322183543 AGIWUR8320                                      |    |   |          |          |                |          |                             |  |
| N2                                                                | CT | V | 17725004 | 17726818 | WBGene00001397 | fat-5    | W06D12.3                    |  |
| -0.19826800018829 AGIWUR14736;AGIWUR20562;AGIWUR22243;AGIWUR27469 |    |   |          |          |                |          |                             |  |
| N2                                                                | CT | V | 17726799 | 17730381 | WBGene00006692 | twk-42   | W06D12.2                    |  |
| -0.184880552597484 AGIWUR35124                                    |    |   |          |          |                |          |                             |  |
| N2                                                                | CT | V | 17733568 | 17739899 | WBGene00012304 | cut1-4   | W06D12.1                    |  |
| -0.00225455480712178 AGIWUR5269;AGIWUR9713;AGIWUR10938            |    |   |          |          |                |          |                             |  |
| N2                                                                | CT | V | 17743651 | 17747059 | WBGene00006688 | twk-36   | R12G8.2 0.286951520070519   |  |
| AGIWUR29554                                                       |    |   |          |          |                |          |                             |  |
| N2                                                                | CT | V | 17747966 | 17749243 | WBGene00011254 | R12G8.1  | R12G8.1 -0.38060420086418   |  |
| AGIWUR20029                                                       |    |   |          |          |                |          |                             |  |
| N2                                                                | CT | V | 17755892 | 17764751 | WBGene00004003 | pgp-9    | C47A10.1                    |  |
| 0.0905426063605788 AGIWUR15356                                    |    |   |          |          |                |          |                             |  |
| N2                                                                | CT | V | 17767549 | 17769621 | WBGene00005489 | srh-284  | C47A10.3                    |  |
| -0.000553138258148067 AGIWUR13539                                 |    |   |          |          |                |          |                             |  |



|                      |    |   |                                                            |          |                |           |           |           |
|----------------------|----|---|------------------------------------------------------------|----------|----------------|-----------|-----------|-----------|
| N2                   | CT | V | 17769653                                                   | 17773208 | WBGene00008126 | sre-21    | C47A10.4  |           |
| 0.0613524475361089   |    |   | AGIWUR6720;AGIWUR10002;AGIWUR10999                         |          |                |           |           |           |
| N2                   | CT | V | 17774187                                                   | 17777227 | WBGene00008127 | ddo-1     | C47A10.5  |           |
| -0.114508337256078   |    |   | AGIWUR14884                                                |          |                |           |           |           |
| N2                   | CT | V | 17777924                                                   | 17779487 | WBGene00008129 | C47A10.12 |           | C47A10.12 |
| 0.00629698106584797  |    |   | AGIWUR12728                                                |          |                |           |           |           |
| N2                   | CT | V | 17780448                                                   | 17783639 | WBGene00008128 | srab-12   | C47A10.6  |           |
| -0.0689624758154386  |    |   | AGIWUR29939                                                |          |                |           |           |           |
| N2                   | CT | V | 17789494                                                   | 17789738 | WBGene00050897 | C47A10.13 |           | C47A10.13 |
| -0.00343997199914359 |    |   | AGIWUR8974;AGIWUR10304;AGIWUR21806;AGIWUR28302;AGIWUR42390 |          |                |           |           |           |
| N2                   | CT | V | 17790491                                                   | 17792470 | WBGene00005494 | srh-290   | C47A10.11 |           |
| -0.289645189771656   |    |   | AGIWUR19006                                                |          |                |           |           |           |
| N2                   | CT | V | 17792679                                                   | 17794086 | WBGene00005493 | srh-289   | C47A10.10 |           |
| -0.0775390233063398  |    |   | AGIWUR14885                                                |          |                |           |           |           |
| N2                   | CT | V | 17794909                                                   | 17795755 | WBGene00005492 | srh-288   | C47A10.7  |           |
| 0.0309467297143327   |    |   | AGIWUR9355                                                 |          |                |           |           |           |
| N2                   | CT | V | 17796200                                                   | 17798889 | WBGene00005909 | srx-18    | C47A10.8  |           |
| -0.103418432711926   |    |   | AGIWUR744                                                  |          |                |           |           |           |
| N2                   | CT | V | 17800838                                                   | 17801906 | WBGene00005491 | srh-287   | C47A10.9  |           |
| -0.042211771694622   |    |   | AGIWUR32425                                                |          |                |           |           |           |
| N2                   | CT | V | 17802410                                                   | 17802619 | WBGene00050893 | Y94A7B.11 |           | Y94A7B.11 |
| -0.332765509822501   |    |   | AGIWUR8422;AGIWUR35883;AGIWUR43835                         |          |                |           |           |           |
| N2                   | CT | V | 17802769                                                   | 17803923 | WBGene00005496 | srh-292   | Y94A7B.1  |           |
| 0.0431140640724239   |    |   | AGIWUR34250                                                |          |                |           |           |           |
| N2                   | CT | V | 17805486                                                   | 17808611 | WBGene00005495 | srh-291   | Y94A7B.3  |           |
| -0.0244058674306054  |    |   | AGIWUR7471                                                 |          |                |           |           |           |
| N2                   | CT | V | 17810353                                                   | 17812794 | WBGene00005500 | srh-296   | Y94A7B.4  |           |
| 0.0190727198454219   |    |   | AGIWUR21677                                                |          |                |           |           |           |
| N2                   | CT | V | 17818867                                                   | 17821003 | WBGene00005502 | srh-298   | Y94A7B.5  |           |
| 0.428970688228239    |    |   | AGIWUR44774                                                |          |                |           |           |           |
| N2                   | CT | V | 17822105                                                   | 17823889 | WBGene00005504 | srh-300   | Y94A7B.6  |           |
| 0.0505850979719717   |    |   | AGIWUR16526                                                |          |                |           |           |           |
| N2                   | CT | V | 17824910                                                   | 17827774 | WBGene00005505 | srh-301   | Y94A7B.8  |           |
| 0.0528594802762488   |    |   | AGIWUR14106                                                |          |                |           |           |           |
| N2                   | CT | V | 17828610                                                   | 17829983 | WBGene00005508 | srh-304   | Y94A7B.9  |           |
| -0.015585804597114   |    |   | AGIWUR4451                                                 |          |                |           |           |           |
| N2                   | CT | V | 17831650                                                   | 17833418 | WBGene00005507 | srh-303   | Y94A7B.7  |           |
| -1.05557806674476    |    |   | AGIWUR19659                                                |          |                |           |           |           |
| N2                   | CT | V | 17837360                                                   | 17838119 | WBGene00013341 | Y59A8A.7  |           | Y59A8A.7  |

|                                                                                                                                              |    |   |                                                                                  |          |                |           |                            |
|----------------------------------------------------------------------------------------------------------------------------------------------|----|---|----------------------------------------------------------------------------------|----------|----------------|-----------|----------------------------|
| 0.158339005810702                                                                                                                            |    |   | AGIWUR19908                                                                      |          |                |           |                            |
| N2                                                                                                                                           | CT | V | 17838831                                                                         | 17841188 | WBGene00005506 | srh-302   | Y59A8A.5                   |
| -0.0955943587274302                                                                                                                          |    |   | AGIWUR38418                                                                      |          |                |           |                            |
| N2                                                                                                                                           | CT | V | 17841483                                                                         | 17844206 | WBGene00005490 | srh-286   | Y59A8A.4                   |
| -0.871722566343708                                                                                                                           |    |   | AGIWUR23633                                                                      |          |                |           |                            |
| N2                                                                                                                                           | CT | V | 17845739                                                                         | 17855989 | WBGene00013340 | tcc-1     | Y59A8A.3                   |
| -0.149168874461724                                                                                                                           |    |   | AGIWUR2535;AGIWUR5566;AGIWUR7194;AGIWUR15447;AGIWUR21458;AGIWUR27254;AGIWUR32170 |          |                |           |                            |
| N2                                                                                                                                           | CT | V | 17861368                                                                         | 17870651 | WBGene00000813 | csn-1     | Y59A8A.1                   |
| -0.244404335357375                                                                                                                           |    |   | AGIWUR10688;AGIWUR14162;AGIWUR37627                                              |          |                |           |                            |
| N2                                                                                                                                           | CT | V | 17871401                                                                         | 17879913 | WBGene00013339 | phf-14    | Y59A8A.2                   |
| -0.164784723201489                                                                                                                           |    |   | AGIWUR31159                                                                      |          |                |           |                            |
| N2                                                                                                                                           | CT | V | 17879844                                                                         | 17888984 | WBGene00007394 | C06H5.6   | C06H5.6 0.0931314207764    |
| AGIWUR7896;AGIWUR8502;AGIWUR8823;AGIWUR15190;AGIWUR16651;AGIWUR18629;AGIWUR21138;AGIWUR25545;AGIWUR28925;AGIWUR35720;AGIWUR40621;AGIWUR44512 |    |   |                                                                                  |          |                |           |                            |
| N2                                                                                                                                           | CT | V | 17892426                                                                         | 17892706 | WBGene00045346 | C06H5.9   | C06H5.9 0.0338662157718392 |
| AGIWUR3364;AGIWUR10273;AGIWUR10645;AGIWUR27916;AGIWUR42380                                                                                   |    |   |                                                                                  |          |                |           |                            |
| N2                                                                                                                                           | CT | V | 17895268                                                                         | 17896804 | WBGene00007392 | fbxa-156  | C06H5.1                    |
| -0.157708621531446                                                                                                                           |    |   | AGIWUR25046                                                                      |          |                |           |                            |
| N2                                                                                                                                           | CT | V | 17897546                                                                         | 17897746 | WBGene00219446 | C06H5.13  | C06H5.13                   |
| 0.037653238706806                                                                                                                            |    |   | AGIWUR952;AGIWUR14193;AGIWUR20483;AGIWUR22689;AGIWUR33984                        |          |                |           |                            |
| N2                                                                                                                                           | CT | V | 17899803                                                                         | 17901913 | WBGene00007393 | fbxa-157  | C06H5.2                    |
| -0.387733438716669                                                                                                                           |    |   | AGIWUR32833                                                                      |          |                |           |                            |
| N2                                                                                                                                           | CT | V | 17910304                                                                         | 17917241 | WBGene00007395 | dcar-1    | C06H5.7 0.0491294189728908 |
| AGIWUR4617;AGIWUR10116;AGIWUR43125                                                                                                           |    |   |                                                                                  |          |                |           |                            |
| N2                                                                                                                                           | CT | V | 17921776                                                                         | 17924185 | WBGene00008442 | E01B7.2   | E01B7.2 -0.326916664664676 |
| AGIWUR9023                                                                                                                                   |    |   |                                                                                  |          |                |           |                            |
| N2                                                                                                                                           | CT | V | 17924916                                                                         | 17934225 | WBGene00008441 | usp-50    | E01B7.1 0.0967513246189329 |
| AGIWUR11877;AGIWUR13337                                                                                                                      |    |   |                                                                                  |          |                |           |                            |
| N2                                                                                                                                           | CT | V | 17936332                                                                         | 17949184 | WBGene00001080 | dpy-21    | Y59A8B.1                   |
| 0.0547875311002208                                                                                                                           |    |   | AGIWUR39389                                                                      |          |                |           |                            |
| N2                                                                                                                                           | CT | V | 17951348                                                                         | 17952820 | WBGene00013356 | Y59A8B.24 | Y59A8B.24                  |
| 0.0608729138874535                                                                                                                           |    |   | AGIWUR42293                                                                      |          |                |           |                            |
| N2                                                                                                                                           | CT | V | 17954054                                                                         | 17966847 | WBGene00013355 | gck-3     | Y59A8B.23                  |
| 0.17360288444136                                                                                                                             |    |   | AGIWUR29083                                                                      |          |                |           |                            |
| N2                                                                                                                                           | CT | V | 17968510                                                                         | 17980082 | WBGene00013354 | snx-6     | Y59A8B.22                  |
| -0.112545296440267                                                                                                                           |    |   | AGIWUR31388                                                                      |          |                |           |                            |
| N2                                                                                                                                           | CT | V | 17986260                                                                         | 17994546 | WBGene00013353 | Y59A8B.21 | Y59A8B.21                  |
| -0.131831820198638                                                                                                                           |    |   | AGIWUR40332                                                                      |          |                |           |                            |
| N2                                                                                                                                           | CT | V | 17995347                                                                         | 18001368 | WBGene00013352 | lon-8     | Y59A8B.20                  |

|                     |                                                                                   |                |                     |
|---------------------|-----------------------------------------------------------------------------------|----------------|---------------------|
| -0.0893454904256803 | AGIWUR8675;AGIWUR9102;AGIWUR15282;AGIWUR17603;AGIWUR19833                         |                |                     |
| N2 CT V             | 18007230 18009041                                                                 | WBGene00013351 | Y59A8B.19 Y59A8B.19 |
| -0.102928099979316  | AGIWUR17315                                                                       |                |                     |
| N2 CT V             | 18010017 18010837                                                                 | WBGene00045459 | Y59A8B.26 Y59A8B.26 |
| 0.0914201505710559  | AGIWUR12442;AGIWUR21434                                                           |                |                     |
| N2 CT V             | 18012413 18014216                                                                 | WBGene00005350 | srh-133 Y59A8B.3    |
| 0.0646301529414233  | AGIWUR8992                                                                        |                |                     |
| N2 CT V             | 18014641 18017326                                                                 | WBGene00005351 | srh-134 Y59A8B.4    |
| -0.0117988389459942 | AGIWUR5306                                                                        |                |                     |
| N2 CT V             | 18017904 18020014                                                                 | WBGene00005511 | srh-307 Y59A8B.5    |
| 0.115118738903469   | AGIWUR5710;AGIWUR35581                                                            |                |                     |
| N2 CT V             | 18022479 18042353                                                                 | WBGene00013343 | prp-6 Y59A8B.6      |
| -0.16572586114083   | AGIWUR7680                                                                        |                |                     |
| N2 CT V             | 18043571 18052323                                                                 | WBGene00013344 | ebp-1 Y59A8B.7      |
| 0.0757298100589381  | AGIWUR16212                                                                       |                |                     |
| N2 CT V             | 18070021 18081957                                                                 | WBGene00013347 | Y59A8B.10 Y59A8B.10 |
| 0.112690197120159   | AGIWUR38201                                                                       |                |                     |
| N2 CT V             | 18082406 18085127                                                                 | WBGene00013348 | fbxa-106 Y59A8B.11  |
| -0.103527950118877  | AGIWUR14652                                                                       |                |                     |
| N2 CT V             | 18085630 18086225                                                                 | WBGene00013349 | Y59A8B.12 Y59A8B.12 |
| -0.271280394844247  | AGIWUR24593                                                                       |                |                     |
| N2 CT V             | 18087123 18097996                                                                 | WBGene00013350 | slr-2 Y59A8B.13     |
| -0.155416129454761  | AGIWUR5909                                                                        |                |                     |
| N2 CT V             | 18098676 18106868                                                                 | WBGene00003919 | par-4 Y59A8B.14     |
| -0.265627039470894  | AGIWUR43625                                                                       |                |                     |
| N2 CT V             | 18108269 18114755                                                                 | WBGene00012562 | Y37H2A.1 Y37H2A.1   |
| -0.148292029957283  | AGIWUR15257                                                                       |                |                     |
| N2 CT V             | 18115402 18123594                                                                 | WBGene00050935 | Y37H2A.16 Y37H2A.16 |
| -0.171103871130663  | AGIWUR5789;AGIWUR9443;AGIWUR11169;AGIWUR17775;AGIWUR27302;AGIWUR29776;AGIWUR41474 |                |                     |
| N2 CT V             | 18123939 18125245                                                                 | WBGene00012564 | fbxa-107 Y37H2A.4   |
| -0.0481064069129697 | AGIWUR43709                                                                       |                |                     |
| N2 CT V             | 18125375 18127205                                                                 | WBGene00012565 | fbxa-210 Y37H2A.5   |
| -0.0989845373439469 | AGIWUR20368                                                                       |                |                     |
| N2 CT V             | 18127519 18128885                                                                 | WBGene00012566 | fbxa-211 Y37H2A.6   |
| -0.172636216115986  | AGIWUR12070;AGIWUR24650;AGIWUR37600                                               |                |                     |
| N2 CT V             | 18129171 18131125                                                                 | WBGene00044758 | Y37H2A.12 Y37H2A.12 |
| -0.21518762009087   | AGIWUR39737                                                                       |                |                     |
| N2 CT V             | 18131667 18133232                                                                 | WBGene00219210 | Y37H2A.18 Y37H2A.18 |
| -0.234016266624657  | AGIWUR26503                                                                       |                |                     |

|                     |    |   |                                                |          |                |                 |                     |
|---------------------|----|---|------------------------------------------------|----------|----------------|-----------------|---------------------|
| N2                  | CT | V | 18134722                                       | 18136022 | WBGene00012568 | fbxa-212        | Y37H2A.8            |
| -0.146100249230152  |    |   | AGIWUR25803;AGIWUR41974                        |          |                |                 |                     |
| N2                  | CT | V | 18136704                                       | 18137714 | WBGene00012569 | fbxc-46         | Y37H2A.9            |
| -0.197934000286356  |    |   | AGIWUR40984                                    |          |                |                 |                     |
| N2                  | CT | V | 18138995                                       | 18140687 | WBGene00012570 | Y37H2A.10       | Y37H2A.10           |
| -0.32919566735422   |    |   | AGIWUR10504                                    |          |                |                 |                     |
| N2                  | CT | V | 18141461                                       | 18142577 | WBGene00012571 | Y37H2A.11       | Y37H2A.11           |
| -0.103276105999583  |    |   | AGIWUR28154                                    |          |                |                 |                     |
| N2                  | CT | V | 18142849                                       | 18143543 | WBGene00045417 | Y37H2A.13       | Y37H2A.13           |
| -0.228824193987651  |    |   | AGIWUR19;AGIWUR2328;AGIWUR27028;AGIWUR27310    |          |                |                 |                     |
| N2                  | CT | V | 18143716                                       | 18144720 | WBGene00045416 | Y37H2A.14       | Y37H2A.14           |
| 1.16218879178703    |    |   | AGIWUR25981                                    |          |                |                 |                     |
| N2                  | CT | V | 18146965                                       | 18154396 | WBGene00206536 | C14A6.16        | C14A6.16            |
| -0.327261860446011  |    |   | AGIWUR26918                                    |          |                |                 |                     |
| N2                  | CT | V | 18159652                                       | 18161339 | WBGene00050956 | C14A6.13        | C14A6.13            |
| 0.0913208208667253  |    |   | AGIWUR13918                                    |          |                |                 |                     |
| N2                  | CT | V | 18162034                                       | 18162668 | WBGene00050955 | C14A6.12        | C14A6.12            |
| 0.00446727993671203 |    |   | AGIWUR3236;AGIWUR21166;AGIWUR21466             |          |                |                 |                     |
| N2                  | CT | V | 18163439                                       | 18164858 | WBGene00007569 | C14A6.5 C14A6.5 | 0.694743225698149   |
| AGIWUR38662         |    |   |                                                |          |                |                 |                     |
| N2                  | CT | V | 18165294                                       | 18167261 | WBGene00007570 | C14A6.6 C14A6.6 | -0.0479497206541168 |
| AGIWUR43342         |    |   |                                                |          |                |                 |                     |
| N2                  | CT | V | 18167634                                       | 18168450 | WBGene00007571 | C14A6.7 C14A6.7 | 0.140448895759103   |
| AGIWUR22025         |    |   |                                                |          |                |                 |                     |
| N2                  | CT | V | 18169087                                       | 18171618 | WBGene00007572 | C14A6.8 C14A6.8 | 0.142322258562235   |
| AGIWUR30547         |    |   |                                                |          |                |                 |                     |
| N2                  | CT | V | 18172484                                       | 18178759 | WBGene00007853 | C31G12.4        | C31G12.4            |
| 0.200777736624802   |    |   | AGIWUR25686;AGIWUR31906                        |          |                |                 |                     |
| N2                  | CT | V | 18179943                                       | 18181373 | WBGene00007850 | C31G12.1        | C31G12.1            |
| -0.25611182182875   |    |   | AGIWUR44939                                    |          |                |                 |                     |
| N2                  | CT | V | 18185210                                       | 18185461 | WBGene00007852 | C31G12.3        | C31G12.3            |
| 0.117934498637098   |    |   | AGIWUR11940                                    |          |                |                 |                     |
| N2                  | CT | V | 18186111                                       | 18188331 | WBGene00007851 | clec-245        | C31G12.2            |
| 0.116630374334896   |    |   | AGIWUR25381                                    |          |                |                 |                     |
| N2                  | CT | V | 18189560                                       | 18191047 | WBGene00008892 | clec-246        | F16H6.2             |
| 0.0761903159168256  |    |   | AGIWUR2615;AGIWUR21493;AGIWUR36344;AGIWUR38574 |          |                |                 |                     |
| N2                  | CT | V | 18191412                                       | 18194167 | WBGene00008891 | clec-42 F16H6.1 | 0.130472992461988   |
| AGIWUR6841          |    |   |                                                |          |                |                 |                     |
| N2                  | CT | V | 18195306                                       | 18197863 | WBGene00008893 | F16H6.3 F16H6.3 | 0.0194471341892664  |

|                                                           |    |   |                                                           |          |                |           |                            |
|-----------------------------------------------------------|----|---|-----------------------------------------------------------|----------|----------------|-----------|----------------------------|
| AGIWUR7554                                                |    |   |                                                           |          |                |           |                            |
| N2                                                        | CT | V | 18198721                                                  | 18205815 | WBGene00008894 | F16H6.4   | F16H6.4 0.161510299753963  |
| AGIWUR11811;AGIWUR29561                                   |    |   |                                                           |          |                |           |                            |
| N2                                                        | CT | V | 18207064                                                  | 18209171 | WBGene00008897 | F16H6.7   | F16H6.7 0.0612103408151246 |
| AGIWUR32034                                               |    |   |                                                           |          |                |           |                            |
| N2                                                        | CT | V | 18217084                                                  | 18222299 | WBGene00008899 | F16H6.9   | F16H6.9 0.04797418753469   |
| AGIWUR12021                                               |    |   |                                                           |          |                |           |                            |
| N2                                                        | CT | V | 18222746                                                  | 18224447 | WBGene00008900 | F16H6.10  | F16H6.10                   |
| 0.12563754247944                                          |    |   | AGIWUR29693                                               |          |                |           |                            |
| N2                                                        | CT | V | 18227037                                                  | 18231455 | WBGene00012572 | Y37H2B.1  | Y37H2B.1                   |
| 0.0891926009078583                                        |    |   | AGIWUR22690                                               |          |                |           |                            |
| N2                                                        | CT | V | 18231635                                                  | 18237223 | WBGene00014821 | R10E8.7   | R10E8.7 -0.307247319946582 |
| AGIWUR28066;AGIWUR30825                                   |    |   |                                                           |          |                |           |                            |
| N2                                                        | CT | V | 18238122                                                  | 18240736 | WBGene00011213 | R10E8.8   | R10E8.8 0.217792175956884  |
| AGIWUR20037                                               |    |   |                                                           |          |                |           |                            |
| N2                                                        | CT | V | 18242339                                                  | 18252416 | WBGene00011207 | R10E8.1   | R10E8.1 -0.234798945455484 |
| AGIWUR5910;AGIWUR8723;AGIWUR17037;AGIWUR20949;AGIWUR20966 |    |   |                                                           |          |                |           |                            |
| N2                                                        | CT | V | 18253794                                                  | 18254403 | WBGene00011208 | R10E8.2   | R10E8.2 0.0530350403790241 |
| AGIWUR22380                                               |    |   |                                                           |          |                |           |                            |
| N2                                                        | CT | V | 18254783                                                  | 18257067 | WBGene00011211 | R10E8.5   | R10E8.5 0.326212434190235  |
| AGIWUR30162                                               |    |   |                                                           |          |                |           |                            |
| N2                                                        | CT | V | 18259270                                                  | 18266370 | WBGene00011212 | R10E8.6   | R10E8.6 -0.170079289558164 |
| AGIWUR11589                                               |    |   |                                                           |          |                |           |                            |
| N2                                                        | CT | V | 18267292                                                  | 18268844 | WBGene00012574 | fbxa-213  | Y37H2C.3                   |
| -0.0543691666795816                                       |    |   | AGIWUR33649                                               |          |                |           |                            |
| N2                                                        | CT | V | 18269616                                                  | 18269985 | WBGene00004812 | skr-6     | Y37H2C.2                   |
| -0.127926554204471                                        |    |   | AGIWUR27438                                               |          |                |           |                            |
| N2                                                        | CT | V | 18270703                                                  | 18272256 | WBGene00012575 | Y37H2C.4  | Y37H2C.4                   |
| 0.461897478820978                                         |    |   | AGIWUR20744                                               |          |                |           |                            |
| N2                                                        | CT | V | 18272889                                                  | 18277694 | WBGene00012573 | Y37H2C.1  | Y37H2C.1                   |
| -0.171399971453142                                        |    |   | AGIWUR17827                                               |          |                |           |                            |
| N2                                                        | CT | V | 18282897                                                  | 18290590 | WBGene00013058 | clec-247  | Y51A2A.1                   |
| 0.0244801758520312                                        |    |   | AGIWUR43134                                               |          |                |           |                            |
| N2                                                        | CT | V | 18290942                                                  | 18291348 | WBGene00013060 | Y51A2A.4  | Y51A2A.4                   |
| -0.0923049204596449                                       |    |   | AGIWUR16311                                               |          |                |           |                            |
| N2                                                        | CT | V | 18292595                                                  | 18292944 | WBGene00077445 | Y51A2A.12 | Y51A2A.12                  |
| -0.0756831955967456                                       |    |   | AGIWUR755;AGIWUR23757;AGIWUR31475;AGIWUR41999;AGIWUR42533 |          |                |           |                            |
| N2                                                        | CT | V | 18298806                                                  | 18300713 | WBGene00013061 | Y51A2A.5  | Y51A2A.5                   |
| 0.0356292731630132                                        |    |   | AGIWUR41693                                               |          |                |           |                            |

|    |    |   |                                                                                                |          |                |          |                             |
|----|----|---|------------------------------------------------------------------------------------------------|----------|----------------|----------|-----------------------------|
| N2 | CT | V | 18309386                                                                                       | 18310203 | WBGene00014906 | fbxa-109 | Y51A2A.8                    |
|    |    |   | -0.091546669895143 AGIWUR38308;AGIWUR43586                                                     |          |                |          |                             |
| N2 | CT | V | 18310924                                                                                       | 18311985 | WBGene00014907 | fbxa-117 | Y51A2A.9                    |
|    |    |   | -0.0411181471528481 AGIWUR23063                                                                |          |                |          |                             |
| N2 | CT | V | 18318595                                                                                       | 18319744 | WBGene00007182 | fbxb-119 | B0462.3                     |
|    |    |   | -0.0669143484690542                                                                            |          |                |          |                             |
|    |    |   | AGIWUR6162;AGIWUR11568;AGIWUR13340;AGIWUR14758;AGIWUR16201;AGIWUR17658;AGIWUR29562;AGIWUR40018 |          |                |          |                             |
| N2 | CT | V | 18320110                                                                                       | 18321527 | WBGene00005580 | sri-68   | B0462.2 0.364998173357197   |
|    |    |   | AGIWUR30149;AGIWUR39795                                                                        |          |                |          |                             |
| N2 | CT | V | 18325035                                                                                       | 18328791 | WBGene00007181 | B0462.1  | B0462.1 0.380649391759985   |
|    |    |   | AGIWUR32448                                                                                    |          |                |          |                             |
| N2 | CT | V | 18329112                                                                                       | 18331179 | WBGene00007183 | B0462.4  | B0462.4 -0.181913418547673  |
|    |    |   | AGIWUR14082                                                                                    |          |                |          |                             |
| N2 | CT | V | 18351021                                                                                       | 18352672 | WBGene00119201 | C08E8.11 | C08E8.11                    |
|    |    |   | -0.384421886406219 AGIWUR33378                                                                 |          |                |          |                             |
| N2 | CT | V | 18353510                                                                                       | 18355842 | WBGene00007438 | C08E8.2  | C08E8.2 -0.147031199172816  |
|    |    |   | AGIWUR19655;AGIWUR23477;AGIWUR40483                                                            |          |                |          |                             |
| N2 | CT | V | 18358035                                                                                       | 18359555 | WBGene00045496 | C08E8.8  | C08E8.8 -0.107048460767698  |
|    |    |   | AGIWUR1498;AGIWUR11590;AGIWUR13685;AGIWUR14012;AGIWUR37565                                     |          |                |          |                             |
| N2 | CT | V | 18359818                                                                                       | 18359988 | WBGene00007441 | C08E8.5  | C08E8.5 -0.079089008593261  |
|    |    |   | AGIWUR31154                                                                                    |          |                |          |                             |
| N2 | CT | V | 18361051                                                                                       | 18362543 | WBGene00007437 | C08E8.1  | C08E8.1 -0.125560372769931  |
|    |    |   | AGIWUR13037;AGIWUR22262;AGIWUR29468                                                            |          |                |          |                             |
| N2 | CT | V | 18364858                                                                                       | 18365224 | WBGene00050891 | C08E8.9  | C08E8.9 -0.0625377391847399 |
|    |    |   | AGIWUR12572;AGIWUR29261;AGIWUR38952;AGIWUR42879;AGIWUR44736                                    |          |                |          |                             |
| N2 | CT | V | 18368014                                                                                       | 18368422 | WBGene00007442 | C08E8.6  | C08E8.6 0.170678239877994   |
|    |    |   | AGIWUR29226                                                                                    |          |                |          |                             |
| N2 | CT | V | 18371846                                                                                       | 18373528 | WBGene00007440 | C08E8.4  | C08E8.4 0.555216904737545   |
|    |    |   | AGIWUR33396;AGIWUR42447                                                                        |          |                |          |                             |
| N2 | CT | V | 18374494                                                                                       | 18376755 | WBGene00013066 | Y51A2B.2 | Y51A2B.2                    |
|    |    |   | 0.158413989260526 AGIWUR530                                                                    |          |                |          |                             |
| N2 | CT | V | 18379119                                                                                       | 18379289 | WBGene00013071 | Y51A2B.8 | Y51A2B.8                    |
|    |    |   | -0.149026017076226 AGIWUR11261;AGIWUR15571;AGIWUR26511;AGIWUR35990;AGIWUR37522;AGIWUR43960     |          |                |          |                             |
| N2 | CT | V | 18380620                                                                                       | 18382690 | WBGene00013067 | nhr-288  | Y51A2B.3                    |
|    |    |   | 0.058752614308835 AGIWUR6038                                                                   |          |                |          |                             |
| N2 | CT | V | 18386252                                                                                       | 18389146 | WBGene00013068 | Y51A2B.4 | Y51A2B.4                    |
|    |    |   | 0.444303008289241 AGIWUR28115                                                                  |          |                |          |                             |
| N2 | CT | V | 18389280                                                                                       | 18391337 | WBGene00013069 | Y51A2B.5 | Y51A2B.5                    |
|    |    |   | 0.215393206608498 AGIWUR3971                                                                   |          |                |          |                             |

|                     |    |   |                                                             |          |                |          |                             |
|---------------------|----|---|-------------------------------------------------------------|----------|----------------|----------|-----------------------------|
| N2                  | CT | V | 18392007                                                    | 18394303 | WBGene00013070 | Y51A2B.6 | Y51A2B.6                    |
| 0.0144273151484828  |    |   | AGIWUR20290                                                 |          |                |          |                             |
| N2                  | CT | V | 18395338                                                    | 18395749 | WBGene00050907 | Y51A2B.9 | Y51A2B.9                    |
| -0.0338869177141543 |    |   | AGIWUR15787;AGIWUR15989;AGIWUR19344;AGIWUR25724;AGIWUR40333 |          |                |          |                             |
| N2                  | CT | V | 18398450                                                    | 18400374 | WBGene00005828 | srw-81   | Y51A2B.7                    |
| -0.0943935732843908 |    |   | AGIWUR14210                                                 |          |                |          |                             |
| N2                  | CT | V | 18406896                                                    | 18408138 | WBGene00014984 | ZK262.12 | ZK262.12                    |
| -0.0363490371317354 |    |   | AGIWUR29494;AGIWUR39668                                     |          |                |          |                             |
| N2                  | CT | V | 18409043                                                    | 18410242 | WBGene00005417 | srh-207  | ZK262.1 0.161584536415441   |
| AGIWUR24982         |    |   |                                                             |          |                |          |                             |
| N2                  | CT | V | 18410758                                                    | 18412987 | WBGene00013949 | ZK262.2  | ZK262.2 0.092485413512394   |
| AGIWUR1816          |    |   |                                                             |          |                |          |                             |
| N2                  | CT | V | 18414351                                                    | 18416861 | WBGene00013950 | ZK262.3  | ZK262.3 0.0370015273224853  |
| AGIWUR39692         |    |   |                                                             |          |                |          |                             |
| N2                  | CT | V | 18417749                                                    | 18419893 | WBGene00005409 | srh-198  | ZK262.13                    |
| -0.0996210514048497 |    |   | AGIWUR10509;AGIWUR15365                                     |          |                |          |                             |
| N2                  | CT | V | 18421097                                                    | 18423477 | WBGene00005614 | srj-26   | ZK262.10                    |
| -0.246962134257268  |    |   | AGIWUR12493;AGIWUR38321;AGIWUR40538                         |          |                |          |                             |
| N2                  | CT | V | 18423883                                                    | 18424207 | WBGene00013951 | ZK262.4  | ZK262.4 0.314045914533455   |
| AGIWUR19656         |    |   |                                                             |          |                |          |                             |
| N2                  | CT | V | 18426580                                                    | 18430537 | WBGene00005830 | srw-83   | ZK262.6 0.0184041344717514  |
| AGIWUR18266         |    |   |                                                             |          |                |          |                             |
| N2                  | CT | V | 18431750                                                    | 18434172 | WBGene00005829 | srw-82   | ZK262.7 0.226519171366437   |
| AGIWUR4528          |    |   |                                                             |          |                |          |                             |
| N2                  | CT | V | 18440578                                                    | 18441340 | WBGene00013954 | ZK262.9  | ZK262.9 0.212955422810369   |
| AGIWUR34089         |    |   |                                                             |          |                |          |                             |
| N2                  | CT | V | 18444418                                                    | 18447019 | WBGene00013944 | ZK228.1  | ZK228.1 -0.0905007681406751 |
| AGIWUR6424          |    |   |                                                             |          |                |          |                             |
| N2                  | CT | V | 18455355                                                    | 18455934 | WBGene00050900 | ZK228.11 | ZK228.11                    |
| 0.150034614933432   |    |   | AGIWUR27728                                                 |          |                |          |                             |
| N2                  | CT | V | 18458238                                                    | 18461231 | WBGene00013946 | ZK228.3  | ZK228.3 -0.267602650569749  |
| AGIWUR704           |    |   |                                                             |          |                |          |                             |
| N2                  | CT | V | 18462804                                                    | 18465320 | WBGene00013947 | ZK228.4  | ZK228.4 -0.0608574491844731 |
| AGIWUR27462         |    |   |                                                             |          |                |          |                             |
| N2                  | CT | V | 18471985                                                    | 18473530 | WBGene00005397 | srh-182  | ZK228.5 -0.0017803275662267 |
| AGIWUR27804         |    |   |                                                             |          |                |          |                             |
| N2                  | CT | V | 18474523                                                    | 18476268 | WBGene00005396 | srh-181  | ZK228.6 0.138936697764798   |
| AGIWUR6220          |    |   |                                                             |          |                |          |                             |
| N2                  | CT | V | 18476390                                                    | 18478061 | WBGene00005394 | srh-179  | ZK228.7 0.0196888570946392  |

|                     |    |   |                                                          |          |                |                                     |
|---------------------|----|---|----------------------------------------------------------|----------|----------------|-------------------------------------|
| AGIWUR29334         |    |   |                                                          |          |                |                                     |
| N2                  | CT | V | 18478467                                                 | 18480331 | WBGene00005393 | srh-178 ZK228.8 -0.0332974570078806 |
| AGIWUR6209          |    |   |                                                          |          |                |                                     |
| N2                  | CT | V | 18481131                                                 | 18487258 | WBGene00013083 | Y51A2D.18 Y51A2D.18                 |
| -0.0887182443983807 |    |   | AGIWUR19122                                              |          |                |                                     |
| N2                  | CT | V | 18492265                                                 | 18508201 | WBGene00004830 | slo-1 Y51A2D.19                     |
| -0.187063630702624  |    |   | AGIWUR35207;AGIWUR43931                                  |          |                |                                     |
| N2                  | CT | V | 18508873                                                 | 18512632 | WBGene00013072 | Y51A2D.1 Y51A2D.1                   |
| -0.093823977953214  |    |   | AGIWUR24034                                              |          |                |                                     |
| N2                  | CT | V | 18516789                                                 | 18523875 | WBGene00013073 | hmit-1.1 Y51A2D.4                   |
| 0.227980944983873   |    |   | AGIWUR9464                                               |          |                |                                     |
| N2                  | CT | V | 18524760                                                 | 18529156 | WBGene00013074 | hmit-1.2 Y51A2D.5                   |
| 0.0972067398910177  |    |   | AGIWUR26939                                              |          |                |                                     |
| N2                  | CT | V | 18533924                                                 | 18549129 | WBGene00013075 | Y51A2D.7 Y51A2D.7                   |
| -0.120638572595425  |    |   | AGIWUR40539                                              |          |                |                                     |
| N2                  | CT | V | 18550022                                                 | 18553867 | WBGene00013076 | Y51A2D.8 Y51A2D.8                   |
| -0.39581513288524   |    |   | AGIWUR41015                                              |          |                |                                     |
| N2                  | CT | V | 18555387                                                 | 18556643 | WBGene00013077 | ttr-24 Y51A2D.9                     |
| -0.170662240379151  |    |   | AGIWUR9673                                               |          |                |                                     |
| N2                  | CT | V | 18556714                                                 | 18558099 | WBGene00013078 | ttr-25 Y51A2D.10                    |
| -0.278030857837827  |    |   | AGIWUR27649                                              |          |                |                                     |
| N2                  | CT | V | 18558748                                                 | 18560308 | WBGene00013079 | ttr-26 Y51A2D.11                    |
| -0.116982758420768  |    |   | AGIWUR38389                                              |          |                |                                     |
| N2                  | CT | V | 18562178                                                 | 18564886 | WBGene00005191 | srg-34 Y51A2D.12                    |
| -0.169328729287196  |    |   | AGIWUR5864;AGIWUR15788;AGIWUR28658                       |          |                |                                     |
| N2                  | CT | V | 18571833                                                 | 18573026 | WBGene00044210 | Y51A2D.21 Y51A2D.21                 |
| -0.136157302089657  |    |   | AGIWUR69;AGIWUR12741;AGIWUR19445;AGIWUR23107;AGIWUR31627 |          |                |                                     |
| N2                  | CT | V | 18573056                                                 | 18579784 | WBGene00013080 | Y51A2D.13 Y51A2D.13                 |
| 0.467457816107926   |    |   | AGIWUR33983                                              |          |                |                                     |
| N2                  | CT | V | 18582658                                                 | 18582963 | WBGene00013081 | Y51A2D.14 Y51A2D.14                 |
| -0.222388117608466  |    |   | AGIWUR35808                                              |          |                |                                     |
| N2                  | CT | V | 18592754                                                 | 18614101 | WBGene00013082 | grdn-1 Y51A2D.15                    |
| -0.119837306321084  |    |   | AGIWUR699;AGIWUR3278;AGIWUR40624                         |          |                |                                     |
| N2                  | CT | V | 18616599                                                 | 18620043 | WBGene00003660 | nhr-70 Y51A2D.17                    |
| -0.189841043172192  |    |   | AGIWUR6583                                               |          |                |                                     |
| N2                  | CT | V | 18620057                                                 | 18623093 | WBGene00013479 | Y69H2.1 Y69H2.1 -0.158715628915474  |
| AGIWUR4951          |    |   |                                                          |          |                |                                     |
| N2                  | CT | V | 18623198                                                 | 18626852 | WBGene00050884 | Y69H2.15 Y69H2.15                   |
| -0.175378179659119  |    |   | AGIWUR11539;AGIWUR42398                                  |          |                |                                     |



|                                                                                     |    |   |          |          |                |           |          |                     |
|-------------------------------------------------------------------------------------|----|---|----------|----------|----------------|-----------|----------|---------------------|
| N2                                                                                  | CT | V | 18628680 | 18636348 | WBGene00013480 | egas-3    | Y69H2.2  | -0.207904560010521  |
| AGIWUR12373                                                                         |    |   |          |          |                |           |          |                     |
| N2                                                                                  | CT | V | 18638484 | 18639591 | WBGene00013489 | col-42    | Y69H2.14 |                     |
| 0.0538964934272332 AGIWUR4525;AGIWUR33265                                           |    |   |          |          |                |           |          |                     |
| N2                                                                                  | CT | V | 18640337 | 18648392 | WBGene00013486 | egas-1    | Y69H2.11 |                     |
| -0.00905922057488517 AGIWUR27908                                                    |    |   |          |          |                |           |          |                     |
| N2                                                                                  | CT | V | 18650343 | 18656165 | WBGene00013487 | egas-2    | Y69H2.12 |                     |
| 0.0696728008493164 AGIWUR11285                                                      |    |   |          |          |                |           |          |                     |
| N2                                                                                  | CT | V | 18656094 | 18664116 | WBGene00013481 | Y69H2.3   | Y69H2.3  | 0.0402657146463987  |
| AGIWUR14840;AGIWUR15424;AGIWUR24446;AGIWUR25250;AGIWUR30766;AGIWUR39487;AGIWUR40523 |    |   |          |          |                |           |          |                     |
| N2                                                                                  | CT | V | 18670315 | 18684360 | WBGene00013485 | Y69H2.10  |          | Y69H2.10            |
| -0.027048898991417 AGIWUR10385;AGIWUR23560;AGIWUR34119                              |    |   |          |          |                |           |          |                     |
| N2                                                                                  | CT | V | 18685060 | 18686349 | WBGene00077455 | Y69H2.17  |          | Y69H2.17            |
| 0.0182898592468241 AGIWUR9288;AGIWUR16970;AGIWUR45036                               |    |   |          |          |                |           |          |                     |
| N2                                                                                  | CT | V | 18686315 | 18689843 | WBGene00006714 | ubc-19    | Y69H2.6  | -0.139427424284825  |
| AGIWUR6785                                                                          |    |   |          |          |                |           |          |                     |
| N2                                                                                  | CT | V | 18689989 | 18696069 | WBGene00013482 | Y69H2.7   | Y69H2.7  | 0.0381518639632796  |
| AGIWUR29711;AGIWUR41114                                                             |    |   |          |          |                |           |          |                     |
| N2                                                                                  | CT | V | 18701540 | 18706098 | WBGene00013484 | Y69H2.9   | Y69H2.9  | -0.233467194506791  |
| AGIWUR13319                                                                         |    |   |          |          |                |           |          |                     |
| N2                                                                                  | CT | V | 18706031 | 18706254 | WBGene00077451 | Y69H2.16  |          | Y69H2.16            |
| -0.337877764500361 AGIWUR12659                                                      |    |   |          |          |                |           |          |                     |
| N2                                                                                  | CT | V | 18709810 | 18711696 | WBGene00194680 | Y17D7C.6  |          | Y17D7C.6            |
| -0.0615918437011285 AGIWUR37831                                                     |    |   |          |          |                |           |          |                     |
| N2                                                                                  | CT | V | 18713728 | 18714612 | WBGene00050903 | Y17D7C.4  |          | Y17D7C.4            |
| -0.226215531942873 AGIWUR689;AGIWUR4289;AGIWUR8035;AGIWUR26888;AGIWUR35127          |    |   |          |          |                |           |          |                     |
| N2                                                                                  | CT | V | 18716075 | 18719944 | WBGene00012456 | Y17D7C.2  |          | Y17D7C.2            |
| 0.0770065371544684 AGIWUR12235                                                      |    |   |          |          |                |           |          |                     |
| N2                                                                                  | CT | V | 18720589 | 18723771 | WBGene00045366 | Y17D7C.3  |          | Y17D7C.3            |
| -0.272734040195898 AGIWUR22892;AGIWUR44345                                          |    |   |          |          |                |           |          |                     |
| N2                                                                                  | CT | V | 18728703 | 18729374 | WBGene00077655 | asp-19    | ZK384.6  | -0.0330714071208327 |
| AGIWUR5848                                                                          |    |   |          |          |                |           |          |                     |
| N2                                                                                  | CT | V | 18731991 | 18732772 | WBGene00013971 | sc1-19    | ZK384.1  | 0.458475702066219   |
| AGIWUR33613                                                                         |    |   |          |          |                |           |          |                     |
| N2                                                                                  | CT | V | 18732802 | 18734466 | WBGene00013972 | sc1-20    | ZK384.2  | 0.0821505782045779  |
| AGIWUR29469                                                                         |    |   |          |          |                |           |          |                     |
| N2                                                                                  | CT | V | 18738955 | 18742208 | WBGene00045364 | clec-250  |          | F11D11.14           |
| -0.0322639042237967 AGIWUR14561;AGIWUR19691;AGIWUR42947                             |    |   |          |          |                |           |          |                     |
| N2                                                                                  | CT | V | 18742427 | 18745266 | WBGene00045363 | F11D11.13 |          | F11D11.13           |

|                                                                                                             |                                                           |                |           |           |  |
|-------------------------------------------------------------------------------------------------------------|-----------------------------------------------------------|----------------|-----------|-----------|--|
| 0.336744064799524                                                                                           | AGIWUR372;AGIWUR17003                                     |                |           |           |  |
| N2 CT V                                                                                                     | 18745718 18746987                                         | WBGene00008703 | clec-251  | F11D11.8  |  |
| -1.31531996527087                                                                                           | AGIWUR24107                                               |                |           |           |  |
| N2 CT V                                                                                                     | 18747943 18748826                                         | WBGene00008702 | clec-252  | F11D11.7  |  |
| 0.402681776953129                                                                                           | AGIWUR30950                                               |                |           |           |  |
| N2 CT V                                                                                                     | 18749579 18750199                                         | WBGene00045362 | F11D11.12 | F11D11.12 |  |
| 0.219418781796411                                                                                           | AGIWUR1476;AGIWUR2080;AGIWUR33437;AGIWUR41696;AGIWUR44609 |                |           |           |  |
| N2 CT V                                                                                                     | 18750163 18750691                                         | WBGene00206492 | F11D11.21 | F11D11.21 |  |
| 0.347563389046091                                                                                           | AGIWUR1746                                                |                |           |           |  |
| N2 CT V                                                                                                     | 18751267 18752299                                         | WBGene00045361 | clec-253  | F11D11.11 |  |
| 0.057737046367015                                                                                           | AGIWUR9867;AGIWUR17636                                    |                |           |           |  |
| N2 CT V                                                                                                     | 18752482 18753136                                         | WBGene00008701 | F11D11.6  | F11D11.6  |  |
| 0.0492624253424436                                                                                          | AGIWUR6810;AGIWUR14978;AGIWUR29426                        |                |           |           |  |
| N2 CT V                                                                                                     | 18753500 18754428                                         | WBGene00008700 | clec-254  | F11D11.5  |  |
| -0.415515843433496                                                                                          | AGIWUR11388                                               |                |           |           |  |
| N2 CT V                                                                                                     | 18755450 18756760                                         | WBGene00050971 | F11D11.15 | F11D11.15 |  |
| -0.181754798556555                                                                                          | AGIWUR7429;AGIWUR24923                                    |                |           |           |  |
| N2 CT V                                                                                                     | 18756846 18757678                                         | WBGene00077442 | F11D11.16 | F11D11.16 |  |
| 0.0400387272672669                                                                                          | AGIWUR4444;AGIWUR5749;AGIWUR14017;AGIWUR24396;AGIWUR44023 |                |           |           |  |
| N2 CT V                                                                                                     | 18757982 18760285                                         | WBGene00008698 | F11D11.3  | F11D11.3  |  |
| -0.0902115224585733                                                                                         | AGIWUR30167                                               |                |           |           |  |
| N2 CT V                                                                                                     | 18761378 18763526                                         | WBGene00008699 | F11D11.4  | F11D11.4  |  |
| 0.42142369637658                                                                                            | AGIWUR35106                                               |                |           |           |  |
| N2 CT V                                                                                                     | 18767754 18768414                                         | WBGene00077659 | F11D11.19 | F11D11.19 |  |
| -0.0509931938519372                                                                                         | AGIWUR24782                                               |                |           |           |  |
| N2 CT V                                                                                                     | 18771690 18772639                                         | WBGene00012454 | clec-256  | Y17D7B.6  |  |
| 0.0471501408850914                                                                                          | AGIWUR32361;AGIWUR35140                                   |                |           |           |  |
| N2 CT V                                                                                                     | 18773061 18774024                                         | WBGene00044892 | clec-257  | Y17D7B.8  |  |
| -0.0828083479744368                                                                                         | AGIWUR43865                                               |                |           |           |  |
| N2 CT V                                                                                                     | 18775226 18776195                                         | WBGene00012453 | Y17D7B.5  | Y17D7B.5  |  |
| -0.136118894745165                                                                                          | AGIWUR36694;AGIWUR37221                                   |                |           |           |  |
| N2 CT V                                                                                                     | 18776198 18780216                                         | WBGene00012452 | Y17D7B.4  | Y17D7B.4  |  |
| -0.076972199127912                                                                                          | AGIWUR2942                                                |                |           |           |  |
| N2 CT V                                                                                                     | 18780490 18782605                                         | WBGene00014562 | Y17D7B.7  | Y17D7B.7  |  |
| -0.323630837064218                                                                                          |                                                           |                |           |           |  |
| AGIWUR13145;AGIWUR14363;AGIWUR22346;AGIWUR24800;AGIWUR34763;AGIWUR36743;AGIWUR37503;AGIWUR41056;AGIWUR44064 |                                                           |                |           |           |  |
| ;AGIWUR44944                                                                                                |                                                           |                |           |           |  |
| N2 CT V                                                                                                     | 18784954 18786788                                         | WBGene00012451 | Y17D7B.3  | Y17D7B.3  |  |
| -0.00918870473934597                                                                                        | AGIWUR11530                                               |                |           |           |  |

|                                                                                             |    |   |                                    |          |                |          |           |
|---------------------------------------------------------------------------------------------|----|---|------------------------------------|----------|----------------|----------|-----------|
| N2                                                                                          | CT | V | 18787806                           | 18789617 | WBGene00012450 | Y17D7B.2 | Y17D7B.2  |
| -0.0839182493374384                                                                         |    |   | AGIWUR8884                         |          |                |          |           |
| N2                                                                                          | CT | V | 18790958                           | 18794781 | WBGene00012449 | nhr-231  | Y17D7B.1  |
| 0.015765373125046                                                                           |    |   | AGIWUR3281;AGIWUR3287              |          |                |          |           |
| N2                                                                                          | CT | V | 18796106                           | 18800822 | WBGene00008309 | nhr-170  | C54E10.5  |
| -0.259388956304994                                                                          |    |   | AGIWUR4988                         |          |                |          |           |
| N2                                                                                          | CT | V | 18804080                           | 18806509 | WBGene00005522 | sri-10   | C54E10.4  |
| 0.239416553858446                                                                           |    |   | AGIWUR35247                        |          |                |          |           |
| N2                                                                                          | CT | V | 18808069                           | 18808670 | WBGene00008310 | C54E10.6 | C54E10.6  |
| -0.153174016026028                                                                          |    |   | AGIWUR20520                        |          |                |          |           |
| N2                                                                                          | CT | V | 18811005                           | 18813481 | WBGene00008308 | C54E10.3 | C54E10.3  |
| -0.0169379099220119                                                                         |    |   | AGIWUR32525                        |          |                |          |           |
| N2                                                                                          | CT | V | 18815036                           | 18818593 | WBGene00008306 | C54E10.1 | C54E10.1  |
| 0.127222922185431                                                                           |    |   | AGIWUR12625                        |          |                |          |           |
| N2                                                                                          | CT | V | 18819766                           | 18831422 | WBGene00008307 | ncs-5    | C54E10.2  |
| -0.165780084086919                                                                          |    |   | AGIWUR7427                         |          |                |          |           |
| N2                                                                                          | CT | V | 18832327                           | 18837214 | WBGene00012448 | cyp-33D3 | Y17D7A.4  |
| -0.306224635097012                                                                          |    |   | AGIWUR43577                        |          |                |          |           |
| N2                                                                                          | CT | V | 18839310                           | 18845401 | WBGene00003655 | nhr-65   | Y17D7A.3  |
| -0.248802458756305                                                                          |    |   | AGIWUR8708                         |          |                |          |           |
| N2                                                                                          | CT | V | 18846817                           | 18852729 | WBGene00012446 | nhr-230  | Y17D7A.1  |
| -0.138880970291605                                                                          |    |   | AGIWUR23803;AGIWUR40110            |          |                |          |           |
| N2                                                                                          | CT | V | 18853127                           | 18859221 | WBGene00006945 | wars-1   | Y80D3A.1  |
| -0.0855593572279485                                                                         |    |   | AGIWUR39065                        |          |                |          |           |
| N2                                                                                          | CT | V | 18860287                           | 18894974 | WBGene00001258 | emb-4    | Y80D3A.2  |
| -0.00445825346758699                                                                        |    |   |                                    |          |                |          |           |
| AGIWUR228;AGIWUR4092;AGIWUR9326;AGIWUR10162;AGIWUR34227;AGIWUR35514;AGIWUR38064;AGIWUR42024 |    |   |                                    |          |                |          |           |
| N2                                                                                          | CT | V | 18895317                           | 18900532 | WBGene00013584 | nhr-243  | Y80D3A.4  |
| -0.184752165731418                                                                          |    |   | AGIWUR41496                        |          |                |          |           |
| N2                                                                                          | CT | V | 18912038                           | 18918109 | WBGene00013585 | cyp-42A1 | Y80D3A.5  |
| -0.203783936414201                                                                          |    |   | AGIWUR7466;AGIWUR41876;AGIWUR42942 |          |                |          |           |
| N2                                                                                          | CT | V | 18919296                           | 18931379 | WBGene00004236 | ptr-22   | Y80D3A.7  |
| -0.306692859585112                                                                          |    |   | AGIWUR13202                        |          |                |          |           |
| N2                                                                                          | CT | V | 18940641                           | 18946905 | WBGene00013586 | Y80D3A.8 | Y80D3A.8  |
| 0.146125552655185                                                                           |    |   | AGIWUR41159;AGIWUR44894            |          |                |          |           |
| N2                                                                                          | CT | V | 18953118                           | 18957317 | WBGene00013587 | Y80D3A.9 | Y80D3A.9  |
| -0.240803892393652                                                                          |    |   | AGIWUR42361                        |          |                |          |           |
| N2                                                                                          | CT | V | 18958240                           | 18960172 | WBGene00012702 | ztf-20   | Y39B6A.46 |
| 0.102248620219181                                                                           |    |   | AGIWUR22117                        |          |                |          |           |

|                     |    |   |                                                                                  |          |                |           |           |
|---------------------|----|---|----------------------------------------------------------------------------------|----------|----------------|-----------|-----------|
| N2                  | CT | V | 18960969                                                                         | 18967842 | WBGene00012701 | Y39B6A.43 | Y39B6A.43 |
| -0.29921574781098   |    |   | AGIWUR14234                                                                      |          |                |           |           |
| N2                  | CT | V | 18968021                                                                         | 18969640 | WBGene00012700 | Y39B6A.42 | Y39B6A.42 |
| 0.370520508930767   |    |   | AGIWUR22324;AGIWUR30146                                                          |          |                |           |           |
| N2                  | CT | V | 18970500                                                                         | 18977976 | WBGene00012699 | Y39B6A.41 | Y39B6A.41 |
| -0.0572765718025696 |    |   | AGIWUR26695                                                                      |          |                |           |           |
| N2                  | CT | V | 18979336                                                                         | 18981193 | WBGene00012698 | sws-1     | Y39B6A.40 |
| -0.417904802985039  |    |   | AGIWUR12800                                                                      |          |                |           |           |
| N2                  | CT | V | 18981306                                                                         | 18985870 | WBGene00012697 | mrps-35   | Y39B6A.39 |
| -0.174956260732715  |    |   | AGIWUR40852                                                                      |          |                |           |           |
| N2                  | CT | V | 18986498                                                                         | 18990421 | WBGene00012696 | reps-1    | Y39B6A.38 |
| -0.213547277199261  |    |   | AGIWUR11454;AGIWUR30291;AGIWUR39000                                              |          |                |           |           |
| N2                  | CT | V | 18990850                                                                         | 18993799 | WBGene00012695 | Y39B6A.37 | Y39B6A.37 |
| -0.022230460157882  |    |   | AGIWUR27863                                                                      |          |                |           |           |
| N2                  | CT | V | 18993940                                                                         | 18998200 | WBGene00012694 | Y39B6A.36 | Y39B6A.36 |
| -0.213670866264639  |    |   | AGIWUR3112                                                                       |          |                |           |           |
| N2                  | CT | V | 18998345                                                                         | 19000918 | WBGene00006567 | tgt-2     | Y39B6A.35 |
| -0.0293548748988748 |    |   | AGIWUR30400                                                                      |          |                |           |           |
| N2                  | CT | V | 19001018                                                                         | 19001856 | WBGene00012693 | Y39B6A.34 | Y39B6A.34 |
| -0.196859602373106  |    |   | AGIWUR4047                                                                       |          |                |           |           |
| N2                  | CT | V | 19001956                                                                         | 19006711 | WBGene00012692 | Y39B6A.33 | Y39B6A.33 |
| 0.0114958572117558  |    |   | AGIWUR11551                                                                      |          |                |           |           |
| N2                  | CT | V | 19008635                                                                         | 19013833 | WBGene00012690 | Y39B6A.31 | Y39B6A.31 |
| 0.178702821758852   |    |   | AGIWUR12356                                                                      |          |                |           |           |
| N2                  | CT | V | 19014573                                                                         | 19020001 | WBGene00012689 | Y39B6A.30 | Y39B6A.30 |
| 0.214342955215312   |    |   | AGIWUR2723;AGIWUR3868;AGIWUR8560;AGIWUR19395;AGIWUR22745;AGIWUR25998;AGIWUR35972 |          |                |           |           |
| N2                  | CT | V | 19020487                                                                         | 19024765 | WBGene00012688 | Y39B6A.29 | Y39B6A.29 |
| 0.0510441725658168  |    |   | AGIWUR29897                                                                      |          |                |           |           |
| N2                  | CT | V | 19031742                                                                         | 19035255 | WBGene00012686 | Y39B6A.27 | Y39B6A.27 |
| 0.099242133004088   |    |   | AGIWUR12883;AGIWUR21823;AGIWUR22555                                              |          |                |           |           |
| N2                  | CT | V | 19035753                                                                         | 19037320 | WBGene00012683 | asp-17    | Y39B6A.24 |
| 0.0251230624577197  |    |   | AGIWUR28496                                                                      |          |                |           |           |
| N2                  | CT | V | 19039058                                                                         | 19042605 | WBGene00012682 | asp-16    | Y39B6A.23 |
| -0.109644302421844  |    |   | AGIWUR29027                                                                      |          |                |           |           |
| N2                  | CT | V | 19043215                                                                         | 19044853 | WBGene00012681 | asp-15    | Y39B6A.22 |
| -0.0635473171611292 |    |   | AGIWUR2429                                                                       |          |                |           |           |
| N2                  | CT | V | 19047047                                                                         | 19048669 | WBGene00012680 | Y39B6A.21 | Y39B6A.21 |
| 0.0602357374053604  |    |   | AGIWUR26567                                                                      |          |                |           |           |
| N2                  | CT | V | 19049461                                                                         | 19050825 | WBGene00000214 | asp-1     | Y39B6A.20 |

|                     |                                                                        |          |                |           |           |
|---------------------|------------------------------------------------------------------------|----------|----------------|-----------|-----------|
| -0.0858763054549954 | AGIWUR25099                                                            |          |                |           |           |
| N2 CT V             | 19060180                                                               | 19067034 | WBGene00006696 | twk-46    | Y39B6A.19 |
| -0.108941983504989  | AGIWUR13015;AGIWUR14878;AGIWUR16757                                    |          |                |           |           |
| N2 CT V             | 19068621                                                               | 19074237 | WBGene00012679 | Y39B6A.18 | Y39B6A.18 |
| 0.472535806335738   | AGIWUR34309                                                            |          |                |           |           |
| N2 CT V             | 19076654                                                               | 19082641 | WBGene00003685 | nhr-95    | Y39B6A.17 |
| 0.02360978458234    | AGIWUR15473;AGIWUR22074;AGIWUR37574                                    |          |                |           |           |
| N2 CT V             | 19087723                                                               | 19092668 | WBGene00012703 | nhr-145   | Y39B6A.47 |
| -0.116412778275486  | AGIWUR17417;AGIWUR35409                                                |          |                |           |           |
| N2 CT V             | 19099085                                                               | 19101108 | WBGene00012678 | Y39B6A.16 | Y39B6A.16 |
| 0.0458448515148717  | AGIWUR34959                                                            |          |                |           |           |
| N2 CT V             | 19101961                                                               | 19118412 | WBGene00012676 | pro-3     | Y39B6A.14 |
| -0.119805340478821  | AGIWUR4302;AGIWUR23872                                                 |          |                |           |           |
| N2 CT V             | 19118505                                                               | 19119425 | WBGene00012675 | Y39B6A.13 | Y39B6A.13 |
| -0.0450150718645457 | AGIWUR1697;AGIWUR18271;AGIWUR25659;AGIWUR42276                         |          |                |           |           |
| N2 CT V             | 19119527                                                               | 19124915 | WBGene00012674 | bed-1     | Y39B6A.12 |
| -0.468433881485172  | AGIWUR8314                                                             |          |                |           |           |
| N2 CT V             | 19127530                                                               | 19130938 | WBGene00012673 | dyf-17    | Y39B6A.11 |
| -0.115483667357372  | AGIWUR31302                                                            |          |                |           |           |
| N2 CT V             | 19131531                                                               | 19133603 | WBGene00012672 | Y39B6A.10 | Y39B6A.10 |
| -0.300633076881898  | AGIWUR28432                                                            |          |                |           |           |
| N2 CT V             | 19136509                                                               | 19138986 | WBGene00012671 | Y39B6A.9  | Y39B6A.9  |
| 0.029495619613531   | AGIWUR37848                                                            |          |                |           |           |
| N2 CT V             | 19140795                                                               | 19145542 | WBGene00012670 | Y39B6A.8  | Y39B6A.8  |
| 0.0857803968277695  | AGIWUR9446;AGIWUR12441;AGIWUR23017;AGIWUR25985;AGIWUR31414;AGIWUR38533 |          |                |           |           |
| N2 CT V             | 19145778                                                               | 19149147 | WBGene00012669 | Y39B6A.7  | Y39B6A.7  |
| -0.0229516391799911 | AGIWUR5513;AGIWUR7476                                                  |          |                |           |           |
| N2 CT V             | 19154106                                                               | 19157674 | WBGene00006639 | tsp-13    | Y39B6A.6  |
| -0.232079327007557  | AGIWUR1772                                                             |          |                |           |           |
| N2 CT V             | 19157659                                                               | 19158877 | WBGene00012668 | Y39B6A.5  | Y39B6A.5  |
| 0.0480467512805305  | AGIWUR38840                                                            |          |                |           |           |
| N2 CT V             | 19174806                                                               | 19187899 | WBGene00001987 | hot-2     | Y39B6A.48 |
| -0.23314269347328   | AGIWUR11607;AGIWUR30465;AGIWUR44669                                    |          |                |           |           |
| N2 CT V             | 19189246                                                               | 19190035 | WBGene00012666 | Y39B6A.3  | Y39B6A.3  |
| -0.111000653463179  | AGIWUR4119;AGIWUR9133;AGIWUR19452                                      |          |                |           |           |
| N2 CT V             | 19190547                                                               | 19199080 | WBGene00012665 | pph-5     | Y39B6A.2  |
| 0.419621179515418   | AGIWUR17724;AGIWUR26103;AGIWUR30573;AGIWUR40282                        |          |                |           |           |
| N2 CT V             | 19201013                                                               | 19203607 | WBGene00012664 | Y39B6A.1  | Y39B6A.1  |
| 0.162139023324204   | AGIWUR381;AGIWUR1405;AGIWUR30522                                       |          |                |           |           |

|                                                                                            |    |   |          |          |                |          |          |                     |
|--------------------------------------------------------------------------------------------|----|---|----------|----------|----------------|----------|----------|---------------------|
| N2                                                                                         | CT | V | 19207684 | 19211895 | WBGene00003669 | nhr-79   | T26H2.9  | 0.155039810940719   |
| AGIWUR33400                                                                                |    |   |          |          |                |          |          |                     |
| N2                                                                                         | CT | V | 19213685 | 19217138 | WBGene00005653 | srr-2    | T26H2.8  | 0.163784411070123   |
| AGIWUR39912                                                                                |    |   |          |          |                |          |          |                     |
| N2                                                                                         | CT | V | 19217975 | 19222908 | WBGene00012068 | oac-49   | T26H2.7  | 0.138338434107212   |
| AGIWUR12320;AGIWUR34436                                                                    |    |   |          |          |                |          |          |                     |
| N2                                                                                         | CT | V | 19252181 | 19253054 | WBGene00219452 | F21D9.11 |          | F21D9.11            |
| 0.0570023331882545 AGIWUR32988                                                             |    |   |          |          |                |          |          |                     |
| N2                                                                                         | CT | V | 19253820 | 19256758 | WBGene00009018 | F21D9.4  | F21D9.4  | -0.196345955587732  |
| AGIWUR14486;AGIWUR27967;AGIWUR40913                                                        |    |   |          |          |                |          |          |                     |
| N2                                                                                         | CT | V | 19257583 | 19257753 | WBGene00009017 | F21D9.3  | F21D9.3  | 0.120507841002272   |
| AGIWUR44583                                                                                |    |   |          |          |                |          |          |                     |
| N2                                                                                         | CT | V | 19258483 | 19262449 | WBGene00009016 | F21D9.2  | F21D9.2  | 0.387571088921318   |
| AGIWUR31772                                                                                |    |   |          |          |                |          |          |                     |
| N2                                                                                         | CT | V | 19264597 | 19269661 | WBGene00009015 | F21D9.1  | F21D9.1  | 0.180811499208967   |
| AGIWUR11826                                                                                |    |   |          |          |                |          |          |                     |
| N2                                                                                         | CT | V | 19279218 | 19279988 | WBGene00009021 | F21D9.8  | F21D9.8  | 0.098215783644684   |
| AGIWUR27067                                                                                |    |   |          |          |                |          |          |                     |
| N2                                                                                         | CT | V | 19282614 | 19284594 | WBGene00010099 | fbxb-117 |          | F55C9.1             |
| 0.191217145882287 AGIWUR13275                                                              |    |   |          |          |                |          |          |                     |
| N2                                                                                         | CT | V | 19287009 | 19288173 | WBGene00010100 | F55C9.3  | F55C9.3  | -0.0675224974740303 |
| AGIWUR494                                                                                  |    |   |          |          |                |          |          |                     |
| N2                                                                                         | CT | V | 19288755 | 19289889 | WBGene00010101 | fbxb-57  | F55C9.4  | 0.0069414667427754  |
| AGIWUR24142                                                                                |    |   |          |          |                |          |          |                     |
| N2                                                                                         | CT | V | 19290616 | 19291028 | WBGene00010102 | F55C9.5  | F55C9.5  | 0.0483660166463045  |
| AGIWUR19911                                                                                |    |   |          |          |                |          |          |                     |
| N2                                                                                         | CT | V | 19299562 | 19300461 | WBGene00077663 | F55C9.14 |          | F55C9.14            |
| 0.0707261947760909 AGIWUR6689                                                              |    |   |          |          |                |          |          |                     |
| N2                                                                                         | CT | V | 19301076 | 19302034 | WBGene00010105 | fbxb-62  | F55C9.8  | 0.0736445183123902  |
| AGIWUR8848                                                                                 |    |   |          |          |                |          |          |                     |
| N2                                                                                         | CT | V | 19302787 | 19303728 | WBGene00044197 | fbxb-63  | F55C9.13 |                     |
| 0.0192201383526021 AGIWUR2799                                                              |    |   |          |          |                |          |          |                     |
| N2                                                                                         | CT | V | 19307242 | 19307583 | WBGene00010107 | F55C9.11 |          | F55C9.11            |
| 0.0811328628083432 AGIWUR11613;AGIWUR17151;AGIWUR17890;AGIWUR25273;AGIWUR41312;AGIWUR44273 |    |   |          |          |                |          |          |                     |
| N2                                                                                         | CT | V | 19308707 | 19309687 | WBGene00077441 | C43D7.10 |          | C43D7.10            |
| 0.180221823887854 AGIWUR30843;AGIWUR31224                                                  |    |   |          |          |                |          |          |                     |
| N2                                                                                         | CT | V | 19310583 | 19311058 | WBGene00008070 | C43D7.8  | C43D7.8  | 0.143104654540502   |
| AGIWUR33714                                                                                |    |   |          |          |                |          |          |                     |
| N2                                                                                         | CT | V | 19313275 | 19316512 | WBGene00008071 | fbxb-64  | C43D7.9  | 0.216426529643588   |

|                         |    |   |                                                                        |          |                |          |                             |
|-------------------------|----|---|------------------------------------------------------------------------|----------|----------------|----------|-----------------------------|
| AGIWUR31078             |    |   |                                                                        |          |                |          |                             |
| N2                      | CT | V | 19317362                                                               | 19318500 | WBGene00005418 | srh-208  | C43D7.6 -0.0143835365858198 |
| AGIWUR23104             |    |   |                                                                        |          |                |          |                             |
| N2                      | CT | V | 19319033                                                               | 19319460 | WBGene00008069 | C43D7.7  | C43D7.7 2.58341200049116    |
| AGIWUR38919             |    |   |                                                                        |          |                |          |                             |
| N2                      | CT | V | 19320624                                                               | 19321203 | WBGene00008068 | sdz-6    | C43D7.5 1.76400354543084    |
| AGIWUR42821             |    |   |                                                                        |          |                |          |                             |
| N2                      | CT | V | 19321901                                                               | 19322487 | WBGene00008067 | C43D7.4  | C43D7.4 3.37201336009743    |
| AGIWUR30874;AGIWUR38230 |    |   |                                                                        |          |                |          |                             |
| N2                      | CT | V | 19324105                                                               | 19325882 | WBGene00014702 | C43D7.3  | C43D7.3 -0.0212609807397559 |
| AGIWUR12126;AGIWUR22143 |    |   |                                                                        |          |                |          |                             |
| N2                      | CT | V | 19329563                                                               | 19330747 | WBGene00008066 | fbxb-65  | C43D7.2 0.579724441282314   |
| AGIWUR44975             |    |   |                                                                        |          |                |          |                             |
| N2                      | CT | V | 19332425                                                               | 19349495 | WBGene00007583 | C14B4.2  | C14B4.2 0.325487498017205   |
| AGIWUR32835;AGIWUR36110 |    |   |                                                                        |          |                |          |                             |
| N2                      | CT | V | 19370602                                                               | 19371331 | WBGene00012808 | Y43F8A.1 | Y43F8A.1                    |
| -0.196282725719975      |    |   | AGIWUR26806                                                            |          |                |          |                             |
| N2                      | CT | V | 19371553                                                               | 19376247 | WBGene00012809 | Y43F8A.2 | Y43F8A.2                    |
| 0.278113670016367       |    |   | AGIWUR28395                                                            |          |                |          |                             |
| N2                      | CT | V | 19377444                                                               | 19381031 | WBGene00012810 | nceh-1   | Y43F8A.3                    |
| -0.164660935040436      |    |   | AGIWUR31819                                                            |          |                |          |                             |
| N2                      | CT | V | 19381268                                                               | 19384760 | WBGene00005831 | srw-84   | Y43F8A.4                    |
| 0.023337935936997       |    |   | AGIWUR43294                                                            |          |                |          |                             |
| N2                      | CT | V | 19384887                                                               | 19390120 | WBGene00012811 | Y43F8A.5 | Y43F8A.5                    |
| 0.093108603665164       |    |   | AGIWUR7721;AGIWUR20141;AGIWUR20247;AGIWUR27153;AGIWUR28536;AGIWUR29250 |          |                |          |                             |
| N2                      | CT | V | 19395055                                                               | 19396609 | WBGene00007727 | C25F9.8  | C25F9.8 -0.0666997726315657 |
| AGIWUR44804             |    |   |                                                                        |          |                |          |                             |
| N2                      | CT | V | 19397828                                                               | 19398982 | WBGene00045413 | C25F9.13 | C25F9.13                    |
| 0.113253500472156       |    |   | AGIWUR475                                                              |          |                |          |                             |
| N2                      | CT | V | 19400142                                                               | 19400715 | WBGene00005833 | srw-86   | C25F9.7 1.41873610390062    |
| AGIWUR6983              |    |   |                                                                        |          |                |          |                             |
| N2                      | CT | V | 19402296                                                               | 19402955 | WBGene00045412 | C25F9.12 | C25F9.12                    |
| 1.53545327705266        |    |   | AGIWUR1593;AGIWUR18466;AGIWUR19405;AGIWUR25246;AGIWUR28580             |          |                |          |                             |
| N2                      | CT | V | 19403530                                                               | 19405326 | WBGene00007726 | C25F9.6  | C25F9.6 0.159604382944245   |
| AGIWUR21894             |    |   |                                                                        |          |                |          |                             |
| N2                      | CT | V | 19405685                                                               | 19406394 | WBGene00044291 | C25F9.10 | C25F9.10                    |
| -0.119956432233453      |    |   | AGIWUR2366;AGIWUR17710;AGIWUR42481                                     |          |                |          |                             |
| N2                      | CT | V | 19407739                                                               | 19410857 | WBGene00007725 | C25F9.5  | C25F9.5                     |
| -0.00911619512733353    |    |   | AGIWUR5091                                                             |          |                |          |                             |

|                                                                                 |    |   |          |          |                |           |         |                    |
|---------------------------------------------------------------------------------|----|---|----------|----------|----------------|-----------|---------|--------------------|
| N2                                                                              | CT | V | 19411274 | 19413914 | WBGene00007724 | C25F9.4   | C25F9.4 | 0.0891997468946837 |
| AGIWUR26318                                                                     |    |   |          |          |                |           |         |                    |
| N2                                                                              | CT | V | 19416633 | 19418004 | WBGene00007728 | C25F9.9   | C25F9.9 | -0.251333617397519 |
| AGIWUR14245;AGIWUR39624                                                         |    |   |          |          |                |           |         |                    |
| N2                                                                              | CT | V | 19418212 | 19418911 | WBGene00050967 | C25F9.15  |         | C25F9.15           |
| -0.14417131568857 AGIWUR2951;AGIWUR35208;AGIWUR39664                            |    |   |          |          |                |           |         |                    |
| N2                                                                              | CT | V | 19421471 | 19426774 | WBGene00007723 | C25F9.2   | C25F9.2 | 0.313337753761834  |
| AGIWUR34473                                                                     |    |   |          |          |                |           |         |                    |
| N2                                                                              | CT | V | 19429440 | 19431687 | WBGene00005832 | srw-85    | C25F9.1 | -0.179225426635128 |
| AGIWUR1639                                                                      |    |   |          |          |                |           |         |                    |
| N2                                                                              | CT | V | 19432441 | 19433072 | WBGene00045411 | C25F9.11  |         | C25F9.11           |
| 1.43108236056163 AGIWUR27999;AGIWUR36828                                        |    |   |          |          |                |           |         |                    |
| N2                                                                              | CT | V | 19436484 | 19437217 | WBGene00045461 | C25F9.14  |         | C25F9.14           |
| -0.0853460327163633 AGIWUR9904;AGIWUR27826;AGIWUR29040;AGIWUR42961              |    |   |          |          |                |           |         |                    |
| N2                                                                              | CT | V | 19437899 | 19445605 | WBGene00010850 | M04C3.1   | M04C3.1 | 0.0410600104188736 |
| AGIWUR15238;AGIWUR16598                                                         |    |   |          |          |                |           |         |                    |
| N2                                                                              | CT | V | 19445873 | 19448901 | WBGene00010851 | M04C3.2   | M04C3.2 | 0.113123920687295  |
| AGIWUR3985;AGIWUR21107                                                          |    |   |          |          |                |           |         |                    |
| N2                                                                              | CT | V | 19449738 | 19450914 | WBGene00206418 | M04C3.5   | M04C3.5 | -0.167757452509231 |
| AGIWUR10907                                                                     |    |   |          |          |                |           |         |                    |
| N2                                                                              | CT | V | 19452183 | 19455031 | WBGene00012824 | Y43F8B.14 |         | Y43F8B.14          |
| 0.155961071677608 AGIWUR7744                                                    |    |   |          |          |                |           |         |                    |
| N2                                                                              | CT | V | 19460818 | 19462102 | WBGene00045415 | Y43F8B.15 |         | Y43F8B.15          |
| 0.615709749700592 AGIWUR1838;AGIWUR3164;AGIWUR37500;AGIWUR41629                 |    |   |          |          |                |           |         |                    |
| N2                                                                              | CT | V | 19462912 | 19463759 | WBGene00195177 | Y43F8B.25 |         | Y43F8B.25          |
| 0.625723172342994 AGIWUR45162                                                   |    |   |          |          |                |           |         |                    |
| N2                                                                              | CT | V | 19468383 | 19469554 | WBGene00012822 | Y43F8B.12 |         | Y43F8B.12          |
| 0.458670205826114 AGIWUR15046                                                   |    |   |          |          |                |           |         |                    |
| N2                                                                              | CT | V | 19470694 | 19472501 | WBGene00012821 | Y43F8B.11 |         | Y43F8B.11          |
| -0.119688759832197 AGIWUR11074                                                  |    |   |          |          |                |           |         |                    |
| N2                                                                              | CT | V | 19474464 | 19476942 | WBGene00012820 | Y43F8B.10 |         | Y43F8B.10          |
| -0.00188528388604503 AGIWUR22443                                                |    |   |          |          |                |           |         |                    |
| N2                                                                              | CT | V | 19479203 | 19480459 | WBGene00012819 | Y43F8B.9  |         | Y43F8B.9           |
| -0.113172067651783 AGIWUR2851                                                   |    |   |          |          |                |           |         |                    |
| N2                                                                              | CT | V | 19483637 | 19483895 | WBGene00014888 | Y43F8B.8  |         | Y43F8B.8           |
| -0.0743387985544777 AGIWUR11075;AGIWUR22024;AGIWUR28783;AGIWUR29367;AGIWUR33429 |    |   |          |          |                |           |         |                    |
| N2                                                                              | CT | V | 19485319 | 19485873 | WBGene00219302 | Y43F8B.28 |         | Y43F8B.28          |
| 0.245849523673718 AGIWUR27524                                                   |    |   |          |          |                |           |         |                    |
| N2                                                                              | CT | V | 19485916 | 19486746 | WBGene00050911 | Y43F8B.18 |         | Y43F8B.18          |



|                                                                                                                       |                                                                                    |                |           |           |                    |
|-----------------------------------------------------------------------------------------------------------------------|------------------------------------------------------------------------------------|----------------|-----------|-----------|--------------------|
| -0.219194107735678                                                                                                    | AGIWUR1861;AGIWUR18935                                                             |                |           |           |                    |
| N2 CT V                                                                                                               | 19490761 19491231                                                                  | WBGene00012818 | Y43F8B.7  | Y43F8B.7  |                    |
| -0.0228798181409102                                                                                                   | AGIWUR13017;AGIWUR18716                                                            |                |           |           |                    |
| N2 CT V                                                                                                               | 19493885 19494657                                                                  | WBGene00012817 | Y43F8B.6  | Y43F8B.6  |                    |
| -0.00941250784108583                                                                                                  | AGIWUR42352                                                                        |                |           |           |                    |
| N2 CT V                                                                                                               | 19494762 19495687                                                                  | WBGene00012816 | sc1-21    | Y43F8B.5  |                    |
| -0.683695461584532                                                                                                    | AGIWUR20613                                                                        |                |           |           |                    |
| N2 CT V                                                                                                               | 19503108 19519950                                                                  | WBGene00012814 | Y43F8B.3  | Y43F8B.3  |                    |
| 0.0828562019639847                                                                                                    | AGIWUR27061;AGIWUR30319;AGIWUR39677                                                |                |           |           |                    |
| N2 CT V                                                                                                               | 19519925 19533110                                                                  | WBGene00012813 | Y43F8B.2  | Y43F8B.2  |                    |
| 0.0385531725187733                                                                                                    |                                                                                    |                |           |           |                    |
| AGIWUR5140;AGIWUR8653;AGIWUR11230;AGIWUR13882;AGIWUR16244;AGIWUR24976;AGIWUR26509;AGIWUR26843;AGIWUR31243;AGIWUR38299 |                                                                                    |                |           |           |                    |
| N2 CT V                                                                                                               | 19534880 19546200                                                                  | WBGene00012812 | Y43F8B.1  | Y43F8B.1  |                    |
| 0.176163244163094                                                                                                     | AGIWUR4012;AGIWUR9462;AGIWUR20201;AGIWUR20421;AGIWUR20989;AGIWUR35973;AGIWUR40150  |                |           |           |                    |
| N2 CT V                                                                                                               | 19548239 19549784                                                                  | WBGene00086559 | Y43F8B.20 | Y43F8B.20 |                    |
| -0.146870521359654                                                                                                    | AGIWUR37706                                                                        |                |           |           |                    |
| N2 CT V                                                                                                               | 19551008 19555969                                                                  | WBGene00007177 | oac-1     | B0399.2   | -0.057578816226703 |
| AGIWUR32001;AGIWUR33010                                                                                               |                                                                                    |                |           |           |                    |
| N2 CT V                                                                                                               | 19565386 19606115                                                                  | WBGene00007176 | kcn1-1    | B0399.1   | 0.266330246824369  |
| AGIWUR25702;AGIWUR29918                                                                                               |                                                                                    |                |           |           |                    |
| N2 CT V                                                                                                               | 19607511 19608346                                                                  | WBGene00003763 | nlp-25    | Y43F8C.1  |                    |
| 0.256319432244968                                                                                                     | AGIWUR26743                                                                        |                |           |           |                    |
| N2 CT V                                                                                                               | 19609494 19612099                                                                  | WBGene00012840 | grsp-1    | Y43F8C.20 |                    |
| -0.11188058127185                                                                                                     | AGIWUR5647;AGIWUR38806                                                             |                |           |           |                    |
| N2 CT V                                                                                                               | 19613461 19614533                                                                  | WBGene00003764 | nlp-26    | Y43F8C.2  |                    |
| 0.185318880711005                                                                                                     | AGIWUR26915                                                                        |                |           |           |                    |
| N2 CT V                                                                                                               | 19614558 19622551                                                                  | WBGene00012825 | Y43F8C.3  | Y43F8C.3  |                    |
| 0.0640960902164185                                                                                                    | AGIWUR8607;AGIWUR9609                                                              |                |           |           |                    |
| N2 CT V                                                                                                               | 19625062 19630753                                                                  | WBGene00012826 | dyf-19    | Y43F8C.4  |                    |
| -0.0319416953933747                                                                                                   | AGIWUR20380                                                                        |                |           |           |                    |
| N2 CT V                                                                                                               | 19633062 19640908                                                                  | WBGene00012828 | Y43F8C.6  | Y43F8C.6  |                    |
| 0.0748874053432083                                                                                                    | AGIWUR7964                                                                         |                |           |           |                    |
| N2 CT V                                                                                                               | 19641292 19644083                                                                  | WBGene00012829 | Y43F8C.7  | Y43F8C.7  |                    |
| 0.203283475753299                                                                                                     | AGIWUR32615                                                                        |                |           |           |                    |
| N2 CT V                                                                                                               | 19644239 19645758                                                                  | WBGene00012830 | mrps-28   | Y43F8C.8  |                    |
| -0.0217010001826381                                                                                                   | AGIWUR2235;AGIWUR13361;AGIWUR20245;AGIWUR21105;AGIWUR28455;AGIWUR30763;AGIWUR31409 |                |           |           |                    |
| N2 CT V                                                                                                               | 19646088 19647338                                                                  | WBGene00012831 | Y43F8C.9  | Y43F8C.9  |                    |
| 0.191045544695847                                                                                                     | AGIWUR11322                                                                        |                |           |           |                    |

|                      |    |   |                                                                        |          |                |            |            |
|----------------------|----|---|------------------------------------------------------------------------|----------|----------------|------------|------------|
| N2                   | CT | V | 19650438                                                               | 19655251 | WBGene00012832 | dmd-3      | Y43F8C.10  |
| 0.0763659958391836   |    |   | AGIWUR41418                                                            |          |                |            |            |
| N2                   | CT | V | 19670259                                                               | 19671411 | WBGene00012833 | Y43F8C.11  | Y43F8C.11  |
| -0.0106462415858033  |    |   | AGIWUR35037                                                            |          |                |            |            |
| N2                   | CT | V | 19674843                                                               | 19693043 | WBGene00003413 | mrp-7      | Y43F8C.12  |
| -0.0287897561479671  |    |   | AGIWUR7172;AGIWUR10445;AGIWUR24658;AGIWUR29604;AGIWUR43123             |          |                |            |            |
| N2                   | CT | V | 19693896                                                               | 19697398 | WBGene00012834 | Y43F8C.13  | Y43F8C.13  |
| -0.0127836420786647  |    |   | AGIWUR15896                                                            |          |                |            |            |
| N2                   | CT | V | 19697560                                                               | 19705212 | WBGene00012835 | ani-3      | Y43F8C.14  |
| -0.103487972980343   |    |   | AGIWUR23978                                                            |          |                |            |            |
| N2                   | CT | V | 19705205                                                               | 19706379 | WBGene00012839 | Y43F8C.18  | Y43F8C.18  |
| 0.0314715168285873   |    |   | AGIWUR6142;AGIWUR28019;AGIWUR32124;AGIWUR32673;AGIWUR34660;AGIWUR44782 |          |                |            |            |
| N2                   | CT | V | 19706890                                                               | 19708949 | WBGene00005714 | srv-3      | Y43F8C.19  |
| 0.0523870591024087   |    |   | AGIWUR44295                                                            |          |                |            |            |
| N2                   | CT | V | 19709775                                                               | 19710614 | WBGene00012836 | Y43F8C.15  | Y43F8C.15  |
| -0.14805978465494    |    |   | AGIWUR32879                                                            |          |                |            |            |
| N2                   | CT | V | 19714213                                                               | 19715519 | WBGene00012837 | Y43F8C.16  | Y43F8C.16  |
| 0.0614578228506848   |    |   | AGIWUR10556;AGIWUR41075                                                |          |                |            |            |
| N2                   | CT | V | 19727481                                                               | 19727964 | WBGene00013819 | Y116F11A.6 | Y116F11A.6 |
| -0.144744575366291   |    |   | AGIWUR17758                                                            |          |                |            |            |
| N2                   | CT | V | 19729038                                                               | 19729590 | WBGene00013817 | Y116F11A.3 | Y116F11A.3 |
| -0.0581979889450626  |    |   | AGIWUR15941                                                            |          |                |            |            |
| N2                   | CT | V | 19730588                                                               | 19732165 | WBGene00013816 | Y116F11A.1 | Y116F11A.1 |
| -0.104817768982204   |    |   | AGIWUR20538;AGIWUR42748                                                |          |                |            |            |
| N2                   | CT | V | 19733411                                                               | 19735075 | WBGene00014615 | Y116F11A.4 | Y116F11A.4 |
| 0.225428181705525    |    |   | AGIWUR1684;AGIWUR15569;AGIWUR33436;AGIWUR44464                         |          |                |            |            |
| N2                   | CT | V | 19735077                                                               | 19737607 | WBGene00012252 | W04E12.7   | W04E12.7   |
| 0.0365350906985409   |    |   | AGIWUR28982;AGIWUR29879;AGIWUR35186                                    |          |                |            |            |
| N2                   | CT | V | 19738417                                                               | 19739393 | WBGene00012246 | fbxa-131   | W04E12.1   |
| -0.00424062914656531 |    |   | AGIWUR27629                                                            |          |                |            |            |
| N2                   | CT | V | 19739559                                                               | 19741117 | WBGene00012247 | W04E12.2   | W04E12.2   |
| -0.162449571945231   |    |   | AGIWUR15328                                                            |          |                |            |            |
| N2                   | CT | V | 19741951                                                               | 19742312 | WBGene00012248 | W04E12.3   | W04E12.3   |
| -0.298471108393292   |    |   | AGIWUR25773                                                            |          |                |            |            |
| N2                   | CT | V | 19746152                                                               | 19748540 | WBGene00012250 | W04E12.5   | W04E12.5   |
| 0.163764788172161    |    |   | AGIWUR39057                                                            |          |                |            |            |
| N2                   | CT | V | 19748987                                                               | 19751212 | WBGene00012251 | cllec-49   | W04E12.6   |
| 0.0712417192849522   |    |   | AGIWUR32                                                               |          |                |            |            |
| N2                   | CT | V | 19752400                                                               | 19755368 | WBGene00012253 | cllec-50   | W04E12.8   |

|                         |                                     |          |                |                   |                    |
|-------------------------|-------------------------------------|----------|----------------|-------------------|--------------------|
| 0.0237483400856071      | AGIWUR44477                         |          |                |                   |                    |
| N2 CT V                 | 19756553                            | 19758552 | WBGene00012254 | W04E12.9          | W04E12.9           |
| -0.122065164101492      | AGIWUR11345                         |          |                |                   |                    |
| N2 CT V                 | 19768261                            | 19770929 | WBGene00050946 | M162.12 M162.12   | -0.303997819176411 |
| AGIWUR37664             |                                     |          |                |                   |                    |
| N2 CT V                 | 19773401                            | 19774975 | WBGene00014811 | M162.9 M162.9     | -0.205201171154654 |
| AGIWUR28727;AGIWUR29002 |                                     |          |                |                   |                    |
| N2 CT V                 | 19777247                            | 19778708 | WBGene00044655 | fbxa-194          | M162.11            |
| 0.197018615301303       | AGIWUR5922;AGIWUR35071              |          |                |                   |                    |
| N2 CT V                 | 19780123                            | 19782314 | WBGene00010930 | srt-46 M162.4     | 0.165450769911381  |
| AGIWUR38377             |                                     |          |                |                   |                    |
| N2 CT V                 | 19784129                            | 19785961 | WBGene00010929 | srt-45 M162.3     | 0.17654035922739   |
| AGIWUR43248             |                                     |          |                |                   |                    |
| N2 CT V                 | 19788704                            | 19789281 | WBGene00010928 | cllec-258         | M162.2             |
| 0.0276162098952835      | AGIWUR1086                          |          |                |                   |                    |
| N2 CT V                 | 19790043                            | 19791248 | WBGene00010927 | cllec-259         | M162.1             |
| 0.102074361209461       | AGIWUR15647                         |          |                |                   |                    |
| N2 CT V                 | 19797999                            | 19801133 | WBGene00013820 | Y116F11B.2        | Y116F11B.2         |
| 0.624984028979809       | AGIWUR577                           |          |                |                   |                    |
| N2 CT V                 | 19815133                            | 19816451 | WBGene00000920 | daf-28 Y116F11B.1 |                    |
| 0.162215017850283       | AGIWUR14505                         |          |                |                   |                    |
| N2 CT V                 | 19822748                            | 19830099 | WBGene00003959 | pcp-4 Y116F11B.3  |                    |
| 0.226688826306571       | AGIWUR32657                         |          |                |                   |                    |
| N2 CT V                 | 19836442                            | 19839342 | WBGene00005785 | srw-38 Y116F11B.5 |                    |
| -0.0676929903398236     | AGIWUR34111                         |          |                |                   |                    |
| N2 CT V                 | 19839403                            | 19841472 | WBGene00013821 | srz-35 Y116F11B.4 |                    |
| -0.0203561147768152     | AGIWUR11931                         |          |                |                   |                    |
| N2 CT V                 | 19848314                            | 19855250 | WBGene00013823 | Y116F11B.7        | Y116F11B.7         |
| 0.214742003299223       | AGIWUR26854                         |          |                |                   |                    |
| N2 CT V                 | 19855174                            | 19867983 | WBGene00013825 | Y116F11B.9        | Y116F11B.9         |
| -0.204817439624355      | AGIWUR15712;AGIWUR38310;AGIWUR39456 |          |                |                   |                    |
| N2 CT V                 | 19870506                            | 19873931 | WBGene00013826 | Y116F11B.10       | Y116F11B.10        |
| -0.0943319451079994     | AGIWUR5727                          |          |                |                   |                    |
| N2 CT V                 | 19881374                            | 19895350 | WBGene00001629 | gly-4 Y116F11B.12 |                    |
| -0.0884216459967462     | AGIWUR44184                         |          |                |                   |                    |
| N2 CT V                 | 19897977                            | 19907434 | WBGene00013361 | fars-2 Y60A3A.13  |                    |
| 0.0267602116431771      | AGIWUR22328;AGIWUR27164;AGIWUR42038 |          |                |                   |                    |
| N2 CT V                 | 19908765                            | 19916023 | WBGene00000499 | chk-2 Y60A3A.12   |                    |
| -0.139768244858841      | AGIWUR5614                          |          |                |                   |                    |

|                                                                                                |    |   |                                     |          |                |           |           |
|------------------------------------------------------------------------------------------------|----|---|-------------------------------------|----------|----------------|-----------|-----------|
| N2                                                                                             | CT | V | 19916557                            | 19919996 | WBGene00013365 | Y60A3A.19 | Y60A3A.19 |
| -0.0542203234553846                                                                            |    |   | AGIWUR1610;AGIWUR39964              |          |                |           |           |
| N2                                                                                             | CT | V | 19921697                            | 19922600 | WBGene00013364 | Y60A3A.16 | Y60A3A.16 |
| -0.241690231098062                                                                             |    |   | AGIWUR13571                         |          |                |           |           |
| N2                                                                                             | CT | V | 19922931                            | 19924049 | WBGene00014934 | Y60A3A.17 | Y60A3A.17 |
| 0.075842981575045                                                                              |    |   | AGIWUR28300                         |          |                |           |           |
| N2                                                                                             | CT | V | 19924224                            | 19925033 | WBGene00004810 | skr-4     | Y60A3A.18 |
| 0.274178454642236                                                                              |    |   | AGIWUR21479;AGIWUR23516;AGIWUR37687 |          |                |           |           |
| N2                                                                                             | CT | V | 19927782                            | 19934323 | WBGene00013362 | align-7   | Y60A3A.14 |
| 0.0685480579611317                                                                             |    |   | AGIWUR37566                         |          |                |           |           |
| N2                                                                                             | CT | V | 19934795                            | 19946629 | WBGene00000987 | dhs-24    | Y60A3A.10 |
| -0.157480451968313                                                                             |    |   | AGIWUR26087;AGIWUR37453             |          |                |           |           |
| N2                                                                                             | CT | V | 19946691                            | 19949093 | WBGene00013360 | Y60A3A.9  | Y60A3A.9  |
| -0.103205140077637                                                                             |    |   | AGIWUR4870                          |          |                |           |           |
| N2                                                                                             | CT | V | 19949982                            | 19955122 | WBGene00013359 | Y60A3A.8  | Y60A3A.8  |
| -0.348941918121845                                                                             |    |   | AGIWUR21853                         |          |                |           |           |
| N2                                                                                             | CT | V | 19955453                            | 19958912 | WBGene00013358 | abhd-3.1  | Y60A3A.7  |
| 0.214580974717364                                                                              |    |   | AGIWUR19672                         |          |                |           |           |
| N2                                                                                             | CT | V | 19959044                            | 19960916 | WBGene00005388 | srh-172   | Y60A3A.6  |
| 0.127528001828555                                                                              |    |   | AGIWUR7190                          |          |                |           |           |
| N2                                                                                             | CT | V | 19965700                            | 19972559 | WBGene00005387 | srh-171   | Y60A3A.5  |
| 0.10703292014343                                                                               |    |   | AGIWUR31131                         |          |                |           |           |
| N2                                                                                             | CT | V | 19973284                            | 19975063 | WBGene00005389 | srh-173   | Y60A3A.4  |
| 0.211630482882463                                                                              |    |   | AGIWUR9556                          |          |                |           |           |
| N2                                                                                             | CT | V | 19975610                            | 19978320 | WBGene00005398 | srh-183   | Y60A3A.3  |
| 0.311194332078975                                                                              |    |   | AGIWUR22288                         |          |                |           |           |
| N2                                                                                             | CT | V | 19978620                            | 19981882 | WBGene00023519 | Y60A3A.24 | Y60A3A.24 |
| 0.230536906909621                                                                              |    |   | AGIWUR10345;AGIWUR29702             |          |                |           |           |
| N2                                                                                             | CT | V | 19982994                            | 19986313 | WBGene00013357 | cllec-260 | Y60A3A.2  |
| 0.225466317114257                                                                              |    |   | AGIWUR17195                         |          |                |           |           |
| N2                                                                                             | CT | V | 19987984                            | 19990504 | WBGene00005579 | sri-67    | Y60A3A.22 |
| -0.084584867434919                                                                             |    |   | AGIWUR9481                          |          |                |           |           |
| N2                                                                                             | CT | V | 19991207                            | 19994189 | WBGene00044211 | Y60A3A.25 | Y60A3A.25 |
| -0.250486888200071                                                                             |    |   | AGIWUR18341;AGIWUR26967             |          |                |           |           |
| N2                                                                                             | CT | V | 19995986                            | 20004485 | WBGene00006786 | unc-51    | Y60A3A.1  |
| 0.195403061543919                                                                              |    |   | AGIWUR2393;AGIWUR4960;AGIWUR34898   |          |                |           |           |
| N2                                                                                             | CT | V | 20007770                            | 20009195 | WBGene00013367 | Y60A3A.23 | Y60A3A.23 |
| -0.101543006215853                                                                             |    |   |                                     |          |                |           |           |
| AGIWUR2176;AGIWUR14126;AGIWUR19113;AGIWUR24124;AGIWUR28719;AGIWUR29428;AGIWUR33373;AGIWUR41318 |    |   |                                     |          |                |           |           |

|                        |    |   |                                                                         |          |                |            |                             |
|------------------------|----|---|-------------------------------------------------------------------------|----------|----------------|------------|-----------------------------|
| N2                     | CT | V | 20011959                                                                | 20015077 | WBGene00013366 | Y60A3A.21  | Y60A3A.21                   |
| -0.131359773948433     |    |   | AGIWUR11192;AGIWUR19356;AGIWUR31108;AGIWUR35001;AGIWUR37667;AGIWUR44305 |          |                |            |                             |
| N2                     | CT | V | 20023046                                                                | 20036667 | WBGene00013746 | lgc-55     | Y113G7A.5                   |
| 0.137586901763498      |    |   | AGIWUR17669                                                             |          |                |            |                             |
| N2                     | CT | V | 20037587                                                                | 20039419 | WBGene00013753 | Y113G7A.16 | Y113G7A.16                  |
| 0.236856190076768      |    |   | AGIWUR35813                                                             |          |                |            |                             |
| N2                     | CT | V | 20040927                                                                | 20047398 | WBGene00013747 | spe-19     | Y113G7A.10                  |
| -0.0303219809244988    |    |   | AGIWUR20899                                                             |          |                |            |                             |
| N2                     | CT | V | 20053733                                                                | 20064174 | WBGene00006652 | ttx-1      | Y113G7A.6                   |
| -0.058506574415166     |    |   | AGIWUR13073;AGIWUR31199;AGIWUR39096;AGIWUR43427                         |          |                |            |                             |
| N2                     | CT | V | 20075935                                                                | 20087733 | WBGene00001485 | fre-1      | Y113G7A.8                   |
| -0.0597115649102253    |    |   | AGIWUR11871                                                             |          |                |            |                             |
| N2                     | CT | V | 20087848                                                                | 20090743 | WBGene00000940 | dcs-1      | Y113G7A.9                   |
| -0.0158500497743574    |    |   | AGIWUR19604                                                             |          |                |            |                             |
| N2                     | CT | V | 20091263                                                                | 20105685 | WBGene00004754 | sec-23     | Y113G7A.3                   |
| 0.0848438807915812     |    |   | AGIWUR20961;AGIWUR27455                                                 |          |                |            |                             |
| N2                     | CT | V | 20105632                                                                | 20120675 | WBGene00003566 | ncx-1      | Y113G7A.4                   |
| 0.113946683706075      |    |   | AGIWUR12631                                                             |          |                |            |                             |
| N2                     | CT | V | 20128416                                                                | 20133142 | WBGene00013748 | ssu-1      | Y113G7A.11                  |
| -0.125159063090011     |    |   | AGIWUR9872                                                              |          |                |            |                             |
| N2                     | CT | V | 20135864                                                                | 20138449 | WBGene00013751 | Y113G7A.14 | Y113G7A.14                  |
| -0.136733691562774     |    |   | AGIWUR29412                                                             |          |                |            |                             |
| N2                     | CT | V | 20144247                                                                | 20146805 | WBGene00013749 | Y113G7A.12 | Y113G7A.12                  |
| 0.17502160679374       |    |   | AGIWUR19626                                                             |          |                |            |                             |
| N2                     | CT | V | 20148195                                                                | 20150357 | WBGene00013750 | Y113G7A.13 | Y113G7A.13                  |
| -0.252046945994733     |    |   | AGIWUR30341                                                             |          |                |            |                             |
| N2                     | CT | V | 20151489                                                                | 20155442 | WBGene00008946 | F19B2.7    | F19B2.7 0.0776475651252113  |
| AGIWUR43667            |    |   |                                                                         |          |                |            |                             |
| N2                     | CT | V | 20158523                                                                | 20161788 | WBGene00008945 | F19B2.6    | F19B2.6 -0.0210498894003717 |
| AGIWUR9773             |    |   |                                                                         |          |                |            |                             |
| N2                     | CT | V | 20162649                                                                | 20164561 | WBGene00008944 | F19B2.5    | F19B2.5 -0.385309321075262  |
| AGIWUR26790            |    |   |                                                                         |          |                |            |                             |
| N2                     | CT | V | 20167309                                                                | 20169283 | WBGene00008943 | srz-36     | F19B2.4 0.0758665578500644  |
| AGIWUR19481            |    |   |                                                                         |          |                |            |                             |
| N2                     | CT | V | 20172821                                                                | 20173999 | WBGene00008942 | srz-34     | F19B2.2 -0.231412969329638  |
| AGIWUR29579            |    |   |                                                                         |          |                |            |                             |
| N2                     | CT | V | 20174988                                                                | 20182756 | WBGene00008941 | srz-33     | F19B2.1 -0.136404992340418  |
| AGIWUR3249;AGIWUR12827 |    |   |                                                                         |          |                |            |                             |
| N2                     | CT | V | 20183843                                                                | 20186679 | WBGene00008947 | srz-16     | F19B2.8 0.21350880133931    |

|                                                                                                                     |    |   |                                                                        |          |                |            |            |
|---------------------------------------------------------------------------------------------------------------------|----|---|------------------------------------------------------------------------|----------|----------------|------------|------------|
| AGIWUR22368                                                                                                         |    |   |                                                                        |          |                |            |            |
| N2                                                                                                                  | CT | V | 20187710                                                               | 20188882 | WBGene00013754 | fbxa-116   | Y113G7B.1  |
| 0.151515352573964                                                                                                   |    |   | AGIWUR41446                                                            |          |                |            |            |
| N2                                                                                                                  | CT | V | 20190535                                                               | 20192152 | WBGene00013755 | fbxa-115   | Y113G7B.3  |
| -0.137092501103626                                                                                                  |    |   | AGIWUR16439;AGIWUR19447;AGIWUR23667                                    |          |                |            |            |
| N2                                                                                                                  | CT | V | 20193463                                                               | 20195246 | WBGene00005427 | srh-217    | Y113G7B.2  |
| -0.241580861145815                                                                                                  |    |   | AGIWUR9761                                                             |          |                |            |            |
| N2                                                                                                                  | CT | V | 20196971                                                               | 20198242 | WBGene00013756 | ftr-1      | Y113G7B.4  |
| -0.199945663295196                                                                                                  |    |   | AGIWUR13945                                                            |          |                |            |            |
| N2                                                                                                                  | CT | V | 20199262                                                               | 20200640 | WBGene00001482 | fog-2      | Y113G7B.5  |
| -0.0688728006381094                                                                                                 |    |   | AGIWUR19874;AGIWUR34434;AGIWUR39227                                    |          |                |            |            |
| N2                                                                                                                  | CT | V | 20201616                                                               | 20202874 | WBGene00013758 | fbxa-114   | Y113G7B.7  |
| -0.172909667678717                                                                                                  |    |   | AGIWUR968                                                              |          |                |            |            |
| N2                                                                                                                  | CT | V | 20203422                                                               | 20204503 | WBGene00013757 | fbxa-113   | Y113G7B.6  |
| -0.175743665598484                                                                                                  |    |   | AGIWUR24213                                                            |          |                |            |            |
| N2                                                                                                                  | CT | V | 20204528                                                               | 20206180 | WBGene00013759 | fbxb-59    | Y113G7B.8  |
| -0.142952767848648                                                                                                  |    |   | AGIWUR32951                                                            |          |                |            |            |
| N2                                                                                                                  | CT | V | 20206318                                                               | 20207907 | WBGene00013760 | srbc-34    | Y113G7B.9  |
| -0.0206109425971013                                                                                                 |    |   | AGIWUR7968;AGIWUR26183                                                 |          |                |            |            |
| N2                                                                                                                  | CT | V | 20208685                                                               | 20212451 | WBGene00013762 | Y113G7B.12 | Y113G7B.12 |
| 0.053576567979313                                                                                                   |    |   | AGIWUR21855                                                            |          |                |            |            |
| N2                                                                                                                  | CT | V | 20213821                                                               | 20215297 | WBGene00013761 | Y113G7B.11 | Y113G7B.11 |
| -0.758483952368056                                                                                                  |    |   | AGIWUR23594                                                            |          |                |            |            |
| N2                                                                                                                  | CT | V | 20224856                                                               | 20225458 | WBGene00013770 | Y113G7B.26 | Y113G7B.26 |
| -0.0977273837578974                                                                                                 |    |   | AGIWUR25398                                                            |          |                |            |            |
| N2                                                                                                                  | CT | V | 20226835                                                               | 20228829 | WBGene00013763 | Y113G7B.14 | Y113G7B.14 |
| 0.352847897751984                                                                                                   |    |   | AGIWUR17338                                                            |          |                |            |            |
| N2                                                                                                                  | CT | V | 20234807                                                               | 20237743 | WBGene00013768 | sld-5      | Y113G7B.24 |
| -0.135194726863265                                                                                                  |    |   | AGIWUR3715                                                             |          |                |            |            |
| N2                                                                                                                  | CT | V | 20239180                                                               | 20249482 | WBGene00004203 | swsn-1     | Y113G7B.23 |
| 0.0242494764348997                                                                                                  |    |   | AGIWUR18515                                                            |          |                |            |            |
| N2                                                                                                                  | CT | V | 20250881                                                               | 20267244 | WBGene00007017 | mdt-17     | Y113G7B.18 |
| -0.0916981333692686                                                                                                 |    |   |                                                                        |          |                |            |            |
| AGIWUR2457;AGIWUR2923;AGIWUR6091;AGIWUR7506;AGIWUR11809;AGIWUR15271;AGIWUR20509;AGIWUR33020;AGIWUR33876;AGIWUR41067 |    |   |                                                                        |          |                |            |            |
| N2                                                                                                                  | CT | V | 20267377                                                               | 20269711 | WBGene00013766 | prmt-1     | Y113G7B.17 |
| 0.187377678739139                                                                                                   |    |   | AGIWUR18691;AGIWUR32192;AGIWUR35752                                    |          |                |            |            |
| N2                                                                                                                  | CT | V | 20270107                                                               | 20275732 | WBGene00013765 | cdkr-3     | Y113G7B.16 |
| -0.243777093356586                                                                                                  |    |   | AGIWUR3128;AGIWUR11138;AGIWUR23975;AGIWUR24040;AGIWUR28760;AGIWUR35598 |          |                |            |            |

|                                                                   |    |   |          |          |                |           |           |                     |
|-------------------------------------------------------------------|----|---|----------|----------|----------------|-----------|-----------|---------------------|
| N2                                                                | CT | V | 20278160 | 20279861 | WBGene00004173 | pqn-94    | ZC15.8    | 0.115884703121619   |
| AGIWUR7199                                                        |    |   |          |          |                |           |           |                     |
| N2                                                                | CT | V | 20281391 | 20289417 | WBGene00013835 | mlt-4     | ZC15.7    | -0.0539480586241741 |
| AGIWUR32698                                                       |    |   |          |          |                |           |           |                     |
| N2                                                                | CT | V | 20289939 | 20294488 | WBGene00013834 | cllec-261 | ZC15.6    |                     |
| -0.104948802903036 AGIWUR1972                                     |    |   |          |          |                |           |           |                     |
| N2                                                                | CT | V | 20303588 | 20304908 | WBGene00013832 | ZC15.3    | ZC15.3    | 0.0868351223953745  |
| AGIWUR43150                                                       |    |   |          |          |                |           |           |                     |
| N2                                                                | CT | V | 20306103 | 20308919 | WBGene00013830 | ZC15.1    | ZC15.1    | -0.180090886982716  |
| AGIWUR7067                                                        |    |   |          |          |                |           |           |                     |
| N2                                                                | CT | V | 20310148 | 20311656 | WBGene00045050 | ZC15.10   | ZC15.10   | 0.31774067527585    |
| AGIWUR3810;AGIWUR21680;AGIWUR40158                                |    |   |          |          |                |           |           |                     |
| N2                                                                | CT | V | 20311819 | 20315628 | WBGene00013831 | cllec-262 | ZC15.2    |                     |
| -0.088612320211749 AGIWUR18438                                    |    |   |          |          |                |           |           |                     |
| N2                                                                | CT | V | 20317742 | 20324024 | WBGene00013771 | Y113G7C.1 | Y113G7C.1 |                     |
| 0.231847429902269 AGIWUR11288                                     |    |   |          |          |                |           |           |                     |
| N2                                                                | CT | V | 20325728 | 20328056 | WBGene00012612 | Y38H6A.1  | Y38H6A.1  |                     |
| -0.0720725874898891 AGIWUR1354                                    |    |   |          |          |                |           |           |                     |
| N2                                                                | CT | V | 20329705 | 20335364 | WBGene00077669 | Y38H6A.5  | Y38H6A.5  |                     |
| -0.113879522964501 AGIWUR9711;AGIWUR32556;AGIWUR33345;AGIWUR34192 |    |   |          |          |                |           |           |                     |
| N2                                                                | CT | V | 20345203 | 20348127 | WBGene00012614 | Y38H6A.3  | Y38H6A.3  |                     |
| 0.0302048675647946 AGIWUR19521                                    |    |   |          |          |                |           |           |                     |
| N2                                                                | CT | V | 20348247 | 20349925 | WBGene00014874 | Y38H6A.4  | Y38H6A.4  |                     |
| -0.216405572716086 AGIWUR26688                                    |    |   |          |          |                |           |           |                     |
| N2                                                                | CT | V | 20356802 | 20365718 | WBGene00001700 | grd-11    | K02E2.2   | -0.121748240592347  |
| AGIWUR28288                                                       |    |   |          |          |                |           |           |                     |
| N2                                                                | CT | V | 20365708 | 20366939 | WBGene00010509 | K02E2.8   | K02E2.8   | 0.0871714249875968  |
| AGIWUR3684                                                        |    |   |          |          |                |           |           |                     |
| N2                                                                | CT | V | 20367480 | 20369253 | WBGene00005392 | srh-177   | K02E2.3   | -0.180364643335766  |
| AGIWUR35201                                                       |    |   |          |          |                |           |           |                     |
| N2                                                                | CT | V | 20375536 | 20376301 | WBGene00002118 | ins-35    | K02E2.4   | -0.254438561249485  |
| AGIWUR3688                                                        |    |   |          |          |                |           |           |                     |
| N2                                                                | CT | V | 20377128 | 20379410 | WBGene00014794 | K02E2.5   | K02E2.5   | 0.102542596654648   |
| AGIWUR1067;AGIWUR26609                                            |    |   |          |          |                |           |           |                     |
| N2                                                                | CT | V | 20380561 | 20382036 | WBGene00010507 | K02E2.6   | K02E2.6   | -0.249328460937178  |
| AGIWUR8603                                                        |    |   |          |          |                |           |           |                     |
| N2                                                                | CT | V | 20384769 | 20391009 | WBGene00010508 | K02E2.7   | K02E2.7   | -0.0724612296851213 |
| AGIWUR24074                                                       |    |   |          |          |                |           |           |                     |
| N2                                                                | CT | V | 20387715 | 20393367 | WBGene00010004 | F53H2.1   | F53H2.1   | 0.128739327807489   |

|                                                                                                            |    |   |          |          |                |          |          |                     |  |
|------------------------------------------------------------------------------------------------------------|----|---|----------|----------|----------------|----------|----------|---------------------|--|
| AGIWUR21255                                                                                                |    |   |          |          |                |          |          |                     |  |
| N2                                                                                                         | CT | V | 20394073 | 20394700 | WBGene00010005 | cnc-7    | F53H2.2  | -0.0700248254936615 |  |
| AGIWUR7651;AGIWUR10762;AGIWUR22903;AGIWUR23224;AGIWUR29673;AGIWUR34032                                     |    |   |          |          |                |          |          |                     |  |
| N2                                                                                                         | CT | V | 20396078 | 20422035 | WBGene00010006 | F53H2.3  | F53H2.3  | -0.0707530561054925 |  |
| AGIWUR4475;AGIWUR5951;AGIWUR21698;AGIWUR37532;AGIWUR42730;AGIWUR44574                                      |    |   |          |          |                |          |          |                     |  |
| N2                                                                                                         | CT | V | 20425301 | 20431337 | WBGene00001406 | fce-2    | F48F5.5  | 0.120514823752373   |  |
| AGIWUR26833                                                                                                |    |   |          |          |                |          |          |                     |  |
| N2                                                                                                         | CT | V | 20440232 | 20446477 | WBGene00009846 | F48F5.2  | F48F5.2  | -0.0857432959949946 |  |
| AGIWUR27354;AGIWUR31784;AGIWUR32244                                                                        |    |   |          |          |                |          |          |                     |  |
| N2                                                                                                         | CT | V | 20448288 | 20453202 | WBGene00009848 | F48F5.6  | F48F5.6  | -0.27301646120844   |  |
| AGIWUR15429;AGIWUR17816;AGIWUR19087;AGIWUR20963;AGIWUR27787;AGIWUR35783;AGIWUR39911                        |    |   |          |          |                |          |          |                     |  |
| N2                                                                                                         | CT | V | 20454111 | 20456433 | WBGene00005147 | srd-70   | F48F5.4  | 0.184191099344044   |  |
| AGIWUR34323                                                                                                |    |   |          |          |                |          |          |                     |  |
| N2                                                                                                         | CT | V | 20458654 | 20464486 | WBGene00007121 | B0250.4  | B0250.4  | -0.110258209803404  |  |
| AGIWUR34256                                                                                                |    |   |          |          |                |          |          |                     |  |
| N2                                                                                                         | CT | V | 20469703 | 20470485 | WBGene00007125 | B0250.8  | B0250.8  | 0.232332279948398   |  |
| AGIWUR43956                                                                                                |    |   |          |          |                |          |          |                     |  |
| N2                                                                                                         | CT | V | 20471566 | 20472496 | WBGene00050926 | B0250.11 |          | B0250.11            |  |
| 0.120540390038209 AGIWUR5746                                                                               |    |   |          |          |                |          |          |                     |  |
| N2                                                                                                         | CT | V | 20473022 | 20476061 | WBGene00007124 | B0250.7  | B0250.7  | -0.0735430201095824 |  |
| AGIWUR22645                                                                                                |    |   |          |          |                |          |          |                     |  |
| N2                                                                                                         | CT | V | 20476748 | 20479089 | WBGene00007119 | calf-1   | B0250.2  | -0.0728032348183554 |  |
| AGIWUR38425                                                                                                |    |   |          |          |                |          |          |                     |  |
| N2                                                                                                         | CT | V | 20480792 | 20485385 | WBGene00007126 | dhcr-7   | B0250.9  | -0.0808889712875072 |  |
| AGIWUR7054                                                                                                 |    |   |          |          |                |          |          |                     |  |
| N2                                                                                                         | CT | V | 20487645 | 20489202 | WBGene00007127 | srbc-78  | B0250.10 |                     |  |
| 0.0343462637965146 AGIWUR41033                                                                             |    |   |          |          |                |          |          |                     |  |
| N2                                                                                                         | CT | V | 20490771 | 20492485 | WBGene00007123 | srbc-79  | B0250.6  | 0.270849385282691   |  |
| AGIWUR42298                                                                                                |    |   |          |          |                |          |          |                     |  |
| N2                                                                                                         | CT | V | 20493924 | 20497348 | WBGene00007122 | B0250.5  | B0250.5  | 0.12826206411854    |  |
| AGIWUR32723;AGIWUR36887                                                                                    |    |   |          |          |                |          |          |                     |  |
| N2                                                                                                         | CT | V | 20497922 | 20499103 | WBGene00012615 | dct-16   | Y38H6C.1 |                     |  |
| -0.126267904614355 AGIWUR14745                                                                             |    |   |          |          |                |          |          |                     |  |
| N2                                                                                                         | CT | V | 20499899 | 20500494 | WBGene00012616 | dct-14   | Y38H6C.3 |                     |  |
| 0.0549976703034947                                                                                         |    |   |          |          |                |          |          |                     |  |
| AGIWUR9853;AGIWUR19303;AGIWUR24521;AGIWUR25903;AGIWUR28169;AGIWUR28994;AGIWUR29363;AGIWUR33453;AGIWUR38174 |    |   |          |          |                |          |          |                     |  |
| N2                                                                                                         | CT | V | 20500812 | 20503228 | WBGene00005812 | srw-65   | Y38H6C.2 |                     |  |
| 0.145576420544341 AGIWUR2254                                                                               |    |   |          |          |                |          |          |                     |  |
| N2                                                                                                         | CT | V | 20504875 | 20505097 | WBGene00012617 | Y38H6C.4 |          | Y38H6C.4            |  |



|                                                                        |                                    |          |                |                 |                  |
|------------------------------------------------------------------------|------------------------------------|----------|----------------|-----------------|------------------|
| 0.0760153434493356                                                     | AGIWUR9045                         |          |                |                 |                  |
| N2 CT V                                                                | 20514637                           | 20515706 | WBGene00012621 | Y38H6C.8        | Y38H6C.8         |
| 0.0677633162182705                                                     | AGIWUR10442                        |          |                |                 |                  |
| N2 CT V                                                                | 20516298                           | 20518036 | WBGene00012623 | fbxa-149        | Y38H6C.10        |
| 0.206324845057773                                                      | AGIWUR24018                        |          |                |                 |                  |
| N2 CT V                                                                | 20520250                           | 20522270 | WBGene00012622 | Y38H6C.9        | Y38H6C.9         |
| -0.0240501940575797                                                    | AGIWUR1386                         |          |                |                 |                  |
| N2 CT V                                                                | 20522621                           | 20524512 | WBGene00012624 | fbxa-150        | Y38H6C.11        |
| -0.0488283022862426                                                    | AGIWUR3580;AGIWUR15698;AGIWUR27527 |          |                |                 |                  |
| N2 CT V                                                                | 20524700                           | 20525866 | WBGene00005382 | srh-166         | Y38H6C.12        |
| -0.155562685141589                                                     | AGIWUR14164                        |          |                |                 |                  |
| N2 CT V                                                                | 20529953                           | 20534169 | WBGene00012626 | famh-161        | Y38H6C.14        |
| -0.00232912974627997                                                   | AGIWUR2469                         |          |                |                 |                  |
| N2 CT V                                                                | 20534774                           | 20536308 | WBGene00012627 | Y38H6C.15       | Y38H6C.15        |
| 0.0542302460674229                                                     | AGIWUR41427                        |          |                |                 |                  |
| N2 CT V                                                                | 20536430                           | 20538155 | WBGene00012628 | Y38H6C.16       | Y38H6C.16        |
| -0.267440260708804                                                     | AGIWUR15764                        |          |                |                 |                  |
| N2 CT V                                                                | 20540395                           | 20544192 | WBGene00012629 | slc-36.3        | Y38H6C.17        |
| -0.238365443707236                                                     | AGIWUR2656                         |          |                |                 |                  |
| N2 CT V                                                                | 20546626                           | 20547148 | WBGene00012630 | Y38H6C.18       | Y38H6C.18        |
| 0.282049265513072                                                      | AGIWUR25153                        |          |                |                 |                  |
| N2 CT V                                                                | 20547261                           | 20551164 | WBGene00012632 | Y38H6C.20       | Y38H6C.20        |
| 0.0174919775127904                                                     | AGIWUR34360                        |          |                |                 |                  |
| N2 CT V                                                                | 20552294                           | 20553071 | WBGene00012631 | Y38H6C.19       | Y38H6C.19        |
| 0.6931443956351                                                        | AGIWUR19219                        |          |                |                 |                  |
| N2 CT V                                                                | 20554116                           | 20555267 | WBGene00012633 | Y38H6C.21       | Y38H6C.21        |
| -0.345494745841467                                                     | AGIWUR29870                        |          |                |                 |                  |
| N2 CT V                                                                | 20555629                           | 20556360 | WBGene00012634 | Y38H6C.23       | Y38H6C.23        |
| -0.00613726557180705                                                   | AGIWUR24290                        |          |                |                 |                  |
| N2 CT V                                                                | 20557945                           | 20558379 | WBGene00000015 | abf-4           | Y38H6C.22        |
| 0.180758495104497                                                      | AGIWUR5038                         |          |                |                 |                  |
| N2 CT V                                                                | 20559080                           | 20561895 | WBGene00009166 | F26F2.1 F26F2.1 | 3.30216832304228 |
| AGIWUR9644;AGIWUR24078;AGIWUR43885                                     |                                    |          |                |                 |                  |
| N2 CT V                                                                | 20564383                           | 20564666 | WBGene00219309 | F26F2.13        | F26F2.13         |
| 3.99971659485588                                                       | AGIWUR33359                        |          |                |                 |                  |
| N2 CT V                                                                | 20565410                           | 20566541 | WBGene00009168 | F26F2.3 F26F2.3 | 5.16560104601337 |
| AGIWUR19294                                                            |                                    |          |                |                 |                  |
| N2 CT V                                                                | 20569295                           | 20570191 | WBGene00009169 | F26F2.4 F26F2.4 | 4.52799280828752 |
| AGIWUR9279;AGIWUR30803;AGIWUR33977;AGIWUR38558;AGIWUR40546;AGIWUR44909 |                                    |          |                |                 |                  |

|                                                                                           |    |   |          |          |                |           |          |                     |
|-------------------------------------------------------------------------------------------|----|---|----------|----------|----------------|-----------|----------|---------------------|
| N2                                                                                        | CT | V | 20573717 | 20574000 | WBGene00009170 | F26F2.5   | F26F2.5  | 2.68959043491916    |
| AGIWUR38019                                                                               |    |   |          |          |                |           |          |                     |
| N2                                                                                        | CT | V | 20574625 | 20577636 | WBGene00009171 | cllec-263 |          | F26F2.6             |
| -0.153767440012187 AGIWUR15828                                                            |    |   |          |          |                |           |          |                     |
| N2                                                                                        | CT | V | 20579546 | 20580678 | WBGene00023504 | F26F2.8   | F26F2.8  | -0.0449874007813404 |
| AGIWUR3190;AGIWUR14596;AGIWUR29229;AGIWUR35095                                            |    |   |          |          |                |           |          |                     |
| N2                                                                                        | CT | V | 20580996 | 20590321 | WBGene00009172 | F26F2.7   | F26F2.7  | 0.00857673850002882 |
| AGIWUR34182                                                                               |    |   |          |          |                |           |          |                     |
| N2                                                                                        | CT | V | 20600095 | 20602474 | WBGene00000736 | col-163   | F46B3.17 |                     |
| 0.00847994786114725 AGIWUR17760                                                           |    |   |          |          |                |           |          |                     |
| N2                                                                                        | CT | V | 20603366 | 20604378 | WBGene00009758 | ttr-11    | F46B3.3  | 0.155613047909496   |
| AGIWUR5985;AGIWUR15582;AGIWUR37486                                                        |    |   |          |          |                |           |          |                     |
| N2                                                                                        | CT | V | 20607804 | 20608559 | WBGene00009759 | ttr-12    | F46B3.4  | 0.2207443918582     |
| AGIWUR28886;AGIWUR29298                                                                   |    |   |          |          |                |           |          |                     |
| N2                                                                                        | CT | V | 20609794 | 20613929 | WBGene00001691 | grd-2     | F46B3.5  | -0.150432310178451  |
| AGIWUR11921                                                                               |    |   |          |          |                |           |          |                     |
| N2                                                                                        | CT | V | 20614382 | 20615054 | WBGene00050932 | F46B3.19  |          | F46B3.19            |
| 0.077138940208533 AGIWUR5624;AGIWUR19280;AGIWUR21487;AGIWUR28143;AGIWUR35096              |    |   |          |          |                |           |          |                     |
| N2                                                                                        | CT | V | 20618120 | 20618656 | WBGene00009760 | F46B3.7   | F46B3.7  | -0.0589554061893223 |
| AGIWUR21128                                                                               |    |   |          |          |                |           |          |                     |
| N2                                                                                        | CT | V | 20618910 | 20621966 | WBGene00077434 | F46B3.20  |          | F46B3.20            |
| -0.0636705449090211 AGIWUR4884                                                            |    |   |          |          |                |           |          |                     |
| N2                                                                                        | CT | V | 20622650 | 20623160 | WBGene00009761 | F46B3.8   | F46B3.8  | 2.13029248866771    |
| AGIWUR11360                                                                               |    |   |          |          |                |           |          |                     |
| N2                                                                                        | CT | V | 20623630 | 20624887 | WBGene00077436 | F46B3.22  |          | F46B3.22            |
| 0.00344244883788924 AGIWUR12526;AGIWUR21313;AGIWUR32702;AGIWUR39543;AGIWUR43533           |    |   |          |          |                |           |          |                     |
| N2                                                                                        | CT | V | 20625186 | 20626143 | WBGene00009762 | F46B3.9   | F46B3.9  | -0.40895665421926   |
| AGIWUR40468                                                                               |    |   |          |          |                |           |          |                     |
| N2                                                                                        | CT | V | 20626711 | 20628206 | WBGene00009763 | srz-18    | F46B3.11 |                     |
| -0.0495030231039664 AGIWUR15575                                                           |    |   |          |          |                |           |          |                     |
| N2                                                                                        | CT | V | 20628422 | 20629802 | WBGene00009764 | srz-17    | F46B3.12 |                     |
| -1.84413096151508 AGIWUR21470                                                             |    |   |          |          |                |           |          |                     |
| N2                                                                                        | CT | V | 20630148 | 20631329 | WBGene00009765 | F46B3.14  |          | F46B3.14            |
| -0.133752186105999 AGIWUR7603;AGIWUR12522;AGIWUR13428;AGIWUR24567;AGIWUR36158;AGIWUR43491 |    |   |          |          |                |           |          |                     |
| N2                                                                                        | CT | V | 20632985 | 20633689 | WBGene00009766 | F46B3.15  |          | F46B3.15            |
| 0.0522485717854808 AGIWUR17891;AGIWUR44745;AGIWUR45040                                    |    |   |          |          |                |           |          |                     |
| N2                                                                                        | CT | V | 20634462 | 20635313 | WBGene00009767 | F46B3.16  |          | F46B3.16            |
| 0.177380167980699 AGIWUR31887                                                             |    |   |          |          |                |           |          |                     |
| N2                                                                                        | CT | V | 20635943 | 20636576 | WBGene00012849 | ttr-13    | Y44A6B.4 |                     |

|                                                                       |                                                            |                |                                     |
|-----------------------------------------------------------------------|------------------------------------------------------------|----------------|-------------------------------------|
| 0.00933872094530663                                                   | AGIWUR4635;AGIWUR32172;AGIWUR34647;AGIWUR34876;AGIWUR35235 |                |                                     |
| N2 CT V                                                               | 20636864 20638444                                          | WBGene00012848 | Y44A6B.3 Y44A6B.3                   |
| -0.364235733022213                                                    | AGIWUR39781                                                |                |                                     |
| N2 CT V                                                               | 20639594 20641049                                          | WBGene00012846 | srxa-14 Y44A6B.1                    |
| 0.0680162561056541                                                    | AGIWUR11441;AGIWUR28556;AGIWUR32560                        |                |                                     |
| N2 CT V                                                               | 20642289 20644356                                          | WBGene00012847 | srxa-15 Y44A6B.2                    |
| -0.036641736096878                                                    | AGIWUR6148;AGIWUR10441;AGIWUR28261                         |                |                                     |
| N2 CT V                                                               | 20654652 20659742                                          | WBGene00012184 | mnr-1 W01F3.1 0.0698451792401507    |
| AGIWUR27576                                                           |                                                            |                |                                     |
| N2 CT V                                                               | 20660325 20662031                                          | WBGene00012185 | W01F3.2 W01F3.2 -0.0669245039844206 |
| AGIWUR21598                                                           |                                                            |                |                                     |
| N2 CT V                                                               | 20667209 20678513                                          | WBGene00012186 | mlt-11 W01F3.3 -0.0593563926660723  |
| AGIWUR34807;AGIWUR41668                                               |                                                            |                |                                     |
| N2 CT V                                                               | 20681420 20683014                                          | WBGene00009999 | srsx-35 F53F8.2 0.089763294663769   |
| AGIWUR5741;AGIWUR37284                                                |                                                            |                |                                     |
| N2 CT V                                                               | 20685683 20688770                                          | WBGene00009998 | k1f-2 F53F8.1 0.021473201588293     |
| AGIWUR30841                                                           |                                                            |                |                                     |
| N2 CT V                                                               | 20688734 20689532                                          | WBGene00010000 | F53F8.3 F53F8.3                     |
| -0.00291200821627235                                                  | AGIWUR22910                                                |                |                                     |
| N2 CT V                                                               | 20690582 20691685                                          | WBGene00010001 | F53F8.4 F53F8.4 -0.0135778770801984 |
| AGIWUR27499                                                           |                                                            |                |                                     |
| N2 CT V                                                               | 20700340 20704048                                          | WBGene00010002 | F53F8.5 F53F8.5 0.0139442854956577  |
| AGIWUR19422                                                           |                                                            |                |                                     |
| N2 CT V                                                               | 20708728 20709794                                          | WBGene00010003 | F53F8.6 F53F8.6 -0.115405112285476  |
| AGIWUR37872                                                           |                                                            |                |                                     |
| N2 CT V                                                               | 20713920 20716872                                          | WBGene00012850 | Y44A6C.1 Y44A6C.1                   |
| -0.0742468632924318                                                   | AGIWUR7317                                                 |                |                                     |
| N2 CT V                                                               | 20717872 20729271                                          | WBGene00012319 | ipla-3 W07A8.2 -0.04242079816947    |
| AGIWUR7440                                                            |                                                            |                |                                     |
| N2 CT V                                                               | 20729948 20744385                                          | WBGene00001043 | dnj-25 W07A8.3 -0.0153858169610359  |
| AGIWUR24301                                                           |                                                            |                |                                     |
| N2 CT V                                                               | 20752883 20760317                                          | WBGene00004013 | pha-4 F38A6.1 0.0660084046007805    |
| AGIWUR4940;AGIWUR7056;AGIWUR10928;AGIWUR11116;AGIWUR33259;AGIWUR39144 |                                                            |                |                                     |
| N2 CT V                                                               | 20764955 20770161                                          | WBGene00001248 | elp-1 F38A6.2 -0.101539969275708    |
| AGIWUR28578                                                           |                                                            |                |                                     |
| N2 CT V                                                               | 20773743 20775369                                          | WBGene00009528 | F38A6.4 F38A6.4 -0.0350784282423104 |
| AGIWUR3923                                                            |                                                            |                |                                     |
| N2 CT V                                                               | 20780413 20785259                                          | WBGene00001851 | hif-1 F38A6.3 0.29749643011223      |
| AGIWUR4461;AGIWUR8388;AGIWUR13579;AGIWUR16367;AGIWUR17143;AGIWUR40614 |                                                            |                |                                     |

|                                                                                                |    |   |                                                           |          |                |          |                             |
|------------------------------------------------------------------------------------------------|----|---|-----------------------------------------------------------|----------|----------------|----------|-----------------------------|
| N2                                                                                             | CT | V | 20789471                                                  | 20790784 | WBGene00012853 | Y44A6D.2 | Y44A6D.2                    |
| -0.0520603327035793                                                                            |    |   | AGIWUR15098                                               |          |                |          |                             |
| N2                                                                                             | CT | V | 20790768                                                  | 20792413 | WBGene00012854 | Y44A6D.3 | Y44A6D.3                    |
| -0.0383799517754362                                                                            |    |   | AGIWUR6196;AGIWUR8125;AGIWUR11022;AGIWUR14203;AGIWUR30558 |          |                |          |                             |
| N2                                                                                             | CT | V | 20798218                                                  | 20801207 | WBGene00004748 | sdf-9    | Y44A6D.4                    |
| -0.116062026208424                                                                             |    |   | AGIWUR37586                                               |          |                |          |                             |
| N2                                                                                             | CT | V | 20801184                                                  | 20803006 | WBGene00012855 | Y44A6D.5 | Y44A6D.5                    |
| 0.158530410814684                                                                              |    |   | AGIWUR43513                                               |          |                |          |                             |
| N2                                                                                             | CT | V | 20816142                                                  | 20816553 | WBGene00011394 | T03D8.7  | T03D8.7 -0.229356447089634  |
| AGIWUR8909                                                                                     |    |   |                                                           |          |                |          |                             |
| N2                                                                                             | CT | V | 20816576                                                  | 20820330 | WBGene00011393 | T03D8.6  | T03D8.6 -0.173364046036408  |
| AGIWUR11094                                                                                    |    |   |                                                           |          |                |          |                             |
| N2                                                                                             | CT | V | 20820366                                                  | 20825028 | WBGene00001547 | gcy-22   | T03D8.5 0.178693734151842   |
| AGIWUR38984                                                                                    |    |   |                                                           |          |                |          |                             |
| N2                                                                                             | CT | V | 20825559                                                  | 20827740 | WBGene00001723 | grl-14   | T03D8.4 -0.739844955380951  |
| AGIWUR2172                                                                                     |    |   |                                                           |          |                |          |                             |
| N2                                                                                             | CT | V | 20827715                                                  | 20828939 | WBGene00011392 | sbt-1    | T03D8.3 0.179925511099789   |
| AGIWUR26432;AGIWUR35497                                                                        |    |   |                                                           |          |                |          |                             |
| N2                                                                                             | CT | V | 20829811                                                  | 20837552 | WBGene00003830 | num-1    | T03D8.1 0.0702183309306275  |
| AGIWUR3244;AGIWUR15343;AGIWUR24653                                                             |    |   |                                                           |          |                |          |                             |
| N2                                                                                             | CT | V | 20838080                                                  | 20838768 | WBGene00011391 | mrps-12  | T03D8.2 -0.233904479816331  |
| AGIWUR36932                                                                                    |    |   |                                                           |          |                |          |                             |
| N2                                                                                             | CT | V | 20838865                                                  | 20841582 | WBGene00009289 | exos-7   | F31D4.1 -0.216484261621805  |
| AGIWUR6280                                                                                     |    |   |                                                           |          |                |          |                             |
| N2                                                                                             | CT | V | 20841573                                                  | 20845546 | WBGene00009290 | F31D4.2  | F31D4.2 0.127902503080229   |
| AGIWUR13395;AGIWUR14102;AGIWUR21065;AGIWUR29128;AGIWUR33661;AGIWUR41259                        |    |   |                                                           |          |                |          |                             |
| N2                                                                                             | CT | V | 20846113                                                  | 20847727 | WBGene00001431 | fbk-6    | F31D4.3 -0.0170831840766614 |
| AGIWUR4919;AGIWUR13185;AGIWUR20145;AGIWUR25639;AGIWUR26171;AGIWUR31644;AGIWUR32800;AGIWUR43487 |    |   |                                                           |          |                |          |                             |
| N2                                                                                             | CT | V | 20847702                                                  | 20850666 | WBGene00009291 | clec-264 | F31D4.4                     |
| 0.0629925356616461                                                                             |    |   | AGIWUR35224                                               |          |                |          |                             |
| N2                                                                                             | CT | V | 20850833                                                  | 20851897 | WBGene00009294 | F31D4.9  | F31D4.9 -0.199617345339972  |
| AGIWUR30890                                                                                    |    |   |                                                           |          |                |          |                             |
| N2                                                                                             | CT | V | 20854143                                                  | 20858576 | WBGene00009292 | F31D4.5  | F31D4.5 -0.122482404924966  |
| AGIWUR42985                                                                                    |    |   |                                                           |          |                |          |                             |
| N2                                                                                             | CT | V | 20859344                                                  | 20861153 | WBGene00006622 | try-4    | F31D4.6 0.351029955637491   |
| AGIWUR26925                                                                                    |    |   |                                                           |          |                |          |                             |
| N2                                                                                             | CT | V | 20862969                                                  | 20865743 | WBGene00006687 | twk-35   | F31D4.7 0.170897167784155   |
| AGIWUR2822                                                                                     |    |   |                                                           |          |                |          |                             |
| N2                                                                                             | CT | V | 20866749                                                  | 20868429 | WBGene00009293 | F31D4.8  | F31D4.8 -0.292599182867697  |

|                                                             |    |   |          |        |                |                |           |                      |                     |
|-------------------------------------------------------------|----|---|----------|--------|----------------|----------------|-----------|----------------------|---------------------|
| AGIWUR43069                                                 |    |   |          |        |                |                |           |                      |                     |
| N2                                                          | CT | V | 20879854 |        | 20898906       | WBGene00006812 | unc-80    | F25C8.3              | 0.134091841364754   |
| AGIWUR27704                                                 |    |   |          |        |                |                |           |                      |                     |
| N2                                                          | CT | V | 20898840 |        | 20903441       | WBGene00000139 | amx-3     | F25C8.2              | -0.133085612503649  |
| AGIWUR6474                                                  |    |   |          |        |                |                |           |                      |                     |
| N2                                                          | CT | V | 20903977 |        | 20907433       | WBGene00009106 | acs-12    | F25C8.4              | -0.072896620558101  |
| AGIWUR25618                                                 |    |   |          |        |                |                |           |                      |                     |
| N2                                                          | CT | V | 20907470 |        | 20909746       | WBGene00009104 | F25C8.1   | F25C8.1              | 0.0297831401682744  |
| AGIWUR6493                                                  |    |   |          |        |                |                |           |                      |                     |
| N2                                                          | CT | V | 20910467 |        | 20914387       | WBGene00044187 | ttl1-9    | F25C8.5              | -0.113065271696571  |
| AGIWUR11335;AGIWUR21432                                     |    |   |          |        |                |                |           |                      |                     |
| N2                                                          | CT | V | 20915486 |        | 20922738       | WBGene00012857 | pbo-5     | Y44A6E.1             |                     |
| 0.28828324351251                                            |    |   |          |        |                |                |           |                      |                     |
| N2                                                          | CT | X | 42728    | 46924  | WBGene00022203 | Y73B3A.1       | Y73B3A.1  |                      | 0.27598475753625    |
| AGIWUR22888                                                 |    |   |          |        |                |                |           |                      |                     |
| N2                                                          | CT | X | 78429    | 80400  | WBGene00022218 | Y73B3A.16      | Y73B3A.16 |                      | -0.228038086536962  |
| AGIWUR23894                                                 |    |   |          |        |                |                |           |                      |                     |
| N2                                                          | CT | X | 135793   | 138075 | WBGene00022209 | Y73B3A.7       | Y73B3A.7  |                      | -0.0710592723985268 |
| AGIWUR25027                                                 |    |   |          |        |                |                |           |                      |                     |
| N2                                                          | CT | X | 140434   | 140683 | WBGene00022210 | Y73B3A.8       | Y73B3A.8  |                      | -0.0761368765418871 |
| AGIWUR23454                                                 |    |   |          |        |                |                |           |                      |                     |
| N2                                                          | CT | X | 150363   | 157246 | WBGene00022211 | Y73B3A.9       | Y73B3A.9  |                      | 0.13415724780387    |
| AGIWUR23115                                                 |    |   |          |        |                |                |           |                      |                     |
| N2                                                          | CT | X | 159638   | 160920 | WBGene00044700 | T08D2.9        | T08D2.9   | -0.132221072781213   | AGIWUR16884         |
| N2                                                          | CT | X | 164036   | 171839 | WBGene00011607 | T08D2.2        | T08D2.2   | 0.115251032788642    | AGIWUR17378         |
| N2                                                          | CT | X | 177396   | 177856 | WBGene00011609 | T08D2.4        | T08D2.4   | -0.147710196495996   |                     |
| AGIWUR14158;AGIWUR14916;AGIWUR19089;AGIWUR23194;AGIWUR35007 |    |   |          |        |                |                |           |                      |                     |
| N2                                                          | CT | X | 192834   | 197901 | WBGene00011613 | T08D2.8        | T08D2.8   | 0.128915420096518    | AGIWUR5792          |
| N2                                                          | CT | X | 199262   | 207723 | WBGene00022227 | Y73B3B.5       | Y73B3B.5  | -0.0706022592421807  |                     |
| AGIWUR22104                                                 |    |   |          |        |                |                |           |                      |                     |
| N2                                                          | CT | X | 211441   | 211676 | WBGene00022225 | Y73B3B.3       | Y73B3B.3  | -0.0625357025837108  |                     |
| AGIWUR18398                                                 |    |   |          |        |                |                |           |                      |                     |
| N2                                                          | CT | X | 221017   | 225084 | WBGene00007077 | AC8.5          | AC8.5     | 0.116208042867738    | AGIWUR44399         |
| N2                                                          | CT | X | 269127   | 270029 | WBGene00022432 | math-43        | Y108F1.4  | -0.00706748203350749 |                     |
| AGIWUR34721                                                 |    |   |          |        |                |                |           |                      |                     |
| N2                                                          | CT | X | 270408   | 274012 | WBGene00022433 | Y108F1.5       | Y108F1.5  | 0.13028523854225     |                     |
| AGIWUR39937                                                 |    |   |          |        |                |                |           |                      |                     |
| N2                                                          | CT | X | 297234   | 299287 | WBGene00020083 | R57.2          | R57.2     | -0.258553575415423   | AGIWUR31539         |
| N2                                                          | CT | X | 301832   | 308298 | WBGene00020082 | gcp-2.1        | R57.1     | -0.0405650160335949  |                     |

|                                                                         |    |   |        |        |                |          |          |                     |                     |
|-------------------------------------------------------------------------|----|---|--------|--------|----------------|----------|----------|---------------------|---------------------|
| AGIWUR15035;AGIWUR31471                                                 |    |   |        |        |                |          |          |                     |                     |
| N2                                                                      | CT | X | 308762 | 311323 | WBGene00019734 | M02E1.2  | M02E1.2  | -0.0143369808268279 |                     |
| AGIWUR10337;AGIWUR35098;AGIWUR37692                                     |    |   |        |        |                |          |          |                     |                     |
| N2                                                                      | CT | X | 326113 | 334600 | WBGene00019733 | M02E1.1  | M02E1.1  | -0.0199559805088594 |                     |
| AGIWUR13020;AGIWUR36891;AGIWUR38182                                     |    |   |        |        |                |          |          |                     |                     |
| N2                                                                      | CT | X | 334580 | 341232 | WBGene00015431 | C04E7.4  | C04E7.4  | -0.0543263647530807 | AGIWUR4709          |
| N2                                                                      | CT | X | 344127 | 346289 | WBGene00015430 | C04E7.3  | C04E7.3  | -0.122463206547187  | AGIWUR11024         |
| N2                                                                      | CT | X | 353619 | 357939 | WBGene00015429 | sor-3    | C04E7.2  | 0.0888537072662956  | AGIWUR32632         |
| N2                                                                      | CT | X | 358092 | 360198 | WBGene00015428 | C04E7.1  | C04E7.1  | -0.136269322470719  | AGIWUR39667         |
| N2                                                                      | CT | X | 360779 | 362938 | WBGene00045270 | C04E7.5  | C04E7.5  | -0.142887967163177  |                     |
| AGIWUR1304;AGIWUR6863;AGIWUR26142;AGIWUR34587                           |    |   |        |        |                |          |          |                     |                     |
| N2                                                                      | CT | X | 372235 | 376900 | WBGene00019862 | nrde-3   | R04A9.2  | -0.0378082113534219 | AGIWUR34371         |
| N2                                                                      | CT | X | 377133 | 380605 | WBGene00019863 | R04A9.3  | R04A9.3  | -0.220100096365012  |                     |
| AGIWUR1910;AGIWUR27720;AGIWUR39047                                      |    |   |        |        |                |          |          |                     |                     |
| N2                                                                      | CT | X | 381338 | 382709 | WBGene00002060 | ife-2    | R04A9.4  | 0.00518550771575654 | AGIWUR44493         |
| N2                                                                      | CT | X | 384382 | 388797 | WBGene00019864 | ceh-93   | R04A9.5  | -0.250218769595534  | AGIWUR4933          |
| N2                                                                      | CT | X | 391360 | 394828 | WBGene00044281 | R04A9.7  | R04A9.7  | -0.204708844866861  |                     |
| AGIWUR15403;AGIWUR22517;AGIWUR22851;AGIWUR29510;AGIWUR35082;AGIWUR39575 |    |   |        |        |                |          |          |                     |                     |
| N2                                                                      | CT | X | 397567 | 400687 | WBGene00019865 | R04A9.6  | R04A9.6  | 0.25493332212858    |                     |
| AGIWUR184;AGIWUR3927;AGIWUR6837;AGIWUR17015;AGIWUR38506                 |    |   |        |        |                |          |          |                     |                     |
| N2                                                                      | CT | X | 404897 | 405357 | WBGene00019861 | R04A9.1  | R04A9.1  | 0.0522559937089531  | AGIWUR29396         |
| N2                                                                      | CT | X | 406459 | 416633 | WBGene00022858 | ZK1193.2 |          | ZK1193.2            | -0.113181599456199  |
| AGIWUR30557                                                             |    |   |        |        |                |          |          |                     |                     |
| N2                                                                      | CT | X | 417482 | 420361 | WBGene00022859 | ZK1193.3 |          | ZK1193.3            | 0.0701835849375652  |
| AGIWUR31872                                                             |    |   |        |        |                |          |          |                     |                     |
| N2                                                                      | CT | X | 421707 | 423033 | WBGene00000608 | col-19   | ZK1193.1 |                     | -0.0338717990577866 |
| AGIWUR6664;AGIWUR10326                                                  |    |   |        |        |                |          |          |                     |                     |
| N2                                                                      | CT | X | 422890 | 425631 | WBGene00022860 | ZK1193.4 |          | ZK1193.4            | 0.0356800724951167  |
| AGIWUR10253                                                             |    |   |        |        |                |          |          |                     |                     |
| N2                                                                      | CT | X | 427043 | 433799 | WBGene00022861 | dve-1    | ZK1193.5 |                     | 0.0421786409632681  |
| AGIWUR26243;AGIWUR30037;AGIWUR42054;AGIWUR44587                         |    |   |        |        |                |          |          |                     |                     |
| N2                                                                      | CT | X | 446356 | 450212 | WBGene00018683 | F52D1.2  | F52D1.2  | -0.212559352941874  | AGIWUR11405         |
| N2                                                                      | CT | X | 450446 | 457648 | WBGene00004127 | abu-12   | F52D1.3  | -0.232788439902688  | AGIWUR18676         |
| N2                                                                      | CT | X | 460651 | 466912 | WBGene00018682 | aagr-4   | F52D1.1  | -0.168798901613105  | AGIWUR38943         |
| N2                                                                      | CT | X | 476561 | 478283 | WBGene00044556 | F38G1.3  | F38G1.3  | 0.0949433181126027  |                     |
| AGIWUR21457;AGIWUR27213;AGIWUR30357                                     |    |   |        |        |                |          |          |                     |                     |
| N2                                                                      | CT | X | 481378 | 486504 | WBGene00000484 | che-2    | F38G1.1  | -0.0403340551101081 | AGIWUR16263         |
| N2                                                                      | CT | X | 489695 | 492273 | WBGene00001185 | egl-17   | F38G1.2  | 0.205558226932299   | AGIWUR37293         |
| N2                                                                      | CT | X | 493211 | 497510 | WBGene00015137 | B0310.1  | B0310.1  | -0.0237584263891861 | AGIWUR27738         |

|                                                                                                                                                                     |    |   |        |        |                |          |          |                     |             |
|---------------------------------------------------------------------------------------------------------------------------------------------------------------------|----|---|--------|--------|----------------|----------|----------|---------------------|-------------|
| N2                                                                                                                                                                  | CT | X | 501965 | 506943 | WBGene00015138 | B0310.2  | B0310.2  | -0.11995957837549   | AGIWUR23228 |
| N2                                                                                                                                                                  | CT | X | 510818 | 520880 | WBGene00015139 | B0310.3  | B0310.3  | -0.622143800301857  | AGIWUR20693 |
| N2                                                                                                                                                                  | CT | X | 525929 | 530289 | WBGene00015141 | ugt-46   | B0310.5  | -0.0273194776955563 | AGIWUR40037 |
| N2                                                                                                                                                                  | CT | X | 530551 | 531009 | WBGene00015142 | B0310.6  | B0310.6  | 0.0405041602053089  | AGIWUR16990 |
| N2                                                                                                                                                                  | CT | X | 531841 | 535834 | WBGene00017898 | F28C10.3 | F28C10.3 | -0.062062856293398  |             |
| AGIWUR13471                                                                                                                                                         |    |   |        |        |                |          |          |                     |             |
| N2                                                                                                                                                                  | CT | X | 537303 | 538910 | WBGene00017899 | F28C10.4 | F28C10.4 | 0.0264197785767895  |             |
| AGIWUR27250                                                                                                                                                         |    |   |        |        |                |          |          |                     |             |
| N2                                                                                                                                                                  | CT | X | 543107 | 544256 | WBGene00017896 | F28C10.1 | F28C10.1 | -0.0762566439311509 |             |
| AGIWUR6343                                                                                                                                                          |    |   |        |        |                |          |          |                     |             |
| N2                                                                                                                                                                  | CT | X | 555788 | 557191 | WBGene00001962 | hlh-19   | F57C12.3 | 0.0939122178933358  |             |
| AGIWUR32848                                                                                                                                                         |    |   |        |        |                |          |          |                     |             |
| N2                                                                                                                                                                  | CT | X | 558141 | 563657 | WBGene00003554 | nas-38   | F57C12.1 | 0.211888901198564   |             |
| AGIWUR34589                                                                                                                                                         |    |   |        |        |                |          |          |                     |             |
| N2                                                                                                                                                                  | CT | X | 563719 | 572701 | WBGene00003408 | mrp-2    | F57C12.4 | -0.137151731695178  |             |
| AGIWUR6975;AGIWUR36018;AGIWUR45099                                                                                                                                  |    |   |        |        |                |          |          |                     |             |
| N2                                                                                                                                                                  | CT | X | 576318 | 587483 | WBGene00003407 | mrp-1    | F57C12.5 | -0.0510819952534991 |             |
| AGIWUR9284;AGIWUR13774;AGIWUR34067                                                                                                                                  |    |   |        |        |                |          |          |                     |             |
| N2                                                                                                                                                                  | CT | X | 593960 | 596289 | WBGene00017423 | F13C5.2  | F13C5.2  | 0.17184922320167    |             |
| AGIWUR10683;AGIWUR13371;AGIWUR22552;AGIWUR22732;AGIWUR31040;AGIWUR35162                                                                                             |    |   |        |        |                |          |          |                     |             |
| N2                                                                                                                                                                  | CT | X | 596314 | 599553 | WBGene00017424 | F13C5.3  | F13C5.3  | 0.0274342513769508  |             |
| AGIWUR302;AGIWUR6079;AGIWUR9605;AGIWUR11481;AGIWUR16677;AGIWUR17142;AGIWUR21336;AGIWUR23589;AGIWUR28821;AGIWUR33103;AGIWUR36497;AGIWUR37477;AGIWUR41870;AGIWUR43585 |    |   |        |        |                |          |          |                     |             |
| N2                                                                                                                                                                  | CT | X | 602172 | 604922 | WBGene00017422 | F13C5.1  | F13C5.1  | -0.0276973180784559 | AGIWUR20727 |
| N2                                                                                                                                                                  | CT | X | 604872 | 608492 | WBGene00017426 | F13C5.5  | F13C5.5  | 0.0743301020534908  | AGIWUR43112 |
| N2                                                                                                                                                                  | CT | X | 611120 | 621290 | WBGene00006825 | unc-96   | F13C5.6  | 0.0833628742332699  | AGIWUR38876 |
| N2                                                                                                                                                                  | CT | X | 629188 | 632868 | WBGene00019776 | M6.4     | M6.4     | 0.109654896696421   | AGIWUR22702 |
| N2                                                                                                                                                                  | CT | X | 633703 | 636993 | WBGene00004011 | pha-2    | M6.3     | 0.0776606376261562  |             |
| AGIWUR2968;AGIWUR10208;AGIWUR16900;AGIWUR22412;AGIWUR23724;AGIWUR24946;AGIWUR28447;AGIWUR39161;AGIWUR40151                                                          |    |   |        |        |                |          |          |                     |             |
| N2                                                                                                                                                                  | CT | X | 642156 | 654903 | WBGene00002056 | ifc-2    | M6.1     | 0.219786686415489   |             |
| AGIWUR13526;AGIWUR33635;AGIWUR35773;AGIWUR42995                                                                                                                     |    |   |        |        |                |          |          |                     |             |
| N2                                                                                                                                                                  | CT | X | 656188 | 658511 | WBGene00020571 | lpr-7    | T19D7.3  | 0.0448846707660868  |             |
| AGIWUR18294;AGIWUR27906                                                                                                                                             |    |   |        |        |                |          |          |                     |             |
| N2                                                                                                                                                                  | CT | X | 658477 | 661777 | WBGene00020572 | rund-1   | T19D7.4  | -0.199681982266384  | AGIWUR36812 |
| N2                                                                                                                                                                  | CT | X | 664714 | 666300 | WBGene00020573 | T19D7.5  | T19D7.5  | -0.294375002989633  | AGIWUR792   |
| N2                                                                                                                                                                  | CT | X | 669684 | 670800 | WBGene00020574 | T19D7.6  | T19D7.6  | -0.428569052534984  | AGIWUR37273 |
| N2                                                                                                                                                                  | CT | X | 673027 | 676484 | WBGene00020569 | lgc-32   | T19D7.1  | -0.0841085843175797 | AGIWUR27396 |
| N2                                                                                                                                                                  | CT | X | 676435 | 680419 | WBGene00020575 | T19D7.7  | T19D7.7  | -0.051933486423235  | AGIWUR41783 |
| N2                                                                                                                                                                  | CT | X | 681129 | 682780 | WBGene00021185 | Y9C12A.1 | Y9C12A.1 | -0.185125358915698  |             |

|                                                                                                                                  |    |   |        |        |                |          |          |                      |             |
|----------------------------------------------------------------------------------------------------------------------------------|----|---|--------|--------|----------------|----------|----------|----------------------|-------------|
| AGIWUR9671                                                                                                                       |    |   |        |        |                |          |          |                      |             |
| N2                                                                                                                               | CT | X | 692978 | 703036 | WBGene00017184 | ncam-1   | F02G3.1  | 0.0587428540721415   |             |
| AGIWUR5275;AGIWUR5619;AGIWUR11793;AGIWUR40249                                                                                    |    |   |        |        |                |          |          |                      |             |
| N2                                                                                                                               | CT | X | 703029 | 714478 | WBGene00002150 | irk-2    | M02A10.2 | -0.150915832396595   |             |
| AGIWUR28735                                                                                                                      |    |   |        |        |                |          |          |                      |             |
| N2                                                                                                                               | CT | X | 720330 | 725957 | WBGene00004829 | sli-1    | M02A10.3 | -0.0260227094743719  |             |
| AGIWUR16071                                                                                                                      |    |   |        |        |                |          |          |                      |             |
| N2                                                                                                                               | CT | X | 731160 | 735672 | WBGene00015364 | npr-19   | C02H7.2  | 0.0735774490006254   | AGIWUR36999 |
| N2                                                                                                                               | CT | X | 751211 | 759732 | WBGene00000086 | aex-3    | C02H7.3  | -0.00171538297442808 |             |
| AGIWUR9247;AGIWUR24583;AGIWUR31811;AGIWUR33793                                                                                   |    |   |        |        |                |          |          |                      |             |
| N2                                                                                                                               | CT | X | 763769 | 766713 | WBGene00001127 | dyf-11   | C02H7.1  | 0.0201787975056549   | AGIWUR33461 |
| N2                                                                                                                               | CT | X | 767023 | 768069 | WBGene00020216 | trap-2   | T04G9.5  | 0.0730706518600135   |             |
| AGIWUR1311;AGIWUR14535;AGIWUR14666;AGIWUR28463;AGIWUR32471;AGIWUR43584                                                           |    |   |        |        |                |          |          |                      |             |
| N2                                                                                                                               | CT | X | 768596 | 770776 | WBGene00002071 | ile-2    | T04G9.3  | -0.031528948244981   | AGIWUR20795 |
| N2                                                                                                                               | CT | X | 770833 | 771882 | WBGene00020218 | T04G9.7  | T04G9.7  | -0.079980463629262   |             |
| AGIWUR9050;AGIWUR38408;AGIWUR38566;AGIWUR43698                                                                                   |    |   |        |        |                |          |          |                      |             |
| N2                                                                                                                               | CT | X | 772353 | 775371 | WBGene00020215 | T04G9.4  | T04G9.4  | -0.0296399709051478  | AGIWUR18022 |
| N2                                                                                                                               | CT | X | 777721 | 780514 | WBGene00003534 | nas-15   | T04G9.2  | 0.0500720435923725   |             |
| AGIWUR6169;AGIWUR9460                                                                                                            |    |   |        |        |                |          |          |                      |             |
| N2                                                                                                                               | CT | X | 780528 | 785624 | WBGene00020217 | T04G9.6  | T04G9.6  | -0.0119584910616712  | AGIWUR25013 |
| N2                                                                                                                               | CT | X | 788353 | 796142 | WBGene00020214 | attf-5   | T04G9.1  | -0.0607741578682912  | AGIWUR24528 |
| N2                                                                                                                               | CT | X | 802796 | 804264 | WBGene00017779 | gtr-1    | F25E2.1  | 0.20526223059696     | AGIWUR19478 |
| N2                                                                                                                               | CT | X | 806993 | 810794 | WBGene00017780 | F25E2.2  | F25E2.2  | -0.0435889050988969  | AGIWUR29915 |
| N2                                                                                                                               | CT | X | 811173 | 813163 | WBGene00017781 | F25E2.3  | F25E2.3  | -0.0323573807151227  | AGIWUR9834  |
| N2                                                                                                                               | CT | X | 813852 | 815929 | WBGene00002058 | ifd-2    | F25E2.4  | -0.0249710420196241  | AGIWUR17114 |
| N2                                                                                                                               | CT | X | 817927 | 825475 | WBGene00000899 | daf-3    | F25E2.5  | -0.0553471998243449  |             |
| AGIWUR2490;AGIWUR2974;AGIWUR8571;AGIWUR16462;AGIWUR19235;AGIWUR20554;AGIWUR23624;AGIWUR25067;AGIWUR29176;AGIWUR30818;AGIWUR40071 |    |   |        |        |                |          |          |                      |             |
| N2                                                                                                                               | CT | X | 830258 | 833760 | WBGene00018213 | F39H12.2 | F39H12.2 | 0.118328971635583    |             |
| AGIWUR39216                                                                                                                      |    |   |        |        |                |          |          |                      |             |
| N2                                                                                                                               | CT | X | 834778 | 837758 | WBGene00018212 | F39H12.1 | F39H12.1 | -0.160097476603266   |             |
| AGIWUR17434                                                                                                                      |    |   |        |        |                |          |          |                      |             |
| N2                                                                                                                               | CT | X | 838144 | 841493 | WBGene00018214 | F39H12.3 | F39H12.3 |                      |             |
| -0.00936925238152853 AGIWUR30604                                                                                                 |    |   |        |        |                |          |          |                      |             |
| N2                                                                                                                               | CT | X | 845731 | 851516 | WBGene00018215 | igcm-1   | F39H12.4 | 0.151782354667514    |             |
| AGIWUR40820                                                                                                                      |    |   |        |        |                |          |          |                      |             |
| N2                                                                                                                               | CT | X | 864925 | 871089 | WBGene00018987 | lg1-1    | F56F10.4 | -0.0531617364999981  |             |
| AGIWUR20878                                                                                                                      |    |   |        |        |                |          |          |                      |             |
| N2                                                                                                                               | CT | X | 872517 | 875948 | WBGene00018984 | F56F10.1 | F56F10.1 | 0.0618037159263851   |             |



|                                                                                     |    |   |        |        |                |          |          |                     |                     |  |
|-------------------------------------------------------------------------------------|----|---|--------|--------|----------------|----------|----------|---------------------|---------------------|--|
| AGIWUR1210;AGIWUR8208;AGIWUR14901;AGIWUR15405;AGIWUR19430;AGIWUR37374               |    |   |        |        |                |          |          |                     |                     |  |
| N2                                                                                  | CT | X | 877239 | 879881 | WBGene00022502 | ZC13.1   | ZC13.1   | 0.048896427295233   |                     |  |
| AGIWUR4898;AGIWUR18529;AGIWUR36418                                                  |    |   |        |        |                |          |          |                     |                     |  |
| N2                                                                                  | CT | X | 880629 | 883049 | WBGene00022503 | ZC13.2   | ZC13.2   | -0.085587755692381  | AGIWUR44486         |  |
| N2                                                                                  | CT | X | 882967 | 888394 | WBGene00022504 | mam-1    | ZC13.3   | 0.187818742047785   |                     |  |
| AGIWUR6310;AGIWUR40476                                                              |    |   |        |        |                |          |          |                     |                     |  |
| N2                                                                                  | CT | X | 892228 | 898117 | WBGene00003104 | mab-7    | ZC13.4   | -0.0217900660215218 | AGIWUR18071         |  |
| N2                                                                                  | CT | X | 899508 | 902599 | WBGene00044557 | ZC13.10  | ZC13.10  | 0.0164871274609366  |                     |  |
| AGIWUR2564;AGIWUR42796                                                              |    |   |        |        |                |          |          |                     |                     |  |
| N2                                                                                  | CT | X | 913290 | 914853 | WBGene00018078 | F35H12.6 |          | F35H12.6            | -0.529553630308048  |  |
| AGIWUR19934                                                                         |    |   |        |        |                |          |          |                     |                     |  |
| N2                                                                                  | CT | X | 915874 | 918290 | WBGene00004769 | sel-12   | F35H12.3 |                     | -0.205471387765149  |  |
| AGIWUR8596;AGIWUR15902                                                              |    |   |        |        |                |          |          |                     |                     |  |
| N2                                                                                  | CT | X | 918353 | 920193 | WBGene00018077 | F35H12.5 |          | F35H12.5            | -0.0985601553971414 |  |
| AGIWUR39745                                                                         |    |   |        |        |                |          |          |                     |                     |  |
| N2                                                                                  | CT | X | 920200 | 924511 | WBGene00018076 | pifk-1   | F35H12.4 |                     | 0.0305162784739075  |  |
| AGIWUR39475                                                                         |    |   |        |        |                |          |          |                     |                     |  |
| N2                                                                                  | CT | X | 924964 | 932255 | WBGene00018075 | tbc-11   | F35H12.2 |                     | -0.102830482944544  |  |
| AGIWUR39704                                                                         |    |   |        |        |                |          |          |                     |                     |  |
| N2                                                                                  | CT | X | 933804 | 934906 | WBGene00018079 | F35H12.7 |          | F35H12.7            | 0.059127783216633   |  |
| AGIWUR12471                                                                         |    |   |        |        |                |          |          |                     |                     |  |
| N2                                                                                  | CT | X | 935460 | 937704 | WBGene00018074 | F35H12.1 |          | F35H12.1            | -0.0473058261679684 |  |
| AGIWUR17036                                                                         |    |   |        |        |                |          |          |                     |                     |  |
| N2                                                                                  | CT | X | 938516 | 942608 | WBGene00018779 | F53H8.3  | F53H8.3  | -0.0650595365668121 | AGIWUR35128         |  |
| N2                                                                                  | CT | X | 944826 | 948883 | WBGene00004893 | sms-2    | F53H8.4  | -0.0758746136683346 |                     |  |
| AGIWUR10675;AGIWUR16059;AGIWUR19890;AGIWUR31185;AGIWUR35157;AGIWUR36174;AGIWUR43169 |    |   |        |        |                |          |          |                     |                     |  |
| N2                                                                                  | CT | X | 950782 | 954233 | WBGene00000195 | arr-1    | F53H8.2  | 0.197924426492481   | AGIWUR32033         |  |
| N2                                                                                  | CT | X | 954839 | 957762 | WBGene00000164 | apm-3    | F53H8.1  | -0.165039388300968  |                     |  |
| AGIWUR12166;AGIWUR44192;AGIWUR45022                                                 |    |   |        |        |                |          |          |                     |                     |  |
| N2                                                                                  | CT | X | 957881 | 960568 | WBGene00016642 | chil-10  | C44C1.2  | -0.0474567181228203 | AGIWUR31190         |  |
| N2                                                                                  | CT | X | 960569 | 963202 | WBGene00003563 | ncs-1    | C44C1.3  | -0.184008976032148  | AGIWUR41639         |  |
| N2                                                                                  | CT | X | 969074 | 970270 | WBGene00016645 | C44C1.6  | C44C1.6  | -0.0615987407396812 | AGIWUR410           |  |
| N2                                                                                  | CT | X | 970583 | 974816 | WBGene00016643 | vps-45   | C44C1.4  | -0.173874869724083  |                     |  |
| AGIWUR8956;AGIWUR18258;AGIWUR38973                                                  |    |   |        |        |                |          |          |                     |                     |  |
| N2                                                                                  | CT | X | 975525 | 978445 | WBGene00016644 | abhd-3.2 |          | C44C1.5             | -0.176685466258483  |  |
| AGIWUR12864                                                                         |    |   |        |        |                |          |          |                     |                     |  |
| N2                                                                                  | CT | X | 980776 | 983030 | WBGene00016641 | C44C1.1  | C44C1.1  | -0.0321665639246902 | AGIWUR16266         |  |
| N2                                                                                  | CT | X | 984581 | 991456 | WBGene00000958 | dgk-1    | C09E10.2 |                     | 0.125873617449016   |  |
| AGIWUR5498                                                                          |    |   |        |        |                |          |          |                     |                     |  |

|                                                                                                           |    |   |         |         |                |         |          |                     |             |
|-----------------------------------------------------------------------------------------------------------|----|---|---------|---------|----------------|---------|----------|---------------------|-------------|
| N2                                                                                                        | CT | X | 1004337 | 1009412 | WBGene00018861 | cutl-21 | F55A4.10 | -0.168289236461598  |             |
| AGIWUR34441                                                                                               |    |   |         |         |                |         |          |                     |             |
| N2                                                                                                        | CT | X | 1011501 | 1012347 | WBGene00023069 | rncs-1  | F55A4.9  | -0.237916666165834  | AGIWUR25420 |
| N2                                                                                                        | CT | X | 1012731 | 1017567 | WBGene00018854 | nlf-1   | F55A4.2  | -0.0516768643333023 |             |
| AGIWUR3564;AGIWUR4708;AGIWUR21428;AGIWUR23400;AGIWUR32736;AGIWUR41565                                     |    |   |         |         |                |         |          |                     |             |
| N2                                                                                                        | CT | X | 1023477 | 1023780 | WBGene00018855 | F55A4.3 | F55A4.3  | -0.22606764091049   | AGIWUR33841 |
| N2                                                                                                        | CT | X | 1024646 | 1025838 | WBGene00018856 | F55A4.4 | F55A4.4  | 0.0145533598698053  | AGIWUR14930 |
| N2                                                                                                        | CT | X | 1027673 | 1035286 | WBGene00018857 | stau-1  | F55A4.5  | 0.0635396773772428  |             |
| AGIWUR10835;AGIWUR23559                                                                                   |    |   |         |         |                |         |          |                     |             |
| N2                                                                                                        | CT | X | 1035548 | 1037046 | WBGene00018853 | sec-22  | F55A4.1  | -0.259607396874994  | AGIWUR3979  |
| N2                                                                                                        | CT | X | 1037023 | 1038447 | WBGene00018859 | F55A4.7 | F55A4.7  | -0.0184070367681599 |             |
| AGIWUR4952;AGIWUR5421;AGIWUR10067;AGIWUR14857;AGIWUR20097;AGIWUR24312;AGIWUR37548                         |    |   |         |         |                |         |          |                     |             |
| N2                                                                                                        | CT | X | 1038514 | 1046206 | WBGene00018860 | vpat-1  | F55A4.8  | 0.0756840993765779  |             |
| AGIWUR2518;AGIWUR5258;AGIWUR18590;AGIWUR29451                                                             |    |   |         |         |                |         |          |                     |             |
| N2                                                                                                        | CT | X | 1054081 | 1056843 | WBGene00003565 | ncs-3   | K03E6.3  | -0.0649266802688615 | AGIWUR18624 |
| N2                                                                                                        | CT | X | 1057487 | 1062447 | WBGene00006741 | unc-1   | K03E6.5  | 0.114055083133877   |             |
| AGIWUR2302;AGIWUR14006;AGIWUR20781                                                                        |    |   |         |         |                |         |          |                     |             |
| N2                                                                                                        | CT | X | 1066789 | 1069033 | WBGene00019364 | mksr-1  | K03E6.4  | 0.31213258934497    | AGIWUR31174 |
| N2                                                                                                        | CT | X | 1073908 | 1079451 | WBGene00002988 | lim-6   | K03E6.1  | -0.0643836801224795 |             |
| AGIWUR8993;AGIWUR10111;AGIWUR20616;AGIWUR21171;AGIWUR36958;AGIWUR43242                                    |    |   |         |         |                |         |          |                     |             |
| N2                                                                                                        | CT | X | 1079446 | 1080653 | WBGene00003991 | pfn-3   | K03E6.6  | -0.100757084544987  |             |
| AGIWUR14050;AGIWUR16785;AGIWUR17554;AGIWUR22606;AGIWUR34446;AGIWUR35978                                   |    |   |         |         |                |         |          |                     |             |
| N2                                                                                                        | CT | X | 1084214 | 1088148 | WBGene00019365 | rei-2   | K03E6.7  | -0.0562462585464232 | AGIWUR9250  |
| N2                                                                                                        | CT | X | 1095547 | 1097013 | WBGene00018634 | F49E7.2 | F49E7.2  | -0.166784398432462  | AGIWUR9891  |
| N2                                                                                                        | CT | X | 1097152 | 1103320 | WBGene00004377 | rme-6   | F49E7.1  | -0.104073182739565  |             |
| AGIWUR1339;AGIWUR17283;AGIWUR18352;AGIWUR27630;AGIWUR32031;AGIWUR35210;AGIWUR37190;AGIWUR39437            |    |   |         |         |                |         |          |                     |             |
| N2                                                                                                        | CT | X | 1104212 | 1106247 | WBGene00002062 | ife-4   | C05D9.5  | -0.07101071418837   | AGIWUR2875  |
| N2                                                                                                        | CT | X | 1107969 | 1110110 | WBGene00015473 | C05D9.4 | C05D9.4  | -0.0467502768430439 | AGIWUR3752  |
| N2                                                                                                        | CT | X | 1111903 | 1116794 | WBGene00015472 | C05D9.3 | C05D9.3  | -0.0857073982604373 | AGIWUR42743 |
| N2                                                                                                        | CT | X | 1117192 | 1119405 | WBGene00015474 | C05D9.7 | C05D9.7  | -0.301131839075962  | AGIWUR25615 |
| N2                                                                                                        | CT | X | 1122422 | 1124308 | WBGene00015476 | C05D9.9 | C05D9.9  | 0.278250994647889   |             |
| AGIWUR28491;AGIWUR45071                                                                                   |    |   |         |         |                |         |          |                     |             |
| N2                                                                                                        | CT | X | 1125170 | 1128288 | WBGene00015471 | lmp-2   | C05D9.2  | -0.15278617622026   | AGIWUR42105 |
| N2                                                                                                        | CT | X | 1128986 | 1132925 | WBGene00004927 | snx-1   | C05D9.1  | 0.0310327861243298  | AGIWUR40310 |
| N2                                                                                                        | CT | X | 1132993 | 1148585 | WBGene00020128 | R193.2  | R193.2   | 0.064975724228022   |             |
| AGIWUR619;AGIWUR14015;AGIWUR19955;AGIWUR21988;AGIWUR24806;AGIWUR31506;AGIWUR33612;AGIWUR39536;AGIWUR41598 |    |   |         |         |                |         |          |                     |             |
| N2                                                                                                        | CT | X | 1151547 | 1153545 | WBGene00020129 | R193.3  | R193.3   | -0.175699396201019  | AGIWUR33696 |
| N2                                                                                                        | CT | X | 1154948 | 1155613 | WBGene00020127 | R193.1  | R193.1   | -0.142887729017702  | AGIWUR37642 |
| N2                                                                                                        | CT | X | 1163153 | 1177172 | WBGene00020490 | tmc-1   | T13G4.3  | 0.04444814375434506 | AGIWUR5257  |

|                                                                                    |    |   |         |         |                |          |          |                      |             |
|------------------------------------------------------------------------------------|----|---|---------|---------|----------------|----------|----------|----------------------|-------------|
| N2                                                                                 | CT | X | 1180284 | 1187932 | WBGene00020489 | hot-8    | T13G4.2  | -0.0359384799622919  | AGIWUR17480 |
| N2                                                                                 | CT | X | 1188453 | 1190752 | WBGene00020491 | T13G4.4  | T13G4.4  | 0.425545208858036    | AGIWUR41536 |
| N2                                                                                 | CT | X | 1193148 | 1193858 | WBGene00020488 | T13G4.1  | T13G4.1  | 0.266346104608946    | AGIWUR44589 |
| N2                                                                                 | CT | X | 1195108 | 1198481 | WBGene00020492 | T13G4.5  | T13G4.5  | -0.0753569852297638  | AGIWUR28194 |
| N2                                                                                 | CT | X | 1202606 | 1203763 | WBGene00020494 | T13G4.7  | T13G4.7  | -0.149077851995092   | AGIWUR29871 |
| N2                                                                                 | CT | X | 1209411 | 1210683 | WBGene00016724 | C46H3.1  | C46H3.1  | -0.170122407071084   | AGIWUR22802 |
| N2                                                                                 | CT | X | 1211760 | 1230758 | WBGene00016725 | C46H3.2  | C46H3.2  | 0.141095253840221    |             |
| AGIWUR35176;AGIWUR42826                                                            |    |   |         |         |                |          |          |                      |             |
| N2                                                                                 | CT | X | 1245984 | 1247892 | WBGene00006635 | tsp-9    | C25G6.2  | -0.139077332503799   | AGIWUR37946 |
| N2                                                                                 | CT | X | 1247833 | 1249838 | WBGene00016109 | C25G6.4  | C25G6.4  | 0.0569934555163081   |             |
| AGIWUR21889;AGIWUR30220;AGIWUR35983;AGIWUR37039                                    |    |   |         |         |                |          |          |                      |             |
| N2                                                                                 | CT | X | 1270898 | 1272561 | WBGene00016107 | C25G6.1  | C25G6.1  | -0.0648439121273778  | AGIWUR15410 |
| N2                                                                                 | CT | X | 1272788 | 1275416 | WBGene00016874 | C52B11.5 | C52B11.5 | 0.108618332789849    |             |
| AGIWUR34464                                                                        |    |   |         |         |                |          |          |                      |             |
| N2                                                                                 | CT | X | 1295278 | 1298823 | WBGene00016872 | dop-4    | C52B11.3 | 0.0275089366020165   |             |
| AGIWUR7407                                                                         |    |   |         |         |                |          |          |                      |             |
| N2                                                                                 | CT | X | 1300149 | 1309504 | WBGene00016871 | inso-1   | C52B11.2 | 0.15772130132741     |             |
| AGIWUR5254;AGIWUR19809;AGIWUR21664;AGIWUR23766;AGIWUR26079;AGIWUR28297;AGIWUR40402 |    |   |         |         |                |          |          |                      |             |
| N2                                                                                 | CT | X | 1311605 | 1316634 | WBGene00019272 | H42K12.3 | H42K12.3 | -0.51858992125337    |             |
| AGIWUR33012                                                                        |    |   |         |         |                |          |          |                      |             |
| N2                                                                                 | CT | X | 1321353 | 1327985 | WBGene00003965 | pdh-1    | H42K12.1 | 0.0236567502111136   |             |
| AGIWUR29723                                                                        |    |   |         |         |                |          |          |                      |             |
| N2                                                                                 | CT | X | 1328143 | 1329947 | WBGene00017666 | F21E9.2  | F21E9.2  | 0.0253513836517651   | AGIWUR18182 |
| N2                                                                                 | CT | X | 1335363 | 1336915 | WBGene00017667 | ttr-37   | F21E9.3  | -0.403189139757512   | AGIWUR28934 |
| N2                                                                                 | CT | X | 1343837 | 1344410 | WBGene00017668 | ins-39   | F21E9.4  | -0.806992228137777   | AGIWUR19013 |
| N2                                                                                 | CT | X | 1355556 | 1356482 | WBGene00017670 | F21E9.6  | F21E9.6  | -0.175297302085021   | AGIWUR33293 |
| N2                                                                                 | CT | X | 1357771 | 1358532 | WBGene00018940 | F56C3.3  | F56C3.3  | -0.0524203760028605  | AGIWUR20347 |
| N2                                                                                 | CT | X | 1359720 | 1362036 | WBGene00018941 | F56C3.4  | F56C3.4  | -0.165254829352373   | AGIWUR22669 |
| N2                                                                                 | CT | X | 1362816 | 1363997 | WBGene00018942 | F56C3.5  | F56C3.5  | 0.276738422055317    | AGIWUR12830 |
| N2                                                                                 | CT | X | 1365474 | 1367516 | WBGene00018943 | dgn-2    | F56C3.6  | 0.144839721695686    |             |
| AGIWUR15039;AGIWUR33689                                                            |    |   |         |         |                |          |          |                      |             |
| N2                                                                                 | CT | X | 1370543 | 1370786 | WBGene00018944 | F56C3.7  | F56C3.7  | 0.000827233939022065 | AGIWUR3068  |
| N2                                                                                 | CT | X | 1372012 | 1374630 | WBGene00018939 | fbxa-190 | F56C3.2  | -0.16268744586621    |             |
| AGIWUR11442                                                                        |    |   |         |         |                |          |          |                      |             |
| N2                                                                                 | CT | X | 1381375 | 1381665 | WBGene00044558 | F56C3.10 | F56C3.10 |                      |             |
| -0.00641032280819953 AGIWUR2372;AGIWUR19801;AGIWUR30724;AGIWUR32967;AGIWUR42194    |    |   |         |         |                |          |          |                      |             |
| N2                                                                                 | CT | X | 1384318 | 1384638 | WBGene00018945 | F56C3.8  | F56C3.8  | -0.324050753582657   | AGIWUR18707 |
| N2                                                                                 | CT | X | 1386248 | 1388160 | WBGene00018938 | F56C3.1  | F56C3.1  | -0.180837722022546   | AGIWUR37168 |
| N2                                                                                 | CT | X | 1391800 | 1393991 | WBGene00018946 | F56C3.9  | F56C3.9  | 0.0462548486765364   | AGIWUR26315 |

|                                                                                                                                              |    |   |         |         |                |          |           |                       |             |
|----------------------------------------------------------------------------------------------------------------------------------------------|----|---|---------|---------|----------------|----------|-----------|-----------------------|-------------|
| N2                                                                                                                                           | CT | X | 1396353 | 1396551 | WBGene00019267 | H39E20.1 | H39E20.1  | -0.12606700719869     |             |
| AGIWUR10559                                                                                                                                  |    |   |         |         |                |          |           |                       |             |
| N2                                                                                                                                           | CT | X | 1398824 | 1400751 | WBGene00022731 | ZK402.5  | ZK402.5   | 0.628776275194216     | AGIWUR27189 |
| N2                                                                                                                                           | CT | X | 1404271 | 1406101 | WBGene00022728 | ZK402.1  | ZK402.1   | -0.197591285987683    | AGIWUR22523 |
| N2                                                                                                                                           | CT | X | 1408836 | 1410652 | WBGene00000025 | abu-2    | F19G12.7  | -0.0347553197129455   |             |
| AGIWUR19145                                                                                                                                  |    |   |         |         |                |          |           |                       |             |
| N2                                                                                                                                           | CT | X | 1413144 | 1416545 | WBGene00005244 | srh-19   | F19G12.5  | -0.000295571169974806 |             |
| AGIWUR14945                                                                                                                                  |    |   |         |         |                |          |           |                       |             |
| N2                                                                                                                                           | CT | X | 1417304 | 1417477 | WBGene00017612 | F19G12.4 | F19G12.4  | 0.0462482675612472    |             |
| AGIWUR1694;AGIWUR5185;AGIWUR16213                                                                                                            |    |   |         |         |                |          |           |                       |             |
| N2                                                                                                                                           | CT | X | 1425727 | 1426164 | WBGene00017611 | F19G12.3 | F19G12.3  | -0.206268078820344    |             |
| AGIWUR32948                                                                                                                                  |    |   |         |         |                |          |           |                       |             |
| N2                                                                                                                                           | CT | X | 1427774 | 1430871 | WBGene00017610 | F19G12.2 | F19G12.2  | -0.446567711570675    |             |
| AGIWUR40163                                                                                                                                  |    |   |         |         |                |          |           |                       |             |
| N2                                                                                                                                           | CT | X | 1439261 | 1440261 | WBGene00021046 | sed1-1   | W05H7.3   | -0.0724422232104214   | AGIWUR2320  |
| N2                                                                                                                                           | CT | X | 1440366 | 1446643 | WBGene00021047 | zfp-3    | W05H7.4   | -0.00479600336215924  |             |
| AGIWUR10664;AGIWUR21164;AGIWUR22713;AGIWUR25733;AGIWUR33192;AGIWUR33399;AGIWUR37599;AGIWUR40048;AGIWUR40099                                  |    |   |         |         |                |          |           |                       |             |
| ;AGIWUR40219;AGIWUR42218;AGIWUR42733;AGIWUR43726                                                                                             |    |   |         |         |                |          |           |                       |             |
| N2                                                                                                                                           | CT | X | 1450768 | 1452306 | WBGene00021044 | W05H7.1  | W05H7.1   | -0.304392973249966    | AGIWUR28997 |
| N2                                                                                                                                           | CT | X | 1452695 | 1454000 | WBGene00016997 | cebp-1   | D1005.3   | -0.217291937674535    | AGIWUR7092  |
| N2                                                                                                                                           | CT | X | 1459047 | 1462793 | WBGene00016996 | D1005.2  | D1005.2   | -0.183649024457701    | AGIWUR38343 |
| N2                                                                                                                                           | CT | X | 1463110 | 1464799 | WBGene00017000 | D1005.6  | D1005.6   | -1.158675825867       | AGIWUR21560 |
| N2                                                                                                                                           | CT | X | 1470998 | 1472919 | WBGene00016999 | D1005.5  | D1005.5   | 0.0543842681186772    | AGIWUR25343 |
| N2                                                                                                                                           | CT | X | 1479542 | 1484398 | WBGene00016995 | acly-1   | D1005.1   | 0.025738605365488     |             |
| AGIWUR2651;AGIWUR19932;AGIWUR34267;AGIWUR38476                                                                                               |    |   |         |         |                |          |           |                       |             |
| N2                                                                                                                                           | CT | X | 1484853 | 1485818 | WBGene00016998 | D1005.4  | D1005.4   | -0.0342844635118356   |             |
| AGIWUR6861;AGIWUR20502;AGIWUR36467;AGIWUR37562                                                                                               |    |   |         |         |                |          |           |                       |             |
| N2                                                                                                                                           | CT | X | 1486473 | 1489326 | WBGene00000988 | dhs-25   | F09E10.3  | -0.0855241218170484   |             |
| AGIWUR6958                                                                                                                                   |    |   |         |         |                |          |           |                       |             |
| N2                                                                                                                                           | CT | X | 1489672 | 1494356 | WBGene00017295 | F09E10.5 | F09E10.5  | 0.137449813549743     |             |
| AGIWUR22470                                                                                                                                  |    |   |         |         |                |          |           |                       |             |
| N2                                                                                                                                           | CT | X | 1495074 | 1497681 | WBGene00017296 | F09E10.6 | F09E10.6  | -0.24065561240314     |             |
| AGIWUR15544                                                                                                                                  |    |   |         |         |                |          |           |                       |             |
| N2                                                                                                                                           | CT | X | 1500180 | 1501852 | WBGene00017297 | F09E10.7 | F09E10.7  | -0.0692548629715883   |             |
| AGIWUR3344;AGIWUR5999;AGIWUR7563;AGIWUR14284;AGIWUR21040;AGIWUR21617;AGIWUR24684;AGIWUR26365;AGIWUR31714;AGIWUR33549;AGIWUR36843;AGIWUR43253 |    |   |         |         |                |          |           |                       |             |
| N2                                                                                                                                           | CT | X | 1502860 | 1503278 | WBGene00017294 | F09E10.1 | F09E10.1  | -0.000473102067530817 | AGIWUR40122 |
| AGIWUR40122                                                                                                                                  |    |   |         |         |                |          |           |                       |             |
| N2                                                                                                                                           | CT | X | 1504131 | 1504841 | WBGene00006650 | tts-1    | F09E10.11 | 0.00334620157183263   |             |

|                                                                                 |    |   |         |         |                |           |           |                     |             |
|---------------------------------------------------------------------------------|----|---|---------|---------|----------------|-----------|-----------|---------------------|-------------|
| AGIWUR9901;AGIWUR15248;AGIWUR21990;AGIWUR22247;AGIWUR25378;AGIWUR28345          |    |   |         |         |                |           |           |                     |             |
| N2                                                                              | CT | X | 1505190 | 1505626 | WBGene00022982 | F09E10.10 | F09E10.10 | -0.096615102403538  |             |
| AGIWUR1241;AGIWUR1434;AGIWUR10913;AGIWUR26832;AGIWUR36065                       |    |   |         |         |                |           |           |                     |             |
| N2                                                                              | CT | X | 1510480 | 1521487 | WBGene00017298 | toca-1    | F09E10.8  | 0.0788886802783431  |             |
| AGIWUR15186                                                                     |    |   |         |         |                |           |           |                     |             |
| N2                                                                              | CT | X | 1536366 | 1540287 | WBGene00019436 | K06A9.2   | K06A9.2   | -0.0295225759228659 | AGIWUR8972  |
| N2                                                                              | CT | X | 1547505 | 1560124 | WBGene00019435 | K06A9.1   | K06A9.1   | 0.148251861547746   |             |
| AGIWUR976;AGIWUR18127                                                           |    |   |         |         |                |           |           |                     |             |
| N2                                                                              | CT | X | 1568678 | 1572854 | WBGene00019146 | H02F09.3  | H02F09.3  | -0.0716914809249465 |             |
| AGIWUR14894                                                                     |    |   |         |         |                |           |           |                     |             |
| N2                                                                              | CT | X | 1573220 | 1574010 | WBGene00019145 | H02F09.2  | H02F09.2  |                     |             |
| -0.00880178289031708 AGIWUR30326                                                |    |   |         |         |                |           |           |                     |             |
| N2                                                                              | CT | X | 1576637 | 1591296 | WBGene00006955 | wrt-9     | B0344.2   | -0.18337134716176   |             |
| AGIWUR1818;AGIWUR5585                                                           |    |   |         |         |                |           |           |                     |             |
| N2                                                                              | CT | X | 1604906 | 1619115 | WBGene00019188 | H11E01.3  | H11E01.3  |                     |             |
| -0.00277966930053442 AGIWUR2438;AGIWUR14187;AGIWUR17474;AGIWUR31358;AGIWUR41516 |    |   |         |         |                |           |           |                     |             |
| N2                                                                              | CT | X | 1621481 | 1625247 | WBGene00019187 | H11E01.2  | H11E01.2  | 0.00127162320998053 |             |
| AGIWUR17159                                                                     |    |   |         |         |                |           |           |                     |             |
| N2                                                                              | CT | X | 1628137 | 1629454 | WBGene00019186 | fbxb-58   | H11E01.1  | 0.0380249626085902  |             |
| AGIWUR41566                                                                     |    |   |         |         |                |           |           |                     |             |
| N2                                                                              | CT | X | 1630615 | 1635727 | WBGene00022723 | ZK380.2   | ZK380.2   | -0.299054397775903  | AGIWUR11129 |
| N2                                                                              | CT | X | 1651419 | 1653897 | WBGene00022724 | ZK380.4   | ZK380.4   | -0.0720006951670085 | AGIWUR12753 |
| N2                                                                              | CT | X | 1655522 | 1656936 | WBGene00006551 | tbx-32    | ZK380.1   | 0.462148742513406   | AGIWUR10520 |
| N2                                                                              | CT | X | 1667019 | 1668848 | WBGene00019991 | R09H3.3   | R09H3.3   | -0.0517790010412167 | AGIWUR16590 |
| N2                                                                              | CT | X | 1671148 | 1674165 | WBGene00006550 | tbx-31    | C36C9.2   | 0.0370473848810722  | AGIWUR28414 |
| N2                                                                              | CT | X | 1676205 | 1678121 | WBGene00016486 | fbxa-170  | C36C9.3   | -0.210911791686897  |             |
| AGIWUR11766;AGIWUR14810;AGIWUR17800                                             |    |   |         |         |                |           |           |                     |             |
| N2                                                                              | CT | X | 1681752 | 1681886 | WBGene00219849 | C36C9.10  | C36C9.10  | -0.145604293260558  |             |
| AGIWUR20054;AGIWUR26371;AGIWUR40994                                             |    |   |         |         |                |           |           |                     |             |
| N2                                                                              | CT | X | 1682954 | 1686419 | WBGene00016485 | meg-4     | C36C9.1   | -0.155129058799395  |             |
| AGIWUR5290;AGIWUR14478                                                          |    |   |         |         |                |           |           |                     |             |
| N2                                                                              | CT | X | 1699788 | 1703938 | WBGene00016488 | C36C9.5   | C36C9.5   | -0.337041288854024  | AGIWUR25128 |
| N2                                                                              | CT | X | 1706370 | 1706638 | WBGene00017224 | F07G6.5   | F07G6.5   | -0.0466069424302429 | AGIWUR37961 |
| N2                                                                              | CT | X | 1710293 | 1711212 | WBGene00017225 | fbxa-52   | F07G6.6   | -0.0908165429811802 | AGIWUR45205 |
| N2                                                                              | CT | X | 1714351 | 1715487 | WBGene00044583 | F07G6.9   | F07G6.9   | -0.0476017986573205 |             |
| AGIWUR6243;AGIWUR29401;AGIWUR39325;AGIWUR44809                                  |    |   |         |         |                |           |           |                     |             |
| N2                                                                              | CT | X | 1716442 | 1718568 | WBGene00017226 | fbxa-53   | F07G6.7   | 0.00630181738095636 |             |
| AGIWUR7155;AGIWUR25529;AGIWUR32530                                              |    |   |         |         |                |           |           |                     |             |
| N2                                                                              | CT | X | 1720093 | 1720428 | WBGene00017227 | F07G6.8   | F07G6.8   | -0.359789715039906  |             |

|                                                                         |    |   |         |         |                |           |           |                      |             |
|-------------------------------------------------------------------------|----|---|---------|---------|----------------|-----------|-----------|----------------------|-------------|
| AGIWUR21530;AGIWUR23105;AGIWUR23920;AGIWUR30816;AGIWUR36057;AGIWUR40612 |    |   |         |         |                |           |           |                      |             |
| N2                                                                      | CT | X | 1727356 | 1729154 | WBGene00017222 | F07G6.2   | F07G6.2   | -0.179349778717253   | AGIWUR44319 |
| N2                                                                      | CT | X | 1729858 | 1731819 | WBGene00017221 | dgn-3     | F07G6.1   | 0.150926554055849    | AGIWUR5604  |
| N2                                                                      | CT | X | 1737906 | 1739229 | WBGene00045271 | F07G6.10  | F07G6.10  | 0.304213561787844    |             |
| AGIWUR31342                                                             |    |   |         |         |                |           |           |                      |             |
| N2                                                                      | CT | X | 1745096 | 1746217 | WBGene00022292 | Y75D11A.3 | Y75D11A.3 | -0.040864154805778   |             |
| AGIWUR1373;AGIWUR2826;AGIWUR4858;AGIWUR13158;AGIWUR41378                |    |   |         |         |                |           |           |                      |             |
| N2                                                                      | CT | X | 1777355 | 1778146 | WBGene00001237 | elc-2     | W03H1.2   | -0.00750056993142589 | AGIWUR8069  |
| N2                                                                      | CT | X | 1786907 | 1788405 | WBGene00000185 | arg-1     | F31A9.3   | -0.183085858109195   |             |
| AGIWUR12589;AGIWUR18681;AGIWUR19310;AGIWUR34927;AGIWUR44042             |    |   |         |         |                |           |           |                      |             |
| N2                                                                      | CT | X | 1794816 | 1795673 | WBGene00017941 | F31A9.2   | F31A9.2   | -0.185484916469319   | AGIWUR2252  |
| N2                                                                      | CT | X | 1806833 | 1807767 | WBGene00015771 | got-1.3   | C14E2.2   | 0.32033347487681     | AGIWUR33854 |
| N2                                                                      | CT | X | 1810686 | 1811536 | WBGene00015772 | C14E2.3   | C14E2.3   | 0.179613664698996    | AGIWUR15532 |
| N2                                                                      | CT | X | 1816361 | 1816762 | WBGene00044562 | C14E2.7   | C14E2.7   | 0.141865962513807    |             |
| AGIWUR1121;AGIWUR9109;AGIWUR24714;AGIWUR42117;AGIWUR44298               |    |   |         |         |                |           |           |                      |             |
| N2                                                                      | CT | X | 1823616 | 1825340 | WBGene00015774 | C14E2.5   | C14E2.5   | 0.0131874185077887   | AGIWUR7100  |
| N2                                                                      | CT | X | 1826466 | 1827354 | WBGene00015770 | C14E2.1   | C14E2.1   | 0.133049562647519    | AGIWUR10204 |
| N2                                                                      | CT | X | 1827738 | 1828487 | WBGene00015775 | C14E2.6   | C14E2.6   | -0.0643605202965514  | AGIWUR656   |
| N2                                                                      | CT | X | 1834445 | 1839024 | WBGene00020829 | T26C11.3  | T26C11.3  | -0.0669063504019594  |             |
| AGIWUR27549                                                             |    |   |         |         |                |           |           |                      |             |
| N2                                                                      | CT | X | 1840554 | 1845565 | WBGene00020830 | T26C11.4  | T26C11.4  | 0.226924117801861    |             |
| AGIWUR24882                                                             |    |   |         |         |                |           |           |                      |             |
| N2                                                                      | CT | X | 1846608 | 1848675 | WBGene00000462 | ceh-41    | T26C11.5  | -0.394561121889775   |             |
| AGIWUR30638                                                             |    |   |         |         |                |           |           |                      |             |
| N2                                                                      | CT | X | 1848795 | 1852736 | WBGene00000444 | ceh-21    | T26C11.6  | 0.0943837111683683   |             |
| AGIWUR20034;AGIWUR42019                                                 |    |   |         |         |                |           |           |                      |             |
| N2                                                                      | CT | X | 1853874 | 1856189 | WBGene00000460 | ceh-39    | T26C11.7  | 0.0724777434058588   |             |
| AGIWUR17728                                                             |    |   |         |         |                |           |           |                      |             |
| N2                                                                      | CT | X | 1860722 | 1863543 | WBGene00044563 | T26C11.8  | T26C11.8  | 0.236335258415724    |             |
| AGIWUR13940;AGIWUR41424                                                 |    |   |         |         |                |           |           |                      |             |
| N2                                                                      | CT | X | 1865246 | 1866638 | WBGene00006560 | tbx-41    | T26C11.1  | 0.0603045275171672   |             |
| AGIWUR10415                                                             |    |   |         |         |                |           |           |                      |             |
| N2                                                                      | CT | X | 1892187 | 1893272 | WBGene00015118 | B0294.3   | B0294.3   | -0.026668554287439   |             |
| AGIWUR903;AGIWUR5963;AGIWUR22701;AGIWUR25360;AGIWUR36315                |    |   |         |         |                |           |           |                      |             |
| N2                                                                      | CT | X | 1896662 | 1897343 | WBGene00015117 | B0294.1   | B0294.1   | 0.124315591548161    | AGIWUR37631 |
| N2                                                                      | CT | X | 1910943 | 1913357 | WBGene00022508 | ZC53.1    | ZC53.1    | 0.174095984264032    | AGIWUR16565 |
| N2                                                                      | CT | X | 1915258 | 1917162 | WBGene00004352 | rgs-9     | ZC53.7    | -0.196469364740276   | AGIWUR2771  |
| N2                                                                      | CT | X | 1917437 | 1919755 | WBGene00022512 | dot-1.5   | ZC53.6    | -0.0134334217376022  | AGIWUR38437 |
| N2                                                                      | CT | X | 1923723 | 1924238 | WBGene00022509 | ZC53.2    | ZC53.2    | -0.25056460756617    | AGIWUR14607 |

|                                                                       |    |   |         |         |                |            |            |                     |             |
|-----------------------------------------------------------------------|----|---|---------|---------|----------------|------------|------------|---------------------|-------------|
| N2                                                                    | CT | X | 1925750 | 1937689 | WBGene00022511 | ZC53.4     | ZC53.4     | 0.116665616486373   | AGIWUR2275  |
| N2                                                                    | CT | X | 1937947 | 1942199 | WBGene00021987 | fbxa-40    | Y59E1A.1   | -0.0994429937076875 |             |
| AGIWUR6971                                                            |    |   |         |         |                |            |            |                     |             |
| N2                                                                    | CT | X | 1955550 | 1956824 | WBGene00018691 | fbxa-17    | F52D2.10   | 0.119705095960352   |             |
| AGIWUR44400                                                           |    |   |         |         |                |            |            |                     |             |
| N2                                                                    | CT | X | 1962573 | 1966188 | WBGene00018689 | F52D2.7    | F52D2.7    | -0.0869455114539406 | AGIWUR5190  |
| N2                                                                    | CT | X | 1969875 | 1972657 | WBGene00006139 | str-79     | F52D2.9    | 0.194639659607587   | AGIWUR34890 |
| N2                                                                    | CT | X | 1973796 | 1974523 | WBGene00018687 | F52D2.5    | F52D2.5    | -0.0182526594899168 |             |
| AGIWUR4221;AGIWUR5847;AGIWUR24939;AGIWUR26041;AGIWUR36663;AGIWUR42686 |    |   |         |         |                |            |            |                     |             |
| N2                                                                    | CT | X | 1978014 | 1980938 | WBGene00219451 | F52D2.12   | F52D2.12   | 0.3585126105013     |             |
| AGIWUR34636                                                           |    |   |         |         |                |            |            |                     |             |
| N2                                                                    | CT | X | 1983714 | 1984833 | WBGene00018690 | fbxa-46    | F52D2.8    | -0.136693676180421  |             |
| AGIWUR9476;AGIWUR13269;AGIWUR27954;AGIWUR29303                        |    |   |         |         |                |            |            |                     |             |
| N2                                                                    | CT | X | 1986429 | 1989607 | WBGene00001569 | meg-3      | F52D2.4    | 0.0178847477395117  | AGIWUR30104 |
| N2                                                                    | CT | X | 1990734 | 1992649 | WBGene00021484 | Y40A1A.2   | Y40A1A.2   | -0.0264752846968523 |             |
| AGIWUR11963;AGIWUR40969;AGIWUR41408                                   |    |   |         |         |                |            |            |                     |             |
| N2                                                                    | CT | X | 1995731 | 1998112 | WBGene00021485 | Y40A1A.3   | Y40A1A.3   | 0.156862860220282   |             |
| AGIWUR7356;AGIWUR27578                                                |    |   |         |         |                |            |            |                     |             |
| N2                                                                    | CT | X | 2001030 | 2002631 | WBGene00021483 | Y40A1A.1   | Y40A1A.1   | 0.758643465952447   |             |
| AGIWUR41690                                                           |    |   |         |         |                |            |            |                     |             |
| N2                                                                    | CT | X | 2013151 | 2018062 | WBGene00022419 | Y102A11A.9 | Y102A11A.9 | 0.107475028648305   |             |
| AGIWUR27143                                                           |    |   |         |         |                |            |            |                     |             |
| N2                                                                    | CT | X | 2019148 | 2025737 | WBGene00022413 | Y102A11A.3 | Y102A11A.3 | -0.0506473564974037 |             |
| AGIWUR42775                                                           |    |   |         |         |                |            |            |                     |             |
| N2                                                                    | CT | X | 2026642 | 2031010 | WBGene00022412 | Y102A11A.2 | Y102A11A.2 | -0.094492169558972  |             |
| AGIWUR41940                                                           |    |   |         |         |                |            |            |                     |             |
| N2                                                                    | CT | X | 2030959 | 2031588 | WBGene00022415 | Y102A11A.5 | Y102A11A.5 | -0.269812404053141  |             |
| AGIWUR14358;AGIWUR22481;AGIWUR35764;AGIWUR37140;AGIWUR41055           |    |   |         |         |                |            |            |                     |             |
| N2                                                                    | CT | X | 2031963 | 2035245 | WBGene00022416 | Y102A11A.6 | Y102A11A.6 | -0.202312130020427  |             |
| AGIWUR11400                                                           |    |   |         |         |                |            |            |                     |             |
| N2                                                                    | CT | X | 2035943 | 2038220 | WBGene00022417 | Y102A11A.7 | Y102A11A.7 | -0.0766655669643406 |             |
| AGIWUR24151                                                           |    |   |         |         |                |            |            |                     |             |
| N2                                                                    | CT | X | 2039397 | 2046360 | WBGene00022418 | igcm-4     | Y102A11A.8 | 0.0980894044466556  |             |
| AGIWUR5133;AGIWUR5331;AGIWUR6948;AGIWUR10058;AGIWUR18787;AGIWUR21402  |    |   |         |         |                |            |            |                     |             |
| N2                                                                    | CT | X | 2051907 | 2054048 | WBGene00022411 | Y102A11A.1 | Y102A11A.1 |                     |             |
| -0.00916649984552365 AGIWUR11614                                      |    |   |         |         |                |            |            |                     |             |
| N2                                                                    | CT | X | 2065038 | 2066567 | WBGene00044753 | F49H12.7   | F49H12.7   | 0.226006998339361   |             |
| AGIWUR14793                                                           |    |   |         |         |                |            |            |                     |             |
| N2                                                                    | CT | X | 2066554 | 2070441 | WBGene00018657 | ac1-4      | F49H12.6   | 0.215037658468393   |             |

AGIWUR9065;AGIWUR9826;AGIWUR20288

|    |    |   |         |         |                |          |          |                    |
|----|----|---|---------|---------|----------------|----------|----------|--------------------|
| N2 | CT | X | 2074448 | 2075944 | WBGene00018656 | F49H12.5 | F49H12.5 | -0.186992236856739 |
|----|----|---|---------|---------|----------------|----------|----------|--------------------|

AGIWUR5705

|    |    |   |         |         |                |          |          |                    |
|----|----|---|---------|---------|----------------|----------|----------|--------------------|
| N2 | CT | X | 2079836 | 2081487 | WBGene00018655 | F49H12.4 | F49H12.4 | -0.282845836175559 |
|----|----|---|---------|---------|----------------|----------|----------|--------------------|

AGIWUR5627

|    |    |   |         |         |                |          |          |                   |
|----|----|---|---------|---------|----------------|----------|----------|-------------------|
| N2 | CT | X | 2084375 | 2085057 | WBGene00018654 | F49H12.3 | F49H12.3 | -0.12511850362726 |
|----|----|---|---------|---------|----------------|----------|----------|-------------------|

AGIWUR30404

|    |    |   |         |         |                |          |          |                    |
|----|----|---|---------|---------|----------------|----------|----------|--------------------|
| N2 | CT | X | 2086057 | 2086730 | WBGene00018653 | F49H12.2 | F49H12.2 | -0.110575778941353 |
|----|----|---|---------|---------|----------------|----------|----------|--------------------|

AGIWUR43736

|    |    |   |         |         |                |       |          |                    |
|----|----|---|---------|---------|----------------|-------|----------|--------------------|
| N2 | CT | X | 2089659 | 2093253 | WBGene00003087 | lsy-2 | F49H12.1 | 0.0888526897310342 |
|----|----|---|---------|---------|----------------|-------|----------|--------------------|

AGIWUR50;AGIWUR1628;AGIWUR22146;AGIWUR28258;AGIWUR28522;AGIWUR33708;AGIWUR37286

|    |    |   |         |         |                |         |         |                     |            |
|----|----|---|---------|---------|----------------|---------|---------|---------------------|------------|
| N2 | CT | X | 2093475 | 2094842 | WBGene00000737 | col-164 | T21D9.1 | 0.00485440919656011 | AGIWUR4292 |
|----|----|---|---------|---------|----------------|---------|---------|---------------------|------------|

|    |    |   |         |         |                |         |         |                    |             |
|----|----|---|---------|---------|----------------|---------|---------|--------------------|-------------|
| N2 | CT | X | 2095370 | 2096058 | WBGene00020645 | T21D9.2 | T21D9.2 | -0.265461199159599 | AGIWUR16571 |
|----|----|---|---------|---------|----------------|---------|---------|--------------------|-------------|

|    |    |   |         |         |                |         |         |                   |
|----|----|---|---------|---------|----------------|---------|---------|-------------------|
| N2 | CT | X | 2105629 | 2107170 | WBGene00018736 | F53B1.3 | F53B1.3 | 0.191862262982582 |
|----|----|---|---------|---------|----------------|---------|---------|-------------------|

AGIWUR22369;AGIWUR33958

|    |    |   |         |         |                |         |         |                     |             |
|----|----|---|---------|---------|----------------|---------|---------|---------------------|-------------|
| N2 | CT | X | 2108982 | 2111441 | WBGene00018735 | F53B1.2 | F53B1.2 | -0.0762876490170648 | AGIWUR28367 |
|----|----|---|---------|---------|----------------|---------|---------|---------------------|-------------|

|    |    |   |         |         |                |         |         |                   |             |
|----|----|---|---------|---------|----------------|---------|---------|-------------------|-------------|
| N2 | CT | X | 2111397 | 2113103 | WBGene00018737 | F53B1.4 | F53B1.4 | 0.144134744908712 | AGIWUR11271 |
|----|----|---|---------|---------|----------------|---------|---------|-------------------|-------------|

|    |    |   |         |         |                |         |         |                    |             |
|----|----|---|---------|---------|----------------|---------|---------|--------------------|-------------|
| N2 | CT | X | 2114629 | 2118257 | WBGene00018738 | swip-10 | F53B1.6 | -0.489560828526054 | AGIWUR20532 |
|----|----|---|---------|---------|----------------|---------|---------|--------------------|-------------|

|    |    |   |         |         |                |       |         |                    |            |
|----|----|---|---------|---------|----------------|-------|---------|--------------------|------------|
| N2 | CT | X | 2118894 | 2121061 | WBGene00001667 | gpa-5 | F53B1.7 | 0.0294546918803364 | AGIWUR2116 |
|----|----|---|---------|---------|----------------|-------|---------|--------------------|------------|

|    |    |   |         |         |                |         |         |                   |
|----|----|---|---------|---------|----------------|---------|---------|-------------------|
| N2 | CT | X | 2123413 | 2130241 | WBGene00018739 | F53B1.8 | F53B1.8 | 0.336781793432474 |
|----|----|---|---------|---------|----------------|---------|---------|-------------------|

AGIWUR11157;AGIWUR24254;AGIWUR26319

|    |    |   |         |         |                |       |         |                   |             |
|----|----|---|---------|---------|----------------|-------|---------|-------------------|-------------|
| N2 | CT | X | 2144605 | 2145647 | WBGene00001065 | dpy-3 | EGAP7.1 | 0.628865449784055 | AGIWUR27602 |
|----|----|---|---------|---------|----------------|-------|---------|-------------------|-------------|

|    |    |   |         |         |                |        |         |                    |            |
|----|----|---|---------|---------|----------------|--------|---------|--------------------|------------|
| N2 | CT | X | 2147614 | 2149252 | WBGene00018591 | npax-2 | F48B9.5 | -0.153808598603955 | AGIWUR4555 |
|----|----|---|---------|---------|----------------|--------|---------|--------------------|------------|

|    |    |   |         |         |                |        |         |                     |             |
|----|----|---|---------|---------|----------------|--------|---------|---------------------|-------------|
| N2 | CT | X | 2163384 | 2164069 | WBGene00018590 | nlp-37 | F48B9.4 | -0.0906862093223673 | AGIWUR34654 |
|----|----|---|---------|---------|----------------|--------|---------|---------------------|-------------|

|    |    |   |         |         |                |         |         |                    |
|----|----|---|---------|---------|----------------|---------|---------|--------------------|
| N2 | CT | X | 2165109 | 2173849 | WBGene00018589 | F48B9.3 | F48B9.3 | 0.0351271703685962 |
|----|----|---|---------|---------|----------------|---------|---------|--------------------|

AGIWUR2612;AGIWUR8870;AGIWUR28980;AGIWUR42374

|    |    |   |         |         |                |         |         |                    |             |
|----|----|---|---------|---------|----------------|---------|---------|--------------------|-------------|
| N2 | CT | X | 2173890 | 2176411 | WBGene00018593 | F48B9.8 | F48B9.8 | -0.232006155398887 | AGIWUR31971 |
|----|----|---|---------|---------|----------------|---------|---------|--------------------|-------------|

|    |    |   |         |         |                |         |         |                   |             |
|----|----|---|---------|---------|----------------|---------|---------|-------------------|-------------|
| N2 | CT | X | 2180888 | 2185854 | WBGene00018587 | F48B9.1 | F48B9.1 | -0.11959137396733 | AGIWUR27228 |
|----|----|---|---------|---------|----------------|---------|---------|-------------------|-------------|

|    |    |   |         |         |                |       |          |                    |
|----|----|---|---------|---------|----------------|-------|----------|--------------------|
| N2 | CT | X | 2192504 | 2195348 | WBGene00001515 | gap-1 | T24C12.2 | 0.0562462799452561 |
|----|----|---|---------|---------|----------------|-------|----------|--------------------|

AGIWUR24037

|    |    |   |         |         |                |          |          |                     |
|----|----|---|---------|---------|----------------|----------|----------|---------------------|
| N2 | CT | X | 2196525 | 2203961 | WBGene00020765 | T24C12.3 | T24C12.3 | -0.0085167017457799 |
|----|----|---|---------|---------|----------------|----------|----------|---------------------|

AGIWUR34456

|    |    |   |         |         |                |          |          |                    |
|----|----|---|---------|---------|----------------|----------|----------|--------------------|
| N2 | CT | X | 2204050 | 2205063 | WBGene00020766 | T24C12.4 | T24C12.4 | -0.226509831716013 |
|----|----|---|---------|---------|----------------|----------|----------|--------------------|

AGIWUR31433

|    |    |   |         |         |                |       |         |                    |
|----|----|---|---------|---------|----------------|-------|---------|--------------------|
| N2 | CT | X | 2215630 | 2218980 | WBGene00003968 | peb-1 | T14F9.4 | -0.136577137223239 |
|----|----|---|---------|---------|----------------|-------|---------|--------------------|

AGIWUR21146;AGIWUR30492

|    |    |   |         |         |                |       |         |                      |
|----|----|---|---------|---------|----------------|-------|---------|----------------------|
| N2 | CT | X | 2221150 | 2226620 | WBGene00020509 | hex-1 | T14F9.3 | -0.00544589679062035 |
|----|----|---|---------|---------|----------------|-------|---------|----------------------|

AGIWUR1715;AGIWUR24945;AGIWUR26864;AGIWUR32391

|    |    |   |         |         |                |        |         |                   |             |
|----|----|---|---------|---------|----------------|--------|---------|-------------------|-------------|
| N2 | CT | X | 2229208 | 2230122 | WBGene00003018 | lin-32 | T14F9.5 | 0.148991228123966 | AGIWUR33532 |
|----|----|---|---------|---------|----------------|--------|---------|-------------------|-------------|



|                                                                                                                                                                       |    |   |         |         |                |          |          |                      |             |
|-----------------------------------------------------------------------------------------------------------------------------------------------------------------------|----|---|---------|---------|----------------|----------|----------|----------------------|-------------|
| N2                                                                                                                                                                    | CT | X | 2234321 | 2236706 | WBGene00020508 | T14F9.2  | T14F9.2  | -0.128139863408501   | AGIWUR30683 |
| N2                                                                                                                                                                    | CT | X | 2237911 | 2240255 | WBGene00020507 | vha-15   | T14F9.1  | 0.135980715968222    | AGIWUR23485 |
| N2                                                                                                                                                                    | CT | X | 2241738 | 2242618 | WBGene00004423 | rp1-11.2 | F07D10.1 | -0.0449019197495701  |             |
| AGIWUR4463;AGIWUR5995;AGIWUR11434;AGIWUR20528;AGIWUR26031;AGIWUR36131;AGIWUR37677;AGIWUR38852                                                                         |    |   |         |         |                |          |          |                      |             |
| N2                                                                                                                                                                    | CT | X | 2255852 | 2258101 | WBGene00000797 | crn-4    | AH9.2    | -0.210178412291288   | AGIWUR16169 |
| N2                                                                                                                                                                    | CT | X | 2259150 | 2260526 | WBGene00014999 | AH9.3    | AH9.3    | -0.226350491185794   | AGIWUR8206  |
| N2                                                                                                                                                                    | CT | X | 2263176 | 2267472 | WBGene00044701 | AH9.6    | AH9.6    | -0.122737910027297   |             |
| AGIWUR1909;AGIWUR4754                                                                                                                                                 |    |   |         |         |                |          |          |                      |             |
| N2                                                                                                                                                                    | CT | X | 2271025 | 2274337 | WBGene00015000 | AH9.4    | AH9.4    | -0.175457331789343   | AGIWUR29159 |
| N2                                                                                                                                                                    | CT | X | 2283998 | 2287188 | WBGene00020427 | sav-1    | T10H10.3 | 0.134931171469052    |             |
| AGIWUR35953                                                                                                                                                           |    |   |         |         |                |          |          |                      |             |
| N2                                                                                                                                                                    | CT | X | 2294750 | 2298193 | WBGene00020426 | T10H10.2 | T10H10.2 | -0.110326794287298   |             |
| AGIWUR43952                                                                                                                                                           |    |   |         |         |                |          |          |                      |             |
| N2                                                                                                                                                                    | CT | X | 2303082 | 2314914 | WBGene00002039 | hum-6    | T10H10.1 | 0.10853766518445     |             |
| AGIWUR38516                                                                                                                                                           |    |   |         |         |                |          |          |                      |             |
| N2                                                                                                                                                                    | CT | X | 2314896 | 2319333 | WBGene00020135 | aakg-4   | T01B6.3  | -0.0499478234620998  |             |
| AGIWUR13944;AGIWUR20760                                                                                                                                               |    |   |         |         |                |          |          |                      |             |
| N2                                                                                                                                                                    | CT | X | 2335684 | 2348635 | WBGene00020134 | T01B6.1  | T01B6.1  | -0.00666918364220148 |             |
| AGIWUR3958;AGIWUR4904;AGIWUR12927;AGIWUR17462;AGIWUR19138;AGIWUR21280;AGIWUR22799;AGIWUR24274;AGIWUR31031;AGIWUR34130;AGIWUR35858;AGIWUR38941;AGIWUR41041;AGIWUR43996 |    |   |         |         |                |          |          |                      |             |
| N2                                                                                                                                                                    | CT | X | 2360097 | 2364818 | WBGene00020767 | lgc-40   | T24D8.1  | 0.08112698002172     | AGIWUR21614 |
| N2                                                                                                                                                                    | CT | X | 2365700 | 2365942 | WBGene00020769 | T24D8.6  | T24D8.6  | -0.0410733865655803  |             |
| AGIWUR7743;AGIWUR26204;AGIWUR32420;AGIWUR34389;AGIWUR36696;AGIWUR44279                                                                                                |    |   |         |         |                |          |          |                      |             |
| N2                                                                                                                                                                    | CT | X | 2375997 | 2379060 | WBGene00018578 | F47G3.3  | F47G3.3  | -0.164520705205208   | AGIWUR44829 |
| N2                                                                                                                                                                    | CT | X | 2382691 | 2384764 | WBGene00018577 | asna-2   | F47G3.2  | 0.110589283845986    | AGIWUR19401 |
| N2                                                                                                                                                                    | CT | X | 2385765 | 2392695 | WBGene00018576 | F47G3.1  | F47G3.1  | -0.0746861907716756  | AGIWUR11303 |
| N2                                                                                                                                                                    | CT | X | 2395505 | 2398826 | WBGene00016619 | C43H6.6  | C43H6.6  | 0.104266978418259    |             |
| AGIWUR2029;AGIWUR18869;AGIWUR19237;AGIWUR31119;AGIWUR35215                                                                                                            |    |   |         |         |                |          |          |                      |             |
| N2                                                                                                                                                                    | CT | X | 2398812 | 2402057 | WBGene00016620 | dhhc-9   | C43H6.7  | -0.0857209300022159  |             |
| AGIWUR5071;AGIWUR27531;AGIWUR40331                                                                                                                                    |    |   |         |         |                |          |          |                      |             |
| N2                                                                                                                                                                    | CT | X | 2404024 | 2407364 | WBGene00016617 | C43H6.4  | C43H6.4  | -0.107623581170029   | AGIWUR3069  |
| N2                                                                                                                                                                    | CT | X | 2407467 | 2409567 | WBGene00016616 | C43H6.3  | C43H6.3  | -0.25529787761731    |             |
| AGIWUR6923;AGIWUR21325                                                                                                                                                |    |   |         |         |                |          |          |                      |             |
| N2                                                                                                                                                                    | CT | X | 2409570 | 2412966 | WBGene00016614 | trpp-12  | C43H6.1  | 0.183100638883075    |             |
| AGIWUR4699;AGIWUR9360;AGIWUR22546;AGIWUR25479;AGIWUR36654                                                                                                             |    |   |         |         |                |          |          |                      |             |
| N2                                                                                                                                                                    | CT | X | 2412953 | 2413377 | WBGene00001959 | hlh-15   | C43H6.8  | -0.176189107086715   | AGIWUR16405 |
| N2                                                                                                                                                                    | CT | X | 2413909 | 2417892 | WBGene00001618 | glr-7    | C43H6.9  | -0.285597365744717   | AGIWUR17578 |
| N2                                                                                                                                                                    | CT | X | 2418425 | 2419877 | WBGene00020303 | T07D1.5  | T07D1.5  | -0.186942070116546   | AGIWUR37199 |
| N2                                                                                                                                                                    | CT | X | 2420462 | 2427504 | WBGene00001551 | gcy-31   | T07D1.1  | 0.0417698475088839   | AGIWUR2312  |

|                                                                        |    |   |         |         |                |          |          |                     |             |
|------------------------------------------------------------------------|----|---|---------|---------|----------------|----------|----------|---------------------|-------------|
| N2                                                                     | CT | X | 2429862 | 2439158 | WBGene00020301 | T07D1.2  | T07D1.2  | -0.197184327624006  |             |
| AGIWUR7384;AGIWUR28486;AGIWUR34400                                     |    |   |         |         |                |          |          |                     |             |
| N2                                                                     | CT | X | 2442970 | 2443404 | WBGene00020302 | T07D1.3  | T07D1.3  | -0.109820886391399  | AGIWUR44069 |
| N2                                                                     | CT | X | 2445500 | 2455949 | WBGene00001484 | fox-1    | T07D1.4  | 0.122583119782541   |             |
| AGIWUR3748;AGIWUR30879;AGIWUR33746                                     |    |   |         |         |                |          |          |                     |             |
| N2                                                                     | CT | X | 2467347 | 2471308 | WBGene00019866 | R04B3.1  | R04B3.1  | 0.0277530362277929  | AGIWUR4954  |
| N2                                                                     | CT | X | 2471540 | 2473718 | WBGene00019867 | R04B3.2  | R04B3.2  | -0.174276212590204  | AGIWUR3145  |
| N2                                                                     | CT | X | 2473758 | 2476030 | WBGene00019868 | R04B3.3  | R04B3.3  | -0.0972087949405065 | AGIWUR2415  |
| N2                                                                     | CT | X | 2477107 | 2478765 | WBGene00019319 | K02E10.5 | K02E10.5 | 0.0884430146422019  |             |
| AGIWUR29502                                                            |    |   |         |         |                |          |          |                     |             |
| N2                                                                     | CT | X | 2480755 | 2482911 | WBGene00019320 | K02E10.6 | K02E10.6 | -0.0576265986431643 |             |
| AGIWUR36677                                                            |    |   |         |         |                |          |          |                     |             |
| N2                                                                     | CT | X | 2483263 | 2488296 | WBGene00019318 | K02E10.4 | K02E10.4 | 0.100588247800518   |             |
| AGIWUR8951;AGIWUR15514;AGIWUR32000;AGIWUR32607                         |    |   |         |         |                |          |          |                     |             |
| N2                                                                     | CT | X | 2489044 | 2494339 | WBGene00001844 | hid-1    | K02E10.2 | 0.0698821498594291  |             |
| AGIWUR9595;AGIWUR16184;AGIWUR22838;AGIWUR23855;AGIWUR43646;AGIWUR44331 |    |   |         |         |                |          |          |                     |             |
| N2                                                                     | CT | X | 2496180 | 2501001 | WBGene00019317 | K02E10.1 | K02E10.1 | 0.0320748599700966  |             |
| AGIWUR9485                                                             |    |   |         |         |                |          |          |                     |             |
| N2                                                                     | CT | X | 2501003 | 2508549 | WBGene00019321 | K02E10.7 | K02E10.7 | 0.0480932814515933  |             |
| AGIWUR45028                                                            |    |   |         |         |                |          |          |                     |             |
| N2                                                                     | CT | X | 2509608 | 2515317 | WBGene00006365 | syg-1    | K02E10.8 | 0.0119007155324766  |             |
| AGIWUR8570;AGIWUR29333                                                 |    |   |         |         |                |          |          |                     |             |
| N2                                                                     | CT | X | 2525191 | 2532457 | WBGene00044061 | tbc-12   | R11B5.1  | 0.273666973931023   | AGIWUR30102 |
| N2                                                                     | CT | X | 2540066 | 2541053 | WBGene00018715 | F52H2.3  | F52H2.3  | -0.102515145961753  | AGIWUR6056  |
| N2                                                                     | CT | X | 2543391 | 2548028 | WBGene00018716 | F52H2.4  | F52H2.4  | -0.0407338477977399 | AGIWUR26943 |
| N2                                                                     | CT | X | 2552436 | 2557726 | WBGene00000004 | aat-3    | F52H2.2  | 0.340519585719655   | AGIWUR21672 |
| N2                                                                     | CT | X | 2557976 | 2559638 | WBGene00018717 | F52H2.5  | F52H2.5  | -0.388172109913615  | AGIWUR7255  |
| N2                                                                     | CT | X | 2559727 | 2564147 | WBGene00018718 | F52H2.6  | F52H2.6  | 0.00098189231596324 |             |
| AGIWUR1964;AGIWUR9945;AGIWUR11343;AGIWUR35339                          |    |   |         |         |                |          |          |                     |             |
| N2                                                                     | CT | X | 2566557 | 2572653 | WBGene00018719 | F52H2.7  | F52H2.7  | -0.037624311418142  | AGIWUR9017  |
| N2                                                                     | CT | X | 2572863 | 2576697 | WBGene00018714 | F52H2.1  | F52H2.1  | -0.565323225444342  | AGIWUR23592 |
| N2                                                                     | CT | X | 2577742 | 2578262 | WBGene00045268 | ttr-42   | H01M10.3 | -0.157693793678888  |             |
| AGIWUR18181;AGIWUR31853                                                |    |   |         |         |                |          |          |                     |             |
| N2                                                                     | CT | X | 2578211 | 2580574 | WBGene00019143 | H01M10.1 | H01M10.1 | -0.132369609585234  |             |
| AGIWUR29748                                                            |    |   |         |         |                |          |          |                     |             |
| N2                                                                     | CT | X | 2584539 | 2585739 | WBGene00019144 | H01M10.2 | H01M10.2 | -0.0894330573509219 |             |
| AGIWUR43764                                                            |    |   |         |         |                |          |          |                     |             |
| N2                                                                     | CT | X | 2594003 | 2606732 | WBGene00003630 | nhr-40   | T03G6.2  | 0.0144669178838042  |             |
| AGIWUR203;AGIWUR11036;AGIWUR21316;AGIWUR45083                          |    |   |         |         |                |          |          |                     |             |

|                                                                                                            |    |   |         |         |                |           |           |                      |             |
|------------------------------------------------------------------------------------------------------------|----|---|---------|---------|----------------|-----------|-----------|----------------------|-------------|
| N2                                                                                                         | CT | X | 2608228 | 2609989 | WBGene00020194 | T03G6.1   | T03G6.1   | -0.405723933703582   | AGIWUR42652 |
| N2                                                                                                         | CT | X | 2610826 | 2615726 | WBGene00020195 | T03G6.3   | T03G6.3   | -0.00224359823547715 | AGIWUR39954 |
| N2                                                                                                         | CT | X | 2621274 | 2664373 | WBGene00018837 | F54G2.1   | F54G2.1   | 0.0268881404487322   |             |
| AGIWUR21188;AGIWUR34450                                                                                    |    |   |         |         |                |           |           |                      |             |
| N2                                                                                                         | CT | X | 2672427 | 2672759 | WBGene00022919 | C09B7.4   | C09B7.4   | 0.0200019189711584   |             |
| AGIWUR472;AGIWUR11888;AGIWUR14220;AGIWUR26186;AGIWUR35518                                                  |    |   |         |         |                |           |           |                      |             |
| N2                                                                                                         | CT | X | 2673471 | 2682379 | WBGene00004780 | ser-7     | C09B7.1   | -0.128099684620663   |             |
| AGIWUR21887;AGIWUR40148;AGIWUR40519                                                                        |    |   |         |         |                |           |           |                      |             |
| N2                                                                                                         | CT | X | 2682754 | 2687184 | WBGene00020511 | immt-1    | T14G11.3  | 0.245382579679879    |             |
| AGIWUR21136                                                                                                |    |   |         |         |                |           |           |                      |             |
| N2                                                                                                         | CT | X | 2688945 | 2692022 | WBGene00020510 | T14G11.1  | T14G11.1  | 0.00449885634030878  |             |
| AGIWUR2431;AGIWUR17996;AGIWUR22135;AGIWUR23764;AGIWUR32517;AGIWUR32564;AGIWUR35471;AGIWUR39291;AGIWUR39542 |    |   |         |         |                |           |           |                      |             |
| N2                                                                                                         | CT | X | 2694908 | 2698273 | WBGene00020158 | T02C5.1   | T02C5.1   | 0.0358173272488873   |             |
| AGIWUR40757;AGIWUR43458                                                                                    |    |   |         |         |                |           |           |                      |             |
| N2                                                                                                         | CT | X | 2698257 | 2705859 | WBGene00020160 | igcm-3    | T02C5.3   | 0.023531933866332    |             |
| AGIWUR21354;AGIWUR38472;AGIWUR40980                                                                        |    |   |         |         |                |           |           |                      |             |
| N2                                                                                                         | CT | X | 2710918 | 2748114 | WBGene00006742 | unc-2     | T02C5.5   | 0.0572602866756369   |             |
| AGIWUR282;AGIWUR15155                                                                                      |    |   |         |         |                |           |           |                      |             |
| N2                                                                                                         | CT | X | 2769588 | 2770060 | WBGene00018888 | F55F1.2   | F55F1.2   | -0.0851156521793452  | AGIWUR62    |
| N2                                                                                                         | CT | X | 2772042 | 2799247 | WBGene00006496 | cgef-1    | C14A11.3  | -0.026532006207562   |             |
| AGIWUR17834;AGIWUR33860;AGIWUR34012;AGIWUR36036                                                            |    |   |         |         |                |           |           |                      |             |
| N2                                                                                                         | CT | X | 2803112 | 2804830 | WBGene00015748 | C14A11.2  | C14A11.2  | 0.188304083933385    |             |
| AGIWUR21605                                                                                                |    |   |         |         |                |           |           |                      |             |
| N2                                                                                                         | CT | X | 2805075 | 2807528 | WBGene00015750 | C14A11.5  | C14A11.5  | -0.0668621403196168  |             |
| AGIWUR28637;AGIWUR29994;AGIWUR33322                                                                        |    |   |         |         |                |           |           |                      |             |
| N2                                                                                                         | CT | X | 2807911 | 2809635 | WBGene00050944 | C14A11.9  | C14A11.9  | 0.0339718209136723   |             |
| AGIWUR28185                                                                                                |    |   |         |         |                |           |           |                      |             |
| N2                                                                                                         | CT | X | 2810484 | 2814125 | WBGene00015751 | C14A11.6  | C14A11.6  | -0.0292759141433709  |             |
| AGIWUR40572;AGIWUR42224                                                                                    |    |   |         |         |                |           |           |                      |             |
| N2                                                                                                         | CT | X | 2820431 | 2822433 | WBGene00006632 | tsp-6     | C14A11.1  | 0.0533497608856721   |             |
| AGIWUR4926;AGIWUR10463;AGIWUR16224;AGIWUR16558                                                             |    |   |         |         |                |           |           |                      |             |
| N2                                                                                                         | CT | X | 2823501 | 2826827 | WBGene00006055 | ssr-2     | C14A11.7  | 0.156638455758639    |             |
| AGIWUR1100                                                                                                 |    |   |         |         |                |           |           |                      |             |
| N2                                                                                                         | CT | X | 2834222 | 2840292 | WBGene00022201 | Y71H10B.1 | Y71H10B.1 | 0.169383646424599    |             |
| AGIWUR944;AGIWUR5971;AGIWUR7849;AGIWUR9130;AGIWUR17991;AGIWUR18894;AGIWUR19077;AGIWUR38626;AGIWUR43058     |    |   |         |         |                |           |           |                      |             |
| N2                                                                                                         | CT | X | 2843922 | 2852520 | WBGene00002210 | kin-29    | F58H12.1  | 0.240805769215019    |             |
| AGIWUR5264;AGIWUR14602;AGIWUR16974;AGIWUR23969;AGIWUR32652                                                 |    |   |         |         |                |           |           |                      |             |
| N2                                                                                                         | CT | X | 2853678 | 2857603 | WBGene00018740 | tra-4     | F53B3.1   | 0.0666123905766582   |             |
| AGIWUR2299;AGIWUR17562                                                                                     |    |   |         |         |                |           |           |                      |             |

|                                                                      |    |   |         |         |                |           |           |                      |             |
|----------------------------------------------------------------------|----|---|---------|---------|----------------|-----------|-----------|----------------------|-------------|
| N2                                                                   | CT | X | 2864211 | 2865683 | WBGene00018744 | F53B3.6   | F53B3.6   | -0.131076044048973   | AGIWUR12334 |
| N2                                                                   | CT | X | 2865960 | 2871060 | WBGene00018742 | F53B3.3   | F53B3.3   | 0.0645932026501317   |             |
| AGIWUR5232;AGIWUR8771;AGIWUR37860                                    |    |   |         |         |                |           |           |                      |             |
| N2                                                                   | CT | X | 2872739 | 2879619 | WBGene00018743 | F53B3.5   | F53B3.5   | 0.0887512848780041   | AGIWUR37342 |
| N2                                                                   | CT | X | 2885863 | 2890625 | WBGene00015171 | vang-1    | B0410.2   | -0.279496199258881   | AGIWUR27637 |
| N2                                                                   | CT | X | 2890612 | 2891491 | WBGene00015172 | B0410.3   | B0410.3   | 0.321911527835782    | AGIWUR35784 |
| N2                                                                   | CT | X | 2892484 | 2898356 | WBGene00044304 | F52B10.3  | F52B10.3  | -0.015526361074941   |             |
| AGIWUR17121;AGIWUR31609                                              |    |   |         |         |                |           |           |                      |             |
| N2                                                                   | CT | X | 2909536 | 2918038 | WBGene00003776 | nmy-1     | F52B10.1  | 0.555063643852709    |             |
| AGIWUR2608;AGIWUR3742;AGIWUR6745;AGIWUR33243;AGIWUR39326;AGIWUR44379 |    |   |         |         |                |           |           |                      |             |
| N2                                                                   | CT | X | 2918730 | 2923984 | WBGene00044303 | hst-3.2   | F52B10.2  | -0.0682701707664792  |             |
| AGIWUR3291;AGIWUR40841                                               |    |   |         |         |                |           |           |                      |             |
| N2                                                                   | CT | X | 2933361 | 2937740 | WBGene00022200 | fard-1    | Y71H10A.2 | 0.00205462477210361  |             |
| AGIWUR7983;AGIWUR12871;AGIWUR22212                                   |    |   |         |         |                |           |           |                      |             |
| N2                                                                   | CT | X | 2940872 | 2945481 | WBGene00022199 | pfk-1.1   | Y71H10A.1 | 0.0469512120995192   |             |
| AGIWUR6779;AGIWUR29236                                               |    |   |         |         |                |           |           |                      |             |
| N2                                                                   | CT | X | 2945803 | 2946570 | WBGene00044901 | Y41G9A.10 | Y41G9A.10 | 0.0608124069653346   |             |
| AGIWUR24427;AGIWUR27514;AGIWUR27676;AGIWUR28212;AGIWUR34418          |    |   |         |         |                |           |           |                      |             |
| N2                                                                   | CT | X | 2946667 | 2949025 | WBGene00021529 | Y41G9A.5  | Y41G9A.5  | 0.0812728576972876   |             |
| AGIWUR26260                                                          |    |   |         |         |                |           |           |                      |             |
| N2                                                                   | CT | X | 2957934 | 2968167 | WBGene00021528 | gbb-1     | Y41G9A.4  | 0.0533607086685062   |             |
| AGIWUR24071;AGIWUR30929                                              |    |   |         |         |                |           |           |                      |             |
| N2                                                                   | CT | X | 2976457 | 2981008 | WBGene00021527 | aakg-3    | Y41G9A.3  | 0.225720571423002    |             |
| AGIWUR36721                                                          |    |   |         |         |                |           |           |                      |             |
| N2                                                                   | CT | X | 2982056 | 2984125 | WBGene00021526 | Y41G9A.2  | Y41G9A.2  | -0.379001833440221   |             |
| AGIWUR14896                                                          |    |   |         |         |                |           |           |                      |             |
| N2                                                                   | CT | X | 2984278 | 2991375 | WBGene00003885 | osm-5     | Y41G9A.1  | 0.190669399215418    |             |
| AGIWUR29544                                                          |    |   |         |         |                |           |           |                      |             |
| N2                                                                   | CT | X | 2998303 | 3003803 | WBGene00021530 | Y41G9A.6  | Y41G9A.6  | -0.0629372200056473  |             |
| AGIWUR4734                                                           |    |   |         |         |                |           |           |                      |             |
| N2                                                                   | CT | X | 3009499 | 3010175 | WBGene00021656 | Y48D7A.1  | Y48D7A.1  | -0.214431578156294   |             |
| AGIWUR39448                                                          |    |   |         |         |                |           |           |                      |             |
| N2                                                                   | CT | X | 3012190 | 3018555 | WBGene00001461 | flp-18    | Y48D7A.2  | 0.0769621705633803   |             |
| AGIWUR22573                                                          |    |   |         |         |                |           |           |                      |             |
| N2                                                                   | CT | X | 3025505 | 3026976 | WBGene00000175 | aqp-7     | M02F4.8   | 0.203243862108259    | AGIWUR18600 |
| N2                                                                   | CT | X | 3027253 | 3030762 | WBGene00019735 | M02F4.1   | M02F4.1   | -0.00788920270151117 | AGIWUR11119 |
| N2                                                                   | CT | X | 3031723 | 3033203 | WBGene00019738 | cllec-265 | M02F4.7   | 0.158462280313683    |             |
| AGIWUR442                                                            |    |   |         |         |                |           |           |                      |             |
| N2                                                                   | CT | X | 3033325 | 3034303 | WBGene00019736 | M02F4.2   | M02F4.2   | -0.767460075129554   | AGIWUR18919 |

|                                                                                                          |    |   |         |         |                |         |          |                      |             |
|----------------------------------------------------------------------------------------------------------|----|---|---------|---------|----------------|---------|----------|----------------------|-------------|
| N2                                                                                                       | CT | X | 3036427 | 3045806 | WBGene00016343 | cnm-3   | C33D12.2 | -0.0564493557107841  |             |
| AGIWUR2882;AGIWUR5098;AGIWUR5720;AGIWUR7394;AGIWUR24199;AGIWUR24738;AGIWUR31588;AGIWUR39336              |    |   |         |         |                |         |          |                      |             |
| N2                                                                                                       | CT | X | 3050365 | 3054585 | WBGene00006679 | twk-26  | C33D12.3 | -0.0582706582811259  |             |
| AGIWUR28243                                                                                              |    |   |         |         |                |         |          |                      |             |
| N2                                                                                                       | CT | X | 3055257 | 3059385 | WBGene00016344 | rsef-1  | C33D12.6 | -0.0566451952510372  |             |
| AGIWUR2392                                                                                               |    |   |         |         |                |         |          |                      |             |
| N2                                                                                                       | CT | X | 3063585 | 3065551 | WBGene00000451 | ceh-30  | C33D12.7 | -0.282978758042436   |             |
| AGIWUR20536                                                                                              |    |   |         |         |                |         |          |                      |             |
| N2                                                                                                       | CT | X | 3068650 | 3070396 | WBGene00000452 | ceh-31  | C33D12.1 | -0.129753224582471   |             |
| AGIWUR1382                                                                                               |    |   |         |         |                |         |          |                      |             |
| N2                                                                                                       | CT | X | 3081125 | 3085336 | WBGene00006670 | twk-16  | F52E4.4  | -0.00321218536731793 |             |
| AGIWUR10197;AGIWUR23264;AGIWUR27801;AGIWUR28179                                                          |    |   |         |         |                |         |          |                      |             |
| N2                                                                                                       | CT | X | 3085829 | 3087345 | WBGene00018702 | F52E4.5 | F52E4.5  | -0.147941896332972   | AGIWUR13956 |
| N2                                                                                                       | CT | X | 3089496 | 3092457 | WBGene00018701 | pccb-1  | F52E4.1  | -0.022500594711067   |             |
| AGIWUR1837;AGIWUR6654;AGIWUR9003;AGIWUR12787;AGIWUR20116;AGIWUR32561;AGIWUR32604;AGIWUR40672;AGIWUR41415 |    |   |         |         |                |         |          |                      |             |
| N2                                                                                                       | CT | X | 3092395 | 3094448 | WBGene00006948 | wrt-2   | F52E4.6  | 0.126141163975312    |             |
| AGIWUR373;AGIWUR722;AGIWUR13619                                                                          |    |   |         |         |                |         |          |                      |             |
| N2                                                                                                       | CT | X | 3095434 | 3099837 | WBGene00018703 | sec-3   | F52E4.7  | -0.273084864562136   | AGIWUR41191 |
| N2                                                                                                       | CT | X | 3103250 | 3106279 | WBGene00019611 | K10B3.5 | K10B3.5  | 0.178242017857889    |             |
| AGIWUR25536;AGIWUR25538                                                                                  |    |   |         |         |                |         |          |                      |             |
| N2                                                                                                       | CT | X | 3106543 | 3110630 | WBGene00019612 | gpcp-1  | K10B3.6  | 0.018352737865758    |             |
| AGIWUR17177;AGIWUR26068;AGIWUR44080                                                                      |    |   |         |         |                |         |          |                      |             |
| N2                                                                                                       | CT | X | 3112083 | 3113382 | WBGene00001685 | gpd-3   | K10B3.7  | -0.0472307167659816  |             |
| AGIWUR6643;AGIWUR7153;AGIWUR12023;AGIWUR23960;AGIWUR36409;AGIWUR36989                                    |    |   |         |         |                |         |          |                      |             |
| N2                                                                                                       | CT | X | 3113434 | 3114771 | WBGene00001684 | gpd-2   | K10B3.8  | -0.284308070374479   | AGIWUR22539 |
| N2                                                                                                       | CT | X | 3114668 | 3116538 | WBGene00003124 | mai-1   | K10B3.9  | 0.00315942676531478  | AGIWUR35840 |
| N2                                                                                                       | CT | X | 3117439 | 3127073 | WBGene00004951 | spc-1   | K10B3.10 | 0.198438957471421    |             |
| AGIWUR4438;AGIWUR7942;AGIWUR9370;AGIWUR10005;AGIWUR12089;AGIWUR31510;AGIWUR42440                         |    |   |         |         |                |         |          |                      |             |
| N2                                                                                                       | CT | X | 3135486 | 3136663 | WBGene00019609 | K10B3.1 | K10B3.1  | -0.203513895454368   |             |
| AGIWUR7520;AGIWUR7583;AGIWUR12761;AGIWUR22048;AGIWUR25116;AGIWUR44994                                    |    |   |         |         |                |         |          |                      |             |
| N2                                                                                                       | CT | X | 3146573 | 3147088 | WBGene00015790 | C15C7.4 | C15C7.4  | 0.229213017996083    | AGIWUR34652 |
| N2                                                                                                       | CT | X | 3151148 | 3152461 | WBGene00015791 | C15C7.5 | C15C7.5  | 0.118736702769061    |             |
| AGIWUR560;AGIWUR19372;AGIWUR23873;AGIWUR28059;AGIWUR30270;AGIWUR39946                                    |    |   |         |         |                |         |          |                      |             |
| N2                                                                                                       | CT | X | 3159940 | 3164424 | WBGene00002220 | gcc-1   | C15C7.2  | -0.287560467379407   |             |
| AGIWUR4551;AGIWUR14889;AGIWUR28773;AGIWUR30268;AGIWUR30613;AGIWUR43739                                   |    |   |         |         |                |         |          |                      |             |
| N2                                                                                                       | CT | X | 3164525 | 3165650 | WBGene00015789 | syx-6   | C15C7.1  | -0.154019490330461   |             |
| AGIWUR1944;AGIWUR3669;AGIWUR41127;AGIWUR45171                                                            |    |   |         |         |                |         |          |                      |             |
| N2                                                                                                       | CT | X | 3165796 | 3167579 | WBGene00015793 | C15C7.7 | C15C7.7  | -0.0316100675318225  | AGIWUR40953 |
| N2                                                                                                       | CT | X | 3167570 | 3170556 | WBGene00015792 | C15C7.6 | C15C7.6  | 0.0638115197183677   |             |

AGIWUR6524;AGIWUR10308;AGIWUR33805;AGIWUR40453

|    |    |   |         |         |                |       |         |                    |  |
|----|----|---|---------|---------|----------------|-------|---------|--------------------|--|
| N2 | CT | X | 3171424 | 3178695 | WBGene00002217 | klp-4 | F56E3.3 | 0.0292329564981859 |  |
|----|----|---|---------|---------|----------------|-------|---------|--------------------|--|

AGIWUR3576;AGIWUR7058;AGIWUR15218;AGIWUR26622;AGIWUR30042;AGIWUR32297;AGIWUR33608

|    |    |   |         |         |                |         |         |                   |             |
|----|----|---|---------|---------|----------------|---------|---------|-------------------|-------------|
| N2 | CT | X | 3206818 | 3209644 | WBGene00017893 | F28B4.4 | F28B4.4 | 0.237908157935821 | AGIWUR22272 |
|----|----|---|---------|---------|----------------|---------|---------|-------------------|-------------|

|    |    |   |         |         |                |       |         |                    |  |
|----|----|---|---------|---------|----------------|-------|---------|--------------------|--|
| N2 | CT | X | 3210470 | 3220367 | WBGene00017891 | rgl-1 | F28B4.2 | 0.0759118492988815 |  |
|----|----|---|---------|---------|----------------|-------|---------|--------------------|--|

AGIWUR11313;AGIWUR17316;AGIWUR20300;AGIWUR36614;AGIWUR36742;AGIWUR40752

|    |    |   |         |         |                |         |         |                     |             |
|----|----|---|---------|---------|----------------|---------|---------|---------------------|-------------|
| N2 | CT | X | 3227489 | 3235408 | WBGene00017892 | F28B4.3 | F28B4.3 | -0.0760207765269421 | AGIWUR28431 |
|----|----|---|---------|---------|----------------|---------|---------|---------------------|-------------|

|    |    |   |         |         |                |       |         |                    |             |
|----|----|---|---------|---------|----------------|-------|---------|--------------------|-------------|
| N2 | CT | X | 3235768 | 3243624 | WBGene00018237 | irg-7 | F40F4.6 | 0.0638120511501974 | AGIWUR39079 |
|----|----|---|---------|---------|----------------|-------|---------|--------------------|-------------|

|    |    |   |         |         |                |         |         |                     |             |
|----|----|---|---------|---------|----------------|---------|---------|---------------------|-------------|
| N2 | CT | X | 3243886 | 3245980 | WBGene00018238 | F40F4.7 | F40F4.7 | -0.0613203383262864 | AGIWUR14512 |
|----|----|---|---------|---------|----------------|---------|---------|---------------------|-------------|

|    |    |   |         |         |                |        |         |                    |             |
|----|----|---|---------|---------|----------------|--------|---------|--------------------|-------------|
| N2 | CT | X | 3247045 | 3250529 | WBGene00004124 | pqn-37 | F40F4.8 | 0.0597431433093991 | AGIWUR35686 |
|----|----|---|---------|---------|----------------|--------|---------|--------------------|-------------|

|    |    |   |         |         |                |       |         |                   |             |
|----|----|---|---------|---------|----------------|-------|---------|-------------------|-------------|
| N2 | CT | X | 3252963 | 3256265 | WBGene00006535 | tba-9 | F40F4.5 | 0.100310052255143 | AGIWUR37481 |
|----|----|---|---------|---------|----------------|-------|---------|-------------------|-------------|

|    |    |   |         |         |                |       |         |                    |  |
|----|----|---|---------|---------|----------------|-------|---------|--------------------|--|
| N2 | CT | X | 3257010 | 3258155 | WBGene00002255 | lbp-3 | F40F4.4 | 0.0573212071729738 |  |
|----|----|---|---------|---------|----------------|-------|---------|--------------------|--|

AGIWUR4882;AGIWUR22843;AGIWUR31099

|    |    |   |         |         |                |       |         |                    |             |
|----|----|---|---------|---------|----------------|-------|---------|--------------------|-------------|
| N2 | CT | X | 3259087 | 3259855 | WBGene00002253 | lbp-1 | F40F4.3 | -0.186067725748835 | AGIWUR15823 |
|----|----|---|---------|---------|----------------|-------|---------|--------------------|-------------|

|    |    |   |         |         |                |       |         |                     |             |
|----|----|---|---------|---------|----------------|-------|---------|---------------------|-------------|
| N2 | CT | X | 3260610 | 3261470 | WBGene00002254 | lbp-2 | F40F4.2 | -0.0191700652628768 | AGIWUR17137 |
|----|----|---|---------|---------|----------------|-------|---------|---------------------|-------------|

|    |    |   |         |         |                |         |         |                    |             |
|----|----|---|---------|---------|----------------|---------|---------|--------------------|-------------|
| N2 | CT | X | 3262900 | 3264161 | WBGene00018236 | fbxb-71 | F40F4.1 | -0.114353942929119 | AGIWUR33431 |
|----|----|---|---------|---------|----------------|---------|---------|--------------------|-------------|

|    |    |   |         |         |                |       |         |                     |             |
|----|----|---|---------|---------|----------------|-------|---------|---------------------|-------------|
| N2 | CT | X | 3267294 | 3270906 | WBGene00006308 | sul-1 | K09C4.8 | -0.0930477930791174 | AGIWUR36553 |
|----|----|---|---------|---------|----------------|-------|---------|---------------------|-------------|

|    |    |   |         |         |                |         |         |                  |             |
|----|----|---|---------|---------|----------------|---------|---------|------------------|-------------|
| N2 | CT | X | 3271353 | 3271773 | WBGene00019553 | K09C4.9 | K09C4.9 | 0.51763819939493 | AGIWUR12345 |
|----|----|---|---------|---------|----------------|---------|---------|------------------|-------------|

|    |    |   |         |         |                |         |         |                    |            |
|----|----|---|---------|---------|----------------|---------|---------|--------------------|------------|
| N2 | CT | X | 3272730 | 3273155 | WBGene00019552 | K09C4.7 | K09C4.7 | -0.101015540989967 | AGIWUR7564 |
|----|----|---|---------|---------|----------------|---------|---------|--------------------|------------|

|    |    |   |         |         |                |         |         |                     |             |
|----|----|---|---------|---------|----------------|---------|---------|---------------------|-------------|
| N2 | CT | X | 3274757 | 3275768 | WBGene00019551 | K09C4.6 | K09C4.6 | -0.0944519631965104 | AGIWUR37707 |
|----|----|---|---------|---------|----------------|---------|---------|---------------------|-------------|

|    |    |   |         |         |                |          |  |          |                   |
|----|----|---|---------|---------|----------------|----------|--|----------|-------------------|
| N2 | CT | X | 3276020 | 3280230 | WBGene00019554 | K09C4.10 |  | K09C4.10 | 0.102336171161818 |
|----|----|---|---------|---------|----------------|----------|--|----------|-------------------|

AGIWUR18845

|    |    |   |         |         |                |         |         |                   |  |
|----|----|---|---------|---------|----------------|---------|---------|-------------------|--|
| N2 | CT | X | 3282602 | 3285721 | WBGene00019550 | K09C4.5 | K09C4.5 | 0.181498232341641 |  |
|----|----|---|---------|---------|----------------|---------|---------|-------------------|--|

AGIWUR1581;AGIWUR33875;AGIWUR44903

|    |    |   |         |         |                |         |         |                   |             |
|----|----|---|---------|---------|----------------|---------|---------|-------------------|-------------|
| N2 | CT | X | 3289485 | 3292412 | WBGene00019549 | K09C4.4 | K09C4.4 | 0.253766896104219 | AGIWUR18440 |
|----|----|---|---------|---------|----------------|---------|---------|-------------------|-------------|

|    |    |   |         |         |                |       |         |                   |  |
|----|----|---|---------|---------|----------------|-------|---------|-------------------|--|
| N2 | CT | X | 3293290 | 3294369 | WBGene00002006 | hsp-2 | K09C4.3 | 0.154690833960225 |  |
|----|----|---|---------|---------|----------------|-------|---------|-------------------|--|

AGIWUR17108;AGIWUR24868;AGIWUR30948;AGIWUR37512

|    |    |   |         |         |                |         |         |                    |            |
|----|----|---|---------|---------|----------------|---------|---------|--------------------|------------|
| N2 | CT | X | 3296482 | 3297993 | WBGene00019548 | K09C4.2 | K09C4.2 | 0.0218759294311832 | AGIWUR6444 |
|----|----|---|---------|---------|----------------|---------|---------|--------------------|------------|

|    |    |   |         |         |                |         |         |                    |             |
|----|----|---|---------|---------|----------------|---------|---------|--------------------|-------------|
| N2 | CT | X | 3298832 | 3301637 | WBGene00019547 | K09C4.1 | K09C4.1 | -0.257571636307731 | AGIWUR35316 |
|----|----|---|---------|---------|----------------|---------|---------|--------------------|-------------|

|    |    |   |         |         |                |         |         |                    |  |
|----|----|---|---------|---------|----------------|---------|---------|--------------------|--|
| N2 | CT | X | 3302070 | 3303927 | WBGene00017382 | F11D5.5 | F11D5.5 | -0.058724667385508 |  |
|----|----|---|---------|---------|----------------|---------|---------|--------------------|--|

AGIWUR19390;AGIWUR29499

|    |    |   |         |         |                |         |         |                     |  |
|----|----|---|---------|---------|----------------|---------|---------|---------------------|--|
| N2 | CT | X | 3304026 | 3306939 | WBGene00043980 | F11D5.7 | F11D5.7 | -0.0251752687163869 |  |
|----|----|---|---------|---------|----------------|---------|---------|---------------------|--|

AGIWUR17430;AGIWUR29001;AGIWUR29773

|    |    |   |         |         |                |       |         |                    |             |
|----|----|---|---------|---------|----------------|-------|---------|--------------------|-------------|
| N2 | CT | X | 3315321 | 3324229 | WBGene00017381 | ddr-2 | F11D5.3 | 0.0729844493741325 | AGIWUR26574 |
|----|----|---|---------|---------|----------------|-------|---------|--------------------|-------------|

|    |    |   |         |         |                |         |         |                     |  |
|----|----|---|---------|---------|----------------|---------|---------|---------------------|--|
| N2 | CT | X | 3325166 | 3326275 | WBGene00017383 | F11D5.6 | F11D5.6 | -0.0426676581171659 |  |
|----|----|---|---------|---------|----------------|---------|---------|---------------------|--|

AGIWUR6111;AGIWUR19770;AGIWUR19885;AGIWUR31566;AGIWUR31777

|    |    |   |         |         |                |         |         |                   |  |
|----|----|---|---------|---------|----------------|---------|---------|-------------------|--|
| N2 | CT | X | 3333130 | 3347302 | WBGene00017380 | F11D5.1 | F11D5.1 | 0.143123016007078 |  |
|----|----|---|---------|---------|----------------|---------|---------|-------------------|--|

AGIWUR21170;AGIWUR35228;AGIWUR36050

|    |    |   |         |         |                |         |         |                    |             |
|----|----|---|---------|---------|----------------|---------|---------|--------------------|-------------|
| N2 | CT | X | 3348121 | 3348642 | WBGene00022826 | ZK816.3 | ZK816.3 | -0.217041625013584 | AGIWUR28879 |
|----|----|---|---------|---------|----------------|---------|---------|--------------------|-------------|

|                                                                                                          |    |   |         |         |                |          |          |                     |                     |
|----------------------------------------------------------------------------------------------------------|----|---|---------|---------|----------------|----------|----------|---------------------|---------------------|
| N2                                                                                                       | CT | X | 3348878 | 3350401 | WBGene00022827 | ZK816.4  | ZK816.4  | 0.0202768034536129  | AGIWUR5143          |
| N2                                                                                                       | CT | X | 3359062 | 3360656 | WBGene00022825 | ZK816.1  | ZK816.1  | -0.0904950823487294 | AGIWUR7579          |
| N2                                                                                                       | CT | X | 3360722 | 3362493 | WBGene00000989 | dhs-26   | ZK816.5  | -0.240016047621546  |                     |
| AGIWUR30451;AGIWUR35473                                                                                  |    |   |         |         |                |          |          |                     |                     |
| N2                                                                                                       | CT | X | 3368959 | 3373217 | WBGene00022767 | ZK563.2  | ZK563.2  | 0.0322409096248872  | AGIWUR18934         |
| N2                                                                                                       | CT | X | 3373247 | 3374740 | WBGene00000524 | clc-3    | ZK563.4  | -0.100280144171297  | AGIWUR27033         |
| N2                                                                                                       | CT | X | 3376874 | 3379234 | WBGene00022769 | sorf-1   | ZK563.5  | -0.0995986671991833 |                     |
| AGIWUR5888;AGIWUR12956;AGIWUR13650;AGIWUR25096;AGIWUR33967;AGIWUR43263                                   |    |   |         |         |                |          |          |                     |                     |
| N2                                                                                                       | CT | X | 3380480 | 3382838 | WBGene00044355 | ZK563.7  | ZK563.7  | -0.0833407157801811 |                     |
| AGIWUR34423;AGIWUR42244                                                                                  |    |   |         |         |                |          |          |                     |                     |
| N2                                                                                                       | CT | X | 3382868 | 3385547 | WBGene00022770 | acp-1    | ZK563.6  | 0.056593150069757   | AGIWUR39590         |
| N2                                                                                                       | CT | X | 3393864 | 3397656 | WBGene00006865 | slcf-2   | ZK563.1  | 0.0373224350687917  |                     |
| AGIWUR37355;AGIWUR38288                                                                                  |    |   |         |         |                |          |          |                     |                     |
| N2                                                                                                       | CT | X | 3397613 | 3400017 | WBGene00000503 | cht-1    | C04F6.3  | 0.351702631199213   | AGIWUR35268         |
| N2                                                                                                       | CT | X | 3408664 | 3411683 | WBGene00006810 | unc-78   | C04F6.4  | 0.0141893772343646  |                     |
| AGIWUR1669;AGIWUR16113;AGIWUR17514;AGIWUR25638                                                           |    |   |         |         |                |          |          |                     |                     |
| N2                                                                                                       | CT | X | 3412876 | 3414708 | WBGene00000990 | dhs-27   | C04F6.5  | -0.226819735315695  | AGIWUR29086         |
| N2                                                                                                       | CT | X | 3424816 | 3427337 | WBGene00044564 | ZK813.6  | ZK813.6  | 0.00499633845820124 |                     |
| AGIWUR15263;AGIWUR34459                                                                                  |    |   |         |         |                |          |          |                     |                     |
| N2                                                                                                       | CT | X | 3427372 | 3430120 | WBGene00022823 | ZK813.4  | ZK813.4  | -0.124791041174145  | AGIWUR25241         |
| N2                                                                                                       | CT | X | 3441839 | 3442458 | WBGene00022822 | ZK813.3  | ZK813.3  | -0.0540668527843646 |                     |
| AGIWUR10722;AGIWUR12466;AGIWUR20222;AGIWUR20531;AGIWUR38971                                              |    |   |         |         |                |          |          |                     |                     |
| N2                                                                                                       | CT | X | 3443782 | 3444420 | WBGene00022821 | ZK813.2  | ZK813.2  | -0.185255175856449  | AGIWUR28329         |
| N2                                                                                                       | CT | X | 3444802 | 3445283 | WBGene00045394 | ZK813.7  | ZK813.7  | -0.145213386591907  |                     |
| AGIWUR3984;AGIWUR4660;AGIWUR9902;AGIWUR11733;AGIWUR22422;AGIWUR26236;AGIWUR35956;AGIWUR36513;AGIWUR44011 |    |   |         |         |                |          |          |                     |                     |
| N2                                                                                                       | CT | X | 3446311 | 3448253 | WBGene00022820 | ZK813.1  | ZK813.1  | -0.059447299758471  | AGIWUR8539          |
| N2                                                                                                       | CT | X | 3448744 | 3451222 | WBGene00022824 | ZK813.5  | ZK813.5  | 0.215051533887085   | AGIWUR14288         |
| N2                                                                                                       | CT | X | 3451945 | 3465925 | WBGene00004729 | sax-3    | ZK377.2  | 0.13202012980052    |                     |
| AGIWUR15391;AGIWUR19547;AGIWUR28949;AGIWUR29051;AGIWUR37636;AGIWUR42492                                  |    |   |         |         |                |          |          |                     |                     |
| N2                                                                                                       | CT | X | 3480251 | 3483649 | WBGene00006952 | wrt-6    | ZK377.1  | 0.0601600423695805  |                     |
| AGIWUR4539;AGIWUR16131;AGIWUR26666;AGIWUR32164;AGIWUR34901                                               |    |   |         |         |                |          |          |                     |                     |
| N2                                                                                                       | CT | X | 3486309 | 3486838 | WBGene00015715 | C12D12.4 |          | C12D12.4            | -0.0628294214013714 |
| AGIWUR27243                                                                                              |    |   |         |         |                |          |          |                     |                     |
| N2                                                                                                       | CT | X | 3487101 | 3487996 | WBGene00022922 | C12D12.7 |          | C12D12.7            | 0.202452181495634   |
| AGIWUR17188                                                                                              |    |   |         |         |                |          |          |                     |                     |
| N2                                                                                                       | CT | X | 3489293 | 3491155 | WBGene00015714 | C12D12.3 |          | C12D12.3            | -0.111164955443093  |
| AGIWUR20187;AGIWUR27237;AGIWUR28908;AGIWUR33500                                                          |    |   |         |         |                |          |          |                     |                     |
| N2                                                                                                       | CT | X | 3496026 | 3499165 | WBGene00001620 | glt-1    | C12D12.2 |                     | 0.107532644155095   |
| AGIWUR20640;AGIWUR30222                                                                                  |    |   |         |         |                |          |          |                     |                     |

|                                                                        |    |   |         |         |                |          |          |                      |             |
|------------------------------------------------------------------------|----|---|---------|---------|----------------|----------|----------|----------------------|-------------|
| N2                                                                     | CT | X | 3499253 | 3505251 | WBGene00015713 | C12D12.1 | C12D12.1 | 0.350160563239226    |             |
| AGIWUR17039;AGIWUR19364                                                |    |   |         |         |                |          |          |                      |             |
| N2                                                                     | CT | X | 3505286 | 3511529 | WBGene00015716 | sox-4    | C12D12.5 | -0.00330502883343442 |             |
| AGIWUR772;AGIWUR8579;AGIWUR38135                                       |    |   |         |         |                |          |          |                      |             |
| N2                                                                     | CT | X | 3528812 | 3531826 | WBGene00006864 | npr-16   | F56B6.5  | 0.181795939009589    | AGIWUR9194  |
| N2                                                                     | CT | X | 3531841 | 3532811 | WBGene00018937 | F56B6.6  | F56B6.6  | 0.168521499114508    |             |
| AGIWUR2309;AGIWUR7014;AGIWUR24773;AGIWUR28044;AGIWUR29035;AGIWUR36026  |    |   |         |         |                |          |          |                      |             |
| N2                                                                     | CT | X | 3537641 | 3540940 | WBGene00006863 | gyg-1    | F56B6.4  | 0.157233533583262    |             |
| AGIWUR4402;AGIWUR40739                                                 |    |   |         |         |                |          |          |                      |             |
| N2                                                                     | CT | X | 3542558 | 3557599 | WBGene00004350 | rgs-7    | F56B6.2  | -0.213254345720302   |             |
| AGIWUR8199;AGIWUR17813;AGIWUR29479;AGIWUR32324;AGIWUR32993;AGIWUR34005 |    |   |         |         |                |          |          |                      |             |
| N2                                                                     | CT | X | 3558839 | 3563974 | WBGene00006928 | vit-4    | F59D8.2  | -0.107974348224166   |             |
| AGIWUR3280;AGIWUR20585                                                 |    |   |         |         |                |          |          |                      |             |
| N2                                                                     | CT | X | 3567355 | 3572549 | WBGene00006927 | vit-3    | F59D8.1  | 0.0216977544966817   | AGIWUR15620 |
| N2                                                                     | CT | X | 3573051 | 3573562 | WBGene00020845 | T27A10.5 | T27A10.5 | 0.0175036681227807   |             |
| AGIWUR1640                                                             |    |   |         |         |                |          |          |                      |             |
| N2                                                                     | CT | X | 3576608 | 3578830 | WBGene00000515 | ckc-1    | T27A10.3 | -0.123292044154173   |             |
| AGIWUR449;AGIWUR4215;AGIWUR8145                                        |    |   |         |         |                |          |          |                      |             |
| N2                                                                     | CT | X | 3588858 | 3596497 | WBGene00020846 | T27A10.6 | T27A10.6 | -0.424954708176854   |             |
| AGIWUR4757;AGIWUR15179;AGIWUR15354                                     |    |   |         |         |                |          |          |                      |             |
| N2                                                                     | CT | X | 3597276 | 3600475 | WBGene00020847 | cgr-1    | T27A10.7 | 0.0287284653582844   |             |
| AGIWUR2139                                                             |    |   |         |         |                |          |          |                      |             |
| N2                                                                     | CT | X | 3601800 | 3604360 | WBGene00015954 | C18B2.3  | C18B2.3  | 0.129540194185099    | AGIWUR35650 |
| N2                                                                     | CT | X | 3604291 | 3605741 | WBGene00015955 | C18B2.4  | C18B2.4  | 0.211048816344643    | AGIWUR41181 |
| N2                                                                     | CT | X | 3606668 | 3611092 | WBGene00015956 | C18B2.5  | C18B2.5  | 0.117878996348865    |             |
| AGIWUR14917;AGIWUR15676                                                |    |   |         |         |                |          |          |                      |             |
| N2                                                                     | CT | X | 3613353 | 3617378 | WBGene00015957 | del-9    | C18B2.6  | -0.00596040696799705 | AGIWUR40349 |
| N2                                                                     | CT | X | 3623522 | 3628359 | WBGene00015953 | C18B2.2  | C18B2.2  | 0.0246875212197581   | AGIWUR37215 |
| N2                                                                     | CT | X | 3628316 | 3630884 | WBGene00015952 | C18B2.1  | C18B2.1  | -0.020319225918529   | AGIWUR28851 |
| N2                                                                     | CT | X | 3632367 | 3633747 | WBGene00001759 | gst-11   | R11G1.3  | 0.0385092287718334   |             |
| AGIWUR1123;AGIWUR11838;AGIWUR17670;AGIWUR34809                         |    |   |         |         |                |          |          |                      |             |
| N2                                                                     | CT | X | 3639189 | 3644896 | WBGene00020012 | R11G1.6  | R11G1.6  | 0.0709608989693784   |             |
| AGIWUR18151;AGIWUR22592;AGIWUR35254;AGIWUR36233;AGIWUR36775            |    |   |         |         |                |          |          |                      |             |
| N2                                                                     | CT | X | 3646320 | 3650150 | WBGene00004727 | sax-1    | R11G1.4  | -0.0722985025245819  |             |
| AGIWUR3701;AGIWUR7535;AGIWUR44764                                      |    |   |         |         |                |          |          |                      |             |
| N2                                                                     | CT | X | 3652017 | 3655419 | WBGene00020011 | R11G1.2  | R11G1.2  | 0.0243391980936467   |             |
| AGIWUR18566;AGIWUR29373                                                |    |   |         |         |                |          |          |                      |             |
| N2                                                                     | CT | X | 3656272 | 3657265 | WBGene00044725 | R11G1.7  | R11G1.7  | -0.407703478700402   | AGIWUR18423 |
| N2                                                                     | CT | X | 3659492 | 3666879 | WBGene00020010 | R11G1.1  | R11G1.1  | -0.0600838381610931  | AGIWUR9479  |



|                                                                                                                             |    |   |         |         |                |          |           |                      |             |
|-----------------------------------------------------------------------------------------------------------------------------|----|---|---------|---------|----------------|----------|-----------|----------------------|-------------|
| N2                                                                                                                          | CT | X | 3668100 | 3668942 | WBGene00015354 | snet-1   | C02F12.3  | 0.125046648859242    |             |
| AGIWUR3210;AGIWUR35056                                                                                                      |    |   |         |         |                |          |           |                      |             |
| N2                                                                                                                          | CT | X | 3670374 | 3672098 | WBGene00015355 | C02F12.5 | C02F12.5  | -0.220502198214401   |             |
| AGIWUR42617                                                                                                                 |    |   |         |         |                |          |           |                      |             |
| N2                                                                                                                          | CT | X | 3672378 | 3673918 | WBGene00045215 | ceh-63   | C02F12.10 | -0.00436914951533662 |             |
| AGIWUR24651;AGIWUR30317;AGIWUR41987                                                                                         |    |   |         |         |                |          |           |                      |             |
| N2                                                                                                                          | CT | X | 3674041 | 3678557 | WBGene00006431 | tag-52   | C02F12.4  | 0.256524721877881    |             |
| AGIWUR35687                                                                                                                 |    |   |         |         |                |          |           |                      |             |
| N2                                                                                                                          | CT | X | 3681170 | 3684232 | WBGene00006643 | tsp-17   | C02F12.1  | -0.0205738627744241  |             |
| AGIWUR71;AGIWUR691;AGIWUR2919;AGIWUR7781;AGIWUR9164;AGIWUR10882;AGIWUR25534;AGIWUR25780;AGIWUR29313;AGIWUR44582;AGIWUR45202 |    |   |         |         |                |          |           |                      |             |
| N2                                                                                                                          | CT | X | 3684212 | 3689205 | WBGene00015356 | tag-278  | C02F12.7  | -0.162120177425892   |             |
| AGIWUR44429                                                                                                                 |    |   |         |         |                |          |           |                      |             |
| N2                                                                                                                          | CT | X | 3690143 | 3693238 | WBGene00015357 | C02F12.8 | C02F12.8  | -0.119950361107158   |             |
| AGIWUR30932                                                                                                                 |    |   |         |         |                |          |           |                      |             |
| N2                                                                                                                          | CT | X | 3696903 | 3700807 | WBGene00015358 | C02F12.9 | C02F12.9  | -0.0572531374087415  |             |
| AGIWUR8648;AGIWUR21142;AGIWUR37573;AGIWUR38180                                                                              |    |   |         |         |                |          |           |                      |             |
| N2                                                                                                                          | CT | X | 3706551 | 3713382 | WBGene00015293 | C01C4.3  | C01C4.3   | 0.118013037321013    |             |
| AGIWUR101;AGIWUR13011;AGIWUR31216                                                                                           |    |   |         |         |                |          |           |                      |             |
| N2                                                                                                                          | CT | X | 3716314 | 3718566 | WBGene00015292 | C01C4.2  | C01C4.2   | 0.0505493530791252   |             |
| AGIWUR380;AGIWUR7965;AGIWUR10650;AGIWUR12661                                                                                |    |   |         |         |                |          |           |                      |             |
| N2                                                                                                                          | CT | X | 3727553 | 3728446 | WBGene00003739 | nlp-1    | C01C4.1   | -0.181849883976794   | AGIWUR42191 |
| N2                                                                                                                          | CT | X | 3729281 | 3731960 | WBGene00006454 | aex-4    | T14G12.2  | -0.0789862682321436  |             |
| AGIWUR5944                                                                                                                  |    |   |         |         |                |          |           |                      |             |
| N2                                                                                                                          | CT | X | 3731894 | 3733457 | WBGene00006408 | tag-18   | T14G12.3  | 0.161178246075682    |             |
| AGIWUR26566                                                                                                                 |    |   |         |         |                |          |           |                      |             |
| N2                                                                                                                          | CT | X | 3740208 | 3742323 | WBGene00001434 | fkx-2    | T14G12.4  | -0.00542861763391489 |             |
| AGIWUR928;AGIWUR1294;AGIWUR4150;AGIWUR7793;AGIWUR14765;AGIWUR30544                                                          |    |   |         |         |                |          |           |                      |             |
| N2                                                                                                                          | CT | X | 3763057 | 3764395 | WBGene00018534 | F47B7.3  | F47B7.3   | 0.167351343162068    |             |
| AGIWUR32605;AGIWUR39322                                                                                                     |    |   |         |         |                |          |           |                      |             |
| N2                                                                                                                          | CT | X | 3765324 | 3766626 | WBGene00018535 | F47B7.4  | F47B7.4   | 0.0459107767817724   | AGIWUR9808  |
| N2                                                                                                                          | CT | X | 3767795 | 3768817 | WBGene00018536 | F47B7.5  | F47B7.5   | 0.389810528539059    | AGIWUR13937 |
| N2                                                                                                                          | CT | X | 3769731 | 3770643 | WBGene00018537 | F47B7.6  | F47B7.6   | 0.241559639231799    | AGIWUR41486 |
| N2                                                                                                                          | CT | X | 3772763 | 3778080 | WBGene00018533 | F47B7.2  | F47B7.2   | -0.0618810090559672  |             |
| AGIWUR213;AGIWUR9801;AGIWUR15390;AGIWUR19993;AGIWUR23514;AGIWUR24158;AGIWUR34104;AGIWUR34713;AGIWUR37042;AGIWUR44702        |    |   |         |         |                |          |           |                      |             |
| N2                                                                                                                          | CT | X | 3778091 | 3781118 | WBGene00018538 | marg-1   | F47B7.7   | 0.150505061806651    | AGIWUR36494 |
| N2                                                                                                                          | CT | X | 3788026 | 3788532 | WBGene00018532 | F47B7.1  | F47B7.1   | -0.0283989631230108  |             |
| AGIWUR5087;AGIWUR6046                                                                                                       |    |   |         |         |                |          |           |                      |             |

|                                                                                                                                                                                             |    |   |         |         |                |         |         |                      |             |
|---------------------------------------------------------------------------------------------------------------------------------------------------------------------------------------------|----|---|---------|---------|----------------|---------|---------|----------------------|-------------|
| N2                                                                                                                                                                                          | CT | X | 3789757 | 3792815 | WBGene00018026 | F35A5.4 | F35A5.4 | -0.111335433622699   |             |
| AGIWUR3889;AGIWUR9459;AGIWUR9820                                                                                                                                                            |    |   |         |         |                |         |         |                      |             |
| N2                                                                                                                                                                                          | CT | X | 3793912 | 3795395 | WBGene00018027 | F35A5.5 | F35A5.5 | -0.0293951821668159  |             |
| AGIWUR230;AGIWUR7864;AGIWUR12138;AGIWUR12675;AGIWUR20530;AGIWUR22072;AGIWUR23940;AGIWUR29917;AGIWUR37314;AGIWUR38248;AGIWUR42205                                                            |    |   |         |         |                |         |         |                      |             |
| N2                                                                                                                                                                                          | CT | X | 3798179 | 3799741 | WBGene00000033 | abu-10  | F35A5.3 | 0.267586606491397    | AGIWUR37428 |
| N2                                                                                                                                                                                          | CT | X | 3800045 | 3802771 | WBGene00001335 | erp-1   | F35A5.8 | -0.0471079488333128  |             |
| AGIWUR6029;AGIWUR8627;AGIWUR42411;AGIWUR45109                                                                                                                                               |    |   |         |         |                |         |         |                      |             |
| N2                                                                                                                                                                                          | CT | X | 3805084 | 3805749 | WBGene00018025 | F35A5.2 | F35A5.2 | 0.0154561751140179   | AGIWUR43919 |
| N2                                                                                                                                                                                          | CT | X | 3807460 | 3816429 | WBGene00018024 | F35A5.1 | F35A5.1 | 0.00946217976334651  |             |
| AGIWUR16665;AGIWUR20440;AGIWUR21793                                                                                                                                                         |    |   |         |         |                |         |         |                      |             |
| N2                                                                                                                                                                                          | CT | X | 3816851 | 3826963 | WBGene00001441 | fkh-9   | K03C7.2 | 0.362831948641761    |             |
| AGIWUR1451;AGIWUR3258;AGIWUR6593;AGIWUR15006;AGIWUR16658;AGIWUR20846;AGIWUR21069;AGIWUR26982;AGIWUR27201                                                                                    |    |   |         |         |                |         |         |                      |             |
| N2                                                                                                                                                                                          | CT | X | 3827231 | 3829300 | WBGene00019359 | K03C7.3 | K03C7.3 | -0.0337884809060807  | AGIWUR5541  |
| N2                                                                                                                                                                                          | CT | X | 3840869 | 3842468 | WBGene00022515 | ttr-48  | ZC64.2  | 0.110004915951716    |             |
| AGIWUR7561;AGIWUR8684;AGIWUR35317;AGIWUR40258                                                                                                                                               |    |   |         |         |                |         |         |                      |             |
| N2                                                                                                                                                                                          | CT | X | 3843367 | 3857797 | WBGene00000441 | ceh-18  | ZC64.3  | 0.0737852572041096   |             |
| AGIWUR2095;AGIWUR8429;AGIWUR8825;AGIWUR22735;AGIWUR27675;AGIWUR28338;AGIWUR37278                                                                                                            |    |   |         |         |                |         |         |                      |             |
| N2                                                                                                                                                                                          | CT | X | 3869753 | 3873295 | WBGene00002987 | lim-4   | ZC64.4  | -0.246365698016398   | AGIWUR27888 |
| N2                                                                                                                                                                                          | CT | X | 3879782 | 3893309 | WBGene00018569 | F47F2.1 | F47F2.1 | 0.0990763393218295   |             |
| AGIWUR8897;AGIWUR10596;AGIWUR21221;AGIWUR41611                                                                                                                                              |    |   |         |         |                |         |         |                      |             |
| N2                                                                                                                                                                                          | CT | X | 3893964 | 3895677 | WBGene00018571 | F47F2.3 | F47F2.3 | 0.283430852557743    | AGIWUR27605 |
| N2                                                                                                                                                                                          | CT | X | 3904591 | 3907671 | WBGene00006321 | sup-12  | T22B2.4 | -0.102435848917865   |             |
| AGIWUR4964;AGIWUR13589;AGIWUR35264;AGIWUR37936;AGIWUR39225;AGIWUR40172                                                                                                                      |    |   |         |         |                |         |         |                      |             |
| N2                                                                                                                                                                                          | CT | X | 3908144 | 3911380 | WBGene00020669 | T22B2.5 | T22B2.5 | 0.0690409186110328   |             |
| AGIWUR11095;AGIWUR14481;AGIWUR17029;AGIWUR20075;AGIWUR36801;AGIWUR39173;AGIWUR41209;AGIWUR45062                                                                                             |    |   |         |         |                |         |         |                      |             |
| N2                                                                                                                                                                                          | CT | X | 3914765 | 3915848 | WBGene00020670 | T22B2.6 | T22B2.6 | 0.0871880408969403   |             |
| AGIWUR3107;AGIWUR3588;AGIWUR7204;AGIWUR8957;AGIWUR11412;AGIWUR11915;AGIWUR17333;AGIWUR19664;AGIWUR26137;AGIWUR29664;AGIWUR32235;AGIWUR35489;AGIWUR36229;AGIWUR37239;AGIWUR44863;AGIWUR44904 |    |   |         |         |                |         |         |                      |             |
| N2                                                                                                                                                                                          | CT | X | 3917301 | 3919835 | WBGene00020667 | T22B2.3 | T22B2.3 | -0.0282782251160194  | AGIWUR4053  |
| N2                                                                                                                                                                                          | CT | X | 3921068 | 3923233 | WBGene00020666 | T22B2.2 | T22B2.2 | -0.141968778345445   | AGIWUR34034 |
| N2                                                                                                                                                                                          | CT | X | 3926081 | 3929576 | WBGene00020665 | T22B2.1 | T22B2.1 | -0.162576777564855   | AGIWUR13633 |
| N2                                                                                                                                                                                          | CT | X | 3931631 | 3937897 | WBGene00020567 | T19D2.1 | T19D2.1 | -0.0758917445699154  | AGIWUR8958  |
| N2                                                                                                                                                                                          | CT | X | 3939401 | 3940092 | WBGene00020568 | T19D2.3 | T19D2.3 | -0.0315912994967391  | AGIWUR40361 |
| N2                                                                                                                                                                                          | CT | X | 3940141 | 3943313 | WBGene00004184 | T19D2.2 | T19D2.2 | 0.0629183719062718   |             |
| AGIWUR288;AGIWUR6348;AGIWUR7010;AGIWUR18174;AGIWUR20877;AGIWUR21653;AGIWUR33189;AGIWUR36185                                                                                                 |    |   |         |         |                |         |         |                      |             |
| N2                                                                                                                                                                                          | CT | X | 3958497 | 3961907 | WBGene00003007 | lin-18  | C16B8.1 | -0.00929449678199035 |             |
| AGIWUR3203;AGIWUR25846;AGIWUR29365                                                                                                                                                          |    |   |         |         |                |         |         |                      |             |
| N2                                                                                                                                                                                          | CT | X | 3961930 | 3966432 | WBGene00015822 | C16B8.2 | C16B8.2 | -0.0497506404617702  |             |

AGIWUR6092;AGIWUR11035;AGIWUR35161

N2 CT X 3968036 3968637 WBGene00015823 C16B8.3 C16B8.3 0.300116331146376

AGIWUR4953;AGIWUR18034;AGIWUR24168;AGIWUR35144

N2 CT X 3970389 3973634 WBGene00015824 C16B8.4 C16B8.4 -0.153291959446525 AGIWUR20367

N2 CT X 3985104 3985465 WBGene00022926 C16B8.5 C16B8.5 -0.0232883145890872

AGIWUR6001;AGIWUR7797;AGIWUR14016;AGIWUR21798;AGIWUR33763

N2 CT X 3997340 3999341 WBGene00019829 R02E12.5 R02E12.5 0.233693910565041

AGIWUR26862

N2 CT X 4003532 4007634 WBGene00019828 R02E12.4 R02E12.4 -0.100102717553255

AGIWUR39405

N2 CT X 4008058 4016185 WBGene00019830 hrg-1 R02E12.6 0.281964062021554

AGIWUR22265

N2 CT X 4012219 4021956 WBGene00019827 mop-25.1 R02E12.2 0.207578230929297

AGIWUR35677

N2 CT X 4022273 4025584 WBGene00000049 acr-10 R02E12.8 -0.0928727486544592

AGIWUR13780

N2 CT X 4056835 4071493 WBGene00020294 T06F4.1 T06F4.1 -0.0515186766871167

AGIWUR12454;AGIWUR40322

N2 CT X 4078236 4081045 WBGene00044566 T06F4.3 T06F4.3 -0.00423071175587708

AGIWUR9614;AGIWUR19207;AGIWUR22647;AGIWUR33199;AGIWUR34873

N2 CT X 4094867 4100573 WBGene00000531 clh-4 T06F4.2 -0.125743995604356

AGIWUR7616;AGIWUR14496;AGIWUR23097;AGIWUR26114

N2 CT X 4101687 4102125 WBGene00044724 R02E4.3 R02E4.3 -0.077066742205167

AGIWUR4745;AGIWUR30953;AGIWUR38166

N2 CT X 4103447 4104521 WBGene00019826 R02E4.1 R02E4.1 -0.0720745220756696

AGIWUR13674;AGIWUR27146

N2 CT X 4107476 4110496 WBGene00044021 R02E4.2 R02E4.2 0.0444667957000178

AGIWUR16898;AGIWUR41313

N2 CT X 4110442 4111474 WBGene00017307 F09F9.2 F09F9.2 -0.759191266214234 AGIWUR15733

N2 CT X 4115330 4117027 WBGene00017306 F09F9.1 F09F9.1 -0.227158140787679 AGIWUR2150

N2 CT X 4117951 4119487 WBGene00045395 F09F9.5 F09F9.5 -0.146741165115889

AGIWUR15072;AGIWUR17778

N2 CT X 4119652 4121016 WBGene00017308 F09F9.3 F09F9.3 0.0476386123806449 AGIWUR7987

N2 CT X 4121786 4128431 WBGene00017309 F09F9.4 F09F9.4 0.117958210347783 AGIWUR3191

N2 CT X 4135133 4147662 WBGene00022745 ZK470.2 ZK470.2 0.238831305118728

AGIWUR4037;AGIWUR17753;AGIWUR18130

N2 CT X 4148648 4153443 WBGene00006410 nck-1 ZK470.5 -0.0428285546615257

AGIWUR19892;AGIWUR25883;AGIWUR27962;AGIWUR30810;AGIWUR33783

N2 CT X 4167459 4169791 WBGene00219362 ZK470.14 ZK470.14 -0.155142558111326

AGIWUR25015  
N2 CT X 4176065 4177494 WBGene00022747 ZK470.6 ZK470.6 -0.0132565789278685  
AGIWUR244;AGIWUR9011;AGIWUR18872;AGIWUR21207  
N2 CT X 4177917 4186756 WBGene00003412 mrp-6 F20B6.3 0.0606221095919826  
AGIWUR11769;AGIWUR13096;AGIWUR28457;AGIWUR31143;AGIWUR32298;AGIWUR35622;AGIWUR38453;AGIWUR40403  
N2 CT X 4191094 4193144 WBGene00006921 vha-12 F20B6.2 0.129766306520967  
AGIWUR6392;AGIWUR21906;AGIWUR38099  
N2 CT X 4194019 4194785 WBGene00017628 F20B6.4 F20B6.4 -0.0573587528361514 AGIWUR38287  
N2 CT X 4201650 4202214 WBGene00017630 F20B6.6 F20B6.6 -0.104384755428539 AGIWUR43841  
N2 CT X 4204602 4206444 WBGene00017632 F20B6.9 F20B6.9 -0.201569619459939  
AGIWUR5286;AGIWUR38141  
N2 CT X 4210573 4217290 WBGene00001994 hpk-1 F20B6.8 -0.0572077590325915  
AGIWUR1171;AGIWUR11680  
N2 CT X 4218279 4218458 WBGene00020922 W01H2.2 W01H2.2 0.16858051775795 AGIWUR21224  
N2 CT X 4227857 4235846 WBGene00004285 rab-37 W01H2.3 0.0409800287804751  
AGIWUR7026;AGIWUR19855;AGIWUR22772;AGIWUR29998;AGIWUR35671;AGIWUR42634  
N2 CT X 4246554 4247212 WBGene00018602 F48D6.4 F48D6.4 0.0094072573198023  
AGIWUR4659;AGIWUR14142;AGIWUR26030;AGIWUR44362  
N2 CT X 4249249 4250764 WBGene00001957 h1h-13 F48D6.3 0.00420911420116932  
AGIWUR12271;AGIWUR31055  
N2 CT X 4252356 4254174 WBGene00005716 srv-5 F48D6.2 -0.387733330630102 AGIWUR32042  
N2 CT X 4255154 4256812 WBGene00006393 taf-11.1 F48D6.1 -0.175710673059182  
AGIWUR12189  
N2 CT X 4257061 4259094 WBGene00005717 srv-6 C52B9.5 -0.0276636302419639 AGIWUR38894  
N2 CT X 4260652 4264591 WBGene00016867 C52B9.4 C52B9.4 -0.0172153315942207 AGIWUR2170  
N2 CT X 4265851 4270486 WBGene00016866 coel-1 C52B9.3 0.105395488854708  
AGIWUR6040;AGIWUR13947;AGIWUR22554;AGIWUR33368;AGIWUR36165;AGIWUR37755;AGIWUR40505  
N2 CT X 4271169 4274229 WBGene00003179 mec-18 C52B9.9 -0.0940001212636563 AGIWUR1282  
N2 CT X 4273914 4274750 WBGene00016869 C52B9.10 C52B9.10 0.0862217840368444  
AGIWUR5387  
N2 CT X 4274786 4279344 WBGene00006680 twk-28 C52B9.6 -0.0512402904809033  
AGIWUR8740;AGIWUR10284;AGIWUR44110  
N2 CT X 4280980 4284176 WBGene00016865 ets-9 C52B9.2 -0.037022456918999 AGIWUR41782  
N2 CT X 4284189 4284901 WBGene00016870 ets-10 C52B9.11 -0.388224983277837  
AGIWUR19859  
N2 CT X 4286737 4291494 WBGene00000510 cka-2 C52B9.1 0.058223975409279  
AGIWUR4895;AGIWUR24931;AGIWUR37447;AGIWUR37628;AGIWUR39879;AGIWUR42350  
N2 CT X 4291475 4297630 WBGene00003907 paf-2 C52B9.7 0.00107095872853602  
AGIWUR1054;AGIWUR26277

|                                                            |    |   |         |         |                |           |           |                      |             |
|------------------------------------------------------------|----|---|---------|---------|----------------|-----------|-----------|----------------------|-------------|
| N2                                                         | CT | X | 4297860 | 4304398 | WBGene00016868 | C52B9.8   | C52B9.8   | -0.019476104079331   | AGIWUR22938 |
| N2                                                         | CT | X | 4328400 | 4328916 | WBGene00016039 | C24A8.5   | C24A8.5   | -0.357254889617391   | AGIWUR16655 |
| N2                                                         | CT | X | 4339634 | 4343702 | WBGene00017472 | cst-1     | F14H12.4  | -0.00829601510542055 |             |
| AGIWUR38627                                                |    |   |         |         |                |           |           |                      |             |
| N2                                                         | CT | X | 4344215 | 4345644 | WBGene00017471 | F14H12.3  | F14H12.3  | -0.319832738391888   |             |
| AGIWUR39369                                                |    |   |         |         |                |           |           |                      |             |
| N2                                                         | CT | X | 4350498 | 4352744 | WBGene00017470 | F14H12.2  | F14H12.2  | 0.218362260187808    |             |
| AGIWUR5219                                                 |    |   |         |         |                |           |           |                      |             |
| N2                                                         | CT | X | 4353618 | 4354820 | WBGene00000738 | col-165   | F14H12.1  | 0.437548731197745    |             |
| AGIWUR4381;AGIWUR38491                                     |    |   |         |         |                |           |           |                      |             |
| N2                                                         | CT | X | 4357015 | 4357567 | WBGene00017473 | F14H12.6  | F14H12.6  | -0.0900671625235958  |             |
| AGIWUR27312                                                |    |   |         |         |                |           |           |                      |             |
| N2                                                         | CT | X | 4361927 | 4362283 | WBGene00017474 | F14H12.7  | F14H12.7  | -0.274684276996361   |             |
| AGIWUR32261                                                |    |   |         |         |                |           |           |                      |             |
| N2                                                         | CT | X | 4362936 | 4363315 | WBGene00219368 | F14H12.17 | F14H12.17 | 0.200799787305451    |             |
| AGIWUR40009                                                |    |   |         |         |                |           |           |                      |             |
| N2                                                         | CT | X | 4365305 | 4366332 | WBGene00020120 | R160.3    | R160.3    | -0.0659029574893335  | AGIWUR21678 |
| N2                                                         | CT | X | 4367159 | 4367514 | WBGene00219369 | R160.10   | R160.10   | -0.0702803413683029  | AGIWUR35788 |
| N2                                                         | CT | X | 4370014 | 4370856 | WBGene00020122 | R160.5    | R160.5    | 0.305417682977671    | AGIWUR13004 |
| N2                                                         | CT | X | 4371036 | 4373211 | WBGene00020123 | R160.6    | R160.6    | -0.0605460534031614  | AGIWUR26469 |
| N2                                                         | CT | X | 4376595 | 4376850 | WBGene00020119 | R160.2    | R160.2    | -0.0539312051897847  | AGIWUR27023 |
| N2                                                         | CT | X | 4378004 | 4383366 | WBGene00003084 | lst-2     | R160.7    | 0.067900224542651    | AGIWUR785   |
| N2                                                         | CT | X | 4389365 | 4393796 | WBGene00001082 | dpy-23    | R160.1    | 0.0798323471651976   |             |
| AGIWUR4657;AGIWUR6146;AGIWUR37164                          |    |   |         |         |                |           |           |                      |             |
| N2                                                         | CT | X | 4403159 | 4407145 | WBGene00017040 | D1079.1   | D1079.1   | -0.0834484129314887  | AGIWUR29911 |
| N2                                                         | CT | X | 4408089 | 4409133 | WBGene00017477 | F15A8.4   | F15A8.4   | -0.0760247388345547  | AGIWUR21412 |
| N2                                                         | CT | X | 4411359 | 4416079 | WBGene00001052 | dop-1     | F15A8.5   | -0.0974692061545372  |             |
| AGIWUR5927;AGIWUR12192;AGIWUR20100;AGIWUR22632;AGIWUR30934 |    |   |         |         |                |           |           |                      |             |
| N2                                                         | CT | X | 4430929 | 4437512 | WBGene00017478 | F15A8.6   | F15A8.6   | 0.443329379829612    | AGIWUR33964 |
| N2                                                         | CT | X | 4440941 | 4441726 | WBGene00017476 | F15A8.1   | F15A8.1   | 0.156303696591396    | AGIWUR39320 |
| N2                                                         | CT | X | 4442152 | 4448383 | WBGene00017794 | mltn-13   | F25F6.1   | -0.0089887797724657  |             |
| AGIWUR20642;AGIWUR27594                                    |    |   |         |         |                |           |           |                      |             |
| N2                                                         | CT | X | 4454120 | 4457304 | WBGene00017177 | F02E8.4   | F02E8.4   | -0.148483146113778   | AGIWUR29684 |
| N2                                                         | CT | X | 4458272 | 4459264 | WBGene00000157 | aps-2     | F02E8.3   | -0.0761219006269909  |             |
| AGIWUR18349;AGIWUR23286;AGIWUR24757;AGIWUR31667            |    |   |         |         |                |           |           |                      |             |
| N2                                                         | CT | X | 4459603 | 4462609 | WBGene00017178 | atg-16.1  | F02E8.5   | -0.108869624385999   |             |
| AGIWUR40988                                                |    |   |         |         |                |           |           |                      |             |
| N2                                                         | CT | X | 4466518 | 4469005 | WBGene00017176 | nmur-3    | F02E8.2   | -0.091612829756162   | AGIWUR11312 |
| N2                                                         | CT | X | 4469743 | 4471476 | WBGene00000207 | asb-2     | F02E8.1   | -0.0368442864816965  |             |

AGIWUR7405;AGIWUR8491;AGIWUR21740;AGIWUR34730;AGIWUR38595;AGIWUR42226  
 N2 CT X 4472244 4488851 WBGene00003561 ncr-1 F02E8.6 -0.0830658489911951 AGIWUR16168  
 N2 CT X 4491651 4492208 WBGene00023460 F46H6.5 F46H6.5 -0.225110606324853 AGIWUR43882  
 N2 CT X 4494914 4504388 WBGene00000959 dgk-2 F46H6.2 -0.0184797964296148  
 AGIWUR8189;AGIWUR8947;AGIWUR12916;AGIWUR22238;AGIWUR23464;AGIWUR25341;AGIWUR27280;AGIWUR28757;AGIWUR30229;A  
 GIWUR42723  
 N2 CT X 4508509 4510960 WBGene00004356 rhi-1 F46H6.1 0.139685205479245  
 AGIWUR3599;AGIWUR16396;AGIWUR24273;AGIWUR27364  
 N2 CT X 4514099 4516894 WBGene00005008 spr-3 C07A12.5 0.11552665137734  
 AGIWUR19165;AGIWUR42543  
 N2 CT X 4517748 4521069 WBGene00015561 C07A12.7 C07A12.7 0.193820192285937  
 AGIWUR15126;AGIWUR25240  
 N2 CT X 4524155 4526536 WBGene00003963 pdi-2 C07A12.4 0.286766205778138  
 AGIWUR3408;AGIWUR14954;AGIWUR15713;AGIWUR20132;AGIWUR21475;AGIWUR25287;AGIWUR28983;AGIWUR29415;AGIWUR43162;  
 AGIWUR43873  
 N2 CT X 4532430 4537545 WBGene00003628 nhr-35 C07A12.3 0.0137962967902432  
 AGIWUR12593  
 N2 CT X 4544876 4545418 WBGene00015560 C07A12.2 C07A12.2 -0.0515230162381393  
 AGIWUR39936  
 N2 CT X 4562163 4562880 WBGene00015495 C05E11.6 C05E11.6 -0.0485931915126958  
 AGIWUR10070  
 N2 CT X 4565302 4569393 WBGene00000136 amt-4 C05E11.5 0.129669429228629  
 AGIWUR20267  
 N2 CT X 4571448 4573914 WBGene00000133 amt-1 C05E11.4 0.233370241452139  
 AGIWUR2915  
 N2 CT X 4578249 4581724 WBGene00015494 C05E11.3 C05E11.3 0.00515719214123678  
 AGIWUR36785  
 N2 CT X 4581586 4585679 WBGene00015496 C05E11.7 C05E11.7 -0.0546642191566526  
 AGIWUR21270  
 N2 CT X 4586917 4587993 WBGene00015493 C05E11.2 C05E11.2 0.0482308386472932  
 AGIWUR32772  
 N2 CT X 4588768 4590446 WBGene00015492 lnp-1 C05E11.1 -0.131222074654382  
 AGIWUR41193  
 N2 CT X 4591281 4592404 WBGene00001455 flp-12 C05E11.8 -0.0735027354657483  
 AGIWUR4207;AGIWUR7649;AGIWUR11808;AGIWUR12376;AGIWUR16211;AGIWUR34929;AGIWUR35398;AGIWUR38482;AGIWUR42059;A  
 GIWUR42237;AGIWUR43382  
 N2 CT X 4596016 4605928 WBGene00020496 spat-3 T13H2.5 -0.0511591799037578  
 AGIWUR24159;AGIWUR33442  
 N2 CT X 4610926 4620423 WBGene00004148 pqn-65 T13H2.4 0.0725827007939266

|                                                                                               |    |   |         |         |                |          |          |                     |
|-----------------------------------------------------------------------------------------------|----|---|---------|---------|----------------|----------|----------|---------------------|
| AGIWUR2057;AGIWUR7236;AGIWUR8289;AGIWUR17805;AGIWUR21667;AGIWUR36009;AGIWUR41841              |    |   |         |         |                |          |          |                     |
| N2                                                                                            | CT | X | 4629039 | 4631838 | WBGene00016706 | C46C11.3 | C46C11.3 | -0.0607058644817862 |
| AGIWUR15591                                                                                   |    |   |         |         |                |          |          |                     |
| N2                                                                                            | CT | X | 4632348 | 4635784 | WBGene00016705 | C46C11.2 | C46C11.2 | 0.212349820787979   |
| AGIWUR36196                                                                                   |    |   |         |         |                |          |          |                     |
| N2                                                                                            | CT | X | 4637242 | 4643695 | WBGene00016704 | hos1-1   | C46C11.1 | 0.0750728204324602  |
| AGIWUR26837                                                                                   |    |   |         |         |                |          |          |                     |
| N2                                                                                            | CT | X | 4644404 | 4647192 | WBGene00044567 | C46C11.4 | C46C11.4 | 0.179084929223639   |
| AGIWUR25422;AGIWUR33961                                                                       |    |   |         |         |                |          |          |                     |
| N2                                                                                            | CT | X | 4647526 | 4649197 | WBGene00017532 | ent-5    | F16H11.3 | -0.0757205237084548 |
| AGIWUR39877                                                                                   |    |   |         |         |                |          |          |                     |
| N2                                                                                            | CT | X | 4653434 | 4654157 | WBGene00000428 | ceh-1    | F16H11.4 | 0.0142904618699546  |
| AGIWUR10788;AGIWUR22423;AGIWUR26594                                                           |    |   |         |         |                |          |          |                     |
| N2                                                                                            | CT | X | 4656433 | 4660318 | WBGene00003635 | nhr-45   | F16H11.5 | -0.0427709507045613 |
| AGIWUR1648                                                                                    |    |   |         |         |                |          |          |                     |
| N2                                                                                            | CT | X | 4668071 | 4673234 | WBGene00017530 | F16H11.1 | F16H11.1 | -0.133970048531316  |
| AGIWUR30876                                                                                   |    |   |         |         |                |          |          |                     |
| N2                                                                                            | CT | X | 4673706 | 4677283 | WBGene00019345 | tmem-135 | K02G10.3 | 0.215447391206435   |
| AGIWUR24352                                                                                   |    |   |         |         |                |          |          |                     |
| N2                                                                                            | CT | X | 4677342 | 4678129 | WBGene00001454 | flp-11   | K02G10.4 | 0.0422066906896754  |
| AGIWUR387;AGIWUR13935;AGIWUR23795;AGIWUR25362;AGIWUR33739;AGIWUR34739;AGIWUR35075;AGIWUR44123 |    |   |         |         |                |          |          |                     |
| N2                                                                                            | CT | X | 4687763 | 4691316 | WBGene00019346 | K02G10.5 | K02G10.5 | 0.117961089283574   |
| AGIWUR44406                                                                                   |    |   |         |         |                |          |          |                     |
| N2                                                                                            | CT | X | 4696952 | 4699461 | WBGene00002044 | hyl-2    | K02G10.6 | 0.0186971475606708  |
| AGIWUR24282                                                                                   |    |   |         |         |                |          |          |                     |
| N2                                                                                            | CT | X | 4702965 | 4704970 | WBGene00000176 | aqp-8    | K02G10.7 | -0.274030367003592  |
| AGIWUR14200                                                                                   |    |   |         |         |                |          |          |                     |
| N2                                                                                            | CT | X | 4707188 | 4709812 | WBGene00019344 | dhhc-10  | K02G10.1 | -0.168122557309607  |
| AGIWUR41098                                                                                   |    |   |         |         |                |          |          |                     |
| N2                                                                                            | CT | X | 4709772 | 4711744 | WBGene00001032 | dnj-14   | K02G10.8 | -0.0439246915287193 |
| AGIWUR126;AGIWUR12952;AGIWUR18427;AGIWUR29641;AGIWUR38758;AGIWUR40737                         |    |   |         |         |                |          |          |                     |
| N2                                                                                            | CT | X | 4712279 | 4715080 | WBGene00018878 | glit-1   | F55D10.3 | 0.122505961725642   |
| AGIWUR8019                                                                                    |    |   |         |         |                |          |          |                     |
| N2                                                                                            | CT | X | 4715178 | 4715801 | WBGene00004438 | rpl-25.1 | F55D10.2 | -0.0380114234757336 |
| AGIWUR3501;AGIWUR18829                                                                        |    |   |         |         |                |          |          |                     |
| N2                                                                                            | CT | X | 4716244 | 4720640 | WBGene00018879 | F55D10.4 | F55D10.4 | -0.109319099349855  |
| AGIWUR8758                                                                                    |    |   |         |         |                |          |          |                     |
| N2                                                                                            | CT | X | 4722877 | 4727481 | WBGene00018880 | acc-3    | F55D10.5 | 0.0270605563870809  |
| AGIWUR17945                                                                                   |    |   |         |         |                |          |          |                     |

|                                                                                              |    |   |         |         |                |          |          |                     |             |
|----------------------------------------------------------------------------------------------|----|---|---------|---------|----------------|----------|----------|---------------------|-------------|
| N2                                                                                           | CT | X | 4732964 | 4738592 | WBGene00018877 | aman-1   | F55D10.1 | -0.290421528397845  |             |
| AGIWUR33927                                                                                  |    |   |         |         |                |          |          |                     |             |
| N2                                                                                           | CT | X | 4738964 | 4749083 | WBGene00003056 | lon-2    | C39E6.1  | -0.0506018549281073 | AGIWUR33141 |
| N2                                                                                           | CT | X | 4754678 | 4755160 | WBGene00016537 | C39E6.2  | C39E6.2  | -0.20815016471171   | AGIWUR13911 |
| N2                                                                                           | CT | X | 4758804 | 4761612 | WBGene00003377 | mls-2    | C39E6.4  | 0.00178171122718496 | AGIWUR29708 |
| N2                                                                                           | CT | X | 4767178 | 4769985 | WBGene00003807 | npr-1    | C39E6.6  | -0.185608862404109  | AGIWUR43511 |
| N2                                                                                           | CT | X | 4777512 | 4782297 | WBGene00018377 | hum-10   | F43C9.3  | 0.0110383589108896  |             |
| AGIWUR36723;AGIWUR38269                                                                      |    |   |         |         |                |          |          |                     |             |
| N2                                                                                           | CT | X | 4786118 | 4790323 | WBGene00018376 | F43C9.2  | F43C9.2  | 0.147400711595591   | AGIWUR33921 |
| N2                                                                                           | CT | X | 4793266 | 4796158 | WBGene00018375 | F43C9.1  | F43C9.1  | -0.0626228962623152 | AGIWUR29075 |
| N2                                                                                           | CT | X | 4796095 | 4800128 | WBGene00003245 | mig-13   | F43C9.4  | 0.00193633167692742 |             |
| AGIWUR2697;AGIWUR29599;AGIWUR30719                                                           |    |   |         |         |                |          |          |                     |             |
| N2                                                                                           | CT | X | 4805998 | 4811536 | WBGene00019960 | ztf-16   | R08E3.4  | 0.128469227015407   |             |
| AGIWUR272;AGIWUR8112;AGIWUR11016;AGIWUR21775;AGIWUR22153;AGIWUR28337;AGIWUR41656;AGIWUR44561 |    |   |         |         |                |          |          |                     |             |
| N2                                                                                           | CT | X | 4818599 | 4821708 | WBGene00019959 | R08E3.3  | R08E3.3  | -0.195925990421309  |             |
| AGIWUR8990;AGIWUR29698;AGIWUR44869                                                           |    |   |         |         |                |          |          |                     |             |
| N2                                                                                           | CT | X | 4822661 | 4824680 | WBGene00019958 | R08E3.2  | R08E3.2  | 0.0091154025962501  | AGIWUR35969 |
| N2                                                                                           | CT | X | 4825003 | 4834905 | WBGene00019957 | R08E3.1  | R08E3.1  | 0.129150354825661   |             |
| AGIWUR1704;AGIWUR8945;AGIWUR10834;AGIWUR11213;AGIWUR17358;AGIWUR38709                        |    |   |         |         |                |          |          |                     |             |
| N2                                                                                           | CT | X | 4834881 | 4853065 | WBGene00018193 | F39C12.1 | F39C12.1 | 0.0563352398511707  |             |
| AGIWUR28106                                                                                  |    |   |         |         |                |          |          |                     |             |
| N2                                                                                           | CT | X | 4854069 | 4860036 | WBGene00000072 | add-1    | F39C12.2 | 0.114592266277883   |             |
| AGIWUR6120;AGIWUR26945;AGIWUR30618;AGIWUR36537;AGIWUR43003                                   |    |   |         |         |                |          |          |                     |             |
| N2                                                                                           | CT | X | 4866075 | 4866690 | WBGene00044568 | ntc-1    | F39C12.4 | -0.0338454602107792 |             |
| AGIWUR14092;AGIWUR17933;AGIWUR25041;AGIWUR26292;AGIWUR29232                                  |    |   |         |         |                |          |          |                     |             |
| N2                                                                                           | CT | X | 4866684 | 4874657 | WBGene00006640 | tsp-14   | F39C12.3 | 0.38993465457663    |             |
| AGIWUR7113;AGIWUR18083;AGIWUR23404;AGIWUR25913;AGIWUR36849;AGIWUR40724;AGIWUR42162           |    |   |         |         |                |          |          |                     |             |
| N2                                                                                           | CT | X | 4885951 | 4889575 | WBGene00020323 | arrd-23  | T07F12.3 | 0.00266671243557326 |             |
| AGIWUR14501                                                                                  |    |   |         |         |                |          |          |                     |             |
| N2                                                                                           | CT | X | 4890221 | 4892328 | WBGene00020322 | T07F12.2 | T07F12.2 | 0.046080431042876   |             |
| AGIWUR12321;AGIWUR14348;AGIWUR33947;AGIWUR34000;AGIWUR34056;AGIWUR35997;AGIWUR40084          |    |   |         |         |                |          |          |                     |             |
| N2                                                                                           | CT | X | 4894055 | 4896615 | WBGene00020321 | T07F12.1 | T07F12.1 | 0.094313692499572   |             |
| AGIWUR38934                                                                                  |    |   |         |         |                |          |          |                     |             |
| N2                                                                                           | CT | X | 4896602 | 4898163 | WBGene00020324 | T07F12.4 | T07F12.4 | -0.0786011291134745 |             |
| AGIWUR3036                                                                                   |    |   |         |         |                |          |          |                     |             |
| N2                                                                                           | CT | X | 4907290 | 4912323 | WBGene00019403 | K05B2.2  | K05B2.2  | 0.0801839046324559  | AGIWUR22809 |
| N2                                                                                           | CT | X | 4912308 | 4915979 | WBGene00002052 | ifa-4    | K05B2.3  | 0.0799059304530125  | AGIWUR8151  |
| N2                                                                                           | CT | X | 4919019 | 4920988 | WBGene00019404 | K05B2.4  | K05B2.4  | 0.524268816463296   | AGIWUR3149  |
| N2                                                                                           | CT | X | 4921252 | 4929757 | WBGene00003986 | mct-4    | K05B2.5  | 0.0517864396063104  |             |



AGIWUR1296;AGIWUR2543;AGIWUR5527;AGIWUR10729;AGIWUR18533;AGIWUR21418;AGIWUR25450;AGIWUR28400;AGIWUR39815  
 N2 CT X 4948049 4955331 WBGene00006475 tyra-3 M03F4.3 -0.146962817055668 AGIWUR44037  
 N2 CT X 4957329 4958067 WBGene00019758 M03F4.4 M03F4.4 0.0268716186138764 AGIWUR32869  
 N2 CT X 4960553 4964416 WBGene00000066 act-4 M03F4.2 0.254694884888883  
 AGIWUR24973;AGIWUR26902  
 N2 CT X 4964413 4969459 WBGene00019759 M03F4.6 M03F4.6 0.00624191975537691 AGIWUR37710  
 N2 CT X 4969537 4972281 WBGene00019760 calu-1 M03F4.7 0.0865239414688546  
 AGIWUR8128;AGIWUR11525;AGIWUR13302;AGIWUR24024;AGIWUR25793;AGIWUR31221;AGIWUR40414  
 N2 CT X 4972575 4997598 WBGene00022501 ZC8.6 ZC8.6 0.149990080754982  
 AGIWUR20769;AGIWUR22221;AGIWUR44515  
 N2 CT X 4999270 5003515 WBGene00022499 set-30 ZC8.3 -0.0655709889625467 AGIWUR11661  
 N2 CT X 5005269 5007024 WBGene00022498 hsd-2 ZC8.1 0.0596188532037809 AGIWUR15242  
 N2 CT X 5009300 5011222 WBGene00022616 hsd-3 ZC449.6 0.0757642291716762  
 AGIWUR21264;AGIWUR39014  
 N2 CT X 5014040 5015452 WBGene00045365 ZC449.7 ZC449.7 0.0259743669689976  
 AGIWUR2844;AGIWUR39162  
 N2 CT X 5017924 5021064 WBGene00022613 sek-3 ZC449.3 -0.0161660049123462 AGIWUR32402  
 N2 CT X 5021215 5024258 WBGene00022612 ZC449.2 ZC449.2 0.100354736959722 AGIWUR16052  
 N2 CT X 5024420 5028165 WBGene00022611 ZC449.1 ZC449.1 -0.0880198351201664  
 AGIWUR17967;AGIWUR31767  
 N2 CT X 5028184 5029568 WBGene00022614 ZC449.4 ZC449.4 0.0376688453873619 AGIWUR20026  
 N2 CT X 5035030 5037773 WBGene00022615 ZC449.5 ZC449.5 -0.117428437455937  
 AGIWUR9356;AGIWUR13636;AGIWUR22963;AGIWUR25078;AGIWUR32327;AGIWUR36618  
 N2 CT X 5043976 5044746 WBGene00022024 Y64H9A.2 Y64H9A.2 -0.0972824024117616  
 AGIWUR11654  
 N2 CT X 5057273 5057581 WBGene00022023 Y64H9A.1 Y64H9A.1 -0.0261327684318609  
 AGIWUR12543  
 N2 CT X 5058367 5058733 WBGene00016070 C24H10.4 C24H10.4 -0.0175924787223272  
 AGIWUR27501  
 N2 CT X 5061056 5062209 WBGene00016069 C24H10.3 C24H10.3 -0.0132254255277546  
 AGIWUR2962;AGIWUR14100  
 N2 CT X 5064602 5066663 WBGene00016068 C24H10.2 C24H10.2 -0.0700021042769308  
 AGIWUR9762  
 N2 CT X 5072019 5074425 WBGene00016067 C24H10.1 C24H10.1 -0.0611604196061197  
 AGIWUR25124  
 N2 CT X 5074399 5078120 WBGene00006861 cal-5 C24H10.5 0.0828299895411213  
 AGIWUR30530  
 N2 CT X 5079773 5084489 WBGene00016600 ets-5 C42D8.4 0.568751679114188 AGIWUR35943  
 N2 CT X 5087840 5092538 WBGene00006862 pnk-4 C42D8.3 0.070419923670265

AGIWUR20818;AGIWUR40779;AGIWUR44864

|    |    |   |         |         |                 |       |         |                     |             |
|----|----|---|---------|---------|-----------------|-------|---------|---------------------|-------------|
| N2 | CT | X | 5092458 | 5097067 | WBGene000000039 | acn-1 | C42D8.5 | -0.0435169701293034 | AGIWUR38360 |
|----|----|---|---------|---------|-----------------|-------|---------|---------------------|-------------|

|    |    |   |         |         |                 |       |         |                     |  |
|----|----|---|---------|---------|-----------------|-------|---------|---------------------|--|
| N2 | CT | X | 5101032 | 5106173 | WBGene000006926 | vit-2 | C42D8.2 | -0.0938613170030393 |  |
|----|----|---|---------|---------|-----------------|-------|---------|---------------------|--|

AGIWUR7138;AGIWUR13310;AGIWUR30312

|    |    |   |         |         |                |         |         |                     |  |
|----|----|---|---------|---------|----------------|---------|---------|---------------------|--|
| N2 | CT | X | 5106260 | 5107039 | WBGene00044299 | C42D8.9 | C42D8.9 | -0.0353723789576579 |  |
|----|----|---|---------|---------|----------------|---------|---------|---------------------|--|

AGIWUR486;AGIWUR17383;AGIWUR42735

|    |    |   |         |         |                |         |         |                   |             |
|----|----|---|---------|---------|----------------|---------|---------|-------------------|-------------|
| N2 | CT | X | 5109504 | 5112452 | WBGene00016599 | C42D8.1 | C42D8.1 | 0.313682356044392 | AGIWUR34679 |
|----|----|---|---------|---------|----------------|---------|---------|-------------------|-------------|

|    |    |   |         |         |                |       |         |                    |  |
|----|----|---|---------|---------|----------------|-------|---------|--------------------|--|
| N2 | CT | X | 5112422 | 5116866 | WBGene00000149 | apl-1 | C42D8.8 | 0.0696407326028119 |  |
|----|----|---|---------|---------|----------------|-------|---------|--------------------|--|

AGIWUR8657;AGIWUR10776;AGIWUR13543;AGIWUR28682;AGIWUR32921;AGIWUR35954;AGIWUR38873;AGIWUR41528

|    |    |   |         |         |                |       |         |                   |             |
|----|----|---|---------|---------|----------------|-------|---------|-------------------|-------------|
| N2 | CT | X | 5138991 | 5146742 | WBGene00016292 | tbc-7 | C31H2.1 | 0.041233626824086 | AGIWUR23489 |
|----|----|---|---------|---------|----------------|-------|---------|-------------------|-------------|

|    |    |   |         |         |                |       |         |                    |             |
|----|----|---|---------|---------|----------------|-------|---------|--------------------|-------------|
| N2 | CT | X | 5148804 | 5150476 | WBGene00001070 | dpy-8 | C31H2.2 | -0.304872316363401 | AGIWUR25466 |
|----|----|---|---------|---------|----------------|-------|---------|--------------------|-------------|

|    |    |   |         |         |                |         |         |                    |             |
|----|----|---|---------|---------|----------------|---------|---------|--------------------|-------------|
| N2 | CT | X | 5151547 | 5154399 | WBGene00016293 | C31H2.3 | C31H2.3 | -0.236763119073373 | AGIWUR40194 |
|----|----|---|---------|---------|----------------|---------|---------|--------------------|-------------|

|    |    |   |         |         |                |         |         |                     |             |
|----|----|---|---------|---------|----------------|---------|---------|---------------------|-------------|
| N2 | CT | X | 5155093 | 5159667 | WBGene00016294 | C31H2.4 | C31H2.4 | -0.0334762585798209 | AGIWUR39874 |
|----|----|---|---------|---------|----------------|---------|---------|---------------------|-------------|

|    |    |   |         |         |                |         |         |                     |             |
|----|----|---|---------|---------|----------------|---------|---------|---------------------|-------------|
| N2 | CT | X | 5163055 | 5163439 | WBGene00017150 | EGAP5.1 | EGAP5.1 | 0.00515605702649324 | AGIWUR14391 |
|----|----|---|---------|---------|----------------|---------|---------|---------------------|-------------|

|    |    |   |         |         |                |        |          |                    |  |
|----|----|---|---------|---------|----------------|--------|----------|--------------------|--|
| N2 | CT | X | 5165395 | 5168778 | WBGene00020197 | mans-3 | T03G11.4 | -0.179216540691904 |  |
|----|----|---|---------|---------|----------------|--------|----------|--------------------|--|

AGIWUR10489

|    |    |   |         |         |                |           |           |                     |  |
|----|----|---|---------|---------|----------------|-----------|-----------|---------------------|--|
| N2 | CT | X | 5168739 | 5171119 | WBGene00044732 | T03G11.10 | T03G11.10 | -0.0422371706081472 |  |
|----|----|---|---------|---------|----------------|-----------|-----------|---------------------|--|

AGIWUR14189;AGIWUR18431

|    |    |   |         |         |                |          |          |                   |  |
|----|----|---|---------|---------|----------------|----------|----------|-------------------|--|
| N2 | CT | X | 5174369 | 5177506 | WBGene00020196 | T03G11.3 | T03G11.3 | 0.117176668709154 |  |
|----|----|---|---------|---------|----------------|----------|----------|-------------------|--|

AGIWUR35567

|    |    |   |         |         |                |          |          |                   |  |
|----|----|---|---------|---------|----------------|----------|----------|-------------------|--|
| N2 | CT | X | 5177519 | 5179210 | WBGene00020199 | T03G11.6 | T03G11.6 | 0.073624107786137 |  |
|----|----|---|---------|---------|----------------|----------|----------|-------------------|--|

AGIWUR2097;AGIWUR6235;AGIWUR26975

|    |    |   |         |         |                |        |          |                    |  |
|----|----|---|---------|---------|----------------|--------|----------|--------------------|--|
| N2 | CT | X | 5180174 | 5181495 | WBGene00005711 | sru-48 | T03G11.2 | -0.184421390505806 |  |
|----|----|---|---------|---------|----------------|--------|----------|--------------------|--|

AGIWUR37034

|    |    |   |         |         |                |          |          |                    |  |
|----|----|---|---------|---------|----------------|----------|----------|--------------------|--|
| N2 | CT | X | 5183828 | 5186623 | WBGene00044584 | T03G11.9 | T03G11.9 | -0.107055311243764 |  |
|----|----|---|---------|---------|----------------|----------|----------|--------------------|--|

AGIWUR7733;AGIWUR10680

|    |    |   |         |         |                |       |          |                    |  |
|----|----|---|---------|---------|----------------|-------|----------|--------------------|--|
| N2 | CT | X | 5186921 | 5189077 | WBGene00006983 | zig-6 | T03G11.8 | -0.146939761546758 |  |
|----|----|---|---------|---------|----------------|-------|----------|--------------------|--|

AGIWUR17299;AGIWUR28407;AGIWUR44746

|    |    |   |         |         |                |        |          |                     |  |
|----|----|---|---------|---------|----------------|--------|----------|---------------------|--|
| N2 | CT | X | 5196110 | 5204250 | WBGene00004145 | pqn-62 | T03G11.1 | 0.00554051417500734 |  |
|----|----|---|---------|---------|----------------|--------|----------|---------------------|--|

AGIWUR4007;AGIWUR5125;AGIWUR30497;AGIWUR31491

|    |    |   |         |         |                |          |          |                     |  |
|----|----|---|---------|---------|----------------|----------|----------|---------------------|--|
| N2 | CT | X | 5205760 | 5216230 | WBGene00019250 | H28G03.2 | H28G03.2 | -0.0600548769931564 |  |
|----|----|---|---------|---------|----------------|----------|----------|---------------------|--|

AGIWUR817;AGIWUR31145;AGIWUR37381;AGIWUR43675

|    |    |   |         |         |                |          |          |                   |  |
|----|----|---|---------|---------|----------------|----------|----------|-------------------|--|
| N2 | CT | X | 5216363 | 5219095 | WBGene00019249 | H28G03.1 | H28G03.1 | 0.112451215473696 |  |
|----|----|---|---------|---------|----------------|----------|----------|-------------------|--|

AGIWUR804;AGIWUR5930;AGIWUR9399;AGIWUR20705;AGIWUR21613;AGIWUR37275;AGIWUR44938

|    |    |   |         |         |                |          |          |                    |  |
|----|----|---|---------|---------|----------------|----------|----------|--------------------|--|
| N2 | CT | X | 5220406 | 5222042 | WBGene00019251 | H28G03.3 | H28G03.3 | -0.316268307636869 |  |
|----|----|---|---------|---------|----------------|----------|----------|--------------------|--|

AGIWUR32465

|    |    |   |         |         |                |       |          |                    |  |
|----|----|---|---------|---------|----------------|-------|----------|--------------------|--|
| N2 | CT | X | 5234669 | 5243408 | WBGene00003477 | mtm-5 | H28G03.6 | 0.0625875103104452 |  |
|----|----|---|---------|---------|----------------|-------|----------|--------------------|--|

AGIWUR17321

|    |    |   |         |         |                |          |          |                    |  |
|----|----|---|---------|---------|----------------|----------|----------|--------------------|--|
| N2 | CT | X | 5244317 | 5246927 | WBGene00021323 | Y34B4A.7 | Y34B4A.7 | -0.173406097288954 |  |
|----|----|---|---------|---------|----------------|----------|----------|--------------------|--|

|                                                                                                                                                         |    |   |         |         |                |           |           |                     |             |
|---------------------------------------------------------------------------------------------------------------------------------------------------------|----|---|---------|---------|----------------|-----------|-----------|---------------------|-------------|
| AGIWUR2665;AGIWUR15980;AGIWUR25310                                                                                                                      |    |   |         |         |                |           |           |                     |             |
| N2                                                                                                                                                      | CT | X | 5249851 | 5252787 | WBGene00021326 | Y34B4A.10 | Y34B4A.10 | 0.0590128750702084  |             |
| AGIWUR18285                                                                                                                                             |    |   |         |         |                |           |           |                     |             |
| N2                                                                                                                                                      | CT | X | 5253001 | 5255068 | WBGene00021322 | Y34B4A.6  | Y34B4A.6  | -0.0392542100126505 |             |
| AGIWUR10605                                                                                                                                             |    |   |         |         |                |           |           |                     |             |
| N2                                                                                                                                                      | CT | X | 5255194 | 5256855 | WBGene00021325 | Y34B4A.9  | Y34B4A.9  | -0.0722730558970257 |             |
| AGIWUR19937;AGIWUR39655                                                                                                                                 |    |   |         |         |                |           |           |                     |             |
| N2                                                                                                                                                      | CT | X | 5257213 | 5258384 | WBGene00021321 | Y34B4A.5  | Y34B4A.5  | -0.0841437479988709 |             |
| AGIWUR44254                                                                                                                                             |    |   |         |         |                |           |           |                     |             |
| N2                                                                                                                                                      | CT | X | 5264330 | 5271799 | WBGene00021320 | Y34B4A.4  | Y34B4A.4  | 0.175378763481575   |             |
| AGIWUR2026;AGIWUR35951                                                                                                                                  |    |   |         |         |                |           |           |                     |             |
| N2                                                                                                                                                      | CT | X | 5271780 | 5275287 | WBGene00021324 | Y34B4A.8  | Y34B4A.8  | 0.235462826656141   |             |
| AGIWUR30828                                                                                                                                             |    |   |         |         |                |           |           |                     |             |
| N2                                                                                                                                                      | CT | X | 5275567 | 5278813 | WBGene00002031 | hst-6     | Y34B4A.3  | -0.218975834636481  |             |
| AGIWUR663                                                                                                                                               |    |   |         |         |                |           |           |                     |             |
| N2                                                                                                                                                      | CT | X | 5279497 | 5283719 | WBGene00021319 | Y34B4A.2  | Y34B4A.2  | -0.0863401914171771 |             |
| AGIWUR406;AGIWUR7277;AGIWUR8792;AGIWUR10761;AGIWUR15875;AGIWUR21692;AGIWUR24499;AGIWUR25055;AGIWUR26841;AGIWUR29281;AGIWUR29621;AGIWUR37635;AGIWUR41542 |    |   |         |         |                |           |           |                     |             |
| N2                                                                                                                                                      | CT | X | 5283831 | 5289726 | WBGene00017974 | vps-41    | F32A6.3   | -0.0908056336897376 |             |
| AGIWUR24978;AGIWUR33755                                                                                                                                 |    |   |         |         |                |           |           |                     |             |
| N2                                                                                                                                                      | CT | X | 5289728 | 5303512 | WBGene00000092 | ags-3     | F32A6.4   | 0.0140873486317918  |             |
| AGIWUR2762;AGIWUR6181;AGIWUR6713;AGIWUR8007;AGIWUR19964;AGIWUR23829;AGIWUR32302                                                                         |    |   |         |         |                |           |           |                     |             |
| N2                                                                                                                                                      | CT | X | 5298561 | 5306328 | WBGene00017973 | ift-81    | F32A6.2   | -0.041471405268787  |             |
| AGIWUR4111;AGIWUR6031;AGIWUR6950;AGIWUR10167;AGIWUR11518;AGIWUR17046;AGIWUR17375;AGIWUR22547;AGIWUR23483;AGIWUR35816                                    |    |   |         |         |                |           |           |                     |             |
| N2                                                                                                                                                      | CT | X | 5307489 | 5323385 | WBGene00006064 | sto-2     | F32A6.5   | -0.108905133484734  | AGIWUR30928 |
| N2                                                                                                                                                      | CT | X | 5329455 | 5332339 | WBGene00016134 | C26B9.5   | C26B9.5   | -0.0358275449253682 | AGIWUR13099 |
| N2                                                                                                                                                      | CT | X | 5332969 | 5335468 | WBGene00016135 | C26B9.6   | C26B9.6   | -0.164249717580887  | AGIWUR9069  |
| N2                                                                                                                                                      | CT | X | 5338273 | 5340182 | WBGene00016133 | C26B9.3   | C26B9.3   | 0.165169024189716   | AGIWUR41485 |
| N2                                                                                                                                                      | CT | X | 5340189 | 5342202 | WBGene00016132 | C26B9.2   | C26B9.2   | -0.103366933737817  | AGIWUR14514 |
| N2                                                                                                                                                      | CT | X | 5342307 | 5342841 | WBGene00016136 | C26B9.7   | C26B9.7   | -0.260966271575102  |             |
| AGIWUR25278;AGIWUR29045;AGIWUR31795;AGIWUR32458;AGIWUR37242;AGIWUR43461                                                                                 |    |   |         |         |                |           |           |                     |             |
| N2                                                                                                                                                      | CT | X | 5344520 | 5348411 | WBGene00016131 | C26B9.1   | C26B9.1   | 0.217449351095686   | AGIWUR34413 |
| N2                                                                                                                                                      | CT | X | 5349098 | 5352423 | WBGene00006371 | syx-3     | F35C8.4   | -0.14601108093337   | AGIWUR7704  |
| N2                                                                                                                                                      | CT | X | 5353033 | 5354144 | WBGene00003990 | pfn-2     | F35C8.6   | 0.0844397976005862  |             |
| AGIWUR7182;AGIWUR10564                                                                                                                                  |    |   |         |         |                |           |           |                     |             |
| N2                                                                                                                                                      | CT | X | 5355638 | 5364322 | WBGene00018037 | cht1-1    | F35C8.7   | 0.0388452798240095  | AGIWUR15722 |
| N2                                                                                                                                                      | CT | X | 5365808 | 5367619 | WBGene00018036 | F35C8.5   | F35C8.5   | -0.03082762226569   | AGIWUR38857 |
| N2                                                                                                                                                      | CT | X | 5368468 | 5372059 | WBGene00002177 | jkk-1     | F35C8.3   | -0.134690383126213  | AGIWUR13137 |

|                                                            |    |   |         |         |                |          |          |                     |             |
|------------------------------------------------------------|----|---|---------|---------|----------------|----------|----------|---------------------|-------------|
| N2                                                         | CT | X | 5372149 | 5374443 | WBGene00018038 | F35C8.8  | F35C8.8  | -0.191225039796446  | AGIWUR41387 |
| N2                                                         | CT | X | 5375070 | 5376911 | WBGene00018035 | sek-4    | F35C8.2  | -0.067815672792082  | AGIWUR22777 |
| N2                                                         | CT | X | 5377607 | 5379353 | WBGene00018034 | sek-5    | F35C8.1  | 0.0374107906473835  | AGIWUR3165  |
| N2                                                         | CT | X | 5386248 | 5394330 | WBGene00015387 | kcnl-3   | C03F11.1 | 0.0237653921157372  |             |
| AGIWUR24146                                                |    |   |         |         |                |          |          |                     |             |
| N2                                                         | CT | X | 5394508 | 5397400 | WBGene00015388 | C03F11.2 | C03F11.2 | 0.177707415070038   |             |
| AGIWUR26439                                                |    |   |         |         |                |          |          |                     |             |
| N2                                                         | CT | X | 5397676 | 5400626 | WBGene00015389 | scav-1   | C03F11.3 | -0.0214204280290478 |             |
| AGIWUR28074                                                |    |   |         |         |                |          |          |                     |             |
| N2                                                         | CT | X | 5401437 | 5406443 | WBGene00015390 | C03F11.4 | C03F11.4 | -0.0982428760905893 |             |
| AGIWUR36310                                                |    |   |         |         |                |          |          |                     |             |
| N2                                                         | CT | X | 5406562 | 5414350 | WBGene00016559 | C41A3.2  | C41A3.2  | 0.196483282052849   |             |
| AGIWUR4001;AGIWUR38812                                     |    |   |         |         |                |          |          |                     |             |
| N2                                                         | CT | X | 5413810 | 5441958 | WBGene00016558 | pks-1    | C41A3.1  | -0.140992977853687  |             |
| AGIWUR7593;AGIWUR7992                                      |    |   |         |         |                |          |          |                     |             |
| N2                                                         | CT | X | 5445163 | 5448085 | WBGene00016106 | C25F6.7  | C25F6.7  | -0.136475690586105  |             |
| AGIWUR7887;AGIWUR15484;AGIWUR15991;AGIWUR27938;AGIWUR33932 |    |   |         |         |                |          |          |                     |             |
| N2                                                         | CT | X | 5448241 | 5450010 | WBGene00044569 | C25F6.8  | C25F6.8  | 0.00982347613059975 |             |
| AGIWUR13339;AGIWUR22448;AGIWUR37292                        |    |   |         |         |                |          |          |                     |             |
| N2                                                         | CT | X | 5450262 | 5450823 | WBGene00016105 | C25F6.6  | C25F6.6  | -0.263345777403484  | AGIWUR38872 |
| N2                                                         | CT | X | 5461256 | 5466310 | WBGene00016104 | ddr-1    | C25F6.4  | -0.119989596370514  | AGIWUR44016 |
| N2                                                         | CT | X | 5467870 | 5472684 | WBGene00016103 | dpyd-1   | C25F6.3  | 0.043878989630425   | AGIWUR8451  |
| N2                                                         | CT | X | 5479700 | 5484941 | WBGene00001006 | dlg-1    | C25F6.2  | -0.0876273157689074 |             |
| AGIWUR6452;AGIWUR6973;AGIWUR37028                          |    |   |         |         |                |          |          |                     |             |
| N2                                                         | CT | X | 5486487 | 5488102 | WBGene00016102 | C25F6.1  | C25F6.1  | -0.160373330314181  | AGIWUR28493 |
| N2                                                         | CT | X | 5488777 | 5489111 | WBGene00018876 | F55D1.2  | F55D1.2  | 0.0272417521918484  | AGIWUR25880 |
| N2                                                         | CT | X | 5489838 | 5490113 | WBGene00018875 | F55D1.1  | F55D1.1  | -0.0563547719782349 | AGIWUR2924  |
| N2                                                         | CT | X | 5492915 | 5496000 | WBGene00044623 | bus-8    | T23F2.1  | -0.362261470367095  | AGIWUR8554  |
| N2                                                         | CT | X | 5496122 | 5505248 | WBGene00020735 | T23F2.2  | T23F2.2  | -0.070254102989308  |             |
| AGIWUR3692;AGIWUR12559;AGIWUR23951                         |    |   |         |         |                |          |          |                     |             |
| N2                                                         | CT | X | 5514798 | 5515080 | WBGene00020737 | T23F2.4  | T23F2.4  | 0.0538079436911172  | AGIWUR42924 |
| N2                                                         | CT | X | 5516454 | 5517162 | WBGene00020738 | T23F2.5  | T23F2.5  | -0.137670386434367  | AGIWUR17349 |
| N2                                                         | CT | X | 5519876 | 5522819 | WBGene00016934 | mboa-3   | C54G7.2  | 0.200496118218346   | AGIWUR4306  |
| N2                                                         | CT | X | 5525199 | 5538514 | WBGene00002983 | lgx-1    | C54G7.3  | 0.0611048873223043  |             |
| AGIWUR2468;AGIWUR35142                                     |    |   |         |         |                |          |          |                     |             |
| N2                                                         | CT | X | 5543951 | 5545529 | WBGene00016933 | C54G7.1  | C54G7.1  | -0.262552869674728  | AGIWUR7203  |
| N2                                                         | CT | X | 5545684 | 5552756 | WBGene00016935 | ifta-1   | C54G7.4  | -0.27763903848235   | AGIWUR32065 |
| N2                                                         | CT | X | 5559021 | 5561330 | WBGene00016518 | C38C5.1  | C38C5.1  | -0.0631565657129425 | AGIWUR21309 |
| N2                                                         | CT | X | 5575932 | 5590815 | WBGene00003166 | mec-2    | F14D12.4 | -0.0163169615782195 |             |

AGIWUR5405;AGIWUR9147;AGIWUR16683;AGIWUR18760;AGIWUR25075;AGIWUR25491;AGIWUR38095;AGIWUR38202;AGIWUR41977;AGIWUR43004

|                                                                        |    |   |         |         |                |          |          |                      |                     |             |
|------------------------------------------------------------------------|----|---|---------|---------|----------------|----------|----------|----------------------|---------------------|-------------|
| N2                                                                     | CT | X | 5593133 | 5594965 | WBGene00006826 | unc-97   | F14D12.2 |                      | 0.265161398545953   |             |
| AGIWUR3367;AGIWUR8261;AGIWUR9120;AGIWUR12267;AGIWUR12558;AGIWUR39269   |    |   |         |         |                |          |          |                      |                     |             |
| N2                                                                     | CT | X | 5595778 | 5599330 | WBGene00017464 | sulp-2   | F14D12.5 |                      | -0.0389870725958055 |             |
| AGIWUR12101;AGIWUR24371;AGIWUR32052;AGIWUR42406                        |    |   |         |         |                |          |          |                      |                     |             |
| N2                                                                     | CT | X | 5603766 | 5609133 | WBGene00017463 | F14D12.1 | F14D12.1 |                      | 0.161424203290164   |             |
| AGIWUR14060;AGIWUR18971;AGIWUR41801                                    |    |   |         |         |                |          |          |                      |                     |             |
| N2                                                                     | CT | X | 5609155 | 5611250 | WBGene00006411 | octr-1   | F14D12.6 |                      | 0.102549277017403   |             |
| AGIWUR27771;AGIWUR34399;AGIWUR35742                                    |    |   |         |         |                |          |          |                      |                     |             |
| N2                                                                     | CT | X | 5630356 | 5632302 | WBGene00020658 | T21F4.1  | T21F4.1  | 0.00155909749539518  |                     | AGIWUR14167 |
| N2                                                                     | CT | X | 5637887 | 5638075 | WBGene00044570 | T22B7.8  | T22B7.8  | -0.156551064868339   |                     |             |
| AGIWUR20092;AGIWUR30776;AGIWUR30830;AGIWUR35628;AGIWUR42724            |    |   |         |         |                |          |          |                      |                     |             |
| N2                                                                     | CT | X | 5638582 | 5641363 | WBGene00020673 | T22B7.4  | T22B7.4  | -0.0118652191489783  |                     | AGIWUR17746 |
| N2                                                                     | CT | X | 5642911 | 5644940 | WBGene00005718 | srv-7    | T22B7.5  | -0.201621865735257   |                     | AGIWUR7545  |
| N2                                                                     | CT | X | 5647378 | 5650213 | WBGene00020672 | T22B7.3  | T22B7.3  | 0.0528311120795699   |                     | AGIWUR1146  |
| N2                                                                     | CT | X | 5651869 | 5653925 | WBGene00020674 | T22B7.7  | T22B7.7  | 0.0756655027149797   |                     | AGIWUR13647 |
| N2                                                                     | CT | X | 5663837 | 5674060 | WBGene00001182 | egl-13   | T22B7.1  | 0.0609390956828704   |                     |             |
| AGIWUR15053;AGIWUR18785;AGIWUR21583;AGIWUR27020                        |    |   |         |         |                |          |          |                      |                     |             |
| N2                                                                     | CT | X | 5675246 | 5680225 | WBGene00020919 | set-19   | W01C8.3  | -0.00197455129482904 |                     |             |
| AGIWUR3495;AGIWUR5274;AGIWUR14343;AGIWUR34668                          |    |   |         |         |                |          |          |                      |                     |             |
| N2                                                                     | CT | X | 5680349 | 5684741 | WBGene00020920 | set-20   | W01C8.4  | -0.0955508161078313  |                     | AGIWUR11570 |
| N2                                                                     | CT | X | 5692399 | 5694426 | WBGene00020918 | W01C8.1  | W01C8.1  | -0.300264139890701   |                     | AGIWUR23186 |
| N2                                                                     | CT | X | 5694475 | 5697308 | WBGene00020921 | W01C8.5  | W01C8.5  | -0.0606313309770705  |                     |             |
| AGIWUR3723;AGIWUR7945;AGIWUR43807                                      |    |   |         |         |                |          |          |                      |                     |             |
| N2                                                                     | CT | X | 5705719 | 5710625 | WBGene00000295 | cat-1    | W01C8.6  | 0.218399643208299    |                     |             |
| AGIWUR4252;AGIWUR19213;AGIWUR23916                                     |    |   |         |         |                |          |          |                      |                     |             |
| N2                                                                     | CT | X | 5714279 | 5717601 | WBGene00017108 | cyp-43A1 |          | E03E2.1              | 0.0971417379685531  |             |
| AGIWUR6770;AGIWUR8326;AGIWUR17479;AGIWUR18439;AGIWUR42387;AGIWUR44987  |    |   |         |         |                |          |          |                      |                     |             |
| N2                                                                     | CT | X | 5717538 | 5720268 | WBGene00016568 | C41G11.1 |          | C41G11.1             | 0.0532665646418442  |             |
| AGIWUR1606;AGIWUR11627;AGIWUR19917;AGIWUR25682;AGIWUR28142;AGIWUR35183 |    |   |         |         |                |          |          |                      |                     |             |
| N2                                                                     | CT | X | 5720438 | 5728656 | WBGene00004349 | rgs-6    | C41G11.3 |                      | 0.0657136731515142  |             |
| AGIWUR25314;AGIWUR29193                                                |    |   |         |         |                |          |          |                      |                     |             |
| N2                                                                     | CT | X | 5738761 | 5743307 | WBGene00016570 | gnrr-4   | C41G11.4 |                      | -0.0873014586259044 |             |
| AGIWUR39635                                                            |    |   |         |         |                |          |          |                      |                     |             |
| N2                                                                     | CT | X | 5760281 | 5763392 | WBGene00016937 | tag-294  | C54H2.3  | -0.188601750111584   |                     | AGIWUR6339  |
| N2                                                                     | CT | X | 5766482 | 5770793 | WBGene00016938 | C54H2.4  | C54H2.4  | -0.120297050572273   |                     | AGIWUR15372 |
| N2                                                                     | CT | X | 5776251 | 5778884 | WBGene00006368 | sym-3    | C54H2.1  | -0.0513566404503516  |                     |             |
| AGIWUR2331;AGIWUR18041;AGIWUR20651;AGIWUR23478                         |    |   |         |         |                |          |          |                      |                     |             |

|                                                                                                                                   |    |   |         |         |                |          |          |                      |
|-----------------------------------------------------------------------------------------------------------------------------------|----|---|---------|---------|----------------|----------|----------|----------------------|
| N2                                                                                                                                | CT | X | 5778875 | 5780758 | WBGene00004788 | sft-4    | C54H2.5  | 0.205923127456132    |
| AGIWUR8477;AGIWUR9575;AGIWUR11346;AGIWUR14701;AGIWUR34782;AGIWUR41146                                                             |    |   |         |         |                |          |          |                      |
| N2                                                                                                                                | CT | X | 5783405 | 5786406 | WBGene00018516 | tag-257  | F46G11.3 | -0.147639201420297   |
| AGIWUR13771                                                                                                                       |    |   |         |         |                |          |          |                      |
| N2                                                                                                                                | CT | X | 5786493 | 5787353 | WBGene00045269 | F46G11.6 | F46G11.6 | 0.0269743876786377   |
| AGIWUR20936                                                                                                                       |    |   |         |         |                |          |          |                      |
| N2                                                                                                                                | CT | X | 5788096 | 5790345 | WBGene00018515 | F46G11.2 | F46G11.2 | -0.120760321477689   |
| AGIWUR4630;AGIWUR41476                                                                                                            |    |   |         |         |                |          |          |                      |
| N2                                                                                                                                | CT | X | 5791703 | 5797328 | WBGene00018514 | F46G11.1 | F46G11.1 | -0.0132047285722612  |
| AGIWUR14159;AGIWUR16979                                                                                                           |    |   |         |         |                |          |          |                      |
| N2                                                                                                                                | CT | X | 5797313 | 5798790 | WBGene00018517 | F46G11.4 | F46G11.4 | 0.132355551938677    |
| AGIWUR28013                                                                                                                       |    |   |         |         |                |          |          |                      |
| N2                                                                                                                                | CT | X | 5804379 | 5805922 | WBGene00017428 | F13D11.3 | F13D11.3 | 0.0306834912862772   |
| AGIWUR8316;AGIWUR8680;AGIWUR33918;AGIWUR37491;AGIWUR38571                                                                         |    |   |         |         |                |          |          |                      |
| N2                                                                                                                                | CT | X | 5822277 | 5827755 | WBGene00001824 | hbl-1    | F13D11.2 | 0.00268816671934502  |
| AGIWUR1043;AGIWUR8461;AGIWUR11581;AGIWUR15453;AGIWUR20933;AGIWUR24101;AGIWUR31648;AGIWUR31830;AGIWUR33022;AGIWUR35804;AGIWUR41028 |    |   |         |         |                |          |          |                      |
| N2                                                                                                                                | CT | X | 5829376 | 5832027 | WBGene00017427 | acp-5    | F13D11.1 | -0.0534777979486947  |
| AGIWUR5445;AGIWUR11396;AGIWUR23581                                                                                                |    |   |         |         |                |          |          |                      |
| N2                                                                                                                                | CT | X | 5831918 | 5834858 | WBGene00017429 | F13D11.4 | F13D11.4 | -0.0985629944840305  |
| AGIWUR5892                                                                                                                        |    |   |         |         |                |          |          |                      |
| N2                                                                                                                                | CT | X | 5838039 | 5839778 | WBGene00021060 | dct-11   | W06B11.3 | 0.0437185557114539   |
| AGIWUR21625                                                                                                                       |    |   |         |         |                |          |          |                      |
| N2                                                                                                                                | CT | X | 5841592 | 5845987 | WBGene00004245 | puf-9    | W06B11.2 | 0.104934197275712    |
| AGIWUR6309;AGIWUR16845;AGIWUR30458                                                                                                |    |   |         |         |                |          |          |                      |
| N2                                                                                                                                | CT | X | 5849104 | 5851971 | WBGene00021059 | atat-2   | W06B11.1 | -0.00915338373039631 |
| AGIWUR1959                                                                                                                        |    |   |         |         |                |          |          |                      |
| N2                                                                                                                                | CT | X | 5851954 | 5854260 | WBGene00001984 | hog-1    | W06B11.4 | -0.0614751889133629  |
| AGIWUR9208                                                                                                                        |    |   |         |         |                |          |          |                      |
| N2                                                                                                                                | CT | X | 5862708 | 5873320 | WBGene00006424 | ctbp-1   | F49E10.5 | -0.0647850319952057  |
| AGIWUR5330;AGIWUR41828                                                                                                            |    |   |         |         |                |          |          |                      |
| N2                                                                                                                                | CT | X | 5875898 | 5881716 | WBGene00018641 | F49E10.4 | F49E10.4 | 0.137820329925479    |
| AGIWUR9852;AGIWUR13472;AGIWUR16268;AGIWUR41839                                                                                    |    |   |         |         |                |          |          |                      |
| N2                                                                                                                                | CT | X | 5885865 | 5886823 | WBGene00001450 | flp-7    | F49E10.3 | -0.111681525694157   |
| AGIWUR358;AGIWUR2865;AGIWUR4562;AGIWUR35967                                                                                       |    |   |         |         |                |          |          |                      |
| N2                                                                                                                                | CT | X | 5890380 | 5894757 | WBGene00018640 | F49E10.2 | F49E10.2 | -0.0849511945829935  |
| AGIWUR32917                                                                                                                       |    |   |         |         |                |          |          |                      |
| N2                                                                                                                                | CT | X | 5897342 | 5902152 | WBGene00018639 | tbc-16   | F49E10.1 | 0.0249352515844015   |
| AGIWUR22634                                                                                                                       |    |   |         |         |                |          |          |                      |

|                                                                                    |    |   |         |         |                |         |          |                      |             |
|------------------------------------------------------------------------------------|----|---|---------|---------|----------------|---------|----------|----------------------|-------------|
| N2                                                                                 | CT | X | 5904627 | 5905346 | WBGene00019160 | crf-1   | H05L03.3 | -0.0235876131527455  |             |
| AGIWUR36178                                                                        |    |   |         |         |                |         |          |                      |             |
| N2                                                                                 | CT | X | 5919656 | 5920494 | WBGene00021268 | capa-1  | Y23B4A.2 | -0.237817533359339   |             |
| AGIWUR13010                                                                        |    |   |         |         |                |         |          |                      |             |
| N2                                                                                 | CT | X | 5931122 | 5934532 | WBGene00001175 | egl-6   | C46F4.1  | -0.343663648674502   | AGIWUR10686 |
| N2                                                                                 | CT | X | 5935780 | 5937549 | WBGene00044571 | C46F4.3 | C46F4.3  | -0.0318362716288152  |             |
| AGIWUR3474;AGIWUR15765;AGIWUR18513;AGIWUR32363                                     |    |   |         |         |                |         |          |                      |             |
| N2                                                                                 | CT | X | 5937506 | 5944510 | WBGene00016716 | acs-17  | C46F4.2  | 0.041523367812121    |             |
| AGIWUR6231;AGIWUR17820;AGIWUR20521;AGIWUR20972;AGIWUR22389;AGIWUR29029             |    |   |         |         |                |         |          |                      |             |
| N2                                                                                 | CT | X | 5945821 | 5948869 | WBGene00003254 | mig-23  | R07E4.4  | 0.10104829569601     | AGIWUR10959 |
| N2                                                                                 | CT | X | 5949529 | 5953174 | WBGene00019938 | R07E4.5 | R07E4.5  | -0.0775524030759271  | AGIWUR41208 |
| N2                                                                                 | CT | X | 5953450 | 5953815 | WBGene00019937 | R07E4.3 | R07E4.3  | -0.089429842115635   | AGIWUR17110 |
| N2                                                                                 | CT | X | 5959115 | 5970158 | WBGene00019935 | R07E4.1 | R07E4.1  | -0.0660692104586262  |             |
| AGIWUR11245;AGIWUR31261                                                            |    |   |         |         |                |         |          |                      |             |
| N2                                                                                 | CT | X | 5970677 | 5977854 | WBGene00002190 | kin-2   | R07E4.6  | 0.000900488355618734 |             |
| AGIWUR8994;AGIWUR10317;AGIWUR10536;AGIWUR14932;AGIWUR15995;AGIWUR34314;AGIWUR35178 |    |   |         |         |                |         |          |                      |             |
| N2                                                                                 | CT | X | 5984975 | 5992103 | WBGene00002224 | k1p-13  | F22F4.3  | -0.0354689372914372  | AGIWUR36520 |
| N2                                                                                 | CT | X | 5992099 | 5992859 | WBGene00017718 | F22F4.5 | F22F4.5  | 0.0436322928929158   |             |
| AGIWUR24185;AGIWUR27325;AGIWUR28641                                                |    |   |         |         |                |         |          |                      |             |
| N2                                                                                 | CT | X | 5996156 | 5998243 | WBGene00002125 | inx-3   | F22F4.2  | -0.0196792390591529  |             |
| AGIWUR11328;AGIWUR26870;AGIWUR41549;AGIWUR42844                                    |    |   |         |         |                |         |          |                      |             |
| N2                                                                                 | CT | X | 5998310 | 6001534 | WBGene00017717 | F22F4.4 | F22F4.4  | -0.172623799762146   | AGIWUR30783 |
| N2                                                                                 | CT | X | 6004482 | 6007071 | WBGene00017716 | F22F4.1 | F22F4.1  | -0.187602332473237   | AGIWUR8904  |
| N2                                                                                 | CT | X | 6006969 | 6011310 | WBGene00015622 | C09B8.3 | C09B8.3  | -0.403762941656154   | AGIWUR18158 |
| N2                                                                                 | CT | X | 6015492 | 6017584 | WBGene00015625 | C09B8.8 | C09B8.8  | -0.174940561672112   | AGIWUR25377 |
| N2                                                                                 | CT | X | 6018442 | 6019936 | WBGene00015623 | C09B8.4 | C09B8.4  | 0.0554031119629741   | AGIWUR28618 |
| N2                                                                                 | CT | X | 6020866 | 6022569 | WBGene00015624 | C09B8.5 | C09B8.5  | -0.124078078123537   | AGIWUR22489 |
| N2                                                                                 | CT | X | 6031469 | 6034525 | WBGene00002146 | ipp-5   | C09B8.1  | 0.186538703880377    |             |
| AGIWUR7509;AGIWUR39391;AGIWUR43663                                                 |    |   |         |         |                |         |          |                      |             |
| N2                                                                                 | CT | X | 6034463 | 6039496 | WBGene00002023 | hsp-25  | C09B8.6  | 0.109478384158892    |             |
| AGIWUR3529;AGIWUR6104;AGIWUR20413;AGIWUR30435;AGIWUR39439;AGIWUR42269              |    |   |         |         |                |         |          |                      |             |
| N2                                                                                 | CT | X | 6044309 | 6048610 | WBGene00003911 | pak-1   | C09B8.7  | -0.116193902028829   |             |
| AGIWUR25778;AGIWUR39887                                                            |    |   |         |         |                |         |          |                      |             |
| N2                                                                                 | CT | X | 6053058 | 6057177 | WBGene00016661 | C45B2.6 | C45B2.6  | -0.17972894765084    | AGIWUR40366 |
| N2                                                                                 | CT | X | 6058255 | 6060242 | WBGene00001602 | gln-1   | C45B2.5  | -0.150513353709659   |             |
| AGIWUR483;AGIWUR9520;AGIWUR30943                                                   |    |   |         |         |                |         |          |                      |             |
| N2                                                                                 | CT | X | 6060754 | 6065986 | WBGene00004219 | ptr-4   | C45B2.7  | -0.244438176454586   |             |
| AGIWUR7044;AGIWUR10815;AGIWUR13775;AGIWUR35960;AGIWUR42720;AGIWUR44398             |    |   |         |         |                |         |          |                      |             |
| N2                                                                                 | CT | X | 6070497 | 6081833 | WBGene00001587 | ggr-2   | C45B2.4  | 0.200016770993115    | AGIWUR16871 |

|                                                                                                                                                                    |    |   |         |         |                 |           |           |                      |             |
|--------------------------------------------------------------------------------------------------------------------------------------------------------------------|----|---|---------|---------|-----------------|-----------|-----------|----------------------|-------------|
| N2                                                                                                                                                                 | CT | X | 6082960 | 6083333 | WBGene00016660  | C45B2.3   | C45B2.3   | 0.400091406758857    | AGIWUR36757 |
| N2                                                                                                                                                                 | CT | X | 6084739 | 6085189 | WBGene00016659  | C45B2.2   | C45B2.2   | 0.0231158828447837   |             |
| AGIWUR7351;AGIWUR20052;AGIWUR28037;AGIWUR36337;AGIWUR44487                                                                                                         |    |   |         |         |                 |           |           |                      |             |
| N2                                                                                                                                                                 | CT | X | 6086124 | 6086567 | WBGene00016658  | C45B2.1   | C45B2.1   | 0.200118008972682    | AGIWUR13077 |
| N2                                                                                                                                                                 | CT | X | 6087985 | 6088391 | WBGene00016662  | C45B2.8   | C45B2.8   | 0.127552842883169    | AGIWUR42228 |
| N2                                                                                                                                                                 | CT | X | 6089033 | 6092124 | WBGene00002007  | hsp-3     | C15H9.6   | -0.00839399385267292 |             |
| AGIWUR794;AGIWUR4634;AGIWUR7413;AGIWUR7841;AGIWUR20115;AGIWUR27420;AGIWUR27912;AGIWUR33491;AGIWUR37727;AGIWUR38048;AGIWUR38338;AGIWUR41750;AGIWUR41826;AGIWUR45001 |    |   |         |         |                 |           |           |                      |             |
| N2                                                                                                                                                                 | CT | X | 6093286 | 6097574 | WBGene00015801  | C15H9.5   | C15H9.5   | 0.050042211319913    | AGIWUR10532 |
| N2                                                                                                                                                                 | CT | X | 6101158 | 6105526 | WBGene00015800  | C15H9.4   | C15H9.4   | -0.104798668980961   | AGIWUR43548 |
| N2                                                                                                                                                                 | CT | X | 6106926 | 6109338 | WBGene00015802  | kynu-1    | C15H9.7   | -0.0536750384416536  | AGIWUR18801 |
| N2                                                                                                                                                                 | CT | X | 6110754 | 6113057 | WBGene00004193  | prx-3     | C15H9.8   | 0.0474147740960227   |             |
| AGIWUR4666;AGIWUR15011;AGIWUR15322;AGIWUR31300;AGIWUR35692                                                                                                         |    |   |         |         |                 |           |           |                      |             |
| N2                                                                                                                                                                 | CT | X | 6115804 | 6118051 | WBGene00015799  | C15H9.3   | C15H9.3   | -0.130583846439968   |             |
| AGIWUR21830;AGIWUR23000;AGIWUR29763                                                                                                                                |    |   |         |         |                 |           |           |                      |             |
| N2                                                                                                                                                                 | CT | X | 6118776 | 6120436 | WBGene00015798  | C15H9.2   | C15H9.2   | 0.125497317076917    | AGIWUR29727 |
| N2                                                                                                                                                                 | CT | X | 6122315 | 6127541 | WBGene00003778  | nnt-1     | C15H9.1   | -0.185296026332705   | AGIWUR7268  |
| N2                                                                                                                                                                 | CT | X | 6127457 | 6128326 | WBGene00015803  | C15H9.9   | C15H9.9   | 0.0709651446348367   | AGIWUR18082 |
| N2                                                                                                                                                                 | CT | X | 6129535 | 6138332 | WBGene00022202  | Y72A10A.1 | Y72A10A.1 | -0.0869986413119488  |             |
| AGIWUR13394                                                                                                                                                        |    |   |         |         |                 |           |           |                      |             |
| N2                                                                                                                                                                 | CT | X | 6142546 | 6150545 | WBGene00016423  | tag-275   | C34H3.1   | -0.119582836303329   | AGIWUR24326 |
| N2                                                                                                                                                                 | CT | X | 6159388 | 6160523 | WBGene00003846  | odd-2     | C34H3.2   | 0.175467582467652    | AGIWUR34622 |
| N2                                                                                                                                                                 | CT | X | 6169305 | 6173748 | WBGene00020786  | T25B2.2   | T25B2.2   | 0.109807949175154    | AGIWUR42133 |
| N2                                                                                                                                                                 | CT | X | 6176129 | 6177154 | WBGene00077592  | T25B2.3   | T25B2.3   | 0.0424607895110682   | AGIWUR29729 |
| N2                                                                                                                                                                 | CT | X | 6179241 | 6180140 | WBGene00020484  | T13C5.3   | T13C5.3   | 0.144439416614238    | AGIWUR32692 |
| N2                                                                                                                                                                 | CT | X | 6180650 | 6181425 | WBGene00020487  | T13C5.7   | T13C5.7   | -0.201234249582582   | AGIWUR4318  |
| N2                                                                                                                                                                 | CT | X | 6188148 | 6189422 | WBGene000206360 | T13C5.10  | T13C5.10  | 0.0760187724471937   |             |
| AGIWUR3002                                                                                                                                                         |    |   |         |         |                 |           |           |                      |             |
| N2                                                                                                                                                                 | CT | X | 6191590 | 6192948 | WBGene00020485  | ceh-54    | T13C5.4   | -0.0180203577895668  | AGIWUR15363 |
| N2                                                                                                                                                                 | CT | X | 6196927 | 6200818 | WBGene00000905  | daf-9     | T13C5.1   | -0.0410288034996036  | AGIWUR17268 |
| N2                                                                                                                                                                 | CT | X | 6201875 | 6204922 | WBGene00000245  | bca-1     | T13C5.5   | 0.18931461402061     |             |
| AGIWUR7829;AGIWUR10187;AGIWUR11293;AGIWUR21637                                                                                                                     |    |   |         |         |                 |           |           |                      |             |
| N2                                                                                                                                                                 | CT | X | 6205180 | 6206475 | WBGene00077690  | mtp-18    | T13C5.8   | 0.0901495931029839   |             |
| AGIWUR13852;AGIWUR15465                                                                                                                                            |    |   |         |         |                 |           |           |                      |             |
| N2                                                                                                                                                                 | CT | X | 6206581 | 6207626 | WBGene00020486  | T13C5.6   | T13C5.6   | 0.0537968079216871   | AGIWUR19108 |
| N2                                                                                                                                                                 | CT | X | 6208161 | 6208563 | WBGene00015782  | C14F11.7  | C14F11.7  | -0.392581421139347   |             |
| AGIWUR44304                                                                                                                                                        |    |   |         |         |                 |           |           |                      |             |
| N2                                                                                                                                                                 | CT | X | 6208761 | 6213911 | WBGene00015779  | lrch-1    | C14F11.2  | -0.0776449401507104  |             |
| AGIWUR15777                                                                                                                                                        |    |   |         |         |                 |           |           |                      |             |



|                                                                                                                                                                                                                   |    |   |         |         |                |          |          |                      |                    |
|-------------------------------------------------------------------------------------------------------------------------------------------------------------------------------------------------------------------|----|---|---------|---------|----------------|----------|----------|----------------------|--------------------|
| N2                                                                                                                                                                                                                | CT | X | 6226131 | 6230701 | WBGene00001803 | lite-1   | C14F11.3 |                      | 0.0666429656869525 |
| AGIWUR41630                                                                                                                                                                                                       |    |   |         |         |                |          |          |                      |                    |
| N2                                                                                                                                                                                                                | CT | X | 6230920 | 6233048 | WBGene00015780 | C14F11.4 | C14F11.4 |                      | 0.1509933291746    |
| AGIWUR10334;AGIWUR14376;AGIWUR42427                                                                                                                                                                               |    |   |         |         |                |          |          |                      |                    |
| N2                                                                                                                                                                                                                | CT | X | 6233149 | 6235541 | WBGene00002024 | hsp-43   | C14F11.5 |                      | 0.0726786785735207 |
| AGIWUR803;AGIWUR2757;AGIWUR3346;AGIWUR5545;AGIWUR7080;AGIWUR11542;AGIWUR12158;AGIWUR12947;AGIWUR13833;AGIWUR20327;AGIWUR24200;AGIWUR26078;AGIWUR26161;AGIWUR27483;AGIWUR30002;AGIWUR31377;AGIWUR37840;AGIWUR41660 |    |   |         |         |                |          |          |                      |                    |
| N2                                                                                                                                                                                                                | CT | X | 6238021 | 6239115 | WBGene00015781 | C14F11.6 | C14F11.6 |                      | -0.200714566871218 |
| AGIWUR1730                                                                                                                                                                                                        |    |   |         |         |                |          |          |                      |                    |
| N2                                                                                                                                                                                                                | CT | X | 6240955 | 6242709 | WBGene00015778 | got-2.2  | C14F11.1 |                      | 0.0936133236848633 |
| AGIWUR9797;AGIWUR14781;AGIWUR26879                                                                                                                                                                                |    |   |         |         |                |          |          |                      |                    |
| N2                                                                                                                                                                                                                | CT | X | 6252274 | 6253785 | WBGene00021050 | W05H9.3  | W05H9.3  | -0.120672567586791   | AGIWUR35259        |
| N2                                                                                                                                                                                                                | CT | X | 6263648 | 6266913 | WBGene00021051 | W05H9.4  | W05H9.4  | 0.000755796211601378 | AGIWUR44050        |
| N2                                                                                                                                                                                                                | CT | X | 6267043 | 6271087 | WBGene00021049 | W05H9.2  | W05H9.2  | -0.00526024493965593 |                    |
| AGIWUR8667;AGIWUR12910;AGIWUR13830;AGIWUR39746;AGIWUR44532                                                                                                                                                        |    |   |         |         |                |          |          |                      |                    |
| N2                                                                                                                                                                                                                | CT | X | 6272089 | 6273768 | WBGene00021048 | W05H9.1  | W05H9.1  | -0.130286695969378   | AGIWUR30479        |
| N2                                                                                                                                                                                                                | CT | X | 6279801 | 6281015 | WBGene00000739 | col-166  | T07H6.3  | 0.388102334322718    |                    |
| AGIWUR37078;AGIWUR44419                                                                                                                                                                                           |    |   |         |         |                |          |          |                      |                    |
| N2                                                                                                                                                                                                                | CT | X | 6281847 | 6291732 | WBGene00002976 | lev-9    | T07H6.5  | 0.0126623503770036   |                    |
| AGIWUR2946;AGIWUR21872;AGIWUR24441;AGIWUR32386                                                                                                                                                                    |    |   |         |         |                |          |          |                      |                    |
| N2                                                                                                                                                                                                                | CT | X | 6293124 | 6298195 | WBGene00003394 | mom-1    | T07H6.2  | -0.298827672992799   | AGIWUR4640         |
| N2                                                                                                                                                                                                                | CT | X | 6300138 | 6305211 | WBGene00020330 | T07H6.1  | T07H6.1  | -0.138764848934404   | AGIWUR44690        |
| N2                                                                                                                                                                                                                | CT | X | 6311715 | 6314588 | WBGene00020420 | T10E10.3 | T10E10.3 | 0.144418764889159    |                    |
| AGIWUR439                                                                                                                                                                                                         |    |   |         |         |                |          |          |                      |                    |
| N2                                                                                                                                                                                                                | CT | X | 6314529 | 6322819 | WBGene00020421 | T10E10.4 | T10E10.4 | 0.24927698493781     |                    |
| AGIWUR46                                                                                                                                                                                                          |    |   |         |         |                |          |          |                      |                    |
| N2                                                                                                                                                                                                                | CT | X | 6323297 | 6324539 | WBGene00000740 | col-167  | T10E10.2 | 0.629801105264274    |                    |
| AGIWUR40205                                                                                                                                                                                                       |    |   |         |         |                |          |          |                      |                    |
| N2                                                                                                                                                                                                                | CT | X | 6329160 | 6330127 | WBGene00000742 | col-169  | T10E10.5 | 0.449046172496272    |                    |
| AGIWUR18709                                                                                                                                                                                                       |    |   |         |         |                |          |          |                      |                    |
| N2                                                                                                                                                                                                                | CT | X | 6331620 | 6332686 | WBGene00000743 | col-170  | T10E10.6 | 0.319919366695084    |                    |
| AGIWUR1815                                                                                                                                                                                                        |    |   |         |         |                |          |          |                      |                    |
| N2                                                                                                                                                                                                                | CT | X | 6335279 | 6338035 | WBGene00015381 | C03B1.13 | C03B1.13 | 0.0487308366182653   |                    |
| AGIWUR25465                                                                                                                                                                                                       |    |   |         |         |                |          |          |                      |                    |
| N2                                                                                                                                                                                                                | CT | X | 6341835 | 6345842 | WBGene00015378 | C03B1.7  | C03B1.7  | 0.433350729208851    | AGIWUR27113        |
| N2                                                                                                                                                                                                                | CT | X | 6346359 | 6347113 | WBGene00015379 | C03B1.9  | C03B1.9  | -0.0546234399057006  |                    |
| AGIWUR1881;AGIWUR13826;AGIWUR18914;AGIWUR19974;AGIWUR23191;AGIWUR24202;AGIWUR32257;AGIWUR34582;AGIWUR37352                                                                                                        |    |   |         |         |                |          |          |                      |                    |
| N2                                                                                                                                                                                                                | CT | X | 6350187 | 6351876 | WBGene00015377 | C03B1.6  | C03B1.6  | 0.140386444218238    |                    |
| AGIWUR9258;AGIWUR38721                                                                                                                                                                                            |    |   |         |         |                |          |          |                      |                    |

|                                                                                    |    |   |         |         |                |          |          |                       |             |
|------------------------------------------------------------------------------------|----|---|---------|---------|----------------|----------|----------|-----------------------|-------------|
| N2                                                                                 | CT | X | 6355585 | 6357689 | WBGene00015376 | C03B1.5  | C03B1.5  | -0.000471215453845986 | AGIWUR14829 |
| N2                                                                                 | CT | X | 6359383 | 6360758 | WBGene00015382 | C03B1.14 | C03B1.14 | 0.0868367711130418    |             |
| AGIWUR20078                                                                        |    |   |         |         |                |          |          |                       |             |
| N2                                                                                 | CT | X | 6364496 | 6365717 | WBGene00015375 | C03B1.4  | C03B1.4  | 0.0607859501626482    | AGIWUR44475 |
| N2                                                                                 | CT | X | 6366013 | 6366831 | WBGene00015374 | C03B1.3  | C03B1.3  | -0.21533184823527     | AGIWUR9747  |
| N2                                                                                 | CT | X | 6367614 | 6373157 | WBGene00015373 | C03B1.2  | C03B1.2  | 0.163398775150289     | AGIWUR29724 |
| N2                                                                                 | CT | X | 6374751 | 6375592 | WBGene00015372 | C03B1.1  | C03B1.1  | 0.216074385485705     | AGIWUR17004 |
| N2                                                                                 | CT | X | 6376459 | 6377684 | WBGene00003053 | lmp-1    | C03B1.12 | 0.105991509792958     |             |
| AGIWUR27222;AGIWUR33434                                                            |    |   |         |         |                |          |          |                       |             |
| N2                                                                                 | CT | X | 6379484 | 6384845 | WBGene00020130 | igcm-2   | SSSD1.1  | 0.0654107761477443    | AGIWUR41163 |
| N2                                                                                 | CT | X | 6385280 | 6387863 | WBGene00020691 | igdb-3   | T22E5.3  | -0.0308351130871198   | AGIWUR40893 |
| N2                                                                                 | CT | X | 6388255 | 6391591 | WBGene00044572 | T22E5.7  | T22E5.7  | 0.0716305616115207    |             |
| AGIWUR17271;AGIWUR19093;AGIWUR37241;AGIWUR38134;AGIWUR42347                        |    |   |         |         |                |          |          |                       |             |
| N2                                                                                 | CT | X | 6403424 | 6406981 | WBGene00001622 | glt-4    | T22E5.2  | -0.0837075578082063   | AGIWUR27019 |
| N2                                                                                 | CT | X | 6408470 | 6410359 | WBGene00003495 | mup-2    | T22E5.5  | 0.178087988879076     |             |
| AGIWUR2620;AGIWUR15971;AGIWUR21994;AGIWUR30200;AGIWUR36727;AGIWUR40271;AGIWUR41617 |    |   |         |         |                |          |          |                       |             |
| N2                                                                                 | CT | X | 6412886 | 6413488 | WBGene00020690 | T22E5.1  | T22E5.1  | -0.217496218491323    |             |
| AGIWUR4696;AGIWUR12616;AGIWUR17543;AGIWUR17768;AGIWUR31630;AGIWUR44181             |    |   |         |         |                |          |          |                       |             |
| N2                                                                                 | CT | X | 6414148 | 6416400 | WBGene00020692 | T22E5.6  | T22E5.6  | 0.260657998267201     | AGIWUR27334 |
| N2                                                                                 | CT | X | 6421036 | 6430610 | WBGene00019617 | K10C2.1  | K10C2.1  | 0.391089809863622     | AGIWUR13082 |
| N2                                                                                 | CT | X | 6430695 | 6433788 | WBGene00019618 | K10C2.2  | K10C2.2  | 0.132667185797876     | AGIWUR31252 |
| N2                                                                                 | CT | X | 6436440 | 6437645 | WBGene00045265 | K10C2.8  | K10C2.8  | -0.051285819458041    |             |
| AGIWUR11725;AGIWUR42028;AGIWUR42307                                                |    |   |         |         |                |          |          |                       |             |
| N2                                                                                 | CT | X | 6443055 | 6443473 | WBGene00019622 | K10C2.7  | K10C2.7  | -0.00747747521347364  |             |
| AGIWUR2183;AGIWUR16937;AGIWUR22507;AGIWUR36334;AGIWUR39501                         |    |   |         |         |                |          |          |                       |             |
| N2                                                                                 | CT | X | 6444189 | 6446664 | WBGene00019619 | asp-14   | K10C2.3  | 0.142546321777877     | AGIWUR11999 |
| N2                                                                                 | CT | X | 6446649 | 6448999 | WBGene00019620 | fah-1    | K10C2.4  | 0.000330560073486197  |             |
| AGIWUR10551;AGIWUR17534;AGIWUR30736;AGIWUR31151                                    |    |   |         |         |                |          |          |                       |             |
| N2                                                                                 | CT | X | 6449959 | 6450939 | WBGene00001715 | grl-6    | K10C2.5  | -0.0323023667789855   | AGIWUR35833 |
| N2                                                                                 | CT | X | 6451363 | 6451859 | WBGene00019621 | K10C2.6  | K10C2.6  | -0.0660338285551409   |             |
| AGIWUR3279;AGIWUR4945;AGIWUR27791;AGIWUR32387;AGIWUR37818                          |    |   |         |         |                |          |          |                       |             |
| N2                                                                                 | CT | X | 6451800 | 6455179 | WBGene00003551 | nas-33   | K04E7.3  | -0.00740600687942017  |             |
| AGIWUR16368;AGIWUR20434;AGIWUR27178;AGIWUR42590                                    |    |   |         |         |                |          |          |                       |             |
| N2                                                                                 | CT | X | 6456687 | 6461767 | WBGene00003877 | pept-1   | K04E7.2  | 0.104714675735323     | AGIWUR35390 |
| N2                                                                                 | CT | X | 6462029 | 6463228 | WBGene00019383 | K04E7.1  | K04E7.1  | 0.131329535897266     | AGIWUR11377 |
| N2                                                                                 | CT | X | 6463412 | 6465861 | WBGene00015784 | C15B12.2 | C15B12.2 | 0.391340516007883     |             |
| AGIWUR19482;AGIWUR23863;AGIWUR31366                                                |    |   |         |         |                |          |          |                       |             |
| N2                                                                                 | CT | X | 6467284 | 6467562 | WBGene00015785 | C15B12.3 | C15B12.3 | 0.375120128560043     |             |
| AGIWUR35027                                                                        |    |   |         |         |                |          |          |                       |             |

|                                                                                                                     |    |   |         |         |                |          |          |                                 |
|---------------------------------------------------------------------------------------------------------------------|----|---|---------|---------|----------------|----------|----------|---------------------------------|
| N2                                                                                                                  | CT | X | 6468799 | 6469803 | WBGene00044573 | C15B12.9 | C15B12.9 | 0.0633103763134244              |
| AGIWUR12978;AGIWUR17588;AGIWUR32647                                                                                 |    |   |         |         |                |          |          |                                 |
| N2                                                                                                                  | CT | X | 6470366 | 6473748 | WBGene00015786 | C15B12.4 | C15B12.4 | 0.0449318889833883              |
| AGIWUR18689                                                                                                         |    |   |         |         |                |          |          |                                 |
| N2                                                                                                                  | CT | X | 6474274 | 6476645 | WBGene00015788 | C15B12.8 | C15B12.8 | -0.0834904242580272             |
| AGIWUR9292                                                                                                          |    |   |         |         |                |          |          |                                 |
| N2                                                                                                                  | CT | X | 6476738 | 6479086 | WBGene00015783 | C15B12.1 | C15B12.1 |                                 |
| -0.00252133136540955 AGIWUR15568                                                                                    |    |   |         |         |                |          |          |                                 |
| N2                                                                                                                  | CT | X | 6479447 | 6484810 | WBGene00001517 | gar-1    | C15B12.5 | -0.0884118028562586             |
| AGIWUR16993;AGIWUR18743;AGIWUR37260                                                                                 |    |   |         |         |                |          |          |                                 |
| N2                                                                                                                  | CT | X | 6496823 | 6499836 | WBGene00015787 | C15B12.6 | C15B12.6 | -0.171701653979495              |
| AGIWUR17851;AGIWUR20196;AGIWUR43327                                                                                 |    |   |         |         |                |          |          |                                 |
| N2                                                                                                                  | CT | X | 6499928 | 6504613 | WBGene00000393 | cdf-1    | C15B12.7 | 0.163454625567588               |
| AGIWUR21474;AGIWUR32017;AGIWUR36111;AGIWUR37609                                                                     |    |   |         |         |                |          |          |                                 |
| N2                                                                                                                  | CT | X | 6506884 | 6509882 | WBGene00001619 | glr-8    | F22A3.3  | 0.0952073697077589              |
| AGIWUR3455;AGIWUR18484;AGIWUR21797                                                                                  |    |   |         |         |                |          |          |                                 |
| N2                                                                                                                  | CT | X | 6510929 | 6512195 | WBGene00044605 | ttr-36   | F22A3.7  | -0.0630052661438052             |
| AGIWUR298;AGIWUR5370;AGIWUR19336;AGIWUR19999                                                                        |    |   |         |         |                |          |          |                                 |
| N2                                                                                                                  | CT | X | 6512285 | 6512956 | WBGene00017688 | ttr-35   | F22A3.2  | 0.0465767131192507 AGIWUR21619  |
| N2                                                                                                                  | CT | X | 6518883 | 6522656 | WBGene00017687 | ets-4    | F22A3.1  | 0.0684093901351961              |
| AGIWUR889;AGIWUR3485;AGIWUR9857;AGIWUR11604;AGIWUR17443;AGIWUR24709;AGIWUR28144;AGIWUR30453;AGIWUR34260;AGIWUR34579 |    |   |         |         |                |          |          |                                 |
| N2                                                                                                                  | CT | X | 6522596 | 6530148 | WBGene00017690 | ceh-60   | F22A3.5  | 0.156045867751707               |
| AGIWUR4658;AGIWUR39511                                                                                              |    |   |         |         |                |          |          |                                 |
| N2                                                                                                                  | CT | X | 6533493 | 6536840 | WBGene00017691 | ilys-5   | F22A3.6  | -0.0478682812304934             |
| AGIWUR4971;AGIWUR38630                                                                                              |    |   |         |         |                |          |          |                                 |
| N2                                                                                                                  | CT | X | 6542992 | 6543983 | WBGene00020505 | T14E8.2  | T14E8.2  | 0.202363637379096 AGIWUR20726   |
| N2                                                                                                                  | CT | X | 6553288 | 6564207 | WBGene00020504 | svh-2    | T14E8.1  | 0.166764251508131               |
| AGIWUR2337;AGIWUR14132;AGIWUR37556                                                                                  |    |   |         |         |                |          |          |                                 |
| N2                                                                                                                  | CT | X | 6564175 | 6569518 | WBGene00020506 | dop-3    | T14E8.3  | 0.0741163499219741              |
| AGIWUR10355;AGIWUR12156;AGIWUR26923                                                                                 |    |   |         |         |                |          |          |                                 |
| N2                                                                                                                  | CT | X | 6582004 | 6585237 | WBGene00020885 | T28B4.2  | T28B4.2  | -0.058807768050543 AGIWUR24266  |
| N2                                                                                                                  | CT | X | 6587898 | 6596135 | WBGene00020884 | T28B4.1  | T28B4.1  | 0.0680407462759245 AGIWUR24308  |
| N2                                                                                                                  | CT | X | 6596425 | 6597121 | WBGene00020886 | ttr-6    | T28B4.3  | -0.0120928627304693 AGIWUR24030 |
| N2                                                                                                                  | CT | X | 6597918 | 6598866 | WBGene00020887 | T28B4.4  | T28B4.4  | -0.0881520517666985 AGIWUR26842 |
| N2                                                                                                                  | CT | X | 6601558 | 6603212 | WBGene00044574 | F23G4.1  | F23G4.1  | 0.00362612747980062             |
| AGIWUR10940;AGIWUR25657;AGIWUR37205                                                                                 |    |   |         |         |                |          |          |                                 |
| N2                                                                                                                  | CT | X | 6607203 | 6609045 | WBGene00000786 | cpr-6    | C25B8.3  | -0.0206316859225568             |
| AGIWUR4925;AGIWUR5195;AGIWUR8195;AGIWUR11216;AGIWUR11804;AGIWUR20912;AGIWUR28068;AGIWUR28947                        |    |   |         |         |                |          |          |                                 |

|                                                                         |    |   |         |         |                |           |          |                     |                    |
|-------------------------------------------------------------------------|----|---|---------|---------|----------------|-----------|----------|---------------------|--------------------|
| N2                                                                      | CT | X | 6610054 | 6615343 | WBGene00044297 | C25B8.8   | C25B8.8  | -0.0600479877103632 |                    |
| AGIWUR27278;AGIWUR29524                                                 |    |   |         |         |                |           |          |                     |                    |
| N2                                                                      | CT | X | 6617393 | 6622915 | WBGene00016088 | clec-266  |          | C25B8.4             | 0.149318819991813  |
| AGIWUR19062;AGIWUR24639;AGIWUR25897;AGIWUR35797;AGIWUR39462;AGIWUR40914 |    |   |         |         |                |           |          |                     |                    |
| N2                                                                      | CT | X | 6619022 | 6628017 | WBGene00002233 | kqt-1     | C25B8.1  | 0.0252213594382802  | AGIWUR20419        |
| N2                                                                      | CT | X | 6628041 | 6631537 | WBGene00016090 | aexr-2    | C25B8.7  | 0.0374859353354591  |                    |
| AGIWUR3032;AGIWUR6225;AGIWUR42800                                       |    |   |         |         |                |           |          |                     |                    |
| N2                                                                      | CT | X | 6631927 | 6635035 | WBGene00016089 | aexr-1    | C25B8.5  | 0.0308030252788321  |                    |
| AGIWUR10697;AGIWUR15587;AGIWUR44665                                     |    |   |         |         |                |           |          |                     |                    |
| N2                                                                      | CT | X | 6636561 | 6640620 | WBGene00003710 | nhr-120   | C25B8.6  | -0.0222661052837267 | AGIWUR24251        |
| N2                                                                      | CT | X | 6645654 | 6651753 | WBGene00016976 | C56E10.3  |          | C56E10.3            | 0.0738780118651583 |
| AGIWUR16579                                                             |    |   |         |         |                |           |          |                     |                    |
| N2                                                                      | CT | X | 6655547 | 6659966 | WBGene00016975 | nhr-173   | C56E10.1 |                     | 0.035625701613589  |
| AGIWUR38723                                                             |    |   |         |         |                |           |          |                     |                    |
| N2                                                                      | CT | X | 6661791 | 6669011 | WBGene00003727 | nhr-137   | C56E10.4 |                     | -0.193916716604967 |
| AGIWUR26005                                                             |    |   |         |         |                |           |          |                     |                    |
| N2                                                                      | CT | X | 6672830 | 6674407 | WBGene00000745 | col-172   | F38B6.5  | 0.146628620309752   |                    |
| AGIWUR2848;AGIWUR4663;AGIWUR37133                                       |    |   |         |         |                |           |          |                     |                    |
| N2                                                                      | CT | X | 6674869 | 6679848 | WBGene00018174 | F38B6.4   | F38B6.4  | -0.287501437848757  | AGIWUR5569         |
| N2                                                                      | CT | X | 6680901 | 6682783 | WBGene00044575 | F38B6.8   | F38B6.8  | 0.101614664565553   |                    |
| AGIWUR32608;AGIWUR44990                                                 |    |   |         |         |                |           |          |                     |                    |
| N2                                                                      | CT | X | 6684440 | 6690085 | WBGene00018175 | F38B6.6   | F38B6.6  | -0.0672119119784762 |                    |
| AGIWUR25333;AGIWUR42026                                                 |    |   |         |         |                |           |          |                     |                    |
| N2                                                                      | CT | X | 6693735 | 6695662 | WBGene00018173 | F38B6.3   | F38B6.3  | -0.0899339236361882 | AGIWUR1165         |
| N2                                                                      | CT | X | 6695820 | 6698337 | WBGene00018176 | F38B6.7   | F38B6.7  | -0.500739915479421  | AGIWUR20268        |
| N2                                                                      | CT | X | 6698533 | 6700826 | WBGene00018172 | F38B6.2   | F38B6.2  | -0.0858246499619657 |                    |
| AGIWUR8745;AGIWUR28477                                                  |    |   |         |         |                |           |          |                     |                    |
| N2                                                                      | CT | X | 6702463 | 6709142 | WBGene00000042 | acr-2     | K11G12.2 |                     | -0.055248371488315 |
| AGIWUR12651;AGIWUR15050                                                 |    |   |         |         |                |           |          |                     |                    |
| N2                                                                      | CT | X | 6709538 | 6712925 | WBGene00000043 | acr-3     | K11G12.7 |                     | 0.136740390382071  |
| AGIWUR1653                                                              |    |   |         |         |                |           |          |                     |                    |
| N2                                                                      | CT | X | 6713577 | 6716381 | WBGene00003530 | nas-11    | K11G12.1 |                     | -0.094622566448411 |
| AGIWUR25194                                                             |    |   |         |         |                |           |          |                     |                    |
| N2                                                                      | CT | X | 6719666 | 6723066 | WBGene00004876 | smf-1     | K11G12.4 |                     | -0.157167265401661 |
| AGIWUR3059                                                              |    |   |         |         |                |           |          |                     |                    |
| N2                                                                      | CT | X | 6723500 | 6725668 | WBGene00019656 | slc-25A10 |          | K11G12.5            | 0.202634573978537  |
| AGIWUR19365                                                             |    |   |         |         |                |           |          |                     |                    |
| N2                                                                      | CT | X | 6725781 | 6729748 | WBGene00019657 | K11G12.6  |          | K11G12.6            | 0.0938486173061532 |
| AGIWUR6530;AGIWUR10261;AGIWUR11629                                      |    |   |         |         |                |           |          |                     |                    |

|                                                                                   |    |   |         |         |                |          |          |                      |             |
|-----------------------------------------------------------------------------------|----|---|---------|---------|----------------|----------|----------|----------------------|-------------|
| N2                                                                                | CT | X | 6729997 | 6733315 | WBGene00019843 | R03E9.2  | R03E9.2  | -0.256019145888063   | AGIWUR12973 |
| N2                                                                                | CT | X | 6742351 | 6743899 | WBGene00003163 | mdl-1    | R03E9.1  | -0.00584647085397805 |             |
| AGIWUR4901;AGIWUR16512;AGIWUR26064;AGIWUR45173                                    |    |   |         |         |                |          |          |                      |             |
| N2                                                                                | CT | X | 6747296 | 6761738 | WBGene00019844 | abts-4   | R03E9.3  | 0.190098914565828    |             |
| AGIWUR6213;AGIWUR6511;AGIWUR21622;AGIWUR27359;AGIWUR31458;AGIWUR35645             |    |   |         |         |                |          |          |                      |             |
| N2                                                                                | CT | X | 6766083 | 6772946 | WBGene00002149 | irk-1    | R03E9.4  | 0.0043071530710721   |             |
| AGIWUR5497;AGIWUR11639                                                            |    |   |         |         |                |          |          |                      |             |
| N2                                                                                | CT | X | 6783157 | 6784197 | WBGene00019226 | H22K11.3 | H22K11.3 | 0.00814244655895902  |             |
| AGIWUR36514                                                                       |    |   |         |         |                |          |          |                      |             |
| N2                                                                                | CT | X | 6784411 | 6787296 | WBGene00019225 | bgal-2   | H22K11.2 | -0.168784556131669   |             |
| AGIWUR40471                                                                       |    |   |         |         |                |          |          |                      |             |
| N2                                                                                | CT | X | 6787256 | 6789578 | WBGene00019227 | sgca-1   | H22K11.4 | 0.108079645903645    |             |
| AGIWUR35089                                                                       |    |   |         |         |                |          |          |                      |             |
| N2                                                                                | CT | X | 6791064 | 6792715 | WBGene00000216 | asp-3    | H22K11.1 | -0.0910371330732289  |             |
| AGIWUR6252;AGIWUR11666;AGIWUR14411;AGIWUR14860;AGIWUR31198;AGIWUR36688            |    |   |         |         |                |          |          |                      |             |
| N2                                                                                | CT | X | 6800688 | 6803700 | WBGene00019749 | M03A8.3  | M03A8.3  | 0.0114887366483454   |             |
| AGIWUR7715;AGIWUR32523                                                            |    |   |         |         |                |          |          |                      |             |
| N2                                                                                | CT | X | 6809104 | 6817266 | WBGene00019748 | atg-2    | M03A8.2  | 0.206818169723087    | AGIWUR4789  |
| N2                                                                                | CT | X | 6818438 | 6820080 | WBGene00000991 | dhs-28   | M03A8.1  | 0.147131651932451    |             |
| AGIWUR7084;AGIWUR8935;AGIWUR10246;AGIWUR13173;AGIWUR15478;AGIWUR33060;AGIWUR33621 |    |   |         |         |                |          |          |                      |             |
| N2                                                                                | CT | X | 6820005 | 6823268 | WBGene00001572 | gei-15   | M03A8.4  | 0.174808425927079    | AGIWUR6969  |
| N2                                                                                | CT | X | 6823890 | 6825862 | WBGene00018257 | F41B4.1  | F41B4.1  | 0.112307634059921    | AGIWUR30496 |
| N2                                                                                | CT | X | 6831251 | 6835266 | WBGene00018258 | F41B4.2  | F41B4.2  | -0.199961651309667   |             |
| AGIWUR6648;AGIWUR31181                                                            |    |   |         |         |                |          |          |                      |             |
| N2                                                                                | CT | X | 6835487 | 6836115 | WBGene00018259 | F41B4.3  | F41B4.3  | -0.0946168970819592  | AGIWUR26760 |
| N2                                                                                | CT | X | 6836386 | 6840615 | WBGene00001617 | glr-6    | F41B4.4  | 0.00353375605166928  |             |
| AGIWUR8107;AGIWUR34692                                                            |    |   |         |         |                |          |          |                      |             |
| N2                                                                                | CT | X | 6841258 | 6842129 | WBGene00000210 | asg-2    | C53B7.4  | -0.0381046659292892  | AGIWUR24638 |
| N2                                                                                | CT | X | 6844755 | 6845976 | WBGene00016894 | C53B7.3  | C53B7.3  | 0.0435657395668994   |             |
| AGIWUR39143;AGIWUR43670                                                           |    |   |         |         |                |          |          |                      |             |
| N2                                                                                | CT | X | 6846233 | 6847547 | WBGene00016893 | C53B7.2  | C53B7.2  | -0.018626150360411   |             |
| AGIWUR12377;AGIWUR30277                                                           |    |   |         |         |                |          |          |                      |             |
| N2                                                                                | CT | X | 6853618 | 6860922 | WBGene00004370 | rig-3    | C53B7.1  | 0.0562282868940294   | AGIWUR369   |
| N2                                                                                | CT | X | 6860946 | 6863414 | WBGene00016896 | nep-4    | C53B7.7  | 0.0767644295689749   |             |
| AGIWUR10965;AGIWUR15889;AGIWUR21335                                               |    |   |         |         |                |          |          |                      |             |
| N2                                                                                | CT | X | 6864313 | 6865939 | WBGene00003856 | odr-10   | C53B7.5  | 0.119814526216265    | AGIWUR17818 |
| N2                                                                                | CT | X | 6870354 | 6871670 | WBGene00018276 | F41C6.2  | F41C6.2  | -0.0377256641114538  | AGIWUR21975 |
| N2                                                                                | CT | X | 6873359 | 6874823 | WBGene00018278 | F41C6.4  | F41C6.4  | -0.308090687664585   | AGIWUR42965 |
| N2                                                                                | CT | X | 6875131 | 6877536 | WBGene00000746 | col-173  | F41C6.5  | 0.18533865758414     | AGIWUR44310 |

|                                                                                                                       |    |   |         |         |                |           |           |                      |             |
|-----------------------------------------------------------------------------------------------------------------------|----|---|---------|---------|----------------|-----------|-----------|----------------------|-------------|
| N2                                                                                                                    | CT | X | 6880909 | 6881571 | WBGene00018279 | F41C6.6   | F41C6.6   | 0.238654730386468    | AGIWUR9981  |
| N2                                                                                                                    | CT | X | 6882493 | 6885277 | WBGene00018280 | F41C6.7   | F41C6.7   | 0.0845560792173412   | AGIWUR37348 |
| N2                                                                                                                    | CT | X | 6889689 | 6897147 | WBGene00006746 | unc-6     | F41C6.1   | 0.162165050408934    | AGIWUR36208 |
| N2                                                                                                                    | CT | X | 6898650 | 6899948 | WBGene00017446 | F14B8.4   | F14B8.4   | -0.0658959654897693  | AGIWUR26049 |
| N2                                                                                                                    | CT | X | 6901378 | 6903985 | WBGene00003987 | pes-23    | F14B8.3   | -0.0549291061420618  |             |
| AGIWUR7012;AGIWUR11006;AGIWUR22618                                                                                    |    |   |         |         |                |           |           |                      |             |
| N2                                                                                                                    | CT | X | 6904721 | 6905849 | WBGene00017445 | sid-5     | F14B8.2   | -0.125594466546188   | AGIWUR3606  |
| N2                                                                                                                    | CT | X | 6914254 | 6921126 | WBGene00003732 | nhx-4     | F14B8.1   | -0.0114553754610878  | AGIWUR24792 |
| N2                                                                                                                    | CT | X | 6921646 | 6924764 | WBGene00017449 | otpl-3    | F14B8.7   | 0.265571225743561    | AGIWUR35094 |
| N2                                                                                                                    | CT | X | 6924804 | 6928704 | WBGene00017447 | F14B8.5   | F14B8.5   | -0.0216519584856614  |             |
| AGIWUR2134;AGIWUR7909;AGIWUR15355;AGIWUR16145;AGIWUR16298;AGIWUR18264;AGIWUR28130;AGIWUR34979;AGIWUR40952;AGIWUR41459 |    |   |         |         |                |           |           |                      |             |
| N2                                                                                                                    | CT | X | 6929262 | 6932359 | WBGene00017448 | F14B8.6   | F14B8.6   | 0.176542173008677    | AGIWUR30709 |
| N2                                                                                                                    | CT | X | 6935732 | 6939041 | WBGene00015866 | C16E9.2   | C16E9.2   | -0.176781148633708   |             |
| AGIWUR31984;AGIWUR40570;AGIWUR40974                                                                                   |    |   |         |         |                |           |           |                      |             |
| N2                                                                                                                    | CT | X | 6940253 | 6943713 | WBGene00015865 | C16E9.1   | C16E9.1   | 0.249190212282723    | AGIWUR38169 |
| N2                                                                                                                    | CT | X | 6943740 | 6956399 | WBGene00002123 | inx-1     | C16E9.4   | -0.0220359669716448  |             |
| AGIWUR1327;AGIWUR4443;AGIWUR41082                                                                                     |    |   |         |         |                |           |           |                      |             |
| N2                                                                                                                    | CT | X | 6967369 | 6974864 | WBGene00017156 | F01E11.3  | F01E11.3  | -0.0144299810672521  |             |
| AGIWUR8518;AGIWUR17384;AGIWUR32545                                                                                    |    |   |         |         |                |           |           |                      |             |
| N2                                                                                                                    | CT | X | 6980784 | 6983132 | WBGene00219372 | F01E11.17 | F01E11.17 | -0.100394832481932   |             |
| AGIWUR29020                                                                                                           |    |   |         |         |                |           |           |                      |             |
| N2                                                                                                                    | CT | X | 6991727 | 6994162 | WBGene00017154 | ugt-57    | F01E11.1  | 0.0502842947053974   |             |
| AGIWUR1259;AGIWUR9010;AGIWUR39364                                                                                     |    |   |         |         |                |           |           |                      |             |
| N2                                                                                                                    | CT | X | 6994784 | 6996620 | WBGene00006642 | tsp-16    | F01E11.4  | -0.109255861013878   |             |
| AGIWUR15782                                                                                                           |    |   |         |         |                |           |           |                      |             |
| N2                                                                                                                    | CT | X | 6996873 | 7005575 | WBGene00017157 | tyra-2    | F01E11.5  | 0.103735938591687    |             |
| AGIWUR1834;AGIWUR19308;AGIWUR32958;AGIWUR34968                                                                        |    |   |         |         |                |           |           |                      |             |
| N2                                                                                                                    | CT | X | 7020033 | 7023950 | WBGene00000283 | cah-5     | R173.1    | -0.149615359074488   | AGIWUR13092 |
| N2                                                                                                                    | CT | X | 7029136 | 7029638 | WBGene00020126 | flp-26    | R173.4    | -0.106830436394613   | AGIWUR20847 |
| N2                                                                                                                    | CT | X | 7030225 | 7036084 | WBGene00020125 | R173.3    | R173.3    | -0.21000648390387    | AGIWUR11682 |
| N2                                                                                                                    | CT | X | 7050577 | 7055667 | WBGene00006712 | ubc-17    | B0403.2   | 0.0593548283884124   |             |
| AGIWUR6165;AGIWUR7860;AGIWUR8038;AGIWUR9008;AGIWUR14371;AGIWUR37718                                                   |    |   |         |         |                |           |           |                      |             |
| N2                                                                                                                    | CT | X | 7057731 | 7061190 | WBGene00015169 | B0403.5   | B0403.5   | -0.00350894465718365 |             |
| AGIWUR25613;AGIWUR42236                                                                                               |    |   |         |         |                |           |           |                      |             |
| N2                                                                                                                    | CT | X | 7061203 | 7063330 | WBGene00015167 | B0403.3   | B0403.3   | -0.116738086494523   | AGIWUR23954 |
| N2                                                                                                                    | CT | X | 7066345 | 7068563 | WBGene00015168 | pdi-6     | B0403.4   | 0.021309371996189    |             |
| AGIWUR13446;AGIWUR43810                                                                                               |    |   |         |         |                |           |           |                      |             |
| N2                                                                                                                    | CT | X | 7071410 | 7075337 | WBGene00043982 | B0403.6   | B0403.6   | -0.190413808798761   |             |

AGIWUR11703;AGIWUR39969

|    |    |   |         |         |                |         |         |                    |             |
|----|----|---|---------|---------|----------------|---------|---------|--------------------|-------------|
| N2 | CT | X | 7083417 | 7086008 | WBGene00016467 | C36B7.4 | C36B7.4 | 0.14017600042409   | AGIWUR5620  |
| N2 | CT | X | 7089228 | 7096449 | WBGene00016468 | C36B7.5 | C36B7.5 | 0.268727511892534  | AGIWUR10931 |
| N2 | CT | X | 7097434 | 7100338 | WBGene00016469 | C36B7.6 | C36B7.6 | -0.036766698307007 |             |

AGIWUR5911;AGIWUR24672;AGIWUR26892;AGIWUR34244;AGIWUR38062

|    |    |   |         |         |                |         |         |                    |             |
|----|----|---|---------|---------|----------------|---------|---------|--------------------|-------------|
| N2 | CT | X | 7101777 | 7102136 | WBGene00016466 | C36B7.3 | C36B7.3 | -0.15915771178318  | AGIWUR17906 |
| N2 | CT | X | 7106407 | 7108436 | WBGene00016465 | C36B7.2 | C36B7.2 | -0.190652972427598 | AGIWUR9259  |
| N2 | CT | X | 7112889 | 7114863 | WBGene00016464 | C36B7.1 | C36B7.1 | 0.0436894512337287 |             |

AGIWUR16046;AGIWUR22687

|    |    |   |         |         |                |       |         |                     |             |
|----|----|---|---------|---------|----------------|-------|---------|---------------------|-------------|
| N2 | CT | X | 7116205 | 7116996 | WBGene00001841 | hen-1 | C36B7.7 | -0.0611050171468595 | AGIWUR31932 |
| N2 | CT | X | 7126648 | 7139646 | WBGene00002163 | ist-1 | C54D1.3 | 0.0658689751498955  |             |

AGIWUR8309;AGIWUR22991;AGIWUR28042;AGIWUR32682;AGIWUR43007;AGIWUR44474

|    |    |   |         |         |                |         |         |                      |             |
|----|----|---|---------|---------|----------------|---------|---------|----------------------|-------------|
| N2 | CT | X | 7139875 | 7140566 | WBGene00016912 | clcc-86 | C54D1.2 | -0.194175199795261   | AGIWUR21885 |
| N2 | CT | X | 7140504 | 7143641 | WBGene00000116 | alh-10  | C54D1.4 | -0.0316046072716247  | AGIWUR9700  |
| N2 | CT | X | 7143918 | 7151235 | WBGene00016913 | lam-2   | C54D1.5 | -0.00688233660269466 |             |

AGIWUR1996;AGIWUR27256

|    |    |   |         |         |                |          |          |                    |             |
|----|----|---|---------|---------|----------------|----------|----------|--------------------|-------------|
| N2 | CT | X | 7153889 | 7156035 | WBGene00016914 | C54D1.7  | C54D1.7  | -0.212015321682982 | AGIWUR27463 |
| N2 | CT | X | 7159036 | 7166021 | WBGene00004004 | pgp-10   | C54D1.1  | 0.0561253702318574 | AGIWUR15114 |
| N2 | CT | X | 7166005 | 7170625 | WBGene00000238 | bar-1    | C54D1.6  | 0.114339854419779  | AGIWUR1646  |
| N2 | CT | X | 7177641 | 7178922 | WBGene00044577 | F43E12.1 | F43E12.1 | 0.11385676479254   |             |

AGIWUR7496;AGIWUR16469;AGIWUR42022;AGIWUR44522

|    |    |   |         |         |                |         |         |                    |             |
|----|----|---|---------|---------|----------------|---------|---------|--------------------|-------------|
| N2 | CT | X | 7187355 | 7188482 | WBGene00016940 | C55B6.4 | C55B6.4 | 0.0643136380249381 | AGIWUR32410 |
| N2 | CT | X | 7194564 | 7198291 | WBGene00001025 | dnj-7   | C55B6.2 | 0.0295703903217626 |             |

AGIWUR1962;AGIWUR10779;AGIWUR11340;AGIWUR14618;AGIWUR30335;AGIWUR34569

|    |    |   |         |         |                |         |         |                     |             |
|----|----|---|---------|---------|----------------|---------|---------|---------------------|-------------|
| N2 | CT | X | 7200364 | 7204044 | WBGene00016939 | C55B6.1 | C55B6.1 | -0.0704011342324726 | AGIWUR30579 |
| N2 | CT | X | 7204742 | 7205295 | WBGene00016941 | C55B6.5 | C55B6.5 | 0.0941194656974336  | AGIWUR4101  |
| N2 | CT | X | 7206719 | 7209985 | WBGene00022829 | ZK867.2 | ZK867.2 | 0.0254979310041117  |             |

AGIWUR27793;AGIWUR39082

|    |    |   |         |         |                |        |         |                   |             |
|----|----|---|---------|---------|----------------|--------|---------|-------------------|-------------|
| N2 | CT | X | 7211705 | 7213956 | WBGene00044283 | spp-22 | ZK867.3 | 0.168104009658428 | AGIWUR30676 |
| N2 | CT | X | 7218109 | 7226825 | WBGene00044068 | syd-9  | ZK867.1 | 0.148588238817062 |             |

AGIWUR366;AGIWUR8810;AGIWUR22384;AGIWUR28559

|    |    |   |         |         |                |         |         |                   |  |
|----|----|---|---------|---------|----------------|---------|---------|-------------------|--|
| N2 | CT | X | 7230330 | 7238662 | WBGene00018519 | F46H5.3 | F46H5.3 | 0.244392727114171 |  |
|----|----|---|---------|---------|----------------|---------|---------|-------------------|--|

AGIWUR2881;AGIWUR5451;AGIWUR6990;AGIWUR30972;AGIWUR32854

|    |    |   |         |         |                |         |         |                   |  |
|----|----|---|---------|---------|----------------|---------|---------|-------------------|--|
| N2 | CT | X | 7238666 | 7242983 | WBGene00018522 | F46H5.7 | F46H5.7 | 0.142271940383461 |  |
|----|----|---|---------|---------|----------------|---------|---------|-------------------|--|

AGIWUR9564;AGIWUR9695;AGIWUR14090;AGIWUR18319;AGIWUR19653;AGIWUR23962;AGIWUR26751;AGIWUR36620

|    |    |   |         |         |                |         |         |                      |             |
|----|----|---|---------|---------|----------------|---------|---------|----------------------|-------------|
| N2 | CT | X | 7245057 | 7254792 | WBGene00018520 | F46H5.4 | F46H5.4 | 0.120348164515541    | AGIWUR39855 |
| N2 | CT | X | 7255927 | 7256978 | WBGene00018521 | F46H5.5 | F46H5.5 | 0.000676336782274412 | AGIWUR29869 |
| N2 | CT | X | 7258116 | 7260377 | WBGene00018523 | lact-1  | F46H5.8 | -0.160948729080285   |             |

AGIWUR2426;AGIWUR13200;AGIWUR29644

|                                                                                                |    |   |         |         |                |          |          |                     |             |
|------------------------------------------------------------------------------------------------|----|---|---------|---------|----------------|----------|----------|---------------------|-------------|
| N2                                                                                             | CT | X | 7265652 | 7267893 | WBGene00018518 | F46H5.2  | F46H5.2  | -0.0166545710557102 |             |
| AGIWUR7598;AGIWUR15397;AGIWUR17951;AGIWUR27236;AGIWUR37973                                     |    |   |         |         |                |          |          |                     |             |
| N2                                                                                             | CT | X | 7267989 | 7272067 | WBGene00001696 | grd-7    | F46H5.6  | -0.175901064000845  | AGIWUR8059  |
| N2                                                                                             | CT | X | 7272334 | 7280322 | WBGene00006750 | unc-10   | T10A3.1  | -0.101059892008174  |             |
| AGIWUR1087;AGIWUR8869;AGIWUR23174;AGIWUR43203                                                  |    |   |         |         |                |          |          |                     |             |
| N2                                                                                             | CT | X | 7292138 | 7296035 | WBGene00019351 | Iron-7   | K03A1.2  | 0.0395834360859322  | AGIWUR24250 |
| N2                                                                                             | CT | X | 7296098 | 7298751 | WBGene00019352 | K03A1.4  | K03A1.4  | 0.0869662889885241  | AGIWUR14580 |
| N2                                                                                             | CT | X | 7301357 | 7305570 | WBGene00006351 | sur-5    | K03A1.5  | 0.241523850598236   |             |
| AGIWUR8047;AGIWUR19938;AGIWUR20779;AGIWUR21098                                                 |    |   |         |         |                |          |          |                     |             |
| N2                                                                                             | CT | X | 7312175 | 7313976 | WBGene00020338 | T08A9.6  | T08A9.6  | 0.0192722216344983  |             |
| AGIWUR11970;AGIWUR20221;AGIWUR32288                                                            |    |   |         |         |                |          |          |                     |             |
| N2                                                                                             | CT | X | 7314969 | 7315353 | WBGene00004988 | spp-3    | T08A9.7  | 0.0777669810816235  |             |
| AGIWUR831;AGIWUR28222;AGIWUR42444                                                              |    |   |         |         |                |          |          |                     |             |
| N2                                                                                             | CT | X | 7315995 | 7316818 | WBGene00004987 | spp-2    | T08A9.12 | -0.108479511997578  |             |
| AGIWUR2832;AGIWUR4441;AGIWUR7152;AGIWUR41734                                                   |    |   |         |         |                |          |          |                     |             |
| N2                                                                                             | CT | X | 7317341 | 7317681 | WBGene00004991 | spp-6    | T08A9.10 | -0.098974463568382  |             |
| AGIWUR3981                                                                                     |    |   |         |         |                |          |          |                     |             |
| N2                                                                                             | CT | X | 7318239 | 7318798 | WBGene00004989 | spp-4    | T08A9.8  | -0.0466264755000054 | AGIWUR39959 |
| N2                                                                                             | CT | X | 7319935 | 7320384 | WBGene00004990 | spp-5    | T08A9.9  | -0.0135611502766899 | AGIWUR16988 |
| N2                                                                                             | CT | X | 7321999 | 7322415 | WBGene00044442 | T08A9.13 | T08A9.13 | 0.128613648816763   |             |
| AGIWUR739;AGIWUR14660;AGIWUR17977;AGIWUR19453;AGIWUR23763                                      |    |   |         |         |                |          |          |                     |             |
| N2                                                                                             | CT | X | 7327605 | 7329677 | WBGene00004912 | sng-1    | T08A9.3  | -0.150364080006156  | AGIWUR19181 |
| N2                                                                                             | CT | X | 7329818 | 7330669 | WBGene00020339 | ttr-59   | T08A9.11 | 0.270640741877406   |             |
| AGIWUR43881                                                                                    |    |   |         |         |                |          |          |                     |             |
| N2                                                                                             | CT | X | 7331189 | 7331903 | WBGene00020335 | ttr-30   | T08A9.2  | -0.179295883425709  | AGIWUR26782 |
| N2                                                                                             | CT | X | 7334714 | 7340224 | WBGene00020334 | epg-7    | T08A9.1  | -0.191871530274096  | AGIWUR13141 |
| N2                                                                                             | CT | X | 7341509 | 7342780 | WBGene00015565 | C07D8.6  | C07D8.6  | 0.0597994801761104  |             |
| AGIWUR2633;AGIWUR25877                                                                         |    |   |         |         |                |          |          |                     |             |
| N2                                                                                             | CT | X | 7344047 | 7344551 | WBGene00015564 | C07D8.5  | C07D8.5  | 0.274940154536118   | AGIWUR16285 |
| N2                                                                                             | CT | X | 7362082 | 7363663 | WBGene00015562 | C07D8.2  | C07D8.2  | -0.0448451465674342 | AGIWUR2955  |
| N2                                                                                             | CT | X | 7365567 | 7366298 | WBGene00016985 | C56G3.2  | C56G3.2  | -0.0514475805413341 |             |
| AGIWUR3048;AGIWUR12259;AGIWUR20965;AGIWUR21589;AGIWUR22826;AGIWUR29368;AGIWUR31432;AGIWUR35429 |    |   |         |         |                |          |          |                     |             |
| N2                                                                                             | CT | X | 7377302 | 7388400 | WBGene00016984 | npr-8    | C56G3.1  | 0.0581579318059662  | AGIWUR30083 |
| N2                                                                                             | CT | X | 7390574 | 7392276 | WBGene00015667 | C10A4.6  | C10A4.6  | 0.136906904286861   | AGIWUR8450  |
| N2                                                                                             | CT | X | 7393467 | 7395987 | WBGene00015666 | gad-2    | C10A4.5  | 0.0789316545221288  | AGIWUR36308 |
| N2                                                                                             | CT | X | 7398884 | 7400858 | WBGene00050957 | C10A4.10 | C10A4.10 | 0.00241203680884894 |             |
| AGIWUR23007                                                                                    |    |   |         |         |                |          |          |                     |             |
| N2                                                                                             | CT | X | 7402131 | 7403609 | WBGene00015665 | C10A4.4  | C10A4.4  | 0.0682554117096128  | AGIWUR10942 |
| N2                                                                                             | CT | X | 7407456 | 7408703 | WBGene00015664 | C10A4.3  | C10A4.3  | 0.0412126321847115  | AGIWUR6197  |



|                                                                                                                                                        |    |   |         |         |                |          |          |                     |             |
|--------------------------------------------------------------------------------------------------------------------------------------------------------|----|---|---------|---------|----------------|----------|----------|---------------------|-------------|
| N2                                                                                                                                                     | CT | X | 7410235 | 7412749 | WBGene00015663 | C10A4.2  | C10A4.2  | -0.0769474521976017 | AGIWUR37959 |
| N2                                                                                                                                                     | CT | X | 7413611 | 7415520 | WBGene00015668 | C10A4.7  | C10A4.7  | 0.0902325061114944  | AGIWUR1003  |
| N2                                                                                                                                                     | CT | X | 7415839 | 7418627 | WBGene00015662 | C10A4.1  | C10A4.1  | -0.114006868914018  | AGIWUR5893  |
| N2                                                                                                                                                     | CT | X | 7420871 | 7422628 | WBGene00045456 | C10A4.9  | C10A4.9  | 0.0882091531801477  |             |
| AGIWUR3200;AGIWUR10221;AGIWUR10599;AGIWUR13837;AGIWUR15117                                                                                             |    |   |         |         |                |          |          |                     |             |
| N2                                                                                                                                                     | CT | X | 7422641 | 7424881 | WBGene00003380 | mnx-2    | C10A4.8  | -0.102102212728955  | AGIWUR7370  |
| N2                                                                                                                                                     | CT | X | 7431472 | 7433548 | WBGene00000523 | clc-2    | C01C10.1 | -0.281735214923654  |             |
| AGIWUR8585;AGIWUR41135                                                                                                                                 |    |   |         |         |                |          |          |                     |             |
| N2                                                                                                                                                     | CT | X | 7433632 | 7435733 | WBGene00000526 | clc-5    | C01C10.4 | 0.0379629045372845  |             |
| AGIWUR9626                                                                                                                                             |    |   |         |         |                |          |          |                     |             |
| N2                                                                                                                                                     | CT | X | 7435602 | 7438000 | WBGene00015294 | C01C10.2 | C01C10.2 | 0.0263018419357     |             |
| AGIWUR10583;AGIWUR28046;AGIWUR41797                                                                                                                    |    |   |         |         |                |          |          |                     |             |
| N2                                                                                                                                                     | CT | X | 7439396 | 7442577 | WBGene00015295 | ac1-12   | C01C10.3 | -0.126202206554066  |             |
| AGIWUR24331                                                                                                                                            |    |   |         |         |                |          |          |                     |             |
| N2                                                                                                                                                     | CT | X | 7458293 | 7463736 | WBGene00004949 | sox-2    | K08A8.2  | 0.0148054590640161  |             |
| AGIWUR580;AGIWUR1927;AGIWUR2157;AGIWUR9025;AGIWUR12690;AGIWUR16873;AGIWUR17998;AGIWUR18918;AGIWUR23196;AGIWUR23402;AGIWUR29307;AGIWUR34708;AGIWUR35922 |    |   |         |         |                |          |          |                     |             |
| N2                                                                                                                                                     | CT | X | 7465193 | 7475014 | WBGene00000591 | coh-1    | K08A8.3  | -0.079928655253334  |             |
| AGIWUR8999;AGIWUR9946;AGIWUR16896;AGIWUR24797;AGIWUR25003;AGIWUR30115                                                                                  |    |   |         |         |                |          |          |                     |             |
| N2                                                                                                                                                     | CT | X | 7479248 | 7481010 | WBGene00003185 | mek-1    | K08A8.1  | -0.090854348682651  |             |
| AGIWUR4305;AGIWUR11188;AGIWUR43700                                                                                                                     |    |   |         |         |                |          |          |                     |             |
| N2                                                                                                                                                     | CT | X | 7481326 | 7485038 | WBGene00018608 | F48E3.9  | F48E3.9  | 0.0392736303900696  |             |
| AGIWUR4018;AGIWUR26749;AGIWUR26772                                                                                                                     |    |   |         |         |                |          |          |                     |             |
| N2                                                                                                                                                     | CT | X | 7485864 | 7490707 | WBGene00001637 | gly-12   | F48E3.1  | -0.762307610913499  | AGIWUR21551 |
| N2                                                                                                                                                     | CT | X | 7493724 | 7495591 | WBGene00018605 | F48E3.4  | F48E3.4  | -0.0178944327917439 | AGIWUR24512 |
| N2                                                                                                                                                     | CT | X | 7495684 | 7500982 | WBGene00018604 | uggt-1   | F48E3.3  | 0.0483880674156261  | AGIWUR23074 |
| N2                                                                                                                                                     | CT | X | 7501236 | 7502674 | WBGene00018606 | F48E3.6  | F48E3.6  | 0.00721784830926886 | AGIWUR16467 |
| N2                                                                                                                                                     | CT | X | 7503823 | 7506633 | WBGene00000061 | lgc-11   | F48E3.7  | 0.0362367648278994  | AGIWUR43951 |
| N2                                                                                                                                                     | CT | X | 7507885 | 7517694 | WBGene00018607 | F48E3.8  | F48E3.8  | -0.0838262406588521 |             |
| AGIWUR13250;AGIWUR17401;AGIWUR20280;AGIWUR34154;AGIWUR35820;AGIWUR41858                                                                                |    |   |         |         |                |          |          |                     |             |
| N2                                                                                                                                                     | CT | X | 7525571 | 7527433 | WBGene00018485 | F46C8.3  | F46C8.3  | -0.182396578046257  | AGIWUR15002 |
| N2                                                                                                                                                     | CT | X | 7528616 | 7532732 | WBGene00000438 | ceh-14   | F46C8.5  | -0.0194259315734744 | AGIWUR29513 |
| N2                                                                                                                                                     | CT | X | 7536417 | 7537792 | WBGene00001069 | dpy-7    | F46C8.6  | -0.0793715440035907 |             |
| AGIWUR4342;AGIWUR38497                                                                                                                                 |    |   |         |         |                |          |          |                     |             |
| N2                                                                                                                                                     | CT | X | 7537844 | 7540129 | WBGene00018486 | glb-16   | F46C8.7  | 0.215179558650931   | AGIWUR8108  |
| N2                                                                                                                                                     | CT | X | 7546842 | 7548365 | WBGene00000747 | col-174  | F46C8.2  | 0.183132573141371   | AGIWUR17224 |
| N2                                                                                                                                                     | CT | X | 7548458 | 7551218 | WBGene00018484 | F46C8.1  | F46C8.1  | -0.0686688965150637 | AGIWUR21652 |
| N2                                                                                                                                                     | CT | X | 7551204 | 7554426 | WBGene00018487 | F46C8.8  | F46C8.8  | 0.246495300094487   | AGIWUR23957 |
| N2                                                                                                                                                     | CT | X | 7556788 | 7559085 | WBGene00019803 | PDB1.1   | PDB1.1   | 0.0313792136151978  |             |

AGIWUR8001;AGIWUR9508;AGIWUR11133;AGIWUR16595;AGIWUR20548;AGIWUR26709  
 N2 CT X 7560024 7562093 WBGene00017243 F08C6.5 F08C6.5 0.190090410813418 AGIWUR31069  
 N2 CT X 7562831 7564805 WBGene00006063 sto-1 F08C6.4 -0.0756436119830983 AGIWUR31380  
 N2 CT X 7565323 7568152 WBGene00007059 vps-52 F08C6.3 -0.117577116399172 AGIWUR5089  
 N2 CT X 7568137 7569722 WBGene00017244 apy-1 F08C6.6 0.170943699505031 AGIWUR19261  
 N2 CT X 7570374 7573751 WBGene00006827 unc-98 F08C6.7 0.0296256558563144 AGIWUR41594  
 N2 CT X 7572110 7581059 WBGene00017241 pcyt-1 F08C6.2 0.0629048483870216  
 AGIWUR294;AGIWUR13737  
 N2 CT X 7585587 7595414 WBGene00000083 adt-2 F08C6.1 0.0804636738743731  
 AGIWUR10684;AGIWUR11003;AGIWUR15407;AGIWUR18101;AGIWUR19164;AGIWUR21177;AGIWUR26814;AGIWUR40645;AGIWUR40834  
 ;AGIWUR41449;AGIWUR42558;AGIWUR43389  
 N2 CT X 7596927 7599824 WBGene00016657 C44E12.1 C44E12.1 -0.0165401660535007  
 AGIWUR899;AGIWUR7416;AGIWUR11671;AGIWUR12930;AGIWUR13227;AGIWUR43370  
 N2 CT X 7599836 7608135 WBGene00006671 twk-17 C44E12.3 -0.0275731908499655  
 AGIWUR3885;AGIWUR20444;AGIWUR20522;AGIWUR24943;AGIWUR29077;AGIWUR33963;AGIWUR39488  
 N2 CT X 7627649 7627848 WBGene00017813 F26A10.1 F26A10.1 0.121693071146124  
 AGIWUR2562  
 N2 CT X 7630905 7637172 WBGene00017814 F26A10.2 F26A10.2 0.0585008122355486  
 AGIWUR12816;AGIWUR43740  
 N2 CT X 7651132 7651548 WBGene00017862 F27D9.3 F27D9.3 0.00705402292302182 AGIWUR33666  
 N2 CT X 7653135 7654425 WBGene00017863 F27D9.4 F27D9.4 0.0420735284297482 AGIWUR37245  
 N2 CT X 7657538 7687738 WBGene00017864 pcca-1 F27D9.5 0.322198315237385  
 AGIWUR2629;AGIWUR3378;AGIWUR6786;AGIWUR14447;AGIWUR31106;AGIWUR38037  
 N2 CT X 7690590 7707086 WBGene00002242 kvs-1 C53C9.3 -0.0593633371566948  
 AGIWUR2769;AGIWUR11806;AGIWUR34819  
 N2 CT X 7710170 7710716 WBGene00019583 K09F5.4 K09F5.4 0.41117068646874 AGIWUR25180  
 N2 CT X 7719272 7725583 WBGene00044698 K09F5.6 K09F5.6 -0.177427500440597  
 AGIWUR5167;AGIWUR13606;AGIWUR14314;AGIWUR22242;AGIWUR39871  
 N2 CT X 7725955 7726383 WBGene00004999 spp-14 K09F5.3 -0.014653335027333 AGIWUR11497  
 N2 CT X 7727889 7733168 WBGene00006925 vit-1 K09F5.2 0.0637570251529098 AGIWUR31944  
 N2 CT X 7733334 7736271 WBGene00019584 set-12 K09F5.5 -0.120210490805585 AGIWUR39637  
 N2 CT X 7739653 7741906 WBGene00019582 K09F5.1 K09F5.1 -0.096000984135765 AGIWUR8592  
 N2 CT X 7744239 7750010 WBGene00004335 ref-2 C47C12.3 -0.0223015855760287  
 AGIWUR12202;AGIWUR17761;AGIWUR31512;AGIWUR35474  
 N2 CT X 7754046 7754284 WBGene00016736 C47C12.2 C47C12.2 -0.125644379436682  
 AGIWUR14617  
 N2 CT X 7763187 7774915 WBGene00000950 deg-1 C47C12.6 -0.129643447039433  
 AGIWUR12770  
 N2 CT X 7774859 7776689 WBGene00003171 mec-7 ZK154.3 0.20963580819527

AGIWUR35991;AGIWUR36555

|    |    |   |         |         |                |         |         |                    |             |
|----|----|---|---------|---------|----------------|---------|---------|--------------------|-------------|
| N2 | CT | X | 7777031 | 7782537 | WBGene00022666 | ZK154.4 | ZK154.4 | 0.132815219575683  | AGIWUR35005 |
| N2 | CT | X | 7783190 | 7787966 | WBGene00022667 | ZK154.5 | ZK154.5 | -0.1651397526762   | AGIWUR30208 |
| N2 | CT | X | 7790178 | 7793563 | WBGene00022668 | ZK154.6 | ZK154.6 | -0.130570270513417 |             |

AGIWUR5581;AGIWUR6159;AGIWUR34648

|    |    |   |         |         |                |       |         |                     |             |
|----|----|---|---------|---------|----------------|-------|---------|---------------------|-------------|
| N2 | CT | X | 7795046 | 7798287 | WBGene00000075 | adm-4 | ZK154.7 | 0.107750099542159   | AGIWUR20603 |
| N2 | CT | X | 7798955 | 7799780 | WBGene00019846 | gpx-7 | R03G5.5 | -0.0873123868995584 |             |

AGIWUR17391;AGIWUR26627;AGIWUR31329;AGIWUR34737

|    |    |   |         |         |                |         |         |                      |             |
|----|----|---|---------|---------|----------------|---------|---------|----------------------|-------------|
| N2 | CT | X | 7800445 | 7805676 | WBGene00019845 | irld-13 | R03G5.3 | -0.00636210353540356 | AGIWUR27593 |
| N2 | CT | X | 7805629 | 7809134 | WBGene00019847 | R03G5.6 | R03G5.6 | -0.0512744676969916  |             |

AGIWUR39142;AGIWUR41155

|    |    |   |         |         |                |          |         |                     |             |
|----|----|---|---------|---------|----------------|----------|---------|---------------------|-------------|
| N2 | CT | X | 7816720 | 7821045 | WBGene00004758 | sek-1    | R03G5.2 | -0.0456486207545428 | AGIWUR29353 |
| N2 | CT | X | 7823652 | 7825769 | WBGene00001169 | eef-1A.2 | R03G5.1 | 0.0901626684876966  |             |

AGIWUR8817;AGIWUR13058;AGIWUR15776;AGIWUR20915;AGIWUR23861;AGIWUR35550;AGIWUR38611;AGIWUR39303;AGIWUR41511

|    |    |   |         |         |                |         |         |                    |             |
|----|----|---|---------|---------|----------------|---------|---------|--------------------|-------------|
| N2 | CT | X | 7827085 | 7834535 | WBGene00006310 | su1-3   | C54D2.4 | 0.010918143596351  | AGIWUR45187 |
| N2 | CT | X | 7838899 | 7839381 | WBGene00016916 | C54D2.2 | C54D2.2 | 0.232699840625362  | AGIWUR18655 |
| N2 | CT | X | 7842632 | 7845438 | WBGene00016915 | C54D2.1 | C54D2.1 | 0.11196318604242   | AGIWUR37793 |
| N2 | CT | X | 7846190 | 7847460 | WBGene00045210 | C54D2.6 | C54D2.6 | 0.0609885076122119 |             |

AGIWUR8415;AGIWUR15984

|    |    |   |         |         |                |       |         |                   |  |
|----|----|---|---------|---------|----------------|-------|---------|-------------------|--|
| N2 | CT | X | 7847682 | 7875954 | WBGene00000367 | cca-1 | C54D2.5 | 0.100542868022542 |  |
|----|----|---|---------|---------|----------------|-------|---------|-------------------|--|

AGIWUR13850;AGIWUR17664;AGIWUR22438;AGIWUR36286

|    |    |   |         |         |                |          |          |                  |  |
|----|----|---|---------|---------|----------------|----------|----------|------------------|--|
| N2 | CT | X | 7879771 | 7880948 | WBGene00016535 | C39D10.8 | C39D10.8 | 0.17200762112237 |  |
|----|----|---|---------|---------|----------------|----------|----------|------------------|--|

AGIWUR154;AGIWUR858;AGIWUR1029;AGIWUR1163;AGIWUR17488;AGIWUR25598;AGIWUR25753;AGIWUR30213;AGIWUR39081;AGIWUR39426;AGIWUR44038

|    |    |   |         |         |                |          |          |                  |  |
|----|----|---|---------|---------|----------------|----------|----------|------------------|--|
| N2 | CT | X | 7884288 | 7887479 | WBGene00016531 | C39D10.3 | C39D10.3 | 0.11176577383601 |  |
|----|----|---|---------|---------|----------------|----------|----------|------------------|--|

AGIWUR11017

|    |    |   |         |         |                |          |          |                    |  |
|----|----|---|---------|---------|----------------|----------|----------|--------------------|--|
| N2 | CT | X | 7889215 | 7889765 | WBGene00016530 | C39D10.2 | C39D10.2 | -0.171739219457628 |  |
|----|----|---|---------|---------|----------------|----------|----------|--------------------|--|

AGIWUR927

|    |    |   |         |         |                |          |          |                     |  |
|----|----|---|---------|---------|----------------|----------|----------|---------------------|--|
| N2 | CT | X | 7890410 | 7892396 | WBGene00016532 | C39D10.5 | C39D10.5 | -0.0648264138167827 |  |
|----|----|---|---------|---------|----------------|----------|----------|---------------------|--|

AGIWUR25921

|    |    |   |         |         |                |          |          |                    |  |
|----|----|---|---------|---------|----------------|----------|----------|--------------------|--|
| N2 | CT | X | 7896221 | 7897773 | WBGene00016533 | C39D10.6 | C39D10.6 | -0.180193811468541 |  |
|----|----|---|---------|---------|----------------|----------|----------|--------------------|--|

AGIWUR42464

|    |    |   |         |         |                |          |          |                   |  |
|----|----|---|---------|---------|----------------|----------|----------|-------------------|--|
| N2 | CT | X | 7901631 | 7901990 | WBGene00016536 | C39D10.9 | C39D10.9 | 0.718066986178628 |  |
|----|----|---|---------|---------|----------------|----------|----------|-------------------|--|

AGIWUR40149

|    |    |   |         |         |                |           |           |                    |  |
|----|----|---|---------|---------|----------------|-----------|-----------|--------------------|--|
| N2 | CT | X | 7903280 | 7905466 | WBGene00043983 | C39D10.11 | C39D10.11 | 0.0483150866964523 |  |
|----|----|---|---------|---------|----------------|-----------|-----------|--------------------|--|

AGIWUR42504;AGIWUR44558

|    |    |   |         |         |                |          |          |                    |  |
|----|----|---|---------|---------|----------------|----------|----------|--------------------|--|
| N2 | CT | X | 7906964 | 7907119 | WBGene00016529 | C39D10.1 | C39D10.1 | -0.143256770201897 |  |
|----|----|---|---------|---------|----------------|----------|----------|--------------------|--|

AGIWUR8159

|    |    |   |         |         |                |          |          |                     |  |
|----|----|---|---------|---------|----------------|----------|----------|---------------------|--|
| N2 | CT | X | 7907955 | 7913930 | WBGene00016534 | C39D10.7 | C39D10.7 | -0.0938985625244211 |  |
|----|----|---|---------|---------|----------------|----------|----------|---------------------|--|

AGIWUR28583  
N2 CT X 7925434 7926594 WBGene00006981 zig-4 C09C7.1 0.26482226293876  
AGIWUR17450;AGIWUR19354;AGIWUR30211  
N2 CT X 7930738 7931808 WBGene00006980 zig-3 C14F5.2 0.159746817875515 AGIWUR2314  
N2 CT X 7937635 7945048 WBGene00006588 tnt-3 C14F5.3 0.136548561700746  
AGIWUR26799;AGIWUR31168;AGIWUR36095  
N2 CT X 7954355 7956211 WBGene00015776 dct-1 C14F5.1 0.0103582379499052 AGIWUR26731  
N2 CT X 7956196 7958303 WBGene00015777 sfxn-2 C14F5.4 0.198520962126983 AGIWUR21473  
N2 CT X 7959452 7961723 WBGene00004774 sem-5 C14F5.5 -0.000702471407418415 AGIWUR1438  
N2 CT X 7976700 7980657 WBGene00018466 F45E1.5 F45E1.5 0.213482964987314 AGIWUR29946  
N2 CT X 7981382 7982070 WBGene00001945 his-71 F45E1.6 -0.118808058437773 AGIWUR28969  
N2 CT X 7985979 7988981 WBGene00018465 F45E1.4 F45E1.4 -0.132807144807821  
AGIWUR3201;AGIWUR6769  
N2 CT X 7988931 7998229 WBGene00018467 sdpn-1 F45E1.7 -0.0723615627631862 AGIWUR28499  
N2 CT X 8003819 8009400 WBGene00018462 F45E1.1 F45E1.1 0.155121214110751 AGIWUR39595  
N2 CT X 8014983 8026858 WBGene00016407 C34D10.2 C34D10.2 -0.029362641631741  
AGIWUR1066;AGIWUR8041  
N2 CT X 8029479 8031614 WBGene00016406 C34D10.1 C34D10.1 -0.0243287364412161  
AGIWUR27238  
N2 CT X 8041327 8044409 WBGene00006962 xol-1 C18A11.5 0.124838291225133  
AGIWUR19381;AGIWUR39183  
N2 CT X 8045552 8047416 WBGene00015950 C18A11.4 C18A11.4 -0.0929991442239366  
AGIWUR36837  
N2 CT X 8050476 8058220 WBGene00001000 dim-1 C18A11.7 0.186288739709735  
AGIWUR746;AGIWUR3893;AGIWUR6746;AGIWUR13907;AGIWUR14088;AGIWUR16775;AGIWUR17481;AGIWUR19007;AGIWUR35992;AGI  
WUR36156;AGIWUR36589  
N2 CT X 8061123 8065688 WBGene00015949 C18A11.3 C18A11.3 -0.0266067759872044  
AGIWUR9153  
N2 CT X 8067568 8068095 WBGene00015948 C18A11.2 C18A11.2 -0.350955895395122  
AGIWUR31132  
N2 CT X 8069328 8070289 WBGene00015947 C18A11.1 C18A11.1 0.0659086040181838  
AGIWUR22349;AGIWUR27090;AGIWUR37350;AGIWUR38997  
N2 CT X 8078063 8080256 WBGene00016714 C46F2.1 C46F2.1 -0.0702583124545253 AGIWUR24718  
N2 CT X 8080869 8084018 WBGene00019492 K07E3.4 K07E3.4 0.162725577596714 AGIWUR28196  
N2 CT X 8084210 8086550 WBGene00000929 dao-3 K07E3.3 -0.159614258838175 AGIWUR33499  
N2 CT X 8087554 8089427 WBGene00006890 vem-1 K07E3.8 -0.072028980562532 AGIWUR5567  
N2 CT X 8089826 8098863 WBGene00019493 catp-5 K07E3.7 -0.00841301461998967 AGIWUR33219  
N2 CT X 8104305 8107557 WBGene00019491 K07E3.2 K07E3.2 -0.152106904763832  
AGIWUR4890;AGIWUR34188

|                                                                                    |    |   |         |         |                |          |          |                     |             |
|------------------------------------------------------------------------------------|----|---|---------|---------|----------------|----------|----------|---------------------|-------------|
| N2                                                                                 | CT | X | 8110449 | 8114762 | WBGene00019490 | K07E3.1  | K07E3.1  | 0.0305377184820426  | AGIWUR34231 |
| N2                                                                                 | CT | X | 8116636 | 8120133 | WBGene00001953 | h1h-8    | C02B8.4  | 0.232637153206139   | AGIWUR37979 |
| N2                                                                                 | CT | X | 8120410 | 8123220 | WBGene00219375 | C02B8.12 | C02B8.12 | -0.121211997533153  |             |
| AGIWUR39796                                                                        |    |   |         |         |                |          |          |                     |             |
| N2                                                                                 | CT | X | 8133155 | 8136326 | WBGene00015324 | C02B8.6  | C02B8.6  | 0.182762855367324   |             |
| AGIWUR5064;AGIWUR14981;AGIWUR16481;AGIWUR17832;AGIWUR30095;AGIWUR30413;AGIWUR42682 |    |   |         |         |                |          |          |                     |             |
| N2                                                                                 | CT | X | 8137721 | 8137879 | WBGene00015325 | C02B8.7  | C02B8.7  | -0.0760556409265156 | AGIWUR31418 |
| N2                                                                                 | CT | X | 8139446 | 8140243 | WBGene00015322 | C02B8.3  | C02B8.3  | -0.0167737538999622 |             |
| AGIWUR2189;AGIWUR25989                                                             |    |   |         |         |                |          |          |                     |             |
| N2                                                                                 | CT | X | 8147710 | 8148588 | WBGene00015320 | C02B8.1  | C02B8.1  | 0.0424228746970261  | AGIWUR14484 |
| N2                                                                                 | CT | X | 8149563 | 8150716 | WBGene00017714 | F22F1.2  | F22F1.2  | -0.182534218109815  | AGIWUR41354 |
| N2                                                                                 | CT | X | 8159153 | 8160084 | WBGene00001854 | h1l-3    | F22F1.1  | 0.120411598796331   | AGIWUR7999  |
| N2                                                                                 | CT | X | 8161839 | 8163073 | WBGene00017715 | F22F1.3  | F22F1.3  | 0.0488246914228405  | AGIWUR24544 |
| N2                                                                                 | CT | X | 8169930 | 8172913 | WBGene00015922 | C17H11.2 | C17H11.2 | 0.063397881445054   |             |
| AGIWUR41888                                                                        |    |   |         |         |                |          |          |                     |             |
| N2                                                                                 | CT | X | 8173910 | 8180865 | WBGene00015921 | C17H11.1 | C17H11.1 | 0.204624748271277   |             |
| AGIWUR43707                                                                        |    |   |         |         |                |          |          |                     |             |
| N2                                                                                 | CT | X | 8181031 | 8181640 | WBGene00015924 | C17H11.4 | C17H11.4 | -0.890715559805193  |             |
| AGIWUR23254                                                                        |    |   |         |         |                |          |          |                     |             |
| N2                                                                                 | CT | X | 8183008 | 8185133 | WBGene00015925 | C17H11.5 | C17H11.5 | -0.0702976068729804 |             |
| AGIWUR38063                                                                        |    |   |         |         |                |          |          |                     |             |
| N2                                                                                 | CT | X | 8185175 | 8203784 | WBGene00015926 | C17H11.6 | C17H11.6 | -0.0143071122200311 |             |
| AGIWUR8111;AGIWUR29624;AGIWUR40357                                                 |    |   |         |         |                |          |          |                     |             |
| N2                                                                                 | CT | X | 8208748 | 8211149 | WBGene00000391 | cdd-1    | C47D2.2  | 0.13448801943354    | AGIWUR13118 |
| N2                                                                                 | CT | X | 8215050 | 8215668 | WBGene00016738 | C47D2.1  | C47D2.1  | -0.0937640424202186 | AGIWUR12024 |
| N2                                                                                 | CT | X | 8219728 | 8220064 | WBGene00019292 | K02A6.1  | K02A6.1  | -0.133427536244501  | AGIWUR628   |
| N2                                                                                 | CT | X | 8224391 | 8224902 | WBGene00019293 | K02A6.2  | K02A6.2  | 0.218290624491032   | AGIWUR21360 |
| N2                                                                                 | CT | X | 8228068 | 8231934 | WBGene00019294 | K02A6.3  | K02A6.3  | 0.181789135334213   | AGIWUR36272 |
| N2                                                                                 | CT | X | 8232254 | 8236316 | WBGene00019780 | M60.4    | M60.4    | -0.0106860472065087 | AGIWUR8759  |
| N2                                                                                 | CT | X | 8242056 | 8247869 | WBGene00019779 | endu-2   | M60.2    | 0.14361183099561    | AGIWUR28695 |
| N2                                                                                 | CT | X | 8248207 | 8252458 | WBGene00019781 | M60.6    | M60.6    | -0.142617655139055  |             |
| AGIWUR6639;AGIWUR20670;AGIWUR39957                                                 |    |   |         |         |                |          |          |                     |             |
| N2                                                                                 | CT | X | 8258149 | 8261175 | WBGene00019782 | M60.7    | M60.7    | -0.0351031006508755 | AGIWUR16017 |
| N2                                                                                 | CT | X | 8262421 | 8271021 | WBGene00017421 | cutl-29  | F13B9.6  | 0.0054640262464698  | AGIWUR18221 |
| N2                                                                                 | CT | X | 8275158 | 8283301 | WBGene00002239 | ksr-1    | F13B9.5  | -0.0253851075083489 | AGIWUR15566 |
| N2                                                                                 | CT | X | 8283282 | 8285219 | WBGene00001425 | fis-2    | F13B9.8  | -0.144419345675207  | AGIWUR29120 |
| N2                                                                                 | CT | X | 8285683 | 8286785 | WBGene00017420 | F13B9.2  | F13B9.2  | -0.470257288076473  | AGIWUR31567 |
| N2                                                                                 | CT | X | 8287261 | 8294514 | WBGene00017419 | F13B9.1  | F13B9.1  | 0.103085012504618   | AGIWUR13018 |
| N2                                                                                 | CT | X | 8294625 | 8296675 | WBGene00019987 | R09F10.3 | R09F10.3 | 0.00332561712287927 |             |

|                                                                                                             |    |   |         |         |                |          |           |                     |
|-------------------------------------------------------------------------------------------------------------|----|---|---------|---------|----------------|----------|-----------|---------------------|
| AGIWUR23087                                                                                                 |    |   |         |         |                |          |           |                     |
| N2                                                                                                          | CT | X | 8299119 | 8299654 | WBGene00000427 | ced-13   | R09F10.9  | -0.168021771630794  |
| AGIWUR36309                                                                                                 |    |   |         |         |                |          |           |                     |
| N2                                                                                                          | CT | X | 8300030 | 8302395 | WBGene00002127 | inx-5    | R09F10.4  | 0.0276088774939192  |
| AGIWUR8644;AGIWUR33230                                                                                      |    |   |         |         |                |          |           |                     |
| N2                                                                                                          | CT | X | 8306225 | 8307700 | WBGene00019988 | R09F10.5 | R09F10.5  | -0.0844399129782847 |
| AGIWUR18056                                                                                                 |    |   |         |         |                |          |           |                     |
| N2                                                                                                          | CT | X | 8313128 | 8314267 | WBGene00005239 | srh-13   | R09F10.10 | 0.137893642245211   |
| AGIWUR6738                                                                                                  |    |   |         |         |                |          |           |                     |
| N2                                                                                                          | CT | X | 8315524 | 8316278 | WBGene00005238 | srh-12   | R09F10.11 | 0.024396133036551   |
| AGIWUR16767;AGIWUR22171;AGIWUR31297                                                                         |    |   |         |         |                |          |           |                     |
| N2                                                                                                          | CT | X | 8317637 | 8319050 | WBGene00005237 | srh-11   | R09F10.6  | -0.154214735082698  |
| AGIWUR29614                                                                                                 |    |   |         |         |                |          |           |                     |
| N2                                                                                                          | CT | X | 8323592 | 8325046 | WBGene00019986 | R09F10.1 | R09F10.1  | 0.0662520628688306  |
| AGIWUR41725                                                                                                 |    |   |         |         |                |          |           |                     |
| N2                                                                                                          | CT | X | 8325099 | 8326451 | WBGene00019989 | R09F10.8 | R09F10.8  | -0.223985771913291  |
| AGIWUR24471                                                                                                 |    |   |         |         |                |          |           |                     |
| N2                                                                                                          | CT | X | 8327559 | 8327900 | WBGene00018883 | F55E10.4 | F55E10.4  | -0.0300620379963146 |
| AGIWUR32061                                                                                                 |    |   |         |         |                |          |           |                     |
| N2                                                                                                          | CT | X | 8333247 | 8337948 | WBGene00018884 | F55E10.5 | F55E10.5  | -0.0954029532271035 |
| AGIWUR28678                                                                                                 |    |   |         |         |                |          |           |                     |
| N2                                                                                                          | CT | X | 8340693 | 8340986 | WBGene00018882 | F55E10.2 | F55E10.2  | -0.318897296753461  |
| AGIWUR19603                                                                                                 |    |   |         |         |                |          |           |                     |
| N2                                                                                                          | CT | X | 8341975 | 8342286 | WBGene00018881 | F55E10.1 | F55E10.1  | 0.047609403813957   |
| AGIWUR4035                                                                                                  |    |   |         |         |                |          |           |                     |
| N2                                                                                                          | CT | X | 8344700 | 8346408 | WBGene00018885 | drd-5    | F55E10.6  | 0.0653900073688352  |
| AGIWUR1745                                                                                                  |    |   |         |         |                |          |           |                     |
| N2                                                                                                          | CT | X | 8348537 | 8351059 | WBGene00018886 | npr-28   | F55E10.7  | 0.156229762193028   |
| AGIWUR20796                                                                                                 |    |   |         |         |                |          |           |                     |
| N2                                                                                                          | CT | X | 8368534 | 8371609 | WBGene00018226 | F40B5.2  | F40B5.2   | -0.0881398353554275 |
| N2                                                                                                          | CT | X | 8372206 | 8374474 | WBGene00018227 | nep-15   | F40B5.3   | 0.244260197312833   |
| N2                                                                                                          | CT | X | 8375288 | 8377304 | WBGene00018225 | nep-14   | F40B5.1   | -0.580535853097048  |
| N2                                                                                                          | CT | X | 8378557 | 8382700 | WBGene00018281 | tbc-18   | F41D9.1   | -0.199795730384162  |
| N2                                                                                                          | CT | X | 8382706 | 8384945 | WBGene00018282 | F41D9.2  | F41D9.2   | 0.449705093444788   |
| N2                                                                                                          | CT | X | 8387448 | 8392584 | WBGene00006942 | wrk-1    | F41D9.3   | 0.128316770937634   |
| AGIWUR156;AGIWUR6021;AGIWUR13188;AGIWUR13370;AGIWUR19239;AGIWUR28819;AGIWUR37022;AGIWUR41612;AGIWUR41671    |    |   |         |         |                |          |           |                     |
| N2                                                                                                          | CT | X | 8403539 | 8408367 | WBGene00018283 | sulp-3   | F41D9.5   | -0.123863721265022  |
| N2                                                                                                          | CT | X | 8411698 | 8414195 | WBGene00017258 | F08F1.4  | F08F1.4   | -0.0625539829533039 |
| AGIWUR4950;AGIWUR6123;AGIWUR12253;AGIWUR14710;AGIWUR15054;AGIWUR17264;AGIWUR18514;AGIWUR30864;AGIWUR43115;A |    |   |         |         |                |          |           |                     |

|                                                                                   |    |   |         |         |                |          |          |                      |             |
|-----------------------------------------------------------------------------------|----|---|---------|---------|----------------|----------|----------|----------------------|-------------|
| GIWUR45009                                                                        |    |   |         |         |                |          |          |                      |             |
| N2                                                                                | CT | X | 8417424 | 8418524 | WBGene00004998 | spp-13   | F08F1.6  | -0.355308055784125   | AGIWUR2104  |
| N2                                                                                | CT | X | 8418646 | 8422055 | WBGene00006472 | tag-123  | F08F1.7  | 0.048711627838129    |             |
| AGIWUR752;AGIWUR6564;AGIWUR12444;AGIWUR28314;AGIWUR34981;AGIWUR40903              |    |   |         |         |                |          |          |                      |             |
| N2                                                                                | CT | X | 8422480 | 8423731 | WBGene00006649 | tth-1    | F08F1.8  | 0.14136966175656     | AGIWUR37804 |
| N2                                                                                | CT | X | 8432663 | 8437346 | WBGene00002195 | kin-9    | F08F1.1  | -0.0146365953021039  | AGIWUR36818 |
| N2                                                                                | CT | X | 8440192 | 8450417 | WBGene00017513 | F16F9.1  | F16F9.1  | 0.130350300797891    | AGIWUR30468 |
| N2                                                                                | CT | X | 8450381 | 8455640 | WBGene00001068 | dpy-6    | F16F9.2  | 0.0935721121108548   | AGIWUR35261 |
| N2                                                                                | CT | X | 8457614 | 8459734 | WBGene00017514 | F16F9.3  | F16F9.3  | -0.150893226746619   | AGIWUR14547 |
| N2                                                                                | CT | X | 8459821 | 8463360 | WBGene00017515 | F16F9.4  | F16F9.4  | 0.169000402101045    | AGIWUR23854 |
| N2                                                                                | CT | X | 8465832 | 8470256 | WBGene00003174 | mec-10   | F16F9.5  | -0.00418384125737958 | AGIWUR42070 |
| N2                                                                                | CT | X | 8473723 | 8476176 | WBGene00003613 | nhr-14   | T01B10.4 | 0.031107433300388    |             |
| AGIWUR1892;AGIWUR2548;AGIWUR14751;AGIWUR15964;AGIWUR19124                         |    |   |         |         |                |          |          |                      |             |
| N2                                                                                | CT | X | 8495322 | 8498062 | WBGene00020137 | T01B10.5 | T01B10.5 | -0.292163533362127   |             |
| AGIWUR41525                                                                       |    |   |         |         |                |          |          |                      |             |
| N2                                                                                | CT | X | 8499664 | 8501037 | WBGene00001703 | grd-14   | T01B10.2 | 0.0795659270582725   |             |
| AGIWUR39755                                                                       |    |   |         |         |                |          |          |                      |             |
| N2                                                                                | CT | X | 8501245 | 8502289 | WBGene00001693 | grd-4    | T01B10.1 | -0.18304252164387    |             |
| AGIWUR5512                                                                        |    |   |         |         |                |          |          |                      |             |
| N2                                                                                | CT | X | 8507876 | 8514126 | WBGene00019148 | H03E18.1 | H03E18.1 | -0.363831860396379   |             |
| AGIWUR37696                                                                       |    |   |         |         |                |          |          |                      |             |
| N2                                                                                | CT | X | 8514088 | 8517830 | WBGene00019149 | H03E18.2 | H03E18.2 | -0.160260381403255   |             |
| AGIWUR17740                                                                       |    |   |         |         |                |          |          |                      |             |
| N2                                                                                | CT | X | 8528250 | 8531033 | WBGene00001448 | flp-5    | C03G5.7  | 0.0978856561288026   |             |
| AGIWUR1829;AGIWUR34234                                                            |    |   |         |         |                |          |          |                      |             |
| N2                                                                                | CT | X | 8542867 | 8546021 | WBGene00015391 | sdha-1   | C03G5.1  | 0.193143492520408    |             |
| AGIWUR270;AGIWUR5327;AGIWUR26113;AGIWUR26614;AGIWUR30788                          |    |   |         |         |                |          |          |                      |             |
| N2                                                                                | CT | X | 8546451 | 8549056 | WBGene00017048 | D2021.4  | D2021.4  | 0.105708703080708    |             |
| AGIWUR6248;AGIWUR11716;AGIWUR20806                                                |    |   |         |         |                |          |          |                      |             |
| N2                                                                                | CT | X | 8552261 | 8556351 | WBGene00044071 | dhhc-14  | D2021.2  | 0.116869120015696    |             |
| AGIWUR2179;AGIWUR13670;AGIWUR28378;AGIWUR41196                                    |    |   |         |         |                |          |          |                      |             |
| N2                                                                                | CT | X | 8557151 | 8563235 | WBGene00017046 | utx-1    | D2021.1  | -0.0641903138560949  |             |
| AGIWUR4714;AGIWUR5935;AGIWUR18865;AGIWUR22140;AGIWUR25209;AGIWUR25406;AGIWUR35006 |    |   |         |         |                |          |          |                      |             |
| N2                                                                                | CT | X | 8571049 | 8575451 | WBGene00017571 | jmjd-3.1 | F18E9.5  | 0.187056007698844    |             |
| AGIWUR38593                                                                       |    |   |         |         |                |          |          |                      |             |
| N2                                                                                | CT | X | 8578585 | 8580104 | WBGene00044780 | F18E9.8  | F18E9.8  | -0.0628091409126039  |             |
| AGIWUR1800;AGIWUR4650;AGIWUR9990                                                  |    |   |         |         |                |          |          |                      |             |
| N2                                                                                | CT | X | 8580656 | 8583537 | WBGene00017570 | F18E9.4  | F18E9.4  | -0.00398292619199481 |             |
| AGIWUR12635;AGIWUR15548;AGIWUR40652                                               |    |   |         |         |                |          |          |                      |             |

|                                                                                     |    |   |         |         |                |          |          |                     |             |
|-------------------------------------------------------------------------------------|----|---|---------|---------|----------------|----------|----------|---------------------|-------------|
| N2                                                                                  | CT | X | 8586147 | 8590290 | WBGene00017569 | F18E9.3  | F18E9.3  | 0.188260908359117   | AGIWUR42934 |
| N2                                                                                  | CT | X | 8593187 | 8593974 | WBGene00003745 | nlp-7    | F18E9.2  | -0.226665191929818  | AGIWUR44693 |
| N2                                                                                  | CT | X | 8595152 | 8597747 | WBGene00017573 | F18E9.7  | F18E9.7  | 0.214314477174307   | AGIWUR25588 |
| N2                                                                                  | CT | X | 8601535 | 8602366 | WBGene00017568 | F18E9.1  | F18E9.1  | -0.0688642615354613 | AGIWUR9199  |
| N2                                                                                  | CT | X | 8607174 | 8607753 | WBGene00019265 | H35N09.1 | H35N09.1 | -0.214937084736583  |             |
| AGIWUR40490                                                                         |    |   |         |         |                |          |          |                     |             |
| N2                                                                                  | CT | X | 8618418 | 8619756 | WBGene00019286 | K01A12.2 | K01A12.2 | 0.0102236103312849  |             |
| AGIWUR2797;AGIWUR18038;AGIWUR23292;AGIWUR32547;AGIWUR36214                          |    |   |         |         |                |          |          |                     |             |
| N2                                                                                  | CT | X | 8620570 | 8625240 | WBGene00019287 | K01A12.3 | K01A12.3 | 0.264420614338615   |             |
| AGIWUR16423;AGIWUR36181;AGIWUR38635                                                 |    |   |         |         |                |          |          |                     |             |
| N2                                                                                  | CT | X | 8639389 | 8643431 | WBGene00017400 | stg-2    | F12D9.1  | -0.13806648953125   | AGIWUR31307 |
| N2                                                                                  | CT | X | 8646606 | 8647097 | WBGene00017401 | F12D9.2  | F12D9.2  | 0.0179834259326679  | AGIWUR2405  |
| N2                                                                                  | CT | X | 8660619 | 8671753 | WBGene00004369 | rig-1    | K09E2.4  | 0.135985038931988   |             |
| AGIWUR23760;AGIWUR27489;AGIWUR32360                                                 |    |   |         |         |                |          |          |                     |             |
| N2                                                                                  | CT | X | 8673060 | 8681653 | WBGene00019571 | K09E2.2  | K09E2.2  | -0.10676385273544   | AGIWUR36350 |
| N2                                                                                  | CT | X | 8681910 | 8686146 | WBGene00019570 | K09E2.1  | K09E2.1  | -0.151140324365338  |             |
| AGIWUR13311;AGIWUR34731;AGIWUR43898                                                 |    |   |         |         |                |          |          |                     |             |
| N2                                                                                  | CT | X | 8697817 | 8702822 | WBGene00018728 | frpr-8   | F53A9.5  | 0.006930077320765   |             |
| AGIWUR1563;AGIWUR37929                                                              |    |   |         |         |                |          |          |                     |             |
| N2                                                                                  | CT | X | 8704309 | 8707197 | WBGene00018727 | jbts-14  | F53A9.4  | 0.174601210800638   | AGIWUR39170 |
| N2                                                                                  | CT | X | 8708365 | 8709370 | WBGene00018726 | F53A9.3  | F53A9.3  | 0.182414818109642   | AGIWUR22905 |
| N2                                                                                  | CT | X | 8709764 | 8710137 | WBGene00018725 | kreg-1   | F53A9.2  | -0.0186692860756796 |             |
| AGIWUR5464;AGIWUR7328;AGIWUR7798;AGIWUR15741;AGIWUR20454;AGIWUR30988                |    |   |         |         |                |          |          |                     |             |
| N2                                                                                  | CT | X | 8711590 | 8711911 | WBGene00018724 | F53A9.1  | F53A9.1  | 0.135504150929455   |             |
| AGIWUR32378;AGIWUR38157                                                             |    |   |         |         |                |          |          |                     |             |
| N2                                                                                  | CT | X | 8713461 | 8713952 | WBGene00018729 | F53A9.6  | F53A9.6  | 0.0932805173412987  | AGIWUR26199 |
| N2                                                                                  | CT | X | 8716532 | 8716929 | WBGene00018730 | F53A9.7  | F53A9.7  | -0.0574183908158474 | AGIWUR11432 |
| N2                                                                                  | CT | X | 8718567 | 8718905 | WBGene00018731 | F53A9.8  | F53A9.8  | -0.17711235615843   | AGIWUR35395 |
| N2                                                                                  | CT | X | 8720226 | 8720758 | WBGene00018732 | F53A9.9  | F53A9.9  | -0.0118913857838461 | AGIWUR40805 |
| N2                                                                                  | CT | X | 8721557 | 8723552 | WBGene00006587 | tnt-2    | F53A9.10 | 0.209478406380413   |             |
| AGIWUR10214;AGIWUR15235;AGIWUR16730;AGIWUR22902;AGIWUR39188;AGIWUR39856;AGIWUR41250 |    |   |         |         |                |          |          |                     |             |
| N2                                                                                  | CT | X | 8726798 | 8727406 | WBGene00017149 | EGAP4.1  | EGAP4.1  | 0.0586628815939605  | AGIWUR37219 |
| N2                                                                                  | CT | X | 8731310 | 8731922 | WBGene00019732 | M02D8.6  | M02D8.6  | -0.0537577361503043 | AGIWUR42632 |
| N2                                                                                  | CT | X | 8732958 | 8737015 | WBGene00019729 | M02D8.3  | M02D8.3  | -0.131226445876674  | AGIWUR43043 |
| N2                                                                                  | CT | X | 8739048 | 8740171 | WBGene00019728 | M02D8.2  | M02D8.2  | 0.0651663464230943  |             |
| AGIWUR13616;AGIWUR23732;AGIWUR26248;AGIWUR30537;AGIWUR39903                         |    |   |         |         |                |          |          |                     |             |
| N2                                                                                  | CT | X | 8740789 | 8743057 | WBGene00044313 | M02D8.7  | M02D8.7  | 0.137045158382915   |             |
| AGIWUR5408;AGIWUR35449                                                              |    |   |         |         |                |          |          |                     |             |
| N2                                                                                  | CT | X | 8748434 | 8750969 | WBGene00019730 | asns-2   | M02D8.4  | 0.262305920400556   |             |



AGIWUR19162;AGIWUR20337;AGIWUR21929;AGIWUR23261

|                                                                       |    |   |         |         |                |          |          |                      |             |
|-----------------------------------------------------------------------|----|---|---------|---------|----------------|----------|----------|----------------------|-------------|
| N2                                                                    | CT | X | 8754576 | 8761580 | WBGene00019731 | M02D8.5  | M02D8.5  | -0.0980173383588099  | AGIWUR16000 |
| N2                                                                    | CT | X | 8763907 | 8766280 | WBGene00019727 | zig-12   | M02D8.1  | -0.0389344314936704  | AGIWUR26789 |
| N2                                                                    | CT | X | 8778847 | 8784441 | WBGene00022811 | ZK721.4  | ZK721.4  | 0.265662890751051    | AGIWUR21245 |
| N2                                                                    | CT | X | 8784534 | 8787072 | WBGene00022810 | ZK721.3  | ZK721.3  | 0.30293532066284     | AGIWUR959   |
| N2                                                                    | CT | X | 8789456 | 8790621 | WBGene00006764 | unc-27   | ZK721.2  | 0.0507283870156812   |             |
| AGIWUR8777;AGIWUR17569                                                |    |   |         |         |                |          |          |                      |             |
| N2                                                                    | CT | X | 8792160 | 8796110 | WBGene00006477 | chup-1   | ZK721.1  | -0.183771561737808   |             |
| AGIWUR29227;AGIWUR32479                                               |    |   |         |         |                |          |          |                      |             |
| N2                                                                    | CT | X | 8796545 | 8797835 | WBGene00019870 | R04E5.7  | R04E5.7  | 0.061259784896623    |             |
| AGIWUR14421;AGIWUR36332;AGIWUR37318;AGIWUR40252;AGIWUR40895           |    |   |         |         |                |          |          |                      |             |
| N2                                                                    | CT | X | 8801624 | 8806113 | WBGene00019871 | R04E5.8  | R04E5.8  | 0.143622901500621    |             |
| AGIWUR27571;AGIWUR40800                                               |    |   |         |         |                |          |          |                      |             |
| N2                                                                    | CT | X | 8806174 | 8811142 | WBGene00019872 | R04E5.9  | R04E5.9  | -0.00187220463361282 |             |
| AGIWUR7613;AGIWUR8776;AGIWUR11944;AGIWUR16588;AGIWUR24497;AGIWUR37816 |    |   |         |         |                |          |          |                      |             |
| N2                                                                    | CT | X | 8812143 | 8816805 | WBGene00019869 | cnm-2    | R04E5.2  | 0.0479529679096373   | AGIWUR22058 |
| N2                                                                    | CT | X | 8820703 | 8824448 | WBGene00002057 | ifd-1    | R04E5.10 | -0.274403687374788   |             |
| AGIWUR7275;AGIWUR21127                                                |    |   |         |         |                |          |          |                      |             |
| N2                                                                    | CT | X | 8826627 | 8828540 | WBGene00016190 | C28G1.5  | C28G1.5  | -0.210157766805404   |             |
| AGIWUR27051;AGIWUR43751                                               |    |   |         |         |                |          |          |                      |             |
| N2                                                                    | CT | X | 8829920 | 8831262 | WBGene00016191 | C28G1.6  | C28G1.6  | -0.399172233038328   | AGIWUR24667 |
| N2                                                                    | CT | X | 8831739 | 8835715 | WBGene00016188 | sec-15   | C28G1.3  | -0.0668064856448956  |             |
| AGIWUR2654;AGIWUR4425                                                 |    |   |         |         |                |          |          |                      |             |
| N2                                                                    | CT | X | 8836644 | 8837661 | WBGene00016187 | C28G1.2  | C28G1.2  | -0.113737636754152   |             |
| AGIWUR6456;AGIWUR30481                                                |    |   |         |         |                |          |          |                      |             |
| N2                                                                    | CT | X | 8847122 | 8848482 | WBGene00219376 | C28G1.10 | C28G1.10 | -0.194369923391745   |             |
| AGIWUR42745                                                           |    |   |         |         |                |          |          |                      |             |
| N2                                                                    | CT | X | 8849137 | 8853621 | WBGene00016189 | C28G1.4  | C28G1.4  | 0.0891189379687658   | AGIWUR32459 |
| N2                                                                    | CT | X | 8857056 | 8857954 | WBGene00015529 | C06E2.5  | C06E2.5  | -0.292236592693438   | AGIWUR40648 |
| N2                                                                    | CT | X | 8861258 | 8861650 | WBGene00044579 | C06E2.9  | C06E2.9  | -0.326317447230359   |             |
| AGIWUR7776;AGIWUR8306;AGIWUR12019;AGIWUR20105;AGIWUR24625             |    |   |         |         |                |          |          |                      |             |
| N2                                                                    | CT | X | 8866238 | 8866640 | WBGene00002092 | ins-9    | C06E2.8  | -0.1891376943766     |             |
| AGIWUR17847;AGIWUR18385;AGIWUR22537;AGIWUR26370;AGIWUR28244           |    |   |         |         |                |          |          |                      |             |
| N2                                                                    | CT | X | 8867603 | 8869153 | WBGene00006717 | ubc-22   | C06E2.7  | -0.123807842774317   | AGIWUR8878  |
| N2                                                                    | CT | X | 8869625 | 8871901 | WBGene00006716 | ubc-21   | C06E2.3  | 0.0155198818532192   |             |
| AGIWUR2345;AGIWUR14287;AGIWUR40115                                    |    |   |         |         |                |          |          |                      |             |
| N2                                                                    | CT | X | 8872933 | 8874848 | WBGene00015527 | C06E2.1  | C06E2.1  | -0.0910228176385051  | AGIWUR42187 |
| N2                                                                    | CT | X | 8879649 | 8880406 | WBGene00015528 | C06E2.2  | C06E2.2  | 0.242751777268703    | AGIWUR44949 |
| N2                                                                    | CT | X | 8893129 | 8898517 | WBGene00015740 | C13E3.1  | C13E3.1  | -0.265303382140516   | AGIWUR22911 |

|                                                                                                                                |    |   |         |         |                |          |          |                     |             |
|--------------------------------------------------------------------------------------------------------------------------------|----|---|---------|---------|----------------|----------|----------|---------------------|-------------|
| N2                                                                                                                             | CT | X | 8908050 | 8910837 | WBGene00017013 | ensh-1   | D1009.3  | 0.0834637448658331  | AGIWUR6361  |
| N2                                                                                                                             | CT | X | 8911293 | 8914261 | WBGene00000884 | cyn-8    | D1009.2  | -0.0865947964341203 |             |
| AGIWUR7443;AGIWUR10061;AGIWUR35701;AGIWUR36094;AGIWUR39431;AGIWUR39528                                                         |    |   |         |         |                |          |          |                     |             |
| N2                                                                                                                             | CT | X | 8917421 | 8919423 | WBGene00003752 | nlp-14   | D1009.4  | -0.140196306444166  | AGIWUR2900  |
| N2                                                                                                                             | CT | X | 8931241 | 8939263 | WBGene00017012 | acs-22   | D1009.1  | 0.0617182983862303  |             |
| AGIWUR4766;AGIWUR6135;AGIWUR9124;AGIWUR27367;AGIWUR32376                                                                       |    |   |         |         |                |          |          |                     |             |
| N2                                                                                                                             | CT | X | 8939389 | 8940143 | WBGene00017014 | dylt-2   | D1009.5  | -0.09540091920117   | AGIWUR21964 |
| N2                                                                                                                             | CT | X | 8941139 | 8950978 | WBGene00017039 | trk-1    | D1073.1  | 0.0627726381174774  |             |
| AGIWUR14010;AGIWUR16072;AGIWUR30714;AGIWUR32171                                                                                |    |   |         |         |                |          |          |                     |             |
| N2                                                                                                                             | CT | X | 8957616 | 8961170 | WBGene00016748 | aexr-3   | C48C5.3  | -0.998541415370283  | AGIWUR21382 |
| N2                                                                                                                             | CT | X | 8980976 | 8985063 | WBGene00016747 | nmur-1   | C48C5.1  | 0.0395397756949762  |             |
| AGIWUR14619;AGIWUR16262;AGIWUR27846                                                                                            |    |   |         |         |                |          |          |                     |             |
| N2                                                                                                                             | CT | X | 8988137 | 8991972 | WBGene00006672 | twk-18   | C24A3.6  | -0.080809326664788  | AGIWUR6794  |
| N2                                                                                                                             | CT | X | 8992406 | 8994763 | WBGene00016034 | C24A3.4  | C24A3.4  | 0.0883727447216822  |             |
| AGIWUR3347;AGIWUR9135;AGIWUR17732;AGIWUR32265;AGIWUR35548;AGIWUR41716                                                          |    |   |         |         |                |          |          |                     |             |
| N2                                                                                                                             | CT | X | 8997479 | 8998909 | WBGene00016033 | C24A3.2  | C24A3.2  | -0.106546210877717  |             |
| AGIWUR13952;AGIWUR26014;AGIWUR28903                                                                                            |    |   |         |         |                |          |          |                     |             |
| N2                                                                                                                             | CT | X | 9001239 | 9006053 | WBGene00016032 | C24A3.1  | C24A3.1  | -0.195529015660313  |             |
| AGIWUR17679;AGIWUR40654                                                                                                        |    |   |         |         |                |          |          |                     |             |
| N2                                                                                                                             | CT | X | 9009780 | 9010457 | WBGene00044580 | C24A3.9  | C24A3.9  | 0.0343178351120383  |             |
| AGIWUR12458;AGIWUR20948;AGIWUR35053;AGIWUR43393                                                                                |    |   |         |         |                |          |          |                     |             |
| N2                                                                                                                             | CT | X | 9015773 | 9016799 | WBGene00020790 | T25B6.4  | T25B6.4  | -0.062113687822924  | AGIWUR26573 |
| N2                                                                                                                             | CT | X | 9020588 | 9021755 | WBGene00020791 | T25B6.5  | T25B6.5  | -0.116080555419709  | AGIWUR13577 |
| N2                                                                                                                             | CT | X | 9021922 | 9022833 | WBGene00020792 | T25B6.6  | T25B6.6  | -0.0551761519026321 | AGIWUR27292 |
| N2                                                                                                                             | CT | X | 9027604 | 9028285 | WBGene00020789 | T25B6.3  | T25B6.3  | -0.0622604257897912 | AGIWUR28443 |
| N2                                                                                                                             | CT | X | 9029478 | 9033955 | WBGene00004911 | snf-12   | T25B6.7  | 0.134939766719887   | AGIWUR10581 |
| N2                                                                                                                             | CT | X | 9034554 | 9038547 | WBGene00020788 | nep-22   | T25B6.2  | 0.175326855591042   |             |
| AGIWUR30322;AGIWUR36231                                                                                                        |    |   |         |         |                |          |          |                     |             |
| N2                                                                                                                             | CT | X | 9040416 | 9041058 | WBGene00020787 | T25B6.1  | T25B6.1  | -0.0164179442452603 | AGIWUR13768 |
| N2                                                                                                                             | CT | X | 9046213 | 9054885 | WBGene00018567 | F47E1.3  | F47E1.3  | 0.134495118974717   | AGIWUR11460 |
| N2                                                                                                                             | CT | X | 9057652 | 9061860 | WBGene00018566 | F47E1.2  | F47E1.2  | 0.172943079051324   |             |
| AGIWUR23020;AGIWUR28657;AGIWUR33267;AGIWUR44410                                                                                |    |   |         |         |                |          |          |                     |             |
| N2                                                                                                                             | CT | X | 9062834 | 9066591 | WBGene00018568 | F47E1.4  | F47E1.4  | -0.0163595483719003 | AGIWUR17318 |
| N2                                                                                                                             | CT | X | 9073800 | 9077724 | WBGene00018565 | F47E1.1  | F47E1.1  | 0.0773539000265941  | AGIWUR3858  |
| N2                                                                                                                             | CT | X | 9078945 | 9113613 | WBGene00000100 | ajm-1    | C25A11.4 | 0.122953099709597   |             |
| AGIWUR1659;AGIWUR2586;AGIWUR3751;AGIWUR5431;AGIWUR5755;AGIWUR10369;AGIWUR18886;AGIWUR19046;AGIWUR28888;AGIWUR42397;AGIWUR43790 |    |   |         |         |                |          |          |                     |             |
| N2                                                                                                                             | CT | X | 9114368 | 9116891 | WBGene00016087 | C25A11.2 | C25A11.2 | 0.05532208926968    |             |
| AGIWUR42121                                                                                                                    |    |   |         |         |                |          |          |                     |             |

|                                                                                                            |    |   |         |         |                |           |           |                     |             |
|------------------------------------------------------------------------------------------------------------|----|---|---------|---------|----------------|-----------|-----------|---------------------|-------------|
| N2                                                                                                         | CT | X | 9119774 | 9121687 | WBGene00016086 | C25A11.1  | C25A11.1  | -0.0167403170337526 |             |
| AGIWUR3468;AGIWUR28257;AGIWUR32811                                                                         |    |   |         |         |                |           |           |                     |             |
| N2                                                                                                         | CT | X | 9121884 | 9123505 | WBGene00219374 | C25A11.10 | C25A11.10 | 0.175071685856185   |             |
| AGIWUR17757;AGIWUR19421;AGIWUR20739;AGIWUR22486                                                            |    |   |         |         |                |           |           |                     |             |
| N2                                                                                                         | CT | X | 9137927 | 9145656 | WBGene00015263 | B0563.6   | B0563.6   | 0.0483932094311026  |             |
| AGIWUR6329;AGIWUR10984;AGIWUR13642;AGIWUR15404;AGIWUR20913;AGIWUR21716;AGIWUR24233;AGIWUR38920;AGIWUR40946 |    |   |         |         |                |           |           |                     |             |
| N2                                                                                                         | CT | X | 9146174 | 9147526 | WBGene00015262 | B0563.5   | B0563.5   | 0.119064033439729   |             |
| AGIWUR16724;AGIWUR26839;AGIWUR28523;AGIWUR29996;AGIWUR40814                                                |    |   |         |         |                |           |           |                     |             |
| N2                                                                                                         | CT | X | 9150694 | 9160646 | WBGene00006479 | tmbi-4    | B0563.4   | -0.144588466240055  | AGIWUR35222 |
| N2                                                                                                         | CT | X | 9163164 | 9166368 | WBGene00006637 | tsp-11    | B0563.2   | -0.230221675241308  | AGIWUR39443 |
| N2                                                                                                         | CT | X | 9168539 | 9169022 | WBGene00044687 | B0563.9   | B0563.9   | -0.161077111495425  |             |
| AGIWUR1912;AGIWUR5988;AGIWUR17520;AGIWUR27703;AGIWUR42134                                                  |    |   |         |         |                |           |           |                     |             |
| N2                                                                                                         | CT | X | 9171562 | 9172204 | WBGene00015261 | B0563.1   | B0563.1   | -0.0326726090174834 | AGIWUR20274 |
| N2                                                                                                         | CT | X | 9173685 | 9174490 | WBGene00015265 | B0563.8   | B0563.8   | -0.680350866916115  | AGIWUR20718 |
| N2                                                                                                         | CT | X | 9180062 | 9180923 | WBGene00044581 | Y81B9A.4  | Y81B9A.4  | -0.0374027619759003 |             |
| AGIWUR2260;AGIWUR26510;AGIWUR39823                                                                         |    |   |         |         |                |           |           |                     |             |
| N2                                                                                                         | CT | X | 9182440 | 9182947 | WBGene00022317 | Y81B9A.3  | Y81B9A.3  | 0.0661307180957245  |             |
| AGIWUR13980;AGIWUR14706;AGIWUR18027;AGIWUR19056;AGIWUR43732                                                |    |   |         |         |                |           |           |                     |             |
| N2                                                                                                         | CT | X | 9184163 | 9190717 | WBGene00022316 | Y81B9A.2  | Y81B9A.2  | 0.153487428443016   |             |
| AGIWUR4160                                                                                                 |    |   |         |         |                |           |           |                     |             |
| N2                                                                                                         | CT | X | 9192444 | 9194382 | WBGene00022315 | Y81B9A.1  | Y81B9A.1  | 0.187002619440317   |             |
| AGIWUR1439                                                                                                 |    |   |         |         |                |           |           |                     |             |
| N2                                                                                                         | CT | X | 9211144 | 9212321 | WBGene00044743 | crb-3     | C35B8.4   | -0.143770882280169  |             |
| AGIWUR10376;AGIWUR17275;AGIWUR17825;AGIWUR28825;AGIWUR37521                                                |    |   |         |         |                |           |           |                     |             |
| N2                                                                                                         | CT | X | 9213953 | 9216856 | WBGene00016438 | C35B8.3   | C35B8.3   | -0.14124548250841   | AGIWUR18703 |
| N2                                                                                                         | CT | X | 9216867 | 9232075 | WBGene00006887 | vav-1     | C35B8.2   | 0.212968800015166   |             |
| AGIWUR455;AGIWUR11041;AGIWUR31927                                                                          |    |   |         |         |                |           |           |                     |             |
| N2                                                                                                         | CT | X | 9233638 | 9234618 | WBGene00000748 | col-175   | C35B8.1   | 0.338809935970094   | AGIWUR29914 |
| N2                                                                                                         | CT | X | 9235103 | 9242223 | WBGene00017580 | lgc-4     | F18G5.4   | -0.160706029047022  | AGIWUR4317  |
| N2                                                                                                         | CT | X | 9247007 | 9249103 | WBGene00001674 | gpa-12    | F18G5.3   | -0.350864754055468  | AGIWUR24993 |
| N2                                                                                                         | CT | X | 9251818 | 9255717 | WBGene00003981 | pes-8     | F18G5.2   | 0.0210929690606072  | AGIWUR23852 |
| N2                                                                                                         | CT | X | 9256008 | 9257456 | WBGene00017581 | F18G5.5   | F18G5.5   | -0.0981166429619442 | AGIWUR27652 |
| N2                                                                                                         | CT | X | 9259852 | 9261066 | WBGene00017579 | F18G5.1   | F18G5.1   | -0.11990529901516   | AGIWUR40631 |
| N2                                                                                                         | CT | X | 9262027 | 9264331 | WBGene00017582 | F18G5.6   | F18G5.6   | -0.234549284824395  |             |
| AGIWUR791;AGIWUR2708;AGIWUR11787;AGIWUR38307                                                               |    |   |         |         |                |           |           |                     |             |
| N2                                                                                                         | CT | X | 9268626 | 9270855 | WBGene00015181 | B0416.5   | B0416.5   | 0.320251049800604   |             |
| AGIWUR2846;AGIWUR16098;AGIWUR34193;AGIWUR40626                                                             |    |   |         |         |                |           |           |                     |             |
| N2                                                                                                         | CT | X | 9278953 | 9279947 | WBGene00015180 | B0416.4   | B0416.4   | -0.0967273109284097 |             |
| AGIWUR25648;AGIWUR36314;AGIWUR39520                                                                        |    |   |         |         |                |           |           |                     |             |

|                                                                                                                                                                                                                    |    |   |         |         |                |          |          |                     |             |
|--------------------------------------------------------------------------------------------------------------------------------------------------------------------------------------------------------------------|----|---|---------|---------|----------------|----------|----------|---------------------|-------------|
| N2                                                                                                                                                                                                                 | CT | X | 9291651 | 9293366 | WBGene00015179 | B0416.3  | B0416.3  | -0.106435020652565  | AGIWUR3498  |
| N2                                                                                                                                                                                                                 | CT | X | 9293664 | 9296622 | WBGene00001638 | gly-13   | B0416.6  | -0.044201897529458  | AGIWUR12912 |
| N2                                                                                                                                                                                                                 | CT | X | 9296947 | 9297934 | WBGene00015182 | B0416.7  | B0416.7  | -0.184342161738898  |             |
| AGIWUR5443;AGIWUR7853;AGIWUR15838;AGIWUR18976;AGIWUR19220;AGIWUR22464;AGIWUR31115;AGIWUR31167;AGIWUR35787;AGIWUR44988                                                                                              |    |   |         |         |                |          |          |                     |             |
| N2                                                                                                                                                                                                                 | CT | X | 9299147 | 9300131 | WBGene00015178 | B0416.2  | B0416.2  | -0.385828332513995  | AGIWUR43083 |
| N2                                                                                                                                                                                                                 | CT | X | 9303724 | 9310439 | WBGene00015177 | tmc-2    | B0416.1  | 0.0229018229554576  | AGIWUR21090 |
| N2                                                                                                                                                                                                                 | CT | X | 9310625 | 9311341 | WBGene00045261 | H29C22.1 | H29C22.1 | -0.43552028884039   |             |
| AGIWUR12636;AGIWUR32509                                                                                                                                                                                            |    |   |         |         |                |          |          |                     |             |
| N2                                                                                                                                                                                                                 | CT | X | 9312648 | 9314488 | WBGene00044788 | ttr-38   | F35G8.2  | -0.197647396603357  |             |
| AGIWUR1546;AGIWUR7857;AGIWUR16234;AGIWUR24607                                                                                                                                                                      |    |   |         |         |                |          |          |                     |             |
| N2                                                                                                                                                                                                                 | CT | X | 9315436 | 9319180 | WBGene00018067 | npr-7    | F35G8.1  | 0.174719028259553   | AGIWUR12994 |
| N2                                                                                                                                                                                                                 | CT | X | 9331133 | 9336632 | WBGene00020595 | T20B5.2  | T20B5.2  | -0.116963670044159  | AGIWUR5555  |
| N2                                                                                                                                                                                                                 | CT | X | 9336819 | 9342970 | WBGene00000161 | apa-2    | T20B5.1  | -0.0455559848810898 |             |
| AGIWUR7529;AGIWUR19739;AGIWUR28855;AGIWUR36115                                                                                                                                                                     |    |   |         |         |                |          |          |                     |             |
| N2                                                                                                                                                                                                                 | CT | X | 9343333 | 9347430 | WBGene00020596 | oga-1    | T20B5.3  | 0.0383010226480662  |             |
| AGIWUR5115;AGIWUR11833;AGIWUR13581;AGIWUR24006;AGIWUR40314;AGIWUR45209                                                                                                                                             |    |   |         |         |                |          |          |                     |             |
| N2                                                                                                                                                                                                                 | CT | X | 9349276 | 9349890 | WBGene00001463 | flp-20   | E01H11.3 | -0.0867393191044226 |             |
| AGIWUR17940                                                                                                                                                                                                        |    |   |         |         |                |          |          |                     |             |
| N2                                                                                                                                                                                                                 | CT | X | 9364818 | 9386035 | WBGene00004033 | pkc-2    | E01H11.1 | 0.0513435416691439  |             |
| AGIWUR4394;AGIWUR5483;AGIWUR5665;AGIWUR8696;AGIWUR9373;AGIWUR10115;AGIWUR11392;AGIWUR16641;AGIWUR18117;AGIWUR27326;AGIWUR30526;AGIWUR33176;AGIWUR34297;AGIWUR34365;AGIWUR35659;AGIWUR38093;AGIWUR40292;AGIWUR44936 |    |   |         |         |                |          |          |                     |             |
| N2                                                                                                                                                                                                                 | CT | X | 9387341 | 9389189 | WBGene00016009 | C23F12.4 | C23F12.4 | -0.0921331643770653 |             |
| AGIWUR5651                                                                                                                                                                                                         |    |   |         |         |                |          |          |                     |             |
| N2                                                                                                                                                                                                                 | CT | X | 9391645 | 9394702 | WBGene00016008 | C23F12.3 | C23F12.3 | -0.367409134044622  |             |
| AGIWUR22232                                                                                                                                                                                                        |    |   |         |         |                |          |          |                     |             |
| N2                                                                                                                                                                                                                 | CT | X | 9397701 | 9427246 | WBGene00016006 | fln-2    | C23F12.1 | 0.0399665179166462  |             |
| AGIWUR2768;AGIWUR3524;AGIWUR4234;AGIWUR6327;AGIWUR11527;AGIWUR13067;AGIWUR19340;AGIWUR21140;AGIWUR21986;AGIWUR27693;AGIWUR28234;AGIWUR33002;AGIWUR33525;AGIWUR36069;AGIWUR40435                                    |    |   |         |         |                |          |          |                     |             |
| N2                                                                                                                                                                                                                 | CT | X | 9428431 | 9430424 | WBGene00007130 | B0272.4  | B0272.4  | 0.011384954478018   | AGIWUR26263 |
| N2                                                                                                                                                                                                                 | CT | X | 9431432 | 9432745 | WBGene00007129 | B0272.3  | B0272.3  | 0.035488025306158   | AGIWUR18153 |
| N2                                                                                                                                                                                                                 | CT | X | 9434452 | 9436893 | WBGene00006538 | tbb-4    | B0272.1  | 0.0950550170713536  | AGIWUR39009 |
| N2                                                                                                                                                                                                                 | CT | X | 9440079 | 9441571 | WBGene00007128 | memb-1   | B0272.2  | -0.225024468313642  | AGIWUR29736 |
| N2                                                                                                                                                                                                                 | CT | X | 9446664 | 9447612 | WBGene00014140 | ZK899.1  | ZK899.1  | -0.0815782432867991 | AGIWUR2353  |
| N2                                                                                                                                                                                                                 | CT | X | 9447861 | 9449399 | WBGene00014145 | ZK899.7  | ZK899.7  | -0.0610945947700232 |             |
| AGIWUR17130;AGIWUR28669;AGIWUR36863                                                                                                                                                                                |    |   |         |         |                |          |          |                     |             |
| N2                                                                                                                                                                                                                 | CT | X | 9450225 | 9451994 | WBGene00014141 | ZK899.2  | ZK899.2  | -0.0252419219352138 | AGIWUR13325 |
| N2                                                                                                                                                                                                                 | CT | X | 9453959 | 9454660 | WBGene00014142 | ZK899.3  | ZK899.3  | -0.102053803726038  | AGIWUR1908  |
| N2                                                                                                                                                                                                                 | CT | X | 9455485 | 9458348 | WBGene00006534 | tba-8    | ZK899.4  | 0.168194549329371   | AGIWUR42441 |

|                                                                                                                                                                                                                                                        |    |   |         |         |                |          |          |                     |             |
|--------------------------------------------------------------------------------------------------------------------------------------------------------------------------------------------------------------------------------------------------------|----|---|---------|---------|----------------|----------|----------|---------------------|-------------|
| N2                                                                                                                                                                                                                                                     | CT | X | 9459911 | 9460934 | WBGene00014143 | ZK899.5  | ZK899.5  | -0.244822369440566  | AGIWUR26787 |
| N2                                                                                                                                                                                                                                                     | CT | X | 9463356 | 9464725 | WBGene00014144 | ZK899.6  | ZK899.6  | 0.196318537272175   | AGIWUR21764 |
| N2                                                                                                                                                                                                                                                     | CT | X | 9472469 | 9516440 | WBGene00001516 | gap-2    | ZK899.8  | 0.0469908123809724  |             |
| AGIWUR1390;AGIWUR6256;AGIWUR8578;AGIWUR9282;AGIWUR9686;AGIWUR16619;AGIWUR19702;AGIWUR20064;AGIWUR20762;AGIWUR20894;AGIWUR23198;AGIWUR23501;AGIWUR24911;AGIWUR25718;AGIWUR26474;AGIWUR27862;AGIWUR29312;AGIWUR30264;AGIWUR32349;AGIWUR35911;AGIWUR40375 |    |   |         |         |                |          |          |                     |             |
| N2                                                                                                                                                                                                                                                     | CT | X | 9516393 | 9517187 | WBGene00007407 | C07B5.2  | C07B5.2  | -0.118911892197172  | AGIWUR35949 |
| N2                                                                                                                                                                                                                                                     | CT | X | 9519022 | 9521486 | WBGene00007410 | C07B5.6  | C07B5.6  | 0.128877562353113   | AGIWUR16034 |
| N2                                                                                                                                                                                                                                                     | CT | X | 9522488 | 9523173 | WBGene00007408 | C07B5.3  | C07B5.3  | -0.108809516106112  | AGIWUR31308 |
| N2                                                                                                                                                                                                                                                     | CT | X | 9529533 | 9536631 | WBGene00007409 | C07B5.4  | C07B5.4  | -0.0125506764150192 |             |
| AGIWUR3621;AGIWUR11381;AGIWUR27991;AGIWUR28114;AGIWUR31629;AGIWUR35020;AGIWUR36150;AGIWUR43450                                                                                                                                                         |    |   |         |         |                |          |          |                     |             |
| N2                                                                                                                                                                                                                                                     | CT | X | 9539905 | 9542430 | WBGene00003828 | nuc-1    | C07B5.5  | -0.0380167754603598 |             |
| AGIWUR8544;AGIWUR19630;AGIWUR27016                                                                                                                                                                                                                     |    |   |         |         |                |          |          |                     |             |
| N2                                                                                                                                                                                                                                                     | CT | X | 9543670 | 9560801 | WBGene00009888 | F49E2.5  | F49E2.5  | 0.0932746088062215  |             |
| AGIWUR1096;AGIWUR1611;AGIWUR2644;AGIWUR2838;AGIWUR7511;AGIWUR8364;AGIWUR10828;AGIWUR14219;AGIWUR16672;AGIWUR19009;AGIWUR21819;AGIWUR23167;AGIWUR25326;AGIWUR29705;AGIWUR30817;AGIWUR35031;AGIWUR35540;AGIWUR35753;AGIWUR35876;AGIWUR42913              |    |   |         |         |                |          |          |                     |             |
| N2                                                                                                                                                                                                                                                     | CT | X | 9561850 | 9565981 | WBGene00009885 | F49E2.1  | F49E2.1  | -0.0662685304100883 |             |
| AGIWUR6116;AGIWUR6559;AGIWUR10854;AGIWUR20850;AGIWUR30883;AGIWUR39455;AGIWUR42055                                                                                                                                                                      |    |   |         |         |                |          |          |                     |             |
| N2                                                                                                                                                                                                                                                     | CT | X | 9567296 | 9573723 | WBGene00009886 | F49E2.2  | F49E2.2  | 0.121623177458002   | AGIWUR6164  |
| N2                                                                                                                                                                                                                                                     | CT | X | 9573741 | 9575866 | WBGene00009887 | glb-17   | F49E2.4  | -0.0394348897601158 |             |
| AGIWUR11201;AGIWUR15486;AGIWUR23651;AGIWUR27022;AGIWUR34920;AGIWUR45030                                                                                                                                                                                |    |   |         |         |                |          |          |                     |             |
| N2                                                                                                                                                                                                                                                     | CT | X | 9584664 | 9586344 | WBGene00007516 | gpx-5    | C11E4.1  | -0.0965026688996797 |             |
| AGIWUR26679;AGIWUR40806                                                                                                                                                                                                                                |    |   |         |         |                |          |          |                     |             |
| N2                                                                                                                                                                                                                                                     | CT | X | 9587942 | 9588879 | WBGene00007517 | gpx-3    | C11E4.2  | -0.102096528189948  |             |
| AGIWUR13307;AGIWUR43368                                                                                                                                                                                                                                |    |   |         |         |                |          |          |                     |             |
| N2                                                                                                                                                                                                                                                     | CT | X | 9589423 | 9595459 | WBGene00007518 | del-8    | C11E4.3  | 0.0777827715124353  | AGIWUR15310 |
| N2                                                                                                                                                                                                                                                     | CT | X | 9595770 | 9595902 | WBGene00201289 | C11E4.14 | C11E4.14 | -0.158126781572351  |             |
| AGIWUR2498                                                                                                                                                                                                                                             |    |   |         |         |                |          |          |                     |             |
| N2                                                                                                                                                                                                                                                     | CT | X | 9610563 | 9617045 | WBGene00007520 | C11E4.6  | C11E4.6  | -0.0315237597463565 | AGIWUR27647 |
| N2                                                                                                                                                                                                                                                     | CT | X | 9617219 | 9619122 | WBGene00007521 | C11E4.7  | C11E4.7  | -0.210266108866282  | AGIWUR9290  |
| N2                                                                                                                                                                                                                                                     | CT | X | 9623304 | 9624714 | WBGene00007522 | C11E4.8  | C11E4.8  | 0.0905930280135223  | AGIWUR4440  |
| N2                                                                                                                                                                                                                                                     | CT | X | 9626135 | 9626849 | WBGene00009378 | F34H10.1 | F34H10.1 | -0.100793069129323  |             |
| AGIWUR24854                                                                                                                                                                                                                                            |    |   |         |         |                |          |          |                     |             |
| N2                                                                                                                                                                                                                                                     | CT | X | 9630423 | 9630875 | WBGene00009379 | F34H10.2 | F34H10.2 | -0.0515947210468433 |             |
| AGIWUR32767                                                                                                                                                                                                                                            |    |   |         |         |                |          |          |                     |             |
| N2                                                                                                                                                                                                                                                     | CT | X | 9633284 | 9635647 | WBGene00009380 | F34H10.3 | F34H10.3 | -0.0327633420011431 |             |
| AGIWUR9257                                                                                                                                                                                                                                             |    |   |         |         |                |          |          |                     |             |
| N2                                                                                                                                                                                                                                                     | CT | X | 9635693 | 9636884 | WBGene00009382 | F34H10.5 | F34H10.5 | -0.116377116404657  |             |

|                                                                                                                                                                       |    |   |         |         |                |          |          |                       |             |
|-----------------------------------------------------------------------------------------------------------------------------------------------------------------------|----|---|---------|---------|----------------|----------|----------|-----------------------|-------------|
| AGIWUR44097                                                                                                                                                           |    |   |         |         |                |          |          |                       |             |
| N2                                                                                                                                                                    | CT | X | 9648532 | 9650928 | WBGene00009381 | F34H10.4 | F34H10.4 | 0.270698291593765     |             |
| AGIWUR38929                                                                                                                                                           |    |   |         |         |                |          |          |                       |             |
| N2                                                                                                                                                                    | CT | X | 9650999 | 9653116 | WBGene00000085 | aex-2    | T14B1.2  | -0.125072644377864    | AGIWUR10230 |
| N2                                                                                                                                                                    | CT | X | 9664499 | 9668755 | WBGene00011763 | T14B1.1  | T14B1.1  | 0.142038695952631     |             |
| AGIWUR14041;AGIWUR17060;AGIWUR21205;AGIWUR41237                                                                                                                       |    |   |         |         |                |          |          |                       |             |
| N2                                                                                                                                                                    | CT | X | 9675844 | 9680169 | WBGene00002067 | ifp-1    | C43C3.1  | 0.100272059923711     |             |
| AGIWUR39748;AGIWUR42431                                                                                                                                               |    |   |         |         |                |          |          |                       |             |
| N2                                                                                                                                                                    | CT | X | 9690745 | 9696718 | WBGene00008065 | npr-18   | C43C3.2  | 0.0627235660058387    | AGIWUR12539 |
| N2                                                                                                                                                                    | CT | X | 9698678 | 9701679 | WBGene00001123 | dyf-7    | C43C3.3  | -0.206734348088301    |             |
| AGIWUR6186;AGIWUR13488;AGIWUR37978;AGIWUR40328                                                                                                                        |    |   |         |         |                |          |          |                       |             |
| N2                                                                                                                                                                    | CT | X | 9706926 | 9708563 | WBGene00008865 | F15G9.1  | F15G9.1  | 0.245938477358268     |             |
| AGIWUR2786;AGIWUR18819;AGIWUR20324;AGIWUR23067;AGIWUR27181;AGIWUR28533;AGIWUR42907;AGIWUR43564                                                                        |    |   |         |         |                |          |          |                       |             |
| N2                                                                                                                                                                    | CT | X | 9708590 | 9713713 | WBGene00008866 | F15G9.2  | F15G9.2  | 0.219260747695017     | AGIWUR38649 |
| N2                                                                                                                                                                    | CT | X | 9717589 | 9753764 | WBGene00001863 | him-4    | F15G9.4  | -0.164009229920456    | AGIWUR31653 |
| N2                                                                                                                                                                    | CT | X | 9757271 | 9759306 | WBGene00011642 | T09B9.1  | T09B9.1  | -0.0495735515360174   |             |
| AGIWUR27426;AGIWUR32169                                                                                                                                               |    |   |         |         |                |          |          |                       |             |
| N2                                                                                                                                                                    | CT | X | 9759297 | 9761281 | WBGene00011644 | T09B9.3  | T09B9.3  | -0.0651671354645362   | AGIWUR17627 |
| N2                                                                                                                                                                    | CT | X | 9761483 | 9764922 | WBGene00011643 | slc-17.9 | T09B9.2  | -0.504872714003637    |             |
| AGIWUR19015                                                                                                                                                           |    |   |         |         |                |          |          |                       |             |
| N2                                                                                                                                                                    | CT | X | 9771697 | 9774352 | WBGene00011645 | T09B9.4  | T09B9.4  | -0.0714274411744711   | AGIWUR6173  |
| N2                                                                                                                                                                    | CT | X | 9777831 | 9780251 | WBGene00011646 | T09B9.5  | T09B9.5  | -0.22017171738        | AGIWUR31885 |
| N2                                                                                                                                                                    | CT | X | 9780375 | 9789275 | WBGene00009482 | F36G3.1  | F36G3.1  | -0.00307683275723925  |             |
| AGIWUR802;AGIWUR15540;AGIWUR16093;AGIWUR37210;AGIWUR42245;AGIWUR44981                                                                                                 |    |   |         |         |                |          |          |                       |             |
| N2                                                                                                                                                                    | CT | X | 9792407 | 9794273 | WBGene00009483 | F36G3.2  | F36G3.2  | -0.0383822883434455   |             |
| AGIWUR11079;AGIWUR15033;AGIWUR31455                                                                                                                                   |    |   |         |         |                |          |          |                       |             |
| N2                                                                                                                                                                    | CT | X | 9798839 | 9801038 | WBGene00009484 | F36G3.3  | F36G3.3  | 0.152710598816178     | AGIWUR26906 |
| N2                                                                                                                                                                    | CT | X | 9801091 | 9807662 | WBGene00009799 | lgc-47   | F47A4.1  | -0.0961499980241998   |             |
| AGIWUR528;AGIWUR6353;AGIWUR10171;AGIWUR29701                                                                                                                          |    |   |         |         |                |          |          |                       |             |
| N2                                                                                                                                                                    | CT | X | 9810202 | 9822273 | WBGene00001081 | dpy-22   | F47A4.2  | -0.000826864323634879 | AGIWUR4384  |
| N2                                                                                                                                                                    | CT | X | 9823752 | 9831249 | WBGene00009800 | rrc-1    | F47A4.3  | -0.16947235792289     | AGIWUR44440 |
| N2                                                                                                                                                                    | CT | X | 9833352 | 9838039 | WBGene00009801 | ipla-2   | F47A4.5  | 0.124936065689191     | AGIWUR8383  |
| N2                                                                                                                                                                    | CT | X | 9847275 | 9849518 | WBGene00006881 | vab-15   | R07B1.1  | -0.124697190810146    | AGIWUR21372 |
| N2                                                                                                                                                                    | CT | X | 9850209 | 9851375 | WBGene00002271 | lec-8    | R07B1.10 | 0.388295292848451     |             |
| AGIWUR25560                                                                                                                                                           |    |   |         |         |                |          |          |                       |             |
| N2                                                                                                                                                                    | CT | X | 9852139 | 9852909 | WBGene00002270 | lec-7    | R07B1.2  | -0.141496472912853    |             |
| AGIWUR5220;AGIWUR7200;AGIWUR12362;AGIWUR21935;AGIWUR22868;AGIWUR25023;AGIWUR25252;AGIWUR25319;AGIWUR27786;AGIWUR29709;AGIWUR37997;AGIWUR39507;AGIWUR43141;AGIWUR43727 |    |   |         |         |                |          |          |                       |             |
| N2                                                                                                                                                                    | CT | X | 9856918 | 9858083 | WBGene00011082 | R07B1.11 | R07B1.11 | -0.0842458630177418   |             |

|                                                                                                                        |    |   |          |          |                |          |          |                     |             |
|------------------------------------------------------------------------------------------------------------------------|----|---|----------|----------|----------------|----------|----------|---------------------|-------------|
| AGIWUR37912                                                                                                            |    |   |          |          |                |          |          |                     |             |
| N2                                                                                                                     | CT | X | 9858339  | 9861735  | WBGene00011076 | scav-5   | R07B1.3  | 0.208821839456423   | AGIWUR27332 |
| N2                                                                                                                     | CT | X | 9861646  | 9862960  | WBGene00001784 | gst-36   | R07B1.4  | 0.015636804487853   | AGIWUR21795 |
| N2                                                                                                                     | CT | X | 9864069  | 9866531  | WBGene00011077 | R07B1.5  | R07B1.5  | 0.047736558991005   | AGIWUR7300  |
| N2                                                                                                                     | CT | X | 9866660  | 9867921  | WBGene00011078 | R07B1.6  | R07B1.6  | 0.166544865697421   | AGIWUR39602 |
| N2                                                                                                                     | CT | X | 9869836  | 9870792  | WBGene00138711 | R07B1.13 | R07B1.13 | -0.270127832107827  |             |
| AGIWUR34623                                                                                                            |    |   |          |          |                |          |          |                     |             |
| N2                                                                                                                     | CT | X | 9870804  | 9872654  | WBGene00001608 | R07B1.8  | R07B1.8  | 0.223994137170612   | AGIWUR28705 |
| N2                                                                                                                     | CT | X | 9872884  | 9882212  | WBGene00011083 | glo-1    | R07B1.12 | 0.0613574719637118  |             |
| AGIWUR13929;AGIWUR23649;AGIWUR27945                                                                                    |    |   |          |          |                |          |          |                     |             |
| N2                                                                                                                     | CT | X | 9884278  | 9889704  | WBGene00003410 | mrp-4    | F21G4.2  | 0.242761888126715   | AGIWUR18807 |
| N2                                                                                                                     | CT | X | 9889618  | 9892328  | WBGene00009023 | F21G4.1  | F21G4.1  | -0.109429240999597  |             |
| AGIWUR23391;AGIWUR33969                                                                                                |    |   |          |          |                |          |          |                     |             |
| N2                                                                                                                     | CT | X | 9895144  | 9897057  | WBGene00009024 | F21G4.3  | F21G4.3  | 0.0511855050560026  | AGIWUR28779 |
| N2                                                                                                                     | CT | X | 9897313  | 9899476  | WBGene00009025 | phf-34   | F21G4.4  | -0.165798030828824  | AGIWUR3666  |
| N2                                                                                                                     | CT | X | 9906148  | 9908116  | WBGene00009026 | F21G4.5  | F21G4.5  | 0.280609041774569   | AGIWUR38645 |
| N2                                                                                                                     | CT | X | 9908794  | 9917448  | WBGene00009027 | F21G4.6  | F21G4.6  | -0.0417239919774506 | AGIWUR1469  |
| N2                                                                                                                     | CT | X | 9919302  | 9920346  | WBGene00007648 | folr-1   | C17G1.1  | 0.0823757437663986  | AGIWUR26776 |
| N2                                                                                                                     | CT | X | 9921557  | 9922843  | WBGene00007649 | C17G1.2  | C17G1.2  | -0.094987781278002  | AGIWUR25661 |
| N2                                                                                                                     | CT | X | 9922910  | 9925173  | WBGene00007650 | ugt-23   | C17G1.3  | -0.104798110881331  | AGIWUR28073 |
| N2                                                                                                                     | CT | X | 9925728  | 9931460  | WBGene00007651 | nra-3    | C17G1.4  | 0.102919074377098   | AGIWUR9330  |
| N2                                                                                                                     | CT | X | 9932371  | 9937133  | WBGene00023491 | tsp-21   | C17G1.8  | -0.270237559519529  | AGIWUR15686 |
| N2                                                                                                                     | CT | X | 9941630  | 9944838  | WBGene00007652 | C17G1.5  | C17G1.5  | 0.066074936897353   |             |
| AGIWUR28795;AGIWUR36756                                                                                                |    |   |          |          |                |          |          |                     |             |
| N2                                                                                                                     | CT | X | 9944844  | 9949060  | WBGene00003553 | nas-37   | C17G1.6  | -0.0121214672897487 | AGIWUR4277  |
| N2                                                                                                                     | CT | X | 9952579  | 9954533  | WBGene00007653 | cysl-1   | C17G1.7  | 0.112838741437713   | AGIWUR28040 |
| N2                                                                                                                     | CT | X | 9958899  | 9964747  | WBGene00013919 | ZC506.1  | ZC506.1  | 0.031780412476107   |             |
| AGIWUR8213;AGIWUR11908;AGIWUR12251;AGIWUR17485;AGIWUR19519;AGIWUR24133;AGIWUR24710;AGIWUR28753;AGIWUR35520;AGIWUR35766 |    |   |          |          |                |          |          |                     |             |
| N2                                                                                                                     | CT | X | 9965495  | 9968584  | WBGene00013920 | pssy-1   | ZC506.3  | 0.181585390053506   | AGIWUR5773  |
| N2                                                                                                                     | CT | X | 9968517  | 9976392  | WBGene00003232 | mg1-1    | ZC506.4  | -0.318985798999279  | AGIWUR6179  |
| N2                                                                                                                     | CT | X | 9982402  | 9985005  | WBGene00008954 | F19C6.5  | F19C6.5  | 0.0669041625383642  | AGIWUR12405 |
| N2                                                                                                                     | CT | X | 9991255  | 9999178  | WBGene00001708 | grk-1    | F19C6.1  | -0.113261282663201  |             |
| AGIWUR3423;AGIWUR6594;AGIWUR9252;AGIWUR19484;AGIWUR28775;AGIWUR30119;AGIWUR30987;AGIWUR31580;AGIWUR34424;AGIWUR36707   |    |   |          |          |                |          |          |                     |             |
| N2                                                                                                                     | CT | X | 10000935 | 10005408 | WBGene00008951 | F19C6.2  | F19C6.2  | -0.148785402966801  |             |
| AGIWUR14774;AGIWUR18317;AGIWUR21208;AGIWUR23874;AGIWUR24789;AGIWUR25351                                                |    |   |          |          |                |          |          |                     |             |
| N2                                                                                                                     | CT | X | 10005733 | 10008755 | WBGene00008952 | F19C6.3  | F19C6.3  | 0.0598819487607685  |             |
| AGIWUR9397                                                                                                             |    |   |          |          |                |          |          |                     |             |

|                                     |    |   |                                                                                                                                            |                        |                |          |           |                     |
|-------------------------------------|----|---|--------------------------------------------------------------------------------------------------------------------------------------------|------------------------|----------------|----------|-----------|---------------------|
| N2                                  | CT | X | 10015045                                                                                                                                   | 10018025               | WBGene00008953 | F19C6.4  | F19C6.4   | -0.0205934370331757 |
| AGIWUR11952;AGIWUR20470;AGIWUR31977 |    |   |                                                                                                                                            |                        |                |          |           |                     |
| N2                                  | CT | X | 10018046                                                                                                                                   | 10022304               | WBGene00009645 | F42G10.1 |           | F42G10.1            |
|                                     |    |   | -0.114889287260702                                                                                                                         | AGIWUR7303             |                |          |           |                     |
| N2                                  | CT | X | 10027856                                                                                                                                   | 10030130               | WBGene00003368 | mkk-4    | F42G10.2  |                     |
|                                     |    |   | -0.107774106846768                                                                                                                         | AGIWUR7431;AGIWUR19589 |                |          |           |                     |
| N2                                  | CT | X | 10031088                                                                                                                                   | 10033283               | WBGene00012162 | sek-6    | VZC374L.1 |                     |
|                                     |    |   | -0.0254127920059064                                                                                                                        | AGIWUR30961            |                |          |           |                     |
| N2                                  | CT | X | 10034836                                                                                                                                   | 10047417               | WBGene00013872 | ZC374.2  | ZC374.2   | 0.270209289021029   |
|                                     |    |   | AGIWUR28487                                                                                                                                |                        |                |          |           |                     |
| N2                                  | CT | X | 10049460                                                                                                                                   | 10052481               | WBGene00013871 | gnrr-3   | ZC374.1   | -0.204868107177748  |
|                                     |    |   | AGIWUR25668                                                                                                                                |                        |                |          |           |                     |
| N2                                  | CT | X | 10054281                                                                                                                                   | 10057524               | WBGene00013866 | cbs-1    | ZC373.1   | -0.133230021583621  |
|                                     |    |   | AGIWUR2325                                                                                                                                 |                        |                |          |           |                     |
| N2                                  | CT | X | 10057925                                                                                                                                   | 10058437               | WBGene00013867 | ZC373.2  | ZC373.2   |                     |
|                                     |    |   | -0.00879110788513771                                                                                                                       | AGIWUR24519            |                |          |           |                     |
| N2                                  | CT | X | 10060525                                                                                                                                   | 10061681               | WBGene00013868 | ZC373.3  | ZC373.3   | 0.0421882076066282  |
|                                     |    |   | AGIWUR8982                                                                                                                                 |                        |                |          |           |                     |
| N2                                  | CT | X | 10062451                                                                                                                                   | 10069783               | WBGene00013869 | mlck-1   | ZC373.4   | -0.0790385212657441 |
|                                     |    |   | AGIWUR28216                                                                                                                                |                        |                |          |           |                     |
| N2                                  | CT | X | 10072507                                                                                                                                   | 10074391               | WBGene00013870 | ZC373.5  | ZC373.5   | -0.198947635904817  |
|                                     |    |   | AGIWUR835;AGIWUR27101;AGIWUR42518;AGIWUR42861                                                                                              |                        |                |          |           |                     |
| N2                                  | CT | X | 10075288                                                                                                                                   | 10076357               | WBGene00000930 | dao-4    | ZC373.6   | -0.0627669960247932 |
|                                     |    |   | AGIWUR28509                                                                                                                                |                        |                |          |           |                     |
| N2                                  | CT | X | 10084627                                                                                                                                   | 10104252               | WBGene00012326 | W07E11.1 |           | W07E11.1            |
|                                     |    |   | 0.00222197472407526                                                                                                                        | AGIWUR4175;AGIWUR11508 |                |          |           |                     |
| N2                                  | CT | X | 10104612                                                                                                                                   | 10125483               | WBGene00006792 | unc-58   | T06H11.1  |                     |
|                                     |    |   | -0.0865027157848575                                                                                                                        | AGIWUR26360            |                |          |           |                     |
| N2                                  | CT | X | 10129588                                                                                                                                   | 10130267               | WBGene00011552 | T06H11.2 |           | T06H11.2            |
|                                     |    |   | -0.153702875840276                                                                                                                         | AGIWUR38332            |                |          |           |                     |
| N2                                  | CT | X | 10136129                                                                                                                                   | 10138620               | WBGene00003384 | moc-1    | T06H11.4  |                     |
|                                     |    |   | -0.0154476128592904                                                                                                                        | AGIWUR25632            |                |          |           |                     |
| N2                                  | CT | X | 10139374                                                                                                                                   | 10142013               | WBGene00008602 | oac-14   | F09B9.1   | 0.15026293904335    |
|                                     |    |   | AGIWUR6547;AGIWUR23375;AGIWUR30796;AGIWUR39301                                                                                             |                        |                |          |           |                     |
| N2                                  | CT | X | 10146889                                                                                                                                   | 10153142               | WBGene00006839 | unc-115  | F09B9.2   | 0.0942645095994656  |
|                                     |    |   | AGIWUR531;AGIWUR1683;AGIWUR2406;AGIWUR8737;AGIWUR14699;AGIWUR17750;AGIWUR18007;AGIWUR32621;AGIWUR35554;AGIWUR37555;AGIWUR37856;AGIWUR38833 |                        |                |          |           |                     |
| N2                                  | CT | X | 10154821                                                                                                                                   | 10156856               | WBGene00008604 | F09B9.5  | F09B9.5   | -0.154858419000615  |
|                                     |    |   | AGIWUR13866;AGIWUR15513;AGIWUR24575                                                                                                        |                        |                |          |           |                     |



|                                                                                          |    |   |          |          |                |          |          |                     |
|------------------------------------------------------------------------------------------|----|---|----------|----------|----------------|----------|----------|---------------------|
| N2                                                                                       | CT | X | 10156858 | 10160438 | WBGene00001331 | erd-2    | F09B9.3  | -0.06342297214346   |
| AGIWUR12862                                                                              |    |   |          |          |                |          |          |                     |
| N2                                                                                       | CT | X | 10160631 | 10161809 | WBGene00008603 | F09B9.4  | F09B9.4  | 0.0863963137290717  |
| AGIWUR18927                                                                              |    |   |          |          |                |          |          |                     |
| N2                                                                                       | CT | X | 10167096 | 10171668 | WBGene00007396 | tiar-3   | C07A4.1  | -0.0637146887498812 |
| AGIWUR7064                                                                               |    |   |          |          |                |          |          |                     |
| N2                                                                                       | CT | X | 10172326 | 10174185 | WBGene00007397 | C07A4.2  | C07A4.2  | -0.24196358518197   |
| AGIWUR12417                                                                              |    |   |          |          |                |          |          |                     |
| N2                                                                                       | CT | X | 10174985 | 10175896 | WBGene00007398 | C07A4.3  | C07A4.3  | -0.0579111656124205 |
| AGIWUR13464                                                                              |    |   |          |          |                |          |          |                     |
| N2                                                                                       | CT | X | 10177237 | 10180662 | WBGene00008998 | ncs-4    | F21A10.1 |                     |
| -0.133478645821961 AGIWUR31188                                                           |    |   |          |          |                |          |          |                     |
| N2                                                                                       | CT | X | 10180953 | 10194377 | WBGene00008999 | myrf-2   | F21A10.2 |                     |
| 0.153604469873335 AGIWUR8406;AGIWUR20315;AGIWUR22227;AGIWUR36013;AGIWUR42903;AGIWUR43892 |    |   |          |          |                |          |          |                     |
| N2                                                                                       | CT | X | 10197706 | 10200407 | WBGene00009674 | nucb-1   | F44A6.1  | 0.0738726684961186  |
| AGIWUR17889;AGIWUR21581                                                                  |    |   |          |          |                |          |          |                     |
| N2                                                                                       | CT | X | 10201329 | 10205433 | WBGene00004786 | sex-1    | F44A6.2  | 0.0327091614550845  |
| AGIWUR14694;AGIWUR24896;AGIWUR30249                                                      |    |   |          |          |                |          |          |                     |
| N2                                                                                       | CT | X | 10212771 | 10214165 | WBGene00009675 | F44A6.3  | F44A6.3  | 0.0205818295224329  |
| AGIWUR25082                                                                              |    |   |          |          |                |          |          |                     |
| N2                                                                                       | CT | X | 10214443 | 10215495 | WBGene00009676 | F44A6.4  | F44A6.4  | -0.0737333878438733 |
| AGIWUR34767                                                                              |    |   |          |          |                |          |          |                     |
| N2                                                                                       | CT | X | 10217310 | 10218760 | WBGene00009677 | F44A6.5  | F44A6.5  | -0.377258806999496  |
| AGIWUR29850                                                                              |    |   |          |          |                |          |          |                     |
| N2                                                                                       | CT | X | 10220644 | 10228137 | WBGene00007593 | C14H10.3 | C14H10.3 |                     |
| -0.00494029887396152 AGIWUR41483                                                         |    |   |          |          |                |          |          |                     |
| N2                                                                                       | CT | X | 10233739 | 10236944 | WBGene00007591 | zipt-13  | C14H10.1 |                     |
| 0.0886077161025014 AGIWUR24523                                                           |    |   |          |          |                |          |          |                     |
| N2                                                                                       | CT | X | 10239805 | 10241039 | WBGene00006135 | str-74   | C14H10.4 |                     |
| 0.256738994521147 AGIWUR42696                                                            |    |   |          |          |                |          |          |                     |
| N2                                                                                       | CT | X | 10242325 | 10252879 | WBGene00007592 | C14H10.2 | C14H10.2 |                     |
| 0.201427021486952 AGIWUR33394                                                            |    |   |          |          |                |          |          |                     |
| N2                                                                                       | CT | X | 10258733 | 10260135 | WBGene00007861 | C32A9.1  | C32A9.1  | -0.086681547250544  |
| AGIWUR8449;AGIWUR16047;AGIWUR35637                                                       |    |   |          |          |                |          |          |                     |
| N2                                                                                       | CT | X | 10273692 | 10278261 | WBGene00009618 | F41E7.2  | F41E7.2  | 0.0813545389419534  |
| AGIWUR12392;AGIWUR25610;AGIWUR37597                                                      |    |   |          |          |                |          |          |                     |
| N2                                                                                       | CT | X | 10279599 | 10282842 | WBGene00009617 | F41E7.1  | F41E7.1  | 0.0275665737008843  |
| AGIWUR907                                                                                |    |   |          |          |                |          |          |                     |
| N2                                                                                       | CT | X | 10282825 | 10285734 | WBGene00009619 | npr-6    | F41E7.3  | -0.130060994137615  |



|                                                                                    |    |   |          |          |                |          |          |                     |
|------------------------------------------------------------------------------------|----|---|----------|----------|----------------|----------|----------|---------------------|
| N2                                                                                 | CT | X | 10412725 | 10416630 | WBGene00000047 | acr-8    | ZC504.2  | 0.0788225236468172  |
| AGIWUR5108                                                                         |    |   |          |          |                |          |          |                     |
| N2                                                                                 | CT | X | 10416639 | 10419764 | WBGene00013917 | cdk-11.2 | ZC504.3  |                     |
| -0.17168190351668 AGIWUR41614                                                      |    |   |          |          |                |          |          |                     |
| N2                                                                                 | CT | X | 10421655 | 10428650 | WBGene00003247 | mig-15   | ZC504.4  | 0.0772918945288588  |
| AGIWUR3064;AGIWUR23047;AGIWUR34681;AGIWUR36617;AGIWUR37004;AGIWUR40485;AGIWUR41703 |    |   |          |          |                |          |          |                     |
| N2                                                                                 | CT | X | 10444169 | 10444674 | WBGene00008023 | C39B10.3 | C39B10.3 |                     |
| -0.0821675539526332 AGIWUR10562                                                    |    |   |          |          |                |          |          |                     |
| N2                                                                                 | CT | X | 10447351 | 10447755 | WBGene00008025 | C39B10.5 | C39B10.5 |                     |
| -0.248700451004641 AGIWUR17118                                                     |    |   |          |          |                |          |          |                     |
| N2                                                                                 | CT | X | 10454309 | 10460341 | WBGene00008022 | lgc-41   | C39B10.2 |                     |
| -0.0721033513376472 AGIWUR7852;AGIWUR20309;AGIWUR22317                             |    |   |          |          |                |          |          |                     |
| N2                                                                                 | CT | X | 10460546 | 10463580 | WBGene00008021 | C39B10.1 | C39B10.1 |                     |
| 0.0611277753426496 AGIWUR34897                                                     |    |   |          |          |                |          |          |                     |
| N2                                                                                 | CT | X | 10475527 | 10475959 | WBGene00001252 | elt-4    | C39B10.6 |                     |
| 0.0187351947080119 AGIWUR17014                                                     |    |   |          |          |                |          |          |                     |
| N2                                                                                 | CT | X | 10481240 | 10483446 | WBGene00001250 | elt-2    | C33D3.1  | 0.542787343306617   |
| AGIWUR16561                                                                        |    |   |          |          |                |          |          |                     |
| N2                                                                                 | CT | X | 10485350 | 10486757 | WBGene00007894 | C33D3.3  | C33D3.3  | -0.105283852538109  |
| AGIWUR33607                                                                        |    |   |          |          |                |          |          |                     |
| N2                                                                                 | CT | X | 10489063 | 10489821 | WBGene00007895 | C33D3.4  | C33D3.4  |                     |
| -0.00157193731420513 AGIWUR29590                                                   |    |   |          |          |                |          |          |                     |
| N2                                                                                 | CT | X | 10491344 | 10497264 | WBGene00007896 | C33D3.5  | C33D3.5  | 0.0824935068837718  |
| AGIWUR7459                                                                         |    |   |          |          |                |          |          |                     |
| N2                                                                                 | CT | X | 10505988 | 10519563 | WBGene00006870 | vab-3    | F14F3.1  | 0.196684332547172   |
| AGIWUR12076;AGIWUR40464                                                            |    |   |          |          |                |          |          |                     |
| N2                                                                                 | CT | X | 10520817 | 10521464 | WBGene00008807 | F14F3.4  | F14F3.4  | -0.341754188815276  |
| AGIWUR31682                                                                        |    |   |          |          |                |          |          |                     |
| N2                                                                                 | CT | X | 10521806 | 10524565 | WBGene00008806 | mboa-7   | F14F3.3  |                     |
| -0.00263101276198086 AGIWUR17910                                                   |    |   |          |          |                |          |          |                     |
| N2                                                                                 | CT | X | 10529294 | 10532677 | WBGene00010340 | slcf-1   | F59F5.1  | -0.529787463548724  |
| AGIWUR21115                                                                        |    |   |          |          |                |          |          |                     |
| N2                                                                                 | CT | X | 10533699 | 10537114 | WBGene00010341 | glo-3    | F59F5.2  | -0.113500704598005  |
| AGIWUR8372;AGIWUR13035                                                             |    |   |          |          |                |          |          |                     |
| N2                                                                                 | CT | X | 10537141 | 10542423 | WBGene00010342 | F59F5.3  | F59F5.3  | -0.0128749646429096 |
| AGIWUR4860                                                                         |    |   |          |          |                |          |          |                     |
| N2                                                                                 | CT | X | 10543042 | 10543410 | WBGene00010343 | F59F5.4  | F59F5.4  | -0.466912391211725  |
| AGIWUR21219                                                                        |    |   |          |          |                |          |          |                     |
| N2                                                                                 | CT | X | 10546062 | 10548962 | WBGene00010344 | F59F5.5  | F59F5.5  | -0.116569994315543  |

|                                                           |    |   |          |          |                |         |         |                     |
|-----------------------------------------------------------|----|---|----------|----------|----------------|---------|---------|---------------------|
| AGIWUR26280;AGIWUR29271;AGIWUR42979                       |    |   |          |          |                |         |         |                     |
| N2                                                        | CT | X | 10549123 | 10555239 | WBGene00006364 | syd-2   | F59F5.6 | -0.118623520646569  |
| AGIWUR15662                                               |    |   |          |          |                |         |         |                     |
| N2                                                        | CT | X | 10559503 | 10566668 | WBGene00010345 | F59F5.7 | F59F5.7 | -0.200608763908811  |
| AGIWUR27353                                               |    |   |          |          |                |         |         |                     |
| N2                                                        | CT | X | 10569273 | 10575718 | WBGene00010199 | bet-2   | F57C7.1 | 0.0175452532355145  |
| AGIWUR1403;AGIWUR28323;AGIWUR41548                        |    |   |          |          |                |         |         |                     |
| N2                                                        | CT | X | 10576960 | 10581054 | WBGene00003733 | nhx-5   | F57C7.2 | 0.031769824023776   |
| AGIWUR6590                                                |    |   |          |          |                |         |         |                     |
| N2                                                        | CT | X | 10581062 | 10589538 | WBGene00010200 | F57C7.4 | F57C7.4 | 0.0539360303062089  |
| AGIWUR2002;AGIWUR10895;AGIWUR23278;AGIWUR24655            |    |   |          |          |                |         |         |                     |
| N2                                                        | CT | X | 10589780 | 10593334 | WBGene00004749 | sdn-1   | F57C7.3 | 0.110913382344877   |
| AGIWUR10022;AGIWUR15527                                   |    |   |          |          |                |         |         |                     |
| N2                                                        | CT | X | 10604686 | 10605828 | WBGene00001462 | flp-19  | M79.4   | -0.100963611847677  |
| AGIWUR2445                                                |    |   |          |          |                |         |         |                     |
| N2                                                        | CT | X | 10605832 | 10624185 | WBGene00000018 | abl-1   | M79.1   | -0.190769046739657  |
| AGIWUR5979                                                |    |   |          |          |                |         |         |                     |
| N2                                                        | CT | X | 10626518 | 10628807 | WBGene00010902 | M79.2   | M79.2   | -0.0997499612216917 |
| AGIWUR502;AGIWUR38051                                     |    |   |          |          |                |         |         |                     |
| N2                                                        | CT | X | 10644409 | 10666874 | WBGene00000908 | daf-12  | F11A1.3 | -0.0890755062369282 |
| AGIWUR11162;AGIWUR39761;AGIWUR45021                       |    |   |          |          |                |         |         |                     |
| N2                                                        | CT | X | 10668280 | 10674293 | WBGene00008746 | F13E6.2 | F13E6.2 | 0.124600901880949   |
| AGIWUR25415                                               |    |   |          |          |                |         |         |                     |
| N2                                                        | CT | X | 10675706 | 10677109 | WBGene00008745 | F13E6.1 | F13E6.1 | 0.00225115788211383 |
| AGIWUR32239                                               |    |   |          |          |                |         |         |                     |
| N2                                                        | CT | X | 10681998 | 10682963 | WBGene00008747 | phf-31  | F13E6.3 | -0.172824554768962  |
| AGIWUR20577                                               |    |   |          |          |                |         |         |                     |
| N2                                                        | CT | X | 10691943 | 10694461 | WBGene00008748 | yap-1   | F13E6.4 | 0.0304570029261129  |
| AGIWUR873;AGIWUR11673;AGIWUR18252;AGIWUR23825;AGIWUR32484 |    |   |          |          |                |         |         |                     |
| N2                                                        | CT | X | 10695312 | 10697894 | WBGene00008749 | F13E6.5 | F13E6.5 | -0.190340578818166  |
| AGIWUR22704                                               |    |   |          |          |                |         |         |                     |
| N2                                                        | CT | X | 10697854 | 10711869 | WBGene00006468 | rhgf-1  | F13E6.6 | 0.106605212187944   |
| AGIWUR32532                                               |    |   |          |          |                |         |         |                     |
| N2                                                        | CT | X | 10716318 | 10717173 | WBGene00011317 | T01C1.4 | T01C1.4 | -0.207007897528339  |
| AGIWUR36558                                               |    |   |          |          |                |         |         |                     |
| N2                                                        | CT | X | 10719554 | 10722054 | WBGene00011315 | mbr-1   | T01C1.2 | 0.0777482398611942  |
| AGIWUR17126;AGIWUR42959                                   |    |   |          |          |                |         |         |                     |
| N2                                                        | CT | X | 10734326 | 10744355 | WBGene00001202 | egl-36  | R07A4.1 | 0.0783140101201845  |
| AGIWUR14098                                               |    |   |          |          |                |         |         |                     |

|                                                                                                            |    |   |          |          |                |          |          |                     |
|------------------------------------------------------------------------------------------------------------|----|---|----------|----------|----------------|----------|----------|---------------------|
| N2                                                                                                         | CT | X | 10744356 | 10746488 | WBGene00011073 | R07A4.2  | R07A4.2  | 0.297806365920088   |
| AGIWUR21532                                                                                                |    |   |          |          |                |          |          |                     |
| N2                                                                                                         | CT | X | 10751666 | 10757708 | WBGene00011075 | R07A4.4  | R07A4.4  | -0.153990712801166  |
| AGIWUR16492                                                                                                |    |   |          |          |                |          |          |                     |
| N2                                                                                                         | CT | X | 10754917 | 10758140 | WBGene00011074 | R07A4.3  | R07A4.3  | 0.471291833826497   |
| AGIWUR35068                                                                                                |    |   |          |          |                |          |          |                     |
| N2                                                                                                         | CT | X | 10769288 | 10782973 | WBGene00004862 | sma-9    | T05A10.1 |                     |
| 0.0769665412633582                                                                                         |    |   |          |          |                |          |          |                     |
| AGIWUR7667;AGIWUR8425;AGIWUR17994;AGIWUR18754;AGIWUR19109;AGIWUR26054;AGIWUR34116;AGIWUR34810;AGIWUR44751  |    |   |          |          |                |          |          |                     |
| N2                                                                                                         | CT | X | 10782996 | 10783907 | WBGene00000525 | clc-4    | T05A10.2 |                     |
| -0.211643840464042                                                                                         |    |   |          |          |                |          |          |                     |
| N2                                                                                                         | CT | X | 10787503 | 10789700 | WBGene00011460 | ttr-14   | T05A10.3 |                     |
| 0.219018826976036                                                                                          |    |   |          |          |                |          |          |                     |
| AGIWUR7785;AGIWUR26286;AGIWUR27583;AGIWUR27923;AGIWUR30927;AGIWUR33316;AGIWUR35945;AGIWUR42650;AGIWUR43068 |    |   |          |          |                |          |          |                     |
| N2                                                                                                         | CT | X | 10789628 | 10792535 | WBGene00011462 | vap-2    | T05A10.5 |                     |
| 0.168896438824918                                                                                          |    |   |          |          |                |          |          |                     |
| N2                                                                                                         | CT | X | 10792903 | 10794734 | WBGene00011463 | T05A10.6 | T05A10.6 |                     |
| -0.135037299056139                                                                                         |    |   |          |          |                |          |          |                     |
| N2                                                                                                         | CT | X | 10794852 | 10815004 | WBGene00004036 | plc-1    | F31B12.1 |                     |
| 0.0501713143242011                                                                                         |    |   |          |          |                |          |          |                     |
| N2                                                                                                         | CT | X | 10816968 | 10838650 | WBGene00001495 | frm-9    | F31B12.3 |                     |
| 0.186359556380744                                                                                          |    |   |          |          |                |          |          |                     |
| N2                                                                                                         | CT | X | 10842658 | 10844674 | WBGene00007317 | C05A9.2  | C05A9.2  | -0.21715172120782   |
| AGIWUR7259                                                                                                 |    |   |          |          |                |          |          |                     |
| N2                                                                                                         | CT | X | 10854320 | 10859297 | WBGene00003999 | pgp-5    | C05A9.1  | -0.121329998259386  |
| AGIWUR16649;AGIWUR20377;AGIWUR39244                                                                        |    |   |          |          |                |          |          |                     |
| N2                                                                                                         | CT | X | 10859351 | 10864422 | WBGene00004002 | pgp-8    | T21E8.3  | 0.100849012581329   |
| AGIWUR37678                                                                                                |    |   |          |          |                |          |          |                     |
| N2                                                                                                         | CT | X | 10871181 | 10877465 | WBGene00004000 | pgp-6    | T21E8.1  | 0.831937487557092   |
| AGIWUR27854                                                                                                |    |   |          |          |                |          |          |                     |
| N2                                                                                                         | CT | X | 10883567 | 10884508 | WBGene00164972 | T21E8.7  | T21E8.7  | 0.124579414121007   |
| AGIWUR1323                                                                                                 |    |   |          |          |                |          |          |                     |
| N2                                                                                                         | CT | X | 10886278 | 10887052 | WBGene00011903 | T21E8.5  | T21E8.5  | -0.0128790051593803 |
| AGIWUR38749                                                                                                |    |   |          |          |                |          |          |                     |
| N2                                                                                                         | CT | X | 10888506 | 10889028 | WBGene00009817 | F47B10.6 | F47B10.6 |                     |
| 0.0771213938398452                                                                                         |    |   |          |          |                |          |          |                     |
| N2                                                                                                         | CT | X | 10889041 | 10890556 | WBGene00009816 | F47B10.5 | F47B10.5 |                     |
| -0.137379870449893                                                                                         |    |   |          |          |                |          |          |                     |
| N2                                                                                                         | CT | X | 10891295 | 10891707 | WBGene00009815 | F47B10.4 | F47B10.4 |                     |
| AGIWUR1819;AGIWUR3353;AGIWUR3360;AGIWUR9921;AGIWUR11152;AGIWUR16718                                        |    |   |          |          |                |          |          |                     |

|                                                                                              |                                                             |          |                |          |          |                    |
|----------------------------------------------------------------------------------------------|-------------------------------------------------------------|----------|----------------|----------|----------|--------------------|
| -0.162199697077334                                                                           | AGIWUR4612                                                  |          |                |          |          |                    |
| N2 CT X                                                                                      | 10892190                                                    | 10893569 | WBGene00009814 | F47B10.3 | F47B10.3 |                    |
| 0.22688543140964                                                                             | AGIWUR42103                                                 |          |                |          |          |                    |
| N2 CT X                                                                                      | 10893567                                                    | 10896598 | WBGene00009813 | haly-1   | F47B10.2 |                    |
| 0.249053740082529                                                                            | AGIWUR18039;AGIWUR18232;AGIWUR21187;AGIWUR30251;AGIWUR42699 |          |                |          |          |                    |
| N2 CT X                                                                                      | 10897678                                                    | 10900114 | WBGene00009812 | suca-1   | F47B10.1 |                    |
| 0.438201019760564                                                                            |                                                             |          |                |          |          |                    |
| AGIWUR2889;AGIWUR3616;AGIWUR8658;AGIWUR11415;AGIWUR11812;AGIWUR16981;AGIWUR23660;AGIWUR26155 |                                                             |          |                |          |          |                    |
| N2 CT X                                                                                      | 10903278                                                    | 10905107 | WBGene00009818 | acbp-3   | F47B10.7 |                    |
| 0.00671927026737151                                                                          | AGIWUR21895                                                 |          |                |          |          |                    |
| N2 CT X                                                                                      | 10905181                                                    | 10910768 | WBGene00009819 | F47B10.8 | F47B10.8 |                    |
| 0.0375864512900668                                                                           | AGIWUR25552                                                 |          |                |          |          |                    |
| N2 CT X                                                                                      | 10912118                                                    | 10914081 | WBGene00009820 | F47B10.9 | F47B10.9 |                    |
| 0.0920420688676695                                                                           | AGIWUR3929;AGIWUR11878;AGIWUR12314;AGIWUR32006              |          |                |          |          |                    |
| N2 CT X                                                                                      | 10916765                                                    | 10920013 | WBGene00011882 | nstp-9   | T21B6.5  | -0.604467131654703 |
| AGIWUR28758                                                                                  |                                                             |          |                |          |          |                    |
| N2 CT X                                                                                      | 10920533                                                    | 10928998 | WBGene00009861 | dgn-1    | T21B6.1  | 0.069442865886411  |
| AGIWUR5992;AGIWUR6010;AGIWUR9266;AGIWUR31210;AGIWUR32355;AGIWUR39633                         |                                                             |          |                |          |          |                    |
| N2 CT X                                                                                      | 10938197                                                    | 10941355 | WBGene00011879 | pho-7    | T21B6.2  | -0.183877236567893 |
| AGIWUR9383                                                                                   |                                                             |          |                |          |          |                    |
| N2 CT X                                                                                      | 10945160                                                    | 10948970 | WBGene00011880 | T21B6.3  | T21B6.3  | -0.19917663292089  |
| AGIWUR12433                                                                                  |                                                             |          |                |          |          |                    |
| N2 CT X                                                                                      | 10950708                                                    | 10951393 | WBGene00010717 | K09C8.7  | K09C8.7  | 0.226817721613264  |
| AGIWUR37457                                                                                  |                                                             |          |                |          |          |                    |
| N2 CT X                                                                                      | 10954134                                                    | 10958236 | WBGene00003943 | pbo-4    | K09C8.1  | 0.185903353846314  |
| AGIWUR5694;AGIWUR21821                                                                       |                                                             |          |                |          |          |                    |
| N2 CT X                                                                                      | 10958761                                                    | 10959178 | WBGene00003757 | nlp-19   | K09C8.6  | -0.314881770843951 |
| AGIWUR20445                                                                                  |                                                             |          |                |          |          |                    |
| N2 CT X                                                                                      | 10959568                                                    | 10960937 | WBGene00010715 | K09C8.2  | K09C8.2  | -0.346871602384093 |
| AGIWUR14659                                                                                  |                                                             |          |                |          |          |                    |
| N2 CT X                                                                                      | 10960982                                                    | 10964725 | WBGene00003529 | nas-10   | K09C8.3  | -0.552885561560579 |
| AGIWUR21993                                                                                  |                                                             |          |                |          |          |                    |
| N2 CT X                                                                                      | 10966551                                                    | 10969898 | WBGene00010716 | lge-1    | K09C8.4  | -0.222114285915599 |
| AGIWUR23818                                                                                  |                                                             |          |                |          |          |                    |
| N2 CT X                                                                                      | 10970963                                                    | 10972107 | WBGene00010718 | K09C8.8  | K09C8.8  | -0.451825953929847 |
| AGIWUR18755                                                                                  |                                                             |          |                |          |          |                    |
| N2 CT X                                                                                      | 10972172                                                    | 10979265 | WBGene00004257 | pxn-2    | K09C8.5  | 0.0926676833645725 |
| AGIWUR22501                                                                                  |                                                             |          |                |          |          |                    |
| N2 CT X                                                                                      | 10982351                                                    | 10987928 | WBGene00006897 | ver-4    | F59F3.5  | 0.474079493992689  |

|                                                                                                                                                                                                            |    |   |          |          |                |          |          |                     |  |
|------------------------------------------------------------------------------------------------------------------------------------------------------------------------------------------------------------|----|---|----------|----------|----------------|----------|----------|---------------------|--|
| AGIWUR40866                                                                                                                                                                                                |    |   |          |          |                |          |          |                     |  |
| N2                                                                                                                                                                                                         | CT | X | 10992483 | 10997846 | WBGene00006896 | ver-3    | F59F3.1  | -0.132740574759076  |  |
| AGIWUR5042;AGIWUR8537;AGIWUR18078;AGIWUR18120;AGIWUR18428;AGIWUR22182;AGIWUR33911;AGIWUR34669;AGIWUR39163;AGIWUR39571;AGIWUR44850                                                                          |    |   |          |          |                |          |          |                     |  |
| N2                                                                                                                                                                                                         | CT | X | 10998004 | 10999276 | WBGene00010335 | F59F3.6  | F59F3.6  | -0.0194853482681019 |  |
| AGIWUR13384                                                                                                                                                                                                |    |   |          |          |                |          |          |                     |  |
| N2                                                                                                                                                                                                         | CT | X | 10999742 | 11001850 | WBGene00000750 | col-177  | F59F3.2  |                     |  |
| -0.00364393198172408 AGIWUR10969                                                                                                                                                                           |    |   |          |          |                |          |          |                     |  |
| N2                                                                                                                                                                                                         | CT | X | 11004984 | 11008181 | WBGene00010334 | del-5    | F59F3.4  | -0.0093063461659959 |  |
| AGIWUR36770                                                                                                                                                                                                |    |   |          |          |                |          |          |                     |  |
| N2                                                                                                                                                                                                         | CT | X | 11008266 | 11009070 | WBGene00010225 | ttr-31   | F58A3.5  | 0.10334550242607    |  |
| AGIWUR22294                                                                                                                                                                                                |    |   |          |          |                |          |          |                     |  |
| N2                                                                                                                                                                                                         | CT | X | 11009558 | 11010640 | WBGene00010224 | F58A3.4  | F58A3.4  | 0.128417808569312   |  |
| AGIWUR33904                                                                                                                                                                                                |    |   |          |          |                |          |          |                     |  |
| N2                                                                                                                                                                                                         | CT | X | 11012662 | 11014412 | WBGene00010223 | F58A3.3  | F58A3.3  | 0.0781827292863468  |  |
| AGIWUR21004                                                                                                                                                                                                |    |   |          |          |                |          |          |                     |  |
| N2                                                                                                                                                                                                         | CT | X | 11016410 | 11023421 | WBGene00001184 | egl-15   | F58A3.2  | -0.13300124369386   |  |
| AGIWUR2025;AGIWUR14387;AGIWUR17579;AGIWUR18150;AGIWUR22661;AGIWUR22831;AGIWUR23615;AGIWUR26322;AGIWUR26361;AGIWUR28249;AGIWUR28413;AGIWUR33328;AGIWUR34362;AGIWUR35573;AGIWUR38056;AGIWUR39477;AGIWUR40101 |    |   |          |          |                |          |          |                     |  |
| N2                                                                                                                                                                                                         | CT | X | 11028917 | 11040612 | WBGene00002261 | ldb-1    | F58A3.1  | 0.00489969366427001 |  |
| AGIWUR12215;AGIWUR18780;AGIWUR20417;AGIWUR26587;AGIWUR32684;AGIWUR42410                                                                                                                                    |    |   |          |          |                |          |          |                     |  |
| N2                                                                                                                                                                                                         | CT | X | 11041032 | 11042877 | WBGene00007483 | C09F12.3 |          | C09F12.3            |  |
| 0.074735087516558 AGIWUR12921                                                                                                                                                                              |    |   |          |          |                |          |          |                     |  |
| N2                                                                                                                                                                                                         | CT | X | 11047446 | 11049271 | WBGene00000522 | clc-1    | C09F12.1 |                     |  |
| -0.0321317843764817 AGIWUR37251                                                                                                                                                                            |    |   |          |          |                |          |          |                     |  |
| N2                                                                                                                                                                                                         | CT | X | 11053915 | 11056970 | WBGene00007482 | C09F12.2 |          | C09F12.2            |  |
| 0.464605974794736 AGIWUR5748                                                                                                                                                                               |    |   |          |          |                |          |          |                     |  |
| N2                                                                                                                                                                                                         | CT | X | 11057401 | 11059794 | WBGene00012261 | lpr-3    | W04G3.8  | -0.364567082273869  |  |
| AGIWUR11517                                                                                                                                                                                                |    |   |          |          |                |          |          |                     |  |
| N2                                                                                                                                                                                                         | CT | X | 11059994 | 11061868 | WBGene00012255 | lpr-6    | W04G3.1  | -0.316399000132926  |  |
| AGIWUR6825                                                                                                                                                                                                 |    |   |          |          |                |          |          |                     |  |
| N2                                                                                                                                                                                                         | CT | X | 11062132 | 11064539 | WBGene00012256 | lpr-5    | W04G3.2  | -0.178320130607128  |  |
| AGIWUR12969;AGIWUR25508                                                                                                                                                                                    |    |   |          |          |                |          |          |                     |  |
| N2                                                                                                                                                                                                         | CT | X | 11065133 | 11066811 | WBGene00012257 | lpr-4    | W04G3.3  | -0.851677738187808  |  |
| AGIWUR5276                                                                                                                                                                                                 |    |   |          |          |                |          |          |                     |  |
| N2                                                                                                                                                                                                         | CT | X | 11068527 | 11071925 | WBGene00000166 | apt-9    | W04G3.4  | 0.159034188708122   |  |
| AGIWUR18454                                                                                                                                                                                                |    |   |          |          |                |          |          |                     |  |
| N2                                                                                                                                                                                                         | CT | X | 11076182 | 11076767 | WBGene00044151 | W04G3.12 |          | W04G3.12            |  |
| -0.148350170899996 AGIWUR19796;AGIWUR23344;AGIWUR40941;AGIWUR43619                                                                                                                                         |    |   |          |          |                |          |          |                     |  |

|                                                                                                                       |    |   |          |          |                |          |                             |
|-----------------------------------------------------------------------------------------------------------------------|----|---|----------|----------|----------------|----------|-----------------------------|
| N2                                                                                                                    | CT | X | 11077772 | 11078243 | WBGene00044152 | W04G3.10 | W04G3.10                    |
| -0.106720532828762 AGIWUR9600;AGIWUR14595;AGIWUR20255;AGIWUR39365                                                     |    |   |          |          |                |          |                             |
| N2                                                                                                                    | CT | X | 11080678 | 11087474 | WBGene00012259 | sulp-7   | W04G3.6 0.0372814166040865  |
| AGIWUR14526;AGIWUR17899;AGIWUR25281;AGIWUR25544;AGIWUR43216                                                           |    |   |          |          |                |          |                             |
| N2                                                                                                                    | CT | X | 11089243 | 11090679 | WBGene00044153 | W04G3.11 | W04G3.11                    |
| -0.0436132079517133 AGIWUR7780;AGIWUR10269;AGIWUR27223;AGIWUR30755;AGIWUR42818                                        |    |   |          |          |                |          |                             |
| N2                                                                                                                    | CT | X | 11096158 | 11096935 | WBGene00012218 | W02H3.2  | W02H3.2 -0.0593912038546485 |
| AGIWUR16182                                                                                                           |    |   |          |          |                |          |                             |
| N2                                                                                                                    | CT | X | 11102587 | 11105460 | WBGene00012217 | W02H3.1  | W02H3.1 -0.343027584225027  |
| AGIWUR14835                                                                                                           |    |   |          |          |                |          |                             |
| N2                                                                                                                    | CT | X | 11107376 | 11109316 | WBGene00011140 | R08B4.4  | R08B4.4 0.02358453680566    |
| AGIWUR1513                                                                                                            |    |   |          |          |                |          |                             |
| N2                                                                                                                    | CT | X | 11109440 | 11115887 | WBGene00001690 | grd-1    | R08B4.1 -0.231830146381851  |
| AGIWUR17903                                                                                                           |    |   |          |          |                |          |                             |
| N2                                                                                                                    | CT | X | 11116107 | 11116823 | WBGene00011141 | R08B4.5  | R08B4.5 -0.382735304631585  |
| AGIWUR24780;AGIWUR26045;AGIWUR30649;AGIWUR32569                                                                       |    |   |          |          |                |          |                             |
| N2                                                                                                                    | CT | X | 11118959 | 11121005 | WBGene00011139 | R08B4.3  | R08B4.3 0.00634024488356211 |
| AGIWUR26481;AGIWUR44332                                                                                               |    |   |          |          |                |          |                             |
| N2                                                                                                                    | CT | X | 11121916 | 11125615 | WBGene00044330 | alr-1    | R08B4.2 0.196884787184824   |
| AGIWUR30021                                                                                                           |    |   |          |          |                |          |                             |
| N2                                                                                                                    | CT | X | 11142971 | 11152820 | WBGene00007327 | C05C9.3  | C05C9.3 0.0970624386070229  |
| AGIWUR5280                                                                                                            |    |   |          |          |                |          |                             |
| N2                                                                                                                    | CT | X | 11153065 | 11157643 | WBGene00007326 | C05C9.2  | C05C9.2 -0.125115361078191  |
| AGIWUR6141;AGIWUR40885                                                                                                |    |   |          |          |                |          |                             |
| N2                                                                                                                    | CT | X | 11160981 | 11164006 | WBGene00007325 | C05C9.1  | C05C9.1 0.0607811399403477  |
| AGIWUR37380                                                                                                           |    |   |          |          |                |          |                             |
| N2                                                                                                                    | CT | X | 11163958 | 11189591 | WBGene00008735 | F13D2.1  | F13D2.1 -0.101228938061223  |
| AGIWUR9368;AGIWUR31805;AGIWUR34326                                                                                    |    |   |          |          |                |          |                             |
| N2                                                                                                                    | CT | X | 11192485 | 11196841 | WBGene00007938 | C34F6.1  | C34F6.1 0.102229985803817   |
| AGIWUR23731                                                                                                           |    |   |          |          |                |          |                             |
| N2                                                                                                                    | CT | X | 11199455 | 11200464 | WBGene00000751 | col-178  | C34F6.2 0.0701263155447869  |
| AGIWUR40880                                                                                                           |    |   |          |          |                |          |                             |
| N2                                                                                                                    | CT | X | 11201465 | 11202488 | WBGene00000752 | col-179  | C34F6.3                     |
| -0.00771151577540863                                                                                                  |    |   |          |          |                |          |                             |
| AGIWUR3484;AGIWUR4228;AGIWUR11395;AGIWUR12859;AGIWUR18664;AGIWUR21635;AGIWUR24699;AGIWUR30009;AGIWUR35779;AGIWUR37272 |    |   |          |          |                |          |                             |
| N2                                                                                                                    | CT | X | 11202476 | 11203990 | WBGene00007945 | C34F6.11 | C34F6.11                    |
| -0.0645914449021756 AGIWUR32368                                                                                       |    |   |          |          |                |          |                             |
| N2                                                                                                                    | CT | X | 11204117 | 11207155 | WBGene00002029 | hst-2    | C34F6.4 -0.0783406493720875 |



|                                                                                                                       |    |   |          |          |                |           |           |                     |
|-----------------------------------------------------------------------------------------------------------------------|----|---|----------|----------|----------------|-----------|-----------|---------------------|
| AGIWUR28552                                                                                                           |    |   |          |          |                |           |           |                     |
| N2                                                                                                                    | CT | X | 11207250 | 11208994 | WBGene00007939 | C34F6.5   | C34F6.5   | -0.0374582607965301 |
| AGIWUR21;AGIWUR994                                                                                                    |    |   |          |          |                |           |           |                     |
| N2                                                                                                                    | CT | X | 11210107 | 11215470 | WBGene00007941 | C34F6.7   | C34F6.7   | 0.0446847691425454  |
| AGIWUR6467;AGIWUR32311;AGIWUR32877                                                                                    |    |   |          |          |                |           |           |                     |
| N2                                                                                                                    | CT | X | 11215696 | 11218305 | WBGene00007942 | idh-2     | C34F6.8   | -0.0455366473243117 |
| AGIWUR3586                                                                                                            |    |   |          |          |                |           |           |                     |
| N2                                                                                                                    | CT | X | 11218135 | 11222811 | WBGene00007943 | C34F6.9   | C34F6.9   | 0.249430385189463   |
| AGIWUR23073                                                                                                           |    |   |          |          |                |           |           |                     |
| N2                                                                                                                    | CT | X | 11229213 | 11237383 | WBGene00007944 | C34F6.10  |           | C34F6.10            |
| -0.0503464029945153 AGIWUR42553                                                                                       |    |   |          |          |                |           |           |                     |
| N2                                                                                                                    | CT | X | 11257361 | 11260225 | WBGene00007266 | C03A3.1   | C03A3.1   | 0.00756183666562471 |
| AGIWUR11397;AGIWUR29952;AGIWUR39266                                                                                   |    |   |          |          |                |           |           |                     |
| N2                                                                                                                    | CT | X | 11262848 | 11266324 | WBGene00007267 | C03A3.2   | C03A3.2   | -0.015719421039516  |
| AGIWUR4732;AGIWUR8292                                                                                                 |    |   |          |          |                |           |           |                     |
| N2                                                                                                                    | CT | X | 11267391 | 11269023 | WBGene00007268 | C03A3.3   | C03A3.3   | 0.125271791684348   |
| AGIWUR44225                                                                                                           |    |   |          |          |                |           |           |                     |
| N2                                                                                                                    | CT | X | 11271184 | 11275482 | WBGene00002050 | ifa-1     | F38B2.1   | 0.166910417876591   |
| AGIWUR2245;AGIWUR4997;AGIWUR15389;AGIWUR25371;AGIWUR31125;AGIWUR33213;AGIWUR38221;AGIWUR40353;AGIWUR40580;AGIWUR43826 |    |   |          |          |                |           |           |                     |
| N2                                                                                                                    | CT | X | 11278401 | 11279376 | WBGene00009529 | F38B2.2   | F38B2.2   | 0.119335966475823   |
| AGIWUR2233;AGIWUR17353;AGIWUR22429;AGIWUR23640;AGIWUR40315;AGIWUR40760                                                |    |   |          |          |                |           |           |                     |
| N2                                                                                                                    | CT | X | 11281716 | 11286346 | WBGene00009530 | F38B2.3   | F38B2.3   | -0.10537619686761   |
| AGIWUR4915                                                                                                            |    |   |          |          |                |           |           |                     |
| N2                                                                                                                    | CT | X | 11286443 | 11287717 | WBGene00009531 | F38B2.4   | F38B2.4   | 0.0385622540666901  |
| AGIWUR5307;AGIWUR5637;AGIWUR26506;AGIWUR39548                                                                         |    |   |          |          |                |           |           |                     |
| N2                                                                                                                    | CT | X | 11294962 | 11296731 | WBGene00002124 | inx-2     | F08G12.10 |                     |
| -0.169763544040684 AGIWUR1732                                                                                         |    |   |          |          |                |           |           |                     |
| N2                                                                                                                    | CT | X | 11298036 | 11299784 | WBGene00008586 | F08G12.2  |           | F08G12.2            |
| -0.160982228586136 AGIWUR40930                                                                                        |    |   |          |          |                |           |           |                     |
| N2                                                                                                                    | CT | X | 11300283 | 11302094 | WBGene00008587 | F08G12.3  |           | F08G12.3            |
| 0.101676414887212 AGIWUR19748                                                                                         |    |   |          |          |                |           |           |                     |
| N2                                                                                                                    | CT | X | 11302074 | 11305873 | WBGene00008585 | F08G12.1  |           | F08G12.1            |
| -0.0215563987943987 AGIWUR19035                                                                                       |    |   |          |          |                |           |           |                     |
| N2                                                                                                                    | CT | X | 11307360 | 11308400 | WBGene00006922 | vh1-1     | F08G12.4  |                     |
| -0.109493396553766 AGIWUR501                                                                                          |    |   |          |          |                |           |           |                     |
| N2                                                                                                                    | CT | X | 11308864 | 11310285 | WBGene00008588 | F08G12.5  |           | F08G12.5            |
| -0.117722158435365 AGIWUR36011                                                                                        |    |   |          |          |                |           |           |                     |
| N2                                                                                                                    | CT | X | 11313385 | 11315612 | WBGene00044135 | F08G12.11 |           | F08G12.11           |

|                                                 |                                                                                     |          |                |                                    |
|-------------------------------------------------|-------------------------------------------------------------------------------------|----------|----------------|------------------------------------|
| 0.133137840726133                               | AGIWUR2107;AGIWUR11925;AGIWUR30415;AGIWUR39046                                      |          |                |                                    |
| N2 CT X                                         | 11317050                                                                            | 11318036 | WBGene00008589 | nlp-57 F08G12.8                    |
| -0.134233631905138                              | AGIWUR25391                                                                         |          |                |                                    |
| N2 CT X                                         | 11318278                                                                            | 11321085 | WBGene00013976 | hizr-1 ZK455.6 -0.107643299486012  |
| AGIWUR3772                                      |                                                                                     |          |                |                                    |
| N2 CT X                                         | 11321079                                                                            | 11324251 | WBGene00000212 | asm-2 ZK455.4 0.148708545272243    |
| AGIWUR12179;AGIWUR20805;AGIWUR30554;AGIWUR45075 |                                                                                     |          |                |                                    |
| N2 CT X                                         | 11324517                                                                            | 11326901 | WBGene00013975 | ZK455.5 ZK455.5 -0.309920766228661 |
| AGIWUR16779                                     |                                                                                     |          |                |                                    |
| N2 CT X                                         | 11328591                                                                            | 11332072 | WBGene00013974 | npr-9 ZK455.3 0.123430349792745    |
| AGIWUR11847                                     |                                                                                     |          |                |                                    |
| N2 CT X                                         | 11332553                                                                            | 11338301 | WBGene00001536 | gcy-9 ZK455.2 0.0432059517820438   |
| AGIWUR15202                                     |                                                                                     |          |                |                                    |
| N2 CT X                                         | 11339874                                                                            | 11343568 | WBGene00000040 | aco-1 ZK455.1 0.0971673517625486   |
| AGIWUR15192;AGIWUR20633;AGIWUR21869;AGIWUR30301 |                                                                                     |          |                |                                    |
| N2 CT X                                         | 11346455                                                                            | 11350244 | WBGene00003843 | oct-2 ZK455.8 -0.0029079125332574  |
| AGIWUR2167;AGIWUR14035                          |                                                                                     |          |                |                                    |
| N2 CT X                                         | 11352136                                                                            | 11357094 | WBGene00003997 | pgp-3 ZK455.7 0.13667854334996     |
| AGIWUR11749;AGIWUR17389;AGIWUR20480;AGIWUR22101 |                                                                                     |          |                |                                    |
| N2 CT X                                         | 11358395                                                                            | 11364049 | WBGene00003998 | pgp-4 F42E11.1                     |
| 0.0894364261778637                              | AGIWUR28989;AGIWUR41306;AGIWUR44841                                                 |          |                |                                    |
| N2 CT X                                         | 11368719                                                                            | 11374358 | WBGene00009632 | ttyh-1 F42E11.2                    |
| -0.0316749345510203                             | AGIWUR10181;AGIWUR19745;AGIWUR21649;AGIWUR22469;AGIWUR28938;AGIWUR38032;AGIWUR44333 |          |                |                                    |
| N2 CT X                                         | 11374599                                                                            | 11375609 | WBGene00009633 | F42E11.3 F42E11.3                  |
| -0.107962393237066                              | AGIWUR39282                                                                         |          |                |                                    |
| N2 CT X                                         | 11375887                                                                            | 11377470 | WBGene00006584 | tni-1 F42E11.4                     |
| 0.0833478146701871                              | AGIWUR8414                                                                          |          |                |                                    |
| N2 CT X                                         | 11384773                                                                            | 11392779 | WBGene00008571 | prmn-1 F08B12.1                    |
| 0.143749806418192                               | AGIWUR2776                                                                          |          |                |                                    |
| N2 CT X                                         | 11393293                                                                            | 11394619 | WBGene00004197 | prx-12 F08B12.2                    |
| 0.100063230080698                               | AGIWUR27319                                                                         |          |                |                                    |
| N2 CT X                                         | 11394605                                                                            | 11405931 | WBGene00004831 | slo-2 F08B12.3                     |
| -0.0823577657154395                             | AGIWUR1051;AGIWUR7985;AGIWUR23787;AGIWUR24004;AGIWUR26341                           |          |                |                                    |
| N2 CT X                                         | 11407054                                                                            | 11407730 | WBGene00008572 | F08B12.4 F08B12.4                  |
| -0.14805020641607                               | AGIWUR9647                                                                          |          |                |                                    |
| N2 CT X                                         | 11410181                                                                            | 11414887 | WBGene00003970 | pek-1 F46C3.1 -0.152311232908085   |
| AGIWUR522;AGIWUR2937;AGIWUR17263                |                                                                                     |          |                |                                    |
| N2 CT X                                         | 11416653                                                                            | 11418740 | WBGene00009777 | F46C3.2 F46C3.2 -0.165626065350102 |
| AGIWUR20393                                     |                                                                                     |          |                |                                    |

|                                                                                              |    |   |          |          |                |          |          |                     |
|----------------------------------------------------------------------------------------------|----|---|----------|----------|----------------|----------|----------|---------------------|
| N2                                                                                           | CT | X | 11419108 | 11420074 | WBGene00045253 | F46C3.6  | F46C3.6  | 0.166616959146123   |
| AGIWUR6859;AGIWUR19299;AGIWUR25267;AGIWUR33107;AGIWUR35145;AGIWUR36021                       |    |   |          |          |                |          |          |                     |
| N2                                                                                           | CT | X | 11420474 | 11433524 | WBGene00002037 | hum-4    | F46C3.3  | 0.0811687269019172  |
| AGIWUR1757;AGIWUR4067;AGIWUR4936;AGIWUR18116;AGIWUR18323;AGIWUR19638;AGIWUR21461;AGIWUR22845 |    |   |          |          |                |          |          |                     |
| N2                                                                                           | CT | X | 11434792 | 11435899 | WBGene00044703 | F46C3.5  | F46C3.5  | 0.227457834340292   |
| AGIWUR7105                                                                                   |    |   |          |          |                |          |          |                     |
| N2                                                                                           | CT | X | 11436124 | 11437747 | WBGene00044702 | F46C3.4  | F46C3.4  | -0.0618279219753717 |
| AGIWUR7674                                                                                   |    |   |          |          |                |          |          |                     |
| N2                                                                                           | CT | X | 11444424 | 11446635 | WBGene00009842 | igeg-2   | F48C5.1  | 0.0024501602037601  |
| AGIWUR24691                                                                                  |    |   |          |          |                |          |          |                     |
| N2                                                                                           | CT | X | 11451617 | 11454195 | WBGene00009843 | F48C5.2  | F48C5.2  |                     |
| -0.00104385251863448 AGIWUR39842                                                             |    |   |          |          |                |          |          |                     |
| N2                                                                                           | CT | X | 11465557 | 11484368 | WBGene00003003 | lin-14   | T25C12.1 |                     |
| 0.0244314137547734 AGIWUR25830                                                               |    |   |          |          |                |          |          |                     |
| N2                                                                                           | CT | X | 11491087 | 11499999 | WBGene00012018 | T25C12.3 |          | T25C12.3            |
| -0.0879228751986787 AGIWUR2452                                                               |    |   |          |          |                |          |          |                     |
| N2                                                                                           | CT | X | 11502267 | 11509432 | WBGene00009257 | F29G6.1  | F29G6.1  | -0.471904611167464  |
| AGIWUR18243                                                                                  |    |   |          |          |                |          |          |                     |
| N2                                                                                           | CT | X | 11509446 | 11511451 | WBGene00009258 | ccdc-149 |          | F29G6.2             |
| -0.112705399498802 AGIWUR15047;AGIWUR17433;AGIWUR35296                                       |    |   |          |          |                |          |          |                     |
| N2                                                                                           | CT | X | 11511558 | 11519062 | WBGene00009259 | hpo-34   | F29G6.3  | 0.217603485381664   |
| AGIWUR844;AGIWUR23574;AGIWUR44644;AGIWUR44749                                                |    |   |          |          |                |          |          |                     |
| N2                                                                                           | CT | X | 11522707 | 11533450 | WBGene00004746 | sdc-2    | C35C5.1  | -0.405782082265388  |
| AGIWUR6463                                                                                   |    |   |          |          |                |          |          |                     |
| N2                                                                                           | CT | X | 11534004 | 11536574 | WBGene00007957 | C35C5.8  | C35C5.8  | -0.0382840242572353 |
| AGIWUR3917;AGIWUR30581;AGIWUR36963                                                           |    |   |          |          |                |          |          |                     |
| N2                                                                                           | CT | X | 11536568 | 11537124 | WBGene00007958 | C35C5.9  | C35C5.9  | 0.133731049659502   |
| AGIWUR9875;AGIWUR17639;AGIWUR34507;AGIWUR35227;AGIWUR43027;AGIWUR44311                       |    |   |          |          |                |          |          |                     |
| N2                                                                                           | CT | X | 11537714 | 11541417 | WBGene00007954 | gcp-2.2  | C35C5.2  | 0.0948900967063704  |
| AGIWUR19973;AGIWUR28266                                                                      |    |   |          |          |                |          |          |                     |
| N2                                                                                           | CT | X | 11542129 | 11545061 | WBGene00044121 | gcp-2.3  | C35C5.11 |                     |
| 0.0903118172174775 AGIWUR24227                                                               |    |   |          |          |                |          |          |                     |
| N2                                                                                           | CT | X | 11545091 | 11546495 | WBGene00007955 | selt-1.1 |          | C35C5.3             |
| 0.279433085997926 AGIWUR22821                                                                |    |   |          |          |                |          |          |                     |
| N2                                                                                           | CT | X | 11548608 | 11550740 | WBGene00003239 | mig-2    | C35C5.4  | -0.120143528269486  |
| AGIWUR1331;AGIWUR5810;AGIWUR8838;AGIWUR17531;AGIWUR43904;AGIWUR44479                         |    |   |          |          |                |          |          |                     |
| N2                                                                                           | CT | X | 11554795 | 11559858 | WBGene00007959 | C35C5.10 |          | C35C5.10            |
| 0.0620392996214889 AGIWUR2588                                                                |    |   |          |          |                |          |          |                     |
| N2                                                                                           | CT | X | 11560915 | 11563697 | WBGene00002975 | lev-8    | C35C5.5  | 0.152647506169108   |

|                                                                                                             |    |   |          |          |                |          |                             |
|-------------------------------------------------------------------------------------------------------------|----|---|----------|----------|----------------|----------|-----------------------------|
| AGIWUR35817                                                                                                 |    |   |          |          |                |          |                             |
| N2                                                                                                          | CT | X | 11563923 | 11569531 | WBGene00007956 | trpp-9   | C35C5.6 -0.126067235454176  |
| AGIWUR43921                                                                                                 |    |   |          |          |                |          |                             |
| N2                                                                                                          | CT | X | 11576247 | 11581727 | WBGene00001490 | frm-3    | H05G16.1                    |
| -0.057844038929427                                                                                          |    |   |          |          |                |          |                             |
| AGIWUR18461;AGIWUR18670;AGIWUR20783;AGIWUR25861;AGIWUR28199;AGIWUR29720;AGIWUR33619;AGIWUR37114;AGIWUR40164 |    |   |          |          |                |          |                             |
| ;AGIWUR40423;AGIWUR43229                                                                                    |    |   |          |          |                |          |                             |
| N2                                                                                                          | CT | X | 11581751 | 11584960 | WBGene00009932 | F52D10.6 | F52D10.6                    |
| -0.0118422557932085                                                                                         |    |   |          |          |                |          |                             |
| N2                                                                                                          | CT | X | 11585675 | 11589757 | WBGene00009929 | abts-2   | F52D10.1                    |
| 0.0863379349646074                                                                                          |    |   |          |          |                |          |                             |
| N2                                                                                                          | CT | X | 11589686 | 11591719 | WBGene00009930 | F52D10.2 | F52D10.2                    |
| -0.157287396234597                                                                                          |    |   |          |          |                |          |                             |
| N2                                                                                                          | CT | X | 11603709 | 11605451 | WBGene00001502 | ftt-2    | F52D10.3                    |
| 0.185652266049361                                                                                           |    |   |          |          |                |          |                             |
| N2                                                                                                          | CT | X | 11617462 | 11619795 | WBGene00009931 | F52D10.4 | F52D10.4                    |
| 0.347209670363718                                                                                           |    |   |          |          |                |          |                             |
| N2                                                                                                          | CT | X | 11620047 | 11621996 | WBGene00006065 | sto-3    | F52D10.5                    |
| -0.113828093426529                                                                                          |    |   |          |          |                |          |                             |
| N2                                                                                                          | CT | X | 11622967 | 11627113 | WBGene00006694 | twk-44   | Y71H9A.1                    |
| -0.0136452972605858                                                                                         |    |   |          |          |                |          |                             |
| N2                                                                                                          | CT | X | 11632407 | 11636508 | WBGene00006068 | sto-6    | Y71H9A.2                    |
| -0.0955262621023962                                                                                         |    |   |          |          |                |          |                             |
| N2                                                                                                          | CT | X | 11644143 | 11647425 | WBGene00006066 | sto-4    | Y71H9A.3                    |
| 0.0401650413846113                                                                                          |    |   |          |          |                |          |                             |
| N2                                                                                                          | CT | X | 11647423 | 11648196 | WBGene00011446 | T04F8.8  | T04F8.8 0.298224778219844   |
| AGIWUR18677                                                                                                 |    |   |          |          |                |          |                             |
| N2                                                                                                          | CT | X | 11648358 | 11650918 | WBGene00011443 | cutl-11  | T04F8.4 -0.0846860201978981 |
| AGIWUR19813                                                                                                 |    |   |          |          |                |          |                             |
| N2                                                                                                          | CT | X | 11653570 | 11656569 | WBGene00011441 | T04F8.2  | T04F8.2 0.0178231953979004  |
| AGIWUR2428;AGIWUR19123                                                                                      |    |   |          |          |                |          |                             |
| N2                                                                                                          | CT | X | 11659510 | 11661660 | WBGene00011440 | sfxn-1.5 | T04F8.1                     |
| 0.115818836952213                                                                                           |    |   |          |          |                |          |                             |
| N2                                                                                                          | CT | X | 11667127 | 11672309 | WBGene00011444 | T04F8.6  | T04F8.6 -0.0535210383506413 |
| AGIWUR7225;AGIWUR17517;AGIWUR18050;AGIWUR18678;AGIWUR18752;AGIWUR29417;AGIWUR31500;AGIWUR34985              |    |   |          |          |                |          |                             |
| N2                                                                                                          | CT | X | 11674416 | 11677090 | WBGene00011447 | T04F8.9  | T04F8.9 0.264418393060838   |
| AGIWUR34736                                                                                                 |    |   |          |          |                |          |                             |
| N2                                                                                                          | CT | X | 11677515 | 11680980 | WBGene00011445 | T04F8.7  | T04F8.7 -0.302256485175672  |
| AGIWUR5669;AGIWUR31052;AGIWUR38300                                                                          |    |   |          |          |                |          |                             |

|                                                                                            |    |   |          |          |                |           |           |                     |
|--------------------------------------------------------------------------------------------|----|---|----------|----------|----------------|-----------|-----------|---------------------|
| N2                                                                                         | CT | X | 11684661 | 11685778 | WBGene00001981 | hnd-1     | C44C10.8  |                     |
| -0.245441074899228 AGIWUR25505                                                             |    |   |          |          |                |           |           |                     |
| N2                                                                                         | CT | X | 11687000 | 11688269 | WBGene00008088 | C44C10.7  | C44C10.7  |                     |
| -0.279053226552403 AGIWUR36171                                                             |    |   |          |          |                |           |           |                     |
| N2                                                                                         | CT | X | 11690314 | 11690789 | WBGene00008090 | C44C10.10 | C44C10.10 |                     |
| -0.195424574546871 AGIWUR42468                                                             |    |   |          |          |                |           |           |                     |
| N2                                                                                         | CT | X | 11691109 | 11692456 | WBGene00008086 | C44C10.5  | C44C10.5  |                     |
| 0.358724377995697 AGIWUR26240                                                              |    |   |          |          |                |           |           |                     |
| N2                                                                                         | CT | X | 11693464 | 11695750 | WBGene00008085 | C44C10.4  | C44C10.4  |                     |
| -0.0725409816949263 AGIWUR6646                                                             |    |   |          |          |                |           |           |                     |
| N2                                                                                         | CT | X | 11696996 | 11698065 | WBGene00044133 | C44C10.12 | C44C10.12 |                     |
| 0.0881795151678588 AGIWUR37824;AGIWUR38613;AGIWUR42182                                     |    |   |          |          |                |           |           |                     |
| N2                                                                                         | CT | X | 11698384 | 11699098 | WBGene00008087 | C44C10.6  | C44C10.6  |                     |
| 0.268096894684936 AGIWUR36681                                                              |    |   |          |          |                |           |           |                     |
| N2                                                                                         | CT | X | 11702525 | 11704500 | WBGene00008084 | C44C10.3  | C44C10.3  |                     |
| -0.328911287116175 AGIWUR21455;AGIWUR29164;AGIWUR41440                                     |    |   |          |          |                |           |           |                     |
| N2                                                                                         | CT | X | 11704888 | 11707238 | WBGene00008083 | cyp-29A1  | C44C10.2  |                     |
| -0.146442119358108 AGIWUR6870                                                              |    |   |          |          |                |           |           |                     |
| N2                                                                                         | CT | X | 11707903 | 11710190 | WBGene00043985 | C44C10.11 | C44C10.11 |                     |
| -0.0612449078237578 AGIWUR5144;AGIWUR21747;AGIWUR26369;AGIWUR35133;AGIWUR35582;AGIWUR40080 |    |   |          |          |                |           |           |                     |
| N2                                                                                         | CT | X | 11711307 | 11712280 | WBGene00000753 | col-180   | C44C10.1  |                     |
| 0.608412720165845 AGIWUR19530                                                              |    |   |          |          |                |           |           |                     |
| N2                                                                                         | CT | X | 11713240 | 11716511 | WBGene00008089 | C44C10.9  | C44C10.9  |                     |
| 0.0919739747019497 AGIWUR1389;AGIWUR14021                                                  |    |   |          |          |                |           |           |                     |
| N2                                                                                         | CT | X | 11721724 | 11724195 | WBGene00008369 | D1053.4   | D1053.4   | 0.168877131534524   |
| AGIWUR22031                                                                                |    |   |          |          |                |           |           |                     |
| N2                                                                                         | CT | X | 11726271 | 11727936 | WBGene00001790 | gst-42    | D1053.1   | -0.144403617725802  |
| AGIWUR39657                                                                                |    |   |          |          |                |           |           |                     |
| N2                                                                                         | CT | X | 11728151 | 11728891 | WBGene00008367 | D1053.2   | D1053.2   | -0.136281631216853  |
| AGIWUR4100                                                                                 |    |   |          |          |                |           |           |                     |
| N2                                                                                         | CT | X | 11729586 | 11733698 | WBGene00008368 | D1053.3   | D1053.3   | -0.489231601443239  |
| AGIWUR22019;AGIWUR42744                                                                    |    |   |          |          |                |           |           |                     |
| N2                                                                                         | CT | X | 11746076 | 11747249 | WBGene00008049 | C40H5.7   | C40H5.7   | -0.0833546109129886 |
| AGIWUR42587                                                                                |    |   |          |          |                |           |           |                     |
| N2                                                                                         | CT | X | 11754776 | 11756762 | WBGene00008045 | C40H5.2   | C40H5.2   | -0.0748232018212605 |
| AGIWUR45000                                                                                |    |   |          |          |                |           |           |                     |
| N2                                                                                         | CT | X | 11759198 | 11764535 | WBGene00008047 | lact-7    | C40H5.4   | -0.0201627569607119 |
| AGIWUR2323;AGIWUR6946;AGIWUR12305;AGIWUR29315                                              |    |   |          |          |                |           |           |                     |
| N2                                                                                         | CT | X | 11764456 | 11769378 | WBGene00006654 | ttx-3     | C40H5.5   | 0.107388367818402   |

|                        |    |   |                                                |          |                |           |          |                     |
|------------------------|----|---|------------------------------------------------|----------|----------------|-----------|----------|---------------------|
| AGIWUR3181;AGIWUR40976 |    |   |                                                |          |                |           |          |                     |
| N2                     | CT | X | 11775190                                       | 11775728 | WBGene00008048 | hpo-41    | C40H5.6  | -0.20951381942645   |
| AGIWUR7235             |    |   |                                                |          |                |           |          |                     |
| N2                     | CT | X | 11781463                                       | 11784330 | WBGene00013631 | Y102F5A.1 |          | Y102F5A.1           |
| 0.166381115795824      |    |   | AGIWUR41265                                    |          |                |           |          |                     |
| N2                     | CT | X | 11798505                                       | 11803656 | WBGene00004682 | rsd-3     | C34E11.1 |                     |
| 0.145062777529278      |    |   | AGIWUR12992                                    |          |                |           |          |                     |
| N2                     | CT | X | 11804210                                       | 11805306 | WBGene00007937 | C34E11.4  |          | C34E11.4            |
| -0.579357809304915     |    |   | AGIWUR29254                                    |          |                |           |          |                     |
| N2                     | CT | X | 11805378                                       | 11814653 | WBGene00007935 | C34E11.2  |          | C34E11.2            |
| 0.0338035535780832     |    |   | AGIWUR6735;AGIWUR17971;AGIWUR18770;AGIWUR41165 |          |                |           |          |                     |
| N2                     | CT | X | 11826093                                       | 11836162 | WBGene00044079 | tag-241   | C34E11.3 |                     |
| 0.131536979751427      |    |   | AGIWUR21066                                    |          |                |           |          |                     |
| N2                     | CT | X | 11836068                                       | 11837478 | WBGene00006388 | taf-7.1   | F54F7.1  | -0.222530254920448  |
| AGIWUR43977            |    |   |                                                |          |                |           |          |                     |
| N2                     | CT | X | 11843663                                       | 11845337 | WBGene00010064 | F54F7.2   | F54F7.2  | 0.0106948503534294  |
| AGIWUR20596            |    |   |                                                |          |                |           |          |                     |
| N2                     | CT | X | 11847856                                       | 11848695 | WBGene00045251 | F54F7.9   | F54F7.9  | -0.219016845194139  |
| AGIWUR36255            |    |   |                                                |          |                |           |          |                     |
| N2                     | CT | X | 11849392                                       | 11850182 | WBGene00010065 | F54F7.3   | F54F7.3  | -0.158781364219895  |
| AGIWUR44650            |    |   |                                                |          |                |           |          |                     |
| N2                     | CT | X | 11852794                                       | 11853729 | WBGene00006965 | xtr-1     | F54F7.4  | 0.0707340928269815  |
| AGIWUR11219            |    |   |                                                |          |                |           |          |                     |
| N2                     | CT | X | 11853818                                       | 11854996 | WBGene00010068 | F54F7.8   | F54F7.8  | -0.20335404713572   |
| AGIWUR34989            |    |   |                                                |          |                |           |          |                     |
| N2                     | CT | X | 11857478                                       | 11862373 | WBGene00003219 | mes-1     | F54F7.5  | -0.0304046050902596 |
| AGIWUR34339            |    |   |                                                |          |                |           |          |                     |
| N2                     | CT | X | 11865383                                       | 11866827 | WBGene00010066 | F54F7.6   | F54F7.6  | -0.280952330511044  |
| AGIWUR14467            |    |   |                                                |          |                |           |          |                     |
| N2                     | CT | X | 11867971                                       | 11869360 | WBGene00010067 | dot-1.2   | F54F7.7  | -0.11918629403804   |
| AGIWUR12110            |    |   |                                                |          |                |           |          |                     |
| N2                     | CT | X | 11875654                                       | 11877242 | WBGene00013389 | Y62H9A.1  |          | Y62H9A.1            |
| -0.202006629712596     |    |   | AGIWUR11046                                    |          |                |           |          |                     |
| N2                     | CT | X | 11877418                                       | 11878196 | WBGene00013390 | Y62H9A.2  |          | Y62H9A.2            |
| 0.0832482945559061     |    |   | AGIWUR43304                                    |          |                |           |          |                     |
| N2                     | CT | X | 11879110                                       | 11879971 | WBGene00013391 | Y62H9A.3  |          | Y62H9A.3            |
| -0.293673534651903     |    |   | AGIWUR45025                                    |          |                |           |          |                     |
| N2                     | CT | X | 11880124                                       | 11881264 | WBGene00013392 | Y62H9A.4  |          | Y62H9A.4            |
| -0.175075528676469     |    |   | AGIWUR33966                                    |          |                |           |          |                     |

|                         |    |   |                         |          |                |           |                             |
|-------------------------|----|---|-------------------------|----------|----------------|-----------|-----------------------------|
| N2                      | CT | X | 11882144                | 11882917 | WBGene00013393 | Y62H9A.5  | Y62H9A.5                    |
| -0.0482232243093712     |    |   | AGIWUR33524             |          |                |           |                             |
| N2                      | CT | X | 11883127                | 11884043 | WBGene00013394 | ule-5     | Y62H9A.6                    |
| -0.216641181565523      |    |   | AGIWUR14679             |          |                |           |                             |
| N2                      | CT | X | 11884330                | 11886438 | WBGene00013395 | Y62H9A.7  | Y62H9A.7                    |
| -0.0439576286169263     |    |   | AGIWUR35290             |          |                |           |                             |
| N2                      | CT | X | 11891259                | 11892422 | WBGene00013396 | Y62H9A.8  | Y62H9A.8                    |
| -0.154525740209703      |    |   | AGIWUR19602             |          |                |           |                             |
| N2                      | CT | X | 11895585                | 11898140 | WBGene00013397 | Y62H9A.9  | Y62H9A.9                    |
| -0.205474667685547      |    |   | AGIWUR45120             |          |                |           |                             |
| N2                      | CT | X | 11904924                | 11907022 | WBGene00013399 | Y62H9A.11 | Y62H9A.11                   |
| 0.123544690717508       |    |   | AGIWUR40597             |          |                |           |                             |
| N2                      | CT | X | 11907267                | 11910145 | WBGene00045252 | Y62H9A.15 | Y62H9A.15                   |
| 0.00521970195980259     |    |   | AGIWUR37686;AGIWUR42152 |          |                |           |                             |
| N2                      | CT | X | 11914124                | 11915558 | WBGene00013400 | Y62H9A.12 | Y62H9A.12                   |
| -0.315540424188582      |    |   | AGIWUR36585             |          |                |           |                             |
| N2                      | CT | X | 11917005                | 11920158 | WBGene00013401 | Y62H9A.13 | Y62H9A.13                   |
| -0.102733886682233      |    |   | AGIWUR26048             |          |                |           |                             |
| N2                      | CT | X | 11921252                | 11923138 | WBGene00013402 | Y62H9A.14 | Y62H9A.14                   |
| 0.0496501990144029      |    |   | AGIWUR30338             |          |                |           |                             |
| N2                      | CT | X | 11924461                | 11927032 | WBGene00010119 | F55G7.1   | F55G7.1 0.0755839880065898  |
| AGIWUR11372;AGIWUR22511 |    |   |                         |          |                |           |                             |
| N2                      | CT | X | 11928107                | 11929372 | WBGene00045493 | F55G7.4   | F55G7.4 -0.0524627271435509 |
| AGIWUR39073             |    |   |                         |          |                |           |                             |
| N2                      | CT | X | 11929899                | 11931646 | WBGene00010120 | dot-1.4   | F55G7.2 -0.176070863271686  |
| AGIWUR9664              |    |   |                         |          |                |           |                             |
| N2                      | CT | X | 11940336                | 11942051 | WBGene00010121 | F55G7.3   | F55G7.3 -0.379926494725665  |
| AGIWUR19193             |    |   |                         |          |                |           |                             |
| N2                      | CT | X | 11944313                | 11946834 | WBGene00011614 | nfya-1    | T08D10.1                    |
| 0.00708051915611918     |    |   | AGIWUR28467             |          |                |           |                             |
| N2                      | CT | X | 11948843                | 11951893 | WBGene00011615 | lsd-1     | T08D10.2                    |
| 0.106728552792571       |    |   | AGIWUR18850             |          |                |           |                             |
| N2                      | CT | X | 11952085                | 11953329 | WBGene00044148 | T08D10.4  | T08D10.4                    |
| -0.0898270169772162     |    |   | AGIWUR17215;AGIWUR24785 |          |                |           |                             |
| N2                      | CT | X | 11957563                | 11958395 | WBGene00206466 | T08D10.5  | T08D10.5                    |
| -0.120472348741478      |    |   | AGIWUR1122              |          |                |           |                             |
| N2                      | CT | X | 11960145                | 11961509 | WBGene00008212 | C49F5.8   | C49F5.8 -0.33136196055389   |
| AGIWUR44049             |    |   |                         |          |                |           |                             |
| N2                      | CT | X | 11961443                | 11961777 | WBGene00268214 | C49F5.12  | C49F5.12                    |

|                      |    |   |                                                                                  |          |                |                                     |
|----------------------|----|---|----------------------------------------------------------------------------------|----------|----------------|-------------------------------------|
| 0.0936638960669445   |    |   | AGIWUR950;AGIWUR15616;AGIWUR43673                                                |          |                |                                     |
| N2                   | CT | X | 11962413                                                                         | 11962646 | WBGene00045316 | C49F5.9 C49F5.9 -0.0200249140043951 |
|                      |    |   | AGIWUR18274;AGIWUR34913;AGIWUR35638;AGIWUR35757;AGIWUR44815                      |          |                |                                     |
| N2                   | CT | X | 11965962                                                                         | 11969784 | WBGene00008205 | sams-1 C49F5.1 0.385030849598099    |
|                      |    |   | AGIWUR1947;AGIWUR7219;AGIWUR10862;AGIWUR24028;AGIWUR26342;AGIWUR32238            |          |                |                                     |
| N2                   | CT | X | 11968034                                                                         | 12021212 | WBGene00012158 | ucr-2.1 VW06B3R.1                   |
| 0.0454436665544078   |    |   | AGIWUR8278;AGIWUR8939;AGIWUR16170;AGIWUR31443                                    |          |                |                                     |
| N2                   | CT | X | 12028711                                                                         | 12031498 | WBGene00007115 | B0198.2 B0198.2 -0.05530149788608   |
|                      |    |   | AGIWUR5120                                                                       |          |                |                                     |
| N2                   | CT | X | 12031598                                                                         | 12034037 | WBGene00006646 | tsp-20 B0198.1 -0.199643552075091   |
|                      |    |   | AGIWUR7276                                                                       |          |                |                                     |
| N2                   | CT | X | 12042593                                                                         | 12057049 | WBGene00007116 | B0198.3 B0198.3 0.077961568450994   |
|                      |    |   | AGIWUR8482                                                                       |          |                |                                     |
| N2                   | CT | X | 12065264                                                                         | 12067432 | WBGene00007594 | lgc-23 C15A7.1 -0.0638366654980143  |
|                      |    |   | AGIWUR16523                                                                      |          |                |                                     |
| N2                   | CT | X | 12068550                                                                         | 12070563 | WBGene00045385 | lgc-24 C15A7.4 -0.0422658038467683  |
|                      |    |   | AGIWUR25344                                                                      |          |                |                                     |
| N2                   | CT | X | 12070743                                                                         | 12073863 | WBGene00007595 | C15A7.2 C15A7.2 0.284244351097919   |
|                      |    |   | AGIWUR26829;AGIWUR37909                                                          |          |                |                                     |
| N2                   | CT | X | 12076553                                                                         | 12093083 | WBGene00012226 | W03G11.4 W03G11.4                   |
| 0.0318035560895229   |    |   | AGIWUR19534;AGIWUR32595                                                          |          |                |                                     |
| N2                   | CT | X | 12100196                                                                         | 12103812 | WBGene00012225 | W03G11.3 W03G11.3                   |
| -0.043139665544885   |    |   | AGIWUR6598;AGIWUR7282;AGIWUR8929;AGIWUR16839;AGIWUR22839;AGIWUR23249;AGIWUR41917 |          |                |                                     |
| N2                   | CT | X | 12104930                                                                         | 12106081 | WBGene00000754 | col-181 W03G11.1                    |
| 0.126267904614355    |    |   | AGIWUR30503                                                                      |          |                |                                     |
| N2                   | CT | X | 12106407                                                                         | 12108617 | WBGene00012224 | W03G11.2 W03G11.2                   |
| -0.0352511997604594  |    |   | AGIWUR7267                                                                       |          |                |                                     |
| N2                   | CT | X | 12109135                                                                         | 12111185 | WBGene00011354 | lgc-13 T01H10.1                     |
| 0.0410868294188642   |    |   | AGIWUR15109                                                                      |          |                |                                     |
| N2                   | CT | X | 12111513                                                                         | 12113475 | WBGene00011355 | lgc-14 T01H10.2                     |
| 0.111299231837157    |    |   | AGIWUR6157;AGIWUR14058;AGIWUR33985;AGIWUR40554                                   |          |                |                                     |
| N2                   | CT | X | 12114324                                                                         | 12115923 | WBGene00011356 | lgc-15 T01H10.3                     |
| -0.0918487153344376  |    |   | AGIWUR16903                                                                      |          |                |                                     |
| N2                   | CT | X | 12116615                                                                         | 12117763 | WBGene00011357 | T01H10.4 T01H10.4                   |
| 0.111335110289735    |    |   | AGIWUR10006;AGIWUR28978;AGIWUR33766                                              |          |                |                                     |
| N2                   | CT | X | 12118640                                                                         | 12120661 | WBGene00011358 | lgc-16 T01H10.5                     |
| -0.211873730461778   |    |   | AGIWUR10023                                                                      |          |                |                                     |
| N2                   | CT | X | 12121585                                                                         | 12125048 | WBGene00011359 | lgc-17 T01H10.6                     |
| -0.00489759993202998 |    |   | AGIWUR31474                                                                      |          |                |                                     |



|                                                                                                 |    |   |          |          |                |          |          |                     |
|-------------------------------------------------------------------------------------------------|----|---|----------|----------|----------------|----------|----------|---------------------|
| N2                                                                                              | CT | X | 12125608 | 12128000 | WBGene00011360 | lgc-18   | T01H10.7 |                     |
| -0.160773186096426 AGIWUR397                                                                    |    |   |          |          |                |          |          |                     |
| N2                                                                                              | CT | X | 12128144 | 12141151 | WBGene00011361 | lyst-1   | T01H10.8 |                     |
| -0.304659571220995 AGIWUR42346                                                                  |    |   |          |          |                |          |          |                     |
| N2                                                                                              | CT | X | 12142869 | 12143819 | WBGene00010926 | M153.3   | M153.3   | 0.0942245525715295  |
| AGIWUR36470                                                                                     |    |   |          |          |                |          |          |                     |
| N2                                                                                              | CT | X | 12144114 | 12145940 | WBGene00045481 | M153.5   | M153.5   | -0.0342386452383385 |
| AGIWUR15412                                                                                     |    |   |          |          |                |          |          |                     |
| N2                                                                                              | CT | X | 12146832 | 12148529 | WBGene00010924 | M153.1   | M153.1   | 0.0720491278631528  |
| AGIWUR36000                                                                                     |    |   |          |          |                |          |          |                     |
| N2                                                                                              | CT | X | 12150080 | 12151474 | WBGene00044144 | M153.4   | M153.4   | 0.00817041383019657 |
| AGIWUR5719;AGIWUR7960;AGIWUR16127;AGIWUR32416;AGIWUR43557                                       |    |   |          |          |                |          |          |                     |
| N2                                                                                              | CT | X | 12151359 | 12154105 | WBGene00010925 | M153.2   | M153.2   | 0.0127933807093452  |
| AGIWUR13412                                                                                     |    |   |          |          |                |          |          |                     |
| N2                                                                                              | CT | X | 12156407 | 12160039 | WBGene00010222 | F57G12.2 |          | F57G12.2            |
| 0.131417427346489 AGIWUR6500;AGIWUR11956;AGIWUR12822;AGIWUR28178                                |    |   |          |          |                |          |          |                     |
| N2                                                                                              | CT | X | 12169092 | 12171681 | WBGene00010221 | F57G12.1 |          | F57G12.1            |
| 0.0273942775960956 AGIWUR24594;AGIWUR27372                                                      |    |   |          |          |                |          |          |                     |
| N2                                                                                              | CT | X | 12199655 | 12213049 | WBGene00000277 | cab-1    | C23H4.1  | 0.0500075391242598  |
| AGIWUR10784;AGIWUR10818;AGIWUR15448;AGIWUR17107;AGIWUR18304;AGIWUR36949;AGIWUR39077;AGIWUR41971 |    |   |          |          |                |          |          |                     |
| N2                                                                                              | CT | X | 12217243 | 12219312 | WBGene00044132 | C23H4.8  | C23H4.8  | -0.0628833366815496 |
| AGIWUR18650;AGIWUR25954                                                                         |    |   |          |          |                |          |          |                     |
| N2                                                                                              | CT | X | 12219710 | 12222745 | WBGene00007691 | C23H4.2  | C23H4.2  | 0.0856086619841374  |
| AGIWUR31189;AGIWUR35320;AGIWUR36580                                                             |    |   |          |          |                |          |          |                     |
| N2                                                                                              | CT | X | 12222869 | 12226047 | WBGene00007695 | C23H4.7  | C23H4.7  | -0.28167830602321   |
| AGIWUR32273                                                                                     |    |   |          |          |                |          |          |                     |
| N2                                                                                              | CT | X | 12226203 | 12229861 | WBGene00007692 | C23H4.3  | C23H4.3  | -0.113801503507316  |
| AGIWUR37430                                                                                     |    |   |          |          |                |          |          |                     |
| N2                                                                                              | CT | X | 12229951 | 12233244 | WBGene00007693 | C23H4.4  | C23H4.4  | -0.310440943262683  |
| AGIWUR7406                                                                                      |    |   |          |          |                |          |          |                     |
| N2                                                                                              | CT | X | 12235621 | 12240781 | WBGene00007694 | C23H4.6  | C23H4.6  | 0.119387245749652   |
| AGIWUR31706                                                                                     |    |   |          |          |                |          |          |                     |
| N2                                                                                              | CT | X | 12241627 | 12244637 | WBGene00008451 | E01G6.3  | E01G6.3  | -0.22323605316622   |
| AGIWUR14402                                                                                     |    |   |          |          |                |          |          |                     |
| N2                                                                                              | CT | X | 12256644 | 12258971 | WBGene00008450 | E01G6.2  | E01G6.2  | 0.100171374051751   |
| AGIWUR5313                                                                                      |    |   |          |          |                |          |          |                     |
| N2                                                                                              | CT | X | 12260881 | 12266537 | WBGene00008449 | E01G6.1  | E01G6.1  | 0.106306779778476   |
| AGIWUR6911                                                                                      |    |   |          |          |                |          |          |                     |
| N2                                                                                              | CT | X | 12266912 | 12270941 | WBGene00010403 | otpl-8   | H19J13.1 |                     |

|                                                           |             |          |                |                  |                     |
|-----------------------------------------------------------|-------------|----------|----------------|------------------|---------------------|
| 0.0821865373576376                                        | AGIWUR20322 |          |                |                  |                     |
| N2 CT X                                                   | 12273638    | 12274691 | WBGene00010404 | H19J13.2         | H19J13.2            |
| -0.0279402991457331                                       | AGIWUR32478 |          |                |                  |                     |
| N2 CT X                                                   | 12275042    | 12275677 | WBGene00007294 | C04B4.6 C04B4.6  | 0.0613298867943692  |
| AGIWUR31570                                               |             |          |                |                  |                     |
| N2 CT X                                                   | 12280707    | 12282559 | WBGene00007289 | C04B4.1 C04B4.1  | 0.045630084235377   |
| AGIWUR36736                                               |             |          |                |                  |                     |
| N2 CT X                                                   | 12283285    | 12285307 | WBGene00007290 | C04B4.2 C04B4.2  | -0.0817857564686797 |
| AGIWUR10264                                               |             |          |                |                  |                     |
| N2 CT X                                                   | 12285824    | 12287253 | WBGene00007291 | lips-2 C04B4.3   | -0.322452470165318  |
| AGIWUR12086                                               |             |          |                |                  |                     |
| N2 CT X                                                   | 12287659    | 12288354 | WBGene00007293 | C04B4.5 C04B4.5  | -0.0595546560964468 |
| AGIWUR44214                                               |             |          |                |                  |                     |
| N2 CT X                                                   | 12290839    | 12293267 | WBGene00007292 | C04B4.4 C04B4.4  | 0.0590449162686291  |
| AGIWUR37988                                               |             |          |                |                  |                     |
| N2 CT X                                                   | 12293767    | 12295311 | WBGene00012299 | W06D11.1         | W06D11.1            |
| 0.0744140170556662                                        | AGIWUR23674 |          |                |                  |                     |
| N2 CT X                                                   | 12296047    | 12296644 | WBGene00012300 | W06D11.2         | W06D11.2            |
| 0.168179197311895                                         | AGIWUR11296 |          |                |                  |                     |
| N2 CT X                                                   | 12298683    | 12300022 | WBGene00012301 | W06D11.3         | W06D11.3            |
| -0.0719204377293003                                       | AGIWUR2184  |          |                |                  |                     |
| N2 CT X                                                   | 12300134    | 12301282 | WBGene00012303 | W06D11.5         | W06D11.5            |
| 0.208220126456317                                         | AGIWUR42832 |          |                |                  |                     |
| N2 CT X                                                   | 12301488    | 12302817 | WBGene00012302 | dot-1.3 W06D11.4 |                     |
| 0.212105294237757                                         | AGIWUR8566  |          |                |                  |                     |
| N2 CT X                                                   | 12306865    | 12309482 | WBGene00008902 | phf-32 F17A2.3   | 0.280466857389981   |
| AGIWUR35016                                               |             |          |                |                  |                     |
| N2 CT X                                                   | 12310812    | 12312730 | WBGene00008903 | F17A2.4 F17A2.4  | 0.0910287897691582  |
| AGIWUR27669                                               |             |          |                |                  |                     |
| N2 CT X                                                   | 12315568    | 12317673 | WBGene00006966 | xtr-2 F17A2.1    | 0.0689841045642705  |
| AGIWUR2512;AGIWUR9538;AGIWUR16671;AGIWUR33859;AGIWUR44395 |             |          |                |                  |                     |
| N2 CT X                                                   | 12318240    | 12320777 | WBGene00000461 | ceh-40 F17A2.5   | -0.1805044444659329 |
| AGIWUR40436                                               |             |          |                |                  |                     |
| N2 CT X                                                   | 12321657    | 12322993 | WBGene00008904 | F17A2.13         | F17A2.13            |
| -0.243271299868338                                        | AGIWUR36689 |          |                |                  |                     |
| N2 CT X                                                   | 12323739    | 12325432 | WBGene00005118 | srd-40 F17A2.12  |                     |
| 0.260718278174821                                         | AGIWUR31745 |          |                |                  |                     |
| N2 CT X                                                   | 12326724    | 12328365 | WBGene00005119 | srd-41 F17A2.6   | -0.364462374138891  |
| AGIWUR18512                                               |             |          |                |                  |                     |

|                                                                                |    |   |          |          |                |           |           |                     |
|--------------------------------------------------------------------------------|----|---|----------|----------|----------------|-----------|-----------|---------------------|
| N2                                                                             | CT | X | 12328976 | 12330526 | WBGene00005123 | srd-45    | F17A2.7   | 0.029297760648582   |
| AGIWUR44137                                                                    |    |   |          |          |                |           |           |                     |
| N2                                                                             | CT | X | 12332095 | 12333302 | WBGene00005124 | srd-46    | F17A2.10  |                     |
| 0.335005856818837 AGIWUR16372                                                  |    |   |          |          |                |           |           |                     |
| N2                                                                             | CT | X | 12333642 | 12335290 | WBGene00005125 | srd-47    | F17A2.11  |                     |
| 0.438841203846231 AGIWUR33221                                                  |    |   |          |          |                |           |           |                     |
| N2                                                                             | CT | X | 12336108 | 12337752 | WBGene00005126 | srd-48    | F17A2.9   | 0.180795498805497   |
| AGIWUR11538                                                                    |    |   |          |          |                |           |           |                     |
| N2                                                                             | CT | X | 12338440 | 12340248 | WBGene00005122 | srd-44    | F17A2.8   | -0.0720546585492512 |
| AGIWUR32586                                                                    |    |   |          |          |                |           |           |                     |
| N2                                                                             | CT | X | 12340378 | 12341438 | WBGene00006979 | zig-2     | F42F12.2  |                     |
| 0.0131397778227704 AGIWUR17101                                                 |    |   |          |          |                |           |           |                     |
| N2                                                                             | CT | X | 12342289 | 12342597 | WBGene00044397 | nspc-8    | F42F12.12 |                     |
| -0.0147882536847135 AGIWUR3560;AGIWUR10811;AGIWUR34815;AGIWUR41515             |    |   |          |          |                |           |           |                     |
| N2                                                                             | CT | X | 12343609 | 12344043 | WBGene00009640 | nspc-10   | F42F12.9  |                     |
| 0.0346837180299069 AGIWUR20803;AGIWUR25081                                     |    |   |          |          |                |           |           |                     |
| N2                                                                             | CT | X | 12347029 | 12347899 | WBGene00044140 | F42F12.11 | F42F12.11 |                     |
| 0.0996342355221653 AGIWUR23806;AGIWUR30383;AGIWUR41994                         |    |   |          |          |                |           |           |                     |
| N2                                                                             | CT | X | 12350578 | 12351788 | WBGene00009635 | F42F12.3  | F42F12.3  |                     |
| -0.0841723302976991 AGIWUR13631                                                |    |   |          |          |                |           |           |                     |
| N2                                                                             | CT | X | 12351978 | 12352949 | WBGene00009636 | F42F12.4  | F42F12.4  |                     |
| 0.0569666994022642 AGIWUR9513;AGIWUR25004;AGIWUR33036;AGIWUR42098              |    |   |          |          |                |           |           |                     |
| N2                                                                             | CT | X | 12353550 | 12353768 | WBGene00044398 | nspc-11   | F42F12.13 |                     |
| -0.0502245185171457 AGIWUR7590;AGIWUR24310;AGIWUR29559;AGIWUR37495;AGIWUR41829 |    |   |          |          |                |           |           |                     |
| N2                                                                             | CT | X | 12356194 | 12356681 | WBGene00023493 | nspc-12   | F42F12.10 |                     |
| 0.038824052259316 AGIWUR20494;AGIWUR24317                                      |    |   |          |          |                |           |           |                     |
| N2                                                                             | CT | X | 12362397 | 12363102 | WBGene00008961 | F19H6.6   | F19H6.6   | -0.0200345357299865 |
| AGIWUR43762                                                                    |    |   |          |          |                |           |           |                     |
| N2                                                                             | CT | X | 12363713 | 12364904 | WBGene00008960 | F19H6.5   | F19H6.5   | -0.215663122000484  |
| AGIWUR22825                                                                    |    |   |          |          |                |           |           |                     |
| N2                                                                             | CT | X | 12365688 | 12367255 | WBGene00008959 | F19H6.4   | F19H6.4   | -0.190024301150151  |
| AGIWUR8462                                                                     |    |   |          |          |                |           |           |                     |
| N2                                                                             | CT | X | 12374223 | 12378393 | WBGene00008957 | glb-13    | F19H6.2   | -0.0583900922265608 |
| AGIWUR12885;AGIWUR35693                                                        |    |   |          |          |                |           |           |                     |
| N2                                                                             | CT | X | 12389594 | 12391474 | WBGene00008956 | nek1-3    | F19H6.1   | 0.00436100071664391 |
| AGIWUR10988                                                                    |    |   |          |          |                |           |           |                     |
| N2                                                                             | CT | X | 12394265 | 12399534 | WBGene00008924 | F17E5.2   | F17E5.2   | -0.12886400788033   |
| AGIWUR1387                                                                     |    |   |          |          |                |           |           |                     |
| N2                                                                             | CT | X | 12399517 | 12414037 | WBGene00002991 | lin-2     | F17E5.1   | -0.0625061593710221 |

|                                                                                                                       |    |   |          |          |                |         |                             |
|-----------------------------------------------------------------------------------------------------------------------|----|---|----------|----------|----------------|---------|-----------------------------|
| AGIWUR13913                                                                                                           |    |   |          |          |                |         |                             |
| N2                                                                                                                    | CT | X | 12425730 | 12426631 | WBGene00023492 | T24D3.2 | T24D3.2 -0.144645809788384  |
| AGIWUR6201;AGIWUR10096;AGIWUR16437;AGIWUR21018;AGIWUR30257;AGIWUR31249;AGIWUR40680;AGIWUR42163                        |    |   |          |          |                |         |                             |
| N2                                                                                                                    | CT | X | 12434154 | 12443915 | WBGene00011824 | T18D3.7 | T18D3.7 -0.0745015190116867 |
| AGIWUR6965;AGIWUR18290;AGIWUR21788                                                                                    |    |   |          |          |                |         |                             |
| N2                                                                                                                    | CT | X | 12449896 | 12451360 | WBGene00011823 | T18D3.6 | T18D3.6 -0.0694590596757507 |
| AGIWUR27988                                                                                                           |    |   |          |          |                |         |                             |
| N2                                                                                                                    | CT | X | 12451356 | 12454328 | WBGene00011826 | T18D3.9 | T18D3.9 -0.0844030725979579 |
| AGIWUR23848                                                                                                           |    |   |          |          |                |         |                             |
| N2                                                                                                                    | CT | X | 12454745 | 12457934 | WBGene00011820 | T18D3.1 | T18D3.1 -0.199449742406305  |
| AGIWUR4299;AGIWUR13787;AGIWUR22278;AGIWUR22796                                                                        |    |   |          |          |                |         |                             |
| N2                                                                                                                    | CT | X | 12459069 | 12461639 | WBGene00003854 | odr-7   | T18D3.2 0.106334473746958   |
| AGIWUR22267;AGIWUR41458                                                                                               |    |   |          |          |                |         |                             |
| N2                                                                                                                    | CT | X | 12463815 | 12464378 | WBGene00011822 | T18D3.5 | T18D3.5 -0.445119001512401  |
| AGIWUR17653                                                                                                           |    |   |          |          |                |         |                             |
| N2                                                                                                                    | CT | X | 12464640 | 12466917 | WBGene00011821 | cdf-2   | T18D3.3 -0.0323561294339285 |
| AGIWUR23602                                                                                                           |    |   |          |          |                |         |                             |
| N2                                                                                                                    | CT | X | 12468061 | 12475348 | WBGene00003514 | myo-2   | T18D3.4 0.119648097020309   |
| AGIWUR3996;AGIWUR9670;AGIWUR14689;AGIWUR15589;AGIWUR19019;AGIWUR21820;AGIWUR26437;AGIWUR30907;AGIWUR33713;AGIWUR36921 |    |   |          |          |                |         |                             |
| N2                                                                                                                    | CT | X | 12475659 | 12477441 | WBGene00009725 | F45E6.1 | F45E6.1 0.245204612100027   |
| AGIWUR32552                                                                                                           |    |   |          |          |                |         |                             |
| N2                                                                                                                    | CT | X | 12480948 | 12484904 | WBGene00000222 | atf-6   | F45E6.2 -0.0314942792187534 |
| AGIWUR6080;AGIWUR36726;AGIWUR42069                                                                                    |    |   |          |          |                |         |                             |
| N2                                                                                                                    | CT | X | 12485054 | 12491102 | WBGene00009726 | tbc-13  | F45E6.3 -0.213073448134624  |
| AGIWUR42166                                                                                                           |    |   |          |          |                |         |                             |
| N2                                                                                                                    | CT | X | 12492865 | 12495862 | WBGene00009727 | lips-1  | F45E6.4 0.192573638779323   |
| AGIWUR2685;AGIWUR6093;AGIWUR33965                                                                                     |    |   |          |          |                |         |                             |
| N2                                                                                                                    | CT | X | 12502802 | 12503338 | WBGene00009728 | sdz-19  | F45E6.6 0.0863547035766095  |
| AGIWUR3292                                                                                                            |    |   |          |          |                |         |                             |
| N2                                                                                                                    | CT | X | 12503885 | 12514048 | WBGene00004739 | scd-1   | H20J18.1                    |
| 0.238900200339777 AGIWUR11901;AGIWUR30749;AGIWUR31931;AGIWUR42881                                                     |    |   |          |          |                |         |                             |
| N2                                                                                                                    | CT | X | 12525344 | 12525783 | WBGene00007634 | C16D6.1 | C16D6.1 -0.354409740383566  |
| AGIWUR33758                                                                                                           |    |   |          |          |                |         |                             |
| N2                                                                                                                    | CT | X | 12526660 | 12527286 | WBGene00007636 | C16D6.3 | C16D6.3 -0.304190857077651  |
| AGIWUR38101                                                                                                           |    |   |          |          |                |         |                             |
| N2                                                                                                                    | CT | X | 12537014 | 12551677 | WBGene00007635 | npr-4   | C16D6.2 -0.145889416906616  |
| AGIWUR4513;AGIWUR13566;AGIWUR38713                                                                                    |    |   |          |          |                |         |                             |
| N2                                                                                                                    | CT | X | 12574069 | 12577209 | WBGene00011989 | T24D5.1 | T24D5.1 -0.0386301878964357 |



|                                                                                                                                               |    |   |          |          |                |         |           |                      |
|-----------------------------------------------------------------------------------------------------------------------------------------------|----|---|----------|----------|----------------|---------|-----------|----------------------|
| N2                                                                                                                                            | CT | X | 12703330 | 12704821 | WBGene00011565 | nhr-272 | T07C5.2   | -0.0817096455503883  |
| AGIWUR25523                                                                                                                                   |    |   |          |          |                |         |           |                      |
| N2                                                                                                                                            | CT | X | 12705624 | 12808249 | WBGene00008901 | nhr-27  | F16H9.2   | -0.204456925614559   |
| AGIWUR34047                                                                                                                                   |    |   |          |          |                |         |           |                      |
| N2                                                                                                                                            | CT | X | 12843311 | 12845384 | WBGene00008260 | C52G5.2 | C52G5.2   | 0.100836689403989    |
| AGIWUR37494                                                                                                                                   |    |   |          |          |                |         |           |                      |
| N2                                                                                                                                            | CT | X | 12845811 | 12846143 | WBGene00008261 | C52G5.3 | C52G5.3   | -0.226168254895857   |
| AGIWUR24543                                                                                                                                   |    |   |          |          |                |         |           |                      |
| N2                                                                                                                                            | CT | X | 12846437 | 12852601 | WBGene00000482 | chd-3   | T14G8.1   | -0.0351895181321709  |
| AGIWUR26268                                                                                                                                   |    |   |          |          |                |         |           |                      |
| N2                                                                                                                                            | CT | X | 12858019 | 12859541 | WBGene00011770 | T14G8.2 | T14G8.2   | -0.228695979685789   |
| AGIWUR412;AGIWUR3957;AGIWUR34879                                                                                                              |    |   |          |          |                |         |           |                      |
| N2                                                                                                                                            | CT | X | 12861237 | 12870025 | WBGene00011771 | T14G8.3 | T14G8.3   | -0.126377410471964   |
| AGIWUR16719;AGIWUR30205;AGIWUR33411                                                                                                           |    |   |          |          |                |         |           |                      |
| N2                                                                                                                                            | CT | X | 12877480 | 12880328 | WBGene00001149 | bcat-1  | K02A4.1   | 0.187080793773237    |
| AGIWUR877;AGIWUR9819;AGIWUR12847;AGIWUR19912;AGIWUR22343;AGIWUR25440;AGIWUR26337                                                              |    |   |          |          |                |         |           |                      |
| N2                                                                                                                                            | CT | X | 12881126 | 12884989 | WBGene00001681 | gpc-1   | K02A4.2   | -0.00675902124636174 |
| AGIWUR1065;AGIWUR7269;AGIWUR12147;AGIWUR13497;AGIWUR17193;AGIWUR18451;AGIWUR20353;AGIWUR22933;AGIWUR33009;AGIWUR36230;AGIWUR36878;AGIWUR41561 |    |   |          |          |                |         |           |                      |
| N2                                                                                                                                            | CT | X | 12907832 | 12920176 | WBGene00004108 | pqn-18  | C34E7.1   | 0.271070264361109    |
| AGIWUR11251                                                                                                                                   |    |   |          |          |                |         |           |                      |
| N2                                                                                                                                            | CT | X | 12930336 | 12932025 | WBGene00007933 | C34E7.3 | C34E7.3   | 0.110989660982021    |
| AGIWUR5962                                                                                                                                    |    |   |          |          |                |         |           |                      |
| N2                                                                                                                                            | CT | X | 12932205 | 12934978 | WBGene00007934 | C34E7.4 | C34E7.4   | 0.0239069045220468   |
| AGIWUR24073                                                                                                                                   |    |   |          |          |                |         |           |                      |
| N2                                                                                                                                            | CT | X | 12938695 | 12940792 | WBGene00007344 | C05E7.2 | C05E7.2   | 0.0903780600061488   |
| AGIWUR43111                                                                                                                                   |    |   |          |          |                |         |           |                      |
| N2                                                                                                                                            | CT | X | 12941441 | 12943547 | WBGene00007343 | C05E7.1 | C05E7.1   | -0.0315379226728787  |
| AGIWUR5159                                                                                                                                    |    |   |          |          |                |         |           |                      |
| N2                                                                                                                                            | CT | X | 12945616 | 12946562 | WBGene00007345 | C05E7.3 | C05E7.3   | -0.0347498392526786  |
| AGIWUR44102                                                                                                                                   |    |   |          |          |                |         |           |                      |
| N2                                                                                                                                            | CT | X | 12965485 | 12968731 | WBGene00007346 | frpr-2  | C05E7.4   | -0.246447108544935   |
| AGIWUR15330                                                                                                                                   |    |   |          |          |                |         |           |                      |
| N2                                                                                                                                            | CT | X | 12968950 | 12975643 | WBGene00004089 | ppk-3   | VF11C1L.1 | 0.0115469509821384   |
| AGIWUR4084                                                                                                                                    |    |   |          |          |                |         |           |                      |
| N2                                                                                                                                            | CT | X | 12978505 | 12979854 | WBGene00008693 | F11C1.4 | F11C1.4   | 0.0923429426885223   |
| AGIWUR4772                                                                                                                                    |    |   |          |          |                |         |           |                      |
| N2                                                                                                                                            | CT | X | 12981775 | 12985852 | WBGene00008692 | scav-4  | F11C1.3   | 0.0357171088184458   |

|                                                                                                                                             |    |   |          |          |                |          |          |                     |  |
|---------------------------------------------------------------------------------------------------------------------------------------------|----|---|----------|----------|----------------|----------|----------|---------------------|--|
| AGIWUR5437;AGIWUR7703;AGIWUR24766                                                                                                           |    |   |          |          |                |          |          |                     |  |
| N2                                                                                                                                          | CT | X | 12985790 | 12987219 | WBGene00008691 | mff-1    | F11C1.2  | -0.262936968655339  |  |
| AGIWUR7567                                                                                                                                  |    |   |          |          |                |          |          |                     |  |
| N2                                                                                                                                          | CT | X | 12987334 | 12990365 | WBGene00008690 | F11C1.1  | F11C1.1  | -0.025630873604463  |  |
| AGIWUR38893                                                                                                                                 |    |   |          |          |                |          |          |                     |  |
| N2                                                                                                                                          | CT | X | 12991447 | 12999638 | WBGene00008694 | F11C1.5  | F11C1.5  | 0.058296896821008   |  |
| AGIWUR955;AGIWUR6921;AGIWUR7291;AGIWUR14107;AGIWUR25945;AGIWUR27374;AGIWUR28924;AGIWUR31966;AGIWUR38085;AGIWUR39778;AGIWUR43066;AGIWUR44053 |    |   |          |          |                |          |          |                     |  |
| N2                                                                                                                                          | CT | X | 13008493 | 13013962 | WBGene00003623 | nhr-25   | F11C1.6  | -0.0342399677442202 |  |
| AGIWUR112;AGIWUR11229;AGIWUR18735;AGIWUR26216;AGIWUR33480                                                                                   |    |   |          |          |                |          |          |                     |  |
| N2                                                                                                                                          | CT | X | 13018848 | 13022023 | WBGene00008278 | npr-10   | C53C7.1  | -0.138378528887662  |  |
| AGIWUR30677                                                                                                                                 |    |   |          |          |                |          |          |                     |  |
| N2                                                                                                                                          | CT | X | 13042182 | 13046220 | WBGene00014294 | C53C7.5  | C53C7.5  | -0.0537004468045641 |  |
| AGIWUR1468;AGIWUR8123;AGIWUR9304;AGIWUR26719;AGIWUR29429;AGIWUR43147;AGIWUR43738;AGIWUR43899                                                |    |   |          |          |                |          |          |                     |  |
| N2                                                                                                                                          | CT | X | 13048558 | 13050885 | WBGene00008279 | C53C7.3  | C53C7.3  | 0.171114661141837   |  |
| AGIWUR43;AGIWUR783;AGIWUR5332;AGIWUR23440                                                                                                   |    |   |          |          |                |          |          |                     |  |
| N2                                                                                                                                          | CT | X | 13051796 | 13055395 | WBGene00010519 | K03A11.1 |          | K03A11.1            |  |
| -0.0295485469674759 AGIWUR3726;AGIWUR10438;AGIWUR18953;AGIWUR28685                                                                          |    |   |          |          |                |          |          |                     |  |
| N2                                                                                                                                          | CT | X | 13055860 | 13058381 | WBGene00045497 | K03A11.6 |          | K03A11.6            |  |
| -0.177593315302094 AGIWUR8903                                                                                                               |    |   |          |          |                |          |          |                     |  |
| N2                                                                                                                                          | CT | X | 13064168 | 13066936 | WBGene00010522 | K03A11.5 |          | K03A11.5            |  |
| 0.0501495404106782 AGIWUR31110                                                                                                              |    |   |          |          |                |          |          |                     |  |
| N2                                                                                                                                          | CT | X | 13067279 | 13068239 | WBGene00010520 | cpx-2    | K03A11.2 |                     |  |
| -0.212049113763194 AGIWUR9477                                                                                                               |    |   |          |          |                |          |          |                     |  |
| N2                                                                                                                                          | CT | X | 13074682 | 13076092 | WBGene00000450 | ceh-28   | K03A11.3 |                     |  |
| 0.00965404314538088 AGIWUR30609                                                                                                             |    |   |          |          |                |          |          |                     |  |
| N2                                                                                                                                          | CT | X | 13078172 | 13082045 | WBGene00010521 | K03A11.4 |          | K03A11.4            |  |
| 0.000109565429363911 AGIWUR28119;AGIWUR42048                                                                                                |    |   |          |          |                |          |          |                     |  |
| N2                                                                                                                                          | CT | X | 13082626 | 13084235 | WBGene00006078 | str-10   | R03G8.5  | -0.0392346509710535 |  |
| AGIWUR10323                                                                                                                                 |    |   |          |          |                |          |          |                     |  |
| N2                                                                                                                                          | CT | X | 13084573 | 13087646 | WBGene00010996 | R03G8.1  | R03G8.1  | -0.164068839506021  |  |
| AGIWUR40244                                                                                                                                 |    |   |          |          |                |          |          |                     |  |
| N2                                                                                                                                          | CT | X | 13091131 | 13094424 | WBGene00010998 | R03G8.3  | R03G8.3  | 0.271770542685749   |  |
| AGIWUR44752                                                                                                                                 |    |   |          |          |                |          |          |                     |  |
| N2                                                                                                                                          | CT | X | 13094558 | 13100445 | WBGene00011000 | R03G8.6  | R03G8.6  | -0.0568120912294034 |  |
| AGIWUR41046                                                                                                                                 |    |   |          |          |                |          |          |                     |  |
| N2                                                                                                                                          | CT | X | 13101306 | 13104205 | WBGene00010999 | R03G8.4  | R03G8.4  | -0.26243508530878   |  |
| AGIWUR30157                                                                                                                                 |    |   |          |          |                |          |          |                     |  |
| N2                                                                                                                                          | CT | X | 13105184 | 13108543 | WBGene00008925 | F17H10.1 |          | F17H10.1            |  |

|                                                                                                                                               |             |          |                |          |                             |
|-----------------------------------------------------------------------------------------------------------------------------------------------|-------------|----------|----------------|----------|-----------------------------|
| -0.00722895447230698                                                                                                                          | AGIWUR29715 |          |                |          |                             |
| N2 CT X                                                                                                                                       | 13113772    | 13116390 | WBGene00008926 | F17H10.2 | F17H10.2                    |
| 0.0203815633926681                                                                                                                            | AGIWUR44308 |          |                |          |                             |
| N2 CT X                                                                                                                                       | 13116352    | 13122291 | WBGene00008927 | snx-17   | F17H10.3                    |
| 0.212301032050899                                                                                                                             | AGIWUR19757 |          |                |          |                             |
| N2 CT X                                                                                                                                       | 13125976    | 13126520 | WBGene00008928 | F17H10.4 | F17H10.4                    |
| -0.355518792852724                                                                                                                            | AGIWUR6044  |          |                |          |                             |
| N2 CT X                                                                                                                                       | 13130263    | 13134124 | WBGene00008598 | spin-3   | F09A5.1 0.554931678825129   |
| AGIWUR37383                                                                                                                                   |             |          |                |          |                             |
| N2 CT X                                                                                                                                       | 13135107    | 13139771 | WBGene00008599 | F09A5.2  | F09A5.2 0.0845389033935149  |
| AGIWUR40861                                                                                                                                   |             |          |                |          |                             |
| N2 CT X                                                                                                                                       | 13139847    | 13140886 | WBGene00045245 | ttr-34   | F09A5.9 0.436852338667927   |
| AGIWUR16227;AGIWUR16758;AGIWUR16976;AGIWUR31415;AGIWUR32230                                                                                   |             |          |                |          |                             |
| N2 CT X                                                                                                                                       | 13141601    | 13152474 | WBGene00008600 | F09A5.3  | F09A5.3 -0.175175022991949  |
| AGIWUR19338                                                                                                                                   |             |          |                |          |                             |
| N2 CT X                                                                                                                                       | 13152821    | 13170113 | WBGene00008601 | F09A5.4  | F09A5.4 0.129229798370273   |
| AGIWUR4543;AGIWUR20864;AGIWUR23880;AGIWUR28567;AGIWUR41955                                                                                    |             |          |                |          |                             |
| N2 CT X                                                                                                                                       | 13177856    | 13178447 | WBGene00003741 | nlp-3    | F48C11.3                    |
| -0.147633641878841                                                                                                                            | AGIWUR24480 |          |                |          |                             |
| N2 CT X                                                                                                                                       | 13182463    | 13189961 | WBGene00009844 | cwp-5    | F48C11.2                    |
| 0.0042171493012777                                                                                                                            | AGIWUR38605 |          |                |          |                             |
| N2 CT X                                                                                                                                       | 13191246    | 13193955 | WBGene00001668 | gpa-6    | F48C11.1                    |
| 0.0739236957989622                                                                                                                            | AGIWUR8673  |          |                |          |                             |
| N2 CT X                                                                                                                                       | 13212390    | 13216707 | WBGene00006749 | unc-9    | R12H7.1 0.0872824601931175  |
| AGIWUR37395                                                                                                                                   |             |          |                |          |                             |
| N2 CT X                                                                                                                                       | 13217101    | 13219019 | WBGene00011255 | R12H7.4  | R12H7.4 -0.251662613937537  |
| AGIWUR1046                                                                                                                                    |             |          |                |          |                             |
| N2 CT X                                                                                                                                       | 13218977    | 13221462 | WBGene00000217 | asp-4    | R12H7.2 0.204156885039114   |
| AGIWUR834;AGIWUR4136;AGIWUR14681;AGIWUR36693                                                                                                  |             |          |                |          |                             |
| N2 CT X                                                                                                                                       | 13222920    | 13223546 | WBGene00004826 | skr-20   | R12H7.5 -0.160716737993646  |
| AGIWUR8378                                                                                                                                    |             |          |                |          |                             |
| N2 CT X                                                                                                                                       | 13223644    | 13224712 | WBGene00004825 | skr-19   | R12H7.3 -0.0741352125786503 |
| AGIWUR5557;AGIWUR9972;AGIWUR11033;AGIWUR13815;AGIWUR20375;AGIWUR21446;AGIWUR30438;AGIWUR31990;AGIWUR35512;AGIWUR36622;AGIWUR42278;AGIWUR42725 |             |          |                |          |                             |
| N2 CT X                                                                                                                                       | 13225818    | 13226678 | WBGene00004827 | skr-21   | K08H2.1 0.00876909081365262 |
| AGIWUR33637                                                                                                                                   |             |          |                |          |                             |
| N2 CT X                                                                                                                                       | 13228669    | 13232328 | WBGene00010694 | bgnt-1.5 | K08H2.9                     |
| -0.00164357703197204                                                                                                                          | AGIWUR41025 |          |                |          |                             |
| N2 CT X                                                                                                                                       | 13234099    | 13234957 | WBGene00010689 | K08H2.2  | K08H2.2 -0.0512027527215402 |





|                                                                                                             |    |   |          |          |                |          |          |                     |
|-------------------------------------------------------------------------------------------------------------|----|---|----------|----------|----------------|----------|----------|---------------------|
| N2                                                                                                          | CT | X | 13301599 | 13303457 | WBGene00005120 | srd-42   | R04D3.7  | -0.0715494051051735 |
| AGIWUR25173                                                                                                 |    |   |          |          |                |          |          |                     |
| N2                                                                                                          | CT | X | 13303905 | 13305844 | WBGene00005121 | srd-43   | R04D3.9  | -0.31949917523781   |
| AGIWUR19251                                                                                                 |    |   |          |          |                |          |          |                     |
| N2                                                                                                          | CT | X | 13307282 | 13308845 | WBGene00011013 | srxa-8   | R04D3.10 |                     |
| -0.257758678269846 AGIWUR10861                                                                              |    |   |          |          |                |          |          |                     |
| N2                                                                                                          | CT | X | 13310227 | 13311830 | WBGene00009796 | F46G10.1 |          | F46G10.1            |
| -0.0427086863063515                                                                                         |    |   |          |          |                |          |          |                     |
| AGIWUR13809;AGIWUR18540;AGIWUR23251;AGIWUR24687;AGIWUR30484;AGIWUR34867;AGIWUR35204;AGIWUR37443;AGIWUR41431 |    |   |          |          |                |          |          |                     |
| N2                                                                                                          | CT | X | 13322963 | 13327854 | WBGene00009797 | F46G10.2 |          | F46G10.2            |
| 0.0366950947623579 AGIWUR27847                                                                              |    |   |          |          |                |          |          |                     |
| N2                                                                                                          | CT | X | 13328252 | 13331248 | WBGene00004801 | sir-2.2  | F46G10.7 |                     |
| -0.312815947902564 AGIWUR11869;AGIWUR16128;AGIWUR41063                                                      |    |   |          |          |                |          |          |                     |
| N2                                                                                                          | CT | X | 13332014 | 13333825 | WBGene00004802 | sir-2.3  | F46G10.3 |                     |
| 0.308481191863187 AGIWUR25984                                                                               |    |   |          |          |                |          |          |                     |
| N2                                                                                                          | CT | X | 13334046 | 13336784 | WBGene00009798 | F46G10.4 |          | F46G10.4            |
| 0.0183355863276429 AGIWUR3389                                                                               |    |   |          |          |                |          |          |                     |
| N2                                                                                                          | CT | X | 13338052 | 13348118 | WBGene00004238 | ptr-24   | F46G10.5 |                     |
| 0.159865913340504 AGIWUR39309                                                                               |    |   |          |          |                |          |          |                     |
| N2                                                                                                          | CT | X | 13349639 | 13350804 | WBGene00003511 | mxl-3    | F46G10.6 |                     |
| -0.148641982258869 AGIWUR27752                                                                              |    |   |          |          |                |          |          |                     |
| N2                                                                                                          | CT | X | 13361201 | 13365294 | WBGene00008213 | C49F8.1  | C49F8.1  | 0.174209250059171   |
| AGIWUR21450                                                                                                 |    |   |          |          |                |          |          |                     |
| N2                                                                                                          | CT | X | 13371612 | 13376992 | WBGene00008214 | gem-1    | C49F8.2  | 0.206962472178738   |
| AGIWUR7625;AGIWUR28459;AGIWUR33570                                                                          |    |   |          |          |                |          |          |                     |
| N2                                                                                                          | CT | X | 13386057 | 13387547 | WBGene00008215 | C49F8.3  | C49F8.3  | 0.285958735199355   |
| AGIWUR11465                                                                                                 |    |   |          |          |                |          |          |                     |
| N2                                                                                                          | CT | X | 13391949 | 13395149 | WBGene00008518 | irld-2   | F02C12.4 |                     |
| 0.187744880500058 AGIWUR29427                                                                               |    |   |          |          |                |          |          |                     |
| N2                                                                                                          | CT | X | 13397323 | 13397710 | WBGene00008517 | F02C12.3 |          | F02C12.3            |
| -0.341167053810392 AGIWUR41613                                                                              |    |   |          |          |                |          |          |                     |
| N2                                                                                                          | CT | X | 13398198 | 13399230 | WBGene00008516 | F02C12.2 |          | F02C12.2            |
| -0.358093113599256 AGIWUR19214                                                                              |    |   |          |          |                |          |          |                     |
| N2                                                                                                          | CT | X | 13402083 | 13406415 | WBGene00008515 | F02C12.1 |          | F02C12.1            |
| 0.0199461097923432 AGIWUR866;AGIWUR5397;AGIWUR16048;AGIWUR28399                                             |    |   |          |          |                |          |          |                     |
| N2                                                                                                          | CT | X | 13406674 | 13409644 | WBGene00008519 | cyp-13B1 |          | F02C12.5            |
| 0.00781785913658428 AGIWUR29779;AGIWUR30525;AGIWUR31387;AGIWUR37308                                         |    |   |          |          |                |          |          |                     |
| N2                                                                                                          | CT | X | 13410720 | 13411285 | WBGene00044405 | C29F7.8  | C29F7.8  | -0.19828732942349   |
| AGIWUR23372;AGIWUR24426;AGIWUR24459;AGIWUR39234                                                             |    |   |          |          |                |          |          |                     |

|                                                                                                       |    |   |          |          |                |          |          |                     |
|-------------------------------------------------------------------------------------------------------|----|---|----------|----------|----------------|----------|----------|---------------------|
| N2                                                                                                    | CT | X | 13412463 | 13414617 | WBGene00007810 | C29F7.1  | C29F7.1  | -0.104584276930193  |
| AGIWUR1665                                                                                            |    |   |          |          |                |          |          |                     |
| N2                                                                                                    | CT | X | 13416078 | 13418220 | WBGene00007811 | C29F7.2  | C29F7.2  | 0.0603955288307816  |
| AGIWUR15482                                                                                           |    |   |          |          |                |          |          |                     |
| N2                                                                                                    | CT | X | 13418841 | 13419934 | WBGene00007812 | C29F7.3  | C29F7.3  | 0.051045729524553   |
| AGIWUR27922                                                                                           |    |   |          |          |                |          |          |                     |
| N2                                                                                                    | CT | X | 13421824 | 13423427 | WBGene00001435 | fkx-3    | C29F7.4  | -0.17962607334133   |
| AGIWUR12036                                                                                           |    |   |          |          |                |          |          |                     |
| N2                                                                                                    | CT | X | 13427062 | 13428842 | WBGene00001436 | fkx-4    | C29F7.5  | 0.0170473052986111  |
| AGIWUR33148                                                                                           |    |   |          |          |                |          |          |                     |
| N2                                                                                                    | CT | X | 13436454 | 13441883 | WBGene00007813 | jmjd-3.3 | C29F7.6  |                     |
| 0.00848372215523741 AGIWUR14123;AGIWUR19403;AGIWUR21987;AGIWUR37163;AGIWUR41094;AGIWUR41742           |    |   |          |          |                |          |          |                     |
| N2                                                                                                    | CT | X | 13444980 | 13448230 | WBGene00008527 | set-8    | F02D10.7 |                     |
| 0.114316453926352 AGIWUR29127                                                                         |    |   |          |          |                |          |          |                     |
| N2                                                                                                    | CT | X | 13449586 | 13451678 | WBGene00008526 | F02D10.6 | F02D10.6 |                     |
| -0.341176094835554 AGIWUR32178                                                                        |    |   |          |          |                |          |          |                     |
| N2                                                                                                    | CT | X | 13452667 | 13456658 | WBGene00001465 | flr-1    | F02D10.5 |                     |
| -0.150308775164447 AGIWUR14339                                                                        |    |   |          |          |                |          |          |                     |
| N2                                                                                                    | CT | X | 13456889 | 13462619 | WBGene00008524 | F02D10.3 | F02D10.3 |                     |
| -0.0221961723876882 AGIWUR2362;AGIWUR5227;AGIWUR11181;AGIWUR31334;AGIWUR31422;AGIWUR33407;AGIWUR35404 |    |   |          |          |                |          |          |                     |
| N2                                                                                                    | CT | X | 13462668 | 13463893 | WBGene00008523 | F02D10.2 | F02D10.2 |                     |
| 0.116871579466947 AGIWUR28889                                                                         |    |   |          |          |                |          |          |                     |
| N2                                                                                                    | CT | X | 13466737 | 13467736 | WBGene00000756 | col-183  | F02D10.1 |                     |
| 0.525363510005503 AGIWUR28871                                                                         |    |   |          |          |                |          |          |                     |
| N2                                                                                                    | CT | X | 13469387 | 13470471 | WBGene00000757 | col-184  | F15A2.1  | 0.0212917998149393  |
| AGIWUR23058;AGIWUR31053                                                                               |    |   |          |          |                |          |          |                     |
| N2                                                                                                    | CT | X | 13472155 | 13475899 | WBGene00006610 | tre-4    | F15A2.2  | -0.113880384517715  |
| AGIWUR43735                                                                                           |    |   |          |          |                |          |          |                     |
| N2                                                                                                    | CT | X | 13475964 | 13477456 | WBGene00001164 | efn-3    | F15A2.5  |                     |
| 0.000735644972266414 AGIWUR588                                                                        |    |   |          |          |                |          |          |                     |
| N2                                                                                                    | CT | X | 13478621 | 13481804 | WBGene00005128 | srd-50   | F15A2.4  | -0.19103979138417   |
| AGIWUR36687                                                                                           |    |   |          |          |                |          |          |                     |
| N2                                                                                                    | CT | X | 13482649 | 13484913 | WBGene00005129 | srd-51   | F15A2.3  | -0.124386953631255  |
| AGIWUR37248                                                                                           |    |   |          |          |                |          |          |                     |
| N2                                                                                                    | CT | X | 13487555 | 13500662 | WBGene00004719 | sad-1    | F15A2.6  | -0.0385685390319854 |
| AGIWUR4261;AGIWUR17936;AGIWUR25295;AGIWUR32392;AGIWUR36840;AGIWUR39256;AGIWUR39714;AGIWUR43372        |    |   |          |          |                |          |          |                     |
| N2                                                                                                    | CT | X | 13507564 | 13510094 | WBGene00010368 | H06A10.1 | H06A10.1 |                     |
| 0.0397213953141673 AGIWUR2679                                                                         |    |   |          |          |                |          |          |                     |
| N2                                                                                                    | CT | X | 13515871 | 13518911 | WBGene00000406 | cdk-4    | F18H3.5  | -0.189598441598214  |

|                                                                                  |    |   |          |          |                |           |                             |
|----------------------------------------------------------------------------------|----|---|----------|----------|----------------|-----------|-----------------------------|
| AGIWUR9653;AGIWUR20273;AGIWUR41553                                               |    |   |          |          |                |           |                             |
| N2                                                                               | CT | X | 13519663 | 13521537 | WBGene00008939 | F18H3.1   | F18H3.1 -0.158260374270723  |
| AGIWUR19712;AGIWUR23248;AGIWUR25409;AGIWUR28478                                  |    |   |          |          |                |           |                             |
| N2                                                                               | CT | X | 13522264 | 13527483 | WBGene00003903 | pab-2     | F18H3.3 0.0600855300485179  |
| AGIWUR4780;AGIWUR26610;AGIWUR29191;AGIWUR43409                                   |    |   |          |          |                |           |                             |
| N2                                                                               | CT | X | 13529088 | 13532032 | WBGene00008940 | F18H3.4   | F18H3.4 -0.0729705288644027 |
| AGIWUR15998                                                                      |    |   |          |          |                |           |                             |
| N2                                                                               | CT | X | 13532871 | 13536433 | WBGene00000051 | acr-12    | R01E6.4 0.151241092939456   |
| AGIWUR42149                                                                      |    |   |          |          |                |           |                             |
| N2                                                                               | CT | X | 13542574 | 13544599 | WBGene00000282 | cah-4     | R01E6.3 -0.0755312611784742 |
| AGIWUR2019;AGIWUR5716;AGIWUR6607;AGIWUR16164;AGIWUR22877;AGIWUR22998;AGIWUR40387 |    |   |          |          |                |           |                             |
| N2                                                                               | CT | X | 13544822 | 13550824 | WBGene00003848 | odr-1     | R01E6.1 0.274245689623564   |
| AGIWUR40730                                                                      |    |   |          |          |                |           |                             |
| N2                                                                               | CT | X | 13552549 | 13556166 | WBGene00010970 | glb-20    | R01E6.6 -0.0359345579820962 |
| AGIWUR23177;AGIWUR32303                                                          |    |   |          |          |                |           |                             |
| N2                                                                               | CT | X | 13565486 | 13566536 | WBGene00010968 | R01E6.2   | R01E6.2 -0.137984993371425  |
| AGIWUR977;AGIWUR6356;AGIWUR8398;AGIWUR33428;AGIWUR35834                          |    |   |          |          |                |           |                             |
| N2                                                                               | CT | X | 13567441 | 13569954 | WBGene00010971 | R01E6.7   | R01E6.7 0.117627663287689   |
| AGIWUR15289                                                                      |    |   |          |          |                |           |                             |
| N2                                                                               | CT | X | 13578783 | 13581728 | WBGene00010034 | F54B11.11 | F54B11.11                   |
| 0.226430065225392 AGIWUR26327                                                    |    |   |          |          |                |           |                             |
| N2                                                                               | CT | X | 13582120 | 13582757 | WBGene00010033 | F54B11.10 | F54B11.10                   |
| -0.211140055754958 AGIWUR11190                                                   |    |   |          |          |                |           |                             |
| N2                                                                               | CT | X | 13584775 | 13589820 | WBGene00006816 | unc-84    | F54B11.3                    |
| 0.0265628309887287 AGIWUR1516;AGIWUR14318                                        |    |   |          |          |                |           |                             |
| N2                                                                               | CT | X | 13590035 | 13591207 | WBGene00000598 | col-9     | F54B11.1                    |
| 0.0601563144800705 AGIWUR20177                                                   |    |   |          |          |                |           |                             |
| N2                                                                               | CT | X | 13591498 | 13592461 | WBGene00000621 | col-44    | F54B11.2                    |
| 0.0928176575555675 AGIWUR41919                                                   |    |   |          |          |                |           |                             |
| N2                                                                               | CT | X | 13592618 | 13593643 | WBGene00010027 | F54B11.4  | F54B11.4                    |
| -0.47435966288529 AGIWUR34481                                                    |    |   |          |          |                |           |                             |
| N2                                                                               | CT | X | 13594121 | 13596068 | WBGene00010028 | F54B11.5  | F54B11.5                    |
| -0.0539328750743575 AGIWUR24045                                                  |    |   |          |          |                |           |                             |
| N2                                                                               | CT | X | 13598449 | 13599687 | WBGene00000262 | bra-1     | F54B11.6                    |
| 0.0341584691335424 AGIWUR17923                                                   |    |   |          |          |                |           |                             |
| N2                                                                               | CT | X | 13600436 | 13601534 | WBGene00010030 | F54B11.7  | F54B11.7                    |
| -0.0848349957609518 AGIWUR7344                                                   |    |   |          |          |                |           |                             |
| N2                                                                               | CT | X | 13602200 | 13603918 | WBGene00010031 | F54B11.8  | F54B11.8                    |
| 0.131352645681253 AGIWUR12031                                                    |    |   |          |          |                |           |                             |

|                                                                                                          |    |   |          |          |                |          |                             |
|----------------------------------------------------------------------------------------------------------|----|---|----------|----------|----------------|----------|-----------------------------|
| N2                                                                                                       | CT | X | 13605567 | 13608369 | WBGene00010032 | F54B11.9 | F54B11.9                    |
| 0.120854605229093 AGIWUR14120                                                                            |    |   |          |          |                |          |                             |
| N2                                                                                                       | CT | X | 13618874 | 13619930 | WBGene00012440 | nlp-53   | Y12A6A.2                    |
| -0.112547629371818 AGIWUR14392;AGIWUR15716;AGIWUR43825                                                   |    |   |          |          |                |          |                             |
| N2                                                                                                       | CT | X | 13619938 | 13621728 | WBGene00012439 | Y12A6A.1 | Y12A6A.1                    |
| -0.0277761218721775 AGIWUR40926                                                                          |    |   |          |          |                |          |                             |
| N2                                                                                                       | CT | X | 13625373 | 13631166 | WBGene00006412 | nlg-1    | C40C9.5 0.0917623666691529  |
| AGIWUR3446;AGIWUR3519;AGIWUR6253;AGIWUR16584;AGIWUR23334;AGIWUR27866;AGIWUR33301;AGIWUR34573;AGIWUR38156 |    |   |          |          |                |          |                             |
| N2                                                                                                       | CT | X | 13639877 | 13642256 | WBGene00006673 | twk-20   | C40C9.1 -0.387119256501201  |
| AGIWUR19296                                                                                              |    |   |          |          |                |          |                             |
| N2                                                                                                       | CT | X | 13642348 | 13646898 | WBGene00000048 | acr-9    | C40C9.2 0.0259429334237806  |
| AGIWUR24132                                                                                              |    |   |          |          |                |          |                             |
| N2                                                                                                       | CT | X | 13647605 | 13648334 | WBGene00008036 | C40C9.3  | C40C9.3 -0.0836589760064701 |
| AGIWUR12524                                                                                              |    |   |          |          |                |          |                             |
| N2                                                                                                       | CT | X | 13651149 | 13651737 | WBGene00008037 | C40C9.4  | C40C9.4 -0.150612821559402  |
| AGIWUR34524                                                                                              |    |   |          |          |                |          |                             |
| N2                                                                                                       | CT | X | 13660519 | 13662963 | WBGene00007285 | C04A11.1 | C04A11.1                    |
| 0.231553779177924 AGIWUR15658                                                                            |    |   |          |          |                |          |                             |
| N2                                                                                                       | CT | X | 13664589 | 13665352 | WBGene00007288 | C04A11.5 | C04A11.5                    |
| -0.0149336275760019 AGIWUR3797                                                                           |    |   |          |          |                |          |                             |
| N2                                                                                                       | CT | X | 13665958 | 13668830 | WBGene00007286 | C04A11.2 | C04A11.2                    |
| -0.404074376197622 AGIWUR10297                                                                           |    |   |          |          |                |          |                             |
| N2                                                                                                       | CT | X | 13677192 | 13682340 | WBGene00007287 | gck-4    | C04A11.3                    |
| 0.18487825672301 AGIWUR34555                                                                             |    |   |          |          |                |          |                             |
| N2                                                                                                       | CT | X | 13687973 | 13695771 | WBGene00000074 | adm-2    | C04A11.4                    |
| 0.0167272455292107 AGIWUR12265                                                                           |    |   |          |          |                |          |                             |
| N2                                                                                                       | CT | X | 13706928 | 13708002 | WBGene00010504 | K02D3.1  | K02D3.1                     |
| 6.41940805321539e-05 AGIWUR309;AGIWUR7863;AGIWUR9204;AGIWUR36261                                         |    |   |          |          |                |          |                             |
| N2                                                                                                       | CT | X | 13708619 | 13711964 | WBGene00010505 | K02D3.2  | K02D3.2 -0.253981979427578  |
| AGIWUR3853                                                                                               |    |   |          |          |                |          |                             |
| N2                                                                                                       | CT | X | 13714157 | 13716298 | WBGene00010773 | K11E4.1  | K11E4.1 0.102560101796277   |
| AGIWUR16769                                                                                              |    |   |          |          |                |          |                             |
| N2                                                                                                       | CT | X | 13717584 | 13719217 | WBGene00010774 | K11E4.2  | K11E4.2 -0.0230125624432382 |
| AGIWUR9551                                                                                               |    |   |          |          |                |          |                             |
| N2                                                                                                       | CT | X | 13719207 | 13722917 | WBGene00010775 | poml-1   | K11E4.3 0.140542009591066   |
| AGIWUR31310                                                                                              |    |   |          |          |                |          |                             |
| N2                                                                                                       | CT | X | 13727298 | 13734404 | WBGene00010776 | pix-1    | K11E4.4 -0.19935448117461   |
| AGIWUR4920                                                                                               |    |   |          |          |                |          |                             |
| N2                                                                                                       | CT | X | 13747315 | 13751777 | WBGene00003661 | nhr-71   | K11E4.5 0.115013681875005   |

|                                                                                             |    |   |          |          |                |          |          |                     |  |
|---------------------------------------------------------------------------------------------|----|---|----------|----------|----------------|----------|----------|---------------------|--|
| AGIWUR2436;AGIWUR7635;AGIWUR15082;AGIWUR15554;AGIWUR15602;AGIWUR37166;AGIWUR40083           |    |   |          |          |                |          |          |                     |  |
| N2                                                                                          | CT | X | 13755771 | 13759391 | WBGene00010115 | aakb-1   | F55F3.1  | -0.208774732759327  |  |
| AGIWUR29247;AGIWUR31066;AGIWUR41100                                                         |    |   |          |          |                |          |          |                     |  |
| N2                                                                                          | CT | X | 13760237 | 13763998 | WBGene00010116 | F55F3.2  | F55F3.2  | 0.0699172874871392  |  |
| AGIWUR17133;AGIWUR19209;AGIWUR35861;AGIWUR37018                                             |    |   |          |          |                |          |          |                     |  |
| N2                                                                                          | CT | X | 13765331 | 13770558 | WBGene00010117 | nkb-3    | F55F3.3  | 0.232366323049184   |  |
| AGIWUR39006;AGIWUR43132                                                                     |    |   |          |          |                |          |          |                     |  |
| N2                                                                                          | CT | X | 13785479 | 13789238 | WBGene00010118 | F55F3.4  | F55F3.4  | 0.297489700219022   |  |
| AGIWUR37949                                                                                 |    |   |          |          |                |          |          |                     |  |
| N2                                                                                          | CT | X | 13790832 | 13792258 | WBGene00014217 | ZK1086.3 |          | ZK1086.3            |  |
| 0.0983951081883179 AGIWUR35791                                                              |    |   |          |          |                |          |          |                     |  |
| N2                                                                                          | CT | X | 13792305 | 13793625 | WBGene00014216 | ZK1086.2 |          | ZK1086.2            |  |
| 0.175440444353092 AGIWUR16136                                                               |    |   |          |          |                |          |          |                     |  |
| N2                                                                                          | CT | X | 13798222 | 13809857 | WBGene00014215 | obr-3    | ZK1086.1 |                     |  |
| -0.0122073059598549 AGIWUR15230;AGIWUR16536;AGIWUR20740;AGIWUR27701;AGIWUR35047;AGIWUR40410 |    |   |          |          |                |          |          |                     |  |
| N2                                                                                          | CT | X | 13817999 | 13823582 | WBGene00006676 | twk-23   | F19D8.1  | 0.254813535912684   |  |
| AGIWUR3421                                                                                  |    |   |          |          |                |          |          |                     |  |
| N2                                                                                          | CT | X | 13834427 | 13836522 | WBGene00008955 | F19D8.2  | F19D8.2  | 0.203700549521063   |  |
| AGIWUR20537                                                                                 |    |   |          |          |                |          |          |                     |  |
| N2                                                                                          | CT | X | 13841610 | 13843108 | WBGene00010833 | M03B6.1  | M03B6.1  | -0.0365008132691855 |  |
| AGIWUR14549                                                                                 |    |   |          |          |                |          |          |                     |  |
| N2                                                                                          | CT | X | 13852906 | 13857324 | WBGene00010834 | mct-3    | M03B6.2  | 0.203936196944822   |  |
| AGIWUR27898                                                                                 |    |   |          |          |                |          |          |                     |  |
| N2                                                                                          | CT | X | 13858841 | 13872915 | WBGene00010836 | M03B6.4  | M03B6.4  | -0.115579993250819  |  |
| AGIWUR15673                                                                                 |    |   |          |          |                |          |          |                     |  |
| N2                                                                                          | CT | X | 13865038 | 13882693 | WBGene00011904 | h1b-1    | T21H8.1  | 0.0298746433393138  |  |
| AGIWUR41754                                                                                 |    |   |          |          |                |          |          |                     |  |
| N2                                                                                          | CT | X | 13890993 | 13893334 | WBGene00005063 | sra-37   | T21H8.2  | -0.0191734878287377 |  |
| AGIWUR36347                                                                                 |    |   |          |          |                |          |          |                     |  |
| N2                                                                                          | CT | X | 13897934 | 13900147 | WBGene00005064 | sra-38   | T21H8.3  | -0.0906302160445769 |  |
| AGIWUR33908                                                                                 |    |   |          |          |                |          |          |                     |  |
| N2                                                                                          | CT | X | 13901064 | 13903428 | WBGene00005065 | sra-39   | T21H8.4  | -0.346561977510634  |  |
| AGIWUR27466                                                                                 |    |   |          |          |                |          |          |                     |  |
| N2                                                                                          | CT | X | 13908414 | 13909950 | WBGene00012514 | Y26E6A.3 |          | Y26E6A.3            |  |
| -0.0175546053244169 AGIWUR15997                                                             |    |   |          |          |                |          |          |                     |  |
| N2                                                                                          | CT | X | 13910937 | 13912978 | WBGene00012513 | Y26E6A.2 |          | Y26E6A.2            |  |
| -0.202364666897905 AGIWUR32408                                                              |    |   |          |          |                |          |          |                     |  |
| N2                                                                                          | CT | X | 13914806 | 13917171 | WBGene00012512 | ek1-5    | Y26E6A.1 |                     |  |
| -0.047956925202298 AGIWUR3073;AGIWUR6875;AGIWUR12665;AGIWUR23214;AGIWUR36035;AGIWUR39348    |    |   |          |          |                |          |          |                     |  |

|                                                 |    |   |          |          |                |          |          |                     |
|-------------------------------------------------|----|---|----------|----------|----------------|----------|----------|---------------------|
| N2                                              | CT | X | 13922663 | 13926129 | WBGene00010493 | meg-2    | K02B9.2  | 0.173547455906343   |
| AGIWUR13859;AGIWUR26357                         |    |   |          |          | WBGene00010492 | meg-1    | K02B9.1  | -0.0335347442600522 |
| N2                                              | CT | X | 13927036 | 13929634 |                |          |          |                     |
| AGIWUR13817;AGIWUR14669;AGIWUR19975;AGIWUR29958 |    |   |          |          | WBGene00010494 | K02B9.3  | K02B9.3  | 0.181090670864553   |
| N2                                              | CT | X | 13930898 | 13932033 |                |          |          |                     |
| AGIWUR43343                                     |    |   |          |          | WBGene00001251 | elt-3    | K02B9.4  | 0.191124432181962   |
| N2                                              | CT | X | 13934883 | 13941247 |                |          |          |                     |
| AGIWUR40564                                     |    |   |          |          | WBGene00000105 | alg-1    | F48F7.1  | 0.0759725743184969  |
| N2                                              | CT | X | 13949114 | 13956261 |                |          |          |                     |
| AGIWUR8665;AGIWUR12306                          |    |   |          |          | WBGene00006372 | syx-2    | F48F7.2  | -0.0338605420969991 |
| N2                                              | CT | X | 13960064 | 13962830 |                |          |          |                     |
| AGIWUR10497;AGIWUR23467;AGIWUR37424             |    |   |          |          | WBGene00009849 | F48F7.3  | F48F7.3  | 0.0827262439840677  |
| N2                                              | CT | X | 13963509 | 13965718 |                |          |          |                     |
| AGIWUR33231                                     |    |   |          |          | WBGene00004126 | pqn-39   | F48F7.4  | 0.231441435471645   |
| N2                                              | CT | X | 13965676 | 13968672 |                |          |          |                     |
| AGIWUR28707                                     |    |   |          |          | WBGene00009850 | F48F7.5  | F48F7.5  | -0.0123714302957829 |
| N2                                              | CT | X | 13975660 | 13976920 |                |          |          |                     |
| AGIWUR26316                                     |    |   |          |          | WBGene00009851 | F48F7.6  | F48F7.6  | -0.293130265783311  |
| N2                                              | CT | X | 13977829 | 13979031 |                |          |          |                     |
| AGIWUR4649                                      |    |   |          |          | WBGene00009852 | arrd-24  | F48F7.7  | -0.0737116372816864 |
| N2                                              | CT | X | 13979240 | 13980515 |                |          |          |                     |
| AGIWUR27486                                     |    |   |          |          | WBGene00009853 | arrd-27  | F48F7.8  | -0.237470148445863  |
| N2                                              | CT | X | 13980840 | 13981629 |                |          |          |                     |
| AGIWUR645                                       |    |   |          |          | WBGene00007842 | C31E10.1 | C31E10.1 |                     |
| N2                                              | CT | X | 13984491 | 13985692 |                |          |          |                     |
| 0.0508923171611997                              |    |   |          |          | WBGene00007844 | irld-24  | C31E10.3 |                     |
| N2                                              | CT | X | 13986607 | 13989009 |                |          |          |                     |
| -0.660603838899302                              |    |   |          |          | WBGene00007845 | C31E10.4 | C31E10.4 |                     |
| N2                                              | CT | X | 13989496 | 13990180 |                |          |          |                     |
| -0.254877471066599                              |    |   |          |          | WBGene00007846 | C31E10.5 | C31E10.5 |                     |
| N2                                              | CT | X | 13991458 | 13995834 |                |          |          |                     |
| 0.0101469080126027                              |    |   |          |          | WBGene00007847 | C31E10.6 | C31E10.6 |                     |
| N2                                              | CT | X | 13996307 | 13999351 |                |          |          |                     |
| -0.0273811979700334                             |    |   |          |          | WBGene00007848 | cytb-5.1 | C31E10.7 |                     |
| N2                                              | CT | X | 14001902 | 14003080 |                |          |          |                     |
| -0.0184068728910987                             |    |   |          |          | WBGene00007849 | tbc-19   | C31E10.8 |                     |
| N2                                              | CT | X | 14003020 | 14012595 |                |          |          |                     |
| 0.0236512881102477                              |    |   |          |          | WBGene00007295 | C04C11.1 | C04C11.1 |                     |
| N2                                              | CT | X | 14020590 | 14022409 |                |          |          |                     |

|                                                             |             |          |                |          |                             |
|-------------------------------------------------------------|-------------|----------|----------------|----------|-----------------------------|
| -0.0398660580308352                                         | AGIWUR2716  |          |                |          |                             |
| N2 CT X                                                     | 14033794    | 14037447 | WBGene00007296 | arrd-25  | C04C11.2                    |
| 0.0374483532144243                                          | AGIWUR25327 |          |                |          |                             |
| N2 CT X                                                     | 14049535    | 14063884 | WBGene00001116 | dyc-1    | C33G3.1 0.125612718470157   |
| AGIWUR42602                                                 |             |          |                |          |                             |
| N2 CT X                                                     | 14064313    | 14067984 | WBGene00007903 | lgc-21   | C33G3.3 0.132386260461505   |
| AGIWUR27168;AGIWUR31618;AGIWUR31972                         |             |          |                |          |                             |
| N2 CT X                                                     | 14071162    | 14076295 | WBGene00007904 | C33G3.4  | C33G3.4 0.094424860815014   |
| AGIWUR35084                                                 |             |          |                |          |                             |
| N2 CT X                                                     | 14076316    | 14078674 | WBGene00007905 | C33G3.5  | C33G3.5 -0.354403572866655  |
| AGIWUR10367                                                 |             |          |                |          |                             |
| N2 CT X                                                     | 14080381    | 14084318 | WBGene00007906 | C33G3.6  | C33G3.6 -0.219477271089485  |
| AGIWUR4232                                                  |             |          |                |          |                             |
| N2 CT X                                                     | 14085508    | 14089581 | WBGene00008879 | F16B12.1 | F16B12.1                    |
| -0.135344876511528                                          | AGIWUR33817 |          |                |          |                             |
| N2 CT X                                                     | 14090389    | 14095490 | WBGene00001106 | dsl-4    | F16B12.2                    |
| 0.0252837019894985                                          | AGIWUR31319 |          |                |          |                             |
| N2 CT X                                                     | 14095738    | 14098664 | WBGene00008880 | F16B12.4 | F16B12.4                    |
| -0.0754846431749652                                         | AGIWUR37367 |          |                |          |                             |
| N2 CT X                                                     | 14100555    | 14101568 | WBGene00008881 | F16B12.5 | F16B12.5                    |
| 0.101633261061485                                           | AGIWUR24008 |          |                |          |                             |
| N2 CT X                                                     | 14102359    | 14107905 | WBGene00008882 | F16B12.6 | F16B12.6                    |
| -0.0859458646769795                                         | AGIWUR3685  |          |                |          |                             |
| N2 CT X                                                     | 14108545    | 14109714 | WBGene00008883 | F16B12.7 | F16B12.7                    |
| -0.185603710563239                                          | AGIWUR44349 |          |                |          |                             |
| N2 CT X                                                     | 14111263    | 14113447 | WBGene00008884 | nhr-281  | F16B12.8                    |
| -0.051572625123776                                          | AGIWUR28687 |          |                |          |                             |
| N2 CT X                                                     | 14116111    | 14116751 | WBGene00009235 | F28H6.7  | F28H6.7 0.190832110968818   |
| AGIWUR42982                                                 |             |          |                |          |                             |
| N2 CT X                                                     | 14117069    | 14125879 | WBGene00009234 | F28H6.6  | F28H6.6 -0.137013498349203  |
| AGIWUR36143                                                 |             |          |                |          |                             |
| N2 CT X                                                     | 14127877    | 14133525 | WBGene00009233 | F28H6.4  | F28H6.4 -0.200969381706205  |
| AGIWUR14483                                                 |             |          |                |          |                             |
| N2 CT X                                                     | 14133896    | 14134344 | WBGene00044137 | F28H6.8  | F28H6.8 -0.0253239992373917 |
| AGIWUR12025;AGIWUR19471;AGIWUR27893;AGIWUR39148;AGIWUR39947 |             |          |                |          |                             |
| N2 CT X                                                     | 14137997    | 14140070 | WBGene00009232 | nkat-1   | F28H6.3 -0.0507177013743085 |
| AGIWUR5953;AGIWUR24988;AGIWUR37065                          |             |          |                |          |                             |
| N2 CT X                                                     | 14141946    | 14144889 | WBGene00009231 | ceh-89   | F28H6.2 -0.363841619768609  |
| AGIWUR17574                                                 |             |          |                |          |                             |



|                                                             |    |   |          |          |                |          |         |                     |
|-------------------------------------------------------------|----|---|----------|----------|----------------|----------|---------|---------------------|
| N2                                                          | CT | X | 14147700 | 14152070 | WBGene00000103 | akt-2    | F28H6.1 | -0.101431974359707  |
| AGIWUR27380;AGIWUR32868                                     |    |   |          |          |                |          |         |                     |
| N2                                                          | CT | X | 14155115 | 14157013 | WBGene00010995 | ceh-90   | R03E1.4 | 0.12668585817289    |
| AGIWUR14794                                                 |    |   |          |          |                |          |         |                     |
| N2                                                          | CT | X | 14158870 | 14161734 | WBGene00010994 | lgc-25   | R03E1.3 | -0.192552748253204  |
| AGIWUR25418;AGIWUR42901                                     |    |   |          |          |                |          |         |                     |
| N2                                                          | CT | X | 14163099 | 14164506 | WBGene00010993 | vha-20   | R03E1.2 | 0.0684291119225762  |
| AGIWUR39470                                                 |    |   |          |          |                |          |         |                     |
| N2                                                          | CT | X | 14164634 | 14169779 | WBGene00006369 | sym-4    | R03E1.1 |                     |
| -0.00660029287673147 AGIWUR24140;AGIWUR27190                |    |   |          |          |                |          |         |                     |
| N2                                                          | CT | X | 14170864 | 14174063 | WBGene00007993 | idhb-1   | C37E2.1 | 0.0367963410114882  |
| AGIWUR20911;AGIWUR23240;AGIWUR25532;AGIWUR37250;AGIWUR43320 |    |   |          |          |                |          |         |                     |
| N2                                                          | CT | X | 14176050 | 14178608 | WBGene00007994 | C37E2.2  | C37E2.2 | -0.0181906759345729 |
| AGIWUR24144;AGIWUR39279                                     |    |   |          |          |                |          |         |                     |
| N2                                                          | CT | X | 14178988 | 14181705 | WBGene00007995 | C37E2.3  | C37E2.3 | -0.068546133157346  |
| AGIWUR218                                                   |    |   |          |          |                |          |         |                     |
| N2                                                          | CT | X | 14183449 | 14185597 | WBGene00000457 | ceh-36   | C37E2.4 | 0.165488439830089   |
| AGIWUR21190                                                 |    |   |          |          |                |          |         |                     |
| N2                                                          | CT | X | 14197373 | 14209153 | WBGene00000458 | ceh-37   | C37E2.5 | -0.0713973451388901 |
| AGIWUR10198;AGIWUR11270                                     |    |   |          |          |                |          |         |                     |
| N2                                                          | CT | X | 14214939 | 14219089 | WBGene00010605 | K06G5.1  | K06G5.1 | 0.0500500869024716  |
| AGIWUR42150                                                 |    |   |          |          |                |          |         |                     |
| N2                                                          | CT | X | 14219568 | 14223256 | WBGene00010607 | K06G5.3  | K06G5.3 | -0.759924709295587  |
| AGIWUR23179                                                 |    |   |          |          |                |          |         |                     |
| N2                                                          | CT | X | 14225573 | 14228768 | WBGene00010606 | cyp-13B2 |         | K06G5.2             |
| -0.843654459111734 AGIWUR19930                              |    |   |          |          |                |          |         |                     |
| N2                                                          | CT | X | 14229668 | 14230876 | WBGene00005193 | srg-36   | K04C1.6 | -0.0115395882155069 |
| AGIWUR2949;AGIWUR2975;AGIWUR10474;AGIWUR34604               |    |   |          |          |                |          |         |                     |
| N2                                                          | CT | X | 14233944 | 14235285 | WBGene00005194 | srg-37   | K04C1.1 | -0.0907871355509409 |
| AGIWUR37515                                                 |    |   |          |          |                |          |         |                     |
| N2                                                          | CT | X | 14238695 | 14241350 | WBGene00010552 | K04C1.2  | K04C1.2 | 0.0937552686810434  |
| AGIWUR39418                                                 |    |   |          |          |                |          |         |                     |
| N2                                                          | CT | X | 14241572 | 14243395 | WBGene00010553 | K04C1.3  | K04C1.3 |                     |
| -0.00867732687607337 AGIWUR22409                            |    |   |          |          |                |          |         |                     |
| N2                                                          | CT | X | 14245650 | 14246623 | WBGene00010554 | mlc-6    | K04C1.4 | -0.230713249769888  |
| AGIWUR30373                                                 |    |   |          |          |                |          |         |                     |
| N2                                                          | CT | X | 14248053 | 14249846 | WBGene00010555 | K04C1.5  | K04C1.5 | -0.106313870617514  |
| AGIWUR32533;AGIWUR34151;AGIWUR42780                         |    |   |          |          |                |          |         |                     |
| N2                                                          | CT | X | 14250512 | 14252146 | WBGene00008464 | E02H4.6  | E02H4.6 | 0.298928430680256   |



|                                                                                 |    |   |          |          |                |           |           |                     |
|---------------------------------------------------------------------------------|----|---|----------|----------|----------------|-----------|-----------|---------------------|
| N2                                                                              | CT | X | 14406117 | 14411181 | WBGene00011765 | frpr-17   | T14C1.1   | 0.202814262960286   |
| AGIWUR14528                                                                     |    |   |          |          |                |           |           |                     |
| N2                                                                              | CT | X | 14411418 | 14412855 | WBGene00045292 | fbxa-179  | T14C1.3   |                     |
| -0.333720513643362 AGIWUR28226                                                  |    |   |          |          |                |           |           |                     |
| N2                                                                              | CT | X | 14413578 | 14415746 | WBGene00045291 | F23D12.10 | F23D12.10 |                     |
| -0.176412987886938 AGIWUR194;AGIWUR17650                                        |    |   |          |          |                |           |           |                     |
| N2                                                                              | CT | X | 14416121 | 14421579 | WBGene00009086 | F23D12.2  | F23D12.2  |                     |
| -0.321859981452317 AGIWUR25607;AGIWUR31917                                      |    |   |          |          |                |           |           |                     |
| N2                                                                              | CT | X | 14423405 | 14423883 | WBGene00009090 | fipr-3    | F23D12.6  |                     |
| 0.369332005526875 AGIWUR10622                                                   |    |   |          |          |                |           |           |                     |
| N2                                                                              | CT | X | 14423871 | 14424751 | WBGene00194674 | F23D12.11 | F23D12.11 |                     |
| 0.0589405102006708 AGIWUR21628                                                  |    |   |          |          |                |           |           |                     |
| N2                                                                              | CT | X | 14434212 | 14435363 | WBGene00044136 | F23D12.8  | F23D12.8  |                     |
| 0.212908201973162 AGIWUR11013;AGIWUR44943                                       |    |   |          |          |                |           |           |                     |
| N2                                                                              | CT | X | 14436751 | 14437656 | WBGene00044217 | F23D12.9  | F23D12.9  |                     |
| -0.20088947905197 AGIWUR4688;AGIWUR9629;AGIWUR20087;AGIWUR24983;AGIWUR37527     |    |   |          |          |                |           |           |                     |
| N2                                                                              | CT | X | 14442621 | 14443446 | WBGene00009087 | F23D12.3  | F23D12.3  |                     |
| -0.163128596001943 AGIWUR16391                                                  |    |   |          |          |                |           |           |                     |
| N2                                                                              | CT | X | 14445001 | 14446165 | WBGene00009088 | F23D12.4  | F23D12.4  |                     |
| -0.155585680529051 AGIWUR15283                                                  |    |   |          |          |                |           |           |                     |
| N2                                                                              | CT | X | 14448224 | 14453562 | WBGene00009089 | jmjd-3.2  | F23D12.5  |                     |
| 0.0853649613638856 AGIWUR4166                                                   |    |   |          |          |                |           |           |                     |
| N2                                                                              | CT | X | 14453557 | 14453835 | WBGene00009091 | F23D12.7  | F23D12.7  |                     |
| -0.226628938512132 AGIWUR43008                                                  |    |   |          |          |                |           |           |                     |
| N2                                                                              | CT | X | 14454689 | 14455519 | WBGene00044156 | Y66C5A.1  | Y66C5A.1  |                     |
| -0.0473036754969307 AGIWUR11294;AGIWUR16226;AGIWUR28674;AGIWUR35288;AGIWUR38878 |    |   |          |          |                |           |           |                     |
| N2                                                                              | CT | X | 14460349 | 14462139 | WBGene00044157 | Y66C5A.2  | Y66C5A.2  |                     |
| -0.0587840906783872 AGIWUR12487;AGIWUR13381                                     |    |   |          |          |                |           |           |                     |
| N2                                                                              | CT | X | 14462857 | 14464400 | WBGene00010938 | M163.6    | M163.6    | 0.0209866721951038  |
| AGIWUR2660                                                                      |    |   |          |          |                |           |           |                     |
| N2                                                                              | CT | X | 14464809 | 14467615 | WBGene00010939 | M163.7    | M163.7    | -0.195323712357922  |
| AGIWUR35597                                                                     |    |   |          |          |                |           |           |                     |
| N2                                                                              | CT | X | 14469647 | 14470066 | WBGene00044145 | M163.9    | M163.9    | 0.0500186896954951  |
| AGIWUR4009;AGIWUR5904;AGIWUR14096;AGIWUR15601;AGIWUR37296                       |    |   |          |          |                |           |           |                     |
| N2                                                                              | CT | X | 14470987 | 14471772 | WBGene00044146 | M163.10   | M163.10   | -0.160061884629842  |
| AGIWUR3264;AGIWUR8009;AGIWUR20332;AGIWUR23335;AGIWUR40949                       |    |   |          |          |                |           |           |                     |
| N2                                                                              | CT | X | 14474038 | 14476153 | WBGene00010937 | M163.5    | M163.5    | -0.0418273022591986 |
| AGIWUR14359                                                                     |    |   |          |          |                |           |           |                     |
| N2                                                                              | CT | X | 14479378 | 14480256 | WBGene00044147 | M163.11   | M163.11   | 0.103111673966487   |

|                                                                                           |    |   |          |          |                |          |          |                     |  |
|-------------------------------------------------------------------------------------------|----|---|----------|----------|----------------|----------|----------|---------------------|--|
| AGIWUR2389;AGIWUR15730                                                                    |    |   |          |          |                |          |          |                     |  |
| N2                                                                                        | CT | X | 14480572 | 14484702 | WBGene00001583 | gfi-3    | M163.4   | -0.160881677069698  |  |
| AGIWUR16280                                                                               |    |   |          |          |                |          |          |                     |  |
| N2                                                                                        | CT | X | 14485127 | 14485955 | WBGene00010940 | M163.8   | M163.8   | -0.023185143947476  |  |
| AGIWUR1287;AGIWUR14317;AGIWUR22925                                                        |    |   |          |          |                |          |          |                     |  |
| N2                                                                                        | CT | X | 14490094 | 14491115 | WBGene00001898 | his-24   | M163.3   | 0.336305347072002   |  |
| AGIWUR14069;AGIWUR31222;AGIWUR32696;AGIWUR34761;AGIWUR38474;AGIWUR42369                   |    |   |          |          |                |          |          |                     |  |
| N2                                                                                        | CT | X | 14496085 | 14499434 | WBGene00010936 | ztf-14   | M163.2   | 0.0477308960651888  |  |
| AGIWUR43318                                                                               |    |   |          |          |                |          |          |                     |  |
| N2                                                                                        | CT | X | 14502487 | 14503862 | WBGene00010935 | M163.1   | M163.1   | 0.150354027228889   |  |
| AGIWUR26347                                                                               |    |   |          |          |                |          |          |                     |  |
| N2                                                                                        | CT | X | 14511248 | 14512912 | WBGene00008355 | fbxa-141 |          | D1025.3             |  |
| -0.382644867836637 AGIWUR19594                                                            |    |   |          |          |                |          |          |                     |  |
| N2                                                                                        | CT | X | 14514136 | 14515073 | WBGene00008354 | gcsh-1   | D1025.2  | 0.0135414745990481  |  |
| AGIWUR34839                                                                               |    |   |          |          |                |          |          |                     |  |
| N2                                                                                        | CT | X | 14516860 | 14519229 | WBGene00044134 | D1025.10 |          | D1025.10            |  |
| 0.0459771385957302 AGIWUR9627;AGIWUR37647                                                 |    |   |          |          |                |          |          |                     |  |
| N2                                                                                        | CT | X | 14520763 | 14522705 | WBGene00008353 | D1025.1  | D1025.1  |                     |  |
| -0.00458006160716451 AGIWUR28702                                                          |    |   |          |          |                |          |          |                     |  |
| N2                                                                                        | CT | X | 14529788 | 14530214 | WBGene00008356 | nspc-20  | D1025.4  | -0.185833380448496  |  |
| AGIWUR10733                                                                               |    |   |          |          |                |          |          |                     |  |
| N2                                                                                        | CT | X | 14537897 | 14539522 | WBGene00011984 | T24C2.5  | T24C2.5  | -0.238753074425262  |  |
| AGIWUR13511;AGIWUR22752;AGIWUR23045;AGIWUR27229;AGIWUR29830                               |    |   |          |          |                |          |          |                     |  |
| N2                                                                                        | CT | X | 14540686 | 14542058 | WBGene00011983 | fbxa-81  | T24C2.4  | 0.129062792187803   |  |
| AGIWUR13255;AGIWUR27010;AGIWUR35307                                                       |    |   |          |          |                |          |          |                     |  |
| N2                                                                                        | CT | X | 14543557 | 14544643 | WBGene00011982 | T24C2.3  | T24C2.3  | -0.0639362218418782 |  |
| AGIWUR4174                                                                                |    |   |          |          |                |          |          |                     |  |
| N2                                                                                        | CT | X | 14545855 | 14546720 | WBGene00011981 | T24C2.2  | T24C2.2  | -0.516007780342672  |  |
| AGIWUR37499                                                                               |    |   |          |          |                |          |          |                     |  |
| N2                                                                                        | CT | X | 14550138 | 14556297 | WBGene00004301 | ram-5    | T24C2.1  | 0.133506821112416   |  |
| AGIWUR1673                                                                                |    |   |          |          |                |          |          |                     |  |
| N2                                                                                        | CT | X | 14558504 | 14561425 | WBGene00003602 | nhr-3    | H01A20.1 |                     |  |
| -0.0980620312081419 AGIWUR7464;AGIWUR8593;AGIWUR12537;AGIWUR17322;AGIWUR28309;AGIWUR36939 |    |   |          |          |                |          |          |                     |  |
| N2                                                                                        | CT | X | 14568854 | 14589101 | WBGene00008094 | C44H4.4  | C44H4.4  | -0.0772553337272086 |  |
| AGIWUR6592                                                                                |    |   |          |          |                |          |          |                     |  |
| N2                                                                                        | CT | X | 14589624 | 14591821 | WBGene00006524 | tap-1    | C44H4.5  | 0.0165450557002913  |  |
| AGIWUR24906                                                                               |    |   |          |          |                |          |          |                     |  |
| N2                                                                                        | CT | X | 14595125 | 14595944 | WBGene00008096 | C44H4.8  | C44H4.8  | -0.200517660657214  |  |
| AGIWUR29980                                                                               |    |   |          |          |                |          |          |                     |  |

|                                                                                               |    |   |          |          |                |          |          |                     |
|-----------------------------------------------------------------------------------------------|----|---|----------|----------|----------------|----------|----------|---------------------|
| N2                                                                                            | CT | X | 14596476 | 14599158 | WBGene00008095 | C44H4.6  | C44H4.6  | 0.0131678352580682  |
| AGIWUR42695                                                                                   |    |   |          |          |                |          |          |                     |
| N2                                                                                            | CT | X | 14603017 | 14608655 | WBGene00001325 | eor-2    | C44H4.7  | -0.128081483472092  |
| AGIWUR23295;AGIWUR35594                                                                       |    |   |          |          |                |          |          |                     |
| N2                                                                                            | CT | X | 14611380 | 14624824 | WBGene00004313 | rbc-1    | F54E4.1  | -0.0377256702156252 |
| AGIWUR32837                                                                                   |    |   |          |          |                |          |          |                     |
| N2                                                                                            | CT | X | 14625452 | 14628916 | WBGene00010058 | F54E4.2  | F54E4.2  | 0.0983388323004784  |
| AGIWUR4544                                                                                    |    |   |          |          |                |          |          |                     |
| N2                                                                                            | CT | X | 14632092 | 14636472 | WBGene00010059 | F54E4.3  | F54E4.3  | 0.104652667512273   |
| AGIWUR5252;AGIWUR17296;AGIWUR18189;AGIWUR22420;AGIWUR35079                                    |    |   |          |          |                |          |          |                     |
| N2                                                                                            | CT | X | 14641391 | 14645486 | WBGene00010060 | F54E4.4  | F54E4.4  | -0.0907782332001297 |
| AGIWUR13807                                                                                   |    |   |          |          |                |          |          |                     |
| N2                                                                                            | CT | X | 14654972 | 14662841 | WBGene00007750 | syg-2    | C26G2.1  | -0.14838738290072   |
| AGIWUR31608                                                                                   |    |   |          |          |                |          |          |                     |
| N2                                                                                            | CT | X | 14664289 | 14671336 | WBGene00007751 | C26G2.2  | C26G2.2  | 0.0603932153426427  |
| AGIWUR16366;AGIWUR33426;AGIWUR34201;AGIWUR40630                                               |    |   |          |          |                |          |          |                     |
| N2                                                                                            | CT | X | 14674328 | 14683326 | WBGene00004854 | slt-1    | F40E10.4 |                     |
| 0.0092943829010359 AGIWUR17273                                                                |    |   |          |          |                |          |          |                     |
| N2                                                                                            | CT | X | 14684877 | 14688322 | WBGene00000822 | csq-1    | F40E10.3 |                     |
| -0.102129071614257 AGIWUR5990;AGIWUR26198;AGIWUR34544                                         |    |   |          |          |                |          |          |                     |
| N2                                                                                            | CT | X | 14690846 | 14692999 | WBGene00004950 | sox-3    | F40E10.2 |                     |
| -0.00347858062273865 AGIWUR31056                                                              |    |   |          |          |                |          |          |                     |
| N2                                                                                            | CT | X | 14696412 | 14699977 | WBGene00001828 | hch-1    | F40E10.1 |                     |
| 0.136310572583266 AGIWUR35024                                                                 |    |   |          |          |                |          |          |                     |
| N2                                                                                            | CT | X | 14701790 | 14703682 | WBGene00009573 | F40E10.5 |          | F40E10.5            |
| -0.0413122433684814 AGIWUR38084                                                               |    |   |          |          |                |          |          |                     |
| N2                                                                                            | CT | X | 14703715 | 14706859 | WBGene00009574 | F40E10.6 |          | F40E10.6            |
| 0.201398166751661                                                                             |    |   |          |          |                |          |          |                     |
| AGIWUR5715;AGIWUR7899;AGIWUR16909;AGIWUR27026;AGIWUR32719;AGIWUR36500;AGIWUR39306;AGIWUR39932 |    |   |          |          |                |          |          |                     |
| N2                                                                                            | CT | X | 14710475 | 14718779 | WBGene00006432 | tag-53   | F33C8.1  | 0.076491182189141   |
| AGIWUR8626;AGIWUR8942                                                                         |    |   |          |          |                |          |          |                     |
| N2                                                                                            | CT | X | 14721398 | 14723437 | WBGene00009357 | F33C8.2  | F33C8.2  | -0.162135874970165  |
| AGIWUR10908                                                                                   |    |   |          |          |                |          |          |                     |
| N2                                                                                            | CT | X | 14726626 | 14729482 | WBGene00006634 | tsp-8    | F33C8.3  | -0.12375117549783   |
| AGIWUR40963                                                                                   |    |   |          |          |                |          |          |                     |
| N2                                                                                            | CT | X | 14732283 | 14734457 | WBGene00009358 | F33C8.4  | F33C8.4  |                     |
| -0.00554139873080217 AGIWUR25047                                                              |    |   |          |          |                |          |          |                     |
| N2                                                                                            | CT | X | 14734443 | 14740088 | WBGene00007347 | C05G5.1  | C05G5.1  | 0.067166232270953   |
| AGIWUR4992                                                                                    |    |   |          |          |                |          |          |                     |

|                                                                                            |    |   |          |          |                |          |          |                    |
|--------------------------------------------------------------------------------------------|----|---|----------|----------|----------------|----------|----------|--------------------|
| N2                                                                                         | CT | X | 14747320 | 14750390 | WBGene00007348 | C05G5.2  | C05G5.2  | -0.144372768243208 |
| AGIWUR26168                                                                                |    |   |          |          |                |          |          |                    |
| N2                                                                                         | CT | X | 14750849 | 14752011 | WBGene00007349 | C05G5.3  | C05G5.3  | -0.278522815812517 |
| AGIWUR43661                                                                                |    |   |          |          |                |          |          |                    |
| N2                                                                                         | CT | X | 14754026 | 14756459 | WBGene00007350 | suc1-1   | C05G5.4  | -0.176969406257637 |
| AGIWUR12280                                                                                |    |   |          |          |                |          |          |                    |
| N2                                                                                         | CT | X | 14761966 | 14771885 | WBGene00012445 | Y16B4A.2 |          | Y16B4A.2           |
| 0.106238246256645 AGIWUR21626                                                              |    |   |          |          |                |          |          |                    |
| N2                                                                                         | CT | X | 14773538 | 14783564 | WBGene00006743 | unc-3    | Y16B4A.1 |                    |
| 0.136340019844397 AGIWUR11747                                                              |    |   |          |          |                |          |          |                    |
| N2                                                                                         | CT | X | 14791008 | 14792980 | WBGene00009628 | tatn-1   | F42D1.2  | 0.291099496181241  |
| AGIWUR9033;AGIWUR21070;AGIWUR35338;AGIWUR43426                                             |    |   |          |          |                |          |          |                    |
| N2                                                                                         | CT | X | 14794217 | 14804359 | WBGene00009629 | spr-2    | F42D1.3  | -0.163601023921643 |
| AGIWUR11796                                                                                |    |   |          |          |                |          |          |                    |
| N2                                                                                         | CT | X | 14807236 | 14807944 | WBGene00044139 | F42D1.4  | F42D1.4  | 0.0224945631070677 |
| AGIWUR12997;AGIWUR16902;AGIWUR28233;AGIWUR41590;AGIWUR44828                                |    |   |          |          |                |          |          |                    |
| N2                                                                                         | CT | X | 14808846 | 14810849 | WBGene00000221 | atf-5    | T04C10.4 |                    |
| -0.0329309446419366 AGIWUR6034                                                             |    |   |          |          |                |          |          |                    |
| N2                                                                                         | CT | X | 14812361 | 14814380 | WBGene00011426 | T04C10.3 |          | T04C10.3           |
| -0.0550427622234837 AGIWUR41380                                                            |    |   |          |          |                |          |          |                    |
| N2                                                                                         | CT | X | 14815828 | 14818507 | WBGene00001329 | epn-1    | T04C10.2 |                    |
| -0.130642662574704 AGIWUR14802;AGIWUR28806;AGIWUR30004;AGIWUR40253;AGIWUR42773;AGIWUR45112 |    |   |          |          |                |          |          |                    |
| N2                                                                                         | CT | X | 14819909 | 14824540 | WBGene00003149 | mbk-1    | T04C10.1 |                    |
| 0.142861387178975 AGIWUR20624                                                              |    |   |          |          |                |          |          |                    |
| N2                                                                                         | CT | X | 14831824 | 14838241 | WBGene00001055 | dpf-2    | C27C12.7 |                    |
| -0.187494394452576 AGIWUR6732                                                              |    |   |          |          |                |          |          |                    |
| N2                                                                                         | CT | X | 14845937 | 14849217 | WBGene00007772 | egrh-1   | C27C12.2 |                    |
| 0.157394265642631 AGIWUR3860;AGIWUR36066                                                   |    |   |          |          |                |          |          |                    |
| N2                                                                                         | CT | X | 14849275 | 14852619 | WBGene00007775 | acd-3    | C27C12.5 |                    |
| -0.0936760887567978 AGIWUR43410                                                            |    |   |          |          |                |          |          |                    |
| N2                                                                                         | CT | X | 14852552 | 14853762 | WBGene00007771 | C27C12.1 |          | C27C12.1           |
| 0.105063645127146 AGIWUR16057                                                              |    |   |          |          |                |          |          |                    |
| N2                                                                                         | CT | X | 14854131 | 14856518 | WBGene00007774 | C27C12.4 |          | C27C12.4           |
| -0.0236843365702875 AGIWUR24339                                                            |    |   |          |          |                |          |          |                    |
| N2                                                                                         | CT | X | 14857303 | 14861801 | WBGene00007776 | dmd-4    | C27C12.6 |                    |
| -0.133746031215199 AGIWUR9518                                                              |    |   |          |          |                |          |          |                    |
| N2                                                                                         | CT | X | 14863678 | 14865844 | WBGene00007773 | C27C12.3 |          | C27C12.3           |
| -0.00190453244621747 AGIWUR1471;AGIWUR20813;AGIWUR29142;AGIWUR41215;AGIWUR43019            |    |   |          |          |                |          |          |                    |
| N2                                                                                         | CT | X | 14867101 | 14868300 | WBGene00009300 | F31F6.1  | F31F6.1  | -0.028241448822202 |

|                                                                                                                                             |    |   |          |          |                |          |                             |
|---------------------------------------------------------------------------------------------------------------------------------------------|----|---|----------|----------|----------------|----------|-----------------------------|
| AGIWUR36444                                                                                                                                 |    |   |          |          |                |          |                             |
| N2                                                                                                                                          | CT | X | 14869606 | 14870675 | WBGene00009301 | F31F6.2  | F31F6.2 0.0629784881494553  |
| AGIWUR24956                                                                                                                                 |    |   |          |          |                |          |                             |
| N2                                                                                                                                          | CT | X | 14876150 | 14878855 | WBGene00044138 | sssh-1   | F31F6.8 -0.162496460056911  |
| AGIWUR19406;AGIWUR20525;AGIWUR31034                                                                                                         |    |   |          |          |                |          |                             |
| N2                                                                                                                                          | CT | X | 14881419 | 14882300 | WBGene00001451 | flp-8    | F31F6.4 -0.14117140152393   |
| AGIWUR4453;AGIWUR7526;AGIWUR9122;AGIWUR9925;AGIWUR14557;AGIWUR15832;AGIWUR15891;AGIWUR25652;AGIWUR25878;AGIWUR34263;AGIWUR37944;AGIWUR44175 |    |   |          |          |                |          |                             |
| N2                                                                                                                                          | CT | X | 14888488 | 14894297 | WBGene00000902 | daf-6    | F31F6.5 -0.0937865508727009 |
| AGIWUR20854                                                                                                                                 |    |   |          |          |                |          |                             |
| N2                                                                                                                                          | CT | X | 14895145 | 14898449 | WBGene00003517 | nac-1    | F31F6.6 0.0257121322578353  |
| AGIWUR44277                                                                                                                                 |    |   |          |          |                |          |                             |
| N2                                                                                                                                          | CT | X | 14898505 | 14900772 | WBGene00009303 | lips-8   | F31F6.7 -1.02203447590739   |
| AGIWUR20024                                                                                                                                 |    |   |          |          |                |          |                             |
| N2                                                                                                                                          | CT | X | 14901881 | 14905261 | WBGene00013497 | hex-5    | Y70D2A.2                    |
| 0.199807079081905 AGIWUR37112                                                                                                               |    |   |          |          |                |          |                             |
| N2                                                                                                                                          | CT | X | 14918836 | 14923942 | WBGene00013496 | Y70D2A.1 | Y70D2A.1                    |
| 0.139579094032595 AGIWUR20397                                                                                                               |    |   |          |          |                |          |                             |
| N2                                                                                                                                          | CT | X | 14925031 | 14928934 | WBGene00008808 | ntr-2    | F14F4.1 0.0808468644462366  |
| AGIWUR24360                                                                                                                                 |    |   |          |          |                |          |                             |
| N2                                                                                                                                          | CT | X | 14938502 | 14946317 | WBGene00003411 | mrp-5    | F14F4.3 0.22911016172       |
| AGIWUR40460                                                                                                                                 |    |   |          |          |                |          |                             |
| N2                                                                                                                                          | CT | X | 14951200 | 14954544 | WBGene00003909 | pag-3    | F45B8.4 0.318533237518593   |
| AGIWUR17163                                                                                                                                 |    |   |          |          |                |          |                             |
| N2                                                                                                                                          | CT | X | 14960544 | 14961571 | WBGene00009720 | F45B8.3  | F45B8.3 -0.22808992551232   |
| AGIWUR17468                                                                                                                                 |    |   |          |          |                |          |                             |
| N2                                                                                                                                          | CT | X | 14962922 | 14963995 | WBGene00004353 | rgs-10   | F45B8.2 -0.211174538058923  |
| AGIWUR38642                                                                                                                                 |    |   |          |          |                |          |                             |
| N2                                                                                                                                          | CT | X | 14964553 | 14965976 | WBGene00004354 | rgs-11   | F45B8.1 -0.107980904638733  |
| AGIWUR19167                                                                                                                                 |    |   |          |          |                |          |                             |
| N2                                                                                                                                          | CT | X | 14968900 | 14970271 | WBGene00008973 | F20D1.1  | F20D1.1 0.155192300165194   |
| AGIWUR33104                                                                                                                                 |    |   |          |          |                |          |                             |
| N2                                                                                                                                          | CT | X | 14970751 | 14974779 | WBGene00008974 | tbc-1    | F20D1.2 -0.19034310802089   |
| AGIWUR5402                                                                                                                                  |    |   |          |          |                |          |                             |
| N2                                                                                                                                          | CT | X | 14976117 | 14978714 | WBGene00008975 | F20D1.3  | F20D1.3 0.0556937290552826  |
| AGIWUR25553;AGIWUR44272                                                                                                                     |    |   |          |          |                |          |                             |
| N2                                                                                                                                          | CT | X | 14979374 | 14980435 | WBGene00008980 | emre-1   | F20D1.10                    |
| -0.137214723853226 AGIWUR21288;AGIWUR30966;AGIWUR38147;AGIWUR40911;AGIWUR42285;AGIWUR44747                                                  |    |   |          |          |                |          |                             |
| N2                                                                                                                                          | CT | X | 14980954 | 14981675 | WBGene00000191 | arl-7    | F20D1.5 0.511169312030359   |

|                                                                                                          |    |   |          |          |                |                 |                            |
|----------------------------------------------------------------------------------------------------------|----|---|----------|----------|----------------|-----------------|----------------------------|
| AGIWUR40958                                                                                              |    |   |          |          |                |                 |                            |
| N2                                                                                                       | CT | X | 14983533 | 14987365 | WBGene00004317 | rbg-1           | F20D1.6 -0.045752626318059 |
| AGIWUR12759                                                                                              |    |   |          |          |                |                 |                            |
| N2                                                                                                       | CT | X | 14987369 | 14991380 | WBGene00008977 | iglr-1          | F20D1.7 -0.101596245189668 |
| AGIWUR17966                                                                                              |    |   |          |          |                |                 |                            |
| N2                                                                                                       | CT | X | 14994752 | 14999198 | WBGene00008978 | cutl-3          | F20D1.8 -0.02831380194855  |
| AGIWUR15768;AGIWUR27261                                                                                  |    |   |          |          |                |                 |                            |
| N2                                                                                                       | CT | X | 15002034 | 15003941 | WBGene00008979 | F20D1.9 F20D1.9 | 0.0361015306034869         |
| AGIWUR33263                                                                                              |    |   |          |          |                |                 |                            |
| N2                                                                                                       | CT | X | 15004064 | 15007308 | WBGene00007668 | C18B12.6        | C18B12.6                   |
| -0.102690637139965 AGIWUR25292                                                                           |    |   |          |          |                |                 |                            |
| N2                                                                                                       | CT | X | 15012684 | 15012926 | WBGene00007663 | C18B12.1        | C18B12.1                   |
| -0.123755488275334 AGIWUR22784                                                                           |    |   |          |          |                |                 |                            |
| N2                                                                                                       | CT | X | 15026308 | 15031084 | WBGene00007664 | seb-3           | C18B12.2                   |
| -0.0491250276271078 AGIWUR15522                                                                          |    |   |          |          |                |                 |                            |
| N2                                                                                                       | CT | X | 15031353 | 15034541 | WBGene00001096 | dsc-1           | C18B12.3                   |
| 0.0512093458871927 AGIWUR482;AGIWUR35604;AGIWUR37220                                                     |    |   |          |          |                |                 |                            |
| N2                                                                                                       | CT | X | 15036662 | 15040602 | WBGene00007666 | C18B12.4        | C18B12.4                   |
| -0.0262047135046419 AGIWUR41884                                                                          |    |   |          |          |                |                 |                            |
| N2                                                                                                       | CT | X | 15042956 | 15045353 | WBGene00007667 | fbxa-97         | C18B12.5                   |
| -0.285241447620299 AGIWUR7812                                                                            |    |   |          |          |                |                 |                            |
| N2                                                                                                       | CT | X | 15051688 | 15052870 | WBGene00044141 | H03G16.6        | H03G16.6                   |
| 0.00382843649055431 AGIWUR568;AGIWUR19092;AGIWUR31424                                                    |    |   |          |          |                |                 |                            |
| N2                                                                                                       | CT | X | 15053883 | 15054652 | WBGene00010358 | H03G16.1        | H03G16.1                   |
| -0.0625180834914767 AGIWUR16692                                                                          |    |   |          |          |                |                 |                            |
| N2                                                                                                       | CT | X | 15055500 | 15056822 | WBGene00010361 | H03G16.5        | H03G16.5                   |
| -0.116536997307849 AGIWUR32198                                                                           |    |   |          |          |                |                 |                            |
| N2                                                                                                       | CT | X | 15058509 | 15060399 | WBGene00010360 | fbxa-96         | H03G16.4                   |
| -0.0233186678874846 AGIWUR9111;AGIWUR12914;AGIWUR33212                                                   |    |   |          |          |                |                 |                            |
| N2                                                                                                       | CT | X | 15064015 | 15067184 | WBGene00014790 | H03G16.3        | H03G16.3                   |
| -0.0112785964563695                                                                                      |    |   |          |          |                |                 |                            |
| AGIWUR4038;AGIWUR23558;AGIWUR24798;AGIWUR30039;AGIWUR30542;AGIWUR41463;AGIWUR44210;AGIWUR44463           |    |   |          |          |                |                 |                            |
| N2                                                                                                       | CT | X | 15067476 | 15069342 | WBGene00010359 | mam-6           | H03G16.2                   |
| 0.0223448069765837 AGIWUR3512                                                                            |    |   |          |          |                |                 |                            |
| N2                                                                                                       | CT | X | 15069743 | 15076480 | WBGene00010434 | H40L08.3        | H40L08.3                   |
| -0.0608286113435339 AGIWUR4784;AGIWUR22840;AGIWUR44346                                                   |    |   |          |          |                |                 |                            |
| N2                                                                                                       | CT | X | 15076696 | 15077748 | WBGene00014793 | H40L08.2        | H40L08.2                   |
| -0.103237543931057                                                                                       |    |   |          |          |                |                 |                            |
| AGIWUR965;AGIWUR4962;AGIWUR10059;AGIWUR15584;AGIWUR34346;AGIWUR35856;AGIWUR36602;AGIWUR42221;AGIWUR43395 |    |   |          |          |                |                 |                            |



|                                                                                                                      |    |   |                                               |          |                |          |                            |
|----------------------------------------------------------------------------------------------------------------------|----|---|-----------------------------------------------|----------|----------------|----------|----------------------------|
| N2                                                                                                                   | CT | X | 15080779                                      | 15084086 | WBGene00010433 | H40L08.1 | H40L08.1                   |
| -0.0268450915936285                                                                                                  |    |   | AGIWUR31733                                   |          |                |          |                            |
| N2                                                                                                                   | CT | X | 15084749                                      | 15088135 | WBGene00008609 | F09B12.5 | F09B12.5                   |
| 0.0409545221828891                                                                                                   |    |   | AGIWUR32756                                   |          |                |          |                            |
| N2                                                                                                                   | CT | X | 15089397                                      | 15093585 | WBGene00001468 | flr-4    | F09B12.6                   |
| -0.0857063243198093                                                                                                  |    |   | AGIWUR41102                                   |          |                |          |                            |
| N2                                                                                                                   | CT | X | 15095343                                      | 15097954 | WBGene00008607 | F09B12.3 | F09B12.3                   |
| 0.0509151535157191                                                                                                   |    |   | AGIWUR25770;AGIWUR36606                       |          |                |          |                            |
| N2                                                                                                                   | CT | X | 15098066                                      | 15100416 | WBGene00008606 | dhhc-1   | F09B12.2                   |
| -0.0586178707626814                                                                                                  |    |   | AGIWUR10831                                   |          |                |          |                            |
| N2                                                                                                                   | CT | X | 15101787                                      | 15107967 | WBGene00008605 | mlt-9    | F09B12.1                   |
| -0.255068934380632                                                                                                   |    |   | AGIWUR4062;AGIWUR7385;AGIWUR36793;AGIWUR39663 |          |                |          |                            |
| N2                                                                                                                   | CT | X | 15109951                                      | 15116618 | WBGene00011101 | R07D5.2  | R07D5.2 0.063926345119091  |
| AGIWUR37283;AGIWUR44061                                                                                              |    |   |                                               |          |                |          |                            |
| N2                                                                                                                   | CT | X | 15120975                                      | 15147742 | WBGene00006747 | unc-7    | R07D5.1 0.0293951158209627 |
| AGIWUR3980;AGIWUR16987;AGIWUR30189;AGIWUR31952                                                                       |    |   |                                               |          |                |          |                            |
| N2                                                                                                                   | CT | X | 15157359                                      | 15158749 | WBGene00007525 | C11G10.1 | C11G10.1                   |
| 0.268952400445149                                                                                                    |    |   | AGIWUR32660;AGIWUR37230                       |          |                |          |                            |
| N2                                                                                                                   | CT | X | 15161283                                      | 15166222 | WBGene00011684 | T10B10.8 | T10B10.8                   |
| 0.261253749103602                                                                                                    |    |   | AGIWUR1307;AGIWUR8812;AGIWUR19532             |          |                |          |                            |
| N2                                                                                                                   | CT | X | 15168722                                      | 15173621 | WBGene00003840 | ocr-3    | T10B10.7                   |
| 0.228774462722394                                                                                                    |    |   | AGIWUR24640                                   |          |                |          |                            |
| N2                                                                                                                   | CT | X | 15173904                                      | 15178145 | WBGene00011679 | ucr-2.2  | T10B10.2                   |
| -0.164522092641027                                                                                                   |    |   | AGIWUR11998                                   |          |                |          |                            |
| N2                                                                                                                   | CT | X | 15178096                                      | 15181501 | WBGene00011680 | T10B10.3 | T10B10.3                   |
| -0.00532502759449915                                                                                                 |    |   |                                               |          |                |          |                            |
| AGIWUR1243;AGIWUR7773;AGIWUR9134;AGIWUR10929;AGIWUR14582;AGIWUR18013;AGIWUR19217;AGIWUR23455;AGIWUR26069;AGIWUR36469 |    |   |                                               |          |                |          |                            |
| N2                                                                                                                   | CT | X | 15190100                                      | 15193066 | WBGene00011681 | T10B10.4 | T10B10.4                   |
| 0.177960621588946                                                                                                    |    |   | AGIWUR16848;AGIWUR22935;AGIWUR44845           |          |                |          |                            |
| N2                                                                                                                   | CT | X | 15193086                                      | 15194324 | WBGene00011683 | phat-6   | T10B10.6                   |
| 0.032000132507239                                                                                                    |    |   | AGIWUR8369                                    |          |                |          |                            |
| N2                                                                                                                   | CT | X | 15195922                                      | 15199136 | WBGene00011682 | snt-7    | T10B10.5                   |
| -0.194448649767155                                                                                                   |    |   | AGIWUR39833;AGIWUR42120;AGIWUR44905           |          |                |          |                            |
| N2                                                                                                                   | CT | X | 15209289                                      | 15213259 | WBGene00010356 | H03A11.1 | H03A11.1                   |
| -0.0236026577570225                                                                                                  |    |   | AGIWUR17022;AGIWUR32933;AGIWUR43737           |          |                |          |                            |
| N2                                                                                                                   | CT | X | 15225869                                      | 15230645 | WBGene00010357 | H03A11.2 | H03A11.2                   |
| 0.10989008090192                                                                                                     |    |   | AGIWUR34239                                   |          |                |          |                            |
| N2                                                                                                                   | CT | X | 15234829                                      | 15246365 | WBGene00009552 | piki-1   | F39B1.1 -0.135745494480092 |

|                                                                                                     |    |   |          |          |                |                                     |
|-----------------------------------------------------------------------------------------------------|----|---|----------|----------|----------------|-------------------------------------|
| AGIWUR23824                                                                                         |    |   |          |          |                |                                     |
| N2                                                                                                  | CT | X | 15250809 | 15253877 | WBGene00009786 | F46F2.1 F46F2.1 0.109216154558741   |
| AGIWUR14648                                                                                         |    |   |          |          |                |                                     |
| N2                                                                                                  | CT | X | 15257597 | 15259048 | WBGene00009788 | F46F2.4 F46F2.4 -0.239441071517376  |
| AGIWUR36542                                                                                         |    |   |          |          |                |                                     |
| N2                                                                                                  | CT | X | 15259579 | 15260290 | WBGene00009787 | F46F2.3 F46F2.3 0.348854691598392   |
| AGIWUR720;AGIWUR8033;AGIWUR37485                                                                    |    |   |          |          |                |                                     |
| N2                                                                                                  | CT | X | 15262727 | 15267857 | WBGene00009789 | F46F2.5 F46F2.5 -0.0189871171037188 |
| AGIWUR14029;AGIWUR19544                                                                             |    |   |          |          |                |                                     |
| N2                                                                                                  | CT | X | 15269074 | 15281110 | WBGene00002203 | kin-20 F46F2.2 0.0231788123915706   |
| AGIWUR2546;AGIWUR3876;AGIWUR6680;AGIWUR29853                                                        |    |   |          |          |                |                                     |
| N2                                                                                                  | CT | X | 15284182 | 15286227 | WBGene00007262 | jud-4 C02D4.1 0.0153645971625616    |
| AGIWUR1289;AGIWUR4849;AGIWUR9307;AGIWUR20816;AGIWUR37557;AGIWUR44498                                |    |   |          |          |                |                                     |
| N2                                                                                                  | CT | X | 15286579 | 15302963 | WBGene00004777 | ser-2 C02D4.2                       |
| -1.26061931897681e-05 AGIWUR10251;AGIWUR15917;AGIWUR16808;AGIWUR28601;AGIWUR35275;AGIWUR36199       |    |   |          |          |                |                                     |
| N2                                                                                                  | CT | X | 15309374 | 15314899 | WBGene00003681 | nhr-91 Y15E3A.1                     |
| 0.0555453421725662 AGIWUR391;AGIWUR8575;AGIWUR11164;AGIWUR30048;AGIWUR32782;AGIWUR38239;AGIWUR40936 |    |   |          |          |                |                                     |
| N2                                                                                                  | CT | X | 15314874 | 15317223 | WBGene00012441 | glb-28 Y15E3A.2                     |
| 0.125782840418816 AGIWUR2433                                                                        |    |   |          |          |                |                                     |
| N2                                                                                                  | CT | X | 15322249 | 15325809 | WBGene00012442 | Y15E3A.3 Y15E3A.3                   |
| -0.021303910138105 AGIWUR223                                                                        |    |   |          |          |                |                                     |
| N2                                                                                                  | CT | X | 15330964 | 15333960 | WBGene00012443 | Y15E3A.4 Y15E3A.4                   |
| 0.0354589694566627 AGIWUR986                                                                        |    |   |          |          |                |                                     |
| N2                                                                                                  | CT | X | 15343154 | 15344146 | WBGene00012444 | Y15E3A.5 Y15E3A.5                   |
| -0.0651843628832527 AGIWUR9705                                                                      |    |   |          |          |                |                                     |
| N2                                                                                                  | CT | X | 15355238 | 15363861 | WBGene00007877 | nfki-1 C33A11.1                     |
| 0.0245356972631772 AGIWUR2664;AGIWUR3693;AGIWUR5288;AGIWUR9684;AGIWUR18915;AGIWUR44109;AGIWUR44590  |    |   |          |          |                |                                     |
| N2                                                                                                  | CT | X | 15365994 | 15369999 | WBGene00007878 | C33A11.2 C33A11.2                   |
| -0.0606326887317721 AGIWUR11040                                                                     |    |   |          |          |                |                                     |
| N2                                                                                                  | CT | X | 15369974 | 15377685 | WBGene00006462 | tag-97 C33A11.4                     |
| 0.0274750303974978 AGIWUR20474                                                                      |    |   |          |          |                |                                     |
| N2                                                                                                  | CT | X | 15407931 | 15419290 | WBGene00009560 | psa-3 F39D8.2 0.295117796570658     |
| AGIWUR22299                                                                                         |    |   |          |          |                |                                     |
| N2                                                                                                  | CT | X | 15420979 | 15425114 | WBGene00009561 | F39D8.3 F39D8.3 -0.0032172580065648 |
| AGIWUR19493;AGIWUR26499;AGIWUR35456                                                                 |    |   |          |          |                |                                     |
| N2                                                                                                  | CT | X | 15425274 | 15428180 | WBGene00003532 | nas-13 F39D8.4 0.00959368148223838  |
| AGIWUR20338;AGIWUR23299;AGIWUR24853;AGIWUR25911;AGIWUR28890;AGIWUR32864;AGIWUR35977;AGIWUR42757     |    |   |          |          |                |                                     |
| N2                                                                                                  | CT | X | 15429925 | 15431198 | WBGene00010981 | blos-8 R03A10.1                     |
| -0.181566873970983 AGIWUR39615                                                                      |    |   |          |          |                |                                     |

|                                                                                               |    |   |                                                |          |                |          |                             |
|-----------------------------------------------------------------------------------------------|----|---|------------------------------------------------|----------|----------------|----------|-----------------------------|
| N2                                                                                            | CT | X | 15433787                                       | 15434972 | WBGene00010982 | flp-32   | R03A10.2                    |
| -0.146831092557754                                                                            |    |   | AGIWUR41012                                    |          |                |          |                             |
| N2                                                                                            | CT | X | 15435665                                       | 15440794 | WBGene00010983 | mocs-1   | R03A10.3                    |
| -0.169367872782999                                                                            |    |   | AGIWUR38137                                    |          |                |          |                             |
| N2                                                                                            | CT | X | 15441731                                       | 15443641 | WBGene00010984 | nkat-3   | R03A10.4                    |
| -0.0616004811087194                                                                           |    |   | AGIWUR9337                                     |          |                |          |                             |
| N2                                                                                            | CT | X | 15446724                                       | 15450362 | WBGene00010985 | R03A10.5 | R03A10.5                    |
| -0.105898565463008                                                                            |    |   | AGIWUR6587;AGIWUR27742;AGIWUR43903             |          |                |          |                             |
| N2                                                                                            | CT | X | 15461843                                       | 15470758 | WBGene00010986 | sprrr-1  | R03A10.6                    |
| 0.00855076350711093                                                                           |    |   | AGIWUR15270;AGIWUR41095                        |          |                |          |                             |
| N2                                                                                            | CT | X | 15470795                                       | 15477402 | WBGene00008116 | C46E1.3  | C46E1.3 0.0668008650633283  |
| AGIWUR34412                                                                                   |    |   |                                                |          |                |          |                             |
| N2                                                                                            | CT | X | 15479017                                       | 15485700 | WBGene00001556 | gcy-36   | C46E1.2 0.160083329110114   |
| AGIWUR6436                                                                                    |    |   |                                                |          |                |          |                             |
| N2                                                                                            | CT | X | 15488106                                       | 15491987 | WBGene00010396 | H13N06.2 | H13N06.2                    |
| 0.273554969494039                                                                             |    |   | AGIWUR20767                                    |          |                |          |                             |
| N2                                                                                            | CT | X | 15493536                                       | 15497504 | WBGene00001649 | gob-1    | H13N06.3                    |
| 0.202600092061989                                                                             |    |   | AGIWUR19792                                    |          |                |          |                             |
| N2                                                                                            | CT | X | 15497555                                       | 15500279 | WBGene00010397 | suox-1   | H13N06.4                    |
| -0.12602216673928                                                                             |    |   |                                                |          |                |          |                             |
| AGIWUR8075;AGIWUR8146;AGIWUR13927;AGIWUR21239;AGIWUR21902;AGIWUR25339;AGIWUR31516;AGIWUR38931 |    |   |                                                |          |                |          |                             |
| N2                                                                                            | CT | X | 15500259                                       | 15504895 | WBGene00006541 | tbh-1    | H13N06.6                    |
| -0.0144790956330887                                                                           |    |   | AGIWUR32109                                    |          |                |          |                             |
| N2                                                                                            | CT | X | 15506037                                       | 15507880 | WBGene00006494 | zipt-7.2 | H13N06.5                    |
| -0.109968902788498                                                                            |    |   | AGIWUR4074                                     |          |                |          |                             |
| N2                                                                                            | CT | X | 15516655                                       | 15524020 | WBGene00001148 | eat-20   | H30A04.1                    |
| 0.0168552661114574                                                                            |    |   | AGIWUR2763;AGIWUR32677;AGIWUR39473;AGIWUR44821 |          |                |          |                             |
| N2                                                                                            | CT | X | 15537662                                       | 15546323 | WBGene00007260 | olrn-1   | C02C6.2 0.23983331045671    |
| AGIWUR33886                                                                                   |    |   |                                                |          |                |          |                             |
| N2                                                                                            | CT | X | 15546688                                       | 15552233 | WBGene00007261 | lron-3   | C02C6.3 0.02518034678942    |
| AGIWUR11376;AGIWUR19492;AGIWUR26257;AGIWUR26685;AGIWUR42061;AGIWUR42454                       |    |   |                                                |          |                |          |                             |
| N2                                                                                            | CT | X | 15568890                                       | 15573693 | WBGene00001130 | dyn-1    | C02C6.1 -0.0535198385411242 |
| AGIWUR28101                                                                                   |    |   |                                                |          |                |          |                             |
| N2                                                                                            | CT | X | 15577470                                       | 15586803 | WBGene00010703 | K09A9.6  | K09A9.6                     |
| -0.00575824697988825                                                                          |    |   | AGIWUR16950;AGIWUR34178                        |          |                |          |                             |
| N2                                                                                            | CT | X | 15586812                                       | 15590397 | WBGene00001520 | gas-1    | K09A9.5 -0.194120855536646  |
| AGIWUR9283                                                                                    |    |   |                                                |          |                |          |                             |
| N2                                                                                            | CT | X | 15591368                                       | 15595387 | WBGene00010702 | usp-33   | K09A9.4 -0.282520143587501  |
| AGIWUR41099                                                                                   |    |   |                                                |          |                |          |                             |

|                                                                                                                                  |    |   |          |          |                |          |          |                     |
|----------------------------------------------------------------------------------------------------------------------------------|----|---|----------|----------|----------------|----------|----------|---------------------|
| N2                                                                                                                               | CT | X | 15601067 | 15603763 | WBGene00010701 | ent-2    | K09A9.3  | 0.148186573760405   |
| AGIWUR33953;AGIWUR41849;AGIWUR43615                                                                                              |    |   |          |          |                |          |          |                     |
| N2                                                                                                                               | CT | X | 15604635 | 15606635 | WBGene00004276 | rab-14   | K09A9.2  | -0.0193496694146269 |
| AGIWUR725;AGIWUR4364;AGIWUR12647;AGIWUR19104;AGIWUR21129;AGIWUR22392;AGIWUR24016;AGIWUR29023;AGIWUR34364;AGIWUR36569;AGIWUR41345 |    |   |          |          |                |          |          |                     |
| N2                                                                                                                               | CT | X | 15607969 | 15610631 | WBGene00010700 | nipi-3   | K09A9.1  | 0.251885914616716   |
| AGIWUR1159;AGIWUR16805;AGIWUR18397;AGIWUR23922;AGIWUR33732                                                                       |    |   |          |          |                |          |          |                     |
| N2                                                                                                                               | CT | X | 15611824 | 15613791 | WBGene00010726 | K09E9.3  | K09E9.3  | -0.0505837601505661 |
| AGIWUR4427;AGIWUR26149;AGIWUR27156;AGIWUR34050;AGIWUR38990;AGIWUR42599;AGIWUR43032                                               |    |   |          |          |                |          |          |                     |
| N2                                                                                                                               | CT | X | 15613805 | 15616519 | WBGene00010725 | erv-46   | K09E9.2  | 0.0452897764445517  |
| AGIWUR44606                                                                                                                      |    |   |          |          |                |          |          |                     |
| N2                                                                                                                               | CT | X | 15620489 | 15626629 | WBGene00010724 | K09E9.1  | K09E9.1  | 0.115347316472493   |
| AGIWUR33744                                                                                                                      |    |   |          |          |                |          |          |                     |
| N2                                                                                                                               | CT | X | 15628606 | 15630440 | WBGene00044143 | K09E9.4  | K09E9.4  | 0.0640954537290455  |
| AGIWUR15297                                                                                                                      |    |   |          |          |                |          |          |                     |
| N2                                                                                                                               | CT | X | 15642938 | 15644336 | WBGene00010372 | H08J19.1 |          | H08J19.1            |
| -0.0698171679751169 AGIWUR25204                                                                                                  |    |   |          |          |                |          |          |                     |
| N2                                                                                                                               | CT | X | 15646380 | 15647369 | WBGene00010332 | F59D12.5 |          | F59D12.5            |
| -0.321906394372194 AGIWUR28052                                                                                                   |    |   |          |          |                |          |          |                     |
| N2                                                                                                                               | CT | X | 15648263 | 15650905 | WBGene00010331 | F59D12.3 |          | F59D12.3            |
| -0.386850102269185 AGIWUR18081                                                                                                   |    |   |          |          |                |          |          |                     |
| N2                                                                                                                               | CT | X | 15666761 | 15672363 | WBGene00010329 | F59D12.1 |          | F59D12.1            |
| -0.156450542345462 AGIWUR31048                                                                                                   |    |   |          |          |                |          |          |                     |
| N2                                                                                                                               | CT | X | 15672743 | 15675722 | WBGene00010330 | F59D12.2 |          | F59D12.2            |
| -0.13976772735131 AGIWUR14911;AGIWUR32565;AGIWUR34025                                                                            |    |   |          |          |                |          |          |                     |
| N2                                                                                                                               | CT | X | 15681693 | 15687477 | WBGene00001687 | gpn-1    | F59D12.4 |                     |
| 0.237498151550573 AGIWUR21149                                                                                                    |    |   |          |          |                |          |          |                     |
| N2                                                                                                                               | CT | X | 15689449 | 15696423 | WBGene00007284 | C03H12.1 |          | C03H12.1            |
| -0.0110844466149125 AGIWUR27399                                                                                                  |    |   |          |          |                |          |          |                     |
| N2                                                                                                                               | CT | X | 15696700 | 15698062 | WBGene00014039 | ZK662.2  | ZK662.2  | 0.0443246226600778  |
| AGIWUR7417                                                                                                                       |    |   |          |          |                |          |          |                     |
| N2                                                                                                                               | CT | X | 15708195 | 15716444 | WBGene00003638 | nhr-48   | ZK662.3  | 0.145410051452913   |
| AGIWUR7223;AGIWUR14331                                                                                                           |    |   |          |          |                |          |          |                     |
| N2                                                                                                                               | CT | X | 15718625 | 15720415 | WBGene00045494 | ZK662.6  | ZK662.6  | -0.108608582917431  |
| AGIWUR9757;AGIWUR29907;AGIWUR30215                                                                                               |    |   |          |          |                |          |          |                     |
| N2                                                                                                                               | CT | X | 15721270 | 15723776 | WBGene00014040 | ZK662.5  | ZK662.5  | -0.383950129195559  |
| AGIWUR6125                                                                                                                       |    |   |          |          |                |          |          |                     |
| N2                                                                                                                               | CT | X | 15726129 | 15732025 | WBGene00023497 | lin-15B  | ZK662.4  | -0.0737081483992803 |
| AGIWUR30716                                                                                                                      |    |   |          |          |                |          |          |                     |

|                                                                         |    |   |          |          |                |          |          |                     |
|-------------------------------------------------------------------------|----|---|----------|----------|----------------|----------|----------|---------------------|
| N2                                                                      | CT | X | 15731968 | 15735386 | WBGene00023498 | lin-15A  | ZK678.1  | -0.0650323463720301 |
| AGIWUR22541                                                             |    |   |          |          |                |          |          |                     |
| N2                                                                      | CT | X | 15736844 | 15740626 | WBGene00005221 | srg-64   | ZK678.6  | -0.126593766373122  |
| AGIWUR2265                                                              |    |   |          |          |                |          |          |                     |
| N2                                                                      | CT | X | 15742610 | 15744298 | WBGene00014068 | nhr-255  | ZK678.2  | -0.238559475486269  |
| AGIWUR24393                                                             |    |   |          |          |                |          |          |                     |
| N2                                                                      | CT | X | 15747005 | 15752138 | WBGene00014070 | srx-9    | ZK678.4  |                     |
| -0.000839118346388723 AGIWUR15499;AGIWUR41953                           |    |   |          |          |                |          |          |                     |
| N2                                                                      | CT | X | 15752258 | 15757269 | WBGene00006950 | wrt-4    | ZK678.5  | 0.116127973026851   |
| AGIWUR23427                                                             |    |   |          |          |                |          |          |                     |
| N2                                                                      | CT | X | 15757868 | 15766354 | WBGene00044630 | bus-17   | ZK678.8  |                     |
| -0.00182987408087154 AGIWUR31074                                        |    |   |          |          |                |          |          |                     |
| N2                                                                      | CT | X | 15767437 | 15771509 | WBGene00012407 | Y7A5A.1  | Y7A5A.1  | 0.172886869376484   |
| AGIWUR19392                                                             |    |   |          |          |                |          |          |                     |
| N2                                                                      | CT | X | 15771707 | 15772735 | WBGene00012408 | Y7A5A.2  | Y7A5A.2  | 0.00972433534744788 |
| AGIWUR23529                                                             |    |   |          |          |                |          |          |                     |
| N2                                                                      | CT | X | 15781625 | 15784670 | WBGene00012409 | Y7A5A.3  | Y7A5A.3  | 0.107181552788537   |
| AGIWUR2339;AGIWUR3012;AGIWUR5234;AGIWUR21524;AGIWUR35525;AGIWUR37483    |    |   |          |          |                |          |          |                     |
| N2                                                                      | CT | X | 15786529 | 15786826 | WBGene00012411 | Y7A5A.5  | Y7A5A.5  | 0.162445514595289   |
| AGIWUR3965                                                              |    |   |          |          |                |          |          |                     |
| N2                                                                      | CT | X | 15793767 | 15794936 | WBGene00044154 | Y7A5A.10 | Y7A5A.10 |                     |
| -0.119617371150552 AGIWUR21480                                          |    |   |          |          |                |          |          |                     |
| N2                                                                      | CT | X | 15797332 | 15799695 | WBGene00012412 | Y7A5A.6  | Y7A5A.6  | -0.217574354107349  |
| AGIWUR10682                                                             |    |   |          |          |                |          |          |                     |
| N2                                                                      | CT | X | 15801310 | 15804172 | WBGene00012413 | Y7A5A.7  | Y7A5A.7  | -0.207353728703708  |
| AGIWUR35640                                                             |    |   |          |          |                |          |          |                     |
| N2                                                                      | CT | X | 15811967 | 15819541 | WBGene00044155 | Y7A5A.11 | Y7A5A.11 |                     |
| 0.0852681248094278 AGIWUR7266;AGIWUR26732;AGIWUR30174;AGIWUR38493       |    |   |          |          |                |          |          |                     |
| N2                                                                      | CT | X | 15828626 | 15829772 | WBGene00219351 | Y7A5A.20 | Y7A5A.20 |                     |
| 0.0654164914549487 AGIWUR33281                                          |    |   |          |          |                |          |          |                     |
| N2                                                                      | CT | X | 15834052 | 15838546 | WBGene00010336 | acox-1.6 | F59F4.1  |                     |
| -0.0162124473679413 AGIWUR14537;AGIWUR31659;AGIWUR44657                 |    |   |          |          |                |          |          |                     |
| N2                                                                      | CT | X | 15841572 | 15842379 | WBGene00010337 | F59F4.2  | F59F4.2  | -0.136250473367152  |
| AGIWUR22010;AGIWUR24003;AGIWUR27657;AGIWUR44124;AGIWUR44610;AGIWUR45157 |    |   |          |          |                |          |          |                     |
| N2                                                                      | CT | X | 15842356 | 15847593 | WBGene00010338 | F59F4.3  | F59F4.3  | 0.0803476406529207  |
| AGIWUR13623                                                             |    |   |          |          |                |          |          |                     |
| N2                                                                      | CT | X | 15849885 | 15851771 | WBGene00010339 | ac1-1    | F59F4.4  | 0.270618097517627   |
| AGIWUR14275                                                             |    |   |          |          |                |          |          |                     |
| N2                                                                      | CT | X | 15852935 | 15860608 | WBGene00010011 | F53H4.6  | F53H4.6  | 0.0789400077241611  |

AGIWUR5968;AGIWUR38837

|    |    |   |          |          |                |       |         |                    |
|----|----|---|----------|----------|----------------|-------|---------|--------------------|
| N2 | CT | X | 15861294 | 15865918 | WBGene00000803 | csb-1 | F53H4.1 | -0.100622541084867 |
|----|----|---|----------|----------|----------------|-------|---------|--------------------|

AGIWUR4195;AGIWUR10825;AGIWUR17135;AGIWUR21736;AGIWUR30198;AGIWUR37770;AGIWUR40998

|    |    |   |          |          |                |         |         |                    |
|----|----|---|----------|----------|----------------|---------|---------|--------------------|
| N2 | CT | X | 15866411 | 15868764 | WBGene00010009 | F53H4.4 | F53H4.4 | -0.226414414117944 |
|----|----|---|----------|----------|----------------|---------|---------|--------------------|

AGIWUR4350;AGIWUR10553;AGIWUR14414;AGIWUR24536;AGIWUR27418;AGIWUR30318;AGIWUR40238;AGIWUR43408

|    |    |   |          |          |                |        |         |                    |
|----|----|---|----------|----------|----------------|--------|---------|--------------------|
| N2 | CT | X | 15879096 | 15885617 | WBGene00010010 | gmeh-2 | F53H4.5 | -0.174944686499966 |
|----|----|---|----------|----------|----------------|--------|---------|--------------------|

AGIWUR17153

|    |    |   |          |          |                |         |         |                     |
|----|----|---|----------|----------|----------------|---------|---------|---------------------|
| N2 | CT | X | 15885604 | 15887593 | WBGene00010008 | F53H4.3 | F53H4.3 | -0.0400201020210442 |
|----|----|---|----------|----------|----------------|---------|---------|---------------------|

AGIWUR23300;AGIWUR37269;AGIWUR39299

|    |    |   |          |          |                |        |         |                   |
|----|----|---|----------|----------|----------------|--------|---------|-------------------|
| N2 | CT | X | 15910638 | 15914159 | WBGene00009278 | npr-33 | F31B9.1 | 0.161366919064175 |
|----|----|---|----------|----------|----------------|--------|---------|-------------------|

AGIWUR32643

|    |    |   |          |          |                |         |         |                    |
|----|----|---|----------|----------|----------------|---------|---------|--------------------|
| N2 | CT | X | 15915699 | 15917100 | WBGene00009281 | F31B9.4 | F31B9.4 | -0.317034047315509 |
|----|----|---|----------|----------|----------------|---------|---------|--------------------|

AGIWUR20462

|    |    |   |          |          |                |         |         |                     |
|----|----|---|----------|----------|----------------|---------|---------|---------------------|
| N2 | CT | X | 15918137 | 15920423 | WBGene00009279 | F31B9.2 | F31B9.2 | -0.0753261279329571 |
|----|----|---|----------|----------|----------------|---------|---------|---------------------|

AGIWUR3218

|    |    |   |          |          |                |         |         |                    |
|----|----|---|----------|----------|----------------|---------|---------|--------------------|
| N2 | CT | X | 15923738 | 15925169 | WBGene00009280 | F31B9.3 | F31B9.3 | 0.0580067426981152 |
|----|----|---|----------|----------|----------------|---------|---------|--------------------|

AGIWUR36631

|    |    |   |          |          |                |       |         |                     |
|----|----|---|----------|----------|----------------|-------|---------|---------------------|
| N2 | CT | X | 15929958 | 15939324 | WBGene00003409 | mrp-3 | E03G2.2 | -0.0533007537080987 |
|----|----|---|----------|----------|----------------|-------|---------|---------------------|

AGIWUR9771

|    |    |   |          |          |                |       |         |                     |
|----|----|---|----------|----------|----------------|-------|---------|---------------------|
| N2 | CT | X | 15944009 | 15948951 | WBGene00003169 | mec-5 | E03G2.3 | -0.0419821759924837 |
|----|----|---|----------|----------|----------------|-------|---------|---------------------|

AGIWUR25286

|    |    |   |          |          |                |         |         |                    |
|----|----|---|----------|----------|----------------|---------|---------|--------------------|
| N2 | CT | X | 15951503 | 15954570 | WBGene00000759 | col-186 | E03G2.4 | -0.289903195437081 |
|----|----|---|----------|----------|----------------|---------|---------|--------------------|

AGIWUR20885

|    |    |   |          |          |                |         |         |                     |
|----|----|---|----------|----------|----------------|---------|---------|---------------------|
| N2 | CT | X | 15959100 | 15962344 | WBGene00007487 | C09G1.5 | C09G1.5 | -0.0606890274574639 |
|----|----|---|----------|----------|----------------|---------|---------|---------------------|

AGIWUR1392;AGIWUR19086;AGIWUR25667;AGIWUR31963;AGIWUR45188

|    |    |   |          |          |                |        |         |                   |
|----|----|---|----------|----------|----------------|--------|---------|-------------------|
| N2 | CT | X | 15966112 | 15972300 | WBGene00004103 | pqn-11 | C09G1.1 | 0.265587534638415 |
|----|----|---|----------|----------|----------------|--------|---------|-------------------|

AGIWUR17453

|    |    |   |          |          |                |         |         |                   |
|----|----|---|----------|----------|----------------|---------|---------|-------------------|
| N2 | CT | X | 15977762 | 15982600 | WBGene00007484 | C09G1.2 | C09G1.2 | 0.313454710477288 |
|----|----|---|----------|----------|----------------|---------|---------|-------------------|

AGIWUR5714

|    |    |   |          |          |                |         |         |                   |
|----|----|---|----------|----------|----------------|---------|---------|-------------------|
| N2 | CT | X | 15986163 | 15987594 | WBGene00007485 | C09G1.3 | C09G1.3 | 0.011163760468123 |
|----|----|---|----------|----------|----------------|---------|---------|-------------------|

AGIWUR19963

|    |    |   |          |          |                |         |         |                     |
|----|----|---|----------|----------|----------------|---------|---------|---------------------|
| N2 | CT | X | 15987971 | 15996936 | WBGene00007486 | C09G1.4 | C09G1.4 | -0.0286290009448069 |
|----|----|---|----------|----------|----------------|---------|---------|---------------------|

AGIWUR10955;AGIWUR15110;AGIWUR18823;AGIWUR19674

|    |    |   |          |          |                |           |           |  |
|----|----|---|----------|----------|----------------|-----------|-----------|--|
| N2 | CT | X | 16013605 | 16016920 | WBGene00044150 | VB0395L.1 | VB0395L.1 |  |
|----|----|---|----------|----------|----------------|-----------|-----------|--|

0.112094759625553 AGIWUR4504;AGIWUR43845

|    |    |   |          |          |                |       |         |                    |
|----|----|---|----------|----------|----------------|-------|---------|--------------------|
| N2 | CT | X | 16017263 | 16021776 | WBGene00003729 | nhx-1 | B0395.1 | 0.0441531264247139 |
|----|----|---|----------|----------|----------------|-------|---------|--------------------|

AGIWUR28160

|    |    |   |          |          |                |        |         |                    |
|----|----|---|----------|----------|----------------|--------|---------|--------------------|
| N2 | CT | X | 16030806 | 16034816 | WBGene00007174 | mboa-1 | B0395.2 | -0.330630530778311 |
|----|----|---|----------|----------|----------------|--------|---------|--------------------|

AGIWUR19203

|                                                                                                 |    |   |          |          |                |           |         |                     |
|-------------------------------------------------------------------------------------------------|----|---|----------|----------|----------------|-----------|---------|---------------------|
| N2                                                                                              | CT | X | 16035055 | 16039514 | WBGene00007175 | B0395.3   | B0395.3 | 0.0834717469606971  |
| AGIWUR3904                                                                                      |    |   |          |          |                |           |         |                     |
| N2                                                                                              | CT | X | 16049844 | 16054623 | WBGene00012073 | cpd-2     | T27A8.1 | 0.0146285394260346  |
| AGIWUR31375                                                                                     |    |   |          |          |                |           |         |                     |
| N2                                                                                              | CT | X | 16057719 | 16058934 | WBGene00012074 | T27A8.2   | T27A8.2 | -0.156881344063375  |
| AGIWUR20370                                                                                     |    |   |          |          |                |           |         |                     |
| N2                                                                                              | CT | X | 16067069 | 16067463 | WBGene00012076 | T27A8.4   | T27A8.4 | 0.217539567750085   |
| AGIWUR150                                                                                       |    |   |          |          |                |           |         |                     |
| N2                                                                                              | CT | X | 16072903 | 16074852 | WBGene00000760 | col-187   | C30F2.1 | 0.0152915809979488  |
| AGIWUR23970                                                                                     |    |   |          |          |                |           |         |                     |
| N2                                                                                              | CT | X | 16075061 | 16075668 | WBGene00007818 | C30F2.4   | C30F2.4 | -0.135526005816065  |
| AGIWUR33122                                                                                     |    |   |          |          |                |           |         |                     |
| N2                                                                                              | CT | X | 16076809 | 16085215 | WBGene00007816 | C30F2.2   | C30F2.2 | -0.206665520681824  |
| AGIWUR27373                                                                                     |    |   |          |          |                |           |         |                     |
| N2                                                                                              | CT | X | 16082435 | 16085799 | WBGene00007817 | C30F2.3   | C30F2.3 | 0.134880504701583   |
| AGIWUR22979                                                                                     |    |   |          |          |                |           |         |                     |
| N2                                                                                              | CT | X | 16094067 | 16096497 | WBGene00007819 | C30F2.5   | C30F2.5 | -0.170317338686962  |
| AGIWUR16587                                                                                     |    |   |          |          |                |           |         |                     |
| N2                                                                                              | CT | X | 16103643 | 16123903 | WBGene00014214 | ZK1073.2  |         | ZK1073.2            |
| 0.0696664082591187 AGIWUR10513                                                                  |    |   |          |          |                |           |         |                     |
| N2                                                                                              | CT | X | 16123942 | 16128865 | WBGene00014213 | ZK1073.1  |         | ZK1073.1            |
| -0.0197944200843487                                                                             |    |   |          |          |                |           |         |                     |
| AGIWUR12484;AGIWUR13643;AGIWUR17965;AGIWUR20567;AGIWUR22715;AGIWUR27247;AGIWUR37118;AGIWUR42707 |    |   |          |          |                |           |         |                     |
| N2                                                                                              | CT | X | 16140507 | 16147022 | WBGene00008622 | F09C8.2   | F09C8.2 | 0.0188495083105851  |
| AGIWUR3954;AGIWUR39843                                                                          |    |   |          |          |                |           |         |                     |
| N2                                                                                              | CT | X | 16159648 | 16163548 | WBGene00008621 | F09C8.1   | F09C8.1 | -0.12020721565815   |
| AGIWUR27457                                                                                     |    |   |          |          |                |           |         |                     |
| N2                                                                                              | CT | X | 16184370 | 16185419 | WBGene00011227 | R11.2     | R11.2   | 0.109907425526981   |
| AGIWUR38968                                                                                     |    |   |          |          |                |           |         |                     |
| N2                                                                                              | CT | X | 16189856 | 16195007 | WBGene00011226 | slc-25A21 |         | R11.1               |
| -0.131240465321335 AGIWUR3436                                                                   |    |   |          |          |                |           |         |                     |
| N2                                                                                              | CT | X | 16196911 | 16199932 | WBGene00011228 | R11.3     | R11.3   | 0.0303720875676463  |
| AGIWUR13201                                                                                     |    |   |          |          |                |           |         |                     |
| N2                                                                                              | CT | X | 16210303 | 16210651 | WBGene00011229 | R11.4     | R11.4   | -0.0748354781775218 |
| AGIWUR11349;AGIWUR39105                                                                         |    |   |          |          |                |           |         |                     |
| N2                                                                                              | CT | X | 16212606 | 16213072 | WBGene00009069 | F23A7.4   | F23A7.4 | -0.212820148209269  |
| AGIWUR4574;AGIWUR7844;AGIWUR21278;AGIWUR27048;AGIWUR39685                                       |    |   |          |          |                |           |         |                     |
| N2                                                                                              | CT | X | 16217392 | 16217666 | WBGene00009067 | F23A7.1   | F23A7.1 | -0.411603810339823  |
| AGIWUR12165                                                                                     |    |   |          |          |                |           |         |                     |

|                                                                                                          |    |   |          |          |                |          |          |                     |
|----------------------------------------------------------------------------------------------------------|----|---|----------|----------|----------------|----------|----------|---------------------|
| N2                                                                                                       | CT | X | 16220010 | 16223519 | WBGene00009068 | F23A7.3  | F23A7.3  | -0.287174252641353  |
| AGIWUR44777                                                                                              |    |   |          |          |                |          |          |                     |
| N2                                                                                                       | CT | X | 16229463 | 16236856 | WBGene00009070 | F23A7.5  | F23A7.5  | -0.037658621183958  |
| AGIWUR14137;AGIWUR17393;AGIWUR33960                                                                      |    |   |          |          |                |          |          |                     |
| N2                                                                                                       | CT | X | 16237273 | 16240702 | WBGene00009071 | F23A7.6  | F23A7.6  | -0.0252019967558903 |
| AGIWUR2598;AGIWUR4477;AGIWUR16594;AGIWUR39535;AGIWUR42446                                                |    |   |          |          |                |          |          |                     |
| N2                                                                                                       | CT | X | 16245194 | 16245559 | WBGene00012378 | W10G6.1  | W10G6.1  | -0.357422106810146  |
| AGIWUR30616                                                                                              |    |   |          |          |                |          |          |                     |
| N2                                                                                                       | CT | X | 16254843 | 16262151 | WBGene00004789 | sgk-1    | W10G6.2  | -0.0845695149619914 |
| AGIWUR40954                                                                                              |    |   |          |          |                |          |          |                     |
| N2                                                                                                       | CT | X | 16262295 | 16265686 | WBGene00003485 | mua-6    | W10G6.3  | 0.118797456087417   |
| AGIWUR3794;AGIWUR30679                                                                                   |    |   |          |          |                |          |          |                     |
| N2                                                                                                       | CT | X | 16275769 | 16282436 | WBGene00004745 | sdc-1    | F52E10.1 |                     |
| -0.137979428239165 AGIWUR7891                                                                            |    |   |          |          |                |          |          |                     |
| N2                                                                                                       | CT | X | 16282806 | 16283203 | WBGene00009933 | F52E10.2 |          | F52E10.2            |
| 0.110768015977516 AGIWUR8938                                                                             |    |   |          |          |                |          |          |                     |
| N2                                                                                                       | CT | X | 16283803 | 16284069 | WBGene00009934 | F52E10.3 |          | F52E10.3            |
| 0.0296958104230844 AGIWUR4159                                                                            |    |   |          |          |                |          |          |                     |
| N2                                                                                                       | CT | X | 16285598 | 16292990 | WBGene00009935 | F52E10.4 |          | F52E10.4            |
| 0.0507577342147174 AGIWUR2646;AGIWUR2750;AGIWUR18312;AGIWUR22395;AGIWUR30979;AGIWUR44314                 |    |   |          |          |                |          |          |                     |
| N2                                                                                                       | CT | X | 16299904 | 16304122 | WBGene00006674 | twk-21   | T01B4.1  | -0.173724515655872  |
| AGIWUR9363                                                                                               |    |   |          |          |                |          |          |                     |
| N2                                                                                                       | CT | X | 16306464 | 16314998 | WBGene00006675 | twk-22   | T01B4.2  | 0.00976956425567366 |
| AGIWUR18542                                                                                              |    |   |          |          |                |          |          |                     |
| N2                                                                                                       | CT | X | 16315356 | 16317729 | WBGene00011310 | T01B4.3  | T01B4.3  | 0.109429831390715   |
| AGIWUR34216                                                                                              |    |   |          |          |                |          |          |                     |
| N2                                                                                                       | CT | X | 16329217 | 16329997 | WBGene00007523 | C11G6.2  | C11G6.2  | -0.0979718538240899 |
| AGIWUR40547                                                                                              |    |   |          |          |                |          |          |                     |
| N2                                                                                                       | CT | X | 16332440 | 16346027 | WBGene00006384 | taf-3    | C11G6.1  |                     |
| -0.00368096719706834                                                                                     |    |   |          |          |                |          |          |                     |
| AGIWUR1561;AGIWUR11199;AGIWUR12052;AGIWUR16051;AGIWUR19008;AGIWUR33712;AGIWUR35393;AGIWUR37423           |    |   |          |          |                |          |          |                     |
| N2                                                                                                       | CT | X | 16354976 | 16359654 | WBGene00003624 | nhr-28   | C11G6.4  | 0.0534652899051693  |
| AGIWUR8488;AGIWUR9598;AGIWUR9927;AGIWUR16883;AGIWUR19635;AGIWUR27806;AGIWUR38710;AGIWUR39679;AGIWUR41588 |    |   |          |          |                |          |          |                     |
| N2                                                                                                       | CT | X | 16367229 | 16373789 | WBGene00000035 | ace-1    | W09B12.1 |                     |
| 0.0266531743489566 AGIWUR15181;AGIWUR18087;AGIWUR34105;AGIWUR44165                                       |    |   |          |          |                |          |          |                     |
| N2                                                                                                       | CT | X | 16376595 | 16380047 | WBGene00006353 | sur-7    | F01G12.2 |                     |
| 0.173239936147976 AGIWUR24885                                                                            |    |   |          |          |                |          |          |                     |
| N2                                                                                                       | CT | X | 16380597 | 16389371 | WBGene00002280 | let-2    | F01G12.5 |                     |
| 0.472421310493978 AGIWUR2727                                                                             |    |   |          |          |                |          |          |                     |



|                                                                                                |    |   |                                                             |          |                |          |                             |
|------------------------------------------------------------------------------------------------|----|---|-------------------------------------------------------------|----------|----------------|----------|-----------------------------|
| N2                                                                                             | CT | X | 16395076                                                    | 16396949 | WBGene00017170 | F01G12.1 | F01G12.1                    |
| -0.0405472712476147                                                                            |    |   | AGIWUR33324                                                 |          |                |          |                             |
| N2                                                                                             | CT | X | 16398958                                                    | 16417063 | WBGene00020770 | eat-17   | T24D11.1                    |
| 0.284386396801196                                                                              |    |   | AGIWUR9558;AGIWUR40096                                      |          |                |          |                             |
| N2                                                                                             | CT | X | 16446197                                                    | 16451336 | WBGene00018187 | F38E9.5  | F38E9.5 0.200235125090494   |
| AGIWUR22680                                                                                    |    |   |                                                             |          |                |          |                             |
| N2                                                                                             | CT | X | 16451942                                                    | 16452559 | WBGene00018186 | F38E9.4  | F38E9.4 -0.088236243900349  |
| AGIWUR17619;AGIWUR24265;AGIWUR42297                                                            |    |   |                                                             |          |                |          |                             |
| N2                                                                                             | CT | X | 16471058                                                    | 16474819 | WBGene00018184 | F38E9.1  | F38E9.1 0.0775458913437763  |
| AGIWUR22012                                                                                    |    |   |                                                             |          |                |          |                             |
| N2                                                                                             | CT | X | 16487481                                                    | 16489397 | WBGene00000281 | cah-3    | K05G3.3 0.174060711982852   |
| AGIWUR12628                                                                                    |    |   |                                                             |          |                |          |                             |
| N2                                                                                             | CT | X | 16494930                                                    | 16499875 | WBGene00019423 | K05G3.2  | K05G3.2 -0.0549752117679851 |
| AGIWUR7369                                                                                     |    |   |                                                             |          |                |          |                             |
| N2                                                                                             | CT | X | 16501332                                                    | 16501943 | WBGene00019422 | K05G3.1  | K05G3.1                     |
| -0.00632300575000677                                                                           |    |   | AGIWUR29717                                                 |          |                |          |                             |
| N2                                                                                             | CT | X | 16505248                                                    | 16507411 | WBGene00020795 | T25D1.3  | T25D1.3 -0.0839852459449668 |
| AGIWUR19131                                                                                    |    |   |                                                             |          |                |          |                             |
| N2                                                                                             | CT | X | 16518137                                                    | 16522295 | WBGene00020793 | T25D1.1  | T25D1.1 -0.180187389873995  |
| AGIWUR34205                                                                                    |    |   |                                                             |          |                |          |                             |
| N2                                                                                             | CT | X | 16536837                                                    | 16540207 | WBGene00003933 | pat-9    | T27B1.2 0.233405132871206   |
| AGIWUR33944                                                                                    |    |   |                                                             |          |                |          |                             |
| N2                                                                                             | CT | X | 16541330                                                    | 16551211 | WBGene00003883 | osm-1    | T27B1.1 0.00705205506456252 |
| AGIWUR26249                                                                                    |    |   |                                                             |          |                |          |                             |
| N2                                                                                             | CT | X | 16551166                                                    | 16553887 | WBGene00019519 | K08B5.2  | K08B5.2 0.00478653654241512 |
| AGIWUR30619                                                                                    |    |   |                                                             |          |                |          |                             |
| N2                                                                                             | CT | X | 16558444                                                    | 16562549 | WBGene00019518 | K08B5.1  | K08B5.1 0.104578401244169   |
| AGIWUR3014                                                                                     |    |   |                                                             |          |                |          |                             |
| N2                                                                                             | CT | X | 16595238                                                    | 16602238 | WBGene00000401 | cdh-9    | F59C12.1                    |
| 0.0280914227841365                                                                             |    |   | AGIWUR44322                                                 |          |                |          |                             |
| N2                                                                                             | CT | X | 16602445                                                    | 16602717 | WBGene00045272 | F59C12.4 | F59C12.4                    |
| -0.125472352680463                                                                             |    |   | AGIWUR17690;AGIWUR23844;AGIWUR25643;AGIWUR31519;AGIWUR37069 |          |                |          |                             |
| N2                                                                                             | CT | X | 16603364                                                    | 16609524 | WBGene00019102 | F59C12.3 | F59C12.3                    |
| -0.126113375713786                                                                             |    |   | AGIWUR17001                                                 |          |                |          |                             |
| N2                                                                                             | CT | X | 16613451                                                    | 16617675 | WBGene00015547 | ain-1    | C06G1.4 -0.0438877877147696 |
| AGIWUR1288;AGIWUR16458;AGIWUR27740;AGIWUR30057;AGIWUR30412;AGIWUR32412;AGIWUR32875;AGIWUR44566 |    |   |                                                             |          |                |          |                             |
| N2                                                                                             | CT | X | 16621807                                                    | 16622739 | WBGene00015546 | C06G1.2  | C06G1.2 -0.170245511950104  |
| AGIWUR30202                                                                                    |    |   |                                                             |          |                |          |                             |
| N2                                                                                             | CT | X | 16633363                                                    | 16637633 | WBGene00015545 | C06G1.1  | C06G1.1 0.040536922049947   |

|                                                                       |    |   |          |                                                                        |                |                                    |
|-----------------------------------------------------------------------|----|---|----------|------------------------------------------------------------------------|----------------|------------------------------------|
| AGIWUR18757                                                           |    |   |          |                                                                        |                |                                    |
| N2                                                                    | CT | X | 16638226 | 16662823                                                               | WBGene00018373 | F43B10.1 F43B10.1                  |
| -0.189707098371755                                                    |    |   |          | AGIWUR10226;AGIWUR36301                                                |                |                                    |
| N2                                                                    | CT | X | 16665116 | 16674732                                                               | WBGene00018374 | tag-343 F43B10.2                   |
| 0.0186232647395155                                                    |    |   |          | AGIWUR39613                                                            |                |                                    |
| N2                                                                    | CT | X | 16677340 | 16677738                                                               | WBGene00017727 | F22H10.3 F22H10.3                  |
| 0.0803678937108776                                                    |    |   |          | AGIWUR1554;AGIWUR10098;AGIWUR15778;AGIWUR17954;AGIWUR19306;AGIWUR23009 |                |                                    |
| N2                                                                    | CT | X | 16678488 | 16679823                                                               | WBGene00017726 | F22H10.2 F22H10.2                  |
| -0.0341797522480771                                                   |    |   |          | AGIWUR52                                                               |                |                                    |
| N2                                                                    | CT | X | 16684414 | 16687196                                                               | WBGene00017729 | F22H10.5 F22H10.5                  |
| -0.0782990434412394                                                   |    |   |          | AGIWUR34045;AGIWUR34560                                                |                |                                    |
| N2                                                                    | CT | X | 16689366 | 16690860                                                               | WBGene00017730 | F22H10.6 F22H10.6                  |
| -0.0770191566638569                                                   |    |   |          | AGIWUR18260                                                            |                |                                    |
| N2                                                                    | CT | X | 16702442 | 16703440                                                               | WBGene00017725 | F22H10.1 F22H10.1                  |
| 0.127858121114337                                                     |    |   |          | AGIWUR35049                                                            |                |                                    |
| N2                                                                    | CT | X | 16711681 | 16720658                                                               | WBGene00020657 | lgc-53 T21F2.1 -0.0476962167590234 |
| AGIWUR6827;AGIWUR10514;AGIWUR34398                                    |    |   |          |                                                                        |                |                                    |
| N2                                                                    | CT | X | 16729559 | 16744698                                                               | WBGene00001837 | hda-4 C10E2.3 -0.0652366144611189  |
| AGIWUR10698;AGIWUR13477;AGIWUR38203;AGIWUR41406                       |    |   |          |                                                                        |                |                                    |
| N2                                                                    | CT | X | 16745753 | 16748208                                                               | WBGene00015673 | C10E2.2 C10E2.2 -0.187950499223244 |
| AGIWUR3308                                                            |    |   |          |                                                                        |                |                                    |
| N2                                                                    | CT | X | 16749755 | 16751110                                                               | WBGene00015674 | C10E2.4 C10E2.4 -0.213713396820561 |
| AGIWUR16706                                                           |    |   |          |                                                                        |                |                                    |
| N2                                                                    | CT | X | 16751864 | 16753673                                                               | WBGene00015675 | C10E2.5 C10E2.5 0.1004130284185    |
| AGIWUR2100;AGIWUR3033;AGIWUR11634                                     |    |   |          |                                                                        |                |                                    |
| N2                                                                    | CT | X | 16763153 | 16766656                                                               | WBGene00015672 | C10E2.1 C10E2.1 0.0361047600951689 |
| AGIWUR44107                                                           |    |   |          |                                                                        |                |                                    |
| N2                                                                    | CT | X | 16767422 | 16770498                                                               | WBGene00015676 | mct-6 C10E2.6 0.250805205239855    |
| AGIWUR17867                                                           |    |   |          |                                                                        |                |                                    |
| N2                                                                    | CT | X | 16780994 | 16782894                                                               | WBGene00020144 | T01C8.3 T01C8.3 -0.118822569679136 |
| AGIWUR41175                                                           |    |   |          |                                                                        |                |                                    |
| N2                                                                    | CT | X | 16786438 | 16787620                                                               | WBGene00020143 | T01C8.2 T01C8.2 -0.162977905004357 |
| AGIWUR42620                                                           |    |   |          |                                                                        |                |                                    |
| N2                                                                    | CT | X | 16787632 | 16790412                                                               | WBGene00020145 | got-1.1 T01C8.4 0.139364965175791  |
| AGIWUR3969                                                            |    |   |          |                                                                        |                |                                    |
| N2                                                                    | CT | X | 16791347 | 16793137                                                               | WBGene00020146 | got-1.2 T01C8.5 0.158286058989722  |
| AGIWUR11961;AGIWUR17870;AGIWUR30233                                   |    |   |          |                                                                        |                |                                    |
| N2                                                                    | CT | X | 16796087 | 16803357                                                               | WBGene00020142 | aak-2 T01C8.1 0.00516038668575058  |
| AGIWUR2222;AGIWUR6304;AGIWUR17730;AGIWUR36784;AGIWUR37853;AGIWUR43105 |    |   |          |                                                                        |                |                                    |

|                                                                         |    |   |          |          |                |          |         |                     |
|-------------------------------------------------------------------------|----|---|----------|----------|----------------|----------|---------|---------------------|
| N2                                                                      | CT | X | 16803368 | 16807125 | WBGene00003168 | mec-4    | T01C8.7 | -0.366658124920839  |
| AGIWUR16250                                                             |    |   |          |          |                |          |         |                     |
| N2                                                                      | CT | X | 16807461 | 16813673 | WBGene00000294 | cas-1    | F41G4.2 | 0.10598796818988    |
| AGIWUR13644;AGIWUR15303;AGIWUR21211;AGIWUR24406                         |    |   |          |          |                |          |         |                     |
| N2                                                                      | CT | X | 16816260 | 16819268 | WBGene00006067 | sto-5    | F41G4.3 | 0.0607327719931376  |
| AGIWUR11224;AGIWUR13982;AGIWUR15700;AGIWUR16568;AGIWUR30756;AGIWUR40541 |    |   |          |          |                |          |         |                     |
| N2                                                                      | CT | X | 16829767 | 16830672 | WBGene00018308 | F41G4.4  | F41G4.4 | 0.110175153155559   |
| AGIWUR34367                                                             |    |   |          |          |                |          |         |                     |
| N2                                                                      | CT | X | 16833588 | 16836404 | WBGene00018310 | F41G4.7  | F41G4.7 | 0.0556008133983688  |
| AGIWUR8357;AGIWUR33677                                                  |    |   |          |          |                |          |         |                     |
| N2                                                                      | CT | X | 16841105 | 16842975 | WBGene00018307 | dyla-1   | F41G4.1 | -0.213622001935843  |
| AGIWUR325                                                               |    |   |          |          |                |          |         |                     |
| N2                                                                      | CT | X | 16843355 | 16845024 | WBGene00018311 | F41G4.8  | F41G4.8 | -0.251013054277818  |
| AGIWUR7728                                                              |    |   |          |          |                |          |         |                     |
| N2                                                                      | CT | X | 16845374 | 16862005 | WBGene00020632 | T20F7.5  | T20F7.5 | -0.0592883583806598 |
| AGIWUR8382;AGIWUR14936                                                  |    |   |          |          |                |          |         |                     |
| N2                                                                      | CT | X | 16866069 | 16869031 | WBGene00020633 | aakg-2   | T20F7.6 | 0.113245233773995   |
| AGIWUR36879                                                             |    |   |          |          |                |          |         |                     |
| N2                                                                      | CT | X | 16872926 | 16878351 | WBGene00020630 | T20F7.1  | T20F7.1 | -0.173119055339235  |
| AGIWUR4889                                                              |    |   |          |          |                |          |         |                     |
| N2                                                                      | CT | X | 16878148 | 16880526 | WBGene00020634 | acs-9    | T20F7.7 | 0.0211555762852211  |
| AGIWUR18018;AGIWUR22812                                                 |    |   |          |          |                |          |         |                     |
| N2                                                                      | CT | X | 16891991 | 16893148 | WBGene00018203 | F39F10.3 |         | F39F10.3            |
| -0.0454594764081104 AGIWUR33743                                         |    |   |          |          |                |          |         |                     |
| N2                                                                      | CT | X | 16894884 | 16895916 | WBGene00018202 | F39F10.2 |         | F39F10.2            |
| -0.101541324555437 AGIWUR36126                                          |    |   |          |          |                |          |         |                     |
| N2                                                                      | CT | X | 16902391 | 16904332 | WBGene00018204 | F39F10.4 |         | F39F10.4            |
| -0.138886195395007 AGIWUR4716                                           |    |   |          |          |                |          |         |                     |
| N2                                                                      | CT | X | 16913906 | 16916800 | WBGene00016255 | C30E1.6  | C30E1.6 | -0.0462239575450778 |
| AGIWUR22467;AGIWUR29826                                                 |    |   |          |          |                |          |         |                     |
| N2                                                                      | CT | X | 16916812 | 16919319 | WBGene00016257 | C30E1.8  | C30E1.8 | 0.174470908323905   |
| AGIWUR41597                                                             |    |   |          |          |                |          |         |                     |
| N2                                                                      | CT | X | 16921853 | 16922861 | WBGene00016254 | fbxb-114 |         | C30E1.5             |
| 0.0504482602134031 AGIWUR31156                                          |    |   |          |          |                |          |         |                     |
| N2                                                                      | CT | X | 16923936 | 16925917 | WBGene00016253 | C30E1.4  | C30E1.4 | 0.162608648079135   |
| AGIWUR42296                                                             |    |   |          |          |                |          |         |                     |
| N2                                                                      | CT | X | 16925954 | 16926821 | WBGene00016252 | C30E1.3  | C30E1.3 | 0.0234832996047531  |
| AGIWUR41174                                                             |    |   |          |          |                |          |         |                     |
| N2                                                                      | CT | X | 16926964 | 16928023 | WBGene00016251 | C30E1.2  | C30E1.2 | 0.254852352821869   |

|                                                                                               |    |   |          |          |                |          |                             |
|-----------------------------------------------------------------------------------------------|----|---|----------|----------|----------------|----------|-----------------------------|
| AGIWUR28158                                                                                   |    |   |          |          |                |          |                             |
| N2                                                                                            | CT | X | 16929914 | 16931619 | WBGene00022951 | C30E1.9  | C30E1.9 0.210901998301072   |
| AGIWUR1340;AGIWUR1400;AGIWUR9127;AGIWUR14609;AGIWUR33336                                      |    |   |          |          |                |          |                             |
| N2                                                                                            | CT | X | 16943323 | 16943517 | WBGene00219964 | F52G3.6  | F52G3.6 0.0420146020364873  |
| AGIWUR34273                                                                                   |    |   |          |          |                |          |                             |
| N2                                                                                            | CT | X | 16944877 | 16948026 | WBGene00018711 | F52G3.3  | F52G3.3 -0.0488754648462617 |
| AGIWUR8520                                                                                    |    |   |          |          |                |          |                             |
| N2                                                                                            | CT | X | 16948355 | 16952113 | WBGene00018712 | F52G3.4  | F52G3.4 0.175762085701885   |
| AGIWUR27777                                                                                   |    |   |          |          |                |          |                             |
| N2                                                                                            | CT | X | 16963871 | 16972808 | WBGene00018710 | F52G3.1  | F52G3.1 0.130432451647266   |
| AGIWUR3424                                                                                    |    |   |          |          |                |          |                             |
| N2                                                                                            | CT | X | 16973227 | 16976130 | WBGene00018713 | F52G3.5  | F52G3.5 0.0486745058402356  |
| AGIWUR17329                                                                                   |    |   |          |          |                |          |                             |
| N2                                                                                            | CT | X | 16986629 | 17008462 | WBGene00019347 | mb1-1    | K02H8.1 0.113837010454487   |
| AGIWUR10094;AGIWUR21006;AGIWUR27337;AGIWUR28511;AGIWUR33493;AGIWUR40744                       |    |   |          |          |                |          |                             |
| N2                                                                                            | CT | X | 17013462 | 17014028 | WBGene00018030 | F35B3.3  | F35B3.3 0.053819703232743   |
| AGIWUR40040                                                                                   |    |   |          |          |                |          |                             |
| N2                                                                                            | CT | X | 17015297 | 17017814 | WBGene00018028 | F35B3.1  | F35B3.1 0.0644276746014807  |
| AGIWUR12954                                                                                   |    |   |          |          |                |          |                             |
| N2                                                                                            | CT | X | 17019616 | 17020958 | WBGene00018031 | F35B3.4  | F35B3.4 0.144412587898721   |
| AGIWUR6234                                                                                    |    |   |          |          |                |          |                             |
| N2                                                                                            | CT | X | 17021821 | 17030219 | WBGene00004121 | ptrn-1   | F35B3.5 0.11881755202836    |
| AGIWUR2363;AGIWUR37820                                                                        |    |   |          |          |                |          |                             |
| N2                                                                                            | CT | X | 17035206 | 17042985 | WBGene00018033 | F35B3.7  | F35B3.7 -0.065204935453405  |
| AGIWUR16065                                                                                   |    |   |          |          |                |          |                             |
| N2                                                                                            | CT | X | 17044115 | 17045497 | WBGene00016268 | C30G4.2  | C30G4.2 0.0911737396845869  |
| AGIWUR30899                                                                                   |    |   |          |          |                |          |                             |
| N2                                                                                            | CT | X | 17046261 | 17055581 | WBGene00001537 | gcy-11   | C30G4.3 -0.0778320119768434 |
| AGIWUR42669                                                                                   |    |   |          |          |                |          |                             |
| N2                                                                                            | CT | X | 17056925 | 17072188 | WBGene00016269 | C30G4.4  | C30G4.4 0.00484135140936726 |
| AGIWUR709;AGIWUR4881;AGIWUR5058;AGIWUR8872;AGIWUR31858;AGIWUR31945;AGIWUR37580;AGIWUR41091    |    |   |          |          |                |          |                             |
| N2                                                                                            | CT | X | 17073810 | 17080685 | WBGene00016271 | irld-23  | C30G4.6 -0.143559407113917  |
| AGIWUR155;AGIWUR11710;AGIWUR29104;AGIWUR29756;AGIWUR34987;AGIWUR36342;AGIWUR39395;AGIWUR43306 |    |   |          |          |                |          |                             |
| N2                                                                                            | CT | X | 17081128 | 17082042 | WBGene00044773 | C08A9.10 | C08A9.10                    |
| 0.0629709982247668 AGIWUR19873;AGIWUR22703                                                    |    |   |          |          |                |          |                             |
| N2                                                                                            | CT | X | 17083162 | 17083742 | WBGene00045273 | C08A9.11 | C08A9.11                    |
| -0.17377920894749 AGIWUR28514                                                                 |    |   |          |          |                |          |                             |
| N2                                                                                            | CT | X | 17087882 | 17093299 | WBGene00015583 | C08A9.3  | C08A9.3 0.147197564663752   |
| AGIWUR10031;AGIWUR22743;AGIWUR23148;AGIWUR31283;AGIWUR39427                                   |    |   |          |          |                |          |                             |

|                                               |    |   |          |          |                |         |          |                     |
|-----------------------------------------------|----|---|----------|----------|----------------|---------|----------|---------------------|
| N2                                            | CT | X | 17092718 | 17094223 | WBGene00004932 | sod-3   | C08A9.1  | -0.276809119709407  |
| AGIWUR31330                                   |    |   |          |          |                |         |          |                     |
| N2                                            | CT | X | 17094288 | 17096537 | WBGene00015586 | C08A9.6 | C08A9.6  | -0.0285806155327304 |
| AGIWUR30672                                   |    |   |          |          |                |         |          |                     |
| N2                                            | CT | X | 17099112 | 17100752 | WBGene00015587 | sdz-2   | C08A9.7  | 0.150060649944647   |
| AGIWUR13578;AGIWUR33350;AGIWUR38756           |    |   |          |          |                |         |          |                     |
| N2                                            | CT | X | 17102845 | 17104871 | WBGene00015588 | C08A9.8 | C08A9.8  |                     |
| -0.00422801364588032 AGIWUR24190;AGIWUR42370  |    |   |          |          |                |         |          |                     |
| N2                                            | CT | X | 17109282 | 17110655 | WBGene00019576 | K09E3.5 | K09E3.5  | -0.0577041941876022 |
| AGIWUR9689                                    |    |   |          |          |                |         |          |                     |
| N2                                            | CT | X | 17113965 | 17115189 | WBGene00019577 | K09E3.6 | K09E3.6  | -0.0708819164956536 |
| AGIWUR35743                                   |    |   |          |          |                |         |          |                     |
| N2                                            | CT | X | 17117659 | 17117988 | WBGene00019574 | K09E3.2 | K09E3.2  | -0.0272745239785959 |
| AGIWUR2162                                    |    |   |          |          |                |         |          |                     |
| N2                                            | CT | X | 17119269 | 17120263 | WBGene00019575 | K09E3.4 | K09E3.4  | -0.132643031862459  |
| AGIWUR1080;AGIWUR6845;AGIWUR22791;AGIWUR24492 |    |   |          |          |                |         |          |                     |
| N2                                            | CT | X | 17131348 | 17134527 | WBGene00019578 | K09E3.7 | K09E3.7  | 0.0441298348907448  |
| AGIWUR19317                                   |    |   |          |          |                |         |          |                     |
| N2                                            | CT | X | 17135975 | 17138110 | WBGene00020725 | cnp-3   | T23C6.3  | -0.182666875513757  |
| AGIWUR12081                                   |    |   |          |          |                |         |          |                     |
| N2                                            | CT | X | 17147531 | 17149927 | WBGene00020726 | T23C6.4 | T23C6.4  | 0.241916672798029   |
| AGIWUR19464                                   |    |   |          |          |                |         |          |                     |
| N2                                            | CT | X | 17151522 | 17154595 | WBGene00007011 | mdt-1.2 | T23C6.1  | -0.0732135244839824 |
| AGIWUR698                                     |    |   |          |          |                |         |          |                     |
| N2                                            | CT | X | 17155088 | 17157957 | WBGene00020727 | npr-21  | T23C6.5  | 0.37137352886398    |
| AGIWUR19735                                   |    |   |          |          |                |         |          |                     |
| N2                                            | CT | X | 17176490 | 17176777 | WBGene00015121 | B0302.4 | B0302.4  | -0.341434629623173  |
| AGIWUR31228                                   |    |   |          |          |                |         |          |                     |
| N2                                            | CT | X | 17178539 | 17178992 | WBGene00015119 | B0302.2 | B0302.2  | -0.322711205581323  |
| AGIWUR36023                                   |    |   |          |          |                |         |          |                     |
| N2                                            | CT | X | 17186380 | 17193289 | WBGene00002207 | sid-3   | B0302.1  | 0.116809696565026   |
| AGIWUR9881                                    |    |   |          |          |                |         |          |                     |
| N2                                            | CT | X | 17193300 | 17195137 | WBGene00015122 | B0302.5 | B0302.5  | 0.0260819431224366  |
| AGIWUR15536                                   |    |   |          |          |                |         |          |                     |
| N2                                            | CT | X | 17205243 | 17209365 | WBGene00020365 | T08G2.2 | T08G2.2  | -0.169764171658103  |
| AGIWUR13064                                   |    |   |          |          |                |         |          |                     |
| N2                                            | CT | X | 17213144 | 17214929 | WBGene00020366 | acdH-10 | T08G2.3  | 0.154297620821504   |
| AGIWUR21557;AGIWUR26581;AGIWUR38674           |    |   |          |          |                |         |          |                     |
| N2                                            | CT | X | 17215018 | 17217105 | WBGene00020812 | acdH-7  | T25G12.5 |                     |

|                       |                                                                        |          |                |                     |
|-----------------------|------------------------------------------------------------------------|----------|----------------|---------------------|
| 0.0240527308211007    | AGIWUR35641                                                            |          |                |                     |
| N2 CT X               | 17222475                                                               | 17224464 | WBGene00004270 | rab-6.2 T25G12.4    |
| 0.0809220753348647    | AGIWUR5495;AGIWUR12185;AGIWUR18195;AGIWUR26907;AGIWUR33675;AGIWUR33764 |          |                |                     |
| N2 CT X               | 17225197                                                               | 17230208 | WBGene00020813 | T25G12.6 T25G12.6   |
| -0.0797332417672001   | AGIWUR6172;AGIWUR9894                                                  |          |                |                     |
| N2 CT X               | 17230719                                                               | 17235838 | WBGene00000993 | dhs-30 T25G12.7     |
| 0.0125316517586755    | AGIWUR20085;AGIWUR42792                                                |          |                |                     |
| N2 CT X               | 17236933                                                               | 17237855 | WBGene00020817 | T25G12.11 T25G12.11 |
| 0.208821344156411     | AGIWUR8755                                                             |          |                |                     |
| N2 CT X               | 17247674                                                               | 17248972 | WBGene00020810 | T25G12.2 T25G12.2   |
| -0.566704114500189    | AGIWUR33125                                                            |          |                |                     |
| N2 CT X               | 17248837                                                               | 17250007 | WBGene00020809 | T25G12.1 T25G12.1   |
| 0.0196127229668743    | AGIWUR1918                                                             |          |                |                     |
| N2 CT X               | 17256235                                                               | 17256780 | WBGene00021500 | Y40C7B.4 Y40C7B.4   |
| -0.262819081747004    | AGIWUR5826;AGIWUR10870;AGIWUR23992                                     |          |                |                     |
| N2 CT X               | 17258335                                                               | 17259585 | WBGene00021499 | Y40C7B.3 Y40C7B.3   |
| 0.0371793934338882    | AGIWUR34942                                                            |          |                |                     |
| N2 CT X               | 17259889                                                               | 17263584 | WBGene00021498 | Y40C7B.1 Y40C7B.1   |
| 0.0896931376279393    | AGIWUR9091;AGIWUR15084                                                 |          |                |                     |
| N2 CT X               | 17263831                                                               | 17266460 | WBGene00021501 | Y40C7B.5 Y40C7B.5   |
| 0.0741018710555092    | AGIWUR40180                                                            |          |                |                     |
| N2 CT X               | 17266695                                                               | 17269960 | WBGene00016348 | C33E10.6 C33E10.6   |
| 0.0141028626505673    | AGIWUR39517                                                            |          |                |                     |
| N2 CT X               | 17272934                                                               | 17279532 | WBGene00016347 | C33E10.5 C33E10.5   |
| -0.160199734626516    | AGIWUR31699                                                            |          |                |                     |
| N2 CT X               | 17280761                                                               | 17283574 | WBGene00023246 | C33E10.4 C33E10.4   |
| 0.165934435775677     | AGIWUR11057                                                            |          |                |                     |
| N2 CT X               | 17284339                                                               | 17285449 | WBGene00023245 | C33E10.3 C33E10.3   |
| -0.0838251060938182   | AGIWUR20722;AGIWUR33047                                                |          |                |                     |
| N2 CT X               | 17286274                                                               | 17287564 | WBGene00023247 | C33E10.7 C33E10.7   |
| -0.000381376550977919 | AGIWUR28214                                                            |          |                |                     |
| N2 CT X               | 17293094                                                               | 17294828 | WBGene00016349 | C33E10.8 C33E10.8   |
| -0.0867661853679653   | AGIWUR14047                                                            |          |                |                     |
| N2 CT X               | 17296644                                                               | 17297231 | WBGene00023248 | C33E10.9 C33E10.9   |
| -0.203363261580662    | AGIWUR4144;AGIWUR19105;AGIWUR19349;AGIWUR39258                         |          |                |                     |
| N2 CT X               | 17301374                                                               | 17301923 | WBGene00016350 | C33E10.10 C33E10.10 |
| 0.000984201294373044  | AGIWUR15483;AGIWUR32562                                                |          |                |                     |
| N2 CT X               | 17302719                                                               | 17303994 | WBGene00016346 | fbxa-120 C33E10.2   |
| -0.241731551581042    | AGIWUR18344                                                            |          |                |                     |

|                                                                                    |    |   |                                                                        |          |                |          |                             |
|------------------------------------------------------------------------------------|----|---|------------------------------------------------------------------------|----------|----------------|----------|-----------------------------|
| N2                                                                                 | CT | X | 17305325                                                               | 17306164 | WBGene00016345 | C33E10.1 | C33E10.1                    |
| 0.0717018205766058                                                                 |    |   | AGIWUR34159                                                            |          |                |          |                             |
| N2                                                                                 | CT | X | 17318584                                                               | 17326603 | WBGene00004220 | ptr-5    | C53C11.3                    |
| 0.470852300172076                                                                  |    |   | AGIWUR18738                                                            |          |                |          |                             |
| N2                                                                                 | CT | X | 17334052                                                               | 17336169 | WBGene00044770 | C53C11.5 | C53C11.5                    |
| 0.345055135457804                                                                  |    |   | AGIWUR36267;AGIWUR38496                                                |          |                |          |                             |
| N2                                                                                 | CT | X | 17337279                                                               | 17338632 | WBGene00016900 | C53C11.2 | C53C11.2                    |
| -0.100687890253346                                                                 |    |   | AGIWUR1053;AGIWUR10129;AGIWUR13719;AGIWUR15294;AGIWUR20496;AGIWUR31951 |          |                |          |                             |
| N2                                                                                 | CT | X | 17339907                                                               | 17342220 | WBGene00016899 | C53C11.1 | C53C11.1                    |
| 0.0565605087645906                                                                 |    |   | AGIWUR10071                                                            |          |                |          |                             |
| N2                                                                                 | CT | X | 17359770                                                               | 17364764 | WBGene00017338 | F10D7.1  | F10D7.1 0.00944790368833459 |
| AGIWUR43231                                                                        |    |   |                                                                        |          |                |          |                             |
| N2                                                                                 | CT | X | 17364646                                                               | 17368642 | WBGene00017339 | F10D7.2  | F10D7.2 -0.131440219870065  |
| AGIWUR12776                                                                        |    |   |                                                                        |          |                |          |                             |
| N2                                                                                 | CT | X | 17372318                                                               | 17374877 | WBGene00017340 | F10D7.3  | F10D7.3 -0.0992629519520563 |
| AGIWUR41425                                                                        |    |   |                                                                        |          |                |          |                             |
| N2                                                                                 | CT | X | 17378569                                                               | 17381818 | WBGene00017341 | F10D7.4  | F10D7.4 -0.0771821909132075 |
| AGIWUR22452                                                                        |    |   |                                                                        |          |                |          |                             |
| N2                                                                                 | CT | X | 17383125                                                               | 17391615 | WBGene00017342 | F10D7.5  | F10D7.5 0.115781503916535   |
| AGIWUR1506;AGIWUR16573;AGIWUR19528;AGIWUR20197;AGIWUR29819;AGIWUR37849;AGIWUR44662 |    |   |                                                                        |          |                |          |                             |
| N2                                                                                 | CT | X | 17393789                                                               | 17396556 | WBGene00006886 | vap-1    | F11C7.3 0.148916135071858   |
| AGIWUR25126                                                                        |    |   |                                                                        |          |                |          |                             |
| N2                                                                                 | CT | X | 17396814                                                               | 17397798 | WBGene00017376 | F11C7.2  | F11C7.2 -0.155594628607176  |
| AGIWUR22548                                                                        |    |   |                                                                        |          |                |          |                             |
| N2                                                                                 | CT | X | 17398593                                                               | 17399357 | WBGene00017379 | F11C7.7  | F11C7.7 0.0394652060177947  |
| AGIWUR29574                                                                        |    |   |                                                                        |          |                |          |                             |
| N2                                                                                 | CT | X | 17401571                                                               | 17402581 | WBGene00017378 | F11C7.6  | F11C7.6 -0.391461157620103  |
| AGIWUR43595                                                                        |    |   |                                                                        |          |                |          |                             |
| N2                                                                                 | CT | X | 17402540                                                               | 17414014 | WBGene00000792 | crb-1    | F11C7.4 0.291437911450755   |
| AGIWUR8685;AGIWUR17055;AGIWUR28897                                                 |    |   |                                                                        |          |                |          |                             |
| N2                                                                                 | CT | X | 17420211                                                               | 17421582 | WBGene00003891 | osm-11   | F11C7.5 -0.0963236052787249 |
| AGIWUR67;AGIWUR19910;AGIWUR40771                                                   |    |   |                                                                        |          |                |          |                             |
| N2                                                                                 | CT | X | 17429042                                                               | 17433103 | WBGene00017375 | pbo-6    | F11C7.1 -0.179352209474741  |
| AGIWUR26634                                                                        |    |   |                                                                        |          |                |          |                             |
| N2                                                                                 | CT | X | 17434445                                                               | 17438080 | WBGene00016489 | C36E6.1  | C36E6.1 -0.152584305382966  |
| AGIWUR10631;AGIWUR13541;AGIWUR41270                                                |    |   |                                                                        |          |                |          |                             |
| N2                                                                                 | CT | X | 17438619                                                               | 17439751 | WBGene00044683 | C36E6.8  | C36E6.8 0.0339686917861242  |
| AGIWUR4420;AGIWUR11987;AGIWUR31569;AGIWUR37832                                     |    |   |                                                                        |          |                |          |                             |
| N2                                                                                 | CT | X | 17452392                                                               | 17455861 | WBGene00016490 | C36E6.2  | C36E6.2 -0.0963801904176087 |

|                                                                         |    |   |          |          |                 |          |          |                     |  |
|-------------------------------------------------------------------------|----|---|----------|----------|-----------------|----------|----------|---------------------|--|
| AGIWUR29514                                                             |    |   |          |          |                 |          |          |                     |  |
| N2                                                                      | CT | X | 17459115 | 17460778 | WBGene00003369  | mlc-1    | C36E6.3  | 0.1386457270733     |  |
| AGIWUR8479;AGIWUR21106;AGIWUR22126;AGIWUR26754;AGIWUR37052              |    |   |          |          |                 |          |          |                     |  |
| N2                                                                      | CT | X | 17460778 | 17464966 | WBGene00022647  | slc-17.1 |          | ZK54.1              |  |
| 0.0783056091360086 AGIWUR15167;AGIWUR35072;AGIWUR40379;AGIWUR43365      |    |   |          |          |                 |          |          |                     |  |
| N2                                                                      | CT | X | 17467121 | 17474585 | WBGene00006602  | tps-1    | ZK54.2   | -0.300142094079854  |  |
| AGIWUR3579;AGIWUR8084;AGIWUR16998                                       |    |   |          |          |                 |          |          |                     |  |
| N2                                                                      | CT | X | 17479842 | 17480309 | WBGene00020085  | R106.1   | R106.1   | 0.0669911883346987  |  |
| AGIWUR7948                                                              |    |   |          |          |                 |          |          |                     |  |
| N2                                                                      | CT | X | 17480653 | 17481960 | WBGene000206419 | R106.5   | R106.5   | 0.092005750967326   |  |
| AGIWUR6816;AGIWUR8226;AGIWUR12105;AGIWUR15357;AGIWUR25111;AGIWUR39075   |    |   |          |          |                 |          |          |                     |  |
| N2                                                                      | CT | X | 17483012 | 17486831 | WBGene00020086  | npr-24   | R106.2   | -0.0311309714567116 |  |
| AGIWUR20558                                                             |    |   |          |          |                 |          |          |                     |  |
| N2                                                                      | CT | X | 17518445 | 17528197 | WBGene00003600  | nhr-1    | R09G11.2 |                     |  |
| -0.07397728719131 AGIWUR2950;AGIWUR4048;AGIWUR32468;AGIWUR39789         |    |   |          |          |                 |          |          |                     |  |
| N2                                                                      | CT | X | 17528344 | 17531980 | WBGene00006319  | sup-10   | R09G11.1 |                     |  |
| -0.125515960038991 AGIWUR22302;AGIWUR35729;AGIWUR37633                  |    |   |          |          |                 |          |          |                     |  |
| N2                                                                      | CT | X | 17532976 | 17534064 | WBGene00017938  | F31A3.3  | F31A3.3  | -0.414123817926652  |  |
| AGIWUR14131                                                             |    |   |          |          |                 |          |          |                     |  |
| N2                                                                      | CT | X | 17553419 | 17554449 | WBGene00000026  | abu-3    | F31A3.1  | 0.181708198177658   |  |
| AGIWUR19465                                                             |    |   |          |          |                 |          |          |                     |  |
| N2                                                                      | CT | X | 17554946 | 17561464 | WBGene00017939  | F31A3.5  | F31A3.5  | 0.060521978604748   |  |
| AGIWUR11105;AGIWUR12739;AGIWUR19710;AGIWUR33019;AGIWUR35493;AGIWUR43788 |    |   |          |          |                 |          |          |                     |  |
| N2                                                                      | CT | X | 17567643 | 17571923 | WBGene00018191  | frpr-7   | F39B3.2  | -0.0526235285429157 |  |
| AGIWUR17280                                                             |    |   |          |          |                 |          |          |                     |  |
| N2                                                                      | CT | X | 17578692 | 17579111 | WBGene00018192  | F39B3.3  | F39B3.3  | 0.00440251261231239 |  |
| AGIWUR14256                                                             |    |   |          |          |                 |          |          |                     |  |
| N2                                                                      | CT | X | 17600412 | 17601503 | WBGene00002272  | lec-9    | C16H3.2  | 0.283813629253768   |  |
| AGIWUR23352                                                             |    |   |          |          |                 |          |          |                     |  |
| N2                                                                      | CT | X | 17601607 | 17610048 | WBGene00015868  | C16H3.3  | C16H3.3  | 0.0553765159061799  |  |
| AGIWUR8937;AGIWUR32768                                                  |    |   |          |          |                 |          |          |                     |  |
| N2                                                                      | CT | X | 17617827 | 17619458 | WBGene00015867  | ncs-7    | C16H3.1  | 0.170457334329546   |  |
| AGIWUR9806                                                              |    |   |          |          |                 |          |          |                     |  |
| N2                                                                      | CT | X | 17622778 | 17640743 | WBGene00019211  | H18N23.2 |          | H18N23.2            |  |
| 0.33580051468693 AGIWUR637;AGIWUR9448;AGIWUR16628                       |    |   |          |          |                 |          |          |                     |  |
| N2                                                                      | CT | X | 17650178 | 17651594 | WBGene00044771  | tmem-218 |          | T23E7.5             |  |
| -0.167953013379324 AGIWUR2801;AGIWUR33791                               |    |   |          |          |                 |          |          |                     |  |
| N2                                                                      | CT | X | 17662458 | 17665357 | WBGene00003744  | nlp-6    | T23E7.4  | -0.0740096100804877 |  |
| AGIWUR7630;AGIWUR25902;AGIWUR28626;AGIWUR43164                          |    |   |          |          |                 |          |          |                     |  |



|                                                                                                                                                                                 |    |   |          |          |                |            |           |                     |
|---------------------------------------------------------------------------------------------------------------------------------------------------------------------------------|----|---|----------|----------|----------------|------------|-----------|---------------------|
| N2                                                                                                                                                                              | CT | X | 17671029 | 17680793 | WBGene00020732 | T23E7.2    | T23E7.2   | 0.0435650238971625  |
| AGIWUR357;AGIWUR3225;AGIWUR7696;AGIWUR15128;AGIWUR17786;AGIWUR19744;AGIWUR22848;AGIWUR23185;AGIWUR24830;AGIWUR31754;AGIWUR36428;AGIWUR39375;AGIWUR41150;AGIWUR42827;AGIWUR42893 |    |   |          |          |                |            |           |                     |
| N2                                                                                                                                                                              | CT | X | 17680873 | 17682294 | WBGene00044772 | T23E7.6    | T23E7.6   | -0.0593016161080682 |
| AGIWUR7154;AGIWUR11579;AGIWUR12544;AGIWUR17726;AGIWUR31690;AGIWUR35251;AGIWUR36341;AGIWUR39773;AGIWUR40382;AGIWUR41037                                                          |    |   |          |          |                |            |           |                     |
| N2                                                                                                                                                                              | CT | X | 17695232 | 17701744 | WBGene00017625 | cgt-2      | F20B4.6   | 0.0290085718715707  |
| AGIWUR4948;AGIWUR24597                                                                                                                                                          |    |   |          |          |                |            |           |                     |
| N2                                                                                                                                                                              | CT | X | 17710286 | 17711674 | WBGene00019189 | H11L12.1   |           | H11L12.1            |
| 0.116923798790888 AGIWUR6383                                                                                                                                                    |    |   |          |          |                |            |           |                     |
| N2                                                                                                                                                                              | CT | X | 17714456 | 17714832 | WBGene00007069 | 6R55.2     | 6R55.2    | -0.100880376593169  |
| AGIWUR33343                                                                                                                                                                     |    |   |          |          |                |            |           |                     |
| N2                                                                                                                                                                              | CT | X | 17714968 | 17718720 | WBGene00007068 | cTel155X.1 |           | cTel155X.1          |
| 0.086399070425685 AGIWUR19047;AGIWUR34189;AGIWUR43038                                                                                                                           |    |   |          |          |                |            |           |                     |
| N2                                                                                                                                                                              | HS | I | 3747     | 3909     | WBGene00023193 | Y74C9A.6   | Y74C9A.6  | 0.160261196595371   |
| AGIWUR10283                                                                                                                                                                     |    |   |          |          |                |            |           |                     |
| N2                                                                                                                                                                              | HS | I | 4116     | 10230    | WBGene00022277 | homt-1     | Y74C9A.3  | 0.106699380735447   |
| AGIWUR36142                                                                                                                                                                     |    |   |          |          |                |            |           |                     |
| N2                                                                                                                                                                              | HS | I | 11495    | 16837    | WBGene00022276 | nlp-40     | Y74C9A.2  | -0.0356964164474025 |
| AGIWUR15573;AGIWUR25172                                                                                                                                                         |    |   |          |          |                |            |           |                     |
| N2                                                                                                                                                                              | HS | I | 17487    | 26781    | WBGene00022278 | rcor-1     | Y74C9A.4  | 0.121681992258509   |
| AGIWUR26476                                                                                                                                                                     |    |   |          |          |                |            |           |                     |
| N2                                                                                                                                                                              | HS | I | 27591    | 32544    | WBGene00022279 | sesn-1     | Y74C9A.5  | 0.0541546519950096  |
| AGIWUR22971                                                                                                                                                                     |    |   |          |          |                |            |           |                     |
| N2                                                                                                                                                                              | HS | I | 43733    | 44677    | WBGene00022275 | Y74C9A.1   | Y74C9A.1  | -0.0727985833351443 |
| AGIWUR5034                                                                                                                                                                      |    |   |          |          |                |            |           |                     |
| N2                                                                                                                                                                              | HS | I | 47467    | 49857    | WBGene00044345 | Y48G1C.12  | Y48G1C.12 | -0.052863096586373  |
| AGIWUR8212;AGIWUR32887;AGIWUR43575                                                                                                                                              |    |   |          |          |                |            |           |                     |
| N2                                                                                                                                                                              | HS | I | 49919    | 54426    | WBGene00021677 | pgs-1      | Y48G1C.4  | 0.172799906476499   |
| AGIWUR6338;AGIWUR29294;AGIWUR41966                                                                                                                                              |    |   |          |          |                |            |           |                     |
| N2                                                                                                                                                                              | HS | I | 55293    | 64066    | WBGene00021678 | Y48G1C.5   | Y48G1C.5  | -0.23358556165037   |
| AGIWUR12519                                                                                                                                                                     |    |   |          |          |                |            |           |                     |
| N2                                                                                                                                                                              | HS | I | 71425    | 81071    | WBGene00000812 | csk-1      | Y48G1C.2  | 0.0669049315175103  |
| AGIWUR18740;AGIWUR27071;AGIWUR29609;AGIWUR40038                                                                                                                                 |    |   |          |          |                |            |           |                     |
| N2                                                                                                                                                                              | HS | I | 81193    | 91020    | WBGene00021683 | Y48G1C.10  | Y48G1C.10 | -0.156043850578456  |
| AGIWUR1487;AGIWUR6768;AGIWUR17886                                                                                                                                               |    |   |          |          |                |            |           |                     |
| N2                                                                                                                                                                              | HS | I | 91380    | 92877    | WBGene00021682 | Y48G1C.9   | Y48G1C.9  | 0.0552476916987974  |
| AGIWUR6641;AGIWUR16497;AGIWUR29495                                                                                                                                              |    |   |          |          |                |            |           |                     |
| N2                                                                                                                                                                              | HS | I | 93024    | 94884    | WBGene00021676 | Y48G1C.1   | Y48G1C.1  | -0.0951856371184956 |

AGIWUR20733

|                                                                                                                                 |    |   |        |        |                |           |           |                     |
|---------------------------------------------------------------------------------------------------------------------------------|----|---|--------|--------|----------------|-----------|-----------|---------------------|
| N2                                                                                                                              | HS | I | 96544  | 108223 | WBGene00021681 | Y48G1C.8  | Y48G1C.8  | -0.179936910185706  |
| AGIWUR2118;AGIWUR4958;AGIWUR17289;AGIWUR20729;AGIWUR23172;AGIWUR25122;AGIWUR30532;AGIWUR33151;AGIWUR37921                       |    |   |        |        |                |           |           |                     |
| N2                                                                                                                              | HS | I | 108670 | 110107 | WBGene00004274 | rab-11.1  | F53G12.1  | -0.0858766374070132 |
| AGIWUR7280;AGIWUR18237                                                                                                          |    |   |        |        |                |           |           |                     |
| N2                                                                                                                              | HS | I | 111038 | 112417 | WBGene00004418 | rp1-7     | F53G12.10 | 0.025568700660358   |
| AGIWUR2263;AGIWUR3392;AGIWUR5751;AGIWUR6722;AGIWUR12865;AGIWUR17613;AGIWUR21588;AGIWUR25879;AGIWUR34428;AGIWUR39201;AGIWUR39669 |    |   |        |        |                |           |           |                     |
| N2                                                                                                                              | HS | I | 112285 | 113721 | WBGene00018774 | F53G12.9  | F53G12.9  | 0.049631971442726   |
| AGIWUR6433;AGIWUR10455;AGIWUR10794;AGIWUR22121;AGIWUR25979;AGIWUR27830;AGIWUR36366;AGIWUR36737                                  |    |   |        |        |                |           |           |                     |
| N2                                                                                                                              | HS | I | 113807 | 114704 | WBGene00018773 | F53G12.8  | F53G12.8  | -0.110659820812682  |
| AGIWUR11234;AGIWUR20914                                                                                                         |    |   |        |        |                |           |           |                     |
| N2                                                                                                                              | HS | I | 115739 | 117438 | WBGene00000622 | col-45    | F53G12.7  | -0.101136097702486  |
| AGIWUR14279                                                                                                                     |    |   |        |        |                |           |           |                     |
| N2                                                                                                                              | HS | I | 118109 | 120870 | WBGene00004962 | spe-8     | F53G12.6  | -0.121826314659609  |
| AGIWUR621;AGIWUR6081;AGIWUR40104;AGIWUR43527                                                                                    |    |   |        |        |                |           |           |                     |
| N2                                                                                                                              | HS | I | 127297 | 134065 | WBGene00003229 | mex-3     | F53G12.5  | -0.284060268516624  |
| AGIWUR13975;AGIWUR29437;AGIWUR44108                                                                                             |    |   |        |        |                |           |           |                     |
| N2                                                                                                                              | HS | I | 134337 | 137282 | WBGene00018772 | F53G12.4  | F53G12.4  | -0.13522029571873   |
| AGIWUR42484                                                                                                                     |    |   |        |        |                |           |           |                     |
| N2                                                                                                                              | HS | I | 146486 | 154850 | WBGene00000253 | bli-3     | F56C11.1  | -0.0341349560805551 |
| AGIWUR3807                                                                                                                      |    |   |        |        |                |           |           |                     |
| N2                                                                                                                              | HS | I | 160172 | 166819 | WBGene00004225 | ptr-11    | F56C11.2  | -0.264999265019897  |
| AGIWUR42837                                                                                                                     |    |   |        |        |                |           |           |                     |
| N2                                                                                                                              | HS | I | 171340 | 175989 | WBGene00018958 | F56C11.6  | F56C11.6  | -0.0187467655863145 |
| AGIWUR6883                                                                                                                      |    |   |        |        |                |           |           |                     |
| N2                                                                                                                              | HS | I | 178538 | 182161 | WBGene00018957 | F56C11.5  | F56C11.5  | -0.226103155073194  |
| AGIWUR2702                                                                                                                      |    |   |        |        |                |           |           |                     |
| N2                                                                                                                              | HS | I | 182079 | 182772 | WBGene00018955 | F56C11.3  | F56C11.3  | 0.0773773666377302  |
| AGIWUR23793                                                                                                                     |    |   |        |        |                |           |           |                     |
| N2                                                                                                                              | HS | I | 183364 | 208465 | WBGene00000227 | atm-1     | Y48G1BL.2 | 0.0426312835687011  |
| AGIWUR463;AGIWUR33245;AGIWUR38423;AGIWUR39307                                                                                   |    |   |        |        |                |           |           |                     |
| N2                                                                                                                              | HS | I | 216028 | 216996 | WBGene00021662 | snpc-3.3  | Y48G1BL.1 | -0.377413297553453  |
| AGIWUR11670                                                                                                                     |    |   |        |        |                |           |           |                     |
| N2                                                                                                                              | HS | I | 219735 | 221575 | WBGene00021664 | Y48G1BL.5 | Y48G1BL.5 | -0.233564332274728  |
| AGIWUR13754                                                                                                                     |    |   |        |        |                |           |           |                     |
| N2                                                                                                                              | HS | I | 238616 | 239021 | WBGene00021672 | Y48G1BM.7 | Y48G1BM.7 | -0.145837773022708  |
| AGIWUR38722                                                                                                                     |    |   |        |        |                |           |           |                     |
| N2                                                                                                                              | HS | I | 240491 | 245414 | WBGene00021668 | Y48G1BM.2 | Y48G1BM.2 | 0.102629966289088   |

|                                                                                                                                                           |    |   |        |        |                |           |           |                                 |
|-----------------------------------------------------------------------------------------------------------------------------------------------------------|----|---|--------|--------|----------------|-----------|-----------|---------------------------------|
| AGIWUR29927                                                                                                                                               |    |   |        |        |                |           |           |                                 |
| N2                                                                                                                                                        | HS | I | 248624 | 251580 | WBGene00021673 | Y48G1BM.8 | Y48G1BM.8 | -0.0513292693339089             |
| AGIWUR38995                                                                                                                                               |    |   |        |        |                |           |           |                                 |
| N2                                                                                                                                                        | HS | I | 252118 | 254277 | WBGene00021667 | snp-3.2   | Y48G1BM.1 | 0.108350103904963               |
| AGIWUR11205                                                                                                                                               |    |   |        |        |                |           |           |                                 |
| N2                                                                                                                                                        | HS | I | 254277 | 259157 | WBGene00021675 | Y48G1BR.1 | Y48G1BR.1 | -0.0576499184855033             |
| AGIWUR4179;AGIWUR5959;AGIWUR23967;AGIWUR27432;AGIWUR32377;AGIWUR37148;AGIWUR43002;AGIWUR43138                                                             |    |   |        |        |                |           |           |                                 |
| N2                                                                                                                                                        | HS | I | 280120 | 280445 | WBGene00016904 | C53D5.3   | C53D5.3   | -0.158614687611312 AGIWUR33409  |
| N2                                                                                                                                                        | HS | I | 283500 | 286115 | WBGene00016903 | marc-4    | C53D5.2   | 0.0133866470290585 AGIWUR3252   |
| N2                                                                                                                                                        | HS | I | 286088 | 289185 | WBGene00016905 | ztf-3     | C53D5.4   | 0.141774229609503 AGIWUR12744   |
| N2                                                                                                                                                        | HS | I | 291215 | 305468 | WBGene00016902 | C53D5.1   | C53D5.1   | 0.132310247718459 AGIWUR2825    |
| N2                                                                                                                                                        | HS | I | 305811 | 311130 | WBGene00016906 | C53D5.5   | C53D5.5   | 0.131621639980033 AGIWUR41850   |
| N2                                                                                                                                                        | HS | I | 310981 | 314989 | WBGene00002077 | imb-3     | C53D5.6   | -0.0641425692573208             |
| AGIWUR3906;AGIWUR8209;AGIWUR34608                                                                                                                         |    |   |        |        |                |           |           |                                 |
| N2                                                                                                                                                        | HS | I | 318390 | 323352 | WBGene00002079 | xpo-2     | Y48G1A.5  | -0.360367826884579              |
| AGIWUR26191                                                                                                                                               |    |   |        |        |                |           |           |                                 |
| N2                                                                                                                                                        | HS | I | 323855 | 330978 | WBGene00021660 | Y48G1A.4  | Y48G1A.4  | -0.123434552520022              |
| AGIWUR8979                                                                                                                                                |    |   |        |        |                |           |           |                                 |
| N2                                                                                                                                                        | HS | I | 332611 | 337839 | WBGene00000917 | daf-25    | Y48G1A.3  | 0.121964092217009               |
| AGIWUR35344                                                                                                                                               |    |   |        |        |                |           |           |                                 |
| N2                                                                                                                                                        | HS | I | 343069 | 348424 | WBGene00021661 | mbtr-1    | Y48G1A.6  | -0.0254889748234355             |
| AGIWUR1177                                                                                                                                                |    |   |        |        |                |           |           |                                 |
| N2                                                                                                                                                        | HS | I | 348460 | 357193 | WBGene00021657 | Y48G1A.1  | Y48G1A.1  | -0.364582333871663              |
| AGIWUR10987                                                                                                                                               |    |   |        |        |                |           |           |                                 |
| N2                                                                                                                                                        | HS | I | 357240 | 363901 | WBGene00020087 | R119.1    | R119.1    | 0.0028906837325593 AGIWUR25426  |
| N2                                                                                                                                                        | HS | I | 364510 | 368319 | WBGene00020091 | rnp-8     | R119.7    | -0.164231247826937 AGIWUR25376  |
| N2                                                                                                                                                        | HS | I | 368370 | 373445 | WBGene00020088 | R119.2    | R119.2    | -0.338458331405493 AGIWUR10202  |
| N2                                                                                                                                                        | HS | I | 373571 | 379073 | WBGene00020089 | R119.3    | R119.3    | 0.180225155395048               |
| AGIWUR3041;AGIWUR17217;AGIWUR27220;AGIWUR29433;AGIWUR30374;AGIWUR42548                                                                                    |    |   |        |        |                |           |           |                                 |
| N2                                                                                                                                                        | HS | I | 379071 | 381902 | WBGene00004143 | pqn-59    | R119.4    | -0.312055264858813              |
| AGIWUR5926;AGIWUR7401;AGIWUR13641;AGIWUR16067;AGIWUR19397;AGIWUR19860;AGIWUR21791;AGIWUR26455;AGIWUR28874;AGIWUR32613;AGIWUR36219;AGIWUR36591;AGIWUR38419 |    |   |        |        |                |           |           |                                 |
| N2                                                                                                                                                        | HS | I | 382648 | 388564 | WBGene00006385 | taf-4     | R119.6    | -0.0996855076228513 AGIWUR11265 |
| N2                                                                                                                                                        | HS | I | 388470 | 394415 | WBGene00020090 | R119.5    | R119.5    | 0.0268388576318528              |
| AGIWUR1299;AGIWUR1860                                                                                                                                     |    |   |        |        |                |           |           |                                 |
| N2                                                                                                                                                        | HS | I | 398891 | 412915 | WBGene00021733 | otub-2    | Y50C1A.1  | -0.130571751976042              |
| AGIWUR9308;AGIWUR14492;AGIWUR36666                                                                                                                        |    |   |        |        |                |           |           |                                 |
| N2                                                                                                                                                        | HS | I | 412911 | 418660 | WBGene00021734 | Y50C1A.2  | Y50C1A.2  | 0.140616026653561               |
| AGIWUR12911                                                                                                                                               |    |   |        |        |                |           |           |                                 |

|                                                                                                                                     |    |   |        |        |                |           |           |                     |
|-------------------------------------------------------------------------------------------------------------------------------------|----|---|--------|--------|----------------|-----------|-----------|---------------------|
| N2                                                                                                                                  | HS | I | 420922 | 423713 | WBGene00015570 | C07F11.2  | C07F11.2  | -0.171533831025866  |
| AGIWUR14464                                                                                                                         |    |   |        |        |                |           |           |                     |
| N2                                                                                                                                  | HS | I | 443999 | 461605 | WBGene00006593 | tol-1     | C07F11.1  | -0.143498139714996  |
| AGIWUR2677;AGIWUR10919;AGIWUR11990;AGIWUR12403;AGIWUR13788;AGIWUR18746;AGIWUR19485;AGIWUR26817;AGIWUR32956;AGIWUR39071;AGIWUR41796  |    |   |        |        |                |           |           |                     |
| N2                                                                                                                                  | HS | I | 461995 | 462651 | WBGene00021026 | W04C9.4   | W04C9.4   | 0.0853405801093619  |
|                                                                                                                                     |    |   |        |        |                |           |           | AGIWUR40613         |
| N2                                                                                                                                  | HS | I | 462657 | 467131 | WBGene00021027 | W04C9.5   | W04C9.5   | 0.0407407232314085  |
|                                                                                                                                     |    |   |        |        |                |           |           | AGIWUR32438         |
| N2                                                                                                                                  | HS | I | 477582 | 481954 | WBGene00021025 | cut1-13   | W04C9.3   | -0.189220412692337  |
| AGIWUR7157;AGIWUR17034;AGIWUR44870                                                                                                  |    |   |        |        |                |           |           |                     |
| N2                                                                                                                                  | HS | I | 482040 | 483880 | WBGene00235388 | W04C9.9   | W04C9.9   | 0.134984720531129   |
|                                                                                                                                     |    |   |        |        |                |           |           | AGIWUR43955         |
| N2                                                                                                                                  | HS | I | 488607 | 489905 | WBGene00021024 | W04C9.2   | W04C9.2   | 0.0246156704654794  |
|                                                                                                                                     |    |   |        |        |                |           |           | AGIWUR6890          |
| N2                                                                                                                                  | HS | I | 489969 | 496150 | WBGene00001814 | haf-4     | W04C9.1   | 0.127519043901941   |
|                                                                                                                                     |    |   |        |        |                |           |           | AGIWUR32786         |
| N2                                                                                                                                  | HS | I | 496144 | 502042 | WBGene00022035 | Y65B4BL.3 | Y65B4BL.3 | -0.200656736345568  |
| AGIWUR355                                                                                                                           |    |   |        |        |                |           |           |                     |
| N2                                                                                                                                  | HS | I | 502932 | 506250 | WBGene00022036 | Y65B4BL.4 | Y65B4BL.4 | -0.278205976740313  |
| AGIWUR42967                                                                                                                         |    |   |        |        |                |           |           |                     |
| N2                                                                                                                                  | HS | I | 506469 | 509056 | WBGene00022034 | deps-1    | Y65B4BL.2 | -0.206458171928476  |
| AGIWUR44389                                                                                                                         |    |   |        |        |                |           |           |                     |
| N2                                                                                                                                  | HS | I | 511052 | 519800 | WBGene00022037 | acs-13    | Y65B4BL.5 | -0.0804313721772481 |
| AGIWUR5213;AGIWUR6411;AGIWUR12098;AGIWUR26016;AGIWUR28762;AGIWUR30485;AGIWUR41922                                                   |    |   |        |        |                |           |           |                     |
| N2                                                                                                                                  | HS | I | 520109 | 521554 | WBGene00022038 | Y65B4BL.6 | Y65B4BL.6 | 0.142839357843334   |
| AGIWUR10694;AGIWUR14351;AGIWUR18806;AGIWUR24805;AGIWUR30981;AGIWUR33410;AGIWUR36376;AGIWUR36747;AGIWUR36896;AGIWUR42899;AGIWUR44259 |    |   |        |        |                |           |           |                     |
| N2                                                                                                                                  | HS | I | 530969 | 533084 | WBGene00022033 | Y65B4BL.1 | Y65B4BL.1 | -0.171167631504016  |
| AGIWUR40224                                                                                                                         |    |   |        |        |                |           |           |                     |
| N2                                                                                                                                  | HS | I | 534455 | 535344 | WBGene00022043 | psf-3     | Y65B4BR.8 | 0.293406748459454   |
| AGIWUR31655                                                                                                                         |    |   |        |        |                |           |           |                     |
| N2                                                                                                                                  | HS | I | 535791 | 536670 | WBGene00022042 | icd-2     | Y65B4BR.5 | -0.129402161704439  |
| AGIWUR5033;AGIWUR8895;AGIWUR9943;AGIWUR17402;AGIWUR44103;AGIWUR45197                                                                |    |   |        |        |                |           |           |                     |
| N2                                                                                                                                  | HS | I | 537122 | 542200 | WBGene00007009 | wwp-1     | Y65B4BR.4 | -0.234486104509791  |
| AGIWUR1688;AGIWUR20352;AGIWUR38522                                                                                                  |    |   |        |        |                |           |           |                     |
| N2                                                                                                                                  | HS | I | 550696 | 556638 | WBGene00004235 | ptr-21    | Y65B4BR.3 | -0.0513529605895719 |
| AGIWUR8387                                                                                                                          |    |   |        |        |                |           |           |                     |
| N2                                                                                                                                  | HS | I | 557375 | 561671 | WBGene00002393 | lpr-1     | Y65B4BR.2 | 0.362538465402482   |
| AGIWUR5420                                                                                                                          |    |   |        |        |                |           |           |                     |
| N2                                                                                                                                  | HS | I | 562736 | 565181 | WBGene00022040 | Y65B4BR.1 | Y65B4BR.1 | -0.297023298519394  |
| AGIWUR36108                                                                                                                         |    |   |        |        |                |           |           |                     |
| N2                                                                                                                                  | HS | I | 565436 | 566414 | WBGene00000434 | ceh-9     | Y65B4BR.9 | -0.0122289208744228 |
| AGIWUR20254;AGIWUR37142                                                                                                             |    |   |        |        |                |           |           |                     |

|                                                                        |    |   |        |        |                |           |           |                       |             |
|------------------------------------------------------------------------|----|---|--------|--------|----------------|-----------|-----------|-----------------------|-------------|
| N2                                                                     | HS | I | 572177 | 575120 | WBGene00001725 | gr1-16    | Y65B4BR.6 | 0.10034706690459      |             |
| AGIWUR7933;AGIWUR10290;AGIWUR17115                                     |    |   |        |        |                |           |           |                       |             |
| N2                                                                     | HS | I | 582288 | 583748 | WBGene00044427 | F56A6.5   | F56A6.5   | 0.219577962253634     |             |
| AGIWUR5027;AGIWUR22482;AGIWUR31223                                     |    |   |        |        |                |           |           |                       |             |
| N2                                                                     | HS | I | 585831 | 607601 | WBGene00002040 | hum-7     | F56A6.2   | -0.0213155631077129   | AGIWUR35233 |
| N2                                                                     | HS | I | 614651 | 629444 | WBGene00018923 | eme-1     | F56A6.4   | -0.118621691292384    |             |
| AGIWUR9658;AGIWUR17702;AGIWUR40576                                     |    |   |        |        |                |           |           |                       |             |
| N2                                                                     | HS | I | 629492 | 636350 | WBGene00022029 | Y65B4A.6  | Y65B4A.6  | 0.094502577462368     |             |
| AGIWUR16088                                                            |    |   |        |        |                |           |           |                       |             |
| N2                                                                     | HS | I | 636804 | 637852 | WBGene00022027 | vps-20    | Y65B4A.3  | 0.035432609470341     |             |
| AGIWUR2007;AGIWUR15178;AGIWUR23419;AGIWUR28868;AGIWUR29377;AGIWUR42530 |    |   |        |        |                |           |           |                       |             |
| N2                                                                     | HS | I | 638129 | 653986 | WBGene00022026 | Y65B4A.2  | Y65B4A.2  | 0.411060733027327     |             |
| AGIWUR28421                                                            |    |   |        |        |                |           |           |                       |             |
| N2                                                                     | HS | I | 654090 | 658810 | WBGene00022025 | Y65B4A.1  | Y65B4A.1  |                       |             |
| -0.00269317628447752 AGIWUR30815                                       |    |   |        |        |                |           |           |                       |             |
| N2                                                                     | HS | I | 659557 | 663686 | WBGene00022031 | Y65B4A.8  | Y65B4A.8  | -0.0554111893500373   |             |
| AGIWUR33639                                                            |    |   |        |        |                |           |           |                       |             |
| N2                                                                     | HS | I | 667615 | 674413 | WBGene00044461 | Y18H1A.14 | Y18H1A.14 | -0.0397075664076421   |             |
| AGIWUR26159;AGIWUR30290                                                |    |   |        |        |                |           |           |                       |             |
| N2                                                                     | HS | I | 682876 | 686599 | WBGene00021214 | hasp-2    | Y18H1A.10 | 0.0857233060271305    |             |
| AGIWUR12962                                                            |    |   |        |        |                |           |           |                       |             |
| N2                                                                     | HS | I | 688286 | 691267 | WBGene00021207 | Y18H1A.1  | Y18H1A.1  | -0.0940565682326078   |             |
| AGIWUR42845                                                            |    |   |        |        |                |           |           |                       |             |
| N2                                                                     | HS | I | 692026 | 694948 | WBGene00021210 | Y18H1A.4  | Y18H1A.4  | 0.0942719384374371    |             |
| AGIWUR32934;AGIWUR40014                                                |    |   |        |        |                |           |           |                       |             |
| N2                                                                     | HS | I | 694982 | 698322 | WBGene00021208 | Y18H1A.2  | Y18H1A.2  | 0.101720482889888     |             |
| AGIWUR21289                                                            |    |   |        |        |                |           |           |                       |             |
| N2                                                                     | HS | I | 700274 | 715874 | WBGene00021209 | hgap-1    | Y18H1A.3  | -0.0542353698490139   |             |
| AGIWUR7556;AGIWUR13243;AGIWUR29984;AGIWUR33686;AGIWUR39061;AGIWUR39297 |    |   |        |        |                |           |           |                       |             |
| N2                                                                     | HS | I | 717893 | 719816 | WBGene00004332 | rec-1     | Y18H1A.7  | -0.000933602375953413 |             |
| AGIWUR12224                                                            |    |   |        |        |                |           |           |                       |             |
| N2                                                                     | HS | I | 719929 | 731078 | WBGene00004028 | pif-1     | Y18H1A.6  | -0.320572515842585    |             |
| AGIWUR23096                                                            |    |   |        |        |                |           |           |                       |             |
| N2                                                                     | HS | I | 731068 | 736552 | WBGene00044434 | Y18H1A.15 | Y18H1A.15 | 0.0893987034882002    |             |
| AGIWUR8664                                                             |    |   |        |        |                |           |           |                       |             |
| N2                                                                     | HS | I | 741913 | 745570 | WBGene00000623 | col-46    | Y18H1A.13 | -0.556396025798852    |             |
| AGIWUR13435                                                            |    |   |        |        |                |           |           |                       |             |
| N2                                                                     | HS | I | 748228 | 757010 | WBGene00021213 | Y18H1A.9  | Y18H1A.9  | 0.216279279442846     |             |
| AGIWUR1232                                                             |    |   |        |        |                |           |           |                       |             |

|                                                                                                                                                                      |    |   |         |         |                |           |           |                      |             |
|----------------------------------------------------------------------------------------------------------------------------------------------------------------------|----|---|---------|---------|----------------|-----------|-----------|----------------------|-------------|
| N2                                                                                                                                                                   | HS | I | 758756  | 760429  | WBGene00021212 | Y18H1A.8  | Y18H1A.8  | 0.468786096365466    |             |
| AGIWUR19119                                                                                                                                                          |    |   |         |         |                |           |           |                      |             |
| N2                                                                                                                                                                   | HS | I | 760848  | 761849  | WBGene00020282 | mps-3     | T06A4.2   | -0.113473466151454   | AGIWUR43985 |
| N2                                                                                                                                                                   | HS | I | 763597  | 770720  | WBGene00020283 | T06A4.3   | T06A4.3   | 0.119433048147965    | AGIWUR4393  |
| N2                                                                                                                                                                   | HS | I | 770892  | 776369  | WBGene00020281 | T06A4.1   | T06A4.1   | 0.0949587739135929   | AGIWUR22830 |
| N2                                                                                                                                                                   | HS | I | 803368  | 835277  | WBGene00022518 | zfh-2     | ZC123.3   | 0.114344988162372    |             |
| AGIWUR8335;AGIWUR26889;AGIWUR32482;AGIWUR36028;AGIWUR37303;AGIWUR42904                                                                                               |    |   |         |         |                |           |           |                      |             |
| N2                                                                                                                                                                   | HS | I | 837996  | 841746  | WBGene00022517 | ZC123.1   | ZC123.1   | 0.0530610909279079   |             |
| AGIWUR1437;AGIWUR5409;AGIWUR11894;AGIWUR21175;AGIWUR35381;AGIWUR36327                                                                                                |    |   |         |         |                |           |           |                      |             |
| N2                                                                                                                                                                   | HS | I | 841742  | 846763  | WBGene00022519 | ZC123.4   | ZC123.4   | -0.104337131749928   |             |
| AGIWUR20395;AGIWUR21786;AGIWUR27160;AGIWUR33235;AGIWUR38509                                                                                                          |    |   |         |         |                |           |           |                      |             |
| N2                                                                                                                                                                   | HS | I | 853451  | 872103  | WBGene00022388 | Y95B8A.8  | Y95B8A.8  | 0.0825594019671301   |             |
| AGIWUR12290;AGIWUR40942                                                                                                                                              |    |   |         |         |                |           |           |                      |             |
| N2                                                                                                                                                                   | HS | I | 873164  | 882713  | WBGene00022389 | pde-6     | Y95B8A.10 | -0.133582015192517   |             |
| AGIWUR2879;AGIWUR8164;AGIWUR17662;AGIWUR23206;AGIWUR27165;AGIWUR27349                                                                                                |    |   |         |         |                |           |           |                      |             |
| N2                                                                                                                                                                   | HS | I | 882918  | 890194  | WBGene00022386 | Y95B8A.6  | Y95B8A.6  | -0.12074360676754    |             |
| AGIWUR26061;AGIWUR39290;AGIWUR39599                                                                                                                                  |    |   |         |         |                |           |           |                      |             |
| N2                                                                                                                                                                   | HS | I | 897286  | 906077  | WBGene00001678 | gpa-16    | Y95B8A.5  | 0.0658717146019256   |             |
| AGIWUR36673                                                                                                                                                          |    |   |         |         |                |           |           |                      |             |
| N2                                                                                                                                                                   | HS | I | 907448  | 911189  | WBGene00022385 | Y95B8A.4  | Y95B8A.4  | 0.178227298296154    |             |
| AGIWUR27919                                                                                                                                                          |    |   |         |         |                |           |           |                      |             |
| N2                                                                                                                                                                   | HS | I | 912415  | 926877  | WBGene00022391 | Y95B8A.12 | Y95B8A.12 | -0.286005847322398   |             |
| AGIWUR20888;AGIWUR31755                                                                                                                                              |    |   |         |         |                |           |           |                      |             |
| N2                                                                                                                                                                   | HS | I | 938464  | 941773  | WBGene00022383 | Y95B8A.2  | Y95B8A.2  | 0.207615708198142    |             |
| AGIWUR3724;AGIWUR34637                                                                                                                                               |    |   |         |         |                |           |           |                      |             |
| N2                                                                                                                                                                   | HS | I | 942257  | 947710  | WBGene00003548 | nas-30    | Y95B8A.1  | 0.347494970687515    |             |
| AGIWUR13336                                                                                                                                                          |    |   |         |         |                |           |           |                      |             |
| N2                                                                                                                                                                   | HS | I | 948569  | 957404  | WBGene00003238 | mig-1     | Y34D9B.1  | 0.0105956972636019   |             |
| AGIWUR19889;AGIWUR24156;AGIWUR39680;AGIWUR41925                                                                                                                      |    |   |         |         |                |           |           |                      |             |
| N2                                                                                                                                                                   | HS | I | 963700  | 969426  | WBGene00018787 | cutl-20   | F54A5.2   | -0.18195410608095    | AGIWUR36883 |
| N2                                                                                                                                                                   | HS | I | 969089  | 976550  | WBGene00018788 | shc-1     | F54A5.3   | -0.044003662956992   |             |
| AGIWUR1520;AGIWUR6328;AGIWUR7799;AGIWUR16360;AGIWUR21266;AGIWUR22224;AGIWUR23180;AGIWUR24163;AGIWUR25177;AGIWUR28900;AGIWUR30401;AGIWUR31527;AGIWUR33487;AGIWUR43199 |    |   |         |         |                |           |           |                      |             |
| N2                                                                                                                                                                   | HS | I | 989671  | 992181  | WBGene00018786 | hmbx-1    | F54A5.1   | 0.0773883077320381   |             |
| AGIWUR17420;AGIWUR21529;AGIWUR26430;AGIWUR28932;AGIWUR31846;AGIWUR38211                                                                                              |    |   |         |         |                |           |           |                      |             |
| N2                                                                                                                                                                   | HS | I | 996045  | 1005066 | WBGene00016932 | C54G6.3   | C54G6.3   | 0.0414879219560764   |             |
| AGIWUR22;AGIWUR16210;AGIWUR29308;AGIWUR31907;AGIWUR35462;AGIWUR41023                                                                                                 |    |   |         |         |                |           |           |                      |             |
| N2                                                                                                                                                                   | HS | I | 1006102 | 1010765 | WBGene00016931 | C54G6.2   | C54G6.2   | -0.00010299512241474 | AGIWUR6501  |
| N2                                                                                                                                                                   | HS | I | 1011371 | 1014455 | WBGene00016930 | madf-6    | C54G6.1   | 0.104476915614185    |             |

AGIWUR5134;AGIWUR11965;AGIWUR20597;AGIWUR20929;AGIWUR32037  
 N2 HS I 1016403 1017180 WBGene00005002 spp-17 C54G6.5 0.0918498148142497 AGIWUR29378  
 N2 HS I 1018835 1019229 WBGene00021335 spp-23 Y34D9A.11 0.209778962769764  
 AGIWUR9839;AGIWUR10201;AGIWUR16077;AGIWUR24534;AGIWUR34141;AGIWUR39770  
 N2 HS I 1019827 1029910 WBGene00021327 mrp1-38 Y34D9A.1 -0.183776236013724  
 AGIWUR42178  
 N2 HS I 1030629 1033436 WBGene00004952 spd-1 Y34D9A.4 -0.26395362077905  
 AGIWUR8339;AGIWUR10414;AGIWUR10601;AGIWUR13233;AGIWUR34053  
 N2 HS I 1034443 1040868 WBGene00021329 Y34D9A.3 Y34D9A.3 -0.0544803071791682  
 AGIWUR17558;AGIWUR19082;AGIWUR25332;AGIWUR28801;AGIWUR35935;AGIWUR41040;AGIWUR41363  
 N2 HS I 1041474 1048329 WBGene00021332 Y34D9A.7 Y34D9A.7 -0.0811941936970166  
 AGIWUR3469  
 N2 HS I 1049596 1050727 WBGene00021331 glrx-10 Y34D9A.6 -0.0752829988761494  
 AGIWUR11461  
 N2 HS I 1050921 1053826 WBGene00021333 Y34D9A.8 Y34D9A.8 0.0205338040482776  
 AGIWUR13006;AGIWUR14778;AGIWUR23259;AGIWUR23416;AGIWUR24085;AGIWUR32213  
 N2 HS I 1053894 1066899 WBGene00021334 vps-4 Y34D9A.10 -0.124725344277879  
 AGIWUR2517;AGIWUR33071;AGIWUR33422  
 N2 HS I 1068484 1075010 WBGene00001745 gsa-1 R06A10.2 -0.346406789705407  
 AGIWUR7028  
 N2 HS I 1084630 1088473 WBGene00019909 R06A10.1 R06A10.1 0.148586987368477  
 AGIWUR12833  
 N2 HS I 1088514 1089742 WBGene00044895 R06A10.5 R06A10.5 0.0802141746233929  
 AGIWUR8078;AGIWUR13536;AGIWUR18834;AGIWUR20617;AGIWUR32661  
 N2 HS I 1089666 1095796 WBGene00019911 R06A10.4 R06A10.4 1.03675461499151  
 AGIWUR18722  
 N2 HS I 1112418 1115501 WBGene00236809 ZK993.5 ZK993.5 -0.151217451961297 AGIWUR41688  
 N2 HS I 1128324 1131737 WBGene00022837 ceh-45 ZK993.1 -0.200715653380507 AGIWUR30087  
 N2 HS I 1136371 1154386 WBGene00021689 Y48G8AL.10 Y48G8AL.10 -0.118507135298498  
 AGIWUR4185;AGIWUR5373;AGIWUR25625  
 N2 HS I 1154511 1156020 WBGene00000165 aps-3 Y48G8AL.14 -0.105414765715008  
 AGIWUR10923  
 N2 HS I 1156579 1157474 WBGene00004429 rpl-17 Y48G8AL.8 0.0151134753934201  
 AGIWUR4065;AGIWUR7333;AGIWUR10981;AGIWUR14030;AGIWUR16076;AGIWUR16834;AGIWUR21488;AGIWUR22895;AGIWUR33449;A  
 GIWUR37938;AGIWUR38748;AGIWUR41085;AGIWUR41517  
 N2 HS I 1157571 1162939 WBGene00021687 Y48G8AL.7 Y48G8AL.7 0.130248391320649  
 AGIWUR25543  
 N2 HS I 1162880 1175868 WBGene00001816 haf-6 Y48G8AL.11 0.123317404688956  
 AGIWUR20067

|                                                                                     |    |   |         |         |                |            |            |                     |
|-------------------------------------------------------------------------------------|----|---|---------|---------|----------------|------------|------------|---------------------|
| N2                                                                                  | HS | I | 1176471 | 1190829 | WBGene00004880 | smg-2      | Y48G8AL.6  | 0.0442042496653912  |
| AGIWUR59                                                                            |    |   |         |         |                |            |            |                     |
| N2                                                                                  | HS | I | 1193158 | 1211434 | WBGene00021686 | Y48G8AL.5  | Y48G8AL.5  | 0.122328833978842   |
| AGIWUR18159;AGIWUR45123                                                             |    |   |         |         |                |            |            |                     |
| N2                                                                                  | HS | I | 1211485 | 1254669 | WBGene00021685 | herc-1     | Y48G8AL.1  | 0.0154584906313957  |
| AGIWUR13334                                                                         |    |   |         |         |                |            |            |                     |
| N2                                                                                  | HS | I | 1254770 | 1258258 | WBGene00021692 | Y48G8AL.15 | Y48G8AL.15 | 0.216679358529586   |
| AGIWUR13059;AGIWUR26397;AGIWUR27751                                                 |    |   |         |         |                |            |            |                     |
| N2                                                                                  | HS | I | 1259374 | 1268155 | WBGene00001707 | grh-1      | Y48G8AR.1  | 0.0948253259756591  |
| AGIWUR17365                                                                         |    |   |         |         |                |            |            |                     |
| N2                                                                                  | HS | I | 1282101 | 1285435 | WBGene00021693 | Y48G8AR.2  | Y48G8AR.2  | -0.0341334665207853 |
| AGIWUR39120                                                                         |    |   |         |         |                |            |            |                     |
| N2                                                                                  | HS | I | 1287304 | 1287959 | WBGene00021694 | Y48G8AR.3  | Y48G8AR.3  | -0.0714584099635438 |
| AGIWUR41090                                                                         |    |   |         |         |                |            |            |                     |
| N2                                                                                  | HS | I | 1305562 | 1328348 | WBGene00003400 | dapk-1     | K12C11.4   | -0.084695909328631  |
| AGIWUR11986                                                                         |    |   |         |         |                |            |            |                     |
| N2                                                                                  | HS | I | 1332698 | 1334074 | WBGene00044896 | K12C11.5   | K12C11.5   | 0.0780994440928584  |
| AGIWUR7756;AGIWUR20555;AGIWUR32336                                                  |    |   |         |         |                |            |            |                     |
| N2                                                                                  | HS | I | 1335321 | 1336867 | WBGene00019674 | K12C11.3   | K12C11.3   | 0.115921617853216   |
| AGIWUR13813;AGIWUR27282;AGIWUR39984;AGIWUR42143                                     |    |   |         |         |                |            |            |                     |
| N2                                                                                  | HS | I | 1337012 | 1338216 | WBGene00045052 | K12C11.6   | K12C11.6   | 0.0715163944329511  |
| AGIWUR12512;AGIWUR16762;AGIWUR45006                                                 |    |   |         |         |                |            |            |                     |
| N2                                                                                  | HS | I | 1338749 | 1339773 | WBGene00045053 | K12C11.7   | K12C11.7   | 0.164282359999795   |
| AGIWUR14477;AGIWUR15520;AGIWUR29050;AGIWUR30108;AGIWUR34743;AGIWUR36565;AGIWUR42371 |    |   |         |         |                |            |            |                     |
| N2                                                                                  | HS | I | 1340678 | 1341258 | WBGene00004888 | smo-1      | K12C11.2   | 0.334959912178811   |
| AGIWUR36454;AGIWUR38737                                                             |    |   |         |         |                |            |            |                     |
| N2                                                                                  | HS | I | 1341218 | 1344692 | WBGene00019673 | K12C11.1   | K12C11.1   | -0.0247351276799241 |
| AGIWUR3302;AGIWUR43117                                                              |    |   |         |         |                |            |            |                     |
| N2                                                                                  | HS | I | 1348503 | 1359595 | WBGene00022363 | Y92H12BL.1 | Y92H12BL.1 | 0.643095270651614   |
| AGIWUR15759;AGIWUR28550;AGIWUR44414                                                 |    |   |         |         |                |            |            |                     |
| N2                                                                                  | HS | I | 1365309 | 1376409 | WBGene00022366 | Y92H12BL.5 | Y92H12BL.5 | -0.143939497770479  |
| AGIWUR35560                                                                         |    |   |         |         |                |            |            |                     |
| N2                                                                                  | HS | I | 1376942 | 1385057 | WBGene00022365 | Y92H12BL.4 | Y92H12BL.4 | -0.144989474954684  |
| AGIWUR6416;AGIWUR23727                                                              |    |   |         |         |                |            |            |                     |
| N2                                                                                  | HS | I | 1385818 | 1392759 | WBGene00022367 | Y92H12BM.1 | Y92H12BM.1 | 0.143908767901121   |
| AGIWUR24013;AGIWUR35109                                                             |    |   |         |         |                |            |            |                     |
| N2                                                                                  | HS | I | 1394569 | 1402975 | WBGene00022372 | Y92H12BR.7 | Y92H12BR.7 | 0.16687121594412    |
| AGIWUR22492                                                                         |    |   |         |         |                |            |            |                     |
| N2                                                                                  | HS | I | 1405935 | 1413100 | WBGene00022371 | set-29     | Y92H12BR.6 | -0.154771058145958  |



|                                                                                                                               |    |   |         |         |                |                    |                                 |
|-------------------------------------------------------------------------------------------------------------------------------|----|---|---------|---------|----------------|--------------------|---------------------------------|
| AGIWUR42567                                                                                                                   |    |   |         |         |                |                    |                                 |
| N2                                                                                                                            | HS | I | 1413915 | 1415807 | WBGene00022368 | Y92H12BR.2         | Y92H12BR.2 -0.0480791286094409  |
| AGIWUR36024                                                                                                                   |    |   |         |         |                |                    |                                 |
| N2                                                                                                                            | HS | I | 1416586 | 1425201 | WBGene00022369 | Y92H12BR.3         | Y92H12BR.3 -0.156692865172364   |
| AGIWUR1737;AGIWUR4253;AGIWUR5022;AGIWUR5477;AGIWUR7001;AGIWUR8655;AGIWUR21433;AGIWUR25311;AGIWUR27839;AGIWUR31391;AGIWUR41245 |    |   |         |         |                |                    |                                 |
| N2                                                                                                                            | HS | I | 1427227 | 1433695 | WBGene00022370 | Y92H12BR.4         | Y92H12BR.4 -0.0189869823553543  |
| AGIWUR17553;AGIWUR20837;AGIWUR27978;AGIWUR31709;AGIWUR35420                                                                   |    |   |         |         |                |                    |                                 |
| N2                                                                                                                            | HS | I | 1436279 | 1441331 | WBGene00022373 | mrp1-15 Y92H12BR.8 | 0.215225599793238               |
| AGIWUR31574                                                                                                                   |    |   |         |         |                |                    |                                 |
| N2                                                                                                                            | HS | I | 1442048 | 1443942 | WBGene00018159 | F37F2.2 F37F2.2    | 0.127806926518321 AGIWUR8713    |
| N2                                                                                                                            | HS | I | 1446497 | 1465358 | WBGene00004969 | spe-15 F47G6.4     | -0.275021917721489              |
| AGIWUR2637;AGIWUR3005;AGIWUR4351;AGIWUR25255;AGIWUR32395;AGIWUR35658                                                          |    |   |         |         |                |                    |                                 |
| N2                                                                                                                            | HS | I | 1465597 | 1469587 | WBGene00018580 | F47G6.3 F47G6.3    | 0.0996014835318135 AGIWUR38276  |
| N2                                                                                                                            | HS | I | 1471227 | 1479920 | WBGene00018579 | acs-16 F47G6.2     | 0.00346919436995563 AGIWUR42596 |
| N2                                                                                                                            | HS | I | 1483083 | 1490494 | WBGene00001115 | dys-1 F47G6.1      | 0.217251794297491               |
| AGIWUR6684;AGIWUR22860;AGIWUR35939                                                                                            |    |   |         |         |                |                    |                                 |
| N2                                                                                                                            | HS | I | 1490887 | 1514411 | WBGene00022361 | Y92H12A.5          | Y92H12A.5 -0.0307301053085141   |
| AGIWUR13887;AGIWUR31743                                                                                                       |    |   |         |         |                |                    |                                 |
| N2                                                                                                                            | HS | I | 1514755 | 1540911 | WBGene00022360 | Y92H12A.4          | Y92H12A.4 -0.0876203855082176   |
| AGIWUR7916;AGIWUR18838                                                                                                        |    |   |         |         |                |                    |                                 |
| N2                                                                                                                            | HS | I | 1543525 | 1556196 | WBGene00022358 | Y92H12A.2          | Y92H12A.2 0.0795556393287615    |
| AGIWUR12716                                                                                                                   |    |   |         |         |                |                    |                                 |
| N2                                                                                                                            | HS | I | 1566929 | 1580196 | WBGene00005077 | src-1 Y92H12A.1    | -0.0509335590666264             |
| AGIWUR29323;AGIWUR36808                                                                                                       |    |   |         |         |                |                    |                                 |
| N2                                                                                                                            | HS | I | 1581394 | 1593668 | WBGene00022270 | Y73E7A.3           | Y73E7A.3 -0.124589062634458     |
| AGIWUR9496                                                                                                                    |    |   |         |         |                |                    |                                 |
| N2                                                                                                                            | HS | I | 1594659 | 1596184 | WBGene00022271 | cpx-1 Y73E7A.4     | 0.241875921961897               |
| AGIWUR20188                                                                                                                   |    |   |         |         |                |                    |                                 |
| N2                                                                                                                            | HS | I | 1600624 | 1601457 | WBGene00022272 | Y73E7A.5           | Y73E7A.5 0.104908296598545      |
| AGIWUR28873                                                                                                                   |    |   |         |         |                |                    |                                 |
| N2                                                                                                                            | HS | I | 1601838 | 1606926 | WBGene00022269 | Y73E7A.2           | Y73E7A.2 0.339143716766156      |
| AGIWUR16524                                                                                                                   |    |   |         |         |                |                    |                                 |
| N2                                                                                                                            | HS | I | 1607658 | 1610041 | WBGene00022273 | Y73E7A.6           | Y73E7A.6 0.14354076499237       |
| AGIWUR32464;AGIWUR39665                                                                                                       |    |   |         |         |                |                    |                                 |
| N2                                                                                                                            | HS | I | 1610390 | 1620080 | WBGene00044440 | adpr-1 Y73E7A.9    | -0.166378152040926              |
| AGIWUR8254;AGIWUR35568                                                                                                        |    |   |         |         |                |                    |                                 |
| N2                                                                                                                            | HS | I | 1621346 | 1628476 | WBGene00000269 | bre-4 Y73E7A.7     | 0.132984716557928               |
| AGIWUR34680                                                                                                                   |    |   |         |         |                |                    |                                 |

|                                                                                                         |    |   |         |         |                |            |            |                       |
|---------------------------------------------------------------------------------------------------------|----|---|---------|---------|----------------|------------|------------|-----------------------|
| N2                                                                                                      | HS | I | 1629003 | 1633498 | WBGene00022268 | Y73E7A.1   | Y73E7A.1   | 0.049948711611794     |
| AGIWUR1633;AGIWUR3458;AGIWUR3977;AGIWUR7843;AGIWUR11159;AGIWUR21506;AGIWUR22736;AGIWUR23690;AGIWUR42544 |    |   |         |         |                |            |            |                       |
| N2                                                                                                      | HS | I | 1634613 | 1644107 | WBGene00022274 | Y73E7A.8   | Y73E7A.8   | 0.25704823912325      |
| AGIWUR20107                                                                                             |    |   |         |         |                |            |            |                       |
| N2                                                                                                      | HS | I | 1644588 | 1651394 | WBGene00003111 | mab-20     | Y71G12B.20 | -0.131956284034115    |
| AGIWUR27582;AGIWUR40456                                                                                 |    |   |         |         |                |            |            |                       |
| N2                                                                                                      | HS | I | 1652901 | 1655399 | WBGene00022156 | Y71G12B.18 | Y71G12B.18 | 0.200031121107811     |
| AGIWUR116                                                                                               |    |   |         |         |                |            |            |                       |
| N2                                                                                                      | HS | I | 1655616 | 1656726 | WBGene00004168 | pqn-88     | Y71G12B.21 | 0.0522786818839158    |
| AGIWUR26050                                                                                             |    |   |         |         |                |            |            |                       |
| N2                                                                                                      | HS | I | 1657513 | 1663331 | WBGene00044358 | Y71G12B.33 | Y71G12B.33 | -0.0498883430419981   |
| AGIWUR2249;AGIWUR8734;AGIWUR20752;AGIWUR30652                                                           |    |   |         |         |                |            |            |                       |
| N2                                                                                                      | HS | I | 1667501 | 1669792 | WBGene00022155 | Y71G12B.17 | Y71G12B.17 | -0.143994382431011    |
| AGIWUR42831                                                                                             |    |   |         |         |                |            |            |                       |
| N2                                                                                                      | HS | I | 1670036 | 1672742 | WBGene00022158 | Y71G12B.23 | Y71G12B.23 | -0.0697603564996196   |
| AGIWUR5132;AGIWUR11929;AGIWUR32676                                                                      |    |   |         |         |                |            |            |                       |
| N2                                                                                                      | HS | I | 1680450 | 1685063 | WBGene00022154 | drag-1     | Y71G12B.16 | 0.00209750053459778   |
| AGIWUR35035                                                                                             |    |   |         |         |                |            |            |                       |
| N2                                                                                                      | HS | I | 1686216 | 1693457 | WBGene00044348 | Y71G12B.31 | Y71G12B.31 | 0.0432363914300327    |
| AGIWUR1166;AGIWUR4811;AGIWUR35486                                                                       |    |   |         |         |                |            |            |                       |
| N2                                                                                                      | HS | I | 1698094 | 1701128 | WBGene00006702 | ubc-3      | Y71G12B.15 | -0.0423826788115722   |
| AGIWUR4490;AGIWUR30533                                                                                  |    |   |         |         |                |            |            |                       |
| N2                                                                                                      | HS | I | 1701361 | 1701808 | WBGene00003080 | lsm-6      | Y71G12B.14 | -0.000221979873853417 |
| AGIWUR4447;AGIWUR11056                                                                                  |    |   |         |         |                |            |            |                       |
| N2                                                                                                      | HS | I | 1702105 | 1708008 | WBGene00022153 | Y71G12B.13 | Y71G12B.13 | -0.4061237973565      |
| AGIWUR12172                                                                                             |    |   |         |         |                |            |            |                       |
| N2                                                                                                      | HS | I | 1709587 | 1715568 | WBGene00022152 | atg-5      | Y71G12B.12 | -0.0739353961124163   |
| AGIWUR7357;AGIWUR29374;AGIWUR37289                                                                      |    |   |         |         |                |            |            |                       |
| N2                                                                                                      | HS | I | 1721592 | 1740670 | WBGene00006771 | tln-1      | Y71G12B.11 | 0.273500862223321     |
| AGIWUR12058;AGIWUR13591;AGIWUR32962;AGIWUR33419;AGIWUR38217;AGIWUR43568                                 |    |   |         |         |                |            |            |                       |
| N2                                                                                                      | HS | I | 1740647 | 1751055 | WBGene00022159 | mppa-1     | Y71G12B.24 | 0.251944636738802     |
| AGIWUR24046                                                                                             |    |   |         |         |                |            |            |                       |
| N2                                                                                                      | HS | I | 1751481 | 1754410 | WBGene00022150 | Y71G12B.10 | Y71G12B.10 | 0.0778632929211422    |
| AGIWUR41998                                                                                             |    |   |         |         |                |            |            |                       |
| N2                                                                                                      | HS | I | 1755329 | 1766400 | WBGene00022149 | lin-65     | Y71G12B.9  | -0.0205004730226186   |
| AGIWUR776;AGIWUR21654                                                                                   |    |   |         |         |                |            |            |                       |
| N2                                                                                                      | HS | I | 1767887 | 1790157 | WBGene00022148 | ddx-27     | Y71G12B.8  | 0.0733278484152233    |
| AGIWUR18548                                                                                             |    |   |         |         |                |            |            |                       |
| N2                                                                                                      | HS | I | 1793254 | 1796424 | WBGene00022146 | Y71G12B.6  | Y71G12B.6  | 0.162354266110603     |

|                                                                                                                                              |    |   |         |         |                |            |            |                     |
|----------------------------------------------------------------------------------------------------------------------------------------------|----|---|---------|---------|----------------|------------|------------|---------------------|
| AGIWUR4786                                                                                                                                   |    |   |         |         |                |            |            |                     |
| N2                                                                                                                                           | HS | I | 1797435 | 1798722 | WBGene00022162 | Y71G12B.27 | Y71G12B.27 | -0.198997466848025  |
| AGIWUR15897                                                                                                                                  |    |   |         |         |                |            |            |                     |
| N2                                                                                                                                           | HS | I | 1799717 | 1806986 | WBGene00022145 | Y71G12B.5  | Y71G12B.5  | 0.115472973173485   |
| AGIWUR2625;AGIWUR25042                                                                                                                       |    |   |         |         |                |            |            |                     |
| N2                                                                                                                                           | HS | I | 1808091 | 1811835 | WBGene00022144 | pgbm-1     | Y71G12B.4  | -0.0757423687972123 |
| AGIWUR4145;AGIWUR9299;AGIWUR10064;AGIWUR17445;AGIWUR18149;AGIWUR45023                                                                        |    |   |         |         |                |            |            |                     |
| N2                                                                                                                                           | HS | I | 1812892 | 1813581 | WBGene00022143 | Y71G12B.3  | Y71G12B.3  |                     |
| -0.000835956240059943 AGIWUR14630                                                                                                            |    |   |         |         |                |            |            |                     |
| N2                                                                                                                                           | HS | I | 1813909 | 1816061 | WBGene00044349 | Y71G12B.32 | Y71G12B.32 | 0.147091037512536   |
| AGIWUR3178;AGIWUR36722;AGIWUR39264                                                                                                           |    |   |         |         |                |            |            |                     |
| N2                                                                                                                                           | HS | I | 1816150 | 1818496 | WBGene00022142 | Y71G12B.2  | Y71G12B.2  | 0.331620982950488   |
| AGIWUR13069                                                                                                                                  |    |   |         |         |                |            |            |                     |
| N2                                                                                                                                           | HS | I | 1818581 | 1822948 | WBGene00044347 | Y71G12B.30 | Y71G12B.30 |                     |
| -0.000836196070850725 AGIWUR19858;AGIWUR26230                                                                                                |    |   |         |         |                |            |            |                     |
| N2                                                                                                                                           | HS | I | 1823447 | 1825967 | WBGene00022141 | chaf-2     | Y71G12B.1  | -0.134429439359121  |
| AGIWUR6848                                                                                                                                   |    |   |         |         |                |            |            |                     |
| N2                                                                                                                                           | HS | I | 1832115 | 1832641 | WBGene00044746 | C53H9.3    | C53H9.3    | 0.0554021435017011  |
| AGIWUR17914;AGIWUR20995;AGIWUR22306;AGIWUR23217;AGIWUR33050;AGIWUR42007                                                                      |    |   |         |         |                |            |            |                     |
| N2                                                                                                                                           | HS | I | 1832897 | 1834764 | WBGene00016907 | C53H9.2    | C53H9.2    | 0.0335409326979628  |
| AGIWUR5438;AGIWUR6589;AGIWUR6611;AGIWUR16807;AGIWUR17795;AGIWUR20304;AGIWUR26029;AGIWUR27807;AGIWUR31482;AGIWUR33037;AGIWUR34381;AGIWUR34900 |    |   |         |         |                |            |            |                     |
| N2                                                                                                                                           | HS | I | 1834881 | 1835439 | WBGene00004441 | rp1-27     | C53H9.1    | 0.10438185234009    |
| N2                                                                                                                                           | HS | I | 1835631 | 1841936 | WBGene00001196 | egl-30     | M01D7.7    | -0.0128318776030936 |
| AGIWUR554;AGIWUR27713                                                                                                                        |    |   |         |         |                |            |            |                     |
| N2                                                                                                                                           | HS | I | 1842445 | 1843227 | WBGene00001309 | emr-1      | M01D7.6    | -0.253015825605299  |
| N2                                                                                                                                           | HS | I | 1843384 | 1843899 | WBGene00003750 | nlp-12     | M01D7.5    | -0.294845328824702  |
| AGIWUR7286;AGIWUR33113                                                                                                                       |    |   |         |         |                |            |            |                     |
| N2                                                                                                                                           | HS | I | 1845221 | 1850523 | WBGene00006461 | tag-96     | M01D7.4    | 0.0270819075019659  |
| N2                                                                                                                                           | HS | I | 1851681 | 1852280 | WBGene00044897 | M01D7.9    | M01D7.9    | 0.0803114260962019  |
| AGIWUR1984;AGIWUR13390;AGIWUR16714                                                                                                           |    |   |         |         |                |            |            |                     |
| N2                                                                                                                                           | HS | I | 1856459 | 1860578 | WBGene00019706 | M01D7.1    | M01D7.1    | -0.185351331803845  |
| N2                                                                                                                                           | HS | I | 1862607 | 1872306 | WBGene00004743 | scm-1      | M01D7.2    | 0.160674645477645   |
| N2                                                                                                                                           | HS | I | 1874033 | 1883639 | WBGene00022139 | tub-2      | Y71G12A.3  | -0.0401353555567709 |
| AGIWUR28588                                                                                                                                  |    |   |         |         |                |            |            |                     |
| N2                                                                                                                                           | HS | I | 1885205 | 1894905 | WBGene00022140 | Y71G12A.4  | Y71G12A.4  | -0.201748131945628  |
| AGIWUR36911                                                                                                                                  |    |   |         |         |                |            |            |                     |
| N2                                                                                                                                           | HS | I | 1895161 | 1923088 | WBGene00022138 | trpp-10    | Y71G12A.2  | 0.147738826961699   |
| AGIWUR19988;AGIWUR29483                                                                                                                      |    |   |         |         |                |            |            |                     |

|                                                                                                                                                         |    |   |         |         |                |            |           |                     |             |
|---------------------------------------------------------------------------------------------------------------------------------------------------------|----|---|---------|---------|----------------|------------|-----------|---------------------|-------------|
| N2                                                                                                                                                      | HS | I | 1924300 | 1932260 | WBGene00021766 | hex-4      | Y51F10.5  | 0.0435650945664863  |             |
| AGIWUR620                                                                                                                                               |    |   |         |         |                |            |           |                     |             |
| N2                                                                                                                                                      | HS | I | 1932352 | 1945212 | WBGene00021765 | Y51F10.4   | Y51F10.4  | 0.0193610804914606  |             |
| AGIWUR33035                                                                                                                                             |    |   |         |         |                |            |           |                     |             |
| N2                                                                                                                                                      | HS | I | 1950594 | 1958527 | WBGene00021771 | spe-48     | Y51F10.10 | -0.0104042971225908 |             |
| AGIWUR38998                                                                                                                                             |    |   |         |         |                |            |           |                     |             |
| N2                                                                                                                                                      | HS | I | 1958707 | 1965267 | WBGene00044438 | Y51F10.11  | Y51F10.11 | -0.0170130279585656 |             |
| AGIWUR3528;AGIWUR6982;AGIWUR40531                                                                                                                       |    |   |         |         |                |            |           |                     |             |
| N2                                                                                                                                                      | HS | I | 1967772 | 1973882 | WBGene00021764 | Y51F10.3   | Y51F10.3  | -0.207464391473531  |             |
| AGIWUR6418                                                                                                                                              |    |   |         |         |                |            |           |                     |             |
| N2                                                                                                                                                      | HS | I | 1977993 | 1983436 | WBGene00021763 | Y51F10.2   | Y51F10.2  | 0.0712820381038224  |             |
| AGIWUR19000                                                                                                                                             |    |   |         |         |                |            |           |                     |             |
| N2                                                                                                                                                      | HS | I | 1988246 | 2010525 | WBGene00021238 | gap-3      | Y20F4.3   | -0.0142716247639747 |             |
| AGIWUR11087;AGIWUR20405;AGIWUR25539;AGIWUR31637;AGIWUR32847;AGIWUR44046                                                                                 |    |   |         |         |                |            |           |                     |             |
| N2                                                                                                                                                      | HS | I | 2026277 | 2033966 | WBGene00021237 | crtc-1     | Y20F4.2   | -0.140688324589469  | AGIWUR16307 |
| N2                                                                                                                                                      | HS | I | 2034383 | 2043805 | WBGene00021239 | Y20F4.4    | Y20F4.4   | -0.109792820079919  | AGIWUR3718  |
| N2                                                                                                                                                      | HS | I | 2049140 | 2050177 | WBGene00044435 | Y20F4.8    | Y20F4.8   | -0.0214080349071342 |             |
| AGIWUR4442;AGIWUR5343;AGIWUR18496                                                                                                                       |    |   |         |         |                |            |           |                     |             |
| N2                                                                                                                                                      | HS | I | 2061667 | 2064077 | WBGene00021346 | Y37E3.1    | Y37E3.1   | 0.0287859097588825  | AGIWUR16488 |
| N2                                                                                                                                                      | HS | I | 2064909 | 2065481 | WBGene00021348 | moag-4     | Y37E3.4   | 0.0157177091265499  | AGIWUR5629  |
| N2                                                                                                                                                      | HS | I | 2065727 | 2069049 | WBGene00021349 | arl-13     | Y37E3.5   | -0.0445780499894193 | AGIWUR20970 |
| N2                                                                                                                                                      | HS | I | 2069086 | 2069587 | WBGene00004409 | r1a-1      | Y37E3.7   | -0.564537057154426  |             |
| AGIWUR3039;AGIWUR4288;AGIWUR14249;AGIWUR27765;AGIWUR37184;AGIWUR40288                                                                                   |    |   |         |         |                |            |           |                     |             |
| N2                                                                                                                                                      | HS | I | 2069681 | 2070607 | WBGene00021350 | Y37E3.8    | Y37E3.8   | 0.0317027029220025  |             |
| AGIWUR13326;AGIWUR16500;AGIWUR18905;AGIWUR33748;AGIWUR34085;AGIWUR35002;AGIWUR38325;AGIWUR39997                                                         |    |   |         |         |                |            |           |                     |             |
| N2                                                                                                                                                      | HS | I | 2071352 | 2072547 | WBGene00004014 | phb-1      | Y37E3.9   | 0.064850560313932   | AGIWUR8000  |
| N2                                                                                                                                                      | HS | I | 2072680 | 2076906 | WBGene00021351 | eif-2alpha | Y37E3.10  | 0.10368898687484    |             |
| AGIWUR6037;AGIWUR23060;AGIWUR26110;AGIWUR41959                                                                                                          |    |   |         |         |                |            |           |                     |             |
| N2                                                                                                                                                      | HS | I | 2078959 | 2085662 | WBGene00021352 | Y37E3.11   | Y37E3.11  | 0.142859263918865   |             |
| AGIWUR2995                                                                                                                                              |    |   |         |         |                |            |           |                     |             |
| N2                                                                                                                                                      | HS | I | 2085673 | 2093822 | WBGene00021353 | iglr-3     | Y37E3.13  | -0.0562753793134032 |             |
| AGIWUR15489;AGIWUR30008                                                                                                                                 |    |   |         |         |                |            |           |                     |             |
| N2                                                                                                                                                      | HS | I | 2097346 | 2123443 | WBGene00003799 | npp-13     | Y37E3.15  | 0.0217369500731612  |             |
| AGIWUR11120;AGIWUR13240                                                                                                                                 |    |   |         |         |                |            |           |                     |             |
| N2                                                                                                                                                      | HS | I | 2128590 | 2145971 | WBGene00021355 | Y37E3.17   | Y37E3.17  | 0.153007008718333   |             |
| AGIWUR25279                                                                                                                                             |    |   |         |         |                |            |           |                     |             |
| N2                                                                                                                                                      | HS | I | 2160042 | 2209629 | WBGene00021009 | afd-1      | W03F11.6  | -0.022839676788994  |             |
| AGIWUR4041;AGIWUR5559;AGIWUR9161;AGIWUR9303;AGIWUR14028;AGIWUR14832;AGIWUR15541;AGIWUR17457;AGIWUR21460;AGIWUR36718;AGIWUR37855;AGIWUR39179;AGIWUR39762 |    |   |         |         |                |            |           |                     |             |

|                                                             |    |   |         |         |                |             |             |                     |
|-------------------------------------------------------------|----|---|---------|---------|----------------|-------------|-------------|---------------------|
| N2                                                          | HS | I | 2216100 | 2219479 | WBGene00021008 | W03F11.5    | W03F11.5    | 0.0597629715721357  |
| AGIWUR42538                                                 |    |   |         |         |                |             |             |                     |
| N2                                                          | HS | I | 2219471 | 2222313 | WBGene00021005 | ule-1       | W03F11.1    | -0.0662331814639057 |
| AGIWUR3046                                                  |    |   |         |         |                |             |             |                     |
| N2                                                          | HS | I | 2223307 | 2233099 | WBGene00001542 | gcy-17      | W03F11.2    | -0.101785803046353  |
| AGIWUR33861                                                 |    |   |         |         |                |             |             |                     |
| N2                                                          | HS | I | 2233744 | 2234957 | WBGene00021006 | dct-9       | W03F11.3    | -0.160555917384979  |
| AGIWUR22187                                                 |    |   |         |         |                |             |             |                     |
| N2                                                          | HS | I | 2235617 | 2241210 | WBGene00021007 | W03F11.4    | W03F11.4    | -0.482167652320081  |
| AGIWUR9560                                                  |    |   |         |         |                |             |             |                     |
| N2                                                          | HS | I | 2242230 | 2247223 | WBGene00017399 | lgc-51      | F12B6.3     | -0.085800200275612  |
| AGIWUR28630                                                 |    |   |         |         |                |             |             |                     |
| N2                                                          | HS | I | 2250131 | 2254901 | WBGene00017398 | slc-17.6    | F12B6.2     | -0.0504508714978389 |
| AGIWUR20287;AGIWUR25238;AGIWUR39652;AGIWUR42417             |    |   |         |         |                |             |             |                     |
| N2                                                          | HS | I | 2255923 | 2272866 | WBGene00000020 | abt-2       | F12B6.1     | 0.110730334310572   |
| AGIWUR23301;AGIWUR28644                                     |    |   |         |         |                |             |             |                     |
| N2                                                          | HS | I | 2279835 | 2281516 | WBGene00021458 | Y39G10AL.1  | Y39G10AL.1  | -0.150996885584853  |
| AGIWUR36209                                                 |    |   |         |         |                |             |             |                     |
| N2                                                          | HS | I | 2281504 | 2291183 | WBGene00000408 | cdk-7       | Y39G10AL.3  | -0.0374511889803273 |
| AGIWUR39048                                                 |    |   |         |         |                |             |             |                     |
| N2                                                          | HS | I | 2293132 | 2297312 | WBGene00021469 | Y39G10AR.11 | Y39G10AR.11 | 0.0182397108022663  |
| AGIWUR22260                                                 |    |   |         |         |                |             |             |                     |
| N2                                                          | HS | I | 2297280 | 2304393 | WBGene00021470 | tpx1-1      | Y39G10AR.12 | -0.240672137386735  |
| AGIWUR12614;AGIWUR36527                                     |    |   |         |         |                |             |             |                     |
| N2                                                          | HS | I | 2304512 | 2306816 | WBGene00002047 | icp-1       | Y39G10AR.13 | 0.042499156508395   |
| AGIWUR14808;AGIWUR28043;AGIWUR29130;AGIWUR29237;AGIWUR38297 |    |   |         |         |                |             |             |                     |
| N2                                                          | HS | I | 2306985 | 2308975 | WBGene00021467 | Y39G10AR.9  | Y39G10AR.9  | 0.1879949849768     |
| AGIWUR6667                                                  |    |   |         |         |                |             |             |                     |
| N2                                                          | HS | I | 2308976 | 2312129 | WBGene00021476 | nsun-4      | Y39G10AR.21 | 0.0688092005316552  |
| AGIWUR13426                                                 |    |   |         |         |                |             |             |                     |
| N2                                                          | HS | I | 2312496 | 2313008 | WBGene00021475 | tbca-1      | Y39G10AR.20 | -0.0229740535969256 |
| AGIWUR41500                                                 |    |   |         |         |                |             |             |                     |
| N2                                                          | HS | I | 2313271 | 2316003 | WBGene00021466 | eif-2gamma  | Y39G10AR.8  | -0.064037263865337  |
| AGIWUR1012;AGIWUR30510                                      |    |   |         |         |                |             |             |                     |
| N2                                                          | HS | I | 2316307 | 2318305 | WBGene00021465 | ekl-7       | Y39G10AR.7  | -0.117607883390491  |
| AGIWUR18593                                                 |    |   |         |         |                |             |             |                     |
| N2                                                          | HS | I | 2318291 | 2321847 | WBGene00003156 | mcm-4       | Y39G10AR.14 | 0.138933719318306   |
| AGIWUR23145                                                 |    |   |         |         |                |             |             |                     |
| N2                                                          | HS | I | 2322025 | 2322596 | WBGene00219275 | Y39G10AR.32 | Y39G10AR.32 | 0.108331767072777   |
| AGIWUR27494                                                 |    |   |         |         |                |             |             |                     |

|                                                                         |    |   |         |         |                |             |             |                      |             |
|-------------------------------------------------------------------------|----|---|---------|---------|----------------|-------------|-------------|----------------------|-------------|
| N2                                                                      | HS | I | 2327989 | 2330162 | WBGene00021477 | srbc-64     | Y39G10AR.22 | 0.0860725520764429   |             |
| AGIWUR16180                                                             |    |   |         |         |                |             |             |                      |             |
| N2                                                                      | HS | I | 2330895 | 2332652 | WBGene00021472 | Y39G10AR.16 | Y39G10AR.16 | -0.310062101757043   |             |
| AGIWUR4806;AGIWUR12047;AGIWUR19458;AGIWUR24864;AGIWUR39806              |    |   |         |         |                |             |             |                      |             |
| N2                                                                      | HS | I | 2333312 | 2338693 | WBGene00021464 | ugt-31      | Y39G10AR.6  | 0.108401126371406    |             |
| AGIWUR16968                                                             |    |   |         |         |                |             |             |                      |             |
| N2                                                                      | HS | I | 2342216 | 2350468 | WBGene00021463 | zeel-1      | Y39G10AR.5  | -0.108936682843597   |             |
| AGIWUR22312                                                             |    |   |         |         |                |             |             |                      |             |
| N2                                                                      | HS | I | 2357883 | 2372964 | WBGene00021461 | nekl-1      | Y39G10AR.3  | 0.00458564385419491  |             |
| AGIWUR3700;AGIWUR12255                                                  |    |   |         |         |                |             |             |                      |             |
| N2                                                                      | HS | I | 2377089 | 2381851 | WBGene00021473 | sydn-1      | Y39G10AR.17 | -0.163654224550954   |             |
| AGIWUR29573;AGIWUR29726                                                 |    |   |         |         |                |             |             |                      |             |
| N2                                                                      | HS | I | 2382953 | 2401492 | WBGene00021474 | dot-1.1     | Y39G10AR.18 | -0.00165636792994306 |             |
| AGIWUR2332;AGIWUR3782;AGIWUR25161;AGIWUR29638                           |    |   |         |         |                |             |             |                      |             |
| N2                                                                      | HS | I | 2402232 | 2409987 | WBGene00021460 | zwl-1       | Y39G10AR.2  | -0.24518052244245    |             |
| AGIWUR39214;AGIWUR43207;AGIWUR45076                                     |    |   |         |         |                |             |             |                      |             |
| N2                                                                      | HS | I | 2415133 | 2418521 | WBGene00017741 | F23C8.13    | F23C8.13    | -0.0443323389084576  |             |
| AGIWUR805                                                               |    |   |         |         |                |             |             |                      |             |
| N2                                                                      | HS | I | 2418450 | 2420801 | WBGene00017734 | F23C8.5     | F23C8.5     | -0.21248297374293    |             |
| AGIWUR9817;AGIWUR12095;AGIWUR12773;AGIWUR21578;AGIWUR22886;AGIWUR43078  |    |   |         |         |                |             |             |                      |             |
| N2                                                                      | HS | I | 2420803 | 2421816 | WBGene00017735 | did-2       | F23C8.6     | 0.0150373140045854   | AGIWUR36365 |
| N2                                                                      | HS | I | 2429675 | 2432601 | WBGene00017737 | F23C8.8     | F23C8.8     | -0.0620059941391737  | AGIWUR29692 |
| N2                                                                      | HS | I | 2432570 | 2433755 | WBGene00017738 | F23C8.9     | F23C8.9     | -0.165191515522348   |             |
| AGIWUR11516;AGIWUR12714;AGIWUR24496;AGIWUR39273;AGIWUR44822;AGIWUR45164 |    |   |         |         |                |             |             |                      |             |
| N2                                                                      | HS | I | 2434004 | 2435708 | WBGene00017733 | ubxn-1      | F23C8.4     | -0.119056478811743   | AGIWUR26378 |
| N2                                                                      | HS | I | 2438767 | 2442948 | WBGene00017732 | F23C8.3     | F23C8.3     | 0.0254045506107712   |             |
| AGIWUR4209;AGIWUR24398;AGIWUR32650;AGIWUR34132                          |    |   |         |         |                |             |             |                      |             |
| N2                                                                      | HS | I | 2445420 | 2445983 | WBGene00023273 | F23C8.2     | F23C8.2     | 0.116265373075125    | AGIWUR10294 |
| N2                                                                      | HS | I | 2446740 | 2448369 | WBGene00017731 | F23C8.1     | F23C8.1     | 0.279391230345014    | AGIWUR34435 |
| N2                                                                      | HS | I | 2449414 | 2451366 | WBGene00017739 | F23C8.11    | F23C8.11    | 0.0334671366777624   |             |
| AGIWUR5077                                                              |    |   |         |         |                |             |             |                      |             |
| N2                                                                      | HS | I | 2451908 | 2464637 | WBGene00002141 | inx-19      | T16H5.1     | 0.00481508040721934  | AGIWUR2403  |
| N2                                                                      | HS | I | 2468787 | 2471972 | WBGene00022280 | Y74C10AL.2  | Y74C10AL.2  | -0.071163730045674   |             |
| AGIWUR21766                                                             |    |   |         |         |                |             |             |                      |             |
| N2                                                                      | HS | I | 2472066 | 2485391 | WBGene00022281 | abtm-1      | Y74C10AR.3  | -0.0284722361315692  |             |
| AGIWUR5309;AGIWUR8973;AGIWUR10270;AGIWUR25468;AGIWUR30612;AGIWUR33610   |    |   |         |         |                |             |             |                      |             |
| N2                                                                      | HS | I | 2485867 | 2489780 | WBGene00001232 | eif-3.I     | Y74C10AR.1  | 0.00474146356997096  |             |
| AGIWUR29413                                                             |    |   |         |         |                |             |             |                      |             |
| N2                                                                      | HS | I | 2489976 | 2497371 | WBGene00021277 | Y23H5B.6    | Y23H5B.6    | -0.179234235275876   |             |

|                                                            |    |   |         |         |                |           |           |                     |             |
|------------------------------------------------------------|----|---|---------|---------|----------------|-----------|-----------|---------------------|-------------|
| AGIWUR38087                                                |    |   |         |         |                |           |           |                     |             |
| N2                                                         | HS | I | 2498134 | 2506259 | WBGene00021276 | Y23H5B.5  | Y23H5B.5  | 0.106071068139102   |             |
| AGIWUR5878;AGIWUR6191;AGIWUR6274;AGIWUR28260               |    |   |         |         |                |           |           |                     |             |
| N2                                                         | HS | I | 2506891 | 2513710 | WBGene00021278 | Y23H5B.7  | Y23H5B.7  | -0.0342622991732697 |             |
| AGIWUR29322;AGIWUR30588                                    |    |   |         |         |                |           |           |                     |             |
| N2                                                         | HS | I | 2533268 | 2542114 | WBGene00021275 | dmsr-2    | Y23H5B.4  | -0.413942025526773  |             |
| AGIWUR14185                                                |    |   |         |         |                |           |           |                     |             |
| N2                                                         | HS | I | 2544749 | 2546163 | WBGene00021274 | Y23H5B.3  | Y23H5B.3  | 0.0970464072462818  |             |
| AGIWUR14576                                                |    |   |         |         |                |           |           |                     |             |
| N2                                                         | HS | I | 2546897 | 2548358 | WBGene00021279 | Y23H5B.8  | Y23H5B.8  | 0.198509580701108   |             |
| AGIWUR24104                                                |    |   |         |         |                |           |           |                     |             |
| N2                                                         | HS | I | 2549296 | 2550543 | WBGene00021273 | Y23H5B.2  | Y23H5B.2  | -0.0305903756513715 |             |
| AGIWUR20479                                                |    |   |         |         |                |           |           |                     |             |
| N2                                                         | HS | I | 2551375 | 2551590 | WBGene00021280 | nspd-8    | Y23H5B.9  | -0.21279094921012   |             |
| AGIWUR21495                                                |    |   |         |         |                |           |           |                     |             |
| N2                                                         | HS | I | 2556252 | 2557425 | WBGene00194701 | Y23H5B.12 | Y23H5B.12 | 0.441923643038774   |             |
| AGIWUR19243                                                |    |   |         |         |                |           |           |                     |             |
| N2                                                         | HS | I | 2558300 | 2560110 | WBGene00016950 | C55C2.4   | C55C2.4   | 0.182719669262738   | AGIWUR14938 |
| N2                                                         | HS | I | 2560396 | 2561820 | WBGene00016949 | C55C2.3   | C55C2.3   | 0.0349659427796318  |             |
| AGIWUR5924;AGIWUR10632                                     |    |   |         |         |                |           |           |                     |             |
| N2                                                         | HS | I | 2562616 | 2563049 | WBGene00006047 | ssp-19    | C55C2.2   | -0.146973181077403  | AGIWUR13085 |
| N2                                                         | HS | I | 2568872 | 2570746 | WBGene00016948 | scrt-1    | C55C2.1   | -0.0147554148001818 | AGIWUR37839 |
| N2                                                         | HS | I | 2571782 | 2576020 | WBGene00000006 | aat-5     | C55C2.5   | -0.0795628131467847 |             |
| AGIWUR2506;AGIWUR10049;AGIWUR18292;AGIWUR40198             |    |   |         |         |                |           |           |                     |             |
| N2                                                         | HS | I | 2580935 | 2586126 | WBGene00001404 | fbp-1     | K07A3.1   | -0.0273428976368297 |             |
| AGIWUR9040;AGIWUR12995;AGIWUR25728;AGIWUR35028;AGIWUR35818 |    |   |         |         |                |           |           |                     |             |
| N2                                                         | HS | I | 2587527 | 2595294 | WBGene00004226 | ptr-12    | K07A3.2   | -0.0860369223281481 |             |
| AGIWUR617;AGIWUR33884;AGIWUR35603                          |    |   |         |         |                |           |           |                     |             |
| N2                                                         | HS | I | 2599979 | 2602627 | WBGene00019461 | K07A3.3   | K07A3.3   | 0.106543052648906   |             |
| AGIWUR13808;AGIWUR24193;AGIWUR42169                        |    |   |         |         |                |           |           |                     |             |
| N2                                                         | HS | I | 2606754 | 2617360 | WBGene00000832 | ctn-1     | Y23H5A.5  | -0.136617744381121  |             |
| AGIWUR10113;AGIWUR17733;AGIWUR41210;AGIWUR41252            |    |   |         |         |                |           |           |                     |             |
| N2                                                         | HS | I | 2617560 | 2620425 | WBGene00021271 | spe-47    | Y23H5A.4  | -0.143252105977194  |             |
| AGIWUR24731                                                |    |   |         |         |                |           |           |                     |             |
| N2                                                         | HS | I | 2620654 | 2621859 | WBGene00021270 | Y23H5A.3  | Y23H5A.3  | -0.0346778016855023 |             |
| AGIWUR40693                                                |    |   |         |         |                |           |           |                     |             |
| N2                                                         | HS | I | 2621957 | 2623186 | WBGene00021269 | Y23H5A.2  | Y23H5A.2  | 0.0295037975440486  |             |
| AGIWUR22648                                                |    |   |         |         |                |           |           |                     |             |
| N2                                                         | HS | I | 2623102 | 2628577 | WBGene00000800 | cars-1    | Y23H5A.7  | -0.138066667565216  |             |

AGIWUR23131  
N2 HS I 2629685 2632320 WBGene00000801 cars-2 Y23H5A.1 -0.060981723732926  
AGIWUR1077;AGIWUR6380;AGIWUR10780;AGIWUR19734;AGIWUR20638  
N2 HS I 2632987 2634561 WBGene00023172 Y23H5A.8 Y23H5A.8 -0.0987930347065582  
AGIWUR14216  
N2 HS I 2638649 2639419 WBGene00018231 F40E3.3 F40E3.3 -0.0533374629521353  
AGIWUR4066;AGIWUR10758;AGIWUR23936;AGIWUR24120;AGIWUR24171;AGIWUR31356;AGIWUR35745;AGIWUR37922;AGIWUR39709;  
AGIWUR43197  
N2 HS I 2642724 2643778 WBGene00018230 mage-1 F40E3.2 0.141250085310295 AGIWUR23200  
N2 HS I 2645273 2657241 WBGene00018232 F40E3.5 F40E3.5 -0.0144367740383657  
AGIWUR26138;AGIWUR32507  
N2 HS I 2668160 2672434 WBGene00017979 F32B5.6 F32B5.6 -0.0686480510784051  
AGIWUR7646;AGIWUR13992;AGIWUR30184  
N2 HS I 2672940 2682797 WBGene00017980 F32B5.7 F32B5.7 0.0485603331616202  
AGIWUR6695;AGIWUR6824;AGIWUR13525;AGIWUR18240;AGIWUR27541;AGIWUR31729  
N2 HS I 2686639 2689493 WBGene00000788 cpz-1 F32B5.8 -0.0676997864303139 AGIWUR41569  
N2 HS I 2692074 2692467 WBGene00017978 F32B5.4 F32B5.4 -0.26571377282462  
AGIWUR7463;AGIWUR9486;AGIWUR10833;AGIWUR14697;AGIWUR21940;AGIWUR33121;AGIWUR33897;AGIWUR44678;AGIWUR45085  
N2 HS I 2692757 2694084 WBGene00017977 F32B5.3 F32B5.3 0.113547291742004 AGIWUR18941  
N2 HS I 2697399 2699955 WBGene00017976 F32B5.2 F32B5.2 -0.0395248915424222 AGIWUR23268  
N2 HS I 2706883 2717549 WBGene00003006 lin-17 Y71F9B.5 -0.0078172281410156  
AGIWUR27001;AGIWUR35050  
N2 HS I 2718027 2721475 WBGene00001048 dnj-30 Y71F9B.16 -0.0805855875871071  
AGIWUR40146  
N2 HS I 2721879 2726724 WBGene00022128 Y71F9B.6 Y71F9B.6 0.0451275942676403  
AGIWUR19507  
N2 HS I 2727014 2727545 WBGene00004920 snr-7 Y71F9B.4 0.19309613409552  
AGIWUR7048  
N2 HS I 2730004 2731453 WBGene00022127 yop-1 Y71F9B.3 -0.201479015107783  
AGIWUR5660;AGIWUR6385;AGIWUR8144;AGIWUR16646;AGIWUR35160;AGIWUR37496  
N2 HS I 2731562 2735371 WBGene00022126 Y71F9B.2 Y71F9B.2 0.167101418192882  
AGIWUR8231  
N2 HS I 2735345 2742508 WBGene00022129 Iron-11 Y71F9B.8 -0.419055715323375  
AGIWUR4975;AGIWUR8612  
N2 HS I 2755540 2758204 WBGene00004043 plk-2 Y71F9B.7 -0.189128622966328  
AGIWUR32009  
N2 HS I 2759023 2761044 WBGene00022130 Y71F9B.9 Y71F9B.9 0.261452728781993  
AGIWUR15089  
N2 HS I 2761158 2776097 WBGene00004946 sop-3 Y71F9B.10 -0.295270092266533



AGIWUR13710;AGIWUR15065;AGIWUR23349  
N2 HS I 2776370 2778726 WBGene00022131 Y71F9B.13 Y71F9B.13 0.179106386755794  
AGIWUR18999;AGIWUR21201  
N2 HS I 2780850 2784276 WBGene00022133 Y71F9B.15 Y71F9B.15 0.0323715470863917  
AGIWUR16378;AGIWUR33305  
N2 HS I 2784620 2786077 WBGene00020990 W03D8.9 W03D8.9 -0.106840531643854 AGIWUR3317  
N2 HS I 2786332 2787514 WBGene00020991 W03D8.10 W03D8.10 -0.118353848611608  
AGIWUR21745  
N2 HS I 2791687 2794976 WBGene00020989 W03D8.8 W03D8.8 -0.214986610410294  
AGIWUR22441;AGIWUR29065;AGIWUR38128  
N2 HS I 2796130 2797238 WBGene00020988 W03D8.7 W03D8.7 0.158259724763931 AGIWUR11786  
N2 HS I 2798175 2800878 WBGene00020985 W03D8.2 W03D8.2 -0.0662966226463269 AGIWUR7975  
N2 HS I 2802822 2815786 WBGene00002174 itx-1 W03D8.6 -0.234398186982158 AGIWUR14038  
N2 HS I 2816415 2817646 WBGene00020987 W03D8.5 W03D8.5 0.0748372938818989  
AGIWUR3546;AGIWUR4156;AGIWUR9484;AGIWUR19425;AGIWUR24118  
N2 HS I 2818744 2820701 WBGene00044796 W03D8.11 W03D8.11 0.253502345361742  
AGIWUR42963  
N2 HS I 2820869 2822300 WBGene00020986 W03D8.3 W03D8.3 0.151549823975909 AGIWUR40700  
N2 HS I 2823254 2830311 WBGene00004077 pop-1 W10C8.2 0.0554410703817076 AGIWUR37103  
N2 HS I 2832872 2833253 WBGene00021126 W10C8.3 W10C8.3 -0.010142807560948 AGIWUR28937  
N2 HS I 2845859 2849792 WBGene00021125 ccb-2 W10C8.1 0.00375359185540347  
AGIWUR17713;AGIWUR29981;AGIWUR44951  
N2 HS I 2851963 2853903 WBGene00021127 W10C8.4 W10C8.4 0.0701613379462138  
AGIWUR2101;AGIWUR26297;AGIWUR28145  
N2 HS I 2858524 2859913 WBGene00044433 W10C8.6 W10C8.6 0.0901212047459268  
AGIWUR1574;AGIWUR2177;AGIWUR33520;AGIWUR42210;AGIWUR45158  
N2 HS I 2862403 2864446 WBGene00022116 Y71F9AL.11 Y71F9AL.11 -0.0148597689938086  
AGIWUR36633  
N2 HS I 2866508 2870167 WBGene00022115 Y71F9AL.10 Y71F9AL.10 -0.0258024215698747  
AGIWUR30152  
N2 HS I 2870608 2875289 WBGene00022117 Y71F9AL.12 Y71F9AL.12 0.055154716598885  
AGIWUR29739  
N2 HS I 2875395 2876324 WBGene00004412 rpl-1 Y71F9AL.13 -0.0310159502097562  
AGIWUR13419;AGIWUR14964  
N2 HS I 2876932 2878523 WBGene00022114 Y71F9AL.9 Y71F9AL.9 -0.219249932415065  
AGIWUR15225;AGIWUR43288  
N2 HS I 2878578 2880929 WBGene00022113 Y71F9AL.8 Y71F9AL.8 -0.0261853616672614  
AGIWUR29805  
N2 HS I 2880919 2883454 WBGene00022118 dnc-5 Y71F9AL.14 -0.0700590309798095

|                                                                                 |    |   |         |         |                |            |            |                     |
|---------------------------------------------------------------------------------|----|---|---------|---------|----------------|------------|------------|---------------------|
| AGIWUR1789;AGIWUR5524;AGIWUR13460;AGIWUR25120;AGIWUR26338                       |    |   |         |         |                |            |            |                     |
| N2                                                                              | HS | I | 2883546 | 2893718 | WBGene00000199 | arx-1      | Y71F9AL.16 | -0.223309970801964  |
| AGIWUR11177                                                                     |    |   |         |         |                |            |            |                     |
| N2                                                                              | HS | I | 2895329 | 2900860 | WBGene00022119 | copa-1     | Y71F9AL.17 | 0.249250310310789   |
| AGIWUR19351                                                                     |    |   |         |         |                |            |            |                     |
| N2                                                                              | HS | I | 2901325 | 2903006 | WBGene00001791 | gst-43     | Y71F9AL.5  | 0.384097884391242   |
| AGIWUR21982                                                                     |    |   |         |         |                |            |            |                     |
| N2                                                                              | HS | I | 2903596 | 2907751 | WBGene00022110 | Y71F9AL.4  | Y71F9AL.4  | -0.185193109869616  |
| AGIWUR25316                                                                     |    |   |         |         |                |            |            |                     |
| N2                                                                              | HS | I | 2925212 | 2928134 | WBGene00022107 | Y71F9AL.1  | Y71F9AL.1  | 0.119037405520391   |
| AGIWUR2864                                                                      |    |   |         |         |                |            |            |                     |
| N2                                                                              | HS | I | 2928395 | 2929687 | WBGene00022122 | trap-1     | Y71F9AM.6  | -0.171852716840917  |
| AGIWUR4502;AGIWUR4985;AGIWUR5165;AGIWUR5707;AGIWUR13179;AGIWUR27433;AGIWUR45195 |    |   |         |         |                |            |            |                     |
| N2                                                                              | HS | I | 2929736 | 2931361 | WBGene00003836 | nxt-1      | Y71F9AM.5  | -0.0994970937037536 |
| AGIWUR15059                                                                     |    |   |         |         |                |            |            |                     |
| N2                                                                              | HS | I | 2931461 | 2947152 | WBGene00022121 | cogc-3     | Y71F9AM.4  | -0.0158728772960988 |
| AGIWUR4108;AGIWUR6047;AGIWUR36855;AGIWUR41452                                   |    |   |         |         |                |            |            |                     |
| N2                                                                              | HS | I | 2949600 | 2957910 | WBGene00000237 | bam-2      | Y71F9AR.1  | -0.145707097971663  |
| AGIWUR41421                                                                     |    |   |         |         |                |            |            |                     |
| N2                                                                              | HS | I | 2981531 | 2983076 | WBGene00044894 | Y71F9AR.4  | Y71F9AR.4  | 0.111713291905845   |
| AGIWUR18847                                                                     |    |   |         |         |                |            |            |                     |
| N2                                                                              | HS | I | 2983213 | 2985167 | WBGene00022123 | Y71F9AR.2  | Y71F9AR.2  | 0.142751188202341   |
| AGIWUR19262                                                                     |    |   |         |         |                |            |            |                     |
| N2                                                                              | HS | I | 2986104 | 2995914 | WBGene00022124 | supr-1     | Y71F9AR.3  | -0.189546077209595  |
| AGIWUR10209                                                                     |    |   |         |         |                |            |            |                     |
| N2                                                                              | HS | I | 2996401 | 3001382 | WBGene00001046 | dnj-28     | Y54E10BL.4 | 0.12667693670433    |
| AGIWUR1394                                                                      |    |   |         |         |                |            |            |                     |
| N2                                                                              | HS | I | 3001360 | 3002847 | WBGene00021839 | nduf-5     | Y54E10BL.5 | 0.188960965247562   |
| AGIWUR6233                                                                      |    |   |         |         |                |            |            |                     |
| N2                                                                              | HS | I | 3015742 | 3021531 | WBGene00021843 | Y54E10BR.4 | Y54E10BR.4 | 0.207298276008352   |
| AGIWUR20452                                                                     |    |   |         |         |                |            |            |                     |
| N2                                                                              | HS | I | 3021651 | 3028396 | WBGene00021842 | Y54E10BR.3 | Y54E10BR.3 | 0.0347025918685446  |
| AGIWUR41419                                                                     |    |   |         |         |                |            |            |                     |
| N2                                                                              | HS | I | 3028307 | 3031092 | WBGene00021844 | Y54E10BR.5 | Y54E10BR.5 | -0.0738689512159398 |
| AGIWUR27706;AGIWUR30378                                                         |    |   |         |         |                |            |            |                     |
| N2                                                                              | HS | I | 3031212 | 3032938 | WBGene00021845 | rpb-7      | Y54E10BR.6 | 0.0440094072212496  |
| AGIWUR32718                                                                     |    |   |         |         |                |            |            |                     |
| N2                                                                              | HS | I | 3032935 | 3034761 | WBGene00021841 | Y54E10BR.2 | Y54E10BR.2 | -0.219113237902994  |
| AGIWUR2238;AGIWUR18683;AGIWUR24455;AGIWUR43905                                  |    |   |         |         |                |            |            |                     |

|                                                                                                           |    |   |         |         |                |            |            |                     |             |
|-----------------------------------------------------------------------------------------------------------|----|---|---------|---------|----------------|------------|------------|---------------------|-------------|
| N2                                                                                                        | HS | I | 3035193 | 3047794 | WBGene00003387 | mod-5      | Y54E10BR.7 | 0.0240037000109812  |             |
| AGIWUR24272                                                                                               |    |   |         |         |                |            |            |                     |             |
| N2                                                                                                        | HS | I | 3052018 | 3059185 | WBGene00021846 | ztf-23     | Y54E10BR.8 | -0.0259894114374504 |             |
| AGIWUR33528                                                                                               |    |   |         |         |                |            |            |                     |             |
| N2                                                                                                        | HS | I | 3059151 | 3069393 | WBGene00021840 | Y54E10BR.1 | Y54E10BR.1 | -0.134817966501778  |             |
| AGIWUR14801                                                                                               |    |   |         |         |                |            |            |                     |             |
| N2                                                                                                        | HS | I | 3069325 | 3070150 | WBGene00000205 | arx-7      | M01B12.3   | -0.0729422566210403 |             |
| AGIWUR5428                                                                                                |    |   |         |         |                |            |            |                     |             |
| N2                                                                                                        | HS | I | 3070973 | 3084874 | WBGene00019697 | M01B12.4   | M01B12.4   | -0.216470125249181  |             |
| AGIWUR16943;AGIWUR36776;AGIWUR37540                                                                       |    |   |         |         |                |            |            |                     |             |
| N2                                                                                                        | HS | I | 3085011 | 3096285 | WBGene00019698 | riok-1     | M01B12.5   | -0.0181532379133529 |             |
| AGIWUR5372;AGIWUR5467;AGIWUR12452;AGIWUR27824;AGIWUR28472;AGIWUR30070;AGIWUR34208;AGIWUR36598;AGIWUR41932 |    |   |         |         |                |            |            |                     |             |
| N2                                                                                                        | HS | I | 3094513 | 3109596 | WBGene00003654 | nhr-64     | C45E1.1    | -0.078770370040365  | AGIWUR14818 |
| N2                                                                                                        | HS | I | 3115036 | 3117628 | WBGene00016663 | C45E1.4    | C45E1.4    | -0.109426944953256  | AGIWUR41381 |
| N2                                                                                                        | HS | I | 3137185 | 3138447 | WBGene00000626 | col-49     | K09H9.3    | 0.0165672487190278  | AGIWUR23696 |
| N2                                                                                                        | HS | I | 3138541 | 3140601 | WBGene00045387 | K09H9.8    | K09H9.8    | -0.24421537702197   |             |
| AGIWUR6683;AGIWUR9499;AGIWUR29974                                                                         |    |   |         |         |                |            |            |                     |             |
| N2                                                                                                        | HS | I | 3141704 | 3143197 | WBGene00019597 | K09H9.5    | K09H9.5    | 0.0505299408202458  | AGIWUR19387 |
| N2                                                                                                        | HS | I | 3144410 | 3147793 | WBGene00003062 | lpd-6      | K09H9.6    | -0.106609139216722  | AGIWUR13406 |
| N2                                                                                                        | HS | I | 3147996 | 3150349 | WBGene00019595 | K09H9.2    | K09H9.2    | 0.18640271676208    | AGIWUR25014 |
| N2                                                                                                        | HS | I | 3150346 | 3162387 | WBGene00006888 | vbh-1      | Y54E10A.9  | 0.0389516501867906  |             |
| AGIWUR36846                                                                                               |    |   |         |         |                |            |            |                     |             |
| N2                                                                                                        | HS | I | 3162803 | 3163649 | WBGene00021829 | mrp1-17    | Y54E10A.7  | 0.104943638623281   |             |
| AGIWUR1305                                                                                                |    |   |         |         |                |            |            |                     |             |
| N2                                                                                                        | HS | I | 3163688 | 3167925 | WBGene00021828 | Y54E10A.6  | Y54E10A.6  | 0.244963242400058   |             |
| AGIWUR24704                                                                                               |    |   |         |         |                |            |            |                     |             |
| N2                                                                                                        | HS | I | 3167908 | 3171230 | WBGene00021827 | dnc-6      | Y54E10A.5  | -0.0986295595408393 |             |
| AGIWUR5057;AGIWUR9073;AGIWUR40125                                                                         |    |   |         |         |                |            |            |                     |             |
| N2                                                                                                        | HS | I | 3173243 | 3176319 | WBGene00021830 | Y54E10A.10 | Y54E10A.10 | -0.192134973911724  |             |
| AGIWUR13178                                                                                               |    |   |         |         |                |            |            |                     |             |
| N2                                                                                                        | HS | I | 3176419 | 3192857 | WBGene00021831 | Y54E10A.11 | Y54E10A.11 | 0.104458153473447   |             |
| AGIWUR2164;AGIWUR16574                                                                                    |    |   |         |         |                |            |            |                     |             |
| N2                                                                                                        | HS | I | 3193528 | 3198838 | WBGene00021832 | Y54E10A.12 | Y54E10A.12 | -0.0768388810123941 |             |
| AGIWUR12213                                                                                               |    |   |         |         |                |            |            |                     |             |
| N2                                                                                                        | HS | I | 3199540 | 3203229 | WBGene00021833 | Y54E10A.13 | Y54E10A.13 | -0.03363347641847   |             |
| AGIWUR9596                                                                                                |    |   |         |         |                |            |            |                     |             |
| N2                                                                                                        | HS | I | 3206730 | 3209294 | WBGene00021835 | Y54E10A.17 | Y54E10A.17 | 0.0767919659675051  |             |
| AGIWUR37690                                                                                               |    |   |         |         |                |            |            |                     |             |
| N2                                                                                                        | HS | I | 3211046 | 3217366 | WBGene00001481 | fog-1      | Y54E10A.4  | 0.112982171632936   |             |

AGIWUR13603;AGIWUR15435;AGIWUR35965  
N2 HS I 3217296 3222950 WBGene00004404 rom-5 Y54E10A.14 -0.0804222142406115  
AGIWUR37258  
N2 HS I 3223160 3228104 WBGene00000413 cdt-1 Y54E10A.15 -0.0938613802470516  
AGIWUR7164;AGIWUR8441;AGIWUR9365;AGIWUR10177;AGIWUR14248;AGIWUR14397;AGIWUR28748;AGIWUR40356  
N2 HS I 3229431 3233294 WBGene00021826 txl-1 Y54E10A.3 0.261419626355273  
AGIWUR39852  
N2 HS I 3233391 3255678 WBGene00003258 cogc-1 Y54E10A.2 0.061300669306247  
AGIWUR30427;AGIWUR32820;AGIWUR39620  
N2 HS I 3259871 3264254 WBGene00021553 tyr-5 Y44E3B.2 0.0469452593766615  
AGIWUR23134  
N2 HS I 3264237 3266762 WBGene00021552 zip-4 Y44E3B.1 -0.0519771087950147  
AGIWUR2699;AGIWUR20566;AGIWUR20700;AGIWUR26560;AGIWUR28062;AGIWUR30568;AGIWUR32351  
N2 HS I 3267094 3269116 WBGene00020915 nol-5 W01B11.3 0.013127829407761  
AGIWUR37743  
N2 HS I 3269406 3280883 WBGene00004154 pqn-72 W01B11.5 0.0103306770842848  
AGIWUR12149;AGIWUR23263;AGIWUR25848;AGIWUR35656;AGIWUR42564;AGIWUR43889  
N2 HS I 3287336 3293127 WBGene00020914 sulp-6 W01B11.2 0.00178726470020463  
AGIWUR2355;AGIWUR10745;AGIWUR30073;AGIWUR36750;AGIWUR37204;AGIWUR39158  
N2 HS I 3293142 3294356 WBGene00020917 W01B11.6 W01B11.6 0.378410091960092  
AGIWUR11957;AGIWUR23982;AGIWUR24179  
N2 HS I 3299606 3300490 WBGene00020913 W01B11.1 W01B11.1 0.146993182734557  
AGIWUR1462  
N2 HS I 3302001 3307587 WBGene00000036 ace-2 Y44E3A.2 0.250043789819713  
AGIWUR33576  
N2 HS I 3317978 3318584 WBGene00021548 trx-4 Y44E3A.3 0.138152480681129  
AGIWUR13327  
N2 HS I 3319540 3330673 WBGene00021549 Y44E3A.4 Y44E3A.4 -0.152452327858057  
AGIWUR4866;AGIWUR12826;AGIWUR21456;AGIWUR37487  
N2 HS I 3338367 3340219 WBGene00021547 Y44E3A.1 Y44E3A.1 0.0420115325950681  
AGIWUR6438;AGIWUR21696;AGIWUR28706  
N2 HS I 3340231 3349907 WBGene00021551 Y44E3A.6 Y44E3A.6 0.0903993817346533  
AGIWUR19599;AGIWUR28799  
N2 HS I 3367640 3368550 WBGene00021035 W05F2.3 W05F2.3 -0.160501056551478  
AGIWUR11491;AGIWUR17920;AGIWUR23022;AGIWUR38692;AGIWUR40671;AGIWUR42685  
N2 HS I 3368785 3371444 WBGene00021038 W05F2.6 W05F2.6 -0.0193240074354684 AGIWUR10259  
N2 HS I 3371769 3373834 WBGene00021037 fbxa-203 W05F2.5 0.206431601574065  
AGIWUR18896  
N2 HS I 3374776 3407189 WBGene00021036 W05F2.4 W05F2.4 -0.0519394009259408

AGIWUR1629;AGIWUR8478;AGIWUR12583;AGIWUR15753;AGIWUR22393;AGIWUR23436;AGIWUR32189;AGIWUR34613

|                                                                                                                                                                        |    |   |         |         |                |           |           |                     |             |
|------------------------------------------------------------------------------------------------------------------------------------------------------------------------|----|---|---------|---------|----------------|-----------|-----------|---------------------|-------------|
| N2                                                                                                                                                                     | HS | I | 3408033 | 3415238 | WBGene00019362 | cdk-2     | K03E5.3   | -0.113472759851899  | AGIWUR23928 |
| N2                                                                                                                                                                     | HS | I | 3419600 | 3424211 | WBGene00019361 | K03E5.2   | K03E5.2   | 0.0354363698690952  |             |
| AGIWUR1571;AGIWUR13604;AGIWUR16735;AGIWUR17165;AGIWUR21604;AGIWUR26478;AGIWUR26766;AGIWUR27970;AGIWUR30728;AGIWUR31092;AGIWUR37714;AGIWUR39861;AGIWUR43156;AGIWUR43908 |    |   |         |         |                |           |           |                     |             |
| N2                                                                                                                                                                     | HS | I | 3427177 | 3433207 | WBGene00019360 | neto-1    | K03E5.1   | 0.0106246636816874  | AGIWUR34916 |
| N2                                                                                                                                                                     | HS | I | 3433157 | 3438543 | WBGene00004775 | sep-1     | Y47G6A.12 | -0.0188163179747214 |             |
| AGIWUR2398                                                                                                                                                             |    |   |         |         |                |           |           |                     |             |
| N2                                                                                                                                                                     | HS | I | 3439108 | 3449175 | WBGene00006440 | tag-63    | Y47G6A.28 | 0.0207146193282508  |             |
| AGIWUR25852                                                                                                                                                            |    |   |         |         |                |           |           |                     |             |
| N2                                                                                                                                                                     | HS | I | 3449326 | 3462177 | WBGene00003422 | msh-6     | Y47G6A.11 | 0.118896511366312   |             |
| AGIWUR22181                                                                                                                                                            |    |   |         |         |                |           |           |                     |             |
| N2                                                                                                                                                                     | HS | I | 3462270 | 3468187 | WBGene00021640 | Y47G6A.14 | Y47G6A.14 | -0.0118636655386926 |             |
| AGIWUR1119                                                                                                                                                             |    |   |         |         |                |           |           |                     |             |
| N2                                                                                                                                                                     | HS | I | 3467132 | 3478515 | WBGene00004978 | spg-7     | Y47G6A.10 | 0.273927814084727   |             |
| AGIWUR21359                                                                                                                                                            |    |   |         |         |                |           |           |                     |             |
| N2                                                                                                                                                                     | HS | I | 3479329 | 3481439 | WBGene00021638 | Y47G6A.9  | Y47G6A.9  | 0.251622608903908   |             |
| AGIWUR35431                                                                                                                                                            |    |   |         |         |                |           |           |                     |             |
| N2                                                                                                                                                                     | HS | I | 3481987 | 3484499 | WBGene00000794 | crn-1     | Y47G6A.8  | 0.0322804265600336  |             |
| AGIWUR13801;AGIWUR22565                                                                                                                                                |    |   |         |         |                |           |           |                     |             |
| N2                                                                                                                                                                     | HS | I | 3487812 | 3499706 | WBGene00021643 | ccep-290  | Y47G6A.17 | 0.0564721017712797  |             |
| AGIWUR3330;AGIWUR15688                                                                                                                                                 |    |   |         |         |                |           |           |                     |             |
| N2                                                                                                                                                                     | HS | I | 3502738 | 3508421 | WBGene00021637 | Y47G6A.7  | Y47G6A.7  | 0.114638860916566   |             |
| AGIWUR6082;AGIWUR7088;AGIWUR24590                                                                                                                                      |    |   |         |         |                |           |           |                     |             |
| N2                                                                                                                                                                     | HS | I | 3508397 | 3512735 | WBGene00021644 | Y47G6A.18 | Y47G6A.18 | -0.0585460402758748 |             |
| AGIWUR4776;AGIWUR5770;AGIWUR6663;AGIWUR14345;AGIWUR18070;AGIWUR30279;AGIWUR31587;AGIWUR36047;AGIWUR38200;AGIWUR38330;AGIWUR41216                                       |    |   |         |         |                |           |           |                     |             |
| N2                                                                                                                                                                     | HS | I | 3516450 | 3523387 | WBGene00021636 | pcaf-1    | Y47G6A.6  | 0.0358975944767082  |             |
| AGIWUR32442                                                                                                                                                            |    |   |         |         |                |           |           |                     |             |
| N2                                                                                                                                                                     | HS | I | 3523313 | 3529956 | WBGene00021645 | Y47G6A.19 | Y47G6A.19 | 0.396774679216387   |             |
| AGIWUR31354                                                                                                                                                            |    |   |         |         |                |           |           |                     |             |
| N2                                                                                                                                                                     | HS | I | 3533885 | 3539196 | WBGene00021635 | Y47G6A.5  | Y47G6A.5  | 0.0326461488778715  |             |
| AGIWUR37951                                                                                                                                                            |    |   |         |         |                |           |           |                     |             |
| N2                                                                                                                                                                     | HS | I | 3539554 | 3546904 | WBGene00004389 | rnp-6     | Y47G6A.20 | 0.0929068284319623  |             |
| AGIWUR16653;AGIWUR31705;AGIWUR35799;AGIWUR39341                                                                                                                        |    |   |         |         |                |           |           |                     |             |
| N2                                                                                                                                                                     | HS | I | 3547071 | 3552005 | WBGene00021634 | rde-10    | Y47G6A.4  | -0.0303582650380214 |             |
| AGIWUR39093                                                                                                                                                            |    |   |         |         |                |           |           |                     |             |
| N2                                                                                                                                                                     | HS | I | 3551949 | 3559807 | WBGene00021646 | Y47G6A.21 | Y47G6A.21 | 0.0612316789111276  |             |
| AGIWUR20916;AGIWUR42118                                                                                                                                                |    |   |         |         |                |           |           |                     |             |

|                                                                                    |    |   |         |         |                |           |           |                      |             |
|------------------------------------------------------------------------------------|----|---|---------|---------|----------------|-----------|-----------|----------------------|-------------|
| N2                                                                                 | HS | I | 3559923 | 3562851 | WBGene00021647 | Y47G6A.22 | Y47G6A.22 | 0.341793263408082    |             |
| AGIWUR28433                                                                        |    |   |         |         |                |           |           |                      |             |
| N2                                                                                 | HS | I | 3564040 | 3565068 | WBGene00045399 | Y47G6A.33 | Y47G6A.33 | 0.0938651936353816   |             |
| AGIWUR25152;AGIWUR41843                                                            |    |   |         |         |                |           |           |                      |             |
| N2                                                                                 | HS | I | 3565012 | 3600729 | WBGene00003060 | lpd-3     | Y47G6A.23 | -0.0716987624587944  |             |
| AGIWUR25264;AGIWUR43063                                                            |    |   |         |         |                |           |           |                      |             |
| N2                                                                                 | HS | I | 3601291 | 3602908 | WBGene00021633 | Y47G6A.3  | Y47G6A.3  | 0.341474893197425    |             |
| AGIWUR21723                                                                        |    |   |         |         |                |           |           |                      |             |
| N2                                                                                 | HS | I | 3603343 | 3604537 | WBGene00044436 | Y47G6A.31 | Y47G6A.31 |                      |             |
| -0.00314214738352492 AGIWUR2009;AGIWUR4486;AGIWUR11467;AGIWUR16255                 |    |   |         |         |                |           |           |                      |             |
| N2                                                                                 | HS | I | 3604520 | 3605763 | WBGene00021648 | mis-12    | Y47G6A.24 | -0.0724893669639535  |             |
| AGIWUR31284                                                                        |    |   |         |         |                |           |           |                      |             |
| N2                                                                                 | HS | I | 3606411 | 3608345 | WBGene00021649 | Y47G6A.25 | Y47G6A.25 | 0.00516052196029904  |             |
| AGIWUR16764;AGIWUR17972;AGIWUR30368;AGIWUR34454;AGIWUR38799                        |    |   |         |         |                |           |           |                      |             |
| N2                                                                                 | HS | I | 3608395 | 3612301 | WBGene00002144 | inx-22    | Y47G6A.2  | -0.00302353512859455 |             |
| AGIWUR32737                                                                        |    |   |         |         |                |           |           |                      |             |
| N2                                                                                 | HS | I | 3611909 | 3618317 | WBGene00002143 | inx-21    | Y47G6A.1  | -0.0724703025706663  |             |
| AGIWUR2419                                                                         |    |   |         |         |                |           |           |                      |             |
| N2                                                                                 | HS | I | 3618889 | 3619697 | WBGene00021650 | Y47G6A.26 | Y47G6A.26 | -0.312465022535138   |             |
| AGIWUR10804                                                                        |    |   |         |         |                |           |           |                      |             |
| N2                                                                                 | HS | I | 3620582 | 3625087 | WBGene00044437 | Y47G6A.32 | Y47G6A.32 | -0.103909844490457   |             |
| AGIWUR28152;AGIWUR35782;AGIWUR39596                                                |    |   |         |         |                |           |           |                      |             |
| N2                                                                                 | HS | I | 3629471 | 3631112 | WBGene00000284 | cah-6     | T28F2.3   | -0.116919881972534   | AGIWUR29909 |
| N2                                                                                 | HS | I | 3631086 | 3636485 | WBGene00020902 | jmjc-1    | T28F2.4   | 0.103729239398943    |             |
| AGIWUR10716;AGIWUR27941                                                            |    |   |         |         |                |           |           |                      |             |
| N2                                                                                 | HS | I | 3637353 | 3638819 | WBGene00020901 | T28F2.2   | T28F2.2   | -0.112413616024159   |             |
| AGIWUR3655;AGIWUR17862;AGIWUR19553;AGIWUR28347;AGIWUR30674;AGIWUR35823             |    |   |         |         |                |           |           |                      |             |
| N2                                                                                 | HS | I | 3639648 | 3641347 | WBGene00020900 | T28F2.1   | T28F2.1   | 0.132221840049416    | AGIWUR41008 |
| N2                                                                                 | HS | I | 3641668 | 3647009 | WBGene00000368 | ccb-1     | T28F2.5   | 0.155477059611952    |             |
| AGIWUR17902;AGIWUR36522                                                            |    |   |         |         |                |           |           |                      |             |
| N2                                                                                 | HS | I | 3651230 | 3652599 | WBGene00000627 | col-50    | T28F2.6   | -0.0699567021588896  |             |
| AGIWUR28502;AGIWUR33906                                                            |    |   |         |         |                |           |           |                      |             |
| N2                                                                                 | HS | I | 3653997 | 3655265 | WBGene00000628 | col-51    | T28F2.8   | 0.320503432998119    | AGIWUR29327 |
| N2                                                                                 | HS | I | 3655413 | 3662183 | WBGene00020903 | acd-5     | T28F2.7   | 0.22192486102551     | AGIWUR13129 |
| N2                                                                                 | HS | I | 3666923 | 3671700 | WBGene00004890 | smp-2     | D1037.2   | 0.189544361670514    | AGIWUR14570 |
| N2                                                                                 | HS | I | 3680178 | 3680944 | WBGene00001501 | ftn-2     | D1037.3   | -0.102037410829743   |             |
| AGIWUR8517;AGIWUR21576;AGIWUR30113;AGIWUR39905;AGIWUR40881;AGIWUR45149             |    |   |         |         |                |           |           |                      |             |
| N2                                                                                 | HS | I | 3682772 | 3684118 | WBGene00004272 | rab-8     | D1037.4   | -0.0855588317705891  |             |
| AGIWUR8091;AGIWUR21531;AGIWUR23567;AGIWUR31383;AGIWUR34408;AGIWUR40705;AGIWUR44617 |    |   |         |         |                |           |           |                      |             |

|                                                                                                |    |   |         |         |                |          |          |                      |             |
|------------------------------------------------------------------------------------------------|----|---|---------|---------|----------------|----------|----------|----------------------|-------------|
| N2                                                                                             | HS | I | 3684783 | 3690192 | WBGene00017025 | D1037.1  | D1037.1  | 0.00627385352015608  | AGIWUR23371 |
| N2                                                                                             | HS | I | 3690181 | 3694021 | WBGene00017026 | ipla-4   | D1037.5  | -0.149594864364344   | AGIWUR39546 |
| N2                                                                                             | HS | I | 3694296 | 3697549 | WBGene00003418 | msh-2    | H26D21.2 | -0.00585311835849112 |             |
| AGIWUR4168                                                                                     |    |   |         |         |                |          |          |                      |             |
| N2                                                                                             | HS | I | 3698102 | 3699300 | WBGene00002042 | hus-1    | H26D21.1 | 0.41164992315662     |             |
| AGIWUR20692                                                                                    |    |   |         |         |                |          |          |                      |             |
| N2                                                                                             | HS | I | 3706030 | 3709435 | WBGene00017651 | F21A9.2  | F21A9.2  | 0.111802935964848    | AGIWUR4947  |
| N2                                                                                             | HS | I | 3712133 | 3713134 | WBGene00017650 | F21A9.1  | F21A9.1  | 0.134110214375428    | AGIWUR22805 |
| N2                                                                                             | HS | I | 3713142 | 3721157 | WBGene00003040 | lin-59   | T12F5.4  | -0.331530965236777   |             |
| AGIWUR22950;AGIWUR24884;AGIWUR25052                                                            |    |   |         |         |                |          |          |                      |             |
| N2                                                                                             | HS | I | 3726011 | 3731265 | WBGene00001601 | glh-4    | T12F5.3  | 0.220907969766575    | AGIWUR15176 |
| N2                                                                                             | HS | I | 3732982 | 3740479 | WBGene00004147 | larp-5   | T12F5.5  | 0.0437935115701471   |             |
| AGIWUR11520;AGIWUR29583;AGIWUR33557                                                            |    |   |         |         |                |          |          |                      |             |
| N2                                                                                             | HS | I | 3741456 | 3742646 | WBGene00020466 | sld-2    | T12F5.1  | 0.366977659771411    | AGIWUR14577 |
| N2                                                                                             | HS | I | 3748523 | 3753958 | WBGene00002135 | inx-13   | Y8G1A.2  | -0.149970877095421   |             |
| AGIWUR5735;AGIWUR7745;AGIWUR14145;AGIWUR26568;AGIWUR30702;AGIWUR38532                          |    |   |         |         |                |          |          |                      |             |
| N2                                                                                             | HS | I | 3755457 | 3759077 | WBGene00002134 | inx-12   | ZK770.3  | 0.06915001456189     |             |
| AGIWUR5815;AGIWUR12211;AGIWUR19906                                                             |    |   |         |         |                |          |          |                      |             |
| N2                                                                                             | HS | I | 3769681 | 3773876 | WBGene00022815 | asic-1   | ZK770.1  | 0.139481590975678    | AGIWUR39041 |
| N2                                                                                             | HS | I | 3774706 | 3777468 | WBGene00016324 | C32E8.6  | C32E8.6  | -0.138858274360244   |             |
| AGIWUR13968;AGIWUR42073                                                                        |    |   |         |         |                |          |          |                      |             |
| N2                                                                                             | HS | I | 3778089 | 3781690 | WBGene00004368 | ric-19   | C32E8.7  | 0.0618431927157523   | AGIWUR5505  |
| N2                                                                                             | HS | I | 3782118 | 3783294 | WBGene00016323 | C32E8.5  | C32E8.5  | -0.17824576643127    |             |
| AGIWUR10554;AGIWUR18167                                                                        |    |   |         |         |                |          |          |                      |             |
| N2                                                                                             | HS | I | 3783835 | 3784435 | WBGene00016322 | C32E8.4  | C32E8.4  | -0.0469075341660909  |             |
| AGIWUR25087;AGIWUR28898;AGIWUR38913                                                            |    |   |         |         |                |          |          |                      |             |
| N2                                                                                             | HS | I | 3786588 | 3787494 | WBGene00016321 | tppp-1   | C32E8.3  | 0.0544609281510127   | AGIWUR830   |
| N2                                                                                             | HS | I | 3788036 | 3788909 | WBGene00004425 | rpl-13   | C32E8.2  | -0.338626930309261   |             |
| AGIWUR4831;AGIWUR12028;AGIWUR21601;AGIWUR24937;AGIWUR36210;AGIWUR40534;AGIWUR40558;AGIWUR40887 |    |   |         |         |                |          |          |                      |             |
| N2                                                                                             | HS | I | 3789309 | 3792797 | WBGene00004217 | ptr-2    | C32E8.8  | -0.228166305675185   |             |
| AGIWUR13785;AGIWUR26858;AGIWUR38652                                                            |    |   |         |         |                |          |          |                      |             |
| N2                                                                                             | HS | I | 3794556 | 3798069 | WBGene00016325 | C32E8.9  | C32E8.9  | 0.17272287521951     | AGIWUR631   |
| N2                                                                                             | HS | I | 3798566 | 3805737 | WBGene00006751 | unc-11   | C32E8.10 | -0.0513743360141952  |             |
| AGIWUR7869;AGIWUR17953;AGIWUR22953;AGIWUR24588;AGIWUR25836;AGIWUR39231;AGIWUR39504             |    |   |         |         |                |          |          |                      |             |
| N2                                                                                             | HS | I | 3807458 | 3816809 | WBGene00016326 | ubr-1    | C32E8.11 | 0.228538875953635    |             |
| AGIWUR21445                                                                                    |    |   |         |         |                |          |          |                      |             |
| N2                                                                                             | HS | I | 3817996 | 3821505 | WBGene00003797 | npp-11   | F53F10.5 | 0.0320139978260663   |             |
| AGIWUR20808                                                                                    |    |   |         |         |                |          |          |                      |             |
| N2                                                                                             | HS | I | 3821656 | 3821990 | WBGene00023066 | F53F10.7 | F53F10.7 | -0.144965353204774   |             |

AGIWUR7872;AGIWUR22404;AGIWUR22849;AGIWUR28979;AGIWUR36927  
 N2 HS I 3824947 3826514 WBGene00006833 unc-108 F53F10.4 -0.0778426008233293  
 AGIWUR4694;AGIWUR13234;AGIWUR19555;AGIWUR21037;AGIWUR23542;AGIWUR33385;AGIWUR35111;AGIWUR36324;AGIWUR37033;  
 AGIWUR41608  
 N2 HS I 3827219 3828143 WBGene00018765 mpc-2 F53F10.3 0.231155550315169  
 AGIWUR21074  
 N2 HS I 3828239 3829308 WBGene00044423 F53F10.8 F53F10.8 -0.0082611170777831  
 AGIWUR6429;AGIWUR15090;AGIWUR36207;AGIWUR43512  
 N2 HS I 3830562 3834124 WBGene00018764 F53F10.2 F53F10.2 -0.287066366659595  
 AGIWUR2264;AGIWUR6729;AGIWUR9892;AGIWUR13356;AGIWUR14555;AGIWUR19732;AGIWUR23173;AGIWUR25744;AGIWUR26007;AG  
 IWUR27943;AGIWUR29611;AGIWUR36716;AGIWUR42029  
 N2 HS I 3834115 3837807 WBGene00018763 F53F10.1 F53F10.1 0.159881243783713  
 AGIWUR22095  
 N2 HS I 3838237 3839899 WBGene00020187 gsp-4 T03F1.5 -0.304612055307267 AGIWUR8768  
 N2 HS I 3839809 3841558 WBGene00020188 T03F1.6 T03F1.6 -0.206680097944375  
 AGIWUR6276;AGIWUR15360;AGIWUR19567  
 N2 HS I 3853810 3854233 WBGene00020192 T03F1.11 T03F1.11 0.20801987763712  
 AGIWUR41326  
 N2 HS I 3854169 3859292 WBGene00020189 tfbm-1 T03F1.7 0.0801907727074287 AGIWUR20942  
 N2 HS I 3859376 3862729 WBGene00020190 guk-1 T03F1.8 0.040432102916121  
 AGIWUR2473;AGIWUR5012;AGIWUR19709;AGIWUR27356  
 N2 HS I 3862775 3865938 WBGene00001832 hcp-4 T03F1.9 -0.011471365574149  
 AGIWUR6379;AGIWUR7648;AGIWUR29704;AGIWUR37109  
 N2 HS I 3867541 3869109 WBGene00020185 pgk-1 T03F1.3 -0.134507760863297 AGIWUR13438  
 N2 HS I 3869214 3870114 WBGene00000764 coq-4 T03F1.2 0.0650886714459311  
 AGIWUR4077;AGIWUR4428;AGIWUR8265  
 N2 HS I 3870642 3871267 WBGene00219725 linc-63 T03F1.13 -0.153467124732725  
 AGIWUR21463  
 N2 HS I 3871474 3873428 WBGene00020191 clec-53 T03F1.10 0.0467135031569246  
 AGIWUR12742  
 N2 HS I 3874037 3875995 WBGene00020184 uba-5 T03F1.1 -0.0449807788036622  
 AGIWUR13281;AGIWUR14762;AGIWUR40606  
 N2 HS I 3875974 3876711 WBGene00020193 T03F1.12 T03F1.12 0.0361812714682159  
 AGIWUR6414;AGIWUR30180;AGIWUR33159;AGIWUR36650;AGIWUR37016  
 N2 HS I 3877063 3880747 WBGene00016837 C50F2.3 C50F2.3 0.178694541205832 AGIWUR4648  
 N2 HS I 3881816 3888313 WBGene00016836 C50F2.2 C50F2.2 -0.354749852661431 AGIWUR20836  
 N2 HS I 3888331 3891598 WBGene00016838 C50F2.4 C50F2.4 0.0731505967892758 AGIWUR21618  
 N2 HS I 3892332 3895271 WBGene00016835 C50F2.1 C50F2.1 0.174490720432126 AGIWUR30897  
 N2 HS I 3898046 3899840 WBGene00001430 fkb-5 C50F2.6 0.21212944982585



AGIWUR566;AGIWUR5699;AGIWUR6375;AGIWUR8997;AGIWUR14812;AGIWUR17905;AGIWUR26306  
 N2 HS I 3900407 3901437 WBGene00016840 C50F2.7 C50F2.7 -0.193055402765319 AGIWUR34430  
 N2 HS I 3901432 3905208 WBGene00016841 magu-3 C50F2.8 -0.248386392502434 AGIWUR10248  
 N2 HS I 3908747 3909701 WBGene00003950 pbs-4 T20F5.2 -0.0374673369529908  
 AGIWUR3637;AGIWUR19846;AGIWUR21083;AGIWUR23708;AGIWUR40592;AGIWUR43430  
 N2 HS I 3909629 3910544 WBGene00020625 mrrf-1 T20F5.3 0.120129157520067 AGIWUR14724  
 N2 HS I 3912635 3915458 WBGene00020626 T20F5.4 T20F5.4 -0.048706808004173 AGIWUR17512  
 N2 HS I 3916064 3916391 WBGene00023142 T20F5.1 T20F5.1 -0.112625426778965 AGIWUR5544  
 N2 HS I 3917911 3920172 WBGene00020627 T20F5.5 T20F5.5 -0.299298176782337 AGIWUR7752  
 N2 HS I 3920177 3925162 WBGene00020628 T20F5.6 T20F5.6 -0.230507534648948  
 AGIWUR29764;AGIWUR39526;AGIWUR41846  
 N2 HS I 3925434 3927887 WBGene00020629 T20F5.7 T20F5.7 -0.249676271877593  
 AGIWUR1843;AGIWUR5114;AGIWUR7038;AGIWUR9628;AGIWUR12435;AGIWUR24370;AGIWUR34443  
 N2 HS I 3930830 3931552 WBGene00020653 T21E3.2 T21E3.2 0.0588985355298028 AGIWUR6826  
 N2 HS I 3932210 3934813 WBGene00020652 egg-4 T21E3.1 0.0395363441617587 AGIWUR3682  
 N2 HS I 3935272 3953991 WBGene00003072 lrp-2 T21E3.3 -0.0364849729970858  
 AGIWUR29102;AGIWUR33825  
 N2 HS I 3968118 3970474 WBGene00018531 F47B3.7 F47B3.7 -0.210563975694789 AGIWUR2971  
 N2 HS I 3974063 3977351 WBGene00017909 F28H1.4 F28H1.4 -0.0513252867690923 AGIWUR4979  
 N2 HS I 3978493 3979538 WBGene00017910 F28H1.5 F28H1.5 -0.114878458467052 AGIWUR27721  
 N2 HS I 3983171 3986915 WBGene00000197 aars-2 F28H1.3 -0.230029324946895  
 AGIWUR5656;AGIWUR5960;AGIWUR22497;AGIWUR31140;AGIWUR35129;AGIWUR42993  
 N2 HS I 3987842 3988699 WBGene00000779 cpn-3 F28H1.2 0.00302463573543399 AGIWUR1643  
 N2 HS I 3995709 3996950 WBGene00017908 F28H1.1 F28H1.1 -0.0143441315221882  
 AGIWUR6699;AGIWUR23035;AGIWUR27226;AGIWUR33403;AGIWUR36968;AGIWUR44156;AGIWUR44775  
 N2 HS I 3999348 4031739 WBGene00006805 unc-73 F55C7.7 -0.102325893024442  
 AGIWUR1149;AGIWUR3451;AGIWUR8764;AGIWUR9185;AGIWUR9442;AGIWUR24092;AGIWUR29201;AGIWUR29929;AGIWUR30982;AGIWUR34557;AGIWUR35974;AGIWUR36594;AGIWUR42637  
 N2 HS I 4035702 4090884 WBGene00006820 unc-89 C09D1.1 -0.163025082763861  
 AGIWUR6300;AGIWUR7462;AGIWUR9086;AGIWUR10960;AGIWUR10976;AGIWUR12117;AGIWUR13718;AGIWUR19966;AGIWUR21298;AGIWUR28254;AGIWUR29472;AGIWUR32385;AGIWUR33294;AGIWUR33479;AGIWUR43580  
 N2 HS I 4094179 4098330 WBGene00016066 acd-2 C24G7.4 -0.0980344570623837 AGIWUR36711  
 N2 HS I 4103713 4108045 WBGene00016064 acd-1 C24G7.2 -0.00932112943053376  
 AGIWUR8785;AGIWUR10183  
 N2 HS I 4109407 4112385 WBGene00016063 delm-2 C24G7.1 -0.210295353607159  
 AGIWUR10048;AGIWUR20136  
 N2 HS I 4114734 4116370 WBGene00000867 cyb-2.2 H31G24.4 0.0924003287981758  
 AGIWUR32371  
 N2 HS I 4123481 4124723 WBGene00019253 H31G24.1 H31G24.1 -0.0486805609154928

AGIWUR24730

N2 HS I 4126056 4129307 WBGene00003029 lin-44 E01A2.3 0.105542751876463

AGIWUR3426;AGIWUR26281;AGIWUR28498;AGIWUR29789;AGIWUR34306;AGIWUR44057

N2 HS I 4129469 4132292 WBGene00002696 let-504 E01A2.4 0.0139238878003134 AGIWUR28032

N2 HS I 4132500 4135239 WBGene00017085 E01A2.2 E01A2.2 -0.0111011470257205

AGIWUR606;AGIWUR16300;AGIWUR28446;AGIWUR41107

N2 HS I 4135239 4137074 WBGene00017087 E01A2.5 E01A2.5 -0.414738927562562 AGIWUR9789

N2 HS I 4137134 4140634 WBGene00017088 akir-1 E01A2.6 -0.113209543196229 AGIWUR15450

N2 HS I 4139514 4142367 WBGene00017084 E01A2.1 E01A2.1 -0.2530444663674199 AGIWUR44336

N2 HS I 4148832 4149429 WBGene00020040 R12E2.15 R12E2.15 0.0297536598579233

AGIWUR12434;AGIWUR26472

N2 HS I 4151099 4151761 WBGene00020032 R12E2.6 R12E2.6 -0.198184145234613 AGIWUR21859

N2 HS I 4153957 4154550 WBGene00020033 R12E2.7 R12E2.7 0.39401627069628 AGIWUR14061

N2 HS I 4155542 4158733 WBGene00020034 R12E2.8 R12E2.8 -0.0147978732172405 AGIWUR2190

N2 HS I 4159014 4161149 WBGene00002137 inx-15 R12E2.9 0.171919080187369 AGIWUR34283

N2 HS I 4162035 4165015 WBGene00002138 inx-16 R12E2.5 0.268225813366481 AGIWUR26075

N2 HS I 4165135 4167229 WBGene00002139 inx-17 R12E2.4 0.290479500727481

AGIWUR9327;AGIWUR17226;AGIWUR20101;AGIWUR22560

N2 HS I 4172433 4173739 WBGene00020036 R12E2.11 R12E2.11 0.184236649501539

AGIWUR10106

N2 HS I 4173743 4174774 WBGene00020037 mrps-6 R12E2.12 0.184452271820362

AGIWUR38727

N2 HS I 4175319 4177271 WBGene00004464 rpn-8 R12E2.3 0.0457037086664611

AGIWUR18623;AGIWUR22338

N2 HS I 4177305 4178447 WBGene00020038 R12E2.13 R12E2.13 -0.170184302673379

AGIWUR3754;AGIWUR18414;AGIWUR22505;AGIWUR41014;AGIWUR42132

N2 HS I 4178812 4182158 WBGene00020031 suco-1 R12E2.2 -0.0713066025450519 AGIWUR2927

N2 HS I 4182221 4184992 WBGene00020030 R12E2.1 R12E2.1 0.0308973258279863 AGIWUR29439

N2 HS I 4190142 4193129 WBGene00015975 cas-2 C18E3.6 0.134924130352591 AGIWUR19315

N2 HS I 4193241 4203303 WBGene00015974 C18E3.5 C18E3.5 -0.0848926009817674 AGIWUR18123

N2 HS I 4203458 4208537 WBGene00015972 C18E3.3 C18E3.3 -0.387108478392491 AGIWUR9106

N2 HS I 4208515 4210341 WBGene00001985 hop-1 C18E3.8 -0.238241006722191 AGIWUR15216

N2 HS I 4210979 4212667 WBGene00015971 swsn-2.2 C18E3.2 -0.0804025871961205

AGIWUR22115

N2 HS I 4212708 4214317 WBGene00015970 C18E3.1 C18E3.1 -0.0620866247401448

AGIWUR5693;AGIWUR8501;AGIWUR13498

N2 HS I 4214294 4215768 WBGene00015976 C18E3.9 C18E3.9 0.217966074136996 AGIWUR20276

N2 HS I 4229577 4236039 WBGene00003516 nab-1 C43E11.6 -0.0844536853970812

AGIWUR2476;AGIWUR3623;AGIWUR14586;AGIWUR14740;AGIWUR15070;AGIWUR28263;AGIWUR34361;AGIWUR39076

|                                                                                    |    |   |         |         |                |           |           |                     |             |
|------------------------------------------------------------------------------------|----|---|---------|---------|----------------|-----------|-----------|---------------------|-------------|
| N2                                                                                 | HS | I | 4239088 | 4242727 | WBGene00003584 | ndx-7     | C43E11.7  | 0.0368417981036977  |             |
| AGIWUR3786                                                                         |    |   |         |         |                |           |           |                     |             |
| N2                                                                                 | HS | I | 4242821 | 4247582 | WBGene00016606 | exoc-7    | C43E11.8  | 0.186240416406712   |             |
| AGIWUR18146                                                                        |    |   |         |         |                |           |           |                     |             |
| N2                                                                                 | HS | I | 4247754 | 4249415 | WBGene00007001 | tufm-2    | C43E11.4  | 0.00380212670938818 |             |
| AGIWUR11352;AGIWUR18532;AGIWUR37882;AGIWUR40266                                    |    |   |         |         |                |           |           |                     |             |
| N2                                                                                 | HS | I | 4249482 | 4253170 | WBGene00016608 | cogc-5    | C43E11.11 | 0.10342580588182    |             |
| AGIWUR16563                                                                        |    |   |         |         |                |           |           |                     |             |
| N2                                                                                 | HS | I | 4253242 | 4254139 | WBGene00016609 | C43E11.12 | C43E11.12 | 0.121675569115792   |             |
| AGIWUR19632                                                                        |    |   |         |         |                |           |           |                     |             |
| N2                                                                                 | HS | I | 4254380 | 4264699 | WBGene00016603 | met-1     | C43E11.3  | 0.0426236117400354  |             |
| AGIWUR2423;AGIWUR5245;AGIWUR8984;AGIWUR14864;AGIWUR15911;AGIWUR26980;AGIWUR38107   |    |   |         |         |                |           |           |                     |             |
| N2                                                                                 | HS | I | 4265109 | 4267238 | WBGene00016602 | mus-81    | C43E11.2  | 0.139823283912488   |             |
| AGIWUR1293                                                                         |    |   |         |         |                |           |           |                     |             |
| N2                                                                                 | HS | I | 4267199 | 4267967 | WBGene00016607 | C43E11.9  | C43E11.9  | -0.0210120190768155 |             |
| AGIWUR3376;AGIWUR11694                                                             |    |   |         |         |                |           |           |                     |             |
| N2                                                                                 | HS | I | 4268070 | 4270287 | WBGene00000382 | cdc-6     | C43E11.10 | -0.0679635333432209 |             |
| AGIWUR23938                                                                        |    |   |         |         |                |           |           |                     |             |
| N2                                                                                 | HS | I | 4270697 | 4273332 | WBGene00016601 | acin-1    | C43E11.1  | 0.0062339745957356  |             |
| AGIWUR26821                                                                        |    |   |         |         |                |           |           |                     |             |
| N2                                                                                 | HS | I | 4273896 | 4274742 | WBGene00021631 | Y47D9A.4  | Y47D9A.4  | 0.151412298938022   |             |
| AGIWUR20658                                                                        |    |   |         |         |                |           |           |                     |             |
| N2                                                                                 | HS | I | 4277684 | 4279622 | WBGene00021632 | Y47D9A.5  | Y47D9A.5  | 0.0133204560625657  |             |
| AGIWUR13379                                                                        |    |   |         |         |                |           |           |                     |             |
| N2                                                                                 | HS | I | 4298184 | 4302243 | WBGene00021629 | scpl-3    | Y47D9A.2  | -0.256619010596031  |             |
| AGIWUR34572;AGIWUR41718                                                            |    |   |         |         |                |           |           |                     |             |
| N2                                                                                 | HS | I | 4303930 | 4308244 | WBGene00021628 | Y47D9A.1  | Y47D9A.1  | -0.453450239028443  |             |
| AGIWUR1935;AGIWUR8700;AGIWUR37027                                                  |    |   |         |         |                |           |           |                     |             |
| N2                                                                                 | HS | I | 4321095 | 4359080 | WBGene00000140 | anc-1     | ZK973.6   | -0.0605964419117324 |             |
| AGIWUR2453;AGIWUR11299;AGIWUR11875;AGIWUR21024;AGIWUR28673;AGIWUR37202;AGIWUR38158 |    |   |         |         |                |           |           |                     |             |
| N2                                                                                 | HS | I | 4359207 | 4362548 | WBGene00000045 | acr-6     | ZK973.5   | 0.112809657305856   | AGIWUR12825 |
| N2                                                                                 | HS | I | 4363415 | 4364048 | WBGene00022833 | ZK973.4   | ZK973.4   | 0.0463451926740177  | AGIWUR43472 |
| N2                                                                                 | HS | I | 4364906 | 4367049 | WBGene00022834 | ZK973.8   | ZK973.8   | -0.0768443070571845 | AGIWUR38768 |
| N2                                                                                 | HS | I | 4368089 | 4370504 | WBGene00022832 | pdp-1     | ZK973.3   | -0.0521336970824748 | AGIWUR38319 |
| N2                                                                                 | HS | I | 4370419 | 4372138 | WBGene00022835 | ZK973.9   | ZK973.9   | -0.105696791964332  | AGIWUR26896 |
| N2                                                                                 | HS | I | 4372255 | 4373018 | WBGene00003061 | lpd-5     | ZK973.10  | 0.255926225714322   |             |
| AGIWUR9768                                                                         |    |   |         |         |                |           |           |                     |             |
| N2                                                                                 | HS | I | 4373656 | 4379329 | WBGene00022831 | cec-10    | ZK973.2   | -0.244929379055561  | AGIWUR11355 |
| N2                                                                                 | HS | I | 4379325 | 4381948 | WBGene00022836 | ZK973.11  | ZK973.11  | -0.18379972447492   |             |

|                                                                        |    |   |         |         |                |            |            |                     |             |
|------------------------------------------------------------------------|----|---|---------|---------|----------------|------------|------------|---------------------|-------------|
| AGIWUR40438                                                            |    |   |         |         |                |            |            |                     |             |
| N2                                                                     | HS | I | 4382565 | 4385218 | WBGene00022830 | ZK973.1    | ZK973.1    | 0.132583322365832   | AGIWUR15329 |
| N2                                                                     | HS | I | 4386785 | 4401980 | WBGene00000962 | dhc-1      | T21E12.4   | 0.0192976044379503  |             |
| AGIWUR25546;AGIWUR28865                                                |    |   |         |         |                |            |            |                     |             |
| N2                                                                     | HS | I | 4401956 | 4404585 | WBGene00020655 | T21E12.3   | T21E12.3   | 0.0923455085538105  |             |
| AGIWUR37344                                                            |    |   |         |         |                |            |            |                     |             |
| N2                                                                     | HS | I | 4409689 | 4426137 | WBGene00015704 | tiam-1     | C11D9.1    | -0.147535454793891  |             |
| AGIWUR16;AGIWUR16270                                                   |    |   |         |         |                |            |            |                     |             |
| N2                                                                     | HS | I | 4428467 | 4444342 | WBGene00016562 | C41D11.3   | C41D11.3   | -0.0197925455907786 |             |
| AGIWUR18411;AGIWUR25427;AGIWUR32861;AGIWUR34009                        |    |   |         |         |                |            |            |                     |             |
| N2                                                                     | HS | I | 4444719 | 4446598 | WBGene00001231 | eif-3.H    | C41D11.2   | 0.177440208423782   |             |
| AGIWUR21203                                                            |    |   |         |         |                |            |            |                     |             |
| N2                                                                     | HS | I | 4446577 | 4448461 | WBGene00000787 | cps-6      | C41D11.8   | 0.0993169376273197  |             |
| AGIWUR1461;AGIWUR12582;AGIWUR32366                                     |    |   |         |         |                |            |            |                     |             |
| N2                                                                     | HS | I | 4448576 | 4449774 | WBGene00016567 | C41D11.9   | C41D11.9   | -0.451814396875671  |             |
| AGIWUR9473                                                             |    |   |         |         |                |            |            |                     |             |
| N2                                                                     | HS | I | 4449879 | 4450927 | WBGene00016564 | cmt-1      | C41D11.5   | -0.0320248599154667 |             |
| AGIWUR43287                                                            |    |   |         |         |                |            |            |                     |             |
| N2                                                                     | HS | I | 4451200 | 4456805 | WBGene00016566 | eri-7      | C41D11.7   | 0.309698970262044   |             |
| AGIWUR27075                                                            |    |   |         |         |                |            |            |                     |             |
| N2                                                                     | HS | I | 4457383 | 4469461 | WBGene00016561 | eri-6      | C41D11.1   | -0.196031602603153  |             |
| AGIWUR9474;AGIWUR15095;AGIWUR33241                                     |    |   |         |         |                |            |            |                     |             |
| N2                                                                     | HS | I | 4481203 | 4508930 | WBGene00020131 | gcy-28     | T01A4.1    | -0.153419463911962  |             |
| AGIWUR8023;AGIWUR9811;AGIWUR10432;AGIWUR11693;AGIWUR25389;AGIWUR29324  |    |   |         |         |                |            |            |                     |             |
| N2                                                                     | HS | I | 4508917 | 4511126 | WBGene00022470 | mrpl-19    | Y119C1B.4  | 0.348249175795004   |             |
| AGIWUR28354                                                            |    |   |         |         |                |            |            |                     |             |
| N2                                                                     | HS | I | 4511440 | 4516512 | WBGene00022471 | Y119C1B.5  | Y119C1B.5  | 0.166388770180884   |             |
| AGIWUR39560                                                            |    |   |         |         |                |            |            |                     |             |
| N2                                                                     | HS | I | 4517260 | 4518491 | WBGene00022472 | Y119C1B.6  | Y119C1B.6  | -0.0146721166691051 |             |
| AGIWUR7587;AGIWUR14994;AGIWUR16399;AGIWUR27205;AGIWUR37427;AGIWUR38985 |    |   |         |         |                |            |            |                     |             |
| N2                                                                     | HS | I | 4520070 | 4522768 | WBGene00044754 | Y119C1B.12 | Y119C1B.12 | -0.0386797970511648 |             |
| AGIWUR5460;AGIWUR27225;AGIWUR42488                                     |    |   |         |         |                |            |            |                     |             |
| N2                                                                     | HS | I | 4526232 | 4534798 | WBGene00022473 | bet-1      | Y119C1B.8  | -0.147720905462929  |             |
| AGIWUR1031;AGIWUR3966;AGIWUR43474                                      |    |   |         |         |                |            |            |                     |             |
| N2                                                                     | HS | I | 4537449 | 4539725 | WBGene00022474 | zig-9      | Y119C1B.9  | 0.0244848055720404  |             |
| AGIWUR17606                                                            |    |   |         |         |                |            |            |                     |             |
| N2                                                                     | HS | I | 4549695 | 4552758 | WBGene00022469 | Y119C1B.3  | Y119C1B.3  | 0.171766366737655   |             |
| AGIWUR19268                                                            |    |   |         |         |                |            |            |                     |             |
| N2                                                                     | HS | I | 4552851 | 4553121 | WBGene00044441 | Y119C1B.11 | Y119C1B.11 | 0.0896827368845443  |             |

AGIWUR4602;AGIWUR7834;AGIWUR9928;AGIWUR28645;AGIWUR31236

|                                                                                                                                              |    |   |         |         |                |            |            |                                |
|----------------------------------------------------------------------------------------------------------------------------------------------|----|---|---------|---------|----------------|------------|------------|--------------------------------|
| N2                                                                                                                                           | HS | I | 4554126 | 4555203 | WBGene00022467 | Y119C1B.1  | Y119C1B.1  |                                |
| 0.000835820857496117 AGIWUR24218                                                                                                             |    |   |         |         |                |            |            |                                |
| N2                                                                                                                                           | HS | I | 4555343 | 4556814 | WBGene00022475 | Y119C1B.10 | Y119C1B.10 | 0.0238953310778438             |
| AGIWUR39830                                                                                                                                  |    |   |         |         |                |            |            |                                |
| N2                                                                                                                                           | HS | I | 4557664 | 4563694 | WBGene00017010 | D1007.15   | D1007.15   | -0.218008199562605             |
| AGIWUR9638                                                                                                                                   |    |   |         |         |                |            |            |                                |
| N2                                                                                                                                           | HS | I | 4564035 | 4565976 | WBGene00004113 | pqn-24     | D1007.14   | 0.00293546613056961            |
| AGIWUR5942                                                                                                                                   |    |   |         |         |                |            |            |                                |
| N2                                                                                                                                           | HS | I | 4566495 | 4568385 | WBGene00017009 | D1007.13   | D1007.13   | 0.122114489242415              |
| AGIWUR36815                                                                                                                                  |    |   |         |         |                |            |            |                                |
| N2                                                                                                                                           | HS | I | 4568962 | 4570027 | WBGene00000440 | ceh-17     | D1007.1    | -0.046580330516349 AGIWUR7465  |
| N2                                                                                                                                           | HS | I | 4571214 | 4572787 | WBGene00000629 | col-52     | D1007.2    | -0.128837089331446 AGIWUR32251 |
| N2                                                                                                                                           | HS | I | 4575782 | 4577204 | WBGene00017001 | D1007.3    | D1007.3    | 0.128500800848617 AGIWUR11775  |
| N2                                                                                                                                           | HS | I | 4578695 | 4579740 | WBGene00044421 | D1007.18   | D1007.18   | 0.126066957863409              |
| AGIWUR1057;AGIWUR2948;AGIWUR11364;AGIWUR23273;AGIWUR28118                                                                                    |    |   |         |         |                |            |            |                                |
| N2                                                                                                                                           | HS | I | 4579964 | 4580601 | WBGene00017002 | D1007.4    | D1007.4    | 0.326868067428611 AGIWUR33335  |
| N2                                                                                                                                           | HS | I | 4580692 | 4583810 | WBGene00017003 | D1007.5    | D1007.5    | -0.135673652537321             |
| AGIWUR6591;AGIWUR13479                                                                                                                       |    |   |         |         |                |            |            |                                |
| N2                                                                                                                                           | HS | I | 4583873 | 4584505 | WBGene00004479 | rps-10     | D1007.6    | 0.387898991637329              |
| AGIWUR23072;AGIWUR34651                                                                                                                      |    |   |         |         |                |            |            |                                |
| N2                                                                                                                                           | HS | I | 4585115 | 4586177 | WBGene00004436 | rpl-24.1   | D1007.12   | -0.318319888187023             |
| AGIWUR2234;AGIWUR7117;AGIWUR7732;AGIWUR16379;AGIWUR17943;AGIWUR18712;AGIWUR21241;AGIWUR28846;AGIWUR31144;AGIWUR31405;AGIWUR32422;AGIWUR32535 |    |   |         |         |                |            |            |                                |
| N2                                                                                                                                           | HS | I | 4586273 | 4589463 | WBGene00017007 | D1007.10   | D1007.10   | 0.101985478979011              |
| AGIWUR22139;AGIWUR22225                                                                                                                      |    |   |         |         |                |            |            |                                |
| N2                                                                                                                                           | HS | I | 4589380 | 4589899 | WBGene00045048 | D1007.19   | D1007.19   | 0.0840222276276457             |
| AGIWUR9696;AGIWUR15492;AGIWUR15856;AGIWUR24796;AGIWUR32400                                                                                   |    |   |         |         |                |            |            |                                |
| N2                                                                                                                                           | HS | I | 4590430 | 4591587 | WBGene00017006 | D1007.9    | D1007.9    | 0.112546825810266 AGIWUR6994   |
| N2                                                                                                                                           | HS | I | 4597914 | 4602666 | WBGene00017004 | nrd-1      | D1007.7    | 0.0647130462168235             |
| AGIWUR12783;AGIWUR16196;AGIWUR18660;AGIWUR21356;AGIWUR22525;AGIWUR37310                                                                      |    |   |         |         |                |            |            |                                |
| N2                                                                                                                                           | HS | I | 4603217 | 4604196 | WBGene00017011 | eaf-1      | D1007.16   | -0.0702227824359412            |
| AGIWUR42215                                                                                                                                  |    |   |         |         |                |            |            |                                |
| N2                                                                                                                                           | HS | I | 4604175 | 4605385 | WBGene00017005 | D1007.8    | D1007.8    | 0.295475420528891 AGIWUR31149  |
| N2                                                                                                                                           | HS | I | 4605655 | 4610202 | WBGene00016654 | C44E4.5    | C44E4.5    | -0.0958517951126154            |
| AGIWUR38528;AGIWUR40268                                                                                                                      |    |   |         |         |                |            |            |                                |
| N2                                                                                                                                           | HS | I | 4610147 | 4633377 | WBGene00016650 | ubr-4      | C44E4.1    | 0.0196451660056685             |
| AGIWUR26053;AGIWUR26807;AGIWUR44636                                                                                                          |    |   |         |         |                |            |            |                                |
| N2                                                                                                                                           | HS | I | 4634103 | 4635620 | WBGene00016653 | C44E4.4    | C44E4.4    | -0.0801692680464567            |

AGIWUR10614;AGIWUR20679

|    |    |   |         |         |                |           |           |                     |             |
|----|----|---|---------|---------|----------------|-----------|-----------|---------------------|-------------|
| N2 | HS | I | 4635722 | 4637328 | WBGene00016655 | acbp-1    | C44E4.6   | 0.1082700540491     | AGIWUR39810 |
| N2 | HS | I | 4637432 | 4640882 | WBGene00016652 | got-2.1   | C44E4.3   | -0.0830510405973293 | AGIWUR9876  |
| N2 | HS | I | 4641003 | 4644069 | WBGene00022466 | Y119C1A.1 | Y119C1A.1 | -0.0943559045144635 |             |

AGIWUR36777

|    |    |   |         |         |                |       |         |                    |             |
|----|----|---|---------|---------|----------------|-------|---------|--------------------|-------------|
| N2 | HS | I | 4644677 | 4645657 | WBGene00015008 | lmd-2 | B0041.3 | 0.172270925245421  | AGIWUR22463 |
| N2 | HS | I | 4645641 | 4646963 | WBGene00004415 | rp1-4 | B0041.4 | -0.193915827479868 |             |

AGIWUR1725;AGIWUR9422;AGIWUR14581;AGIWUR19810;AGIWUR33413;AGIWUR42912

|    |    |   |         |         |                |         |         |                    |  |
|----|----|---|---------|---------|----------------|---------|---------|--------------------|--|
| N2 | HS | I | 4647280 | 4648275 | WBGene00015011 | B0041.8 | B0041.8 | 0.0432215567475662 |  |
|----|----|---|---------|---------|----------------|---------|---------|--------------------|--|

AGIWUR864;AGIWUR12611;AGIWUR13671;AGIWUR30350

|    |    |   |         |         |                |         |         |                    |             |
|----|----|---|---------|---------|----------------|---------|---------|--------------------|-------------|
| N2 | HS | I | 4648272 | 4650770 | WBGene00015009 | B0041.5 | B0041.5 | -0.224928833873278 | AGIWUR43682 |
|----|----|---|---------|---------|----------------|---------|---------|--------------------|-------------|

|    |    |   |         |         |                |        |         |                   |  |
|----|----|---|---------|---------|----------------|--------|---------|-------------------|--|
| N2 | HS | I | 4652145 | 4652906 | WBGene00015010 | ptps-1 | B0041.6 | 0.141096513271703 |  |
|----|----|---|---------|---------|----------------|--------|---------|-------------------|--|

AGIWUR1589;AGIWUR18373;AGIWUR27336;AGIWUR28856;AGIWUR39809;AGIWUR42507

|    |    |   |         |         |                |       |         |                     |  |
|----|----|---|---------|---------|----------------|-------|---------|---------------------|--|
| N2 | HS | I | 4653471 | 4660151 | WBGene00015007 | ain-2 | B0041.2 | -0.0681168781243389 |  |
|----|----|---|---------|---------|----------------|-------|---------|---------------------|--|

AGIWUR108;AGIWUR2251;AGIWUR8966;AGIWUR12167;AGIWUR12517;AGIWUR13698;AGIWUR29300;AGIWUR30748;AGIWUR30865;AGIWUR32722

|    |    |   |         |         |                |       |         |                     |  |
|----|----|---|---------|---------|----------------|-------|---------|---------------------|--|
| N2 | HS | I | 4665744 | 4671738 | WBGene00006961 | xnp-1 | B0041.7 | -0.0863661175476937 |  |
|----|----|---|---------|---------|----------------|-------|---------|---------------------|--|

AGIWUR6803;AGIWUR7645;AGIWUR8360;AGIWUR9104;AGIWUR18059;AGIWUR25526;AGIWUR26185;AGIWUR26197;AGIWUR32396;AGIWUR34797;AGIWUR35523;AGIWUR41946

|    |    |   |         |         |                |        |         |                   |  |
|----|----|---|---------|---------|----------------|--------|---------|-------------------|--|
| N2 | HS | I | 4675135 | 4679409 | WBGene00006791 | unc-57 | T04D1.3 | 0.067235130294593 |  |
|----|----|---|---------|---------|----------------|--------|---------|-------------------|--|

AGIWUR19596;AGIWUR20386;AGIWUR30589

|    |    |   |         |         |                |         |         |                   |             |
|----|----|---|---------|---------|----------------|---------|---------|-------------------|-------------|
| N2 | HS | I | 4679671 | 4682755 | WBGene00020212 | T04D1.2 | T04D1.2 | 0.302183017888325 | AGIWUR20292 |
|----|----|---|---------|---------|----------------|---------|---------|-------------------|-------------|

|    |    |   |         |         |                |       |         |                    |             |
|----|----|---|---------|---------|----------------|-------|---------|--------------------|-------------|
| N2 | HS | I | 4685865 | 4698575 | WBGene00007053 | chd-7 | T04D1.4 | -0.248922279742104 | AGIWUR42196 |
|----|----|---|---------|---------|----------------|-------|---------|--------------------|-------------|

|    |    |   |         |         |                |         |         |                   |            |
|----|----|---|---------|---------|----------------|---------|---------|-------------------|------------|
| N2 | HS | I | 4704598 | 4705881 | WBGene00021112 | W09C3.4 | W09C3.4 | 0.104206216112027 | AGIWUR1005 |
|----|----|---|---------|---------|----------------|---------|---------|-------------------|------------|

|    |    |   |         |         |                |         |         |                   |             |
|----|----|---|---------|---------|----------------|---------|---------|-------------------|-------------|
| N2 | HS | I | 4706682 | 4708762 | WBGene00021111 | W09C3.3 | W09C3.3 | 0.211047316157687 | AGIWUR16434 |
|----|----|---|---------|---------|----------------|---------|---------|-------------------|-------------|

|    |    |   |         |         |                |       |         |                    |  |
|----|----|---|---------|---------|----------------|-------|---------|--------------------|--|
| N2 | HS | I | 4709262 | 4710712 | WBGene00021113 | gsp-3 | W09C3.6 | -0.110067564160715 |  |
|----|----|---|---------|---------|----------------|-------|---------|--------------------|--|

AGIWUR17793;AGIWUR31790

|    |    |   |         |         |                |         |         |                    |             |
|----|----|---|---------|---------|----------------|---------|---------|--------------------|-------------|
| N2 | HS | I | 4711414 | 4713572 | WBGene00021110 | W09C3.2 | W09C3.2 | -0.035455637446967 | AGIWUR13150 |
|----|----|---|---------|---------|----------------|---------|---------|--------------------|-------------|

|    |    |   |         |         |                |         |         |                   |             |
|----|----|---|---------|---------|----------------|---------|---------|-------------------|-------------|
| N2 | HS | I | 4714320 | 4715485 | WBGene00021114 | W09C3.7 | W09C3.7 | 0.111706186233111 | AGIWUR37490 |
|----|----|---|---------|---------|----------------|---------|---------|-------------------|-------------|

|    |    |   |         |         |                |         |         |                   |            |
|----|----|---|---------|---------|----------------|---------|---------|-------------------|------------|
| N2 | HS | I | 4716059 | 4717441 | WBGene00021115 | W09C3.8 | W09C3.8 | 0.113219045747243 | AGIWUR9668 |
|----|----|---|---------|---------|----------------|---------|---------|-------------------|------------|

|    |    |   |         |         |                |          |          |                   |  |
|----|----|---|---------|---------|----------------|----------|----------|-------------------|--|
| N2 | HS | I | 4719789 | 4721098 | WBGene00015696 | C10H11.7 | C10H11.7 | 0.285997679056599 |  |
|----|----|---|---------|---------|----------------|----------|----------|-------------------|--|

AGIWUR22151

|    |    |   |         |         |                |        |          |                     |  |
|----|----|---|---------|---------|----------------|--------|----------|---------------------|--|
| N2 | HS | I | 4721131 | 4723960 | WBGene00015695 | ugt-26 | C10H11.6 | -0.0645296621725215 |  |
|----|----|---|---------|---------|----------------|--------|----------|---------------------|--|

AGIWUR8772

|    |    |   |         |         |                |        |          |                     |  |
|----|----|---|---------|---------|----------------|--------|----------|---------------------|--|
| N2 | HS | I | 4724065 | 4726779 | WBGene00015694 | ugt-27 | C10H11.5 | -0.0783697909390337 |  |
|----|----|---|---------|---------|----------------|--------|----------|---------------------|--|

AGIWUR3550;AGIWUR34887;AGIWUR35735

|    |    |   |         |         |                |        |          |                     |  |
|----|----|---|---------|---------|----------------|--------|----------|---------------------|--|
| N2 | HS | I | 4727280 | 4730366 | WBGene00015693 | ugt-28 | C10H11.4 | -0.0429848026616386 |  |
|----|----|---|---------|---------|----------------|--------|----------|---------------------|--|

AGIWUR10641;AGIWUR42541

|    |    |   |         |         |                |        |          |                    |  |
|----|----|---|---------|---------|----------------|--------|----------|--------------------|--|
| N2 | HS | I | 4731603 | 4735276 | WBGene00015692 | ugt-25 | C10H11.3 | -0.192564841060879 |  |
|----|----|---|---------|---------|----------------|--------|----------|--------------------|--|

|                                                                       |    |   |         |         |                |          |           |                      |             |
|-----------------------------------------------------------------------|----|---|---------|---------|----------------|----------|-----------|----------------------|-------------|
| AGIWUR33026                                                           |    |   |         |         |                |          |           |                      |             |
| N2                                                                    | HS | I | 4735471 | 4738100 | WBGene00015697 | mlst-8   | C10H11.8  | -0.0850777422589548  |             |
| AGIWUR33168                                                           |    |   |         |         |                |          |           |                      |             |
| N2                                                                    | HS | I | 4738171 | 4744321 | WBGene00002694 | let-502  | C10H11.9  | -0.0492864176966936  |             |
| AGIWUR13661;AGIWUR36987                                               |    |   |         |         |                |          |           |                      |             |
| N2                                                                    | HS | I | 4747490 | 4759601 | WBGene00015691 | viln-1   | C10H11.1  | 0.218388604017816    |             |
| AGIWUR26405                                                           |    |   |         |         |                |          |           |                      |             |
| N2                                                                    | HS | I | 4759820 | 4761321 | WBGene00015698 | kca-1    | C10H11.10 | -0.356949000754283   |             |
| AGIWUR10472;AGIWUR41596                                               |    |   |         |         |                |          |           |                      |             |
| N2                                                                    | HS | I | 4769694 | 4771358 | WBGene00019767 | rpa-2    | M04F3.1   | -0.0703949549394558  | AGIWUR40091 |
| N2                                                                    | HS | I | 4771348 | 4773673 | WBGene00019770 | M04F3.4  | M04F3.4   | -0.062606076783819   |             |
| AGIWUR6019;AGIWUR14997;AGIWUR27654;AGIWUR28372;AGIWUR32364            |    |   |         |         |                |          |           |                      |             |
| N2                                                                    | HS | I | 4773818 | 4788358 | WBGene00019771 | M04F3.5  | M04F3.5   | -0.0776104642004309  |             |
| AGIWUR32895;AGIWUR36661                                               |    |   |         |         |                |          |           |                      |             |
| N2                                                                    | HS | I | 4789190 | 4789592 | WBGene00023067 | rp1-41.1 | F54D7.6   | -0.00557755503300505 |             |
| AGIWUR16924                                                           |    |   |         |         |                |          |           |                      |             |
| N2                                                                    | HS | I | 4790292 | 4790649 | WBGene00023068 | rp1-41.2 | F54D7.7   | -0.00293054362801115 |             |
| AGIWUR5284;AGIWUR28223                                                |    |   |         |         |                |          |           |                      |             |
| N2                                                                    | HS | I | 4790644 | 4792560 | WBGene00006984 | zig-7    | F54D7.4   | 0.0657045438365138   | AGIWUR1938  |
| N2                                                                    | HS | I | 4800043 | 4804268 | WBGene00018798 | gnrr-1   | F54D7.3   | 0.0323508508431054   | AGIWUR35863 |
| N2                                                                    | HS | I | 4805607 | 4809674 | WBGene00018797 | F54D7.2  | F54D7.2   | -0.0452000894783433  |             |
| AGIWUR13252;AGIWUR32663;AGIWUR38228;AGIWUR41575                       |    |   |         |         |                |          |           |                      |             |
| N2                                                                    | HS | I | 4821933 | 4824811 | WBGene00019012 | F57C9.6  | F57C9.6   | 0.234181976182406    | AGIWUR8277  |
| N2                                                                    | HS | I | 4824921 | 4826633 | WBGene00019013 | tofu-4   | F57C9.7   | 0.177572474392909    |             |
| AGIWUR17499;AGIWUR26308                                               |    |   |         |         |                |          |           |                      |             |
| N2                                                                    | HS | I | 4827072 | 4829794 | WBGene00002034 | htp-3    | F57C9.5   | -0.0437326941759757  | AGIWUR12950 |
| N2                                                                    | HS | I | 4830135 | 4835619 | WBGene00019011 | F57C9.4  | F57C9.4   | 0.0858211625937173   |             |
| AGIWUR3295;AGIWUR5793;AGIWUR12169;AGIWUR24527;AGIWUR27565;AGIWUR37268 |    |   |         |         |                |          |           |                      |             |
| N2                                                                    | HS | I | 4836187 | 4844966 | WBGene00019010 | glo-2    | F57C9.3   | 0.123403996897979    | AGIWUR34322 |
| N2                                                                    | HS | I | 4845013 | 4847336 | WBGene00019009 | clcc-90  | F57C9.2   | -0.0860175741370952  |             |
| AGIWUR3253;AGIWUR3898;AGIWUR4431;AGIWUR28280;AGIWUR28715;AGIWUR32897  |    |   |         |         |                |          |           |                      |             |
| N2                                                                    | HS | I | 4848425 | 4850717 | WBGene00019008 | pdxk-1   | F57C9.1   | -0.113918353492709   |             |
| AGIWUR4151;AGIWUR8744;AGIWUR38672;AGIWUR42153;AGIWUR43420;AGIWUR43542 |    |   |         |         |                |          |           |                      |             |
| N2                                                                    | HS | I | 4850682 | 4867825 | WBGene00015303 | rga-6    | C01F4.2   | -0.228225108264625   |             |
| AGIWUR6175;AGIWUR8844                                                 |    |   |         |         |                |          |           |                      |             |
| N2                                                                    | HS | I | 4884903 | 4895495 | WBGene00017795 | F25F8.1  | F25F8.1   | 0.0424970296149016   | AGIWUR32285 |
| N2                                                                    | HS | I | 4896003 | 4897541 | WBGene00017674 | F21F3.4  | F21F3.4   | 0.188077787517987    | AGIWUR17618 |
| N2                                                                    | HS | I | 4897620 | 4900977 | WBGene00006774 | unc-38   | F21F3.5   | 0.0854097893358308   | AGIWUR19032 |
| N2                                                                    | HS | I | 4901918 | 4903264 | WBGene00017673 | icmt-1   | F21F3.3   | -0.174469298922933   | AGIWUR10653 |

|                                                                                                |    |   |         |         |                |          |          |                     |             |
|------------------------------------------------------------------------------------------------|----|---|---------|---------|----------------|----------|----------|---------------------|-------------|
| N2                                                                                             | HS | I | 4903437 | 4905138 | WBGene00017672 | F21F3.2  | F21F3.2  | 0.0422571836293493  | AGIWUR36704 |
| N2                                                                                             | HS | I | 4906786 | 4911829 | WBGene00017671 | pgal-1   | F21F3.1  | 0.0129262236530128  |             |
| AGIWUR10360;AGIWUR11221;AGIWUR39787                                                            |    |   |         |         |                |          |          |                     |             |
| N2                                                                                             | HS | I | 4911805 | 4914047 | WBGene00017675 | F21F3.6  | F21F3.6  | -0.148742050533413  |             |
| AGIWUR6443;AGIWUR19391;AGIWUR23423;AGIWUR28728                                                 |    |   |         |         |                |          |          |                     |             |
| N2                                                                                             | HS | I | 4918372 | 4920770 | WBGene00017676 | F21F3.7  | F21F3.7  | -0.0270337476359095 |             |
| AGIWUR4819;AGIWUR10338;AGIWUR11236;AGIWUR12715;AGIWUR18328;AGIWUR22480;AGIWUR36384;AGIWUR42305 |    |   |         |         |                |          |          |                     |             |
| N2                                                                                             | HS | I | 4920707 | 4926233 | WBGene00002075 | imb-1    | F28B3.8  | -0.0318230313677095 |             |
| AGIWUR17237;AGIWUR19494;AGIWUR21477;AGIWUR23298;AGIWUR26174;AGIWUR40448                        |    |   |         |         |                |          |          |                     |             |
| N2                                                                                             | HS | I | 4926592 | 4928840 | WBGene00017886 | F28B3.5  | F28B3.5  | 0.151414243628552   |             |
| AGIWUR3834;AGIWUR29211                                                                         |    |   |         |         |                |          |          |                     |             |
| N2                                                                                             | HS | I | 4928654 | 4932147 | WBGene00017888 | acl-11   | F28B3.9  | 0.0858035934668635  | AGIWUR26348 |
| N2                                                                                             | HS | I | 4934118 | 4949332 | WBGene00017885 | dip-2    | F28B3.4  | -0.0788697118641148 |             |
| AGIWUR3431;AGIWUR18607;AGIWUR29662;AGIWUR33088;AGIWUR34513;AGIWUR42148                         |    |   |         |         |                |          |          |                     |             |
| N2                                                                                             | HS | I | 4949327 | 4950410 | WBGene00017889 | F28B3.10 | F28B3.10 | 0.151909251313359   |             |
| AGIWUR37298                                                                                    |    |   |         |         |                |          |          |                     |             |
| N2                                                                                             | HS | I | 4950583 | 4951550 | WBGene00017887 | F28B3.6  | F28B3.6  | 0.127858852236937   |             |
| AGIWUR14419;AGIWUR15223;AGIWUR19224;AGIWUR29297;AGIWUR31798;AGIWUR41653                        |    |   |         |         |                |          |          |                     |             |
| N2                                                                                             | HS | I | 4951570 | 4957667 | WBGene00001860 | him-1    | F28B3.7  | -0.044487646399336  | AGIWUR5462  |
| N2                                                                                             | HS | I | 4957776 | 4958309 | WBGene00044431 | W03G9.8  | W03G9.8  | 0.116262333265421   |             |
| AGIWUR521;AGIWUR2774;AGIWUR10077;AGIWUR19733;AGIWUR42359                                       |    |   |         |         |                |          |          |                     |             |
| N2                                                                                             | HS | I | 4962451 | 4964745 | WBGene00021014 | W03G9.2  | W03G9.2  | -0.08259176558823   | AGIWUR17245 |
| N2                                                                                             | HS | I | 4964667 | 4967089 | WBGene00000155 | app-1    | W03G9.4  | -0.0551898883299735 | AGIWUR31837 |
| N2                                                                                             | HS | I | 4968007 | 4970245 | WBGene00021016 | W03G9.5  | W03G9.5  | 0.169141434946273   | AGIWUR898   |
| N2                                                                                             | HS | I | 4969923 | 4972243 | WBGene00044432 | W03G9.9  | W03G9.9  | -0.0938444180766966 |             |
| AGIWUR4097;AGIWUR15675                                                                         |    |   |         |         |                |          |          |                     |             |
| N2                                                                                             | HS | I | 4980307 | 4983958 | WBGene00004900 | snf-1    | W03G9.1  | -0.263957109030443  | AGIWUR37640 |
| N2                                                                                             | HS | I | 4984760 | 4986739 | WBGene00003906 | paf-1    | W03G9.6  | 0.33647882523772    | AGIWUR30136 |
| N2                                                                                             | HS | I | 4986954 | 4989454 | WBGene00021017 | cil-7    | W03G9.7  | 0.0292234154108684  | AGIWUR41717 |
| N2                                                                                             | HS | I | 4989568 | 4994675 | WBGene00001117 | dyf-1    | F54C1.5  | 0.104840081414571   | AGIWUR4202  |
| N2                                                                                             | HS | I | 4996839 | 5003161 | WBGene00003221 | mes-3    | F54C1.3  | 0.126001909738626   |             |
| AGIWUR28141;AGIWUR30866;AGIWUR40884                                                            |    |   |         |         |                |          |          |                     |             |
| N2                                                                                             | HS | I | 5003351 | 5005163 | WBGene00001050 | dom-3    | F54C1.2  | 0.0659884635125962  | AGIWUR4782  |
| N2                                                                                             | HS | I | 5004924 | 5006057 | WBGene00018792 | F54C1.8  | F54C1.8  | -0.13114517287552   |             |
| AGIWUR8345;AGIWUR9536;AGIWUR21501;AGIWUR36845                                                  |    |   |         |         |                |          |          |                     |             |
| N2                                                                                             | HS | I | 5006706 | 5007991 | WBGene00006058 | sst-20   | F54C1.9  | -0.258234733822167  | AGIWUR11233 |
| N2                                                                                             | HS | I | 5008770 | 5013581 | WBGene00018789 | F54C1.1  | F54C1.1  | 0.309816631016313   | AGIWUR29730 |
| N2                                                                                             | HS | I | 5014351 | 5016260 | WBGene00018791 | F54C1.6  | F54C1.6  | -0.116224157020232  | AGIWUR27151 |
| N2                                                                                             | HS | I | 5018770 | 5020166 | WBGene00003934 | pat-10   | F54C1.7  | 0.0614338529742806  |             |



|                                                                        |    |   |         |         |                |            |            |                                  |
|------------------------------------------------------------------------|----|---|---------|---------|----------------|------------|------------|----------------------------------|
| AGIWUR6495;AGIWUR16624;AGIWUR26202;AGIWUR38199                         |    |   |         |         |                |            |            |                                  |
| N2                                                                     | HS | I | 5020748 | 5023210 | WBGene00016730 | C46H11.6   | C46H11.6   | 0.161167898710499                |
| AGIWUR39021                                                            |    |   |         |         |                |            |            |                                  |
| N2                                                                     | HS | I | 5023889 | 5041149 | WBGene00002979 | lfe-2      | C46H11.4   | -0.075634169893009               |
| AGIWUR527;AGIWUR15498;AGIWUR15600;AGIWUR22329;AGIWUR39734              |    |   |         |         |                |            |            |                                  |
| N2                                                                     | HS | I | 5041492 | 5042055 | WBGene00016729 | C46H11.3   | C46H11.3   | -0.0620045512421168              |
| AGIWUR2153;AGIWUR17010;AGIWUR19831;AGIWUR31265;AGIWUR41786             |    |   |         |         |                |            |            |                                  |
| N2                                                                     | HS | I | 5042102 | 5043453 | WBGene00016731 | C46H11.7   | C46H11.7   | 0.211048243054037                |
| AGIWUR10507                                                            |    |   |         |         |                |            |            |                                  |
| N2                                                                     | HS | I | 5044201 | 5045720 | WBGene00016732 | phat-1     | C46H11.8   | -0.0115706803022597              |
| AGIWUR10717                                                            |    |   |         |         |                |            |            |                                  |
| N2                                                                     | HS | I | 5050040 | 5052523 | WBGene00016728 | C46H11.2   | C46H11.2   | 0.0159729602341852               |
| AGIWUR43572                                                            |    |   |         |         |                |            |            |                                  |
| N2                                                                     | HS | I | 5052529 | 5054960 | WBGene00016734 | C46H11.10  | C46H11.10  | 0.196065599707091                |
| AGIWUR25478                                                            |    |   |         |         |                |            |            |                                  |
| N2                                                                     | HS | I | 5055686 | 5056039 | WBGene00016727 | C46H11.1   | C46H11.1   | 0.0021364842930387               |
| AGIWUR1249;AGIWUR10642;AGIWUR11922;AGIWUR15339;AGIWUR28513;AGIWUR41170 |    |   |         |         |                |            |            |                                  |
| N2                                                                     | HS | I | 5058251 | 5068829 | WBGene00016735 | fhod-1     | C46H11.11  | -0.0654210436653777              |
| AGIWUR2364                                                             |    |   |         |         |                |            |            |                                  |
| N2                                                                     | HS | I | 5079911 | 5082279 | WBGene00016258 | vha-16     | C30F8.2    | 0.0271378314640423               |
| AGIWUR9041;AGIWUR12777;AGIWUR38333                                     |    |   |         |         |                |            |            |                                  |
| N2                                                                     | HS | I | 5086317 | 5093793 | WBGene00002213 | kin-32     | C30F8.4    | -0.106506721404768 AGIWUR30640   |
| N2                                                                     | HS | I | 5096601 | 5100579 | WBGene00016259 | C30F8.3    | C30F8.3    | 0.000267262939182444 AGIWUR38945 |
| N2                                                                     | HS | I | 5100751 | 5101674 | WBGene00022465 | ift-20     | Y110A7A.20 | -0.0566093846466824              |
| AGIWUR43171                                                            |    |   |         |         |                |            |            |                                  |
| N2                                                                     | HS | I | 5101682 | 5103467 | WBGene00004959 | spe-5      | Y110A7A.12 | 0.0344640306891169               |
| AGIWUR45082                                                            |    |   |         |         |                |            |            |                                  |
| N2                                                                     | HS | I | 5103581 | 5104956 | WBGene00000502 | chp-1      | Y110A7A.13 | 0.255845419392294                |
| AGIWUR23337                                                            |    |   |         |         |                |            |            |                                  |
| N2                                                                     | HS | I | 5105110 | 5106204 | WBGene00003924 | pas-3      | Y110A7A.14 | 0.067384544262449                |
| AGIWUR17561;AGIWUR38486;AGIWUR39496;AGIWUR41863                        |    |   |         |         |                |            |            |                                  |
| N2                                                                     | HS | I | 5106204 | 5107625 | WBGene00022460 | use-1      | Y110A7A.11 | -0.0920787508600647              |
| AGIWUR8138;AGIWUR10961;AGIWUR39888                                     |    |   |         |         |                |            |            |                                  |
| N2                                                                     | HS | I | 5107833 | 5110183 | WBGene00000001 | aap-1      | Y110A7A.10 | 0.0276602378471384               |
| AGIWUR5137                                                             |    |   |         |         |                |            |            |                                  |
| N2                                                                     | HS | I | 5110075 | 5111154 | WBGene00045212 | Y110A7A.21 | Y110A7A.21 | 0.0744580731131741               |
| AGIWUR7396                                                             |    |   |         |         |                |            |            |                                  |
| N2                                                                     | HS | I | 5114119 | 5118852 | WBGene00022463 | elpc-1     | Y110A7A.16 | -0.116812441126712               |
| AGIWUR39107                                                            |    |   |         |         |                |            |            |                                  |

|                                                             |    |   |         |         |                |           |            |                                 |
|-------------------------------------------------------------|----|---|---------|---------|----------------|-----------|------------|---------------------------------|
| N2                                                          | HS | I | 5119223 | 5123985 | WBGene00022459 | Y110A7A.9 | Y110A7A.9  | -0.156552808391959              |
| AGIWUR5638;AGIWUR13186;AGIWUR37146                          |    |   |         |         |                |           |            |                                 |
| N2                                                          | HS | I | 5123916 | 5127199 | WBGene00003132 | mat-1     | Y110A7A.17 | -0.236240148951205              |
| AGIWUR10232;AGIWUR10763;AGIWUR11746;AGIWUR18147;AGIWUR21523 |    |   |         |         |                |           |            |                                 |
| N2                                                          | HS | I | 5127828 | 5129611 | WBGene00022458 | prp-31    | Y110A7A.8  | 0.233521398471979               |
| AGIWUR13052                                                 |    |   |         |         |                |           |            |                                 |
| N2                                                          | HS | I | 5129640 | 5131065 | WBGene00022457 | Y110A7A.7 | Y110A7A.7  | 0.0280289058362833              |
| AGIWUR36758                                                 |    |   |         |         |                |           |            |                                 |
| N2                                                          | HS | I | 5131288 | 5134101 | WBGene00022456 | pfkb-1.1  | Y110A7A.6  | 0.215502897173302               |
| AGIWUR12324;AGIWUR19557;AGIWUR24616;AGIWUR42679             |    |   |         |         |                |           |            |                                 |
| N2                                                          | HS | I | 5134709 | 5137971 | WBGene00003475 | mtm-1     | Y110A7A.5  | -0.0165957028496493             |
| AGIWUR8180                                                  |    |   |         |         |                |           |            |                                 |
| N2                                                          | HS | I | 5138256 | 5139382 | WBGene00022455 | tyms-1    | Y110A7A.4  | -0.0387533949088716             |
| AGIWUR26036;AGIWUR30844;AGIWUR32359                         |    |   |         |         |                |           |            |                                 |
| N2                                                          | HS | I | 5141675 | 5149226 | WBGene00006797 | unc-63    | Y110A7A.3  | 0.00313346604922859             |
| AGIWUR19692                                                 |    |   |         |         |                |           |            |                                 |
| N2                                                          | HS | I | 5154529 | 5158467 | WBGene00022454 | Y110A7A.2 | Y110A7A.2  |                                 |
| -0.00750422506093074 AGIWUR12450                            |    |   |         |         |                |           |            |                                 |
| N2                                                          | HS | I | 5158511 | 5162231 | WBGene00004094 | ppw-2     | Y110A7A.18 | -0.151841399196211              |
| AGIWUR38604                                                 |    |   |         |         |                |           |            |                                 |
| N2                                                          | HS | I | 5165152 | 5171313 | WBGene00001833 | hcp-6     | Y110A7A.1  | 0.196339219530717               |
| AGIWUR23546;AGIWUR27668;AGIWUR29091                         |    |   |         |         |                |           |            |                                 |
| N2                                                          | HS | I | 5171285 | 5176664 | WBGene00004955 | spd-5     | F56A3.4    | 0.110917869486824 AGIWUR43280   |
| N2                                                          | HS | I | 5176466 | 5182801 | WBGene00003792 | npp-6     | F56A3.3    | -0.0646792780332013             |
| AGIWUR31488;AGIWUR37695                                     |    |   |         |         |                |           |            |                                 |
| N2                                                          | HS | I | 5182736 | 5186234 | WBGene00018909 | slx-1     | F56A3.2    | -0.0500714074659481 AGIWUR23385 |
| N2                                                          | HS | I | 5186926 | 5188995 | WBGene00000272 | bro-1     | F56A3.5    | -0.0737318576966377 AGIWUR18690 |
| N2                                                          | HS | I | 5190142 | 5195243 | WBGene00018908 | fncm-1    | F56A3.1    | 0.0394472508012722 AGIWUR16044  |
| N2                                                          | HS | I | 5196078 | 5200102 | WBGene00016328 | pde-5     | C32E12.2   | -0.177043827643078              |
| AGIWUR4483;AGIWUR25559;AGIWUR44681                          |    |   |         |         |                |           |            |                                 |
| N2                                                          | HS | I | 5200258 | 5203504 | WBGene00016329 | osr-1     | C32E12.3   | 0.438191464099228               |
| AGIWUR37480                                                 |    |   |         |         |                |           |            |                                 |
| N2                                                          | HS | I | 5204540 | 5215218 | WBGene00004771 | sem-2     | C32E12.5   | 0.0418780955427711              |
| AGIWUR14738;AGIWUR27347                                     |    |   |         |         |                |           |            |                                 |
| N2                                                          | HS | I | 5230549 | 5242607 | WBGene00016330 | C32E12.4  | C32E12.4   | 0.0174904488288838              |
| AGIWUR34566                                                 |    |   |         |         |                |           |            |                                 |
| N2                                                          | HS | I | 5244283 | 5245402 | WBGene00015092 | mrp1-47   | B0261.4    | 0.102721437491708 AGIWUR25197   |
| N2                                                          | HS | I | 5245743 | 5263413 | WBGene00002583 | let-363   | B0261.2    | 0.00393447384691825 AGIWUR44044 |
| N2                                                          | HS | I | 5263694 | 5268380 | WBGene00015091 | B0261.1   | B0261.1    | -0.0285637830125847 AGIWUR18289 |

|                                                                                  |    |   |         |         |                |           |          |                             |                     |
|----------------------------------------------------------------------------------|----|---|---------|---------|----------------|-----------|----------|-----------------------------|---------------------|
| N2                                                                               | HS | I | 5269545 | 5270941 | WBGene00015095 | B0261.7   | B0261.7  | -0.0765547227792034         | AGIWUR8322          |
| N2                                                                               | HS | I | 5271265 | 5272037 | WBGene00015096 | B0261.8   | B0261.8  | 0.13920888711327            | AGIWUR2556          |
| N2                                                                               | HS | I | 5272846 | 5274339 | WBGene00015312 | C01G8.1   | C01G8.1  | -0.0434741904767115         |                     |
| AGIWUR694;AGIWUR16178;AGIWUR34561                                                |    |   |         |         |                |           |          |                             |                     |
| N2                                                                               | HS | I | 5274693 | 5278708 | WBGene00000540 | cln-3.2   | C01G8.2  | 0.0759054793556153          | AGIWUR30422         |
| N2                                                                               | HS | I | 5278803 | 5281526 | WBGene00000965 | dhs-1     | C01G8.3  | 0.214048843145966           | AGIWUR15951         |
| N2                                                                               | HS | I | 5282085 | 5283944 | WBGene00001022 | dnj-4     | C01G8.4  | 0.111942073268626           | AGIWUR42            |
| N2                                                                               | HS | I | 5284062 | 5291604 | WBGene00001333 | erm-1     | C01G8.5  | -0.296006235989175          | AGIWUR16002         |
| N2                                                                               | HS | I | 5298755 | 5300331 | WBGene00015313 | hpo-32    | C01G8.6  | 0.0855303129508727          | AGIWUR26468         |
| N2                                                                               | HS | I | 5300901 | 5317392 | WBGene00002717 | let-526   | C01G8.9  | -0.0916065462869149         |                     |
| AGIWUR7817;AGIWUR8550;AGIWUR8678;AGIWUR20851;AGIWUR25435;AGIWUR30166;AGIWUR37870 |    |   |         |         |                |           |          |                             |                     |
| N2                                                                               | HS | I | 5317491 | 5318124 | WBGene00018598 | F48C1.5   | F48C1.5  | 0.0205197673073449          | AGIWUR33414         |
| N2                                                                               | HS | I | 5318225 | 5319301 | WBGene00018599 | F48C1.6   | F48C1.6  | -0.0634188312140136         | AGIWUR37907         |
| N2                                                                               | HS | I | 5319720 | 5321117 | WBGene00018595 | fbxa-145  |          | F48C1.2 0.279270710246699   |                     |
| AGIWUR1383                                                                       |    |   |         |         |                |           |          |                             |                     |
| N2                                                                               | HS | I | 5324511 | 5330222 | WBGene00018594 | aman-3    | F48C1.1  | 0.0085808460459651          |                     |
| AGIWUR25737;AGIWUR28725;AGIWUR31540                                              |    |   |         |         |                |           |          |                             |                     |
| N2                                                                               | HS | I | 5330578 | 5332194 | WBGene00004965 | spe-11    | F48C1.7  | -0.0415638974635719         | AGIWUR39988         |
| N2                                                                               | HS | I | 5332249 | 5332780 | WBGene00018601 | F48C1.9   | F48C1.9  | -0.50437904853753           | AGIWUR10340         |
| N2                                                                               | HS | I | 5338922 | 5342012 | WBGene00018865 | F55A12.6  |          | F55A12.6 0.0370564301085663 |                     |
| AGIWUR15674                                                                      |    |   |         |         |                |           |          |                             |                     |
| N2                                                                               | HS | I | 5342180 | 5344724 | WBGene00000150 | apm-1     | F55A12.7 |                             | -0.219852665082687  |
| AGIWUR9311                                                                       |    |   |         |         |                |           |          |                             |                     |
| N2                                                                               | HS | I | 5345927 | 5349657 | WBGene00018864 | F55A12.5  |          | F55A12.5 -0.22761548980219  |                     |
| AGIWUR43597                                                                      |    |   |         |         |                |           |          |                             |                     |
| N2                                                                               | HS | I | 5349646 | 5353767 | WBGene00018866 | nath-10   | F55A12.8 |                             | 0.122636237442208   |
| AGIWUR6506                                                                       |    |   |         |         |                |           |          |                             |                     |
| N2                                                                               | HS | I | 5354160 | 5357026 | WBGene00000966 | dhs-2     | F55A12.4 |                             | -0.0384069076637914 |
| AGIWUR6834;AGIWUR39323                                                           |    |   |         |         |                |           |          |                             |                     |
| N2                                                                               | HS | I | 5358522 | 5365170 | WBGene00004087 | ppk-1     | F55A12.3 |                             | -0.152383147981807  |
| AGIWUR9665                                                                       |    |   |         |         |                |           |          |                             |                     |
| N2                                                                               | HS | I | 5365265 | 5366875 | WBGene00018863 | F55A12.2  |          | F55A12.2                    |                     |
| -0.00754217103664612 AGIWUR5975;AGIWUR16690;AGIWUR23746                          |    |   |         |         |                |           |          |                             |                     |
| N2                                                                               | HS | I | 5366944 | 5367829 | WBGene00018867 | F55A12.10 |          | F55A12.10 0.115387436315398 |                     |
| AGIWUR25431                                                                      |    |   |         |         |                |           |          |                             |                     |
| N2                                                                               | HS | I | 5368478 | 5372643 | WBGene00018862 | wago-2    | F55A12.1 |                             | -0.0100652097472409 |
| AGIWUR28246                                                                      |    |   |         |         |                |           |          |                             |                     |
| N2                                                                               | HS | I | 5372854 | 5384508 | WBGene00004131 | pqn-44    | F55A12.9 |                             | 0.0725002979724447  |
| AGIWUR896;AGIWUR27262                                                            |    |   |         |         |                |           |          |                             |                     |

|                                                                        |    |   |         |         |                |          |          |                      |             |
|------------------------------------------------------------------------|----|---|---------|---------|----------------|----------|----------|----------------------|-------------|
| N2                                                                     | HS | I | 5384639 | 5385737 | WBGene00016042 | C24A11.5 | C24A11.5 | 0.0808308788534813   |             |
| AGIWUR7145                                                             |    |   |         |         |                |          |          |                      |             |
| N2                                                                     | HS | I | 5396269 | 5396503 | WBGene00016043 | C24A11.6 | C24A11.6 | -0.19306457742662    |             |
| AGIWUR14300                                                            |    |   |         |         |                |          |          |                      |             |
| N2                                                                     | HS | I | 5401757 | 5402896 | WBGene00016040 | C24A11.1 | C24A11.1 | 0.00585701391148419  |             |
| AGIWUR5355                                                             |    |   |         |         |                |          |          |                      |             |
| N2                                                                     | HS | I | 5402889 | 5408344 | WBGene00001491 | frm-4    | C24A11.8 | -0.0119150295064463  |             |
| AGIWUR981;AGIWUR4212;AGIWUR6365;AGIWUR15596;AGIWUR16887;AGIWUR31981    |    |   |         |         |                |          |          |                      |             |
| N2                                                                     | HS | I | 5412841 | 5415629 | WBGene00000761 | coq-1    | C24A11.9 | 0.201531462526923    |             |
| AGIWUR43800                                                            |    |   |         |         |                |          |          |                      |             |
| N2                                                                     | HS | I | 5416649 | 5420731 | WBGene00016278 | C30H7.2  | C30H7.2  | -0.0646987334033238  | AGIWUR21269 |
| N2                                                                     | HS | I | 5421313 | 5428457 | WBGene00017855 | F27C1.6  | F27C1.6  | 0.192363916103593    | AGIWUR3947  |
| N2                                                                     | HS | I | 5428469 | 5429908 | WBGene00000230 | atp-3    | F27C1.7  | -0.00287139701722072 |             |
| AGIWUR4068;AGIWUR34961                                                 |    |   |         |         |                |          |          |                      |             |
| N2                                                                     | HS | I | 5430164 | 5431449 | WBGene00017852 | F27C1.2  | F27C1.2  | -0.138182270252219   |             |
| AGIWUR2440;AGIWUR34813                                                 |    |   |         |         |                |          |          |                      |             |
| N2                                                                     | HS | I | 5432158 | 5433054 | WBGene00001067 | dpy-5    | F27C1.8  | -0.23182769085553    |             |
| AGIWUR27120;AGIWUR44335                                                |    |   |         |         |                |          |          |                      |             |
| N2                                                                     | HS | I | 5433907 | 5443026 | WBGene00017858 | F27C1.11 | F27C1.11 | 0.136058616790139    |             |
| AGIWUR5701;AGIWUR9333;AGIWUR22774;AGIWUR27305;AGIWUR27976              |    |   |         |         |                |          |          |                      |             |
| N2                                                                     | HS | I | 5443878 | 5446855 | WBGene00017860 | F27C1.13 | F27C1.13 | -0.0462464750289406  |             |
| AGIWUR6830;AGIWUR24304;AGIWUR35087;AGIWUR39993;AGIWUR41117;AGIWUR42850 |    |   |         |         |                |          |          |                      |             |
| N2                                                                     | HS | I | 5455730 | 5459550 | WBGene00020262 | fer1-1   | T05E8.1  | 0.146504357271905    | AGIWUR22748 |
| N2                                                                     | HS | I | 5463480 | 5469627 | WBGene00001859 | hil-8    | T05E8.2  | 0.00617567318951906  |             |
| AGIWUR8595;AGIWUR8928;AGIWUR15131;AGIWUR28796;AGIWUR36374              |    |   |         |         |                |          |          |                      |             |
| N2                                                                     | HS | I | 5472321 | 5479438 | WBGene00020263 | let-355  | T05E8.3  | 0.0736300235610194   | AGIWUR30390 |
| N2                                                                     | HS | I | 5479550 | 5484643 | WBGene00015635 | C09D4.4  | C09D4.4  | -0.426671774827792   | AGIWUR10054 |
| N2                                                                     | HS | I | 5484779 | 5486354 | WBGene00004431 | rpl-19   | C09D4.5  | 0.201372489152995    | AGIWUR34311 |
| N2                                                                     | HS | I | 5486487 | 5487150 | WBGene00015636 | C09D4.6  | C09D4.6  | -0.00398688375795775 | AGIWUR45087 |
| N2                                                                     | HS | I | 5488309 | 5490626 | WBGene00015634 | C09D4.3  | C09D4.3  | 0.0302236063603196   | AGIWUR5653  |
| N2                                                                     | HS | I | 5491424 | 5493263 | WBGene00015633 | C09D4.2  | C09D4.2  | 0.0358436740832033   | AGIWUR16931 |
| N2                                                                     | HS | I | 5497679 | 5505447 | WBGene00015632 | C09D4.1  | C09D4.1  | 0.322688274844618    | AGIWUR27450 |
| N2                                                                     | HS | I | 5505377 | 5507023 | WBGene00019076 | mrp1-24  | F59A3.3  | -0.0948440028019348  | AGIWUR34650 |
| N2                                                                     | HS | I | 5507123 | 5509288 | WBGene00019077 | zipt-11  | F59A3.4  | -0.0531257321587044  |             |
| AGIWUR5874;AGIWUR13042;AGIWUR14294;AGIWUR18200                         |    |   |         |         |                |          |          |                      |             |
| N2                                                                     | HS | I | 5509473 | 5511705 | WBGene00019079 | rpa-4    | F59A3.6  | 0.0389143082901597   |             |
| AGIWUR22494;AGIWUR27515;AGIWUR32418;AGIWUR38402                        |    |   |         |         |                |          |          |                      |             |
| N2                                                                     | HS | I | 5512048 | 5514557 | WBGene00019075 | F59A3.2  | F59A3.2  | 0.091469656021653    | AGIWUR6715  |
| N2                                                                     | HS | I | 5514651 | 5516025 | WBGene00185086 | F59A3.12 | F59A3.12 | -0.0529836340581955  |             |

AGIWUR27384  
N2 HS I 5520389 5529763 WBGene00019074 cpd-1 F59A3.1 0.0092970623112647  
AGIWUR832;AGIWUR9804;AGIWUR16154;AGIWUR23805;AGIWUR36548;AGIWUR40265;AGIWUR40556  
N2 HS I 5530618 5533710 WBGene00019082 pup-3 F59A3.9 0.00434679585192299 AGIWUR5052  
N2 HS I 5542630 5543334 WBGene00019083 F59A3.10 F59A3.10 0.0322071264819339  
AGIWUR23620  
N2 HS I 5546120 5561642 WBGene00006594 tom-1 M01A10.2 0.016989058563023  
AGIWUR11147;AGIWUR11431;AGIWUR21101;AGIWUR27403;AGIWUR28716;AGIWUR31664  
N2 HS I 5563827 5566265 WBGene00019692 M01A10.1 M01A10.1 -0.0314870496637649  
AGIWUR14718  
N2 HS I 5566343 5570081 WBGene00019713 pqn-52 M01E11.4 -0.119541208201452  
AGIWUR6355;AGIWUR8778;AGIWUR14340;AGIWUR18170;AGIWUR19043;AGIWUR39174  
N2 HS I 5571787 5573019 WBGene00000474 cey-3 M01E11.5 -0.00262988224940042  
AGIWUR15351;AGIWUR34621  
N2 HS I 5573214 5576749 WBGene00019712 rmh-1 M01E11.3 0.151606450523076  
AGIWUR30964  
N2 HS I 5579666 5581979 WBGene00019711 M01E11.2 M01E11.2 0.118182112934042  
AGIWUR34357  
N2 HS I 5582005 5583471 WBGene00019710 M01E11.1 M01E11.1 0.0984931210916216  
AGIWUR18685  
N2 HS I 5583407 5607529 WBGene00006508 tns-1 M01E11.7 -0.0721321721205412  
AGIWUR6532;AGIWUR6811;AGIWUR11533;AGIWUR11928;AGIWUR15727;AGIWUR18697;AGIWUR19135;AGIWUR21857;AGIWUR30199;A  
GIWUR31547;AGIWUR36030;AGIWUR38255  
N2 HS I 5607820 5608841 WBGene00006726 ubl-5 F46F11.4 0.275254454009197  
AGIWUR38965  
N2 HS I 5609310 5610270 WBGene00006919 vha-10 F46F11.5 -0.0890032947808703  
AGIWUR5301;AGIWUR16359  
N2 HS I 5610375 5616402 WBGene00018512 trpp-8 F46F11.9 0.175330529236627  
AGIWUR28006  
N2 HS I 5616593 5618682 WBGene00018509 F46F11.6 F46F11.6 0.0166366655798544  
AGIWUR31483  
N2 HS I 5619569 5620668 WBGene00000473 cey-2 F46F11.2 -0.206592099283291  
AGIWUR19929;AGIWUR20244;AGIWUR20969;AGIWUR39577;AGIWUR39981;AGIWUR43534  
N2 HS I 5620751 5623035 WBGene00018510 F46F11.7 F46F11.7 0.228832391561669  
AGIWUR6851  
N2 HS I 5623019 5624475 WBGene00018513 F46F11.10 F46F11.10 0.0550948591604365  
AGIWUR14352;AGIWUR29230  
N2 HS I 5624558 5626288 WBGene00018511 F46F11.8 F46F11.8 -0.269707071462918  
AGIWUR13272

|                                                                                                                                                         |    |   |         |         |                |          |          |                     |             |
|---------------------------------------------------------------------------------------------------------------------------------------------------------|----|---|---------|---------|----------------|----------|----------|---------------------|-------------|
| N2                                                                                                                                                      | HS | I | 5627819 | 5637622 | WBGene00018508 | F46F11.1 | F46F11.1 | 0.202035826735111   |             |
| AGIWUR40503                                                                                                                                             |    |   |         |         |                |          |          |                     |             |
| N2                                                                                                                                                      | HS | I | 5643310 | 5644057 | WBGene00044616 | M01A12.4 | M01A12.4 | 0.124120733450814   |             |
| AGIWUR32316                                                                                                                                             |    |   |         |         |                |          |          |                     |             |
| N2                                                                                                                                                      | HS | I | 5644729 | 5646370 | WBGene00000630 | col-53   | M01A12.1 | 0.134812851777983   |             |
| AGIWUR31336;AGIWUR38774                                                                                                                                 |    |   |         |         |                |          |          |                     |             |
| N2                                                                                                                                                      | HS | I | 5646369 | 5649656 | WBGene00018890 | F55F8.2  | F55F8.2  | 0.141372868402652   | AGIWUR37570 |
| N2                                                                                                                                                      | HS | I | 5649756 | 5653648 | WBGene00018891 | F55F8.3  | F55F8.3  | 0.147830594446482   | AGIWUR43787 |
| N2                                                                                                                                                      | HS | I | 5653804 | 5655857 | WBGene00018892 | cir-1    | F55F8.4  | 0.00644523756074644 |             |
| AGIWUR18388;AGIWUR44318                                                                                                                                 |    |   |         |         |                |          |          |                     |             |
| N2                                                                                                                                                      | HS | I | 5655950 | 5658118 | WBGene00018893 | wdr-12   | F55F8.5  | 0.037131574413273   | AGIWUR44268 |
| N2                                                                                                                                                      | HS | I | 5657980 | 5658723 | WBGene00018894 | mff-2    | F55F8.6  | 0.177260260379398   | AGIWUR22067 |
| N2                                                                                                                                                      | HS | I | 5662143 | 5667160 | WBGene00004224 | ptr-10   | F55F8.1  | 0.0653451614600451  | AGIWUR34950 |
| N2                                                                                                                                                      | HS | I | 5667069 | 5668837 | WBGene00018896 | F55F8.8  | F55F8.8  | 0.134732845793053   | AGIWUR44721 |
| N2                                                                                                                                                      | HS | I | 5669950 | 5673352 | WBGene00018897 | zip-2.4  | F55F8.9  | -0.12525179830385   |             |
| AGIWUR33516                                                                                                                                             |    |   |         |         |                |          |          |                     |             |
| N2                                                                                                                                                      | HS | I | 5674304 | 5676609 | WBGene00020558 | T19B4.5  | T19B4.5  | -0.112498130352026  |             |
| AGIWUR11276;AGIWUR12993;AGIWUR32131                                                                                                                     |    |   |         |         |                |          |          |                     |             |
| N2                                                                                                                                                      | HS | I | 5676827 | 5677646 | WBGene00001039 | dnj-21   | T19B4.4  | 0.159691781745552   | AGIWUR16865 |
| N2                                                                                                                                                      | HS | I | 5678638 | 5679862 | WBGene00020557 | T19B4.3  | T19B4.3  | 0.3836826576564     |             |
| AGIWUR27841;AGIWUR39756;AGIWUR40511;AGIWUR44979                                                                                                         |    |   |         |         |                |          |          |                     |             |
| N2                                                                                                                                                      | HS | I | 5679844 | 5691503 | WBGene00006776 | unc-40   | T19B4.7  | -0.311095565198194  | AGIWUR10286 |
| N2                                                                                                                                                      | HS | I | 5691838 | 5697506 | WBGene00003793 | npp-7    | T19B4.2  | 0.00100010400111294 |             |
| AGIWUR623;AGIWUR6784;AGIWUR10030;AGIWUR11279;AGIWUR12845;AGIWUR28597;AGIWUR30194;AGIWUR36089;AGIWUR37196                                                |    |   |         |         |                |          |          |                     |             |
| N2                                                                                                                                                      | HS | I | 5702156 | 5706838 | WBGene00020556 | pamn-1   | T19B4.1  | -0.0180897057501612 |             |
| AGIWUR1427;AGIWUR1919;AGIWUR4740;AGIWUR7671;AGIWUR18929;AGIWUR19185;AGIWUR19546;AGIWUR19808;AGIWUR21670;AGIWUR22000;AGIWUR33507;AGIWUR34825;AGIWUR36338 |    |   |         |         |                |          |          |                     |             |
| N2                                                                                                                                                      | HS | I | 5716574 | 5725772 | WBGene00002989 | lim-7    | C04F1.3  | -0.217450244115163  | AGIWUR315   |
| N2                                                                                                                                                      | HS | I | 5726308 | 5729310 | WBGene00015442 | C04F1.1  | C04F1.1  | 0.391012046380422   |             |
| AGIWUR21075;AGIWUR37345                                                                                                                                 |    |   |         |         |                |          |          |                     |             |
| N2                                                                                                                                                      | HS | I | 5729793 | 5735842 | WBGene00018994 | F56H1.3  | F56H1.3  | 0.135470780332941   | AGIWUR3566  |
| N2                                                                                                                                                      | HS | I | 5741186 | 5741622 | WBGene00269393 | F56H1.11 | F56H1.11 | 0.165980175299593   |             |
| AGIWUR11632                                                                                                                                             |    |   |         |         |                |          |          |                     |             |
| N2                                                                                                                                                      | HS | I | 5741868 | 5743571 | WBGene00004505 | rpt-5    | F56H1.4  | -0.0277224837825525 |             |
| AGIWUR4545;AGIWUR10484;AGIWUR34653;AGIWUR44921                                                                                                          |    |   |         |         |                |          |          |                     |             |
| N2                                                                                                                                                      | HS | I | 5744148 | 5745617 | WBGene00044305 | rad-8    | F56H1.6  | 0.153493016020693   |             |
| AGIWUR15763;AGIWUR22891                                                                                                                                 |    |   |         |         |                |          |          |                     |             |
| N2                                                                                                                                                      | HS | I | 5746633 | 5754278 | WBGene00000493 | che-14   | F56H1.1  | 0.141564217230782   | AGIWUR27291 |
| N2                                                                                                                                                      | HS | I | 5754312 | 5760803 | WBGene00018995 | ccpp-1   | F56H1.5  | 0.0863023551756399  |             |

AGIWUR12374;AGIWUR14910;AGIWUR28454

N2 HS I 5760897 5762435 WBGene00045483 oxy-5 F56H1.7 0.185075093819284

AGIWUR6195;AGIWUR37147

N2 HS I 5764030 5768190 WBGene00020694 dhhc-11 T22E7.2 0.0788604978176028 AGIWUR20471

N2 HS I 5768919 5773627 WBGene00020693 lron-8 T22E7.1 0.0644163772496094

AGIWUR7310;AGIWUR37476

N2 HS I 5774585 5775610 WBGene00001856 hil-5 B0414.3 -0.0783519898781924

AGIWUR31929;AGIWUR38263

N2 HS I 5776154 5788610 WBGene00004393 rnt-1 B0414.2 -0.134759696292583 AGIWUR35389

N2 HS I 5788634 5791752 WBGene00000772 cpb-3 B0414.5 -0.674172710540317 AGIWUR11416

N2 HS I 5792324 5795114 WBGene00001600 glh-3 B0414.6 0.123593503959542 AGIWUR26903

N2 HS I 5795404 5801299 WBGene00003472 mtk-1 B0414.7 -0.22163577314195

AGIWUR5791;AGIWUR9780;AGIWUR32266

N2 HS I 5801872 5803266 WBGene00015175 srz-4 B0414.1 0.00649626344350551 AGIWUR4046

N2 HS I 5803959 5807291 WBGene00015176 vps-51 B0414.8 -0.0203484982143589 AGIWUR1676

N2 HS I 5807709 5815637 WBGene00003020 lin-35 C32F10.2 -0.0333275142440037

AGIWUR39684

N2 HS I 5815609 5818132 WBGene00001973 hmg-3 C32F10.5 0.051555737215633

AGIWUR20478

N2 HS I 5818477 5821134 WBGene00003601 nhr-2 C32F10.6 0.0999948556583394

AGIWUR39715

N2 HS I 5822841 5826148 WBGene00016333 C32F10.8 C32F10.8 0.0185612285191361

AGIWUR11408;AGIWUR13429;AGIWUR22672;AGIWUR24518;AGIWUR28667

N2 HS I 5829072 5834640 WBGene00016331 obr-4 C32F10.1 0.0491972243801548

AGIWUR16969;AGIWUR31133

N2 HS I 5834644 5837392 WBGene00018002 twk-47 F33D11.5 0.086901827536912

AGIWUR6580

N2 HS I 5840289 5841888 WBGene00000436 ceh-12 F33D11.4 0.150377646689549

AGIWUR24005

N2 HS I 5842709 5844050 WBGene00000631 col-54 F33D11.3 -0.054926083663279

AGIWUR26608

N2 HS I 5844836 5846466 WBGene00018003 F33D11.6 F33D11.6 -0.0887032516931452

AGIWUR20606

N2 HS I 5847477 5849391 WBGene00018001 F33D11.2 F33D11.2

-0.00786311649762617

AGIWUR26643

N2 HS I 5852045 5852962 WBGene00018000 F33D11.1 F33D11.1 0.119169796588873

AGIWUR2935;AGIWUR8296;AGIWUR17179;AGIWUR33917;AGIWUR37035;AGIWUR38448

N2 HS I 5854261 5855047 WBGene00018005 F33D11.8 F33D11.8 0.1313926344842

AGIWUR1231;AGIWUR12588

|                                                                                                             |    |   |         |         |                |           |           |                       |             |
|-------------------------------------------------------------------------------------------------------------|----|---|---------|---------|----------------|-----------|-----------|-----------------------|-------------|
| N2                                                                                                          | HS | I | 5857548 | 5862557 | WBGene00018006 | hpo-3     | F33D11.9  | 0.134941187268193     |             |
| AGIWUR20778;AGIWUR26526;AGIWUR29283                                                                         |    |   |         |         |                |           |           |                       |             |
| N2                                                                                                          | HS | I | 5862644 | 5866431 | WBGene00018009 | dhhc-3    | F33D11.12 | 0.0844076539995644    |             |
| AGIWUR35887                                                                                                 |    |   |         |         |                |           |           |                       |             |
| N2                                                                                                          | HS | I | 5866514 | 5868139 | WBGene00018007 | F33D11.10 | F33D11.10 | -0.258782980988062    |             |
| AGIWUR11065;AGIWUR33616                                                                                     |    |   |         |         |                |           |           |                       |             |
| N2                                                                                                          | HS | I | 5868266 | 5869954 | WBGene00018008 | vpr-1     | F33D11.11 | 0.0810103580878945    |             |
| AGIWUR24026                                                                                                 |    |   |         |         |                |           |           |                       |             |
| N2                                                                                                          | HS | I | 5872174 | 5874343 | WBGene00016421 | cdc-7     | C34G6.5   | 0.0722193412009062    | AGIWUR4240  |
| N2                                                                                                          | HS | I | 5874422 | 5878954 | WBGene00016422 | noah-1    | C34G6.6   | 0.130893515273332     | AGIWUR31175 |
| N2                                                                                                          | HS | I | 5886613 | 5895970 | WBGene00003996 | pgp-2     | C34G6.4   | 0.0819865805034823    | AGIWUR25666 |
| N2                                                                                                          | HS | I | 5898303 | 5902112 | WBGene00016419 | tyr-4     | C34G6.2   | -0.0487960860834917   | AGIWUR39659 |
| N2                                                                                                          | HS | I | 5902106 | 5904695 | WBGene00004109 | stam-1    | C34G6.7   | -0.178146060905357    |             |
| AGIWUR1601;AGIWUR1672;AGIWUR38163;AGIWUR39752                                                               |    |   |         |         |                |           |           |                       |             |
| N2                                                                                                          | HS | I | 5906662 | 5918229 | WBGene00016418 | hpo-27    | C34G6.1   | -0.16720876580268     |             |
| AGIWUR1717;AGIWUR13154;AGIWUR14544                                                                          |    |   |         |         |                |           |           |                       |             |
| N2                                                                                                          | HS | I | 5919055 | 5935416 | WBGene00015028 | B0207.5   | B0207.5   | 0.0916477476853812    | AGIWUR5023  |
| N2                                                                                                          | HS | I | 5935370 | 5936957 | WBGene00015029 | B0207.6   | B0207.6   | 0.155397115156035     | AGIWUR21951 |
| N2                                                                                                          | HS | I | 5937477 | 5938885 | WBGene00000099 | air-2     | B0207.4   | -0.112208088279441    |             |
| AGIWUR8154;AGIWUR34964                                                                                      |    |   |         |         |                |           |           |                       |             |
| N2                                                                                                          | HS | I | 5942419 | 5945537 | WBGene00001676 | gpa-14    | B0207.3   | 0.0386405370386722    | AGIWUR7895  |
| N2                                                                                                          | HS | I | 5945581 | 5947620 | WBGene00015030 | B0207.7   | B0207.7   | 0.398606138923896     | AGIWUR22759 |
| N2                                                                                                          | HS | I | 5951136 | 5951742 | WBGene00015031 | B0207.8   | B0207.8   | 0.0059099244774643    | AGIWUR38503 |
| N2                                                                                                          | HS | I | 5955031 | 5956883 | WBGene00015027 | B0207.2   | B0207.2   | -0.000639638975977519 |             |
| AGIWUR25443;AGIWUR37060;AGIWUR41309                                                                         |    |   |         |         |                |           |           |                       |             |
| N2                                                                                                          | HS | I | 5957461 | 5958457 | WBGene00015032 | B0207.9   | B0207.9   | 0.192463116939928     | AGIWUR15640 |
| N2                                                                                                          | HS | I | 5959008 | 5959526 | WBGene00015033 | B0207.10  | B0207.10  | 0.0439580556983223    |             |
| AGIWUR5455                                                                                                  |    |   |         |         |                |           |           |                       |             |
| N2                                                                                                          | HS | I | 5962953 | 5964183 | WBGene00015034 | B0207.11  | B0207.11  | -0.0133348284110824   |             |
| AGIWUR25597                                                                                                 |    |   |         |         |                |           |           |                       |             |
| N2                                                                                                          | HS | I | 5965062 | 5967211 | WBGene00015026 | B0207.1   | B0207.1   | 0.274744936504407     | AGIWUR35700 |
| N2                                                                                                          | HS | I | 5967250 | 5973320 | WBGene00000232 | avr-14    | B0207.12  | -0.023576374485125    |             |
| AGIWUR636;AGIWUR9364;AGIWUR18879;AGIWUR37041;AGIWUR37132                                                    |    |   |         |         |                |           |           |                       |             |
| N2                                                                                                          | HS | I | 5981778 | 5985869 | WBGene00015504 | C06A5.6   | C06A5.6   | -0.305748661052732    | AGIWUR39294 |
| N2                                                                                                          | HS | I | 5986443 | 5990581 | WBGene00015501 | C06A5.3   | C06A5.3   | -0.171796438471127    | AGIWUR35558 |
| N2                                                                                                          | HS | I | 5990741 | 5992658 | WBGene00004803 | sir-2.4   | C06A5.11  | -0.00344135183450334  |             |
| AGIWUR43540                                                                                                 |    |   |         |         |                |           |           |                       |             |
| N2                                                                                                          | HS | I | 5992661 | 6003363 | WBGene00006823 | unc-94    | C06A5.7   | 0.0648395937382897    |             |
| AGIWUR4768;AGIWUR18849;AGIWUR18987;AGIWUR20008;AGIWUR20709;AGIWUR27311;AGIWUR32220;AGIWUR33730;AGIWUR35148; |    |   |         |         |                |           |           |                       |             |



AGIWUR36712;AGIWUR40863  
N2 HS I 6004599 6007595 WBGene00044414 C06A5.12 C06A5.12 0.0675552008283908  
AGIWUR28163;AGIWUR31238;AGIWUR34035;AGIWUR42647;AGIWUR42784  
N2 HS I 6008105 6009606 WBGene00015505 C06A5.8 C06A5.8 -0.32069365975803  
AGIWUR34087;AGIWUR37759  
N2 HS I 6009782 6011586 WBGene00004380 rnf-1 C06A5.9 0.140401504689409  
AGIWUR4178;AGIWUR27456  
N2 HS I 6011977 6022516 WBGene00015499 inst-1 C06A5.1 0.00385172761502339 AGIWUR33571  
N2 HS I 6022660 6026874 WBGene00000814 csn-2 B0025.2 0.124471391237805 AGIWUR5887  
N2 HS I 6027194 6028370 WBGene00015001 B0025.4 B0025.4 -0.683772949216838 AGIWUR11731  
N2 HS I 6028486 6033457 WBGene00006932 vps-34 B0025.1 0.221423223116381  
AGIWUR18092;AGIWUR25361;AGIWUR41664;AGIWUR42560  
N2 HS I 6035452 6037745 WBGene00016155 C27A12.4 C27A12.4 -0.105522228493856  
AGIWUR43310  
N2 HS I 6038406 6041265 WBGene00006492 let-391 C27A12.3 0.0999309972608344  
AGIWUR4733  
N2 HS I 6041672 6046018 WBGene00016154 C27A12.2 C27A12.2 0.320396013448853  
AGIWUR17644  
N2 HS I 6046832 6050462 WBGene00000429 ceh-2 C27A12.5 0.161714995383715  
AGIWUR28248  
N2 HS I 6053785 6055821 WBGene00016156 C27A12.6 C27A12.6 -0.0916142836843434  
AGIWUR2214;AGIWUR7904;AGIWUR27980;AGIWUR37666  
N2 HS I 6055947 6058424 WBGene00016157 C27A12.7 C27A12.7 -0.155964063600513  
AGIWUR7052;AGIWUR18453;AGIWUR30076;AGIWUR32444  
N2 HS I 6058546 6061033 WBGene00016158 ari-1 C27A12.8 -0.0228723544058074  
AGIWUR43402  
N2 HS I 6061752 6068040 WBGene00016159 C27A12.9 C27A12.9 -0.0364208517076507  
AGIWUR2352;AGIWUR10114;AGIWUR11058;AGIWUR38416;AGIWUR44563;AGIWUR45035  
N2 HS I 6068526 6070122 WBGene00022749 ZK484.3 ZK484.3 0.0706164794040731  
AGIWUR23472;AGIWUR25484;AGIWUR42142  
N2 HS I 6070236 6078895 WBGene00022750 ZK484.4 ZK484.4 0.00075418470081523  
AGIWUR32976;AGIWUR33451  
N2 HS I 6081782 6085962 WBGene00001819 haf-9 ZK484.2 0.227902351514288  
AGIWUR2028;AGIWUR12808;AGIWUR25179;AGIWUR39792;AGIWUR43940  
N2 HS I 6087366 6087764 WBGene00022751 ZK484.5 ZK484.5 0.125285053214466 AGIWUR40045  
N2 HS I 6090015 6090919 WBGene00022752 ZK484.6 ZK484.6 0.261479969889059 AGIWUR15679  
N2 HS I 6093305 6094426 WBGene00022748 oaz-1 ZK484.1 -0.00292764706498527  
AGIWUR5633;AGIWUR6260;AGIWUR9669;AGIWUR10174;AGIWUR10329;AGIWUR11262;AGIWUR14480;AGIWUR16682;AGIWUR17416;AGIWUR18340;AGIWUR18545;AGIWUR22968;AGIWUR23831;AGIWUR23930;AGIWUR25183;AGIWUR25365;AGIWUR26539;AGIWUR26756;A

GIWUR30941;AGIWUR34252;AGIWUR34836;AGIWUR40956;AGIWUR41471;AGIWUR45198  
 N2 HS I 6095060 6096589 WBGene00022753 ZK484.7 ZK484.7 0.110878803880968 AGIWUR24816  
 N2 HS I 6097494 6097837 WBGene00022754 nspd-1 ZK484.8 0.209498913185691 AGIWUR17934  
 N2 HS I 6098927 6099731 WBGene00020840 spch-3 T27A3.4 0.0166919136387698 AGIWUR32101  
 N2 HS I 6100261 6101789 WBGene00020841 T27A3.5 T27A3.5 -0.0595939433141872 AGIWUR19455  
 N2 HS I 6102032 6102463 WBGene00006044 ssp-16 T27A3.3 -0.119975209579698  
 AGIWUR14575;AGIWUR23833;AGIWUR26401;AGIWUR29267;AGIWUR33358;AGIWUR42127  
 N2 HS I 6104805 6105589 WBGene00044611 T27A3.8 T27A3.8 0.160739889529319 AGIWUR22882  
 N2 HS I 6105863 6107715 WBGene00020842 T27A3.6 T27A3.6 0.339141980546804  
 AGIWUR18567;AGIWUR24268;AGIWUR41070  
 N2 HS I 6107809 6109679 WBGene00020843 T27A3.7 T27A3.7 -0.12342968501105 AGIWUR37549  
 N2 HS I 6110134 6114537 WBGene00020839 usp-5 T27A3.2 -0.227062797162755 AGIWUR22004  
 N2 HS I 6122590 6126851 WBGene00020838 trak-1 T27A3.1 0.102420257506967  
 AGIWUR9827;AGIWUR13114;AGIWUR18998;AGIWUR19263;AGIWUR20155;AGIWUR21043;AGIWUR21050;AGIWUR21240;AGIWUR25994;  
 AGIWUR26331;AGIWUR34093  
 N2 HS I 6133245 6137978 WBGene00003878 pept-3 F56F4.5 0.0474757721355203 AGIWUR25162  
 N2 HS I 6137994 6138955 WBGene00018981 F56F4.4 F56F4.4 0.172894574601328 AGIWUR7191  
 N2 HS I 6139216 6140444 WBGene00018982 abt-6 F56F4.6 0.223699446466084  
 AGIWUR6130;AGIWUR7439;AGIWUR21554  
 N2 HS I 6141469 6144386 WBGene00018980 F56F4.3 F56F4.3 0.00989638469508458  
 AGIWUR1365;AGIWUR31670  
 N2 HS I 6145455 6146477 WBGene00018979 ttr-55 F56F4.2 0.0980812914307121  
 AGIWUR9831;AGIWUR12974;AGIWUR17577;AGIWUR23966;AGIWUR27059  
 N2 HS I 6146461 6147068 WBGene00050896 ttr-56 F56F4.9 0.00587510894039145 AGIWUR33891  
 N2 HS I 6149197 6150480 WBGene00045498 F56F4.8 F56F4.8 -0.0784700741100028  
 AGIWUR18973;AGIWUR22403;AGIWUR42734  
 N2 HS I 6154075 6157438 WBGene00020379 T09B4.5 T09B4.5 -0.338193571735762  
 AGIWUR8668;AGIWUR31230  
 N2 HS I 6157473 6159264 WBGene00020380 T09B4.6 T09B4.6 0.255197263252295 AGIWUR26255  
 N2 HS I 6164719 6166539 WBGene00020382 T09B4.8 T09B4.8 0.114008810410255 AGIWUR22457  
 N2 HS I 6167940 6168642 WBGene00020378 T09B4.4 T09B4.4 -0.048699105675631 AGIWUR8464  
 N2 HS I 6176252 6178057 WBGene00020377 T09B4.3 T09B4.3 0.0353250511041328 AGIWUR20677  
 N2 HS I 6177983 6180840 WBGene00020383 tin-44 T09B4.9 0.168903213078423 AGIWUR33554  
 N2 HS I 6181314 6183913 WBGene00000500 chn-1 T09B4.10 0.124314918064595  
 AGIWUR3531;AGIWUR14093;AGIWUR30546  
 N2 HS I 6184072 6185368 WBGene00020376 T09B4.2 T09B4.2 -0.0897926367513069 AGIWUR5828  
 N2 HS I 6185462 6188121 WBGene00020375 pigv-1 T09B4.1 -0.102554604203851 AGIWUR2739  
 N2 HS I 6188157 6192632 WBGene00020259 T05E7.3 T05E7.3 -0.132653768690261  
 AGIWUR8483;AGIWUR13425;AGIWUR16427;AGIWUR36048

|                                                                                                                                                                        |    |   |         |         |                |          |          |                      |             |
|------------------------------------------------------------------------------------------------------------------------------------------------------------------------|----|---|---------|---------|----------------|----------|----------|----------------------|-------------|
| N2                                                                                                                                                                     | HS | I | 6192552 | 6194897 | WBGene00020260 | T05E7.4  | T05E7.4  | -0.160709341623374   | AGIWUR3464  |
| N2                                                                                                                                                                     | HS | I | 6199141 | 6200193 | WBGene00000632 | col-55   | T05E7.2  | -0.131199998326061   | AGIWUR45093 |
| N2                                                                                                                                                                     | HS | I | 6200798 | 6202076 | WBGene00020261 | vet-1    | T05E7.5  | -0.0587497968155848  | AGIWUR29881 |
| N2                                                                                                                                                                     | HS | I | 6203897 | 6206927 | WBGene00020258 | T05E7.1  | T05E7.1  | -0.601476013760863   | AGIWUR11566 |
| N2                                                                                                                                                                     | HS | I | 6206955 | 6211155 | WBGene00020347 | ech-1.2  | T08B2.7  | -0.145299604012803   |             |
| AGIWUR1878;AGIWUR13286;AGIWUR24847;AGIWUR27700                                                                                                                         |    |   |         |         |                |          |          |                      |             |
| N2                                                                                                                                                                     | HS | I | 6211270 | 6211885 | WBGene00020348 | mrp1-23  | T08B2.8  | 0.235870199317969    | AGIWUR12288 |
| N2                                                                                                                                                                     | HS | I | 6211986 | 6214645 | WBGene00001497 | fars-1   | T08B2.9  | -0.15367169090355    |             |
| AGIWUR15691;AGIWUR18498;AGIWUR21754;AGIWUR24091;AGIWUR31467;AGIWUR34640;AGIWUR39566                                                                                    |    |   |         |         |                |          |          |                      |             |
| N2                                                                                                                                                                     | HS | I | 6215669 | 6219911 | WBGene00020346 | rbm-5    | T08B2.5  | -0.0085038550450145  |             |
| AGIWUR389;AGIWUR3390;AGIWUR17098;AGIWUR17725;AGIWUR21019;AGIWUR24671;AGIWUR42870;AGIWUR45169                                                                           |    |   |         |         |                |          |          |                      |             |
| N2                                                                                                                                                                     | HS | I | 6220090 | 6220766 | WBGene00004486 | rps-17   | T08B2.10 | 0.204628978934457    |             |
| AGIWUR6912;AGIWUR15081;AGIWUR16480;AGIWUR16946;AGIWUR21104;AGIWUR24229;AGIWUR24253;AGIWUR26223;AGIWUR28324;AGIWUR28853;AGIWUR32494;AGIWUR38938;AGIWUR40673;AGIWUR43660 |    |   |         |         |                |          |          |                      |             |
| N2                                                                                                                                                                     | HS | I | 6221245 | 6223116 | WBGene00020349 | T08B2.11 | T08B2.11 | 0.00162272232961413  |             |
| AGIWUR41230                                                                                                                                                            |    |   |         |         |                |          |          |                      |             |
| N2                                                                                                                                                                     | HS | I | 6232777 | 6234280 | WBGene00000633 | col-56   | T08B2.2  | -0.0655420078371254  |             |
| AGIWUR18477;AGIWUR21810;AGIWUR23961                                                                                                                                    |    |   |         |         |                |          |          |                      |             |
| N2                                                                                                                                                                     | HS | I | 6249556 | 6250197 | WBGene00005000 | spp-15   | C48E7.10 | 0.228077229930974    |             |
| AGIWUR26334                                                                                                                                                            |    |   |         |         |                |          |          |                      |             |
| N2                                                                                                                                                                     | HS | I | 6250475 | 6252834 | WBGene00000583 | cof-2    | C48E7.5  | 0.0391189991559067   |             |
| AGIWUR25222;AGIWUR43373                                                                                                                                                |    |   |         |         |                |          |          |                      |             |
| N2                                                                                                                                                                     | HS | I | 6252986 | 6253584 | WBGene00016754 | cebp-2   | C48E7.11 | -0.0799715204482325  |             |
| AGIWUR4905                                                                                                                                                             |    |   |         |         |                |          |          |                      |             |
| N2                                                                                                                                                                     | HS | I | 6253701 | 6254947 | WBGene00003059 | lpd-2    | C48E7.3  | 0.240141012837249    | AGIWUR36039 |
| N2                                                                                                                                                                     | HS | I | 6255035 | 6257791 | WBGene00016750 | let-611  | C48E7.2  | 0.0805578083629257   | AGIWUR8583  |
| N2                                                                                                                                                                     | HS | I | 6260249 | 6264540 | WBGene00016749 | C48E7.1  | C48E7.1  | -0.00590161231319541 | AGIWUR25489 |
| N2                                                                                                                                                                     | HS | I | 6265691 | 6269073 | WBGene00016753 | oac-9    | C48E7.8  | 0.36720413990845     | AGIWUR7858  |
| N2                                                                                                                                                                     | HS | I | 6269561 | 6271541 | WBGene00006689 | twk-37   | C48E7.9  | 0.0995144772114713   | AGIWUR32998 |
| N2                                                                                                                                                                     | HS | I | 6271866 | 6273780 | WBGene00015688 | C10G11.8 | C10G11.8 | -0.135496659370478   |             |
| AGIWUR25031;AGIWUR33880;AGIWUR36459                                                                                                                                    |    |   |         |         |                |          |          |                      |             |
| N2                                                                                                                                                                     | HS | I | 6284973 | 6289340 | WBGene00015687 | chdp-1   | C10G11.7 | 0.166637084950546    |             |
| AGIWUR4250                                                                                                                                                             |    |   |         |         |                |          |          |                      |             |
| N2                                                                                                                                                                     | HS | I | 6289433 | 6293855 | WBGene00015686 | C10G11.6 | C10G11.6 | -0.220223647443916   |             |
| AGIWUR8034                                                                                                                                                             |    |   |         |         |                |          |          |                      |             |
| N2                                                                                                                                                                     | HS | I | 6295067 | 6297625 | WBGene00004068 | pnk-1    | C10G11.5 | 0.169603810404173    |             |
| AGIWUR13687;AGIWUR29299;AGIWUR36480;AGIWUR43272                                                                                                                        |    |   |         |         |                |          |          |                      |             |
| N2                                                                                                                                                                     | HS | I | 6297767 | 6299729 | WBGene00005272 | srh-49   | C10G11.4 | -0.0297622390912986  |             |
| AGIWUR16346                                                                                                                                                            |    |   |         |         |                |          |          |                      |             |

|                                                                                                                                                                    |    |   |         |         |                |           |           |                     |             |
|--------------------------------------------------------------------------------------------------------------------------------------------------------------------|----|---|---------|---------|----------------|-----------|-----------|---------------------|-------------|
| N2                                                                                                                                                                 | HS | I | 6300493 | 6302298 | WBGene00005274 | srh-51    | C10G11.3  | 0.0060689692345699  |             |
| AGIWUR12171;AGIWUR16140                                                                                                                                            |    |   |         |         |                |           |           |                     |             |
| N2                                                                                                                                                                 | HS | I | 6302474 | 6304263 | WBGene00005273 | srh-50    | C10G11.2  | -0.109125752434636  |             |
| AGIWUR41687                                                                                                                                                        |    |   |         |         |                |           |           |                     |             |
| N2                                                                                                                                                                 | HS | I | 6304916 | 6306363 | WBGene00015690 | C10G11.10 | C10G11.10 | -0.134765426434525  |             |
| AGIWUR33367                                                                                                                                                        |    |   |         |         |                |           |           |                     |             |
| N2                                                                                                                                                                 | HS | I | 6309114 | 6310781 | WBGene00017817 | F26B1.5   | F26B1.5   | -0.0207375662849874 |             |
| AGIWUR7184;AGIWUR31624                                                                                                                                             |    |   |         |         |                |           |           |                     |             |
| N2                                                                                                                                                                 | HS | I | 6311229 | 6312413 | WBGene00000634 | col-58    | F26B1.4   | 0.303456950863449   | AGIWUR2202  |
| N2                                                                                                                                                                 | HS | I | 6312750 | 6314624 | WBGene00005171 | srg-14    | F26B1.6   | 0.216930209629966   | AGIWUR3070  |
| N2                                                                                                                                                                 | HS | I | 6315233 | 6317267 | WBGene00002073 | ima-2     | F26B1.3   | -0.289853630482598  |             |
| AGIWUR10902;AGIWUR14196;AGIWUR25439;AGIWUR31579;AGIWUR37813                                                                                                        |    |   |         |         |                |           |           |                     |             |
| N2                                                                                                                                                                 | HS | I | 6317701 | 6320365 | WBGene00017816 | hrpk-1    | F26B1.2   | -0.0943259326762425 |             |
| AGIWUR1418;AGIWUR1827;AGIWUR3187;AGIWUR5329;AGIWUR9787;AGIWUR16221;AGIWUR17680;AGIWUR18701;AGIWUR18921;AGIWUR26852;AGIWUR27039;AGIWUR36351;AGIWUR39126;AGIWUR43994 |    |   |         |         |                |           |           |                     |             |
| N2                                                                                                                                                                 | HS | I | 6320289 | 6324018 | WBGene00002601 | let-381   | F26B1.7   | 0.0851189915753956  | AGIWUR36974 |
| N2                                                                                                                                                                 | HS | I | 6342231 | 6356678 | WBGene00000254 | bli-4     | K04F10.4  | -0.0690808343493852 |             |
| AGIWUR3978;AGIWUR12697;AGIWUR17473;AGIWUR25337;AGIWUR32461;AGIWUR34393;AGIWUR42192;AGIWUR44317                                                                     |    |   |         |         |                |           |           |                     |             |
| N2                                                                                                                                                                 | HS | I | 6356614 | 6358410 | WBGene00003499 | mut-2     | K04F10.6  | -0.148768748562275  |             |
| AGIWUR2874;AGIWUR9366;AGIWUR9500;AGIWUR26345;AGIWUR33780;AGIWUR36604;AGIWUR41011;AGIWUR42263                                                                       |    |   |         |         |                |           |           |                     |             |
| N2                                                                                                                                                                 | HS | I | 6358585 | 6360457 | WBGene00019396 | K04F10.3  | K04F10.3  | -0.143321412162891  |             |
| AGIWUR13704                                                                                                                                                        |    |   |         |         |                |           |           |                     |             |
| N2                                                                                                                                                                 | HS | I | 6360844 | 6364172 | WBGene00019395 | K04F10.2  | K04F10.2  | 0.174503287334086   |             |
| AGIWUR4876                                                                                                                                                         |    |   |         |         |                |           |           |                     |             |
| N2                                                                                                                                                                 | HS | I | 6364886 | 6366224 | WBGene00019394 | K04F10.1  | K04F10.1  | 0.0430907286005482  |             |
| AGIWUR3231                                                                                                                                                         |    |   |         |         |                |           |           |                     |             |
| N2                                                                                                                                                                 | HS | I | 6366331 | 6368078 | WBGene00019399 | K04F10.7  | K04F10.7  | 0.189938000667464   |             |
| AGIWUR6668                                                                                                                                                         |    |   |         |         |                |           |           |                     |             |
| N2                                                                                                                                                                 | HS | I | 6368270 | 6369598 | WBGene00022586 | ZC308.4   | ZC308.4   | 0.0129461085781557  | AGIWUR37754 |
| N2                                                                                                                                                                 | HS | I | 6369934 | 6386183 | WBGene00001596 | gld-2     | ZC308.1   | -0.200629695604038  |             |
| AGIWUR1922;AGIWUR5338;AGIWUR9092;AGIWUR24999                                                                                                                       |    |   |         |         |                |           |           |                     |             |
| N2                                                                                                                                                                 | HS | I | 6386149 | 6392524 | WBGene00022592 | klu-2     | ZC328.2   | -0.426616407420809  | AGIWUR9565  |
| N2                                                                                                                                                                 | HS | I | 6404587 | 6405705 | WBGene00022591 | cuti-1    | ZC328.1   | -0.0533776404451505 |             |
| AGIWUR28749;AGIWUR40109;AGIWUR42212                                                                                                                                |    |   |         |         |                |           |           |                     |             |
| N2                                                                                                                                                                 | HS | I | 6405882 | 6406936 | WBGene00022594 | ZC328.5   | ZC328.5   | -0.0713888481998755 | AGIWUR29601 |
| N2                                                                                                                                                                 | HS | I | 6407458 | 6409212 | WBGene00004721 | san-1     | ZC328.4   | -0.0171462813543091 |             |
| AGIWUR10499;AGIWUR16704;AGIWUR24958;AGIWUR38192;AGIWUR40688                                                                                                        |    |   |         |         |                |           |           |                     |             |
| N2                                                                                                                                                                 | HS | I | 6409050 | 6417010 | WBGene00022593 | ZC328.3   | ZC328.3   | 0.175282985033763   |             |
| AGIWUR2496;AGIWUR16461;AGIWUR19232                                                                                                                                 |    |   |         |         |                |           |           |                     |             |

|                                                                                                                                              |    |   |         |         |                |          |          |                     |             |
|----------------------------------------------------------------------------------------------------------------------------------------------|----|---|---------|---------|----------------|----------|----------|---------------------|-------------|
| N2                                                                                                                                           | HS | I | 6418565 | 6418809 | WBGene00019992 | R10A10.1 | R10A10.1 | 0.084748382941255   |             |
| AGIWUR38650                                                                                                                                  |    |   |         |         |                |          |          |                     |             |
| N2                                                                                                                                           | HS | I | 6420660 | 6421985 | WBGene00019993 | rbx-2    | R10A10.2 | 0.170574882682235   |             |
| AGIWUR20356                                                                                                                                  |    |   |         |         |                |          |          |                     |             |
| N2                                                                                                                                           | HS | I | 6421978 | 6425794 | WBGene00018156 | ncbp-1   | F37E3.1  | 0.126866416292973   | AGIWUR26304 |
| N2                                                                                                                                           | HS | I | 6425793 | 6428942 | WBGene00018157 | lron-6   | F37E3.2  | 0.174894009942569   | AGIWUR1813  |
| N2                                                                                                                                           | HS | I | 6429525 | 6431586 | WBGene00018158 | comp-1   | F37E3.3  | 0.119202696553282   |             |
| AGIWUR1030;AGIWUR34352                                                                                                                       |    |   |         |         |                |          |          |                     |             |
| N2                                                                                                                                           | HS | I | 6436058 | 6441192 | WBGene00004924 | snt-4    | T23H2.2  | -0.0196850643857225 | AGIWUR23814 |
| N2                                                                                                                                           | HS | I | 6441637 | 6446465 | WBGene00020742 | T23H2.3  | T23H2.3  | -0.107275931428875  |             |
| AGIWUR2836;AGIWUR2981;AGIWUR5671;AGIWUR11513;AGIWUR12657;AGIWUR14273;AGIWUR15264;AGIWUR15865;AGIWUR20917;AGIWUR26561;AGIWUR34382;AGIWUR43457 |    |   |         |         |                |          |          |                     |             |
| N2                                                                                                                                           | HS | I | 6447304 | 6453933 | WBGene00003798 | npp-12   | T23H2.1  | -0.219393486615314  |             |
| AGIWUR565;AGIWUR8913;AGIWUR37341;AGIWUR41730                                                                                                 |    |   |         |         |                |          |          |                     |             |
| N2                                                                                                                                           | HS | I | 6453875 | 6456984 | WBGene00020743 | mam-8    | T23H2.4  | 0.0344307200570491  | AGIWUR24944 |
| N2                                                                                                                                           | HS | I | 6457061 | 6458479 | WBGene00004273 | rab-10   | T23H2.5  | 0.110820618415785   |             |
| AGIWUR1929;AGIWUR2575;AGIWUR4282;AGIWUR8097;AGIWUR10011;AGIWUR21666;AGIWUR34705                                                              |    |   |         |         |                |          |          |                     |             |
| N2                                                                                                                                           | HS | I | 6460433 | 6464286 | WBGene00019432 | kn1-2    | K06A5.4  | 0.0518619139391134  | AGIWUR32152 |
| N2                                                                                                                                           | HS | I | 6464197 | 6466941 | WBGene00019433 | acd-3    | K06A5.6  | 0.010138198219984   | AGIWUR7557  |
| N2                                                                                                                                           | HS | I | 6466752 | 6467515 | WBGene00019431 | K06A5.3  | K06A5.3  | -0.205768972343837  | AGIWUR8782  |
| N2                                                                                                                                           | HS | I | 6468113 | 6469392 | WBGene00019430 | K06A5.2  | K06A5.2  | 0.103933653181404   | AGIWUR24586 |
| N2                                                                                                                                           | HS | I | 6469386 | 6471995 | WBGene00000386 | cdc-25.1 | K06A5.7  | -0.319318148925412  |             |
| AGIWUR40783                                                                                                                                  |    |   |         |         |                |          |          |                     |             |
| N2                                                                                                                                           | HS | I | 6474183 | 6489030 | WBGene00019434 | nmt-1    | K06A5.8  | -0.0018930501093859 |             |
| AGIWUR3470;AGIWUR27663;AGIWUR38621                                                                                                           |    |   |         |         |                |          |          |                     |             |
| N2                                                                                                                                           | HS | I | 6490716 | 6492727 | WBGene00000937 | dbr-1    | C55B7.8  | 0.0650386909743474  | AGIWUR15559 |
| N2                                                                                                                                           | HS | I | 6492722 | 6494754 | WBGene00007018 | mdt-18   | C55B7.9  | 0.215933105757626   | AGIWUR24134 |
| N2                                                                                                                                           | HS | I | 6494216 | 6496109 | WBGene00016944 | uri-1    | C55B7.5  | 0.027558686991398   | AGIWUR23828 |
| N2                                                                                                                                           | HS | I | 6497436 | 6499560 | WBGene00016943 | acd-1    | C55B7.4  | 0.255542751653326   |             |
| AGIWUR9071;AGIWUR12896;AGIWUR13562;AGIWUR24409;AGIWUR29961                                                                                   |    |   |         |         |                |          |          |                     |             |
| N2                                                                                                                                           | HS | I | 6507894 | 6511630 | WBGene00001627 | gly-2    | C55B7.2  | 0.0573666116265859  | AGIWUR38944 |
| N2                                                                                                                                           | HS | I | 6511612 | 6513843 | WBGene00016947 | C55B7.11 | C55B7.11 | -0.0691824385340976 |             |
| AGIWUR317;AGIWUR10946;AGIWUR17661;AGIWUR19575;AGIWUR40605                                                                                    |    |   |         |         |                |          |          |                     |             |
| N2                                                                                                                                           | HS | I | 6513928 | 6517507 | WBGene00001599 | glh-2    | C55B7.1  | 0.29753292406653    | AGIWUR14020 |
| N2                                                                                                                                           | HS | I | 6517575 | 6520879 | WBGene00000483 | che-1    | C55B7.12 | -0.617514829061832  |             |
| AGIWUR40311                                                                                                                                  |    |   |         |         |                |          |          |                     |             |
| N2                                                                                                                                           | HS | I | 6525045 | 6528689 | WBGene00020414 | T10E9.4  | T10E9.4  | -0.659161065084106  | AGIWUR11816 |
| N2                                                                                                                                           | HS | I | 6529158 | 6530099 | WBGene00020416 | T10E9.6  | T10E9.6  | 0.222983586193369   | AGIWUR1670  |
| N2                                                                                                                                           | HS | I | 6530131 | 6533031 | WBGene00020417 | nuo-2    | T10E9.7  | 0.0728388106405262  |             |

AGIWUR3800;AGIWUR20696;AGIWUR23397

|                                                                         |    |   |         |         |                |          |           |                     |             |
|-------------------------------------------------------------------------|----|---|---------|---------|----------------|----------|-----------|---------------------|-------------|
| N2                                                                      | HS | I | 6534072 | 6539193 | WBGene00020413 | T10E9.3  | T10E9.3   | 0.179969033319498   | AGIWUR7632  |
| N2                                                                      | HS | I | 6539129 | 6541084 | WBGene00020418 | T10E9.8  | T10E9.8   | 0.0515869468652208  |             |
| AGIWUR8524;AGIWUR10486;AGIWUR10560;AGIWUR16490;AGIWUR32642;AGIWUR35271  |    |   |         |         |                |          |           |                     |             |
| N2                                                                      | HS | I | 6542090 | 6544966 | WBGene00020412 | T10E9.2  | T10E9.2   | 0.240626593754397   | AGIWUR39070 |
| N2                                                                      | HS | I | 6545110 | 6546593 | WBGene00020411 | T10E9.1  | T10E9.1   | 0.171444827850062   | AGIWUR29543 |
| N2                                                                      | HS | I | 6548644 | 6550447 | WBGene00019005 | F57B10.8 | F57B10.8  | 0.105203548871032   |             |
| AGIWUR34149                                                             |    |   |         |         |                |          |           |                     |             |
| N2                                                                      | HS | I | 6550536 | 6552665 | WBGene00019006 | spg-20   | F57B10.9  | 0.0140884392448655  |             |
| AGIWUR2257                                                              |    |   |         |         |                |          |           |                     |             |
| N2                                                                      | HS | I | 6552834 | 6553379 | WBGene00019007 | ucr-11   | F57B10.14 | 0.0824944087280386  |             |
| AGIWUR26529                                                             |    |   |         |         |                |          |           |                     |             |
| N2                                                                      | HS | I | 6553481 | 6554290 | WBGene00000896 | dad-1    | F57B10.10 | 0.0255223268504992  |             |
| AGIWUR15439                                                             |    |   |         |         |                |          |           |                     |             |
| N2                                                                      | HS | I | 6554729 | 6558623 | WBGene00006607 | tre-1    | F57B10.7  | 0.0279826468749285  |             |
| AGIWUR30347                                                             |    |   |         |         |                |          |           |                     |             |
| N2                                                                      | HS | I | 6558696 | 6562346 | WBGene00019004 | xpg-1    | F57B10.6  | -0.160972358193067  |             |
| AGIWUR13434                                                             |    |   |         |         |                |          |           |                     |             |
| N2                                                                      | HS | I | 6562699 | 6563660 | WBGene00019003 | F57B10.5 | F57B10.5  | 0.0554871652200717  |             |
| AGIWUR37962                                                             |    |   |         |         |                |          |           |                     |             |
| N2                                                                      | HS | I | 6563629 | 6564451 | WBGene00000236 | bag-1    | F57B10.11 | 0.176796651476391   |             |
| AGIWUR18247                                                             |    |   |         |         |                |          |           |                     |             |
| N2                                                                      | HS | I | 6564749 | 6565868 | WBGene00003184 | mei-2    | F57B10.12 | 0.189205425926827   |             |
| AGIWUR37281                                                             |    |   |         |         |                |          |           |                     |             |
| N2                                                                      | HS | I | 6566173 | 6568905 | WBGene00019002 | F57B10.4 | F57B10.4  | -0.0796988042159619 |             |
| AGIWUR37891                                                             |    |   |         |         |                |          |           |                     |             |
| N2                                                                      | HS | I | 6569494 | 6572598 | WBGene00019001 | ipgm-1   | F57B10.3  | 0.085426387356379   |             |
| AGIWUR7348;AGIWUR17880;AGIWUR19488;AGIWUR23845                          |    |   |         |         |                |          |           |                     |             |
| N2                                                                      | HS | I | 6574004 | 6585510 | WBGene00002783 | let-607  | F57B10.1  | -0.208279117314039  |             |
| AGIWUR10303;AGIWUR13630;AGIWUR16293;AGIWUR22955;AGIWUR28124;AGIWUR31341 |    |   |         |         |                |          |           |                     |             |
| N2                                                                      | HS | I | 6585039 | 6587882 | WBGene00006624 | try-6    | F48A9.3   | 0.504003407683886   | AGIWUR17630 |
| N2                                                                      | HS | I | 6592332 | 6593831 | WBGene00018582 | F48A9.2  | F48A9.2   | 0.0335742062149489  | AGIWUR22685 |
| N2                                                                      | HS | I | 6594320 | 6596231 | WBGene00018581 | F48A9.1  | F48A9.1   | -0.132640760438075  | AGIWUR30733 |
| N2                                                                      | HS | I | 6596919 | 6598928 | WBGene00017067 | D2092.6  | D2092.6   | 0.0965712360721804  | AGIWUR13165 |
| N2                                                                      | HS | I | 6598981 | 6607520 | WBGene00017066 | maco-1   | D2092.5   | -0.135061909945556  |             |
| AGIWUR6251;AGIWUR33086                                                  |    |   |         |         |                |          |           |                     |             |
| N2                                                                      | HS | I | 6612188 | 6615990 | WBGene00017065 | D2092.4  | D2092.4   | 0.212697834677199   | AGIWUR33325 |
| N2                                                                      | HS | I | 6616304 | 6618560 | WBGene00006645 | tsp-19   | D2092.7   | 0.223171512774563   | AGIWUR38000 |
| N2                                                                      | HS | I | 6620665 | 6621292 | WBGene00017068 | D2092.8  | D2092.8   | 0.0601725007886529  | AGIWUR24576 |

|                                                                      |    |   |         |         |                 |          |          |                     |             |
|----------------------------------------------------------------------|----|---|---------|---------|-----------------|----------|----------|---------------------|-------------|
| N2                                                                   | HS | I | 6621687 | 6624894 | WBGene000000050 | acr-11   | D2092.3  | 0.196812076417277   | AGIWUR4258  |
| N2                                                                   | HS | I | 6625066 | 6626788 | WBGene00017064  | ppfr-2   | D2092.2  | -0.0793676133886176 | AGIWUR39480 |
| N2                                                                   | HS | I | 6627045 | 6627914 | WBGene00044610  | D2092.10 | D2092.10 | -0.0968648126414546 |             |
| AGIWUR21189;AGIWUR22339;AGIWUR38102;AGIWUR40477                      |    |   |         |         |                 |          |          |                     |             |
| N2                                                                   | HS | I | 6629717 | 6637429 | WBGene00017063  | mctp-1   | D2092.1  | -0.150644843254675  | AGIWUR30994 |
| N2                                                                   | HS | I | 6640662 | 6642643 | WBGene00006625  | try-7    | ZC581.6  | 0.226612898711025   | AGIWUR4027  |
| N2                                                                   | HS | I | 6651220 | 6655430 | WBGene00022633  | ZC581.3  | ZC581.3  | 0.120881670220095   | AGIWUR20637 |
| N2                                                                   | HS | I | 6655608 | 6658371 | WBGene00022632  | ZC581.2  | ZC581.2  | -0.237105592471138  |             |
| AGIWUR13462;AGIWUR32856;AGIWUR33302                                  |    |   |         |         |                 |          |          |                     |             |
| N2                                                                   | HS | I | 6660436 | 6662315 | WBGene00022634  | ZC581.7  | ZC581.7  | -0.101641948224588  | AGIWUR41254 |
| N2                                                                   | HS | I | 6663050 | 6665160 | WBGene00022631  | nek1-2   | ZC581.1  | 0.17583991190287    | AGIWUR4970  |
| N2                                                                   | HS | I | 6665077 | 6673840 | WBGene00022635  | ZC581.9  | ZC581.9  | -0.265475957311239  | AGIWUR14388 |
| N2                                                                   | HS | I | 6687349 | 6691662 | WBGene00020712  | ckr-1    | T23B3.4  | 0.0479782736207497  | AGIWUR27855 |
| N2                                                                   | HS | I | 6706766 | 6708919 | WBGene00020714  | T23B3.6  | T23B3.6  | -0.0183816569781259 | AGIWUR31861 |
| N2                                                                   | HS | I | 6711512 | 6712327 | WBGene00020711  | rmd-5    | T23B3.3  | 0.0354108142203966  | AGIWUR43249 |
| N2                                                                   | HS | I | 6715949 | 6717090 | WBGene00020710  | T23B3.2  | T23B3.2  | -0.0222966603002828 | AGIWUR4376  |
| N2                                                                   | HS | I | 6717819 | 6719430 | WBGene00020709  | T23B3.1  | T23B3.1  | -0.0519361740208737 | AGIWUR41299 |
| N2                                                                   | HS | I | 6719368 | 6723059 | WBGene00020933  | W02D3.4  | W02D3.4  | 0.0854756974541573  | AGIWUR22746 |
| N2                                                                   | HS | I | 6724917 | 6728330 | WBGene00003170  | mec-6    | W02D3.3  | 0.358395448274222   | AGIWUR969   |
| N2                                                                   | HS | I | 6728290 | 6729376 | WBGene00002258  | lbp-6    | W02D3.5  | 0.284859683290613   | AGIWUR30217 |
| N2                                                                   | HS | I | 6729996 | 6730959 | WBGene00007057  | ant-1.2  | W02D3.6  | -0.167332303343038  | AGIWUR30633 |
| N2                                                                   | HS | I | 6731267 | 6732280 | WBGene00002257  | lbp-5    | W02D3.7  | 0.030402081867273   |             |
| AGIWUR35562;AGIWUR35903                                              |    |   |         |         |                 |          |          |                     |             |
| N2                                                                   | HS | I | 6734029 | 6736161 | WBGene00004883  | smg-5    | W02D3.8  | 0.186919757844485   | AGIWUR40678 |
| N2                                                                   | HS | I | 6736680 | 6741175 | WBGene00020932  | dhod-1   | W02D3.2  | 0.0485791573394181  | AGIWUR16146 |
| N2                                                                   | HS | I | 6741274 | 6741877 | WBGene00020931  | cytb-5.2 | W02D3.1  | 0.218844160096666   |             |
| AGIWUR6119;AGIWUR17412                                               |    |   |         |         |                 |          |          |                     |             |
| N2                                                                   | HS | I | 6741984 | 6742358 | WBGene00020937  | W02D3.12 | W02D3.12 | 0.143693071819808   |             |
| AGIWUR27444                                                          |    |   |         |         |                 |          |          |                     |             |
| N2                                                                   | HS | I | 6742293 | 6745341 | WBGene00006773  | unc-37   | W02D3.9  | 0.0981005183935544  |             |
| AGIWUR5383;AGIWUR17092                                               |    |   |         |         |                 |          |          |                     |             |
| N2                                                                   | HS | I | 6745991 | 6753031 | WBGene00020935  | fnci-1   | W02D3.10 | -0.163423465573833  |             |
| AGIWUR9400;AGIWUR35508                                               |    |   |         |         |                 |          |          |                     |             |
| N2                                                                   | HS | I | 6753219 | 6756348 | WBGene00020936  | hrpf-1   | W02D3.11 | -0.137590491248742  |             |
| AGIWUR3301;AGIWUR4929;AGIWUR6674;AGIWUR15926;AGIWUR19943;AGIWUR35377 |    |   |         |         |                 |          |          |                     |             |
| N2                                                                   | HS | I | 6757763 | 6758178 | WBGene00001682  | gpc-2    | F08B6.2  | 0.188780202293898   |             |
| AGIWUR8016;AGIWUR25894                                               |    |   |         |         |                 |          |          |                     |             |
| N2                                                                   | HS | I | 6758181 | 6760179 | WBGene00017240  | calu-2   | F08B6.3  | 0.24739716426531    | AGIWUR31    |
| N2                                                                   | HS | I | 6761228 | 6767797 | WBGene00006819  | unc-87   | F08B6.4  | 0.0219039156419232  |             |

AGIWUR5112;AGIWUR7202;AGIWUR19433;AGIWUR32709  
 N2 HS I 6773976 6780151 WBGene00004111 pqn-21 C37A2.5 -0.0213715068286726  
 AGIWUR8188;AGIWUR13214;AGIWUR28740;AGIWUR31351;AGIWUR36292;AGIWUR38150;AGIWUR42687  
 N2 HS I 6780806 6784396 WBGene00000871 cye-1 C37A2.4 0.0133998561435238  
 AGIWUR21118;AGIWUR35011  
 N2 HS I 6784854 6787139 WBGene00016491 acdh-5 C37A2.3 0.193245084442182  
 AGIWUR16440;AGIWUR35452;AGIWUR44135  
 N2 HS I 6788032 6789002 WBGene00016492 C37A2.6 C37A2.6 -0.0414893059847863  
 AGIWUR6422;AGIWUR37330  
 N2 HS I 6789039 6789738 WBGene00016493 C37A2.7 C37A2.7 -0.256462574664752  
 AGIWUR6374;AGIWUR44421  
 N2 HS I 6791025 6797470 WBGene00004110 pqn-20 C37A2.2 -0.10701849086335 AGIWUR19579  
 N2 HS I 6798232 6799674 WBGene00016494 C37A2.8 C37A2.8 0.0990472607463939  
 AGIWUR28525;AGIWUR44472  
 N2 HS I 6800386 6804860 WBGene00017098 E02D9.1 E02D9.1 0.130659078924225  
 AGIWUR17002;AGIWUR18835;AGIWUR27530;AGIWUR29337;AGIWUR32622;AGIWUR35400;AGIWUR42665  
 N2 HS I 6804788 6810451 WBGene00019324 K02F2.5 K02F2.5 0.0243355412821371  
 AGIWUR7002;AGIWUR14204;AGIWUR16418;AGIWUR24188;AGIWUR38556;AGIWUR42759  
 N2 HS I 6812664 6814248 WBGene00006740 ulp-5 K02F2.4 -0.0296513336793609 AGIWUR25907  
 N2 HS I 6814511 6834687 WBGene00019323 teg-4 K02F2.3 -0.0589921004751019 AGIWUR33779  
 N2 HS I 6836375 6838140 WBGene00019322 ahcy-1 K02F2.2 -0.166419233521061  
 AGIWUR287;AGIWUR1378;AGIWUR4956;AGIWUR8493;AGIWUR9338;AGIWUR9562;AGIWUR12159;AGIWUR14900;AGIWUR17808;AGIWUR  
 17829;AGIWUR19142;AGIWUR23216;AGIWUR23428;AGIWUR26001;AGIWUR28582;AGIWUR29154;AGIWUR32426  
 N2 HS I 6838354 6843343 WBGene00001056 dpf-3 K02F2.1 -0.00602019072466753 AGIWUR15334  
 N2 HS I 6843589 6845134 WBGene00001075 dpy-14 H27M09.4 -0.967555564501492  
 AGIWUR26750  
 N2 HS I 6845175 6846952 WBGene00019248 H27M09.5 H27M09.5 0.0863764408941172  
 AGIWUR12565  
 N2 HS I 6847511 6849923 WBGene00019247 syp-4 H27M09.3 -0.0338008857714556  
 AGIWUR16231  
 N2 HS I 6850409 6851356 WBGene00019246 rpb-5 H27M09.2 0.0546670564723435  
 AGIWUR41547  
 N2 HS I 6851372 6854140 WBGene00019245 sacy-1 H27M09.1 0.0166335599092307  
 AGIWUR16956;AGIWUR24226;AGIWUR38168;AGIWUR39686;AGIWUR41837  
 N2 HS I 6862397 6870424 WBGene00044898 let-383 T21G5.6 -0.0628022893903264  
 AGIWUR3358;AGIWUR6039;AGIWUR10814;AGIWUR19853;AGIWUR35561  
 N2 HS I 6870415 6871911 WBGene00020660 T21G5.2 T21G5.2 0.209245285739528  
 AGIWUR21753;AGIWUR29068;AGIWUR35710  
 N2 HS I 6872597 6873755 WBGene00020661 smz-2 T21G5.4 -0.0349539644593584 AGIWUR42609



|                                                                                     |    |   |         |         |                |          |          |                     |             |
|-------------------------------------------------------------------------------------|----|---|---------|---------|----------------|----------|----------|---------------------|-------------|
| N2                                                                                  | HS | I | 6874304 | 6876928 | WBGene00020659 | T21G5.1  | T21G5.1  | 0.186473448024808   | AGIWUR26740 |
| N2                                                                                  | HS | I | 6877080 | 6888217 | WBGene00006423 | asd-2    | T21G5.5  | -0.122950212287826  |             |
| AGIWUR22524;AGIWUR24899;AGIWUR25729;AGIWUR34706;AGIWUR38832;AGIWUR43537;AGIWUR44294 |    |   |         |         |                |          |          |                     |             |
| N2                                                                                  | HS | I | 6889254 | 6891501 | WBGene00016742 | C48B6.4  | C48B6.4  | -0.095309677155754  | AGIWUR13786 |
| N2                                                                                  | HS | I | 6897755 | 6900619 | WBGene00016743 | srb-15   | C48B6.5  | 0.133389934051902   | AGIWUR12549 |
| N2                                                                                  | HS | I | 6900947 | 6913579 | WBGene00004879 | smg-1    | C48B6.6  | -0.198853457078828  |             |
| AGIWUR26267;AGIWUR29121;AGIWUR35234                                                 |    |   |         |         |                |          |          |                     |             |
| N2                                                                                  | HS | I | 6915049 | 6916609 | WBGene00016741 | C48B6.3  | C48B6.3  | -0.0658729971799259 |             |
| AGIWUR3569;AGIWUR8775;AGIWUR16126;AGIWUR22913;AGIWUR32725;AGIWUR33646               |    |   |         |         |                |          |          |                     |             |
| N2                                                                                  | HS | I | 6916766 | 6917560 | WBGene00016740 | C48B6.2  | C48B6.2  | 0.242091362937984   | AGIWUR3988  |
| N2                                                                                  | HS | I | 6923076 | 6923688 | WBGene00016746 | C48B6.10 | C48B6.10 | 0.160189618692216   |             |
| AGIWUR2589;AGIWUR8621;AGIWUR26363;AGIWUR28730;AGIWUR30871;AGIWUR44258               |    |   |         |         |                |          |          |                     |             |
| N2                                                                                  | HS | I | 6924288 | 6925463 | WBGene00016745 | C48B6.9  | C48B6.9  | -0.094765143800899  | AGIWUR21629 |
| N2                                                                                  | HS | I | 6926262 | 6929664 | WBGene00020399 | ztf-4    | T10B11.3 | -0.259335471263395  |             |
| AGIWUR20363                                                                         |    |   |         |         |                |          |          |                     |             |
| N2                                                                                  | HS | I | 6931138 | 6936928 | WBGene00020398 | cerk-1   | T10B11.2 | -0.270022430350576  |             |
| AGIWUR8530                                                                          |    |   |         |         |                |          |          |                     |             |
| N2                                                                                  | HS | I | 6937504 | 6939618 | WBGene00020400 | T10B11.4 | T10B11.4 | -0.0640306484571989 |             |
| AGIWUR31514                                                                         |    |   |         |         |                |          |          |                     |             |
| N2                                                                                  | HS | I | 6940249 | 6941950 | WBGene00020401 | T10B11.5 | T10B11.5 | 0.0724419551970374  |             |
| AGIWUR43470                                                                         |    |   |         |         |                |          |          |                     |             |
| N2                                                                                  | HS | I | 6943176 | 6945358 | WBGene00020402 | T10B11.6 | T10B11.6 | 0.0866278547393424  |             |
| AGIWUR14326                                                                         |    |   |         |         |                |          |          |                     |             |
| N2                                                                                  | HS | I | 6945596 | 6950499 | WBGene00020403 | T10B11.7 | T10B11.7 | 0.0521367619635971  |             |
| AGIWUR41683                                                                         |    |   |         |         |                |          |          |                     |             |
| N2                                                                                  | HS | I | 6951135 | 6951982 | WBGene00020397 | pcbd-1   | T10B11.1 | 0.205968434214872   |             |
| AGIWUR16908                                                                         |    |   |         |         |                |          |          |                     |             |
| N2                                                                                  | HS | I | 6951900 | 6954252 | WBGene00020404 | T10B11.8 | T10B11.8 | 0.101858517409262   |             |
| AGIWUR11281                                                                         |    |   |         |         |                |          |          |                     |             |
| N2                                                                                  | HS | I | 6954414 | 6961139 | WBGene00016260 | rege-1   | C30F12.1 | 0.120559309796513   |             |
| AGIWUR409;AGIWUR6954;AGIWUR24743;AGIWUR28854;AGIWUR31266;AGIWUR32912                |    |   |         |         |                |          |          |                     |             |
| N2                                                                                  | HS | I | 6967670 | 6970190 | WBGene00016261 | C30F12.2 | C30F12.2 | 0.0557906710522085  |             |
| AGIWUR4610;AGIWUR34084                                                              |    |   |         |         |                |          |          |                     |             |
| N2                                                                                  | HS | I | 6970367 | 6971879 | WBGene00016262 | C30F12.3 | C30F12.3 | 0.0752004735265288  |             |
| AGIWUR15866                                                                         |    |   |         |         |                |          |          |                     |             |
| N2                                                                                  | HS | I | 6972157 | 6973789 | WBGene00016263 | C30F12.4 | C30F12.4 | 0.0105495870399324  |             |
| AGIWUR17475                                                                         |    |   |         |         |                |          |          |                     |             |
| N2                                                                                  | HS | I | 6974558 | 6977100 | WBGene00016266 | idhg-2   | C30F12.7 | 0.272497853907923   |             |
| AGIWUR38700                                                                         |    |   |         |         |                |          |          |                     |             |

|                                                                                                                       |    |   |         |         |                |          |          |                       |             |
|-----------------------------------------------------------------------------------------------------------------------|----|---|---------|---------|----------------|----------|----------|-----------------------|-------------|
| N2                                                                                                                    | HS | I | 6989067 | 6992106 | WBGene00016265 | trhr-1   | C30F12.6 | 0.135744162113649     |             |
| AGIWUR4257                                                                                                            |    |   |         |         |                |          |          |                       |             |
| N2                                                                                                                    | HS | I | 6991951 | 6999706 | WBGene00016264 | C30F12.5 | C30F12.5 | 0.0452460164001609    |             |
| AGIWUR3647;AGIWUR41737                                                                                                |    |   |         |         |                |          |          |                       |             |
| N2                                                                                                                    | HS | I | 7002870 | 7003481 | WBGene00010371 | H06001.4 | H06001.4 | 0.184487536717382     |             |
| AGIWUR24652                                                                                                           |    |   |         |         |                |          |          |                       |             |
| N2                                                                                                                    | HS | I | 7005443 | 7009190 | WBGene00010370 | ctg-1    | H06001.3 | 0.16159713392455      |             |
| AGIWUR39363                                                                                                           |    |   |         |         |                |          |          |                       |             |
| N2                                                                                                                    | HS | I | 7009139 | 7015212 | WBGene00010369 | chd-1    | H06001.2 | 0.128607350816033     |             |
| AGIWUR350                                                                                                             |    |   |         |         |                |          |          |                       |             |
| N2                                                                                                                    | HS | I | 7015912 | 7021743 | WBGene00003964 | pdi-3    | H06001.1 | 0.150431395107641     |             |
| AGIWUR20997;AGIWUR22066                                                                                               |    |   |         |         |                |          |          |                       |             |
| N2                                                                                                                    | HS | I | 7021946 | 7029076 | WBGene00008852 | ubql-1   | F15C11.2 | -0.205021101129501    |             |
| AGIWUR2160;AGIWUR4824;AGIWUR10320;AGIWUR10692;AGIWUR12397;AGIWUR13433;AGIWUR13487;AGIWUR23339;AGIWUR37152;AGIWUR44055 |    |   |         |         |                |          |          |                       |             |
| N2                                                                                                                    | HS | I | 7038900 | 7048832 | WBGene00004773 | sem-4    | F15C11.1 | -0.0668930940916255   |             |
| AGIWUR17306;AGIWUR32821;AGIWUR36613;AGIWUR38195;AGIWUR39733                                                           |    |   |         |         |                |          |          |                       |             |
| N2                                                                                                                    | HS | I | 7050042 | 7051712 | WBGene00044764 | W01A8.7  | W01A8.7  | 0.017102246246953     | AGIWUR24025 |
| N2                                                                                                                    | HS | I | 7057170 | 7059351 | WBGene00007024 | plin-1   | W01A8.1  | -0.0955131011119885   |             |
| AGIWUR6882;AGIWUR21896;AGIWUR25710;AGIWUR39335;AGIWUR41766                                                            |    |   |         |         |                |          |          |                       |             |
| N2                                                                                                                    | HS | I | 7065263 | 7067899 | WBGene00012165 | cutl-6   | W01A8.3  | -0.0144726912743005   | AGIWUR6403  |
| N2                                                                                                                    | HS | I | 7068106 | 7069186 | WBGene00012166 | nuo-6    | W01A8.4  | -0.0624392109484351   |             |
| AGIWUR5024;AGIWUR14516;AGIWUR20848                                                                                    |    |   |         |         |                |          |          |                       |             |
| N2                                                                                                                    | HS | I | 7069440 | 7070728 | WBGene00012167 | tofu-5   | W01A8.5  | -0.26046881313601     |             |
| AGIWUR10884;AGIWUR16983;AGIWUR23898;AGIWUR29769;AGIWUR44504                                                           |    |   |         |         |                |          |          |                       |             |
| N2                                                                                                                    | HS | I | 7070649 | 7074733 | WBGene00012168 | W01A8.6  | W01A8.6  | 0.369686998864392     | AGIWUR2324  |
| N2                                                                                                                    | HS | I | 7075918 | 7079566 | WBGene00002198 | kin-14   | F22D6.1  | 0.150913748579507     | AGIWUR11797 |
| N2                                                                                                                    | HS | I | 7079868 | 7081520 | WBGene00009050 | F22D6.2  | F22D6.2  | -0.000612919936834544 |             |
| AGIWUR7047;AGIWUR7697;AGIWUR28913;AGIWUR33699                                                                         |    |   |         |         |                |          |          |                       |             |
| N2                                                                                                                    | HS | I | 7088030 | 7090062 | WBGene00003815 | nars-1   | F22D6.3  | 0.0124979604743913    |             |
| AGIWUR8353;AGIWUR28891;AGIWUR31912                                                                                    |    |   |         |         |                |          |          |                       |             |
| N2                                                                                                                    | HS | I | 7090623 | 7091371 | WBGene00009051 | nduf-6   | F22D6.4  | 0.123206553924197     | AGIWUR24434 |
| N2                                                                                                                    | HS | I | 7091309 | 7094537 | WBGene00004186 | prpf-4   | F22D6.5  | -0.747763028752647    | AGIWUR11477 |
| N2                                                                                                                    | HS | I | 7095486 | 7098406 | WBGene00009052 | ekl-1    | F22D6.6  | -0.0136153190287374   | AGIWUR22881 |
| N2                                                                                                                    | HS | I | 7098981 | 7099497 | WBGene00043279 | F22D6.8  | F22D6.8  | -0.101505641735149    |             |
| AGIWUR5007;AGIWUR5895;AGIWUR19127;AGIWUR27377;AGIWUR36296;AGIWUR44085                                                 |    |   |         |         |                |          |          |                       |             |
| N2                                                                                                                    | HS | I | 7099810 | 7101775 | WBGene00009054 | F22D6.9  | F22D6.9  | 0.108173230979737     | AGIWUR19730 |
| N2                                                                                                                    | HS | I | 7102216 | 7103392 | WBGene00009056 | F22D6.15 | F22D6.15 | 0.126631125721755     |             |
| AGIWUR11066;AGIWUR24483;AGIWUR44167                                                                                   |    |   |         |         |                |          |          |                       |             |

|                                                                        |    |   |         |         |                |          |          |                      |             |
|------------------------------------------------------------------------|----|---|---------|---------|----------------|----------|----------|----------------------|-------------|
| N2                                                                     | HS | I | 7105302 | 7106926 | WBGene00000636 | col-60   | F22D6.10 | 0.171444520654923    |             |
| AGIWUR14941                                                            |    |   |         |         |                |          |          |                      |             |
| N2                                                                     | HS | I | 7110240 | 7112287 | WBGene00001643 | gly-18   | F22D6.11 | 0.189601633862054    |             |
| AGIWUR10272                                                            |    |   |         |         |                |          |          |                      |             |
| N2                                                                     | HS | I | 7112903 | 7115001 | WBGene00001644 | gly-19   | F22D6.12 | 0.12539313255284     |             |
| AGIWUR30017;AGIWUR32849                                                |    |   |         |         |                |          |          |                      |             |
| N2                                                                     | HS | I | 7116092 | 7116889 | WBGene00010740 | K10D3.6  | K10D3.6  | -0.0468686580190436  |             |
| AGIWUR34630;AGIWUR43978                                                |    |   |         |         |                |          |          |                      |             |
| N2                                                                     | HS | I | 7117808 | 7121545 | WBGene00001614 | glr-3    | K10D3.1  | 0.0500579140742072   |             |
| AGIWUR1117;AGIWUR20863                                                 |    |   |         |         |                |          |          |                      |             |
| N2                                                                     | HS | I | 7121657 | 7122194 | WBGene00219281 | K10D3.8  | K10D3.8  | -0.306753102050443   | AGIWUR40179 |
| N2                                                                     | HS | I | 7122614 | 7128423 | WBGene00006753 | unc-14   | K10D3.2  | 0.210554935530242    |             |
| AGIWUR5593;AGIWUR16242;AGIWUR16992;AGIWUR17744;AGIWUR22269;AGIWUR37434 |    |   |         |         |                |          |          |                      |             |
| N2                                                                     | HS | I | 7132747 | 7134312 | WBGene00006394 | taf-11.2 | K10D3.3  | 0.0282924420858279   |             |
| AGIWUR23016;AGIWUR35624;AGIWUR37192                                    |    |   |         |         |                |          |          |                      |             |
| N2                                                                     | HS | I | 7134738 | 7139973 | WBGene00010738 | K10D3.4  | K10D3.4  | 0.0639492400871262   | AGIWUR12834 |
| N2                                                                     | HS | I | 7140278 | 7147230 | WBGene00010427 | hpo-11   | H37N21.1 | -0.247055012125021   |             |
| AGIWUR9880;AGIWUR43725                                                 |    |   |         |         |                |          |          |                      |             |
| N2                                                                     | HS | I | 7149937 | 7151887 | WBGene00010645 | fec1-1   | K07G5.6  | 0.0972034641743154   | AGIWUR6918  |
| N2                                                                     | HS | I | 7152463 | 7156868 | WBGene00010641 | crml-1   | K07G5.1  | -0.0966051412162825  |             |
| AGIWUR923;AGIWUR2297;AGIWUR24001;AGIWUR40638                           |    |   |         |         |                |          |          |                      |             |
| N2                                                                     | HS | I | 7159714 | 7160917 | WBGene00006963 | xpa-1    | K07G5.2  | -0.336198758643519   | AGIWUR9973  |
| N2                                                                     | HS | I | 7161016 | 7166518 | WBGene00010642 | mks-6    | K07G5.3  | 0.0976114934453838   |             |
| AGIWUR17006;AGIWUR35676                                                |    |   |         |         |                |          |          |                      |             |
| N2                                                                     | HS | I | 7166932 | 7168783 | WBGene00010643 | K07G5.4  | K07G5.4  | 0.147884117781755    | AGIWUR19839 |
| N2                                                                     | HS | I | 7169997 | 7172189 | WBGene00010644 | K07G5.5  | K07G5.5  | 0.284831548053404    | AGIWUR36732 |
| N2                                                                     | HS | I | 7172463 | 7174156 | WBGene00010870 | let-522  | M05B5.2  | -0.0895327563557018  | AGIWUR13948 |
| N2                                                                     | HS | I | 7177953 | 7179430 | WBGene00010869 | M05B5.1  | M05B5.1  | -0.215681756554794   | AGIWUR15124 |
| N2                                                                     | HS | I | 7183053 | 7185709 | WBGene00010873 | trpa-2   | M05B5.6  | -0.168054321472724   | AGIWUR13437 |
| N2                                                                     | HS | I | 7185695 | 7188298 | WBGene00010871 | M05B5.3  | M05B5.3  | 0.0224144411210343   | AGIWUR6763  |
| N2                                                                     | HS | I | 7188465 | 7190581 | WBGene00010872 | M05B5.4  | M05B5.4  | 0.165456796919431    |             |
| AGIWUR6384;AGIWUR17510                                                 |    |   |         |         |                |          |          |                      |             |
| N2                                                                     | HS | I | 7190834 | 7193924 | WBGene00001949 | hlh-2    | M05B5.5  | 0.0180250657675955   |             |
| AGIWUR8155;AGIWUR10611;AGIWUR18355                                     |    |   |         |         |                |          |          |                      |             |
| N2                                                                     | HS | I | 7202242 | 7203533 | WBGene00000637 | col-61   | C01H6.1  | -0.00635443261099944 | AGIWUR17413 |
| N2                                                                     | HS | I | 7204541 | 7207717 | WBGene00007252 | mlt-2    | C01H6.2  | 0.243562652913301    | AGIWUR13393 |
| N2                                                                     | HS | I | 7208028 | 7209866 | WBGene00007253 | C01H6.3  | C01H6.3  | 0.0349466929741027   | AGIWUR12247 |
| N2                                                                     | HS | I | 7210515 | 7212579 | WBGene00007254 | C01H6.4  | C01H6.4  | 0.271547874779469    |             |
| AGIWUR31742;AGIWUR32511                                                |    |   |         |         |                |          |          |                      |             |

|                                                                                                           |    |   |         |         |                |          |          |                      |             |
|-----------------------------------------------------------------------------------------------------------|----|---|---------|---------|----------------|----------|----------|----------------------|-------------|
| N2                                                                                                        | HS | I | 7214745 | 7221781 | WBGene00003622 | nhr-23   | C01H6.5  | -0.205888443409739   |             |
| AGIWUR5349;AGIWUR8686;AGIWUR11774;AGIWUR22468;AGIWUR27636;AGIWUR31994;AGIWUR33632;AGIWUR34495;AGIWUR36432 |    |   |         |         |                |          |          |                      |             |
| N2                                                                                                        | HS | I | 7222296 | 7224381 | WBGene00007255 | cnm-4    | C01H6.6  | -0.00464476646312395 |             |
| AGIWUR485;AGIWUR20649;AGIWUR41720                                                                         |    |   |         |         |                |          |          |                      |             |
| N2                                                                                                        | HS | I | 7224656 | 7227767 | WBGene00007256 | swn-9    | C01H6.7  | -0.147087890542968   | AGIWUR16237 |
| N2                                                                                                        | HS | I | 7227859 | 7229434 | WBGene00007257 | C01H6.8  | C01H6.8  | 0.334874260523998    |             |
| AGIWUR18870;AGIWUR23323;AGIWUR27055;AGIWUR27094                                                           |    |   |         |         |                |          |          |                      |             |
| N2                                                                                                        | HS | I | 7229433 | 7233121 | WBGene00007258 | hasp-1   | C01H6.9  | 0.00740289644118031  |             |
| AGIWUR21484;AGIWUR22965                                                                                   |    |   |         |         |                |          |          |                      |             |
| N2                                                                                                        | HS | I | 7233645 | 7234501 | WBGene00011062 | R06C7.2  | R06C7.2  | -0.288594551758193   | AGIWUR43578 |
| N2                                                                                                        | HS | I | 7235371 | 7238790 | WBGene00011061 | wago-1   | R06C7.1  | -0.130697927037052   |             |
| AGIWUR2605;AGIWUR31860                                                                                    |    |   |         |         |                |          |          |                      |             |
| N2                                                                                                        | HS | I | 7238994 | 7243967 | WBGene00000963 | dhp-1    | R06C7.3  | -0.183138009283272   |             |
| AGIWUR11332;AGIWUR32947                                                                                   |    |   |         |         |                |          |          |                      |             |
| N2                                                                                                        | HS | I | 7246849 | 7248741 | WBGene00011064 | adsl-1   | R06C7.5  | -0.079533369068411   |             |
| AGIWUR2006;AGIWUR8376;AGIWUR29052;AGIWUR41518                                                             |    |   |         |         |                |          |          |                      |             |
| N2                                                                                                        | HS | I | 7248828 | 7251422 | WBGene00003041 | lin-61   | R06C7.7  | 0.0806796727123897   |             |
| AGIWUR29775;AGIWUR42249                                                                                   |    |   |         |         |                |          |          |                      |             |
| N2                                                                                                        | HS | I | 7251941 | 7255223 | WBGene00000275 | bub-1    | R06C7.8  | 0.0931158432355623   | AGIWUR20021 |
| N2                                                                                                        | HS | I | 7255380 | 7258700 | WBGene00011066 | ztf-15   | R06C7.9  | 0.206330774297651    | AGIWUR32881 |
| N2                                                                                                        | HS | I | 7258915 | 7267117 | WBGene00002348 | myo-1    | R06C7.10 | -0.222370809792199   |             |
| AGIWUR24541                                                                                               |    |   |         |         |                |          |          |                      |             |
| N2                                                                                                        | HS | I | 7269179 | 7273005 | WBGene00006656 | twk-1    | F21C3.1  | 0.259459752518195    | AGIWUR16353 |
| N2                                                                                                        | HS | I | 7274282 | 7278573 | WBGene00009001 | tyr-3    | F21C3.2  | 0.236226573405844    | AGIWUR19725 |
| N2                                                                                                        | HS | I | 7278802 | 7279609 | WBGene00077548 | F21C3.7  | F21C3.7  | -0.032408489930865   |             |
| AGIWUR21181;AGIWUR29371;AGIWUR42066                                                                       |    |   |         |         |                |          |          |                      |             |
| N2                                                                                                        | HS | I | 7279658 | 7280501 | WBGene00009002 | hint-1   | F21C3.3  | 0.118392512747439    | AGIWUR34525 |
| N2                                                                                                        | HS | I | 7280552 | 7282871 | WBGene00004324 | rde-2    | F21C3.4  | 0.262885646194388    | AGIWUR37884 |
| N2                                                                                                        | HS | I | 7282964 | 7283818 | WBGene00009004 | pfd-6    | F21C3.5  | 0.487730537923433    | AGIWUR14191 |
| N2                                                                                                        | HS | I | 7283907 | 7285762 | WBGene00009005 | F21C3.6  | F21C3.6  | 0.13137716688777     | AGIWUR6232  |
| N2                                                                                                        | HS | I | 7291272 | 7293331 | WBGene00008762 | ztf-2    | F13G3.1  | -0.0737142316743888  | AGIWUR38805 |
| N2                                                                                                        | HS | I | 7294038 | 7295687 | WBGene00005131 | srd-53   | F13G3.2  | 0.238170780866737    | AGIWUR18194 |
| N2                                                                                                        | HS | I | 7295753 | 7297004 | WBGene00008770 | F13G3.12 | F13G3.12 | -0.0106132300304429  |             |
| AGIWUR44355                                                                                               |    |   |         |         |                |          |          |                      |             |
| N2                                                                                                        | HS | I | 7296913 | 7299983 | WBGene00008763 | F13G3.3  | F13G3.3  | 0.0381983748427945   | AGIWUR37892 |
| N2                                                                                                        | HS | I | 7300062 | 7300913 | WBGene00008764 | dylt-1   | F13G3.4  | -0.221231713142329   |             |
| AGIWUR23442;AGIWUR40549                                                                                   |    |   |         |         |                |          |          |                      |             |
| N2                                                                                                        | HS | I | 7301007 | 7303227 | WBGene00008765 | ttx-7    | F13G3.5  | 0.0403821076084689   |             |
| AGIWUR26166;AGIWUR32307                                                                                   |    |   |         |         |                |          |          |                      |             |

|                                                                                 |    |   |         |         |                |          |          |                      |             |
|---------------------------------------------------------------------------------|----|---|---------|---------|----------------|----------|----------|----------------------|-------------|
| N2                                                                              | HS | I | 7303300 | 7304690 | WBGene00008766 | F13G3.6  | F13G3.6  | 0.0646443275678994   | AGIWUR33952 |
| N2                                                                              | HS | I | 7304918 | 7307010 | WBGene00008767 | F13G3.7  | F13G3.7  | 0.0534640364512384   |             |
| AGIWUR7091;AGIWUR24366;AGIWUR27990                                              |    |   |         |         |                |          |          |                      |             |
| N2                                                                              | HS | I | 7307117 | 7308626 | WBGene00008769 | mrp1-13  | F13G3.11 | -0.0958769221828288  |             |
| AGIWUR7546;AGIWUR8371;AGIWUR24043;AGIWUR27410;AGIWUR37354;AGIWUR37886           |    |   |         |         |                |          |          |                      |             |
| N2                                                                              | HS | I | 7308603 | 7311939 | WBGene00001136 | eat-5    | F13G3.8  | 0.166491764284534    | AGIWUR15708 |
| N2                                                                              | HS | I | 7312797 | 7313525 | WBGene00003236 | mif-3    | F13G3.9  | -0.00520896032635854 | AGIWUR6050  |
| N2                                                                              | HS | I | 7313585 | 7314277 | WBGene00008768 | F13G3.10 | F13G3.10 | -0.122221465728849   |             |
| AGIWUR10810                                                                     |    |   |         |         |                |          |          |                      |             |
| N2                                                                              | HS | I | 7317646 | 7318337 | WBGene00009915 | F52A8.1  | F52A8.1  | 0.153424690285359    |             |
| AGIWUR17070;AGIWUR32537                                                         |    |   |         |         |                |          |          |                      |             |
| N2                                                                              | HS | I | 7318290 | 7321085 | WBGene00001680 | gpb-2    | F52A8.2  | -0.180264248574501   |             |
| AGIWUR5017;AGIWUR30919                                                          |    |   |         |         |                |          |          |                      |             |
| N2                                                                              | HS | I | 7322270 | 7324415 | WBGene00009916 | F52A8.3  | F52A8.3  | 0.0555013428387641   |             |
| AGIWUR15576;AGIWUR38874;AGIWUR39839                                             |    |   |         |         |                |          |          |                      |             |
| N2                                                                              | HS | I | 7339204 | 7345949 | WBGene00009917 | glb-18   | F52A8.4  | 0.0474004077475758   | AGIWUR25073 |
| N2                                                                              | HS | I | 7345932 | 7347427 | WBGene00009918 | gcsh-2   | F52A8.5  | 0.186980673815533    | AGIWUR45177 |
| N2                                                                              | HS | I | 7347222 | 7350386 | WBGene00009919 | kbr1-1   | F52A8.6  | 0.0325015755446509   |             |
| AGIWUR12791;AGIWUR16926;AGIWUR22612;AGIWUR29694;AGIWUR39394;AGIWUR40419         |    |   |         |         |                |          |          |                      |             |
| N2                                                                              | HS | I | 7350312 | 7352235 | WBGene00002136 | inx-14   | F07A5.1  | -0.0466768671440807  |             |
| AGIWUR519;AGIWUR43444                                                           |    |   |         |         |                |          |          |                      |             |
| N2                                                                              | HS | I | 7352415 | 7353701 | WBGene00008541 | F07A5.2  | F07A5.2  | 0.024579210636162    | AGIWUR31313 |
| N2                                                                              | HS | I | 7354491 | 7357180 | WBGene00008542 | scav-6   | F07A5.3  | 0.566684242480768    | AGIWUR34532 |
| N2                                                                              | HS | I | 7357180 | 7359100 | WBGene00008543 | F07A5.4  | F07A5.4  | -0.0110487787751925  |             |
| AGIWUR5394;AGIWUR32250;AGIWUR43624                                              |    |   |         |         |                |          |          |                      |             |
| N2                                                                              | HS | I | 7360199 | 7371534 | WBGene00006306 | sue-1    | F07A5.5  | -0.0468372956129546  |             |
| AGIWUR7614;AGIWUR42629                                                          |    |   |         |         |                |          |          |                      |             |
| N2                                                                              | HS | I | 7376604 | 7383197 | WBGene00006754 | unc-15   | F07A5.7  | -0.165268439593513   |             |
| AGIWUR979;AGIWUR5073;AGIWUR7505;AGIWUR11096;AGIWUR28192;AGIWUR34853;AGIWUR44241 |    |   |         |         |                |          |          |                      |             |
| N2                                                                              | HS | I | 7384398 | 7388792 | WBGene00007597 | C15A11.2 | C15A11.2 | -0.17898276572142    |             |
| AGIWUR25007                                                                     |    |   |         |         |                |          |          |                      |             |
| N2                                                                              | HS | I | 7389049 | 7395918 | WBGene00004944 | sol-1    | C15A11.3 | -0.155131510743125   |             |
| AGIWUR36489                                                                     |    |   |         |         |                |          |          |                      |             |
| N2                                                                              | HS | I | 7398824 | 7401023 | WBGene00007598 | C15A11.4 | C15A11.4 | 0.313568035444181    |             |
| AGIWUR3755                                                                      |    |   |         |         |                |          |          |                      |             |
| N2                                                                              | HS | I | 7404950 | 7408511 | WBGene00007599 | C15A11.7 | C15A11.7 | 0.0450287982948723   |             |
| AGIWUR5504;AGIWUR10256;AGIWUR20323                                              |    |   |         |         |                |          |          |                      |             |
| N2                                                                              | HS | I | 7422785 | 7454088 | WBGene00006752 | unc-13   | ZK524.2  | -0.0566662534263997  | AGIWUR25843 |
| N2                                                                              | HS | I | 7454660 | 7456953 | WBGene00004958 | spe-4    | ZK524.1  | -0.41568950021445    | AGIWUR9983  |

|                                                                                                                                  |    |   |         |         |                |          |          |                     |             |
|----------------------------------------------------------------------------------------------------------------------------------|----|---|---------|---------|----------------|----------|----------|---------------------|-------------|
| N2                                                                                                                               | HS | I | 7457153 | 7460756 | WBGene00003074 | lars-2   | ZK524.3  | 0.16899269051153    | AGIWUR37098 |
| N2                                                                                                                               | HS | I | 7460858 | 7466424 | WBGene00013994 | ZK524.4  | ZK524.4  | -0.0567246570136248 |             |
| AGIWUR7548;AGIWUR15682;AGIWUR18485;AGIWUR23215;AGIWUR24454;AGIWUR32072;AGIWUR39429;AGIWUR40886                                   |    |   |         |         |                |          |          |                     |             |
| N2                                                                                                                               | HS | I | 7472611 | 7476946 | WBGene00012136 | T28F4.1  | T28F4.1  | -0.14617633371661   | AGIWUR23973 |
| N2                                                                                                                               | HS | I | 7480108 | 7483392 | WBGene00012137 | asic-2   | T28F4.2  | -0.175412176965799  | AGIWUR28627 |
| N2                                                                                                                               | HS | I | 7484159 | 7486302 | WBGene00012138 | T28F4.3  | T28F4.3  | 0.102290529748023   |             |
| AGIWUR3863;AGIWUR23076;AGIWUR41466                                                                                               |    |   |         |         |                |          |          |                     |             |
| N2                                                                                                                               | HS | I | 7486577 | 7490174 | WBGene00012139 | T28F4.4  | T28F4.4  | 0.236380636555444   | AGIWUR26867 |
| N2                                                                                                                               | HS | I | 7491816 | 7492934 | WBGene00012140 | T28F4.5  | T28F4.5  | 0.0967476006407981  |             |
| AGIWUR3589;AGIWUR3804;AGIWUR5333;AGIWUR18046;AGIWUR25627;AGIWUR36240                                                             |    |   |         |         |                |          |          |                     |             |
| N2                                                                                                                               | HS | I | 7492788 | 7494700 | WBGene00012141 | T28F4.6  | T28F4.6  | -0.0176074791196008 | AGIWUR22039 |
| N2                                                                                                                               | HS | I | 7495437 | 7503577 | WBGene00007042 | pbrm-1   | C26C6.1  | -0.0883937146178226 |             |
| AGIWUR4581;AGIWUR8361;AGIWUR8965;AGIWUR20774                                                                                     |    |   |         |         |                |          |          |                     |             |
| N2                                                                                                                               | HS | I | 7503576 | 7505580 | WBGene00007742 | C26C6.8  | C26C6.8  | 0.0474920937232404  |             |
| AGIWUR24774;AGIWUR26471                                                                                                          |    |   |         |         |                |          |          |                     |             |
| N2                                                                                                                               | HS | I | 7505951 | 7506693 | WBGene00007740 | C26C6.6  | C26C6.6  | 0.429834832505716   | AGIWUR1050  |
| N2                                                                                                                               | HS | I | 7508721 | 7512593 | WBGene00007741 | glb-8    | C26C6.7  | 0.0503168776364582  | AGIWUR32542 |
| N2                                                                                                                               | HS | I | 7512918 | 7513726 | WBGene00077553 | C26C6.10 | C26C6.10 | 0.1017376944440451  |             |
| AGIWUR8783;AGIWUR12734;AGIWUR16803;AGIWUR31486;AGIWUR45154                                                                       |    |   |         |         |                |          |          |                     |             |
| N2                                                                                                                               | HS | I | 7514117 | 7515126 | WBGene00007743 | C26C6.9  | C26C6.9  | 0.36834813346692    | AGIWUR8485  |
| N2                                                                                                                               | HS | I | 7522116 | 7526703 | WBGene00001648 | goa-1    | C26C6.2  | -0.208363951408597  |             |
| AGIWUR13528;AGIWUR17695;AGIWUR38775;AGIWUR41116                                                                                  |    |   |         |         |                |          |          |                     |             |
| N2                                                                                                                               | HS | I | 7527224 | 7531715 | WBGene00003552 | nas-36   | C26C6.3  | 0.360096377553429   | AGIWUR16556 |
| N2                                                                                                                               | HS | I | 7532315 | 7535997 | WBGene00007739 | C26C6.4  | C26C6.4  | -0.0494058676326432 | AGIWUR19863 |
| N2                                                                                                                               | HS | I | 7536204 | 7542157 | WBGene00000938 | dcp-66   | C26C6.5  | 0.0555074475220856  |             |
| AGIWUR1334;AGIWUR14944;AGIWUR20106;AGIWUR32961;AGIWUR44832                                                                       |    |   |         |         |                |          |          |                     |             |
| N2                                                                                                                               | HS | I | 7552975 | 7554553 | WBGene00012029 | T25G3.1  | T25G3.1  | 0.152929262166253   | AGIWUR18597 |
| N2                                                                                                                               | HS | I | 7554855 | 7559916 | WBGene00000496 | chs-1    | T25G3.2  | 0.0289011367638423  | AGIWUR19128 |
| N2                                                                                                                               | HS | I | 7559839 | 7562349 | WBGene00012030 | T25G3.3  | T25G3.3  | 0.109723694174175   |             |
| AGIWUR3427;AGIWUR4620;AGIWUR5004;AGIWUR7005;AGIWUR12640;AGIWUR22358;AGIWUR23711;AGIWUR27358;AGIWUR31286;AGIWUR31532;AGIWUR40279  |    |   |         |         |                |          |          |                     |             |
| N2                                                                                                                               | HS | I | 7564584 | 7567719 | WBGene00012031 | T25G3.4  | T25G3.4  | -0.272007303123004  |             |
| AGIWUR186;AGIWUR12674;AGIWUR13829;AGIWUR42301                                                                                    |    |   |         |         |                |          |          |                     |             |
| N2                                                                                                                               | HS | I | 7567775 | 7571250 | WBGene00008411 | mans-1   | D2030.1  | -0.0180582482885416 |             |
| AGIWUR1155;AGIWUR3168;AGIWUR4637;AGIWUR12685;AGIWUR20584;AGIWUR26209;AGIWUR26452;AGIWUR30258;AGIWUR38235;AGIWUR41375;AGIWUR42688 |    |   |         |         |                |          |          |                     |             |
| N2                                                                                                                               | HS | I | 7574195 | 7578564 | WBGene00008412 | D2030.2  | D2030.2  | -0.134974720429041  |             |
| AGIWUR13197;AGIWUR43842;AGIWUR43976                                                                                              |    |   |         |         |                |          |          |                     |             |
| N2                                                                                                                               | HS | I | 7578512 | 7580833 | WBGene00008413 | D2030.3  | D2030.3  | -0.0265947489113261 |             |

AGIWUR13349;AGIWUR37279

|    |    |   |         |         |                |         |         |                  |             |
|----|----|---|---------|---------|----------------|---------|---------|------------------|-------------|
| N2 | HS | I | 7580944 | 7581628 | WBGene00008414 | D2030.4 | D2030.4 | 0.19017049555524 | AGIWUR31361 |
|----|----|---|---------|---------|----------------|---------|---------|------------------|-------------|

|    |    |   |         |         |                |       |         |                      |  |
|----|----|---|---------|---------|----------------|-------|---------|----------------------|--|
| N2 | HS | I | 7582106 | 7583349 | WBGene00008415 | mce-1 | D2030.5 | -0.00767379478564845 |  |
|----|----|---|---------|---------|----------------|-------|---------|----------------------|--|

AGIWUR7421;AGIWUR9392;AGIWUR21647;AGIWUR32440;AGIWUR39252;AGIWUR44166

|    |    |   |         |         |                |          |  |          |                    |
|----|----|---|---------|---------|----------------|----------|--|----------|--------------------|
| N2 | HS | I | 7583810 | 7585340 | WBGene00008421 | D2030.12 |  | D2030.12 | 0.0622547850346855 |
|----|----|---|---------|---------|----------------|----------|--|----------|--------------------|

AGIWUR34170

|    |    |   |         |         |                |       |         |                    |             |
|----|----|---|---------|---------|----------------|-------|---------|--------------------|-------------|
| N2 | HS | I | 7585324 | 7588367 | WBGene00004178 | prg-1 | D2030.6 | -0.365602552529991 | AGIWUR10305 |
|----|----|---|---------|---------|----------------|-------|---------|--------------------|-------------|

|    |    |   |         |         |                |         |         |                   |             |
|----|----|---|---------|---------|----------------|---------|---------|-------------------|-------------|
| N2 | HS | I | 7588580 | 7590565 | WBGene00008417 | D2030.7 | D2030.7 | 0.108742589826726 | AGIWUR29435 |
|----|----|---|---------|---------|----------------|---------|---------|-------------------|-------------|

|    |    |   |         |         |                |          |  |          |                    |
|----|----|---|---------|---------|----------------|----------|--|----------|--------------------|
| N2 | HS | I | 7590543 | 7591204 | WBGene00008420 | D2030.11 |  | D2030.11 | 0.0349234897027486 |
|----|----|---|---------|---------|----------------|----------|--|----------|--------------------|

AGIWUR30935

|    |    |   |         |         |                |         |         |                    |             |
|----|----|---|---------|---------|----------------|---------|---------|--------------------|-------------|
| N2 | HS | I | 7591288 | 7595198 | WBGene00008418 | D2030.8 | D2030.8 | -0.265802779847331 | AGIWUR31838 |
|----|----|---|---------|---------|----------------|---------|---------|--------------------|-------------|

|    |    |   |         |         |                |        |         |                     |  |
|----|----|---|---------|---------|----------------|--------|---------|---------------------|--|
| N2 | HS | I | 7596507 | 7602203 | WBGene00008419 | wdr-23 | D2030.9 | -0.0425532498257573 |  |
|----|----|---|---------|---------|----------------|--------|---------|---------------------|--|

AGIWUR1501;AGIWUR4494;AGIWUR8516;AGIWUR23572;AGIWUR25857;AGIWUR41529

|    |    |   |         |         |                |       |          |  |                   |
|----|----|---|---------|---------|----------------|-------|----------|--|-------------------|
| N2 | HS | I | 7602307 | 7608245 | WBGene00000084 | aex-1 | D2030.10 |  | 0.119249772846055 |
|----|----|---|---------|---------|----------------|-------|----------|--|-------------------|

AGIWUR10350;AGIWUR16639;AGIWUR17325;AGIWUR19915;AGIWUR29156;AGIWUR30595;AGIWUR37321

|    |    |   |         |         |                |       |          |  |                    |
|----|----|---|---------|---------|----------------|-------|----------|--|--------------------|
| N2 | HS | I | 7614176 | 7634135 | WBGene00003071 | lrp-1 | F29D11.1 |  | 0.0045864497209358 |
|----|----|---|---------|---------|----------------|-------|----------|--|--------------------|

AGIWUR29566

|    |    |   |         |         |                |        |          |  |                    |
|----|----|---|---------|---------|----------------|--------|----------|--|--------------------|
| N2 | HS | I | 7634494 | 7639780 | WBGene00009254 | capg-1 | F29D11.2 |  | 0.0282799881392855 |
|----|----|---|---------|---------|----------------|--------|----------|--|--------------------|

AGIWUR1032;AGIWUR21417

|    |    |   |         |         |                |         |         |                    |  |
|----|----|---|---------|---------|----------------|---------|---------|--------------------|--|
| N2 | HS | I | 7640338 | 7641767 | WBGene00009140 | F26A3.1 | F26A3.1 | -0.117057524099417 |  |
|----|----|---|---------|---------|----------------|---------|---------|--------------------|--|

AGIWUR2059;AGIWUR17278;AGIWUR34924

|    |    |   |         |         |                |        |         |                   |             |
|----|----|---|---------|---------|----------------|--------|---------|-------------------|-------------|
| N2 | HS | I | 7642270 | 7643328 | WBGene00009141 | ncbp-2 | F26A3.2 | 0.048701931030017 | AGIWUR28835 |
|----|----|---|---------|---------|----------------|--------|---------|-------------------|-------------|

|    |    |   |         |         |                |       |         |                    |  |
|----|----|---|---------|---------|----------------|-------|---------|--------------------|--|
| N2 | HS | I | 7643431 | 7649777 | WBGene00004508 | rrf-1 | F26A3.8 | 0.0811247110999775 |  |
|----|----|---|---------|---------|----------------|-------|---------|--------------------|--|

AGIWUR5335;AGIWUR25229

|    |    |   |         |         |                |       |         |                    |             |
|----|----|---|---------|---------|----------------|-------|---------|--------------------|-------------|
| N2 | HS | I | 7650418 | 7656336 | WBGene00001214 | ego-1 | F26A3.3 | 0.0593157440483925 | AGIWUR44352 |
|----|----|---|---------|---------|----------------|-------|---------|--------------------|-------------|

|    |    |   |         |         |                |         |         |                   |  |
|----|----|---|---------|---------|----------------|---------|---------|-------------------|--|
| N2 | HS | I | 7656978 | 7658291 | WBGene00009142 | F26A3.4 | F26A3.4 | 0.128176533461613 |  |
|----|----|---|---------|---------|----------------|---------|---------|-------------------|--|

AGIWUR14432;AGIWUR20058;AGIWUR35343

|    |    |   |         |         |                |         |         |                   |             |
|----|----|---|---------|---------|----------------|---------|---------|-------------------|-------------|
| N2 | HS | I | 7667729 | 7669900 | WBGene00009143 | F26A3.5 | F26A3.5 | 0.153356401072138 | AGIWUR25193 |
|----|----|---|---------|---------|----------------|---------|---------|-------------------|-------------|

|    |    |   |         |         |                |       |         |                    |             |
|----|----|---|---------|---------|----------------|-------|---------|--------------------|-------------|
| N2 | HS | I | 7670314 | 7672714 | WBGene00009144 | del-3 | F26A3.6 | 0.0637246384151187 | AGIWUR30425 |
|----|----|---|---------|---------|----------------|-------|---------|--------------------|-------------|

|    |    |   |         |         |                |         |         |                   |             |
|----|----|---|---------|---------|----------------|---------|---------|-------------------|-------------|
| N2 | HS | I | 7674734 | 7676127 | WBGene00009145 | F26A3.7 | F26A3.7 | 0.125616797546961 | AGIWUR23284 |
|----|----|---|---------|---------|----------------|---------|---------|-------------------|-------------|

|    |    |   |         |         |                |         |         |                   |             |
|----|----|---|---------|---------|----------------|---------|---------|-------------------|-------------|
| N2 | HS | I | 7676668 | 7679061 | WBGene00011975 | T24B1.1 | T24B1.1 | 0.229465659017972 | AGIWUR18387 |
|----|----|---|---------|---------|----------------|---------|---------|-------------------|-------------|

|    |    |   |         |         |                |          |  |          |                     |
|----|----|---|---------|---------|----------------|----------|--|----------|---------------------|
| N2 | HS | I | 7679454 | 7683041 | WBGene00011972 | T23G11.7 |  | T23G11.7 | -0.0972415610632513 |
|----|----|---|---------|---------|----------------|----------|--|----------|---------------------|

AGIWUR25258;AGIWUR36273

|    |    |   |         |         |                |        |          |  |                    |
|----|----|---|---------|---------|----------------|--------|----------|--|--------------------|
| N2 | HS | I | 7683341 | 7694210 | WBGene00011970 | r1bp-1 | T23G11.5 |  | 0.0493776914348665 |
|----|----|---|---------|---------|----------------|--------|----------|--|--------------------|

AGIWUR25068

|    |    |   |         |         |                |          |  |          |                   |
|----|----|---|---------|---------|----------------|----------|--|----------|-------------------|
| N2 | HS | I | 7694325 | 7695233 | WBGene00011969 | T23G11.4 |  | T23G11.4 | 0.215616058792346 |
|----|----|---|---------|---------|----------------|----------|--|----------|-------------------|

AGIWUR38478

|    |    |   |         |         |                |       |          |  |                    |
|----|----|---|---------|---------|----------------|-------|----------|--|--------------------|
| N2 | HS | I | 7695661 | 7698227 | WBGene00001595 | gld-1 | T23G11.3 |  | -0.243324287872083 |
|----|----|---|---------|---------|----------------|-------|----------|--|--------------------|

AGIWUR3931;AGIWUR7691;AGIWUR8949;AGIWUR9950;AGIWUR13665;AGIWUR16668;AGIWUR17200;AGIWUR25690;AGIWUR30259;AGI

WUR35080;AGIWUR37229;AGIWUR42811

|    |    |   |         |         |                |           |           |                   |
|----|----|---|---------|---------|----------------|-----------|-----------|-------------------|
| N2 | HS | I | 7698301 | 7699037 | WBGene00011973 | T23G11.10 | T23G11.10 | 0.112739568841151 |
|----|----|---|---------|---------|----------------|-----------|-----------|-------------------|

AGIWUR28833

|    |    |   |         |         |                |       |          |                      |
|----|----|---|---------|---------|----------------|-------|----------|----------------------|
| N2 | HS | I | 7699543 | 7700958 | WBGene00001647 | gna-2 | T23G11.2 | -0.00052327269588659 |
|----|----|---|---------|---------|----------------|-------|----------|----------------------|

AGIWUR38355

|    |    |   |         |         |                |          |          |                    |
|----|----|---|---------|---------|----------------|----------|----------|--------------------|
| N2 | HS | I | 7701365 | 7702053 | WBGene00011968 | T23G11.1 | T23G11.1 | 0.0461672998030043 |
|----|----|---|---------|---------|----------------|----------|----------|--------------------|

AGIWUR4190

|    |    |   |         |         |                |         |         |                   |             |
|----|----|---|---------|---------|----------------|---------|---------|-------------------|-------------|
| N2 | HS | I | 7702429 | 7704584 | WBGene00009187 | F27D4.1 | F27D4.1 | 0.179327083668436 | AGIWUR30511 |
|----|----|---|---------|---------|----------------|---------|---------|-------------------|-------------|

|    |    |   |         |         |                |        |         |                     |
|----|----|---|---------|---------|----------------|--------|---------|---------------------|
| N2 | HS | I | 7704565 | 7707049 | WBGene00009188 | lsy-22 | F27D4.2 | 0.00268164024742035 |
|----|----|---|---------|---------|----------------|--------|---------|---------------------|

AGIWUR3195;AGIWUR10700;AGIWUR10886;AGIWUR11509;AGIWUR13652;AGIWUR16965;AGIWUR18957;AGIWUR21690;AGIWUR23469;AGIWUR26882;AGIWUR38016;AGIWUR41279

|    |    |   |         |         |                |         |         |                     |             |
|----|----|---|---------|---------|----------------|---------|---------|---------------------|-------------|
| N2 | HS | I | 7723754 | 7724656 | WBGene00009191 | F27D4.7 | F27D4.7 | -0.0702164260057252 | AGIWUR32828 |
|----|----|---|---------|---------|----------------|---------|---------|---------------------|-------------|

|    |    |   |         |         |                |         |         |                   |             |
|----|----|---|---------|---------|----------------|---------|---------|-------------------|-------------|
| N2 | HS | I | 7725019 | 7727112 | WBGene00009189 | F27D4.4 | F27D4.4 | 0.102043053588492 | AGIWUR45003 |
|----|----|---|---------|---------|----------------|---------|---------|-------------------|-------------|

|    |    |   |         |         |                |         |         |                    |
|----|----|---|---------|---------|----------------|---------|---------|--------------------|
| N2 | HS | I | 7727267 | 7729092 | WBGene00006518 | bckd-1B | F27D4.5 | -0.133885347913651 |
|----|----|---|---------|---------|----------------|---------|---------|--------------------|

AGIWUR6557;AGIWUR28991;AGIWUR29478

|    |    |   |         |         |                |         |         |                   |
|----|----|---|---------|---------|----------------|---------|---------|-------------------|
| N2 | HS | I | 7729184 | 7729878 | WBGene00077543 | F27D4.8 | F27D4.8 | -0.08453496424608 |
|----|----|---|---------|---------|----------------|---------|---------|-------------------|

AGIWUR8217;AGIWUR12100;AGIWUR27032;AGIWUR32572;AGIWUR43980

|    |    |   |         |         |                |         |         |                   |
|----|----|---|---------|---------|----------------|---------|---------|-------------------|
| N2 | HS | I | 7731121 | 7737995 | WBGene00009190 | F27D4.6 | F27D4.6 | 0.120243328462038 |
|----|----|---|---------|---------|----------------|---------|---------|-------------------|

AGIWUR9006;AGIWUR33873;AGIWUR45113

|    |    |   |         |         |                |          |          |                    |
|----|----|---|---------|---------|----------------|----------|----------|--------------------|
| N2 | HS | I | 7755778 | 7756353 | WBGene00010291 | F58H10.1 | F58H10.1 | -0.209818074832472 |
|----|----|---|---------|---------|----------------|----------|----------|--------------------|

AGIWUR742;AGIWUR9492;AGIWUR18367;AGIWUR22334;AGIWUR37012;AGIWUR40797;AGIWUR44521

|    |    |   |         |         |                |       |          |                   |
|----|----|---|---------|---------|----------------|-------|----------|-------------------|
| N2 | HS | I | 7766532 | 7772231 | WBGene00003818 | nsf-1 | H15N14.2 | 0.172428600443396 |
|----|----|---|---------|---------|----------------|-------|----------|-------------------|

AGIWUR5898;AGIWUR23021;AGIWUR40675

|    |    |   |         |         |                |       |          |                    |
|----|----|---|---------|---------|----------------|-------|----------|--------------------|
| N2 | HS | I | 7773180 | 7777652 | WBGene00000079 | adr-1 | H15N14.1 | -0.155879598920881 |
|----|----|---|---------|---------|----------------|-------|----------|--------------------|

AGIWUR36832;AGIWUR41920

|    |    |   |         |         |                |         |         |                     |             |
|----|----|---|---------|---------|----------------|---------|---------|---------------------|-------------|
| N2 | HS | I | 7786205 | 7793539 | WBGene00008401 | D2005.6 | D2005.6 | 0.00444431864501293 | AGIWUR22650 |
|----|----|---|---------|---------|----------------|---------|---------|---------------------|-------------|

|    |    |   |         |         |                |       |         |                     |             |
|----|----|---|---------|---------|----------------|-------|---------|---------------------|-------------|
| N2 | HS | I | 7800458 | 7801822 | WBGene00003746 | nlp-8 | D2005.2 | -0.0952168659185375 | AGIWUR14278 |
|----|----|---|---------|---------|----------------|-------|---------|---------------------|-------------|

|    |    |   |         |         |                |         |         |                    |             |
|----|----|---|---------|---------|----------------|---------|---------|--------------------|-------------|
| N2 | HS | I | 7813761 | 7815042 | WBGene00008398 | D2005.3 | D2005.3 | -0.395841865031446 | AGIWUR39084 |
|----|----|---|---------|---------|----------------|---------|---------|--------------------|-------------|

|    |    |   |         |         |                 |         |         |                    |             |
|----|----|---|---------|---------|-----------------|---------|---------|--------------------|-------------|
| N2 | HS | I | 7819579 | 7820489 | WBGene000086551 | D2005.7 | D2005.7 | -0.125110966856635 | AGIWUR22887 |
|----|----|---|---------|---------|-----------------|---------|---------|--------------------|-------------|

|    |    |   |         |         |                |       |         |                   |            |
|----|----|---|---------|---------|----------------|-------|---------|-------------------|------------|
| N2 | HS | I | 7820831 | 7826433 | WBGene00008400 | drh-3 | D2005.5 | 0.102689348004892 | AGIWUR6818 |
|----|----|---|---------|---------|----------------|-------|---------|-------------------|------------|

|    |    |   |         |         |                |        |         |                   |             |
|----|----|---|---------|---------|----------------|--------|---------|-------------------|-------------|
| N2 | HS | I | 7826442 | 7831629 | WBGene00009271 | glna-3 | F30F8.2 | 0.183362990233071 | AGIWUR18761 |
|----|----|---|---------|---------|----------------|--------|---------|-------------------|-------------|

|    |    |   |         |         |                |         |         |                     |             |
|----|----|---|---------|---------|----------------|---------|---------|---------------------|-------------|
| N2 | HS | I | 7832692 | 7835453 | WBGene00009270 | F30F8.1 | F30F8.1 | -0.0459064934003983 | AGIWUR20487 |
|----|----|---|---------|---------|----------------|---------|---------|---------------------|-------------|

|    |    |   |         |         |                |        |         |                      |             |
|----|----|---|---------|---------|----------------|--------|---------|----------------------|-------------|
| N2 | HS | I | 7835814 | 7836967 | WBGene00009272 | gras-1 | F30F8.3 | -0.00552530443497012 | AGIWUR42039 |
|----|----|---|---------|---------|----------------|--------|---------|----------------------|-------------|

|    |    |   |         |         |                |         |         |                     |
|----|----|---|---------|---------|----------------|---------|---------|---------------------|
| N2 | HS | I | 7837063 | 7840022 | WBGene00009276 | F30F8.9 | F30F8.9 | -0.0284374609271607 |
|----|----|---|---------|---------|----------------|---------|---------|---------------------|

AGIWUR12971;AGIWUR13463

|    |    |   |         |         |                |          |          |                     |
|----|----|---|---------|---------|----------------|----------|----------|---------------------|
| N2 | HS | I | 7840442 | 7846923 | WBGene00009277 | F30F8.10 | F30F8.10 | -0.0519545441065761 |
|----|----|---|---------|---------|----------------|----------|----------|---------------------|

AGIWUR8230;AGIWUR31083;AGIWUR35509;AGIWUR43910

|    |    |   |         |         |                |         |         |                   |             |
|----|----|---|---------|---------|----------------|---------|---------|-------------------|-------------|
| N2 | HS | I | 7847246 | 7848920 | WBGene00009274 | F30F8.5 | F30F8.5 | 0.259770583185809 | AGIWUR42023 |
|----|----|---|---------|---------|----------------|---------|---------|-------------------|-------------|

|    |    |   |         |         |                |       |         |                    |             |
|----|----|---|---------|---------|----------------|-------|---------|--------------------|-------------|
| N2 | HS | I | 7848975 | 7853631 | WBGene00006386 | taf-5 | F30F8.8 | -0.201056705722188 | AGIWUR13028 |
|----|----|---|---------|---------|----------------|-------|---------|--------------------|-------------|



|                                                                                                                                              |    |   |         |         |                |          |          |                     |             |
|----------------------------------------------------------------------------------------------------------------------------------------------|----|---|---------|---------|----------------|----------|----------|---------------------|-------------|
| N2                                                                                                                                           | HS | I | 7853750 | 7857850 | WBGene00000163 | apb-3    | R11A5.1  | 0.2946710155205     | AGIWUR978   |
| N2                                                                                                                                           | HS | I | 7857823 | 7859417 | WBGene00011230 | nud-2    | R11A5.2  | 0.0298018588778373  | AGIWUR24764 |
| N2                                                                                                                                           | HS | I | 7862736 | 7863553 | WBGene00011231 | R11A5.3  | R11A5.3  | 0.479366001606341   | AGIWUR16938 |
| N2                                                                                                                                           | HS | I | 7866136 | 7872080 | WBGene00011232 | pck-2    | R11A5.4  | 0.432636552021464   | AGIWUR14830 |
| N2                                                                                                                                           | HS | I | 7872057 | 7875554 | WBGene00011235 | suro-1   | R11A5.7  | 0.444405645947093   |             |
| AGIWUR1591;AGIWUR9643;AGIWUR18550;AGIWUR25192;AGIWUR29119                                                                                    |    |   |         |         |                |          |          |                     |             |
| N2                                                                                                                                           | HS | I | 7884319 | 7885769 | WBGene00010110 | F55D12.1 | F55D12.1 | 0.301283285592097   |             |
| AGIWUR28202                                                                                                                                  |    |   |         |         |                |          |          |                     |             |
| N2                                                                                                                                           | HS | I | 7889310 | 7894864 | WBGene00010111 | F55D12.2 | F55D12.2 | 0.440496716732875   |             |
| AGIWUR30725                                                                                                                                  |    |   |         |         |                |          |          |                     |             |
| N2                                                                                                                                           | HS | I | 7896125 | 7897725 | WBGene00010112 | nhr-191  | F55D12.3 | -0.290255171375935  |             |
| AGIWUR40247                                                                                                                                  |    |   |         |         |                |          |          |                     |             |
| N2                                                                                                                                           | HS | I | 7899037 | 7903334 | WBGene00006790 | unc-55   | F55D12.4 | -0.0327134168131487 |             |
| AGIWUR29846                                                                                                                                  |    |   |         |         |                |          |          |                     |             |
| N2                                                                                                                                           | HS | I | 7906826 | 7914269 | WBGene00010113 | F55D12.5 | F55D12.5 | -0.246365341957084  |             |
| AGIWUR6230                                                                                                                                   |    |   |         |         |                |          |          |                     |             |
| N2                                                                                                                                           | HS | I | 7913937 | 7918341 | WBGene00008991 | F20G4.2  | F20G4.2  | -0.079475835157556  |             |
| AGIWUR833;AGIWUR9193;AGIWUR38969                                                                                                             |    |   |         |         |                |          |          |                     |             |
| N2                                                                                                                                           | HS | I | 7918443 | 7926338 | WBGene00008990 | smg1-1   | F20G4.1  | 0.183167644020745   | AGIWUR24802 |
| N2                                                                                                                                           | HS | I | 7926623 | 7934577 | WBGene00003777 | nmy-2    | F20G4.3  | -0.11240268272887   |             |
| AGIWUR1539;AGIWUR3678;AGIWUR4118;AGIWUR15521;AGIWUR21394;AGIWUR21683;AGIWUR26098;AGIWUR31723;AGIWUR36619;AGIWUR38685;AGIWUR42013;AGIWUR45084 |    |   |         |         |                |          |          |                     |             |
| N2                                                                                                                                           | HS | I | 7936223 | 7938328 | WBGene00011912 | T22C1.1  | T22C1.1  | 0.137193735431598   | AGIWUR12142 |
| N2                                                                                                                                           | HS | I | 7938560 | 7940388 | WBGene00011914 | T22C1.3  | T22C1.3  | 0.137510845504799   | AGIWUR24799 |
| N2                                                                                                                                           | HS | I | 7940893 | 7941994 | WBGene00011916 | T22C1.5  | T22C1.5  | -0.0849255460251035 |             |
| AGIWUR618;AGIWUR3363;AGIWUR8190;AGIWUR8908;AGIWUR9720;AGIWUR28946                                                                            |    |   |         |         |                |          |          |                     |             |
| N2                                                                                                                                           | HS | I | 7942719 | 7945588 | WBGene00011917 | T22C1.6  | T22C1.6  | 0.105185248428358   | AGIWUR19335 |
| N2                                                                                                                                           | HS | I | 7946186 | 7951593 | WBGene00002179 | jph-1    | T22C1.7  | 0.213577570817053   |             |
| AGIWUR3743;AGIWUR13804;AGIWUR18557;AGIWUR18715;AGIWUR22762;AGIWUR37124                                                                       |    |   |         |         |                |          |          |                     |             |
| N2                                                                                                                                           | HS | I | 7955977 | 7958505 | WBGene00011918 | T22C1.8  | T22C1.8  | 0.00206848234615187 | AGIWUR19143 |
| N2                                                                                                                                           | HS | I | 7958647 | 7960158 | WBGene00011919 | T22C1.9  | T22C1.9  | 0.288717455170691   |             |
| AGIWUR14647;AGIWUR17388;AGIWUR33828;AGIWUR40991                                                                                              |    |   |         |         |                |          |          |                     |             |
| N2                                                                                                                                           | HS | I | 7960388 | 7961460 | WBGene00011921 | T22C1.12 | T22C1.12 | -0.312079096957484  |             |
| AGIWUR39086                                                                                                                                  |    |   |         |         |                |          |          |                     |             |
| N2                                                                                                                                           | HS | I | 7962052 | 7972443 | WBGene00004318 | rbg-2    | T22C1.10 | -0.0971235422051091 |             |
| AGIWUR34380                                                                                                                                  |    |   |         |         |                |          |          |                     |             |
| N2                                                                                                                                           | HS | I | 7972473 | 7977078 | WBGene00010366 | H05L14.1 | H05L14.1 | 0.0800379703034615  |             |
| AGIWUR3563                                                                                                                                   |    |   |         |         |                |          |          |                     |             |
| N2                                                                                                                                           | HS | I | 7980237 | 7993159 | WBGene00010367 | H05L14.2 | H05L14.2 | -0.0366808954141877 |             |

|                                                                                               |    |   |         |         |                |           |          |                     |             |
|-----------------------------------------------------------------------------------------------|----|---|---------|---------|----------------|-----------|----------|---------------------|-------------|
| AGIWUR24280                                                                                   |    |   |         |         |                |           |          |                     |             |
| N2                                                                                            | HS | I | 7995738 | 7996669 | WBGene00008315 | C54G4.5   | C54G4.5  | -0.0299801835272557 | AGIWUR19383 |
| N2                                                                                            | HS | I | 7996728 | 8003179 | WBGene00008314 | C54G4.4   | C54G4.4  | 0.00722836825502426 | AGIWUR2268  |
| N2                                                                                            | HS | I | 8005127 | 8006448 | WBGene00008313 | C54G4.3   | C54G4.3  | 0.0890139478240037  |             |
| AGIWUR11601;AGIWUR24007;AGIWUR43355                                                           |    |   |         |         |                |           |          |                     |             |
| N2                                                                                            | HS | I | 8006650 | 8009118 | WBGene00008312 | C54G4.2   | C54G4.2  | -0.0209061615927197 | AGIWUR25325 |
| N2                                                                                            | HS | I | 8014412 | 8019572 | WBGene00008311 | rskn-2    | C54G4.1  | 0.049399268970344   |             |
| AGIWUR7952;AGIWUR17948;AGIWUR28022                                                            |    |   |         |         |                |           |          |                     |             |
| N2                                                                                            | HS | I | 8019501 | 8022730 | WBGene00008317 | C54G4.7   | C54G4.7  | 0.0328209760491038  |             |
| AGIWUR32071;AGIWUR34039;AGIWUR43802                                                           |    |   |         |         |                |           |          |                     |             |
| N2                                                                                            | HS | I | 8022674 | 8024422 | WBGene00008318 | cyc-1     | C54G4.8  | -0.124188049638281  |             |
| AGIWUR8905;AGIWUR9205;AGIWUR12984;AGIWUR23480;AGIWUR28992;AGIWUR36574                         |    |   |         |         |                |           |          |                     |             |
| N2                                                                                            | HS | I | 8024880 | 8026525 | WBGene00008318 | C54G4.9   | C54G4.9  | 0.244411418475899   | AGIWUR42787 |
| N2                                                                                            | HS | I | 8026606 | 8028752 | WBGene00010560 | eif-2beta | K04G2.1  | -0.153781207044335  |             |
| AGIWUR9491;AGIWUR22485;AGIWUR24936;AGIWUR35928;AGIWUR40176                                    |    |   |         |         |                |           |          |                     |             |
| N2                                                                                            | HS | I | 8030959 | 8032886 | WBGene00045192 | aho-3     | K04G2.2  | 0.0114089898541589  | AGIWUR36029 |
| N2                                                                                            | HS | I | 8032863 | 8035696 | WBGene00010562 | cdc-48.3  | K04G2.3  | 0.0532296510918115  |             |
| AGIWUR8959                                                                                    |    |   |         |         |                |           |          |                     |             |
| N2                                                                                            | HS | I | 8036944 | 8039752 | WBGene00010564 | ath-1     | K04G2.5  | -0.0714261363374824 |             |
| AGIWUR7565;AGIWUR22477;AGIWUR35481                                                            |    |   |         |         |                |           |          |                     |             |
| N2                                                                                            | HS | I | 8039879 | 8040526 | WBGene00010569 | scbp-2    | K04G2.11 | 0.0339350091976787  |             |
| AGIWUR10517                                                                                   |    |   |         |         |                |           |          |                     |             |
| N2                                                                                            | HS | I | 8040799 | 8043277 | WBGene00010565 | vac1-14   | K04G2.6  | -0.0896685714703089 | AGIWUR459   |
| N2                                                                                            | HS | I | 8047345 | 8049351 | WBGene00010566 | K04G2.7   | K04G2.7  | 0.101330430701664   | AGIWUR13374 |
| N2                                                                                            | HS | I | 8050043 | 8055489 | WBGene00000156 | apr-1     | K04G2.8  | -0.0490231406673627 |             |
| AGIWUR2386;AGIWUR8642;AGIWUR15749;AGIWUR23225;AGIWUR24248;AGIWUR24940;AGIWUR33692;AGIWUR41192 |    |   |         |         |                |           |          |                     |             |
| N2                                                                                            | HS | I | 8055459 | 8057029 | WBGene00010567 | K04G2.9   | K04G2.9  | -0.214113807945475  | AGIWUR13708 |
| N2                                                                                            | HS | I | 8057762 | 8060557 | WBGene00010568 | K04G2.10  | K04G2.10 | -0.277715466058245  |             |
| AGIWUR31263                                                                                   |    |   |         |         |                |           |          |                     |             |
| N2                                                                                            | HS | I | 8060791 | 8061793 | WBGene00008935 | F18C12.4  | F18C12.4 | 0.0856042775993409  |             |
| AGIWUR11272                                                                                   |    |   |         |         |                |           |          |                     |             |
| N2                                                                                            | HS | I | 8062059 | 8081671 | WBGene00000485 | che-3     | F18C12.1 | 0.204052014307778   |             |
| AGIWUR19754;AGIWUR31660;AGIWUR42151                                                           |    |   |         |         |                |           |          |                     |             |
| N2                                                                                            | HS | I | 8083583 | 8095574 | WBGene00004378 | rme-8     | F18C12.2 | 0.00370588935388838 |             |
| AGIWUR1718;AGIWUR4249                                                                         |    |   |         |         |                |           |          |                     |             |
| N2                                                                                            | HS | I | 8095740 | 8098444 | WBGene00008934 | F18C12.3  | F18C12.3 | 0.221366774679563   |             |
| AGIWUR23155                                                                                   |    |   |         |         |                |           |          |                     |             |
| N2                                                                                            | HS | I | 8103601 | 8109227 | WBGene00005009 | spr-4     | C09H6.1  | 0.038813132894127   | AGIWUR22535 |
| N2                                                                                            | HS | I | 8109746 | 8119314 | WBGene00002999 | lin-10    | C09H6.2  | -0.0328098305183424 | AGIWUR34214 |

|                                                                         |    |   |         |         |                |          |          |                      |             |
|-------------------------------------------------------------------------|----|---|---------|---------|----------------|----------|----------|----------------------|-------------|
| N2                                                                      | HS | I | 8125801 | 8130091 | WBGene00003136 | mau-2    | C09H6.3  | 0.0890204221250315   | AGIWUR29187 |
| N2                                                                      | HS | I | 8133891 | 8135051 | WBGene00012113 | T28B8.1  | T28B8.1  | -0.256299326044442   |             |
| AGIWUR234;AGIWUR7128;AGIWUR13741;AGIWUR18450;AGIWUR31586;AGIWUR35869    |    |   |         |         |                |          |          |                      |             |
| N2                                                                      | HS | I | 8139468 | 8142537 | WBGene00012116 | del-4    | T28B8.5  | -0.0991558295668025  | AGIWUR41269 |
| N2                                                                      | HS | I | 8147400 | 8149723 | WBGene00002101 | ins-18   | T28B8.2  | -0.343665535021355   | AGIWUR37506 |
| N2                                                                      | HS | I | 8150331 | 8151368 | WBGene00044122 | T28B8.6  | T28B8.6  | 0.157316332432126    |             |
| AGIWUR3015;AGIWUR12297;AGIWUR24914                                      |    |   |         |         |                |          |          |                      |             |
| N2                                                                      | HS | I | 8151985 | 8159732 | WBGene00012114 | T28B8.3  | T28B8.3  | 0.0264062799183034   | AGIWUR24289 |
| N2                                                                      | HS | I | 8160512 | 8168643 | WBGene00012115 | T28B8.4  | T28B8.4  | -0.0809526334774802  |             |
| AGIWUR7458;AGIWUR11534;AGIWUR12150;AGIWUR29517;AGIWUR36686              |    |   |         |         |                |          |          |                      |             |
| N2                                                                      | HS | I | 8172721 | 8173489 | WBGene00023413 | H31B20.2 | H31B20.2 | -0.0499790027188736  |             |
| AGIWUR3366;AGIWUR40756                                                  |    |   |         |         |                |          |          |                      |             |
| N2                                                                      | HS | I | 8174888 | 8208740 | WBGene00008570 | kcn1-2   | F08A10.1 | -0.0756705255176895  |             |
| AGIWUR11841;AGIWUR13112;AGIWUR15015;AGIWUR27508;AGIWUR31988;AGIWUR43818 |    |   |         |         |                |          |          |                      |             |
| N2                                                                      | HS | I | 8208712 | 8210703 | WBGene00011379 | T02E1.7  | T02E1.7  | -0.00191908393744811 | AGIWUR28236 |
| N2                                                                      | HS | I | 8210931 | 8212411 | WBGene00011378 | T02E1.6  | T02E1.6  | 0.0197798991413727   | AGIWUR11385 |
| N2                                                                      | HS | I | 8212362 | 8218361 | WBGene00000967 | dhs-3    | T02E1.5  | -0.118340547544635   |             |
| AGIWUR11837;AGIWUR21469                                                 |    |   |         |         |                |          |          |                      |             |
| N2                                                                      | HS | I | 8219998 | 8223009 | WBGene00011375 | T02E1.2  | T02E1.2  | 0.123071377789845    | AGIWUR13580 |
| N2                                                                      | HS | I | 8224539 | 8226297 | WBGene00004966 | spe-12   | T02E1.1  | 0.185330103940323    | AGIWUR35507 |
| N2                                                                      | HS | I | 8226509 | 8240637 | WBGene00013955 | kri-1    | ZK265.1  | -0.208339252283452   |             |
| AGIWUR16436;AGIWUR37773;AGIWUR41475                                     |    |   |         |         |                |          |          |                      |             |
| N2                                                                      | HS | I | 8242104 | 8243572 | WBGene00013956 | ZK265.3  | ZK265.3  | -0.214713297123236   |             |
| AGIWUR13680;AGIWUR16508;AGIWUR18985                                     |    |   |         |         |                |          |          |                      |             |
| N2                                                                      | HS | I | 8243695 | 8244963 | WBGene00000639 | col-63   | ZK265.2  | -0.131907155212502   | AGIWUR22009 |
| N2                                                                      | HS | I | 8245722 | 8250896 | WBGene00000433 | ceh-8    | ZK265.4  | -0.235673201105854   | AGIWUR32521 |
| N2                                                                      | HS | I | 8253452 | 8254961 | WBGene00044094 | fitm-2   | ZK265.9  | -0.268935453475859   | AGIWUR37013 |
| N2                                                                      | HS | I | 8255348 | 8256312 | WBGene00013958 | ZK265.6  | ZK265.6  | 0.117811313044285    |             |
| AGIWUR7197;AGIWUR34833;AGIWUR42498                                      |    |   |         |         |                |          |          |                      |             |
| N2                                                                      | HS | I | 8256360 | 8258939 | WBGene00013957 | sre-23   | ZK265.5  | 0.0928433052049882   |             |
| AGIWUR18546;AGIWUR38634                                                 |    |   |         |         |                |          |          |                      |             |
| N2                                                                      | HS | I | 8262039 | 8268990 | WBGene00013959 | ZK265.7  | ZK265.7  | 0.0563980560575637   | AGIWUR1840  |
| N2                                                                      | HS | I | 8270304 | 8275701 | WBGene00013960 | cut1-8   | ZK265.8  | 0.161910913682051    |             |
| AGIWUR23965;AGIWUR30635                                                 |    |   |         |         |                |          |          |                      |             |
| N2                                                                      | HS | I | 8275611 | 8288124 | WBGene00011344 | T01G9.2  | T01G9.2  | 0.0665790627969454   |             |
| AGIWUR22898;AGIWUR27052                                                 |    |   |         |         |                |          |          |                      |             |
| N2                                                                      | HS | I | 8288959 | 8291077 | WBGene00002196 | kin-10   | T01G9.6  | -0.0702646471449437  |             |
| AGIWUR14009;AGIWUR14529                                                 |    |   |         |         |                |          |          |                      |             |
| N2                                                                      | HS | I | 8291289 | 8293640 | WBGene00003788 | npp-2    | T01G9.4  | 0.245760727048314    | AGIWUR31441 |

|                                                                         |    |   |         |         |                |          |         |                              |             |
|-------------------------------------------------------------------------|----|---|---------|---------|----------------|----------|---------|------------------------------|-------------|
| N2                                                                      | HS | I | 8294881 | 8296940 | WBGene00003183 | mei-1    | T01G9.5 | 0.014284134928781            |             |
| AGIWUR22653;AGIWUR25821;AGIWUR25892;AGIWUR43030                         |    |   |         |         |                |          |         |                              |             |
| N2                                                                      | HS | I | 8296917 | 8307566 | WBGene00009920 | abts-1   | F52B5.1 | 0.033248917331667            | AGIWUR30789 |
| N2                                                                      | HS | I | 8313228 | 8315432 | WBGene00009923 | F52B5.7  | F52B5.7 | -0.129232407940254           | AGIWUR36330 |
| N2                                                                      | HS | I | 8315898 | 8318250 | WBGene00009921 | F52B5.2  | F52B5.2 | 0.0664031609325804           |             |
| AGIWUR12506;AGIWUR37654;AGIWUR39112                                     |    |   |         |         |                |          |         |                              |             |
| N2                                                                      | HS | I | 8318347 | 8323987 | WBGene00009922 | F52B5.3  | F52B5.3 | -0.0240801067583689          | AGIWUR15537 |
| N2                                                                      | HS | I | 8324120 | 8328853 | WBGene00000467 | cep-1    | F52B5.5 | 0.0664966379170053           | AGIWUR34163 |
| N2                                                                      | HS | I | 8329062 | 8329684 | WBGene00004439 | rp1-25.2 |         | F52B5.6 0.093555404553479    |             |
| AGIWUR14531;AGIWUR21549;AGIWUR23326;AGIWUR37715;AGIWUR38978;AGIWUR41115 |    |   |         |         |                |          |         |                              |             |
| N2                                                                      | HS | I | 8330552 | 8332783 | WBGene00007911 | C34B7.1  | C34B7.1 | 0.0921708101224592           |             |
| AGIWUR2961;AGIWUR20830;AGIWUR24915                                      |    |   |         |         |                |          |         |                              |             |
| N2                                                                      | HS | I | 8333082 | 8336144 | WBGene00007914 | mys-4    | C34B7.4 | -0.145072132895196           | AGIWUR30760 |
| N2                                                                      | HS | I | 8336966 | 8341826 | WBGene00007912 | C34B7.2  | C34B7.2 | -0.010340018359829           |             |
| AGIWUR3075;AGIWUR7142;AGIWUR24662;AGIWUR29512                           |    |   |         |         |                |          |         |                              |             |
| N2                                                                      | HS | I | 8341709 | 8346023 | WBGene00007913 | cyp-36A1 |         | C34B7.3 -0.138973621057765   |             |
| AGIWUR26344                                                             |    |   |         |         |                |          |         |                              |             |
| N2                                                                      | HS | I | 8353410 | 8357828 | WBGene00006531 | tba-5    | F16D3.1 | 0.0143134441982462           |             |
| AGIWUR20180;AGIWUR43630                                                 |    |   |         |         |                |          |         |                              |             |
| N2                                                                      | HS | I | 8358254 | 8363858 | WBGene00004684 | rsd-6    | F16D3.2 | -0.0338792245404278          | AGIWUR25032 |
| N2                                                                      | HS | I | 8363954 | 8369917 | WBGene00008887 | tbcd-1   | F16D3.4 | 0.195147106349623            | AGIWUR15687 |
| N2                                                                      | HS | I | 8377601 | 8392768 | WBGene00011827 | T19A6.1  | T19A6.1 | 0.0451167554603291           |             |
| AGIWUR416;AGIWUR7327;AGIWUR31170;AGIWUR37062                            |    |   |         |         |                |          |         |                              |             |
| N2                                                                      | HS | I | 8394728 | 8398626 | WBGene00003596 | ngp-1    | T19A6.2 | 0.17292695519229             |             |
| AGIWUR14013;AGIWUR17089;AGIWUR36590                                     |    |   |         |         |                |          |         |                              |             |
| N2                                                                      | HS | I | 8398918 | 8400472 | WBGene00011828 | nepr-1   | T19A6.3 | -0.0361686692686032          | AGIWUR20226 |
| N2                                                                      | HS | I | 8401389 | 8403939 | WBGene00011829 | T19A6.4  | T19A6.4 | 0.162902180115982            |             |
| AGIWUR3638;AGIWUR42337;AGIWUR43968                                      |    |   |         |         |                |          |         |                              |             |
| N2                                                                      | HS | I | 8404547 | 8405955 | WBGene00008529 | F02E9.3  | F02E9.3 | 0.027603449628085            |             |
| AGIWUR27790;AGIWUR41404                                                 |    |   |         |         |                |          |         |                              |             |
| N2                                                                      | HS | I | 8406828 | 8407645 | WBGene00008528 | F02E9.1  | F02E9.1 | 0.200731195637363            | AGIWUR14333 |
| N2                                                                      | HS | I | 8407802 | 8410804 | WBGene00003014 | lin-28   | F02E9.2 | -0.114576313174666           |             |
| AGIWUR28453;AGIWUR32342                                                 |    |   |         |         |                |          |         |                              |             |
| N2                                                                      | HS | I | 8413253 | 8416195 | WBGene00008531 | F02E9.7  | F02E9.7 | 0.0260379357059861           | AGIWUR27934 |
| N2                                                                      | HS | I | 8435958 | 8438638 | WBGene00008648 | F10D11.2 |         | F10D11.2 -0.0693200387315613 |             |
| AGIWUR38994                                                             |    |   |         |         |                |          |         |                              |             |
| N2                                                                      | HS | I | 8439756 | 8440470 | WBGene00008649 | F10D11.3 |         | F10D11.3 -0.0382155622970419 |             |
| AGIWUR20074                                                             |    |   |         |         |                |          |         |                              |             |
| N2                                                                      | HS | I | 8441543 | 8442452 | WBGene00008650 | F10D11.4 |         | F10D11.4 -0.030784347867284  |             |

|                                                                                    |    |   |         |         |                |          |          |                                |
|------------------------------------------------------------------------------------|----|---|---------|---------|----------------|----------|----------|--------------------------------|
| AGIWUR38060                                                                        |    |   |         |         |                |          |          |                                |
| N2                                                                                 | HS | I | 8442695 | 8444934 | WBGene00008651 | F10D11.5 | F10D11.5 | 0.0924271894928168             |
| AGIWUR6906                                                                         |    |   |         |         |                |          |          |                                |
| N2                                                                                 | HS | I | 8445351 | 8451023 | WBGene00008652 | F10D11.6 | F10D11.6 | 0.293435939537453              |
| AGIWUR25958                                                                        |    |   |         |         |                |          |          |                                |
| N2                                                                                 | HS | I | 8460225 | 8463015 | WBGene00006844 | unc-120  | D1081.2  | 0.296370257523384 AGIWUR32798  |
| N2                                                                                 | HS | I | 8463356 | 8469309 | WBGene00008381 | D1081.3  | D1081.3  | 0.283082301593922 AGIWUR4534   |
| N2                                                                                 | HS | I | 8469922 | 8471852 | WBGene00045508 | D1081.10 | D1081.10 | 0.141622456562573              |
| AGIWUR32516;AGIWUR38018                                                            |    |   |         |         |                |          |          |                                |
| N2                                                                                 | HS | I | 8472556 | 8473481 | WBGene00050879 | D1081.11 | D1081.11 | 0.110405594309684              |
| AGIWUR24143                                                                        |    |   |         |         |                |          |          |                                |
| N2                                                                                 | HS | I | 8474061 | 8474767 | WBGene00086554 | D1081.12 | D1081.12 | 0.143864080682164              |
| AGIWUR6030;AGIWUR32272                                                             |    |   |         |         |                |          |          |                                |
| N2                                                                                 | HS | I | 8481152 | 8482538 | WBGene00008383 | D1081.5  | D1081.5  | -0.068628671993622 AGIWUR28444 |
| N2                                                                                 | HS | I | 8482759 | 8485694 | WBGene00008384 | D1081.6  | D1081.6  | -0.0773824119577426            |
| AGIWUR9889;AGIWUR12027;AGIWUR23754;AGIWUR31661;AGIWUR41169                         |    |   |         |         |                |          |          |                                |
| N2                                                                                 | HS | I | 8485876 | 8487043 | WBGene00008387 | D1081.9  | D1081.9  | -0.23198769791918 AGIWUR17852  |
| N2                                                                                 | HS | I | 8487618 | 8490938 | WBGene00008385 | D1081.7  | D1081.7  | -0.2884517887288 AGIWUR13110   |
| N2                                                                                 | HS | I | 8491291 | 8495855 | WBGene00008386 | cdc-5L   | D1081.8  | 0.155553055292403 AGIWUR1233   |
| N2                                                                                 | HS | I | 8498114 | 8502412 | WBGene00000431 | ceh-6    | K02B12.1 | 0.0636418135412953             |
| AGIWUR39847                                                                        |    |   |         |         |                |          |          |                                |
| N2                                                                                 | HS | I | 8509041 | 8511412 | WBGene00010496 | sec-12   | K02B12.3 | -0.246553429866896             |
| AGIWUR33956                                                                        |    |   |         |         |                |          |          |                                |
| N2                                                                                 | HS | I | 8511600 | 8512505 | WBGene00010495 | K02B12.2 | K02B12.2 | 0.0593221695856982             |
| AGIWUR10637                                                                        |    |   |         |         |                |          |          |                                |
| N2                                                                                 | HS | I | 8513919 | 8517535 | WBGene00010497 | axl-1    | K02B12.4 | 0.0658308950695332             |
| AGIWUR10856;AGIWUR17622                                                            |    |   |         |         |                |          |          |                                |
| N2                                                                                 | HS | I | 8517481 | 8526621 | WBGene00010498 | K02B12.5 | K02B12.5 | -0.137941630961667             |
| AGIWUR18930                                                                        |    |   |         |         |                |          |          |                                |
| N2                                                                                 | HS | I | 8529380 | 8531338 | WBGene00006976 | zhp-3    | K02B12.8 | 0.08764111275228               |
| AGIWUR5845                                                                         |    |   |         |         |                |          |          |                                |
| N2                                                                                 | HS | I | 8531760 | 8534527 | WBGene00001677 | gpa-15   | M04C7.1  | -0.193195622053958 AGIWUR18844 |
| N2                                                                                 | HS | I | 8540025 | 8544415 | WBGene00010855 | M04C7.4  | M04C7.4  | -0.0465185479917469 AGIWUR8927 |
| N2                                                                                 | HS | I | 8546063 | 8546725 | WBGene00010854 | M04C7.3  | M04C7.3  | 0.0427619170000506 AGIWUR33468 |
| N2                                                                                 | HS | I | 8549513 | 8570998 | WBGene00001651 | gon-2    | T01H8.5  | -0.00872744471547993           |
| AGIWUR3928;AGIWUR20657;AGIWUR27009;AGIWUR28841;AGIWUR29968;AGIWUR31752;AGIWUR33924 |    |   |         |         |                |          |          |                                |
| N2                                                                                 | HS | I | 8571557 | 8573749 | WBGene00011353 | T01H8.2  | T01H8.2  | 0.160567423430752 AGIWUR21519  |
| N2                                                                                 | HS | I | 8573855 | 8580157 | WBGene00011352 | rskn-1   | T01H8.1  | -0.167436982557067             |
| AGIWUR2751;AGIWUR11425;AGIWUR16452;AGIWUR19665;AGIWUR25198                         |    |   |         |         |                |          |          |                                |

|                                                                                                           |    |   |         |         |                |           |           |                      |             |
|-----------------------------------------------------------------------------------------------------------|----|---|---------|---------|----------------|-----------|-----------|----------------------|-------------|
| N2                                                                                                        | HS | I | 8584081 | 8587505 | WBGene00000904 | daf-8     | R05D11.1  | -0.0208546799567007  |             |
| AGIWUR2662;AGIWUR6435;AGIWUR14094                                                                         |    |   |         |         |                |           |           |                      |             |
| N2                                                                                                        | HS | I | 8591215 | 8591978 | WBGene00004305 | ran-4     | R05D11.3  | -0.114048402521341   |             |
| AGIWUR243;AGIWUR4908                                                                                      |    |   |         |         |                |           |           |                      |             |
| N2                                                                                                        | HS | I | 8592092 | 8592926 | WBGene00011033 | R05D11.5  | R05D11.5  | 0.238444964880728    |             |
| AGIWUR32579                                                                                               |    |   |         |         |                |           |           |                      |             |
| N2                                                                                                        | HS | I | 8593027 | 8596225 | WBGene00011037 | R05D11.9  | R05D11.9  | 0.0577529472821965   |             |
| AGIWUR22806                                                                                               |    |   |         |         |                |           |           |                      |             |
| N2                                                                                                        | HS | I | 8596333 | 8598552 | WBGene00011034 | paxt-1    | R05D11.6  | 0.151653679760438    |             |
| AGIWUR40684                                                                                               |    |   |         |         |                |           |           |                      |             |
| N2                                                                                                        | HS | I | 8598658 | 8600923 | WBGene00011032 | R05D11.4  | R05D11.4  | -0.0324744396254162  |             |
| AGIWUR137;AGIWUR4605;AGIWUR11633;AGIWUR20068;AGIWUR30339;AGIWUR31404                                      |    |   |         |         |                |           |           |                      |             |
| N2                                                                                                        | HS | I | 8601339 | 8602034 | WBGene00011035 | snrp-27   | R05D11.7  | 0.135549880510979    |             |
| AGIWUR38331                                                                                               |    |   |         |         |                |           |           |                      |             |
| N2                                                                                                        | HS | I | 8602125 | 8605165 | WBGene00011036 | edc-3     | R05D11.8  | 0.069944588000876    |             |
| AGIWUR28087                                                                                               |    |   |         |         |                |           |           |                      |             |
| N2                                                                                                        | HS | I | 8606404 | 8608631 | WBGene00009664 | idha-1    | F43G9.1   | -0.0713707207401431  |             |
| AGIWUR1214;AGIWUR8312;AGIWUR18719;AGIWUR29935;AGIWUR31785;AGIWUR34086;AGIWUR35501;AGIWUR37048;AGIWUR43639 |    |   |         |         |                |           |           |                      |             |
| N2                                                                                                        | HS | I | 8609925 | 8611066 | WBGene00009665 | lmd-1     | F43G9.2   | -0.0171733101470775  |             |
| AGIWUR9510;AGIWUR16545;AGIWUR21608;AGIWUR26157                                                            |    |   |         |         |                |           |           |                      |             |
| N2                                                                                                        | HS | I | 8612728 | 8615175 | WBGene00009666 | slc-25A42 | F43G9.3   | 0.104476382548782    |             |
| AGIWUR38648                                                                                               |    |   |         |         |                |           |           |                      |             |
| N2                                                                                                        | HS | I | 8615388 | 8616420 | WBGene00009668 | cfim-1    | F43G9.5   | -0.139399759064638   | AGIWUR2016  |
| N2                                                                                                        | HS | I | 8617400 | 8618889 | WBGene00009670 | F43G9.8   | F43G9.8   | 0.00383717637328118  | AGIWUR17255 |
| N2                                                                                                        | HS | I | 8623017 | 8631184 | WBGene00001414 | fer-1     | F43G9.6   | 0.130752885212246    | AGIWUR32229 |
| N2                                                                                                        | HS | I | 8633925 | 8636044 | WBGene00000468 | ces-1     | F43G9.11  | -0.00288169081735923 |             |
| AGIWUR40030                                                                                               |    |   |         |         |                |           |           |                      |             |
| N2                                                                                                        | HS | I | 8636123 | 8637971 | WBGene00000777 | cpn-1     | F43G9.9   | -0.142613941620425   | AGIWUR7568  |
| N2                                                                                                        | HS | I | 8638514 | 8640236 | WBGene00009671 | mfap-1    | F43G9.10  | 0.0373994944485716   |             |
| AGIWUR36870                                                                                               |    |   |         |         |                |           |           |                      |             |
| N2                                                                                                        | HS | I | 8640508 | 8644399 | WBGene00009672 | F43G9.12  | F43G9.12  | -0.0529238525514466  |             |
| AGIWUR3156;AGIWUR6132;AGIWUR7150;AGIWUR13796                                                              |    |   |         |         |                |           |           |                      |             |
| N2                                                                                                        | HS | I | 8644460 | 8646304 | WBGene00012150 | syx-17    | VF39H2L.1 | -0.0365757302565584  |             |
| AGIWUR33011                                                                                               |    |   |         |         |                |           |           |                      |             |
| N2                                                                                                        | HS | I | 8646451 | 8651777 | WBGene00000890 | sig-7     | F39H2.2   | -0.22769787074115    |             |
| AGIWUR6319;AGIWUR9396;AGIWUR10898;AGIWUR19443;AGIWUR40323;AGIWUR41019                                     |    |   |         |         |                |           |           |                      |             |
| N2                                                                                                        | HS | I | 8658874 | 8659967 | WBGene00009562 | f1p-22    | F39H2.1   | 0.0825721585517858   | AGIWUR19806 |
| N2                                                                                                        | HS | I | 8660820 | 8663127 | WBGene00045237 | mrt-1     | F39H2.5   | 0.0518868397737293   | AGIWUR15553 |
| N2                                                                                                        | HS | I | 8663048 | 8664143 | WBGene00006377 | syp-3     | F39H2.4   | 0.0912284733173898   | AGIWUR18940 |

|                                                                         |    |   |         |         |                |          |          |                      |             |
|-------------------------------------------------------------------------|----|---|---------|---------|----------------|----------|----------|----------------------|-------------|
| N2                                                                      | HS | I | 8664925 | 8666499 | WBGene00009563 | F39H2.3  | F39H2.3  | 0.186460361784032    | AGIWUR1893  |
| N2                                                                      | HS | I | 8666595 | 8669792 | WBGene00010620 | K07A12.1 | K07A12.1 | 0.237041878762838    |             |
| AGIWUR4177                                                              |    |   |         |         |                |          |          |                      |             |
| N2                                                                      | HS | I | 8676666 | 8681325 | WBGene00010621 | egg-6    | K07A12.2 | -0.00435920814024904 |             |
| AGIWUR2537;AGIWUR6447;AGIWUR13392;AGIWUR18818;AGIWUR31594;AGIWUR44231   |    |   |         |         |                |          |          |                      |             |
| N2                                                                      | HS | I | 8683220 | 8687217 | WBGene00001990 | hot-5    | K07A12.6 | 0.308116107249763    |             |
| AGIWUR18893                                                             |    |   |         |         |                |          |          |                      |             |
| N2                                                                      | HS | I | 8687634 | 8690937 | WBGene00010622 | K07A12.4 | K07A12.4 | -0.116427240656168   |             |
| AGIWUR12861;AGIWUR13225;AGIWUR40426                                     |    |   |         |         |                |          |          |                      |             |
| N2                                                                      | HS | I | 8691039 | 8692622 | WBGene00010624 | mrps-15  | K07A12.7 | 0.352933400525959    |             |
| AGIWUR271                                                               |    |   |         |         |                |          |          |                      |             |
| N2                                                                      | HS | I | 8692946 | 8693468 | WBGene00000209 | asg-1    | K07A12.3 | 0.0690989500107158   |             |
| AGIWUR21398                                                             |    |   |         |         |                |          |          |                      |             |
| N2                                                                      | HS | I | 8693451 | 8695159 | WBGene00010623 | K07A12.5 | K07A12.5 | 0.0444131755852712   |             |
| AGIWUR40                                                                |    |   |         |         |                |          |          |                      |             |
| N2                                                                      | HS | I | 8695205 | 8696376 | WBGene00003953 | pbs-7    | F39H11.5 | 0.084300344814686    |             |
| AGIWUR15172;AGIWUR32863;AGIWUR39094;AGIWUR40619                         |    |   |         |         |                |          |          |                      |             |
| N2                                                                      | HS | I | 8696603 | 8697596 | WBGene00009565 | F39H11.1 | F39H11.1 | 0.288279404207525    |             |
| AGIWUR20511                                                             |    |   |         |         |                |          |          |                      |             |
| N2                                                                      | HS | I | 8697923 | 8701971 | WBGene00006577 | tlf-1    | F39H11.2 | -0.132448867141297   |             |
| AGIWUR18615;AGIWUR19525;AGIWUR27512;AGIWUR44922                         |    |   |         |         |                |          |          |                      |             |
| N2                                                                      | HS | I | 8702478 | 8705825 | WBGene00000409 | cdk-8    | F39H11.3 | -0.0638353524568345  |             |
| AGIWUR21102                                                             |    |   |         |         |                |          |          |                      |             |
| N2                                                                      | HS | I | 8705670 | 8724279 | WBGene00000527 | cle-1    | C36B1.1  | -0.0199586388667479  |             |
| AGIWUR3067;AGIWUR23941;AGIWUR27821;AGIWUR32409;AGIWUR40629;AGIWUR41723  |    |   |         |         |                |          |          |                      |             |
| N2                                                                      | HS | I | 8727214 | 8728497 | WBGene00003925 | pas-4    | C36B1.4  | 0.0290939603998375   |             |
| AGIWUR1803;AGIWUR20887;AGIWUR43761                                      |    |   |         |         |                |          |          |                      |             |
| N2                                                                      | HS | I | 8728687 | 8730054 | WBGene00007971 | rpb-3    | C36B1.3  | 0.0572203299673983   | AGIWUR39563 |
| N2                                                                      | HS | I | 8730156 | 8730922 | WBGene00044614 | C36B1.14 | C36B1.14 | 0.0993671915390912   |             |
| AGIWUR5597                                                              |    |   |         |         |                |          |          |                      |             |
| N2                                                                      | HS | I | 8730905 | 8732125 | WBGene00044120 | C36B1.13 | C36B1.13 | 0.125968888793015    |             |
| AGIWUR3219;AGIWUR15030;AGIWUR36543                                      |    |   |         |         |                |          |          |                      |             |
| N2                                                                      | HS | I | 8732219 | 8733436 | WBGene00007973 | C36B1.6  | C36B1.6  | 0.142183141028855    |             |
| AGIWUR10616;AGIWUR14532;AGIWUR16176;AGIWUR16962;AGIWUR17067;AGIWUR30963 |    |   |         |         |                |          |          |                      |             |
| N2                                                                      | HS | I | 8733413 | 8735717 | WBGene00007972 | prp-4    | C36B1.5  | 0.0571231945189759   | AGIWUR6599  |
| N2                                                                      | HS | I | 8736213 | 8737038 | WBGene00007974 | dhfr-1   | C36B1.7  | 0.0875380690909076   |             |
| AGIWUR4679;AGIWUR12507;AGIWUR26096                                      |    |   |         |         |                |          |          |                      |             |
| N2                                                                      | HS | I | 8737072 | 8742548 | WBGene00007975 | gls-1    | C36B1.8  | -0.123546043876739   |             |
| AGIWUR14858;AGIWUR18949                                                 |    |   |         |         |                |          |          |                      |             |

|                                                                         |    |   |         |         |                |          |          |                     |             |
|-------------------------------------------------------------------------|----|---|---------|---------|----------------|----------|----------|---------------------|-------------|
| N2                                                                      | HS | I | 8743849 | 8746925 | WBGene00007976 | C36B1.9  | C36B1.9  | -0.0824800974713771 | AGIWUR42991 |
| N2                                                                      | HS | I | 8749616 | 8751397 | WBGene00007977 | gska-3   | C36B1.10 | 0.0547553218252332  |             |
| AGIWUR27792                                                             |    |   |         |         |                |          |          |                     |             |
| N2                                                                      | HS | I | 8752236 | 8755678 | WBGene00007979 | imp-1    | C36B1.12 | 0.0380005514332815  |             |
| AGIWUR17031                                                             |    |   |         |         |                |          |          |                     |             |
| N2                                                                      | HS | I | 8755846 | 8757603 | WBGene00007978 | C36B1.11 | C36B1.11 | 0.304559879021056   |             |
| AGIWUR2671                                                              |    |   |         |         |                |          |          |                     |             |
| N2                                                                      | HS | I | 8758156 | 8759032 | WBGene00008440 | DY3.8    | DY3.8    | 0.109002972832428   |             |
| AGIWUR28207;AGIWUR35048                                                 |    |   |         |         |                |          |          |                     |             |
| N2                                                                      | HS | I | 8759204 | 8759788 | WBGene00006574 | tin-13   | DY3.1    | 0.272823367883456   |             |
| AGIWUR18692;AGIWUR32809                                                 |    |   |         |         |                |          |          |                     |             |
| N2                                                                      | HS | I | 8762986 | 8765633 | WBGene00003052 | lmn-1    | DY3.2    | -0.135949338838401  |             |
| AGIWUR31393;AGIWUR32136;AGIWUR45124                                     |    |   |         |         |                |          |          |                     |             |
| N2                                                                      | HS | I | 8768325 | 8771248 | WBGene00006618 | trt-1    | DY3.4    | 0.101791474510158   | AGIWUR33053 |
| N2                                                                      | HS | I | 8771275 | 8777514 | WBGene00004115 | pqn-26   | DY3.5    | 0.0391509696269337  | AGIWUR42740 |
| N2                                                                      | HS | I | 8779731 | 8785415 | WBGene00008439 | mfb-1    | DY3.6    | -0.264251241035841  |             |
| AGIWUR12938;AGIWUR30025                                                 |    |   |         |         |                |          |          |                     |             |
| N2                                                                      | HS | I | 8792965 | 8797293 | WBGene00006324 | sup-17   | DY3.7    | -0.0112030315873319 | AGIWUR24707 |
| N2                                                                      | HS | I | 8798785 | 8801694 | WBGene00009453 | F36A2.3  | F36A2.3  | 0.17654043267526    | AGIWUR5208  |
| N2                                                                      | HS | I | 8801612 | 8804697 | WBGene00009452 | F36A2.2  | F36A2.2  | 0.0364372869432081  | AGIWUR32436 |
| N2                                                                      | HS | I | 8804799 | 8808081 | WBGene00009451 | cids-2   | F36A2.1  | -0.187349366411334  | AGIWUR13864 |
| N2                                                                      | HS | I | 8808775 | 8813298 | WBGene00009455 | phip-1   | F36A2.8  | 0.150412583157372   |             |
| AGIWUR9233;AGIWUR16121;AGIWUR31991;AGIWUR34048;AGIWUR40925              |    |   |         |         |                |          |          |                     |             |
| N2                                                                      | HS | I | 8813761 | 8814979 | WBGene00009454 | F36A2.7  | F36A2.7  | 0.205156067333018   |             |
| AGIWUR18419;AGIWUR27255                                                 |    |   |         |         |                |          |          |                     |             |
| N2                                                                      | HS | I | 8815554 | 8816193 | WBGene00004484 | rps-15   | F36A2.6  | -0.0097597359143009 |             |
| AGIWUR10589;AGIWUR16337;AGIWUR20215;AGIWUR23222;AGIWUR31135;AGIWUR34061 |    |   |         |         |                |          |          |                     |             |
| N2                                                                      | HS | I | 8816978 | 8821359 | WBGene00009456 | F36A2.9  | F36A2.9  | -0.0596566192273862 | AGIWUR32707 |
| N2                                                                      | HS | I | 8822188 | 8823637 | WBGene00009458 | F36A2.11 | F36A2.11 | 0.121967358966186   |             |
| AGIWUR14729                                                             |    |   |         |         |                |          |          |                     |             |
| N2                                                                      | HS | I | 8824401 | 8825628 | WBGene00023490 | F36A2.14 | F36A2.14 | 0.0159168285427498  |             |
| AGIWUR38352                                                             |    |   |         |         |                |          |          |                     |             |
| N2                                                                      | HS | I | 8826167 | 8826670 | WBGene00009459 | F36A2.12 | F36A2.12 | 0.301879480622665   |             |
| AGIWUR3383;AGIWUR3491;AGIWUR20812;AGIWUR24892                           |    |   |         |         |                |          |          |                     |             |
| N2                                                                      | HS | I | 8828048 | 8838719 | WBGene00009460 | ubr-5    | F36A2.13 | -0.075084117899868  |             |
| AGIWUR2272;AGIWUR9912;AGIWUR27719;AGIWUR32971;AGIWUR34063;AGIWUR44432   |    |   |         |         |                |          |          |                     |             |
| N2                                                                      | HS | I | 8840634 | 8841163 | WBGene00009250 | F29D10.1 | F29D10.1 | -0.0517916455139531 |             |
| AGIWUR6675                                                              |    |   |         |         |                |          |          |                     |             |
| N2                                                                      | HS | I | 8841770 | 8842323 | WBGene00009251 | F29D10.2 | F29D10.2 | 0.44897662368755    |             |



|                                                                        |    |   |         |         |                |          |          |                     |             |
|------------------------------------------------------------------------|----|---|---------|---------|----------------|----------|----------|---------------------|-------------|
| AGIWUR35680                                                            |    |   |         |         |                |          |          |                     |             |
| N2                                                                     | HS | I | 8842552 | 8845595 | WBGene00009252 | F29D10.3 | F29D10.3 | 0.119093312529475   |             |
| AGIWUR40719                                                            |    |   |         |         |                |          |          |                     |             |
| N2                                                                     | HS | I | 8845809 | 8851116 | WBGene00002035 | hum-1    | F29D10.4 | 0.0994591135139444  |             |
| AGIWUR26300                                                            |    |   |         |         |                |          |          |                     |             |
| N2                                                                     | HS | I | 8853686 | 8861274 | WBGene00010137 | ztf-26   | F55H12.6 | -0.153246244558085  |             |
| AGIWUR10402;AGIWUR26678;AGIWUR32959;AGIWUR43440                        |    |   |         |         |                |          |          |                     |             |
| N2                                                                     | HS | I | 8863996 | 8865475 | WBGene00219283 | F55H12.7 | F55H12.7 | 0.00143865808908039 |             |
| AGIWUR10168;AGIWUR13074;AGIWUR22738;AGIWUR23038;AGIWUR37370            |    |   |         |         |                |          |          |                     |             |
| N2                                                                     | HS | I | 8866907 | 8868293 | WBGene00010133 | F55H12.2 | F55H12.2 | 0.309994980945692   |             |
| AGIWUR12233                                                            |    |   |         |         |                |          |          |                     |             |
| N2                                                                     | HS | I | 8869709 | 8871698 | WBGene00010136 | F55H12.5 | F55H12.5 | 0.151717799427264   |             |
| AGIWUR5794                                                             |    |   |         |         |                |          |          |                     |             |
| N2                                                                     | HS | I | 8871791 | 8875253 | WBGene00004901 | snf-2    | F55H12.1 | 0.0298080959868416  |             |
| AGIWUR9487;AGIWUR19311                                                 |    |   |         |         |                |          |          |                     |             |
| N2                                                                     | HS | I | 8876319 | 8893051 | WBGene00010134 | F55H12.3 | F55H12.3 | 0.164967535453162   |             |
| AGIWUR9070                                                             |    |   |         |         |                |          |          |                     |             |
| N2                                                                     | HS | I | 8893308 | 8894137 | WBGene00010135 | F55H12.4 | F55H12.4 | 0.192554389572464   |             |
| AGIWUR3304;AGIWUR5417;AGIWUR36249                                      |    |   |         |         |                |          |          |                     |             |
| N2                                                                     | HS | I | 8897613 | 8901435 | WBGene00006765 | unc-29   | T08G11.5 | 0.173010144209735   |             |
| AGIWUR16459                                                            |    |   |         |         |                |          |          |                     |             |
| N2                                                                     | HS | I | 8902747 | 8905534 | WBGene00011631 | T08G11.4 | T08G11.4 | 0.277133192558225   |             |
| AGIWUR14591                                                            |    |   |         |         |                |          |          |                     |             |
| N2                                                                     | HS | I | 8905644 | 8916805 | WBGene00011629 | T08G11.1 | T08G11.1 | -0.135198035143665  |             |
| AGIWUR1995;AGIWUR15550;AGIWUR25916                                     |    |   |         |         |                |          |          |                     |             |
| N2                                                                     | HS | I | 8919329 | 8920516 | WBGene00044684 | T08G11.2 | T08G11.2 | -0.162448569933048  |             |
| AGIWUR9790;AGIWUR15705                                                 |    |   |         |         |                |          |          |                     |             |
| N2                                                                     | HS | I | 8921190 | 8925327 | WBGene00011630 | T08G11.3 | T08G11.3 | 0.0541867090869994  |             |
| AGIWUR19825                                                            |    |   |         |         |                |          |          |                     |             |
| N2                                                                     | HS | I | 8928748 | 8931089 | WBGene00006641 | tsp-15   | F53B6.1  | 0.0791528586315362  | AGIWUR2572  |
| N2                                                                     | HS | I | 8931035 | 8942287 | WBGene00009958 | madd-4   | F53B6.2  | 0.0768914354566661  |             |
| AGIWUR22167;AGIWUR26682;AGIWUR29905;AGIWUR37895;AGIWUR41106            |    |   |         |         |                |          |          |                     |             |
| N2                                                                     | HS | I | 8945533 | 8946205 | WBGene00009964 | fip-6    | F53B6.9  | -0.116039982152987  |             |
| AGIWUR7478;AGIWUR11131;AGIWUR11435;AGIWUR20023;AGIWUR25202;AGIWUR43705 |    |   |         |         |                |          |          |                     |             |
| N2                                                                     | HS | I | 8946686 | 8947201 | WBGene00009963 | fipr-26  | F53B6.8  | 0.0991912948377216  | AGIWUR33720 |
| N2                                                                     | HS | I | 8947304 | 8948711 | WBGene00009959 | F53B6.4  | F53B6.4  | -0.183495908663096  |             |
| AGIWUR31357;AGIWUR34697                                                |    |   |         |         |                |          |          |                     |             |
| N2                                                                     | HS | I | 8948778 | 8954394 | WBGene00009962 | F53B6.7  | F53B6.7  | 0.225935271313016   | AGIWUR3335  |
| N2                                                                     | HS | I | 8954559 | 8957482 | WBGene00009961 | cutl-7   | F53B6.6  | -0.0516959395681136 | AGIWUR18610 |

|                                                                                                                                               |    |   |         |         |                |          |          |                     |             |
|-----------------------------------------------------------------------------------------------------------------------------------------------|----|---|---------|---------|----------------|----------|----------|---------------------|-------------|
| N2                                                                                                                                            | HS | I | 8958061 | 8960889 | WBGene00043049 | F32H2.11 | F32H2.11 | 0.22786391387595    |             |
| AGIWUR30582                                                                                                                                   |    |   |         |         |                |          |          |                     |             |
| N2                                                                                                                                            | HS | I | 8962322 | 8966129 | WBGene00001568 | snp-4    | F32H2.1  | -0.072160522396036  | AGIWUR16674 |
| N2                                                                                                                                            | HS | I | 8966130 | 8967004 | WBGene00007026 | mdt-31   | F32H2.2  | 0.239657724472846   | AGIWUR34254 |
| N2                                                                                                                                            | HS | I | 8966985 | 8970158 | WBGene00004953 | spd-2    | F32H2.3  | 0.0445227026413111  | AGIWUR12491 |
| N2                                                                                                                                            | HS | I | 8970293 | 8971031 | WBGene00009346 | F32H2.10 | F32H2.10 | 0.107706885273718   |             |
| AGIWUR31683                                                                                                                                   |    |   |         |         |                |          |          |                     |             |
| N2                                                                                                                                            | HS | I | 8971139 | 8973063 | WBGene00009341 | thoc-3   | F32H2.4  | -0.0605593155764943 | AGIWUR33313 |
| N2                                                                                                                                            | HS | I | 8973066 | 8974575 | WBGene00050880 | F32H2.12 | F32H2.12 | 0.0883109548001166  |             |
| AGIWUR1994;AGIWUR33278                                                                                                                        |    |   |         |         |                |          |          |                     |             |
| N2                                                                                                                                            | HS | I | 8975384 | 8986534 | WBGene00009342 | fasn-1   | F32H2.5  | -0.11642025884837   |             |
| AGIWUR11210;AGIWUR43314                                                                                                                       |    |   |         |         |                |          |          |                     |             |
| N2                                                                                                                                            | HS | I | 8989938 | 8993461 | WBGene00009345 | F32H2.8  | F32H2.8  | -0.27336004864369   | AGIWUR40399 |
| N2                                                                                                                                            | HS | I | 8994002 | 8998593 | WBGene00006532 | tba-6    | F32H2.9  | 0.0736130367306442  |             |
| AGIWUR6102;AGIWUR8788;AGIWUR19549                                                                                                             |    |   |         |         |                |          |          |                     |             |
| N2                                                                                                                                            | HS | I | 8998532 | 8999564 | WBGene00009343 | F32H2.6  | F32H2.6  | -0.261208025137002  | AGIWUR6481  |
| N2                                                                                                                                            | HS | I | 9000097 | 9001721 | WBGene00009480 | F36F2.7  | F36F2.7  | 0.212316469852201   | AGIWUR19884 |
| N2                                                                                                                                            | HS | I | 9001913 | 9003963 | WBGene00009478 | syx-7    | F36F2.4  | 0.245647138229799   | AGIWUR4349  |
| N2                                                                                                                                            | HS | I | 9004513 | 9008708 | WBGene00009479 | fcp-1    | F36F2.6  | 0.0524011831467073  |             |
| AGIWUR1634;AGIWUR1989;AGIWUR12067;AGIWUR12943;AGIWUR19990;AGIWUR23535;AGIWUR23931;AGIWUR33444;AGIWUR33850;AGIWUR35249;AGIWUR37967;AGIWUR38798 |    |   |         |         |                |          |          |                     |             |
| N2                                                                                                                                            | HS | I | 9009260 | 9013885 | WBGene00009477 | rbp1-1   | F36F2.3  | -0.21585825442266   |             |
| AGIWUR8448;AGIWUR9874;AGIWUR11081;AGIWUR20523;AGIWUR42216;AGIWUR44180                                                                         |    |   |         |         |                |          |          |                     |             |
| N2                                                                                                                                            | HS | I | 9015357 | 9015711 | WBGene00009481 | F36F2.8  | F36F2.8  | 0.307565494448271   | AGIWUR18272 |
| N2                                                                                                                                            | HS | I | 9016755 | 9017994 | WBGene00009476 | F36F2.2  | F36F2.2  | 0.130474952445649   | AGIWUR2277  |
| N2                                                                                                                                            | HS | I | 9018623 | 9020304 | WBGene00009475 | F36F2.1  | F36F2.1  | 0.246303248497698   | AGIWUR26314 |
| N2                                                                                                                                            | HS | I | 9020945 | 9025553 | WBGene00006525 | tax-2    | F36F2.5  | 0.0392775314618738  | AGIWUR29674 |
| N2                                                                                                                                            | HS | I | 9025779 | 9031232 | WBGene00007854 | C31H5.1  | C31H5.1  | 0.029691884448666   | AGIWUR2925  |
| N2                                                                                                                                            | HS | I | 9031274 | 9036695 | WBGene00000058 | acr-19   | C31H5.3  | -0.0583665370472399 | AGIWUR7763  |
| N2                                                                                                                                            | HS | I | 9041374 | 9041988 | WBGene00007858 | C31H5.7  | C31H5.7  | 0.127357265760034   | AGIWUR33167 |
| N2                                                                                                                                            | HS | I | 9042270 | 9042599 | WBGene00007855 | C31H5.4  | C31H5.4  | 0.108392192052309   | AGIWUR26962 |
| N2                                                                                                                                            | HS | I | 9043315 | 9046889 | WBGene00007857 | C31H5.6  | C31H5.6  | 0.222489807011307   | AGIWUR44224 |
| N2                                                                                                                                            | HS | I | 9048188 | 9049427 | WBGene00007856 | C31H5.5  | C31H5.5  | 0.017599663757796   | AGIWUR15377 |
| N2                                                                                                                                            | HS | I | 9049460 | 9055457 | WBGene00001843 | hgo-1    | W06D4.1  | 0.066621331473856   | AGIWUR36152 |
| N2                                                                                                                                            | HS | I | 9056293 | 9057822 | WBGene00012296 | spe-46   | W06D4.2  | -0.0750023888039841 |             |
| AGIWUR906;AGIWUR18763;AGIWUR24886                                                                                                             |    |   |         |         |                |          |          |                     |             |
| N2                                                                                                                                            | HS | I | 9058852 | 9060473 | WBGene00012297 | W06D4.3  | W06D4.3  | 0.0339675440960754  |             |
| AGIWUR9186;AGIWUR28315;AGIWUR40836                                                                                                            |    |   |         |         |                |          |          |                     |             |
| N2                                                                                                                                            | HS | I | 9060493 | 9063160 | WBGene00012298 | prmt-7   | W06D4.4  | 0.315529779742986   | AGIWUR3456  |

|                                                                                                                                                                                                                                |    |   |         |         |                |          |          |                     |             |
|--------------------------------------------------------------------------------------------------------------------------------------------------------------------------------------------------------------------------------|----|---|---------|---------|----------------|----------|----------|---------------------|-------------|
| N2                                                                                                                                                                                                                             | HS | I | 9063588 | 9064403 | WBGene00006503 | snx-3    | W06D4.5  | -0.0212853205221215 | AGIWUR28774 |
| N2                                                                                                                                                                                                                             | HS | I | 9065087 | 9070264 | WBGene00004298 | rad-54   | W06D4.6  | -0.171758854674696  |             |
| AGIWUR159;AGIWUR21282;AGIWUR26162                                                                                                                                                                                              |    |   |         |         |                |          |          |                     |             |
| N2                                                                                                                                                                                                                             | HS | I | 9070247 | 9075077 | WBGene00011531 | rsbp-1   | T06D10.1 | -0.0343408509188654 |             |
| AGIWUR241;AGIWUR1536;AGIWUR4469;AGIWUR5365;AGIWUR12649;AGIWUR14014;AGIWUR18637;AGIWUR23781;AGIWUR24397;AGIWUR26444;AGIWUR26777;AGIWUR40003;AGIWUR43991                                                                         |    |   |         |         |                |          |          |                     |             |
| N2                                                                                                                                                                                                                             | HS | I | 9077565 | 9080024 | WBGene00011532 | chaf-1   | T06D10.2 | 0.0171629857824236  |             |
| AGIWUR26057                                                                                                                                                                                                                    |    |   |         |         |                |          |          |                     |             |
| N2                                                                                                                                                                                                                             | HS | I | 9095957 | 9100862 | WBGene00003182 | mef-2    | W10D5.1  | 0.08519342783686    |             |
| AGIWUR1934;AGIWUR2035;AGIWUR36060;AGIWUR40628                                                                                                                                                                                  |    |   |         |         |                |          |          |                     |             |
| N2                                                                                                                                                                                                                             | HS | I | 9100846 | 9107939 | WBGene00001574 | gei-17   | W10D5.3  | -0.221799006790855  |             |
| AGIWUR1675;AGIWUR2117;AGIWUR7167;AGIWUR7510;AGIWUR9339;AGIWUR11898;AGIWUR12040;AGIWUR15245;AGIWUR21852;AGIWUR23780;AGIWUR23859;AGIWUR28852;AGIWUR32519;AGIWUR36685;AGIWUR37731;AGIWUR37792;AGIWUR37857;AGIWUR39942;AGIWUR42717 |    |   |         |         |                |          |          |                     |             |
| N2                                                                                                                                                                                                                             | HS | I | 9108173 | 9110918 | WBGene00012376 | nduf-7   | W10D5.2  | 0.072005121592591   |             |
| AGIWUR9870;AGIWUR19362;AGIWUR25841;AGIWUR39958;AGIWUR42432                                                                                                                                                                     |    |   |         |         |                |          |          |                     |             |
| N2                                                                                                                                                                                                                             | HS | I | 9118115 | 9122398 | WBGene00014115 | gld-4    | ZK858.1  | 0.110893793559887   |             |
| AGIWUR8183;AGIWUR20297;AGIWUR27306                                                                                                                                                                                             |    |   |         |         |                |          |          |                     |             |
| N2                                                                                                                                                                                                                             | HS | I | 9123182 | 9124509 | WBGene00014116 | ZK858.2  | ZK858.2  | -0.138593230004291  | AGIWUR39603 |
| N2                                                                                                                                                                                                                             | HS | I | 9124664 | 9126155 | WBGene00014121 | ZK858.8  | ZK858.8  | -0.069760315360833  | AGIWUR34245 |
| N2                                                                                                                                                                                                                             | HS | I | 9126140 | 9127101 | WBGene00014117 | clcc-91  | ZK858.3  | 0.123824801514701   | AGIWUR32994 |
| N2                                                                                                                                                                                                                             | HS | I | 9132538 | 9135753 | WBGene00003209 | mel-26   | ZK858.4  | -0.0512303038591817 | AGIWUR17332 |
| N2                                                                                                                                                                                                                             | HS | I | 9135764 | 9138361 | WBGene00014118 | ZK858.5  | ZK858.5  | 0.17055371316234    | AGIWUR21277 |
| N2                                                                                                                                                                                                                             | HS | I | 9138267 | 9145632 | WBGene00014119 | ZK858.6  | ZK858.6  | -0.273502265142248  | AGIWUR1164  |
| N2                                                                                                                                                                                                                             | HS | I | 9149474 | 9153252 | WBGene00010421 | slc-36.4 | H32K16.1 | -0.0564788674631442 |             |
| AGIWUR12001;AGIWUR14839;AGIWUR39085                                                                                                                                                                                            |    |   |         |         |                |          |          |                     |             |
| N2                                                                                                                                                                                                                             | HS | I | 9154228 | 9154789 | WBGene00010422 | H32K16.2 | H32K16.2 | 0.231732377689273   |             |
| AGIWUR19106                                                                                                                                                                                                                    |    |   |         |         |                |          |          |                     |             |
| N2                                                                                                                                                                                                                             | HS | I | 9155513 | 9157411 | WBGene00009129 | F25H5.7  | F25H5.7  | 0.313984516707324   | AGIWUR22773 |
| N2                                                                                                                                                                                                                             | HS | I | 9159015 | 9159757 | WBGene00009128 | mrpl-54  | F25H5.6  | 0.221025571919839   | AGIWUR41190 |
| N2                                                                                                                                                                                                                             | HS | I | 9159938 | 9163261 | WBGene00009127 | clsp-1   | F25H5.5  | 0.0706712020045543  | AGIWUR34600 |
| N2                                                                                                                                                                                                                             | HS | I | 9163531 | 9166952 | WBGene00001167 | eef-2    | F25H5.4  | 0.15975984158921    |             |
| AGIWUR2082;AGIWUR2145;AGIWUR3539;AGIWUR3615;AGIWUR6960;AGIWUR18490;AGIWUR19460;AGIWUR20868;AGIWUR29742;AGIWUR34740;AGIWUR37900;AGIWUR42189;AGIWUR44830                                                                         |    |   |         |         |                |          |          |                     |             |
| N2                                                                                                                                                                                                                             | HS | I | 9168432 | 9177488 | WBGene00009126 | pyk-1    | F25H5.3  | -0.0964527626350176 |             |
| AGIWUR13861;AGIWUR19221;AGIWUR20544;AGIWUR20814                                                                                                                                                                                |    |   |         |         |                |          |          |                     |             |
| N2                                                                                                                                                                                                                             | HS | I | 9177664 | 9178703 | WBGene00009130 | F25H5.8  | F25H5.8  | 0.363261552281736   | AGIWUR17782 |
| N2                                                                                                                                                                                                                             | HS | I | 9179941 | 9181119 | WBGene00009125 | F25H5.2  | F25H5.2  | 0.20407839539333    | AGIWUR3832  |
| N2                                                                                                                                                                                                                             | HS | I | 9181819 | 9220766 | WBGene00006407 | lim-9    | F25H5.1  | 0.04796343126689    |             |

AGIWUR4251;AGIWUR5434;AGIWUR8051;AGIWUR12308;AGIWUR12581;AGIWUR14843;AGIWUR27883;AGIWUR28401;AGIWUR34213;AGIWUR37608;AGIWUR40066

|                                                                         |    |   |         |         |                |         |           |                     |             |
|-------------------------------------------------------------------------|----|---|---------|---------|----------------|---------|-----------|---------------------|-------------|
| N2                                                                      | HS | I | 9221834 | 9226390 | WBGene00008107 | aspm-1  | C45G3.1   | -0.0534978026168647 |             |
| AGIWUR10033;AGIWUR19229;AGIWUR22943;AGIWUR26742;AGIWUR35966;AGIWUR38022 |    |   |         |         |                |         |           |                     |             |
| N2                                                                      | HS | I | 9226905 | 9228184 | WBGene00001590 | C45G3.3 | C45G3.3   | 0.119845847940597   |             |
| AGIWUR3937;AGIWUR4120;AGIWUR8367;AGIWUR41921                            |    |   |         |         |                |         |           |                     |             |
| N2                                                                      | HS | I | 9228163 | 9232097 | WBGene00044008 | gip-2   | C45G3.5   | 0.152422154042565   | AGIWUR39028 |
| N2                                                                      | HS | I | 9232071 | 9233560 | WBGene00000147 | aph-1   | VF36H2L.1 | -0.0707920479837796 |             |
| AGIWUR20506                                                             |    |   |         |         |                |         |           |                     |             |
| N2                                                                      | HS | I | 9234174 | 9245924 | WBGene00009498 | tat-5   | F36H2.1   | 0.00558855203148667 | AGIWUR33349 |
| N2                                                                      | HS | I | 9246028 | 9249383 | WBGene00009499 | ent-6   | F36H2.2   | -0.0224143459085209 | AGIWUR33843 |
| N2                                                                      | HS | I | 9249542 | 9250488 | WBGene00044247 | F36H2.4 | F36H2.4   | 0.355141793603419   |             |
| AGIWUR1039;AGIWUR13806;AGIWUR14703;AGIWUR14903                          |    |   |         |         |                |         |           |                     |             |
| N2                                                                      | HS | I | 9251838 | 9261657 | WBGene00009500 | F36H2.3 | F36H2.3   | 0.222214704029594   |             |
| AGIWUR5375;AGIWUR18730                                                  |    |   |         |         |                |         |           |                     |             |
| N2                                                                      | HS | I | 9265951 | 9270919 | WBGene00008779 | F14B4.1 | F14B4.1   | -0.0286443623849495 | AGIWUR35273 |
| N2                                                                      | HS | I | 9271443 | 9278689 | WBGene00008780 | hxc-1   | F14B4.2   | -0.155160035571125  |             |
| AGIWUR9996;AGIWUR14587;AGIWUR24932                                      |    |   |         |         |                |         |           |                     |             |
| N2                                                                      | HS | I | 9280963 | 9286577 | WBGene00008781 | rpoa-2  | F14B4.3   | 0.247547999360821   | AGIWUR24437 |
| N2                                                                      | HS | I | 9287437 | 9289770 | WBGene00009173 | prom-1  | F26H9.1   | 0.129238192033256   | AGIWUR21546 |
| N2                                                                      | HS | I | 9289753 | 9294035 | WBGene00009174 | F26H9.2 | F26H9.2   | 0.0881301060964184  |             |
| AGIWUR18009;AGIWUR21415;AGIWUR26246                                     |    |   |         |         |                |         |           |                     |             |
| N2                                                                      | HS | I | 9305751 | 9306844 | WBGene00009176 | nmf-2   | F26H9.4   | 0.293430449513789   | AGIWUR38957 |
| N2                                                                      | HS | I | 9308442 | 9310221 | WBGene00004268 | rab-5   | F26H9.6   | -0.0760575279365554 |             |
| AGIWUR6586;AGIWUR20214;AGIWUR26895;AGIWUR43354                          |    |   |         |         |                |         |           |                     |             |
| N2                                                                      | HS | I | 9310329 | 9312641 | WBGene00006732 | uev-3   | F26H9.7   | 0.183597125773517   | AGIWUR29491 |
| N2                                                                      | HS | I | 9312635 | 9314488 | WBGene00009177 | F26H9.5 | F26H9.5   | 0.0616308278744633  | AGIWUR38121 |
| N2                                                                      | HS | I | 9317736 | 9327279 | WBGene00009178 | uggt-2  | F26H9.8   | 0.0514409406963736  | AGIWUR43492 |
| N2                                                                      | HS | I | 9327857 | 9330928 | WBGene00007533 | cb1-1   | C12C8.2   | 0.0494307688807973  |             |
| AGIWUR4013;AGIWUR4482;AGIWUR30682;AGIWUR40616                           |    |   |         |         |                |         |           |                     |             |
| N2                                                                      | HS | I | 9334812 | 9342496 | WBGene00003026 | lin-41  | C12C8.3   | -0.0507635117752079 |             |
| AGIWUR30548;AGIWUR38608                                                 |    |   |         |         |                |         |           |                     |             |
| N2                                                                      | HS | I | 9344724 | 9349558 | WBGene00010857 | M04C9.2 | M04C9.2   | -0.0427633738523907 |             |
| AGIWUR9274;AGIWUR27747;AGIWUR37255                                      |    |   |         |         |                |         |           |                     |             |
| N2                                                                      | HS | I | 9350274 | 9352700 | WBGene00010856 | M04C9.1 | M04C9.1   | 0.24622684766233    |             |
| AGIWUR13465;AGIWUR15038;AGIWUR30895;AGIWUR32551;AGIWUR38207             |    |   |         |         |                |         |           |                     |             |
| N2                                                                      | HS | I | 9352882 | 9354541 | WBGene00010858 | M04C9.3 | M04C9.3   | -0.0714084625932143 |             |
| AGIWUR17011;AGIWUR34564;AGIWUR40124                                     |    |   |         |         |                |         |           |                     |             |
| N2                                                                      | HS | I | 9355072 | 9357079 | WBGene00010859 | M04C9.4 | M04C9.4   | 0.161391227052944   | AGIWUR12795 |

|                                                                         |    |   |         |         |                |           |           |                      |             |
|-------------------------------------------------------------------------|----|---|---------|---------|----------------|-----------|-----------|----------------------|-------------|
| N2                                                                      | HS | I | 9359075 | 9364180 | WBGene00001121 | dyf-5     | M04C9.5   | -0.00380432911790596 | AGIWUR3172  |
| N2                                                                      | HS | I | 9364099 | 9389982 | WBGene00008878 | ppfr-1    | F16A11.3  | 0.0206949615393475   |             |
| AGIWUR6600;AGIWUR24113;AGIWUR33603                                      |    |   |         |         |                |           |           |                      |             |
| N2                                                                      | HS | I | 9390829 | 9393095 | WBGene00008877 | rtcb-1    | F16A11.2  | -0.0433819872467893  |             |
| AGIWUR39556                                                             |    |   |         |         |                |           |           |                      |             |
| N2                                                                      | HS | I | 9393948 | 9404024 | WBGene00008876 | F16A11.1  | F16A11.1  | -0.16009872340579    |             |
| AGIWUR4470                                                              |    |   |         |         |                |           |           |                      |             |
| N2                                                                      | HS | I | 9408356 | 9410094 | WBGene00007641 | C17E4.1   | C17E4.1   | 0.21270600349421     | AGIWUR21934 |
| N2                                                                      | HS | I | 9414456 | 9416703 | WBGene00219313 | C17E4.20  | C17E4.20  | -0.0259373997534311  |             |
| AGIWUR33741                                                             |    |   |         |         |                |           |           |                      |             |
| N2                                                                      | HS | I | 9416704 | 9418884 | WBGene00007643 | marc-3    | C17E4.3   | -0.215029443027518   |             |
| AGIWUR7149;AGIWUR44386                                                  |    |   |         |         |                |           |           |                      |             |
| N2                                                                      | HS | I | 9419368 | 9419998 | WBGene00007644 | C17E4.4   | C17E4.4   | -0.0505857045177045  | AGIWUR38083 |
| N2                                                                      | HS | I | 9419973 | 9420813 | WBGene00044236 | C17E4.11  | C17E4.11  | 0.22270962215843     |             |
| AGIWUR27536;AGIWUR36882                                                 |    |   |         |         |                |           |           |                      |             |
| N2                                                                      | HS | I | 9420907 | 9421992 | WBGene00003904 | pabp-2    | C17E4.5   | -0.134407130881488   |             |
| AGIWUR3676;AGIWUR21561;AGIWUR38882;AGIWUR41249                          |    |   |         |         |                |           |           |                      |             |
| N2                                                                      | HS | I | 9422556 | 9431120 | WBGene00007645 | C17E4.6   | C17E4.6   | -0.145721741500378   |             |
| AGIWUR13805;AGIWUR17385;AGIWUR29208                                     |    |   |         |         |                |           |           |                      |             |
| N2                                                                      | HS | I | 9431098 | 9433828 | WBGene00007646 | nkb-1     | C17E4.9   | -0.245440739233652   |             |
| AGIWUR8987;AGIWUR12137;AGIWUR17620;AGIWUR22816;AGIWUR23728;AGIWUR43795  |    |   |         |         |                |           |           |                      |             |
| N2                                                                      | HS | I | 9435377 | 9441029 | WBGene00007647 | C17E4.10  | C17E4.10  | -0.0346426900401635  |             |
| AGIWUR23779;AGIWUR25582;AGIWUR42996                                     |    |   |         |         |                |           |           |                      |             |
| N2                                                                      | HS | I | 9441010 | 9450731 | WBGene00003172 | mec-8     | F46A9.6   | -0.245586959677309   |             |
| AGIWUR10739;AGIWUR11464;AGIWUR28789;AGIWUR38678;AGIWUR43431;AGIWUR44090 |    |   |         |         |                |           |           |                      |             |
| N2                                                                      | HS | I | 9457456 | 9458842 | WBGene00009754 | F46A9.1   | F46A9.1   | 0.391736333746774    | AGIWUR34224 |
| N2                                                                      | HS | I | 9459287 | 9460550 | WBGene00009755 | F46A9.2   | F46A9.2   | 0.365343633025413    | AGIWUR16726 |
| N2                                                                      | HS | I | 9463760 | 9468917 | WBGene00006681 | twk-29    | F46A9.3   | 0.100257225823949    | AGIWUR11445 |
| N2                                                                      | HS | I | 9469704 | 9470633 | WBGene00004808 | skr-2     | F46A9.4   | 0.158860684278132    | AGIWUR3845  |
| N2                                                                      | HS | I | 9471341 | 9472642 | WBGene00004807 | skr-1     | F46A9.5   | -0.0680922956344894  |             |
| AGIWUR10859;AGIWUR17688;AGIWUR21590;AGIWUR24111;AGIWUR37526             |    |   |         |         |                |           |           |                      |             |
| N2                                                                      | HS | I | 9472642 | 9474794 | WBGene00009260 | calm-1    | F30A10.1  | 0.324775268850432    |             |
| AGIWUR3316                                                              |    |   |         |         |                |           |           |                      |             |
| N2                                                                      | HS | I | 9476597 | 9477181 | WBGene00045473 | F30A10.14 | F30A10.14 | 0.297104140818716    |             |
| AGIWUR13773                                                             |    |   |         |         |                |           |           |                      |             |
| N2                                                                      | HS | I | 9477478 | 9478098 | WBGene00009268 | F30A10.11 | F30A10.11 | 0.134116638956687    |             |
| AGIWUR10060                                                             |    |   |         |         |                |           |           |                      |             |
| N2                                                                      | HS | I | 9478470 | 9479091 | WBGene00044680 | F30A10.13 | F30A10.13 | 0.352420726244715    |             |
| AGIWUR16460;AGIWUR40269                                                 |    |   |         |         |                |           |           |                      |             |

|                                                                                               |    |   |         |         |                |           |           |                       |             |
|-----------------------------------------------------------------------------------------------|----|---|---------|---------|----------------|-----------|-----------|-----------------------|-------------|
| N2                                                                                            | HS | I | 9479101 | 9480774 | WBGene00009261 | F30A10.2  | F30A10.2  | 0.343811206670201     |             |
| AGIWUR14176;AGIWUR14360;AGIWUR22666                                                           |    |   |         |         |                |           |           |                       |             |
| N2                                                                                            | HS | I | 9481629 | 9482275 | WBGene00009269 | F30A10.12 | F30A10.12 | 0.10146938924097      |             |
| AGIWUR5625;AGIWUR19501                                                                        |    |   |         |         |                |           |           |                       |             |
| N2                                                                                            | HS | I | 9483810 | 9486540 | WBGene00009263 | F30A10.4  | F30A10.4  | -0.0320665295418765   |             |
| AGIWUR16094                                                                                   |    |   |         |         |                |           |           |                       |             |
| N2                                                                                            | HS | I | 9486642 | 9488229 | WBGene00006061 | stl-1     | F30A10.5  | -0.0676949999904899   |             |
| AGIWUR12020                                                                                   |    |   |         |         |                |           |           |                       |             |
| N2                                                                                            | HS | I | 9488488 | 9492620 | WBGene00009264 | sac-1     | F30A10.6  | 0.0281768404682179    |             |
| AGIWUR8404;AGIWUR15613;AGIWUR21401                                                            |    |   |         |         |                |           |           |                       |             |
| N2                                                                                            | HS | I | 9492615 | 9494589 | WBGene00009262 | F30A10.3  | F30A10.3  | -0.0497179592378973   |             |
| AGIWUR7533;AGIWUR30325;AGIWUR31913                                                            |    |   |         |         |                |           |           |                       |             |
| N2                                                                                            | HS | I | 9501268 | 9505173 | WBGene00006062 | stn-1     | F30A10.8  | -0.0325989160796576   |             |
| AGIWUR11443;AGIWUR37826                                                                       |    |   |         |         |                |           |           |                       |             |
| N2                                                                                            | HS | I | 9506553 | 9511184 | WBGene00009267 | usp-48    | F30A10.10 | -0.224292908040951    |             |
| AGIWUR41266                                                                                   |    |   |         |         |                |           |           |                       |             |
| N2                                                                                            | HS | I | 9511181 | 9512236 | WBGene00004887 | smn-1     | C41G7.1   | 0.22659875507453      | AGIWUR40754 |
| N2                                                                                            | HS | I | 9512428 | 9514755 | WBGene00002226 | klp-16    | C41G7.2   | -0.166342545411204    | AGIWUR16204 |
| N2                                                                                            | HS | I | 9515002 | 9516776 | WBGene00077771 | C41G7.9   | C41G7.9   | -0.163933368195872    |             |
| AGIWUR9965;AGIWUR12718;AGIWUR34772                                                            |    |   |         |         |                |           |           |                       |             |
| N2                                                                                            | HS | I | 9519244 | 9521275 | WBGene00008062 | set-32    | C41G7.4   | 0.233490786477113     |             |
| AGIWUR11730;AGIWUR16788;AGIWUR18476                                                           |    |   |         |         |                |           |           |                       |             |
| N2                                                                                            | HS | I | 9530816 | 9532831 | WBGene00077525 | C41G7.8   | C41G7.8   | 0.321651491578717     |             |
| AGIWUR15227;AGIWUR15913;AGIWUR20146;AGIWUR21311                                               |    |   |         |         |                |           |           |                       |             |
| N2                                                                                            | HS | I | 9533580 | 9536271 | WBGene00008064 | C41G7.7   | C41G7.7   | 0.0466702334042681    | AGIWUR40452 |
| N2                                                                                            | HS | I | 9536465 | 9540966 | WBGene00007984 | irx-1     | C36F7.1   | -0.0362212558190684   |             |
| AGIWUR3595;AGIWUR4726;AGIWUR12384;AGIWUR15187;AGIWUR40383                                     |    |   |         |         |                |           |           |                       |             |
| N2                                                                                            | HS | I | 9544733 | 9558096 | WBGene00007985 | swah-1    | C36F7.2   | 0.271295183151892     |             |
| AGIWUR4941;AGIWUR23912;AGIWUR33178                                                            |    |   |         |         |                |           |           |                       |             |
| N2                                                                                            | HS | I | 9565394 | 9574377 | WBGene00004372 | rig-5     | C36F7.4   | -0.084240729892775    |             |
| AGIWUR610;AGIWUR8403;AGIWUR17086;AGIWUR19523;AGIWUR44163                                      |    |   |         |         |                |           |           |                       |             |
| N2                                                                                            | HS | I | 9574762 | 9576141 | WBGene00007986 | C36F7.5   | C36F7.5   | -0.000963964977296783 | AGIWUR26301 |
| N2                                                                                            | HS | I | 9578526 | 9581267 | WBGene00002276 | lem-3     | F42H11.2  | 0.118522469447267     |             |
| AGIWUR4832                                                                                    |    |   |         |         |                |           |           |                       |             |
| N2                                                                                            | HS | I | 9581786 | 9582583 | WBGene00044987 | K07A1.17  | K07A1.17  | -0.439893415725326    |             |
| AGIWUR11068                                                                                   |    |   |         |         |                |           |           |                       |             |
| N2                                                                                            | HS | I | 9582682 | 9583533 | WBGene00010608 | K07A1.1   | K07A1.1   | 0.102581298683337     |             |
| AGIWUR3309;AGIWUR7293;AGIWUR13669;AGIWUR14108;AGIWUR25109;AGIWUR29244;AGIWUR34922;AGIWUR40044 |    |   |         |         |                |           |           |                       |             |
| N2                                                                                            | HS | I | 9583869 | 9584817 | WBGene00010617 | K07A1.13  | K07A1.13  | 0.0959153398639092    |             |

AGIWUR31686  
 N2 HS I 9585317 9587206 WBGene00010609 dut-1 K07A1.2 0.0189243098121974  
 AGIWUR17209;AGIWUR24219;AGIWUR34406  
 N2 HS I 9587169 9588132 WBGene00010610 K07A1.3 K07A1.3 0.131098146309807  
 AGIWUR10401;AGIWUR13401;AGIWUR21452  
 N2 HS I 9588710 9589931 WBGene00010611 K07A1.4 K07A1.4 0.356038625026446 AGIWUR21507  
 N2 HS I 9591939 9593103 WBGene00010613 K07A1.6 K07A1.6 0.0722088937436878  
 AGIWUR12219;AGIWUR17738;AGIWUR20345;AGIWUR27107;AGIWUR29821  
 N2 HS I 9595276 9598363 WBGene00010614 cri-1 K07A1.7 -0.133537118370331  
 AGIWUR6642;AGIWUR9009;AGIWUR42113  
 N2 HS I 9605896 9609025 WBGene00000177 aqp-9 K07A1.16 0.1527911632959  
 AGIWUR14146;AGIWUR43748  
 N2 HS I 9608926 9609705 WBGene00010619 K07A1.15 K07A1.15 -0.0426658433544187  
 AGIWUR34358  
 N2 HS I 9609501 9611620 WBGene00002070 ile-1 K07A1.8 -0.00193484799457888  
 AGIWUR11387;AGIWUR26158;AGIWUR44299;AGIWUR45019  
 N2 HS I 9611815 9615082 WBGene00010615 ate-1 K07A1.9 0.234339954416496  
 AGIWUR5578;AGIWUR19246  
 N2 HS I 9615195 9616474 WBGene00010616 K07A1.10 K07A1.10 0.268747458401746  
 AGIWUR8008;AGIWUR36377;AGIWUR40995;AGIWUR43062  
 N2 HS I 9616508 9618107 WBGene00004312 rba-1 K07A1.11 0.211563409149207  
 AGIWUR21971  
 N2 HS I 9618207 9619760 WBGene00003036 lin-53 K07A1.12 -0.220604106184976  
 AGIWUR784;AGIWUR14734;AGIWUR15058;AGIWUR17077;AGIWUR22021;AGIWUR28468  
 N2 HS I 9621160 9625796 WBGene00004488 rps-19 T05F1.3 -0.00880347235436263  
 AGIWUR1014;AGIWUR3605;AGIWUR6371;AGIWUR9406;AGIWUR15578;AGIWUR17883;AGIWUR19787;AGIWUR21395;AGIWUR23441;AGI  
 WUR32203;AGIWUR35058;AGIWUR41713  
 N2 HS I 9626241 9630848 WBGene00002027 hsr-9 T05F1.6 -0.245116090911392 AGIWUR37000  
 N2 HS I 9631388 9632402 WBGene00011490 T05F1.4 T05F1.4 -0.0811706485938295 AGIWUR14722  
 N2 HS I 9633183 9635945 WBGene00011491 T05F1.5 T05F1.5 -0.392034787780215 AGIWUR9793  
 N2 HS I 9638886 9641736 WBGene00011492 T05F1.7 T05F1.7 0.132378938735682 AGIWUR266  
 N2 HS I 9642344 9643804 WBGene00011493 T05F1.8 T05F1.8 0.0984347246478912 AGIWUR38596  
 N2 HS I 9645699 9647676 WBGene00011494 T05F1.9 T05F1.9 -0.137016873246068 AGIWUR9312  
 N2 HS I 9647603 9649238 WBGene00000968 dhs-4 T05F1.10 0.115764322985378  
 AGIWUR27482  
 N2 HS I 9650499 9652946 WBGene00011497 T05F1.13 T05F1.13 0.478125962763601  
 AGIWUR14401  
 N2 HS I 9653021 9657040 WBGene00011495 T05F1.11 T05F1.11 0.0268149752695441  
 AGIWUR25086

|                                                                       |    |   |         |         |                |          |           |                      |             |
|-----------------------------------------------------------------------|----|---|---------|---------|----------------|----------|-----------|----------------------|-------------|
| N2                                                                    | HS | I | 9657012 | 9657871 | WBGene00007278 | lab-1    | C03D6.6   | -0.248876182308646   | AGIWUR9702  |
| N2                                                                    | HS | I | 9658274 | 9660080 | WBGene00007277 | asf1-1   | C03D6.5   | -0.27717940742351    | AGIWUR14465 |
| N2                                                                    | HS | I | 9660174 | 9664915 | WBGene00003800 | npp-14   | C03D6.4   | 0.0966331733591357   | AGIWUR18409 |
| N2                                                                    | HS | I | 9665194 | 9668664 | WBGene00000466 | cel-1    | C03D6.3   | 0.0678390017819472   |             |
| AGIWUR2773;AGIWUR8832;AGIWUR16240;AGIWUR35365                         |    |   |         |         |                |          |           |                      |             |
| N2                                                                    | HS | I | 9668628 | 9670726 | WBGene00007275 | C03D6.1  | C03D6.1   | 0.0351816462357473   | AGIWUR13138 |
| N2                                                                    | HS | I | 9673668 | 9678553 | WBGene00007297 | C04F12.1 | C04F12.1  | 0.0830680016552812   |             |
| AGIWUR33114                                                           |    |   |         |         |                |          |           |                      |             |
| N2                                                                    | HS | I | 9685398 | 9688653 | WBGene00002069 | ikb-1    | C04F12.3  | 0.132276604759369    |             |
| AGIWUR2266                                                            |    |   |         |         |                |          |           |                      |             |
| N2                                                                    | HS | I | 9689185 | 9690084 | WBGene00004426 | rp1-14   | C04F12.4  | 0.0976589012025286   |             |
| AGIWUR38081                                                           |    |   |         |         |                |          |           |                      |             |
| N2                                                                    | HS | I | 9690079 | 9690557 | WBGene00007299 | C04F12.5 | C04F12.5  | -0.0989779567101929  |             |
| AGIWUR2681;AGIWUR6569;AGIWUR15195;AGIWUR17394;AGIWUR19832;AGIWUR21206 |    |   |         |         |                |          |           |                      |             |
| N2                                                                    | HS | I | 9692701 | 9693781 | WBGene00007300 | C04F12.6 | C04F12.6  | 0.105323966648626    |             |
| AGIWUR7919                                                            |    |   |         |         |                |          |           |                      |             |
| N2                                                                    | HS | I | 9695707 | 9696762 | WBGene00007301 | C04F12.7 | C04F12.7  | -0.24806691037265    |             |
| AGIWUR8242                                                            |    |   |         |         |                |          |           |                      |             |
| N2                                                                    | HS | I | 9697237 | 9699561 | WBGene00007302 | C04F12.8 | C04F12.8  | 0.172930649183645    |             |
| AGIWUR19847                                                           |    |   |         |         |                |          |           |                      |             |
| N2                                                                    | HS | I | 9710093 | 9710767 | WBGene00007303 | rnh-1.3  | C04F12.9  | -0.101368879288943   |             |
| AGIWUR2458                                                            |    |   |         |         |                |          |           |                      |             |
| N2                                                                    | HS | I | 9711064 | 9712719 | WBGene00001405 | fce-1    | C04F12.10 | 0.218697484640996    |             |
| AGIWUR36986                                                           |    |   |         |         |                |          |           |                      |             |
| N2                                                                    | HS | I | 9712825 | 9715230 | WBGene00007621 | C16C2.4  | C16C2.4   | 0.0341852324246403   | AGIWUR25185 |
| N2                                                                    | HS | I | 9715321 | 9728108 | WBGene00007620 | ocr1-1   | C16C2.3   | 0.108023389544199    | AGIWUR34995 |
| N2                                                                    | HS | I | 9737823 | 9744190 | WBGene00001582 | gfi-2    | K02A11.1  | -0.00523458039485281 |             |
| AGIWUR27008;AGIWUR33816                                               |    |   |         |         |                |          |           |                      |             |
| N2                                                                    | HS | I | 9744242 | 9745990 | WBGene00010487 | K02A11.2 | K02A11.2  | 0.269715082437432    |             |
| AGIWUR32384                                                           |    |   |         |         |                |          |           |                      |             |
| N2                                                                    | HS | I | 9745967 | 9747923 | WBGene00010488 | endu-1   | K02A11.3  | 0.417614463763908    |             |
| AGIWUR26684                                                           |    |   |         |         |                |          |           |                      |             |
| N2                                                                    | HS | I | 9748517 | 9749953 | WBGene00044607 | K02A11.4 | K02A11.4  | 0.242137536074736    |             |
| AGIWUR1620;AGIWUR25104;AGIWUR38391;AGIWUR44265;AGIWUR45015            |    |   |         |         |                |          |           |                      |             |
| N2                                                                    | HS | I | 9754122 | 9757898 | WBGene00006352 | sur-6    | F26E4.1   | -0.324176176925168   |             |
| AGIWUR2096;AGIWUR2215;AGIWUR9115;AGIWUR12953;AGIWUR13411;AGIWUR24929  |    |   |         |         |                |          |           |                      |             |
| N2                                                                    | HS | I | 9757854 | 9760787 | WBGene00009157 | F26E4.2  | F26E4.2   | 0.204089802235293    | AGIWUR8064  |
| N2                                                                    | HS | I | 9762403 | 9767873 | WBGene00009158 | F26E4.3  | F26E4.3   | 0.258166360101646    |             |
| AGIWUR4512;AGIWUR27007                                                |    |   |         |         |                |          |           |                      |             |



|                                                                                   |    |   |         |         |                |          |          |                      |             |
|-----------------------------------------------------------------------------------|----|---|---------|---------|----------------|----------|----------|----------------------|-------------|
| N2                                                                                | HS | I | 9768836 | 9771068 | WBGene00009160 | F26E4.5  | F26E4.5  | 0.122345860479154    | AGIWUR23988 |
| N2                                                                                | HS | I | 9771061 | 9772565 | WBGene00009159 | F26E4.4  | F26E4.4  | -0.0704057325299665  | AGIWUR27196 |
| N2                                                                                | HS | I | 9773172 | 9774012 | WBGene00009161 | F26E4.6  | F26E4.6  | 0.294250683318062    | AGIWUR5123  |
| N2                                                                                | HS | I | 9774165 | 9779541 | WBGene00009162 | F26E4.7  | F26E4.7  | 0.184710959709543    | AGIWUR18395 |
| N2                                                                                | HS | I | 9780287 | 9781418 | WBGene00009165 | gpx-1    | F26E4.12 | -0.00922037187830682 |             |
| AGIWUR41088                                                                       |    |   |         |         |                |          |          |                      |             |
| N2                                                                                | HS | I | 9781338 | 9785722 | WBGene00009163 | drsh-1   | F26E4.10 | 0.078956764220937    |             |
| AGIWUR9346;AGIWUR17525                                                            |    |   |         |         |                |          |          |                      |             |
| N2                                                                                | HS | I | 9785778 | 9787624 | WBGene00006528 | tba-1    | F26E4.8  | -0.228707274669249   |             |
| AGIWUR26699;AGIWUR27386;AGIWUR38577                                               |    |   |         |         |                |          |          |                      |             |
| N2                                                                                | HS | I | 9788749 | 9790050 | WBGene00000371 | cco-1    | F26E4.9  | 0.120736875126331    |             |
| AGIWUR2388;AGIWUR7324;AGIWUR10896;AGIWUR25457;AGIWUR26663;AGIWUR29113;AGIWUR38370 |    |   |         |         |                |          |          |                      |             |
| N2                                                                                | HS | I | 9793756 | 9796675 | WBGene00009164 | hrd1-1   | F26E4.11 | -0.233667260246664   |             |
| AGIWUR477;AGIWUR5508;AGIWUR9022                                                   |    |   |         |         |                |          |          |                      |             |
| N2                                                                                | HS | I | 9808904 | 9813075 | WBGene00003569 | ncx-4    | F35C12.2 | -0.0434368961963743  |             |
| AGIWUR18843;AGIWUR26111;AGIWUR27942;AGIWUR30673                                   |    |   |         |         |                |          |          |                      |             |
| N2                                                                                | HS | I | 9813034 | 9823448 | WBGene00009408 | F35C12.3 | F35C12.3 | 0.416205829290485    |             |
| AGIWUR41111                                                                       |    |   |         |         |                |          |          |                      |             |
| N2                                                                                | HS | I | 9829827 | 9830599 | WBGene00013449 | Y67A6A.1 | Y67A6A.1 | -0.0702270795227022  |             |
| AGIWUR44360                                                                       |    |   |         |         |                |          |          |                      |             |
| N2                                                                                | HS | I | 9839598 | 9844809 | WBGene00003652 | nhr-62   | Y67A6A.2 | 0.0643140041475476   |             |
| AGIWUR2485                                                                        |    |   |         |         |                |          |          |                      |             |
| N2                                                                                | HS | I | 9847406 | 9850082 | WBGene00006978 | zig-1    | K10C3.3  | 0.116510898434452    |             |
| AGIWUR21169;AGIWUR39109;AGIWUR39381                                               |    |   |         |         |                |          |          |                      |             |
| N2                                                                                | HS | I | 9850020 | 9851791 | WBGene00010730 | ensa-1   | K10C3.2  | -0.186332995958104   |             |
| AGIWUR18495;AGIWUR30294;AGIWUR30891;AGIWUR35413;AGIWUR35421;AGIWUR41141           |    |   |         |         |                |          |          |                      |             |
| N2                                                                                | HS | I | 9853658 | 9863492 | WBGene00010731 | K10C3.4  | K10C3.4  | -0.0960721474995445  |             |
| AGIWUR1891;AGIWUR30585                                                            |    |   |         |         |                |          |          |                      |             |
| N2                                                                                | HS | I | 9863588 | 9869055 | WBGene00010732 | K10C3.5  | K10C3.5  | -0.0538864424354415  | AGIWUR42407 |
| N2                                                                                | HS | I | 9869632 | 9874676 | WBGene00003639 | nhr-49   | K10C3.6  | -0.142721413801844   |             |
| AGIWUR7928;AGIWUR12085;AGIWUR13755;AGIWUR22758                                    |    |   |         |         |                |          |          |                      |             |
| N2                                                                                | HS | I | 9874698 | 9879119 | WBGene00002142 | inx-20   | T23H4.1  | -0.108338507200033   | AGIWUR21242 |
| N2                                                                                | HS | I | 9879183 | 9881504 | WBGene00003659 | nhr-69   | T23H4.2  | 0.142739212355314    |             |
| AGIWUR5029;AGIWUR19276;AGIWUR24449                                                |    |   |         |         |                |          |          |                      |             |
| N2                                                                                | HS | I | 9886200 | 9888154 | WBGene00003524 | nas-5    | T23H4.3  | 0.141833712609897    | AGIWUR21924 |
| N2                                                                                | HS | I | 9888356 | 9892223 | WBGene00003842 | oct-1    | F52F12.1 | 0.0986613537240153   |             |
| AGIWUR6287;AGIWUR17666;AGIWUR21319                                                |    |   |         |         |                |          |          |                      |             |
| N2                                                                                | HS | I | 9893698 | 9895596 | WBGene00000640 | col-64   | F52F12.2 | 0.0285059254286635   |             |
| AGIWUR24554                                                                       |    |   |         |         |                |          |          |                      |             |

|                                                                                                            |    |   |         |         |                |           |           |                      |             |
|------------------------------------------------------------------------------------------------------------|----|---|---------|---------|----------------|-----------|-----------|----------------------|-------------|
| N2                                                                                                         | HS | I | 9895693 | 9900817 | WBGene00003396 | mom-4     | F52F12.3  | -0.0374127048078399  |             |
| AGIWUR385;AGIWUR4265;AGIWUR14861;AGIWUR22928;AGIWUR26295;AGIWUR27202;AGIWUR30831;AGIWUR34120               |    |   |         |         |                |           |           |                      |             |
| N2                                                                                                         | HS | I | 9901255 | 9902929 | WBGene00009937 | ls1-1     | F52F12.4  | -0.00266734161705173 |             |
| AGIWUR13054                                                                                                |    |   |         |         |                |           |           |                      |             |
| N2                                                                                                         | HS | I | 9902943 | 9910545 | WBGene00009939 | ztf-11    | F52F12.6  | -0.060088952095056   |             |
| AGIWUR22662;AGIWUR22912                                                                                    |    |   |         |         |                |           |           |                      |             |
| N2                                                                                                         | HS | I | 9921211 | 9921961 | WBGene00009938 | F52F12.5  | F52F12.5  | -0.025918486072225   |             |
| AGIWUR14086                                                                                                |    |   |         |         |                |           |           |                      |             |
| N2                                                                                                         | HS | I | 9923610 | 9924280 | WBGene00009941 | F52F12.8  | F52F12.8  | -0.102532125195561   |             |
| AGIWUR14551                                                                                                |    |   |         |         |                |           |           |                      |             |
| N2                                                                                                         | HS | I | 9925978 | 9929032 | WBGene00009942 | F52F12.9  | F52F12.9  | -0.025086746778908   |             |
| AGIWUR9358;AGIWUR35586                                                                                     |    |   |         |         |                |           |           |                      |             |
| N2                                                                                                         | HS | I | 9928946 | 9930885 | WBGene00009940 | str1-1    | F52F12.7  | 0.0319916531536499   |             |
| AGIWUR24560                                                                                                |    |   |         |         |                |           |           |                      |             |
| N2                                                                                                         | HS | I | 9930972 | 9931882 | WBGene00013696 | Y106G6A.4 | Y106G6A.4 | 0.0142099715611472   |             |
| AGIWUR2031                                                                                                 |    |   |         |         |                |           |           |                      |             |
| N2                                                                                                         | HS | I | 9931870 | 9934290 | WBGene00013695 | epg-8     | Y106G6A.2 | -0.16079977252312    |             |
| AGIWUR2744;AGIWUR18245;AGIWUR18984;AGIWUR28290;AGIWUR31270;AGIWUR32991;AGIWUR41204;AGIWUR43220;AGIWUR43432 |    |   |         |         |                |           |           |                      |             |
| N2                                                                                                         | HS | I | 9934639 | 9936022 | WBGene00013697 | dsbn-1    | Y106G6A.5 | -0.0890132771491885  |             |
| AGIWUR37460                                                                                                |    |   |         |         |                |           |           |                      |             |
| N2                                                                                                         | HS | I | 9936125 | 9938378 | WBGene00013694 | Y106G6A.1 | Y106G6A.1 | 0.0304336852714862   |             |
| AGIWUR3372;AGIWUR9642;AGIWUR28741                                                                          |    |   |         |         |                |           |           |                      |             |
| N2                                                                                                         | HS | I | 9947805 | 9953387 | WBGene00005023 | sqv-5     | T24D1.1   | -0.435086417945421   |             |
| AGIWUR9388;AGIWUR42746                                                                                     |    |   |         |         |                |           |           |                      |             |
| N2                                                                                                         | HS | I | 9953409 | 9955873 | WBGene00011985 | T24D1.2   | T24D1.2   | -0.0267529193301979  |             |
| AGIWUR6789;AGIWUR19798;AGIWUR22341                                                                         |    |   |         |         |                |           |           |                      |             |
| N2                                                                                                         | HS | I | 9956150 | 9958357 | WBGene00011988 | har-2     | T24D1.5   | -0.134415422998796   | AGIWUR42509 |
| N2                                                                                                         | HS | I | 9958782 | 9960155 | WBGene00011986 | T24D1.3   | T24D1.3   | 0.0250499059307892   | AGIWUR3679  |
| N2                                                                                                         | HS | I | 9960370 | 9961973 | WBGene00007043 | tag-179   | T24D1.4   | 0.10838029546739     |             |
| AGIWUR14556;AGIWUR29087                                                                                    |    |   |         |         |                |           |           |                      |             |
| N2                                                                                                         | HS | I | 9965580 | 9970037 | WBGene00003397 | mom-5     | T23D8.1   | -0.248604930249676   |             |
| AGIWUR7889;AGIWUR22460                                                                                     |    |   |         |         |                |           |           |                      |             |
| N2                                                                                                         | HS | I | 9970037 | 9973177 | WBGene00006633 | tsp-7     | T23D8.2   | -0.0108151712031592  | AGIWUR25168 |
| N2                                                                                                         | HS | I | 9973377 | 9976315 | WBGene00011944 | T23D8.3   | T23D8.3   | 0.146438156959782    | AGIWUR31007 |
| N2                                                                                                         | HS | I | 9976393 | 9979662 | WBGene00001226 | eif-3.C   | T23D8.4   | -0.0295662628037823  |             |
| AGIWUR3943;AGIWUR14459                                                                                     |    |   |         |         |                |           |           |                      |             |
| N2                                                                                                         | HS | I | 9980064 | 9984848 | WBGene00006379 | sys-1     | T23D8.9   | -0.0688870547326861  |             |
| AGIWUR584;AGIWUR11881;AGIWUR12778;AGIWUR27780;AGIWUR30185;AGIWUR34013;AGIWUR43769                          |    |   |         |         |                |           |           |                      |             |
| N2                                                                                                         | HS | I | 9988341 | 9988826 | WBGene00001941 | his-67    | T23D8.5   | 0.0774797771934139   | AGIWUR20059 |

|                                                                            |    |   |          |          |                |           |          |                     |             |
|----------------------------------------------------------------------------|----|---|----------|----------|----------------|-----------|----------|---------------------|-------------|
| N2                                                                         | HS | I | 9989061  | 9989617  | WBGene00001942 | his-68    | T23D8.6  | -0.475385702935274  |             |
| AGIWUR9020;AGIWUR10398;AGIWUR19130;AGIWUR38394;AGIWUR41721                 |    |   |          |          |                |           |          |                     |             |
| N2                                                                         | HS | I | 9989802  | 9993975  | WBGene00011945 | hpo-24    | T23D8.7  | -0.0535690080877043 |             |
| AGIWUR8843;AGIWUR15233;AGIWUR36871                                         |    |   |          |          |                |           |          |                     |             |
| N2                                                                         | HS | I | 9994731  | 9999928  | WBGene00000476 | cfi-1     | T23D8.8  | 0.00984075271255591 |             |
| AGIWUR4844;AGIWUR34287;AGIWUR44917                                         |    |   |          |          |                |           |          |                     |             |
| N2                                                                         | HS | I | 10014547 | 10015495 | WBGene00007274 |           | C03C11.1 |                     | C03C11.1    |
| -0.12295593253029 AGIWUR25138                                              |    |   |          |          |                |           |          |                     |             |
| N2                                                                         | HS | I | 10016778 | 10018114 | WBGene00001483 | fog-3     |          | C03C11.2            |             |
| 0.120922112380358 AGIWUR2227                                               |    |   |          |          |                |           |          |                     |             |
| N2                                                                         | HS | I | 10023810 | 10025831 | WBGene00008663 | eak-6     | F10G8.4  | -0.0563403526535016 |             |
| AGIWUR19346                                                                |    |   |          |          |                |           |          |                     |             |
| N2                                                                         | HS | I | 10026188 | 10030058 | WBGene00003803 | rae-1     | F10G8.3  | 0.0182201047718689  |             |
| AGIWUR14990                                                                |    |   |          |          |                |           |          |                     |             |
| N2                                                                         | HS | I | 10030174 | 10046760 | WBGene00008665 | ercc-1    | F10G8.7  | -0.0775123414207179 |             |
| AGIWUR7402;AGIWUR8445;AGIWUR8743;AGIWUR10512                               |    |   |          |          |                |           |          |                     |             |
| N2                                                                         | HS | I | 10046442 | 10048028 | WBGene00008664 | nubp-1    | F10G8.6  | 0.101884536695795   |             |
| AGIWUR7984;AGIWUR8402;AGIWUR9547;AGIWUR44930                               |    |   |          |          |                |           |          |                     |             |
| N2                                                                         | HS | I | 10048087 | 10050770 | WBGene00008667 | F10G8.9   | F10G8.9  | 0.202542014635608   |             |
| AGIWUR18885;AGIWUR29836;AGIWUR32672                                        |    |   |          |          |                |           |          |                     |             |
| N2                                                                         | HS | I | 10050691 | 10062026 | WBGene00008666 | F10G8.8   | F10G8.8  | 0.0913765386380483  |             |
| AGIWUR15028;AGIWUR31677                                                    |    |   |          |          |                |           |          |                     |             |
| N2                                                                         | HS | I | 10072578 | 10074399 | WBGene00007159 | B0379.7   | B0379.7  | 0                   | AGIWUR21196 |
| N2                                                                         | HS | I | 10074952 | 10077749 | WBGene00007155 | B0379.1   | B0379.1  | 0.00361828504124162 |             |
| AGIWUR38309;AGIWUR41296;AGIWUR44354                                        |    |   |          |          |                |           |          |                     |             |
| N2                                                                         | HS | I | 10080159 | 10085777 | WBGene00003508 | mut-16    | B0379.3  | -0.0509162522275268 |             |
| AGIWUR788;AGIWUR33569                                                      |    |   |          |          |                |           |          |                     |             |
| N2                                                                         | HS | I | 10085713 | 10102012 | WBGene00007054 | scpl-1    | B0379.4  | -0.0247212942887316 |             |
| AGIWUR35678                                                                |    |   |          |          |                |           |          |                     |             |
| N2                                                                         | HS | I | 10107393 | 10109000 | WBGene00013698 | Y106G6D.1 |          | Y106G6D.1           |             |
| -0.130736084716721 AGIWUR15930                                             |    |   |          |          |                |           |          |                     |             |
| N2                                                                         | HS | I | 10110982 | 10111916 | WBGene00013699 | Y106G6D.2 |          | Y106G6D.2           |             |
| 0.0305125196412916 AGIWUR24239                                             |    |   |          |          |                |           |          |                     |             |
| N2                                                                         | HS | I | 10112088 | 10114256 | WBGene00013700 | Y106G6D.3 |          | Y106G6D.3           |             |
| -0.156181062103721 AGIWUR43241                                             |    |   |          |          |                |           |          |                     |             |
| N2                                                                         | HS | I | 10114759 | 10116583 | WBGene00013701 | Y106G6D.4 |          | Y106G6D.4           |             |
| 0.0446856559996727 AGIWUR7232;AGIWUR36951                                  |    |   |          |          |                |           |          |                     |             |
| N2                                                                         | HS | I | 10117061 | 10118134 | WBGene00013704 | Y106G6D.8 |          | Y106G6D.8           |             |
| 0.399153433203988 AGIWUR6334;AGIWUR8836;AGIWUR9264;AGIWUR27542;AGIWUR35825 |    |   |          |          |                |           |          |                     |             |

|                                                                                                            |    |   |                                                |          |                |           |                             |
|------------------------------------------------------------------------------------------------------------|----|---|------------------------------------------------|----------|----------------|-----------|-----------------------------|
| N2                                                                                                         | HS | I | 10119209                                       | 10122171 | WBGene00014965 | Y106G6D.5 | Y106G6D.5                   |
| 0.0214498015190241                                                                                         |    |   | AGIWUR20599;AGIWUR43526                        |          |                |           |                             |
| N2                                                                                                         | HS | I | 10122459                                       | 10130215 | WBGene00013703 | Y106G6D.7 | Y106G6D.7                   |
| -0.0721386832829189                                                                                        |    |   | AGIWUR14206;AGIWUR26940                        |          |                |           |                             |
| N2                                                                                                         | HS | I | 10147325                                       | 10149888 | WBGene00008885 | F16C3.1   | F16C3.1 -0.0229493187495144 |
| AGIWUR6363                                                                                                 |    |   |                                                |          |                |           |                             |
| N2                                                                                                         | HS | I | 10150280                                       | 10155131 | WBGene00008886 | F16C3.2   | F16C3.2 0.196548058641913   |
| AGIWUR7129                                                                                                 |    |   |                                                |          |                |           |                             |
| N2                                                                                                         | HS | I | 10155161                                       | 10158558 | WBGene00023415 | F16C3.3   | F16C3.3 0.0694780837574918  |
| AGIWUR25814;AGIWUR41744                                                                                    |    |   |                                                |          |                |           |                             |
| N2                                                                                                         | HS | I | 10158951                                       | 10160034 | WBGene00044243 | F16C3.4   | F16C3.4 0.210499521410554   |
| AGIWUR37530;AGIWUR41968;AGIWUR44496                                                                        |    |   |                                                |          |                |           |                             |
| N2                                                                                                         | HS | I | 10159982                                       | 10161883 | WBGene00006447 | tag-72    | C25A1.3 -0.183555448713907  |
| AGIWUR27730                                                                                                |    |   |                                                |          |                |           |                             |
| N2                                                                                                         | HS | I | 10162379                                       | 10163578 | WBGene00007705 | C25A1.1   | C25A1.1 -0.120387336862162  |
| AGIWUR38730                                                                                                |    |   |                                                |          |                |           |                             |
| N2                                                                                                         | HS | I | 10163475                                       | 10165135 | WBGene00001442 | fkh-10    | C25A1.2 -0.0260850028595705 |
| AGIWUR5426                                                                                                 |    |   |                                                |          |                |           |                             |
| N2                                                                                                         | HS | I | 10169639                                       | 10172645 | WBGene00007706 | C25A1.4   | C25A1.4 -0.0660796381470465 |
| AGIWUR7340;AGIWUR20206;AGIWUR39825                                                                         |    |   |                                                |          |                |           |                             |
| N2                                                                                                         | HS | I | 10177181                                       | 10178921 | WBGene00007707 | C25A1.5   | C25A1.5 -0.19578670066835   |
| AGIWUR9829                                                                                                 |    |   |                                                |          |                |           |                             |
| N2                                                                                                         | HS | I | 10179832                                       | 10184075 | WBGene00002153 | iars-2    | C25A1.7 -0.0357210000459429 |
| AGIWUR4515;AGIWUR17911;AGIWUR22885;AGIWUR24106;AGIWUR27797;AGIWUR32150                                     |    |   |                                                |          |                |           |                             |
| N2                                                                                                         | HS | I | 10184478                                       | 10185470 | WBGene00007709 | clec-87   | C25A1.8 -0.156242529098998  |
| AGIWUR10786;AGIWUR12722;AGIWUR14448;AGIWUR17486;AGIWUR31726;AGIWUR32435                                    |    |   |                                                |          |                |           |                             |
| N2                                                                                                         | HS | I | 10185780                                       | 10187550 | WBGene00007710 | rsa-1     | C25A1.9 -0.052356766098848  |
| AGIWUR24491                                                                                                |    |   |                                                |          |                |           |                             |
| N2                                                                                                         | HS | I | 10187515                                       | 10190896 | WBGene00000931 | dao-5     | C25A1.10                    |
| -0.0422307439709266                                                                                        |    |   | AGIWUR2193;AGIWUR14692;AGIWUR38010;AGIWUR41462 |          |                |           |                             |
| N2                                                                                                         | HS | I | 10191273                                       | 10192894 | WBGene00007711 | lid-1     | C25A1.12                    |
| -0.00553992915214607                                                                                       |    |   |                                                |          |                |           |                             |
| AGIWUR7759;AGIWUR12214;AGIWUR12894;AGIWUR18762;AGIWUR24648;AGIWUR30354;AGIWUR37784;AGIWUR42516;AGIWUR43176 |    |   |                                                |          |                |           |                             |
| N2                                                                                                         | HS | I | 10193242                                       | 10193999 | WBGene00007712 | mrp1-34   | C25A1.13                    |
| 0.00344126474634265                                                                                        |    |   | AGIWUR6533                                     |          |                |           |                             |
| N2                                                                                                         | HS | I | 10193925                                       | 10197000 | WBGene00000095 | aha-1     | C25A1.11                    |
| -0.123316789807696                                                                                         |    |   | AGIWUR44293                                    |          |                |           |                             |
| N2                                                                                                         | HS | I | 10197321                                       | 10197596 | WBGene00007713 | C25A1.15  | C25A1.15                    |
| -0.0346306836046715                                                                                        |    |   | AGIWUR19876                                    |          |                |           |                             |

|                                                            |    |   |                                                                      |          |                |           |                             |
|------------------------------------------------------------|----|---|----------------------------------------------------------------------|----------|----------------|-----------|-----------------------------|
| N2                                                         | HS | I | 10198286                                                             | 10200440 | WBGene00013705 | Y106G6E.1 | Y106G6E.1                   |
| 0.00614529804925823                                        |    |   | AGIWUR11466                                                          |          |                |           |                             |
| N2                                                         | HS | I | 10221635                                                             | 10222778 | WBGene00013708 | Y106G6E.4 | Y106G6E.4                   |
| 0.170259817851252                                          |    |   | AGIWUR36816;AGIWUR38525                                              |          |                |           |                             |
| N2                                                         | HS | I | 10222881                                                             | 10227009 | WBGene00000426 | ced-12    | Y106G6E.5                   |
| -0.0528563444729766                                        |    |   | AGIWUR6640;AGIWUR10649;AGIWUR39379                                   |          |                |           |                             |
| N2                                                         | HS | I | 10227210                                                             | 10231214 | WBGene00013709 | csnk-1    | Y106G6E.6                   |
| -0.240333714376803                                         |    |   | AGIWUR6259;AGIWUR41120                                               |          |                |           |                             |
| N2                                                         | HS | I | 10248256                                                             | 10255327 | WBGene00003000 | lin-11    | ZC247.3 0.00664912792154837 |
| AGIWUR5317;AGIWUR13003;AGIWUR24260;AGIWUR25289;AGIWUR33061 |    |   |                                                                      |          |                |           |                             |
| N2                                                         | HS | I | 10255632                                                             | 10262250 | WBGene00013860 | ZC247.2   | ZC247.2 0.167290329400803   |
| AGIWUR1179                                                 |    |   |                                                                      |          |                |           |                             |
| N2                                                         | HS | I | 10264314                                                             | 10279234 | WBGene00013859 | ZC247.1   | ZC247.1 -0.0699714300207201 |
| AGIWUR19141                                                |    |   |                                                                      |          |                |           |                             |
| N2                                                         | HS | I | 10291870                                                             | 10297927 | WBGene00007047 | wts-1     | T20F10.1                    |
| 0.211205444240193                                          |    |   | AGIWUR24166                                                          |          |                |           |                             |
| N2                                                         | HS | I | 10298140                                                             | 10300598 | WBGene00011864 | T20F10.2  | T20F10.2                    |
| 0.0384658626311563                                         |    |   | AGIWUR17094;AGIWUR17549;AGIWUR23612;AGIWUR43299                      |          |                |           |                             |
| N2                                                         | HS | I | 10300573                                                             | 10302945 | WBGene00011866 | T20F10.5  | T20F10.5                    |
| 0.00414368231678264                                        |    |   | AGIWUR5199;AGIWUR5957;AGIWUR9005;AGIWUR20137;AGIWUR28724;AGIWUR36038 |          |                |           |                             |
| N2                                                         | HS | I | 10309757                                                             | 10311591 | WBGene00045057 | Y106G6G.7 | Y106G6G.7                   |
| 0.0811629042279343                                         |    |   | AGIWUR20883                                                          |          |                |           |                             |
| N2                                                         | HS | I | 10319669                                                             | 10321493 | WBGene00013715 | Y106G6G.6 | Y106G6G.6                   |
| -0.0247077274662719                                        |    |   | AGIWUR13079;AGIWUR28186                                              |          |                |           |                             |
| N2                                                         | HS | I | 10321711                                                             | 10323398 | WBGene00013713 | Y106G6G.4 | Y106G6G.4                   |
| -0.0489760535938224                                        |    |   | AGIWUR1645                                                           |          |                |           |                             |
| N2                                                         | HS | I | 10323511                                                             | 10324145 | WBGene00013712 | dlc-6     | Y106G6G.3                   |
| -0.00313022837473032                                       |    |   | AGIWUR14226                                                          |          |                |           |                             |
| N2                                                         | HS | I | 10328984                                                             | 10330370 | WBGene00013710 | Y106G6G.1 | Y106G6G.1                   |
| -0.0619718094953168                                        |    |   | AGIWUR3549                                                           |          |                |           |                             |
| N2                                                         | HS | I | 10330879                                                             | 10331808 | WBGene00004476 | rps-7     | ZC434.2 0.10988139927171    |
| AGIWUR1411;AGIWUR7247;AGIWUR25024                          |    |   |                                                                      |          |                |           |                             |
| N2                                                         | HS | I | 10331945                                                             | 10333082 | WBGene00013892 | ZC434.4   | ZC434.4 -0.0210385305529641 |
| AGIWUR35993                                                |    |   |                                                                      |          |                |           |                             |
| N2                                                         | HS | I | 10333471                                                             | 10334590 | WBGene00220261 | ZC434.10  | ZC434.10                    |
| 0.560315102984783                                          |    |   | AGIWUR43270                                                          |          |                |           |                             |
| N2                                                         | HS | I | 10334661                                                             | 10335739 | WBGene00013891 | ZC434.3   | ZC434.3 0.0450623665218042  |
| AGIWUR2990;AGIWUR17062;AGIWUR22980;AGIWUR26531             |    |   |                                                                      |          |                |           |                             |
| N2                                                         | HS | I | 10336395                                                             | 10341178 | WBGene00001337 | ears-1    | ZC434.5 0.0501735733583928  |

|                                                                                                                                   |    |   |          |          |                |           |           |                     |  |
|-----------------------------------------------------------------------------------------------------------------------------------|----|---|----------|----------|----------------|-----------|-----------|---------------------|--|
| AGIWUR436;AGIWUR496;AGIWUR43053                                                                                                   |    |   |          |          |                |           |           |                     |  |
| N2                                                                                                                                | HS | I | 10340997 | 10345648 | WBGene00000148 | aph-2     | ZC434.6   | 0.238969046848037   |  |
| AGIWUR28276                                                                                                                       |    |   |          |          |                |           |           |                     |  |
| N2                                                                                                                                | HS | I | 10345736 | 10348061 | WBGene00013893 | ZC434.7   | ZC434.7   | 0.123988582436503   |  |
| AGIWUR7669;AGIWUR26724;AGIWUR33950;AGIWUR39834;AGIWUR42693;AGIWUR43556                                                            |    |   |          |          |                |           |           |                     |  |
| N2                                                                                                                                | HS | I | 10348055 | 10349379 | WBGene00013894 | ZC434.8   | ZC434.8   | -0.0375207782954972 |  |
| AGIWUR17368;AGIWUR26084                                                                                                           |    |   |          |          |                |           |           |                     |  |
| N2                                                                                                                                | HS | I | 10356251 | 10360890 | WBGene00013895 | ZC434.9   | ZC434.9   | -0.366092849879326  |  |
| AGIWUR44177                                                                                                                       |    |   |          |          |                |           |           |                     |  |
| N2                                                                                                                                | HS | I | 10366621 | 10371699 | WBGene00009743 | sptf-1    | F45H11.1  |                     |  |
| 0.0984768988143969 AGIWUR2830;AGIWUR23379;AGIWUR41497                                                                             |    |   |          |          |                |           |           |                     |  |
| N2                                                                                                                                | HS | I | 10373368 | 10373862 | WBGene00003587 | ned-8     | F45H11.2  |                     |  |
| -0.0280221081514309 AGIWUR23345                                                                                                   |    |   |          |          |                |           |           |                     |  |
| N2                                                                                                                                | HS | I | 10374809 | 10379631 | WBGene00009744 | hpo-35    | F45H11.3  |                     |  |
| 0.000466112322698553 AGIWUR4287;AGIWUR33299;AGIWUR33740;AGIWUR42031                                                               |    |   |          |          |                |           |           |                     |  |
| N2                                                                                                                                | HS | I | 10381082 | 10382040 | WBGene00009745 | F45H11.5  |           | F45H11.5            |  |
| 0.0725112282217424 AGIWUR3840;AGIWUR9168;AGIWUR22568;AGIWUR39623                                                                  |    |   |          |          |                |           |           |                     |  |
| N2                                                                                                                                | HS | I | 10382746 | 10384222 | WBGene00077521 | maf-1     | F45H11.6  |                     |  |
| -0.0615993656624685                                                                                                               |    |   |          |          |                |           |           |                     |  |
| AGIWUR1078;AGIWUR6836;AGIWUR12363;AGIWUR12557;AGIWUR12681;AGIWUR25932;AGIWUR34710;AGIWUR39209;AGIWUR40992;AGIWUR43296;AGIWUR43530 |    |   |          |          |                |           |           |                     |  |
| N2                                                                                                                                | HS | I | 10384219 | 10391388 | WBGene00003233 | mg1-2     | F45H11.4  |                     |  |
| -0.116667516207001 AGIWUR4879;AGIWUR20282                                                                                         |    |   |          |          |                |           |           |                     |  |
| N2                                                                                                                                | HS | I | 10398944 | 10400195 | WBGene00000843 | cup-2     | F25D7.1   | -0.0675716571863223 |  |
| AGIWUR4401;AGIWUR20500                                                                                                            |    |   |          |          |                |           |           |                     |  |
| N2                                                                                                                                | HS | I | 10401065 | 10402774 | WBGene00009112 | tag-353   | F25D7.2   | -0.146717130676629  |  |
| AGIWUR6582                                                                                                                        |    |   |          |          |                |           |           |                     |  |
| N2                                                                                                                                | HS | I | 10409302 | 10414707 | WBGene00003847 | blmp-1    | F25D7.3   | 0.047628737717786   |  |
| AGIWUR1162;AGIWUR2993;AGIWUR8630;AGIWUR9914;AGIWUR13060;AGIWUR35588;AGIWUR36795;AGIWUR37572                                       |    |   |          |          |                |           |           |                     |  |
| N2                                                                                                                                | HS | I | 10422958 | 10429026 | WBGene00009114 | F25D7.5   | F25D7.5   | -0.0316168161349477 |  |
| AGIWUR14538;AGIWUR16277;AGIWUR26686                                                                                               |    |   |          |          |                |           |           |                     |  |
| N2                                                                                                                                | HS | I | 10429629 | 10432336 | WBGene00013716 | Y106G6H.1 |           | Y106G6H.1           |  |
| 0.227172582673225 AGIWUR3844                                                                                                      |    |   |          |          |                |           |           |                     |  |
| N2                                                                                                                                | HS | I | 10432815 | 10435882 | WBGene00003902 | pab-1     | Y106G6H.2 |                     |  |
| -0.149665929151293                                                                                                                |    |   |          |          |                |           |           |                     |  |
| AGIWUR551;AGIWUR1625;AGIWUR4054;AGIWUR8505;AGIWUR14804;AGIWUR15583;AGIWUR16120;AGIWUR24249;AGIWUR29890;AGIWUR36402                |    |   |          |          |                |           |           |                     |  |
| N2                                                                                                                                | HS | I | 10436254 | 10436884 | WBGene00004444 | rpl-30    | Y106G6H.3 |                     |  |
| -0.0281297533403695 AGIWUR24641                                                                                                   |    |   |          |          |                |           |           |                     |  |

|                                                                         |    |   |                                                |          |                |            |            |                     |
|-------------------------------------------------------------------------|----|---|------------------------------------------------|----------|----------------|------------|------------|---------------------|
| N2                                                                      | HS | I | 10436895                                       | 10437708 | WBGene00013717 | madf-10    | Y106G6H.4  |                     |
| -0.224096744062585                                                      |    |   | AGIWUR8428                                     |          |                |            |            |                     |
| N2                                                                      | HS | I | 10438075                                       | 10443563 | WBGene00013718 | pdpr-1     | Y106G6H.5  |                     |
| -0.120673222954941                                                      |    |   | AGIWUR3494;AGIWUR4149;AGIWUR31485;AGIWUR40774  |          |                |            |            |                     |
| N2                                                                      | HS | I | 10443668                                       | 10446133 | WBGene00013719 | Y106G6H.6  |            | Y106G6H.6           |
| 0.194021760956078                                                       |    |   | AGIWUR7986                                     |          |                |            |            |                     |
| N2                                                                      | HS | I | 10446661                                       | 10452071 | WBGene00004753 | sec-8      | Y106G6H.7  |                     |
| 0.141049974033606                                                       |    |   | AGIWUR20305                                    |          |                |            |            |                     |
| N2                                                                      | HS | I | 10452178                                       | 10452895 | WBGene00013720 | Y106G6H.8  |            | Y106G6H.8           |
| -0.107156385660808                                                      |    |   | AGIWUR6889;AGIWUR24705;AGIWUR26727;AGIWUR31225 |          |                |            |            |                     |
| N2                                                                      | HS | I | 10464328                                       | 10471056 | WBGene00001112 | duo-3      | Y106G6H.12 |                     |
| 0.217964093769767                                                       |    |   | AGIWUR27835                                    |          |                |            |            |                     |
| N2                                                                      | HS | I | 10472196                                       | 10473389 | WBGene00013724 | Y106G6H.14 |            | Y106G6H.14          |
| 0.0955531316385514                                                      |    |   | AGIWUR4557;AGIWUR19187;AGIWUR19475             |          |                |            |            |                     |
| N2                                                                      | HS | I | 10473513                                       | 10474449 | WBGene00013725 | ska-1      | Y106G6H.15 |                     |
| -0.255959925855596                                                      |    |   | AGIWUR32773                                    |          |                |            |            |                     |
| N2                                                                      | HS | I | 10474835                                       | 10475525 | WBGene00013726 | Y106G6H.16 |            | Y106G6H.16          |
| 0.087161075627753                                                       |    |   | AGIWUR31191                                    |          |                |            |            |                     |
| N2                                                                      | HS | I | 10475522                                       | 10478129 | WBGene00009508 | row-1      | F37D6.2    | -0.510883994245226  |
| AGIWUR11222                                                             |    |   |                                                |          |                |            |            |                     |
| N2                                                                      | HS | I | 10479283                                       | 10484969 | WBGene00009507 | mus-101    | F37D6.1    | -0.121859432154477  |
| AGIWUR201;AGIWUR29531;AGIWUR41907                                       |    |   |                                                |          |                |            |            |                     |
| N2                                                                      | HS | I | 10486714                                       | 10487322 | WBGene00009509 | F37D6.3    | F37D6.3    | 0.113672617483697   |
| AGIWUR26244                                                             |    |   |                                                |          |                |            |            |                     |
| N2                                                                      | HS | I | 10488648                                       | 10489569 | WBGene00009510 | F37D6.4    | F37D6.4    | -0.0700254096854991 |
| AGIWUR11781;AGIWUR16130;AGIWUR23068;AGIWUR24394;AGIWUR24669;AGIWUR39352 |    |   |                                                |          |                |            |            |                     |
| N2                                                                      | HS | I | 10501585                                       | 10505949 | WBGene00006445 | tag-68     | F37D6.6    | -0.0517014365375119 |
| AGIWUR2748;AGIWUR11690;AGIWUR14931;AGIWUR27423;AGIWUR41788;AGIWUR43215  |    |   |                                                |          |                |            |            |                     |
| N2                                                                      | HS | I | 10507000                                       | 10515506 | WBGene00000492 | che-13     | F59C6.7    | -0.0176258362680777 |
| AGIWUR10651                                                             |    |   |                                                |          |                |            |            |                     |
| N2                                                                      | HS | I | 10516036                                       | 10516432 | WBGene00206464 | F59C6.18   |            | F59C6.18            |
| 0.0507330511764152                                                      |    |   | AGIWUR38691                                    |          |                |            |            |                     |
| N2                                                                      | HS | I | 10518379                                       | 10519263 | WBGene00010325 | exos-3     | F59C6.4    | 0.102361254607324   |
| AGIWUR35660                                                             |    |   |                                                |          |                |            |            |                     |
| N2                                                                      | HS | I | 10519360                                       | 10520761 | WBGene00010326 | F59C6.5    | F59C6.5    | 0.0392882398033709  |
| AGIWUR2505                                                              |    |   |                                                |          |                |            |            |                     |
| N2                                                                      | HS | I | 10520863                                       | 10521986 | WBGene00044251 | F59C6.12   |            | F59C6.12            |
| 0.0347918903955282                                                      |    |   | AGIWUR25235;AGIWUR38986                        |          |                |            |            |                     |
| N2                                                                      | HS | I | 10522091                                       | 10523996 | WBGene00010323 | dhhc-12    | F59C6.2    | 0.407291380724747   |

|                                                                                                                                                                                                                                             |    |   |          |          |                |          |          |                     |
|---------------------------------------------------------------------------------------------------------------------------------------------------------------------------------------------------------------------------------------------|----|---|----------|----------|----------------|----------|----------|---------------------|
| AGIWUR23798                                                                                                                                                                                                                                 |    |   |          |          |                |          |          |                     |
| N2                                                                                                                                                                                                                                          | HS | I | 10524424 | 10525509 | WBGene00010324 | F59C6.3  | F59C6.3  | 0.285127137864746   |
| AGIWUR7210;AGIWUR25869                                                                                                                                                                                                                      |    |   |          |          |                |          |          |                     |
| N2                                                                                                                                                                                                                                          | HS | I | 10526533 | 10530095 | WBGene00044792 | F59C6.14 |          | F59C6.14            |
| 0.182889702163976                                                                                                                                                                                                                           |    |   |          |          |                |          |          |                     |
| AGIWUR2011;AGIWUR7131;AGIWUR11982;AGIWUR22037;AGIWUR24402;AGIWUR24720;AGIWUR25617;AGIWUR28187;AGIWUR28827;AGIWUR36554;AGIWUR38820;AGIWUR39490;AGIWUR43929                                                                                   |    |   |          |          |                |          |          |                     |
| N2                                                                                                                                                                                                                                          | HS | I | 10530339 | 10531547 | WBGene00014789 | F59C6.10 |          | F59C6.10            |
| -0.0586275368116347 AGIWUR29319                                                                                                                                                                                                             |    |   |          |          |                |          |          |                     |
| N2                                                                                                                                                                                                                                          | HS | I | 10532667 | 10534484 | WBGene00010328 | F59C6.11 |          | F59C6.11            |
| 0.121235297374458 AGIWUR14721                                                                                                                                                                                                               |    |   |          |          |                |          |          |                     |
| N2                                                                                                                                                                                                                                          | HS | I | 10543024 | 10546435 | WBGene00009116 | snx-27   | F25H2.2  | 0.258207088825214   |
| AGIWUR29978                                                                                                                                                                                                                                 |    |   |          |          |                |          |          |                     |
| N2                                                                                                                                                                                                                                          | HS | I | 10547721 | 10549876 | WBGene00009117 | F25H2.3  | F25H2.3  | -0.0156412676871556 |
| AGIWUR40211                                                                                                                                                                                                                                 |    |   |          |          |                |          |          |                     |
| N2                                                                                                                                                                                                                                          | HS | I | 10551972 | 10553035 | WBGene00009118 | F25H2.4  | F25H2.4  | 0.288976753686308   |
| AGIWUR22807                                                                                                                                                                                                                                 |    |   |          |          |                |          |          |                     |
| N2                                                                                                                                                                                                                                          | HS | I | 10553116 | 10553913 | WBGene00009119 | ndk-1    | F25H2.5  | -0.231856650428274  |
| AGIWUR1428;AGIWUR4491;AGIWUR7177;AGIWUR8978;AGIWUR10087;AGIWUR11437;AGIWUR13155;AGIWUR13297;AGIWUR14349;AGIWUR23883;AGIWUR25992;AGIWUR32023;AGIWUR32499;AGIWUR33225;AGIWUR36407;AGIWUR39612;AGIWUR41122;AGIWUR42164;AGIWUR44511;AGIWUR45155 |    |   |          |          |                |          |          |                     |
| N2                                                                                                                                                                                                                                          | HS | I | 10554366 | 10557838 | WBGene00009120 | F25H2.6  | F25H2.6  | 0.129578468344578   |
| AGIWUR32606                                                                                                                                                                                                                                 |    |   |          |          |                |          |          |                     |
| N2                                                                                                                                                                                                                                          | HS | I | 10558323 | 10560006 | WBGene00009121 | F25H2.7  | F25H2.7  | 0.188411421362181   |
| AGIWUR30852                                                                                                                                                                                                                                 |    |   |          |          |                |          |          |                     |
| N2                                                                                                                                                                                                                                          | HS | I | 10562968 | 10564914 | WBGene00006720 | ubc-25   | F25H2.8  | -0.0656456583016549 |
| AGIWUR14963;AGIWUR16386;AGIWUR38751                                                                                                                                                                                                         |    |   |          |          |                |          |          |                     |
| N2                                                                                                                                                                                                                                          | HS | I | 10566350 | 10567300 | WBGene00003926 | pas-5    | F25H2.9  | 0.0747607666121084  |
| AGIWUR16852                                                                                                                                                                                                                                 |    |   |          |          |                |          |          |                     |
| N2                                                                                                                                                                                                                                          | HS | I | 10567894 | 10569019 | WBGene00004408 | r1a-0    | F25H2.10 |                     |
| -0.508215725389666 AGIWUR3634;AGIWUR4230;AGIWUR5948;AGIWUR12550;AGIWUR14129;AGIWUR17615;AGIWUR31740                                                                                                                                         |    |   |          |          |                |          |          |                     |
| N2                                                                                                                                                                                                                                          | HS | I | 10569112 | 10570030 | WBGene00009122 | tct-1    | F25H2.11 |                     |
| 0.0531044715194149 AGIWUR34683                                                                                                                                                                                                              |    |   |          |          |                |          |          |                     |
| N2                                                                                                                                                                                                                                          | HS | I | 10570079 | 10571916 | WBGene00009123 | F25H2.12 |          | F25H2.12            |
| -0.0246098655227449 AGIWUR42316                                                                                                                                                                                                             |    |   |          |          |                |          |          |                     |
| N2                                                                                                                                                                                                                                          | HS | I | 10571954 | 10577135 | WBGene00009124 | rtel-1   | F25H2.13 |                     |
| 0.209563094234415 AGIWUR14329                                                                                                                                                                                                               |    |   |          |          |                |          |          |                     |
| N2                                                                                                                                                                                                                                          | HS | I | 10579413 | 10580890 | WBGene00009243 | F29C6.1  | F29C6.1  | 0.115372475823921   |
| AGIWUR1176;AGIWUR28962                                                                                                                                                                                                                      |    |   |          |          |                |          |          |                     |



|                                                                        |    |   |          |          |                |          |                             |
|------------------------------------------------------------------------|----|---|----------|----------|----------------|----------|-----------------------------|
| N2                                                                     | HS | I | 10581538 | 10582609 | WBGene00011906 | hsp-12.1 | T22A3.2                     |
| 0.124801927491831 AGIWUR22241                                          |    |   |          |          |                |          |                             |
| N2                                                                     | HS | I | 10588177 | 10590464 | WBGene00003083 | lst-1    | T22A3.3 -0.0637539143388413 |
| AGIWUR4603                                                             |    |   |          |          |                |          |                             |
| N2                                                                     | HS | I | 10590678 | 10593972 | WBGene00044070 | set-18   | T22A3.4 0.0281753062266112  |
| AGIWUR474                                                              |    |   |          |          |                |          |                             |
| N2                                                                     | HS | I | 10595545 | 10598490 | WBGene00011909 | T22A3.6  | T22A3.6 0.158719993815165   |
| AGIWUR40214                                                            |    |   |          |          |                |          |                             |
| N2                                                                     | HS | I | 10598673 | 10606620 | WBGene00011908 | pash-1   | T22A3.5 -0.0133615785501764 |
| AGIWUR31209                                                            |    |   |          |          |                |          |                             |
| N2                                                                     | HS | I | 10608466 | 10621433 | WBGene00002248 | lam-3    | T22A3.8 0.0235822292744645  |
| AGIWUR5500;AGIWUR37672                                                 |    |   |          |          |                |          |                             |
| N2                                                                     | HS | I | 10622952 | 10624361 | WBGene00016622 | mafr-1   | C43H8.2 -0.301402280302847  |
| AGIWUR45017                                                            |    |   |          |          |                |          |                             |
| N2                                                                     | HS | I | 10624464 | 10625387 | WBGene00016621 | arch-1   | C43H8.1 0.307177823491392   |
| AGIWUR41519                                                            |    |   |          |          |                |          |                             |
| N2                                                                     | HS | I | 10625388 | 10628387 | WBGene00015232 | B0511.6  | B0511.6 -0.0350784726615636 |
| AGIWUR3687;AGIWUR4208;AGIWUR4272;AGIWUR4753;AGIWUR45010                |    |   |          |          |                |          |                             |
| N2                                                                     | HS | I | 10628712 | 10631674 | WBGene00015231 | cutl-14  | B0511.5 -0.115286648704858  |
| AGIWUR12758                                                            |    |   |          |          |                |          |                             |
| N2                                                                     | HS | I | 10631665 | 10633150 | WBGene00015233 | B0511.7  | B0511.7 0.0105567144794136  |
| AGIWUR29044                                                            |    |   |          |          |                |          |                             |
| N2                                                                     | HS | I | 10633279 | 10634078 | WBGene00255714 | B0511.19 | B0511.19                    |
| 0.0877963289159904 AGIWUR2149                                          |    |   |          |          |                |          |                             |
| N2                                                                     | HS | I | 10636692 | 10638977 | WBGene00044321 | mrps-30  | B0511.8 0.114454471786626   |
| AGIWUR24656                                                            |    |   |          |          |                |          |                             |
| N2                                                                     | HS | I | 10639079 | 10640230 | WBGene00015235 | cdc-26   | B0511.9 -0.141351603932351  |
| AGIWUR4793;AGIWUR28476;AGIWUR31998;AGIWUR37074;AGIWUR37096;AGIWUR40826 |    |   |          |          |                |          |                             |
| N2                                                                     | HS | I | 10640465 | 10642281 | WBGene00001228 | eif-3.E  | B0511.10                    |
| -0.222160045083591 AGIWUR37070                                         |    |   |          |          |                |          |                             |
| N2                                                                     | HS | I | 10644245 | 10645617 | WBGene00015230 | tag-344  | B0511.4 0.16247943902931    |
| AGIWUR24553                                                            |    |   |          |          |                |          |                             |
| N2                                                                     | HS | I | 10646762 | 10647777 | WBGene00015229 | fbxa-125 | B0511.3                     |
| 0.392079326852064 AGIWUR14685                                          |    |   |          |          |                |          |                             |
| N2                                                                     | HS | I | 10648606 | 10654179 | WBGene00015236 | B0511.11 | B0511.11                    |
| -0.360096524979518 AGIWUR44598                                         |    |   |          |          |                |          |                             |
| N2                                                                     | HS | I | 10654298 | 10666933 | WBGene00015237 | B0511.12 | B0511.12                    |
| -0.253393107103054 AGIWUR11649;AGIWUR13533;AGIWUR15421                 |    |   |          |          |                |          |                             |
| N2                                                                     | HS | I | 10667808 | 10671301 | WBGene00001432 | fbk-7    | B0511.1 -0.0709942069356639 |

|                                                                                |    |   |          |          |                |          |         |                     |  |
|--------------------------------------------------------------------------------|----|---|----------|----------|----------------|----------|---------|---------------------|--|
| AGIWUR39506                                                                    |    |   |          |          |                |          |         |                     |  |
| N2                                                                             | HS | I | 10671460 | 10672589 | WBGene00016389 | C34B2.4  | C34B2.4 | 0.0985615678534284  |  |
| AGIWUR41157                                                                    |    |   |          |          |                |          |         |                     |  |
| N2                                                                             | HS | I | 10675167 | 10676811 | WBGene00016390 | C34B2.5  | C34B2.5 | 0.0530062021886879  |  |
| AGIWUR7716;AGIWUR29153                                                         |    |   |          |          |                |          |         |                     |  |
| N2                                                                             | HS | I | 10676922 | 10682374 | WBGene00016391 | lonp-1   | C34B2.6 | -0.0266464620675846 |  |
| AGIWUR943;AGIWUR2718;AGIWUR5681                                                |    |   |          |          |                |          |         |                     |  |
| N2                                                                             | HS | I | 10682472 | 10683155 | WBGene00016395 | C34B2.10 |         | C34B2.10            |  |
| -0.0253723486720725 AGIWUR14716;AGIWUR15847                                    |    |   |          |          |                |          |         |                     |  |
| N2                                                                             | HS | I | 10683270 | 10685664 | WBGene00016392 | sdha-2   | C34B2.7 | -0.0138763089326268 |  |
| AGIWUR38680                                                                    |    |   |          |          |                |          |         |                     |  |
| N2                                                                             | HS | I | 10685825 | 10687058 | WBGene00016393 | C34B2.8  | C34B2.8 | 0.149925499476544   |  |
| AGIWUR1458;AGIWUR3758;AGIWUR26926;AGIWUR36412;AGIWUR43567;AGIWUR44915          |    |   |          |          |                |          |         |                     |  |
| N2                                                                             | HS | I | 10687363 | 10688068 | WBGene00016387 | kbp-5    | C34B2.2 | -0.063424345511244  |  |
| AGIWUR11015                                                                    |    |   |          |          |                |          |         |                     |  |
| N2                                                                             | HS | I | 10688332 | 10690790 | WBGene00016386 | tag-272  | C34B2.1 | -0.0227266760113825 |  |
| AGIWUR21234                                                                    |    |   |          |          |                |          |         |                     |  |
| N2                                                                             | HS | I | 10691345 | 10696783 | WBGene00016396 | C34B2.11 |         | C34B2.11            |  |
| 0.164740565408105 AGIWUR2570;AGIWUR10840;AGIWUR43723                           |    |   |          |          |                |          |         |                     |  |
| N2                                                                             | HS | I | 10699562 | 10703801 | WBGene00016394 | C34B2.9  | C34B2.9 | -0.146240780255349  |  |
| AGIWUR34791                                                                    |    |   |          |          |                |          |         |                     |  |
| N2                                                                             | HS | I | 10708363 | 10710376 | WBGene00015024 | B0205.10 |         | B0205.10            |  |
| -0.000250020097530168 AGIWUR13757                                              |    |   |          |          |                |          |         |                     |  |
| N2                                                                             | HS | I | 10713505 | 10718201 | WBGene00015017 | B0205.1  | B0205.1 | 0.0382098479872148  |  |
| AGIWUR28744                                                                    |    |   |          |          |                |          |         |                     |  |
| N2                                                                             | HS | I | 10720813 | 10723496 | WBGene00015023 | B0205.9  | B0205.9 | -0.160136858360712  |  |
| AGIWUR7558                                                                     |    |   |          |          |                |          |         |                     |  |
| N2                                                                             | HS | I | 10724161 | 10726136 | WBGene00015018 | srz-85   | B0205.2 | -0.0800774383365663 |  |
| AGIWUR40535                                                                    |    |   |          |          |                |          |         |                     |  |
| N2                                                                             | HS | I | 10726903 | 10727364 | WBGene00044646 | B0205.14 |         | B0205.14            |  |
| 0.4068103922808 AGIWUR19150;AGIWUR26793;AGIWUR29668;AGIWUR31946;AGIWUR42563    |    |   |          |          |                |          |         |                     |  |
| N2                                                                             | HS | I | 10727755 | 10728808 | WBGene00044644 | B0205.13 |         | B0205.13            |  |
| 0.683141345456544 AGIWUR18822;AGIWUR35516;AGIWUR42241                          |    |   |          |          |                |          |         |                     |  |
| N2                                                                             | HS | I | 10728959 | 10730287 | WBGene00015022 | B0205.8  | B0205.8 | 0.0325144931173753  |  |
| AGIWUR1980                                                                     |    |   |          |          |                |          |         |                     |  |
| N2                                                                             | HS | I | 10730467 | 10730743 | WBGene00044413 | B0205.12 |         | B0205.12            |  |
| 0.0597157791877461 AGIWUR32246;AGIWUR34973;AGIWUR40595;AGIWUR42095;AGIWUR44666 |    |   |          |          |                |          |         |                     |  |
| N2                                                                             | HS | I | 10730712 | 10732448 | WBGene00004466 | rpn-10   | B0205.3 | 0.147183266585891   |  |
| AGIWUR1283;AGIWUR18646;AGIWUR19121;AGIWUR19902;AGIWUR37875                     |    |   |          |          |                |          |         |                     |  |

|                                                                                 |    |   |          |          |                |          |          |                     |
|---------------------------------------------------------------------------------|----|---|----------|----------|----------------|----------|----------|---------------------|
| N2                                                                              | HS | I | 10732543 | 10733686 | WBGene00015025 | mrp1-9   | B0205.11 |                     |
| 0.096697860751096 AGIWUR17494                                                   |    |   |          |          |                |          |          |                     |
| N2                                                                              | HS | I | 10734022 | 10736615 | WBGene00002191 | kin-3    | B0205.7  | -0.0092200047365294 |
| AGIWUR6814;AGIWUR14979;AGIWUR16721;AGIWUR31425;AGIWUR35891;AGIWUR36826          |    |   |          |          |                |          |          |                     |
| N2                                                                              | HS | I | 10736697 | 10739911 | WBGene00015021 | B0205.6  | B0205.6  | 0.249496366756969   |
| AGIWUR33097                                                                     |    |   |          |          |                |          |          |                     |
| N2                                                                              | HS | I | 10740218 | 10740590 | WBGene00015020 | B0205.5  | B0205.5  | -0.016870255112468  |
| AGIWUR43771                                                                     |    |   |          |          |                |          |          |                     |
| N2                                                                              | HS | I | 10741368 | 10744445 | WBGene00015019 | B0205.4  | B0205.4  | 0.050801169279584   |
| AGIWUR6510;AGIWUR34542                                                          |    |   |          |          |                |          |          |                     |
| N2                                                                              | HS | I | 10750343 | 10776700 | WBGene00000912 | daf-16   | R13H8.1  | -0.0272137182790804 |
| AGIWUR15683;AGIWUR17069;AGIWUR19627;AGIWUR26737;AGIWUR27096                     |    |   |          |          |                |          |          |                     |
| N2                                                                              | HS | I | 10781442 | 10782890 | WBGene00018850 | gpx-8    | F55A3.5  | 0.147735878100863   |
| AGIWUR1381                                                                      |    |   |          |          |                |          |          |                     |
| N2                                                                              | HS | I | 10785128 | 10787863 | WBGene00018852 | F55A3.7  | F55A3.7  | -0.130496769327257  |
| AGIWUR35755                                                                     |    |   |          |          |                |          |          |                     |
| N2                                                                              | HS | I | 10789130 | 10793152 | WBGene00018849 | F55A3.3  | F55A3.3  | -0.11608553033426   |
| AGIWUR21198;AGIWUR26112;AGIWUR28742;AGIWUR36072;AGIWUR43803;AGIWUR44363         |    |   |          |          |                |          |          |                     |
| N2                                                                              | HS | I | 10793161 | 10798059 | WBGene00018848 | F55A3.2  | F55A3.2  |                     |
| -0.00049736400553968 AGIWUR32325                                                |    |   |          |          |                |          |          |                     |
| N2                                                                              | HS | I | 10799623 | 10806901 | WBGene00018847 | marc-6   | F55A3.1  | 0.173634277841057   |
| AGIWUR19410                                                                     |    |   |          |          |                |          |          |                     |
| N2                                                                              | HS | I | 10806922 | 10808238 | WBGene00016461 | C35E7.9  | C35E7.9  | 0.0937564465548366  |
| AGIWUR15468;AGIWUR34153                                                         |    |   |          |          |                |          |          |                     |
| N2                                                                              | HS | I | 10808590 | 10810497 | WBGene00016460 | C35E7.8  | C35E7.8  | 0.166005140419188   |
| AGIWUR12957                                                                     |    |   |          |          |                |          |          |                     |
| N2                                                                              | HS | I | 10810648 | 10812923 | WBGene00016462 | C35E7.10 |          | C35E7.10            |
| -0.0279550982725674 AGIWUR1500                                                  |    |   |          |          |                |          |          |                     |
| N2                                                                              | HS | I | 10813815 | 10814904 | WBGene00016459 | C35E7.7  | C35E7.7  | 0.0648184827378557  |
| AGIWUR27260                                                                     |    |   |          |          |                |          |          |                     |
| N2                                                                              | HS | I | 10817352 | 10819963 | WBGene00016458 | C35E7.6  | C35E7.6  | 0.0973284574658262  |
| AGIWUR19288                                                                     |    |   |          |          |                |          |          |                     |
| N2                                                                              | HS | I | 10823363 | 10828454 | WBGene00016457 | C35E7.5  | C35E7.5  | -0.0643834645548509 |
| AGIWUR221;AGIWUR3071;AGIWUR7500;AGIWUR13387;AGIWUR13605;AGIWUR15219;AGIWUR35549 |    |   |          |          |                |          |          |                     |
| N2                                                                              | HS | I | 10831881 | 10834812 | WBGene00016456 | C35E7.4  | C35E7.4  | 0.00400905655453343 |
| AGIWUR26878                                                                     |    |   |          |          |                |          |          |                     |
| N2                                                                              | HS | I | 10836985 | 10838877 | WBGene00016455 | C35E7.3  | C35E7.3  | -0.0131510371365469 |
| AGIWUR38197                                                                     |    |   |          |          |                |          |          |                     |
| N2                                                                              | HS | I | 10841114 | 10844647 | WBGene00016454 | C35E7.2  | C35E7.2  | -0.138108177904947  |

|                       |                                                                     |          |                |           |           |                     |
|-----------------------|---------------------------------------------------------------------|----------|----------------|-----------|-----------|---------------------|
| AGIWUR9766            |                                                                     |          |                |           |           |                     |
| N2 HS I               | 10844772                                                            | 10845922 | WBGene00016463 | C35E7.11  | C35E7.11  |                     |
| 0.316672907303952     | AGIWUR28616                                                         |          |                |           |           |                     |
| N2 HS I               | 10846777                                                            | 10850103 | WBGene00016453 | vet-2     | C35E7.1   | -0.224686577571206  |
| AGIWUR10906           |                                                                     |          |                |           |           |                     |
| N2 HS I               | 10855935                                                            | 10857620 | WBGene00021383 | Y37F4.2   | Y37F4.2   | -0.0990139351382773 |
| AGIWUR3056            |                                                                     |          |                |           |           |                     |
| N2 HS I               | 10859534                                                            | 10860769 | WBGene00021382 | Y37F4.1   | Y37F4.1   | -0.0406824732431659 |
| AGIWUR7087            |                                                                     |          |                |           |           |                     |
| N2 HS I               | 10861215                                                            | 10863453 | WBGene00021386 | Y37F4.5   | Y37F4.5   | 0.0505312228464394  |
| AGIWUR44323           |                                                                     |          |                |           |           |                     |
| N2 HS I               | 10863880                                                            | 10866495 | WBGene00021388 | Y37F4.7   | Y37F4.7   | -0.0418849690752925 |
| AGIWUR1404;AGIWUR3734 |                                                                     |          |                |           |           |                     |
| N2 HS I               | 10867554                                                            | 10868530 | WBGene00044289 | Y37F4.8   | Y37F4.8   | -0.0292394512071912 |
| AGIWUR36705           |                                                                     |          |                |           |           |                     |
| N2 HS I               | 10870023                                                            | 10875046 | WBGene00021387 | Y37F4.6   | Y37F4.6   | 0.0832695002961632  |
| AGIWUR44270           |                                                                     |          |                |           |           |                     |
| N2 HS I               | 10878047                                                            | 10878378 | WBGene00020860 | nspd-10   | T27C10.7  |                     |
| -0.159567161999693    | AGIWUR23135                                                         |          |                |           |           |                     |
| N2 HS I               | 10879138                                                            | 10879572 | WBGene00269435 | T27C10.9  | T27C10.9  |                     |
| 0.0912902996687794    | AGIWUR40191                                                         |          |                |           |           |                     |
| N2 HS I               | 10879769                                                            | 10894239 | WBGene00003068 | lrk-1     | T27C10.6  |                     |
| -0.313124954039733    | AGIWUR10723                                                         |          |                |           |           |                     |
| N2 HS I               | 10899110                                                            | 10902024 | WBGene00020857 | srt-62    | T27C10.2  |                     |
| 0.145270052768999     | AGIWUR18376;AGIWUR33397                                             |          |                |           |           |                     |
| N2 HS I               | 10906812                                                            | 10912203 | WBGene00018630 | F49D11.6  | F49D11.6  |                     |
| -0.00559932411786512  | AGIWUR9641                                                          |          |                |           |           |                     |
| N2 HS I               | 10912913                                                            | 10915796 | WBGene00018628 | F49D11.4  | F49D11.4  |                     |
| -0.0434153644209694   | AGIWUR33044                                                         |          |                |           |           |                     |
| N2 HS I               | 10917064                                                            | 10919095 | WBGene00018627 | F49D11.3  | F49D11.3  |                     |
| 0.210773193120372     | AGIWUR7428                                                          |          |                |           |           |                     |
| N2 HS I               | 10921416                                                            | 10923484 | WBGene00018626 | F49D11.2  | F49D11.2  |                     |
| -0.0571638260232028   | AGIWUR4503;AGIWUR16229;AGIWUR16872                                  |          |                |           |           |                     |
| N2 HS I               | 10923574                                                            | 10923944 | WBGene00018631 | F49D11.7  | F49D11.7  |                     |
| 0.00704345949568586   | AGIWUR2557;AGIWUR8303;AGIWUR9080;AGIWUR9566;AGIWUR38563;AGIWUR40010 |          |                |           |           |                     |
| N2 HS I               | 10924240                                                            | 10925753 | WBGene00000780 | cpn-4     | F49D11.8  |                     |
| 0.0576841319007819    | AGIWUR2714;AGIWUR20006;AGIWUR29506                                  |          |                |           |           |                     |
| N2 HS I               | 10926883                                                            | 10933705 | WBGene00045433 | F49D11.10 | F49D11.10 |                     |
| -0.120443155373069    | AGIWUR42404                                                         |          |                |           |           |                     |

|                                                                      |    |   |                                                                        |          |                |            |            |                     |
|----------------------------------------------------------------------|----|---|------------------------------------------------------------------------|----------|----------------|------------|------------|---------------------|
| N2                                                                   | HS | I | 10933810                                                               | 10935712 | WBGene00018632 | tag-296    | F49D11.9   |                     |
| -0.420056983173382                                                   |    |   | AGIWUR11932                                                            |          |                |            |            |                     |
| N2                                                                   | HS | I | 10936819                                                               | 10940521 | WBGene00018625 | prp-17     | F49D11.1   |                     |
| 0.308373906464263                                                    |    |   | AGIWUR16544                                                            |          |                |            |            |                     |
| N2                                                                   | HS | I | 10940685                                                               | 10943922 | WBGene00045434 | Y95D11A.3  | Y95D11A.3  |                     |
| 0.0423503262010954                                                   |    |   | AGIWUR10746;AGIWUR23575                                                |          |                |            |            |                     |
| N2                                                                   | HS | I | 10944210                                                               | 10945690 | WBGene00013605 | Y95D11A.1  | Y95D11A.1  |                     |
| -0.238527590904761                                                   |    |   | AGIWUR11591                                                            |          |                |            |            |                     |
| N2                                                                   | HS | I | 10958297                                                               | 10959906 | WBGene00044262 | Y95D11A.2  | Y95D11A.2  |                     |
| -0.320269596964168                                                   |    |   | AGIWUR38881                                                            |          |                |            |            |                     |
| N2                                                                   | HS | I | 10964473                                                               | 10966348 | WBGene00013121 | spe-38     | Y52B11A.1  |                     |
| 0.122380788487169                                                    |    |   | AGIWUR10936;AGIWUR13151;AGIWUR29137                                    |          |                |            |            |                     |
| N2                                                                   | HS | I | 10966394                                                               | 10970166 | WBGene00013122 | impt-1     | Y52B11A.2  |                     |
| 0.0278306070333385                                                   |    |   | AGIWUR5756;AGIWUR11019;AGIWUR12958;AGIWUR13000;AGIWUR18911;AGIWUR29124 |          |                |            |            |                     |
| N2                                                                   | HS | I | 10970493                                                               | 10980111 | WBGene00013123 | Y52B11A.3  | Y52B11A.3  |                     |
| -0.20887151428455                                                    |    |   | AGIWUR948;AGIWUR8774;AGIWUR10299;AGIWUR30518;AGIWUR35426;AGIWUR35479   |          |                |            |            |                     |
| N2                                                                   | HS | I | 11011435                                                               | 11014274 | WBGene00219422 | Y52B11A.20 | Y52B11A.20 |                     |
| -0.0736648853589834                                                  |    |   | AGIWUR3523;AGIWUR43245                                                 |          |                |            |            |                     |
| N2                                                                   | HS | I | 11012959                                                               | 11014739 | WBGene00077539 | Y52B11A.12 | Y52B11A.12 |                     |
| 0.0800433415367605                                                   |    |   | AGIWUR8711;AGIWUR18783                                                 |          |                |            |            |                     |
| N2                                                                   | HS | I | 11015486                                                               | 11017497 | WBGene00013125 | cllec-92   | Y52B11A.5  |                     |
| 0.412516417627079                                                    |    |   | AGIWUR15108                                                            |          |                |            |            |                     |
| N2                                                                   | HS | I | 11018571                                                               | 11025653 | WBGene00013126 | mltn-2     | Y52B11A.7  |                     |
| -0.0710561147560589                                                  |    |   | AGIWUR13171;AGIWUR21642                                                |          |                |            |            |                     |
| N2                                                                   | HS | I | 11032339                                                               | 11034055 | WBGene00013127 | Y52B11A.8  | Y52B11A.8  |                     |
| -0.0297366535132806                                                  |    |   | AGIWUR32358                                                            |          |                |            |            |                     |
| N2                                                                   | HS | I | 11034057                                                               | 11038857 | WBGene00013128 | dxbp-1     | Y52B11A.9  |                     |
| -0.106850954142365                                                   |    |   | AGIWUR22113                                                            |          |                |            |            |                     |
| N2                                                                   | HS | I | 11039056                                                               | 11052494 | WBGene00013129 | Y52B11A.10 | Y52B11A.10 |                     |
| -0.0617741275849326                                                  |    |   | AGIWUR18772;AGIWUR35839;AGIWUR36487                                    |          |                |            |            |                     |
| N2                                                                   | HS | I | 11067699                                                               | 11069996 | WBGene00014914 | Y52B11A.11 | Y52B11A.11 |                     |
| 0.0433602254478442                                                   |    |   | AGIWUR356;AGIWUR941;AGIWUR13335;AGIWUR18309;AGIWUR23163                |          |                |            |            |                     |
| N2                                                                   | HS | I | 11075758                                                               | 11134667 | WBGene00001980 | hmr-1      | W02B9.1    | -0.349464793335449  |
| AGIWUR2464;AGIWUR4079;AGIWUR7642;AGIWUR14037;AGIWUR25685;AGIWUR25807 |    |   |                                                                        |          |                |            |            |                     |
| N2                                                                   | HS | I | 11142113                                                               | 11144090 | WBGene00013929 | cllec-93   | ZK39.4     | 0.0468886714278014  |
| AGIWUR16569                                                          |    |   |                                                                        |          |                |            |            |                     |
| N2                                                                   | HS | I | 11144652                                                               | 11145696 | WBGene00044266 | ZK39.9     | ZK39.9     | -0.0483407980952313 |
| AGIWUR3953;AGIWUR18942;AGIWUR31124;AGIWUR35697;AGIWUR38465           |    |   |                                                                        |          |                |            |            |                     |
| N2                                                                   | HS | I | 11146448                                                               | 11148309 | WBGene00013928 | cllec-94   | ZK39.3     | 0.0369949337479625  |

|                                     |    |   |          |          |                |           |           |                     |
|-------------------------------------|----|---|----------|----------|----------------|-----------|-----------|---------------------|
| AGIWUR7109                          |    |   |          |          |                |           |           |                     |
| N2                                  | HS | I | 11148973 | 11150295 | WBGene00013927 | clec-95   | ZK39.2    | 0.427102746057449   |
| AGIWUR14880                         |    |   |          |          |                |           |           |                     |
| N2                                  | HS | I | 11151241 | 11151972 | WBGene00013930 | clec-96   | ZK39.5    | 0.412056203666663   |
| AGIWUR38744                         |    |   |          |          |                |           |           |                     |
| N2                                  | HS | I | 11152704 | 11154329 | WBGene00013931 | clec-97   | ZK39.6    | -0.0944143263629327 |
| AGIWUR3379;AGIWUR10205              |    |   |          |          |                |           |           |                     |
| N2                                  | HS | I | 11156745 | 11158831 | WBGene00013933 | clec-99   | ZK39.8    | 0.160080513970676   |
| AGIWUR13126                         |    |   |          |          |                |           |           |                     |
| N2                                  | HS | I | 11160034 | 11162602 | WBGene00050881 | ZK39.10   | ZK39.10   | -0.149554812881801  |
| AGIWUR15295;AGIWUR25506             |    |   |          |          |                |           |           |                     |
| N2                                  | HS | I | 11163811 | 11168736 | WBGene00013131 | Y52B11C.1 | Y52B11C.1 |                     |
| -0.269032320602394                  |    |   |          |          |                |           |           |                     |
| N2                                  | HS | I | 11177805 | 11182115 | WBGene00004706 | rsr-1     | F28D9.1   | -0.152041290642206  |
| AGIWUR25663                         |    |   |          |          |                |           |           |                     |
| N2                                  | HS | I | 11182817 | 11186137 | WBGene00005517 | sri-5     | F28D9.2   | 0.185527311617855   |
| AGIWUR20194                         |    |   |          |          |                |           |           |                     |
| N2                                  | HS | I | 11206922 | 11211842 | WBGene00012317 | ztf-6     | W06H12.1  |                     |
| -0.305585649228032                  |    |   |          |          |                |           |           |                     |
| N2                                  | HS | I | 11212426 | 11215091 | WBGene00002119 | ins-36    | Y53H1A.4  |                     |
| 0.138362379113628                   |    |   |          |          |                |           |           |                     |
| N2                                  | HS | I | 11216118 | 11221995 | WBGene00013177 | rsy-1     | Y53H1A.1  |                     |
| -0.00679339335570583                |    |   |          |          |                |           |           |                     |
| N2                                  | HS | I | 11222326 | 11224400 | WBGene00013178 | Y53H1A.2  | Y53H1A.2  |                     |
| 0.165417754279696                   |    |   |          |          |                |           |           |                     |
| N2                                  | HS | I | 11224836 | 11233334 | WBGene00043056 | nfya-2    | Y53H1A.5  |                     |
| -0.12123052247729                   |    |   |          |          |                |           |           |                     |
| N2                                  | HS | I | 11234302 | 11235176 | WBGene00013179 | clec-100  | Y53H1A.3  |                     |
| -0.21273928304878                   |    |   |          |          |                |           |           |                     |
| N2                                  | HS | I | 11235385 | 11235594 | WBGene00044781 | Y53H1A.6  | Y53H1A.6  |                     |
| -0.00073294749658892                |    |   |          |          |                |           |           |                     |
| N2                                  | HS | I | 11243836 | 11245003 | WBGene00009749 | F46A8.6   | F46A8.6   | -0.0867157756158505 |
| AGIWUR32965                         |    |   |          |          |                |           |           |                     |
| N2                                  | HS | I | 11245823 | 11246765 | WBGene00014760 | F46A8.2   | F46A8.2   | 0.0246181495326208  |
| AGIWUR32278;AGIWUR33361             |    |   |          |          |                |           |           |                     |
| N2                                  | HS | I | 11248270 | 11249952 | WBGene00014761 | F46A8.11  | F46A8.11  |                     |
| 0.0453508963159521                  |    |   |          |          |                |           |           |                     |
| N2                                  | HS | I | 11250139 | 11251602 | WBGene00014759 | F46A8.1   | F46A8.1   | 0.0220239713045967  |
| AGIWUR15744;AGIWUR23653;AGIWUR27635 |    |   |          |          |                |           |           |                     |

|                                                                                |    |   |          |          |                |          |          |                     |
|--------------------------------------------------------------------------------|----|---|----------|----------|----------------|----------|----------|---------------------|
| N2                                                                             | HS | I | 11252238 | 11252981 | WBGene00009752 | F46A8.9  | F46A8.9  | -0.0925739171344215 |
| AGIWUR9494                                                                     |    |   |          |          |                |          |          |                     |
| N2                                                                             | HS | I | 11253256 | 11256022 | WBGene00009753 | scrm-6   | F46A8.10 |                     |
| -0.092109398349816 AGIWUR31148                                                 |    |   |          |          |                |          |          |                     |
| N2                                                                             | HS | I | 11256550 | 11259225 | WBGene00009467 | F36D1.8  | F36D1.8  | 0.11486028537453    |
| AGIWUR29021                                                                    |    |   |          |          |                |          |          |                     |
| N2                                                                             | HS | I | 11263066 | 11263661 | WBGene00009466 | F36D1.7  | F36D1.7  | 0.235498392517519   |
| AGIWUR2766;AGIWUR3959;AGIWUR7252;AGIWUR15487;AGIWUR32950;AGIWUR45156           |    |   |          |          |                |          |          |                     |
| N2                                                                             | HS | I | 11265523 | 11265714 | WBGene00077524 | F36D1.11 |          | F36D1.11            |
| -0.0611125428382704 AGIWUR3397;AGIWUR28134                                     |    |   |          |          |                |          |          |                     |
| N2                                                                             | HS | I | 11266070 | 11266474 | WBGene00009464 | F36D1.5  | F36D1.5  | 0.134012516597066   |
| AGIWUR19361                                                                    |    |   |          |          |                |          |          |                     |
| N2                                                                             | HS | I | 11268030 | 11268409 | WBGene00044246 | F36D1.10 |          | F36D1.10            |
| -0.0203678177044848 AGIWUR2407;AGIWUR4902;AGIWUR6043;AGIWUR20336;AGIWUR24359   |    |   |          |          |                |          |          |                     |
| N2                                                                             | HS | I | 11269946 | 11271226 | WBGene00009465 | F36D1.6  | F36D1.6  | 0.16605499734005    |
| AGIWUR5059;AGIWUR16986;AGIWUR23497                                             |    |   |          |          |                |          |          |                     |
| N2                                                                             | HS | I | 11271708 | 11272346 | WBGene00009463 | F36D1.4  | F36D1.4  |                     |
| -0.00632622399402294 AGIWUR27994                                               |    |   |          |          |                |          |          |                     |
| N2                                                                             | HS | I | 11274899 | 11276346 | WBGene00009468 | F36D1.9  | F36D1.9  | -0.108977107434207  |
| AGIWUR28466;AGIWUR30243;AGIWUR30436                                            |    |   |          |          |                |          |          |                     |
| N2                                                                             | HS | I | 11276451 | 11280018 | WBGene00009461 | madf-2   | F36D1.1  | -0.0309964124709143 |
| AGIWUR18025                                                                    |    |   |          |          |                |          |          |                     |
| N2                                                                             | HS | I | 11282473 | 11286290 | WBGene00009462 | sre-22   | F36D1.2  | 0.0727962386212919  |
| AGIWUR8829;AGIWUR32183                                                         |    |   |          |          |                |          |          |                     |
| N2                                                                             | HS | I | 11289044 | 11291868 | WBGene00005710 | sru-47   | F36D1.3  | -0.112182581280781  |
| AGIWUR34147                                                                    |    |   |          |          |                |          |          |                     |
| N2                                                                             | HS | I | 11292662 | 11294197 | WBGene00013181 | Y53H1B.2 |          | Y53H1B.2            |
| 0.0648091303935558 AGIWUR1839                                                  |    |   |          |          |                |          |          |                     |
| N2                                                                             | HS | I | 11294593 | 11297206 | WBGene00013180 | cutl-10  | Y53H1B.1 |                     |
| -0.144493319514813 AGIWUR9275                                                  |    |   |          |          |                |          |          |                     |
| N2                                                                             | HS | I | 11300743 | 11301662 | WBGene00013182 | Y53H1B.4 |          | Y53H1B.4            |
| -0.223247677265961 AGIWUR40711                                                 |    |   |          |          |                |          |          |                     |
| N2                                                                             | HS | I | 11305882 | 11307450 | WBGene00219319 | H25P06.5 |          | H25P06.5            |
| -0.117188006509934 AGIWUR14863;AGIWUR22874;AGIWUR29330;AGIWUR31715;AGIWUR39430 |    |   |          |          |                |          |          |                     |
| N2                                                                             | HS | I | 11311516 | 11323110 | WBGene00010416 | hxx-2    | H25P06.1 |                     |
| -0.121968781546174 AGIWUR19499                                                 |    |   |          |          |                |          |          |                     |
| N2                                                                             | HS | I | 11323527 | 11333152 | WBGene00000410 | cdk-9    | H25P06.2 |                     |
| 0.0112446190214932 AGIWUR2599;AGIWUR5704;AGIWUR16319;AGIWUR18803;AGIWUR22679   |    |   |          |          |                |          |          |                     |
| N2                                                                             | HS | I | 11334223 | 11337431 | WBGene00014807 | M04D5.1  | M04D5.1  | -0.179596260963097  |

|                                                                                          |    |   |          |          |                |                                     |
|------------------------------------------------------------------------------------------|----|---|----------|----------|----------------|-------------------------------------|
| AGIWUR1348;AGIWUR28722                                                                   |    |   |          |          |                |                                     |
| N2                                                                                       | HS | I | 11339787 | 11341521 | WBGene00077770 | M04D5.3 M04D5.3 0.563034149614435   |
| AGIWUR20198                                                                              |    |   |          |          |                |                                     |
| N2                                                                                       | HS | I | 11361090 | 11362900 | WBGene00044250 | F56G4.7 F56G4.7 0.26227535121839    |
| AGIWUR219;AGIWUR6931;AGIWUR14752;AGIWUR17788;AGIWUR20636                                 |    |   |          |          |                |                                     |
| N2                                                                                       | HS | I | 11364321 | 11374334 | WBGene00010161 | F56G4.6 F56G4.6 0.0619433034094889  |
| AGIWUR42088                                                                              |    |   |          |          |                |                                     |
| N2                                                                                       | HS | I | 11374620 | 11380127 | WBGene00010159 | F56G4.4 F56G4.4 0.212192330621981   |
| AGIWUR21621                                                                              |    |   |          |          |                |                                     |
| N2                                                                                       | HS | I | 11380231 | 11388751 | WBGene00010160 | png-1 F56G4.5 0.289716575997527     |
| AGIWUR20127                                                                              |    |   |          |          |                |                                     |
| N2                                                                                       | HS | I | 11388689 | 11396660 | WBGene00000010 | aat-9 Y53H1C.1                      |
| -0.132643061328114 AGIWUR16336;AGIWUR17335;AGIWUR18837                                   |    |   |          |          |                |                                     |
| N2                                                                                       | HS | I | 11400612 | 11416427 | WBGene00001215 | ego-2 Y53H1C.2                      |
| -0.0997817994412245 AGIWUR2467;AGIWUR2804;AGIWUR4341;AGIWUR10016;AGIWUR25366;AGIWUR45207 |    |   |          |          |                |                                     |
| N2                                                                                       | HS | I | 11417844 | 11421236 | WBGene00013186 | Y53H1C.3 Y53H1C.3                   |
| 0.0427206389789276 AGIWUR20556                                                           |    |   |          |          |                |                                     |
| N2                                                                                       | HS | I | 11422190 | 11423600 | WBGene00007769 | C27C7.7 C27C7.7 -0.0746858417740031 |
| AGIWUR13993                                                                              |    |   |          |          |                |                                     |
| N2                                                                                       | HS | I | 11423993 | 11426054 | WBGene00007768 | C27C7.5 C27C7.5 0.0363639024398257  |
| AGIWUR1894                                                                               |    |   |          |          |                |                                     |
| N2                                                                                       | HS | I | 11429029 | 11432145 | WBGene00003664 | nhr-74 C27C7.3 -0.0548589494611793  |
| AGIWUR43950                                                                              |    |   |          |          |                |                                     |
| N2                                                                                       | HS | I | 11443452 | 11446644 | WBGene00014992 | ZK1025.1 ZK1025.1                   |
| 0.274495495301999 AGIWUR9385                                                             |    |   |          |          |                |                                     |
| N2                                                                                       | HS | I | 11460780 | 11463074 | WBGene00014183 | ZK1025.3 ZK1025.3                   |
| 0.556627180203659 AGIWUR9770                                                             |    |   |          |          |                |                                     |
| N2                                                                                       | HS | I | 11473218 | 11475677 | WBGene00003703 | nhr-113 ZK1025.9                    |
| 0.265368027985385 AGIWUR19572                                                            |    |   |          |          |                |                                     |
| N2                                                                                       | HS | I | 11483392 | 11484571 | WBGene00010652 | K08C9.5 K08C9.5                     |
| -0.00634315367913452 AGIWUR40298                                                         |    |   |          |          |                |                                     |
| N2                                                                                       | HS | I | 11484778 | 11486598 | WBGene00010650 | K08C9.1 K08C9.1 -0.0692754662718187 |
| AGIWUR24763                                                                              |    |   |          |          |                |                                     |
| N2                                                                                       | HS | I | 11486895 | 11488471 | WBGene00010651 | K08C9.2 K08C9.2 0.137108533071235   |
| AGIWUR16644                                                                              |    |   |          |          |                |                                     |
| N2                                                                                       | HS | I | 11489158 | 11490630 | WBGene00000641 | col-65 K08C9.4 -0.110381504138076   |
| AGIWUR17873                                                                              |    |   |          |          |                |                                     |
| N2                                                                                       | HS | I | 11493036 | 11495080 | WBGene00045218 | K08C9.8 K08C9.8 -0.115431022584844  |
| AGIWUR14097;AGIWUR39873                                                                  |    |   |          |          |                |                                     |



|                                                             |    |   |          |          |                |           |          |                    |
|-------------------------------------------------------------|----|---|----------|----------|----------------|-----------|----------|--------------------|
| N2                                                          | HS | I | 11498914 | 11499655 | WBGene00010653 | K08C9.6   | K08C9.6  | 0.144216491953012  |
| AGIWUR354;AGIWUR5663;AGIWUR10669;AGIWUR15581;AGIWUR43275    |    |   |          |          |                |           |          |                    |
| N2                                                          | HS | I | 11501625 | 11507129 | WBGene00009318 | F32B4.8   | F32B4.8  | 0.153328293548299  |
| AGIWUR31965                                                 |    |   |          |          |                |           |          |                    |
| N2                                                          | HS | I | 11510066 | 11512769 | WBGene00009312 | F32B4.1   | F32B4.1  | 0.0554631838055695 |
| AGIWUR10881;AGIWUR12015;AGIWUR29788                         |    |   |          |          |                |           |          |                    |
| N2                                                          | HS | I | 11512840 | 11513853 | WBGene00009313 | F32B4.2   | F32B4.2  | -0.127585271408199 |
| AGIWUR23120;AGIWUR37167;AGIWUR44941                         |    |   |          |          |                |           |          |                    |
| N2                                                          | HS | I | 11515127 | 11517108 | WBGene00009316 | abhd-11.1 |          | F32B4.6            |
| -0.0872341868385167 AGIWUR39042                             |    |   |          |          |                |           |          |                    |
| N2                                                          | HS | I | 11517558 | 11526962 | WBGene00009314 | F32B4.4   | F32B4.4  |                    |
| -0.00739833801174239 AGIWUR25980;AGIWUR30552                |    |   |          |          |                |           |          |                    |
| N2                                                          | HS | I | 11526918 | 11557851 | WBGene00001131 | dys-1     | F15D3.1  | 0.0289504763947956 |
| AGIWUR12141;AGIWUR22309;AGIWUR24862;AGIWUR34445;AGIWUR40088 |    |   |          |          |                |           |          |                    |
| N2                                                          | HS | I | 11557986 | 11558671 | WBGene00077557 | F15D3.9   | F15D3.9  | 0.0850304567726301 |
| AGIWUR2903;AGIWUR3479;AGIWUR5850;AGIWUR17559;AGIWUR22084    |    |   |          |          |                |           |          |                    |
| N2                                                          | HS | I | 11560637 | 11564387 | WBGene00008853 | cllec-101 |          | F15D3.2            |
| 0.0138094476912469 AGIWUR11727;AGIWUR34026                  |    |   |          |          |                |           |          |                    |
| N2                                                          | HS | I | 11565238 | 11570803 | WBGene00008854 | F15D3.4   | F15D3.4  | 0.0819561400597753 |
| AGIWUR1550                                                  |    |   |          |          |                |           |          |                    |
| N2                                                          | HS | I | 11570886 | 11571178 | WBGene00008855 | F15D3.5   | F15D3.5  | 0.141147901730617  |
| AGIWUR38955                                                 |    |   |          |          |                |           |          |                    |
| N2                                                          | HS | I | 11572121 | 11577488 | WBGene00008856 | F15D3.6   | F15D3.6  | -0.248988074549759 |
| AGIWUR36119;AGIWUR37869                                     |    |   |          |          |                |           |          |                    |
| N2                                                          | HS | I | 11578641 | 11579612 | WBGene00008857 | timmm-23  | F15D3.7  | 0.0689080085623015 |
| AGIWUR37010                                                 |    |   |          |          |                |           |          |                    |
| N2                                                          | HS | I | 11579861 | 11581986 | WBGene00008858 | pals-1    | F15D3.8  | 0.533975549617713  |
| AGIWUR20103                                                 |    |   |          |          |                |           |          |                    |
| N2                                                          | HS | I | 11582743 | 11586069 | WBGene00004963 | spe-9     | C17D12.6 |                    |
| 0.113808942525477 AGIWUR2003                                |    |   |          |          |                |           |          |                    |
| N2                                                          | HS | I | 11585922 | 11587294 | WBGene00007639 | C17D12.5  |          | C17D12.5           |
| -0.113167045790785 AGIWUR29807                              |    |   |          |          |                |           |          |                    |
| N2                                                          | HS | I | 11592302 | 11602095 | WBGene00006807 | unc-75    | C17D12.2 |                    |
| -0.0517144886220637 AGIWUR17392;AGIWUR20095                 |    |   |          |          |                |           |          |                    |
| N2                                                          | HS | I | 11604027 | 11611314 | WBGene00007640 | C17D12.7  |          | C17D12.7           |
| -0.0106224211327284 AGIWUR32357                             |    |   |          |          |                |           |          |                    |
| N2                                                          | HS | I | 11611672 | 11616244 | WBGene00007637 | dhhc-7    | C17D12.1 |                    |
| -0.265362382226215 AGIWUR38592                              |    |   |          |          |                |           |          |                    |
| N2                                                          | HS | I | 11616816 | 11620263 | WBGene00007638 | C17D12.3  |          | C17D12.3           |

|                                                                                    |            |          |                |          |         |                     |  |
|------------------------------------------------------------------------------------|------------|----------|----------------|----------|---------|---------------------|--|
| 0.0794783550314291                                                                 | AGIWUR9660 |          |                |          |         |                     |  |
| N2 HS I                                                                            | 11630064   | 11632879 | WBGene00012265 | W04G5.4  | W04G5.4 | -0.0809585615112987 |  |
| AGIWUR32019;AGIWUR32119;AGIWUR43756                                                |            |          |                |          |         |                     |  |
| N2 HS I                                                                            | 11633002   | 11638491 | WBGene00004275 | rab-11.2 |         | W04G5.2             |  |
| -0.147116734214706 AGIWUR6515;AGIWUR17616;AGIWUR24210                              |            |          |                |          |         |                     |  |
| N2 HS I                                                                            | 11638482   | 11640414 | WBGene00012270 | W04G5.10 |         | W04G5.10            |  |
| 0.143358509947353 AGIWUR4128;AGIWUR31161;AGIWUR34859                               |            |          |                |          |         |                     |  |
| N2 HS I                                                                            | 11640687   | 11642206 | WBGene00002205 | kin-23   | W04G5.6 | -0.151438930748101  |  |
| AGIWUR14720                                                                        |            |          |                |          |         |                     |  |
| N2 HS I                                                                            | 11642625   | 11645420 | WBGene00012269 | W04G5.9  | W04G5.9 | 0.0178201991923164  |  |
| AGIWUR26630                                                                        |            |          |                |          |         |                     |  |
| N2 HS I                                                                            | 11646525   | 11647020 | WBGene00045075 | W04G5.12 |         | W04G5.12            |  |
| -0.0344686733283588 AGIWUR863;AGIWUR7332;AGIWUR13915                               |            |          |                |          |         |                     |  |
| N2 HS I                                                                            | 11647753   | 11648428 | WBGene00045076 | W04G5.13 |         | W04G5.13            |  |
| 0.089151109547597 AGIWUR11630;AGIWUR42286;AGIWUR42442                              |            |          |                |          |         |                     |  |
| N2 HS I                                                                            | 11649982   | 11651912 | WBGene00012268 | W04G5.8  | W04G5.8 | -0.0784049673871614 |  |
| AGIWUR29292                                                                        |            |          |                |          |         |                     |  |
| N2 HS I                                                                            | 11652789   | 11654254 | WBGene00012267 | W04G5.7  | W04G5.7 | 0.229331318450361   |  |
| AGIWUR227;AGIWUR4758;AGIWUR23631                                                   |            |          |                |          |         |                     |  |
| N2 HS I                                                                            | 11675850   | 11680975 | WBGene00002232 | kpc-1    | F11A6.1 | 0.00884432117791079 |  |
| AGIWUR6129;AGIWUR35941;AGIWUR40036;AGIWUR40532;AGIWUR41868;AGIWUR43223;AGIWUR44060 |            |          |                |          |         |                     |  |
| N2 HS I                                                                            | 11680913   | 11682441 | WBGene00008681 | scrm-4   | F11A6.2 | 0.15119344612728    |  |
| AGIWUR12708;AGIWUR15152;AGIWUR37914                                                |            |          |                |          |         |                     |  |
| N2 HS I                                                                            | 11687811   | 11688522 | WBGene00077549 | F11A6.3  | F11A6.3 | -0.0988655500428468 |  |
| AGIWUR5970                                                                         |            |          |                |          |         |                     |  |
| N2 HS I                                                                            | 11688680   | 11690830 | WBGene00011935 | scrm-1   | T22H2.5 | -0.169097506043453  |  |
| AGIWUR22686;AGIWUR42928                                                            |            |          |                |          |         |                     |  |
| N2 HS I                                                                            | 11694722   | 11694997 | WBGene00011934 | T22H2.4  | T22H2.4 | 0.271263810166934   |  |
| AGIWUR33144                                                                        |            |          |                |          |         |                     |  |
| N2 HS I                                                                            | 11695339   | 11697943 | WBGene00005523 | sri-11   | T22H2.3 | 0.071883104845238   |  |
| AGIWUR24552                                                                        |            |          |                |          |         |                     |  |
| N2 HS I                                                                            | 11699169   | 11701178 | WBGene00005524 | sri-12   | T22H2.1 | 0.0311856200531366  |  |
| AGIWUR26364                                                                        |            |          |                |          |         |                     |  |
| N2 HS I                                                                            | 11701631   | 11703698 | WBGene00011936 | pgrn-1   | T22H2.6 | -0.0129061666357844 |  |
| AGIWUR27058;AGIWUR43309                                                            |            |          |                |          |         |                     |  |
| N2 HS I                                                                            | 11703718   | 11706612 | WBGene00011933 | oac-47   | T22H2.2 | 0.00698015175744437 |  |
| AGIWUR23499                                                                        |            |          |                |          |         |                     |  |
| N2 HS I                                                                            | 11707818   | 11712197 | WBGene00009413 | oac-19   | F35E2.6 | 0.182348790920074   |  |
| AGIWUR25636                                                                        |            |          |                |          |         |                     |  |

|                                                                                                           |    |   |          |          |                |          |          |                     |
|-----------------------------------------------------------------------------------------------------------|----|---|----------|----------|----------------|----------|----------|---------------------|
| N2                                                                                                        | HS | I | 11714956 | 11717616 | WBGene00009414 | F35E2.7  | F35E2.7  | -0.0830779970452173 |
| AGIWUR21665                                                                                               |    |   |          |          |                |          |          |                     |
| N2                                                                                                        | HS | I | 11718864 | 11719790 | WBGene00009415 | F35E2.8  | F35E2.8  | -0.0478393005200584 |
| AGIWUR4814                                                                                                |    |   |          |          |                |          |          |                     |
| N2                                                                                                        | HS | I | 11719902 | 11722936 | WBGene00044270 | F35E2.10 |          | F35E2.10            |
| 0.0479417740394004 AGIWUR4911;AGIWUR28015;AGIWUR32014;AGIWUR44280                                         |    |   |          |          |                |          |          |                     |
| N2                                                                                                        | HS | I | 11723427 | 11726326 | WBGene00009416 | F35E2.9  | F35E2.9  | 0.0472389221373071  |
| AGIWUR15496                                                                                               |    |   |          |          |                |          |          |                     |
| N2                                                                                                        | HS | I | 11733940 | 11735964 | WBGene00009411 | F35E2.3  | F35E2.3  | 0.138596908789223   |
| AGIWUR643;AGIWUR24810;AGIWUR32708;AGIWUR40664;AGIWUR43891                                                 |    |   |          |          |                |          |          |                     |
| N2                                                                                                        | HS | I | 11736637 | 11737699 | WBGene00009410 | F35E2.2  | F35E2.2  | 0.129428296071429   |
| AGIWUR38091                                                                                               |    |   |          |          |                |          |          |                     |
| N2                                                                                                        | HS | I | 11741603 | 11743951 | WBGene00009412 | F35E2.5  | F35E2.5  | 0.0547216206354015  |
| AGIWUR19040;AGIWUR31412                                                                                   |    |   |          |          |                |          |          |                     |
| N2                                                                                                        | HS | I | 11744172 | 11747451 | WBGene00012946 | Y47H9B.2 |          | Y47H9B.2            |
| -0.198258529741391 AGIWUR3183;AGIWUR27320;AGIWUR39374;AGIWUR42978                                         |    |   |          |          |                |          |          |                     |
| N2                                                                                                        | HS | I | 11747428 | 11792118 | WBGene00006876 | vab-10   | ZK1151.1 |                     |
| -0.075257233200599                                                                                        |    |   |          |          |                |          |          |                     |
| AGIWUR5594;AGIWUR6483;AGIWUR14405;AGIWUR15572;AGIWUR17308;AGIWUR19666;AGIWUR20230;AGIWUR25708;AGIWUR38637 |    |   |          |          |                |          |          |                     |
| N2                                                                                                        | HS | I | 11797032 | 11797947 | WBGene00011384 | T02G6.1  | T02G6.1  | -0.0293618599200194 |
| AGIWUR30583                                                                                               |    |   |          |          |                |          |          |                     |
| N2                                                                                                        | HS | I | 11800433 | 11804991 | WBGene00011385 | T02G6.2  | T02G6.2  | 0.0536170251701757  |
| AGIWUR1183;AGIWUR9681;AGIWUR13350;AGIWUR33790;AGIWUR38283;AGIWUR38543                                     |    |   |          |          |                |          |          |                     |
| N2                                                                                                        | HS | I | 11809132 | 11811266 | WBGene00011387 | T02G6.4  | T02G6.4  | -0.128702791509952  |
| AGIWUR25717                                                                                               |    |   |          |          |                |          |          |                     |
| N2                                                                                                        | HS | I | 11813779 | 11814451 | WBGene00011386 | T02G6.3  | T02G6.3  | -0.0376977918213708 |
| AGIWUR33810                                                                                               |    |   |          |          |                |          |          |                     |
| N2                                                                                                        | HS | I | 11815910 | 11819277 | WBGene00011388 | T02G6.5  | T02G6.5  | 0.127405023128318   |
| AGIWUR1129                                                                                                |    |   |          |          |                |          |          |                     |
| N2                                                                                                        | HS | I | 11820688 | 11823459 | WBGene00086562 | T02G6.11 |          | T02G6.11            |
| 0.0360964888811446 AGIWUR4176;AGIWUR10405;AGIWUR11978;AGIWUR13971;AGIWUR40335;AGIWUR44344                 |    |   |          |          |                |          |          |                     |
| N2                                                                                                        | HS | I | 11827549 | 11828619 | WBGene00011390 | T02G6.7  | T02G6.7  | 0.091937308840361   |
| AGIWUR6776                                                                                                |    |   |          |          |                |          |          |                     |
| N2                                                                                                        | HS | I | 11830985 | 11833166 | WBGene00012947 | Y47H9C.1 |          | Y47H9C.1            |
| -0.847262874581451 AGIWUR41747                                                                            |    |   |          |          |                |          |          |                     |
| N2                                                                                                        | HS | I | 11836460 | 11849251 | WBGene00012948 | dhhc-2   | Y47H9C.2 |                     |
| -0.0724611854076631 AGIWUR13146                                                                           |    |   |          |          |                |          |          |                     |
| N2                                                                                                        | HS | I | 11851566 | 11868105 | WBGene00000415 | ced-1    | Y47H9C.4 |                     |
| -0.0369670521761369 AGIWUR17222;AGIWUR19662;AGIWUR22787;AGIWUR40343                                       |    |   |          |          |                |          |          |                     |

|                                                                                                                      |    |   |          |          |                |            |                             |
|----------------------------------------------------------------------------------------------------------------------|----|---|----------|----------|----------------|------------|-----------------------------|
| N2                                                                                                                   | HS | I | 11888501 | 11890558 | WBGene00000821 | csp-3      | Y47H9C.6                    |
| -0.0788766618054275 AGIWUR42697                                                                                      |    |   |          |          |                |            |                             |
| N2                                                                                                                   | HS | I | 11891549 | 11893727 | WBGene00012950 | eif-2Bbeta | Y47H9C.7                    |
| -0.120539619750783 AGIWUR36725                                                                                       |    |   |          |          |                |            |                             |
| N2                                                                                                                   | HS | I | 11893881 | 11896284 | WBGene00012951 | Y47H9C.8   | Y47H9C.8                    |
| 0.0471789513406033 AGIWUR13628                                                                                       |    |   |          |          |                |            |                             |
| N2                                                                                                                   | HS | I | 11898789 | 11901476 | WBGene00012952 | Y47H9C.9   | Y47H9C.9                    |
| 0.0780962509986036 AGIWUR19718                                                                                       |    |   |          |          |                |            |                             |
| N2                                                                                                                   | HS | I | 11901608 | 11903305 | WBGene00012953 | fbxa-216   | Y47H9C.10                   |
| 0.316227306507491 AGIWUR18820                                                                                        |    |   |          |          |                |            |                             |
| N2                                                                                                                   | HS | I | 11903734 | 11905148 | WBGene00012954 | fbxa-217   | Y47H9C.11                   |
| 0.242435589108936 AGIWUR28607                                                                                        |    |   |          |          |                |            |                             |
| N2                                                                                                                   | HS | I | 11905957 | 11907484 | WBGene00014820 | R09B3.6    | R09B3.6 -0.0491017564362015 |
| AGIWUR33163;AGIWUR44264                                                                                              |    |   |          |          |                |            |                             |
| N2                                                                                                                   | HS | I | 11907571 | 11909280 | WBGene00001372 | exo-3      | R09B3.1 0.166072452730655   |
| AGIWUR18555                                                                                                          |    |   |          |          |                |            |                             |
| N2                                                                                                                   | HS | I | 11909366 | 11910104 | WBGene00011155 | R09B3.2    | R09B3.2 0.166989315997677   |
| AGIWUR1991;AGIWUR2354;AGIWUR5088;AGIWUR17198;AGIWUR19184;AGIWUR19657;AGIWUR32430;AGIWUR32996;AGIWUR36348;AGIWUR38502 |    |   |          |          |                |            |                             |
| N2                                                                                                                   | HS | I | 11910328 | 11911021 | WBGene00011156 | R09B3.3    | R09B3.3 0.279695548436418   |
| AGIWUR19760                                                                                                          |    |   |          |          |                |            |                             |
| N2                                                                                                                   | HS | I | 11911324 | 11912052 | WBGene00006707 | ubc-12     | R09B3.4                     |
| -0.00522961030439539 AGIWUR27816                                                                                     |    |   |          |          |                |            |                             |
| N2                                                                                                                   | HS | I | 11912791 | 11917719 | WBGene00001836 | hda-3      | R06C1.1 -0.0397049381376071 |
| AGIWUR26718                                                                                                          |    |   |          |          |                |            |                             |
| N2                                                                                                                   | HS | I | 11917834 | 11923915 | WBGene00011058 | fdps-1     | R06C1.2 -0.0610577393428589 |
| AGIWUR5488                                                                                                           |    |   |          |          |                |            |                             |
| N2                                                                                                                   | HS | I | 11924785 | 11929511 | WBGene00006958 | wve-1      | R06C1.3 -0.0399496963876622 |
| AGIWUR2816;AGIWUR28617;AGIWUR38538                                                                                   |    |   |          |          |                |            |                             |
| N2                                                                                                                   | HS | I | 11930704 | 11931757 | WBGene00011059 | R06C1.4    | R06C1.4 -0.125011584858021  |
| AGIWUR13265;AGIWUR15867;AGIWUR18035;AGIWUR19895;AGIWUR36452;AGIWUR40223                                              |    |   |          |          |                |            |                             |
| N2                                                                                                                   | HS | I | 11947001 | 11953126 | WBGene00011060 | R06C1.6    | R06C1.6 0.127698081647951   |
| AGIWUR16528                                                                                                          |    |   |          |          |                |            |                             |
| N2                                                                                                                   | HS | I | 11953512 | 11961984 | WBGene00002004 | hsf-1      | Y53C10A.12                  |
| -0.102710553621051 AGIWUR5003                                                                                        |    |   |          |          |                |            |                             |
| N2                                                                                                                   | HS | I | 11966271 | 11967591 | WBGene00014915 | Y53C10A.1  | Y53C10A.1                   |
| -0.093533578517361 AGIWUR3407;AGIWUR13951;AGIWUR27588;AGIWUR39138;AGIWUR40433                                        |    |   |          |          |                |            |                             |
| N2                                                                                                                   | HS | I | 11968022 | 11969847 | WBGene00013134 | hsf-2      | Y53C10A.3                   |
| -0.247381242408445 AGIWUR14077;AGIWUR30255                                                                           |    |   |          |          |                |            |                             |

|                      |    |   |                                                                                   |          |                |            |                             |
|----------------------|----|---|-----------------------------------------------------------------------------------|----------|----------------|------------|-----------------------------|
| N2                   | HS | I | 11971179                                                                          | 11971797 | WBGene00044805 | Y53C10A.15 | Y53C10A.15                  |
| -0.0269106713458864  |    |   | AGIWUR5972;AGIWUR10075;AGIWUR17097;AGIWUR25230;AGIWUR41924                        |          |                |            |                             |
| N2                   | HS | I | 11979401                                                                          | 11985612 | WBGene00013135 | rga-2      | Y53C10A.4                   |
| -0.0176411331754913  |    |   | AGIWUR7868                                                                        |          |                |            |                             |
| N2                   | HS | I | 11998781                                                                          | 12002643 | WBGene00013136 | Y53C10A.5  | Y53C10A.5                   |
| -0.382978177483002   |    |   | AGIWUR35184                                                                       |          |                |            |                             |
| N2                   | HS | I | 12002552                                                                          | 12004997 | WBGene00013137 | Y53C10A.6  | Y53C10A.6                   |
| -0.00865427749859649 |    |   | AGIWUR28508                                                                       |          |                |            |                             |
| N2                   | HS | I | 12005177                                                                          | 12006296 | WBGene00014916 | fbxa-124   | Y53C10A.7                   |
| -0.00698462327917504 |    |   | AGIWUR32469                                                                       |          |                |            |                             |
| N2                   | HS | I | 12006911                                                                          | 12008040 | WBGene00014917 | fbxa-122   | Y53C10A.13                  |
| -0.00839645664124511 |    |   | AGIWUR4146;AGIWUR13689;AGIWUR26279;AGIWUR27755;AGIWUR38162                        |          |                |            |                             |
| N2                   | HS | I | 12008625                                                                          | 12009625 | WBGene00014918 | fbxa-123   | Y53C10A.14                  |
| 0.228691867330843    |    |   | AGIWUR4517                                                                        |          |                |            |                             |
| N2                   | HS | I | 12011195                                                                          | 12018668 | WBGene00000023 | abt-5      | Y53C10A.9                   |
| -0.136200690016114   |    |   | AGIWUR9468                                                                        |          |                |            |                             |
| N2                   | HS | I | 12020756                                                                          | 12028313 | WBGene00013138 | Y53C10A.10 | Y53C10A.10                  |
| 0.0292942845828819   |    |   | AGIWUR3846;AGIWUR7803;AGIWUR19726;AGIWUR30908;AGIWUR33643;AGIWUR37169;AGIWUR42595 |          |                |            |                             |
| N2                   | HS | I | 12029927                                                                          | 12031762 | WBGene00010247 | F58D5.8    | F58D5.8 0.240985727288088   |
| AGIWUR33736          |    |   |                                                                                   |          |                |            |                             |
| N2                   | HS | I | 12032289                                                                          | 12033706 | WBGene00010246 | F58D5.7    | F58D5.7 -0.0293367289336608 |
| AGIWUR18434          |    |   |                                                                                   |          |                |            |                             |
| N2                   | HS | I | 12034072                                                                          | 12037230 | WBGene00010245 | F58D5.6    | F58D5.6 -0.0352854095806361 |
| AGIWUR31967          |    |   |                                                                                   |          |                |            |                             |
| N2                   | HS | I | 12041035                                                                          | 12045200 | WBGene00010244 | F58D5.5    | F58D5.5                     |
| -0.00714316135165838 |    |   | AGIWUR541;AGIWUR6183;AGIWUR18314;AGIWUR21111;AGIWUR28012                          |          |                |            |                             |
| N2                   | HS | I | 12045201                                                                          | 12046617 | WBGene00010248 | F58D5.9    | F58D5.9 -0.251025740552375  |
| AGIWUR21103          |    |   |                                                                                   |          |                |            |                             |
| N2                   | HS | I | 12047469                                                                          | 12059798 | WBGene00002240 | ksr-2      | F58D5.4 -0.0128990730491392 |
| AGIWUR8113           |    |   |                                                                                   |          |                |            |                             |
| N2                   | HS | I | 12060271                                                                          | 12064897 | WBGene00002000 | hrp-2      | F58D5.1 -0.585426213559282  |
| AGIWUR10039          |    |   |                                                                                   |          |                |            |                             |
| N2                   | HS | I | 12066010                                                                          | 12068668 | WBGene00010242 | F58D5.2    | F58D5.2 0.297147561667721   |
| AGIWUR41355          |    |   |                                                                                   |          |                |            |                             |
| N2                   | HS | I | 12069806                                                                          | 12072878 | WBGene00010243 | F58D5.3    | F58D5.3 0.0433844518034814  |
| AGIWUR42289          |    |   |                                                                                   |          |                |            |                             |
| N2                   | HS | I | 12084721                                                                          | 12087830 | WBGene00012958 | Y47H10A.2  | Y47H10A.2                   |
| 0.0623911041460214   |    |   | AGIWUR9810;AGIWUR11617;AGIWUR34817                                                |          |                |            |                             |
| N2                   | HS | I | 12088120                                                                          | 12089969 | WBGene00012959 | Y47H10A.3  | Y47H10A.3                   |

|                                     |                                     |          |                |           |                             |
|-------------------------------------|-------------------------------------|----------|----------------|-----------|-----------------------------|
| -0.0764597837014742                 | AGIWUR19345                         |          |                |           |                             |
| N2 HS I                             | 12091571                            | 12094740 | WBGene00012960 | Y47H10A.4 | Y47H10A.4                   |
| -0.139882792099424                  | AGIWUR7903                          |          |                |           |                             |
| N2 HS I                             | 12095777                            | 12097987 | WBGene00012961 | Y47H10A.5 | Y47H10A.5                   |
| 0.319294201480864                   | AGIWUR33342                         |          |                |           |                             |
| N2 HS I                             | 12098671                            | 12106112 | WBGene00004509 | rrf-2     | M01G12.12                   |
| -0.0477471738893485                 | AGIWUR44168                         |          |                |           |                             |
| N2 HS I                             | 12106912                            | 12108503 | WBGene00010825 | M01G12.14 | M01G12.14                   |
| 0.0677776503843845                  | AGIWUR13895;AGIWUR22435             |          |                |           |                             |
| N2 HS I                             | 12109096                            | 12112505 | WBGene00010822 | M01G12.9  | M01G12.9                    |
| 0.0649280817712761                  | AGIWUR10130;AGIWUR16412;AGIWUR27321 |          |                |           |                             |
| N2 HS I                             | 12114064                            | 12116304 | WBGene00010821 | M01G12.7  | M01G12.7                    |
| 1.82536375881812                    | AGIWUR27585                         |          |                |           |                             |
| N2 HS I                             | 12117997                            | 12122282 | WBGene00010820 | M01G12.6  | M01G12.6                    |
| 0.183953717834443                   | AGIWUR15151                         |          |                |           |                             |
| N2 HS I                             | 12122811                            | 12125586 | WBGene00005858 | srw-111   | M01G12.4                    |
| -0.0106399422738566                 | AGIWUR20447                         |          |                |           |                             |
| N2 HS I                             | 12126455                            | 12128965 | WBGene00010818 | srt-21    | M01G12.3                    |
| -0.172284347294331                  | AGIWUR8394                          |          |                |           |                             |
| N2 HS I                             | 12144007                            | 12146977 | WBGene00005529 | sri-17    | F15H9.3 -0.0843369464699069 |
| AGIWUR6764;AGIWUR41347              |                                     |          |                |           |                             |
| N2 HS I                             | 12148080                            | 12150741 | WBGene00005528 | sri-16    | F15H9.4 -0.0254637367133146 |
| AGIWUR44834                         |                                     |          |                |           |                             |
| N2 HS I                             | 12151021                            | 12154333 | WBGene00005527 | sri-15    | F15H9.2 0.0509092277975149  |
| AGIWUR8549                          |                                     |          |                |           |                             |
| N2 HS I                             | 12157151                            | 12158712 | WBGene00008870 | F15H9.1   | F15H9.1 0.109826950698235   |
| AGIWUR434;AGIWUR33445               |                                     |          |                |           |                             |
| N2 HS I                             | 12160100                            | 12162091 | WBGene00077535 | F15H9.7   | F15H9.7                     |
| -0.00751972060312722                | AGIWUR16743;AGIWUR44656             |          |                |           |                             |
| N2 HS I                             | 12162399                            | 12163703 | WBGene00011026 | R05D7.1   | R05D7.1 0.215718833725989   |
| AGIWUR27624                         |                                     |          |                |           |                             |
| N2 HS I                             | 12165729                            | 12168022 | WBGene00011027 | R05D7.2   | R05D7.2 0.228219986197541   |
| AGIWUR10353;AGIWUR10361;AGIWUR19900 |                                     |          |                |           |                             |
| N2 HS I                             | 12168238                            | 12177782 | WBGene00011028 | R05D7.3   | R05D7.3 0.0946061504944602  |
| AGIWUR20284                         |                                     |          |                |           |                             |
| N2 HS I                             | 12181046                            | 12183297 | WBGene00011029 | abhd-11.2 | R05D7.4                     |
| -0.225636129266464                  | AGIWUR12358                         |          |                |           |                             |
| N2 HS I                             | 12183688                            | 12189007 | WBGene00011030 | R05D7.5   | R05D7.5 -0.0612852807126512 |
| AGIWUR7362                          |                                     |          |                |           |                             |

|                                                             |    |   |          |          |                |          |          |                     |
|-------------------------------------------------------------|----|---|----------|----------|----------------|----------|----------|---------------------|
| N2                                                          | HS | I | 12189521 | 12190218 | WBGene00077559 | R05D7.7  | R05D7.7  | 0.106955735162359   |
| AGIWUR3082;AGIWUR11879;AGIWUR19486;AGIWUR35942;AGIWUR38583  |    |   |          |          |                |          |          |                     |
| N2                                                          | HS | I | 12202232 | 12203717 | WBGene00007600 | C15C6.1  | C15C6.1  | 0.0302596185833526  |
| AGIWUR33988                                                 |    |   |          |          |                |          |          |                     |
| N2                                                          | HS | I | 12203800 | 12205809 | WBGene00007601 | C15C6.2  | C15C6.2  | -0.0329991465962456 |
| AGIWUR7410;AGIWUR19117                                      |    |   |          |          |                |          |          |                     |
| N2                                                          | HS | I | 12207097 | 12212206 | WBGene00007602 | C15C6.3  | C15C6.3  | -0.0524827064588322 |
| AGIWUR13087                                                 |    |   |          |          |                |          |          |                     |
| N2                                                          | HS | I | 12213109 | 12215184 | WBGene00007603 | C15C6.4  | C15C6.4  | -0.0736762210054813 |
| AGIWUR2360                                                  |    |   |          |          |                |          |          |                     |
| N2                                                          | HS | I | 12218433 | 12222298 | WBGene00008783 | F14B6.2  | F14B6.2  | -0.116483472060084  |
| AGIWUR18283                                                 |    |   |          |          |                |          |          |                     |
| N2                                                          | HS | I | 12230418 | 12232303 | WBGene00008784 | F14B6.3  | F14B6.3  | -0.0461794408581246 |
| AGIWUR26961                                                 |    |   |          |          |                |          |          |                     |
| N2                                                          | HS | I | 12232689 | 12235193 | WBGene00008787 | F14B6.6  | F14B6.6  | 0.149833072070274   |
| AGIWUR15381                                                 |    |   |          |          |                |          |          |                     |
| N2                                                          | HS | I | 12236018 | 12238252 | WBGene00008785 | F14B6.4  | F14B6.4  | 0.14631132703231    |
| AGIWUR38387                                                 |    |   |          |          |                |          |          |                     |
| N2                                                          | HS | I | 12239160 | 12241808 | WBGene00008786 | oac-16   | F14B6.5  | -0.203752929556122  |
| AGIWUR42049                                                 |    |   |          |          |                |          |          |                     |
| N2                                                          | HS | I | 12245456 | 12246751 | WBGene00003672 | nhr-82   | F41D3.1  | -0.222345000104816  |
| AGIWUR30564                                                 |    |   |          |          |                |          |          |                     |
| N2                                                          | HS | I | 12247771 | 12250210 | WBGene00009607 | oac-26   | F41D3.2  | -0.252802209820101  |
| AGIWUR21424                                                 |    |   |          |          |                |          |          |                     |
| N2                                                          | HS | I | 12251906 | 12253554 | WBGene00009608 | nhr-265  | F41D3.3  | 0.107106667453789   |
| AGIWUR20066                                                 |    |   |          |          |                |          |          |                     |
| N2                                                          | HS | I | 12254506 | 12257180 | WBGene00009609 | oac-27   | F41D3.4  | 0.101074390858456   |
| AGIWUR10798;AGIWUR12390;AGIWUR20094;AGIWUR38069;AGIWUR43226 |    |   |          |          |                |          |          |                     |
| N2                                                          | HS | I | 12264521 | 12266267 | WBGene00009611 | F41D3.6  | F41D3.6  | 0.0773630208895701  |
| AGIWUR37864                                                 |    |   |          |          |                |          |          |                     |
| N2                                                          | HS | I | 12267045 | 12267491 | WBGene00009612 | F41D3.7  | F41D3.7  | -0.0469075055391706 |
| AGIWUR35359                                                 |    |   |          |          |                |          |          |                     |
| N2                                                          | HS | I | 12267499 | 12268128 | WBGene00009613 | F41D3.8  | F41D3.8  | 0.0454891347729838  |
| AGIWUR42139                                                 |    |   |          |          |                |          |          |                     |
| N2                                                          | HS | I | 12272981 | 12274636 | WBGene00009614 | F41D3.9  | F41D3.9  | 0.0235120586975155  |
| AGIWUR39869                                                 |    |   |          |          |                |          |          |                     |
| N2                                                          | HS | I | 12276893 | 12278775 | WBGene00009616 | F41D3.11 | F41D3.11 |                     |
| -0.171504978438124 AGIWUR44485                              |    |   |          |          |                |          |          |                     |
| N2                                                          | HS | I | 12281221 | 12282615 | WBGene00010162 | F56H6.1  | F56H6.1  | -0.172300725691597  |

|                                     |    |   |                                     |          |                |          |                             |
|-------------------------------------|----|---|-------------------------------------|----------|----------------|----------|-----------------------------|
| AGIWUR18565                         |    |   |                                     |          |                |          |                             |
| N2                                  | HS | I | 12283270                            | 12285384 | WBGene00010173 | F56H6.13 | F56H6.13                    |
| 0.00344828020480836                 |    |   | AGIWUR13846                         |          |                |          |                             |
| N2                                  | HS | I | 12287199                            | 12289307 | WBGene00010163 | F56H6.2  | F56H6.2 0.238626001128255   |
| AGIWUR39362                         |    |   |                                     |          |                |          |                             |
| N2                                  | HS | I | 12289552                            | 12290191 | WBGene00010164 | F56H6.3  | F56H6.3 0.0569944390296779  |
| AGIWUR16604                         |    |   |                                     |          |                |          |                             |
| N2                                  | HS | I | 12290449                            | 12292212 | WBGene00010165 | F56H6.4  | F56H6.4 -0.195615418326831  |
| AGIWUR18750                         |    |   |                                     |          |                |          |                             |
| N2                                  | HS | I | 12292269                            | 12293936 | WBGene00010166 | gmd-2    | F56H6.5 0.0898144791956659  |
| AGIWUR7165                          |    |   |                                     |          |                |          |                             |
| N2                                  | HS | I | 12294380                            | 12296263 | WBGene00010167 | bgnt-1.6 | F56H6.6                     |
| 0.235661025299778                   |    |   | AGIWUR963                           |          |                |          |                             |
| N2                                  | HS | I | 12297734                            | 12300817 | WBGene00010168 | F56H6.7  | F56H6.7 0.0297314059734504  |
| AGIWUR17051                         |    |   |                                     |          |                |          |                             |
| N2                                  | HS | I | 12301424                            | 12303157 | WBGene00010169 | cllec-18 | F56H6.8 -0.0760167692623339 |
| AGIWUR41003                         |    |   |                                     |          |                |          |                             |
| N2                                  | HS | I | 12303599                            | 12306820 | WBGene00010170 | F56H6.9  | F56H6.9 -0.0966851494739567 |
| AGIWUR1010;AGIWUR14730              |    |   |                                     |          |                |          |                             |
| N2                                  | HS | I | 12307731                            | 12310406 | WBGene00010171 | oac-35   | F56H6.11                    |
| -0.0141412744334684                 |    |   | AGIWUR41513                         |          |                |          |                             |
| N2                                  | HS | I | 12312335                            | 12314895 | WBGene00010172 | oac-36   | F56H6.12                    |
| -0.0218416047447203                 |    |   | AGIWUR24225;AGIWUR26226;AGIWUR40420 |          |                |          |                             |
| N2                                  | HS | I | 12315193                            | 12316688 | WBGene00008159 | C47F8.3  | C47F8.3 0.0863702450027137  |
| AGIWUR13904                         |    |   |                                     |          |                |          |                             |
| N2                                  | HS | I | 12317321                            | 12318735 | WBGene00008160 | glct-4   | C47F8.4 -0.169096950766082  |
| AGIWUR15638                         |    |   |                                     |          |                |          |                             |
| N2                                  | HS | I | 12319350                            | 12320854 | WBGene00008162 | C47F8.6  | C47F8.6 -0.0784580160792441 |
| AGIWUR31086                         |    |   |                                     |          |                |          |                             |
| N2                                  | HS | I | 12321937                            | 12324062 | WBGene00008161 | C47F8.5  | C47F8.5 0.0649060828266181  |
| AGIWUR37700                         |    |   |                                     |          |                |          |                             |
| N2                                  | HS | I | 12326441                            | 12327030 | WBGene00008163 | C47F8.7  | C47F8.7                     |
| -0.00506272275365838                |    |   | AGIWUR4906                          |          |                |          |                             |
| N2                                  | HS | I | 12328100                            | 12329508 | WBGene00003671 | nhr-81   | C47F8.8 -0.0384849256798194 |
| AGIWUR10579;AGIWUR25388;AGIWUR39749 |    |   |                                     |          |                |          |                             |
| N2                                  | HS | I | 12331085                            | 12333413 | WBGene00008158 | nhr-165  | C47F8.2 0.0402931229977375  |
| AGIWUR37607                         |    |   |                                     |          |                |          |                             |
| N2                                  | HS | I | 12335035                            | 12336605 | WBGene00008157 | C47F8.1  | C47F8.1 -0.0414147080042149 |
| AGIWUR45                            |    |   |                                     |          |                |          |                             |



|                      |    |   |                                    |          |                |           |          |                     |
|----------------------|----|---|------------------------------------|----------|----------------|-----------|----------|---------------------|
| N2                   | HS | I | 12337968                           | 12339239 | WBGene00011650 | glct-1    | T09E11.1 |                     |
| -0.1296558988698     |    |   | AGIWUR41546                        |          |                |           |          |                     |
| N2                   | HS | I | 12341145                           | 12342826 | WBGene00011651 | nhr-217   | T09E11.2 |                     |
| 0.101296015261859    |    |   | AGIWUR38513                        |          |                |           |          |                     |
| N2                   | HS | I | 12344167                           | 12345702 | WBGene00011660 | T09E11.11 |          | T09E11.11           |
| -0.5089539399495     |    |   | AGIWUR9231                         |          |                |           |          |                     |
| N2                   | HS | I | 12345819                           | 12347265 | WBGene00011659 | T09E11.10 |          | T09E11.10           |
| -0.00215672187453819 |    |   | AGIWUR9137;AGIWUR26055;AGIWUR36895 |          |                |           |          |                     |
| N2                   | HS | I | 12347700                           | 12349819 | WBGene00011658 | T09E11.9  |          | T09E11.9            |
| 0.0264915937833266   |    |   | AGIWUR36326                        |          |                |           |          |                     |
| N2                   | HS | I | 12350692                           | 12352724 | WBGene00011657 | T09E11.8  |          | T09E11.8            |
| -0.0495680326754506  |    |   | AGIWUR32745                        |          |                |           |          |                     |
| N2                   | HS | I | 12353506                           | 12356337 | WBGene00011656 | oac-45    | T09E11.7 |                     |
| -0.134364261145706   |    |   | AGIWUR34978                        |          |                |           |          |                     |
| N2                   | HS | I | 12356942                           | 12359341 | WBGene00011654 | oac-44    | T09E11.5 |                     |
| -0.0926734369706539  |    |   | AGIWUR16338;AGIWUR30786            |          |                |           |          |                     |
| N2                   | HS | I | 12359942                           | 12363416 | WBGene00011653 | oac-43    | T09E11.4 |                     |
| 0.0777293249743041   |    |   | AGIWUR1706                         |          |                |           |          |                     |
| N2                   | HS | I | 12364718                           | 12365948 | WBGene00045103 | T09E11.12 |          | T09E11.12           |
| -0.0916222110485752  |    |   | AGIWUR13986;AGIWUR27610            |          |                |           |          |                     |
| N2                   | HS | I | 12366335                           | 12368619 | WBGene00011655 | T09E11.6  |          | T09E11.6            |
| -0.00845301907841822 |    |   | AGIWUR2283;AGIWUR21346;AGIWUR43303 |          |                |           |          |                     |
| N2                   | HS | I | 12374205                           | 12376649 | WBGene00011779 | bgnt-1.7  |          | T15D6.4             |
| 0.125324236328402    |    |   | AGIWUR15806;AGIWUR17941            |          |                |           |          |                     |
| N2                   | HS | I | 12376904                           | 12378674 | WBGene00001642 | gly-17    | T15D6.3  | -0.116228415383159  |
| AGIWUR4623           |    |   |                                    |          |                |           |          |                     |
| N2                   | HS | I | 12379335                           | 12381032 | WBGene00001641 | gly-16    | T15D6.2  | 0.0529362995228819  |
| AGIWUR19223          |    |   |                                    |          |                |           |          |                     |
| N2                   | HS | I | 12381808                           | 12383259 | WBGene00011780 | T15D6.5   | T15D6.5  | -0.0683505877327271 |
| AGIWUR15742          |    |   |                                    |          |                |           |          |                     |
| N2                   | HS | I | 12384277                           | 12385731 | WBGene00003667 | nhr-77    | T15D6.6  |                     |
| -0.00731613987904911 |    |   | AGIWUR37750                        |          |                |           |          |                     |
| N2                   | HS | I | 12385766                           | 12388791 | WBGene00011781 | glct-3    | T15D6.7  | -0.128230089619787  |
| AGIWUR2441           |    |   |                                    |          |                |           |          |                     |
| N2                   | HS | I | 12392009                           | 12393585 | WBGene00011783 | T15D6.9   | T15D6.9  | -0.184548264371625  |
| AGIWUR21864          |    |   |                                    |          |                |           |          |                     |
| N2                   | HS | I | 12394120                           | 12396322 | WBGene00011784 | T15D6.10  |          | T15D6.10            |
| -0.113762767686199   |    |   | AGIWUR795                          |          |                |           |          |                     |
| N2                   | HS | I | 12396644                           | 12398267 | WBGene00011785 | T15D6.11  |          | T15D6.11            |

|                        |             |          |                |                  |                     |
|------------------------|-------------|----------|----------------|------------------|---------------------|
| -0.786090953712664     | AGIWUR40226 |          |                |                  |                     |
| N2 HS I                | 12399323    | 12401206 | WBGene00011786 | T15D6.12         | T15D6.12            |
| 0.00550427510962859    | AGIWUR7270  |          |                |                  |                     |
| N2 HS I                | 12403110    | 12404489 | WBGene00008470 | E03H4.2 E03H4.2  | -0.26001385782423   |
| AGIWUR40136            |             |          |                |                  |                     |
| N2 HS I                | 12405525    | 12406946 | WBGene00008471 | E03H4.3 E03H4.3  | -0.115241755817108  |
| AGIWUR39310            |             |          |                |                  |                     |
| N2 HS I                | 12407564    | 12411435 | WBGene00008472 | E03H4.4 E03H4.4  | -0.205130478913685  |
| AGIWUR38190            |             |          |                |                  |                     |
| N2 HS I                | 12413809    | 12415745 | WBGene00008473 | E03H4.5 E03H4.5  | -0.0567817500801393 |
| AGIWUR5938             |             |          |                |                  |                     |
| N2 HS I                | 12417386    | 12418800 | WBGene00008474 | nhr-174 E03H4.6  | -0.10735953455315   |
| AGIWUR19291            |             |          |                |                  |                     |
| N2 HS I                | 12421239    | 12424411 | WBGene00008475 | oac-13 E03H4.7   | 0.0289738955719443  |
| AGIWUR4799             |             |          |                |                  |                     |
| N2 HS I                | 12424555    | 12426850 | WBGene00008476 | E03H4.8 E03H4.8  | 0.169010339657993   |
| AGIWUR40478            |             |          |                |                  |                     |
| N2 HS I                | 12427388    | 12429094 | WBGene00014729 | E03H4.9 E03H4.9  | -0.121155557264635  |
| AGIWUR6347;AGIWUR40147 |             |          |                |                  |                     |
| N2 HS I                | 12430028    | 12431500 | WBGene00008477 | clcc-17 E03H4.10 |                     |
| -0.17351027850227      | AGIWUR22801 |          |                |                  |                     |
| N2 HS I                | 12433061    | 12434886 | WBGene00008478 | E03H4.11         | E03H4.11            |
| 0.271797207817083      | AGIWUR5267  |          |                |                  |                     |
| N2 HS I                | 12435726    | 12437285 | WBGene00008479 | glct-2 E03H4.12  |                     |
| -0.10143783811931      | AGIWUR34058 |          |                |                  |                     |
| N2 HS I                | 12439936    | 12441253 | WBGene00003679 | nhr-89 E03H4.13  |                     |
| -0.00310827308990103   | AGIWUR39890 |          |                |                  |                     |
| N2 HS I                | 12442299    | 12443728 | WBGene00008289 | nhr-169 C54C8.1  | 0.350435462417975   |
| AGIWUR43082            |             |          |                |                  |                     |
| N2 HS I                | 12444587    | 12446502 | WBGene00008290 | bgnt-1.8         | C54C8.2             |
| 0.417704214936888      | AGIWUR19147 |          |                |                  |                     |
| N2 HS I                | 12447167    | 12448421 | WBGene00008291 | C54C8.3 C54C8.3  | -0.0705648288861074 |
| AGIWUR7375             |             |          |                |                  |                     |
| N2 HS I                | 12449977    | 12452027 | WBGene00008292 | C54C8.4 C54C8.4  | 0.0629578015046857  |
| AGIWUR35933            |             |          |                |                  |                     |
| N2 HS I                | 12453389    | 12454764 | WBGene00008293 | glct-5 C54C8.5   | 0.290485474797711   |
| AGIWUR25504            |             |          |                |                  |                     |
| N2 HS I                | 12454853    | 12455826 | WBGene00003098 | lys-9 C54C8.6    | -0.0298915130737809 |
| AGIWUR2072             |             |          |                |                  |                     |

|                                                                                                                                                         |    |   |          |          |                |          |                             |
|---------------------------------------------------------------------------------------------------------------------------------------------------------|----|---|----------|----------|----------------|----------|-----------------------------|
| N2                                                                                                                                                      | HS | I | 12456918 | 12457209 | WBGene00044242 | C54C8.12 | C54C8.12                    |
| -0.414257997364622 AGIWUR19622;AGIWUR21351;AGIWUR24934;AGIWUR29563;AGIWUR35527                                                                          |    |   |          |          |                |          |                             |
| N2                                                                                                                                                      | HS | I | 12458028 | 12458996 | WBGene00014714 | C54C8.8  | C54C8.8 0.240043057540809   |
| AGIWUR2522                                                                                                                                              |    |   |          |          |                |          |                             |
| N2                                                                                                                                                      | HS | I | 12459499 | 12460903 | WBGene00008294 | clec-11  | C54C8.7 0.183742299749324   |
| AGIWUR6618;AGIWUR36802                                                                                                                                  |    |   |          |          |                |          |                             |
| N2                                                                                                                                                      | HS | I | 12461645 | 12461925 | WBGene00008295 | nlp-39   | C54C8.9 -0.984879659591249  |
| AGIWUR2285                                                                                                                                              |    |   |          |          |                |          |                             |
| N2                                                                                                                                                      | HS | I | 12462176 | 12465831 | WBGene00001640 | gly-15   | C54C8.11                    |
| -0.13191041432528 AGIWUR4226;AGIWUR19199;AGIWUR41172                                                                                                    |    |   |          |          |                |          |                             |
| N2                                                                                                                                                      | HS | I | 12470620 | 12473404 | WBGene00012102 | T27F6.1  | T27F6.1 0.122637074584954   |
| AGIWUR6133                                                                                                                                              |    |   |          |          |                |          |                             |
| N2                                                                                                                                                      | HS | I | 12474620 | 12475934 | WBGene00077508 | T27F6.10 | T27F6.10                    |
| -0.104093648651814 AGIWUR40057                                                                                                                          |    |   |          |          |                |          |                             |
| N2                                                                                                                                                      | HS | I | 12476685 | 12478588 | WBGene00012103 | clec-12  | T27F6.2 -0.0191665452697363 |
| AGIWUR32740                                                                                                                                             |    |   |          |          |                |          |                             |
| N2                                                                                                                                                      | HS | I | 12483809 | 12486235 | WBGene00012104 | sygl-1   | T27F6.4 -0.774679533732517  |
| AGIWUR43852                                                                                                                                             |    |   |          |          |                |          |                             |
| N2                                                                                                                                                      | HS | I | 12486872 | 12490931 | WBGene00004190 | pars-2   | T27F6.5 0.193737774323244   |
| AGIWUR1856;AGIWUR2356;AGIWUR8002;AGIWUR8434;AGIWUR11790;AGIWUR11802;AGIWUR15588;AGIWUR16087;AGIWUR28139;AGIWUR29090;AGIWUR41244;AGIWUR43781;AGIWUR45063 |    |   |          |          |                |          |                             |
| N2                                                                                                                                                      | HS | I | 12490976 | 12494530 | WBGene00012105 | T27F6.6  | T27F6.6 0.343676756256592   |
| AGIWUR3497                                                                                                                                              |    |   |          |          |                |          |                             |
| N2                                                                                                                                                      | HS | I | 12494826 | 12497354 | WBGene00012106 | T27F6.7  | T27F6.7 0.0661184643170891  |
| AGIWUR36447                                                                                                                                             |    |   |          |          |                |          |                             |
| N2                                                                                                                                                      | HS | I | 12497467 | 12505010 | WBGene00010768 | K11D2.1  | K11D2.1 -0.159255269179445  |
| AGIWUR17267;AGIWUR40837                                                                                                                                 |    |   |          |          |                |          |                             |
| N2                                                                                                                                                      | HS | I | 12505028 | 12508064 | WBGene00010769 | asah-1   | K11D2.2 -0.341470863399874  |
| AGIWUR37730                                                                                                                                             |    |   |          |          |                |          |                             |
| N2                                                                                                                                                      | HS | I | 12508299 | 12513419 | WBGene00006829 | unc-101  | K11D2.3 0.0308589214367867  |
| AGIWUR417;AGIWUR2271;AGIWUR7234;AGIWUR18404;AGIWUR20120;AGIWUR22240;AGIWUR26389;AGIWUR38381;AGIWUR40794                                                 |    |   |          |          |                |          |                             |
| N2                                                                                                                                                      | HS | I | 12513516 | 12518694 | WBGene00010771 | K11D2.5  | K11D2.5 -0.173858198319762  |
| AGIWUR11668                                                                                                                                             |    |   |          |          |                |          |                             |
| N2                                                                                                                                                      | HS | I | 12518787 | 12527906 | WBGene00010770 | K11D2.4  | K11D2.4 0.0467772115057725  |
| AGIWUR1842                                                                                                                                              |    |   |          |          |                |          |                             |
| N2                                                                                                                                                      | HS | I | 12528312 | 12532182 | WBGene00004181 | pri-2    | W02D9.1 -0.0828059428864378 |
| AGIWUR3305                                                                                                                                              |    |   |          |          |                |          |                             |
| N2                                                                                                                                                      | HS | I | 12532669 | 12534400 | WBGene00012208 | W02D9.2  | W02D9.2 -0.177792255281119  |
| AGIWUR32177                                                                                                                                             |    |   |          |          |                |          |                             |

|    |    |   |                                                             |          |                |          |          |                     |
|----|----|---|-------------------------------------------------------------|----------|----------------|----------|----------|---------------------|
| N2 | HS | I | 12535312                                                    | 12537671 | WBGene00012209 | hmg-20   | W02D9.3  |                     |
|    |    |   | -0.00602395432043679 AGIWUR2684;AGIWUR36464                 |          |                |          |          |                     |
| N2 | HS | I | 12551537                                                    | 12552375 | WBGene00012216 | W02D9.10 | W02D9.10 |                     |
|    |    |   | -0.223180012395407 AGIWUR8060                               |          |                |          |          |                     |
| N2 | HS | I | 12557164                                                    | 12557563 | WBGene00012215 | W02D9.9  | W02D9.9  | 0.283519290506916   |
|    |    |   | AGIWUR19044                                                 |          |                |          |          |                     |
| N2 | HS | I | 12558547                                                    | 12558944 | WBGene00012214 | W02D9.8  | W02D9.8  | -0.111762695836534  |
|    |    |   | AGIWUR38870                                                 |          |                |          |          |                     |
| N2 | HS | I | 12559245                                                    | 12559674 | WBGene00012213 | W02D9.7  | W02D9.7  | 0.367082889629643   |
|    |    |   | AGIWUR19286                                                 |          |                |          |          |                     |
| N2 | HS | I | 12560292                                                    | 12560714 | WBGene00012212 | W02D9.6  | W02D9.6  | 0.135378245568315   |
|    |    |   | AGIWUR5048                                                  |          |                |          |          |                     |
| N2 | HS | I | 12561040                                                    | 12561560 | WBGene00012211 | ssp-37   | W02D9.5  | -0.0214621040957272 |
|    |    |   | AGIWUR14307                                                 |          |                |          |          |                     |
| N2 | HS | I | 12562756                                                    | 12564210 | WBGene00045474 | C49G9.2  | C49G9.2  | 0.186291607882993   |
|    |    |   | AGIWUR20355;AGIWUR23937;AGIWUR31109;AGIWUR35803;AGIWUR35835 |          |                |          |          |                     |
| N2 | HS | I | 12564356                                                    | 12565893 | WBGene00008216 | mec-19   | C49G9.1  | 0.125257433103982   |
|    |    |   | AGIWUR41066                                                 |          |                |          |          |                     |
| N2 | HS | I | 12565804                                                    | 12572801 | WBGene00001008 | d1k-1    | F33E2.2  | -0.0605981694721156 |
|    |    |   | AGIWUR40022;AGIWUR42874                                     |          |                |          |          |                     |
| N2 | HS | I | 12578108                                                    | 12579205 | WBGene00077769 | F33E2.10 | F33E2.10 |                     |
|    |    |   | -0.0297391637585971 AGIWUR5546                              |          |                |          |          |                     |
| N2 | HS | I | 12582074                                                    | 12584711 | WBGene00009360 | F33E2.4  | F33E2.4  | 0.112805265734238   |
|    |    |   | AGIWUR43140                                                 |          |                |          |          |                     |
| N2 | HS | I | 12583786                                                    | 12585119 | WBGene00045254 | F33E2.8  | F33E2.8  | 0.107194081566102   |
|    |    |   | AGIWUR28003;AGIWUR30710                                     |          |                |          |          |                     |
| N2 | HS | I | 12585382                                                    | 12585971 | WBGene00009363 | F33E2.7  | F33E2.7  | 0.00676007061700101 |
|    |    |   | AGIWUR16591                                                 |          |                |          |          |                     |
| N2 | HS | I | 12587242                                                    | 12591091 | WBGene00009362 | F33E2.6  | F33E2.6  | 0.095856680491579   |
|    |    |   | AGIWUR22599                                                 |          |                |          |          |                     |
| N2 | HS | I | 12591116                                                    | 12597442 | WBGene00009361 | F33E2.5  | F33E2.5  | -0.0261590231910365 |
|    |    |   | AGIWUR2198;AGIWUR32087;AGIWUR32401                          |          |                |          |          |                     |
| N2 | HS | I | 12603772                                                    | 12606248 | WBGene00011581 | T07D10.1 | T07D10.1 |                     |
|    |    |   | -0.194784093105668 AGIWUR33134                              |          |                |          |          |                     |
| N2 | HS | I | 12621171                                                    | 12623084 | WBGene00011582 | ntr-1    | T07D10.2 |                     |
|    |    |   | -0.0861215940180511 AGIWUR20900                             |          |                |          |          |                     |
| N2 | HS | I | 12624235                                                    | 12625238 | WBGene00011586 | f1p-33   | T07D10.6 |                     |
|    |    |   | -0.21257479847921 AGIWUR26500                               |          |                |          |          |                     |
| N2 | HS | I | 12626742                                                    | 12628997 | WBGene00011583 | T07D10.3 | T07D10.3 |                     |

|                                                                                                                                                                                                                      |             |          |                |           |                             |
|----------------------------------------------------------------------------------------------------------------------------------------------------------------------------------------------------------------------|-------------|----------|----------------|-----------|-----------------------------|
| 0.0301317642722356                                                                                                                                                                                                   | AGIWUR36305 |          |                |           |                             |
| N2 HS I                                                                                                                                                                                                              | 12640720    | 12641501 | WBGene00195255 | H16D19.7  | H16D19.7                    |
| 0.184079431456411                                                                                                                                                                                                    | AGIWUR43884 |          |                |           |                             |
| N2 HS I                                                                                                                                                                                                              | 12647376    | 12652087 | WBGene00010420 | mcrs-1    | H28016.2                    |
| -0.140324744538869                                                                                                                                                                                                   | AGIWUR40821 |          |                |           |                             |
| N2 HS I                                                                                                                                                                                                              | 12652277    | 12654646 | WBGene00010419 | H28016.1  | H28016.1                    |
| -0.244460775294217                                                                                                                                                                                                   |             |          |                |           |                             |
| AGIWUR1002;AGIWUR6017;AGIWUR9225;AGIWUR15093;AGIWUR18400;AGIWUR19137;AGIWUR20909;AGIWUR21162;AGIWUR22474;AGIWUR25477;AGIWUR30636;AGIWUR30684;AGIWUR33565;AGIWUR37320;AGIWUR37771;AGIWUR38251;AGIWUR40047;AGIWUR42542 |             |          |                |           |                             |
| N2 HS I                                                                                                                                                                                                              | 12655449    | 12655970 | WBGene00012040 | T26E3.7   | T26E3.7 0.224215295558462   |
| AGIWUR36996                                                                                                                                                                                                          |             |          |                |           |                             |
| N2 HS I                                                                                                                                                                                                              | 12657762    | 12659446 | WBGene00012041 | T26E3.8   | T26E3.8 0.0836628364296317  |
| AGIWUR37661                                                                                                                                                                                                          |             |          |                |           |                             |
| N2 HS I                                                                                                                                                                                                              | 12659729    | 12660647 | WBGene00044905 | T26E3.11  | T26E3.11                    |
| 0.12244903467181                                                                                                                                                                                                     | AGIWUR41658 |          |                |           |                             |
| N2 HS I                                                                                                                                                                                                              | 12661254    | 12661729 | WBGene00012039 | T26E3.6   | T26E3.6 0.230593871603439   |
| AGIWUR36512                                                                                                                                                                                                          |             |          |                |           |                             |
| N2 HS I                                                                                                                                                                                                              | 12662938    | 12663833 | WBGene00012038 | T26E3.5   | T26E3.5 -0.0322145984274762 |
| AGIWUR1201                                                                                                                                                                                                           |             |          |                |           |                             |
| N2 HS I                                                                                                                                                                                                              | 12665067    | 12668893 | WBGene00012037 | T26E3.4   | T26E3.4 0.0116276158388962  |
| AGIWUR2560;AGIWUR11531;AGIWUR28485;AGIWUR30882;AGIWUR32370;AGIWUR41162                                                                                                                                               |             |          |                |           |                             |
| N2 HS I                                                                                                                                                                                                              | 12669380    | 12674447 | WBGene00003921 | par-6     | T26E3.3 -0.05697778767993   |
| AGIWUR4153;AGIWUR21135;AGIWUR24877                                                                                                                                                                                   |             |          |                |           |                             |
| N2 HS I                                                                                                                                                                                                              | 12679207    | 12681816 | WBGene00003578 | ndx-1     | T26E3.2 -0.254388919522132  |
| AGIWUR36323                                                                                                                                                                                                          |             |          |                |           |                             |
| N2 HS I                                                                                                                                                                                                              | 12681883    | 12682681 | WBGene00012042 | T26E3.10  | T26E3.10                    |
| -0.0782584239169948                                                                                                                                                                                                  | AGIWUR2023  |          |                |           |                             |
| N2 HS I                                                                                                                                                                                                              | 12683238    | 12684359 | WBGene00012036 | cllec-103 | T26E3.1                     |
| 0.136826112532836                                                                                                                                                                                                    | AGIWUR36031 |          |                |           |                             |
| N2 HS I                                                                                                                                                                                                              | 12686116    | 12688206 | WBGene00005051 | sra-25    | T26E3.9 -0.137928143586221  |
| AGIWUR23081                                                                                                                                                                                                          |             |          |                |           |                             |
| N2 HS I                                                                                                                                                                                                              | 12688727    | 12690572 | WBGene00005043 | sra-17    | F28C12.1                    |
| 0.0153664412773047                                                                                                                                                                                                   | AGIWUR103   |          |                |           |                             |
| N2 HS I                                                                                                                                                                                                              | 12692169    | 12693724 | WBGene00005044 | sra-18    | F28C12.2                    |
| 0.146567002805632                                                                                                                                                                                                    | AGIWUR40855 |          |                |           |                             |
| N2 HS I                                                                                                                                                                                                              | 12694406    | 12695934 | WBGene00005045 | sra-19    | F28C12.3                    |
| 0.0362689567039167 AGIWUR2298;AGIWUR5976;AGIWUR10097;AGIWUR12389;AGIWUR26934;AGIWUR30505;AGIWUR39618                                                                                                                 |             |          |                |           |                             |
| N2 HS I                                                                                                                                                                                                              | 12696558    | 12698214 | WBGene00005046 | sra-20    | F28C12.4                    |
| -0.0646008607777704                                                                                                                                                                                                  | AGIWUR24117 |          |                |           |                             |

|                      |    |   |                                                                      |          |                |          |                             |
|----------------------|----|---|----------------------------------------------------------------------|----------|----------------|----------|-----------------------------|
| N2                   | HS | I | 12698904                                                             | 12699200 | WBGene00077555 | F28C12.8 | F28C12.8                    |
| 0.16377612923499     |    |   | AGIWUR4271;AGIWUR9750;AGIWUR13760;AGIWUR22255;AGIWUR25005            |          |                |          |                             |
| N2                   | HS | I | 12699430                                                             | 12701093 | WBGene00005047 | sra-21   | F28C12.5                    |
| 0.280288830005687    |    |   | AGIWUR44687                                                          |          |                |          |                             |
| N2                   | HS | I | 12701439                                                             | 12702886 | WBGene00005048 | sra-22   | F28C12.7                    |
| 0.072681842155836    |    |   | AGIWUR34243                                                          |          |                |          |                             |
| N2                   | HS | I | 12703435                                                             | 12704727 | WBGene00005049 | sra-23   | T06G6.1 -0.052375961677205  |
| AGIWUR6499           |    |   |                                                                      |          |                |          |                             |
| N2                   | HS | I | 12705097                                                             | 12706983 | WBGene00005050 | sra-24   | T06G6.2 0.10969314539071    |
| AGIWUR44570          |    |   |                                                                      |          |                |          |                             |
| N2                   | HS | I | 12707513                                                             | 12708691 | WBGene00011550 | T06G6.11 | T06G6.11                    |
| 0.121482477087845    |    |   | AGIWUR6450                                                           |          |                |          |                             |
| N2                   | HS | I | 12708863                                                             | 12711596 | WBGene00011545 | T06G6.3  | T06G6.3 -0.171276911740405  |
| AGIWUR36658          |    |   |                                                                      |          |                |          |                             |
| N2                   | HS | I | 12712158                                                             | 12714722 | WBGene00011546 | T06G6.4  | T06G6.4 0.0882127459507753  |
| AGIWUR7160           |    |   |                                                                      |          |                |          |                             |
| N2                   | HS | I | 12715648                                                             | 12716583 | WBGene00011547 | T06G6.5  | T06G6.5 -0.0935343939680688 |
| AGIWUR30650          |    |   |                                                                      |          |                |          |                             |
| N2                   | HS | I | 12718296                                                             | 12719795 | WBGene00011548 | T06G6.6  | T06G6.6 0.589774608420431   |
| AGIWUR17689          |    |   |                                                                      |          |                |          |                             |
| N2                   | HS | I | 12720205                                                             | 12722036 | WBGene00005835 | srw-88   | T06G6.7 -0.0566750493206207 |
| AGIWUR1507           |    |   |                                                                      |          |                |          |                             |
| N2                   | HS | I | 12722045                                                             | 12722883 | WBGene00011551 | T06G6.12 | T06G6.12                    |
| 0.0990301667305022   |    |   | AGIWUR32980                                                          |          |                |          |                             |
| N2                   | HS | I | 12724751                                                             | 12726206 | WBGene00011549 | T06G6.8  | T06G6.8 -0.0332746885747293 |
| AGIWUR34628          |    |   |                                                                      |          |                |          |                             |
| N2                   | HS | I | 12728137                                                             | 12729870 | WBGene00006889 | pfd-3    | T06G6.9                     |
| -0.00835904149324573 |    |   | AGIWUR1885;AGIWUR2341;AGIWUR7063;AGIWUR17219;AGIWUR19489;AGIWUR31484 |          |                |          |                             |
| N2                   | HS | I | 12730011                                                             | 12732753 | WBGene00012192 | W02A11.1 | W02A11.1                    |
| -0.00236882839471164 |    |   | AGIWUR8401                                                           |          |                |          |                             |
| N2                   | HS | I | 12733287                                                             | 12741275 | WBGene00012193 | vps-25   | W02A11.2                    |
| 0.329402762909272    |    |   | AGIWUR17203                                                          |          |                |          |                             |
| N2                   | HS | I | 12741588                                                             | 12749318 | WBGene00006700 | uba-2    | W02A11.4                    |
| -0.090105750243648   |    |   | AGIWUR31511                                                          |          |                |          |                             |
| N2                   | HS | I | 12749890                                                             | 12752087 | WBGene00012195 | bath-34  | W02A11.5                    |
| -0.134001896958863   |    |   | AGIWUR9884;AGIWUR28264                                               |          |                |          |                             |
| N2                   | HS | I | 12758433                                                             | 12759572 | WBGene00012196 | bath-35  | W02A11.8                    |
| 0.035694384717285    |    |   | AGIWUR37753                                                          |          |                |          |                             |
| N2                   | HS | I | 12759545                                                             | 12764960 | WBGene00000138 | amx-2    | B0019.1 0.0219820377324034  |

|                        |    |   |                                                                        |          |                |                                   |
|------------------------|----|---|------------------------------------------------------------------------|----------|----------------|-----------------------------------|
| AGIWUR19037            |    |   |                                                                        |          |                |                                   |
| N2                     | HS | I | 12773659                                                               | 12782282 | WBGene00007094 | B0019.2 B0019.2 -0.22688052151944 |
| AGIWUR9959;AGIWUR22906 |    |   |                                                                        |          |                |                                   |
| N2                     | HS | I | 12783358                                                               | 12784978 | WBGene00023459 | Y18D10A.26 Y18D10A.26             |
| -0.118216384286363     |    |   | AGIWUR24786;AGIWUR33759                                                |          |                |                                   |
| N2                     | HS | I | 12787944                                                               | 12806581 | WBGene00012474 | attf-6 Y18D10A.1                  |
| -0.173696407078189     |    |   | AGIWUR42137                                                            |          |                |                                   |
| N2                     | HS | I | 12807586                                                               | 12809682 | WBGene00012475 | Y18D10A.2 Y18D10A.2               |
| 0.151108436491855      |    |   | AGIWUR13443                                                            |          |                |                                   |
| N2                     | HS | I | 12809999                                                               | 12815641 | WBGene00012476 | Y18D10A.3 Y18D10A.3               |
| 0.131723471079251      |    |   | AGIWUR36104                                                            |          |                |                                   |
| N2                     | HS | I | 12815904                                                               | 12816428 | WBGene00012477 | Y18D10A.4 Y18D10A.4               |
| 0.0893335999938483     |    |   | AGIWUR2617                                                             |          |                |                                   |
| N2                     | HS | I | 12819216                                                               | 12825562 | WBGene00001746 | gsk-3 Y18D10A.5                   |
| -0.283449742260816     |    |   | AGIWUR44507                                                            |          |                |                                   |
| N2                     | HS | I | 12825664                                                               | 12834143 | WBGene00003735 | nhx-8 Y18D10A.6                   |
| 0.0295094873641641     |    |   | AGIWUR10024;AGIWUR18724;AGIWUR35964                                    |          |                |                                   |
| N2                     | HS | I | 12834665                                                               | 12843233 | WBGene00004231 | ptr-17 Y18D10A.7                  |
| -0.0711129940409894    |    |   | AGIWUR2500;AGIWUR17127;AGIWUR35830;AGIWUR38073                         |          |                |                                   |
| N2                     | HS | I | 12844269                                                               | 12853105 | WBGene00012478 | mxt-1 Y18D10A.8                   |
| -0.0942300792112327    |    |   | AGIWUR4070                                                             |          |                |                                   |
| N2                     | HS | I | 12853088                                                               | 12858272 | WBGene00012479 | Y18D10A.9 Y18D10A.9               |
| 0.239291027604329      |    |   | AGIWUR18598                                                            |          |                |                                   |
| N2                     | HS | I | 12859499                                                               | 12861197 | WBGene00012480 | cllec-104 Y18D10A.10              |
| 0.241185536308549      |    |   | AGIWUR26490                                                            |          |                |                                   |
| N2                     | HS | I | 12861951                                                               | 12863544 | WBGene00012481 | Y18D10A.11 Y18D10A.11             |
| -0.121885915982185     |    |   | AGIWUR18588                                                            |          |                |                                   |
| N2                     | HS | I | 12864230                                                               | 12865568 | WBGene00012488 | cllec-105 Y18D10A.24              |
| -0.126171029084309     |    |   | AGIWUR22133                                                            |          |                |                                   |
| N2                     | HS | I | 12866120                                                               | 12866896 | WBGene00012482 | cllec-106 Y18D10A.12              |
| -0.0325003734904463    |    |   | AGIWUR40586                                                            |          |                |                                   |
| N2                     | HS | I | 12866991                                                               | 12869556 | WBGene00012487 | Y18D10A.23 Y18D10A.23             |
| 0.10872994973306       |    |   | AGIWUR21563                                                            |          |                |                                   |
| N2                     | HS | I | 12878595                                                               | 12902806 | WBGene00003905 | pad-1 Y18D10A.13                  |
| -0.254575611875993     |    |   | AGIWUR16264                                                            |          |                |                                   |
| N2                     | HS | I | 12903059                                                               | 12904072 | WBGene00012483 | Y18D10A.16 Y18D10A.16             |
| -0.118755103831471     |    |   | AGIWUR10347;AGIWUR19850;AGIWUR33702                                    |          |                |                                   |
| N2                     | HS | I | 12904470                                                               | 12906212 | WBGene00012484 | car-1 Y18D10A.17                  |
| -0.205927505390227     |    |   | AGIWUR9634;AGIWUR11573;AGIWUR13065;AGIWUR30240;AGIWUR35163;AGIWUR41272 |          |                |                                   |

|                                                          |    |   |                                                                       |          |                |                 |                            |
|----------------------------------------------------------|----|---|-----------------------------------------------------------------------|----------|----------------|-----------------|----------------------------|
| N2                                                       | HS | I | 12906462                                                              | 12907754 | WBGene00012485 | fbxa-121        | Y18D10A.18                 |
| 0.0619714768088944                                       |    |   | AGIWUR33138                                                           |          |                |                 |                            |
| N2                                                       | HS | I | 12908304                                                              | 12909436 | WBGene00077556 | Y18D10A.27      | Y18D10A.27                 |
| -0.0236021498788848                                      |    |   | AGIWUR5790;AGIWUR7354;AGIWUR9630                                      |          |                |                 |                            |
| N2                                                       | HS | I | 12916441                                                              | 12918108 | WBGene00001433 | fbk-8           | Y18D10A.25                 |
| 0.317841040484936                                        |    |   | AGIWUR3419;AGIWUR11778                                                |          |                |                 |                            |
| N2                                                       | HS | I | 12918722                                                              | 12919278 | WBGene00001427 | fbk-2           | Y18D10A.19                 |
| -0.0574904606924882                                      |    |   | AGIWUR1517;AGIWUR18093;AGIWUR43780                                    |          |                |                 |                            |
| N2                                                       | HS | I | 12922004                                                              | 12923548 | WBGene00003989 | pfn-1           | Y18D10A.20                 |
| -0.00581963192998636                                     |    |   | AGIWUR749;AGIWUR10648;AGIWUR13965;AGIWUR14413;AGIWUR19323;AGIWUR22987 |          |                |                 |                            |
| N2                                                       | HS | I | 12929372                                                              | 12931069 | WBGene00012486 | Y18D10A.21      | Y18D10A.21                 |
| 0.265339982299384                                        |    |   | AGIWUR15932                                                           |          |                |                 |                            |
| N2                                                       | HS | I | 12932037                                                              | 12933751 | WBGene00014864 | Y18D10A.22      | Y18D10A.22                 |
| 0.115761093009514                                        |    |   | AGIWUR28353                                                           |          |                |                 |                            |
| N2                                                       | HS | I | 12934767                                                              | 12937252 | WBGene00006484 | tag-138         | F08A8.6 -0.137585073712025 |
| AGIWUR2434                                               |    |   |                                                                       |          |                |                 |                            |
| N2                                                       | HS | I | 12938555                                                              | 12942224 | WBGene00008564 | acox-1.1        | F08A8.1                    |
| 0.167308781323291                                        |    |   | AGIWUR34581                                                           |          |                |                 |                            |
| N2                                                       | HS | I | 12942280                                                              | 12946562 | WBGene00008565 | acox-1.2        | F08A8.2                    |
| 0.219851128473101                                        |    |   | AGIWUR825                                                             |          |                |                 |                            |
| N2                                                       | HS | I | 12951025                                                              | 12954015 | WBGene00008567 | acox-1.4        | F08A8.4                    |
| -0.0382736422402088                                      |    |   | AGIWUR1174;AGIWUR16821                                                |          |                |                 |                            |
| N2                                                       | HS | I | 12953969                                                              | 12955322 | WBGene00045468 | F08A8.8 F08A8.8 | 0.154162226799786          |
| AGIWUR441                                                |    |   |                                                                       |          |                |                 |                            |
| N2                                                       | HS | I | 12955328                                                              | 12957902 | WBGene00008568 | F08A8.5 F08A8.5 | 0.20507508418323           |
| AGIWUR26122                                              |    |   |                                                                       |          |                |                 |                            |
| N2                                                       | HS | I | 12958639                                                              | 12959955 | WBGene00008569 | fbxa-101        | F08A8.7                    |
| 0.0979070433656606                                       |    |   | AGIWUR11695                                                           |          |                |                 |                            |
| N2                                                       | HS | I | 12960313                                                              | 12961606 | WBGene00008130 | fbxa-140        | C47B2.1                    |
| 0.213789254197884                                        |    |   | AGIWUR4596                                                            |          |                |                 |                            |
| N2                                                       | HS | I | 12962042                                                              | 12964579 | WBGene00008131 | C47B2.2 C47B2.2 | 0.1359876651983            |
| AGIWUR30169                                              |    |   |                                                                       |          |                |                 |                            |
| N2                                                       | HS | I | 12964674                                                              | 12966876 | WBGene00006529 | tba-2           | C47B2.3 -0.162419060598378 |
| AGIWUR4560;AGIWUR7861;AGIWUR17254;AGIWUR33286            |    |   |                                                                       |          |                |                 |                            |
| N2                                                       | HS | I | 12967216                                                              | 12968280 | WBGene00003948 | pbs-2           | C47B2.4 -0.133693107259189 |
| AGIWUR41108                                              |    |   |                                                                       |          |                |                 |                            |
| N2                                                       | HS | I | 12968921                                                              | 12970238 | WBGene00001234 | EIF-6           | C47B2.5 0.0437234071638777 |
| AGIWUR1942;AGIWUR2030;AGIWUR4142;AGIWUR21916;AGIWUR24490 |    |   |                                                                       |          |                |                 |                            |
| N2                                                       | HS | I | 12971120                                                              | 12972347 | WBGene00004196 | prx-11          | C47B2.8 0.0351384717871852 |



|                                                                       |    |   |                     |                        |                |           |          |                     |  |
|-----------------------------------------------------------------------|----|---|---------------------|------------------------|----------------|-----------|----------|---------------------|--|
| AGIWUR1599                                                            |    |   |                     |                        |                |           |          |                     |  |
| N2                                                                    | HS | I | 12975183            | 12978749               | WBGene00008132 | gale-1    | C47B2.6  | -0.150111265888722  |  |
| AGIWUR10738;AGIWUR34894                                               |    |   |                     |                        |                |           |          |                     |  |
| N2                                                                    | HS | I | 12978839            | 12982452               | WBGene00008133 | efsc-1    | C47B2.7  | 0.0723102630787942  |  |
| AGIWUR34915                                                           |    |   |                     |                        |                |           |          |                     |  |
| N2                                                                    | HS | I | 12983004            | 12983974               | WBGene00008134 | C47B2.9   | C47B2.9  | 0.145892767400424   |  |
| AGIWUR36090                                                           |    |   |                     |                        |                |           |          |                     |  |
| N2                                                                    | HS | I | 12988223            | 12995475               | WBGene00003753 | nlp-15    | CC4.2    | 0.169451614091688   |  |
| AGIWUR1711                                                            |    |   |                     |                        |                |           |          |                     |  |
| N2                                                                    | HS | I | 12995803            | 13012859               | WBGene00004895 | smu-1     | CC4.3    | 0.0373393498642969  |  |
| AGIWUR14067                                                           |    |   |                     |                        |                |           |          |                     |  |
| N2                                                                    | HS | I | 13004437            | 13023625               | WBGene00004063 | pmr-1     | ZK256.1  | -0.110022541941601  |  |
| AGIWUR12760;AGIWUR19470;AGIWUR21490;AGIWUR37538                       |    |   |                     |                        |                |           |          |                     |  |
| N2                                                                    | HS | I | 13033483            | 13045555               | WBGene00012274 | W05B5.1   | W05B5.1  | -0.132068596585437  |  |
| AGIWUR130;AGIWUR13029;AGIWUR16053;AGIWUR21284;AGIWUR34592;AGIWUR42290 |    |   |                     |                        |                |           |          |                     |  |
| N2                                                                    | HS | I | 13050445            | 13057435               | WBGene00012275 | npr-14    | W05B5.2  | 0.0609256830548546  |  |
| AGIWUR22861                                                           |    |   |                     |                        |                |           |          |                     |  |
| N2                                                                    | HS | I | 13066924            | 13069038               | WBGene00012500 | hpo-2     | Y26D4A.2 |                     |  |
|                                                                       |    |   | 0.284338107183178   | AGIWUR24458            |                |           |          |                     |  |
| N2                                                                    | HS | I | 13069529            | 13071190               | WBGene00012502 | cllec-107 |          | Y26D4A.4            |  |
|                                                                       |    |   | 0.0060523484387538  | AGIWUR8324             |                |           |          |                     |  |
| N2                                                                    | HS | I | 13073837            | 13075124               | WBGene00044706 | Y26D4A.15 |          | Y26D4A.15           |  |
|                                                                       |    |   | -0.0531734151664067 | AGIWUR1641;AGIWUR27615 |                |           |          |                     |  |
| N2                                                                    | HS | I | 13075122            | 13075381               | WBGene00044710 | Y26D4A.16 |          | Y26D4A.16           |  |
|                                                                       |    |   | 0.092934041903364   | AGIWUR73               |                |           |          |                     |  |
| N2                                                                    | HS | I | 13077994            | 13078880               | WBGene00045235 | Y26D4A.18 |          | Y26D4A.18           |  |
|                                                                       |    |   | -0.508296076435711  | AGIWUR39678            |                |           |          |                     |  |
| N2                                                                    | HS | I | 13079742            | 13080633               | WBGene00045236 | Y26D4A.19 |          | Y26D4A.19           |  |
|                                                                       |    |   | 0.00762666784016552 | AGIWUR40017            |                |           |          |                     |  |
| N2                                                                    | HS | I | 13081448            | 13082166               | WBGene00012504 | cllec-108 |          | Y26D4A.6            |  |
|                                                                       |    |   | 0.0101923083111242  | AGIWUR7770             |                |           |          |                     |  |
| N2                                                                    | HS | I | 13082681            | 13082966               | WBGene00012509 | Y26D4A.12 |          | Y26D4A.12           |  |
|                                                                       |    |   | 0.0551846281336807  | AGIWUR41342            |                |           |          |                     |  |
| N2                                                                    | HS | I | 13083321            | 13085505               | WBGene00012505 | pals-13   | Y26D4A.8 |                     |  |
|                                                                       |    |   | -0.0895455447364215 | AGIWUR17033            |                |           |          |                     |  |
| N2                                                                    | HS | I | 13085106            | 13103119               | WBGene00007655 | C17H1.2   | C17H1.2  | -0.0271398905811857 |  |
| AGIWUR9507;AGIWUR23034;AGIWUR29977;AGIWUR37866;AGIWUR42970            |    |   |                     |                        |                |           |          |                     |  |
| N2                                                                    | HS | I | 13104253            | 13106298               | WBGene00007656 | pals-2    | C17H1.3  | 1.5761322017538     |  |
| AGIWUR5622;AGIWUR17946;AGIWUR35948                                    |    |   |                     |                        |                |           |          |                     |  |

|                                                                            |    |   |          |          |                |          |          |                     |
|----------------------------------------------------------------------------|----|---|----------|----------|----------------|----------|----------|---------------------|
| N2                                                                         | HS | I | 13107140 | 13107457 | WBGene00044711 | pals-10  | C17H1.11 |                     |
| 1.2488673373967 AGIWUR9138;AGIWUR27537;AGIWUR32329;AGIWUR37188;AGIWUR42291 |    |   |          |          |                |          |          |                     |
| N2                                                                         | HS | I | 13107492 | 13112443 | WBGene00007657 | pals-3   | C17H1.4  | 1.04608242526938    |
| AGIWUR37391                                                                |    |   |          |          |                |          |          |                     |
| N2                                                                         | HS | I | 13113487 | 13116434 | WBGene00007658 | pals-4   | C17H1.5  | 1.16478890101895    |
| AGIWUR37559                                                                |    |   |          |          |                |          |          |                     |
| N2                                                                         | HS | I | 13117629 | 13120324 | WBGene00007654 | C17H1.1  | C17H1.1  | 0.383879565897383   |
| AGIWUR17604;AGIWUR25487;AGIWUR28593                                        |    |   |          |          |                |          |          |                     |
| N2                                                                         | HS | I | 13121092 | 13123513 | WBGene00007662 | pals-8   | C17H1.9  | 1.39107273192253    |
| AGIWUR32197                                                                |    |   |          |          |                |          |          |                     |
| N2                                                                         | HS | I | 13124081 | 13126650 | WBGene00044708 | pals-11  | C17H1.13 |                     |
| 1.43298050650717 AGIWUR17715                                               |    |   |          |          |                |          |          |                     |
| N2                                                                         | HS | I | 13127152 | 13127876 | WBGene00044722 | C17H1.12 |          | C17H1.12            |
| 0.0237451557060488 AGIWUR6757;AGIWUR7071;AGIWUR11735;AGIWUR13554           |    |   |          |          |                |          |          |                     |
| N2                                                                         | HS | I | 13128470 | 13130409 | WBGene00007661 | pals-7   | C17H1.8  | 0.304808434311338   |
| AGIWUR41771                                                                |    |   |          |          |                |          |          |                     |
| N2                                                                         | HS | I | 13130808 | 13132464 | WBGene00007659 | pals-5   | C17H1.6  | 0.600997450385201   |
| AGIWUR7049                                                                 |    |   |          |          |                |          |          |                     |
| N2                                                                         | HS | I | 13133638 | 13136156 | WBGene00044237 | pals-9   | C17H1.10 |                     |
| 1.60450960553329 AGIWUR18891                                               |    |   |          |          |                |          |          |                     |
| N2                                                                         | HS | I | 13136467 | 13138521 | WBGene00007660 | pals-6   | C17H1.7  | 1.66158429612572    |
| AGIWUR2479                                                                 |    |   |          |          |                |          |          |                     |
| N2                                                                         | HS | I | 13139132 | 13141789 | WBGene00009061 | pals-14  | F22G12.1 |                     |
| 3.07751648403464 AGIWUR8641;AGIWUR17238                                    |    |   |          |          |                |          |          |                     |
| N2                                                                         | HS | I | 13144912 | 13146453 | WBGene00044712 | pals-15  | F22G12.8 |                     |
| 0.135983693327185 AGIWUR2413;AGIWUR10665;AGIWUR28917                       |    |   |          |          |                |          |          |                     |
| N2                                                                         | HS | I | 13152575 | 13153706 | WBGene00009063 | F22G12.3 |          | F22G12.3            |
| 0.134995540704943 AGIWUR38346                                              |    |   |          |          |                |          |          |                     |
| N2                                                                         | HS | I | 13155239 | 13161508 | WBGene00009064 | F22G12.4 |          | F22G12.4            |
| 0.0623843602062397 AGIWUR15762;AGIWUR18080;AGIWUR18882                     |    |   |          |          |                |          |          |                     |
| N2                                                                         | HS | I | 13162492 | 13182725 | WBGene00009065 | F22G12.5 |          | F22G12.5            |
| -0.174576394904136 AGIWUR21603                                             |    |   |          |          |                |          |          |                     |
| N2                                                                         | HS | I | 13184852 | 13188234 | WBGene00008905 | F17B5.1  | F17B5.1  | 0.224886511585568   |
| AGIWUR11554                                                                |    |   |          |          |                |          |          |                     |
| N2                                                                         | HS | I | 13189792 | 13190583 | WBGene00138716 | F17B5.10 |          | F17B5.10            |
| 0.361545741970153 AGIWUR9777                                               |    |   |          |          |                |          |          |                     |
| N2                                                                         | HS | I | 13190578 | 13191921 | WBGene00045458 | F17B5.8  | F17B5.8  | -0.0147981485825328 |
| AGIWUR1859;AGIWUR10263;AGIWUR21965;AGIWUR23242;AGIWUR29567                 |    |   |          |          |                |          |          |                     |
| N2                                                                         | HS | I | 13197179 | 13198374 | WBGene00008907 | clec-109 |          | F17B5.3             |

|                                     |                                                                        |                                    |
|-------------------------------------|------------------------------------------------------------------------|------------------------------------|
| 0.0463955023999523                  | AGIWUR6963;AGIWUR18308;AGIWUR20621;AGIWUR21937;AGIWUR41207             |                                    |
| N2 HS I                             | 13199359                                                               | 13200980                           |
| AGIWUR11419;AGIWUR39916             | WBGene00008908                                                         | F17B5.4 F17B5.4 0.193778594967539  |
| N2 HS I                             | 13201710                                                               | 13204293                           |
| AGIWUR5127                          | WBGene00044058                                                         | F17B5.6 F17B5.6 -0.260345014737053 |
| N2 HS I                             | 13204497                                                               | 13205403                           |
| -0.0234022237178175                 | AGIWUR4687;AGIWUR17223;AGIWUR17887;AGIWUR29019                         | WBGene00008909 clec-110 F17B5.5    |
| N2 HS I                             | 13205664                                                               | 13207759                           |
| 0.0108084237949315                  | AGIWUR129                                                              | WBGene00014235 ZK1225.1 ZK1225.1   |
| N2 HS I                             | 13208441                                                               | 13210462                           |
| -0.0498982488606217                 | AGIWUR9579;AGIWUR13739;AGIWUR37030                                     | WBGene00014236 ZK1225.2 ZK1225.2   |
| N2 HS I                             | 13210585                                                               | 13211352                           |
| -0.00016371057386344                | AGIWUR719;AGIWUR16159;AGIWUR31446                                      | WBGene00044713 ZK1225.9 ZK1225.9   |
| N2 HS I                             | 13211826                                                               | 13213806                           |
| -0.0965709574235811                 | AGIWUR37508;AGIWUR38006;AGIWUR42906                                    | WBGene00044714 ZK1225.10 ZK1225.10 |
| N2 HS I                             | 13214095                                                               | 13216230                           |
| 0.000464068352439284                | AGIWUR23716                                                            | WBGene00014238 ZK1225.4 ZK1225.4   |
| N2 HS I                             | 13216605                                                               | 13218867                           |
| 0.362099065096448                   | AGIWUR1722                                                             | WBGene00014239 ZK1225.5 ZK1225.5   |
| N2 HS I                             | 13219056                                                               | 13219545                           |
| -0.110060192573059                  | AGIWUR4043;AGIWUR11256;AGIWUR18577;AGIWUR20890;AGIWUR21770;AGIWUR43896 | WBGene00006048 ssp-31 ZK1225.6     |
| N2 HS I                             | 13227995                                                               | 13229751                           |
| -0.0877436590743574                 | AGIWUR8882                                                             | WBGene00014196 ZK1053.1 ZK1053.1   |
| N2 HS I                             | 13232121                                                               | 13234686                           |
| -0.24380516389718                   | AGIWUR12680                                                            | WBGene00014197 ZK1053.2 ZK1053.2   |
| N2 HS I                             | 13235367                                                               | 13236662                           |
| 0.183244233066922                   | AGIWUR23919                                                            | WBGene00014200 scrm-2 ZK1053.5     |
| N2 HS I                             | 13237054                                                               | 13238302                           |
| -0.0284778497368121                 | AGIWUR29991;AGIWUR34385                                                | WBGene00044786 ZK1053.7 ZK1053.7   |
| N2 HS I                             | 13238540                                                               | 13240726                           |
| -0.0286931104029353                 | AGIWUR20160                                                            | WBGene00014201 ZK1053.6 ZK1053.6   |
| N2 HS I                             | 13241645                                                               | 13244797                           |
| -0.0671273251767222                 | AGIWUR9930                                                             | WBGene00014199 ZK1053.4 ZK1053.4   |
| N2 HS I                             | 13246853                                                               | 13249789                           |
| -0.295691114081608                  | AGIWUR10322                                                            | WBGene00014198 ZK1053.3 ZK1053.3   |
| N2 HS I                             | 13250519                                                               | 13252902                           |
| AGIWUR11569;AGIWUR12707;AGIWUR35981 | WBGene00009693                                                         | F44F1.1 F44F1.1 0.0648842021416076 |
| N2 HS I                             | 13254141                                                               | 13257729                           |
| AGIWUR36983                         | WBGene00009695                                                         | F44F1.3 F44F1.3 0.193630303569616  |

|                                                                                                           |    |   |          |          |                |          |         |                     |
|-----------------------------------------------------------------------------------------------------------|----|---|----------|----------|----------------|----------|---------|---------------------|
| N2                                                                                                        | HS | I | 13258381 | 13260217 | WBGene00009697 | F44F1.5  | F44F1.5 | -0.0469652519496035 |
| AGIWUR24484                                                                                               |    |   |          |          |                |          |         |                     |
| N2                                                                                                        | HS | I | 13260933 | 13262727 | WBGene00009698 | F44F1.6  | F44F1.6 | -0.111402242392737  |
| AGIWUR2878;AGIWUR9405;AGIWUR14989;AGIWUR18297;AGIWUR19140;AGIWUR22641;AGIWUR25795;AGIWUR33450;AGIWUR43720 |    |   |          |          |                |          |         |                     |
| N2                                                                                                        | HS | I | 13263803 | 13265570 | WBGene00009696 | F44F1.4  | F44F1.4 | -0.144574156412317  |
| AGIWUR33801                                                                                               |    |   |          |          |                |          |         |                     |
| N2                                                                                                        | HS | I | 13269984 | 13272784 | WBGene00006902 | vet-6    | F44F1.7 | 0.0971226043179669  |
| AGIWUR16532                                                                                               |    |   |          |          |                |          |         |                     |
| N2                                                                                                        | HS | I | 13274111 | 13276462 | WBGene00010804 | M01E5.1  | M01E5.1 | 0.168334058746664   |
| AGIWUR23175;AGIWUR33900;AGIWUR42322                                                                       |    |   |          |          |                |          |         |                     |
| N2                                                                                                        | HS | I | 13277061 | 13280175 | WBGene00010805 | M01E5.2  | M01E5.2 | 0.0554930890374337  |
| AGIWUR39432                                                                                               |    |   |          |          |                |          |         |                     |
| N2                                                                                                        | HS | I | 13280892 | 13286497 | WBGene00010806 | M01E5.3  | M01E5.3 | -0.0750003491111331 |
| AGIWUR24647;AGIWUR27603;AGIWUR30431;AGIWUR31429                                                           |    |   |          |          |                |          |         |                     |
| N2                                                                                                        | HS | I | 13287551 | 13289542 | WBGene00010807 | M01E5.4  | M01E5.4 | -0.0411363687636319 |
| AGIWUR20792;AGIWUR38781                                                                                   |    |   |          |          |                |          |         |                     |
| N2                                                                                                        | HS | I | 13292506 | 13297555 | WBGene00006595 | top-1    | M01E5.5 | -0.0983971027254    |
| AGIWUR1777;AGIWUR15898;AGIWUR16737;AGIWUR17593;AGIWUR26904;AGIWUR32658;AGIWUR39976                        |    |   |          |          |                |          |         |                     |
| N2                                                                                                        | HS | I | 13298209 | 13300716 | WBGene00010808 | sepa-1   | M01E5.6 | -0.046307967686384  |
| AGIWUR6207                                                                                                |    |   |          |          |                |          |         |                     |
| N2                                                                                                        | HS | I | 13302759 | 13304311 | WBGene00011431 | T04D3.1  | T04D3.1 |                     |
| -0.00478270524376256 AGIWUR30784                                                                          |    |   |          |          |                |          |         |                     |
| N2                                                                                                        | HS | I | 13307031 | 13308787 | WBGene00011432 | sdz-30   | T04D3.2 | -0.129449928099874  |
| AGIWUR10330;AGIWUR32859;AGIWUR44585                                                                       |    |   |          |          |                |          |         |                     |
| N2                                                                                                        | HS | I | 13309994 | 13310715 | WBGene00011435 | T04D3.8  | T04D3.8 | -0.0132242887689866 |
| AGIWUR31158                                                                                               |    |   |          |          |                |          |         |                     |
| N2                                                                                                        | HS | I | 13310915 | 13318704 | WBGene00011433 | pde-1    | T04D3.3 | 0.0416292577895412  |
| AGIWUR2048                                                                                                |    |   |          |          |                |          |         |                     |
| N2                                                                                                        | HS | I | 13325230 | 13333508 | WBGene00001555 | gcy-35   | T04D3.4 | 0.00427905327501144 |
| AGIWUR30654                                                                                               |    |   |          |          |                |          |         |                     |
| N2                                                                                                        | HS | I | 13333380 | 13336146 | WBGene00012343 | W08E3.2  | W08E3.2 | -0.188500563765096  |
| AGIWUR23946                                                                                               |    |   |          |          |                |          |         |                     |
| N2                                                                                                        | HS | I | 13337460 | 13338921 | WBGene00012345 | W08E3.4  | W08E3.4 | 0.313214811265453   |
| AGIWUR15170                                                                                               |    |   |          |          |                |          |         |                     |
| N2                                                                                                        | HS | I | 13339397 | 13340224 | WBGene00004915 | snr-2    | W08E3.1 | 0.140464668927887   |
| AGIWUR2020;AGIWUR17872;AGIWUR37716                                                                        |    |   |          |          |                |          |         |                     |
| N2                                                                                                        | HS | I | 13340327 | 13343940 | WBGene00012344 | ola-1    | W08E3.3 |                     |
| -0.00525195709800386 AGIWUR20746                                                                          |    |   |          |          |                |          |         |                     |
| N2                                                                                                        | HS | I | 13344044 | 13346966 | WBGene00012732 | Y40B1A.1 |         | Y40B1A.1            |

|                                                                         |                                                                        |
|-------------------------------------------------------------------------|------------------------------------------------------------------------|
| -0.0957518510400939                                                     | AGIWUR8122;AGIWUR14845;AGIWUR22783;AGIWUR24127;AGIWUR30754;AGIWUR33337 |
| N2 HS I                                                                 | 13347068 13349259 WBGene00012733 Y40B1A.2 Y40B1A.2                     |
| -0.171901717551624                                                      | AGIWUR39339                                                            |
| N2 HS I                                                                 | 13349410 13358674 WBGene00012734 Y40B1A.3 Y40B1A.3                     |
| -0.0263072641763777                                                     | AGIWUR7751;AGIWUR14091                                                 |
| N2 HS I                                                                 | 13360401 13366888 WBGene00012735 sptf-3 Y40B1A.4                       |
| -0.0817512960217837                                                     | AGIWUR4406                                                             |
| N2 HS I                                                                 | 13379917 13384371 WBGene00007218 C01A2.6 C01A2.6 -0.22479985505864     |
| AGIWUR11252                                                             |                                                                        |
| N2 HS I                                                                 | 13384752 13387084 WBGene00007217 tads-1 C01A2.5 0.493020719180636      |
| AGIWUR15887                                                             |                                                                        |
| N2 HS I                                                                 | 13387819 13391450 WBGene00007215 oxa-1 C01A2.3 0.0760595793178478      |
| AGIWUR15608;AGIWUR16802;AGIWUR22209;AGIWUR26992;AGIWUR29372;AGIWUR30785 |                                                                        |
| N2 HS I                                                                 | 13392118 13394001 WBGene00007216 C01A2.4 C01A2.4 -0.214620860672374    |
| AGIWUR11598                                                             |                                                                        |
| N2 HS I                                                                 | 13397270 13398529 WBGene00007214 C01A2.2 C01A2.2 -0.0638780840597644   |
| AGIWUR43823                                                             |                                                                        |
| N2 HS I                                                                 | 13402447 13404106 WBGene00007219 nlp-38 C01A2.7 -0.0310638722547281    |
| AGIWUR11225;AGIWUR16600;AGIWUR17922;AGIWUR36114                         |                                                                        |
| N2 HS I                                                                 | 13414273 13414465 WBGene00077561 W05H12.3 W05H12.3                     |
| 0.00875095562447026                                                     | AGIWUR9577;AGIWUR17249;AGIWUR24012;AGIWUR29770;AGIWUR38825             |
| N2 HS I                                                                 | 13418458 13423379 WBGene00012289 W05H12.1 W05H12.1                     |
| 0.0552309736435408                                                      | AGIWUR2538;AGIWUR7093;AGIWUR42065                                      |
| N2 HS I                                                                 | 13423994 13425148 WBGene00044066 fbx-66 Y40B1B.3                       |
| -0.1285075147551                                                        | AGIWUR5934                                                             |
| N2 HS I                                                                 | 13426454 13428471 WBGene00012739 Y40B1B.7 Y40B1B.7                     |
| 0.178450510386416                                                       | AGIWUR19958                                                            |
| N2 HS I                                                                 | 13428913 13434717 WBGene00012740 slc-25A46 Y40B1B.8                    |
| 0.0234124638349376                                                      | AGIWUR4532;AGIWUR25826;AGIWUR38819;AGIWUR40634                         |
| N2 HS I                                                                 | 13435489 13437965 WBGene00012738 eif-3.J Y40B1B.5                      |
| -0.0383356856732036                                                     | AGIWUR5279                                                             |
| N2 HS I                                                                 | 13438058 13450216 WBGene00005010 spr-5 Y40B1B.6                        |
| 0.0377351803714134                                                      | AGIWUR25838;AGIWUR27172;AGIWUR43055                                    |
| N2 HS I                                                                 | 13451463 13452841 WBGene00013023 Y48G10A.6 Y48G10A.6                   |
| 0.160055893391097                                                       | AGIWUR1449;AGIWUR19843;AGIWUR21746;AGIWUR24663;AGIWUR26086;AGIWUR30523 |
| N2 HS I                                                                 | 13455356 13470439 WBGene00013021 Y48G10A.4 Y48G10A.4                   |
| -0.200536056933287                                                      | AGIWUR4727;AGIWUR25796;AGIWUR35731;AGIWUR39194;AGIWUR41307;AGIWUR44612 |
| N2 HS I                                                                 | 13471683 13474185 WBGene00013020 Y48G10A.3 Y48G10A.3                   |
| 0.188940079018666                                                       | AGIWUR36511                                                            |

|                     |    |   |                                                                                   |          |                |           |           |
|---------------------|----|---|-----------------------------------------------------------------------------------|----------|----------------|-----------|-----------|
| N2                  | HS | I | 13477214                                                                          | 13487404 | WBGene00013019 | Y48G10A.2 | Y48G10A.2 |
| -0.0326815509462559 |    |   | AGIWUR14937                                                                       |          |                |           |           |
| N2                  | HS | I | 13489552                                                                          | 13491226 | WBGene00013018 | Y48G10A.1 | Y48G10A.1 |
| 0.440197597746257   |    |   | AGIWUR2483                                                                        |          |                |           |           |
| N2                  | HS | I | 13491425                                                                          | 13493317 | WBGene00013603 | soem-1    | Y87G2A.17 |
| 0.0918271128284749  |    |   | AGIWUR34580                                                                       |          |                |           |           |
| N2                  | HS | I | 13503045                                                                          | 13507064 | WBGene00003585 | ndx-8     | Y87G2A.14 |
| -0.221187604415554  |    |   | AGIWUR42138                                                                       |          |                |           |           |
| N2                  | HS | I | 13508785                                                                          | 13512026 | WBGene00044260 | Y87G2A.19 | Y87G2A.19 |
| 0.0489879597181755  |    |   | AGIWUR38809                                                                       |          |                |           |           |
| N2                  | HS | I | 13512313                                                                          | 13514320 | WBGene00013604 | Y87G2A.18 | Y87G2A.18 |
| -0.242051993101505  |    |   | AGIWUR37837                                                                       |          |                |           |           |
| N2                  | HS | I | 13514550                                                                          | 13526254 | WBGene00013593 | Y87G2A.1  | Y87G2A.1  |
| -0.0897290464305822 |    |   | AGIWUR10029                                                                       |          |                |           |           |
| N2                  | HS | I | 13528706                                                                          | 13531444 | WBGene00044261 | Y87G2A.20 | Y87G2A.20 |
| 0.092712815346303   |    |   | AGIWUR10888;AGIWUR20595;AGIWUR33352;AGIWUR35074;AGIWUR44230                       |          |                |           |           |
| N2                  | HS | I | 13534718                                                                          | 13537014 | WBGene00013594 | Y87G2A.2  | Y87G2A.2  |
| -0.312299715839856  |    |   | AGIWUR11310                                                                       |          |                |           |           |
| N2                  | HS | I | 13536892                                                                          | 13542703 | WBGene00013595 | atg-4.1   | Y87G2A.3  |
| 0.0254331438201163  |    |   | AGIWUR21404                                                                       |          |                |           |           |
| N2                  | HS | I | 13543079                                                                          | 13545188 | WBGene00000089 | aex-6     | Y87G2A.4  |
| 0.0624279086915229  |    |   | AGIWUR6216;AGIWUR10423;AGIWUR15952;AGIWUR20591;AGIWUR26131;AGIWUR43384            |          |                |           |           |
| N2                  | HS | I | 13547898                                                                          | 13559361 | WBGene00006936 | glp-4     | Y87G2A.5  |
| -0.0522304782177443 |    |   | AGIWUR33323                                                                       |          |                |           |           |
| N2                  | HS | I | 13560447                                                                          | 13563465 | WBGene00013602 | Y87G2A.16 | Y87G2A.16 |
| -0.336813845143679  |    |   | AGIWUR9625                                                                        |          |                |           |           |
| N2                  | HS | I | 13564567                                                                          | 13566362 | WBGene00001704 | grd-15    | Y87G2A.15 |
| 0.314407003370466   |    |   | AGIWUR1040                                                                        |          |                |           |           |
| N2                  | HS | I | 13566258                                                                          | 13572063 | WBGene00000891 | cyn-15    | Y87G2A.6  |
| -0.243168328137354  |    |   | AGIWUR11314                                                                       |          |                |           |           |
| N2                  | HS | I | 13572379                                                                          | 13575805 | WBGene00013596 | nyn-2     | Y87G2A.7  |
| -0.162917731352541  |    |   | AGIWUR32583;AGIWUR42958                                                           |          |                |           |           |
| N2                  | HS | I | 13576148                                                                          | 13581585 | WBGene00013597 | gpi-1     | Y87G2A.8  |
| -0.0685449639616982 |    |   | AGIWUR4888;AGIWUR42506                                                            |          |                |           |           |
| N2                  | HS | I | 13581698                                                                          | 13585295 | WBGene00006709 | ubc-14    | Y87G2A.9  |
| 0.236982497623789   |    |   | AGIWUR13481                                                                       |          |                |           |           |
| N2                  | HS | I | 13586037                                                                          | 13588831 | WBGene00013598 | vps-28    | Y87G2A.10 |
| 0.0310313332345995  |    |   | AGIWUR4233;AGIWUR7451;AGIWUR18989;AGIWUR19541;AGIWUR22158;AGIWUR22997;AGIWUR26235 |          |                |           |           |
| N2                  | HS | I | 13589099                                                                          | 13598505 | WBGene00013599 | eipr-1    | Y87G2A.11 |

|                                                                                                                                             |             |                |           |           |                     |  |
|---------------------------------------------------------------------------------------------------------------------------------------------|-------------|----------------|-----------|-----------|---------------------|--|
| 0.309025039023023                                                                                                                           | AGIWUR26147 |                |           |           |                     |  |
| N2 HS I 13598618                                                                                                                            | 13603393    | WBGene00013601 | Y87G2A.13 | Y87G2A.13 |                     |  |
| -0.0633806991133561                                                                                                                         | AGIWUR15125 |                |           |           |                     |  |
| N2 HS I 13603885                                                                                                                            | 13626225    | WBGene00012386 | agef-1    | Y6B3A.1   | -0.0240084453815586 |  |
| AGIWUR25300;AGIWUR33210                                                                                                                     |             |                |           |           |                     |  |
| N2 HS I 13626522                                                                                                                            | 13628447    | WBGene00012351 | W09C5.1   | W09C5.1   | 0.0633788904157502  |  |
| AGIWUR17955;AGIWUR23847;AGIWUR32726                                                                                                         |             |                |           |           |                     |  |
| N2 HS I 13629227                                                                                                                            | 13633494    | WBGene00006793 | unc-59    | W09C5.2   | -0.291298008404759  |  |
| AGIWUR44683                                                                                                                                 |             |                |           |           |                     |  |
| N2 HS I 13635042                                                                                                                            | 13635958    | WBGene00014858 | W09C5.3   | W09C5.3   | -0.0721940323238561 |  |
| AGIWUR3493;AGIWUR4777                                                                                                                       |             |                |           |           |                     |  |
| N2 HS I 13637845                                                                                                                            | 13639311    | WBGene00002116 | ins-33    | W09C5.4   | -0.191995021311911  |  |
| AGIWUR10812                                                                                                                                 |             |                |           |           |                     |  |
| N2 HS I 13640297                                                                                                                            | 13648405    | WBGene00012352 | dkf-1     | W09C5.5   | 0.0512040049957676  |  |
| AGIWUR22471                                                                                                                                 |             |                |           |           |                     |  |
| N2 HS I 13652939                                                                                                                            | 13653704    | WBGene00004445 | rp1-31    | W09C5.6   | 0.0189517309908833  |  |
| AGIWUR3290;AGIWUR3645;AGIWUR5928;AGIWUR8527;AGIWUR12729;AGIWUR14128;AGIWUR19084;AGIWUR22677;AGIWUR26990;AGIWUR30940;AGIWUR31232;AGIWUR42891 |             |                |           |           |                     |  |
| N2 HS I 13654009                                                                                                                            | 13658167    | WBGene00012353 | W09C5.7   | W09C5.7   | 0.00354914258747385 |  |
| AGIWUR16306                                                                                                                                 |             |                |           |           |                     |  |
| N2 HS I 13658171                                                                                                                            | 13659128    | WBGene00012354 | W09C5.8   | W09C5.8   | 0.126714539430473   |  |
| AGIWUR1781;AGIWUR3960;AGIWUR9938;AGIWUR16533;AGIWUR18251;AGIWUR25895                                                                        |             |                |           |           |                     |  |
| N2 HS I 13663462                                                                                                                            | 13674997    | WBGene00012234 | W04A4.5   | W04A4.5   | 0.0666735261848572  |  |
| AGIWUR2477                                                                                                                                  |             |                |           |           |                     |  |
| N2 HS I 13676255                                                                                                                            | 13677792    | WBGene00012233 | W04A4.4   | W04A4.4   | -0.027204512176799  |  |
| AGIWUR39892                                                                                                                                 |             |                |           |           |                     |  |
| N2 HS I 13680415                                                                                                                            | 13681366    | WBGene00012232 | W04A4.3   | W04A4.3   | 0.59696830013185    |  |
| AGIWUR12765                                                                                                                                 |             |                |           |           |                     |  |
| N2 HS I 13682137                                                                                                                            | 13684417    | WBGene00012231 | W04A4.2   | W04A4.2   | -0.175972744382141  |  |
| AGIWUR12922;AGIWUR28553;AGIWUR29183                                                                                                         |             |                |           |           |                     |  |
| N2 HS I 13685303                                                                                                                            | 13687582    | WBGene00012235 | W04A4.6   | W04A4.6   | -0.158322966890154  |  |
| AGIWUR30052;AGIWUR32598                                                                                                                     |             |                |           |           |                     |  |
| N2 HS I 13692929                                                                                                                            | 13702954    | WBGene00012387 | Y6B3B.1   | Y6B3B.1   | 0.261597900357224   |  |
| AGIWUR2983                                                                                                                                  |             |                |           |           |                     |  |
| N2 HS I 13709779                                                                                                                            | 13719528    | WBGene00012388 | Y6B3B.3   | Y6B3B.3   | 0.124336599256214   |  |
| AGIWUR35375                                                                                                                                 |             |                |           |           |                     |  |
| N2 HS I 13720125                                                                                                                            | 13724453    | WBGene00012394 | hsd-1     | Y6B3B.11  |                     |  |
| 0.00842921424751886                                                                                                                         | AGIWUR42334 |                |           |           |                     |  |
| N2 HS I 13724577                                                                                                                            | 13732046    | WBGene00006505 | lagr-1    | Y6B3B.10  |                     |  |

|                                                                         |             |          |                |          |           |                     |  |
|-------------------------------------------------------------------------|-------------|----------|----------------|----------|-----------|---------------------|--|
| 0.115797753945944                                                       | AGIWUR14852 |          |                |          |           |                     |  |
| N2 HS I                                                                 | 13734958    | 13751124 | WBGene00012393 | Y6B3B.9  | Y6B3B.9   | 0.170879472114157   |  |
| AGIWUR2653                                                              |             |          |                |          |           |                     |  |
| N2 HS I                                                                 | 13751234    | 13756354 | WBGene00012390 | gpap-1   | Y6B3B.5   | 0.123546985734603   |  |
| AGIWUR18956                                                             |             |          |                |          |           |                     |  |
| N2 HS I                                                                 | 13756730    | 13771773 | WBGene00012389 | Y6B3B.4  | Y6B3B.4   | 0.0440253446712995  |  |
| AGIWUR1970;AGIWUR5684;AGIWUR19132;AGIWUR32826                           |             |          |                |          |           |                     |  |
| N2 HS I                                                                 | 13773067    | 13778782 | WBGene00012576 | Y37H9A.1 |           | Y37H9A.1            |  |
| 0.0669497634741809                                                      | AGIWUR36695 |          |                |          |           |                     |  |
| N2 HS I                                                                 | 13778899    | 13792165 | WBGene00012578 | Y37H9A.3 |           | Y37H9A.3            |  |
| 0.162144956935926                                                       | AGIWUR7845  |          |                |          |           |                     |  |
| N2 HS I                                                                 | 13792645    | 13794152 | WBGene00003581 | ndx-4    | Y37H9A.6  |                     |  |
| 0.13716513751887                                                        | AGIWUR33795 |          |                |          |           |                     |  |
| N2 HS I                                                                 | 13795277    | 13795867 | WBGene00014870 | Y37H9A.4 |           | Y37H9A.4            |  |
| -0.104349723139556                                                      | AGIWUR24358 |          |                |          |           |                     |  |
| N2 HS I                                                                 | 13802390    | 13806801 | WBGene00044065 | tag-229  | W09G3.3   | 0.156270976350401   |  |
| AGIWUR9860                                                              |             |          |                |          |           |                     |  |
| N2 HS I                                                                 | 13806917    | 13812268 | WBGene00012366 | maea-1   | W09G3.2   | 0.0518753556886509  |  |
| AGIWUR20326;AGIWUR24050;AGIWUR35534                                     |             |          |                |          |           |                     |  |
| N2 HS I                                                                 | 13814756    | 13827988 | WBGene00012369 | W09G3.6  | W09G3.6   | -0.128981029507152  |  |
| AGIWUR9505                                                              |             |          |                |          |           |                     |  |
| N2 HS I                                                                 | 13828102    | 13832146 | WBGene00012365 | W09G3.1  | W09G3.1   | 0.0225094874180805  |  |
| AGIWUR21708;AGIWUR21737;AGIWUR23876;AGIWUR31807;AGIWUR34127;AGIWUR37740 |             |          |                |          |           |                     |  |
| N2 HS I                                                                 | 13835292    | 13840047 | WBGene00012236 | W04A8.1  | W04A8.1   | 0.0085819571309429  |  |
| AGIWUR8302                                                              |             |          |                |          |           |                     |  |
| N2 HS I                                                                 | 13840706    | 13841846 | WBGene00012237 | W04A8.2  | W04A8.2   | -0.0369523287027591 |  |
| AGIWUR13981;AGIWUR15281;AGIWUR17643;AGIWUR36920;AGIWUR42788;AGIWUR44916 |             |          |                |          |           |                     |  |
| N2 HS I                                                                 | 13841895    | 13843480 | WBGene00012239 | W04A8.4  | W04A8.4   | -0.0674933308732379 |  |
| AGIWUR3994;AGIWUR38834;AGIWUR41125;AGIWUR42044                          |             |          |                |          |           |                     |  |
| N2 HS I                                                                 | 13844729    | 13846957 | WBGene00012238 | W04A8.3  | W04A8.3   | -0.0854333739867625 |  |
| AGIWUR41862                                                             |             |          |                |          |           |                     |  |
| N2 HS I                                                                 | 13849599    | 13850893 | WBGene00012240 | W04A8.5  | W04A8.5   | -0.0612222007479861 |  |
| AGIWUR25404                                                             |             |          |                |          |           |                     |  |
| N2 HS I                                                                 | 13854632    | 13859699 | WBGene00012241 | W04A8.6  | W04A8.6   | -0.148298668522038  |  |
| AGIWUR43163                                                             |             |          |                |          |           |                     |  |
| N2 HS I                                                                 | 13861472    | 13887468 | WBGene00006382 | taf-1    | W04A8.7   | 0.0163603575601918  |  |
| AGIWUR29095                                                             |             |          |                |          |           |                     |  |
| N2 HS I                                                                 | 13899085    | 13913854 | WBGene00006616 | trp-4    | Y71A12B.4 |                     |  |
| 0.0678367788759875                                                      | AGIWUR41758 |          |                |          |           |                     |  |



|                                                          |    |   |                                                            |          |                |            |                             |
|----------------------------------------------------------|----|---|------------------------------------------------------------|----------|----------------|------------|-----------------------------|
| N2                                                       | HS | I | 13915664                                                   | 13917809 | WBGene00013502 | clec-111   | Y71A12B.5                   |
| 0.191215225287625                                        |    |   | AGIWUR36981                                                |          |                |            |                             |
| N2                                                       | HS | I | 13919375                                                   | 13922122 | WBGene00013503 | clec-112   | Y71A12B.6                   |
| 0.182942713734091                                        |    |   | AGIWUR23899                                                |          |                |            |                             |
| N2                                                       | HS | I | 13938185                                                   | 13942016 | WBGene00013505 | Y71A12B.8  | Y71A12B.8                   |
| 0.03842347251436                                         |    |   | AGIWUR3434                                                 |          |                |            |                             |
| N2                                                       | HS | I | 13943079                                                   | 13951628 | WBGene00013506 | usp-3      | Y71A12B.9                   |
| 0.051291489493476                                        |    |   | AGIWUR41370                                                |          |                |            |                             |
| N2                                                       | HS | I | 13952159                                                   | 13953194 | WBGene00004475 | rps-6      | Y71A12B.1                   |
| -0.0353974498638543                                      |    |   | AGIWUR4211;AGIWUR15277;AGIWUR23183;AGIWUR37410;AGIWUR42537 |          |                |            |                             |
| N2                                                       | HS | I | 13957199                                                   | 13960440 | WBGene00013507 | Y71A12B.10 | Y71A12B.10                  |
| -0.113462987257557                                       |    |   | AGIWUR3766                                                 |          |                |            |                             |
| N2                                                       | HS | I | 13978430                                                   | 13980144 | WBGene00013508 | Y71A12B.11 | Y71A12B.11                  |
| 0.0615727537011068                                       |    |   | AGIWUR15619                                                |          |                |            |                             |
| N2                                                       | HS | I | 13984308                                                   | 13989588 | WBGene00045058 | gadr-5     | Y71A12B.17                  |
| -0.00103040628614526                                     |    |   | AGIWUR11183;AGIWUR29400                                    |          |                |            |                             |
| N2                                                       | HS | I | 13992582                                                   | 13996221 | WBGene00013511 | Y71A12B.15 | Y71A12B.15                  |
| 0.000718520191609784                                     |    |   | AGIWUR23417;AGIWUR23555                                    |          |                |            |                             |
| N2                                                       | HS | I | 13997363                                                   | 14007078 | WBGene00045077 | Y71A12B.18 | Y71A12B.18                  |
| -0.211633028425688                                       |    |   | AGIWUR33089                                                |          |                |            |                             |
| N2                                                       | HS | I | 14004412                                                   | 14008484 | WBGene00013509 | Y71A12B.12 | Y71A12B.12                  |
| -0.103494724530611                                       |    |   | AGIWUR15382;AGIWUR42964                                    |          |                |            |                             |
| N2                                                       | HS | I | 14009871                                                   | 14011521 | WBGene00013865 | ZC334.7    | ZC334.7 -0.0867939492207768 |
| AGIWUR38733                                              |    |   |                                                            |          |                |            |                             |
| N2                                                       | HS | I | 14012369                                                   | 14013629 | WBGene00002111 | ins-28     | ZC334.9 -0.0991935204395293 |
| AGIWUR19714                                              |    |   |                                                            |          |                |            |                             |
| N2                                                       | HS | I | 14018785                                                   | 14019759 | WBGene00002112 | ins-29     | ZC334.10                    |
| -0.0130511938255662                                      |    |   | AGIWUR5899;AGIWUR9154;AGIWUR12469;AGIWUR28025;AGIWUR32013  |          |                |            |                             |
| N2                                                       | HS | I | 14020364                                                   | 14021155 | WBGene00002108 | ins-25     | ZC334.8 0.0414444946197001  |
| AGIWUR2131;AGIWUR3614;AGIWUR5931;AGIWUR17706;AGIWUR32860 |    |   |                                                            |          |                |            |                             |
| N2                                                       | HS | I | 14027236                                                   | 14027588 | WBGene00002110 | ins-27     | ZC334.11                    |
| 0.116930979561197                                        |    |   | AGIWUR1125;AGIWUR12173;AGIWUR16115;AGIWUR19429;AGIWUR27925 |          |                |            |                             |
| N2                                                       | HS | I | 14028997                                                   | 14029212 | WBGene00045396 | ZC334.12   | ZC334.12                    |
| 0.254617713902826                                        |    |   | AGIWUR3784;AGIWUR6250;AGIWUR31903;AGIWUR38530;AGIWUR42619  |          |                |            |                             |
| N2                                                       | HS | I | 14031147                                                   | 14031667 | WBGene00002107 | ins-24     | ZC334.3 -0.0793145805028601 |
| AGIWUR3689                                               |    |   |                                                            |          |                |            |                             |
| N2                                                       | HS | I | 14035096                                                   | 14036057 | WBGene00002113 | ins-30     | ZC334.2 -0.185603704143695  |
| AGIWUR40182                                              |    |   |                                                            |          |                |            |                             |
| N2                                                       | HS | I | 14037151                                                   | 14037803 | WBGene00002109 | ins-26     | ZC334.1 0.121842553091168   |

|                                                                                                                                                                                                         |    |   |          |          |                        |           |                             |
|---------------------------------------------------------------------------------------------------------------------------------------------------------------------------------------------------------|----|---|----------|----------|------------------------|-----------|-----------------------------|
| AGIWUR2102                                                                                                                                                                                              |    |   |          |          |                        |           |                             |
| N2                                                                                                                                                                                                      | HS | I | 14041627 | 14043478 | WBGene00013512         | nhr-276   | Y71A12C.1                   |
| -0.0476736359879739                                                                                                                                                                                     |    |   |          |          | AGIWUR30870            |           |                             |
| N2                                                                                                                                                                                                      | HS | I | 14043531 | 14045694 | WBGene00050878         | Y71A12C.3 | Y71A12C.3                   |
| -0.0748756211248089                                                                                                                                                                                     |    |   |          |          | AGIWUR19098            |           |                             |
| N2                                                                                                                                                                                                      | HS | I | 14046234 | 14048017 | WBGene00013513         | Y71A12C.2 | Y71A12C.2                   |
| 0.183164463882678                                                                                                                                                                                       |    |   |          |          | AGIWUR9179;AGIWUR15094 |           |                             |
| N2                                                                                                                                                                                                      | HS | I | 14048085 | 14051003 | WBGene00004875         | smd-1     | F47G4.7 0.0396344859967712  |
| AGIWUR33737                                                                                                                                                                                             |    |   |          |          |                        |           |                             |
| N2                                                                                                                                                                                                      | HS | I | 14052136 | 14054154 | WBGene00009828         | F47G4.8   | F47G4.8 -0.0559944176115819 |
| AGIWUR4404                                                                                                                                                                                              |    |   |          |          |                        |           |                             |
| N2                                                                                                                                                                                                      | HS | I | 14054593 | 14056894 | WBGene00009822         | cllec-113 | F47G4.1                     |
| 0.161775023356235                                                                                                                                                                                       |    |   |          |          | AGIWUR33408            |           |                             |
| N2                                                                                                                                                                                                      | HS | I | 14059411 | 14060829 | WBGene00009827         | hmg-6     | F47G4.6 -0.159912634879896  |
| AGIWUR8349                                                                                                                                                                                              |    |   |          |          |                        |           |                             |
| N2                                                                                                                                                                                                      | HS | I | 14060876 | 14062137 | WBGene00009826         | F47G4.5   | F47G4.5 -0.0389233767669515 |
| AGIWUR13877                                                                                                                                                                                             |    |   |          |          |                        |           |                             |
| N2                                                                                                                                                                                                      | HS | I | 14062749 | 14068803 | WBGene00009825         | F47G4.4   | F47G4.4 -0.12596970638772   |
| AGIWUR5650;AGIWUR9090;AGIWUR19297;AGIWUR26208;AGIWUR33296;AGIWUR39500                                                                                                                                   |    |   |          |          |                        |           |                             |
| N2                                                                                                                                                                                                      | HS | I | 14075836 | 14078211 | WBGene00009824         | gpdh-1    | F47G4.3 0.191275601923161   |
| AGIWUR20253                                                                                                                                                                                             |    |   |          |          |                        |           |                             |
| N2                                                                                                                                                                                                      | HS | I | 14078193 | 14082643 | WBGene00009823         | gadr-6    | F47G4.2 0.0312936524009881  |
| AGIWUR14336;AGIWUR14614                                                                                                                                                                                 |    |   |          |          |                        |           |                             |
| N2                                                                                                                                                                                                      | HS | I | 14088094 | 14089858 | WBGene00013404         | fbxb-101  | Y63D3A.3                    |
| -0.27008398021694                                                                                                                                                                                       |    |   |          |          | AGIWUR20759            |           |                             |
| N2                                                                                                                                                                                                      | HS | I | 14090738 | 14096346 | WBGene00013403         | fbxb-100  | Y63D3A.2                    |
| -0.298109971366511                                                                                                                                                                                      |    |   |          |          | AGIWUR42011            |           |                             |
| N2                                                                                                                                                                                                      | HS | I | 14097492 | 14101090 | WBGene00013405         | tdpt-1    | Y63D3A.4                    |
| -0.248828771350869                                                                                                                                                                                      |    |   |          |          | AGIWUR8766             |           |                             |
| N2                                                                                                                                                                                                      | HS | I | 14101236 | 14104475 | WBGene00006565         | tfg-1     | Y63D3A.5                    |
| -0.368345565539347                                                                                                                                                                                      |    |   |          |          | AGIWUR3031             |           |                             |
| N2                                                                                                                                                                                                      | HS | I | 14104429 | 14113179 | WBGene00001047         | dnj-29    | Y63D3A.6                    |
| 0.0332416843207728                                                                                                                                                                                      |    |   |          |          |                        |           |                             |
| AGIWUR2497;AGIWUR2707;AGIWUR8430;AGIWUR9345;AGIWUR14768;AGIWUR14847;AGIWUR15853;AGIWUR20958;AGIWUR23646;AGIWUR25975;AGIWUR26974;AGIWUR26995;AGIWUR28054;AGIWUR28176;AGIWUR32588;AGIWUR35335;AGIWUR35775 |    |   |          |          |                        |           |                             |
| N2                                                                                                                                                                                                      | HS | I | 14113636 | 14114085 | WBGene00013406         | Y63D3A.7  | Y63D3A.7                    |
| 0.316443742222264                                                                                                                                                                                       |    |   |          |          |                        |           |                             |
| AGIWUR7230;AGIWUR16354;AGIWUR21021;AGIWUR25749;AGIWUR29079;AGIWUR34860;AGIWUR35530;AGIWUR35904;AGIWUR43091;AGIWUR44857                                                                                  |    |   |          |          |                        |           |                             |

|                                                                         |    |   |                                                           |          |                |          |                             |
|-------------------------------------------------------------------------|----|---|-----------------------------------------------------------|----------|----------------|----------|-----------------------------|
| N2                                                                      | HS | I | 14114194                                                  | 14118650 | WBGene00013407 | Y63D3A.8 | Y63D3A.8                    |
| -0.0852791712666967                                                     |    |   | AGIWUR5018;AGIWUR21326;AGIWUR39732                        |          |                |          |                             |
| N2                                                                      | HS | I | 14118753                                                  | 14127199 | WBGene00010537 | mys-2    | K03D10.3                    |
| -0.068485735682176                                                      |    |   | AGIWUR15721;AGIWUR29820                                   |          |                |          |                             |
| N2                                                                      | HS | I | 14128594                                                  | 14142207 | WBGene00002181 | kal-1    | K03D10.1                    |
| 0.162888279065309                                                       |    |   | AGIWUR36370                                               |          |                |          |                             |
| N2                                                                      | HS | I | 14150731                                                  | 14151041 | WBGene00014700 | C37A5.6  | C37A5.6 -0.0585272914289039 |
| AGIWUR31033                                                             |    |   |                                                           |          |                |          |                             |
| N2                                                                      | HS | I | 14154769                                                  | 14155249 | WBGene00014698 | C37A5.3  | C37A5.3                     |
| -0.00967092942803571                                                    |    |   | AGIWUR138;AGIWUR9321;AGIWUR10493;AGIWUR12985;AGIWUR39666  |          |                |          |                             |
| N2                                                                      | HS | I | 14157611                                                  | 14158076 | WBGene00007992 | fipr-24  | C37A5.8 -0.208269123536541  |
| AGIWUR23130                                                             |    |   |                                                           |          |                |          |                             |
| N2                                                                      | HS | I | 14158506                                                  | 14161718 | WBGene00007988 | best-8   | C37A5.1 -0.060087547209978  |
| AGIWUR7467                                                              |    |   |                                                           |          |                |          |                             |
| N2                                                                      | HS | I | 14163447                                                  | 14168309 | WBGene00007991 | C37A5.7  | C37A5.7 -0.0373591256990728 |
| AGIWUR43696                                                             |    |   |                                                           |          |                |          |                             |
| N2                                                                      | HS | I | 14171864                                                  | 14172786 | WBGene00077520 | C37A5.11 | C37A5.11                    |
| 0.109821001194845                                                       |    |   | AGIWUR202;AGIWUR14942;AGIWUR22282;AGIWUR26996;AGIWUR33327 |          |                |          |                             |
| N2                                                                      | HS | I | 14172840                                                  | 14179360 | WBGene00004202 | pry-1    | C37A5.9 0.0850547778791135  |
| AGIWUR33395                                                             |    |   |                                                           |          |                |          |                             |
| N2                                                                      | HS | I | 14182787                                                  | 14185717 | WBGene00014100 | ZK849.1  | ZK849.1 -0.0683046382286854 |
| AGIWUR13863                                                             |    |   |                                                           |          |                |          |                             |
| N2                                                                      | HS | I | 14185647                                                  | 14196295 | WBGene00014101 | gopc-1   | ZK849.2 -0.0611158185198546 |
| AGIWUR26761;AGIWUR33441;AGIWUR34814;AGIWUR41624;AGIWUR42335;AGIWUR42882 |    |   |                                                           |          |                |          |                             |
| N2                                                                      | HS | I | 14198612                                                  | 14199099 | WBGene00014104 | ZK849.6  | ZK849.6 -0.0874310865218746 |
| AGIWUR16143                                                             |    |   |                                                           |          |                |          |                             |
| N2                                                                      | HS | I | 14200020                                                  | 14204687 | WBGene00014103 | best-26  | ZK849.5 0.145136448617073   |
| AGIWUR7283;AGIWUR24096;AGIWUR30353                                      |    |   |                                                           |          |                |          |                             |
| N2                                                                      | HS | I | 14205717                                                  | 14208581 | WBGene00014102 | best-25  | ZK849.4 -0.2740605343183    |
| AGIWUR15418                                                             |    |   |                                                           |          |                |          |                             |
| N2                                                                      | HS | I | 14209215                                                  | 14212501 | WBGene00008185 | best-10  | C49A1.2 0.186444199533879   |
| AGIWUR31693                                                             |    |   |                                                           |          |                |          |                             |
| N2                                                                      | HS | I | 14213681                                                  | 14215790 | WBGene00008184 | C49A1.1  | C49A1.1 0.0440061398843881  |
| AGIWUR10091                                                             |    |   |                                                           |          |                |          |                             |
| N2                                                                      | HS | I | 14216756                                                  | 14220624 | WBGene00008186 | best-11  | C49A1.3 0.302998962647829   |
| AGIWUR23910                                                             |    |   |                                                           |          |                |          |                             |
| N2                                                                      | HS | I | 14220783                                                  | 14231360 | WBGene00001377 | eya-1    | C49A1.4 -0.0105381269895233 |
| AGIWUR4852                                                              |    |   |                                                           |          |                |          |                             |
| N2                                                                      | HS | I | 14237359                                                  | 14241188 | WBGene00008187 | C49A1.5  | C49A1.5 0.0822303447389894  |

AGIWUR33564;AGIWUR41607

|                                     |    |   |          |          |                |                 |                     |
|-------------------------------------|----|---|----------|----------|----------------|-----------------|---------------------|
| N2                                  | HS | I | 14241898 | 14244452 | WBGene00008191 | C49A1.10        | C49A1.10            |
| 0.0641589244831842 AGIWUR23897      |    |   |          |          |                |                 |                     |
| N2                                  | HS | I | 14246228 | 14247314 | WBGene00008188 | clec-115        | C49A1.6             |
| -0.0189078364990216 AGIWUR35266     |    |   |          |          |                |                 |                     |
| N2                                  | HS | I | 14251061 | 14252362 | WBGene00010576 | clec-116        | K04H8.1             |
| 0.114608638204661 AGIWUR39037       |    |   |          |          |                |                 |                     |
| N2                                  | HS | I | 14252957 | 14255510 | WBGene00010577 | K04H8.2 K04H8.2 | -0.116769143872887  |
| AGIWUR7769                          |    |   |          |          |                |                 |                     |
| N2                                  | HS | I | 14255684 | 14256970 | WBGene00010578 | K04H8.3 K04H8.3 | -0.0384947726465326 |
| AGIWUR23282                         |    |   |          |          |                |                 |                     |
| N2                                  | HS | I | 14263301 | 14271321 | WBGene00003980 | pes-7 F09C3.1   | 0.0398594377008763  |
| AGIWUR25123                         |    |   |          |          |                |                 |                     |
| N2                                  | HS | I | 14271893 | 14274213 | WBGene00008610 | F09C3.2 F09C3.2 | -0.116778939295099  |
| AGIWUR42136                         |    |   |          |          |                |                 |                     |
| N2                                  | HS | I | 14283464 | 14285319 | WBGene00008613 | fbxb-69 F09C3.5 | 0.0544127794331546  |
| AGIWUR25537                         |    |   |          |          |                |                 |                     |
| N2                                  | HS | I | 14287872 | 14295898 | WBGene00008612 | fbxa-103        | F09C3.4             |
| -0.185172929012195 AGIWUR3613       |    |   |          |          |                |                 |                     |
| N2                                  | HS | I | 14297287 | 14298265 | WBGene00009862 | fbxb-67 F49B2.2 | -0.180985895523765  |
| AGIWUR34725                         |    |   |          |          |                |                 |                     |
| N2                                  | HS | I | 14305070 | 14307134 | WBGene00086555 | F49B2.7 F49B2.7 | -0.257685424972594  |
| AGIWUR6124                          |    |   |          |          |                |                 |                     |
| N2                                  | HS | I | 14311009 | 14312871 | WBGene00009863 | F49B2.3 F49B2.3 | -0.0381674849948777 |
| AGIWUR21423                         |    |   |          |          |                |                 |                     |
| N2                                  | HS | I | 14319114 | 14319913 | WBGene00268216 | F49B2.9 F49B2.9 | -0.0109873504474791 |
| AGIWUR17709;AGIWUR21668;AGIWUR35873 |    |   |          |          |                |                 |                     |
| N2                                  | HS | I | 14322237 | 14328965 | WBGene00005078 | src-2 F49B2.5   | -0.0349807129773483 |
| AGIWUR33270                         |    |   |          |          |                |                 |                     |
| N2                                  | HS | I | 14331085 | 14339831 | WBGene00009865 | F49B2.6 F49B2.6 | -0.0307281324397808 |
| AGIWUR8730;AGIWUR31462;AGIWUR36353  |    |   |          |          |                |                 |                     |
| N2                                  | HS | I | 14341571 | 14343815 | WBGene00013666 | Y105E8A.1       | Y105E8A.1           |
| 0.0891025340583056 AGIWUR26600      |    |   |          |          |                |                 |                     |
| N2                                  | HS | I | 14347514 | 14358326 | WBGene00013667 | Y105E8A.2       | Y105E8A.2           |
| 0.1140072089299 AGIWUR28921         |    |   |          |          |                |                 |                     |
| N2                                  | HS | I | 14358502 | 14367594 | WBGene00013668 | Y105E8A.3       | Y105E8A.3           |
| 0.0872419995982252 AGIWUR38906      |    |   |          |          |                |                 |                     |
| N2                                  | HS | I | 14367608 | 14369773 | WBGene00001156 | ech-7 Y105E8A.4 |                     |
| -0.0207952033004979 AGIWUR4586      |    |   |          |          |                |                 |                     |

|                                                                                              |    |   |                                     |          |                |            |            |
|----------------------------------------------------------------------------------------------|----|---|-------------------------------------|----------|----------------|------------|------------|
| N2                                                                                           | HS | I | 14371142                            | 14376025 | WBGene00000241 | bbs-1      | Y105E8A.5  |
| -0.0916105670994192                                                                          |    |   | AGIWUR133                           |          |                |            |            |
| N2                                                                                           | HS | I | 14378386                            | 14379425 | WBGene00044264 | Y105E8A.32 | Y105E8A.32 |
| 0.000619927159927869                                                                         |    |   | AGIWUR17134                         |          |                |            |            |
| N2                                                                                           | HS | I | 14381344                            | 14384737 | WBGene00006824 | unc-95     | Y105E8A.6  |
| 0.0058811328474242                                                                           |    |   | AGIWUR23275                         |          |                |            |            |
| N2                                                                                           | HS | I | 14390333                            | 14400222 | WBGene00002977 | lev-10     | Y105E8A.7  |
| 0.0600028570804074                                                                           |    |   | AGIWUR23424;AGIWUR35694;AGIWUR38498 |          |                |            |            |
| N2                                                                                           | HS | I | 14400679                            | 14405649 | WBGene00013669 | Y105E8A.8  | Y105E8A.8  |
| -0.0778315927343343                                                                          |    |   | AGIWUR12986                         |          |                |            |            |
| N2                                                                                           | HS | I | 14406028                            | 14417942 | WBGene00000158 | apg-1      | Y105E8A.9  |
| -0.170385226399357                                                                           |    |   | AGIWUR1586;AGIWUR14637              |          |                |            |            |
| N2                                                                                           | HS | I | 14418197                            | 14431806 | WBGene00013670 | hpo-13     | Y105E8A.10 |
| 0.154547247915612                                                                            |    |   | AGIWUR42701                         |          |                |            |            |
| N2                                                                                           | HS | I | 14432793                            | 14433841 | WBGene00013671 | Y105E8A.11 | Y105E8A.11 |
| 0.234956835044059                                                                            |    |   | AGIWUR15864                         |          |                |            |            |
| N2                                                                                           | HS | I | 14436810                            | 14451880 | WBGene00013672 | catp-1     | Y105E8A.12 |
| 0.00427754642364064                                                                          |    |   | AGIWUR4487                          |          |                |            |            |
| N2                                                                                           | HS | I | 14465380                            | 14468214 | WBGene00013674 | Y105E8A.14 | Y105E8A.14 |
| -0.0839167477368425                                                                          |    |   |                                     |          |                |            |            |
| AGIWUR918;AGIWUR7311;AGIWUR12133;AGIWUR12400;AGIWUR29395;AGIWUR31736;AGIWUR37639;AGIWUR43745 |    |   |                                     |          |                |            |            |
| N2                                                                                           | HS | I | 14468321                            | 14469354 | WBGene00004489 | rps-20     | Y105E8A.16 |
| -0.271453506484459                                                                           |    |   | AGIWUR26559                         |          |                |            |            |
| N2                                                                                           | HS | I | 14469506                            | 14476790 | WBGene00013676 | ekl-4      | Y105E8A.17 |
| -0.108647874603621                                                                           |    |   | AGIWUR43665;AGIWUR43829             |          |                |            |            |
| N2                                                                                           | HS | I | 14476674                            | 14486767 | WBGene00013677 | yars-1     | Y105E8A.19 |
| 0.0531576663478193                                                                           |    |   | AGIWUR18952;AGIWUR25570             |          |                |            |            |
| N2                                                                                           | HS | I | 14486878                            | 14496560 | WBGene00013678 | Y105E8A.20 | Y105E8A.20 |
| -0.3577218490358                                                                             |    |   | AGIWUR11146                         |          |                |            |            |
| N2                                                                                           | HS | I | 14496909                            | 14498291 | WBGene00013685 | Y105E8A.28 | Y105E8A.28 |
| 0.0783410284052746                                                                           |    |   | AGIWUR6382                          |          |                |            |            |
| N2                                                                                           | HS | I | 14499727                            | 14510552 | WBGene00013679 | Y105E8A.21 | Y105E8A.21 |
| 0.176446618784778                                                                            |    |   | AGIWUR3433                          |          |                |            |            |
| N2                                                                                           | HS | I | 14511431                            | 14518719 | WBGene00001365 | exc-4      | Y105E8A.22 |
| 0.0206291691605163                                                                           |    |   | AGIWUR16297;AGIWUR28292             |          |                |            |            |
| N2                                                                                           | HS | I | 14529531                            | 14546634 | WBGene00013683 | zoo-1      | Y105E8A.26 |
| -0.191755298966157                                                                           |    |   | AGIWUR38954                         |          |                |            |            |
| N2                                                                                           | HS | I | 14552030                            | 14565853 | WBGene00013680 | rpom-1     | Y105E8A.23 |
| 0.26533414025975                                                                             |    |   | AGIWUR36449                         |          |                |            |            |

|                       |    |   |                                                                                 |          |                |                 |                            |
|-----------------------|----|---|---------------------------------------------------------------------------------|----------|----------------|-----------------|----------------------------|
| N2                    | HS | I | 14567169                                                                        | 14616524 | WBGene00013682 | Y105E8A.25      | Y105E8A.25                 |
| 0.099290023736426     |    |   | AGIWUR1343;AGIWUR2683;AGIWUR4821;AGIWUR7929;AGIWUR18859;AGIWUR19624;AGIWUR36825 |          |                |                 |                            |
| N2                    | HS | I | 14620388                                                                        | 14620632 | WBGene00044265 | Y105E8B.11      | Y105E8B.11                 |
| -0.111420630460026    |    |   | AGIWUR949;AGIWUR4198;AGIWUR10506;AGIWUR29150;AGIWUR40348                        |          |                |                 |                            |
| N2                    | HS | I | 14621173                                                                        | 14631254 | WBGene00002978 | lev-11          | Y105E8B.1                  |
| -0.156052203113168    |    |   | AGIWUR10189;AGIWUR13276;AGIWUR26792;AGIWUR32066                                 |          |                |                 |                            |
| N2                    | HS | I | 14634456                                                                        | 14642653 | WBGene00013687 | exoc-8          | Y105E8B.2                  |
| -0.154548222972836    |    |   | AGIWUR34821;AGIWUR40365;AGIWUR40499;AGIWUR43251                                 |          |                |                 |                            |
| N2                    | HS | I | 14642714                                                                        | 14646600 | WBGene00013692 | Y105E8B.7       | Y105E8B.7                  |
| 0.138369795896915     |    |   | AGIWUR3209                                                                      |          |                |                 |                            |
| N2                    | HS | I | 14647782                                                                        | 14651456 | WBGene00013689 | bath-40         | Y105E8B.4                  |
| -0.306340819800232    |    |   | AGIWUR35669                                                                     |          |                |                 |                            |
| N2                    | HS | I | 14652116                                                                        | 14657275 | WBGene00013688 | riok-2          | Y105E8B.3                  |
| 0.112447787749362     |    |   | AGIWUR17763;AGIWUR26680;AGIWUR41638                                             |          |                |                 |                            |
| N2                    | HS | I | 14657355                                                                        | 14661414 | WBGene00013690 | hprt-1          | Y105E8B.5                  |
| 0.280853336533898     |    |   | AGIWUR26599                                                                     |          |                |                 |                            |
| N2                    | HS | I | 14662524                                                                        | 14662873 | WBGene00013691 | Y105E8B.6       | Y105E8B.6                  |
| 0.0442198044598752    |    |   | AGIWUR6708;AGIWUR11489;AGIWUR23025;AGIWUR33975;AGIWUR37197;AGIWUR39910          |          |                |                 |                            |
| N2                    | HS | I | 14663209                                                                        | 14674822 | WBGene00001334 | ero-1           | Y105E8B.8                  |
| -0.0457015347317036   |    |   | AGIWUR15790;AGIWUR38676                                                         |          |                |                 |                            |
| N2                    | HS | I | 14675600                                                                        | 14682566 | WBGene00013693 | Y105E8B.9       | Y105E8B.9                  |
| -0.121849998542714    |    |   | AGIWUR1425;AGIWUR6556;AGIWUR10139;AGIWUR24148                                   |          |                |                 |                            |
| N2                    | HS | I | 14688639                                                                        | 14691736 | WBGene00013197 | ttm-5           | Y54E5A.1                   |
| 0.172267044154218     |    |   | AGIWUR43809                                                                     |          |                |                 |                            |
| N2                    | HS | I | 14694154                                                                        | 14700392 | WBGene00013198 | Y54E5A.2        | Y54E5A.2                   |
| -0.0312724029764126   |    |   | AGIWUR12835;AGIWUR39872                                                         |          |                |                 |                            |
| N2                    | HS | I | 14701122                                                                        | 14706522 | WBGene00003790 | npp-4           | Y54E5A.4                   |
| 0.0331966489850029    |    |   | AGIWUR665;AGIWUR10793;AGIWUR11371;AGIWUR15099;AGIWUR25502;AGIWUR33722           |          |                |                 |                            |
| N2                    | HS | I | 14707059                                                                        | 14707875 | WBGene00013200 | Y54E5A.5        | Y54E5A.5                   |
| 0.145445646753156     |    |   | AGIWUR39609                                                                     |          |                |                 |                            |
| N2                    | HS | I | 14708195                                                                        | 14710961 | WBGene00013201 | dus-2           | Y54E5A.6                   |
| 0.37424689702026      |    |   | AGIWUR32804                                                                     |          |                |                 |                            |
| N2                    | HS | I | 14711081                                                                        | 14715030 | WBGene00013202 | Y54E5A.7        | Y54E5A.7                   |
| -0.0634987780703007   |    |   | AGIWUR27553                                                                     |          |                |                 |                            |
| N2                    | HS | I | 14716528                                                                        | 14719027 | WBGene00013203 | Y54E5A.8        | Y54E5A.8                   |
| 0.0391977542540829    |    |   | AGIWUR31127;AGIWUR33181                                                         |          |                |                 |                            |
| N2                    | HS | I | 14719167                                                                        | 14720477 | WBGene00003951 | pbs-5           | K05C4.1 0.0122620347447064 |
| AGIWUR4323;AGIWUR6843 |    |   |                                                                                 |          |                |                 |                            |
| N2                    | HS | I | 14720588                                                                        | 14721979 | WBGene00010579 | K05C4.2 K05C4.2 | -0.0195002582775707        |

|                                                                                                |    |   |          |          |                |          |                             |
|------------------------------------------------------------------------------------------------|----|---|----------|----------|----------------|----------|-----------------------------|
| AGIWUR97;AGIWUR12763;AGIWUR19503;AGIWUR28718;AGIWUR37026;AGIWUR39116;AGIWUR39497               |    |   |          |          |                |          |                             |
| N2                                                                                             | HS | I | 14725296 | 14726131 | WBGene00010586 | K05C4.10 | K05C4.10                    |
| -0.0397894688492455 AGIWUR6961;AGIWUR7840;AGIWUR25950                                          |    |   |          |          |                |          |                             |
| N2                                                                                             | HS | I | 14726804 | 14730719 | WBGene00010585 | K05C4.9  | K05C4.9 0.154511877965282   |
| AGIWUR29746                                                                                    |    |   |          |          |                |          |                             |
| N2                                                                                             | HS | I | 14732426 | 14733549 | WBGene00010584 | K05C4.8  | K05C4.8 -0.647587165316596  |
| AGIWUR39087                                                                                    |    |   |          |          |                |          |                             |
| N2                                                                                             | HS | I | 14735236 | 14736945 | WBGene00010581 | K05C4.4  | K05C4.4 -0.0077421023677342 |
| AGIWUR43308                                                                                    |    |   |          |          |                |          |                             |
| N2                                                                                             | HS | I | 14737702 | 14738796 | WBGene00010583 | K05C4.7  | K05C4.7 0.0871957111632433  |
| AGIWUR26735                                                                                    |    |   |          |          |                |          |                             |
| N2                                                                                             | HS | I | 14738882 | 14742657 | WBGene00001979 | hmp-2    | K05C4.6 0.043137217208848   |
| AGIWUR5348                                                                                     |    |   |          |          |                |          |                             |
| N2                                                                                             | HS | I | 14742765 | 14747789 | WBGene00010582 | K05C4.5  | K05C4.5 0.154359350261103   |
| AGIWUR38011                                                                                    |    |   |          |          |                |          |                             |
| N2                                                                                             | HS | I | 14755154 | 14756432 | WBGene00009559 | mtx-1    | F39B2.11                    |
| -0.0572534810904646 AGIWUR191;AGIWUR5779;AGIWUR11203;AGIWUR43974                               |    |   |          |          |                |          |                             |
| N2                                                                                             | HS | I | 14756858 | 14759354 | WBGene00001030 | dnj-12   | F39B2.10                    |
| -0.300417428048823 AGIWUR13540;AGIWUR15860;AGIWUR19114;AGIWUR25936;AGIWUR32563;AGIWUR40305     |    |   |          |          |                |          |                             |
| N2                                                                                             | HS | I | 14759918 | 14760654 | WBGene00004495 | rps-26   | F39B2.6 -0.407378481727906  |
| AGIWUR5600;AGIWUR11547;AGIWUR15702;AGIWUR16030;AGIWUR26227;AGIWUR35000;AGIWUR36505;AGIWUR42692 |    |   |          |          |                |          |                             |
| N2                                                                                             | HS | I | 14760644 | 14768980 | WBGene00009558 | F39B2.8  | F39B2.8 0.185262708493728   |
| AGIWUR40829                                                                                    |    |   |          |          |                |          |                             |
| N2                                                                                             | HS | I | 14770689 | 14775007 | WBGene00009557 | mtcu-1   | F39B2.7 -0.0413633952839199 |
| AGIWUR33237                                                                                    |    |   |          |          |                |          |                             |
| N2                                                                                             | HS | I | 14775184 | 14776663 | WBGene00009556 | F39B2.5  | F39B2.5 0.0299204792962033  |
| AGIWUR3717                                                                                     |    |   |          |          |                |          |                             |
| N2                                                                                             | HS | I | 14777139 | 14787804 | WBGene00006349 | sur-2    | F39B2.4 0.0591447830428393  |
| AGIWUR2835                                                                                     |    |   |          |          |                |          |                             |
| N2                                                                                             | HS | I | 14788125 | 14789517 | WBGene00009554 | F39B2.3  | F39B2.3 -0.14171776603905   |
| AGIWUR9553;AGIWUR10012;AGIWUR18635;AGIWUR19118;AGIWUR28859;AGIWUR38962                         |    |   |          |          |                |          |                             |
| N2                                                                                             | HS | I | 14790244 | 14790934 | WBGene00006730 | uev-1    | F39B2.2 -0.23466642051927   |
| AGIWUR32262                                                                                    |    |   |          |          |                |          |                             |
| N2                                                                                             | HS | I | 14791040 | 14794371 | WBGene00009553 | hinf-1   | F39B2.1 -0.0936344035189576 |
| AGIWUR523;AGIWUR1351;AGIWUR6152;AGIWUR7485;AGIWUR15969;AGIWUR17279;AGIWUR21722;AGIWUR25305     |    |   |          |          |                |          |                             |
| N2                                                                                             | HS | I | 14794899 | 14797166 | WBGene00010766 | K11B4.1  | K11B4.1 0.327462870527853   |
| AGIWUR14744                                                                                    |    |   |          |          |                |          |                             |
| N2                                                                                             | HS | I | 14797660 | 14798705 | WBGene00010767 | blos-9   | K11B4.2 0.0084164294750213  |
| AGIWUR7970                                                                                     |    |   |          |          |                |          |                             |

|                                                                                                                                                                                 |    |   |          |          |                |          |          |                     |
|---------------------------------------------------------------------------------------------------------------------------------------------------------------------------------|----|---|----------|----------|----------------|----------|----------|---------------------|
| N2                                                                                                                                                                              | HS | I | 14807467 | 14815725 | WBGene00004889 | smp-1    | Y54E5B.1 |                     |
| -0.0716700824648839 AGIWUR30467;AGIWUR30814                                                                                                                                     |    |   |          |          |                |          |          |                     |
| N2                                                                                                                                                                              | HS | I | 14815706 | 14820222 | WBGene00013204 | Y54E5B.2 | Y54E5B.2 |                     |
| 0.117119921541943 AGIWUR11700;AGIWUR39232                                                                                                                                       |    |   |          |          |                |          |          |                     |
| N2                                                                                                                                                                              | HS | I | 14820381 | 14821651 | WBGene00002324 | let-49   | Y54E5B.3 |                     |
| -0.0446310093421296 AGIWUR23956                                                                                                                                                 |    |   |          |          |                |          |          |                     |
| N2                                                                                                                                                                              | HS | I | 14822050 | 14823996 | WBGene00006711 | ubc-16   | Y54E5B.4 |                     |
| -0.131995517606092 AGIWUR12386;AGIWUR26881;AGIWUR26984;AGIWUR40178                                                                                                              |    |   |          |          |                |          |          |                     |
| N2                                                                                                                                                                              | HS | I | 14824493 | 14825952 | WBGene00014921 | Y54E5B.5 | Y54E5B.5 |                     |
| 0.115401115086228 AGIWUR12811;AGIWUR14671                                                                                                                                       |    |   |          |          |                |          |          |                     |
| N2                                                                                                                                                                              | HS | I | 14826558 | 14827779 | WBGene00005839 | srw-92   | F32A7.1  | -0.0077604356397023 |
| AGIWUR1679;AGIWUR23528;AGIWUR25181;AGIWUR30153;AGIWUR41623;AGIWUR41896                                                                                                          |    |   |          |          |                |          |          |                     |
| N2                                                                                                                                                                              | HS | I | 14828200 | 14829594 | WBGene00005840 | srw-93   | F32A7.2  | 0.0490879479254649  |
| AGIWUR1982;AGIWUR19601;AGIWUR32483;AGIWUR33418                                                                                                                                  |    |   |          |          |                |          |          |                     |
| N2                                                                                                                                                                              | HS | I | 14829667 | 14834839 | WBGene00009304 | eva-1    | F32A7.3  | -0.0588103881771023 |
| AGIWUR1324;AGIWUR10089;AGIWUR20986;AGIWUR37717;AGIWUR43383                                                                                                                      |    |   |          |          |                |          |          |                     |
| N2                                                                                                                                                                              | HS | I | 14838917 | 14839138 | WBGene00044245 | F32A7.8  | F32A7.8  | 0.0962663091236102  |
| AGIWUR10354;AGIWUR11237;AGIWUR18460;AGIWUR40339;AGIWUR41657                                                                                                                     |    |   |          |          |                |          |          |                     |
| N2                                                                                                                                                                              | HS | I | 14839856 | 14843128 | WBGene00009305 | F32A7.4  | F32A7.4  | 0.0331675217786227  |
| AGIWUR13160                                                                                                                                                                     |    |   |          |          |                |          |          |                     |
| N2                                                                                                                                                                              | HS | I | 14846476 | 14850137 | WBGene00009306 | maph-1.1 | F32A7.5  |                     |
| -0.154027908701345 AGIWUR5224;AGIWUR15454;AGIWUR20881;AGIWUR24422;AGIWUR29527                                                                                                   |    |   |          |          |                |          |          |                     |
| N2                                                                                                                                                                              | HS | I | 14850054 | 14855827 | WBGene00000088 | aex-5    | F32A7.6  | 0.1367181817853     |
| AGIWUR36674                                                                                                                                                                     |    |   |          |          |                |          |          |                     |
| N2                                                                                                                                                                              | HS | I | 14855901 | 14863573 | WBGene00006789 | unc-54   | F11C3.3  | -0.103353700591498  |
| AGIWUR25719;AGIWUR36183;AGIWUR43581                                                                                                                                             |    |   |          |          |                |          |          |                     |
| N2                                                                                                                                                                              | HS | I | 14867924 | 14871467 | WBGene00008695 | F11C3.1  | F11C3.1  | 0.100776742905049   |
| AGIWUR21606                                                                                                                                                                     |    |   |          |          |                |          |          |                     |
| N2                                                                                                                                                                              | HS | I | 14872112 | 14875378 | WBGene00006845 | unc-122  | F11C3.2  | 0.136787220908538   |
| AGIWUR5296                                                                                                                                                                      |    |   |          |          |                |          |          |                     |
| N2                                                                                                                                                                              | HS | I | 14875784 | 14900213 | WBGene00001488 | frm-1    | ZK270.2  | -0.0581258825149806 |
| AGIWUR29071;AGIWUR39050;AGIWUR42633                                                                                                                                             |    |   |          |          |                |          |          |                     |
| N2                                                                                                                                                                              | HS | I | 14909240 | 14913083 | WBGene00004237 | ptr-23   | ZK270.1  | 0.0372630433324517  |
| AGIWUR19053                                                                                                                                                                     |    |   |          |          |                |          |          |                     |
| N2                                                                                                                                                                              | HS | I | 14913623 | 14915571 | WBGene00009022 | F21F12.1 | F21F12.1 |                     |
| 0.025318692786068 AGIWUR3298                                                                                                                                                    |    |   |          |          |                |          |          |                     |
| N2                                                                                                                                                                              | HS | I | 14919533 | 14951924 | WBGene00002189 | kin-1    | ZK909.2  | -0.0797412775542217 |
| AGIWUR2274;AGIWUR5154;AGIWUR8830;AGIWUR9986;AGIWUR11088;AGIWUR14732;AGIWUR18535;AGIWUR27166;AGIWUR34274;AGIWUR35252;AGIWUR38388;AGIWUR40098;AGIWUR41578;AGIWUR42171;AGIWUR43175 |    |   |          |          |                |          |          |                     |



|                                                                         |    |   |          |          |                |         |         |                     |
|-------------------------------------------------------------------------|----|---|----------|----------|----------------|---------|---------|---------------------|
| N2                                                                      | HS | I | 14953490 | 14955492 | WBGene00014148 | ZK909.3 | ZK909.3 | 0.196423504273938   |
| AGIWUR12225;AGIWUR23203;AGIWUR29149;AGIWUR39359;AGIWUR39889             |    |   |          |          |                |         |         |                     |
| N2                                                                      | HS | I | 14955647 | 14957097 | WBGene00014149 | fbxb-70 | ZK909.5 | -0.0671525949115077 |
| AGIWUR10119;AGIWUR38208;AGIWUR44401                                     |    |   |          |          |                |         |         |                     |
| N2                                                                      | HS | I | 14961501 | 14965361 | WBGene00000469 | ces-2   | ZK909.4 | -0.739496548137504  |
| AGIWUR13093                                                             |    |   |          |          |                |         |         |                     |
| N2                                                                      | HS | I | 14967301 | 14968540 | WBGene00014150 | ZK909.6 | ZK909.6 | 0.381088296886199   |
| AGIWUR20349                                                             |    |   |          |          |                |         |         |                     |
| N2                                                                      | HS | I | 14975419 | 14980586 | WBGene00013970 | klu-1   | ZK337.2 | -0.0585970829201585 |
| AGIWUR38347                                                             |    |   |          |          |                |         |         |                     |
| N2                                                                      | HS | I | 14984178 | 14987658 | WBGene00006399 | tag-4   | ZK337.4 | -0.0150245515354026 |
| AGIWUR16061                                                             |    |   |          |          |                |         |         |                     |
| N2                                                                      | HS | I | 14993821 | 15001682 | WBGene00013969 | tep-1   | ZK337.1 | -0.166745437623888  |
| AGIWUR25691                                                             |    |   |          |          |                |         |         |                     |
| N2                                                                      | HS | I | 15001854 | 15005608 | WBGene00003471 | mtt-1   | ZK337.5 | -0.112520705829391  |
| AGIWUR33354                                                             |    |   |          |          |                |         |         |                     |
| N2                                                                      | HS | I | 15005603 | 15013904 | WBGene00009368 | pole-1  | F33H2.5 | -0.237463786688279  |
| AGIWUR7795                                                              |    |   |          |          |                |         |         |                     |
| N2                                                                      | HS | I | 15014851 | 15016595 | WBGene00009369 | F33H2.6 | F33H2.6 | 0.224482363901705   |
| AGIWUR26108;AGIWUR28125;AGIWUR29986;AGIWUR34837;AGIWUR37775;AGIWUR38817 |    |   |          |          |                |         |         |                     |
| N2                                                                      | HS | I | 15017283 | 15023017 | WBGene00001049 | dog-1   | F33H2.1 | 0.183492593246264   |
| AGIWUR16013                                                             |    |   |          |          |                |         |         |                     |
| N2                                                                      | HS | I | 15023092 | 15027761 | WBGene00009366 | F33H2.2 | F33H2.2 | 0.102386182484157   |
| AGIWUR41707                                                             |    |   |          |          |                |         |         |                     |
| N2                                                                      | HS | I | 15027717 | 15030666 | WBGene00009370 | set-10  | F33H2.7 | 0.182748927442658   |
| AGIWUR21015;AGIWUR27125                                                 |    |   |          |          |                |         |         |                     |
| N2                                                                      | HS | I | 15031145 | 15033039 | WBGene00009371 | F33H2.8 | F33H2.8 | 0.131085858565234   |
| AGIWUR34249                                                             |    |   |          |          |                |         |         |                     |
| N2                                                                      | HS | I | 15034517 | 15035467 | WBGene00009367 | F33H2.3 | F33H2.3 | -0.152499834981967  |
| AGIWUR26011                                                             |    |   |          |          |                |         |         |                     |
| N2                                                                      | HS | I | 15036373 | 15040487 | WBGene00009284 | F31C3.2 | F31C3.2 | 0.056097217866883   |
| AGIWUR3373                                                              |    |   |          |          |                |         |         |                     |
| N2                                                                      | HS | I | 15040427 | 15041274 | WBGene00000881 | cyn-5   | F31C3.1 | 0.092125652968754   |
| AGIWUR8073;AGIWUR36731                                                  |    |   |          |          |                |         |         |                     |
| N2                                                                      | HS | I | 15041433 | 15050700 | WBGene00009285 | F31C3.3 | F31C3.3 | -0.21080601509135   |
| AGIWUR40656                                                             |    |   |          |          |                |         |         |                     |
| N2                                                                      | HS | I | 15050797 | 15052420 | WBGene00009286 | zipt-1  | F31C3.4 | -0.0599589721776592 |
| AGIWUR32215;AGIWUR36866;AGIWUR41938                                     |    |   |          |          |                |         |         |                     |
| N2                                                                      | HS | I | 15053025 | 15053670 | WBGene00009287 | psf-2   | F31C3.5 | -0.0160911892886126 |

AGIWUR7586  
N2 HS I 15053617 15059003 WBGene00009288 F31C3.6 F31C3.6 -0.0692190817775997  
AGIWUR4435;AGIWUR6596;AGIWUR10855;AGIWUR23668;AGIWUR30942;AGIWUR43814  
N2 HS I 15064301 15064453 WBGene00004567 rrn-2.1 F31C3.11  
0.0671526629894998 AGIWUR3226;AGIWUR10771;AGIWUR23918;AGIWUR33092;AGIWUR34754  
N2 HS I 15064838 15068346 WBGene00004622 rrn-3.1 F31C3.9 -0.186312547255849  
AGIWUR1682;AGIWUR9181;AGIWUR9854;AGIWUR13031;AGIWUR16753;AGIWUR20764;AGIWUR24344;AGIWUR25995;AGIWUR26866;AGIWUR28966;AGIWUR31062;AGIWUR40604;AGIWUR42613  
N2 HS II 1848 4717 WBGene00007063 2L52.1 2L52.1 -0.0336227921367911 AGIWUR7229  
N2 HS II 5129 5483 WBGene00022904 C01B12.9 C01B12.9 -0.146827515271596  
AGIWUR3983;AGIWUR13294;AGIWUR20192;AGIWUR35059;AGIWUR42377  
N2 HS II 6664 9486 WBGene00015287 osta-1 C01B12.4 -0.02924416976186  
AGIWUR4697;AGIWUR29006;AGIWUR40725  
N2 HS II 9485 11846 WBGene00015288 best-4 C01B12.5 0.0085133155010606  
AGIWUR7492;AGIWUR13932;AGIWUR42239  
N2 HS II 12985 16001 WBGene00015286 best-3 C01B12.3 0.178283875650891  
AGIWUR14530  
N2 HS II 19538 22169 WBGene00015285 gmeb-1 C01B12.2 -0.0735722815665838  
AGIWUR30642;AGIWUR31147;AGIWUR31577;AGIWUR43552  
N2 HS II 23328 24458 WBGene00005017 sqt-2 C01B12.1 -0.00675864356929878  
AGIWUR13749;AGIWUR14151;AGIWUR38043  
N2 HS II 24666 25446 WBGene00015291 C01B12.8 C01B12.8 0.409387560632808  
AGIWUR4616  
N2 HS II 25382 28423 WBGene00017745 F23F1.4 F23F1.4 0.105037869274518  
AGIWUR29868;AGIWUR33772  
N2 HS II 30061 31584 WBGene00017746 F23F1.5 F23F1.5 -0.273783023590703 AGIWUR40336  
N2 HS II 31768 33610 WBGene00017744 fbxc-54 F23F1.3 0.232655398544438 AGIWUR18725  
N2 HS II 34204 35262 WBGene00017743 F23F1.2 F23F1.2 -0.112815865470498 AGIWUR15988  
N2 HS II 35202 37313 WBGene00017747 F23F1.6 F23F1.6 0.265937648815934 AGIWUR34202  
N2 HS II 38558 39537 WBGene00017748 F23F1.7 F23F1.7 0.157212637551506 AGIWUR1202  
N2 HS II 41471 41982 WBGene00017750 F23F1.10 F23F1.10 0.119050174759206  
AGIWUR3668;AGIWUR12855;AGIWUR14753;AGIWUR19238;AGIWUR28736  
N2 HS II 42181 46216 WBGene00004504 rpt-4 F23F1.8 -0.239364109250374  
AGIWUR4840;AGIWUR5595;AGIWUR18020;AGIWUR20985;AGIWUR35442  
N2 HS II 45040 47479 WBGene00017749 rpoa-49 F23F1.9 -0.168461951884995 AGIWUR41889  
N2 HS II 47580 50303 WBGene00016021 C23H3.5 C23H3.5 0.296181357197852 AGIWUR14601  
N2 HS II 51072 57576 WBGene00016020 spt1-1 C23H3.4 0.122650581787301  
AGIWUR15255;AGIWUR28293;AGIWUR41602  
N2 HS II 57670 60040 WBGene00016019 C23H3.3 C23H3.3 0.0583622137154762

AGIWUR17330;AGIWUR18749;AGIWUR41138  
N2 HS II 61302 64340 WBGene00016018 C23H3.2 C23H3.2 -0.0837124743382187  
AGIWUR1906;AGIWUR13184;AGIWUR26164;AGIWUR32918  
N2 HS II 69654 71279 WBGene00001193 eg1-26 C23H3.1 -0.0976077669147912 AGIWUR31601  
N2 HS II 71672 79266 WBGene00016022 C23H3.9 C23H3.9 0.215742968287056  
AGIWUR6544;AGIWUR37497;AGIWUR38816  
N2 HS II 84434 87823 WBGene00016809 C50D2.6 C50D2.6 -0.0473113823837714 AGIWUR28282  
N2 HS II 88221 91519 WBGene00016812 C50D2.9 C50D2.9 0.0456193756071066 AGIWUR14627  
N2 HS II 92169 95277 WBGene00016810 C50D2.7 C50D2.7 -0.119841550462439 AGIWUR26625  
N2 HS II 96127 98027 WBGene00016811 C50D2.8 C50D2.8 0.0864031395551947 AGIWUR13595  
N2 HS II 98404 98961 WBGene00016808 C50D2.5 C50D2.5 -0.143117715369378  
AGIWUR3897;AGIWUR20416;AGIWUR21779;AGIWUR31226  
N2 HS II 99647 101061 WBGene00044420 C50D2.10 C50D2.10 -0.0132578048925307  
AGIWUR3739;AGIWUR5801;AGIWUR7174;AGIWUR29349;AGIWUR42173  
N2 HS II 104534 105833 WBGene00000644 col-68 C50D2.4 -0.0654177458855294 AGIWUR5687  
N2 HS II 106189 107521 WBGene00016807 C50D2.3 C50D2.3 0.251246099530986 AGIWUR39774  
N2 HS II 109165 111429 WBGene00016806 C50D2.2 C50D2.2 -0.0566528653811638  
AGIWUR1716;AGIWUR23387;AGIWUR40635  
N2 HS II 111621 114454 WBGene00016805 C50D2.1 C50D2.1 0.106925009255566 AGIWUR33829  
N2 HS II 114429 121222 WBGene00019615 K10B4.3 K10B4.3 0.0460785333815874 AGIWUR40135  
N2 HS II 123270 125004 WBGene00019616 nmur-2 K10B4.4 0.0727575281661013 AGIWUR4619  
N2 HS II 126938 128706 WBGene00005081 srd-3 K10B4.5 -0.0812075397097081 AGIWUR20269  
N2 HS II 130983 133598 WBGene00000857 cwn-1 K10B4.6 0.245711584920013 AGIWUR16463  
N2 HS II 135466 139999 WBGene00019613 K10B4.1 K10B4.1 0.130414288604916 AGIWUR11600  
N2 HS II 147241 152825 WBGene00020798 T25D3.4 T25D3.4 -0.123405327929609 AGIWUR37414  
N2 HS II 152525 154936 WBGene00020797 T25D3.3 T25D3.3 0.0330935374382122 AGIWUR40922  
N2 HS II 154875 156043 WBGene00020796 mrp1-28 T25D3.2 -0.0970095843871697  
AGIWUR5393;AGIWUR23054;AGIWUR24701;AGIWUR35171;AGIWUR35915;AGIWUR40250;AGIWUR43080  
N2 HS II 162374 170628 WBGene00001340 etr-1 T01D1.2 0.137929753101075  
AGIWUR4015;AGIWUR8140;AGIWUR15274;AGIWUR21571;AGIWUR31029;AGIWUR31047;AGIWUR31656;AGIWUR32715;AGIWUR36529;AGIWUR42342  
N2 HS II 171386 173779 WBGene00044428 T01D1.7 T01D1.7 -0.13555855247479  
AGIWUR33551;AGIWUR37702  
N2 HS II 174401 175642 WBGene00020148 T01D1.3 T01D1.3 0.0774095870311164 AGIWUR6933  
N2 HS II 176997 179093 WBGene00020149 T01D1.4 T01D1.4 0.190465139328394 AGIWUR11472  
N2 HS II 179261 192078 WBGene00044641 T01D1.8 T01D1.8 0.199269553933421  
AGIWUR3097;AGIWUR10524;AGIWUR10527;AGIWUR16181;AGIWUR19838;AGIWUR28896  
N2 HS II 192531 194558 WBGene00000034 abu-11 T01D1.6 0.535835363193533 AGIWUR5572  
N2 HS II 196985 211941 WBGene00000497 chs-2 F48A11.1 -0.0157574439559944

AGIWUR6866;AGIWUR9413;AGIWUR12416;AGIWUR12580;AGIWUR13068;AGIWUR28174;AGIWUR32227;AGIWUR38725  
N2 HS II 213169 216621 WBGene00018585 F48A11.4 F48A11.4 -0.23175497997839  
AGIWUR38865  
N2 HS II 217049 220667 WBGene00018586 ubxn-3 F48A11.5 -0.158734605643701  
AGIWUR38277  
N2 HS II 222700 232739 WBGene00021545 Y43H11AL.1 Y43H11AL.1 0.174856577612275  
AGIWUR31822  
N2 HS II 232852 237821 WBGene00021546 laa-1 Y43H11AL.2 -0.365403434325502  
AGIWUR382;AGIWUR607;AGIWUR4019;AGIWUR31192;AGIWUR32769;AGIWUR41132  
N2 HS II 240722 255182 WBGene00004166 pqn-85 Y43H11AL.3 -0.564127136404382  
AGIWUR10541  
N2 HS II 257819 261063 WBGene00000296 cat-2 B0432.5 0.0633681162551785  
AGIWUR7552;AGIWUR31219  
N2 HS II 264353 266077 WBGene00044640 B0432.14 B0432.14 -0.0193676719656075  
AGIWUR7508;AGIWUR7619;AGIWUR9732;AGIWUR17555;AGIWUR23611;AGIWUR35504;AGIWUR36059;AGIWUR38673;AGIWUR40321  
N2 HS II 266301 273966 WBGene00015188 B0432.7 B0432.7 -0.08592443511463  
AGIWUR4743;AGIWUR10714  
N2 HS II 276212 278736 WBGene00015189 B0432.8 B0432.8 0.0840415838805404 AGIWUR8831  
N2 HS II 278621 282576 WBGene00015194 B0432.13 B0432.13 -0.057086017440362  
AGIWUR20880  
N2 HS II 282576 283694 WBGene00015190 B0432.9 B0432.9 0.140982267297268 AGIWUR23197  
N2 HS II 283887 286275 WBGene00015191 B0432.10 B0432.10 0.291943553011116  
AGIWUR20057  
N2 HS II 286625 288850 WBGene00015186 misc-1 B0432.4 0.0379488386537314 AGIWUR20234  
N2 HS II 288939 290391 WBGene00015185 mrpl-41 B0432.3 0.303665878120505 AGIWUR1350  
N2 HS II 290582 291861 WBGene00015184 djr-1.1 B0432.2 -0.351366021841656 AGIWUR11594  
N2 HS II 293864 294706 WBGene00015192 B0432.11 B0432.11 -0.0794959791389136  
AGIWUR35985  
N2 HS II 296291 297010 WBGene00015193 clec-117 B0432.12 0.119734518936973  
AGIWUR35170  
N2 HS II 297399 299735 WBGene00015183 B0432.1 B0432.1 -0.343423957206483 AGIWUR9466  
N2 HS II 302405 303659 WBGene00019280 K01A2.5 K01A2.5 0.329828935212401 AGIWUR41704  
N2 HS II 303924 305530 WBGene00000645 col-69 K01A2.7 0.0867992967915541 AGIWUR24367  
N2 HS II 307545 313969 WBGene00019279 K01A2.4 K01A2.4 -0.14707259020852  
AGIWUR1000;AGIWUR1739  
N2 HS II 319785 321445 WBGene00001391 far-7 K01A2.2 0.0929566936948909  
AGIWUR24256;AGIWUR29060;AGIWUR40355  
N2 HS II 321442 323098 WBGene00019284 K01A2.10 K01A2.10 0.115828651026382  
AGIWUR2318

|                                                                                  |    |    |        |        |                |           |           |                     |             |
|----------------------------------------------------------------------------------|----|----|--------|--------|----------------|-----------|-----------|---------------------|-------------|
| N2                                                                               | HS | II | 326262 | 328224 | WBGene00019277 | sgcb-1    | K01A2.1   | 0.143320710494924   |             |
| AGIWUR7196;AGIWUR43662                                                           |    |    |        |        |                |           |           |                     |             |
| N2                                                                               | HS | II | 328564 | 332513 | WBGene00019285 | cbn-1     | K01A2.11  | 0.145375118129767   |             |
| AGIWUR15086;AGIWUR18315;AGIWUR42119                                              |    |    |        |        |                |           |           |                     |             |
| N2                                                                               | HS | II | 337339 | 339248 | WBGene00000778 | cpn-2     | D1069.2   | 0.197871352959371   | AGIWUR32382 |
| N2                                                                               | HS | II | 341982 | 347891 | WBGene00017037 | D1069.3   | D1069.3   | -0.114012264960188  |             |
| AGIWUR2482;AGIWUR11734;AGIWUR22668;AGIWUR31920                                   |    |    |        |        |                |           |           |                     |             |
| N2                                                                               | HS | II | 348266 | 357024 | WBGene00017038 | dmsr-4    | D1069.4   | -0.0824224175505623 |             |
| AGIWUR1416;AGIWUR19580                                                           |    |    |        |        |                |           |           |                     |             |
| N2                                                                               | HS | II | 362495 | 367555 | WBGene00004218 | ptr-3     | C41D7.2   | 0.125306401093834   | AGIWUR13713 |
| N2                                                                               | HS | II | 375250 | 375835 | WBGene00015406 | C03H5.4   | C03H5.4   | -0.100286838792493  |             |
| AGIWUR16004;AGIWUR28127;AGIWUR29633                                              |    |    |        |        |                |           |           |                     |             |
| N2                                                                               | HS | II | 380573 | 382257 | WBGene00015409 | C03H5.7   | C03H5.7   | -0.0364360914814439 |             |
| AGIWUR1131;AGIWUR3098;AGIWUR42721                                                |    |    |        |        |                |           |           |                     |             |
| N2                                                                               | HS | II | 382309 | 385358 | WBGene00015407 | C03H5.5   | C03H5.5   | -0.1974873743871    | AGIWUR9543  |
| N2                                                                               | HS | II | 386134 | 387949 | WBGene00015405 | C03H5.3   | C03H5.3   | 0.167845729759479   | AGIWUR35781 |
| N2                                                                               | HS | II | 388833 | 392732 | WBGene00015404 | nstp-4    | C03H5.2   | -0.350846902343182  | AGIWUR10131 |
| N2                                                                               | HS | II | 402580 | 404235 | WBGene00015403 | clcc-10   | C03H5.1   | 0.667923222092805   | AGIWUR17547 |
| N2                                                                               | HS | II | 406141 | 410961 | WBGene00016074 | C24H12.5  | C24H12.5  | -0.275316536128349  |             |
| AGIWUR38684                                                                      |    |    |        |        |                |           |           |                     |             |
| N2                                                                               | HS | II | 411222 | 416620 | WBGene00016073 | C24H12.4  | C24H12.4  | -0.0549257335064404 |             |
| AGIWUR8344;AGIWUR26796;AGIWUR27112;AGIWUR35447;AGIWUR44221                       |    |    |        |        |                |           |           |                     |             |
| N2                                                                               | HS | II | 417349 | 418882 | WBGene00016075 | C24H12.6  | C24H12.6  | 0.0168329070765809  |             |
| AGIWUR12274                                                                      |    |    |        |        |                |           |           |                     |             |
| N2                                                                               | HS | II | 419178 | 420568 | WBGene00016076 | C24H12.7  | C24H12.7  | -0.0607909064947378 |             |
| AGIWUR2158                                                                       |    |    |        |        |                |           |           |                     |             |
| N2                                                                               | HS | II | 422319 | 423142 | WBGene00016077 | C24H12.8  | C24H12.8  | -0.0533936423342105 |             |
| AGIWUR66                                                                         |    |    |        |        |                |           |           |                     |             |
| N2                                                                               | HS | II | 423624 | 427019 | WBGene00016078 | C24H12.9  | C24H12.9  | -0.0131429814175164 |             |
| AGIWUR781;AGIWUR7070;AGIWUR11382;AGIWUR12130;AGIWUR15508;AGIWUR37267;AGIWUR45078 |    |    |        |        |                |           |           |                     |             |
| N2                                                                               | HS | II | 427603 | 429152 | WBGene00016080 | C24H12.11 | C24H12.11 | -0.0502600498416079 |             |
| AGIWUR31524                                                                      |    |    |        |        |                |           |           |                     |             |
| N2                                                                               | HS | II | 436867 | 438748 | WBGene00016072 | C24H12.2  | C24H12.2  | -0.218229868467636  |             |
| AGIWUR8039                                                                       |    |    |        |        |                |           |           |                     |             |
| N2                                                                               | HS | II | 444132 | 446928 | WBGene00235338 | C24H12.19 | C24H12.19 | -0.195732800421043  |             |
| AGIWUR25847                                                                      |    |    |        |        |                |           |           |                     |             |
| N2                                                                               | HS | II | 448346 | 453156 | WBGene00021130 | W10D9.2   | W10D9.2   | -0.0432071272240417 | AGIWUR34864 |
| N2                                                                               | HS | II | 456113 | 457886 | WBGene00185079 | W10D9.6   | W10D9.6   | 0.162200271902599   | AGIWUR5554  |
| N2                                                                               | HS | II | 461667 | 467365 | WBGene00021132 | nfyb-1    | W10D9.4   | 0.19988360643832    | AGIWUR25019 |

|                                                                        |    |    |        |        |                 |          |          |                             |                    |
|------------------------------------------------------------------------|----|----|--------|--------|-----------------|----------|----------|-----------------------------|--------------------|
| N2                                                                     | HS | II | 468374 | 470475 | WBGene00021133  | tomm-22  | W10D9.5  | 0.109338438046851           | AGIWUR7361         |
| N2                                                                     | HS | II | 471247 | 475940 | WBGene00021073  | no1-1    | W07E6.1  | 0.00165542693761189         |                    |
| AGIWUR4767;AGIWUR18751;AGIWUR29814;AGIWUR30790;AGIWUR35336;AGIWUR42846 |    |    |        |        |                 |          |          |                             |                    |
| N2                                                                     | HS | II | 476222 | 478063 | WBGene00021076  | W07E6.5  | W07E6.5  | -0.0474076009700717         |                    |
| AGIWUR697;AGIWUR10017;AGIWUR17438;AGIWUR35291;AGIWUR42424              |    |    |        |        |                 |          |          |                             |                    |
| N2                                                                     | HS | II | 480722 | 484386 | WBGene00021074  | W07E6.2  | W07E6.2  | -0.0445949963308045         | AGIWUR43424        |
| N2                                                                     | HS | II | 484866 | 490403 | WBGene00004188  | prp-21   | W07E6.4  | -0.00327010811823669        | AGIWUR25405        |
| N2                                                                     | HS | II | 495424 | 498659 | WBGene00021075  | W07E6.3  | W07E6.3  | 0.199584828081971           | AGIWUR28387        |
| N2                                                                     | HS | II | 503229 | 506014 | WBGene00005324  | T27A1.1  | T27A1.1  | -0.0856016590977089         |                    |
| AGIWUR10735;AGIWUR24620                                                |    |    |        |        |                 |          |          |                             |                    |
| N2                                                                     | HS | II | 508245 | 509326 | WBGene00005512  | srh-105  | T27A1.7  | -0.0662190478301543         | AGIWUR40738        |
| N2                                                                     | HS | II | 516014 | 521605 | WBGene00003106  | mab-9    | T27A1.6  | 0.0437745418879274          |                    |
| AGIWUR7631;AGIWUR14622;AGIWUR24220                                     |    |    |        |        |                 |          |          |                             |                    |
| N2                                                                     | HS | II | 522594 | 525983 | WBGene00020837  | slc-36.2 |          | T27A1.5 0.109591902238677   |                    |
| AGIWUR8375                                                             |    |    |        |        |                 |          |          |                             |                    |
| N2                                                                     | HS | II | 526574 | 530374 | WBGene00020836  | lgc-34   | T27A1.4  | 0.0290958615750565          | AGIWUR23718        |
| N2                                                                     | HS | II | 535578 | 546944 | WBGene00020835  | T27A1.3  | T27A1.3  | 0.00289124493379234         | AGIWUR41722        |
| N2                                                                     | HS | II | 546705 | 552031 | WBGene00015646  | mlt-10   | C09E8.3  | -0.504898218866916          |                    |
| AGIWUR13193;AGIWUR31746                                                |    |    |        |        |                 |          |          |                             |                    |
| N2                                                                     | HS | II | 553086 | 554789 | WBGene00015645  | lips-7   | C09E8.2  | 0.0955356832733942          |                    |
| AGIWUR27124;AGIWUR27958;AGIWUR30248                                    |    |    |        |        |                 |          |          |                             |                    |
| N2                                                                     | HS | II | 556485 | 564215 | WBGene00015644  | C09E8.1  | C09E8.1  | -0.194886834947837          |                    |
| AGIWUR16148;AGIWUR22381;AGIWUR24838;AGIWUR43911                        |    |    |        |        |                 |          |          |                             |                    |
| N2                                                                     | HS | II | 569236 | 572110 | WBGene00021095  | mlt-8    | W08F4.6  | 0.247061287038308           | AGIWUR39199        |
| N2                                                                     | HS | II | 574872 | 577732 | WBGene00021096  | W08F4.7  | W08F4.7  | 0.259578004879153           |                    |
| AGIWUR15585;AGIWUR17009;AGIWUR42523                                    |    |    |        |        |                 |          |          |                             |                    |
| N2                                                                     | HS | II | 577839 | 580593 | WBGene00021097  | cdc-37   | W08F4.8  | -0.192001939234462          |                    |
| AGIWUR41954;AGIWUR45168                                                |    |    |        |        |                 |          |          |                             |                    |
| N2                                                                     | HS | II | 580602 | 582014 | WBGene00021093  | W08F4.3  | W08F4.3  | -0.162010199928494          | AGIWUR6026         |
| N2                                                                     | HS | II | 584798 | 586241 | WBGene00044733  | W08F4.13 |          | W08F4.13 -0.249002836638151 |                    |
| AGIWUR8104                                                             |    |    |        |        |                 |          |          |                             |                    |
| N2                                                                     | HS | II | 589161 | 589993 | WBGene000268207 | W08F4.20 |          | W08F4.20 0.0489890892184945 |                    |
| AGIWUR27767                                                            |    |    |        |        |                 |          |          |                             |                    |
| N2                                                                     | HS | II | 590578 | 591210 | WBGene00021099  | W08F4.10 |          | W08F4.10 0.0436233732311351 |                    |
| AGIWUR29;AGIWUR12451;AGIWUR19061;AGIWUR26023;AGIWUR36121               |    |    |        |        |                 |          |          |                             |                    |
| N2                                                                     | HS | II | 595207 | 602120 | WBGene00003599  | nh1-3    | W04H10.3 |                             | -0.102578033599794 |
| AGIWUR39114                                                            |    |    |        |        |                 |          |          |                             |                    |
| N2                                                                     | HS | II | 606350 | 606735 | WBGene000206416 | W04H10.5 |          | W04H10.5 0.0149415340459118 |                    |
| AGIWUR34751                                                            |    |    |        |        |                 |          |          |                             |                    |

|                                                                         |    |    |        |        |                |           |           |                     |             |
|-------------------------------------------------------------------------|----|----|--------|--------|----------------|-----------|-----------|---------------------|-------------|
| N2                                                                      | HS | II | 614767 | 624543 | WBGene00020207 | T04B8.5   | T04B8.5   | -0.0964504031712536 |             |
| AGIWUR9756;AGIWUR21808;AGIWUR36894;AGIWUR41802;AGIWUR41815              |    |    |        |        |                |           |           |                     |             |
| N2                                                                      | HS | II | 627506 | 628662 | WBGene00020205 | arrd-1    | T04B8.3   | -0.2564315614592    | AGIWUR21856 |
| N2                                                                      | HS | II | 630075 | 631980 | WBGene00020204 | T04B8.2   | T04B8.2   | -0.193661908225456  | AGIWUR16818 |
| N2                                                                      | HS | II | 637346 | 639488 | WBGene00019497 | K07E8.6   | K07E8.6   | 0.0301434043685749  |             |
| AGIWUR26831;AGIWUR32972                                                 |    |    |        |        |                |           |           |                     |             |
| N2                                                                      | HS | II | 641010 | 650367 | WBGene00019498 | K07E8.7   | K07E8.7   | -0.0218318561006097 | AGIWUR8822  |
| N2                                                                      | HS | II | 650964 | 654062 | WBGene00019496 | frpr-14   | K07E8.5   | -0.273872281633715  | AGIWUR41435 |
| N2                                                                      | HS | II | 658669 | 659867 | WBGene00019495 | sdz-24    | K07E8.3   | -0.264689390022932  | AGIWUR38836 |
| N2                                                                      | HS | II | 660091 | 661796 | WBGene00005557 | sri-45    | K07E8.9   | 0.28088065359036    | AGIWUR3487  |
| N2                                                                      | HS | II | 667755 | 668444 | WBGene00019494 | K07E8.1   | K07E8.1   | -0.0264534560884657 | AGIWUR39454 |
| N2                                                                      | HS | II | 669506 | 671125 | WBGene00005558 | sri-46    | K07E8.11  | -0.248360030420168  |             |
| AGIWUR22123                                                             |    |    |        |        |                |           |           |                     |             |
| N2                                                                      | HS | II | 671542 | 673844 | WBGene00005556 | sri-44    | K07E8.12  | 0.149240941371263   |             |
| AGIWUR6105;AGIWUR19807                                                  |    |    |        |        |                |           |           |                     |             |
| N2                                                                      | HS | II | 675603 | 678347 | WBGene00021457 | Y39F10C.1 | Y39F10C.1 | -0.154546051105056  |             |
| AGIWUR14888                                                             |    |    |        |        |                |           |           |                     |             |
| N2                                                                      | HS | II | 679025 | 679714 | WBGene00020179 | T02H6.9   | T02H6.9   | 0.0068471835516295  | AGIWUR35739 |
| N2                                                                      | HS | II | 679777 | 680712 | WBGene00020180 | T02H6.10  | T02H6.10  | -0.0820310736997678 |             |
| AGIWUR41544                                                             |    |    |        |        |                |           |           |                     |             |
| N2                                                                      | HS | II | 680832 | 681516 | WBGene00020178 | T02H6.8   | T02H6.8   | 0.101101481993366   | AGIWUR11615 |
| N2                                                                      | HS | II | 682626 | 683320 | WBGene00020177 | T02H6.7   | T02H6.7   | 0.110885895081836   |             |
| AGIWUR2807;AGIWUR31704                                                  |    |    |        |        |                |           |           |                     |             |
| N2                                                                      | HS | II | 683767 | 684116 | WBGene00020176 | T02H6.6   | T02H6.6   | -0.0241162831301587 | AGIWUR30315 |
| N2                                                                      | HS | II | 685234 | 689014 | WBGene00020175 | T02H6.5   | T02H6.5   | -0.0938122040929468 | AGIWUR10088 |
| N2                                                                      | HS | II | 690049 | 691084 | WBGene00020174 | T02H6.4   | T02H6.4   | 0.0360403679383463  | AGIWUR35824 |
| N2                                                                      | HS | II | 691881 | 693456 | WBGene00020173 | T02H6.3   | T02H6.3   | -0.053866598562812  |             |
| AGIWUR16045;AGIWUR20376;AGIWUR25904;AGIWUR30689;AGIWUR39982             |    |    |        |        |                |           |           |                     |             |
| N2                                                                      | HS | II | 700482 | 701125 | WBGene00020181 | T02H6.11  | T02H6.11  | 0.180988165261035   |             |
| AGIWUR22052;AGIWUR36290                                                 |    |    |        |        |                |           |           |                     |             |
| N2                                                                      | HS | II | 702107 | 708608 | WBGene00020172 | thoc-1    | T02H6.2   | -0.0825576598260831 |             |
| AGIWUR13124;AGIWUR24834;AGIWUR29393;AGIWUR34043;AGIWUR39938;AGIWUR39989 |    |    |        |        |                |           |           |                     |             |
| N2                                                                      | HS | II | 709381 | 723699 | WBGene00020171 | T02H6.1   | T02H6.1   | 0.0355650039720627  |             |
| AGIWUR1925;AGIWUR31002                                                  |    |    |        |        |                |           |           |                     |             |
| N2                                                                      | HS | II | 723788 | 732513 | WBGene00021456 | Y39F10B.1 | Y39F10B.1 | -0.258201863969045  |             |
| AGIWUR578                                                               |    |    |        |        |                |           |           |                     |             |
| N2                                                                      | HS | II | 734607 | 738666 | WBGene00015614 | C08G5.1   | C08G5.1   | 0.00406951266034028 |             |
| AGIWUR7483;AGIWUR22598;AGIWUR26950                                      |    |    |        |        |                |           |           |                     |             |
| N2                                                                      | HS | II | 739598 | 740852 | WBGene00015615 | fbxc-48   | C08G5.2   | -0.0900654994833943 | AGIWUR33530 |

|                                                                                                                                                                                                                                |    |    |        |        |                |           |           |                     |             |
|--------------------------------------------------------------------------------------------------------------------------------------------------------------------------------------------------------------------------------|----|----|--------|--------|----------------|-----------|-----------|---------------------|-------------|
| N2                                                                                                                                                                                                                             | HS | II | 741595 | 745128 | WBGene00015616 | C08G5.3   | C08G5.3   | -0.116968063028598  | AGIWUR34991 |
| N2                                                                                                                                                                                                                             | HS | II | 745418 | 750164 | WBGene00004926 | snt-6     | C08G5.4   | -0.294909170577103  | AGIWUR20804 |
| N2                                                                                                                                                                                                                             | HS | II | 756195 | 765317 | WBGene00044418 | C08G5.7   | C08G5.7   | 0.0112410541747252  |             |
| AGIWUR1376;AGIWUR2926;AGIWUR3173;AGIWUR7059;AGIWUR8584;AGIWUR11962;AGIWUR14089;AGIWUR15395;AGIWUR16770;AGIWUR16869;AGIWUR17068;AGIWUR17422;AGIWUR31479;AGIWUR32296;AGIWUR33655;AGIWUR35357;AGIWUR38066;AGIWUR38457;AGIWUR40764 |    |    |        |        |                |           |           |                     |             |
| N2                                                                                                                                                                                                                             | HS | II | 770553 | 772117 | WBGene00015618 | C08G5.6   | C08G5.6   | -0.0643155978477967 |             |
| AGIWUR31084;AGIWUR39491                                                                                                                                                                                                        |    |    |        |        |                |           |           |                     |             |
| N2                                                                                                                                                                                                                             | HS | II | 775333 | 776780 | WBGene00021452 | Y39F10A.1 | Y39F10A.1 | -0.147225872463796  |             |
| AGIWUR13624                                                                                                                                                                                                                    |    |    |        |        |                |           |           |                     |             |
| N2                                                                                                                                                                                                                             | HS | II | 779380 | 779882 | WBGene00269331 | Y39F10A.5 | Y39F10A.5 | 0.264159051158726   |             |
| AGIWUR43684                                                                                                                                                                                                                    |    |    |        |        |                |           |           |                     |             |
| N2                                                                                                                                                                                                                             | HS | II | 781884 | 783001 | WBGene00021454 | Y39F10A.3 | Y39F10A.3 | 0.335545539137243   |             |
| AGIWUR5346;AGIWUR32953;AGIWUR43193                                                                                                                                                                                             |    |    |        |        |                |           |           |                     |             |
| N2                                                                                                                                                                                                                             | HS | II | 787312 | 787994 | WBGene00018507 | F46F5.16  | F46F5.16  | 0.229134973987938   |             |
| AGIWUR29948                                                                                                                                                                                                                    |    |    |        |        |                |           |           |                     |             |
| N2                                                                                                                                                                                                                             | HS | II | 788378 | 789175 | WBGene00018506 | F46F5.15  | F46F5.15  | 0.0571627251415636  |             |
| AGIWUR11301                                                                                                                                                                                                                    |    |    |        |        |                |           |           |                     |             |
| N2                                                                                                                                                                                                                             | HS | II | 8e+05  | 801454 | WBGene00018505 | F46F5.14  | F46F5.14  | 0.0504631786253569  |             |
| AGIWUR12850                                                                                                                                                                                                                    |    |    |        |        |                |           |           |                     |             |
| N2                                                                                                                                                                                                                             | HS | II | 801728 | 802693 | WBGene00023287 | F46F5.3   | F46F5.3   | 0.0556663850939403  |             |
| AGIWUR4664;AGIWUR27371                                                                                                                                                                                                         |    |    |        |        |                |           |           |                     |             |
| N2                                                                                                                                                                                                                             | HS | II | 803309 | 803717 | WBGene00018504 | F46F5.13  | F46F5.13  | 0.308118632847393   |             |
| AGIWUR26178                                                                                                                                                                                                                    |    |    |        |        |                |           |           |                     |             |
| N2                                                                                                                                                                                                                             | HS | II | 805028 | 806438 | WBGene00018495 | F46F5.4   | F46F5.4   | 0.262507114667047   | AGIWUR10079 |
| N2                                                                                                                                                                                                                             | HS | II | 807372 | 808070 | WBGene00018503 | F46F5.12  | F46F5.12  | -0.0329250966745862 |             |
| AGIWUR5055                                                                                                                                                                                                                     |    |    |        |        |                |           |           |                     |             |
| N2                                                                                                                                                                                                                             | HS | II | 808757 | 811887 | WBGene00018502 | F46F5.11  | F46F5.11  | 0.317393321176718   |             |
| AGIWUR38924                                                                                                                                                                                                                    |    |    |        |        |                |           |           |                     |             |
| N2                                                                                                                                                                                                                             | HS | II | 812141 | 813708 | WBGene00018496 | F46F5.5   | F46F5.5   | 0.0547385860180452  | AGIWUR5636  |
| N2                                                                                                                                                                                                                             | HS | II | 814452 | 814866 | WBGene00018497 | F46F5.6   | F46F5.6   | -0.329016196262783  | AGIWUR40706 |
| N2                                                                                                                                                                                                                             | HS | II | 818578 | 820683 | WBGene00018498 | F46F5.7   | F46F5.7   | 0.194179114427178   |             |
| AGIWUR4943;AGIWUR18449                                                                                                                                                                                                         |    |    |        |        |                |           |           |                     |             |
| N2                                                                                                                                                                                                                             | HS | II | 821408 | 821614 | WBGene00018499 | F46F5.8   | F46F5.8   | -0.0471992852986212 | AGIWUR38844 |
| N2                                                                                                                                                                                                                             | HS | II | 823829 | 825245 | WBGene00018501 | F46F5.10  | F46F5.10  | 0.2535858930581     |             |
| AGIWUR22274                                                                                                                                                                                                                    |    |    |        |        |                |           |           |                     |             |
| N2                                                                                                                                                                                                                             | HS | II | 825848 | 827500 | WBGene00017869 | F28A10.1  | F28A10.1  | 0.671423588779369   |             |
| AGIWUR9597                                                                                                                                                                                                                     |    |    |        |        |                |           |           |                     |             |
| N2                                                                                                                                                                                                                             | HS | II | 827891 | 830267 | WBGene00017870 | F28A10.2  | F28A10.2  | 0.0281437502764073  |             |



|                                     |    |    |        |        |                |           |           |                     |
|-------------------------------------|----|----|--------|--------|----------------|-----------|-----------|---------------------|
| AGIWUR44947                         |    |    |        |        |                |           |           |                     |
| N2                                  | HS | II | 831069 | 831871 | WBGene00017878 | F28A10.10 | F28A10.10 | 0.127970741476068   |
| AGIWUR22041                         |    |    |        |        |                |           |           |                     |
| N2                                  | HS | II | 833607 | 835270 | WBGene00017877 | F28A10.9  | F28A10.9  | 0.118897722799965   |
| AGIWUR6656;AGIWUR38454              |    |    |        |        |                |           |           |                     |
| N2                                  | HS | II | 837719 | 838470 | WBGene00017876 | F28A10.8  | F28A10.8  | -0.0155317279162039 |
| AGIWUR7741                          |    |    |        |        |                |           |           |                     |
| N2                                  | HS | II | 840567 | 841113 | WBGene00017871 | F28A10.3  | F28A10.3  | 0.0461931441991599  |
| AGIWUR37007                         |    |    |        |        |                |           |           |                     |
| N2                                  | HS | II | 844274 | 845085 | WBGene00017872 | F28A10.4  | F28A10.4  | 0.146789228265568   |
| AGIWUR21076                         |    |    |        |        |                |           |           |                     |
| N2                                  | HS | II | 845288 | 845686 | WBGene00017875 | F28A10.7  | F28A10.7  | 0.160327527885549   |
| AGIWUR26593                         |    |    |        |        |                |           |           |                     |
| N2                                  | HS | II | 846864 | 848603 | WBGene00017874 | acdH-9    | F28A10.6  | -0.0274828986181959 |
| AGIWUR29074                         |    |    |        |        |                |           |           |                     |
| N2                                  | HS | II | 849678 | 850654 | WBGene00017873 | F28A10.5  | F28A10.5  | 0.0284802664629886  |
| AGIWUR39524                         |    |    |        |        |                |           |           |                     |
| N2                                  | HS | II | 862927 | 866901 | WBGene00021578 | Y46B2A.3  | Y46B2A.3  | -0.20755967847212   |
| AGIWUR35944                         |    |    |        |        |                |           |           |                     |
| N2                                  | HS | II | 868814 | 871699 | WBGene00021576 | fbxc-51   | Y46B2A.1  | -0.474014823053241  |
| AGIWUR29811                         |    |    |        |        |                |           |           |                     |
| N2                                  | HS | II | 873176 | 879001 | WBGene00000106 | alg-2     | T07D3.7   | -0.397678319701962  |
| AGIWUR35217;AGIWUR37697;AGIWUR40213 |    |    |        |        |                |           |           |                     |
| N2                                  | HS | II | 881576 | 890710 | WBGene00020307 | T07D3.4   | T07D3.4   | 0.00105815507403406 |
| AGIWUR7775;AGIWUR43697              |    |    |        |        |                |           |           |                     |
| N2                                  | HS | II | 893863 | 897379 | WBGene00020306 | T07D3.3   | T07D3.3   | 0.0547472984127291  |
| N2                                  | HS | II | 898043 | 901164 | WBGene00020311 | T07D3.9   | T07D3.9   | 0.168367211898571   |
| AGIWUR4965;AGIWUR39971              |    |    |        |        |                |           |           |                     |
| N2                                  | HS | II | 904425 | 906039 | WBGene00020304 | fbxa-200  | T07D3.1   | -0.143364708849772  |
| AGIWUR27126                         |    |    |        |        |                |           |           |                     |
| N2                                  | HS | II | 907535 | 909631 | WBGene00019927 | fbxc-24   | R07C3.11  | -0.197274525323696  |
| AGIWUR15211;AGIWUR21913;AGIWUR26453 |    |    |        |        |                |           |           |                     |
| N2                                  | HS | II | 909884 | 911592 | WBGene00019926 | fbxc-27   | R07C3.10  | -0.251741283087402  |
| AGIWUR10868                         |    |    |        |        |                |           |           |                     |
| N2                                  | HS | II | 912003 | 913030 | WBGene00019925 | fbxc-31   | R07C3.9   | -0.104707303633534  |
| N2                                  | HS | II | 913680 | 915219 | WBGene00019924 | fbxc-33   | R07C3.8   | 0.179030817469021   |
| N2                                  | HS | II | 916051 | 917464 | WBGene00019923 | fbxc-29   | R07C3.7   | -0.0158134535261309 |
| AGIWUR5918;AGIWUR10571              |    |    |        |        |                |           |           |                     |
| N2                                  | HS | II | 917624 | 919417 | WBGene00045302 | fbxc-30   | R07C3.15  | -0.196774764983855  |

|                                               |    |    |        |        |                |          |           |                                 |
|-----------------------------------------------|----|----|--------|--------|----------------|----------|-----------|---------------------------------|
| AGIWUR27335                                   |    |    |        |        |                |          |           |                                 |
| N2                                            | HS | II | 919575 | 920407 | WBGene00269338 | R07C3.16 | R07C3.16  | 0.586621468409572               |
| AGIWUR17863                                   |    |    |        |        |                |          |           |                                 |
| N2                                            | HS | II | 923821 | 925192 | WBGene00019922 | fbxc-28  | R07C3.6   | -0.0307500695698195             |
| AGIWUR564;AGIWUR11358;AGIWUR20652             |    |    |        |        |                |          |           |                                 |
| N2                                            | HS | II | 926496 | 927431 | WBGene00019929 | R07C3.13 | R07C3.13  | 0.221031322455222               |
| AGIWUR7319                                    |    |    |        |        |                |          |           |                                 |
| N2                                            | HS | II | 931171 | 932327 | WBGene00019921 | fbxc-34  | R07C3.5   | -0.0344773144760611 AGIWUR16572 |
| N2                                            | HS | II | 933018 | 936989 | WBGene00019920 | acs-15   | R07C3.4   | -0.12846078069729 AGIWUR7727    |
| N2                                            | HS | II | 938849 | 940683 | WBGene00019919 | R07C3.3  | R07C3.3   | 0.145862451660523 AGIWUR9697    |
| N2                                            | HS | II | 940983 | 943162 | WBGene00019918 | fbxc-36  | R07C3.2   | -0.238183350575551 AGIWUR14198  |
| N2                                            | HS | II | 944066 | 946157 | WBGene00019917 | cllec-43 | R07C3.1   | 0.0886713029219575 AGIWUR36973  |
| N2                                            | HS | II | 946485 | 948191 | WBGene00016303 | fbxc-32  | C32B5.10  | 0.172371772590616               |
| AGIWUR7472                                    |    |    |        |        |                |          |           |                                 |
| N2                                            | HS | II | 948432 | 950507 | WBGene00016304 | fbxc-41  | C32B5.11  | 0.0778946619832199              |
| AGIWUR28739                                   |    |    |        |        |                |          |           |                                 |
| N2                                            | HS | II | 950842 | 952843 | WBGene00016305 | fbxc-57  | C32B5.12  | -0.0640323295983656             |
| AGIWUR2248;AGIWUR3184;AGIWUR30209;AGIWUR31810 |    |    |        |        |                |          |           |                                 |
| N2                                            | HS | II | 954953 | 956337 | WBGene00016302 | fbxc-7   | C32B5.9   | 0.161220724251862 AGIWUR10362   |
| N2                                            | HS | II | 956674 | 957961 | WBGene00016301 | fbxc-6   | C32B5.8   | 0.250266813675243 AGIWUR33819   |
| N2                                            | HS | II | 958918 | 960179 | WBGene00016309 | sdz-4    | C32B5.16  | 0.0628756680717633              |
| AGIWUR17898                                   |    |    |        |        |                |          |           |                                 |
| N2                                            | HS | II | 960528 | 964260 | WBGene00016300 | C32B5.7  | C32B5.7   | 0.0189731563938338              |
| AGIWUR15819;AGIWUR28262;AGIWUR37767           |    |    |        |        |                |          |           |                                 |
| N2                                            | HS | II | 965576 | 967062 | WBGene00016307 | fbxc-18  | C32B5.14  | -0.286342651964349              |
| AGIWUR34121                                   |    |    |        |        |                |          |           |                                 |
| N2                                            | HS | II | 968406 | 970523 | WBGene00016299 | C32B5.6  | C32B5.6   | 0.0641719848012876 AGIWUR6752   |
| N2                                            | HS | II | 970645 | 972950 | WBGene00016308 | C32B5.15 | C32B5.15  | 0.507340467555299               |
| AGIWUR41227                                   |    |    |        |        |                |          |           |                                 |
| N2                                            | HS | II | 974290 | 975511 | WBGene00016298 | fbxc-14  | C32B5.5   | -0.345633097303191 AGIWUR22506  |
| N2                                            | HS | II | 976208 | 978951 | WBGene00044419 | fbxc-17  | C32B5.17  | -0.228194935766755              |
| AGIWUR25275;AGIWUR40429                       |    |    |        |        |                |          |           |                                 |
| N2                                            | HS | II | 979423 | 980825 | WBGene00016297 | fbxc-15  | C32B5.4   | -0.182841157317026 AGIWUR41541  |
| N2                                            | HS | II | 981282 | 982435 | WBGene00016296 | fbxc-16  | C32B5.3   | 0.0480184631819149              |
| AGIWUR13034;AGIWUR18974;AGIWUR22521           |    |    |        |        |                |          |           |                                 |
| N2                                            | HS | II | 986003 | 988666 | WBGene00016295 | fbxc-40  | C32B5.1   | -0.17705131698044               |
| AGIWUR33276;AGIWUR33872;AGIWUR41781           |    |    |        |        |                |          |           |                                 |
| N2                                            | HS | II | 988737 | 991074 | WBGene00018456 | fbxc-39  | F45D11.10 | -0.186044273773913              |
| AGIWUR14227                                   |    |    |        |        |                |          |           |                                 |

|                                     |    |    |         |         |                |          |           |                      |                     |
|-------------------------------------|----|----|---------|---------|----------------|----------|-----------|----------------------|---------------------|
| N2                                  | HS | II | 991600  | 993638  | WBGene00018455 | fbxc-42  | F45D11.9  |                      | -0.0342393462956734 |
| AGIWUR39826                         |    |    |         |         |                |          |           |                      |                     |
| N2                                  | HS | II | 993293  | 994189  | WBGene00018454 | fbxb-28  | F45D11.8  |                      | -0.0048616116221849 |
| AGIWUR11045;AGIWUR15570             |    |    |         |         |                |          |           |                      |                     |
| N2                                  | HS | II | 1000437 | 1001449 | WBGene00018458 | fbxb-30  | F45D11.13 |                      | -0.0815576445897701 |
| AGIWUR44765                         |    |    |         |         |                |          |           |                      |                     |
| N2                                  | HS | II | 1001703 | 1002437 | WBGene00018452 | F45D11.5 |           | F45D11.5             | 0.0092121019184539  |
| AGIWUR28527                         |    |    |         |         |                |          |           |                      |                     |
| N2                                  | HS | II | 1021505 | 1023528 | WBGene00018448 | F45D11.1 |           | F45D11.1             | -0.0487063166743917 |
| AGIWUR11280;AGIWUR21120             |    |    |         |         |                |          |           |                      |                     |
| N2                                  | HS | II | 1023693 | 1024784 | WBGene00019700 | btb-11   | M01D1.3   | 0.0329086308812805   | AGIWUR26307         |
| N2                                  | HS | II | 1028987 | 1033664 | WBGene00019699 | math-34  | M01D1.2   | 0.16840390224422     | AGIWUR42003         |
| N2                                  | HS | II | 1039697 | 1040564 | WBGene00019702 | fbxb-39  | M01D1.7   | -0.0608622605278697  | AGIWUR12176         |
| N2                                  | HS | II | 1041321 | 1042327 | WBGene00019703 | fbxb-41  | M01D1.8   | -0.053278608160511   | AGIWUR34886         |
| N2                                  | HS | II | 1042969 | 1044025 | WBGene00019705 | fbxb-45  | M01D1.10  |                      | 0.0213704189509816  |
| AGIWUR40701                         |    |    |         |         |                |          |           |                      |                     |
| N2                                  | HS | II | 1046505 | 1048276 | WBGene00006195 | str-148  | M01D1.1   | 0.0745803060902457   | AGIWUR17949         |
| N2                                  | HS | II | 1048863 | 1049949 | WBGene00019704 | fbxb-40  | M01D1.9   | 0.0412123278348933   |                     |
| AGIWUR9353;AGIWUR20714              |    |    |         |         |                |          |           |                      |                     |
| N2                                  | HS | II | 1057212 | 1059280 | WBGene00019311 | K02E7.6  | K02E7.6   | -0.407080387443497   |                     |
| AGIWUR13530;AGIWUR14487             |    |    |         |         |                |          |           |                      |                     |
| N2                                  | HS | II | 1059664 | 1060802 | WBGene00019313 | btb-10   | K02E7.9   | 0.103737967892385    | AGIWUR2350          |
| N2                                  | HS | II | 1065566 | 1066998 | WBGene00019314 | K02E7.10 |           | K02E7.10             | 0.0428905642783146  |
| AGIWUR12881                         |    |    |         |         |                |          |           |                      |                     |
| N2                                  | HS | II | 1070640 | 1071490 | WBGene00019316 | K02E7.12 |           | K02E7.12             | 0.235043400351264   |
| AGIWUR28681                         |    |    |         |         |                |          |           |                      |                     |
| N2                                  | HS | II | 1074751 | 1075505 | WBGene00019315 | K02E7.11 |           | K02E7.11             | 0.171478342551847   |
| AGIWUR7722                          |    |    |         |         |                |          |           |                      |                     |
| N2                                  | HS | II | 1083159 | 1083929 | WBGene00019306 | K02E7.1  | K02E7.1   | 0.0589986347543707   |                     |
| AGIWUR12424;AGIWUR33478;AGIWUR36865 |    |    |         |         |                |          |           |                      |                     |
| N2                                  | HS | II | 1092006 | 1097899 | WBGene00004902 | snf-3    | T13B5.1   | 0.015523222322102    | AGIWUR19715         |
| N2                                  | HS | II | 1097926 | 1100819 | WBGene00020471 | pho-14   | T13B5.3   | 0.0310009152183852   |                     |
| AGIWUR10194;AGIWUR28391             |    |    |         |         |                |          |           |                      |                     |
| N2                                  | HS | II | 1101371 | 1104509 | WBGene00020476 | T13B5.9  | T13B5.9   | -0.0969320745469657  | AGIWUR26618         |
| N2                                  | HS | II | 1104945 | 1106925 | WBGene00000617 | col-40   | T13B5.4   | -0.164465170068072   | AGIWUR17459         |
| N2                                  | HS | II | 1108841 | 1110992 | WBGene00020472 | lips-11  | T13B5.5   | -0.00779449804725463 | AGIWUR21783         |
| N2                                  | HS | II | 1112189 | 1114226 | WBGene00020473 | lips-12  | T13B5.6   | 0.0655963359048997   | AGIWUR1562          |
| N2                                  | HS | II | 1115641 | 1118033 | WBGene00020474 | lips-13  | T13B5.7   | -0.122770724418864   | AGIWUR32051         |
| N2                                  | HS | II | 1121018 | 1123259 | WBGene00020475 | sut-1    | T13B5.8   | -0.177267676888869   | AGIWUR17492         |

|                                                                                     |    |    |         |         |                |           |           |                     |             |
|-------------------------------------------------------------------------------------|----|----|---------|---------|----------------|-----------|-----------|---------------------|-------------|
| N2                                                                                  | HS | II | 1123534 | 1127791 | WBGene00021103 | eri-3     | W09B6.3   | -0.0570082770293325 | AGIWUR1524  |
| N2                                                                                  | HS | II | 1127976 | 1132352 | WBGene00006387 | taf-6.1   | W09B6.2   | 0.0609475882731267  | AGIWUR14620 |
| N2                                                                                  | HS | II | 1132302 | 1134240 | WBGene00021104 | W09B6.4   | W09B6.4   | 0.03687780647493    |             |
| AGIWUR11511;AGIWUR20518;AGIWUR21674;AGIWUR23256;AGIWUR28565;AGIWUR34057;AGIWUR36897 |    |    |         |         |                |           |           |                     |             |
| N2                                                                                  | HS | II | 1136781 | 1152701 | WBGene00004076 | pod-2     | W09B6.1   | 0.118262682067462   |             |
| AGIWUR4199;AGIWUR14789                                                              |    |    |         |         |                |           |           |                     |             |
| N2                                                                                  | HS | II | 1163575 | 1165488 | WBGene00020740 | T23F4.2   | T23F4.2   | 0.0364655046460758  | AGIWUR1509  |
| N2                                                                                  | HS | II | 1166490 | 1169168 | WBGene00020739 | T23F4.1   | T23F4.1   | 0.475732284661067   | AGIWUR11835 |
| N2                                                                                  | HS | II | 1169546 | 1172130 | WBGene00020741 | dlhd-1    | T23F4.3   | 0.172689974358356   | AGIWUR44663 |
| N2                                                                                  | HS | II | 1175976 | 1179323 | WBGene00003545 | nas-27    | T23F4.4   | 0.205674997260987   | AGIWUR14074 |
| N2                                                                                  | HS | II | 1197374 | 1230782 | WBGene00018734 | F53A10.2  | F53A10.2  | -0.276681466294175  |             |
| AGIWUR30798;AGIWUR41285;AGIWUR43186                                                 |    |    |         |         |                |           |           |                     |             |
| N2                                                                                  | HS | II | 1233236 | 1252359 | WBGene00018572 | lin-42    | F47F6.1   | -0.0605293936133156 |             |
| AGIWUR15290;AGIWUR36002                                                             |    |    |         |         |                |           |           |                     |             |
| N2                                                                                  | HS | II | 1255937 | 1258353 | WBGene00018575 | cllec-119 | F47F6.5   | 0.169701915021163   |             |
| AGIWUR24296;AGIWUR41961                                                             |    |    |         |         |                |           |           |                     |             |
| N2                                                                                  | HS | II | 1259365 | 1262998 | WBGene00023410 | F47F6.9   | F47F6.9   | 0.22646107763918    |             |
| AGIWUR32467;AGIWUR38054                                                             |    |    |         |         |                |           |           |                     |             |
| N2                                                                                  | HS | II | 1262987 | 1266890 | WBGene00018573 | oac-30    | F47F6.3   | 0.00666200347996426 |             |
| AGIWUR11993;AGIWUR35046                                                             |    |    |         |         |                |           |           |                     |             |
| N2                                                                                  | HS | II | 1269540 | 1271914 | WBGene00005813 | srw-66    | Y57G7A.4  | 0.161772128915984   |             |
| AGIWUR7731;AGIWUR8027                                                               |    |    |         |         |                |           |           |                     |             |
| N2                                                                                  | HS | II | 1273169 | 1275539 | WBGene00021968 | Y57G7A.5  | Y57G7A.5  | -0.105376393862652  |             |
| AGIWUR11546                                                                         |    |    |         |         |                |           |           |                     |             |
| N2                                                                                  | HS | II | 1275752 | 1276872 | WBGene00021974 | Y57G7A.11 | Y57G7A.11 | 0.253652084331285   |             |
| AGIWUR17548                                                                         |    |    |         |         |                |           |           |                     |             |
| N2                                                                                  | HS | II | 1278650 | 1281039 | WBGene00023499 | srz-63    | Y57G7A.12 | -0.124895339493962  |             |
| AGIWUR2017;AGIWUR41865;AGIWUR43322                                                  |    |    |         |         |                |           |           |                     |             |
| N2                                                                                  | HS | II | 1281974 | 1285614 | WBGene00021969 | Y57G7A.6  | Y57G7A.6  | 0.0601435664101846  |             |
| AGIWUR17694                                                                         |    |    |         |         |                |           |           |                     |             |
| N2                                                                                  | HS | II | 1285797 | 1286371 | WBGene00021967 | Y57G7A.3  | Y57G7A.3  | -0.0468958043784342 |             |
| AGIWUR9015;AGIWUR19309;AGIWUR20491;AGIWUR25151;AGIWUR25756;AGIWUR39388              |    |    |         |         |                |           |           |                     |             |
| N2                                                                                  | HS | II | 1288735 | 1293257 | WBGene00021970 | srz-64    | Y57G7A.7  | -0.106643425797799  |             |
| AGIWUR34238                                                                         |    |    |         |         |                |           |           |                     |             |
| N2                                                                                  | HS | II | 1296078 | 1296746 | WBGene00021966 | Y57G7A.2  | Y57G7A.2  | -0.13446618952913   |             |
| AGIWUR8814                                                                          |    |    |         |         |                |           |           |                     |             |
| N2                                                                                  | HS | II | 1298469 | 1299716 | WBGene00021965 | Y57G7A.1  | Y57G7A.1  | 0.293657539700458   |             |
| AGIWUR20526                                                                         |    |    |         |         |                |           |           |                     |             |
| N2                                                                                  | HS | II | 1300064 | 1301641 | WBGene00021972 | glb-31    | Y57G7A.9  | 0.237194689607136   |             |

|                                                                                                |    |    |         |         |                |           |           |                      |
|------------------------------------------------------------------------------------------------|----|----|---------|---------|----------------|-----------|-----------|----------------------|
| AGIWUR8263                                                                                     |    |    |         |         |                |           |           |                      |
| N2                                                                                             | HS | II | 1302497 | 1306136 | WBGene00021973 | emc-2     | Y57G7A.10 | -0.00462980694197057 |
| AGIWUR4278                                                                                     |    |    |         |         |                |           |           |                      |
| N2                                                                                             | HS | II | 1306240 | 1310133 | WBGene00000112 | alh-6     | F56D12.1  | -0.115440906125485   |
| AGIWUR21026;AGIWUR21258;AGIWUR24232;AGIWUR28867;AGIWUR34752;AGIWUR36615;AGIWUR43212            |    |    |         |         |                |           |           |                      |
| N2                                                                                             | HS | II | 1310518 | 1320437 | WBGene00018974 | fcho-1    | F56D12.6  | -0.263186595530605   |
| AGIWUR3322;AGIWUR10578                                                                         |    |    |         |         |                |           |           |                      |
| N2                                                                                             | HS | II | 1321037 | 1323170 | WBGene00006924 | vig-1     | F56D12.5  | -0.572123650290838   |
| AGIWUR2756;AGIWUR18673;AGIWUR22674;AGIWUR30958;AGIWUR33919;AGIWUR35778;AGIWUR35851;AGIWUR41568 |    |    |         |         |                |           |           |                      |
| N2                                                                                             | HS | II | 1326995 | 1350136 | WBGene00002176 | jip-1     | F56D12.4  | -0.0881635264462179  |
| AGIWUR11259                                                                                    |    |    |         |         |                |           |           |                      |
| N2                                                                                             | HS | II | 1350720 | 1355641 | WBGene00015728 | C13A10.1  | C13A10.1  | -0.0578520528696576  |
| AGIWUR42053                                                                                    |    |    |         |         |                |           |           |                      |
| N2                                                                                             | HS | II | 1357177 | 1358005 | WBGene00015729 | C13A10.2  | C13A10.2  | -0.0731865490672874  |
| AGIWUR20549                                                                                    |    |    |         |         |                |           |           |                      |
| N2                                                                                             | HS | II | 1368103 | 1374988 | WBGene00018819 | rog-1     | F54D12.6  | -0.268179859191739   |
| AGIWUR42436;AGIWUR43632                                                                        |    |    |         |         |                |           |           |                      |
| N2                                                                                             | HS | II | 1377628 | 1378359 | WBGene00044424 | F54D12.10 | F54D12.10 | 0.297203183055392    |
| AGIWUR38508                                                                                    |    |    |         |         |                |           |           |                      |
| N2                                                                                             | HS | II | 1380944 | 1381713 | WBGene00018822 | F54D12.9  | F54D12.9  | 0.181122338252445    |
| AGIWUR30305                                                                                    |    |    |         |         |                |           |           |                      |
| N2                                                                                             | HS | II | 1381807 | 1385380 | WBGene00018820 | F54D12.7  | F54D12.7  | -0.0293022582183937  |
| AGIWUR17467                                                                                    |    |    |         |         |                |           |           |                      |
| N2                                                                                             | HS | II | 1386888 | 1391567 | WBGene00000008 | aat-7     | F54D12.3  | -0.060728056820901   |
| AGIWUR12832                                                                                    |    |    |         |         |                |           |           |                      |
| N2                                                                                             | HS | II | 1393488 | 1394105 | WBGene00044425 | F54D12.11 | F54D12.11 | -0.0237519977261034  |
| AGIWUR1470;AGIWUR23949;AGIWUR28151;AGIWUR37605;AGIWUR41989                                     |    |    |         |         |                |           |           |                      |
| N2                                                                                             | HS | II | 1395004 | 1398038 | WBGene00018821 | F54D12.8  | F54D12.8  | 0.0586834396272042   |
| AGIWUR36291                                                                                    |    |    |         |         |                |           |           |                      |
| N2                                                                                             | HS | II | 1398761 | 1400030 | WBGene00018816 | F54D12.2  | F54D12.2  | -0.138683954718209   |
| AGIWUR41051                                                                                    |    |    |         |         |                |           |           |                      |
| N2                                                                                             | HS | II | 1400405 | 1401371 | WBGene00018815 | F54D12.1  | F54D12.1  | -0.0164038810629501  |
| AGIWUR2284                                                                                     |    |    |         |         |                |           |           |                      |
| N2                                                                                             | HS | II | 1401774 | 1402134 | WBGene00021786 | Y51H7C.8  | Y51H7C.8  | 0.369980628879834    |
| AGIWUR23325                                                                                    |    |    |         |         |                |           |           |                      |
| N2                                                                                             | HS | II | 1402569 | 1403215 | WBGene00021785 | Y51H7C.7  | Y51H7C.7  | 0.078576949545095    |
| AGIWUR3019                                                                                     |    |    |         |         |                |           |           |                      |
| N2                                                                                             | HS | II | 1403321 | 1409118 | WBGene00021784 | cogc-4    | Y51H7C.6  | 0.00149265708621016  |
| AGIWUR9683;AGIWUR21974;AGIWUR26256;AGIWUR35503;AGIWUR35651;AGIWUR37749;AGIWUR41187             |    |    |         |         |                |           |           |                      |

|                                                                                                            |    |    |         |         |                |           |           |                     |
|------------------------------------------------------------------------------------------------------------|----|----|---------|---------|----------------|-----------|-----------|---------------------|
| N2                                                                                                         | HS | II | 1409184 | 1411472 | WBGene00021787 | Y51H7C.9  | Y51H7C.9  | 0.00427713863480683 |
| AGIWUR30133                                                                                                |    |    |         |         |                |           |           |                     |
| N2                                                                                                         | HS | II | 1412409 | 1420150 | WBGene00021783 | Y51H7C.5  | Y51H7C.5  | 0.19605021270787    |
| AGIWUR13720;AGIWUR20788;AGIWUR28870                                                                        |    |    |         |         |                |           |           |                     |
| N2                                                                                                         | HS | II | 1420422 | 1423668 | WBGene00021788 | Y51H7C.10 | Y51H7C.10 | -0.0496479497949851 |
| AGIWUR18507;AGIWUR32455;AGIWUR33386;AGIWUR37153;AGIWUR38549                                                |    |    |         |         |                |           |           |                     |
| N2                                                                                                         | HS | II | 1425758 | 1437499 | WBGene00021789 | no1-6     | Y51H7C.11 | -0.136157114230386  |
| AGIWUR11653;AGIWUR20656                                                                                    |    |    |         |         |                |           |           |                     |
| N2                                                                                                         | HS | II | 1438490 | 1439697 | WBGene00021781 | Y51H7C.3  | Y51H7C.3  |                     |
| -0.00527521795367392 AGIWUR8694;AGIWUR17307;AGIWUR19226;AGIWUR22706;AGIWUR27660;AGIWUR42418                |    |    |         |         |                |           |           |                     |
| N2                                                                                                         | HS | II | 1440066 | 1446746 | WBGene00021790 | Y51H7C.12 | Y51H7C.12 | -0.124687978250796  |
| AGIWUR27053                                                                                                |    |    |         |         |                |           |           |                     |
| N2                                                                                                         | HS | II | 1459140 | 1461307 | WBGene00044439 | Y51H7C.15 | Y51H7C.15 | -0.177869315041663  |
| AGIWUR793;AGIWUR1636;AGIWUR35924;AGIWUR36322;AGIWUR41340                                                   |    |    |         |         |                |           |           |                     |
| N2                                                                                                         | HS | II | 1463268 | 1466546 | WBGene00021791 | Y51H7C.13 | Y51H7C.13 | 0.0533310003355911  |
| AGIWUR16739                                                                                                |    |    |         |         |                |           |           |                     |
| N2                                                                                                         | HS | II | 1467727 | 1469604 | WBGene00021779 | Y51H7C.1  | Y51H7C.1  | 0.0819251485897787  |
| AGIWUR40157                                                                                                |    |    |         |         |                |           |           |                     |
| N2                                                                                                         | HS | II | 1472625 | 1473581 | WBGene00044643 | H17B01.5  | H17B01.5  | -0.175436348098654  |
| AGIWUR42937                                                                                                |    |    |         |         |                |           |           |                     |
| N2                                                                                                         | HS | II | 1484094 | 1485764 | WBGene00019208 | lips-14   | H17B01.3  | 0.140853540900752   |
| AGIWUR28063                                                                                                |    |    |         |         |                |           |           |                     |
| N2                                                                                                         | HS | II | 1489930 | 1500330 | WBGene00019209 | emc-1     | H17B01.4  | -0.0366372971716533 |
| AGIWUR5311;AGIWUR12574;AGIWUR14027                                                                         |    |    |         |         |                |           |           |                     |
| N2                                                                                                         | HS | II | 1504566 | 1509831 | WBGene00019207 | fgt-1     | H17B01.1  | -0.133289108542694  |
| AGIWUR3961;AGIWUR9439;AGIWUR14822;AGIWUR17175;AGIWUR35685;AGIWUR37584                                      |    |    |         |         |                |           |           |                     |
| N2                                                                                                         | HS | II | 1510288 | 1517454 | WBGene00021772 | math-45   | Y51H7BM.1 | -0.0828170995772375 |
| AGIWUR22347                                                                                                |    |    |         |         |                |           |           |                     |
| N2                                                                                                         | HS | II | 1519222 | 1520328 | WBGene00044645 | Y51H7BR.8 | Y51H7BR.8 | -0.0181759650839339 |
| AGIWUR13474;AGIWUR17530;AGIWUR23980;AGIWUR31130;AGIWUR37906                                                |    |    |         |         |                |           |           |                     |
| N2                                                                                                         | HS | II | 1520384 | 1521842 | WBGene00005704 | sru-41    | Y51H7BR.6 | 0.0442876970216428  |
| AGIWUR12775;AGIWUR36218                                                                                    |    |    |         |         |                |           |           |                     |
| N2                                                                                                         | HS | II | 1523565 | 1525598 | WBGene00021778 | Y51H7BR.7 | Y51H7BR.7 | 0.0453023640080072  |
| AGIWUR41969                                                                                                |    |    |         |         |                |           |           |                     |
| N2                                                                                                         | HS | II | 1529359 | 1535208 | WBGene00021776 | Y51H7BR.4 | Y51H7BR.4 | 0.0850328595317613  |
| AGIWUR5447;AGIWUR16636;AGIWUR18616;AGIWUR23149;AGIWUR24516;AGIWUR25783;AGIWUR31085;AGIWUR38742;AGIWUR39425 |    |    |         |         |                |           |           |                     |
| N2                                                                                                         | HS | II | 1536231 | 1537275 | WBGene00021774 | fbxb-43   | Y51H7BR.2 | -0.0278461560653254 |
| AGIWUR17877                                                                                                |    |    |         |         |                |           |           |                     |
| N2                                                                                                         | HS | II | 1537621 | 1538666 | WBGene00021773 | fbxb-42   | Y51H7BR.1 | 0.075053349091081   |

|                                                                        |    |    |         |         |                |          |          |                     |             |
|------------------------------------------------------------------------|----|----|---------|---------|----------------|----------|----------|---------------------|-------------|
| AGIWUR31502                                                            |    |    |         |         |                |          |          |                     |             |
| N2                                                                     | HS | II | 1538891 | 1539901 | WBGene00019416 | fbxb-44  | K05F6.5  | 0.0927237965520771  |             |
| AGIWUR4279;AGIWUR17677                                                 |    |    |         |         |                |          |          |                     |             |
| N2                                                                     | HS | II | 1543482 | 1545415 | WBGene00019415 | K05F6.4  | K05F6.4  | 0.138474612095377   | AGIWUR24379 |
| N2                                                                     | HS | II | 1545925 | 1546991 | WBGene00045486 | K05F6.12 | K05F6.12 | 0.0485386239087164  |             |
| AGIWUR28538                                                            |    |    |         |         |                |          |          |                     |             |
| N2                                                                     | HS | II | 1547060 | 1548182 | WBGene00269420 | K05F6.16 | K05F6.16 | -0.067184132196779  |             |
| AGIWUR7272                                                             |    |    |         |         |                |          |          |                     |             |
| N2                                                                     | HS | II | 1555257 | 1556335 | WBGene00019418 | fbxb-54  | K05F6.7  | 0.0858262446582421  | AGIWUR5734  |
| N2                                                                     | HS | II | 1567324 | 1567746 | WBGene00019419 | K05F6.8  | K05F6.8  | 0.0271610011876988  |             |
| AGIWUR4026;AGIWUR22442;AGIWUR26126;AGIWUR30746;AGIWUR36813;AGIWUR44179 |    |    |         |         |                |          |          |                     |             |
| N2                                                                     | HS | II | 1570065 | 1571134 | WBGene00019420 | fbxb-46  | K05F6.9  | -0.162217597133044  | AGIWUR5730  |
| N2                                                                     | HS | II | 1572522 | 1573300 | WBGene00269419 | K05F6.15 | K05F6.15 | 0.200946845867028   |             |
| AGIWUR20317                                                            |    |    |         |         |                |          |          |                     |             |
| N2                                                                     | HS | II | 1574557 | 1576115 | WBGene00019421 | K05F6.10 | K05F6.10 | 0.0262651576192297  |             |
| AGIWUR3384;AGIWUR5668;AGIWUR9394;AGIWUR24867                           |    |    |         |         |                |          |          |                     |             |
| N2                                                                     | HS | II | 1577471 | 1579986 | WBGene00020326 | math-38  | T07H3.3  | -0.0678034828101737 | AGIWUR28995 |
| N2                                                                     | HS | II | 1582876 | 1584240 | WBGene00020327 | cllec-21 | T07H3.4  | 0.0792770595139993  |             |
| AGIWUR7239;AGIWUR35909                                                 |    |    |         |         |                |          |          |                     |             |
| N2                                                                     | HS | II | 1588542 | 1589945 | WBGene00044429 | T07H3.7  | T07H3.7  | 0.155305249968245   |             |
| AGIWUR11204;AGIWUR19451;AGIWUR40079                                    |    |    |         |         |                |          |          |                     |             |
| N2                                                                     | HS | II | 1593480 | 1595237 | WBGene00020328 | cllec-20 | T07H3.5  | -0.222451531857895  | AGIWUR37368 |
| N2                                                                     | HS | II | 1598029 | 1599488 | WBGene00020325 | bath-46  | T07H3.2  | -0.056173080975352  | AGIWUR648   |
| N2                                                                     | HS | II | 1599471 | 1600714 | WBGene00020329 | bath-26  | T07H3.6  | 0.0976371177766353  | AGIWUR27574 |
| N2                                                                     | HS | II | 1601789 | 1604618 | WBGene00006464 | bath-47  | T07H3.1  | 0.114029724435724   | AGIWUR1261  |
| N2                                                                     | HS | II | 1604666 | 1606143 | WBGene00015595 | bath-33  | C08E3.3  | -0.023431953432449  | AGIWUR35175 |
| N2                                                                     | HS | II | 1606595 | 1607603 | WBGene00015596 | fbxa-161 | C08E3.4  | 0.1207323123793     | AGIWUR37564 |
| N2                                                                     | HS | II | 1607869 | 1609014 | WBGene00015597 | fbxa-162 | C08E3.5  | 0.429698965544467   |             |
| AGIWUR13440                                                            |    |    |         |         |                |          |          |                     |             |
| N2                                                                     | HS | II | 1609256 | 1610715 | WBGene00015598 | fbxa-163 | C08E3.6  | 0.0619208323433682  |             |
| AGIWUR10816;AGIWUR28346;AGIWUR37259                                    |    |    |         |         |                |          |          |                     |             |
| N2                                                                     | HS | II | 1611331 | 1612510 | WBGene00015594 | btb-15   | C08E3.2  | 0.167391427882746   | AGIWUR30529 |
| N2                                                                     | HS | II | 1612788 | 1614059 | WBGene00015599 | fbxa-164 | C08E3.7  | 0.0675833802031791  |             |
| AGIWUR28121;AGIWUR30670;AGIWUR34271                                    |    |    |         |         |                |          |          |                     |             |
| N2                                                                     | HS | II | 1614793 | 1616463 | WBGene00015600 | fbxa-165 | C08E3.8  | 0.0107355336537207  |             |
| AGIWUR14879                                                            |    |    |         |         |                |          |          |                     |             |
| N2                                                                     | HS | II | 1616912 | 1619004 | WBGene00015601 | fbxa-166 | C08E3.9  | 0.208245030254509   |             |
| AGIWUR21789                                                            |    |    |         |         |                |          |          |                     |             |
| N2                                                                     | HS | II | 1619894 | 1621261 | WBGene00015602 | fbxa-158 | C08E3.10 | 1.41109786048399    |             |

AGIWUR1075;AGIWUR11977;AGIWUR27950  
N2 HS II 1623907 1624672 WBGene00015604 fbxa-160 C08E3.12 0.0942337644714986  
AGIWUR26010  
N2 HS II 1625966 1626883 WBGene00044415 C08E3.14 C08E3.14 0.0354292578002342  
AGIWUR16413;AGIWUR35631  
N2 HS II 1627479 1627883 WBGene00044416 C08E3.15 C08E3.15 2.09432609557038  
AGIWUR12234;AGIWUR14033;AGIWUR20688  
N2 HS II 1639213 1640596 WBGene00005293 srh-72 ZC204.5 -0.131079251352594 AGIWUR31572  
N2 HS II 1644249 1644814 WBGene00022556 ZC204.6 ZC204.6 0.00610690216719956 AGIWUR18821  
N2 HS II 1645410 1646299 WBGene00194714 ZC204.17 ZC204.17 0.042294959516922  
AGIWUR23907  
N2 HS II 1646597 1647568 WBGene00044695 fbxb-27 ZC204.16 -0.130477685770275  
AGIWUR5799;AGIWUR21143  
N2 HS II 1647908 1648865 WBGene00022558 fbxb-21 ZC204.8 0.0355945183034461  
AGIWUR3003;AGIWUR17859  
N2 HS II 1649138 1650197 WBGene00022559 fbxb-20 ZC204.9 -0.0199121993326417 AGIWUR31394  
N2 HS II 1650819 1651580 WBGene00022560 fbxb-16 ZC204.10 -0.233439644194069  
AGIWUR12940  
N2 HS II 1652510 1653497 WBGene00022557 fbxb-15 ZC204.7 -0.0495945634097774 AGIWUR27611  
N2 HS II 1653775 1654732 WBGene00022561 btb-13 ZC204.11 -0.206297203133301  
AGIWUR16801  
N2 HS II 1655217 1656148 WBGene00022555 btb-12 ZC204.3 -0.134315936628258 AGIWUR30043  
N2 HS II 1656263 1657302 WBGene00022562 ZC204.12 ZC204.12 0.0200941335811562  
AGIWUR4325;AGIWUR23512;AGIWUR25253;AGIWUR38231  
N2 HS II 1663699 1665764 WBGene00022554 duxl-1 ZC204.2 -0.231206367426255  
AGIWUR8677;AGIWUR19314  
N2 HS II 1666325 1667482 WBGene00022553 ZC204.1 ZC204.1 0.033371521087  
AGIWUR14813;AGIWUR30212;AGIWUR36411;AGIWUR42000  
N2 HS II 1667522 1669013 WBGene00005844 srw-97 ZC204.15 0.183648550765954  
AGIWUR4173  
N2 HS II 1670833 1674337 WBGene00003734 nhx-6 F58E1.6 0.727568313993955 AGIWUR15556  
N2 HS II 1676388 1677439 WBGene00019037 fbxb-17 F58E1.5 0.00965423035872881 AGIWUR9617  
N2 HS II 1677449 1679252 WBGene00019038 irld-37 F58E1.7 -0.0204695981750529 AGIWUR21516  
N2 HS II 1679381 1682134 WBGene00019036 irld-36 F58E1.4 -0.190667092250857 AGIWUR38369  
N2 HS II 1682518 1683655 WBGene00019035 fbxb-26 F58E1.3 -0.247314966121804 AGIWUR8917  
N2 HS II 1684048 1685091 WBGene00019034 fbxb-25 F58E1.2 -0.21658954854024 AGIWUR21302  
N2 HS II 1688235 1689172 WBGene00019040 fbxb-19 F58E1.9 -0.291061732434821  
AGIWUR2980;AGIWUR24623;AGIWUR33051  
N2 HS II 1689696 1691077 WBGene00019041 fbxc-22 F58E1.10 -0.144092164908997



|                                                             |    |    |         |         |                |           |                               |
|-------------------------------------------------------------|----|----|---------|---------|----------------|-----------|-------------------------------|
| AGIWUR38601                                                 |    |    |         |         |                |           |                               |
| N2                                                          | HS | II | 1691557 | 1692907 | WBGene00019042 | fbxc-21   | F58E1.11 -0.0478398273690495  |
| AGIWUR28792                                                 |    |    |         |         |                |           |                               |
| N2                                                          | HS | II | 1693296 | 1694615 | WBGene00019043 | fbxc-26   | F58E1.12 0.0816841116349156   |
| AGIWUR27871                                                 |    |    |         |         |                |           |                               |
| N2                                                          | HS | II | 1694815 | 1695827 | WBGene00019044 | F58E1.13  | F58E1.13 -0.258187107329046   |
| AGIWUR42519                                                 |    |    |         |         |                |           |                               |
| N2                                                          | HS | II | 1702384 | 1703463 | WBGene00019045 | fbxb-47   | F58E1.14 0.0538355810771858   |
| AGIWUR1950                                                  |    |    |         |         |                |           |                               |
| N2                                                          | HS | II | 1704904 | 1706476 | WBGene00018442 | sdz-18    | F45C12.11 -0.057763821130413  |
| AGIWUR31803                                                 |    |    |         |         |                |           |                               |
| N2                                                          | HS | II | 1706709 | 1707720 | WBGene00018441 | math-29   | F45C12.10 -0.0764530836053461 |
| AGIWUR29511;AGIWUR39167                                     |    |    |         |         |                |           |                               |
| N2                                                          | HS | II | 1708432 | 1709696 | WBGene00018440 | F45C12.9  | F45C12.9 0.264191403600502    |
| AGIWUR37829                                                 |    |    |         |         |                |           |                               |
| N2                                                          | HS | II | 1710259 | 1711417 | WBGene00018439 | fbxa-184  | F45C12.8 -0.115217323930489   |
| AGIWUR11427;AGIWUR15075;AGIWUR21331;AGIWUR23042;AGIWUR42225 |    |    |         |         |                |           |                               |
| N2                                                          | HS | II | 1713238 | 1714397 | WBGene00018443 | btb-7     | F45C12.12 -0.18086739293457   |
| AGIWUR35441                                                 |    |    |         |         |                |           |                               |
| N2                                                          | HS | II | 1715162 | 1716497 | WBGene00018438 | btb-6     | F45C12.7 -0.0555570267731067  |
| AGIWUR9254                                                  |    |    |         |         |                |           |                               |
| N2                                                          | HS | II | 1718175 | 1719253 | WBGene00018444 | fbxb-48   | F45C12.13 0.0864861028240513  |
| AGIWUR32498                                                 |    |    |         |         |                |           |                               |
| N2                                                          | HS | II | 1721323 | 1722423 | WBGene00018445 | fbxb-5    | F45C12.14 -0.176905157065003  |
| AGIWUR6059;AGIWUR14552;AGIWUR42708                          |    |    |         |         |                |           |                               |
| N2                                                          | HS | II | 1722770 | 1724186 | WBGene00018437 | btb-8     | F45C12.6 0.0799981634065325   |
| AGIWUR19396                                                 |    |    |         |         |                |           |                               |
| N2                                                          | HS | II | 1726141 | 1727106 | WBGene00269388 | F45C12.17 | F45C12.17 -0.012661339845887  |
| AGIWUR7469;AGIWUR23367                                      |    |    |         |         |                |           |                               |
| N2                                                          | HS | II | 1728506 | 1730065 | WBGene00018435 | btb-9     | F45C12.4 0.0181714767014753   |
| AGIWUR20385;AGIWUR29933;AGIWUR32157                         |    |    |         |         |                |           |                               |
| N2                                                          | HS | II | 1730403 | 1732046 | WBGene00018434 | ceh-81    | F45C12.3 0.135416289400334    |
| AGIWUR25864                                                 |    |    |         |         |                |           |                               |
| N2                                                          | HS | II | 1732276 | 1733291 | WBGene00018433 | ceh-82    | F45C12.2 -0.260385356486362   |
| AGIWUR16980                                                 |    |    |         |         |                |           |                               |
| N2                                                          | HS | II | 1733718 | 1736533 | WBGene00018446 | ceh-83    | F45C12.15 -0.19537154262332   |
| AGIWUR43133                                                 |    |    |         |         |                |           |                               |
| N2                                                          | HS | II | 1736866 | 1738944 | WBGene00018447 | irld-9    | F45C12.16 0.07211467419011    |
| AGIWUR1756                                                  |    |    |         |         |                |           |                               |

|                                                                                                            |    |    |         |         |                |          |          |                     |             |
|------------------------------------------------------------------------------------------------------------|----|----|---------|---------|----------------|----------|----------|---------------------|-------------|
| N2                                                                                                         | HS | II | 1739076 | 1741013 | WBGene00018432 | irld-33  | F45C12.1 | 0.0416090074156781  |             |
| AGIWUR35733                                                                                                |    |    |         |         |                |          |          |                     |             |
| N2                                                                                                         | HS | II | 1744483 | 1745859 | WBGene00018105 | clcc-19  | F36H5.6  | -0.335176344084609  | AGIWUR34948 |
| N2                                                                                                         | HS | II | 1746189 | 1747582 | WBGene00006223 | str-179  | F36H5.7  | -0.0513606129302957 |             |
| AGIWUR6697;AGIWUR7711;AGIWUR18141;AGIWUR18259;AGIWUR19978;AGIWUR25714;AGIWUR34971;AGIWUR42875;AGIWUR43866  |    |    |         |         |                |          |          |                     |             |
| N2                                                                                                         | HS | II | 1748378 | 1749943 | WBGene00206519 | F36H5.13 | F36H5.13 |                     |             |
| -0.00955490412564686 AGIWUR24315                                                                           |    |    |         |         |                |          |          |                     |             |
| N2                                                                                                         | HS | II | 1752749 | 1753090 | WBGene00018107 | F36H5.9  | F36H5.9  | 0.00394324138583713 | AGIWUR28515 |
| N2                                                                                                         | HS | II | 1753526 | 1754439 | WBGene00018109 | fbxb-12  | F36H5.11 | 0.169316436729664   |             |
| AGIWUR21376                                                                                                |    |    |         |         |                |          |          |                     |             |
| N2                                                                                                         | HS | II | 1756820 | 1757761 | WBGene00018108 | F36H5.10 | F36H5.10 | -0.0670891084232919 |             |
| AGIWUR4473;AGIWUR14070;AGIWUR15873;AGIWUR17539;AGIWUR21671;AGIWUR22520;AGIWUR33979;AGIWUR38675;AGIWUR39220 |    |    |         |         |                |          |          |                     |             |
| N2                                                                                                         | HS | II | 1758326 | 1760667 | WBGene00018104 | fbxb-53  | F36H5.5  | -0.113964819451207  | AGIWUR9607  |
| N2                                                                                                         | HS | II | 1761839 | 1762906 | WBGene00018103 | F36H5.4  | F36H5.4  | -0.0147294635310624 |             |
| AGIWUR19793;AGIWUR21756;AGIWUR22590;AGIWUR25767;AGIWUR34490                                                |    |    |         |         |                |          |          |                     |             |
| N2                                                                                                         | HS | II | 1763372 | 1766555 | WBGene00018102 | math-28  | F36H5.3  | -0.0147327687065832 |             |
| AGIWUR2347;AGIWUR15007;AGIWUR27128                                                                         |    |    |         |         |                |          |          |                     |             |
| N2                                                                                                         | HS | II | 1767802 | 1777394 | WBGene00018101 | math-27  | F36H5.2  | 0.199229047266896   |             |
| AGIWUR11186;AGIWUR32824                                                                                    |    |    |         |         |                |          |          |                     |             |
| N2                                                                                                         | HS | II | 1772085 | 1778526 | WBGene00015608 | math-3   | C08F1.4  | 0.0742522965201511  |             |
| AGIWUR32321;AGIWUR38372                                                                                    |    |    |         |         |                |          |          |                     |             |
| N2                                                                                                         | HS | II | 1778772 | 1782409 | WBGene00015609 | math-4   | C08F1.5  | 0.533230537273084   | AGIWUR13924 |
| N2                                                                                                         | HS | II | 1783451 | 1784481 | WBGene00044417 | C08F1.11 | C08F1.11 | -0.258467021075047  |             |
| AGIWUR27089                                                                                                |    |    |         |         |                |          |          |                     |             |
| N2                                                                                                         | HS | II | 1785270 | 1786309 | WBGene00015613 | C08F1.10 | C08F1.10 | -0.026443141356967  |             |
| AGIWUR3444;AGIWUR13602;AGIWUR23231;AGIWUR23253;AGIWUR27163;AGIWUR40491                                     |    |    |         |         |                |          |          |                     |             |
| N2                                                                                                         | HS | II | 1787222 | 1788187 | WBGene00015610 | C08F1.6  | C08F1.6  | 0.0107668558878959  | AGIWUR11918 |
| N2                                                                                                         | HS | II | 1789181 | 1790217 | WBGene00015607 | fbxb-13  | C08F1.3  | 0.0600026796887434  | AGIWUR38059 |
| N2                                                                                                         | HS | II | 1791981 | 1792962 | WBGene00006088 | str-21   | C08F1.2  | -0.230070217632223  | AGIWUR15309 |
| N2                                                                                                         | HS | II | 1797852 | 1801377 | WBGene00015606 | math-2   | C08F1.1  | -0.275988901816138  | AGIWUR37774 |
| N2                                                                                                         | HS | II | 1802107 | 1803302 | WBGene00006089 | str-22   | C08F1.7  | 0.0800177437463594  |             |
| AGIWUR10773;AGIWUR24537                                                                                    |    |    |         |         |                |          |          |                     |             |
| N2                                                                                                         | HS | II | 1817281 | 1818400 | WBGene00020362 | fbxb-10  | T08E11.6 | 0.0999417177940396  |             |
| AGIWUR7747                                                                                                 |    |    |         |         |                |          |          |                     |             |
| N2                                                                                                         | HS | II | 1818889 | 1820094 | WBGene00020363 | fbxa-3   | T08E11.7 | 0.390451201428292   |             |
| AGIWUR29418                                                                                                |    |    |         |         |                |          |          |                     |             |
| N2                                                                                                         | HS | II | 1821026 | 1823034 | WBGene00020361 | fbxc-19  | T08E11.5 | -0.0397348023339461 |             |
| AGIWUR22962;AGIWUR26801;AGIWUR29434;AGIWUR38598;AGIWUR39671;AGIWUR42018                                    |    |    |         |         |                |          |          |                     |             |
| N2                                                                                                         | HS | II | 1824629 | 1830195 | WBGene00020360 | math-41  | T08E11.4 | 0.00872899370268421 |             |

|                                                                                 |    |    |         |         |                |                                     |                     |
|---------------------------------------------------------------------------------|----|----|---------|---------|----------------|-------------------------------------|---------------------|
| AGIWUR14454                                                                     |    |    |         |         |                |                                     |                     |
| N2                                                                              | HS | II | 1830632 | 1831789 | WBGene00020359 | math-40 T08E11.3                    | 0.00463003927758621 |
| AGIWUR21133                                                                     |    |    |         |         |                |                                     |                     |
| N2                                                                              | HS | II | 1832343 | 1833518 | WBGene00020358 | math-39 T08E11.2                    | 0.131346156399175   |
| AGIWUR14134                                                                     |    |    |         |         |                |                                     |                     |
| N2                                                                              | HS | II | 1833627 | 1835783 | WBGene00020364 | T08E11.8 T08E11.8                   | 0.249889995697875   |
| AGIWUR7322                                                                      |    |    |         |         |                |                                     |                     |
| N2                                                                              | HS | II | 1840975 | 1842942 | WBGene00016884 | C52E2.5 C52E2.5 0.21960399571502    | AGIWUR28213         |
| N2                                                                              | HS | II | 1843165 | 1846234 | WBGene00016883 | C52E2.4 C52E2.4 -0.119364732551554  | AGIWUR9343          |
| N2                                                                              | HS | II | 1846990 | 1848154 | WBGene00016885 | fbxb-97 C52E2.6 0.151767292884594   | AGIWUR4720          |
| N2                                                                              | HS | II | 1849430 | 1850403 | WBGene00016886 | fbxb-96 C52E2.7 -0.0526059395527643 | AGIWUR33334         |
| N2                                                                              | HS | II | 1852803 | 1853092 | WBGene00016881 | C52E2.2 C52E2.2 -0.113120172084217  | AGIWUR33694         |
| N2                                                                              | HS | II | 1854394 | 1855360 | WBGene00016880 | fbxb-95 C52E2.1 -0.073684604458923  |                     |
| AGIWUR16918;AGIWUR31962;AGIWUR36994                                             |    |    |         |         |                |                                     |                     |
| N2                                                                              | HS | II | 1862634 | 1863782 | WBGene00015830 | fbxb-98 C16C4.6 -0.123688667165903  | AGIWUR26970         |
| N2                                                                              | HS | II | 1864578 | 1864884 | WBGene00044359 | C16C4.17 C16C4.17                   |                     |
| -0.00815829005772173 AGIWUR5683;AGIWUR26687;AGIWUR28800;AGIWUR32417;AGIWUR33559 |    |    |         |         |                |                                     |                     |
| N2                                                                              | HS | II | 1866386 | 1867894 | WBGene00015829 | math-15 C16C4.5 0.911849946279288   | AGIWUR14519         |
| N2                                                                              | HS | II | 1869410 | 1870803 | WBGene00015828 | math-14 C16C4.4 0.939632941427623   | AGIWUR20950         |
| N2                                                                              | HS | II | 1873480 | 1875106 | WBGene00015840 | math-11 C16C4.16 -0.227611971130852 |                     |
| AGIWUR33822                                                                     |    |    |         |         |                |                                     |                     |
| N2                                                                              | HS | II | 1875958 | 1877237 | WBGene00015827 | math-13 C16C4.3 0.258594612476966   | AGIWUR291           |
| N2                                                                              | HS | II | 1877579 | 1878763 | WBGene00015832 | math-16 C16C4.8 0.270682640717508   | AGIWUR13056         |
| N2                                                                              | HS | II | 1879590 | 1880708 | WBGene00015833 | math-17 C16C4.9 0.221566177214489   | AGIWUR27825         |
| N2                                                                              | HS | II | 1881611 | 1882805 | WBGene00015834 | math-5 C16C4.10 1.21804507039461    |                     |
| AGIWUR44984                                                                     |    |    |         |         |                |                                     |                     |
| N2                                                                              | HS | II | 1883596 | 1884735 | WBGene00015835 | math-6 C16C4.11 0.461093534357452   |                     |
| AGIWUR35980                                                                     |    |    |         |         |                |                                     |                     |
| N2                                                                              | HS | II | 1885439 | 1886479 | WBGene00015836 | math-7 C16C4.12 -0.0679583229508163 |                     |
| AGIWUR25687                                                                     |    |    |         |         |                |                                     |                     |
| N2                                                                              | HS | II | 1887209 | 1889171 | WBGene00015837 | math-8 C16C4.13 0.0179917533829013  |                     |
| AGIWUR20908                                                                     |    |    |         |         |                |                                     |                     |
| N2                                                                              | HS | II | 1889909 | 1890782 | WBGene00015838 | math-9 C16C4.14 -0.107580138675671  |                     |
| AGIWUR34335                                                                     |    |    |         |         |                |                                     |                     |
| N2                                                                              | HS | II | 1890851 | 1891699 | WBGene00015826 | math-12 C16C4.2 -0.0965811194841333 | AGIWUR17591         |
| N2                                                                              | HS | II | 1900238 | 1901921 | WBGene00016719 | math-24 C46F9.3 0.186056949447366   | AGIWUR32651         |
| N2                                                                              | HS | II | 1902281 | 1904446 | WBGene00016718 | math-23 C46F9.2 -0.0494565727513496 | AGIWUR5837          |
| N2                                                                              | HS | II | 1905429 | 1907775 | WBGene00016717 | math-22 C46F9.1 -0.103732061774701  |                     |
| AGIWUR15993;AGIWUR33102                                                         |    |    |         |         |                |                                     |                     |

|                                                            |    |    |         |         |                |          |           |                       |             |
|------------------------------------------------------------|----|----|---------|---------|----------------|----------|-----------|-----------------------|-------------|
| N2                                                         | HS | II | 1908161 | 1909735 | WBGene00018662 | math-30  | F52C6.5   | 0.0954963190117439    | AGIWUR14125 |
| N2                                                         | HS | II | 1912450 | 1912841 | WBGene00018663 | math-31  | F52C6.6   | 0.139684906373489     | AGIWUR328   |
| N2                                                         | HS | II | 1913605 | 1916376 | WBGene00018664 | bath-11  | F52C6.7   | -0.0691170162759676   | AGIWUR41813 |
| N2                                                         | HS | II | 1916713 | 1917958 | WBGene00018665 | bath-4   | F52C6.8   | 0.0817304431166832    | AGIWUR32571 |
| N2                                                         | HS | II | 1918319 | 1919439 | WBGene00018666 | bath-6   | F52C6.9   | -0.000900403165992714 |             |
| AGIWUR1207;AGIWUR16786;AGIWUR29145;AGIWUR41161             |    |    |         |         |                |          |           |                       |             |
| N2                                                         | HS | II | 1919926 | 1921111 | WBGene00018667 | bath-7   | F52C6.10  | 0.189094227628448     |             |
| AGIWUR5473                                                 |    |    |         |         |                |          |           |                       |             |
| N2                                                         | HS | II | 1921452 | 1922744 | WBGene00018668 | bath-2   | F52C6.11  | -0.119305225933998    |             |
| AGIWUR14381                                                |    |    |         |         |                |          |           |                       |             |
| N2                                                         | HS | II | 1923140 | 1923827 | WBGene00018661 | F52C6.4  | F52C6.4   | 0.0431698117727759    |             |
| AGIWUR2439;AGIWUR6117;AGIWUR13431;AGIWUR24905;AGIWUR32132  |    |    |         |         |                |          |           |                       |             |
| N2                                                         | HS | II | 1924759 | 1925752 | WBGene00018660 | F52C6.3  | F52C6.3   | -0.142211970386102    |             |
| AGIWUR10072;AGIWUR19332                                    |    |    |         |         |                |          |           |                       |             |
| N2                                                         | HS | II | 1926462 | 1927347 | WBGene00018659 | F52C6.2  | F52C6.2   | -0.13293955512302     | AGIWUR29257 |
| N2                                                         | HS | II | 1927879 | 1928734 | WBGene00018658 | bath-22  | F52C6.1   | 0.196533812143934     |             |
| AGIWUR7050;AGIWUR16188;AGIWUR18552;AGIWUR42126             |    |    |         |         |                |          |           |                       |             |
| N2                                                         | HS | II | 1929149 | 1930086 | WBGene00018669 | F52C6.12 | F52C6.12  | 0.0922789273164346    |             |
| AGIWUR9215;AGIWUR11588;AGIWUR21193;AGIWUR26570;AGIWUR42282 |    |    |         |         |                |          |           |                       |             |
| N2                                                         | HS | II | 1930190 | 1930747 | WBGene00018670 | F52C6.13 | F52C6.13  | 0.112152101294157     |             |
| AGIWUR2092                                                 |    |    |         |         |                |          |           |                       |             |
| N2                                                         | HS | II | 1930991 | 1934507 | WBGene00018671 | F52C6.14 | F52C6.14  | 0.105296422371743     |             |
| AGIWUR11418                                                |    |    |         |         |                |          |           |                       |             |
| N2                                                         | HS | II | 1937063 | 1940147 | WBGene00235352 | ZK250.13 | ZK250.13  | 0.152836068089266     |             |
| AGIWUR42114                                                |    |    |         |         |                |          |           |                       |             |
| N2                                                         | HS | II | 1944058 | 1945168 | WBGene00235354 | ZK250.14 | ZK250.14  | -0.0742231092676287   |             |
| AGIWUR9209;AGIWUR37083                                     |    |    |         |         |                |          |           |                       |             |
| N2                                                         | HS | II | 1953680 | 1955668 | WBGene00022690 | math-49  | ZK250.7   | 0.147382514478732     | AGIWUR24489 |
| N2                                                         | HS | II | 1956050 | 1958255 | WBGene00022691 | math-50  | ZK250.8   | 0.323490380696333     | AGIWUR41755 |
| N2                                                         | HS | II | 1987285 | 1990667 | WBGene00021193 | math-44  | Y16E11A.1 | -0.0236681971094033   |             |
| AGIWUR42798                                                |    |    |         |         |                |          |           |                       |             |
| N2                                                         | HS | II | 1994047 | 1995701 | WBGene00016556 | math-21  | C40D2.3   | 0.214475425853146     |             |
| AGIWUR9190;AGIWUR26554                                     |    |    |         |         |                |          |           |                       |             |
| N2                                                         | HS | II | 1996537 | 1998531 | WBGene00016555 | math-20  | C40D2.2   | -0.122512542695288    | AGIWUR12840 |
| N2                                                         | HS | II | 1999743 | 2000820 | WBGene00016557 | ceh-84   | C40D2.4   | 0.196362743046777     | AGIWUR25294 |
| N2                                                         | HS | II | 2011485 | 2012838 | WBGene00019137 | ceh-85   | F59H6.6   | -0.0181851329365665   | AGIWUR34788 |
| N2                                                         | HS | II | 2012998 | 2013386 | WBGene00269394 | F59H6.15 | F59H6.15  | -0.16297858823436     |             |
| AGIWUR9029                                                 |    |    |         |         |                |          |           |                       |             |
| N2                                                         | HS | II | 2019654 | 2022441 | WBGene00019133 | F59H6.2  | F59H6.2   | -0.0631387281605829   | AGIWUR29740 |

|                                                           |    |    |         |         |                |          |          |                      |             |
|-----------------------------------------------------------|----|----|---------|---------|----------------|----------|----------|----------------------|-------------|
| N2                                                        | HS | II | 2025642 | 2026610 | WBGene00019138 | bath-21  | F59H6.8  | 0.126948642173254    | AGIWUR24725 |
| N2                                                        | HS | II | 2027612 | 2028812 | WBGene00019139 | bath-1   | F59H6.9  | -0.00179471546030463 | AGIWUR35302 |
| N2                                                        | HS | II | 2029232 | 2030467 | WBGene00019140 | bath-3   | F59H6.10 | 0.00163546573740447  |             |
| AGIWUR1254                                                |    |    |         |         |                |          |          |                      |             |
| N2                                                        | HS | II | 2030750 | 2031952 | WBGene00019141 | bath-5   | F59H6.11 | 0.25847348552521     |             |
| AGIWUR2269                                                |    |    |         |         |                |          |          |                      |             |
| N2                                                        | HS | II | 2032569 | 2033243 | WBGene00019142 | btb-4    | F59H6.12 | 0.158951845354207    |             |
| AGIWUR41441;AGIWUR44999                                   |    |    |         |         |                |          |          |                      |             |
| N2                                                        | HS | II | 2033586 | 2034812 | WBGene00206415 | F59H6.14 | F59H6.14 | -0.0177118843888504  |             |
| AGIWUR1220                                                |    |    |         |         |                |          |          |                      |             |
| N2                                                        | HS | II | 2035702 | 2039388 | WBGene00019132 | bath-19  | F59H6.1  | 0.00480363982732079  | AGIWUR32883 |
| N2                                                        | HS | II | 2040368 | 2041629 | WBGene00015012 | bath-20  | B0047.1  | 0.175020354559063    |             |
| AGIWUR19234;AGIWUR42677;AGIWUR44896                       |    |    |         |         |                |          |          |                      |             |
| N2                                                        | HS | II | 2043089 | 2044087 | WBGene00015013 | btb-3    | B0047.2  | 0.0294461702484403   | AGIWUR36170 |
| N2                                                        | HS | II | 2044619 | 2045601 | WBGene00015014 | bath-24  | B0047.3  | -0.219295055171763   | AGIWUR9357  |
| N2                                                        | HS | II | 2048061 | 2049175 | WBGene00015016 | bath-14  | B0047.5  | -0.0461686799532792  |             |
| AGIWUR22179;AGIWUR23543                                   |    |    |         |         |                |          |          |                      |             |
| N2                                                        | HS | II | 2050023 | 2051679 | WBGene00017209 | F07E5.4  | F07E5.4  | 0.069809352919588    | AGIWUR13648 |
| N2                                                        | HS | II | 2053919 | 2059072 | WBGene00017210 | F07E5.5  | F07E5.5  | -0.25614009201105    | AGIWUR43260 |
| N2                                                        | HS | II | 2059869 | 2064018 | WBGene00017211 | fbxb-36  | F07E5.6  | 0.0040735281929436   | AGIWUR21594 |
| N2                                                        | HS | II | 2068354 | 2068971 | WBGene00219315 | F07E5.12 | F07E5.12 | -0.297650003493258   |             |
| AGIWUR2322                                                |    |    |         |         |                |          |          |                      |             |
| N2                                                        | HS | II | 2070593 | 2071516 | WBGene00017212 | F07E5.7  | F07E5.7  | 0.112393516456001    |             |
| AGIWUR2175;AGIWUR23158;AGIWUR36248                        |    |    |         |         |                |          |          |                      |             |
| N2                                                        | HS | II | 2072221 | 2075830 | WBGene00017213 | F07E5.8  | F07E5.8  | 0.0253224523632198   | AGIWUR11692 |
| N2                                                        | HS | II | 2076291 | 2080526 | WBGene00017214 | F07E5.9  | F07E5.9  | 0.8912102666525      | AGIWUR21892 |
| N2                                                        | HS | II | 2081557 | 2082016 | WBGene00020535 | T16A1.4  | T16A1.4  | -0.0741806589064087  | AGIWUR35506 |
| N2                                                        | HS | II | 2083595 | 2083826 | WBGene00020536 | T16A1.5  | T16A1.5  | 0.313273121408377    | AGIWUR15560 |
| N2                                                        | HS | II | 2084129 | 2084891 | WBGene00020534 | fbxc-49  | T16A1.3  | 0.0697772564545591   | AGIWUR3770  |
| N2                                                        | HS | II | 2091772 | 2092111 | WBGene00269431 | T16A1.10 | T16A1.10 | -0.315540492206971   |             |
| AGIWUR5174                                                |    |    |         |         |                |          |          |                      |             |
| N2                                                        | HS | II | 2095304 | 2098671 | WBGene00020533 | T16A1.2  | T16A1.2  | 0.0915857075381101   | AGIWUR25813 |
| N2                                                        | HS | II | 2098871 | 2104149 | WBGene00020532 | math-42  | T16A1.1  | 0.0491311099584388   |             |
| AGIWUR4912;AGIWUR5197;AGIWUR24871;AGIWUR27173;AGIWUR31259 |    |    |         |         |                |          |          |                      |             |
| N2                                                        | HS | II | 2104524 | 2106866 | WBGene00020075 | math-35  | R52.3    | 0.0520860136831365   | AGIWUR19446 |
| N2                                                        | HS | II | 2107197 | 2108395 | WBGene00020076 | R52.4    | R52.4    | 0.130205216982372    | AGIWUR29766 |
| N2                                                        | HS | II | 2108787 | 2110043 | WBGene00020077 | R52.5    | R52.5    | 0.222801853845999    | AGIWUR35621 |
| N2                                                        | HS | II | 2111227 | 2113048 | WBGene00020078 | R52.6    | R52.6    | -0.0531186285387726  | AGIWUR17386 |
| N2                                                        | HS | II | 2114554 | 2116894 | WBGene00005408 | srh-195  | R52.7    | -0.0395514746412111  |             |

AGIWUR25884;AGIWUR27171;AGIWUR30449  
N2 HS II 2117276 2122181 WBGene00020080 math-37 R52.9 0.421892982359031  
AGIWUR22322;AGIWUR38481  
N2 HS II 2123687 2129281 WBGene00020081 sdz-29 R52.10 -0.0271050248153184  
AGIWUR997;AGIWUR7585;AGIWUR9725;AGIWUR17929;AGIWUR24130;AGIWUR36877;AGIWUR39906  
N2 HS II 2131070 2132475 WBGene00020073 sdz-28 R52.1 0.137857935289633 AGIWUR26196  
N2 HS II 2133666 2135704 WBGene00016548 hpo-7 C40A11.5 -0.0473633774487663  
AGIWUR40590  
N2 HS II 2136822 2136909 WBGene00016553 C40A11.10 C40A11.10 0.0246035012120958  
AGIWUR29844  
N2 HS II 2137422 2138951 WBGene00016547 C40A11.4 C40A11.4 -0.0950226119395339  
AGIWUR17400  
N2 HS II 2144292 2145666 WBGene00016549 C40A11.6 C40A11.6  
-0.00199960147907952 AGIWUR8253;AGIWUR18636;AGIWUR31194;AGIWUR37868;AGIWUR39471;AGIWUR42954  
N2 HS II 2146950 2148775 WBGene00016545 C40A11.2 C40A11.2 -0.168782749227411  
AGIWUR19003  
N2 HS II 2148732 2150363 WBGene00016550 C40A11.7 C40A11.7 -0.0504767964421315  
AGIWUR18171  
N2 HS II 2150552 2151290 WBGene00016551 C40A11.8 C40A11.8 -0.0802539217597271  
AGIWUR23141;AGIWUR29012;AGIWUR41581  
N2 HS II 2154008 2155220 WBGene00016544 math-18 C40A11.1 0.105610223491987  
AGIWUR19325  
N2 HS II 2163341 2163832 WBGene00044360 C33C12.11 C33C12.11 -0.0661770035290967  
AGIWUR26375  
N2 HS II 2165440 2166498 WBGene00016336 C33C12.4 C33C12.4 0.204408065546421  
AGIWUR11200  
N2 HS II 2170325 2173219 WBGene00016338 srb-14 C33C12.6 0.0352295913230054  
AGIWUR212;AGIWUR2539;AGIWUR6574;AGIWUR16245;AGIWUR18339;AGIWUR37823  
N2 HS II 2174586 2175289 WBGene00016339 C33C12.7 C33C12.7 0.156618135004958  
AGIWUR41219  
N2 HS II 2176741 2181990 WBGene00016335 gba-1 C33C12.3 0.00945470532844084  
AGIWUR19527  
N2 HS II 2182503 2186434 WBGene00016340 gba-2 C33C12.8 0.105767300952386  
AGIWUR32624  
N2 HS II 2187149 2189457 WBGene00016341 mtq-2 C33C12.9 -0.0549844072865842  
AGIWUR36138  
N2 HS II 2192339 2194114 WBGene00016342 C33C12.10 C33C12.10 -0.432430714680669  
AGIWUR44353  
N2 HS II 2197846 2198675 WBGene00016334 C33C12.1 C33C12.1 -0.0716497676911487

|                                                           |    |    |         |         |                |          |          |                                 |
|-----------------------------------------------------------|----|----|---------|---------|----------------|----------|----------|---------------------------------|
| AGIWUR20259                                               |    |    |         |         |                |          |          |                                 |
| N2                                                        | HS | II | 2199143 | 2204139 | WBGene00021985 | Y59C2A.2 | Y59C2A.2 | 0.0453790980000566              |
| AGIWUR13216                                               |    |    |         |         |                |          |          |                                 |
| N2                                                        | HS | II | 2208112 | 2212863 | WBGene00021984 | Y59C2A.1 | Y59C2A.1 | 0.0607557649867978              |
| AGIWUR9506                                                |    |    |         |         |                |          |          |                                 |
| N2                                                        | HS | II | 2215476 | 2219921 | WBGene00021986 | Y59C2A.3 | Y59C2A.3 | -0.127942613085386              |
| AGIWUR15526                                               |    |    |         |         |                |          |          |                                 |
| N2                                                        | HS | II | 2224359 | 2225708 | WBGene00018784 | F54A3.5  | F54A3.5  | 0.221431871137495 AGIWUR36961   |
| N2                                                        | HS | II | 2225817 | 2232470 | WBGene00018785 | F54A3.6  | F54A3.6  | -0.451293952063805 AGIWUR44438  |
| N2                                                        | HS | II | 2233540 | 2243539 | WBGene00018782 | cct-3    | F54A3.3  | -0.288626106280317              |
| AGIWUR2521;AGIWUR9717;AGIWUR20960;AGIWUR24186;AGIWUR32791 |    |    |         |         |                |          |          |                                 |
| N2                                                        | HS | II | 2255172 | 2261101 | WBGene00019586 | K09F6.3  | K09F6.3  | 0.118404495745073               |
| AGIWUR31678;AGIWUR37475                                   |    |    |         |         |                |          |          |                                 |
| N2                                                        | HS | II | 2262128 | 2265768 | WBGene00019587 | K09F6.4  | K09F6.4  | -0.0434637962788127 AGIWUR10760 |
| N2                                                        | HS | II | 2274876 | 2279146 | WBGene00019589 | K09F6.6  | K09F6.6  | -0.103641419455295 AGIWUR31027  |
| N2                                                        | HS | II | 2280139 | 2280580 | WBGene00044361 | K09F6.11 | K09F6.11 | -0.168264519623371              |
| AGIWUR660;AGIWUR7865;AGIWUR12531;AGIWUR38262              |    |    |         |         |                |          |          |                                 |
| N2                                                        | HS | II | 2287030 | 2290226 | WBGene00019593 | K09F6.10 | K09F6.10 | 0.0157690016863601              |
| AGIWUR39646                                               |    |    |         |         |                |          |          |                                 |
| N2                                                        | HS | II | 2290896 | 2292184 | WBGene00019590 | K09F6.7  | K09F6.7  | 0.173980309452342 AGIWUR35281   |
| N2                                                        | HS | II | 2294693 | 2296265 | WBGene00019591 | fbxc-25  | K09F6.8  | -0.00536355585730863            |
| AGIWUR7503;AGIWUR25600                                    |    |    |         |         |                |          |          |                                 |
| N2                                                        | HS | II | 2297847 | 2298793 | WBGene00015111 | B0281.4  | B0281.4  | -0.0721739562208228 AGIWUR32252 |
| N2                                                        | HS | II | 2299854 | 2300946 | WBGene00015112 | B0281.5  | B0281.5  | 0.00376110074177127 AGIWUR17596 |
| N2                                                        | HS | II | 2301308 | 2302229 | WBGene00015113 | B0281.6  | B0281.6  | 0.149612345756521 AGIWUR30003   |
| N2                                                        | HS | II | 2307041 | 2308361 | WBGene00015110 | B0281.3  | B0281.3  | 0.119677755822622               |
| AGIWUR10890;AGIWUR22129;AGIWUR38792                       |    |    |         |         |                |          |          |                                 |
| N2                                                        | HS | II | 2310071 | 2311074 | WBGene00023225 | B0281.7  | B0281.7  | -0.0158501832869558 AGIWUR19027 |
| N2                                                        | HS | II | 2313067 | 2314927 | WBGene00015108 | B0281.1  | B0281.1  | 0.147933422851469 AGIWUR29422   |
| N2                                                        | HS | II | 2315084 | 2315622 | WBGene00022869 | ZK1240.4 | ZK1240.4 | 0.16812777838217                |
| AGIWUR40750                                               |    |    |         |         |                |          |          |                                 |
| N2                                                        | HS | II | 2316163 | 2317877 | WBGene00022870 | ZK1240.5 | ZK1240.5 | -0.092134873745608              |
| AGIWUR35040                                               |    |    |         |         |                |          |          |                                 |
| N2                                                        | HS | II | 2318189 | 2320134 | WBGene00022873 | ZK1240.9 | ZK1240.9 | 0.0288235197179123              |
| AGIWUR6381;AGIWUR34515;AGIWUR37334                        |    |    |         |         |                |          |          |                                 |
| N2                                                        | HS | II | 2320153 | 2321951 | WBGene00022868 | ZK1240.3 | ZK1240.3 | 0.0784940672310821              |
| AGIWUR2960                                                |    |    |         |         |                |          |          |                                 |
| N2                                                        | HS | II | 2322367 | 2322907 | WBGene00022871 | ZK1240.6 | ZK1240.6 | 0.0207371392392215              |
| AGIWUR5666                                                |    |    |         |         |                |          |          |                                 |

|                                   |    |    |         |         |                |           |           |                     |
|-----------------------------------|----|----|---------|---------|----------------|-----------|-----------|---------------------|
| N2                                | HS | II | 2323376 | 2325215 | WBGene00022867 | ZK1240.2  | ZK1240.2  | 0.144965565817385   |
| AGIWUR14511                       |    |    |         |         |                |           |           |                     |
| N2                                | HS | II | 2326995 | 2329053 | WBGene00022872 | ZK1240.8  | ZK1240.8  | 0.00473993385788596 |
| AGIWUR42400                       |    |    |         |         |                |           |           |                     |
| N2                                | HS | II | 2329355 | 2331792 | WBGene00022866 | ZK1240.1  | ZK1240.1  | 0.0634671650906906  |
| AGIWUR11319                       |    |    |         |         |                |           |           |                     |
| N2                                | HS | II | 2332520 | 2334338 | WBGene00018385 | F43C11.8  | F43C11.8  | -0.198435596128454  |
| AGIWUR12050                       |    |    |         |         |                |           |           |                     |
| N2                                | HS | II | 2335933 | 2337696 | WBGene00018384 | F43C11.7  | F43C11.7  | -0.182747712721749  |
| AGIWUR27872                       |    |    |         |         |                |           |           |                     |
| N2                                | HS | II | 2337897 | 2340746 | WBGene00018386 | F43C11.9  | F43C11.9  | 0.0297504851761268  |
| AGIWUR20373                       |    |    |         |         |                |           |           |                     |
| N2                                | HS | II | 2342433 | 2343925 | WBGene00018383 | F43C11.6  | F43C11.6  | 0.0868096366068247  |
| AGIWUR25498                       |    |    |         |         |                |           |           |                     |
| N2                                | HS | II | 2345118 | 2346028 | WBGene00018382 | F43C11.5  | F43C11.5  | 0.171099581537456   |
| AGIWUR45203                       |    |    |         |         |                |           |           |                     |
| N2                                | HS | II | 2347015 | 2350030 | WBGene00018381 | F43C11.4  | F43C11.4  | -0.117028310304841  |
| AGIWUR19877                       |    |    |         |         |                |           |           |                     |
| N2                                | HS | II | 2350216 | 2351657 | WBGene00018387 | F43C11.10 | F43C11.10 | -0.0991157818249091 |
| AGIWUR2098;AGIWUR5664;AGIWUR17935 |    |    |         |         |                |           |           |                     |
| N2                                | HS | II | 2354776 | 2355972 | WBGene00018379 | F43C11.2  | F43C11.2  | 0.108025976250595   |
| AGIWUR27877                       |    |    |         |         |                |           |           |                     |
| N2                                | HS | II | 2357095 | 2358278 | WBGene00018378 | F43C11.1  | F43C11.1  | 0.265479483417533   |
| AGIWUR35747;AGIWUR36438           |    |    |         |         |                |           |           |                     |
| N2                                | HS | II | 2358801 | 2363773 | WBGene00018388 | F43C11.11 | F43C11.11 | -0.0935402118346751 |
| AGIWUR6497                        |    |    |         |         |                |           |           |                     |
| N2                                | HS | II | 2365573 | 2366720 | WBGene00018389 | F43C11.12 | F43C11.12 | 0.239414328955217   |
| AGIWUR28662                       |    |    |         |         |                |           |           |                     |
| N2                                | HS | II | 2367528 | 2368708 | WBGene00017520 | F16G10.5  | F16G10.5  | 0.124679926284911   |
| AGIWUR7640                        |    |    |         |         |                |           |           |                     |
| N2                                | HS | II | 2369256 | 2370089 | WBGene00017519 | hpo-25    | F16G10.4  | -0.149719818061384  |
| AGIWUR33028                       |    |    |         |         |                |           |           |                     |
| N2                                | HS | II | 2372390 | 2374340 | WBGene00017518 | F16G10.3  | F16G10.3  | -0.207496718037341  |
| AGIWUR8438                        |    |    |         |         |                |           |           |                     |
| N2                                | HS | II | 2375273 | 2376411 | WBGene00017517 | F16G10.2  | F16G10.2  | -0.0762229165198507 |
| AGIWUR3215                        |    |    |         |         |                |           |           |                     |
| N2                                | HS | II | 2377199 | 2377851 | WBGene00017521 | F16G10.6  | F16G10.6  | -0.0756817969971708 |
| AGIWUR12468                       |    |    |         |         |                |           |           |                     |
| N2                                | HS | II | 2379579 | 2380274 | WBGene00017522 | F16G10.7  | F16G10.7  | -0.0514323289768246 |



|                                     |    |    |         |         |                |           |           |                     |
|-------------------------------------|----|----|---------|---------|----------------|-----------|-----------|---------------------|
| AGIWUR29225                         |    |    |         |         |                |           |           |                     |
| N2                                  | HS | II | 2381949 | 2383434 | WBGene00017523 | F16G10.8  | F16G10.8  | 0.00960086833518581 |
| AGIWUR20430                         |    |    |         |         |                |           |           |                     |
| N2                                  | HS | II | 2384186 | 2385595 | WBGene00017524 | F16G10.9  | F16G10.9  | 0.0158304123464701  |
| AGIWUR11291;AGIWUR33652;AGIWUR45181 |    |    |         |         |                |           |           |                     |
| N2                                  | HS | II | 2394916 | 2395964 | WBGene00017527 | F16G10.13 | F16G10.13 | -0.2478819858578    |
| AGIWUR12983                         |    |    |         |         |                |           |           |                     |
| N2                                  | HS | II | 2404284 | 2404659 | WBGene00017516 | F16G10.1  | F16G10.1  | -0.203532045538106  |
| AGIWUR30351                         |    |    |         |         |                |           |           |                     |
| N2                                  | HS | II | 2409643 | 2412741 | WBGene00018353 | fbxa-182  | F42G2.4   | 0.332892706227049   |
| AGIWUR13568;AGIWUR39835             |    |    |         |         |                |           |           |                     |
| N2                                  | HS | II | 2414119 | 2415531 | WBGene00044672 | fbxa-4    | F42G2.8   | 0.0633834872680268  |
| AGIWUR27382;AGIWUR33844             |    |    |         |         |                |           |           |                     |
| N2                                  | HS | II | 2416101 | 2417971 | WBGene00018354 | F42G2.5   | F42G2.5   | 0.131444855666642   |
| AGIWUR9576;AGIWUR25080;AGIWUR33778  |    |    |         |         |                |           |           |                     |
| N2                                  | HS | II | 2418448 | 2419025 | WBGene00044362 | F42G2.7   | F42G2.7   | -0.167864402033056  |
| N2                                  | HS | II | 2419472 | 2420794 | WBGene00018352 | fbxc-20   | F42G2.3   | 0.0923991003431421  |
| N2                                  | HS | II | 2426372 | 2429944 | WBGene00018355 | ceh-86    | F42G2.6   | -0.224203291875697  |
| N2                                  | HS | II | 2443279 | 2451130 | WBGene00006882 | vab-19    | T22D2.1   | -0.150297928422263  |
| AGIWUR22528;AGIWUR42638             |    |    |         |         |                |           |           |                     |
| N2                                  | HS | II | 2452970 | 2458981 | WBGene00004129 | pqn-42    | F53G2.4   | -0.0163693436065664 |
| AGIWUR2755;AGIWUR27831              |    |    |         |         |                |           |           |                     |
| N2                                  | HS | II | 2460866 | 2472862 | WBGene00006647 | tsr-1     | F53G2.6   | -0.0919391448182125 |
| N2                                  | HS | II | 2480399 | 2481312 | WBGene00018768 | F53G2.3   | F53G2.3   | -0.0191373667872394 |
| N2                                  | HS | II | 2481921 | 2485922 | WBGene00018767 | F53G2.2   | F53G2.2   | -0.195041519179162  |
| N2                                  | HS | II | 2488754 | 2496641 | WBGene00018766 | F53G2.1   | F53G2.1   | -0.107536154092966  |
| N2                                  | HS | II | 2504878 | 2514846 | WBGene00019130 | gbas-1    | F59H5.1   | 0.257249811910139   |
| N2                                  | HS | II | 2514977 | 2516097 | WBGene00019131 | bath-12   | F59H5.3   | 0.0874448358206443  |
| AGIWUR865;AGIWUR4761;AGIWUR18764    |    |    |         |         |                |           |           |                     |
| N2                                  | HS | II | 2520965 | 2522044 | WBGene00018223 | bath-13   | F40B1.1   | 0.204497765706681   |
| N2                                  | HS | II | 2522628 | 2524475 | WBGene00018224 | bath-18   | F40B1.2   | 0.0721839852623738  |
| N2                                  | HS | II | 2525220 | 2529255 | WBGene00019341 | K02F6.7   | K02F6.7   | -0.0676514147559129 |
| N2                                  | HS | II | 2530817 | 2531476 | WBGene00019340 | K02F6.6   | K02F6.6   | 0.0915706352770869  |
| N2                                  | HS | II | 2546225 | 2553572 | WBGene00019337 | K02F6.3   | K02F6.3   | 0.0714882240098014  |
| AGIWUR13728;AGIWUR21707;AGIWUR42219 |    |    |         |         |                |           |           |                     |
| N2                                  | HS | II | 2553962 | 2556313 | WBGene00019335 | K02F6.1   | K02F6.1   | 0.194792934531794   |
| N2                                  | HS | II | 2557781 | 2563677 | WBGene00019343 | nep-18    | K02F6.9   | -0.0281626100623225 |
| AGIWUR27404;AGIWUR31183;AGIWUR32099 |    |    |         |         |                |           |           |                     |
| N2                                  | HS | II | 2565275 | 2575930 | WBGene00017280 | usp-39    | F09D1.1   | 0.31126536445068    |
| AGIWUR22184                         |    |    |         |         |                |           |           |                     |

|                                                                                                         |    |    |         |         |                |          |          |                     |             |
|---------------------------------------------------------------------------------------------------------|----|----|---------|---------|----------------|----------|----------|---------------------|-------------|
| N2                                                                                                      | HS | II | 2578536 | 2579595 | WBGene00005587 | sri-75   | F33H12.3 | -0.0519765460861343 |             |
| AGIWUR5883                                                                                              |    |    |         |         |                |          |          |                     |             |
| N2                                                                                                      | HS | II | 2580901 | 2583346 | WBGene00005586 | sri-74   | F33H12.4 | 0.00509964565241283 |             |
| AGIWUR38546                                                                                             |    |    |         |         |                |          |          |                     |             |
| N2                                                                                                      | HS | II | 2583782 | 2585593 | WBGene00005548 | sri-36   | F33H12.5 | 0.0319803158931711  |             |
| AGIWUR29515                                                                                             |    |    |         |         |                |          |          |                     |             |
| N2                                                                                                      | HS | II | 2586078 | 2586911 | WBGene00045457 | F33H12.7 | F33H12.7 | 0.198430755569409   |             |
| AGIWUR10211;AGIWUR11014;AGIWUR14494;AGIWUR20112;AGIWUR21173;AGIWUR27869                                 |    |    |         |         |                |          |          |                     |             |
| N2                                                                                                      | HS | II | 2587504 | 2589754 | WBGene00005551 | sri-39   | F33H12.2 | 0.00670953666648844 |             |
| AGIWUR2569;AGIWUR9926                                                                                   |    |    |         |         |                |          |          |                     |             |
| N2                                                                                                      | HS | II | 2600553 | 2601779 | WBGene00018019 | F33H12.1 | F33H12.1 | -0.189143422803398  |             |
| AGIWUR33272                                                                                             |    |    |         |         |                |          |          |                     |             |
| N2                                                                                                      | HS | II | 2603208 | 2605419 | WBGene00005589 | sri-77   | D2062.9  | 0.0161839228478904  | AGIWUR10343 |
| N2                                                                                                      | HS | II | 2610862 | 2612359 | WBGene00005550 | sri-38   | D2062.8  | 0.0699456147959179  |             |
| AGIWUR18254;AGIWUR39361                                                                                 |    |    |         |         |                |          |          |                     |             |
| N2                                                                                                      | HS | II | 2616905 | 2617374 | WBGene00017059 | D2062.7  | D2062.7  | 0.131577618212159   | AGIWUR30414 |
| N2                                                                                                      | HS | II | 2619419 | 2619789 | WBGene00017058 | D2062.6  | D2062.6  | 0.0151984876718299  |             |
| AGIWUR152;AGIWUR6988;AGIWUR17021;AGIWUR28623;AGIWUR37201;AGIWUR42200                                    |    |    |         |         |                |          |          |                     |             |
| N2                                                                                                      | HS | II | 2623402 | 2624530 | WBGene00017056 | D2062.4  | D2062.4  | -0.139960724628816  |             |
| AGIWUR11959;AGIWUR21825;AGIWUR31235;AGIWUR43927                                                         |    |    |         |         |                |          |          |                     |             |
| N2                                                                                                      | HS | II | 2625092 | 2627070 | WBGene00044301 | lgc-28   | D2062.12 | 0.147870125613387   |             |
| AGIWUR30690;AGIWUR43966                                                                                 |    |    |         |         |                |          |          |                     |             |
| N2                                                                                                      | HS | II | 2627749 | 2629196 | WBGene00005583 | sri-71   | D2062.3  | -0.0565270445216921 | AGIWUR35298 |
| N2                                                                                                      | HS | II | 2629570 | 2631231 | WBGene00005549 | sri-37   | D2062.2  | -0.0163556187282783 | AGIWUR17145 |
| N2                                                                                                      | HS | II | 2631473 | 2633054 | WBGene00017055 | D2062.1  | D2062.1  | -0.135232164854049  | AGIWUR15096 |
| N2                                                                                                      | HS | II | 2634210 | 2635321 | WBGene00005553 | sri-41   | F22E5.10 | 0.0540775401970794  |             |
| AGIWUR35927;AGIWUR43074                                                                                 |    |    |         |         |                |          |          |                     |             |
| N2                                                                                                      | HS | II | 2635360 | 2637608 | WBGene00044363 | F22E5.21 | F22E5.21 | -0.130369870443702  |             |
| AGIWUR6996;AGIWUR13791                                                                                  |    |    |         |         |                |          |          |                     |             |
| N2                                                                                                      | HS | II | 2638392 | 2639353 | WBGene00017708 | F22E5.9  | F22E5.9  | -0.293648455050779  | AGIWUR8605  |
| N2                                                                                                      | HS | II | 2640081 | 2641897 | WBGene00017707 | F22E5.8  | F22E5.8  | 0.138194899220565   | AGIWUR29034 |
| N2                                                                                                      | HS | II | 2642090 | 2642884 | WBGene00017706 | F22E5.7  | F22E5.7  | 0.125530388204758   | AGIWUR2135  |
| N2                                                                                                      | HS | II | 2643685 | 2645703 | WBGene00017709 | F22E5.11 | F22E5.11 | -0.130771865111334  |             |
| AGIWUR16622                                                                                             |    |    |         |         |                |          |          |                     |             |
| N2                                                                                                      | HS | II | 2647637 | 2649639 | WBGene00017711 | F22E5.13 | F22E5.13 | -0.235580623146048  |             |
| AGIWUR15725;AGIWUR33628                                                                                 |    |    |         |         |                |          |          |                     |             |
| N2                                                                                                      | HS | II | 2649870 | 2650715 | WBGene00017705 | F22E5.6  | F22E5.6  | -0.022367311638595  | AGIWUR39051 |
| N2                                                                                                      | HS | II | 2652841 | 2654464 | WBGene00005561 | sri-49   | F22E5.14 | -0.0141410216511328 |             |
| AGIWUR283;AGIWUR4661;AGIWUR8245;AGIWUR13251;AGIWUR28279;AGIWUR32069;AGIWUR33970;AGIWUR35353;AGIWUR37519 |    |    |         |         |                |          |          |                     |             |

|                                                             |    |    |         |         |                |          |          |                     |             |
|-------------------------------------------------------------|----|----|---------|---------|----------------|----------|----------|---------------------|-------------|
| N2                                                          | HS | II | 2659670 | 2665022 | WBGene00001546 | gcy-21   | F22E5.3  | 0.0427689895861327  | AGIWUR44744 |
| N2                                                          | HS | II | 2666283 | 2668162 | WBGene00005567 | sri-55   | F22E5.15 | 0.0289016326828175  |             |
| AGIWUR3285;AGIWUR11082                                      |    |    |         |         |                |          |          |                     |             |
| N2                                                          | HS | II | 2672632 | 2673634 | WBGene00017713 | F22E5.20 | F22E5.20 | -0.128740610611079  |             |
| AGIWUR8172                                                  |    |    |         |         |                |          |          |                     |             |
| N2                                                          | HS | II | 2673908 | 2677588 | WBGene00017703 | F22E5.1  | F22E5.1  | 0.210037923830065   | AGIWUR18331 |
| N2                                                          | HS | II | 2678041 | 2679162 | WBGene00017712 | F22E5.17 | F22E5.17 | -0.471805035359857  |             |
| AGIWUR11407                                                 |    |    |         |         |                |          |          |                     |             |
| N2                                                          | HS | II | 2679163 | 2681218 | WBGene00018021 | F34D6.1  | F34D6.1  | -0.234576382126066  | AGIWUR32910 |
| N2                                                          | HS | II | 2683329 | 2684308 | WBGene00018022 | ceh-87   | F34D6.2  | -0.241639406866095  | AGIWUR1083  |
| N2                                                          | HS | II | 2684669 | 2686977 | WBGene00006318 | sup-9    | F34D6.3  | 0.0305946798695818  | AGIWUR35930 |
| N2                                                          | HS | II | 2688916 | 2689179 | WBGene00044365 | F34D6.8  | F34D6.8  | 0.268895717484487   |             |
| AGIWUR3570;AGIWUR14833;AGIWUR16546;AGIWUR25095;AGIWUR30598  |    |    |         |         |                |          |          |                     |             |
| N2                                                          | HS | II | 2690472 | 2694311 | WBGene00018023 | set-11   | F34D6.4  | 0.526888430296717   | AGIWUR35159 |
| N2                                                          | HS | II | 2696939 | 2698478 | WBGene00005574 | sri-62   | F34D6.5  | 0.0312649257677666  | AGIWUR37243 |
| N2                                                          | HS | II | 2698865 | 2700329 | WBGene00005573 | sri-61   | F34D6.6  | 0.025244986595748   | AGIWUR26167 |
| N2                                                          | HS | II | 2701389 | 2702857 | WBGene00005572 | sri-60   | Y47G7B.3 | -0.112948292874389  |             |
| AGIWUR4730                                                  |    |    |         |         |                |          |          |                     |             |
| N2                                                          | HS | II | 2703371 | 2705316 | WBGene00005345 | srh-128  | Y47G7B.1 | -0.120658063294076  |             |
| AGIWUR42635                                                 |    |    |         |         |                |          |          |                     |             |
| N2                                                          | HS | II | 2705996 | 2707982 | WBGene00021654 | Y47G7B.2 | Y47G7B.2 | 0.0202282174363244  |             |
| AGIWUR5884                                                  |    |    |         |         |                |          |          |                     |             |
| N2                                                          | HS | II | 2708438 | 2710096 | WBGene00020227 | T05A8.1  | T05A8.1  | 0.143237926762218   | AGIWUR29682 |
| N2                                                          | HS | II | 2709942 | 2711019 | WBGene00020228 | T05A8.2  | T05A8.2  | 0.482034801698743   | AGIWUR23765 |
| N2                                                          | HS | II | 2714647 | 2717435 | WBGene00020229 | T05A8.3  | T05A8.3  | 0.0657344571110077  |             |
| AGIWUR2639;AGIWUR12034                                      |    |    |         |         |                |          |          |                     |             |
| N2                                                          | HS | II | 2717522 | 2725541 | WBGene00020230 | nep-2    | T05A8.4  | -0.011431972856677  | AGIWUR4193  |
| N2                                                          | HS | II | 2731319 | 2735250 | WBGene00020231 | T05A8.5  | T05A8.5  | -0.142931633821604  | AGIWUR33951 |
| N2                                                          | HS | II | 2736678 | 2737556 | WBGene00044367 | T05A8.8  | T05A8.8  | -0.15086888741728   |             |
| AGIWUR6273;AGIWUR21950;AGIWUR29441;AGIWUR34602;AGIWUR42076  |    |    |         |         |                |          |          |                     |             |
| N2                                                          | HS | II | 2738523 | 2739642 | WBGene00020232 | T05A8.6  | T05A8.6  | -0.148955433558696  | AGIWUR36070 |
| N2                                                          | HS | II | 2740403 | 2742341 | WBGene00020233 | T05A8.7  | T05A8.7  | -0.384321395015968  | AGIWUR12867 |
| N2                                                          | HS | II | 2747393 | 2747728 | WBGene00017915 | F29A7.5  | F29A7.5  | -0.0773004775334485 | AGIWUR5403  |
| N2                                                          | HS | II | 2748588 | 2751573 | WBGene00017914 | F29A7.4  | F29A7.4  | -0.129213593664168  | AGIWUR35213 |
| N2                                                          | HS | II | 2751741 | 2752611 | WBGene00017916 | F29A7.6  | F29A7.6  | 0.0729063766132994  |             |
| AGIWUR1148;AGIWUR13132                                      |    |    |         |         |                |          |          |                     |             |
| N2                                                          | HS | II | 2753299 | 2754379 | WBGene00017913 | F29A7.3  | F29A7.3  | 0.121624009354218   |             |
| AGIWUR10580;AGIWUR15672;AGIWUR31599;AGIWUR38911;AGIWUR39414 |    |    |         |         |                |          |          |                     |             |
| N2                                                          | HS | II | 2756021 | 2757018 | WBGene00017917 | clcc-120 | F29A7.7  | -0.0612581197701978 |             |

|                                     |    |    |         |         |                |           |           |                    |                      |
|-------------------------------------|----|----|---------|---------|----------------|-----------|-----------|--------------------|----------------------|
| AGIWUR37125                         |    |    |         |         |                |           |           |                    |                      |
| N2                                  | HS | II | 2757147 | 2758054 | WBGene00017918 | F29A7.8   | F29A7.8   | -0.207380763379043 | AGIWUR26911          |
| N2                                  | HS | II | 2758625 | 2761856 | WBGene00017912 | fbxb-107  |           | F29A7.2            | -0.050691671490755   |
| AGIWUR35880                         |    |    |         |         |                |           |           |                    |                      |
| N2                                  | HS | II | 2764964 | 2767230 | WBGene00017249 | fbxb-108  |           | F08D12.6           | -0.0149771719983463  |
| AGIWUR27513                         |    |    |         |         |                |           |           |                    |                      |
| N2                                  | HS | II | 2767250 | 2769121 | WBGene00017250 | F08D12.7  |           | F08D12.7           | 0.144544379957964    |
| AGIWUR13638                         |    |    |         |         |                |           |           |                    |                      |
| N2                                  | HS | II | 2769670 | 2770888 | WBGene00017251 | fbxb-105  |           | F08D12.8           | -0.232377992512433   |
| AGIWUR32943                         |    |    |         |         |                |           |           |                    |                      |
| N2                                  | HS | II | 2771082 | 2772266 | WBGene00017252 | sdz-10    | F08D12.9  |                    | -0.0599079075052718  |
| AGIWUR22665                         |    |    |         |         |                |           |           |                    |                      |
| N2                                  | HS | II | 2772389 | 2773634 | WBGene00017253 | sdz-9     | F08D12.10 |                    | -0.258553302797777   |
| AGIWUR14124                         |    |    |         |         |                |           |           |                    |                      |
| N2                                  | HS | II | 2773954 | 2775042 | WBGene00017254 | fbxb-111  |           | F08D12.11          | -0.169987387511612   |
| AGIWUR23089                         |    |    |         |         |                |           |           |                    |                      |
| N2                                  | HS | II | 2778146 | 2779282 | WBGene00017248 | F08D12.4  |           | F08D12.4           | -0.0914679110908949  |
| AGIWUR34662                         |    |    |         |         |                |           |           |                    |                      |
| N2                                  | HS | II | 2779544 | 2780838 | WBGene00017247 | F08D12.3  |           | F08D12.3           | 0.057087989093076    |
| AGIWUR11622;AGIWUR14891;AGIWUR21016 |    |    |         |         |                |           |           |                    |                      |
| N2                                  | HS | II | 2781628 | 2783083 | WBGene00017246 | F08D12.2  |           | F08D12.2           | -0.0314011721166949  |
| AGIWUR20210                         |    |    |         |         |                |           |           |                    |                      |
| N2                                  | HS | II | 2783102 | 2787089 | WBGene00017255 | F08D12.12 |           | F08D12.12          | 0.162563845182603    |
| AGIWUR24811                         |    |    |         |         |                |           |           |                    |                      |
| N2                                  | HS | II | 2787481 | 2793471 | WBGene00017245 | srpa-72   | F08D12.1  |                    | -0.109547946470062   |
| AGIWUR36556                         |    |    |         |         |                |           |           |                    |                      |
| N2                                  | HS | II | 2794974 | 2800600 | WBGene00003709 | nhr-119   | K12H6.1   |                    | -0.00286490948112528 |
| AGIWUR24562;AGIWUR32874             |    |    |         |         |                |           |           |                    |                      |
| N2                                  | HS | II | 2808167 | 2812860 | WBGene00019691 | K12H6.12  |           | K12H6.12           | 0.00593066970947476  |
| AGIWUR21824                         |    |    |         |         |                |           |           |                    |                      |
| N2                                  | HS | II | 2812872 | 2815544 | WBGene00019683 | K12H6.2   | K12H6.2   | 0.186672376006719  | AGIWUR31778          |
| N2                                  | HS | II | 2816976 | 2819123 | WBGene00019690 | set-13    | K12H6.11  |                    | -0.0245699185689574  |
| AGIWUR6625                          |    |    |         |         |                |           |           |                    |                      |
| N2                                  | HS | II | 2819435 | 2822490 | WBGene00001507 | fut-4     | K12H6.3   | 0.0759699377608207 | AGIWUR42179          |
| N2                                  | HS | II | 2823707 | 2824269 | WBGene00019684 | K12H6.4   | K12H6.4   | 0.151758915163795  | AGIWUR42778          |
| N2                                  | HS | II | 2825662 | 2826598 | WBGene00019685 | K12H6.5   | K12H6.5   | 0.24621857300711   | AGIWUR12317          |
| N2                                  | HS | II | 2827897 | 2828603 | WBGene00019688 | K12H6.8   | K12H6.8   | 0.138819351427763  | AGIWUR35848          |
| N2                                  | HS | II | 2828594 | 2831233 | WBGene00019686 | K12H6.6   | K12H6.6   | -0.343288907265149 |                      |
| AGIWUR10125;AGIWUR17611             |    |    |         |         |                |           |           |                    |                      |

|                                                                        |    |    |         |         |                |             |             |                      |             |
|------------------------------------------------------------------------|----|----|---------|---------|----------------|-------------|-------------|----------------------|-------------|
| N2                                                                     | HS | II | 2834953 | 2836780 | WBGene00019687 | K12H6.7     | K12H6.7     | 0.00696080310066094  | AGIWUR41986 |
| N2                                                                     | HS | II | 2839304 | 2840386 | WBGene00022441 | Y110A2AL.4  | Y110A2AL.4  | -0.0296305369273937  |             |
| AGIWUR2788;AGIWUR19080;AGIWUR19398;AGIWUR38238                         |    |    |         |         |                |             |             |                      |             |
| N2                                                                     | HS | II | 2841010 | 2841629 | WBGene00022443 | Y110A2AL.6  | Y110A2AL.6  |                      |             |
| -0.00585813658628354 AGIWUR18505                                       |    |    |         |         |                |             |             |                      |             |
| N2                                                                     | HS | II | 2842608 | 2843188 | WBGene00022444 | Y110A2AL.7  | Y110A2AL.7  | 0.227743025052622    |             |
| AGIWUR361                                                              |    |    |         |         |                |             |             |                      |             |
| N2                                                                     | HS | II | 2845384 | 2852593 | WBGene00004210 | ptc-3       | Y110A2AL.8  | -0.00254106773620544 |             |
| AGIWUR20873;AGIWUR36226;AGIWUR36414;AGIWUR44866                        |    |    |         |         |                |             |             |                      |             |
| N2                                                                     | HS | II | 2864529 | 2865363 | WBGene00022442 | Y110A2AL.5  | Y110A2AL.5  | 0.0862031280777362   |             |
| AGIWUR26948                                                            |    |    |         |         |                |             |             |                      |             |
| N2                                                                     | HS | II | 2865971 | 2866655 | WBGene00022445 | Y110A2AL.9  | Y110A2AL.9  | 0.00981904373001097  |             |
| AGIWUR3686;AGIWUR15915;AGIWUR18333;AGIWUR20884;AGIWUR37977;AGIWUR39130 |    |    |         |         |                |             |             |                      |             |
| N2                                                                     | HS | II | 2867074 | 2867779 | WBGene00022440 | Y110A2AL.3  | Y110A2AL.3  | -0.232463718303106   |             |
| AGIWUR8722                                                             |    |    |         |         |                |             |             |                      |             |
| N2                                                                     | HS | II | 2867993 | 2870758 | WBGene00022439 | Y110A2AL.2  | Y110A2AL.2  | -0.160877478425446   |             |
| AGIWUR5974;AGIWUR13320;AGIWUR16794;AGIWUR16833;AGIWUR30884             |    |    |         |         |                |             |             |                      |             |
| N2                                                                     | HS | II | 2871377 | 2871914 | WBGene00022446 | Y110A2AL.10 | Y110A2AL.10 | 0.00710665379649633  |             |
| AGIWUR28531                                                            |    |    |         |         |                |             |             |                      |             |
| N2                                                                     | HS | II | 2875101 | 2876618 | WBGene00022438 | Y110A2AL.1  | Y110A2AL.1  | -0.195913657441112   |             |
| AGIWUR6925                                                             |    |    |         |         |                |             |             |                      |             |
| N2                                                                     | HS | II | 2878729 | 2884910 | WBGene00022447 | hpo-20      | Y110A2AL.12 | -0.0108199181563311  |             |
| AGIWUR1875;AGIWUR11336;AGIWUR14290;AGIWUR30668;AGIWUR40005;AGIWUR44573 |    |    |         |         |                |             |             |                      |             |
| N2                                                                     | HS | II | 2886317 | 2889016 | WBGene00022448 | pinn-1      | Y110A2AL.13 | -0.213322256457474   |             |
| AGIWUR13612                                                            |    |    |         |         |                |             |             |                      |             |
| N2                                                                     | HS | II | 2889104 | 2894395 | WBGene00005020 | sqv-2       | Y110A2AL.14 | -0.0441175083136063  |             |
| AGIWUR42414                                                            |    |    |         |         |                |             |             |                      |             |
| N2                                                                     | HS | II | 2896737 | 2900348 | WBGene00022450 | ubc-26      | Y110A2AM.3  | 0.173117533362742    |             |
| AGIWUR5889;AGIWUR23227;AGIWUR30571;AGIWUR38183;AGIWUR42075             |    |    |         |         |                |             |             |                      |             |
| N2                                                                     | HS | II | 2902962 | 2904001 | WBGene00022449 | Y110A2AM.1  | Y110A2AM.1  | -0.0893038324183291  |             |
| AGIWUR17641                                                            |    |    |         |         |                |             |             |                      |             |
| N2                                                                     | HS | II | 2913705 | 2919314 | WBGene00022453 | Y110A2AR.3  | Y110A2AR.3  | -0.177015789252994   |             |
| AGIWUR20065;AGIWUR38218;AGIWUR40062                                    |    |    |         |         |                |             |             |                      |             |
| N2                                                                     | HS | II | 2919710 | 2920904 | WBGene00022452 | Y110A2AR.1  | Y110A2AR.1  | -0.189294165536445   |             |
| AGIWUR30954                                                            |    |    |         |         |                |             |             |                      |             |
| N2                                                                     | HS | II | 2923899 | 2926533 | WBGene00022712 | ZK355.2     | ZK355.2     | -0.2598808049365     |             |
| AGIWUR36579;AGIWUR38145                                                |    |    |         |         |                |             |             |                      |             |
| N2                                                                     | HS | II | 2927017 | 2927633 | WBGene00022713 | ZK355.3     | ZK355.3     | 0.740873239350901    | AGIWUR16281 |
| N2                                                                     | HS | II | 2928221 | 2930599 | WBGene00022714 | irld-64     | ZK355.4     | 0.090501733888761    | AGIWUR25390 |

|                                                            |    |    |         |         |                |          |          |                       |             |
|------------------------------------------------------------|----|----|---------|---------|----------------|----------|----------|-----------------------|-------------|
| N2                                                         | HS | II | 2930728 | 2933463 | WBGene00022711 | irld-63  | ZK355.1  | -0.030620801075222    | AGIWUR574   |
| N2                                                         | HS | II | 2933521 | 2934454 | WBGene00044369 | irld-67  | ZK355.7  | 0.0635857673487319    |             |
| AGIWUR7665;AGIWUR17850;AGIWUR29654                         |    |    |         |         |                |          |          |                       |             |
| N2                                                         | HS | II | 2934805 | 2937952 | WBGene00022715 | irld-65  | ZK355.5  | -0.0970166103694394   | AGIWUR18946 |
| N2                                                         | HS | II | 2938143 | 2940847 | WBGene00022716 | irld-66  | ZK355.6  | -0.000835781588952145 | AGIWUR36728 |
| N2                                                         | HS | II | 2940996 | 2944077 | WBGene00020431 | irld-50  | T11F1.7  | -0.00720661660096056  | AGIWUR1396  |
| N2                                                         | HS | II | 2944176 | 2946533 | WBGene00020430 | irld-49  | T11F1.6  | 0.311402203965331     | AGIWUR11744 |
| N2                                                         | HS | II | 2946738 | 2948434 | WBGene00005826 | srw-79   | T11F1.5  | -0.107360085676007    |             |
| AGIWUR11043;AGIWUR16519;AGIWUR19279;AGIWUR29750            |    |    |         |         |                |          |          |                       |             |
| N2                                                         | HS | II | 2948929 | 2952729 | WBGene00077759 | irld-51  | T11F1.9  | 0.0434617730947124    | AGIWUR3293  |
| N2                                                         | HS | II | 2956065 | 2958191 | WBGene00020428 | irld-48  | T11F1.2  | -0.128093086491779    | AGIWUR5921  |
| N2                                                         | HS | II | 2958608 | 2961883 | WBGene00005807 | srw-60   | T11F1.1  | -0.0652695811601758   | AGIWUR20994 |
| N2                                                         | HS | II | 2976639 | 2987023 | WBGene00003678 | nhr-88   | K08A2.5  | 0.0286156830868389    |             |
| AGIWUR9908;AGIWUR25658;AGIWUR25973;AGIWUR31000;AGIWUR33208 |    |    |         |         |                |          |          |                       |             |
| N2                                                         | HS | II | 2988307 | 2991238 | WBGene00019513 | K08A2.4  | K08A2.4  | 0.0306474106960604    | AGIWUR23537 |
| N2                                                         | HS | II | 2991613 | 2994313 | WBGene00019512 | K08A2.2  | K08A2.2  | 0.0043627822675063    | AGIWUR16689 |
| N2                                                         | HS | II | 2997021 | 3000653 | WBGene00019511 | K08A2.1  | K08A2.1  | -0.28813963706137     | AGIWUR37176 |
| N2                                                         | HS | II | 3000768 | 3002411 | WBGene00016576 | C41H7.6  | C41H7.6  | -0.0977340216524585   | AGIWUR20719 |
| N2                                                         | HS | II | 3002513 | 3003827 | WBGene00016575 | C41H7.5  | C41H7.5  | -0.121874534314308    | AGIWUR269   |
| N2                                                         | HS | II | 3003969 | 3005573 | WBGene00016574 | C41H7.4  | C41H7.4  | -0.134183449055627    | AGIWUR2896  |
| N2                                                         | HS | II | 3005799 | 3007506 | WBGene00016573 | C41H7.3  | C41H7.3  | 0.0170167945428137    | AGIWUR27129 |
| N2                                                         | HS | II | 3014835 | 3015961 | WBGene00016572 | C41H7.2  | C41H7.2  | -0.0919978831924446   | AGIWUR19017 |
| N2                                                         | HS | II | 3016068 | 3017471 | WBGene00016571 | C41H7.1  | C41H7.1  | 0.125900619973812     | AGIWUR18416 |
| N2                                                         | HS | II | 3017482 | 3019907 | WBGene00016577 | clec-3   | C41H7.7  | 0.14295893875066      | AGIWUR41295 |
| N2                                                         | HS | II | 3032780 | 3036122 | WBGene00015197 | B0454.6  | B0454.6  | 0.287919260984507     | AGIWUR13089 |
| N2                                                         | HS | II | 3038859 | 3040822 | WBGene00015196 | B0454.5  | B0454.5  | -0.219217099022785    |             |
| AGIWUR14221;AGIWUR34522                                    |    |    |         |         |                |          |          |                       |             |
| N2                                                         | HS | II | 3040943 | 3043406 | WBGene00015199 | B0454.8  | B0454.8  | -0.0118294450478462   |             |
| AGIWUR43750;AGIWUR44012;AGIWUR44391                        |    |    |         |         |                |          |          |                       |             |
| N2                                                         | HS | II | 3044323 | 3046115 | WBGene00005541 | sri-29   | B0454.4  | 0.0568598363558541    | AGIWUR2475  |
| N2                                                         | HS | II | 3046219 | 3048154 | WBGene00005542 | sri-30   | B0454.10 | -0.0495654413331756   |             |
| AGIWUR8463                                                 |    |    |         |         |                |          |          |                       |             |
| N2                                                         | HS | II | 3048678 | 3050435 | WBGene00005540 | sri-28   | B0454.3  | 0.117743407583895     | AGIWUR12561 |
| N2                                                         | HS | II | 3051003 | 3052322 | WBGene00005543 | sri-31   | B0454.2  | 0.0613869271941319    | AGIWUR14825 |
| N2                                                         | HS | II | 3052597 | 3054348 | WBGene00015200 | B0454.9  | B0454.9  | -0.0728434008570389   | AGIWUR25688 |
| N2                                                         | HS | II | 3056822 | 3060207 | WBGene00002997 | lin-8    | B0454.1  | -0.164128446192048    | AGIWUR39951 |
| N2                                                         | HS | II | 3061082 | 3062112 | WBGene00021293 | Y25C1A.6 | Y25C1A.6 | 0.0645220370053874    |             |
| AGIWUR19149                                                |    |    |         |         |                |          |          |                       |             |
| N2                                                         | HS | II | 3062542 | 3071381 | WBGene00021294 | Y25C1A.7 | Y25C1A.7 | -0.143391943153985    |             |

AGIWUR3099;AGIWUR9962;AGIWUR12918;AGIWUR14161;AGIWUR14668;AGIWUR18126;AGIWUR23317;AGIWUR23438;AGIWUR36817;AGIWUR38161;AGIWUR42714;AGIWUR43276

|                                                             |    |    |         |         |                |           |           |                       |             |
|-------------------------------------------------------------|----|----|---------|---------|----------------|-----------|-----------|-----------------------|-------------|
| N2                                                          | HS | II | 3071164 | 3076953 | WBGene00021295 | Y25C1A.8  | Y25C1A.8  | 0.310847478092267     |             |
| AGIWUR29733                                                 |    |    |         |         |                |           |           |                       |             |
| N2                                                          | HS | II | 3078796 | 3087682 | WBGene00021292 | copb-1    | Y25C1A.5  | -0.369909144781753    |             |
| AGIWUR44602                                                 |    |    |         |         |                |           |           |                       |             |
| N2                                                          | HS | II | 3088474 | 3091296 | WBGene00005178 | srg-21    | Y25C1A.9  | -0.18622182594661     |             |
| AGIWUR38380                                                 |    |    |         |         |                |           |           |                       |             |
| N2                                                          | HS | II | 3091503 | 3093452 | WBGene00005179 | srg-22    | Y25C1A.10 | -0.0526311292976658   |             |
| AGIWUR15037                                                 |    |    |         |         |                |           |           |                       |             |
| N2                                                          | HS | II | 3093902 | 3096160 | WBGene00005180 | srg-23    | Y25C1A.11 | -0.0293283042934807   |             |
| AGIWUR11917                                                 |    |    |         |         |                |           |           |                       |             |
| N2                                                          | HS | II | 3098403 | 3100646 | WBGene00005181 | srg-24    | Y25C1A.12 | -0.0056555750540177   |             |
| AGIWUR14814                                                 |    |    |         |         |                |           |           |                       |             |
| N2                                                          | HS | II | 3102318 | 3104736 | WBGene00021291 | clec-121  | Y25C1A.4  | 0.231252410944037     |             |
| AGIWUR11656                                                 |    |    |         |         |                |           |           |                       |             |
| N2                                                          | HS | II | 3106065 | 3108032 | WBGene00021290 | clec-122  | Y25C1A.3  | 0.18325563078308      |             |
| AGIWUR39278                                                 |    |    |         |         |                |           |           |                       |             |
| N2                                                          | HS | II | 3109368 | 3111247 | WBGene00021296 | Y25C1A.13 | Y25C1A.13 | 0.106768770497725     |             |
| AGIWUR14960;AGIWUR25497                                     |    |    |         |         |                |           |           |                       |             |
| N2                                                          | HS | II | 3112613 | 3113337 | WBGene00021289 | Y25C1A.2  | Y25C1A.2  | -0.0294555270260108   |             |
| AGIWUR33174                                                 |    |    |         |         |                |           |           |                       |             |
| N2                                                          | HS | II | 3114234 | 3116758 | WBGene00021288 | clec-123  | Y25C1A.1  | -0.310255210766305    |             |
| AGIWUR10375                                                 |    |    |         |         |                |           |           |                       |             |
| N2                                                          | HS | II | 3117771 | 3118451 | WBGene00020409 | T10D4.7   | T10D4.7   | -0.0663346287267164   | AGIWUR8077  |
| N2                                                          | HS | II | 3119332 | 3123192 | WBGene00020408 | T10D4.6   | T10D4.6   | 0.0879724062635869    | AGIWUR6156  |
| N2                                                          | HS | II | 3123506 | 3124899 | WBGene00005292 | srh-71    | T10D4.5   | -0.00161463832024911  | AGIWUR36043 |
| N2                                                          | HS | II | 3126037 | 3126441 | WBGene00002102 | ins-19    | T10D4.13  | -0.132752998512061    |             |
| AGIWUR11814;AGIWUR14823;AGIWUR29537;AGIWUR31712;AGIWUR36904 |    |    |         |         |                |           |           |                       |             |
| N2                                                          | HS | II | 3127041 | 3127790 | WBGene00002114 | ins-31    | T10D4.4   | 0.0501857623297894    |             |
| AGIWUR11011;AGIWUR28105;AGIWUR30924;AGIWUR31563;AGIWUR40948 |    |    |         |         |                |           |           |                       |             |
| N2                                                          | HS | II | 3129179 | 3131288 | WBGene00020407 | chil-24   | T10D4.3   | 0.12491672547913      | AGIWUR34237 |
| N2                                                          | HS | II | 3134099 | 3135283 | WBGene00005568 | sri-56    | T10D4.2   | -0.0652988709961781   |             |
| AGIWUR16953;AGIWUR32344                                     |    |    |         |         |                |           |           |                       |             |
| N2                                                          | HS | II | 3135581 | 3137904 | WBGene00005566 | sri-54    | T10D4.8   | 0.00845328302807324   | AGIWUR3261  |
| N2                                                          | HS | II | 3140918 | 3142955 | WBGene00005554 | sri-42    | T10D4.9   | -0.000904289423593774 | AGIWUR31287 |
| N2                                                          | HS | II | 3143394 | 3144652 | WBGene00005555 | sri-43    | T10D4.10  | 0.0693920385565043    |             |
| AGIWUR8985                                                  |    |    |         |         |                |           |           |                       |             |
| N2                                                          | HS | II | 3146142 | 3146992 | WBGene00077522 | T10D4.15  | T10D4.15  | 0.169163394634104     |             |

|                                                                                  |    |    |         |         |                |           |           |                     |             |
|----------------------------------------------------------------------------------|----|----|---------|---------|----------------|-----------|-----------|---------------------|-------------|
| AGIWUR19568;AGIWUR37353                                                          |    |    |         |         |                |           |           |                     |             |
| N2                                                                               | HS | II | 3148504 | 3149621 | WBGene00020410 | T10D4.11  | T10D4.11  | 0.284646447850134   |             |
| AGIWUR41738                                                                      |    |    |         |         |                |           |           |                     |             |
| N2                                                                               | HS | II | 3150140 | 3152575 | WBGene00020406 | T10D4.1   | T10D4.1   | -0.438382396470075  | AGIWUR10791 |
| N2                                                                               | HS | II | 3153050 | 3154483 | WBGene00005544 | sri-32    | T10D4.12  | -0.0587010801386736 |             |
| AGIWUR39838                                                                      |    |    |         |         |                |           |           |                     |             |
| N2                                                                               | HS | II | 3155167 | 3156849 | WBGene00005545 | sri-33    | Y27F2A.4  | -0.11976244146188   |             |
| AGIWUR38115                                                                      |    |    |         |         |                |           |           |                     |             |
| N2                                                                               | HS | II | 3157491 | 3159085 | WBGene00005546 | sri-34    | Y27F2A.7  | -0.0362206297975938 |             |
| AGIWUR36938                                                                      |    |    |         |         |                |           |           |                     |             |
| N2                                                                               | HS | II | 3168767 | 3170189 | WBGene00021297 | fbxc-55   | Y27F2A.5  | 0.105506492984305   |             |
| AGIWUR9674                                                                       |    |    |         |         |                |           |           |                     |             |
| N2                                                                               | HS | II | 3171468 | 3172276 | WBGene00045303 | Y27F2A.10 | Y27F2A.10 | -0.0947808199905009 |             |
| AGIWUR17309;AGIWUR17803                                                          |    |    |         |         |                |           |           |                     |             |
| N2                                                                               | HS | II | 3177963 | 3180476 | WBGene00005552 | sri-40    | Y27F2A.3  | -0.361129486697026  |             |
| AGIWUR21152;AGIWUR38695                                                          |    |    |         |         |                |           |           |                     |             |
| N2                                                                               | HS | II | 3180479 | 3182676 | WBGene00021298 | Y27F2A.6  | Y27F2A.6  | -0.0348790058165722 |             |
| AGIWUR12463                                                                      |    |    |         |         |                |           |           |                     |             |
| N2                                                                               | HS | II | 3185158 | 3186790 | WBGene00005590 | sri-78    | Y27F2A.2  | -0.123227115816334  |             |
| AGIWUR16945                                                                      |    |    |         |         |                |           |           |                     |             |
| N2                                                                               | HS | II | 3197613 | 3199098 | WBGene00005563 | sri-51    | ZC239.8   | 0.100896129893437   | AGIWUR36077 |
| N2                                                                               | HS | II | 3206020 | 3206541 | WBGene00044371 | ZC239.20  | ZC239.20  | 0.0472080797670831  |             |
| AGIWUR6160;AGIWUR8135;AGIWUR9712;AGIWUR18739;AGIWUR26353;AGIWUR35448;AGIWUR39029 |    |    |         |         |                |           |           |                     |             |
| N2                                                                               | HS | II | 3206939 | 3207388 | WBGene00044372 | ZC239.21  | ZC239.21  | 0.0332230022664302  |             |
| AGIWUR7815;AGIWUR14066;AGIWUR22921                                               |    |    |         |         |                |           |           |                     |             |
| N2                                                                               | HS | II | 3207683 | 3208751 | WBGene00022570 | sdz-35    | ZC239.12  | 0.114807959644487   |             |
| AGIWUR30050                                                                      |    |    |         |         |                |           |           |                     |             |
| N2                                                                               | HS | II | 3209478 | 3211181 | WBGene00022569 | ZC239.6   | ZC239.6   | -0.154936827683086  | AGIWUR1572  |
| N2                                                                               | HS | II | 3212371 | 3213208 | WBGene00022568 | ZC239.5   | ZC239.5   | 0.140160955627517   | AGIWUR27087 |
| N2                                                                               | HS | II | 3214452 | 3215565 | WBGene00022567 | ZC239.4   | ZC239.4   | 0.00863358521827529 |             |
| AGIWUR1430;AGIWUR11052;AGIWUR38797                                               |    |    |         |         |                |           |           |                     |             |
| N2                                                                               | HS | II | 3216081 | 3216600 | WBGene00022566 | ZC239.3   | ZC239.3   | -0.0219338458497269 | AGIWUR30364 |
| N2                                                                               | HS | II | 3217907 | 3218990 | WBGene00022565 | ZC239.2   | ZC239.2   | 0.171330516992287   | AGIWUR11486 |
| N2                                                                               | HS | II | 3221126 | 3222010 | WBGene00022572 | ZC239.14  | ZC239.14  | 0.174782357029706   |             |
| AGIWUR28231                                                                      |    |    |         |         |                |           |           |                     |             |
| N2                                                                               | HS | II | 3222406 | 3222827 | WBGene00022571 | ZC239.13  | ZC239.13  | -0.0479173600131446 |             |
| AGIWUR7714                                                                       |    |    |         |         |                |           |           |                     |             |
| N2                                                                               | HS | II | 3224770 | 3225285 | WBGene00022574 | ZC239.16  | ZC239.16  | 0.303308790522024   |             |
| AGIWUR28996                                                                      |    |    |         |         |                |           |           |                     |             |



|                                                                       |    |    |         |         |                |          |          |                     |
|-----------------------------------------------------------------------|----|----|---------|---------|----------------|----------|----------|---------------------|
| N2                                                                    | HS | II | 3225348 | 3225968 | WBGene00022575 | ZC239.17 | ZC239.17 | 0.0602213620630065  |
| AGIWUR8136                                                            |    |    |         |         |                |          |          |                     |
| N2                                                                    | HS | II | 3228885 | 3230522 | WBGene00005501 | srh-297  | C17F4.4  | -0.168174147812369  |
| AGIWUR26598;AGIWUR31997                                               |    |    |         |         |                |          |          |                     |
| N2                                                                    | HS | II | 3230817 | 3234813 | WBGene00015914 | C17F4.8  | C17F4.8  | 0.216469642686839   |
| N2                                                                    | HS | II | 3235956 | 3237138 | WBGene00023479 | srz-67   | C17F4.10 | -0.148281871986281  |
| AGIWUR21449;AGIWUR34302;AGIWUR41495                                   |    |    |         |         |                |          |          |                     |
| N2                                                                    | HS | II | 3237471 | 3238179 | WBGene00044373 | C17F4.11 | C17F4.11 | -0.087404898552057  |
| AGIWUR8847;AGIWUR26875;AGIWUR29109                                    |    |    |         |         |                |          |          |                     |
| N2                                                                    | HS | II | 3238169 | 3240043 | WBGene00023480 | srz-68   | C17F4.9  | -0.0310809328615615 |
| N2                                                                    | HS | II | 3240545 | 3241726 | WBGene00015911 | C17F4.3  | C17F4.3  | 0.363397199839326   |
| N2                                                                    | HS | II | 3243676 | 3244162 | WBGene00044374 | C17F4.12 | C17F4.12 | -0.0867007438949852 |
| AGIWUR946;AGIWUR4095;AGIWUR14240;AGIWUR31293;AGIWUR35584              |    |    |         |         |                |          |          |                     |
| N2                                                                    | HS | II | 3245087 | 3246015 | WBGene00015913 | C17F4.7  | C17F4.7  | 0.099428745397752   |
| N2                                                                    | HS | II | 3246316 | 3248174 | WBGene00015912 | fbxc-50  | C17F4.5  | -0.0963322027692186 |
| N2                                                                    | HS | II | 3248623 | 3249386 | WBGene00015910 | C17F4.2  | C17F4.2  | 0.429405424799572   |
| N2                                                                    | HS | II | 3250313 | 3250856 | WBGene00015909 | clec-124 | C17F4.1  | 0.131674552620431   |
| AGIWUR1933                                                            |    |    |         |         |                |          |          |                     |
| N2                                                                    | HS | II | 3250985 | 3259354 | WBGene00001544 | gcy-19   | C17F4.6  | 0.0348998764052002  |
| N2                                                                    | HS | II | 3267663 | 3271505 | WBGene00195073 | F02E11.7 | F02E11.7 | -0.272374628619662  |
| AGIWUR11844                                                           |    |    |         |         |                |          |          |                     |
| N2                                                                    | HS | II | 3272349 | 3275023 | WBGene00017181 | F02E11.3 | F02E11.3 | -0.0605184331845852 |
| AGIWUR41749                                                           |    |    |         |         |                |          |          |                     |
| N2                                                                    | HS | II | 3276256 | 3277305 | WBGene00017182 | F02E11.4 | F02E11.4 | 0.0477061078638323  |
| AGIWUR37077                                                           |    |    |         |         |                |          |          |                     |
| N2                                                                    | HS | II | 3278987 | 3281686 | WBGene00017179 | wht-4    | F02E11.1 | -0.0831601645358941 |
| AGIWUR987;AGIWUR15251;AGIWUR17304;AGIWUR24953;AGIWUR30539;AGIWUR35672 |    |    |         |         |                |          |          |                     |
| N2                                                                    | HS | II | 3282653 | 3287158 | WBGene00018196 | nep-13   | F39E9.4  | -0.0591544856072836 |
| N2                                                                    | HS | II | 3287373 | 3289031 | WBGene00005575 | sri-63   | F39E9.3  | 0.0458208564314173  |
| N2                                                                    | HS | II | 3290486 | 3290644 | WBGene00044375 | F39E9.14 | F39E9.14 | -0.028529847088401  |
| AGIWUR1826                                                            |    |    |         |         |                |          |          |                     |
| N2                                                                    | HS | II | 3292264 | 3293472 | WBGene00023281 | F39E9.8  | F39E9.8  | -0.1261987994341    |
| N2                                                                    | HS | II | 3294021 | 3295068 | WBGene00023282 | F39E9.9  | F39E9.9  | -0.242230710832223  |
| N2                                                                    | HS | II | 3295414 | 3296582 | WBGene00018200 | btb-17   | F39E9.11 | -0.133552266861949  |
| AGIWUR14277;AGIWUR18377                                               |    |    |         |         |                |          |          |                     |
| N2                                                                    | HS | II | 3296908 | 3298027 | WBGene00018195 | btb-16   | F39E9.2  | 0.357634649642522   |
| N2                                                                    | HS | II | 3299825 | 3300676 | WBGene00269387 | btb-22   | F39E9.27 | 0.1370111920777     |
| N2                                                                    | HS | II | 3302761 | 3303750 | WBGene00023036 | F39E9.10 | F39E9.10 | -0.0390605321217947 |
| AGIWUR23026;AGIWUR23331;AGIWUR23832;AGIWUR27066;AGIWUR32012           |    |    |         |         |                |          |          |                     |

|                                                            |    |    |         |         |                |          |           |                      |
|------------------------------------------------------------|----|----|---------|---------|----------------|----------|-----------|----------------------|
| N2                                                         | HS | II | 3324021 | 3326431 | WBGene00021589 | Y46D2A.1 | Y46D2A.1  | -0.282722897119343   |
| AGIWUR28811                                                |    |    |         |         |                |          |           |                      |
| N2                                                         | HS | II | 3326492 | 3327197 | WBGene00021591 | Y46D2A.3 | Y46D2A.3  | -0.114022866949572   |
| AGIWUR26527                                                |    |    |         |         |                |          |           |                      |
| N2                                                         | HS | II | 3331889 | 3334205 | WBGene00077751 | irld-27  | F14D2.17  | -0.158950115945368   |
| AGIWUR2293                                                 |    |    |         |         |                |          |           |                      |
| N2                                                         | HS | II | 3335422 | 3337139 | WBGene00206522 | F14D2.19 | F14D2.19  | 0.252912169313434    |
| AGIWUR31445                                                |    |    |         |         |                |          |           |                      |
| N2                                                         | HS | II | 3340556 | 3341260 | WBGene00017453 | F14D2.5  | F14D2.5   | -0.0736567692604506  |
| AGIWUR12906                                                |    |    |         |         |                |          |           |                      |
| N2                                                         | HS | II | 3341268 | 3342104 | WBGene00017459 | F14D2.11 | F14D2.11  | 0.070750183833038    |
| AGIWUR40910                                                |    |    |         |         |                |          |           |                      |
| N2                                                         | HS | II | 3343710 | 3344967 | WBGene00017461 | bath-28  | F14D2.13  | 0.0378549139770756   |
| AGIWUR23578;AGIWUR35439;AGIWUR38267;AGIWUR40583            |    |    |         |         |                |          |           |                      |
| N2                                                         | HS | II | 3345218 | 3346378 | WBGene00017460 | bath-30  | F14D2.12  | -0.0214069485445769  |
| AGIWUR37539                                                |    |    |         |         |                |          |           |                      |
| N2                                                         | HS | II | 3346745 | 3347519 | WBGene00017462 | F14D2.14 | F14D2.14  | -0.13833081350368    |
| AGIWUR23383;AGIWUR28782;AGIWUR38077                        |    |    |         |         |                |          |           |                      |
| N2                                                         | HS | II | 3347574 | 3349870 | WBGene00017456 | F14D2.8  | F14D2.8   | -0.285713668537078   |
| AGIWUR8496;AGIWUR16471;AGIWUR17696;AGIWUR37394;AGIWUR38928 |    |    |         |         |                |          |           |                      |
| N2                                                         | HS | II | 3350252 | 3358981 | WBGene00017452 | bath-29  | F14D2.4   | -0.0142852280074131  |
| AGIWUR8805;AGIWUR22859;AGIWUR23701;AGIWUR25164;AGIWUR32290 |    |    |         |         |                |          |           |                      |
| N2                                                         | HS | II | 3359139 | 3360255 | WBGene00017451 | F14D2.2  | F14D2.2   | -0.00632291508951965 |
| AGIWUR24777                                                |    |    |         |         |                |          |           |                      |
| N2                                                         | HS | II | 3361899 | 3365961 | WBGene00021728 | Y49F6C.6 | Y49F6C.6  | -0.0464510845992168  |
| AGIWUR8396                                                 |    |    |         |         |                |          |           |                      |
| N2                                                         | HS | II | 3367258 | 3368197 | WBGene00021729 | Y49F6C.7 | Y49F6C.7  | 0.0332740939956793   |
| AGIWUR17291                                                |    |    |         |         |                |          |           |                      |
| N2                                                         | HS | II | 3369175 | 3370111 | WBGene00021730 | Y49F6C.8 | Y49F6C.8  | -0.08425436255345    |
| AGIWUR7299;AGIWUR13872;AGIWUR34677                         |    |    |         |         |                |          |           |                      |
| N2                                                         | HS | II | 3371310 | 3372145 | WBGene00021727 | bath-23  | Y49F6C.5  | 0.139385886745408    |
| AGIWUR11832                                                |    |    |         |         |                |          |           |                      |
| N2                                                         | HS | II | 3373169 | 3374185 | WBGene00219758 | linc-11  | Y49F6C.11 | 0.131406720713334    |
| AGIWUR23245;AGIWUR36507                                    |    |    |         |         |                |          |           |                      |
| N2                                                         | HS | II | 3375079 | 3376714 | WBGene00021726 | bath-10  | Y49F6C.4  | -0.120589677352212   |
| AGIWUR38786                                                |    |    |         |         |                |          |           |                      |
| N2                                                         | HS | II | 3377111 | 3378726 | WBGene00021725 | bath-9   | Y49F6C.3  | -0.147371603927402   |
| AGIWUR26956                                                |    |    |         |         |                |          |           |                      |
| N2                                                         | HS | II | 3378575 | 3379551 | WBGene00021724 | Y49F6C.2 | Y49F6C.2  | -0.127305070335917   |
| AGIWUR42499                                                |    |    |         |         |                |          |           |                      |
| N2                                                         | HS | II | 3380288 | 3381403 | WBGene00021723 | bath-8   | Y49F6C.1  | -0.0687144508303117  |

AGIWUR16875;AGIWUR21492;AGIWUR35386

|                                     |    |    |         |         |                 |          |          |                     |             |
|-------------------------------------|----|----|---------|---------|-----------------|----------|----------|---------------------|-------------|
| N2                                  | HS | II | 3381836 | 3384017 | WBGene00020290  | T06D4.1  | T06D4.1  | -0.131945136819468  | AGIWUR42268 |
| N2                                  | HS | II | 3388280 | 3391586 | WBGene00020292  | nep-19   | T06D4.3  | 0.15191692291397    | AGIWUR35625 |
| N2                                  | HS | II | 3392036 | 3395533 | WBGene00020293  | nep-20   | T06D4.4  | 0.232043716193376   | AGIWUR13318 |
| N2                                  | HS | II | 3395821 | 3399303 | WBGene00017554  | nep-9    | F18A12.5 | 0.175932366031988   |             |
| AGIWUR32423;AGIWUR41571;AGIWUR43562 |    |    |         |         |                 |          |          |                     |             |
| N2                                  | HS | II | 3399754 | 3402925 | WBGene00017555  | nep-10   | F18A12.6 | 0.146675420999291   |             |
| AGIWUR28365                         |    |    |         |         |                 |          |          |                     |             |
| N2                                  | HS | II | 3403835 | 3406838 | WBGene00017553  | nep-8    | F18A12.4 | 0.0990516367204233  |             |
| AGIWUR7990                          |    |    |         |         |                 |          |          |                     |             |
| N2                                  | HS | II | 3406951 | 3409774 | WBGene00017552  | nep-7    | F18A12.3 | 0.112950671870776   |             |
| AGIWUR5802;AGIWUR20138              |    |    |         |         |                 |          |          |                     |             |
| N2                                  | HS | II | 3411425 | 3414469 | WBGene00017556  | F18A12.7 | F18A12.7 | -0.303260811597163  |             |
| AGIWUR10742                         |    |    |         |         |                 |          |          |                     |             |
| N2                                  | HS | II | 3415005 | 3416250 | WBGene00017551  | F18A12.2 | F18A12.2 | -0.016495609331459  |             |
| AGIWUR39979                         |    |    |         |         |                 |          |          |                     |             |
| N2                                  | HS | II | 3416838 | 3420671 | WBGene00017550  | nep-6    | F18A12.1 | 0.0895061610983046  |             |
| AGIWUR29679;AGIWUR39896             |    |    |         |         |                 |          |          |                     |             |
| N2                                  | HS | II | 3420653 | 3425533 | WBGene00017557  | nep-11   | F18A12.8 | -0.283791676447258  |             |
| AGIWUR10985;AGIWUR21992             |    |    |         |         |                 |          |          |                     |             |
| N2                                  | HS | II | 3429406 | 3431303 | WBGene00015855  | C16C8.18 | C16C8.18 | -0.0427911840973643 |             |
| AGIWUR10454                         |    |    |         |         |                 |          |          |                     |             |
| N2                                  | HS | II | 3431286 | 3436512 | WBGene00015841  | skpo-2   | C16C8.2  | 0.301098387909622   | AGIWUR13637 |
| N2                                  | HS | II | 3440827 | 3442445 | WBGene00015854  | C16C8.17 | C16C8.17 | 0.127623067022289   |             |
| AGIWUR17336                         |    |    |         |         |                 |          |          |                     |             |
| N2                                  | HS | II | 3443488 | 3444380 | WBGene00015842  | C16C8.4  | C16C8.4  | 0.0317063786217702  | AGIWUR11008 |
| N2                                  | HS | II | 3444689 | 3445381 | WBGene00015843  | C16C8.5  | C16C8.5  | -0.35120273571969   | AGIWUR10128 |
| N2                                  | HS | II | 3448206 | 3448759 | WBGene000195071 | C16C8.21 | C16C8.21 | 0.261625783765137   |             |
| AGIWUR6579                          |    |    |         |         |                 |          |          |                     |             |
| N2                                  | HS | II | 3449562 | 3450994 | WBGene00015852  | C16C8.14 | C16C8.14 |                     |             |
| -0.00191471530028586 AGIWUR21154    |    |    |         |         |                 |          |          |                     |             |
| N2                                  | HS | II | 3452721 | 3453602 | WBGene00015850  | C16C8.12 | C16C8.12 | -0.0828132846674023 |             |
| AGIWUR31623                         |    |    |         |         |                 |          |          |                     |             |
| N2                                  | HS | II | 3453708 | 3454688 | WBGene00015849  | C16C8.11 | C16C8.11 | 0.0184757665539159  |             |
| AGIWUR34563                         |    |    |         |         |                 |          |          |                     |             |
| N2                                  | HS | II | 3458501 | 3459023 | WBGene00015856  | C16C8.19 | C16C8.19 | 0.206869895192011   |             |
| AGIWUR34765                         |    |    |         |         |                 |          |          |                     |             |
| N2                                  | HS | II | 3459619 | 3460314 | WBGene00015845  | C16C8.7  | C16C8.7  | 0.152963861003055   | AGIWUR32514 |
| N2                                  | HS | II | 3461112 | 3461681 | WBGene00015846  | C16C8.8  | C16C8.8  | -0.110157743529291  | AGIWUR41834 |

|                                                                         |    |    |         |         |                |           |           |                     |             |
|-------------------------------------------------------------------------|----|----|---------|---------|----------------|-----------|-----------|---------------------|-------------|
| N2                                                                      | HS | II | 3462570 | 3463194 | WBGene00015847 | C16C8.9   | C16C8.9   | 0.144614258830605   | AGIWUR25088 |
| N2                                                                      | HS | II | 3464155 | 3464680 | WBGene00015848 | C16C8.10  | C16C8.10  | 0.0656518315067398  |             |
| AGIWUR44392                                                             |    |    |         |         |                |           |           |                     |             |
| N2                                                                      | HS | II | 3470060 | 3471703 | WBGene00044377 | Y49F6B.13 | Y49F6B.13 | -0.0157189013715224 |             |
| AGIWUR18112;AGIWUR21244;AGIWUR23083;AGIWUR31974;AGIWUR35691;AGIWUR36406 |    |    |         |         |                |           |           |                     |             |
| N2                                                                      | HS | II | 3472075 | 3472430 | WBGene00044376 | Y49F6B.12 | Y49F6B.12 | 0.0877608957263627  |             |
| AGIWUR8840;AGIWUR19052;AGIWUR20133                                      |    |    |         |         |                |           |           |                     |             |
| N2                                                                      | HS | II | 3472879 | 3473289 | WBGene00021718 | Y49F6B.6  | Y49F6B.6  | 0.221323622101757   |             |
| AGIWUR26738                                                             |    |    |         |         |                |           |           |                     |             |
| N2                                                                      | HS | II | 3474050 | 3474729 | WBGene00021717 | sdz-32    | Y49F6B.5  | 0.0786548493284025  |             |
| AGIWUR40496                                                             |    |    |         |         |                |           |           |                     |             |
| N2                                                                      | HS | II | 3475644 | 3477271 | WBGene00021719 | fbxb-104  | Y49F6B.7  | -0.0304043829655996 |             |
| AGIWUR1658                                                              |    |    |         |         |                |           |           |                     |             |
| N2                                                                      | HS | II | 3479473 | 3481685 | WBGene00021720 | Y49F6B.8  | Y49F6B.8  | 0.0328872410558709  |             |
| AGIWUR15937                                                             |    |    |         |         |                |           |           |                     |             |
| N2                                                                      | HS | II | 3482408 | 3490143 | WBGene00004896 | smu-2     | Y49F6B.4  | 0.0215438571072717  |             |
| AGIWUR14962;AGIWUR16930;AGIWUR17405;AGIWUR39392                         |    |    |         |         |                |           |           |                     |             |
| N2                                                                      | HS | II | 3491179 | 3492881 | WBGene00021716 | fbxb-112  | Y49F6B.3  | -0.0391429327381356 |             |
| AGIWUR39175                                                             |    |    |         |         |                |           |           |                     |             |
| N2                                                                      | HS | II | 3493934 | 3499426 | WBGene00021721 | Y49F6B.9  | Y49F6B.9  | -0.206427999041364  |             |
| AGIWUR7086;AGIWUR11562;AGIWUR16713;AGIWUR26276;AGIWUR36914;AGIWUR39027  |    |    |         |         |                |           |           |                     |             |
| N2                                                                      | HS | II | 3500077 | 3502449 | WBGene00000647 | col-71    | Y49F6B.10 | -0.0809933497980975 |             |
| AGIWUR4133                                                              |    |    |         |         |                |           |           |                     |             |
| N2                                                                      | HS | II | 3502968 | 3504910 | WBGene00021715 | Y49F6B.2  | Y49F6B.2  | 0.334414236413373   |             |
| AGIWUR6288                                                              |    |    |         |         |                |           |           |                     |             |
| N2                                                                      | HS | II | 3505017 | 3509956 | WBGene00021714 | cyh-1     | Y49F6B.1  | 0.0594396041707981  |             |
| AGIWUR13832                                                             |    |    |         |         |                |           |           |                     |             |
| N2                                                                      | HS | II | 3512690 | 3514731 | WBGene00021722 | srz-5     | Y49F6B.11 | 0.309556697001889   |             |
| AGIWUR17341                                                             |    |    |         |         |                |           |           |                     |             |
| N2                                                                      | HS | II | 3514963 | 3515484 | WBGene00044378 | Y49F6B.14 | Y49F6B.14 | -0.0667493664593524 |             |
| AGIWUR5485;AGIWUR5867;AGIWUR23289                                       |    |    |         |         |                |           |           |                     |             |
| N2                                                                      | HS | II | 3516008 | 3518898 | WBGene00021118 | cllec-125 | W09G10.6  | 0.168362658211848   |             |
| AGIWUR25512                                                             |    |    |         |         |                |           |           |                     |             |
| N2                                                                      | HS | II | 3519494 | 3520421 | WBGene00021117 | cllec-126 | W09G10.5  | 0.16345162717792    |             |
| AGIWUR40239                                                             |    |    |         |         |                |           |           |                     |             |
| N2                                                                      | HS | II | 3520703 | 3524180 | WBGene00000648 | col-72    | W09G10.1  | 0.22426888162708    |             |
| AGIWUR26693                                                             |    |    |         |         |                |           |           |                     |             |
| N2                                                                      | HS | II | 3525172 | 3528516 | WBGene00021116 | ncs-6     | W09G10.3  | 0.0717779573698447  |             |
| AGIWUR29131                                                             |    |    |         |         |                |           |           |                     |             |

|                                                |    |    |         |         |                 |           |           |                     |             |
|------------------------------------------------|----|----|---------|---------|-----------------|-----------|-----------|---------------------|-------------|
| N2                                             | HS | II | 3532527 | 3546431 | WBGene00000162  | apd-3     | W09G10.4  | -0.068830505001884  |             |
| AGIWUR18273                                    |    |    |         |         |                 |           |           |                     |             |
| N2                                             | HS | II | 3550651 | 3553437 | WBGene00021148  | W10G11.19 | W10G11.19 | 0.0481949987717734  |             |
| AGIWUR32549                                    |    |    |         |         |                 |           |           |                     |             |
| N2                                             | HS | II | 3553724 | 3554618 | WBGene00021149  | dnc-3     | W10G11.20 | 0.0987982106389822  |             |
| AGIWUR15212                                    |    |    |         |         |                 |           |           |                     |             |
| N2                                             | HS | II | 3557474 | 3567490 | WBGene00021146  | lgc-45    | W10G11.16 | 0.0301127661183411  |             |
| AGIWUR3670;AGIWUR23297;AGIWUR31206;AGIWUR38708 |    |    |         |         |                 |           |           |                     |             |
| N2                                             | HS | II | 3568117 | 3569218 | WBGene00021138  | clcc-127  | W10G11.5  | -0.239833351542386  |             |
| AGIWUR29457                                    |    |    |         |         |                 |           |           |                     |             |
| N2                                             | HS | II | 3569430 | 3571027 | WBGene00021139  | clcc-128  | W10G11.6  | -0.01031172483665   |             |
| AGIWUR17823                                    |    |    |         |         |                 |           |           |                     |             |
| N2                                             | HS | II | 3571491 | 3572883 | WBGene00021145  | clcc-129  | W10G11.15 | 0.154538008516261   |             |
| AGIWUR20030                                    |    |    |         |         |                 |           |           |                     |             |
| N2                                             | HS | II | 3573556 | 3574652 | WBGene00021144  | clcc-130  | W10G11.14 | 0.0642561013857232  |             |
| AGIWUR4511;AGIWUR10186;AGIWUR26533;AGIWUR28817 |    |    |         |         |                 |           |           |                     |             |
| N2                                             | HS | II | 3574699 | 3576201 | WBGene00021140  | clcc-131  | W10G11.7  | -0.320724081739781  |             |
| AGIWUR21113                                    |    |    |         |         |                 |           |           |                     |             |
| N2                                             | HS | II | 3577045 | 3578110 | WBGene00021143  | clcc-132  | W10G11.13 | -0.194472978411895  |             |
| AGIWUR29293                                    |    |    |         |         |                 |           |           |                     |             |
| N2                                             | HS | II | 3578421 | 3579031 | WBGene00021142  | clcc-133  | W10G11.12 | 0.118300719544923   |             |
| AGIWUR40246                                    |    |    |         |         |                 |           |           |                     |             |
| N2                                             | HS | II | 3580083 | 3581433 | WBGene00021141  | clcc-134  | W10G11.11 | -0.314048731902101  |             |
| AGIWUR34394                                    |    |    |         |         |                 |           |           |                     |             |
| N2                                             | HS | II | 3582052 | 3583505 | WBGene00005281  | srh-59    | W10G11.10 | 0.0283779487533016  |             |
| AGIWUR25922                                    |    |    |         |         |                 |           |           |                     |             |
| N2                                             | HS | II | 3583987 | 3586063 | WBGene00005282  | srh-60    | W10G11.9  | -0.101208190874099  |             |
| AGIWUR8096                                     |    |    |         |         |                 |           |           |                     |             |
| N2                                             | HS | II | 3603387 | 3607384 | WBGene00021711  | wago-11   | Y49F6A.1  | -0.0908884177465801 |             |
| AGIWUR4569;AGIWUR22972;AGIWUR38323             |    |    |         |         |                 |           |           |                     |             |
| N2                                             | HS | II | 3607937 | 3609862 | WBGene00021713  | Y49F6A.5  | Y49F6A.5  | -0.241232686282535  |             |
| AGIWUR38967                                    |    |    |         |         |                 |           |           |                     |             |
| N2                                             | HS | II | 3610409 | 3615352 | WBGene00018235  | F40E12.2  | F40E12.2  | 0.0279330246878526  |             |
| AGIWUR15978                                    |    |    |         |         |                 |           |           |                     |             |
| N2                                             | HS | II | 3617812 | 3618621 | WBGene00018234  | F40E12.1  | F40E12.1  | 0.0762166532327981  |             |
| AGIWUR20499                                    |    |    |         |         |                 |           |           |                     |             |
| N2                                             | HS | II | 3624198 | 3626950 | WBGene00019796  | M151.4    | M151.4    | -0.10112728841402   | AGIWUR7391  |
| N2                                             | HS | II | 3629295 | 3630860 | WBGene000219238 | M151.9    | M151.9    | 0.104654376824183   | AGIWUR19947 |
| N2                                             | HS | II | 3631444 | 3633875 | WBGene00019794  | M151.2    | M151.2    | 0.0293108945765086  | AGIWUR40444 |

|                                                                        |    |    |         |         |                |           |           |                      |             |
|------------------------------------------------------------------------|----|----|---------|---------|----------------|-----------|-----------|----------------------|-------------|
| N2                                                                     | HS | II | 3637811 | 3639338 | WBGene00019797 | fbxb-31   | M151.5    | -0.0252812592439735  | AGIWUR21468 |
| N2                                                                     | HS | II | 3641500 | 3644082 | WBGene00019793 | M151.1    | M151.1    | -0.0969880932205145  | AGIWUR37972 |
| N2                                                                     | HS | II | 3645427 | 3646982 | WBGene00019798 | fbxb-32   | M151.6    | -0.0731951988251751  | AGIWUR21526 |
| N2                                                                     | HS | II | 3647411 | 3648599 | WBGene00044314 | fbxb-33   | M151.8    | 0.266548472585065    | AGIWUR37742 |
| N2                                                                     | HS | II | 3651256 | 3654276 | WBGene00017590 | F19B10.11 | F19B10.11 | 0.0961234342964108   |             |
| AGIWUR19558                                                            |    |    |         |         |                |           |           |                      |             |
| N2                                                                     | HS | II | 3655678 | 3657732 | WBGene00017587 | F19B10.5  | F19B10.5  | -0.19491899004861    |             |
| AGIWUR136                                                              |    |    |         |         |                |           |           |                      |             |
| N2                                                                     | HS | II | 3662204 | 3662618 | WBGene00194713 | F19B10.13 | F19B10.13 | 0.214104637168649    |             |
| AGIWUR21305                                                            |    |    |         |         |                |           |           |                      |             |
| N2                                                                     | HS | II | 3663509 | 3663896 | WBGene00017588 | F19B10.6  | F19B10.6  | -0.1235032377836     |             |
| AGIWUR32405                                                            |    |    |         |         |                |           |           |                      |             |
| N2                                                                     | HS | II | 3664404 | 3665120 | WBGene00017585 | F19B10.3  | F19B10.3  | -0.0676357180182912  |             |
| AGIWUR9260                                                             |    |    |         |         |                |           |           |                      |             |
| N2                                                                     | HS | II | 3667179 | 3668664 | WBGene00005988 | srx-97    | F19B10.7  | -0.0549585241663166  |             |
| AGIWUR11010                                                            |    |    |         |         |                |           |           |                      |             |
| N2                                                                     | HS | II | 3669321 | 3671056 | WBGene00005989 | srx-98    | F19B10.8  | -0.0844530805873287  |             |
| AGIWUR27383                                                            |    |    |         |         |                |           |           |                      |             |
| N2                                                                     | HS | II | 3671908 | 3673593 | WBGene00004750 | sea-1     | F19B10.9  | -0.0773168092500676  |             |
| AGIWUR13545                                                            |    |    |         |         |                |           |           |                      |             |
| N2                                                                     | HS | II | 3675624 | 3676733 | WBGene00017584 | F19B10.2  | F19B10.2  | -0.0970391437601759  |             |
| AGIWUR1693;AGIWUR12007;AGIWUR13921;AGIWUR30059;AGIWUR30085;AGIWUR31919 |    |    |         |         |                |           |           |                      |             |
| N2                                                                     | HS | II | 3677535 | 3681415 | WBGene00017589 | F19B10.10 | F19B10.10 | 0.0457529536418129   |             |
| AGIWUR2171                                                             |    |    |         |         |                |           |           |                      |             |
| N2                                                                     | HS | II | 3683177 | 3684996 | WBGene00017583 | F19B10.1  | F19B10.1  | -0.0498072459183199  |             |
| AGIWUR4480;AGIWUR5713;AGIWUR20096                                      |    |    |         |         |                |           |           |                      |             |
| N2                                                                     | HS | II | 3685952 | 3687133 | WBGene00005990 | srx-99    | F19B10.12 | -0.0942275459972408  |             |
| AGIWUR110;AGIWUR17748                                                  |    |    |         |         |                |           |           |                      |             |
| N2                                                                     | HS | II | 3687791 | 3688691 | WBGene00044379 | F40H7.12  | F40H7.12  | -0.165087789693649   |             |
| AGIWUR26635                                                            |    |    |         |         |                |           |           |                      |             |
| N2                                                                     | HS | II | 3689467 | 3690746 | WBGene00005992 | srx-101   | F40H7.4   | -0.106493667587159   |             |
| AGIWUR24580;AGIWUR30666                                                |    |    |         |         |                |           |           |                      |             |
| N2                                                                     | HS | II | 3691784 | 3693231 | WBGene00005991 | srx-100   | F40H7.3   | -0.0253360399698339  | AGIWUR33715 |
| N2                                                                     | HS | II | 3693401 | 3694764 | WBGene00005993 | srx-102   | F40H7.5   | 0.0152270388933315   | AGIWUR22545 |
| N2                                                                     | HS | II | 3695383 | 3698162 | WBGene00005994 | srx-103   | F40H7.11  | 0.00642409852639858  |             |
| AGIWUR8577                                                             |    |    |         |         |                |           |           |                      |             |
| N2                                                                     | HS | II | 3698599 | 3699691 | WBGene00005995 | srx-104   | F40H7.7   | -0.00806227597129539 |             |
| AGIWUR19918;AGIWUR37276                                                |    |    |         |         |                |           |           |                      |             |
| N2                                                                     | HS | II | 3699834 | 3701405 | WBGene00005996 | srx-105   | F40H7.8   | 0.0572301971859668   | AGIWUR30107 |

|                                                                     |    |    |         |         |                |           |           |                     |             |
|---------------------------------------------------------------------|----|----|---------|---------|----------------|-----------|-----------|---------------------|-------------|
| N2                                                                  | HS | II | 3701708 | 3703250 | WBGene00005997 | srx-106   | F40H7.9   | 0.0510433130262928  | AGIWUR13997 |
| N2                                                                  | HS | II | 3703721 | 3704945 | WBGene00005998 | srx-107   | F40H7.10  | -0.0674971381988829 |             |
| AGIWUR31004                                                         |    |    |         |         |                |           |           |                     |             |
| N2                                                                  | HS | II | 3705620 | 3707065 | WBGene00005999 | srx-108   | F40H7.2   | 0.0522974854053366  | AGIWUR15821 |
| N2                                                                  | HS | II | 3707610 | 3709221 | WBGene00006000 | srx-109   | F40H7.1   | -0.0167924437992406 |             |
| AGIWUR710;AGIWUR29482                                               |    |    |         |         |                |           |           |                     |             |
| N2                                                                  | HS | II | 3709555 | 3710952 | WBGene00006001 | srx-110   | C46E10.6  | -0.118560446215604  |             |
| AGIWUR33826                                                         |    |    |         |         |                |           |           |                     |             |
| N2                                                                  | HS | II | 3711293 | 3713048 | WBGene00016711 | fbxc-53   | C46E10.5  | -0.107411868115454  |             |
| AGIWUR35329                                                         |    |    |         |         |                |           |           |                     |             |
| N2                                                                  | HS | II | 3713188 | 3714695 | WBGene00005319 | srh-100   | C46E10.10 | 0.00728553437782598 |             |
| AGIWUR15850                                                         |    |    |         |         |                |           |           |                     |             |
| N2                                                                  | HS | II | 3715000 | 3716555 | WBGene00005318 | srh-99    | C46E10.7  | 0.0128675871764941  |             |
| AGIWUR7220                                                          |    |    |         |         |                |           |           |                     |             |
| N2                                                                  | HS | II | 3717138 | 3719768 | WBGene00016710 | fbxc-52   | C46E10.4  | -0.0772784833359914 |             |
| AGIWUR29686;AGIWUR42598                                             |    |    |         |         |                |           |           |                     |             |
| N2                                                                  | HS | II | 3721316 | 3723084 | WBGene00016709 | C46E10.3  | C46E10.3  | 0.0288281442149216  |             |
| AGIWUR4335                                                          |    |    |         |         |                |           |           |                     |             |
| N2                                                                  | HS | II | 3723378 | 3723896 | WBGene00016708 | C46E10.2  | C46E10.2  | 0.0435666873556393  |             |
| AGIWUR1714                                                          |    |    |         |         |                |           |           |                     |             |
| N2                                                                  | HS | II | 3724225 | 3725909 | WBGene00016707 | C46E10.1  | C46E10.1  | 0.0208223976825632  |             |
| AGIWUR15609                                                         |    |    |         |         |                |           |           |                     |             |
| N2                                                                  | HS | II | 3725906 | 3727479 | WBGene00016712 | C46E10.8  | C46E10.8  | -0.42127659276521   |             |
| AGIWUR300;AGIWUR7910;AGIWUR9883;AGIWUR13329;AGIWUR14299;AGIWUR34806 |    |    |         |         |                |           |           |                     |             |
| N2                                                                  | HS | II | 3727690 | 3729707 | WBGene00016713 | C46E10.9  | C46E10.9  | -0.183441744639312  |             |
| AGIWUR9856                                                          |    |    |         |         |                |           |           |                     |             |
| N2                                                                  | HS | II | 3730152 | 3731548 | WBGene00017406 | sdz-12    | F12E12.5  | -0.195303590959778  |             |
| AGIWUR42036                                                         |    |    |         |         |                |           |           |                     |             |
| N2                                                                  | HS | II | 3731973 | 3733203 | WBGene00017405 | bath-31   | F12E12.4  | -0.0740652861264337 |             |
| AGIWUR7461;AGIWUR23673;AGIWUR27896                                  |    |    |         |         |                |           |           |                     |             |
| N2                                                                  | HS | II | 3735929 | 3736943 | WBGene00017407 | F12E12.6  | F12E12.6  | -0.0907564479518328 |             |
| AGIWUR2208                                                          |    |    |         |         |                |           |           |                     |             |
| N2                                                                  | HS | II | 3737334 | 3738282 | WBGene00017404 | F12E12.3  | F12E12.3  | 0.00492862052444654 |             |
| AGIWUR1974                                                          |    |    |         |         |                |           |           |                     |             |
| N2                                                                  | HS | II | 3739947 | 3740837 | WBGene00017403 | F12E12.2  | F12E12.2  | -0.0315508450642596 |             |
| AGIWUR28417                                                         |    |    |         |         |                |           |           |                     |             |
| N2                                                                  | HS | II | 3741884 | 3742509 | WBGene00017402 | F12E12.1  | F12E12.1  | -0.0525439920881041 |             |
| AGIWUR38937                                                         |    |    |         |         |                |           |           |                     |             |
| N2                                                                  | HS | II | 3742465 | 3743819 | WBGene00044811 | F12E12.11 | F12E12.11 | 0.359358691417874   |             |

|                                                                                     |    |    |         |         |                |           |           |                     |                      |
|-------------------------------------------------------------------------------------|----|----|---------|---------|----------------|-----------|-----------|---------------------|----------------------|
| AGIWUR40004                                                                         |    |    |         |         |                |           |           |                     |                      |
| N2                                                                                  | HS | II | 3746474 | 3747459 | WBGene00044693 | fbxb-92   | F12E12.9  |                     | -0.037225586475409   |
| AGIWUR35746                                                                         |    |    |         |         |                |           |           |                     |                      |
| N2                                                                                  | HS | II | 3747679 | 3748819 | WBGene00044694 | fbxb-90   | F12E12.10 |                     | 0.0892086372309873   |
| AGIWUR34471                                                                         |    |    |         |         |                |           |           |                     |                      |
| N2                                                                                  | HS | II | 3749061 | 3750785 | WBGene00044692 | fbxb-91   | F12E12.8  |                     | 0.0169600374961609   |
| AGIWUR19698;AGIWUR21274;AGIWUR30396;AGIWUR32964;AGIWUR40368;AGIWUR41591             |    |    |         |         |                |           |           |                     |                      |
| N2                                                                                  | HS | II | 3751261 | 3752284 | WBGene00017408 | sdz-11    | F12E12.7  |                     | 0.360835713870965    |
| AGIWUR23637;AGIWUR41398                                                             |    |    |         |         |                |           |           |                     |                      |
| N2                                                                                  | HS | II | 3753921 | 3757428 | WBGene00020774 | T24E12.5  | T24E12.5  |                     | 0.781476354318106    |
| AGIWUR16825;AGIWUR41472                                                             |    |    |         |         |                |           |           |                     |                      |
| N2                                                                                  | HS | II | 3757799 | 3759252 | WBGene00006002 | srx-111   | T24E12.4  |                     | -0.00291222508817413 |
| AGIWUR28133                                                                         |    |    |         |         |                |           |           |                     |                      |
| N2                                                                                  | HS | II | 3759581 | 3760036 | WBGene00044380 | T24E12.12 | T24E12.12 |                     | -0.0386527629760955  |
| AGIWUR2239;AGIWUR5391;AGIWUR24035;AGIWUR25488;AGIWUR25844                           |    |    |         |         |                |           |           |                     |                      |
| N2                                                                                  | HS | II | 3760300 | 3761699 | WBGene00020775 | T24E12.6  | T24E12.6  |                     | -0.0444111907708695  |
| AGIWUR13969;AGIWUR17251;AGIWUR23816;AGIWUR33656;AGIWUR36990;AGIWUR38176;AGIWUR40059 |    |    |         |         |                |           |           |                     |                      |
| N2                                                                                  | HS | II | 3763447 | 3764586 | WBGene00006003 | srx-112   | T24E12.8  |                     | 0.0368389615673812   |
| AGIWUR14156;AGIWUR23415                                                             |    |    |         |         |                |           |           |                     |                      |
| N2                                                                                  | HS | II | 3765087 | 3773191 | WBGene00020777 | T24E12.10 | T24E12.10 |                     | -0.11036112565524    |
| AGIWUR10671;AGIWUR13962                                                             |    |    |         |         |                |           |           |                     |                      |
| N2                                                                                  | HS | II | 3776019 | 3777459 | WBGene00020773 | T24E12.3  | T24E12.3  |                     | 0.209058451492622    |
| AGIWUR9708                                                                          |    |    |         |         |                |           |           |                     |                      |
| N2                                                                                  | HS | II | 3778406 | 3779563 | WBGene00020778 | T24E12.11 | T24E12.11 |                     | -0.094903194477352   |
| AGIWUR41241                                                                         |    |    |         |         |                |           |           |                     |                      |
| N2                                                                                  | HS | II | 3782950 | 3784156 | WBGene00020772 | T24E12.2  | T24E12.2  |                     | -0.0579214787888844  |
| AGIWUR44647                                                                         |    |    |         |         |                |           |           |                     |                      |
| N2                                                                                  | HS | II | 3787451 | 3788479 | WBGene00195077 | T24E12.13 | T24E12.13 |                     |                      |
| 0.000977857053191755 AGIWUR25725                                                    |    |    |         |         |                |           |           |                     |                      |
| N2                                                                                  | HS | II | 3790750 | 3791395 | WBGene00021173 | Y8A9A.4   | Y8A9A.4   | -0.0475274755429451 | AGIWUR33339          |
| N2                                                                                  | HS | II | 3791534 | 3792102 | WBGene00021172 | Y8A9A.3   | Y8A9A.3   | -0.105766593858936  | AGIWUR18649          |
| N2                                                                                  | HS | II | 3792524 | 3793425 | WBGene00021174 | fbxb-99   | Y8A9A.5   | -0.0234870906752906 | AGIWUR23693          |
| N2                                                                                  | HS | II | 3795623 | 3800608 | WBGene00021171 | Y8A9A.2   | Y8A9A.2   | -0.473673052831558  | AGIWUR2883           |
| N2                                                                                  | HS | II | 3801171 | 3802589 | WBGene00005380 | srh-164   | Y8A9A.1   | -0.061587985728762  |                      |
| AGIWUR8919;AGIWUR15796                                                              |    |    |         |         |                |           |           |                     |                      |
| N2                                                                                  | HS | II | 3802959 | 3803324 | WBGene00002115 | ins-32    | Y8A9A.6   | 0.181004759008876   | AGIWUR20661          |
| N2                                                                                  | HS | II | 3805493 | 3807053 | WBGene00018805 | F54D10.4  | F54D10.4  | -0.0894558699850529 |                      |
| AGIWUR4615;AGIWUR13344;AGIWUR27279;AGIWUR40304                                      |    |    |         |         |                |           |           |                     |                      |
| N2                                                                                  | HS | II | 3807096 | 3808223 | WBGene00018806 | F54D10.5  | F54D10.5  | -0.124283111749234  |                      |





|                                                                                                                                                          |    |    |         |         |                |           |           |                     |             |
|----------------------------------------------------------------------------------------------------------------------------------------------------------|----|----|---------|---------|----------------|-----------|-----------|---------------------|-------------|
| N2                                                                                                                                                       | HS | II | 3880245 | 3882182 | WBGene00016772 | nhr-166   | C49D10.2  | -0.0183145631596489 |             |
| AGIWUR42489                                                                                                                                              |    |    |         |         |                |           |           |                     |             |
| N2                                                                                                                                                       | HS | II | 3885032 | 3887995 | WBGene00005311 | srh-90    | F53C3.10  | -0.0811052465058335 |             |
| AGIWUR14811;AGIWUR30096;AGIWUR37788                                                                                                                      |    |    |         |         |                |           |           |                     |             |
| N2                                                                                                                                                       | HS | II | 3891424 | 3893574 | WBGene00018752 | F53C3.8   | F53C3.8   | -0.0138733941192548 | AGIWUR22070 |
| N2                                                                                                                                                       | HS | II | 3894841 | 3896239 | WBGene00018751 | F53C3.7   | F53C3.7   | -0.0124092165033005 | AGIWUR24285 |
| N2                                                                                                                                                       | HS | II | 3898142 | 3899663 | WBGene00018750 | F53C3.6   | F53C3.6   | -0.163256098167523  |             |
| AGIWUR1696;AGIWUR34501                                                                                                                                   |    |    |         |         |                |           |           |                     |             |
| N2                                                                                                                                                       | HS | II | 3899851 | 3900783 | WBGene00018749 | F53C3.5   | F53C3.5   | 0.0624020340278033  | AGIWUR22853 |
| N2                                                                                                                                                       | HS | II | 3900788 | 3902773 | WBGene00018748 | F53C3.4   | F53C3.4   | -0.0355963611799535 |             |
| AGIWUR7950;AGIWUR9230;AGIWUR14856;AGIWUR22223;AGIWUR35451;AGIWUR35695                                                                                    |    |    |         |         |                |           |           |                     |             |
| N2                                                                                                                                                       | HS | II | 3902860 | 3904794 | WBGene00018747 | F53C3.3   | F53C3.3   | 0.157161687456547   | AGIWUR37908 |
| N2                                                                                                                                                       | HS | II | 3904816 | 3906620 | WBGene00018754 | F53C3.11  | F53C3.11  | 0.11697596111982    |             |
| AGIWUR18190                                                                                                                                              |    |    |         |         |                |           |           |                     |             |
| N2                                                                                                                                                       | HS | II | 3907140 | 3908478 | WBGene00018746 | fbxb-103  | F53C3.2   | -0.0743923768464274 |             |
| AGIWUR2972                                                                                                                                               |    |    |         |         |                |           |           |                     |             |
| N2                                                                                                                                                       | HS | II | 3908491 | 3910837 | WBGene00018755 | bcmo-2    | F53C3.12  | 0.0755632916708802  |             |
| AGIWUR28605                                                                                                                                              |    |    |         |         |                |           |           |                     |             |
| N2                                                                                                                                                       | HS | II | 3912003 | 3913385 | WBGene00018745 | F53C3.1   | F53C3.1   | -0.0065323170035132 | AGIWUR32457 |
| N2                                                                                                                                                       | HS | II | 3919794 | 3927982 | WBGene00018756 | F53C3.13  | F53C3.13  | -0.17459454989584   |             |
| AGIWUR8437;AGIWUR8647;AGIWUR8821;AGIWUR10822;AGIWUR13228;AGIWUR16084;AGIWUR17645;AGIWUR19318;AGIWUR24545;AGIWUR27913;AGIWUR30509;AGIWUR33161;AGIWUR39802 |    |    |         |         |                |           |           |                     |             |
| N2                                                                                                                                                       | HS | II | 3932178 | 3933740 | WBGene00021192 | Y14H12B.2 | Y14H12B.2 | -0.136341878016394  |             |
| AGIWUR14725                                                                                                                                              |    |    |         |         |                |           |           |                     |             |
| N2                                                                                                                                                       | HS | II | 3934451 | 3936008 | WBGene00021191 | Y14H12B.1 | Y14H12B.1 | -0.149054416009329  |             |
| AGIWUR6516;AGIWUR9325                                                                                                                                    |    |    |         |         |                |           |           |                     |             |
| N2                                                                                                                                                       | HS | II | 3950145 | 3972137 | WBGene00004751 | sea-2     | K10G6.3   | -0.0374680064454473 |             |
| AGIWUR6369;AGIWUR29408                                                                                                                                   |    |    |         |         |                |           |           |                     |             |
| N2                                                                                                                                                       | HS | II | 3972820 | 3974968 | WBGene00019641 | K10G6.4   | K10G6.4   | 0.0639240876157015  | AGIWUR42914 |
| N2                                                                                                                                                       | HS | II | 3976246 | 3977969 | WBGene00019640 | dos-2     | K10G6.2   | 0.531853577236683   | AGIWUR16014 |
| N2                                                                                                                                                       | HS | II | 3982549 | 3986944 | WBGene00003017 | lin-31    | K10G6.1   | -0.0328286627926175 |             |
| AGIWUR37327;AGIWUR44727                                                                                                                                  |    |    |         |         |                |           |           |                     |             |
| N2                                                                                                                                                       | HS | II | 3987281 | 3988185 | WBGene00044381 | K10G6.5   | K10G6.5   | 0.134669792173436   |             |
| AGIWUR15812;AGIWUR23686;AGIWUR40325                                                                                                                      |    |    |         |         |                |           |           |                     |             |
| N2                                                                                                                                                       | HS | II | 3988700 | 3989677 | WBGene00044382 | Y14H12A.2 | Y14H12A.2 | -0.190456592830396  |             |
| AGIWUR5795;AGIWUR13726;AGIWUR24093;AGIWUR28723;AGIWUR29110;AGIWUR34219;AGIWUR36017;AGIWUR38335;AGIWUR43600;AGIWUR45160                                   |    |    |         |         |                |           |           |                     |             |
| N2                                                                                                                                                       | HS | II | 3993210 | 3993887 | WBGene00021190 | Y14H12A.1 | Y14H12A.1 | -0.103118256413014  |             |
| AGIWUR37602                                                                                                                                              |    |    |         |         |                |           |           |                     |             |

|                                                                                    |    |    |         |         |                |          |          |                     |             |
|------------------------------------------------------------------------------------|----|----|---------|---------|----------------|----------|----------|---------------------|-------------|
| N2                                                                                 | HS | II | 4004885 | 4016072 | WBGene00019487 | ephx-1   | K07D4.7  | 0.00868496280033781 | AGIWUR1973  |
| N2                                                                                 | HS | II | 4016827 | 4018701 | WBGene00019486 | K07D4.6  | K07D4.6  | -0.193496959672396  | AGIWUR37055 |
| N2                                                                                 | HS | II | 4020482 | 4025562 | WBGene00019485 | K07D4.5  | K07D4.5  | 0.0127326654946236  |             |
| AGIWUR4273;AGIWUR23840;AGIWUR27598;AGIWUR27867;AGIWUR39078                         |    |    |         |         |                |          |          |                     |             |
| N2                                                                                 | HS | II | 4028577 | 4029985 | WBGene00019488 | K07D4.9  | K07D4.9  | -0.336084722159704  | AGIWUR12587 |
| N2                                                                                 | HS | II | 4031214 | 4032387 | WBGene00019484 | K07D4.4  | K07D4.4  | 0.0597625633582561  | AGIWUR27836 |
| N2                                                                                 | HS | II | 4038868 | 4043070 | WBGene00004135 | pqn-48   | K07D4.8  | 0.301363466961673   | AGIWUR44569 |
| N2                                                                                 | HS | II | 4043059 | 4044330 | WBGene00004467 | rpn-11   | K07D4.3  | -0.110257483922633  |             |
| AGIWUR2574;AGIWUR13756;AGIWUR14661;AGIWUR25654;AGIWUR35845;AGIWUR37390             |    |    |         |         |                |          |          |                     |             |
| N2                                                                                 | HS | II | 4044771 | 4047247 | WBGene00019483 | K07D4.2  | K07D4.2  | -0.108219085433658  | AGIWUR20974 |
| N2                                                                                 | HS | II | 4048525 | 4049129 | WBGene00023318 | K07D4.1  | K07D4.1  | 0.361617556480661   | AGIWUR22099 |
| N2                                                                                 | HS | II | 4055939 | 4057707 | WBGene00021055 | W06A11.4 | W06A11.4 | -0.0129075583404412 |             |
| AGIWUR4127;AGIWUR22591;AGIWUR24503;AGIWUR43789                                     |    |    |         |         |                |          |          |                     |             |
| N2                                                                                 | HS | II | 4063008 | 4064057 | WBGene00021054 | fbxb-118 | W06A11.3 | 0.0273876446587589  |             |
| AGIWUR5599;AGIWUR16342;AGIWUR21363;AGIWUR28791                                     |    |    |         |         |                |          |          |                     |             |
| N2                                                                                 | HS | II | 4067558 | 4069771 | WBGene00021052 | W06A11.1 | W06A11.1 | 0.032205354284204   |             |
| AGIWUR2631;AGIWUR13752;AGIWUR14821                                                 |    |    |         |         |                |          |          |                     |             |
| N2                                                                                 | HS | II | 4070009 | 4072920 | WBGene00020009 | R11F4.3  | R11F4.3  | 0.0122685000866523  |             |
| AGIWUR29471;AGIWUR29931                                                            |    |    |         |         |                |          |          |                     |             |
| N2                                                                                 | HS | II | 4083065 | 4086226 | WBGene00020008 | R11F4.2  | R11F4.2  | -0.0416636580947856 |             |
| AGIWUR4756;AGIWUR10772;AGIWUR13044;AGIWUR25629;AGIWUR33062;AGIWUR35536             |    |    |         |         |                |          |          |                     |             |
| N2                                                                                 | HS | II | 4091837 | 4094349 | WBGene00020007 | R11F4.1  | R11F4.1  | -0.0624769619061532 |             |
| AGIWUR5157;AGIWUR18910;AGIWUR23303;AGIWUR32277                                     |    |    |         |         |                |          |          |                     |             |
| N2                                                                                 | HS | II | 4100788 | 4127849 | WBGene00006476 | rhgf-2   | T08H4.1  | -0.151470220724554  |             |
| AGIWUR5268;AGIWUR12668;AGIWUR13047;AGIWUR20456;AGIWUR23101;AGIWUR31904;AGIWUR40324 |    |    |         |         |                |          |          |                     |             |
| N2                                                                                 | HS | II | 4127848 | 4134867 | WBGene00020368 | ast-1    | T08H4.3  | -0.178134924031715  |             |
| AGIWUR8003;AGIWUR11487                                                             |    |    |         |         |                |          |          |                     |             |
| N2                                                                                 | HS | II | 4140901 | 4141105 | WBGene00021822 | Y54C5A.1 | Y54C5A.1 | -0.234894140237416  |             |
| AGIWUR32585                                                                        |    |    |         |         |                |          |          |                     |             |
| N2                                                                                 | HS | II | 4142816 | 4149678 | WBGene00018969 | F56D3.1  | F56D3.1  | 0.0619393067271385  | AGIWUR37694 |
| N2                                                                                 | HS | II | 4155773 | 4167368 | WBGene00019855 | R03H10.2 | R03H10.2 | -0.19463196839171   |             |
| AGIWUR7979                                                                         |    |    |         |         |                |          |          |                     |             |
| N2                                                                                 | HS | II | 4167555 | 4168500 | WBGene00019856 | R03H10.4 | R03H10.4 | 0.194049660027767   |             |
| AGIWUR36427                                                                        |    |    |         |         |                |          |          |                     |             |
| N2                                                                                 | HS | II | 4169723 | 4170608 | WBGene00019857 | R03H10.5 | R03H10.5 | 0.0259737009572927  |             |
| AGIWUR35423                                                                        |    |    |         |         |                |          |          |                     |             |
| N2                                                                                 | HS | II | 4171294 | 4173875 | WBGene00019858 | R03H10.6 | R03H10.6 | -0.120844153630676  |             |
| AGIWUR30977                                                                        |    |    |         |         |                |          |          |                     |             |
| N2                                                                                 | HS | II | 4180271 | 4183545 | WBGene00019854 | R03H10.1 | R03H10.1 | -0.151375666037167  |             |

|                                                                        |    |    |         |         |                |           |          |                      |             |
|------------------------------------------------------------------------|----|----|---------|---------|----------------|-----------|----------|----------------------|-------------|
| AGIWUR32688                                                            |    |    |         |         |                |           |          |                      |             |
| N2                                                                     | HS | II | 4186666 | 4208499 | WBGene00006495 | cpna-1    | F31D5.3  | -0.0710650298871389  |             |
| AGIWUR1322;AGIWUR15868;AGIWUR24333                                     |    |    |         |         |                |           |          |                      |             |
| N2                                                                     | HS | II | 4211425 | 4213335 | WBGene00206414 | F31D5.7   | F31D5.7  | -0.290471264062361   | AGIWUR22076 |
| N2                                                                     | HS | II | 4215605 | 4218243 | WBGene00017945 | F31D5.2   | F31D5.2  | 0.031851314123422    | AGIWUR31542 |
| N2                                                                     | HS | II | 4223309 | 4226330 | WBGene00015818 | C16A11.5  | C16A11.5 | 0.132787418722893    |             |
| AGIWUR789;AGIWUR26752;AGIWUR44848                                      |    |    |         |         |                |           |          |                      |             |
| N2                                                                     | HS | II | 4227046 | 4229157 | WBGene00015817 | C16A11.4  | C16A11.4 | -0.0805868041359363  |             |
| AGIWUR4751;AGIWUR14422;AGIWUR22204;AGIWUR24954;AGIWUR35304;AGIWUR42962 |    |    |         |         |                |           |          |                      |             |
| N2                                                                     | HS | II | 4234950 | 4235982 | WBGene00045297 | fbxc-43   | C16A11.9 | -0.195311760186163   |             |
| AGIWUR12352                                                            |    |    |         |         |                |           |          |                      |             |
| N2                                                                     | HS | II | 4236504 | 4237751 | WBGene00015819 | fbxc-44   | C16A11.6 | -0.00442851641782216 |             |
| AGIWUR11430;AGIWUR38404                                                |    |    |         |         |                |           |          |                      |             |
| N2                                                                     | HS | II | 4238159 | 4244830 | WBGene00015815 | C16A11.2  | C16A11.2 | 0.0354731720058368   |             |
| AGIWUR22166                                                            |    |    |         |         |                |           |          |                      |             |
| N2                                                                     | HS | II | 4247197 | 4255281 | WBGene00001673 | gpa-11    | C16A11.1 | -0.0156945982373333  |             |
| AGIWUR6819                                                             |    |    |         |         |                |           |          |                      |             |
| N2                                                                     | HS | II | 4255848 | 4256989 | WBGene00015820 | C16A11.7  | C16A11.7 | -0.137178392625998   |             |
| AGIWUR34626                                                            |    |    |         |         |                |           |          |                      |             |
| N2                                                                     | HS | II | 4257092 | 4258781 | WBGene00015821 | cllec-135 | C16A11.8 | 0.105881320220579    |             |
| AGIWUR36533                                                            |    |    |         |         |                |           |          |                      |             |
| N2                                                                     | HS | II | 4276209 | 4279268 | WBGene00015299 | C01F1.4   | C01F1.4  | -0.0278987638182411  | AGIWUR35062 |
| N2                                                                     | HS | II | 4279424 | 4281967 | WBGene00015300 | C01F1.5   | C01F1.5  | 1.13295070379096     | AGIWUR3406  |
| N2                                                                     | HS | II | 4282321 | 4288211 | WBGene00015301 | C01F1.6   | C01F1.6  | -0.492989306830413   | AGIWUR39703 |
| N2                                                                     | HS | II | 4295101 | 4299006 | WBGene00015298 | C01F1.3   | C01F1.3  | 0.287960339102375    | AGIWUR11357 |
| N2                                                                     | HS | II | 4299653 | 4300919 | WBGene00015297 | sco-1     | C01F1.2  | 0.238591918631609    | AGIWUR1126  |
| N2                                                                     | HS | II | 4301607 | 4305287 | WBGene00015296 | C01F1.1   | C01F1.1  | 0.0378076944244636   | AGIWUR3997  |
| N2                                                                     | HS | II | 4305262 | 4307004 | WBGene00021796 | Y52E8A.3  | Y52E8A.3 | -0.023392228934112   |             |
| AGIWUR25352                                                            |    |    |         |         |                |           |          |                      |             |
| N2                                                                     | HS | II | 4309725 | 4312215 | WBGene00021797 | plep-1    | Y52E8A.4 | 0.229695182929698    |             |
| AGIWUR31602                                                            |    |    |         |         |                |           |          |                      |             |
| N2                                                                     | HS | II | 4314417 | 4316111 | WBGene00005787 | srw-40    | Y52E8A.5 | 0.0773108590302973   |             |
| AGIWUR31610                                                            |    |    |         |         |                |           |          |                      |             |
| N2                                                                     | HS | II | 4316629 | 4319969 | WBGene00021798 | Y52E8A.6  | Y52E8A.6 | -0.116050933357785   |             |
| AGIWUR8856                                                             |    |    |         |         |                |           |          |                      |             |
| N2                                                                     | HS | II | 4320836 | 4321654 | WBGene00021795 | Y52E8A.2  | Y52E8A.2 | -0.0563692255089645  |             |
| AGIWUR13205                                                            |    |    |         |         |                |           |          |                      |             |
| N2                                                                     | HS | II | 4321663 | 4322616 | WBGene00021794 | Y52E8A.1  | Y52E8A.1 | 0.0649619967674511   |             |
| AGIWUR2488                                                             |    |    |         |         |                |           |          |                      |             |

|                                                            |    |    |         |         |                |          |          |                                 |
|------------------------------------------------------------|----|----|---------|---------|----------------|----------|----------|---------------------------------|
| N2                                                         | HS | II | 4323256 | 4324187 | WBGene00019221 | H20J04.6 | H20J04.6 |                                 |
| -0.00678793839520608 AGIWUR29158                           |    |    |         |         |                |          |          |                                 |
| N2                                                         | HS | II | 4324361 | 4326089 | WBGene00003390 | mog-2    | H20J04.8 | 0.0777804550403607              |
| AGIWUR24324;AGIWUR26270                                    |    |    |         |         |                |          |          |                                 |
| N2                                                         | HS | II | 4326720 | 4328284 | WBGene00019220 | pfd-2    | H20J04.5 | -0.000532716549283663           |
| AGIWUR28829                                                |    |    |         |         |                |          |          |                                 |
| N2                                                         | HS | II | 4329023 | 4334484 | WBGene00019219 | H20J04.4 | H20J04.4 | -0.0257974851820926             |
| AGIWUR12223;AGIWUR19295;AGIWUR19960                        |    |    |         |         |                |          |          |                                 |
| N2                                                         | HS | II | 4335707 | 4338424 | WBGene00019218 | madf-3   | H20J04.3 | -0.205591813500471              |
| AGIWUR41477                                                |    |    |         |         |                |          |          |                                 |
| N2                                                         | HS | II | 4340151 | 4350984 | WBGene00019217 | athp-2   | H20J04.2 | -0.0809657903373449             |
| AGIWUR13157                                                |    |    |         |         |                |          |          |                                 |
| N2                                                         | HS | II | 4351188 | 4353159 | WBGene00044310 | H20J04.9 | H20J04.9 | 0.258919528503404               |
| AGIWUR27110;AGIWUR39688                                    |    |    |         |         |                |          |          |                                 |
| N2                                                         | HS | II | 4353221 | 4355317 | WBGene00019222 | H20J04.7 | H20J04.7 | -0.0425825727648945             |
| AGIWUR32453                                                |    |    |         |         |                |          |          |                                 |
| N2                                                         | HS | II | 4355633 | 4358844 | WBGene00019216 | H20J04.1 | H20J04.1 | 0.255543520211061               |
| AGIWUR42306                                                |    |    |         |         |                |          |          |                                 |
| N2                                                         | HS | II | 4359082 | 4368332 | WBGene00002252 | lat-2    | B0286.2  | -0.198012936289271 AGIWUR17581  |
| N2                                                         | HS | II | 4368490 | 4369692 | WBGene00023425 | try-9    | B0286.6  | 0.304630656124365 AGIWUR47      |
| N2                                                         | HS | II | 4369625 | 4372597 | WBGene00015116 | pacs-1   | B0286.3  | 0.288769630664952 AGIWUR37001   |
| N2                                                         | HS | II | 4372740 | 4376742 | WBGene00003825 | ntl-2    | B0286.4  | -0.141201820606206              |
| AGIWUR9456;AGIWUR25085;AGIWUR30605;AGIWUR31866;AGIWUR32151 |    |    |         |         |                |          |          |                                 |
| N2                                                         | HS | II | 4375504 | 4386343 | WBGene00015115 | B0286.1  | B0286.1  | 0.0827994766052935 AGIWUR29486  |
| N2                                                         | HS | II | 4392800 | 4404850 | WBGene00022743 | mlt-7    | ZK430.8  | 0.0359264767702392 AGIWUR39940  |
| N2                                                         | HS | II | 4405864 | 4416553 | WBGene00022741 | ZK430.5  | ZK430.5  | -0.144119849967336 AGIWUR214    |
| N2                                                         | HS | II | 4417683 | 4419131 | WBGene00007036 | sod-5    | ZK430.3  | -0.0299994324508663 AGIWUR15490 |
| N2                                                         | HS | II | 4420255 | 4422319 | WBGene00044063 | bpnt-1   | ZK430.2  | 0.143635644197651 AGIWUR8553    |
| N2                                                         | HS | II | 4422463 | 4424902 | WBGene00022742 | ZK430.7  | ZK430.7  | 0.123517341128112 AGIWUR22253   |
| N2                                                         | HS | II | 4425167 | 4432613 | WBGene00022739 | toe-1    | ZK430.1  | 0.300780060246344 AGIWUR7011    |
| N2                                                         | HS | II | 4433332 | 4435169 | WBGene00003699 | nhr-109  | T12C9.5  | 0.198465270042664               |
| AGIWUR376;AGIWUR15168;AGIWUR17704;AGIWUR19399;AGIWUR35164  |    |    |         |         |                |          |          |                                 |
| N2                                                         | HS | II | 4435300 | 4436995 | WBGene00020460 | nhr-273  | T12C9.1  | 0.183892084194808 AGIWUR25363   |
| N2                                                         | HS | II | 4438867 | 4440867 | WBGene00003615 | nhr-16   | T12C9.6  | -0.000995803538756945 AGIWUR908 |
| N2                                                         | HS | II | 4441265 | 4453151 | WBGene00006657 | twk-2    | T12C9.3  | 0.11428497034753                |
| AGIWUR27308;AGIWUR39529                                    |    |    |         |         |                |          |          |                                 |
| N2                                                         | HS | II | 4458263 | 4460404 | WBGene00020461 | T12C9.7  | T12C9.7  | -0.111767541018859              |
| AGIWUR2066;AGIWUR5575;AGIWUR24733                          |    |    |         |         |                |          |          |                                 |
| N2                                                         | HS | II | 4461130 | 4467895 | WBGene00021058 | vps-18   | W06B4.3  | 0.348050360029148 AGIWUR2565    |

|                                                                                    |    |    |         |         |                |          |          |                           |             |
|------------------------------------------------------------------------------------|----|----|---------|---------|----------------|----------|----------|---------------------------|-------------|
| N2                                                                                 | HS | II | 4468169 | 4471038 | WBGene00021057 | W06B4.2  | W06B4.2  | 0.261446546570273         | AGIWUR716   |
| N2                                                                                 | HS | II | 4471401 | 4473553 | WBGene00021056 | W06B4.1  | W06B4.1  | -0.00768901449831461      | AGIWUR16691 |
| N2                                                                                 | HS | II | 4478613 | 4480948 | WBGene00020248 | T05C1.1  | T05C1.1  | 0.0205733237020453        | AGIWUR5570  |
| N2                                                                                 | HS | II | 4481025 | 4483722 | WBGene00020249 | T05C1.2  | T05C1.2  | 0.0370189211120628        | AGIWUR6661  |
| N2                                                                                 | HS | II | 4487694 | 4489388 | WBGene00020250 | T05C1.3  | T05C1.3  | 0.283027976819593         | AGIWUR7186  |
| N2                                                                                 | HS | II | 4490408 | 4490865 | WBGene00020252 | T05C1.5  | T05C1.5  | 0.124078281803448         | AGIWUR15261 |
| N2                                                                                 | HS | II | 4491152 | 4505147 | WBGene00020251 | camt-1   | T05C1.4  | -0.0867828032062761       |             |
| AGIWUR5533;AGIWUR37397;AGIWUR42799                                                 |    |    |         |         |                |          |          |                           |             |
| N2                                                                                 | HS | II | 4512211 | 4516115 | WBGene00015135 | cyp-23A1 |          | B0304.3 0.277184055177292 |             |
| AGIWUR14628                                                                        |    |    |         |         |                |          |          |                           |             |
| N2                                                                                 | HS | II | 4518560 | 4522523 | WBGene00001948 | hlh-1    | B0304.1  | 0.319530260932971         |             |
| AGIWUR17528;AGIWUR23856                                                            |    |    |         |         |                |          |          |                           |             |
| N2                                                                                 | HS | II | 4522465 | 4523222 | WBGene00015136 | B0304.4  | B0304.4  | -0.0685260398169909       |             |
| AGIWUR1375;AGIWUR6577;AGIWUR19962;AGIWUR37814                                      |    |    |         |         |                |          |          |                           |             |
| N2                                                                                 | HS | II | 4523622 | 4524589 | WBGene00015134 | B0304.2  | B0304.2  | -0.0537702953399553       | AGIWUR28156 |
| N2                                                                                 | HS | II | 4524634 | 4527900 | WBGene00005061 | sra-35   | B0304.8  | -0.1337813551139          |             |
| AGIWUR7786;AGIWUR36780;AGIWUR38769                                                 |    |    |         |         |                |          |          |                           |             |
| N2                                                                                 | HS | II | 4529636 | 4531964 | WBGene00005058 | sra-32   | B0304.5  | -0.0577623787758181       | AGIWUR14583 |
| N2                                                                                 | HS | II | 4534742 | 4537241 | WBGene00005059 | sra-33   | B0304.6  | 0.0776076030618329        | AGIWUR42367 |
| N2                                                                                 | HS | II | 4538988 | 4540731 | WBGene00005062 | sra-36   | B0304.9  | -0.0170929146478613       | AGIWUR37011 |
| N2                                                                                 | HS | II | 4541865 | 4543668 | WBGene00005060 | sra-34   | B0304.7  | 0.240002841710576         | AGIWUR11853 |
| N2                                                                                 | HS | II | 4550894 | 4552177 | WBGene00019489 | K07E1.1  | K07E1.1  | 0.156850954755802         |             |
| AGIWUR7894;AGIWUR11475;AGIWUR11642;AGIWUR17958;AGIWUR35065;AGIWUR35352;AGIWUR38739 |    |    |         |         |                |          |          |                           |             |
| N2                                                                                 | HS | II | 4557787 | 4559573 | WBGene00019746 | M03A1.3  | M03A1.3  | 0.0312700949687201        |             |
| AGIWUR16157;AGIWUR20492                                                            |    |    |         |         |                |          |          |                           |             |
| N2                                                                                 | HS | II | 4560397 | 4562618 | WBGene00077490 | M03A1.8  | M03A1.8  | -0.016466113906259        | AGIWUR33318 |
| N2                                                                                 | HS | II | 4562853 | 4563546 | WBGene00000928 | dao-2    | M03A1.7  | 0.588368000750904         | AGIWUR19408 |
| N2                                                                                 | HS | II | 4572000 | 4590970 | WBGene00006868 | vab-1    | M03A1.1  | -0.112052401310591        |             |
| AGIWUR14824;AGIWUR44039                                                            |    |    |         |         |                |          |          |                           |             |
| N2                                                                                 | HS | II | 4590952 | 4601354 | WBGene00019747 | ipla-1   | M03A1.6  | -0.107846774382891        |             |
| AGIWUR4878;AGIWUR35821                                                             |    |    |         |         |                |          |          |                           |             |
| N2                                                                                 | HS | II | 4601355 | 4602633 | WBGene00018046 | F35D11.5 | F35D11.5 | 0.237697529967697         |             |
| AGIWUR22207                                                                        |    |    |         |         |                |          |          |                           |             |
| N2                                                                                 | HS | II | 4603406 | 4604161 | WBGene00018045 | F35D11.4 | F35D11.4 | 0.00407462293133065       |             |
| AGIWUR14130                                                                        |    |    |         |         |                |          |          |                           |             |
| N2                                                                                 | HS | II | 4608372 | 4612082 | WBGene00018044 | F35D11.3 | F35D11.3 | 0.0725311635874188        |             |
| AGIWUR43345                                                                        |    |    |         |         |                |          |          |                           |             |
| N2                                                                                 | HS | II | 4612989 | 4626107 | WBGene00004122 | pqn-35   | F35D11.2 | -0.0851536294792954       |             |
| AGIWUR28360                                                                        |    |    |         |         |                |          |          |                           |             |

|                                                                                   |    |    |         |         |                |          |           |                     |             |
|-----------------------------------------------------------------------------------|----|----|---------|---------|----------------|----------|-----------|---------------------|-------------|
| N2                                                                                | HS | II | 4626906 | 4627805 | WBGene00018043 | F35D11.1 | F35D11.1  | 0.170090173193024   |             |
| AGIWUR1128                                                                        |    |    |         |         |                |          |           |                     |             |
| N2                                                                                | HS | II | 4627811 | 4638384 | WBGene00018051 | che-10   | F35D11.11 | -0.0357431301801237 |             |
| AGIWUR23841;AGIWUR35432                                                           |    |    |         |         |                |          |           |                     |             |
| N2                                                                                | HS | II | 4649085 | 4653280 | WBGene00022283 | lgc-27   | Y74E4A.1  | -0.0215881147393793 |             |
| AGIWUR12849;AGIWUR33651                                                           |    |    |         |         |                |          |           |                     |             |
| N2                                                                                | HS | II | 4653189 | 4655934 | WBGene00020222 | fut-6    | T05A7.5   | 0.266369220210927   |             |
| AGIWUR17270;AGIWUR39398                                                           |    |    |         |         |                |          |           |                     |             |
| N2                                                                                | HS | II | 4665893 | 4667588 | WBGene00043986 | fut-5    | T05A7.10  | 0.201243962181984   |             |
| AGIWUR9107;AGIWUR32803                                                            |    |    |         |         |                |          |           |                     |             |
| N2                                                                                | HS | II | 4668644 | 4671774 | WBGene00020223 | T05A7.6  | T05A7.6   | -0.0216204607019215 | AGIWUR15019 |
| N2                                                                                | HS | II | 4672798 | 4673746 | WBGene00001976 | hmg-11   | T05A7.4   | 0.13095551957367    |             |
| AGIWUR31120;AGIWUR38858                                                           |    |    |         |         |                |          |           |                     |             |
| N2                                                                                | HS | II | 4674420 | 4675729 | WBGene00020220 | clcc-140 | T05A7.2   | 0.0617457461844513  |             |
| AGIWUR14366                                                                       |    |    |         |         |                |          |           |                     |             |
| N2                                                                                | HS | II | 4675779 | 4676250 | WBGene00020221 | T05A7.3  | T05A7.3   | 0.539882516516109   | AGIWUR18858 |
| N2                                                                                | HS | II | 4678026 | 4679638 | WBGene00020219 | T05A7.1  | T05A7.1   | -0.273138456817833  | AGIWUR40718 |
| N2                                                                                | HS | II | 4679667 | 4681324 | WBGene00020224 | T05A7.7  | T05A7.7   | 0.106729829266547   | AGIWUR18383 |
| N2                                                                                | HS | II | 4681764 | 4683728 | WBGene00020225 | sre-40   | T05A7.8   | -0.11947437741572   | AGIWUR18657 |
| N2                                                                                | HS | II | 4687241 | 4689392 | WBGene00017371 | sre-39   | F10G7.7   | -0.0111529105398751 |             |
| AGIWUR4968;AGIWUR29347                                                            |    |    |         |         |                |          |           |                     |             |
| N2                                                                                | HS | II | 4689777 | 4690484 | WBGene00044744 | F10G7.12 | F10G7.12  | 0.0462796514180415  |             |
| AGIWUR12475                                                                       |    |    |         |         |                |          |           |                     |             |
| N2                                                                                | HS | II | 4691227 | 4693075 | WBGene00017370 | F10G7.6  | F10G7.6   | 0.236074253644794   | AGIWUR6909  |
| N2                                                                                | HS | II | 4693414 | 4696408 | WBGene00017369 | F10G7.5  | F10G7.5   | 0.0527879709364978  | AGIWUR25609 |
| N2                                                                                | HS | II | 4696419 | 4698427 | WBGene00004461 | rpn-5    | F10G7.8   | 0.0626436395112204  | AGIWUR22904 |
| N2                                                                                | HS | II | 4698721 | 4700994 | WBGene00004737 | scc-1    | F10G7.4   | -0.0782734475873674 | AGIWUR4631  |
| N2                                                                                | HS | II | 4702069 | 4703219 | WBGene00006817 | unc-85   | F10G7.3   | 0.0271955414521194  | AGIWUR32576 |
| N2                                                                                | HS | II | 4703254 | 4706498 | WBGene00017372 | F10G7.9  | F10G7.9   | 0.026356339241719   | AGIWUR38407 |
| N2                                                                                | HS | II | 4706821 | 4710052 | WBGene00006626 | tsn-1    | F10G7.2   | -0.305724432478977  | AGIWUR860   |
| N2                                                                                | HS | II | 4710277 | 4713690 | WBGene00006497 | tag-151  | F10G7.1   | -0.0300821669605522 |             |
| AGIWUR3622;AGIWUR3894;AGIWUR14759;AGIWUR19454;AGIWUR25721;AGIWUR34601;AGIWUR41035 |    |    |         |         |                |          |           |                     |             |
| N2                                                                                | HS | II | 4713674 | 4726264 | WBGene00017373 | F10G7.10 | F10G7.10  | -0.126968361386561  |             |
| AGIWUR1239;AGIWUR33197                                                            |    |    |         |         |                |          |           |                     |             |
| N2                                                                                | HS | II | 4727326 | 4727869 | WBGene00017374 | ttr-41   | F10G7.11  | 0.329924465609235   |             |
| AGIWUR30715                                                                       |    |    |         |         |                |          |           |                     |             |
| N2                                                                                | HS | II | 4731178 | 4733949 | WBGene00018275 | F41C3.11 | F41C3.11  | 0.27658852030601    |             |
| AGIWUR43633                                                                       |    |    |         |         |                |          |           |                     |             |
| N2                                                                                | HS | II | 4735113 | 4736850 | WBGene00018272 | F41C3.6  | F41C3.6   | -0.0817195789146545 | AGIWUR15758 |

|                                                                        |    |    |         |         |                |           |           |                      |             |
|------------------------------------------------------------------------|----|----|---------|---------|----------------|-----------|-----------|----------------------|-------------|
| N2                                                                     | HS | II | 4737617 | 4739906 | WBGene00018271 | F41C3.5   | F41C3.5   | 0.116316190850695    | AGIWUR38501 |
| N2                                                                     | HS | II | 4740412 | 4741616 | WBGene00018270 | F41C3.4   | F41C3.4   | 0.0505775447440335   | AGIWUR32312 |
| N2                                                                     | HS | II | 4742128 | 4745280 | WBGene00018269 | acs-11    | F41C3.3   | 0.00922060608318276  | AGIWUR34073 |
| N2                                                                     | HS | II | 4749968 | 4751822 | WBGene00018268 | F41C3.2   | F41C3.2   | 0.11279598404604     |             |
| AGIWUR23211;AGIWUR35292;AGIWUR38772                                    |    |    |         |         |                |           |           |                      |             |
| N2                                                                     | HS | II | 4752388 | 4752942 | WBGene00018267 | F41C3.1   | F41C3.1   | -0.0706959021320968  | AGIWUR4862  |
| N2                                                                     | HS | II | 4753413 | 4755595 | WBGene00016163 | C27D9.1   | C27D9.1   | -0.265117817910852   | AGIWUR8054  |
| N2                                                                     | HS | II | 4755589 | 4756851 | WBGene00016164 | C27D9.2   | C27D9.2   | 0.314934716255939    |             |
| AGIWUR26144;AGIWUR26845                                                |    |    |         |         |                |           |           |                      |             |
| N2                                                                     | HS | II | 4758762 | 4759289 | WBGene00017839 | F26G1.3   | F26G1.3   | 0.568028259273115    | AGIWUR40801 |
| N2                                                                     | HS | II | 4763081 | 4764174 | WBGene00017838 | F26G1.2   | F26G1.2   | -0.0895493732926091  |             |
| AGIWUR7212;AGIWUR31440;AGIWUR34452                                     |    |    |         |         |                |           |           |                      |             |
| N2                                                                     | HS | II | 4764159 | 4766384 | WBGene00017840 | ttm-2     | F26G1.4   | 0.153705632201433    | AGIWUR36669 |
| N2                                                                     | HS | II | 4770534 | 4771382 | WBGene00017841 | F26G1.5   | F26G1.5   | 0.121938341376655    | AGIWUR2996  |
| N2                                                                     | HS | II | 4772835 | 4773991 | WBGene00044662 | F26G1.9   | F26G1.9   | 0.0658087113060462   |             |
| AGIWUR6370;AGIWUR16681;AGIWUR26642;AGIWUR37047;AGIWUR37704;AGIWUR41281 |    |    |         |         |                |           |           |                      |             |
| N2                                                                     | HS | II | 4774382 | 4774883 | WBGene00044663 | F26G1.10  | F26G1.10  | -0.0169852114125324  |             |
| AGIWUR6035;AGIWUR18054;AGIWUR22730;AGIWUR24550                         |    |    |         |         |                |           |           |                      |             |
| N2                                                                     | HS | II | 4775295 | 4781347 | WBGene00017842 | nep-12    | F26G1.6   | 0.199258775931538    | AGIWUR16205 |
| N2                                                                     | HS | II | 4785861 | 4786316 | WBGene00003424 | msp-3     | F26G1.7   | -0.0417932216759809  | AGIWUR39844 |
| N2                                                                     | HS | II | 4791620 | 4795643 | WBGene00017837 | F26G1.1   | F26G1.1   | -0.184536873957422   |             |
| AGIWUR6838;AGIWUR8224;AGIWUR11071;AGIWUR12821;AGIWUR17678;AGIWUR38146  |    |    |         |         |                |           |           |                      |             |
| N2                                                                     | HS | II | 4795761 | 4797216 | WBGene00016353 | C33F10.4  | C33F10.4  | 0.196142582294733    |             |
| AGIWUR2568;AGIWUR20383;AGIWUR20844;AGIWUR21310                         |    |    |         |         |                |           |           |                      |             |
| N2                                                                     | HS | II | 4797371 | 4798176 | WBGene00050941 | C33F10.14 | C33F10.14 | -0.00143507883756655 | AGIWUR4432  |
| N2                                                                     | HS | II | 4798154 | 4812136 | WBGene00016354 | rig-6     | C33F10.5  | -0.0301794534296094  |             |
| AGIWUR8328;AGIWUR10082;AGIWUR34741;AGIWUR37698;AGIWUR37741;AGIWUR40358 |    |    |         |         |                |           |           |                      |             |
| N2                                                                     | HS | II | 4818662 | 4821564 | WBGene00016355 | lact-5    | C33F10.7  | -0.183835441056457   |             |
| AGIWUR440;AGIWUR17904;AGIWUR32830                                      |    |    |         |         |                |           |           |                      |             |
| N2                                                                     | HS | II | 4823381 | 4825196 | WBGene00016356 | C33F10.8  | C33F10.8  | 0.0616650573208837   |             |
| AGIWUR3888                                                             |    |    |         |         |                |           |           |                      |             |
| N2                                                                     | HS | II | 4826507 | 4827884 | WBGene00016359 | fbxb-88   | C33F10.13 | -0.199428467577471   |             |
| AGIWUR8862                                                             |    |    |         |         |                |           |           |                      |             |
| N2                                                                     | HS | II | 4828560 | 4832469 | WBGene00016352 | tbck-1    | C33F10.2  | -0.28891060444931    |             |
| AGIWUR11843                                                            |    |    |         |         |                |           |           |                      |             |
| N2                                                                     | HS | II | 4836304 | 4837759 | WBGene00016358 | C33F10.12 | C33F10.12 | 0.0782191550664386   |             |
| AGIWUR20730                                                            |    |    |         |         |                |           |           |                      |             |
| N2                                                                     | HS | II | 4850185 | 4851441 | WBGene00044767 | T23B7.3   | T23B7.3   | -0.169409225858182   |             |



AGIWUR18343;AGIWUR37964;AGIWUR43618  
N2 HS II 4852056 4857880 WBGene00001027 dnj-9 F11G11.7 0.216100873746653  
AGIWUR1344;AGIWUR27861  
N2 HS II 4857923 4859185 WBGene00017385 F11G11.5 F11G11.5 -0.180174796095772  
AGIWUR30732  
N2 HS II 4860064 4860411 WBGene00017386 nspd-5 F11G11.8 0.0664801811345228  
AGIWUR6006  
N2 HS II 4860594 4861696 WBGene00017384 F11G11.4 F11G11.4 -0.268443659309856  
AGIWUR9900  
N2 HS II 4862318 4863457 WBGene00017387 mpst-4 F11G11.9 0.0224497341468624  
AGIWUR35205  
N2 HS II 4866436 4867576 WBGene00000606 col-17 F11G11.10 0.146901781730934  
AGIWUR20968  
N2 HS II 4872098 4873127 WBGene00000649 col-73 F11G11.12 0.196747862290739  
AGIWUR5980  
N2 HS II 4875280 4875666 WBGene00017388 F11G11.13 F11G11.13  
-0.000595632164512416 AGIWUR13442;AGIWUR18299;AGIWUR24022;AGIWUR39742;AGIWUR43786;AGIWUR44698  
N2 HS II 4879885 4881105 WBGene00001754 gst-6 F11G11.3 0.104467779000894  
AGIWUR24152  
N2 HS II 4882062 4883358 WBGene00001755 gst-7 F11G11.2 0.0359657393610533  
AGIWUR29841  
N2 HS II 4883749 4884602 WBGene00001756 gst-8 F11G11.1 -0.0263886909538478  
AGIWUR30738  
N2 HS II 4886276 4888211 WBGene00019891 R05F9.7 R05F9.7 -0.0545603460281816 AGIWUR42366  
N2 HS II 4889437 4891427 WBGene00019890 R05F9.6 R05F9.6 -0.13771765646229  
AGIWUR15697;AGIWUR19070;AGIWUR25990;AGIWUR32241  
N2 HS II 4891573 4893573 WBGene00001757 gst-9 R05F9.5 -0.0445675376191836 AGIWUR26662  
N2 HS II 4899859 4902100 WBGene00019892 R05F9.9 R05F9.9 0.100266084016535  
AGIWUR32806;AGIWUR38871  
N2 HS II 4902288 4903796 WBGene00019893 sgt-1 R05F9.10 -0.0278438314681253  
AGIWUR8466  
N2 HS II 4905008 4911835 WBGene00019888 btbd-10 R05F9.1 -0.160984215104187  
AGIWUR2401;AGIWUR8282;AGIWUR8547;AGIWUR11478;AGIWUR12754;AGIWUR16406;AGIWUR28362;AGIWUR33870;AGIWUR35150;AG  
IWUR36112;AGIWUR38514;AGIWUR44911  
N2 HS II 4911765 4914218 WBGene00019894 R05F9.11 R05F9.11 -0.393686136321787  
AGIWUR11820  
N2 HS II 4914494 4925248 WBGene00019895 aagr-2 R05F9.12 0.158522468062646  
AGIWUR6585;AGIWUR22779;AGIWUR27231  
N2 HS II 4930873 4932114 WBGene00022763 ZK546.7 ZK546.7 -0.245109995515874 AGIWUR33470

|                                                                                                                                   |    |    |         |         |                |          |          |                      |             |
|-----------------------------------------------------------------------------------------------------------------------------------|----|----|---------|---------|----------------|----------|----------|----------------------|-------------|
| N2                                                                                                                                | HS | II | 4932991 | 4933450 | WBGene00003470 | msp-152  | ZK546.6  | -3.5527136788005e-15 | AGIWUR34259 |
| N2                                                                                                                                | HS | II | 4933883 | 4935038 | WBGene00001778 | gst-30   | ZK546.11 | 0.0611103472687304   |             |
| AGIWUR12388                                                                                                                       |    |    |         |         |                |          |          |                      |             |
| N2                                                                                                                                | HS | II | 4935563 | 4937956 | WBGene00022762 | ZK546.5  | ZK546.5  | 0.163254413081036    | AGIWUR12473 |
| N2                                                                                                                                | HS | II | 4938004 | 4938602 | WBGene00022761 | ZK546.4  | ZK546.4  | -0.0969311885418911  | AGIWUR18441 |
| N2                                                                                                                                | HS | II | 4938599 | 4941150 | WBGene00022766 | cb1c-1   | ZK546.17 | 0.144256375646528    |             |
| AGIWUR34186;AGIWUR38869                                                                                                           |    |    |         |         |                |          |          |                      |             |
| N2                                                                                                                                | HS | II | 4944042 | 4945838 | WBGene00022765 | ZK546.14 | ZK546.14 | 0.00107400276645331  |             |
| AGIWUR6967;AGIWUR30274                                                                                                            |    |    |         |         |                |          |          |                      |             |
| N2                                                                                                                                | HS | II | 4946025 | 4948070 | WBGene00022759 | ZK546.2  | ZK546.2  | 0.289045134984693    | AGIWUR28619 |
| N2                                                                                                                                | HS | II | 4948154 | 4949527 | WBGene00006619 | try-1    | ZK546.15 | -0.107851817455522   |             |
| AGIWUR1091                                                                                                                        |    |    |         |         |                |          |          |                      |             |
| N2                                                                                                                                | HS | II | 4949902 | 4953488 | WBGene00006997 | zyg-12   | ZK546.1  | -0.171682892122863   |             |
| AGIWUR32075;AGIWUR42593                                                                                                           |    |    |         |         |                |          |          |                      |             |
| N2                                                                                                                                | HS | II | 4953589 | 4954503 | WBGene00003580 | ndx-3    | Y38A8.1  | 0.143239125090938    | AGIWUR15903 |
| N2                                                                                                                                | HS | II | 4954480 | 4955427 | WBGene00003949 | pbs-3    | Y38A8.2  | -0.0764234355965243  |             |
| AGIWUR4506;AGIWUR7923                                                                                                             |    |    |         |         |                |          |          |                      |             |
| N2                                                                                                                                | HS | II | 4955646 | 4959876 | WBGene00006737 | ulp-2    | Y38A8.3  | -0.462357350338944   | AGIWUR9197  |
| N2                                                                                                                                | HS | II | 4969186 | 4988934 | WBGene00020867 | shc-2    | T27F7.2  | -0.15510542519887    |             |
| AGIWUR4201;AGIWUR16312;AGIWUR17522;AGIWUR25678                                                                                    |    |    |         |         |                |          |          |                      |             |
| N2                                                                                                                                | HS | II | 4990831 | 4993580 | WBGene00020868 | eif-1    | T27F7.3  | -0.0378970985791618  |             |
| AGIWUR8012;AGIWUR8543;AGIWUR26232;AGIWUR26466                                                                                     |    |    |         |         |                |          |          |                      |             |
| N2                                                                                                                                | HS | II | 4994002 | 4995607 | WBGene00020866 | vps-24   | T27F7.1  | 0.0375683402724931   |             |
| AGIWUR197;AGIWUR18963;AGIWUR28840                                                                                                 |    |    |         |         |                |          |          |                      |             |
| N2                                                                                                                                | HS | II | 4995551 | 4998035 | WBGene00004382 | rnh-1.0  | F59A6.6  | -0.191616295120126   |             |
| AGIWUR10797;AGIWUR42154                                                                                                           |    |    |         |         |                |          |          |                      |             |
| N2                                                                                                                                | HS | II | 4998007 | 4998757 | WBGene00044664 | F59A6.11 | F59A6.11 | -0.0994586905662675  |             |
| AGIWUR3207;AGIWUR22750;AGIWUR28950;AGIWUR37911;AGIWUR43828                                                                        |    |    |         |         |                |          |          |                      |             |
| N2                                                                                                                                | HS | II | 4999520 | 5003806 | WBGene00019087 | F59A6.5  | F59A6.5  | -0.111229366443411   | AGIWUR27627 |
| N2                                                                                                                                | HS | II | 5003960 | 5004849 | WBGene00044385 | F59A6.10 | F59A6.10 | 0.0145467603618572   |             |
| AGIWUR1690;AGIWUR3674;AGIWUR12293;AGIWUR17634;AGIWUR18276;AGIWUR24820;AGIWUR29279;AGIWUR29498;AGIWUR31744;AGIWUR32928;AGIWUR42515 |    |    |         |         |                |          |          |                      |             |
| N2                                                                                                                                | HS | II | 5005081 | 5008068 | WBGene00019086 | F59A6.4  | F59A6.4  | -0.0522669722745253  | AGIWUR44174 |
| N2                                                                                                                                | HS | II | 5008341 | 5011179 | WBGene00019085 | F59A6.3  | F59A6.3  | 0.0347401109493406   |             |
| AGIWUR14498;AGIWUR29885;AGIWUR44263                                                                                               |    |    |         |         |                |          |          |                      |             |
| N2                                                                                                                                | HS | II | 5011523 | 5012078 | WBGene00044665 | F59A6.12 | F59A6.12 | 0.424835033990974    |             |
| AGIWUR6143;AGIWUR21365                                                                                                            |    |    |         |         |                |          |          |                      |             |
| N2                                                                                                                                | HS | II | 5014699 | 5015324 | WBGene00019084 | F59A6.2  | F59A6.2  | -0.172358922605834   | AGIWUR27186 |
| N2                                                                                                                                | HS | II | 5022764 | 5029982 | WBGene00003822 | nsy-1    | F59A6.1  | -0.0229447254935646  | AGIWUR7127  |

|                                                                                                                       |    |    |         |         |                 |          |          |                      |             |
|-----------------------------------------------------------------------------------------------------------------------|----|----|---------|---------|-----------------|----------|----------|----------------------|-------------|
| N2                                                                                                                    | HS | II | 5029942 | 5031712 | WBGene00018014  | F33G12.2 | F33G12.2 | 0.112586325327569    |             |
| AGIWUR1431;AGIWUR6223;AGIWUR12852;AGIWUR14295;AGIWUR14922;AGIWUR15737;AGIWUR24470;AGIWUR34893;AGIWUR41448;AGIWUR44513 |    |    |         |         |                 |          |          |                      |             |
| N2                                                                                                                    | HS | II | 5031757 | 5034035 | WBGene00018015  | F33G12.3 | F33G12.3 | -0.138561629097584   |             |
| AGIWUR559;AGIWUR909;AGIWUR6263;AGIWUR23996;AGIWUR37724                                                                |    |    |         |         |                 |          |          |                      |             |
| N2                                                                                                                    | HS | II | 5034142 | 5036439 | WBGene00018016  | lrr-1    | F33G12.4 | -0.0845136836767733  |             |
| AGIWUR20211                                                                                                           |    |    |         |         |                 |          |          |                      |             |
| N2                                                                                                                    | HS | II | 5036561 | 5040196 | WBGene00018017  | golg-2   | F33G12.5 | 0.0992997605894441   |             |
| AGIWUR38302                                                                                                           |    |    |         |         |                 |          |          |                      |             |
| N2                                                                                                                    | HS | II | 5040208 | 5040681 | WBGene00044666  | F33G12.7 | F33G12.7 | 0.184040583813022    |             |
| AGIWUR11782;AGIWUR22608                                                                                               |    |    |         |         |                 |          |          |                      |             |
| N2                                                                                                                    | HS | II | 5049915 | 5053966 | WBGene00018018  | F33G12.6 | F33G12.6 | 0.035151593695828    |             |
| AGIWUR7871;AGIWUR12854;AGIWUR35039;AGIWUR35780                                                                        |    |    |         |         |                 |          |          |                      |             |
| N2                                                                                                                    | HS | II | 5054084 | 5055338 | WBGene00002068  | ify-1    | C27A2.3  | -0.17863970576739    | AGIWUR37903 |
| N2                                                                                                                    | HS | II | 5055616 | 5056214 | WBGene00004434  | rp1-22   | C27A2.2  | 0.146157164577094    |             |
| AGIWUR8338;AGIWUR19216;AGIWUR25761;AGIWUR35665;AGIWUR36144;AGIWUR39113;AGIWUR39990;AGIWUR40550                        |    |    |         |         |                 |          |          |                      |             |
| N2                                                                                                                    | HS | II | 5056211 | 5058113 | WBGene000206373 | C27A2.12 | C27A2.12 | 0.359549652918172    |             |
| AGIWUR25367                                                                                                           |    |    |         |         |                 |          |          |                      |             |
| N2                                                                                                                    | HS | II | 5062129 | 5067116 | WBGene00016151  | smc-5    | C27A2.1  | -0.0291524277896409  |             |
| AGIWUR13886;AGIWUR34831;AGIWUR36227                                                                                   |    |    |         |         |                 |          |          |                      |             |
| N2                                                                                                                    | HS | II | 5067088 | 5067980 | WBGene00044387  | C27A2.8  | C27A2.8  | -0.0355448207427811  |             |
| AGIWUR9687;AGIWUR23394;AGIWUR34194;AGIWUR44428                                                                        |    |    |         |         |                 |          |          |                      |             |
| N2                                                                                                                    | HS | II | 5068648 | 5069625 | WBGene00016153  | C27A2.5  | C27A2.5  | 0.245568975448174    | AGIWUR20299 |
| N2                                                                                                                    | HS | II | 5069764 | 5071365 | WBGene00044386  | C27A2.7  | C27A2.7  | 0.207911137908494    |             |
| AGIWUR320;AGIWUR7549;AGIWUR32727                                                                                      |    |    |         |         |                 |          |          |                      |             |
| N2                                                                                                                    | HS | II | 5078235 | 5081161 | WBGene00001102  | dsh-2    | C27A2.6  | -0.370261896568211   | AGIWUR6526  |
| N2                                                                                                                    | HS | II | 5081490 | 5083441 | WBGene00015454  | C04G6.4  | C04G6.4  | -0.121847400987759   | AGIWUR13458 |
| N2                                                                                                                    | HS | II | 5083848 | 5091690 | WBGene00004040  | p1d-1    | C04G6.3  | 0.0523446708389912   |             |
| AGIWUR8787;AGIWUR15467                                                                                                |    |    |         |         |                 |          |          |                      |             |
| N2                                                                                                                    | HS | II | 5093214 | 5094263 | WBGene00015453  | C04G6.2  | C04G6.2  | 0.180926948932346    |             |
| AGIWUR3836;AGIWUR20839                                                                                                |    |    |         |         |                 |          |          |                      |             |
| N2                                                                                                                    | HS | II | 5094245 | 5095370 | WBGene00077489  | C04G6.13 | C04G6.13 | 0.181166564121677    |             |
| AGIWUR41830                                                                                                           |    |    |         |         |                 |          |          |                      |             |
| N2                                                                                                                    | HS | II | 5098770 | 5100242 | WBGene00015456  | C04G6.6  | C04G6.6  | -0.0226796765531443  | AGIWUR35921 |
| N2                                                                                                                    | HS | II | 5100412 | 5101801 | WBGene00015457  | C04G6.7  | C04G6.7  | -0.0691321754508589  | AGIWUR1649  |
| N2                                                                                                                    | HS | II | 5103341 | 5103834 | WBGene00015459  | C04G6.11 | C04G6.11 | -0.410288549385502   |             |
| AGIWUR4781                                                                                                            |    |    |         |         |                 |          |          |                      |             |
| N2                                                                                                                    | HS | II | 5104118 | 5108901 | WBGene00003402  | mpk-2    | C04G6.1  | -0.00734012132101203 |             |
| AGIWUR2806;AGIWUR28220                                                                                                |    |    |         |         |                 |          |          |                      |             |

|                                                                                  |    |    |         |         |                |          |          |                      |
|----------------------------------------------------------------------------------|----|----|---------|---------|----------------|----------|----------|----------------------|
| N2                                                                               | HS | II | 5110029 | 5112232 | WBGene00017277 | F09C12.2 | F09C12.2 | -0.206332637491246   |
| AGIWUR15962                                                                      |    |    |         |         |                |          |          |                      |
| N2                                                                               | HS | II | 5112382 | 5114153 | WBGene00017279 | F09C12.8 | F09C12.8 | -0.0878867593315888  |
| AGIWUR10339                                                                      |    |    |         |         |                |          |          |                      |
| N2                                                                               | HS | II | 5116033 | 5118276 | WBGene00017278 | F09C12.6 | F09C12.6 | -0.0786126554070572  |
| AGIWUR25931                                                                      |    |    |         |         |                |          |          |                      |
| N2                                                                               | HS | II | 5130384 | 5133215 | WBGene00001588 | ggr-3    | F09C12.1 | -0.00163249123287557 |
| AGIWUR28057                                                                      |    |    |         |         |                |          |          |                      |
| N2                                                                               | HS | II | 5136717 | 5138568 | WBGene00019023 | F58A6.2  | F58A6.2  | 0.0815575371048771   |
| AGIWUR11752;AGIWUR14733;AGIWUR23481;AGIWUR27769;AGIWUR37991                      |    |    |         |         |                |          |          |                      |
| N2                                                                               | HS | II | 5138648 | 5142036 | WBGene00003547 | nas-29   | F58A6.4  | 0.0147678049129492   |
| AGIWUR2730;AGIWUR7599;AGIWUR17429;AGIWUR25274;AGIWUR27316;AGIWUR34128            |    |    |         |         |                |          |          |                      |
| N2                                                                               | HS | II | 5142343 | 5144021 | WBGene00019022 | F58A6.1  | F58A6.1  | 0.203000787314121    |
| AGIWUR19021                                                                      |    |    |         |         |                |          |          |                      |
| N2                                                                               | HS | II | 5146967 | 5148465 | WBGene00019024 | F58A6.5  | F58A6.5  | 0.172302078654615    |
| AGIWUR18647;AGIWUR28907;AGIWUR29036                                              |    |    |         |         |                |          |          |                      |
| N2                                                                               | HS | II | 5148530 | 5150853 | WBGene00019025 | srb-16   | F58A6.6  | 0.138845004978715    |
| AGIWUR31347                                                                      |    |    |         |         |                |          |          |                      |
| N2                                                                               | HS | II | 5153119 | 5154638 | WBGene00019027 | srb-12   | F58A6.10 | -0.161523388746116   |
| AGIWUR35711                                                                      |    |    |         |         |                |          |          |                      |
| N2                                                                               | HS | II | 5155436 | 5157625 | WBGene00019028 | srb-13   | F58A6.11 | 0.0446025138441417   |
| AGIWUR31294                                                                      |    |    |         |         |                |          |          |                      |
| N2                                                                               | HS | II | 5158566 | 5158988 | WBGene00019026 | F58A6.9  | F58A6.9  | -0.184432389303906   |
| AGIWUR42574                                                                      |    |    |         |         |                |          |          |                      |
| N2                                                                               | HS | II | 5159717 | 5161130 | WBGene00044388 | C27D6.11 | C27D6.11 | -0.267293485393923   |
| AGIWUR40723                                                                      |    |    |         |         |                |          |          |                      |
| N2                                                                               | HS | II | 5161995 | 5163383 | WBGene00005070 | srb-5    | C27D6.6  | 0.0254471252334953   |
| AGIWUR40918                                                                      |    |    |         |         |                |          |          |                      |
| N2                                                                               | HS | II | 5163868 | 5165020 | WBGene00005069 | srb-4    | C27D6.7  | 0.257974521942325    |
| AGIWUR34426                                                                      |    |    |         |         |                |          |          |                      |
| N2                                                                               | HS | II | 5165315 | 5166838 | WBGene00005068 | srb-3    | C27D6.8  | -0.102447038379191   |
| AGIWUR21541                                                                      |    |    |         |         |                |          |          |                      |
| N2                                                                               | HS | II | 5168110 | 5169324 | WBGene00005067 | srb-2    | C27D6.9  | 0.108980243387077    |
| AGIWUR22739                                                                      |    |    |         |         |                |          |          |                      |
| N2                                                                               | HS | II | 5169726 | 5171032 | WBGene00005066 | srb-1    | C27D6.10 | -0.0366161860489918  |
| AGIWUR9291                                                                       |    |    |         |         |                |          |          |                      |
| N2                                                                               | HS | II | 5171910 | 5177440 | WBGene00016160 | C27D6.1  | C27D6.1  | -0.0611397511371585  |
| AGIWUR9081                                                                       |    |    |         |         |                |          |          |                      |
| N2                                                                               | HS | II | 5179034 | 5187569 | WBGene00016162 | crh-2    | C27D6.4  | -0.13122222943138    |
| AGIWUR6531;AGIWUR9803;AGIWUR31953                                                |    |    |         |         |                |          |          |                      |
| N2                                                                               | HS | II | 5195804 | 5199257 | WBGene00016416 | C34F11.5 | C34F11.5 | -0.520253936299429   |
| AGIWUR10404                                                                      |    |    |         |         |                |          |          |                      |
| N2                                                                               | HS | II | 5199763 | 5200223 | WBGene00003443 | msp-50   | C34F11.4 | -0.221736333711128   |
| AGIWUR44471                                                                      |    |    |         |         |                |          |          |                      |
| N2                                                                               | HS | II | 5203322 | 5209799 | WBGene00016415 | ampd-1   | C34F11.3 | 0.0788372915848008   |
| AGIWUR3205;AGIWUR3377;AGIWUR8618;AGIWUR26632;AGIWUR28743;AGIWUR29238;AGIWUR30148 |    |    |         |         |                |          |          |                      |
| N2                                                                               | HS | II | 5209780 | 5210978 | WBGene00016417 | C34F11.8 | C34F11.8 | 0.122984706103409    |

|                                                                                                                                                                                                          |    |    |         |         |                |          |          |                                 |
|----------------------------------------------------------------------------------------------------------------------------------------------------------------------------------------------------------|----|----|---------|---------|----------------|----------|----------|---------------------------------|
| AGIWUR22884                                                                                                                                                                                              |    |    |         |         |                |          |          |                                 |
| N2                                                                                                                                                                                                       | HS | II | 5212270 | 5212789 | WBGene00016414 | C34F11.2 | C34F11.2 | -0.214000772976526              |
| AGIWUR12844                                                                                                                                                                                              |    |    |         |         |                |          |          |                                 |
| N2                                                                                                                                                                                                       | HS | II | 5212932 | 5213932 | WBGene00016413 | C34F11.1 | C34F11.1 | 0.106632178240584               |
| AGIWUR34064                                                                                                                                                                                              |    |    |         |         |                |          |          |                                 |
| N2                                                                                                                                                                                                       | HS | II | 5214441 | 5225377 | WBGene00001101 | dsh-1    | C34F11.9 | -0.0750317621955023             |
| AGIWUR2992;AGIWUR5381;AGIWUR18371;AGIWUR19496;AGIWUR37180;AGIWUR42341;AGIWUR43485;AGIWUR43880                                                                                                            |    |    |         |         |                |          |          |                                 |
| N2                                                                                                                                                                                                       | HS | II | 5230081 | 5230501 | WBGene00017148 | EGAP2.2  | EGAP2.2  | -0.0756921715720456 AGIWUR38655 |
| N2                                                                                                                                                                                                       | HS | II | 5231424 | 5233273 | WBGene00017147 | EGAP2.1  | EGAP2.1  | -0.152639882282479 AGIWUR19126  |
| N2                                                                                                                                                                                                       | HS | II | 5233154 | 5235926 | WBGene00004020 | pho-1    | EGAP2.3  | 0.078917960499794 AGIWUR29936   |
| N2                                                                                                                                                                                                       | HS | II | 5236258 | 5238514 | WBGene00004023 | pho-4    | T16D1.2  | 0.111709219153575               |
| AGIWUR3712;AGIWUR12698;AGIWUR37571;AGIWUR39791                                                                                                                                                           |    |    |         |         |                |          |          |                                 |
| N2                                                                                                                                                                                                       | HS | II | 5241233 | 5241660 | WBGene00020539 | T16D1.1  | T16D1.1  | -0.164342354588026 AGIWUR41030  |
| N2                                                                                                                                                                                                       | HS | II | 5242452 | 5246837 | WBGene00004221 | ptr-6    | C54A12.1 | -0.0364002603355935             |
| AGIWUR4575;AGIWUR29782;AGIWUR33750;AGIWUR35269;AGIWUR36517;AGIWUR42135                                                                                                                                   |    |    |         |         |                |          |          |                                 |
| N2                                                                                                                                                                                                       | HS | II | 5251121 | 5255529 | WBGene00016909 | frpr-4   | C54A12.2 | -0.0262917612230567             |
| AGIWUR34619                                                                                                                                                                                              |    |    |         |         |                |          |          |                                 |
| N2                                                                                                                                                                                                       | HS | II | 5270406 | 5271845 | WBGene00016911 | drn-1    | C54A12.4 | 0.219623257200412               |
| AGIWUR19420                                                                                                                                                                                              |    |    |         |         |                |          |          |                                 |
| N2                                                                                                                                                                                                       | HS | II | 5278137 | 5282525 | WBGene00022781 | pmt-1    | ZK622.3  | -0.219405818775858              |
| AGIWUR3942;AGIWUR11991;AGIWUR15724                                                                                                                                                                       |    |    |         |         |                |          |          |                                 |
| N2                                                                                                                                                                                                       | HS | II | 5285329 | 5288908 | WBGene00001806 | gur-5    | ZK622.2  | -0.0918670984108623 AGIWUR8811  |
| N2                                                                                                                                                                                                       | HS | II | 5289442 | 5290326 | WBGene00044667 | ZK622.5  | ZK622.5  | -0.0534678979210845             |
| AGIWUR12678;AGIWUR42990                                                                                                                                                                                  |    |    |         |         |                |          |          |                                 |
| N2                                                                                                                                                                                                       | HS | II | 5292683 | 5293306 | WBGene00022782 | ZK622.4  | ZK622.4  | -0.125630678910666              |
| AGIWUR12395;AGIWUR36745;AGIWUR38572;AGIWUR41852                                                                                                                                                          |    |    |         |         |                |          |          |                                 |
| N2                                                                                                                                                                                                       | HS | II | 5293800 | 5295612 | WBGene00022780 | ZK622.1  | ZK622.1  | 0.010506525376897 AGIWUR44091   |
| N2                                                                                                                                                                                                       | HS | II | 5312046 | 5319234 | WBGene00001538 | gcy-12   | F08B1.2  | -0.0650813233064724             |
| AGIWUR12960;AGIWUR42287                                                                                                                                                                                  |    |    |         |         |                |          |          |                                 |
| N2                                                                                                                                                                                                       | HS | II | 5323005 | 5340826 | WBGene00006923 | vhp-1    | F08B1.1  | -0.0717220268143688             |
| AGIWUR5649;AGIWUR6552;AGIWUR7813;AGIWUR10624;AGIWUR11567;AGIWUR13821;AGIWUR15922;AGIWUR18468;AGIWUR20242;AGIWUR21499;AGIWUR26859;AGIWUR29335;AGIWUR29995;AGIWUR38653;AGIWUR41812;AGIWUR42052;AGIWUR44227 |    |    |         |         |                |          |          |                                 |
| N2                                                                                                                                                                                                       | HS | II | 5342663 | 5344875 | WBGene00017291 | F09E5.14 | F09E5.14 | 0.170430607651976               |
| AGIWUR32159                                                                                                                                                                                              |    |    |         |         |                |          |          |                                 |
| N2                                                                                                                                                                                                       | HS | II | 5350669 | 5351993 | WBGene00017286 | F09E5.8  | F09E5.8  | 0.110925834257667 AGIWUR5675    |
| N2                                                                                                                                                                                                       | HS | II | 5352087 | 5353759 | WBGene00017285 | F09E5.7  | F09E5.7  | -0.184897576294203 AGIWUR39499  |
| N2                                                                                                                                                                                                       | HS | II | 5355712 | 5357341 | WBGene00005226 | srg-69   | F09E5.4  | 0.18692608184133 AGIWUR24261    |
| N2                                                                                                                                                                                                       | HS | II | 5357308 | 5358187 | WBGene00017289 | F09E5.11 | F09E5.11 | 0.144221362906912               |
| AGIWUR3030                                                                                                                                                                                               |    |    |         |         |                |          |          |                                 |

|                                                 |    |    |         |         |                |          |          |                     |             |
|-------------------------------------------------|----|----|---------|---------|----------------|----------|----------|---------------------|-------------|
| N2                                              | HS | II | 5358695 | 5359469 | WBGene00017293 | bmy-1    | F09E5.17 | 0.0143381914468783  |             |
| AGIWUR7837                                      |    |    |         |         |                |          |          |                     |             |
| N2                                              | HS | II | 5359552 | 5372122 | WBGene00017284 | sec-6    | F09E5.5  | 0.0924705966828121  | AGIWUR1999  |
| N2                                              | HS | II | 5371980 | 5373433 | WBGene00000094 | agt-2    | F09E5.13 | 0.153064134899516   |             |
| AGIWUR5697                                      |    |    |         |         |                |          |          |                     |             |
| N2                                              | HS | II | 5373997 | 5375177 | WBGene00017283 | F09E5.3  | F09E5.3  | 0.289561037510699   | AGIWUR233   |
| N2                                              | HS | II | 5375267 | 5377111 | WBGene00017282 | algn-2   | F09E5.2  | 0.241060785160137   |             |
| AGIWUR12610;AGIWUR34310                         |    |    |         |         |                |          |          |                     |             |
| N2                                              | HS | II | 5378068 | 5379632 | WBGene00006434 | prdx-2   | F09E5.15 | 0.0333597697950729  |             |
| AGIWUR2121                                      |    |    |         |         |                |          |          |                     |             |
| N2                                              | HS | II | 5380027 | 5384169 | WBGene00004034 | pkc-3    | F09E5.1  | -0.0401195147477136 | AGIWUR11029 |
| N2                                              | HS | II | 5384137 | 5387317 | WBGene00017136 | ccpp-6   | EEED8.6  | 0.0241416844205897  | AGIWUR7326  |
| N2                                              | HS | II | 5387411 | 5388830 | WBGene00004701 | rsp-4    | EEED8.7  | -0.0284875140395755 |             |
| AGIWUR14445;AGIWUR27407;AGIWUR28507             |    |    |         |         |                |          |          |                     |             |
| N2                                              | HS | II | 5388829 | 5390104 | WBGene00003583 | ndx-6    | EEED8.8  | 0.106620006695016   |             |
| AGIWUR13822;AGIWUR15361;AGIWUR34198;AGIWUR39738 |    |    |         |         |                |          |          |                     |             |
| N2                                              | HS | II | 5390233 | 5393190 | WBGene00017144 | brap-2   | EEED8.16 | 0.128446270001305   |             |
| AGIWUR33548                                     |    |    |         |         |                |          |          |                     |             |
| N2                                              | HS | II | 5393293 | 5395694 | WBGene00017137 | pink-1   | EEED8.9  | 0.217442480003642   | AGIWUR43636 |
| N2                                              | HS | II | 5395889 | 5398902 | WBGene00017138 | EEED8.10 | EEED8.10 | 0.0950816380069295  |             |
| AGIWUR13646;AGIWUR29548;AGIWUR32140             |    |    |         |         |                |          |          |                     |             |
| N2                                              | HS | II | 5399538 | 5405810 | WBGene00003393 | mog-5    | EEED8.5  | 0.193992625367121   | AGIWUR17482 |
| N2                                              | HS | II | 5405819 | 5407634 | WBGene00017139 | clcc-141 | EEED8.11 | 0.0321953661687102  |             |
| AGIWUR19066                                     |    |    |         |         |                |          |          |                     |             |
| N2                                              | HS | II | 5408260 | 5409024 | WBGene00017140 | EEED8.12 | EEED8.12 | 0.0289406871094453  |             |
| AGIWUR11005                                     |    |    |         |         |                |          |          |                     |             |
| N2                                              | HS | II | 5410467 | 5411235 | WBGene00017135 | EEED8.4  | EEED8.4  | 0.0394377294811568  | AGIWUR16324 |
| N2                                              | HS | II | 5411542 | 5412174 | WBGene00017141 | EEED8.13 | EEED8.13 | 0.0147391893644073  |             |
| AGIWUR306                                       |    |    |         |         |                |          |          |                     |             |
| N2                                              | HS | II | 5412196 | 5412610 | WBGene00194696 | EEED8.18 | EEED8.18 | -0.0704547444781598 |             |
| AGIWUR43040                                     |    |    |         |         |                |          |          |                     |             |
| N2                                              | HS | II | 5414207 | 5415580 | WBGene00017134 | EEED8.3  | EEED8.3  | 0.153407642789205   | AGIWUR17225 |
| N2                                              | HS | II | 5416714 | 5418377 | WBGene00017133 | EEED8.2  | EEED8.2  | -0.2768747000797    | AGIWUR40222 |
| N2                                              | HS | II | 5419233 | 5421093 | WBGene00017143 | EEED8.15 | EEED8.15 | 0.032970463183692   |             |
| AGIWUR2513                                      |    |    |         |         |                |          |          |                     |             |
| N2                                              | HS | II | 5421248 | 5422737 | WBGene00017132 | tofu-6   | EEED8.1  | 0.175556490411637   | AGIWUR23738 |
| N2                                              | HS | II | 5422735 | 5423858 | WBGene00017219 | F07F6.7  | F07F6.7  | 0.457187848075634   | AGIWUR20957 |
| N2                                              | HS | II | 5424141 | 5425733 | WBGene00017220 | F07F6.8  | F07F6.8  | 0.358812768606448   | AGIWUR16885 |
| N2                                              | HS | II | 5425750 | 5429572 | WBGene00017217 | F07F6.4  | F07F6.4  | -0.0592493469403412 |             |

AGIWUR4465;AGIWUR5507;AGIWUR9414;AGIWUR22035;AGIWUR28235;AGIWUR34889  
 N2 HS II 5430392 5431422 WBGene00017216 F07F6.2 F07F6.2 0.185226093271411  
 AGIWUR3809;AGIWUR9682;AGIWUR16521;AGIWUR28895;AGIWUR36864;AGIWUR42556  
 N2 HS II 5431476 5433048 WBGene00006005 srx-114 F07F6.9 0.26855447786993 AGIWUR27966  
 N2 HS II 5435724 5436933 WBGene00017218 dct-5 F07F6.5 0.169692181585214  
 AGIWUR15543;AGIWUR21500;AGIWUR27471  
 N2 HS II 5437891 5440256 WBGene00017215 F07F6.1 F07F6.1 -0.237520784300907 AGIWUR12415  
 N2 HS II 5440243 5446705 WBGene00003774 nmr-1 F07F6.6 0.0155017800306245 AGIWUR35436  
 N2 HS II 5447681 5448634 WBGene00023407 cex-1 F56D1.6 0.140981772245407 AGIWUR41097  
 N2 HS II 5453847 5455977 WBGene00000969 dhs-5 F56D1.5 -0.0396769695516674 AGIWUR3066  
 N2 HS II 5456305 5458609 WBGene00000935 daz-1 F56D1.7 0.0807523695781729 AGIWUR29003  
 N2 HS II 5466363 5473812 WBGene00000548 clr-1 F56D1.4 -0.087332457639274  
 AGIWUR15780;AGIWUR32701;AGIWUR40029  
 N2 HS II 5474373 5475475 WBGene00018961 mrps-16 F56D1.3 0.131423814202217  
 AGIWUR20329;AGIWUR22842;AGIWUR30295  
 N2 HS II 5475409 5478524 WBGene00018960 ilcr-2 F56D1.2 -0.0466869379017023 AGIWUR3916  
 N2 HS II 5478578 5480490 WBGene00018959 F56D1.1 F56D1.1 0.148411899757017  
 AGIWUR12541;AGIWUR32062;AGIWUR39277  
 N2 HS II 5480591 5482041 WBGene00017394 cal-8 F12A10.5 0.020282221272204  
 AGIWUR35593  
 N2 HS II 5488151 5490606 WBGene00017393 nep-5 F12A10.4 0.0223822973181562  
 AGIWUR35809  
 N2 HS II 5491111 5493192 WBGene00017392 basl-2 F12A10.3 0.0667108420664597  
 AGIWUR23641  
 N2 HS II 5494085 5494505 WBGene00017395 F12A10.6 F12A10.6 0.381573356648494  
 AGIWUR41057  
 N2 HS II 5497285 5498256 WBGene00017396 F12A10.7 F12A10.7 -0.627144507183482  
 AGIWUR25210  
 N2 HS II 5498851 5501409 WBGene00017397 F12A10.8 F12A10.8 -0.0990950227387728  
 AGIWUR33792  
 N2 HS II 5501633 5503908 WBGene00001511 fzy-1 ZK177.6 0.159878168032858 AGIWUR9934  
 N2 HS II 5503966 5506115 WBGene00000375 cyp-44A1 ZK177.5 -0.134164830264721  
 AGIWUR8962;AGIWUR13879;AGIWUR35034;AGIWUR38693;AGIWUR43217  
 N2 HS II 5505870 5509056 WBGene00022672 ZK177.4 ZK177.4 -0.111566138586126  
 AGIWUR12615;AGIWUR36298  
 N2 HS II 5509028 5513775 WBGene00022673 ZK177.8 ZK177.8 0.127193801873584  
 AGIWUR15416;AGIWUR18492;AGIWUR22202;AGIWUR33128  
 N2 HS II 5515861 5517133 WBGene00022671 ZK177.3 ZK177.3 0.0601631823639242 AGIWUR21731  
 N2 HS II 5517157 5517743 WBGene00022674 ZK177.9 ZK177.9 0.687179148094282 AGIWUR36184

|                                                                                                                                          |    |    |         |         |                 |           |           |                     |
|------------------------------------------------------------------------------------------------------------------------------------------|----|----|---------|---------|-----------------|-----------|-----------|---------------------|
| N2                                                                                                                                       | HS | II | 5522937 | 5523488 | WBGene00044390  | ZK177.11  | ZK177.11  | 0.0892057915324127  |
| AGIWUR11132;AGIWUR14057;AGIWUR25550;AGIWUR38479;AGIWUR44677                                                                              |    |    |         |         |                 |           |           |                     |
| N2                                                                                                                                       | HS | II | 5524200 | 5525379 | WBGene00006554  | tbx-35    | ZK177.10  | -0.0287625579683342 |
| AGIWUR8139;AGIWUR44660                                                                                                                   |    |    |         |         |                 |           |           |                     |
| N2                                                                                                                                       | HS | II | 5528141 | 5529637 | WBGene00022669  | ZK177.1   | ZK177.1   | -0.0683109260528241 |
| AGIWUR3590                                                                                                                               |    |    |         |         |                 |           |           |                     |
| N2                                                                                                                                       | HS | II | 5530501 | 5530928 | WBGene00002121  | ins-38    | C17C3.20  | -0.0629129716392933 |
| AGIWUR10095;AGIWUR17770;AGIWUR24592;AGIWUR26179;AGIWUR31150                                                                              |    |    |         |         |                 |           |           |                     |
| N2                                                                                                                                       | HS | II | 5531313 | 5532259 | WBGene00015892  | C17C3.9   | C17C3.9   | 0.389322840383867   |
| AGIWUR3551                                                                                                                               |    |    |         |         |                 |           |           |                     |
| N2                                                                                                                                       | HS | II | 5532857 | 5533738 | WBGene00001965  | hlh-26    | C17C3.8   | 0.0703436474252115  |
| AGIWUR33494                                                                                                                              |    |    |         |         |                 |           |           |                     |
| N2                                                                                                                                       | HS | II | 5537835 | 5539004 | WBGene00015893  | C17C3.11  | C17C3.11  | 0.0196414546103334  |
| AGIWUR2886                                                                                                                               |    |    |         |         |                 |           |           |                     |
| N2                                                                                                                                       | HS | II | 5544585 | 5544851 | WBGene00002096  | ins-13    | C17C3.18  | 0.298103416439344   |
| AGIWUR11025;AGIWUR15472                                                                                                                  |    |    |         |         |                 |           |           |                     |
| N2                                                                                                                                       | HS | II | 5544781 | 5547492 | WBGene00015894  | acdh-2    | C17C3.12  | 0.483939869918995   |
| AGIWUR10216;AGIWUR11158;AGIWUR11868;AGIWUR39769;AGIWUR44925                                                                              |    |    |         |         |                 |           |           |                     |
| N2                                                                                                                                       | HS | II | 5551833 | 5552335 | WBGene00015890  | C17C3.5   | C17C3.5   | -0.0183153466472774 |
| AGIWUR20466                                                                                                                              |    |    |         |         |                 |           |           |                     |
| N2                                                                                                                                       | HS | II | 5554617 | 5555306 | WBGene00002095  | ins-12    | C17C3.19  | 0.142871565718409   |
| AGIWUR1112;AGIWUR11658;AGIWUR22944;AGIWUR26429;AGIWUR44694                                                                               |    |    |         |         |                 |           |           |                     |
| N2                                                                                                                                       | HS | II | 5556761 | 5557088 | WBGene00002094  | ins-11    | C17C3.4   | 0.234861255708562   |
| AGIWUR24660                                                                                                                              |    |    |         |         |                 |           |           |                     |
| N2                                                                                                                                       | HS | II | 5561763 | 5563523 | WBGene00015889  | C17C3.3   | C17C3.3   | -0.0479718204714938 |
| AGIWUR13473                                                                                                                              |    |    |         |         |                 |           |           |                     |
| N2                                                                                                                                       | HS | II | 5570572 | 5574943 | WBGene00015887  | C17C3.1   | C17C3.1   | -0.0104516947115183 |
| AGIWUR655;AGIWUR1027;AGIWUR2276;AGIWUR3952;AGIWUR5419;AGIWUR9121;AGIWUR18932;AGIWUR33510;AGIWUR36819;AGIWUR37926;AGIWUR38475;AGIWUR42256 |    |    |         |         |                 |           |           |                     |
| N2                                                                                                                                       | HS | II | 5578318 | 5579965 | WBGene00020803  | T25E4.1   | T25E4.1   | 0.133400351821168   |
| AGIWUR17629;AGIWUR39775                                                                                                                  |    |    |         |         |                 |           |           |                     |
| N2                                                                                                                                       | HS | II | 5580125 | 5582409 | WBGene00020804  | T25E4.2   | T25E4.2   | 0.0864096189839749  |
| AGIWUR34051                                                                                                                              |    |    |         |         |                 |           |           |                     |
| N2                                                                                                                                       | HS | II | 5586165 | 5587651 | WBGene00003097  | lys-8     | C17G10.5  | 0.146778299142277   |
| AGIWUR8095                                                                                                                               |    |    |         |         |                 |           |           |                     |
| N2                                                                                                                                       | HS | II | 5587614 | 5589755 | WBGene000270322 | C17G10.13 | C17G10.13 | 0.152735411636762   |
| AGIWUR40743                                                                                                                              |    |    |         |         |                 |           |           |                     |
| N2                                                                                                                                       | HS | II | 5589186 | 5593628 | WBGene00000383  | cdc-14    | C17G10.4  | -0.101118213772974  |
| AGIWUR4060;AGIWUR6178;AGIWUR9427;AGIWUR23768;AGIWUR27886;AGIWUR37473;AGIWUR44066                                                         |    |    |         |         |                 |           |           |                     |
| N2                                                                                                                                       | HS | II | 5594714 | 5596463 | WBGene00015916  | C17G10.2  | C17G10.2  | 0.24881220819641    |
| AGIWUR5214                                                                                                                               |    |    |         |         |                 |           |           |                     |
| N2                                                                                                                                       | HS | II | 5596547 | 5598449 | WBGene00015915  | C17G10.1  | C17G10.1  | -0.156898977562971  |
| AGIWUR10468;AGIWUR25020;AGIWUR29338                                                                                                      |    |    |         |         |                 |           |           |                     |
| N2                                                                                                                                       | HS | II | 5599930 | 5603294 | WBGene00015918  | C17G10.6  | C17G10.6  | 0.0930704615141211  |
| AGIWUR4653;AGIWUR5160;AGIWUR9532;AGIWUR11414;AGIWUR33077;AGIWUR39820                                                                     |    |    |         |         |                 |           |           |                     |
| N2                                                                                                                                       | HS | II | 5606542 | 5607856 | WBGene00015919  | C17G10.7  | C17G10.7  | -0.267977430756694  |



|                                                                                                                                                           |    |    |         |         |                |           |           |                               |
|-----------------------------------------------------------------------------------------------------------------------------------------------------------|----|----|---------|---------|----------------|-----------|-----------|-------------------------------|
| AGIWUR34206                                                                                                                                               |    |    |         |         |                |           |           |                               |
| N2                                                                                                                                                        | HS | II | 5617122 | 5619319 | WBGene00000970 | dhs-6     | C17G10.8  | 0.129841705872151             |
| AGIWUR41943                                                                                                                                               |    |    |         |         |                |           |           |                               |
| N2                                                                                                                                                        | HS | II | 5619590 | 5622483 | WBGene00015920 | eif-3.L   | C17G10.9  | 0.245007788177702             |
| AGIWUR6407                                                                                                                                                |    |    |         |         |                |           |           |                               |
| N2                                                                                                                                                        | HS | II | 5626316 | 5627263 | WBGene00235269 | F59E12.15 | F59E12.15 | 0.194100697052072             |
| AGIWUR35828                                                                                                                                               |    |    |         |         |                |           |           |                               |
| N2                                                                                                                                                        | HS | II | 5634528 | 5636926 | WBGene00019123 | F59E12.8  | F59E12.8  | 0.352500513744165             |
| AGIWUR11995                                                                                                                                               |    |    |         |         |                |           |           |                               |
| N2                                                                                                                                                        | HS | II | 5638381 | 5639752 | WBGene00019119 | F59E12.3  | F59E12.3  | 0.153158020175499             |
| AGIWUR18907;AGIWUR24208;AGIWUR40233;AGIWUR42077                                                                                                           |    |    |         |         |                |           |           |                               |
| N2                                                                                                                                                        | HS | II | 5640063 | 5647042 | WBGene00019124 | F59E12.9  | F59E12.9  | -0.259458993688861            |
| AGIWUR6420                                                                                                                                                |    |    |         |         |                |           |           |                               |
| N2                                                                                                                                                        | HS | II | 5647154 | 5647884 | WBGene00019125 | ddl-1     | F59E12.10 | 0.0129200333187782            |
| AGIWUR42386                                                                                                                                               |    |    |         |         |                |           |           |                               |
| N2                                                                                                                                                        | HS | II | 5647986 | 5649472 | WBGene00019126 | sam-4     | F59E12.11 | 0.0479423523122176            |
| AGIWUR3369                                                                                                                                                |    |    |         |         |                |           |           |                               |
| N2                                                                                                                                                        | HS | II | 5649737 | 5654422 | WBGene00006988 | zyg-1     | F59E12.2  | 0.220717197555643             |
| AGIWUR21062                                                                                                                                               |    |    |         |         |                |           |           |                               |
| N2                                                                                                                                                        | HS | II | 5654515 | 5657371 | WBGene00019118 | F59E12.1  | F59E12.1  |                               |
| -0.00995370085686176 AGIWUR27965                                                                                                                          |    |    |         |         |                |           |           |                               |
| N2                                                                                                                                                        | HS | II | 5657710 | 5659854 | WBGene00006402 | fut-3     | F59E12.13 | 0.0106471724909163            |
| AGIWUR857                                                                                                                                                 |    |    |         |         |                |           |           |                               |
| N2                                                                                                                                                        | HS | II | 5659937 | 5660786 | WBGene00016121 | C25H3.12  | C25H3.12  | -0.0440569621293374           |
| AGIWUR7009;AGIWUR11907;AGIWUR20481;AGIWUR34018                                                                                                            |    |    |         |         |                |           |           |                               |
| N2                                                                                                                                                        | HS | II | 5661167 | 5665243 | WBGene00016115 | mdt-26    | C25H3.6   | -0.024869812918288            |
| AGIWUR1167;AGIWUR3321;AGIWUR12078;AGIWUR15580;AGIWUR22399;AGIWUR26846;AGIWUR31427;AGIWUR38315;AGIWUR40073;AGIWUR41078;AGIWUR41188;AGIWUR42279;AGIWUR44075 |    |    |         |         |                |           |           |                               |
| N2                                                                                                                                                        | HS | II | 5665408 | 5666278 | WBGene00044391 | C25H3.15  | C25H3.15  | 0.0673840329548554            |
| AGIWUR31701;AGIWUR41371                                                                                                                                   |    |    |         |         |                |           |           |                               |
| N2                                                                                                                                                        | HS | II | 5666291 | 5666850 | WBGene00044392 | C25H3.16  | C25H3.16  | 0.304455530477918             |
| AGIWUR1916;AGIWUR4138                                                                                                                                     |    |    |         |         |                |           |           |                               |
| N2                                                                                                                                                        | HS | II | 5666756 | 5668930 | WBGene00016116 | C25H3.7   | C25H3.7   | 0.147432617358351 AGIWUR35607 |
| N2                                                                                                                                                        | HS | II | 5669788 | 5679276 | WBGene00016117 | C25H3.8   | C25H3.8   | -0.0756391464364032           |
| AGIWUR9610;AGIWUR19861;AGIWUR23395;AGIWUR35785;AGIWUR44190;AGIWUR44837                                                                                    |    |    |         |         |                |           |           |                               |
| N2                                                                                                                                                        | HS | II | 5680980 | 5682667 | WBGene00016114 | f1p-27    | C25H3.5   | 0.022416145757207 AGIWUR40585 |
| N2                                                                                                                                                        | HS | II | 5684479 | 5689030 | WBGene00016120 | C25H3.11  | C25H3.11  | 0.0644491217599761            |
| AGIWUR29501                                                                                                                                               |    |    |         |         |                |           |           |                               |
| N2                                                                                                                                                        | HS | II | 5690137 | 5691355 | WBGene00016118 | C25H3.9   | C25H3.9   | 0.0896301230659233            |

AGIWUR1206;AGIWUR40397

|                                                                                                                                                          |    |    |         |         |                |          |          |                      |             |
|----------------------------------------------------------------------------------------------------------------------------------------------------------|----|----|---------|---------|----------------|----------|----------|----------------------|-------------|
| N2                                                                                                                                                       | HS | II | 5691662 | 5693939 | WBGene00016113 | eif-2D   | C25H3.4  | 0.529973050407873    | AGIWUR25622 |
| N2                                                                                                                                                       | HS | II | 5694195 | 5695237 | WBGene00016112 | C25H3.3  | C25H3.3  | 0.0514586963986563   | AGIWUR18537 |
| N2                                                                                                                                                       | HS | II | 5695383 | 5696358 | WBGene00016123 | C25H3.14 | C25H3.14 | -0.0880534899573426  |             |
| AGIWUR41054                                                                                                                                              |    |    |         |         |                |          |          |                      |             |
| N2                                                                                                                                                       | HS | II | 5696585 | 5698969 | WBGene00016119 | C25H3.10 | C25H3.10 | 0.382626789253564    |             |
| AGIWUR16686                                                                                                                                              |    |    |         |         |                |          |          |                      |             |
| N2                                                                                                                                                       | HS | II | 5700170 | 5701408 | WBGene00016111 | C25H3.1  | C25H3.1  | 0.261287120109384    |             |
| AGIWUR34742;AGIWUR36546                                                                                                                                  |    |    |         |         |                |          |          |                      |             |
| N2                                                                                                                                                       | HS | II | 5707691 | 5712351 | WBGene00015942 | osta-2   | C18A3.4  | -0.217038192603996   |             |
| AGIWUR3856;AGIWUR8859;AGIWUR9550;AGIWUR16022;AGIWUR17152;AGIWUR18066;AGIWUR25677;AGIWUR26532                                                             |    |    |         |         |                |          |          |                      |             |
| N2                                                                                                                                                       | HS | II | 5712351 | 5714823 | WBGene00015943 | tiar-1   | C18A3.5  | -0.213051384282828   |             |
| AGIWUR9718;AGIWUR16952;AGIWUR31759;AGIWUR34523;AGIWUR37236                                                                                               |    |    |         |         |                |          |          |                      |             |
| N2                                                                                                                                                       | HS | II | 5714924 | 5716250 | WBGene00015945 | C18A3.9  | C18A3.9  | 0.111972535024506    | AGIWUR43356 |
| N2                                                                                                                                                       | HS | II | 5716307 | 5718038 | WBGene00015941 | C18A3.3  | C18A3.3  | 0.0298784153724281   | AGIWUR23308 |
| N2                                                                                                                                                       | HS | II | 5718129 | 5720052 | WBGene00015940 | zipt-3   | C18A3.2  | -0.00601007018215327 | AGIWUR30196 |
| N2                                                                                                                                                       | HS | II | 5720148 | 5721791 | WBGene00015939 | C18A3.1  | C18A3.1  | -0.0588611263638725  |             |
| AGIWUR17352;AGIWUR27379;AGIWUR35544                                                                                                                      |    |    |         |         |                |          |          |                      |             |
| N2                                                                                                                                                       | HS | II | 5721791 | 5727651 | WBGene00004267 | rab-3    | C18A3.6  | 0.037515430872908    |             |
| AGIWUR6991;AGIWUR23755;AGIWUR42885                                                                                                                       |    |    |         |         |                |          |          |                      |             |
| N2                                                                                                                                                       | HS | II | 5729597 | 5730443 | WBGene00015944 | C18A3.7  | C18A3.7  | 0.244215658319577    | AGIWUR39731 |
| N2                                                                                                                                                       | HS | II | 5731033 | 5731741 | WBGene00044668 | C18A3.11 | C18A3.11 | 0.0259227095054722   |             |
| AGIWUR3854;AGIWUR14342                                                                                                                                   |    |    |         |         |                |          |          |                      |             |
| N2                                                                                                                                                       | HS | II | 5737790 | 5738888 | WBGene00001958 | hlh-14   | C18A3.8  | -0.259461453642942   | AGIWUR37206 |
| N2                                                                                                                                                       | HS | II | 5742971 | 5745284 | WBGene00044296 | F10C1.9  | F10C1.9  | 0.0976002186294416   |             |
| AGIWUR25000;AGIWUR40035                                                                                                                                  |    |    |         |         |                |          |          |                      |             |
| N2                                                                                                                                                       | HS | II | 5750190 | 5754140 | WBGene00002054 | ifb-2    | F10C1.7  | -0.0416228763253201  |             |
| AGIWUR2064;AGIWUR4264;AGIWUR9690;AGIWUR16751;AGIWUR17005;AGIWUR20723;AGIWUR23981;AGIWUR25070;AGIWUR25591;AGIWUR32916;AGIWUR36312;AGIWUR36639;AGIWUR39866 |    |    |         |         |                |          |          |                      |             |
| N2                                                                                                                                                       | HS | II | 5754468 | 5756684 | WBGene00017327 | F10C1.8  | F10C1.8  | -0.114297412045355   |             |
| AGIWUR11828;AGIWUR20400;AGIWUR23510                                                                                                                      |    |    |         |         |                |          |          |                      |             |
| N2                                                                                                                                                       | HS | II | 5756891 | 5758421 | WBGene00017325 | F10C1.3  | F10C1.3  | 0.183923987473767    | AGIWUR28265 |
| N2                                                                                                                                                       | HS | II | 5765618 | 5772084 | WBGene00002053 | ifb-1    | F10C1.2  | 0.0560456025599718   |             |
| AGIWUR3359;AGIWUR9541;AGIWUR22649;AGIWUR27085;AGIWUR32186;AGIWUR35412                                                                                    |    |    |         |         |                |          |          |                      |             |
| N2                                                                                                                                                       | HS | II | 5772065 | 5774220 | WBGene00017326 | dmd-5    | F10C1.5  | -0.450004081073173   | AGIWUR29796 |
| N2                                                                                                                                                       | HS | II | 5774229 | 5774420 | WBGene00017324 | F10C1.1  | F10C1.1  | -0.0305647725380567  | AGIWUR41388 |
| N2                                                                                                                                                       | HS | II | 5782524 | 5787658 | WBGene00019408 | K05F1.6  | K05F1.6  | 0.142119443793852    | AGIWUR25660 |
| N2                                                                                                                                                       | HS | II | 5790726 | 5794402 | WBGene00019407 | lect-2   | K05F1.5  | 0.141610589017958    | AGIWUR42763 |
| N2                                                                                                                                                       | HS | II | 5794495 | 5796185 | WBGene00019406 | acdh-8   | K05F1.3  | -0.0441519517264553  | AGIWUR44040 |

|                                                                                                                      |    |    |         |         |                |           |           |                     |             |
|----------------------------------------------------------------------------------------------------------------------|----|----|---------|---------|----------------|-----------|-----------|---------------------|-------------|
| N2                                                                                                                   | HS | II | 5797893 | 5798341 | WBGene00003469 | msp-142   | K05F1.2   | -0.0623849778141192 | AGIWUR20776 |
| N2                                                                                                                   | HS | II | 5799321 | 5799642 | WBGene00019409 | K05F1.8   | K05F1.8   | 0.257308324572048   | AGIWUR38573 |
| N2                                                                                                                   | HS | II | 5800067 | 5801175 | WBGene00019410 | K05F1.9   | K05F1.9   | 0.276975017316902   | AGIWUR22440 |
| N2                                                                                                                   | HS | II | 5801382 | 5803680 | WBGene00019405 | K05F1.1   | K05F1.1   | 0.277476663342172   | AGIWUR16912 |
| N2                                                                                                                   | HS | II | 5804717 | 5805475 | WBGene00019411 | K05F1.10  | K05F1.10  | -0.224248396140245  |             |
| AGIWUR32783                                                                                                          |    |    |         |         |                |           |           |                     |             |
| N2                                                                                                                   | HS | II | 5810514 | 5811749 | WBGene00022876 | ZK1248.5  | ZK1248.5  | 0.0386319589526636  |             |
| AGIWUR38632                                                                                                          |    |    |         |         |                |           |           |                     |             |
| N2                                                                                                                   | HS | II | 5812375 | 5815482 | WBGene00022877 | wago-5    | ZK1248.7  | 0.18549433567861    |             |
| AGIWUR11337;AGIWUR33360;AGIWUR40670                                                                                  |    |    |         |         |                |           |           |                     |             |
| N2                                                                                                                   | HS | II | 5816573 | 5817306 | WBGene00044393 | ZK1248.20 | ZK1248.20 | 0.208608365139172   |             |
| AGIWUR2122;AGIWUR2856;AGIWUR13420;AGIWUR13878;AGIWUR19625                                                            |    |    |         |         |                |           |           |                     |             |
| N2                                                                                                                   | HS | II | 5820712 | 5823919 | WBGene00001224 | ehs-1     | ZK1248.3  | -0.147991202593715  |             |
| AGIWUR724;AGIWUR6312;AGIWUR10853;AGIWUR12575;AGIWUR17892;AGIWUR33127;AGIWUR37745;AGIWUR37955;AGIWUR41914;AGIWUR42738 |    |    |         |         |                |           |           |                     |             |
| N2                                                                                                                   | HS | II | 5827587 | 5828586 | WBGene00022881 | ZK1248.11 | ZK1248.11 | 0.127289345669391   |             |
| AGIWUR34944;AGIWUR43813                                                                                              |    |    |         |         |                |           |           |                     |             |
| N2                                                                                                                   | HS | II | 5828683 | 5833232 | WBGene00022882 | ZK1248.13 | ZK1248.13 | 0.319628550465055   |             |
| AGIWUR29446                                                                                                          |    |    |         |         |                |           |           |                     |             |
| N2                                                                                                                   | HS | II | 5833328 | 5836203 | WBGene00001509 | fzo-1     | ZK1248.14 | -0.07492358641103   |             |
| AGIWUR6222;AGIWUR26024;AGIWUR34210                                                                                   |    |    |         |         |                |           |           |                     |             |
| N2                                                                                                                   | HS | II | 5836777 | 5838553 | WBGene00022883 | ZK1248.15 | ZK1248.15 | 0.1402434659538     |             |
| AGIWUR3262                                                                                                           |    |    |         |         |                |           |           |                     |             |
| N2                                                                                                                   | HS | II | 5838663 | 5839414 | WBGene00022885 | ZK1248.19 | ZK1248.19 | 0.200686753019806   |             |
| AGIWUR11421;AGIWUR22217;AGIWUR44302                                                                                  |    |    |         |         |                |           |           |                     |             |
| N2                                                                                                                   | HS | II | 5839639 | 5841134 | WBGene00002268 | lec-5     | ZK1248.16 | 0.166856893798638   |             |
| AGIWUR24252                                                                                                          |    |    |         |         |                |           |           |                     |             |
| N2                                                                                                                   | HS | II | 5842243 | 5844575 | WBGene00022874 | nep-25    | ZK1248.1  | 0.132943771185721   |             |
| AGIWUR2152                                                                                                           |    |    |         |         |                |           |           |                     |             |
| N2                                                                                                                   | HS | II | 5845254 | 5845541 | WBGene00022884 | ZK1248.17 | ZK1248.17 | 0.272411176964578   |             |
| AGIWUR39346                                                                                                          |    |    |         |         |                |           |           |                     |             |
| N2                                                                                                                   | HS | II | 5845777 | 5850308 | WBGene00019270 | H41C03.3  | H41C03.3  | 0.0280686967011619  |             |
| AGIWUR11954                                                                                                          |    |    |         |         |                |           |           |                     |             |
| N2                                                                                                                   | HS | II | 5850362 | 5852038 | WBGene00019269 | H41C03.2  | H41C03.2  | -0.146819167332625  |             |
| AGIWUR25991                                                                                                          |    |    |         |         |                |           |           |                     |             |
| N2                                                                                                                   | HS | II | 5854422 | 5857172 | WBGene00019268 | H41C03.1  | H41C03.1  | 0.0242465245906978  |             |
| AGIWUR44238                                                                                                          |    |    |         |         |                |           |           |                     |             |
| N2                                                                                                                   | HS | II | 5857080 | 5858422 | WBGene00018871 | F55C12.4  | F55C12.4  | 0.0661449807075325  |             |
| AGIWUR14984                                                                                                          |    |    |         |         |                |           |           |                     |             |

|                                                                                                            |    |    |         |         |                |          |          |                      |             |
|------------------------------------------------------------------------------------------------------------|----|----|---------|---------|----------------|----------|----------|----------------------|-------------|
| N2                                                                                                         | HS | II | 5864182 | 5867041 | WBGene00018874 | tag-234  | F55C12.7 | -0.0101577728565552  |             |
| AGIWUR1948;AGIWUR3530;AGIWUR13556;AGIWUR25750;AGIWUR29295;AGIWUR32862;AGIWUR33273;AGIWUR35149              |    |    |         |         |                |          |          |                      |             |
| N2                                                                                                         | HS | II | 5867268 | 5873614 | WBGene00018872 | F55C12.5 | F55C12.5 | 0.130768107170667    |             |
| AGIWUR8048;AGIWUR12256;AGIWUR13416;AGIWUR22582;AGIWUR25368;AGIWUR29569;AGIWUR29585;AGIWUR32447;AGIWUR37960 |    |    |         |         |                |          |          |                      |             |
| N2                                                                                                         | HS | II | 5874507 | 5876101 | WBGene00018873 | F55C12.6 | F55C12.6 | 0.0802752039275134   |             |
| AGIWUR10598                                                                                                |    |    |         |         |                |          |          |                      |             |
| N2                                                                                                         | HS | II | 5884552 | 5892664 | WBGene00018869 | rfig-1   | F55C12.1 | -0.123006677516239   |             |
| AGIWUR14819;AGIWUR33856                                                                                    |    |    |         |         |                |          |          |                      |             |
| N2                                                                                                         | HS | II | 5896170 | 5904588 | WBGene00019128 | F59G1.4  | F59G1.4  | -0.0130741935451817  |             |
| AGIWUR4397;AGIWUR8473;AGIWUR22602;AGIWUR24898;AGIWUR27600;AGIWUR29800;AGIWUR33108;AGIWUR36179              |    |    |         |         |                |          |          |                      |             |
| N2                                                                                                         | HS | II | 5904552 | 5906308 | WBGene00006644 | tsp-18   | F59G1.2  | 0.118183089112204    | AGIWUR36316 |
| N2                                                                                                         | HS | II | 5906545 | 5907613 | WBGene00019129 | F59G1.8  | F59G1.8  | -0.210685666776797   | AGIWUR13867 |
| N2                                                                                                         | HS | II | 5907794 | 5911222 | WBGene00006933 | vps-35   | F59G1.3  | 0.0457731219494759   |             |
| AGIWUR7216;AGIWUR8177;AGIWUR32419;AGIWUR39608                                                              |    |    |         |         |                |          |          |                      |             |
| N2                                                                                                         | HS | II | 5911324 | 5916910 | WBGene00019127 | cgt-3    | F59G1.1  | -0.129298896459169   |             |
| AGIWUR12481;AGIWUR21844;AGIWUR24749;AGIWUR30188;AGIWUR36709;AGIWUR43677                                    |    |    |         |         |                |          |          |                      |             |
| N2                                                                                                         | HS | II | 5917422 | 5918564 | WBGene00001486 | frh-1    | F59G1.7  | 0.192650052374532    | AGIWUR21616 |
| N2                                                                                                         | HS | II | 5918626 | 5921617 | WBGene00004214 | ptp-2    | F59G1.5  | -0.157096427432909   |             |
| AGIWUR4553;AGIWUR27592                                                                                     |    |    |         |         |                |          |          |                      |             |
| N2                                                                                                         | HS | II | 5921967 | 5924838 | WBGene00017895 | vrk-1    | F28B12.3 | 0.017643932593522    |             |
| AGIWUR36435                                                                                                |    |    |         |         |                |          |          |                      |             |
| N2                                                                                                         | HS | II | 5933493 | 5940815 | WBGene00001208 | egl-44   | F28B12.2 | -0.0493035896139586  |             |
| AGIWUR7961;AGIWUR17363;AGIWUR42207                                                                         |    |    |         |         |                |          |          |                      |             |
| N2                                                                                                         | HS | II | 5942927 | 5943990 | WBGene00017894 | F28B12.1 | F28B12.1 | 0.190557489724569    |             |
| AGIWUR3006                                                                                                 |    |    |         |         |                |          |          |                      |             |
| N2                                                                                                         | HS | II | 5945418 | 5956683 | WBGene00000403 | casy-1   | B0034.3  | -0.126542243971191   |             |
| AGIWUR3914;AGIWUR14297;AGIWUR18652;AGIWUR18713;AGIWUR34228;AGIWUR37542;AGIWUR44343                         |    |    |         |         |                |          |          |                      |             |
| N2                                                                                                         | HS | II | 5961677 | 5962024 | WBGene00044394 | B0034.7  | B0034.7  | 0.0984752398537907   |             |
| AGIWUR5321;AGIWUR14988;AGIWUR15791;AGIWUR20321;AGIWUR43460                                                 |    |    |         |         |                |          |          |                      |             |
| N2                                                                                                         | HS | II | 5968079 | 5969058 | WBGene00015004 | B0034.4  | B0034.4  | 0.156956324828682    | AGIWUR14408 |
| N2                                                                                                         | HS | II | 5970105 | 5972658 | WBGene00015002 | B0034.1  | B0034.1  | 0.136086560630673    | AGIWUR972   |
| N2                                                                                                         | HS | II | 5988526 | 5989394 | WBGene00002085 | ins-2    | ZK75.2   | -0.103997394467502   | AGIWUR17557 |
| N2                                                                                                         | HS | II | 5990103 | 5990818 | WBGene00002086 | ins-3    | ZK75.3   | -0.00320053361199246 |             |
| AGIWUR17233;AGIWUR19321;AGIWUR27154;AGIWUR37216                                                            |    |    |         |         |                |          |          |                      |             |
| N2                                                                                                         | HS | II | 5996370 | 5997007 | WBGene00002087 | ins-4    | ZK75.1   | 0.0380672835600677   | AGIWUR27264 |
| N2                                                                                                         | HS | II | 5997803 | 5999019 | WBGene00002088 | ins-5    | ZK84.3   | -0.199148112020606   |             |
| AGIWUR3314;AGIWUR4383;AGIWUR12709;AGIWUR18430;AGIWUR32680;AGIWUR37567;AGIWUR41810                          |    |    |         |         |                |          |          |                      |             |
| N2                                                                                                         | HS | II | 6000421 | 6001009 | WBGene00002089 | ins-6    | ZK84.6   | -0.118904435496582   | AGIWUR2430  |
| N2                                                                                                         | HS | II | 6010844 | 6011321 | WBGene00002103 | ins-20   | ZK84.7   | -0.104871607481913   |             |

|                                                                                                             |    |    |         |         |                |           |           |                                |
|-------------------------------------------------------------------------------------------------------------|----|----|---------|---------|----------------|-----------|-----------|--------------------------------|
| AGIWUR16068;AGIWUR20676;AGIWUR23288;AGIWUR27852;AGIWUR27895;AGIWUR32162;AGIWUR38494;AGIWUR41736;AGIWUR44906 |    |    |         |         |                |           |           |                                |
| N2                                                                                                          | HS | II | 6014357 | 6015891 | WBGene00022650 | ZK84.2    | ZK84.2    | 0.343392654195631 AGIWUR25039  |
| N2                                                                                                          | HS | II | 6016229 | 6016561 | WBGene00022652 | ZK84.5    | ZK84.5    | 0.0755270817221785 AGIWUR12563 |
| N2                                                                                                          | HS | II | 6020653 | 6023349 | WBGene00022649 | ZK84.1    | ZK84.1    | -0.136483485852155 AGIWUR20753 |
| N2                                                                                                          | HS | II | 6023323 | 6025035 | WBGene00020029 | R12C12.9  | R12C12.9  | 0.192805154953668              |
| AGIWUR15643                                                                                                 |    |    |         |         |                |           |           |                                |
| N2                                                                                                          | HS | II | 6029514 | 6031206 | WBGene00020023 | frpr-16   | R12C12.3  | -0.0519918057071749            |
| AGIWUR26305                                                                                                 |    |    |         |         |                |           |           |                                |
| N2                                                                                                          | HS | II | 6039344 | 6039650 | WBGene00020024 | R12C12.4  | R12C12.4  | -0.0213936220589552            |
| AGIWUR16314                                                                                                 |    |    |         |         |                |           |           |                                |
| N2                                                                                                          | HS | II | 6042797 | 6043266 | WBGene00044395 | R12C12.10 | R12C12.10 | 0.368002593425436              |
| AGIWUR4656;AGIWUR11468;AGIWUR14971;AGIWUR28761;AGIWUR34529                                                  |    |    |         |         |                |           |           |                                |
| N2                                                                                                          | HS | II | 6044145 | 6045218 | WBGene00020025 | R12C12.5  | R12C12.5  | 0.0482658201495951             |
| AGIWUR4312                                                                                                  |    |    |         |         |                |           |           |                                |
| N2                                                                                                          | HS | II | 6046286 | 6047867 | WBGene00020026 | R12C12.6  | R12C12.6  | -0.167055236839327             |
| AGIWUR2250;AGIWUR7065;AGIWUR32439;AGIWUR39270                                                               |    |    |         |         |                |           |           |                                |
| N2                                                                                                          | HS | II | 6048109 | 6049686 | WBGene00004306 | ran-5     | R12C12.2  | -0.0209352334760418            |
| AGIWUR19265;AGIWUR21585;AGIWUR31081                                                                         |    |    |         |         |                |           |           |                                |
| N2                                                                                                          | HS | II | 6050332 | 6054307 | WBGene00020022 | gldc-1    | R12C12.1  | -0.190579856156352             |
| AGIWUR2327;AGIWUR4982;AGIWUR19292;AGIWUR33072                                                               |    |    |         |         |                |           |           |                                |
| N2                                                                                                          | HS | II | 6055039 | 6056388 | WBGene00020027 | R12C12.7  | R12C12.7  | 0.213143716943968              |
| AGIWUR16099                                                                                                 |    |    |         |         |                |           |           |                                |
| N2                                                                                                          | HS | II | 6057379 | 6061520 | WBGene00020028 | R12C12.8  | R12C12.8  | -0.0843363755388387            |
| AGIWUR4081;AGIWUR13422;AGIWUR28711;AGIWUR30011;AGIWUR31749;AGIWUR44325                                      |    |    |         |         |                |           |           |                                |
| N2                                                                                                          | HS | II | 6061977 | 6067166 | WBGene00019190 | H12I13.1  | H12I13.1  | 0.0592186967787844             |
| AGIWUR31215;AGIWUR31279                                                                                     |    |    |         |         |                |           |           |                                |
| N2                                                                                                          | HS | II | 6071386 | 6073251 | WBGene00019192 | H12I13.3  | H12I13.3  | -0.0736480990651032            |
| AGIWUR33937                                                                                                 |    |    |         |         |                |           |           |                                |
| N2                                                                                                          | HS | II | 6077700 | 6078230 | WBGene00019193 | H12I13.5  | H12I13.5  | 0.00837747422485435            |
| AGIWUR4388;AGIWUR15709;AGIWUR23079;AGIWUR35963;AGIWUR38074                                                  |    |    |         |         |                |           |           |                                |
| N2                                                                                                          | HS | II | 6077904 | 6078235 | WBGene00019194 | H12I13.6  | H12I13.6  | 0.413878682092825              |
| AGIWUR13378                                                                                                 |    |    |         |         |                |           |           |                                |
| N2                                                                                                          | HS | II | 6078265 | 6080843 | WBGene00001401 | fbf-1     | H12I13.4  | -0.511312778336308             |
| AGIWUR10379                                                                                                 |    |    |         |         |                |           |           |                                |
| N2                                                                                                          | HS | II | 6083060 | 6083232 | WBGene00201452 | F21H12.9  | F21H12.9  | -0.0098790670983453            |
| AGIWUR20248                                                                                                 |    |    |         |         |                |           |           |                                |
| N2                                                                                                          | HS | II | 6088008 | 6088202 | WBGene00017684 | F21H12.2  | F21H12.2  | 0.172796471416714              |
| AGIWUR3403                                                                                                  |    |    |         |         |                |           |           |                                |
| N2                                                                                                          | HS | II | 6088866 | 6091480 | WBGene00001402 | fbf-2     | F21H12.5  | 0.0602164044649971             |

|                                                                                                |    |    |         |         |                |          |          |                      |             |
|------------------------------------------------------------------------------------------------|----|----|---------|---------|----------------|----------|----------|----------------------|-------------|
| AGIWUR38480                                                                                    |    |    |         |         |                |          |          |                      |             |
| N2                                                                                             | HS | II | 6091820 | 6092789 | WBGene00044287 | F21H12.7 | F21H12.7 | 0.0197233606731055   |             |
| AGIWUR13232;AGIWUR24259                                                                        |    |    |         |         |                |          |          |                      |             |
| N2                                                                                             | HS | II | 6092766 | 6097597 | WBGene00017686 | tpp-2    | F21H12.6 | 0.2266162049038      |             |
| AGIWUR1355;AGIWUR10802;AGIWUR13569;AGIWUR39948                                                 |    |    |         |         |                |          |          |                      |             |
| N2                                                                                             | HS | II | 6100060 | 6110122 | WBGene00004346 | rgs-3    | C29H12.3 | -0.0813679833895371  |             |
| AGIWUR13208;AGIWUR30201;AGIWUR31773;AGIWUR42877                                                |    |    |         |         |                |          |          |                      |             |
| N2                                                                                             | HS | II | 6110452 | 6113194 | WBGene00016236 | cec-9    | C29H12.5 | 0.0284510578665937   |             |
| AGIWUR31509                                                                                    |    |    |         |         |                |          |          |                      |             |
| N2                                                                                             | HS | II | 6114423 | 6118263 | WBGene00016237 | C29H12.6 | C29H12.6 | -0.0738926720766884  |             |
| AGIWUR19780                                                                                    |    |    |         |         |                |          |          |                      |             |
| N2                                                                                             | HS | II | 6123809 | 6125438 | WBGene00016235 | C29H12.2 | C29H12.2 | -0.249623385942312   |             |
| AGIWUR7944;AGIWUR11819;AGIWUR29712;AGIWUR41243                                                 |    |    |         |         |                |          |          |                      |             |
| N2                                                                                             | HS | II | 6125559 | 6127942 | WBGene00004680 | rars-2   | C29H12.1 | -0.204013629701453   |             |
| AGIWUR265                                                                                      |    |    |         |         |                |          |          |                      |             |
| N2                                                                                             | HS | II | 6136094 | 6157176 | WBGene00019018 | abts-3   | F57F10.1 | -0.0245311798940051  |             |
| AGIWUR36284                                                                                    |    |    |         |         |                |          |          |                      |             |
| N2                                                                                             | HS | II | 6157167 | 6161094 | WBGene00001373 | exp-1    | H35N03.1 | 0.082453275794844    |             |
| AGIWUR28654                                                                                    |    |    |         |         |                |          |          |                      |             |
| N2                                                                                             | HS | II | 6165721 | 6169231 | WBGene00002030 | hst-3.1  | F40H3.5  | 0.104249389884266    |             |
| AGIWUR1423;AGIWUR14920;AGIWUR33288;AGIWUR34425;AGIWUR35649;AGIWUR36354;AGIWUR38927;AGIWUR43602 |    |    |         |         |                |          |          |                      |             |
| N2                                                                                             | HS | II | 6171507 | 6173159 | WBGene00018251 | F40H3.3  | F40H3.3  | 0.141504837438147    | AGIWUR15632 |
| N2                                                                                             | HS | II | 6173568 | 6174863 | WBGene00018250 | F40H3.2  | F40H3.2  | 0.00190399042063305  | AGIWUR22105 |
| N2                                                                                             | HS | II | 6179867 | 6184684 | WBGene00018249 | F40H3.1  | F40H3.1  | 0.0519104692675079   |             |
| AGIWUR2525;AGIWUR3859;AGIWUR26674                                                              |    |    |         |         |                |          |          |                      |             |
| N2                                                                                             | HS | II | 6187010 | 6187722 | WBGene00018252 | F40H3.6  | F40H3.6  | 0.114494139270811    | AGIWUR7675  |
| N2                                                                                             | HS | II | 6189580 | 6191402 | WBGene00001440 | fkx-8    | F40H3.4  | 0.146050303515473    | AGIWUR19154 |
| N2                                                                                             | HS | II | 6192784 | 6195170 | WBGene00000771 | cpb-2    | C30B5.3  | -0.00124875834329963 |             |
| AGIWUR9692;AGIWUR28077;AGIWUR33384                                                             |    |    |         |         |                |          |          |                      |             |
| N2                                                                                             | HS | II | 6195813 | 6196959 | WBGene00016245 | C30B5.4  | C30B5.4  | 3.5527136788005e-15  | AGIWUR20508 |
| N2                                                                                             | HS | II | 6197180 | 6198308 | WBGene00016244 | C30B5.2  | C30B5.2  | 0.0477090712032382   |             |
| AGIWUR1981;AGIWUR4452;AGIWUR6505;AGIWUR36902;AGIWUR41508;AGIWUR42485;AGIWUR43717               |    |    |         |         |                |          |          |                      |             |
| N2                                                                                             | HS | II | 6198696 | 6201628 | WBGene00077732 | szy-4    | C30B5.1  | -0.0540622573695337  | AGIWUR38892 |
| N2                                                                                             | HS | II | 6219526 | 6222658 | WBGene00016247 | C30B5.6  | C30B5.6  | 0.161692986956522    |             |
| AGIWUR8793;AGIWUR34758;AGIWUR36628;AGIWUR38666                                                 |    |    |         |         |                |          |          |                      |             |
| N2                                                                                             | HS | II | 6224892 | 6227095 | WBGene00016248 | C30B5.7  | C30B5.7  | -0.127932600936091   | AGIWUR14114 |
| N2                                                                                             | HS | II | 6234483 | 6244287 | WBGene00020784 | tat-4    | T24H7.5  | 0.0830033091128186   |             |
| AGIWUR10956;AGIWUR15388;AGIWUR17815;AGIWUR27470;AGIWUR28746                                    |    |    |         |         |                |          |          |                      |             |
| N2                                                                                             | HS | II | 6245748 | 6246257 | WBGene00020783 | blos-4   | T24H7.4  | 0.0212169882873887   | AGIWUR43685 |

|                                                                        |    |    |         |         |                |          |          |                     |             |
|------------------------------------------------------------------------|----|----|---------|---------|----------------|----------|----------|---------------------|-------------|
| N2                                                                     | HS | II | 6246354 | 6247334 | WBGene00020782 | T24H7.3  | T24H7.3  | -0.0643907842019225 |             |
| AGIWUR2657;AGIWUR5181;AGIWUR13345;AGIWUR28033;AGIWUR30272              |    |    |         |         |                |          |          |                     |             |
| N2                                                                     | HS | II | 6247311 | 6250841 | WBGene00020781 | T24H7.2  | T24H7.2  | 0.112128781776686   |             |
| AGIWUR14735;AGIWUR28910;AGIWUR33691                                    |    |    |         |         |                |          |          |                     |             |
| N2                                                                     | HS | II | 6251411 | 6252797 | WBGene00004015 | phb-2    | T24H7.1  | 0.0217159452194196  | AGIWUR1862  |
| N2                                                                     | HS | II | 6252774 | 6256124 | WBGene00017438 | F13H8.5  | F13H8.5  | -0.113347099829724  | AGIWUR39790 |
| N2                                                                     | HS | II | 6257628 | 6260021 | WBGene00017443 | F13H8.11 | F13H8.11 | -0.0373837413473019 |             |
| AGIWUR32496                                                            |    |    |         |         |                |          |          |                     |             |
| N2                                                                     | HS | II | 6260857 | 6262524 | WBGene00017437 | nmgp-1   | F13H8.4  | 0.339243755102258   | AGIWUR27005 |
| N2                                                                     | HS | II | 6262522 | 6263325 | WBGene00017444 | F13H8.12 | F13H8.12 | 0.2222772721149     |             |
| AGIWUR31676                                                            |    |    |         |         |                |          |          |                     |             |
| N2                                                                     | HS | II | 6264050 | 6265502 | WBGene00017436 | F13H8.3  | F13H8.3  | 0.208609471240088   | AGIWUR33928 |
| N2                                                                     | HS | II | 6265612 | 6268083 | WBGene00017441 | F13H8.8  | F13H8.8  | 0.110410170992656   |             |
| AGIWUR9280;AGIWUR18592;AGIWUR29470;AGIWUR42923                         |    |    |         |         |                |          |          |                     |             |
| N2                                                                     | HS | II | 6270370 | 6274005 | WBGene00017435 | F13H8.2  | F13H8.2  | -0.0248477071314799 |             |
| AGIWUR6887;AGIWUR11903;AGIWUR22150;AGIWUR23635                         |    |    |         |         |                |          |          |                     |             |
| N2                                                                     | HS | II | 6274115 | 6279699 | WBGene00000259 | bp1-1    | F13H8.10 | 0.0355116408832075  |             |
| AGIWUR5304;AGIWUR14955;AGIWUR24067;AGIWUR41077;AGIWUR44743             |    |    |         |         |                |          |          |                     |             |
| N2                                                                     | HS | II | 6279676 | 6281102 | WBGene00017442 | F13H8.9  | F13H8.9  | -0.166599096056672  | AGIWUR41405 |
| N2                                                                     | HS | II | 6283386 | 6284724 | WBGene00017434 | F13H8.1  | F13H8.1  | -0.0671301265589648 | AGIWUR4875  |
| N2                                                                     | HS | II | 6284817 | 6286869 | WBGene00017439 | F13H8.6  | F13H8.6  | 0.0615594378142212  | AGIWUR37478 |
| N2                                                                     | HS | II | 6288413 | 6290097 | WBGene00017440 | upb-1    | F13H8.7  | -0.196765794635204  |             |
| AGIWUR9195;AGIWUR17843;AGIWUR21426;AGIWUR32208;AGIWUR41349;AGIWUR41634 |    |    |         |         |                |          |          |                     |             |
| N2                                                                     | HS | II | 6290652 | 6292524 | WBGene00016212 | C29F5.3  | C29F5.3  | 0.154599607079247   | AGIWUR44222 |
| N2                                                                     | HS | II | 6292652 | 6294356 | WBGene00003403 | mps-1    | C29F5.4  | 0.0361296374580338  | AGIWUR17874 |
| N2                                                                     | HS | II | 6297243 | 6298675 | WBGene00016213 | C29F5.5  | C29F5.5  | 0.227623780273666   | AGIWUR11702 |
| N2                                                                     | HS | II | 6299502 | 6301398 | WBGene00016211 | sdz-3    | C29F5.2  | 0.347788661757495   | AGIWUR5265  |
| N2                                                                     | HS | II | 6303424 | 6306283 | WBGene00016210 | C29F5.1  | C29F5.1  | -0.037459834380897  | AGIWUR39617 |
| N2                                                                     | HS | II | 6306429 | 6308073 | WBGene00044589 | C29F5.8  | C29F5.8  | 0.0770400201470345  |             |
| AGIWUR12713;AGIWUR30405                                                |    |    |         |         |                |          |          |                     |             |
| N2                                                                     | HS | II | 6308114 | 6309298 | WBGene00016215 | glb-10   | C29F5.7  | 0.171247696816723   | AGIWUR22465 |
| N2                                                                     | HS | II | 6318087 | 6321159 | WBGene00016311 | C32D5.3  | C32D5.3  | 0.0582855738852341  |             |
| AGIWUR24680;AGIWUR44562                                                |    |    |         |         |                |          |          |                     |             |
| N2                                                                     | HS | II | 6321340 | 6323079 | WBGene00016312 | C32D5.4  | C32D5.4  | 0.0602248680539059  | AGIWUR36431 |
| N2                                                                     | HS | II | 6324484 | 6327355 | WBGene00004860 | sma-6    | C32D5.2  | 0.0679913827103835  |             |
| AGIWUR49;AGIWUR39534                                                   |    |    |         |         |                |          |          |                     |             |
| N2                                                                     | HS | II | 6329850 | 6331341 | WBGene00016313 | set-4    | C32D5.5  | -0.107769240728409  | AGIWUR32781 |
| N2                                                                     | HS | II | 6331899 | 6333987 | WBGene00016314 | C32D5.6  | C32D5.6  | 0.125355512770266   | AGIWUR23810 |
| N2                                                                     | HS | II | 6335478 | 6336334 | WBGene00044755 | C32D5.14 | C32D5.14 | 0.0111651632180756  |             |

AGIWUR1397;AGIWUR12037;AGIWUR13449;AGIWUR17048;AGIWUR39841  
 N2 HS II 6336345 6339557 WBGene00016315 C32D5.7 C32D5.7 -0.0175706416134371 AGIWUR24724  
 N2 HS II 6343058 6345925 WBGene00016316 C32D5.8 C32D5.8 -0.0815330805103209  
 AGIWUR20118;AGIWUR36064;AGIWUR41359;AGIWUR41461  
 N2 HS II 6346960 6347719 WBGene00002980 lgg-1 C32D5.9 -0.0367635717887413  
 AGIWUR21157;AGIWUR39449;AGIWUR39870  
 N2 HS II 6349207 6351987 WBGene00016317 C32D5.10 C32D5.10 0.0331160642764807  
 AGIWUR18554  
 N2 HS II 6352542 6355911 WBGene00016318 C32D5.11 C32D5.11 -0.113406057051092  
 AGIWUR20770;AGIWUR26037;AGIWUR28595;AGIWUR31352;AGIWUR38108;AGIWUR38590  
 N2 HS II 6356416 6359005 WBGene00016319 C32D5.12 C32D5.12 0.169851661721861  
 AGIWUR30696  
 N2 HS II 6360331 6360959 WBGene00019607 K10B2.4 K10B2.4 0.0130091327173005 AGIWUR3646  
 N2 HS II 6361159 6365367 WBGene00019608 ani-2 K10B2.5 -0.0722463431169462 AGIWUR26224  
 N2 HS II 6365722 6367002 WBGene00019606 clec-88 K10B2.3 -0.164670741762027  
 AGIWUR692;AGIWUR9567;AGIWUR33254;AGIWUR42994  
 N2 HS II 6366990 6369210 WBGene00019605 ctsa-1 K10B2.2 0.15281858131249  
 AGIWUR12427;AGIWUR18699;AGIWUR19182;AGIWUR31523;AGIWUR41372  
 N2 HS II 6371295 6374544 WBGene00003009 lin-23 K10B2.1 -0.0687900520931084 AGIWUR16062  
 N2 HS II 6383645 6384692 WBGene00019061 F58F12.1 F58F12.1 -0.267802712133148  
 AGIWUR9471;AGIWUR23871  
 N2 HS II 6386767 6387568 WBGene00044756 F58F12.4 F58F12.4 0.0444051162838797  
 AGIWUR4742;AGIWUR26851;AGIWUR28350  
 N2 HS II 6387525 6388242 WBGene00019062 F58F12.2 F58F12.2 0.312164780594033  
 AGIWUR32553  
 N2 HS II 6389275 6391295 WBGene00019063 F58F12.3 F58F12.3 0.0789741824229973  
 AGIWUR1198;AGIWUR7481;AGIWUR10443;AGIWUR30768;AGIWUR37971;AGIWUR43033  
 N2 HS II 6398706 6400940 WBGene00020800 zig-10 T25D10.2 -0.134769807196631  
 AGIWUR4485;AGIWUR9846;AGIWUR26601;AGIWUR27441;AGIWUR36937  
 N2 HS II 6401949 6403102 WBGene00020802 btb-2 T25D10.5 0.164346742288133  
 AGIWUR34805  
 N2 HS II 6403401 6405040 WBGene00020799 T25D10.1 T25D10.1  
 -0.00567885540375279 AGIWUR43640  
 N2 HS II 6405391 6407346 WBGene00004996 spp-11 T25D10.3 0.0287201774076618  
 AGIWUR32974  
 N2 HS II 6407537 6410281 WBGene00020801 T25D10.4 T25D10.4 -0.0469437085714652  
 AGIWUR42618  
 N2 HS II 6423112 6424925 WBGene00019372 K03H9.3 K03H9.3 0.151524092958223 AGIWUR5579  
 N2 HS II 6426293 6427513 WBGene00000651 col-75 K03H9.2 0.0621570278528374 AGIWUR25302



|                                                                                               |    |    |         |         |                |          |          |                      |             |
|-----------------------------------------------------------------------------------------------|----|----|---------|---------|----------------|----------|----------|----------------------|-------------|
| N2                                                                                            | HS | II | 6431261 | 6431875 | WBGene00019371 | K03H9.1  | K03H9.1  | 0.19725177088808     | AGIWUR43614 |
| N2                                                                                            | HS | II | 6441428 | 6443921 | WBGene00019426 | cut1-16  | K06A1.3  | 0.0743947330622614   | AGIWUR25549 |
| N2                                                                                            | HS | II | 6444010 | 6446134 | WBGene00019425 | K06A1.2  | K06A1.2  | 0.139481060680948    | AGIWUR15893 |
| N2                                                                                            | HS | II | 6446079 | 6449819 | WBGene00003621 | nhr-22   | K06A1.4  | 0.263460319101013    | AGIWUR30016 |
| N2                                                                                            | HS | II | 6450889 | 6453391 | WBGene00019427 | atg-16.2 | K06A1.5  | -0.0851480995523684  |             |
| AGIWUR13723;AGIWUR19569;AGIWUR29959;AGIWUR42434                                               |    |    |         |         |                |          |          |                      |             |
| N2                                                                                            | HS | II | 6454974 | 6456440 | WBGene00019424 | aptf-1   | K06A1.1  | -0.0257741177656037  | AGIWUR35064 |
| N2                                                                                            | HS | II | 6456522 | 6467642 | WBGene00019428 | dgk-5    | K06A1.6  | 0.0103341834926871   | AGIWUR36916 |
| N2                                                                                            | HS | II | 6470095 | 6470506 | WBGene00044669 | T28D9.12 | T28D9.12 | -0.0880120914289737  |             |
| AGIWUR1436;AGIWUR13032;AGIWUR16320;AGIWUR20238;AGIWUR35214                                    |    |    |         |         |                |          |          |                      |             |
| N2                                                                                            | HS | II | 6474338 | 6482125 | WBGene00020897 | del-10   | T28D9.7  | 0.108447296770036    | AGIWUR19065 |
| N2                                                                                            | HS | II | 6483953 | 6484967 | WBGene00020898 | T28D9.9  | T28D9.9  | 0.105358862906886    | AGIWUR13709 |
| N2                                                                                            | HS | II | 6485677 | 6488861 | WBGene00020895 | T28D9.3  | T28D9.3  | 0.0616840150793028   |             |
| AGIWUR31909;AGIWUR38236;AGIWUR43877                                                           |    |    |         |         |                |          |          |                      |             |
| N2                                                                                            | HS | II | 6488830 | 6489761 | WBGene00004916 | snr-3    | T28D9.10 | 0.0500031559716305   |             |
| AGIWUR4000;AGIWUR15440;AGIWUR22068;AGIWUR22293;AGIWUR29265;AGIWUR37787;AGIWUR42229            |    |    |         |         |                |          |          |                      |             |
| N2                                                                                            | HS | II | 6490158 | 6491340 | WBGene00004702 | rsp-5    | T28D9.2  | -0.0974657241267156  |             |
| AGIWUR5146;AGIWUR5155;AGIWUR10143;AGIWUR12090;AGIWUR17860;AGIWUR27025;AGIWUR28242;AGIWUR40736 |    |    |         |         |                |          |          |                      |             |
| N2                                                                                            | HS | II | 6491469 | 6491993 | WBGene00020899 | T28D9.11 | T28D9.11 | -0.122184413393888   |             |
| AGIWUR21047;AGIWUR34760                                                                       |    |    |         |         |                |          |          |                      |             |
| N2                                                                                            | HS | II | 6492402 | 6493778 | WBGene00020894 | T28D9.1  | T28D9.1  | 0.190505224716059    | AGIWUR5642  |
| N2                                                                                            | HS | II | 6493720 | 6498633 | WBGene00019904 | twk-49   | R05G9.2  | 0.127342587864957    | AGIWUR26459 |
| N2                                                                                            | HS | II | 6500397 | 6501520 | WBGene00019905 | R05G9.3  | R05G9.3  | -0.347823638075399   | AGIWUR11317 |
| N2                                                                                            | HS | II | 6503360 | 6526333 | WBGene00016970 | C56E6.2  | C56E6.2  | -0.289521361449888   |             |
| AGIWUR8020;AGIWUR8720;AGIWUR8781;AGIWUR28926                                                  |    |    |         |         |                |          |          |                      |             |
| N2                                                                                            | HS | II | 6526372 | 6528801 | WBGene00016972 | C56E6.4  | C56E6.4  | -0.0390434575398011  |             |
| AGIWUR11683;AGIWUR17423;AGIWUR23906                                                           |    |    |         |         |                |          |          |                      |             |
| N2                                                                                            | HS | II | 6528933 | 6531610 | WBGene00016973 | abch-1   | C56E6.5  | 0.24154932275038     | AGIWUR23341 |
| N2                                                                                            | HS | II | 6536380 | 6554846 | WBGene00007050 | utp-20   | F18C5.3  | -0.126833595161988   |             |
| AGIWUR10754;AGIWUR11524;AGIWUR42658;AGIWUR43051                                               |    |    |         |         |                |          |          |                      |             |
| N2                                                                                            | HS | II | 6554977 | 6559267 | WBGene00006944 | wrn-1    | F18C5.2  | -0.0203705763907678  | AGIWUR29106 |
| N2                                                                                            | HS | II | 6559258 | 6561583 | WBGene00017563 | F18C5.10 | F18C5.10 | -0.0215162116668655  |             |
| AGIWUR207;AGIWUR5082;AGIWUR13583;AGIWUR14924;AGIWUR17027;AGIWUR27722;AGIWUR36568;AGIWUR37877  |    |    |         |         |                |          |          |                      |             |
| N2                                                                                            | HS | II | 6563796 | 6565154 | WBGene00017559 | mpz-3    | F18C5.4  | -0.262399385468147   | AGIWUR16305 |
| N2                                                                                            | HS | II | 6567134 | 6567870 | WBGene00017562 | F18C5.9  | F18C5.9  | 0.151319564344695    | AGIWUR27361 |
| N2                                                                                            | HS | II | 6569014 | 6570434 | WBGene00005053 | sra-27   | F18C5.1  | 6.11880420873234e-05 | AGIWUR39606 |
| N2                                                                                            | HS | II | 6570547 | 6573777 | WBGene00005054 | sra-28   | F18C5.6  | -0.58718475144433    | AGIWUR37994 |
| N2                                                                                            | HS | II | 6574378 | 6575747 | WBGene00005055 | sra-29   | F18C5.8  | -0.107037346264446   | AGIWUR25113 |
| N2                                                                                            | HS | II | 6576974 | 6578478 | WBGene00005057 | sra-31   | C56C10.5 | -0.0793268005839352  |             |

|                                                                         |    |    |         |         |                |                   |                                |
|-------------------------------------------------------------------------|----|----|---------|---------|----------------|-------------------|--------------------------------|
| AGIWUR32720                                                             |    |    |         |         |                |                   |                                |
| N2                                                                      | HS | II | 6583039 | 6584514 | WBGene00016962 | C56C10.4          | 0.265920037144253              |
| AGIWUR12231                                                             |    |    |         |         |                |                   |                                |
| N2                                                                      | HS | II | 6584409 | 6587569 | WBGene00016964 | C56C10.7          | 0.0328008636359964             |
| AGIWUR10789;AGIWUR13070;AGIWUR19595;AGIWUR43494;AGIWUR44239             |    |    |         |         |                |                   |                                |
| N2                                                                      | HS | II | 6587577 | 6588679 | WBGene00002045 | icd-1 C56C10.8    | 0.0459576758654094             |
| AGIWUR11449;AGIWUR16844;AGIWUR16923;AGIWUR19543;AGIWUR37015;AGIWUR43221 |    |    |         |         |                |                   |                                |
| N2                                                                      | HS | II | 6589290 | 6591081 | WBGene00016961 | vps-32.1 C56C10.3 | -0.0127588198737669            |
| AGIWUR32474                                                             |    |    |         |         |                |                   |                                |
| N2                                                                      | HS | II | 6591048 | 6592351 | WBGene00016965 | C56C10.9          | 0.114906104563977              |
| AGIWUR19535                                                             |    |    |         |         |                |                   |                                |
| N2                                                                      | HS | II | 6592440 | 6594251 | WBGene00016966 | aipr-1 C56C10.10  | 0.00464473620630201            |
| AGIWUR35463                                                             |    |    |         |         |                |                   |                                |
| N2                                                                      | HS | II | 6594382 | 6598080 | WBGene00001026 | dnj-8 C56C10.13   | -0.0182474325890034            |
| AGIWUR18501                                                             |    |    |         |         |                |                   |                                |
| N2                                                                      | HS | II | 6598349 | 6601119 | WBGene00016967 | C56C10.11         | -0.216371301675771             |
| AGIWUR37942                                                             |    |    |         |         |                |                   |                                |
| N2                                                                      | HS | II | 6601216 | 6603449 | WBGene00016960 | vps-33.2 C56C10.1 | 0.206129944686928              |
| AGIWUR11698                                                             |    |    |         |         |                |                   |                                |
| N2                                                                      | HS | II | 6603441 | 6609356 | WBGene00016968 | epg-5 C56C10.12   | -0.0184647729951273            |
| AGIWUR42321                                                             |    |    |         |         |                |                   |                                |
| N2                                                                      | HS | II | 6618218 | 6622168 | WBGene00003480 | k1f-3 F54H5.4     | -0.176757329094748 AGIWUR40709 |
| N2                                                                      | HS | II | 6622189 | 6623500 | WBGene00018840 | F54H5.3 F54H5.3   | -0.120436196561176 AGIWUR32792 |
| N2                                                                      | HS | II | 6623423 | 6625389 | WBGene00255600 | F54H5.14          | F54H5.14 0.226146157766264     |
| AGIWUR17284                                                             |    |    |         |         |                |                   |                                |
| N2                                                                      | HS | II | 6631105 | 6637099 | WBGene00020579 | T19D12.4          | T19D12.4 0.266874555575051     |
| AGIWUR31097;AGIWUR40733                                                 |    |    |         |         |                |                   |                                |
| N2                                                                      | HS | II | 6637093 | 6643117 | WBGene00020581 | T19D12.6          | T19D12.6 0.0525158561606629    |
| AGIWUR5677;AGIWUR11762;AGIWUR34722;AGIWUR35376                          |    |    |         |         |                |                   |                                |
| N2                                                                      | HS | II | 6647166 | 6649126 | WBGene00020582 | oig-8 T19D12.7    | 0.00593731483952897            |
| AGIWUR13576                                                             |    |    |         |         |                |                   |                                |
| N2                                                                      | HS | II | 6649789 | 6651819 | WBGene00005052 | sra-26 T19D12.8   | 0.159173663694479              |
| AGIWUR43747                                                             |    |    |         |         |                |                   |                                |
| N2                                                                      | HS | II | 6652339 | 6654384 | WBGene00020583 | T19D12.9          | T19D12.9 0.38170457430998      |
| AGIWUR13667                                                             |    |    |         |         |                |                   |                                |
| N2                                                                      | HS | II | 6655096 | 6658866 | WBGene00020584 | T19D12.10         | T19D12.10 0.163950858426144    |
| AGIWUR11924                                                             |    |    |         |         |                |                   |                                |
| N2                                                                      | HS | II | 6660274 | 6660994 | WBGene00020578 | T19D12.3          | T19D12.3 0.134876680752592     |
| AGIWUR14410                                                             |    |    |         |         |                |                   |                                |

|                                                                                   |    |    |         |         |                |          |          |                      |             |
|-----------------------------------------------------------------------------------|----|----|---------|---------|----------------|----------|----------|----------------------|-------------|
| N2                                                                                | HS | II | 6661335 | 6665206 | WBGene00020577 | T19D12.2 | T19D12.2 | 0.143585569737184    |             |
| AGIWUR3051;AGIWUR10166;AGIWUR16961;AGIWUR29672                                    |    |    |         |         |                |          |          |                      |             |
| N2                                                                                | HS | II | 6666898 | 6673752 | WBGene00020576 | T19D12.1 | T19D12.1 | 0.117617199502398    |             |
| AGIWUR44211                                                                       |    |    |         |         |                |          |          |                      |             |
| N2                                                                                | HS | II | 6674268 | 6679363 | WBGene00019273 | H43E16.1 | H43E16.1 | -0.0806735584607763  |             |
| AGIWUR6136;AGIWUR30081                                                            |    |    |         |         |                |          |          |                      |             |
| N2                                                                                | HS | II | 6679545 | 6682971 | WBGene00016005 | ift-74   | C18H9.8  | -0.0546527911895902  | AGIWUR238   |
| N2                                                                                | HS | II | 6684236 | 6691841 | WBGene00016002 | C18H9.3  | C18H9.3  | -0.00333948128237438 |             |
| AGIWUR206;AGIWUR13368;AGIWUR18047;AGIWUR23125;AGIWUR37969;AGIWUR38975;AGIWUR41873 |    |    |         |         |                |          |          |                      |             |
| N2                                                                                | HS | II | 6692748 | 6695566 | WBGene00016003 | C18H9.5  | C18H9.5  | 0.187788995164091    |             |
| AGIWUR4158;AGIWUR8718;AGIWUR38275                                                 |    |    |         |         |                |          |          |                      |             |
| N2                                                                                | HS | II | 6699084 | 6700482 | WBGene00016000 | C18H9.1  | C18H9.1  | 0.00808605860750689  | AGIWUR2090  |
| N2                                                                                | HS | II | 6700660 | 6701625 | WBGene00016004 | C18H9.6  | C18H9.6  | -0.112854665732049   | AGIWUR41807 |
| N2                                                                                | HS | II | 6702233 | 6705643 | WBGene00004507 | rpy-1    | C18H9.7  | -0.0453794728452763  | AGIWUR37590 |
| N2                                                                                | HS | II | 6710156 | 6712931 | WBGene00001072 | dpy-10   | T14B4.7  | -0.046239522597892   |             |
| AGIWUR5189;AGIWUR7679;AGIWUR8899;AGIWUR9246                                       |    |    |         |         |                |          |          |                      |             |
| N2                                                                                | HS | II | 6714292 | 6715971 | WBGene00001064 | dpy-2    | T14B4.6  | 0.134872282465977    | AGIWUR7774  |
| N2                                                                                | HS | II | 6716863 | 6717868 | WBGene00020501 | T14B4.5  | T14B4.5  | 0.0884592314176302   | AGIWUR38846 |
| N2                                                                                | HS | II | 6718532 | 6720294 | WBGene00006636 | tsp-10   | T14B4.4  | -0.181014681859653   | AGIWUR4910  |
| N2                                                                                | HS | II | 6720177 | 6729302 | WBGene00020502 | T14B4.8  | T14B4.8  | -0.0198727605862166  | AGIWUR25786 |
| N2                                                                                | HS | II | 6730207 | 6733795 | WBGene00020503 | T14B4.9  | T14B4.9  | 0.00582653778071052  |             |
| AGIWUR6731;AGIWUR12919;AGIWUR20426                                                |    |    |         |         |                |          |          |                      |             |
| N2                                                                                | HS | II | 6734907 | 6736110 | WBGene00020500 | T14B4.3  | T14B4.3  | 0.183546289542972    | AGIWUR16797 |
| N2                                                                                | HS | II | 6736203 | 6736793 | WBGene00020499 | T14B4.2  | T14B4.2  | 0.152598633805338    | AGIWUR20086 |
| N2                                                                                | HS | II | 6736904 | 6741482 | WBGene00020498 | T14B4.1  | T14B4.1  | -0.0714713452789009  |             |
| AGIWUR1770;AGIWUR25503;AGIWUR37363;AGIWUR39875                                    |    |    |         |         |                |          |          |                      |             |
| N2                                                                                | HS | II | 6741663 | 6742819 | WBGene00018305 | exos-8   | F41G3.14 | 0.0630553599945607   |             |
| AGIWUR34684                                                                       |    |    |         |         |                |          |          |                      |             |
| N2                                                                                | HS | II | 6742914 | 6744267 | WBGene00018302 | F41G3.6  | F41G3.6  | -0.153840503802487   | AGIWUR4505  |
| N2                                                                                | HS | II | 6744339 | 6744735 | WBGene00002098 | ins-15   | F41G3.17 | 0.00679307447367705  |             |
| AGIWUR6727;AGIWUR34476;AGIWUR39415                                                |    |    |         |         |                |          |          |                      |             |
| N2                                                                                | HS | II | 6745435 | 6745960 | WBGene00002097 | ins-14   | F41G3.16 | 0.0972616328443436   |             |
| AGIWUR3224;AGIWUR9228;AGIWUR29224;AGIWUR40668;AGIWUR40844                         |    |    |         |         |                |          |          |                      |             |
| N2                                                                                | HS | II | 6746704 | 6748586 | WBGene00018301 | F41G3.5  | F41G3.5  | -0.0441090810880738  | AGIWUR8791  |
| N2                                                                                | HS | II | 6748632 | 6749522 | WBGene00018303 | F41G3.10 | F41G3.10 | 0.276474213071616    |             |
| AGIWUR22145                                                                       |    |    |         |         |                |          |          |                      |             |
| N2                                                                                | HS | II | 6749793 | 6751029 | WBGene00044315 | F41G3.20 | F41G3.20 | -0.0268092792199877  |             |
| AGIWUR22149;AGIWUR35617                                                           |    |    |         |         |                |          |          |                      |             |
| N2                                                                                | HS | II | 6751624 | 6752127 | WBGene00044317 | F41G3.19 | F41G3.19 | 0.25467258698156     |             |

AGIWUR18381;AGIWUR41751  
N2 HS II 6752352 6752950 WBGene00044316 F41G3.21 F41G3.21 0.250946424271914  
AGIWUR6402;AGIWUR13731;AGIWUR34977  
N2 HS II 6753126 6754774 WBGene00005986 srx-95 F41G3.11 -0.127003124073575  
AGIWUR36254  
N2 HS II 6755136 6755965 WBGene00001424 fis-1 F41G3.4 -0.270616208021545 AGIWUR36073  
N2 HS II 6756476 6758934 WBGene00018300 F41G3.3 F41G3.3 -0.033698329229459 AGIWUR26073  
N2 HS II 6758885 6760385 WBGene00018299 F41G3.2 F41G3.2 -0.0174958800173339 AGIWUR26874  
N2 HS II 6760684 6775176 WBGene00018304 agr-1 F41G3.12 0.0287586266560096  
AGIWUR11141;AGIWUR41695  
N2 HS II 6777076 6777889 WBGene00020480 ssup-72 T13C2.4 0.161772901673954 AGIWUR39899  
N2 HS II 6779464 6781686 WBGene00020482 T13C2.7 T13C2.7 -0.128272409389924 AGIWUR34416  
N2 HS II 6783427 6788255 WBGene00020481 T13C2.6 T13C2.6 -0.259106326885332 AGIWUR25670  
N2 HS II 6789248 6791782 WBGene00020479 T13C2.3 T13C2.3 -0.0558695045877142 AGIWUR27932  
N2 HS II 6799114 6800154 WBGene00017954 F31E8.4 F31E8.4 0.110783472038834 AGIWUR13901  
N2 HS II 6803758 6804863 WBGene00006380 tab-1 F31E8.3 -0.000457360671438867  
AGIWUR2387;AGIWUR23684  
N2 HS II 6805022 6807262 WBGene00017955 F31E8.5 F31E8.5 0.0337484052239425 AGIWUR41168  
N2 HS II 6810963 6816443 WBGene00004921 snt-1 F31E8.2 0.278311100851253  
AGIWUR14122;AGIWUR14322;AGIWUR16861;AGIWUR34583;AGIWUR41369  
N2 HS II 6817750 6819328 WBGene00017956 F31E8.6 F31E8.6 0.0309579997431166  
AGIWUR2540;AGIWUR4379;AGIWUR9978;AGIWUR12041;AGIWUR20457;AGIWUR24482  
N2 HS II 6828119 6830456 WBGene00017953 F31E8.1 F31E8.1 -0.182040007961939 AGIWUR8839  
N2 HS II 6835021 6847906 WBGene00001194 egl-27 C04A2.3 -0.212455868314397  
AGIWUR11721;AGIWUR12570;AGIWUR20852;AGIWUR21383;AGIWUR35051;AGIWUR36106;AGIWUR43838  
N2 HS II 6848060 6851531 WBGene00015410 tbc-6 C04A2.1 0.0960907152176098  
AGIWUR21486;AGIWUR36834  
N2 HS II 6853464 6858298 WBGene00001023 dnj-5 C04A2.7 -0.147142276149218  
AGIWUR4098;AGIWUR14610;AGIWUR24347;AGIWUR32490;AGIWUR43650  
N2 HS II 6860582 6863752 WBGene00016625 aff-1 C44B7.3 -0.0689395811347948 AGIWUR33412  
N2 HS II 6868946 6871039 WBGene00016626 clhm-1 C44B7.4 -0.149868658592521 AGIWUR13362  
N2 HS II 6871376 6872593 WBGene00016627 C44B7.5 C44B7.5 0.191583375111389 AGIWUR26083  
N2 HS II 6872829 6877089 WBGene00016628 slc-36.5 C44B7.6 -0.123351883725115  
AGIWUR8784;AGIWUR36690  
N2 HS II 6879185 6880180 WBGene00016629 C44B7.7 C44B7.7 0.265774492567843 AGIWUR28103  
N2 HS II 6880701 6883754 WBGene00004058 pmp-1 C44B7.8 0.143817560190937 AGIWUR27618  
N2 HS II 6884049 6887805 WBGene00004059 pmp-2 C44B7.9 0.112787418448382  
AGIWUR16453;AGIWUR17155;AGIWUR31533;AGIWUR41323  
N2 HS II 6888553 6890418 WBGene00016630 acer-1 C44B7.10 -0.228979641196675

AGIWUR7035;AGIWUR9317;AGIWUR30334;AGIWUR34052;AGIWUR44700  
N2 HS II 6891709 6893639 WBGene00016632 C44B7.12 C44B7.12 -0.0503588078351562  
AGIWUR40790  
N2 HS II 6894179 6897540 WBGene00016631 C44B7.11 C44B7.11 0.265567220440246  
AGIWUR3641;AGIWUR13332  
N2 HS II 6898736 6901792 WBGene00016624 C44B7.2 C44B7.2 0.138418720888385  
AGIWUR11113;AGIWUR17944;AGIWUR27708  
N2 HS II 6902095 6902937 WBGene00016623 psmd-9 C44B7.1 0.173085064905639 AGIWUR30804  
N2 HS II 6902853 6907757 WBGene00015088 B0252.3 B0252.3 0.163421195713502  
AGIWUR18014;AGIWUR18631;AGIWUR31815;AGIWUR42012  
N2 HS II 6910031 6912697 WBGene00000211 asm-1 B0252.2 0.310952484408595 AGIWUR20342  
N2 HS II 6912543 6913365 WBGene00000886 cyn-10 B0252.4 0.101396907991658 AGIWUR2938  
N2 HS II 6916110 6916963 WBGene00044615 B0252.8 B0252.8 -0.0713898176983641  
AGIWUR6502;AGIWUR23113;AGIWUR26771;AGIWUR28445;AGIWUR32697  
N2 HS II 6917032 6918922 WBGene00015089 B0252.5 B0252.5 0.435096900106561 AGIWUR35704  
N2 HS II 6919680 6923665 WBGene00015087 B0252.1 B0252.1 0.577738391587786 AGIWUR6212  
N2 HS II 6924115 6925951 WBGene00017700 F22D3.4 F22D3.4 0.150740390025873  
AGIWUR14957;AGIWUR25809;AGIWUR26039;AGIWUR30794  
N2 HS II 6928770 6947899 WBGene00017699 flcn-1 F22D3.2 -0.117623139703569  
AGIWUR26716;AGIWUR31344;AGIWUR32445;AGIWUR42782  
N2 HS II 6947855 6951300 WBGene00017702 F22D3.6 F22D3.6 0.149516463561427  
AGIWUR15369;AGIWUR32339;AGIWUR36734;AGIWUR42314  
N2 HS II 6951640 6955381 WBGene00000459 ceh-38 F22D3.1 -0.0751248675149405 AGIWUR24803  
N2 HS II 6955402 6965687 WBGene00006605 tra-2 C15F1.3 -0.121176764822098  
AGIWUR13352;AGIWUR31857  
N2 HS II 6965800 6967648 WBGene00004090 eif-2Bgamma C15F1.4 0.239382129394379  
AGIWUR19676  
N2 HS II 6967900 6970615 WBGene00015796 C15F1.5 C15F1.5 0.190554797861823 AGIWUR28615  
N2 HS II 6970668 6972235 WBGene00000198 art-1 C15F1.6 -0.245288995227731  
AGIWUR4636;AGIWUR10000;AGIWUR14253;AGIWUR15413;AGIWUR17324;AGIWUR25159;AGIWUR31374;AGIWUR45180  
N2 HS II 6972712 6973892 WBGene00004930 sod-1 C15F1.7 -0.3927328509779  
AGIWUR2953;AGIWUR3132;AGIWUR7934;AGIWUR9931;AGIWUR10748;AGIWUR12065;AGIWUR14775;AGIWUR21755;AGIWUR23619;AGIWUR42900;AGIWUR44763  
N2 HS II 6976031 6977790 WBGene00015797 C15F1.8 C15F1.8 0.0164642226920595 AGIWUR9736  
N2 HS II 6979953 6988629 WBGene00015795 C15F1.2 C15F1.2 0.0820556804000176 AGIWUR8419  
N2 HS II 6988778 6991797 WBGene00015794 C15F1.1 C15F1.1 0.107739889208267 AGIWUR39010  
N2 HS II 6994987 7010624 WBGene00006831 unc-104 C52E12.2 0.218586973662545  
AGIWUR5540;AGIWUR13662;AGIWUR16843  
N2 HS II 7010798 7012690 WBGene00005025 sqv-7 C52E12.3 0.016300627197289

|                                                                                                                                                                                 |    |    |         |         |                |          |           |                                |
|---------------------------------------------------------------------------------------------------------------------------------------------------------------------------------|----|----|---------|---------|----------------|----------|-----------|--------------------------------|
| AGIWUR39600                                                                                                                                                                     |    |    |         |         |                |          |           |                                |
| N2                                                                                                                                                                              | HS | II | 7012787 | 7022509 | WBGene00016889 | lst-6    | C52E12.4  | -0.262300284814108             |
| AGIWUR35200                                                                                                                                                                     |    |    |         |         |                |          |           |                                |
| N2                                                                                                                                                                              | HS | II | 7022913 | 7024930 | WBGene00016890 | lst-5    | C52E12.6  | 0.206014274882357              |
| AGIWUR36634                                                                                                                                                                     |    |    |         |         |                |          |           |                                |
| N2                                                                                                                                                                              | HS | II | 7025802 | 7030152 | WBGene00016888 | C52E12.1 | C52E12.1  | 0.138926443960369              |
| AGIWUR28857                                                                                                                                                                     |    |    |         |         |                |          |           |                                |
| N2                                                                                                                                                                              | HS | II | 7038292 | 7041685 | WBGene00022854 | cin-4    | ZK1127.7  | -0.196095303423625             |
| AGIWUR8703                                                                                                                                                                      |    |    |         |         |                |          |           |                                |
| N2                                                                                                                                                                              | HS | II | 7046041 | 7050071 | WBGene00022855 | tcer-1   | ZK1127.9  | 0.211346638637401              |
| AGIWUR38935                                                                                                                                                                     |    |    |         |         |                |          |           |                                |
| N2                                                                                                                                                                              | HS | II | 7050672 | 7052001 | WBGene00022852 | ZK1127.5 | ZK1127.5  | 0.177464537238937              |
| AGIWUR12643                                                                                                                                                                     |    |    |         |         |                |          |           |                                |
| N2                                                                                                                                                                              | HS | II | 7053949 | 7055208 | WBGene00022851 | ZK1127.4 | ZK1127.4  | 0.479326253296392              |
| AGIWUR22920                                                                                                                                                                     |    |    |         |         |                |          |           |                                |
| N2                                                                                                                                                                              | HS | II | 7055287 | 7056185 | WBGene00022850 | ZK1127.3 | ZK1127.3  | 0.150484381097867              |
| AGIWUR20341                                                                                                                                                                     |    |    |         |         |                |          |           |                                |
| N2                                                                                                                                                                              | HS | II | 7056173 | 7058014 | WBGene00022856 | cth-2    | ZK1127.10 | -0.0682594585552607            |
| AGIWUR40731                                                                                                                                                                     |    |    |         |         |                |          |           |                                |
| N2                                                                                                                                                                              | HS | II | 7061999 | 7064777 | WBGene00022849 | acs-6    | ZK1127.2  | -0.105171040397916             |
| AGIWUR7902;AGIWUR26493;AGIWUR32029;AGIWUR35905                                                                                                                                  |    |    |         |         |                |          |           |                                |
| N2                                                                                                                                                                              | HS | II | 7065020 | 7069966 | WBGene00001872 | him-14   | ZK1127.11 | 0.105001125894351              |
| AGIWUR32896                                                                                                                                                                     |    |    |         |         |                |          |           |                                |
| N2                                                                                                                                                                              | HS | II | 7070183 | 7072415 | WBGene00002238 | kars-1   | T02G5.9   | -0.149102111921561             |
| AGIWUR8558;AGIWUR8762;AGIWUR9241;AGIWUR9623;AGIWUR14316;AGIWUR16111;AGIWUR16580;AGIWUR16967;AGIWUR17504;AGIWUR19670;AGIWUR19785;AGIWUR20560;AGIWUR24332;AGIWUR25804;AGIWUR29473 |    |    |         |         |                |          |           |                                |
| N2                                                                                                                                                                              | HS | II | 7073796 | 7075551 | WBGene00002183 | kat-1    | T02G5.8   | 0.139639045539734 AGIWUR30245  |
| N2                                                                                                                                                                              | HS | II | 7075614 | 7077188 | WBGene00020166 | T02G5.7  | T02G5.7   | 0.0685728639106298 AGIWUR17844 |
| N2                                                                                                                                                                              | HS | II | 7089674 | 7093102 | WBGene00020170 | T02G5.14 | T02G5.14  | 0.0209972108890693             |
| AGIWUR23431                                                                                                                                                                     |    |    |         |         |                |          |           |                                |
| N2                                                                                                                                                                              | HS | II | 7094159 | 7099348 | WBGene00020163 | T02G5.3  | T02G5.3   | -0.0885833597290491            |
| AGIWUR16849;AGIWUR21511;AGIWUR23413                                                                                                                                             |    |    |         |         |                |          |           |                                |
| N2                                                                                                                                                                              | HS | II | 7099587 | 7101163 | WBGene00020169 | mmaa-1   | T02G5.13  | 0.12080378124945               |
| AGIWUR11168;AGIWUR18345;AGIWUR31200                                                                                                                                             |    |    |         |         |                |          |           |                                |
| N2                                                                                                                                                                              | HS | II | 7101218 | 7105030 | WBGene00017349 | far1-11  | F10E7.8   | -0.130259246449263             |
| AGIWUR11964;AGIWUR23533;AGIWUR42834                                                                                                                                             |    |    |         |         |                |          |           |                                |
| N2                                                                                                                                                                              | HS | II | 7105556 | 7106462 | WBGene00004447 | rp1-33   | F10E7.7   | 0.00492443344144               |
| AGIWUR11876;AGIWUR26736                                                                                                                                                         |    |    |         |         |                |          |           |                                |
| N2                                                                                                                                                                              | HS | II | 7106412 | 7110056 | WBGene00017350 | F10E7.9  | F10E7.9   | -0.203475491445668             |

AGIWUR16688;AGIWUR32795;AGIWUR33226  
N2 HS II 7111978 7112982 WBGene00017347 F10E7.5 F10E7.5 -0.0601885470063195  
AGIWUR4400;AGIWUR7502;AGIWUR24469;AGIWUR42014  
N2 HS II 7113080 7113732 WBGene00017348 F10E7.6 F10E7.6 0.0593127567071701  
AGIWUR1488;AGIWUR7762;AGIWUR13851;AGIWUR26019;AGIWUR37859  
N2 HS II 7113683 7115906 WBGene00017351 cutl-5 F10E7.10 0.120577541950686  
AGIWUR13722;AGIWUR22484  
N2 HS II 7116557 7120558 WBGene00006893 spon-1 F10E7.4 0.25338296336869 AGIWUR20876  
N2 HS II 7122242 7124386 WBGene00017344 F10E7.2 F10E7.2 0.163612821126605 AGIWUR15200  
N2 HS II 7126757 7129015 WBGene00017343 F10E7.1 F10E7.1 -0.198521230455926 AGIWUR10452  
N2 HS II 7132643 7137522 WBGene00001597 gld-3 T07F8.3 -0.000501778771958783  
AGIWUR22578;AGIWUR44550  
N2 HS II 7144607 7147253 WBGene00020319 npr-31 T07F8.2 0.0288734400779855  
AGIWUR9277;AGIWUR13635  
N2 HS II 7149248 7151760 WBGene00020318 T07F8.1 T07F8.1 -0.0814841272626019 AGIWUR36349  
N2 HS II 7152566 7155474 WBGene00016173 fust-1 C27H5.3 -0.120856797539384  
AGIWUR14809;AGIWUR16435;AGIWUR22532;AGIWUR27041;AGIWUR27422;AGIWUR32056  
N2 HS II 7155581 7160950 WBGene00016172 C27H5.2 C27H5.2 0.119068577128626  
AGIWUR2348;AGIWUR28082;AGIWUR37493  
N2 HS II 7167513 7168662 WBGene00000613 col-36 C27H5.5 -0.248536147964497 AGIWUR24577  
N2 HS II 7168817 7171355 WBGene00001129 dyf-13 C27H5.7 -0.0772784236850184 AGIWUR24706  
N2 HS II 7172204 7174936 WBGene00001594 glc-4 C27H5.8 0.123964548603505 AGIWUR4113  
N2 HS II 7183806 7185192 WBGene00003966 pdl-1 C27H5.1 -0.0949750927942379 AGIWUR41484  
N2 HS II 7185277 7187210 WBGene00016175 C27H5.6 C27H5.6 -0.0430663571504413 AGIWUR5202  
N2 HS II 7189420 7192507 WBGene00017124 E04F6.4 E04F6.4 0.216632627069897 AGIWUR27694  
N2 HS II 7192436 7194815 WBGene00017125 acdh-12 E04F6.5 0.0339603566467499  
AGIWUR7890;AGIWUR8115  
N2 HS II 7196276 7197495 WBGene00017123 maoc-1 E04F6.3 0.114084702694734 AGIWUR36730  
N2 HS II 7197415 7199565 WBGene00017126 E04F6.6 E04F6.6 -0.314489186952187  
AGIWUR3875;AGIWUR9971  
N2 HS II 7200233 7200418 WBGene00045095 mrpr-1 E04F6.16 0.211395127969082  
AGIWUR7702;AGIWUR18469;AGIWUR20475;AGIWUR43358;AGIWUR43666  
N2 HS II 7200611 7201880 WBGene00017122 pcrg-1 E04F6.2 0.127337727801565 AGIWUR38515  
N2 HS II 7202016 7203210 WBGene00005134 srd-56 E04F6.14 -0.0716188997676062  
AGIWUR7886  
N2 HS II 7203911 7205051 WBGene00005135 srd-58 E04F6.13 0.0238058711267222  
AGIWUR34211  
N2 HS II 7205688 7206892 WBGene00005136 srd-59 E04F6.1 -0.0029708402070785 AGIWUR2527  
N2 HS II 7206990 7208460 WBGene00000971 dhs-7 E04F6.7 0.429745735829664 AGIWUR40494

|                                                                         |    |    |         |         |                |          |          |                     |             |
|-------------------------------------------------------------------------|----|----|---------|---------|----------------|----------|----------|---------------------|-------------|
| N2                                                                      | HS | II | 7208773 | 7210287 | WBGene00017131 | E04F6.15 | E04F6.15 | -0.0859177067443433 |             |
| AGIWUR13348                                                             |    |    |         |         |                |          |          |                     |             |
| N2                                                                      | HS | II | 7210731 | 7211380 | WBGene00017127 | E04F6.8  | E04F6.8  | 0.336155959559322   |             |
| AGIWUR14338;AGIWUR16369;AGIWUR26017;AGIWUR26803;AGIWUR27394;AGIWUR44297 |    |    |         |         |                |          |          |                     |             |
| N2                                                                      | HS | II | 7211625 | 7212159 | WBGene00017128 | E04F6.9  | E04F6.9  | 0.0131822997052868  |             |
| AGIWUR19581;AGIWUR30555;AGIWUR35295                                     |    |    |         |         |                |          |          |                     |             |
| N2                                                                      | HS | II | 7214055 | 7216957 | WBGene00017129 | E04F6.10 | E04F6.10 | 0.0331330917482688  |             |
| AGIWUR3141;AGIWUR7507;AGIWUR15684;AGIWUR26762                           |    |    |         |         |                |          |          |                     |             |
| N2                                                                      | HS | II | 7217076 | 7217478 | WBGene00017130 | E04F6.12 | E04F6.12 | -0.0671410723792132 |             |
| AGIWUR22286                                                             |    |    |         |         |                |          |          |                     |             |
| N2                                                                      | HS | II | 7217955 | 7225648 | WBGene00000530 | clh-3    | E04F6.11 | 0.0151210922382967  |             |
| AGIWUR15731;AGIWUR24176;AGIWUR25909;AGIWUR41732                         |    |    |         |         |                |          |          |                     |             |
| N2                                                                      | HS | II | 7228784 | 7230616 | WBGene00017970 | F32A5.4  | F32A5.4  | -0.138592281600436  |             |
| AGIWUR1286;AGIWUR8256;AGIWUR16085;AGIWUR39884                           |    |    |         |         |                |          |          |                     |             |
| N2                                                                      | HS | II | 7232853 | 7235920 | WBGene00017969 | F32A5.3  | F32A5.3  | -0.119612665801067  |             |
| AGIWUR12121;AGIWUR13016;AGIWUR27135;AGIWUR36318                         |    |    |         |         |                |          |          |                     |             |
| N2                                                                      | HS | II | 7235834 | 7238349 | WBGene00000169 | aqp-1    | F32A5.5  | -0.147339045726224  |             |
| AGIWUR4628;AGIWUR5582                                                   |    |    |         |         |                |          |          |                     |             |
| N2                                                                      | HS | II | 7245876 | 7250181 | WBGene00017968 | skpo-3   | F32A5.2  | 0.0962456916522436  |             |
| AGIWUR884;AGIWUR9594;AGIWUR11173;AGIWUR29384;AGIWUR34437;AGIWUR41351    |    |    |         |         |                |          |          |                     |             |
| N2                                                                      | HS | II | 7250151 | 7252010 | WBGene00004198 | prx-13   | F32A5.6  | 0.175241134428632   | AGIWUR18591 |
| N2                                                                      | HS | II | 7252259 | 7255735 | WBGene00017967 | ada-2    | F32A5.1  | 0.137380897128832   | AGIWUR15959 |
| N2                                                                      | HS | II | 7256112 | 7258112 | WBGene00017971 | F32A5.8  | F32A5.8  | 0.0879981866251152  |             |
| AGIWUR24468;AGIWUR31093                                                 |    |    |         |         |                |          |          |                     |             |
| N2                                                                      | HS | II | 7258389 | 7258829 | WBGene00023021 | F32A5.9  | F32A5.9  | 0.199881660270245   |             |
| AGIWUR9798;AGIWUR18140;AGIWUR30385                                      |    |    |         |         |                |          |          |                     |             |
| N2                                                                      | HS | II | 7261648 | 7263654 | WBGene00016276 | C30G12.4 | C30G12.4 | 0.276061565513469   |             |
| AGIWUR13871;AGIWUR19260;AGIWUR31662;AGIWUR32334                         |    |    |         |         |                |          |          |                     |             |
| N2                                                                      | HS | II | 7274732 | 7277223 | WBGene00016275 | C30G12.3 | C30G12.3 | 0.160750138904622   |             |
| AGIWUR23627                                                             |    |    |         |         |                |          |          |                     |             |
| N2                                                                      | HS | II | 7290373 | 7291882 | WBGene00016274 | C30G12.2 | C30G12.2 | -0.0196058609217111 |             |
| AGIWUR32700                                                             |    |    |         |         |                |          |          |                     |             |
| N2                                                                      | HS | II | 7292192 | 7296015 | WBGene00016277 | C30G12.6 | C30G12.6 | 0.0690959841537087  |             |
| AGIWUR13314                                                             |    |    |         |         |                |          |          |                     |             |
| N2                                                                      | HS | II | 7296110 | 7298247 | WBGene00004244 | puf-8    | C30G12.7 | -0.179422130045583  |             |
| AGIWUR29920;AGIWUR31561;AGIWUR36265                                     |    |    |         |         |                |          |          |                     |             |
| N2                                                                      | HS | II | 7299514 | 7301632 | WBGene00016273 | C30G12.1 | C30G12.1 | -0.0412580945158734 |             |
| AGIWUR26118                                                             |    |    |         |         |                |          |          |                     |             |
| N2                                                                      | HS | II | 7302101 | 7305760 | WBGene00000839 | cul-4    | F45E12.3 | 0.0314548323611668  |             |



AGIWUR495;AGIWUR13180;AGIWUR36169

N2 HS II 7305861 7308738 WBGene00000271 brf-1 F45E12.2 0.211361085898705

AGIWUR18584

N2 HS II 7308702 7310115 WBGene00018475 mrpl-14 F45E12.5 0.129709628553339

AGIWUR11390;AGIWUR37904

N2 HS II 7310348 7313787 WBGene00018474 cnep-1 F45E12.1 -0.299216221291333

AGIWUR35826

N2 HS II 7313774 7314181 WBGene00018476 F45E12.6 F45E12.6 -0.017656669533002

AGIWUR27968

N2 HS II 7318684 7319153 WBGene00017662 F21D12.2 F21D12.2 -0.140993436833567

AGIWUR25324

N2 HS II 7319910 7323200 WBGene00017663 F21D12.3 F21D12.3 0.0463815522129281

AGIWUR34329

N2 HS II 7328736 7331324 WBGene00017664 npax-1 F21D12.5 0.1095836703346 AGIWUR29093

N2 HS II 7339229 7349124 WBGene00003620 nhr-21 F21D12.1 -0.112345344744703

AGIWUR32353;AGIWUR34044;AGIWUR38422

N2 HS II 7350121 7352636 WBGene00002008 hsp-4 F43E2.8 -0.209759776232993 AGIWUR16929

N2 HS II 7353576 7356426 WBGene00001812 haf-2 F43E2.4 0.0882239492677002 AGIWUR37462

N2 HS II 7358913 7359504 WBGene00018396 F43E2.9 F43E2.9 -0.218255850739308 AGIWUR10546

N2 HS II 7359961 7363247 WBGene00018392 insc-1 F43E2.3 0.0414655698594473 AGIWUR35459

N2 HS II 7363216 7364107 WBGene00018393 msra-1 F43E2.5 0.248619621355097 AGIWUR8710

N2 HS II 7366591 7369049 WBGene00018394 F43E2.6 F43E2.6 -0.0150916638763929

AGIWUR14479;AGIWUR28754;AGIWUR30906;AGIWUR36753;AGIWUR37020

N2 HS II 7369992 7371275 WBGene00018397 F43E2.11 F43E2.11 0.0852170137659929

AGIWUR28564

N2 HS II 7372594 7374172 WBGene00018395 mtch-1 F43E2.7 -0.118280928787473

AGIWUR157;AGIWUR28677

N2 HS II 7374501 7375237 WBGene00018391 rpb-4 F43E2.2 0.0531103533148158 AGIWUR21679

N2 HS II 7379177 7379612 WBGene00044673 C07D10.6 C07D10.6 -0.0511365553273784

AGIWUR13270;AGIWUR14746;AGIWUR30620;AGIWUR31090;AGIWUR44996

N2 HS II 7381561 7383499 WBGene00015569 C07D10.5 C07D10.5 -0.324531759949044

AGIWUR44000

N2 HS II 7387162 7389142 WBGene00015568 sre-3 C07D10.3 0.168341978966192

AGIWUR45007

N2 HS II 7394765 7397351 WBGene00015567 bath-44 C07D10.2 -0.139562961042344

AGIWUR36096

N2 HS II 7399012 7400540 WBGene00015566 C07D10.1 C07D10.1 0.381859469774604

AGIWUR18473

N2 HS II 7400544 7402724 WBGene00003526 nas-7 C07D10.4 0.165649982160136

AGIWUR3626;AGIWUR16232;AGIWUR39221

|    |    |    |         |         |                |         |         |                     |             |
|----|----|----|---------|---------|----------------|---------|---------|---------------------|-------------|
| N2 | HS | II | 7408492 | 7410747 | WBGene00005133 | srd-55  | K02A2.2 | -0.0613370553008128 | AGIWUR21751 |
| N2 | HS | II | 7411075 | 7412030 | WBGene00019290 | K02A2.5 | K02A2.5 | -0.0184087858432065 |             |

AGIWUR3083;AGIWUR17628;AGIWUR20926

|    |    |    |         |         |                |        |         |                     |            |
|----|----|----|---------|---------|----------------|--------|---------|---------------------|------------|
| N2 | HS | II | 7425935 | 7431390 | WBGene00019289 | kcc-3  | K02A2.3 | 0.123465276719529   | AGIWUR7656 |
| N2 | HS | II | 7432696 | 7434216 | WBGene00005132 | srd-54 | K02A2.7 | -0.0076896423632955 |            |

AGIWUR9242;AGIWUR28397

|    |    |    |         |         |                |        |         |                    |  |
|----|----|----|---------|---------|----------------|--------|---------|--------------------|--|
| N2 | HS | II | 7435852 | 7436999 | WBGene00005130 | srd-52 | K02A2.4 | -0.146231779880611 |  |
|----|----|----|---------|---------|----------------|--------|---------|--------------------|--|

AGIWUR5866;AGIWUR13963;AGIWUR24611;AGIWUR39878

|    |    |    |         |         |                |         |         |                     |             |
|----|----|----|---------|---------|----------------|---------|---------|---------------------|-------------|
| N2 | HS | II | 7456242 | 7457380 | WBGene00017023 | D1022.4 | D1022.4 | 0.228273604552172   | AGIWUR19967 |
| N2 | HS | II | 7457667 | 7458806 | WBGene00017024 | D1022.5 | D1022.5 | -0.0360441288218851 |             |

AGIWUR30740;AGIWUR45185

|    |    |    |         |         |                |         |         |                     |             |
|----|----|----|---------|---------|----------------|---------|---------|---------------------|-------------|
| N2 | HS | II | 7459531 | 7460076 | WBGene00017021 | D1022.2 | D1022.2 | -0.0515469070369692 | AGIWUR8681  |
| N2 | HS | II | 7460110 | 7463614 | WBGene00005641 | sro-1   | D1022.6 | -0.0240696390801691 | AGIWUR15307 |
| N2 | HS | II | 7472729 | 7478959 | WBGene00000101 | aka-1   | D1022.7 | -0.0247648676045902 |             |

AGIWUR3114;AGIWUR3158;AGIWUR6829;AGIWUR12669;AGIWUR17212;AGIWUR18049;AGIWUR24183;AGIWUR40155

|    |    |    |         |         |                |         |         |                    |             |
|----|----|----|---------|---------|----------------|---------|---------|--------------------|-------------|
| N2 | HS | II | 7479064 | 7480713 | WBGene00006703 | ubc-6   | D1022.1 | 0.0858340652095144 | AGIWUR40011 |
| N2 | HS | II | 7480751 | 7483109 | WBGene00000280 | cah-2   | D1022.8 | 0.086773832904905  | AGIWUR1356  |
| N2 | HS | II | 7488242 | 7489661 | WBGene00044300 | D1022.9 | D1022.9 | 0.0316258016494606 |             |

AGIWUR33482;AGIWUR42517

|    |    |    |         |         |                |        |         |                   |  |
|----|----|----|---------|---------|----------------|--------|---------|-------------------|--|
| N2 | HS | II | 7491399 | 7493699 | WBGene00003542 | nas-23 | R10H1.5 | 0.260582291377643 |  |
|----|----|----|---------|---------|----------------|--------|---------|-------------------|--|

AGIWUR4989;AGIWUR8815;AGIWUR12650;AGIWUR18219;AGIWUR22957;AGIWUR30287

|    |    |    |         |         |                |         |         |                   |            |
|----|----|----|---------|---------|----------------|---------|---------|-------------------|------------|
| N2 | HS | II | 7494460 | 7496174 | WBGene00019998 | R10H1.1 | R10H1.1 | 0.196649894795957 | AGIWUR6877 |
| N2 | HS | II | 7496247 | 7497369 | WBGene00023416 | spi-1   | R10H1.4 | 0.174106168146191 |            |

AGIWUR2722;AGIWUR5494;AGIWUR8413;AGIWUR33980;AGIWUR34800;AGIWUR41809

|    |    |    |         |         |                |         |         |                    |  |
|----|----|----|---------|---------|----------------|---------|---------|--------------------|--|
| N2 | HS | II | 7497286 | 7499475 | WBGene00019999 | srab-14 | R10H1.2 | -0.158058814142094 |  |
|----|----|----|---------|---------|----------------|---------|---------|--------------------|--|

AGIWUR20225;AGIWUR41600

|    |    |    |         |         |                |         |         |                    |             |
|----|----|----|---------|---------|----------------|---------|---------|--------------------|-------------|
| N2 | HS | II | 7505351 | 7506595 | WBGene00016183 | C28F5.1 | C28F5.1 | 0.314899962711866  | AGIWUR23368 |
| N2 | HS | II | 7507319 | 7513975 | WBGene00016184 | glb-9   | C28F5.2 | 0.0730519410173409 |             |

AGIWUR3730;AGIWUR40072

|    |    |    |         |         |                |           |           |                   |             |
|----|----|----|---------|---------|----------------|-----------|-----------|-------------------|-------------|
| N2 | HS | II | 7519860 | 7523368 | WBGene00016185 | C28F5.4   | C28F5.4   | 0.206033559264052 | AGIWUR19483 |
| N2 | HS | II | 7523581 | 7524421 | WBGene00044775 | ZK1290.15 | ZK1290.15 | 0.341846348398497 |             |

AGIWUR634;AGIWUR9068;AGIWUR12802;AGIWUR26783;AGIWUR31840

|    |    |    |         |         |                |          |          |                   |  |
|----|----|----|---------|---------|----------------|----------|----------|-------------------|--|
| N2 | HS | II | 7524467 | 7525558 | WBGene00022889 | ZK1290.7 | ZK1290.7 | 0.153766446757396 |  |
|----|----|----|---------|---------|----------------|----------|----------|-------------------|--|

AGIWUR43100

|    |    |    |         |         |                |         |          |                   |  |
|----|----|----|---------|---------|----------------|---------|----------|-------------------|--|
| N2 | HS | II | 7525738 | 7528241 | WBGene00022888 | rnh-1.1 | ZK1290.6 | 0.161896865856891 |  |
|----|----|----|---------|---------|----------------|---------|----------|-------------------|--|

AGIWUR18436

|    |    |    |         |         |                |          |          |                    |  |
|----|----|----|---------|---------|----------------|----------|----------|--------------------|--|
| N2 | HS | II | 7529643 | 7530991 | WBGene00022887 | ZK1290.5 | ZK1290.5 | -0.136843054349605 |  |
|----|----|----|---------|---------|----------------|----------|----------|--------------------|--|

AGIWUR13403

|                                                                        |    |    |         |         |                |           |           |                      |             |
|------------------------------------------------------------------------|----|----|---------|---------|----------------|-----------|-----------|----------------------|-------------|
| N2                                                                     | HS | II | 7531145 | 7533246 | WBGene00006947 | wrt-1     | ZK1290.12 | 0.632894927386413    |             |
| AGIWUR18642                                                            |    |    |         |         |                |           |           |                      |             |
| N2                                                                     | HS | II | 7533300 | 7534563 | WBGene00006956 | wrt-10    | ZK1290.8  | 0.0451523247492389   |             |
| AGIWUR42222                                                            |    |    |         |         |                |           |           |                      |             |
| N2                                                                     | HS | II | 7535006 | 7536989 | WBGene00022893 | ZK1290.13 | ZK1290.13 | 0.138547444934242    |             |
| AGIWUR16643                                                            |    |    |         |         |                |           |           |                      |             |
| N2                                                                     | HS | II | 7538187 | 7543000 | WBGene00003592 | nfi-1     | ZK1290.4  | 0.11443886169559     |             |
| AGIWUR3009;AGIWUR17692;AGIWUR20277;AGIWUR43039                         |    |    |         |         |                |           |           |                      |             |
| N2                                                                     | HS | II | 7544069 | 7545335 | WBGene00004398 | rol-8     | ZK1290.3  | -0.045460179583916   |             |
| AGIWUR40755;AGIWUR41897                                                |    |    |         |         |                |           |           |                      |             |
| N2                                                                     | HS | II | 7546807 | 7548129 | WBGene00022890 | fbxa-224  | ZK1290.9  | 0.216344113417644    |             |
| AGIWUR8162;AGIWUR22574;AGIWUR33222                                     |    |    |         |         |                |           |           |                      |             |
| N2                                                                     | HS | II | 7549335 | 7551977 | WBGene00006600 | tph-1     | ZK1290.2  | -0.00575587919092158 |             |
| AGIWUR15624;AGIWUR34300;AGIWUR45200                                    |    |    |         |         |                |           |           |                      |             |
| N2                                                                     | HS | II | 7551951 | 7553906 | WBGene00022891 | ZK1290.10 | ZK1290.10 | 0.133718247825684    |             |
| AGIWUR20209                                                            |    |    |         |         |                |           |           |                      |             |
| N2                                                                     | HS | II | 7554092 | 7554844 | WBGene00044396 | ZK1290.14 | ZK1290.14 | 0.0366805605352312   |             |
| AGIWUR31327                                                            |    |    |         |         |                |           |           |                      |             |
| N2                                                                     | HS | II | 7560925 | 7561594 | WBGene00022892 | ZK1290.11 | ZK1290.11 | 0.458631953198596    |             |
| AGIWUR11550                                                            |    |    |         |         |                |           |           |                      |             |
| N2                                                                     | HS | II | 7561753 | 7562701 | WBGene00022886 | ZK1290.1  | ZK1290.1  | 0.0442459999218734   |             |
| AGIWUR14827                                                            |    |    |         |         |                |           |           |                      |             |
| N2                                                                     | HS | II | 7570605 | 7572444 | WBGene00018041 | F35D2.3   | F35D2.3   | -0.277200733083327   | AGIWUR25303 |
| N2                                                                     | HS | II | 7574431 | 7575830 | WBGene00018040 | F35D2.2   | F35D2.2   | 0.301877056944118    | AGIWUR28100 |
| N2                                                                     | HS | II | 7577723 | 7580244 | WBGene00194916 | F35D2.6   | F35D2.6   | 0.0571857065707917   | AGIWUR5613  |
| N2                                                                     | HS | II | 7580270 | 7583557 | WBGene00018042 | mks-3     | F35D2.4   | -0.0445926489014408  |             |
| AGIWUR1760;AGIWUR12494;AGIWUR15947                                     |    |    |         |         |                |           |           |                      |             |
| N2                                                                     | HS | II | 7585731 | 7594912 | WBGene00006363 | syd-1     | F35D2.5   | 0.022474079107182    |             |
| AGIWUR5413;AGIWUR13745;AGIWUR15444;AGIWUR20159;AGIWUR24267;AGIWUR33701 |    |    |         |         |                |           |           |                      |             |
| N2                                                                     | HS | II | 7597545 | 7598752 | WBGene00019941 | pgam-5    | R07G3.5   | -0.118040975573593   |             |
| AGIWUR8443;AGIWUR16940;AGIWUR37105;AGIWUR38237                         |    |    |         |         |                |           |           |                      |             |
| N2                                                                     | HS | II | 7599657 | 7608014 | WBGene00019940 | npp-21    | R07G3.3   | -0.0284464332710961  |             |
| AGIWUR8835;AGIWUR16750;AGIWUR44811                                     |    |    |         |         |                |           |           |                      |             |
| N2                                                                     | HS | II | 7608253 | 7610986 | WBGene00019939 | lips-17   | R07G3.2   | 0.414913812787161    | AGIWUR37450 |
| N2                                                                     | HS | II | 7610986 | 7613730 | WBGene00019943 | R07G3.7   | R07G3.7   | -0.0233892642911027  | AGIWUR29343 |
| N2                                                                     | HS | II | 7613541 | 7614434 | WBGene00043050 | oig-4     | R07G3.9   | -0.229552781431106   |             |
| AGIWUR43422;AGIWUR44530                                                |    |    |         |         |                |           |           |                      |             |
| N2                                                                     | HS | II | 7616452 | 7618245 | WBGene00000390 | cdc-42    | R07G3.1   | -0.214999445013305   |             |
| AGIWUR19545;AGIWUR38027                                                |    |    |         |         |                |           |           |                      |             |

|                                                                                                                                     |    |    |         |         |                |          |          |                            |             |
|-------------------------------------------------------------------------------------------------------------------------------------|----|----|---------|---------|----------------|----------|----------|----------------------------|-------------|
| N2                                                                                                                                  | HS | II | 7618238 | 7620513 | WBGene00019944 | R07G3.8  | R07G3.8  | 0.00366300418750765        |             |
| AGIWUR9490;AGIWUR14987;AGIWUR16684;AGIWUR38424                                                                                      |    |    |         |         |                |          |          |                            |             |
| N2                                                                                                                                  | HS | II | 7627250 | 7651295 | WBGene00020114 | pde-4    | R153.1   | -0.155713090386934         |             |
| AGIWUR19305;AGIWUR24964;AGIWUR29067;AGIWUR34488;AGIWUR36443;AGIWUR36503;AGIWUR36847;AGIWUR39101;AGIWUR40129;AGIWUR40871;AGIWUR41328 |    |    |         |         |                |          |          |                            |             |
| N2                                                                                                                                  | HS | II | 7658324 | 7662522 | WBGene00017547 | alfa-1   | F18A1.6  | -0.0237424123167003        | AGIWUR39387 |
| N2                                                                                                                                  | HS | II | 7662706 | 7663754 | WBGene00017548 | F18A1.7  | F18A1.7  | -0.107791769305635         |             |
| AGIWUR4578;AGIWUR9651;AGIWUR31096                                                                                                   |    |    |         |         |                |          |          |                            |             |
| N2                                                                                                                                  | HS | II | 7664582 | 7667110 | WBGene00017546 | rpa-1    | F18A1.5  | 0.0846778274029507         | AGIWUR6934  |
| N2                                                                                                                                  | HS | II | 7667993 | 7671905 | WBGene00003045 | lir-2    | F18A1.4  | 0.134481085175011          | AGIWUR26034 |
| N2                                                                                                                                  | HS | II | 7672010 | 7682359 | WBGene00003044 | lir-1    | F18A1.3  | -0.142242187912707         |             |
| AGIWUR17589;AGIWUR35849;AGIWUR42838                                                                                                 |    |    |         |         |                |          |          |                            |             |
| N2                                                                                                                                  | HS | II | 7682198 | 7684760 | WBGene00003012 | lin-26   | F18A1.2  | -0.0275899615159894        |             |
| AGIWUR3543;AGIWUR19668;AGIWUR28083;AGIWUR31105;AGIWUR32625                                                                          |    |    |         |         |                |          |          |                            |             |
| N2                                                                                                                                  | HS | II | 7684889 | 7689689 | WBGene00017545 | F18A1.1  | F18A1.1  | -0.00843689886173404       |             |
| AGIWUR23601;AGIWUR25978;AGIWUR40021                                                                                                 |    |    |         |         |                |          |          |                            |             |
| N2                                                                                                                                  | HS | II | 7689710 | 7690572 | WBGene00017549 | pid-1    | F18A1.8  | 0.102080853666219          | AGIWUR21471 |
| N2                                                                                                                                  | HS | II | 7690711 | 7693957 | WBGene00003730 | nhx-2    | B0495.4  | -0.0806720062270703        | AGIWUR12604 |
| N2                                                                                                                                  | HS | II | 7695935 | 7698506 | WBGene00015204 | B0495.5  | B0495.5  | 0.203833712087453          | AGIWUR31611 |
| N2                                                                                                                                  | HS | II | 7698613 | 7699046 | WBGene00015205 | moa-2    | B0495.6  | 0.0801690564851505         | AGIWUR24473 |
| N2                                                                                                                                  | HS | II | 7699254 | 7702012 | WBGene00015203 | cdk-11.1 |          | B0495.2 0.0609316852519157 |             |
| AGIWUR6112;AGIWUR35553;AGIWUR42351                                                                                                  |    |    |         |         |                |          |          |                            |             |
| N2                                                                                                                                  | HS | II | 7701948 | 7705276 | WBGene00015206 | B0495.7  | B0495.7  | 0.0539970588869734         |             |
| AGIWUR15900;AGIWUR33473                                                                                                             |    |    |         |         |                |          |          |                            |             |
| N2                                                                                                                                  | HS | II | 7705536 | 7707483 | WBGene00015207 | B0495.8  | B0495.8  | 0.000727503802955276       |             |
| AGIWUR1814;AGIWUR6376;AGIWUR14232;AGIWUR18839;AGIWUR31518;AGIWUR45176                                                               |    |    |         |         |                |          |          |                            |             |
| N2                                                                                                                                  | HS | II | 7707586 | 7708725 | WBGene00015208 | B0495.9  | B0495.9  | 0.222249018207663          | AGIWUR13090 |
| N2                                                                                                                                  | HS | II | 7709789 | 7711444 | WBGene00005149 | sre-1    | B0495.1  | 0.133592214799203          | AGIWUR10241 |
| N2                                                                                                                                  | HS | II | 7711871 | 7718591 | WBGene00007044 | cpna-5   | B0495.10 | 0.0293760721303613         |             |
| AGIWUR11799;AGIWUR15380;AGIWUR25684                                                                                                 |    |    |         |         |                |          |          |                            |             |
| N2                                                                                                                                  | HS | II | 7724903 | 7752715 | WBGene00015061 | cpna-2   | B0228.4  | -0.0162782944294193        |             |
| AGIWUR6619;AGIWUR9887;AGIWUR16731;AGIWUR25986;AGIWUR31582;AGIWUR34570;AGIWUR38002                                                   |    |    |         |         |                |          |          |                            |             |
| N2                                                                                                                                  | HS | II | 7752637 | 7753607 | WBGene00015062 | trx-1    | B0228.5  | -0.084345351749695         |             |
| AGIWUR23893;AGIWUR30447;AGIWUR42639                                                                                                 |    |    |         |         |                |          |          |                            |             |
| N2                                                                                                                                  | HS | II | 7754147 | 7755156 | WBGene00015063 | B0228.6  | B0228.6  | 0.0627849727018202         | AGIWUR23399 |
| N2                                                                                                                                  | HS | II | 7755997 | 7756907 | WBGene00015059 | B0228.1  | B0228.1  | 0.138726153079393          |             |
| AGIWUR36033;AGIWUR39436;AGIWUR45163                                                                                                 |    |    |         |         |                |          |          |                            |             |
| N2                                                                                                                                  | HS | II | 7757190 | 7758922 | WBGene00015064 | B0228.7  | B0228.7  | 0.0735459122626416         | AGIWUR30631 |
| N2                                                                                                                                  | HS | II | 7759710 | 7761540 | WBGene00015065 | B0228.8  | B0228.8  | 0.106532311001649          | AGIWUR32882 |

|                                                |    |    |         |         |                |          |          |                     |             |
|------------------------------------------------|----|----|---------|---------|----------------|----------|----------|---------------------|-------------|
| N2                                             | HS | II | 7762062 | 7763669 | WBGene00015066 | B0228.9  | B0228.9  | 0.0854134207052564  |             |
| AGIWUR2478;AGIWUR10101                         |    |    |         |         |                |          |          |                     |             |
| N2                                             | HS | II | 7763937 | 7765516 | WBGene00005262 | srh-39   | C06A8.7  | -0.141342290770721  |             |
| AGIWUR17170;AGIWUR21579;AGIWUR36225            |    |    |         |         |                |          |          |                     |             |
| N2                                             | HS | II | 7765545 | 7772017 | WBGene00015517 | C06A8.8  | C06A8.8  | 0.0821204523413721  |             |
| AGIWUR13385;AGIWUR31560                        |    |    |         |         |                |          |          |                     |             |
| N2                                             | HS | II | 7772499 | 7773914 | WBGene00015516 | C06A8.6  | C06A8.6  | 0.157597613619835   | AGIWUR378   |
| N2                                             | HS | II | 7773880 | 7777827 | WBGene00015512 | mthf-1   | C06A8.1  | -0.0214331422911087 | AGIWUR23482 |
| N2                                             | HS | II | 7779297 | 7781301 | WBGene00015513 | snp-1.1  | C06A8.2  | 0.055767419210671   |             |
| AGIWUR28830                                    |    |    |         |         |                |          |          |                     |             |
| N2                                             | HS | II | 7781566 | 7783354 | WBGene00015515 | spdl-1   | C06A8.5  | -0.0576318700904856 | AGIWUR5128  |
| N2                                             | HS | II | 7783829 | 7784654 | WBGene00004823 | skr-17   | C06A8.4  | -0.0792913934235653 | AGIWUR37247 |
| N2                                             | HS | II | 7785100 | 7794319 | WBGene00001615 | glr-4    | C06A8.9  | -0.0994943530112415 |             |
| AGIWUR6451;AGIWUR19537;AGIWUR21410             |    |    |         |         |                |          |          |                     |             |
| N2                                             | HS | II | 7811240 | 7812105 | WBGene00000516 | cki-1    | T05A6.1  | 0.201522109240715   | AGIWUR39862 |
| N2                                             | HS | II | 7816509 | 7820301 | WBGene00000517 | cki-2    | T05A6.2  | -0.116952171277662  |             |
| AGIWUR15835;AGIWUR32206                        |    |    |         |         |                |          |          |                     |             |
| N2                                             | HS | II | 7820333 | 7822554 | WBGene00011458 | irld-47  | T05A6.4  | -0.157881466670088  | AGIWUR4446  |
| N2                                             | HS | II | 7822749 | 7825196 | WBGene00011459 | T05A6.5  | T05A6.5  | 0.186202862339741   | AGIWUR10914 |
| N2                                             | HS | II | 7825407 | 7826694 | WBGene00005809 | srw-62   | T05A6.6  | -0.170861661497854  |             |
| AGIWUR14075;AGIWUR40775                        |    |    |         |         |                |          |          |                     |             |
| N2                                             | HS | II | 7832391 | 7832668 | WBGene00011640 | T09A5.14 | T09A5.14 | 0.502789731063515   |             |
| AGIWUR35                                       |    |    |         |         |                |          |          |                     |             |
| N2                                             | HS | II | 7832844 | 7835414 | WBGene00023408 | cex-2    | T09A5.1  | -0.136879681757746  | AGIWUR34455 |
| N2                                             | HS | II | 7842353 | 7845653 | WBGene00002216 | k1p-3    | T09A5.2  | 0.0873794200684541  |             |
| AGIWUR4382;AGIWUR20513;AGIWUR29273;AGIWUR36971 |    |    |         |         |                |          |          |                     |             |
| N2                                             | HS | II | 7845662 | 7849797 | WBGene00000046 | acr-7    | T09A5.3  | -0.0498040227770442 | AGIWUR3882  |
| N2                                             | HS | II | 7852821 | 7853779 | WBGene00011634 | T09A5.5  | T09A5.5  | 0.359067071453744   | AGIWUR19073 |
| N2                                             | HS | II | 7853880 | 7855042 | WBGene00007014 | mdt-10   | T09A5.6  | 0.0686947505483602  | AGIWUR41745 |
| N2                                             | HS | II | 7855135 | 7855719 | WBGene00011635 | T09A5.7  | T09A5.7  | 0.154794596596098   | AGIWUR7525  |
| N2                                             | HS | II | 7855814 | 7857600 | WBGene00011636 | cec-3    | T09A5.8  | -0.133900489580583  | AGIWUR33974 |
| N2                                             | HS | II | 7857811 | 7858334 | WBGene00011641 | T09A5.15 | T09A5.15 | 0.108591904001335   |             |
| AGIWUR23369                                    |    |    |         |         |                |          |          |                     |             |
| N2                                             | HS | II | 7858401 | 7859781 | WBGene00011637 | sds-22   | T09A5.9  | 0.146564923043876   |             |
| AGIWUR24015;AGIWUR38639;AGIWUR40986            |    |    |         |         |                |          |          |                     |             |
| N2                                             | HS | II | 7860574 | 7863563 | WBGene00002994 | lin-5    | T09A5.10 | 0.056267603031193   |             |
| AGIWUR1605;AGIWUR16198;AGIWUR34726             |    |    |         |         |                |          |          |                     |             |
| N2                                             | HS | II | 7864074 | 7866256 | WBGene00011638 | ostb-1   | T09A5.11 | 0.0401962323255027  |             |
| AGIWUR20189;AGIWUR29057;AGIWUR41636            |    |    |         |         |                |          |          |                     |             |

|                                                                                            |    |    |         |         |                |          |          |                     |             |
|--------------------------------------------------------------------------------------------|----|----|---------|---------|----------------|----------|----------|---------------------|-------------|
| N2                                                                                         | HS | II | 7866256 | 7870162 | WBGene00011639 | ztf-17   | T09A5.12 | 0.0559302311171734  |             |
| AGIWUR4682;AGIWUR13291;AGIWUR19500;AGIWUR22289                                             |    |    |         |         |                |          |          |                     |             |
| N2                                                                                         | HS | II | 7870881 | 7873893 | WBGene00011349 | T01H3.3  | T01H3.3  | 0.0860187337971574  | AGIWUR23452 |
| N2                                                                                         | HS | II | 7874242 | 7878097 | WBGene00011348 | T01H3.2  | T01H3.2  | 0.0336909390055666  | AGIWUR24353 |
| N2                                                                                         | HS | II | 7878083 | 7879406 | WBGene00006913 | vha-4    | T01H3.1  | 0.096245686207646   |             |
| AGIWUR1184;AGIWUR10620;AGIWUR20756;AGIWUR24307                                             |    |    |         |         |                |          |          |                     |             |
| N2                                                                                         | HS | II | 7879720 | 7880464 | WBGene00011351 | T01H3.5  | T01H3.5  | 0.0401505249106009  | AGIWUR24996 |
| N2                                                                                         | HS | II | 7880812 | 7882767 | WBGene00011350 | perm-1   | T01H3.4  | -0.0707811709499779 | AGIWUR7835  |
| N2                                                                                         | HS | II | 7893229 | 7900510 | WBGene00004208 | ptc-1    | ZK675.1  | -0.165618399225141  |             |
| AGIWUR3463;AGIWUR7183;AGIWUR24141;AGIWUR37844;AGIWUR40130;AGIWUR41556                      |    |    |         |         |                |          |          |                     |             |
| N2                                                                                         | HS | II | 7900647 | 7904636 | WBGene00014066 | rev-1    | ZK675.2  | 0.0987905295521134  | AGIWUR37852 |
| N2                                                                                         | HS | II | 7904639 | 7907589 | WBGene00014989 | best-23  | ZK675.3  | 0.0525046564888285  |             |
| AGIWUR3527;AGIWUR8672;AGIWUR13711;AGIWUR14386;AGIWUR17626;AGIWUR32827;AGIWUR39001          |    |    |         |         |                |          |          |                     |             |
| N2                                                                                         | HS | II | 7911323 | 7912113 | WBGene00014067 | ZK675.4  | ZK675.4  | -0.0122689388344304 | AGIWUR20932 |
| N2                                                                                         | HS | II | 7912093 | 7928694 | WBGene00014051 | spv-1    | ZK669.1  | 0.00755511801591613 |             |
| AGIWUR26977;AGIWUR30516;AGIWUR36509                                                        |    |    |         |         |                |          |          |                     |             |
| N2                                                                                         | HS | II | 7936592 | 7938583 | WBGene00014052 | ZK669.2  | ZK669.2  | 0.138435276469393   | AGIWUR4723  |
| N2                                                                                         | HS | II | 7942463 | 7945206 | WBGene00014054 | dbt-1    | ZK669.4  | -0.0364599613428318 | AGIWUR37925 |
| N2                                                                                         | HS | II | 7945501 | 7946894 | WBGene00014055 | ZK669.5  | ZK669.5  | 0.0736067262512989  |             |
| AGIWUR4467;AGIWUR5732;AGIWUR27011;AGIWUR33319;AGIWUR33597                                  |    |    |         |         |                |          |          |                     |             |
| N2                                                                                         | HS | II | 7958844 | 7960237 | WBGene00007311 | C04H4.1  | C04H4.1  | 0.0604412714017446  | AGIWUR17895 |
| N2                                                                                         | HS | II | 7976614 | 7994206 | WBGene00008438 | DH11.5   | DH11.5   | -0.111427553331457  |             |
| AGIWUR8512;AGIWUR15852;AGIWUR17295;AGIWUR34568                                             |    |    |         |         |                |          |          |                     |             |
| N2                                                                                         | HS | II | 7995587 | 8003152 | WBGene00004005 | pgp-11   | DH11.3   | -0.0702286036780251 | AGIWUR43425 |
| N2                                                                                         | HS | II | 8008619 | 8011633 | WBGene00008435 | glna-2   | DH11.1   | 0.0470203828942157  | AGIWUR29345 |
| N2                                                                                         | HS | II | 8012816 | 8015264 | WBGene00008436 | DH11.2   | DH11.2   | 0.254051615546246   | AGIWUR42760 |
| N2                                                                                         | HS | II | 8017669 | 8020785 | WBGene00006996 | zyg-11   | C08B11.1 | -0.180316390731347  |             |
| AGIWUR3394;AGIWUR3850;AGIWUR10462;AGIWUR19652                                              |    |    |         |         |                |          |          |                     |             |
| N2                                                                                         | HS | II | 8020780 | 8022561 | WBGene00001835 | hda-2    | C08B11.2 | 0.336083337793202   |             |
| AGIWUR26485                                                                                |    |    |         |         |                |          |          |                     |             |
| N2                                                                                         | HS | II | 8022649 | 8027756 | WBGene00007433 | swsn-7   | C08B11.3 | -0.111259360198471  |             |
| AGIWUR43476                                                                                |    |    |         |         |                |          |          |                     |             |
| N2                                                                                         | HS | II | 8028953 | 8032742 | WBGene00003813 | nr-f-6   | C08B11.4 | 0.0657346387343978  |             |
| AGIWUR7101                                                                                 |    |    |         |         |                |          |          |                     |             |
| N2                                                                                         | HS | II | 8034250 | 8035767 | WBGene00004723 | sap-49   | C08B11.5 | -0.281235367637497  |             |
| AGIWUR2998;AGIWUR3824;AGIWUR4991;AGIWUR5242;AGIWUR6636;AGIWUR32094;AGIWUR42094;AGIWUR43153 |    |    |         |         |                |          |          |                     |             |
| N2                                                                                         | HS | II | 8035869 | 8037346 | WBGene00007434 | arp-6    | C08B11.6 | -0.107211513167811  |             |
| AGIWUR5868;AGIWUR37186;AGIWUR38567;AGIWUR42177                                             |    |    |         |         |                |          |          |                     |             |
| N2                                                                                         | HS | II | 8037316 | 8038167 | WBGene00007436 | C08B11.9 | C08B11.9 | -0.0833901880786811 |             |

|                                               |    |    |         |         |                |          |          |                     |             |
|-----------------------------------------------|----|----|---------|---------|----------------|----------|----------|---------------------|-------------|
| AGIWUR14890                                   |    |    |         |         |                |          |          |                     |             |
| N2                                            | HS | II | 8038271 | 8039597 | WBGene00006724 | ubh-4    | C08B11.7 | -0.164006000944148  |             |
| AGIWUR8971;AGIWUR33365;AGIWUR43766            |    |    |         |         |                |          |          |                     |             |
| N2                                            | HS | II | 8040006 | 8041732 | WBGene00007435 | C08B11.8 | C08B11.8 | 0.200336758878597   |             |
| AGIWUR31312                                   |    |    |         |         |                |          |          |                     |             |
| N2                                            | HS | II | 8042589 | 8047452 | WBGene00011507 | T05H10.1 | T05H10.1 | -0.0398393527262719 |             |
| AGIWUR7238;AGIWUR35900;AGIWUR42683            |    |    |         |         |                |          |          |                     |             |
| N2                                            | HS | II | 8047564 | 8049105 | WBGene00000151 | apn-1    | T05H10.2 | -0.148030731763871  |             |
| AGIWUR5389;AGIWUR33387;AGIWUR40600            |    |    |         |         |                |          |          |                     |             |
| N2                                            | HS | II | 8049049 | 8050564 | WBGene00011508 | T05H10.3 | T05H10.3 | -0.421499800221708  |             |
| AGIWUR35674                                   |    |    |         |         |                |          |          |                     |             |
| N2                                            | HS | II | 8053137 | 8054965 | WBGene00011509 | T05H10.4 | T05H10.4 | -0.027993228425057  |             |
| AGIWUR18325                                   |    |    |         |         |                |          |          |                     |             |
| N2                                            | HS | II | 8059069 | 8061464 | WBGene00011512 | T05H10.8 | T05H10.8 | 0.0435832584307887  |             |
| AGIWUR2912                                    |    |    |         |         |                |          |          |                     |             |
| N2                                            | HS | II | 8062741 | 8066193 | WBGene00006734 | ufd-2    | T05H10.5 | -0.0236316874204121 |             |
| AGIWUR6799                                    |    |    |         |         |                |          |          |                     |             |
| N2                                            | HS | II | 8066111 | 8068184 | WBGene00011510 | pdha-1   | T05H10.6 | -0.0410133558528987 |             |
| AGIWUR31011                                   |    |    |         |         |                |          |          |                     |             |
| N2                                            | HS | II | 8067990 | 8073372 | WBGene00011511 | gpcp-2   | T05H10.7 | -0.0551366603909802 |             |
| AGIWUR983;AGIWUR13509;AGIWUR13688;AGIWUR15497 |    |    |         |         |                |          |          |                     |             |
| N2                                            | HS | II | 8075760 | 8076836 | WBGene00010501 | K02C4.2  | K02C4.2  | 0.158563111238729   |             |
| AGIWUR7423;AGIWUR23396;AGIWUR28188            |    |    |         |         |                |          |          |                     |             |
| N2                                            | HS | II | 8078457 | 8080847 | WBGene00010503 | K02C4.5  | K02C4.5  | 0.00853331545077118 | AGIWUR17113 |
| N2                                            | HS | II | 8080789 | 8086849 | WBGene00010502 | K02C4.3  | K02C4.3  | 0.0137632055130172  |             |
| AGIWUR5833;AGIWUR12426;AGIWUR31499            |    |    |         |         |                |          |          |                     |             |
| N2                                            | HS | II | 8088427 | 8092754 | WBGene00003089 | ltd-1    | K02C4.4  | 0.147174258991955   | AGIWUR7221  |
| N2                                            | HS | II | 8100375 | 8102141 | WBGene00005150 | sre-2    | C41C4.2  | 0.0512567410039164  | AGIWUR22986 |
| N2                                            | HS | II | 8102108 | 8105052 | WBGene00044049 | sfxn-5   | C41C4.10 | 0.151903955834145   |             |
| AGIWUR5877;AGIWUR16602;AGIWUR26988            |    |    |         |         |                |          |          |                     |             |
| N2                                            | HS | II | 8105614 | 8106967 | WBGene00008050 | chst-1   | C41C4.1  | 0.117515984919471   | AGIWUR7477  |
| N2                                            | HS | II | 8107645 | 8108954 | WBGene00008054 | C41C4.9  | C41C4.9  | 0.0315139460325291  | AGIWUR16390 |
| N2                                            | HS | II | 8108941 | 8112163 | WBGene00008051 | lron-4   | C41C4.3  | 0.297768231001466   | AGIWUR2733  |
| N2                                            | HS | II | 8112262 | 8124910 | WBGene00002147 | ire-1    | C41C4.4  | 0.107767053104553   | AGIWUR29507 |
| N2                                            | HS | II | 8129960 | 8134742 | WBGene00006739 | ulp-4    | C41C4.6  | -0.0474656744678503 |             |
| AGIWUR2044;AGIWUR6926                         |    |    |         |         |                |          |          |                     |             |
| N2                                            | HS | II | 8134765 | 8136916 | WBGene00008052 | ctns-1   | C41C4.7  | 0.0066079875749061  |             |
| AGIWUR22871;AGIWUR30307;AGIWUR39329           |    |    |         |         |                |          |          |                     |             |
| N2                                            | HS | II | 8137880 | 8141276 | WBGene00008053 | cdc-48.2 | C41C4.8  | -0.0959310938745208 |             |

AGIWUR22177;AGIWUR23786

|                                                                                     |    |    |         |         |                |           |           |                     |             |
|-------------------------------------------------------------------------------------|----|----|---------|---------|----------------|-----------|-----------|---------------------|-------------|
| N2                                                                                  | HS | II | 8141213 | 8143478 | WBGene00008642 | F10B5.8   | F10B5.8   | -0.0789954965606547 | AGIWUR42674 |
| N2                                                                                  | HS | II | 8143863 | 8144671 | WBGene00004421 | rp1-10    | F10B5.1   | 0.0910514462897822  |             |
| AGIWUR15626;AGIWUR19210;AGIWUR25935;AGIWUR27480;AGIWUR38463;AGIWUR42597;AGIWUR44548 |    |    |         |         |                |           |           |                     |             |
| N2                                                                                  | HS | II | 8144762 | 8147236 | WBGene00008639 | F10B5.2   | F10B5.2   | 0.203798392253898   | AGIWUR23843 |
| N2                                                                                  | HS | II | 8147190 | 8150030 | WBGene00008640 | F10B5.3   | F10B5.3   | 0.00937151119281765 | AGIWUR14621 |
| N2                                                                                  | HS | II | 8154096 | 8156937 | WBGene00006655 | tub-1     | F10B5.4   | 0.0967474609481584  | AGIWUR23466 |
| N2                                                                                  | HS | II | 8157362 | 8158045 | WBGene00008643 | tmem-138  | F10B5.9   | -0.0443630340305754 |             |
| AGIWUR3504                                                                          |    |    |         |         |                |           |           |                     |             |
| N2                                                                                  | HS | II | 8158349 | 8159925 | WBGene00008641 | pch-2     | F10B5.5   | 0.160031062755372   | AGIWUR2022  |
| N2                                                                                  | HS | II | 8159865 | 8162170 | WBGene00001281 | emb-27    | F10B5.6   | 0.115287159432269   | AGIWUR21615 |
| N2                                                                                  | HS | II | 8162465 | 8168644 | WBGene00004510 | rrf-3     | F10B5.7   | -0.261464237444555  | AGIWUR12684 |
| N2                                                                                  | HS | II | 8168682 | 8170358 | WBGene00011473 | T05C12.11 | T05C12.11 | 0.309810703567573   |             |
| AGIWUR37097                                                                         |    |    |         |         |                |           |           |                     |             |
| N2                                                                                  | HS | II | 8172229 | 8173562 | WBGene00011467 | decr-1.3  | T05C12.3  | 0.138984278085667   |             |
| AGIWUR7309                                                                          |    |    |         |         |                |           |           |                     |             |
| N2                                                                                  | HS | II | 8173680 | 8174866 | WBGene00011466 | T05C12.1  | T05C12.1  |                     |             |
| -0.00430061663330683 AGIWUR8960;AGIWUR11009;AGIWUR38979                             |    |    |         |         |                |           |           |                     |             |
| N2                                                                                  | HS | II | 8174845 | 8177195 | WBGene00000053 | acr-14    | T05C12.2  | 0.00312248523140912 |             |
| AGIWUR222;AGIWUR34520;AGIWUR36830                                                   |    |    |         |         |                |           |           |                     |             |
| N2                                                                                  | HS | II | 8177578 | 8180381 | WBGene00011468 | T05C12.4  | T05C12.4  | 0.221871279841714   |             |
| AGIWUR8536                                                                          |    |    |         |         |                |           |           |                     |             |
| N2                                                                                  | HS | II | 8181737 | 8182309 | WBGene00011469 | dylt-3    | T05C12.5  | 0.189134927955164   |             |
| AGIWUR19498                                                                         |    |    |         |         |                |           |           |                     |             |
| N2                                                                                  | HS | II | 8182323 | 8185023 | WBGene00003241 | mig-5     | T05C12.6  | 0.03165268521394    |             |
| AGIWUR41036                                                                         |    |    |         |         |                |           |           |                     |             |
| N2                                                                                  | HS | II | 8185443 | 8187601 | WBGene00000377 | cct-1     | T05C12.7  | -0.0948029309627589 |             |
| AGIWUR2764;AGIWUR11724;AGIWUR14998;AGIWUR15680;AGIWUR20879;AGIWUR28442;AGIWUR29277  |    |    |         |         |                |           |           |                     |             |
| N2                                                                                  | HS | II | 8187607 | 8190528 | WBGene00011471 | T05C12.8  | T05C12.8  | -0.29433880156423   |             |
| AGIWUR13267                                                                         |    |    |         |         |                |           |           |                     |             |
| N2                                                                                  | HS | II | 8191773 | 8193329 | WBGene00011472 | T05C12.9  | T05C12.9  | 0.0605796184051588  |             |
| AGIWUR22375                                                                         |    |    |         |         |                |           |           |                     |             |
| N2                                                                                  | HS | II | 8198803 | 8204001 | WBGene00004264 | qua-1     | T05C12.10 | 0.301855301461108   |             |
| AGIWUR18808                                                                         |    |    |         |         |                |           |           |                     |             |
| N2                                                                                  | HS | II | 8204341 | 8207491 | WBGene00000652 | col-76    | M110.1    | 0.0196132189985754  | AGIWUR5673  |
| N2                                                                                  | HS | II | 8208000 | 8209444 | WBGene00010916 | M110.8    | M110.8    | -0.094271239787167  | AGIWUR18001 |
| N2                                                                                  | HS | II | 8210662 | 8212751 | WBGene00006658 | twk-3     | M110.2    | 0.0313780481589641  | AGIWUR10521 |
| N2                                                                                  | HS | II | 8214575 | 8216616 | WBGene00010913 | M110.3    | M110.3    | 0.0677632296344992  | AGIWUR23590 |
| N2                                                                                  | HS | II | 8217231 | 8222395 | WBGene00002066 | ifg-1     | M110.4    | 0.182641757518251   |             |



AGIWUR3842;AGIWUR23909;AGIWUR24055

N2 HS II 8226132 8229122 WBGene00000894 dab-1 M110.5 -0.0494551716595772

AGIWUR2336;AGIWUR6350;AGIWUR30204;AGIWUR38810

N2 HS II 8231239 8232769 WBGene00010917 M110.9 M110.9 0.192475577199566 AGIWUR35202

N2 HS II 8232789 8237202 WBGene00010915 M110.7 M110.7 0.249570731066651 AGIWUR27439

N2 HS II 8238455 8243747 WBGene00003743 nlp-5 F35C11.1 0.0326818220596667

AGIWUR18693

N2 HS II 8246776 8248263 WBGene00009402 F35C11.3 F35C11.3 0.308180424959684

AGIWUR20539

N2 HS II 8249879 8251980 WBGene00009403 F35C11.4 F35C11.4 0.193132503396455

AGIWUR37143

N2 HS II 8253740 8255319 WBGene00009404 F35C11.5 F35C11.5 -0.416316113945815

AGIWUR44340

N2 HS II 8256313 8257605 WBGene00009406 F35C11.7 F35C11.7 0.00452197392971154

AGIWUR7569

N2 HS II 8258074 8259210 WBGene00009405 F35C11.6 F35C11.6 -0.123236856513763

AGIWUR32766

N2 HS II 8264661 8267360 WBGene00010456 K01C8.1 K01C8.1 -0.0745447112899384 AGIWUR25064

N2 HS II 8267253 8269914 WBGene00010457 K01C8.2 K01C8.2 0.0150530397953661

AGIWUR195;AGIWUR41552

N2 HS II 8270567 8273611 WBGene00006562 tdc-1 K01C8.3 -0.0794026232944631

AGIWUR2061;AGIWUR34794

N2 HS II 8273543 8276231 WBGene00001571 gei-14 K01C8.5 0.00520779179759501 AGIWUR1841

N2 HS II 8276298 8277611 WBGene00010459 slc-25A32 K01C8.7 -0.0128313873018708

AGIWUR8565;AGIWUR13542;AGIWUR37798;AGIWUR41814;AGIWUR44670

N2 HS II 8277531 8278515 WBGene00010458 mrpl-10 K01C8.6 0.0665904601196967 AGIWUR38766

N2 HS II 8278686 8281035 WBGene00010460 clec-142 K01C8.8 -0.0228639571137581

AGIWUR9226;AGIWUR13203;AGIWUR43626

N2 HS II 8280855 8283208 WBGene00003821 nst-1 K01C8.9 0.145441580407805 AGIWUR40653

N2 HS II 8283667 8285711 WBGene00000379 cct-4 K01C8.10 -0.163167225073255

AGIWUR13181;AGIWUR32010

N2 HS II 8294829 8295396 WBGene00008820 nlp-55 F14F11.2 0.0256243846022368

AGIWUR1677

N2 HS II 8305745 8321471 WBGene00008819 shw-1 F14F11.1 -0.038852697332028

AGIWUR4986;AGIWUR9350;AGIWUR21060;AGIWUR29497;AGIWUR34911;AGIWUR42810;AGIWUR45012

N2 HS II 8322612 8325052 WBGene00004304 ran-3 C26D10.1 -0.0212942487501309

AGIWUR40833

N2 HS II 8325386 8329658 WBGene00007744 C26D10.3 C26D10.3 -0.0722401821011953

AGIWUR19644

|                                                                         |    |    |         |         |                |           |           |                     |             |
|-------------------------------------------------------------------------|----|----|---------|---------|----------------|-----------|-----------|---------------------|-------------|
| N2                                                                      | HS | II | 8329758 | 8333481 | WBGene00007745 | C26D10.4  | C26D10.4  | 0.146220287966296   |             |
| AGIWUR16715;AGIWUR19903;AGIWUR40329;AGIWUR43871                         |    |    |         |         |                |           |           |                     |             |
| N2                                                                      | HS | II | 8334094 | 8336503 | WBGene00023420 | C26D10.7  | C26D10.7  | 0.198756956996287   |             |
| AGIWUR16828                                                             |    |    |         |         |                |           |           |                     |             |
| N2                                                                      | HS | II | 8346690 | 8350557 | WBGene00001159 | eff-1     | C26D10.5  | -0.0107058560769517 |             |
| AGIWUR22682;AGIWUR29270                                                 |    |    |         |         |                |           |           |                     |             |
| N2                                                                      | HS | II | 8350535 | 8354700 | WBGene00007746 | C26D10.6  | C26D10.6  | -0.1602639382658    |             |
| AGIWUR25563                                                             |    |    |         |         |                |           |           |                     |             |
| N2                                                                      | HS | II | 8358228 | 8359381 | WBGene00000653 | col-77    | M195.1    | 0.148454066740261   | AGIWUR23505 |
| N2                                                                      | HS | II | 8359712 | 8363196 | WBGene00010948 | M195.2    | M195.2    | 0.0482921680151041  | AGIWUR30560 |
| N2                                                                      | HS | II | 8363196 | 8369159 | WBGene00000135 | amt-3     | M195.3    | -0.0384420667579555 | AGIWUR26721 |
| N2                                                                      | HS | II | 8376611 | 8377357 | WBGene00010949 | M195.4    | M195.4    | 0.0874327477953125  | AGIWUR139   |
| N2                                                                      | HS | II | 8381497 | 8383905 | WBGene00009904 | F49E12.12 | F49E12.12 | 0.326933528889954   |             |
| AGIWUR41004                                                             |    |    |         |         |                |           |           |                     |             |
| N2                                                                      | HS | II | 8388051 | 8389891 | WBGene00009902 | drd-1     | F49E12.9  | -0.174517124685156  |             |
| AGIWUR3152;AGIWUR16685;AGIWUR28016;AGIWUR44394                          |    |    |         |         |                |           |           |                     |             |
| N2                                                                      | HS | II | 8391088 | 8392281 | WBGene00009903 | F49E12.10 | F49E12.10 | -0.0871589804208845 |             |
| AGIWUR8922                                                              |    |    |         |         |                |           |           |                     |             |
| N2                                                                      | HS | II | 8392571 | 8394202 | WBGene00009901 | F49E12.8  | F49E12.8  | 0.218032552948468   |             |
| AGIWUR7589                                                              |    |    |         |         |                |           |           |                     |             |
| N2                                                                      | HS | II | 8395276 | 8396141 | WBGene00009900 | F49E12.7  | F49E12.7  | 0.0785532278813372  |             |
| AGIWUR21880                                                             |    |    |         |         |                |           |           |                     |             |
| N2                                                                      | HS | II | 8398161 | 8399160 | WBGene00009898 | dod-23    | F49E12.2  | 0.619673499833661   |             |
| AGIWUR23090                                                             |    |    |         |         |                |           |           |                     |             |
| N2                                                                      | HS | II | 8400299 | 8404848 | WBGene00009897 | skpo-1    | F49E12.1  | 0.0953985906503618  |             |
| AGIWUR22459                                                             |    |    |         |         |                |           |           |                     |             |
| N2                                                                      | HS | II | 8405603 | 8406924 | WBGene00006719 | ubc-24    | F49E12.4  | 0.0784485825762999  |             |
| AGIWUR30944                                                             |    |    |         |         |                |           |           |                     |             |
| N2                                                                      | HS | II | 8407685 | 8409237 | WBGene00005039 | sra-13    | F49E12.5  | -0.144729362927657  |             |
| AGIWUR5312;AGIWUR21380;AGIWUR38003                                      |    |    |         |         |                |           |           |                     |             |
| N2                                                                      | HS | II | 8412671 | 8416857 | WBGene00009899 | efl-3     | F49E12.6  | 0.0435906018445831  |             |
| AGIWUR13219;AGIWUR15145;AGIWUR32279;AGIWUR38296;AGIWUR43804;AGIWUR44927 |    |    |         |         |                |           |           |                     |             |
| N2                                                                      | HS | II | 8417618 | 8419758 | WBGene00008799 | F14E5.1   | F14E5.1   | 0.237728074217021   | AGIWUR18246 |
| N2                                                                      | HS | II | 8423951 | 8428855 | WBGene00008800 | F14E5.2   | F14E5.2   | 0.0222372495558449  |             |
| AGIWUR3167;AGIWUR17171;AGIWUR35433                                      |    |    |         |         |                |           |           |                     |             |
| N2                                                                      | HS | II | 8429959 | 8432054 | WBGene00008802 | acp-2     | F14E5.4   | 0.284131429446229   | AGIWUR23377 |
| N2                                                                      | HS | II | 8432773 | 8435105 | WBGene00008804 | acp-4     | F14E5.6   | 0.133776459556454   | AGIWUR21718 |
| N2                                                                      | HS | II | 8435347 | 8437135 | WBGene00008801 | acp-3     | F14E5.3   | 0.175879972597654   | AGIWUR26233 |
| N2                                                                      | HS | II | 8439118 | 8442151 | WBGene00008803 | lips-10   | F14E5.5   | 0.0819089953875292  | AGIWUR4094  |

|                                                                                                           |    |    |         |         |                |          |          |                      |             |
|-----------------------------------------------------------------------------------------------------------|----|----|---------|---------|----------------|----------|----------|----------------------|-------------|
| N2                                                                                                        | HS | II | 8442765 | 8444239 | WBGene00001230 | eif-3.G  | F22B5.2  | -0.0331907666284375  |             |
| AGIWUR9270;AGIWUR19095;AGIWUR24859;AGIWUR29721;AGIWUR29987;AGIWUR38375                                    |    |    |         |         |                |          |          |                      |             |
| N2                                                                                                        | HS | II | 8444307 | 8445177 | WBGene00001358 | evl-20   | F22B5.1  | -0.113036276530742   | AGIWUR34115 |
| N2                                                                                                        | HS | II | 8445168 | 8446831 | WBGene00009041 | cut-3    | F22B5.3  | -0.481102389667504   | AGIWUR30519 |
| N2                                                                                                        | HS | II | 8449701 | 8452739 | WBGene00009042 | F22B5.4  | F22B5.4  | 0.289387943668768    | AGIWUR24088 |
| N2                                                                                                        | HS | II | 8453254 | 8454613 | WBGene00009043 | F22B5.5  | F22B5.5  | -0.090859596866192   | AGIWUR2516  |
| N2                                                                                                        | HS | II | 8454612 | 8456194 | WBGene00009044 | F22B5.6  | F22B5.6  | 0.000857974000485484 | AGIWUR11320 |
| N2                                                                                                        | HS | II | 8457818 | 8464517 | WBGene00006994 | zyg-9    | F22B5.7  | 0.157369960259516    | AGIWUR36027 |
| N2                                                                                                        | HS | II | 8464848 | 8467072 | WBGene00001498 | fars-3   | F22B5.9  | -0.158111544425694   | AGIWUR34112 |
| N2                                                                                                        | HS | II | 8467174 | 8468010 | WBGene00009045 | F22B5.10 | F22B5.10 | -0.292806849527064   |             |
| AGIWUR6122;AGIWUR11334;AGIWUR27711;AGIWUR28547                                                            |    |    |         |         |                |          |          |                      |             |
| N2                                                                                                        | HS | II | 8468109 | 8470162 | WBGene00010875 | M05D6.2  | M05D6.2  | -0.0306393927901567  | AGIWUR31827 |
| N2                                                                                                        | HS | II | 8470079 | 8471217 | WBGene00010880 | M05D6.8  | M05D6.8  | 0.131023376595481    | AGIWUR15604 |
| N2                                                                                                        | HS | II | 8471880 | 8473522 | WBGene00044168 | M05D6.10 | M05D6.10 | 0.140103207784445    |             |
| AGIWUR11206;AGIWUR35547                                                                                   |    |    |         |         |                |          |          |                      |             |
| N2                                                                                                        | HS | II | 8473819 | 8475568 | WBGene00010874 | M05D6.1  | M05D6.1  | 0.15137057645161     | AGIWUR35206 |
| N2                                                                                                        | HS | II | 8478010 | 8480478 | WBGene00010877 | lact-4   | M05D6.4  | 0.0577876615406474   |             |
| AGIWUR13800;AGIWUR34952                                                                                   |    |    |         |         |                |          |          |                      |             |
| N2                                                                                                        | HS | II | 8480457 | 8482216 | WBGene00010878 | M05D6.5  | M05D6.5  | 0.0755290332104481   |             |
| AGIWUR3221;AGIWUR10469;AGIWUR10734;AGIWUR41286                                                            |    |    |         |         |                |          |          |                      |             |
| N2                                                                                                        | HS | II | 8482376 | 8483872 | WBGene00010879 | M05D6.6  | M05D6.6  | 0.0936048535040772   | AGIWUR33291 |
| N2                                                                                                        | HS | II | 8485879 | 8487571 | WBGene00001523 | gbh-2    | M05D6.7  | 0.115310170920344    |             |
| AGIWUR2809;AGIWUR14517;AGIWUR29356;AGIWUR29456;AGIWUR39469;AGIWUR39551                                    |    |    |         |         |                |          |          |                      |             |
| N2                                                                                                        | HS | II | 8487571 | 8509055 | WBGene00011755 | T13H5.1  | T13H5.1  | 0.0948947755739695   |             |
| AGIWUR6797;AGIWUR8690;AGIWUR15118;AGIWUR15740;AGIWUR16271;AGIWUR21225;AGIWUR27017;AGIWUR30143;AGIWUR33771 |    |    |         |         |                |          |          |                      |             |
| N2                                                                                                        | HS | II | 8514118 | 8516891 | WBGene00011756 | ctg-2    | T13H5.2  | -0.131519862703174   |             |
| AGIWUR9249;AGIWUR11176;AGIWUR25165;AGIWUR25634;AGIWUR26294;AGIWUR32840                                    |    |    |         |         |                |          |          |                      |             |
| N2                                                                                                        | HS | II | 8517150 | 8518412 | WBGene00004383 | rnh-2    | T13H5.7  | 0.0657082132698505   | AGIWUR12815 |
| N2                                                                                                        | HS | II | 8518510 | 8520700 | WBGene00011761 | T13H5.8  | T13H5.8  | 0.0692129870094202   | AGIWUR1284  |
| N2                                                                                                        | HS | II | 8520905 | 8523490 | WBGene00011757 | cht-2    | T13H5.3  | 0.393052491339596    | AGIWUR8100  |
| N2                                                                                                        | HS | II | 8523494 | 8525396 | WBGene00011758 | T13H5.4  | T13H5.4  | -0.100490218330708   |             |
| AGIWUR4164;AGIWUR25257;AGIWUR28277;AGIWUR39003                                                            |    |    |         |         |                |          |          |                      |             |
| N2                                                                                                        | HS | II | 8525685 | 8526804 | WBGene00011759 | mrps-18B | T13H5.5  | 0.204219735298146    |             |
| AGIWUR26447                                                                                               |    |    |         |         |                |          |          |                      |             |
| N2                                                                                                        | HS | II | 8526799 | 8531222 | WBGene00011760 | T13H5.6  | T13H5.6  | 0.370965258423036    | AGIWUR15371 |
| N2                                                                                                        | HS | II | 8533095 | 8534363 | WBGene00012175 | W01C9.1  | W01C9.1  | 0.144234426020102    | AGIWUR17469 |
| N2                                                                                                        | HS | II | 8536133 | 8538603 | WBGene00012176 | W01C9.2  | W01C9.2  | -0.0389518076476989  | AGIWUR13147 |
| N2                                                                                                        | HS | II | 8540720 | 8545452 | WBGene00004155 | pqn-73   | W01C9.3  | -0.0766112684572704  | AGIWUR70    |
| N2                                                                                                        | HS | II | 8545652 | 8546854 | WBGene00012177 | decr-1.2 | W01C9.4  | 0.00115396601143125  |             |

AGIWUR35156

|                                                                                    |    |    |         |         |                |          |          |                     |             |
|------------------------------------------------------------------------------------|----|----|---------|---------|----------------|----------|----------|---------------------|-------------|
| N2                                                                                 | HS | II | 8547339 | 8556258 | WBGene00012178 | glb-27   | W01C9.5  | 0.15041649832351    | AGIWUR20195 |
| N2                                                                                 | HS | II | 8559394 | 8561352 | WBGene00002065 | iff-2    | F54C9.1  | 0.0108111415871566  |             |
| AGIWUR1041;AGIWUR13119;AGIWUR18172;AGIWUR31956;AGIWUR34294;AGIWUR35827;AGIWUR38745 |    |    |         |         |                |          |          |                     |             |
| N2                                                                                 | HS | II | 8563714 | 8566139 | WBGene00006059 | stc-1    | F54C9.2  | 0.178858196126681   | AGIWUR27084 |
| N2                                                                                 | HS | II | 8566508 | 8566857 | WBGene00010041 | F54C9.3  | F54C9.3  | 0.00675151931018192 | AGIWUR35414 |
| N2                                                                                 | HS | II | 8568035 | 8569089 | WBGene00000615 | col-38   | F54C9.4  | 0.205193325006583   | AGIWUR17395 |
| N2                                                                                 | HS | II | 8569927 | 8571100 | WBGene00004416 | rp1-5    | F54C9.5  | -0.114741791301583  |             |
| AGIWUR9145;AGIWUR16011;AGIWUR23458                                                 |    |    |         |         |                |          |          |                     |             |
| N2                                                                                 | HS | II | 8571085 | 8572904 | WBGene00010042 | bcs-1    | F54C9.6  | -0.060899506373894  |             |
| AGIWUR6986;AGIWUR16748;AGIWUR26834;AGIWUR38862                                     |    |    |         |         |                |          |          |                     |             |
| N2                                                                                 | HS | II | 8573355 | 8575045 | WBGene00010043 | F54C9.7  | F54C9.7  | 0.0215063495289858  |             |
| AGIWUR42579;AGIWUR43932                                                            |    |    |         |         |                |          |          |                     |             |
| N2                                                                                 | HS | II | 8575541 | 8577732 | WBGene00004241 | puf-5    | F54C9.8  | -0.0872141112409857 | AGIWUR17244 |
| N2                                                                                 | HS | II | 8578049 | 8581513 | WBGene00010044 | F54C9.9  | F54C9.9  | 0.104379342503272   |             |
| AGIWUR1419;AGIWUR4848;AGIWUR15723                                                  |    |    |         |         |                |          |          |                     |             |
| N2                                                                                 | HS | II | 8581945 | 8583080 | WBGene00000187 | arl-1    | F54C9.10 | 0.124226334930395   |             |
| AGIWUR21476                                                                        |    |    |         |         |                |          |          |                     |             |
| N2                                                                                 | HS | II | 8583034 | 8585086 | WBGene00010045 | F54C9.11 | F54C9.11 | 0.0629320493639458  |             |
| AGIWUR34137                                                                        |    |    |         |         |                |          |          |                     |             |
| N2                                                                                 | HS | II | 8590984 | 8593010 | WBGene00009202 | aptf-4   | F28C6.1  | 0.16286865071339    |             |
| AGIWUR10388;AGIWUR16446;AGIWUR39555                                                |    |    |         |         |                |          |          |                     |             |
| N2                                                                                 | HS | II | 8594190 | 8596294 | WBGene00009203 | aptf-3   | F28C6.2  | -0.111667852076058  |             |
| AGIWUR12578;AGIWUR32441;AGIWUR42969                                                |    |    |         |         |                |          |          |                     |             |
| N2                                                                                 | HS | II | 8596286 | 8600265 | WBGene00009204 | F28C6.4  | F28C6.4  | -0.0672179914877891 |             |
| AGIWUR10920;AGIWUR17476;AGIWUR38808                                                |    |    |         |         |                |          |          |                     |             |
| N2                                                                                 | HS | II | 8599508 | 8600506 | WBGene00009205 | F28C6.5  | F28C6.5  | 0.207827378517674   | AGIWUR22408 |
| N2                                                                                 | HS | II | 8600435 | 8602479 | WBGene00000773 | cpf-1    | F28C6.3  | 0.0242248043045343  | AGIWUR30019 |
| N2                                                                                 | HS | II | 8602787 | 8603581 | WBGene00004440 | rp1-26   | F28C6.7  | 0.250920841794981   |             |
| AGIWUR22308;AGIWUR42774                                                            |    |    |         |         |                |          |          |                     |             |
| N2                                                                                 | HS | II | 8603846 | 8606744 | WBGene00006307 | suf-1    | F28C6.6  | -0.0143607554593554 |             |
| AGIWUR15406;AGIWUR42122;AGIWUR43954                                                |    |    |         |         |                |          |          |                     |             |
| N2                                                                                 | HS | II | 8606849 | 8607749 | WBGene00009207 | F28C6.8  | F28C6.8  | 0.210676968888539   | AGIWUR35865 |
| N2                                                                                 | HS | II | 8607889 | 8608865 | WBGene00009209 | F28C6.10 | F28C6.10 | 0.27618017895346    |             |
| AGIWUR30551                                                                        |    |    |         |         |                |          |          |                     |             |
| N2                                                                                 | HS | II | 8608876 | 8610110 | WBGene00009208 | F28C6.9  | F28C6.9  | 0.252731893603866   | AGIWUR41437 |
| N2                                                                                 | HS | II | 8612770 | 8614426 | WBGene00011922 | T22C8.1  | T22C8.1  | 0.17155837567533    | AGIWUR25354 |
| N2                                                                                 | HS | II | 8614546 | 8617603 | WBGene00011923 | chhy-1   | T22C8.2  | 0.307703790575713   | AGIWUR21816 |
| N2                                                                                 | HS | II | 8620397 | 8621978 | WBGene00011924 | T22C8.3  | T22C8.3  | -0.110329623636501  | AGIWUR1762  |

|                                                                                                             |    |    |         |         |                |               |         |                     |             |
|-------------------------------------------------------------------------------------------------------------|----|----|---------|---------|----------------|---------------|---------|---------------------|-------------|
| N2                                                                                                          | HS | II | 8622447 | 8624254 | WBGene00011925 | T22C8.4       | T22C8.4 | -0.0486615763674632 |             |
| AGIWUR1196;AGIWUR12798;AGIWUR30886                                                                          |    |    |         |         |                |               |         |                     |             |
| N2                                                                                                          | HS | II | 8625728 | 8627620 | WBGene00011926 | sptf-2        | T22C8.5 | 0.0955767989914111  | AGIWUR21226 |
| N2                                                                                                          | HS | II | 8627573 | 8630239 | WBGene00011927 | T22C8.6       | T22C8.6 | -0.0973864651281424 | AGIWUR8779  |
| N2                                                                                                          | HS | II | 8630710 | 8634464 | WBGene00011928 | cutl-12       | T22C8.7 | 0.147184123420992   |             |
| AGIWUR11556;AGIWUR39206                                                                                     |    |    |         |         |                |               |         |                     |             |
| N2                                                                                                          | HS | II | 8636233 | 8637711 | WBGene00006875 | vab-9         | T22C8.8 | 0.139565883196362   | AGIWUR25044 |
| N2                                                                                                          | HS | II | 8641381 | 8648227 | WBGene00008432 | D2085.7       | D2085.7 | 0.20171458637355    | AGIWUR40175 |
| N2                                                                                                          | HS | II | 8651109 | 8658808 | WBGene00004259 | pyr-1         | D2085.1 | 0.0509322245339354  |             |
| AGIWUR22823;AGIWUR41113                                                                                     |    |    |         |         |                |               |         |                     |             |
| N2                                                                                                          | HS | II | 8659135 | 8659800 | WBGene00008427 | atg-10        | D2085.2 | 0.0154725267163016  | AGIWUR42128 |
| N2                                                                                                          | HS | II | 8659782 | 8661712 | WBGene00008431 | piga-1        | D2085.6 | 0.161421169632806   | AGIWUR5013  |
| N2                                                                                                          | HS | II | 8661869 | 8664721 | WBGene00008428 | eif-2Bepsilon | D2085.3 | 0.202349084209191   |             |
| AGIWUR41224                                                                                                 |    |    |         |         |                |               |         |                     |             |
| N2                                                                                                          | HS | II | 8664833 | 8669154 | WBGene00008429 | D2085.4       | D2085.4 | 0.187166463000143   | AGIWUR36593 |
| N2                                                                                                          | HS | II | 8669133 | 8684897 | WBGene00008430 | hgap-2        | D2085.5 | 0.126325672156953   |             |
| AGIWUR23447;AGIWUR45090                                                                                     |    |    |         |         |                |               |         |                     |             |
| N2                                                                                                          | HS | II | 8691789 | 8694180 | WBGene00007916 | C34C6.3       | C34C6.3 | -0.0229294939232245 | AGIWUR9910  |
| N2                                                                                                          | HS | II | 8696591 | 8698928 | WBGene00007917 | C34C6.4       | C34C6.4 | 0.204802522547807   | AGIWUR465   |
| N2                                                                                                          | HS | II | 8699045 | 8702193 | WBGene00007918 | sphk-1        | C34C6.5 | -0.187434030762635  |             |
| AGIWUR4466;AGIWUR18165;AGIWUR24595;AGIWUR30041                                                              |    |    |         |         |                |               |         |                     |             |
| N2                                                                                                          | HS | II | 8703368 | 8703829 | WBGene00000432 | ceh-7         | C34C6.8 | -0.0644625951281199 | AGIWUR28771 |
| N2                                                                                                          | HS | II | 8704824 | 8706768 | WBGene00004194 | prx-5         | C34C6.6 | -0.0078603100350576 |             |
| AGIWUR1248;AGIWUR5786;AGIWUR10847;AGIWUR40056                                                               |    |    |         |         |                |               |         |                     |             |
| N2                                                                                                          | HS | II | 8707155 | 8708860 | WBGene00007919 | C34C6.7       | C34C6.7 | 0.0387672863215691  | AGIWUR29170 |
| N2                                                                                                          | HS | II | 8709069 | 8710413 | WBGene00005172 | srg-15        | C34C6.1 | 0.0743586063443029  | AGIWUR33606 |
| N2                                                                                                          | HS | II | 8711589 | 8712035 | WBGene00014827 | T01B7.1       | T01B7.1 | -0.0481512441944698 |             |
| AGIWUR3554;AGIWUR8918;AGIWUR20861;AGIWUR27845;AGIWUR35574                                                   |    |    |         |         |                |               |         |                     |             |
| N2                                                                                                          | HS | II | 8712068 | 8713412 | WBGene00005175 | srg-18        | T01B7.2 | 0.154624512600794   | AGIWUR21000 |
| N2                                                                                                          | HS | II | 8713992 | 8715013 | WBGene00004279 | rab-21        | T01B7.3 | 0                   | AGIWUR4900  |
| N2                                                                                                          | HS | II | 8715132 | 8716281 | WBGene00000887 | cyn-11        | T01B7.4 | -0.0288845738349579 | AGIWUR26435 |
| N2                                                                                                          | HS | II | 8716834 | 8721691 | WBGene00011311 | T01B7.5       | T01B7.5 | 0.0566662413651002  |             |
| AGIWUR20070;AGIWUR27309;AGIWUR31333;AGIWUR43034                                                             |    |    |         |         |                |               |         |                     |             |
| N2                                                                                                          | HS | II | 8722474 | 8725522 | WBGene00011312 | trcs-2        | T01B7.6 | 0.0212457917508573  | AGIWUR22900 |
| N2                                                                                                          | HS | II | 8725533 | 8729777 | WBGene00011314 | T01B7.9       | T01B7.9 | 0.265929113288187   | AGIWUR6767  |
| N2                                                                                                          | HS | II | 8733050 | 8734314 | WBGene00004397 | rol-6         | T01B7.7 | 0.0244274456024574  | AGIWUR25131 |
| N2                                                                                                          | HS | II | 8736726 | 8737556 | WBGene00011313 | T01B7.8       | T01B7.8 | 0.128968782023843   | AGIWUR14303 |
| N2                                                                                                          | HS | II | 8743725 | 8747234 | WBGene00010681 | mak-1         | K08F8.1 | -0.0475423765257244 |             |
| AGIWUR4577;AGIWUR13470;AGIWUR14854;AGIWUR18734;AGIWUR19560;AGIWUR20333;AGIWUR20930;AGIWUR21944;AGIWUR22982; |    |    |         |         |                |               |         |                     |             |

AGIWUR25100;AGIWUR30687;AGIWUR31970;AGIWUR32850;AGIWUR34735;AGIWUR37918;AGIWUR40571;AGIWUR42916  
 N2 HS II 8751986 8753939 WBGene00000220 atf-2 K08F8.2 -0.0221557502153216 AGIWUR24767  
 N2 HS II 8754113 8755248 WBGene00010683 K08F8.7 K08F8.7 0.0961184136738744 AGIWUR32053  
 N2 HS II 8756291 8758723 WBGene00001505 fut-1 K08F8.3 0.16541155343883 AGIWUR29855  
 N2 HS II 8762668 8766922 WBGene00000240 pah-1 K08F8.4 -0.0908578081265734  
 AGIWUR3575;AGIWUR4523;AGIWUR22284;AGIWUR29197;AGIWUR45094  
 N2 HS II 8767185 8769307 WBGene00010682 K08F8.5 K08F8.5 0.223431025885755 AGIWUR39492  
 N2 HS II 8770975 8782020 WBGene00002295 let-19 K08F8.6 -0.0439969073067981  
 AGIWUR4540;AGIWUR10212;AGIWUR18372;AGIWUR25471;AGIWUR28734;AGIWUR42522  
 N2 HS II 8782029 8783670 WBGene00004790 sgn-1 F07H5.2 0.274507339587423 AGIWUR29530  
 N2 HS II 8784535 8785513 WBGene00014307 F07H5.3 F07H5.3 0.310284680558633 AGIWUR41665  
 N2 HS II 8786457 8787119 WBGene00014308 F07H5.4 F07H5.4 -0.0394011866916628 AGIWUR18538  
 N2 HS II 8787770 8789716 WBGene00014309 F07H5.5 F07H5.5 0.0327775989793366  
 AGIWUR17372;AGIWUR24243;AGIWUR28524;AGIWUR32492;AGIWUR39338;AGIWUR44699  
 N2 HS II 8790558 8791318 WBGene00008563 F07H5.13 F07H5.13 0.0782779413425834  
 AGIWUR7414;AGIWUR39817  
 N2 HS II 8791927 8792740 WBGene00008557 F07H5.6 F07H5.6 0.0568000245072273  
 AGIWUR4059;AGIWUR10978;AGIWUR39366  
 N2 HS II 8792912 8794162 WBGene00008558 F07H5.7 F07H5.7 -0.082762194219379 AGIWUR34161  
 N2 HS II 8801130 8804889 WBGene00008559 F07H5.8 F07H5.8 0.0298293385849622  
 AGIWUR9599;AGIWUR12195;AGIWUR14389;AGIWUR26173;AGIWUR29115  
 N2 HS II 8804835 8807021 WBGene00008560 pho-13 F07H5.9 0.152671227471838 AGIWUR21693  
 N2 HS II 8807133 8808582 WBGene00008561 F07H5.10 F07H5.10 0.007444941261048737  
 AGIWUR28131  
 N2 HS II 8808636 8810729 WBGene00009784 F46C5.9 F46C5.9 -0.235698271898039 AGIWUR9698  
 N2 HS II 8811353 8812633 WBGene00009783 rer-1 F46C5.8 0.0934167471864349  
 AGIWUR2840;AGIWUR4345;AGIWUR39178  
 N2 HS II 8817593 8818426 WBGene00009785 F46C5.10 F46C5.10 -0.083921983818513  
 AGIWUR30007  
 N2 HS II 8820149 8821248 WBGene00009778 F46C5.1 F46C5.1 -1.06506415457083 AGIWUR19741  
 N2 HS II 8826069 8828215 WBGene00003544 nas-25 F46C5.3 0.119575243697279  
 AGIWUR2053;AGIWUR14007;AGIWUR15314;AGIWUR18326;AGIWUR22006;AGIWUR25476  
 N2 HS II 8828196 8829287 WBGene00009779 F46C5.2 F46C5.2 -0.0925655910898122 AGIWUR36211  
 N2 HS II 8836175 8839313 WBGene00009780 F46C5.4 F46C5.4 0.0402716239730783 AGIWUR4321  
 N2 HS II 8839325 8840243 WBGene00009782 F46C5.7 F46C5.7 0.301265601397407 AGIWUR12915  
 N2 HS II 8840200 8844515 WBGene00009781 F46C5.6 F46C5.6 0.0257053785665722 AGIWUR15946  
 N2 HS II 8845598 8848902 WBGene00011767 agxt-1 T14D7.1 0.0525396599794981  
 AGIWUR23608;AGIWUR43545  
 N2 HS II 8848843 8852096 WBGene00011768 oac-46 T14D7.2 0.0373017197956376

AGIWUR22936;AGIWUR29185;AGIWUR31496;AGIWUR34912;AGIWUR35792;AGIWUR37935  
 N2 HS II 8859074 8859696 WBGene00044062 snb-6 T14D7.3 -0.235742410379224 AGIWUR10821  
 N2 HS II 8860913 8865173 WBGene00011578 npr-20 T07D4.1 -0.198508565489647 AGIWUR14786  
 N2 HS II 8869549 8874020 WBGene00011579 T07D4.2 T07D4.2 -0.126085224474432 AGIWUR34616  
 N2 HS II 8878496 8883659 WBGene00004355 rha-1 T07D4.3 -0.138630187020393 AGIWUR8834  
 N2 HS II 8883763 8884418 WBGene00045407 T07D4.5 T07D4.5 0.449929438540651  
 AGIWUR2542;AGIWUR42808  
 N2 HS II 8884901 8889673 WBGene00011580 ddx-19 T07D4.4 0.059390375867137  
 AGIWUR1657;AGIWUR3284;AGIWUR7547  
 N2 HS II 8896841 8908666 WBGene00002251 lat-1 B0457.1 -0.0685011155609185  
 AGIWUR4436;AGIWUR10719;AGIWUR13483;AGIWUR16585;AGIWUR16626;AGIWUR21725;AGIWUR23036;AGIWUR29098;AGIWUR29801;  
 AGIWUR36610;AGIWUR38597;AGIWUR44924  
 N2 HS II 8909008 8909994 WBGene00014660 B0457.3 B0457.3 0.0579152509111354  
 AGIWUR20307;AGIWUR37158  
 N2 HS II 8910913 8912029 WBGene00007179 B0457.4 B0457.4 0.182651149039375 AGIWUR5875  
 N2 HS II 8922423 8924373 WBGene00007180 B0457.6 B0457.6 -0.0650780125344959 AGIWUR30915  
 N2 HS II 8924572 8926678 WBGene00007178 B0457.2 B0457.2 0.029385853830167 AGIWUR32452  
 N2 HS II 8927741 8929820 WBGene00000378 cct-2 T21B10.7 -0.196285284781421  
 AGIWUR1976;AGIWUR8551;AGIWUR9167;AGIWUR14051;AGIWUR22008;AGIWUR22119;AGIWUR23132;AGIWUR25480;AGIWUR29685;AG  
 IWUR30090;AGIWUR34863;AGIWUR35363;AGIWUR40687;AGIWUR42308;AGIWUR42836  
 N2 HS II 8929841 8930937 WBGene00011883 mrp1-50 T21B10.1 0.437273325940094  
 AGIWUR14079  
 N2 HS II 8930985 8933833 WBGene00011884 eno1-1 T21B10.2 0.047084118285083  
 AGIWUR5548;AGIWUR7435;AGIWUR9458;AGIWUR12492;AGIWUR12639;AGIWUR30121;AGIWUR31823  
 N2 HS II 8934382 8939033 WBGene00011885 T21B10.3 T21B10.3  
 -0.00895857142534773 AGIWUR25642  
 N2 HS II 8939204 8940488 WBGene00011887 set-17 T21B10.5 -0.153407683994562  
 AGIWUR5839  
 N2 HS II 8940894 8942718 WBGene00011886 T21B10.4 T21B10.4 -0.142098348936312  
 AGIWUR40409  
 N2 HS II 8942674 8947688 WBGene00011888 cut1-15 T21B10.6 -0.0719170488460525  
 AGIWUR8379;AGIWUR37786  
 N2 HS II 8955240 8964149 WBGene00007690 sftd-3 C18E9.10 -0.2013343108115  
 AGIWUR39676  
 N2 HS II 8964238 8964901 WBGene00007684 C18E9.4 C18E9.4 0.220594260616293 AGIWUR2027  
 N2 HS II 8965006 8966919 WBGene00007683 C18E9.2 C18E9.2 0.438751222463312 AGIWUR19427  
 N2 HS II 8966921 8969473 WBGene00004105 szy-20 C18E9.3 -0.213493949026411 AGIWUR232  
 N2 HS II 8969980 8971967 WBGene00007685 C18E9.5 C18E9.5 -0.137114191774174 AGIWUR9657  
 N2 HS II 8971965 8973566 WBGene00007686 tomm-40 C18E9.6 -0.0164109216060666 AGIWUR15552

|                                                                                                 |    |    |         |         |                |          |          |                      |             |
|-------------------------------------------------------------------------------------------------|----|----|---------|---------|----------------|----------|----------|----------------------|-------------|
| N2                                                                                              | HS | II | 8978475 | 8982678 | WBGene00007687 | C18E9.7  | C18E9.7  | 0.0982872843777596   | AGIWUR29598 |
| N2                                                                                              | HS | II | 8985900 | 8988062 | WBGene00007688 | C18E9.8  | C18E9.8  | 0.0590367338869182   | AGIWUR27516 |
| N2                                                                                              | HS | II | 8988359 | 8989544 | WBGene00007689 | C18E9.9  | C18E9.9  | -0.0922758378965387  | AGIWUR34240 |
| N2                                                                                              | HS | II | 8993169 | 8994533 | WBGene00003870 | ooc-5    | C18E9.11 | -0.00809386476229079 |             |
| AGIWUR34657                                                                                     |    |    |         |         |                |          |          |                      |             |
| N2                                                                                              | HS | II | 8994636 | 8996269 | WBGene00009711 | F44G4.1  | F44G4.1  | 0.233951245655984    | AGIWUR36515 |
| N2                                                                                              | HS | II | 8996364 | 8997037 | WBGene00009712 | F44G4.2  | F44G4.2  | 0.179393515532142    |             |
| AGIWUR26656;AGIWUR29476;AGIWUR37899                                                             |    |    |         |         |                |          |          |                      |             |
| N2                                                                                              | HS | II | 8997027 | 8997662 | WBGene00009713 | F44G4.3  | F44G4.3  | 0.292109483821417    | AGIWUR39850 |
| N2                                                                                              | HS | II | 8997827 | 8999722 | WBGene00006514 | tdp-1    | F44G4.4  | -0.192033246255123   |             |
| AGIWUR6241;AGIWUR23305;AGIWUR31169;AGIWUR40138;AGIWUR43127;AGIWUR43210                          |    |    |         |         |                |          |          |                      |             |
| N2                                                                                              | HS | II | 8999727 | 9000431 | WBGene00009714 | F44G4.5  | F44G4.5  | 0.104106413207209    | AGIWUR28065 |
| N2                                                                                              | HS | II | 9000872 | 9001793 | WBGene00009715 | F44G4.6  | F44G4.6  | 0.160776384387224    | AGIWUR23769 |
| N2                                                                                              | HS | II | 9002527 | 9005167 | WBGene00009716 | F44G4.7  | F44G4.7  | -0.043607552647873   | AGIWUR41942 |
| N2                                                                                              | HS | II | 9005796 | 9019775 | WBGene00009717 | dep-1    | F44G4.8  | -0.16732896382506    |             |
| AGIWUR4980;AGIWUR14304;AGIWUR27995                                                              |    |    |         |         |                |          |          |                      |             |
| N2                                                                                              | HS | II | 9026968 | 9029263 | WBGene00009504 | F37B12.1 | F37B12.1 | -0.168115971374206   |             |
| AGIWUR28129                                                                                     |    |    |         |         |                |          |          |                      |             |
| N2                                                                                              | HS | II | 9035562 | 9038301 | WBGene00001527 | gcs-1    | F37B12.2 | 0.130494350267707    |             |
| AGIWUR36032;AGIWUR39622                                                                         |    |    |         |         |                |          |          |                      |             |
| N2                                                                                              | HS | II | 9039820 | 9041406 | WBGene00009505 | F37B12.3 | F37B12.3 | 0.0190548033700555   |             |
| AGIWUR6571                                                                                      |    |    |         |         |                |          |          |                      |             |
| N2                                                                                              | HS | II | 9042180 | 9053824 | WBGene00011980 | T24B8.7  | T24B8.7  | -0.0197458528946299  |             |
| AGIWUR3801;AGIWUR7738;AGIWUR38682                                                               |    |    |         |         |                |          |          |                      |             |
| N2                                                                                              | HS | II | 9054972 | 9056504 | WBGene00011976 | T24B8.2  | T24B8.2  | -0.0792410506693493  | AGIWUR38510 |
| N2                                                                                              | HS | II | 9056499 | 9057111 | WBGene00004446 | rp1-32   | T24B8.1  | -0.511096906966862   |             |
| AGIWUR17408;AGIWUR18356;AGIWUR19434;AGIWUR19524;AGIWUR26213;AGIWUR26733;AGIWUR34869;AGIWUR36838 |    |    |         |         |                |          |          |                      |             |
| N2                                                                                              | HS | II | 9059389 | 9061138 | WBGene00011977 | T24B8.3  | T24B8.3  | -0.0834849242683071  |             |
| AGIWUR8853;AGIWUR15171;AGIWUR15912;AGIWUR22651;AGIWUR28452;AGIWUR38847                          |    |    |         |         |                |          |          |                      |             |
| N2                                                                                              | HS | II | 9063687 | 9070904 | WBGene00011978 | T24B8.4  | T24B8.4  | 0.105492262504765    |             |
| AGIWUR11315;AGIWUR11955;AGIWUR12228;AGIWUR35707                                                 |    |    |         |         |                |          |          |                      |             |
| N2                                                                                              | HS | II | 9082626 | 9083146 | WBGene00011979 | T24B8.5  | T24B8.5  | 0.246167721013343    |             |
| AGIWUR4785;AGIWUR5986;AGIWUR16640;AGIWUR24375;AGIWUR34447;AGIWUR40012                           |    |    |         |         |                |          |          |                      |             |
| N2                                                                                              | HS | II | 9086608 | 9087917 | WBGene00001950 | hlh-3    | T24B8.6  | -0.235755305715916   | AGIWUR14966 |
| N2                                                                                              | HS | II | 9091109 | 9093696 | WBGene00007421 | C07H4.1  | C07H4.1  | 0.355167431843473    | AGIWUR20829 |
| N2                                                                                              | HS | II | 9094710 | 9098605 | WBGene00000532 | clh-5    | C07H4.2  | -0.263569661751788   | AGIWUR9749  |
| N2                                                                                              | HS | II | 9099371 | 9100639 | WBGene00012000 | T24H10.1 | T24H10.1 | -0.451796072037567   |             |
| AGIWUR27507                                                                                     |    |    |         |         |                |          |          |                      |             |
| N2                                                                                              | HS | II | 9101098 | 9105451 | WBGene00012003 | T24H10.5 | T24H10.5 | 0.274263124626955    |             |



|                                                                        |    |    |         |         |                |                   |                                  |
|------------------------------------------------------------------------|----|----|---------|---------|----------------|-------------------|----------------------------------|
| AGIWUR7016                                                             |    |    |         |         |                |                   |                                  |
| N2                                                                     | HS | II | 9106515 | 9107145 | WBGene00012004 | dyrb-1 T24H10.6   | 0.0632206509857127               |
| AGIWUR14292                                                            |    |    |         |         |                |                   |                                  |
| N2                                                                     | HS | II | 9107382 | 9108600 | WBGene00001041 | dnj-23 T24H10.3   | -0.160068181069381               |
| AGIWUR28826                                                            |    |    |         |         |                |                   |                                  |
| N2                                                                     | HS | II | 9109534 | 9111240 | WBGene00012002 | T24H10.4 T24H10.4 | -0.0177878051327998              |
| AGIWUR39308                                                            |    |    |         |         |                |                   |                                  |
| N2                                                                     | HS | II | 9113219 | 9132213 | WBGene00012005 | jun-1 T24H10.7    | 0.0738506677227564               |
| AGIWUR15041;AGIWUR15175;AGIWUR39207;AGIWUR43228                        |    |    |         |         |                |                   |                                  |
| N2                                                                     | HS | II | 9131663 | 9134543 | WBGene00007633 | C16D2.1 C16D2.1   | -0.16805734223253                |
| AGIWUR3556;AGIWUR11436;AGIWUR25167;AGIWUR25792;AGIWUR35378;AGIWUR43292 |    |    |         |         |                |                   |                                  |
| N2                                                                     | HS | II | 9139651 | 9145352 | WBGene00012421 | Y9C2UA.1 Y9C2UA.1 | -0.208630202453717               |
| AGIWUR28136;AGIWUR44101                                                |    |    |         |         |                |                   |                                  |
| N2                                                                     | HS | II | 9146261 | 9146641 | WBGene00012422 | Y9C2UA.2 Y9C2UA.2 | 0.168528202997811                |
| AGIWUR34874                                                            |    |    |         |         |                |                   |                                  |
| N2                                                                     | HS | II | 9148356 | 9152311 | WBGene00012322 | W07A12.4 W07A12.4 | -0.087694949661957               |
| AGIWUR14184                                                            |    |    |         |         |                |                   |                                  |
| N2                                                                     | HS | II | 9152531 | 9154310 | WBGene00000654 | col-78 W07A12.5   | -0.202109499393123               |
| AGIWUR17535                                                            |    |    |         |         |                |                   |                                  |
| N2                                                                     | HS | II | 9158108 | 9159874 | WBGene00012323 | oac-54 W07A12.6   | -0.0325456814475871              |
| AGIWUR12447                                                            |    |    |         |         |                |                   |                                  |
| N2                                                                     | HS | II | 9161379 | 9163448 | WBGene00012324 | rhy-1 W07A12.7    | 0.27378100375077                 |
| AGIWUR26959                                                            |    |    |         |         |                |                   |                                  |
| N2                                                                     | HS | II | 9163368 | 9165800 | WBGene00012325 | W07A12.8 W07A12.8 | 0.378305983752398                |
| AGIWUR12569                                                            |    |    |         |         |                |                   |                                  |
| N2                                                                     | HS | II | 9165929 | 9167830 | WBGene00011966 | T23G7.3 T23G7.3   | 0.178659824987829 AGIWUR30241    |
| N2                                                                     | HS | II | 9167933 | 9172991 | WBGene00011965 | T23G7.2 T23G7.2   | -0.00789577169537736 AGIWUR12448 |
| N2                                                                     | HS | II | 9173175 | 9177152 | WBGene00004752 | sec-5 T23G7.4     | 0.0508373686826005 AGIWUR6458    |
| N2                                                                     | HS | II | 9177300 | 9178585 | WBGene00011967 | pir-1 T23G7.5     | 0.0224135909326257               |
| AGIWUR12789;AGIWUR28676;AGIWUR35975                                    |    |    |         |         |                |                   |                                  |
| N2                                                                     | HS | II | 9178514 | 9188480 | WBGene00006367 | sym-2 ZK1067.6    | -0.266937558354686               |
| AGIWUR16239                                                            |    |    |         |         |                |                   |                                  |
| N2                                                                     | HS | II | 9197518 | 9207210 | WBGene00002299 | let-23 ZK1067.1   | -0.0394286216221076              |
| AGIWUR38958                                                            |    |    |         |         |                |                   |                                  |
| N2                                                                     | HS | II | 9210376 | 9213100 | WBGene00014210 | ZK1067.4 ZK1067.4 | 0.159018230618043                |
| AGIWUR18196                                                            |    |    |         |         |                |                   |                                  |
| N2                                                                     | HS | II | 9213658 | 9222798 | WBGene00014208 | ZK1067.2 ZK1067.2 | 0.103449910302919                |
| AGIWUR280;AGIWUR30742;AGIWUR36429;AGIWUR38565                          |    |    |         |         |                |                   |                                  |
| N2                                                                     | HS | II | 9223269 | 9225176 | WBGene00014209 | ZK1067.3 ZK1067.3 | 0.124983867865726                |

AGIWUR11545  
N2 HS II 9225186 9227261 WBGene00004174 abu-14 ZK1067.7 -0.131354954560146  
AGIWUR14252;AGIWUR36345;AGIWUR43716  
N2 HS II 9231457 9232340 WBGene00001761 gst-13 T26C5.1 0.341691174997107 AGIWUR6051  
N2 HS II 9233223 9236202 WBGene00012032 T26C5.2 T26C5.2 0.254183860659192  
AGIWUR22340;AGIWUR30572;AGIWUR39818  
N2 HS II 9236583 9249123 WBGene00012033 T26C5.3 T26C5.3 -0.16458346933169 AGIWUR43937  
N2 HS II 9249048 9250522 WBGene00012034 T26C5.4 T26C5.4 -0.112790332893194 AGIWUR5499  
N2 HS II 9251788 9254312 WBGene00044006 H32K21.1 H32K21.1 -0.0977233110540858  
AGIWUR9374;AGIWUR14634;AGIWUR29552;AGIWUR32187;AGIWUR33749  
N2 HS II 9258913 9261994 WBGene00000170 aqp-2 C01G6.1 -0.241866749917186  
AGIWUR6503;AGIWUR16119;AGIWUR16505;AGIWUR16669;AGIWUR38863;AGIWUR42186;AGIWUR43505  
N2 HS II 9267336 9268303 WBGene00007224 C01G6.2 C01G6.2 0.137526442297879 AGIWUR904  
N2 HS II 9269888 9271267 WBGene00007225 C01G6.3 C01G6.3 -0.587569992792011 AGIWUR10148  
N2 HS II 9271265 9273042 WBGene00007226 C01G6.4 C01G6.4 -0.210603734701543 AGIWUR4309  
N2 HS II 9275024 9280098 WBGene00007227 C01G6.5 C01G6.5 -0.118748708617147  
AGIWUR7512;AGIWUR15656;AGIWUR20663;AGIWUR34921  
N2 HS II 9285932 9289136 WBGene00006510 mtrr-1 C01G6.6 0.243436250310848  
AGIWUR4599;AGIWUR5472;AGIWUR6166;AGIWUR8083;AGIWUR10918;AGIWUR36993  
N2 HS II 9289506 9291539 WBGene00014663 C01G6.10 C01G6.10 0.0980477434259597  
AGIWUR10768;AGIWUR33227  
N2 HS II 9292017 9294050 WBGene00007228 acs-7 C01G6.7 -0.186149012388174  
AGIWUR16134;AGIWUR20204;AGIWUR41951  
N2 HS II 9294029 9295753 WBGene00007229 C01G6.9 C01G6.9 -0.0389835432801693 AGIWUR9968  
N2 HS II 9295918 9310304 WBGene00000289 cam-1 C01G6.8 0.0503472268743117 AGIWUR22200  
N2 HS II 9317551 9319627 WBGene00008403 csa-1 D2013.3 0.123824792227369 AGIWUR20055  
N2 HS II 9319865 9321888 WBGene00008402 wdfy-2 D2013.2 0.188892405875301 AGIWUR11794  
N2 HS II 9321858 9322916 WBGene00004286 rab-39 D2013.1 0.126939471713213 AGIWUR37896  
N2 HS II 9323955 9324873 WBGene00006520 tag-175 D2013.10 0.0222603040373492  
AGIWUR7498;AGIWUR13845;AGIWUR37776  
N2 HS II 9324874 9329665 WBGene00001134 eat-3 D2013.5 0.0215755939120292  
AGIWUR5032;AGIWUR9059;AGIWUR14969  
N2 HS II 9329757 9331510 WBGene00008404 D2013.6 D2013.6 -0.353024185086092 AGIWUR9103  
N2 HS II 9331643 9333925 WBGene00001229 eif-3.F D2013.7 0.305002161014144 AGIWUR26638  
N2 HS II 9334014 9338896 WBGene00004744 scp-1 D2013.8 0.333020162355913 AGIWUR31494  
N2 HS II 9338890 9341394 WBGene00008405 ttll-12 D2013.9 -0.0627919055354802  
AGIWUR4157;AGIWUR10715;AGIWUR42764  
N2 HS II 9341397 9346590 WBGene00009626 F42A8.1 F42A8.1 0.0322627434995155 AGIWUR629  
N2 HS II 9350648 9352801 WBGene00006433 sdhb-1 F42A8.2 -0.0862530119755203

AGIWUR10676;AGIWUR41853

|    |    |    |         |         |                |         |         |                    |            |
|----|----|----|---------|---------|----------------|---------|---------|--------------------|------------|
| N2 | HS | II | 9353000 | 9354327 | WBGene00009627 | F42A8.3 | F42A8.3 | -0.039915238397306 | AGIWUR6749 |
|----|----|----|---------|---------|----------------|---------|---------|--------------------|------------|

|    |    |    |         |         |                |        |         |                    |  |
|----|----|----|---------|---------|----------------|--------|---------|--------------------|--|
| N2 | HS | II | 9358531 | 9369098 | WBGene00003196 | mel-11 | C06C3.1 | -0.124278001626303 |  |
|----|----|----|---------|---------|----------------|--------|---------|--------------------|--|

AGIWUR488;AGIWUR8877;AGIWUR12482;AGIWUR18840;AGIWUR22152;AGIWUR27473;AGIWUR28945;AGIWUR31426;AGIWUR32983;AGIWUR35345;AGIWUR41789

|    |    |    |         |         |                |         |         |                   |             |
|----|----|----|---------|---------|----------------|---------|---------|-------------------|-------------|
| N2 | HS | II | 9369178 | 9372485 | WBGene00007374 | C06C3.3 | C06C3.3 | -0.15939644612379 | AGIWUR42015 |
|----|----|----|---------|---------|----------------|---------|---------|-------------------|-------------|

|    |    |    |         |         |                |          |          |                   |  |
|----|----|----|---------|---------|----------------|----------|----------|-------------------|--|
| N2 | HS | II | 9375845 | 9377258 | WBGene00044169 | C06C3.10 | C06C3.10 | 0.224071911251622 |  |
|----|----|----|---------|---------|----------------|----------|----------|-------------------|--|

AGIWUR7373;AGIWUR19914;AGIWUR21399;AGIWUR24535;AGIWUR35394;AGIWUR42353;AGIWUR44149

|    |    |    |         |         |                |          |          |                   |  |
|----|----|----|---------|---------|----------------|----------|----------|-------------------|--|
| N2 | HS | II | 9378557 | 9379596 | WBGene00045404 | C06C3.11 | C06C3.11 | 0.156190673711292 |  |
|----|----|----|---------|---------|----------------|----------|----------|-------------------|--|

AGIWUR14892;AGIWUR22768

|    |    |    |         |         |                |         |         |                    |  |
|----|----|----|---------|---------|----------------|---------|---------|--------------------|--|
| N2 | HS | II | 9380106 | 9381355 | WBGene00007376 | C06C3.5 | C06C3.5 | 0.0192746810337687 |  |
|----|----|----|---------|---------|----------------|---------|---------|--------------------|--|

AGIWUR7789;AGIWUR43989

|    |    |    |         |         |                |        |         |                    |  |
|----|----|----|---------|---------|----------------|--------|---------|--------------------|--|
| N2 | HS | II | 9380822 | 9384995 | WBGene00005271 | srh-48 | C06C3.6 | 0.0813112502356024 |  |
|----|----|----|---------|---------|----------------|--------|---------|--------------------|--|

AGIWUR777;AGIWUR30993;AGIWUR41635

|    |    |    |         |         |                |         |         |                     |            |
|----|----|----|---------|---------|----------------|---------|---------|---------------------|------------|
| N2 | HS | II | 9385541 | 9386537 | WBGene00007377 | C06C3.7 | C06C3.7 | -0.0643627174249843 | AGIWUR9039 |
|----|----|----|---------|---------|----------------|---------|---------|---------------------|------------|

|    |    |    |         |         |                |         |         |                   |             |
|----|----|----|---------|---------|----------------|---------|---------|-------------------|-------------|
| N2 | HS | II | 9386584 | 9390900 | WBGene00007378 | C06C3.8 | C06C3.8 | -0.19264963390761 | AGIWUR24997 |
|----|----|----|---------|---------|----------------|---------|---------|-------------------|-------------|

|    |    |    |         |         |                |          |          |                    |  |
|----|----|----|---------|---------|----------------|----------|----------|--------------------|--|
| N2 | HS | II | 9395493 | 9397596 | WBGene00013091 | Y51B9A.9 | Y51B9A.9 | 0.0106309823376396 |  |
|----|----|----|---------|---------|----------------|----------|----------|--------------------|--|

AGIWUR15463

|    |    |    |         |         |                |          |          |                     |  |
|----|----|----|---------|---------|----------------|----------|----------|---------------------|--|
| N2 | HS | II | 9398866 | 9399828 | WBGene00013090 | Y51B9A.8 | Y51B9A.8 | -0.0593256604221253 |  |
|----|----|----|---------|---------|----------------|----------|----------|---------------------|--|

AGIWUR38154

|    |    |    |         |         |                |          |          |                   |  |
|----|----|----|---------|---------|----------------|----------|----------|-------------------|--|
| N2 | HS | II | 9400053 | 9400567 | WBGene00013089 | Y51B9A.7 | Y51B9A.7 | 0.236908935861187 |  |
|----|----|----|---------|---------|----------------|----------|----------|-------------------|--|

AGIWUR18686

|    |    |    |         |         |                |          |          |                  |  |
|----|----|----|---------|---------|----------------|----------|----------|------------------|--|
| N2 | HS | II | 9400717 | 9403187 | WBGene00013088 | Y51B9A.6 | Y51B9A.6 | 0.25449606939128 |  |
|----|----|----|---------|---------|----------------|----------|----------|------------------|--|

AGIWUR41585

|    |    |    |         |         |                |          |          |                    |  |
|----|----|----|---------|---------|----------------|----------|----------|--------------------|--|
| N2 | HS | II | 9404146 | 9404779 | WBGene00013087 | Y51B9A.5 | Y51B9A.5 | -0.168246048541217 |  |
|----|----|----|---------|---------|----------------|----------|----------|--------------------|--|

AGIWUR8521

|    |    |    |         |         |                |       |          |                    |  |
|----|----|----|---------|---------|----------------|-------|----------|--------------------|--|
| N2 | HS | II | 9405539 | 9407114 | WBGene00013085 | mpz-6 | Y51B9A.3 | -0.264650450889754 |  |
|----|----|----|---------|---------|----------------|-------|----------|--------------------|--|

AGIWUR30524

|    |    |    |         |         |                |          |          |                   |  |
|----|----|----|---------|---------|----------------|----------|----------|-------------------|--|
| N2 | HS | II | 9407270 | 9407547 | WBGene00014909 | Y51B9A.2 | Y51B9A.2 | 0.114546064450352 |  |
|----|----|----|---------|---------|----------------|----------|----------|-------------------|--|

AGIWUR27725

|    |    |    |         |         |                |        |          |                   |  |
|----|----|----|---------|---------|----------------|--------|----------|-------------------|--|
| N2 | HS | II | 9407769 | 9409017 | WBGene00013086 | arrd-2 | Y51B9A.4 | -0.12859453166582 |  |
|----|----|----|---------|---------|----------------|--------|----------|-------------------|--|

AGIWUR1161;AGIWUR16056;AGIWUR19379

|    |    |    |         |         |                |        |        |                    |  |
|----|----|----|---------|---------|----------------|--------|--------|--------------------|--|
| N2 | HS | II | 9409341 | 9411597 | WBGene00014813 | M176.9 | M176.9 | 0.0438248325937414 |  |
|----|----|----|---------|---------|----------------|--------|--------|--------------------|--|

AGIWUR5800;AGIWUR17079;AGIWUR29430;AGIWUR30418;AGIWUR33537;AGIWUR38628;AGIWUR42401

|    |    |    |         |         |                |        |        |                    |             |
|----|----|----|---------|---------|----------------|--------|--------|--------------------|-------------|
| N2 | HS | II | 9412565 | 9414144 | WBGene00006429 | arrd-3 | M176.1 | 0.0580036357341678 | AGIWUR39634 |
|----|----|----|---------|---------|----------------|--------|--------|--------------------|-------------|

|    |    |    |         |         |                |       |        |                    |  |
|----|----|----|---------|---------|----------------|-------|--------|--------------------|--|
| N2 | HS | II | 9414559 | 9416431 | WBGene00010941 | gss-1 | M176.2 | 0.0485298151120497 |  |
|----|----|----|---------|---------|----------------|-------|--------|--------------------|--|

AGIWUR3744;AGIWUR7901;AGIWUR17536;AGIWUR39771

|    |    |    |         |         |                |        |        |                    |  |
|----|----|----|---------|---------|----------------|--------|--------|--------------------|--|
| N2 | HS | II | 9417013 | 9418316 | WBGene00010942 | chch-3 | M176.3 | -0.153608467950022 |  |
|----|----|----|---------|---------|----------------|--------|--------|--------------------|--|

AGIWUR14876;AGIWUR32165

|                                                                                                                      |    |    |         |         |                |          |          |                             |                    |
|----------------------------------------------------------------------------------------------------------------------|----|----|---------|---------|----------------|----------|----------|-----------------------------|--------------------|
| N2                                                                                                                   | HS | II | 9420178 | 9422196 | WBGene00010943 | M176.4   | M176.4   | -0.152832207833152          | AGIWUR16670        |
| N2                                                                                                                   | HS | II | 9422269 | 9423296 | WBGene00010947 | M176.11  | M176.11  | 0.0604348489996465          | AGIWUR6138         |
| N2                                                                                                                   | HS | II | 9423331 | 9426173 | WBGene00010946 | M176.10  | M176.10  | 0.134539824233535           | AGIWUR8173         |
| N2                                                                                                                   | HS | II | 9426229 | 9427744 | WBGene00010944 | M176.5   | M176.5   | 0.112117393338174           | AGIWUR437          |
| N2                                                                                                                   | HS | II | 9431383 | 9433709 | WBGene00002199 | kin-15   | M176.6   | 0.288646684285641           | AGIWUR9251         |
| N2                                                                                                                   | HS | II | 9434021 | 9436120 | WBGene00002200 | kin-16   | M176.7   | -0.00843316508353276        | AGIWUR37351        |
| N2                                                                                                                   | HS | II | 9436649 | 9438327 | WBGene00010945 | chil-13  | M176.8   | 0.0987219367799437          |                    |
| AGIWUR14242;AGIWUR18118;AGIWUR20828;AGIWUR22939;AGIWUR39368                                                          |    |    |         |         |                |          |          |                             |                    |
| N2                                                                                                                   | HS | II | 9438609 | 9440160 | WBGene00011159 | chil-17  | R09D1.3  | 0.0813382550801069          | AGIWUR9661         |
| N2                                                                                                                   | HS | II | 9440441 | 9441959 | WBGene00011158 | chil-16  | R09D1.2  | 0.0389582509363589          | AGIWUR12002        |
| N2                                                                                                                   | HS | II | 9442168 | 9443629 | WBGene00011157 | chil-15  | R09D1.1  | -0.16924740020083           | AGIWUR22130        |
| N2                                                                                                                   | HS | II | 9443827 | 9445468 | WBGene00011169 | R09D1.13 |          | R09D1.13 0.0160786662957069 |                    |
| AGIWUR9592                                                                                                           |    |    |         |         |                |          |          |                             |                    |
| N2                                                                                                                   | HS | II | 9446090 | 9447705 | WBGene00011160 | R09D1.4  | R09D1.4  | -0.101664400929251          | AGIWUR21760        |
| N2                                                                                                                   | HS | II | 9448273 | 9449726 | WBGene00011161 | chil-18  | R09D1.5  | -0.0601409648122768         | AGIWUR17840        |
| N2                                                                                                                   | HS | II | 9450028 | 9452263 | WBGene00011168 | R09D1.12 |          | R09D1.12 0.176956216860199  |                    |
| AGIWUR2982;AGIWUR9608;AGIWUR10424;AGIWUR16494                                                                        |    |    |         |         |                |          |          |                             |                    |
| N2                                                                                                                   | HS | II | 9455417 | 9456617 | WBGene00011163 | chil-20  | R09D1.7  | -0.0415588093741519         | AGIWUR41221        |
| N2                                                                                                                   | HS | II | 9462537 | 9464093 | WBGene00011165 | R09D1.9  | R09D1.9  | -0.00874333022571072        |                    |
| AGIWUR13346;AGIWUR21482;AGIWUR21719;AGIWUR24513                                                                      |    |    |         |         |                |          |          |                             |                    |
| N2                                                                                                                   | HS | II | 9464470 | 9466195 | WBGene00011166 | chil-22  | R09D1.10 |                             | 0.37687064656796   |
| AGIWUR31774                                                                                                          |    |    |         |         |                |          |          |                             |                    |
| N2                                                                                                                   | HS | II | 9466960 | 9468477 | WBGene00011167 | chil-23  | R09D1.11 |                             | 0.0332457637855876 |
| AGIWUR22536                                                                                                          |    |    |         |         |                |          |          |                             |                    |
| N2                                                                                                                   | HS | II | 9469119 | 9470082 | WBGene00044807 | T19H5.6  | T19H5.6  | -0.197526839608991          | AGIWUR34993        |
| N2                                                                                                                   | HS | II | 9470521 | 9471924 | WBGene00044806 | T19H5.5  | T19H5.5  | 0.107163123029284           | AGIWUR44827        |
| N2                                                                                                                   | HS | II | 9472691 | 9474467 | WBGene00011846 | chil-25  | T19H5.1  | 0.121578052655733           |                    |
| AGIWUR41436;AGIWUR41503                                                                                              |    |    |         |         |                |          |          |                             |                    |
| N2                                                                                                                   | HS | II | 9475055 | 9476375 | WBGene00011847 | chil-26  | T19H5.2  | -0.0538774280754826         | AGIWUR15275        |
| N2                                                                                                                   | HS | II | 9477867 | 9479536 | WBGene00011848 | chil-27  | T19H5.3  | 0.0395965648928085          | AGIWUR1801         |
| N2                                                                                                                   | HS | II | 9479641 | 9480106 | WBGene00045414 | T19H5.7  | T19H5.7  | 0.0524464429355684          |                    |
| AGIWUR267;AGIWUR4245;AGIWUR12414;AGIWUR16867;AGIWUR18186;AGIWUR18396;AGIWUR19091;AGIWUR23500;AGIWUR26261;AGIWUR36288 |    |    |         |         |                |          |          |                             |                    |
| N2                                                                                                                   | HS | II | 9486377 | 9488260 | WBGene00011849 | T19H5.4  | T19H5.4  | -0.449010836910588          | AGIWUR33194        |
| N2                                                                                                                   | HS | II | 9502757 | 9507281 | WBGene00001530 | gcy-3    | R134.1   | -0.0966376298425935         | AGIWUR20905        |
| N2                                                                                                                   | HS | II | 9507604 | 9512095 | WBGene00001529 | gcy-2    | R134.2   | 0.137413590434303           | AGIWUR21956        |
| N2                                                                                                                   | HS | II | 9512490 | 9516936 | WBGene00001528 | gcy-1    | AH6.1    | 0.0960161527206012          | AGIWUR34842        |
| N2                                                                                                                   | HS | II | 9517567 | 9518876 | WBGene00007080 | sfxn-1.1 |          | AH6.2 -0.105322160170534    |                    |
| AGIWUR30366                                                                                                          |    |    |         |         |                |          |          |                             |                    |

|                                                                                                 |    |    |         |         |                |         |         |                     |             |
|-------------------------------------------------------------------------------------------------|----|----|---------|---------|----------------|---------|---------|---------------------|-------------|
| N2                                                                                              | HS | II | 9519055 | 9520205 | WBGene00007081 | AH6.3   | AH6.3   | 0.0447815505795859  | AGIWUR10180 |
| N2                                                                                              | HS | II | 9520200 | 9521670 | WBGene00005027 | sra-1   | AH6.4   | -0.0907538622596435 | AGIWUR40761 |
| N2                                                                                              | HS | II | 9524174 | 9526390 | WBGene00003231 | mex-6   | AH6.5   | -0.106031546122267  | AGIWUR26335 |
| N2                                                                                              | HS | II | 9527031 | 9528253 | WBGene00005041 | sra-15  | AH6.16  | -0.059543201863649  |             |
| AGIWUR9384;AGIWUR33043;AGIWUR38123                                                              |    |    |         |         |                |         |         |                     |             |
| N2                                                                                              | HS | II | 9528780 | 9529862 | WBGene00005028 | sra-2   | AH6.6   | 0.0422594709196638  | AGIWUR45064 |
| N2                                                                                              | HS | II | 9530517 | 9531253 | WBGene00005042 | sra-16  | AH6.13  | 0.0144117227085538  |             |
| AGIWUR12292;AGIWUR13397;AGIWUR19197;AGIWUR27224;AGIWUR30160;AGIWUR39965;AGIWUR43396;AGIWUR44805 |    |    |         |         |                |         |         |                     |             |
| N2                                                                                              | HS | II | 9532299 | 9533974 | WBGene00005035 | sra-9   | AH6.14  | 0.56022461728049    | AGIWUR20488 |
| N2                                                                                              | HS | II | 9537729 | 9539085 | WBGene00005034 | sra-8   | AH6.12  | 0.091548646603397   | AGIWUR26993 |
| N2                                                                                              | HS | II | 9539274 | 9540823 | WBGene00005029 | sra-3   | AH6.7   | 0.155812193547558   | AGIWUR22844 |
| N2                                                                                              | HS | II | 9541601 | 9542885 | WBGene00005030 | sra-4   | AH6.8   | 0.0529212999496806  | AGIWUR22321 |
| N2                                                                                              | HS | II | 9544686 | 9546208 | WBGene00005033 | sra-7   | AH6.11  | 0.637917192135317   | AGIWUR39696 |
| N2                                                                                              | HS | II | 9546438 | 9547647 | WBGene00005031 | sra-5   | AH6.9   | -0.0798362208886476 |             |
| AGIWUR15593;AGIWUR21584                                                                         |    |    |         |         |                |         |         |                     |             |
| N2                                                                                              | HS | II | 9548405 | 9549698 | WBGene00005032 | sra-6   | AH6.10  | -0.184900001682116  | AGIWUR7915  |
| N2                                                                                              | HS | II | 9552631 | 9553279 | WBGene00009446 | F35H8.1 | F35H8.1 | 0.24146189544229    |             |
| AGIWUR10695;AGIWUR11849;AGIWUR16382                                                             |    |    |         |         |                |         |         |                     |             |
| N2                                                                                              | HS | II | 9555503 | 9557532 | WBGene00009447 | F35H8.2 | F35H8.2 | -0.22274490308137   | AGIWUR43323 |
| N2                                                                                              | HS | II | 9557646 | 9559516 | WBGene00009448 | zfp-2   | F35H8.3 | -0.233296807033579  | AGIWUR44357 |
| N2                                                                                              | HS | II | 9559497 | 9560029 | WBGene00009449 | F35H8.4 | F35H8.4 | -0.124076355957254  | AGIWUR31921 |
| N2                                                                                              | HS | II | 9575971 | 9581490 | WBGene00001368 | exc-7   | F35H8.5 | 0.0619116840856062  |             |
| AGIWUR723;AGIWUR8197;AGIWUR12981;AGIWUR13353;AGIWUR20665;AGIWUR38098                            |    |    |         |         |                |         |         |                     |             |
| N2                                                                                              | HS | II | 9581756 | 9583548 | WBGene00006938 | wee-1.1 | F35H8.7 | -0.0562760043963895 |             |
| AGIWUR8384;AGIWUR24870;AGIWUR25452                                                              |    |    |         |         |                |         |         |                     |             |
| N2                                                                                              | HS | II | 9584384 | 9586815 | WBGene00009450 | ugt-58  | F35H8.6 | 0.104931002608756   | AGIWUR29447 |
| N2                                                                                              | HS | II | 9588212 | 9589767 | WBGene00008456 | E02H1.2 | E02H1.2 | 0.259788175813528   | AGIWUR5067  |
| N2                                                                                              | HS | II | 9589865 | 9591221 | WBGene00008455 | E02H1.1 | E02H1.1 | 0.158340919893192   |             |
| AGIWUR4770;AGIWUR6968;AGIWUR20250                                                               |    |    |         |         |                |         |         |                     |             |
| N2                                                                                              | HS | II | 9591292 | 9592936 | WBGene00006473 | tag-124 | E02H1.3 | 0.444901818055264   | AGIWUR30273 |
| N2                                                                                              | HS | II | 9593037 | 9595128 | WBGene00004050 | parp-2  | E02H1.4 | -0.0518259160057397 |             |
| AGIWUR16193;AGIWUR17717;AGIWUR35231;AGIWUR43516                                                 |    |    |         |         |                |         |         |                     |             |
| N2                                                                                              | HS | II | 9595224 | 9596598 | WBGene00008457 | E02H1.5 | E02H1.5 | 0.344158284099098   | AGIWUR4642  |
| N2                                                                                              | HS | II | 9596701 | 9597528 | WBGene00008458 | E02H1.6 | E02H1.6 | 0.214171168295644   | AGIWUR24417 |
| N2                                                                                              | HS | II | 9597622 | 9598201 | WBGene00008459 | mrp1-53 | E02H1.8 | -0.332318986896183  | AGIWUR10408 |
| N2                                                                                              | HS | II | 9598197 | 9605526 | WBGene00003618 | nhr-19  | E02H1.7 | -0.0681502013349018 | AGIWUR17743 |
| N2                                                                                              | HS | II | 9607533 | 9609396 | WBGene00011791 | T15H9.6 | T15H9.6 | -0.242576341221643  | AGIWUR2463  |
| N2                                                                                              | HS | II | 9610678 | 9611372 | WBGene00011790 | T15H9.5 | T15H9.5 | -0.0474534227687062 | AGIWUR29738 |
| N2                                                                                              | HS | II | 9611873 | 9613403 | WBGene00011789 | T15H9.4 | T15H9.4 | 0.146606007369281   |             |

AGIWUR14684;AGIWUR16096;AGIWUR22993

|    |    |    |         |         |                |         |         |                     |             |
|----|----|----|---------|---------|----------------|---------|---------|---------------------|-------------|
| N2 | HS | II | 9613463 | 9614812 | WBGene00001952 | hlh-6   | T15H9.3 | -0.0599104063163196 | AGIWUR7175  |
| N2 | HS | II | 9615800 | 9617125 | WBGene00011788 | T15H9.2 | T15H9.2 | 0.134795749816002   | AGIWUR40983 |
| N2 | HS | II | 9617426 | 9624176 | WBGene00001038 | dnj-20  | T15H9.7 | -0.0986509789640486 |             |

AGIWUR32249;AGIWUR37878;AGIWUR41905;AGIWUR44083

|    |    |    |         |         |                |          |          |                   |  |
|----|----|----|---------|---------|----------------|----------|----------|-------------------|--|
| N2 | HS | II | 9624590 | 9626641 | WBGene00014249 | ZK1307.8 | ZK1307.8 | 0.154291085909481 |  |
|----|----|----|---------|---------|----------------|----------|----------|-------------------|--|

AGIWUR2824

|    |    |    |         |         |                |          |          |                    |  |
|----|----|----|---------|---------|----------------|----------|----------|--------------------|--|
| N2 | HS | II | 9636628 | 9640170 | WBGene00014248 | ZK1307.7 | ZK1307.7 | 0.0283921658136128 |  |
|----|----|----|---------|---------|----------------|----------|----------|--------------------|--|

AGIWUR17502;AGIWUR21999;AGIWUR22593

|    |    |    |         |         |                |       |          |                     |  |
|----|----|----|---------|---------|----------------|-------|----------|---------------------|--|
| N2 | HS | II | 9640167 | 9644466 | WBGene00001510 | fzr-1 | ZK1307.6 | -0.0357952724495902 |  |
|----|----|----|---------|---------|----------------|-------|----------|---------------------|--|

AGIWUR711;AGIWUR5820;AGIWUR6478;AGIWUR13776;AGIWUR16291;AGIWUR25244;AGIWUR44524

|    |    |    |         |         |                |       |          |                   |  |
|----|----|----|---------|---------|----------------|-------|----------|-------------------|--|
| N2 | HS | II | 9647887 | 9649367 | WBGene00005026 | sqv-8 | ZK1307.5 | 0.188038775584982 |  |
|----|----|----|---------|---------|----------------|-------|----------|-------------------|--|

AGIWUR27876

|    |    |    |         |         |                |          |          |                     |  |
|----|----|----|---------|---------|----------------|----------|----------|---------------------|--|
| N2 | HS | II | 9649491 | 9650959 | WBGene00014250 | ZK1307.9 | ZK1307.9 | -0.0750402294768691 |  |
|----|----|----|---------|---------|----------------|----------|----------|---------------------|--|

AGIWUR32506

|    |    |    |         |         |                |          |          |                    |  |
|----|----|----|---------|---------|----------------|----------|----------|--------------------|--|
| N2 | HS | II | 9652308 | 9653019 | WBGene00014246 | ZK1307.3 | ZK1307.3 | 0.0452332166010017 |  |
|----|----|----|---------|---------|----------------|----------|----------|--------------------|--|

AGIWUR3583

|    |    |    |         |         |                |          |          |                   |  |
|----|----|----|---------|---------|----------------|----------|----------|-------------------|--|
| N2 | HS | II | 9653109 | 9653952 | WBGene00014245 | ZK1307.2 | ZK1307.2 | 0.125211563527127 |  |
|----|----|----|---------|---------|----------------|----------|----------|-------------------|--|

AGIWUR13506;AGIWUR21858;AGIWUR23126;AGIWUR32393;AGIWUR33914

|    |    |    |         |         |                |          |          |                     |  |
|----|----|----|---------|---------|----------------|----------|----------|---------------------|--|
| N2 | HS | II | 9654345 | 9655616 | WBGene00014244 | ZK1307.1 | ZK1307.1 | -0.0994870801689984 |  |
|----|----|----|---------|---------|----------------|----------|----------|---------------------|--|

AGIWUR3698;AGIWUR8636;AGIWUR32380

|    |    |    |         |         |                |        |          |                    |  |
|----|----|----|---------|---------|----------------|--------|----------|--------------------|--|
| N2 | HS | II | 9656689 | 9657719 | WBGene00014251 | gstk-1 | ZK1320.1 | -0.217043364622263 |  |
|----|----|----|---------|---------|----------------|--------|----------|--------------------|--|

AGIWUR2086;AGIWUR2871;AGIWUR24119;AGIWUR28278;AGIWUR28822;AGIWUR32853

|    |    |    |         |         |                |          |          |                    |  |
|----|----|----|---------|---------|----------------|----------|----------|--------------------|--|
| N2 | HS | II | 9657876 | 9659002 | WBGene00014252 | ZK1320.2 | ZK1320.2 | 0.0747780436927847 |  |
|----|----|----|---------|---------|----------------|----------|----------|--------------------|--|

AGIWUR25137

|    |    |    |         |         |                |          |          |                    |  |
|----|----|----|---------|---------|----------------|----------|----------|--------------------|--|
| N2 | HS | II | 9659246 | 9660442 | WBGene00014253 | ZK1320.3 | ZK1320.3 | -0.118108698117729 |  |
|----|----|----|---------|---------|----------------|----------|----------|--------------------|--|

AGIWUR6554;AGIWUR24271;AGIWUR40507

|    |    |    |         |         |                |           |          |                    |  |
|----|----|----|---------|---------|----------------|-----------|----------|--------------------|--|
| N2 | HS | II | 9660839 | 9663007 | WBGene00014254 | cyp-13A10 | ZK1320.4 | 0.0170235598814816 |  |
|----|----|----|---------|---------|----------------|-----------|----------|--------------------|--|

AGIWUR16893

|    |    |    |         |         |                |          |          |                    |  |
|----|----|----|---------|---------|----------------|----------|----------|--------------------|--|
| N2 | HS | II | 9663616 | 9665664 | WBGene00014255 | ZK1320.5 | ZK1320.5 | -0.119824833278853 |  |
|----|----|----|---------|---------|----------------|----------|----------|--------------------|--|

AGIWUR36576

|    |    |    |         |         |                |           |           |                   |  |
|----|----|----|---------|---------|----------------|-----------|-----------|-------------------|--|
| N2 | HS | II | 9667624 | 9668555 | WBGene00014259 | ZK1320.11 | ZK1320.11 | 0.169812555371124 |  |
|----|----|----|---------|---------|----------------|-----------|-----------|-------------------|--|

AGIWUR41760

|    |    |    |         |         |                |       |           |                   |  |
|----|----|----|---------|---------|----------------|-------|-----------|-------------------|--|
| N2 | HS | II | 9669324 | 9671499 | WBGene00006390 | taf-8 | ZK1320.12 | 0.056032533563009 |  |
|----|----|----|---------|---------|----------------|-------|-----------|-------------------|--|

AGIWUR7931

|    |    |    |         |         |                |          |          |                   |  |
|----|----|----|---------|---------|----------------|----------|----------|-------------------|--|
| N2 | HS | II | 9671608 | 9673263 | WBGene00014256 | ZK1320.7 | ZK1320.7 | 0.189775002430148 |  |
|----|----|----|---------|---------|----------------|----------|----------|-------------------|--|

AGIWUR28766

|    |    |    |         |         |                |       |          |                  |  |
|----|----|----|---------|---------|----------------|-------|----------|------------------|--|
| N2 | HS | II | 9674978 | 9677210 | WBGene00000180 | arc-1 | ZK1320.6 | 0.10642043453576 |  |
|----|----|----|---------|---------|----------------|-------|----------|------------------|--|

AGIWUR30528

|                                                                                                                                             |    |    |         |         |                |            |            |                      |
|---------------------------------------------------------------------------------------------------------------------------------------------|----|----|---------|---------|----------------|------------|------------|----------------------|
| N2                                                                                                                                          | HS | II | 9680798 | 9683089 | WBGene00044007 | ZK1320.13  | ZK1320.13  | 0.206680932176965    |
| AGIWUR2819;AGIWUR11856;AGIWUR29269;AGIWUR29780;AGIWUR42776                                                                                  |    |    |         |         |                |            |            |                      |
| N2                                                                                                                                          | HS | II | 9684088 | 9686713 | WBGene00014258 | ZK1320.9   | ZK1320.9   | -0.0784690515010702  |
| AGIWUR8317;AGIWUR20469;AGIWUR20978;AGIWUR24292;AGIWUR33498                                                                                  |    |    |         |         |                |            |            |                      |
| N2                                                                                                                                          | HS | II | 9689664 | 9691939 | WBGene00003749 | nlp-11     | ZK1320.10  | -0.0805917552862372  |
| AGIWUR11616                                                                                                                                 |    |    |         |         |                |            |            |                      |
| N2                                                                                                                                          | HS | II | 9698281 | 9700463 | WBGene00044158 | Y53C12A.8  | Y53C12A.8  | 0.177773796070855    |
| AGIWUR32060;AGIWUR36415                                                                                                                     |    |    |         |         |                |            |            |                      |
| N2                                                                                                                                          | HS | II | 9700543 | 9701839 | WBGene00013142 | Y53C12A.7  | Y53C12A.7  | 0.021547836163812    |
| AGIWUR2909                                                                                                                                  |    |    |         |         |                |            |            |                      |
| N2                                                                                                                                          | HS | II | 9701402 | 9703732 | WBGene00013140 | mop-25.2   | Y53C12A.4  | 0.324273501404896    |
| AGIWUR20398                                                                                                                                 |    |    |         |         |                |            |            |                      |
| N2                                                                                                                                          | HS | II | 9703812 | 9704789 | WBGene00175030 | Y53C12A.10 | Y53C12A.10 | 0.114293572182127    |
| AGIWUR40049                                                                                                                                 |    |    |         |         |                |            |            |                      |
| N2                                                                                                                                          | HS | II | 9706483 | 9708885 | WBGene00001623 | glt-5      | Y53C12A.2  | -0.0387743787796264  |
| AGIWUR40808                                                                                                                                 |    |    |         |         |                |            |            |                      |
| N2                                                                                                                                          | HS | II | 9713737 | 9716467 | WBGene00006940 | wee-1.3    | Y53C12A.1  | -0.0683170001003397  |
| AGIWUR7842;AGIWUR12273;AGIWUR14315;AGIWUR16110;AGIWUR25779;AGIWUR30829;AGIWUR39441                                                          |    |    |         |         |                |            |            |                      |
| N2                                                                                                                                          | HS | II | 9717478 | 9717775 | WBGene00013141 | Y53C12A.6  | Y53C12A.6  | 0.0840023536563717   |
| AGIWUR20674                                                                                                                                 |    |    |         |         |                |            |            |                      |
| N2                                                                                                                                          | HS | II | 9721828 | 9724526 | WBGene00013145 | cutl-2     | Y53C12B.6  | -0.268022614572049   |
| AGIWUR17058                                                                                                                                 |    |    |         |         |                |            |            |                      |
| N2                                                                                                                                          | HS | II | 9732137 | 9738035 | WBGene00003100 | mab-3      | Y53C12B.5  | 0.061069331656407    |
| AGIWUR19751;AGIWUR21247;AGIWUR42412                                                                                                         |    |    |         |         |                |            |            |                      |
| N2                                                                                                                                          | HS | II | 9738982 | 9742884 | WBGene00013144 | Y53C12B.2  | Y53C12B.2  | -0.00688029003315371 |
| AGIWUR29533                                                                                                                                 |    |    |         |         |                |            |            |                      |
| N2                                                                                                                                          | HS | II | 9742982 | 9746074 | WBGene00013143 | Y53C12B.1  | Y53C12B.1  | 0.300187325651562    |
| AGIWUR19337                                                                                                                                 |    |    |         |         |                |            |            |                      |
| N2                                                                                                                                          | HS | II | 9746316 | 9750454 | WBGene00003785 | nos-3      | Y53C12B.3  | -0.147124842568729   |
| AGIWUR1727;AGIWUR1776;AGIWUR3921;AGIWUR9435;AGIWUR15558;AGIWUR20432;AGIWUR20708;AGIWUR27214;AGIWUR31897;AGIWUR31923;AGIWUR37671;AGIWUR39396 |    |    |         |         |                |            |            |                      |
| N2                                                                                                                                          | HS | II | 9750442 | 9752317 | WBGene00013146 | Y53C12B.7  | Y53C12B.7  | -0.0703723550445439  |
| AGIWUR35367                                                                                                                                 |    |    |         |         |                |            |            |                      |
| N2                                                                                                                                          | HS | II | 9754030 | 9754967 | WBGene00014260 | ZK1321.1   | ZK1321.1   | -0.150731997160292   |
| AGIWUR35488                                                                                                                                 |    |    |         |         |                |            |            |                      |
| N2                                                                                                                                          | HS | II | 9758234 | 9768265 | WBGene00014261 | shk-1      | ZK1321.2   | 0.0265391967293924   |
| AGIWUR5056;AGIWUR8325;AGIWUR11748;AGIWUR15319;AGIWUR22352;AGIWUR25944;AGIWUR35532;AGIWUR37189;AGIWUR38830                                   |    |    |         |         |                |            |            |                      |
| N2                                                                                                                                          | HS | II | 9768357 | 9769847 | WBGene00000178 | aqp-10     | ZK1321.3   | 0.0529837811760827   |
| AGIWUR6508;AGIWUR9418;AGIWUR15485;AGIWUR21502;AGIWUR23911;AGIWUR30029;AGIWUR33320;AGIWUR44993                                               |    |    |         |         |                |            |            |                      |

|                                     |    |    |         |         |                |          |           |                     |             |
|-------------------------------------|----|----|---------|---------|----------------|----------|-----------|---------------------|-------------|
| N2                                  | HS | II | 9770759 | 9774292 | WBGene00014262 | ZK1321.4 | ZK1321.4  | 0.138356451483183   |             |
| AGIWUR28204                         |    |    |         |         |                |          |           |                     |             |
| N2                                  | HS | II | 9775146 | 9775883 | WBGene00011678 | T10B9.9  | T10B9.9   | 0.0035677551128046  | AGIWUR43510 |
| N2                                  | HS | II | 9779182 | 9781950 | WBGene00011677 | cyp-13A1 | T10B9.8   | -0.293609344553312  |             |
| AGIWUR10407                         |    |    |         |         |                |          |           |                     |             |
| N2                                  | HS | II | 9783403 | 9787419 | WBGene00011676 | cyp-13A2 | T10B9.7   | 0.0632096976526038  |             |
| AGIWUR9781;AGIWUR17049;AGIWUR32347  |    |    |         |         |                |          |           |                     |             |
| N2                                  | HS | II | 9788801 | 9793284 | WBGene00011675 | cyp-13A3 | T10B9.5   | -0.0082863839231555 |             |
| AGIWUR19245;AGIWUR23212;AGIWUR33620 |    |    |         |         |                |          |           |                     |             |
| N2                                  | HS | II | 9793754 | 9795541 | WBGene00014838 | cyp-13A9 | T10B9.6   | 0.0401696281441768  |             |
| AGIWUR6915;AGIWUR29141              |    |    |         |         |                |          |           |                     |             |
| N2                                  | HS | II | 9795848 | 9797740 | WBGene00011671 | cyp-13A4 | T10B9.1   | -0.024122643808548  |             |
| AGIWUR2689;AGIWUR6539               |    |    |         |         |                |          |           |                     |             |
| N2                                  | HS | II | 9798277 | 9800363 | WBGene00011672 | cyp-13A5 | T10B9.2   | -0.0466208913027346 |             |
| AGIWUR2802;AGIWUR22628;AGIWUR37154  |    |    |         |         |                |          |           |                     |             |
| N2                                  | HS | II | 9800761 | 9802721 | WBGene00011673 | cyp-13A6 | T10B9.3   | 0.444014963624583   |             |
| AGIWUR22808                         |    |    |         |         |                |          |           |                     |             |
| N2                                  | HS | II | 9803620 | 9805510 | WBGene00000372 | cyp-13A7 | T10B9.10  | -0.172906626135123  |             |
| AGIWUR29039                         |    |    |         |         |                |          |           |                     |             |
| N2                                  | HS | II | 9805627 | 9807532 | WBGene00011674 | cyp-13A8 | T10B9.4   | 0.206574365025409   |             |
| AGIWUR14110                         |    |    |         |         |                |          |           |                     |             |
| N2                                  | HS | II | 9826513 | 9827926 | WBGene00013147 | eyg-1    | Y53C12C.1 | 0.0715971825438171  |             |
| AGIWUR28836                         |    |    |         |         |                |          |           |                     |             |
| N2                                  | HS | II | 9829408 | 9830753 | WBGene00014158 | ZK938.1  | ZK938.1   | -0.210145684595445  | AGIWUR42641 |
| N2                                  | HS | II | 9831648 | 9834364 | WBGene00014160 | ZK938.3  | ZK938.3   | -0.0286075762593789 | AGIWUR21525 |
| N2                                  | HS | II | 9835221 | 9836925 | WBGene00014161 | arrd-5   | ZK938.4   | -0.094330973538046  |             |
| AGIWUR12573;AGIWUR33602;AGIWUR41879 |    |    |         |         |                |          |           |                     |             |
| N2                                  | HS | II | 9837089 | 9838305 | WBGene00014159 | arrd-4   | ZK938.2   | -0.0653916400496453 | AGIWUR18357 |
| N2                                  | HS | II | 9839191 | 9840288 | WBGene00270290 | ZK938.11 | ZK938.11  | -0.104474694800283  |             |
| AGIWUR4886                          |    |    |         |         |                |          |           |                     |             |
| N2                                  | HS | II | 9843380 | 9847006 | WBGene00014162 | chil-9   | ZK938.6   | 0.0560472777669379  | AGIWUR32304 |
| N2                                  | HS | II | 9847483 | 9849597 | WBGene00003863 | old-2    | ZK938.5   | -0.101916525775411  | AGIWUR2536  |
| N2                                  | HS | II | 9851471 | 9853394 | WBGene00007468 | C08H9.8  | C08H9.8   | -0.0907718752102635 | AGIWUR35968 |
| N2                                  | HS | II | 9855936 | 9857857 | WBGene00007471 | chil-6   | C08H9.12  | 0.0198505826930919  |             |
| AGIWUR26676                         |    |    |         |         |                |          |           |                     |             |
| N2                                  | HS | II | 9858110 | 9859639 | WBGene00007470 | chil-5   | C08H9.11  | 0.0160535475886459  |             |
| AGIWUR37372                         |    |    |         |         |                |          |           |                     |             |
| N2                                  | HS | II | 9859784 | 9861473 | WBGene00007467 | chil-3   | C08H9.7   | 0.313539072318136   | AGIWUR7823  |
| N2                                  | HS | II | 9862431 | 9866404 | WBGene00007465 | chil-1   | C08H9.4   | 0.0402332921783621  |             |



AGIWUR1457;AGIWUR28590;AGIWUR41487

|                                                                                                                                                                                   |    |    |         |         |                |          |          |                     |             |
|-----------------------------------------------------------------------------------------------------------------------------------------------------------------------------------|----|----|---------|---------|----------------|----------|----------|---------------------|-------------|
| N2                                                                                                                                                                                | HS | II | 9869456 | 9871172 | WBGene00007472 | chil-7   | C08H9.13 | 0.118011943620607   |             |
| AGIWUR8656                                                                                                                                                                        |    |    |         |         |                |          |          |                     |             |
| N2                                                                                                                                                                                | HS | II | 9871608 | 9872986 | WBGene00007473 | chil-8   | C08H9.14 | 0.101439285727424   |             |
| AGIWUR37468                                                                                                                                                                       |    |    |         |         |                |          |          |                     |             |
| N2                                                                                                                                                                                | HS | II | 9873249 | 9874521 | WBGene00007466 | chil-2   | C08H9.6  | -0.0625388970156289 | AGIWUR604   |
| N2                                                                                                                                                                                | HS | II | 9875179 | 9878008 | WBGene00007462 | C08H9.1  | C08H9.1  | 0.181022787379174   | AGIWUR39315 |
| N2                                                                                                                                                                                | HS | II | 9881193 | 9882530 | WBGene00007474 | C08H9.15 | C08H9.15 | 0.182265478838042   |             |
| AGIWUR35591                                                                                                                                                                       |    |    |         |         |                |          |          |                     |             |
| N2                                                                                                                                                                                | HS | II | 9882728 | 9886442 | WBGene00007464 | C08H9.3  | C08H9.3  | -0.0208343722761128 |             |
| AGIWUR38534;AGIWUR38815;AGIWUR42777                                                                                                                                               |    |    |         |         |                |          |          |                     |             |
| N2                                                                                                                                                                                | HS | II | 9886557 | 9891081 | WBGene00007463 | vgln-1   | C08H9.2  | -0.098204154772187  |             |
| AGIWUR2728;AGIWUR6936;AGIWUR12035;AGIWUR13504;AGIWUR14455;AGIWUR19542;AGIWUR20507;AGIWUR25206;AGIWUR25934;AGIWUR32289;AGIWUR34288;AGIWUR34470;AGIWUR35940;AGIWUR40340;AGIWUR43517 |    |    |         |         |                |          |          |                     |             |
| N2                                                                                                                                                                                | HS | II | 9895538 | 9897351 | WBGene00009146 | F26C11.1 | F26C11.1 | 0.151496559133101   |             |
| AGIWUR8276                                                                                                                                                                        |    |    |         |         |                |          |          |                     |             |
| N2                                                                                                                                                                                | HS | II | 9897754 | 9900376 | WBGene00006744 | unc-4    | F26C11.2 | -0.0822811528601823 |             |
| AGIWUR19606;AGIWUR34527;AGIWUR35185                                                                                                                                               |    |    |         |         |                |          |          |                     |             |
| N2                                                                                                                                                                                | HS | II | 9903059 | 9915099 | WBGene00009147 | F26C11.3 | F26C11.3 |                     |             |
| -0.00519805169987109 AGIWUR33285                                                                                                                                                  |    |    |         |         |                |          |          |                     |             |
| N2                                                                                                                                                                                | HS | II | 9915438 | 9916289 | WBGene00044159 | F26C11.4 | F26C11.4 | 0.144836569669581   |             |
| AGIWUR26120;AGIWUR28479;AGIWUR32920;AGIWUR35033                                                                                                                                   |    |    |         |         |                |          |          |                     |             |
| N2                                                                                                                                                                                | HS | II | 9917122 | 9917943 | WBGene00086567 | C05C10.8 | C05C10.8 | 0.108159951783799   |             |
| AGIWUR38038                                                                                                                                                                       |    |    |         |         |                |          |          |                     |             |
| N2                                                                                                                                                                                | HS | II | 9922248 | 9930830 | WBGene00007329 | C05C10.2 | C05C10.2 | 0.129397557047646   |             |
| AGIWUR6878;AGIWUR29477;AGIWUR44420                                                                                                                                                |    |    |         |         |                |          |          |                     |             |
| N2                                                                                                                                                                                | HS | II | 9931845 | 9934443 | WBGene00007331 | pho-11   | C05C10.4 | -0.0187239099483998 |             |
| AGIWUR2532;AGIWUR6049;AGIWUR22087;AGIWUR30141;AGIWUR34634;AGIWUR34659;AGIWUR36019                                                                                                 |    |    |         |         |                |          |          |                     |             |
| N2                                                                                                                                                                                | HS | II | 9934403 | 9936893 | WBGene00007330 | C05C10.3 | C05C10.3 | 0.232926958599109   |             |
| AGIWUR2054;AGIWUR3537;AGIWUR18491;AGIWUR21068;AGIWUR21521;AGIWUR25993;AGIWUR37963                                                                                                 |    |    |         |         |                |          |          |                     |             |
| N2                                                                                                                                                                                | HS | II | 9938106 | 9938971 | WBGene00007334 | C05C10.7 | C05C10.7 | 0.399585797886754   |             |
| AGIWUR37632                                                                                                                                                                       |    |    |         |         |                |          |          |                     |             |
| N2                                                                                                                                                                                | HS | II | 9939040 | 9940432 | WBGene00007332 | C05C10.5 | C05C10.5 | -0.0452255652033049 |             |
| AGIWUR22090;AGIWUR32414                                                                                                                                                           |    |    |         |         |                |          |          |                     |             |
| N2                                                                                                                                                                                | HS | II | 9940758 | 9944006 | WBGene00007333 | ufd-3    | C05C10.6 | -0.176883502117023  |             |
| AGIWUR3612;AGIWUR5667;AGIWUR10944;AGIWUR24102;AGIWUR24734;AGIWUR35125;AGIWUR39205;AGIWUR41062;AGIWUR42078;AGIWUR42640                                                             |    |    |         |         |                |          |          |                     |             |
| N2                                                                                                                                                                                | HS | II | 9944026 | 9947121 | WBGene00011271 | flad-1   | R53.1    | -0.101659354873157  |             |
| AGIWUR12784;AGIWUR21392;AGIWUR30921;AGIWUR33515                                                                                                                                   |    |    |         |         |                |          |          |                     |             |

|                                                                                                                              |    |    |          |          |                |         |         |                      |             |
|------------------------------------------------------------------------------------------------------------------------------|----|----|----------|----------|----------------|---------|---------|----------------------|-------------|
| N2                                                                                                                           | HS | II | 9955185  | 9962344  | WBGene00001207 | egl-43  | R53.3   | -0.00540605882864575 | AGIWUR28128 |
| N2                                                                                                                           | HS | II | 9962966  | 9967132  | WBGene00011272 | dtmk-1  | R53.2   | -0.137045511640311   |             |
| AGIWUR14400;AGIWUR44983                                                                                                      |    |    |          |          |                |         |         |                      |             |
| N2                                                                                                                           | HS | II | 9967277  | 9968049  | WBGene00011273 | R53.4   | R53.4   | -0.0960811736262563  |             |
| AGIWUR274;AGIWUR839;AGIWUR1651;AGIWUR2205;AGIWUR2273;AGIWUR19713;AGIWUR21938;AGIWUR30159;AGIWUR30299;AGIWUR30811;AGIWUR33954 |    |    |          |          |                |         |         |                      |             |
| N2                                                                                                                           | HS | II | 9968659  | 9969631  | WBGene00011275 | psf-1   | R53.6   | -0.126507513708347   |             |
| AGIWUR651;AGIWUR4183;AGIWUR19144;AGIWUR19922                                                                                 |    |    |          |          |                |         |         |                      |             |
| N2                                                                                                                           | HS | II | 9969620  | 9970515  | WBGene00011274 | R53.5   | R53.5   | -0.0570621498663293  | AGIWUR39788 |
| N2                                                                                                                           | HS | II | 9971035  | 9975125  | WBGene00011276 | aakg-5  | R53.7   | -0.263278614003557   | AGIWUR19477 |
| N2                                                                                                                           | HS | II | 9976705  | 9977877  | WBGene00011277 | R53.8   | R53.8   | -0.0317659338533112  | AGIWUR38025 |
| N2                                                                                                                           | HS | II | 9978765  | 9980076  | WBGene00014130 | ZK892.6 | ZK892.6 | -0.008056964081673   | AGIWUR41533 |
| N2                                                                                                                           | HS | II | 9980886  | 9981752  | WBGene00014131 | sdz-38  | ZK892.7 | 0.0225048396127701   | AGIWUR12129 |
| N2                                                                                                                           | HS | II | 9991160  | 10000350 | WBGene00002266 | lec-3   | ZK892.1 | -0.229548759917108   |             |
| AGIWUR8893;AGIWUR9049;AGIWUR11331;AGIWUR11760;AGIWUR36080                                                                    |    |    |          |          |                |         |         |                      |             |
| N2                                                                                                                           | HS | II | 10000335 | 10001198 | WBGene00003773 | nlt-1   | ZK892.2 | -0.156886975586366   |             |
| AGIWUR9175;AGIWUR15509;AGIWUR22828;AGIWUR25447;AGIWUR39257;AGIWUR39674;AGIWUR42147                                           |    |    |          |          |                |         |         |                      |             |
| N2                                                                                                                           | HS | II | 10001846 | 10003987 | WBGene00014127 | ZK892.3 | ZK892.3 | 0.127802089905275    |             |
| AGIWUR26549                                                                                                                  |    |    |          |          |                |         |         |                      |             |
| N2                                                                                                                           | HS | II | 10006111 | 10006535 | WBGene00044037 | ZK892.8 | ZK892.8 | 0.0908039024029321   |             |
| AGIWUR23204                                                                                                                  |    |    |          |          |                |         |         |                      |             |
| N2                                                                                                                           | HS | II | 10006642 | 10008089 | WBGene00014128 | ZK892.4 | ZK892.4 | 0.0133373515356663   |             |
| AGIWUR41562                                                                                                                  |    |    |          |          |                |         |         |                      |             |
| N2                                                                                                                           | HS | II | 10008217 | 10009401 | WBGene00014129 | ZK892.5 | ZK892.5 | 0.116129339132149    |             |
| AGIWUR7848;AGIWUR20371;AGIWUR34857                                                                                           |    |    |          |          |                |         |         |                      |             |
| N2                                                                                                                           | HS | II | 10009608 | 10016183 | WBGene00002265 | lec-2   | F52H3.7 | -0.259696744398227   |             |
| AGIWUR7658;AGIWUR10730;AGIWUR27476;AGIWUR34199                                                                               |    |    |          |          |                |         |         |                      |             |
| N2                                                                                                                           | HS | II | 10030195 | 10030970 | WBGene00009947 | F52H3.5 | F52H3.5 | 0.202849775499441    |             |
| AGIWUR26508                                                                                                                  |    |    |          |          |                |         |         |                      |             |
| N2                                                                                                                           | HS | II | 10030895 | 10033213 | WBGene00009944 | mtcu-2  | F52H3.2 | -0.175099379161765   |             |
| AGIWUR8504                                                                                                                   |    |    |          |          |                |         |         |                      |             |
| N2                                                                                                                           | HS | II | 10033309 | 10039980 | WBGene00002497 | let-268 | F52H3.1 | 0.115600303917921    |             |
| AGIWUR26464                                                                                                                  |    |    |          |          |                |         |         |                      |             |
| N2                                                                                                                           | HS | II | 10041134 | 10042515 | WBGene00009946 | F52H3.4 | F52H3.4 | 0.0590380271857107   |             |
| AGIWUR8233                                                                                                                   |    |    |          |          |                |         |         |                      |             |
| N2                                                                                                                           | HS | II | 10042780 | 10045270 | WBGene00009945 | bath-38 | F52H3.3 | 0.0504274280441557   |             |
| AGIWUR38471                                                                                                                  |    |    |          |          |                |         |         |                      |             |
| N2                                                                                                                           | HS | II | 10054623 | 10055594 | WBGene00001447 | flp-4   | C18D1.3 | -0.0801354312259619  |             |
| AGIWUR27802                                                                                                                  |    |    |          |          |                |         |         |                      |             |

|                                                                                    |    |    |          |          |                |         |         |                     |
|------------------------------------------------------------------------------------|----|----|----------|----------|----------------|---------|---------|---------------------|
| N2                                                                                 | HS | II | 10056311 | 10060582 | WBGene00007670 | stg-1   | C18D1.4 | -0.121382602215487  |
| AGIWUR14704                                                                        |    |    |          |          |                |         |         |                     |
| N2                                                                                 | HS | II | 10061287 | 10074443 | WBGene00000995 | die-1   | C18D1.1 | -0.0537863239529077 |
| AGIWUR1596;AGIWUR11535;AGIWUR23819;AGIWUR27718;AGIWUR27931;AGIWUR31103;AGIWUR42675 |    |    |          |          |                |         |         |                     |
| N2                                                                                 | HS | II | 10094873 | 10098785 | WBGene00014164 | lact-2  | ZK945.1 | 0.0819722529302851  |
| AGIWUR39450                                                                        |    |    |          |          |                |         |         |                     |
| N2                                                                                 | HS | II | 10098782 | 10099867 | WBGene00003928 | pas-7   | ZK945.2 | 0.0768182981824088  |
| AGIWUR12828;AGIWUR14425                                                            |    |    |          |          |                |         |         |                     |
| N2                                                                                 | HS | II | 10100310 | 10103059 | WBGene00014165 | puf-12  | ZK945.3 | 0.333329811424727   |
| AGIWUR15434                                                                        |    |    |          |          |                |         |         |                     |
| N2                                                                                 | HS | II | 10102975 | 10105704 | WBGene00014166 | ZK945.4 | ZK945.4 | 0.064518599581767   |
| AGIWUR3719;AGIWUR12972;AGIWUR17154;AGIWUR23722;AGIWUR35881                         |    |    |          |          |                |         |         |                     |
| N2                                                                                 | HS | II | 10106080 | 10106970 | WBGene00014168 | ZK945.6 | ZK945.6 | 0.156919320062316   |
| AGIWUR30388                                                                        |    |    |          |          |                |         |         |                     |
| N2                                                                                 | HS | II | 10107473 | 10108477 | WBGene00014169 | ZK945.7 | ZK945.7 | -0.0734714724292118 |
| AGIWUR37463                                                                        |    |    |          |          |                |         |         |                     |
| N2                                                                                 | HS | II | 10108702 | 10109081 | WBGene00014170 | ZK945.8 | ZK945.8 | 0.272667264548774   |
| AGIWUR37452                                                                        |    |    |          |          |                |         |         |                     |
| N2                                                                                 | HS | II | 10109279 | 10121825 | WBGene00003058 | lov-1   | ZK945.9 | -0.115069909601106  |
| AGIWUR1185                                                                         |    |    |          |          |                |         |         |                     |
| N2                                                                                 | HS | II | 10122765 | 10125015 | WBGene00044035 | F27E5.7 | F27E5.7 | 0.365065738986008   |
| AGIWUR32500                                                                        |    |    |          |          |                |         |         |                     |
| N2                                                                                 | HS | II | 10125898 | 10127455 | WBGene00044027 | F27E5.8 | F27E5.8 | -0.179011049258785  |
| AGIWUR25811                                                                        |    |    |          |          |                |         |         |                     |
| N2                                                                                 | HS | II | 10128254 | 10131860 | WBGene00009194 | F27E5.5 | F27E5.5 | 0.128136956271748   |
| AGIWUR7390                                                                         |    |    |          |          |                |         |         |                     |
| N2                                                                                 | HS | II | 10137658 | 10139216 | WBGene00004017 | phg-1   | F27E5.4 | 0.113667452399676   |
| AGIWUR40529                                                                        |    |    |          |          |                |         |         |                     |
| N2                                                                                 | HS | II | 10139590 | 10141406 | WBGene00009192 | asah-2  | F27E5.1 |                     |
| -0.00130593126243639 AGIWUR18928;AGIWUR22197;AGIWUR33073                           |    |    |          |          |                |         |         |                     |
| N2                                                                                 | HS | II | 10141457 | 10144192 | WBGene00009193 | F27E5.3 | F27E5.3 | -0.154148514386899  |
| AGIWUR44100                                                                        |    |    |          |          |                |         |         |                     |
| N2                                                                                 | HS | II | 10146746 | 10152445 | WBGene00003939 | pax-3   | F27E5.2 | -0.169740726023855  |
| AGIWUR18917                                                                        |    |    |          |          |                |         |         |                     |
| N2                                                                                 | HS | II | 10155413 | 10156220 | WBGene00044028 | F33H1.6 | F33H1.6 | 0.188031225200715   |
| AGIWUR5814;AGIWUR10380;AGIWUR29406;AGIWUR40440;AGIWUR44519                         |    |    |          |          |                |         |         |                     |
| N2                                                                                 | HS | II | 10157537 | 10169346 | WBGene00000914 | daf-19  | F33H1.1 | -0.389759677836732  |
| AGIWUR10712;AGIWUR11493;AGIWUR14380                                                |    |    |          |          |                |         |         |                     |
| N2                                                                                 | HS | II | 10172923 | 10174346 | WBGene00009364 | F33H1.3 | F33H1.3 | -0.0136383036356573 |

|                                                                         |    |    |          |          |                |          |         |                     |  |
|-------------------------------------------------------------------------|----|----|----------|----------|----------------|----------|---------|---------------------|--|
| AGIWUR16485                                                             |    |    |          |          |                |          |         |                     |  |
| N2                                                                      | HS | II | 10174572 | 10180183 | WBGene00009365 | F33H1.4  | F33H1.4 | -0.196886072797235  |  |
| AGIWUR21472;AGIWUR27653;AGIWUR34930                                     |    |    |          |          |                |          |         |                     |  |
| N2                                                                      | HS | II | 10180199 | 10182734 | WBGene00005079 | srd-1    | F33H1.5 | 0.041391463757023   |  |
| AGIWUR18723                                                             |    |    |          |          |                |          |         |                     |  |
| N2                                                                      | HS | II | 10185789 | 10187908 | WBGene00005080 | srd-2    | R05H5.1 | 0.0409902593697984  |  |
| AGIWUR14572                                                             |    |    |          |          |                |          |         |                     |  |
| N2                                                                      | HS | II | 10188263 | 10189469 | WBGene00000389 | cdc-25.4 | R05H5.2 |                     |  |
| -0.0649881481599603 AGIWUR15999                                         |    |    |          |          |                |          |         |                     |  |
| N2                                                                      | HS | II | 10192529 | 10193451 | WBGene00011041 | R05H5.7  | R05H5.7 | -0.0049611718891116 |  |
| AGIWUR6013;AGIWUR11895;AGIWUR21955;AGIWUR26462                          |    |    |          |          |                |          |         |                     |  |
| N2                                                                      | HS | II | 10194905 | 10196835 | WBGene00005071 | srb-6    | R05H5.6 | -0.110841727979532  |  |
| AGIWUR32602                                                             |    |    |          |          |                |          |         |                     |  |
| N2                                                                      | HS | II | 10197625 | 10198324 | WBGene00011038 | R05H5.3  | R05H5.3 | -0.0977233541967646 |  |
| AGIWUR6581;AGIWUR9461;AGIWUR24214;AGIWUR29342;AGIWUR31178;AGIWUR37075   |    |    |          |          |                |          |         |                     |  |
| N2                                                                      | HS | II | 10198309 | 10199768 | WBGene00011039 | R05H5.4  | R05H5.4 | -0.424669912786596  |  |
| AGIWUR10312                                                             |    |    |          |          |                |          |         |                     |  |
| N2                                                                      | HS | II | 10199810 | 10200819 | WBGene00011040 | R05H5.5  | R05H5.5 | -0.25606033579702   |  |
| AGIWUR12341                                                             |    |    |          |          |                |          |         |                     |  |
| N2                                                                      | HS | II | 10201125 | 10202230 | WBGene00006651 | tts-2    | R05H5.8 | -0.0443154821449667 |  |
| AGIWUR23370                                                             |    |    |          |          |                |          |         |                     |  |
| N2                                                                      | HS | II | 10206715 | 10209391 | WBGene00011331 | T01E8.1  | T01E8.1 | 0.15890483781164    |  |
| AGIWUR29024                                                             |    |    |          |          |                |          |         |                     |  |
| N2                                                                      | HS | II | 10218471 | 10220025 | WBGene00004334 | ref-1    | T01E8.2 | -0.16579569237938   |  |
| AGIWUR8907                                                              |    |    |          |          |                |          |         |                     |  |
| N2                                                                      | HS | II | 10222877 | 10229440 | WBGene00004038 | plc-3    | T01E8.3 | 0.250962332544563   |  |
| AGIWUR14929;AGIWUR18912;AGIWUR22081;AGIWUR24082;AGIWUR28683;AGIWUR42469 |    |    |          |          |                |          |         |                     |  |
| N2                                                                      | HS | II | 10231272 | 10236014 | WBGene00011335 | T01E8.8  | T01E8.8 | 0.15011324627168    |  |
| AGIWUR33309                                                             |    |    |          |          |                |          |         |                     |  |
| N2                                                                      | HS | II | 10236936 | 10239695 | WBGene00003177 | mec-15   | T01E8.4 | -0.138129635319329  |  |
| AGIWUR1407;AGIWUR9774;AGIWUR10357;AGIWUR34006                           |    |    |          |          |                |          |         |                     |  |
| N2                                                                      | HS | II | 10240277 | 10242490 | WBGene00011334 | mrps-14  | T01E8.6 | 0.0983755345155846  |  |
| AGIWUR1632;AGIWUR18563;AGIWUR25105                                      |    |    |          |          |                |          |         |                     |  |
| N2                                                                      | HS | II | 10242595 | 10247638 | WBGene00011333 | nrde-2   | T01E8.5 | 0.17096544837845    |  |
| AGIWUR1484;AGIWUR28560                                                  |    |    |          |          |                |          |         |                     |  |
| N2                                                                      | HS | II | 10248991 | 10251165 | WBGene00010015 | atad-3   | F54B3.3 | 0.120690453058673   |  |
| AGIWUR20261;AGIWUR36134;AGIWUR44377                                     |    |    |          |          |                |          |         |                     |  |
| N2                                                                      | HS | II | 10251266 | 10268168 | WBGene00010013 | F54B3.1  | F54B3.1 | 0.111470144231223   |  |
| AGIWUR11170;AGIWUR12967;AGIWUR28208                                     |    |    |          |          |                |          |         |                     |  |

|                                     |    |    |          |          |                |          |          |                     |
|-------------------------------------|----|----|----------|----------|----------------|----------|----------|---------------------|
| N2                                  | HS | II | 10268143 | 10270152 | WBGene00010014 | F54B3.2  | F54B3.2  | 0.0925750760113075  |
| AGIWUR39268                         |    |    |          |          |                |          |          |                     |
| N2                                  | HS | II | 10278732 | 10280459 | WBGene00014175 | ZK971.1  | ZK971.1  | -0.0504622060055948 |
| AGIWUR39627;AGIWUR39902             |    |    |          |          |                |          |          |                     |
| N2                                  | HS | II | 10283466 | 10300132 | WBGene00014171 | nep-26   | ZK970.1  | -0.11496872266694   |
| AGIWUR41540                         |    |    |          |          |                |          |          |                     |
| N2                                  | HS | II | 10300789 | 10302859 | WBGene00014172 | clpp-1   | ZK970.2  | -0.0195774810818197 |
| AGIWUR39591                         |    |    |          |          |                |          |          |                     |
| N2                                  | HS | II | 10303007 | 10303713 | WBGene00006918 | vha-9    | ZK970.4  | 0.0145912407441084  |
| AGIWUR29615                         |    |    |          |          |                |          |          |                     |
| N2                                  | HS | II | 10304139 | 10308826 | WBGene00001531 | gcy-4    | ZK970.5  | 0.416203849704505   |
| AGIWUR24821                         |    |    |          |          |                |          |          |                     |
| N2                                  | HS | II | 10309418 | 10310068 | WBGene00014174 | ZK970.8  | ZK970.8  | 0.358368088938922   |
| AGIWUR15415                         |    |    |          |          |                |          |          |                     |
| N2                                  | HS | II | 10310400 | 10316219 | WBGene00001532 | gcy-5    | ZK970.6  | -0.0229848806971571 |
| AGIWUR35870                         |    |    |          |          |                |          |          |                     |
| N2                                  | HS | II | 10318228 | 10319970 | WBGene00010832 | M02G9.3  | M02G9.3  | 0.0912962461783771  |
| AGIWUR754                           |    |    |          |          |                |          |          |                     |
| N2                                  | HS | II | 10321460 | 10324850 | WBGene00010831 | M02G9.2  | M02G9.2  | -0.0526942417874974 |
| AGIWUR29671                         |    |    |          |          |                |          |          |                     |
| N2                                  | HS | II | 10326041 | 10335807 | WBGene00010830 | M02G9.1  | M02G9.1  |                     |
| -0.00837304402017303 AGIWUR21007    |    |    |          |          |                |          |          |                     |
| N2                                  | HS | II | 10339692 | 10345112 | WBGene00007413 | pro-2    | C07E3.2  | 0.236631562036894   |
| AGIWUR25738                         |    |    |          |          |                |          |          |                     |
| N2                                  | HS | II | 10346375 | 10347001 | WBGene00007420 | C07E3.10 | C07E3.10 |                     |
| 0.0681516455484932 AGIWUR7074       |    |    |          |          |                |          |          |                     |
| N2                                  | HS | II | 10346981 | 10350007 | WBGene00007412 | stip-1   | C07E3.1  | -0.022058598386252  |
| AGIWUR16235;AGIWUR18632;AGIWUR37575 |    |    |          |          |                |          |          |                     |
| N2                                  | HS | II | 10350760 | 10351613 | WBGene00007419 | C07E3.9  | C07E3.9  | 0.0729648896084694  |
| AGIWUR41793                         |    |    |          |          |                |          |          |                     |
| N2                                  | HS | II | 10353584 | 10357518 | WBGene00007414 | C07E3.3  | C07E3.3  | 0.232494566400071   |
| AGIWUR42376                         |    |    |          |          |                |          |          |                     |
| N2                                  | HS | II | 10363584 | 10365709 | WBGene00007416 | ceh-57   | C07E3.5  | 0.0303865836093218  |
| AGIWUR12801                         |    |    |          |          |                |          |          |                     |
| N2                                  | HS | II | 10367741 | 10369597 | WBGene00007417 | ceh-58   | C07E3.6  | -0.160306662127563  |
| AGIWUR5364;AGIWUR14869              |    |    |          |          |                |          |          |                     |
| N2                                  | HS | II | 10385333 | 10388133 | WBGene00011661 | ztf-27   | T09F3.1  | -0.339929743551515  |
| AGIWUR9306                          |    |    |          |          |                |          |          |                     |
| N2                                  | HS | II | 10391154 | 10393614 | WBGene00011662 | T09F3.2  | T09F3.2  | -0.212999627314797  |

|                                                                                   |    |    |          |          |                |          |          |                     |  |
|-----------------------------------------------------------------------------------|----|----|----------|----------|----------------|----------|----------|---------------------|--|
| AGIWUR3756;AGIWUR5121;AGIWUR16551;AGIWUR28159;AGIWUR35682;AGIWUR38281;AGIWUR39478 |    |    |          |          |                |          |          |                     |  |
| N2                                                                                | HS | II | 10394114 | 10395349 | WBGene00001683 | gpd-1    | T09F3.3  | -0.268366203802508  |  |
| AGIWUR11243                                                                       |    |    |          |          |                |          |          |                     |  |
| N2                                                                                | HS | II | 10395707 | 10396756 | WBGene00011663 | T09F3.4  | T09F3.4  | 0.163492734595665   |  |
| AGIWUR881;AGIWUR42449                                                             |    |    |          |          |                |          |          |                     |  |
| N2                                                                                | HS | II | 10396878 | 10399320 | WBGene00011664 | T09F3.5  | T09F3.5  | 0.197648435442208   |  |
| AGIWUR17018                                                                       |    |    |          |          |                |          |          |                     |  |
| N2                                                                                | HS | II | 10411289 | 10412670 | WBGene00008484 | E04D5.5  | E04D5.5  | 0.00214541932522039 |  |
| AGIWUR2989                                                                        |    |    |          |          |                |          |          |                     |  |
| N2                                                                                | HS | II | 10416786 | 10419237 | WBGene00008480 | eif-2A   | E04D5.1  | -0.215842252549457  |  |
| AGIWUR21663;AGIWUR24337;AGIWUR42583                                               |    |    |          |          |                |          |          |                     |  |
| N2                                                                                | HS | II | 10419230 | 10422026 | WBGene00008481 | E04D5.2  | E04D5.2  | 0.060131334962815   |  |
| AGIWUR1199                                                                        |    |    |          |          |                |          |          |                     |  |
| N2                                                                                | HS | II | 10440286 | 10442515 | WBGene00008483 | E04D5.4  | E04D5.4  | -0.120953880287468  |  |
| AGIWUR3398;AGIWUR37195;AGIWUR39288                                                |    |    |          |          |                |          |          |                     |  |
| N2                                                                                | HS | II | 10443327 | 10445233 | WBGene00014057 | ZK673.1  | ZK673.1  | -0.179948311913339  |  |
| AGIWUR43812                                                                       |    |    |          |          |                |          |          |                     |  |
| N2                                                                                | HS | II | 10448266 | 10450222 | WBGene00014058 | ZK673.2  | ZK673.2  | -0.149976321085417  |  |
| AGIWUR4328;AGIWUR10658;AGIWUR17853;AGIWUR37680                                    |    |    |          |          |                |          |          |                     |  |
| N2                                                                                | HS | II | 10450607 | 10452004 | WBGene00003038 | lin-56   | ZK673.3  | 0.19577177689067    |  |
| AGIWUR25094                                                                       |    |    |          |          |                |          |          |                     |  |
| N2                                                                                | HS | II | 10452920 | 10455200 | WBGene00014060 | ZK673.4  | ZK673.4  | -0.202050275457977  |  |
| AGIWUR34906                                                                       |    |    |          |          |                |          |          |                     |  |
| N2                                                                                | HS | II | 10457786 | 10462672 | WBGene00014065 | ZK673.11 |          | ZK673.11            |  |
| 0.187290903712526 AGIWUR1953                                                      |    |    |          |          |                |          |          |                     |  |
| N2                                                                                | HS | II | 10462870 | 10464330 | WBGene00014062 | ZK673.6  | ZK673.6  | -0.0101222599288313 |  |
| AGIWUR41397                                                                       |    |    |          |          |                |          |          |                     |  |
| N2                                                                                | HS | II | 10464870 | 10465298 | WBGene00014064 | sdz-37   | ZK673.10 |                     |  |
| 0.199039895482876 AGIWUR36805                                                     |    |    |          |          |                |          |          |                     |  |
| N2                                                                                | HS | II | 10466852 | 10468344 | WBGene00006583 | tnc-2    | ZK673.7  | 0.191376843131859   |  |
| AGIWUR23392                                                                       |    |    |          |          |                |          |          |                     |  |
| N2                                                                                | HS | II | 10468351 | 10470297 | WBGene00014063 | clcc-143 |          | ZK673.9             |  |
| 0.161923562579494 AGIWUR27744                                                     |    |    |          |          |                |          |          |                     |  |
| N2                                                                                | HS | II | 10470934 | 10471347 | WBGene00014041 | ZK666.1  | ZK666.1  | -0.0841082930814885 |  |
| AGIWUR24121                                                                       |    |    |          |          |                |          |          |                     |  |
| N2                                                                                | HS | II | 10471696 | 10471890 | WBGene00014042 | ZK666.2  | ZK666.2  | -0.110667198689358  |  |
| AGIWUR4815;AGIWUR39373                                                            |    |    |          |          |                |          |          |                     |  |
| N2                                                                                | HS | II | 10472439 | 10473726 | WBGene00005520 | sri-8    | ZK666.10 |                     |  |
| 0.00111933891311811 AGIWUR876;AGIWUR12313;AGIWUR40432                             |    |    |          |          |                |          |          |                     |  |

|                                                                                            |    |    |          |          |                |          |          |                     |
|--------------------------------------------------------------------------------------------|----|----|----------|----------|----------------|----------|----------|---------------------|
| N2                                                                                         | HS | II | 10474221 | 10476139 | WBGene00014043 | clec-58  | ZK666.3  | 0.0750945792375246  |
| AGIWUR14034;AGIWUR18180;AGIWUR26359                                                        |    |    |          |          |                |          |          |                     |
| N2                                                                                         | HS | II | 10478022 | 10479448 | WBGene00014045 | clec-59  | ZK666.5  | 0.0674834355548199  |
| AGIWUR30540                                                                                |    |    |          |          |                |          |          |                     |
| N2                                                                                         | HS | II | 10479920 | 10480081 | WBGene00044046 | ZK666.13 | ZK666.13 |                     |
| -0.141285766798945 AGIWUR12895;AGIWUR23306;AGIWUR31826;AGIWUR35627;AGIWUR39741             |    |    |          |          |                |          |          |                     |
| N2                                                                                         | HS | II | 10480152 | 10481846 | WBGene00014046 | clec-60  | ZK666.6  | -0.507115295740469  |
| AGIWUR2509;AGIWUR31381;AGIWUR35871                                                         |    |    |          |          |                |          |          |                     |
| N2                                                                                         | HS | II | 10488747 | 10490514 | WBGene00014047 | clec-61  | ZK666.7  | 0.0619041659938944  |
| AGIWUR38848                                                                                |    |    |          |          |                |          |          |                     |
| N2                                                                                         | HS | II | 10491662 | 10493134 | WBGene00014048 | ZK666.8  | ZK666.8  | 0.0687900077870118  |
| AGIWUR3288                                                                                 |    |    |          |          |                |          |          |                     |
| N2                                                                                         | HS | II | 10496212 | 10496703 | WBGene00014050 | ZK666.12 | ZK666.12 |                     |
| -0.0368862585425056 AGIWUR8874                                                             |    |    |          |          |                |          |          |                     |
| N2                                                                                         | HS | II | 10496987 | 10502541 | WBGene00004134 | myrf-1   | F59B10.1 |                     |
| -0.172421689527145 AGIWUR131                                                               |    |    |          |          |                |          |          |                     |
| N2                                                                                         | HS | II | 10507269 | 10509932 | WBGene00010318 | F59B10.2 | F59B10.2 |                     |
| -0.0662236779776659 AGIWUR23868                                                            |    |    |          |          |                |          |          |                     |
| N2                                                                                         | HS | II | 10510542 | 10512991 | WBGene00010319 | F59B10.3 | F59B10.3 |                     |
| 0.0279445287380433 AGIWUR38198                                                             |    |    |          |          |                |          |          |                     |
| N2                                                                                         | HS | II | 10513827 | 10519108 | WBGene00010320 | F59B10.4 | F59B10.4 |                     |
| 0.00370294367778712 AGIWUR38327                                                            |    |    |          |          |                |          |          |                     |
| N2                                                                                         | HS | II | 10521788 | 10523191 | WBGene00010321 | F59B10.5 | F59B10.5 |                     |
| 0.150876856660986 AGIWUR6528                                                               |    |    |          |          |                |          |          |                     |
| N2                                                                                         | HS | II | 10523274 | 10524474 | WBGene00010322 | F59B10.6 | F59B10.6 |                     |
| -0.0612932591395925 AGIWUR5739;AGIWUR23280;AGIWUR29381;AGIWUR36335;AGIWUR40116;AGIWUR44732 |    |    |          |          |                |          |          |                     |
| N2                                                                                         | HS | II | 10528084 | 10533880 | WBGene00003107 | mab-10   | R166.1   | 0.0766169020056919  |
| AGIWUR1300                                                                                 |    |    |          |          |                |          |          |                     |
| N2                                                                                         | HS | II | 10534332 | 10537671 | WBGene00011302 | R166.2   | R166.2   | -0.0392730539842816 |
| AGIWUR39289                                                                                |    |    |          |          |                |          |          |                     |
| N2                                                                                         | HS | II | 10537799 | 10539332 | WBGene00011303 | R166.3   | R166.3   | 0.434608747319807   |
| AGIWUR36948                                                                                |    |    |          |          |                |          |          |                     |
| N2                                                                                         | HS | II | 10539438 | 10541996 | WBGene00004185 | pro-1    | R166.4   | 0.452139502434264   |
| AGIWUR31553                                                                                |    |    |          |          |                |          |          |                     |
| N2                                                                                         | HS | II | 10542428 | 10555044 | WBGene00011304 | mnk-1    | R166.5   | -0.251003027942875  |
| AGIWUR34539                                                                                |    |    |          |          |                |          |          |                     |
| N2                                                                                         | HS | II | 10560018 | 10563407 | WBGene00007352 | cdc-48.1 | C06A1.1  |                     |
| -0.19532544090978 AGIWUR11455;AGIWUR13116;AGIWUR21063;AGIWUR26985;AGIWUR43969              |    |    |          |          |                |          |          |                     |
| N2                                                                                         | HS | II | 10570602 | 10572530 | WBGene00007353 | C06A1.2  | C06A1.2  | -0.248552734241976  |

|                                                                                                         |    |    |          |          |                |                                     |
|---------------------------------------------------------------------------------------------------------|----|----|----------|----------|----------------|-------------------------------------|
| AGIWUR9060                                                                                              |    |    |          |          |                |                                     |
| N2                                                                                                      | HS | II | 10572247 | 10574067 | WBGene00007354 | C06A1.3 C06A1.3 -0.266708817673567  |
| AGIWUR6893                                                                                              |    |    |          |          |                |                                     |
| N2                                                                                                      | HS | II | 10574842 | 10578193 | WBGene00014667 | C06A1.4 C06A1.4 -0.296037347420004  |
| AGIWUR25976;AGIWUR30602                                                                                 |    |    |          |          |                |                                     |
| N2                                                                                                      | HS | II | 10579366 | 10579955 | WBGene00007355 | rpb-6 C06A1.5 -0.0795034823302316   |
| AGIWUR5821                                                                                              |    |    |          |          |                |                                     |
| N2                                                                                                      | HS | II | 10579955 | 10581045 | WBGene00007555 | dohh-1 C14A4.1 0.0207462931447111   |
| AGIWUR2970;AGIWUR7187;AGIWUR19048                                                                       |    |    |          |          |                |                                     |
| N2                                                                                                      | HS | II | 10581133 | 10582519 | WBGene00000933 | dap-3 C14A4.2 0.0818803540951247    |
| AGIWUR24770;AGIWUR27331;AGIWUR27823;AGIWUR32317                                                         |    |    |          |          |                |                                     |
| N2                                                                                                      | HS | II | 10582618 | 10584236 | WBGene00007564 | mrps-22 C14A4.14                    |
| -0.0391273345031777 AGIWUR11916;AGIWUR14585;AGIWUR17314;AGIWUR19277;AGIWUR22350;AGIWUR33834;AGIWUR36123 |    |    |          |          |                |                                     |
| N2                                                                                                      | HS | II | 10584336 | 10587928 | WBGene00007556 | C14A4.3 C14A4.3 0.23066881280516    |
| AGIWUR41411                                                                                             |    |    |          |          |                |                                     |
| N2                                                                                                      | HS | II | 10588042 | 10592652 | WBGene00000796 | crn-3 C14A4.4 0.202709816880192     |
| AGIWUR23554;AGIWUR44213                                                                                 |    |    |          |          |                |                                     |
| N2                                                                                                      | HS | II | 10592752 | 10593591 | WBGene00000798 | crn-5 C14A4.5 0.170774659214946     |
| AGIWUR22345;AGIWUR34177;AGIWUR35482                                                                     |    |    |          |          |                |                                     |
| N2                                                                                                      | HS | II | 10593529 | 10594776 | WBGene00007557 | C14A4.6 C14A4.6 -0.0681894986413329 |
| AGIWUR4051;AGIWUR21431;AGIWUR24456                                                                      |    |    |          |          |                |                                     |
| N2                                                                                                      | HS | II | 10595266 | 10596562 | WBGene00007558 | C14A4.7 C14A4.7 0.0971813218826796  |
| AGIWUR15049;AGIWUR25017;AGIWUR26477;AGIWUR39292                                                         |    |    |          |          |                |                                     |
| N2                                                                                                      | HS | II | 10597174 | 10598100 | WBGene00007559 | C14A4.8 C14A4.8 0.15360823094762    |
| AGIWUR22102                                                                                             |    |    |          |          |                |                                     |
| N2                                                                                                      | HS | II | 10599337 | 10600529 | WBGene00007560 | C14A4.9 C14A4.9 0.614219347337166   |
| AGIWUR25127                                                                                             |    |    |          |          |                |                                     |
| N2                                                                                                      | HS | II | 10600599 | 10602276 | WBGene00005713 | srv-2 C14A4.15                      |
| -0.156125577661577 AGIWUR22923                                                                          |    |    |          |          |                |                                     |
| N2                                                                                                      | HS | II | 10605030 | 10605612 | WBGene00006397 | taf-13 C14A4.10                     |
| 0.0115042941937684 AGIWUR24634                                                                          |    |    |          |          |                |                                     |
| N2                                                                                                      | HS | II | 10605717 | 10607275 | WBGene00007561 | ccm-3 C14A4.11                      |
| 0.18661957344554 AGIWUR27434                                                                            |    |    |          |          |                |                                     |
| N2                                                                                                      | HS | II | 10613020 | 10618332 | WBGene00007562 | C14A4.12 C14A4.12                   |
| -0.115446529058151 AGIWUR29508                                                                          |    |    |          |          |                |                                     |
| N2                                                                                                      | HS | II | 10618471 | 10620503 | WBGene00007563 | C14A4.13 C14A4.13                   |
| -0.245921717657602 AGIWUR32603                                                                          |    |    |          |          |                |                                     |
| N2                                                                                                      | HS | II | 10622265 | 10625943 | WBGene00010893 | cutl-9 M28.1 0.053037206798705      |
| AGIWUR4593;AGIWUR17552;AGIWUR21126;AGIWUR23189;AGIWUR36371;AGIWUR36670;AGIWUR40197                      |    |    |          |          |                |                                     |



|                                                                                                             |    |    |          |          |                |          |          |                     |
|-------------------------------------------------------------------------------------------------------------|----|----|----------|----------|----------------|----------|----------|---------------------|
| N2                                                                                                          | HS | II | 10628263 | 10633216 | WBGene00010899 | M28.8    | M28.8    | 0.0794267919261387  |
| AGIWUR44648                                                                                                 |    |    |          |          |                |          |          |                     |
| N2                                                                                                          | HS | II | 10633476 | 10639112 | WBGene00010894 | M28.2    | M28.2    | 0.0287952208782007  |
| AGIWUR2316;AGIWUR15524;AGIWUR29354                                                                          |    |    |          |          |                |          |          |                     |
| N2                                                                                                          | HS | II | 10639410 | 10643536 | WBGene00010900 | M28.9    | M28.9    | -0.037204679218835  |
| AGIWUR4478                                                                                                  |    |    |          |          |                |          |          |                     |
| N2                                                                                                          | HS | II | 10643703 | 10646978 | WBGene00010895 | M28.4    | M28.4    | 0.268969510276944   |
| AGIWUR26377                                                                                                 |    |    |          |          |                |          |          |                     |
| N2                                                                                                          | HS | II | 10647480 | 10648676 | WBGene00010901 | M28.10   | M28.10   | 0.100000510591045   |
| AGIWUR21717                                                                                                 |    |    |          |          |                |          |          |                     |
| N2                                                                                                          | HS | II | 10648938 | 10652256 | WBGene00010898 | nphp-1   | M28.7    | -0.018561657290272  |
| AGIWUR6755                                                                                                  |    |    |          |          |                |          |          |                     |
| N2                                                                                                          | HS | II | 10652353 | 10657841 | WBGene00010897 | lact-3   | M28.6    | -0.141837027633184  |
| AGIWUR25318                                                                                                 |    |    |          |          |                |          |          |                     |
| N2                                                                                                          | HS | II | 10658027 | 10658626 | WBGene00010896 | M28.5    | M28.5    | 0.0649914616982361  |
| AGIWUR25451;AGIWUR33760                                                                                     |    |    |          |          |                |          |          |                     |
| N2                                                                                                          | HS | II | 10659206 | 10662317 | WBGene00004704 | rsp-7    | D2089.1  | -0.23188114598051   |
| AGIWUR4646;AGIWUR11930;AGIWUR13996;AGIWUR17240;AGIWUR21144;AGIWUR29901;AGIWUR38441;AGIWUR40407;AGIWUR43998  |    |    |          |          |                |          |          |                     |
| N2                                                                                                          | HS | II | 10662256 | 10665131 | WBGene00008434 | D2089.3  | D2089.3  | -0.0618683187878206 |
| AGIWUR26579;AGIWUR27148;AGIWUR28093;AGIWUR33867                                                             |    |    |          |          |                |          |          |                     |
| N2                                                                                                          | HS | II | 10675602 | 10690271 | WBGene00004207 | ptb-1    | D2089.4  | 0.0268727934033279  |
| AGIWUR6285;AGIWUR12901;AGIWUR21246                                                                          |    |    |          |          |                |          |          |                     |
| N2                                                                                                          | HS | II | 10690452 | 10693863 | WBGene00001522 | gbh-1    | D2089.5  | 0.198691361338101   |
| AGIWUR19935                                                                                                 |    |    |          |          |                |          |          |                     |
| N2                                                                                                          | HS | II | 10695013 | 10702524 | WBGene00001586 | ggr-1    | C09G5.1  | 0.110944034525936   |
| AGIWUR2899;AGIWUR11942                                                                                      |    |    |          |          |                |          |          |                     |
| N2                                                                                                          | HS | II | 10702509 | 10714297 | WBGene00007488 | dph-2    | C09G5.2  | 0.120727143465798   |
| AGIWUR23621                                                                                                 |    |    |          |          |                |          |          |                     |
| N2                                                                                                          | HS | II | 10714886 | 10716416 | WBGene00007489 | C09G5.7  | C09G5.7  | 0.308634483612011   |
| AGIWUR23618                                                                                                 |    |    |          |          |                |          |          |                     |
| N2                                                                                                          | HS | II | 10720231 | 10729252 | WBGene00007490 | mks-5    | C09G5.8  | -0.0150633899662358 |
| AGIWUR34107                                                                                                 |    |    |          |          |                |          |          |                     |
| N2                                                                                                          | HS | II | 10729804 | 10731627 | WBGene00008256 | glb-12   | C52A11.2 |                     |
| -0.016231600885809 AGIWUR27689                                                                              |    |    |          |          |                |          |          |                     |
| N2                                                                                                          | HS | II | 10737402 | 10738628 | WBGene00008257 | C52A11.3 |          | C52A11.3            |
| -0.116152490164849 AGIWUR42803                                                                              |    |    |          |          |                |          |          |                     |
| N2                                                                                                          | HS | II | 10738635 | 10775061 | WBGene00003404 | mpz-1    | C52A11.4 |                     |
| 0.124217259836316                                                                                           |    |    |          |          |                |          |          |                     |
| AGIWUR6677;AGIWUR9212;AGIWUR16617;AGIWUR19487;AGIWUR20489;AGIWUR20775;AGIWUR25775;AGIWUR27445;AGIWUR28484;A |    |    |          |          |                |          |          |                     |

GIWUR30306;AGIWUR32704;AGIWUR32857;AGIWUR39509;AGIWUR40262

|                                                                                         |    |    |          |          |                |          |          |                     |
|-----------------------------------------------------------------------------------------|----|----|----------|----------|----------------|----------|----------|---------------------|
| N2                                                                                      | HS | II | 10778389 | 10783962 | WBGene00002297 | ect-2    | T19E10.1 |                     |
| -0.463278457418928 AGIWUR1328;AGIWUR5981;AGIWUR9727;AGIWUR21337;AGIWUR24688;AGIWUR44022 |    |    |          |          |                |          |          |                     |
| N2                                                                                      | HS | II | 10785452 | 10787272 | WBGene00000411 | cdl-1    | R06F6.1  | -0.0289127685515469 |
| AGIWUR1579;AGIWUR4225                                                                   |    |    |          |          |                |          |          |                     |
| N2                                                                                      | HS | II | 10787312 | 10787914 | WBGene00011072 | tag-209  | R06F6.11 |                     |
| 0.195463128960579 AGIWUR5104                                                            |    |    |          |          |                |          |          |                     |
| N2                                                                                      | HS | II | 10788106 | 10793493 | WBGene00011067 | vps-11   | R06F6.2  | -0.287757776749666  |
| AGIWUR9444                                                                              |    |    |          |          |                |          |          |                     |
| N2                                                                                      | HS | II | 10793575 | 10796294 | WBGene00011068 | set-14   | R06F6.4  | 0.0195926727106546  |
| AGIWUR9082                                                                              |    |    |          |          |                |          |          |                     |
| N2                                                                                      | HS | II | 10796646 | 10798479 | WBGene00003805 | npp-19   | R06F6.5  | -0.0612720774022133 |
| AGIWUR27834;AGIWUR30360                                                                 |    |    |          |          |                |          |          |                     |
| N2                                                                                      | HS | II | 10809279 | 10809847 | WBGene00269421 | R06F6.14 |          | R06F6.14            |
| 0.284255061008064 AGIWUR20089                                                           |    |    |          |          |                |          |          |                     |
| N2                                                                                      | HS | II | 10811016 | 10812188 | WBGene00011070 | R06F6.7  | R06F6.7  | -0.368296938338974  |
| AGIWUR37319                                                                             |    |    |          |          |                |          |          |                     |
| N2                                                                                      | HS | II | 10812949 | 10819978 | WBGene00011071 | R06F6.8  | R06F6.8  | 0.108442929310822   |
| AGIWUR13413                                                                             |    |    |          |          |                |          |          |                     |
| N2                                                                                      | HS | II | 10821015 | 10822443 | WBGene00001153 | ech-4    | R06F6.9  | 0.135836126890283   |
| AGIWUR32397                                                                             |    |    |          |          |                |          |          |                     |
| N2                                                                                      | HS | II | 10822328 | 10824081 | WBGene00023418 | R06F6.12 |          | R06F6.12            |
| 0.175793850000282 AGIWUR23823                                                           |    |    |          |          |                |          |          |                     |
| N2                                                                                      | HS | II | 10824294 | 10841424 | WBGene00003367 | mix-1    | M106.1   | 0.028713087769046   |
| AGIWUR7474;AGIWUR7521;AGIWUR30139;AGIWUR39827                                           |    |    |          |          |                |          |          |                     |
| N2                                                                                      | HS | II | 10855642 | 10857177 | WBGene00044924 | M106.7   | M106.7   | -0.152626767028632  |
| AGIWUR22794                                                                             |    |    |          |          |                |          |          |                     |
| N2                                                                                      | HS | II | 10857473 | 10860909 | WBGene00010911 | M106.3   | M106.3   | -0.0301722752858762 |
| AGIWUR25515;AGIWUR38047                                                                 |    |    |          |          |                |          |          |                     |
| N2                                                                                      | HS | II | 10863682 | 10868714 | WBGene00010912 | gmps-1   | M106.4   | -0.129804945207479  |
| AGIWUR4592;AGIWUR25800;AGIWUR26865;AGIWUR30939;AGIWUR33439                              |    |    |          |          |                |          |          |                     |
| N2                                                                                      | HS | II | 10869196 | 10870827 | WBGene00000293 | cap-2    | M106.5   | 0.0191203993926505  |
| AGIWUR17286;AGIWUR17665;AGIWUR38899;AGIWUR40831                                         |    |    |          |          |                |          |          |                     |
| N2                                                                                      | HS | II | 10870779 | 10872611 | WBGene00000880 | cyn-4    | F59E10.2 |                     |
| -0.0487974128473248 AGIWUR17570;AGIWUR29891;AGIWUR33211                                 |    |    |          |          |                |          |          |                     |
| N2                                                                                      | HS | II | 10872879 | 10873796 | WBGene00010333 | copz-1   | F59E10.3 |                     |
| 0.103989541690158 AGIWUR33271                                                           |    |    |          |          |                |          |          |                     |
| N2                                                                                      | HS | II | 10873931 | 10877934 | WBGene00003882 | orc-2    | F59E10.1 |                     |
| -0.170318321187036 AGIWUR32871;AGIWUR40159                                              |    |    |          |          |                |          |          |                     |

|                                                       |    |    |          |          |                |          |          |                     |
|-------------------------------------------------------|----|----|----------|----------|----------------|----------|----------|---------------------|
| N2                                                    | HS | II | 10880925 | 10882427 | WBGene00009700 | lurp-1   | F44F4.1  | 0.157165242781264   |
| AGIWUR27458                                           |    |    |          |          |                |          |          |                     |
| N2                                                    | HS | II | 10882408 | 10884462 | WBGene00009701 | egg-3    | F44F4.2  | 0.0583066312649265  |
| AGIWUR20772                                           |    |    |          |          |                |          |          |                     |
| N2                                                    | HS | II | 10884705 | 10885878 | WBGene00009702 | F44F4.3  | F44F4.3  | -0.0206474434474444 |
| AGIWUR21067                                           |    |    |          |          |                |          |          |                     |
| N2                                                    | HS | II | 10889279 | 10893288 | WBGene00004222 | ptr-8    | F44F4.4  | 0.102973566012118   |
| AGIWUR37161                                           |    |    |          |          |                |          |          |                     |
| N2                                                    | HS | II | 10893275 | 10895088 | WBGene00005036 | sra-10   | F44F4.5  | -0.0120231442584053 |
| AGIWUR12637                                           |    |    |          |          |                |          |          |                     |
| N2                                                    | HS | II | 10900042 | 10902204 | WBGene00001626 | gly-1    | F44F4.6  | 0.0464046687193234  |
| AGIWUR1846                                            |    |    |          |          |                |          |          |                     |
| N2                                                    | HS | II | 10902756 | 10904479 | WBGene00005038 | sra-12   | F44F4.7  | 0.130814715931276   |
| AGIWUR16841;AGIWUR26876                               |    |    |          |          |                |          |          |                     |
| N2                                                    | HS | II | 10908808 | 10910319 | WBGene00005037 | sra-11   | F44F4.13 |                     |
| 0.0354919663529571 AGIWUR9493;AGIWUR17231;AGIWUR40553 |    |    |          |          |                |          |          |                     |
| N2                                                    | HS | II | 10915901 | 10917274 | WBGene00009705 | F44F4.10 |          | F44F4.10            |
| 0.205584928387523 AGIWUR15150                         |    |    |          |          |                |          |          |                     |
| N2                                                    | HS | II | 10918706 | 10920202 | WBGene00006530 | tba-4    | F44F4.11 |                     |
| -0.0199507918048694 AGIWUR1211;AGIWUR23556            |    |    |          |          |                |          |          |                     |
| N2                                                    | HS | II | 10922672 | 10922974 | WBGene00012489 | Y19D2B.1 |          | Y19D2B.1            |
| -0.181178039378739 AGIWUR43206                        |    |    |          |          |                |          |          |                     |
| N2                                                    | HS | II | 10923716 | 10924595 | WBGene00012490 | Y19D2B.2 |          | Y19D2B.2            |
| -0.147980906089754 AGIWUR25225                        |    |    |          |          |                |          |          |                     |
| N2                                                    | HS | II | 10926561 | 10931075 | WBGene00010988 | metr-1   | R03D7.1  | -0.0291473112729337 |
| AGIWUR5757;AGIWUR6884;AGIWUR43211                     |    |    |          |          |                |          |          |                     |
| N2                                                    | HS | II | 10935726 | 10942198 | WBGene00014814 | R03D7.3  | R03D7.3  | -0.186040788311773  |
| AGIWUR4633;AGIWUR35952                                |    |    |          |          |                |          |          |                     |
| N2                                                    | HS | II | 10943390 | 10945660 | WBGene00010990 | R03D7.4  | R03D7.4  | 0.129697112535759   |
| AGIWUR31576                                           |    |    |          |          |                |          |          |                     |
| N2                                                    | HS | II | 10947610 | 10949184 | WBGene00010991 | R03D7.5  | R03D7.5  | 0.0675584281805968  |
| AGIWUR30739                                           |    |    |          |          |                |          |          |                     |
| N2                                                    | HS | II | 10950350 | 10951604 | WBGene00001753 | gst-5    | R03D7.6  | 0.152501849624151   |
| AGIWUR32044                                           |    |    |          |          |                |          |          |                     |
| N2                                                    | HS | II | 10951879 | 10953165 | WBGene00003783 | nos-1    | R03D7.7  | -0.118492892177752  |
| AGIWUR19424                                           |    |    |          |          |                |          |          |                     |
| N2                                                    | HS | II | 10953594 | 10956878 | WBGene00010992 | R03D7.8  | R03D7.8  | -0.118118862435196  |
| AGIWUR44506                                           |    |    |          |          |                |          |          |                     |
| N2                                                    | HS | II | 10968386 | 11012247 | WBGene00004215 | ptp-3    | C09D8.1  | -0.130022123586475  |

|                                                                       |    |    |          |          |                 |           |          |                     |  |
|-----------------------------------------------------------------------|----|----|----------|----------|-----------------|-----------|----------|---------------------|--|
| AGIWUR3429;AGIWUR6662;AGIWUR13959;AGIWUR34474;AGIWUR35314;AGIWUR37980 |    |    |          |          |                 |           |          |                     |  |
| N2                                                                    | HS | II | 11012397 | 11013820 | WBGene00000657  | col-81    | F38A3.1  | -0.0615615941908363 |  |
| AGIWUR3425                                                            |    |    |          |          |                 |           |          |                     |  |
| N2                                                                    | HS | II | 11015588 | 11016881 | WBGene00004300  | ram-2     | F38A3.2  | 0.200498098146827   |  |
| AGIWUR4854;AGIWUR6326;AGIWUR11647                                     |    |    |          |          |                 |           |          |                     |  |
| N2                                                                    | HS | II | 11022370 | 11027909 | WBGene00002957  | let-858   | F33A8.1  | 0.0781290574348699  |  |
| AGIWUR12874;AGIWUR29582                                               |    |    |          |          |                 |           |          |                     |  |
| N2                                                                    | HS | II | 11027962 | 11030404 | WBGene00003756  | nlp-18    | F33A8.2  | -0.172071857370184  |  |
| AGIWUR5506;AGIWUR38400                                                |    |    |          |          |                 |           |          |                     |  |
| N2                                                                    | HS | II | 11036074 | 11039471 | WBGene00009356  | F33A8.10  |          | F33A8.10            |  |
| 0.278465480032803 AGIWUR20869                                         |    |    |          |          |                 |           |          |                     |  |
| N2                                                                    | HS | II | 11039348 | 11041206 | WBGene00000472  | cey-1     | F33A8.3  | -0.0168840645906112 |  |
| AGIWUR534;AGIWUR9013;AGIWUR15336;AGIWUR29341;AGIWUR30653              |    |    |          |          |                 |           |          |                     |  |
| N2                                                                    | HS | II | 11044135 | 11045968 | WBGene00000658  | col-83    | F33A8.9  | -0.33740980379999   |  |
| AGIWUR40812                                                           |    |    |          |          |                 |           |          |                     |  |
| N2                                                                    | HS | II | 11045786 | 11049030 | WBGene00009352  | F33A8.4   | F33A8.4  | 0.140853381883087   |  |
| AGIWUR17337                                                           |    |    |          |          |                 |           |          |                     |  |
| N2                                                                    | HS | II | 11049144 | 11049913 | WBGene00009353  | sdhd-1    | F33A8.5  | -0.0653890680027835 |  |
| AGIWUR2216                                                            |    |    |          |          |                 |           |          |                     |  |
| N2                                                                    | HS | II | 11058096 | 11089456 | WBGene00006788  | unc-53    | F45E10.1 |                     |  |
| -0.253119082593225 AGIWUR14085                                        |    |    |          |          |                 |           |          |                     |  |
| N2                                                                    | HS | II | 11092713 | 11093871 | WBGene00004455  | rpl-42    | C09H10.1 |                     |  |
| -0.00508506305790135 AGIWUR24645                                      |    |    |          |          |                 |           |          |                     |  |
| N2                                                                    | HS | II | 11095048 | 11096475 | WBGene00007504  | C09H10.10 |          | C09H10.10           |  |
| -0.194330417737998 AGIWUR31480                                        |    |    |          |          |                 |           |          |                     |  |
| N2                                                                    | HS | II | 11096542 | 11097204 | WBGene00004454  | rpl-36.A  |          | C09H10.2            |  |
| 0.0451806116469662 AGIWUR20646                                        |    |    |          |          |                 |           |          |                     |  |
| N2                                                                    | HS | II | 11097841 | 11100146 | WBGene00003831  | nuo-1     | C09H10.3 |                     |  |
| -0.0351055638006335 AGIWUR11037;AGIWUR44982                           |    |    |          |          |                 |           |          |                     |  |
| N2                                                                    | HS | II | 11100141 | 11100462 | WBGene000043120 | C09H10.4  |          | C09H10.4            |  |
| -0.182765627500593 AGIWUR35898                                        |    |    |          |          |                 |           |          |                     |  |
| N2                                                                    | HS | II | 11100479 | 11103779 | WBGene00007499  | C09H10.5  |          | C09H10.5            |  |
| 0.242341913749222 AGIWUR19231                                         |    |    |          |          |                 |           |          |                     |  |
| N2                                                                    | HS | II | 11104462 | 11106046 | WBGene00007503  | C09H10.9  |          | C09H10.9            |  |
| 0.172634404465764 AGIWUR20653                                         |    |    |          |          |                 |           |          |                     |  |
| N2                                                                    | HS | II | 11106616 | 11108070 | WBGene00007500  | nasp-1    | C09H10.6 |                     |  |
| 0.122393097078444 AGIWUR24585                                         |    |    |          |          |                 |           |          |                     |  |
| N2                                                                    | HS | II | 11108159 | 11109583 | WBGene00007501  | apc-17    | C09H10.7 |                     |  |
| -0.212558917229728 AGIWUR44608                                        |    |    |          |          |                 |           |          |                     |  |

|                                                                                |    |    |          |          |                |          |          |                     |
|--------------------------------------------------------------------------------|----|----|----------|----------|----------------|----------|----------|---------------------|
| N2                                                                             | HS | II | 11109584 | 11111169 | WBGene00007502 | glb-4    | C09H10.8 |                     |
| -0.238044011048446 AGIWUR34694                                                 |    |    |          |          |                |          |          |                     |
| N2                                                                             | HS | II | 11112719 | 11120788 | WBGene00003133 | mat-2    | W10C6.1  | -0.0737155445835516 |
| AGIWUR1142;AGIWUR11753;AGIWUR12091;AGIWUR12124;AGIWUR13946;AGIWUR26553         |    |    |          |          |                |          |          |                     |
| N2                                                                             | HS | II | 11120882 | 11121900 | WBGene00044160 | W10C6.2  | W10C6.2  |                     |
| -0.00917657603548339 AGIWUR3254;AGIWUR7000;AGIWUR13656;AGIWUR14327;AGIWUR41178 |    |    |          |          |                |          |          |                     |
| N2                                                                             | HS | II | 11125371 | 11126362 | WBGene00004478 | rps-9    | F40F8.10 |                     |
| 0.0234557328609881 AGIWUR13095;AGIWUR27232;AGIWUR44243                         |    |    |          |          |                |          |          |                     |
| N2                                                                             | HS | II | 11126932 | 11127530 | WBGene00003076 | lsm-1    | F40F8.9  | 0.0371227958973535  |
| AGIWUR21932                                                                    |    |    |          |          |                |          |          |                     |
| N2                                                                             | HS | II | 11127634 | 11129256 | WBGene00009575 | F40F8.1  | F40F8.1  | -0.0602290354019566 |
| AGIWUR30901                                                                    |    |    |          |          |                |          |          |                     |
| N2                                                                             | HS | II | 11129289 | 11130187 | WBGene00009576 | F40F8.3  | F40F8.3  | -0.166687181608843  |
| AGIWUR8310;AGIWUR20158;AGIWUR29689;AGIWUR34395;AGIWUR34689                     |    |    |          |          |                |          |          |                     |
| N2                                                                             | HS | II | 11130275 | 11130698 | WBGene00044917 | F40F8.12 |          | F40F8.12            |
| -0.0844262409394112 AGIWUR40447                                                |    |    |          |          |                |          |          |                     |
| N2                                                                             | HS | II | 11130690 | 11132648 | WBGene00044916 | F40F8.11 |          | F40F8.11            |
| -0.217893518890742 AGIWUR7480;AGIWUR13537;AGIWUR13618;AGIWUR40789;AGIWUR42894  |    |    |          |          |                |          |          |                     |
| N2                                                                             | HS | II | 11132861 | 11135140 | WBGene00009578 | F40F8.5  | F40F8.5  | 0.310195118109217   |
| AGIWUR4445;AGIWUR33682                                                         |    |    |          |          |                |          |          |                     |
| N2                                                                             | HS | II | 11139407 | 11140275 | WBGene00009577 | F40F8.4  | F40F8.4  | -0.036910234283293  |
| AGIWUR8970;AGIWUR28271;AGIWUR29838;AGIWUR35430                                 |    |    |          |          |                |          |          |                     |
| N2                                                                             | HS | II | 11142751 | 11150381 | WBGene00009579 | arrd-6   | F40F8.8  | -0.0947898617923242 |
| AGIWUR36363                                                                    |    |    |          |          |                |          |          |                     |
| N2                                                                             | HS | II | 11150299 | 11152600 | WBGene00004096 | pqm-1    | F40F8.7  | 0.259339794061152   |
| AGIWUR28055                                                                    |    |    |          |          |                |          |          |                     |
| N2                                                                             | HS | II | 11157094 | 11162481 | WBGene00004227 | ptr-13   | K07C10.1 |                     |
| -0.0228159675663298 AGIWUR42577                                                |    |    |          |          |                |          |          |                     |
| N2                                                                             | HS | II | 11171446 | 11175479 | WBGene00009511 | F37H8.2  | F37H8.2  | 0.214363222580715   |
| AGIWUR28562                                                                    |    |    |          |          |                |          |          |                     |
| N2                                                                             | HS | II | 11181654 | 11183147 | WBGene00009512 | F37H8.3  | F37H8.3  | -0.169741420669052  |
| AGIWUR7905                                                                     |    |    |          |          |                |          |          |                     |
| N2                                                                             | HS | II | 11183075 | 11184807 | WBGene00003046 | lir-3    | F37H8.1  | 0.0314020402937096  |
| AGIWUR1936                                                                     |    |    |          |          |                |          |          |                     |
| N2                                                                             | HS | II | 11186028 | 11188080 | WBGene00009513 | sfxn-1.2 |          | F37H8.4             |
| 0.0057508926346248 AGIWUR24608                                                 |    |    |          |          |                |          |          |                     |
| N2                                                                             | HS | II | 11188206 | 11189437 | WBGene00009514 | F37H8.5  | F37H8.5  | 0.0491121684597502  |
| AGIWUR7339                                                                     |    |    |          |          |                |          |          |                     |
| N2                                                                             | HS | II | 11203221 | 11220642 | WBGene00011522 | srp-1    | T06D8.1  | -0.194336964380504  |

|                                                                                 |    |    |          |          |                |          |         |                     |  |
|---------------------------------------------------------------------------------|----|----|----------|----------|----------------|----------|---------|---------------------|--|
| AGIWUR17063;AGIWUR23459;AGIWUR36933                                             |    |    |          |          |                |          |         |                     |  |
| N2                                                                              | HS | II | 11222305 | 11226548 | WBGene00011524 | T06D8.3  | T06D8.3 | 0.0350644601013137  |  |
| AGIWUR21094                                                                     |    |    |          |          |                |          |         |                     |  |
| N2                                                                              | HS | II | 11226679 | 11232835 | WBGene00011523 | T06D8.2  | T06D8.2 | 0.187736294195954   |  |
| AGIWUR9844;AGIWUR12839;AGIWUR36573                                              |    |    |          |          |                |          |         |                     |  |
| N2                                                                              | HS | II | 11232756 | 11234952 | WBGene00011526 | cox-15   | T06D8.5 | -0.106549512162687  |  |
| AGIWUR17356                                                                     |    |    |          |          |                |          |         |                     |  |
| N2                                                                              | HS | II | 11235053 | 11236450 | WBGene00011527 | cchl-1   | T06D8.6 | -0.117110291533659  |  |
| AGIWUR20738;AGIWUR29488                                                         |    |    |          |          |                |          |         |                     |  |
| N2                                                                              | HS | II | 11236624 | 11237323 | WBGene00011528 | T06D8.7  | T06D8.7 | 0.0978028558520876  |  |
| AGIWUR41769                                                                     |    |    |          |          |                |          |         |                     |  |
| N2                                                                              | HS | II | 11237447 | 11239092 | WBGene00004465 | rpn-9    | T06D8.8 | 0.0047391558060097  |  |
| AGIWUR3086;AGIWUR16274                                                          |    |    |          |          |                |          |         |                     |  |
| N2                                                                              | HS | II | 11239407 | 11240988 | WBGene00011529 | T06D8.9  | T06D8.9 | -0.0879070567177918 |  |
| AGIWUR7515;AGIWUR38105                                                          |    |    |          |          |                |          |         |                     |  |
| N2                                                                              | HS | II | 11240932 | 11247514 | WBGene00011530 | T06D8.10 |         | T06D8.10            |  |
| 0.111266711059201 AGIWUR28942                                                   |    |    |          |          |                |          |         |                     |  |
| N2                                                                              | HS | II | 11257081 | 11258506 | WBGene00011465 | T05B9.2  | T05B9.2 |                     |  |
| -0.00372424878779665 AGIWUR1889;AGIWUR27281;AGIWUR29593;AGIWUR34102;AGIWUR38410 |    |    |          |          |                |          |         |                     |  |
| N2                                                                              | HS | II | 11260087 | 11261256 | WBGene00011464 | T05B9.1  | T05B9.1 |                     |  |
| -0.00383530134788046 AGIWUR5135                                                 |    |    |          |          |                |          |         |                     |  |
| N2                                                                              | HS | II | 11269124 | 11271599 | WBGene00000851 | cut-1    | C47G2.1 | 0.00443173635983385 |  |
| AGIWUR10983                                                                     |    |    |          |          |                |          |         |                     |  |
| N2                                                                              | HS | II | 11281986 | 11283953 | WBGene00006853 | unc-130  | C47G2.2 | -0.391844319222303  |  |
| AGIWUR15293                                                                     |    |    |          |          |                |          |         |                     |  |
| N2                                                                              | HS | II | 11288690 | 11290159 | WBGene00008164 | C47G2.3  | C47G2.3 | -0.0325261027694066 |  |
| AGIWUR4536;AGIWUR5872                                                           |    |    |          |          |                |          |         |                     |  |
| N2                                                                              | HS | II | 11290843 | 11293606 | WBGene00008165 | C47G2.4  | C47G2.4 | 0.199042458590311   |  |
| AGIWUR17801                                                                     |    |    |          |          |                |          |         |                     |  |
| N2                                                                              | HS | II | 11293997 | 11294579 | WBGene00044038 | C47G2.6  | C47G2.6 | 0.0716722404132204  |  |
| AGIWUR25886                                                                     |    |    |          |          |                |          |         |                     |  |
| N2                                                                              | HS | II | 11295563 | 11296019 | WBGene00044039 | C47G2.7  | C47G2.7 | -0.0225137525928183 |  |
| AGIWUR23223                                                                     |    |    |          |          |                |          |         |                     |  |
| N2                                                                              | HS | II | 11297700 | 11301254 | WBGene00008166 | saps-1   | C47G2.5 | 0.109332664465864   |  |
| AGIWUR26416;AGIWUR31317;AGIWUR39412                                             |    |    |          |          |                |          |         |                     |  |
| N2                                                                              | HS | II | 11301359 | 11302783 | WBGene00006414 | raga-1   | T24F1.1 |                     |  |
| -0.00175649665255406 AGIWUR32876                                                |    |    |          |          |                |          |         |                     |  |
| N2                                                                              | HS | II | 11302891 | 11305683 | WBGene00011994 | samp-1   | T24F1.2 | -0.199517146640051  |  |
| AGIWUR30                                                                        |    |    |          |          |                |          |         |                     |  |

|                                                            |    |    |          |          |                |          |         |                     |
|------------------------------------------------------------|----|----|----------|----------|----------------|----------|---------|---------------------|
| N2                                                         | HS | II | 11306399 | 11311940 | WBGene00011995 | rsf-1    | T24F1.3 | -0.018422193263417  |
| AGIWUR16058                                                |    |    |          |          |                |          |         |                     |
| N2                                                         | HS | II | 11312460 | 11313346 | WBGene00011999 | T24F1.7  | T24F1.7 | 0.0237545760025561  |
| AGIWUR545                                                  |    |    |          |          |                |          |         |                     |
| N2                                                         | HS | II | 11313331 | 11314265 | WBGene00011996 | T24F1.4  | T24F1.4 | -0.0904095767420348 |
| AGIWUR38428                                                |    |    |          |          |                |          |         |                     |
| N2                                                         | HS | II | 11319241 | 11319691 | WBGene00011997 | nlp-51   | T24F1.5 | -0.336995016184268  |
| AGIWUR32939                                                |    |    |          |          |                |          |         |                     |
| N2                                                         | HS | II | 11323051 | 11329429 | WBGene00007041 | tag-180  | T24F1.6 | 0.0173321475207846  |
| AGIWUR3735;AGIWUR11884;AGIWUR43713                         |    |    |          |          |                |          |         |                     |
| N2                                                         | HS | II | 11336693 | 11337837 | WBGene00005016 | sqt-1    | B0491.2 | 0.0376873685821746  |
| AGIWUR5183                                                 |    |    |          |          |                |          |         |                     |
| N2                                                         | HS | II | 11338451 | 11339620 | WBGene00007190 | rmd-3    | B0491.3 | -0.110230532353545  |
| AGIWUR3162;AGIWUR18812;AGIWUR39848                         |    |    |          |          |                |          |         |                     |
| N2                                                         | HS | II | 11340134 | 11343530 | WBGene00007191 | lgc-20   | B0491.4 | 0.0132234629036514  |
| AGIWUR19561                                                |    |    |          |          |                |          |         |                     |
| N2                                                         | HS | II | 11343716 | 11345743 | WBGene00007192 | B0491.5  | B0491.5 | -0.11105695937702   |
| AGIWUR6670;AGIWUR9367                                      |    |    |          |          |                |          |         |                     |
| N2                                                         | HS | II | 11345943 | 11348248 | WBGene00007193 | B0491.6  | B0491.6 | 0.145331264228311   |
| AGIWUR12652                                                |    |    |          |          |                |          |         |                     |
| N2                                                         | HS | II | 11348430 | 11349946 | WBGene00007189 | B0491.1  | B0491.1 | -0.165700255034899  |
| AGIWUR37232                                                |    |    |          |          |                |          |         |                     |
| N2                                                         | HS | II | 11350192 | 11351373 | WBGene00007194 | B0491.7  | B0491.7 | 0.347345725758611   |
| AGIWUR41619                                                |    |    |          |          |                |          |         |                     |
| N2                                                         | HS | II | 11358447 | 11370311 | WBGene00000529 | clh-2    | B0491.8 | 0.0661061938055503  |
| AGIWUR16507;AGIWUR21676;AGIWUR31905;AGIWUR39721            |    |    |          |          |                |          |         |                     |
| N2                                                         | HS | II | 11370315 | 11372145 | WBGene00007891 | C33B4.2  | C33B4.2 | 0.492290588864625   |
| AGIWUR36998                                                |    |    |          |          |                |          |         |                     |
| N2                                                         | HS | II | 11375608 | 11376269 | WBGene00007892 | C33B4.4  | C33B4.4 | -0.0430274445388434 |
| AGIWUR17076                                                |    |    |          |          |                |          |         |                     |
| N2                                                         | HS | II | 11383327 | 11384570 | WBGene00007893 | C33B4.5  | C33B4.5 | 0.257193741907014   |
| AGIWUR19815                                                |    |    |          |          |                |          |         |                     |
| N2                                                         | HS | II | 11384594 | 11390862 | WBGene00006444 | shn-1    | C33B4.3 | -0.215848954927681  |
| AGIWUR34943                                                |    |    |          |          |                |          |         |                     |
| N2                                                         | HS | II | 11410091 | 11412280 | WBGene00044029 | C05D12.7 |         | C05D12.7            |
| 0.00938013941599358                                        |    |    |          |          |                |          |         |                     |
| N2                                                         | HS | II | 11412232 | 11415820 | WBGene00007339 | C05D12.1 |         | C05D12.1            |
| -0.3576048377834                                           |    |    |          |          |                |          |         |                     |
| N2                                                         | HS | II | 11418314 | 11423393 | WBGene00007340 | C05D12.2 |         | C05D12.2            |
| AGIWUR12511                                                |    |    |          |          |                |          |         |                     |
| AGIWUR1320;AGIWUR20111;AGIWUR26683;AGIWUR26954;AGIWUR33534 |    |    |          |          |                |          |         |                     |

|                     |                                                            |          |                |            |            |
|---------------------|------------------------------------------------------------|----------|----------------|------------|------------|
| -0.0391999798829588 | AGIWUR10538                                                |          |                |            |            |
| N2 HS II            | 11424830                                                   | 11430607 | WBGene00014666 | C05D12.3   | C05D12.3   |
| 0.0337507139047419  | AGIWUR21963;AGIWUR23327                                    |          |                |            |            |
| N2 HS II            | 11431709                                                   | 11432766 | WBGene00007341 | C05D12.4   | C05D12.4   |
| -0.0753411594990929 | AGIWUR6395                                                 |          |                |            |            |
| N2 HS II            | 11434221                                                   | 11434958 | WBGene00007342 | C05D12.5   | C05D12.5   |
| -0.201337440592489  | AGIWUR19686;AGIWUR25321;AGIWUR39345                        |          |                |            |            |
| N2 HS II            | 11435212                                                   | 11438464 | WBGene00006915 | vha-6      | VW02B12L.1 |
| -0.0408737172037466 | AGIWUR891;AGIWUR8238;AGIWUR15957                           |          |                |            |            |
| N2 HS II            | 11439177                                                   | 11439762 | WBGene00012155 | VW02B12L.2 | VW02B12L.2 |
| -0.142643708618161  | AGIWUR3395                                                 |          |                |            |            |
| N2 HS II            | 11442693                                                   | 11444009 | WBGene00012156 | ebp-2      | VW02B12L.3 |
| -0.141849473569079  | AGIWUR7374;AGIWUR30744                                     |          |                |            |            |
| N2 HS II            | 11444162                                                   | 11445255 | WBGene00012157 | adbp-1     | VW02B12L.4 |
| 0.114211490546266   | AGIWUR1736                                                 |          |                |            |            |
| N2 HS II            | 11445289                                                   | 11448895 | WBGene00043534 | W02B12.13  | W02B12.13  |
| -0.0710227860351509 | AGIWUR23311;AGIWUR26362;AGIWUR40669                        |          |                |            |            |
| N2 HS II            | 11448965                                                   | 11451445 | WBGene00012201 | W02B12.1   | W02B12.1   |
| 0.204509420215597   | AGIWUR3778                                                 |          |                |            |            |
| N2 HS II            | 11451444                                                   | 11452955 | WBGene00004699 | rsp-2      | W02B12.2   |
| -0.249554847723438  | AGIWUR7342;AGIWUR16886;AGIWUR19469;AGIWUR24287;AGIWUR28283 |          |                |            |            |
| N2 HS II            | 11453362                                                   | 11455864 | WBGene00004698 | rsp-1      | W02B12.3   |
| -0.0560738807172294 | AGIWUR8808;AGIWUR19633;AGIWUR44613                         |          |                |            |            |
| N2 HS II            | 11455759                                                   | 11459356 | WBGene00012202 | W02B12.4   | W02B12.4   |
| -0.127364994076933  | AGIWUR9639;AGIWUR25066;AGIWUR32512                         |          |                |            |            |
| N2 HS II            | 11460215                                                   | 11464129 | WBGene00000196 | aars-1     | W02B12.6   |
| 0.108986774073662   | AGIWUR42057                                                |          |                |            |            |
| N2 HS II            | 11464892                                                   | 11468653 | WBGene00012203 | rga-1      | W02B12.8   |
| 0.0602547143818617  | AGIWUR9836;AGIWUR17737;AGIWUR20910;AGIWUR37766             |          |                |            |            |
| N2 HS II            | 11468552                                                   | 11469624 | WBGene00044026 | cisd-1     | W02B12.15  |
| 0.0495828780696002  | AGIWUR9645;AGIWUR11244;AGIWUR30877;AGIWUR36766;AGIWUR43387 |          |                |            |            |
| N2 HS II            | 11470010                                                   | 11472033 | WBGene00012204 | mfn-1      | W02B12.9   |
| -0.0541627899725228 | AGIWUR7193;AGIWUR40221                                     |          |                |            |            |
| N2 HS II            | 11472135                                                   | 11473571 | WBGene00012205 | W02B12.10  | W02B12.10  |
| 0.0632384158165085  | AGIWUR25960                                                |          |                |            |            |
| N2 HS II            | 11473861                                                   | 11476019 | WBGene00012206 | W02B12.11  | W02B12.11  |
| -0.133424945039689  | AGIWUR16635;AGIWUR22977;AGIWUR44267                        |          |                |            |            |
| N2 HS II            | 11476757                                                   | 11479176 | WBGene00012207 | W02B12.12  | W02B12.12  |
| 0.0389673209006993  | AGIWUR13834;AGIWUR34835;AGIWUR35852                        |          |                |            |            |



|                                                                                |    |    |          |          |                |           |          |                     |
|--------------------------------------------------------------------------------|----|----|----------|----------|----------------|-----------|----------|---------------------|
| N2                                                                             | HS | II | 11480432 | 11482385 | WBGene00007147 | B0334.9   | B0334.9  | 0.300275440953378   |
| AGIWUR3847                                                                     |    |    |          |          |                |           |          |                     |
| N2                                                                             | HS | II | 11483201 | 11485359 | WBGene00006660 | twk-5     | B0334.2  | 0.11206813124546    |
| AGIWUR24833                                                                    |    |    |          |          |                |           |          |                     |
| N2                                                                             | HS | II | 11485510 | 11486774 | WBGene00007142 | ttr-18    | B0334.1  | -0.0788543783814131 |
| AGIWUR35879                                                                    |    |    |          |          |                |           |          |                     |
| N2                                                                             | HS | II | 11488302 | 11489619 | WBGene00007149 | B0334.13  |          | B0334.13            |
| 0.482190018682607 AGIWUR2411                                                   |    |    |          |          |                |           |          |                     |
| N2                                                                             | HS | II | 11489605 | 11493039 | WBGene00007143 | B0334.3   | B0334.3  | -0.377759827711778  |
| AGIWUR8770                                                                     |    |    |          |          |                |           |          |                     |
| N2                                                                             | HS | II | 11493231 | 11495321 | WBGene00003868 | ooc-3     | B0334.11 |                     |
| 0.0467056846629408 AGIWUR41973                                                 |    |    |          |          |                |           |          |                     |
| N2                                                                             | HS | II | 11495692 | 11496663 | WBGene00007144 | B0334.4   | B0334.4  |                     |
| -0.00893619777956545 AGIWUR44324                                               |    |    |          |          |                |           |          |                     |
| N2                                                                             | HS | II | 11497665 | 11499620 | WBGene00007145 | B0334.5   | B0334.5  | -0.132129429875295  |
| AGIWUR1708                                                                     |    |    |          |          |                |           |          |                     |
| N2                                                                             | HS | II | 11510673 | 11513890 | WBGene00007146 | B0334.6   | B0334.6  | 0.0282576965511865  |
| AGIWUR18391                                                                    |    |    |          |          |                |           |          |                     |
| N2                                                                             | HS | II | 11515075 | 11518154 | WBGene00005267 | srh-44    | B0334.7  | 0.0620167520466248  |
| AGIWUR18781                                                                    |    |    |          |          |                |           |          |                     |
| N2                                                                             | HS | II | 11519323 | 11527062 | WBGene00000090 | age-1     | B0334.8  | -0.0853269299633705 |
| AGIWUR6065;AGIWUR20151;AGIWUR40421                                             |    |    |          |          |                |           |          |                     |
| N2                                                                             | HS | II | 11527172 | 11533814 | WBGene00007013 | mdt-8     | Y62F5A.1 |                     |
| -0.0726569569335691 AGIWUR10085;AGIWUR18350                                    |    |    |          |          |                |           |          |                     |
| N2                                                                             | HS | II | 11533925 | 11534479 | WBGene00077453 | Y62F5A.12 |          | Y62F5A.12           |
| 0.0127382580678059 AGIWUR15635;AGIWUR22508;AGIWUR29852;AGIWUR30561;AGIWUR32531 |    |    |          |          |                |           |          |                     |
| N2                                                                             | HS | II | 11535165 | 11538841 | WBGene00013387 | Y62F5A.9  |          | Y62F5A.9            |
| 0.0911111761593766 AGIWUR2621                                                  |    |    |          |          |                |           |          |                     |
| N2                                                                             | HS | II | 11538904 | 11540630 | WBGene00010055 | F54D5.12  |          | F54D5.12            |
| -0.147890928972188 AGIWUR4071;AGIWUR32091;AGIWUR43219                          |    |    |          |          |                |           |          |                     |
| N2                                                                             | HS | II | 11540772 | 11542579 | WBGene00010054 | F54D5.11  |          | F54D5.11            |
| 0.121510946137649 AGIWUR23057                                                  |    |    |          |          |                |           |          |                     |
| N2                                                                             | HS | II | 11542636 | 11544875 | WBGene00010053 | F54D5.9   | F54D5.9  | -0.0416452055059437 |
| AGIWUR20809                                                                    |    |    |          |          |                |           |          |                     |
| N2                                                                             | HS | II | 11545563 | 11547366 | WBGene00001031 | dnj-13    | F54D5.8  | -0.540156189508602  |
| AGIWUR32433                                                                    |    |    |          |          |                |           |          |                     |
| N2                                                                             | HS | II | 11547481 | 11549313 | WBGene00010052 | F54D5.7   | F54D5.7  | -0.174942410270645  |
| AGIWUR16917;AGIWUR18203                                                        |    |    |          |          |                |           |          |                     |
| N2                                                                             | HS | II | 11558715 | 11564227 | WBGene00010057 | F54D5.15  |          | F54D5.15            |

|                                                                                                                       |    |    |                                                |          |                |          |          |                     |  |
|-----------------------------------------------------------------------------------------------------------------------|----|----|------------------------------------------------|----------|----------------|----------|----------|---------------------|--|
| 0.167187996872651                                                                                                     |    |    | AGIWUR23389                                    |          |                |          |          |                     |  |
| N2                                                                                                                    | HS | II | 11564385                                       | 11567020 | WBGene00010051 | F54D5.5  | F54D5.5  | -0.178758923632506  |  |
| AGIWUR4180;AGIWUR8631                                                                                                 |    |    |                                                |          |                |          |          |                     |  |
| N2                                                                                                                    | HS | II | 11569818                                       | 11571002 | WBGene00010050 | F54D5.4  | F54D5.4  | 0.0185553587017928  |  |
| AGIWUR25511;AGIWUR35726;AGIWUR43286                                                                                   |    |    |                                                |          |                |          |          |                     |  |
| N2                                                                                                                    | HS | II | 11571805                                       | 11573025 | WBGene00010049 | F54D5.3  | F54D5.3  | 0.0295096758896829  |  |
| AGIWUR31038                                                                                                           |    |    |                                                |          |                |          |          |                     |  |
| N2                                                                                                                    | HS | II | 11573180                                       | 11575000 | WBGene00010048 | F54D5.2  | F54D5.2  | -0.193723456335908  |  |
| AGIWUR14382                                                                                                           |    |    |                                                |          |                |          |          |                     |  |
| N2                                                                                                                    | HS | II | 11574940                                       | 11577258 | WBGene00003960 | pcs-1    | F54D5.1  | -0.0604534742421023 |  |
| AGIWUR12093;AGIWUR26991;AGIWUR27917                                                                                   |    |    |                                                |          |                |          |          |                     |  |
| N2                                                                                                                    | HS | II | 11578716                                       | 11582758 | WBGene00010056 | smc-6    | F54D5.14 |                     |  |
| -0.314096619142322                                                                                                    |    |    | AGIWUR9293;AGIWUR28985;AGIWUR42540             |          |                |          |          |                     |  |
| N2                                                                                                                    | HS | II | 11582849                                       | 11588536 | WBGene00008361 | D1043.1  | D1043.1  | -0.0638567508073358 |  |
| AGIWUR31695                                                                                                           |    |    |                                                |          |                |          |          |                     |  |
| N2                                                                                                                    | HS | II | 11588464                                       | 11592060 | WBGene00008545 | F07A11.1 |          | F07A11.1            |  |
| 0.0872045945274502                                                                                                    |    |    | AGIWUR540                                      |          |                |          |          |                     |  |
| N2                                                                                                                    | HS | II | 11592392                                       | 11596590 | WBGene00008546 | gfat-1   | F07A11.2 |                     |  |
| -0.232967795474455                                                                                                    |    |    | AGIWUR7924                                     |          |                |          |          |                     |  |
| N2                                                                                                                    | HS | II | 11596767                                       | 11599809 | WBGene00003791 | npp-5    | F07A11.3 |                     |  |
| 0.0324149382927583                                                                                                    |    |    | AGIWUR15789                                    |          |                |          |          |                     |  |
| N2                                                                                                                    | HS | II | 11603956                                       | 11611532 | WBGene00008547 | F07A11.4 |          | F07A11.4            |  |
| 0.226520320429998                                                                                                     |    |    | AGIWUR16553                                    |          |                |          |          |                     |  |
| N2                                                                                                                    | HS | II | 11612257                                       | 11614391 | WBGene00008548 | F07A11.5 |          | F07A11.5            |  |
| 0.0179855189748466                                                                                                    |    |    | AGIWUR34591                                    |          |                |          |          |                     |  |
| N2                                                                                                                    | HS | II | 11614636                                       | 11633609 | WBGene00008549 | din-1    | F07A11.6 |                     |  |
| -0.147374358170907                                                                                                    |    |    |                                                |          |                |          |          |                     |  |
| AGIWUR2384;AGIWUR5574;AGIWUR20351;AGIWUR26081;AGIWUR29000;AGIWUR30375;AGIWUR35211;AGIWUR35355;AGIWUR40727;AGIWUR42354 |    |    |                                                |          |                |          |          |                     |  |
| N2                                                                                                                    | HS | II | 11640454                                       | 11641778 | WBGene00002194 | kin-6    | ZK20.2   | -0.0879451049260442 |  |
| AGIWUR20410                                                                                                           |    |    |                                                |          |                |          |          |                     |  |
| N2                                                                                                                    | HS | II | 11646747                                       | 11649139 | WBGene00013923 | ghi-1    | ZK20.1   | -0.213090196032148  |  |
| AGIWUR21946                                                                                                           |    |    |                                                |          |                |          |          |                     |  |
| N2                                                                                                                    | HS | II | 11649096                                       | 11651213 | WBGene00013925 | ZK20.4   | ZK20.4   | 0.140541736579952   |  |
| AGIWUR28663                                                                                                           |    |    |                                                |          |                |          |          |                     |  |
| N2                                                                                                                    | HS | II | 11651261                                       | 11652906 | WBGene00013924 | rad-23   | ZK20.3   |                     |  |
| -0.00460257491436344                                                                                                  |    |    | AGIWUR7698;AGIWUR12477;AGIWUR32141;AGIWUR39417 |          |                |          |          |                     |  |
| N2                                                                                                                    | HS | II | 11653096                                       | 11654194 | WBGene00004468 | rpn-12   | ZK20.5   | 0.0200567812742527  |  |
| AGIWUR27674                                                                                                           |    |    |                                                |          |                |          |          |                     |  |

|                                                                                                                                                                                                                                                           |    |    |          |          |                |            |          |                     |
|-----------------------------------------------------------------------------------------------------------------------------------------------------------------------------------------------------------------------------------------------------------|----|----|----------|----------|----------------|------------|----------|---------------------|
| N2                                                                                                                                                                                                                                                        | HS | II | 11654214 | 11657172 | WBGene00013926 | nep-1      | ZK20.6   | -0.0988642706801777 |
| AGIWUR2710                                                                                                                                                                                                                                                |    |    |          |          |                |            |          |                     |
| N2                                                                                                                                                                                                                                                        | HS | II | 11661583 | 11675927 | WBGene00007028 | trr-1      | C47D12.1 |                     |
| -0.134279677061034 AGIWUR5325;AGIWUR12751;AGIWUR31535                                                                                                                                                                                                     |    |    |          |          |                |            |          |                     |
| N2                                                                                                                                                                                                                                                        | HS | II | 11676306 | 11679197 | WBGene00008136 | C47D12.2   |          | C47D12.2            |
| -0.0118172234438045 AGIWUR5784                                                                                                                                                                                                                            |    |    |          |          |                |            |          |                     |
| N2                                                                                                                                                                                                                                                        | HS | II | 11679091 | 11681068 | WBGene00008137 | sfxn-1.4   |          | C47D12.3            |
| 0.174432248652277 AGIWUR19634                                                                                                                                                                                                                             |    |    |          |          |                |            |          |                     |
| N2                                                                                                                                                                                                                                                        | HS | II | 11681825 | 11682881 | WBGene00008138 | C47D12.4   |          | C47D12.4            |
| -0.155472844935892 AGIWUR23593                                                                                                                                                                                                                            |    |    |          |          |                |            |          |                     |
| N2                                                                                                                                                                                                                                                        | HS | II | 11683479 | 11685289 | WBGene00008139 | C47D12.5   |          | C47D12.5            |
| -0.00269154668825777 AGIWUR40843                                                                                                                                                                                                                          |    |    |          |          |                |            |          |                     |
| N2                                                                                                                                                                                                                                                        | HS | II | 11696171 | 11705371 | WBGene00008140 | xpf-1      | C47D12.8 |                     |
| -0.179360452978749 AGIWUR41402                                                                                                                                                                                                                            |    |    |          |          |                |            |          |                     |
| N2                                                                                                                                                                                                                                                        | HS | II | 11705989 | 11713610 | WBGene00012149 | VF13D12L.3 |          | VF13D12L.3          |
| 0.0187345787440307 AGIWUR3208                                                                                                                                                                                                                             |    |    |          |          |                |            |          |                     |
| N2                                                                                                                                                                                                                                                        | HS | II | 11713721 | 11716785 | WBGene00008744 | F13D12.10  |          | F13D12.10           |
| -0.547555412411757 AGIWUR10883                                                                                                                                                                                                                            |    |    |          |          |                |            |          |                     |
| N2                                                                                                                                                                                                                                                        | HS | II | 11720444 | 11722308 | WBGene00008739 | F13D12.3   |          | F13D12.3            |
| -0.280568544719479 AGIWUR43065                                                                                                                                                                                                                            |    |    |          |          |                |            |          |                     |
| N2                                                                                                                                                                                                                                                        | HS | II | 11724204 | 11726533 | WBGene00002262 | ldh-1      | F13D12.2 |                     |
| -0.166786643458746 AGIWUR13529                                                                                                                                                                                                                            |    |    |          |          |                |            |          |                     |
| N2                                                                                                                                                                                                                                                        | HS | II | 11726814 | 11728541 | WBGene00008740 | F13D12.5   |          | F13D12.5            |
| 0.040196618112752 AGIWUR26392                                                                                                                                                                                                                             |    |    |          |          |                |            |          |                     |
| N2                                                                                                                                                                                                                                                        | HS | II | 11728949 | 11731226 | WBGene00000114 | alh-8      | F13D12.4 |                     |
| -0.195591386388744                                                                                                                                                                                                                                        |    |    |          |          |                |            |          |                     |
| AGIWUR1224;AGIWUR5891;AGIWUR12029;AGIWUR14165;AGIWUR15757;AGIWUR16773;AGIWUR17567;AGIWUR18235;AGIWUR20123;AGIWUR20401;AGIWUR22020;AGIWUR24172;AGIWUR24755;AGIWUR29296;AGIWUR34759;AGIWUR38206;AGIWUR41118;AGIWUR41506;AGIWUR42887;AGIWUR43612;AGIWUR44212 |    |    |          |          |                |            |          |                     |
| N2                                                                                                                                                                                                                                                        | HS | II | 11731165 | 11732594 | WBGene00008742 | F13D12.8   |          | F13D12.8            |
| 0.063295709083981 AGIWUR8447                                                                                                                                                                                                                              |    |    |          |          |                |            |          |                     |
| N2                                                                                                                                                                                                                                                        | HS | II | 11739456 | 11742876 | WBGene00008741 | F13D12.6   |          | F13D12.6            |
| -0.181011519560396 AGIWUR13795                                                                                                                                                                                                                            |    |    |          |          |                |            |          |                     |
| N2                                                                                                                                                                                                                                                        | HS | II | 11742814 | 11748611 | WBGene00001679 | gpb-1      | F13D12.7 |                     |
| -0.0414662166740234                                                                                                                                                                                                                                       |    |    |          |          |                |            |          |                     |
| AGIWUR1044;AGIWUR6942;AGIWUR12617;AGIWUR16349;AGIWUR22503;AGIWUR22766;AGIWUR27763;AGIWUR37448;AGIWUR38234;AGIWUR39837                                                                                                                                     |    |    |          |          |                |            |          |                     |
| N2                                                                                                                                                                                                                                                        | HS | II | 11762166 | 11765662 | WBGene00009690 | F44E5.3    | F44E5.3  | -0.164120200792448  |
| AGIWUR39880                                                                                                                                                                                                                                               |    |    |          |          |                |            |          |                     |

|                                                                                                        |    |    |          |          |                |           |                             |
|--------------------------------------------------------------------------------------------------------|----|----|----------|----------|----------------|-----------|-----------------------------|
| N2                                                                                                     | HS | II | 11771978 | 11774039 | WBGene00206377 | F44E5.15  | F44E5.15                    |
| -0.00208968700526313 AGIWUR4924                                                                        |    |    |          |          |                |           |                             |
| N2                                                                                                     | HS | II | 11774144 | 11774559 | WBGene00009688 | F44E5.1   | F44E5.1 0.00681593150228466 |
| AGIWUR4219;AGIWUR6573;AGIWUR8599;AGIWUR12421;AGIWUR14398;AGIWUR25459;AGIWUR41823                       |    |    |          |          |                |           |                             |
| N2                                                                                                     | HS | II | 11774669 | 11777943 | WBGene00009661 | patr-1    | F43G6.9 -0.241365519868737  |
| AGIWUR8301;AGIWUR9463;AGIWUR35105                                                                      |    |    |          |          |                |           |                             |
| N2                                                                                                     | HS | II | 11778435 | 11782231 | WBGene00001016 | dna-2     | F43G6.1 -0.252902495044484  |
| AGIWUR42987                                                                                            |    |    |          |          |                |           |                             |
| N2                                                                                                     | HS | II | 11782987 | 11784086 | WBGene00009656 | F43G6.3   | F43G6.3 -0.278587595618514  |
| AGIWUR7939;AGIWUR9994;AGIWUR39798                                                                      |    |    |          |          |                |           |                             |
| N2                                                                                                     | HS | II | 11790759 | 11797322 | WBGene00009657 | F43G6.4   | F43G6.4 0.0662716858974193  |
| AGIWUR3169;AGIWUR32275                                                                                 |    |    |          |          |                |           |                             |
| N2                                                                                                     | HS | II | 11806567 | 11808805 | WBGene00005013 | jmjd-1.1  | F43G6.6                     |
| 0.103467532601126 AGIWUR21925                                                                          |    |    |          |          |                |           |                             |
| N2                                                                                                     | HS | II | 11812294 | 11814113 | WBGene00009660 | F43G6.8   | F43G6.8 0.135791204136826   |
| AGIWUR840                                                                                              |    |    |          |          |                |           |                             |
| N2                                                                                                     | HS | II | 11814839 | 11816706 | WBGene00009658 | F43G6.5   | F43G6.5 -0.262832761130136  |
| AGIWUR34108                                                                                            |    |    |          |          |                |           |                             |
| N2                                                                                                     | HS | II | 11818248 | 11819924 | WBGene00012396 | Y6D1A.2   | Y6D1A.2 0.177654557835056   |
| AGIWUR3568                                                                                             |    |    |          |          |                |           |                             |
| N2                                                                                                     | HS | II | 11827933 | 11830020 | WBGene00003979 | pes-5     | T27D12.4                    |
| -0.141008817992919 AGIWUR42789                                                                         |    |    |          |          |                |           |                             |
| N2                                                                                                     | HS | II | 11831062 | 11832575 | WBGene00012086 | cllec-144 | T27D12.3                    |
| -0.213389878037891 AGIWUR3999                                                                          |    |    |          |          |                |           |                             |
| N2                                                                                                     | HS | II | 11842617 | 11846026 | WBGene00012085 | T27D12.1  | T27D12.1                    |
| 0.000917511576616903 AGIWUR43883                                                                       |    |    |          |          |                |           |                             |
| N2                                                                                                     | HS | II | 11846508 | 11854743 | WBGene00000528 | clh-1     | T27D12.2                    |
| 0.0556240915137867 AGIWUR11100;AGIWUR27732;AGIWUR44823                                                 |    |    |          |          |                |           |                             |
| N2                                                                                                     | HS | II | 11861029 | 11863420 | WBGene00010787 | K12D12.5  | K12D12.5                    |
| -0.228121159328646 AGIWUR27714                                                                         |    |    |          |          |                |           |                             |
| N2                                                                                                     | HS | II | 11863525 | 11865506 | WBGene00010786 | K12D12.4  | K12D12.4                    |
| 0.0939087005326584 AGIWUR32968                                                                         |    |    |          |          |                |           |                             |
| N2                                                                                                     | HS | II | 11865523 | 11874702 | WBGene00003789 | npp-3     | K12D12.2                    |
| -0.147911903511304 AGIWUR28569                                                                         |    |    |          |          |                |           |                             |
| N2                                                                                                     | HS | II | 11875145 | 11880588 | WBGene00010785 | top-2     | K12D12.1                    |
| -0.0543373085527472 AGIWUR7051;AGIWUR16104;AGIWUR21962;AGIWUR37958;AGIWUR39538;AGIWUR40938;AGIWUR41350 |    |    |          |          |                |           |                             |
| N2                                                                                                     | HS | II | 11882614 | 11883685 | WBGene00014155 | ZK930.5   | ZK930.5 0.389694671948448   |
| AGIWUR19690                                                                                            |    |    |          |          |                |           |                             |
| N2                                                                                                     | HS | II | 11885588 | 11886601 | WBGene00014156 | ZK930.6   | ZK930.6 0.0503747424204022  |

|                                                                                              |    |    |                                                                       |          |                |           |          |                     |  |
|----------------------------------------------------------------------------------------------|----|----|-----------------------------------------------------------------------|----------|----------------|-----------|----------|---------------------|--|
| AGIWUR43651                                                                                  |    |    |                                                                       |          |                |           |          |                     |  |
| N2                                                                                           | HS | II | 11890992                                                              | 11893423 | WBGene00014152 | ZK930.2   | ZK930.2  | -0.111364451208996  |  |
| AGIWUR42824                                                                                  |    |    |                                                                       |          |                |           |          |                     |  |
| N2                                                                                           | HS | II | 11897365                                                              | 11901210 | WBGene00014153 | vab-23    | ZK930.3  | 0.0602985146848898  |  |
| AGIWUR3989;AGIWUR8215;AGIWUR15786                                                            |    |    |                                                                       |          |                |           |          |                     |  |
| N2                                                                                           | HS | II | 11906517                                                              | 11908601 | WBGene00014154 | ZK930.4   | ZK930.4  | -0.064950716797668  |  |
| AGIWUR34030                                                                                  |    |    |                                                                       |          |                |           |          |                     |  |
| N2                                                                                           | HS | II | 11908714                                                              | 11915852 | WBGene00014151 | vps-15    | ZK930.1  | -0.196653634985609  |  |
| AGIWUR6792                                                                                   |    |    |                                                                       |          |                |           |          |                     |  |
| N2                                                                                           | HS | II | 11916513                                                              | 11917643 | WBGene00001977 | hmg-12    | Y17G7A.1 |                     |  |
| -0.208324325322395                                                                           |    |    | AGIWUR3120;AGIWUR4269;AGIWUR7020;AGIWUR18198;AGIWUR21727;AGIWUR26983  |          |                |           |          |                     |  |
| N2                                                                                           | HS | II | 11917642                                                              | 11935343 | WBGene00003015 | lin-29    | W03C9.4  | -0.0572865706450196 |  |
| AGIWUR21089;AGIWUR27180                                                                      |    |    |                                                                       |          |                |           |          |                     |  |
| N2                                                                                           | HS | II | 11948727                                                              | 11949474 | WBGene00012223 | W03C9.8   | W03C9.8  | -0.0225332130433493 |  |
| AGIWUR29013                                                                                  |    |    |                                                                       |          |                |           |          |                     |  |
| N2                                                                                           | HS | II | 11953239                                                              | 11960743 | WBGene00012222 | W03C9.6   | W03C9.6  | 0.152775422696379   |  |
| AGIWUR32907                                                                                  |    |    |                                                                       |          |                |           |          |                     |  |
| N2                                                                                           | HS | II | 11960989                                                              | 11962128 | WBGene00012219 | W03C9.1   | W03C9.1  | -0.100528269936575  |  |
| AGIWUR38306                                                                                  |    |    |                                                                       |          |                |           |          |                     |  |
| N2                                                                                           | HS | II | 11962111                                                              | 11965258 | WBGene00012220 | W03C9.2   | W03C9.2  | -0.0501356199866496 |  |
| AGIWUR29253                                                                                  |    |    |                                                                       |          |                |           |          |                     |  |
| N2                                                                                           | HS | II | 11965339                                                              | 11966931 | WBGene00004271 | rab-7     | W03C9.3  | -0.111185000468704  |  |
| AGIWUR4192;AGIWUR4526;AGIWUR8098;AGIWUR17129;AGIWUR22447;AGIWUR23927;AGIWUR25730;AGIWUR33425 |    |    |                                                                       |          |                |           |          |                     |  |
| N2                                                                                           | HS | II | 11967048                                                              | 11967533 | WBGene00012221 | W03C9.5   | W03C9.5  | -0.401118731544488  |  |
| AGIWUR2780;AGIWUR8954;AGIWUR14848;AGIWUR18824;AGIWUR24306;AGIWUR42497                        |    |    |                                                                       |          |                |           |          |                     |  |
| N2                                                                                           | HS | II | 11968637                                                              | 11972334 | WBGene00003228 | mex-1     | W03C9.7  | -0.378683846154203  |  |
| AGIWUR43188                                                                                  |    |    |                                                                       |          |                |           |          |                     |  |
| N2                                                                                           | HS | II | 11972310                                                              | 11973732 | WBGene00012457 | acbp-6    | Y17G7B.1 |                     |  |
| 0.0271465967290503                                                                           |    |    | AGIWUR920;AGIWUR15194;AGIWUR16203;AGIWUR37119;AGIWUR38415;AGIWUR39380 |          |                |           |          |                     |  |
| N2                                                                                           | HS | II | 11975190                                                              | 11977659 | WBGene00012472 | Y17G7B.21 |          | Y17G7B.21           |  |
| -0.0364276169445183                                                                          |    |    | AGIWUR31694                                                           |          |                |           |          |                     |  |
| N2                                                                                           | HS | II | 11977784                                                              | 11979859 | WBGene00012471 | Y17G7B.20 |          | Y17G7B.20           |  |
| -0.240864307521651                                                                           |    |    | AGIWUR10903                                                           |          |                |           |          |                     |  |
| N2                                                                                           | HS | II | 11979838                                                              | 11989017 | WBGene00012458 | ash-2     | Y17G7B.2 |                     |  |
| 0.0557782471895045                                                                           |    |    | AGIWUR10526;AGIWUR16389;AGIWUR28205;AGIWUR36922;AGIWUR39383           |          |                |           |          |                     |  |
| N2                                                                                           | HS | II | 11989024                                                              | 11992823 | WBGene00012459 | Y17G7B.3  |          | Y17G7B.3            |  |
| 0.122459022559433                                                                            |    |    | AGIWUR1664                                                            |          |                |           |          |                     |  |
| N2                                                                                           | HS | II | 11993001                                                              | 11998009 | WBGene00012460 | dhps-1    | Y17G7B.4 |                     |  |
| 0.00990154350366979                                                                          |    |    | AGIWUR8348                                                            |          |                |           |          |                     |  |

|                      |    |    |                                                                                                |          |                |           |           |
|----------------------|----|----|------------------------------------------------------------------------------------------------|----------|----------------|-----------|-----------|
| N2                   | HS | II | 11999260                                                                                       | 12001422 | WBGene00044030 | Y17G7B.23 | Y17G7B.23 |
| 0.0558780744510958   |    |    | AGIWUR22822                                                                                    |          |                |           |           |
| N2                   | HS | II | 12001510                                                                                       | 12006625 | WBGene00003154 | mcm-2     | Y17G7B.5  |
| -0.0792058175279049  |    |    | AGIWUR6431;AGIWUR14362;AGIWUR22034;AGIWUR22863;AGIWUR24320;AGIWUR27510;AGIWUR31581;AGIWUR43987 |          |                |           |           |
| N2                   | HS | II | 12009077                                                                                       | 12023825 | WBGene00012461 | glb-29    | Y17G7B.6  |
| -0.101481305367762   |    |    | AGIWUR14390;AGIWUR23983;AGIWUR25092;AGIWUR26552;AGIWUR34236;AGIWUR39129                        |          |                |           |           |
| N2                   | HS | II | 12023861                                                                                       | 12025932 | WBGene00012465 | Y17G7B.12 | Y17G7B.12 |
| -0.0682465311001828  |    |    | AGIWUR29467                                                                                    |          |                |           |           |
| N2                   | HS | II | 12028763                                                                                       | 12036742 | WBGene00000892 | cyn-16    | Y17G7B.9  |
| 0.0370793775404881   |    |    | AGIWUR4024;AGIWUR23109                                                                         |          |                |           |           |
| N2                   | HS | II | 12036842                                                                                       | 12039139 | WBGene00006601 | tpi-1     | Y17G7B.7  |
| 0.0179663463388016   |    |    | AGIWUR1217;AGIWUR2688;AGIWUR4294;AGIWUR7287;AGIWUR8391;AGIWUR11326                             |          |                |           |           |
| N2                   | HS | II | 12042910                                                                                       | 12049260 | WBGene00012466 | ippk-1    | Y17G7B.13 |
| -0.274923494869263   |    |    | AGIWUR17013;AGIWUR20129;AGIWUR22244;AGIWUR29786;AGIWUR35371;AGIWUR35857                        |          |                |           |           |
| N2                   | HS | II | 12049583                                                                                       | 12059866 | WBGene00012463 | Y17G7B.10 | Y17G7B.10 |
| -0.0100438659809448  |    |    | AGIWUR3151;AGIWUR18392;AGIWUR21813;AGIWUR22929;AGIWUR30218;AGIWUR30266                         |          |                |           |           |
| N2                   | HS | II | 12060228                                                                                       | 12062621 | WBGene00012464 | arrd-7    | Y17G7B.11 |
| -0.00669165039301767 |    |    | AGIWUR8573                                                                                     |          |                |           |           |
| N2                   | HS | II | 12065085                                                                                       | 12067568 | WBGene00012467 | arrd-8    | Y17G7B.14 |
| 0.0929069555555317   |    |    | AGIWUR8442                                                                                     |          |                |           |           |
| N2                   | HS | II | 12068099                                                                                       | 12070675 | WBGene00012473 | Y17G7B.22 | Y17G7B.22 |
| -0.0499796822560459  |    |    | AGIWUR5117;AGIWUR30056;AGIWUR39044                                                             |          |                |           |           |
| N2                   | HS | II | 12072082                                                                                       | 12088868 | WBGene00000565 | cnt-1     | Y17G7B.15 |
| -0.268886421677811   |    |    | AGIWUR32973                                                                                    |          |                |           |           |
| N2                   | HS | II | 12092422                                                                                       | 12099989 | WBGene00012468 | Y17G7B.17 | Y17G7B.17 |
| -0.101550576759017   |    |    | AGIWUR39390                                                                                    |          |                |           |           |
| N2                   | HS | II | 12103331                                                                                       | 12107857 | WBGene00012469 | Y17G7B.18 | Y17G7B.18 |
| -0.122731181434952   |    |    | AGIWUR21167;AGIWUR32919                                                                        |          |                |           |           |
| N2                   | HS | II | 12108273                                                                                       | 12112552 | WBGene00012470 | Y17G7B.19 | Y17G7B.19 |
| -0.0799173461150406  |    |    | AGIWUR15320                                                                                    |          |                |           |           |
| N2                   | HS | II | 12114971                                                                                       | 12130968 | WBGene00012845 | set-24    | Y43F11A.5 |
| -0.19198811747404    |    |    | AGIWUR1402;AGIWUR10026;AGIWUR26909;AGIWUR33032;AGIWUR43098                                     |          |                |           |           |
| N2                   | HS | II | 12131530                                                                                       | 12132894 | WBGene00014576 | Y43F11A.6 | Y43F11A.6 |
| -0.409307944451991   |    |    | AGIWUR3471;AGIWUR10296                                                                         |          |                |           |           |
| N2                   | HS | II | 12133535                                                                                       | 12147134 | WBGene00013246 | Y57A10A.1 | Y57A10A.1 |
| 0.163739495150672    |    |    | AGIWUR4370                                                                                     |          |                |           |           |
| N2                   | HS | II | 12147633                                                                                       | 12150216 | WBGene00013247 | Y57A10A.2 | Y57A10A.2 |
| 0.0897339085355036   |    |    | AGIWUR26512                                                                                    |          |                |           |           |

|                     |    |    |                                                             |          |                |            |            |
|---------------------|----|----|-------------------------------------------------------------|----------|----------------|------------|------------|
| N2                  | HS | II | 12154486                                                    | 12156812 | WBGene00013250 | Y57A10A.5  | Y57A10A.5  |
| 0.135241242606096   |    |    | AGIWUR27774                                                 |          |                |            |            |
| N2                  | HS | II | 12156940                                                    | 12159252 | WBGene00013251 | Y57A10A.6  | Y57A10A.6  |
| -0.0903398606198387 |    |    | AGIWUR7730                                                  |          |                |            |            |
| N2                  | HS | II | 12159472                                                    | 12162671 | WBGene00013252 | Y57A10A.7  | Y57A10A.7  |
| 0.0445894902260537  |    |    | AGIWUR6939                                                  |          |                |            |            |
| N2                  | HS | II | 12164839                                                    | 12170762 | WBGene00013253 | Y57A10A.8  | Y57A10A.8  |
| 0.0657964926260703  |    |    | AGIWUR22872                                                 |          |                |            |            |
| N2                  | HS | II | 12172571                                                    | 12176069 | WBGene00004394 | rol-1      | Y57A10A.11 |
| -0.115349499078736  |    |    | AGIWUR34088                                                 |          |                |            |            |
| N2                  | HS | II | 12176880                                                    | 12184875 | WBGene00013256 | Y57A10A.13 | Y57A10A.13 |
| 0.196078926690754   |    |    | AGIWUR5797                                                  |          |                |            |            |
| N2                  | HS | II | 12186007                                                    | 12189265 | WBGene00013257 | Y57A10A.14 | Y57A10A.14 |
| 0.249487048262556   |    |    | AGIWUR43593                                                 |          |                |            |            |
| N2                  | HS | II | 12189795                                                    | 12199959 | WBGene00013258 | polg-1     | Y57A10A.15 |
| 0.231027863344529   |    |    | AGIWUR23407                                                 |          |                |            |            |
| N2                  | HS | II | 12200607                                                    | 12202381 | WBGene00013259 | trpp-5     | Y57A10A.16 |
| 0.0667837010688395  |    |    | AGIWUR40094                                                 |          |                |            |            |
| N2                  | HS | II | 12203309                                                    | 12209160 | WBGene00013272 | aqp-12     | Y57A10A.35 |
| 0.111367132969352   |    |    | AGIWUR11399                                                 |          |                |            |            |
| N2                  | HS | II | 12209228                                                    | 12225086 | WBGene00004167 | pqn-87     | Y57A10A.18 |
| -0.306638843594087  |    |    | AGIWUR40602                                                 |          |                |            |            |
| N2                  | HS | II | 12225356                                                    | 12227265 | WBGene00013260 | rsr-2      | Y57A10A.19 |
| -0.0759090856372673 |    |    | AGIWUR30536                                                 |          |                |            |            |
| N2                  | HS | II | 12228305                                                    | 12237051 | WBGene00013261 | sinh-1     | Y57A10A.20 |
| -0.130874132179459  |    |    | AGIWUR11106;AGIWUR29352;AGIWUR30256;AGIWUR35620;AGIWUR42257 |          |                |            |            |
| N2                  | HS | II | 12240388                                                    | 12242567 | WBGene00013263 | Y57A10A.23 | Y57A10A.23 |
| 0.167561392297934   |    |    | AGIWUR11981                                                 |          |                |            |            |
| N2                  | HS | II | 12242946                                                    | 12247611 | WBGene00013264 | Y57A10A.24 | Y57A10A.24 |
| -0.0221381717988773 |    |    | AGIWUR40090                                                 |          |                |            |            |
| N2                  | HS | II | 12248125                                                    | 12249135 | WBGene00013254 | tag-276    | Y57A10A.9  |
| 0.0160633830944548  |    |    | AGIWUR11305                                                 |          |                |            |            |
| N2                  | HS | II | 12251667                                                    | 12256628 | WBGene00013265 | parn-2     | Y57A10A.25 |
| 0.0756853865260219  |    |    | AGIWUR36791                                                 |          |                |            |            |
| N2                  | HS | II | 12256950                                                    | 12269706 | WBGene00013255 | Y57A10A.10 | Y57A10A.10 |
| 0.180009917325908   |    |    | AGIWUR16522                                                 |          |                |            |            |
| N2                  | HS | II | 12269815                                                    | 12275044 | WBGene00013267 | Y57A10A.27 | Y57A10A.27 |
| 0.0557154759935266  |    |    | AGIWUR37762                                                 |          |                |            |            |
| N2                  | HS | II | 12275936                                                    | 12279383 | WBGene00013268 | Y57A10A.28 | Y57A10A.28 |

|                     |                                     |          |                |            |            |
|---------------------|-------------------------------------|----------|----------------|------------|------------|
| -0.0925299299331606 | AGIWUR8915                          |          |                |            |            |
| N2 HS II            | 12279561                            | 12280595 | WBGene00013269 | Y57A10A.29 | Y57A10A.29 |
| 0.182382744644579   | AGIWUR12646                         |          |                |            |            |
| N2 HS II            | 12280662                            | 12284133 | WBGene00002063 | ife-5      | Y57A10A.30 |
| 0.156428810493942   | AGIWUR30348                         |          |                |            |            |
| N2 HS II            | 12289385                            | 12300573 | WBGene00013270 | Y57A10A.31 | Y57A10A.31 |
| -0.137201453067401  | AGIWUR15857;AGIWUR44592             |          |                |            |            |
| N2 HS II            | 12301077                            | 12302429 | WBGene00016825 | C50E10.1   | C50E10.1   |
| -0.193168815878163  | AGIWUR13445                         |          |                |            |            |
| N2 HS II            | 12303525                            | 12305132 | WBGene00016834 | sre-50     | C50E10.11  |
| 0.0804914108403967  | AGIWUR26514                         |          |                |            |            |
| N2 HS II            | 12311860                            | 12313660 | WBGene00016833 | sre-51     | C50E10.10  |
| 0.0177750527477167  | AGIWUR26368                         |          |                |            |            |
| N2 HS II            | 12318841                            | 12321070 | WBGene00016832 | sre-49     | C50E10.9   |
| -0.138097484231769  | AGIWUR24431                         |          |                |            |            |
| N2 HS II            | 12321193                            | 12323405 | WBGene00016827 | sre-53     | C50E10.3   |
| 0.146736050119232   | AGIWUR15154                         |          |                |            |            |
| N2 HS II            | 12325544                            | 12327514 | WBGene00016831 | sre-56     | C50E10.8   |
| -0.127832105143248  | AGIWUR15130                         |          |                |            |            |
| N2 HS II            | 12329294                            | 12331122 | WBGene00016830 | sre-55     | C50E10.7   |
| -0.151830264456375  | AGIWUR35147                         |          |                |            |            |
| N2 HS II            | 12332924                            | 12335044 | WBGene00016829 | sre-54     | C50E10.6   |
| 0.0254003605137516  | AGIWUR21803                         |          |                |            |            |
| N2 HS II            | 12335730                            | 12338093 | WBGene00016828 | sre-52     | C50E10.5   |
| 0.0687983315454366  | AGIWUR10613                         |          |                |            |            |
| N2 HS II            | 12339944                            | 12344795 | WBGene00004945 | sop-2      | C50E10.4   |
| -0.30291567501941   | AGIWUR34187                         |          |                |            |            |
| N2 HS II            | 12345285                            | 12352243 | WBGene00004310 | ras-1      | C44C11.1   |
| -0.244617617127024  | AGIWUR23461;AGIWUR41923             |          |                |            |            |
| N2 HS II            | 12358756                            | 12367023 | WBGene00013273 | marc-5     | Y57A10B.1  |
| 0.144038153842542   | AGIWUR22652                         |          |                |            |            |
| N2 HS II            | 12373522                            | 12379511 | WBGene00013274 | Y57A10B.2  | Y57A10B.2  |
| -0.0910815487145138 | AGIWUR19618                         |          |                |            |            |
| N2 HS II            | 12383463                            | 12384692 | WBGene00013275 | btb-14     | Y57A10B.3  |
| 0.0490136516390489  | AGIWUR16330;AGIWUR18091;AGIWUR33933 |          |                |            |            |
| N2 HS II            | 12384593                            | 12386881 | WBGene00013276 | sre-42     | Y57A10B.4  |
| -0.121111234145972  | AGIWUR5074                          |          |                |            |            |
| N2 HS II            | 12388293                            | 12389839 | WBGene00013277 | sre-41     | Y57A10B.5  |
| 0.0432005340183403  | AGIWUR11779                         |          |                |            |            |



|    |    |    |                                    |                                                            |                |            |                             |
|----|----|----|------------------------------------|------------------------------------------------------------|----------------|------------|-----------------------------|
| N2 | HS | II | 12390083                           | 12392662                                                   | WBGene00013278 | Y57A10B.6  | Y57A10B.6                   |
|    |    |    | -0.222673011641682                 | AGIWUR7958                                                 |                |            |                             |
| N2 | HS | II | 12392701                           | 12393743                                                   | WBGene00013279 | Y57A10B.7  | Y57A10B.7                   |
|    |    |    | -0.0323088829578815                | AGIWUR36071                                                |                |            |                             |
| N2 | HS | II | 12394856                           | 12397756                                                   | WBGene00044048 | F57G9.7    | F57G9.7 0.00463897445203187 |
|    |    |    | AGIWUR25016;AGIWUR42871            |                                                            |                |            |                             |
| N2 | HS | II | 12399399                           | 12401891                                                   | WBGene00010220 | sre-29     | F57G9.4 -0.0373807770761587 |
|    |    |    | AGIWUR10397                        |                                                            |                |            |                             |
| N2 | HS | II | 12402434                           | 12404887                                                   | WBGene00044041 | F57G9.6    | F57G9.6 -0.0626528143593781 |
|    |    |    | AGIWUR4855;AGIWUR19927;AGIWUR33180 |                                                            |                |            |                             |
| N2 | HS | II | 12404951                           | 12406494                                                   | WBGene00010218 | sre-30     | F57G9.2 0.325136523197092   |
|    |    |    | AGIWUR12686                        |                                                            |                |            |                             |
| N2 | HS | II | 12406822                           | 12408817                                                   | WBGene00010217 | sre-31     | F57G9.1 0.210931351125399   |
|    |    |    | AGIWUR19812                        |                                                            |                |            |                             |
| N2 | HS | II | 12409320                           | 12410207                                                   | WBGene00010219 | F57G9.3    | F57G9.3 -0.182039428992878  |
|    |    |    | AGIWUR30827                        |                                                            |                |            |                             |
| N2 | HS | II | 12411622                           | 12412517                                                   | WBGene00013280 | Y57A10C.1  | Y57A10C.1                   |
|    |    |    | -0.0164665766140626                | AGIWUR20533                                                |                |            |                             |
| N2 | HS | II | 12412723                           | 12412957                                                   | WBGene00044052 | Y57A10C.12 | Y57A10C.12                  |
|    |    |    | 0.000902892838465341               | AGIWUR4626;AGIWUR12188;AGIWUR26299;AGIWUR31376;AGIWUR36187 |                |            |                             |
| N2 | HS | II | 12414036                           | 12414905                                                   | WBGene00044047 | Y57A10C.11 | Y57A10C.11                  |
|    |    |    | -0.0806821090018786                | AGIWUR3841;AGIWUR14115                                     |                |            |                             |
| N2 | HS | II | 12415527                           | 12417527                                                   | WBGene00013281 | sre-27     | Y57A10C.3                   |
|    |    |    | -0.00631296690185579               | AGIWUR5752                                                 |                |            |                             |
| N2 | HS | II | 12419133                           | 12420586                                                   | WBGene00013282 | sre-26     | Y57A10C.4                   |
|    |    |    | 0.0329659614147726                 | AGIWUR220                                                  |                |            |                             |
| N2 | HS | II | 12421204                           | 12422623                                                   | WBGene00013283 | sre-25     | Y57A10C.5                   |
|    |    |    | -0.633261671862466                 | AGIWUR38853                                                |                |            |                             |
| N2 | HS | II | 12423514                           | 12425694                                                   | WBGene00013284 | daf-22     | Y57A10C.6                   |
|    |    |    | 0.176387748799423                  | AGIWUR5216                                                 |                |            |                             |
| N2 | HS | II | 12427986                           | 12429946                                                   | WBGene00013286 | Y57A10C.8  | Y57A10C.8                   |
|    |    |    | -0.0380854977932827                | AGIWUR24902                                                |                |            |                             |
| N2 | HS | II | 12430788                           | 12432311                                                   | WBGene00013285 | dct-12     | Y57A10C.7                   |
|    |    |    | 0.033810719972351                  | AGIWUR17519                                                |                |            |                             |
| N2 | HS | II | 12433608                           | 12435846                                                   | WBGene00013287 | Y57A10C.9  | Y57A10C.9                   |
|    |    |    | 0.033265998177173                  | AGIWUR21893                                                |                |            |                             |
| N2 | HS | II | 12442142                           | 12442367                                                   | WBGene00012284 | W05H5.2    | W05H5.2 0.151053901108099   |
|    |    |    | AGIWUR19090                        |                                                            |                |            |                             |
| N2 | HS | II | 12443119                           | 12444779                                                   | WBGene00012283 | W05H5.1    | W05H5.1 0.106807235218648   |

|                                     |    |    |                                                |          |                |          |          |                     |
|-------------------------------------|----|----|------------------------------------------------|----------|----------------|----------|----------|---------------------|
| AGIWUR12242                         |    |    |                                                |          |                |          |          |                     |
| N2                                  | HS | II | 12445332                                       | 12447769 | WBGene00012285 | pitr-6   | W05H5.3  | 0.0715631517160524  |
| AGIWUR13105;AGIWUR15362;AGIWUR30498 |    |    |                                                |          |                |          |          |                     |
| N2                                  | HS | II | 12448541                                       | 12449887 | WBGene00005250 | srh-27   | W05H5.4  | 0.447021423397777   |
| AGIWUR3233                          |    |    |                                                |          |                |          |          |                     |
| N2                                  | HS | II | 12450149                                       | 12451407 | WBGene00043058 | sre-34   | W05H5.8  | 0.149073388365503   |
| AGIWUR10523                         |    |    |                                                |          |                |          |          |                     |
| N2                                  | HS | II | 12453302                                       | 12454693 | WBGene00012287 | sre-33   | W05H5.6  | -0.0706429812294473 |
| AGIWUR3814                          |    |    |                                                |          |                |          |          |                     |
| N2                                  | HS | II | 12454954                                       | 12456733 | WBGene00012288 | sre-32   | W05H5.7  | -0.0437609959192651 |
| AGIWUR4582                          |    |    |                                                |          |                |          |          |                     |
| N2                                  | HS | II | 12457575                                       | 12459510 | WBGene00008837 | sre-38   | F15A4.1  | 0.0186379655330944  |
| AGIWUR35287                         |    |    |                                                |          |                |          |          |                     |
| N2                                  | HS | II | 12459772                                       | 12460551 | WBGene00044323 | tag-281  | F15A4.11 |                     |
| 0.202996680704848                   |    |    | AGIWUR7257;AGIWUR25748;AGIWUR28954;AGIWUR31949 |          |                |          |          |                     |
| N2                                  | HS | II | 12460641                                       | 12461471 | WBGene00044322 | tag-280  | F15A4.12 |                     |
| 0.088226671033123                   |    |    | AGIWUR18364                                    |          |                |          |          |                     |
| N2                                  | HS | II | 12462418                                       | 12464078 | WBGene00008838 | F15A4.2  | F15A4.2  | -0.0900437930122546 |
| AGIWUR36102                         |    |    |                                                |          |                |          |          |                     |
| N2                                  | HS | II | 12465872                                       | 12467519 | WBGene00008839 | sre-37   | F15A4.3  | -0.151051658521276  |
| AGIWUR20272                         |    |    |                                                |          |                |          |          |                     |
| N2                                  | HS | II | 12467732                                       | 12469369 | WBGene00005173 | srg-16   | F15A4.4  | 0.0778342567004131  |
| AGIWUR3092                          |    |    |                                                |          |                |          |          |                     |
| N2                                  | HS | II | 12469374                                       | 12471211 | WBGene00008840 | F15A4.5  | F15A4.5  | 0.0977934749735461  |
| AGIWUR32638                         |    |    |                                                |          |                |          |          |                     |
| N2                                  | HS | II | 12471805                                       | 12473084 | WBGene00008841 | F15A4.6  | F15A4.6  | 0.130075731199533   |
| AGIWUR44991                         |    |    |                                                |          |                |          |          |                     |
| N2                                  | HS | II | 12473706                                       | 12475234 | WBGene00005174 | srg-17   | F15A4.7  | -0.0682981848996098 |
| AGIWUR23534                         |    |    |                                                |          |                |          |          |                     |
| N2                                  | HS | II | 12475514                                       | 12478917 | WBGene00008842 | chil-28  | F15A4.8  | 0.0664749924659871  |
| AGIWUR2093;AGIWUR3251;AGIWUR33896   |    |    |                                                |          |                |          |          |                     |
| N2                                  | HS | II | 12479590                                       | 12480910 | WBGene00008843 | arrd-9   | F15A4.9  | 0.0653344969711238  |
| AGIWUR34011                         |    |    |                                                |          |                |          |          |                     |
| N2                                  | HS | II | 12482931                                       | 12484279 | WBGene00008847 | fbxb-102 | F15A4.13 |                     |
| 0.0537017773522628                  |    |    | AGIWUR8569                                     |          |                |          |          |                     |
| N2                                  | HS | II | 12484544                                       | 12485160 | WBGene00008844 | F15A4.10 | F15A4.10 |                     |
| -0.245578669448216                  |    |    | AGIWUR7846                                     |          |                |          |          |                     |
| N2                                  | HS | II | 12490214                                       | 12491815 | WBGene00043054 | T21B4.15 | T21B4.15 |                     |
| -0.152803274019369                  |    |    | AGIWUR19166;AGIWUR22620;AGIWUR28953            |          |                |          |          |                     |

|                                                |    |    |          |          |                |          |          |                     |
|------------------------------------------------|----|----|----------|----------|----------------|----------|----------|---------------------|
| N2                                             | HS | II | 12492398 | 12493623 | WBGene00011876 | srz-6    | T21B4.1  | -0.31351437691651   |
| AGIWUR12887                                    |    |    |          |          |                |          |          |                     |
| N2                                             | HS | II | 12493800 | 12495106 | WBGene00000660 | col-85   | T21B4.2  | -0.0242190447649584 |
| AGIWUR28426                                    |    |    |          |          |                |          |          |                     |
| N2                                             | HS | II | 12495487 | 12496387 | WBGene00011877 | T21B4.3  | T21B4.3  | -0.0172092231571428 |
| AGIWUR379                                      |    |    |          |          |                |          |          |                     |
| N2                                             | HS | II | 12497217 | 12502878 | WBGene00011878 | ador-1   | T21B4.4  | -0.0370392362223702 |
| AGIWUR925;AGIWUR19024                          |    |    |          |          |                |          |          |                     |
| N2                                             | HS | II | 12507338 | 12508452 | WBGene00005289 | srh-68   | T21B4.5  | 0.260877845001835   |
| AGIWUR27004                                    |    |    |          |          |                |          |          |                     |
| N2                                             | HS | II | 12508950 | 12510135 | WBGene00005288 | srh-67   | T21B4.6  | 0.0747596551740068  |
| AGIWUR19619                                    |    |    |          |          |                |          |          |                     |
| N2                                             | HS | II | 12510682 | 12511814 | WBGene00005287 | srh-66   | T21B4.10 |                     |
| -0.0995119313344066 AGIWUR21685                |    |    |          |          |                |          |          |                     |
| N2                                             | HS | II | 12512166 | 12513316 | WBGene00005294 | srh-73   | T21B4.14 |                     |
| -0.116378428244895 AGIWUR29018                 |    |    |          |          |                |          |          |                     |
| N2                                             | HS | II | 12513618 | 12514715 | WBGene00005290 | srh-69   | T21B4.7  | 0.215066610483556   |
| AGIWUR18370                                    |    |    |          |          |                |          |          |                     |
| N2                                             | HS | II | 12514972 | 12516413 | WBGene00005283 | srh-61   | T21B4.8  | -0.22276978061865   |
| AGIWUR32493                                    |    |    |          |          |                |          |          |                     |
| N2                                             | HS | II | 12516753 | 12517858 | WBGene00005291 | srh-70   | T21B4.9  |                     |
| -0.00762605401321625 AGIWUR1997                |    |    |          |          |                |          |          |                     |
| N2                                             | HS | II | 12520004 | 12524478 | WBGene00044032 | ceh-99   | T21B4.17 |                     |
| -0.000112323224971789 AGIWUR22947              |    |    |          |          |                |          |          |                     |
| N2                                             | HS | II | 12525828 | 12527868 | WBGene00006009 | srx-118  | T21B4.12 |                     |
| 0.204605755334896 AGIWUR15515                  |    |    |          |          |                |          |          |                     |
| N2                                             | HS | II | 12528247 | 12529746 | WBGene00006010 | srx-119  | F49C5.1  | -0.0136003786167764 |
| AGIWUR7947                                     |    |    |          |          |                |          |          |                     |
| N2                                             | HS | II | 12531258 | 12532977 | WBGene00006011 | srx-120  | F49C5.2  | -0.07657465821194   |
| AGIWUR44058                                    |    |    |          |          |                |          |          |                     |
| N2                                             | HS | II | 12535760 | 12542569 | WBGene00009867 | F49C5.4  | F49C5.4  | 0.0815123282437997  |
| AGIWUR1250;AGIWUR15649;AGIWUR16749;AGIWUR42084 |    |    |          |          |                |          |          |                     |
| N2                                             | HS | II | 12542754 | 12544633 | WBGene00044031 | F49C5.9  | F49C5.9  | 0.281418072141379   |
| AGIWUR19466;AGIWUR27810                        |    |    |          |          |                |          |          |                     |
| N2                                             | HS | II | 12546030 | 12546513 | WBGene00009868 | F49C5.5  | F49C5.5  | 0.169779312617004   |
| AGIWUR5768                                     |    |    |          |          |                |          |          |                     |
| N2                                             | HS | II | 12546761 | 12548249 | WBGene00044162 | F49C5.10 |          | F49C5.10            |
| -0.0458711975094008 AGIWUR8807;AGIWUR9074      |    |    |          |          |                |          |          |                     |
| N2                                             | HS | II | 12555884 | 12557129 | WBGene00044163 | F49C5.11 |          | F49C5.11            |

0.287689640152307

AGIWUR1347;AGIWUR3489;AGIWUR3872;AGIWUR3883;AGIWUR6795;AGIWUR7306;AGIWUR11761;AGIWUR12963;AGIWUR20946;AGIWUR22899;AGIWUR26088;AGIWUR31262;AGIWUR39486;AGIWUR44001

N2 HS II 12564185 12565943 WBGene00006254 str-223 F49C5.6 -0.210142781238599

AGIWUR36858

N2 HS II 12566165 12568297 WBGene00009869 F49C5.7 F49C5.7 0.125860890940791

AGIWUR10009

N2 HS II 12570198 12570623 WBGene00012579 Y38E10A.1 Y38E10A.1

0.146242891734852 AGIWUR18619

N2 HS II 12571572 12573529 WBGene00012580 Y38E10A.2 Y38E10A.2

-0.0735347179745007

AGIWUR4355

N2 HS II 12573940 12574768 WBGene00012581 Y38E10A.3 Y38E10A.3

-0.0398331670223016

AGIWUR18800

N2 HS II 12575691 12577748 WBGene00012582 clec-8 Y38E10A.4

0.0277740808034252 AGIWUR5171;AGIWUR8397;AGIWUR26584;AGIWUR28388;AGIWUR36068;AGIWUR41478

N2 HS II 12578356 12581098 WBGene00012583 clec-4 Y38E10A.5

0.263601006721256 AGIWUR23230

N2 HS II 12582179 12603680 WBGene00012584 ceh-100 Y38E10A.6

-0.0539357003306637

AGIWUR17963

N2 HS II 12605968 12607027 WBGene00012585 lips-15 Y38E10A.7

-0.241061518782971 AGIWUR14642;AGIWUR19800

N2 HS II 12607200 12608788 WBGene00012586 Y38E10A.8 Y38E10A.8

-0.194480993026733 AGIWUR40371

N2 HS II 12608953 12609630 WBGene00012587 Y38E10A.9 Y38E10A.9

-0.107866009327625

AGIWUR17764

N2 HS II 12610313 12612357 WBGene00012588 lips-16 Y38E10A.10

0.241872559946062

AGIWUR39472

N2 HS II 12613564 12613939 WBGene00012589 nspe-4 Y38E10A.11

-0.148583064547049 AGIWUR11054;AGIWUR13607;AGIWUR20167;AGIWUR22819;AGIWUR26536;AGIWUR41154

N2 HS II 12615897 12616166 WBGene00012603 nspe-6 Y38E10A.25

-0.371784129002595

AGIWUR27393

N2 HS II 12617886 12618209 WBGene00012590 nspe-3 Y38E10A.12

-0.699849868280554

AGIWUR8742

N2 HS II 12620548 12620888 WBGene00012591 nspe-1 Y38E10A.13

-0.577911184289391

AGIWUR7082

N2 HS II 12623215 12624506 WBGene00012592 Y38E10A.14 Y38E10A.14

-0.0908085606105296 AGIWUR14522;AGIWUR18602;AGIWUR33881

N2 HS II 12627187 12627570 WBGene00012593 nspe-7 Y38E10A.15

-0.971066593842188

AGIWUR13856

|                      |    |    |                                    |          |                |            |            |
|----------------------|----|----|------------------------------------|----------|----------------|------------|------------|
| N2                   | HS | II | 12628936                           | 12629380 | WBGene00012594 | nspe-5     | Y38E10A.16 |
| -0.773411372086223   |    |    | AGIWUR8167                         |          |                |            |            |
| N2                   | HS | II | 12629687                           | 12631995 | WBGene00044034 | Y38E10A.28 | Y38E10A.28 |
| -0.00482360724386766 |    |    | AGIWUR22063                        |          |                |            |            |
| N2                   | HS | II | 12632593                           | 12634799 | WBGene00012595 | Y38E10A.17 | Y38E10A.17 |
| 0.0589454466902879   |    |    | AGIWUR10282                        |          |                |            |            |
| N2                   | HS | II | 12636699                           | 12638448 | WBGene00012596 | nhr-234    | Y38E10A.18 |
| -0.0139622817432432  |    |    | AGIWUR6486;AGIWUR13527;AGIWUR40928 |          |                |            |            |
| N2                   | HS | II | 12640670                           | 12642740 | WBGene00012597 | nhr-235    | Y38E10A.19 |
| -0.0127338764540745  |    |    | AGIWUR37120                        |          |                |            |            |
| N2                   | HS | II | 12662759                           | 12671920 | WBGene00004347 | rgs-4      | Y38E10A.21 |
| -0.00503334629976315 |    |    | AGIWUR13627                        |          |                |            |            |
| N2                   | HS | II | 12673166                           | 12677803 | WBGene00012600 | Y38E10A.22 | Y38E10A.22 |
| -0.338010270209384   |    |    | AGIWUR14395;AGIWUR15734            |          |                |            |            |
| N2                   | HS | II | 12679035                           | 12679413 | WBGene00012602 | Y38E10A.24 | Y38E10A.24 |
| 0.0632952413931136   |    |    | AGIWUR20712                        |          |                |            |            |
| N2                   | HS | II | 12679954                           | 12686713 | WBGene00012895 | cox-10     | Y46G5A.2   |
| -0.172499770920261   |    |    | AGIWUR34531                        |          |                |            |            |
| N2                   | HS | II | 12694412                           | 12725483 | WBGene00012894 | tbc-17     | Y46G5A.1   |
| -0.199695563659878   |    |    | AGIWUR733;AGIWUR2958;AGIWUR13448   |          |                |            |            |
| N2                   | HS | II | 12726963                           | 12736910 | WBGene00012896 | snrp-200   | Y46G5A.4   |
| -0.174386727870655   |    |    | AGIWUR35032                        |          |                |            |            |
| N2                   | HS | II | 12737032                           | 12738334 | WBGene00012897 | pisyl-1    | Y46G5A.5   |
| -0.0108032506036277  |    |    | AGIWUR12144                        |          |                |            |            |
| N2                   | HS | II | 12742546                           | 12744256 | WBGene00077636 | Y46G5A.43  | Y46G5A.43  |
| -0.0815686952504908  |    |    | AGIWUR35875                        |          |                |            |            |
| N2                   | HS | II | 12752854                           | 12753813 | WBGene00044164 | Y46G5A.39  | Y46G5A.39  |
| -0.0244954199411698  |    |    | AGIWUR7494;AGIWUR40442             |          |                |            |            |
| N2                   | HS | II | 12754610                           | 12754877 | WBGene00077634 | Y46G5A.41  | Y46G5A.41  |
| 0.0261141304645101   |    |    | AGIWUR17785                        |          |                |            |            |
| N2                   | HS | II | 12756353                           | 12757677 | WBGene00012900 | Y46G5A.8   | Y46G5A.8   |
| -0.0446498157143465  |    |    | AGIWUR8892                         |          |                |            |            |
| N2                   | HS | II | 12760797                           | 12767232 | WBGene00012901 | cnpl-2     | Y46G5A.10  |
| 0.0311802606866447   |    |    | AGIWUR11892;AGIWUR14337            |          |                |            |            |
| N2                   | HS | II | 12767221                           | 12768217 | WBGene00012903 | vps-2      | Y46G5A.12  |
| -0.0443954432905755  |    |    | AGIWUR25006                        |          |                |            |            |
| N2                   | HS | II | 12768686                           | 12773903 | WBGene00012904 | tiar-2     | Y46G5A.13  |
| -0.0350855648649855  |    |    | AGIWUR40126                        |          |                |            |            |
| N2                   | HS | II | 12774646                           | 12781705 | WBGene00012919 | Y46G5A.34  | Y46G5A.34  |

|                      |                                                                        |          |                |                 |                     |
|----------------------|------------------------------------------------------------------------|----------|----------------|-----------------|---------------------|
| 0.0297574241345906   | AGIWUR34502                                                            |          |                |                 |                     |
| N2 HS II             | 12782751                                                               | 12785412 | WBGene00012906 | Y46G5A.15       | Y46G5A.15           |
| 0.075990847102176    | AGIWUR19252                                                            |          |                |                 |                     |
| N2 HS II             | 12786322                                                               | 12788153 | WBGene00012920 | Y46G5A.35       | Y46G5A.35           |
| -0.0359261662496877  | AGIWUR1477                                                             |          |                |                 |                     |
| N2 HS II             | 12788252                                                               | 12796452 | WBGene00012907 | cpt-1           | Y46G5A.17           |
| -0.105129807411269   | AGIWUR9426;AGIWUR17814;AGIWUR24235;AGIWUR34373                         |          |                |                 |                     |
| N2 HS II             | 12800449                                                               | 12805383 | WBGene00012908 | Y46G5A.18       | Y46G5A.18           |
| -0.228362488774343   | AGIWUR2765;AGIWUR7180;AGIWUR7666;AGIWUR13153;AGIWUR35086;AGIWUR44753   |          |                |                 |                     |
| N2 HS II             | 12804862                                                               | 12810872 | WBGene00012909 | spds-1          | Y46G5A.19           |
| 0.239207761619751    | AGIWUR24011                                                            |          |                |                 |                     |
| N2 HS II             | 12811009                                                               | 12811934 | WBGene00012910 | Y46G5A.20       | Y46G5A.20           |
| 0.570503195029211    | AGIWUR1526;AGIWUR11175;AGIWUR20331;AGIWUR20731;AGIWUR23358;AGIWUR29839 |          |                |                 |                     |
| N2 HS II             | 12811802                                                               | 12816462 | WBGene00012911 | ac1-7           | Y46G5A.21           |
| -0.197808592610624   | AGIWUR8222                                                             |          |                |                 |                     |
| N2 HS II             | 12816820                                                               | 12818588 | WBGene00012912 | Y46G5A.22       | Y46G5A.22           |
| -0.276725204484084   | AGIWUR29260;AGIWUR39522                                                |          |                |                 |                     |
| N2 HS II             | 12823649                                                               | 12824177 | WBGene00012921 | Y46G5A.36       | Y46G5A.36           |
| -0.00448508053308849 | AGIWUR40412                                                            |          |                |                 |                     |
| N2 HS II             | 12825546                                                               | 12825833 | WBGene00044042 | Y46G5A.37       | Y46G5A.37           |
| -0.0183437386270491  | AGIWUR4500;AGIWUR9007;AGIWUR9678;AGIWUR17026;AGIWUR33153               |          |                |                 |                     |
| N2 HS II             | 12827032                                                               | 12827519 | WBGene00044043 | Y46G5A.38       | Y46G5A.38           |
| 0.338417735485844    | AGIWUR15102;AGIWUR25500;AGIWUR37081;AGIWUR40350;AGIWUR44577            |          |                |                 |                     |
| N2 HS II             | 12830707                                                               | 12832720 | WBGene00012914 | bcmo-1          | Y46G5A.24           |
| -0.0267118882131747  | AGIWUR15666                                                            |          |                |                 |                     |
| N2 HS II             | 12832915                                                               | 12835824 | WBGene00004903 | snf-4           | Y46G5A.25           |
| -0.149054688707038   | AGIWUR35822                                                            |          |                |                 |                     |
| N2 HS II             | 12836548                                                               | 12840157 | WBGene00012915 | lgc-35          | Y46G5A.26           |
| 0.121751221354411    | AGIWUR22436;AGIWUR38636                                                |          |                |                 |                     |
| N2 HS II             | 12846203                                                               | 12847836 | WBGene00003983 | pes-10          | Y46G5A.27           |
| 0.144545543364147    | AGIWUR14951                                                            |          |                |                 |                     |
| N2 HS II             | 12856200                                                               | 12862058 | WBGene00012917 | Y46G5A.29       | Y46G5A.29           |
| 0.266639315905348    | AGIWUR21330                                                            |          |                |                 |                     |
| N2 HS II             | 12861963                                                               | 12865883 | WBGene00004904 | snf-5           | Y46G5A.30           |
| -0.0829670127262645  | AGIWUR7331                                                             |          |                |                 |                     |
| N2 HS II             | 12866448                                                               | 12878116 | WBGene00001793 | gsy-1           | Y46G5A.31           |
| -0.0512793059484515  | AGIWUR37228                                                            |          |                |                 |                     |
| N2 HS II             | 12880815                                                               | 12881968 | WBGene00009390 | F35C5.1 F35C5.1 | -0.0200855633209009 |
| AGIWUR36217          |                                                                        |          |                |                 |                     |

|                                                                                                          |    |    |                      |                                                 |                |          |          |                     |
|----------------------------------------------------------------------------------------------------------|----|----|----------------------|-------------------------------------------------|----------------|----------|----------|---------------------|
| N2                                                                                                       | HS | II | 12885276             | 12888606                                        | WBGene00005040 | sra-14   | F35C5.2  | -0.0626148287222854 |
| AGIWUR40027                                                                                              |    |    |                      |                                                 |                |          |          |                     |
| N2                                                                                                       | HS | II | 12888762             | 12890460                                        | WBGene00009391 | F35C5.3  | F35C5.3  | -0.099796195179545  |
| AGIWUR32174                                                                                              |    |    |                      |                                                 |                |          |          |                     |
| N2                                                                                                       | HS | II | 12890630             | 12892024                                        | WBGene00009392 | F35C5.4  | F35C5.4  | 0.0460192752029993  |
| AGIWUR25875                                                                                              |    |    |                      |                                                 |                |          |          |                     |
| N2                                                                                                       | HS | II | 12893065             | 12895098                                        | WBGene00009393 | cllec-62 | F35C5.5  | -0.0166611704819086 |
| AGIWUR31973                                                                                              |    |    |                      |                                                 |                |          |          |                     |
| N2                                                                                                       | HS | II | 12895638             | 12897462                                        | WBGene00009394 | cllec-63 | F35C5.6  | -0.0260703814230716 |
| AGIWUR2709;AGIWUR9580;AGIWUR9637;AGIWUR12263;AGIWUR24969;AGIWUR26563;AGIWUR27914;AGIWUR39707;AGIWUR40319 |    |    |                      |                                                 |                |          |          |                     |
| N2                                                                                                       | HS | II | 12898242             | 12900435                                        | WBGene00009395 | cllec-64 | F35C5.7  |                     |
|                                                                                                          |    |    | -0.00155830553539715 | AGIWUR25751                                     |                |          |          |                     |
| N2                                                                                                       | HS | II | 12901264             | 12903336                                        | WBGene00009396 | cllec-65 | F35C5.8  | 0.0873239068309015  |
| AGIWUR13763                                                                                              |    |    |                      |                                                 |                |          |          |                     |
| N2                                                                                                       | HS | II | 12904398             | 12906686                                        | WBGene00009397 | cllec-66 | F35C5.9  | 0.00464746841358066 |
| AGIWUR15704;AGIWUR25952                                                                                  |    |    |                      |                                                 |                |          |          |                     |
| N2                                                                                                       | HS | II | 12907370             | 12907783                                        | WBGene00009398 | nspb-11  | F35C5.10 |                     |
|                                                                                                          |    |    | 0.0898884545478182   | AGIWUR40518                                     |                |          |          |                     |
| N2                                                                                                       | HS | II | 12909079             | 12910334                                        | WBGene00009399 | F35C5.11 |          | F35C5.11            |
|                                                                                                          |    |    | 0.114391940196275    | AGIWUR13730;AGIWUR21453;AGIWUR45080             |                |          |          |                     |
| N2                                                                                                       | HS | II | 12910229             | 12914603                                        | WBGene00009400 | F35C5.12 |          | F35C5.12            |
|                                                                                                          |    |    | -0.0838079629886721  | AGIWUR17427;AGIWUR23921;AGIWUR31371;AGIWUR33008 |                |          |          |                     |
| N2                                                                                                       | HS | II | 12915417             | 12919018                                        | WBGene00010264 | F58G1.2  | F58G1.2  | -0.236182167357395  |
| AGIWUR4611                                                                                               |    |    |                      |                                                 |                |          |          |                     |
| N2                                                                                                       | HS | II | 12919551             | 12923377                                        | WBGene00010263 | wago-4   | F58G1.1  | -0.379396487101833  |
| AGIWUR13287;AGIWUR32641                                                                                  |    |    |                      |                                                 |                |          |          |                     |
| N2                                                                                                       | HS | II | 12924026             | 12925241                                        | WBGene00010271 | F58G1.9  | F58G1.9  | 0.103775650770718   |
| AGIWUR28772                                                                                              |    |    |                      |                                                 |                |          |          |                     |
| N2                                                                                                       | HS | II | 12925304             | 12925602                                        | WBGene00010270 | F58G1.8  | F58G1.8  | -0.195303773870251  |
| AGIWUR43158                                                                                              |    |    |                      |                                                 |                |          |          |                     |
| N2                                                                                                       | HS | II | 12925981             | 12928341                                        | WBGene00010265 | F58G1.3  | F58G1.3  | 0.124140584491677   |
| AGIWUR22297                                                                                              |    |    |                      |                                                 |                |          |          |                     |
| N2                                                                                                       | HS | II | 12931873             | 12933515                                        | WBGene00010266 | dct-18   | F58G1.4  | -0.337157792090711  |
| AGIWUR44081                                                                                              |    |    |                      |                                                 |                |          |          |                     |
| N2                                                                                                       | HS | II | 12933854             | 12935362                                        | WBGene00010267 | lips-9   | F58G1.5  | -0.0106645185003647 |
| AGIWUR25581                                                                                              |    |    |                      |                                                 |                |          |          |                     |
| N2                                                                                                       | HS | II | 12938869             | 12943867                                        | WBGene00010268 | arrd-10  | F58G1.6  | -0.0657393617631339 |
| AGIWUR3865                                                                                               |    |    |                      |                                                 |                |          |          |                     |
| N2                                                                                                       | HS | II | 12943862             | 12948143                                        | WBGene00010269 | F58G1.7  | F58G1.7  | -0.242353838931236  |

|                                                 |    |    |                                                                                 |          |                |          |                             |
|-------------------------------------------------|----|----|---------------------------------------------------------------------------------|----------|----------------|----------|-----------------------------|
| AGIWUR3737                                      |    |    |                                                                                 |          |                |          |                             |
| N2                                              | HS | II | 12952490                                                                        | 12954832 | WBGene00012605 | Y38F1A.1 | Y38F1A.1                    |
| 0.146057479853901                               |    |    | AGIWUR25647                                                                     |          |                |          |                             |
| N2                                              | HS | II | 12954962                                                                        | 12958018 | WBGene00012606 | Y38F1A.2 | Y38F1A.2                    |
| -0.0721650549833086                             |    |    | AGIWUR36625                                                                     |          |                |          |                             |
| N2                                              | HS | II | 12965546                                                                        | 12978168 | WBGene00004232 | ptr-18   | Y38F1A.3                    |
| 0.00603359843748041                             |    |    | AGIWUR718                                                                       |          |                |          |                             |
| N2                                              | HS | II | 12980591                                                                        | 12993118 | WBGene00000870 | cyd-1    | Y38F1A.5                    |
| 0.0361426805334961                              |    |    | AGIWUR2519;AGIWUR4218;AGIWUR4651;AGIWUR8981;AGIWUR24138;AGIWUR33027;AGIWUR42526 |          |                |          |                             |
| N2                                              | HS | II | 12994358                                                                        | 12996571 | WBGene00012608 | hphd-1   | Y38F1A.6                    |
| 0.238757378512236                               |    |    | AGIWUR17199;AGIWUR23064;AGIWUR41550                                             |          |                |          |                             |
| N2                                              | HS | II | 12996921                                                                        | 12997804 | WBGene00012609 | Y38F1A.7 | Y38F1A.7                    |
| 0.260676456648623                               |    |    | AGIWUR12368                                                                     |          |                |          |                             |
| N2                                              | HS | II | 12997986                                                                        | 13000853 | WBGene00012610 | Y38F1A.8 | Y38F1A.8                    |
| 0.25478076015194                                |    |    | AGIWUR15880                                                                     |          |                |          |                             |
| N2                                              | HS | II | 13006610                                                                        | 13008164 | WBGene00003860 | oig-2    | Y38F1A.9                    |
| 0.0116717346615918                              |    |    | AGIWUR43827                                                                     |          |                |          |                             |
| N2                                              | HS | II | 13014331                                                                        | 13025838 | WBGene00003144 | max-2    | Y38F1A.10                   |
| -0.00154804776239281                            |    |    | AGIWUR11822;AGIWUR27909;AGIWUR29030;AGIWUR41651;AGIWUR42104                     |          |                |          |                             |
| N2                                              | HS | II | 13032778                                                                        | 13036505 | WBGene00008929 | F18A11.2 | F18A11.2                    |
| -0.00906876044844829                            |    |    | AGIWUR33087                                                                     |          |                |          |                             |
| N2                                              | HS | II | 13047941                                                                        | 13050807 | WBGene00009641 | F42G4.2  | F42G4.2 -0.0515873160426352 |
| AGIWUR32122                                     |    |    |                                                                                 |          |                |          |                             |
| N2                                              | HS | II | 13056814                                                                        | 13071530 | WBGene00006999 | zyx-1    | F42G4.3 -0.0510793012759212 |
| AGIWUR13740;AGIWUR22966;AGIWUR35979;AGIWUR44121 |    |    |                                                                                 |          |                |          |                             |
| N2                                              | HS | II | 13073493                                                                        | 13076223 | WBGene00009642 | F42G4.5  | F42G4.5 0.144169592747655   |
| AGIWUR61;AGIWUR9936;AGIWUR27632                 |    |    |                                                                                 |          |                |          |                             |
| N2                                              | HS | II | 13081776                                                                        | 13082322 | WBGene00195150 | Y81G3A.6 | Y81G3A.6                    |
| -0.00166938361854374                            |    |    | AGIWUR7372                                                                      |          |                |          |                             |
| N2                                              | HS | II | 13083989                                                                        | 13091483 | WBGene00013591 | gcn-2    | Y81G3A.3                    |
| 0.037870196097721                               |    |    | AGIWUR1733;AGIWUR23403;AGIWUR36942                                              |          |                |          |                             |
| N2                                              | HS | II | 13091587                                                                        | 13094241 | WBGene00013592 | Y81G3A.4 | Y81G3A.4                    |
| 0.269604670320174                               |    |    | AGIWUR27760                                                                     |          |                |          |                             |
| N2                                              | HS | II | 13096009                                                                        | 13098275 | WBGene00000661 | col-86   | Y81G3A.5                    |
| -0.206376326219527                              |    |    | AGIWUR17449                                                                     |          |                |          |                             |
| N2                                              | HS | II | 13098249                                                                        | 13116806 | WBGene00009245 | rict-1   | F29C12.3                    |
| -0.0499672427813227                             |    |    | AGIWUR30701;AGIWUR40860                                                         |          |                |          |                             |
| N2                                              | HS | II | 13117483                                                                        | 13122085 | WBGene00009246 | gfm-1    | F29C12.4                    |
| -0.10146089110752                               |    |    | AGIWUR22803                                                                     |          |                |          |                             |



|                                                                                             |    |    |          |          |                |          |          |                     |
|---------------------------------------------------------------------------------------------|----|----|----------|----------|----------------|----------|----------|---------------------|
| N2                                                                                          | HS | II | 13123038 | 13124789 | WBGene00009247 | bath-45  | F29C12.5 |                     |
| 0.224225251949413 AGIWUR30834                                                               |    |    |          |          |                |          |          |                     |
| N2                                                                                          | HS | II | 13129902 | 13130189 | WBGene00009248 | F29C12.6 |          | F29C12.6            |
| -0.12522705704156 AGIWUR16796                                                               |    |    |          |          |                |          |          |                     |
| N2                                                                                          | HS | II | 13131009 | 13134212 | WBGene00009310 | F32A11.5 |          | F32A11.5            |
| -0.0573911735363191 AGIWUR15642;AGIWUR20935;AGIWUR21948;AGIWUR22348;AGIWUR36357;AGIWUR36804 |    |    |          |          |                |          |          |                     |
| N2                                                                                          | HS | II | 13139465 | 13145225 | WBGene00009311 | mltn-1   | F32A11.7 |                     |
| -0.160748237960942 AGIWUR6903                                                               |    |    |          |          |                |          |          |                     |
| N2                                                                                          | HS | II | 13151459 | 13153399 | WBGene00009308 | F32A11.3 |          | F32A11.3            |
| 0.114539643320121 AGIWUR807                                                                 |    |    |          |          |                |          |          |                     |
| N2                                                                                          | HS | II | 13153461 | 13157093 | WBGene00001998 | hpr-17   | F32A11.2 |                     |
| -0.305832994141529 AGIWUR7794                                                               |    |    |          |          |                |          |          |                     |
| N2                                                                                          | HS | II | 13157333 | 13160462 | WBGene00009307 | F32A11.1 |          | F32A11.1            |
| 0.0803138362468445 AGIWUR31770                                                              |    |    |          |          |                |          |          |                     |
| N2                                                                                          | HS | II | 13160545 | 13165733 | WBGene00003388 | moe-3    | F32A11.6 |                     |
| 0.138840864772411 AGIWUR6208                                                                |    |    |          |          |                |          |          |                     |
| N2                                                                                          | HS | II | 13175857 | 13181561 | WBGene00012372 | W09H1.1  | W09H1.1  | -0.0348319886038517 |
| AGIWUR5978                                                                                  |    |    |          |          |                |          |          |                     |
| N2                                                                                          | HS | II | 13183450 | 13183845 | WBGene00001947 | his-73   | W09H1.2  | -0.131032616840768  |
| AGIWUR31054                                                                                 |    |    |          |          |                |          |          |                     |
| N2                                                                                          | HS | II | 13184429 | 13185023 | WBGene00012373 | W09H1.3  | W09H1.3  | -0.0168780465424216 |
| AGIWUR24666                                                                                 |    |    |          |          |                |          |          |                     |
| N2                                                                                          | HS | II | 13185092 | 13185914 | WBGene00012374 | W09H1.4  | W09H1.4  | -0.152126731905861  |
| AGIWUR21145                                                                                 |    |    |          |          |                |          |          |                     |
| N2                                                                                          | HS | II | 13185987 | 13187351 | WBGene00012375 | mecr-1   | W09H1.5  | 0.110618665470529   |
| AGIWUR34282                                                                                 |    |    |          |          |                |          |          |                     |
| N2                                                                                          | HS | II | 13195549 | 13199603 | WBGene00002264 | lec-1    | W09H1.6  | -0.342478397515025  |
| AGIWUR18206;AGIWUR41352;AGIWUR41572                                                         |    |    |          |          |                |          |          |                     |
| N2                                                                                          | HS | II | 13200165 | 13215701 | WBGene00000274 | btf-1    | F15D4.1  | -0.0818190433178074 |
| AGIWUR12208;AGIWUR39267                                                                     |    |    |          |          |                |          |          |                     |
| N2                                                                                          | HS | II | 13216092 | 13216764 | WBGene00008859 | F15D4.2  | F15D4.2  | -0.147469884485028  |
| AGIWUR8652;AGIWUR29706;AGIWUR37514                                                          |    |    |          |          |                |          |          |                     |
| N2                                                                                          | HS | II | 13235306 | 13237417 | WBGene00001459 | flp-16   | F15D4.8  | -0.0573292564724985 |
| AGIWUR3652;AGIWUR16501;AGIWUR36244;AGIWUR39440                                              |    |    |          |          |                |          |          |                     |
| N2                                                                                          | HS | II | 13239249 | 13243121 | WBGene00008861 | F15D4.4  | F15D4.4  | -0.054980338301617  |
| AGIWUR28570;AGIWUR37736                                                                     |    |    |          |          |                |          |          |                     |
| N2                                                                                          | HS | II | 13245348 | 13247774 | WBGene00008862 | F15D4.5  | F15D4.5  | -0.140567331350974  |
| AGIWUR1585                                                                                  |    |    |          |          |                |          |          |                     |
| N2                                                                                          | HS | II | 13249189 | 13249895 | WBGene00008863 | F15D4.6  | F15D4.6  | -0.0896056975358475 |

AGIWUR859;AGIWUR4033;AGIWUR13762;AGIWUR13873;AGIWUR18842;AGIWUR26669;AGIWUR33094;AGIWUR43311  
 N2 HS II 13260495 13261201 WBGene00012985 Y48C3A.1 Y48C3A.1  
 0.118036182019973 AGIWUR22693  
 N2 HS II 13272634 13304229 WBGene00012989 Y48C3A.5 Y48C3A.5  
 -0.37447938180199 AGIWUR11657  
 N2 HS II 13309290 13311488 WBGene00012987 Y48C3A.3 Y48C3A.3  
 0.174983554546374 AGIWUR12236;AGIWUR12626;AGIWUR21275  
 N2 HS II 13311459 13320911 WBGene00003119 mac-1 Y48C3A.7  
 -0.228922121000276 AGIWUR9960;AGIWUR9979;AGIWUR21632;AGIWUR43284  
 N2 HS II 13321954 13330825 WBGene00012990 sam-10 Y48C3A.8  
 0.149675183069289 AGIWUR19200  
 N2 HS II 13338281 13339961 WBGene00012992 mrp1-20 Y48C3A.10  
 0.15705224688285 AGIWUR16972  
 N2 HS II 13340644 13347884 WBGene00012993 dmsr-3 Y48C3A.11  
 -0.122035355207751 AGIWUR8773  
 N2 HS II 13369607 13375290 WBGene00012998 Y48C3A.20 Y48C3A.20  
 -0.0916951091752889 AGIWUR6602;AGIWUR34545  
 N2 HS II 13376412 13388879 WBGene00012994 Y48C3A.12 Y48C3A.12  
 -0.222472978566233 AGIWUR4627;AGIWUR21344  
 N2 HS II 13389761 13401992 WBGene00012995 Y48C3A.14 Y48C3A.14  
 0.0831908867924991 AGIWUR13908  
 N2 HS II 13402980 13404629 WBGene00012996 pinn-4 Y48C3A.16  
 0.151513229624758 AGIWUR26311  
 N2 HS II 13406160 13411483 WBGene00001162 efl-2 Y48C3A.17  
 0.0991328990095779 AGIWUR25742;AGIWUR26124;AGIWUR26605  
 N2 HS II 13412635 13414906 WBGene00012997 Y48C3A.18 Y48C3A.18  
 -0.0388314771546492 AGIWUR8883;AGIWUR13097;AGIWUR13111;AGIWUR16520;AGIWUR24033;AGIWUR25801  
 N2 HS II 13415024 13424446 WBGene00013014 Y48E1C.1 Y48E1C.1  
 -0.108255944655566 AGIWUR2649;AGIWUR5616;AGIWUR12338;AGIWUR16989;AGIWUR19071;AGIWUR32260;AGIWUR41231  
 N2 HS II 13424506 13428970 WBGene00013015 Y48E1C.2 Y48E1C.2  
 0.147832803798355 AGIWUR13917  
 N2 HS II 13433880 13436825 WBGene00013017 Y48E1C.4 Y48E1C.4  
 -0.245465166198965 AGIWUR10395  
 N2 HS II 13437579 13447593 WBGene00008444 tbc-14 E01G4.1 0.0334530957743966  
 AGIWUR5556;AGIWUR44407  
 N2 HS II 13448835 13460642 WBGene00004116 pqn-27 E01G4.4 -0.07490824363627  
 AGIWUR25;AGIWUR10877;AGIWUR44806  
 N2 HS II 13460991 13469602 WBGene00008446 E01G4.3 E01G4.3 -0.0563626309638448  
 AGIWUR10416;AGIWUR28784;AGIWUR33582;AGIWUR41256;AGIWUR44661

|                                                                                                                                   |    |    |                      |                                                             |                |          |           |                    |
|-----------------------------------------------------------------------------------------------------------------------------------|----|----|----------------------|-------------------------------------------------------------|----------------|----------|-----------|--------------------|
| N2                                                                                                                                | HS | II | 13472401             | 13473995                                                    | WBGene00008447 | E01G4.5  | E01G4.5   | -0.162901874622817 |
| AGIWUR4017;AGIWUR39799                                                                                                            |    |    |                      |                                                             |                |          |           |                    |
| N2                                                                                                                                | HS | II | 13477471             | 13478929                                                    | WBGene00045410 | E01G4.7  | E01G4.7   | 0.0830500332408937 |
| AGIWUR4005;AGIWUR8184;AGIWUR21131;AGIWUR27985;AGIWUR29964;AGIWUR39135                                                             |    |    |                      |                                                             |                |          |           |                    |
| N2                                                                                                                                | HS | II | 13482405             | 13485780                                                    | WBGene00008448 | E01G4.6  | E01G4.6   | -0.096069258336664 |
| AGIWUR7121                                                                                                                        |    |    |                      |                                                             |                |          |           |                    |
| N2                                                                                                                                | HS | II | 13485792             | 13491786                                                    | WBGene00000113 | alh-7    | F45H10.1  |                    |
|                                                                                                                                   |    |    | 0.199057128323048    | AGIWUR37785                                                 |                |          |           |                    |
| N2                                                                                                                                | HS | II | 13491803             | 13493050                                                    | WBGene00009739 | F45H10.2 |           | F45H10.2           |
|                                                                                                                                   |    |    | 0.0372233925048793   | AGIWUR16910                                                 |                |          |           |                    |
| N2                                                                                                                                | HS | II | 13493181             | 13494600                                                    | WBGene00009740 | F45H10.3 |           | F45H10.3           |
|                                                                                                                                   |    |    | -0.0121701841042894  | AGIWUR19029;AGIWUR22747                                     |                |          |           |                    |
| N2                                                                                                                                | HS | II | 13495050             | 13495900                                                    | WBGene00009741 | drr-1    | F45H10.4  |                    |
|                                                                                                                                   |    |    | 0.175133150199333    | AGIWUR8290                                                  |                |          |           |                    |
| N2                                                                                                                                | HS | II | 13501877             | 13503822                                                    | WBGene00009742 | F45H10.5 |           | F45H10.5           |
|                                                                                                                                   |    |    | -0.0802812310020027  |                                                             |                |          |           |                    |
| AGIWUR5292;AGIWUR9571;AGIWUR12387;AGIWUR12768;AGIWUR21572;AGIWUR25012;AGIWUR29346;AGIWUR34331;AGIWUR35280;AGIWUR39653;AGIWUR40900 |    |    |                      |                                                             |                |          |           |                    |
| N2                                                                                                                                | HS | II | 13504082             | 13506905                                                    | WBGene00010069 | F54F11.1 |           | F54F11.1           |
|                                                                                                                                   |    |    | 0.0677329642942546   | AGIWUR34937                                                 |                |          |           |                    |
| N2                                                                                                                                | HS | II | 13507806             | 13516479                                                    | WBGene00010070 | nep-17   | F54F11.2  |                    |
|                                                                                                                                   |    |    | -0.00600484531938861 | AGIWUR31258                                                 |                |          |           |                    |
| N2                                                                                                                                | HS | II | 13517912             | 13522925                                                    | WBGene00010071 | sre-45   | F54F11.3  |                    |
|                                                                                                                                   |    |    | 0.163554627368498    | AGIWUR27402                                                 |                |          |           |                    |
| N2                                                                                                                                | HS | II | 13522919             | 13531218                                                    | WBGene00013011 | snx-14   | Y48E1B.14 |                    |
|                                                                                                                                   |    |    | -0.217825730738242   | AGIWUR11452;AGIWUR18223;AGIWUR20153;AGIWUR36079;AGIWUR41053 |                |          |           |                    |
| N2                                                                                                                                | HS | II | 13533486             | 13541084                                                    | WBGene00013001 | Y48E1B.2 |           | Y48E1B.2           |
|                                                                                                                                   |    |    | 0.129148433873315    | AGIWUR24617;AGIWUR29266                                     |                |          |           |                    |
| N2                                                                                                                                | HS | II | 13542007             | 13547645                                                    | WBGene00013000 | ddl-2    | Y48E1B.1  |                    |
|                                                                                                                                   |    |    | -0.143331396267727   | AGIWUR8887;AGIWUR16973                                      |                |          |           |                    |
| N2                                                                                                                                | HS | II | 13547739             | 13567999                                                    | WBGene00013002 | Y48E1B.3 |           | Y48E1B.3           |
|                                                                                                                                   |    |    | -0.0925132626432461  |                                                             |                |          |           |                    |
| AGIWUR15123;AGIWUR19802;AGIWUR31063;AGIWUR31692;AGIWUR33404;AGIWUR34595;AGIWUR44162;AGIWUR44251                                   |    |    |                      |                                                             |                |          |           |                    |
| N2                                                                                                                                | HS | II | 13568077             | 13575068                                                    | WBGene00013004 | mrp1-37  | Y48E1B.5  |                    |
|                                                                                                                                   |    |    | 0.239954934043686    | AGIWUR2143                                                  |                |          |           |                    |
| N2                                                                                                                                | HS | II | 13575925             | 13584732                                                    | WBGene00013006 | lin-38   | Y48E1B.7  |                    |
|                                                                                                                                   |    |    | -0.0557007082265297  | AGIWUR2850;AGIWUR25413                                      |                |          |           |                    |
| N2                                                                                                                                | HS | II | 13585705             | 13589033                                                    | WBGene00013007 | Y48E1B.8 |           | Y48E1B.8           |
|                                                                                                                                   |    |    | 0.10714830178944     | AGIWUR15064                                                 |                |          |           |                    |

|    |    |    |                                                                                                 |                                    |                |          |                             |
|----|----|----|-------------------------------------------------------------------------------------------------|------------------------------------|----------------|----------|-----------------------------|
| N2 | HS | II | 13589036                                                                                        | 13590552                           | WBGene00013013 | clec-145 | Y48E1B.16                   |
|    |    |    | -0.165910956427261                                                                              | AGIWUR7883                         |                |          |                             |
| N2 | HS | II | 13590640                                                                                        | 13593797                           | WBGene00013008 | clec-146 | Y48E1B.9                    |
|    |    |    | -0.119891196533437                                                                              | AGIWUR7912;AGIWUR21835;AGIWUR41929 |                |          |                             |
| N2 | HS | II | 13595006                                                                                        | 13596551                           | WBGene00013009 | fbxc-23  | Y48E1B.11                   |
|    |    |    | 0.107494929502376                                                                               |                                    |                |          |                             |
|    |    |    | AGIWUR11623;AGIWUR14076;AGIWUR30753;AGIWUR33903;AGIWUR35723;AGIWUR38420;AGIWUR39312;AGIWUR42220 |                                    |                |          |                             |
| N2 | HS | II | 13596955                                                                                        | 13598068                           | WBGene00000804 | csc-1    | Y48E1B.12                   |
|    |    |    | -0.0268856962429043                                                                             | AGIWUR7181;AGIWUR27268             |                |          |                             |
| N2 | HS | II | 13601204                                                                                        | 13605057                           | WBGene00000819 | csp-1    | Y48E1B.13                   |
|    |    |    | -0.04749931085263                                                                               | AGIWUR13033                        |                |          |                             |
| N2 | HS | II | 13608154                                                                                        | 13609824                           | WBGene00001768 | gst-20   | Y48E1B.10                   |
|    |    |    | -0.337596011887527                                                                              | AGIWUR21650                        |                |          |                             |
| N2 | HS | II | 13610443                                                                                        | 13611349                           | WBGene00001772 | gst-24   | F37B1.1 0.146420114083062   |
|    |    |    | AGIWUR15934                                                                                     |                                    |                |          |                             |
| N2 | HS | II | 13611771                                                                                        | 13613196                           | WBGene00001763 | gst-15   | F37B1.4 -0.0774688393273077 |
|    |    |    | AGIWUR43213                                                                                     |                                    |                |          |                             |
| N2 | HS | II | 13614788                                                                                        | 13616100                           | WBGene00001762 | gst-14   | F37B1.3 -0.124252028956309  |
|    |    |    | AGIWUR27122                                                                                     |                                    |                |          |                             |
| N2 | HS | II | 13616685                                                                                        | 13618061                           | WBGene00001760 | gst-12   | F37B1.2 -0.509434450360928  |
|    |    |    | AGIWUR11751                                                                                     |                                    |                |          |                             |
| N2 | HS | II | 13622967                                                                                        | 13624502                           | WBGene00001764 | gst-16   | F37B1.5 0.00646233387002404 |
|    |    |    | AGIWUR31264                                                                                     |                                    |                |          |                             |
| N2 | HS | II | 13625544                                                                                        | 13627141                           | WBGene00001767 | gst-19   | F37B1.8 0.098391779143217   |
|    |    |    | AGIWUR3777;AGIWUR36800                                                                          |                                    |                |          |                             |
| N2 | HS | II | 13628017                                                                                        | 13628774                           | WBGene00001765 | gst-17   | F37B1.6 -0.063951988511544  |
|    |    |    | AGIWUR36475                                                                                     |                                    |                |          |                             |
| N2 | HS | II | 13629799                                                                                        | 13630887                           | WBGene00001766 | gst-18   | F37B1.7 -0.0265107773267728 |
|    |    |    | AGIWUR12330;AGIWUR24948;AGIWUR32902;AGIWUR38232;AGIWUR44742                                     |                                    |                |          |                             |
| N2 | HS | II | 13632655                                                                                        | 13636986                           | WBGene00006404 | tag-10   | C31C9.1 0.0267846407484118  |
|    |    |    | AGIWUR37940                                                                                     |                                    |                |          |                             |
| N2 | HS | II | 13636929                                                                                        | 13638480                           | WBGene00007836 | C31C9.2  | C31C9.2 0.173085725719283   |
|    |    |    | AGIWUR3095;AGIWUR8721;AGIWUR10783;AGIWUR21035;AGIWUR28229;AGIWUR36644                           |                                    |                |          |                             |
| N2 | HS | II | 13641495                                                                                        | 13643821                           | WBGene00007837 | fbxa-167 | C31C9.3                     |
|    |    |    | 0.0852425638666645                                                                              | AGIWUR44122                        |                |          |                             |
| N2 | HS | II | 13645781                                                                                        | 13648850                           | WBGene00007838 | fbxa-168 | C31C9.4                     |
|    |    |    | -0.0592830736007182                                                                             | AGIWUR1946                         |                |          |                             |
| N2 | HS | II | 13648530                                                                                        | 13655347                           | WBGene00045289 | fbxa-169 | C31C9.8                     |
|    |    |    | 0.210502178397126                                                                               | AGIWUR7582                         |                |          |                             |

|                                                            |    |    |          |          |                |          |           |                     |
|------------------------------------------------------------|----|----|----------|----------|----------------|----------|-----------|---------------------|
| N2                                                         | HS | II | 13669104 | 13669713 | WBGene00007841 | C31C9.7  | C31C9.7   | -0.402948308409336  |
| AGIWUR36149                                                |    |    |          |          |                |          |           |                     |
| N2                                                         | HS | II | 13670633 | 13694787 | WBGene00012999 | rpoa-1   | Y48E1A.1  |                     |
| -0.370684372685575 AGIWUR5492;AGIWUR11083                  |    |    |          |          |                |          |           |                     |
| N2                                                         | HS | II | 13703877 | 13712911 | WBGene00002235 | kqt-3    | Y54G9A.3  |                     |
| 0.0603883960044413 AGIWUR17672;AGIWUR41149                 |    |    |          |          |                |          |           |                     |
| N2                                                         | HS | II | 13712921 | 13715893 | WBGene00013207 | zipt-2.3 | Y54G9A.4  |                     |
| -0.0474941519477863 AGIWUR31247                            |    |    |          |          |                |          |           |                     |
| N2                                                         | HS | II | 13718185 | 13721318 | WBGene00044084 | sre-46   | Y54G9A.10 |                     |
| 0.0146839528450355 AGIWUR9584;AGIWUR39918                  |    |    |          |          |                |          |           |                     |
| N2                                                         | HS | II | 13722964 | 13725037 | WBGene00013208 | Y54G9A.5 | Y54G9A.5  |                     |
| -0.108804006768612 AGIWUR38181                             |    |    |          |          |                |          |           |                     |
| N2                                                         | HS | II | 13724978 | 13725805 | WBGene00013210 | Y54G9A.7 | Y54G9A.7  |                     |
| 0.150657494343951 AGIWUR8650                               |    |    |          |          |                |          |           |                     |
| N2                                                         | HS | II | 13726062 | 13729610 | WBGene00013209 | bub-3    | Y54G9A.6  |                     |
| 0.0160342162683946 AGIWUR27299                             |    |    |          |          |                |          |           |                     |
| N2                                                         | HS | II | 13729716 | 13731543 | WBGene00013211 | Y54G9A.9 | Y54G9A.9  |                     |
| 0.691729683772701 AGIWUR6367                               |    |    |          |          |                |          |           |                     |
| N2                                                         | HS | II | 13736349 | 13736933 | WBGene00011056 | R06B9.5  | R06B9.5   | -0.250861789334899  |
| AGIWUR29910                                                |    |    |          |          |                |          |           |                     |
| N2                                                         | HS | II | 13741742 | 13749983 | WBGene00003246 | mig-14   | R06B9.6   | -0.268149665136971  |
| AGIWUR3974                                                 |    |    |          |          |                |          |           |                     |
| N2                                                         | HS | II | 13752316 | 13756267 | WBGene00011055 | arrd-14  | R06B9.4   | -0.436866519686067  |
| AGIWUR11577                                                |    |    |          |          |                |          |           |                     |
| N2                                                         | HS | II | 13758408 | 13761233 | WBGene00011054 | arrd-13  | R06B9.3   | 0.00777547831423675 |
| AGIWUR21367                                                |    |    |          |          |                |          |           |                     |
| N2                                                         | HS | II | 13792229 | 13817398 | WBGene00013934 | ZK131.11 | ZK131.11  |                     |
| -0.342576558683974 AGIWUR2862;AGIWUR10799                  |    |    |          |          |                |          |           |                     |
| N2                                                         | HS | II | 13821778 | 13822333 | WBGene00001885 | his-11   | ZK131.5   | 0.164601240777319   |
| AGIWUR9952;AGIWUR15972;AGIWUR16772;AGIWUR23210;AGIWUR36528 |    |    |          |          |                |          |           |                     |
| N2                                                         | HS | II | 13828287 | 13828697 | WBGene00001916 | his-42   | F08G2.3   | -0.228342369765334  |
| AGIWUR34096                                                |    |    |          |          |                |          |           |                     |
| N2                                                         | HS | II | 13830592 | 13831213 | WBGene00008576 | F08G2.4  | F08G2.4   | -0.0194068875031732 |
| AGIWUR31364                                                |    |    |          |          |                |          |           |                     |
| N2                                                         | HS | II | 13832870 | 13833653 | WBGene00008577 | F08G2.5  | F08G2.5   | -0.022806649615652  |
| AGIWUR43189                                                |    |    |          |          |                |          |           |                     |
| N2                                                         | HS | II | 13835103 | 13835709 | WBGene00002120 | ins-37   | F08G2.6   | -0.0089084024686894 |
| AGIWUR44380                                                |    |    |          |          |                |          |           |                     |
| N2                                                         | HS | II | 13836241 | 13841139 | WBGene00008578 | F08G2.7  | F08G2.7   | -0.196377735064676  |

|                                                                                                          |    |    |          |          |                |                                     |
|----------------------------------------------------------------------------------------------------------|----|----|----------|----------|----------------|-------------------------------------|
| AGIWUR28240                                                                                              |    |    |          |          |                |                                     |
| N2                                                                                                       | HS | II | 13852311 | 13855290 | WBGene00008579 | F08G2.8 F08G2.8 -0.102966541136052  |
| AGIWUR5634                                                                                               |    |    |          |          |                |                                     |
| N2                                                                                                       | HS | II | 13855788 | 13872315 | WBGene00013093 | Y51H1A.2 Y51H1A.2                   |
| -0.244540372920348 AGIWUR10118;AGIWUR12948;AGIWUR15961;AGIWUR23741;AGIWUR29105;AGIWUR32778;AGIWUR41195   |    |    |          |          |                |                                     |
| N2                                                                                                       | HS | II | 13872869 | 13875423 | WBGene00013094 | Y51H1A.3 Y51H1A.3                   |
| -0.00438222241381681 AGIWUR11740;AGIWUR14779;AGIWUR19083;AGIWUR23307;AGIWUR31503;AGIWUR38345;AGIWUR41980 |    |    |          |          |                |                                     |
| N2                                                                                                       | HS | II | 13876034 | 13882585 | WBGene00013095 | ing-3 Y51H1A.4                      |
| -0.0783796170442379 AGIWUR539                                                                            |    |    |          |          |                |                                     |
| N2                                                                                                       | HS | II | 13882705 | 13888031 | WBGene00001838 | hda-10 Y51H1A.5                     |
| -0.163076671498327 AGIWUR33508                                                                           |    |    |          |          |                |                                     |
| N2                                                                                                       | HS | II | 13888583 | 13898394 | WBGene00013096 | mcd-1 Y51H1A.6                      |
| -0.180140190824631 AGIWUR8763;AGIWUR38762                                                                |    |    |          |          |                |                                     |
| N2                                                                                                       | HS | II | 13898366 | 13902114 | WBGene00012197 | W02B8.1 W02B8.1 -0.0136518780729382 |
| AGIWUR36040                                                                                              |    |    |          |          |                |                                     |
| N2                                                                                                       | HS | II | 13908921 | 13915254 | WBGene00012198 | W02B8.2 W02B8.2 -0.167966831230192  |
| AGIWUR13508                                                                                              |    |    |          |          |                |                                     |
| N2                                                                                                       | HS | II | 13916340 | 13919838 | WBGene00012199 | mltn-3 W02B8.3 -0.0497507034207674  |
| AGIWUR4662;AGIWUR18634;AGIWUR35203                                                                       |    |    |          |          |                |                                     |
| N2                                                                                                       | HS | II | 13920555 | 13924724 | WBGene00012200 | mltn-4 W02B8.4 -0.175934037602036   |
| AGIWUR36510;AGIWUR40714                                                                                  |    |    |          |          |                |                                     |
| N2                                                                                                       | HS | II | 13925268 | 13930516 | WBGene00044074 | mltn-5 W02B8.6 0.164733007894098    |
| AGIWUR39189                                                                                              |    |    |          |          |                |                                     |
| N2                                                                                                       | HS | II | 13930648 | 13931997 | WBGene00001988 | hot-3 W02B8.5 -0.0287656293368541   |
| AGIWUR31128;AGIWUR40137                                                                                  |    |    |          |          |                |                                     |
| N2                                                                                                       | HS | II | 13937995 | 13939631 | WBGene00012328 | W07G1.1 W07G1.1 0.129431048419281   |
| AGIWUR33574                                                                                              |    |    |          |          |                |                                     |
| N2                                                                                                       | HS | II | 13949590 | 13951869 | WBGene00012329 | sre-44 W07G1.2 -0.0682427450175425  |
| AGIWUR23234;AGIWUR24414;AGIWUR34747                                                                      |    |    |          |          |                |                                     |
| N2                                                                                                       | HS | II | 13951906 | 13957543 | WBGene00012330 | zip-3 W07G1.3 -0.106371266026065    |
| AGIWUR18520;AGIWUR40639                                                                                  |    |    |          |          |                |                                     |
| N2                                                                                                       | HS | II | 13959239 | 13962417 | WBGene00012332 | rpi-1 W07G1.5 -0.231389179335302    |
| AGIWUR29081;AGIWUR34293;AGIWUR44572                                                                      |    |    |          |          |                |                                     |
| N2                                                                                                       | HS | II | 13964891 | 13966333 | WBGene00012334 | W07G1.7 W07G1.7 0.238890558256465   |
| AGIWUR15265                                                                                              |    |    |          |          |                |                                     |
| N2                                                                                                       | HS | II | 13966534 | 13969079 | WBGene00012333 | sre-43 W07G1.6 -0.0528870476153509  |
| AGIWUR27997                                                                                              |    |    |          |          |                |                                     |
| N2                                                                                                       | HS | II | 13970584 | 13972970 | WBGene00012722 | Y39G8B.1 Y39G8B.1                   |
| -0.0331335576029357 AGIWUR15112;AGIWUR16525                                                              |    |    |          |          |                |                                     |

|                     |    |    |                                                                        |          |                |           |                             |
|---------------------|----|----|------------------------------------------------------------------------|----------|----------------|-----------|-----------------------------|
| N2                  | HS | II | 13973690                                                               | 13976221 | WBGene00012723 | Y39G8B.2  | Y39G8B.2                    |
| -0.129440700848505  |    |    | AGIWUR6405                                                             |          |                |           |                             |
| N2                  | HS | II | 13977164                                                               | 13979883 | WBGene00012724 | sre-48    | Y39G8B.3                    |
| -0.0209311544173891 |    |    | AGIWUR23507                                                            |          |                |           |                             |
| N2                  | HS | II | 13981330                                                               | 13981785 | WBGene00012728 | Y39G8B.9  | Y39G8B.9                    |
| 0.0296413893939329  |    |    | AGIWUR1280;AGIWUR18970;AGIWUR25187;AGIWUR37328;AGIWUR41482;AGIWUR44093 |          |                |           |                             |
| N2                  | HS | II | 13982048                                                               | 13983115 | WBGene00012729 | Y39G8B.10 | Y39G8B.10                   |
| -0.0885190252102195 |    |    | AGIWUR44923                                                            |          |                |           |                             |
| N2                  | HS | II | 13983397                                                               | 13984651 | WBGene00012725 | sre-47    | Y39G8B.4                    |
| -0.209069983351169  |    |    | AGIWUR14222                                                            |          |                |           |                             |
| N2                  | HS | II | 13987616                                                               | 13991838 | WBGene00012726 | Y39G8B.5  | Y39G8B.5                    |
| 0.486796975501734   |    |    | AGIWUR5997;AGIWUR29173                                                 |          |                |           |                             |
| N2                  | HS | II | 13993009                                                               | 13993527 | WBGene00014885 | Y39G8B.8  | Y39G8B.8                    |
| -0.0169409187467515 |    |    | AGIWUR4346;AGIWUR37185;AGIWUR43820                                     |          |                |           |                             |
| N2                  | HS | II | 13994411                                                               | 13995045 | WBGene00012727 | Y39G8B.7  | Y39G8B.7                    |
| 0.0936720549604022  |    |    | AGIWUR25154                                                            |          |                |           |                             |
| N2                  | HS | II | 13995401                                                               | 13995876 | WBGene00008501 | fbxa-177  | F01D5.11                    |
| 0.115085575893384   |    |    | AGIWUR13019                                                            |          |                |           |                             |
| N2                  | HS | II | 13996958                                                               | 13997606 | WBGene00008492 | F01D5.1   | F01D5.1 -0.268997171905371  |
| AGIWUR10090         |    |    |                                                                        |          |                |           |                             |
| N2                  | HS | II | 13998497                                                               | 13999064 | WBGene00008493 | F01D5.2   | F01D5.2 -0.0482709025770074 |
| AGIWUR45174         |    |    |                                                                        |          |                |           |                             |
| N2                  | HS | II | 13999059                                                               | 14000144 | WBGene00008494 | F01D5.3   | F01D5.3 -0.457870753937083  |
| AGIWUR16727         |    |    |                                                                        |          |                |           |                             |
| N2                  | HS | II | 14001686                                                               | 14002306 | WBGene00008495 | F01D5.5   | F01D5.5 -0.17120157941171   |
| AGIWUR8659          |    |    |                                                                        |          |                |           |                             |
| N2                  | HS | II | 14006511                                                               | 14008514 | WBGene00008496 | F01D5.6   | F01D5.6 0.0712005974625232  |
| AGIWUR18402         |    |    |                                                                        |          |                |           |                             |
| N2                  | HS | II | 14008666                                                               | 14010583 | WBGene00008497 | F01D5.7   | F01D5.7 0.0477197670281519  |
| AGIWUR41689         |    |    |                                                                        |          |                |           |                             |
| N2                  | HS | II | 14010706                                                               | 14013826 | WBGene00008498 | F01D5.8   | F01D5.8 -0.0695553999496745 |
| AGIWUR10871         |    |    |                                                                        |          |                |           |                             |
| N2                  | HS | II | 14013825                                                               | 14016965 | WBGene00008499 | cyp-37A1  | F01D5.9                     |
| -0.204803225139507  |    |    | AGIWUR11139;AGIWUR13421;AGIWUR31528;AGIWUR34500                        |          |                |           |                             |
| N2                  | HS | II | 14017839                                                               | 14021330 | WBGene00008500 | F01D5.10  | F01D5.10                    |
| -0.169065188251807  |    |    | AGIWUR9014                                                             |          |                |           |                             |
| N2                  | HS | II | 14031402                                                               | 14032644 | WBGene00014851 | W01G7.2   | W01G7.2 0.0271585592899592  |
| AGIWUR33995         |    |    |                                                                        |          |                |           |                             |
| N2                  | HS | II | 14033233                                                               | 14037721 | WBGene00000901 | daf-5     | W01G7.1 -0.15065194070766   |

AGIWUR2777;AGIWUR3143;AGIWUR4552;AGIWUR23271;AGIWUR42691;AGIWUR43981  
 N2 HS II 14060061 14060624 WBGene00012187 rpb-11 W01G7.3 0.0110102555210716  
 AGIWUR1799  
 N2 HS II 14060739 14062960 WBGene00012188 W01G7.4 W01G7.4 -0.109263478588232  
 AGIWUR6293;AGIWUR13407;AGIWUR25133;AGIWUR39814;AGIWUR41628;AGIWUR42037  
 N2 HS II 14063450 14066170 WBGene00002275 lem-2 W01G7.5 -0.108957430930095  
 AGIWUR36856  
 N2 HS II 14068907 14089119 WBGene00012730 xrn-1 Y39G8C.1  
 -0.0475628409589905 AGIWUR3029;AGIWUR27428  
 N2 HS II 14090075 14094690 WBGene00000662 col-87 Y39G8C.4  
 -0.0171305078131407 AGIWUR21941  
 N2 HS II 14095447 14097390 WBGene00012731 Y39G8C.2 Y39G8C.2  
 0.0258910158005339 AGIWUR18523  
 N2 HS II 14101263 14102961 WBGene00014569 bkip-1 Y39G8C.3  
 0.108796361211881  
 AGIWUR2676;AGIWUR3891;AGIWUR12056;AGIWUR14174;AGIWUR15841;AGIWUR15877;AGIWUR16335;AGIWUR23672;AGIWUR35130;A  
 GIWUR37737;AGIWUR38371;AGIWUR40259;AGIWUR41719;AGIWUR43332  
 N2 HS II 14104773 14108072 WBGene00001805 gur-4 K09E4.5  
 -0.00802825454968836 AGIWUR819  
 N2 HS II 14108016 14109635 WBGene00010723 cpg-7 K09E4.6 0.119406041329107  
 AGIWUR861  
 N2 HS II 14114213 14122165 WBGene00010722 K09E4.4 K09E4.4 0.0219991436510973  
 AGIWUR36499  
 N2 HS II 14123945 14126941 WBGene00010721 K09E4.3 K09E4.3 -0.0359743836786421  
 AGIWUR12853  
 N2 HS II 14127687 14132833 WBGene00010720 K09E4.2 K09E4.2 0.112685074065876  
 AGIWUR6171  
 N2 HS II 14133397 14142289 WBGene00012230 cacn-1 W03H9.4 0.240687772050986  
 AGIWUR27840  
 N2 HS II 14142949 14143874 WBGene00012228 W03H9.2 W03H9.2 0.0208831176390656  
 AGIWUR7297;AGIWUR20495  
 N2 HS II 14151040 14154373 WBGene00012978 Y48B6A.1 Y48B6A.1  
 -0.197537150182407 AGIWUR7453;AGIWUR18959  
 N2 HS II 14155280 14155660 WBGene00004456 rpl-43 Y48B6A.2  
 -0.169117100462714  
 AGIWUR3534;AGIWUR4568;AGIWUR11626;AGIWUR13510;AGIWUR21750;AGIWUR21886;AGIWUR26463;AGIWUR33415;AGIWUR36339;A  
 GIWUR38880  
 N2 HS II 14155768 14166018 WBGene00006964 xrn-2 Y48B6A.3  
 -0.123972281487383 AGIWUR40875



|                     |    |    |                                                                                                         |          |                |            |            |
|---------------------|----|----|---------------------------------------------------------------------------------------------------------|----------|----------------|------------|------------|
| N2                  | HS | II | 14172833                                                                                                | 14175174 | WBGene00012979 | Y48B6A.5   | Y48B6A.5   |
| -0.286188802672681  |    |    | AGIWUR8342                                                                                              |          |                |            |            |
| N2                  | HS | II | 14178814                                                                                                | 14189917 | WBGene00012980 | efhd-1     | Y48B6A.6   |
| -0.014323151274676  |    |    | AGIWUR14476;AGIWUR16862;AGIWUR19411;AGIWUR21777                                                         |          |                |            |            |
| N2                  | HS | II | 14205633                                                                                                | 14210214 | WBGene00000037 | ace-3      | Y48B6A.8   |
| 0.123582068759651   |    |    | AGIWUR33827                                                                                             |          |                |            |            |
| N2                  | HS | II | 14211439                                                                                                | 14213123 | WBGene00001992 | hot-7      | Y48B6A.9   |
| 0.227676067963153   |    |    | AGIWUR20114;AGIWUR22691                                                                                 |          |                |            |            |
| N2                  | HS | II | 14214409                                                                                                | 14217139 | WBGene00012981 | Y48B6A.10  | Y48B6A.10  |
| -0.283285113113649  |    |    | AGIWUR21643                                                                                             |          |                |            |            |
| N2                  | HS | II | 14217107                                                                                                | 14218064 | WBGene00050948 | Y48B6A.16  | Y48B6A.16  |
| 0.15226554633248    |    |    | AGIWUR4514;AGIWUR21323;AGIWUR24184;AGIWUR35402;AGIWUR42266                                              |          |                |            |            |
| N2                  | HS | II | 14220938                                                                                                | 14226287 | WBGene00012984 | Y48B6A.13  | Y48B6A.13  |
| -0.0876034435484367 |    |    | AGIWUR31036                                                                                             |          |                |            |            |
| N2                  | HS | II | 14226377                                                                                                | 14234120 | WBGene00012983 | men-1      | Y48B6A.12  |
| -0.145288867009462  |    |    | AGIWUR33695                                                                                             |          |                |            |            |
| N2                  | HS | II | 14234972                                                                                                | 14243603 | WBGene00012982 | jmjd-2     | Y48B6A.11  |
| -0.0806699275782474 |    |    | AGIWUR484;AGIWUR4107;AGIWUR9451;AGIWUR12375;AGIWUR17242;AGIWUR26629;AGIWUR28009;AGIWUR35789;AGIWUR40210 |          |                |            |            |
| N2                  | HS | II | 14250683                                                                                                | 14251448 | WBGene00001971 | hmg-1.1    | Y48B6A.14  |
| -0.0767291561623118 |    |    | AGIWUR2307;AGIWUR6488;AGIWUR12701;AGIWUR18413;AGIWUR19350;AGIWUR40655                                   |          |                |            |            |
| N2                  | HS | II | 14252357                                                                                                | 14255705 | WBGene00013213 | Y54G11A.2  | Y54G11A.2  |
| -0.293830591253176  |    |    | AGIWUR11933                                                                                             |          |                |            |            |
| N2                  | HS | II | 14256610                                                                                                | 14256987 | WBGene00235256 | Y54G11A.19 | Y54G11A.19 |
| -0.228696480859202  |    |    | AGIWUR5247                                                                                              |          |                |            |            |
| N2                  | HS | II | 14276621                                                                                                | 14283973 | WBGene00013214 | Y54G11A.3  | Y54G11A.3  |
| -0.149238820351808  |    |    | AGIWUR26523                                                                                             |          |                |            |            |
| N2                  | HS | II | 14285780                                                                                                | 14287377 | WBGene00005264 | srh-41     | Y54G11A.12 |
| -0.155025659362957  |    |    | AGIWUR23858                                                                                             |          |                |            |            |
| N2                  | HS | II | 14287632                                                                                                | 14289068 | WBGene00005265 | srh-42     | Y54G11A.15 |
| 0.0478427819138201  |    |    | AGIWUR36608                                                                                             |          |                |            |            |
| N2                  | HS | II | 14289696                                                                                                | 14290875 | WBGene00005266 | srh-43     | Y54G11A.16 |
| -0.0706280289191721 |    |    | AGIWUR8458                                                                                              |          |                |            |            |
| N2                  | HS | II | 14292824                                                                                                | 14296055 | WBGene00013215 | Y54G11A.4  | Y54G11A.4  |
| 0.100356608999087   |    |    | AGIWUR27775                                                                                             |          |                |            |            |
| N2                  | HS | II | 14297305                                                                                                | 14299633 | WBGene00013216 | Y54G11A.7  | Y54G11A.7  |
| 0.212374124960064   |    |    | AGIWUR2686                                                                                              |          |                |            |            |
| N2                  | HS | II | 14299553                                                                                                | 14302083 | WBGene00000831 | ctl-2      | Y54G11A.5  |
| 0.138392023826412   |    |    | AGIWUR8751                                                                                              |          |                |            |            |

|                                                                                                                                                                      |    |    |          |          |                |            |                             |
|----------------------------------------------------------------------------------------------------------------------------------------------------------------------|----|----|----------|----------|----------------|------------|-----------------------------|
| N2                                                                                                                                                                   | HS | II | 14318158 | 14320917 | WBGene00013221 | Y54G11A.14 | Y54G11A.14                  |
| -0.141991543929681 AGIWUR43300                                                                                                                                       |    |    |          |          |                |            |                             |
| N2                                                                                                                                                                   | HS | II | 14340068 | 14344454 | WBGene00013217 | ddl-3      | Y54G11A.8                   |
| 0.311920812544085 AGIWUR17300;AGIWUR32646                                                                                                                            |    |    |          |          |                |            |                             |
| N2                                                                                                                                                                   | HS | II | 14346877 | 14348792 | WBGene00002996 | lin-7      | Y54G11A.10                  |
| 0.0500901134602572 AGIWUR14816                                                                                                                                       |    |    |          |          |                |            |                             |
| N2                                                                                                                                                                   | HS | II | 14349783 | 14350795 | WBGene00013219 | Y54G11A.11 | Y54G11A.11                  |
| -0.0342191987997182 AGIWUR20166;AGIWUR32611                                                                                                                          |    |    |          |          |                |            |                             |
| N2                                                                                                                                                                   | HS | II | 14350719 | 14358113 | WBGene00011050 | agl-1      | R06A4.8 0.114894663925114   |
| AGIWUR23864                                                                                                                                                          |    |    |          |          |                |            |                             |
| N2                                                                                                                                                                   | HS | II | 14358366 | 14361701 | WBGene00011051 | pfs-2      | R06A4.9 0.0629068315680943  |
| AGIWUR11966                                                                                                                                                          |    |    |          |          |                |            |                             |
| N2                                                                                                                                                                   | HS | II | 14362019 | 14365177 | WBGene00011047 | R06A4.2    | R06A4.2 -0.0546212606283909 |
| AGIWUR31139                                                                                                                                                          |    |    |          |          |                |            |                             |
| N2                                                                                                                                                                   | HS | II | 14365705 | 14373899 | WBGene00002076 | imb-2      | R06A4.4 -0.123162871157943  |
| AGIWUR3727;AGIWUR8967;AGIWUR15087;AGIWUR16722;AGIWUR22315                                                                                                            |    |    |          |          |                |            |                             |
| N2                                                                                                                                                                   | HS | II | 14373831 | 14377890 | WBGene00000059 | acr-20     | R06A4.10                    |
| 0.296192022450452 AGIWUR3520                                                                                                                                         |    |    |          |          |                |            |                             |
| N2                                                                                                                                                                   | HS | II | 14381772 | 14383376 | WBGene00011049 | sdz-26     | R06A4.6 0.0897899603525261  |
| AGIWUR11439                                                                                                                                                          |    |    |          |          |                |            |                             |
| N2                                                                                                                                                                   | HS | II | 14383973 | 14388454 | WBGene00003220 | mes-2      | R06A4.7 -0.221296666489089  |
| AGIWUR7454                                                                                                                                                           |    |    |          |          |                |            |                             |
| N2                                                                                                                                                                   | HS | II | 14389236 | 14390116 | WBGene00009179 | kbp-3      | F26H11.1                    |
| -0.129227470270315 AGIWUR37325                                                                                                                                       |    |    |          |          |                |            |                             |
| N2                                                                                                                                                                   | HS | II | 14390718 | 14407905 | WBGene00009180 | nurf-1     | F26H11.2                    |
| -0.0623093959813081                                                                                                                                                  |    |    |          |          |                |            |                             |
| AGIWUR1055;AGIWUR3235;AGIWUR7486;AGIWUR10576;AGIWUR22291;AGIWUR22413;AGIWUR23878;AGIWUR26556;AGIWUR26933;AGIWUR27114;AGIWUR29545;AGIWUR33257;AGIWUR38259;AGIWUR40676 |    |    |          |          |                |            |                             |
| N2                                                                                                                                                                   | HS | II | 14411095 | 14412218 | WBGene00194892 | dsb-2      | F26H11.6                    |
| 0.265352921060156 AGIWUR17446                                                                                                                                        |    |    |          |          |                |            |                             |
| N2                                                                                                                                                                   | HS | II | 14412201 | 14413516 | WBGene00001371 | exl-1      | F26H11.5                    |
| -0.130694730009672 AGIWUR41988                                                                                                                                       |    |    |          |          |                |            |                             |
| N2                                                                                                                                                                   | HS | II | 14417889 | 14424891 | WBGene00004048 | plx-2      | K04B12.1                    |
| -0.0874460608090812 AGIWUR4508;AGIWUR33866;AGIWUR38759;AGIWUR44043                                                                                                   |    |    |          |          |                |            |                             |
| N2                                                                                                                                                                   | HS | II | 14434419 | 14438977 | WBGene00010550 | K04B12.2   | K04B12.2                    |
| -0.369044932415139 AGIWUR8514                                                                                                                                        |    |    |          |          |                |            |                             |
| N2                                                                                                                                                                   | HS | II | 14441409 | 14447219 | WBGene00010551 | smg-8      | K04B12.3                    |
| 0.00883447214446242 AGIWUR21796                                                                                                                                      |    |    |          |          |                |            |                             |
| N2                                                                                                                                                                   | HS | II | 14455632 | 14464911 | WBGene00013222 | dmsr-6     | Y54G11B.1                   |

|                                                                                                                     |             |                |           |          |                    |  |  |
|---------------------------------------------------------------------------------------------------------------------|-------------|----------------|-----------|----------|--------------------|--|--|
| -0.0660664257955119                                                                                                 | AGIWUR16816 |                |           |          |                    |  |  |
| N2 HS II 14470371                                                                                                   | 14479627    | WBGene00007545 | C13B4.1   | C13B4.1  | -0.126171700571852 |  |  |
| AGIWUR7062                                                                                                          |             |                |           |          |                    |  |  |
| N2 HS II 14485624                                                                                                   | 14488688    | WBGene00006856 | usp-14    | C13B4.2  | -0.115905523607819 |  |  |
| AGIWUR9141;AGIWUR11923;AGIWUR27616;AGIWUR28554;AGIWUR34325;AGIWUR36729;AGIWUR43933                                  |             |                |           |          |                    |  |  |
| N2 HS II 14489802                                                                                                   | 14492901    | WBGene00010758 | vnut-1    | K10H10.1 |                    |  |  |
| -0.0219661844972681                                                                                                 | AGIWUR5410  |                |           |          |                    |  |  |
| N2 HS II 14492826                                                                                                   | 14494514    | WBGene00010759 | cysl-2    | K10H10.2 |                    |  |  |
| -0.129060639196307                                                                                                  | AGIWUR25107 |                |           |          |                    |  |  |
| N2 HS II 14498026                                                                                                   | 14499755    | WBGene00000972 | dhs-8     | K10H10.3 |                    |  |  |
| 0.334036590815094                                                                                                   | AGIWUR22194 |                |           |          |                    |  |  |
| N2 HS II 14500422                                                                                                   | 14501663    | WBGene00010760 | K10H10.4  |          | K10H10.4           |  |  |
| 0.0223390562733989                                                                                                  | AGIWUR44601 |                |           |          |                    |  |  |
| N2 HS II 14501747                                                                                                   | 14502543    | WBGene00010761 | K10H10.5  |          | K10H10.5           |  |  |
| 0.0981920588686283                                                                                                  | AGIWUR33435 |                |           |          |                    |  |  |
| N2 HS II 14505015                                                                                                   | 14506409    | WBGene00045403 | K10H10.12 |          | K10H10.12          |  |  |
| -0.00453734312106491                                                                                                |             |                |           |          |                    |  |  |
| AGIWUR871;AGIWUR3702;AGIWUR4293;AGIWUR13405;AGIWUR18072;AGIWUR18318;AGIWUR20971;AGIWUR23433;AGIWUR28318;AGIWUR29134 |             |                |           |          |                    |  |  |
| N2 HS II 14507092                                                                                                   | 14507663    | WBGene00010763 | K10H10.7  |          | K10H10.7           |  |  |
| 0.0131431299435896                                                                                                  | AGIWUR17523 |                |           |          |                    |  |  |
| N2 HS II 14508068                                                                                                   | 14510162    | WBGene00010765 | K10H10.10 |          | K10H10.10          |  |  |
| 0.268725100918473                                                                                                   | AGIWUR37841 |                |           |          |                    |  |  |
| N2 HS II 14513191                                                                                                   | 14515117    | WBGene00010764 | K10H10.9  |          | K10H10.9           |  |  |
| 0.0721229557242431                                                                                                  | AGIWUR826   |                |           |          |                    |  |  |
| N2 HS II 14524173                                                                                                   | 14525112    | WBGene00010195 | pot-2     | F57C2.3  | 0.3897765112385    |  |  |
| AGIWUR14166                                                                                                         |             |                |           |          |                    |  |  |
| N2 HS II 14525312                                                                                                   | 14526031    | WBGene00010196 | F57C2.4   | F57C2.4  | 0.34014509543452   |  |  |
| AGIWUR38942                                                                                                         |             |                |           |          |                    |  |  |
| N2 HS II 14526213                                                                                                   | 14528296    | WBGene00010197 | F57C2.5   | F57C2.5  | 0.0195978020563707 |  |  |
| AGIWUR20898                                                                                                         |             |                |           |          |                    |  |  |
| N2 HS II 14528754                                                                                                   | 14534173    | WBGene00010198 | spat-1    | F57C2.6  | -0.171899947854351 |  |  |
| AGIWUR21485                                                                                                         |             |                |           |          |                    |  |  |
| N2 HS II 14534300                                                                                                   | 14535365    | WBGene00007312 | C04H5.1   | C04H5.1  | 0.128297061906707  |  |  |
| AGIWUR6314                                                                                                          |             |                |           |          |                    |  |  |
| N2 HS II 14535923                                                                                                   | 14537579    | WBGene00007313 | cllec-147 |          | C04H5.2            |  |  |
| 0.129750097830158                                                                                                   | AGIWUR37021 |                |           |          |                    |  |  |
| N2 HS II 14537946                                                                                                   | 14539162    | WBGene00007315 | C04H5.7   | C04H5.7  | 0.371607686996157  |  |  |
| AGIWUR11910;AGIWUR32330;AGIWUR41692;AGIWUR42941                                                                     |             |                |           |          |                    |  |  |

|                                                                     |    |    |          |          |                |           |           |                     |
|---------------------------------------------------------------------|----|----|----------|----------|----------------|-----------|-----------|---------------------|
| N2                                                                  | HS | II | 14540895 | 14548791 | WBGene00007314 | gcy-29    | C04H5.3   | -0.0589963369640634 |
| AGIWUR12134                                                         |    |    |          |          |                |           |           |                     |
| N2                                                                  | HS | II | 14550913 | 14552476 | WBGene00007316 | nlp-41    | C04H5.8   | 0.140590952200339   |
| AGIWUR1866;AGIWUR5601;AGIWUR7581;AGIWUR9920;AGIWUR14170;AGIWUR37811 |    |    |          |          |                |           |           |                     |
| N2                                                                  | HS | II | 14552501 | 14561599 | WBGene00003392 | mog-4     | C04H5.6   | 0.392571995464007   |
| AGIWUR18263                                                         |    |    |          |          |                |           |           |                     |
| N2                                                                  | HS | II | 14573615 | 14576558 | WBGene00007242 | madf-5    | C01G12.1  |                     |
| -0.173927002943167 AGIWUR44209                                      |    |    |          |          |                |           |           |                     |
| N2                                                                  | HS | II | 14576957 | 14578075 | WBGene00044333 | C01G12.13 |           | C01G12.13           |
| 0.0391668552815183 AGIWUR14353;AGIWUR44551                          |    |    |          |          |                |           |           |                     |
| N2                                                                  | HS | II | 14579016 | 14580124 | WBGene00007249 | C01G12.9  |           | C01G12.9            |
| 0.0180954150773971 AGIWUR34770                                      |    |    |          |          |                |           |           |                     |
| N2                                                                  | HS | II | 14580254 | 14581043 | WBGene00007250 | nspp-8    | C01G12.10 |                     |
| -0.0180047501239216 AGIWUR8498;AGIWUR34778;AGIWUR36101              |    |    |          |          |                |           |           |                     |
| N2                                                                  | HS | II | 14581377 | 14582361 | WBGene00007244 | C01G12.3  |           | C01G12.3            |
| -0.0386379079642474 AGIWUR28563                                     |    |    |          |          |                |           |           |                     |
| N2                                                                  | HS | II | 14583706 | 14585733 | WBGene00006939 | wee-1.2   | C01G12.4  |                     |
| -0.0291816749643679 AGIWUR12799;AGIWUR41845                         |    |    |          |          |                |           |           |                     |
| N2                                                                  | HS | II | 14586527 | 14587507 | WBGene00007245 | C01G12.5  |           | C01G12.5            |
| -0.0558260904951888 AGIWUR21158                                     |    |    |          |          |                |           |           |                     |
| N2                                                                  | HS | II | 14587957 | 14588241 | WBGene00007246 | nspp-10   | C01G12.6  |                     |
| 0.226607598856466 AGIWUR22159                                       |    |    |          |          |                |           |           |                     |
| N2                                                                  | HS | II | 14588621 | 14591893 | WBGene00007247 | C01G12.7  |           | C01G12.7            |
| -0.112879904156342 AGIWUR6995                                       |    |    |          |          |                |           |           |                     |
| N2                                                                  | HS | II | 14593581 | 14597657 | WBGene00007248 | catp-4    | C01G12.8  |                     |
| -0.0445500596826118 AGIWUR22850;AGIWUR29822                         |    |    |          |          |                |           |           |                     |
| N2                                                                  | HS | II | 14600902 | 14610554 | WBGene00006603 | tps-2     | F19H8.1   | 0.0717380449608385  |
| AGIWUR35888                                                         |    |    |          |          |                |           |           |                     |
| N2                                                                  | HS | II | 14616068 | 14622612 | WBGene00008964 | mltn-9    | F19H8.4   | -0.328214618218713  |
| AGIWUR22280                                                         |    |    |          |          |                |           |           |                     |
| N2                                                                  | HS | II | 14627630 | 14630121 | WBGene00007999 | tag-297   | C38C6.6   | 0.143496900533973   |
| AGIWUR1156                                                          |    |    |          |          |                |           |           |                     |
| N2                                                                  | HS | II | 14630553 | 14632636 | WBGene00007998 | C38C6.5   | C38C6.5   | 0.331446777470263   |
| AGIWUR2409;AGIWUR16695                                              |    |    |          |          |                |           |           |                     |
| N2                                                                  | HS | II | 14633123 | 14634657 | WBGene00007996 | C38C6.3   | C38C6.3   | 0.29775088360724    |
| AGIWUR29542                                                         |    |    |          |          |                |           |           |                     |
| N2                                                                  | HS | II | 14634656 | 14636837 | WBGene00007997 | sre-13    | C38C6.4   | 0.152722205663592   |
| AGIWUR30223                                                         |    |    |          |          |                |           |           |                     |
| N2                                                                  | HS | II | 14640096 | 14644083 | WBGene00000225 | atgp-2    | C38C6.2   | 0.0128348325032048  |

|                                                                               |    |    |          |          |                |           |           |                     |  |
|-------------------------------------------------------------------------------|----|----|----------|----------|----------------|-----------|-----------|---------------------|--|
| AGIWUR3765;AGIWUR21389;AGIWUR21804;AGIWUR28905                                |    |    |          |          |                |           |           |                     |  |
| N2                                                                            | HS | II | 14647325 | 14666943 | WBGene00006787 | unc-52    | ZC101.2   |                     |  |
| -0.000560537076715661 AGIWUR18169;AGIWUR31295;AGIWUR36135                     |    |    |          |          |                |           |           |                     |  |
| N2                                                                            | HS | II | 14675263 | 14684296 | WBGene00013851 | ZC101.1   | ZC101.1   | -0.222659021161956  |  |
| AGIWUR35897                                                                   |    |    |          |          |                |           |           |                     |  |
| N2                                                                            | HS | II | 14694192 | 14695299 | WBGene00010491 | K02B7.3   | K02B7.3   | 0.2959092000604     |  |
| AGIWUR13831;AGIWUR17035;AGIWUR22360;AGIWUR27365;AGIWUR31050;AGIWUR37046       |    |    |          |          |                |           |           |                     |  |
| N2                                                                            | HS | II | 14698701 | 14699362 | WBGene00007478 | C09F9.1   | C09F9.1   | 0.105456619415806   |  |
| AGIWUR371                                                                     |    |    |          |          |                |           |           |                     |  |
| N2                                                                            | HS | II | 14705512 | 14712800 | WBGene00007479 | C09F9.2   | C09F9.2   | 0.0118948254703461  |  |
| AGIWUR3438                                                                    |    |    |          |          |                |           |           |                     |  |
| N2                                                                            | HS | II | 14713340 | 14718225 | WBGene00045322 | C09F9.7   | C09F9.7   | 0.0156577746295206  |  |
| AGIWUR30576                                                                   |    |    |          |          |                |           |           |                     |  |
| N2                                                                            | HS | II | 14734410 | 14739243 | WBGene00013187 | npr-34    | Y54E2A.1  |                     |  |
| 0.0582773138145409 AGIWUR27662                                                |    |    |          |          |                |           |           |                     |  |
| N2                                                                            | HS | II | 14746890 | 14752489 | WBGene00013188 | smg-9     | Y54E2A.2  |                     |  |
| -0.0676636422769512 AGIWUR8749;AGIWUR25196;AGIWUR38912                        |    |    |          |          |                |           |           |                     |  |
| N2                                                                            | HS | II | 14752891 | 14753907 | WBGene00006381 | tac-1     | Y54E2A.3  |                     |  |
| -0.0396998240737929 AGIWUR18103                                               |    |    |          |          |                |           |           |                     |  |
| N2                                                                            | HS | II | 14754622 | 14778149 | WBGene00013189 | Y54E2A.4  |           | Y54E2A.4            |  |
| 0.0496071876956297 AGIWUR9156;AGIWUR23342                                     |    |    |          |          |                |           |           |                     |  |
| N2                                                                            | HS | II | 14778345 | 14782723 | WBGene00013193 | Y54E2A.8  |           | Y54E2A.8            |  |
| -0.316483151725457 AGIWUR8170                                                 |    |    |          |          |                |           |           |                     |  |
| N2                                                                            | HS | II | 14785184 | 14785995 | WBGene00013194 | Y54E2A.9  |           | Y54E2A.9            |  |
| 0.181061629177105 AGIWUR1495                                                  |    |    |          |          |                |           |           |                     |  |
| N2                                                                            | HS | II | 14786198 | 14786512 | WBGene00044171 | Y54E2A.13 |           | Y54E2A.13           |  |
| 0.0520420811788984 AGIWUR8457;AGIWUR19675;AGIWUR30747;AGIWUR37073;AGIWUR43089 |    |    |          |          |                |           |           |                     |  |
| N2                                                                            | HS | II | 14791101 | 14792554 | WBGene00013195 | Y54E2A.10 |           | Y54E2A.10           |  |
| 0.120949964738818 AGIWUR30769                                                 |    |    |          |          |                |           |           |                     |  |
| N2                                                                            | HS | II | 14795404 | 14798224 | WBGene00001225 | eif-3.B   | Y54E2A.11 |                     |  |
| -0.462396745464985 AGIWUR3619;AGIWUR7825;AGIWUR11053;AGIWUR11745;AGIWUR15942  |    |    |          |          |                |           |           |                     |  |
| N2                                                                            | HS | II | 14798472 | 14800971 | WBGene00013196 | tbc-20    | Y54E2A.12 |                     |  |
| -0.22056317598728 AGIWUR13816;AGIWUR17503;AGIWUR33262                         |    |    |          |          |                |           |           |                     |  |
| N2                                                                            | HS | II | 14800918 | 14804309 | WBGene00012180 | W01D2.3   | W01D2.3   |                     |  |
| -0.00421793618400557 AGIWUR5729                                               |    |    |          |          |                |           |           |                     |  |
| N2                                                                            | HS | II | 14805986 | 14808087 | WBGene00012181 | srt-11    | W01D2.4   | -0.0888246978415204 |  |
| AGIWUR13564                                                                   |    |    |          |          |                |           |           |                     |  |
| N2                                                                            | HS | II | 14808922 | 14809204 | WBGene00012183 | W01D2.6   | W01D2.6   | 0.00898528953928412 |  |
| AGIWUR19703                                                                   |    |    |          |          |                |           |           |                     |  |

|                                                                                                                                 |    |    |          |          |                |           |           |                     |
|---------------------------------------------------------------------------------------------------------------------------------|----|----|----------|----------|----------------|-----------|-----------|---------------------|
| N2                                                                                                                              | HS | II | 14812182 | 14814889 | WBGene00012182 | osta-3    | W01D2.5   | -0.105347645112609  |
| AGIWUR28930                                                                                                                     |    |    |          |          |                |           |           |                     |
| N2                                                                                                                              | HS | II | 14816136 | 14840005 | WBGene00003651 | nhr-61    | W01D2.2   | -0.185529821114359  |
| AGIWUR20157;AGIWUR25353;AGIWUR29518;AGIWUR30187                                                                                 |    |    |          |          |                |           |           |                     |
| N2                                                                                                                              | HS | II | 14843177 | 14850905 | WBGene00000399 | cdh-7     | R05H10.6  |                     |
| -0.228836314187975 AGIWUR6629                                                                                                   |    |    |          |          |                |           |           |                     |
| N2                                                                                                                              | HS | II | 14852430 | 14853594 | WBGene00011042 | R05H10.1  | R05H10.1  |                     |
| -0.10283474830742 AGIWUR42783                                                                                                   |    |    |          |          |                |           |           |                     |
| N2                                                                                                                              | HS | II | 14855529 | 14857010 | WBGene00011046 | R05H10.7  | R05H10.7  |                     |
| 0.525151564974598 AGIWUR24851                                                                                                   |    |    |          |          |                |           |           |                     |
| N2                                                                                                                              | HS | II | 14857259 | 14866636 | WBGene00011043 | rbm-28    | R05H10.2  |                     |
| 0.123314105277796 AGIWUR4595                                                                                                    |    |    |          |          |                |           |           |                     |
| N2                                                                                                                              | HS | II | 14866716 | 14869577 | WBGene00011045 | gpx-2     | R05H10.5  |                     |
| 0.0445460170578933 AGIWUR24659                                                                                                  |    |    |          |          |                |           |           |                     |
| N2                                                                                                                              | HS | II | 14869944 | 14883054 | WBGene00011044 | R05H10.3  | R05H10.3  |                     |
| -0.130609078075221 AGIWUR38905                                                                                                  |    |    |          |          |                |           |           |                     |
| N2                                                                                                                              | HS | II | 14902493 | 14907533 | WBGene00000584 | cog-1     | R03C1.3   | 0.0338522023914729  |
| AGIWUR6298;AGIWUR13164;AGIWUR13360;AGIWUR13897;AGIWUR23597;AGIWUR32475                                                          |    |    |          |          |                |           |           |                     |
| N2                                                                                                                              | HS | II | 14907508 | 14910405 | WBGene00010987 | R03C1.1   | R03C1.1   | -0.0707850023111991 |
| AGIWUR36717;AGIWUR40106                                                                                                         |    |    |          |          |                |           |           |                     |
| N2                                                                                                                              | HS | II | 14919705 | 14953312 | WBGene00008443 | pde-3     | E01F3.1   | -0.0599106341674167 |
| AGIWUR2735;AGIWUR5932;AGIWUR6278;AGIWUR7192;AGIWUR10161;AGIWUR10894;AGIWUR16006;AGIWUR25584;AGIWUR29713;AGIWUR40204;AGIWUR41494 |    |    |          |          |                |           |           |                     |
| N2                                                                                                                              | HS | II | 14954278 | 14958189 | WBGene00013149 | Y53F4B.1  | Y53F4B.1  |                     |
| -0.0522021511230424 AGIWUR36946                                                                                                 |    |    |          |          |                |           |           |                     |
| N2                                                                                                                              | HS | II | 14959675 | 14964108 | WBGene00001247 | elo-9     | Y53F4B.2  |                     |
| 0.287525094148714 AGIWUR40927                                                                                                   |    |    |          |          |                |           |           |                     |
| N2                                                                                                                              | HS | II | 14968633 | 14969354 | WBGene00013150 | Y53F4B.3  | Y53F4B.3  |                     |
| -0.10713000619157 AGIWUR40915                                                                                                   |    |    |          |          |                |           |           |                     |
| N2                                                                                                                              | HS | II | 14969617 | 14977005 | WBGene00013151 | nsun-5    | Y53F4B.4  |                     |
| -0.0233734442305527 AGIWUR13954;AGIWUR28834                                                                                     |    |    |          |          |                |           |           |                     |
| N2                                                                                                                              | HS | II | 14982592 | 14984009 | WBGene00013152 | Y53F4B.5  | Y53F4B.5  |                     |
| 0.248824501448045 AGIWUR25839                                                                                                   |    |    |          |          |                |           |           |                     |
| N2                                                                                                                              | HS | II | 14985806 | 14987225 | WBGene00013153 | Y53F4B.6  | Y53F4B.6  |                     |
| -0.0856836638195251 AGIWUR3788;AGIWUR23842;AGIWUR26105;AGIWUR36212;AGIWUR36748                                                  |    |    |          |          |                |           |           |                     |
| N2                                                                                                                              | HS | II | 14988471 | 14992667 | WBGene00044726 | Y53F4B.43 | Y53F4B.43 |                     |
| 0.0423612635572344 AGIWUR13396;AGIWUR22421;AGIWUR27105                                                                          |    |    |          |          |                |           |           |                     |
| N2                                                                                                                              | HS | II | 14994197 | 14997444 | WBGene00013155 | Y53F4B.8  | Y53F4B.8  |                     |
| -0.129330481487936 AGIWUR38021                                                                                                  |    |    |          |          |                |           |           |                     |

|                      |    |    |                                                            |          |                |           |           |
|----------------------|----|----|------------------------------------------------------------|----------|----------------|-----------|-----------|
| N2                   | HS | II | 15001896                                                   | 15003510 | WBGene00013157 | Y53F4B.10 | Y53F4B.10 |
| -0.114408208627809   |    |    | AGIWUR34468                                                |          |                |           |           |
| N2                   | HS | II | 15004869                                                   | 15010416 | WBGene00013156 | Y53F4B.9  | Y53F4B.9  |
| -0.184941993624207   |    |    | AGIWUR36328                                                |          |                |           |           |
| N2                   | HS | II | 15010748                                                   | 15013408 | WBGene00013158 | Y53F4B.11 | Y53F4B.11 |
| 0.210808922914154    |    |    | AGIWUR2609                                                 |          |                |           |           |
| N2                   | HS | II | 15019223                                                   | 15025768 | WBGene00013159 | Y53F4B.12 | Y53F4B.12 |
| -0.0975157190419438  |    |    | AGIWUR38902                                                |          |                |           |           |
| N2                   | HS | II | 15026137                                                   | 15037807 | WBGene00013160 | Y53F4B.13 | Y53F4B.13 |
| 0.0757477289429698   |    |    | AGIWUR26575                                                |          |                |           |           |
| N2                   | HS | II | 15037991                                                   | 15039297 | WBGene00013161 | Y53F4B.14 | Y53F4B.14 |
| 0.0274126011398268   |    |    | AGIWUR12472;AGIWUR18353                                    |          |                |           |           |
| N2                   | HS | II | 15039404                                                   | 15048904 | WBGene00000208 | asc-1     | Y53F4B.15 |
| 0.0062276293703647   |    |    | AGIWUR15313;AGIWUR41331;AGIWUR44728                        |          |                |           |           |
| N2                   | HS | II | 15052085                                                   | 15055718 | WBGene00013162 | Y53F4B.16 | Y53F4B.16 |
| -0.101838545260583   |    |    | AGIWUR16810                                                |          |                |           |           |
| N2                   | HS | II | 15064267                                                   | 15071671 | WBGene00013164 | Y53F4B.18 | Y53F4B.18 |
| -0.134018172976766   |    |    | AGIWUR33080                                                |          |                |           |           |
| N2                   | HS | II | 15077218                                                   | 15079475 | WBGene00013165 | Y53F4B.19 | Y53F4B.19 |
| 0.0840027019978784   |    |    | AGIWUR8305;AGIWUR20252;AGIWUR43799                         |          |                |           |           |
| N2                   | HS | II | 15084476                                                   | 15089626 | WBGene00013166 | Y53F4B.20 | Y53F4B.20 |
| 0.0585924825867012   |    |    | AGIWUR10663                                                |          |                |           |           |
| N2                   | HS | II | 15090172                                                   | 15109042 | WBGene00013167 | Y53F4B.21 | Y53F4B.21 |
| -0.0558533805439776  |    |    | AGIWUR3656;AGIWUR23425;AGIWUR24369;AGIWUR38305;AGIWUR42729 |          |                |           |           |
| N2                   | HS | II | 15110144                                                   | 15116306 | WBGene00013176 | Y53F4B.39 | Y53F4B.39 |
| 0.0757288660570747   |    |    | AGIWUR38178                                                |          |                |           |           |
| N2                   | HS | II | 15117686                                                   | 15117963 | WBGene00044729 | Y53F4B.46 | Y53F4B.46 |
| -0.132025595593353   |    |    | AGIWUR5825;AGIWUR8271;AGIWUR12857;AGIWUR33283;AGIWUR37234  |          |                |           |           |
| N2                   | HS | II | 15118282                                                   | 15118951 | WBGene00014920 | Y53F4B.38 | Y53F4B.38 |
| -0.0597998083182469  |    |    | AGIWUR17970;AGIWUR35908                                    |          |                |           |           |
| N2                   | HS | II | 15120301                                                   | 15123345 | WBGene00013168 | arp-1     | Y53F4B.22 |
| 0.000899165812976221 |    |    | AGIWUR3603                                                 |          |                |           |           |
| N2                   | HS | II | 15124504                                                   | 15126365 | WBGene00013169 | Y53F4B.23 | Y53F4B.23 |
| -0.268585820131608   |    |    | AGIWUR31793;AGIWUR32003                                    |          |                |           |           |
| N2                   | HS | II | 15136186                                                   | 15145370 | WBGene00013171 | Y53F4B.25 | Y53F4B.25 |
| 0.123905531221727    |    |    | AGIWUR5360                                                 |          |                |           |           |
| N2                   | HS | II | 15145894                                                   | 15151934 | WBGene00013173 | Y53F4B.27 | Y53F4B.27 |
| 0.0665628677797052   |    |    | AGIWUR27560                                                |          |                |           |           |
| N2                   | HS | II | 15158180                                                   | 15163614 | WBGene00004234 | ptr-20    | Y53F4B.28 |

|                                   |                        |                |                |            |                             |  |  |
|-----------------------------------|------------------------|----------------|----------------|------------|-----------------------------|--|--|
| 0.192073310204337                 | AGIWUR24814            |                |                |            |                             |  |  |
| N2 HS II                          | 15163808               | 15164646       | WBGene00001774 | gst-26     | Y53F4B.29                   |  |  |
| 0.0801530195670015                | AGIWUR6018             |                |                |            |                             |  |  |
| N2 HS II                          | 15164890               | 15165731       | WBGene00001775 | gst-27     | Y53F4B.30                   |  |  |
| 0.110780543987552                 | AGIWUR31989            |                |                |            |                             |  |  |
| N2 HS II                          | 15166194               | 15167406       | WBGene00001776 | gst-28     | Y53F4B.31                   |  |  |
| 0.0303479338193409                | AGIWUR1127             |                |                |            |                             |  |  |
| N2 HS II                          | 15168538               | 15169860       | WBGene00001777 | gst-29     | Y53F4B.32                   |  |  |
| 0.0842106672320284                | AGIWUR31465            |                |                |            |                             |  |  |
| N2 HS II                          | 15171163               | 15171912       | WBGene00001787 | gst-39     | Y53F4B.33                   |  |  |
| -0.0971626325937578               | AGIWUR6423             |                |                |            |                             |  |  |
| N2 HS II                          | 15174271               | 15174965       | WBGene00001779 | gst-31     | Y53F4B.35                   |  |  |
| 0.105458567459052                 | AGIWUR37191            |                |                |            |                             |  |  |
| N2 HS II                          | 15175943               | 15177271       | WBGene00013175 | Y53F4B.36  | Y53F4B.36                   |  |  |
| 0.30010320610879                  | AGIWUR4348;AGIWUR23408 |                |                |            |                             |  |  |
| N2 HS II                          | 15177372               | 15178594       | WBGene00001780 | gst-32     | Y53F4B.37                   |  |  |
| 0.169283081929827                 | AGIWUR32214            |                |                |            |                             |  |  |
| N2 HS II                          | 15179971               | 15183232       | WBGene00001782 | gst-34     | Y1H11.1 0.242194427947403   |  |  |
| AGIWUR779;AGIWUR18828;AGIWUR37638 |                        |                |                |            |                             |  |  |
| N2 HS II                          | 15183801               | 15185385       | WBGene00001783 | gst-35     | Y1H11.2 0.117504333095786   |  |  |
| AGIWUR2855                        |                        |                |                |            |                             |  |  |
| N2 HS II                          | 15196214               | 15198075       | WBGene00021598 | Y46E12BR.1 | Y46E12BR.1                  |  |  |
| 0.122151845854184                 | AGIWUR26873            |                |                |            |                             |  |  |
| N2 HS II                          | 15207443               | 15229725       | WBGene00021597 | spsb-1     | Y46E12BL.4                  |  |  |
| -0.0871374955763038               | AGIWUR15839            |                |                |            |                             |  |  |
| N2 HS II                          | 15230343               | 15232803       | WBGene00021596 | spsb-2     | Y46E12BL.3                  |  |  |
| -0.0859335582110301               | AGIWUR17487            |                |                |            |                             |  |  |
| N2 HS II                          | 15233153               | 15244931       | WBGene00021595 | Y46E12BL.2 | Y46E12BL.2                  |  |  |
| -0.125558668261949                | AGIWUR12187            |                |                |            |                             |  |  |
| N2 HS II                          | 15268212               | 15275689       | WBGene00007064 | 2RSSE.1    | 2RSSE.1 -0.0299292245068878 |  |  |
| AGIWUR40832;AGIWUR43546           |                        |                |                |            |                             |  |  |
| N2 HS III                         | 1271 3092              | WBGene00008352 | fbxa-6         | cTel154X.1 | 0.314598920675374           |  |  |
| AGIWUR922;AGIWUR23412;AGIWUR38130 |                        |                |                |            |                             |  |  |
| N2 HS III                         | 3321 11940             | WBGene00019183 | npr-30         | H10E21.2   | 0.0209291696277001          |  |  |
| AGIWUR33824                       |                        |                |                |            |                             |  |  |
| N2 HS III                         | 12170 14869            | WBGene00003670 | nhr-80         | H10E21.3   | -0.00647974984589261        |  |  |
| AGIWUR301                         |                        |                |                |            |                             |  |  |
| N2 HS III                         | 15720 17332            | WBGene00019182 | H10E21.1       | H10E21.1   | 0.0560459133727562          |  |  |
| AGIWUR6087;AGIWUR27387            |                        |                |                |            |                             |  |  |



|                                                                                                             |    |     |        |        |                |          |          |                     |
|-------------------------------------------------------------------------------------------------------------|----|-----|--------|--------|----------------|----------|----------|---------------------|
| N2                                                                                                          | HS | III | 17316  | 19675  | WBGene00019184 | H10E21.4 | H10E21.4 | 0.510757769406531   |
| AGIWUR9512                                                                                                  |    |     |        |        |                |          |          |                     |
| N2                                                                                                          | HS | III | 20531  | 23962  | WBGene00019185 | H10E21.5 | H10E21.5 | -0.130780639431077  |
| AGIWUR42375                                                                                                 |    |     |        |        |                |          |          |                     |
| N2                                                                                                          | HS | III | 35454  | 39462  | WBGene00021041 | W05G11.4 | W05G11.4 | -0.235246235115649  |
| AGIWUR21738                                                                                                 |    |     |        |        |                |          |          |                     |
| N2                                                                                                          | HS | III | 41061  | 42021  | WBGene00000663 | col-88   | W05G11.3 | 0.16173210777519    |
| AGIWUR40441                                                                                                 |    |     |        |        |                |          |          |                     |
| N2                                                                                                          | HS | III | 57702  | 58682  | WBGene00021040 | W05G11.2 | W05G11.2 | 0.153845812256687   |
| AGIWUR3886                                                                                                  |    |     |        |        |                |          |          |                     |
| N2                                                                                                          | HS | III | 62888  | 66261  | WBGene00021043 | pck-1    | W05G11.6 | -0.0896283666118292 |
| AGIWUR11857;AGIWUR14639;AGIWUR19103;AGIWUR23802;AGIWUR24065;AGIWUR25842;AGIWUR34655;AGIWUR38529;AGIWUR41918 |    |     |        |        |                |          |          |                     |
| N2                                                                                                          | HS | III | 69073  | 69817  | WBGene00005014 | spt-4    | F54C4.2  | -0.24697424430247   |
| AGIWUR11937                                                                                                 |    |     |        |        |                |          |          |                     |
| N2                                                                                                          | HS | III | 70442  | 86384  | WBGene00018794 | attf-3   | F54C4.3  | -0.070164363290445  |
| AGIWUR6291                                                                                                  |    |     |        |        |                |          |          |                     |
| N2                                                                                                          | HS | III | 86677  | 87381  | WBGene00018795 | F54C4.4  | F54C4.4  | -0.0854254723856371 |
| AGIWUR11681                                                                                                 |    |     |        |        |                |          |          |                     |
| N2                                                                                                          | HS | III | 87559  | 89243  | WBGene00018793 | mrp1-40  | F54C4.1  | -0.134242745091079  |
| AGIWUR18193                                                                                                 |    |     |        |        |                |          |          |                     |
| N2                                                                                                          | HS | III | 89453  | 94809  | WBGene00003931 | pat-4    | C29F9.7  | -0.0348077677689957 |
| AGIWUR26748                                                                                                 |    |     |        |        |                |          |          |                     |
| N2                                                                                                          | HS | III | 95394  | 97726  | WBGene00016222 | C29F9.8  | C29F9.8  | 0.082133284667874   |
| AGIWUR17287                                                                                                 |    |     |        |        |                |          |          |                     |
| N2                                                                                                          | HS | III | 106824 | 107899 | WBGene00016224 | fbxa-57  | C29F9.10 | -0.0549925342186182 |
| AGIWUR32662                                                                                                 |    |     |        |        |                |          |          |                     |
| N2                                                                                                          | HS | III | 109322 | 110185 | WBGene00016225 | fbxa-58  | C29F9.11 | -0.0572796515754455 |
| AGIWUR32908                                                                                                 |    |     |        |        |                |          |          |                     |
| N2                                                                                                          | HS | III | 114903 | 116619 | WBGene00016221 | C29F9.6  | C29F9.6  | 0.00180095087907173 |
| AGIWUR41447                                                                                                 |    |     |        |        |                |          |          |                     |
| N2                                                                                                          | HS | III | 117707 | 118767 | WBGene00016220 | C29F9.5  | C29F9.5  | -0.23438623735931   |
| AGIWUR24053                                                                                                 |    |     |        |        |                |          |          |                     |
| N2                                                                                                          | HS | III | 120492 | 124641 | WBGene00016219 | pals-24  | C29F9.4  | 0.217529203356089   |
| AGIWUR14875;AGIWUR40400                                                                                     |    |     |        |        |                |          |          |                     |
| N2                                                                                                          | HS | III | 124778 | 126527 | WBGene00016218 | pals-23  | C29F9.3  | 0.010951910391972   |
| AGIWUR245;AGIWUR5444;AGIWUR26093;AGIWUR30406;AGIWUR30704;AGIWUR34729;AGIWUR34764                            |    |     |        |        |                |          |          |                     |
| N2                                                                                                          | HS | III | 130180 | 130750 | WBGene00016227 | nhr-280  | C29F9.13 | -0.0213252944199489 |
| AGIWUR8933;AGIWUR19189;AGIWUR27290;AGIWUR38196;AGIWUR39253                                                  |    |     |        |        |                |          |          |                     |
| N2                                                                                                          | HS | III | 130947 | 131751 | WBGene00016217 | C29F9.2  | C29F9.2  | 0.123158405624718   |
| AGIWUR9509                                                                                                  |    |     |        |        |                |          |          |                     |
| N2                                                                                                          | HS | III | 132418 | 134401 | WBGene00016216 | pals-22  | C29F9.1  | 0.194489484729235   |
| AGIWUR40864                                                                                                 |    |     |        |        |                |          |          |                     |
| N2                                                                                                          | HS | III | 134494 | 137975 | WBGene00020540 | pals-25  | T17A3.2  | 0.182270953778966   |
| AGIWUR36367                                                                                                 |    |     |        |        |                |          |          |                     |
| N2                                                                                                          | HS | III | 142121 | 143217 | WBGene00020542 | fbxb-82  | T17A3.4  | 0.262426343200806   |
| AGIWUR11919                                                                                                 |    |     |        |        |                |          |          |                     |
| N2                                                                                                          | HS | III | 143631 | 144792 | WBGene00020543 | fbxb-83  | T17A3.6  | 0.0329313470719921  |
| AGIWUR12633                                                                                                 |    |     |        |        |                |          |          |                     |
| N2                                                                                                          | HS | III | 144994 | 145299 | WBGene00020548 | T17A3.12 | T17A3.12 | 0.139139681792313   |
| AGIWUR35103                                                                                                 |    |     |        |        |                |          |          |                     |
| N2                                                                                                          | HS | III | 145360 | 146491 | WBGene00020544 | fbxb-84  | T17A3.7  | 0.0268068090333937  |
| AGIWUR4909                                                                                                  |    |     |        |        |                |          |          |                     |
| N2                                                                                                          | HS | III | 146917 | 147607 | WBGene00269434 | sqst-5   | T17A3.13 | -0.0678672991559637 |

AGIWUR8165;AGIWUR15973;AGIWUR24457

|    |    |     |        |        |                |       |          |                    |
|----|----|-----|--------|--------|----------------|-------|----------|--------------------|
| N2 | HS | III | 150481 | 151805 | WBGene00020547 | srz-7 | T17A3.11 | 0.0137561186311252 |
|----|----|-----|--------|--------|----------------|-------|----------|--------------------|

AGIWUR1435

|    |    |     |        |        |                |        |         |                    |             |
|----|----|-----|--------|--------|----------------|--------|---------|--------------------|-------------|
| N2 | HS | III | 152572 | 153418 | WBGene00020545 | adbp-2 | T17A3.9 | 0.0918183128988463 | AGIWUR16101 |
|----|----|-----|--------|--------|----------------|--------|---------|--------------------|-------------|

|    |    |     |        |        |                |          |          |                     |
|----|----|-----|--------|--------|----------------|----------|----------|---------------------|
| N2 | HS | III | 154475 | 156674 | WBGene00020546 | T17A3.10 | T17A3.10 | -0.0730006764914091 |
|----|----|-----|--------|--------|----------------|----------|----------|---------------------|

AGIWUR19180

|    |    |     |        |        |                |       |         |                    |             |
|----|----|-----|--------|--------|----------------|-------|---------|--------------------|-------------|
| N2 | HS | III | 156824 | 163542 | WBGene00006894 | ver-1 | T17A3.1 | -0.129324871724839 | AGIWUR29063 |
|----|----|-----|--------|--------|----------------|-------|---------|--------------------|-------------|

|    |    |     |        |        |                |         |         |                    |             |
|----|----|-----|--------|--------|----------------|---------|---------|--------------------|-------------|
| N2 | HS | III | 163598 | 164875 | WBGene00018244 | F40G9.8 | F40G9.8 | -0.160900412167999 | AGIWUR31936 |
|----|----|-----|--------|--------|----------------|---------|---------|--------------------|-------------|

|    |    |     |        |        |                |         |         |                   |             |
|----|----|-----|--------|--------|----------------|---------|---------|-------------------|-------------|
| N2 | HS | III | 165690 | 166285 | WBGene00018243 | F40G9.7 | F40G9.7 | 0.139309408896242 | AGIWUR25649 |
|----|----|-----|--------|--------|----------------|---------|---------|-------------------|-------------|

|    |    |     |        |        |                |          |          |                    |
|----|----|-----|--------|--------|----------------|----------|----------|--------------------|
| N2 | HS | III | 167385 | 169556 | WBGene00189954 | F40G9.18 | F40G9.18 | 0.0202867738579702 |
|----|----|-----|--------|--------|----------------|----------|----------|--------------------|

AGIWUR35541

|    |    |     |        |        |                |          |          |                    |
|----|----|-----|--------|--------|----------------|----------|----------|--------------------|
| N2 | HS | III | 173797 | 174558 | WBGene00189955 | F40G9.19 | F40G9.19 | 0.0899577367835445 |
|----|----|-----|--------|--------|----------------|----------|----------|--------------------|

AGIWUR17083

|    |    |     |        |        |                |          |          |                     |
|----|----|-----|--------|--------|----------------|----------|----------|---------------------|
| N2 | HS | III | 174609 | 175833 | WBGene00018246 | clec-148 | F40G9.10 | -0.0537706693558588 |
|----|----|-----|--------|--------|----------------|----------|----------|---------------------|

AGIWUR4961

|    |    |     |        |        |                |          |          |                    |
|----|----|-----|--------|--------|----------------|----------|----------|--------------------|
| N2 | HS | III | 176111 | 177815 | WBGene00018248 | F40G9.14 | F40G9.14 | 0.0773879653354559 |
|----|----|-----|--------|--------|----------------|----------|----------|--------------------|

AGIWUR9016

|    |    |     |        |        |                |         |         |                   |             |
|----|----|-----|--------|--------|----------------|---------|---------|-------------------|-------------|
| N2 | HS | III | 179542 | 180140 | WBGene00018242 | F40G9.6 | F40G9.6 | -0.10925816484573 | AGIWUR33631 |
|----|----|-----|--------|--------|----------------|---------|---------|-------------------|-------------|

|    |    |     |        |        |                |          |          |                   |
|----|----|-----|--------|--------|----------------|----------|----------|-------------------|
| N2 | HS | III | 181561 | 182981 | WBGene00077531 | F40G9.15 | F40G9.15 | 0.144531664553586 |
|----|----|-----|--------|--------|----------------|----------|----------|-------------------|

AGIWUR32497;AGIWUR36577;AGIWUR39549

|    |    |     |        |        |                |         |         |                   |             |
|----|----|-----|--------|--------|----------------|---------|---------|-------------------|-------------|
| N2 | HS | III | 183231 | 184915 | WBGene00018241 | F40G9.5 | F40G9.5 | 0.288712416794416 | AGIWUR37387 |
|----|----|-----|--------|--------|----------------|---------|---------|-------------------|-------------|

|    |    |     |        |        |                |       |         |                   |            |
|----|----|-----|--------|--------|----------------|-------|---------|-------------------|------------|
| N2 | HS | III | 185652 | 186922 | WBGene00001963 | btb-1 | F40G9.4 | 0.175220849674367 | AGIWUR9514 |
|----|----|-----|--------|--------|----------------|-------|---------|-------------------|------------|

|    |    |     |        |        |                |       |          |                   |
|----|----|-----|--------|--------|----------------|-------|----------|-------------------|
| N2 | HS | III | 186951 | 188131 | WBGene00003510 | mxl-2 | F40G9.11 | -0.21453629054138 |
|----|----|-----|--------|--------|----------------|-------|----------|-------------------|

AGIWUR14877

|    |    |     |        |        |                |        |         |                    |
|----|----|-----|--------|--------|----------------|--------|---------|--------------------|
| N2 | HS | III | 188838 | 190974 | WBGene00006715 | ubc-20 | F40G9.3 | -0.241254322883423 |
|----|----|-----|--------|--------|----------------|--------|---------|--------------------|

AGIWUR5501;AGIWUR11356;AGIWUR36186;AGIWUR37947;AGIWUR38131

|    |    |     |        |        |                |        |         |                   |             |
|----|----|-----|--------|--------|----------------|--------|---------|-------------------|-------------|
| N2 | HS | III | 190986 | 191981 | WBGene00018240 | cox-17 | F40G9.2 | 0.197121367290398 | AGIWUR31562 |
|----|----|-----|--------|--------|----------------|--------|---------|-------------------|-------------|

|    |    |     |        |        |                |          |          |                    |
|----|----|-----|--------|--------|----------------|----------|----------|--------------------|
| N2 | HS | III | 194460 | 210063 | WBGene00185078 | F40G9.17 | F40G9.17 | -0.107987753043663 |
|----|----|-----|--------|--------|----------------|----------|----------|--------------------|

AGIWUR33957

|    |    |     |        |        |                |        |          |                   |
|----|----|-----|--------|--------|----------------|--------|----------|-------------------|
| N2 | HS | III | 209992 | 230450 | WBGene00002230 | k1p-20 | Y50D7A.6 | 0.020286119157225 |
|----|----|-----|--------|--------|----------------|--------|----------|-------------------|

AGIWUR17698

|    |    |     |        |        |                |        |          |                    |
|----|----|-----|--------|--------|----------------|--------|----------|--------------------|
| N2 | HS | III | 230429 | 235121 | WBGene00021755 | hpo-38 | Y50D7A.5 | -0.323785614075195 |
|----|----|-----|--------|--------|----------------|--------|----------|--------------------|

AGIWUR10164

|    |    |     |        |        |                |        |          |                     |
|----|----|-----|--------|--------|----------------|--------|----------|---------------------|
| N2 | HS | III | 235844 | 254067 | WBGene00021754 | hpo-29 | Y50D7A.4 | -0.0297740500019259 |
|----|----|-----|--------|--------|----------------|--------|----------|---------------------|

AGIWUR23049

|    |    |     |        |        |                |          |          |                     |
|----|----|-----|--------|--------|----------------|----------|----------|---------------------|
| N2 | HS | III | 254535 | 264636 | WBGene00021753 | Y50D7A.3 | Y50D7A.3 | 0.00549576846837496 |
|----|----|-----|--------|--------|----------------|----------|----------|---------------------|

AGIWUR3020;AGIWUR32669;AGIWUR45172

|    |    |     |        |        |                |           |           |                     |
|----|----|-----|--------|--------|----------------|-----------|-----------|---------------------|
| N2 | HS | III | 265090 | 266593 | WBGene00021759 | Y50D7A.11 | Y50D7A.11 | -0.0713424732852559 |
|----|----|-----|--------|--------|----------------|-----------|-----------|---------------------|

AGIWUR17396

|                                                                                           |    |     |        |        |                |           |           |                     |             |
|-------------------------------------------------------------------------------------------|----|-----|--------|--------|----------------|-----------|-----------|---------------------|-------------|
| N2                                                                                        | HS | III | 268458 | 283009 | WBGene00021752 | xpd-1     | Y50D7A.2  | 0.0425283544601989  |             |
| AGIWUR16560                                                                               |    |     |        |        |                |           |           |                     |             |
| N2                                                                                        | HS | III | 284117 | 289444 | WBGene00021757 | taco-1    | Y50D7A.9  | 0.319792483939263   |             |
| AGIWUR6437                                                                                |    |     |        |        |                |           |           |                     |             |
| N2                                                                                        | HS | III | 292640 | 314266 | WBGene00021751 | Y50D7A.1  | Y50D7A.1  | -0.0791338956801102 |             |
| AGIWUR30024                                                                               |    |     |        |        |                |           |           |                     |             |
| N2                                                                                        | HS | III | 315460 | 321721 | WBGene00021758 | Y50D7A.10 | Y50D7A.10 | 0.0745484316243434  |             |
| AGIWUR2997;AGIWUR9957;AGIWUR40637                                                         |    |     |        |        |                |           |           |                     |             |
| N2                                                                                        | HS | III | 335956 | 343241 | WBGene00021756 | Y50D7A.8  | Y50D7A.8  | -0.306672782057525  |             |
| AGIWUR15243                                                                               |    |     |        |        |                |           |           |                     |             |
| N2                                                                                        | HS | III | 344307 | 378250 | WBGene00001561 | gei-4     | W07B3.2   | -0.197511430911199  |             |
| AGIWUR34;AGIWUR2203;AGIWUR4322;AGIWUR9947;AGIWUR12564;AGIWUR37982;AGIWUR38490;AGIWUR43785 |    |     |        |        |                |           |           |                     |             |
| N2                                                                                        | HS | III | 378004 | 381298 | WBGene00019636 | gst0-3    | K10F12.4  | -0.172464720931934  |             |
| AGIWUR38396                                                                               |    |     |        |        |                |           |           |                     |             |
| N2                                                                                        | HS | III | 381900 | 382570 | WBGene00019639 | K10F12.7  | K10F12.7  | 0.0331793305470605  |             |
| AGIWUR31688                                                                               |    |     |        |        |                |           |           |                     |             |
| N2                                                                                        | HS | III | 383771 | 384827 | WBGene00023104 | K10F12.8  | K10F12.8  | -0.138341707090857  |             |
| AGIWUR25628;AGIWUR32699;AGIWUR33484;AGIWUR37265;AGIWUR42159                               |    |     |        |        |                |           |           |                     |             |
| N2                                                                                        | HS | III | 398730 | 399392 | WBGene00019638 | K10F12.6  | K10F12.6  | -0.13890059590425   |             |
| AGIWUR36075                                                                               |    |     |        |        |                |           |           |                     |             |
| N2                                                                                        | HS | III | 402384 | 405589 | WBGene00021909 | Y55B1BL.1 | Y55B1BL.1 | -0.15681845866705   |             |
| AGIWUR8894;AGIWUR10666;AGIWUR13026;AGIWUR20424                                            |    |     |        |        |                |           |           |                     |             |
| N2                                                                                        | HS | III | 408094 | 418738 | WBGene00021910 | stim-1    | Y55B1BM.1 | 0.335607022493711   |             |
| AGIWUR37725                                                                               |    |     |        |        |                |           |           |                     |             |
| N2                                                                                        | HS | III | 429300 | 431750 | WBGene00021913 | cec-8     | Y55B1BR.3 | -0.0175335463765229 |             |
| AGIWUR21073                                                                               |    |     |        |        |                |           |           |                     |             |
| N2                                                                                        | HS | III | 434891 | 440142 | WBGene00021912 | Y55B1BR.2 | Y55B1BR.2 | -0.249227324277447  |             |
| AGIWUR10365                                                                               |    |     |        |        |                |           |           |                     |             |
| N2                                                                                        | HS | III | 453785 | 463811 | WBGene00044401 | Y55B1BR.6 | Y55B1BR.6 | 0.149566507450596   |             |
| AGIWUR16016;AGIWUR19782;AGIWUR25028;AGIWUR28804;AGIWUR32799                               |    |     |        |        |                |           |           |                     |             |
| N2                                                                                        | HS | III | 464715 | 471702 | WBGene00021914 | magu-1    | Y55B1BR.4 | -0.0249798689660858 |             |
| AGIWUR9636;AGIWUR33177;AGIWUR35853                                                        |    |     |        |        |                |           |           |                     |             |
| N2                                                                                        | HS | III | 472301 | 475349 | WBGene00017328 | F10C5.2   | F10C5.2   | -0.0750096347667615 | AGIWUR41874 |
| N2                                                                                        | HS | III | 475454 | 482322 | WBGene00003134 | mat-3     | F10C5.1   | 0.191097277616457   | AGIWUR30332 |
| N2                                                                                        | HS | III | 486123 | 486547 | WBGene00003770 | nlp-32    | F30H5.2   | -0.296639308812432  | AGIWUR5416  |
| N2                                                                                        | HS | III | 488764 | 489452 | WBGene00044288 | F30H5.5   | F30H5.5   | 0.0228527437822437  |             |
| AGIWUR1090;AGIWUR12017;AGIWUR13475;AGIWUR25827                                            |    |     |        |        |                |           |           |                     |             |
| N2                                                                                        | HS | III | 491547 | 502625 | WBGene00006781 | unc-45    | F30H5.1   | 0.0271847593112788  | AGIWUR15042 |
| N2                                                                                        | HS | III | 505241 | 512217 | WBGene00017937 | F30H5.3   | F30H5.3   | 0.0504442825297184  | AGIWUR28952 |

|                                                                        |    |     |        |        |                |           |           |                      |                     |
|------------------------------------------------------------------------|----|-----|--------|--------|----------------|-----------|-----------|----------------------|---------------------|
| N2                                                                     | HS | III | 513720 | 516614 | WBGene00020704 | T22F7.5   | T22F7.5   | 0.0506171358270606   | AGIWUR18109         |
| N2                                                                     | HS | III | 518356 | 524044 | WBGene00020702 | T22F7.3   | T22F7.3   | -0.123812864813346   | AGIWUR35438         |
| N2                                                                     | HS | III | 525234 | 526924 | WBGene00020703 | T22F7.4   | T22F7.4   | 0.0665016479484155   | AGIWUR20184         |
| N2                                                                     | HS | III | 542066 | 546537 | WBGene00020701 | T22F7.1   | T22F7.1   | -0.178568867209163   | AGIWUR2200          |
| N2                                                                     | HS | III | 557518 | 572137 | WBGene00015155 | B0353.1   | B0353.1   | -0.116493002290678   |                     |
| AGIWUR21682;AGIWUR27532;AGIWUR33521                                    |    |     |        |        |                |           |           |                      |                     |
| N2                                                                     | HS | III | 573984 | 576447 | WBGene00021903 | Y55B1AL.1 |           | Y55B1AL.1            | 0.112799409844881   |
| AGIWUR5302                                                             |    |     |        |        |                |           |           |                      |                     |
| N2                                                                     | HS | III | 576956 | 577567 | WBGene00021904 | Y55B1AL.2 |           | Y55B1AL.2            | -0.217469569324855  |
| AGIWUR5763;AGIWUR12164;AGIWUR16417;AGIWUR23626;AGIWUR25079;AGIWUR43817 |    |     |        |        |                |           |           |                      |                     |
| N2                                                                     | HS | III | 577684 | 587105 | WBGene00021905 | helq-1    | Y55B1AL.3 |                      | 0.116927139791972   |
| AGIWUR20903                                                            |    |     |        |        |                |           |           |                      |                     |
| N2                                                                     | HS | III | 587244 | 598117 | WBGene00021906 | Y55B1AR.2 |           | Y55B1AR.2            | -0.127559926622588  |
| AGIWUR1743;AGIWUR21403;AGIWUR32389                                     |    |     |        |        |                |           |           |                      |                     |
| N2                                                                     | HS | III | 599509 | 600366 | WBGene00002269 | lec-6     | Y55B1AR.1 |                      | 0.0274429541792038  |
| AGIWUR670;AGIWUR6324;AGIWUR18866;AGIWUR21263;AGIWUR33575;AGIWUR43375   |    |     |        |        |                |           |           |                      |                     |
| N2                                                                     | HS | III | 602708 | 603822 | WBGene00021907 | Y55B1AR.3 |           | Y55B1AR.3            | 0.0353202244482702  |
| AGIWUR22782                                                            |    |     |        |        |                |           |           |                      |                     |
| N2                                                                     | HS | III | 604003 | 605515 | WBGene00021908 | Y55B1AR.4 |           | Y55B1AR.4            | 0.352170624845767   |
| AGIWUR6153                                                             |    |     |        |        |                |           |           |                      |                     |
| N2                                                                     | HS | III | 606004 | 606994 | WBGene00020566 | ttr-7     | T19C3.9   | -0.00431772705641009 | AGIWUR12291         |
| N2                                                                     | HS | III | 607045 | 609973 | WBGene00020559 | best-17   | T19C3.1   | -0.0947133234163768  | AGIWUR246           |
| N2                                                                     | HS | III | 610881 | 614547 | WBGene00020561 | T19C3.3   | T19C3.3   | -0.167187669987012   | AGIWUR28405         |
| N2                                                                     | HS | III | 614707 | 617447 | WBGene00020560 | T19C3.2   | T19C3.2   | 0.103013815938239    |                     |
| AGIWUR27733;AGIWUR37800                                                |    |     |        |        |                |           |           |                      |                     |
| N2                                                                     | HS | III | 618246 | 620254 | WBGene00020562 | T19C3.4   | T19C3.4   | 0.0457751801051298   | AGIWUR19194         |
| N2                                                                     | HS | III | 624607 | 627938 | WBGene00020563 | T19C3.5   | T19C3.5   | 0.285052898787374    | AGIWUR17749         |
| N2                                                                     | HS | III | 628175 | 630987 | WBGene00020564 | T19C3.6   | T19C3.6   | 0.231047364949074    | AGIWUR11209         |
| N2                                                                     | HS | III | 631938 | 634645 | WBGene00001412 | fem-2     | T19C3.8   | -0.277236505085849   | AGIWUR12509         |
| N2                                                                     | HS | III | 634893 | 636167 | WBGene00020565 | T19C3.7   | T19C3.7   | -0.0283823126063947  | AGIWUR7024          |
| N2                                                                     | HS | III | 636479 | 638419 | WBGene00021063 | sbd-1     | W06E11.4  |                      | 0.257047455921711   |
| AGIWUR37227                                                            |    |     |        |        |                |           |           |                      |                     |
| N2                                                                     | HS | III | 638531 | 640226 | WBGene00044319 | tag-266   | W06E11.5  |                      | 0.0391456838024471  |
| AGIWUR19835;AGIWUR27606                                                |    |     |        |        |                |           |           |                      |                     |
| N2                                                                     | HS | III | 640790 | 641625 | WBGene00044318 | tag-267   | W06E11.2  |                      | 0.35818247463386    |
| AGIWUR22516                                                            |    |     |        |        |                |           |           |                      |                     |
| N2                                                                     | HS | III | 642059 | 645613 | WBGene00021061 | W06E11.1  |           | W06E11.1             | 0.00545211450052285 |
| AGIWUR14099;AGIWUR36340                                                |    |     |        |        |                |           |           |                      |                     |
| N2                                                                     | HS | III | 646754 | 654463 | WBGene00015648 | orai-1    | C09F5.2   | -0.0335895254243717  |                     |

AGIWUR14468;AGIWUR23243

|    |    |     |        |        |                |         |         |                     |             |
|----|----|-----|--------|--------|----------------|---------|---------|---------------------|-------------|
| N2 | HS | III | 658709 | 662732 | WBGene00015647 | C09F5.1 | C09F5.1 | -0.0632557339589184 | AGIWUR8004  |
| N2 | HS | III | 662847 | 666265 | WBGene00015649 | C09F5.3 | C09F5.3 | -0.246863097948089  | AGIWUR9052  |
| N2 | HS | III | 668098 | 668433 | WBGene00020923 | W02B3.3 | W02B3.3 | -0.141565556435435  | AGIWUR26697 |
| N2 | HS | III | 676122 | 680253 | WBGene00001709 | grk-2   | W02B3.2 | 0.141575344818143   |             |

AGIWUR2530;AGIWUR28189

|    |    |     |        |        |                |         |         |                     |             |
|----|----|-----|--------|--------|----------------|---------|---------|---------------------|-------------|
| N2 | HS | III | 680634 | 683418 | WBGene00020924 | W02B3.4 | W02B3.4 | -0.148396365114065  | AGIWUR42698 |
| N2 | HS | III | 686237 | 692033 | WBGene00020927 | W02B3.7 | W02B3.7 | 0.16852243738728    | AGIWUR7724  |
| N2 | HS | III | 688739 | 715823 | WBGene00016029 | elf-1   | C24A1.2 | 0.158614174615826   | AGIWUR13322 |
| N2 | HS | III | 725022 | 726155 | WBGene00016028 | flp-24  | C24A1.1 | -0.0309571592848759 |             |

AGIWUR8330;AGIWUR16177

|    |    |     |        |        |                |        |         |                      |  |
|----|----|-----|--------|--------|----------------|--------|---------|----------------------|--|
| N2 | HS | III | 727211 | 752426 | WBGene00003936 | pat-12 | T17H7.4 | -0.00231112779849152 |  |
|----|----|-----|--------|--------|----------------|--------|---------|----------------------|--|

AGIWUR17747;AGIWUR24713;AGIWUR43935

|    |    |     |        |        |                |         |         |                     |             |
|----|----|-----|--------|--------|----------------|---------|---------|---------------------|-------------|
| N2 | HS | III | 755298 | 758080 | WBGene00020551 | T17H7.7 | T17H7.7 | 0.0533487889344464  | AGIWUR17028 |
| N2 | HS | III | 761779 | 762392 | WBGene00018363 | nlp-52  | F42G9.4 | -0.363532418098853  | AGIWUR13691 |
| N2 | HS | III | 763810 | 771366 | WBGene00004212 | ptl-1   | F42G9.9 | -0.0214687639408759 |             |

AGIWUR17260;AGIWUR23112;AGIWUR30034;AGIWUR30114;AGIWUR31642;AGIWUR43414

|    |    |     |        |        |                |        |         |                    |             |
|----|----|-----|--------|--------|----------------|--------|---------|--------------------|-------------|
| N2 | HS | III | 771577 | 772819 | WBGene00018365 | tpst-2 | F42G9.8 | 0.0468241897667623 | AGIWUR18955 |
| N2 | HS | III | 773403 | 774159 | WBGene00000882 | cyn-6  | F42G9.2 | 0.0372109422166624 |             |

AGIWUR2632;AGIWUR7089;AGIWUR13686;AGIWUR21840;AGIWUR23853;AGIWUR42813

|    |    |     |        |        |                |        |         |                     |  |
|----|----|-----|--------|--------|----------------|--------|---------|---------------------|--|
| N2 | HS | III | 774321 | 778871 | WBGene00000117 | alh-11 | F42G9.5 | -0.0840528891253611 |  |
|----|----|-----|--------|--------|----------------|--------|---------|---------------------|--|

AGIWUR25312;AGIWUR36861

|    |    |     |        |        |                |         |         |                    |  |
|----|----|-----|--------|--------|----------------|---------|---------|--------------------|--|
| N2 | HS | III | 783714 | 786092 | WBGene00018362 | F42G9.1 | F42G9.1 | -0.112996614730186 |  |
|----|----|-----|--------|--------|----------------|---------|---------|--------------------|--|

AGIWUR2021;AGIWUR26590;AGIWUR41729

|    |    |     |        |        |                |       |         |                     |  |
|----|----|-----|--------|--------|----------------|-------|---------|---------------------|--|
| N2 | HS | III | 786532 | 793733 | WBGene00004922 | snt-2 | F42G9.7 | -0.0247300252397999 |  |
|----|----|-----|--------|--------|----------------|-------|---------|---------------------|--|

AGIWUR6947;AGIWUR14223;AGIWUR27057;AGIWUR28596;AGIWUR35258;AGIWUR42534

|    |    |     |        |        |                |        |         |                     |  |
|----|----|-----|--------|--------|----------------|--------|---------|---------------------|--|
| N2 | HS | III | 794300 | 795120 | WBGene00004498 | rps-29 | B0412.4 | -0.0249532006996311 |  |
|----|----|-----|--------|--------|----------------|--------|---------|---------------------|--|

AGIWUR4823;AGIWUR17511;AGIWUR19190;AGIWUR30443;AGIWUR33838;AGIWUR34596;AGIWUR44337

|    |    |     |        |        |                |          |         |                     |             |
|----|----|-----|--------|--------|----------------|----------|---------|---------------------|-------------|
| N2 | HS | III | 795136 | 809439 | WBGene00015173 | trpp-11  | B0412.3 | -0.170461646214164  | AGIWUR28634 |
| N2 | HS | III | 811828 | 813773 | WBGene00000903 | daf-7    | B0412.2 | -0.131013793106472  | AGIWUR34983 |
| N2 | HS | III | 816145 | 821730 | WBGene00000895 | dac-1    | B0412.1 | 0.0177221993916774  | AGIWUR21958 |
| N2 | HS | III | 823222 | 826408 | WBGene00019328 | clcc-149 | K02F3.5 | -0.0317390394383743 |             |

AGIWUR8225;AGIWUR30863

|    |    |     |        |        |                |        |         |                    |  |
|----|----|-----|--------|--------|----------------|--------|---------|--------------------|--|
| N2 | HS | III | 828590 | 832277 | WBGene00019329 | ceeh-1 | K02F3.6 | -0.105765532907713 |  |
|----|----|-----|--------|--------|----------------|--------|---------|--------------------|--|

AGIWUR5535;AGIWUR20354;AGIWUR29930;AGIWUR42060

|    |    |     |        |        |                |       |         |                     |             |
|----|----|-----|--------|--------|----------------|-------|---------|---------------------|-------------|
| N2 | HS | III | 833858 | 835808 | WBGene00019327 | zip-2 | K02F3.4 | 0.181030674283278   | AGIWUR37051 |
| N2 | HS | III | 835815 | 839591 | WBGene00019331 | dos-3 | K02F3.8 | -0.0294812442486516 |             |

AGIWUR14933;AGIWUR21593

|    |    |     |        |        |                |         |         |                    |             |
|----|----|-----|--------|--------|----------------|---------|---------|--------------------|-------------|
| N2 | HS | III | 840460 | 841366 | WBGene00019332 | K02F3.9 | K02F3.9 | 0.0740149620246626 | AGIWUR30193 |
|----|----|-----|--------|--------|----------------|---------|---------|--------------------|-------------|

|                                                                        |    |     |        |        |                |          |          |                     |             |
|------------------------------------------------------------------------|----|-----|--------|--------|----------------|----------|----------|---------------------|-------------|
| N2                                                                     | HS | III | 842935 | 843802 | WBGene00001392 | far-8    | K02F3.3  | 0.264472511559401   | AGIWUR16155 |
| N2                                                                     | HS | III | 845842 | 850586 | WBGene00019326 | K02F3.2  | K02F3.2  | -0.171305135258866  | AGIWUR6966  |
| N2                                                                     | HS | III | 851328 | 852396 | WBGene00019333 | moma-1   | K02F3.10 | -0.070259441779033  |             |
| AGIWUR42016                                                            |    |     |        |        |                |          |          |                     |             |
| N2                                                                     | HS | III | 852801 | 853909 | WBGene00004388 | rnp-5    | K02F3.11 | -0.0516046430049339 |             |
| AGIWUR17078                                                            |    |     |        |        |                |          |          |                     |             |
| N2                                                                     | HS | III | 854219 | 856535 | WBGene00006430 | tag-51   | K02F3.1  | 0.0205500502000611  |             |
| AGIWUR1565;AGIWUR16267;AGIWUR32843                                     |    |     |        |        |                |          |          |                     |             |
| N2                                                                     | HS | III | 856560 | 860090 | WBGene00019334 | K02F3.12 | K02F3.12 | -0.0223608667086959 |             |
| AGIWUR15344;AGIWUR19706;AGIWUR40168                                    |    |     |        |        |                |          |          |                     |             |
| N2                                                                     | HS | III | 860198 | 861324 | WBGene00000202 | exos-4.2 | Y6D11A.1 |                     |             |
| -0.00455925785557287 AGIWUR23712;AGIWUR35800                           |    |     |        |        |                |          |          |                     |             |
| N2                                                                     | HS | III | 862306 | 865399 | WBGene00021170 | arx-4    | Y6D11A.2 | 0.00853183470056607 |             |
| AGIWUR30094                                                            |    |     |        |        |                |          |          |                     |             |
| N2                                                                     | HS | III | 867512 | 869987 | WBGene00020758 | T24C4.2  | T24C4.2  | -0.0807589935407211 |             |
| AGIWUR25065;AGIWUR38112;AGIWUR42624                                    |    |     |        |        |                |          |          |                     |             |
| N2                                                                     | HS | III | 871783 | 872385 | WBGene00020759 | T24C4.3  | T24C4.3  | 0.03111111426024673 |             |
| AGIWUR14423;AGIWUR16344;AGIWUR41032;AGIWUR42660                        |    |     |        |        |                |          |          |                     |             |
| N2                                                                     | HS | III | 872622 | 873531 | WBGene00020760 | T24C4.4  | T24C4.4  | 0.0124245652004751  |             |
| AGIWUR2930;AGIWUR34970;AGIWUR38120;AGIWUR39190                         |    |     |        |        |                |          |          |                     |             |
| N2                                                                     | HS | III | 874310 | 875325 | WBGene00044681 | T24C4.8  | T24C4.8  | 0.257646121433147   |             |
| AGIWUR2329;AGIWUR6257;AGIWUR26491                                      |    |     |        |        |                |          |          |                     |             |
| N2                                                                     | HS | III | 877435 | 879734 | WBGene00020761 | T24C4.5  | T24C4.5  | 0.0268705557327635  | AGIWUR2668  |
| N2                                                                     | HS | III | 879860 | 881506 | WBGene00020757 | ucr-2.3  | T24C4.1  | 0.0308877159962737  | AGIWUR35884 |
| N2                                                                     | HS | III | 881443 | 886789 | WBGene00020762 | zer-1    | T24C4.6  | -0.263385132766858  |             |
| AGIWUR39357;AGIWUR44580                                                |    |     |        |        |                |          |          |                     |             |
| N2                                                                     | HS | III | 889955 | 895634 | WBGene00020763 | ztf-18   | T24C4.7  | 0.073401408884548   |             |
| AGIWUR8590;AGIWUR22251;AGIWUR24829;AGIWUR30563;AGIWUR41360;AGIWUR43319 |    |     |        |        |                |          |          |                     |             |
| N2                                                                     | HS | III | 895786 | 900158 | WBGene00017758 | F23H11.2 | F23H11.2 | 0.189070667796738   |             |
| AGIWUR11974                                                            |    |     |        |        |                |          |          |                     |             |
| N2                                                                     | HS | III | 900138 | 901444 | WBGene00017759 | suc1-2   | F23H11.3 | -0.0617231714309305 |             |
| AGIWUR17484                                                            |    |     |        |        |                |          |          |                     |             |
| N2                                                                     | HS | III | 902151 | 907539 | WBGene00017760 | F23H11.4 | F23H11.4 | 0.0897147888433363  |             |
| AGIWUR6869;AGIWUR39276                                                 |    |     |        |        |                |          |          |                     |             |
| N2                                                                     | HS | III | 908328 | 909902 | WBGene00017763 | cr1s-1   | F23H11.9 | -0.227739630599364  |             |
| AGIWUR8468                                                             |    |     |        |        |                |          |          |                     |             |
| N2                                                                     | HS | III | 909957 | 910589 | WBGene00000263 | F23H11.5 | F23H11.5 | 0.0179064250986869  |             |
| AGIWUR6932;AGIWUR8088;AGIWUR33553;AGIWUR37413;AGIWUR37756;AGIWUR41694  |    |     |        |        |                |          |          |                     |             |
| N2                                                                     | HS | III | 911261 | 912243 | WBGene00017757 | bra-2    | F23H11.1 | 0.0555416893149001  |             |

|                                                             |    |     |         |         |                |           |          |                                |
|-------------------------------------------------------------|----|-----|---------|---------|----------------|-----------|----------|--------------------------------|
| AGIWUR1147                                                  |    |     |         |         |                |           |          |                                |
| N2                                                          | HS | III | 913248  | 916997  | WBGene00017761 | F23H11.6  | F23H11.6 | 0.0137223726172095             |
| AGIWUR33605                                                 |    |     |         |         |                |           |          |                                |
| N2                                                          | HS | III | 917088  | 919422  | WBGene00017762 | F23H11.7  | F23H11.7 | -0.0210727022277766            |
| AGIWUR13839                                                 |    |     |         |         |                |           |          |                                |
| N2                                                          | HS | III | 919528  | 926314  | WBGene00003969 | pef-1     | F23H11.8 | -0.148698128670779             |
| AGIWUR10891;AGIWUR36664                                     |    |     |         |         |                |           |          |                                |
| N2                                                          | HS | III | 933585  | 936067  | WBGene00020453 | fbxa-55   | T12B5.6  | 0.079001128805789 AGIWUR1047   |
| N2                                                          | HS | III | 937302  | 938061  | WBGene00020454 | fbxa-56   | T12B5.7  | 0.527080365740012 AGIWUR34001  |
| N2                                                          | HS | III | 938869  | 939437  | WBGene00020452 | fbxa-22   | T12B5.5  | 0.519912058860972 AGIWUR25671  |
| N2                                                          | HS | III | 940879  | 943469  | WBGene00020455 | fbxa-59   | T12B5.8  | 0.235553740749905 AGIWUR41567  |
| N2                                                          | HS | III | 944795  | 946298  | WBGene00020456 | fbxa-60   | T12B5.10 | 0.198626105197707              |
| AGIWUR20061                                                 |    |     |         |         |                |           |          |                                |
| N2                                                          | HS | III | 947848  | 949092  | WBGene00020459 | fbxa-23   | T12B5.13 | 0.29470997961851               |
| AGIWUR31728                                                 |    |     |         |         |                |           |          |                                |
| N2                                                          | HS | III | 950869  | 952264  | WBGene00020451 | fbxa-11   | T12B5.4  | 0.240973861991507 AGIWUR23723  |
| N2                                                          | HS | III | 952419  | 953803  | WBGene00020450 | fbxa-10   | T12B5.3  | 0.0952223050310153 AGIWUR38989 |
| N2                                                          | HS | III | 954291  | 954653  | WBGene00050914 | T12B5.15  | T12B5.15 | 0.413148925375198              |
| AGIWUR1132;AGIWUR1851;AGIWUR22450;AGIWUR38458;AGIWUR39446   |    |     |         |         |                |           |          |                                |
| N2                                                          | HS | III | 954873  | 955295  | WBGene00050913 | T12B5.14  | T12B5.14 | 0.109228900232774              |
| AGIWUR18737;AGIWUR28984;AGIWUR31470;AGIWUR32166;AGIWUR41902 |    |     |         |         |                |           |          |                                |
| N2                                                          | HS | III | 956334  | 957947  | WBGene00020449 | fbxa-54   | T12B5.2  | 0.224474416970899 AGIWUR27557  |
| N2                                                          | HS | III | 960268  | 961347  | WBGene00020458 | fbxa-70   | T12B5.12 | 0.222933933010326              |
| AGIWUR18579                                                 |    |     |         |         |                |           |          |                                |
| N2                                                          | HS | III | 962304  | 963679  | WBGene00020448 | fbxa-51   | T12B5.1  | 0.0270691551800128 AGIWUR21655 |
| N2                                                          | HS | III | 966654  | 972269  | WBGene00019912 | R06B10.1  | R06B10.1 | 0.133081295235652              |
| AGIWUR22141                                                 |    |     |         |         |                |           |          |                                |
| N2                                                          | HS | III | 973311  | 980451  | WBGene00019913 | R06B10.2  | R06B10.2 | -0.031084810473466             |
| AGIWUR38698                                                 |    |     |         |         |                |           |          |                                |
| N2                                                          | HS | III | 977386  | 988446  | WBGene00019915 | tbc-10    | R06B10.5 | -0.203568663834222             |
| AGIWUR23747;AGIWUR27330;AGIWUR30813                         |    |     |         |         |                |           |          |                                |
| N2                                                          | HS | III | 991881  | 1001907 | WBGene00006615 | trp-2     | R06B10.4 | -0.0450810866512006            |
| AGIWUR18580;AGIWUR36258                                     |    |     |         |         |                |           |          |                                |
| N2                                                          | HS | III | 1002707 | 1006298 | WBGene00019914 | cllec-150 | R06B10.3 | 0.0987713527958647             |
| AGIWUR43057                                                 |    |     |         |         |                |           |          |                                |
| N2                                                          | HS | III | 1010535 | 1011385 | WBGene00021337 | Y34F4.2   | Y34F4.2  | 0.466489056998977 AGIWUR37101  |
| N2                                                          | HS | III | 1015680 | 1016136 | WBGene00021338 | Y34F4.3   | Y34F4.3  | 0.119700811035278 AGIWUR27784  |
| N2                                                          | HS | III | 1020954 | 1021876 | WBGene00021336 | Y34F4.1   | Y34F4.1  | 0.164615547381756              |
| AGIWUR24935;AGIWUR25182                                     |    |     |         |         |                |           |          |                                |

|                                                                                    |    |     |         |         |                |             |             |                      |             |
|------------------------------------------------------------------------------------|----|-----|---------|---------|----------------|-------------|-------------|----------------------|-------------|
| N2                                                                                 | HS | III | 1023221 | 1024561 | WBGene00021339 | Y34F4.4     | Y34F4.4     | 0.082785522405666    | AGIWUR4205  |
| N2                                                                                 | HS | III | 1026916 | 1031065 | WBGene00021340 | Y34F4.5     | Y34F4.5     | 0.127958075468939    | AGIWUR17466 |
| N2                                                                                 | HS | III | 1031324 | 1037212 | WBGene00015267 | chin-1      | BE0003N10.2 | 0.0548245615299621   |             |
| AGIWUR40526                                                                        |    |     |         |         |                |             |             |                      |             |
| N2                                                                                 | HS | III | 1037492 | 1046261 | WBGene00015266 | BE0003N10.1 | BE0003N10.1 | -0.305779581807615   |             |
| AGIWUR20325;AGIWUR32995                                                            |    |     |         |         |                |             |             |                      |             |
| N2                                                                                 | HS | III | 1045809 | 1053246 | WBGene00015268 | BE0003N10.3 | BE0003N10.3 | -0.202152070158794   |             |
| AGIWUR996                                                                          |    |     |         |         |                |             |             |                      |             |
| N2                                                                                 | HS | III | 1062793 | 1076555 | WBGene00006697 | uaf-1       | Y92C3B.2    | -0.204088319366988   |             |
| AGIWUR8964;AGIWUR25966                                                             |    |     |         |         |                |             |             |                      |             |
| N2                                                                                 | HS | III | 1078150 | 1080775 | WBGene00004277 | rab-18      | Y92C3B.3    | -0.116364436155433   |             |
| AGIWUR11765;AGIWUR17720;AGIWUR21390;AGIWUR30018;AGIWUR33466;AGIWUR38575            |    |     |         |         |                |             |             |                      |             |
| N2                                                                                 | HS | III | 1080901 | 1081300 | WBGene00022357 | kbp-4       | Y92C3B.1    | -0.00457230792995311 |             |
| AGIWUR33018                                                                        |    |     |         |         |                |             |             |                      |             |
| N2                                                                                 | HS | III | 1081402 | 1095073 | WBGene00003917 | par-2       | F58B6.3     | -0.125296617440795   |             |
| AGIWUR17088;AGIWUR25963                                                            |    |     |         |         |                |             |             |                      |             |
| N2                                                                                 | HS | III | 1103224 | 1111923 | WBGene00019030 | exc-6       | F58B6.2     | -0.0936140948062985  | AGIWUR41199 |
| N2                                                                                 | HS | III | 1112279 | 1116374 | WBGene00019029 | F58B6.1     | F58B6.1     | 0.167427017509324    |             |
| AGIWUR6761;AGIWUR17185;AGIWUR25640;AGIWUR33066;AGIWUR42074                         |    |     |         |         |                |             |             |                      |             |
| N2                                                                                 | HS | III | 1116424 | 1142927 | WBGene00022104 | acsd-1      | Y71D11A.3   | -0.53024621748272    |             |
| AGIWUR10744                                                                        |    |     |         |         |                |             |             |                      |             |
| N2                                                                                 | HS | III | 1143172 | 1145211 | WBGene00004891 | smr-1       | Y71D11A.2   | -0.118333292791121   |             |
| AGIWUR35021;AGIWUR39134                                                            |    |     |         |         |                |             |             |                      |             |
| N2                                                                                 | HS | III | 1152044 | 1181137 | WBGene00022103 | cdh-12      | Y71D11A.1   | 0.118172116067552    |             |
| AGIWUR9139;AGIWUR11394;AGIWUR17116;AGIWUR32780;AGIWUR32922                         |    |     |         |         |                |             |             |                      |             |
| N2                                                                                 | HS | III | 1181990 | 1184942 | WBGene00022490 | Y119D3B.13  | Y119D3B.13  | 0.0223516159180797   |             |
| AGIWUR31799                                                                        |    |     |         |         |                |             |             |                      |             |
| N2                                                                                 | HS | III | 1185248 | 1193812 | WBGene00022491 | Y119D3B.14  | Y119D3B.14  | 0.295504883870866    |             |
| AGIWUR26380                                                                        |    |     |         |         |                |             |             |                      |             |
| N2                                                                                 | HS | III | 1194367 | 1196292 | WBGene00022492 | dss-1       | Y119D3B.15  | -0.509177041071903   |             |
| AGIWUR8941                                                                         |    |     |         |         |                |             |             |                      |             |
| N2                                                                                 | HS | III | 1196560 | 1202008 | WBGene00022493 | mrp1-45     | Y119D3B.16  | 0.00938743665333597  |             |
| AGIWUR3926                                                                         |    |     |         |         |                |             |             |                      |             |
| N2                                                                                 | HS | III | 1202548 | 1207346 | WBGene00022489 | Y119D3B.12  | Y119D3B.12  | -0.19058871735322    |             |
| AGIWUR3387;AGIWUR12866;AGIWUR16578;AGIWUR21705;AGIWUR27552;AGIWUR35374;AGIWUR36012 |    |     |         |         |                |             |             |                      |             |
| N2                                                                                 | HS | III | 1208104 | 1213650 | WBGene00022488 | orc-3       | Y119D3B.11  | 0.0850918981202149   |             |
| AGIWUR15068                                                                        |    |     |         |         |                |             |             |                      |             |
| N2                                                                                 | HS | III | 1214951 | 1215293 | WBGene00022497 | Y119D3B.21  | Y119D3B.21  | 0.287130976949392    |             |
| AGIWUR32793                                                                        |    |     |         |         |                |             |             |                      |             |



|                                    |    |     |         |         |                |            |            |                     |             |
|------------------------------------|----|-----|---------|---------|----------------|------------|------------|---------------------|-------------|
| N2                                 | HS | III | 1216116 | 1222072 | WBGene00003978 | pes-4      | Y119D3B.17 | 0.0719910338912655  |             |
| AGIWUR25541                        |    |     |         |         |                |            |            |                     |             |
| N2                                 | HS | III | 1225459 | 1226065 | WBGene00023205 | Y119D3B.10 | Y119D3B.10 | 0.285171895552644   |             |
| AGIWUR12248                        |    |     |         |         |                |            |            |                     |             |
| N2                                 | HS | III | 1236015 | 1237142 | WBGene00022487 | fbxa-21    | Y119D3B.9  | 0.238148898855933   |             |
| AGIWUR39017                        |    |     |         |         |                |            |            |                     |             |
| N2                                 | HS | III | 1239260 | 1242780 | WBGene00022486 | fbxa-61    | Y119D3B.8  | 0.0597518718094285  |             |
| AGIWUR8976;AGIWUR34220;AGIWUR38464 |    |     |         |         |                |            |            |                     |             |
| N2                                 | HS | III | 1243513 | 1245283 | WBGene00022485 | fbxa-63    | Y119D3B.7  | 0.265659317268589   |             |
| AGIWUR29215                        |    |     |         |         |                |            |            |                     |             |
| N2                                 | HS | III | 1247618 | 1249153 | WBGene00044675 | fbxa-76    | Y119D3B.22 | 0.0112536996373533  |             |
| AGIWUR7976;AGIWUR28206             |    |     |         |         |                |            |            |                     |             |
| N2                                 | HS | III | 1249493 | 1251838 | WBGene00022484 | fbxa-77    | Y119D3B.6  | 0.022016646154011   |             |
| AGIWUR5949                         |    |     |         |         |                |            |            |                     |             |
| N2                                 | HS | III | 1253384 | 1254401 | WBGene00022494 | fbxa-91    | Y119D3B.18 | 0.235373056091674   |             |
| AGIWUR20168                        |    |     |         |         |                |            |            |                     |             |
| N2                                 | HS | III | 1267338 | 1269256 | WBGene00013839 | fbxa-32    | ZC47.6     | 0.0351225606863279  | AGIWUR6737  |
| N2                                 | HS | III | 1269558 | 1271451 | WBGene00013838 | fbxa-31    | ZC47.5     | 0.225686169487565   | AGIWUR2303  |
| N2                                 | HS | III | 1272474 | 1273676 | WBGene00013836 | fbxa-29    | ZC47.3     | 0.344474659012449   | AGIWUR25699 |
| N2                                 | HS | III | 1276249 | 1277360 | WBGene00014979 | ZC47.11    | ZC47.11    | -0.0477335984839327 | AGIWUR3704  |
| N2                                 | HS | III | 1277960 | 1278991 | WBGene00014978 | ZC47.8     | ZC47.8     | -0.125260482857896  | AGIWUR7537  |
| N2                                 | HS | III | 1279627 | 1281725 | WBGene00013841 | fbxa-33    | ZC47.9     | 0.262194142199807   | AGIWUR29339 |
| N2                                 | HS | III | 1282401 | 1284144 | WBGene00013842 | fbxa-34    | ZC47.10    | 0.14703647283876    | AGIWUR33731 |
| N2                                 | HS | III | 1285016 | 1287119 | WBGene00013845 | fbxa-37    | ZC47.14    | 0.378802120598722   | AGIWUR16699 |
| N2                                 | HS | III | 1287299 | 1288523 | WBGene00013844 | fbxa-50    | ZC47.13    | -0.736292595415156  | AGIWUR40231 |
| N2                                 | HS | III | 1289747 | 1290938 | WBGene00013843 | fbxa-49    | ZC47.12    | -0.20687699317506   | AGIWUR28291 |
| N2                                 | HS | III | 1292051 | 1293215 | WBGene00022479 | fbxa-36    | Y119D3A.4  | 0.00190203781960463 |             |
| AGIWUR23896                        |    |     |         |         |                |            |            |                     |             |
| N2                                 | HS | III | 1297904 | 1299484 | WBGene00022477 | fbxa-28    | Y119D3A.2  | -0.0799085254624767 |             |
| AGIWUR43481                        |    |     |         |         |                |            |            |                     |             |
| N2                                 | HS | III | 1303714 | 1305461 | WBGene00022476 | fbxa-75    | Y119D3A.1  | 1.68556676117762    |             |
| AGIWUR17956                        |    |     |         |         |                |            |            |                     |             |
| N2                                 | HS | III | 1305716 | 1308294 | WBGene00022329 | fbxa-79    | Y82E9BL.13 | 0.123665528562025   |             |
| AGIWUR43569                        |    |     |         |         |                |            |            |                     |             |
| N2                                 | HS | III | 1309187 | 1311226 | WBGene00022328 | Y82E9BL.12 | Y82E9BL.12 | 0.178005695451339   |             |
| AGIWUR33175                        |    |     |         |         |                |            |            |                     |             |
| N2                                 | HS | III | 1311228 | 1313148 | WBGene00022332 | fbxa-20    | Y82E9BL.16 | 0.226747381532772   |             |
| AGIWUR37149                        |    |     |         |         |                |            |            |                     |             |
| N2                                 | HS | III | 1313297 | 1315229 | WBGene00022330 | fbxa-80    | Y82E9BL.14 | 0.372196429300553   |             |



|                                                                                    |    |     |         |         |                |            |            |                     |             |
|------------------------------------------------------------------------------------|----|-----|---------|---------|----------------|------------|------------|---------------------|-------------|
| N2                                                                                 | HS | III | 1379140 | 1380663 | WBGene00255597 | pals-21    | Y82E9BR.32 | 0.0597183322391093  |             |
| AGIWUR43451                                                                        |    |     |         |         |                |            |            |                     |             |
| N2                                                                                 | HS | III | 1390450 | 1391852 | WBGene00022346 | pals-17    | Y82E9BR.13 | 0.366362406191701   |             |
| AGIWUR19418                                                                        |    |     |         |         |                |            |            |                     |             |
| N2                                                                                 | HS | III | 1399972 | 1401305 | WBGene00022337 | pals-16    | Y82E9BR.4  | 0.199394680724895   |             |
| AGIWUR19480;AGIWUR25923                                                            |    |     |         |         |                |            |            |                     |             |
| N2                                                                                 | HS | III | 1401946 | 1403460 | WBGene00044761 | pals-19    | Y82E9BR.23 | 0.199984368566708   |             |
| AGIWUR1993                                                                         |    |     |         |         |                |            |            |                     |             |
| N2                                                                                 | HS | III | 1404792 | 1406230 | WBGene00022353 | pals-18    | Y82E9BR.21 | 0.104768474111541   |             |
| AGIWUR7285                                                                         |    |     |         |         |                |            |            |                     |             |
| N2                                                                                 | HS | III | 1406463 | 1409239 | WBGene00022354 | Y82E9BR.22 | Y82E9BR.22 | 0.196168722137426   |             |
| AGIWUR4189;AGIWUR14797;AGIWUR32752;AGIWUR42719;AGIWUR45183                         |    |     |         |         |                |            |            |                     |             |
| N2                                                                                 | HS | III | 1409243 | 1414116 | WBGene00022347 | Y82E9BR.14 | Y82E9BR.14 | 0.0331956442343255  |             |
| AGIWUR7123;AGIWUR10710;AGIWUR14676;AGIWUR29289                                     |    |     |         |         |                |            |            |                     |             |
| N2                                                                                 | HS | III | 1415152 | 1417188 | WBGene00001236 | elc-1      | Y82E9BR.15 | -0.320064127898268  |             |
| AGIWUR1874                                                                         |    |     |         |         |                |            |            |                     |             |
| N2                                                                                 | HS | III | 1419196 | 1419914 | WBGene00022336 | Y82E9BR.3  | Y82E9BR.3  | -0.0154778539481413 |             |
| AGIWUR2471;AGIWUR6917;AGIWUR26470;AGIWUR28885;AGIWUR32675;AGIWUR33117;AGIWUR38718  |    |     |         |         |                |            |            |                     |             |
| N2                                                                                 | HS | III | 1419863 | 1427228 | WBGene00022348 | Y82E9BR.16 | Y82E9BR.16 | -0.165092456861572  |             |
| AGIWUR3732;AGIWUR21213;AGIWUR28839;AGIWUR29791;AGIWUR32813;AGIWUR36733;AGIWUR40929 |    |     |         |         |                |            |            |                     |             |
| N2                                                                                 | HS | III | 1438832 | 1443190 | WBGene00022335 | Y82E9BR.2  | Y82E9BR.2  | 0.0631880453563696  |             |
| AGIWUR14741                                                                        |    |     |         |         |                |            |            |                     |             |
| N2                                                                                 | HS | III | 1447495 | 1455770 | WBGene00022349 | Y82E9BR.17 | Y82E9BR.17 | -0.356331102327752  |             |
| AGIWUR27623                                                                        |    |     |         |         |                |            |            |                     |             |
| N2                                                                                 | HS | III | 1458536 | 1466732 | WBGene00022334 | Y82E9BR.1  | Y82E9BR.1  | 0.0245415647454559  |             |
| AGIWUR31260                                                                        |    |     |         |         |                |            |            |                     |             |
| N2                                                                                 | HS | III | 1467876 | 1483507 | WBGene00022350 | Y82E9BR.18 | Y82E9BR.18 | 0.00157601672094643 |             |
| AGIWUR44514                                                                        |    |     |         |         |                |            |            |                     |             |
| N2                                                                                 | HS | III | 1468643 | 1517993 | WBGene00019716 | M01G5.3    | M01G5.3    | -0.0839522380972539 | AGIWUR43524 |
| N2                                                                                 | HS | III | 1520224 | 1532768 | WBGene00004905 | snf-6      | M01G5.5    | 0.0268059754732834  |             |
| AGIWUR10711;AGIWUR30660                                                            |    |     |         |         |                |            |            |                     |             |
| N2                                                                                 | HS | III | 1533774 | 1538198 | WBGene00022054 | Y67D2.4    | Y67D2.4    | 0.0939713431195237  |             |
| AGIWUR16840;AGIWUR18256;AGIWUR19412;AGIWUR33162;AGIWUR38801;AGIWUR39025            |    |     |         |         |                |            |            |                     |             |
| N2                                                                                 | HS | III | 1538472 | 1540244 | WBGene00022055 | Y67D2.5    | Y67D2.5    | 0.102922984187177   |             |
| AGIWUR4238;AGIWUR4934;AGIWUR24164;AGIWUR41948                                      |    |     |         |         |                |            |            |                     |             |
| N2                                                                                 | HS | III | 1555395 | 1558529 | WBGene00022057 | Y67D2.7    | Y67D2.7    | -0.05283149832022   | AGIWUR7019  |
| N2                                                                                 | HS | III | 1558800 | 1570129 | WBGene00022052 | Y67D2.2    | Y67D2.2    | 0.0629466207885514  | AGIWUR42933 |
| N2                                                                                 | HS | III | 1570306 | 1576638 | WBGene00022051 | rep-1      | Y67D2.1    | 0.126222483883474   |             |
| AGIWUR13469;AGIWUR21879                                                            |    |     |         |         |                |            |            |                     |             |

|                                                                                                                                                           |    |     |         |         |                |            |            |                     |
|-----------------------------------------------------------------------------------------------------------------------------------------------------------|----|-----|---------|---------|----------------|------------|------------|---------------------|
| N2                                                                                                                                                        | HS | III | 1576751 | 1580857 | WBGene00021246 | Y22D7AL.7  | Y22D7AL.7  | 0.168276642180807   |
| AGIWUR30553                                                                                                                                               |    |     |         |         |                |            |            |                     |
| N2                                                                                                                                                        | HS | III | 1583155 | 1601140 | WBGene00004894 | sms-3      | Y22D7AL.8  | -0.119341574999178  |
| AGIWUR22781                                                                                                                                               |    |     |         |         |                |            |            |                     |
| N2                                                                                                                                                        | HS | III | 1604955 | 1606850 | WBGene00021245 | Y22D7AL.6  | Y22D7AL.6  | 0.209626172404648   |
| AGIWUR11587;AGIWUR13083                                                                                                                                   |    |     |         |         |                |            |            |                     |
| N2                                                                                                                                                        | HS | III | 1606829 | 1614033 | WBGene00021247 | Y22D7AL.9  | Y22D7AL.9  | 0.0907181815170892  |
| AGIWUR10604;AGIWUR11815;AGIWUR13461;AGIWUR20754                                                                                                           |    |     |         |         |                |            |            |                     |
| N2                                                                                                                                                        | HS | III | 1617151 | 1618954 | WBGene00021248 | Y22D7AL.10 | Y22D7AL.10 | 0.244871756839269   |
| AGIWUR3499;AGIWUR30303                                                                                                                                    |    |     |         |         |                |            |            |                     |
| N2                                                                                                                                                        | HS | III | 1619742 | 1625797 | WBGene00002025 | hsp-60     | Y22D7AL.5  | -0.128641891946954  |
| AGIWUR10628;AGIWUR19794;AGIWUR20849;AGIWUR20967;AGIWUR21651;AGIWUR26390;AGIWUR33280;AGIWUR34824;AGIWUR42555                                               |    |     |         |         |                |            |            |                     |
| ;AGIWUR43856                                                                                                                                              |    |     |         |         |                |            |            |                     |
| N2                                                                                                                                                        | HS | III | 1626632 | 1637561 | WBGene00021244 | Y22D7AL.4  | Y22D7AL.4  | -0.0656436968692278 |
| AGIWUR9679;AGIWUR24031                                                                                                                                    |    |     |         |         |                |            |            |                     |
| N2                                                                                                                                                        | HS | III | 1641463 | 1641735 | WBGene00021243 | Y22D7AL.3  | Y22D7AL.3  | -0.115990974772512  |
| AGIWUR6951                                                                                                                                                |    |     |         |         |                |            |            |                     |
| N2                                                                                                                                                        | HS | III | 1642649 | 1644563 | WBGene00021250 | Y22D7AL.12 | Y22D7AL.12 | 0.100365347425523   |
| AGIWUR44260                                                                                                                                               |    |     |         |         |                |            |            |                     |
| N2                                                                                                                                                        | HS | III | 1648621 | 1648806 | WBGene00021251 | Y22D7AL.13 | Y22D7AL.13 |                     |
| -0.00593817934230501 AGIWUR43504                                                                                                                          |    |     |         |         |                |            |            |                     |
| N2                                                                                                                                                        | HS | III | 1650302 | 1652669 | WBGene00021241 | Y22D7AL.1  | Y22D7AL.1  | -0.0541725218926734 |
| AGIWUR26222                                                                                                                                               |    |     |         |         |                |            |            |                     |
| N2                                                                                                                                                        | HS | III | 1653731 | 1657480 | WBGene00021252 | cht-4      | Y22D7AL.14 | 0.199084223161305   |
| AGIWUR39024                                                                                                                                               |    |     |         |         |                |            |            |                     |
| N2                                                                                                                                                        | HS | III | 1658207 | 1659863 | WBGene00021253 | Y22D7AL.15 | Y22D7AL.15 | 0.270855612966557   |
| AGIWUR28095                                                                                                                                               |    |     |         |         |                |            |            |                     |
| N2                                                                                                                                                        | HS | III | 1662104 | 1665152 | WBGene00021254 | Y22D7AL.16 | Y22D7AL.16 | 0.0524334072128898  |
| AGIWUR14048;AGIWUR28872;AGIWUR29282;AGIWUR35626;AGIWUR42920;AGIWUR43018                                                                                   |    |     |         |         |                |            |            |                     |
| N2                                                                                                                                                        | HS | III | 1665493 | 1665793 | WBGene00021257 | Y22D7AR.3  | Y22D7AR.3  | 0.208231844525973   |
| AGIWUR37407                                                                                                                                               |    |     |         |         |                |            |            |                     |
| N2                                                                                                                                                        | HS | III | 1665913 | 1668634 | WBGene00021259 | glb-30     | Y22D7AR.5  | 0.0378751784701983  |
| AGIWUR3197;AGIWUR7436;AGIWUR12048;AGIWUR14806;AGIWUR16613;AGIWUR17397;AGIWUR19490;AGIWUR21379;AGIWUR26038;AGIWUR36213;AGIWUR38898;AGIWUR40232;AGIWUR41393 |    |     |         |         |                |            |            |                     |
| N2                                                                                                                                                        | HS | III | 1672517 | 1676721 | WBGene00021260 | Y22D7AR.6  | Y22D7AR.6  | 0.18317157415118    |
| AGIWUR542;AGIWUR6397                                                                                                                                      |    |     |         |         |                |            |            |                     |
| N2                                                                                                                                                        | HS | III | 1683630 | 1688099 | WBGene00021261 | Y22D7AR.7  | Y22D7AR.7  |                     |
| 0.000545835979344211 AGIWUR43214                                                                                                                          |    |     |         |         |                |            |            |                     |
| N2                                                                                                                                                        | HS | III | 1688144 | 1691770 | WBGene00021266 | Y22D7AR.14 | Y22D7AR.14 | 0.208080584380598   |

|                                     |     |         |         |                |            |            |                     |
|-------------------------------------|-----|---------|---------|----------------|------------|------------|---------------------|
| AGIWUR43757                         |     |         |         |                |            |            |                     |
| N2 HS                               | III | 1692081 | 1695106 | WBGene00005141 | srd-64     | Y22D7AR.8  | 0.42289234980817    |
| AGIWUR1225                          |     |         |         |                |            |            |                     |
| N2 HS                               | III | 1697221 | 1698986 | WBGene00021262 | fbxa-74    | Y22D7AR.9  | 0.224723007204183   |
| AGIWUR2493                          |     |         |         |                |            |            |                     |
| N2 HS                               | III | 1701714 | 1702437 | WBGene00021263 | Y22D7AR.10 | Y22D7AR.10 | -0.136451430209366  |
| AGIWUR35366                         |     |         |         |                |            |            |                     |
| N2 HS                               | III | 1703500 | 1705899 | WBGene00021264 | fbxa-13    | Y22D7AR.11 | 0.281579872446073   |
| AGIWUR33164                         |     |         |         |                |            |            |                     |
| N2 HS                               | III | 1705946 | 1713729 | WBGene00021256 | Y22D7AR.2  | Y22D7AR.2  | 0.111534646046699   |
| AGIWUR21273                         |     |         |         |                |            |            |                     |
| N2 HS                               | III | 1716527 | 1722605 | WBGene00021265 | Y22D7AR.12 | Y22D7AR.12 | 0.095411539505303   |
| AGIWUR30137                         |     |         |         |                |            |            |                     |
| N2 HS                               | III | 1723194 | 1733101 | WBGene00004779 | ser-4      | Y22D7AR.13 | -0.182892816981415  |
| AGIWUR29875;AGIWUR39631;AGIWUR41915 |     |         |         |                |            |            |                     |
| N2 HS                               | III | 1752183 | 1754942 | WBGene00021593 | Y46E12A.3  | Y46E12A.3  | 0.136320160193598   |
| AGIWUR10721                         |     |         |         |                |            |            |                     |
| N2 HS                               | III | 1758721 | 1759783 | WBGene00021592 | Y46E12A.2  | Y46E12A.2  | -0.239951992753692  |
| AGIWUR26043                         |     |         |         |                |            |            |                     |
| N2 HS                               | III | 1763524 | 1764836 | WBGene00000560 | cnc-6      | Y46E12A.1  | -0.393564076286353  |
| AGIWUR12088                         |     |         |         |                |            |            |                     |
| N2 HS                               | III | 1765458 | 1770091 | WBGene00044798 | tbx-43     | Y46E12A.4  | -0.289356914980901  |
| AGIWUR9296;AGIWUR9677               |     |         |         |                |            |            |                     |
| N2 HS                               | III | 1772531 | 1778069 | WBGene00021442 | Y39A3CL.4  | Y39A3CL.4  | 0.20361236973848    |
| AGIWUR34744                         |     |         |         |                |            |            |                     |
| N2 HS                               | III | 1777802 | 1778309 | WBGene00021441 | Y39A3CL.3  | Y39A3CL.3  | -0.0432124517042851 |
| AGIWUR43170                         |     |         |         |                |            |            |                     |
| N2 HS                               | III | 1789084 | 1806859 | WBGene00006513 | rimb-1     | Y39A3CL.2  | 0.122471728505564   |
| AGIWUR16195                         |     |         |         |                |            |            |                     |
| N2 HS                               | III | 1807740 | 1818323 | WBGene00000545 | clp-4      | Y39A3CL.5  | -0.127594637350513  |
| AGIWUR8475;AGIWUR36088              |     |         |         |                |            |            |                     |
| N2 HS                               | III | 1821150 | 1824180 | WBGene00004249 | pvf-1      | Y39A3CL.6  | -0.126715829053511  |
| AGIWUR2416                          |     |         |         |                |            |            |                     |
| N2 HS                               | III | 1824919 | 1834347 | WBGene00021443 | Y39A3CL.7  | Y39A3CL.7  | 0.0110806432189516  |
| AGIWUR20246;AGIWUR32428             |     |         |         |                |            |            |                     |
| N2 HS                               | III | 1834513 | 1846758 | WBGene00021440 | Y39A3CL.1  | Y39A3CL.1  | 0.115139663553661   |
| AGIWUR36420                         |     |         |         |                |            |            |                     |
| N2 HS                               | III | 1849047 | 1852902 | WBGene00004163 | pqn-82     | Y39A3CR.7  | 0.156529215131661   |
| AGIWUR18098                         |     |         |         |                |            |            |                     |

|                                                                                                                                                                    |    |     |         |         |                |           |           |                      |             |
|--------------------------------------------------------------------------------------------------------------------------------------------------------------------|----|-----|---------|---------|----------------|-----------|-----------|----------------------|-------------|
| N2                                                                                                                                                                 | HS | III | 1855390 | 1858884 | WBGene00021446 | hlh-33    | Y39A3CR.6 | -0.0589591816393273  |             |
| AGIWUR4579                                                                                                                                                         |    |     |         |         |                |           |           |                      |             |
| N2                                                                                                                                                                 | HS | III | 1858913 | 1859569 | WBGene00021445 | Y39A3CR.5 | Y39A3CR.5 | -0.0401123035283071  |             |
| AGIWUR25527                                                                                                                                                        |    |     |         |         |                |           |           |                      |             |
| N2                                                                                                                                                                 | HS | III | 1859888 | 1860381 | WBGene00000941 | ddp-1     | Y39A3CR.4 | -0.0547981228283412  |             |
| AGIWUR11023;AGIWUR17766                                                                                                                                            |    |     |         |         |                |           |           |                      |             |
| N2                                                                                                                                                                 | HS | III | 1860429 | 1877514 | WBGene00021444 | ttc-7     | Y39A3CR.3 | -0.318030087021933   |             |
| AGIWUR13456                                                                                                                                                        |    |     |         |         |                |           |           |                      |             |
| N2                                                                                                                                                                 | HS | III | 1878365 | 1880866 | WBGene00004886 | smi-1     | Y39A3CR.1 | 0.357851010009702    |             |
| AGIWUR12074;AGIWUR28726                                                                                                                                            |    |     |         |         |                |           |           |                      |             |
| N2                                                                                                                                                                 | HS | III | 1881158 | 1883017 | WBGene00021447 | Y39A3CR.8 | Y39A3CR.8 | 0.164644539731064    |             |
| AGIWUR17516                                                                                                                                                        |    |     |         |         |                |           |           |                      |             |
| N2                                                                                                                                                                 | HS | III | 1883607 | 1886218 | WBGene00015243 | B0524.4   | B0524.4   | 0.171537077651012    | AGIWUR13914 |
| N2                                                                                                                                                                 | HS | III | 1887558 | 1889691 | WBGene00015242 | B0524.3   | B0524.3   | 0.0432234801965308   | AGIWUR39402 |
| N2                                                                                                                                                                 | HS | III | 1891383 | 1893842 | WBGene00015244 | B0524.5   | B0524.5   | -0.0460323510330678  | AGIWUR13306 |
| N2                                                                                                                                                                 | HS | III | 1894057 | 1899856 | WBGene00015241 | B0524.2   | B0524.2   | 0.0800755777461273   | AGIWUR35356 |
| N2                                                                                                                                                                 | HS | III | 1902193 | 1905640 | WBGene00015245 | B0524.6   | B0524.6   | 0.198065138437144    | AGIWUR23257 |
| N2                                                                                                                                                                 | HS | III | 1905962 | 1939568 | WBGene00004128 | pqn-41    | F53A3.4   | -0.0735477753841591  |             |
| AGIWUR1642;AGIWUR6490;AGIWUR7208;AGIWUR8911;AGIWUR9570;AGIWUR11776;AGIWUR13585;AGIWUR18268;AGIWUR19636;AGIWUR19977;AGIWUR22432;AGIWUR27099;AGIWUR34458;AGIWUR40424 |    |     |         |         |                |           |           |                      |             |
| N2                                                                                                                                                                 | HS | III | 1939546 | 1943653 | WBGene00018720 | F53A3.1   | F53A3.1   | 0.117328912452965    | AGIWUR44653 |
| N2                                                                                                                                                                 | HS | III | 1945058 | 1950270 | WBGene00018721 | polh-1    | F53A3.2   | -0.0480876423448038  | AGIWUR34536 |
| N2                                                                                                                                                                 | HS | III | 1950492 | 1951426 | WBGene00004491 | rps-22    | F53A3.3   | -0.388034413058495   |             |
| AGIWUR12230;AGIWUR28690;AGIWUR34975;AGIWUR38589;AGIWUR39036;AGIWUR41473;AGIWUR43706                                                                                |    |     |         |         |                |           |           |                      |             |
| N2                                                                                                                                                                 | HS | III | 1951526 | 1952032 | WBGene00018723 | F53A3.7   | F53A3.7   | 0.0214792233174084   | AGIWUR7627  |
| N2                                                                                                                                                                 | HS | III | 1952014 | 1961945 | WBGene00020115 | mboa-6    | R155.1    | -0.0188021506473621  | AGIWUR26427 |
| N2                                                                                                                                                                 | HS | III | 1963566 | 1969902 | WBGene00020116 | moa-1     | R155.2    | 0.12964933826883     | AGIWUR40050 |
| N2                                                                                                                                                                 | HS | III | 1971182 | 1975709 | WBGene00020117 | R155.3    | R155.3    | 0.0583304502987456   | AGIWUR28349 |
| N2                                                                                                                                                                 | HS | III | 1977315 | 1980462 | WBGene00020118 | R155.4    | R155.4    | -0.154098337882791   | AGIWUR10910 |
| N2                                                                                                                                                                 | HS | III | 1980823 | 1982647 | WBGene00005143 | srd-66    | Y39A3B.4  | -0.0136306246935618  |             |
| AGIWUR24540                                                                                                                                                        |    |     |         |         |                |           |           |                      |             |
| N2                                                                                                                                                                 | HS | III | 1985109 | 1987466 | WBGene00021438 | Y39A3B.3  | Y39A3B.3  | -0.0478511210850998  |             |
| AGIWUR29085                                                                                                                                                        |    |     |         |         |                |           |           |                      |             |
| N2                                                                                                                                                                 | HS | III | 1997841 | 2002438 | WBGene00021437 | lgc-42    | Y39A3B.2  | 0.0735173859527913   |             |
| AGIWUR39318                                                                                                                                                        |    |     |         |         |                |           |           |                      |             |
| N2                                                                                                                                                                 | HS | III | 2006029 | 2009196 | WBGene00021436 | Y39A3B.1  | Y39A3B.1  | -0.0922426625448445  |             |
| AGIWUR42754                                                                                                                                                        |    |     |         |         |                |           |           |                      |             |
| N2                                                                                                                                                                 | HS | III | 2009302 | 2021589 | WBGene00021439 | ckr-2     | Y39A3B.5  | -0.00773306221104697 |             |
| AGIWUR1930;AGIWUR17361;AGIWUR30236;AGIWUR38253;AGIWUR44531                                                                                                         |    |     |         |         |                |           |           |                      |             |

|                                                             |    |     |         |         |                |           |           |                     |             |
|-------------------------------------------------------------|----|-----|---------|---------|----------------|-----------|-----------|---------------------|-------------|
| N2                                                          | HS | III | 2035036 | 2048007 | WBGene00001063 | dpy-1     | M01E10.2  | 0.00152951024627157 |             |
| AGIWUR23010                                                 |    |     |         |         |                |           |           |                     |             |
| N2                                                          | HS | III | 2053872 | 2054449 | WBGene00019709 | M01E10.3  | M01E10.3  | 0.447332697093605   |             |
| AGIWUR23384                                                 |    |     |         |         |                |           |           |                     |             |
| N2                                                          | HS | III | 2056730 | 2057670 | WBGene00021433 | Y39A3A.2  | Y39A3A.2  | -0.0130755218628646 |             |
| AGIWUR20632                                                 |    |     |         |         |                |           |           |                     |             |
| N2                                                          | HS | III | 2060673 | 2060957 | WBGene00002099 | ins-16    | Y39A3A.5  | 0.0132377434981432  |             |
| AGIWUR14112;AGIWUR31180;AGIWUR32785;AGIWUR34303;AGIWUR38456 |    |     |         |         |                |           |           |                     |             |
| N2                                                          | HS | III | 2063442 | 2065855 | WBGene00023471 | srz-86    | Y39A3A.7  | -0.0305465912910301 |             |
| AGIWUR3884;AGIWUR32374                                      |    |     |         |         |                |           |           |                     |             |
| N2                                                          | HS | III | 2066640 | 2068350 | WBGene00021434 | Y39A3A.3  | Y39A3A.3  | 0.108431108392024   |             |
| AGIWUR13923                                                 |    |     |         |         |                |           |           |                     |             |
| N2                                                          | HS | III | 2071513 | 2072347 | WBGene00023470 | srz-87    | Y39A3A.6  | -0.156744234368482  |             |
| AGIWUR7389;AGIWUR23252                                      |    |     |         |         |                |           |           |                     |             |
| N2                                                          | HS | III | 2073009 | 2076520 | WBGene00021435 | Y39A3A.4  | Y39A3A.4  | 0.0904399433733083  |             |
| AGIWUR36719                                                 |    |     |         |         |                |           |           |                     |             |
| N2                                                          | HS | III | 2082819 | 2088248 | WBGene00021703 | cpt-3     | Y48G9A.10 | -0.0913909479156381 |             |
| AGIWUR30430                                                 |    |     |         |         |                |           |           |                     |             |
| N2                                                          | HS | III | 2092709 | 2099881 | WBGene00021702 | Y48G9A.9  | Y48G9A.9  | 0.146093872930299   |             |
| AGIWUR713                                                   |    |     |         |         |                |           |           |                     |             |
| N2                                                          | HS | III | 2102295 | 2107497 | WBGene00004088 | ppk-2     | Y48G9A.8  | -0.156899631790619  |             |
| AGIWUR28088                                                 |    |     |         |         |                |           |           |                     |             |
| N2                                                          | HS | III | 2111802 | 2112427 | WBGene00021701 | Y48G9A.7  | Y48G9A.7  | 0.328663799901568   |             |
| AGIWUR5690                                                  |    |     |         |         |                |           |           |                     |             |
| N2                                                          | HS | III | 2112416 | 2116897 | WBGene00021704 | Y48G9A.11 | Y48G9A.11 | -0.0459689618064818 |             |
| AGIWUR39784                                                 |    |     |         |         |                |           |           |                     |             |
| N2                                                          | HS | III | 2117842 | 2119091 | WBGene00021700 | Y48G9A.6  | Y48G9A.6  | 0.210734413198512   |             |
| AGIWUR31978                                                 |    |     |         |         |                |           |           |                     |             |
| N2                                                          | HS | III | 2124137 | 2151550 | WBGene00021698 | frl-1     | Y48G9A.4  | -0.219322477681495  |             |
| AGIWUR33287                                                 |    |     |         |         |                |           |           |                     |             |
| N2                                                          | HS | III | 2151968 | 2197908 | WBGene00021697 | gcn-1     | Y48G9A.3  | 0.0332552350878208  |             |
| AGIWUR2499;AGIWUR24890;AGIWUR39089                          |    |     |         |         |                |           |           |                     |             |
| N2                                                          | HS | III | 2198006 | 2206882 | WBGene00016524 | C39B5.6   | C39B5.6   | 0.0815484091871177  | AGIWUR32372 |
| N2                                                          | HS | III | 2211420 | 2217095 | WBGene00189950 | C39B5.14  | C39B5.14  | -0.464319566797974  |             |
| AGIWUR9309;AGIWUR17915;AGIWUR33312                          |    |     |         |         |                |           |           |                     |             |
| N2                                                          | HS | III | 2217173 | 2219494 | WBGene00016526 | fbxa-8    | C39B5.8   | 0.0758204678057268  | AGIWUR33756 |
| N2                                                          | HS | III | 2219797 | 2222365 | WBGene00016525 | fbxa-12   | C39B5.7   | 0.034742234455357   | AGIWUR19075 |
| N2                                                          | HS | III | 2222438 | 2224000 | WBGene00005142 | srd-65    | C39B5.12  | -0.176317166866331  |             |
| AGIWUR31417                                                 |    |     |         |         |                |           |           |                     |             |

|                                                            |    |     |         |         |                 |             |             |                     |             |
|------------------------------------------------------------|----|-----|---------|---------|-----------------|-------------|-------------|---------------------|-------------|
| N2                                                         | HS | III | 2224672 | 2227198 | WBGene00016522  | fbxa-38     | C39B5.4     | 0.295549423427879   | AGIWUR24971 |
| N2                                                         | HS | III | 2227707 | 2229228 | WBGene00016521  | fbxa-62     | C39B5.3     | 0.0402695242992674  | AGIWUR15201 |
| N2                                                         | HS | III | 2229992 | 2232460 | WBGene00016527  | fbxa-47     | C39B5.9     | 0.00329322677063093 | AGIWUR41580 |
| N2                                                         | HS | III | 2233888 | 2236987 | WBGene00016520  | C39B5.2     | C39B5.2     | 0.0449093055198615  | AGIWUR33275 |
| N2                                                         | HS | III | 2238967 | 2240172 | WBGene00016528  | C39B5.10    | C39B5.10    | 0.143028037727448   |             |
| AGIWUR18177                                                |    |     |         |         |                 |             |             |                     |             |
| N2                                                         | HS | III | 2240771 | 2243843 | WBGene00016519  | srz-56      | C39B5.1     | -0.199779211877615  | AGIWUR37544 |
| N2                                                         | HS | III | 2244165 | 2245827 | WBGene00005144  | srd-67      | C39B5.11    | -0.1170344114116    |             |
| AGIWUR34479                                                |    |     |         |         |                 |             |             |                     |             |
| N2                                                         | HS | III | 2246016 | 2249404 | WBGene00020642  | T20H9.6     | T20H9.6     | 0.286330042536166   | AGIWUR25745 |
| N2                                                         | HS | III | 2249932 | 2251448 | WBGene00020637  | fbxa-7      | T20H9.1     | 0.252303362813075   | AGIWUR37127 |
| N2                                                         | HS | III | 2251957 | 2252989 | WBGene00020641  | fbxa-68     | T20H9.5     | -0.0226919387151661 | AGIWUR3648  |
| N2                                                         | HS | III | 2253449 | 2254783 | WBGene00020640  | fbxa-73     | T20H9.4     | 0.158075494976076   | AGIWUR32193 |
| N2                                                         | HS | III | 2257554 | 2258941 | WBGene00020638  | fbxa-43     | T20H9.2     | 0.0118300371046507  |             |
| AGIWUR4357;AGIWUR25103;AGIWUR25937;AGIWUR41236;AGIWUR44639 |    |     |         |         |                 |             |             |                     |             |
| N2                                                         | HS | III | 2260004 | 2261445 | WBGene00044676  | fbxa-42     | Y54F10BL.1  | 0.405605471274688   |             |
| AGIWUR13364                                                |    |     |         |         |                 |             |             |                     |             |
| N2                                                         | HS | III | 2266980 | 2272175 | WBGene00021862  | fbxa-48     | Y54F10BM.7  | 0.148960527095216   |             |
| AGIWUR4973                                                 |    |     |         |         |                 |             |             |                     |             |
| N2                                                         | HS | III | 2272453 | 2276965 | WBGene00021859  | fbxa-39     | Y54F10BM.4  | 0.0366230913108563  |             |
| AGIWUR40392                                                |    |     |         |         |                 |             |             |                     |             |
| N2                                                         | HS | III | 2277279 | 2289967 | WBGene00021858  | Y54F10BM.3  | Y54F10BM.3  | 0.0751244540629603  |             |
| AGIWUR2267                                                 |    |     |         |         |                 |             |             |                     |             |
| N2                                                         | HS | III | 2291419 | 2294124 | WBGene00044403  | fbxa-219    | Y54F10BM.15 | 0.263462096767087   |             |
| AGIWUR28098                                                |    |     |         |         |                 |             |             |                     |             |
| N2                                                         | HS | III | 2295344 | 2304920 | WBGene00021863  | Y54F10BM.9  | Y54F10BM.9  | 0.0250742808879103  |             |
| AGIWUR29475                                                |    |     |         |         |                 |             |             |                     |             |
| N2                                                         | HS | III | 2305942 | 2308008 | WBGene00021864  | fbxa-1      | Y54F10BM.10 | 0.0947243809698097  |             |
| AGIWUR24508                                                |    |     |         |         |                 |             |             |                     |             |
| N2                                                         | HS | III | 2308256 | 2309744 | WBGene000206486 | Y54F10BM.20 | Y54F10BM.20 | -0.100842659104186  |             |
| AGIWUR32548                                                |    |     |         |         |                 |             |             |                     |             |
| N2                                                         | HS | III | 2309924 | 2314073 | WBGene00021865  | fbxa-66     | Y54F10BM.11 | 0.238137076784168   |             |
| AGIWUR7609                                                 |    |     |         |         |                 |             |             |                     |             |
| N2                                                         | HS | III | 2314436 | 2326901 | WBGene00021857  | iffb-1      | Y54F10BM.2  | -0.190033704527814  |             |
| AGIWUR5626;AGIWUR10411;AGIWUR23707                         |    |     |         |         |                 |             |             |                     |             |
| N2                                                         | HS | III | 2326921 | 2329644 | WBGene00021866  | Y54F10BM.12 | Y54F10BM.12 | 0.228866294023534   |             |
| AGIWUR29344                                                |    |     |         |         |                 |             |             |                     |             |
| N2                                                         | HS | III | 2329577 | 2331183 | WBGene00021867  | Y54F10BM.13 | Y54F10BM.13 | 0.0208131016853272  |             |
| AGIWUR19905;AGIWUR36281                                    |    |     |         |         |                 |             |             |                     |             |



|                                                                                                       |    |     |         |         |                |            |             |                     |             |
|-------------------------------------------------------------------------------------------------------|----|-----|---------|---------|----------------|------------|-------------|---------------------|-------------|
| N2                                                                                                    | HS | III | 2331572 | 2342184 | WBGene00021856 | Y54F10BM.1 | Y54F10BM.1  | -0.0122919186904618 |             |
| AGIWUR20766                                                                                           |    |     |         |         |                |            |             |                     |             |
| N2                                                                                                    | HS | III | 2343573 | 2347329 | WBGene00004016 | phf-5      | Y54F10BM.14 | -0.041995001412106  |             |
| AGIWUR869;AGIWUR3182;AGIWUR4589;AGIWUR5858;AGIWUR6693;AGIWUR10165;AGIWUR12970;AGIWUR22995;AGIWUR41822 |    |     |         |         |                |            |             |                     |             |
| N2                                                                                                    | HS | III | 2347591 | 2362056 | WBGene00001589 | gip-1      | H04J21.3    | 0.0174646121932467  |             |
| AGIWUR2869;AGIWUR12151;AGIWUR21514                                                                    |    |     |         |         |                |            |             |                     |             |
| N2                                                                                                    | HS | III | 2362948 | 2366278 | WBGene00005146 | srd-69     | H04J21.2    | 0.0407378177782256  |             |
| AGIWUR37224                                                                                           |    |     |         |         |                |            |             |                     |             |
| N2                                                                                                    | HS | III | 2366884 | 2372655 | WBGene00019150 | H04J21.1   | H04J21.1    | 0.0156689628553597  |             |
| AGIWUR14406                                                                                           |    |     |         |         |                |            |             |                     |             |
| N2                                                                                                    | HS | III | 2376193 | 2384840 | WBGene00019199 | H14E04.2   | H14E04.2    | 0.00106660919372459 |             |
| AGIWUR2073;AGIWUR27203                                                                                |    |     |         |         |                |            |             |                     |             |
| N2                                                                                                    | HS | III | 2384892 | 2386579 | WBGene00019200 | H14E04.3   | H14E04.3    | 0.150200560832443   |             |
| AGIWUR20025                                                                                           |    |     |         |         |                |            |             |                     |             |
| N2                                                                                                    | HS | III | 2390203 | 2392116 | WBGene00019201 | H14E04.4   | H14E04.4    | 0.104855854023505   |             |
| AGIWUR24047                                                                                           |    |     |         |         |                |            |             |                     |             |
| N2                                                                                                    | HS | III | 2394325 | 2401308 | WBGene00000506 | cic-1      | H14E04.5    | -0.354418798404799  |             |
| AGIWUR12520                                                                                           |    |     |         |         |                |            |             |                     |             |
| N2                                                                                                    | HS | III | 2402070 | 2406332 | WBGene00019198 | strm-1     | H14E04.1    | -0.0469255201661056 |             |
| AGIWUR40650                                                                                           |    |     |         |         |                |            |             |                     |             |
| N2                                                                                                    | HS | III | 2406308 | 2410985 | WBGene00021021 | mrpl-30    | W04B5.4     | 0.208361034671952   | AGIWUR43598 |
| N2                                                                                                    | HS | III | 2411090 | 2418205 | WBGene00021022 | W04B5.5    | W04B5.5     | 0.218315274144469   | AGIWUR8262  |
| N2                                                                                                    | HS | III | 2418345 | 2423912 | WBGene00021020 | W04B5.3    | W04B5.3     | -0.270117014795705  |             |
| AGIWUR42343;AGIWUR43483                                                                               |    |     |         |         |                |            |             |                     |             |
| N2                                                                                                    | HS | III | 2424355 | 2427738 | WBGene00021019 | W04B5.2    | W04B5.2     | 0.0795848446445806  | AGIWUR18604 |
| N2                                                                                                    | HS | III | 2436105 | 2442328 | WBGene00017104 | E02H9.6    | E02H9.6     | 0.167354806825449   | AGIWUR23811 |
| N2                                                                                                    | HS | III | 2445228 | 2446142 | WBGene00017105 | E02H9.7    | E02H9.7     | 0.0813483268853972  |             |
| AGIWUR25516;AGIWUR35139;AGIWUR40542                                                                   |    |     |         |         |                |            |             |                     |             |
| N2                                                                                                    | HS | III | 2446223 | 2448696 | WBGene00017103 | klo-2      | E02H9.5     | -0.0709475241269288 |             |
| AGIWUR3705;AGIWUR22017;AGIWUR43846                                                                    |    |     |         |         |                |            |             |                     |             |
| N2                                                                                                    | HS | III | 2449382 | 2454949 | WBGene00003711 | nhr-121    | E02H9.8     | -0.0108397927439086 | AGIWUR34209 |
| N2                                                                                                    | HS | III | 2461911 | 2465079 | WBGene00017101 | E02H9.3    | E02H9.3     | 0.0976232834504245  | AGIWUR12571 |
| N2                                                                                                    | HS | III | 2465474 | 2466800 | WBGene00017100 | E02H9.2    | E02H9.2     | 0.0394813285580087  | AGIWUR12410 |
| N2                                                                                                    | HS | III | 2467347 | 2468302 | WBGene00017106 | E02H9.9    | E02H9.9     | 0.207846336174813   | AGIWUR3644  |
| N2                                                                                                    | HS | III | 2468486 | 2469443 | WBGene00017099 | E02H9.1    | E02H9.1     | 0.174801903288879   |             |
| AGIWUR672;AGIWUR6778;AGIWUR8337;AGIWUR36905                                                           |    |     |         |         |                |            |             |                     |             |
| N2                                                                                                    | HS | III | 2473868 | 2486620 | WBGene00004884 | smg-6      | Y54F10AL.2  | 0.082691454516322   |             |
| AGIWUR11295;AGIWUR20339;AGIWUR22367;AGIWUR22837;AGIWUR26612;AGIWUR28035;AGIWUR28767                   |    |     |         |         |                |            |             |                     |             |
| N2                                                                                                    | HS | III | 2487769 | 2494340 | WBGene00021847 | Y54F10AL.1 | Y54F10AL.1  | -0.127598794920722  |             |

AGIWUR905;AGIWUR13399;AGIWUR33083;AGIWUR33626;AGIWUR33848;AGIWUR42816  
N2 HS III 2503448 2507972 WBGene00021852 Y54F10AM.8 Y54F10AM.8 0.137484325338331  
AGIWUR2335;AGIWUR25672;AGIWUR32210;AGIWUR35648;AGIWUR36425  
N2 HS III 2508848 2511802 WBGene00021850 Y54F10AM.6 Y54F10AM.6 0.468561812893707  
AGIWUR27666;AGIWUR38314  
N2 HS III 2512283 2528628 WBGene00004314 rbc-2 Y54F10AM.10 -0.0138440699103586  
AGIWUR29963;AGIWUR39097  
N2 HS III 2529063 2530502 WBGene00021849 Y54F10AM.5 Y54F10AM.5 0.0691209770754178  
AGIWUR19611  
N2 HS III 2530615 2546420 WBGene00000464 ceh-44 Y54F10AM.4 0.317162288417135  
AGIWUR4705;AGIWUR16518;AGIWUR24433  
N2 HS III 2549927 2560684 WBGene00001410 feh-1 Y54F10AM.2 0.318634551853359  
AGIWUR4773  
N2 HS III 2561710 2566589 WBGene00021848 nhr-239 Y54F10AM.1 -0.0997376529883853  
AGIWUR14239;AGIWUR19746;AGIWUR25060;AGIWUR30065  
N2 HS III 2567404 2571547 WBGene00021855 Y54F10AR.2 Y54F10AR.2 0.0411074679495123  
AGIWUR40408  
N2 HS III 2572031 2575723 WBGene00021854 Y54F10AR.1 Y54F10AR.1 0.120890185245328  
AGIWUR16208  
N2 HS III 2579314 2580664 WBGene00022197 Y71H2B.8 Y71H2B.8 -0.303954623986152  
AGIWUR12764  
N2 HS III 2583953 2597034 WBGene00000160 apb-1 Y71H2B.10 0.00679652396986263  
AGIWUR28860;AGIWUR38318  
N2 HS III 2598057 2603299 WBGene00007019 mdt-19 Y71H2B.6 0.295089936649905  
AGIWUR9849  
N2 HS III 2604236 2606541 WBGene00022198 Y71H2B.11 Y71H2B.11 0.130585202609026  
AGIWUR3768;AGIWUR39503  
N2 HS III 2608017 2618856 WBGene00022195 Y71H2B.5 Y71H2B.5 0.0286323374723079  
AGIWUR16225  
N2 HS III 2618963 2619375 WBGene00022194 Y71H2B.4 Y71H2B.4 0.0635959647652218  
AGIWUR6650  
N2 HS III 2619936 2622709 WBGene00022193 ppfr-4 Y71H2B.3 -0.128224468318031  
AGIWUR44844  
N2 HS III 2623170 2627771 WBGene00022192 Y71H2B.2 Y71H2B.2 -0.195289606369377  
AGIWUR42251  
N2 HS III 2629013 2631439 WBGene00022191 Y71H2B.1 Y71H2B.1 0.136956530167264  
AGIWUR20164;AGIWUR34065;AGIWUR41211  
N2 HS III 2636405 2642848 WBGene00019212 zmp-2 H19M22.3 -0.142696749848813  
AGIWUR10196;AGIWUR17797;AGIWUR22540;AGIWUR22981;AGIWUR30381;AGIWUR30911;AGIWUR35936;AGIWUR39133;AGIWUR42071

|                                                                                                                                                |    |     |         |         |                |            |            |                     |
|------------------------------------------------------------------------------------------------------------------------------------------------|----|-----|---------|---------|----------------|------------|------------|---------------------|
| N2                                                                                                                                             | HS | III | 2650851 | 2651565 | WBGene00023084 | H19M22.4   | H19M22.4   | 0.0285374085373977  |
| AGIWUR7023;AGIWUR25650;AGIWUR36609;AGIWUR42415;AGIWUR43101                                                                                     |    |     |         |         |                |            |            |                     |
| N2                                                                                                                                             | HS | III | 2658083 | 2681112 | WBGene00002915 | let-805    | H19M22.2   | -0.010620933206825  |
| AGIWUR2534;AGIWUR15885;AGIWUR16395;AGIWUR16752;AGIWUR18969;AGIWUR21421;AGIWUR25034;AGIWUR30471;AGIWUR34160;AGIWUR35690;AGIWUR40260;AGIWUR42896 |    |     |         |         |                |            |            |                     |
| N2                                                                                                                                             | HS | III | 2681451 | 2686463 | WBGene00003941 | pbo-1      | Y71H2AL.1  | 0.141981341440564   |
| AGIWUR16024                                                                                                                                    |    |     |         |         |                |            |            |                     |
| N2                                                                                                                                             | HS | III | 2686791 | 2688997 | WBGene00022165 | Y71H2AL.2  | Y71H2AL.2  | 0.115551560047823   |
| AGIWUR36616                                                                                                                                    |    |     |         |         |                |            |            |                     |
| N2                                                                                                                                             | HS | III | 2690160 | 2698817 | WBGene00022174 | Y71H2AM.9  | Y71H2AM.9  | -0.278205874943247  |
| AGIWUR44591                                                                                                                                    |    |     |         |         |                |            |            |                     |
| N2                                                                                                                                             | HS | III | 2700937 | 2707818 | WBGene00022173 | set-27     | Y71H2AM.8  | 0.149567851086697   |
| AGIWUR19608                                                                                                                                    |    |     |         |         |                |            |            |                     |
| N2                                                                                                                                             | HS | III | 2707737 | 2716447 | WBGene00022175 | Y71H2AM.10 | Y71H2AM.10 | 0.0654771875758673  |
| AGIWUR31620                                                                                                                                    |    |     |         |         |                |            |            |                     |
| N2                                                                                                                                             | HS | III | 2718158 | 2725092 | WBGene00022176 | Y71H2AM.11 | Y71H2AM.11 | -0.0881175292555287 |
| AGIWUR34264                                                                                                                                    |    |     |         |         |                |            |            |                     |
| N2                                                                                                                                             | HS | III | 2734080 | 2739531 | WBGene00022178 | Y71H2AM.13 | Y71H2AM.13 | 0.127657882617507   |
| AGIWUR29754                                                                                                                                    |    |     |         |         |                |            |            |                     |
| N2                                                                                                                                             | HS | III | 2743719 | 2746653 | WBGene00022179 | Y71H2AM.14 | Y71H2AM.14 | 0.0156070038821259  |
| AGIWUR1759                                                                                                                                     |    |     |         |         |                |            |            |                     |
| N2                                                                                                                                             | HS | III | 2747130 | 2756512 | WBGene00022180 | Y71H2AM.15 | Y71H2AM.15 | -0.139055479689704  |
| AGIWUR14045                                                                                                                                    |    |     |         |         |                |            |            |                     |
| N2                                                                                                                                             | HS | III | 2757087 | 2760816 | WBGene00022181 | pho-9      | Y71H2AM.16 | 0.164906849995086   |
| AGIWUR1582;AGIWUR7980;AGIWUR12398;AGIWUR14707;AGIWUR22714                                                                                      |    |     |         |         |                |            |            |                     |
| N2                                                                                                                                             | HS | III | 2764037 | 2768675 | WBGene00022182 | swsn-3     | Y71H2AM.17 | 0.100172648350289   |
| AGIWUR22386;AGIWUR25232                                                                                                                        |    |     |         |         |                |            |            |                     |
| N2                                                                                                                                             | HS | III | 2769358 | 2779053 | WBGene00002244 | laf-1      | Y71H2AM.19 | -0.0388243506396879 |
| AGIWUR3116;AGIWUR3798;AGIWUR9004;AGIWUR23603;AGIWUR24974;AGIWUR25228;AGIWUR30455                                                               |    |     |         |         |                |            |            |                     |
| N2                                                                                                                                             | HS | III | 2781039 | 2782817 | WBGene00022171 | Y71H2AM.6  | Y71H2AM.6  | 0.137087717083531   |
| AGIWUR24357                                                                                                                                    |    |     |         |         |                |            |            |                     |
| N2                                                                                                                                             | HS | III | 2782733 | 2785993 | WBGene00022185 | Y71H2AM.20 | Y71H2AM.20 | -0.304527230935012  |
| AGIWUR33509;AGIWUR38426                                                                                                                        |    |     |         |         |                |            |            |                     |
| N2                                                                                                                                             | HS | III | 2786117 | 2786859 | WBGene00022170 | Y71H2AM.5  | Y71H2AM.5  | 0.109481727839125   |
| AGIWUR2693;AGIWUR6440;AGIWUR17716;AGIWUR32055;AGIWUR36884;AGIWUR38719;AGIWUR41121                                                              |    |     |         |         |                |            |            |                     |
| N2                                                                                                                                             | HS | III | 2786854 | 2788028 | WBGene00022169 | Y71H2AM.4  | Y71H2AM.4  | -0.0285262305549017 |
| AGIWUR36947;AGIWUR43443                                                                                                                        |    |     |         |         |                |            |            |                     |
| N2                                                                                                                                             | HS | III | 2788441 | 2792973 | WBGene00044609 | tbcc-1     | Y71H2AM.24 | 0.152791669872745   |
| AGIWUR23229;AGIWUR33566                                                                                                                        |    |     |         |         |                |            |            |                     |

|                                                                       |    |     |         |         |                |            |            |                     |             |
|-----------------------------------------------------------------------|----|-----|---------|---------|----------------|------------|------------|---------------------|-------------|
| N2                                                                    | HS | III | 2793323 | 2801900 | WBGene00006695 | twk-45     | Y71H2AM.22 | 0.111968060257927   |             |
| AGIWUR3799;AGIWUR4712;AGIWUR14874;AGIWUR21233;AGIWUR27245;AGIWUR35937 |    |     |         |         |                |            |            |                     |             |
| N2                                                                    | HS | III | 2802450 | 2803681 | WBGene00044760 | Y71H2AM.25 | Y71H2AM.25 | 0.0911271103247389  |             |
| AGIWUR36266                                                           |    |     |         |         |                |            |            |                     |             |
| N2                                                                    | HS | III | 2805430 | 2811096 | WBGene00022168 | Y71H2AM.3  | Y71H2AM.3  | -0.0255142939979223 |             |
| AGIWUR192                                                             |    |     |         |         |                |            |            |                     |             |
| N2                                                                    | HS | III | 2811870 | 2814969 | WBGene00007000 | tufm-1     | Y71H2AM.23 | 0.115862738111513   |             |
| AGIWUR44719                                                           |    |     |         |         |                |            |            |                     |             |
| N2                                                                    | HS | III | 2819280 | 2826153 | WBGene00022167 | Y71H2AM.2  | Y71H2AM.2  |                     |             |
| -0.00718458682919199 AGIWUR9342                                       |    |     |         |         |                |            |            |                     |             |
| N2                                                                    | HS | III | 2827070 | 2833824 | WBGene00022166 | Y71H2AM.1  | Y71H2AM.1  | 0.317698034855341   |             |
| AGIWUR25268;AGIWUR25695                                               |    |     |         |         |                |            |            |                     |             |
| N2                                                                    | HS | III | 2834663 | 2836261 | WBGene00022188 | Y71H2AR.1  | Y71H2AR.1  | -0.0346431160783567 |             |
| AGIWUR8952                                                            |    |     |         |         |                |            |            |                     |             |
| N2                                                                    | HS | III | 2836639 | 2838453 | WBGene00022190 | josd-1     | Y71H2AR.3  | 0.126649582946133   |             |
| AGIWUR10191;AGIWUR14524;AGIWUR20442;AGIWUR42988                       |    |     |         |         |                |            |            |                     |             |
| N2                                                                    | HS | III | 2838763 | 2840927 | WBGene00022189 | Y71H2AR.2  | Y71H2AR.2  | 0.173199046544062   |             |
| AGIWUR36642                                                           |    |     |         |         |                |            |            |                     |             |
| N2                                                                    | HS | III | 2842044 | 2845197 | WBGene00019261 | H34I24.2   | H34I24.2   | 0.115196280789732   |             |
| AGIWUR22219                                                           |    |     |         |         |                |            |            |                     |             |
| N2                                                                    | HS | III | 2847016 | 2848582 | WBGene00019260 | H34I24.1   | H34I24.1   | 0.00902528721952045 |             |
| AGIWUR16301                                                           |    |     |         |         |                |            |            |                     |             |
| N2                                                                    | HS | III | 2849066 | 2855419 | WBGene00018992 | trpl-1     | F56F11.5   | 0.04384930082011    |             |
| AGIWUR13328;AGIWUR37474;AGIWUR40427                                   |    |     |         |         |                |            |            |                     |             |
| N2                                                                    | HS | III | 2855554 | 2865497 | WBGene00018991 | F56F11.4   | F56F11.4   | 0.293873347409555   |             |
| AGIWUR5816                                                            |    |     |         |         |                |            |            |                     |             |
| N2                                                                    | HS | III | 2874818 | 2880705 | WBGene00018990 | k1f-1      | F56F11.3   | -0.293863369587439  |             |
| AGIWUR37613                                                           |    |     |         |         |                |            |            |                     |             |
| N2                                                                    | HS | III | 2882304 | 2884967 | WBGene00018989 | F56F11.2   | F56F11.2   |                     |             |
| -0.00399470015720738 AGIWUR6833;AGIWUR13653;AGIWUR40840               |    |     |         |         |                |            |            |                     |             |
| N2                                                                    | HS | III | 2891762 | 2892613 | WBGene00018988 | F56F11.1   | F56F11.1   | 0.408416391404966   |             |
| AGIWUR13941                                                           |    |     |         |         |                |            |            |                     |             |
| N2                                                                    | HS | III | 2893433 | 2897183 | WBGene00020598 | T20B6.2    | T20B6.2    | 0.297993478808386   | AGIWUR17017 |
| N2                                                                    | HS | III | 2897711 | 2898802 | WBGene00020597 | T20B6.1    | T20B6.1    | 0.229653373698428   | AGIWUR19617 |
| N2                                                                    | HS | III | 2899441 | 2900402 | WBGene00020599 | T20B6.3    | T20B6.3    | 0.07025327746112    | AGIWUR28148 |
| N2                                                                    | HS | III | 2910910 | 2935740 | WBGene00019994 | cdh-1      | R10F2.1    | -0.238158525093191  | AGIWUR5450  |
| N2                                                                    | HS | III | 2937103 | 2944044 | WBGene00019997 | R10F2.6    | R10F2.6    | -0.0395801604409147 | AGIWUR7457  |
| N2                                                                    | HS | III | 2947091 | 2960574 | WBGene00019157 | H05C05.1   | H05C05.1   | 0.0450083938198986  |             |
| AGIWUR1750;AGIWUR25924                                                |    |     |         |         |                |            |            |                     |             |

|                                                                                                |    |     |         |         |                |          |          |                     |
|------------------------------------------------------------------------------------------------|----|-----|---------|---------|----------------|----------|----------|---------------------|
| N2                                                                                             | HS | III | 2962170 | 2965634 | WBGene00019158 | H05C05.2 | H05C05.2 | -0.0181290518719921 |
| AGIWUR33855;AGIWUR33898                                                                        |    |     |         |         |                |          |          |                     |
| N2                                                                                             | HS | III | 2970677 | 2975785 | WBGene00021917 | Y55D5A.3 | Y55D5A.3 | 0.0613785977835395  |
| AGIWUR1723                                                                                     |    |     |         |         |                |          |          |                     |
| N2                                                                                             | HS | III | 2982414 | 2988150 | WBGene00021915 | Y55D5A.1 | Y55D5A.1 | 0.0761383291857669  |
| AGIWUR10708;AGIWUR39069                                                                        |    |     |         |         |                |          |          |                     |
| N2                                                                                             | HS | III | 2988081 | 2990057 | WBGene00021918 | Y55D5A.4 | Y55D5A.4 | -0.0737861094106815 |
| AGIWUR22699;AGIWUR34129                                                                        |    |     |         |         |                |          |          |                     |
| N2                                                                                             | HS | III | 2995487 | 3040860 | WBGene00000898 | daf-2    | Y55D5A.5 | -0.0486986751467242 |
| AGIWUR7133;AGIWUR13223;AGIWUR19374;AGIWUR30665;AGIWUR30985;AGIWUR34221;AGIWUR38552             |    |     |         |         |                |          |          |                     |
| N2                                                                                             | HS | III | 3042726 | 3047125 | WBGene00021919 | cutl-25  | Y55D5A.6 | 0.0758192038493739  |
| AGIWUR4266                                                                                     |    |     |         |         |                |          |          |                     |
| N2                                                                                             | HS | III | 3052916 | 3057550 | WBGene00019169 | H06I04.5 | H06I04.5 | 0.16276299528432    |
| AGIWUR17811                                                                                    |    |     |         |         |                |          |          |                     |
| N2                                                                                             | HS | III | 3059598 | 3059943 | WBGene00019171 | fipr-29  | H06I04.7 | 0.106347399755685   |
| AGIWUR3286                                                                                     |    |     |         |         |                |          |          |                     |
| N2                                                                                             | HS | III | 3061192 | 3064328 | WBGene00019170 | H06I04.6 | H06I04.6 | 0.0495261731895233  |
| AGIWUR17697;AGIWUR28831                                                                        |    |     |         |         |                |          |          |                     |
| N2                                                                                             | HS | III | 3068306 | 3069210 | WBGene00006725 | ubl-1    | H06I04.4 | -0.106344516508575  |
| AGIWUR40097                                                                                    |    |     |         |         |                |          |          |                     |
| N2                                                                                             | HS | III | 3070523 | 3085268 | WBGene00019168 | H06I04.3 | H06I04.3 | 0.256837061426928   |
| AGIWUR19571;AGIWUR26916;AGIWUR43041;AGIWUR43553                                                |    |     |         |         |                |          |          |                     |
| N2                                                                                             | HS | III | 3086693 | 3091738 | WBGene00004787 | sft-1    | H06I04.2 | 0.216286591733869   |
| AGIWUR34593                                                                                    |    |     |         |         |                |          |          |                     |
| N2                                                                                             | HS | III | 3091850 | 3100468 | WBGene00019167 | H06I04.1 | H06I04.1 | 0.0651713780240235  |
| AGIWUR8697;AGIWUR11825;AGIWUR19377;AGIWUR24950;AGIWUR25370;AGIWUR27115;AGIWUR30206;AGIWUR37893 |    |     |         |         |                |          |          |                     |
| N2                                                                                             | HS | III | 3101267 | 3103955 | WBGene00021818 | Y53G8B.2 | Y53G8B.2 | 0.0780680224728805  |
| AGIWUR23098                                                                                    |    |     |         |         |                |          |          |                     |
| N2                                                                                             | HS | III | 3105668 | 3111828 | WBGene00021819 | Y53G8B.3 | Y53G8B.3 | -0.0320783228020782 |
| AGIWUR20240;AGIWUR39483                                                                        |    |     |         |         |                |          |          |                     |
| N2                                                                                             | HS | III | 3112428 | 3127124 | WBGene00021820 | nipa-1   | Y53G8B.4 | -0.0395899670217865 |
| AGIWUR13380;AGIWUR15191;AGIWUR20673;AGIWUR22382;AGIWUR27257;AGIWUR28555                        |    |     |         |         |                |          |          |                     |
| N2                                                                                             | HS | III | 3129277 | 3131399 | WBGene00021817 | Y53G8B.1 | Y53G8B.1 | -0.106904020427002  |
| AGIWUR8460                                                                                     |    |     |         |         |                |          |          |                     |
| N2                                                                                             | HS | III | 3131574 | 3139234 | WBGene00003175 | mec-12   | C44B11.3 | -0.127869073193636  |
| AGIWUR9745                                                                                     |    |     |         |         |                |          |          |                     |
| N2                                                                                             | HS | III | 3142198 | 3143757 | WBGene00016634 | C44B11.4 | C44B11.4 | -0.0776081401694348 |
| AGIWUR35263                                                                                    |    |     |         |         |                |          |          |                     |
| N2                                                                                             | HS | III | 3152722 | 3153471 | WBGene00016635 | C44B11.6 | C44B11.6 | 0.0231847107522718  |

|                                                                                                        |    |     |         |         |                |           |           |                     |
|--------------------------------------------------------------------------------------------------------|----|-----|---------|---------|----------------|-----------|-----------|---------------------|
| AGIWUR35468                                                                                            |    |     |         |         |                |           |           |                     |
| N2                                                                                                     | HS | III | 3155268 | 3158393 | WBGene00016633 | C44B11.1  | C44B11.1  | -0.027791199879653  |
| AGIWUR38618                                                                                            |    |     |         |         |                |           |           |                     |
| N2                                                                                                     | HS | III | 3166285 | 3171198 | WBGene00020104 | R148.5    | R148.5    | -0.170915309868992  |
| AGIWUR3695;AGIWUR8574;AGIWUR10518;AGIWUR10971;AGIWUR23515;AGIWUR35283;AGIWUR40568                      |    |     |         |         |                |           |           |                     |
| N2                                                                                                     | HS | III | 3171592 | 3174845 | WBGene00020103 | R148.4    | R148.4    | -0.0602695111491869 |
| AGIWUR2853;AGIWUR12459;AGIWUR13273;AGIWUR20228;AGIWUR20610;AGIWUR30751;AGIWUR38883                     |    |     |         |         |                |           |           |                     |
| N2                                                                                                     | HS | III | 3175339 | 3183498 | WBGene00020102 | R148.3    | R148.3    | -0.0956231558730778 |
| AGIWUR12884;AGIWUR22527                                                                                |    |     |         |         |                |           |           |                     |
| N2                                                                                                     | HS | III | 3183677 | 3185237 | WBGene00020101 | lmtr-5    | R148.2    | 0.205079509969142   |
| AGIWUR96;AGIWUR32957                                                                                   |    |     |         |         |                |           |           |                     |
| N2                                                                                                     | HS | III | 3186700 | 3192206 | WBGene00020100 | mks-1     | R148.1    | 0.109920725332616   |
| AGIWUR15590;AGIWUR23354                                                                                |    |     |         |         |                |           |           |                     |
| N2                                                                                                     | HS | III | 3195561 | 3198407 | WBGene00020105 | R148.7    | R148.7    | -0.164343323270192  |
| N2                                                                                                     | HS | III | 3198477 | 3199516 | WBGene00006452 | heh-1     | R148.6    | 0.168312391540683   |
| N2                                                                                                     | HS | III | 3200795 | 3219150 | WBGene00001494 | frm-8     | H09G03.2  | -0.13096914503595   |
| AGIWUR6857                                                                                             |    |     |         |         |                |           |           |                     |
| N2                                                                                                     | HS | III | 3226352 | 3230652 | WBGene00019174 | H09G03.1  | H09G03.1  | 0.0476825184516607  |
| AGIWUR20902;AGIWUR38539                                                                                |    |     |         |         |                |           |           |                     |
| N2                                                                                                     | HS | III | 3233102 | 3241263 | WBGene00021799 | Y53G8AL.1 | Y53G8AL.1 | 0.00733719441492475 |
| AGIWUR3746;AGIWUR9132;AGIWUR27505                                                                      |    |     |         |         |                |           |           |                     |
| N2                                                                                                     | HS | III | 3241717 | 3248575 | WBGene00021800 | Y53G8AL.2 | Y53G8AL.2 | 0.194392006630647   |
| AGIWUR11969                                                                                            |    |     |         |         |                |           |           |                     |
| N2                                                                                                     | HS | III | 3249346 | 3250538 | WBGene00050917 | Y53G8AL.4 | Y53G8AL.4 | 0.0206183390923567  |
| AGIWUR98;AGIWUR2795;AGIWUR8581;AGIWUR11247;AGIWUR12880;AGIWUR27907;AGIWUR29640;AGIWUR31983;AGIWUR32616 |    |     |         |         |                |           |           |                     |
| N2                                                                                                     | HS | III | 3251461 | 3253143 | WBGene00021801 | Y53G8AL.3 | Y53G8AL.3 | 0.0266464050948336  |
| AGIWUR3567                                                                                             |    |     |         |         |                |           |           |                     |
| N2                                                                                                     | HS | III | 3253969 | 3255619 | WBGene00021804 | Y53G8AM.4 | Y53G8AM.4 | -0.0141104005245927 |
| AGIWUR11618;AGIWUR14433;AGIWUR15534                                                                    |    |     |         |         |                |           |           |                     |
| N2                                                                                                     | HS | III | 3256730 | 3258395 | WBGene00021805 | Y53G8AM.5 | Y53G8AM.5 | -0.107434482366708  |
| AGIWUR6953                                                                                             |    |     |         |         |                |           |           |                     |
| N2                                                                                                     | HS | III | 3259331 | 3260882 | WBGene00021806 | Y53G8AM.6 | Y53G8AM.6 | -0.0768256814791037 |
| AGIWUR37373                                                                                            |    |     |         |         |                |           |           |                     |
| N2                                                                                                     | HS | III | 3263682 | 3266608 | WBGene00021807 | Y53G8AM.7 | Y53G8AM.7 | 0.0316160050905001  |
| AGIWUR31082                                                                                            |    |     |         |         |                |           |           |                     |
| N2                                                                                                     | HS | III | 3267178 | 3278710 | WBGene00021808 | Y53G8AM.8 | Y53G8AM.8 | -0.155614806461935  |
| AGIWUR2613;AGIWUR10843                                                                                 |    |     |         |         |                |           |           |                     |
| N2                                                                                                     | HS | III | 3282308 | 3290215 | WBGene00021814 | Y53G8AR.7 | Y53G8AR.7 | 0.155689597997792   |
| AGIWUR17390;AGIWUR29595;AGIWUR30914                                                                    |    |     |         |         |                |           |           |                     |

|                                                                                    |    |     |         |         |                |           |           |                     |             |
|------------------------------------------------------------------------------------|----|-----|---------|---------|----------------|-----------|-----------|---------------------|-------------|
| N2                                                                                 | HS | III | 3290117 | 3294330 | WBGene00021815 | Y53G8AR.8 | Y53G8AR.8 | 0.202619747275488   |             |
| AGIWUR37995                                                                        |    |     |         |         |                |           |           |                     |             |
| N2                                                                                 | HS | III | 3294743 | 3297115 | WBGene00021813 | Y53G8AR.6 | Y53G8AR.6 | 0.14241400982426    |             |
| AGIWUR4561;AGIWUR24284;AGIWUR24788;AGIWUR38114                                     |    |     |         |         |                |           |           |                     |             |
| N2                                                                                 | HS | III | 3297454 | 3302151 | WBGene00021812 | Y53G8AR.5 | Y53G8AR.5 | 0.387850144357831   |             |
| AGIWUR41086                                                                        |    |     |         |         |                |           |           |                     |             |
| N2                                                                                 | HS | III | 3311423 | 3317713 | WBGene00021811 | ral-1     | Y53G8AR.3 | 0.336883256419265   |             |
| AGIWUR39100                                                                        |    |     |         |         |                |           |           |                     |             |
| N2                                                                                 | HS | III | 3317737 | 3321245 | WBGene00021816 | Y53G8AR.9 | Y53G8AR.9 | 0.207385409366644   |             |
| AGIWUR331                                                                          |    |     |         |         |                |           |           |                     |             |
| N2                                                                                 | HS | III | 3322962 | 3331727 | WBGene00021810 | phf-15    | Y53G8AR.2 | -0.130765519714657  |             |
| AGIWUR35836                                                                        |    |     |         |         |                |           |           |                     |             |
| N2                                                                                 | HS | III | 3333036 | 3333957 | WBGene00021809 | Y53G8AR.1 | Y53G8AR.1 | 0.0576863927811075  |             |
| AGIWUR12431;AGIWUR18982;AGIWUR22098                                                |    |     |         |         |                |           |           |                     |             |
| N2                                                                                 | HS | III | 3344875 | 3363409 | WBGene00001559 | gei-1     | F45H7.2   | -0.0331696720815522 |             |
| AGIWUR6128;AGIWUR42668                                                             |    |     |         |         |                |           |           |                     |             |
| N2                                                                                 | HS | III | 3363668 | 3370209 | WBGene00004183 | prk-2     | F45H7.4   | -0.202194598130898  | AGIWUR39213 |
| N2                                                                                 | HS | III | 3377408 | 3389970 | WBGene00009738 | hecw-1    | F45H7.6   | 0.0432566303878281  |             |
| AGIWUR2775;AGIWUR13999                                                             |    |     |         |         |                |           |           |                     |             |
| N2                                                                                 | HS | III | 3389894 | 3392525 | WBGene00008348 | C56G7.3   | C56G7.3   | 0.0298492211901298  | AGIWUR39672 |
| N2                                                                                 | HS | III | 3392514 | 3393787 | WBGene00003372 | mlc-4     | C56G7.1   | 0.0247854915274246  |             |
| AGIWUR30999;AGIWUR42250;AGIWUR42527                                                |    |     |         |         |                |           |           |                     |             |
| N2                                                                                 | HS | III | 3396585 | 3397675 | WBGene00010303 | cri-3     | F59A2.3   | 0.0485580055691948  |             |
| AGIWUR13117;AGIWUR25564;AGIWUR26708;AGIWUR37141;AGIWUR43589                        |    |     |         |         |                |           |           |                     |             |
| N2                                                                                 | HS | III | 3397743 | 3400644 | WBGene00010304 | clpf-1    | F59A2.4   | 0.0877005838293741  | AGIWUR17293 |
| N2                                                                                 | HS | III | 3400644 | 3404479 | WBGene00003795 | npp-9     | F59A2.1   | -0.18287851955334   |             |
| AGIWUR8688;AGIWUR12216;AGIWUR18359;AGIWUR29274;AGIWUR32884;AGIWUR34620;AGIWUR35151 |    |     |         |         |                |           |           |                     |             |
| N2                                                                                 | HS | III | 3404863 | 3405469 | WBGene00010305 | F59A2.5   | F59A2.5   | 0.111944683420063   | AGIWUR18938 |
| N2                                                                                 | HS | III | 3405576 | 3411624 | WBGene00010302 | F59A2.2   | F59A2.2   | -0.0494127700497904 | AGIWUR22160 |
| N2                                                                                 | HS | III | 3415552 | 3425447 | WBGene00010306 | golg-4    | F59A2.6   | 0.0765477660937739  | AGIWUR43196 |
| N2                                                                                 | HS | III | 3425736 | 3428094 | WBGene00010450 | K01A11.2  | K01A11.2  | 0.0702579928997284  |             |
| AGIWUR41248                                                                        |    |     |         |         |                |           |           |                     |             |
| N2                                                                                 | HS | III | 3428080 | 3431366 | WBGene00010449 | K01A11.1  | K01A11.1  | 0.157140602847964   |             |
| AGIWUR37728                                                                        |    |     |         |         |                |           |           |                     |             |
| N2                                                                                 | HS | III | 3439023 | 3444207 | WBGene00004976 | spe-41    | K01A11.4  | -0.242090578261678  |             |
| AGIWUR42753                                                                        |    |     |         |         |                |           |           |                     |             |
| N2                                                                                 | HS | III | 3447140 | 3452613 | WBGene00010451 | K01A11.3  | K01A11.3  | -0.158621312790116  |             |
| AGIWUR12199                                                                        |    |     |         |         |                |           |           |                     |             |
| N2                                                                                 | HS | III | 3454345 | 3455850 | WBGene00007920 | C34C12.1  | C34C12.1  | 0.0764712158050607  |             |

|                                                                                                       |    |     |         |         |                |          |          |                      |
|-------------------------------------------------------------------------------------------------------|----|-----|---------|---------|----------------|----------|----------|----------------------|
| AGIWUR8950                                                                                            |    |     |         |         |                |          |          |                      |
| N2                                                                                                    | HS | III | 3456435 | 3460106 | WBGene00007921 | C34C12.2 | C34C12.2 | 0.13009686364224     |
| AGIWUR33347                                                                                           |    |     |         |         |                |          |          |                      |
| N2                                                                                                    | HS | III | 3460406 | 3461590 | WBGene00007927 | C34C12.8 | C34C12.8 | 0.132105158175605    |
| AGIWUR23839                                                                                           |    |     |         |         |                |          |          |                      |
| N2                                                                                                    | HS | III | 3461703 | 3467687 | WBGene00007922 | pph-6    | C34C12.3 | -0.187779925781978   |
| AGIWUR15982                                                                                           |    |     |         |         |                |          |          |                      |
| N2                                                                                                    | HS | III | 3467664 | 3469827 | WBGene00007923 | C34C12.4 | C34C12.4 | -0.236790074150486   |
| AGIWUR4591;AGIWUR11505;AGIWUR14624;AGIWUR27106;AGIWUR34870                                            |    |     |         |         |                |          |          |                      |
| N2                                                                                                    | HS | III | 3472003 | 3473718 | WBGene00007924 | rsu-1    | C34C12.5 | -0.109817199291398   |
| AGIWUR68;AGIWUR4021;AGIWUR7201;AGIWUR8236;AGIWUR24702;AGIWUR27827;AGIWUR32997;AGIWUR37412;AGIWUR44729 |    |     |         |         |                |          |          |                      |
| N2                                                                                                    | HS | III | 3474019 | 3475450 | WBGene00007928 | C34C12.9 | C34C12.9 | -0.402052444874183   |
| AGIWUR12359                                                                                           |    |     |         |         |                |          |          |                      |
| N2                                                                                                    | HS | III | 3482591 | 3484843 | WBGene00007925 | C34C12.6 | C34C12.6 | 0.0661680932408988   |
| AGIWUR31348                                                                                           |    |     |         |         |                |          |          |                      |
| N2                                                                                                    | HS | III | 3484813 | 3488341 | WBGene00007926 | C34C12.7 | C34C12.7 | -0.0128154489129049  |
| AGIWUR32822                                                                                           |    |     |         |         |                |          |          |                      |
| N2                                                                                                    | HS | III | 3490363 | 3493234 | WBGene00001639 | gly-14   | M01F1.1  | -0.0267089496652329  |
| N2                                                                                                    | HS | III | 3493811 | 3499057 | WBGene00010815 | M01F1.9  | M01F1.9  | -0.0401863025448019  |
| AGIWUR15859;AGIWUR37865;AGIWUR43079                                                                   |    |     |         |         |                |          |          |                      |
| N2                                                                                                    | HS | III | 3499375 | 3502547 | WBGene00010814 | M01F1.8  | M01F1.8  | 0.0207486164365491   |
| N2                                                                                                    | HS | III | 3502841 | 3503724 | WBGene00004428 | rp1-16   | M01F1.2  | -0.583960420567877   |
| AGIWUR5475;AGIWUR9044;AGIWUR10626;AGIWUR28475;AGIWUR28655;AGIWUR34090                                 |    |     |         |         |                |          |          |                      |
| N2                                                                                                    | HS | III | 3503710 | 3505355 | WBGene00010809 | M01F1.3  | M01F1.3  | -0.00769798925451859 |
| N2                                                                                                    | HS | III | 3505649 | 3510033 | WBGene00010810 | M01F1.4  | M01F1.4  | -0.153771251938691   |
| N2                                                                                                    | HS | III | 3510237 | 3511011 | WBGene00010812 | mrp1-35  | M01F1.6  | 0.133904954485342    |
| N2                                                                                                    | HS | III | 3510964 | 3519607 | WBGene00010811 | hmit-1.3 | M01F1.5  | -0.0373332690860408  |
| AGIWUR26004                                                                                           |    |     |         |         |                |          |          |                      |
| N2                                                                                                    | HS | III | 3521133 | 3529838 | WBGene00010813 | pitp-1   | M01F1.7  | -0.0639624791790361  |
| N2                                                                                                    | HS | III | 3534660 | 3537496 | WBGene00008288 | C54C6.6  | C54C6.6  | 0.136623860815776    |
| N2                                                                                                    | HS | III | 3537688 | 3541628 | WBGene00000248 | ben-1    | C54C6.2  | 0.040842006201153    |
| N2                                                                                                    | HS | III | 3545740 | 3546419 | WBGene00044166 | C54C6.7  | C54C6.7  | 0.143902584496638    |
| N2                                                                                                    | HS | III | 3549410 | 3549850 | WBGene00008287 | C54C6.5  | C54C6.5  | 0.0284289860624911   |
| AGIWUR3248;AGIWUR7930;AGIWUR11537;AGIWUR12523;AGIWUR12823;AGIWUR23202                                 |    |     |         |         |                |          |          |                      |
| N2                                                                                                    | HS | III | 3553649 | 3556627 | WBGene00008286 | C54C6.4  | C54C6.4  | 0.00443736861953425  |
| AGIWUR2455;AGIWUR20439;AGIWUR35219                                                                    |    |     |         |         |                |          |          |                      |
| N2                                                                                                    | HS | III | 3573585 | 3578771 | WBGene00003605 | nhr-6    | C48D5.1  | -0.0190881141140284  |
| N2                                                                                                    | HS | III | 3578716 | 3581736 | WBGene00008180 | C48D5.3  | C48D5.3  | 0.449170222506898    |
| N2                                                                                                    | HS | III | 3590734 | 3611993 | WBGene00004213 | ptp-1    | C48D5.2  | -0.0554489555383872  |



AGIWUR6891;AGIWUR25035;AGIWUR35090

|    |    |     |         |         |                |         |          |                    |             |
|----|----|-----|---------|---------|----------------|---------|----------|--------------------|-------------|
| N2 | HS | III | 3612951 | 3627142 | WBGene00004765 | sel-8   | C32A3.1  | 0.257966277395067  | AGIWUR25533 |
| N2 | HS | III | 3627986 | 3630368 | WBGene00007859 | mrps-31 | C32A3.2  | 0.0921796310291789 | AGIWUR2977  |
| N2 | HS | III | 3635876 | 3643670 | WBGene00007860 | rilp-1  | C32A3.3  | -0.16794893679797  | AGIWUR12909 |
| N2 | HS | III | 3644375 | 3648822 | WBGene00006822 | unc-93  | C46F11.1 | 0.314985503640298  |             |

AGIWUR19227

|    |    |     |         |         |                |        |          |                    |  |
|----|----|-----|---------|---------|----------------|--------|----------|--------------------|--|
| N2 | HS | III | 3648792 | 3650832 | WBGene00008118 | madf-8 | C46F11.3 | -0.143421484213956 |  |
|----|----|-----|---------|---------|----------------|--------|----------|--------------------|--|

AGIWUR4896

|    |    |     |         |         |                |       |          |                    |  |
|----|----|-----|---------|---------|----------------|-------|----------|--------------------|--|
| N2 | HS | III | 3650905 | 3652973 | WBGene00008117 | gsr-1 | C46F11.2 | -0.169925719723739 |  |
|----|----|-----|---------|---------|----------------|-------|----------|--------------------|--|

AGIWUR3922;AGIWUR4457;AGIWUR11413;AGIWUR16538;AGIWUR21036;AGIWUR25473;AGIWUR30459

|    |    |     |         |         |                |          |          |                   |  |
|----|----|-----|---------|---------|----------------|----------|----------|-------------------|--|
| N2 | HS | III | 3652866 | 3657602 | WBGene00008120 | C46F11.5 | C46F11.5 | 0.232959885176649 |  |
|----|----|-----|---------|---------|----------------|----------|----------|-------------------|--|

AGIWUR2103;AGIWUR17982;AGIWUR19818

|    |    |     |         |         |                |          |          |                    |  |
|----|----|-----|---------|---------|----------------|----------|----------|--------------------|--|
| N2 | HS | III | 3657716 | 3664494 | WBGene00008119 | C46F11.4 | C46F11.4 | -0.269432662343775 |  |
|----|----|-----|---------|---------|----------------|----------|----------|--------------------|--|

AGIWUR9635

|    |    |     |         |         |                |          |          |                    |  |
|----|----|-----|---------|---------|----------------|----------|----------|--------------------|--|
| N2 | HS | III | 3667022 | 3670436 | WBGene00008121 | C46F11.6 | C46F11.6 | 0.0236315188011105 |  |
|----|----|-----|---------|---------|----------------|----------|----------|--------------------|--|

AGIWUR5194

|    |    |     |         |         |                |        |         |                    |             |
|----|----|-----|---------|---------|----------------|--------|---------|--------------------|-------------|
| N2 | HS | III | 3683253 | 3685808 | WBGene00012084 | npr-15 | T27D1.3 | -0.129286758279683 | AGIWUR45091 |
|----|----|-----|---------|---------|----------------|--------|---------|--------------------|-------------|

|    |    |     |         |         |                |       |         |                    |  |
|----|----|-----|---------|---------|----------------|-------|---------|--------------------|--|
| N2 | HS | III | 3697821 | 3699640 | WBGene00000885 | cyn-9 | T27D1.1 | 0.0460404599492925 |  |
|----|----|-----|---------|---------|----------------|-------|---------|--------------------|--|

AGIWUR5691;AGIWUR22866

|    |    |     |         |         |                |       |         |                     |             |
|----|----|-----|---------|---------|----------------|-------|---------|---------------------|-------------|
| N2 | HS | III | 3699740 | 3701476 | WBGene00003962 | pdi-1 | C14B1.1 | -0.0316701541015938 | AGIWUR26524 |
|----|----|-----|---------|---------|----------------|-------|---------|---------------------|-------------|

|    |    |     |         |         |                |         |         |                    |             |
|----|----|-----|---------|---------|----------------|---------|---------|--------------------|-------------|
| N2 | HS | III | 3702260 | 3703172 | WBGene00007573 | C14B1.2 | C14B1.2 | -0.131488022723001 | AGIWUR35229 |
|----|----|-----|---------|---------|----------------|---------|---------|--------------------|-------------|

|    |    |     |         |         |                |         |         |                    |             |
|----|----|-----|---------|---------|----------------|---------|---------|--------------------|-------------|
| N2 | HS | III | 3703564 | 3705046 | WBGene00007574 | C14B1.3 | C14B1.3 | 0.0105201926034972 | AGIWUR36098 |
|----|----|-----|---------|---------|----------------|---------|---------|--------------------|-------------|

|    |    |     |         |         |                |         |         |                    |             |
|----|----|-----|---------|---------|----------------|---------|---------|--------------------|-------------|
| N2 | HS | III | 3705265 | 3706784 | WBGene00006474 | wdr-5.1 | C14B1.4 | -0.120082547275628 | AGIWUR43195 |
|----|----|-----|---------|---------|----------------|---------|---------|--------------------|-------------|

|    |    |     |         |         |                |       |         |                    |             |
|----|----|-----|---------|---------|----------------|-------|---------|--------------------|-------------|
| N2 | HS | III | 3706886 | 3709225 | WBGene00007576 | dph-1 | C14B1.5 | 0.0089886542024189 | AGIWUR42170 |
|----|----|-----|---------|---------|----------------|-------|---------|--------------------|-------------|

|    |    |     |         |         |                |        |          |                     |  |
|----|----|-----|---------|---------|----------------|--------|----------|---------------------|--|
| N2 | HS | III | 3709330 | 3713282 | WBGene00007581 | alkb-8 | C14B1.10 | -0.0120333058191964 |  |
|----|----|-----|---------|---------|----------------|--------|----------|---------------------|--|

AGIWUR43295

|    |    |     |         |         |                |        |         |                   |             |
|----|----|-----|---------|---------|----------------|--------|---------|-------------------|-------------|
| N2 | HS | III | 3713463 | 3718745 | WBGene00007577 | nrde-1 | C14B1.6 | 0.155157601793711 | AGIWUR30630 |
|----|----|-----|---------|---------|----------------|--------|---------|-------------------|-------------|

|    |    |     |         |         |                |         |         |                   |  |
|----|----|-----|---------|---------|----------------|---------|---------|-------------------|--|
| N2 | HS | III | 3718655 | 3719722 | WBGene00007579 | C14B1.8 | C14B1.8 | 0.142757053012058 |  |
|----|----|-----|---------|---------|----------------|---------|---------|-------------------|--|

AGIWUR1479;AGIWUR19965;AGIWUR23671;AGIWUR36535

|    |    |     |         |         |                |         |         |                    |  |
|----|----|-----|---------|---------|----------------|---------|---------|--------------------|--|
| N2 | HS | III | 3719904 | 3723597 | WBGene00007578 | C14B1.7 | C14B1.7 | -0.180369070087607 |  |
|----|----|-----|---------|---------|----------------|---------|---------|--------------------|--|

AGIWUR3899;AGIWUR7683;AGIWUR11406;AGIWUR14763;AGIWUR18063;AGIWUR23634;AGIWUR27561

|    |    |     |         |         |                |          |          |                   |  |
|----|----|-----|---------|---------|----------------|----------|----------|-------------------|--|
| N2 | HS | III | 3724222 | 3724980 | WBGene00184990 | C14B1.12 | C14B1.12 | 0.049404927704801 |  |
|----|----|-----|---------|---------|----------------|----------|----------|-------------------|--|

AGIWUR40467

|    |    |     |         |         |                |          |          |                    |  |
|----|----|-----|---------|---------|----------------|----------|----------|--------------------|--|
| N2 | HS | III | 3726683 | 3729570 | WBGene00045484 | F34D10.9 | F34D10.9 | 0.0790318179864151 |  |
|----|----|-----|---------|---------|----------------|----------|----------|--------------------|--|

AGIWUR26415

|    |    |     |         |         |                |        |          |                    |  |
|----|----|-----|---------|---------|----------------|--------|----------|--------------------|--|
| N2 | HS | III | 3729493 | 3735039 | WBGene00009372 | evl-18 | F34D10.2 | -0.120240722279972 |  |
|----|----|-----|---------|---------|----------------|--------|----------|--------------------|--|

AGIWUR31255;AGIWUR41733

|    |    |     |         |         |                |          |          |                   |  |
|----|----|-----|---------|---------|----------------|----------|----------|-------------------|--|
| N2 | HS | III | 3736602 | 3739765 | WBGene00009374 | F34D10.4 | F34D10.4 | -0.13368696333965 |  |
|----|----|-----|---------|---------|----------------|----------|----------|-------------------|--|

AGIWUR6706

|                                                                                                                                                                    |    |     |         |         |                |          |          |                     |             |
|--------------------------------------------------------------------------------------------------------------------------------------------------------------------|----|-----|---------|---------|----------------|----------|----------|---------------------|-------------|
| N2                                                                                                                                                                 | HS | III | 3745461 | 3747451 | WBGene00003033 | lin-48   | F34D10.5 | -0.129218182221763  |             |
| AGIWUR8297;AGIWUR33973                                                                                                                                             |    |     |         |         |                |          |          |                     |             |
| N2                                                                                                                                                                 | HS | III | 3747560 | 3759412 | WBGene00009375 | F34D10.6 | F34D10.6 | 0.129168808076159   |             |
| AGIWUR24321;AGIWUR27132                                                                                                                                            |    |     |         |         |                |          |          |                     |             |
| N2                                                                                                                                                                 | HS | III | 3760378 | 3765556 | WBGene00008091 | C44F1.1  | C44F1.1  | -0.0358546343750614 | AGIWUR34530 |
| N2                                                                                                                                                                 | HS | III | 3768500 | 3770321 | WBGene00008092 | gmeb-3   | C44F1.2  | 0.368282414732681   |             |
| AGIWUR17407;AGIWUR28024;AGIWUR36161                                                                                                                                |    |     |         |         |                |          |          |                     |             |
| N2                                                                                                                                                                 | HS | III | 3771425 | 3773394 | WBGene00002267 | lec-4    | C44F1.3  | 0.173420405856954   | AGIWUR34709 |
| N2                                                                                                                                                                 | HS | III | 3774896 | 3786640 | WBGene00000070 | acy-3    | C44F1.5  | 0.00782497517238312 | AGIWUR26920 |
| N2                                                                                                                                                                 | HS | III | 3789982 | 3800547 | WBGene00003476 | mtm-3    | T24A11.1 | -0.147118830038152  |             |
| AGIWUR9591;AGIWUR13492                                                                                                                                             |    |     |         |         |                |          |          |                     |             |
| N2                                                                                                                                                                 | HS | III | 3802452 | 3804438 | WBGene00011974 | xbx-5    | T24A11.2 | -0.0331915123270066 |             |
| AGIWUR16614;AGIWUR30028                                                                                                                                            |    |     |         |         |                |          |          |                     |             |
| N2                                                                                                                                                                 | HS | III | 3804772 | 3809030 | WBGene00006591 | toh-1    | T24A11.3 | 0.0720633596833089  |             |
| AGIWUR2545;AGIWUR10073;AGIWUR17610;AGIWUR19116;AGIWUR29103;AGIWUR29370;AGIWUR36519                                                                                 |    |     |         |         |                |          |          |                     |             |
| N2                                                                                                                                                                 | HS | III | 3813519 | 3819679 | WBGene00001086 | dpy-27   | R13G10.1 | 0.107002375453765   |             |
| AGIWUR14664                                                                                                                                                        |    |     |         |         |                |          |          |                     |             |
| N2                                                                                                                                                                 | HS | III | 3822403 | 3826261 | WBGene00000137 | amx-1    | R13G10.2 | -0.176827319362527  |             |
| AGIWUR18369                                                                                                                                                        |    |     |         |         |                |          |          |                     |             |
| N2                                                                                                                                                                 | HS | III | 3826378 | 3829205 | WBGene00011260 | cnm-5    | R13G10.4 | 0.291983918630367   |             |
| AGIWUR24264                                                                                                                                                        |    |     |         |         |                |          |          |                     |             |
| N2                                                                                                                                                                 | HS | III | 3832591 | 3834522 | WBGene00007963 | cyp-25A1 | C36A4.1  | -0.133027956499532  |             |
| AGIWUR27481;AGIWUR44867                                                                                                                                            |    |     |         |         |                |          |          |                     |             |
| N2                                                                                                                                                                 | HS | III | 3835221 | 3837211 | WBGene00007964 | cyp-25A2 | C36A4.2  | -0.051712120573848  |             |
| AGIWUR18068                                                                                                                                                        |    |     |         |         |                |          |          |                     |             |
| N2                                                                                                                                                                 | HS | III | 3837551 | 3839477 | WBGene00014697 | cyp-25A3 | C36A4.3  | -0.0531100188548121 |             |
| AGIWUR33808                                                                                                                                                        |    |     |         |         |                |          |          |                     |             |
| N2                                                                                                                                                                 | HS | III | 3841262 | 3843614 | WBGene00007965 | C36A4.4  | C36A4.4  | -0.149012807061592  | AGIWUR21773 |
| N2                                                                                                                                                                 | HS | III | 3853026 | 3862958 | WBGene00000264 | brc-1    | C36A4.8  | 0.363944580813804   | AGIWUR18213 |
| N2                                                                                                                                                                 | HS | III | 3864036 | 3867098 | WBGene00007969 | acs-19   | C36A4.9  | -0.0348501384822555 |             |
| AGIWUR5743;AGIWUR8131;AGIWUR18162;AGIWUR24888;AGIWUR42768                                                                                                          |    |     |         |         |                |          |          |                     |             |
| N2                                                                                                                                                                 | HS | III | 3867852 | 3869587 | WBGene00004414 | rpl-3    | F13B10.2 | -0.0583200576633525 |             |
| AGIWUR4750;AGIWUR29310                                                                                                                                             |    |     |         |         |                |          |          |                     |             |
| N2                                                                                                                                                                 | HS | III | 3869591 | 3901466 | WBGene00006575 | tir-1    | F13B10.1 | -0.224236027246403  |             |
| AGIWUR2597;AGIWUR3084;AGIWUR3265;AGIWUR5178;AGIWUR9784;AGIWUR15222;AGIWUR19101;AGIWUR21064;AGIWUR30859;AGIWUR30875;AGIWUR34308;AGIWUR38888;AGIWUR39275;AGIWUR40787 |    |     |         |         |                |          |          |                     |             |
| N2                                                                                                                                                                 | HS | III | 3903114 | 3907687 | WBGene00014202 | mmcm-1   | ZK1058.1 | -0.103870815772144  |             |
| AGIWUR1795;AGIWUR2675;AGIWUR8381;AGIWUR12443;AGIWUR14231;AGIWUR16597;AGIWUR17881;AGIWUR33357;AGIWUR39146;AGIWUR41856                                               |    |     |         |         |                |          |          |                     |             |

|                                                                      |    |     |         |         |                |          |          |                     |             |
|----------------------------------------------------------------------|----|-----|---------|---------|----------------|----------|----------|---------------------|-------------|
| N2                                                                   | HS | III | 3908929 | 3914149 | WBGene00003930 | pat-3    | ZK1058.2 | -0.116626553368366  |             |
| AGIWUR35961                                                          |    |     |         |         |                |          |          |                     |             |
| N2                                                                   | HS | III | 3916933 | 3918809 | WBGene00014204 | ccdc-47  | ZK1058.4 | 0.058597228399325   |             |
| AGIWUR44755                                                          |    |     |         |         |                |          |          |                     |             |
| N2                                                                   | HS | III | 3918871 | 3920700 | WBGene00014203 | ZK1058.3 | ZK1058.3 | 0.0620445228116271  |             |
| AGIWUR18587                                                          |    |     |         |         |                |          |          |                     |             |
| N2                                                                   | HS | III | 3920626 | 3921711 | WBGene00014205 | ZK1058.5 | ZK1058.5 | 0.0851789424610256  |             |
| AGIWUR39458                                                          |    |     |         |         |                |          |          |                     |             |
| N2                                                                   | HS | III | 3922207 | 3923869 | WBGene00014206 | nit-1    | ZK1058.6 | 0.0185132410496429  |             |
| AGIWUR42259                                                          |    |     |         |         |                |          |          |                     |             |
| N2                                                                   | HS | III | 3923792 | 3926238 | WBGene00014207 | ZK1058.9 | ZK1058.9 | -0.102019119162936  |             |
| AGIWUR27933                                                          |    |     |         |         |                |          |          |                     |             |
| N2                                                                   | HS | III | 3929530 | 3931523 | WBGene00009502 | F37A8.2  | F37A8.2  | 0.152437109895132   | AGIWUR14427 |
| N2                                                                   | HS | III | 3933577 | 3935908 | WBGene00003748 | nlp-10   | F37A8.4  | 0.215698514275122   | AGIWUR40346 |
| N2                                                                   | HS | III | 3956624 | 3958161 | WBGene00009503 | F37A8.5  | F37A8.5  | -0.094411022380525  | AGIWUR6158  |
| N2                                                                   | HS | III | 3960258 | 3961825 | WBGene00011215 | R10E9.3  | R10E9.3  | 0.0272701478108095  | AGIWUR21427 |
| N2                                                                   | HS | III | 3962731 | 3964158 | WBGene00011214 | R10E9.2  | R10E9.2  | 0.0246225678331591  | AGIWUR23439 |
| N2                                                                   | HS | III | 3964663 | 3976391 | WBGene00003423 | msi-1    | R10E9.1  | -0.0631959243302624 |             |
| AGIWUR32590;AGIWUR33464                                              |    |     |         |         |                |          |          |                     |             |
| N2                                                                   | HS | III | 3984367 | 3984670 | WBGene00012380 | Y1A5A.2  | Y1A5A.2  | -0.0921648084494162 | AGIWUR12504 |
| N2                                                                   | HS | III | 3985565 | 3986809 | WBGene00012379 | Y1A5A.1  | Y1A5A.1  | -0.0407609288876287 |             |
| AGIWUR35450;AGIWUR37937                                              |    |     |         |         |                |          |          |                     |             |
| N2                                                                   | HS | III | 3988059 | 3988575 | WBGene00044230 | C36E8.6  | C36E8.6  | -0.0400168966918155 | AGIWUR30001 |
| N2                                                                   | HS | III | 3989298 | 3992174 | WBGene00007981 | glb-11   | C36E8.2  | 0.115759218154412   | AGIWUR33067 |
| N2                                                                   | HS | III | 3999286 | 4004143 | WBGene00007980 | C36E8.1  | C36E8.1  | 0.083883366106452   |             |
| AGIWUR1345;AGIWUR21250;AGIWUR23164                                   |    |     |         |         |                |          |          |                     |             |
| N2                                                                   | HS | III | 4006142 | 4009960 | WBGene00007982 | pxd-1    | C36E8.3  | -0.0638339344452552 | AGIWUR29639 |
| N2                                                                   | HS | III | 4012336 | 4015763 | WBGene00007983 | C36E8.4  | C36E8.4  | 0.075608577675883   | AGIWUR41273 |
| N2                                                                   | HS | III | 4015769 | 4017643 | WBGene00006537 | tbb-2    | C36E8.5  | 0.123214515517143   |             |
| AGIWUR668;AGIWUR1222;AGIWUR16069;AGIWUR18887;AGIWUR19179;AGIWUR42288 |    |     |         |         |                |          |          |                     |             |
| N2                                                                   | HS | III | 4020037 | 4021867 | WBGene00011367 | snpc-3.4 | T02C12.2 | 0.144439936527938   |             |
| AGIWUR24584                                                          |    |     |         |         |                |          |          |                     |             |
| N2                                                                   | HS | III | 4022166 | 4025658 | WBGene00011368 | tftc-5   | T02C12.3 | 0.100343331453466   |             |
| AGIWUR29547                                                          |    |     |         |         |                |          |          |                     |             |
| N2                                                                   | HS | III | 4029115 | 4036840 | WBGene00002038 | hum-5    | T02C12.1 | 0.056116344888796   |             |
| AGIWUR9502                                                           |    |     |         |         |                |          |          |                     |             |
| N2                                                                   | HS | III | 4052807 | 4057976 | WBGene00004322 | rcq-5    | E03A3.2  | 0.287026955814724   |             |
| AGIWUR3697;AGIWUR26154;AGIWUR31769                                   |    |     |         |         |                |          |          |                     |             |
| N2                                                                   | HS | III | 4058272 | 4058743 | WBGene00001943 | his-69   | E03A3.3  | -0.208636161043     | AGIWUR40118 |

|                                                                                                                                                                      |    |     |         |         |                |         |           |                     |                     |
|----------------------------------------------------------------------------------------------------------------------------------------------------------------------|----|-----|---------|---------|----------------|---------|-----------|---------------------|---------------------|
| N2                                                                                                                                                                   | HS | III | 4059647 | 4060172 | WBGene00001944 | his-70  | E03A3.4   | 0.0724104221048965  | AGIWUR14280         |
| N2                                                                                                                                                                   | HS | III | 4060591 | 4062822 | WBGene00008465 | E03A3.5 | E03A3.5   | 0.376548240947281   | AGIWUR14656         |
| N2                                                                                                                                                                   | HS | III | 4066717 | 4082794 | WBGene00006811 | unc-79  | E03A3.6   | -0.0542126249194519 |                     |
| AGIWUR4423;AGIWUR5142;AGIWUR15798;AGIWUR15963;AGIWUR18293;AGIWUR20493;AGIWUR28967;AGIWUR39605;AGIWUR41832                                                            |    |     |         |         |                |         |           |                     |                     |
| N2                                                                                                                                                                   | HS | III | 4084003 | 4086636 | WBGene00002202 | kin-19  | C03C10.1  | -0.186338398154728  |                     |
| AGIWUR1828;AGIWUR5712;AGIWUR8099;AGIWUR15304;AGIWUR16042;AGIWUR21790;AGIWUR22763;AGIWUR30118;AGIWUR32074;AGIWUR33100;AGIWUR34225;AGIWUR34996;AGIWUR37313;AGIWUR37347 |    |     |         |         |                |         |           |                     |                     |
| N2                                                                                                                                                                   | HS | III | 4090291 | 4092120 | WBGene00007271 |         | C03C10.5  | C03C10.5            | -0.221834469921442  |
| AGIWUR25475                                                                                                                                                          |    |     |         |         |                |         |           |                     |                     |
| N2                                                                                                                                                                   | HS | III | 4091126 | 4093311 | WBGene00007269 |         | C03C10.2  | C03C10.2            | 0.250066012064501   |
| AGIWUR111                                                                                                                                                            |    |     |         |         |                |         |           |                     |                     |
| N2                                                                                                                                                                   | HS | III | 4093306 | 4094921 | WBGene00004392 | rnr-2   | C03C10.3  | -0.12743265387108   |                     |
| AGIWUR10602;AGIWUR20109;AGIWUR25130;AGIWUR33669;AGIWUR38097;AGIWUR44770                                                                                              |    |     |         |         |                |         |           |                     |                     |
| N2                                                                                                                                                                   | HS | III | 4096045 | 4096915 | WBGene00007273 |         | C03C10.7  | C03C10.7            | -0.236018727577308  |
| AGIWUR44164                                                                                                                                                          |    |     |         |         |                |         |           |                     |                     |
| N2                                                                                                                                                                   | HS | III | 4096896 | 4098190 | WBGene00007270 | rei-1   | C03C10.4  | 0.0198966110693419  |                     |
| AGIWUR20043                                                                                                                                                          |    |     |         |         |                |         |           |                     |                     |
| N2                                                                                                                                                                   | HS | III | 4115226 | 4147255 | WBGene00006830 | unc-103 | C30D11.1  | -0.0653309790750933 |                     |
| AGIWUR8148;AGIWUR9828;AGIWUR16874;AGIWUR24520;AGIWUR31702;AGIWUR35136;AGIWUR35765;AGIWUR38831;AGIWUR41941                                                            |    |     |         |         |                |         |           |                     |                     |
| N2                                                                                                                                                                   | HS | III | 4147425 | 4151598 | WBGene00007631 | wht-3   | C16C10.12 | 0.410104536539333   |                     |
| AGIWUR39934                                                                                                                                                          |    |     |         |         |                |         |           |                     |                     |
| N2                                                                                                                                                                   | HS | III | 4152054 | 4152915 | WBGene00007630 | har-1   | C16C10.11 | 0.118861477215366   |                     |
| AGIWUR2630;AGIWUR3696;AGIWUR4247;AGIWUR8756;AGIWUR24873;AGIWUR36702                                                                                                  |    |     |         |         |                |         |           |                     |                     |
| N2                                                                                                                                                                   | HS | III | 4153599 | 4154650 | WBGene00006448 | glod-4  | C16C10.10 | 0.203124651643542   |                     |
| AGIWUR16289                                                                                                                                                          |    |     |         |         |                |         |           |                     |                     |
| N2                                                                                                                                                                   | HS | III | 4155388 | 4157394 | WBGene00007629 |         | C16C10.9  | C16C10.9            | 0.0972158396287881  |
| AGIWUR38186                                                                                                                                                          |    |     |         |         |                |         |           |                     |                     |
| N2                                                                                                                                                                   | HS | III | 4161951 | 4164171 | WBGene00007628 |         | C16C10.8  | C16C10.8            | 0.258176907993608   |
| AGIWUR15159                                                                                                                                                          |    |     |         |         |                |         |           |                     |                     |
| N2                                                                                                                                                                   | HS | III | 4164275 | 4166845 | WBGene00004381 | rnf-5   | C16C10.7  | -0.232854897093503  |                     |
| AGIWUR10393                                                                                                                                                          |    |     |         |         |                |         |           |                     |                     |
| N2                                                                                                                                                                   | HS | III | 4166944 | 4168765 | WBGene00007627 | ccdc-55 | C16C10.6  | 0.0185455678647148  |                     |
| AGIWUR21267                                                                                                                                                          |    |     |         |         |                |         |           |                     |                     |
| N2                                                                                                                                                                   | HS | III | 4168797 | 4170949 | WBGene00007626 | rnf-121 | C16C10.5  | 0.0963156565293044  |                     |
| AGIWUR2199                                                                                                                                                           |    |     |         |         |                |         |           |                     |                     |
| N2                                                                                                                                                                   | HS | III | 4171336 | 4172223 | WBGene00007625 |         | C16C10.4  | C16C10.4            | 0.00631810497646867 |
| AGIWUR17931                                                                                                                                                          |    |     |         |         |                |         |           |                     |                     |
| N2                                                                                                                                                                   | HS | III | 4172337 | 4176159 | WBGene00007624 | hrde-1  | C16C10.3  | -0.207889920468164  |                     |
| AGIWUR20823                                                                                                                                                          |    |     |         |         |                |         |           |                     |                     |

|                                                                        |    |     |         |         |                |           |           |                     |             |
|------------------------------------------------------------------------|----|-----|---------|---------|----------------|-----------|-----------|---------------------|-------------|
| N2                                                                     | HS | III | 4176678 | 4177578 | WBGene00007632 | C16C10.13 | C16C10.13 | -0.109046900640168  |             |
| AGIWUR1567                                                             |    |     |         |         |                |           |           |                     |             |
| N2                                                                     | HS | III | 4177532 | 4178664 | WBGene00007623 | C16C10.2  | C16C10.2  | 0.135860571490538   |             |
| AGIWUR10585;AGIWUR12996;AGIWUR21393;AGIWUR27638;AGIWUR30103            |    |     |         |         |                |           |           |                     |             |
| N2                                                                     | HS | III | 4178783 | 4181438 | WBGene00007622 | C16C10.1  | C16C10.1  | 0.0491868277207601  |             |
| AGIWUR31291                                                            |    |     |         |         |                |           |           |                     |             |
| N2                                                                     | HS | III | 4181543 | 4186825 | WBGene00003073 | lars-1    | R74.1     | 0.303369898058877   | AGIWUR30809 |
| N2                                                                     | HS | III | 4188160 | 4189285 | WBGene00011278 | R74.2     | R74.2     | 0.149406574711799   |             |
| AGIWUR27575;AGIWUR27987;AGIWUR31182;AGIWUR31227;AGIWUR43478            |    |     |         |         |                |           |           |                     |             |
| N2                                                                     | HS | III | 4189380 | 4190341 | WBGene00206525 | R74.10    | R74.10    | -0.0892607249783133 | AGIWUR44068 |
| N2                                                                     | HS | III | 4191141 | 4193427 | WBGene00001034 | dnj-16    | R74.4     | 0.103214015088704   |             |
| AGIWUR19228;AGIWUR30349                                                |    |     |         |         |                |           |           |                     |             |
| N2                                                                     | HS | III | 4193809 | 4195358 | WBGene00006959 | xbp-1     | R74.3     | -0.27772932103996   |             |
| AGIWUR16166;AGIWUR22379;AGIWUR37406                                    |    |     |         |         |                |           |           |                     |             |
| N2                                                                     | HS | III | 4197285 | 4202289 | WBGene00011279 | asd-1     | R74.5     | -0.0345436131740158 |             |
| AGIWUR33402;AGIWUR35999                                                |    |     |         |         |                |           |           |                     |             |
| N2                                                                     | HS | III | 4202253 | 4204269 | WBGene00011280 | R74.6     | R74.6     | 0.251797528925559   |             |
| AGIWUR1687;AGIWUR16800;AGIWUR35134                                     |    |     |         |         |                |           |           |                     |             |
| N2                                                                     | HS | III | 4204429 | 4205814 | WBGene00011281 | R74.7     | R74.7     | 0.417546623280836   | AGIWUR28021 |
| N2                                                                     | HS | III | 4206253 | 4208265 | WBGene00011282 | R74.8     | R74.8     | -0.0466918194041526 |             |
| AGIWUR5769;AGIWUR22059                                                 |    |     |         |         |                |           |           |                     |             |
| N2                                                                     | HS | III | 4210562 | 4216724 | WBGene00009647 | F43C1.1   | F43C1.1   | 0.0141102458944156  | AGIWUR35794 |
| N2                                                                     | HS | III | 4216764 | 4228108 | WBGene00003401 | mpk-1     | F43C1.2   | -0.12508645499488   |             |
| AGIWUR1958;AGIWUR9733;AGIWUR14898;AGIWUR14905;AGIWUR17406;AGIWUR40763  |    |     |         |         |                |           |           |                     |             |
| N2                                                                     | HS | III | 4229141 | 4230427 | WBGene00009649 | F43C1.5   | F43C1.5   | 0.0302568436251249  | AGIWUR1306  |
| N2                                                                     | HS | III | 4230436 | 4233219 | WBGene00003619 | nhr-20    | F43C1.4   | -0.0645949071289085 | AGIWUR42423 |
| N2                                                                     | HS | III | 4241477 | 4242593 | WBGene00023423 | F43C1.7   | F43C1.7   | 0.404169247046451   |             |
| AGIWUR8452;AGIWUR19266;AGIWUR33069                                     |    |     |         |         |                |           |           |                     |             |
| N2                                                                     | HS | III | 4242672 | 4243561 | WBGene00023422 | mrpl-21   | F43C1.6   | 0.202811194309046   | AGIWUR5851  |
| N2                                                                     | HS | III | 4243674 | 4244385 | WBGene00009648 | zhit-2    | F43C1.3   | 0.0349972453156178  |             |
| AGIWUR3825;AGIWUR22128;AGIWUR36936;AGIWUR44159                         |    |     |         |         |                |           |           |                     |             |
| N2                                                                     | HS | III | 4244858 | 4247671 | WBGene00012858 | Y44F5A.1  | Y44F5A.1  | 0.284284668042078   |             |
| AGIWUR13909                                                            |    |     |         |         |                |           |           |                     |             |
| N2                                                                     | HS | III | 4248155 | 4263048 | WBGene00011604 | T08A11.1  | T08A11.1  | -0.112014461208957  |             |
| AGIWUR8299;AGIWUR14489;AGIWUR20691;AGIWUR32732;AGIWUR33366;AGIWUR37156 |    |     |         |         |                |           |           |                     |             |
| N2                                                                     | HS | III | 4263785 | 4269270 | WBGene00011605 | sftb-1    | T08A11.2  | -0.0485469540621803 |             |
| AGIWUR1553;AGIWUR11891;AGIWUR19820;AGIWUR25548                         |    |     |         |         |                |           |           |                     |             |
| N2                                                                     | HS | III | 4269743 | 4272506 | WBGene00011198 | R10E4.1   | R10E4.1   | 0.0485834549911441  |             |
| AGIWUR7076;AGIWUR9157;AGIWUR18471                                      |    |     |         |         |                |           |           |                     |             |

|                                                                        |    |     |         |         |                |          |          |                     |             |
|------------------------------------------------------------------------|----|-----|---------|---------|----------------|----------|----------|---------------------|-------------|
| N2                                                                     | HS | III | 4276266 | 4280217 | WBGene00006331 | sup-26   | R10E4.2  | -0.0967873516052791 |             |
| AGIWUR6823;AGIWUR16442;AGIWUR16959;AGIWUR20757;AGIWUR24961;AGIWUR41251 |    |     |         |         |                |          |          |                     |             |
| N2                                                                     | HS | III | 4285861 | 4287472 | WBGene00011200 | R10E4.3  | R10E4.3  | -0.115593906763516  | AGIWUR36049 |
| N2                                                                     | HS | III | 4288264 | 4291283 | WBGene00003157 | mcm-5    | R10E4.4  | -0.120640718396244  |             |
| AGIWUR11433;AGIWUR14883;AGIWUR23176;AGIWUR25320;AGIWUR33448            |    |     |         |         |                |          |          |                     |             |
| N2                                                                     | HS | III | 4291543 | 4293413 | WBGene00011201 | nth-1    | R10E4.5  | 0.148277633757811   | AGIWUR25315 |
| N2                                                                     | HS | III | 4293408 | 4295142 | WBGene00011202 | R10E4.6  | R10E4.6  | 0.280431631440953   | AGIWUR16345 |
| N2                                                                     | HS | III | 4295224 | 4296599 | WBGene00011203 | R10E4.7  | R10E4.7  | -0.102801647351287  | AGIWUR34301 |
| N2                                                                     | HS | III | 4297239 | 4301039 | WBGene00011206 | R10E4.11 | R10E4.11 | 0.0981654770902196  |             |
| AGIWUR3790                                                             |    |     |         |         |                |          |          |                     |             |
| N2                                                                     | HS | III | 4301620 | 4302393 | WBGene00011205 | R10E4.9  | R10E4.9  | 0.0642843495007543  | AGIWUR33427 |
| N2                                                                     | HS | III | 4303096 | 4313128 | WBGene00001352 | evl-14   | H38K22.1 | 0.0372869012804316  |             |
| AGIWUR33989                                                            |    |     |         |         |                |          |          |                     |             |
| N2                                                                     | HS | III | 4313927 | 4317608 | WBGene00010428 | dcn-1    | H38K22.2 | -0.075175332520276  |             |
| AGIWUR30845                                                            |    |     |         |         |                |          |          |                     |             |
| N2                                                                     | HS | III | 4317702 | 4320341 | WBGene00006478 | tag-131  | H38K22.3 | -0.0949391532434802 |             |
| AGIWUR20634                                                            |    |     |         |         |                |          |          |                     |             |
| N2                                                                     | HS | III | 4320389 | 4321348 | WBGene00044911 | H38K22.6 | H38K22.6 | 0.0595606525324079  |             |
| AGIWUR13317;AGIWUR17809;AGIWUR26894;AGIWUR40933;AGIWUR41799            |    |     |         |         |                |          |          |                     |             |
| N2                                                                     | HS | III | 4321748 | 4322867 | WBGene00044912 | H38K22.7 | H38K22.7 | -0.178355321961478  |             |
| AGIWUR917;AGIWUR9416;AGIWUR19948;AGIWUR20893;AGIWUR30626               |    |     |         |         |                |          |          |                     |             |
| N2                                                                     | HS | III | 4324280 | 4331227 | WBGene00001631 | gly-6    | H38K22.5 | 0.0195384743127089  |             |
| AGIWUR11179;AGIWUR26035;AGIWUR27415;AGIWUR29155;AGIWUR39994            |    |     |         |         |                |          |          |                     |             |
| N2                                                                     | HS | III | 4332996 | 4340464 | WBGene00007135 | cdk-12   | B0285.1  | -0.207644606342017  | AGIWUR15012 |
| N2                                                                     | HS | III | 4341983 | 4343336 | WBGene00007136 | B0285.3  | B0285.3  | 0.0402998517283901  | AGIWUR31964 |
| N2                                                                     | HS | III | 4343446 | 4345366 | WBGene00007137 | B0285.4  | B0285.4  | -0.272305637691147  | AGIWUR9788  |
| N2                                                                     | HS | III | 4345339 | 4350079 | WBGene00002003 | hse-5    | B0285.5  | -0.0214362826001597 | AGIWUR25929 |
| N2                                                                     | HS | III | 4352246 | 4355888 | WBGene00007138 | B0285.6  | B0285.6  | 0.158160795991598   | AGIWUR18506 |
| N2                                                                     | HS | III | 4356539 | 4364974 | WBGene00007139 | mnp-1    | B0285.7  | -0.0721653505979223 | AGIWUR19898 |
| N2                                                                     | HS | III | 4365285 | 4367469 | WBGene00000511 | ckb-1    | B0285.8  | 0.34780874277925    | AGIWUR25566 |
| N2                                                                     | HS | III | 4367832 | 4370160 | WBGene00000512 | ckb-2    | B0285.9  | -0.336191435121252  | AGIWUR19613 |
| N2                                                                     | HS | III | 4370885 | 4372820 | WBGene00000513 | ckb-3    | B0285.10 | -0.220809945142244  |             |
| AGIWUR12272                                                            |    |     |         |         |                |          |          |                     |             |
| N2                                                                     | HS | III | 4373179 | 4375323 | WBGene00045188 | B0284.5  | B0284.5  | 0.171136896618997   |             |
| AGIWUR6647;AGIWUR44597                                                 |    |     |         |         |                |          |          |                     |             |
| N2                                                                     | HS | III | 4376503 | 4379200 | WBGene00007131 | pals-26  | B0284.1  | 0.784310811740502   |             |
| AGIWUR659;AGIWUR34401                                                  |    |     |         |         |                |          |          |                     |             |
| N2                                                                     | HS | III | 4379368 | 4381041 | WBGene00007133 | B0284.3  | B0284.3  | 0.225906420106853   | AGIWUR22476 |
| N2                                                                     | HS | III | 4381739 | 4384141 | WBGene00007132 | pals-27  | B0284.2  | 1.19301382206632    | AGIWUR2667  |

|                                                                                                                      |    |     |         |         |                |          |          |                      |             |
|----------------------------------------------------------------------------------------------------------------------|----|-----|---------|---------|----------------|----------|----------|----------------------|-------------|
| N2                                                                                                                   | HS | III | 4384787 | 4387757 | WBGene00007134 | pals-28  | B0284.4  | 1.0190652889076      | AGIWUR31960 |
| N2                                                                                                                   | HS | III | 4394796 | 4396617 | WBGene00011112 | R07E5.4  | R07E5.4  | 0.116884900354012    | AGIWUR14612 |
| N2                                                                                                                   | HS | III | 4397415 | 4398576 | WBGene00011113 | R07E5.5  | R07E5.5  | 0.123837594443561    | AGIWUR38210 |
| N2                                                                                                                   | HS | III | 4398763 | 4400942 | WBGene00011114 | R07E5.6  | R07E5.6  | -0.159895043111938   | AGIWUR35081 |
| N2                                                                                                                   | HS | III | 4401442 | 4402505 | WBGene00011120 | R07E5.15 | R07E5.15 | -0.256554543311404   |             |
| AGIWUR37803                                                                                                          |    |     |         |         |                |          |          |                      |             |
| N2                                                                                                                   | HS | III | 4402595 | 4404436 | WBGene00011121 | R07E5.17 | R07E5.17 |                      |             |
| -0.00412241300541316 AGIWUR2552;AGIWUR38683                                                                          |    |     |         |         |                |          |          |                      |             |
| N2                                                                                                                   | HS | III | 4404786 | 4406285 | WBGene00011111 | snfc-5   | R07E5.3  | -0.0679846160200803  |             |
| AGIWUR11492;AGIWUR14649;AGIWUR22515;AGIWUR25831;AGIWUR28126;AGIWUR28837;AGIWUR29804;AGIWUR32754;AGIWUR35093          |    |     |         |         |                |          |          |                      |             |
| N2                                                                                                                   | HS | III | 4406286 | 4407326 | WBGene00004387 | rnp-4    | R07E5.14 | 0.114311361272271    |             |
| AGIWUR11861;AGIWUR14460;AGIWUR19160;AGIWUR24049;AGIWUR25412;AGIWUR25790;AGIWUR27926                                  |    |     |         |         |                |          |          |                      |             |
| N2                                                                                                                   | HS | III | 4407444 | 4408437 | WBGene00011110 | prdx-3   | R07E5.2  | -0.00848360830013561 |             |
| AGIWUR25524;AGIWUR35814;AGIWUR37579;AGIWUR41024                                                                      |    |     |         |         |                |          |          |                      |             |
| N2                                                                                                                   | HS | III | 4408551 | 4412149 | WBGene00011109 | R07E5.1  | R07E5.1  | 0.296327076738963    | AGIWUR8228  |
| N2                                                                                                                   | HS | III | 4413457 | 4414748 | WBGene00011119 | mpc-1    | R07E5.13 | 0.140586648100006    |             |
| AGIWUR5754;AGIWUR9776;AGIWUR19771;AGIWUR33099;AGIWUR40240                                                            |    |     |         |         |                |          |          |                      |             |
| N2                                                                                                                   | HS | III | 4414732 | 4415235 | WBGene00011117 | R07E5.11 | R07E5.11 | 0.154014549499275    |             |
| AGIWUR32637                                                                                                          |    |     |         |         |                |          |          |                      |             |
| N2                                                                                                                   | HS | III | 4415520 | 4418058 | WBGene00011116 | pdcd-2   | R07E5.10 | -0.0352671320586264  |             |
| AGIWUR4236;AGIWUR6736;AGIWUR6974;AGIWUR15557;AGIWUR19842;AGIWUR20601;AGIWUR20807;AGIWUR36005;AGIWUR38031;AGIWUR38783 |    |     |         |         |                |          |          |                      |             |
| N2                                                                                                                   | HS | III | 4418343 | 4419167 | WBGene00011115 | R07E5.7  | R07E5.7  | -0.0236583112657485  |             |
| AGIWUR1971;AGIWUR7078;AGIWUR8963;AGIWUR28166;AGIWUR32271                                                             |    |     |         |         |                |          |          |                      |             |
| N2                                                                                                                   | HS | III | 4419848 | 4423368 | WBGene00000520 | cku-80   | R07E5.8  | 0.181823879163666    | AGIWUR29231 |
| N2                                                                                                                   | HS | III | 4423711 | 4429499 | WBGene00007791 | C28A5.6  | C28A5.6  | 0.215860713825716    | AGIWUR37808 |
| N2                                                                                                                   | HS | III | 4442081 | 4444237 | WBGene00003590 | nex-3    | C28A5.3  | 0.381940664415694    | AGIWUR30120 |
| N2                                                                                                                   | HS | III | 4446637 | 4449943 | WBGene00000463 | ceh-43   | C28A5.4  | -0.158781324399152   | AGIWUR11902 |
| N2                                                                                                                   | HS | III | 4462833 | 4467377 | WBGene00003577 | ndg-4    | F56F3.2  | 0.088689540286671    |             |
| AGIWUR18135;AGIWUR26646                                                                                              |    |     |         |         |                |          |          |                      |             |
| N2                                                                                                                   | HS | III | 4468878 | 4470808 | WBGene00010155 | F56F3.4  | F56F3.4  | -0.0295849175998608  | AGIWUR33529 |
| N2                                                                                                                   | HS | III | 4471407 | 4475150 | WBGene00004132 | ifet-1   | F56F3.1  | -0.219690040570207   |             |
| AGIWUR13827;AGIWUR40868;AGIWUR42975                                                                                  |    |     |         |         |                |          |          |                      |             |
| N2                                                                                                                   | HS | III | 4475918 | 4476887 | WBGene00004470 | rps-1    | F56F3.5  | 0.00233581015068474  |             |
| AGIWUR7578;AGIWUR16537;AGIWUR18534;AGIWUR24392;AGIWUR34321;AGIWUR36331                                               |    |     |         |         |                |          |          |                      |             |
| N2                                                                                                                   | HS | III | 4476888 | 4477583 | WBGene00002100 | ins-17   | F56F3.6  | -0.0538869110020759  |             |
| AGIWUR7314;AGIWUR9236;AGIWUR11108;AGIWUR13900;AGIWUR16963;AGIWUR24675                                                |    |     |         |         |                |          |          |                      |             |
| N2                                                                                                                   | HS | III | 4489359 | 4491392 | WBGene00000465 | cpg-1    | C07G2.1  | -0.0515259730159379  |             |
| AGIWUR3126;AGIWUR4450;AGIWUR6962;AGIWUR9701;AGIWUR25056;AGIWUR28301;AGIWUR33939                                      |    |     |         |         |                |          |          |                      |             |

|                                                                                                                                   |    |     |         |         |                |           |           |                      |             |
|-----------------------------------------------------------------------------------------------------------------------------------|----|-----|---------|---------|----------------|-----------|-----------|----------------------|-------------|
| N2                                                                                                                                | HS | III | 4491627 | 4499043 | WBGene00000223 | atf-7     | C07G2.2   | -0.138300416569969   |             |
| AGIWUR4927;AGIWUR5314;AGIWUR14974;AGIWUR20820;AGIWUR24837;AGIWUR29854;AGIWUR31507;AGIWUR34947;AGIWUR35619;AGIWUR37894;AGIWUR42736 |    |     |         |         |                |           |           |                      |             |
| N2                                                                                                                                | HS | III | 4499191 | 4508114 | WBGene00000380 | cct-5     | C07G2.3   | -0.00594665812074613 |             |
| AGIWUR3833;AGIWUR4408;AGIWUR31324;AGIWUR40854                                                                                     |    |     |         |         |                |           |           |                      |             |
| N2                                                                                                                                | HS | III | 4508855 | 4512162 | WBGene00009115 | F25F2.1   | F25F2.1   | 0.0577185869250059   | AGIWUR307   |
| N2                                                                                                                                | HS | III | 4520363 | 4536991 | WBGene00000396 | cdh-4     | F25F2.2   | -0.0943531686133916  | AGIWUR20794 |
| N2                                                                                                                                | HS | III | 4537277 | 4540644 | WBGene00010904 | ugt-62    | M88.1     | 0.476926642397919    | AGIWUR13910 |
| N2                                                                                                                                | HS | III | 4541326 | 4542452 | WBGene00010905 | mrps-34   | M88.2     | 0.17446822494982     | AGIWUR38242 |
| N2                                                                                                                                | HS | III | 4542881 | 4546025 | WBGene00010909 | cisd-3.1  | M88.7     | 0.000520063755214295 |             |
| AGIWUR21078                                                                                                                       |    |     |         |         |                |           |           |                      |             |
| N2                                                                                                                                | HS | III | 4549063 | 4551567 | WBGene00010907 | M88.4     | M88.4     | -0.214995782614988   | AGIWUR44096 |
| N2                                                                                                                                | HS | III | 4553618 | 4560350 | WBGene00010908 | zbp-1     | M88.5     | -0.103846236859667   |             |
| AGIWUR6561;AGIWUR6686;AGIWUR36835                                                                                                 |    |     |         |         |                |           |           |                      |             |
| N2                                                                                                                                | HS | III | 4562738 | 4566276 | WBGene00003915 | pan-1     | M88.6     | 0.0995060197084214   | AGIWUR26141 |
| N2                                                                                                                                | HS | III | 4566279 | 4568144 | WBGene00009439 | mlcd-1    | F35G12.1  | 0.00905538287229746  |             |
| AGIWUR2770;AGIWUR2817;AGIWUR13489;AGIWUR27496;AGIWUR33025;AGIWUR39632                                                             |    |     |         |         |                |           |           |                      |             |
| N2                                                                                                                                | HS | III | 4567325 | 4571835 | WBGene00009440 | idhg-1    | F35G12.2  | -0.0933795639248221  |             |
| AGIWUR3341;AGIWUR9882;AGIWUR23281                                                                                                 |    |     |         |         |                |           |           |                      |             |
| N2                                                                                                                                | HS | III | 4571753 | 4578437 | WBGene00004762 | sel-5     | F35G12.3  | 0.109611198302376    |             |
| AGIWUR4191;AGIWUR10977;AGIWUR11373;AGIWUR15605;AGIWUR17298;AGIWUR22658;AGIWUR30054;AGIWUR38843                                    |    |     |         |         |                |           |           |                      |             |
| N2                                                                                                                                | HS | III | 4578855 | 4581696 | WBGene00009441 | wdr-48    | F35G12.4  | -0.121333434482577   |             |
| AGIWUR16083;AGIWUR31303;AGIWUR33315                                                                                               |    |     |         |         |                |           |           |                      |             |
| N2                                                                                                                                | HS | III | 4581795 | 4583893 | WBGene00009445 | F35G12.12 | F35G12.12 | 0.11007307156498     |             |
| AGIWUR19409                                                                                                                       |    |     |         |         |                |           |           |                      |             |
| N2                                                                                                                                | HS | III | 4584583 | 4586753 | WBGene00009442 | F35G12.5  | F35G12.5  | 0.0420983671672701   |             |
| AGIWUR40495                                                                                                                       |    |     |         |         |                |           |           |                      |             |
| N2                                                                                                                                | HS | III | 4586628 | 4587330 | WBGene00009443 | F35G12.7  | F35G12.7  | 0.0149481768348458   |             |
| AGIWUR3544                                                                                                                        |    |     |         |         |                |           |           |                      |             |
| N2                                                                                                                                | HS | III | 4587415 | 4593124 | WBGene00004874 | smc-4     | F35G12.8  | 0.0144999745864958   |             |
| AGIWUR39484                                                                                                                       |    |     |         |         |                |           |           |                      |             |
| N2                                                                                                                                | HS | III | 4593176 | 4593832 | WBGene00009444 | F35G12.11 | F35G12.11 | 0.0708835652358193   |             |
| AGIWUR25108                                                                                                                       |    |     |         |         |                |           |           |                      |             |
| N2                                                                                                                                | HS | III | 4593769 | 4594426 | WBGene00000145 | apc-11    | F35G12.9  | -0.118304387662063   |             |
| AGIWUR11099                                                                                                                       |    |     |         |         |                |           |           |                      |             |
| N2                                                                                                                                | HS | III | 4594543 | 4595944 | WBGene00000206 | asb-1     | F35G12.10 | 0.162962137909194    |             |
| AGIWUR14757;AGIWUR15446;AGIWUR18553                                                                                               |    |     |         |         |                |           |           |                      |             |
| N2                                                                                                                                | HS | III | 4596134 | 4612384 | WBGene00004760 | sel-2     | F10F2.1   | -0.0855033116124488  | AGIWUR7358  |
| N2                                                                                                                                | HS | III | 4616479 | 4618893 | WBGene00008655 | lips-3    | F10F2.3   | -0.132149615690659   |             |



AGIWUR2515;AGIWUR12349;AGIWUR13166;AGIWUR21826;AGIWUR35962;AGIWUR38897  
 N2 HS III 4618853 4643305 WBGene00008654 F10F2.2 F10F2.2 0.219239785343587 AGIWUR33800  
 N2 HS III 4643999 4646346 WBGene00004118 pqn-29 F10F2.9 0.122440386790972 AGIWUR32867  
 N2 HS III 4646507 4647854 WBGene00011957 T23F11.6 T23F11.6 0.0830681899230825  
 AGIWUR29047  
 N2 HS III 4648591 4653929 WBGene00011953 ppm-2 T23F11.1 0.0886347321174057  
 AGIWUR2592;AGIWUR7677;AGIWUR16510;AGIWUR23088;AGIWUR31765  
 N2 HS III 4658739 4662697 WBGene00011955 cdka-1 T23F11.3 -0.0113715673722199  
 AGIWUR5542;AGIWUR14846;AGIWUR38432;AGIWUR39512  
 N2 HS III 4663185 4665368 WBGene00011956 T23F11.4 T23F11.4 -0.0341504675859401  
 AGIWUR1001  
 N2 HS III 4672249 4674207 WBGene00005170 srg-13 T23F11.5 -0.243166397792947  
 AGIWUR40917  
 N2 HS III 4677766 4679663 WBGene00005168 srg-10 T04A8.1 0.189091326838526 AGIWUR27750  
 N2 HS III 4680013 4681562 WBGene00005169 srg-11 T04A8.2 -0.0653099246078268 AGIWUR13241  
 N2 HS III 4682774 4685533 WBGene00011405 clec-155 T04A8.3 -0.205887373076123  
 AGIWUR11086  
 N2 HS III 4686088 4688210 WBGene00044078 tag-243 T04A8.4 0.0163020276834747  
 AGIWUR18509;AGIWUR24487  
 N2 HS III 4689280 4692166 WBGene00011407 ppat-1 T04A8.5 0.282368591019313 AGIWUR40473  
 N2 HS III 4692098 4693303 WBGene00011408 T04A8.6 T04A8.6 0.0199863169640757 AGIWUR18609  
 N2 HS III 4694003 4695270 WBGene00011410 T04A8.8 T04A8.8 -0.175748277052717 AGIWUR12099  
 N2 HS III 4695361 4698010 WBGene00011409 T04A8.7 T04A8.7 -0.142671765198691  
 AGIWUR21833;AGIWUR25655;AGIWUR27695;AGIWUR37122  
 N2 HS III 4697987 4699453 WBGene00001036 dnj-18 T04A8.9 0.0868140197049243  
 AGIWUR2611;AGIWUR38656;AGIWUR41916  
 N2 HS III 4699407 4700224 WBGene00011411 sel-13 T04A8.10 0.0855692587722565  
 AGIWUR32048  
 N2 HS III 4700325 4704054 WBGene00000543 clp-2 T04A8.16 0.136399469496915  
 AGIWUR21921  
 N2 HS III 4704404 4705404 WBGene00011412 mrpl-16 T04A8.11 -0.0172873101496656  
 AGIWUR8495;AGIWUR22631;AGIWUR34099  
 N2 HS III 4705413 4706949 WBGene00007045 tag-189 T04A8.12 0.0481906811509027  
 AGIWUR964;AGIWUR10737;AGIWUR33930  
 N2 HS III 4709248 4712547 WBGene00119203 T04A8.18 T04A8.18 0.155859390681798  
 AGIWUR29768  
 N2 HS III 4712572 4715188 WBGene00011415 him-18 T04A8.15 0.187490822799845  
 AGIWUR14976  
 N2 HS III 4715293 4720670 WBGene00001259 emb-5 T04A8.14 -0.157523255263081

AGIWUR10332;AGIWUR10446;AGIWUR22030;AGIWUR23199;AGIWUR23677;AGIWUR30711;AGIWUR33433;AGIWUR34113;AGIWUR36496  
 N2 HS III 4722126 4730919 WBGene00000068 acy-1 F17C8.1 0.0591642889060289 AGIWUR11552  
 N2 HS III 4734356 4736065 WBGene00185014 F17C8.9 F17C8.9 0.132515132691664  
 AGIWUR14597;AGIWUR41893  
 N2 HS III 4736050 4737258 WBGene00008912 F17C8.7 F17C8.7 -0.193072047986318 AGIWUR19939  
 N2 HS III 4737589 4740075 WBGene00004311 ras-2 F17C8.4 0.318163257289899  
 AGIWUR2834;AGIWUR17837;AGIWUR26706;AGIWUR32802  
 N2 HS III 4748127 4749164 WBGene00000664 col-89 F17C8.2 0.187073921537593 AGIWUR18994  
 N2 HS III 4752998 4754083 WBGene00004469 rps-0 B0393.1 -0.0625044496636917  
 AGIWUR193;AGIWUR6226;AGIWUR6783  
 N2 HS III 4754432 4757017 WBGene00007167 rbg-3 B0393.2 -0.0715046944612538 AGIWUR3240  
 N2 HS III 4757201 4759728 WBGene00007168 B0393.3 B0393.3 -0.217416829123732 AGIWUR43498  
 N2 HS III 4759744 4763609 WBGene00007169 B0393.4 B0393.4 0.157180621021205 AGIWUR6601  
 N2 HS III 4765833 4776342 WBGene00007170 B0393.5 B0393.5 0.151780503513828 AGIWUR34080  
 N2 HS III 4776264 4778065 WBGene00007172 B0393.7 B0393.7 0.023877908335006 AGIWUR36678  
 N2 HS III 4778390 4780157 WBGene00044636 B0393.9 B0393.9 0.110192502391374  
 AGIWUR1374;AGIWUR3283;AGIWUR40762  
 N2 HS III 4780130 4781987 WBGene00007171 B0393.6 B0393.6 -0.360456519827199 AGIWUR45184  
 N2 HS III 4786080 4792391 WBGene00003210 mel-28 C38D4.3 -0.0346245808073888 AGIWUR40516  
 N2 HS III 4793086 4795423 WBGene00008005 C38D4.4 C38D4.4 0.191067687870053 AGIWUR5766  
 N2 HS III 4796839 4802907 WBGene00008006 tag-325 C38D4.5 0.18734437375003 AGIWUR17735  
 N2 HS III 4803007 4804753 WBGene00008008 C38D4.9 C38D4.9 0.0954152562691881  
 AGIWUR4922;AGIWUR26328;AGIWUR39586  
 N2 HS III 4804708 4809489 WBGene00003912 pal-1 C38D4.6 -0.185985568946296  
 AGIWUR3503;AGIWUR8986;AGIWUR17483;AGIWUR25142;AGIWUR26070;AGIWUR26964;AGIWUR29813;AGIWUR34020  
 N2 HS III 4810031 4811162 WBGene00008007 C38D4.7 C38D4.7 0.11657160724295 AGIWUR275  
 N2 HS III 4813309 4814814 WBGene00000193 arl-6 C38D4.8 -0.166543395223375 AGIWUR6297  
 N2 HS III 4816040 4817078 WBGene00017804 F26A1.6 F26A1.6 -0.0206104015091348 AGIWUR20049  
 N2 HS III 4818042 4819073 WBGene00017803 F26A1.4 F26A1.4 0.148055990591518 AGIWUR21527  
 N2 HS III 4819328 4819943 WBGene00017805 F26A1.7 F26A1.7 -0.00515238566042875 AGIWUR34354  
 N2 HS III 4820670 4822226 WBGene00017806 F26A1.8 F26A1.8 0.279753514305623 AGIWUR25170  
 N2 HS III 4825345 4829509 WBGene00017807 F26A1.9 F26A1.9 0.508159135554461 AGIWUR16711  
 N2 HS III 4830010 4830349 WBGene00017808 nsdp-9 F26A1.10 0.0457818167762163  
 AGIWUR5361  
 N2 HS III 4837731 4839931 WBGene00270319 F26A1.19 F26A1.19 0.0861969975634604  
 AGIWUR745  
 N2 HS III 4840187 4841024 WBGene00044603 acbp-7 F26A1.15 0.187581452999423  
 AGIWUR8465;AGIWUR28608  
 N2 HS III 4841039 4842273 WBGene00017809 clec-156 F26A1.11 0.00503749291033628

|                                                 |    |     |         |         |                |           |                                         |
|-------------------------------------------------|----|-----|---------|---------|----------------|-----------|-----------------------------------------|
| AGIWUR40380                                     |    |     |         |         |                |           |                                         |
| N2                                              | HS | III | 4843493 | 4844410 | WBGene00017810 | clec-157  | F26A1.12 -0.261696439360823             |
| AGIWUR41337                                     |    |     |         |         |                |           |                                         |
| N2                                              | HS | III | 4844662 | 4846546 | WBGene00001437 | fkf-5     | F26A1.2 -0.148511731454985              |
| AGIWUR10841;AGIWUR35894;AGIWUR40674             |    |     |         |         |                |           |                                         |
| N2                                              | HS | III | 4847072 | 4848967 | WBGene00017811 | F26A1.13  | F26A1.13 0.0407210094040282             |
| AGIWUR9823;AGIWUR14986;AGIWUR25874              |    |     |         |         |                |           |                                         |
| N2                                              | HS | III | 4849266 | 4849850 | WBGene00017812 | F26A1.14  | F26A1.14 0.0213513803134795             |
| AGIWUR21644;AGIWUR25758;AGIWUR38856             |    |     |         |         |                |           |                                         |
| N2                                              | HS | III | 4850507 | 4851910 | WBGene00017801 | F26A1.1   | F26A1.1 -0.0638286530013641 AGIWUR13881 |
| N2                                              | HS | III | 4852313 | 4855177 | WBGene00000418 | ced-4     | C35D10.9 0.0434658832859576             |
| AGIWUR5354;AGIWUR5654;AGIWUR41670               |    |     |         |         |                |           |                                         |
| N2                                              | HS | III | 4855250 | 4856101 | WBGene00016445 | C35D10.8  | C35D10.8 -0.024894841324052             |
| AGIWUR5688                                      |    |     |         |         |                |           |                                         |
| N2                                              | HS | III | 4856193 | 4859240 | WBGene00016444 | C35D10.7  | C35D10.7 -0.0745366858429515            |
| AGIWUR24486;AGIWUR38743                         |    |     |         |         |                |           |                                         |
| N2                                              | HS | III | 4859339 | 4860772 | WBGene00016443 | C35D10.6  | C35D10.6 0.0426573253181779             |
| AGIWUR6719                                      |    |     |         |         |                |           |                                         |
| N2                                              | HS | III | 4860669 | 4861794 | WBGene00016446 | C35D10.10 | C35D10.10 0.139224703650781             |
| AGIWUR44106                                     |    |     |         |         |                |           |                                         |
| N2                                              | HS | III | 4862351 | 4863426 | WBGene00016442 | C35D10.5  | C35D10.5 0.0612615815355806             |
| AGIWUR10145;AGIWUR15024;AGIWUR19643;AGIWUR27288 |    |     |         |         |                |           |                                         |
| N2                                              | HS | III | 4863427 | 4866949 | WBGene00000767 | coq-8     | C35D10.4 0.0411119408393423             |
| AGIWUR31304;AGIWUR41201;AGIWUR43913             |    |     |         |         |                |           |                                         |
| N2                                              | HS | III | 4867062 | 4867469 | WBGene00016452 | C35D10.17 | C35D10.17 0.119487227333829             |
| AGIWUR26941                                     |    |     |         |         |                |           |                                         |
| N2                                              | HS | III | 4868333 | 4868769 | WBGene00016447 | msd-4     | C35D10.11 0.277098137595473             |
| AGIWUR19153                                     |    |     |         |         |                |           |                                         |
| N2                                              | HS | III | 4868921 | 4870106 | WBGene00016441 | C35D10.3  | C35D10.3 0.205827902713356              |
| AGIWUR25259                                     |    |     |         |         |                |           |                                         |
| N2                                              | HS | III | 4870762 | 4872046 | WBGene00016440 | gipc-1    | C35D10.2 -0.0390683756205252            |
| AGIWUR18831;AGIWUR36466                         |    |     |         |         |                |           |                                         |
| N2                                              | HS | III | 4872501 | 4874751 | WBGene00016448 | C35D10.12 | C35D10.12 0.162976593685162             |
| AGIWUR21860                                     |    |     |         |         |                |           |                                         |
| N2                                              | HS | III | 4877526 | 4878311 | WBGene00016449 | C35D10.13 | C35D10.13 -0.0643438048168843           |
| AGIWUR28892                                     |    |     |         |         |                |           |                                         |
| N2                                              | HS | III | 4878658 | 4879643 | WBGene00000204 | arx-6     | C35D10.16 0.0247280136271222            |
| AGIWUR41105                                     |    |     |         |         |                |           |                                         |
| N2                                              | HS | III | 4879745 | 4881497 | WBGene00016439 | C35D10.1  | C35D10.1 0.0356091812037782             |

AGIWUR11893;AGIWUR14564  
N2 HS III 4881909 4883606 WBGene00016450 clec-5 C35D10.14 0.563178740321874  
AGIWUR14533  
N2 HS III 4885697 4887442 WBGene00016451 clec-6 C35D10.15 0.161018035169075  
AGIWUR7022  
N2 HS III 4887921 4891252 WBGene00017827 F26F4.5 F26F4.5 0.158270924832832 AGIWUR19753  
N2 HS III 4891609 4893409 WBGene00017828 F26F4.6 F26F4.6 -0.0315985209751126  
AGIWUR3837;AGIWUR40615  
N2 HS III 4894647 4899085 WBGene00003598 nh1-2 F26F4.7 -0.193139297545207 AGIWUR5479  
N2 HS III 4900073 4903143 WBGene00017826 tag-340 F26F4.4 0.0777956695751882 AGIWUR3465  
N2 HS III 4903177 4903884 WBGene00017832 kbp-2 F26F4.13 0.0905380177571082  
AGIWUR33560  
N2 HS III 4903997 4905473 WBGene00005011 F26F4.8 F26F4.8 0.194927461223918 AGIWUR28628  
N2 HS III 4907217 4908968 WBGene00004400 rom-1 F26F4.3 0.192960523617518 AGIWUR39550  
N2 HS III 4908960 4910038 WBGene00017831 F26F4.12 F26F4.12 -0.0202158854892547  
AGIWUR21349;AGIWUR24383;AGIWUR27298;AGIWUR33398  
N2 HS III 4910475 4912521 WBGene00017829 F26F4.9 F26F4.9 0.0662125291058908  
AGIWUR42549;AGIWUR44256  
N2 HS III 4912207 4914133 WBGene00017825 cee-1 F26F4.1 0.0164922059932096  
AGIWUR2541;AGIWUR6238;AGIWUR9786;AGIWUR15199;AGIWUR42030  
N2 HS III 4914096 4917129 WBGene00004679 rars-1 F26F4.10 0.00394822823247054  
AGIWUR12;AGIWUR6520;AGIWUR9621;AGIWUR21567;AGIWUR22168;AGIWUR24027;AGIWUR30044;AGIWUR36014;AGIWUR36740  
N2 HS III 4917104 4918008 WBGene00017830 rpb-8 F26F4.11 -0.156589922559821  
AGIWUR18230;AGIWUR19441;AGIWUR25054;AGIWUR29048  
N2 HS III 4918277 4920319 WBGene00006735 ula-1 C26E6.8 0.10574143475065  
AGIWUR12372;AGIWUR16420;AGIWUR26326  
N2 HS III 4920442 4921747 WBGene00016144 mmab-1 C26E6.11 -0.312146309502076  
AGIWUR11339  
N2 HS III 4922446 4930204 WBGene00004782 set-2 C26E6.9 0.0429911934750988  
AGIWUR1720;AGIWUR9964;AGIWUR18640;AGIWUR33687;AGIWUR35092;AGIWUR36053  
N2 HS III 4930602 4932253 WBGene00016145 C26E6.12 C26E6.12 0.100047832637634  
AGIWUR1262  
N2 HS III 4932450 4934945 WBGene00016143 eri-9 C26E6.7 0.0307153885163967 AGIWUR36611  
N2 HS III 4935578 4937223 WBGene00016142 mrps-18C C26E6.6 -0.0496442298141719  
AGIWUR8152;AGIWUR10057;AGIWUR17312;AGIWUR26927;AGIWUR38877;AGIWUR40105  
N2 HS III 4937322 4939453 WBGene00001499 fsn-1 C26E6.5 0.15196352705067 AGIWUR21648  
N2 HS III 4939567 4944404 WBGene00016140 rpb-2 C26E6.4 -0.0194543844693271  
AGIWUR1292;AGIWUR7484;AGIWUR13354;AGIWUR26461;AGIWUR26734;AGIWUR28828;AGIWUR31075;AGIWUR31332;AGIWUR34633;AGIWUR36394;AGIWUR38499

|                                                                        |    |     |         |         |                |          |          |                      |             |
|------------------------------------------------------------------------|----|-----|---------|---------|----------------|----------|----------|----------------------|-------------|
| N2                                                                     | HS | III | 4944513 | 4947317 | WBGene00016139 | ntl-9    | C26E6.3  | -0.0141468324761718  |             |
| AGIWUR4765;AGIWUR6733;AGIWUR29362                                      |    |     |         |         |                |          |          |                      |             |
| N2                                                                     | HS | III | 4952124 | 4955171 | WBGene00016138 | flh-2    | C26E6.2  | -0.0492905998170472  |             |
| AGIWUR7622;AGIWUR8591;AGIWUR17173;AGIWUR26133;AGIWUR26422;AGIWUR33680  |    |     |         |         |                |          |          |                      |             |
| N2                                                                     | HS | III | 4956891 | 4957539 | WBGene00016137 | C26E6.1  | C26E6.1  | -0.00403339974940753 | AGIWUR6750  |
| N2                                                                     | HS | III | 4958329 | 4960305 | WBGene00016166 | C27F2.4  | C27F2.4  | 0.163632509135073    | AGIWUR5822  |
| N2                                                                     | HS | III | 4960390 | 4961715 | WBGene00016167 | vps-22   | C27F2.5  | -0.0482413085660216  |             |
| AGIWUR27289;AGIWUR30151;AGIWUR37552                                    |    |     |         |         |                |          |          |                      |             |
| N2                                                                     | HS | III | 4961817 | 4963092 | WBGene00043156 | C27F2.9  | C27F2.9  | -0.141049802075656   |             |
| AGIWUR5606;AGIWUR22616;AGIWUR34511;AGIWUR35346;AGIWUR35703;AGIWUR36189 |    |     |         |         |                |          |          |                      |             |
| N2                                                                     | HS | III | 4965571 | 4979729 | WBGene00003558 | nca-2    | C27F2.2  | 0.22248467122688     | AGIWUR38222 |
| N2                                                                     | HS | III | 4979796 | 4980418 | WBGene00016168 | C27F2.6  | C27F2.6  | 0.366382795675969    | AGIWUR5107  |
| N2                                                                     | HS | III | 4980644 | 4984474 | WBGene00016169 | C27F2.7  | C27F2.7  | -0.159483198616456   |             |
| AGIWUR3709;AGIWUR13500;AGIWUR26613;AGIWUR44036                         |    |     |         |         |                |          |          |                      |             |
| N2                                                                     | HS | III | 4985019 | 4986931 | WBGene00016171 | C27F2.10 | C27F2.10 | -0.216015557386598   |             |
| AGIWUR8510                                                             |    |     |         |         |                |          |          |                      |             |
| N2                                                                     | HS | III | 4987209 | 4991450 | WBGene00016165 | C27F2.1  | C27F2.1  | 0.0529735979201575   | AGIWUR8370  |
| N2                                                                     | HS | III | 4991439 | 4998161 | WBGene00016170 | C27F2.8  | C27F2.8  | -0.0221987746451617  |             |
| AGIWUR7004;AGIWUR15438;AGIWUR21077;AGIWUR22621;AGIWUR35360             |    |     |         |         |                |          |          |                      |             |
| N2                                                                     | HS | III | 4999379 | 5001336 | WBGene00020095 | R144.5   | R144.5   | -0.163595620777206   | AGIWUR12094 |
| N2                                                                     | HS | III | 5001297 | 5002331 | WBGene00020098 | R144.10  | R144.10  | 0.0934039423783712   | AGIWUR808   |
| N2                                                                     | HS | III | 5003197 | 5004721 | WBGene00020096 | R144.6   | R144.6   | -0.0886177117557025  | AGIWUR16813 |
| N2                                                                     | HS | III | 5004820 | 5006981 | WBGene00043060 | R144.12  | R144.12  | 0.317381782900325    | AGIWUR1049  |
| N2                                                                     | HS | III | 5007100 | 5008830 | WBGene00020099 | R144.11  | R144.11  | 0.27861665898978     | AGIWUR11854 |
| N2                                                                     | HS | III | 5008933 | 5017860 | WBGene00020097 | larp-1   | R144.7   | -0.21828682620502    |             |
| AGIWUR5277;AGIWUR8701;AGIWUR34641                                      |    |     |         |         |                |          |          |                      |             |
| N2                                                                     | HS | III | 5018645 | 5021118 | WBGene00020094 | wip-1    | R144.4   | -0.516273059063078   |             |
| AGIWUR10954;AGIWUR22155;AGIWUR23908                                    |    |     |         |         |                |          |          |                      |             |
| N2                                                                     | HS | III | 5021224 | 5021910 | WBGene00007015 | mdt-11   | R144.9   | 0.0990111674883174   | AGIWUR43452 |
| N2                                                                     | HS | III | 5022047 | 5023200 | WBGene00020093 | R144.3   | R144.3   | 0.288245693904155    |             |
| AGIWUR20707;AGIWUR39793                                                |    |     |         |         |                |          |          |                      |             |
| N2                                                                     | HS | III | 5023264 | 5024064 | WBGene00044648 | R144.13  | R144.13  | 0.148149767725775    | AGIWUR7341  |
| N2                                                                     | HS | III | 5024966 | 5029540 | WBGene00020092 | pcf-11   | R144.2   | 0.0240000886298262   |             |
| AGIWUR6885;AGIWUR28587;AGIWUR41768                                     |    |     |         |         |                |          |          |                      |             |
| N2                                                                     | HS | III | 5030929 | 5036548 | WBGene00002218 | klp-6    | R144.1   | -0.0752433966701633  |             |
| AGIWUR6002;AGIWUR10422;AGIWUR27584;AGIWUR31010                         |    |     |         |         |                |          |          |                      |             |
| N2                                                                     | HS | III | 5036381 | 5040413 | WBGene00016677 | C45G9.6  | C45G9.6  | 0.0540823023048356   |             |
| AGIWUR2247;AGIWUR31234                                                 |    |     |         |         |                |          |          |                      |             |
| N2                                                                     | HS | III | 5042412 | 5044672 | WBGene00016684 | nlp-43   | C45G9.13 | 0.040530596482256    |             |

AGIWUR41739  
N2 HS III 5045009 5045667 WBGene00044409 C45G9.14 C45G9.14 -0.0275445785973227  
AGIWUR6835;AGIWUR12672;AGIWUR13383;AGIWUR37679  
N2 HS III 5046170 5047161 WBGene00016678 C45G9.7 C45G9.7 0.259115447728636 AGIWUR3268  
N2 HS III 5048117 5050158 WBGene00016676 C45G9.5 C45G9.5 0.363230959067314 AGIWUR13838  
N2 HS III 5050107 5052068 WBGene00050919 C45G9.15 C45G9.15 0.0578435537254816  
AGIWUR35385  
N2 HS III 5052529 5053341 WBGene00016679 C45G9.8 C45G9.8 0.135342262160254  
AGIWUR5777;AGIWUR13001;AGIWUR13513;AGIWUR30470;AGIWUR36583  
N2 HS III 5056847 5061888 WBGene00016681 C45G9.10 C45G9.10 0.0591444221379662  
AGIWUR12766  
N2 HS III 5063993 5068725 WBGene00016682 C45G9.11 C45G9.11 -0.130314284586051  
AGIWUR36530  
N2 HS III 5069001 5070418 WBGene00016674 C45G9.2 C45G9.2 0.0152716287455776  
AGIWUR38185;AGIWUR39760  
N2 HS III 5070431 5071597 WBGene00016683 C45G9.12 C45G9.12 0.0150869485905964  
AGIWUR39034  
N2 HS III 5074698 5075968 WBGene00016673 C45G9.1 C45G9.1 -0.0341798933017596 AGIWUR22776  
N2 HS III 5077765 5080665 WBGene00000107 alh-1 F54D8.3 0.278385971755455  
AGIWUR22754;AGIWUR36700  
N2 HS III 5081726 5082995 WBGene00006519 tag-174 F54D8.2 0.154889669235684  
AGIWUR58;AGIWUR4165;AGIWUR4356;AGIWUR6331;AGIWUR6584;AGIWUR26746;AGIWUR28653;AGIWUR34083  
N2 HS III 5083206 5085289 WBGene00000279 cah-1 F54D8.4 -0.11662086934418 AGIWUR22257  
N2 HS III 5102991 5106955 WBGene00018802 F54D8.6 F54D8.6 0.0734625116837773  
AGIWUR15008;AGIWUR28987  
N2 HS III 5107330 5108497 WBGene00001076 dpy-17 F54D8.1 -0.658343131609469  
AGIWUR26534;AGIWUR31818  
N2 HS III 5109701 5130673 WBGene00004728 sax-2 F21H11.2 -0.0670518223450038  
AGIWUR6192;AGIWUR7162;AGIWUR12049;AGIWUR17202;AGIWUR32090  
N2 HS III 5130923 5136319 WBGene00006543 tbx-2 F21H11.3 -0.0439058681306452  
AGIWUR14269  
N2 HS III 5137252 5149578 WBGene00021900 Y54H5A.2 Y54H5A.2 0.180755911629422  
AGIWUR5297;AGIWUR36403;AGIWUR39420  
N2 HS III 5151907 5153229 WBGene00021901 tag-262 Y54H5A.3 0.0783367785395335  
AGIWUR36811  
N2 HS III 5153406 5155465 WBGene00021899 Y54H5A.1 Y54H5A.1 0.120045562664494  
AGIWUR27003  
N2 HS III 5155472 5158774 WBGene00021902 oxy-4 Y54H5A.4 0.26329522285851  
AGIWUR33031

|                                                                                  |    |     |         |         |                |           |           |                     |             |
|----------------------------------------------------------------------------------|----|-----|---------|---------|----------------|-----------|-----------|---------------------|-------------|
| N2                                                                               | HS | III | 5158873 | 5159605 | WBGene00044604 | T10F2.5   | T10F2.5   | 0.194961090141915   |             |
| AGIWUR16189;AGIWUR34183;AGIWUR37130                                              |    |     |         |         |                |           |           |                     |             |
| N2                                                                               | HS | III | 5159729 | 5163627 | WBGene00001744 | gars-1    | T10F2.1   | -0.0173239022265133 |             |
| AGIWUR8674;AGIWUR17893                                                           |    |     |         |         |                |           |           |                     |             |
| N2                                                                               | HS | III | 5163766 | 5165311 | WBGene00020422 | T10F2.2   | T10F2.2   | 0.0908468858464833  | AGIWUR5009  |
| N2                                                                               | HS | III | 5165659 | 5169799 | WBGene00006736 | ulp-1     | T10F2.3   | -0.12161151994561   |             |
| AGIWUR17583;AGIWUR39466;AGIWUR39693                                              |    |     |         |         |                |           |           |                     |             |
| N2                                                                               | HS | III | 5169933 | 5172045 | WBGene00020423 | prp-19    | T10F2.4   | -0.229615112770367  |             |
| AGIWUR8511;AGIWUR11498;AGIWUR12677;AGIWUR16041;AGIWUR16667;AGIWUR42332           |    |     |         |         |                |           |           |                     |             |
| N2                                                                               | HS | III | 5172720 | 5173338 | WBGene00019631 | K10D2.5   | K10D2.5   | 0.146104051901649   |             |
| AGIWUR12667;AGIWUR13199;AGIWUR17632;AGIWUR36997                                  |    |     |         |         |                |           |           |                     |             |
| N2                                                                               | HS | III | 5173439 | 5173809 | WBGene00019630 | emb-1     | K10D2.4   | 0.101898047085102   | AGIWUR2253  |
| N2                                                                               | HS | III | 5173922 | 5180507 | WBGene00019629 | cid-1     | K10D2.3   | 0.045256389412172   | AGIWUR29111 |
| N2                                                                               | HS | III | 5185920 | 5188646 | WBGene00019628 | pup-2     | K10D2.2   | -0.408480698223257  |             |
| AGIWUR6106;AGIWUR24493;AGIWUR28776;AGIWUR33868;AGIWUR45004;AGIWUR45089           |    |     |         |         |                |           |           |                     |             |
| N2                                                                               | HS | III | 5191131 | 5196028 | WBGene00019627 | K10D2.1   | K10D2.1   | 0.0651789897474493  |             |
| AGIWUR535;AGIWUR40874                                                            |    |     |         |         |                |           |           |                     |             |
| N2                                                                               | HS | III | 5196027 | 5196709 | WBGene00019633 | K10D2.7   | K10D2.7   | 0.0527638162563129  |             |
| AGIWUR525;AGIWUR7607;AGIWUR14899                                                 |    |     |         |         |                |           |           |                     |             |
| N2                                                                               | HS | III | 5196678 | 5199688 | WBGene00001262 | emb-8     | K10D2.6   | -0.0934432619567911 |             |
| AGIWUR318;AGIWUR7707;AGIWUR14019;AGIWUR19026;AGIWUR23518;AGIWUR30421;AGIWUR38124 |    |     |         |         |                |           |           |                     |             |
| N2                                                                               | HS | III | 5203713 | 5206911 | WBGene00022531 | morc-1    | ZC155.3   | 0.104393636200403   | AGIWUR31982 |
| N2                                                                               | HS | III | 5207567 | 5209557 | WBGene00022534 | syx-16    | ZC155.7   | -0.0415371176026946 |             |
| AGIWUR5863;AGIWUR22835;AGIWUR32681                                               |    |     |         |         |                |           |           |                     |             |
| N2                                                                               | HS | III | 5211781 | 5215512 | WBGene00022532 | ZC155.4   | ZC155.4   | 0.292616207782871   | AGIWUR17968 |
| N2                                                                               | HS | III | 5215949 | 5217604 | WBGene00022533 | cutl-19   | ZC155.5   | 0.107802426139672   | AGIWUR43291 |
| N2                                                                               | HS | III | 5219280 | 5220093 | WBGene00022530 | ZC155.2   | ZC155.2   | 0.0809166622684927  | AGIWUR24241 |
| N2                                                                               | HS | III | 5225621 | 5226801 | WBGene00003588 | nex-1     | ZC155.1   | 0.0112880367532702  |             |
| AGIWUR20142;AGIWUR20359                                                          |    |     |         |         |                |           |           |                     |             |
| N2                                                                               | HS | III | 5226818 | 5227884 | WBGene00016411 | C34E10.10 | C34E10.10 | 0.306413247356817   |             |
| AGIWUR29112                                                                      |    |     |         |         |                |           |           |                     |             |
| N2                                                                               | HS | III | 5228417 | 5230536 | WBGene00000229 | atp-2     | C34E10.6  | -0.143267532122669  |             |
| AGIWUR5070;AGIWUR12032;AGIWUR19582;AGIWUR21091;AGIWUR26182;AGIWUR37558           |    |     |         |         |                |           |           |                     |             |
| N2                                                                               | HS | III | 5230555 | 5234530 | WBGene00016408 | prmt-5    | C34E10.5  | 0.0279704613962455  |             |
| AGIWUR31212;AGIWUR33990                                                          |    |     |         |         |                |           |           |                     |             |
| N2                                                                               | HS | III | 5234617 | 5236364 | WBGene00016412 | mrps-26   | C34E10.11 | 0.0293600778298071  |             |
| AGIWUR42475                                                                      |    |     |         |         |                |           |           |                     |             |
| N2                                                                               | HS | III | 5236410 | 5240055 | WBGene00006946 | prx-10    | C34E10.4  | 0.171544800171208   |             |
| AGIWUR4880                                                                       |    |     |         |         |                |           |           |                     |             |

|                                                                                    |    |     |         |         |                |           |           |                     |             |
|------------------------------------------------------------------------------------|----|-----|---------|---------|----------------|-----------|-----------|---------------------|-------------|
| N2                                                                                 | HS | III | 5240593 | 5242108 | WBGene00000561 | cnd-1     | C34E10.7  | -0.230285138560315  |             |
| AGIWUR4625                                                                         |    |     |         |         |                |           |           |                     |             |
| N2                                                                                 | HS | III | 5249075 | 5254187 | WBGene00016409 | sumv-1    | C34E10.8  | 0.221003129441112   |             |
| AGIWUR6645                                                                         |    |     |         |         |                |           |           |                     |             |
| N2                                                                                 | HS | III | 5254438 | 5258922 | WBGene00001660 | gop-1     | C34E10.3  | 0.0807560744351008  |             |
| AGIWUR33981                                                                        |    |     |         |         |                |           |           |                     |             |
| N2                                                                                 | HS | III | 5259023 | 5260512 | WBGene00001661 | gop-2     | C34E10.2  | 0.151355793172829   |             |
| AGIWUR3830;AGIWUR7839;AGIWUR12289;AGIWUR26150                                      |    |     |         |         |                |           |           |                     |             |
| N2                                                                                 | HS | III | 5260693 | 5263837 | WBGene00001662 | gop-3     | C34E10.1  | 0.125563413286404   |             |
| AGIWUR3380;AGIWUR23142;AGIWUR26880                                                 |    |     |         |         |                |           |           |                     |             |
| N2                                                                                 | HS | III | 5263943 | 5264996 | WBGene00001823 | hap-1     | ZC395.7   | 0.51246404490885    | AGIWUR27062 |
| N2                                                                                 | HS | III | 5265113 | 5267204 | WBGene00001740 | gro-1     | ZC395.6   | 0.177665554943175   | AGIWUR27294 |
| N2                                                                                 | HS | III | 5267809 | 5268581 | WBGene00022597 | ZC395.5   | ZC395.5   | 0.377913986677799   | AGIWUR28768 |
| N2                                                                                 | HS | III | 5268682 | 5273471 | WBGene00022598 | ztf-8     | ZC395.8   | -0.0549439555811393 | AGIWUR13066 |
| N2                                                                                 | HS | III | 5273800 | 5274787 | WBGene00022599 | ZC395.10  | ZC395.10  | -0.237345602355163  |             |
| AGIWUR16003;AGIWUR22790                                                            |    |     |         |         |                |           |           |                     |             |
| N2                                                                                 | HS | III | 5275225 | 5277797 | WBGene00006590 | toc-1     | ZC395.3   | 0.0311602125486896  | AGIWUR21186 |
| N2                                                                                 | HS | III | 5277894 | 5279344 | WBGene00000536 | clk-1     | ZC395.2   | -0.0312744232988731 | AGIWUR12724 |
| N2                                                                                 | HS | III | 5286086 | 5286305 | WBGene00022600 | ZC395.11  | ZC395.11  | -0.276464567281272  |             |
| AGIWUR24858                                                                        |    |     |         |         |                |           |           |                     |             |
| N2                                                                                 | HS | III | 5288180 | 5298361 | WBGene00020530 | T15B12.1  | T15B12.1  | 0.150695839426068   |             |
| AGIWUR295;AGIWUR35679                                                              |    |     |         |         |                |           |           |                     |             |
| N2                                                                                 | HS | III | 5300008 | 5301886 | WBGene00020531 | T15B12.2  | T15B12.2  | 0.0554872074249708  |             |
| AGIWUR13248                                                                        |    |     |         |         |                |           |           |                     |             |
| N2                                                                                 | HS | III | 5302218 | 5306324 | WBGene00018675 | F52C9.5   | F52C9.5   | 0.0161986766291875  | AGIWUR11007 |
| N2                                                                                 | HS | III | 5308600 | 5311140 | WBGene00003391 | mog-3     | F52C9.7   | 0.145569045515249   | AGIWUR40263 |
| N2                                                                                 | HS | III | 5311246 | 5321732 | WBGene00004095 | pqe-1     | F52C9.8   | -0.0214536910834102 |             |
| AGIWUR2071;AGIWUR19151;AGIWUR21084;AGIWUR30521;AGIWUR39453;AGIWUR40792;AGIWUR40889 |    |     |         |         |                |           |           |                     |             |
| N2                                                                                 | HS | III | 5321885 | 5326345 | WBGene00018674 | F52C9.3   | F52C9.3   | 0.142355949869778   | AGIWUR18125 |
| N2                                                                                 | HS | III | 5326623 | 5333620 | WBGene00018672 | sorf-2    | F52C9.1   | -0.0583297793969404 |             |
| AGIWUR14541;AGIWUR27235;AGIWUR30565                                                |    |     |         |         |                |           |           |                     |             |
| N2                                                                                 | HS | III | 5341682 | 5344273 | WBGene00022664 | ZK121.2   | ZK121.2   | -0.253503248383202  |             |
| AGIWUR10875;AGIWUR28689;AGIWUR36103                                                |    |     |         |         |                |           |           |                     |             |
| N2                                                                                 | HS | III | 5345252 | 5346117 | WBGene00022663 | glrx-21   | ZK121.1   | 0.226219006222866   |             |
| AGIWUR4869;AGIWUR43468                                                             |    |     |         |         |                |           |           |                     |             |
| N2                                                                                 | HS | III | 5345982 | 5349401 | WBGene00021311 | Y32H12A.2 | Y32H12A.2 | 0.313428500581232   |             |
| AGIWUR28001                                                                        |    |     |         |         |                |           |           |                     |             |
| N2                                                                                 | HS | III | 5362209 | 5364372 | WBGene00021310 | Y32H12A.1 | Y32H12A.1 |                     |             |
| -0.00888515409374513 AGIWUR5008                                                    |    |     |         |         |                |           |           |                     |             |



|                                                                                   |    |     |         |         |                |           |           |                     |             |
|-----------------------------------------------------------------------------------|----|-----|---------|---------|----------------|-----------|-----------|---------------------|-------------|
| N2                                                                                | HS | III | 5364512 | 5368045 | WBGene00000973 | dhs-9     | Y32H12A.3 | -0.116123456048432  |             |
| AGIWUR9949;AGIWUR33255                                                            |    |     |         |         |                |           |           |                     |             |
| N2                                                                                | HS | III | 5368967 | 5371274 | WBGene00021312 | szy-2     | Y32H12A.4 | -0.0896158912498564 |             |
| AGIWUR12268;AGIWUR40185                                                           |    |     |         |         |                |           |           |                     |             |
| N2                                                                                | HS | III | 5375698 | 5379929 | WBGene00021313 | paqr-2    | Y32H12A.5 | -0.12860897886557   |             |
| AGIWUR28786                                                                       |    |     |         |         |                |           |           |                     |             |
| N2                                                                                | HS | III | 5380906 | 5382173 | WBGene00021314 | Y32H12A.6 | Y32H12A.6 | -0.0756002169419077 |             |
| AGIWUR12120                                                                       |    |     |         |         |                |           |           |                     |             |
| N2                                                                                | HS | III | 5382288 | 5385415 | WBGene00021315 | Y32H12A.7 | Y32H12A.7 | -0.0653220934524441 |             |
| AGIWUR41756                                                                       |    |     |         |         |                |           |           |                     |             |
| N2                                                                                | HS | III | 5385617 | 5406037 | WBGene00021316 | Y32H12A.8 | Y32H12A.8 | 0.00353484979800811 |             |
| AGIWUR44435                                                                       |    |     |         |         |                |           |           |                     |             |
| N2                                                                                | HS | III | 5406102 | 5407968 | WBGene00020967 | W03A5.2   | W03A5.2   | 0.103293799877132   | AGIWUR4501  |
| N2                                                                                | HS | III | 5407888 | 5413177 | WBGene00020966 | W03A5.1   | W03A5.1   | 0.122330193703519   | AGIWUR1467  |
| N2                                                                                | HS | III | 5413137 | 5413993 | WBGene00001731 | gr1-22    | W03A5.3   | -0.0460783965136731 | AGIWUR36919 |
| N2                                                                                | HS | III | 5415556 | 5419565 | WBGene00001042 | dnj-24    | W03A5.7   | -0.128823529135645  |             |
| AGIWUR24399;AGIWUR33765                                                           |    |     |         |         |                |           |           |                     |             |
| N2                                                                                | HS | III | 5431407 | 5434467 | WBGene00020968 | W03A5.4   | W03A5.4   | -0.0606109997857232 | AGIWUR14281 |
| N2                                                                                | HS | III | 5438826 | 5440632 | WBGene00020970 | W03A5.6   | W03A5.6   | -0.201173486844538  |             |
| AGIWUR6394;AGIWUR38349                                                            |    |     |         |         |                |           |           |                     |             |
| N2                                                                                | HS | III | 5440862 | 5442761 | WBGene00020779 | T24G10.2  | T24G10.2  | -0.161775448563294  |             |
| AGIWUR29411                                                                       |    |     |         |         |                |           |           |                     |             |
| N2                                                                                | HS | III | 5443167 | 5446506 | WBGene00018612 | dis1-2    | F48E8.6   | 0.0115234245383951  |             |
| AGIWUR13480;AGIWUR16272;AGIWUR25335;AGIWUR32043                                   |    |     |         |         |                |           |           |                     |             |
| N2                                                                                | HS | III | 5446510 | 5448419 | WBGene00018613 | skpt-1    | F48E8.7   | -0.0978703129062204 | AGIWUR12645 |
| N2                                                                                | HS | III | 5448838 | 5449868 | WBGene00044410 | F48E8.8   | F48E8.8   | 0.052465056174944   |             |
| AGIWUR7055;AGIWUR24195;AGIWUR37290;AGIWUR42009                                    |    |     |         |         |                |           |           |                     |             |
| N2                                                                                | HS | III | 5450106 | 5453137 | WBGene00003901 | paa-1     | F48E8.5   | -0.0218703718909907 |             |
| AGIWUR21505;AGIWUR27982;AGIWUR29246                                               |    |     |         |         |                |           |           |                     |             |
| N2                                                                                | HS | III | 5453590 | 5459516 | WBGene00018611 | F48E8.4   | F48E8.4   | 0.184257078923304   |             |
| AGIWUR12928;AGIWUR13899;AGIWUR38555                                               |    |     |         |         |                |           |           |                     |             |
| N2                                                                                | HS | III | 5461379 | 5464382 | WBGene00018610 | F48E8.3   | F48E8.3   | -0.172473622601034  |             |
| AGIWUR5788;AGIWUR6747;AGIWUR21003;AGIWUR34646;AGIWUR36155;AGIWUR36413;AGIWUR40162 |    |     |         |         |                |           |           |                     |             |
| N2                                                                                | HS | III | 5464381 | 5467992 | WBGene00018609 | F48E8.2   | F48E8.2   | 0.0376783752220082  |             |
| AGIWUR16941;AGIWUR22846                                                           |    |     |         |         |                |           |           |                     |             |
| N2                                                                                | HS | III | 5474478 | 5478005 | WBGene00003055 | lon-1     | F48E8.1   | 0.0584722233416883  | AGIWUR36140 |
| N2                                                                                | HS | III | 5478682 | 5478924 | WBGene00019835 | R02F2.6   | R02F2.6   | 0.16116509233976    |             |
| AGIWUR13517;AGIWUR30140                                                           |    |     |         |         |                |           |           |                     |             |
| N2                                                                                | HS | III | 5479318 | 5480278 | WBGene00019834 | R02F2.5   | R02F2.5   | 0.0935649323591274  | AGIWUR23390 |

|                                                                                               |    |     |         |         |                |         |         |                     |             |
|-----------------------------------------------------------------------------------------------|----|-----|---------|---------|----------------|---------|---------|---------------------|-------------|
| N2                                                                                            | HS | III | 5480262 | 5483784 | WBGene00019836 | R02F2.7 | R02F2.7 | 0.136615325414295   |             |
| AGIWUR16860;AGIWUR18493;AGIWUR20223;AGIWUR37735                                               |    |     |         |         |                |         |         |                     |             |
| N2                                                                                            | HS | III | 5484200 | 5486005 | WBGene00019833 | R02F2.4 | R02F2.4 | -0.143949910187171  | AGIWUR13548 |
| N2                                                                                            | HS | III | 5487642 | 5498943 | WBGene00019832 | osg-1   | R02F2.2 | -0.0958292965516039 | AGIWUR4638  |
| N2                                                                                            | HS | III | 5499190 | 5499976 | WBGene00019838 | R02F2.9 | R02F2.9 | 0.0858392795802274  | AGIWUR37966 |
| N2                                                                                            | HS | III | 5501861 | 5506392 | WBGene00019831 | R02F2.1 | R02F2.1 | -0.0488843676574771 |             |
| AGIWUR11309;AGIWUR20593;AGIWUR33029;AGIWUR36550;AGIWUR37726;AGIWUR40000;AGIWUR40694           |    |     |         |         |                |         |         |                     |             |
| N2                                                                                            | HS | III | 5507050 | 5508738 | WBGene00017032 | D1044.7 | D1044.7 | 0.229699906872568   | AGIWUR24507 |
| N2                                                                                            | HS | III | 5512927 | 5517523 | WBGene00017033 | nek1-4  | D1044.8 | 0.358204313359557   | AGIWUR2553  |
| N2                                                                                            | HS | III | 5524181 | 5524439 | WBGene00017030 | D1044.5 | D1044.5 | -0.0427478196247568 | AGIWUR8736  |
| N2                                                                                            | HS | III | 5526071 | 5535481 | WBGene00017028 | dex-1   | D1044.2 | 0.189612159714772   |             |
| AGIWUR21827;AGIWUR23018;AGIWUR23267                                                           |    |     |         |         |                |         |         |                     |             |
| N2                                                                                            | HS | III | 5535660 | 5543218 | WBGene00017031 | D1044.6 | D1044.6 | -0.0856050549911807 | AGIWUR15083 |
| N2                                                                                            | HS | III | 5544304 | 5546287 | WBGene00017027 | D1044.1 | D1044.1 | -0.104031305500904  | AGIWUR40892 |
| N2                                                                                            | HS | III | 5546987 | 5551231 | WBGene00017302 | F09F7.5 | F09F7.5 | -0.0370347321648277 |             |
| AGIWUR4529;AGIWUR6227;AGIWUR12534;AGIWUR18161;AGIWUR23373;AGIWUR25157;AGIWUR35306;AGIWUR40309 |    |     |         |         |                |         |         |                     |             |
| N2                                                                                            | HS | III | 5551232 | 5552131 | WBGene00017303 | F09F7.6 | F09F7.6 | -0.0138000123364002 | AGIWUR225   |
| N2                                                                                            | HS | III | 5553489 | 5554934 | WBGene00017304 | F09F7.7 | F09F7.7 | 0.0145198322063615  |             |
| AGIWUR5737;AGIWUR9245;AGIWUR35372;AGIWUR35725                                                 |    |     |         |         |                |         |         |                     |             |
| N2                                                                                            | HS | III | 5555404 | 5557318 | WBGene00017301 | hach-1  | F09F7.4 | 0.412425648852094   |             |
| AGIWUR605;AGIWUR4972;AGIWUR14052;AGIWUR26931                                                  |    |     |         |         |                |         |         |                     |             |
| N2                                                                                            | HS | III | 5557344 | 5564837 | WBGene00017300 | rpc-2   | F09F7.3 | -0.0299717848954151 |             |
| AGIWUR897;AGIWUR31854;AGIWUR34704;AGIWUR43566                                                 |    |     |         |         |                |         |         |                     |             |
| N2                                                                                            | HS | III | 5565025 | 5567382 | WBGene00003371 | mlc-3   | F09F7.2 | 0.0814373840828395  |             |
| AGIWUR3571;AGIWUR7969;AGIWUR9563;AGIWUR9855;AGIWUR23139;AGIWUR26212;AGIWUR31710               |    |     |         |         |                |         |         |                     |             |
| N2                                                                                            | HS | III | 5568213 | 5568779 | WBGene00017305 | nspb-12 | F09F7.8 | 0.194723440226603   | AGIWUR36124 |
| N2                                                                                            | HS | III | 5573994 | 5576684 | WBGene00017299 | mol-1   | F09F7.1 | -0.0537360354141745 | AGIWUR5547  |
| N2                                                                                            | HS | III | 5578435 | 5581343 | WBGene00018966 | F56D2.5 | F56D2.5 | 0.125453188525302   | AGIWUR36564 |
| N2                                                                                            | HS | III | 5581582 | 5582411 | WBGene00018968 | F56D2.8 | F56D2.8 | 0.1155264090477     | AGIWUR43983 |
| N2                                                                                            | HS | III | 5583135 | 5584213 | WBGene00006731 | uev-2   | F56D2.4 | -0.0788354402303657 | AGIWUR10384 |
| N2                                                                                            | HS | III | 5584687 | 5587110 | WBGene00018965 | F56D2.3 | F56D2.3 | 0.218258978139247   | AGIWUR32222 |
| N2                                                                                            | HS | III | 5587263 | 5589095 | WBGene00018964 | F56D2.2 | F56D2.2 | -0.062744019405061  |             |
| AGIWUR12096;AGIWUR16038;AGIWUR18564                                                           |    |     |         |         |                |         |         |                     |             |
| N2                                                                                            | HS | III | 5589036 | 5591718 | WBGene00018967 | ddx-15  | F56D2.6 | -0.174513762285507  |             |
| AGIWUR1234;AGIWUR6210;AGIWUR11625;AGIWUR28848;AGIWUR44724                                     |    |     |         |         |                |         |         |                     |             |
| N2                                                                                            | HS | III | 5592135 | 5594785 | WBGene00018963 | ucr-1   | F56D2.1 | -0.0425922579484008 |             |
| AGIWUR396;AGIWUR17595;AGIWUR18618;AGIWUR33070;AGIWUR33417;AGIWUR39900                         |    |     |         |         |                |         |         |                     |             |
| N2                                                                                            | HS | III | 5595771 | 5598066 | WBGene00000420 | ced-6   | F56D2.7 | -0.0876612718355827 |             |
| AGIWUR21338;AGIWUR38804                                                                       |    |     |         |         |                |         |         |                     |             |

|                                                                                     |    |     |         |         |                |          |          |                     |             |
|-------------------------------------------------------------------------------------|----|-----|---------|---------|----------------|----------|----------|---------------------|-------------|
| N2                                                                                  | HS | III | 5597947 | 5600058 | WBGene00015470 | C05D2.10 | C05D2.10 | -0.0668116396296465 |             |
| AGIWUR30330                                                                         |    |     |         |         |                |          |          |                     |             |
| N2                                                                                  | HS | III | 5600393 | 5603656 | WBGene00015468 | madf-11  | C05D2.6  | -0.0831061532552262 | AGIWUR20578 |
| N2                                                                                  | HS | III | 5604460 | 5607549 | WBGene00001514 | xnd-1    | C05D2.5  | -0.0667278359557848 | AGIWUR12205 |
| N2                                                                                  | HS | III | 5607509 | 5610346 | WBGene00015469 | C05D2.8  | C05D2.8  | -0.017499741135433  | AGIWUR22365 |
| N2                                                                                  | HS | III | 5612274 | 5614700 | WBGene00000239 | bas-1    | C05D2.4  | 0.203596734176049   |             |
| AGIWUR11865;AGIWUR22234;AGIWUR25155                                                 |    |     |         |         |                |          |          |                     |             |
| N2                                                                                  | HS | III | 5614972 | 5617257 | WBGene00015467 | bas1-1   | C05D2.3  | -0.132517887399155  |             |
| AGIWUR5686;AGIWUR25855;AGIWUR41332;AGIWUR44004                                      |    |     |         |         |                |          |          |                     |             |
| N2                                                                                  | HS | III | 5625014 | 5632322 | WBGene00000900 | daf-4    | C05D2.1  | -0.227929426235701  |             |
| AGIWUR741;AGIWUR4499;AGIWUR13629;AGIWUR26026;AGIWUR28955                            |    |     |         |         |                |          |          |                     |             |
| N2                                                                                  | HS | III | 5635479 | 5654558 | WBGene00000518 | ckk-1    | C05H8.1  | 0.0326621676591663  |             |
| AGIWUR35270;AGIWUR44158                                                             |    |     |         |         |                |          |          |                     |             |
| N2                                                                                  | HS | III | 5654984 | 5656994 | WBGene00018828 | sdz-21   | F54E7.5  | -0.254417171996185  | AGIWUR8561  |
| N2                                                                                  | HS | III | 5659889 | 5661085 | WBGene00018829 | F54E7.6  | F54E7.6  | 0.00875348040827362 | AGIWUR2470  |
| N2                                                                                  | HS | III | 5664234 | 5676732 | WBGene00003918 | par-3    | F54E7.3  | -0.272640825003825  |             |
| AGIWUR5765;AGIWUR39210                                                              |    |     |         |         |                |          |          |                     |             |
| N2                                                                                  | HS | III | 5676612 | 5677890 | WBGene00018831 | F54E7.9  | F54E7.9  | 0.0726667131995686  |             |
| AGIWUR7591;AGIWUR27414;AGIWUR31239;AGIWUR42631                                      |    |     |         |         |                |          |          |                     |             |
| N2                                                                                  | HS | III | 5677953 | 5679038 | WBGene00018830 | ska-3    | F54E7.8  | -0.0965146656318687 | AGIWUR242   |
| N2                                                                                  | HS | III | 5679298 | 5680187 | WBGene00004481 | rps-12   | F54E7.2  | 0.0476186454019576  | AGIWUR34405 |
| N2                                                                                  | HS | III | 5680433 | 5682326 | WBGene00018827 | pst-2    | F54E7.1  | 0.116473998889045   | AGIWUR2823  |
| N2                                                                                  | HS | III | 5682310 | 5684098 | WBGene00004321 | rca-1    | F54E7.7  | -0.0544807641933538 |             |
| AGIWUR2604;AGIWUR22461                                                              |    |     |         |         |                |          |          |                     |             |
| N2                                                                                  | HS | III | 5690107 | 5692740 | WBGene00015146 | abi-1    | B0336.6  | -0.190949237968923  | AGIWUR34075 |
| N2                                                                                  | HS | III | 5692896 | 5693938 | WBGene00015145 | B0336.5  | B0336.5  | 0.0212498061645991  | AGIWUR40695 |
| N2                                                                                  | HS | III | 5694036 | 5694784 | WBGene00015150 | B0336.13 | B0336.13 | -0.0731360964603756 |             |
| AGIWUR6621                                                                          |    |     |         |         |                |          |          |                     |             |
| N2                                                                                  | HS | III | 5694735 | 5697366 | WBGene00015147 | B0336.7  | B0336.7  | 0.136752999628828   |             |
| AGIWUR24198;AGIWUR34686                                                             |    |     |         |         |                |          |          |                     |             |
| N2                                                                                  | HS | III | 5697477 | 5698013 | WBGene00002982 | lgg-3    | B0336.8  | -0.0382579797555636 | AGIWUR43374 |
| N2                                                                                  | HS | III | 5698430 | 5702304 | WBGene00004348 | rgs-5    | B0336.4  | 0.0698638114450958  |             |
| AGIWUR7851;AGIWUR7993;AGIWUR20937                                                   |    |     |         |         |                |          |          |                     |             |
| N2                                                                                  | HS | III | 5702248 | 5705464 | WBGene00006359 | swp-1    | B0336.9  | 0.0279231007315239  |             |
| AGIWUR12277;AGIWUR15861;AGIWUR22510;AGIWUR29765;AGIWUR33611;AGIWUR35913;AGIWUR40245 |    |     |         |         |                |          |          |                     |             |
| N2                                                                                  | HS | III | 5705521 | 5706129 | WBGene00004435 | rp1-23   | B0336.10 | 0.0254555230411206  |             |
| AGIWUR5646;AGIWUR25265                                                              |    |     |         |         |                |          |          |                     |             |
| N2                                                                                  | HS | III | 5706718 | 5709329 | WBGene00015148 | hpo-28   | B0336.11 | -0.133389313889243  |             |
| AGIWUR204;AGIWUR5819;AGIWUR30382;AGIWUR44654                                        |    |     |         |         |                |          |          |                     |             |

|                                                                                                         |    |     |         |         |                |           |           |                       |             |
|---------------------------------------------------------------------------------------------------------|----|-----|---------|---------|----------------|-----------|-----------|-----------------------|-------------|
| N2                                                                                                      | HS | III | 5710062 | 5710509 | WBGene00015149 | B0336.12  | B0336.12  | -0.0253481047027542   |             |
| AGIWUR43192                                                                                             |    |     |         |         |                |           |           |                       |             |
| N2                                                                                                      | HS | III | 5711548 | 5714846 | WBGene00015143 | B0336.3   | B0336.3   | -0.0818468577859246   | AGIWUR38024 |
| N2                                                                                                      | HS | III | 5714861 | 5717585 | WBGene00000182 | arf-1.2   | B0336.2   | 0.00279743197458959   |             |
| AGIWUR6417;AGIWUR10593;AGIWUR23258;AGIWUR26259                                                          |    |     |         |         |                |           |           |                       |             |
| N2                                                                                                      | HS | III | 5722824 | 5727115 | WBGene00006943 | wrm-1     | B0336.1   | 0.0179051275656956    | AGIWUR16540 |
| N2                                                                                                      | HS | III | 5728180 | 5730159 | WBGene00015083 | egg-1     | B0244.8   | -0.346570709235355    |             |
| AGIWUR973;AGIWUR2213;AGIWUR8633;AGIWUR12270;AGIWUR15368;AGIWUR28877;AGIWUR30186;AGIWUR35008;AGIWUR44144 |    |     |         |         |                |           |           |                       |             |
| N2                                                                                                      | HS | III | 5730118 | 5731030 | WBGene00015084 | B0244.9   | B0244.9   | 0.247138858361181     | AGIWUR29575 |
| N2                                                                                                      | HS | III | 5731501 | 5732854 | WBGene00015082 | B0244.7   | B0244.7   | -0.156435418357912    | AGIWUR27688 |
| N2                                                                                                      | HS | III | 5733997 | 5737481 | WBGene00015085 | B0244.10  | B0244.10  | 0.213247693036765     |             |
| AGIWUR3640;AGIWUR11691;AGIWUR22636                                                                      |    |     |         |         |                |           |           |                       |             |
| N2                                                                                                      | HS | III | 5742556 | 5744820 | WBGene00206513 | B0244.15  | B0244.15  | -0.090057072461013    |             |
| AGIWUR27006                                                                                             |    |     |         |         |                |           |           |                       |             |
| N2                                                                                                      | HS | III | 5744870 | 5747195 | WBGene00015080 | B0244.5   | B0244.5   | 0.273581772771939     | AGIWUR35844 |
| N2                                                                                                      | HS | III | 5747485 | 5751637 | WBGene00015079 | B0244.4   | B0244.4   | 0.0550564641488656    | AGIWUR28304 |
| N2                                                                                                      | HS | III | 5755496 | 5765815 | WBGene00002048 | ida-1     | B0244.2   | -0.189615810109157    | AGIWUR14657 |
| N2                                                                                                      | HS | III | 5767882 | 5768665 | WBGene00015086 | B0244.11  | B0244.11  | 0.0792023598942153    |             |
| AGIWUR6678                                                                                              |    |     |         |         |                |           |           |                       |             |
| N2                                                                                                      | HS | III | 5770185 | 5774703 | WBGene00021343 | cutl-23   | Y37B11A.1 | 0.00393273246215919   |             |
| AGIWUR41663                                                                                             |    |     |         |         |                |           |           |                       |             |
| N2                                                                                                      | HS | III | 5774679 | 5790707 | WBGene00021344 | Y37B11A.2 | Y37B11A.2 | -0.231279703552786    |             |
| AGIWUR10288                                                                                             |    |     |         |         |                |           |           |                       |             |
| N2                                                                                                      | HS | III | 5791171 | 5803042 | WBGene00020964 | polq-1    | W03A3.2   | 0.100029518066104     |             |
| AGIWUR5084;AGIWUR19096                                                                                  |    |     |         |         |                |           |           |                       |             |
| N2                                                                                                      | HS | III | 5803260 | 5805112 | WBGene00001869 | him-10    | R12B2.4   | 0.0496545651512861    | AGIWUR38298 |
| N2                                                                                                      | HS | III | 5805563 | 5806975 | WBGene00020019 | R12B2.3   | R12B2.3   | 0.098599096675354     | AGIWUR18560 |
| N2                                                                                                      | HS | III | 5807052 | 5809206 | WBGene00020018 | R12B2.2   | R12B2.2   | -0.000213462526343022 | AGIWUR31538 |
| N2                                                                                                      | HS | III | 5815045 | 5815513 | WBGene00020021 | R12B2.7   | R12B2.7   | 0.0175593435627324    | AGIWUR42938 |
| N2                                                                                                      | HS | III | 5816203 | 5820200 | WBGene00004858 | sma-4     | R12B2.1   | 0.196352742981983     |             |
| AGIWUR15423;AGIWUR34046;AGIWUR34858;AGIWUR38559                                                         |    |     |         |         |                |           |           |                       |             |
| N2                                                                                                      | HS | III | 5823957 | 5828651 | WBGene00044411 | R12B2.8   | R12B2.8   | 0.0628743323276861    |             |
| AGIWUR7783;AGIWUR23563;AGIWUR28200;AGIWUR28780;AGIWUR28810                                              |    |     |         |         |                |           |           |                       |             |
| N2                                                                                                      | HS | III | 5828603 | 5833745 | WBGene00007016 | mdt-15    | R12B2.5   | -0.0459538411494762   | AGIWUR4471  |
| N2                                                                                                      | HS | III | 5834022 | 5835756 | WBGene00020020 | R12B2.6   | R12B2.6   | -0.150855518622802    | AGIWUR33024 |
| N2                                                                                                      | HS | III | 5836926 | 5837183 | WBGene00021029 | W04D12.1  | W04D12.1  | 0.0807727784018963    |             |
| AGIWUR33001                                                                                             |    |     |         |         |                |           |           |                       |             |
| N2                                                                                                      | HS | III | 5848838 | 5853269 | WBGene00017162 | ddx-23    | F01F1.7   | -0.0200092397202845   | AGIWUR17455 |
| N2                                                                                                      | HS | III | 5853532 | 5855687 | WBGene00000381 | cct-6     | F01F1.8   | -0.145612177755127    |             |

AGIWUR6023;AGIWUR22509;AGIWUR24670;AGIWUR31718;AGIWUR33596;AGIWUR43085  
 N2 HS III 5856018 5859186 WBGene00000115 alh-9 F01F1.6 -0.00750172122347337  
 AGIWUR7791;AGIWUR17410;AGIWUR18827;AGIWUR41022;AGIWUR44087  
 N2 HS III 5859308 5861907 WBGene00001057 dpf-4 F01F1.5 0.149760224812777  
 AGIWUR11864;AGIWUR27021;AGIWUR45153  
 N2 HS III 5861855 5863546 WBGene00017163 dnpp-1 F01F1.9 -0.204192097815881  
 AGIWUR4140;AGIWUR30765;AGIWUR43330  
 N2 HS III 5864500 5866541 WBGene00017161 rabn-5 F01F1.4 -0.206596289856584 AGIWUR7226  
 N2 HS III 5866495 5868501 WBGene00017164 eng-1 F01F1.10 0.0232112712482415  
 AGIWUR8283  
 N2 HS III 5868587 5869620 WBGene00017169 F01F1.15 F01F1.15 0.117997247242123  
 AGIWUR26321;AGIWUR33269  
 N2 HS III 5869685 5872396 WBGene00017165 F01F1.11 F01F1.11 0.0395317953210572  
 AGIWUR12560  
 N2 HS III 5873025 5874680 WBGene00017160 F01F1.3 F01F1.3 0.00122625369765217 AGIWUR13608  
 N2 HS III 5874672 5876625 WBGene00017166 aldo-2 F01F1.12 -0.0716498609344551  
 AGIWUR12260;AGIWUR18058;AGIWUR25115;AGIWUR25603;AGIWUR31691;AGIWUR40498  
 N2 HS III 5877020 5878419 WBGene00003252 mig-21 F01F1.13 -0.0430601811168554  
 AGIWUR44500  
 N2 HS III 5878521 5879415 WBGene00017159 F01F1.2 F01F1.2 -0.19748252115915  
 AGIWUR400;AGIWUR17259;AGIWUR18227;AGIWUR28252;AGIWUR33591;AGIWUR38436  
 N2 HS III 5879489 5882428 WBGene00017158 hpo-10 F01F1.1 -0.0473087693893142  
 AGIWUR1028;AGIWUR18342;AGIWUR23790  
 N2 HS III 5882319 5882923 WBGene00017168 F01F1.14 F01F1.14 -0.0796522883416806  
 AGIWUR11771  
 N2 HS III 5884307 5885848 WBGene00016196 C28H8.5 C28H8.5 -0.0272441601400022 AGIWUR19907  
 N2 HS III 5885847 5886956 WBGene00016198 C28H8.7 C28H8.7 0.00929347901639055 AGIWUR7242  
 N2 HS III 5887104 5888775 WBGene00016199 C28H8.8 C28H8.8 -0.026720746392022 AGIWUR21123  
 N2 HS III 5889721 5896013 WBGene00016197 pxl-1 C28H8.6 0.0679069023546175  
 AGIWUR2647;AGIWUR6131;AGIWUR10300;AGIWUR12567;AGIWUR13793;AGIWUR15805;AGIWUR18173;AGIWUR21049;AGIWUR24758;A  
 GIWUR30067;AGIWUR33589;AGIWUR42592  
 N2 HS III 5903576 5906122 WBGene00016200 dpff-1 C28H8.9 -0.265019726620235  
 AGIWUR5400;AGIWUR12108;AGIWUR23801  
 N2 HS III 5907044 5908457 WBGene00016195 C28H8.4 C28H8.4 -0.142873938797571  
 AGIWUR5053;AGIWUR10268;AGIWUR28529  
 N2 HS III 5908700 5914734 WBGene00016194 C28H8.3 C28H8.3 -0.12200633429591  
 AGIWUR4907;AGIWUR5521;AGIWUR5753;AGIWUR8116;AGIWUR15977;AGIWUR18776;AGIWUR38328;AGIWUR38602;AGIWUR41317;AGI  
 WUR44843  
 N2 HS III 5917628 5920086 WBGene00016201 tdo-2 C28H8.11 0.148410235988509

AGIWUR189;AGIWUR9055;AGIWUR37615;AGIWUR44015

|                                                                                                            |    |     |         |         |                |         |          |                      |             |
|------------------------------------------------------------------------------------------------------------|----|-----|---------|---------|----------------|---------|----------|----------------------|-------------|
| N2                                                                                                         | HS | III | 5923187 | 5924431 | WBGene00016193 | C28H8.2 | C28H8.2  | 0.0142395740073589   | AGIWUR33140 |
| N2                                                                                                         | HS | III | 5924394 | 5925754 | WBGene00001018 | dnc-2   | C28H8.12 | -0.192450246193264   |             |
| AGIWUR7289;AGIWUR28714;AGIWUR32259                                                                         |    |     |         |         |                |         |          |                      |             |
| N2                                                                                                         | HS | III | 5926086 | 5926987 | WBGene00016192 | bcl-7   | C28H8.1  | -0.00356769760430886 | AGIWUR14967 |
| N2                                                                                                         | HS | III | 5926898 | 5932953 | WBGene00006987 | zmp-1   | EGAP1.3  | 0.214474139299192    |             |
| AGIWUR7925;AGIWUR17769                                                                                     |    |     |         |         |                |         |          |                      |             |
| N2                                                                                                         | HS | III | 5935749 | 5937220 | WBGene00017146 | EGAP1.1 | EGAP1.1  | 0.101443449543795    | AGIWUR25306 |
| N2                                                                                                         | HS | III | 5940244 | 5943835 | WBGene00006727 | ubq-1   | F25B5.4  | 0.0337997765469993   |             |
| AGIWUR8687;AGIWUR12178;AGIWUR21911;AGIWUR22522;AGIWUR22721;AGIWUR23032;AGIWUR27981;AGIWUR32258;AGIWUR40838 |    |     |         |         |                |         |          |                      |             |
| N2                                                                                                         | HS | III | 5943833 | 5946124 | WBGene00017776 | F25B5.5 | F25B5.5  | 0.039935080792155    | AGIWUR17556 |
| N2                                                                                                         | HS | III | 5946217 | 5948711 | WBGene00017777 | F25B5.6 | F25B5.6  | -0.19581212418526    |             |
| AGIWUR4867;AGIWUR36391;AGIWUR42299                                                                         |    |     |         |         |                |         |          |                      |             |
| N2                                                                                                         | HS | III | 5948890 | 5953534 | WBGene00017775 | F25B5.3 | F25B5.3  | -0.050414445893435   |             |
| AGIWUR1552;AGIWUR4298;AGIWUR15197;AGIWUR41985                                                              |    |     |         |         |                |         |          |                      |             |
| N2                                                                                                         | HS | III | 5953526 | 5958246 | WBGene00017778 | nono-1  | F25B5.7  | -0.144663686155304   |             |
| AGIWUR5396;AGIWUR8117;AGIWUR13268;AGIWUR16611;AGIWUR18055;AGIWUR20561;AGIWUR37674;AGIWUR38427              |    |     |         |         |                |         |          |                      |             |
| N2                                                                                                         | HS | III | 5958722 | 5962322 | WBGene00017774 | nop-1   | F25B5.2  | -0.0397363739002312  | AGIWUR31282 |
| N2                                                                                                         | HS | III | 5966413 | 5971510 | WBGene00017773 | dct-6   | F25B5.1  | 0.54670302383434     | AGIWUR14598 |
| N2                                                                                                         | HS | III | 5971530 | 5973664 | WBGene00003375 | mlp-1   | T04C9.4  | 0.295677299101613    |             |
| AGIWUR33014;AGIWUR37421                                                                                    |    |     |         |         |                |         |          |                      |             |
| N2                                                                                                         | HS | III | 5976781 | 5982126 | WBGene00001489 | frm-2   | T04C9.6  | -0.0325969937714206  | AGIWUR3828  |
| N2                                                                                                         | HS | III | 5985640 | 5985858 | WBGene00020211 | T04C9.3 | T04C9.3  | -0.0998330510049463  | AGIWUR38664 |
| N2                                                                                                         | HS | III | 5991880 | 5992230 | WBGene00020210 | T04C9.2 | T04C9.2  | -0.0988854922721494  | AGIWUR36256 |
| N2                                                                                                         | HS | III | 5993219 | 6006360 | WBGene00020209 | T04C9.1 | T04C9.1  | -0.11469903272384    |             |
| AGIWUR11458;AGIWUR16358;AGIWUR30105;AGIWUR35380;AGIWUR39302;AGIWUR42067                                    |    |     |         |         |                |         |          |                      |             |
| N2                                                                                                         | HS | III | 6006344 | 6009084 | WBGene00022694 | gcna-1  | ZK328.4  | 0.0347686183955034   | AGIWUR18288 |
| N2                                                                                                         | HS | III | 6009550 | 6012839 | WBGene00001166 | eftu-2  | ZK328.2  | -0.0146256930122881  |             |
| AGIWUR1543;AGIWUR1621;AGIWUR23124;AGIWUR33224;AGIWUR33784;AGIWUR39115;AGIWUR42275                          |    |     |         |         |                |         |          |                      |             |
| N2                                                                                                         | HS | III | 6013536 | 6019562 | WBGene00003796 | npp-10  | ZK328.5  | -0.0937766346949145  |             |
| AGIWUR17451;AGIWUR18497;AGIWUR19359;AGIWUR19986;AGIWUR31346;AGIWUR35634;AGIWUR38716                        |    |     |         |         |                |         |          |                      |             |
| N2                                                                                                         | HS | III | 6020165 | 6024659 | WBGene00000874 | cyk-3   | ZK328.1  | 0.15692572367461     |             |
| AGIWUR587;AGIWUR7409                                                                                       |    |     |         |         |                |         |          |                      |             |
| N2                                                                                                         | HS | III | 6025090 | 6028532 | WBGene00006544 | tbx-7   | ZK328.8  | 0.0693928189724051   | AGIWUR35350 |
| N2                                                                                                         | HS | III | 6028790 | 6030583 | WBGene00022695 | ZK328.6 | ZK328.6  | -0.270711671978548   | AGIWUR13455 |
| N2                                                                                                         | HS | III | 6032696 | 6039475 | WBGene00022696 | ZK328.7 | ZK328.7  | 0.0925432867671891   |             |
| AGIWUR21256;AGIWUR23219                                                                                    |    |     |         |         |                |         |          |                      |             |
| N2                                                                                                         | HS | III | 6040334 | 6045125 | WBGene00018254 | F40H6.2 | F40H6.2  | -0.163114332488757   | AGIWUR42043 |
| N2                                                                                                         | HS | III | 6045771 | 6046981 | WBGene00006547 | tbx-11  | F40H6.4  | -0.2439831841958     |             |

AGIWUR31993;AGIWUR39421  
N2 HS III 6049316 6055448 WBGene00018255 F40H6.5 F40H6.5 0.0290050951462102  
AGIWUR16778;AGIWUR34353  
N2 HS III 6057055 6058444 WBGene00018253 F40H6.1 F40H6.1 0.0775744360073141 AGIWUR16150  
N2 HS III 6065139 6066217 WBGene00044412 F40H6.6 F40H6.6 -0.047158263500986 AGIWUR6163  
N2 HS III 6067857 6072076 WBGene00015478 C05D10.2 C05D10.2 0.180153138261784  
AGIWUR106;AGIWUR11939;AGIWUR23889;AGIWUR29361;AGIWUR43021  
N2 HS III 6080563 6084748 WBGene00015477 attf-4 C05D10.1 0.0195440778575424  
AGIWUR35938  
N2 HS III 6084665 6087721 WBGene00015479 wht-1 C05D10.3 0.385568158570791  
AGIWUR18060  
N2 HS III 6088684 6102862 WBGene00015480 C05D10.4 C05D10.4 0.0624435535278085  
AGIWUR2123;AGIWUR4314;AGIWUR4703;AGIWUR8809;AGIWUR10254;AGIWUR27781;AGIWUR42360  
N2 HS III 6114482 6116331 WBGene00020549 nmt-1 T17E9.2 0.0562650391173527  
AGIWUR27138;AGIWUR31541;AGIWUR41341  
N2 HS III 6118627 6124055 WBGene00002201 kin-18 T17E9.1 -0.0669887058500782  
AGIWUR1170;AGIWUR5256  
N2 HS III 6124184 6136276 WBGene00021534 mvk-1 Y42G9A.4 -0.11893310317253  
AGIWUR12699;AGIWUR40028  
N2 HS III 6142123 6149590 WBGene00021535 wht-7 Y42G9A.6 -0.0186856056534044  
AGIWUR12629  
N2 HS III 6149961 6154933 WBGene00021531 Y42G9A.1 Y42G9A.1 0.0252376419495484  
AGIWUR36020  
N2 HS III 6154844 6157758 WBGene00018340 anmt-2 F42A10.3 -0.14059203903847  
AGIWUR34997  
N2 HS III 6159842 6164588 WBGene00003593 nfm-1 F42A10.2 -0.0692549946009722  
AGIWUR1316;AGIWUR1497;AGIWUR7359;AGIWUR41587  
N2 HS III 6164645 6171165 WBGene00023489 F42A10.9 F42A10.9 0.205466195589707  
AGIWUR19772;AGIWUR40858  
N2 HS III 6171147 6172800 WBGene00018341 F42A10.5 F42A10.5 0.283789781387156  
AGIWUR24355;AGIWUR30556  
N2 HS III 6173305 6176171 WBGene00018339 abcf-3 F42A10.1 0.0714661405553993  
AGIWUR32812  
N2 HS III 6176148 6176861 WBGene00018342 F42A10.6 F42A10.6 0.0174942429435205  
AGIWUR14546  
N2 HS III 6177916 6178686 WBGene00018343 F42A10.7 F42A10.7 0.0662769765899753  
AGIWUR20743;AGIWUR44549  
N2 HS III 6181078 6183218 WBGene00003546 nas-28 F42A10.8 -0.0589848714518473  
AGIWUR10042;AGIWUR38272

|                                                                                                                       |    |     |         |         |                |           |           |                      |
|-----------------------------------------------------------------------------------------------------------------------|----|-----|---------|---------|----------------|-----------|-----------|----------------------|
| N2                                                                                                                    | HS | III | 6191110 | 6192081 | WBGene00016012 | C23G10.5  | C23G10.5  | 0.259066636773212    |
| AGIWUR42032                                                                                                           |    |     |         |         |                |           |           |                      |
| N2                                                                                                                    | HS | III | 6192116 | 6194580 | WBGene00016013 | C23G10.6  | C23G10.6  | 0.119808101614982    |
| AGIWUR42473                                                                                                           |    |     |         |         |                |           |           |                      |
| N2                                                                                                                    | HS | III | 6195984 | 6198414 | WBGene00016014 | C23G10.7  | C23G10.7  | 0.0184717718883753   |
| AGIWUR1598;AGIWUR10377;AGIWUR17777;AGIWUR19282                                                                        |    |     |         |         |                |           |           |                      |
| N2                                                                                                                    | HS | III | 6198902 | 6202594 | WBGene00004459 | rpn-2     | C23G10.4  | -0.146424694792355   |
| AGIWUR2174;AGIWUR13729;AGIWUR23688;AGIWUR24196;AGIWUR24746;AGIWUR38535;AGIWUR43344                                    |    |     |         |         |                |           |           |                      |
| N2                                                                                                                    | HS | III | 6202619 | 6206211 | WBGene00016015 | C23G10.8  | C23G10.8  | -0.301194048489677   |
| AGIWUR39422                                                                                                           |    |     |         |         |                |           |           |                      |
| N2                                                                                                                    | HS | III | 6206803 | 6207971 | WBGene00004472 | rps-3     | C23G10.3  | -0.0917514502289194  |
| AGIWUR7661;AGIWUR40667                                                                                                |    |     |         |         |                |           |           |                      |
| N2                                                                                                                    | HS | III | 6208064 | 6209140 | WBGene00016011 | C23G10.2  | C23G10.2  | 0.137983929825136    |
| AGIWUR31032                                                                                                           |    |     |         |         |                |           |           |                      |
| N2                                                                                                                    | HS | III | 6209284 | 6212904 | WBGene00016010 | C23G10.1  | C23G10.1  | -0.129475778453475   |
| AGIWUR19899                                                                                                           |    |     |         |         |                |           |           |                      |
| N2                                                                                                                    | HS | III | 6213112 | 6213923 | WBGene00016016 | C23G10.10 | C23G10.10 | 0.0598306030211573   |
| AGIWUR15153                                                                                                           |    |     |         |         |                |           |           |                      |
| N2                                                                                                                    | HS | III | 6215164 | 6215576 | WBGene00016017 | C23G10.11 | C23G10.11 | -0.689477620125813   |
| AGIWUR44734                                                                                                           |    |     |         |         |                |           |           |                      |
| N2                                                                                                                    | HS | III | 6220537 | 6224451 | WBGene00001989 | hot-4     | T12A2.16  | -0.091203694879912   |
| AGIWUR4554;AGIWUR11038;AGIWUR14225;AGIWUR34548;AGIWUR41379                                                            |    |     |         |         |                |           |           |                      |
| N2                                                                                                                    | HS | III | 6224491 | 6229403 | WBGene00020443 | esyt-2    | T12A2.15  | 0.237252736431646    |
| AGIWUR11091;AGIWUR17234;AGIWUR18813;AGIWUR22069;AGIWUR27544                                                           |    |     |         |         |                |           |           |                      |
| N2                                                                                                                    | HS | III | 6233718 | 6239336 | WBGene00020439 | T12A2.5   | T12A2.5   | -0.00481886248161256 |
| AGIWUR41851                                                                                                           |    |     |         |         |                |           |           |                      |
| N2                                                                                                                    | HS | III | 6240775 | 6241581 | WBGene00020438 | T12A2.3   | T12A2.3   | -0.0141404470830828  |
| AGIWUR17752;AGIWUR29138;AGIWUR37203;AGIWUR43278                                                                       |    |     |         |         |                |           |           |                      |
| N2                                                                                                                    | HS | III | 6241850 | 6244383 | WBGene00020440 | T12A2.6   | T12A2.6   | -0.105849022118528   |
| AGIWUR10318;AGIWUR21837;AGIWUR24481                                                                                   |    |     |         |         |                |           |           |                      |
| N2                                                                                                                    | HS | III | 6244672 | 6246039 | WBGene00020441 | T12A2.7   | T12A2.7   | 0.193054566537807    |
| AGIWUR27093                                                                                                           |    |     |         |         |                |           |           |                      |
| N2                                                                                                                    | HS | III | 6245932 | 6248234 | WBGene00020442 | gen-1     | T12A2.8   | 0.0692638792165639   |
| AGIWUR5759;AGIWUR14650;AGIWUR23445                                                                                    |    |     |         |         |                |           |           |                      |
| N2                                                                                                                    | HS | III | 6248317 | 6251607 | WBGene00020437 | stt-3     | T12A2.2   | -0.0485485777273897  |
| AGIWUR3513;AGIWUR9746;AGIWUR13447;AGIWUR19992;AGIWUR22561;AGIWUR28326;AGIWUR35902;AGIWUR38028;AGIWUR39066;AGIWUR41574 |    |     |         |         |                |           |           |                      |
| N2                                                                                                                    | HS | III | 6251811 | 6271282 | WBGene00020436 | T12A2.1   | T12A2.1   | 0.116848133552253    |
| AGIWUR4320                                                                                                            |    |     |         |         |                |           |           |                      |
| N2                                                                                                                    | HS | III | 6271561 | 6272959 | WBGene00015979 | C18F10.9  | C18F10.9  | -0.0435906769156507  |
| AGIWUR9386                                                                                                            |    |     |         |         |                |           |           |                      |
| N2                                                                                                                    | HS | III | 6273160 | 6276016 | WBGene00015977 | C18F10.2  | C18F10.2  | -0.221641433589498   |



AGIWUR41470  
N2 HS III 6276048 6278351 WBGene00015978 C18F10.7 C18F10.7 -0.31527580587178  
AGIWUR5641;AGIWUR11223;AGIWUR19375;AGIWUR26373;AGIWUR27221;AGIWUR27295;AGIWUR29666;AGIWUR29857;AGIWUR30170;  
AGIWUR32153;AGIWUR36457;AGIWUR40713  
N2 HS III 6280380 6282411 WBGene00001972 hmg-1.2 F47D12.4 0.150050569419449  
AGIWUR26400;AGIWUR26979  
N2 HS III 6282444 6286231 WBGene00018561 gadr-3 F47D12.5 0.168730050894892  
AGIWUR26317  
N2 HS III 6286629 6287293 WBGene00018562 F47D12.6 F47D12.6 0.0887070708688018  
AGIWUR17571  
N2 HS III 6293247 6296022 WBGene00018563 F47D12.7 F47D12.7 -0.0724033466691409  
AGIWUR28697  
N2 HS III 6298461 6299338 WBGene00018560 F47D12.3 F47D12.3 0.0302704213353771  
AGIWUR29555  
N2 HS III 6299331 6303217 WBGene00018564 F47D12.9 F47D12.9 -0.147061279693836  
AGIWUR6888;AGIWUR10228;AGIWUR20703;AGIWUR25146;AGIWUR30129;AGIWUR30161  
N2 HS III 6309378 6320872 WBGene00001518 gar-2 F47D12.1 0.0577304794584492  
AGIWUR3654;AGIWUR4396;AGIWUR18671;AGIWUR18967;AGIWUR29649;AGIWUR38247;AGIWUR38822  
N2 HS III 6321176 6324239 WBGene00016980 C56G2.5 C56G2.5 -0.0440724898686859  
AGIWUR2514;AGIWUR14213;AGIWUR15494;AGIWUR37144;AGIWUR40562;AGIWUR43714  
N2 HS III 6331732 6335829 WBGene00016979 C56G2.4 C56G2.4 0.0526832994917967 AGIWUR28406  
N2 HS III 6338508 6340228 WBGene00002891 let-767 C56G2.6 0.164810856216423  
AGIWUR23719;AGIWUR39408  
N2 HS III 6342481 6343287 WBGene00016982 C56G2.9 C56G2.9 0.041445951966133 AGIWUR27081  
N2 HS III 6346285 6348121 WBGene00016978 C56G2.3 C56G2.3 0.280168602938041 AGIWUR7248  
N2 HS III 6353384 6366660 WBGene00016977 akap-1 C56G2.1 -0.0731366107693501  
AGIWUR630;AGIWUR2907;AGIWUR8486;AGIWUR8983;AGIWUR15005;AGIWUR20081;AGIWUR29898;AGIWUR38741  
N2 HS III 6366582 6367899 WBGene00016983 C56G2.15 C56G2.15 0.0349078958613074  
AGIWUR37593  
N2 HS III 6368042 6373904 WBGene00015813 thoc-2 C16A3.8 -0.0447237186746019 AGIWUR35223  
N2 HS III 6374048 6374997 WBGene00004482 rps-13 C16A3.9 0.114019889762478  
AGIWUR19240;AGIWUR42951  
N2 HS III 6375379 6379190 WBGene00007048 nfx-1 C16A3.7 0.0527682666246818 AGIWUR32264  
N2 HS III 6379449 6380671 WBGene00015811 C16A3.6 C16A3.6 -0.328623815590399  
AGIWUR10740;AGIWUR41642  
N2 HS III 6380695 6381517 WBGene00015810 C16A3.5 C16A3.5 -0.0702035267585579 AGIWUR18873  
N2 HS III 6381634 6383024 WBGene00015809 C16A3.4 C16A3.4 -0.0987769225195372 AGIWUR8037  
N2 HS III 6383552 6389401 WBGene00002850 let-716 C16A3.3 0.0629474886025641 AGIWUR5062  
N2 HS III 6389833 6390841 WBGene00015807 C16A3.2 C16A3.2 0.322450887408186 AGIWUR37881

|                                                 |    |     |         |         |                |           |           |                      |             |
|-------------------------------------------------|----|-----|---------|---------|----------------|-----------|-----------|----------------------|-------------|
| N2                                              | HS | III | 6390946 | 6393843 | WBGene00015806 | smrc-1    | C16A3.1   | -0.179150762722358   |             |
| AGIWUR10053;AGIWUR20541;AGIWUR34378             |    |     |         |         |                |           |           |                      |             |
| N2                                              | HS | III | 6394223 | 6396182 | WBGene00015814 | oatr-1    | C16A3.10  | -0.0404667415661191  |             |
| AGIWUR29129;AGIWUR41871;AGIWUR42636             |    |     |         |         |                |           |           |                      |             |
| N2                                              | HS | III | 6407129 | 6410018 | WBGene00002881 | let-756   | C05D11.4  | -0.155128415295258   |             |
| AGIWUR36676;AGIWUR40092;AGIWUR44667             |    |     |         |         |                |           |           |                      |             |
| N2                                              | HS | III | 6410033 | 6412014 | WBGene00015483 | C05D11.5  | C05D11.5  | 0.432941346821004    |             |
| AGIWUR25683;AGIWUR32018;AGIWUR33469;AGIWUR36116 |    |     |         |         |                |           |           |                      |             |
| N2                                              | HS | III | 6411816 | 6414993 | WBGene00003523 | nas-4     | C05D11.6  | 0.236074346965268    |             |
| AGIWUR26546;AGIWUR27915;AGIWUR35771             |    |     |         |         |                |           |           |                      |             |
| N2                                              | HS | III | 6415774 | 6421885 | WBGene00015484 | atgl-1    | C05D11.7  | -0.0388064422328789  |             |
| AGIWUR16740;AGIWUR21361;AGIWUR28752             |    |     |         |         |                |           |           |                      |             |
| N2                                              | HS | III | 6422459 | 6427305 | WBGene00015485 | C05D11.8  | C05D11.8  | -0.087771342214527   |             |
| AGIWUR13966                                     |    |     |         |         |                |           |           |                      |             |
| N2                                              | HS | III | 6427529 | 6430934 | WBGene00015486 | C05D11.9  | C05D11.9  | 0.108473724205439    |             |
| AGIWUR7701                                      |    |     |         |         |                |           |           |                      |             |
| N2                                              | HS | III | 6431153 | 6431792 | WBGene00015487 | mrps-17   | C05D11.10 | 0.206843440677819    |             |
| AGIWUR30900                                     |    |     |         |         |                |           |           |                      |             |
| N2                                              | HS | III | 6432178 | 6433145 | WBGene00006515 | txdc-9    | C05D11.3  | 0.447648441488468    |             |
| AGIWUR13727                                     |    |     |         |         |                |           |           |                      |             |
| N2                                              | HS | III | 6433239 | 6436502 | WBGene00006516 | vps-16    | C05D11.2  | 0.145755220546203    |             |
| AGIWUR12562                                     |    |     |         |         |                |           |           |                      |             |
| N2                                              | HS | III | 6436608 | 6439959 | WBGene00015481 | C05D11.1  | C05D11.1  | 0.163333082101915    |             |
| AGIWUR20542;AGIWUR28535                         |    |     |         |         |                |           |           |                      |             |
| N2                                              | HS | III | 6440145 | 6443000 | WBGene00003214 | mel-32    | C05D11.11 | 0.119544913399032    |             |
| AGIWUR4122;AGIWUR20891;AGIWUR29394;AGIWUR41655  |    |     |         |         |                |           |           |                      |             |
| N2                                              | HS | III | 6443044 | 6444079 | WBGene00015488 | C05D11.13 | C05D11.13 | 0.0659786289537116   |             |
| AGIWUR6024                                      |    |     |         |         |                |           |           |                      |             |
| N2                                              | HS | III | 6444693 | 6446943 | WBGene00002855 | let-721   | C05D11.12 | 0.0356228002482126   |             |
| AGIWUR6107;AGIWUR19355;AGIWUR41545              |    |     |         |         |                |           |           |                      |             |
| N2                                              | HS | III | 6448075 | 6450696 | WBGene00020822 | T26A5.6   | T26A5.6   | 0.228832996211178    | AGIWUR16995 |
| N2                                              | HS | III | 6454483 | 6460014 | WBGene00020821 | jhdm-1    | T26A5.5   | 0.11189255909553     |             |
| AGIWUR22295;AGIWUR37371                         |    |     |         |         |                |           |           |                      |             |
| N2                                              | HS | III | 6460120 | 6462222 | WBGene00020820 | algn-1    | T26A5.4   | 0.17219037765147     | AGIWUR10349 |
| N2                                              | HS | III | 6462216 | 6462856 | WBGene00020823 | T26A5.8   | T26A5.8   | -0.00617588897507027 | AGIWUR29912 |
| N2                                              | HS | III | 6462907 | 6463801 | WBGene00001005 | d1c-1     | T26A5.9   | 0.00944808103280259  |             |
| AGIWUR2065;AGIWUR7456;AGIWUR14904;AGIWUR27849   |    |     |         |         |                |           |           |                      |             |
| N2                                              | HS | III | 6465157 | 6467208 | WBGene00006463 | nduf-2.2  | T26A5.3   | 0.197146738775434    |             |
| AGIWUR33657                                     |    |     |         |         |                |           |           |                      |             |

|                                                 |    |     |         |         |                |           |           |                      |             |
|-------------------------------------------------|----|-----|---------|---------|----------------|-----------|-----------|----------------------|-------------|
| N2                                              | HS | III | 6467382 | 6471510 | WBGene00020819 | T26A5.2   | T26A5.2   | -0.327887124469607   | AGIWUR11165 |
| N2                                              | HS | III | 6471720 | 6475246 | WBGene00007060 | wht-6     | T26A5.1   | -0.057137288028823   | AGIWUR31046 |
| N2                                              | HS | III | 6478961 | 6481226 | WBGene00017755 | zip-8     | F23F12.9  | -0.134823316352093   |             |
| AGIWUR18229;AGIWUR25746                         |    |     |         |         |                |           |           |                      |             |
| N2                                              | HS | III | 6483218 | 6488875 | WBGene00017754 | F23F12.8  | F23F12.8  | 0.064819852716651    |             |
| AGIWUR7260;AGIWUR7807;AGIWUR20366               |    |     |         |         |                |           |           |                      |             |
| N2                                              | HS | III | 6489793 | 6491282 | WBGene00004503 | rpt-3     | F23F12.6  | -0.105171233596234   |             |
| AGIWUR5122;AGIWUR30499;AGIWUR41391              |    |     |         |         |                |           |           |                      |             |
| N2                                              | HS | III | 6491368 | 6492907 | WBGene00005076 | srb-11    | F23F12.10 | -0.0325821040077798  |             |
| AGIWUR30246                                     |    |     |         |         |                |           |           |                      |             |
| N2                                              | HS | III | 6493553 | 6494781 | WBGene00005075 | srb-10    | F23F12.11 | -0.139117958275362   |             |
| AGIWUR24014                                     |    |     |         |         |                |           |           |                      |             |
| N2                                              | HS | III | 6495677 | 6498198 | WBGene00044455 | F23F12.13 | F23F12.13 | -0.179807964688332   |             |
| AGIWUR33864;AGIWUR45117                         |    |     |         |         |                |           |           |                      |             |
| N2                                              | HS | III | 6498476 | 6500023 | WBGene00017752 | sdz-15    | F23F12.4  | -0.0101962077554676  |             |
| AGIWUR867;AGIWUR22937;AGIWUR25799               |    |     |         |         |                |           |           |                      |             |
| N2                                              | HS | III | 6500514 | 6507717 | WBGene00017751 | F23F12.3  | F23F12.3  | -0.0571428908288016  |             |
| AGIWUR12746;AGIWUR22390;AGIWUR33264;AGIWUR43307 |    |     |         |         |                |           |           |                      |             |
| N2                                              | HS | III | 6508132 | 6509499 | WBGene00017756 | F23F12.12 | F23F12.12 | 0.585429780039707    |             |
| AGIWUR24827                                     |    |     |         |         |                |           |           |                      |             |
| N2                                              | HS | III | 6509699 | 6514768 | WBGene00000044 | acr-5     | K03F8.2   | 0.0785839189878548   |             |
| AGIWUR945;AGIWUR2385;AGIWUR14698;AGIWUR31814    |    |     |         |         |                |           |           |                      |             |
| N2                                              | HS | III | 6518714 | 6520049 | WBGene00044295 | C09E7.10  | C09E7.10  | -0.026499026929196   |             |
| AGIWUR9196;AGIWUR10502;AGIWUR25243              |    |     |         |         |                |           |           |                      |             |
| N2                                              | HS | III | 6524051 | 6525660 | WBGene00003859 | oig-1     | C09E7.3   | 0.322794448163838    | AGIWUR44575 |
| N2                                              | HS | III | 6528202 | 6532088 | WBGene00004102 | pqn-10    | C09E7.2   | -0.206307619882971   | AGIWUR41366 |
| N2                                              | HS | III | 6532560 | 6533819 | WBGene00015637 | srxa-5    | C09E7.1   | 0.0335540007692927   | AGIWUR26008 |
| N2                                              | HS | III | 6534467 | 6536995 | WBGene00015638 | C09E7.4   | C09E7.4   | -0.677332569619558   | AGIWUR8849  |
| N2                                              | HS | III | 6538101 | 6541312 | WBGene00015639 | C09E7.5   | C09E7.5   | -0.0271742090383995  | AGIWUR9379  |
| N2                                              | HS | III | 6541550 | 6546425 | WBGene00015640 | C09E7.6   | C09E7.6   | -0.00921716461534761 |             |
| AGIWUR1061;AGIWUR30995                          |    |     |         |         |                |           |           |                      |             |
| N2                                              | HS | III | 6553575 | 6558575 | WBGene00015642 | C09E7.8   | C09E7.8   | -0.0691196229679711  | AGIWUR2078  |
| N2                                              | HS | III | 6559097 | 6563666 | WBGene00017849 | F27B3.7   | F27B3.7   | -0.0611034759062221  | AGIWUR40502 |
| N2                                              | HS | III | 6577827 | 6578584 | WBGene00017848 | F27B3.6   | F27B3.6   | -0.154901566053931   | AGIWUR29969 |
| N2                                              | HS | III | 6579698 | 6579877 | WBGene00044454 | F27B3.8   | F27B3.8   | -0.105060633308895   | AGIWUR13094 |
| N2                                              | HS | III | 6583461 | 6585617 | WBGene00000060 | acr-21    | F27B3.2   | -0.0509386543865897  | AGIWUR28720 |
| N2                                              | HS | III | 6587864 | 6589398 | WBGene00017648 | ddo-3     | F20H11.5  | -0.0329941995946754  |             |
| AGIWUR24363;AGIWUR41686                         |    |     |         |         |                |           |           |                      |             |
| N2                                              | HS | III | 6589377 | 6592175 | WBGene00017646 | F20H11.1  | F20H11.1  | -0.0219355316264505  |             |

|                                                                                 |    |     |         |         |                |           |           |                      |                     |
|---------------------------------------------------------------------------------|----|-----|---------|---------|----------------|-----------|-----------|----------------------|---------------------|
| AGIWUR29171                                                                     |    |     |         |         |                |           |           |                      |                     |
| N2                                                                              | HS | III | 6592567 | 6601171 | WBGene00002889 | let-765   | F20H11.2  |                      | -0.0374544078094603 |
| AGIWUR17640;AGIWUR25140;AGIWUR27253;AGIWUR43209                                 |    |     |         |         |                |           |           |                      |                     |
| N2                                                                              | HS | III | 6606247 | 6608106 | WBGene00003162 | mdh-2     | F20H11.3  |                      | -0.167898125663665  |
| AGIWUR5742;AGIWUR9105;AGIWUR11499;AGIWUR32191;AGIWUR32225;AGIWUR43317           |    |     |         |         |                |           |           |                      |                     |
| N2                                                                              | HS | III | 6608622 | 6610455 | WBGene00017647 | F20H11.4  | F20H11.4  |                      | 0.0389947782667548  |
| AGIWUR25769                                                                     |    |     |         |         |                |           |           |                      |                     |
| N2                                                                              | HS | III | 6610822 | 6612263 | WBGene00005263 | srh-40    | Y40D12A.3 |                      | -0.0870753320966262 |
| AGIWUR28492                                                                     |    |     |         |         |                |           |           |                      |                     |
| N2                                                                              | HS | III | 6612516 | 6615134 | WBGene00021503 | ctsa-2    | Y40D12A.2 |                      | -0.247664263576478  |
| AGIWUR11341                                                                     |    |     |         |         |                |           |           |                      |                     |
| N2                                                                              | HS | III | 6615414 | 6620051 | WBGene00021502 | Y40D12A.1 | Y40D12A.1 |                      | 0.0253453423949743  |
| AGIWUR14140;AGIWUR35368;AGIWUR38777                                             |    |     |         |         |                |           |           |                      |                     |
| N2                                                                              | HS | III | 6620254 | 6622265 | WBGene00015733 | C13B9.2   | C13B9.2   | -0.0962353103381197  | AGIWUR32233         |
| N2                                                                              | HS | III | 6622676 | 6624972 | WBGene00015734 | copd-1    | C13B9.3   | 0.267127303899594    | AGIWUR24038         |
| N2                                                                              | HS | III | 6632841 | 6652083 | WBGene00015735 | pdf-1     | C13B9.4   | 0.0155425287982984   |                     |
| AGIWUR2877;AGIWUR3657;AGIWUR9278;AGIWUR12756;AGIWUR39212                        |    |     |         |         |                |           |           |                      |                     |
| N2                                                                              | HS | III | 6664960 | 6665374 | WBGene00019714 | M01G4.1   | M01G4.1   | 0.110939630915592    | AGIWUR17124         |
| N2                                                                              | HS | III | 6675801 | 6703974 | WBGene00004316 | rbf-1     | F37A4.7   | 0.0106396195328964   |                     |
| AGIWUR809;AGIWUR10220;AGIWUR21533;AGIWUR33340;AGIWUR35132                       |    |     |         |         |                |           |           |                      |                     |
| N2                                                                              | HS | III | 6703993 | 6710084 | WBGene00002169 | isw-1     | F37A4.8   | -0.208206953784642   |                     |
| AGIWUR21624;AGIWUR25898;AGIWUR35837;AGIWUR38143                                 |    |     |         |         |                |           |           |                      |                     |
| N2                                                                              | HS | III | 6711869 | 6713191 | WBGene00018135 | F37A4.5   | F37A4.5   | 0.153538577889901    | AGIWUR10785         |
| N2                                                                              | HS | III | 6713583 | 6718022 | WBGene00018134 | F37A4.4   | F37A4.4   | 0.0320327095145476   | AGIWUR38765         |
| N2                                                                              | HS | III | 6718570 | 6720487 | WBGene00018133 | F37A4.3   | F37A4.3   | 0.117359595043871    | AGIWUR28310         |
| N2                                                                              | HS | III | 6720415 | 6722258 | WBGene00018137 | bath-41   | F37A4.9   | 0.156071756685744    | AGIWUR38646         |
| N2                                                                              | HS | III | 6722454 | 6723284 | WBGene00018132 | F37A4.2   | F37A4.2   | -0.00333180332646243 | AGIWUR15914         |
| N2                                                                              | HS | III | 6723389 | 6725711 | WBGene00018131 | F37A4.1   | F37A4.1   | -0.175579238772883   | AGIWUR31813         |
| N2                                                                              | HS | III | 6725789 | 6728058 | WBGene00022420 | wdr-4     | Y102E9.2  | -0.0992521987509605  |                     |
| AGIWUR29143                                                                     |    |     |         |         |                |           |           |                      |                     |
| N2                                                                              | HS | III | 6728155 | 6730170 | WBGene00044452 | Y102E9.5  | Y102E9.5  | -0.0452714405406081  |                     |
| AGIWUR3681;AGIWUR14452                                                          |    |     |         |         |                |           |           |                      |                     |
| N2                                                                              | HS | III | 6730781 | 6733935 | WBGene00003851 | odr-4     | Y102E9.1  | 0.124216979454811    |                     |
| AGIWUR7032;AGIWUR24539;AGIWUR26097;AGIWUR33738                                  |    |     |         |         |                |           |           |                      |                     |
| N2                                                                              | HS | III | 6733992 | 6734520 | WBGene00022421 | Y102E9.3  | Y102E9.3  | 0.208191758863402    |                     |
| AGIWUR36461                                                                     |    |     |         |         |                |           |           |                      |                     |
| N2                                                                              | HS | III | 6735968 | 6736642 | WBGene00044453 | Y102E9.6  | Y102E9.6  |                      |                     |
| -0.00133601854133047 AGIWUR2619;AGIWUR10795;AGIWUR16286;AGIWUR21903;AGIWUR28604 |    |     |         |         |                |           |           |                      |                     |
| N2                                                                              | HS | III | 6737271 | 6737783 | WBGene00019501 | K07E12.2  | K07E12.2  | -0.0718355708099452  |                     |

|                                                                                                             |    |     |         |         |                |          |          |                      |             |
|-------------------------------------------------------------------------------------------------------------|----|-----|---------|---------|----------------|----------|----------|----------------------|-------------|
| AGIWUR36836                                                                                                 |    |     |         |         |                |          |          |                      |             |
| N2                                                                                                          | HS | III | 6746308 | 6794764 | WBGene00000998 | dig-1    | K07E12.1 | 0.147709496317011    |             |
| AGIWUR27360                                                                                                 |    |     |         |         |                |          |          |                      |             |
| N2                                                                                                          | HS | III | 6795626 | 6797774 | WBGene00019907 | R05H11.1 | R05H11.1 | -0.0440871983140476  |             |
| AGIWUR12904;AGIWUR43298                                                                                     |    |     |         |         |                |          |          |                      |             |
| N2                                                                                                          | HS | III | 6798299 | 6800489 | WBGene00019908 | R05H11.2 | R05H11.2 | -0.0645892770799668  |             |
| AGIWUR9915                                                                                                  |    |     |         |         |                |          |          |                      |             |
| N2                                                                                                          | HS | III | 6802788 | 6816132 | WBGene00017904 | lim-8    | F28F5.3  | -0.00697122565320196 |             |
| AGIWUR16870;AGIWUR44041                                                                                     |    |     |         |         |                |          |          |                      |             |
| N2                                                                                                          | HS | III | 6816643 | 6816880 | WBGene00043297 | F28F5.4  | F28F5.4  | -0.126445160042731   |             |
| AGIWUR16112;AGIWUR20630;AGIWUR25870;AGIWUR27417;AGIWUR29321;AGIWUR35286                                     |    |     |         |         |                |          |          |                      |             |
| N2                                                                                                          | HS | III | 6817316 | 6819372 | WBGene00017905 | F28F5.6  | F28F5.6  | 0.0997836895162791   | AGIWUR24831 |
| N2                                                                                                          | HS | III | 6820935 | 6847283 | WBGene00006498 | ten-1    | R13F6.4  | -0.190266958824115   |             |
| AGIWUR35629;AGIWUR38757;AGIWUR41531                                                                         |    |     |         |         |                |          |          |                      |             |
| N2                                                                                                          | HS | III | 6847390 | 6849055 | WBGene00020066 | dhhc-5   | R13F6.5  | 0.145096006430137    | AGIWUR6886  |
| N2                                                                                                          | HS | III | 6851254 | 6853130 | WBGene00005712 | srv-1    | R13F6.3  | -0.0829213038104903  | AGIWUR24472 |
| N2                                                                                                          | HS | III | 6853113 | 6856804 | WBGene00006971 | zak-1    | R13F6.6  | 0.00728690363781936  | AGIWUR29484 |
| N2                                                                                                          | HS | III | 6858793 | 6859571 | WBGene00020067 | clcc-158 | R13F6.8  | 0.137358958651411    |             |
| AGIWUR19949;AGIWUR39355                                                                                     |    |     |         |         |                |          |          |                      |             |
| N2                                                                                                          | HS | III | 6859863 | 6860786 | WBGene00020065 | clcc-159 | R13F6.2  | 0.0836272643421392   |             |
| AGIWUR5341                                                                                                  |    |     |         |         |                |          |          |                      |             |
| N2                                                                                                          | HS | III | 6860939 | 6863968 | WBGene00004857 | sma-3    | R13F6.9  | 0.0466687409628914   | AGIWUR29198 |
| N2                                                                                                          | HS | III | 6865207 | 6869460 | WBGene00020068 | cra-1    | R13F6.10 | 0.0419783153066824   |             |
| AGIWUR6115                                                                                                  |    |     |         |         |                |          |          |                      |             |
| N2                                                                                                          | HS | III | 6869634 | 6870298 | WBGene00020064 | kbp-1    | R13F6.1  | 0.0654123463753749   | AGIWUR9178  |
| N2                                                                                                          | HS | III | 6870296 | 6871171 | WBGene00044312 | K04C2.8  | K04C2.8  | -0.0200001605426561  |             |
| AGIWUR8796;AGIWUR11686;AGIWUR12275;AGIWUR21315;AGIWUR28990;AGIWUR41699;AGIWUR44588                          |    |     |         |         |                |          |          |                      |             |
| N2                                                                                                          | HS | III | 6873048 | 6873729 | WBGene00019381 | K04C2.3  | K04C2.3  | -0.232565572715391   |             |
| AGIWUR13400;AGIWUR14947;AGIWUR25514;AGIWUR26287;AGIWUR31355;AGIWUR34016;AGIWUR34276;AGIWUR34672;AGIWUR40758 |    |     |         |         |                |          |          |                      |             |
| N2                                                                                                          | HS | III | 6880947 | 6883853 | WBGene00044311 | K04C2.7  | K04C2.7  | 0.0318686665883963   |             |
| AGIWUR7543;AGIWUR16799;AGIWUR39321                                                                          |    |     |         |         |                |          |          |                      |             |
| N2                                                                                                          | HS | III | 6885204 | 6889523 | WBGene00000265 | brd-1    | K04C2.4  | 0.101143251958401    | AGIWUR29695 |
| N2                                                                                                          | HS | III | 6889749 | 6895089 | WBGene00019380 | K04C2.2  | K04C2.2  | -0.107587124085871   | AGIWUR9457  |
| N2                                                                                                          | HS | III | 6898016 | 6900605 | WBGene00020315 | T07E3.4  | T07E3.4  | 0.0125808526366029   | AGIWUR17150 |
| N2                                                                                                          | HS | III | 6900568 | 6903106 | WBGene00020316 | brc-2    | T07E3.5  | 0.164773503223488    | AGIWUR23409 |
| N2                                                                                                          | HS | III | 6903895 | 6905170 | WBGene00020314 | T07E3.3  | T07E3.3  | -0.0377836294258858  |             |
| AGIWUR6606;AGIWUR7386                                                                                       |    |     |         |         |                |          |          |                      |             |
| N2                                                                                                          | HS | III | 6907441 | 6908012 | WBGene00020313 | T07E3.2  | T07E3.2  | 0.113638217777119    | AGIWUR40870 |
| N2                                                                                                          | HS | III | 6909438 | 6912481 | WBGene00020317 | pdf-1    | T07E3.6  | 0.0285815741360587   | AGIWUR21194 |

|                                                                                                           |    |     |         |         |                |          |          |                     |             |
|-----------------------------------------------------------------------------------------------------------|----|-----|---------|---------|----------------|----------|----------|---------------------|-------------|
| N2                                                                                                        | HS | III | 6924097 | 6928817 | WBGene00018998 | flap-1   | F57B9.7  | 0.122103305181646   | AGIWUR38961 |
| N2                                                                                                        | HS | III | 6930039 | 6931953 | WBGene00002083 | inf-1    | F57B9.6  | 0.134947329744165   | AGIWUR32955 |
| N2                                                                                                        | HS | III | 6932001 | 6935862 | WBGene00000276 | byn-1    | F57B9.5  | -0.100241626989769  |             |
| AGIWUR2887;AGIWUR9859;AGIWUR13290                                                                         |    |     |         |         |                |          |          |                     |             |
| N2                                                                                                        | HS | III | 6935967 | 6939443 | WBGene00000762 | coq-2    | F57B9.4  | -0.139850396446933  |             |
| AGIWUR7144;AGIWUR9523;AGIWUR12892;AGIWUR31473;AGIWUR38173;AGIWUR43114                                     |    |     |         |         |                |          |          |                     |             |
| N2                                                                                                        | HS | III | 6939888 | 6941736 | WBGene00018997 | F57B9.3  | F57B9.3  | 0.0698000897697924  |             |
| AGIWUR23882;AGIWUR25698;AGIWUR38042                                                                       |    |     |         |         |                |          |          |                     |             |
| N2                                                                                                        | HS | III | 6941889 | 6945895 | WBGene00004133 | abu-13   | F57B9.9  | 0.0929433676055957  | AGIWUR40209 |
| N2                                                                                                        | HS | III | 6946718 | 6958882 | WBGene00002845 | let-711  | F57B9.2  | -0.491117217291073  | AGIWUR10152 |
| N2                                                                                                        | HS | III | 6959110 | 6962027 | WBGene00004462 | rpn-6.1  | F57B9.10 | -0.177770355220607  |             |
| AGIWUR2602;AGIWUR16836;AGIWUR22959                                                                        |    |     |         |         |                |          |          |                     |             |
| N2                                                                                                        | HS | III | 6962090 | 6963319 | WBGene00018996 | F57B9.1  | F57B9.1  | 0.278776152548492   | AGIWUR37456 |
| N2                                                                                                        | HS | III | 6963620 | 6968130 | WBGene00017951 | pan1-2   | F31E3.4  | -0.124258445973602  | AGIWUR3878  |
| N2                                                                                                        | HS | III | 6970026 | 6972003 | WBGene00001168 | eef-1A.1 | F31E3.5  | -0.102474920620079  |             |
| AGIWUR14568;AGIWUR18769;AGIWUR22122;AGIWUR25445;AGIWUR25772;AGIWUR41301;AGIWUR42112                       |    |     |         |         |                |          |          |                     |             |
| N2                                                                                                        | HS | III | 6972210 | 6973717 | WBGene00004340 | rfc-4    | F31E3.3  | 0.144892677331448   | AGIWUR37637 |
| N2                                                                                                        | HS | III | 6974338 | 6978025 | WBGene00017950 | F31E3.2  | F31E3.2  | -0.0272691477627935 |             |
| AGIWUR6472;AGIWUR9830;AGIWUR20256;AGIWUR21734;AGIWUR27342;AGIWUR35926;AGIWUR37116;AGIWUR37915;AGIWUR39344 |    |     |         |         |                |          |          |                     |             |
| N2                                                                                                        | HS | III | 6979884 | 6981785 | WBGene00000443 | ceh-20   | F31E3.1  | 0.122841969920795   | AGIWUR8244  |
| N2                                                                                                        | HS | III | 6990168 | 7002310 | WBGene00004182 | prk-1    | C06E8.3  | -0.235007000202975  |             |
| AGIWUR1009;AGIWUR20404;AGIWUR20919;AGIWUR43839                                                            |    |     |         |         |                |          |          |                     |             |
| N2                                                                                                        | HS | III | 7002301 | 7005450 | WBGene00015544 | C06E8.5  | C06E8.5  | 0.38922128217509    | AGIWUR44652 |
| N2                                                                                                        | HS | III | 7009136 | 7019574 | WBGene00017389 | lgc-38   | F11H8.2  | -0.308539779917104  |             |
| AGIWUR127;AGIWUR44935                                                                                     |    |     |         |         |                |          |          |                     |             |
| N2                                                                                                        | HS | III | 7019583 | 7020600 | WBGene00000597 | col-8    | F11H8.3  | -0.367067853506159  | AGIWUR25771 |
| N2                                                                                                        | HS | III | 7021167 | 7023652 | WBGene00004341 | rfl-1    | F11H8.1  | 0.0926729022547086  | AGIWUR25920 |
| N2                                                                                                        | HS | III | 7023642 | 7029203 | WBGene00000872 | cyk-1    | F11H8.4  | 0.00328936127488433 |             |
| AGIWUR2929;AGIWUR7188;AGIWUR9447;AGIWUR31305;AGIWUR34755;AGIWUR36247                                      |    |     |         |         |                |          |          |                     |             |
| N2                                                                                                        | HS | III | 7035432 | 7045724 | WBGene00023414 | R01H2.7  | R01H2.7  | 0.0281756055111804  |             |
| AGIWUR10603;AGIWUR22901;AGIWUR23233;AGIWUR41509                                                           |    |     |         |         |                |          |          |                     |             |
| N2                                                                                                        | HS | III | 7056541 | 7058526 | WBGene00019810 | R01H2.2  | R01H2.2  | 0.0272694889910543  |             |
| AGIWUR6400;AGIWUR27609;AGIWUR33698                                                                        |    |     |         |         |                |          |          |                     |             |
| N2                                                                                                        | HS | III | 7058516 | 7060597 | WBGene00019811 | egg-2    | R01H2.3  | -0.0725495646872059 | AGIWUR39983 |
| N2                                                                                                        | HS | III | 7061111 | 7064275 | WBGene00019812 | R01H2.4  | R01H2.4  | 0.21286974688628    | AGIWUR17584 |
| N2                                                                                                        | HS | III | 7065439 | 7067477 | WBGene00019813 | ger-1    | R01H2.5  | 0.253324717823856   |             |
| AGIWUR8609;AGIWUR22100;AGIWUR34387                                                                        |    |     |         |         |                |          |          |                     |             |
| N2                                                                                                        | HS | III | 7067686 | 7068570 | WBGene00006713 | ubc-18   | R01H2.6  | -0.131375272929515  |             |
| AGIWUR20704;AGIWUR29116;AGIWUR36145;AGIWUR38951                                                           |    |     |         |         |                |          |          |                     |             |

|                                                                                               |    |     |         |         |                |          |          |                     |             |
|-----------------------------------------------------------------------------------------------|----|-----|---------|---------|----------------|----------|----------|---------------------|-------------|
| N2                                                                                            | HS | III | 7069103 | 7069580 | WBGene00045190 | R01H2.8  | R01H2.8  | -0.104384265958159  |             |
| AGIWUR613;AGIWUR4684;AGIWUR11900;AGIWUR31809;AGIWUR39639                                      |    |     |         |         |                |          |          |                     |             |
| N2                                                                                            | HS | III | 7070800 | 7072552 | WBGene00003022 | lin-37   | ZK418.4  | 0.0235976560211686  | AGIWUR4353  |
| N2                                                                                            | HS | III | 7072613 | 7073851 | WBGene00022734 | ZK418.5  | ZK418.5  | 0.0242217291496889  | AGIWUR5961  |
| N2                                                                                            | HS | III | 7074250 | 7076349 | WBGene00220259 | ZK418.13 | ZK418.13 |                     |             |
| -0.00288847264455327 AGIWUR31633;AGIWUR36398;AGIWUR37087                                      |    |     |         |         |                |          |          |                     |             |
| N2                                                                                            | HS | III | 7079077 | 7080789 | WBGene00022736 | ZK418.7  | ZK418.7  | 0.197065487303481   |             |
| AGIWUR15775;AGIWUR28330;AGIWUR32337                                                           |    |     |         |         |                |          |          |                     |             |
| N2                                                                                            | HS | III | 7083684 | 7085088 | WBGene00022737 | tofu-7   | ZK418.8  | 0.160973656103954   | AGIWUR1384  |
| N2                                                                                            | HS | III | 7085197 | 7087741 | WBGene00022738 | ZK418.9  | ZK418.9  | -0.0175785304522336 |             |
| AGIWUR5350;AGIWUR11967;AGIWUR12779;AGIWUR22635;AGIWUR44900                                    |    |     |         |         |                |          |          |                     |             |
| N2                                                                                            | HS | III | 7088644 | 7090132 | WBGene00044353 | ZK418.10 | ZK418.10 |                     |             |
| -0.00861587229712146 AGIWUR33945                                                              |    |     |         |         |                |          |          |                     |             |
| N2                                                                                            | HS | III | 7091330 | 7093408 | WBGene00022732 | ZK418.2  | ZK418.2  | -0.0173425972558885 |             |
| AGIWUR26774;AGIWUR38970;AGIWUR43419                                                           |    |     |         |         |                |          |          |                     |             |
| N2                                                                                            | HS | III | 7095553 | 7097079 | WBGene00003608 | nhr-9    | ZK418.1  | 0.0362928572376013  | AGIWUR40203 |
| N2                                                                                            | HS | III | 7100482 | 7102033 | WBGene00044354 | ZK418.11 | ZK418.11 | 0.00801054450952199 |             |
| AGIWUR12692;AGIWUR40894                                                                       |    |     |         |         |                |          |          |                     |             |
| N2                                                                                            | HS | III | 7102086 | 7103990 | WBGene00015102 | cpq-2    | B0280.5  | -0.0350883518032887 |             |
| AGIWUR14788;AGIWUR26818                                                                       |    |     |         |         |                |          |          |                     |             |
| N2                                                                                            | HS | III | 7108322 | 7109741 | WBGene00003845 | odd-1    | B0280.4  | 0.122614789543525   | AGIWUR21681 |
| N2                                                                                            | HS | III | 7110302 | 7111893 | WBGene00015103 | B0280.7  | B0280.7  | 0.335723923495038   | AGIWUR8179  |
| N2                                                                                            | HS | III | 7112300 | 7115438 | WBGene00003609 | nhr-10   | B0280.8  | 0.041056556992503   | AGIWUR15057 |
| N2                                                                                            | HS | III | 7120905 | 7122895 | WBGene00015104 | B0280.9  | B0280.9  | -0.182251220410015  | AGIWUR38406 |
| N2                                                                                            | HS | III | 7123128 | 7124329 | WBGene00015101 | rpia-1   | B0280.3  | 0.024192347670196   |             |
| AGIWUR24377;AGIWUR29690;AGIWUR34957;AGIWUR43357                                               |    |     |         |         |                |          |          |                     |             |
| N2                                                                                            | HS | III | 7132038 | 7133674 | WBGene00015105 | pot-1    | B0280.10 | 0.128871487974282   |             |
| AGIWUR17608                                                                                   |    |     |         |         |                |          |          |                     |             |
| N2                                                                                            | HS | III | 7133766 | 7136460 | WBGene00015099 | ggtb-1   | B0280.1  | 0.116506937448896   |             |
| AGIWUR26;AGIWUR16425;AGIWUR21558;AGIWUR29845                                                  |    |     |         |         |                |          |          |                     |             |
| N2                                                                                            | HS | III | 7136510 | 7138278 | WBGene00015106 | B0280.11 | B0280.11 | 0.113926719031577   |             |
| AGIWUR27947;AGIWUR34409                                                                       |    |     |         |         |                |          |          |                     |             |
| N2                                                                                            | HS | III | 7138683 | 7144832 | WBGene00001613 | glr-2    | B0280.12 | 0.16867939510722    |             |
| AGIWUR21369                                                                                   |    |     |         |         |                |          |          |                     |             |
| N2                                                                                            | HS | III | 7145816 | 7153795 | WBGene00003858 | ogt-1    | K04G7.3  | 0.0195442080245369  |             |
| AGIWUR5550;AGIWUR36960                                                                        |    |     |         |         |                |          |          |                     |             |
| N2                                                                                            | HS | III | 7156032 | 7158809 | WBGene00019401 | nuo-4    | K04G7.4  | 0.00981165536191364 |             |
| AGIWUR1349;AGIWUR3103;AGIWUR11949;AGIWUR15549;AGIWUR17066;AGIWUR21918;AGIWUR42710;AGIWUR44306 |    |     |         |         |                |          |          |                     |             |
| N2                                                                                            | HS | III | 7158912 | 7161157 | WBGene00004390 | rnp-7    | K04G7.10 | 0.0767626504764376  |             |

|                                                           |    |     |         |         |                |           |           |                                 |
|-----------------------------------------------------------|----|-----|---------|---------|----------------|-----------|-----------|---------------------------------|
| AGIWUR27127                                               |    |     |         |         |                |           |           |                                 |
| N2                                                        | HS | III | 7161157 | 7162115 | WBGene00019402 | K04G7.11  | K04G7.11  | 0.0551904343626113              |
| AGIWUR41126                                               |    |     |         |         |                |           |           |                                 |
| N2                                                        | HS | III | 7162694 | 7165261 | WBGene00019400 | K04G7.1   | K04G7.1   | -0.0172216014667068 AGIWUR11536 |
| N2                                                        | HS | III | 7167838 | 7170990 | WBGene00018152 | acs-4     | F37C12.7  | 0.00872781594998795             |
| AGIWUR33729;AGIWUR35716                                   |    |     |         |         |                |           |           |                                 |
| N2                                                        | HS | III | 7177530 | 7178853 | WBGene00005072 | srb-7     | F37C12.17 | 0.0103568154851317              |
| AGIWUR8880                                                |    |     |         |         |                |           |           |                                 |
| N2                                                        | HS | III | 7178984 | 7179606 | WBGene00004483 | rps-14    | F37C12.9  | -0.0337613632321965             |
| AGIWUR2374;AGIWUR32041                                    |    |     |         |         |                |           |           |                                 |
| N2                                                        | HS | III | 7180249 | 7180677 | WBGene00004450 | rp1-36    | F37C12.4  | 0.0645195106953196              |
| AGIWUR3760;AGIWUR5590;AGIWUR25437                         |    |     |         |         |                |           |           |                                 |
| N2                                                        | HS | III | 7180730 | 7181925 | WBGene00018151 | F37C12.3  | F37C12.3  | 0.320591857158258               |
| AGIWUR5900;AGIWUR21081                                    |    |     |         |         |                |           |           |                                 |
| N2                                                        | HS | III | 7181970 | 7184049 | WBGene00018150 | epg-4     | F37C12.2  | -0.0551267162361171             |
| AGIWUR42197                                               |    |     |         |         |                |           |           |                                 |
| N2                                                        | HS | III | 7184348 | 7187868 | WBGene00018149 | F37C12.1  | F37C12.1  | -0.0334767309658162             |
| AGIWUR4488                                                |    |     |         |         |                |           |           |                                 |
| N2                                                        | HS | III | 7187841 | 7188430 | WBGene00018153 | F37C12.10 | F37C12.10 | -0.0128947906304688             |
| AGIWUR22078                                               |    |     |         |         |                |           |           |                                 |
| N2                                                        | HS | III | 7189142 | 7189631 | WBGene00004490 | rps-21    | F37C12.11 | -0.038723918302459              |
| AGIWUR12006;AGIWUR31276;AGIWUR34444                       |    |     |         |         |                |           |           |                                 |
| N2                                                        | HS | III | 7190207 | 7192992 | WBGene00003176 | mec-14    | F37C12.12 | 0.101499998615739               |
| AGIWUR9445;AGIWUR17804;AGIWUR28649;AGIWUR39147            |    |     |         |         |                |           |           |                                 |
| N2                                                        | HS | III | 7194094 | 7195425 | WBGene00044005 | F37C12.18 | F37C12.18 | 0.0742570789299233              |
| AGIWUR11612                                               |    |     |         |         |                |           |           |                                 |
| N2                                                        | HS | III | 7196225 | 7232172 | WBGene00018154 | exos-9    | F37C12.13 | -0.0756114874136777             |
| AGIWUR7392;AGIWUR7814;AGIWUR20734;AGIWUR21953;AGIWUR33274 |    |     |         |         |                |           |           |                                 |
| N2                                                        | HS | III | 7232926 | 7234202 | WBGene00020636 | T20H4.5   | T20H4.5   | -0.137570568905871              |
| AGIWUR19610;AGIWUR21920;AGIWUR24242;AGIWUR33423           |    |     |         |         |                |           |           |                                 |
| N2                                                        | HS | III | 7238607 | 7241284 | WBGene00004189 | pars-1    | T20H4.3   | -0.0199399071161519             |
| AGIWUR4343;AGIWUR9909;AGIWUR36586                         |    |     |         |         |                |           |           |                                 |
| N2                                                        | HS | III | 7241365 | 7242950 | WBGene00020635 | T20H4.2   | T20H4.2   | 0.0373242242753129 AGIWUR15565  |
| N2                                                        | HS | III | 7243305 | 7245743 | WBGene00003890 | osm-10    | T20H4.1   | 0.193713559060049 AGIWUR39413   |
| N2                                                        | HS | III | 7245703 | 7247937 | WBGene00020646 | zmp-6     | T21D11.1  | -0.237288905977655              |
| AGIWUR9527                                                |    |     |         |         |                |           |           |                                 |
| N2                                                        | HS | III | 7268414 | 7275396 | WBGene00015159 | psd-1     | B0361.5   | -0.0264657907359753             |
| AGIWUR9371;AGIWUR25166                                    |    |     |         |         |                |           |           |                                 |
| N2                                                        | HS | III | 7275502 | 7277274 | WBGene00015160 | B0361.6   | B0361.6   | -0.063852749821411 AGIWUR42062  |



|                                                                                                          |    |     |         |         |                |          |          |                                 |
|----------------------------------------------------------------------------------------------------------|----|-----|---------|---------|----------------|----------|----------|---------------------------------|
| N2                                                                                                       | HS | III | 7277604 | 7281217 | WBGene00015165 | B0361.11 | B0361.11 |                                 |
| -0.00444761853019671 AGIWUR44378                                                                         |    |     |         |         |                |          |          |                                 |
| N2                                                                                                       | HS | III | 7281377 | 7283959 | WBGene00015157 | B0361.3  | B0361.3  | 0.30825514347978 AGIWUR22638    |
| N2                                                                                                       | HS | III | 7283915 | 7285883 | WBGene00015161 | pho-5    | B0361.7  | 0.029276480171343               |
| AGIWUR4284;AGIWUR4841;AGIWUR6453;AGIWUR19407;AGIWUR27150;AGIWUR32167                                     |    |     |         |         |                |          |          |                                 |
| N2                                                                                                       | HS | III | 7285983 | 7287603 | WBGene00015164 | ykt-6    | B0361.10 | 0.262153448560243               |
| AGIWUR22374                                                                                              |    |     |         |         |                |          |          |                                 |
| N2                                                                                                       | HS | III | 7287848 | 7290562 | WBGene00015162 | algn-11  | B0361.8  | 0.234797260657306 AGIWUR25298   |
| N2                                                                                                       | HS | III | 7293632 | 7308364 | WBGene00015156 | B0361.2  | B0361.2  | 0.16742640325727 AGIWUR464      |
| N2                                                                                                       | HS | III | 7308354 | 7308975 | WBGene00018949 | acbp-4   | F56C9.5  | 0.100356790583845 AGIWUR42872   |
| N2                                                                                                       | HS | III | 7308998 | 7310773 | WBGene00018950 | F56C9.6  | F56C9.6  | -0.179809067731039 AGIWUR36977  |
| N2                                                                                                       | HS | III | 7311290 | 7313195 | WBGene00018948 | F56C9.3  | F56C9.3  | -0.0566955438094574 AGIWUR2658  |
| N2                                                                                                       | HS | III | 7313149 | 7314977 | WBGene00018951 | F56C9.7  | F56C9.7  | 0.171323037464695 AGIWUR21582   |
| N2                                                                                                       | HS | III | 7315903 | 7319595 | WBGene00018952 | F56C9.8  | F56C9.8  | 0.128915208734023 AGIWUR35334   |
| N2                                                                                                       | HS | III | 7324940 | 7329649 | WBGene00018954 | F56C9.11 | F56C9.11 | 0.195888925535083               |
| AGIWUR145                                                                                                |    |     |         |         |                |          |          |                                 |
| N2                                                                                                       | HS | III | 7329714 | 7335316 | WBGene00018953 | F56C9.10 | F56C9.10 | -0.0345248884924656             |
| AGIWUR4974;AGIWUR6930;AGIWUR7997;AGIWUR15213;AGIWUR25399;AGIWUR25573;AGIWUR40411;AGIWUR43493;AGIWUR43851 |    |     |         |         |                |          |          |                                 |
| N2                                                                                                       | HS | III | 7336587 | 7338765 | WBGene00001748 | gsp-2    | F56C9.1  | -0.0725983933376142 AGIWUR26543 |
| N2                                                                                                       | HS | III | 7339001 | 7343626 | WBGene00002182 | kap-1    | F08F8.3  | 0.181326599399518               |
| AGIWUR23181;AGIWUR29263                                                                                  |    |     |         |         |                |          |          |                                 |
| N2                                                                                                       | HS | III | 7343675 | 7345855 | WBGene00017271 | F08F8.6  | F08F8.6  | 0.193642222967307 AGIWUR6914    |
| N2                                                                                                       | HS | III | 7345861 | 7347149 | WBGene00017272 | F08F8.7  | F08F8.7  | 0.207307607390946               |
| AGIWUR3256;AGIWUR12445;AGIWUR15029;AGIWUR17210;AGIWUR17376;AGIWUR43081                                   |    |     |         |         |                |          |          |                                 |
| N2                                                                                                       | HS | III | 7347237 | 7349175 | WBGene00017273 | gos-28   | F08F8.8  | 0.0587279159536038 AGIWUR19819  |
| N2                                                                                                       | HS | III | 7349291 | 7354090 | WBGene00017274 | F08F8.9  | F08F8.9  | -0.106246125495964              |
| AGIWUR6831;AGIWUR31117;AGIWUR42085                                                                       |    |     |         |         |                |          |          |                                 |
| N2                                                                                                       | HS | III | 7354159 | 7357395 | WBGene00017275 | F08F8.10 | F08F8.10 | -0.0651224321302806             |
| AGIWUR3820                                                                                               |    |     |         |         |                |          |          |                                 |
| N2                                                                                                       | HS | III | 7357663 | 7359183 | WBGene00017269 | F08F8.4  | F08F8.4  | 0.171595271881715 AGIWUR6271    |
| N2                                                                                                       | HS | III | 7359498 | 7362132 | WBGene00017268 | hmgr-1   | F08F8.2  | 0.061113145061567               |
| AGIWUR15001;AGIWUR25419;AGIWUR25776                                                                      |    |     |         |         |                |          |          |                                 |
| N2                                                                                                       | HS | III | 7365902 | 7366448 | WBGene00269381 | F08F8.11 | F08F8.11 | 0.167226069844627               |
| AGIWUR5929                                                                                               |    |     |         |         |                |          |          |                                 |
| N2                                                                                                       | HS | III | 7366717 | 7367112 | WBGene00020603 | T20B12.5 | T20B12.5 | -0.021601396595381              |
| AGIWUR45073                                                                                              |    |     |         |         |                |          |          |                                 |
| N2                                                                                                       | HS | III | 7367710 | 7369538 | WBGene00020602 | T20B12.4 | T20B12.4 | 0.123439929494427               |
| AGIWUR29818                                                                                              |    |     |         |         |                |          |          |                                 |
| N2                                                                                                       | HS | III | 7370131 | 7374731 | WBGene00003378 | mm1-1    | T20B12.6 | 0.0409457996738318              |

AGIWUR277;AGIWUR27528;AGIWUR27964  
 N2 HS III 7377854 7379045 WBGene00020604 T20B12.7 T20B12.7 -0.0846158570013582  
 AGIWUR17909;AGIWUR18286;AGIWUR31122;AGIWUR35623;AGIWUR36772;AGIWUR43617  
 N2 HS III 7379143 7381609 WBGene00001974 hmg-4 T20B12.8 -0.162603148980789  
 AGIWUR13021;AGIWUR13254;AGIWUR15814;AGIWUR16997;AGIWUR37862  
 N2 HS III 7382115 7383906 WBGene00020601 T20B12.3 T20B12.3 0.201829937990283  
 AGIWUR22514  
 N2 HS III 7384033 7386132 WBGene00006542 tbp-1 T20B12.2 -0.0301959488600421  
 AGIWUR1258;AGIWUR1790;AGIWUR12732;AGIWUR19590;AGIWUR40034  
 N2 HS III 7386229 7391135 WBGene00020600 trd-1 T20B12.1 0.0333524199310347  
 AGIWUR24657;AGIWUR32413;AGIWUR36042  
 N2 HS III 7391482 7395454 WBGene00020605 lgc-50 T20B12.9 0.0880323619015968  
 AGIWUR5207  
 N2 HS III 7454012 7455980 WBGene00000118 alh-12 Y69F12A.2 0.165562829519797  
 AGIWUR29059;AGIWUR34442  
 N2 HS III 7456734 7458544 WBGene00022102 Y69F12A.1 Y69F12A.1 0.0171988803366432  
 AGIWUR11528;AGIWUR13958;AGIWUR44146  
 N2 HS III 7460341 7461931 WBGene00003376 mls-1 H14A12.4 0.171480836919596  
 AGIWUR13598  
 N2 HS III 7463797 7465238 WBGene00019196 H14A12.3 H14A12.3 -0.0324019182865651  
 AGIWUR2821  
 N2 HS III 7465605 7467633 WBGene00001503 fum-1 H14A12.2 -0.139134324854378  
 AGIWUR21960;AGIWUR44920  
 N2 HS III 7467574 7468676 WBGene00019197 H14A12.5 H14A12.5 0.0953358812458607  
 AGIWUR34074  
 N2 HS III 7479680 7489075 WBGene00003497 mup-4 K07D8.1 0.179421921691581 AGIWUR31451  
 N2 HS III 7495320 7497832 WBGene00000479 cgh-1 C07H6.5 -0.138879123427236  
 AGIWUR3774;AGIWUR4099;AGIWUR15533;AGIWUR16780;AGIWUR28635;AGIWUR38324;AGIWUR42561  
 N2 HS III 7498819 7499447 WBGene00015582 C07H6.9 C07H6.9 -0.189758806552758 AGIWUR10743  
 N2 HS III 7499677 7503241 WBGene00015581 C07H6.4 C07H6.4 -0.00610542994172114  
 AGIWUR706;AGIWUR875;AGIWUR5973;AGIWUR7898;AGIWUR15254;AGIWUR15464;AGIWUR21636;AGIWUR23127;AGIWUR33052;AGIWUR33165;AGIWUR38055  
 N2 HS III 7508178 7515285 WBGene00015580 cls-1 C07H6.3 0.0499166496433778  
 AGIWUR6187;AGIWUR26175;AGIWUR28060;AGIWUR38483  
 N2 HS III 7515223 7518524 WBGene00000537 clk-2 C07H6.6 -0.150308726912339  
 AGIWUR5586;AGIWUR7836  
 N2 HS III 7518628 7520845 WBGene00000854 cux-7 C07H6.8 -0.0771766710611583  
 AGIWUR12788;AGIWUR23553;AGIWUR39468;AGIWUR43244  
 N2 HS III 7521004 7524836 WBGene00002986 lig-4 C07H6.1 -0.205474909553734 AGIWUR12502

|                                                                                   |    |     |         |         |                |          |          |                      |             |
|-----------------------------------------------------------------------------------|----|-----|---------|---------|----------------|----------|----------|----------------------|-------------|
| N2                                                                                | HS | III | 7528641 | 7536632 | WBGene00003024 | lin-39   | C07H6.7  | 0.0585900138786268   | AGIWUR2784  |
| N2                                                                                | HS | III | 7555617 | 7558208 | WBGene00000437 | ceh-13   | R13A5.5  | -0.162759283674433   | AGIWUR6653  |
| N2                                                                                | HS | III | 7562172 | 7564529 | WBGene00020048 | lgc-12   | R13A5.4  | 0.0294932223045521   | AGIWUR22283 |
| N2                                                                                | HS | III | 7564500 | 7565347 | WBGene00020049 | ttr-8    | R13A5.6  | -0.180115438242341   | AGIWUR10718 |
| N2                                                                                | HS | III | 7566411 | 7567486 | WBGene00020047 | ttr-32   | R13A5.3  | -0.133324528939069   | AGIWUR44767 |
| N2                                                                                | HS | III | 7567475 | 7570133 | WBGene00020050 | R13A5.7  | R13A5.7  | -0.129382479465834   | AGIWUR8137  |
| N2                                                                                | HS | III | 7572105 | 7572831 | WBGene00004420 | rpl-9    | R13A5.8  | -0.00671449955225256 | AGIWUR14686 |
| N2                                                                                | HS | III | 7573350 | 7575263 | WBGene00003063 | lpd-7    | R13A5.12 | 0.0241685686470738   |             |
| AGIWUR3802;AGIWUR36129;AGIWUR45192                                                |    |     |         |         |                |          |          |                      |             |
| N2                                                                                | HS | III | 7575274 | 7579411 | WBGene00020051 | R13A5.9  | R13A5.9  | 0.172860955204447    | AGIWUR25499 |
| N2                                                                                | HS | III | 7582033 | 7582999 | WBGene00020052 | R13A5.10 | R13A5.10 | 0.265118274853439    |             |
| AGIWUR14155                                                                       |    |     |         |         |                |          |          |                      |             |
| N2                                                                                | HS | III | 7584181 | 7591570 | WBGene00000846 | cup-5    | R13A5.1  | -0.251032462394201   |             |
| AGIWUR8333;AGIWUR37240                                                            |    |     |         |         |                |          |          |                      |             |
| N2                                                                                | HS | III | 7605949 | 7608290 | WBGene00020202 | T04A6.3  | T04A6.3  | 0.134509559933684    | AGIWUR19994 |
| N2                                                                                | HS | III | 7614862 | 7615699 | WBGene00020201 | T04A6.2  | T04A6.2  | 0.0370192807435794   |             |
| AGIWUR4917;AGIWUR9169;AGIWUR22596;AGIWUR28490                                     |    |     |         |         |                |          |          |                      |             |
| N2                                                                                | HS | III | 7616528 | 7617590 | WBGene00020200 | T04A6.1  | T04A6.1  | -0.0575717118361814  |             |
| AGIWUR22210;AGIWUR23187;AGIWUR23913;AGIWUR27973                                   |    |     |         |         |                |          |          |                      |             |
| N2                                                                                | HS | III | 7625376 | 7641053 | WBGene00022816 | fbn-1    | ZK783.1  | -0.140192210616634   |             |
| AGIWUR3202;AGIWUR4339;AGIWUR28751;AGIWUR30718;AGIWUR36180;AGIWUR43017             |    |     |         |         |                |          |          |                      |             |
| N2                                                                                | HS | III | 7641034 | 7643101 | WBGene00022817 | upp-1    | ZK783.2  | -0.127961618324079   |             |
| AGIWUR33056;AGIWUR36827;AGIWUR44756;AGIWUR44950                                   |    |     |         |         |                |          |          |                      |             |
| N2                                                                                | HS | III | 7648788 | 7650005 | WBGene00044448 | ZK783.6  | ZK783.6  | -0.0344620103746358  | AGIWUR41156 |
| N2                                                                                | HS | III | 7650549 | 7656032 | WBGene00001470 | baz-2    | ZK783.4  | 0.123923166061163    | AGIWUR33055 |
| N2                                                                                | HS | III | 7662428 | 7672153 | WBGene00015988 | C18H2.1  | C18H2.1  | 0.106498813792269    | AGIWUR27375 |
| N2                                                                                | HS | III | 7684357 | 7688917 | WBGene00015990 | C18H2.3  | C18H2.3  | 0.16909610589002     | AGIWUR18472 |
| N2                                                                                | HS | III | 7689356 | 7694398 | WBGene00015992 | C18H2.5  | C18H2.5  | 0.15582568357449     | AGIWUR36085 |
| N2                                                                                | HS | III | 7694554 | 7700381 | WBGene00015991 | C18H2.4  | C18H2.4  | 0.0689044516034194   | AGIWUR28887 |
| N2                                                                                | HS | III | 7700338 | 7709491 | WBGene00003002 | lin-13   | C03B8.4  | -0.0226675448688027  |             |
| AGIWUR1136;AGIWUR13351;AGIWUR42089                                                |    |     |         |         |                |          |          |                      |             |
| N2                                                                                | HS | III | 7712309 | 7717314 | WBGene00015386 | C03B8.3  | C03B8.3  | 0.108913178397612    |             |
| AGIWUR4334;AGIWUR7654;AGIWUR10933;AGIWUR12045;AGIWUR13588;AGIWUR22325;AGIWUR26403 |    |     |         |         |                |          |          |                      |             |
| N2                                                                                | HS | III | 7719791 | 7738105 | WBGene00003559 | nc1-1    | ZK112.2  | 0.0645406465452876   |             |
| AGIWUR29632;AGIWUR30707;AGIWUR44134                                               |    |     |         |         |                |          |          |                      |             |
| N2                                                                                | HS | III | 7738085 | 7739656 | WBGene00022661 | ZK112.5  | ZK112.5  | 0.0352849895805409   | AGIWUR8890  |
| N2                                                                                | HS | III | 7739855 | 7740541 | WBGene00022662 | ZK112.6  | ZK112.6  | 0.162478208026664    | AGIWUR34004 |
| N2                                                                                | HS | III | 7741326 | 7754448 | WBGene00000395 | cdh-3    | ZK112.7  | 0.088734988382547    | AGIWUR26163 |
| N2                                                                                | HS | III | 7758730 | 7761273 | WBGene00003956 | pcp-1    | ZK112.1  | 0.309433871402419    | AGIWUR32149 |

|                                                                                                                                   |    |     |         |         |                |          |          |                       |             |
|-----------------------------------------------------------------------------------------------------------------------------------|----|-----|---------|---------|----------------|----------|----------|-----------------------|-------------|
| N2                                                                                                                                | HS | III | 7761977 | 7763603 | WBGene00022516 | mtx-2    | ZC97.1   | 0.351693057334671     | AGIWUR33978 |
| N2                                                                                                                                | HS | III | 7763698 | 7766052 | WBGene00022792 | ZK686.2  | ZK686.2  | 0.170294456599519     | AGIWUR29287 |
| N2                                                                                                                                | HS | III | 7766389 | 7767515 | WBGene00022795 | ZK686.5  | ZK686.5  | 0.129526946245807     | AGIWUR15013 |
| N2                                                                                                                                | HS | III | 7767571 | 7769063 | WBGene00022793 | ZK686.3  | ZK686.3  | -0.0617415065573299   |             |
| AGIWUR1330;AGIWUR17964                                                                                                            |    |     |         |         |                |          |          |                       |             |
| N2                                                                                                                                | HS | III | 7769165 | 7770149 | WBGene00022794 | snu-23   | ZK686.4  | -0.150628911484341    |             |
| AGIWUR31585;AGIWUR44773                                                                                                           |    |     |         |         |                |          |          |                       |             |
| N2                                                                                                                                | HS | III | 7771591 | 7772559 | WBGene00044799 | ZK686.6  | ZK686.6  | -0.0556315125313538   |             |
| AGIWUR10543;AGIWUR38278                                                                                                           |    |     |         |         |                |          |          |                       |             |
| N2                                                                                                                                | HS | III | 7773134 | 7773849 | WBGene00022791 | ZK686.1  | ZK686.1  | -0.131852168361895    |             |
| AGIWUR3542;AGIWUR27040;AGIWUR33797                                                                                                |    |     |         |         |                |          |          |                       |             |
| N2                                                                                                                                | HS | III | 7774778 | 7776039 | WBGene00015590 | bath-15  | C08C3.2  | -0.01072510912552     | AGIWUR30918 |
| N2                                                                                                                                | HS | III | 7776835 | 7783454 | WBGene00003102 | mab-5    | C08C3.3  | 0.285950934907794     | AGIWUR524   |
| N2                                                                                                                                | HS | III | 7793446 | 7795409 | WBGene00015591 | cyk-7    | C08C3.4  | -0.11402317357323     | AGIWUR39828 |
| N2                                                                                                                                | HS | III | 7814380 | 7817127 | WBGene00001174 | egl-5    | C08C3.1  | -0.0701169182687291   |             |
| AGIWUR9619;AGIWUR10136;AGIWUR23410;AGIWUR31673;AGIWUR34828;AGIWUR41220                                                            |    |     |         |         |                |          |          |                       |             |
| N2                                                                                                                                | HS | III | 7824377 | 7828626 | WBGene00001209 | egl-45   | C27D11.1 | -0.0325243123920984   |             |
| AGIWUR16837                                                                                                                       |    |     |         |         |                |          |          |                       |             |
| N2                                                                                                                                | HS | III | 7829411 | 7832503 | WBGene00022785 | ZK652.6  | ZK652.6  | 0.246299050728275     |             |
| AGIWUR22114;AGIWUR26296;AGIWUR34734                                                                                               |    |     |         |         |                |          |          |                       |             |
| N2                                                                                                                                | HS | III | 7839594 | 7841491 | WBGene00000446 | ceh-23   | ZK652.5  | -0.228391000593851    | AGIWUR4590  |
| N2                                                                                                                                | HS | III | 7842381 | 7843636 | WBGene00022786 | ZK652.8  | ZK652.8  | -0.0695719560323873   | AGIWUR21230 |
| N2                                                                                                                                | HS | III | 7855118 | 7855680 | WBGene00004449 | rp1-35   | ZK652.4  | -0.20203610068554     |             |
| AGIWUR1318;AGIWUR7271;AGIWUR13592;AGIWUR15530;AGIWUR19789;AGIWUR21396;AGIWUR22629;AGIWUR23860;AGIWUR27111;AGIWUR36006;AGIWUR41499 |    |     |         |         |                |          |          |                       |             |
| N2                                                                                                                                | HS | III | 7855840 | 7857242 | WBGene00022787 | tag-307  | ZK652.10 | 0.205747367939169     |             |
| AGIWUR7350                                                                                                                        |    |     |         |         |                |          |          |                       |             |
| N2                                                                                                                                | HS | III | 7857315 | 7858457 | WBGene00000765 | coq-5    | ZK652.9  | 0.204315733986544     | AGIWUR16679 |
| N2                                                                                                                                | HS | III | 7858979 | 7859512 | WBGene00044324 | ufm-1    | ZK652.3  | -0.000400107865009769 |             |
| AGIWUR7099;AGIWUR15272                                                                                                            |    |     |         |         |                |          |          |                       |             |
| N2                                                                                                                                | HS | III | 7859613 | 7860159 | WBGene00022783 | tomm-7   | ZK652.2  | -0.0409713655952206   |             |
| AGIWUR10295;AGIWUR25626;AGIWUR26385;AGIWUR36387;AGIWUR38431;AGIWUR41648                                                           |    |     |         |         |                |          |          |                       |             |
| N2                                                                                                                                | HS | III | 7860466 | 7861004 | WBGene00000835 | cuc-1    | ZK652.11 | 0.378261221801864     |             |
| AGIWUR21223                                                                                                                       |    |     |         |         |                |          |          |                       |             |
| N2                                                                                                                                | HS | III | 7862070 | 7862577 | WBGene00004918 | snr-5    | ZK652.1  | 0.0760159128017257    |             |
| AGIWUR7207;AGIWUR8160;AGIWUR18084;AGIWUR22192;AGIWUR27998;AGIWUR30639                                                             |    |     |         |         |                |          |          |                       |             |
| N2                                                                                                                                | HS | III | 7862583 | 7865306 | WBGene00015333 | slc-17.3 | C02C2.4  | 0.167799115005696     |             |
| AGIWUR31202                                                                                                                       |    |     |         |         |                |          |          |                       |             |
| N2                                                                                                                                | HS | III | 7866509 | 7868732 | WBGene00000845 | cup-4    | C02C2.3  | 0.249528019345846     | AGIWUR37722 |

|                                                                                                                                     |    |     |         |         |                |          |          |                     |             |
|-------------------------------------------------------------------------------------------------------------------------------------|----|-----|---------|---------|----------------|----------|----------|---------------------|-------------|
| N2                                                                                                                                  | HS | III | 7873781 | 7877194 | WBGene00015332 | tyr-1    | C02C2.1  | -0.0331577542003725 | AGIWUR41080 |
| N2                                                                                                                                  | HS | III | 7877176 | 7878839 | WBGene00015334 | sup-18   | C02C2.5  | 0.177634982297629   | AGIWUR39722 |
| N2                                                                                                                                  | HS | III | 7881113 | 7883003 | WBGene00022803 | ZK688.9  | ZK688.9  | 0.0524355162047776  | AGIWUR43699 |
| N2                                                                                                                                  | HS | III | 7883574 | 7884963 | WBGene00044762 | ZK688.11 | ZK688.11 | 0.0462872548011006  |             |
| AGIWUR19621;AGIWUR27683                                                                                                             |    |     |         |         |                |          |          |                     |             |
| N2                                                                                                                                  | HS | III | 7885088 | 7891615 | WBGene00022800 | ZK688.5  | ZK688.5  | -0.065697148337982  |             |
| AGIWUR14059;AGIWUR42115                                                                                                             |    |     |         |         |                |          |          |                     |             |
| N2                                                                                                                                  | HS | III | 7892256 | 7894625 | WBGene00022798 | fahd-1   | ZK688.3  | -0.115031695546925  | AGIWUR9390  |
| N2                                                                                                                                  | HS | III | 7895024 | 7895270 | WBGene00022799 | ZK688.4  | ZK688.4  | -0.0424402176163721 |             |
| AGIWUR13823;AGIWUR16019;AGIWUR16901;AGIWUR19883;AGIWUR19970;AGIWUR22563;AGIWUR28504;AGIWUR37484;AGIWUR37746;AGIWUR38268;AGIWUR40686 |    |     |         |         |                |          |          |                     |             |
| N2                                                                                                                                  | HS | III | 7895752 | 7897025 | WBGene00044447 | ZK688.10 | ZK688.10 | -0.286876078245325  |             |
| AGIWUR2695;AGIWUR9783                                                                                                               |    |     |         |         |                |          |          |                     |             |
| N2                                                                                                                                  | HS | III | 7901033 | 7904473 | WBGene00022797 | best-24  | ZK688.2  | -0.0411853751317715 |             |
| AGIWUR3194;AGIWUR10548;AGIWUR22051                                                                                                  |    |     |         |         |                |          |          |                     |             |
| N2                                                                                                                                  | HS | III | 7904945 | 7907843 | WBGene00022801 | pcp-5    | ZK688.6  | 0.385796349206922   | AGIWUR20771 |
| N2                                                                                                                                  | HS | III | 7909563 | 7910758 | WBGene00022796 | ZK688.1  | ZK688.1  | -0.165280471839054  | AGIWUR6214  |
| N2                                                                                                                                  | HS | III | 7910798 | 7911630 | WBGene00022802 | ZK688.7  | ZK688.7  | -0.0384602733175399 | AGIWUR42017 |
| N2                                                                                                                                  | HS | III | 7912698 | 7913600 | WBGene00044763 | ZK688.12 | ZK688.12 | 0.132317542159559   |             |
| AGIWUR36930;AGIWUR43391;AGIWUR44954                                                                                                 |    |     |         |         |                |          |          |                     |             |
| N2                                                                                                                                  | HS | III | 7914314 | 7917767 | WBGene00001628 | gly-3    | ZK688.8  | 0.109218387045255   |             |
| AGIWUR13062;AGIWUR36778;AGIWUR36892                                                                                                 |    |     |         |         |                |          |          |                     |             |
| N2                                                                                                                                  | HS | III | 7917987 | 7924917 | WBGene00016203 | tag-250  | C29E4.5  | 0.00246331439128422 |             |
| AGIWUR16151;AGIWUR24388;AGIWUR44595;AGIWUR44893                                                                                     |    |     |         |         |                |          |          |                     |             |
| N2                                                                                                                                  | HS | III | 7926999 | 7928734 | WBGene00043051 | C29E4.13 | C29E4.13 | 0.113469126550833   |             |
| AGIWUR727;AGIWUR15228                                                                                                               |    |     |         |         |                |          |          |                     |             |
| N2                                                                                                                                  | HS | III | 7929013 | 7932993 | WBGene00003801 | npp-15   | C29E4.4  | 0.163422322583767   | AGIWUR31543 |
| N2                                                                                                                                  | HS | III | 7933535 | 7937708 | WBGene00004303 | ran-2    | C29E4.3  | 0.0131711204527711  | AGIWUR24556 |
| N2                                                                                                                                  | HS | III | 7937827 | 7940931 | WBGene00016207 | C29E4.10 | C29E4.10 | 0.151150060325687   |             |
| AGIWUR39117                                                                                                                         |    |     |         |         |                |          |          |                     |             |
| N2                                                                                                                                  | HS | III | 7941057 | 7941614 | WBGene00016209 | C29E4.12 | C29E4.12 | -0.284057496611263  |             |
| AGIWUR10229                                                                                                                         |    |     |         |         |                |          |          |                     |             |
| N2                                                                                                                                  | HS | III | 7941717 | 7945593 | WBGene00016202 | kle-2    | C29E4.2  | 0.0630960811096006  | AGIWUR24070 |
| N2                                                                                                                                  | HS | III | 7945544 | 7947018 | WBGene00016204 | gsto-1   | C29E4.7  | 0.203287888757885   | AGIWUR31884 |
| N2                                                                                                                                  | HS | III | 7948838 | 7950068 | WBGene00000665 | col-90   | C29E4.1  | 0.0769074225688549  |             |
| AGIWUR12003;AGIWUR43808                                                                                                             |    |     |         |         |                |          |          |                     |             |
| N2                                                                                                                                  | HS | III | 7949975 | 7951915 | WBGene00002879 | let-754  | C29E4.8  | 0.0834323767517775  |             |
| AGIWUR3078;AGIWUR6977;AGIWUR16207;AGIWUR24532                                                                                       |    |     |         |         |                |          |          |                     |             |
| N2                                                                                                                                  | HS | III | 7952623 | 7955816 | WBGene00045246 | C29E4.15 | C29E4.15 | 0.160258739348343   |             |

AGIWUR7251;AGIWUR10062;AGIWUR39986  
 N2 HS III 7955828 7958105 WBGene00016206 C29E4.9 C29E4.9 0.0336166820350581  
 AGIWUR3333;AGIWUR5912;AGIWUR14429;AGIWUR23987;AGIWUR24372;AGIWUR27083;AGIWUR27187;AGIWUR37254;AGIWUR40677  
 N2 HS III 7961596 7962741 WBGene00018844 F54H12.4 F54H12.4 -0.153582360556056  
 AGIWUR22335  
 N2 HS III 7966601 7969221 WBGene00045247 F54H12.8 F54H12.8 0.1091799928691  
 AGIWUR229  
 N2 HS III 7969319 7970283 WBGene00044633 F54H12.7 F54H12.7 0.39931176865813  
 AGIWUR4710;AGIWUR17387;AGIWUR38904  
 N2 HS III 7970263 7972161 WBGene00018845 F54H12.5 F54H12.5 0.152070018534832  
 AGIWUR34607  
 N2 HS III 7972382 7973386 WBGene00018846 eef-1B.1 F54H12.6 -0.0524575578439883  
 AGIWUR27194;AGIWUR33538  
 N2 HS III 7973717 7977355 WBGene00000041 aco-2 F54H12.1 0.0415682527873793  
 AGIWUR550;AGIWUR666;AGIWUR7264;AGIWUR7765;AGIWUR11526;AGIWUR32513;AGIWUR33054;AGIWUR39786  
 N2 HS III 7977216 7977803 WBGene00015558 C06G4.4 C06G4.4 0.0449575986566089  
 AGIWUR12183;AGIWUR18220;AGIWUR45108  
 N2 HS III 7980913 7986327 WBGene00000542 clp-1 C06G4.2 -0.157728208012287  
 AGIWUR2782;AGIWUR10623;AGIWUR24515  
 N2 HS III 7987121 7990613 WBGene00015557 C06G4.1 C06G4.1 0.224090242828924 AGIWUR11719  
 N2 HS III 7990789 7996438 WBGene00015559 npr-17 C06G4.5 0.0436915867437602 AGIWUR34939  
 N2 HS III 8004397 8005887 WBGene00044446 C06G4.6 C06G4.6 0.266950037846907 AGIWUR299  
 N2 HS III 8005935 8009821 WBGene00000507 cit-1.1 F44B9.4 -0.100538756369801  
 AGIWUR4816;AGIWUR18943;AGIWUR28638  
 N2 HS III 8010778 8013774 WBGene00000508 cit-1.2 F44B9.3 -0.132736618037578  
 AGIWUR8542;AGIWUR15822;AGIWUR17269  
 N2 HS III 8013753 8016538 WBGene00018408 F44B9.5 F44B9.5 0.182255584431841 AGIWUR17897  
 N2 HS III 8016648 8020873 WBGene00003021 lin-36 F44B9.6 -0.13103386933876  
 AGIWUR12990;AGIWUR14761;AGIWUR20035;AGIWUR29449;AGIWUR36188;AGIWUR44489;AGIWUR45031  
 N2 HS III 8022463 8025195 WBGene00018407 F44B9.2 F44B9.2 -0.0996189622230723 AGIWUR33109  
 N2 HS III 8025210 8028042 WBGene00004125 mdt-30 F44B9.7 0.102512968791153 AGIWUR34503  
 N2 HS III 8028133 8029649 WBGene00018409 F44B9.8 F44B9.8 0.0966738134978531  
 AGIWUR1353;AGIWUR8841;AGIWUR14148;AGIWUR15772  
 N2 HS III 8029858 8031063 WBGene00018410 F44B9.9 F44B9.9 0.128179333521618 AGIWUR21414  
 N2 HS III 8031413 8033727 WBGene00018411 F44B9.10 F44B9.10 0.0400481558329542  
 AGIWUR27975  
 N2 HS III 8038241 8041374 WBGene00001059 dpf-6 F44B9.1 0.112157722881195  
 AGIWUR786;AGIWUR7937;AGIWUR10600;AGIWUR12968;AGIWUR15899;AGIWUR39780  
 N2 HS III 8042577 8042875 WBGene00019681 K12H4.6 K12H4.6 -0.100957886750322 AGIWUR27362

|                                                                        |    |     |         |         |                |          |          |                     |             |
|------------------------------------------------------------------------|----|-----|---------|---------|----------------|----------|----------|---------------------|-------------|
| N2                                                                     | HS | III | 8044481 | 8044916 | WBGene00019680 | K12H4.5  | K12H4.5  | 0.250885160037537   | AGIWUR19414 |
| N2                                                                     | HS | III | 8045017 | 8045931 | WBGene00019679 | K12H4.4  | K12H4.4  | 0.0604151848665264  | AGIWUR20073 |
| N2                                                                     | HS | III | 8046034 | 8047612 | WBGene00019678 | K12H4.3  | K12H4.3  | 0.2437383492931     | AGIWUR25530 |
| N2                                                                     | HS | III | 8047712 | 8048461 | WBGene00019677 | K12H4.2  | K12H4.2  | 0.0271268388687709  | AGIWUR20148 |
| N2                                                                     | HS | III | 8048424 | 8051155 | WBGene00019682 | K12H4.7  | K12H4.7  | 0.176045907753316   |             |
| AGIWUR10819;AGIWUR15259;AGIWUR34223                                    |    |     |         |         |                |          |          |                     |             |
| N2                                                                     | HS | III | 8067289 | 8071455 | WBGene00000448 | pros-1   | K12H4.1  | -0.325077712476485  | AGIWUR34802 |
| N2                                                                     | HS | III | 8071916 | 8080281 | WBGene00000939 | dcr-1    | K12H4.8  | 0.182484137361573   | AGIWUR15164 |
| N2                                                                     | HS | III | 8080570 | 8083701 | WBGene00000143 | apc-2    | K06H7.6  | -0.0946485370677728 | AGIWUR44183 |
| N2                                                                     | HS | III | 8083692 | 8085538 | WBGene00019458 | K06H7.7  | K06H7.7  | 0.00912472575827117 | AGIWUR13531 |
| N2                                                                     | HS | III | 8085705 | 8088449 | WBGene00001743 | grp-1    | K06H7.4  | 0.0341028277797957  |             |
| AGIWUR12843;AGIWUR21602;AGIWUR32200                                    |    |     |         |         |                |          |          |                     |             |
| N2                                                                     | HS | III | 8088482 | 8091730 | WBGene00019457 | vms-1    | K06H7.3  | 0.131833951999072   | AGIWUR34576 |
| N2                                                                     | HS | III | 8091708 | 8093042 | WBGene00019460 | idi-1    | K06H7.9  | 0.0631830738861794  | AGIWUR11791 |
| N2                                                                     | HS | III | 8093570 | 8096311 | WBGene00019456 | K06H7.2  | K06H7.2  | 0.192351135396391   | AGIWUR11874 |
| N2                                                                     | HS | III | 8096736 | 8098216 | WBGene00019459 | K06H7.8  | K06H7.8  | 0.254985285306585   | AGIWUR25434 |
| N2                                                                     | HS | III | 8099327 | 8100638 | WBGene00019455 | K06H7.1  | K06H7.1  | -0.0263556059544818 | AGIWUR23564 |
| N2                                                                     | HS | III | 8101348 | 8104076 | WBGene00004042 | plk-1    | C14B9.4  | -0.0787595874908984 |             |
| AGIWUR7884;AGIWUR22550                                                 |    |     |         |         |                |          |          |                     |             |
| N2                                                                     | HS | III | 8108703 | 8111245 | WBGene00015753 | C14B9.3  | C14B9.3  | -0.0317581193491021 |             |
| AGIWUR5914;AGIWUR11983;AGIWUR39945;AGIWUR43369;AGIWUR44024;AGIWUR44415 |    |     |         |         |                |          |          |                     |             |
| N2                                                                     | HS | III | 8111166 | 8126222 | WBGene00001565 | gei-8    | C14B9.6  | 0.1075555344915     |             |
| AGIWUR22239;AGIWUR29182;AGIWUR35088                                    |    |     |         |         |                |          |          |                     |             |
| N2                                                                     | HS | III | 8129551 | 8130227 | WBGene00004433 | rp1-21   | C14B9.7  | 0.0337682018571996  | AGIWUR13555 |
| N2                                                                     | HS | III | 8130852 | 8132436 | WBGene00015755 | C14B9.10 | C14B9.10 | 0.17140047795307    |             |
| AGIWUR9726;AGIWUR20003;AGIWUR24913;AGIWUR25956;AGIWUR27149;AGIWUR34179 |    |     |         |         |                |          |          |                     |             |
| N2                                                                     | HS | III | 8133665 | 8136649 | WBGene00015752 | C14B9.2  | C14B9.2  | -0.236092921536109  |             |
| AGIWUR8508;AGIWUR11821;AGIWUR19513;AGIWUR30168;AGIWUR41633             |    |     |         |         |                |          |          |                     |             |
| N2                                                                     | HS | III | 8138090 | 8139645 | WBGene00002011 | hsp-12.2 | C14B9.1  | 0.202445825437407   |             |
| AGIWUR13046;AGIWUR29749                                                |    |     |         |         |                |          |          |                     |             |
| N2                                                                     | HS | III | 8139610 | 8144629 | WBGene00015754 | C14B9.8  | C14B9.8  | 0.178283926518262   | AGIWUR1876  |
| N2                                                                     | HS | III | 8145015 | 8145974 | WBGene00017044 | mrp1-18  | D2007.4  | 0.0745044581160368  |             |
| AGIWUR3327;AGIWUR16310;AGIWUR26805                                     |    |     |         |         |                |          |          |                     |             |
| N2                                                                     | HS | III | 8148967 | 8154619 | WBGene00017042 | D2007.2  | D2007.2  | 0.0476823517342613  |             |
| AGIWUR24883;AGIWUR30242                                                |    |     |         |         |                |          |          |                     |             |
| N2                                                                     | HS | III | 8155470 | 8155989 | WBGene00017041 | D2007.1  | D2007.1  | -0.0723185052707649 | AGIWUR34639 |
| N2                                                                     | HS | III | 8155928 | 8158245 | WBGene00017045 | atg-13   | D2007.5  | 0.0434721265268969  | AGIWUR4063  |
| N2                                                                     | HS | III | 8159155 | 8161338 | WBGene00086546 | cil-1    | C50C3.7  | 0.074735836899082   | AGIWUR24538 |
| N2                                                                     | HS | III | 8161449 | 8163383 | WBGene00016803 | bath-42  | C50C3.8  | -0.083018945349437  |             |

AGIWUR3146;AGIWUR20862;AGIWUR21544;AGIWUR34384  
 N2 HS III 8164373 8172702 WBGene00004187 prp-8 C50C3.6 -0.22239271915073  
 AGIWUR12014;AGIWUR25090;AGIWUR31758  
 N2 HS III 8176484 8177243 WBGene00016804 C50C3.12 C50C3.12 0.0126195898979677  
 AGIWUR1160;AGIWUR13818;AGIWUR27621  
 N2 HS III 8179224 8180549 WBGene00016801 C50C3.5 C50C3.5 0.208398560020397  
 AGIWUR2594;AGIWUR18155;AGIWUR27487  
 N2 HS III 8181881 8189372 WBGene00016800 C50C3.2 C50C3.2 0.134491237790671 AGIWUR16251  
 N2 HS III 8191817 8193847 WBGene00016799 C50C3.1 C50C3.1 -0.0630715935574226 AGIWUR10522  
 N2 HS III 8193844 8201206 WBGene00006772 unc-36 C50C3.9 0.00755800333345924  
 AGIWUR10266;AGIWUR11145;AGIWUR18480  
 N2 HS III 8205124 8209945 WBGene00016242 C30A5.10 C30A5.10 0.00510580216293288  
 AGIWUR5775;AGIWUR37751;AGIWUR40981  
 N2 HS III 8212750 8216336 WBGene00006818 unc-86 C30A5.7 0.125839037946191 AGIWUR37956  
 N2 HS III 8225097 8226386 WBGene00016238 C30A5.3 C30A5.3 -0.0230545161807427  
 AGIWUR1588;AGIWUR5145;AGIWUR13733;AGIWUR20984;AGIWUR34110;AGIWUR39012  
 N2 HS III 8226478 8227650 WBGene00004342 rfs-1 C30A5.2 0.0872999710272557 AGIWUR40272  
 N2 HS III 8227362 8232660 WBGene00015350 fbx1-1 C02F5.7 -0.011466982233804  
 AGIWUR32117;AGIWUR40156;AGIWUR40691;AGIWUR41092  
 N2 HS III 8232651 8234591 WBGene00015349 henn-1 C02F5.6 0.109933186677466  
 AGIWUR13862;AGIWUR17509;AGIWUR20220;AGIWUR33609;AGIWUR35010  
 N2 HS III 8234526 8235543 WBGene00044445 C02F5.14 C02F5.14 0.177770797794101  
 AGIWUR3399;AGIWUR8250;AGIWUR16249;AGIWUR19857;AGIWUR33544;AGIWUR37801  
 N2 HS III 8236126 8236908 WBGene00015348 C02F5.5 C02F5.5 0.104131858103635 AGIWUR24696  
 N2 HS III 8236984 8237881 WBGene00006628 tsp-2 C02F5.11 0.0426077821464692  
 AGIWUR37744;AGIWUR39045  
 N2 HS III 8237995 8239423 WBGene00006627 tsp-1 C02F5.8 0.480845037314928 AGIWUR1230  
 N2 HS III 8240872 8243029 WBGene00015352 C02F5.12 C02F5.12 -0.134526505474245  
 AGIWUR8531  
 N2 HS III 8243122 8244092 WBGene00003952 pbs-6 C02F5.9 -0.110067113774234  
 AGIWUR1154;AGIWUR35929  
 N2 HS III 8244445 8245794 WBGene00015347 cids-1 C02F5.4 -0.0806638260881947 AGIWUR42649  
 N2 HS III 8245891 8247258 WBGene00015346 C02F5.3 C02F5.3 0.149075566538491 AGIWUR2618  
 N2 HS III 8247351 8248814 WBGene00015353 C02F5.13 C02F5.13 -0.397734335995271  
 AGIWUR12182  
 N2 HS III 8248685 8249512 WBGene00015351 C02F5.10 C02F5.10 -0.0899243318157765  
 AGIWUR11304  
 N2 HS III 8249619 8250193 WBGene00015345 C02F5.2 C02F5.2 0.038319174883092  
 AGIWUR134;AGIWUR4847;AGIWUR16620;AGIWUR19511;AGIWUR28543;AGIWUR31316



|                                                                        |    |     |         |         |                |          |          |                      |             |
|------------------------------------------------------------------------|----|-----|---------|---------|----------------|----------|----------|----------------------|-------------|
| N2                                                                     | HS | III | 8250636 | 8254286 | WBGene00002231 | kn1-1    | C02F5.1  | 0.11649118356628     | AGIWUR21785 |
| N2                                                                     | HS | III | 8254975 | 8257638 | WBGene00017320 | F09G8.5  | F09G8.5  | 0.0751761063562206   | AGIWUR1808  |
| N2                                                                     | HS | III | 8258345 | 8265805 | WBGene00003562 | ncr-2    | F09G8.4  | -0.0184707569212375  | AGIWUR10674 |
| N2                                                                     | HS | III | 8266062 | 8267841 | WBGene00017319 | mrps-9   | F09G8.3  | -0.0250393851202411  | AGIWUR33013 |
| N2                                                                     | HS | III | 8267921 | 8268355 | WBGene00017321 | F09G8.7  | F09G8.7  | -0.0686001361123827  |             |
| AGIWUR5913;AGIWUR16944;AGIWUR22226;AGIWUR22263;AGIWUR22551;AGIWUR34486 |    |     |         |         |                |          |          |                      |             |
| N2                                                                     | HS | III | 8268609 | 8270680 | WBGene00007056 | crn-7    | F09G8.2  | 0.395568435706853    | AGIWUR29025 |
| N2                                                                     | HS | III | 8272960 | 8275971 | WBGene00017322 | clcc-160 | F09G8.8  | 0.170604051726357    |             |
| AGIWUR31776                                                            |    |     |         |         |                |          |          |                      |             |
| N2                                                                     | HS | III | 8279108 | 8305832 | WBGene00003243 | mig-10   | F10E9.6  | -0.0126573020390026  |             |
| AGIWUR9097;AGIWUR10503;AGIWUR26773                                     |    |     |         |         |                |          |          |                      |             |
| N2                                                                     | HS | III | 8305733 | 8326818 | WBGene00017358 | F10E9.7  | F10E9.7  | 0.162755943252488    | AGIWUR4437  |
| N2                                                                     | HS | III | 8326516 | 8330947 | WBGene00022580 | iglr-2   | ZC262.3  | -0.033196113437107   |             |
| AGIWUR8953;AGIWUR24237;AGIWUR26998                                     |    |     |         |         |                |          |          |                      |             |
| N2                                                                     | HS | III | 8331047 | 8331919 | WBGene00022583 | mrps-18A | ZC262.8  | 0.306930134575595    |             |
| AGIWUR27397                                                            |    |     |         |         |                |          |          |                      |             |
| N2                                                                     | HS | III | 8332223 | 8333572 | WBGene00022579 | ZC262.2  | ZC262.2  | -0.175558306792328   |             |
| AGIWUR6868;AGIWUR9361;AGIWUR12810;AGIWUR18704;AGIWUR34135;AGIWUR42356  |    |     |         |         |                |          |          |                      |             |
| N2                                                                     | HS | III | 8333663 | 8334233 | WBGene00022581 | ZC262.4  | ZC262.4  | 0.0963438978085431   | AGIWUR15636 |
| N2                                                                     | HS | III | 8351249 | 8355174 | WBGene00006840 | unc-116  | R05D3.7  | -0.0302269667406483  |             |
| AGIWUR1060;AGIWUR21329                                                 |    |     |         |         |                |          |          |                      |             |
| N2                                                                     | HS | III | 8356887 | 8358844 | WBGene00019881 | R05D3.8  | R05D3.8  | -0.19417039651188    |             |
| AGIWUR1460;AGIWUR10567                                                 |    |     |         |         |                |          |          |                      |             |
| N2                                                                     | HS | III | 8358625 | 8362496 | WBGene00007008 | rfp-1    | R05D3.4  | -0.326532613519744   | AGIWUR37669 |
| N2                                                                     | HS | III | 8362408 | 8368848 | WBGene00019882 | R05D3.9  | R05D3.9  | -0.0197065099727514  |             |
| AGIWUR23033;AGIWUR30286                                                |    |     |         |         |                |          |          |                      |             |
| N2                                                                     | HS | III | 8372255 | 8375175 | WBGene00019877 | R05D3.2  | R05D3.2  | -0.227365410925671   |             |
| AGIWUR4020;AGIWUR13106;AGIWUR43656                                     |    |     |         |         |                |          |          |                      |             |
| N2                                                                     | HS | III | 8375300 | 8380833 | WBGene00019883 | met-2    | R05D3.11 | 0.0729232306840828   |             |
| AGIWUR27065                                                            |    |     |         |         |                |          |          |                      |             |
| N2                                                                     | HS | III | 8380943 | 8387529 | WBGene00019884 | R05D3.12 | R05D3.12 | -0.0482987817750571  |             |
| AGIWUR9424;AGIWUR40415                                                 |    |     |         |         |                |          |          |                      |             |
| N2                                                                     | HS | III | 8388466 | 8389639 | WBGene00022700 | ZK353.4  | ZK353.4  | -0.525193816446423   | AGIWUR10980 |
| N2                                                                     | HS | III | 8389882 | 8394424 | WBGene00044677 | ZK353.10 | ZK353.10 | -0.0634663873084396  |             |
| AGIWUR43758                                                            |    |     |         |         |                |          |          |                      |             |
| N2                                                                     | HS | III | 8395985 | 8396727 | WBGene00022699 | ZK353.3  | ZK353.3  | -0.123224889705773   |             |
| AGIWUR7042;AGIWUR10899;AGIWUR11298;AGIWUR16527;AGIWUR22949             |    |     |         |         |                |          |          |                      |             |
| N2                                                                     | HS | III | 8398711 | 8399240 | WBGene00022698 | ZK353.2  | ZK353.2  | -0.00743536455193272 | AGIWUR43243 |
| N2                                                                     | HS | III | 8399190 | 8401928 | WBGene00002249 | lap-1    | ZK353.6  | -0.245542640711907   |             |

AGIWUR19824;AGIWUR21981;AGIWUR31549  
 N2 HS III 8402049 8403607 WBGene00022702 cutc-1 ZK353.7 -0.0507327789867382  
 AGIWUR11611;AGIWUR15249;AGIWUR19716;AGIWUR22359;AGIWUR28520;AGIWUR30902;AGIWUR34334;AGIWUR35842;AGIWUR37404  
 N2 HS III 8403715 8405562 WBGene00022703 ubxn-4 ZK353.8 -0.00165774362972471 AGIWUR17659  
 N2 HS III 8405874 8409406 WBGene00022697 cyy-1 ZK353.1 -0.0582304890519865  
 AGIWUR158;AGIWUR1847;AGIWUR4594;AGIWUR6679;AGIWUR26066;AGIWUR33796  
 N2 HS III 8409496 8412017 WBGene00022704 ZK353.9 ZK353.9 -0.140223290242645 AGIWUR9955  
 N2 HS III 8416227 8422650 WBGene00023405 sor-1 ZK1236.3 0.081169053341771  
 AGIWUR14064  
 N2 HS III 8426334 8428583 WBGene00000414 cec-1 ZK1236.2 0.066401845283611  
 AGIWUR35155  
 N2 HS III 8429307 8431586 WBGene00022862 ZK1236.1 ZK1236.1 -0.361087109599625  
 AGIWUR10904  
 N2 HS III 8431552 8432214 WBGene00022864 ZK1236.5 ZK1236.5 -0.0186046845465118  
 AGIWUR44607  
 N2 HS III 8432469 8435174 WBGene00044588 ZK1236.9 ZK1236.9 0.183155224567208  
 AGIWUR16787;AGIWUR29697  
 N2 HS III 8436700 8437811 WBGene00023223 ZK1236.8 ZK1236.8 -0.119214587893708  
 AGIWUR5337;AGIWUR11160;AGIWUR24137;AGIWUR26002;AGIWUR37523  
 N2 HS III 8438061 8439412 WBGene00004175 pqn-96 ZK1236.6 -0.322505276079763  
 AGIWUR25763  
 N2 HS III 8439468 8443607 WBGene00022865 ufbp-1 ZK1236.7 0.0318548389870372  
 AGIWUR21809;AGIWUR40300;AGIWUR43834  
 N2 HS III 8443917 8446920 WBGene00016250 hsp-110 C30C11.4 -0.213626773881003  
 AGIWUR13298;AGIWUR24695;AGIWUR24876  
 N2 HS III 8447353 8449346 WBGene00004460 rpn-3 C30C11.2 0.0213988097622213  
 AGIWUR40229  
 N2 HS III 8449757 8450519 WBGene00016249 mrpl-32 C30C11.1 0.00594107573885339  
 AGIWUR42312  
 N2 HS III 8467035 8478377 WBGene00018369 mig-39 F42H10.5 0.134310546184999  
 AGIWUR20369  
 N2 HS III 8478382 8480455 WBGene00018370 F42H10.6 F42H10.6 0.209238475372617  
 AGIWUR13388  
 N2 HS III 8484153 8488365 WBGene00018367 F42H10.3 F42H10.3 0.0862935127867654  
 AGIWUR11127;AGIWUR40428  
 N2 HS III 8488344 8490347 WBGene00018371 ess-2 F42H10.7 -0.0376456929253273  
 AGIWUR20825  
 N2 HS III 8490624 8491097 WBGene00018366 F42H10.2 F42H10.2 0.168289210651677  
 AGIWUR6373

|                                                                                                                        |    |     |         |         |                |          |          |                     |             |
|------------------------------------------------------------------------------------------------------------------------|----|-----|---------|---------|----------------|----------|----------|---------------------|-------------|
| N2                                                                                                                     | HS | III | 8493878 | 8518879 | WBGene00015418 | pac-1    | C04D8.1  | -0.10325084071314   |             |
| AGIWUR8499;AGIWUR21807                                                                                                 |    |     |         |         |                |          |          |                     |             |
| N2                                                                                                                     | HS | III | 8518904 | 8519945 | WBGene00022507 | ZC21.8   | ZC21.8   | 0.0549673522208174  | AGIWUR36373 |
| N2                                                                                                                     | HS | III | 8525073 | 8528650 | WBGene00022505 | ZC21.3   | ZC21.3   | -0.0513810298407607 |             |
| AGIWUR6744;AGIWUR18379;AGIWUR21048;AGIWUR26702;AGIWUR33777;AGIWUR41319                                                 |    |     |         |         |                |          |          |                     |             |
| N2                                                                                                                     | HS | III | 8530077 | 8531123 | WBGene00044443 | ZC21.10  | ZC21.10  | -0.231927411433942  |             |
| AGIWUR25900;AGIWUR30228;AGIWUR41931                                                                                    |    |     |         |         |                |          |          |                     |             |
| N2                                                                                                                     | HS | III | 8535131 | 8542748 | WBGene00006614 | trp-1    | ZC21.2   | 0.0586118007617582  | AGIWUR12908 |
| N2                                                                                                                     | HS | III | 8542952 | 8545608 | WBGene00022506 | ZC21.6   | ZC21.6   | -0.0286486945191662 | AGIWUR43550 |
| N2                                                                                                                     | HS | III | 8552555 | 8553839 | WBGene00043097 | C02D5.4  | C02D5.4  | 0.0808978407028711  |             |
| AGIWUR11444;AGIWUR40140;AGIWUR42459                                                                                    |    |     |         |         |                |          |          |                     |             |
| N2                                                                                                                     | HS | III | 8554772 | 8555821 | WBGene00015337 | gst-2    | C02D5.3  | -0.0776822886462547 |             |
| AGIWUR16755;AGIWUR36587;AGIWUR38455                                                                                    |    |     |         |         |                |          |          |                     |             |
| N2                                                                                                                     | HS | III | 8557335 | 8559194 | WBGene00015336 | C02D5.2  | C02D5.2  | 0.4067041243955     | AGIWUR27961 |
| N2                                                                                                                     | HS | III | 8561136 | 8563026 | WBGene00015335 | acd-6    | C02D5.1  | 0.16236066608691    | AGIWUR2682  |
| N2                                                                                                                     | HS | III | 8581102 | 8583928 | WBGene00015519 | doxa-1   | C06E1.3  | -0.0626723394986186 | AGIWUR20889 |
| N2                                                                                                                     | HS | III | 8584186 | 8588642 | WBGene00001612 | glr-1    | C06E1.4  | -0.0406388113868354 | AGIWUR5066  |
| N2                                                                                                                     | HS | III | 8589336 | 8589488 | WBGene00015520 | fip-3    | C06E1.5  | -0.059708464059657  | AGIWUR5323  |
| N2                                                                                                                     | HS | III | 8590833 | 8590982 | WBGene00015521 | fipr-16  | C06E1.6  | 0.0942877100101409  |             |
| AGIWUR15253;AGIWUR15387;AGIWUR16496;AGIWUR18026;AGIWUR21580;AGIWUR34124                                                |    |     |         |         |                |          |          |                     |             |
| N2                                                                                                                     | HS | III | 8591239 | 8593720 | WBGene00015522 | C06E1.7  | C06E1.7  | 0.190974051916976   | AGIWUR10879 |
| N2                                                                                                                     | HS | III | 8595339 | 8597870 | WBGene00015523 | ztf-30   | C06E1.8  | -0.103888419714851  | AGIWUR16028 |
| N2                                                                                                                     | HS | III | 8605832 | 8606622 | WBGene00015518 | C06E1.1  | C06E1.1  | -0.100027996579056  |             |
| AGIWUR2461;AGIWUR14714;AGIWUR20169;AGIWUR35713                                                                         |    |     |         |         |                |          |          |                     |             |
| N2                                                                                                                     | HS | III | 8609882 | 8614569 | WBGene00015525 | rha-2    | C06E1.10 | -0.0247641238274401 |             |
| AGIWUR2692;AGIWUR15564;AGIWUR31321                                                                                     |    |     |         |         |                |          |          |                     |             |
| N2                                                                                                                     | HS | III | 8614762 | 8616381 | WBGene00015526 | C06E1.11 | C06E1.11 | -0.0496787725788028 |             |
| AGIWUR14844                                                                                                            |    |     |         |         |                |          |          |                     |             |
| N2                                                                                                                     | HS | III | 8616781 | 8626917 | WBGene00015747 | C13G5.2  | C13G5.2  | 0.0876372284068285  | AGIWUR17169 |
| N2                                                                                                                     | HS | III | 8626291 | 8628571 | WBGene00017696 | polk-1   | F22B7.6  | 0.207551694868418   |             |
| AGIWUR4510;AGIWUR37658;AGIWUR39072                                                                                     |    |     |         |         |                |          |          |                     |             |
| N2                                                                                                                     | HS | III | 8631165 | 8633549 | WBGene00001028 | dnj-10   | F22B7.5  | 0.25571785717069    |             |
| AGIWUR815;AGIWUR6507;AGIWUR26820;AGIWUR28613                                                                           |    |     |         |         |                |          |          |                     |             |
| N2                                                                                                                     | HS | III | 8634078 | 8643739 | WBGene00006662 | twk-7    | F22B7.7  | 0.0864234217076247  |             |
| AGIWUR395;AGIWUR39525                                                                                                  |    |     |         |         |                |          |          |                     |             |
| N2                                                                                                                     | HS | III | 8648889 | 8649477 | WBGene00017694 | F22B7.3  | F22B7.3  | 0.0691619978288989  | AGIWUR43782 |
| N2                                                                                                                     | HS | III | 8650764 | 8652190 | WBGene00017693 | flp-23   | F22B7.2  | -0.0237615945487479 |             |
| AGIWUR4182;AGIWUR16416;AGIWUR16449;AGIWUR17359;AGIWUR25271;AGIWUR29653;AGIWUR30956;AGIWUR37005;AGIWUR42211;AGIWUR43285 |    |     |         |         |                |          |          |                     |             |

|                                                                                              |    |     |         |         |                |          |          |                          |                     |
|----------------------------------------------------------------------------------------------|----|-----|---------|---------|----------------|----------|----------|--------------------------|---------------------|
| N2                                                                                           | HS | III | 8652578 | 8653925 | WBGene00017698 | F22B7.9  | F22B7.9  | 0.148263498112575        |                     |
| AGIWUR3277;AGIWUR19821;AGIWUR23277;AGIWUR25110;AGIWUR27887;AGIWUR28497                       |    |     |         |         |                |          |          |                          |                     |
| N2                                                                                           | HS | III | 8659872 | 8667482 | WBGene00001078 | dpy-19   | F22B7.10 | 0.0973188186799581       |                     |
| AGIWUR34986                                                                                  |    |     |         |         |                |          |          |                          |                     |
| N2                                                                                           | HS | III | 8670543 | 8675051 | WBGene00003993 | pgl-2    | B0523.3  | 0.307339063502113        | AGIWUR18234         |
| N2                                                                                           | HS | III | 8675297 | 8683732 | WBGene00001443 | fli-1    | B0523.5  | 0.0909342873527486       |                     |
| AGIWUR4414;AGIWUR25594;AGIWUR32485                                                           |    |     |         |         |                |          |          |                          |                     |
| N2                                                                                           | HS | III | 8686118 | 8688457 | WBGene00015125 | B0303.3  | B0303.3  | -0.00835204520456312     |                     |
| AGIWUR2262;AGIWUR10093;AGIWUR21243;AGIWUR36276                                               |    |     |         |         |                |          |          |                          |                     |
| N2                                                                                           | HS | III | 8689850 | 8693473 | WBGene00015126 | B0303.4  | B0303.4  | -0.0967637180513918      | AGIWUR16137         |
| N2                                                                                           | HS | III | 8693638 | 8699497 | WBGene00015128 | B0303.7  | B0303.7  | -0.173581108372009       | AGIWUR39808         |
| N2                                                                                           | HS | III | 8699481 | 8700333 | WBGene00015129 | sdz-1    | B0303.8  | 0.0210263971576818       | AGIWUR26442         |
| N2                                                                                           | HS | III | 8700927 | 8703341 | WBGene00015130 | vps-33.1 |          | B0303.9 0.13380688000289 |                     |
| AGIWUR13675                                                                                  |    |     |         |         |                |          |          |                          |                     |
| N2                                                                                           | HS | III | 8703300 | 8710410 | WBGene00015131 | B0303.11 |          | B0303.11                 | -0.0781490571412053 |
| AGIWUR39482                                                                                  |    |     |         |         |                |          |          |                          |                     |
| N2                                                                                           | HS | III | 8713993 | 8716184 | WBGene00015132 | B0303.14 |          | B0303.14                 | -0.151592701301715  |
| AGIWUR29492                                                                                  |    |     |         |         |                |          |          |                          |                     |
| N2                                                                                           | HS | III | 8717644 | 8718567 | WBGene00015133 | mrpl-11  | B0303.15 |                          | -0.163083135911524  |
| AGIWUR38117;AGIWUR41229                                                                      |    |     |         |         |                |          |          |                          |                     |
| N2                                                                                           | HS | III | 8720201 | 8725334 | WBGene00022717 | hipr-1   | ZK370.3  | 0.0124203689725686       | AGIWUR1623          |
| N2                                                                                           | HS | III | 8725323 | 8731373 | WBGene00022718 | ZK370.4  | ZK370.4  | -0.195310107168965       |                     |
| AGIWUR393;AGIWUR13330;AGIWUR23503;AGIWUR25689;AGIWUR29681;AGIWUR34771;AGIWUR35829            |    |     |         |         |                |          |          |                          |                     |
| N2                                                                                           | HS | III | 8737686 | 8741412 | WBGene00022719 | pdhk-2   | ZK370.5  | -0.5689393601023         | AGIWUR9815          |
| N2                                                                                           | HS | III | 8742007 | 8743842 | WBGene00022720 | ZK370.6  | ZK370.6  | 0.0574766669686122       | AGIWUR11574         |
| N2                                                                                           | HS | III | 8746216 | 8748701 | WBGene00022721 | ugtp-1   | ZK370.7  | 0.306414160107835        | AGIWUR25896         |
| N2                                                                                           | HS | III | 8749763 | 8757069 | WBGene00004856 | sma-2    | ZK370.2  | 0.128362206518466        | AGIWUR33081         |
| N2                                                                                           | HS | III | 8756995 | 8761101 | WBGene00019801 | aak-1    | PAR2.3   | 0.121465495880066        |                     |
| AGIWUR5774;AGIWUR7517;AGIWUR34094                                                            |    |     |         |         |                |          |          |                          |                     |
| N2                                                                                           | HS | III | 8763291 | 8767342 | WBGene00003253 | mig-22   | PAR2.4   | 0.0645653544468159       |                     |
| AGIWUR7118;AGIWUR40525                                                                       |    |     |         |         |                |          |          |                          |                     |
| N2                                                                                           | HS | III | 8768311 | 8769252 | WBGene00019800 | mtss-1   | PAR2.1   | 0.0640788837926642       | AGIWUR33250         |
| N2                                                                                           | HS | III | 8769502 | 8776141 | WBGene00019301 | K02D10.1 |          | K02D10.1                 | -0.051308395606779  |
| AGIWUR3144;AGIWUR5099;AGIWUR7470;AGIWUR11325;AGIWUR18329;AGIWUR25715;AGIWUR39553;AGIWUR42939 |    |     |         |         |                |          |          |                          |                     |
| N2                                                                                           | HS | III | 8776183 | 8777895 | WBGene00019305 | snap-29  | K02D10.5 |                          | 0.171706011962142   |
| AGIWUR2012                                                                                   |    |     |         |         |                |          |          |                          |                     |
| N2                                                                                           | HS | III | 8777890 | 8780012 | WBGene00019304 | K02D10.4 |          | K02D10.4                 | -0.204709654440943  |
| AGIWUR11635;AGIWUR12464;AGIWUR16357                                                          |    |     |         |         |                |          |          |                          |                     |
| N2                                                                                           | HS | III | 8787092 | 8792346 | WBGene00018833 | ztf-1    | F54F2.5  | 0.0251688256814759       |                     |

|                                                                         |    |     |         |         |                |          |          |                     |             |
|-------------------------------------------------------------------------|----|-----|---------|---------|----------------|----------|----------|---------------------|-------------|
| AGIWUR12987;AGIWUR35878                                                 |    |     |         |         |                |          |          |                     |             |
| N2                                                                      | HS | III | 8792847 | 8806305 | WBGene00006975 | zfp-1    | F54F2.2  | 0.0826423680401094  |             |
| AGIWUR16269;AGIWUR28175                                                 |    |     |         |         |                |          |          |                     |             |
| N2                                                                      | HS | III | 8806231 | 8807346 | WBGene00018835 | F54F2.7  | F54F2.7  | 0.170052247011268   | AGIWUR45086 |
| N2                                                                      | HS | III | 8807482 | 8809329 | WBGene00004201 | prx-19   | F54F2.8  | -0.0280251155448799 | AGIWUR28794 |
| N2                                                                      | HS | III | 8818899 | 8825270 | WBGene00003929 | pat-2    | F54F2.1  | -0.0760656537710354 | AGIWUR44985 |
| N2                                                                      | HS | III | 8825243 | 8827228 | WBGene00018836 | F54F2.9  | F54F2.9  | 0.353942073975258   | AGIWUR21876 |
| N2                                                                      | HS | III | 8827358 | 8829305 | WBGene00018417 | F44E2.3  | F44E2.3  | 0.0463174488755671  |             |
| AGIWUR13313;AGIWUR22083                                                 |    |     |         |         |                |          |          |                     |             |
| N2                                                                      | HS | III | 8829493 | 8831109 | WBGene00018423 | F44E2.10 | F44E2.10 | 0.418129113384014   |             |
| AGIWUR14243                                                             |    |     |         |         |                |          |          |                     |             |
| N2                                                                      | HS | III | 8832479 | 8838424 | WBGene00018418 | F44E2.4  | F44E2.4  | 0.0924383041370085  | AGIWUR21160 |
| N2                                                                      | HS | III | 8844494 | 8845214 | WBGene00018419 | F44E2.6  | F44E2.6  | 0.348806539275584   |             |
| AGIWUR15400;AGIWUR16092;AGIWUR16254;AGIWUR16985;AGIWUR34165;AGIWUR38620 |    |     |         |         |                |          |          |                     |             |
| N2                                                                      | HS | III | 8845856 | 8848486 | WBGene00018420 | F44E2.7  | F44E2.7  | 0.0135358137017754  |             |
| AGIWUR16197;AGIWUR37883;AGIWUR40627                                     |    |     |         |         |                |          |          |                     |             |
| N2                                                                      | HS | III | 8848582 | 8849877 | WBGene00018421 | F44E2.8  | F44E2.8  | -0.129886781506901  | AGIWUR26871 |
| N2                                                                      | HS | III | 8849994 | 8850532 | WBGene00018422 | F44E2.9  | F44E2.9  | 0.231331520462705   | AGIWUR30697 |
| N2                                                                      | HS | III | 8852264 | 8864451 | WBGene00004041 | plg-1    | F44E2.11 | -0.0640046347156353 |             |
| AGIWUR5095;AGIWUR10027;AGIWUR20923;AGIWUR36446                          |    |     |         |         |                |          |          |                     |             |
| N2                                                                      | HS | III | 8870099 | 8877128 | WBGene00010475 | K01F9.2  | K01F9.2  | 0.136582318828222   | AGIWUR30346 |
| N2                                                                      | HS | III | 8882707 | 8885482 | WBGene00014021 | svop-1   | ZK637.1  | -0.103688719514438  | AGIWUR11249 |
| N2                                                                      | HS | III | 8887751 | 8890143 | WBGene00014022 | ZK637.2  | ZK637.2  | -0.161177179178045  | AGIWUR45186 |
| N2                                                                      | HS | III | 8890231 | 8894208 | WBGene00014023 | lnkn-1   | ZK637.3  | -0.318721191437719  | AGIWUR10243 |
| N2                                                                      | HS | III | 8894209 | 8894691 | WBGene00014024 | ZK637.4  | ZK637.4  | -0.054283534712269  | AGIWUR37235 |
| N2                                                                      | HS | III | 8895082 | 8896654 | WBGene00014025 | asna-1   | ZK637.5  | 0.00814446374882039 | AGIWUR17798 |
| N2                                                                      | HS | III | 8898622 | 8899530 | WBGene00014987 | ZK637.6  | ZK637.6  | -0.163279499350562  |             |
| AGIWUR11772;AGIWUR16118                                                 |    |     |         |         |                |          |          |                     |             |
| N2                                                                      | HS | III | 8900237 | 8904160 | WBGene00002998 | lin-9    | ZK637.7  | 0.00229271886006899 |             |
| AGIWUR7682;AGIWUR11606;AGIWUR14623                                      |    |     |         |         |                |          |          |                     |             |
| N2                                                                      | HS | III | 8905615 | 8911749 | WBGene00006768 | unc-32   | ZK637.8  | -0.0588480659212021 |             |
| AGIWUR30237;AGIWUR33688;AGIWUR37194                                     |    |     |         |         |                |          |          |                     |             |
| N2                                                                      | HS | III | 8912144 | 8913632 | WBGene00014027 | tpk-1    | ZK637.9  | 0.13216288226452    |             |
| AGIWUR23783;AGIWUR40284;AGIWUR42847                                     |    |     |         |         |                |          |          |                     |             |
| N2                                                                      | HS | III | 8913769 | 8916450 | WBGene00014028 | trxr-2   | ZK637.10 | 0.145543343175413   |             |
| AGIWUR2437                                                              |    |     |         |         |                |          |          |                     |             |
| N2                                                                      | HS | III | 8916351 | 8917929 | WBGene00000388 | cdc-25.3 | ZK637.11 | -0.0212156182869379 |             |
| AGIWUR1926                                                              |    |     |         |         |                |          |          |                     |             |
| N2                                                                      | HS | III | 8922292 | 8925302 | WBGene00014029 | ZK637.12 | ZK637.12 | -0.134713802444335  |             |

|                                                                       |    |     |         |         |                |          |         |                     |                     |
|-----------------------------------------------------------------------|----|-----|---------|---------|----------------|----------|---------|---------------------|---------------------|
| AGIWUR11063                                                           |    |     |         |         |                |          |         |                     |                     |
| N2                                                                    | HS | III | 8925607 | 8926529 | WBGene00014038 | ZK643.7  | ZK643.7 | -0.0837445087094997 | AGIWUR30593         |
| N2                                                                    | HS | III | 8930036 | 8936682 | WBGene00014033 | arrd-15  | ZK643.1 | 0.168430758084067   | AGIWUR3131          |
| N2                                                                    | HS | III | 8944686 | 8952953 | WBGene00014035 | seb-2    | ZK643.3 | 0.00430770959035165 |                     |
| AGIWUR21977;AGIWUR41246;AGIWUR42198                                   |    |     |         |         |                |          |         |                     |                     |
| N2                                                                    | HS | III | 8952886 | 8956216 | WBGene00014036 | ZK643.5  | ZK643.5 | -0.0199814746315816 | AGIWUR1264          |
| N2                                                                    | HS | III | 8956459 | 8957731 | WBGene00014034 | ZK643.2  | ZK643.2 | 0.249393050892195   | AGIWUR7832          |
| N2                                                                    | HS | III | 8957704 | 8960693 | WBGene00014037 | ZK643.6  | ZK643.6 | -0.0569893717637369 | AGIWUR15236         |
| N2                                                                    | HS | III | 8962295 | 8965638 | WBGene00001734 | gr1-25   | ZK643.8 | 0.0693441983135408  | AGIWUR45029         |
| N2                                                                    | HS | III | 8966022 | 8967727 | WBGene00011142 | R08D7.1  | R08D7.1 | -0.0852076692889661 | AGIWUR42741         |
| N2                                                                    | HS | III | 8967917 | 8969658 | WBGene00011143 | R08D7.2  | R08D7.2 | 0.145836528986404   | AGIWUR1150          |
| N2                                                                    | HS | III | 8969638 | 8971578 | WBGene00001227 | eif-3.D  | R08D7.3 | -0.261453253621858  |                     |
| AGIWUR1208;AGIWUR4378;AGIWUR22575;AGIWUR33307;AGIWUR34559;AGIWUR43455 |    |     |         |         |                |          |         |                     |                     |
| N2                                                                    | HS | III | 8971892 | 8973672 | WBGene00011144 | R08D7.4  | R08D7.4 | -0.0494360270615042 |                     |
| AGIWUR13868;AGIWUR41913                                               |    |     |         |         |                |          |         |                     |                     |
| N2                                                                    | HS | III | 8974126 | 8975061 | WBGene00011145 | R08D7.5  | R08D7.5 | -0.015218899924335  | AGIWUR41124         |
| N2                                                                    | HS | III | 8975070 | 8981897 | WBGene00011146 | pde-2    | R08D7.6 | -0.102492383500643  |                     |
| AGIWUR20156;AGIWUR22060;AGIWUR24440;AGIWUR33393                       |    |     |         |         |                |          |         |                     |                     |
| N2                                                                    | HS | III | 8992205 | 8994827 | WBGene00011147 | R08D7.7  | R08D7.7 | 0.254193181272752   | AGIWUR24736         |
| N2                                                                    | HS | III | 8996418 | 8999785 | WBGene00010308 | F59B2.3  | F59B2.3 | 0.00804583839900364 |                     |
| AGIWUR2749;AGIWUR3789;AGIWUR8329;AGIWUR22566;AGIWUR25535;AGIWUR35192  |    |     |         |         |                |          |         |                     |                     |
| N2                                                                    | HS | III | 8999828 | 9001973 | WBGene00010309 | rpn-6.2  | F59B2.5 | -0.0251209322448798 | AGIWUR44151         |
| N2                                                                    | HS | III | 9002779 | 9004839 | WBGene00006977 | zif-1    | F59B2.6 | -0.211975460007999  | AGIWUR43029         |
| N2                                                                    | HS | III | 9004821 | 9005955 | WBGene00004269 | rab-6.1  | F59B2.7 | -0.065670070032926  |                     |
| AGIWUR5493;AGIWUR6537;AGIWUR18805;AGIWUR36400;AGIWUR44152             |    |     |         |         |                |          |         |                     |                     |
| N2                                                                    | HS | III | 9007974 | 9010121 | WBGene00010310 | F59B2.8  | F59B2.8 | -0.152142788990355  | AGIWUR43386         |
| N2                                                                    | HS | III | 9010676 | 9012409 | WBGene00010311 | F59B2.9  | F59B2.9 | 0.143095646918406   |                     |
| AGIWUR8241;AGIWUR25616;AGIWUR28441                                    |    |     |         |         |                |          |         |                     |                     |
| N2                                                                    | HS | III | 9013003 | 9016961 | WBGene00010313 | F59B2.11 |         | F59B2.11            |                     |
| -0.00384679149041478 AGIWUR5273;AGIWUR14502;AGIWUR15535               |    |     |         |         |                |          |         |                     |                     |
| N2                                                                    | HS | III | 9017607 | 9020960 | WBGene00010314 | F59B2.12 |         | F59B2.12            | 0.125429611364813   |
| AGIWUR35085                                                           |    |     |         |         |                |          |         |                     |                     |
| N2                                                                    | HS | III | 9021370 | 9022635 | WBGene00050931 | F59B2.14 |         | F59B2.14            | -0.125753496574311  |
| AGIWUR25458;AGIWUR30439;AGIWUR39247                                   |    |     |         |         |                |          |         |                     |                     |
| N2                                                                    | HS | III | 9023964 | 9027044 | WBGene00010315 | F59B2.13 |         | F59B2.13            | -0.0715411372971095 |
| AGIWUR39438                                                           |    |     |         |         |                |          |         |                     |                     |
| N2                                                                    | HS | III | 9038779 | 9043300 | WBGene00003518 | nac-2    | R107.1  | 0.168211076153646   | AGIWUR17074         |
| N2                                                                    | HS | III | 9043886 | 9045938 | WBGene00011298 | R107.2   | R107.2  | 0.136734053060369   | AGIWUR29941         |
| N2                                                                    | HS | III | 9046055 | 9050693 | WBGene00011299 | ikke-1   | R107.4  | -0.150796590212265  |                     |

AGIWUR24852;AGIWUR26951

|    |    |     |         |         |                |        |        |                    |  |
|----|----|-----|---------|---------|----------------|--------|--------|--------------------|--|
| N2 | HS | III | 9051592 | 9053793 | WBGene00011300 | R107.5 | R107.5 | 0.0868598939488621 |  |
|----|----|-----|---------|---------|----------------|--------|--------|--------------------|--|

AGIWUR19646;AGIWUR26520

|    |    |     |         |         |                |       |        |                    |             |
|----|----|-----|---------|---------|----------------|-------|--------|--------------------|-------------|
| N2 | HS | III | 9055052 | 9058882 | WBGene00000549 | cls-2 | R107.6 | -0.359544127170182 | AGIWUR39897 |
|----|----|-----|---------|---------|----------------|-------|--------|--------------------|-------------|

|    |    |     |         |         |                |       |        |                    |             |
|----|----|-----|---------|---------|----------------|-------|--------|--------------------|-------------|
| N2 | HS | III | 9059314 | 9060181 | WBGene00001749 | gst-1 | R107.7 | -0.144369624013553 | AGIWUR24754 |
|----|----|-----|---------|---------|----------------|-------|--------|--------------------|-------------|

|    |    |     |         |         |                |        |        |                     |             |
|----|----|-----|---------|---------|----------------|--------|--------|---------------------|-------------|
| N2 | HS | III | 9060096 | 9071760 | WBGene00003001 | lin-12 | R107.8 | 0.00114276601019903 | AGIWUR31911 |
|----|----|-----|---------|---------|----------------|--------|--------|---------------------|-------------|

|    |    |     |         |         |                |         |         |                   |           |
|----|----|-----|---------|---------|----------------|---------|---------|-------------------|-----------|
| N2 | HS | III | 9074872 | 9075639 | WBGene00044406 | F02A9.7 | F02A9.7 | 0.149552010668307 | AGIWUR800 |
|----|----|-----|---------|---------|----------------|---------|---------|-------------------|-----------|

|    |    |     |         |         |                |         |         |                   |  |
|----|----|-----|---------|---------|----------------|---------|---------|-------------------|--|
| N2 | HS | III | 9075726 | 9077804 | WBGene00008513 | F02A9.1 | F02A9.1 | 0.155561050379897 |  |
|----|----|-----|---------|---------|----------------|---------|---------|-------------------|--|

AGIWUR6275;AGIWUR14081;AGIWUR19721;AGIWUR31244;AGIWUR37134

|    |    |     |         |         |                |       |         |                     |  |
|----|----|-----|---------|---------|----------------|-------|---------|---------------------|--|
| N2 | HS | III | 9080371 | 9081179 | WBGene00001385 | far-1 | F02A9.2 | -0.0480212571099479 |  |
|----|----|-----|---------|---------|----------------|-------|---------|---------------------|--|

AGIWUR9075;AGIWUR11257;AGIWUR19678;AGIWUR20921;AGIWUR23169;AGIWUR26703;AGIWUR42791

|    |    |     |         |         |                |       |         |                   |  |
|----|----|-----|---------|---------|----------------|-------|---------|-------------------|--|
| N2 | HS | III | 9081679 | 9082511 | WBGene00001386 | far-2 | F02A9.3 | 0.140723575718571 |  |
|----|----|-----|---------|---------|----------------|-------|---------|-------------------|--|

AGIWUR6957;AGIWUR13264;AGIWUR15268;AGIWUR31229

|    |    |     |         |         |                |         |         |                    |  |
|----|----|-----|---------|---------|----------------|---------|---------|--------------------|--|
| N2 | HS | III | 9084306 | 9089386 | WBGene00008514 | F02A9.4 | F02A9.4 | -0.168993755683222 |  |
|----|----|-----|---------|---------|----------------|---------|---------|--------------------|--|

AGIWUR2606;AGIWUR4621;AGIWUR4931;AGIWUR5859;AGIWUR8562;AGIWUR27392;AGIWUR31943;AGIWUR43479

|    |    |     |         |         |                |       |         |                    |             |
|----|----|-----|---------|---------|----------------|-------|---------|--------------------|-------------|
| N2 | HS | III | 9092241 | 9099698 | WBGene00001609 | glp-1 | F02A9.6 | -0.293086314117877 | AGIWUR41673 |
|----|----|-----|---------|---------|----------------|-------|---------|--------------------|-------------|

|    |    |     |         |         |                |         |         |                    |            |
|----|----|-----|---------|---------|----------------|---------|---------|--------------------|------------|
| N2 | HS | III | 9101367 | 9103095 | WBGene00013979 | ZK507.3 | ZK507.3 | -0.157790691366795 | AGIWUR8624 |
|----|----|-----|---------|---------|----------------|---------|---------|--------------------|------------|

|    |    |     |         |         |                |       |         |                   |  |
|----|----|-----|---------|---------|----------------|-------|---------|-------------------|--|
| N2 | HS | III | 9103943 | 9106805 | WBGene00013980 | dos-1 | ZK507.4 | 0.361478928403546 |  |
|----|----|-----|---------|---------|----------------|-------|---------|-------------------|--|

AGIWUR121;AGIWUR22323;AGIWUR25063

|    |    |     |         |         |                |       |         |                     |             |
|----|----|-----|---------|---------|----------------|-------|---------|---------------------|-------------|
| N2 | HS | III | 9106702 | 9109272 | WBGene00000863 | cya-1 | ZK507.6 | -0.0113005656867777 | AGIWUR31862 |
|----|----|-----|---------|---------|----------------|-------|---------|---------------------|-------------|

|    |    |     |         |         |                |         |         |                     |             |
|----|----|-----|---------|---------|----------------|---------|---------|---------------------|-------------|
| N2 | HS | III | 9115082 | 9117270 | WBGene00013982 | ZK512.1 | ZK512.1 | -0.0298126719732323 | AGIWUR11510 |
|----|----|-----|---------|---------|----------------|---------|---------|---------------------|-------------|

|    |    |     |         |         |                |        |         |                      |             |
|----|----|-----|---------|---------|----------------|--------|---------|----------------------|-------------|
| N2 | HS | III | 9117349 | 9118364 | WBGene00001720 | grl-11 | ZK512.9 | -0.00138285686770789 | AGIWUR20150 |
|----|----|-----|---------|---------|----------------|--------|---------|----------------------|-------------|

|    |    |     |         |         |                |        |         |                   |            |
|----|----|-----|---------|---------|----------------|--------|---------|-------------------|------------|
| N2 | HS | III | 9119559 | 9125153 | WBGene00000425 | ced-11 | ZK512.3 | 0.127077333234039 | AGIWUR9162 |
|----|----|-----|---------|---------|----------------|--------|---------|-------------------|------------|

|    |    |     |         |         |                |        |         |                    |  |
|----|----|-----|---------|---------|----------------|--------|---------|--------------------|--|
| N2 | HS | III | 9125641 | 9130807 | WBGene00013985 | sec-16 | ZK512.5 | -0.315436034931015 |  |
|----|----|-----|---------|---------|----------------|--------|---------|--------------------|--|

AGIWUR8065;AGIWUR12160;AGIWUR25926;AGIWUR42645

|    |    |     |         |         |                |          |  |          |                   |
|----|----|-----|---------|---------|----------------|----------|--|----------|-------------------|
| N2 | HS | III | 9130844 | 9131360 | WBGene00013988 | ZK512.10 |  | ZK512.10 | 0.188352618306151 |
|----|----|-----|---------|---------|----------------|----------|--|----------|-------------------|

AGIWUR14773

|    |    |     |         |         |                |       |         |                   |             |
|----|----|-----|---------|---------|----------------|-------|---------|-------------------|-------------|
| N2 | HS | III | 9136916 | 9141822 | WBGene00001135 | eat-4 | ZK512.6 | 0.119221991568493 | AGIWUR15306 |
|----|----|-----|---------|---------|----------------|-------|---------|-------------------|-------------|

|    |    |     |         |         |                |         |         |                  |  |
|----|----|-----|---------|---------|----------------|---------|---------|------------------|--|
| N2 | HS | III | 9141789 | 9144794 | WBGene00013983 | ZK512.2 | ZK512.2 | 0.11113584383363 |  |
|----|----|-----|---------|---------|----------------|---------|---------|------------------|--|

AGIWUR2192;AGIWUR3650;AGIWUR7066

|    |    |     |         |         |                |         |         |                   |             |
|----|----|-----|---------|---------|----------------|---------|---------|-------------------|-------------|
| N2 | HS | III | 9145325 | 9145976 | WBGene00013984 | ZK512.4 | ZK512.4 | 0.318021489822828 | AGIWUR25270 |
|----|----|-----|---------|---------|----------------|---------|---------|-------------------|-------------|

|    |    |     |         |         |                |         |         |                   |             |
|----|----|-----|---------|---------|----------------|---------|---------|-------------------|-------------|
| N2 | HS | III | 9146031 | 9147411 | WBGene00013987 | ZK512.8 | ZK512.8 | -0.07400904569473 | AGIWUR44998 |
|----|----|-----|---------|---------|----------------|---------|---------|-------------------|-------------|

|    |    |     |         |         |                |       |         |                   |            |
|----|----|-----|---------|---------|----------------|-------|---------|-------------------|------------|
| N2 | HS | III | 9147395 | 9153909 | WBGene00003597 | nhl-1 | F54G8.4 | 0.069226823587627 | AGIWUR7367 |
|----|----|-----|---------|---------|----------------|-------|---------|-------------------|------------|

|    |    |     |         |         |                |         |         |                   |             |
|----|----|-----|---------|---------|----------------|---------|---------|-------------------|-------------|
| N2 | HS | III | 9155116 | 9157165 | WBGene00010074 | irld-34 | F54G8.1 | 0.151114524011961 | AGIWUR18148 |
|----|----|-----|---------|---------|----------------|---------|---------|-------------------|-------------|

|    |    |     |         |         |                |       |         |                    |             |
|----|----|-----|---------|---------|----------------|-------|---------|--------------------|-------------|
| N2 | HS | III | 9157243 | 9161653 | WBGene00004223 | ptr-9 | F54G8.5 | 0.0672609348528077 | AGIWUR15185 |
|----|----|-----|---------|---------|----------------|-------|---------|--------------------|-------------|

|    |    |     |         |         |                |       |         |                     |             |
|----|----|-----|---------|---------|----------------|-------|---------|---------------------|-------------|
| N2 | HS | III | 9163077 | 9168027 | WBGene00000960 | dgk-3 | F54G8.2 | -0.0760850986501218 | AGIWUR30352 |
|----|----|-----|---------|---------|----------------|-------|---------|---------------------|-------------|

|    |    |     |         |         |                |       |         |                    |            |
|----|----|-----|---------|---------|----------------|-------|---------|--------------------|------------|
| N2 | HS | III | 9168040 | 9172802 | WBGene00002081 | ina-1 | F54G8.3 | 0.0881246105327325 | AGIWUR3362 |
|----|----|-----|---------|---------|----------------|-------|---------|--------------------|------------|

|    |    |     |         |         |                |       |        |                     |             |
|----|----|-----|---------|---------|----------------|-------|--------|---------------------|-------------|
| N2 | HS | III | 9181550 | 9185649 | WBGene00006526 | tax-4 | ZC84.2 | 0.00521451972893772 | AGIWUR15160 |
|----|----|-----|---------|---------|----------------|-------|--------|---------------------|-------------|

|    |    |     |         |         |                |        |        |                    |             |
|----|----|-----|---------|---------|----------------|--------|--------|--------------------|-------------|
| N2 | HS | III | 9186077 | 9192951 | WBGene00013850 | ZC84.7 | ZC84.7 | 0.0842474550565155 | AGIWUR31325 |
|----|----|-----|---------|---------|----------------|--------|--------|--------------------|-------------|

|                                                                                                             |    |     |         |         |                |         |         |                     |             |
|-------------------------------------------------------------------------------------------------------------|----|-----|---------|---------|----------------|---------|---------|---------------------|-------------|
| N2                                                                                                          | HS | III | 9192983 | 9199507 | WBGene00013849 | ZC84.6  | ZC84.6  | 0.126411878569405   | AGIWUR6565  |
| N2                                                                                                          | HS | III | 9199450 | 9206285 | WBGene00013846 | ZC84.1  | ZC84.1  | -0.011318272978988  |             |
| AGIWUR1559;AGIWUR10301;AGIWUR12527;AGIWUR22077                                                              |    |     |         |         |                |         |         |                     |             |
| N2                                                                                                          | HS | III | 9206966 | 9207854 | WBGene00014980 | ZC84.5  | ZC84.5  | -0.112231221230141  | AGIWUR15239 |
| N2                                                                                                          | HS | III | 9208288 | 9215440 | WBGene00013848 | npr-29  | ZC84.4  | -0.0115655389504568 | AGIWUR25356 |
| N2                                                                                                          | HS | III | 9225374 | 9228786 | WBGene00004391 | rnr-1   | T23G5.1 | -0.129463139867308  |             |
| AGIWUR21235;AGIWUR28652;AGIWUR34624                                                                         |    |     |         |         |                |         |         |                     |             |
| N2                                                                                                          | HS | III | 9229235 | 9231210 | WBGene00011963 | T23G5.3 | T23G5.3 | -0.0259237157235219 | AGIWUR12934 |
| N2                                                                                                          | HS | III | 9231421 | 9236322 | WBGene00011962 | T23G5.2 | T23G5.2 | -0.0785523832133386 |             |
| AGIWUR21176;AGIWUR33460;AGIWUR36304                                                                         |    |     |         |         |                |         |         |                     |             |
| N2                                                                                                          | HS | III | 9240337 | 9242514 | WBGene00011964 | saeg-2  | T23G5.6 | 0.0198548402444043  |             |
| AGIWUR6898;AGIWUR13321;AGIWUR38443                                                                          |    |     |         |         |                |         |         |                     |             |
| N2                                                                                                          | HS | III | 9242914 | 9246802 | WBGene00000934 | dat-1   | T23G5.5 | 0.150045162422988   | AGIWUR22310 |
| N2                                                                                                          | HS | III | 9247422 | 9248618 | WBGene00011365 | T02C1.1 | T02C1.1 | 0.367747154436181   | AGIWUR26963 |
| N2                                                                                                          | HS | III | 9251029 | 9253126 | WBGene00011366 | T02C1.2 | T02C1.2 | -0.051681650626259  | AGIWUR13854 |
| N2                                                                                                          | HS | III | 9257259 | 9260222 | WBGene00010795 | M01A8.1 | M01A8.1 | -0.0649891644629008 |             |
| AGIWUR13143;AGIWUR15928;AGIWUR16043;AGIWUR38473;AGIWUR38524;AGIWUR45013                                     |    |     |         |         |                |         |         |                     |             |
| N2                                                                                                          | HS | III | 9260191 | 9269062 | WBGene00010796 | clip-1  | M01A8.2 | -0.0341933356812945 |             |
| AGIWUR9838;AGIWUR11840;AGIWUR19871                                                                          |    |     |         |         |                |         |         |                     |             |
| N2                                                                                                          | HS | III | 9281785 | 9296668 | WBGene00010453 | fozi-1  | K01B6.1 | -0.0775121396395759 | AGIWUR1508  |
| N2                                                                                                          | HS | III | 9296627 | 9297394 | WBGene00010455 | K01B6.4 | K01B6.4 | 0.234818727636791   | AGIWUR5362  |
| N2                                                                                                          | HS | III | 9300219 | 9303928 | WBGene00010454 | K01B6.3 | K01B6.3 | -0.0244219389886862 | AGIWUR27244 |
| N2                                                                                                          | HS | III | 9304034 | 9306696 | WBGene00005936 | srx-45  | K01B6.2 | -0.229769384640806  |             |
| AGIWUR8476;AGIWUR18281;AGIWUR39530                                                                          |    |     |         |         |                |         |         |                     |             |
| N2                                                                                                          | HS | III | 9314714 | 9317365 | WBGene00008043 | C40H1.8 | C40H1.8 | 0.0589995649008621  | AGIWUR23496 |
| N2                                                                                                          | HS | III | 9318044 | 9319271 | WBGene00008038 | C40H1.2 | C40H1.2 | -0.0060510342812945 | AGIWUR40443 |
| N2                                                                                                          | HS | III | 9320040 | 9321663 | WBGene00008044 | C40H1.9 | C40H1.9 | -0.0655580477029396 | AGIWUR14266 |
| N2                                                                                                          | HS | III | 9322316 | 9324733 | WBGene00000770 | cpb-1   | C40H1.1 | -0.147420899195945  | AGIWUR13573 |
| N2                                                                                                          | HS | III | 9325048 | 9327031 | WBGene00008042 | C40H1.7 | C40H1.7 | -0.362699502490898  | AGIWUR16820 |
| N2                                                                                                          | HS | III | 9327307 | 9329366 | WBGene00008039 | C40H1.3 | C40H1.3 | 0.0297221940797847  | AGIWUR27686 |
| N2                                                                                                          | HS | III | 9330316 | 9330928 | WBGene00008040 | ttr-5   | C40H1.5 | 0.166422298545767   | AGIWUR40524 |
| N2                                                                                                          | HS | III | 9331514 | 9332284 | WBGene00008041 | ufc-1   | C40H1.6 | 0.0365515047830733  | AGIWUR41584 |
| N2                                                                                                          | HS | III | 9332269 | 9334274 | WBGene00001242 | elo-4   | C40H1.4 | 0.293196009861049   | AGIWUR23388 |
| N2                                                                                                          | HS | III | 9336881 | 9344447 | WBGene00001263 | emb-9   | K04H4.1 | -0.240831452187434  |             |
| AGIWUR9539;AGIWUR9984                                                                                       |    |     |         |         |                |         |         |                     |             |
| N2                                                                                                          | HS | III | 9347714 | 9355480 | WBGene00010573 | K04H4.2 | K04H4.2 | 0.0250287307665591  |             |
| AGIWUR7753;AGIWUR12418;AGIWUR14842;AGIWUR21373;AGIWUR22356;AGIWUR23321;AGIWUR25593;AGIWUR36790;AGIWUR39493; |    |     |         |         |                |         |         |                     |             |
| AGIWUR40643;AGIWUR41480;AGIWUR42869;AGIWUR43596                                                             |    |     |         |         |                |         |         |                     |             |
| N2                                                                                                          | HS | III | 9360269 | 9361333 | WBGene00010574 | K04H4.5 | K04H4.5 | -0.126103736718111  | AGIWUR28137 |



|                                                                                                                                 |    |     |         |         |                |          |          |                       |             |
|---------------------------------------------------------------------------------------------------------------------------------|----|-----|---------|---------|----------------|----------|----------|-----------------------|-------------|
| N2                                                                                                                              | HS | III | 9361528 | 9365380 | WBGene00010575 | flp-25   | K04H4.7  | 0.168241620291164     |             |
| AGIWUR2661;AGIWUR28217;AGIWUR28904;AGIWUR38699                                                                                  |    |     |         |         |                |          |          |                       |             |
| N2                                                                                                                              | HS | III | 9367238 | 9370385 | WBGene00000799 | crn-6    | K04H4.6  | 0.0649825994375917    |             |
| AGIWUR3728;AGIWUR24581                                                                                                          |    |     |         |         |                |          |          |                       |             |
| N2                                                                                                                              | HS | III | 9383796 | 9387605 | WBGene00006576 | tkr-1    | C38C10.1 | 0.218057473029377     |             |
| AGIWUR1367                                                                                                                      |    |     |         |         |                |          |          |                       |             |
| N2                                                                                                                              | HS | III | 9387601 | 9390107 | WBGene00008000 | slc-17.2 | C38C10.2 | -0.165635882955891    |             |
| AGIWUR8053;AGIWUR12304;AGIWUR18680;AGIWUR21362;AGIWUR22003;AGIWUR28566                                                          |    |     |         |         |                |          |          |                       |             |
| N2                                                                                                                              | HS | III | 9393981 | 9404532 | WBGene00004343 | rgr-1    | C38C10.5 | -0.138386246049331    |             |
| AGIWUR31939                                                                                                                     |    |     |         |         |                |          |          |                       |             |
| N2                                                                                                                              | HS | III | 9404484 | 9406641 | WBGene00012059 | T26G10.1 | T26G10.1 | 0.112718319945023     |             |
| AGIWUR39909                                                                                                                     |    |     |         |         |                |          |          |                       |             |
| N2                                                                                                                              | HS | III | 9412854 | 9413440 | WBGene00012060 | T26G10.3 | T26G10.3 | -0.0382292832256619   |             |
| AGIWUR18817                                                                                                                     |    |     |         |         |                |          |          |                       |             |
| N2                                                                                                                              | HS | III | 9420531 | 9421574 | WBGene00012061 | T26G10.4 | T26G10.4 | -0.0103012819232546   |             |
| AGIWUR40905                                                                                                                     |    |     |         |         |                |          |          |                       |             |
| N2                                                                                                                              | HS | III | 9425536 | 9426674 | WBGene00012062 | T26G10.5 | T26G10.5 | 0.00437137882330774   |             |
| AGIWUR17340                                                                                                                     |    |     |         |         |                |          |          |                       |             |
| N2                                                                                                                              | HS | III | 9434057 | 9435100 | WBGene00010036 | cpar-1   | F54C8.2  | -0.11440900718566     | AGIWUR14509 |
| N2                                                                                                                              | HS | III | 9435083 | 9441539 | WBGene00001284 | emb-30   | F54C8.3  | -0.0340923460617546   |             |
| AGIWUR12925;AGIWUR43849                                                                                                         |    |     |         |         |                |          |          |                       |             |
| N2                                                                                                                              | HS | III | 9441557 | 9443634 | WBGene00010037 | F54C8.4  | F54C8.4  | -0.133358177587491    |             |
| AGIWUR12673;AGIWUR18539;AGIWUR19722;AGIWUR26404                                                                                 |    |     |         |         |                |          |          |                       |             |
| N2                                                                                                                              | HS | III | 9444360 | 9449931 | WBGene00010039 | F54C8.6  | F54C8.6  | -0.220918497031565    | AGIWUR35169 |
| N2                                                                                                                              | HS | III | 9451595 | 9454062 | WBGene00010040 | F54C8.7  | F54C8.7  | 0.0217049007602661    | AGIWUR30464 |
| N2                                                                                                                              | HS | III | 9454163 | 9456030 | WBGene00010038 | rheb-1   | F54C8.5  | 0.110082649335        | AGIWUR34422 |
| N2                                                                                                                              | HS | III | 9456563 | 9463004 | WBGene00004980 | spk-1    | B0464.5  | -0.174504248998744    |             |
| AGIWUR2559;AGIWUR3910;AGIWUR29612                                                                                               |    |     |         |         |                |          |          |                       |             |
| N2                                                                                                                              | HS | III | 9462989 | 9465965 | WBGene00007186 | B0464.6  | B0464.6  | -0.000318259765812012 |             |
| AGIWUR956;AGIWUR34359                                                                                                           |    |     |         |         |                |          |          |                       |             |
| N2                                                                                                                              | HS | III | 9465767 | 9467177 | WBGene00007188 | B0464.9  | B0464.9  | -0.404717763562253    | AGIWUR10494 |
| N2                                                                                                                              | HS | III | 9467464 | 9468058 | WBGene00000235 | baf-1    | B0464.7  | 0.0175514790873361    |             |
| AGIWUR652;AGIWUR2228;AGIWUR3386;AGIWUR20361;AGIWUR21114;AGIWUR22416;AGIWUR27119;AGIWUR28155;AGIWUR29069;AGIWUR31986;AGIWUR33673 |    |     |         |         |                |          |          |                       |             |
| N2                                                                                                                              | HS | III | 9468157 | 9469899 | WBGene00007187 | tag-342  | B0464.8  | 0.0440156078508975    |             |
| AGIWUR1236;AGIWUR26705                                                                                                          |    |     |         |         |                |          |          |                       |             |
| N2                                                                                                                              | HS | III | 9469920 | 9485451 | WBGene00000268 | bre-3    | B0464.4  | -0.363908044332534    | AGIWUR9948  |
| N2                                                                                                                              | HS | III | 9488731 | 9489188 | WBGene00007185 | nlp-36   | B0464.3  | 0.188178086804751     | AGIWUR14705 |
| N2                                                                                                                              | HS | III | 9489176 | 9491236 | WBGene00001094 | dars-1   | B0464.1  | -0.121900472801656    |             |

AGIWUR10366;AGIWUR28818;AGIWUR37587  
 N2 HS III 9491640 9497044 WBGene00007184 ctr-9 B0464.2 -0.015984199129826  
 AGIWUR4327;AGIWUR4818;AGIWUR5388;AGIWUR16073;AGIWUR26585;AGIWUR26624  
 N2 HS III 9497019 9500202 WBGene00004933 sod-4 F55H2.1 -0.145230188660108  
 AGIWUR16498;AGIWUR25425;AGIWUR32411;AGIWUR40264;AGIWUR40842  
 N2 HS III 9504764 9507081 WBGene00003067 lrg-1 F55H2.4 -0.296020517748512  
 AGIWUR20208;AGIWUR34899  
 N2 HS III 9508074 9509806 WBGene00010130 vha-14 F55H2.2 0.0559613353501973  
 AGIWUR3972;AGIWUR25785;AGIWUR39739  
 N2 HS III 9511470 9513375 WBGene00010131 F55H2.5 F55H2.5 -0.0312644689832702  
 AGIWUR15384;AGIWUR16468;AGIWUR17057;AGIWUR18183;AGIWUR21757;AGIWUR32281;AGIWUR39797  
 N2 HS III 9513348 9516248 WBGene00010132 F55H2.7 F55H2.7 0.339008119817301 AGIWUR21357  
 N2 HS III 9516631 9521460 WBGene00000550 clu-1 F55H2.6 0.0237441171636377  
 AGIWUR6012;AGIWUR12781;AGIWUR24985;AGIWUR25703  
 N2 HS III 9522075 9525437 WBGene00014218 ZK1098.1 ZK1098.1 -0.0490940422866366  
 AGIWUR40242  
 N2 HS III 9525552 9527068 WBGene00014222 trpp-3 ZK1098.5 -0.0968365709871142  
 AGIWUR27234;AGIWUR28384;AGIWUR35407;AGIWUR36975  
 N2 HS III 9527151 9528689 WBGene00014223 ZK1098.6 ZK1098.6 0.384991704825856  
 AGIWUR23405  
 N2 HS III 9529166 9531888 WBGene00014219 ZK1098.2 ZK1098.2 0.185413999476097  
 AGIWUR25200  
 N2 HS III 9532427 9538700 WBGene00014220 ZK1098.3 ZK1098.3 0.0737785049435455  
 AGIWUR7676;AGIWUR9497;AGIWUR42452  
 N2 HS III 9539031 9542380 WBGene00003504 mut-7 ZK1098.8 -0.00810495066555816  
 AGIWUR25701  
 N2 HS III 9543069 9544404 WBGene00014221 eif-2Balpha ZK1098.4 0.409963548228159  
 AGIWUR18997  
 N2 HS III 9545120 9545897 WBGene00194691 ZK1098.12 ZK1098.12 -0.341628571586703  
 AGIWUR12008  
 N2 HS III 9546258 9556514 WBGene00006755 unc-16 ZK1098.10 -0.0712407846930425  
 AGIWUR5621;AGIWUR33196;AGIWUR42349  
 N2 HS III 9556507 9557454 WBGene00014226 ZK1098.11 ZK1098.11 0.26820304845543  
 AGIWUR25774  
 N2 HS III 9557448 9558563 WBGene00008169 C48B4.6 C48B4.6 -0.170734848853376 AGIWUR1145  
 N2 HS III 9558669 9559427 WBGene00008170 C48B4.7 C48B4.7 -0.181519123462291 AGIWUR8640  
 N2 HS III 9559831 9561258 WBGene00008171 C48B4.8 C48B4.8 -0.128664959573962 AGIWUR29752  
 N2 HS III 9562336 9563335 WBGene00008172 C48B4.9 C48B4.9 -0.14459521646708 AGIWUR12846  
 N2 HS III 9563437 9564510 WBGene00008173 C48B4.10 C48B4.10 0.102038746620828

|                                                                                                          |    |     |         |         |                |                   |                                  |
|----------------------------------------------------------------------------------------------------------|----|-----|---------|---------|----------------|-------------------|----------------------------------|
| AGIWUR29101                                                                                              |    |     |         |         |                |                   |                                  |
| N2                                                                                                       | HS | III | 9564605 | 9566115 | WBGene00008174 | C48B4.11          | C48B4.11 -0.0497396298670871     |
| AGIWUR9676                                                                                               |    |     |         |         |                |                   |                                  |
| N2                                                                                                       | HS | III | 9568751 | 9570460 | WBGene00008176 | C48B4.13          | C48B4.13 0.0225931219233866      |
| AGIWUR5852                                                                                               |    |     |         |         |                |                   |                                  |
| N2                                                                                                       | HS | III | 9570394 | 9580081 | WBGene00000421 | ced-7 C48B4.4     | 0.0353221149650356               |
| AGIWUR15134;AGIWUR15652;AGIWUR41526                                                                      |    |     |         |         |                |                   |                                  |
| N2                                                                                                       | HS | III | 9581220 | 9582361 | WBGene00008168 | C48B4.3 C48B4.3   | -0.00679004983854448 AGIWUR39224 |
| N2                                                                                                       | HS | III | 9586617 | 9592192 | WBGene00008167 | acox-1.5 C48B4.1  | 0.313641796763338                |
| AGIWUR40965                                                                                              |    |     |         |         |                |                   |                                  |
| N2                                                                                                       | HS | III | 9592282 | 9595667 | WBGene00004401 | rom-2 C48B4.2     | -0.223814844049652 AGIWUR30006   |
| N2                                                                                                       | HS | III | 9597359 | 9598361 | WBGene00008175 | C48B4.12 C48B4.12 | -0.0706128275806215              |
| AGIWUR33971                                                                                              |    |     |         |         |                |                   |                                  |
| N2                                                                                                       | HS | III | 9598475 | 9600049 | WBGene00010226 | F58A4.1 F58A4.1   | -0.0168630475419347 AGIWUR44129  |
| N2                                                                                                       | HS | III | 9600038 | 9600745 | WBGene00010227 | F58A4.2 F58A4.2   | 0.215366054799695 AGIWUR17790    |
| N2                                                                                                       | HS | III | 9603030 | 9608688 | WBGene00010228 | clec-161 F58A4.5  | 0.0494485516215857               |
| AGIWUR38854                                                                                              |    |     |         |         |                |                   |                                  |
| N2                                                                                                       | HS | III | 9609568 | 9612191 | WBGene00043992 | bbs-4 F58A4.14    | -0.0652347284904558              |
| AGIWUR13700;AGIWUR30878                                                                                  |    |     |         |         |                |                   |                                  |
| N2                                                                                                       | HS | III | 9614425 | 9615332 | WBGene00010229 | F58A4.6 F58A4.6   | -0.02759010480756 AGIWUR11369    |
| N2                                                                                                       | HS | III | 9615306 | 9616470 | WBGene00001831 | hcp-3 F58A4.3     | -0.0317417174937873 AGIWUR41202  |
| N2                                                                                                       | HS | III | 9619711 | 9626537 | WBGene00001955 | h1h-11 F58A4.7    | -0.148755559320753               |
| AGIWUR1204;AGIWUR18661;AGIWUR29302                                                                       |    |     |         |         |                |                   |                                  |
| N2                                                                                                       | HS | III | 9626532 | 9629154 | WBGene00006540 | tbg-1 F58A4.8     | -0.220083209045535               |
| AGIWUR5583;AGIWUR6671;AGIWUR8319;AGIWUR23541;AGIWUR24863;AGIWUR27460;AGIWUR31856;AGIWUR39229;AGIWUR39539 |    |     |         |         |                |                   |                                  |
| N2                                                                                                       | HS | III | 9629246 | 9629917 | WBGene00010230 | rpac-19 F58A4.9   | 0.0100378369105094               |
| AGIWUR15916;AGIWUR37629                                                                                  |    |     |         |         |                |                   |                                  |
| N2                                                                                                       | HS | III | 9630085 | 9631167 | WBGene00006704 | ubc-7 F58A4.10    | 0.0911238930740357               |
| AGIWUR18406;AGIWUR20044;AGIWUR40951;AGIWUR43784                                                          |    |     |         |         |                |                   |                                  |
| N2                                                                                                       | HS | III | 9631994 | 9637116 | WBGene00001570 | gei-13 F58A4.11   | -0.00277435548782101             |
| AGIWUR30688                                                                                              |    |     |         |         |                |                   |                                  |
| N2                                                                                                       | HS | III | 9650422 | 9651971 | WBGene00007610 | C15H7.3 C15H7.3   | 0.184849538700945 AGIWUR41659    |
| N2                                                                                                       | HS | III | 9652313 | 9653641 | WBGene00014678 | C15H7.2 C15H7.2   | 0.0744451290962056 AGIWUR3998    |
| N2                                                                                                       | HS | III | 9654409 | 9655859 | WBGene00007611 | C15H7.4 C15H7.4   | 0.238839827592798 AGIWUR12873    |
| N2                                                                                                       | HS | III | 9663290 | 9667640 | WBGene00007405 | C07A9.9 C07A9.9   | -0.134032709526155               |
| AGIWUR2793;AGIWUR21425;AGIWUR40053;AGIWUR40663                                                           |    |     |         |         |                |                   |                                  |
| N2                                                                                                       | HS | III | 9676320 | 9679051 | WBGene00007402 | ugt-60 C07A9.6    | 0.0925666598817756 AGIWUR2544    |
| N2                                                                                                       | HS | III | 9679698 | 9681269 | WBGene00044227 | C07A9.13 C07A9.13 | -0.157600594055623               |
| AGIWUR9129                                                                                               |    |     |         |         |                |                   |                                  |

|                                                                         |    |     |         |         |                |          |          |                      |             |
|-------------------------------------------------------------------------|----|-----|---------|---------|----------------|----------|----------|----------------------|-------------|
| N2                                                                      | HS | III | 9681524 | 9682829 | WBGene00007401 | C07A9.5  | C07A9.5  | 0.176543700170524    |             |
| AGIWUR35061;AGIWUR41297                                                 |    |     |         |         |                |          |          |                      |             |
| N2                                                                      | HS | III | 9686990 | 9690253 | WBGene00007404 | best-5   | C07A9.8  | 0.210816349200103    | AGIWUR16656 |
| N2                                                                      | HS | III | 9691030 | 9694572 | WBGene00007403 | set-3    | C07A9.7  | -0.063128189710234   |             |
| AGIWUR6874;AGIWUR16066                                                  |    |     |         |         |                |          |          |                      |             |
| N2                                                                      | HS | III | 9694668 | 9696517 | WBGene00007400 | C07A9.2  | C07A9.2  | 0.074029501927761    |             |
| AGIWUR2106;AGIWUR8528;AGIWUR23710;AGIWUR30448;AGIWUR44233               |    |     |         |         |                |          |          |                      |             |
| N2                                                                      | HS | III | 9699876 | 9710268 | WBGene00006579 | tlk-1    | C07A9.3  | -0.243872875248204   |             |
| AGIWUR28026;AGIWUR28045;AGIWUR37049                                     |    |     |         |         |                |          |          |                      |             |
| N2                                                                      | HS | III | 9710312 | 9713928 | WBGene00003571 | ncx-6    | C07A9.4  | 0.026081830958983    | AGIWUR5692  |
| N2                                                                      | HS | III | 9715883 | 9720291 | WBGene00003572 | ncx-7    | C07A9.11 | 0.0688087262465906   |             |
| AGIWUR41131                                                             |    |     |         |         |                |          |          |                      |             |
| N2                                                                      | HS | III | 9723282 | 9725214 | WBGene00007399 | clcc-162 | C07A9.1  | 0.00275844463618569  |             |
| AGIWUR18;AGIWUR21283;AGIWUR43658                                        |    |     |         |         |                |          |          |                      |             |
| N2                                                                      | HS | III | 9725285 | 9727539 | WBGene00043994 | C07A9.12 | C07A9.12 | -0.123883018824643   |             |
| AGIWUR23015;AGIWUR42131                                                 |    |     |         |         |                |          |          |                      |             |
| N2                                                                      | HS | III | 9735265 | 9736057 | WBGene00000932 | dao-6    | T05G5.12 | 0.0984901798480475   |             |
| AGIWUR8538;AGIWUR16163;AGIWUR36321                                      |    |     |         |         |                |          |          |                      |             |
| N2                                                                      | HS | III | 9736030 | 9736869 | WBGene00004097 | pqm-96   | T05G5.11 | 0.176158372797422    |             |
| AGIWUR4087;AGIWUR11001;AGIWUR19161;AGIWUR25569;AGIWUR34670              |    |     |         |         |                |          |          |                      |             |
| N2                                                                      | HS | III | 9737469 | 9738839 | WBGene00001951 | hlh-4    | T05G5.2  | -0.00735904287958533 | AGIWUR41294 |
| N2                                                                      | HS | III | 9745864 | 9747193 | WBGene00002064 | iff-1    | T05G5.10 | 0.073312915746353    |             |
| AGIWUR21180                                                             |    |     |         |         |                |          |          |                      |             |
| N2                                                                      | HS | III | 9747432 | 9748852 | WBGene00000405 | cdk-1    | T05G5.3  | 0.0120320641984151   |             |
| AGIWUR18204;AGIWUR25840;AGIWUR26140                                     |    |     |         |         |                |          |          |                      |             |
| N2                                                                      | HS | III | 9748863 | 9749673 | WBGene00011499 | T05G5.4  | T05G5.4  | -0.0603991680633307  | AGIWUR44760 |
| N2                                                                      | HS | III | 9751440 | 9752922 | WBGene00001155 | ech-6    | T05G5.6  | 0.161012395570378    |             |
| AGIWUR4728;AGIWUR22276;AGIWUR32179;AGIWUR36972;AGIWUR39062              |    |     |         |         |                |          |          |                      |             |
| N2                                                                      | HS | III | 9753672 | 9757514 | WBGene00011502 | vps-53   | T05G5.8  | 0.23522653287111     | AGIWUR12730 |
| N2                                                                      | HS | III | 9757616 | 9762143 | WBGene00011503 | gcc-2    | T05G5.9  | -0.0398515819503658  | AGIWUR26271 |
| N2                                                                      | HS | III | 9766516 | 9774825 | WBGene00000366 | cbp-1    | R10E11.1 | 0.0409723479590705   |             |
| AGIWUR3680;AGIWUR20510;AGIWUR23302;AGIWUR36765                          |    |     |         |         |                |          |          |                      |             |
| N2                                                                      | HS | III | 9776532 | 9778850 | WBGene00011216 | usp-46   | R10E11.3 | 0.0627572558536587   |             |
| AGIWUR828;AGIWUR9155;AGIWUR27956;AGIWUR35299                            |    |     |         |         |                |          |          |                      |             |
| N2                                                                      | HS | III | 9778782 | 9780350 | WBGene00005021 | sqv-3    | R10E11.4 | -0.109684469611635   |             |
| AGIWUR4791                                                              |    |     |         |         |                |          |          |                      |             |
| N2                                                                      | HS | III | 9781243 | 9782057 | WBGene00006910 | vha-1    | R10E11.8 | -0.0294407757114499  |             |
| AGIWUR12283;AGIWUR14952;AGIWUR20193;AGIWUR21407;AGIWUR26765;AGIWUR32083 |    |     |         |         |                |          |          |                      |             |
| N2                                                                      | HS | III | 9782164 | 9783212 | WBGene00006911 | vha-2    | R10E11.2 | 0.0216724990616566   |             |

|                                                                         |    |     |         |         |                |          |          |                      |             |
|-------------------------------------------------------------------------|----|-----|---------|---------|----------------|----------|----------|----------------------|-------------|
| AGIWUR28465                                                             |    |     |         |         |                |          |          |                      |             |
| N2                                                                      | HS | III | 9783325 | 9786038 | WBGene00011218 | R10E11.6 | R10E11.6 | 0.0155793186395554   |             |
| AGIWUR4535;AGIWUR8860                                                   |    |     |         |         |                |          |          |                      |             |
| N2                                                                      | HS | III | 9785957 | 9789657 | WBGene00011217 | R10E11.5 | R10E11.5 | 0.236059784486997    |             |
| AGIWUR32181;AGIWUR38562;AGIWUR42235                                     |    |     |         |         |                |          |          |                      |             |
| N2                                                                      | HS | III | 9792548 | 9793642 | WBGene00011220 | R10E11.9 | R10E11.9 | 0.218856976764598    |             |
| AGIWUR44902                                                             |    |     |         |         |                |          |          |                      |             |
| N2                                                                      | HS | III | 9794367 | 9798643 | WBGene00003158 | mcm-6    | ZK632.1  | -0.111844781757907   |             |
| AGIWUR3400;AGIWUR44759                                                  |    |     |         |         |                |          |          |                      |             |
| N2                                                                      | HS | III | 9799107 | 9802333 | WBGene00014011 | ZK632.2  | ZK632.2  | 0.027623552003579    | AGIWUR31557 |
| N2                                                                      | HS | III | 9802354 | 9805093 | WBGene00014012 | riok-3   | ZK632.3  | 0.00108885349206389  | AGIWUR17835 |
| N2                                                                      | HS | III | 9805515 | 9807454 | WBGene00014013 | ZK632.4  | ZK632.4  | 0.170611817939765    | AGIWUR36478 |
| N2                                                                      | HS | III | 9808544 | 9812639 | WBGene00014014 | ZK632.5  | ZK632.5  | 0.241430011461411    | AGIWUR40919 |
| N2                                                                      | HS | III | 9813446 | 9814424 | WBGene00014020 | ZK632.14 | ZK632.14 | -0.0712019409916151  |             |
| AGIWUR10501;AGIWUR29646;AGIWUR30662;AGIWUR44427                         |    |     |         |         |                |          |          |                      |             |
| N2                                                                      | HS | III | 9814364 | 9817137 | WBGene00000567 | cnx-1    | ZK632.6  | -0.234905954115757   | AGIWUR9035  |
| N2                                                                      | HS | III | 9819294 | 9823120 | WBGene00014015 | panl-3   | ZK632.7  | -0.114300754218316   | AGIWUR30337 |
| N2                                                                      | HS | III | 9823242 | 9824132 | WBGene00000189 | arl-5    | ZK632.8  | -0.0387781802747931  | AGIWUR25912 |
| N2                                                                      | HS | III | 9824877 | 9825445 | WBGene00014016 | ZK632.9  | ZK632.9  | 0.0855935552664562   |             |
| AGIWUR16999;AGIWUR17140;AGIWUR17442;AGIWUR20289;AGIWUR29675;AGIWUR30283 |    |     |         |         |                |          |          |                      |             |
| N2                                                                      | HS | III | 9826130 | 9827178 | WBGene00014017 | ZK632.10 | ZK632.10 | 0.0743868192812656   |             |
| AGIWUR30752                                                             |    |     |         |         |                |          |          |                      |             |
| N2                                                                      | HS | III | 9827915 | 9829719 | WBGene00014018 | ZK632.11 | ZK632.11 | 0.414492886915049    |             |
| AGIWUR24674                                                             |    |     |         |         |                |          |          |                      |             |
| N2                                                                      | HS | III | 9830792 | 9832430 | WBGene00014019 | ZK632.12 | ZK632.12 | -0.0210542405424867  |             |
| AGIWUR42050                                                             |    |     |         |         |                |          |          |                      |             |
| N2                                                                      | HS | III | 9835192 | 9838311 | WBGene00185002 | K11H3.8  | K11H3.8  | 0.0166192054662861   | AGIWUR26726 |
| N2                                                                      | HS | III | 9843782 | 9845733 | WBGene00010782 | K11H3.5  | K11H3.5  | -0.0783540369622662  | AGIWUR35882 |
| N2                                                                      | HS | III | 9846393 | 9847521 | WBGene00010779 | K11H3.2  | K11H3.2  | -0.0274480649432292  | AGIWUR4923  |
| N2                                                                      | HS | III | 9847626 | 9848116 | WBGene00010783 | mrp1-36  | K11H3.6  | -0.0614077419014265  | AGIWUR40294 |
| N2                                                                      | HS | III | 9851854 | 9854102 | WBGene00010780 | K11H3.3  | K11H3.3  | -0.12321018039842    | AGIWUR32929 |
| N2                                                                      | HS | III | 9854077 | 9859183 | WBGene00010778 | gpdh-2   | K11H3.1  | 0.154232588163579    |             |
| AGIWUR18384;AGIWUR23070                                                 |    |     |         |         |                |          |          |                      |             |
| N2                                                                      | HS | III | 9860730 | 9863302 | WBGene00010784 | twk-48   | K11H3.7  | -0.018825166165545   |             |
| AGIWUR9189;AGIWUR22564;AGIWUR37335                                      |    |     |         |         |                |          |          |                      |             |
| N2                                                                      | HS | III | 9863251 | 9867786 | WBGene00014075 | dhhc-4   | ZK757.4  | -0.00343174670893909 |             |
| AGIWUR2140;AGIWUR3995;AGIWUR20382;AGIWUR33633                           |    |     |         |         |                |          |          |                      |             |
| N2                                                                      | HS | III | 9868594 | 9871124 | WBGene00014073 | ZK757.1  | ZK757.1  | 0.0227779534706229   | AGIWUR24918 |
| N2                                                                      | HS | III | 9874142 | 9877476 | WBGene00014074 | ZK757.2  | ZK757.2  | -0.0443998919905217  | AGIWUR40144 |

|                                                                                                                       |    |     |         |          |                |          |          |                     |             |
|-----------------------------------------------------------------------------------------------------------------------|----|-----|---------|----------|----------------|----------|----------|---------------------|-------------|
| N2                                                                                                                    | HS | III | 9887210 | 9891458  | WBGene00006449 | alg-4    | ZK757.3  | 0.0118303265791111  |             |
| AGIWUR21301;AGIWUR22137                                                                                               |    |     |         |          |                |          |          |                     |             |
| N2                                                                                                                    | HS | III | 9893155 | 9898426  | WBGene00009593 | mam-7    | F40F12.4 | 0.0437750262172267  |             |
| AGIWUR30722                                                                                                           |    |     |         |          |                |          |          |                     |             |
| N2                                                                                                                    | HS | III | 9898602 | 9910658  | WBGene00009594 | cyld-1   | F40F12.5 | -0.364270309596771  |             |
| AGIWUR11679;AGIWUR20472                                                                                               |    |     |         |          |                |          |          |                     |             |
| N2                                                                                                                    | HS | III | 9913021 | 9914075  | WBGene00043995 | F40F12.9 | F40F12.9 | 0.120739922268973   |             |
| AGIWUR3535;AGIWUR7077;AGIWUR10893;AGIWUR13925;AGIWUR16426;AGIWUR21462;AGIWUR23195;AGIWUR30134;AGIWUR31059;AGIWUR34499 |    |     |         |          |                |          |          |                     |             |
| N2                                                                                                                    | HS | III | 9918645 | 9920864  | WBGene00009592 | F40F12.3 | F40F12.3 | 0.0657114332026136  |             |
| AGIWUR20178                                                                                                           |    |     |         |          |                |          |          |                     |             |
| N2                                                                                                                    | HS | III | 9921200 | 9921892  | WBGene00014755 | F40F12.8 | F40F12.8 | 0.0398255183062748  |             |
| AGIWUR19378                                                                                                           |    |     |         |          |                |          |          |                     |             |
| N2                                                                                                                    | HS | III | 9923174 | 9925443  | WBGene00010545 | cbp-2    | K03H1.10 | -0.0773826583187862 |             |
| AGIWUR37099                                                                                                           |    |     |         |          |                |          |          |                     |             |
| N2                                                                                                                    | HS | III | 9927732 | 9929004  | WBGene00010539 | ttr-2    | K03H1.4  | 0.339734605811625   | AGIWUR29522 |
| N2                                                                                                                    | HS | III | 9929058 | 9930413  | WBGene00010541 | ttr-1    | K03H1.6  | 0.0130039688644601  |             |
| AGIWUR9772;AGIWUR14636;AGIWUR19049;AGIWUR34888                                                                        |    |     |         |          |                |          |          |                     |             |
| N2                                                                                                                    | HS | III | 9932398 | 9939712  | WBGene00010540 | K03H1.5  | K03H1.5  | -0.296571552154724  | AGIWUR34316 |
| N2                                                                                                                    | HS | III | 9940771 | 9941464  | WBGene00010544 | K03H1.9  | K03H1.9  | -0.0143599490130804 | AGIWUR31829 |
| N2                                                                                                                    | HS | III | 9941624 | 9942345  | WBGene00010547 | K03H1.12 | K03H1.12 | -0.0364361953628265 |             |
| AGIWUR11705                                                                                                           |    |     |         |          |                |          |          |                     |             |
| N2                                                                                                                    | HS | III | 9943243 | 9944823  | WBGene00001603 | gln-2    | K03H1.1  | 0.154196877205766   | AGIWUR42968 |
| N2                                                                                                                    | HS | III | 9945395 | 9946663  | WBGene00010543 | K03H1.8  | K03H1.8  | 0.247406284746679   | AGIWUR23294 |
| N2                                                                                                                    | HS | III | 9950381 | 9951964  | WBGene00010546 | K03H1.11 | K03H1.11 |                     |             |
| -0.00579804004778151 AGIWUR27779;AGIWUR29848;AGIWUR39811                                                              |    |     |         |          |                |          |          |                     |             |
| N2                                                                                                                    | HS | III | 9952056 | 9956271  | WBGene00003389 | mog-1    | K03H1.2  | 0.133274281031294   | AGIWUR16381 |
| N2                                                                                                                    | HS | III | 9957357 | 9963171  | WBGene00007010 | alx-1    | R10E12.1 | 0.00540981979542909 |             |
| AGIWUR17080;AGIWUR21528;AGIWUR23807;AGIWUR38367;AGIWUR41652;AGIWUR44473                                               |    |     |         |          |                |          |          |                     |             |
| N2                                                                                                                    | HS | III | 9963121 | 9973865  | WBGene00011221 | R10E12.2 | R10E12.2 | 0.063173958341852   |             |
| AGIWUR40690                                                                                                           |    |     |         |          |                |          |          |                     |             |
| N2                                                                                                                    | HS | III | 9987367 | 9987728  | WBGene00194886 | C05B5.12 | C05B5.12 | 0.304367974972684   |             |
| AGIWUR29906                                                                                                           |    |     |         |          |                |          |          |                     |             |
| N2                                                                                                                    | HS | III | 9993885 | 9996235  | WBGene00007321 | C05B5.4  | C05B5.4  | -0.326210288803539  | AGIWUR11599 |
| N2                                                                                                                    | HS | III | 9996205 | 9997955  | WBGene00004100 | pqn-8    | C05B5.3  | 0.135962923807542   | AGIWUR38225 |
| N2                                                                                                                    | HS | III | 9998542 | 9999335  | WBGene00219314 | C05B5.17 | C05B5.17 | 0.145366639584843   |             |
| AGIWUR44836                                                                                                           |    |     |         |          |                |          |          |                     |             |
| N2                                                                                                                    | HS | III | 9999819 | 10000528 | WBGene00007320 | C05B5.2  | C05B5.2  | -0.0874514298031794 |             |
| AGIWUR23685                                                                                                           |    |     |         |          |                |          |          |                     |             |

|                                                        |    |     |          |          |                |           |          |                     |
|--------------------------------------------------------|----|-----|----------|----------|----------------|-----------|----------|---------------------|
| N2                                                     | HS | III | 10001400 | 10003856 | WBGene00007322 | C05B5.5   | C05B5.5  | 0.299648843681359   |
| AGIWUR28548                                            |    |     |          |          |                |           |          |                     |
| N2                                                     | HS | III | 10005459 | 10006784 | WBGene00007324 | C05B5.8   | C05B5.8  | -0.0243317828950929 |
| AGIWUR10471;AGIWUR21687;AGIWUR31806                    |    |     |          |          |                |           |          |                     |
| N2                                                     | HS | III | 10007966 | 10010177 | WBGene00007323 | fbxa-155  |          | C05B5.6             |
| -0.0775100222983269 AGIWUR33096                        |    |     |          |          |                |           |          |                     |
| N2                                                     | HS | III | 10010843 | 10011065 | WBGene00044130 | C05B5.10  |          | C05B5.10            |
| 0.363447771026923 AGIWUR30379                          |    |     |          |          |                |           |          |                     |
| N2                                                     | HS | III | 10014188 | 10016558 | WBGene00004344 | rgs-1     | C05B5.7  | 0.155188158369588   |
| AGIWUR23156                                            |    |     |          |          |                |           |          |                     |
| N2                                                     | HS | III | 10023804 | 10024120 | WBGene00002104 | ins-21    | M04D8.1  | 0.0800772885843939  |
| AGIWUR44786                                            |    |     |          |          |                |           |          |                     |
| N2                                                     | HS | III | 10026289 | 10026673 | WBGene00002105 | ins-22    | M04D8.2  | 0.235394998493542   |
| AGIWUR4200                                             |    |     |          |          |                |           |          |                     |
| N2                                                     | HS | III | 10028247 | 10028600 | WBGene00002106 | ins-23    | M04D8.3  | 0.0154708977343407  |
| AGIWUR37017                                            |    |     |          |          |                |           |          |                     |
| N2                                                     | HS | III | 10029991 | 10030600 | WBGene00010862 | M04D8.4   | M04D8.4  | 0.290476495284349   |
| AGIWUR2895                                             |    |     |          |          |                |           |          |                     |
| N2                                                     | HS | III | 10032344 | 10033313 | WBGene00010863 | M04D8.5   | M04D8.5  | -0.015075285313169  |
| AGIWUR3713;AGIWUR20119;AGIWUR22864;AGIWUR36190         |    |     |          |          |                |           |          |                     |
| N2                                                     | HS | III | 10034181 | 10035102 | WBGene00010866 | M04D8.8   | M04D8.8  | 0.0555731689350898  |
| AGIWUR36738                                            |    |     |          |          |                |           |          |                     |
| N2                                                     | HS | III | 10036004 | 10036796 | WBGene00010864 | xbx-3     | M04D8.6  | 0.117691879169947   |
| AGIWUR28393                                            |    |     |          |          |                |           |          |                     |
| N2                                                     | HS | III | 10037450 | 10038247 | WBGene00010865 | M04D8.7   | M04D8.7  | -0.200985621270739  |
| AGIWUR9287                                             |    |     |          |          |                |           |          |                     |
| N2                                                     | HS | III | 10038458 | 10040113 | WBGene00011808 | T16G12.7  |          | T16G12.7            |
| 0.063934557275692 AGIWUR12066;AGIWUR16783;AGIWUR24474  |    |     |          |          |                |           |          |                     |
| N2                                                     | HS | III | 10040191 | 10049857 | WBGene00011803 | T16G12.1  |          | T16G12.1            |
| -0.0712248206705972 AGIWUR9573;AGIWUR22085;AGIWUR24630 |    |     |          |          |                |           |          |                     |
| N2                                                     | HS | III | 10055604 | 10056133 | WBGene00044222 | T16G12.10 |          | T16G12.10           |
| 0.217561157791709 AGIWUR15645;AGIWUR32508              |    |     |          |          |                |           |          |                     |
| N2                                                     | HS | III | 10057822 | 10058684 | WBGene00011805 | T16G12.4  |          | T16G12.4            |
| -0.116423152282211 AGIWUR43984                         |    |     |          |          |                |           |          |                     |
| N2                                                     | HS | III | 10059302 | 10061982 | WBGene00011809 | T16G12.8  |          | T16G12.8            |
| 0.0146859456721931 AGIWUR26835                         |    |     |          |          |                |           |          |                     |
| N2                                                     | HS | III | 10064337 | 10069201 | WBGene00011806 | ekl-6     | T16G12.5 |                     |
| 0.0424953193771156 AGIWUR57                            |    |     |          |          |                |           |          |                     |
| N2                                                     | HS | III | 10069564 | 10075995 | WBGene00011807 | T16G12.6  |          | T16G12.6            |

|                      |                                     |          |                |                                    |           |
|----------------------|-------------------------------------|----------|----------------|------------------------------------|-----------|
| 0.196422428294174    | AGIWUR23002                         |          |                |                                    |           |
| N2 HS III            | 10076387                            | 10078707 | WBGene00011810 | T16G12.9                           | T16G12.9  |
| -0.0804723677675074  | AGIWUR25375                         |          |                |                                    |           |
| N2 HS III            | 10081443                            | 10083286 | WBGene00011813 | T16H12.3                           | T16H12.3  |
| 0.298679229691242    | AGIWUR17981                         |          |                |                                    |           |
| N2 HS III            | 10085403                            | 10086064 | WBGene00194725 | T16H12.13                          | T16H12.13 |
| -0.184461461797977   | AGIWUR21108                         |          |                |                                    |           |
| N2 HS III            | 10086303                            | 10087171 | WBGene00011812 | T16H12.2                           | T16H12.2  |
| -0.0406955847358184  | AGIWUR2932                          |          |                |                                    |           |
| N2 HS III            | 10087223                            | 10088673 | WBGene00011819 | hal-2 T16H12.11                    |           |
| -0.00888182041379082 | AGIWUR1595;AGIWUR7708;AGIWUR15104   |          |                |                                    |           |
| N2 HS III            | 10088757                            | 10090800 | WBGene00011814 | T16H12.4                           | T16H12.4  |
| -0.129696517400206   | AGIWUR28361;AGIWUR38433             |          |                |                                    |           |
| N2 HS III            | 10090862                            | 10098081 | WBGene00011815 | bath-43 T16H12.5                   |           |
| -0.0512834758224123  | AGIWUR20784                         |          |                |                                    |           |
| N2 HS III            | 10098469                            | 10101608 | WBGene00002186 | kel-10 T16H12.6                    |           |
| 0.107629211321273    | AGIWUR6246;AGIWUR10107;AGIWUR40683  |          |                |                                    |           |
| N2 HS III            | 10104841                            | 10106490 | WBGene00011816 | srt-55 T16H12.8                    |           |
| 0.00883361734695498  | AGIWUR16209                         |          |                |                                    |           |
| N2 HS III            | 10109423                            | 10112108 | WBGene00011817 | T16H12.9                           | T16H12.9  |
| 0.126834104017451    | AGIWUR24769;AGIWUR33645;AGIWUR40685 |          |                |                                    |           |
| N2 HS III            | 10112100                            | 10113046 | WBGene00014234 | vps-29 ZK1128.8                    |           |
| -0.252758921961234   | AGIWUR6205;AGIWUR11659              |          |                |                                    |           |
| N2 HS III            | 10113146                            | 10114826 | WBGene00014227 | ZK1128.1                           | ZK1128.1  |
| 0.0548029216728594   | AGIWUR23994;AGIWUR27881;AGIWUR29799 |          |                |                                    |           |
| N2 HS III            | 10115042                            | 10116760 | WBGene00014228 | mett-10 ZK1128.2                   |           |
| 0.294419312736325    | AGIWUR25608                         |          |                |                                    |           |
| N2 HS III            | 10116967                            | 10118918 | WBGene00014229 | ZK1128.3                           | ZK1128.3  |
| 0.0637986335242964   | AGIWUR10949;AGIWUR26661;AGIWUR29008 |          |                |                                    |           |
| N2 HS III            | 10118961                            | 10120148 | WBGene00014230 | ZK1128.4                           | ZK1128.4  |
| -0.0103354467449712  | AGIWUR26863                         |          |                |                                    |           |
| N2 HS III            | 10120781                            | 10122928 | WBGene00044072 | ham-3 ZK1128.5                     |           |
| -0.0699923657101653  | AGIWUR31504                         |          |                |                                    |           |
| N2 HS III            | 10124183                            | 10132411 | WBGene00014232 | ttl1-4 ZK1128.6                    |           |
| -0.063162638595017   | AGIWUR8363;AGIWUR19920;AGIWUR35531  |          |                |                                    |           |
| N2 HS III            | 10136982                            | 10139241 | WBGene00014233 | ZK1128.7                           | ZK1128.7  |
| 0.0861273604795656   | AGIWUR2705;AGIWUR17993;AGIWUR31730  |          |                |                                    |           |
| N2 HS III            | 10141573                            | 10146801 | WBGene00014801 | K08E5.1 K08E5.1 -0.120628766201073 |           |
| AGIWUR5036           |                                     |          |                |                                    |           |



|                                                                                    |    |     |          |          |                |           |          |                     |
|------------------------------------------------------------------------------------|----|-----|----------|----------|----------------|-----------|----------|---------------------|
| N2                                                                                 | HS | III | 10152795 | 10157923 | WBGene00003519 | nac-3     | K08E5.2  | -0.138598792947874  |
| AGIWUR13516;AGIWUR34351                                                            |    |     |          |          |                |           |          |                     |
| N2                                                                                 | HS | III | 10159027 | 10160482 | WBGene00077703 | K08E5.5   | K08E5.5  |                     |
| -0.00561540038629538 AGIWUR38527;AGIWUR38946;AGIWUR39699                           |    |     |          |          |                |           |          |                     |
| N2                                                                                 | HS | III | 10160697 | 10183529 | WBGene00003482 | mua-3     | K08E5.3  | -0.0168545782163569 |
| AGIWUR10672                                                                        |    |     |          |          |                |           |          |                     |
| N2                                                                                 | HS | III | 10183794 | 10186390 | WBGene00006783 | unc-47    | T20G5.6  | 0.0511014727476073  |
| AGIWUR12361                                                                        |    |     |          |          |                |           |          |                     |
| N2                                                                                 | HS | III | 10189218 | 10195399 | WBGene00004255 | epac-1    | T20G5.5  | 0.15055611275165    |
| AGIWUR25467                                                                        |    |     |          |          |                |           |          |                     |
| N2                                                                                 | HS | III | 10197716 | 10198352 | WBGene00011869 | dod-6     | T20G5.7  | 0.0462418065173109  |
| AGIWUR14195;AGIWUR22878;AGIWUR26343;AGIWUR29516                                    |    |     |          |          |                |           |          |                     |
| N2                                                                                 | HS | III | 10199337 | 10199859 | WBGene00011870 | T20G5.8   | T20G5.8  | 0.0742080530570024  |
| AGIWUR6691;AGIWUR18399;AGIWUR22022;AGIWUR40445                                     |    |     |          |          |                |           |          |                     |
| N2                                                                                 | HS | III | 10199894 | 10201326 | WBGene00011874 | T20G5.13  |          | T20G5.13            |
| -0.0372579572980145 AGIWUR48;AGIWUR21088                                           |    |     |          |          |                |           |          |                     |
| N2                                                                                 | HS | III | 10201623 | 10202528 | WBGene00011873 | T20G5.12  |          | T20G5.12            |
| -0.0164456228465362 AGIWUR37044                                                    |    |     |          |          |                |           |          |                     |
| N2                                                                                 | HS | III | 10203821 | 10209704 | WBGene00011867 | chc-1     | T20G5.1  | -0.238307624521759  |
| AGIWUR23019;AGIWUR39562;AGIWUR40241                                                |    |     |          |          |                |           |          |                     |
| N2                                                                                 | HS | III | 10209840 | 10211093 | WBGene00011871 | T20G5.9   | T20G5.9  | 0.0608223330335047  |
| AGIWUR1557                                                                         |    |     |          |          |                |           |          |                     |
| N2                                                                                 | HS | III | 10211041 | 10211946 | WBGene00011872 | bls-1     | T20G5.10 |                     |
| 0.0209636066930194 AGIWUR28631                                                     |    |     |          |          |                |           |          |                     |
| N2                                                                                 | HS | III | 10212396 | 10214825 | WBGene00011868 | best-18   | T20G5.4  | -0.102016267531491  |
| AGIWUR1668;AGIWUR12462;AGIWUR19724;AGIWUR27812;AGIWUR32888;AGIWUR33217;AGIWUR41702 |    |     |          |          |                |           |          |                     |
| N2                                                                                 | HS | III | 10214814 | 10216635 | WBGene00000833 | cts-1     | T20G5.2  | -0.203486241729996  |
| AGIWUR6067;AGIWUR20186;AGIWUR25038;AGIWUR27140;AGIWUR44892                         |    |     |          |          |                |           |          |                     |
| N2                                                                                 | HS | III | 10217302 | 10218646 | WBGene00004326 | rde-4     | T20G5.11 |                     |
| 0.19205378611543 AGIWUR1070                                                        |    |     |          |          |                |           |          |                     |
| N2                                                                                 | HS | III | 10218943 | 10222935 | WBGene00011875 | T20G5.14  |          | T20G5.14            |
| -0.0672588421948319 AGIWUR13544;AGIWUR16763;AGIWUR17186;AGIWUR21489;AGIWUR33131    |    |     |          |          |                |           |          |                     |
| N2                                                                                 | HS | III | 10223524 | 10224162 | WBGene00014946 | Y70G10A.1 |          | Y70G10A.1           |
| -0.141053373159412 AGIWUR14372                                                     |    |     |          |          |                |           |          |                     |
| N2                                                                                 | HS | III | 10228164 | 10234079 | WBGene00013498 | Y70G10A.2 |          | Y70G10A.2           |
| -0.0882112365472025 AGIWUR17841;AGIWUR20918;AGIWUR22136;AGIWUR38703;AGIWUR41816    |    |     |          |          |                |           |          |                     |
| N2                                                                                 | HS | III | 10238672 | 10244810 | WBGene00013499 | Y70G10A.3 |          | Y70G10A.3           |
| -0.0860127173762439 AGIWUR42684                                                    |    |     |          |          |                |           |          |                     |
| N2                                                                                 | HS | III | 10245056 | 10248905 | WBGene00001002 | div-1     | R01H10.1 |                     |

|                                                                       |                                                                       |          |                |          |          |                     |  |
|-----------------------------------------------------------------------|-----------------------------------------------------------------------|----------|----------------|----------|----------|---------------------|--|
| -0.134310400045969                                                    | AGIWUR32960                                                           |          |                |          |          |                     |  |
| N2 HS III                                                             | 10249111                                                              | 10254709 | WBGene00000768 | cor-1    | R01H10.3 |                     |  |
| -0.00635306933301516                                                  | AGIWUR4531;AGIWUR25414;AGIWUR37845;AGIWUR40559                        |          |                |          |          |                     |  |
| N2 HS III                                                             | 10254800                                                              | 10257221 | WBGene00010972 | R01H10.4 |          | R01H10.4            |  |
| 0.250757621141942                                                     | AGIWUR39750                                                           |          |                |          |          |                     |  |
| N2 HS III                                                             | 10257181                                                              | 10258736 | WBGene00010973 | rip-1    | R01H10.5 |                     |  |
| -0.0581820844247223                                                   | AGIWUR2959;AGIWUR5367;AGIWUR14748;AGIWUR29061;AGIWUR36636;AGIWUR38963 |          |                |          |          |                     |  |
| N2 HS III                                                             | 10258856                                                              | 10261679 | WBGene00010974 | bbs-5    | R01H10.6 |                     |  |
| -0.0796714465052726                                                   | AGIWUR28666;AGIWUR30482                                               |          |                |          |          |                     |  |
| N2 HS III                                                             | 10261799                                                              | 10267381 | WBGene00010975 | R01H10.7 |          | R01H10.7            |  |
| -0.157701765697318                                                    | AGIWUR23476                                                           |          |                |          |          |                     |  |
| N2 HS III                                                             | 10271257                                                              | 10278579 | WBGene00000564 | cnk-1    | R01H10.8 |                     |  |
| -0.0587722929541696                                                   | AGIWUR31863                                                           |          |                |          |          |                     |  |
| N2 HS III                                                             | 10279127                                                              | 10281476 | WBGene00010757 | pad-2    | K10G9.3  | 0.0913929260638007  |  |
| AGIWUR15507                                                           |                                                                       |          |                |          |          |                     |  |
| N2 HS III                                                             | 10285923                                                              | 10288621 | WBGene00010756 | K10G9.2  | K10G9.2  | -0.202399873674077  |  |
| AGIWUR11899                                                           |                                                                       |          |                |          |          |                     |  |
| N2 HS III                                                             | 10295137                                                              | 10298687 | WBGene00010755 | vglu-2   | K10G9.1  | 0.230158153838291   |  |
| AGIWUR9593                                                            |                                                                       |          |                |          |          |                     |  |
| N2 HS III                                                             | 10299164                                                              | 10299949 | WBGene00011557 | ostf-4   | T07A5.4  | 0.0401119268141397  |  |
| AGIWUR24598                                                           |                                                                       |          |                |          |          |                     |  |
| N2 HS III                                                             | 10300293                                                              | 10303423 | WBGene00011556 | vglu-3   | T07A5.3  | 0.295033930614171   |  |
| AGIWUR19587                                                           |                                                                       |          |                |          |          |                     |  |
| N2 HS III                                                             | 10303368                                                              | 10306188 | WBGene00011554 | T07A5.1  | T07A5.1  | -0.224936557523775  |  |
| AGIWUR10153                                                           |                                                                       |          |                |          |          |                     |  |
| N2 HS III                                                             | 10306756                                                              | 10311100 | WBGene00045475 | T07A5.7  | T07A5.7  | 0.171406457495085   |  |
| AGIWUR11178;AGIWUR39351;AGIWUR42277;AGIWUR43222                       |                                                                       |          |                |          |          |                     |  |
| N2 HS III                                                             | 10314490                                                              | 10318162 | WBGene00006785 | unc-50   | T07A5.2  | -0.0406152910863948 |  |
| AGIWUR8024;AGIWUR9434;AGIWUR11973;AGIWUR25507;AGIWUR29014;AGIWUR32340 |                                                                       |          |                |          |          |                     |  |
| N2 HS III                                                             | 10318939                                                              | 10320021 | WBGene00006802 | unc-69   | T07A5.6  | -0.125355204013898  |  |
| AGIWUR30280;AGIWUR32788;AGIWUR33203;AGIWUR41320                       |                                                                       |          |                |          |          |                     |  |
| N2 HS III                                                             | 10321019                                                              | 10325675 | WBGene00011562 | T07C4.10 |          | T07C4.10            |  |
| 0.130462640315905                                                     | AGIWUR29783                                                           |          |                |          |          |                     |  |
| N2 HS III                                                             | 10325613                                                              | 10330422 | WBGene00003589 | nex-2    | T07C4.9  | -0.0932759793602029 |  |
| AGIWUR2964;AGIWUR5102;AGIWUR5328;AGIWUR10659;AGIWUR41869;AGIWUR42232  |                                                                       |          |                |          |          |                     |  |
| N2 HS III                                                             | 10331551                                                              | 10332480 | WBGene00044891 | T07C4.12 |          | T07C4.12            |  |
| -0.00939391948013224                                                  | AGIWUR11953                                                           |          |                |          |          |                     |  |
| N2 HS III                                                             | 10334267                                                              | 10335171 | WBGene00003225 | mev-1    | T07C4.7  | -0.144140144433561  |  |
| AGIWUR10210;AGIWUR33889                                               |                                                                       |          |                |          |          |                     |  |

|                                                                                          |    |     |          |          |                |          |          |                     |
|------------------------------------------------------------------------------------------|----|-----|----------|----------|----------------|----------|----------|---------------------|
| N2                                                                                       | HS | III | 10335172 | 10337536 | WBGene00000423 | ced-9    | T07C4.8  | -0.259413540290271  |
| AGIWUR286;AGIWUR6854;AGIWUR9572;AGIWUR16216;AGIWUR23511;AGIWUR33329                      |    |     |          |          |                |          |          |                     |
| N2                                                                                       | HS | III | 10337840 | 10339440 | WBGene00011561 | ttr-15   | T07C4.5  | 0.251416020078903   |
| AGIWUR12663                                                                              |    |     |          |          |                |          |          |                     |
| N2                                                                                       | HS | III | 10339984 | 10341858 | WBGene00006546 | tbx-9    | T07C4.6  | -0.173046560471846  |
| AGIWUR5722                                                                               |    |     |          |          |                |          |          |                     |
| N2                                                                                       | HS | III | 10347575 | 10349740 | WBGene00006545 | tbx-8    | T07C4.2  | -0.0792602821816679 |
| AGIWUR29064                                                                              |    |     |          |          |                |          |          |                     |
| N2                                                                                       | HS | III | 10352157 | 10355117 | WBGene00011560 | T07C4.3  | T07C4.3  | -0.265872776522996  |
| AGIWUR20793;AGIWUR29934;AGIWUR31453;AGIWUR31839                                          |    |     |          |          |                |          |          |                     |
| N2                                                                                       | HS | III | 10355122 | 10355982 | WBGene00004986 | spp-1    | T07C4.4  |                     |
| -0.00643338832704288 AGIWUR237;AGIWUR7718;AGIWUR8291;AGIWUR10149;AGIWUR21291;AGIWUR35483 |    |     |          |          |                |          |          |                     |
| N2                                                                                       | HS | III | 10355799 | 10357761 | WBGene00011559 | umps-1   | T07C4.1  | -0.166570906182322  |
| AGIWUR7994;AGIWUR33842                                                                   |    |     |          |          |                |          |          |                     |
| N2                                                                                       | HS | III | 10364951 | 10373231 | WBGene00008018 | tbc-8    | C38H2.1  | 0.00144341877643583 |
| AGIWUR4274;AGIWUR22656;AGIWUR25009;AGIWUR35189;AGIWUR38326;AGIWUR43448                   |    |     |          |          |                |          |          |                     |
| N2                                                                                       | HS | III | 10381740 | 10385335 | WBGene00008019 | C38H2.2  | C38H2.2  | 0.107353373934532   |
| AGIWUR1650;AGIWUR12814;AGIWUR18659;AGIWUR32985;AGIWUR34960;AGIWUR36869                   |    |     |          |          |                |          |          |                     |
| N2                                                                                       | HS | III | 10385313 | 10386572 | WBGene00008020 | C38H2.3  | C38H2.3  | -0.134044896480161  |
| AGIWUR33304                                                                              |    |     |          |          |                |          |          |                     |
| N2                                                                                       | HS | III | 10393389 | 10396081 | WBGene00010838 | M03C11.1 | M03C11.1 |                     |
| 0.19944742484463 AGIWUR36458                                                             |    |     |          |          |                |          |          |                     |
| N2                                                                                       | HS | III | 10399174 | 10405240 | WBGene00010839 | chl-1    | M03C11.2 |                     |
| -0.180002264600409 AGIWUR44839                                                           |    |     |          |          |                |          |          |                     |
| N2                                                                                       | HS | III | 10405070 | 10415150 | WBGene00010840 | M03C11.3 | M03C11.3 |                     |
| 0.0963347359668401 AGIWUR3706                                                            |    |     |          |          |                |          |          |                     |
| N2                                                                                       | HS | III | 10416069 | 10421785 | WBGene00010842 | ymel-1   | M03C11.5 |                     |
| 0.0696000869358269 AGIWUR16409;AGIWUR23999                                               |    |     |          |          |                |          |          |                     |
| N2                                                                                       | HS | III | 10421781 | 10424006 | WBGene00010843 | M03C11.6 | M03C11.6 |                     |
| 0.0142108612722822 AGIWUR23661                                                           |    |     |          |          |                |          |          |                     |
| N2                                                                                       | HS | III | 10424112 | 10427982 | WBGene00010844 | prp-3    | M03C11.7 |                     |
| 0.0867926821495733 AGIWUR586;AGIWUR12218                                                 |    |     |          |          |                |          |          |                     |
| N2                                                                                       | HS | III | 10428334 | 10435988 | WBGene00010845 | M03C11.8 | M03C11.8 |                     |
| 0.215118599446154 AGIWUR27739                                                            |    |     |          |          |                |          |          |                     |
| N2                                                                                       | HS | III | 10445805 | 10451112 | WBGene00010365 | H04D03.4 | H04D03.4 |                     |
| 0.0601241579764507 AGIWUR7036                                                            |    |     |          |          |                |          |          |                     |
| N2                                                                                       | HS | III | 10461389 | 10468051 | WBGene00000231 | atx-2    | D2045.1  | -0.389089512216961  |
| AGIWUR11012;AGIWUR23942;AGIWUR24350;AGIWUR38378;AGIWUR40827;AGIWUR43539                  |    |     |          |          |                |          |          |                     |
| N2                                                                                       | HS | III | 10471237 | 10475245 | WBGene00000836 | cul-1    | D2045.6  | -0.0986865642850141 |

|                                                                                                                                                                                            |    |     |          |          |                |          |                             |
|--------------------------------------------------------------------------------------------------------------------------------------------------------------------------------------------|----|-----|----------|----------|----------------|----------|-----------------------------|
| AGIWUR42378                                                                                                                                                                                |    |     |          |          |                |          |                             |
| N2                                                                                                                                                                                         | HS | III | 10475245 | 10479758 | WBGene00008426 | D2045.9  | D2045.9 -0.0284512360492375 |
| AGIWUR4407;AGIWUR25018;AGIWUR30597;AGIWUR35709;AGIWUR36584;AGIWUR39005                                                                                                                     |    |     |          |          |                |          |                             |
| N2                                                                                                                                                                                         | HS | III | 10479807 | 10482285 | WBGene00008424 | D2045.7  | D2045.7 -0.0309889826393093 |
| AGIWUR14104                                                                                                                                                                                |    |     |          |          |                |          |                             |
| N2                                                                                                                                                                                         | HS | III | 10482288 | 10483926 | WBGene00008425 | D2045.8  | D2045.8 0.302625408668566   |
| AGIWUR39626                                                                                                                                                                                |    |     |          |          |                |          |                             |
| N2                                                                                                                                                                                         | HS | III | 10488128 | 10500267 | WBGene00009653 | F43D9.1  | F43D9.1 0.060049145809316   |
| AGIWUR22640                                                                                                                                                                                |    |     |          |          |                |          |                             |
| N2                                                                                                                                                                                         | HS | III | 10500284 | 10503853 | WBGene00004283 | rab-33   | F43D9.2 -0.151702249433301  |
| AGIWUR9622;AGIWUR24413;AGIWUR29010;AGIWUR31447;AGIWUR32558;AGIWUR42267                                                                                                                     |    |     |          |          |                |          |                             |
| N2                                                                                                                                                                                         | HS | III | 10503965 | 10505250 | WBGene00006395 | taf-11.3 | F43D9.5                     |
| 0.168291392122164 AGIWUR20041                                                                                                                                                              |    |     |          |          |                |          |                             |
| N2                                                                                                                                                                                         | HS | III | 10506106 | 10506801 | WBGene00004798 | sip-1    | F43D9.4 0.129109943033846   |
| AGIWUR7686;AGIWUR13613;AGIWUR38909                                                                                                                                                         |    |     |          |          |                |          |                             |
| N2                                                                                                                                                                                         | HS | III | 10507058 | 10518391 | WBGene00009654 | sly-1    | F43D9.3 -0.117962125213988  |
| AGIWUR8732;AGIWUR19708;AGIWUR29661;AGIWUR35705                                                                                                                                             |    |     |          |          |                |          |                             |
| N2                                                                                                                                                                                         | HS | III | 10520676 | 10532705 | WBGene00006784 | unc-49   | T21C12.1                    |
| -0.0576038179088676                                                                                                                                                                        |    |     |          |          |                |          |                             |
| AGIWUR1626;AGIWUR2943;AGIWUR6217;AGIWUR7139;AGIWUR8761;AGIWUR13176;AGIWUR14305;AGIWUR15017;AGIWUR15943;AGIWUR16705;AGIWUR21882;AGIWUR26074;AGIWUR26395;AGIWUR29204;AGIWUR33200;AGIWUR36268 |    |     |          |          |                |          |                             |
| N2                                                                                                                                                                                         | HS | III | 10535526 | 10537682 | WBGene00001993 | hpd-1    | T21C12.2                    |
| 0.158308454415376 AGIWUR15910;AGIWUR42722;AGIWUR43555                                                                                                                                      |    |     |          |          |                |          |                             |
| N2                                                                                                                                                                                         | HS | III | 10538081 | 10539163 | WBGene00011899 | T21C12.3 | T21C12.3                    |
| -0.182816177725793 AGIWUR24461;AGIWUR33959;AGIWUR35118;AGIWUR39927                                                                                                                         |    |     |          |          |                |          |                             |
| N2                                                                                                                                                                                         | HS | III | 10551102 | 10552955 | WBGene00043998 | T21C12.8 | T21C12.8                    |
| 0.0983758161402442                                                                                                                                                                         |    |     |          |          |                |          |                             |
| AGIWUR4565;AGIWUR7449;AGIWUR8399;AGIWUR15232;AGIWUR17836;AGIWUR21442;AGIWUR42310;AGIWUR43489;AGIWUR44757                                                                                   |    |     |          |          |                |          |                             |
| N2                                                                                                                                                                                         | HS | III | 10553005 | 10558009 | WBGene00011900 | T21C12.4 | T21C12.4                    |
| 0.0353138370384976 AGIWUR7867;AGIWUR22646;AGIWUR32575                                                                                                                                      |    |     |          |          |                |          |                             |
| N2                                                                                                                                                                                         | HS | III | 10558189 | 10561948 | WBGene00012859 | Y45F3A.1 | Y45F3A.1                    |
| 0.0393084771926553 AGIWUR32679                                                                                                                                                             |    |     |          |          |                |          |                             |
| N2                                                                                                                                                                                         | HS | III | 10563026 | 10565603 | WBGene00004282 | rab-30   | Y45F3A.2                    |
| 0.0158499223326087 AGIWUR1388;AGIWUR2446;AGIWUR25760;AGIWUR28411;AGIWUR29148;AGIWUR37905                                                                                                   |    |     |          |          |                |          |                             |
| N2                                                                                                                                                                                         | HS | III | 10566181 | 10571606 | WBGene00012860 | acd-11   | Y45F3A.3                    |
| 0.17704708505989 AGIWUR23517                                                                                                                                                               |    |     |          |          |                |          |                             |
| N2                                                                                                                                                                                         | HS | III | 10572475 | 10575420 | WBGene00012861 | Y45F3A.4 | Y45F3A.4                    |
| 0.0153866313172273 AGIWUR20000;AGIWUR21324;AGIWUR36197                                                                                                                                     |    |     |          |          |                |          |                             |
| N2                                                                                                                                                                                         | HS | III | 10585848 | 10586343 | WBGene00012862 | Y45F3A.5 | Y45F3A.5                    |

|                      |                                                |                |                  |           |  |
|----------------------|------------------------------------------------|----------------|------------------|-----------|--|
| -0.00984389264456897 | AGIWUR39377                                    |                |                  |           |  |
| N2 HS III 10586407   | 10587706                                       | WBGene00014898 | Y45F3A.6         | Y45F3A.6  |  |
| 0.0420698733610294   | AGIWUR12638                                    |                |                  |           |  |
| N2 HS III 10589865   | 10592801                                       | WBGene00012863 | Y45F3A.8         | Y45F3A.8  |  |
| 0.123448071100331    | AGIWUR28002                                    |                |                  |           |  |
| N2 HS III 10592754   | 10595166                                       | WBGene00012864 | Y45F3A.9         | Y45F3A.9  |  |
| -0.352653962658238   | AGIWUR12357                                    |                |                  |           |  |
| N2 HS III 10595258   | 10596487                                       | WBGene00012643 | Y39A1A.3         | Y39A1A.3  |  |
| 0.0686302199486164   | AGIWUR113                                      |                |                  |           |  |
| N2 HS III 10596615   | 10600184                                       | WBGene00012641 | epg-6 Y39A1A.1   |           |  |
| 0.048375381380108    | AGIWUR29369                                    |                |                  |           |  |
| N2 HS III 10601905   | 10603566                                       | WBGene00012642 | Y39A1A.2         | Y39A1A.2  |  |
| 0.0957384925510034   | AGIWUR308;AGIWUR29627;AGIWUR38468;AGIWUR41990  |                |                  |           |  |
| N2 HS III 10605349   | 10613294                                       | WBGene00012644 | rabx-5 Y39A1A.5  |           |  |
| 0.179110559243041    | AGIWUR5300                                     |                |                  |           |  |
| N2 HS III 10613567   | 10614931                                       | WBGene00012660 | Y39A1A.24        | Y39A1A.24 |  |
| 0.0186010658294649   | AGIWUR9172                                     |                |                  |           |  |
| N2 HS III 10615466   | 10617862                                       | WBGene00012645 | mrp1-22 Y39A1A.6 |           |  |
| 0.122967741687827    | AGIWUR27121                                    |                |                  |           |  |
| N2 HS III 10617863   | 10621369                                       | WBGene00012646 | lron-10 Y39A1A.7 |           |  |
| -0.0416296621669563  | AGIWUR6665;AGIWUR11602;AGIWUR35533;AGIWUR39777 |                |                  |           |  |
| N2 HS III 10630070   | 10633501                                       | WBGene00012648 | Y39A1A.9         | Y39A1A.9  |  |
| -0.358081067322196   | AGIWUR11161                                    |                |                  |           |  |
| N2 HS III 10640828   | 10642872                                       | WBGene00000974 | dhs-11 Y39A1A.11 |           |  |
| 0.0646106182812751   | AGIWUR10943                                    |                |                  |           |  |
| N2 HS III 10643002   | 10646107                                       | WBGene00012650 | orc-1 Y39A1A.12  |           |  |
| -0.170353097327322   | AGIWUR7399                                     |                |                  |           |  |
| N2 HS III 10646170   | 10648861                                       | WBGene00012651 | orc-4 Y39A1A.13  |           |  |
| -0.0568471658096037  | AGIWUR18023;AGIWUR45072                        |                |                  |           |  |
| N2 HS III 10649519   | 10650908                                       | WBGene00012652 | Y39A1A.14        | Y39A1A.14 |  |
| 0.183540834857354    | AGIWUR5717                                     |                |                  |           |  |
| N2 HS III 10655018   | 10677521                                       | WBGene00000566 | cnt-2 Y39A1A.15  |           |  |
| -0.173815072761078   | AGIWUR9480;AGIWUR11595;AGIWUR17227;AGIWUR22673 |                |                  |           |  |
| N2 HS III 10679474   | 10682212                                       | WBGene00012654 | Y39A1A.16        | Y39A1A.16 |  |
| 0.113817411963532    | AGIWUR3345                                     |                |                  |           |  |
| N2 HS III 10687127   | 10691101                                       | WBGene00012655 | Y39A1A.17        | Y39A1A.17 |  |
| -0.00436852360222328 | AGIWUR3054                                     |                |                  |           |  |
| N2 HS III 10692221   | 10694391                                       | WBGene00012656 | Y39A1A.18        | Y39A1A.18 |  |
| 0.00935093272419074  | AGIWUR6126                                     |                |                  |           |  |

|    |    |     |                                                                                   |                                                                                     |                |           |                             |
|----|----|-----|-----------------------------------------------------------------------------------|-------------------------------------------------------------------------------------|----------------|-----------|-----------------------------|
| N2 | HS | III | 10694590                                                                          | 10698861                                                                            | WBGene00001478 | fmo-3     | Y39A1A.19                   |
|    |    |     | 0.335546742891857                                                                 | AGIWUR32081                                                                         |                |           |                             |
| N2 | HS | III | 10699216                                                                          | 10700560                                                                            | WBGene00012657 | Y39A1A.20 | Y39A1A.20                   |
|    |    |     | 0.260920461854445                                                                 | AGIWUR2587                                                                          |                |           |                             |
| N2 | HS | III | 10700652                                                                          | 10707024                                                                            | WBGene00012658 | Y39A1A.21 | Y39A1A.21                   |
|    |    |     | -0.0144618050387688                                                               | AGIWUR23804;AGIWUR30508;AGIWUR38450                                                 |                |           |                             |
| N2 | HS | III | 10707761                                                                          | 10708518                                                                            | WBGene00012361 | mrp1-12   | W09D10.3                    |
|    |    |     | 0.120347772105832                                                                 | AGIWUR11263;AGIWUR27960;AGIWUR37422                                                 |                |           |                             |
| N2 | HS | III | 10708484                                                                          | 10711527                                                                            | WBGene00012363 | W09D10.5  | W09D10.5                    |
|    |    |     | 0.238671197606491                                                                 | AGIWUR24376                                                                         |                |           |                             |
| N2 | HS | III | 10711724                                                                          | 10716191                                                                            | WBGene00012362 | W09D10.4  | W09D10.4                    |
|    |    |     | -0.25370417887758                                                                 | AGIWUR23890                                                                         |                |           |                             |
| N2 | HS | III | 10722148                                                                          | 10730705                                                                            | WBGene00012360 | tat-3     | W09D10.2                    |
|    |    |     | -0.143242376211678                                                                | AGIWUR23128                                                                         |                |           |                             |
| N2 | HS | III | 10736893                                                                          | 10739824                                                                            | WBGene00012359 | W09D10.1  | W09D10.1                    |
|    |    |     | -0.549926970761765                                                                | AGIWUR9099                                                                          |                |           |                             |
| N2 | HS | III | 10740280                                                                          | 10740772                                                                            | WBGene00010479 | K01G5.8   | K01G5.8 -0.0131892126081485 |
|    |    |     | AGIWUR1395;AGIWUR8920;AGIWUR21836;AGIWUR27800;AGIWUR30550;AGIWUR36735;AGIWUR42856 |                                                                                     |                |           |                             |
| N2 | HS | III | 10740868                                                                          | 10742461                                                                            | WBGene00006536 | tbb-1     | K01G5.7 -0.177187349739176  |
|    |    |     | AGIWUR12340;AGIWUR24533                                                           |                                                                                     |                |           |                             |
| N2 | HS | III | 10742777                                                                          | 10746675                                                                            | WBGene00004361 | rib-2     | K01G5.6 -0.110296391545438  |
|    |    |     | AGIWUR18008                                                                       |                                                                                     |                |           |                             |
| N2 | HS | III | 10746581                                                                          | 10747728                                                                            | WBGene00004302 | ran-1     | K01G5.4 -0.151682422261698  |
|    |    |     | AGIWUR4222;AGIWUR5342;AGIWUR31873;AGIWUR37645;AGIWUR37954;AGIWUR44185             |                                                                                     |                |           |                             |
| N2 | HS | III | 10748429                                                                          | 10750080                                                                            | WBGene00010478 | K01G5.5   | K01G5.5 0.00760645581111774 |
|    |    |     | AGIWUR2813                                                                        |                                                                                     |                |           |                             |
| N2 | HS | III | 10752254                                                                          | 10755523                                                                            | WBGene00001996 | hpl-2     | K01G5.2 -0.101526324728134  |
|    |    |     | AGIWUR26193                                                                       |                                                                                     |                |           |                             |
| N2 | HS | III | 10755624                                                                          | 10757640                                                                            | WBGene00010476 | rnf-113   | K01G5.1 0.195896729122422   |
|    |    |     | AGIWUR5623;AGIWUR16936;AGIWUR23877;AGIWUR30190;AGIWUR33377                        |                                                                                     |                |           |                             |
| N2 | HS | III | 10757641                                                                          | 10758522                                                                            | WBGene00010481 | K01G5.10  | K01G5.10                    |
|    |    |     | 0.094819278719914                                                                 | AGIWUR42363                                                                         |                |           |                             |
| N2 | HS | III | 10759290                                                                          | 10763006                                                                            | WBGene00010480 | K01G5.9   | K01G5.9 0.184277458777697   |
|    |    |     | AGIWUR2342;AGIWUR26214;AGIWUR43246                                                |                                                                                     |                |           |                             |
| N2 | HS | III | 10763131                                                                          | 10777343                                                                            | WBGene00001087 | dpy-28    | Y39A1B.3                    |
|    |    |     | -0.233890710432185                                                                | AGIWUR19814;AGIWUR31824;AGIWUR37311;AGIWUR39594;AGIWUR42588;AGIWUR44785;AGIWUR44913 |                |           |                             |
| N2 | HS | III | 10781853                                                                          | 10791252                                                                            | WBGene00004233 | ptr-19    | Y39A1B.2                    |
|    |    |     | 0.0862850085098508                                                                | AGIWUR2310                                                                          |                |           |                             |
| N2 | HS | III | 10794349                                                                          | 10796369                                                                            | WBGene00012661 | cllec-163 | Y39A1B.1                    |

|                                                                                                 |    |     |                                    |          |                |          |          |                     |
|-------------------------------------------------------------------------------------------------|----|-----|------------------------------------|----------|----------------|----------|----------|---------------------|
| 0.109551868024961                                                                               |    |     | AGIWUR4091;AGIWUR16942;AGIWUR30849 |          |                |          |          |                     |
| N2                                                                                              | HS | III | 10796711                           | 10802212 | WBGene00010772 | K11D9.3  | K11D9.3  | -0.0901201674288714 |
| AGIWUR43139                                                                                     |    |     |                                    |          |                |          |          |                     |
| N2                                                                                              | HS | III | 10805930                           | 10810999 | WBGene00002219 | klp-7    | K11D9.1  | -0.382316519310594  |
| AGIWUR11370;AGIWUR12933;AGIWUR13168;AGIWUR23162;AGIWUR34095;AGIWUR34776;AGIWUR35301             |    |     |                                    |          |                |          |          |                     |
| N2                                                                                              | HS | III | 10811906                           | 10816844 | WBGene00004736 | sca-1    | K11D9.2  | -0.184702224529934  |
| AGIWUR12804;AGIWUR13224;AGIWUR18711;AGIWUR22264;AGIWUR22479;AGIWUR26781;AGIWUR32116;AGIWUR40601 |    |     |                                    |          |                |          |          |                     |
| N2                                                                                              | HS | III | 10832936                           | 10839451 | WBGene00011269 | R17.3    | R17.3    | 0.221545696486689   |
| AGIWUR22883                                                                                     |    |     |                                    |          |                |          |          |                     |
| N2                                                                                              | HS | III | 10840023                           | 10845020 | WBGene00011268 | pde-12   | R17.2    | -0.0565619640557724 |
| AGIWUR23043                                                                                     |    |     |                                    |          |                |          |          |                     |
| N2                                                                                              | HS | III | 10847619                           | 10848670 | WBGene00011267 | fbxb-85  | R17.1    | 0.130554649350637   |
| AGIWUR2734                                                                                      |    |     |                                    |          |                |          |          |                     |
| N2                                                                                              | HS | III | 10849222                           | 10854561 | WBGene00012663 | hex-3    | Y39A1C.4 |                     |
| 0.0700496994213573 AGIWUR15260;AGIWUR27664;AGIWUR37209                                          |    |     |                                    |          |                |          |          |                     |
| N2                                                                                              | HS | III | 10856776                           | 10858186 | WBGene00012662 | Y39A1C.1 |          | Y39A1C.1            |
| 0.0768967852416083 AGIWUR27789                                                                  |    |     |                                    |          |                |          |          |                     |
| N2                                                                                              | HS | III | 10858284                           | 10866994 | WBGene00003898 | oxi-1    | Y39A1C.2 |                     |
| -0.0308701916253042 AGIWUR24661                                                                 |    |     |                                    |          |                |          |          |                     |
| N2                                                                                              | HS | III | 10866870                           | 10868727 | WBGene00000475 | cey-4    | Y39A1C.3 |                     |
| 0.0808431392994757 AGIWUR12140;AGIWUR16283;AGIWUR18401;AGIWUR22576;AGIWUR38439;AGIWUR42063      |    |     |                                    |          |                |          |          |                     |
| N2                                                                                              | HS | III | 10869193                           | 10874528 | WBGene00008078 | vps-50   | C44B9.1  | -0.119950998850047  |
| AGIWUR35718                                                                                     |    |     |                                    |          |                |          |          |                     |
| N2                                                                                              | HS | III | 10875459                           | 10878061 | WBGene00008079 | C44B9.2  | C44B9.2  | -0.254448515654239  |
| AGIWUR32805                                                                                     |    |     |                                    |          |                |          |          |                     |
| N2                                                                                              | HS | III | 10878191                           | 10880183 | WBGene00008080 | C44B9.3  | C44B9.3  | -0.0800075194946182 |
| AGIWUR18192                                                                                     |    |     |                                    |          |                |          |          |                     |
| N2                                                                                              | HS | III | 10882345                           | 10893672 | WBGene00008081 | athp-1   | C44B9.4  | 0.0750102860713255  |
| AGIWUR37057                                                                                     |    |     |                                    |          |                |          |          |                     |
| N2                                                                                              | HS | III | 10894520                           | 10895732 | WBGene00043996 | fbxb-87  | C44B9.6  | 0.0409525715407519  |
| AGIWUR31035;AGIWUR40977                                                                         |    |     |                                    |          |                |          |          |                     |
| N2                                                                                              | HS | III | 10896363                           | 10901836 | WBGene00008082 | com-1    | C44B9.5  | -0.0724854160340147 |
| AGIWUR17334;AGIWUR29610;AGIWUR37809                                                             |    |     |                                    |          |                |          |          |                     |
| N2                                                                                              | HS | III | 10902648                           | 10908927 | WBGene00006843 | unc-119  | M142.1   | -0.209957104812695  |
| AGIWUR42584                                                                                     |    |     |                                    |          |                |          |          |                     |
| N2                                                                                              | HS | III | 10911460                           | 10916567 | WBGene00000853 | cut-6    | M142.2   | 0.119912783601175   |
| AGIWUR20219;AGIWUR21209;AGIWUR27188;AGIWUR37502                                                 |    |     |                                    |          |                |          |          |                     |
| N2                                                                                              | HS | III | 10920336                           | 10926041 | WBGene00006873 | vab-7    | M142.4   | -0.0890474371552816 |
| AGIWUR44250                                                                                     |    |     |                                    |          |                |          |          |                     |

|                                                                                                          |    |     |          |          |                |          |           |                     |
|----------------------------------------------------------------------------------------------------------|----|-----|----------|----------|----------------|----------|-----------|---------------------|
| N2                                                                                                       | HS | III | 10927093 | 10928909 | WBGene00014809 | M142.3   | M142.3    | 0.0249281726229675  |
| AGIWUR38763                                                                                              |    |     |          |          |                |          |           |                     |
| N2                                                                                                       | HS | III | 10931208 | 10932226 | WBGene00010922 | M142.5   | M142.5    | -0.0909723732650853 |
| AGIWUR29358                                                                                              |    |     |          |          |                |          |           |                     |
| N2                                                                                                       | HS | III | 10933631 | 10936129 | WBGene00043057 | M142.8   | M142.8    |                     |
| -0.00392346130443499 AGIWUR36829                                                                         |    |     |          |          |                |          |           |                     |
| N2                                                                                                       | HS | III | 10936246 | 10946834 | WBGene00010923 | rle-1    | M142.6    | 0.00696350113391109 |
| AGIWUR4139                                                                                               |    |     |          |          |                |          |           |                     |
| N2                                                                                                       | HS | III | 10947446 | 10951169 | WBGene00013132 | strd-1   | Y52D3.1   | 0.0516466332897956  |
| AGIWUR11800;AGIWUR26861;AGIWUR34611                                                                      |    |     |          |          |                |          |           |                     |
| N2                                                                                                       | HS | III | 10951225 | 10953505 | WBGene00006982 | zig-5    | Y48A6A.1  |                     |
| -0.0586821068628236 AGIWUR7315;AGIWUR13367;AGIWUR16414;AGIWUR26225;AGIWUR43305                           |    |     |          |          |                |          |           |                     |
| N2                                                                                                       | HS | III | 10960243 | 10966996 | WBGene00012271 | W05B2.2  | W05B2.2   | 0.0762688128070912  |
| AGIWUR10851;AGIWUR17598                                                                                  |    |     |          |          |                |          |           |                     |
| N2                                                                                                       | HS | III | 10967779 | 10969472 | WBGene00014854 | W05B2.3  | W05B2.3   | 0.154566374115872   |
| AGIWUR18948                                                                                              |    |     |          |          |                |          |           |                     |
| N2                                                                                                       | HS | III | 10969944 | 10981848 | WBGene00012272 | dhc-4    | W05B2.4   | -0.165187499751313  |
| AGIWUR14770                                                                                              |    |     |          |          |                |          |           |                     |
| N2                                                                                                       | HS | III | 10982166 | 10983253 | WBGene00000667 | col-92   | W05B2.6   | -0.120924223666972  |
| AGIWUR6521                                                                                               |    |     |          |          |                |          |           |                     |
| N2                                                                                                       | HS | III | 10988133 | 10991912 | WBGene00012273 | W05B2.7  | W05B2.7   | -0.356718797706801  |
| AGIWUR7734;AGIWUR9067;AGIWUR9729;AGIWUR17657;AGIWUR26332;AGIWUR29538;AGIWUR33745;AGIWUR37673;AGIWUR38793 |    |     |          |          |                |          |           |                     |
| N2                                                                                                       | HS | III | 10992129 | 10995237 | WBGene00012962 | dmsr-5   | Y48A6B.1  |                     |
| -0.0919210010931852 AGIWUR32538;AGIWUR40488;AGIWUR43570                                                  |    |     |          |          |                |          |           |                     |
| N2                                                                                                       | HS | III | 11007415 | 11007620 | WBGene00012965 | fipr-17  | Y48A6B.4  |                     |
| 0.112189787283635 AGIWUR446;AGIWUR13076;AGIWUR15516;AGIWUR36422;AGIWUR41315                              |    |     |          |          |                |          |           |                     |
| N2                                                                                                       | HS | III | 11008222 | 11008934 | WBGene00012964 | Y48A6B.3 |           | Y48A6B.3            |
| 0.0594284181729039 AGIWUR29078;AGIWUR40689                                                               |    |     |          |          |                |          |           |                     |
| N2                                                                                                       | HS | III | 11009043 | 11010595 | WBGene00012966 | exos-1   | Y48A6B.5  |                     |
| 0.167830608193482 AGIWUR7404                                                                             |    |     |          |          |                |          |           |                     |
| N2                                                                                                       | HS | III | 11012566 | 11025292 | WBGene00012967 | kvs-4    | Y48A6B.6  |                     |
| -0.203859586392515 AGIWUR4045                                                                            |    |     |          |          |                |          |           |                     |
| N2                                                                                                       | HS | III | 11033172 | 11036080 | WBGene00012970 | Y48A6B.9 |           | Y48A6B.9            |
| -0.229792958186865 AGIWUR8842                                                                            |    |     |          |          |                |          |           |                     |
| N2                                                                                                       | HS | III | 11036943 | 11063027 | WBGene00012973 | spat-2   | Y48A6B.13 |                     |
| -0.268004625551738 AGIWUR11863;AGIWUR15358;AGIWUR26237;AGIWUR29100                                       |    |     |          |          |                |          |           |                     |
| N2                                                                                                       | HS | III | 11063479 | 11068753 | WBGene00012972 | rsa-2    | Y48A6B.11 |                     |
| 0.0316228596588335 AGIWUR29460                                                                           |    |     |          |          |                |          |           |                     |
| N2                                                                                                       | HS | III | 11068858 | 11072981 | WBGene00012356 | W09D6.1  | W09D6.1   | -0.159569977435337  |



|                                                                                               |     |                                   |          |                |           |                             |
|-----------------------------------------------------------------------------------------------|-----|-----------------------------------|----------|----------------|-----------|-----------------------------|
| AGIWUR7033                                                                                    |     |                                   |          |                |           |                             |
| N2 HS                                                                                         | III | 11074536                          | 11077494 | WBGene00006287 | str-261   | W09D6.2 0.0383808563277697  |
| AGIWUR26409                                                                                   |     |                                   |          |                |           |                             |
| N2 HS                                                                                         | III | 11077704                          | 11079446 | WBGene00006273 | str-246   | W09D6.3 -0.0866272613302987 |
| AGIWUR13621                                                                                   |     |                                   |          |                |           |                             |
| N2 HS                                                                                         | III | 11079745                          | 11080413 | WBGene00012357 | W09D6.4   | W09D6.4 -0.0490415273771916 |
| AGIWUR2936                                                                                    |     |                                   |          |                |           |                             |
| N2 HS                                                                                         | III | 11088487                          | 11091616 | WBGene00012358 | W09D6.5   | W09D6.5 -0.0312922107725768 |
| AGIWUR27195                                                                                   |     |                                   |          |                |           |                             |
| N2 HS                                                                                         | III | 11091548                          | 11099964 | WBGene00001815 | hmt-1     | W09D6.6 -0.0818659442910032 |
| AGIWUR10993;AGIWUR34799;AGIWUR37401                                                           |     |                                   |          |                |           |                             |
| N2 HS                                                                                         | III | 11101268                          | 11107206 | WBGene00012974 | Y48A6C.1  | Y48A6C.1                    |
| 0.0778681176144485                                                                            |     | AGIWUR35097                       |          |                |           |                             |
| N2 HS                                                                                         | III | 11116994                          | 11119222 | WBGene00012976 | sup-35    | Y48A6C.3                    |
| -0.0324928611171167                                                                           |     | AGIWUR22107                       |          |                |           |                             |
| N2 HS                                                                                         | III | 11131775                          | 11136380 | WBGene00004010 | pha-1     | Y48A6C.5                    |
| -0.0582157405978556                                                                           |     | AGIWUR37170                       |          |                |           |                             |
| N2 HS                                                                                         | III | 11136802                          | 11138905 | WBGene00012923 | fbxa-128  | Y47D3A.2                    |
| 0.114117545644882                                                                             |     | AGIWUR43741                       |          |                |           |                             |
| N2 HS                                                                                         | III | 11139241                          | 11141825 | WBGene00012922 | Y47D3A.1  | Y47D3A.1                    |
| 0.0969946087309905                                                                            |     | AGIWUR18483                       |          |                |           |                             |
| N2 HS                                                                                         | III | 11142448                          | 11154287 | WBGene00012936 | Y47D3A.29 | Y47D3A.29                   |
| 0.0774859794605085                                                                            |     | AGIWUR2112                        |          |                |           |                             |
| N2 HS                                                                                         | III | 11154827                          | 11168820 | WBGene00000519 | cku-70    | Y47D3A.4                    |
| 0.0031130098235117                                                                            |     | AGIWUR31521                       |          |                |           |                             |
| N2 HS                                                                                         | III | 11168923                          | 11170865 | WBGene00012924 | Y47D3A.5  | Y47D3A.5                    |
| -0.0332762066421282                                                                           |     | AGIWUR42591                       |          |                |           |                             |
| N2 HS                                                                                         | III | 11170889                          | 11195207 | WBGene00006604 | tra-1     | Y47D3A.6                    |
| -0.0943098560320266                                                                           |     |                                   |          |                |           |                             |
| AGIWUR1689;AGIWUR2672;AGIWUR17668;AGIWUR22313;AGIWUR25374;AGIWUR29878;AGIWUR35190;AGIWUR38829 |     |                                   |          |                |           |                             |
| N2 HS                                                                                         | III | 11216398                          | 11218260 | WBGene00006553 | tbx-34    | Y47D3A.10                   |
| -0.185399953844612                                                                            |     | AGIWUR45039                       |          |                |           |                             |
| N2 HS                                                                                         | III | 11218797                          | 11222666 | WBGene00012925 | wht-8     | Y47D3A.11                   |
| 0.0170103302461175                                                                            |     | AGIWUR5856;AGIWUR6471;AGIWUR18518 |          |                |           |                             |
| N2 HS                                                                                         | III | 11223439                          | 11224106 | WBGene00012926 | Y47D3A.13 | Y47D3A.13                   |
| 0.214100864982257                                                                             |     | AGIWUR20032;AGIWUR22061           |          |                |           |                             |
| N2 HS                                                                                         | III | 11224800                          | 11227125 | WBGene00006556 | tbx-37    | Y47D3A.12                   |
| 0.157310950439546                                                                             |     | AGIWUR19564                       |          |                |           |                             |
| N2 HS                                                                                         | III | 11235581                          | 11236868 | WBGene00012927 | Y47D3A.14 | Y47D3A.14                   |

|                                                                       |                                                                       |           |           |                     |
|-----------------------------------------------------------------------|-----------------------------------------------------------------------|-----------|-----------|---------------------|
| -0.0408959383604799                                                   | AGIWUR18209;AGIWUR21353                                               |           |           |                     |
| N2 HS III 11237149 11238252                                           | WBGene00012928                                                        | aakb-2    | Y47D3A.15 |                     |
| 0.246906783586802                                                     | AGIWUR26897                                                           |           |           |                     |
| N2 HS III 11245120 11252281                                           | WBGene00012929                                                        | rsks-1    | Y47D3A.16 |                     |
| -0.0378820326541769                                                   | AGIWUR17817;AGIWUR19720                                               |           |           |                     |
| N2 HS III 11252391 11256646                                           | WBGene00012938                                                        | Y47D3A.32 | Y47D3A.32 |                     |
| -0.0928544572781576                                                   | AGIWUR9222                                                            |           |           |                     |
| N2 HS III 11257307 11270875                                           | WBGene00012930                                                        | obr-1     | Y47D3A.17 |                     |
| 0.148203463296873                                                     | AGIWUR4034                                                            |           |           |                     |
| N2 HS III 11274901 11276032                                           | WBGene00012931                                                        | Y47D3A.20 | Y47D3A.20 |                     |
| -0.0689336317870364                                                   | AGIWUR17656                                                           |           |           |                     |
| N2 HS III 11276292 11278917                                           | WBGene00012932                                                        | Y47D3A.21 | Y47D3A.21 |                     |
| 0.10222314153636                                                      | AGIWUR43113                                                           |           |           |                     |
| N2 HS III 11279021 11290580                                           | WBGene00012934                                                        | gly-9     | Y47D3A.23 |                     |
| 0.211040564294628                                                     | AGIWUR10346                                                           |           |           |                     |
| N2 HS III 11290911 11306145                                           | WBGene00004873                                                        | smc-3     | Y47D3A.26 |                     |
| -0.202881227086973                                                    | AGIWUR11729                                                           |           |           |                     |
| N2 HS III 11306560 11311566                                           | WBGene00004284                                                        | rab-35    | Y47D3A.25 |                     |
| -0.00189983172518371                                                  | AGIWUR2957;AGIWUR6937;AGIWUR24812;AGIWUR25485;AGIWUR28738;AGIWUR36629 |           |           |                     |
| N2 HS III 11312251 11317055                                           | WBGene00006563                                                        | teg-1     | Y47D3A.27 |                     |
| 0.0113140351024574                                                    | AGIWUR30380                                                           |           |           |                     |
| N2 HS III 11317570 11326664                                           | WBGene00012935                                                        | mcm-10    | Y47D3A.28 |                     |
| -0.0427442062298731                                                   | AGIWUR37595                                                           |           |           |                     |
| N2 HS III 11326654 11343108                                           | WBGene00012126                                                        | T28D6.6   | T28D6.6   | -0.0173879283942675 |
| AGIWUR8625                                                            |                                                                       |           |           |                     |
| N2 HS III 11343272 11344147                                           | WBGene00003975                                                        | pen-2     | T28D6.9   | -0.203214336183342  |
| AGIWUR8411                                                            |                                                                       |           |           |                     |
| N2 HS III 11344255 11346789                                           | WBGene00012127                                                        | T28D6.7   | T28D6.7   | 0.0842439196998441  |
| AGIWUR10769                                                           |                                                                       |           |           |                     |
| N2 HS III 11360456 11366214                                           | WBGene00012124                                                        | T28D6.4   | T28D6.4   | 0.0476034217427532  |
| AGIWUR36605                                                           |                                                                       |           |           |                     |
| N2 HS III 11366618 11368435                                           | WBGene00012123                                                        | T28D6.3   | T28D6.3   | -0.283806956073841  |
| AGIWUR3710;AGIWUR7468;AGIWUR14018;AGIWUR35762;AGIWUR40316;AGIWUR41376 |                                                                       |           |           |                     |
| N2 HS III 11368415 11371775                                           | WBGene00006533                                                        | tba-7     | T28D6.2   | -0.027326697383991  |
| AGIWUR715;AGIWUR5371;AGIWUR29133;AGIWUR32168;AGIWUR42111              |                                                                       |           |           |                     |
| N2 HS III 11372886 11377980                                           | WBGene00001077                                                        | dpy-18    | Y47D3B.10 |                     |
| -0.222951005419641                                                    | AGIWUR12436;AGIWUR13772                                               |           |           |                     |
| N2 HS III 11382222 11388669                                           | WBGene00012939                                                        | Y47D3B.1  | Y47D3B.1  |                     |
| 0.18513303518181                                                      | AGIWUR1218;AGIWUR5068;AGIWUR16542                                     |           |           |                     |

|    |    |     |                                                                                                     |          |                |            |            |
|----|----|-----|-----------------------------------------------------------------------------------------------------|----------|----------------|------------|------------|
| N2 | HS | III | 11388606                                                                                            | 11393261 | WBGene00003759 | nlp-21     | Y47D3B.2   |
|    |    |     | -0.183608177036781 AGIWUR821;AGIWUR1951;AGIWUR3467;AGIWUR16106;AGIWUR18641;AGIWUR34936;AGIWUR40877  |          |                |            |            |
| N2 | HS | III | 11403017                                                                                            | 11404197 | WBGene00185055 | Y47D3B.12  | Y47D3B.12  |
|    |    |     | -0.036896147495777 AGIWUR10572;AGIWUR15106;AGIWUR27216                                              |          |                |            |            |
| N2 | HS | III | 11405361                                                                                            | 11409425 | WBGene00012941 | Y47D3B.4   | Y47D3B.4   |
|    |    |     | -0.0239554154421482 AGIWUR6626;AGIWUR12982;AGIWUR13920;AGIWUR22355;AGIWUR36034                      |          |                |            |            |
| N2 | HS | III | 11410712                                                                                            | 11424655 | WBGene00006683 | twk-31     | Y47D3B.5   |
|    |    |     | -0.171767864703838 AGIWUR26655                                                                      |          |                |            |            |
| N2 | HS | III | 11427135                                                                                            | 11428414 | WBGene00012942 | Y47D3B.6   | Y47D3B.6   |
|    |    |     | -0.109661306939179 AGIWUR2691;AGIWUR6711;AGIWUR8090;AGIWUR16063;AGIWUR19274;AGIWUR21033;AGIWUR42739 |          |                |            |            |
| N2 | HS | III | 11428367                                                                                            | 11442566 | WBGene00004735 | sbp-1      | Y47D3B.7   |
|    |    |     | 0.135255906886954 AGIWUR35305                                                                       |          |                |            |            |
| N2 | HS | III | 11456877                                                                                            | 11462897 | WBGene00023404 | plr-1      | Y47D3B.11  |
|    |    |     | -0.178456539690909 AGIWUR38850                                                                      |          |                |            |            |
| N2 | HS | III | 11463665                                                                                            | 11470805 | WBGene00012943 | bed-2      | Y47D3B.9   |
|    |    |     | 0.26839176916851 AGIWUR34421                                                                        |          |                |            |            |
| N2 | HS | III | 11482603                                                                                            | 11484244 | WBGene00013421 | fbxa-220   | Y66A7A.1   |
|    |    |     | -0.0249226769614346 AGIWUR9425                                                                      |          |                |            |            |
| N2 | HS | III | 11485474                                                                                            | 11487345 | WBGene00013422 | Y66A7A.2   | Y66A7A.2   |
|    |    |     | 0.24194886455 AGIWUR6555                                                                            |          |                |            |            |
| N2 | HS | III | 11488355                                                                                            | 11500747 | WBGene00013447 | nars-2     | Y66D12A.23 |
|    |    |     | 0.07945103635039 AGIWUR8032;AGIWUR18572;AGIWUR36913                                                 |          |                |            |            |
| N2 | HS | III | 11500867                                                                                            | 11502852 | WBGene00006573 | tin-10     | Y66D12A.22 |
|    |    |     | 0.452475185286657 AGIWUR23071                                                                       |          |                |            |            |
| N2 | HS | III | 11502963                                                                                            | 11505291 | WBGene00013446 | Y66D12A.21 | Y66D12A.21 |
|    |    |     | 0.044473894978494 AGIWUR236;AGIWUR33308                                                             |          |                |            |            |
| N2 | HS | III | 11505535                                                                                            | 11508919 | WBGene00004960 | spe-6      | Y66D12A.20 |
|    |    |     | 0.347400273054827 AGIWUR19592                                                                       |          |                |            |            |
| N2 | HS | III | 11509081                                                                                            | 11511467 | WBGene00013445 | Y66D12A.19 | Y66D12A.19 |
|    |    |     | -0.0312519247651979 AGIWUR6432;AGIWUR11711                                                          |          |                |            |            |
| N2 | HS | III | 11512860                                                                                            | 11523759 | WBGene00013443 | such-1     | Y66D12A.17 |
|    |    |     | -0.147644139664465 AGIWUR42355                                                                      |          |                |            |            |
| N2 | HS | III | 11524322                                                                                            | 11526564 | WBGene00013442 | Y66D12A.16 | Y66D12A.16 |
|    |    |     | 0.055281682092243 AGIWUR24201                                                                       |          |                |            |            |
| N2 | HS | III | 11526372                                                                                            | 11534595 | WBGene00013441 | xpb-1      | Y66D12A.15 |
|    |    |     | -0.0588522291196689 AGIWUR3323                                                                      |          |                |            |            |
| N2 | HS | III | 11534674                                                                                            | 11546669 | WBGene00013440 | nrps-1     | Y66D12A.14 |
|    |    |     | 0.030541651261041 AGIWUR32086                                                                       |          |                |            |            |
| N2 | HS | III | 11548377                                                                                            | 11552398 | WBGene00013439 | Y66D12A.13 | Y66D12A.13 |

|                     |                                                             |             |                |            |            |  |
|---------------------|-------------------------------------------------------------|-------------|----------------|------------|------------|--|
| 0.211847138592061   |                                                             | AGIWUR43703 |                |            |            |  |
| N2 HS III           | 11561152                                                    | 11562655    | WBGene00013438 | ztf-29     | Y66D12A.12 |  |
| -0.0638233776835637 | AGIWUR30629                                                 |             |                |            |            |  |
| N2 HS III           | 11563467                                                    | 11565536    | WBGene00013437 | Y66D12A.11 | Y66D12A.11 |  |
| -0.226439050846992  | AGIWUR7037;AGIWUR9963;AGIWUR19649                           |             |                |            |            |  |
| N2 HS III           | 11565833                                                    | 11568007    | WBGene00013436 | Y66D12A.10 | Y66D12A.10 |  |
| 0.197718826621369   | AGIWUR19129                                                 |             |                |            |            |  |
| N2 HS III           | 11568137                                                    | 11573343    | WBGene00013435 | Y66D12A.9  | Y66D12A.9  |  |
| -0.389566924987891  | AGIWUR11078                                                 |             |                |            |            |  |
| N2 HS III           | 11574221                                                    | 11578752    | WBGene00013434 | Y66D12A.8  | Y66D12A.8  |  |
| -0.28146239672229   | AGIWUR27440;AGIWUR44945                                     |             |                |            |            |  |
| N2 HS III           | 11579265                                                    | 11580478    | WBGene00013433 | Y66D12A.7  | Y66D12A.7  |  |
| -0.0270794287815779 | AGIWUR7522                                                  |             |                |            |            |  |
| N2 HS III           | 11580694                                                    | 11581402    | WBGene00013432 | Y66D12A.6  | Y66D12A.6  |  |
| -0.075356160123853  | AGIWUR18421                                                 |             |                |            |            |  |
| N2 HS III           | 11581600                                                    | 11589133    | WBGene00013431 | ceh-92     | Y66D12A.5  |  |
| 0.0800870081567702  | AGIWUR8014;AGIWUR41570                                      |             |                |            |            |  |
| N2 HS III           | 11589211                                                    | 11592837    | WBGene00013429 | Y66D12A.3  | Y66D12A.3  |  |
| -0.0229515396477709 | AGIWUR32063                                                 |             |                |            |            |  |
| N2 HS III           | 11608170                                                    | 11609082    | WBGene00013427 | Y66D12A.1  | Y66D12A.1  |  |
| 0.0795243218930679  | AGIWUR31529                                                 |             |                |            |            |  |
| N2 HS III           | 11612607                                                    | 11615707    | WBGene00013424 | Y66A7A.4   | Y66A7A.4   |  |
| 0.452256810646315   | AGIWUR22804                                                 |             |                |            |            |  |
| N2 HS III           | 11616758                                                    | 11623991    | WBGene00013425 | ceh-91     | Y66A7A.5   |  |
| 0.0831114534510196  | AGIWUR26537                                                 |             |                |            |            |  |
| N2 HS III           | 11624991                                                    | 11628238    | WBGene00001633 | gly-8      | Y66A7A.6   |  |
| 0.12913738626785    | AGIWUR39593                                                 |             |                |            |            |  |
| N2 HS III           | 11628386                                                    | 11631014    | WBGene00013426 | Y66A7A.7   | Y66A7A.7   |  |
| 0.221159798198896   | AGIWUR39184                                                 |             |                |            |            |  |
| N2 HS III           | 11633216                                                    | 11636840    | WBGene00006552 | tbx-33     | Y66A7A.8   |  |
| -0.0619756305200081 | AGIWUR1180                                                  |             |                |            |            |  |
| N2 HS III           | 11641461                                                    | 11641861    | WBGene00012760 | Y41C4A.17  | Y41C4A.17  |  |
| 0.0499602253478564  | AGIWUR15250;AGIWUR16680;AGIWUR23606;AGIWUR24686;AGIWUR39423 |             |                |            |            |  |
| N2 HS III           | 11647769                                                    | 11649893    | WBGene00012749 | Y41C4A.1   | Y41C4A.1   |  |
| 0.234076999627813   | AGIWUR15681                                                 |             |                |            |            |  |
| N2 HS III           | 11650471                                                    | 11656185    | WBGene00012750 | faah-6     | Y41C4A.2   |  |
| -0.0251953354800136 | AGIWUR17139                                                 |             |                |            |            |  |
| N2 HS III           | 11657738                                                    | 11693837    | WBGene00000793 | crh-1      | Y41C4A.4   |  |
| -0.0335380561041134 |                                                             |             |                |            |            |  |

AGIWUR743;AGIWUR3806;AGIWUR4913;AGIWUR12286;AGIWUR22855;AGIWUR24059;AGIWUR26704;AGIWUR27210;AGIWUR28416;AGIWUR33693;AGIWUR35499;AGIWUR40809;AGIWUR41451;AGIWUR42718;AGIWUR43847

|    |    |     |                                                                                          |          |                |           |           |
|----|----|-----|------------------------------------------------------------------------------------------|----------|----------------|-----------|-----------|
| N2 | HS | III | 11696599                                                                                 | 11698306 | WBGene00012753 | Y41C4A.6  | Y41C4A.6  |
|    |    |     | -0.0235448861097405 AGIWUR279;AGIWUR8193;AGIWUR16575;AGIWUR27230;AGIWUR37467;AGIWUR44508 |          |                |           |           |
| N2 | HS | III | 11698869                                                                                 | 11700087 | WBGene00012754 | Y41C4A.7  | Y41C4A.7  |
|    |    |     | 0.183173366751173 AGIWUR34332                                                            |          |                |           |           |
| N2 | HS | III | 11700285                                                                                 | 11702856 | WBGene00004165 | pqn-84    | Y41C4A.5  |
|    |    |     | 0.135930342874378 AGIWUR28537                                                            |          |                |           |           |
| N2 | HS | III | 11703885                                                                                 | 11705091 | WBGene00000670 | col-95    | Y41C4A.16 |
|    |    |     | -0.52885894660341 AGIWUR43392                                                            |          |                |           |           |
| N2 | HS | III | 11705713                                                                                 | 11706644 | WBGene00000671 | col-96    | Y41C4A.19 |
|    |    |     | -0.344294350458441 AGIWUR15044                                                           |          |                |           |           |
| N2 | HS | III | 11706969                                                                                 | 11708820 | WBGene00012755 | Y41C4A.8  | Y41C4A.8  |
|    |    |     | 0.258394068468345 AGIWUR314                                                              |          |                |           |           |
| N2 | HS | III | 11710827                                                                                 | 11718741 | WBGene00012756 | Y41C4A.9  | Y41C4A.9  |
|    |    |     | -0.198359144806979 AGIWUR36806                                                           |          |                |           |           |
| N2 | HS | III | 11718834                                                                                 | 11719450 | WBGene00001235 | elb-1     | Y41C4A.10 |
|    |    |     | 0.0537266640796226 AGIWUR44409                                                           |          |                |           |           |
| N2 | HS | III | 11721706                                                                                 | 11723602 | WBGene00270321 | Y41C4A.32 | Y41C4A.32 |
|    |    |     | 0.258541805583867 AGIWUR18044                                                            |          |                |           |           |
| N2 | HS | III | 11724038                                                                                 | 11726690 | WBGene00012758 | Y41C4A.12 | Y41C4A.12 |
|    |    |     | -0.314726191362004 AGIWUR11342;AGIWUR37933                                               |          |                |           |           |
| N2 | HS | III | 11730612                                                                                 | 11731305 | WBGene00012761 | Y41C4A.18 | Y41C4A.18 |
|    |    |     | 0.353933315437505 AGIWUR22498                                                            |          |                |           |           |
| N2 | HS | III | 11733346                                                                                 | 11737627 | WBGene00012759 | sup-1     | Y41C4A.13 |
|    |    |     | 0.0684812271576654 AGIWUR24400                                                           |          |                |           |           |
| N2 | HS | III | 11747042                                                                                 | 11750160 | WBGene00003417 | mrt-2     | Y41C4A.14 |
|    |    |     | 0.137287460556754 AGIWUR6066                                                             |          |                |           |           |
| N2 | HS | III | 11751320                                                                                 | 11773681 | WBGene00007703 | gbf-1     | C24H11.7  |
|    |    |     | -0.0410680823544087 AGIWUR21724                                                          |          |                |           |           |
| N2 | HS | III | 11774950                                                                                 | 11776675 | WBGene00007021 | immp-1    | C24H11.6  |
|    |    |     | 0.338128831449469 AGIWUR14285;AGIWUR14709;AGIWUR24365;AGIWUR28971;AGIWUR37179            |          |                |           |           |
| N2 | HS | III | 11777625                                                                                 | 11779629 | WBGene00007704 | mdt-21    | C24H11.9  |
|    |    |     | 0.0147607966661099 AGIWUR15738                                                           |          |                |           |           |
| N2 | HS | III | 11780235                                                                                 | 11781035 | WBGene00007702 | C24H11.5  | C24H11.5  |
|    |    |     | 0.155325092131885 AGIWUR9878;AGIWUR11324;AGIWUR14573;AGIWUR14995;AGIWUR23570;AGIWUR25385 |          |                |           |           |
| N2 | HS | III | 11782112                                                                                 | 11784074 | WBGene00007701 | srd-74    | C24H11.4  |
|    |    |     | 0.191473291572092 AGIWUR22266                                                            |          |                |           |           |
| N2 | HS | III | 11784147                                                                                 | 11786052 | WBGene00006557 | tbx-38    | C24H11.3  |

|                             |                                                |           |           |  |
|-----------------------------|------------------------------------------------|-----------|-----------|--|
| 0.0704939543128198          | AGIWUR8227                                     |           |           |  |
| N2 HS III 11795748 11803243 | WBGene00006690                                 | twk-39    | C24H11.8  |  |
| 0.0787195114650863          | AGIWUR3472;AGIWUR15834                         |           |           |  |
| N2 HS III 11804547 11806795 | WBGene00044232                                 | C18D11.7  | C18D11.7  |  |
| 0.114072444573202           | AGIWUR6793;AGIWUR14078                         |           |           |  |
| N2 HS III 11809118 11809561 | WBGene00045211                                 | C18D11.9  | C18D11.9  |  |
| 0.369176567047704           | AGIWUR1937;AGIWUR17901;AGIWUR26015;AGIWUR27348 |           |           |  |
| N2 HS III 11810556 11811046 | WBGene00007682                                 | C18D11.6  | C18D11.6  |  |
| -0.328872887637946          | AGIWUR24374;AGIWUR28866                        |           |           |  |
| N2 HS III 11816569 11819806 | WBGene00007679                                 | C18D11.1  | C18D11.1  |  |
| -0.116840972393712          | AGIWUR30952                                    |           |           |  |
| N2 HS III 11819745 11822526 | WBGene00007680                                 | maa-1     | C18D11.2  |  |
| 0.0456639784458481          | AGIWUR10358;AGIWUR12232;AGIWUR27929            |           |           |  |
| N2 HS III 11823327 11824975 | WBGene00007681                                 | C18D11.3  | C18D11.3  |  |
| 0.0142170796201881          | AGIWUR37930                                    |           |           |  |
| N2 HS III 11826215 11830996 | WBGene00004705                                 | rsp-8     | C18D11.4  |  |
| -0.117189824077952          | AGIWUR491;AGIWUR962                            |           |           |  |
| N2 HS III 11831008 11846465 | WBGene00003826                                 | ntl-3     | Y56A3A.1  |  |
| -0.266976495091884          | AGIWUR15901;AGIWUR41835                        |           |           |  |
| N2 HS III 11848152 11849522 | WBGene00003234                                 | mif-1     | Y56A3A.3  |  |
| -0.067186784686152          | AGIWUR51                                       |           |           |  |
| N2 HS III 11849951 11862249 | WBGene00013225                                 | Y56A3A.2  | Y56A3A.2  |  |
| 0.00386796773040921         | AGIWUR6842;AGIWUR31751                         |           |           |  |
| N2 HS III 11862393 11869281 | WBGene00006396                                 | taf-12    | Y56A3A.4  |  |
| 0.0350630292707832          | AGIWUR32671;AGIWUR32932                        |           |           |  |
| N2 HS III 11871252 11878889 | WBGene00013227                                 | Y56A3A.6  | Y56A3A.6  |  |
| -0.661319399908635          | AGIWUR9530                                     |           |           |  |
| N2 HS III 11886485 11891435 | WBGene00013226                                 | faah-5    | Y56A3A.5  |  |
| 0.016398366370713           | AGIWUR23762                                    |           |           |  |
| N2 HS III 11894784 11898269 | WBGene00013231                                 | tsen-2    | Y56A3A.11 |  |
| 0.235850322119862           | AGIWUR30976;AGIWUR31534;AGIWUR41043            |           |           |  |
| N2 HS III 11899337 11907387 | WBGene00013232                                 | faah-4    | Y56A3A.12 |  |
| 0.213285809499812           | AGIWUR22557                                    |           |           |  |
| N2 HS III 11907477 11908474 | WBGene00013233                                 | sdz-33    | Y56A3A.14 |  |
| -0.120495865278484          | AGIWUR5241                                     |           |           |  |
| N2 HS III 11915151 11915712 | WBGene00013237                                 | Y56A3A.19 | Y56A3A.19 |  |
| 0.207123552082908           | AGIWUR10004;AGIWUR20598;AGIWUR30622            |           |           |  |
| N2 HS III 11915891 11917876 | WBGene00003802                                 | npp-16    | Y56A3A.17 |  |
| -0.0315824761505974         |                                                |           |           |  |

AGIWUR6396;AGIWUR6847;AGIWUR9066;AGIWUR15726;AGIWUR16215;AGIWUR18214;AGIWUR27133;AGIWUR28029;AGIWUR29924;AGIWUR30267;AGIWUR33353;AGIWUR41005

|                                                                                              |    |     |                     |                                                                                 |                |           |           |
|----------------------------------------------------------------------------------------------|----|-----|---------------------|---------------------------------------------------------------------------------|----------------|-----------|-----------|
| N2                                                                                           | HS | III | 11918828            | 11920237                                                                        | WBGene00000369 | ccf-1     | Y56A3A.20 |
| 0.101541822577813                                                                            |    |     |                     |                                                                                 |                |           |           |
| AGIWUR3851;AGIWUR4029;AGIWUR6652;AGIWUR15305;AGIWUR22050;AGIWUR33330;AGIWUR35362;AGIWUR41944 |    |     |                     |                                                                                 |                |           |           |
| N2                                                                                           | HS | III | 11920716            | 11921590                                                                        | WBGene00013238 | trap-4    | Y56A3A.21 |
|                                                                                              |    |     | -0.0588095643671558 | AGIWUR42080                                                                     |                |           |           |
| N2                                                                                           | HS | III | 11921692            | 11923825                                                                        | WBGene00013239 | Y56A3A.22 | Y56A3A.22 |
|                                                                                              |    |     | 0.0547226774817453  | AGIWUR24269                                                                     |                |           |           |
| N2                                                                                           | HS | III | 11923886            | 11929376                                                                        | WBGene00003594 | nft-1     | Y56A3A.13 |
|                                                                                              |    |     | 0.0949556220013523  | AGIWUR21699                                                                     |                |           |           |
| N2                                                                                           | HS | III | 11929889            | 11933639                                                                        | WBGene00044233 | Y56A3A.36 | Y56A3A.36 |
|                                                                                              |    |     | 0.109225693260897   | AGIWUR5818;AGIWUR35337;AGIWUR37064                                              |                |           |           |
| N2                                                                                           | HS | III | 11934002            | 11947017                                                                        | WBGene00013228 | Y56A3A.7  | Y56A3A.7  |
|                                                                                              |    |     | 0.111307186014368   | AGIWUR6563;AGIWUR12033                                                          |                |           |           |
| N2                                                                                           | HS | III | 11949918            | 11960180                                                                        | WBGene00006596 | top-3     | Y56A3A.27 |
|                                                                                              |    |     | 0.269045020059739   | AGIWUR2678                                                                      |                |           |           |
| N2                                                                                           | HS | III | 11961470            | 11971367                                                                        | WBGene00013240 | Y56A3A.28 | Y56A3A.28 |
|                                                                                              |    |     | 0.00161386671371311 | AGIWUR1138;AGIWUR8487                                                           |                |           |           |
| N2                                                                                           | HS | III | 11971461            | 11974092                                                                        | WBGene00013241 | ung-1     | Y56A3A.29 |
|                                                                                              |    |     | -0.0760307903695683 | AGIWUR5152;AGIWUR6264;AGIWUR7720                                                |                |           |           |
| N2                                                                                           | HS | III | 11974077            | 11979065                                                                        | WBGene00013242 | Y56A3A.30 | Y56A3A.30 |
|                                                                                              |    |     | 0.105036052570366   | AGIWUR1081                                                                      |                |           |           |
| N2                                                                                           | HS | III | 11974477            | 11989885                                                                        | WBGene00013243 | Y56A3A.31 | Y56A3A.31 |
|                                                                                              |    |     | 0.0831139299285262  | AGIWUR3812                                                                      |                |           |           |
| N2                                                                                           | HS | III | 11990167            | 11999552                                                                        | WBGene00006937 | wah-1     | Y56A3A.32 |
|                                                                                              |    |     | 0.0394217296495647  | AGIWUR2501;AGIWUR3631;AGIWUR34419;AGIWUR35517;AGIWUR35901;AGIWUR45018           |                |           |           |
| N2                                                                                           | HS | III | 11999497            | 12002950                                                                        | WBGene00013244 | Y56A3A.33 | Y56A3A.33 |
|                                                                                              |    |     | -0.0992738560956035 | AGIWUR10400;AGIWUR17573;AGIWUR27018                                             |                |           |           |
| N2                                                                                           | HS | III | 12020552            | 12025325                                                                        | WBGene00000273 | brp-1     | Y79H2A.1  |
|                                                                                              |    |     | 0.0962041729855425  | AGIWUR20615                                                                     |                |           |           |
| N2                                                                                           | HS | III | 12025559            | 12028811                                                                        | WBGene00043997 | Y79H2A.12 | Y79H2A.12 |
|                                                                                              |    |     | -0.0308294672722855 | AGIWUR31274;AGIWUR37681                                                         |                |           |           |
| N2                                                                                           | HS | III | 12028969            | 12030769                                                                        | WBGene00013579 | Y79H2A.2  | Y79H2A.2  |
|                                                                                              |    |     | 0.184297471618026   | AGIWUR21385;AGIWUR43928                                                         |                |           |           |
| N2                                                                                           | HS | III | 12031516            | 12052303                                                                        | WBGene00013580 | Y79H2A.3  | Y79H2A.3  |
|                                                                                              |    |     | -0.109026077343232  | AGIWUR3496;AGIWUR4375;AGIWUR5043;AGIWUR7222;AGIWUR15628;AGIWUR20046;AGIWUR38151 |                |           |           |
| N2                                                                                           | HS | III | 12052424            | 12058458                                                                        | WBGene00000201 | arx-3     | Y79H2A.6  |
|                                                                                              |    |     | 0.0315977415592155  | AGIWUR26668                                                                     |                |           |           |

|    |    |     |                                                                        |          |                |           |           |
|----|----|-----|------------------------------------------------------------------------|----------|----------------|-----------|-----------|
| N2 | HS | III | 12058844                                                               | 12072293 | WBGene00006993 | zyg-8     | Y79H2A.11 |
|    |    |     | AGIWUR36623;AGIWUR44842                                                |          |                |           |           |
| N2 | HS | III | 12074290                                                               | 12077556 | WBGene00004024 | php-3     | Y75B8A.1  |
|    |    |     | AGIWUR9119                                                             |          |                |           |           |
| N2 | HS | III | 12077788                                                               | 12084320 | WBGene00003779 | nob-1     | Y75B8A.2  |
|    |    |     | AGIWUR2669;AGIWUR13194                                                 |          |                |           |           |
| N2 | HS | III | 12101810                                                               | 12106597 | WBGene00013540 | Y75B8A.3  | Y75B8A.3  |
|    |    |     | AGIWUR41000                                                            |          |                |           |           |
| N2 | HS | III | 12107774                                                               | 12113471 | WBGene00013541 | lonp-2    | Y75B8A.4  |
|    |    |     | AGIWUR44655                                                            |          |                |           |           |
| N2 | HS | III | 12114577                                                               | 12118470 | WBGene00013542 | Iron-12   | Y75B8A.5  |
|    |    |     | AGIWUR24439                                                            |          |                |           |           |
| N2 | HS | III | 12123881                                                               | 12130352 | WBGene00013543 | Y75B8A.6  | Y75B8A.6  |
|    |    |     | AGIWUR12891                                                            |          |                |           |           |
| N2 | HS | III | 12152899                                                               | 12160100 | WBGene00013544 | Y75B8A.7  | Y75B8A.7  |
|    |    |     | AGIWUR40081                                                            |          |                |           |           |
| N2 | HS | III | 12160758                                                               | 12171356 | WBGene00013545 | Y75B8A.8  | Y75B8A.8  |
|    |    |     | AGIWUR8629                                                             |          |                |           |           |
| N2 | HS | III | 12171353                                                               | 12177245 | WBGene00001636 | gly-11    | Y75B8A.9  |
|    |    |     | AGIWUR185;AGIWUR4639;AGIWUR34343;AGIWUR43642                           |          |                |           |           |
| N2 | HS | III | 12180960                                                               | 12183013 | WBGene00013547 | Y75B8A.10 | Y75B8A.10 |
|    |    |     | AGIWUR41582                                                            |          |                |           |           |
| N2 | HS | III | 12186411                                                               | 12190116 | WBGene00013548 | Y75B8A.11 | Y75B8A.11 |
|    |    |     | AGIWUR9380                                                             |          |                |           |           |
| N2 | HS | III | 12191056                                                               | 12202450 | WBGene00003892 | osm-12    | Y75B8A.12 |
|    |    |     | AGIWUR1812;AGIWUR18881;AGIWUR24126                                     |          |                |           |           |
| N2 | HS | III | 12203822                                                               | 12215686 | WBGene00013549 | Y75B8A.13 | Y75B8A.13 |
|    |    |     | AGIWUR19945;AGIWUR20922;AGIWUR30232;AGIWUR36978                        |          |                |           |           |
| N2 | HS | III | 12216779                                                               | 12218634 | WBGene00013550 | Y75B8A.14 | Y75B8A.14 |
|    |    |     | AGIWUR9294                                                             |          |                |           |           |
| N2 | HS | III | 12218990                                                               | 12223934 | WBGene00013551 | Y75B8A.16 | Y75B8A.16 |
|    |    |     | AGIWUR33754                                                            |          |                |           |           |
| N2 | HS | III | 12224487                                                               | 12225331 | WBGene00013552 | gmn-1     | Y75B8A.17 |
|    |    |     | AGIWUR1240;AGIWUR23735;AGIWUR30289;AGIWUR30706;AGIWUR31045;AGIWUR33207 |          |                |           |           |
| N2 | HS | III | 12225638                                                               | 12226267 | WBGene00013553 | Y75B8A.18 | Y75B8A.18 |
|    |    |     | AGIWUR31363                                                            |          |                |           |           |
| N2 | HS | III | 12226632                                                               | 12232241 | WBGene00013554 | Y75B8A.19 | Y75B8A.19 |
|    |    |     | AGIWUR15908;AGIWUR16398;AGIWUR29200                                    |          |                |           |           |
| N2 | HS | III | 12232632                                                               | 12235711 | WBGene00001724 | grl-15    | Y75B8A.20 |



|                     |    |     |                                                             |          |                |                     |
|---------------------|----|-----|-------------------------------------------------------------|----------|----------------|---------------------|
| 0.80103924425172    |    |     | AGIWUR20943                                                 |          |                |                     |
| N2                  | HS | III | 12240367                                                    | 12250164 | WBGene00006571 | tim-1 Y75B8A.22     |
| 0.070614562700074   |    |     | AGIWUR1647;AGIWUR6048;AGIWUR11763                           |          |                |                     |
| N2                  | HS | III | 12250602                                                    | 12251009 | WBGene00013556 | Y75B8A.23 Y75B8A.23 |
| 0.225307003893047   |    |     | AGIWUR30023                                                 |          |                |                     |
| N2                  | HS | III | 12251492                                                    | 12273692 | WBGene00013557 | Y75B8A.24 Y75B8A.24 |
| 0.112489233338517   |    |     | AGIWUR17796                                                 |          |                |                     |
| N2                  | HS | III | 12274040                                                    | 12282221 | WBGene00013558 | Y75B8A.25 Y75B8A.25 |
| 0.02186222708219    |    |     | AGIWUR29151                                                 |          |                |                     |
| N2                  | HS | III | 12283208                                                    | 12303216 | WBGene00003414 | mrp-8 Y75B8A.26     |
| -0.0639038830219949 |    |     | AGIWUR6025;AGIWUR14868;AGIWUR30937;AGIWUR39033              |          |                |                     |
| N2                  | HS | III | 12307771                                                    | 12311924 | WBGene00004172 | pqn-92 Y75B8A.27    |
| 0.044328263802317   |    |     | AGIWUR41336                                                 |          |                |                     |
| N2                  | HS | III | 12313287                                                    | 12314403 | WBGene00023483 | Y75B8A.39 Y75B8A.39 |
| 1.40398750268301    |    |     | AGIWUR2361                                                  |          |                |                     |
| N2                  | HS | III | 12315479                                                    | 12315857 | WBGene00013565 | Y75B8A.37 Y75B8A.37 |
| -0.148150282350507  |    |     | AGIWUR38393                                                 |          |                |                     |
| N2                  | HS | III | 12319108                                                    | 12323771 | WBGene00013559 | Y75B8A.28 Y75B8A.28 |
| 0.0519213326512098  |    |     | AGIWUR24263                                                 |          |                |                     |
| N2                  | HS | III | 12327667                                                    | 12332274 | WBGene00013560 | zip-12 Y75B8A.29    |
| -0.217772992137034  |    |     | AGIWUR20625                                                 |          |                |                     |
| N2                  | HS | III | 12333745                                                    | 12345347 | WBGene00006986 | zip-1 Y75B8A.35     |
| 0.0015320632228164  |    |     | AGIWUR10170                                                 |          |                |                     |
| N2                  | HS | III | 12345323                                                    | 12351336 | WBGene00004085 | pph-4.1 Y75B8A.30   |
| -0.130168492451432  |    |     | AGIWUR12115                                                 |          |                |                     |
| N2                  | HS | III | 12351642                                                    | 12354925 | WBGene00013561 | Y75B8A.31 Y75B8A.31 |
| 0.0526309684067137  |    |     | AGIWUR12456                                                 |          |                |                     |
| N2                  | HS | III | 12354944                                                    | 12358561 | WBGene00013562 | Y75B8A.32 Y75B8A.32 |
| 0.104302344612523   |    |     | AGIWUR36648                                                 |          |                |                     |
| N2                  | HS | III | 12359565                                                    | 12361248 | WBGene00013564 | Y75B8A.34 Y75B8A.34 |
| -0.0333315603439619 |    |     | AGIWUR19352;AGIWUR29568;AGIWUR38384                         |          |                |                     |
| N2                  | HS | III | 12361859                                                    | 12367373 | WBGene00013563 | Y75B8A.33 Y75B8A.33 |
| 0.122674137994481   |    |     | AGIWUR20947;AGIWUR37137;AGIWUR37178                         |          |                |                     |
| N2                  | HS | III | 12367474                                                    | 12369050 | WBGene00001946 | his-72 Y49E10.6     |
| -0.074461104244623  |    |     | AGIWUR13672;AGIWUR22973;AGIWUR24494;AGIWUR28018;AGIWUR42852 |          |                |                     |
| N2                  | HS | III | 12370456                                                    | 12372625 | WBGene00004506 | rpt-6 Y49E10.1      |
| -0.0915955189490809 |    |     | AGIWUR41530                                                 |          |                |                     |
| N2                  | HS | III | 12372583                                                    | 12373857 | WBGene00013029 | glrx-5 Y49E10.2     |
| 0.0155463198859174  |    |     | AGIWUR36243                                                 |          |                |                     |

|                                                                                               |    |     |          |          |                |           |           |
|-----------------------------------------------------------------------------------------------|----|-----|----------|----------|----------------|-----------|-----------|
| N2                                                                                            | HS | III | 12374126 | 12377248 | WBGene00004086 | pph-4.2   | Y49E10.3  |
| -0.0236664858539752                                                                           |    |     |          |          |                |           |           |
| AGIWUR6473;AGIWUR7787;AGIWUR15115;AGIWUR24606;AGIWUR27782;AGIWUR33390;AGIWUR42004;AGIWUR43090 |    |     |          |          |                |           |           |
| N2                                                                                            | HS | III | 12377731 | 12378829 | WBGene00013031 | Y49E10.7  | Y49E10.7  |
| -0.103880940777549                                                                            |    |     |          |          |                |           |           |
| AGIWUR33767                                                                                   |    |     |          |          |                |           |           |
| N2                                                                                            | HS | III | 12378724 | 12380647 | WBGene00013030 | Y49E10.4  | Y49E10.4  |
| -0.0198547854348217                                                                           |    |     |          |          |                |           |           |
| AGIWUR12131;AGIWUR22301;AGIWUR32211;AGIWUR38930                                               |    |     |          |          |                |           |           |
| N2                                                                                            | HS | III | 12387891 | 12388985 | WBGene00014904 | Y49E10.26 | Y49E10.26 |
| -0.327746319347024                                                                            |    |     |          |          |                |           |           |
| AGIWUR30780                                                                                   |    |     |          |          |                |           |           |
| N2                                                                                            | HS | III | 12389885 | 12390556 | WBGene00014903 | Y49E10.8  | Y49E10.8  |
| 0.112648623479544                                                                             |    |     |          |          |                |           |           |
| AGIWUR24628                                                                                   |    |     |          |          |                |           |           |
| N2                                                                                            | HS | III | 12398901 | 12421570 | WBGene00013034 | tat-1     | Y49E10.11 |
| -0.0704019758795873                                                                           |    |     |          |          |                |           |           |
| AGIWUR15617;AGIWUR18057;AGIWUR27355;AGIWUR34118                                               |    |     |          |          |                |           |           |
| N2                                                                                            | HS | III | 12426862 | 12429195 | WBGene00004027 | pie-1     | Y49E10.14 |
| -0.196467424472796                                                                            |    |     |          |          |                |           |           |
| AGIWUR4842;AGIWUR43801                                                                        |    |     |          |          |                |           |           |
| N2                                                                                            | HS | III | 12429172 | 12429630 | WBGene00004919 | snr-6     | Y49E10.15 |
| 0.0526539712642329                                                                            |    |     |          |          |                |           |           |
| AGIWUR43554                                                                                   |    |     |          |          |                |           |           |
| N2                                                                                            | HS | III | 12430430 | 12433892 | WBGene00013035 | Y49E10.16 | Y49E10.16 |
| 0.256477396460628                                                                             |    |     |          |          |                |           |           |
| AGIWUR15845;AGIWUR27141;AGIWUR43362                                                           |    |     |          |          |                |           |           |
| N2                                                                                            | HS | III | 12436552 | 12441056 | WBGene00013036 | fbxa-218  | Y49E10.17 |
| 0.240563762964614                                                                             |    |     |          |          |                |           |           |
| AGIWUR23422                                                                                   |    |     |          |          |                |           |           |
| N2                                                                                            | HS | III | 12442630 | 12446145 | WBGene00013037 | Y49E10.18 | Y49E10.18 |
| -0.247025202729038                                                                            |    |     |          |          |                |           |           |
| AGIWUR10529;AGIWUR24845;AGIWUR26960;AGIWUR29787;AGIWUR32268;AGIWUR34014                       |    |     |          |          |                |           |           |
| N2                                                                                            | HS | III | 12446353 | 12453202 | WBGene00013038 | ani-1     | Y49E10.19 |
| -0.104344497523552                                                                            |    |     |          |          |                |           |           |
| AGIWUR4746                                                                                    |    |     |          |          |                |           |           |
| N2                                                                                            | HS | III | 12453588 | 12456850 | WBGene00013039 | scav-3    | Y49E10.20 |
| 0.0986458517968813                                                                            |    |     |          |          |                |           |           |
| AGIWUR22103;AGIWUR31816;AGIWUR37790;AGIWUR43918                                               |    |     |          |          |                |           |           |
| N2                                                                                            | HS | III | 12457599 | 12465821 | WBGene00013040 | Y49E10.21 | Y49E10.21 |
| 0.156270331975563                                                                             |    |     |          |          |                |           |           |
| AGIWUR105;AGIWUR15140;AGIWUR38802                                                             |    |     |          |          |                |           |           |
| N2                                                                                            | HS | III | 12466610 | 12468277 | WBGene00013041 | pstk-1    | Y49E10.22 |
| 0.0456016324845407                                                                            |    |     |          |          |                |           |           |
| AGIWUR13994                                                                                   |    |     |          |          |                |           |           |
| N2                                                                                            | HS | III | 12469169 | 12472541 | WBGene00045239 | Y49E10.29 | Y49E10.29 |
| -0.0863956985043441                                                                           |    |     |          |          |                |           |           |
| AGIWUR11208;AGIWUR22942;AGIWUR28929;AGIWUR33709;AGIWUR34350;AGIWUR38560                       |    |     |          |          |                |           |           |
| N2                                                                                            | HS | III | 12472868 | 12484651 | WBGene00013042 | cccp-1    | Y49E10.23 |
| 0.082790678459375                                                                             |    |     |          |          |                |           |           |
| AGIWUR13894                                                                                   |    |     |          |          |                |           |           |
| N2                                                                                            | HS | III | 12484732 | 12488339 | WBGene00013043 | arrd-16   | Y49E10.24 |
| 0.0952919355796444                                                                            |    |     |          |          |                |           |           |
| AGIWUR7495;AGIWUR21391;AGIWUR42175                                                            |    |     |          |          |                |           |           |
| N2                                                                                            | HS | III | 12488679 | 12492084 | WBGene00013044 | Y49E10.25 | Y49E10.25 |
| -0.342772962281648                                                                            |    |     |          |          |                |           |           |
| AGIWUR10386                                                                                   |    |     |          |          |                |           |           |

|                     |    |     |                                                                        |          |                |            |                             |
|---------------------|----|-----|------------------------------------------------------------------------|----------|----------------|------------|-----------------------------|
| N2                  | HS | III | 12492793                                                               | 12495640 | WBGene00013727 | Y111B2A.1  | Y111B2A.1                   |
| -0.103117599090682  |    |     | AGIWUR15820                                                            |          |                |            |                             |
| N2                  | HS | III | 12496538                                                               | 12499352 | WBGene00013729 | Y111B2A.3  | Y111B2A.3                   |
| -0.197657068091917  |    |     | AGIWUR8789                                                             |          |                |            |                             |
| N2                  | HS | III | 12499557                                                               | 12527924 | WBGene00013730 | sql-1      | Y111B2A.4                   |
| 0.158802987129222   |    |     | AGIWUR4403;AGIWUR5215;AGIWUR17830;AGIWUR26217;AGIWUR27811              |          |                |            |                             |
| N2                  | HS | III | 12528287                                                               | 12536848 | WBGene00014613 | Y111B2A.25 | Y111B2A.25                  |
| -0.173590631499657  |    |     | AGIWUR5020;AGIWUR7629;AGIWUR17399;AGIWUR32936;AGIWUR37551              |          |                |            |                             |
| N2                  | HS | III | 12538664                                                               | 12575401 | WBGene00013732 | aakg-1     | Y111B2A.8                   |
| -0.178177786406203  |    |     | AGIWUR17518;AGIWUR19289;AGIWUR39040;AGIWUR41104;AGIWUR42689            |          |                |            |                             |
| N2                  | HS | III | 12595994                                                               | 12598604 | WBGene00013734 | Y111B2A.10 | Y111B2A.10                  |
| -0.355653457774158  |    |     | AGIWUR31114;AGIWUR32437                                                |          |                |            |                             |
| N2                  | HS | III | 12599304                                                               | 12608604 | WBGene00007030 | epc-1      | Y111B2A.11                  |
| 0.104252060795861   |    |     | AGIWUR24947                                                            |          |                |            |                             |
| N2                  | HS | III | 12609289                                                               | 12623740 | WBGene00013735 | Y111B2A.12 | Y111B2A.12                  |
| 0.057539323322473   |    |     | AGIWUR1326;AGIWUR15735;AGIWUR23494;AGIWUR25188;AGIWUR27817;AGIWUR29975 |          |                |            |                             |
| N2                  | HS | III | 12624766                                                               | 12625890 | WBGene00013736 | Y111B2A.13 | Y111B2A.13                  |
| 0.0578975108779005  |    |     | AGIWUR7917;AGIWUR20589;AGIWUR21701;AGIWUR22852;AGIWUR24926             |          |                |            |                             |
| N2                  | HS | III | 12626568                                                               | 12651757 | WBGene00004161 | pqn-80     | Y111B2A.14                  |
| 0.0316017136665927  |    |     | AGIWUR3950;AGIWUR19275;AGIWUR36462;AGIWUR45159                         |          |                |            |                             |
| N2                  | HS | III | 12652344                                                               | 12662286 | WBGene00013737 | tpst-1     | Y111B2A.15                  |
| -0.0543894201650907 |    |     | AGIWUR30331                                                            |          |                |            |                             |
| N2                  | HS | III | 12671307                                                               | 12673421 | WBGene00006389 | taf-7.2    | Y111B2A.16                  |
| 0.12453456378905    |    |     | AGIWUR31423                                                            |          |                |            |                             |
| N2                  | HS | III | 12673633                                                               | 12686230 | WBGene00013738 | elpc-2     | Y111B2A.17                  |
| 0.0155396330206212  |    |     | AGIWUR37084                                                            |          |                |            |                             |
| N2                  | HS | III | 12686243                                                               | 12687916 | WBGene00004700 | rsp-3      | Y111B2A.18                  |
| -0.0432301501668029 |    |     | AGIWUR5188;AGIWUR13561;AGIWUR19588                                     |          |                |            |                             |
| N2                  | HS | III | 12699494                                                               | 12710888 | WBGene00013742 | sas-1      | Y111B2A.24                  |
| 0.0726127072589691  |    |     | AGIWUR24021                                                            |          |                |            |                             |
| N2                  | HS | III | 12711506                                                               | 12713874 | WBGene00013740 | hut-1      | Y111B2A.20                  |
| 0.206744744501579   |    |     | AGIWUR14912                                                            |          |                |            |                             |
| N2                  | HS | III | 12714566                                                               | 12743929 | WBGene00007027 | ssl-1      | Y111B2A.22                  |
| -0.250230948765502  |    |     | AGIWUR15732;AGIWUR31590;AGIWUR43765                                    |          |                |            |                             |
| N2                  | HS | III | 12746450                                                               | 12747621 | WBGene00013741 | Y111B2A.21 | Y111B2A.21                  |
| 0.2211133878459     |    |     | AGIWUR15341                                                            |          |                |            |                             |
| N2                  | HS | III | 12747899                                                               | 12750927 | WBGene00013911 | irld-60    | ZC482.2 -0.16865830851213   |
| AGIWUR8989          |    |     |                                                                        |          |                |            |                             |
| N2                  | HS | III | 12751109                                                               | 12753634 | WBGene00013915 | irld-20    | ZC482.7 0.00353514194382676 |

|                                                           |    |     |                                                |          |                |           |          |                     |  |
|-----------------------------------------------------------|----|-----|------------------------------------------------|----------|----------------|-----------|----------|---------------------|--|
| AGIWUR6282                                                |    |     |                                                |          |                |           |          |                     |  |
| N2                                                        | HS | III | 12755348                                       | 12756613 | WBGene00005757 | srw-10    | ZC482.6  | 0.107334560069795   |  |
| AGIWUR3866;AGIWUR16156;AGIWUR34190                        |    |     |                                                |          |                |           |          |                     |  |
| N2                                                        | HS | III | 12757667                                       | 12759619 | WBGene00005756 | srw-9     | ZC482.8  | 0.122756194279843   |  |
| AGIWUR4324                                                |    |     |                                                |          |                |           |          |                     |  |
| N2                                                        | HS | III | 12760684                                       | 12764341 | WBGene00013912 | irld-19   | ZC482.3  | 0.065308873319271   |  |
| AGIWUR17913                                               |    |     |                                                |          |                |           |          |                     |  |
| N2                                                        | HS | III | 12764553                                       | 12769048 | WBGene00013913 | irld-61   | ZC482.4  | -0.0426921659488073 |  |
| AGIWUR489;AGIWUR22473;AGIWUR34972                         |    |     |                                                |          |                |           |          |                     |  |
| N2                                                        | HS | III | 12769564                                       | 12771594 | WBGene00005752 | srw-5     | ZC482.9  | -0.0677188024101802 |  |
| AGIWUR1998;AGIWUR30084                                    |    |     |                                                |          |                |           |          |                     |  |
| N2                                                        | HS | III | 12771878                                       | 12779726 | WBGene00001512 | gab-1     | ZC482.1  | 0.195118243314589   |  |
| AGIWUR28927;AGIWUR31006;AGIWUR38849                       |    |     |                                                |          |                |           |          |                     |  |
| N2                                                        | HS | III | 12785154                                       | 12793128 | WBGene00013914 | lgc-37    | ZC482.5  | 0.0715553226649965  |  |
| AGIWUR454;AGIWUR11920;AGIWUR37953;AGIWUR45122             |    |     |                                                |          |                |           |          |                     |  |
| N2                                                        | HS | III | 12793386                                       | 12798157 | WBGene00007210 | agmo-1    | BE10.2   | 0.277996794124677   |  |
| AGIWUR5835;AGIWUR38227                                    |    |     |                                                |          |                |           |          |                     |  |
| N2                                                        | HS | III | 12804599                                       | 12804761 | WBGene00044128 | BE10.6    | BE10.6   | -0.0669689290979001 |  |
| AGIWUR12532                                               |    |     |                                                |          |                |           |          |                     |  |
| N2                                                        | HS | III | 12806175                                       | 12806855 | WBGene00044127 | BE10.5    | BE10.5   | -0.0691599082752976 |  |
| AGIWUR6016;AGIWUR6428;AGIWUR33191;AGIWUR37207;AGIWUR42255 |    |     |                                                |          |                |           |          |                     |  |
| N2                                                        | HS | III | 12813541                                       | 12816798 | WBGene00007212 | BE10.4    | BE10.4   | -0.0650322377825163 |  |
| AGIWUR5283;AGIWUR14355;AGIWUR17624;AGIWUR23051            |    |     |                                                |          |                |           |          |                     |  |
| N2                                                        | HS | III | 12816789                                       | 12818100 | WBGene00000203 | arx-5     | Y37D8A.1 |                     |  |
| -0.0964842568253088                                       |    |     | AGIWUR8540;AGIWUR16491;AGIWUR26323;AGIWUR42562 |          |                |           |          |                     |  |
| N2                                                        | HS | III | 12818658                                       | 12820252 | WBGene00012560 | Y37D8A.25 |          | Y37D8A.25           |  |
| 0.262363170544765                                         |    |     | AGIWUR1537                                     |          |                |           |          |                     |  |
| N2                                                        | HS | III | 12820141                                       | 12825651 | WBGene00012544 | Y37D8A.2  |          | Y37D8A.2            |  |
| 0.133111659747431                                         |    |     | AGIWUR281                                      |          |                |           |          |                     |  |
| N2                                                        | HS | III | 12829368                                       | 12837274 | WBGene00012545 | Y37D8A.3  |          | Y37D8A.3            |  |
| 0.0605752268106645                                        |    |     | AGIWUR42989                                    |          |                |           |          |                     |  |
| N2                                                        | HS | III | 12837189                                       | 12838959 | WBGene00012546 | Y37D8A.4  |          | Y37D8A.4            |  |
| -0.21808294210898                                         |    |     | AGIWUR26272                                    |          |                |           |          |                     |  |
| N2                                                        | HS | III | 12854051                                       | 12855315 | WBGene00012547 | Y37D8A.5  |          | Y37D8A.5            |  |
| -0.0167639960128358                                       |    |     | AGIWUR12221                                    |          |                |           |          |                     |  |
| N2                                                        | HS | III | 12855844                                       | 12856728 | WBGene00012561 | Y37D8A.26 |          | Y37D8A.26           |  |
| 0.0814682725213522                                        |    |     | AGIWUR29792                                    |          |                |           |          |                     |  |
| N2                                                        | HS | III | 12856833                                       | 12857911 | WBGene00012548 | Y37D8A.6  |          | Y37D8A.6            |  |
| 0.292202261269983                                         |    |     | AGIWUR19054                                    |          |                |           |          |                     |  |

|                                                                                                                |    |     |          |          |                |           |           |
|----------------------------------------------------------------------------------------------------------------|----|-----|----------|----------|----------------|-----------|-----------|
| N2                                                                                                             | HS | III | 12864948 | 12867591 | WBGene00012549 | Y37D8A.8  | Y37D8A.8  |
| -0.0910417923994249 AGIWUR42474                                                                                |    |     |          |          |                |           |           |
| N2                                                                                                             | HS | III | 12871195 | 12874654 | WBGene00003406 | mrg-1     | Y37D8A.9  |
| -0.0175641907107114 AGIWUR13050;AGIWUR24765;AGIWUR32619                                                        |    |     |          |          |                |           |           |
| N2                                                                                                             | HS | III | 12875007 | 12875831 | WBGene00012550 | hpo-21    | Y37D8A.10 |
| 0.0944653739312145 AGIWUR36621                                                                                 |    |     |          |          |                |           |           |
| N2                                                                                                             | HS | III | 12875771 | 12877577 | WBGene00012551 | cec-7     | Y37D8A.11 |
| -0.00529817972573454 AGIWUR21609                                                                               |    |     |          |          |                |           |           |
| N2                                                                                                             | HS | III | 12881037 | 12891738 | WBGene00006804 | unc-71    | Y37D8A.13 |
| 0.0494407148770755 AGIWUR35864                                                                                 |    |     |          |          |                |           |           |
| N2                                                                                                             | HS | III | 12905491 | 12906619 | WBGene00012553 | cco-2     | Y37D8A.14 |
| 0.181786952730988 AGIWUR611;AGIWUR5718;AGIWUR11609;AGIWUR18775;AGIWUR29351;AGIWUR29790;AGIWUR39376;AGIWUR42144 |    |     |          |          |                |           |           |
| N2                                                                                                             | HS | III | 12910510 | 12914930 | WBGene00001457 | flp-14    | Y37D8A.15 |
| 0.222376967566788 AGIWUR36571                                                                                  |    |     |          |          |                |           |           |
| N2                                                                                                             | HS | III | 12915118 | 12918675 | WBGene00012554 | Y37D8A.16 | Y37D8A.16 |
| 0.0545725404403976 AGIWUR1963;AGIWUR9465;AGIWUR12505;AGIWUR19886                                               |    |     |          |          |                |           |           |
| N2                                                                                                             | HS | III | 12921282 | 12925997 | WBGene00012555 | Y37D8A.17 | Y37D8A.17 |
| -0.281239868124658 AGIWUR34460                                                                                 |    |     |          |          |                |           |           |
| N2                                                                                                             | HS | III | 12926557 | 12927886 | WBGene00012556 | mrps-10   | Y37D8A.18 |
| 0.00468016237256208 AGIWUR32331                                                                                |    |     |          |          |                |           |           |
| N2                                                                                                             | HS | III | 12928370 | 12931867 | WBGene00012558 | Y37D8A.21 | Y37D8A.21 |
| -0.00506190269207352 AGIWUR8071                                                                                |    |     |          |          |                |           |           |
| N2                                                                                                             | HS | III | 12934717 | 12941069 | WBGene00012559 | epg-3     | Y37D8A.22 |
| 0.126765667997169 AGIWUR15032                                                                                  |    |     |          |          |                |           |           |
| N2                                                                                                             | HS | III | 12942617 | 12949899 | WBGene00006762 | unc-25    | Y37D8A.23 |
| 0.0431997352432472 AGIWUR1644;AGIWUR15904;AGIWUR33380                                                          |    |     |          |          |                |           |           |
| N2                                                                                                             | HS | III | 12951429 | 12952342 | WBGene00012711 | Y39E4A.1  | Y39E4A.1  |
| 0.154069587268772 AGIWUR25309                                                                                  |    |     |          |          |                |           |           |
| N2                                                                                                             | HS | III | 12952969 | 12966995 | WBGene00012712 | ttm-1     | Y39E4A.2  |
| 0.0813401734351196 AGIWUR32890                                                                                 |    |     |          |          |                |           |           |
| N2                                                                                                             | HS | III | 12967898 | 12972498 | WBGene00012713 | bckd-1A   | Y39E4A.3  |
| 0.0631876907321285 AGIWUR27070;AGIWUR27757;AGIWUR28392;AGIWUR44309                                             |    |     |          |          |                |           |           |
| N2                                                                                                             | HS | III | 12975068 | 12977862 | WBGene00014176 | ZK1010.2  | ZK1010.2  |
| -0.0954969094933311 AGIWUR29594                                                                                |    |     |          |          |                |           |           |
| N2                                                                                                             | HS | III | 12977910 | 12978523 | WBGene00006728 | ubq-2     | ZK1010.1  |
| 0.157767464813029 AGIWUR20435;AGIWUR37225                                                                      |    |     |          |          |                |           |           |
| N2                                                                                                             | HS | III | 12979162 | 12980163 | WBGene00014177 | frg-1     | ZK1010.3  |
| -0.0779796988977255 AGIWUR3936;AGIWUR5758;AGIWUR6372;AGIWUR13721;AGIWUR15815;AGIWUR41903                       |    |     |          |          |                |           |           |

|                                                                                            |    |     |                                                           |          |                |           |                             |
|--------------------------------------------------------------------------------------------|----|-----|-----------------------------------------------------------|----------|----------------|-----------|-----------------------------|
| N2                                                                                         | HS | III | 12981070                                                  | 12984423 | WBGene00014178 | ZK1010.4  | ZK1010.4                    |
| 0.202472128937412                                                                          |    |     | AGIWUR27206                                               |          |                |           |                             |
| N2                                                                                         | HS | III | 12984493                                                  | 12987542 | WBGene00014179 | ZK1010.5  | ZK1010.5                    |
| -0.021097367992704                                                                         |    |     | AGIWUR17826                                               |          |                |           |                             |
| N2                                                                                         | HS | III | 12987672                                                  | 12992492 | WBGene00014180 | ZK1010.6  | ZK1010.6                    |
| 0.0685466235387313                                                                         |    |     | AGIWUR37174                                               |          |                |           |                             |
| N2                                                                                         | HS | III | 12992405                                                  | 12993707 | WBGene00000672 | col-97    | ZK1010.7                    |
| 0.211396227508033                                                                          |    |     | AGIWUR142;AGIWUR14870;AGIWUR16747;AGIWUR17138;AGIWUR42663 |          |                |           |                             |
| N2                                                                                         | HS | III | 12995738                                                  | 13000670 | WBGene00014181 | ZK1010.8  | ZK1010.8                    |
| -0.0479382860823083                                                                        |    |     | AGIWUR29793                                               |          |                |           |                             |
| N2                                                                                         | HS | III | 13005461                                                  | 13011130 | WBGene00004906 | snf-7     | ZK1010.9                    |
| 0.19762022410028                                                                           |    |     | AGIWUR16387                                               |          |                |           |                             |
| N2                                                                                         | HS | III | 13018935                                                  | 13020226 | WBGene00000673 | col-98    | F14F7.1 -0.0915873948405679 |
| AGIWUR16447                                                                                |    |     |                                                           |          |                |           |                             |
| N2                                                                                         | HS | III | 13021009                                                  | 13023949 | WBGene00008809 | cyp-13A11 | F14F7.2                     |
| 0.0012609560987018                                                                         |    |     | AGIWUR22639                                               |          |                |           |                             |
| N2                                                                                         | HS | III | 13024547                                                  | 13028012 | WBGene00008810 | cyp-13A12 | F14F7.3                     |
| 0.0329207506233367                                                                         |    |     | AGIWUR44517                                               |          |                |           |                             |
| N2                                                                                         | HS | III | 13028393                                                  | 13029708 | WBGene00008811 | F14F7.4   | F14F7.4 -0.120705204061219  |
| AGIWUR6007                                                                                 |    |     |                                                           |          |                |           |                             |
| N2                                                                                         | HS | III | 13032001                                                  | 13036344 | WBGene00008812 | F14F7.5   | F14F7.5 0.126677835989323   |
| AGIWUR42336                                                                                |    |     |                                                           |          |                |           |                             |
| N2                                                                                         | HS | III | 13040100                                                  | 13049434 | WBGene00010073 | F54F12.2  | F54F12.2                    |
| 0.225677414475373                                                                          |    |     | AGIWUR36521                                               |          |                |           |                             |
| N2                                                                                         | HS | III | 13049588                                                  | 13055485 | WBGene00010072 | F54F12.1  | F54F12.1                    |
| -0.0610523294139291                                                                        |    |     | AGIWUR38600                                               |          |                |           |                             |
| N2                                                                                         | HS | III | 13070756                                                  | 13074697 | WBGene00012717 | Y39E4B.6  | Y39E4B.6                    |
| -0.195663074154847                                                                         |    |     |                                                           |          |                |           |                             |
| AGIWUR1705;AGIWUR3123;AGIWUR5764;AGIWUR6739;AGIWUR9897;AGIWUR11950;AGIWUR14953;AGIWUR16922 |    |     |                                                           |          |                |           |                             |
| N2                                                                                         | HS | III | 13087479                                                  | 13099455 | WBGene00004164 | pqn-83    | Y39E4B.3                    |
| 0.0500449771287057                                                                         |    |     | AGIWUR3211;AGIWUR22318                                    |          |                |           |                             |
| N2                                                                                         | HS | III | 13107607                                                  | 13119042 | WBGene00012718 | dhhc-8    | Y39E4B.7                    |
| -0.0418968667725963                                                                        |    |     | AGIWUR17580;AGIWUR37080;AGIWUR41866                       |          |                |           |                             |
| N2                                                                                         | HS | III | 13119820                                                  | 13133938 | WBGene00006985 | zig-8     | Y39E4B.8                    |
| 0.205790925208118                                                                          |    |     | AGIWUR17456                                               |          |                |           |                             |
| N2                                                                                         | HS | III | 13134014                                                  | 13139614 | WBGene00000267 | bre-2     | Y39E4B.9                    |
| 0.0473795298636546                                                                         |    |     | AGIWUR38640                                               |          |                |           |                             |
| N2                                                                                         | HS | III | 13143373                                                  | 13152858 | WBGene00012719 | Y39E4B.10 | Y39E4B.10                   |
| -0.0784718837656424                                                                        |    |     | AGIWUR33059                                               |          |                |           |                             |

|                                                                                                             |    |     |                                                                                   |          |                |           |           |                     |  |
|-------------------------------------------------------------------------------------------------------------|----|-----|-----------------------------------------------------------------------------------|----------|----------------|-----------|-----------|---------------------|--|
| N2                                                                                                          | HS | III | 13153817                                                                          | 13160284 | WBGene00012714 | abce-1    | Y39E4B.1  |                     |  |
| 0.0650377613935369                                                                                          |    |     | AGIWUR6306                                                                        |          |                |           |           |                     |  |
| N2                                                                                                          | HS | III | 13162475                                                                          | 13164864 | WBGene00014884 | Y39E4B.14 |           | Y39E4B.14           |  |
| 0.0603095435970307                                                                                          |    |     | AGIWUR12326;AGIWUR36130;AGIWUR36504                                               |          |                |           |           |                     |  |
| N2                                                                                                          | HS | III | 13165659                                                                          | 13169520 | WBGene00012715 | snpc-1.2  |           | Y39E4B.2            |  |
| -0.0415337949258596                                                                                         |    |     | AGIWUR31060                                                                       |          |                |           |           |                     |  |
| N2                                                                                                          | HS | III | 13169916                                                                          | 13173106 | WBGene00012716 | Y39E4B.5  |           | Y39E4B.5            |  |
| -0.453171249312913                                                                                          |    |     | AGIWUR43541                                                                       |          |                |           |           |                     |  |
| N2                                                                                                          | HS | III | 13187392                                                                          | 13204897 | WBGene00001630 | gly-5     | Y39E4B.12 |                     |  |
| -0.250384934678951                                                                                          |    |     | AGIWUR9158;AGIWUR10483;AGIWUR11255;AGIWUR15746;AGIWUR16404;AGIWUR18625            |          |                |           |           |                     |  |
| N2                                                                                                          | HS | III | 13204982                                                                          | 13207393 | WBGene00012720 | Y39E4B.11 |           | Y39E4B.11           |  |
| 0.0976474337444113                                                                                          |    |     | AGIWUR445;AGIWUR13620;AGIWUR31679                                                 |          |                |           |           |                     |  |
| N2                                                                                                          | HS | III | 13212666                                                                          | 13214371 | WBGene00006629 | tsp-3     | Y39E4B.4  |                     |  |
| 0.153332856739                                                                                              |    |     | AGIWUR20275;AGIWUR27390;AGIWUR42535                                               |          |                |           |           |                     |  |
| N2                                                                                                          | HS | III | 13223072                                                                          | 13229465 | WBGene00012796 | Y43F4A.1  |           | Y43F4A.1            |  |
| 0.0921305008848954                                                                                          |    |     | AGIWUR3573;AGIWUR8389;AGIWUR13912;AGIWUR15547;AGIWUR19301;AGIWUR23348;AGIWUR38773 |          |                |           |           |                     |  |
| N2                                                                                                          | HS | III | 13254675                                                                          | 13256456 | WBGene00185001 | F56A8.9   | F56A8.9   | 0.138943531382331   |  |
| AGIWUR12170                                                                                                 |    |     |                                                                                   |          |                |           |           |                     |  |
| N2                                                                                                          | HS | III | 13256878                                                                          | 13262905 | WBGene00010139 | F56A8.3   | F56A8.3   | -0.137103601854906  |  |
| AGIWUR10753;AGIWUR11459;AGIWUR13812;AGIWUR14851;AGIWUR20482;AGIWUR33389;AGIWUR34133;AGIWUR35104;AGIWUR37135 |    |     |                                                                                   |          |                |           |           |                     |  |
| ;AGIWUR37646                                                                                                |    |     |                                                                                   |          |                |           |           |                     |  |
| N2                                                                                                          | HS | III | 13263268                                                                          | 13265038 | WBGene00010140 | F56A8.4   | F56A8.4   | 0.330421211376477   |  |
| AGIWUR38160                                                                                                 |    |     |                                                                                   |          |                |           |           |                     |  |
| N2                                                                                                          | HS | III | 13265866                                                                          | 13266932 | WBGene00010141 | F56A8.5   | F56A8.5   | 0.00917616473360816 |  |
| AGIWUR4737                                                                                                  |    |     |                                                                                   |          |                |           |           |                     |  |
| N2                                                                                                          | HS | III | 13266874                                                                          | 13268897 | WBGene00000774 | cpf-2     | F56A8.6   | -0.0568063937000733 |  |
| AGIWUR820;AGIWUR36539;AGIWUR44328                                                                           |    |     |                                                                                   |          |                |           |           |                     |  |
| N2                                                                                                          | HS | III | 13277261                                                                          | 13283883 | WBGene00006798 | unc-64    | F56A8.7   | -0.0061666759335921 |  |
| AGIWUR4899;AGIWUR14105;AGIWUR27209;AGIWUR27682;AGIWUR28092;AGIWUR28579;AGIWUR30962;AGIWUR34538;AGIWUR37059  |    |     |                                                                                   |          |                |           |           |                     |  |
| N2                                                                                                          | HS | III | 13283892                                                                          | 13293088 | WBGene00012802 | set-25    | Y43F4B.3  |                     |  |
| -0.303777980376266                                                                                          |    |     |                                                                                   |          |                |           |           |                     |  |
| AGIWUR6872;AGIWUR10552;AGIWUR11103;AGIWUR20458;AGIWUR33492;AGIWUR35107;AGIWUR37662;AGIWUR39018              |    |     |                                                                                   |          |                |           |           |                     |  |
| N2                                                                                                          | HS | III | 13296853                                                                          | 13299122 | WBGene00003804 | npp-18    | Y43F4B.4  |                     |  |
| 0.0382685353395935                                                                                          |    |     | AGIWUR1607;AGIWUR7364                                                             |          |                |           |           |                     |  |
| N2                                                                                                          | HS | III | 13299378                                                                          | 13302760 | WBGene00012803 | Y43F4B.5  |           | Y43F4B.5            |  |
| 0.0598150523812855                                                                                          |    |     | AGIWUR12941;AGIWUR17119;AGIWUR18458;AGIWUR30210                                   |          |                |           |           |                     |  |
| N2                                                                                                          | HS | III | 13302743                                                                          | 13307259 | WBGene00002229 | k1p-19    | Y43F4B.6  |                     |  |
| 0.14614198503478                                                                                            |    |     | AGIWUR17050;AGIWUR26586;AGIWUR31738;AGIWUR38118;AGIWUR39195;AGIWUR39404           |          |                |           |           |                     |  |
| N2                                                                                                          | HS | III | 13307502                                                                          | 13313389 | WBGene00012804 | Y43F4B.7  |           | Y43F4B.7            |  |

|                                                                        |                                                                       |                |                 |                     |  |  |
|------------------------------------------------------------------------|-----------------------------------------------------------------------|----------------|-----------------|---------------------|--|--|
| 0.030035706394667                                                      | AGIWUR45165                                                           |                |                 |                     |  |  |
| N2 HS III 13314011                                                     | 13314721                                                              | WBGene00012807 | Y43F4B.10       | Y43F4B.10           |  |  |
| -0.00129789042191319                                                   | AGIWUR3272                                                            |                |                 |                     |  |  |
| N2 HS III 13315088                                                     | 13318597                                                              | WBGene00012806 | Y43F4B.9        | Y43F4B.9            |  |  |
| 0.0173436650960044                                                     | AGIWUR2346;AGIWUR5832;AGIWUR10132;AGIWUR20720;AGIWUR31478;AGIWUR32629 |                |                 |                     |  |  |
| N2 HS III 13319265                                                     | 13321892                                                              | WBGene00194870 | F53A2.11        | F53A2.11            |  |  |
| -0.0115578093286519                                                    | AGIWUR27265                                                           |                |                 |                     |  |  |
| N2 HS III 13334600                                                     | 13336422                                                              | WBGene00009950 | sdz-20 F53A2.2  | -0.0262088695958917 |  |  |
| AGIWUR36368                                                            |                                                                       |                |                 |                     |  |  |
| N2 HS III 13336940                                                     | 13339768                                                              | WBGene00009951 | F53A2.3 F53A2.3 | 0.196951255328665   |  |  |
| AGIWUR1393                                                             |                                                                       |                |                 |                     |  |  |
| N2 HS III 13341527                                                     | 13342607                                                              | WBGene00003829 | nud-1 F53A2.4   | 0.0273409129131066  |  |  |
| AGIWUR7935;AGIWUR15431;AGIWUR29058;AGIWUR34024;AGIWUR35551;AGIWUR45037 |                                                                       |                |                 |                     |  |  |
| N2 HS III 13342684                                                     | 13343337                                                              | WBGene00001092 | dro-1 F53A2.5   | 0.00720390067066745 |  |  |
| AGIWUR18467                                                            |                                                                       |                |                 |                     |  |  |
| N2 HS III 13343574                                                     | 13344616                                                              | WBGene00002059 | ife-1 F53A2.6   | -0.259317295401694  |  |  |
| AGIWUR10155;AGIWUR12605;AGIWUR23772;AGIWUR29803;AGIWUR38165            |                                                                       |                |                 |                     |  |  |
| N2 HS III 13344917                                                     | 13346866                                                              | WBGene00009952 | acaa-2 F53A2.7  | 0.144134257050784   |  |  |
| AGIWUR17228;AGIWUR29233;AGIWUR44741                                    |                                                                       |                |                 |                     |  |  |
| N2 HS III 13347085                                                     | 13355683                                                              | WBGene00003478 | mtm-6 F53A2.8   | -0.0350484288071327 |  |  |
| AGIWUR13022;AGIWUR20098;AGIWUR41009;AGIWUR43895                        |                                                                       |                |                 |                     |  |  |
| N2 HS III 13356610                                                     | 13359354                                                              | WBGene00009953 | F53A2.9 F53A2.9 | 0.0878468647759281  |  |  |
| AGIWUR15428                                                            |                                                                       |                |                 |                     |  |  |
| N2 HS III 13361299                                                     | 13364765                                                              | WBGene00044229 | T03F6.8 T03F6.8 | 0.012027837508692   |  |  |
| AGIWUR5376;AGIWUR39849                                                 |                                                                       |                |                 |                     |  |  |
| N2 HS III 13365425                                                     | 13367747                                                              | WBGene00044228 | T03F6.7 T03F6.7 |                     |  |  |
| -0.00259086207493775                                                   | AGIWUR7179;AGIWUR21758                                                |                |                 |                     |  |  |
| N2 HS III 13368087                                                     | 13371072                                                              | WBGene00045482 | T03F6.9 T03F6.9 | -0.0273286497471368 |  |  |
| AGIWUR31129;AGIWUR33220;AGIWUR43152                                    |                                                                       |                |                 |                     |  |  |
| N2 HS III 13371175                                                     | 13376710                                                              | WBGene00003047 | lis-1 T03F6.5   | -0.793072725252109  |  |  |
| AGIWUR9723                                                             |                                                                       |                |                 |                     |  |  |
| N2 HS III 13377830                                                     | 13378342                                                              | WBGene00185005 | T03F6.10        | T03F6.10            |  |  |
| 0.226232936212236                                                      | AGIWUR20586                                                           |                |                 |                     |  |  |
| N2 HS III 13386150                                                     | 13388353                                                              | WBGene00011400 | T03F6.4 T03F6.4 | 0.0469727778345677  |  |  |
| AGIWUR11909;AGIWUR29629                                                |                                                                       |                |                 |                     |  |  |
| N2 HS III 13389399                                                     | 13390857                                                              | WBGene00011399 | T03F6.3 T03F6.3 | -0.224266382985318  |  |  |
| AGIWUR5191;AGIWUR9832;AGIWUR24981;AGIWUR25586;AGIWUR32831;AGIWUR41743  |                                                                       |                |                 |                     |  |  |
| N2 HS III 13390850                                                     | 13393339                                                              | WBGene00001035 | dnj-17 T03F6.2  | -0.104476382548778  |  |  |
| AGIWUR42653                                                            |                                                                       |                |                 |                     |  |  |



|                                                                                                                                                |    |     |          |          |                |          |          |                     |
|------------------------------------------------------------------------------------------------------------------------------------------------|----|-----|----------|----------|----------------|----------|----------|---------------------|
| N2                                                                                                                                             | HS | III | 13393910 | 13394979 | WBGene00011398 | qdpr-1   | T03F6.1  | -0.0315035012018008 |
| AGIWUR43190                                                                                                                                    |    |     |          |          |                |          |          |                     |
| N2                                                                                                                                             | HS | III | 13395633 | 13400563 | WBGene00008714 | F11F1.1  | F11F1.1  | 0.166597764570514   |
| AGIWUR36166                                                                                                                                    |    |     |          |          |                |          |          |                     |
| N2                                                                                                                                             | HS | III | 13400962 | 13401773 | WBGene00008716 | F11F1.4  | F11F1.4  | 0.134442248798894   |
| AGIWUR45038                                                                                                                                    |    |     |          |          |                |          |          |                     |
| N2                                                                                                                                             | HS | III | 13403234 | 13404514 | WBGene00003249 | mig-18   | F11F1.6  | 0.142495805939957   |
| AGIWUR34265                                                                                                                                    |    |     |          |          |                |          |          |                     |
| N2                                                                                                                                             | HS | III | 13404737 | 13405645 | WBGene00008719 | ttr-52   | F11F1.7  | -0.0423772759463228 |
| AGIWUR4329;AGIWUR6840;AGIWUR26823;AGIWUR27520;AGIWUR33186;AGIWUR34462;AGIWUR38554;AGIWUR45068                                                  |    |     |          |          |                |          |          |                     |
| N2                                                                                                                                             | HS | III | 13405965 | 13409292 | WBGene00003520 | nas-1    | F45G2.1  | 0.173547983857919   |
| AGIWUR7337                                                                                                                                     |    |     |          |          |                |          |          |                     |
| N2                                                                                                                                             | HS | III | 13409895 | 13423537 | WBGene00009730 | myo-6    | F45G2.2  | -0.116417631951593  |
| AGIWUR9322                                                                                                                                     |    |     |          |          |                |          |          |                     |
| N2                                                                                                                                             | HS | III | 13423514 | 13426204 | WBGene00009731 | exo-1    | F45G2.3  | 0.20252638178577    |
| AGIWUR34496                                                                                                                                    |    |     |          |          |                |          |          |                     |
| N2                                                                                                                                             | HS | III | 13426100 | 13427715 | WBGene00009732 | cope-1   | F45G2.4  | 0.266719127596755   |
| AGIWUR20389                                                                                                                                    |    |     |          |          |                |          |          |                     |
| N2                                                                                                                                             | HS | III | 13427642 | 13429713 | WBGene00000255 | bli-5    | F45G2.5  | 0.364399109564552   |
| AGIWUR30064                                                                                                                                    |    |     |          |          |                |          |          |                     |
| N2                                                                                                                                             | HS | III | 13430462 | 13433394 | WBGene00006612 | trf-1    | F45G2.6  | 0.144657518688842   |
| AGIWUR18199                                                                                                                                    |    |     |          |          |                |          |          |                     |
| N2                                                                                                                                             | HS | III | 13433447 | 13434504 | WBGene00009733 | F45G2.7  | F45G2.7  | 0.102369645410203   |
| AGIWUR31301                                                                                                                                    |    |     |          |          |                |          |          |                     |
| N2                                                                                                                                             | HS | III | 13434861 | 13435670 | WBGene00009734 | F45G2.8  | F45G2.8  | 0.203034904968327   |
| AGIWUR8725                                                                                                                                     |    |     |          |          |                |          |          |                     |
| N2                                                                                                                                             | HS | III | 13435771 | 13436943 | WBGene00009735 | F45G2.9  | F45G2.9  | 0.00498549238585433 |
| AGIWUR15689;AGIWUR32039;AGIWUR40076                                                                                                            |    |     |          |          |                |          |          |                     |
| N2                                                                                                                                             | HS | III | 13437054 | 13439586 | WBGene00009736 | F45G2.10 | F45G2.10 |                     |
| 0.121746074254677 AGIWUR41087                                                                                                                  |    |     |          |          |                |          |          |                     |
| N2                                                                                                                                             | HS | III | 13439730 | 13455307 | WBGene00000834 | cua-1    | Y76A2A.2 |                     |
| 0.139647506880719 AGIWUR21350                                                                                                                  |    |     |          |          |                |          |          |                     |
| N2                                                                                                                                             | HS | III | 13457687 | 13462238 | WBGene00012097 | abcf-2   | T27E9.7  |                     |
| -0.00557244132751933 AGIWUR9395;AGIWUR15925;AGIWUR26658;AGIWUR29496;AGIWUR39154                                                                |    |     |          |          |                |          |          |                     |
| N2                                                                                                                                             | HS | III | 13462239 | 13462594 | WBGene00012094 | T27E9.2  | T27E9.2  | 0.037160740156498   |
| AGIWUR44257                                                                                                                                    |    |     |          |          |                |          |          |                     |
| N2                                                                                                                                             | HS | III | 13463163 | 13464657 | WBGene00006439 | ant-1.1  | T27E9.1  | -0.0856721894300581 |
| AGIWUR9898;AGIWUR15073;AGIWUR22154;AGIWUR23463;AGIWUR23557;AGIWUR24064;AGIWUR24262;AGIWUR24722;AGIWUR25282;AGIWUR26293;AGIWUR27044;AGIWUR30394 |    |     |          |          |                |          |          |                     |

|                                                                                                      |    |     |          |          |                |          |          |                     |
|------------------------------------------------------------------------------------------------------|----|-----|----------|----------|----------------|----------|----------|---------------------|
| N2                                                                                                   | HS | III | 13464829 | 13471348 | WBGene00002185 | kel-3    | T27E9.4  | 0.144594908597673   |
| AGIWUR39681                                                                                          |    |     |          |          |                |          |          |                     |
| N2                                                                                                   | HS | III | 13471708 | 13475385 | WBGene00012095 | pssy-2   | T27E9.5  | -0.0750124083483072 |
| AGIWUR30488                                                                                          |    |     |          |          |                |          |          |                     |
| N2                                                                                                   | HS | III | 13475406 | 13476107 | WBGene00012096 | T27E9.6  | T27E9.6  | -0.204868942588471  |
| AGIWUR32016                                                                                          |    |     |          |          |                |          |          |                     |
| N2                                                                                                   | HS | III | 13478561 | 13479629 | WBGene00012098 | fbxb-86  | T27E9.8  | 0.0188567804986306  |
| AGIWUR728                                                                                            |    |     |          |          |                |          |          |                     |
| N2                                                                                                   | HS | III | 13480665 | 13484155 | WBGene00012099 | acc-4    | T27E9.9  | -0.0193031186027737 |
| AGIWUR43609                                                                                          |    |     |          |          |                |          |          |                     |
| N2                                                                                                   | HS | III | 13486643 | 13492430 | WBGene00006691 | twk-40   | T28A8.1  | 0.117125560283148   |
| AGIWUR11101;AGIWUR18718;AGIWUR21352                                                                  |    |     |          |          |                |          |          |                     |
| N2                                                                                                   | HS | III | 13493892 | 13495671 | WBGene00012108 | T28A8.2  | T28A8.2  | -0.0118759771004555 |
| AGIWUR17099                                                                                          |    |     |          |          |                |          |          |                     |
| N2                                                                                                   | HS | III | 13499199 | 13501510 | WBGene00012112 | T28A8.6  | T28A8.6  | 0.11781382041133    |
| AGIWUR4827;AGIWUR27619;AGIWUR28503                                                                   |    |     |          |          |                |          |          |                     |
| N2                                                                                                   | HS | III | 13502813 | 13503578 | WBGene00194852 | T28A8.8  | T28A8.8  | -0.015379437022693  |
| AGIWUR5587                                                                                           |    |     |          |          |                |          |          |                     |
| N2                                                                                                   | HS | III | 13503679 | 13505536 | WBGene00012110 | T28A8.4  | T28A8.4  | 0.0869977980178369  |
| AGIWUR32059                                                                                          |    |     |          |          |                |          |          |                     |
| N2                                                                                                   | HS | III | 13506018 | 13508650 | WBGene00012109 | T28A8.3  | T28A8.3  | 0.121997934070787   |
| AGIWUR27068                                                                                          |    |     |          |          |                |          |          |                     |
| N2                                                                                                   | HS | III | 13509301 | 13514570 | WBGene00003373 | mlh-1    | T28A8.7  |                     |
| -0.00251114901024607 AGIWUR32352                                                                     |    |     |          |          |                |          |          |                     |
| N2                                                                                                   | HS | III | 13514945 | 13524110 | WBGene00004075 | pod-1    | Y76A2B.1 |                     |
| 0.0638157176747534 AGIWUR15436;AGIWUR24420;AGIWUR33016;AGIWUR34472;AGIWUR37115;AGIWUR43659           |    |     |          |          |                |          |          |                     |
| N2                                                                                                   | HS | III | 13527438 | 13539971 | WBGene00013574 | lron-13  | Y76A2B.2 |                     |
| -0.00897965239064646 AGIWUR25269                                                                     |    |     |          |          |                |          |          |                     |
| N2                                                                                                   | HS | III | 13540139 | 13543534 | WBGene00013575 | acs-5    | Y76A2B.3 |                     |
| -0.103493286228685 AGIWUR9452;AGIWUR9888;AGIWUR28530;AGIWUR31495;AGIWUR36463;AGIWUR43869;AGIWUR44980 |    |     |          |          |                |          |          |                     |
| N2                                                                                                   | HS | III | 13545245 | 13546777 | WBGene00013576 | Y76A2B.4 | Y76A2B.4 |                     |
| -0.346751065846277 AGIWUR28901                                                                       |    |     |          |          |                |          |          |                     |
| N2                                                                                                   | HS | III | 13546889 | 13549020 | WBGene00013577 | Y76A2B.5 | Y76A2B.5 |                     |
| 0.0329671558810833 AGIWUR2571                                                                        |    |     |          |          |                |          |          |                     |
| N2                                                                                                   | HS | III | 13550699 | 13555334 | WBGene00013578 | scav-2   | Y76A2B.6 |                     |
| -0.0069220046396552 AGIWUR3260                                                                       |    |     |          |          |                |          |          |                     |
| N2                                                                                                   | HS | III | 13561729 | 13563082 | WBGene00011475 | T05D4.2  | T05D4.2  | 0.0109532072523972  |
| AGIWUR7893                                                                                           |    |     |          |          |                |          |          |                     |
| N2                                                                                                   | HS | III | 13563346 | 13564990 | WBGene00011474 | aldo-1   | T05D4.1  | -0.306488648176216  |

|                                                                                                             |    |     |          |          |                                                    |
|-------------------------------------------------------------------------------------------------------------|----|-----|----------|----------|----------------------------------------------------|
| AGIWUR4857;AGIWUR14566                                                                                      |    |     |          |          |                                                    |
| N2                                                                                                          | HS | III | 13566874 | 13570447 | WBGene00011476 T05D4.3 T05D4.3 0.0803881755746225  |
| AGIWUR23312                                                                                                 |    |     |          |          |                                                    |
| N2                                                                                                          | HS | III | 13576188 | 13580662 | WBGene00003887 osm-7 T05D4.4 0.220542315998522     |
| AGIWUR27770                                                                                                 |    |     |          |          |                                                    |
| N2                                                                                                          | HS | III | 13580850 | 13583589 | WBGene00011478 T05D4.5 T05D4.5 0.073635619808611   |
| AGIWUR33116                                                                                                 |    |     |          |          |                                                    |
| N2                                                                                                          | HS | III | 13601760 | 13603156 | WBGene00001605 gln-4 T25C8.3 -0.257756803687176    |
| AGIWUR11582                                                                                                 |    |     |          |          |                                                    |
| N2                                                                                                          | HS | III | 13604339 | 13606067 | WBGene00000067 act-5 T25C8.2 0.0467173118221389    |
| AGIWUR17983;AGIWUR31487;AGIWUR45107                                                                         |    |     |          |          |                                                    |
| N2                                                                                                          | HS | III | 13608072 | 13614704 | WBGene00012017 T25C8.1 T25C8.1 0.125463842850674   |
| AGIWUR34341                                                                                                 |    |     |          |          |                                                    |
| N2                                                                                                          | HS | III | 13614699 | 13622489 | WBGene00011735 hip-1 T12D8.8 -0.18558311918511     |
| AGIWUR3805;AGIWUR19795;AGIWUR30111;AGIWUR38096                                                              |    |     |          |          |                                                    |
| N2                                                                                                          | HS | III | 13623279 | 13624172 | WBGene00011734 mlc-5 T12D8.6 0.191768405476985     |
| AGIWUR11723                                                                                                 |    |     |          |          |                                                    |
| N2                                                                                                          | HS | III | 13624195 | 13626007 | WBGene00006391 taf-9 T12D8.7 0.0484206029584726    |
| AGIWUR19328                                                                                                 |    |     |          |          |                                                    |
| N2                                                                                                          | HS | III | 13625968 | 13626750 | WBGene00011733 T12D8.5 T12D8.5 0.00919095031472494 |
| AGIWUR44006                                                                                                 |    |     |          |          |                                                    |
| N2                                                                                                          | HS | III | 13626994 | 13630808 | WBGene00011732 arrd-17 T12D8.4 0.109928505585818   |
| AGIWUR9273;AGIWUR23751;AGIWUR25808;AGIWUR30362                                                              |    |     |          |          |                                                    |
| N2                                                                                                          | HS | III | 13639893 | 13641688 | WBGene00011731 acbp-5 T12D8.3 -0.0791473341223554  |
| AGIWUR15630;AGIWUR23888;AGIWUR25272;AGIWUR27449;AGIWUR38615;AGIWUR39949                                     |    |     |          |          |                                                    |
| N2                                                                                                          | HS | III | 13641795 | 13642327 | WBGene00023450 T12D8.10 T12D8.10                   |
| -0.144043489010059 AGIWUR44933                                                                              |    |     |          |          |                                                    |
| N2                                                                                                          | HS | III | 13642420 | 13643570 | WBGene00011730 drr-2 T12D8.2 0.00161900283444183   |
| AGIWUR27572;AGIWUR36635                                                                                     |    |     |          |          |                                                    |
| N2                                                                                                          | HS | III | 13643916 | 13656637 | WBGene00011729 set-16 T12D8.1 -0.0353761803916193  |
| AGIWUR27385;AGIWUR40824                                                                                     |    |     |          |          |                                                    |
| N2                                                                                                          | HS | III | 13663400 | 13667839 | WBGene00001458 flp-15 ZK525.1 -0.15386528102821    |
| AGIWUR11195                                                                                                 |    |     |          |          |                                                    |
| N2                                                                                                          | HS | III | 13673280 | 13674746 | WBGene00000179 aqp-11 ZK525.2 0.251918064139907    |
| AGIWUR16789                                                                                                 |    |     |          |          |                                                    |
| N2                                                                                                          | HS | III | 13674917 | 13686445 | WBGene00001118 dyf-2 ZK520.3 -0.218483657738721    |
| AGIWUR11571                                                                                                 |    |     |          |          |                                                    |
| N2                                                                                                          | HS | III | 13687199 | 13692683 | WBGene00000837 cul-2 ZK520.4 -0.138851938708219    |
| AGIWUR20;AGIWUR1441;AGIWUR1540;AGIWUR13518;AGIWUR13995;AGIWUR14723;AGIWUR23792;AGIWUR28327;AGIWUR41222;AGIW |    |     |          |          |                                                    |

|                                                                                                             |    |     |          |          |                |          |           |                     |             |
|-------------------------------------------------------------------------------------------------------------|----|-----|----------|----------|----------------|----------|-----------|---------------------|-------------|
| UR42608                                                                                                     |    |     |          |          |                |          |           |                     |             |
| N2                                                                                                          | HS | III | 13692668 | 13693811 | WBGene00000878 | cyn-2    | ZK520.5   | 0.0762709012904583  |             |
| AGIWUR39498                                                                                                 |    |     |          |          |                |          |           |                     |             |
| N2                                                                                                          | HS | III | 13701993 | 13724401 | WBGene00003048 | lit-1    | W06F12.1  |                     |             |
| -0.252641356582894 AGIWUR6941;AGIWUR12354;AGIWUR32350                                                       |    |     |          |          |                |          |           |                     |             |
| N2                                                                                                          | HS | III | 13726641 | 13731679 | WBGene00012306 | W06F12.2 | W06F12.2  |                     |             |
| -0.0583910509836798 AGIWUR33882;AGIWUR37683;AGIWUR40574                                                     |    |     |          |          |                |          |           |                     |             |
| N2                                                                                                          | HS | III | 13735071 | 13736541 | WBGene00012307 | W06F12.3 | W06F12.3  |                     |             |
| 0.0441534132481749 AGIWUR25203                                                                              |    |     |          |          |                |          |           |                     |             |
| N2                                                                                                          | HS | III | 13744222 | 13747287 | WBGene00010661 | tyr-2    | K08E3.1   | 0.0392046772621555  |             |
| AGIWUR5503                                                                                                  |    |     |          |          |                |          |           |                     |             |
| N2                                                                                                          | HS | III | 13747472 | 13748686 | WBGene00010662 | K08E3.2  | K08E3.2   | 0.0731679478507719  |             |
| AGIWUR9724                                                                                                  |    |     |          |          |                |          |           |                     |             |
| N2                                                                                                          | HS | III | 13752406 | 13755861 | WBGene00023451 | mlc-7    | K08E3.10  |                     |             |
| 0.166111092359023 AGIWUR4778;AGIWUR24245;AGIWUR35195;AGIWUR44855                                            |    |     |          |          |                |          |           |                     |             |
| N2                                                                                                          | HS | III | 13755896 | 13759434 | WBGene00010663 | toca-2   | K08E3.3   | -0.0134652555001793 |             |
| AGIWUR13679;AGIWUR25876;AGIWUR25927;AGIWUR33111                                                             |    |     |          |          |                |          |           |                     |             |
| N2                                                                                                          | HS | III | 13759444 | 13762069 | WBGene00010664 | dbn-1    | K08E3.4   | 0.0045384218369815  |             |
| AGIWUR34377                                                                                                 |    |     |          |          |                |          |           |                     |             |
| N2                                                                                                          | HS | III | 13764030 | 13768092 | WBGene00010665 | K08E3.5  | K08E3.5   | -0.240204577429617  |             |
| AGIWUR9559;AGIWUR16248;AGIWUR17000;AGIWUR18925;AGIWUR25456;AGIWUR26080;AGIWUR27983;AGIWUR30514              |    |     |          |          |                |          |           |                     |             |
| N2                                                                                                          | HS | III | 13768541 | 13771242 | WBGene00000875 | cyk-4    | K08E3.6   | -0.40288205272854   |             |
| AGIWUR11676;AGIWUR19991;AGIWUR24305;AGIWUR25234                                                             |    |     |          |          |                |          |           |                     |             |
| N2                                                                                                          | HS | III | 13771448 | 13773348 | WBGene00003967 | pdr-1    | K08E3.7   | 0.0461930927696006  |             |
| AGIWUR30328                                                                                                 |    |     |          |          |                |          |           |                     |             |
| N2                                                                                                          | HS | III | 13773456 | 13778896 | WBGene00007025 | mdt-29   | K08E3.8   | 0.0720290239983048  |             |
| AGIWUR9180;AGIWUR10608                                                                                      |    |     |          |          |                |          |           |                     |             |
| N2                                                                                                          | HS | III | 13780220 | 13781133 | WBGene00007065 | pot-3    | 3R5.1     | -0.311565372804685  |             |
| AGIWUR9200                                                                                                  |    |     |          |          |                |          |           |                     |             |
| N2                                                                                                          | HS | IV  | 32481    | 48880    | WBGene00001492 | frm-5.1  | Y38C1AB.8 | 0.220509976667046   |             |
| AGIWUR11307;AGIWUR23830                                                                                     |    |     |          |          |                |          |           |                     |             |
| N2                                                                                                          | HS | IV  | 86890    | 90082    | WBGene00015246 | sc1-23   | B0545.3   | -0.10536911413711   | AGIWUR11368 |
| N2                                                                                                          | HS | IV  | 112408   | 118629   | WBGene00001111 | duo-2    | F29C4.5   | -0.0847574319151869 | AGIWUR31597 |
| N2                                                                                                          | HS | IV  | 119272   | 121707   | WBGene00017928 | tut-1    | F29C4.6   | -0.0466907406724602 |             |
| AGIWUR33251;AGIWUR36931                                                                                     |    |     |          |          |                |          |           |                     |             |
| N2                                                                                                          | HS | IV  | 121797   | 126225   | WBGene00017929 | gr1d-1   | F29C4.7   | -0.0512782931269156 |             |
| AGIWUR23201;AGIWUR26391                                                                                     |    |     |          |          |                |          |           |                     |             |
| N2                                                                                                          | HS | IV  | 126731   | 127640   | WBGene00017926 | F29C4.2  | F29C4.2   | -0.0159019086420571 |             |
| AGIWUR6362;AGIWUR10252;AGIWUR12097;AGIWUR12529;AGIWUR16172;AGIWUR23544;AGIWUR27558;AGIWUR31184;AGIWUR37211; |    |     |          |          |                |          |           |                     |             |

AGIWUR37885;AGIWUR40280

|    |    |    |        |        |                |        |         |                      |             |
|----|----|----|--------|--------|----------------|--------|---------|----------------------|-------------|
| N2 | HS | IV | 132416 | 138076 | WBGene00000897 | daf-1  | F29C4.1 | -0.247470024323832   | AGIWUR34627 |
| N2 | HS | IV | 138346 | 147919 | WBGene00000674 | col-99 | F29C4.8 | -0.00325274897843109 |             |

AGIWUR2432;AGIWUR9402

|    |    |    |        |        |                |           |           |                     |  |
|----|----|----|--------|--------|----------------|-----------|-----------|---------------------|--|
| N2 | HS | IV | 156071 | 157901 | WBGene00021400 | Y38C1AA.9 | Y38C1AA.9 | -0.0278850277284235 |  |
|----|----|----|--------|--------|----------------|-----------|-----------|---------------------|--|

AGIWUR3829

|    |    |    |        |        |                |           |           |                  |  |
|----|----|----|--------|--------|----------------|-----------|-----------|------------------|--|
| N2 | HS | IV | 158962 | 159836 | WBGene00021398 | Y38C1AA.7 | Y38C1AA.7 | -0.4509069004045 |  |
|----|----|----|--------|--------|----------------|-----------|-----------|------------------|--|

AGIWUR10389;AGIWUR17218;AGIWUR26513;AGIWUR30309;AGIWUR31337;AGIWUR38359

|    |    |    |        |        |                |           |           |                  |  |
|----|----|----|--------|--------|----------------|-----------|-----------|------------------|--|
| N2 | HS | IV | 162830 | 164814 | WBGene00021397 | Y38C1AA.6 | Y38C1AA.6 | 0.17228011557083 |  |
|----|----|----|--------|--------|----------------|-----------|-----------|------------------|--|

AGIWUR38082

|    |    |    |        |        |                |         |           |                   |  |
|----|----|----|--------|--------|----------------|---------|-----------|-------------------|--|
| N2 | HS | IV | 165077 | 169980 | WBGene00021396 | cutl-24 | Y38C1AA.5 | 0.137113151987965 |  |
|----|----|----|--------|--------|----------------|---------|-----------|-------------------|--|

AGIWUR7334;AGIWUR11652;AGIWUR32978

|    |    |    |        |        |                |       |           |                    |  |
|----|----|----|--------|--------|----------------|-------|-----------|--------------------|--|
| N2 | HS | IV | 179008 | 183261 | WBGene00006561 | tc1-2 | Y38C1AA.4 | -0.202862045034399 |  |
|----|----|----|--------|--------|----------------|-------|-----------|--------------------|--|

AGIWUR34449

|    |    |    |        |        |                |       |           |                      |  |
|----|----|----|--------|--------|----------------|-------|-----------|----------------------|--|
| N2 | HS | IV | 184554 | 192151 | WBGene00021395 | pnc-1 | Y38C1AA.3 | -0.00872800926303707 |  |
|----|----|----|--------|--------|----------------|-------|-----------|----------------------|--|

AGIWUR1594;AGIWUR5204

|    |    |    |        |        |                |            |            |                     |  |
|----|----|----|--------|--------|----------------|------------|------------|---------------------|--|
| N2 | HS | IV | 192256 | 194745 | WBGene00021402 | Y38C1AA.12 | Y38C1AA.12 | -0.0331377807909408 |  |
|----|----|----|--------|--------|----------------|------------|------------|---------------------|--|

AGIWUR6999;AGIWUR31095

|    |    |    |        |        |                |       |           |                     |  |
|----|----|----|--------|--------|----------------|-------|-----------|---------------------|--|
| N2 | HS | IV | 194745 | 202586 | WBGene00000815 | csn-3 | Y38C1AA.2 | -0.0527701063335151 |  |
|----|----|----|--------|--------|----------------|-------|-----------|---------------------|--|

AGIWUR42984

|    |    |    |        |        |                |            |            |                    |  |
|----|----|----|--------|--------|----------------|------------|------------|--------------------|--|
| N2 | HS | IV | 205239 | 208049 | WBGene00195063 | Y38C1AA.14 | Y38C1AA.14 | 0.0768384819176404 |  |
|----|----|----|--------|--------|----------------|------------|------------|--------------------|--|

AGIWUR12592;AGIWUR34861

|    |    |    |        |        |                |           |           |                     |  |
|----|----|----|--------|--------|----------------|-----------|-----------|---------------------|--|
| N2 | HS | IV | 208189 | 217390 | WBGene00021394 | Y38C1AA.1 | Y38C1AA.1 | -0.0606133215936984 |  |
|----|----|----|--------|--------|----------------|-----------|-----------|---------------------|--|

AGIWUR10055;AGIWUR19059;AGIWUR22478;AGIWUR30888;AGIWUR35437;AGIWUR44502

|    |    |    |        |        |                |        |            |                    |  |
|----|----|----|--------|--------|----------------|--------|------------|--------------------|--|
| N2 | HS | IV | 218551 | 220854 | WBGene00021401 | prdx-6 | Y38C1AA.11 | -0.109463224425156 |  |
|----|----|----|--------|--------|----------------|--------|------------|--------------------|--|

AGIWUR8871;AGIWUR23470;AGIWUR26757

|    |    |    |        |        |                |         |         |                   |            |
|----|----|----|--------|--------|----------------|---------|---------|-------------------|------------|
| N2 | HS | IV | 225439 | 231773 | WBGene00019821 | R02D3.3 | R02D3.3 | 0.217762370181593 | AGIWUR3185 |
|----|----|----|--------|--------|----------------|---------|---------|-------------------|------------|

|    |    |    |        |        |                |         |         |                    |             |
|----|----|----|--------|--------|----------------|---------|---------|--------------------|-------------|
| N2 | HS | IV | 232473 | 237450 | WBGene00019822 | R02D3.4 | R02D3.4 | 0.0283114273614054 | AGIWUR39185 |
|----|----|----|--------|--------|----------------|---------|---------|--------------------|-------------|

|    |    |    |        |        |                |        |         |                   |  |
|----|----|----|--------|--------|----------------|--------|---------|-------------------|--|
| N2 | HS | IV | 237591 | 240307 | WBGene00019823 | fnta-1 | R02D3.5 | 0.124361495800977 |  |
|----|----|----|--------|--------|----------------|--------|---------|-------------------|--|

AGIWUR5534;AGIWUR12653;AGIWUR22990;AGIWUR24412;AGIWUR29214;AGIWUR29389

|    |    |    |        |        |                |        |         |                    |            |
|----|----|----|--------|--------|----------------|--------|---------|--------------------|------------|
| N2 | HS | IV | 240451 | 244129 | WBGene00019820 | cogc-8 | R02D3.2 | 0.0791678150163939 | AGIWUR1137 |
|----|----|----|--------|--------|----------------|--------|---------|--------------------|------------|

|    |    |    |        |        |                |         |         |                     |  |
|----|----|----|--------|--------|----------------|---------|---------|---------------------|--|
| N2 | HS | IV | 245114 | 251925 | WBGene00019819 | R02D3.1 | R02D3.1 | -0.0621649165256706 |  |
|----|----|----|--------|--------|----------------|---------|---------|---------------------|--|

AGIWUR3486;AGIWUR11047;AGIWUR27639;AGIWUR30392;AGIWUR39481

|    |    |    |        |        |                |        |         |                    |  |
|----|----|----|--------|--------|----------------|--------|---------|--------------------|--|
| N2 | HS | IV | 251970 | 252554 | WBGene00001728 | grl-19 | R02D3.6 | 0.0443926252900892 |  |
|----|----|----|--------|--------|----------------|--------|---------|--------------------|--|

AGIWUR9545;AGIWUR9685;AGIWUR13103;AGIWUR30596;AGIWUR32729;AGIWUR41213

|    |    |    |        |        |                |         |         |                    |             |
|----|----|----|--------|--------|----------------|---------|---------|--------------------|-------------|
| N2 | HS | IV | 253571 | 255429 | WBGene00019824 | R02D3.7 | R02D3.7 | -0.691358608047768 | AGIWUR39002 |
|----|----|----|--------|--------|----------------|---------|---------|--------------------|-------------|

|    |    |    |        |        |                |         |         |                     |             |
|----|----|----|--------|--------|----------------|---------|---------|---------------------|-------------|
| N2 | HS | IV | 255966 | 257199 | WBGene00019825 | R02D3.8 | R02D3.8 | -0.0721080663360034 | AGIWUR22427 |
|----|----|----|--------|--------|----------------|---------|---------|---------------------|-------------|

|    |    |    |        |        |                |       |          |                     |  |
|----|----|----|--------|--------|----------------|-------|----------|---------------------|--|
| N2 | HS | IV | 257384 | 259204 | WBGene00001071 | dpy-9 | T21D12.2 | 0.00530129157863568 |  |
|----|----|----|--------|--------|----------------|-------|----------|---------------------|--|

AGIWUR18790;AGIWUR27258

|                                                 |    |    |        |        |                 |           |           |                     |             |
|-------------------------------------------------|----|----|--------|--------|-----------------|-----------|-----------|---------------------|-------------|
| N2                                              | HS | IV | 261886 | 264232 | WBGene00003932  | pat-6     | T21D12.4  | 0.284471075259852   |             |
| AGIWUR43224                                     |    |    |        |        |                 |           |           |                     |             |
| N2                                              | HS | IV | 266448 | 268322 | WBGene00020651  | T21D12.12 | T21D12.12 | 0.0899471693983678  |             |
| AGIWUR14769;AGIWUR43154;AGIWUR43734             |    |    |        |        |                 |           |           |                     |             |
| N2                                              | HS | IV | 269407 | 272099 | WBGene00020650  | T21D12.11 | T21D12.11 |                     |             |
| -0.00878917203671481 AGIWUR37598                |    |    |        |        |                 |           |           |                     |             |
| N2                                              | HS | IV | 272315 | 273263 | WBGene00005487  | srh-282   | T21D12.5  | -0.0979662667861989 |             |
| AGIWUR7137                                      |    |    |        |        |                 |           |           |                     |             |
| N2                                              | HS | IV | 274570 | 279940 | WBGene00020649  | sma-10    | T21D12.9  | 0.00355689561865979 |             |
| AGIWUR15332;AGIWUR23401;AGIWUR28389;AGIWUR36460 |    |    |        |        |                 |           |           |                     |             |
| N2                                              | HS | IV | 283647 | 287212 | WBGene000206487 | best-19   | T21D12.15 | -0.0780754618887674 |             |
| AGIWUR28322                                     |    |    |        |        |                 |           |           |                     |             |
| N2                                              | HS | IV | 287305 | 288127 | WBGene00045177  | T21D12.14 | T21D12.14 | 0.193195900725803   |             |
| AGIWUR14474                                     |    |    |        |        |                 |           |           |                     |             |
| N2                                              | HS | IV | 288803 | 291456 | WBGene00020648  | T21D12.7  | T21D12.7  | 0.00932193898968903 |             |
| AGIWUR8323;AGIWUR24804                          |    |    |        |        |                 |           |           |                     |             |
| N2                                              | HS | IV | 292429 | 298280 | WBGene00019298  | K02D7.1   | K02D7.1   | 0.147424296063173   | AGIWUR22001 |
| N2                                              | HS | IV | 307505 | 311232 | WBGene00019300  | swt-1     | K02D7.5   | -0.330861817676247  | AGIWUR44079 |
| N2                                              | HS | IV | 311512 | 313697 | WBGene00019299  | snai-1    | K02D7.2   | -0.22104140986783   | AGIWUR5231  |
| N2                                              | HS | IV | 315056 | 320605 | WBGene00001099  | dsc-4     | K02D7.4   | -0.0631341114654109 | AGIWUR35592 |
| N2                                              | HS | IV | 321571 | 323022 | WBGene00001735  | grl-26    | K02D7.6   | 0.0412093650665701  | AGIWUR36277 |
| N2                                              | HS | IV | 325063 | 330631 | WBGene00017578  | dr1-1     | F18F11.5  | 0.0478379429394415  |             |
| AGIWUR15146                                     |    |    |        |        |                 |           |           |                     |             |
| N2                                              | HS | IV | 330823 | 334385 | WBGene00017577  | F18F11.4  | F18F11.4  | 0.193383857803654   |             |
| AGIWUR18816;AGIWUR18855;AGIWUR32242;AGIWUR34618 |    |    |        |        |                 |           |           |                     |             |
| N2                                              | HS | IV | 334809 | 337178 | WBGene00017574  | F18F11.1  | F18F11.1  | 0.286996451452403   |             |
| AGIWUR39978                                     |    |    |        |        |                 |           |           |                     |             |
| N2                                              | HS | IV | 339629 | 358976 | WBGene00017576  | cdh-8     | F18F11.3  | 0.0619606444869358  |             |
| AGIWUR3867;AGIWUR7444;AGIWUR27378               |    |    |        |        |                 |           |           |                     |             |
| N2                                              | HS | IV | 359204 | 376062 | WBGene00022048  | f1n-1     | Y66H1B.2  | -0.0687756500540804 |             |
| AGIWUR6229;AGIWUR12057;AGIWUR34969              |    |    |        |        |                 |           |           |                     |             |
| N2                                              | HS | IV | 379898 | 383185 | WBGene00004981  | sp1-1     | Y66H1B.4  | 0.171989333886888   |             |
| AGIWUR14485                                     |    |    |        |        |                 |           |           |                     |             |
| N2                                              | HS | IV | 385894 | 386607 | WBGene00004493  | rps-24    | T07A9.11  | -0.0568588134036858 |             |
| AGIWUR18988                                     |    |    |        |        |                 |           |           |                     |             |
| N2                                              | HS | IV | 386699 | 387949 | WBGene00044789  | T07A9.14  | T07A9.14  | -0.383945847690152  |             |
| AGIWUR18205                                     |    |    |        |        |                 |           |           |                     |             |
| N2                                              | HS | IV | 388084 | 388733 | WBGene00020300  | tag-261   | T07A9.13  | 0.0336993368624636  |             |
| AGIWUR1038                                      |    |    |        |        |                 |           |           |                     |             |

|                                                                                                                                                           |    |    |        |        |                |          |          |                     |             |
|-----------------------------------------------------------------------------------------------------------------------------------------------------------|----|----|--------|--------|----------------|----------|----------|---------------------|-------------|
| N2                                                                                                                                                        | HS | IV | 388686 | 390468 | WBGene00001338 | ears-2   | T07A9.2  | 0.0966909136351788  | AGIWUR4672  |
| N2                                                                                                                                                        | HS | IV | 390512 | 393158 | WBGene00020298 | T07A9.10 | T07A9.10 | 0.0508486759726985  |             |
| AGIWUR8392;AGIWUR29528;AGIWUR35867                                                                                                                        |    |    |        |        |                |          |          |                     |             |
| N2                                                                                                                                                        | HS | IV | 393156 | 393546 | WBGene00045249 | T07A9.15 | T07A9.15 | 0.0983487665960183  |             |
| AGIWUR8754;AGIWUR11842;AGIWUR20015;AGIWUR22125;AGIWUR24642;AGIWUR30586;AGIWUR31937;AGIWUR33298;AGIWUR34076                                                |    |    |        |        |                |          |          |                     |             |
| N2                                                                                                                                                        | HS | IV | 393880 | 396554 | WBGene00020297 | nog-1    | T07A9.9  | -0.239127207159326  |             |
| AGIWUR8931;AGIWUR9531;AGIWUR16928;AGIWUR20629;AGIWUR28111;AGIWUR30284;AGIWUR32858;AGIWUR34292;AGIWUR35408;AGIWUR39296;AGIWUR40218;AGIWUR41675;AGIWUR44447 |    |    |        |        |                |          |          |                     |             |
| N2                                                                                                                                                        | HS | IV | 396545 | 399095 | WBGene00020296 | T07A9.8  | T07A9.8  | -0.155888846354522  | AGIWUR13100 |
| N2                                                                                                                                                        | HS | IV | 401695 | 405346 | WBGene00001666 | gpa-4    | T07A9.7  | -0.0745237614408572 |             |
| AGIWUR11240;AGIWUR23437;AGIWUR40058                                                                                                                       |    |    |        |        |                |          |          |                     |             |
| N2                                                                                                                                                        | HS | IV | 405621 | 410033 | WBGene00002187 | kbg-1    | T07A9.3  | 0.0257250945876848  | AGIWUR7146  |
| N2                                                                                                                                                        | HS | IV | 410831 | 415615 | WBGene00020299 | T07A9.12 | T07A9.12 | -0.0591956903559998 |             |
| AGIWUR10654;AGIWUR20490;AGIWUR28756;AGIWUR37082                                                                                                           |    |    |        |        |                |          |          |                     |             |
| N2                                                                                                                                                        | HS | IV | 415635 | 419958 | WBGene00001332 | eri-1    | T07A9.5  | 0.179851614668252   |             |
| AGIWUR3022;AGIWUR3334;AGIWUR17888;AGIWUR20131;AGIWUR41811                                                                                                 |    |    |        |        |                |          |          |                     |             |
| N2                                                                                                                                                        | HS | IV | 419938 | 425181 | WBGene00000913 | daf-18   | T07A9.6  | -0.218256260670774  |             |
| AGIWUR2814;AGIWUR14949;AGIWUR15080;AGIWUR23347;AGIWUR28679;AGIWUR32747;AGIWUR39915                                                                        |    |    |        |        |                |          |          |                     |             |
| N2                                                                                                                                                        | HS | IV | 425972 | 427204 | WBGene00022046 | Y66H1A.4 | Y66H1A.4 | -0.0494294347465338 |             |
| AGIWUR14850                                                                                                                                               |    |    |        |        |                |          |          |                     |             |
| N2                                                                                                                                                        | HS | IV | 428070 | 429133 | WBGene00022047 | Y66H1A.5 | Y66H1A.5 | 0.115356649161679   |             |
| AGIWUR29648                                                                                                                                               |    |    |        |        |                |          |          |                     |             |
| N2                                                                                                                                                        | HS | IV | 429214 | 440554 | WBGene00002041 | hum-8    | Y66H1A.6 | 0.129726422189952   |             |
| AGIWUR34330                                                                                                                                               |    |    |        |        |                |          |          |                     |             |
| N2                                                                                                                                                        | HS | IV | 443985 | 444783 | WBGene00022045 | mrpl-55  | Y66H1A.3 | 0.0038343014330664  |             |
| AGIWUR35396                                                                                                                                               |    |    |        |        |                |          |          |                     |             |
| N2                                                                                                                                                        | HS | IV | 445677 | 448439 | WBGene00022044 | dpm-1    | Y66H1A.2 | 0.170560219736494   |             |
| AGIWUR39955                                                                                                                                               |    |    |        |        |                |          |          |                     |             |
| N2                                                                                                                                                        | HS | IV | 455726 | 457099 | WBGene00019772 | M04G7.1  | M04G7.1  | -0.0907762010865696 | AGIWUR737   |
| N2                                                                                                                                                        | HS | IV | 458032 | 461029 | WBGene00019773 | M04G7.2  | M04G7.2  | 0.15616603988464    | AGIWUR13061 |
| N2                                                                                                                                                        | HS | IV | 461292 | 481167 | WBGene00019774 | M04G7.3  | M04G7.3  | -0.243469574464129  | AGIWUR16593 |
| N2                                                                                                                                                        | HS | IV | 505069 | 506600 | WBGene00021011 | W03G1.5  | W03G1.5  | -0.408652917676473  | AGIWUR7800  |
| N2                                                                                                                                                        | HS | IV | 506737 | 519457 | WBGene00021012 | pig-1    | W03G1.6  | -0.139227479004722  |             |
| AGIWUR1369;AGIWUR2867;AGIWUR7710;AGIWUR12794;AGIWUR15026;AGIWUR38661;AGIWUR43168                                                                          |    |    |        |        |                |          |          |                     |             |
| N2                                                                                                                                                        | HS | IV | 520214 | 523809 | WBGene00000213 | asm-3    | W03G1.7  | -0.614289036028802  |             |
| AGIWUR17779;AGIWUR43469                                                                                                                                   |    |    |        |        |                |          |          |                     |             |
| N2                                                                                                                                                        | HS | IV | 524652 | 526479 | WBGene00021010 | W03G1.2  | W03G1.2  | -0.203143343294379  | AGIWUR7043  |
| N2                                                                                                                                                        | HS | IV | 527379 | 528583 | WBGene00021013 | W03G1.8  | W03G1.8  | -0.058765184196572  | AGIWUR8211  |
| N2                                                                                                                                                        | HS | IV | 532135 | 535703 | WBGene00001625 | glt-7    | W03G1.1  | -0.0657848896744522 | AGIWUR40008 |

|                                                             |    |    |        |        |                |           |           |                                 |
|-------------------------------------------------------------|----|----|--------|--------|----------------|-----------|-----------|---------------------------------|
| N2                                                          | HS | IV | 543231 | 544086 | WBGene00017276 | F09C11.1  | F09C11.1  |                                 |
| -0.00679068352627965 AGIWUR1852                             |    |    |        |        |                |           |           |                                 |
| N2                                                          | HS | IV | 548302 | 553231 | WBGene00018924 | F56A11.4  | F56A11.4  | -0.200651607382405              |
| AGIWUR5465                                                  |    |    |        |        |                |           |           |                                 |
| N2                                                          | HS | IV | 559234 | 568076 | WBGene00001165 | efn-4     | F56A11.3  | -0.0538787035539521             |
| AGIWUR31786                                                 |    |    |        |        |                |           |           |                                 |
| N2                                                          | HS | IV | 568372 | 570875 | WBGene00018925 | F56A11.5  | F56A11.5  | -0.0706995869015881             |
| AGIWUR35066                                                 |    |    |        |        |                |           |           |                                 |
| N2                                                          | HS | IV | 572723 | 583577 | WBGene00001579 | gex-2     | F56A11.1  | -0.0287297471788008             |
| AGIWUR20233                                                 |    |    |        |        |                |           |           |                                 |
| N2                                                          | HS | IV | 583813 | 587829 | WBGene00189987 | C18H7.12  | C18H7.12  | 0.0138279720041421              |
| AGIWUR4609                                                  |    |    |        |        |                |           |           |                                 |
| N2                                                          | HS | IV | 589030 | 592485 | WBGene00015996 | C18H7.6   | C18H7.6   | -0.113470612234279 AGIWUR16736  |
| N2                                                          | HS | IV | 593329 | 595233 | WBGene00015994 | C18H7.4   | C18H7.4   | -0.139594043013233 AGIWUR16422  |
| N2                                                          | HS | IV | 595722 | 596419 | WBGene00015997 | C18H7.7   | C18H7.7   | 0.00860867870216619             |
| AGIWUR12555;AGIWUR23432;AGIWUR33157;AGIWUR40236             |    |    |        |        |                |           |           |                                 |
| N2                                                          | HS | IV | 596864 | 598771 | WBGene00044457 | C18H7.11  | C18H7.11  | 0.130454712719466               |
| AGIWUR26978                                                 |    |    |        |        |                |           |           |                                 |
| N2                                                          | HS | IV | 599449 | 601695 | WBGene00015998 | srt-59    | C18H7.8   | -0.126402159332981 AGIWUR38612  |
| N2                                                          | HS | IV | 602991 | 603643 | WBGene00015999 | prmt-4    | C18H7.9   | -0.0670491271489722 AGIWUR21044 |
| N2                                                          | HS | IV | 604444 | 605876 | WBGene00000676 | col-102   | C18H7.3   | -0.194396501437864 AGIWUR16403  |
| N2                                                          | HS | IV | 606355 | 614021 | WBGene00002140 | inx-18    | C18H7.2   | 0.100163640362919 AGIWUR28351   |
| N2                                                          | HS | IV | 615544 | 620925 | WBGene00015993 | C18H7.1   | C18H7.1   | 0.0722013673498942 AGIWUR4760   |
| N2                                                          | HS | IV | 627537 | 633954 | WBGene00015497 | nhr-76    | C05G6.1   | 0.0597850981330819              |
| AGIWUR2051;AGIWUR7810                                       |    |    |        |        |                |           |           |                                 |
| N2                                                          | HS | IV | 649665 | 651994 | WBGene00019665 | K11H12.9  | K11H12.9  | 0.0873764032995448              |
| AGIWUR23645                                                 |    |    |        |        |                |           |           |                                 |
| N2                                                          | HS | IV | 652130 | 653421 | WBGene00019658 | K11H12.1  | K11H12.1  | 0.0878105095026847              |
| AGIWUR13212                                                 |    |    |        |        |                |           |           |                                 |
| N2                                                          | HS | IV | 653436 | 654576 | WBGene00004427 | rp1-15    | K11H12.2  | 0.00961806526050513             |
| AGIWUR18481;AGIWUR24381                                     |    |    |        |        |                |           |           |                                 |
| N2                                                          | HS | IV | 655353 | 658604 | WBGene00019664 | K11H12.8  | K11H12.8  | -0.220546002537649              |
| AGIWUR33789;AGIWUR35461                                     |    |    |        |        |                |           |           |                                 |
| N2                                                          | HS | IV | 665525 | 666917 | WBGene00019663 | K11H12.7  | K11H12.7  | -0.117330514560688              |
| AGIWUR16784;AGIWUR20600;AGIWUR28935;AGIWUR34976;AGIWUR35464 |    |    |        |        |                |           |           |                                 |
| N2                                                          | HS | IV | 667291 | 668556 | WBGene00019662 | K11H12.6  | K11H12.6  | -0.263706836079376              |
| AGIWUR21661                                                 |    |    |        |        |                |           |           |                                 |
| N2                                                          | HS | IV | 668962 | 670555 | WBGene00044723 | K11H12.11 | K11H12.11 | 0.139598205301644               |
| AGIWUR4530;AGIWUR41020                                      |    |    |        |        |                |           |           |                                 |



|                                                                                     |    |    |        |        |                |            |            |                      |
|-------------------------------------------------------------------------------------|----|----|--------|--------|----------------|------------|------------|----------------------|
| N2                                                                                  | HS | IV | 674036 | 675883 | WBGene00019660 | K11H12.4   | K11H12.4   | 0.0415910267956967   |
| AGIWUR12851                                                                         |    |    |        |        |                |            |            |                      |
| N2                                                                                  | HS | IV | 676075 | 676687 | WBGene00044458 | K11H12.10  | K11H12.10  | 0.0921389758606068   |
| AGIWUR22675                                                                         |    |    |        |        |                |            |            |                      |
| N2                                                                                  | HS | IV | 677616 | 679171 | WBGene00019661 | K11H12.5   | K11H12.5   | 0.261112126814954    |
| AGIWUR26759                                                                         |    |    |        |        |                |            |            |                      |
| N2                                                                                  | HS | IV | 684497 | 688336 | WBGene00018256 | cut1-28    | F41A4.1    | 0.0598618100527544   |
| AGIWUR7323                                                                          |    |    |        |        |                |            |            |                      |
| N2                                                                                  | HS | IV | 698761 | 707719 | WBGene00021950 | cut1-26    | Y55F3C.7   | 0.000319169940208752 |
| AGIWUR3838                                                                          |    |    |        |        |                |            |            |                      |
| N2                                                                                  | HS | IV | 717925 | 719451 | WBGene00044460 | Y55F3C.10  | Y55F3C.10  | -0.0624087400375117  |
| AGIWUR29659                                                                         |    |    |        |        |                |            |            |                      |
| N2                                                                                  | HS | IV | 719766 | 727481 | WBGene00044459 | Y55F3C.9   | Y55F3C.9   | 0.120773865985405    |
| AGIWUR3147;AGIWUR17197                                                              |    |    |        |        |                |            |            |                      |
| N2                                                                                  | HS | IV | 728500 | 731037 | WBGene00021951 | srt-24     | Y55F3C.8   | -0.0160580953692224  |
| AGIWUR31555;AGIWUR35044                                                             |    |    |        |        |                |            |            |                      |
| N2                                                                                  | HS | IV | 736675 | 753316 | WBGene00021948 | kvs-5      | Y55F3C.3   | -0.158403836421066   |
| AGIWUR4683;AGIWUR4981;AGIWUR12075;AGIWUR25624                                       |    |    |        |        |                |            |            |                      |
| N2                                                                                  | HS | IV | 756721 | 759084 | WBGene00021947 | srt-23     | Y55F3C.2   | 0.13910498395812     |
| AGIWUR19631;AGIWUR28671                                                             |    |    |        |        |                |            |            |                      |
| N2                                                                                  | HS | IV | 760610 | 762342 | WBGene00001788 | gst-40     | F56B3.10   | -0.136541647629716   |
| AGIWUR6114                                                                          |    |    |        |        |                |            |            |                      |
| N2                                                                                  | HS | IV | 762416 | 763680 | WBGene00000677 | col-103    | F56B3.1    | -0.357883876827129   |
| AGIWUR8934;AGIWUR12460                                                              |    |    |        |        |                |            |            |                      |
| N2                                                                                  | HS | IV | 764078 | 768584 | WBGene00018928 | F56B3.2    | F56B3.2    | -0.145381086876654   |
| AGIWUR34465                                                                         |    |    |        |        |                |            |            |                      |
| N2                                                                                  | HS | IV | 773228 | 776655 | WBGene00018932 | mrpl-2     | F56B3.8    | 0.110545476822512    |
| AGIWUR13207                                                                         |    |    |        |        |                |            |            |                      |
| N2                                                                                  | HS | IV | 778784 | 784182 | WBGene00018931 | ugt-52     | F56B3.7    | -0.223597285945733   |
| AGIWUR43381                                                                         |    |    |        |        |                |            |            |                      |
| N2                                                                                  | HS | IV | 786234 | 794326 | WBGene00004824 | F56B3.4    | F56B3.4    | 0.0185231054012451   |
| AGIWUR4977                                                                          |    |    |        |        |                |            |            |                      |
| N2                                                                                  | HS | IV | 794632 | 795689 | WBGene00018935 | skr-18     | F56B3.12   | 0.0956889013092628   |
| AGIWUR20815                                                                         |    |    |        |        |                |            |            |                      |
| N2                                                                                  | HS | IV | 795755 | 796567 | WBGene00018934 | F56B3.11   | F56B3.11   | -0.189078896008958   |
| AGIWUR10110;AGIWUR20027;AGIWUR22185;AGIWUR26451;AGIWUR30559;AGIWUR37301;AGIWUR43312 |    |    |        |        |                |            |            |                      |
| N2                                                                                  | HS | IV | 797023 | 799922 | WBGene00001154 | ech-5      | F56B3.5    | 0.401777518260324    |
| AGIWUR22304                                                                         |    |    |        |        |                |            |            |                      |
| N2                                                                                  | HS | IV | 805102 | 806236 | WBGene00185088 | Y55F3BL.4  | Y55F3BL.4  | 0.143075450852715    |
| AGIWUR21165                                                                         |    |    |        |        |                |            |            |                      |
| N2                                                                                  | HS | IV | 807439 | 824954 | WBGene00021936 | zipt-20    | Y55F3BL.2  | 0.0507552512489937   |
| AGIWUR5347;AGIWUR13156;AGIWUR14357                                                  |    |    |        |        |                |            |            |                      |
| N2                                                                                  | HS | IV | 830359 | 831896 | WBGene00021942 | madf-1     | Y55F3BR.5  | -0.012727472891557   |
| AGIWUR35663                                                                         |    |    |        |        |                |            |            |                      |
| N2                                                                                  | HS | IV | 832362 | 833329 | WBGene00044742 | Y55F3BR.10 | Y55F3BR.10 | 0.0583016861889667   |

AGIWUR13482;AGIWUR20780;AGIWUR28506;AGIWUR42338  
N2 HS IV 835033 842126 WBGene00021943 Y55F3BR.6 Y55F3BR.6  
0.000796147904294386 AGIWUR15121;AGIWUR42889  
N2 HS IV 845881 848850 WBGene00021941 lgc-33 Y55F3BR.4 -0.311122041489522  
AGIWUR12929  
N2 HS IV 849269 854780 WBGene00021945 lem-4 Y55F3BR.8 0.021413855176581  
AGIWUR6239  
N2 HS IV 857327 874724 WBGene00021939 Y55F3BR.2 Y55F3BR.2 0.0646949131914116  
AGIWUR2219;AGIWUR14690;AGIWUR43144  
N2 HS IV 874791 881910 WBGene00021938 Y55F3BR.1 Y55F3BR.1 0.271790306124048  
AGIWUR8321  
N2 HS IV 885346 890200 WBGene00007007 mak-2 C44C8.6 -0.269505231651291  
AGIWUR5736;AGIWUR10731;AGIWUR10982;AGIWUR40813  
N2 HS IV 919990 920808 WBGene00019070 F58H7.5 F58H7.5 -0.243853070044433 AGIWUR34903  
N2 HS IV 924936 939667 WBGene00019069 lgc-30 F58H7.3 -0.123783032019745 AGIWUR10043  
N2 HS IV 940017 945653 WBGene00019068 faah-3 F58H7.2 0.0142590013012978 AGIWUR10182  
N2 HS IV 959452 984392 WBGene00004047 plx-1 Y55F3AL.1 -0.0835198264768398  
AGIWUR24475  
N2 HS IV 984405 990521 WBGene00043705 egrh-2 Y55F3AM.7 0.0193987219279723  
AGIWUR6981  
N2 HS IV 992240 998348 WBGene00021924 Y55F3AM.6 Y55F3AM.6 -0.0209466506105294  
AGIWUR12792;AGIWUR15312;AGIWUR16365;AGIWUR19661  
N2 HS IV 999214 1003639 WBGene00021923 Y55F3AM.5 Y55F3AM.5 0.0797864110812103  
AGIWUR1547;AGIWUR20689;AGIWUR44614  
N2 HS IV 1003600 1005864 WBGene00021925 immp-2 Y55F3AM.8 0.0645302994866288  
AGIWUR9588  
N2 HS IV 1006083 1009734 WBGene00021926 Y55F3AM.9 Y55F3AM.9 -0.0146423402244906  
AGIWUR35970  
N2 HS IV 1010054 1012502 WBGene00021922 atg-3 Y55F3AM.4 -0.200363022642456  
AGIWUR44533  
N2 HS IV 1012624 1019558 WBGene00021921 Y55F3AM.3 Y55F3AM.3 -0.0180483612823608  
AGIWUR19334;AGIWUR19775;AGIWUR20515;AGIWUR20761;AGIWUR24236;AGIWUR37138;AGIWUR42157  
N2 HS IV 1027787 1030024 WBGene00021927 abhd-14 Y55F3AM.10 0.125448818646845  
AGIWUR26712  
N2 HS IV 1038671 1041008 WBGene00021928 Y55F3AM.11 Y55F3AM.11 0.103913353194727  
AGIWUR19979  
N2 HS IV 1045983 1049506 WBGene00005903 srx-12 Y55F3AM.2 -0.134280844673885  
AGIWUR42547  
N2 HS IV 1052524 1054794 WBGene00021929 dcap-1 Y55F3AM.12 -0.220543054609629

|                                                                         |    |    |         |         |                |            |            |                      |             |
|-------------------------------------------------------------------------|----|----|---------|---------|----------------|------------|------------|----------------------|-------------|
| AGIWUR13844;AGIWUR14536;AGIWUR15020;AGIWUR20920;AGIWUR35100;AGIWUR36637 |    |    |         |         |                |            |            |                      |             |
| N2                                                                      | HS | IV | 1056890 | 1057620 | WBGene00021920 | mrps-25    | Y55F3AM.1  | 0.318628344600572    |             |
| AGIWUR31309                                                             |    |    |         |         |                |            |            |                      |             |
| N2                                                                      | HS | IV | 1058695 | 1067525 | WBGene00021931 | Y55F3AM.14 | Y55F3AM.14 | -0.141424419164845   |             |
| AGIWUR14109                                                             |    |    |         |         |                |            |            |                      |             |
| N2                                                                      | HS | IV | 1077463 | 1087013 | WBGene00000816 | csn-4      | Y55F3AM.15 | 0.0216247559199845   |             |
| AGIWUR14506;AGIWUR35063;AGIWUR36445;AGIWUR38851                         |    |    |         |         |                |            |            |                      |             |
| N2                                                                      | HS | IV | 1087095 | 1093920 | WBGene00021934 | cct-8      | Y55F3AR.3  | -0.0788524334541751  |             |
| AGIWUR7621                                                              |    |    |         |         |                |            |            |                      |             |
| N2                                                                      | HS | IV | 1094545 | 1096723 | WBGene00021933 | Y55F3AR.2  | Y55F3AR.2  | -0.114007545850207   |             |
| AGIWUR7254                                                              |    |    |         |         |                |            |            |                      |             |
| N2                                                                      | HS | IV | 1097453 | 1102980 | WBGene00021932 | Y55F3AR.1  | Y55F3AR.1  |                      |             |
| -0.00169335928590542 AGIWUR2526                                         |    |    |         |         |                |            |            |                      |             |
| N2                                                                      | HS | IV | 1103541 | 1104609 | WBGene00044462 | C44B12.9   | C44B12.9   | 0.02088124825009     |             |
| AGIWUR13870;AGIWUR22722;AGIWUR29440;AGIWUR34768;AGIWUR38469             |    |    |         |         |                |            |            |                      |             |
| N2                                                                      | HS | IV | 1107396 | 1110856 | WBGene00003893 | ost-1      | C44B12.2   | 0.036831300372655    |             |
| AGIWUR35036;AGIWUR44237                                                 |    |    |         |         |                |            |            |                      |             |
| N2                                                                      | HS | IV | 1111462 | 1114820 | WBGene00005905 | srx-14     | C44B12.8   | -0.00541175254474524 |             |
| AGIWUR3271                                                              |    |    |         |         |                |            |            |                      |             |
| N2                                                                      | HS | IV | 1114969 | 1118666 | WBGene00005904 | srx-13     | C44B12.4   | -0.100128458583148   |             |
| AGIWUR26071                                                             |    |    |         |         |                |            |            |                      |             |
| N2                                                                      | HS | IV | 1121457 | 1125107 | WBGene00016638 | perm-4     | C44B12.5   | -0.235997478168692   |             |
| AGIWUR36087                                                             |    |    |         |         |                |            |            |                      |             |
| N2                                                                      | HS | IV | 1126790 | 1128848 | WBGene00016636 | perm-2     | C44B12.1   | -0.341755968969981   |             |
| AGIWUR12455;AGIWUR35647                                                 |    |    |         |         |                |            |            |                      |             |
| N2                                                                      | HS | IV | 1128964 | 1136947 | WBGene00016639 | C44B12.6   | C44B12.6   | 0.249638427278583    |             |
| AGIWUR17771                                                             |    |    |         |         |                |            |            |                      |             |
| N2                                                                      | HS | IV | 1145681 | 1158028 | WBGene00016797 | C50A2.3    | C50A2.3    | -0.037029735664543   | AGIWUR22624 |
| N2                                                                      | HS | IV | 1159637 | 1160484 | WBGene00016798 | ets-8      | C50A2.4    | -0.0963593499593545  | AGIWUR6703  |
| N2                                                                      | HS | IV | 1170672 | 1177776 | WBGene00016796 | cec-2      | C50A2.2    | 0.0994827930261284   | AGIWUR29859 |
| N2                                                                      | HS | IV | 1178022 | 1182837 | WBGene00022426 | Y104H12D.2 | Y104H12D.2 | 0.113468433831191    |             |
| AGIWUR25304                                                             |    |    |         |         |                |            |            |                      |             |
| N2                                                                      | HS | IV | 1182592 | 1186604 | WBGene00022428 | Y104H12D.4 | Y104H12D.4 | -0.0486085576959567  |             |
| AGIWUR14593                                                             |    |    |         |         |                |            |            |                      |             |
| N2                                                                      | HS | IV | 1187799 | 1192977 | WBGene00007020 | mdt-20     | Y104H12D.1 | -0.159341151613697   |             |
| AGIWUR13101                                                             |    |    |         |         |                |            |            |                      |             |
| N2                                                                      | HS | IV | 1193065 | 1201846 | WBGene00022427 | Y104H12D.3 | Y104H12D.3 | -0.294452656629641   |             |
| AGIWUR34307                                                             |    |    |         |         |                |            |            |                      |             |
| N2                                                                      | HS | IV | 1202651 | 1204970 | WBGene00001104 | ds1-2      | W09G12.1   | 0.106892530126472    |             |

|                                                                                                                      |    |    |         |         |                |                 |                               |
|----------------------------------------------------------------------------------------------------------------------|----|----|---------|---------|----------------|-----------------|-------------------------------|
| AGIWUR13919                                                                                                          |    |    |         |         |                |                 |                               |
| N2                                                                                                                   | HS | IV | 1205868 | 1206377 | WBGene00023163 | W09G12.3        | W09G12.3 -0.0307239805555519  |
| AGIWUR8237;AGIWUR25731;AGIWUR35019;AGIWUR42511                                                                       |    |    |         |         |                |                 |                               |
| N2                                                                                                                   | HS | IV | 1207255 | 1208102 | WBGene00001103 | ds1-1 W09G12.4  | -0.104989444573754            |
| AGIWUR14118                                                                                                          |    |    |         |         |                |                 |                               |
| N2                                                                                                                   | HS | IV | 1216590 | 1218527 | WBGene00021123 | W09G12.9        | W09G12.9 -0.380994404062013   |
| AGIWUR34992                                                                                                          |    |    |         |         |                |                 |                               |
| N2                                                                                                                   | HS | IV | 1219333 | 1221287 | WBGene00044463 | W09G12.10       | W09G12.10 0.33122783810612    |
| AGIWUR6676;AGIWUR24423;AGIWUR28632;AGIWUR31254;AGIWUR40883                                                           |    |    |         |         |                |                 |                               |
| N2                                                                                                                   | HS | IV | 1226182 | 1227668 | WBGene00021122 | W09G12.8        | W09G12.8 -0.0136141832259291  |
| AGIWUR26633                                                                                                          |    |    |         |         |                |                 |                               |
| N2                                                                                                                   | HS | IV | 1229080 | 1230789 | WBGene00021121 | W09G12.7        | W09G12.7 -0.227378990052607   |
| AGIWUR44787                                                                                                          |    |    |         |         |                |                 |                               |
| N2                                                                                                                   | HS | IV | 1231897 | 1232812 | WBGene00021120 | W09G12.6        | W09G12.6 0.218895161298979    |
| AGIWUR15970                                                                                                          |    |    |         |         |                |                 |                               |
| N2                                                                                                                   | HS | IV | 1232872 | 1239852 | WBGene00009521 | F38A1.8 F38A1.8 | 0.0423008054625287            |
| AGIWUR1399;AGIWUR42823                                                                                               |    |    |         |         |                |                 |                               |
| N2                                                                                                                   | HS | IV | 1241332 | 1243402 | WBGene00044908 | F38A1.15        | F38A1.15 -0.048716553089351   |
| AGIWUR6368                                                                                                           |    |    |         |         |                |                 |                               |
| N2                                                                                                                   | HS | IV | 1244247 | 1245344 | WBGene00009522 | F38A1.9 F38A1.9 | 0.266708281737097 AGIWUR39998 |
| N2                                                                                                                   | HS | IV | 1245399 | 1246886 | WBGene00009523 | clec-165        | F38A1.10 0.0189428120218675   |
| AGIWUR18756                                                                                                          |    |    |         |         |                |                 |                               |
| N2                                                                                                                   | HS | IV | 1247386 | 1249025 | WBGene00009524 | F38A1.11        | F38A1.11 0.460877149635635    |
| AGIWUR15217                                                                                                          |    |    |         |         |                |                 |                               |
| N2                                                                                                                   | HS | IV | 1249018 | 1251366 | WBGene00009518 | clec-166        | F38A1.5 -0.00583163472992609  |
| AGIWUR3404                                                                                                           |    |    |         |         |                |                 |                               |
| N2                                                                                                                   | HS | IV | 1251861 | 1252470 | WBGene00009519 | F38A1.6 F38A1.6 | 0.121009639009348 AGIWUR39698 |
| N2                                                                                                                   | HS | IV | 1253137 | 1255732 | WBGene00009517 | clec-167        | F38A1.4 -0.123480609608709    |
| AGIWUR32291                                                                                                          |    |    |         |         |                |                 |                               |
| N2                                                                                                                   | HS | IV | 1256956 | 1259344 | WBGene00009520 | clec-168        | F38A1.7 0.209886219371718     |
| AGIWUR22643                                                                                                          |    |    |         |         |                |                 |                               |
| N2                                                                                                                   | HS | IV | 1261272 | 1264622 | WBGene00009526 | clec-169        | F38A1.14 0.133936023164575    |
| AGIWUR1769                                                                                                           |    |    |         |         |                |                 |                               |
| N2                                                                                                                   | HS | IV | 1265228 | 1265848 | WBGene00009525 | F38A1.13        | F38A1.13 0.168178680899459    |
| AGIWUR34868                                                                                                          |    |    |         |         |                |                 |                               |
| N2                                                                                                                   | HS | IV | 1266866 | 1274425 | WBGene00009515 | clec-170        | F38A1.1 0.0091863118207387    |
| AGIWUR120;AGIWUR3055;AGIWUR12336;AGIWUR18316;AGIWUR25656;AGIWUR28250;AGIWUR29831;AGIWUR31041;AGIWUR35445;AGIWUR35831 |    |    |         |         |                |                 |                               |
| N2                                                                                                                   | HS | IV | 1275865 | 1277091 | WBGene00007476 | C09E9.1 C09E9.1 | 0.221709187386657             |

AGIWUR1226;AGIWUR23153;AGIWUR24526;AGIWUR25781;AGIWUR28437;AGIWUR38895  
 N2 HS IV 1289627 1296897 WBGene00022425 plst-1 Y104H12BR.1 0.0432383091723789  
 AGIWUR6341;AGIWUR8186;AGIWUR19456;AGIWUR20224;AGIWUR30101;AGIWUR30260;AGIWUR33915;AGIWUR35453;AGIWUR36595;A  
 GIWUR41949  
 N2 HS IV 1297222 1309652 WBGene00018776 F53H1.1 F53H1.1 -0.0272255034713282 AGIWUR7687  
 N2 HS IV 1310166 1328241 WBGene00018778 F53H1.4 F53H1.4 -0.00283533305386463  
 AGIWUR7608;AGIWUR20200;AGIWUR20748;AGIWUR22712  
 N2 HS IV 1329162 1339376 WBGene00018777 F53H1.3 F53H1.3 -0.0483243335466028 AGIWUR16858  
 N2 HS IV 1347316 1352977 WBGene00004338 rfc-2 F58F6.4 0.240554766830353 AGIWUR19510  
 N2 HS IV 1353636 1355305 WBGene00000678 col-104 F58F6.1 -0.255336630762454 AGIWUR9061  
 N2 HS IV 1357816 1359225 WBGene00000679 col-105 F58F6.2 0.369279219352261 AGIWUR12554  
 N2 HS IV 1375369 1376563 WBGene00019052 F58F6.3 F58F6.3 -0.167577969905936 AGIWUR5879  
 N2 HS IV 1386045 1399538 WBGene00022423 nhr-41 Y104H12A.1 0.0185101417064728  
 AGIWUR7746;AGIWUR10431;AGIWUR12457;AGIWUR30123  
 N2 HS IV 1406542 1408131 WBGene00022314 Y77E11A.14 Y77E11A.14 0.183282663727374  
 AGIWUR40359  
 N2 HS IV 1408582 1410041 WBGene00022309 rpc-11 Y77E11A.6 -0.00316568885915558  
 AGIWUR12229  
 N2 HS IV 1410786 1419847 WBGene00022310 Y77E11A.7 Y77E11A.7 -0.117945458311626  
 AGIWUR268;AGIWUR9813;AGIWUR11788;AGIWUR15813;AGIWUR17418;AGIWUR22112;AGIWUR22493;AGIWUR34355  
 N2 HS IV 1420929 1421770 WBGene00002180 jtr-1 Y77E11A.4 0.227871464435488  
 AGIWUR20279  
 N2 HS IV 1425482 1426887 WBGene00022312 clec-171 Y77E11A.9 -0.0464225664557389  
 AGIWUR15284;AGIWUR26848;AGIWUR35309  
 N2 HS IV 1429041 1430367 WBGene000235267 Y77E11A.23 Y77E11A.23 -0.124513417690603  
 AGIWUR20360  
 N2 HS IV 1435465 1446182 WBGene00000547 clp-7 Y77E11A.11 0.0413318710693673  
 AGIWUR14913  
 N2 HS IV 1447594 1448316 WBGene00022308 Y77E11A.3 Y77E11A.3 -0.253770000103245  
 AGIWUR17454  
 N2 HS IV 1457075 1459521 WBGene00022307 Y77E11A.2 Y77E11A.2 -0.119804277582418  
 AGIWUR20302  
 N2 HS IV 1459866 1460786 WBGene00000680 col-106 Y77E11A.15 0.0108320515778857  
 AGIWUR30247  
 N2 HS IV 1461899 1475109 WBGene00022313 Y77E11A.12 Y77E11A.12 -0.292619847650885  
 AGIWUR10496  
 N2 HS IV 1485286 1489762 WBGene00044464 Y77E11A.16 Y77E11A.16  
 -0.000982064065508936 AGIWUR7338  
 N2 HS IV 1490653 1496022 WBGene00003806 npp-20 Y77E11A.13 0.149810069235732

AGIWUR4990;AGIWUR24613;AGIWUR40679

|    |    |    |         |         |                |       |           |                     |
|----|----|----|---------|---------|----------------|-------|-----------|---------------------|
| N2 | HS | IV | 1497630 | 1509965 | WBGene00022306 | hxx-3 | Y77E11A.1 | -0.0024146295536589 |
|----|----|----|---------|---------|----------------|-------|-----------|---------------------|

AGIWUR29596

|    |    |    |         |         |                |         |         |                   |             |
|----|----|----|---------|---------|----------------|---------|---------|-------------------|-------------|
| N2 | HS | IV | 1510546 | 1515251 | WBGene00019368 | K03H6.2 | K03H6.2 | -0.42590573433508 | AGIWUR12991 |
|----|----|----|---------|---------|----------------|---------|---------|-------------------|-------------|

|    |    |    |         |         |                |          |         |                    |
|----|----|----|---------|---------|----------------|----------|---------|--------------------|
| N2 | HS | IV | 1515510 | 1516627 | WBGene00044719 | clcc-172 | K03H6.7 | -0.150902539601355 |
|----|----|----|---------|---------|----------------|----------|---------|--------------------|

AGIWUR18366

|    |    |    |         |         |                |         |         |                     |
|----|----|----|---------|---------|----------------|---------|---------|---------------------|
| N2 | HS | IV | 1517969 | 1521324 | WBGene00019369 | K03H6.4 | K03H6.4 | -0.0780544123851334 |
|----|----|----|---------|---------|----------------|---------|---------|---------------------|

AGIWUR24843;AGIWUR40141

|    |    |    |         |         |                |         |         |                    |             |
|----|----|----|---------|---------|----------------|---------|---------|--------------------|-------------|
| N2 | HS | IV | 1523718 | 1526599 | WBGene00019367 | K03H6.1 | K03H6.1 | 0.0577566274399226 | AGIWUR37618 |
|----|----|----|---------|---------|----------------|---------|---------|--------------------|-------------|

|    |    |    |         |         |                |         |         |                    |
|----|----|----|---------|---------|----------------|---------|---------|--------------------|
| N2 | HS | IV | 1527221 | 1536398 | WBGene00019370 | K03H6.5 | K03H6.5 | -0.146838032123108 |
|----|----|----|---------|---------|----------------|---------|---------|--------------------|

AGIWUR25528;AGIWUR39670

|    |    |    |         |         |                |         |         |                    |
|----|----|----|---------|---------|----------------|---------|---------|--------------------|
| N2 | HS | IV | 1545296 | 1566192 | WBGene00016427 | C34H4.5 | C34H4.5 | -0.142840199698011 |
|----|----|----|---------|---------|----------------|---------|---------|--------------------|

AGIWUR13;AGIWUR480;AGIWUR7571;AGIWUR10154;AGIWUR15441;AGIWUR21312;AGIWUR36966;AGIWUR38213;AGIWUR44132

|    |    |    |         |         |                |       |           |                    |
|----|----|----|---------|---------|----------------|-------|-----------|--------------------|
| N2 | HS | IV | 1567921 | 1595824 | WBGene00003794 | npp-8 | Y41D4B.19 | -0.100382181919478 |
|----|----|----|---------|---------|----------------|-------|-----------|--------------------|

AGIWUR451;AGIWUR7749;AGIWUR13128;AGIWUR14605;AGIWUR16223;AGIWUR17183;AGIWUR19609;AGIWUR27086;AGIWUR33432;AGIWUR35153;AGIWUR37403;AGIWUR38651;AGIWUR42141

|    |    |    |         |         |                |       |           |                    |
|----|----|----|---------|---------|----------------|-------|-----------|--------------------|
| N2 | HS | IV | 1597316 | 1601620 | WBGene00000416 | ced-2 | Y41D4B.13 | -0.121996804100842 |
|----|----|----|---------|---------|----------------|-------|-----------|--------------------|

AGIWUR16139

|    |    |    |         |         |                |        |           |                    |
|----|----|----|---------|---------|----------------|--------|-----------|--------------------|
| N2 | HS | IV | 1602985 | 1605609 | WBGene00021515 | set-23 | Y41D4B.12 | -0.248983309121074 |
|----|----|----|---------|---------|----------------|--------|-----------|--------------------|

AGIWUR12103

|    |    |    |         |         |                |           |           |                   |
|----|----|----|---------|---------|----------------|-----------|-----------|-------------------|
| N2 | HS | IV | 1605712 | 1608901 | WBGene00021514 | Y41D4B.11 | Y41D4B.11 | 0.203109512163723 |
|----|----|----|---------|---------|----------------|-----------|-----------|-------------------|

AGIWUR41173

|    |    |    |         |         |                |       |           |                     |
|----|----|----|---------|---------|----------------|-------|-----------|---------------------|
| N2 | HS | IV | 1610236 | 1612915 | WBGene00001105 | ds1-3 | Y41D4B.10 | -0.0706889899124832 |
|----|----|----|---------|---------|----------------|-------|-----------|---------------------|

AGIWUR20853

|    |    |    |         |         |                |         |          |                    |
|----|----|----|---------|---------|----------------|---------|----------|--------------------|
| N2 | HS | IV | 1613897 | 1616766 | WBGene00003712 | nhr-122 | Y41D4B.9 | 0.0473005629967727 |
|----|----|----|---------|---------|----------------|---------|----------|--------------------|

AGIWUR37999

|    |    |    |         |         |                |         |           |                     |
|----|----|----|---------|---------|----------------|---------|-----------|---------------------|
| N2 | HS | IV | 1626973 | 1630756 | WBGene00045255 | nhr-146 | Y41D4B.27 | -0.0669440637576066 |
|----|----|----|---------|---------|----------------|---------|-----------|---------------------|

AGIWUR21898;AGIWUR30984;AGIWUR32578;AGIWUR38940;AGIWUR43528

|    |    |    |         |         |                |           |           |                    |
|----|----|----|---------|---------|----------------|-----------|-----------|--------------------|
| N2 | HS | IV | 1631951 | 1633257 | WBGene00021525 | Y41D4B.26 | Y41D4B.26 | -0.157948957561631 |
|----|----|----|---------|---------|----------------|-----------|-----------|--------------------|

AGIWUR36375

|    |    |    |         |         |                |          |          |                     |
|----|----|----|---------|---------|----------------|----------|----------|---------------------|
| N2 | HS | IV | 1633772 | 1637367 | WBGene00021513 | Y41D4B.6 | Y41D4B.6 | -0.0976443920914498 |
|----|----|----|---------|---------|----------------|----------|----------|---------------------|

AGIWUR39537

|    |    |    |         |         |                |        |          |                    |
|----|----|----|---------|---------|----------------|--------|----------|--------------------|
| N2 | HS | IV | 1659691 | 1660011 | WBGene00004497 | rps-28 | Y41D4B.5 | -0.554849281208067 |
|----|----|----|---------|---------|----------------|--------|----------|--------------------|

AGIWUR42056

|    |    |    |         |         |                |          |          |                    |
|----|----|----|---------|---------|----------------|----------|----------|--------------------|
| N2 | HS | IV | 1660112 | 1669707 | WBGene00021512 | Y41D4B.4 | Y41D4B.4 | 0.0160538255711185 |
|----|----|----|---------|---------|----------------|----------|----------|--------------------|

AGIWUR30269

|    |    |    |         |         |                |          |          |                     |
|----|----|----|---------|---------|----------------|----------|----------|---------------------|
| N2 | HS | IV | 1672706 | 1676209 | WBGene00021511 | Y41D4B.1 | Y41D4B.1 | -0.0330719699350457 |
|----|----|----|---------|---------|----------------|----------|----------|---------------------|

AGIWUR2885

|    |    |    |         |         |                |           |           |                    |
|----|----|----|---------|---------|----------------|-----------|-----------|--------------------|
| N2 | HS | IV | 1676720 | 1682159 | WBGene00021524 | Y41D4B.24 | Y41D4B.24 | 0.0292222214050959 |
|----|----|----|---------|---------|----------------|-----------|-----------|--------------------|

AGIWUR572;AGIWUR2148;AGIWUR10477;AGIWUR11515;AGIWUR12627;AGIWUR16482;AGIWUR19697;AGIWUR25338;AGIWUR29364;AGIWUR30172;AGIWUR38879  
 N2 HS IV 1699899 1702820 WBGene00044618 bus-2 K08D12.5 -0.192827070499278  
 AGIWUR6907  
 N2 HS IV 1707296 1708691 WBGene00019538 K08D12.4 K08D12.4 -0.0247579455268649  
 AGIWUR41649  
 N2 HS IV 1708804 1709745 WBGene00003947 pbs-1 K08D12.1 0.0899161980154854  
 AGIWUR526  
 N2 HS IV 1710265 1711127 WBGene00019537 K08D12.3 K08D12.3 0.013218287815814  
 AGIWUR1281;AGIWUR4072;AGIWUR7432;AGIWUR7623;AGIWUR10035;AGIWUR15285;AGIWUR19577;AGIWUR24436;AGIWUR25955;AGIWUR29099;AGIWUR32333;AGIWUR32915;AGIWUR33849;AGIWUR36200;AGIWUR42283  
 N2 HS IV 1711279 1714179 WBGene00019536 rpi-2 K08D12.2 -0.154360059025043  
 AGIWUR9019  
 N2 HS IV 1720790 1723067 WBGene00019540 K08D12.6 K08D12.6 -0.209700263556083  
 AGIWUR1415;AGIWUR2340;AGIWUR41859;AGIWUR42751  
 N2 HS IV 1723199 1724143 WBGene00044293 K08D12.7 K08D12.7 -0.162018809912315  
 AGIWUR27413  
 N2 HS IV 1727438 1737884 WBGene00021507 Y41D4A.5 Y41D4A.5 -0.425966505275168  
 AGIWUR8940  
 N2 HS IV 1740921 1745587 WBGene00021508 Y41D4A.6 Y41D4A.6 -0.222760039296634  
 AGIWUR11580  
 N2 HS IV 1745875 1751633 WBGene00021506 Y41D4A.4 Y41D4A.4 -0.558001307340596  
 AGIWUR9031;AGIWUR10979;AGIWUR20429  
 N2 HS IV 1752270 1761647 WBGene00021509 Y41D4A.7 Y41D4A.7 0.0677588359493235  
 AGIWUR14956  
 N2 HS IV 1768621 1769667 WBGene00000682 col-108 Y41D4A.2 -0.158955627869132  
 AGIWUR23691  
 N2 HS IV 1772144 1774695 WBGene00021504 Y41D4A.1 Y41D4A.1 0.0805459850193326  
 AGIWUR38771  
 N2 HS IV 1775277 1781562 WBGene00021510 frpr-19 Y41D4A.8 -0.0453422734955913  
 AGIWUR8492  
 N2 HS IV 1802026 1803982 WBGene00021410 Y38C1BA.1 Y38C1BA.1 -0.315362010704495  
 AGIWUR12252  
 N2 HS IV 1805037 1815099 WBGene00004913 snn-1 Y38C1BA.2 -0.404096212969693  
 AGIWUR9737  
 N2 HS IV 1817311 1820253 WBGene00000683 col-109 Y38C1BA.3 -0.0869036179275327  
 AGIWUR41439  
 N2 HS IV 1824481 1834029 WBGene00000553 cmk-1 K07A9.2 -0.16063201014477  
 AGIWUR6980;AGIWUR44640

|                                                                                                                                                                                  |    |    |         |         |                |           |           |                     |
|----------------------------------------------------------------------------------------------------------------------------------------------------------------------------------|----|----|---------|---------|----------------|-----------|-----------|---------------------|
| N2                                                                                                                                                                               | HS | IV | 1834628 | 1847336 | WBGene00019462 | K07A9.3   | K07A9.3   | 0.0644618637499539  |
| AGIWUR8587;AGIWUR9835;AGIWUR41314                                                                                                                                                |    |    |         |         |                |           |           |                     |
| N2                                                                                                                                                                               | HS | IV | 1847968 | 1880587 | WBGene00001173 | egl-4     | F55A8.2   | -0.081866461365836  |
| AGIWUR6005;AGIWUR7284;AGIWUR8769;AGIWUR10842;AGIWUR11592;AGIWUR11699;AGIWUR19320;AGIWUR20152;AGIWUR29949;AGIWUR30504;AGIWUR34266;AGIWUR36671;AGIWUR37765;AGIWUR44393;AGIWUR44568 |    |    |         |         |                |           |           |                     |
| N2                                                                                                                                                                               | HS | IV | 1902323 | 1917841 | WBGene00001186 | egl-18    | F55A8.1   | -0.409361205640272  |
| AGIWUR5983;AGIWUR11851;AGIWUR22220;AGIWUR24154;AGIWUR26660;AGIWUR35388                                                                                                           |    |    |         |         |                |           |           |                     |
| N2                                                                                                                                                                               | HS | IV | 1917854 | 1921644 | WBGene00001253 | elt-6     | F52C12.5  | -0.208105121427651  |
| AGIWUR35073                                                                                                                                                                      |    |    |         |         |                |           |           |                     |
| N2                                                                                                                                                                               | HS | IV | 1923939 | 1948040 | WBGene00018681 | denn-4    | F52C12.4  | -0.155468558493306  |
| AGIWUR27710                                                                                                                                                                      |    |    |         |         |                |           |           |                     |
| N2                                                                                                                                                                               | HS | IV | 1948191 | 1953322 | WBGene00018680 | tsen-54   | F52C12.3  | 0.044173616483512   |
| AGIWUR15719                                                                                                                                                                      |    |    |         |         |                |           |           |                     |
| N2                                                                                                                                                                               | HS | IV | 1953579 | 1956704 | WBGene00018679 | F52C12.2  | F52C12.2  | 0.0911322807578117  |
| AGIWUR30822;AGIWUR41330                                                                                                                                                          |    |    |         |         |                |           |           |                     |
| N2                                                                                                                                                                               | HS | IV | 1956711 | 1959749 | WBGene00138717 | F52C12.6  | F52C12.6  | -0.0481651982044236 |
| AGIWUR10670;AGIWUR13703;AGIWUR23756;AGIWUR30117;AGIWUR37019                                                                                                                      |    |    |         |         |                |           |           |                     |
| N2                                                                                                                                                                               | HS | IV | 1959854 | 1963240 | WBGene00018678 | F52C12.1  | F52C12.1  | 0.0264756364485503  |
| AGIWUR20817                                                                                                                                                                      |    |    |         |         |                |           |           |                     |
| N2                                                                                                                                                                               | HS | IV | 1963191 | 1964724 | WBGene00006738 | ulp-3     | Y48A5A.2  | 0.236832929815815   |
| AGIWUR12318                                                                                                                                                                      |    |    |         |         |                |           |           |                     |
| N2                                                                                                                                                                               | HS | IV | 1965481 | 1969650 | WBGene00021655 | Y48A5A.1  | Y48A5A.1  | -0.12463224761393   |
| AGIWUR7982;AGIWUR29240                                                                                                                                                           |    |    |         |         |                |           |           |                     |
| N2                                                                                                                                                                               | HS | IV | 1969737 | 1970280 | WBGene00044466 | Y48A5A.3  | Y48A5A.3  | 0.132119731218975   |
| AGIWUR18424;AGIWUR25118;AGIWUR36764;AGIWUR37110;AGIWUR39187                                                                                                                      |    |    |         |         |                |           |           |                     |
| N2                                                                                                                                                                               | HS | IV | 1970734 | 1972977 | WBGene00022298 | Y76B12C.4 | Y76B12C.4 | -0.237675357127637  |
| AGIWUR11644                                                                                                                                                                      |    |    |         |         |                |           |           |                     |
| N2                                                                                                                                                                               | HS | IV | 1973702 | 1975677 | WBGene00022297 | Y76B12C.3 | Y76B12C.3 | -0.0288583208037778 |
| AGIWUR39977                                                                                                                                                                      |    |    |         |         |                |           |           |                     |
| N2                                                                                                                                                                               | HS | IV | 1979988 | 1980363 | WBGene00022302 | Y76B12C.8 | Y76B12C.8 | 0.280187765206609   |
| AGIWUR19264                                                                                                                                                                      |    |    |         |         |                |           |           |                     |
| N2                                                                                                                                                                               | HS | IV | 1981406 | 1992966 | WBGene00022300 | Y76B12C.6 | Y76B12C.6 | -0.124369921554227  |
| AGIWUR11393;AGIWUR23683;AGIWUR35565                                                                                                                                              |    |    |         |         |                |           |           |                     |
| N2                                                                                                                                                                               | HS | IV | 1993089 | 2008993 | WBGene00022296 | xpc-1     | Y76B12C.2 | -0.0136966697882031 |
| AGIWUR4472                                                                                                                                                                       |    |    |         |         |                |           |           |                     |
| N2                                                                                                                                                                               | HS | IV | 2009038 | 2032998 | WBGene00022301 | cpsf-1    | Y76B12C.7 | 0.178077957606259   |
| AGIWUR32546                                                                                                                                                                      |    |    |         |         |                |           |           |                     |
| N2                                                                                                                                                                               | HS | IV | 2034982 | 2035986 | WBGene00022303 | Y76B12C.9 | Y76B12C.9 | 0.252398219807592   |
| AGIWUR6069                                                                                                                                                                       |    |    |         |         |                |           |           |                     |



|                                                                                                                       |    |    |         |         |                |            |            |                     |             |
|-----------------------------------------------------------------------------------------------------------------------|----|----|---------|---------|----------------|------------|------------|---------------------|-------------|
| N2                                                                                                                    | HS | IV | 2037191 | 2043191 | WBGene00022295 | cng-2      | Y76B12C.1  | -0.106489256012678  |             |
| AGIWUR30761                                                                                                           |    |    |         |         |                |            |            |                     |             |
| N2                                                                                                                    | HS | IV | 2051500 | 2057079 | WBGene00044467 | R05C11.4   | R05C11.4   | 0.0912135449906915  |             |
| AGIWUR7195                                                                                                            |    |    |         |         |                |            |            |                     |             |
| N2                                                                                                                    | HS | IV | 2057878 | 2059111 | WBGene00019874 | R05C11.2   | R05C11.2   | 0.119369470326412   |             |
| AGIWUR26095                                                                                                           |    |    |         |         |                |            |            |                     |             |
| N2                                                                                                                    | HS | IV | 2066200 | 2071741 | WBGene00019873 | arrd-26    | R05C11.1   | 0.127559586454277   |             |
| AGIWUR33154                                                                                                           |    |    |         |         |                |            |            |                     |             |
| N2                                                                                                                    | HS | IV | 2084034 | 2091931 | WBGene00019875 | mca-2      | R05C11.3   | -0.104735201981646  |             |
| AGIWUR11098;AGIWUR19693;AGIWUR30452;AGIWUR43035                                                                       |    |    |         |         |                |            |            |                     |             |
| N2                                                                                                                    | HS | IV | 2091929 | 2099890 | WBGene00044649 | C23H5.11   | C23H5.11   | -0.0530288497234279 |             |
| AGIWUR6993                                                                                                            |    |    |         |         |                |            |            |                     |             |
| N2                                                                                                                    | HS | IV | 2104056 | 2111605 | WBGene00000487 | che-6      | C23H5.7    | -0.0664354151759836 | AGIWUR31703 |
| N2                                                                                                                    | HS | IV | 2111894 | 2113422 | WBGene00016027 | C23H5.8    | C23H5.8    | 0.513568214542669   |             |
| AGIWUR13732;AGIWUR14068;AGIWUR24032;AGIWUR24904;AGIWUR36120;AGIWUR42627                                               |    |    |         |         |                |            |            |                     |             |
| N2                                                                                                                    | HS | IV | 2114626 | 2115625 | WBGene00016025 | xbx-4      | C23H5.3    | 0.0857871556286423  |             |
| AGIWUR4935;AGIWUR5289;AGIWUR12000;AGIWUR18510;AGIWUR36867;AGIWUR37752                                                 |    |    |         |         |                |            |            |                     |             |
| N2                                                                                                                    | HS | IV | 2122797 | 2126038 | WBGene00016024 | glb-7      | C23H5.2    | 0.113687681430221   | AGIWUR1915  |
| N2                                                                                                                    | HS | IV | 2126145 | 2128852 | WBGene00001729 | grl-20     | C23H5.9    | -0.0232223457936591 |             |
| AGIWUR3649;AGIWUR24293;AGIWUR25291;AGIWUR31492;AGIWUR35279;AGIWUR40828                                                |    |    |         |         |                |            |            |                     |             |
| N2                                                                                                                    | HS | IV | 2130965 | 2133025 | WBGene00016023 | prmt-6     | C23H5.1    | 0.320834627388992   |             |
| AGIWUR5424;AGIWUR17274                                                                                                |    |    |         |         |                |            |            |                     |             |
| N2                                                                                                                    | HS | IV | 2133481 | 2134708 | WBGene00077523 | C23H5.12   | C23H5.12   | 0.049184716835839   |             |
| AGIWUR6775                                                                                                            |    |    |         |         |                |            |            |                     |             |
| N2                                                                                                                    | HS | IV | 2136895 | 2146461 | WBGene00016918 | test-1     | C54E4.2    | 0.113248636781066   |             |
| AGIWUR1237;AGIWUR8185                                                                                                 |    |    |         |         |                |            |            |                     |             |
| N2                                                                                                                    | HS | IV | 2146672 | 2149297 | WBGene00016920 | C54E4.5    | C54E4.5    | -0.257933240018836  | AGIWUR24380 |
| N2                                                                                                                    | HS | IV | 2150650 | 2159162 | WBGene00001557 | gcy-37     | C54E4.3    | -0.151052700299452  | AGIWUR40786 |
| N2                                                                                                                    | HS | IV | 2161252 | 2168626 | WBGene00016919 | C54E4.4    | C54E4.4    | -0.0827884781239554 | AGIWUR28881 |
| N2                                                                                                                    | HS | IV | 2175606 | 2177579 | WBGene00016917 | C54E4.1    | C54E4.1    | -0.220855332882749  | AGIWUR7652  |
| N2                                                                                                                    | HS | IV | 2177900 | 2198871 | WBGene00022134 | Y71G10AL.1 | Y71G10AL.1 | -0.0502862871433916 |             |
| AGIWUR6949;AGIWUR10218;AGIWUR16899;AGIWUR23265;AGIWUR37024;AGIWUR38505;AGIWUR43268                                    |    |    |         |         |                |            |            |                     |             |
| N2                                                                                                                    | HS | IV | 2199041 | 2209051 | WBGene00044650 | Y71G10AR.4 | Y71G10AR.4 |                     |             |
| 0.000309129985197387 AGIWUR10691;AGIWUR30628;AGIWUR30812                                                              |    |    |         |         |                |            |            |                     |             |
| N2                                                                                                                    | HS | IV | 2222828 | 2235795 | WBGene00020208 | T04C4.1    | T04C4.1    | -0.0548153968865481 |             |
| AGIWUR5060;AGIWUR9922;AGIWUR18558;AGIWUR18666;AGIWUR22407;AGIWUR24849;AGIWUR26201;AGIWUR34832;AGIWUR35575;AGIWUR38382 |    |    |         |         |                |            |            |                     |             |
| N2                                                                                                                    | HS | IV | 2237663 | 2242449 | WBGene00019785 | M70.3      | M70.3      | 0.0506984242321344  | AGIWUR21308 |
| N2                                                                                                                    | HS | IV | 2243060 | 2243699 | WBGene00019784 | M70.2      | M70.2      | 0.280163867796636   | AGIWUR43594 |

|                                                                        |    |    |         |         |                |            |            |                      |             |
|------------------------------------------------------------------------|----|----|---------|---------|----------------|------------|------------|----------------------|-------------|
| N2                                                                     | HS | IV | 2245874 | 2252370 | WBGene00019783 | M70.1      | M70.1      | 0.0754624396054826   | AGIWUR44404 |
| N2                                                                     | HS | IV | 2253004 | 2263704 | WBGene00019786 | M70.4      | M70.4      | -0.398748417084315   | AGIWUR8671  |
| N2                                                                     | HS | IV | 2264309 | 2275622 | WBGene00019787 | M70.5      | M70.5      | 0.0729128102341381   | AGIWUR41044 |
| N2                                                                     | HS | IV | 2275864 | 2300351 | WBGene00002990 | lin-1      | C37F5.1    | -0.100215833972804   |             |
| AGIWUR2520;AGIWUR11089;AGIWUR14119;AGIWUR19872;AGIWUR40161;AGIWUR43471 |    |    |         |         |                |            |            |                      |             |
| N2                                                                     | HS | IV | 2304446 | 2306540 | WBGene00021416 | mksr-2     | Y38F2AL.2  | 0.168969832481586    |             |
| AGIWUR19462                                                            |    |    |         |         |                |            |            |                      |             |
| N2                                                                     | HS | IV | 2307819 | 2314567 | WBGene00006920 | vha-11     | Y38F2AL.3  | 0.108125641357898    |             |
| AGIWUR5573;AGIWUR21184;AGIWUR35616;AGIWUR38366                         |    |    |         |         |                |            |            |                      |             |
| N2                                                                     | HS | IV | 2314589 | 2315990 | WBGene00006912 | vha-3      | Y38F2AL.4  | -0.164641969952335   |             |
| AGIWUR8240                                                             |    |    |         |         |                |            |            |                      |             |
| N2                                                                     | HS | IV | 2324058 | 2326739 | WBGene00021415 | nsy-4      | Y38F2AL.1  | -0.327465656462071   |             |
| AGIWUR35241                                                            |    |    |         |         |                |            |            |                      |             |
| N2                                                                     | HS | IV | 2327126 | 2329640 | WBGene00021417 | nhr-236    | Y38F2AL.5  | -0.176823775630817   |             |
| AGIWUR33118                                                            |    |    |         |         |                |            |            |                      |             |
| N2                                                                     | HS | IV | 2330193 | 2331009 | WBGene00021418 | Y38F2AL.6  | Y38F2AL.6  | 0.0289164090906961   |             |
| AGIWUR12369;AGIWUR40782                                                |    |    |         |         |                |            |            |                      |             |
| N2                                                                     | HS | IV | 2333837 | 2348912 | WBGene00021425 | ppgn-1     | Y38F2AR.7  | 0.215088185336562    |             |
| AGIWUR27269;AGIWUR34081                                                |    |    |         |         |                |            |            |                      |             |
| N2                                                                     | HS | IV | 2349271 | 2382171 | WBGene00021423 | tftc-1     | Y38F2AR.5  | -0.109545985462109   |             |
| AGIWUR2694;AGIWUR40174                                                 |    |    |         |         |                |            |            |                      |             |
| N2                                                                     | HS | IV | 2384013 | 2388089 | WBGene00021421 | Y38F2AR.3  | Y38F2AR.3  | 0.0160114948967323   |             |
| AGIWUR26768;AGIWUR29181;AGIWUR34184                                    |    |    |         |         |                |            |            |                      |             |
| N2                                                                     | HS | IV | 2388195 | 2388675 | WBGene00021427 | Y38F2AR.9  | Y38F2AR.9  | 0.00116365935938934  |             |
| AGIWUR23976;AGIWUR42445                                                |    |    |         |         |                |            |            |                      |             |
| N2                                                                     | HS | IV | 2389445 | 2390386 | WBGene00021420 | trap-3     | Y38F2AR.2  | -0.316141559601419   |             |
| AGIWUR18279                                                            |    |    |         |         |                |            |            |                      |             |
| N2                                                                     | HS | IV | 2390821 | 2396263 | WBGene00021419 | eri-5      | Y38F2AR.1  | -0.0155492971396178  |             |
| AGIWUR30757                                                            |    |    |         |         |                |            |            |                      |             |
| N2                                                                     | HS | IV | 2396257 | 2399420 | WBGene00021428 | Y38F2AR.10 | Y38F2AR.10 | -0.0529143621218182  |             |
| AGIWUR17742                                                            |    |    |         |         |                |            |            |                      |             |
| N2                                                                     | HS | IV | 2399515 | 2412410 | WBGene00021430 | Y38F2AR.12 | Y38F2AR.12 | 0.115403131294958    |             |
| AGIWUR8407;AGIWUR30068                                                 |    |    |         |         |                |            |            |                      |             |
| N2                                                                     | HS | IV | 2432993 | 2436472 | WBGene00016671 | C45G7.4    | C45G7.4    | 0.0392082352390393   | AGIWUR18077 |
| N2                                                                     | HS | IV | 2436505 | 2463405 | WBGene00000402 | cdh-10     | C45G7.5    | -0.180370886246599   |             |
| AGIWUR32982;AGIWUR37797                                                |    |    |         |         |                |            |            |                      |             |
| N2                                                                     | HS | IV | 2464456 | 2465401 | WBGene00016670 | ilys-3     | C45G7.3    | 0.471725483494282    | AGIWUR18202 |
| N2                                                                     | HS | IV | 2467681 | 2468810 | WBGene00016669 | ilys-2     | C45G7.2    | -0.0365748382801492  | AGIWUR12281 |
| N2                                                                     | HS | IV | 2470414 | 2471449 | WBGene00016668 | ilys-1     | C45G7.1    | -0.00949461347661273 | AGIWUR12322 |

|                                                                                                |    |    |         |         |                |            |            |                     |
|------------------------------------------------------------------------------------------------|----|----|---------|---------|----------------|------------|------------|---------------------|
| N2                                                                                             | HS | IV | 2476700 | 2480218 | WBGene00001705 | grd-16     | Y69A2AL.1  | 0.285997339079454   |
| AGIWUR28070                                                                                    |    |    |         |         |                |            |            |                     |
| N2                                                                                             | HS | IV | 2482255 | 2484218 | WBGene00044468 | Y69A2AL.2  | Y69A2AL.2  | 0.11513292377419    |
| AGIWUR4846;AGIWUR10333;AGIWUR22619                                                             |    |    |         |         |                |            |            |                     |
| N2                                                                                             | HS | IV | 2488820 | 2494135 | WBGene00022090 | Y69A2AR.19 | Y69A2AR.19 | -0.0901648698303017 |
| AGIWUR32158                                                                                    |    |    |         |         |                |            |            |                     |
| N2                                                                                             | HS | IV | 2494513 | 2495174 | WBGene00022092 | Y69A2AR.21 | Y69A2AR.21 | 0.0685029107313664  |
| AGIWUR3459;AGIWUR6118;AGIWUR16638;AGIWUR29487;AGIWUR29613                                      |    |    |         |         |                |            |            |                     |
| N2                                                                                             | HS | IV | 2495735 | 2497683 | WBGene00022089 | Y69A2AR.18 | Y69A2AR.18 | -0.0212592603602282 |
| AGIWUR4576;AGIWUR29217;AGIWUR34804                                                             |    |    |         |         |                |            |            |                     |
| N2                                                                                             | HS | IV | 2497801 | 2530296 | WBGene00022087 | Y69A2AR.16 | Y69A2AR.16 | 0.0101371402571058  |
| AGIWUR8327;AGIWUR23283;AGIWUR27495;AGIWUR40391                                                 |    |    |         |         |                |            |            |                     |
| N2                                                                                             | HS | IV | 2542326 | 2548719 | WBGene00022086 | spr-3      | Y69A2AR.15 | -0.166462453782788  |
| AGIWUR36441                                                                                    |    |    |         |         |                |            |            |                     |
| N2                                                                                             | HS | IV | 2549926 | 2551697 | WBGene00022094 | Y69A2AR.23 | Y69A2AR.23 | 0.00622406316980673 |
| AGIWUR21548                                                                                    |    |    |         |         |                |            |            |                     |
| N2                                                                                             | HS | IV | 2551872 | 2557106 | WBGene00022085 | Y69A2AR.14 | Y69A2AR.14 | -0.0835781455820559 |
| AGIWUR24129                                                                                    |    |    |         |         |                |            |            |                     |
| N2                                                                                             | HS | IV | 2563778 | 2564069 | WBGene00022095 | Y69A2AR.24 | Y69A2AR.24 | 0.281063091571316   |
| AGIWUR38735                                                                                    |    |    |         |         |                |            |            |                     |
| N2                                                                                             | HS | IV | 2565820 | 2568367 | WBGene00022096 | Y69A2AR.25 | Y69A2AR.25 | -0.205419973497623  |
| AGIWUR31094                                                                                    |    |    |         |         |                |            |            |                     |
| N2                                                                                             | HS | IV | 2568614 | 2572056 | WBGene00022083 | Y69A2AR.12 | Y69A2AR.12 | -0.143858152425308  |
| AGIWUR43136                                                                                    |    |    |         |         |                |            |            |                     |
| N2                                                                                             | HS | IV | 2592395 | 2596786 | WBGene00022079 | Y69A2AR.8  | Y69A2AR.8  | -0.0458542642463895 |
| AGIWUR43208;AGIWUR44094                                                                        |    |    |         |         |                |            |            |                     |
| N2                                                                                             | HS | IV | 2597574 | 2597970 | WBGene00235294 | Y69A2AR.47 | Y69A2AR.47 | -0.0578132657334205 |
| AGIWUR35460                                                                                    |    |    |         |         |                |            |            |                     |
| N2                                                                                             | HS | IV | 2601141 | 2607571 | WBGene00022078 | epg-9      | Y69A2AR.7  | -0.180922173819934  |
| AGIWUR7888;AGIWUR11032;AGIWUR12009;AGIWUR21991;AGIWUR24627;AGIWUR31250;AGIWUR33586;AGIWUR44851 |    |    |         |         |                |            |            |                     |
| N2                                                                                             | HS | IV | 2608051 | 2610200 | WBGene00022077 | vamp-7     | Y69A2AR.6  | -0.263003669891372  |
| AGIWUR41890                                                                                    |    |    |         |         |                |            |            |                     |
| N2                                                                                             | HS | IV | 2610408 | 2612435 | WBGene00022101 | Y69A2AR.32 | Y69A2AR.32 | -0.182979821461451  |
| AGIWUR1713;AGIWUR9524;AGIWUR20374;AGIWUR24017;AGIWUR36001;AGIWUR38697                          |    |    |         |         |                |            |            |                     |
| N2                                                                                             | HS | IV | 2614200 | 2617135 | WBGene00022076 | daao-1     | Y69A2AR.5  | 0.0511480800748951  |
| AGIWUR1766;AGIWUR3255;AGIWUR8311;AGIWUR25091;AGIWUR35754;AGIWUR36807                           |    |    |         |         |                |            |            |                     |
| N2                                                                                             | HS | IV | 2619875 | 2625438 | WBGene00004878 | smf-3      | Y69A2AR.4  | -0.0402561471037668 |
| AGIWUR7804                                                                                     |    |    |         |         |                |            |            |                     |
| N2                                                                                             | HS | IV | 2626132 | 2628271 | WBGene00003595 | ngn-1      | Y69A2AR.29 | -0.244576764922141  |

|                                                                         |    |    |         |         |                |            |            |                      |
|-------------------------------------------------------------------------|----|----|---------|---------|----------------|------------|------------|----------------------|
| AGIWUR28661                                                             |    |    |         |         |                |            |            |                      |
| N2                                                                      | HS | IV | 2636228 | 2641117 | WBGene00003161 | mdf-2      | Y69A2AR.30 | 0.000604863718211224 |
| AGIWUR3452;AGIWUR25205;AGIWUR38116;AGIWUR39583                          |    |    |         |         |                |            |            |                      |
| N2                                                                      | HS | IV | 2641310 | 2642113 | WBGene00022075 | Y69A2AR.3  | Y69A2AR.3  | 0.458014568791949    |
| AGIWUR24450                                                             |    |    |         |         |                |            |            |                      |
| N2                                                                      | HS | IV | 2642979 | 2650104 | WBGene00004367 | ric-8      | Y69A2AR.2  | -0.118728476779612   |
| AGIWUR22951;AGIWUR44852                                                 |    |    |         |         |                |            |            |                      |
| N2                                                                      | HS | IV | 2650384 | 2664003 | WBGene00022100 | Y69A2AR.31 | Y69A2AR.31 | -0.04613814604879    |
| AGIWUR15525                                                             |    |    |         |         |                |            |            |                      |
| N2                                                                      | HS | IV | 2667050 | 2672202 | WBGene00022074 | Y69A2AR.1  | Y69A2AR.1  | -0.133932239191381   |
| AGIWUR16654;AGIWUR29046;AGIWUR35364                                     |    |    |         |         |                |            |            |                      |
| N2                                                                      | HS | IV | 2673098 | 2675015 | WBGene00022377 | gpx-4      | Y94H6A.4   | -0.0168744644408916  |
| AGIWUR32332                                                             |    |    |         |         |                |            |            |                      |
| N2                                                                      | HS | IV | 2676512 | 2678162 | WBGene00022376 | Y94H6A.3   | Y94H6A.3   | -0.103745962967928   |
| AGIWUR1371                                                              |    |    |         |         |                |            |            |                      |
| N2                                                                      | HS | IV | 2680098 | 2688808 | WBGene00044651 | egrh-3     | Y94H6A.11  | -0.0495271816478189  |
| AGIWUR18045;AGIWUR18215                                                 |    |    |         |         |                |            |            |                      |
| N2                                                                      | HS | IV | 2688947 | 2703977 | WBGene00022378 | Y94H6A.5   | Y94H6A.5   | 0.147770367660328    |
| AGIWUR39570                                                             |    |    |         |         |                |            |            |                      |
| N2                                                                      | HS | IV | 2704693 | 2707231 | WBGene00006705 | ubc-8      | Y94H6A.6   | -0.0151931671708665  |
| AGIWUR17647                                                             |    |    |         |         |                |            |            |                      |
| N2                                                                      | HS | IV | 2709942 | 2711374 | WBGene00022382 | Y94H6A.10  | Y94H6A.10  | -0.0857789074026591  |
| AGIWUR41705                                                             |    |    |         |         |                |            |            |                      |
| N2                                                                      | HS | IV | 2711939 | 2713035 | WBGene00050885 | Y94H6A.12  | Y94H6A.12  | 0.404833026565637    |
| AGIWUR4052                                                              |    |    |         |         |                |            |            |                      |
| N2                                                                      | HS | IV | 2713907 | 2716574 | WBGene00022379 | Y94H6A.7   | Y94H6A.7   | -0.0369215507293053  |
| AGIWUR2447;AGIWUR5357;AGIWUR6386;AGIWUR7246                             |    |    |         |         |                |            |            |                      |
| N2                                                                      | HS | IV | 2716661 | 2719834 | WBGene00022380 | Y94H6A.8   | Y94H6A.8   | 0.285745172831557    |
| AGIWUR29445                                                             |    |    |         |         |                |            |            |                      |
| N2                                                                      | HS | IV | 2720323 | 2725858 | WBGene00022381 | ubxn-2     | Y94H6A.9   | -0.214513161715356   |
| AGIWUR14157;AGIWUR22376;AGIWUR23767;AGIWUR25071;AGIWUR28469;AGIWUR30699 |    |    |         |         |                |            |            |                      |
| N2                                                                      | HS | IV | 2730252 | 2732404 | WBGene00022375 | Y94H6A.2   | Y94H6A.2   | 0.865713570019357    |
| AGIWUR29436                                                             |    |    |         |         |                |            |            |                      |
| N2                                                                      | HS | IV | 2743007 | 2747476 | WBGene00022374 | nhr-277    | Y94H6A.1   | 0.0716797405078964   |
| AGIWUR28763                                                             |    |    |         |         |                |            |            |                      |
| N2                                                                      | HS | IV | 2751868 | 2753461 | WBGene00044485 | Y54G2A.41  | Y54G2A.41  | -0.00390828362795137 |
| AGIWUR14592;AGIWUR15871;AGIWUR18786;AGIWUR23658;AGIWUR44244             |    |    |         |         |                |            |            |                      |
| N2                                                                      | HS | IV | 2762680 | 2765612 | WBGene00235350 | Y54G2A.77  | Y54G2A.77  | 0.105900749446977    |
| AGIWUR18732                                                             |    |    |         |         |                |            |            |                      |

|                                                                                                                       |    |    |         |         |                |           |           |                     |
|-----------------------------------------------------------------------------------------------------------------------|----|----|---------|---------|----------------|-----------|-----------|---------------------|
| N2                                                                                                                    | HS | IV | 2765719 | 2771790 | WBGene00021876 | Y54G2A.11 | Y54G2A.11 | -0.047175304649774  |
| AGIWUR7881;AGIWUR8693;AGIWUR10151;AGIWUR12762;AGIWUR13973;AGIWUR16616                                                 |    |    |         |         |                |           |           |                     |
| N2                                                                                                                    | HS | IV | 2777232 | 2782843 | WBGene00021877 | Y54G2A.12 | Y54G2A.12 | 0.120208536981175   |
| AGIWUR4693;AGIWUR23522                                                                                                |    |    |         |         |                |           |           |                     |
| N2                                                                                                                    | HS | IV | 2788692 | 2796805 | WBGene00021868 | atln-1    | Y54G2A.2  | 0.0136199896292091  |
| AGIWUR33912                                                                                                           |    |    |         |         |                |           |           |                     |
| N2                                                                                                                    | HS | IV | 2797061 | 2798573 | WBGene00045397 | Y54G2A.52 | Y54G2A.52 | 0.168436212397774   |
| AGIWUR10865;AGIWUR18487;AGIWUR25860;AGIWUR31076;AGIWUR40561;AGIWUR45067                                               |    |    |         |         |                |           |           |                     |
| N2                                                                                                                    | HS | IV | 2799689 | 2801039 | WBGene00021875 | Y54G2A.10 | Y54G2A.10 | -0.283355960097762  |
| AGIWUR7140;AGIWUR12331;AGIWUR26440                                                                                    |    |    |         |         |                |           |           |                     |
| N2                                                                                                                    | HS | IV | 2801902 | 2803240 | WBGene00044487 | Y54G2A.44 | Y54G2A.44 | -0.0143458360667017 |
| AGIWUR24750;AGIWUR34109                                                                                               |    |    |         |         |                |           |           |                     |
| N2                                                                                                                    | HS | IV | 2803589 | 2804916 | WBGene00021894 | Y54G2A.32 | Y54G2A.32 | 0.0853676519618425  |
| AGIWUR13210                                                                                                           |    |    |         |         |                |           |           |                     |
| N2                                                                                                                    | HS | IV | 2805839 | 2809504 | WBGene00044488 | Y54G2A.45 | Y54G2A.45 | -0.0644970443060942 |
| AGIWUR7243;AGIWUR20787                                                                                                |    |    |         |         |                |           |           |                     |
| N2                                                                                                                    | HS | IV | 2814568 | 2819733 | WBGene00021878 | Y54G2A.13 | Y54G2A.13 | 0.0868448085906159  |
| AGIWUR42785                                                                                                           |    |    |         |         |                |           |           |                     |
| N2                                                                                                                    | HS | IV | 2823746 | 2828069 | WBGene00043062 | clec-80   | Y54G2A.39 | -0.145845559917227  |
| AGIWUR35552                                                                                                           |    |    |         |         |                |           |           |                     |
| N2                                                                                                                    | HS | IV | 2831477 | 2832687 | WBGene00044491 | Y54G2A.48 | Y54G2A.48 | 0.0541457958830431  |
| AGIWUR2292;AGIWUR8308;AGIWUR23599;AGIWUR35331;AGIWUR36640                                                             |    |    |         |         |                |           |           |                     |
| N2                                                                                                                    | HS | IV | 2832877 | 2833480 | WBGene00044489 | pudl-1    | Y54G2A.46 | 0.192239954842867   |
| AGIWUR15460;AGIWUR22792                                                                                               |    |    |         |         |                |           |           |                     |
| N2                                                                                                                    | HS | IV | 2834816 | 2835357 | WBGene00044490 | pudl-2    | Y54G2A.47 | 0.0180729106366329  |
| AGIWUR3206;AGIWUR12409;AGIWUR21422                                                                                    |    |    |         |         |                |           |           |                     |
| N2                                                                                                                    | HS | IV | 2835664 | 2838583 | WBGene00021873 | clec-82   | Y54G2A.8  | -0.18471357498606   |
| AGIWUR28251                                                                                                           |    |    |         |         |                |           |           |                     |
| N2                                                                                                                    | HS | IV | 2838608 | 2839422 | WBGene00043702 | Y54G2A.7  | Y54G2A.7  | 0.127493151442773   |
| AGIWUR6401;AGIWUR8166;AGIWUR14841;AGIWUR23759;AGIWUR31835;AGIWUR32286;AGIWUR34675;AGIWUR36900;AGIWUR37090;AGIWUR40142 |    |    |         |         |                |           |           |                     |
| N2                                                                                                                    | HS | IV | 2839375 | 2841434 | WBGene00021879 | clec-83   | Y54G2A.14 | -0.0872920559934158 |
| AGIWUR41939                                                                                                           |    |    |         |         |                |           |           |                     |
| N2                                                                                                                    | HS | IV | 2842474 | 2845604 | WBGene00021895 | clec-84   | Y54G2A.33 | -0.223714966747266  |
| AGIWUR29146                                                                                                           |    |    |         |         |                |           |           |                     |
| N2                                                                                                                    | HS | IV | 2846476 | 2851282 | WBGene00044495 | Y54G2A.40 | Y54G2A.40 | 0.111488556566093   |
| AGIWUR3193;AGIWUR17597                                                                                                |    |    |         |         |                |           |           |                     |
| N2                                                                                                                    | HS | IV | 2851691 | 2854293 | WBGene00044492 | Y54G2A.49 | Y54G2A.49 | 0.0769092996126801  |
| AGIWUR13172;AGIWUR17819;AGIWUR31750;AGIWUR41764;AGIWUR42281                                                           |    |    |         |         |                |           |           |                     |

|                                                             |    |    |         |         |                |           |           |                     |
|-------------------------------------------------------------|----|----|---------|---------|----------------|-----------|-----------|---------------------|
| N2                                                          | HS | IV | 2854339 | 2855456 | WBGene00021872 | clec-85   | Y54G2A.6  | -0.107528641681585  |
| AGIWUR3905                                                  |    |    |         |         |                |           |           |                     |
| N2                                                          | HS | IV | 2855607 | 2864843 | WBGene00021881 | Y54G2A.16 | Y54G2A.16 | -0.156745091390864  |
| AGIWUR29314                                                 |    |    |         |         |                |           |           |                     |
| N2                                                          | HS | IV | 2872050 | 2890449 | WBGene00021882 | nprrt-1   | Y54G2A.17 | -0.100267592618062  |
| AGIWUR2046;AGIWUR6560;AGIWUR18981;AGIWUR41129               |    |    |         |         |                |           |           |                     |
| N2                                                          | HS | IV | 2890888 | 2891636 | WBGene00235102 | Y54G2A.75 | Y54G2A.75 | -0.163471875165701  |
| AGIWUR32909                                                 |    |    |         |         |                |           |           |                     |
| N2                                                          | HS | IV | 2891560 | 2892495 | WBGene00021883 | Y54G2A.18 | Y54G2A.18 | -0.202154161305192  |
| AGIWUR14241;AGIWUR28071                                     |    |    |         |         |                |           |           |                     |
| N2                                                          | HS | IV | 2893819 | 2894730 | WBGene00021884 | Y54G2A.19 | Y54G2A.19 | -0.160702118739955  |
| AGIWUR2785                                                  |    |    |         |         |                |           |           |                     |
| N2                                                          | HS | IV | 2896968 | 2900638 | WBGene00021885 | Y54G2A.20 | Y54G2A.20 | -0.116579420603951  |
| AGIWUR17990                                                 |    |    |         |         |                |           |           |                     |
| N2                                                          | HS | IV | 2902436 | 2914816 | WBGene00021886 | Y54G2A.21 | Y54G2A.21 | -0.0558993891260422 |
| AGIWUR473;AGIWUR4090;AGIWUR6409;AGIWUR28153                 |    |    |         |         |                |           |           |                     |
| N2                                                          | HS | IV | 2918441 | 2919780 | WBGene00044493 | Y54G2A.50 | Y54G2A.50 | 0.107457948624945   |
| AGIWUR14616;AGIWUR16703                                     |    |    |         |         |                |           |           |                     |
| N2                                                          | HS | IV | 2919826 | 2922251 | WBGene00021887 | fbxc-45   | Y54G2A.22 | -0.0483050505982536 |
| AGIWUR4439                                                  |    |    |         |         |                |           |           |                     |
| N2                                                          | HS | IV | 2922591 | 2925691 | WBGene00006708 | ubc-13    | Y54G2A.31 | -0.0477203232807302 |
| AGIWUR3658                                                  |    |    |         |         |                |           |           |                     |
| N2                                                          | HS | IV | 2927515 | 2928421 | WBGene00021888 | Y54G2A.23 | Y54G2A.23 | -0.121491347798663  |
| AGIWUR8295                                                  |    |    |         |         |                |           |           |                     |
| N2                                                          | HS | IV | 2931403 | 2936843 | WBGene00021870 | samt-1    | Y54G2A.4  | -0.405618699617934  |
| AGIWUR10505                                                 |    |    |         |         |                |           |           |                     |
| N2                                                          | HS | IV | 2937990 | 2939862 | WBGene00021889 | Y54G2A.24 | Y54G2A.24 | 0.0201124320691477  |
| AGIWUR20311                                                 |    |    |         |         |                |           |           |                     |
| N2                                                          | HS | IV | 2960123 | 2964395 | WBGene00021897 | ser-6     | Y54G2A.35 | -0.0394821816061812 |
| AGIWUR7278                                                  |    |    |         |         |                |           |           |                     |
| N2                                                          | HS | IV | 2964365 | 2978461 | WBGene00002243 | lad-2     | Y54G2A.25 | 0.0538743635112882  |
| AGIWUR29465;AGIWUR35601;AGIWUR41610                         |    |    |         |         |                |           |           |                     |
| N2                                                          | HS | IV | 2986104 | 2995573 | WBGene00021890 | Y54G2A.26 | Y54G2A.26 | -0.11566505763251   |
| AGIWUR29419;AGIWUR31009;AGIWUR39038                         |    |    |         |         |                |           |           |                     |
| N2                                                          | HS | IV | 2998877 | 2999485 | WBGene00021891 | Y54G2A.27 | Y54G2A.27 | -0.192844161043074  |
| AGIWUR32480                                                 |    |    |         |         |                |           |           |                     |
| N2                                                          | HS | IV | 3000541 | 3008892 | WBGene00219425 | Y54G2A.73 | Y54G2A.73 | -0.139823342214411  |
| AGIWUR14853;AGIWUR19329;AGIWUR28296;AGIWUR28643;AGIWUR37339 |    |    |         |         |                |           |           |                     |
| N2                                                          | HS | IV | 3012587 | 3014440 | WBGene00021869 | vrp-1     | Y54G2A.3  | 0.345649970346575   |

|                                                                                                                                              |    |    |         |         |                 |           |           |                     |
|----------------------------------------------------------------------------------------------------------------------------------------------|----|----|---------|---------|-----------------|-----------|-----------|---------------------|
| AGIWUR26458                                                                                                                                  |    |    |         |         |                 |           |           |                     |
| N2                                                                                                                                           | HS | IV | 3019738 | 3022315 | WBGene00003008  | lin-22    | Y54G2A.1  | 0.17021379212199    |
| AGIWUR15555;AGIWUR17357;AGIWUR23870                                                                                                          |    |    |         |         |                 |           |           |                     |
| N2                                                                                                                                           | HS | IV | 3023403 | 3028942 | WBGene00021893  | ndnf-1    | Y54G2A.29 | 0.0375461202853362  |
| AGIWUR24891                                                                                                                                  |    |    |         |         |                 |           |           |                     |
| N2                                                                                                                                           | HS | IV | 3032578 | 3050102 | WBGene00022069  | eel-1     | Y67D8C.5  | -0.0968687376249102 |
| AGIWUR9265;AGIWUR12793;AGIWUR16370;AGIWUR19875;AGIWUR25410;AGIWUR32832;AGIWUR34877;AGIWUR36944                                               |    |    |         |         |                 |           |           |                     |
| N2                                                                                                                                           | HS | IV | 3053730 | 3062053 | WBGene00022067  | Y67D8C.3  | Y67D8C.3  | -0.216742313377652  |
| AGIWUR20090;AGIWUR34714                                                                                                                      |    |    |         |         |                 |           |           |                     |
| N2                                                                                                                                           | HS | IV | 3062524 | 3063366 | WBGene00022070  | Y67D8C.6  | Y67D8C.6  | -0.014914300810144  |
| AGIWUR18899                                                                                                                                  |    |    |         |         |                 |           |           |                     |
| N2                                                                                                                                           | HS | IV | 3065568 | 3066934 | WBGene00022071  | Y67D8C.7  | Y67D8C.7  | 0.100487535436776   |
| AGIWUR3480;AGIWUR14950;AGIWUR36360                                                                                                           |    |    |         |         |                 |           |           |                     |
| N2                                                                                                                                           | HS | IV | 3067848 | 3069876 | WBGene00022072  | cpg-9     | Y67D8C.8  | 0.0727203307353221  |
| AGIWUR798;AGIWUR6063;AGIWUR12656;AGIWUR20171;AGIWUR23004;AGIWUR23055;AGIWUR23636;AGIWUR24578;AGIWUR25102;AGIWUR33268;AGIWUR38111;AGIWUR39434 |    |    |         |         |                 |           |           |                     |
| N2                                                                                                                                           | HS | IV | 3070134 | 3076307 | WBGene000235279 | Y67D8C.22 | Y67D8C.22 | 0.180550229677252   |
| AGIWUR11754                                                                                                                                  |    |    |         |         |                 |           |           |                     |
| N2                                                                                                                                           | HS | IV | 3077466 | 3086923 | WBGene00022073  | Y67D8C.9  | Y67D8C.9  | -0.0344911118303077 |
| AGIWUR128;AGIWUR18909;AGIWUR22466;AGIWUR23929;AGIWUR24530;AGIWUR24619;AGIWUR26816;AGIWUR34605;AGIWUR35226;AGIWUR38622;AGIWUR39640            |    |    |         |         |                 |           |           |                     |
| N2                                                                                                                                           | HS | IV | 3103157 | 3133147 | WBGene00003153  | mca-3     | Y67D8C.10 | -0.102776674440257  |
| AGIWUR13343;AGIWUR25220                                                                                                                      |    |    |         |         |                 |           |           |                     |
| N2                                                                                                                                           | HS | IV | 3139833 | 3146723 | WBGene00020729  | T23E1.2   | T23E1.2   | 0.107914362969254   |
| AGIWUR8351;AGIWUR39712                                                                                                                       |    |    |         |         |                 |           |           |                     |
| N2                                                                                                                                           | HS | IV | 3146894 | 3148882 | WBGene00020730  | T23E1.3   | T23E1.3   | 0.0688042301400706  |
| N2                                                                                                                                           | HS | IV | 3151361 | 3155987 | WBGene00020728  | T23E1.1   | T23E1.1   | -0.005822487994676  |
| AGIWUR1768;AGIWUR6637;AGIWUR10515;AGIWUR12603;AGIWUR17243;AGIWUR18643;AGIWUR19244;AGIWUR27038;AGIWUR33531;AGIWUR33996;AGIWUR38671            |    |    |         |         |                 |           |           |                     |
| N2                                                                                                                                           | HS | IV | 3169946 | 3172610 | WBGene00022061  | Y67D8B.1  | Y67D8B.1  | 0.0213220924956596  |
| AGIWUR30463                                                                                                                                  |    |    |         |         |                 |           |           |                     |
| N2                                                                                                                                           | HS | IV | 3173550 | 3176115 | WBGene00022063  | Y67D8B.4  | Y67D8B.4  | -0.115459427617401  |
| AGIWUR12437;AGIWUR15848;AGIWUR18862;AGIWUR23118;AGIWUR31340;AGIWUR32394;AGIWUR33681;AGIWUR36083;AGIWUR39191                                  |    |    |         |         |                 |           |           |                     |
| N2                                                                                                                                           | HS | IV | 3186080 | 3191562 | WBGene00022062  | Y67D8B.2  | Y67D8B.2  | -0.100597168159373  |
| AGIWUR9123;AGIWUR35608                                                                                                                       |    |    |         |         |                 |           |           |                     |
| N2                                                                                                                                           | HS | IV | 3202333 | 3203861 | WBGene00022064  | Y67D8B.5  | Y67D8B.5  | 0.00268886865983831 |
| AGIWUR29258                                                                                                                                  |    |    |         |         |                 |           |           |                     |
| N2                                                                                                                                           | HS | IV | 3204559 | 3210582 | WBGene00004240  | puf-4     | M4.2      | 0.0687316603567858  |
| N2                                                                                                                                           | HS | IV | 3213764 | 3219825 | WBGene00019766  | M4.1      | M4.1      | 0.104631158815007   |
| AGIWUR19536                                                                                                                                  |    |    |         |         |                 |           |           |                     |
| AGIWUR39578                                                                                                                                  |    |    |         |         |                 |           |           |                     |

|                                                                                                             |    |    |         |         |                |           |           |                     |
|-------------------------------------------------------------------------------------------------------------|----|----|---------|---------|----------------|-----------|-----------|---------------------|
| N2                                                                                                          | HS | IV | 3222440 | 3252601 | WBGene00022059 | Y67D8A.2  | Y67D8A.2  |                     |
| -0.00359205270408491 AGIWUR4774;AGIWUR19074;AGIWUR21542;AGIWUR25290                                         |    |    |         |         |                |           |           |                     |
| N2                                                                                                          | HS | IV | 3253263 | 3254543 | WBGene00022060 | dmd-9     | Y67D8A.3  | -0.282323356591792  |
| AGIWUR7989                                                                                                  |    |    |         |         |                |           |           |                     |
| N2                                                                                                          | HS | IV | 3258910 | 3263489 | WBGene00020831 | T26C12.1  | T26C12.1  | -0.112718611390749  |
| AGIWUR7690;AGIWUR10912;AGIWUR32472                                                                          |    |    |         |         |                |           |           |                     |
| N2                                                                                                          | HS | IV | 3263851 | 3265372 | WBGene00020832 | T26C12.2  | T26C12.2  | 0.0060668746406094  |
| AGIWUR6073                                                                                                  |    |    |         |         |                |           |           |                     |
| N2                                                                                                          | HS | IV | 3266404 | 3267677 | WBGene00044469 | clec-173  | T26C12.6  | -0.183637908995037  |
| AGIWUR20423                                                                                                 |    |    |         |         |                |           |           |                     |
| N2                                                                                                          | HS | IV | 3269527 | 3273397 | WBGene00020833 | T26C12.3  | T26C12.3  | -0.135109356599821  |
| AGIWUR1492;AGIWUR16675;AGIWUR27212;AGIWUR38075                                                              |    |    |         |         |                |           |           |                     |
| N2                                                                                                          | HS | IV | 3282885 | 3289337 | WBGene00001548 | gcy-23    | T26C12.4  | 0.269796234920998   |
| AGIWUR42079                                                                                                 |    |    |         |         |                |           |           |                     |
| N2                                                                                                          | HS | IV | 3292120 | 3294633 | WBGene00021089 | W08E12.8  | W08E12.8  | -0.209954002883904  |
| AGIWUR25114                                                                                                 |    |    |         |         |                |           |           |                     |
| N2                                                                                                          | HS | IV | 3295135 | 3297225 | WBGene00021088 | W08E12.7  | W08E12.7  | -0.0140722125552823 |
| AGIWUR209;AGIWUR14640                                                                                       |    |    |         |         |                |           |           |                     |
| N2                                                                                                          | HS | IV | 3298629 | 3299687 | WBGene00021087 | W08E12.6  | W08E12.6  | -0.19758339775692   |
| AGIWUR36833                                                                                                 |    |    |         |         |                |           |           |                     |
| N2                                                                                                          | HS | IV | 3305898 | 3306541 | WBGene00021083 | W08E12.2  | W08E12.2  | 0.190239135450804   |
| AGIWUR27318                                                                                                 |    |    |         |         |                |           |           |                     |
| N2                                                                                                          | HS | IV | 3306664 | 3307563 | WBGene00021090 | W08E12.9  | W08E12.9  | -0.0713451758699533 |
| AGIWUR887                                                                                                   |    |    |         |         |                |           |           |                     |
| N2                                                                                                          | HS | IV | 3311276 | 3313180 | WBGene00021082 | zip-11    | W08E12.1  | -0.250724214546256  |
| AGIWUR24069                                                                                                 |    |    |         |         |                |           |           |                     |
| N2                                                                                                          | HS | IV | 3320013 | 3324950 | WBGene00018325 | F42A6.3   | F42A6.3   | 0.0844875481361651  |
| AGIWUR41089                                                                                                 |    |    |         |         |                |           |           |                     |
| N2                                                                                                          | HS | IV | 3334042 | 3336868 | WBGene00018328 | F42A6.6   | F42A6.6   | -0.0931042040371608 |
| AGIWUR33815                                                                                                 |    |    |         |         |                |           |           |                     |
| N2                                                                                                          | HS | IV | 3336927 | 3338867 | WBGene00001999 | hrp-1     | F42A6.7   | -0.307829287709291  |
| AGIWUR11495;AGIWUR13108;AGIWUR16261;AGIWUR18729;AGIWUR24759;AGIWUR30889;AGIWUR35196;AGIWUR42971;AGIWUR43704 |    |    |         |         |                |           |           |                     |
| N2                                                                                                          | HS | IV | 3339792 | 3340953 | WBGene00018329 | fbxa-130  | F42A6.8   | 0.00199459918833611 |
| AGIWUR41895                                                                                                 |    |    |         |         |                |           |           |                     |
| N2                                                                                                          | HS | IV | 3341470 | 3341939 | WBGene00018324 | F42A6.2   | F42A6.2   | 0.0197445800624969  |
| AGIWUR28289                                                                                                 |    |    |         |         |                |           |           |                     |
| N2                                                                                                          | HS | IV | 3342519 | 3350027 | WBGene00018330 | elks-1    | F42A6.9   | -0.086555105114245  |
| AGIWUR3955                                                                                                  |    |    |         |         |                |           |           |                     |
| N2                                                                                                          | HS | IV | 3363553 | 3366079 | WBGene00021953 | Y55H10A.2 | Y55H10A.2 | -0.138871767221107  |
| AGIWUR44245                                                                                                 |    |    |         |         |                |           |           |                     |
| N2                                                                                                          | HS | IV | 3369197 | 3373467 | WBGene00021952 | vha-19    | Y55H10A.1 | 0.0702147782774727  |
| AGIWUR27642                                                                                                 |    |    |         |         |                |           |           |                     |
| N2                                                                                                          | HS | IV | 3373387 | 3378130 | WBGene00015249 | otub-4    | B0546.2   | -0.28960976254701   |



AGIWUR36668;AGIWUR40143

|    |    |    |         |         |                |         |         |                     |             |
|----|----|----|---------|---------|----------------|---------|---------|---------------------|-------------|
| N2 | HS | IV | 3382949 | 3384147 | WBGene00015251 | B0546.4 | B0546.4 | -0.0594325231547774 | AGIWUR8456  |
| N2 | HS | IV | 3385903 | 3386904 | WBGene00015248 | mai-2   | B0546.1 | 0.132254951874589   | AGIWUR23582 |
| N2 | HS | IV | 3396581 | 3399123 | WBGene00001119 | dyf-3   | C04C3.5 | -0.160063830385498  | AGIWUR32839 |
| N2 | HS | IV | 3399672 | 3403904 | WBGene00015413 | pdhb-1  | C04C3.3 | 0.00154335541086326 |             |

AGIWUR9048;AGIWUR21733

|    |    |    |         |         |                |         |         |                     |             |
|----|----|----|---------|---------|----------------|---------|---------|---------------------|-------------|
| N2 | HS | IV | 3415683 | 3419234 | WBGene00015412 | lgc-9   | C04C3.2 | 0.121664523574621   | AGIWUR16793 |
| N2 | HS | IV | 3419813 | 3422607 | WBGene00015416 | C04C3.6 | C04C3.6 | 0.00420590877094362 |             |

AGIWUR7655;AGIWUR10839;AGIWUR23041

|    |    |    |         |         |                |         |          |                     |             |
|----|----|----|---------|---------|----------------|---------|----------|---------------------|-------------|
| N2 | HS | IV | 3428900 | 3430327 | WBGene00015411 | srz-60  | C04C3.1  | 0.210115314923795   | AGIWUR41151 |
| N2 | HS | IV | 3430310 | 3432470 | WBGene00219646 | linc-89 | C04C3.15 | -0.0512214763363383 |             |

AGIWUR39779

|    |    |    |         |         |                |        |         |                   |  |
|----|----|----|---------|---------|----------------|--------|---------|-------------------|--|
| N2 | HS | IV | 3436319 | 3437878 | WBGene00021033 | srz-32 | W05E7.2 | 0.124246045632514 |  |
|----|----|----|---------|---------|----------------|--------|---------|-------------------|--|

AGIWUR8896;AGIWUR37518;AGIWUR39643

|    |    |    |         |         |                |        |         |                     |            |
|----|----|----|---------|---------|----------------|--------|---------|---------------------|------------|
| N2 | HS | IV | 3438312 | 3439503 | WBGene00001702 | grd-13 | W05E7.3 | -0.0621095895756767 | AGIWUR1917 |
| N2 | HS | IV | 3439655 | 3440453 | WBGene00001692 | grd-3  | W05E7.1 | -0.33521799616263   |            |

AGIWUR6630;AGIWUR31335

|    |    |    |         |         |                |        |          |                    |  |
|----|----|----|---------|---------|----------------|--------|----------|--------------------|--|
| N2 | HS | IV | 3441055 | 3441770 | WBGene00001699 | grd-10 | F09D12.1 | 0.0707846474011244 |  |
|----|----|----|---------|---------|----------------|--------|----------|--------------------|--|

AGIWUR27659

|    |    |    |         |         |                |          |          |                    |  |
|----|----|----|---------|---------|----------------|----------|----------|--------------------|--|
| N2 | HS | IV | 3442303 | 3444201 | WBGene00017281 | F09D12.2 | F09D12.2 | 0.0997989029955137 |  |
|----|----|----|---------|---------|----------------|----------|----------|--------------------|--|

AGIWUR38734

|    |    |    |         |         |                |         |         |                     |             |
|----|----|----|---------|---------|----------------|---------|---------|---------------------|-------------|
| N2 | HS | IV | 3444914 | 3446528 | WBGene00019049 | F58E2.5 | F58E2.5 | 0.0194591449961194  | AGIWUR34019 |
| N2 | HS | IV | 3447216 | 3448708 | WBGene00023302 | F58E2.6 | F58E2.6 | -0.0733646310736642 | AGIWUR18347 |
| N2 | HS | IV | 3453608 | 3454788 | WBGene00019051 | srz-23  | F58E2.9 | -0.123938749422848  | AGIWUR34738 |
| N2 | HS | IV | 3455893 | 3457113 | WBGene00019050 | srz-88  | F58E2.7 | 0.0274071166034684  |             |

AGIWUR19533;AGIWUR37029

|    |    |    |         |         |                |        |          |                   |  |
|----|----|----|---------|---------|----------------|--------|----------|-------------------|--|
| N2 | HS | IV | 3458600 | 3460440 | WBGene00023481 | srz-22 | F58E2.10 | 0.114934739579633 |  |
|----|----|----|---------|---------|----------------|--------|----------|-------------------|--|

AGIWUR42395

|    |    |    |         |         |                |         |         |                    |             |
|----|----|----|---------|---------|----------------|---------|---------|--------------------|-------------|
| N2 | HS | IV | 3462027 | 3462929 | WBGene00023303 | F58E2.8 | F58E2.8 | 0.041754950210585  | AGIWUR12004 |
| N2 | HS | IV | 3463567 | 3466276 | WBGene00019048 | F58E2.4 | F58E2.4 | 0.0521364983698982 |             |

AGIWUR16957;AGIWUR18621;AGIWUR27185

|    |    |    |         |         |                |         |         |                    |             |
|----|----|----|---------|---------|----------------|---------|---------|--------------------|-------------|
| N2 | HS | IV | 3467430 | 3469828 | WBGene00019047 | F58E2.3 | F58E2.3 | 0.0508068748683961 | AGIWUR6323  |
| N2 | HS | IV | 3470042 | 3470711 | WBGene00019046 | F58E2.2 | F58E2.2 | 0.136259581488489  | AGIWUR15414 |
| N2 | HS | IV | 3471563 | 3473584 | WBGene00023301 | F58E2.1 | F58E2.1 | 0.110068472041049  |             |

AGIWUR9201;AGIWUR12704

|    |    |    |         |         |                |        |          |                     |  |
|----|----|----|---------|---------|----------------|--------|----------|---------------------|--|
| N2 | HS | IV | 3477392 | 3479011 | WBGene00015656 | srz-70 | C09G12.6 | -0.0334349474608278 |  |
|----|----|----|---------|---------|----------------|--------|----------|---------------------|--|

AGIWUR23116

|    |    |    |         |         |                |          |          |                   |  |
|----|----|----|---------|---------|----------------|----------|----------|-------------------|--|
| N2 | HS | IV | 3479335 | 3479730 | WBGene00015655 | C09G12.5 | C09G12.5 | 0.294277726764902 |  |
|----|----|----|---------|---------|----------------|----------|----------|-------------------|--|

AGIWUR37214

|                                                           |    |    |         |         |                |           |           |                     |             |
|-----------------------------------------------------------|----|----|---------|---------|----------------|-----------|-----------|---------------------|-------------|
| N2                                                        | HS | IV | 3480011 | 3481860 | WBGene00023474 | srz-37    | C09G12.16 | 0.014024749602215   |             |
| AGIWUR18826;AGIWUR38245                                   |    |    |         |         |                |           |           |                     |             |
| N2                                                        | HS | IV | 3482112 | 3482565 | WBGene00023476 | srz-55    | C09G12.14 | 0.0118464527442086  |             |
| AGIWUR278;AGIWUR16470;AGIWUR33376;AGIWUR34469             |    |    |         |         |                |           |           |                     |             |
| N2                                                        | HS | IV | 3482895 | 3484706 | WBGene00023463 | srz-82    | C09G12.11 | -0.073678380001363  |             |
| AGIWUR5025;AGIWUR33887                                    |    |    |         |         |                |           |           |                     |             |
| N2                                                        | HS | IV | 3485316 | 3487105 | WBGene00023465 | srz-81    | C09G12.13 | -0.126948089369668  |             |
| AGIWUR5334;AGIWUR17762                                    |    |    |         |         |                |           |           |                     |             |
| N2                                                        | HS | IV | 3487524 | 3489089 | WBGene00015654 | srz-77    | C09G12.4  | 0.129402752100313   |             |
| AGIWUR30868                                               |    |    |         |         |                |           |           |                     |             |
| N2                                                        | HS | IV | 3489858 | 3491519 | WBGene00023464 | srz-80    | C09G12.12 | 0.0973243799370849  |             |
| AGIWUR1603                                                |    |    |         |         |                |           |           |                     |             |
| N2                                                        | HS | IV | 3491777 | 3493216 | WBGene00015653 | srz-78    | C09G12.3  | 0.00844006819546994 |             |
| AGIWUR40657                                               |    |    |         |         |                |           |           |                     |             |
| N2                                                        | HS | IV | 3493610 | 3495179 | WBGene00015652 | srz-79    | C09G12.2  | 0.0401937695264039  |             |
| AGIWUR2191                                                |    |    |         |         |                |           |           |                     |             |
| N2                                                        | HS | IV | 3495296 | 3496440 | WBGene00044470 | C09G12.17 | C09G12.17 | 0.128987262410235   |             |
| AGIWUR671;AGIWUR27248;AGIWUR36976;AGIWUR39683;AGIWUR40123 |    |    |         |         |                |           |           |                     |             |
| N2                                                        | HS | IV | 3498218 | 3503912 | WBGene00015651 | ceh-53    | C09G12.1  | -0.101957529689281  |             |
| AGIWUR21847                                               |    |    |         |         |                |           |           |                     |             |
| N2                                                        | HS | IV | 3504444 | 3506115 | WBGene00023462 | srz-83    | C09G12.10 | -0.0663688855708249 |             |
| AGIWUR26431;AGIWUR37625                                   |    |    |         |         |                |           |           |                     |             |
| N2                                                        | HS | IV | 3506328 | 3509527 | WBGene00000424 | ced-10    | C09G12.8  | -0.0357658216327232 |             |
| AGIWUR21339;AGIWUR26580;AGIWUR27559                       |    |    |         |         |                |           |           |                     |             |
| N2                                                        | HS | IV | 3510046 | 3514572 | WBGene00015658 | tsg-101   | C09G12.9  | -0.0895008043111361 |             |
| AGIWUR3762;AGIWUR5733;AGIWUR14214                         |    |    |         |         |                |           |           |                     |             |
| N2                                                        | HS | IV | 3516819 | 3526602 | WBGene00006769 | unc-33    | Y37E11C.1 | -0.0668231556516883 |             |
| AGIWUR33833                                               |    |    |         |         |                |           |           |                     |             |
| N2                                                        | HS | IV | 3527354 | 3532521 | WBGene00019778 | M57.2     | M57.2     | -0.289654666719477  | AGIWUR38368 |
| N2                                                        | HS | IV | 3543628 | 3547600 | WBGene00015038 | nstp-6    | B0212.4   | -0.0438138025912451 | AGIWUR32216 |
| N2                                                        | HS | IV | 3551090 | 3557431 | WBGene00003889 | osm-9     | B0212.5   | 0.225536043989561   | AGIWUR16919 |
| N2                                                        | HS | IV | 3565201 | 3567814 | WBGene00015036 | sre-5     | B0212.2   | -0.0649027993839972 | AGIWUR39523 |
| N2                                                        | HS | IV | 3568979 | 3577630 | WBGene00015035 | otpl-1    | B0212.1   | 0.0682612848839455  |             |
| AGIWUR6709;AGIWUR25191                                    |    |    |         |         |                |           |           |                     |             |
| N2                                                        | HS | IV | 3578937 | 3581020 | WBGene00021374 | Y37E11B.1 | Y37E11B.1 | 0.299454162841965   |             |
| AGIWUR42712                                               |    |    |         |         |                |           |           |                     |             |
| N2                                                        | HS | IV | 3580970 | 3582909 | WBGene00021376 | blos-7    | Y37E11B.3 | -0.0920175286141252 |             |
| AGIWUR24972                                               |    |    |         |         |                |           |           |                     |             |
| N2                                                        | HS | IV | 3584314 | 3593615 | WBGene00006383 | taf-2     | Y37E11B.4 | -0.0714541349009821 |             |

|                                                                       |    |    |         |         |                |            |                                |                     |
|-----------------------------------------------------------------------|----|----|---------|---------|----------------|------------|--------------------------------|---------------------|
| AGIWUR40540                                                           |    |    |         |         |                |            |                                |                     |
| N2                                                                    | HS | IV | 3593960 | 3598552 | WBGene00021377 | Y37E11B.5  | Y37E11B.5                      | -0.0668475564181619 |
| AGIWUR27479;AGIWUR36703                                               |    |    |         |         |                |            |                                |                     |
| N2                                                                    | HS | IV | 3598656 | 3599299 | WBGene00021378 | Y37E11B.6  | Y37E11B.6                      | 0.093803528423086   |
| AGIWUR32299                                                           |    |    |         |         |                |            |                                |                     |
| N2                                                                    | HS | IV | 3599497 | 3600164 | WBGene00021379 | Y37E11B.7  | Y37E11B.7                      | -0.0571069782692719 |
| AGIWUR1502;AGIWUR9722;AGIWUR10223;AGIWUR10260;AGIWUR10569;AGIWUR32668 |    |    |         |         |                |            |                                |                     |
| N2                                                                    | HS | IV | 3601735 | 3603401 | WBGene00021380 | Y37E11B.9  | Y37E11B.9                      | -0.0970007594428921 |
| AGIWUR23524                                                           |    |    |         |         |                |            |                                |                     |
| N2                                                                    | HS | IV | 3603550 | 3606466 | WBGene00021381 | Y37E11B.10 | Y37E11B.10                     | -0.130276195163181  |
| AGIWUR4295;AGIWUR39675                                                |    |    |         |         |                |            |                                |                     |
| N2                                                                    | HS | IV | 3606784 | 3609229 | WBGene00002188 | kcb-2      | ZC416.4 0.227874974913309      | AGIWUR24635         |
| N2                                                                    | HS | IV | 3609218 | 3613072 | WBGene00022610 | ZC416.6    | ZC416.6 -0.450648652186025     | AGIWUR9980          |
| N2                                                                    | HS | IV | 3613934 | 3624697 | WBGene00000481 | cha-1      | ZC416.8 0.158446586280185      | AGIWUR11212         |
| N2                                                                    | HS | IV | 3633619 | 3635472 | WBGene00022609 | ZC416.2    | ZC416.2 -0.369389822217935     | AGIWUR44932         |
| N2                                                                    | HS | IV | 3637079 | 3640265 | WBGene00022608 | madf-9     | ZC416.1 0.0526172775519069     |                     |
| AGIWUR25395;AGIWUR25919                                               |    |    |         |         |                |            |                                |                     |
| N2                                                                    | HS | IV | 3645166 | 3648684 | WBGene00016987 | CC8.2      | CC8.2 -0.134079002501053       | AGIWUR24618         |
| N2                                                                    | HS | IV | 3658877 | 3668703 | WBGene00021362 | Y37E11AL.6 | Y37E11AL.6                     | -0.104512536532041  |
| AGIWUR14654;AGIWUR28359                                               |    |    |         |         |                |            |                                |                     |
| N2                                                                    | HS | IV | 3683537 | 3686865 | WBGene00003129 | map-1      | Y37E11AL.7 0.148706373162604   |                     |
| AGIWUR16605                                                           |    |    |         |         |                |            |                                |                     |
| N2                                                                    | HS | IV | 3687565 | 3694837 | WBGene00021363 | taf-6.2    | Y37E11AL.8 -0.122056992197393  |                     |
| AGIWUR18124                                                           |    |    |         |         |                |            |                                |                     |
| N2                                                                    | HS | IV | 3694905 | 3698436 | WBGene00021359 | Y37E11AL.3 | Y37E11AL.3                     | -0.0142519241098213 |
| AGIWUR8174;AGIWUR10767;AGIWUR17784                                    |    |    |         |         |                |            |                                |                     |
| N2                                                                    | HS | IV | 3698501 | 3699722 | WBGene00021358 | Y37E11AL.2 | Y37E11AL.2                     | -0.0722915777800885 |
| AGIWUR187                                                             |    |    |         |         |                |            |                                |                     |
| N2                                                                    | HS | IV | 3699804 | 3700654 | WBGene00021364 | Y37E11AL.9 | Y37E11AL.9                     | -0.139289080754788  |
| AGIWUR38046                                                           |    |    |         |         |                |            |                                |                     |
| N2                                                                    | HS | IV | 3709515 | 3715381 | WBGene00021357 | Y37E11AL.1 | Y37E11AL.1                     | -0.0874459773558964 |
| AGIWUR20687                                                           |    |    |         |         |                |            |                                |                     |
| N2                                                                    | HS | IV | 3715782 | 3722790 | WBGene00021367 | Y37E11AM.3 | Y37E11AM.3                     | -0.0389356986629505 |
| AGIWUR3608;AGIWUR8546;AGIWUR9320;AGIWUR16402                          |    |    |         |         |                |            |                                |                     |
| N2                                                                    | HS | IV | 3722886 | 3725461 | WBGene00021366 | Y37E11AM.2 | Y37E11AM.2                     | -0.196468969334267  |
| AGIWUR29009                                                           |    |    |         |         |                |            |                                |                     |
| N2                                                                    | HS | IV | 3726112 | 3735495 | WBGene00021365 | smg1-2     | Y37E11AM.1 -0.0467568397007536 |                     |
| AGIWUR41488                                                           |    |    |         |         |                |            |                                |                     |
| N2                                                                    | HS | IV | 3735845 | 3738917 | WBGene00021370 | nape-2     | Y37E11AR.3 -0.0302471655679524 |                     |

|                                                                                   |    |    |         |         |                |            |            |                     |             |
|-----------------------------------------------------------------------------------|----|----|---------|---------|----------------|------------|------------|---------------------|-------------|
| AGIWUR1805;AGIWUR6459                                                             |    |    |         |         |                |            |            |                     |             |
| N2                                                                                | HS | IV | 3739524 | 3740876 | WBGene00021371 | nape-1     | Y37E11AR.4 | 0.00690088888995    |             |
| AGIWUR1499;AGIWUR10188                                                            |    |    |         |         |                |            |            |                     |             |
| N2                                                                                | HS | IV | 3744048 | 3747655 | WBGene00021369 | siah-1     | Y37E11AR.2 | -0.0878025866539733 |             |
| AGIWUR32287                                                                       |    |    |         |         |                |            |            |                     |             |
| N2                                                                                | HS | IV | 3748210 | 3751101 | WBGene00021372 | ugt-45     | Y37E11AR.5 | 0.180740002163233   |             |
| AGIWUR35655                                                                       |    |    |         |         |                |            |            |                     |             |
| N2                                                                                | HS | IV | 3752612 | 3755419 | WBGene00021373 | Y37E11AR.7 | Y37E11AR.7 | -0.155516472528692  |             |
| AGIWUR15651                                                                       |    |    |         |         |                |            |            |                     |             |
| N2                                                                                | HS | IV | 3756242 | 3759910 | WBGene00021368 | best-20    | Y37E11AR.1 | -0.331288172541411  |             |
| AGIWUR14000                                                                       |    |    |         |         |                |            |            |                     |             |
| N2                                                                                | HS | IV | 3761192 | 3766826 | WBGene00006869 | vab-2      | Y37E11AR.6 | -0.218709466932292  |             |
| AGIWUR5528                                                                        |    |    |         |         |                |            |            |                     |             |
| N2                                                                                | HS | IV | 3784358 | 3794044 | WBGene00019546 | glct-6     | W07G9.2    | 0.143035039997397   |             |
| AGIWUR20512;AGIWUR38088                                                           |    |    |         |         |                |            |            |                     |             |
| N2                                                                                | HS | IV | 3794767 | 3796267 | WBGene00019545 | K09B3.1    | K09B3.1    | 0.0813103516234785  |             |
| AGIWUR2928;AGIWUR10590;AGIWUR15949;AGIWUR18365;AGIWUR32674;AGIWUR43271            |    |    |         |         |                |            |            |                     |             |
| N2                                                                                | HS | IV | 3796306 | 3800461 | WBGene00003884 | osm-3      | M02B7.3    | -0.0215494548503798 | AGIWUR1662  |
| N2                                                                                | HS | IV | 3801864 | 3803426 | WBGene00019725 | algn-14    | M02B7.4    | -0.0314566590407264 | AGIWUR4303  |
| N2                                                                                | HS | IV | 3803581 | 3804949 | WBGene00019724 | M02B7.2    | M02B7.2    | -0.246016837949356  |             |
| AGIWUR13365;AGIWUR36768                                                           |    |    |         |         |                |            |            |                     |             |
| N2                                                                                | HS | IV | 3806703 | 3807190 | WBGene00044690 | M02B7.7    | M02B7.7    | -0.219510796508802  | AGIWUR2282  |
| N2                                                                                | HS | IV | 3807870 | 3819328 | WBGene00019726 | bris-1     | M02B7.5    | -0.164418264682386  |             |
| AGIWUR3769;AGIWUR15598;AGIWUR33890                                                |    |    |         |         |                |            |            |                     |             |
| N2                                                                                | HS | IV | 3839720 | 3841628 | WBGene00017906 | F28F9.2    | F28F9.2    | -0.0542818834512619 | AGIWUR21998 |
| N2                                                                                | HS | IV | 3855843 | 3861552 | WBGene00006970 | zag-1      | F28F9.1    | -0.106725416946141  | AGIWUR16716 |
| N2                                                                                | HS | IV | 3862129 | 3865042 | WBGene00000009 | aat-8      | F28F9.4    | 0.101538337059744   | AGIWUR6881  |
| N2                                                                                | HS | IV | 3867147 | 3871842 | WBGene00018144 | F37C4.4    | F37C4.4    | 0.125723013232128   |             |
| AGIWUR1949;AGIWUR44847                                                            |    |    |         |         |                |            |            |                     |             |
| N2                                                                                | HS | IV | 3871829 | 3874416 | WBGene00018145 | F37C4.5    | F37C4.5    | -0.0645764469379628 |             |
| AGIWUR4389;AGIWUR8043;AGIWUR22760;AGIWUR31925;AGIWUR35017;AGIWUR38139;AGIWUR42284 |    |    |         |         |                |            |            |                     |             |
| N2                                                                                | HS | IV | 3875410 | 3878372 | WBGene00018146 | F37C4.6    | F37C4.6    | -0.377211379484802  | AGIWUR24044 |
| N2                                                                                | HS | IV | 3878547 | 3881187 | WBGene00018148 | F37C4.8    | F37C4.8    | 0.163005997344146   |             |
| AGIWUR10242;AGIWUR16117                                                           |    |    |         |         |                |            |            |                     |             |
| N2                                                                                | HS | IV | 3881852 | 3884683 | WBGene00018143 | oac-23     | F37C4.3    | 0.425419146205947   | AGIWUR37307 |
| N2                                                                                | HS | IV | 3885665 | 3888836 | WBGene00018142 | oac-22     | F37C4.2    | 0.0670041150420442  | AGIWUR8307  |
| N2                                                                                | HS | IV | 3889263 | 3892563 | WBGene00018141 | oac-21     | F37C4.1    | -0.361323356991115  | AGIWUR40823 |
| N2                                                                                | HS | IV | 3892998 | 3893283 | WBGene00044471 | F56D6.9    | F56D6.9    | -0.112100421590787  | AGIWUR9848  |
| N2                                                                                | HS | IV | 3894058 | 3894430 | WBGene00044292 | F56D6.8    | F56D6.8    | -0.201623195811935  | AGIWUR20004 |

|                                                             |    |    |         |         |                |           |           |                     |             |
|-------------------------------------------------------------|----|----|---------|---------|----------------|-----------|-----------|---------------------|-------------|
| N2                                                          | HS | IV | 3895070 | 3895506 | WBGene00044472 | dct-8     | F56D6.10  | 0.332178519162275   |             |
| AGIWUR2226                                                  |    |    |         |         |                |           |           |                     |             |
| N2                                                          | HS | IV | 3895963 | 3897997 | WBGene00219307 | F56D6.17  | F56D6.17  | 0.23614941384398    |             |
| AGIWUR26987;AGIWUR37616                                     |    |    |         |         |                |           |           |                     |             |
| N2                                                          | HS | IV | 3898478 | 3899806 | WBGene00219304 | F56D6.16  | F56D6.16  | 0.0275523133932669  |             |
| AGIWUR30419                                                 |    |    |         |         |                |           |           |                     |             |
| N2                                                          | HS | IV | 3900571 | 3902326 | WBGene00023478 | srz-62    | F56D6.7   | -0.139057338728417  |             |
| AGIWUR2650;AGIWUR24689                                      |    |    |         |         |                |           |           |                     |             |
| N2                                                          | HS | IV | 3906113 | 3906493 | WBGene00044473 | F56D6.11  | F56D6.11  | -0.257212476469716  |             |
| AGIWUR10325;AGIWUR14565;AGIWUR22261;AGIWUR29588             |    |    |         |         |                |           |           |                     |             |
| N2                                                          | HS | IV | 3908107 | 3908509 | WBGene00044474 | F56D6.12  | F56D6.12  | 0.191311575846239   |             |
| AGIWUR39239                                                 |    |    |         |         |                |           |           |                     |             |
| N2                                                          | HS | IV | 3909381 | 3909799 | WBGene00044475 | F56D6.13  | F56D6.13  | -0.0246624406670897 |             |
| AGIWUR35300                                                 |    |    |         |         |                |           |           |                     |             |
| N2                                                          | HS | IV | 3915610 | 3916901 | WBGene00018973 | srz-20    | F56D6.5   | -0.142931063809484  | AGIWUR43400 |
| N2                                                          | HS | IV | 3917679 | 3918056 | WBGene00044476 | F56D6.14  | F56D6.14  | 0.207459502137199   |             |
| AGIWUR7218;AGIWUR7742;AGIWUR31197;AGIWUR39159;AGIWUR42565   |    |    |         |         |                |           |           |                     |             |
| N2                                                          | HS | IV | 3919806 | 3921613 | WBGene00018972 | srz-19    | F56D6.4   | -0.0205162838787167 | AGIWUR5228  |
| N2                                                          | HS | IV | 3926417 | 3929024 | WBGene00018970 | cllec-68  | F56D6.1   | 0.0964532591316267  |             |
| AGIWUR28660;AGIWUR41001                                     |    |    |         |         |                |           |           |                     |             |
| N2                                                          | HS | IV | 3932733 | 3936238 | WBGene00021581 | cllec-70  | Y46C8AL.3 | 0.32117653064919    |             |
| AGIWUR30235                                                 |    |    |         |         |                |           |           |                     |             |
| N2                                                          | HS | IV | 3937464 | 3939924 | WBGene00021582 | cllec-71  | Y46C8AL.4 | -0.0735101081575884 |             |
| AGIWUR21185                                                 |    |    |         |         |                |           |           |                     |             |
| N2                                                          | HS | IV | 3940259 | 3941702 | WBGene00021580 | cllec-174 | Y46C8AL.2 | -0.0775089556667101 |             |
| AGIWUR33517                                                 |    |    |         |         |                |           |           |                     |             |
| N2                                                          | HS | IV | 3944816 | 3947364 | WBGene00021583 | cllec-72  | Y46C8AL.5 | -0.0069496734804293 |             |
| AGIWUR25323                                                 |    |    |         |         |                |           |           |                     |             |
| N2                                                          | HS | IV | 3953935 | 3956210 | WBGene00021579 | cllec-73  | Y46C8AL.1 | 0.0965575848137679  |             |
| AGIWUR38603                                                 |    |    |         |         |                |           |           |                     |             |
| N2                                                          | HS | IV | 3957005 | 3960139 | WBGene00021585 | cllec-74  | Y46C8AL.8 | -0.132083840421416  |             |
| AGIWUR2330;AGIWUR6622;AGIWUR11329                           |    |    |         |         |                |           |           |                     |             |
| N2                                                          | HS | IV | 3960734 | 3964657 | WBGene00021586 | cllec-75  | Y46C8AL.9 | -0.013869552116434  |             |
| AGIWUR14291;AGIWUR22989;AGIWUR29616;AGIWUR30729;AGIWUR31166 |    |    |         |         |                |           |           |                     |             |
| N2                                                          | HS | IV | 3965246 | 3969025 | WBGene00021587 | cllec-76  | Y46C8AR.1 | 0.128396932510654   |             |
| AGIWUR23862                                                 |    |    |         |         |                |           |           |                     |             |
| N2                                                          | HS | IV | 3969931 | 3972616 | WBGene00044343 | cllec-77  | Y46C8AR.3 | -0.285063807454703  |             |
| AGIWUR31568                                                 |    |    |         |         |                |           |           |                     |             |
| N2                                                          | HS | IV | 3973349 | 3975721 | WBGene00018548 | cllec-79  | F47C12.4  | -0.138835640184775  |             |

AGIWUR4310;AGIWUR7539;AGIWUR26372  
N2 HS IV 3976429 3978015 WBGene00005430 srh-220 F47C12.5 -0.0614854417233968  
AGIWUR20619  
N2 HS IV 3979825 3981205 WBGene00005432 srh-222 F47C12.10 -0.0156829370599629  
AGIWUR24878;AGIWUR41002;AGIWUR42461  
N2 HS IV 3981901 3983609 WBGene00005433 srh-223 F47C12.3 0.31929314886312  
AGIWUR17687  
N2 HS IV 3989102 4014195 WBGene00018547 clec-78 F47C12.2 -0.114408120024512  
AGIWUR12467;AGIWUR29123;AGIWUR35382  
N2 HS IV 4014799 4028127 WBGene00020930 hlh-30 W02C12.3 -0.10890469641161  
AGIWUR12568;AGIWUR14682;AGIWUR22585  
N2 HS IV 4040308 4041532 WBGene00018065 F35F11.2 F35F11.2 0.0668978614540716  
AGIWUR4078;AGIWUR9316;AGIWUR38890  
N2 HS IV 4042575 4047786 WBGene00018064 cdc-73 F35F11.1 0.0256846448274137  
AGIWUR4520;AGIWUR41674  
N2 HS IV 4047937 4049448 WBGene00003955 pcn-1 W03D2.4 -0.0880475397002227  
AGIWUR1229;AGIWUR1452;AGIWUR10565;AGIWUR13258;AGIWUR27822;AGIWUR40277  
N2 HS IV 4050049 4051639 WBGene00006951 wrt-5 W03D2.5 0.267486721321035 AGIWUR29565  
N2 HS IV 4056586 4058243 WBGene00020981 W03D2.6 W03D2.6 0.00169000606633762 AGIWUR34941  
N2 HS IV 4062567 4063673 WBGene00020982 ily-6 W03D2.7 -0.151416453221785 AGIWUR15927  
N2 HS IV 4065905 4068412 WBGene00006173 str-122 W03D2.10 0.0554066797988666  
AGIWUR12209  
N2 HS IV 4068780 4069548 WBGene00020979 fbxb-55 W03D2.2 -0.0712697099432615 AGIWUR30957  
N2 HS IV 4072327 4077644 WBGene00004157 pqn-75 W03D2.1 -0.339181137656919 AGIWUR43269  
N2 HS IV 4077671 4078953 WBGene00016437 C35B1.8 C35B1.8 0.00181580360997957  
AGIWUR13784;AGIWUR23914;AGIWUR29188;AGIWUR29380;AGIWUR30138;AGIWUR44411  
N2 HS IV 4079804 4080207 WBGene00016434 C35B1.4 C35B1.4 -0.0162990316581357 AGIWUR17839  
N2 HS IV 4081136 4081348 WBGene00016433 C35B1.3 C35B1.3 0.157895262532616  
AGIWUR12609;AGIWUR19585;AGIWUR39717  
N2 HS IV 4083603 4084209 WBGene00016435 C35B1.5 C35B1.5 0.117330304043255 AGIWUR696  
N2 HS IV 4086212 4102907 WBGene00016432 C35B1.2 C35B1.2 0.0295953674640304  
AGIWUR34404;AGIWUR40227  
N2 HS IV 4103020 4106220 WBGene00006701 ubc-1 C35B1.1 -0.0556943455884795  
AGIWUR11827;AGIWUR34071  
N2 HS IV 4109067 4110471 WBGene00016436 C35B1.7 C35B1.7 -0.19361409723156 AGIWUR19562  
N2 HS IV 4110544 4112487 WBGene00044477 F49F1.14 F49F1.14 -0.101764126030788  
AGIWUR17789;AGIWUR24698;AGIWUR25509;AGIWUR28648  
N2 HS IV 4117732 4119179 WBGene00018643 drd-50 F49F1.1 -0.160757626732202 AGIWUR14882  
N2 HS IV 4119460 4120399 WBGene00018645 F49F1.5 F49F1.5 -0.446757987537996 AGIWUR27910

|                                                           |    |    |         |         |                |           |           |                     |            |
|-----------------------------------------------------------|----|----|---------|---------|----------------|-----------|-----------|---------------------|------------|
| N2                                                        | HS | IV | 4121342 | 4123166 | WBGene00018646 | mul-1     | F49F1.6   | -0.189069289787053  |            |
| AGIWUR37789;AGIWUR40067                                   |    |    |         |         |                |           |           |                     |            |
| N2                                                        | HS | IV | 4123525 | 4125757 | WBGene00018647 | F49F1.7   | F49F1.7   | -0.238444846696759  | AGIWUR4538 |
| N2                                                        | HS | IV | 4130503 | 4134631 | WBGene00018648 | F49F1.8   | F49F1.8   | -0.0864309400058358 |            |
| AGIWUR23704;AGIWUR29660                                   |    |    |         |         |                |           |           |                     |            |
| N2                                                        | HS | IV | 4138408 | 4139122 | WBGene00018650 | F49F1.10  | F49F1.10  | 0.0133822477022907  |            |
| AGIWUR29551                                               |    |    |         |         |                |           |           |                     |            |
| N2                                                        | HS | IV | 4139685 | 4140363 | WBGene00235368 | F49F1.18  | F49F1.18  | 0.275814757950151   |            |
| AGIWUR21703                                               |    |    |         |         |                |           |           |                     |            |
| N2                                                        | HS | IV | 4141734 | 4143019 | WBGene00018652 | F49F1.12  | F49F1.12  | -0.0944446610537044 |            |
| AGIWUR15653;AGIWUR25495                                   |    |    |         |         |                |           |           |                     |            |
| N2                                                        | HS | IV | 4145084 | 4147064 | WBGene00019933 | R07C12.3  | R07C12.3  | -0.0463460471133379 |            |
| AGIWUR35115                                               |    |    |         |         |                |           |           |                     |            |
| N2                                                        | HS | IV | 4148141 | 4150055 | WBGene00019932 | R07C12.2  | R07C12.2  | -0.139818073291433  |            |
| AGIWUR2270                                                |    |    |         |         |                |           |           |                     |            |
| N2                                                        | HS | IV | 4152547 | 4154029 | WBGene00019931 | R07C12.1  | R07C12.1  | 0.148304485161325   |            |
| AGIWUR36113                                               |    |    |         |         |                |           |           |                     |            |
| N2                                                        | HS | IV | 4155273 | 4157185 | WBGene00219216 | K08D10.14 | K08D10.14 | 0.0406201433432614  |            |
| AGIWUR27539                                               |    |    |         |         |                |           |           |                     |            |
| N2                                                        | HS | IV | 4157634 | 4161789 | WBGene00019532 | K08D10.9  | K08D10.9  | -0.23049668172031   |            |
| AGIWUR39171                                               |    |    |         |         |                |           |           |                     |            |
| N2                                                        | HS | IV | 4162517 | 4164481 | WBGene00019531 | scrm-5    | K08D10.8  | -0.0411396999327351 |            |
| AGIWUR3106                                                |    |    |         |         |                |           |           |                     |            |
| N2                                                        | HS | IV | 4164692 | 4166230 | WBGene00019530 | scrm-8    | K08D10.7  | -0.456199992930879  |            |
| AGIWUR9450                                                |    |    |         |         |                |           |           |                     |            |
| N2                                                        | HS | IV | 4166541 | 4168120 | WBGene00235369 | K08D10.18 | K08D10.18 | -0.0911151865966149 |            |
| AGIWUR35321                                               |    |    |         |         |                |           |           |                     |            |
| N2                                                        | HS | IV | 4168038 | 4169891 | WBGene00019529 | K08D10.5  | K08D10.5  | 0.0799142347288084  |            |
| AGIWUR13883                                               |    |    |         |         |                |           |           |                     |            |
| N2                                                        | HS | IV | 4172076 | 4173988 | WBGene00004385 | rnp-2     | K08D10.4  | 0.35395230639487    |            |
| AGIWUR23011                                               |    |    |         |         |                |           |           |                     |            |
| N2                                                        | HS | IV | 4174089 | 4176279 | WBGene00004386 | rnp-3     | K08D10.3  | 0.0166781080379188  |            |
| AGIWUR32748                                               |    |    |         |         |                |           |           |                     |            |
| N2                                                        | HS | IV | 4176388 | 4178364 | WBGene00001033 | dnj-15    | K08D10.2  | 0.194621398140047   |            |
| AGIWUR41604                                               |    |    |         |         |                |           |           |                     |            |
| N2                                                        | HS | IV | 4178463 | 4179531 | WBGene00019535 | tsen-34   | K08D10.12 | -0.0270398102288709 |            |
| AGIWUR8924;AGIWUR19233;AGIWUR22445                        |    |    |         |         |                |           |           |                     |            |
| N2                                                        | HS | IV | 4196173 | 4196695 | WBGene00044478 | K06B9.6   | K06B9.6   | 0.107965994366511   |            |
| AGIWUR1235;AGIWUR5457;AGIWUR15755;AGIWUR17854;AGIWUR29162 |    |    |         |         |                |           |           |                     |            |

|                                                                         |    |    |         |         |                |          |          |                     |             |
|-------------------------------------------------------------------------|----|----|---------|---------|----------------|----------|----------|---------------------|-------------|
| N2                                                                      | HS | IV | 4199501 | 4204375 | WBGene00003938 | pax-2    | K06B9.5  | 0.00558710058939305 | AGIWUR38588 |
| N2                                                                      | HS | IV | 4205975 | 4218259 | WBGene00017934 | F30B5.4  | F30B5.4  | -0.0972618129803546 | AGIWUR34612 |
| N2                                                                      | HS | IV | 4219271 | 4220083 | WBGene00235371 | F30B5.11 | F30B5.11 | 0.0196402770989135  |             |
| AGIWUR18478                                                             |    |    |         |         |                |          |          |                     |             |
| N2                                                                      | HS | IV | 4222183 | 4223140 | WBGene00044093 | srbc-72  | F30B5.9  | -0.0895157178543977 |             |
| AGIWUR5787;AGIWUR27677;AGIWUR41288                                      |    |    |         |         |                |          |          |                     |             |
| N2                                                                      | HS | IV | 4223857 | 4225946 | WBGene00044092 | srbc-71  | F30B5.8  | 0.0188482266622523  |             |
| AGIWUR25867;AGIWUR30376                                                 |    |    |         |         |                |          |          |                     |             |
| N2                                                                      | HS | IV | 4226858 | 4228017 | WBGene00017935 | srbc-70  | F30B5.6  | -0.148416804956056  | AGIWUR22342 |
| N2                                                                      | HS | IV | 4229195 | 4231861 | WBGene00017936 | zipt-2.2 | F30B5.7  | -0.205291695871084  |             |
| AGIWUR42862                                                             |    |    |         |         |                |          |          |                     |             |
| N2                                                                      | HS | IV | 4235614 | 4236710 | WBGene00001074 | dpy-13   | F30B5.1  | -0.137804191359825  |             |
| AGIWUR16246;AGIWUR43234                                                 |    |    |         |         |                |          |          |                     |             |
| N2                                                                      | HS | IV | 4239853 | 4240855 | WBGene00023279 | F36A4.9  | F36A4.9  | 0.0434713860146774  |             |
| AGIWUR6068;AGIWUR29161                                                  |    |    |         |         |                |          |          |                     |             |
| N2                                                                      | HS | IV | 4243548 | 4244610 | WBGene00000611 | col-34   | F36A4.10 | -0.43051487618119   |             |
| AGIWUR6058                                                              |    |    |         |         |                |          |          |                     |             |
| N2                                                                      | HS | IV | 4244956 | 4245620 | WBGene00018086 | F36A4.11 | F36A4.11 | -0.0862768491663175 |             |
| AGIWUR22161                                                             |    |    |         |         |                |          |          |                     |             |
| N2                                                                      | HS | IV | 4246760 | 4247486 | WBGene00018085 | ttr-20   | F36A4.8  | 0.122253367633229   | AGIWUR31794 |
| N2                                                                      | HS | IV | 4248020 | 4258173 | WBGene00000123 | ama-1    | F36A4.7  | 0.154049068029348   |             |
| AGIWUR3117;AGIWUR13557;AGIWUR21122;AGIWUR27884;AGIWUR30437;AGIWUR40528  |    |    |         |         |                |          |          |                     |             |
| N2                                                                      | HS | IV | 4263293 | 4265202 | WBGene00000610 | col-33   | F36A4.6  | 0.124147520235075   | AGIWUR7365  |
| N2                                                                      | HS | IV | 4265524 | 4266598 | WBGene00018084 | F36A4.5  | F36A4.5  | 0.100365905579105   | AGIWUR32046 |
| N2                                                                      | HS | IV | 4267582 | 4268236 | WBGene00018083 | F36A4.4  | F36A4.4  | -0.0728670186868818 | AGIWUR41627 |
| N2                                                                      | HS | IV | 4269608 | 4270186 | WBGene00018082 | F36A4.3  | F36A4.3  | 0.0526820741496241  | AGIWUR2033  |
| N2                                                                      | HS | IV | 4271215 | 4271820 | WBGene00018081 | F36A4.2  | F36A4.2  | 0.25392721740352    |             |
| AGIWUR6627;AGIWUR15954;AGIWUR37357                                      |    |    |         |         |                |          |          |                     |             |
| N2                                                                      | HS | IV | 4272473 | 4272899 | WBGene00018080 | F36A4.1  | F36A4.1  | 0.172286924431124   | AGIWUR37819 |
| N2                                                                      | HS | IV | 4274341 | 4277875 | WBGene00003668 | nhr-78   | F36A4.14 | 0.100277074772881   |             |
| AGIWUR11194                                                             |    |    |         |         |                |          |          |                     |             |
| N2                                                                      | HS | IV | 4278825 | 4284120 | WBGene00017487 | F15E6.6  | F15E6.6  | 0.104015597149701   | AGIWUR27430 |
| N2                                                                      | HS | IV | 4285403 | 4288432 | WBGene00005715 | srv-4    | F15E6.7  | -0.0203826047720002 |             |
| AGIWUR4587;AGIWUR9840;AGIWUR33733                                       |    |    |         |         |                |          |          |                     |             |
| N2                                                                      | HS | IV | 4289567 | 4290061 | WBGene00017486 | F15E6.5  | F15E6.5  | -0.19485673686912   | AGIWUR24506 |
| N2                                                                      | HS | IV | 4290189 | 4290703 | WBGene00017488 | dct-7    | F15E6.8  | 0.303559798811655   | AGIWUR18791 |
| N2                                                                      | HS | IV | 4291467 | 4291872 | WBGene00017485 | F15E6.4  | F15E6.4  | -0.0967271905272669 |             |
| AGIWUR10390;AGIWUR18519;AGIWUR29557;AGIWUR30230;AGIWUR37617;AGIWUR43915 |    |    |         |         |                |          |          |                     |             |
| N2                                                                      | HS | IV | 4292869 | 4293611 | WBGene00044479 | F15E6.10 | F15E6.10 | 0.116390179808555   |             |



AGIWUR14420;AGIWUR18856;AGIWUR23310;AGIWUR31892;AGIWUR36814

|    |    |    |         |         |                |         |         |                    |             |
|----|----|----|---------|---------|----------------|---------|---------|--------------------|-------------|
| N2 | HS | IV | 4293620 | 4299083 | WBGene00017489 | F15E6.9 | F15E6.9 | 0.271502523226241  | AGIWUR4362  |
| N2 | HS | IV | 4301308 | 4304437 | WBGene00017483 | lgc-22  | F15E6.2 | 0.111839578480156  | AGIWUR23008 |
| N2 | HS | IV | 4326656 | 4332018 | WBGene00020972 | trp1-2  | W03B1.2 | 0.267087441796267  | AGIWUR25968 |
| N2 | HS | IV | 4332692 | 4335372 | WBGene00020973 | W03B1.3 | W03B1.3 | 0.0327089970245655 | AGIWUR32449 |
| N2 | HS | IV | 4336834 | 4341304 | WBGene00020976 | oac-51  | W03B1.7 | 0.0732908220120123 |             |

AGIWUR63;AGIWUR4276

|    |    |    |         |         |                |        |         |                    |             |
|----|----|----|---------|---------|----------------|--------|---------|--------------------|-------------|
| N2 | HS | IV | 4342357 | 4346558 | WBGene00020977 | oac-52 | W03B1.8 | 0.164771426244867  | AGIWUR14080 |
| N2 | HS | IV | 4357631 | 4359936 | WBGene00005662 | sars-2 | W03B1.4 | 0.0871153808740424 |             |

AGIWUR1886;AGIWUR40320;AGIWUR44856

|    |    |    |         |         |                |          |          |                    |  |
|----|----|----|---------|---------|----------------|----------|----------|--------------------|--|
| N2 | HS | IV | 4359953 | 4360657 | WBGene00050916 | F55F10.3 | F55F10.3 | 0.0252769071516354 |  |
|----|----|----|---------|---------|----------------|----------|----------|--------------------|--|

AGIWUR16657;AGIWUR29416;AGIWUR41260

|    |    |    |         |         |                |          |          |                     |  |
|----|----|----|---------|---------|----------------|----------|----------|---------------------|--|
| N2 | HS | IV | 4360837 | 4386533 | WBGene00018898 | F55F10.1 | F55F10.1 | -0.0283659869752597 |  |
|----|----|----|---------|---------|----------------|----------|----------|---------------------|--|

AGIWUR28847

|    |    |    |         |         |                |        |          |                     |  |
|----|----|----|---------|---------|----------------|--------|----------|---------------------|--|
| N2 | HS | IV | 4386630 | 4388878 | WBGene00021286 | talD-1 | Y24D9A.8 | -0.0211928407822946 |  |
|----|----|----|---------|---------|----------------|--------|----------|---------------------|--|

AGIWUR1068;AGIWUR23705

|    |    |    |         |         |                |        |          |                     |  |
|----|----|----|---------|---------|----------------|--------|----------|---------------------|--|
| N2 | HS | IV | 4389135 | 4390649 | WBGene00004419 | rp1-7A | Y24D9A.4 | -0.0388582337351799 |  |
|----|----|----|---------|---------|----------------|--------|----------|---------------------|--|

AGIWUR8205

|    |    |    |         |         |                |        |          |                     |  |
|----|----|----|---------|---------|----------------|--------|----------|---------------------|--|
| N2 | HS | IV | 4390848 | 4393403 | WBGene00021282 | set-21 | Y24D9A.2 | -0.0744647301121599 |  |
|----|----|----|---------|---------|----------------|--------|----------|---------------------|--|

AGIWUR34746

|    |    |    |         |         |                |       |          |                    |  |
|----|----|----|---------|---------|----------------|-------|----------|--------------------|--|
| N2 | HS | IV | 4394410 | 4415622 | WBGene00021281 | ell-1 | Y24D9A.1 | -0.150079187636141 |  |
|----|----|----|---------|---------|----------------|-------|----------|--------------------|--|

AGIWUR632;AGIWUR12116

|    |    |    |         |         |                |           |         |                 |  |
|----|----|----|---------|---------|----------------|-----------|---------|-----------------|--|
| N2 | HS | IV | 4422339 | 4426566 | WBGene00019950 | cllec-175 | R08C7.6 | 0.1189946398688 |  |
|----|----|----|---------|---------|----------------|-----------|---------|-----------------|--|

AGIWUR5192;AGIWUR14417;AGIWUR21071

|    |    |    |         |         |                |         |         |                     |             |
|----|----|----|---------|---------|----------------|---------|---------|---------------------|-------------|
| N2 | HS | IV | 4427713 | 4429782 | WBGene00006228 | str-185 | R08C7.7 | -0.0349752699319801 | AGIWUR27    |
| N2 | HS | IV | 4433049 | 4434541 | WBGene00019951 | R08C7.8 | R08C7.8 | -0.244655567559022  | AGIWUR24643 |
| N2 | HS | IV | 4435127 | 4437318 | WBGene00019948 | R08C7.4 | R08C7.4 | -0.10516038906599   | AGIWUR1608  |
| N2 | HS | IV | 4437786 | 4439290 | WBGene00019952 | fbxb-74 | R08C7.9 | -0.037326890941658  |             |

AGIWUR6404;AGIWUR13245;AGIWUR18904;AGIWUR24042;AGIWUR27521;AGIWUR30324

|    |    |    |         |         |                |        |          |                     |  |
|----|----|----|---------|---------|----------------|--------|----------|---------------------|--|
| N2 | HS | IV | 4442399 | 4445876 | WBGene00019953 | wap1-1 | R08C7.10 | -0.0908834517397654 |  |
|----|----|----|---------|---------|----------------|--------|----------|---------------------|--|

AGIWUR3049;AGIWUR3502;AGIWUR5857;AGIWUR6345;AGIWUR8110;AGIWUR14201;AGIWUR16332;AGIWUR20448;AGIWUR45027

|    |    |    |         |         |                |       |         |                     |  |
|----|----|----|---------|---------|----------------|-------|---------|---------------------|--|
| N2 | HS | IV | 4445990 | 4446997 | WBGene00019947 | htz-1 | R08C7.3 | 0.00409646067141889 |  |
|----|----|----|---------|---------|----------------|-------|---------|---------------------|--|

AGIWUR35276;AGIWUR40345

|    |    |    |         |         |                |        |         |                    |  |
|----|----|----|---------|---------|----------------|--------|---------|--------------------|--|
| N2 | HS | IV | 4447299 | 4449897 | WBGene00019946 | chat-1 | R08C7.2 | 0.0273323939359678 |  |
|----|----|----|---------|---------|----------------|--------|---------|--------------------|--|

AGIWUR23617;AGIWUR24421

|    |    |    |         |         |                |          |          |                    |  |
|----|----|----|---------|---------|----------------|----------|----------|--------------------|--|
| N2 | HS | IV | 4450000 | 4460027 | WBGene00019955 | R08C7.12 | R08C7.12 | -0.214726076017364 |  |
|----|----|----|---------|---------|----------------|----------|----------|--------------------|--|

AGIWUR26172;AGIWUR28842;AGIWUR31454;AGIWUR40599;AGIWUR43621

|    |    |    |         |         |                |         |         |                    |             |
|----|----|----|---------|---------|----------------|---------|---------|--------------------|-------------|
| N2 | HS | IV | 4460179 | 4462061 | WBGene00019718 | M01H9.2 | M01H9.2 | -0.118770124357255 | AGIWUR8857  |
| N2 | HS | IV | 4465484 | 4468509 | WBGene00019721 | M01H9.5 | M01H9.5 | -0.19218508357592  | AGIWUR11586 |

|                                                                                                                                                                                   |    |    |         |         |                |          |          |                       |             |
|-----------------------------------------------------------------------------------------------------------------------------------------------------------------------------------|----|----|---------|---------|----------------|----------|----------|-----------------------|-------------|
| N2                                                                                                                                                                                | HS | IV | 4468505 | 4477059 | WBGene00019719 | M01H9.3  | M01H9.3  | -0.178746215136599    |             |
| AGIWUR3461;AGIWUR16506;AGIWUR18811;AGIWUR37123;AGIWUR42973                                                                                                                        |    |    |         |         |                |          |          |                       |             |
| N2                                                                                                                                                                                | HS | IV | 4479693 | 4482764 | WBGene00019720 | M01H9.4  | M01H9.4  | -0.000276922313116934 |             |
| AGIWUR1939;AGIWUR17950;AGIWUR22449;AGIWUR29216;AGIWUR30278;AGIWUR36545                                                                                                            |    |    |         |         |                |          |          |                       |             |
| N2                                                                                                                                                                                | HS | IV | 4487028 | 4489000 | WBGene00019717 | trx-3    | M01H9.1  | -0.207817085757869    | AGIWUR33279 |
| N2                                                                                                                                                                                | HS | IV | 4489012 | 4506708 | WBGene00022675 | gbb-2    | ZK180.1  | -0.0692729469238458   |             |
| AGIWUR3783;AGIWUR5291;AGIWUR12774;AGIWUR13601;AGIWUR20036;AGIWUR29856;AGIWUR31024;AGIWUR31657;AGIWUR32763;AGIWUR33247;AGIWUR33381;AGIWUR33807;AGIWUR35502;AGIWUR41532;AGIWUR42433 |    |    |         |         |                |          |          |                       |             |
| N2                                                                                                                                                                                | HS | IV | 4508499 | 4511320 | WBGene00022677 | ZK180.3  | ZK180.3  | 0.0423600695003676    |             |
| AGIWUR25175;AGIWUR32103                                                                                                                                                           |    |    |         |         |                |          |          |                       |             |
| N2                                                                                                                                                                                | HS | IV | 4511896 | 4513319 | WBGene00022678 | sar-1    | ZK180.4  | 0.0898155277766506    | AGIWUR17236 |
| N2                                                                                                                                                                                | HS | IV | 4515044 | 4517169 | WBGene00022679 | ZK180.5  | ZK180.5  | -0.107123776177991    |             |
| AGIWUR13104;AGIWUR17731;AGIWUR25887;AGIWUR38271                                                                                                                                   |    |    |         |         |                |          |          |                       |             |
| N2                                                                                                                                                                                | HS | IV | 4520181 | 4525043 | WBGene00022680 | ZK180.6  | ZK180.6  | 0.0107053784508189    | AGIWUR1519  |
| N2                                                                                                                                                                                | HS | IV | 4528730 | 4530382 | WBGene00022683 | ZK185.3  | ZK185.3  | -0.0300662111701477   | AGIWUR18708 |
| N2                                                                                                                                                                                | HS | IV | 4531222 | 4533121 | WBGene00044480 | ZK185.4  | ZK185.4  | -0.0436060331385089   |             |
| AGIWUR32050;AGIWUR33234                                                                                                                                                           |    |    |         |         |                |          |          |                       |             |
| N2                                                                                                                                                                                | HS | IV | 4536553 | 4541771 | WBGene00022682 | ZK185.2  | ZK185.2  | 0.0129601093011837    | AGIWUR38270 |
| N2                                                                                                                                                                                | HS | IV | 4541769 | 4545918 | WBGene00044481 | ZK185.5  | ZK185.5  | 0.392011410392815     |             |
| AGIWUR5901;AGIWUR10425                                                                                                                                                            |    |    |         |         |                |          |          |                       |             |
| N2                                                                                                                                                                                | HS | IV | 4548553 | 4552742 | WBGene00022681 | ZK185.1  | ZK185.1  | -0.0641286429691812   | AGIWUR11021 |
| N2                                                                                                                                                                                | HS | IV | 4562654 | 4565674 | WBGene00017901 | igeg-1   | F28E10.2 | -0.0435275525596417   |             |
| AGIWUR35893                                                                                                                                                                       |    |    |         |         |                |          |          |                       |             |
| N2                                                                                                                                                                                | HS | IV | 4566018 | 4567443 | WBGene00017902 | F28E10.4 | F28E10.4 | -0.0669299913295154   |             |
| AGIWUR500;AGIWUR10120;AGIWUR31071;AGIWUR32695;AGIWUR32757;AGIWUR32829                                                                                                             |    |    |         |         |                |          |          |                       |             |
| N2                                                                                                                                                                                | HS | IV | 4568841 | 4590297 | WBGene00017900 | F28E10.1 | F28E10.1 | -0.0266146546702402   |             |
| AGIWUR450;AGIWUR3642;AGIWUR15545;AGIWUR26942;AGIWUR33923;AGIWUR35572;AGIWUR36232;AGIWUR41759                                                                                      |    |    |         |         |                |          |          |                       |             |
| N2                                                                                                                                                                                | HS | IV | 4595052 | 4595530 | WBGene00017596 | F19C7.6  | F19C7.6  | 0.0335983874075971    | AGIWUR35427 |
| N2                                                                                                                                                                                | HS | IV | 4595958 | 4596732 | WBGene00017595 | F19C7.5  | F19C7.5  | 0.0377821670044796    | AGIWUR33005 |
| N2                                                                                                                                                                                | HS | IV | 4605786 | 4608216 | WBGene00017591 | F19C7.1  | F19C7.1  | -0.0896992925867615   | AGIWUR43965 |
| N2                                                                                                                                                                                | HS | IV | 4608201 | 4609679 | WBGene00000684 | col-110  | F19C7.7  | 0.225746672424055     |             |
| AGIWUR14499;AGIWUR24835                                                                                                                                                           |    |    |         |         |                |          |          |                       |             |
| N2                                                                                                                                                                                | HS | IV | 4610576 | 4638095 | WBGene00017597 | F19C7.8  | F19C7.8  | -0.00696182361183872  |             |
| AGIWUR16659;AGIWUR19393;AGIWUR23800;AGIWUR28813;AGIWUR29521                                                                                                                       |    |    |         |         |                |          |          |                       |             |
| N2                                                                                                                                                                                | HS | IV | 4647202 | 4649743 | WBGene00017923 | F29B9.8  | F29B9.8  | -0.0868311378570379   | AGIWUR11048 |
| N2                                                                                                                                                                                | HS | IV | 4649744 | 4650654 | WBGene00017922 | F29B9.7  | F29B9.7  | 0.0382411322946279    | AGIWUR18836 |
| N2                                                                                                                                                                                | HS | IV | 4651044 | 4652468 | WBGene00006706 | ubc-9    | F29B9.6  | -0.322883937154552    |             |
| AGIWUR18958;AGIWUR43174                                                                                                                                                           |    |    |         |         |                |          |          |                       |             |
| N2                                                                                                                                                                                | HS | IV | 4652459 | 4653159 | WBGene00017921 | F29B9.5  | F29B9.5  | -0.0749482174438931   | AGIWUR26617 |

|                                                                                                                                   |    |    |         |         |                |             |          |                     |             |
|-----------------------------------------------------------------------------------------------------------------------------------|----|----|---------|---------|----------------|-------------|----------|---------------------|-------------|
| N2                                                                                                                                | HS | IV | 4653293 | 4655848 | WBGene00004205 | psr-1       | F29B9.4  | 0.0797007843295283  | AGIWUR21294 |
| N2                                                                                                                                | HS | IV | 4655776 | 4657783 | WBGene00000685 | col-111     | F29B9.9  | -0.0457463500040376 |             |
| AGIWUR4023;AGIWUR27103;AGIWUR31068;AGIWUR31841;AGIWUR33074;AGIWUR37890;AGIWUR38286;AGIWUR39857;AGIWUR41390                        |    |    |         |         |                |             |          |                     |             |
| N2                                                                                                                                | HS | IV | 4659049 | 4659517 | WBGene00017924 | mrps-21     | F29B9.10 | 0.0508349235071304  |             |
| AGIWUR3956                                                                                                                        |    |    |         |         |                |             |          |                     |             |
| N2                                                                                                                                | HS | IV | 4659521 | 4660203 | WBGene00017925 | F29B9.11    | F29B9.11 | 0.0544865443402678  |             |
| AGIWUR3042;AGIWUR27108;AGIWUR33457;AGIWUR35521;AGIWUR41724;AGIWUR43364                                                            |    |    |         |         |                |             |          |                     |             |
| N2                                                                                                                                | HS | IV | 4660991 | 4665204 | WBGene00017920 | jmjd-1.2    | F29B9.2  | 0.074400138061236   |             |
| AGIWUR352;AGIWUR20412;AGIWUR21912                                                                                                 |    |    |         |         |                |             |          |                     |             |
| N2                                                                                                                                | HS | IV | 4665251 | 4667293 | WBGene00017919 | F29B9.1     | F29B9.1  | -0.506385896587281  | AGIWUR28303 |
| N2                                                                                                                                | HS | IV | 4669529 | 4671992 | WBGene00044482 | F29B9.12    | F29B9.12 | -0.0830002628289686 |             |
| AGIWUR10537                                                                                                                       |    |    |         |         |                |             |          |                     |             |
| N2                                                                                                                                | HS | IV | 4679018 | 4685168 | WBGene00020678 | T22B11.4    | T22B11.4 | -0.303604781438693  |             |
| AGIWUR181;AGIWUR5515;AGIWUR9417;AGIWUR13970;AGIWUR23451;AGIWUR32601;AGIWUR33091                                                   |    |    |         |         |                |             |          |                     |             |
| N2                                                                                                                                | HS | IV | 4688269 | 4691936 | WBGene00044620 | bus-4       | T22B11.2 | 0.0855875822428462  |             |
| AGIWUR34594                                                                                                                       |    |    |         |         |                |             |          |                     |             |
| N2                                                                                                                                | HS | IV | 4692793 | 4696826 | WBGene00020675 | T22B11.1    | T22B11.1 | -0.0308941005665089 |             |
| AGIWUR44942                                                                                                                       |    |    |         |         |                |             |          |                     |             |
| N2                                                                                                                                | HS | IV | 4696982 | 4704011 | WBGene00020679 | ogdh-1      | T22B11.5 | -0.122014688104032  |             |
| AGIWUR20048;AGIWUR28410                                                                                                           |    |    |         |         |                |             |          |                     |             |
| N2                                                                                                                                | HS | IV | 4706777 | 4710755 | WBGene00019543 | cif-1       | K08F11.3 | -0.104674106092326  |             |
| AGIWUR36907;AGIWUR44735                                                                                                           |    |    |         |         |                |             |          |                     |             |
| N2                                                                                                                                | HS | IV | 4710861 | 4712624 | WBGene00006968 | yars-2      | K08F11.4 | 0.0584921964188432  |             |
| AGIWUR1336;AGIWUR23561;AGIWUR33150                                                                                                |    |    |         |         |                |             |          |                     |             |
| N2                                                                                                                                | HS | IV | 4712825 | 4715807 | WBGene00019544 | miro-1      | K08F11.5 | -0.332902913317933  |             |
| AGIWUR13942;AGIWUR43333                                                                                                           |    |    |         |         |                |             |          |                     |             |
| N2                                                                                                                                | HS | IV | 4724862 | 4725332 | WBGene00019541 | K08F11.1    | K08F11.1 |                     |             |
| -0.000173911389754089 AGIWUR16904                                                                                                 |    |    |         |         |                |             |          |                     |             |
| N2                                                                                                                                | HS | IV | 4730636 | 4732750 | WBGene00017118 | E04A4.3     | E04A4.3  | -1.25655263895716   | AGIWUR23548 |
| N2                                                                                                                                | HS | IV | 4734305 | 4735876 | WBGene00017117 | fbxb-80     | E04A4.2  | -0.111002571847166  | AGIWUR35293 |
| N2                                                                                                                                | HS | IV | 4737558 | 4738734 | WBGene00017116 | fbxb-78     | E04A4.1  | -0.266902180164927  | AGIWUR23218 |
| N2                                                                                                                                | HS | IV | 4739490 | 4744269 | WBGene00001983 | hoe-1       | E04A4.4  | 0.452611855257398   | AGIWUR18753 |
| N2                                                                                                                                | HS | IV | 4744377 | 4745492 | WBGene00017119 | timmm-17B.1 | E04A4.5  | -0.0463373948109975 |             |
| AGIWUR16514                                                                                                                       |    |    |         |         |                |             |          |                     |             |
| N2                                                                                                                                | HS | IV | 4745825 | 4747832 | WBGene00017120 | tctn-1      | E04A4.6  | -0.0879608626255344 | AGIWUR11344 |
| N2                                                                                                                                | HS | IV | 4747901 | 4749113 | WBGene00017121 | cyc-2.1     | E04A4.7  | 0.236853290708179   |             |
| AGIWUR322;AGIWUR10063;AGIWUR11494;AGIWUR16074;AGIWUR24498;AGIWUR26130;AGIWUR28305;AGIWUR30014;AGIWUR36824;AGIWUR38385;AGIWUR43982 |    |    |         |         |                |             |          |                     |             |
| N2                                                                                                                                | HS | IV | 4749012 | 4749778 | WBGene00004432 | rpl-20      | E04A4.8  | -0.0871068943596285 |             |

|                                                                       |    |    |         |         |                |           |           |                     |
|-----------------------------------------------------------------------|----|----|---------|---------|----------------|-----------|-----------|---------------------|
| AGIWUR2616;AGIWUR4332;AGIWUR15631;AGIWUR18334;AGIWUR27175;AGIWUR37198 |    |    |         |         |                |           |           |                     |
| N2                                                                    | HS | IV | 4750240 | 4751491 | WBGene00021202 | Y17G9B.5  | Y17G9B.5  | 0.105089152757763   |
| AGIWUR26981                                                           |    |    |         |         |                |           |           |                     |
| N2                                                                    | HS | IV | 4752119 | 4753163 | WBGene00021201 | Y17G9B.4  | Y17G9B.4  | 0.0641740864187046  |
| AGIWUR20135                                                           |    |    |         |         |                |           |           |                     |
| N2                                                                    | HS | IV | 4754199 | 4756157 | WBGene00021204 | fbxb-77   | Y17G9B.7  | 0.0716760498752542  |
| AGIWUR5085;AGIWUR28574                                                |    |    |         |         |                |           |           |                     |
| N2                                                                    | HS | IV | 4757179 | 4758840 | WBGene00021205 | Y17G9B.8  | Y17G9B.8  | -0.0602123442788649 |
| AGIWUR17568                                                           |    |    |         |         |                |           |           |                     |
| N2                                                                    | HS | IV | 4758982 | 4760428 | WBGene00003216 | memi-1    | Y17G9B.9  | -0.164557264809179  |
| AGIWUR30173                                                           |    |    |         |         |                |           |           |                     |
| N2                                                                    | HS | IV | 4761049 | 4762856 | WBGene00021200 | cyp-31A3  | Y17G9B.3  | -0.0478414755656011 |
| AGIWUR18877                                                           |    |    |         |         |                |           |           |                     |
| N2                                                                    | HS | IV | 4764182 | 4764602 | WBGene00021199 | Y17G9B.2  | Y17G9B.2  | -0.196758525941151  |
| AGIWUR35670                                                           |    |    |         |         |                |           |           |                     |
| N2                                                                    | HS | IV | 4764748 | 4767839 | WBGene00021198 | Y17G9B.1  | Y17G9B.1  | -0.160670019080353  |
| AGIWUR6283;AGIWUR20407;AGIWUR41861                                    |    |    |         |         |                |           |           |                     |
| N2                                                                    | HS | IV | 4772092 | 4775133 | WBGene00020004 | R11E3.2   | R11E3.2   | 0.223231134410977   |
| N2                                                                    | HS | IV | 4775242 | 4776096 | WBGene00235374 | R11E3.19  | R11E3.19  | 0.255837266446635   |
| AGIWUR17262                                                           |    |    |         |         |                |           |           |                     |
| N2                                                                    | HS | IV | 4784233 | 4788692 | WBGene00003694 | nhr-104   | R11E3.5   | 0.272651564262488   |
| AGIWUR26636;AGIWUR33735                                               |    |    |         |         |                |           |           |                     |
| N2                                                                    | HS | IV | 4789503 | 4791983 | WBGene00020003 | R11E3.1   | R11E3.1   | 0.00757973831867886 |
| AGIWUR18867;AGIWUR23382                                               |    |    |         |         |                |           |           |                     |
| N2                                                                    | HS | IV | 4793202 | 4799378 | WBGene00001324 | eor-1     | R11E3.6   | -0.0544757521352581 |
| AGIWUR23443;AGIWUR36822                                               |    |    |         |         |                |           |           |                     |
| N2                                                                    | HS | IV | 4799388 | 4802592 | WBGene00001060 | dpf-7     | R11E3.7   | 0.110068011416124   |
| AGIWUR20072;AGIWUR31018                                               |    |    |         |         |                |           |           |                     |
| N2                                                                    | HS | IV | 4802702 | 4806586 | WBGene00001058 | dpf-5     | R11E3.8   | -0.138070708247413  |
| AGIWUR4930;AGIWUR6015;AGIWUR20859;AGIWUR21375                         |    |    |         |         |                |           |           |                     |
| N2                                                                    | HS | IV | 4806697 | 4807319 | WBGene00044483 | H06H21.11 | H06H21.11 | 0.165363933113976   |
| AGIWUR21364                                                           |    |    |         |         |                |           |           |                     |
| N2                                                                    | HS | IV | 4807426 | 4809976 | WBGene00019163 | ubxn-6    | H06H21.6  | -0.189928386854866  |
| AGIWUR12053;AGIWUR32125;AGIWUR41983;AGIWUR43407                       |    |    |         |         |                |           |           |                     |
| N2                                                                    | HS | IV | 4810934 | 4811983 | WBGene00019162 | eif-1.A   | H06H21.3  | 0.0102126522401367  |
| AGIWUR17674                                                           |    |    |         |         |                |           |           |                     |
| N2                                                                    | HS | IV | 4812075 | 4814029 | WBGene00005842 | srw-95    | H06H21.2  | -0.0323085306994226 |
| AGIWUR17290                                                           |    |    |         |         |                |           |           |                     |
| N2                                                                    | HS | IV | 4817388 | 4821131 | WBGene00019164 | H06H21.8  | H06H21.8  | 0.210489164709439   |

|                                     |    |    |         |         |                |           |           |                     |             |
|-------------------------------------|----|----|---------|---------|----------------|-----------|-----------|---------------------|-------------|
| AGIWUR3945;AGIWUR19556              |    |    |         |         |                |           |           |                     |             |
| N2                                  | HS | IV | 4825488 | 4827281 | WBGene00019165 | mpz-4     | H06H21.9  | 0.0297174461994985  |             |
| AGIWUR14973                         |    |    |         |         |                |           |           |                     |             |
| N2                                  | HS | IV | 4827853 | 4846893 | WBGene00019166 | tat-2     | H06H21.10 | 0.0113846484025348  |             |
| AGIWUR3450                          |    |    |         |         |                |           |           |                     |             |
| N2                                  | HS | IV | 4854394 | 4856287 | WBGene00021195 | Y17G9A.2  | Y17G9A.2  | 0.109868396243391   |             |
| AGIWUR6330;AGIWUR26489;AGIWUR39776  |    |    |         |         |                |           |           |                     |             |
| N2                                  | HS | IV | 4859255 | 4860255 | WBGene00235375 | Y17G9A.91 | Y17G9A.91 | -0.0385452477947874 |             |
| AGIWUR30819                         |    |    |         |         |                |           |           |                     |             |
| N2                                  | HS | IV | 4862185 | 4864141 | WBGene00006217 | str-173   | Y17G9A.1  | -0.288202430129264  |             |
| AGIWUR43543                         |    |    |         |         |                |           |           |                     |             |
| N2                                  | HS | IV | 4864978 | 4867659 | WBGene00006216 | str-172   | Y17G9A.5  | -0.113631492926055  |             |
| AGIWUR33017                         |    |    |         |         |                |           |           |                     |             |
| N2                                  | HS | IV | 4872267 | 4874703 | WBGene00006218 | str-174   | Y17G9A.7  | -0.164618141403897  |             |
| AGIWUR26745                         |    |    |         |         |                |           |           |                     |             |
| N2                                  | HS | IV | 4877402 | 4880315 | WBGene00006214 | str-170   | T08B6.7   | 0.323620236042061   | AGIWUR41481 |
| N2                                  | HS | IV | 4884296 | 4886897 | WBGene00006211 | str-166   | T08B6.6   | 0.200201826606789   | AGIWUR31779 |
| N2                                  | HS | IV | 4886885 | 4887358 | WBGene00020351 | T08B6.1   | T08B6.1   | -0.0371059525911583 | AGIWUR34344 |
| N2                                  | HS | IV | 4889918 | 4890672 | WBGene00020354 | T08B6.5   | T08B6.5   | -0.101341202779455  | AGIWUR30916 |
| N2                                  | HS | IV | 4890843 | 4894085 | WBGene00020356 | T08B6.9   | T08B6.9   | 0.233558472443377   | AGIWUR3587  |
| N2                                  | HS | IV | 4894370 | 4897043 | WBGene00020352 | T08B6.2   | T08B6.2   | 0.130714537507854   | AGIWUR36141 |
| N2                                  | HS | IV | 4902422 | 4904061 | WBGene00006206 | str-161   | T08B6.3   | 0.073780279935626   | AGIWUR22867 |
| N2                                  | HS | IV | 4905658 | 4908498 | WBGene00020353 | T08B6.4   | T08B6.4   | 0.17692174226714    | AGIWUR25964 |
| N2                                  | HS | IV | 4909339 | 4910962 | WBGene00006204 | str-159   | Y9C9A.18  | 0.125188679454683   |             |
| AGIWUR10470;AGIWUR14777             |    |    |         |         |                |           |           |                     |             |
| N2                                  | HS | IV | 4911320 | 4912780 | WBGene00021184 | Y9C9A.17  | Y9C9A.17  | -0.0378649177907224 |             |
| AGIWUR25700                         |    |    |         |         |                |           |           |                     |             |
| N2                                  | HS | IV | 4915989 | 4917553 | WBGene00006201 | str-155   | Y9C9A.10  | -0.0349027019687176 |             |
| AGIWUR21959                         |    |    |         |         |                |           |           |                     |             |
| N2                                  | HS | IV | 4918074 | 4919632 | WBGene00006203 | str-158   | Y9C9A.9   | -0.0378961364143535 |             |
| AGIWUR11250;AGIWUR15567;AGIWUR22659 |    |    |         |         |                |           |           |                     |             |
| N2                                  | HS | IV | 4930365 | 4932217 | WBGene00021178 | Y9C9A.8   | Y9C9A.8   | 0.30989070249862    | AGIWUR14229 |
| N2                                  | HS | IV | 4934414 | 4936643 | WBGene00006199 | str-153   | Y9C9A.7   | 0.122724662807238   | AGIWUR15918 |
| N2                                  | HS | IV | 4936655 | 4938011 | WBGene00021179 | fbxa-86   | Y9C9A.12  | 0.352786796540251   |             |
| AGIWUR44600                         |    |    |         |         |                |           |           |                     |             |
| N2                                  | HS | IV | 4939315 | 4941506 | WBGene00006212 | str-168   | Y9C9A.6   | 0.330252220252893   |             |
| AGIWUR1074;AGIWUR27267;AGIWUR41906  |    |    |         |         |                |           |           |                     |             |
| N2                                  | HS | IV | 4941981 | 4944588 | WBGene00021177 | Y9C9A.5   | Y9C9A.5   | -0.0723807695674736 | AGIWUR25885 |
| N2                                  | HS | IV | 4946105 | 4948518 | WBGene00006213 | str-169   | Y9C9A.4   | 0.0298836977274251  |             |

AGIWUR13121;AGIWUR15955

N2 HS IV 4954187 4958206 WBGene00006208 str-163 Y9C9A.3 -0.0449374695004039

AGIWUR3410;AGIWUR26106;AGIWUR29004

N2 HS IV 4960735 4963147 WBGene00006209 str-164 Y9C9A.2 0.217656589045061 AGIWUR26339

N2 HS IV 4963883 4965369 WBGene00021176 Y9C9A.1 Y9C9A.1 0.227264710442526 AGIWUR19033

N2 HS IV 4966097 4969540 WBGene00021180 Y9C9A.13 Y9C9A.13 -0.088405613556799

AGIWUR32536

N2 HS IV 4969840 4971145 WBGene00021181 srz-27 Y9C9A.14 -0.00321534816704627

AGIWUR18744

N2 HS IV 4971671 4973203 WBGene00021182 srz-28 Y9C9A.15 -0.217024542368545

AGIWUR11092

N2 HS IV 4973622 4976089 WBGene00021183 Y9C9A.16 Y9C9A.16 0.00731632291662709

AGIWUR10233;AGIWUR14926;AGIWUR24909

N2 HS IV 4977201 4978084 WBGene00017112 E03H12.5 E03H12.5 -0.201731081362006

AGIWUR2197;AGIWUR17016;AGIWUR28451;AGIWUR35167;AGIWUR38500

N2 HS IV 4979789 4981127 WBGene00017113 srz-24 E03H12.6 -0.00910758535753509

AGIWUR17310;AGIWUR19064;AGIWUR20580

N2 HS IV 4982596 4983892 WBGene00017111 E03H12.4 E03H12.4 0.259133581850975

AGIWUR11663

N2 HS IV 4984046 4985375 WBGene00017110 clec-176 E03H12.3 -0.133418724130085

AGIWUR27091

N2 HS IV 4986546 4987725 WBGene00017109 clec-177 E03H12.2 -0.0104709189484691

AGIWUR12062

N2 HS IV 4987702 4988642 WBGene00017114 E03H12.7 E03H12.7 -0.151137435587829

AGIWUR45032

N2 HS IV 4989065 4989717 WBGene00023265 E03H12.8 E03H12.8 -0.070841242371225

AGIWUR18233;AGIWUR28268;AGIWUR31646;AGIWUR32544;AGIWUR39099

N2 HS IV 4990255 4991433 WBGene00017115 E03H12.9 E03H12.9 -0.0393796242489275

AGIWUR469

N2 HS IV 4992389 4993857 WBGene00006207 str-162 E03H12.1 -0.0176898002203485

AGIWUR15331

N2 HS IV 4996142 4997559 WBGene00006051 ssq-2 T28H11.5 -0.191819923225417

AGIWUR44466

N2 HS IV 4999434 4999853 WBGene00006040 ssp-11 T28H11.6 0.156603352357301

AGIWUR6740

N2 HS IV 5002752 5005418 WBGene00003976 pes-1 T28H11.4 -0.324377168287336

AGIWUR30072

N2 HS IV 5008678 5010789 WBGene00005639 srm-2 T28H11.3 -0.0923239457906693

AGIWUR22655

|                                                                                                                               |    |    |         |         |                |          |          |                     |             |
|-------------------------------------------------------------------------------------------------------------------------------|----|----|---------|---------|----------------|----------|----------|---------------------|-------------|
| N2                                                                                                                            | HS | IV | 5012549 | 5014604 | WBGene00005638 | srm-1    | T28H11.2 | -0.142150753613587  |             |
| AGIWUR3163                                                                                                                    |    |    |         |         |                |          |          |                     |             |
| N2                                                                                                                            | HS | IV | 5017989 | 5020654 | WBGene00020906 | T28H11.8 | T28H11.8 | 0.0179694022244217  |             |
| AGIWUR17781                                                                                                                   |    |    |         |         |                |          |          |                     |             |
| N2                                                                                                                            | HS | IV | 5021188 | 5025746 | WBGene00220250 | C09B9.85 | C09B9.85 | 0.183560879621906   |             |
| AGIWUR21248;AGIWUR39960                                                                                                       |    |    |         |         |                |          |          |                     |             |
| N2                                                                                                                            | HS | IV | 5029250 | 5031046 | WBGene00015627 | C09B9.2  | C09B9.2  | -0.105297754644685  | AGIWUR33878 |
| N2                                                                                                                            | HS | IV | 5031596 | 5033395 | WBGene00015629 | C09B9.4  | C09B9.4  | -0.0981588569680074 | AGIWUR41775 |
| N2                                                                                                                            | HS | IV | 5037815 | 5040495 | WBGene00015626 | C09B9.1  | C09B9.1  | -0.0197536170718102 |             |
| AGIWUR7046;AGIWUR28974;AGIWUR34100                                                                                            |    |    |         |         |                |          |          |                     |             |
| N2                                                                                                                            | HS | IV | 5040859 | 5045485 | WBGene00044484 | hot-9    | C09B9.8  | 0.0223713628458007  |             |
| AGIWUR33253;AGIWUR38760                                                                                                       |    |    |         |         |                |          |          |                     |             |
| N2                                                                                                                            | HS | IV | 5056973 | 5061012 | WBGene00015630 | C09B9.7  | C09B9.7  | 0.109090003643763   | AGIWUR22172 |
| N2                                                                                                                            | HS | IV | 5083303 | 5086887 | WBGene00015330 | C02B10.5 | C02B10.5 | -0.138611727072059  |             |
| AGIWUR12136;AGIWUR16791;AGIWUR30192                                                                                           |    |    |         |         |                |          |          |                     |             |
| N2                                                                                                                            | HS | IV | 5086839 | 5088883 | WBGene00015326 | ivd-1    | C02B10.1 | -0.300064478561541  |             |
| AGIWUR9354;AGIWUR17617;AGIWUR18265;AGIWUR20484;AGIWUR26324;AGIWUR27425;AGIWUR35957;AGIWUR42479                                |    |    |         |         |                |          |          |                     |             |
| N2                                                                                                                            | HS | IV | 5090243 | 5091043 | WBGene00015327 | snpn-1   | C02B10.2 | 0.207093302163738   |             |
| AGIWUR16347                                                                                                                   |    |    |         |         |                |          |          |                     |             |
| N2                                                                                                                            | HS | IV | 5091586 | 5092807 | WBGene00015329 | C02B10.4 | C02B10.4 | 0.0355803104767354  |             |
| AGIWUR7850;AGIWUR23239;AGIWUR33462                                                                                            |    |    |         |         |                |          |          |                     |             |
| N2                                                                                                                            | HS | IV | 5092823 | 5103279 | WBGene00015328 | C02B10.3 | C02B10.3 | 0.113923700859939   |             |
| AGIWUR17458;AGIWUR21441;AGIWUR22579;AGIWUR29397;AGIWUR32557;AGIWUR37173                                                       |    |    |         |         |                |          |          |                     |             |
| N2                                                                                                                            | HS | IV | 5111839 | 5112917 | WBGene00014997 | AC7.3    | AC7.3    | 0.364272016825918   | AGIWUR5318  |
| N2                                                                                                                            | HS | IV | 5112929 | 5122019 | WBGene00006428 | tkr-3    | AC7.1    | 0.196819293503053   | AGIWUR3307  |
| N2                                                                                                                            | HS | IV | 5127006 | 5152485 | WBGene00004929 | soc-2    | AC7.2    | 0.0147833678363458  |             |
| AGIWUR7562;AGIWUR17527;AGIWUR17969;AGIWUR20865;AGIWUR22829;AGIWUR24095;AGIWUR29132                                            |    |    |         |         |                |          |          |                     |             |
| N2                                                                                                                            | HS | IV | 5159427 | 5160248 | WBGene00016057 | C24D10.6 | C24D10.6 | 0.0657259023885075  |             |
| AGIWUR2577                                                                                                                    |    |    |         |         |                |          |          |                     |             |
| N2                                                                                                                            | HS | IV | 5160522 | 5161388 | WBGene00016055 | C24D10.4 | C24D10.4 | 0.0353218124185695  |             |
| AGIWUR2286                                                                                                                    |    |    |         |         |                |          |          |                     |             |
| N2                                                                                                                            | HS | IV | 5162223 | 5162712 | WBGene00023243 | C24D10.3 | C24D10.3 | -0.157800755573409  |             |
| AGIWUR38800                                                                                                                   |    |    |         |         |                |          |          |                     |             |
| N2                                                                                                                            | HS | IV | 5162743 | 5163074 | WBGene00016058 | nspd-3   | C24D10.7 | 0.0269619901616149  |             |
| AGIWUR5468                                                                                                                    |    |    |         |         |                |          |          |                     |             |
| N2                                                                                                                            | HS | IV | 5163293 | 5164351 | WBGene00016054 | C24D10.2 | C24D10.2 | 0.0199205409771324  |             |
| AGIWUR653;AGIWUR1095;AGIWUR1370;AGIWUR2640;AGIWUR5782;AGIWUR12706;AGIWUR23865;AGIWUR26333;AGIWUR30473;AGIWUR31756;AGIWUR34688 |    |    |         |         |                |          |          |                     |             |
| N2                                                                                                                            | HS | IV | 5166330 | 5168427 | WBGene00016053 | C24D10.1 | C24D10.1 | 0.210058456463862   |             |

|                                                                                                |    |    |         |         |                |            |            |                     |             |
|------------------------------------------------------------------------------------------------|----|----|---------|---------|----------------|------------|------------|---------------------|-------------|
| AGIWUR4016                                                                                     |    |    |         |         |                |            |            |                     |             |
| N2                                                                                             | HS | IV | 5173280 | 5183708 | WBGene00002247 | lam-1      | W03F8.5    | -0.0218501321374185 |             |
| AGIWUR8912;AGIWUR20019;AGIWUR22298;AGIWUR26640;AGIWUR31449;AGIWUR36076;AGIWUR42853;AGIWUR43042 |    |    |         |         |                |            |            |                     |             |
| N2                                                                                             | HS | IV | 5184123 | 5185240 | WBGene00020994 | W03F8.4    | W03F8.4    | -0.0921018761862165 | AGIWUR5806  |
| N2                                                                                             | HS | IV | 5185333 | 5189096 | WBGene00020993 | W03F8.3    | W03F8.3    | 0.313830982093883   | AGIWUR31727 |
| N2                                                                                             | HS | IV | 5189042 | 5195627 | WBGene00020997 | gpa-18     | W03F8.9    | -0.136428609342512  |             |
| AGIWUR32817;AGIWUR45125                                                                        |    |    |         |         |                |            |            |                     |             |
| N2                                                                                             | HS | IV | 5204591 | 5207138 | WBGene00006586 | tni-4      | W03F8.1    | -0.093842909949065  |             |
| AGIWUR13736;AGIWUR40275                                                                        |    |    |         |         |                |            |            |                     |             |
| N2                                                                                             | HS | IV | 5207109 | 5209481 | WBGene00195093 | Y59E9AL.36 | Y59E9AL.36 | -0.255541196320742  |             |
| AGIWUR6575;AGIWUR10992                                                                         |    |    |         |         |                |            |            |                     |             |
| N2                                                                                             | HS | IV | 5209501 | 5210690 | WBGene00043064 | nbet-1     | Y59E9AL.7  | 0.0440087158908291  |             |
| AGIWUR26374                                                                                    |    |    |         |         |                |            |            |                     |             |
| N2                                                                                             | HS | IV | 5221284 | 5222133 | WBGene00021995 | Y59E9AL.5  | Y59E9AL.5  | -0.289456625130347  |             |
| AGIWUR35112                                                                                    |    |    |         |         |                |            |            |                     |             |
| N2                                                                                             | HS | IV | 5223237 | 5224172 | WBGene00044346 | Y59E9AL.8  | Y59E9AL.8  | 0.398062953164916   |             |
| AGIWUR20183;AGIWUR32714                                                                        |    |    |         |         |                |            |            |                     |             |
| N2                                                                                             | HS | IV | 5224899 | 5225772 | WBGene00021996 | Y59E9AL.6  | Y59E9AL.6  | -0.101633044906098  |             |
| AGIWUR7006;AGIWUR23221                                                                         |    |    |         |         |                |            |            |                     |             |
| N2                                                                                             | HS | IV | 5228919 | 5230083 | WBGene00021992 | thn-6      | Y59E9AL.1  | -0.0412174417520177 |             |
| AGIWUR7330                                                                                     |    |    |         |         |                |            |            |                     |             |
| N2                                                                                             | HS | IV | 5230830 | 5232479 | WBGene00021999 | thn-5      | Y59E9AR.4  | -0.178683670273174  |             |
| AGIWUR38274                                                                                    |    |    |         |         |                |            |            |                     |             |
| N2                                                                                             | HS | IV | 5241364 | 5241794 | WBGene00022002 | Y59E9AR.7  | Y59E9AR.7  | 0.0320570111621876  |             |
| AGIWUR31205                                                                                    |    |    |         |         |                |            |            |                     |             |
| N2                                                                                             | HS | IV | 5262786 | 5264433 | WBGene00018127 | F36H12.14  | F36H12.14  | 0.0654464323690132  |             |
| AGIWUR3951;AGIWUR14943;AGIWUR16218;AGIWUR19616;AGIWUR23777;AGIWUR30541;AGIWUR36641;AGIWUR44470 |    |    |         |         |                |            |            |                     |             |
| N2                                                                                             | HS | IV | 5268049 | 5278070 | WBGene00018130 | F36H12.17  | F36H12.17  | 0.0567603904628218  |             |
| AGIWUR29954;AGIWUR36873;AGIWUR44131                                                            |    |    |         |         |                |            |            |                     |             |
| N2                                                                                             | HS | IV | 5290847 | 5293689 | WBGene00018117 | nlp-47     | F36H12.1   | -0.0704115945066643 |             |
| AGIWUR9348                                                                                     |    |    |         |         |                |            |            |                     |             |
| N2                                                                                             | HS | IV | 5295931 | 5297487 | WBGene00022707 | ZK354.6    | ZK354.6    | -0.0448257448146396 | AGIWUR43447 |
| N2                                                                                             | HS | IV | 5302141 | 5303078 | WBGene00022708 | ZK354.7    | ZK354.7    | 0.100747657110837   | AGIWUR14632 |
| N2                                                                                             | HS | IV | 5304021 | 5306140 | WBGene00022709 | ZK354.8    | ZK354.8    | 0.180461799153516   | AGIWUR16814 |
| N2                                                                                             | HS | IV | 5310042 | 5311445 | WBGene00022706 | ZK354.3    | ZK354.3    | 0.146707434902229   | AGIWUR4701  |
| N2                                                                                             | HS | IV | 5313405 | 5315525 | WBGene00022705 | ZK354.2    | ZK354.2    | -0.0256169081835376 |             |
| AGIWUR1753;AGIWUR19004                                                                         |    |    |         |         |                |            |            |                     |             |
| N2                                                                                             | HS | IV | 5319253 | 5325033 | WBGene00021159 | Y4C6B.5    | Y4C6B.5    | 0.197003338830228   | AGIWUR27808 |
| N2                                                                                             | HS | IV | 5326444 | 5329640 | WBGene00021158 | Y4C6B.4    | Y4C6B.4    | 0.147727907103996   |             |



AGIWUR21358;AGIWUR34632

|    |    |    |         |         |                |         |         |                      |             |
|----|----|----|---------|---------|----------------|---------|---------|----------------------|-------------|
| N2 | HS | IV | 5332478 | 5336827 | WBGene00021157 | Y4C6B.3 | Y4C6B.3 | 0.000556671522575769 | AGIWUR25646 |
|----|----|----|---------|---------|----------------|---------|---------|----------------------|-------------|

|    |    |    |         |         |                |         |         |                   |             |
|----|----|----|---------|---------|----------------|---------|---------|-------------------|-------------|
| N2 | HS | IV | 5340890 | 5344204 | WBGene00021156 | Y4C6B.2 | Y4C6B.2 | 0.446369035622165 | AGIWUR21116 |
|----|----|----|---------|---------|----------------|---------|---------|-------------------|-------------|

|    |    |    |         |         |                |       |         |                    |  |
|----|----|----|---------|---------|----------------|-------|---------|--------------------|--|
| N2 | HS | IV | 5344592 | 5350947 | WBGene00021160 | gba-4 | Y4C6B.6 | -0.123110690637731 |  |
|----|----|----|---------|---------|----------------|-------|---------|--------------------|--|

AGIWUR20362;AGIWUR23005;AGIWUR28435;AGIWUR39463

|    |    |    |         |         |                |         |         |                   |  |
|----|----|----|---------|---------|----------------|---------|---------|-------------------|--|
| N2 | HS | IV | 5351420 | 5353464 | WBGene00021161 | Y4C6B.7 | Y4C6B.7 | 0.150146139916749 |  |
|----|----|----|---------|---------|----------------|---------|---------|-------------------|--|

AGIWUR1244;AGIWUR12051;AGIWUR17871;AGIWUR26058;AGIWUR41428;AGIWUR41479

|    |    |    |         |         |                |         |         |                    |             |
|----|----|----|---------|---------|----------------|---------|---------|--------------------|-------------|
| N2 | HS | IV | 5354488 | 5356539 | WBGene00021155 | Y4C6B.1 | Y4C6B.1 | -0.215592480785361 | AGIWUR23550 |
|----|----|----|---------|---------|----------------|---------|---------|--------------------|-------------|

|    |    |    |         |         |                |       |          |                    |  |
|----|----|----|---------|---------|----------------|-------|----------|--------------------|--|
| N2 | HS | IV | 5356538 | 5364306 | WBGene00018319 | hda-6 | F41H10.6 | 0.0505162524711302 |  |
|----|----|----|---------|---------|----------------|-------|----------|--------------------|--|

AGIWUR3721;AGIWUR16258;AGIWUR17382;AGIWUR27562

|    |    |    |         |         |                |          |          |                   |  |
|----|----|----|---------|---------|----------------|----------|----------|-------------------|--|
| N2 | HS | IV | 5364559 | 5366751 | WBGene00018317 | F41H10.4 | F41H10.4 | 0.240237222547917 |  |
|----|----|----|---------|---------|----------------|----------|----------|-------------------|--|

AGIWUR8752

|    |    |    |         |         |                |        |           |                    |  |
|----|----|----|---------|---------|----------------|--------|-----------|--------------------|--|
| N2 | HS | IV | 5366867 | 5368866 | WBGene00018321 | sand-1 | F41H10.11 | -0.312843570138099 |  |
|----|----|----|---------|---------|----------------|--------|-----------|--------------------|--|

AGIWUR18778;AGIWUR36540;AGIWUR44444

|    |    |    |         |         |                |          |          |                    |  |
|----|----|----|---------|---------|----------------|----------|----------|--------------------|--|
| N2 | HS | IV | 5369797 | 5374673 | WBGene00018316 | F41H10.3 | F41H10.3 | -0.262010475498521 |  |
|----|----|----|---------|---------|----------------|----------|----------|--------------------|--|

AGIWUR28505;AGIWUR32473;AGIWUR39991;AGIWUR42589

|    |    |    |         |         |                |       |          |                    |  |
|----|----|----|---------|---------|----------------|-------|----------|--------------------|--|
| N2 | HS | IV | 5374598 | 5377275 | WBGene00001243 | elo-5 | F41H10.7 | 0.0563181849641214 |  |
|----|----|----|---------|---------|----------------|-------|----------|--------------------|--|

AGIWUR38049

|    |    |    |         |         |                |          |          |                   |  |
|----|----|----|---------|---------|----------------|----------|----------|-------------------|--|
| N2 | HS | IV | 5381634 | 5382470 | WBGene00018315 | F41H10.2 | F41H10.2 | 0.134943687031006 |  |
|----|----|----|---------|---------|----------------|----------|----------|-------------------|--|

AGIWUR10409

|    |    |    |         |         |                |           |           |                   |  |
|----|----|----|---------|---------|----------------|-----------|-----------|-------------------|--|
| N2 | HS | IV | 5385320 | 5386080 | WBGene00018322 | F41H10.12 | F41H10.12 | 0.119968477915224 |  |
|----|----|----|---------|---------|----------------|-----------|-----------|-------------------|--|

AGIWUR27702

|    |    |    |         |         |                |       |          |                   |  |
|----|----|----|---------|---------|----------------|-------|----------|-------------------|--|
| N2 | HS | IV | 5386629 | 5388559 | WBGene00001244 | elo-6 | F41H10.8 | 0.150395447682151 |  |
|----|----|----|---------|---------|----------------|-------|----------|-------------------|--|

AGIWUR12198;AGIWUR38050

|    |    |    |         |         |                |       |           |                   |  |
|----|----|----|---------|---------|----------------|-------|-----------|-------------------|--|
| N2 | HS | IV | 5390184 | 5391557 | WBGene00002032 | htp-1 | F41H10.10 | 0.162504786686998 |  |
|----|----|----|---------|---------|----------------|-------|-----------|-------------------|--|

AGIWUR17040

|    |    |    |         |         |                |         |         |                    |             |
|----|----|----|---------|---------|----------------|---------|---------|--------------------|-------------|
| N2 | HS | IV | 5391912 | 5393572 | WBGene00022775 | ZK616.5 | ZK616.5 | -0.153211482827206 | AGIWUR17545 |
|----|----|----|---------|---------|----------------|---------|---------|--------------------|-------------|

|    |    |    |         |         |                |        |         |                    |  |
|----|----|----|---------|---------|----------------|--------|---------|--------------------|--|
| N2 | HS | IV | 5393843 | 5394849 | WBGene00022776 | perm-3 | ZK616.6 | -0.298616622449669 |  |
|----|----|----|---------|---------|----------------|--------|---------|--------------------|--|

AGIWUR3289;AGIWUR10280;AGIWUR14230;AGIWUR37025;AGIWUR37266;AGIWUR42327

|    |    |    |         |         |                |        |         |                     |             |
|----|----|----|---------|---------|----------------|--------|---------|---------------------|-------------|
| N2 | HS | IV | 5394962 | 5396966 | WBGene00022774 | swsn-6 | ZK616.4 | -0.0994201119844966 | AGIWUR19887 |
|----|----|----|---------|---------|----------------|--------|---------|---------------------|-------------|

|    |    |    |         |         |                |         |         |                   |             |
|----|----|----|---------|---------|----------------|---------|---------|-------------------|-------------|
| N2 | HS | IV | 5397069 | 5397694 | WBGene00022773 | ZK616.3 | ZK616.3 | 0.387369390353626 | AGIWUR16868 |
|----|----|----|---------|---------|----------------|---------|---------|-------------------|-------------|

|    |    |    |         |         |                |         |         |                    |             |
|----|----|----|---------|---------|----------------|---------|---------|--------------------|-------------|
| N2 | HS | IV | 5397839 | 5398591 | WBGene00022772 | ZK616.2 | ZK616.2 | -0.198634938796896 | AGIWUR16916 |
|----|----|----|---------|---------|----------------|---------|---------|--------------------|-------------|

|    |    |    |         |         |                |          |          |                   |  |
|----|----|----|---------|---------|----------------|----------|----------|-------------------|--|
| N2 | HS | IV | 5405645 | 5407375 | WBGene00194816 | ZK616.61 | ZK616.61 | 0.133669284041094 |  |
|----|----|----|---------|---------|----------------|----------|----------|-------------------|--|

AGIWUR8298

|    |    |    |         |         |                |          |          |                   |  |
|----|----|----|---------|---------|----------------|----------|----------|-------------------|--|
| N2 | HS | IV | 5408426 | 5411166 | WBGene00235383 | ZK616.65 | ZK616.65 | 0.216681863895602 |  |
|----|----|----|---------|---------|----------------|----------|----------|-------------------|--|

AGIWUR31061

|    |    |    |         |         |                |       |         |                   |            |
|----|----|----|---------|---------|----------------|-------|---------|-------------------|------------|
| N2 | HS | IV | 5412827 | 5415771 | WBGene00004992 | spp-7 | ZK616.9 | 0.429995172383615 | AGIWUR2110 |
|----|----|----|---------|---------|----------------|-------|---------|-------------------|------------|

|    |    |    |         |         |                |       |          |                    |  |
|----|----|----|---------|---------|----------------|-------|----------|--------------------|--|
| N2 | HS | IV | 5416906 | 5419195 | WBGene00001223 | ehn-3 | ZK616.10 | -0.159683237393973 |  |
|----|----|----|---------|---------|----------------|-------|----------|--------------------|--|

AGIWUR26234

|                                                                                     |    |    |         |         |                |          |          |                      |             |
|-------------------------------------------------------------------------------------|----|----|---------|---------|----------------|----------|----------|----------------------|-------------|
| N2                                                                                  | HS | IV | 5423576 | 5450802 | WBGene00021152 | mg1-3    | Y4C6A.2  | -0.00978238868377757 |             |
| AGIWUR24178;AGIWUR32618                                                             |    |    |         |         |                |          |          |                      |             |
| N2                                                                                  | HS | IV | 5450993 | 5452455 | WBGene00021153 | Y4C6A.3  | Y4C6A.3  | -0.32736274909748    | AGIWUR10331 |
| N2                                                                                  | HS | IV | 5452967 | 5453640 | WBGene00021154 | Y4C6A.4  | Y4C6A.4  | 0.222425421497649    | AGIWUR8178  |
| N2                                                                                  | HS | IV | 5458767 | 5460735 | WBGene00021151 | Y4C6A.1  | Y4C6A.1  | 0.103537207476647    |             |
| AGIWUR37588;AGIWUR42972                                                             |    |    |         |         |                |          |          |                      |             |
| N2                                                                                  | HS | IV | 5462501 | 5464448 | WBGene00021793 | Y52D5A.2 | Y52D5A.2 | -0.226292329229692   |             |
| AGIWUR31886                                                                         |    |    |         |         |                |          |          |                      |             |
| N2                                                                                  | HS | IV | 5467393 | 5469134 | WBGene00021792 | Y52D5A.1 | Y52D5A.1 | -0.208847993020102   |             |
| AGIWUR17822                                                                         |    |    |         |         |                |          |          |                      |             |
| N2                                                                                  | HS | IV | 5469961 | 5473174 | WBGene00004374 | rme-2    | T11F8.3  | 0.0765674024040166   | AGIWUR29033 |
| N2                                                                                  | HS | IV | 5474162 | 5476568 | WBGene00020435 | T11F8.4  | T11F8.4  | 0.104358606316811    | AGIWUR40747 |
| N2                                                                                  | HS | IV | 5477214 | 5478708 | WBGene00020434 | T11F8.2  | T11F8.2  | 0.040268115067978    |             |
| AGIWUR8500;AGIWUR20411;AGIWUR27745;AGIWUR38023                                      |    |    |         |         |                |          |          |                      |             |
| N2                                                                                  | HS | IV | 5479589 | 5480644 | WBGene00020433 | T11F8.1  | T11F8.1  | 0.111331275105599    | AGIWUR14895 |
| N2                                                                                  | HS | IV | 5493992 | 5495252 | WBGene00015097 | B0273.1  | B0273.1  | -0.0724424971880424  | AGIWUR31928 |
| N2                                                                                  | HS | IV | 5495666 | 5528338 | WBGene00006745 | unc-5    | B0273.4  | -0.0224607172391558  | AGIWUR31044 |
| N2                                                                                  | HS | IV | 5533142 | 5537992 | WBGene00001411 | fem-1    | F35D6.1  | -0.0754328590203137  |             |
| AGIWUR3074;AGIWUR5563;AGIWUR31665;AGIWUR31934;AGIWUR33987;AGIWUR37509;AGIWUR44674   |    |    |         |         |                |          |          |                      |             |
| N2                                                                                  | HS | IV | 5537981 | 5541365 | WBGene00001093 | drp-1    | T12E12.4 | -0.181450439765667   |             |
| AGIWUR7638;AGIWUR8632;AGIWUR21497;AGIWUR26100;AGIWUR26830;AGIWUR27798               |    |    |         |         |                |          |          |                      |             |
| N2                                                                                  | HS | IV | 5541607 | 5544765 | WBGene00020464 | T12E12.3 | T12E12.3 | 0.109626657410075    |             |
| AGIWUR16529                                                                         |    |    |         |         |                |          |          |                      |             |
| N2                                                                                  | HS | IV | 5544860 | 5548459 | WBGene00020463 | cec-6    | T12E12.2 | -0.148673211295604   |             |
| AGIWUR35802                                                                         |    |    |         |         |                |          |          |                      |             |
| N2                                                                                  | HS | IV | 5551134 | 5558820 | WBGene00020462 | T12E12.1 | T12E12.1 | -0.0979987211606961  |             |
| AGIWUR4873;AGIWUR8315;AGIWUR18358;AGIWUR20163;AGIWUR28072;AGIWUR31360               |    |    |         |         |                |          |          |                      |             |
| N2                                                                                  | HS | IV | 5567020 | 5574133 | WBGene00020465 | T12E12.6 | T12E12.6 | -0.129389330577311   |             |
| AGIWUR22199;AGIWUR35240;AGIWUR35383                                                 |    |    |         |         |                |          |          |                      |             |
| N2                                                                                  | HS | IV | 5584661 | 5610368 | WBGene00001439 | fkh-7    | F26D12.1 | -0.0233325203538159  |             |
| AGIWUR21093;AGIWUR25106;AGIWUR27035;AGIWUR32201;AGIWUR38013;AGIWUR38887;AGIWUR42087 |    |    |         |         |                |          |          |                      |             |
| N2                                                                                  | HS | IV | 5611950 | 5614608 | WBGene00016542 | C39H7.4  | C39H7.4  | 0.424159070622247    | AGIWUR23749 |
| N2                                                                                  | HS | IV | 5615522 | 5619685 | WBGene00044125 | srsx-16  | C39H7.9  | -0.00406390914400312 |             |
| AGIWUR32633;AGIWUR34370                                                             |    |    |         |         |                |          |          |                      |             |
| N2                                                                                  | HS | IV | 5622063 | 5623818 | WBGene00044124 | srsx-15  | C39H7.8  | -0.122634877400456   |             |
| AGIWUR25141;AGIWUR35563;AGIWUR45008                                                 |    |    |         |         |                |          |          |                      |             |
| N2                                                                                  | HS | IV | 5624855 | 5627156 | WBGene00016543 | srsx-14  | C39H7.5  | -0.0681782744624657  | AGIWUR22984 |
| N2                                                                                  | HS | IV | 5628792 | 5630239 | WBGene00005090 | srd-12   | C39H7.6  | -0.0743901270601155  | AGIWUR14655 |
| N2                                                                                  | HS | IV | 5633818 | 5635651 | WBGene00005091 | srd-13   | C39H7.7  | -0.0574781565215856  | AGIWUR33901 |

|                                                                                   |    |    |         |         |                |          |          |                      |             |
|-----------------------------------------------------------------------------------|----|----|---------|---------|----------------|----------|----------|----------------------|-------------|
| N2                                                                                | HS | IV | 5637835 | 5640190 | WBGene00005092 | srd-14   | B0547.3  | -0.0163215826235943  |             |
| AGIWUR37068;AGIWUR42849                                                           |    |    |         |         |                |          |          |                      |             |
| N2                                                                                | HS | IV | 5643252 | 5645614 | WBGene00005086 | srd-8    | B0547.4  | -0.0439808780564759  | AGIWUR13315 |
| N2                                                                                | HS | IV | 5645831 | 5646233 | WBGene00015253 | B0547.2  | B0547.2  | 0.222099452780075    | AGIWUR4167  |
| N2                                                                                | HS | IV | 5647432 | 5648910 | WBGene00005084 | srd-6    | B0547.5  | -0.0653410273457213  |             |
| AGIWUR15071;AGIWUR24916                                                           |    |    |         |         |                |          |          |                      |             |
| N2                                                                                | HS | IV | 5649533 | 5651079 | WBGene00000817 | csn-5    | B0547.1  | -0.0225667801321778  |             |
| AGIWUR15023;AGIWUR26838;AGIWUR30038;AGIWUR44781                                   |    |    |         |         |                |          |          |                      |             |
| N2                                                                                | HS | IV | 5651087 | 5660523 | WBGene00004804 | skn-1    | T19E7.2  | -0.344488148573604   |             |
| AGIWUR1037;AGIWUR1729;AGIWUR7018;AGIWUR30483                                      |    |    |         |         |                |          |          |                      |             |
| N2                                                                                | HS | IV | 5661141 | 5664425 | WBGene00000247 | bec-1    | T19E7.3  | -0.0548948922987726  | AGIWUR28646 |
| N2                                                                                | HS | IV | 5667525 | 5669583 | WBGene00044500 | T19E7.6  | T19E7.6  | 0.120660065071455    |             |
| AGIWUR1961;AGIWUR7360;AGIWUR13107;AGIWUR18108;AGIWUR28425;AGIWUR31204;AGIWUR37038 |    |    |         |         |                |          |          |                      |             |
| N2                                                                                | HS | IV | 5672633 | 5674542 | WBGene00005083 | srd-5    | T19E7.5  | -0.0245588708713811  |             |
| AGIWUR18363;AGIWUR21112;AGIWUR40940                                               |    |    |         |         |                |          |          |                      |             |
| N2                                                                                | HS | IV | 5676212 | 5678144 | WBGene00016954 | C55C3.4  | C55C3.4  | 0.151759648027554    | AGIWUR31025 |
| N2                                                                                | HS | IV | 5678847 | 5682639 | WBGene00043065 | C55C3.7  | C55C3.7  | -0.135661649864967   |             |
| AGIWUR20678;AGIWUR31895;AGIWUR44145                                               |    |    |         |         |                |          |          |                      |             |
| N2                                                                                | HS | IV | 5683184 | 5684672 | WBGene00016956 | C55C3.6  | C55C3.6  | 0.240732036943727    |             |
| AGIWUR3247;AGIWUR44402                                                            |    |    |         |         |                |          |          |                      |             |
| N2                                                                                | HS | IV | 5685287 | 5688273 | WBGene00016953 | C55C3.3  | C55C3.3  | -0.0812342225960592  | AGIWUR31711 |
| N2                                                                                | HS | IV | 5691030 | 5694646 | WBGene00044501 | C55C3.8  | C55C3.8  | 0.128512619806068    |             |
| AGIWUR11565;AGIWUR14365;AGIWUR41535                                               |    |    |         |         |                |          |          |                      |             |
| N2                                                                                | HS | IV | 5695777 | 5703468 | WBGene00016955 | perm-5   | C55C3.5  | -0.0364017720253447  |             |
| AGIWUR2558;AGIWUR12926;AGIWUR13869                                                |    |    |         |         |                |          |          |                      |             |
| N2                                                                                | HS | IV | 5709096 | 5714336 | WBGene00016951 | C55C3.1  | C55C3.1  | -0.0772741262223473  | AGIWUR33858 |
| N2                                                                                | HS | IV | 5725600 | 5729727 | WBGene00019263 | H35B03.1 | H35B03.1 | 0.00931727632264412  |             |
| AGIWUR12168;AGIWUR15462;AGIWUR16089;AGIWUR21515;AGIWUR42466                       |    |    |         |         |                |          |          |                      |             |
| N2                                                                                | HS | IV | 5729658 | 5732636 | WBGene00019264 | H35B03.2 | H35B03.2 | 0.263747485621972    |             |
| AGIWUR20162;AGIWUR24408;AGIWUR43047;AGIWUR44813                                   |    |    |         |         |                |          |          |                      |             |
| N2                                                                                | HS | IV | 5735019 | 5737106 | WBGene00016667 | C45E5.4  | C45E5.4  | 0.0611124729308994   | AGIWUR28686 |
| N2                                                                                | HS | IV | 5744336 | 5747110 | WBGene00016664 | C45E5.1  | C45E5.1  | 0.0419942489074536   |             |
| AGIWUR3135;AGIWUR7956;AGIWUR37449                                                 |    |    |         |         |                |          |          |                      |             |
| N2                                                                                | HS | IV | 5747376 | 5757862 | WBGene00003636 | nhr-46   | C45E5.6  | -0.00423571389661959 |             |
| AGIWUR3975;AGIWUR15663;AGIWUR18429;AGIWUR27946;AGIWUR29904                        |    |    |         |         |                |          |          |                      |             |
| N2                                                                                | HS | IV | 5791296 | 5793457 | WBGene00016287 | C31H1.2  | C31H1.2  | 0.00738245348128075  |             |
| AGIWUR7772;AGIWUR9298;AGIWUR24041                                                 |    |    |         |         |                |          |          |                      |             |
| N2                                                                                | HS | IV | 5794932 | 5796825 | WBGene00016288 | C31H1.5  | C31H1.5  | 0.00314048117503063  | AGIWUR15801 |
| N2                                                                                | HS | IV | 5797453 | 5800233 | WBGene00016286 | C31H1.1  | C31H1.1  | -0.042142866213613   | AGIWUR44740 |

|                                                          |    |    |         |         |                |           |           |                     |             |
|----------------------------------------------------------|----|----|---------|---------|----------------|-----------|-----------|---------------------|-------------|
| N2                                                       | HS | IV | 5800336 | 5807093 | WBGene00016289 | Int1-1    | C31H1.6   | 0.198575807664709   |             |
| AGIWUR1036;AGIWUR26901                                   |    |    |         |         |                |           |           |                     |             |
| N2                                                       | HS | IV | 5811583 | 5814142 | WBGene00016291 | C31H1.8   | C31H1.8   | -0.0452634972154691 | AGIWUR28224 |
| N2                                                       | HS | IV | 5820370 | 5830199 | WBGene00015680 | egal-1    | C10G6.1   | 0.182017650376232   |             |
| AGIWUR11282;AGIWUR38980                                  |    |    |         |         |                |           |           |                     |             |
| N2                                                       | HS | IV | 5839387 | 5844004 | WBGene00015539 | C06E7.2   | C06E7.2   | 0.26473196589285    | AGIWUR16132 |
| N2                                                       | HS | IV | 5843890 | 5846398 | WBGene00015540 | sams-4    | C06E7.3   | -0.200925327035348  | AGIWUR33922 |
| N2                                                       | HS | IV | 5848657 | 5850845 | WBGene00015538 | sams-3    | C06E7.1   | -0.24491501814077   | AGIWUR8961  |
| N2                                                       | HS | IV | 5850826 | 5859976 | WBGene00015541 | C06E7.4   | C06E7.4   | 0.109319681818397   | AGIWUR4608  |
| N2                                                       | HS | IV | 5864529 | 5865918 | WBGene00004973 | spe-27    | C06E7.6   | -0.0886493402940189 | AGIWUR7261  |
| N2                                                       | HS | IV | 5867689 | 5870172 | WBGene00005728 | srv-17    | C06E7.7   | 0.51695507121331    | AGIWUR11136 |
| N2                                                       | HS | IV | 5871143 | 5871737 | WBGene00005729 | srv-18    | H04M03.5  | -0.0300013933802861 |             |
| AGIWUR72;AGIWUR9244;AGIWUR19701;AGIWUR19952;AGIWUR27219  |    |    |         |         |                |           |           |                     |             |
| N2                                                       | HS | IV | 5871976 | 5874081 | WBGene00005730 | srv-19    | H04M03.6  | 0.00335011252424078 |             |
| AGIWUR30456                                              |    |    |         |         |                |           |           |                     |             |
| N2                                                       | HS | IV | 5874559 | 5875659 | WBGene00005731 | srv-20    | H04M03.7  | 0.0982655818761096  |             |
| AGIWUR1978;AGIWUR4326;AGIWUR7692;AGIWUR11512;AGIWUR32527 |    |    |         |         |                |           |           |                     |             |
| N2                                                       | HS | IV | 5876092 | 5877346 | WBGene00005732 | srv-21    | H04M03.8  | 0.00937547472821976 |             |
| AGIWUR15833                                              |    |    |         |         |                |           |           |                     |             |
| N2                                                       | HS | IV | 5878470 | 5879953 | WBGene00005733 | srv-22    | H04M03.9  | -0.145308983662092  |             |
| AGIWUR31893                                              |    |    |         |         |                |           |           |                     |             |
| N2                                                       | HS | IV | 5882707 | 5884529 | WBGene00019155 | H04M03.11 | H04M03.11 | 0.349406532543531   |             |
| AGIWUR17441                                              |    |    |         |         |                |           |           |                     |             |
| N2                                                       | HS | IV | 5885835 | 5889821 | WBGene00019154 | glf-1     | H04M03.4  | 0.271235346392331   |             |
| AGIWUR44615                                              |    |    |         |         |                |           |           |                     |             |
| N2                                                       | HS | IV | 5891565 | 5893329 | WBGene00019153 | H04M03.3  | H04M03.3  | 0.114268238981538   |             |
| AGIWUR27890                                              |    |    |         |         |                |           |           |                     |             |
| N2                                                       | HS | IV | 5895490 | 5895888 | WBGene00019152 | nspb-6    | H04M03.2  | -0.227013142707603  |             |
| AGIWUR11992                                              |    |    |         |         |                |           |           |                     |             |
| N2                                                       | HS | IV | 5896623 | 5899112 | WBGene00019151 | pck-3     | H04M03.1  | -0.0872614756464696 |             |
| AGIWUR8619                                               |    |    |         |         |                |           |           |                     |             |
| N2                                                       | HS | IV | 5899586 | 5903355 | WBGene00019156 | H04M03.12 | H04M03.12 | -0.0154632210739756 |             |
| AGIWUR14194                                              |    |    |         |         |                |           |           |                     |             |
| N2                                                       | HS | IV | 5917326 | 5921446 | WBGene00019257 | dhhc-13   | H32C10.3  | 0.245212053480303   |             |
| AGIWUR33658                                              |    |    |         |         |                |           |           |                     |             |
| N2                                                       | HS | IV | 5930645 | 5933326 | WBGene00003019 | lin-33    | H32C10.2  | 0.164980378244392   |             |
| AGIWUR31530                                              |    |    |         |         |                |           |           |                     |             |
| N2                                                       | HS | IV | 5934346 | 5937497 | WBGene00019255 | H32C10.1  | H32C10.1  | 0.00662775610129351 |             |
| AGIWUR5965;AGIWUR20503;AGIWUR32526                       |    |    |         |         |                |           |           |                     |             |

|                                                                                                                                                                                                                                           |    |    |         |         |                |          |          |                     |             |
|-------------------------------------------------------------------------------------------------------------------------------------------------------------------------------------------------------------------------------------------|----|----|---------|---------|----------------|----------|----------|---------------------|-------------|
| N2                                                                                                                                                                                                                                        | HS | IV | 5937445 | 5939230 | WBGene00019296 | mcu-1    | K02B2.3  | -0.108851115466695  |             |
| AGIWUR5511;AGIWUR16477;AGIWUR17572                                                                                                                                                                                                        |    |    |         |         |                |          |          |                     |             |
| N2                                                                                                                                                                                                                                        | HS | IV | 5941926 | 5943998 | WBGene00019295 | pfkb-1.2 | K02B2.1  | -0.0851034939652555 |             |
| AGIWUR3026;AGIWUR7954                                                                                                                                                                                                                     |    |    |         |         |                |          |          |                     |             |
| N2                                                                                                                                                                                                                                        | HS | IV | 5943981 | 5946754 | WBGene00002129 | inx-7    | K02B2.4  | -0.0868450258443083 | AGIWUR7168  |
| N2                                                                                                                                                                                                                                        | HS | IV | 5947036 | 5947607 | WBGene00004494 | rps-25   | K02B2.5  | -0.0199798140510641 |             |
| AGIWUR37136;AGIWUR39980                                                                                                                                                                                                                   |    |    |         |         |                |          |          |                     |             |
| N2                                                                                                                                                                                                                                        | HS | IV | 5961690 | 5962132 | WBGene00019297 | K02B2.6  | K02B2.6  | -0.176390433576245  | AGIWUR24823 |
| N2                                                                                                                                                                                                                                        | HS | IV | 5966656 | 6004857 | WBGene00006780 | unc-44   | B0350.2  | -0.133967119384591  |             |
| AGIWUR7735;AGIWUR8509;AGIWUR10238;AGIWUR12013;AGIWUR12342;AGIWUR14441;AGIWUR17621;AGIWUR19110;AGIWUR25248;AGIWUR27550;AGIWUR27667;AGIWUR29096;AGIWUR32226;AGIWUR35643;AGIWUR38125;AGIWUR39293;AGIWUR44581                                 |    |    |         |         |                |          |          |                     |             |
| N2                                                                                                                                                                                                                                        | HS | IV | 6010352 | 6011645 | WBGene00044502 | C46G7.5  | C46G7.5  | -0.123681354760512  | AGIWUR17759 |
| N2                                                                                                                                                                                                                                        | HS | IV | 6015195 | 6017803 | WBGene00016722 | C46G7.2  | C46G7.2  | 0.0631867100521433  | AGIWUR4371  |
| N2                                                                                                                                                                                                                                        | HS | IV | 6018003 | 6019713 | WBGene00016721 | C46G7.1  | C46G7.1  | 0.0878353412092441  | AGIWUR8440  |
| N2                                                                                                                                                                                                                                        | HS | IV | 6019705 | 6033639 | WBGene00004112 | pqn-22   | C46G7.4  | 0.211438511594974   | AGIWUR19188 |
| N2                                                                                                                                                                                                                                        | HS | IV | 6040976 | 6074507 | WBGene00019205 | kcc-2    | H16014.1 | -0.0914016584633042 |             |
| AGIWUR1911;AGIWUR2231;AGIWUR5271;AGIWUR6446;AGIWUR7025;AGIWUR8507;AGIWUR13439;AGIWUR13842;AGIWUR14139;AGIWUR15302;AGIWUR17542;AGIWUR19667;AGIWUR21985;AGIWUR26651;AGIWUR27097;AGIWUR28020;AGIWUR29762;AGIWUR34185;AGIWUR42611;AGIWUR42648 |    |    |         |         |                |          |          |                     |             |
| N2                                                                                                                                                                                                                                        | HS | IV | 6075301 | 6076157 | WBGene00019514 | K08B4.2  | K08B4.2  | -0.181981101615539  | AGIWUR42732 |
| N2                                                                                                                                                                                                                                        | HS | IV | 6076692 | 6079945 | WBGene00019515 | ugt-19   | K08B4.3  | 0.672942245797026   | AGIWUR11886 |
| N2                                                                                                                                                                                                                                        | HS | IV | 6080907 | 6083592 | WBGene00019516 | ugt-20   | K08B4.4  | 0.33923473045753    | AGIWUR914   |
| N2                                                                                                                                                                                                                                        | HS | IV | 6086350 | 6089404 | WBGene00019517 | K08B4.5  | K08B4.5  | -0.0535278685410532 | AGIWUR15458 |
| N2                                                                                                                                                                                                                                        | HS | IV | 6091536 | 6092413 | WBGene00023486 | K08B4.7  | K08B4.7  | 0.107211117517632   |             |
| AGIWUR5558;AGIWUR16663;AGIWUR19385                                                                                                                                                                                                        |    |    |         |         |                |          |          |                     |             |
| N2                                                                                                                                                                                                                                        | HS | IV | 6095411 | 6110639 | WBGene00002245 | lag-1    | K08B4.1  | -0.151262115303759  |             |
| AGIWUR1113;AGIWUR12391;AGIWUR34040                                                                                                                                                                                                        |    |    |         |         |                |          |          |                     |             |
| N2                                                                                                                                                                                                                                        | HS | IV | 6110651 | 6112391 | WBGene00019750 | M03D4.3  | M03D4.3  | 0.048777181042361   | AGIWUR34204 |
| N2                                                                                                                                                                                                                                        | HS | IV | 6118219 | 6121775 | WBGene00006974 | zen-4    | M03D4.1  | -0.136479044721785  |             |
| AGIWUR6721;AGIWUR7368;AGIWUR10759;AGIWUR19300;AGIWUR31924                                                                                                                                                                                 |    |    |         |         |                |          |          |                     |             |
| N2                                                                                                                                                                                                                                        | HS | IV | 6143183 | 6149923 | WBGene00019176 | H10D12.2 | H10D12.2 | -0.0013146631818981 |             |
| AGIWUR2783;AGIWUR6943;AGIWUR11080;AGIWUR17501;AGIWUR23031;AGIWUR44002                                                                                                                                                                     |    |    |         |         |                |          |          |                     |             |
| N2                                                                                                                                                                                                                                        | HS | IV | 6152437 | 6154623 | WBGene00015701 | C11D2.3  | C11D2.3  | 0.150072224689271   | AGIWUR2737  |
| N2                                                                                                                                                                                                                                        | HS | IV | 6154558 | 6155396 | WBGene00015703 | C11D2.7  | C11D2.7  | 0.0817442509377653  | AGIWUR26177 |
| N2                                                                                                                                                                                                                                        | HS | IV | 6155492 | 6156960 | WBGene00015702 | C11D2.4  | C11D2.4  | -0.171385095325155  |             |
| AGIWUR9202;AGIWUR10951;AGIWUR18099;AGIWUR20572                                                                                                                                                                                            |    |    |         |         |                |          |          |                     |             |
| N2                                                                                                                                                                                                                                        | HS | IV | 6157310 | 6183857 | WBGene00006809 | unc-77   | C11D2.6  | 0.192032958400941   |             |
| AGIWUR18031;AGIWUR29623;AGIWUR40642;AGIWUR43664                                                                                                                                                                                           |    |    |         |         |                |          |          |                     |             |
| N2                                                                                                                                                                                                                                        | HS | IV | 6185888 | 6189205 | WBGene00015700 | asp-9    | C11D2.2  | 0.0464193817170577  |             |

AGIWUR3747;AGIWUR12177

|    |    |    |         |         |                |          |         |                     |                   |
|----|----|----|---------|---------|----------------|----------|---------|---------------------|-------------------|
| N2 | HS | IV | 6202080 | 6205703 | WBGene00016761 | tkr-2    | C49A9.7 | -0.0311676592249324 | AGIWUR14708       |
| N2 | HS | IV | 6205793 | 6206344 | WBGene00016764 | C49A9.10 |         | C49A9.10            | 0.220941092547395 |

AGIWUR23758

|    |    |    |         |         |                |         |         |                     |             |
|----|----|----|---------|---------|----------------|---------|---------|---------------------|-------------|
| N2 | HS | IV | 6206843 | 6209527 | WBGene00016762 | ugt-24  | C49A9.8 | 0.311865320649975   | AGIWUR14772 |
| N2 | HS | IV | 6210936 | 6213181 | WBGene00016760 | C49A9.6 | C49A9.6 | -0.0366044680090489 | AGIWUR38078 |
| N2 | HS | IV | 6213822 | 6216371 | WBGene00016759 | C49A9.5 | C49A9.5 | 0.113693421732796   | AGIWUR8070  |
| N2 | HS | IV | 6217349 | 6219449 | WBGene00016763 | C49A9.9 | C49A9.9 | 0.170971778218018   |             |

AGIWUR1773;AGIWUR15196

|    |    |    |         |         |                |         |         |                     |             |
|----|----|----|---------|---------|----------------|---------|---------|---------------------|-------------|
| N2 | HS | IV | 6219604 | 6222346 | WBGene00016758 | C49A9.4 | C49A9.4 | -0.147590114401821  | AGIWUR12726 |
| N2 | HS | IV | 6222089 | 6225009 | WBGene00016757 | C49A9.3 | C49A9.3 | 0.257108245783625   | AGIWUR37712 |
| N2 | HS | IV | 6225443 | 6228046 | WBGene00016756 | C49A9.2 | C49A9.2 | 0.427060943112696   | AGIWUR23748 |
| N2 | HS | IV | 6228203 | 6230025 | WBGene00016755 | C49A9.1 | C49A9.1 | -0.142951124755065  | AGIWUR3139  |
| N2 | HS | IV | 6231023 | 6232607 | WBGene00019058 | F58F9.4 | F58F9.4 | -0.0296850662749115 | AGIWUR41348 |
| N2 | HS | IV | 6233246 | 6235666 | WBGene00019057 | F58F9.3 | F58F9.3 | 0.179534318515184   |             |

AGIWUR7538;AGIWUR20237

|    |    |    |         |         |                |         |         |                    |             |
|----|----|----|---------|---------|----------------|---------|---------|--------------------|-------------|
| N2 | HS | IV | 6235977 | 6237543 | WBGene00019059 | F58F9.6 | F58F9.6 | 0.0714866506326972 | AGIWUR19018 |
| N2 | HS | IV | 6238192 | 6239437 | WBGene00044306 | F58F9.8 | F58F9.8 | 0.0481736353840847 |             |

AGIWUR9116;AGIWUR24570

|    |    |    |         |         |                |         |         |                    |  |
|----|----|----|---------|---------|----------------|---------|---------|--------------------|--|
| N2 | HS | IV | 6240306 | 6241389 | WBGene00044307 | F58F9.9 | F58F9.9 | 0.0174063536908324 |  |
|----|----|----|---------|---------|----------------|---------|---------|--------------------|--|

AGIWUR18241;AGIWUR29280

|    |    |    |         |         |                |          |  |          |                     |
|----|----|----|---------|---------|----------------|----------|--|----------|---------------------|
| N2 | HS | IV | 6241855 | 6242795 | WBGene00044308 | F58F9.10 |  | F58F9.10 | -0.0841786155739883 |
|----|----|----|---------|---------|----------------|----------|--|----------|---------------------|

AGIWUR26484;AGIWUR38991

|    |    |    |         |         |                |          |  |          |                   |
|----|----|----|---------|---------|----------------|----------|--|----------|-------------------|
| N2 | HS | IV | 6243382 | 6244374 | WBGene00044309 | F58F9.11 |  | F58F9.11 | 0.330974054887466 |
|----|----|----|---------|---------|----------------|----------|--|----------|-------------------|

AGIWUR17345

|    |    |    |         |         |                |         |          |                     |             |
|----|----|----|---------|---------|----------------|---------|----------|---------------------|-------------|
| N2 | HS | IV | 6245341 | 6248492 | WBGene00019060 | acox-3  | F58F9.7  | 0.364407071954009   | AGIWUR24700 |
| N2 | HS | IV | 6249874 | 6253083 | WBGene00019055 | F58F9.1 | F58F9.1  | -0.0795381743900494 | AGIWUR12407 |
| N2 | HS | IV | 6255071 | 6259858 | WBGene00003754 | nlp-16  | T13A10.5 | 0.0390816850482754  |             |

AGIWUR21097;AGIWUR24636

|    |    |    |         |         |                |        |           |  |                    |
|----|----|----|---------|---------|----------------|--------|-----------|--|--------------------|
| N2 | HS | IV | 6261058 | 6263344 | WBGene00005739 | srv-28 | T13A10.14 |  | -0.143556775717641 |
|----|----|----|---------|---------|----------------|--------|-----------|--|--------------------|

AGIWUR7801

|    |    |    |         |         |                |        |          |  |                    |
|----|----|----|---------|---------|----------------|--------|----------|--|--------------------|
| N2 | HS | IV | 6267457 | 6269446 | WBGene00005741 | srv-30 | T13A10.7 |  | 0.0405872818152417 |
|----|----|----|---------|---------|----------------|--------|----------|--|--------------------|

AGIWUR37058

|    |    |    |         |         |                |        |          |  |                    |
|----|----|----|---------|---------|----------------|--------|----------|--|--------------------|
| N2 | HS | IV | 6269773 | 6272023 | WBGene00005742 | srv-31 | T13A10.9 |  | 0.0831429611294743 |
|----|----|----|---------|---------|----------------|--------|----------|--|--------------------|

AGIWUR40378

|    |    |    |         |         |                |       |           |  |                    |
|----|----|----|---------|---------|----------------|-------|-----------|--|--------------------|
| N2 | HS | IV | 6272529 | 6275713 | WBGene00000005 | aat-4 | T13A10.10 |  | 0.0771666704993272 |
|----|----|----|---------|---------|----------------|-------|-----------|--|--------------------|

AGIWUR15818

|    |    |    |         |         |                |        |           |  |                    |
|----|----|----|---------|---------|----------------|--------|-----------|--|--------------------|
| N2 | HS | IV | 6277435 | 6279572 | WBGene00006416 | sams-5 | T13A10.11 |  | 0.0295694699289211 |
|----|----|----|---------|---------|----------------|--------|-----------|--|--------------------|

AGIWUR3761;AGIWUR11823;AGIWUR19459;AGIWUR20660;AGIWUR41960

|                                                                     |    |    |         |         |                |            |            |                      |
|---------------------------------------------------------------------|----|----|---------|---------|----------------|------------|------------|----------------------|
| N2                                                                  | HS | IV | 6280147 | 6282243 | WBGene00005743 | srv-32     | T13A10.12  | -0.0257163517108818  |
| AGIWUR18255                                                         |    |    |         |         |                |            |            |                      |
| N2                                                                  | HS | IV | 6282931 | 6284387 | WBGene00005744 | ops-1      | T13A10.13  | -0.00596678529192829 |
| AGIWUR33785                                                         |    |    |         |         |                |            |            |                      |
| N2                                                                  | HS | IV | 6288364 | 6290841 | WBGene00005735 | srv-24     | Y73B6BL.10 | 0.0602208619839271   |
| AGIWUR42294                                                         |    |    |         |         |                |            |            |                      |
| N2                                                                  | HS | IV | 6294234 | 6295219 | WBGene00001853 | hil-2      | Y73B6BL.9  | 0.113195845269793    |
| AGIWUR18626                                                         |    |    |         |         |                |            |            |                      |
| N2                                                                  | HS | IV | 6296279 | 6298347 | WBGene00005738 | srv-27     | Y73B6BL.41 | -0.129925130990527   |
| AGIWUR7755;AGIWUR37612;AGIWUR39406                                  |    |    |         |         |                |            |            |                      |
| N2                                                                  | HS | IV | 6299273 | 6301864 | WBGene00005737 | srv-26     | Y73B6BL.40 | -0.174088154406841   |
| AGIWUR22999                                                         |    |    |         |         |                |            |            |                      |
| N2                                                                  | HS | IV | 6302159 | 6303742 | WBGene00005736 | srv-25     | Y73B6BL.11 | -0.147473903695426   |
| AGIWUR2146                                                          |    |    |         |         |                |            |            |                      |
| N2                                                                  | HS | IV | 6307739 | 6315719 | WBGene00000820 | csp-2      | Y73B6BL.7  | 0.0507771345878467   |
| AGIWUR27137;AGIWUR37601                                             |    |    |         |         |                |            |            |                      |
| N2                                                                  | HS | IV | 6321948 | 6323562 | WBGene00022250 | Y73B6BL.29 | Y73B6BL.29 | 0.187071794165957    |
| AGIWUR43135                                                         |    |    |         |         |                |            |            |                      |
| N2                                                                  | HS | IV | 6323979 | 6326421 | WBGene00022235 | sqd-1      | Y73B6BL.6  | -0.126012259616386   |
| AGIWUR5530;AGIWUR6062;AGIWUR6714;AGIWUR9941;AGIWUR10169;AGIWUR30227 |    |    |         |         |                |            |            |                      |
| N2                                                                  | HS | IV | 6326526 | 6329461 | WBGene00003082 | lsm-8      | Y73B6BL.32 | -0.0648516111860999  |
| AGIWUR39819                                                         |    |    |         |         |                |            |            |                      |
| N2                                                                  | HS | IV | 6329578 | 6333554 | WBGene00004783 | seu-1      | Y73B6BL.5  | -0.0974064847721188  |
| AGIWUR2395;AGIWUR9149;AGIWUR33136;AGIWUR35630;AGIWUR41727           |    |    |         |         |                |            |            |                      |
| N2                                                                  | HS | IV | 6334215 | 6335168 | WBGene00022251 | blos-2     | Y73B6BL.30 | -0.14878323347302    |
| AGIWUR34101                                                         |    |    |         |         |                |            |            |                      |
| N2                                                                  | HS | IV | 6335249 | 6335994 | WBGene00003237 | mif-4      | Y73B6BL.13 | 0.0807966998070562   |
| AGIWUR43599                                                         |    |    |         |         |                |            |            |                      |
| N2                                                                  | HS | IV | 6337653 | 6340098 | WBGene00022233 | ipla-6     | Y73B6BL.4  | -0.0987083513804357  |
| AGIWUR9142;AGIWUR19157;AGIWUR25759;AGIWUR35569                      |    |    |         |         |                |            |            |                      |
| N2                                                                  | HS | IV | 6342471 | 6342976 | WBGene00022237 | Y73B6BL.14 | Y73B6BL.14 | 0.113201327454121    |
| AGIWUR15623                                                         |    |    |         |         |                |            |            |                      |
| N2                                                                  | HS | IV | 6373162 | 6376523 | WBGene00022253 | hrpf-2     | Y73B6BL.33 | -0.00858735142801592 |
| AGIWUR15470                                                         |    |    |         |         |                |            |            |                      |
| N2                                                                  | HS | IV | 6377065 | 6378195 | WBGene00000256 | bli-6      | Y73B6BL.34 | 0.206784615517567    |
| AGIWUR43023                                                         |    |    |         |         |                |            |            |                      |
| N2                                                                  | HS | IV | 6378594 | 6384070 | WBGene00022240 | shl-1      | Y73B6BL.19 | 0.274661082222533    |
| AGIWUR18216                                                         |    |    |         |         |                |            |            |                      |
| N2                                                                  | HS | IV | 6396582 | 6402458 | WBGene00022242 | sfrp-1     | Y73B6BL.21 | -0.104814885181831   |

|                                                                         |    |    |         |         |                |            |            |                     |
|-------------------------------------------------------------------------|----|----|---------|---------|----------------|------------|------------|---------------------|
| AGIWUR5050                                                              |    |    |         |         |                |            |            |                     |
| N2                                                                      | HS | IV | 6405176 | 6408236 | WBGene00005724 | srv-13     | Y73B6BL.39 | 0.0405034477886552  |
| AGIWUR3601                                                              |    |    |         |         |                |            |            |                     |
| N2                                                                      | HS | IV | 6409557 | 6413566 | WBGene00022254 | Y73B6BL.35 | Y73B6BL.35 | -0.100083283126865  |
| AGIWUR21204;AGIWUR23050;AGIWUR23340;AGIWUR26890;AGIWUR29462;AGIWUR40052 |    |    |         |         |                |            |            |                     |
| N2                                                                      | HS | IV | 6415478 | 6417457 | WBGene00022232 | exos-2     | Y73B6BL.3  | -0.344845366923426  |
| AGIWUR10655                                                             |    |    |         |         |                |            |            |                     |
| N2                                                                      | HS | IV | 6417696 | 6419078 | WBGene00022244 | Y73B6BL.23 | Y73B6BL.23 | -0.0924229312707503 |
| AGIWUR3816;AGIWUR6155;AGIWUR11951;AGIWUR28586;AGIWUR40745               |    |    |         |         |                |            |            |                     |
| N2                                                                      | HS | IV | 6419500 | 6420898 | WBGene00002033 | htp-2      | Y73B6BL.2  | -0.122565843482377  |
| AGIWUR10934                                                             |    |    |         |         |                |            |            |                     |
| N2                                                                      | HS | IV | 6421036 | 6421200 | WBGene00044752 | Y73B6BL.45 | Y73B6BL.45 | -0.16354903205006   |
| AGIWUR9734                                                              |    |    |         |         |                |            |            |                     |
| N2                                                                      | HS | IV | 6421589 | 6423489 | WBGene00022257 | puf-11     | Y73B6BL.38 | -0.174209529770284  |
| AGIWUR28069                                                             |    |    |         |         |                |            |            |                     |
| N2                                                                      | HS | IV | 6424600 | 6426139 | WBGene00022245 | acp-6      | Y73B6BL.24 | 0.0284177409499353  |
| AGIWUR5531;AGIWUR20296;AGIWUR22193                                      |    |    |         |         |                |            |            |                     |
| N2                                                                      | HS | IV | 6428305 | 6431707 | WBGene00022246 | acp-7      | Y73B6BL.25 | 0.0510159807503161  |
| AGIWUR31201                                                             |    |    |         |         |                |            |            |                     |
| N2                                                                      | HS | IV | 6438223 | 6440032 | WBGene00043067 | d1c-5      | Y73B6BL.43 | 0.0407861814035964  |
| AGIWUR5344;AGIWUR7316;AGIWUR16502;AGIWUR29630                           |    |    |         |         |                |            |            |                     |
| N2                                                                      | HS | IV | 6442229 | 6446532 | WBGene00022252 | Y73B6BL.31 | Y73B6BL.31 | 0.350362281032913   |
| AGIWUR10068;AGIWUR14224;AGIWUR30990                                     |    |    |         |         |                |            |            |                     |
| N2                                                                      | HS | IV | 6446573 | 6457543 | WBGene00022247 | lgc-10     | Y73B6BL.26 | 0.0221887512282128  |
| AGIWUR18076                                                             |    |    |         |         |                |            |            |                     |
| N2                                                                      | HS | IV | 6464352 | 6468327 | WBGene00043066 | acr-25     | Y73B6BL.42 | 0.143141440109299   |
| AGIWUR38243                                                             |    |    |         |         |                |            |            |                     |
| N2                                                                      | HS | IV | 6469955 | 6471384 | WBGene00022255 | Y73B6BL.36 | Y73B6BL.36 | 0.0310272430768896  |
| AGIWUR11423;AGIWUR14886                                                 |    |    |         |         |                |            |            |                     |
| N2                                                                      | HS | IV | 6472155 | 6473235 | WBGene00022248 | Y73B6BL.27 | Y73B6BL.27 |                     |
| -0.00188566615573116<br>AGIWUR42102                                     |    |    |         |         |                |            |            |                     |
| N2                                                                      | HS | IV | 6480521 | 6486971 | WBGene00022231 | tyr-6      | Y73B6BL.1  | 0.176928106347031   |
| AGIWUR1895                                                              |    |    |         |         |                |            |            |                     |
| N2                                                                      | HS | IV | 6487347 | 6489090 | WBGene00022256 | Y73B6BL.37 | Y73B6BL.37 | -0.028448980839813  |
| AGIWUR12748                                                             |    |    |         |         |                |            |            |                     |
| N2                                                                      | HS | IV | 6493599 | 6497378 | WBGene00044350 | Y73B6BL.44 | Y73B6BL.44 | 0.00831899916737111 |
| AGIWUR1321;AGIWUR8689                                                   |    |    |         |         |                |            |            |                     |
| N2                                                                      | HS | IV | 6506726 | 6511042 | WBGene00004169 | pqn-89     | Y73B6BR.1  | 0.189711658068987   |
| AGIWUR2166;AGIWUR18201;AGIWUR33782;AGIWUR35889;AGIWUR41226              |    |    |         |         |                |            |            |                     |



|                                                                                   |    |    |         |         |                |           |           |                     |             |
|-----------------------------------------------------------------------------------|----|----|---------|---------|----------------|-----------|-----------|---------------------|-------------|
| N2                                                                                | HS | IV | 6518174 | 6519502 | WBGene00015309 | C01G5.7   | C01G5.7   | -0.144707084499401  | AGIWUR30933 |
| N2                                                                                | HS | IV | 6519926 | 6522242 | WBGene00015311 | C01G5.9   | C01G5.9   | 0.092030719430392   | AGIWUR16070 |
| N2                                                                                | HS | IV | 6522874 | 6524568 | WBGene00015308 | ddi-1     | C01G5.6   | 0.255923027288405   | AGIWUR695   |
| N2                                                                                | HS | IV | 6524610 | 6526524 | WBGene00015307 | C01G5.5   | C01G5.5   | -0.0355206181491159 | AGIWUR13057 |
| N2                                                                                | HS | IV | 6526729 | 6529802 | WBGene00004179 | prg-2     | C01G5.2   | 0.0230750885699695  |             |
| AGIWUR19766;AGIWUR25037;AGIWUR35662                                               |    |    |         |         |                |           |           |                     |             |
| N2                                                                                | HS | IV | 6531750 | 6535677 | WBGene00015306 | C01G5.4   | C01G5.4   | -0.17637057885101   | AGIWUR12939 |
| N2                                                                                | HS | IV | 6548818 | 6552511 | WBGene00015310 | fan-1     | C01G5.8   | 0.191062296261437   | AGIWUR30930 |
| N2                                                                                | HS | IV | 6552479 | 6555920 | WBGene00016610 | paqr-1    | C43G2.1   | -0.067876478898734  |             |
| AGIWUR6337;AGIWUR20140;AGIWUR39059                                                |    |    |         |         |                |           |           |                     |             |
| N2                                                                                | HS | IV | 6557171 | 6560881 | WBGene00006621 | try-3     | C43G2.5   | 0.568417099327593   | AGIWUR22974 |
| N2                                                                                | HS | IV | 6560736 | 6565261 | WBGene00016613 | best-9    | C43G2.4   | 0.158650611682227   | AGIWUR27424 |
| N2                                                                                | HS | IV | 6565384 | 6572338 | WBGene00016611 | bicd-1    | C43G2.2   | 0.18057522141531    | AGIWUR13162 |
| N2                                                                                | HS | IV | 6578197 | 6579402 | WBGene00016612 | C43G2.3   | C43G2.3   | 0.369531737658702   | AGIWUR21928 |
| N2                                                                                | HS | IV | 6579840 | 6582676 | WBGene00018160 | odr-8     | F38A5.1   | -0.0486299122729825 |             |
| AGIWUR2601;AGIWUR3004;AGIWUR4843;AGIWUR31954;AGIWUR33472;AGIWUR34492;AGIWUR44384  |    |    |         |         |                |           |           |                     |             |
| N2                                                                                | HS | IV | 6582703 | 6585571 | WBGene00018161 | F38A5.2   | F38A5.2   | -0.118798932177661  |             |
| AGIWUR1637;AGIWUR1880;AGIWUR26971;AGIWUR31257;AGIWUR33703;AGIWUR41277;AGIWUR42545 |    |    |         |         |                |           |           |                     |             |
| N2                                                                                | HS | IV | 6585871 | 6588186 | WBGene00001029 | dnj-11    | F38A5.13  | 0.118151055049598   |             |
| AGIWUR26044;AGIWUR32851;AGIWUR33015;AGIWUR41606                                   |    |    |         |         |                |           |           |                     |             |
| N2                                                                                | HS | IV | 6588184 | 6590307 | WBGene00002274 | lec-11    | F38A5.3   | 0.405663728103589   |             |
| AGIWUR6492;AGIWUR16105;AGIWUR16475;AGIWUR27350                                    |    |    |         |         |                |           |           |                     |             |
| N2                                                                                | HS | IV | 6592666 | 6594529 | WBGene00018168 | irld-7    | F38A5.11  | 0.27801861856307    |             |
| AGIWUR3776                                                                        |    |    |         |         |                |           |           |                     |             |
| N2                                                                                | HS | IV | 6596108 | 6597398 | WBGene00018163 | F38A5.6   | F38A5.6   | 0.210552790037418   | AGIWUR30197 |
| N2                                                                                | HS | IV | 6599882 | 6600491 | WBGene00018165 | F38A5.8   | F38A5.8   | 0.161024969874745   | AGIWUR19468 |
| N2                                                                                | HS | IV | 6601678 | 6602443 | WBGene00018164 | sup-36    | F38A5.7   | -0.164408445334759  | AGIWUR35277 |
| N2                                                                                | HS | IV | 6602680 | 6603966 | WBGene00017481 | F15B10.3  | F15B10.3  | 0.204238488899644   |             |
| AGIWUR29802                                                                       |    |    |         |         |                |           |           |                     |             |
| N2                                                                                | HS | IV | 6604001 | 6606188 | WBGene00017480 | nstp-2    | F15B10.1  | -0.082796011607341  |             |
| AGIWUR9501                                                                        |    |    |         |         |                |           |           |                     |             |
| N2                                                                                | HS | IV | 6607376 | 6613353 | WBGene00001090 | drh-1     | F15B10.2  | 0.076538183264633   |             |
| AGIWUR1034;AGIWUR9440;AGIWUR42915                                                 |    |    |         |         |                |           |           |                     |             |
| N2                                                                                | HS | IV | 6613918 | 6618498 | WBGene00001091 | drh-2     | C01B10.1  | -0.0631935208573182 |             |
| AGIWUR7926;AGIWUR18407                                                            |    |    |         |         |                |           |           |                     |             |
| N2                                                                                | HS | IV | 6619468 | 6621352 | WBGene00015278 | C01B10.3  | C01B10.3  | 0.119921602954498   |             |
| AGIWUR34609                                                                       |    |    |         |         |                |           |           |                     |             |
| N2                                                                                | HS | IV | 6624528 | 6627992 | WBGene00015284 | C01B10.10 | C01B10.10 | 0.380309654265261   |             |
| AGIWUR10607;AGIWUR34060                                                           |    |    |         |         |                |           |           |                     |             |

|                                                                                                                        |    |    |         |         |                |           |           |                     |
|------------------------------------------------------------------------------------------------------------------------|----|----|---------|---------|----------------|-----------|-----------|---------------------|
| N2                                                                                                                     | HS | IV | 6628366 | 6631745 | WBGene00015279 | C01B10.4  | C01B10.4  | 0.391434829732859   |
| AGIWUR31155                                                                                                            |    |    |         |         |                |           |           |                     |
| N2                                                                                                                     | HS | IV | 6632222 | 6634986 | WBGene00015283 | C01B10.9  | C01B10.9  | 0.208158931015108   |
| AGIWUR27315                                                                                                            |    |    |         |         |                |           |           |                     |
| N2                                                                                                                     | HS | IV | 6635039 | 6638155 | WBGene00015282 | C01B10.8  | C01B10.8  |                     |
| -0.00393553462191321 AGIWUR40431                                                                                       |    |    |         |         |                |           |           |                     |
| N2                                                                                                                     | HS | IV | 6638556 | 6639271 | WBGene00015281 | C01B10.7  | C01B10.7  | 0.147356749542512   |
| AGIWUR44495                                                                                                            |    |    |         |         |                |           |           |                     |
| N2                                                                                                                     | HS | IV | 6640161 | 6645352 | WBGene00015280 | C01B10.6  | C01B10.6  | -0.123507866243788  |
| AGIWUR35272;AGIWUR40404;AGIWUR42883                                                                                    |    |    |         |         |                |           |           |                     |
| N2                                                                                                                     | HS | IV | 6646034 | 6646936 | WBGene00001858 | hil-7     | C01B10.5  | -0.805662574472988  |
| AGIWUR1319;AGIWUR11770;AGIWUR16609;AGIWUR22740;AGIWUR24965;AGIWUR25043;AGIWUR29174;AGIWUR31187;AGIWUR40020;AGIWUR42223 |    |    |         |         |                |           |           |                     |
| N2                                                                                                                     | HS | IV | 6657981 | 6660434 | WBGene00044294 | C01B10.11 | C01B10.11 | -0.322332563110958  |
| AGIWUR27716                                                                                                            |    |    |         |         |                |           |           |                     |
| N2                                                                                                                     | HS | IV | 6661234 | 6668054 | WBGene00022228 | Y73B6A.1  | Y73B6A.1  | 0.268864063347038   |
| AGIWUR26914                                                                                                            |    |    |         |         |                |           |           |                     |
| N2                                                                                                                     | HS | IV | 6704925 | 6707052 | WBGene00044503 | Y73B6A.6  | Y73B6A.6  | 0.02711020880096    |
| AGIWUR2811;AGIWUR15743;AGIWUR23600                                                                                     |    |    |         |         |                |           |           |                     |
| N2                                                                                                                     | HS | IV | 6732980 | 6736110 | WBGene00022229 | Y73B6A.2  | Y73B6A.2  | 0.202641563613488   |
| AGIWUR33883                                                                                                            |    |    |         |         |                |           |           |                     |
| N2                                                                                                                     | HS | IV | 6738727 | 6740374 | WBGene00022230 | Y73B6A.3  | Y73B6A.3  | 0.523841412037154   |
| AGIWUR7831                                                                                                             |    |    |         |         |                |           |           |                     |
| N2                                                                                                                     | HS | IV | 6740496 | 6742443 | WBGene00004885 | smg-7     | Y73B6A.4  | 0.108982046614313   |
| AGIWUR5239                                                                                                             |    |    |         |         |                |           |           |                     |
| N2                                                                                                                     | HS | IV | 6742538 | 6748424 | WBGene00003030 | lin-45    | Y73B6A.5  | -0.0281527893203926 |
| AGIWUR561;AGIWUR3602;AGIWUR11674;AGIWUR12654;AGIWUR18197;AGIWUR21509;AGIWUR22879;AGIWUR32207                           |    |    |         |         |                |           |           |                     |
| N2                                                                                                                     | HS | IV | 6757311 | 6762609 | WBGene00019259 | H34C03.2  | H34C03.2  | -0.131731487185439  |
| AGIWUR4690;AGIWUR5240;AGIWUR6955;AGIWUR32986;AGIWUR33475                                                               |    |    |         |         |                |           |           |                     |
| N2                                                                                                                     | HS | IV | 6762716 | 6765200 | WBGene00004954 | spd-3     | H34C03.1  | 0.777452304358132   |
| AGIWUR42614                                                                                                            |    |    |         |         |                |           |           |                     |
| N2                                                                                                                     | HS | IV | 6770810 | 6779859 | WBGene00015938 | anat-1    | C17H12.13 | -0.0124698659069864 |
| AGIWUR5446;AGIWUR28862;AGIWUR30020;AGIWUR40363                                                                         |    |    |         |         |                |           |           |                     |
| N2                                                                                                                     | HS | IV | 6779848 | 6784340 | WBGene00015927 | dyci-1    | C17H12.1  | 0.101690877724135   |
| AGIWUR20301                                                                                                            |    |    |         |         |                |           |           |                     |
| N2                                                                                                                     | HS | IV | 6786858 | 6789644 | WBGene00015928 | C17H12.2  | C17H12.2  | -0.0552939931478829 |
| AGIWUR4069                                                                                                             |    |    |         |         |                |           |           |                     |
| N2                                                                                                                     | HS | IV | 6791074 | 6792629 | WBGene00006917 | vha-8     | C17H12.14 | -0.124482810776581  |
| AGIWUR10144;AGIWUR10801;AGIWUR12310;AGIWUR12618;AGIWUR34885                                                            |    |    |         |         |                |           |           |                     |

|                                                            |    |    |         |         |                |           |           |                     |
|------------------------------------------------------------|----|----|---------|---------|----------------|-----------|-----------|---------------------|
| N2                                                         | HS | IV | 6793912 | 6795629 | WBGene00015929 | C17H12.3  | C17H12.3  | 0.282495161452294   |
| AGIWUR18330                                                |    |    |         |         |                |           |           |                     |
| N2                                                         | HS | IV | 6795913 | 6798789 | WBGene00015937 | C17H12.12 | C17H12.12 | 0.138731438607998   |
| AGIWUR20007                                                |    |    |         |         |                |           |           |                     |
| N2                                                         | HS | IV | 6798921 | 6802337 | WBGene00015930 | C17H12.4  | C17H12.4  | 0.207040630720904   |
| AGIWUR24155;AGIWUR26596                                    |    |    |         |         |                |           |           |                     |
| N2                                                         | HS | IV | 6805115 | 6805908 | WBGene00236786 | C17H12.37 | C17H12.37 | 0.0571864635221875  |
| AGIWUR25400                                                |    |    |         |         |                |           |           |                     |
| N2                                                         | HS | IV | 6806810 | 6809630 | WBGene00015935 | C17H12.10 | C17H12.10 | 0.108749981772      |
| AGIWUR32645                                                |    |    |         |         |                |           |           |                     |
| N2                                                         | HS | IV | 6812108 | 6815607 | WBGene00015934 | ceh-48    | C17H12.9  | 0.189278328375814   |
| AGIWUR28941                                                |    |    |         |         |                |           |           |                     |
| N2                                                         | HS | IV | 6815912 | 6817654 | WBGene00015931 | C17H12.5  | C17H12.5  | 0.118720484131929   |
| AGIWUR15237;AGIWUR24685;AGIWUR36468                        |    |    |         |         |                |           |           |                     |
| N2                                                         | HS | IV | 6818606 | 6820643 | WBGene00015933 | C17H12.8  | C17H12.8  | 0.0682403740951116  |
| AGIWUR24325                                                |    |    |         |         |                |           |           |                     |
| N2                                                         | HS | IV | 6821077 | 6822506 | WBGene00015932 | C17H12.6  | C17H12.6  | 0.0800798425880593  |
| AGIWUR28820                                                |    |    |         |         |                |           |           |                     |
| N2                                                         | HS | IV | 6824894 | 6826763 | WBGene00019215 | H20E11.3  | H20E11.3  | -0.121471746063559  |
| AGIWUR43547                                                |    |    |         |         |                |           |           |                     |
| N2                                                         | HS | IV | 6827777 | 6829490 | WBGene00019214 | H20E11.2  | H20E11.2  | 0.00415823790321213 |
| AGIWUR41422                                                |    |    |         |         |                |           |           |                     |
| N2                                                         | HS | IV | 6830145 | 6833464 | WBGene00019213 | H20E11.1  | H20E11.1  | 0.032007707478221   |
| AGIWUR1515;AGIWUR24083;AGIWUR24257;AGIWUR26117;AGIWUR34547 |    |    |         |         |                |           |           |                     |
| N2                                                         | HS | IV | 6839064 | 6839199 | WBGene00202332 | C05B10.21 | C05B10.21 | -0.140320421379381  |
| AGIWUR14375;AGIWUR36755                                    |    |    |         |         |                |           |           |                     |
| N2                                                         | HS | IV | 6841485 | 6841609 | WBGene00202097 | C05B10.20 | C05B10.20 | -0.11658533481784   |
| AGIWUR28691                                                |    |    |         |         |                |           |           |                     |
| N2                                                         | HS | IV | 6842964 | 6845805 | WBGene00003043 | lip-1     | C05B10.1  | -0.0347788467167272 |
| AGIWUR28238                                                |    |    |         |         |                |           |           |                     |
| N2                                                         | HS | IV | 6846129 | 6859370 | WBGene00020069 | R13H7.2   | R13H7.2   | 0.14031020483964    |
| AGIWUR6354;AGIWUR17959;AGIWUR26946                         |    |    |         |         |                |           |           |                     |
| N2                                                         | HS | IV | 6868091 | 6869137 | WBGene00005911 | srx-20    | R13H7.1   | -0.029913577372378  |
| AGIWUR15324                                                |    |    |         |         |                |           |           |                     |
| N2                                                         | HS | IV | 6873258 | 6874774 | WBGene00005910 | srx-19    | T05A12.1  | -0.104420950429825  |
| AGIWUR25873;AGIWUR26519                                    |    |    |         |         |                |           |           |                     |
| N2                                                         | HS | IV | 6876737 | 6883461 | WBGene00006608 | tre-2     | T05A12.2  | -0.0310343982593064 |
| AGIWUR3771;AGIWUR16934;AGIWUR34702;AGIWUR35029;AGIWUR37513 |    |    |         |         |                |           |           |                     |
| N2                                                         | HS | IV | 6883576 | 6887662 | WBGene00020234 | T05A12.3  | T05A12.3  | 0.167181314394957   |
| AGIWUR16023                                                |    |    |         |         |                |           |           |                     |

|                                     |    |    |         |         |                |          |          |                      |             |
|-------------------------------------|----|----|---------|---------|----------------|----------|----------|----------------------|-------------|
| N2                                  | HS | IV | 6887948 | 6897777 | WBGene00020235 | T05A12.4 | T05A12.4 | 0.119974605240433    |             |
| AGIWUR17582;AGIWUR23680;AGIWUR36204 |    |    |         |         |                |          |          |                      |             |
| N2                                  | HS | IV | 6899519 | 6900056 | WBGene00020685 | T22D1.6  | T22D1.6  | -0.00510871045009065 | AGIWUR24019 |
| N2                                  | HS | IV | 6900326 | 6903624 | WBGene00020686 | T22D1.8  | T22D1.8  | 0.208235284514346    |             |
| AGIWUR7978;AGIWUR22377;AGIWUR36253  |    |    |         |         |                |          |          |                      |             |
| N2                                  | HS | IV | 6903950 | 6905546 | WBGene00020684 | T22D1.5  | T22D1.5  | 0.0447694096233064   | AGIWUR28419 |
| N2                                  | HS | IV | 6906415 | 6909913 | WBGene00004458 | rpn-1    | T22D1.9  | -0.0716429706016903  | AGIWUR2624  |
| N2                                  | HS | IV | 6910683 | 6912865 | WBGene00020683 | ribo-1   | T22D1.4  | 0.00815738082028261  | AGIWUR17258 |
| N2                                  | HS | IV | 6913536 | 6917110 | WBGene00020682 | T22D1.3  | T22D1.3  | -0.149632105279426   |             |
| AGIWUR30821;AGIWUR45070             |    |    |         |         |                |          |          |                      |             |
| N2                                  | HS | IV | 6917111 | 6919454 | WBGene00020687 | ruvb-2   | T22D1.10 | 0.0177112128558861   |             |
| AGIWUR21494                         |    |    |         |         |                |          |          |                      |             |
| N2                                  | HS | IV | 6921855 | 6922852 | WBGene00020681 | T22D1.2  | T22D1.2  | -0.268935372821453   | AGIWUR30873 |
| N2                                  | HS | IV | 6926140 | 6928517 | WBGene00020688 | T22D1.11 | T22D1.11 | 0.112003533465545    |             |
| AGIWUR32365                         |    |    |         |         |                |          |          |                      |             |
| N2                                  | HS | IV | 6928942 | 6937713 | WBGene00020689 | npr-12   | T22D1.12 | -0.00241781468360269 |             |
| AGIWUR16564                         |    |    |         |         |                |          |          |                      |             |
| N2                                  | HS | IV | 6957641 | 6963716 | WBGene00002178 | jnk-1    | B0478.1  | 0.168352592665186    |             |
| AGIWUR5169;AGIWUR22314              |    |    |         |         |                |          |          |                      |             |
| N2                                  | HS | IV | 6963716 | 6964654 | WBGene00015202 | B0478.3  | B0478.3  | 0.101068770624283    | AGIWUR3282  |
| N2                                  | HS | IV | 6965492 | 6967806 | WBGene00022725 | ZK381.2  | ZK381.2  | -0.0936557292438174  |             |
| AGIWUR31292;AGIWUR35750             |    |    |         |         |                |          |          |                      |             |
| N2                                  | HS | IV | 6968209 | 6970280 | WBGene00044352 | ZK381.8  | ZK381.8  | 0.0576660973647614   |             |
| AGIWUR21041;AGIWUR21905             |    |    |         |         |                |          |          |                      |             |
| N2                                  | HS | IV | 6971898 | 6972527 | WBGene00022726 | nhr-249  | ZK381.3  | -0.221760033238009   | AGIWUR41593 |
| N2                                  | HS | IV | 6974401 | 6977318 | WBGene00003992 | pgl-1    | ZK381.4  | -0.321423884435834   | AGIWUR9053  |
| N2                                  | HS | IV | 6977517 | 6978943 | WBGene00001862 | him-3    | ZK381.1  | -0.00182442591536613 | AGIWUR7115  |
| N2                                  | HS | IV | 6978775 | 6986935 | WBGene00022727 | prkl-1   | ZK381.5  | -0.0260620704496963  |             |
| AGIWUR33041;AGIWUR40133             |    |    |         |         |                |          |          |                      |             |
| N2                                  | HS | IV | 6999557 | 7001493 | WBGene00016085 | C25A8.5  | C25A8.5  | 0.0487189833765882   | AGIWUR40307 |
| N2                                  | HS | IV | 7003623 | 7009268 | WBGene00016084 | cht-3    | C25A8.4  | 0.11420693426949     | AGIWUR32990 |
| N2                                  | HS | IV | 7009841 | 7010744 | WBGene00016083 | C25A8.2  | C25A8.2  | 0.0709606763719801   |             |
| AGIWUR4076;AGIWUR20082              |    |    |         |         |                |          |          |                      |             |
| N2                                  | HS | IV | 7011960 | 7016542 | WBGene00015553 | trxr-1   | C06G3.7  | 0.0162336943267096   | AGIWUR31747 |
| N2                                  | HS | IV | 7017626 | 7020210 | WBGene00015552 | C06G3.6  | C06G3.6  | -0.0380904646918143  |             |
| AGIWUR7736;AGIWUR28620;AGIWUR44593  |    |    |         |         |                |          |          |                      |             |
| N2                                  | HS | IV | 7024211 | 7028144 | WBGene00015551 | C06G3.5  | C06G3.5  | 0.11023184836921     |             |
| AGIWUR30316;AGIWUR36250;AGIWUR38569 |    |    |         |         |                |          |          |                      |             |
| N2                                  | HS | IV | 7028173 | 7030967 | WBGene00015550 | C06G3.4  | C06G3.4  | -0.118820536041511   | AGIWUR44247 |

|                                                                         |    |    |         |         |                |            |            |                      |             |
|-------------------------------------------------------------------------|----|----|---------|---------|----------------|------------|------------|----------------------|-------------|
| N2                                                                      | HS | IV | 7031298 | 7032559 | WBGene00015554 | C06G3.8    | C06G3.8    | -0.0580516012595798  | AGIWUR5950  |
| N2                                                                      | HS | IV | 7032716 | 7036982 | WBGene00015555 | ufl-1      | C06G3.9    | 0.257674886663004    | AGIWUR13922 |
| N2                                                                      | HS | IV | 7036960 | 7039580 | WBGene00000585 | cogc-2     | C06G3.10   | 0.0983459447168578   |             |
| AGIWUR23147                                                             |    |    |         |         |                |            |            |                      |             |
| N2                                                                      | HS | IV | 7040211 | 7043694 | WBGene00002228 | klp-18     | C06G3.2    | 0.00153418184399845  |             |
| AGIWUR14117;AGIWUR15370;AGIWUR19879;AGIWUR28610;AGIWUR31615;AGIWUR38249 |    |    |         |         |                |            |            |                      |             |
| N2                                                                      | HS | IV | 7043935 | 7044604 | WBGene00006572 | tin-9.1    | C06G3.11   | 0.183098550215893    |             |
| AGIWUR17497;AGIWUR24565;AGIWUR36287;AGIWUR41579                         |    |    |         |         |                |            |            |                      |             |
| N2                                                                      | HS | IV | 7049954 | 7053450 | WBGene00003695 | nhr-105    | C06G3.1    | -0.0554074077084294  |             |
| AGIWUR8408;AGIWUR25401;AGIWUR27613;AGIWUR38972;AGIWUR39864              |    |    |         |         |                |            |            |                      |             |
| N2                                                                      | HS | IV | 7057977 | 7059911 | WBGene00005941 | srx-50     | Y43B11AL.2 | 0.0550059024217155   |             |
| AGIWUR10633                                                             |    |    |         |         |                |            |            |                      |             |
| N2                                                                      | HS | IV | 7060192 | 7061778 | WBGene00005811 | srw-64     | Y43B11AL.3 | -0.0926589255452113  |             |
| AGIWUR25631;AGIWUR29248;AGIWUR34284;AGIWUR38179                         |    |    |         |         |                |            |            |                      |             |
| N2                                                                      | HS | IV | 7065322 | 7068035 | WBGene00021542 | Y43B11AL.1 | Y43B11AL.1 | -0.032759499081056   |             |
| AGIWUR28733                                                             |    |    |         |         |                |            |            |                      |             |
| N2                                                                      | HS | IV | 7070858 | 7071736 | WBGene00005206 | srg-49     | Y43B11AR.6 | -0.176733575582491   |             |
| AGIWUR28710                                                             |    |    |         |         |                |            |            |                      |             |
| N2                                                                      | HS | IV | 7072410 | 7073625 | WBGene00005205 | srg-48     | Y43B11AR.5 | -0.0579568576506713  |             |
| AGIWUR9062                                                              |    |    |         |         |                |            |            |                      |             |
| N2                                                                      | HS | IV | 7074030 | 7075163 | WBGene00005207 | srg-50     | Y43B11AR.2 | -0.210938498745735   |             |
| AGIWUR25216                                                             |    |    |         |         |                |            |            |                      |             |
| N2                                                                      | HS | IV | 7081514 | 7082266 | WBGene00021543 | Y43B11AR.1 | Y43B11AR.1 | 0.390438171726728    |             |
| AGIWUR4163                                                              |    |    |         |         |                |            |            |                      |             |
| N2                                                                      | HS | IV | 7082220 | 7083716 | WBGene00021544 | Y43B11AR.3 | Y43B11AR.3 | 0.167686816287672    |             |
| AGIWUR16252                                                             |    |    |         |         |                |            |            |                      |             |
| N2                                                                      | HS | IV | 7083694 | 7084682 | WBGene00004473 | rps-4      | Y43B11AR.4 | -0.0584081730774528  |             |
| AGIWUR360;AGIWUR10099                                                   |    |    |         |         |                |            |            |                      |             |
| N2                                                                      | HS | IV | 7085216 | 7094364 | WBGene00000942 | deb-1      | ZC477.9    | -0.216197339442284   |             |
| AGIWUR22512;AGIWUR25757;AGIWUR32217;AGIWUR32771                         |    |    |         |         |                |            |            |                      |             |
| N2                                                                      | HS | IV | 7101375 | 7103261 | WBGene00022620 | rde-8      | ZC477.5    | 0.0962256079132473   | AGIWUR23519 |
| N2                                                                      | HS | IV | 7103492 | 7105096 | WBGene00022618 | ZC477.3    | ZC477.3    | -0.00177116874707917 |             |
| AGIWUR6342;AGIWUR8916;AGIWUR23991;AGIWUR24712                           |    |    |         |         |                |            |            |                      |             |
| N2                                                                      | HS | IV | 7105169 | 7107733 | WBGene00022622 | ZC477.10   | ZC477.10   | -0.068490979965568   |             |
| AGIWUR38280                                                             |    |    |         |         |                |            |            |                      |             |
| N2                                                                      | HS | IV | 7108221 | 7109912 | WBGene00022617 | ZC477.2    | ZC477.2    | 0.451791738857047    | AGIWUR23545 |
| N2                                                                      | HS | IV | 7114899 | 7119926 | WBGene00003527 | nas-8      | C34D4.9    | 0.182808040114995    | AGIWUR2427  |
| N2                                                                      | HS | IV | 7119918 | 7121413 | WBGene00016402 | C34D4.10   | C34D4.10   | 0.286479735972065    |             |
| AGIWUR17282                                                             |    |    |         |         |                |            |            |                      |             |

|                                     |    |    |         |         |                |          |          |                      |             |
|-------------------------------------|----|----|---------|---------|----------------|----------|----------|----------------------|-------------|
| N2                                  | HS | IV | 7122194 | 7123947 | WBGene00006113 | str-48   | C34D4.8  | 0.0977423585285555   |             |
| AGIWUR19828;AGIWUR35417;AGIWUR42209 |    |    |         |         |                |          |          |                      |             |
| N2                                  | HS | IV | 7124481 | 7125516 | WBGene00006114 | str-49   | C34D4.7  | -0.205333876943589   | AGIWUR31208 |
| N2                                  | HS | IV | 7127683 | 7130462 | WBGene00006115 | str-50   | C34D4.16 | 0.150752526280175    |             |
| AGIWUR42325                         |    |    |         |         |                |          |          |                      |             |
| N2                                  | HS | IV | 7130701 | 7131928 | WBGene00016403 | grsp-3   | C34D4.11 | -0.28837670378824    |             |
| AGIWUR9753                          |    |    |         |         |                |          |          |                      |             |
| N2                                  | HS | IV | 7132132 | 7133217 | WBGene00000888 | cyn-12   | C34D4.12 | 0.242465134285549    |             |
| AGIWUR701                           |    |    |         |         |                |          |          |                      |             |
| N2                                  | HS | IV | 7133448 | 7134083 | WBGene00016404 | mutd-1   | C34D4.13 | 0.189220038228189    |             |
| AGIWUR16341                         |    |    |         |         |                |          |          |                      |             |
| N2                                  | HS | IV | 7134347 | 7144898 | WBGene00016405 | hecd-1   | C34D4.14 | -0.259907072319445   |             |
| AGIWUR20390                         |    |    |         |         |                |          |          |                      |             |
| N2                                  | HS | IV | 7149361 | 7150692 | WBGene00016400 | C34D4.4  | C34D4.4  | -0.0314678809452893  | AGIWUR3381  |
| N2                                  | HS | IV | 7150663 | 7152501 | WBGene00000687 | col-113  | C34D4.15 | -0.00246420610448972 |             |
| AGIWUR33931                         |    |    |         |         |                |          |          |                      |             |
| N2                                  | HS | IV | 7153623 | 7154193 | WBGene00016399 | C34D4.3  | C34D4.3  | -0.0977945730963672  | AGIWUR8606  |
| N2                                  | HS | IV | 7154656 | 7156010 | WBGene00016398 | C34D4.2  | C34D4.2  | 0.0419359071651204   | AGIWUR28894 |
| N2                                  | HS | IV | 7156900 | 7160109 | WBGene00016397 | maph-9   | C34D4.1  | 0.0257859424930968   | AGIWUR21448 |
| N2                                  | HS | IV | 7160135 | 7165748 | WBGene00004411 | rpc-1    | C42D4.8  | -0.0932161371644717  | AGIWUR40633 |
| N2                                  | HS | IV | 7168710 | 7169346 | WBGene00004822 | skr-16   | C42D4.6  | -0.231017130488214   | AGIWUR44191 |
| N2                                  | HS | IV | 7169931 | 7171322 | WBGene00006251 | str-220  | C42D4.9  | -0.096125590638878   | AGIWUR13622 |
| N2                                  | HS | IV | 7171489 | 7172691 | WBGene00006250 | str-219  | C42D4.10 | -0.0644349599535539  |             |
| AGIWUR984;AGIWUR38838               |    |    |         |         |                |          |          |                      |             |
| N2                                  | HS | IV | 7173789 | 7175008 | WBGene00006069 | str-1    | C42D4.5  | -0.0342346623054546  | AGIWUR28880 |
| N2                                  | HS | IV | 7177187 | 7178423 | WBGene00006109 | str-44   | C42D4.4  | -0.267616679323409   | AGIWUR8855  |
| N2                                  | HS | IV | 7179239 | 7180484 | WBGene00016596 | C42D4.3  | C42D4.3  | 0.14828157730499     | AGIWUR3239  |
| N2                                  | HS | IV | 7180535 | 7182993 | WBGene00016595 | C42D4.2  | C42D4.2  | 0.389138207060842    | AGIWUR26269 |
| N2                                  | HS | IV | 7183412 | 7184697 | WBGene00016597 | clcc-179 | C42D4.11 | 0.0280830947422999   |             |
| AGIWUR42822                         |    |    |         |         |                |          |          |                      |             |
| N2                                  | HS | IV | 7185283 | 7186856 | WBGene00006276 | str-249  | C42D4.12 | -0.00819210462910824 |             |
| AGIWUR22230;AGIWUR41333             |    |    |         |         |                |          |          |                      |             |
| N2                                  | HS | IV | 7187189 | 7188130 | WBGene00016598 | C42D4.13 | C42D4.13 | 0.204457467314505    |             |
| AGIWUR12548                         |    |    |         |         |                |          |          |                      |             |
| N2                                  | HS | IV | 7189191 | 7190331 | WBGene00016594 | C42D4.1  | C42D4.1  | 0.26828381406983     | AGIWUR18620 |
| N2                                  | HS | IV | 7191076 | 7191841 | WBGene00020043 | R13A1.5  | R13A1.5  | 0.268945789268622    | AGIWUR28017 |
| N2                                  | HS | IV | 7193520 | 7195834 | WBGene00020046 | best-16  | R13A1.9  | 0.207021272106507    | AGIWUR33813 |
| N2                                  | HS | IV | 7197153 | 7203643 | WBGene00006748 | unc-8    | R13A1.4  | 0.170359777781059    | AGIWUR37063 |
| N2                                  | HS | IV | 7206246 | 7218000 | WBGene00006504 | kcc-1    | R13A1.2  | -0.00456275155297714 |             |

AGIWUR8066;AGIWUR11215;AGIWUR19432;AGIWUR21562;AGIWUR24569;AGIWUR25696;AGIWUR27820;AGIWUR29249  
 N2 HS IV 7218049 7219485 WBGene00020045 glb-23 R13A1.8 0.177672870769772 AGIWUR17701  
 N2 HS IV 7220104 7220607 WBGene00020041 R13A1.1 R13A1.1 0.215962119684269 AGIWUR17265  
 N2 HS IV 7225416 7227172 WBGene00044504 R13A1.10 R13A1.10 0.0953126893236096  
 AGIWUR11055;AGIWUR15267  
 N2 HS IV 7227274 7228306 WBGene00017053 D2024.5 D2024.5 -0.0455492015236443  
 AGIWUR23426;AGIWUR37950  
 N2 HS IV 7228403 7230223 WBGene00000292 cap-1 D2024.6 -0.00933774416267497 AGIWUR37009  
 N2 HS IV 7231235 7232822 WBGene00017052 D2024.4 D2024.4 0.089537734418828  
 AGIWUR13170;AGIWUR14444;AGIWUR40395  
 N2 HS IV 7237722 7239976 WBGene00001241 elo-3 D2024.3 -0.0522557020197993 AGIWUR10615  
 N2 HS IV 7240445 7242270 WBGene00017054 gstk-2 D2024.7 0.0819448168510615 AGIWUR35947  
 N2 HS IV 7244208 7245502 WBGene00017051 afmd-1 D2024.2 0.347902101728516  
 AGIWUR4942;AGIWUR16746  
 N2 HS IV 7247543 7249437 WBGene00017050 D2024.1 D2024.1 0.136733908254969 AGIWUR40720  
 N2 HS IV 7254990 7255909 WBGene00015534 C06E4.5 C06E4.5 0.0558867393959357 AGIWUR6487  
 N2 HS IV 7257217 7258248 WBGene00015535 C06E4.6 C06E4.6 0.194031557832793 AGIWUR40975  
 N2 HS IV 7258653 7259622 WBGene00015533 C06E4.4 C06E4.4 -0.0251015218324353 AGIWUR32146  
 N2 HS IV 7260875 7262132 WBGene00015532 C06E4.3 C06E4.3 0.194523411632039 AGIWUR15367  
 N2 HS IV 7262237 7263237 WBGene00015536 glb-2 C06E4.7 -0.0530795495160667 AGIWUR22556  
 N2 HS IV 7276961 7283086 WBGene00015531 C06E4.2 C06E4.2 -0.0750624344772097 AGIWUR4170  
 N2 HS IV 7283257 7283871 WBGene00015530 C06E4.1 C06E4.1 -0.0813052784337209 AGIWUR38303  
 N2 HS IV 7284219 7285873 WBGene00015537 C06E4.8 C06E4.8 0.0937368645038728 AGIWUR19169  
 N2 HS IV 7286182 7287526 WBGene00018345 F42C5.3 F42C5.3 2.46197563532448 AGIWUR36799  
 N2 HS IV 7288074 7292127 WBGene00018346 F42C5.4 F42C5.4 0.50408987272861 AGIWUR22927  
 N2 HS IV 7292536 7294221 WBGene00018347 F42C5.5 F42C5.5 0.305711781682859 AGIWUR27276  
 N2 HS IV 7305628 7308350 WBGene00018344 npr-27 F42C5.2 -0.175327595412105 AGIWUR10249  
 N2 HS IV 7308486 7309057 WBGene00018348 F42C5.6 F42C5.6 0.00653212705013484 AGIWUR32176  
 N2 HS IV 7309838 7310760 WBGene00001713 grl-4 F42C5.7 0.132311761742866 AGIWUR17540  
 N2 HS IV 7312981 7313864 WBGene00004477 rps-8 F42C5.8 -0.405853786056962  
 AGIWUR14443;AGIWUR25098;AGIWUR29580;AGIWUR41164;AGIWUR41234;AGIWUR43049  
 N2 HS IV 7314371 7317163 WBGene00018349 F42C5.9 F42C5.9 -0.0046204496631832  
 AGIWUR6426;AGIWUR34872  
 N2 HS IV 7320734 7326663 WBGene00018350 ifo-1 F42C5.10 -0.000967333566219253  
 AGIWUR19909  
 N2 HS IV 7327110 7329108 WBGene00021495 sqst-2 Y40C5A.1 0.0251852555542094  
 AGIWUR16543  
 N2 HS IV 7329620 7332811 WBGene00003841 ocr-4 Y40C5A.2 0.0866720422750387  
 AGIWUR23250

|                                                                                 |    |    |         |         |                |          |          |                      |             |
|---------------------------------------------------------------------------------|----|----|---------|---------|----------------|----------|----------|----------------------|-------------|
| N2                                                                              | HS | IV | 7349283 | 7365111 | WBGene00021497 | Y40C5A.4 | Y40C5A.4 | -0.0459409403515973  |             |
| AGIWUR41795;AGIWUR44488                                                         |    |    |         |         |                |          |          |                      |             |
| N2                                                                              | HS | IV | 7375147 | 7376635 | WBGene00020446 | T12B3.3  | T12B3.3  | 0.0274253507371416   | AGIWUR11785 |
| N2                                                                              | HS | IV | 7376811 | 7378906 | WBGene00020445 | T12B3.2  | T12B3.2  | 0.190612827098716    | AGIWUR26548 |
| N2                                                                              | HS | IV | 7382415 | 7384752 | WBGene00020444 | T12B3.1  | T12B3.1  | 0.238821695580632    |             |
| AGIWUR11306;AGIWUR19404;AGIWUR43250                                             |    |    |         |         |                |          |          |                      |             |
| N2                                                                              | HS | IV | 7384756 | 7388943 | WBGene00020447 | T12B3.4  | T12B3.4  | -0.0465232555987853  | AGIWUR28778 |
| N2                                                                              | HS | IV | 7393221 | 7397555 | WBGene00016739 | pit-1    | C48A7.2  | 0.0468422265488027   | AGIWUR21517 |
| N2                                                                              | HS | IV | 7405460 | 7418733 | WBGene00001187 | egl-19   | C48A7.1  | -0.0637316601077158  |             |
| AGIWUR364;AGIWUR4859;AGIWUR5340;AGIWUR16650;AGIWUR17147;AGIWUR31639;AGIWUR43178 |    |    |         |         |                |          |          |                      |             |
| N2                                                                              | HS | IV | 7419118 | 7419971 | WBGene00015215 | B0496.6  | B0496.6  | 0.123157008897216    | AGIWUR8028  |
| N2                                                                              | HS | IV | 7420958 | 7422671 | WBGene00015214 | srtx-1   | B0496.5  | 0.105422639051213    |             |
| AGIWUR6765;AGIWUR18892;AGIWUR42651                                              |    |    |         |         |                |          |          |                      |             |
| N2                                                                              | HS | IV | 7424498 | 7444660 | WBGene00006814 | unc-82   | B0496.3  | 0.0755394642444149   |             |
| AGIWUR29816;AGIWUR33821                                                         |    |    |         |         |                |          |          |                      |             |
| N2                                                                              | HS | IV | 7444639 | 7445432 | WBGene00015216 | valv-1   | B0496.7  | 0.537470276031293    | AGIWUR490   |
| N2                                                                              | HS | IV | 7446390 | 7447466 | WBGene00015210 | B0496.1  | B0496.1  | 0.44354566017708     | AGIWUR23905 |
| N2                                                                              | HS | IV | 7447856 | 7449169 | WBGene00015211 | B0496.2  | B0496.2  | -0.0244255121932273  |             |
| AGIWUR6296;AGIWUR8092;AGIWUR26012                                               |    |    |         |         |                |          |          |                      |             |
| N2                                                                              | HS | IV | 7449067 | 7451445 | WBGene00015217 | tes-1    | B0496.8  | 0.185455403852748    | AGIWUR15116 |
| N2                                                                              | HS | IV | 7456525 | 7458214 | WBGene00017416 | F13B6.1  | F13B6.1  | -0.117285278562033   |             |
| AGIWUR11830;AGIWUR14383;AGIWUR42047                                             |    |    |         |         |                |          |          |                      |             |
| N2                                                                              | HS | IV | 7458836 | 7460424 | WBGene00017417 | F13B6.2  | F13B6.2  | 0.215011780377623    | AGIWUR26063 |
| N2                                                                              | HS | IV | 7461966 | 7465957 | WBGene00017418 | F13B6.3  | F13B6.3  | -0.00225788388048898 | AGIWUR17248 |
| N2                                                                              | HS | IV | 7466702 | 7469832 | WBGene00018903 | F55G1.7  | F55G1.7  | -0.0747738518359249  | AGIWUR216   |
| N2                                                                              | HS | IV | 7470860 | 7473340 | WBGene00004044 | plk-3    | F55G1.8  | -0.251819385262539   |             |
| AGIWUR16334;AGIWUR37685                                                         |    |    |         |         |                |          |          |                      |             |
| N2                                                                              | HS | IV | 7473476 | 7474957 | WBGene00018902 | F55G1.6  | F55G1.6  | 0.0585807597678158   | AGIWUR23448 |
| N2                                                                              | HS | IV | 7475041 | 7476215 | WBGene00018901 | F55G1.5  | F55G1.5  | 0.327687164630698    | AGIWUR31696 |
| N2                                                                              | HS | IV | 7476171 | 7477344 | WBGene00018904 | F55G1.9  | F55G1.9  | -0.0341391480308086  | AGIWUR9261  |
| N2                                                                              | HS | IV | 7478171 | 7485523 | WBGene00018900 | rod-1    | F55G1.4  | 0.22040092456697     | AGIWUR3348  |
| N2                                                                              | HS | IV | 7486519 | 7486962 | WBGene00001936 | his-62   | F55G1.3  | -0.198254489945787   | AGIWUR11523 |
| N2                                                                              | HS | IV | 7487560 | 7488025 | WBGene00001934 | his-60   | F55G1.11 | -0.072710950863943   |             |
| AGIWUR12606;AGIWUR26290                                                         |    |    |         |         |                |          |          |                      |             |
| N2                                                                              | HS | IV | 7488216 | 7488956 | WBGene00001933 | his-59   | F55G1.2  | -0.262644427114235   | AGIWUR33079 |
| N2                                                                              | HS | IV | 7491771 | 7493764 | WBGene00018899 | F55G1.1  | F55G1.1  | 0.0907495062308108   | AGIWUR18883 |
| N2                                                                              | HS | IV | 7493843 | 7497850 | WBGene00018906 | egas-4   | F55G1.13 | 0.0383827973694775   |             |
| AGIWUR4429;AGIWUR13990                                                          |    |    |         |         |                |          |          |                      |             |
| N2                                                                              | HS | IV | 7498129 | 7501437 | WBGene00018907 | F55G1.15 | F55G1.15 | -0.328975352175638   |             |



AGIWUR15014

|                                                                                                                                               |    |    |         |         |                |          |          |                     |             |
|-----------------------------------------------------------------------------------------------------------------------------------------------|----|----|---------|---------|----------------|----------|----------|---------------------|-------------|
| N2                                                                                                                                            | HS | IV | 7503622 | 7506447 | WBGene00001624 | glt-6    | R05G6.6  | -0.185169989633935  | AGIWUR44783 |
| N2                                                                                                                                            | HS | IV | 7506425 | 7507891 | WBGene00019900 | vdac-1   | R05G6.7  | -0.185341325395796  |             |
| AGIWUR7516;AGIWUR13358;AGIWUR26690;AGIWUR34696                                                                                                |    |    |         |         |                |          |          |                     |             |
| N2                                                                                                                                            | HS | IV | 7508514 | 7509475 | WBGene00019899 | R05G6.5  | R05G6.5  | -0.0461475906046438 | AGIWUR24234 |
| N2                                                                                                                                            | HS | IV | 7509479 | 7512667 | WBGene00004039 | plc-4    | R05G6.8  | -0.0526577333758231 |             |
| AGIWUR15511;AGIWUR15657;AGIWUR38392                                                                                                           |    |    |         |         |                |          |          |                     |             |
| N2                                                                                                                                            | HS | IV | 7513233 | 7514459 | WBGene00019898 | R05G6.4  | R05G6.4  | 0.0291599285066901  | AGIWUR24319 |
| N2                                                                                                                                            | HS | IV | 7514366 | 7516267 | WBGene00019901 | R05G6.9  | R05G6.9  | 0.409979407803185   | AGIWUR43722 |
| N2                                                                                                                                            | HS | IV | 7516585 | 7517035 | WBGene00043466 | R05G6.3  | R05G6.3  | 0.134136081353734   | AGIWUR30281 |
| N2                                                                                                                                            | HS | IV | 7517445 | 7542535 | WBGene00019902 | R05G6.10 | R05G6.10 | 0.0515261597160688  |             |
| AGIWUR4083;AGIWUR9586;AGIWUR17594;AGIWUR19402;AGIWUR21095;AGIWUR22162;AGIWUR23598;AGIWUR30608;AGIWUR35767;AGIWUR37498;AGIWUR39891;AGIWUR44953 |    |    |         |         |                |          |          |                     |             |
| N2                                                                                                                                            | HS | IV | 7543984 | 7550812 | WBGene00003914 | pam-1    | F49E8.3  | 0.0221612083386802  |             |
| AGIWUR2787;AGIWUR8214;AGIWUR17602;AGIWUR18876;AGIWUR23932                                                                                     |    |    |         |         |                |          |          |                     |             |
| N2                                                                                                                                            | HS | IV | 7548417 | 7551511 | WBGene00018636 | F49E8.2  | F49E8.2  | -0.193850388051503  | AGIWUR43872 |
| N2                                                                                                                                            | HS | IV | 7551550 | 7553008 | WBGene00000996 | dif-1    | F49E8.5  | 0.0591395971583086  |             |
| AGIWUR12711;AGIWUR41882                                                                                                                       |    |    |         |         |                |          |          |                     |             |
| N2                                                                                                                                            | HS | IV | 7553532 | 7554488 | WBGene00018637 | F49E8.6  | F49E8.6  | -0.665696496205539  | AGIWUR10807 |
| N2                                                                                                                                            | HS | IV | 7554489 | 7556447 | WBGene00018638 | F49E8.7  | F49E8.7  | 0.325441637540838   | AGIWUR26569 |
| N2                                                                                                                                            | HS | IV | 7556637 | 7558759 | WBGene00018635 | npr1-2   | F49E8.1  | -0.205145273985075  |             |
| AGIWUR6442;AGIWUR23027;AGIWUR37510                                                                                                            |    |    |         |         |                |          |          |                     |             |
| N2                                                                                                                                            | HS | IV | 7558726 | 7561664 | WBGene00002074 | ima-3    | F32E10.4 | -0.209778929364651  |             |
| AGIWUR4573;AGIWUR43964                                                                                                                        |    |    |         |         |                |          |          |                     |             |
| N2                                                                                                                                            | HS | IV | 7562220 | 7563724 | WBGene00043068 | F32E10.9 | F32E10.9 | 0.132264955143045   |             |
| AGIWUR22062                                                                                                                                   |    |    |         |         |                |          |          |                     |             |
| N2                                                                                                                                            | HS | IV | 7567607 | 7568507 | WBGene00017995 | F32E10.8 | F32E10.8 | 0.0300294500076497  |             |
| AGIWUR42705                                                                                                                                   |    |    |         |         |                |          |          |                     |             |
| N2                                                                                                                                            | HS | IV | 7568893 | 7573761 | WBGene00017991 | clcc-180 | F32E10.3 | 0.173449627021999   |             |
| AGIWUR7560                                                                                                                                    |    |    |         |         |                |          |          |                     |             |
| N2                                                                                                                                            | HS | IV | 7574355 | 7578381 | WBGene00017992 | F32E10.5 | F32E10.5 | 0.202085700739502   |             |
| AGIWUR30292                                                                                                                                   |    |    |         |         |                |          |          |                     |             |
| N2                                                                                                                                            | HS | IV | 7578501 | 7580269 | WBGene00017993 | cec-5    | F32E10.6 | 0.119720836016071   |             |
| AGIWUR26501;AGIWUR38094                                                                                                                       |    |    |         |         |                |          |          |                     |             |
| N2                                                                                                                                            | HS | IV | 7580597 | 7583726 | WBGene00017989 | noi-10   | F32E10.1 | 0.160733440882449   |             |
| AGIWUR40007                                                                                                                                   |    |    |         |         |                |          |          |                     |             |
| N2                                                                                                                                            | HS | IV | 7588931 | 7628234 | WBGene00018468 | tag-80   | F45E4.3  | 0.0202021232649821  |             |
| AGIWUR2833;AGIWUR3482;AGIWUR15919;AGIWUR21429;AGIWUR30093;AGIWUR30681;AGIWUR33742;AGIWUR34251                                                 |    |    |         |         |                |          |          |                     |             |
| N2                                                                                                                                            | HS | IV | 7628206 | 7629042 | WBGene00018470 | F45E4.5  | F45E4.5  | 0.241978726461381   |             |

AGIWUR1969;AGIWUR7378;AGIWUR9519;AGIWUR11474;AGIWUR13230;AGIWUR18375;AGIWUR19195;AGIWUR20605;AGIWUR22249;AGIWUR35994;AGIWUR42005

|                                                                                                                                               |    |    |         |         |                |         |          |                      |             |
|-----------------------------------------------------------------------------------------------------------------------------------------------|----|----|---------|---------|----------------|---------|----------|----------------------|-------------|
| N2                                                                                                                                            | HS | IV | 7633360 | 7634657 | WBGene00004046 | plp-1   | F45E4.2  | 0.037402308391731    |             |
| AGIWUR13584;AGIWUR15669                                                                                                                       |    |    |         |         |                |         |          |                      |             |
| N2                                                                                                                                            | HS | IV | 7634786 | 7635710 | WBGene00000190 | arf-1.1 | F45E4.1  | 0.0670692119583451   |             |
| AGIWUR9982;AGIWUR29192                                                                                                                        |    |    |         |         |                |         |          |                      |             |
| N2                                                                                                                                            | HS | IV | 7635655 | 7641925 | WBGene00018472 | nep-16  | F45E4.7  | 0.0559394654198924   |             |
| AGIWUR10429;AGIWUR19799;AGIWUR25987;AGIWUR37128;AGIWUR37568;AGIWUR39304                                                                       |    |    |         |         |                |         |          |                      |             |
| N2                                                                                                                                            | HS | IV | 7642052 | 7643096 | WBGene00003758 | nlp-20  | F45E4.8  | -0.0165616658081937  | AGIWUR31298 |
| N2                                                                                                                                            | HS | IV | 7644895 | 7646219 | WBGene00001975 | hmg-5   | F45E4.9  | 0.0599810520357078   | AGIWUR23274 |
| N2                                                                                                                                            | HS | IV | 7646200 | 7654230 | WBGene00001584 | nrde-4  | F45E4.10 | 0.162373426835311    |             |
| AGIWUR36051                                                                                                                                   |    |    |         |         |                |         |          |                      |             |
| N2                                                                                                                                            | HS | IV | 7658734 | 7664166 | WBGene00015619 | C08G9.1 | C08G9.1  | -0.0392649226770292  |             |
| AGIWUR8284;AGIWUR21343;AGIWUR34698                                                                                                            |    |    |         |         |                |         |          |                      |             |
| N2                                                                                                                                            | HS | IV | 7664157 | 7672972 | WBGene00015620 | C08G9.2 | C08G9.2  | -0.172386407137581   |             |
| AGIWUR12102;AGIWUR35330;AGIWUR39246;AGIWUR40267;AGIWUR44579                                                                                   |    |    |         |         |                |         |          |                      |             |
| N2                                                                                                                                            | HS | IV | 7675174 | 7696923 | WBGene00002173 | itr-1   | F33D4.2  | 0.120038266560765    |             |
| AGIWUR1811;AGIWUR9866;AGIWUR11333;AGIWUR16479;AGIWUR20010;AGIWUR24951;AGIWUR24980;AGIWUR25962;AGIWUR27452;AGIWUR27554;AGIWUR31844;AGIWUR40796 |    |    |         |         |                |         |          |                      |             |
| N2                                                                                                                                            | HS | IV | 7696932 | 7698420 | WBGene00001456 | flp-13  | F33D4.3  | -0.472374028402784   | AGIWUR40385 |
| N2                                                                                                                                            | HS | IV | 7703873 | 7706905 | WBGene00017996 | F33D4.4 | F33D4.4  | -0.172266531507734   | AGIWUR40904 |
| N2                                                                                                                                            | HS | IV | 7707575 | 7709084 | WBGene00017997 | mrp1-1  | F33D4.5  | 0.120347964722026    |             |
| AGIWUR23551;AGIWUR40906;AGIWUR40985                                                                                                           |    |    |         |         |                |         |          |                      |             |
| N2                                                                                                                                            | HS | IV | 7709192 | 7709736 | WBGene00017999 | emc-6   | F33D4.7  | -0.0422979640306007  | AGIWUR3453  |
| N2                                                                                                                                            | HS | IV | 7710045 | 7710826 | WBGene00023487 | mrps-24 | F33D4.8  | -0.169583155196509   |             |
| AGIWUR1782;AGIWUR18029;AGIWUR24110;AGIWUR41310                                                                                                |    |    |         |         |                |         |          |                      |             |
| N2                                                                                                                                            | HS | IV | 7710975 | 7714198 | WBGene00003607 | nhr-8   | F33D4.1  | -0.125801334142408   |             |
| AGIWUR9043;AGIWUR11051;AGIWUR20855;AGIWUR37299                                                                                                |    |    |         |         |                |         |          |                      |             |
| N2                                                                                                                                            | HS | IV | 7714164 | 7718009 | WBGene00017998 | F33D4.6 | F33D4.6  | 0.158413135055904    |             |
| AGIWUR2259;AGIWUR4489;AGIWUR4741;AGIWUR6491;AGIWUR20721;AGIWUR21072;AGIWUR30717;AGIWUR34578;AGIWUR41364                                       |    |    |         |         |                |         |          |                      |             |
| N2                                                                                                                                            | HS | IV | 7720566 | 7723199 | WBGene00016846 | C50F7.6 | C50F7.6  | 0.0797267669308805   | AGIWUR29864 |
| N2                                                                                                                                            | HS | IV | 7726718 | 7727951 | WBGene00016845 | C50F7.5 | C50F7.5  | -0.259712538917384   |             |
| AGIWUR5278;AGIWUR18042;AGIWUR42280                                                                                                            |    |    |         |         |                |         |          |                      |             |
| N2                                                                                                                                            | HS | IV | 7728913 | 7730645 | WBGene00016844 | sucg-1  | C50F7.4  | 0.185848883670985    | AGIWUR31058 |
| N2                                                                                                                                            | HS | IV | 7730669 | 7732060 | WBGene00016847 | C50F7.9 | C50F7.9  | -0.0786166528274155  | AGIWUR29923 |
| N2                                                                                                                                            | HS | IV | 7732329 | 7734210 | WBGene00016843 | C50F7.3 | C50F7.3  | -0.0122836919549094  | AGIWUR22357 |
| N2                                                                                                                                            | HS | IV | 7734647 | 7736409 | WBGene00000551 | clx-1   | C50F7.2  | 0.000716236028311279 | AGIWUR36592 |
| N2                                                                                                                                            | HS | IV | 7743906 | 7746074 | WBGene00016842 | npr-35  | C50F7.1  | 0.0838114787110413   |             |
| AGIWUR5063;AGIWUR17132;AGIWUR28609                                                                                                            |    |    |         |         |                |         |          |                      |             |

|                                                                                                             |    |    |         |         |                |          |          |                      |             |
|-------------------------------------------------------------------------------------------------------------|----|----|---------|---------|----------------|----------|----------|----------------------|-------------|
| N2                                                                                                          | HS | IV | 7745979 | 7748225 | WBGene00016848 | klo-1    | C50F7.10 | 0.020025008719653    |             |
| AGIWUR5356                                                                                                  |    |    |         |         |                |          |          |                      |             |
| N2                                                                                                          | HS | IV | 7748157 | 7757358 | WBGene00016700 | C46A5.4  | C46A5.4  | 0.0767744386671154   | AGIWUR5385  |
| N2                                                                                                          | HS | IV | 7757513 | 7759627 | WBGene00016701 | C46A5.5  | C46A5.5  | 0.00996342609309409  | AGIWUR36380 |
| N2                                                                                                          | HS | IV | 7760000 | 7763848 | WBGene00016702 | C46A5.6  | C46A5.6  | 0.1434913039349      | AGIWUR4718  |
| N2                                                                                                          | HS | IV | 7763931 | 7767094 | WBGene00016698 | C46A5.1  | C46A5.1  | -0.0192889143741262  | AGIWUR10952 |
| N2                                                                                                          | HS | IV | 7768395 | 7770025 | WBGene00016703 | rdl-1    | C46A5.8  | 0.010477571980168    | AGIWUR19222 |
| N2                                                                                                          | HS | IV | 7770770 | 7774275 | WBGene00001827 | hcf-1    | C46A5.9  | -0.0764318595459681  |             |
| AGIWUR14670;AGIWUR29125;AGIWUR34534                                                                         |    |    |         |         |                |          |          |                      |             |
| N2                                                                                                          | HS | IV | 7774411 | 7775956 | WBGene00016374 | swd-2.2  | C33H5.7  | 0.0895838130635074   | AGIWUR13567 |
| N2                                                                                                          | HS | IV | 7776025 | 7778022 | WBGene00016373 | swd-2.1  | C33H5.6  | -0.157913862830593   | AGIWUR4839  |
| N2                                                                                                          | HS | IV | 7779379 | 7782499 | WBGene00016376 | sec-10   | C33H5.9  | -0.0823069008092592  |             |
| AGIWUR24432;AGIWUR29650;AGIWUR29677;AGIWUR35758;AGIWUR37825                                                 |    |    |         |         |                |          |          |                      |             |
| N2                                                                                                          | HS | IV | 7782599 | 7783851 | WBGene00044325 | tag-321  | C33H5.19 | -0.00348236777902855 |             |
| AGIWUR8294                                                                                                  |    |    |         |         |                |          |          |                      |             |
| N2                                                                                                          | HS | IV | 7783970 | 7785556 | WBGene00044326 | tag-322  | C33H5.10 | 0.0754161414728483   |             |
| AGIWUR5860                                                                                                  |    |    |         |         |                |          |          |                      |             |
| N2                                                                                                          | HS | IV | 7786000 | 7789613 | WBGene00016378 | imp-3    | C33H5.11 | 0.0533826469333052   |             |
| AGIWUR351;AGIWUR4509;AGIWUR18679;AGIWUR19177;AGIWUR28518                                                    |    |    |         |         |                |          |          |                      |             |
| N2                                                                                                          | HS | IV | 7789847 | 7791229 | WBGene00004703 | rsp-6    | C33H5.12 | -0.200006329797767   |             |
| AGIWUR2502;AGIWUR3624;AGIWUR21741;AGIWUR27504;AGIWUR32559;AGIWUR34162;AGIWUR37983;AGIWUR38089               |    |    |         |         |                |          |          |                      |             |
| N2                                                                                                          | HS | IV | 7791704 | 7792263 | WBGene00016379 | C33H5.13 | C33H5.13 | 0.201088852670061    |             |
| AGIWUR285;AGIWUR2593;AGIWUR16455;AGIWUR20732;AGIWUR31399;AGIWUR41305                                        |    |    |         |         |                |          |          |                      |             |
| N2                                                                                                          | HS | IV | 7792349 | 7794809 | WBGene00016380 | ntp-1    | C33H5.14 | -0.184419980229638   |             |
| AGIWUR738;AGIWUR12371;AGIWUR31554                                                                           |    |    |         |         |                |          |          |                      |             |
| N2                                                                                                          | HS | IV | 7794871 | 7796376 | WBGene00016381 | sgo-1    | C33H5.15 | -0.0496264679592073  |             |
| AGIWUR36220                                                                                                 |    |    |         |         |                |          |          |                      |             |
| N2                                                                                                          | HS | IV | 7797192 | 7800252 | WBGene00002221 | klp-10   | C33H5.4  | -0.0818120750326692  |             |
| AGIWUR403;AGIWUR20408;AGIWUR24076;AGIWUR44025                                                               |    |    |         |         |                |          |          |                      |             |
| N2                                                                                                          | HS | IV | 7801916 | 7803350 | WBGene00016382 | C33H5.16 | C33H5.16 | -0.20295761868816    |             |
| AGIWUR39505                                                                                                 |    |    |         |         |                |          |          |                      |             |
| N2                                                                                                          | HS | IV | 7805040 | 7807948 | WBGene00016371 | C33H5.2  | C33H5.2  | -0.0833014263644571  | AGIWUR22667 |
| N2                                                                                                          | HS | IV | 7808912 | 7810681 | WBGene00016370 | C33H5.1  | C33H5.1  | -0.185101863196485   | AGIWUR4459  |
| N2                                                                                                          | HS | IV | 7811157 | 7812809 | WBGene00016383 | zgpa-1   | C33H5.17 | 0.222776372286425    |             |
| AGIWUR8182                                                                                                  |    |    |         |         |                |          |          |                      |             |
| N2                                                                                                          | HS | IV | 7812770 | 7815733 | WBGene00016384 | cdgs-1   | C33H5.18 | 0.0229033522935009   |             |
| AGIWUR10278;AGIWUR14325;AGIWUR20433;AGIWUR20750;AGIWUR21303;AGIWUR21397;AGIWUR25679;AGIWUR28313;AGIWUR28334 |    |    |         |         |                |          |          |                      |             |
| ;AGIWUR29500;AGIWUR30310;AGIWUR36176;AGIWUR39157;AGIWUR44187                                                |    |    |         |         |                |          |          |                      |             |
| N2                                                                                                          | HS | IV | 7818251 | 7821195 | WBGene00004363 | ric-3    | T14A8.1  | -0.104766174536151   | AGIWUR12936 |

|                                                                                |    |    |         |         |                |          |          |                     |             |
|--------------------------------------------------------------------------------|----|----|---------|---------|----------------|----------|----------|---------------------|-------------|
| N2                                                                             | HS | IV | 7821673 | 7822700 | WBGene00020497 | T14A8.2  | T14A8.2  | 0.337171840313626   | AGIWUR21984 |
| N2                                                                             | HS | IV | 7826334 | 7829301 | WBGene00015509 | C06A6.4  | C06A6.4  | 0.14954476269895    | AGIWUR17848 |
| N2                                                                             | HS | IV | 7830525 | 7832401 | WBGene00015508 | mvb-12   | C06A6.3  | 0.0518928741040696  | AGIWUR28526 |
| N2                                                                             | HS | IV | 7832344 | 7834675 | WBGene00015510 | C06A6.5  | C06A6.5  | -0.106322671731377  | AGIWUR44246 |
| N2                                                                             | HS | IV | 7837350 | 7838548 | WBGene00015511 | C06A6.7  | C06A6.7  | 0.222365368328994   |             |
| AGIWUR1094;AGIWUR1440;AGIWUR43137                                              |    |    |         |         |                |          |          |                     |             |
| N2                                                                             | HS | IV | 7846630 | 7854224 | WBGene00015507 | C06A6.2  | C06A6.2  | -0.0177927001342182 | AGIWUR3948  |
| N2                                                                             | HS | IV | 7868907 | 7870100 | WBGene00001453 | flp-10   | T06C10.4 | -0.0356864480556016 |             |
| AGIWUR12836;AGIWUR17073;AGIWUR17722;AGIWUR20675;AGIWUR29234                    |    |    |         |         |                |          |          |                     |             |
| N2                                                                             | HS | IV | 7870865 | 7873034 | WBGene00020289 | T06C10.3 | T06C10.3 | -0.130127802165509  |             |
| AGIWUR11575                                                                    |    |    |         |         |                |          |          |                     |             |
| N2                                                                             | HS | IV | 7875727 | 7877881 | WBGene00002208 | kin-26   | T06C10.6 | -0.186379170858233  |             |
| AGIWUR12261                                                                    |    |    |         |         |                |          |          |                     |             |
| N2                                                                             | HS | IV | 7879317 | 7881034 | WBGene00020288 | srt-73   | T06C10.2 | 0.247690451223633   |             |
| AGIWUR1450                                                                     |    |    |         |         |                |          |          |                     |             |
| N2                                                                             | HS | IV | 7882028 | 7900247 | WBGene00016957 | atic-1   | C55F2.1  | 0.390991579574733   |             |
| AGIWUR11020;AGIWUR15539;AGIWUR31631;AGIWUR40721                                |    |    |         |         |                |          |          |                     |             |
| N2                                                                             | HS | IV | 7900200 | 7902271 | WBGene00016793 | arp-11   | C49H3.8  | -0.0375409564376801 |             |
| AGIWUR22789;AGIWUR27681;AGIWUR41817                                            |    |    |         |         |                |          |          |                     |             |
| N2                                                                             | HS | IV | 7903740 | 7907083 | WBGene00016792 | C49H3.6  | C49H3.6  | -0.159352052251679  | AGIWUR35959 |
| N2                                                                             | HS | IV | 7907093 | 7909474 | WBGene00016794 | C49H3.9  | C49H3.9  | -0.202052702278358  |             |
| AGIWUR7966;AGIWUR10533;AGIWUR33949                                             |    |    |         |         |                |          |          |                     |             |
| N2                                                                             | HS | IV | 7910575 | 7915184 | WBGene00003827 | ntl-4    | C49H3.5  | 0.00875846089271093 |             |
| AGIWUR1118;AGIWUR2358;AGIWUR7312;AGIWUR8161;AGIWUR8439;AGIWUR19950;AGIWUR23304 |    |    |         |         |                |          |          |                     |             |
| N2                                                                             | HS | IV | 7915291 | 7916711 | WBGene00016791 | C49H3.4  | C49H3.4  | -0.0726447870180391 |             |
| AGIWUR3522;AGIWUR10447;AGIWUR11519;AGIWUR14805                                 |    |    |         |         |                |          |          |                     |             |
| N2                                                                             | HS | IV | 7916699 | 7924129 | WBGene00002080 | xpo-3    | C49H3.10 | -0.0127584211564127 |             |
| AGIWUR39598                                                                    |    |    |         |         |                |          |          |                     |             |
| N2                                                                             | HS | IV | 7924350 | 7924968 | WBGene00016790 | C49H3.3  | C49H3.3  | 0.215073844655464   | AGIWUR2622  |
| N2                                                                             | HS | IV | 7925298 | 7926391 | WBGene00004471 | rps-2    | C49H3.11 | 0.0226841042045383  |             |
| AGIWUR7606;AGIWUR9077                                                          |    |    |         |         |                |          |          |                     |             |
| N2                                                                             | HS | IV | 7926748 | 7927315 | WBGene00016795 | C49H3.12 | C49H3.12 | 0.0219542066838789  |             |
| AGIWUR44761                                                                    |    |    |         |         |                |          |          |                     |             |
| N2                                                                             | HS | IV | 7928159 | 7933775 | WBGene00001535 | gcy-8    | C49H3.1  | 0.292085422636235   | AGIWUR30693 |
| N2                                                                             | HS | IV | 7934097 | 7937746 | WBGene00000242 | bbs-2    | F20D12.3 | 0.268989938517444   |             |
| AGIWUR5162                                                                     |    |    |         |         |                |          |          |                     |             |
| N2                                                                             | HS | IV | 7937959 | 7938934 | WBGene00017645 | F20D12.7 | F20D12.7 | 0.0207686595545029  |             |
| AGIWUR12975                                                                    |    |    |         |         |                |          |          |                     |             |
| N2                                                                             | HS | IV | 7939812 | 7941064 | WBGene00017644 | exc-9    | F20D12.5 | -0.141513912928719  |             |

|                                                                        |    |    |         |         |                |          |          |                      |
|------------------------------------------------------------------------|----|----|---------|---------|----------------|----------|----------|----------------------|
| AGIWUR36421                                                            |    |    |         |         |                |          |          |                      |
| N2                                                                     | HS | IV | 7943617 | 7946819 | WBGene00017643 | czw-1    | F20D12.4 | 0.0545779726387652   |
| AGIWUR16838;AGIWUR18511;AGIWUR27746;AGIWUR30226                        |    |    |         |         |                |          |          |                      |
| N2                                                                     | HS | IV | 7948643 | 7953548 | WBGene00017642 | F20D12.2 | F20D12.2 | 0.134454318498111    |
| AGIWUR4597                                                             |    |    |         |         |                |          |          |                      |
| N2                                                                     | HS | IV | 7953509 | 7955898 | WBGene00000442 | ceh-19   | F20D12.6 | -0.00727274530324795 |
| AGIWUR15960;AGIWUR38313                                                |    |    |         |         |                |          |          |                      |
| N2                                                                     | HS | IV | 7957580 | 7962129 | WBGene00017641 | csr-1    | F20D12.1 | -0.325220786088039   |
| AGIWUR32004                                                            |    |    |         |         |                |          |          |                      |
| N2                                                                     | HS | IV | 7967363 | 7969600 | WBGene00019020 | F57H12.5 | F57H12.5 | 0.0899716003284539   |
| AGIWUR37274                                                            |    |    |         |         |                |          |          |                      |
| N2                                                                     | HS | IV | 7970525 | 7973363 | WBGene00019019 | frpr-10  | F57H12.4 | 0.155629543803609    |
| AGIWUR12162                                                            |    |    |         |         |                |          |          |                      |
| N2                                                                     | HS | IV | 7975430 | 7976406 | WBGene00019021 | F57H12.6 | F57H12.6 | 0.26768315090321     |
| AGIWUR23322                                                            |    |    |         |         |                |          |          |                      |
| N2                                                                     | HS | IV | 7977836 | 7979014 | WBGene00003879 | ora-1    | F57H12.3 | 0.0085632880026818   |
| AGIWUR273                                                              |    |    |         |         |                |          |          |                      |
| N2                                                                     | HS | IV | 7979823 | 7982005 | WBGene00006761 | unc-24   | F57H12.2 | 0.210793246748546    |
| AGIWUR28958                                                            |    |    |         |         |                |          |          |                      |
| N2                                                                     | HS | IV | 7982526 | 7983919 | WBGene00000183 | arf-3    | F57H12.1 | -0.111122167689359   |
| AGIWUR17772                                                            |    |    |         |         |                |          |          |                      |
| N2                                                                     | HS | IV | 7983854 | 7987183 | WBGene00003178 | mec-17   | F57H12.7 | 0.167044681882851    |
| AGIWUR6494                                                             |    |    |         |         |                |          |          |                      |
| N2                                                                     | HS | IV | 7988685 | 7991425 | WBGene00000689 | col-115  | Y42H9B.1 | 0.0701125610111646   |
| AGIWUR29817                                                            |    |    |         |         |                |          |          |                      |
| N2                                                                     | HS | IV | 7991410 | 8004136 | WBGene00004371 | rig-4    | Y42H9B.2 | -0.112413663268818   |
| AGIWUR2109                                                             |    |    |         |         |                |          |          |                      |
| N2                                                                     | HS | IV | 8011031 | 8012430 | WBGene00021541 | Y42H9B.3 | Y42H9B.3 | -0.0579573930640791  |
| AGIWUR16920                                                            |    |    |         |         |                |          |          |                      |
| N2                                                                     | HS | IV | 8014149 | 8015722 | WBGene00016130 | C26B2.8  | C26B2.8  | 0.220691583220381    |
| AGIWUR8660;AGIWUR13048;AGIWUR25460                                     |    |    |         |         |                |          |          |                      |
| N2                                                                     | HS | IV | 8016153 | 8016882 | WBGene00016129 | C26B2.7  | C26B2.7  | -0.0226262425010688  |
| AGIWUR10974;AGIWUR14635;AGIWUR23376;AGIWUR29971                        |    |    |         |         |                |          |          |                      |
| N2                                                                     | HS | IV | 8016994 | 8018221 | WBGene00016128 | elpc-4   | C26B2.6  | 0.0730451571982869   |
| N2                                                                     | HS | IV | 8018130 | 8019808 | WBGene00016124 | dnc-4    | C26B2.1  | -0.255231103350518   |
| AGIWUR7415;AGIWUR34884;AGIWUR41679;AGIWUR42082;AGIWUR42711             |    |    |         |         |                |          |          |                      |
| N2                                                                     | HS | IV | 8021146 | 8022122 | WBGene00016125 | C26B2.2  | C26B2.2  | -0.170011347900109   |
| N2                                                                     | HS | IV | 8022656 | 8029513 | WBGene00003625 | nhr-31   | C26B2.3  | 0.00124893012719429  |
| AGIWUR5390;AGIWUR12112;AGIWUR24589;AGIWUR24612;AGIWUR28272;AGIWUR38754 |    |    |         |         |                |          |          |                      |

|                                                                                    |    |    |         |         |                |           |           |                      |             |
|------------------------------------------------------------------------------------|----|----|---------|---------|----------------|-----------|-----------|----------------------|-------------|
| N2                                                                                 | HS | IV | 8045045 | 8047363 | WBGene00016126 | nhr-258   | C26B2.4   | -0.00295957072296638 | AGIWUR15286 |
| N2                                                                                 | HS | IV | 8062669 | 8084087 | WBGene00004732 | sax-7     | C18F3.2   | -0.0645645058641016  |             |
| AGIWUR1466;AGIWUR9755;AGIWUR15045;AGIWUR23315;AGIWUR30426;AGIWUR32779;AGIWUR34494  |    |    |         |         |                |           |           |                      |             |
| N2                                                                                 | HS | IV | 8099918 | 8101424 | WBGene00021537 | Y42H9AR.2 | Y42H9AR.2 | 0.0683580501077685   |             |
| AGIWUR33662                                                                        |    |    |         |         |                |           |           |                      |             |
| N2                                                                                 | HS | IV | 8102501 | 8104323 | WBGene00021540 | Y42H9AR.5 | Y42H9AR.5 | 0.0700358650217385   |             |
| AGIWUR18854;AGIWUR21863;AGIWUR44955                                                |    |    |         |         |                |           |           |                      |             |
| N2                                                                                 | HS | IV | 8104287 | 8107600 | WBGene00021538 | rabs-5    | Y42H9AR.3 | 0.175185540636713    |             |
| AGIWUR18906                                                                        |    |    |         |         |                |           |           |                      |             |
| N2                                                                                 | HS | IV | 8107766 | 8112241 | WBGene00021539 | Y42H9AR.4 | Y42H9AR.4 | -0.159657450321868   |             |
| AGIWUR1965;AGIWUR5037;AGIWUR6631;AGIWUR23066;AGIWUR30445;AGIWUR33465               |    |    |         |         |                |           |           |                      |             |
| N2                                                                                 | HS | IV | 8113384 | 8115670 | WBGene00021536 | Y42H9AR.1 | Y42H9AR.1 | -0.300670933941801   |             |
| AGIWUR31877                                                                        |    |    |         |         |                |           |           |                      |             |
| N2                                                                                 | HS | IV | 8115762 | 8118445 | WBGene00018360 | irld-8    | F42G8.9   | 0.333282100081789    | AGIWUR18758 |
| N2                                                                                 | HS | IV | 8121908 | 8122240 | WBGene00249816 | F42G8.18  | F42G8.18  | 0.315358515832214    |             |
| AGIWUR20867                                                                        |    |    |         |         |                |           |           |                      |             |
| N2                                                                                 | HS | IV | 8127734 | 8128909 | WBGene00249817 | F42G8.19  | F42G8.19  | 0.285016805222302    |             |
| AGIWUR34512                                                                        |    |    |         |         |                |           |           |                      |             |
| N2                                                                                 | HS | IV | 8128940 | 8130256 | WBGene00018361 | F42G8.10  | F42G8.10  | 0.0208158403418679   |             |
| AGIWUR2781;AGIWUR14396;AGIWUR19987;AGIWUR20573;AGIWUR25865;AGIWUR33090;AGIWUR34700 |    |    |         |         |                |           |           |                      |             |
| N2                                                                                 | HS | IV | 8130561 | 8132213 | WBGene00018357 | moc-3     | F42G8.6   | 0.256981570184131    | AGIWUR33514 |
| N2                                                                                 | HS | IV | 8132175 | 8133692 | WBGene00004979 | sph-1     | F42G8.11  | 0.0241163093865282   |             |
| AGIWUR35585                                                                        |    |    |         |         |                |           |           |                      |             |
| N2                                                                                 | HS | IV | 8133789 | 8136055 | WBGene00002162 | isp-1     | F42G8.12  | -0.0948471001152171  |             |
| AGIWUR2986;AGIWUR42505                                                             |    |    |         |         |                |           |           |                      |             |
| N2                                                                                 | HS | IV | 8136325 | 8139087 | WBGene00018356 | islo-1    | F42G8.5   | 0.0887070518266961   |             |
| AGIWUR16021;AGIWUR21631;AGIWUR44443;AGIWUR44737                                    |    |    |         |         |                |           |           |                      |             |
| N2                                                                                 | HS | IV | 8139219 | 8143151 | WBGene00004057 | pmk-3     | F42G8.4   | -0.10213220100179    | AGIWUR35419 |
| N2                                                                                 | HS | IV | 8143500 | 8148647 | WBGene00004056 | pmk-2     | F42G8.3   | 0.129588644721789    |             |
| AGIWUR24;AGIWUR6567;AGIWUR11118;AGIWUR28986;AGIWUR30474;AGIWUR41777;AGIWUR42922    |    |    |         |         |                |           |           |                      |             |
| N2                                                                                 | HS | IV | 8148794 | 8151156 | WBGene00004055 | pmk-1     | B0218.3   | 0.0966995296888769   |             |
| AGIWUR2001;AGIWUR5179;AGIWUR10399;AGIWUR20441;AGIWUR23734;AGIWUR34850;AGIWUR36924  |    |    |         |         |                |           |           |                      |             |
| N2                                                                                 | HS | IV | 8152445 | 8154857 | WBGene00015048 | faah-2    | B0218.2   | 0.364533424145034    | AGIWUR16601 |
| N2                                                                                 | HS | IV | 8155211 | 8156587 | WBGene00015049 | B0218.5   | B0218.5   | 0.340333568756265    | AGIWUR3420  |
| N2                                                                                 | HS | IV | 8159358 | 8162042 | WBGene00015047 | faah-1    | B0218.1   | 0.0747714687077217   | AGIWUR22394 |
| N2                                                                                 | HS | IV | 8161967 | 8163795 | WBGene00015050 | cllec-51  | B0218.6   | -0.144567304143227   |             |
| AGIWUR5196;AGIWUR44442                                                             |    |    |         |         |                |           |           |                      |             |
| N2                                                                                 | HS | IV | 8164590 | 8166050 | WBGene00015051 | B0218.7   | B0218.7   | -0.117896594928075   | AGIWUR5993  |
| N2                                                                                 | HS | IV | 8167164 | 8168813 | WBGene00015052 | cllec-52  | B0218.8   | -0.0353279863091913  | AGIWUR921   |

|                                                                                    |    |    |         |         |                |          |          |                     |             |
|------------------------------------------------------------------------------------|----|----|---------|---------|----------------|----------|----------|---------------------|-------------|
| N2                                                                                 | HS | IV | 8176479 | 8188879 | WBGene00003961 | pct-1    | C07G1.3  | -0.0848343946835515 |             |
| AGIWUR35135;AGIWUR38001                                                            |    |    |         |         |                |          |          |                     |             |
| N2                                                                                 | HS | IV | 8188904 | 8198951 | WBGene00006957 | wsp-1    | C07G1.4  | -0.0988512186347652 |             |
| AGIWUR1941;AGIWUR4372;AGIWUR9072;AGIWUR9845;AGIWUR15505;AGIWUR19474;AGIWUR41409    |    |    |         |         |                |          |          |                     |             |
| N2                                                                                 | HS | IV | 8200604 | 8201233 | WBGene00044608 | glrx-22  | C07G1.8  | 0.0758186589987861  |             |
| AGIWUR2696;AGIWUR10561;AGIWUR19689;AGIWUR27723;AGIWUR33581                         |    |    |         |         |                |          |          |                     |             |
| N2                                                                                 | HS | IV | 8201378 | 8206048 | WBGene00004101 | hgrs-1   | C07G1.5  | -0.28182884660024   | AGIWUR13098 |
| N2                                                                                 | HS | IV | 8206614 | 8213723 | WBGene00006620 | svh-1    | C07G1.1  | 0.137990905049677   |             |
| AGIWUR22767;AGIWUR25262                                                            |    |    |         |         |                |          |          |                     |             |
| N2                                                                                 | HS | IV | 8213826 | 8220036 | WBGene00003839 | ocr-2    | T09A12.3 | 0.359657500366529   |             |
| AGIWUR7008                                                                         |    |    |         |         |                |          |          |                     |             |
| N2                                                                                 | HS | IV | 8222202 | 8223459 | WBGene00020373 | gpx-6    | T09A12.2 | 0.192141225353373   |             |
| AGIWUR5259;AGIWUR30035                                                             |    |    |         |         |                |          |          |                     |             |
| N2                                                                                 | HS | IV | 8225674 | 8226366 | WBGene00020374 | T09A12.5 | T09A12.5 | 0.0341363384023534  |             |
| AGIWUR19944                                                                        |    |    |         |         |                |          |          |                     |             |
| N2                                                                                 | HS | IV | 8226337 | 8236602 | WBGene00003656 | nhr-66   | T09A12.4 | 0.00893567399089434 |             |
| AGIWUR5339;AGIWUR18857;AGIWUR19208;AGIWUR25358;AGIWUR26631;AGIWUR30253;AGIWUR43015 |    |    |         |         |                |          |          |                     |             |
| N2                                                                                 | HS | IV | 8259248 | 8259979 | WBGene00019507 | K07H8.7  | K07H8.7  | 0.00843105187399207 |             |
| AGIWUR3973;AGIWUR19600                                                             |    |    |         |         |                |          |          |                     |             |
| N2                                                                                 | HS | IV | 8261134 | 8266462 | WBGene00006930 | vit-6    | K07H8.6  | -0.149536232508658  |             |
| AGIWUR8837;AGIWUR35220                                                             |    |    |         |         |                |          |          |                     |             |
| N2                                                                                 | HS | IV | 8266752 | 8268435 | WBGene00019508 | K07H8.8  | K07H8.8  | -0.0663919401387094 | AGIWUR19784 |
| N2                                                                                 | HS | IV | 8273226 | 8275332 | WBGene00044510 | K07H8.11 | K07H8.11 | 0.00475901122962163 |             |
| AGIWUR24203;AGIWUR36263                                                            |    |    |         |         |                |          |          |                     |             |
| N2                                                                                 | HS | IV | 8275621 | 8276709 | WBGene00044509 | K07H8.12 | K07H8.12 | 0.156164493946012   |             |
| AGIWUR17978;AGIWUR27697;AGIWUR31520;AGIWUR37850;AGIWUR38264                        |    |    |         |         |                |          |          |                     |             |
| N2                                                                                 | HS | IV | 8285175 | 8286566 | WBGene00019509 | K07H8.9  | K07H8.9  | -0.295384035643359  | AGIWUR36215 |
| N2                                                                                 | HS | IV | 8286587 | 8289531 | WBGene00019510 | K07H8.10 | K07H8.10 | -0.227971165817745  |             |
| AGIWUR657;AGIWUR2486;AGIWUR8519;AGIWUR15273;AGIWUR22002;AGIWUR26379;AGIWUR28977    |    |    |         |         |                |          |          |                     |             |
| N2                                                                                 | HS | IV | 8290273 | 8291496 | WBGene00000923 | daf-31   | K07H8.3  | -0.0126577800798238 | AGIWUR20212 |
| N2                                                                                 | HS | IV | 8291515 | 8294596 | WBGene00019504 | K07H8.2  | K07H8.2  | -0.152875289540583  |             |
| AGIWUR2279;AGIWUR6071;AGIWUR17654;AGIWUR26947                                      |    |    |         |         |                |          |          |                     |             |
| N2                                                                                 | HS | IV | 8294690 | 8297283 | WBGene00019503 | tbce-1   | K07H8.1  | 0.131175595935332   | AGIWUR15141 |
| N2                                                                                 | HS | IV | 8297197 | 8299843 | WBGene00018072 | npr1-3   | F35H10.7 | -0.150615559308479  |             |
| AGIWUR4422;AGIWUR42532                                                             |    |    |         |         |                |          |          |                     |             |
| N2                                                                                 | HS | IV | 8299936 | 8300647 | WBGene00018071 | F35H10.6 | F35H10.6 | 0.153535203185772   |             |
| AGIWUR17331                                                                        |    |    |         |         |                |          |          |                     |             |
| N2                                                                                 | HS | IV | 8300755 | 8301165 | WBGene00018070 | F35H10.5 | F35H10.5 | -0.286123056037514  |             |
| AGIWUR44449                                                                        |    |    |         |         |                |          |          |                     |             |

|                                                            |    |    |         |         |                |           |           |                     |             |
|------------------------------------------------------------|----|----|---------|---------|----------------|-----------|-----------|---------------------|-------------|
| N2                                                         | HS | IV | 8303968 | 8307369 | WBGene00006914 | vha-5     | F35H10.4  | 0.224583159011615   |             |
| AGIWUR21901;AGIWUR30912;AGIWUR35131                        |    |    |         |         |                |           |           |                     |             |
| N2                                                         | HS | IV | 8307294 | 8312946 | WBGene00018073 | F35H10.10 | F35H10.10 | 0.0538815471084888  |             |
| AGIWUR17187                                                |    |    |         |         |                |           |           |                     |             |
| N2                                                         | HS | IV | 8325967 | 8327062 | WBGene00018069 | F35H10.3  | F35H10.3  | 0.123190508592518   |             |
| AGIWUR9334                                                 |    |    |         |         |                |           |           |                     |             |
| N2                                                         | HS | IV | 8329205 | 8329956 | WBGene00018068 | F35H10.2  | F35H10.2  | 0.349504527706104   |             |
| AGIWUR36343                                                |    |    |         |         |                |           |           |                     |             |
| N2                                                         | HS | IV | 8332826 | 8333559 | WBGene00003099 | lys-10    | F17E9.11  | -0.425473582350552  |             |
| AGIWUR42956                                                |    |    |         |         |                |           |           |                     |             |
| N2                                                         | HS | IV | 8333557 | 8334021 | WBGene00001905 | his-31    | F17E9.12  | 0.185257096665918   |             |
| AGIWUR22692                                                |    |    |         |         |                |           |           |                     |             |
| N2                                                         | HS | IV | 8334298 | 8334862 | WBGene00001906 | his-32    | F17E9.10  | -0.340900377343939  |             |
| AGIWUR5672;AGIWUR14633;AGIWUR15754;AGIWUR21832;AGIWUR32746 |    |    |         |         |                |           |           |                     |             |
| N2                                                         | HS | IV | 8336807 | 8338172 | WBGene00023270 | F17E9.14  | F17E9.14  | -0.173392179327559  |             |
| AGIWUR44242                                                |    |    |         |         |                |           |           |                     |             |
| N2                                                         | HS | IV | 8342685 | 8344485 | WBGene00017543 | lgc-5     | F17E9.7   | -0.260235295191775  | AGIWUR8436  |
| N2                                                         | HS | IV | 8345818 | 8346546 | WBGene00017542 | F17E9.5   | F17E9.5   | -0.407068600058494  | AGIWUR38365 |
| N2                                                         | HS | IV | 8348373 | 8349169 | WBGene00017541 | F17E9.4   | F17E9.4   | 0.212095690829472   | AGIWUR2460  |
| N2                                                         | HS | IV | 8354874 | 8355433 | WBGene00017540 | F17E9.3   | F17E9.3   | 0.225501503424729   | AGIWUR9498  |
| N2                                                         | HS | IV | 8355892 | 8356503 | WBGene00017539 | F17E9.2   | F17E9.2   | 0.156574792721541   | AGIWUR27596 |
| N2                                                         | HS | IV | 8356776 | 8357854 | WBGene00000690 | col-116   | F17E9.1   | 0.190905076861814   | AGIWUR39272 |
| N2                                                         | HS | IV | 8357938 | 8358592 | WBGene00044953 | D2096.13  | D2096.13  | 0.096221423576683   |             |
| AGIWUR44484;AGIWUR9578;AGIWUR10373;AGIWUR22490             |    |    |         |         |                |           |           |                     |             |
| N2                                                         | HS | IV | 8359165 | 8359716 | WBGene00017072 | D2096.5   | D2096.5   | 0.184042530081186   | AGIWUR14138 |
| N2                                                         | HS | IV | 8361089 | 8363370 | WBGene00005019 | sqv-1     | D2096.4   | -0.0284128036359057 |             |
| AGIWUR5412;AGIWUR24328;AGIWUR41399                         |    |    |         |         |                |           |           |                     |             |
| N2                                                         | HS | IV | 8363463 | 8366376 | WBGene00017079 | D2096.12  | D2096.12  | 0.0467151351003352  |             |
| AGIWUR8270                                                 |    |    |         |         |                |           |           |                     |             |
| N2                                                         | HS | IV | 8366539 | 8375371 | WBGene00017071 | aagr-1    | D2096.3   | -0.38123445933666   | AGIWUR12328 |
| N2                                                         | HS | IV | 8375720 | 8377698 | WBGene00017074 | D2096.7   | D2096.7   | 0.047574325921766   |             |
| AGIWUR3581;AGIWUR8824;AGIWUR12898;AGIWUR41238              |    |    |         |         |                |           |           |                     |             |
| N2                                                         | HS | IV | 8377703 | 8379319 | WBGene00017075 | nap-1     | D2096.8   | 0.0936678615425244  | AGIWUR22992 |
| N2                                                         | HS | IV | 8379984 | 8381925 | WBGene00017070 | praf-3    | D2096.2   | -0.139398206358943  |             |
| AGIWUR9038;AGIWUR18527;AGIWUR31847;AGIWUR40100             |    |    |         |         |                |           |           |                     |             |
| N2                                                         | HS | IV | 8381922 | 8382814 | WBGene00017076 | D2096.9   | D2096.9   | -0.01928821224028   | AGIWUR3892  |
| N2                                                         | HS | IV | 8387626 | 8389239 | WBGene00017077 | D2096.10  | D2096.10  | 0.166045014910557   |             |
| AGIWUR19057                                                |    |    |         |         |                |           |           |                     |             |
| N2                                                         | HS | IV | 8398923 | 8399762 | WBGene00019789 | M116.2    | M116.2    | -0.204774914165402  | AGIWUR34103 |



|                                                                                              |    |    |         |         |                |           |           |                     |             |
|----------------------------------------------------------------------------------------------|----|----|---------|---------|----------------|-----------|-----------|---------------------|-------------|
| N2                                                                                           | HS | IV | 8414293 | 8421061 | WBGene00019792 | M116.5    | M116.5    | -0.147964958884591  | AGIWUR4969  |
| N2                                                                                           | HS | IV | 8422053 | 8424146 | WBGene00023488 | srz-84    | T26A8.5   | 0.0342668982639225  |             |
| AGIWUR7668;AGIWUR26211;AGIWUR32005;AGIWUR37031;AGIWUR38715;AGIWUR44688                       |    |    |         |         |                |           |           |                     |             |
| N2                                                                                           | HS | IV | 8424278 | 8428512 | WBGene00020825 | tmem-231  | T26A8.2   | 0.0368761003845481  |             |
| AGIWUR2333                                                                                   |    |    |         |         |                |           |           |                     |             |
| N2                                                                                           | HS | IV | 8428961 | 8431493 | WBGene00020827 | T26A8.4   | T26A8.4   | 0.0134005722011992  | AGIWUR31550 |
| N2                                                                                           | HS | IV | 8433038 | 8438004 | WBGene00020824 | T26A8.1   | T26A8.1   | 0.103110852010495   | AGIWUR25557 |
| N2                                                                                           | HS | IV | 8447204 | 8449048 | WBGene00020138 | T01B11.1  | T01B11.1  | -0.0259077007714854 |             |
| AGIWUR23119                                                                                  |    |    |         |         |                |           |           |                     |             |
| N2                                                                                           | HS | IV | 8449353 | 8451771 | WBGene00020139 | T01B11.2  | T01B11.2  | 0.139537764376277   |             |
| AGIWUR1975;AGIWUR23355;AGIWUR24343;AGIWUR27969;AGIWUR37585                                   |    |    |         |         |                |           |           |                     |             |
| N2                                                                                           | HS | IV | 8457280 | 8458933 | WBGene00006374 | syx-4     | T01B11.3  | -0.0749464403503115 |             |
| AGIWUR12060                                                                                  |    |    |         |         |                |           |           |                     |             |
| N2                                                                                           | HS | IV | 8459178 | 8460327 | WBGene00020140 | ant-1.4   | T01B11.4  | 0.0468279938436544  |             |
| AGIWUR8471;AGIWUR23208                                                                       |    |    |         |         |                |           |           |                     |             |
| N2                                                                                           | HS | IV | 8460999 | 8463816 | WBGene00006220 | str-176   | T01B11.5  | 0.214344086206925   |             |
| AGIWUR2743;AGIWUR7347;AGIWUR17297;AGIWUR25379;AGIWUR28348                                    |    |    |         |         |                |           |           |                     |             |
| N2                                                                                           | HS | IV | 8464752 | 8472605 | WBGene00003837 | oat-1     | T01B11.7  | 0.442013318876018   |             |
| AGIWUR1624;AGIWUR6649;AGIWUR13136                                                            |    |    |         |         |                |           |           |                     |             |
| N2                                                                                           | HS | IV | 8474056 | 8475278 | WBGene00016181 | C28C12.11 | C28C12.11 | -0.186326230528634  |             |
| AGIWUR8444                                                                                   |    |    |         |         |                |           |           |                     |             |
| N2                                                                                           | HS | IV | 8477182 | 8480656 | WBGene00004995 | spp-10    | C28C12.7  | -0.193195525662356  |             |
| AGIWUR10234;AGIWUR13523;AGIWUR23082;AGIWUR44161                                              |    |    |         |         |                |           |           |                     |             |
| N2                                                                                           | HS | IV | 8481664 | 8483710 | WBGene00004993 | spp-8     | C28C12.5  | -0.138849092199688  |             |
| AGIWUR19253                                                                                  |    |    |         |         |                |           |           |                     |             |
| N2                                                                                           | HS | IV | 8487497 | 8488481 | WBGene00016180 | C28C12.4  | C28C12.4  | -0.196842074352242  |             |
| AGIWUR31231                                                                                  |    |    |         |         |                |           |           |                     |             |
| N2                                                                                           | HS | IV | 8490221 | 8490857 | WBGene00016179 | C28C12.3  | C28C12.3  | 0.378954599779695   |             |
| AGIWUR40139                                                                                  |    |    |         |         |                |           |           |                     |             |
| N2                                                                                           | HS | IV | 8492542 | 8494487 | WBGene00005670 | sru-7     | C28C12.13 | 0.042383975873669   |             |
| AGIWUR1844                                                                                   |    |    |         |         |                |           |           |                     |             |
| N2                                                                                           | HS | IV | 8494550 | 8496363 | WBGene00016182 | C28C12.12 | C28C12.12 | -0.0335700249766657 |             |
| AGIWUR5702;AGIWUR6603;AGIWUR6924;AGIWUR25765;AGIWUR26275;AGIWUR26545;AGIWUR29922;AGIWUR41298 |    |    |         |         |                |           |           |                     |             |
| N2                                                                                           | HS | IV | 8496486 | 8498871 | WBGene00001566 | acdH-13   | C28C12.9  | 0.102664737002964   |             |
| AGIWUR33202                                                                                  |    |    |         |         |                |           |           |                     |             |
| N2                                                                                           | HS | IV | 8499310 | 8500076 | WBGene00016178 | mesp-1    | C28C12.2  | -0.0233907363743988 |             |
| AGIWUR28639                                                                                  |    |    |         |         |                |           |           |                     |             |
| N2                                                                                           | HS | IV | 8501479 | 8502983 | WBGene00016177 | C28C12.1  | C28C12.1  | 0.128890883353674   |             |
| AGIWUR1654;AGIWUR16632;AGIWUR31146;AGIWUR32280;AGIWUR34091;AGIWUR39245                       |    |    |         |         |                |           |           |                     |             |

|                                                                                    |    |    |         |         |                |            |            |                     |             |
|------------------------------------------------------------------------------------|----|----|---------|---------|----------------|------------|------------|---------------------|-------------|
| N2                                                                                 | HS | IV | 8503493 | 8510559 | WBGene00006450 | tag-77     | C28C12.10  | -0.0341560239613941 |             |
| AGIWUR11253;AGIWUR18212;AGIWUR32240;AGIWUR36697                                    |    |    |         |         |                |            |            |                     |             |
| N2                                                                                 | HS | IV | 8513205 | 8513916 | WBGene00044001 | C09G4.4    | C09G4.4    | -0.0132418298872903 |             |
| AGIWUR28241;AGIWUR42704                                                            |    |    |         |         |                |            |            |                     |             |
| N2                                                                                 | HS | IV | 8513919 | 8514725 | WBGene00001051 | cks-1      | C09G4.3    | -0.0259842424026502 | AGIWUR43376 |
| N2                                                                                 | HS | IV | 8520894 | 8538182 | WBGene00015650 | pkg-2      | C09G4.2    | 0.00338081515767108 |             |
| AGIWUR4010;AGIWUR11603;AGIWUR13590;AGIWUR16392;AGIWUR23473;AGIWUR31328;AGIWUR39930 |    |    |         |         |                |            |            |                     |             |
| N2                                                                                 | HS | IV | 8539123 | 8544403 | WBGene00002043 | hyl-1      | C09G4.1    | 0.0522521510691369  |             |
| AGIWUR19450;AGIWUR23662;AGIWUR38311                                                |    |    |         |         |                |            |            |                     |             |
| N2                                                                                 | HS | IV | 8559434 | 8563159 | WBGene00022004 | npr-22     | Y59H11AL.1 | -0.0547279629317301 |             |
| AGIWUR20346;AGIWUR29725                                                            |    |    |         |         |                |            |            |                     |             |
| N2                                                                                 | HS | IV | 8569144 | 8570353 | WBGene00022008 | Y59H11AM.4 | Y59H11AM.4 | -0.040364828789075  |             |
| AGIWUR21150                                                                        |    |    |         |         |                |            |            |                     |             |
| N2                                                                                 | HS | IV | 8571438 | 8571821 | WBGene00022005 | Y59H11AM.1 | Y59H11AM.1 | -0.0342785488263999 |             |
| AGIWUR27952                                                                        |    |    |         |         |                |            |            |                     |             |
| N2                                                                                 | HS | IV | 8585516 | 8594613 | WBGene00022010 | catp-7     | Y59H11AR.2 | -0.132165763814552  |             |
| AGIWUR26104                                                                        |    |    |         |         |                |            |            |                     |             |
| N2                                                                                 | HS | IV | 8594871 | 8595417 | WBGene00022011 | Y59H11AR.3 | Y59H11AR.3 | 0.450189638468525   |             |
| AGIWUR27882                                                                        |    |    |         |         |                |            |            |                     |             |
| N2                                                                                 | HS | IV | 8596067 | 8596943 | WBGene00044511 | cllec-181  | Y59H11AR.5 | -0.0207045915973278 |             |
| AGIWUR10135;AGIWUR12743;AGIWUR39931                                                |    |    |         |         |                |            |            |                     |             |
| N2                                                                                 | HS | IV | 8597762 | 8598727 | WBGene00077437 | Y59H11AR.6 | Y59H11AR.6 | 0.0669311187306585  |             |
| AGIWUR1141;AGIWUR20626;AGIWUR26591;AGIWUR30910;AGIWUR39286;AGIWUR45101             |    |    |         |         |                |            |            |                     |             |
| N2                                                                                 | HS | IV | 8598739 | 8600742 | WBGene00022012 | Y59H11AR.4 | Y59H11AR.4 | -0.156966881400061  |             |
| AGIWUR9861;AGIWUR14711                                                             |    |    |         |         |                |            |            |                     |             |
| N2                                                                                 | HS | IV | 8609239 | 8611595 | WBGene00018335 | F42A9.6    | F42A9.6    | 0.0632329811144992  | AGIWUR15055 |
| N2                                                                                 | HS | IV | 8612363 | 8614683 | WBGene00018334 | cyp-33E2   | F42A9.5    | 0.357660583372359   |             |
| AGIWUR4458                                                                         |    |    |         |         |                |            |            |                     |             |
| N2                                                                                 | HS | IV | 8616006 | 8617147 | WBGene00018336 | F42A9.7    | F42A9.7    | 0.0978915361916659  | AGIWUR26310 |
| N2                                                                                 | HS | IV | 8617285 | 8618153 | WBGene00018332 | F42A9.3    | F42A9.3    | 0.0557873636730157  | AGIWUR21805 |
| N2                                                                                 | HS | IV | 8618244 | 8618788 | WBGene00018337 | F42A9.8    | F42A9.8    | -0.0208314709811983 | AGIWUR17831 |
| N2                                                                                 | HS | IV | 8620683 | 8626149 | WBGene00003034 | lin-49     | F42A9.2    | 0.189310491339102   | AGIWUR15629 |
| N2                                                                                 | HS | IV | 8631334 | 8644019 | WBGene00006483 | dgk-4      | F42A9.1    | -0.0989485714311371 | AGIWUR31290 |
| N2                                                                                 | HS | IV | 8644732 | 8645345 | WBGene00016767 | C49C8.3    | C49C8.3    | 0.204121520103556   | AGIWUR16082 |
| N2                                                                                 | HS | IV | 8645521 | 8648429 | WBGene00016768 | cyp-33E1   | C49C8.4    | 0.0975137456443314  |             |
| AGIWUR34645                                                                        |    |    |         |         |                |            |            |                     |             |
| N2                                                                                 | HS | IV | 8648596 | 8653677 | WBGene00016769 | C49C8.5    | C49C8.5    | 0.204183905542861   | AGIWUR21299 |
| N2                                                                                 | HS | IV | 8654604 | 8656829 | WBGene00016765 | C49C8.1    | C49C8.1    | 0.151407793282823   | AGIWUR6466  |
| N2                                                                                 | HS | IV | 8657455 | 8658184 | WBGene00016770 | C49C8.6    | C49C8.6    | -0.0474553388945864 | AGIWUR9489  |

|                                                                        |    |    |         |         |                |          |          |                     |             |
|------------------------------------------------------------------------|----|----|---------|---------|----------------|----------|----------|---------------------|-------------|
| N2                                                                     | HS | IV | 8666252 | 8667177 | WBGene00017235 | F08B4.3  | F08B4.3  | -0.157805157734     | AGIWUR5523  |
| N2                                                                     | HS | IV | 8668941 | 8676542 | WBGene00000397 | cdh-5    | F08B4.2  | 0.104153314555925   |             |
| AGIWUR11543;AGIWUR30314;AGIWUR32142                                    |    |    |         |         |                |          |          |                     |             |
| N2                                                                     | HS | IV | 8677590 | 8678019 | WBGene00255375 | F08B4.8  | F08B4.8  | 0.0875872588662805  | AGIWUR22110 |
| N2                                                                     | HS | IV | 8678695 | 8679325 | WBGene00017236 | F08B4.4  | F08B4.4  | 0.0858641145770447  | AGIWUR989   |
| N2                                                                     | HS | IV | 8682239 | 8686610 | WBGene00017237 | pole-2   | F08B4.5  | 0.0249886110038444  |             |
| AGIWUR19783;AGIWUR31958                                                |    |    |         |         |                |          |          |                     |             |
| N2                                                                     | HS | IV | 8686756 | 8687810 | WBGene00017238 | F08B4.7  | F08B4.7  | 0.0667396823035205  |             |
| AGIWUR1268;AGIWUR30177                                                 |    |    |         |         |                |          |          |                     |             |
| N2                                                                     | HS | IV | 8688273 | 8691513 | WBGene00002028 | hst-1    | F08B4.6  | -0.308055664466874  | AGIWUR10146 |
| N2                                                                     | HS | IV | 8692086 | 8696553 | WBGene00000994 | dic-1    | F08B4.1  | 0.183301888199303   |             |
| AGIWUR9759;AGIWUR35715                                                 |    |    |         |         |                |          |          |                     |             |
| N2                                                                     | HS | IV | 8697736 | 8702699 | WBGene00019230 | ttl1-11  | H23L24.3 | 0.18895332288848    |             |
| AGIWUR37576                                                            |    |    |         |         |                |          |          |                     |             |
| N2                                                                     | HS | IV | 8703043 | 8705606 | WBGene00019231 | H23L24.4 | H23L24.4 | 0.0540150939716284  |             |
| AGIWUR33495                                                            |    |    |         |         |                |          |          |                     |             |
| N2                                                                     | HS | IV | 8712635 | 8715027 | WBGene00004052 | parg-2   | H23L24.5 | 0.40280764435807    |             |
| AGIWUR20011                                                            |    |    |         |         |                |          |          |                     |             |
| N2                                                                     | HS | IV | 8715247 | 8717881 | WBGene00019229 | ipla-5   | H23L24.2 | 0.0592573697261791  |             |
| AGIWUR35798                                                            |    |    |         |         |                |          |          |                     |             |
| N2                                                                     | HS | IV | 8724020 | 8724876 | WBGene00009014 | F21D5.9  | F21D5.9  | -0.173864946464263  | AGIWUR22252 |
| N2                                                                     | HS | IV | 8725722 | 8728060 | WBGene00009006 | F21D5.1  | F21D5.1  | -0.14272905597152   |             |
| AGIWUR5139;AGIWUR23171;AGIWUR26887;AGIWUR27754;AGIWUR34703;AGIWUR36880 |    |    |         |         |                |          |          |                     |             |
| N2                                                                     | HS | IV | 8728139 | 8730510 | WBGene00009007 | otub-3   | F21D5.2  | 0.103487353589751   |             |
| AGIWUR5723;AGIWUR5991;AGIWUR13125;AGIWUR18617;AGIWUR25556              |    |    |         |         |                |          |          |                     |             |
| N2                                                                     | HS | IV | 8730721 | 8735686 | WBGene00009008 | F21D5.3  | F21D5.3  | 0.238371326192141   | AGIWUR19369 |
| N2                                                                     | HS | IV | 8735695 | 8739394 | WBGene00009010 | F21D5.5  | F21D5.5  | 0.0301609934584945  | AGIWUR8645  |
| N2                                                                     | HS | IV | 8739504 | 8740026 | WBGene00009013 | mrps-33  | F21D5.8  | 0.175228216314277   | AGIWUR26351 |
| N2                                                                     | HS | IV | 8740140 | 8741388 | WBGene00009011 | F21D5.6  | F21D5.6  | 0.206598343319424   | AGIWUR32885 |
| N2                                                                     | HS | IV | 8741383 | 8743704 | WBGene00009012 | F21D5.7  | F21D5.7  | 0.148527823665503   |             |
| AGIWUR448;AGIWUR7143;AGIWUR44082                                       |    |    |         |         |                |          |          |                     |             |
| N2                                                                     | HS | IV | 8744411 | 8745691 | WBGene00008972 | F20C5.7  | F20C5.7  | 0.0279252311057512  | AGIWUR17508 |
| N2                                                                     | HS | IV | 8746252 | 8752676 | WBGene00004051 | parg-1   | F20C5.1  | -0.143171947717972  |             |
| AGIWUR4893;AGIWUR38395;AGIWUR43587                                     |    |    |         |         |                |          |          |                     |             |
| N2                                                                     | HS | IV | 8753195 | 8754823 | WBGene00008968 | F20C5.3  | F20C5.3  | -0.274085576750315  | AGIWUR12683 |
| N2                                                                     | HS | IV | 8755038 | 8762057 | WBGene00002222 | k1p-11   | F20C5.2  | 0.134788180561064   |             |
| AGIWUR5353;AGIWUR17348;AGIWUR26051;AGIWUR27395                         |    |    |         |         |                |          |          |                     |             |
| N2                                                                     | HS | IV | 8764867 | 8767450 | WBGene00008969 | F20C5.4  | F20C5.4  | 0.128114527195542   | AGIWUR25943 |
| N2                                                                     | HS | IV | 8767688 | 8770092 | WBGene00008970 | F20C5.5  | F20C5.5  | -0.0244805996694808 | AGIWUR33556 |

|                                                                                  |    |    |         |         |                |          |          |                     |             |
|----------------------------------------------------------------------------------|----|----|---------|---------|----------------|----------|----------|---------------------|-------------|
| N2                                                                               | HS | IV | 8771558 | 8773206 | WBGene00008971 | F20C5.6  | F20C5.6  | 0.076301175146936   |             |
| AGIWUR25050;AGIWUR31933;AGIWUR40251                                              |    |    |         |         |                |          |          |                     |             |
| N2                                                                               | HS | IV | 8773977 | 8778145 | WBGene00007900 | C33D9.6  | C33D9.6  | 0.107614058819572   |             |
| AGIWUR13080;AGIWUR24131;AGIWUR35116;AGIWUR41899;AGIWUR42317                      |    |    |         |         |                |          |          |                     |             |
| N2                                                                               | HS | IV | 8778721 | 8780872 | WBGene00007899 | C33D9.5  | C33D9.5  | -0.124891898767718  | AGIWUR13505 |
| N2                                                                               | HS | IV | 8783271 | 8785254 | WBGene00194651 | C33D9.13 | C33D9.13 | 0.202685771486067   |             |
| AGIWUR30795                                                                      |    |    |         |         |                |          |          |                     |             |
| N2                                                                               | HS | IV | 8787459 | 8788057 | WBGene00044239 | C33D9.10 | C33D9.10 | -0.0609063139185029 |             |
| AGIWUR14289;AGIWUR29107;AGIWUR29938;AGIWUR33034;AGIWUR38129                      |    |    |         |         |                |          |          |                     |             |
| N2                                                                               | HS | IV | 8788449 | 8790244 | WBGene00005698 | sru-35   | C33D9.4  | 0.272973793228285   | AGIWUR3912  |
| N2                                                                               | HS | IV | 8790742 | 8793294 | WBGene00007898 | C33D9.3  | C33D9.3  | -0.0756483407459907 | AGIWUR40327 |
| N2                                                                               | HS | IV | 8796881 | 8798355 | WBGene00007897 | clcc-182 | C33D9.2  | -0.0235012292251922 |             |
| AGIWUR38966                                                                      |    |    |         |         |                |          |          |                     |             |
| N2                                                                               | HS | IV | 8799089 | 8813539 | WBGene00001366 | exc-5    | C33D9.1  | 0.104446634453195   |             |
| AGIWUR702;AGIWUR39104                                                            |    |    |         |         |                |          |          |                     |             |
| N2                                                                               | HS | IV | 8816335 | 8818525 | WBGene00012118 | grsp-2   | T28C6.1  | -0.0386218492485693 |             |
| AGIWUR5776;AGIWUR8431;AGIWUR8780;AGIWUR11470;AGIWUR29223;AGIWUR29771;AGIWUR34493 |    |    |         |         |                |          |          |                     |             |
| N2                                                                               | HS | IV | 8818555 | 8819158 | WBGene00045183 | T28C6.10 | T28C6.10 | 0.0816679236051288  |             |
| AGIWUR2357;AGIWUR9034;AGIWUR27977;AGIWUR30031;AGIWUR41136                        |    |    |         |         |                |          |          |                     |             |
| N2                                                                               | HS | IV | 8820356 | 8821265 | WBGene00012119 | T28C6.3  | T28C6.3  | 0.144458412026729   | AGIWUR3511  |
| N2                                                                               | HS | IV | 8821447 | 8822874 | WBGene00012120 | T28C6.5  | T28C6.5  | 0.324907983922291   | AGIWUR23333 |
| N2                                                                               | HS | IV | 8840725 | 8842805 | WBGene00011706 | T11B7.1  | T11B7.1  | -0.17326394115983   | AGIWUR462   |
| N2                                                                               | HS | IV | 8843621 | 8844491 | WBGene00011707 | T11B7.2  | T11B7.2  | 0.263948218818014   | AGIWUR18714 |
| N2                                                                               | HS | IV | 8848182 | 8849673 | WBGene00000692 | col-118  | T11B7.3  | -0.273708077593197  |             |
| AGIWUR9680;AGIWUR43006                                                           |    |    |         |         |                |          |          |                     |             |
| N2                                                                               | HS | IV | 8850865 | 8851127 | WBGene00044914 | T11B7.6  | T11B7.6  | 0.0202005769320559  | AGIWUR38341 |
| N2                                                                               | HS | IV | 8852500 | 8862228 | WBGene00001132 | alp-1    | T11B7.4  | 0.0795106305064683  |             |
| AGIWUR1301;AGIWUR11637;AGIWUR14354;AGIWUR16309                                   |    |    |         |         |                |          |          |                     |             |
| N2                                                                               | HS | IV | 8862173 | 8865483 | WBGene00007492 | C09G9.1  | C09G9.1  | 0.00741507372512373 |             |
| AGIWUR6290;AGIWUR24125;AGIWUR40398                                               |    |    |         |         |                |          |          |                     |             |
| N2                                                                               | HS | IV | 8868036 | 8869679 | WBGene00007493 | npp-23   | C09G9.2  | -0.0495447488777074 | AGIWUR42471 |
| N2                                                                               | HS | IV | 8869962 | 8873057 | WBGene00007494 | C09G9.3  | C09G9.3  | 0.0493999266052421  |             |
| AGIWUR10147;AGIWUR37282                                                          |    |    |         |         |                |          |          |                     |             |
| N2                                                                               | HS | IV | 8873820 | 8874007 | WBGene00045323 | C09G9.9  | C09G9.9  | 0.0504270525360582  |             |
| AGIWUR13666;AGIWUR14560;AGIWUR17102;AGIWUR28067;AGIWUR33063                      |    |    |         |         |                |          |          |                     |             |
| N2                                                                               | HS | IV | 8874129 | 8877022 | WBGene00006409 | hdl-2    | C09G9.4  | 0.275329016405667   | AGIWUR18595 |
| N2                                                                               | HS | IV | 8877553 | 8879910 | WBGene00007496 | npax-4   | C09G9.7  | 0.0767605501077933  | AGIWUR3477  |
| N2                                                                               | HS | IV | 8881481 | 8882240 | WBGene00007497 | C09G9.8  | C09G9.8  | -0.031079946778334  | AGIWUR35470 |
| N2                                                                               | HS | IV | 8886528 | 8888602 | WBGene00007495 | C09G9.5  | C09G9.5  | 0.536918315277449   |             |

|                                                                         |    |    |         |         |                |           |          |                             |             |
|-------------------------------------------------------------------------|----|----|---------|---------|----------------|-----------|----------|-----------------------------|-------------|
| AGIWUR1804;AGIWUR30771                                                  |    |    |         |         |                |           |          |                             |             |
| N2                                                                      | HS | IV | 8888976 | 8890999 | WBGene00003864 | oma-1     | C09G9.6  | -0.314276707503794          | AGIWUR35807 |
| N2                                                                      | HS | IV | 8891466 | 8892747 | WBGene00005007 | spr-2     | C27B7.1  | 0.0824711884857035          |             |
| AGIWUR5937;AGIWUR16694                                                  |    |    |         |         |                |           |          |                             |             |
| N2                                                                      | HS | IV | 8892858 | 8893854 | WBGene00007760 | C27B7.2   | C27B7.2  | 0.312363913815176           | AGIWUR23338 |
| N2                                                                      | HS | IV | 8894083 | 8901386 | WBGene00007761 | rad-26    | C27B7.4  | 0.0696177425950548          |             |
| AGIWUR14504;AGIWUR17257;AGIWUR21870;AGIWUR23761;AGIWUR27573;AGIWUR42108 |    |    |         |         |                |           |          |                             |             |
| N2                                                                      | HS | IV | 8901646 | 8903177 | WBGene00007762 | C27B7.5   | C27B7.5  | -0.251365066193703          | AGIWUR23632 |
| N2                                                                      | HS | IV | 8903222 | 8906205 | WBGene00007763 | C27B7.6   | C27B7.6  | -0.00170482290432972        | AGIWUR44147 |
| N2                                                                      | HS | IV | 8907047 | 8915383 | WBGene00007764 | C27B7.7   | C27B7.7  | 0.0875530561828697          | AGIWUR44416 |
| N2                                                                      | HS | IV | 8915472 | 8916110 | WBGene00007765 | C27B7.9   | C27B7.9  | -0.229307300324374          | AGIWUR39920 |
| N2                                                                      | HS | IV | 8916408 | 8918890 | WBGene00004307 | rap-1     | C27B7.8  | -0.276672549210156          |             |
| AGIWUR9710;AGIWUR16339;AGIWUR18115;AGIWUR32787;AGIWUR38012;AGIWUR39863  |    |    |         |         |                |           |          |                             |             |
| N2                                                                      | HS | IV | 8924161 | 8926112 | WBGene00008363 | D1046.2   | D1046.2  | -0.0140954578972501         |             |
| AGIWUR2947;AGIWUR32878                                                  |    |    |         |         |                |           |          |                             |             |
| N2                                                                      | HS | IV | 8926335 | 8930315 | WBGene00008362 | cfim-2    | D1046.1  | -0.227187517605621          | AGIWUR43416 |
| N2                                                                      | HS | IV | 8930442 | 8932791 | WBGene00008364 | slc-25A26 |          | D1046.3 -0.0435804030991349 |             |
| AGIWUR37641                                                             |    |    |         |         |                |           |          |                             |             |
| N2                                                                      | HS | IV | 8933997 | 8937400 | WBGene00008365 | D1046.4   | D1046.4  | 0.154884414240584           |             |
| AGIWUR4421;AGIWUR21306;AGIWUR29332                                      |    |    |         |         |                |           |          |                             |             |
| N2                                                                      | HS | IV | 8956489 | 8965534 | WBGene00008366 | tpa-1     | D1046.5  | -0.0451914021105182         | AGIWUR13759 |
| N2                                                                      | HS | IV | 8966133 | 8967903 | WBGene00008272 | C53B4.2   | C53B4.2  | 0.183448810926706           | AGIWUR12201 |
| N2                                                                      | HS | IV | 8968290 | 8970565 | WBGene00008271 | C53B4.1   | C53B4.1  | 0.0188052290635667          | AGIWUR35347 |
| N2                                                                      | HS | IV | 8970868 | 8973707 | WBGene00008273 | C53B4.3   | C53B4.3  | 0.224114793227171           | AGIWUR18768 |
| N2                                                                      | HS | IV | 8975532 | 8984706 | WBGene00008274 | C53B4.4   | C53B4.4  | -0.120045854907769          | AGIWUR9423  |
| N2                                                                      | HS | IV | 8984866 | 8986774 | WBGene00008275 | nstp-1    | C53B4.6  | 0.102066549082487           | AGIWUR16097 |
| N2                                                                      | HS | IV | 8987130 | 8990444 | WBGene00000266 | bre-1     | C53B4.7  | 0.0256140306651722          |             |
| AGIWUR2014;AGIWUR6820;AGIWUR10995;AGIWUR14717;AGIWUR21811;AGIWUR33573   |    |    |         |         |                |           |          |                             |             |
| N2                                                                      | HS | IV | 8993086 | 9000774 | WBGene00008277 | mltn-12   | C53B4.8  | 0.0503300409430167          | AGIWUR43232 |
| N2                                                                      | HS | IV | 9001145 | 9002734 | WBGene00008285 | C53D6.8   | C53D6.8  | 0.0462580030056703          | AGIWUR36472 |
| N2                                                                      | HS | IV | 9002837 | 9005410 | WBGene00006852 | unc-129   | C53D6.2  | 0.00991115757054928         | AGIWUR24153 |
| N2                                                                      | HS | IV | 9010584 | 9012339 | WBGene00044241 | C53D6.11  | C53D6.11 | 0.107769784275145           |             |
| AGIWUR9918;AGIWUR38669                                                  |    |    |         |         |                |           |          |                             |             |
| N2                                                                      | HS | IV | 9016788 | 9019101 | WBGene00008280 | acc-2     | C53D6.3  | 0.0133906983503245          |             |
| AGIWUR5422;AGIWUR31435;AGIWUR43909                                      |    |    |         |         |                |           |          |                             |             |
| N2                                                                      | HS | IV | 9019175 | 9020940 | WBGene00008281 | C53D6.4   | C53D6.4  | 0.0401204124080827          | AGIWUR14521 |
| N2                                                                      | HS | IV | 9021515 | 9023607 | WBGene00005906 | srx-15    | C53D6.9  | 0.0406812521608106          |             |
| AGIWUR17975;AGIWUR34822                                                 |    |    |         |         |                |           |          |                             |             |
| N2                                                                      | HS | IV | 9024738 | 9027598 | WBGene00008282 | C53D6.5   | C53D6.5  | 0.152452122105834           | AGIWUR44862 |

|                                                                                  |    |    |         |         |                |          |          |                     |                    |
|----------------------------------------------------------------------------------|----|----|---------|---------|----------------|----------|----------|---------------------|--------------------|
| N2                                                                               | HS | IV | 9027686 | 9032659 | WBGene00008283 | C53D6.6  | C53D6.6  | 0.00247693240793367 | AGIWUR17419        |
| N2                                                                               | HS | IV | 9033576 | 9034440 | WBGene00023424 | C53D6.10 |          | C53D6.10            | 0.0429924593281932 |
| AGIWUR7408                                                                       |    |    |         |         |                |          |          |                     |                    |
| N2                                                                               | HS | IV | 9034845 | 9037163 | WBGene00008284 | C53D6.7  | C53D6.7  | 0.366424209793793   | AGIWUR3673         |
| N2                                                                               | HS | IV | 9039575 | 9040504 | WBGene00013516 | Y73F4A.3 |          | Y73F4A.3            | -0.254791120991174 |
| AGIWUR10887                                                                      |    |    |         |         |                |          |          |                     |                    |
| N2                                                                               | HS | IV | 9042387 | 9043347 | WBGene00013515 | Y73F4A.2 |          | Y73F4A.2            | -0.124015275499374 |
| AGIWUR3643                                                                       |    |    |         |         |                |          |          |                     |                    |
| N2                                                                               | HS | IV | 9043938 | 9045369 | WBGene00013514 | Y73F4A.1 |          | Y73F4A.1            | -0.010655804421372 |
| AGIWUR9218                                                                       |    |    |         |         |                |          |          |                     |                    |
| N2                                                                               | HS | IV | 9070010 | 9073622 | WBGene00003610 | nhr-11   | ZC410.1  | -0.108914569876619  |                    |
| AGIWUR7171;AGIWUR11583;AGIWUR23108;AGIWUR39961                                   |    |    |         |         |                |          |          |                     |                    |
| N2                                                                               | HS | IV | 9074673 | 9076571 | WBGene00013880 | mppb-1   | ZC410.2  | 0.121710570199493   | AGIWUR19324        |
| N2                                                                               | HS | IV | 9076501 | 9078807 | WBGene00013881 | mans-4   | ZC410.3  | 0.0714727185466515  |                    |
| AGIWUR9478;AGIWUR18890;AGIWUR19559                                               |    |    |         |         |                |          |          |                     |                    |
| N2                                                                               | HS | IV | 9082361 | 9087554 | WBGene00006663 | twk-8    | ZC410.4  | 0.103824431631693   |                    |
| AGIWUR23492;AGIWUR23900                                                          |    |    |         |         |                |          |          |                     |                    |
| N2                                                                               | HS | IV | 9088594 | 9092193 | WBGene00013882 | msa-1    | ZC410.5  | -0.0288836739515936 |                    |
| AGIWUR3044;AGIWUR5696;AGIWUR19247;AGIWUR31771                                    |    |    |         |         |                |          |          |                     |                    |
| N2                                                                               | HS | IV | 9092217 | 9094468 | WBGene00003066 | lpl-1    | ZC410.7  | 0.0587678855449205  |                    |
| AGIWUR13244;AGIWUR23652;AGIWUR27179                                              |    |    |         |         |                |          |          |                     |                    |
| N2                                                                               | HS | IV | 9094541 | 9095653 | WBGene00002046 | icl-1    | C01F6.8  | -0.068618254457407  |                    |
| AGIWUR3303;AGIWUR13660                                                           |    |    |         |         |                |          |          |                     |                    |
| N2                                                                               | HS | IV | 9095754 | 9096231 | WBGene00007223 | C01F6.9  | C01F6.9  | 0.0964087716558115  |                    |
| AGIWUR1398;AGIWUR29038                                                           |    |    |         |         |                |          |          |                     |                    |
| N2                                                                               | HS | IV | 9096842 | 9099364 | WBGene00007221 | cpna-3   | C01F6.1  | 0.016304069956143   |                    |
| AGIWUR2412;AGIWUR10869;AGIWUR24822                                               |    |    |         |         |                |          |          |                     |                    |
| N2                                                                               | HS | IV | 9099242 | 9101592 | WBGene00007222 | C01F6.2  | C01F6.2  | -0.202401136805044  | AGIWUR12163        |
| N2                                                                               | HS | IV | 9101773 | 9103851 | WBGene00000374 | cyp-31A1 |          | C01F6.3             | 0.133692296642499  |
| AGIWUR3245                                                                       |    |    |         |         |                |          |          |                     |                    |
| N2                                                                               | HS | IV | 9104966 | 9107609 | WBGene00001413 | fem-3    | C01F6.4  | 0.134120941053425   | AGIWUR43635        |
| N2                                                                               | HS | IV | 9108931 | 9109753 | WBGene00000120 | aly-1    | C01F6.5  | 0.126837400681973   | AGIWUR13547        |
| N2                                                                               | HS | IV | 9119098 | 9130378 | WBGene00006438 | nrfl-1   | C01F6.6  | -0.0561904030551261 |                    |
| AGIWUR548;AGIWUR8424;AGIWUR27484;AGIWUR31768;AGIWUR33238;AGIWUR34798;AGIWUR37061 |    |    |         |         |                |          |          |                     |                    |
| N2                                                                               | HS | IV | 9132600 | 9135477 | WBGene00009073 | delm-1   | F23B2.3  | -0.137989295416467  |                    |
| AGIWUR2991;AGIWUR25145;AGIWUR25402                                               |    |    |         |         |                |          |          |                     |                    |
| N2                                                                               | HS | IV | 9136933 | 9146210 | WBGene00000906 | daf-10   | F23B2.4  | 0.191879130332076   | AGIWUR2652         |
| N2                                                                               | HS | IV | 9146337 | 9146869 | WBGene00009078 | rpb-12   | F23B2.13 | 0.1379626569287     | AGIWUR18561        |
| N2                                                                               | HS | IV | 9147468 | 9148579 | WBGene00000121 | aly-2    | F23B2.6  | 0.0246554269904991  | AGIWUR995          |

|                                                                        |    |    |         |         |                |           |           |                     |             |
|------------------------------------------------------------------------|----|----|---------|---------|----------------|-----------|-----------|---------------------|-------------|
| N2                                                                     | HS | IV | 9148949 | 9149297 | WBGene00043283 | F23B2.9   | F23B2.9   | -0.0361912283950829 | AGIWUR32127 |
| N2                                                                     | HS | IV | 9150491 | 9152043 | WBGene00009075 | F23B2.7   | F23B2.7   | 0.19613956275164    | AGIWUR26059 |
| N2                                                                     | HS | IV | 9152819 | 9154320 | WBGene00009077 | F23B2.10  | F23B2.10  | 0.421966284019009   |             |
| AGIWUR26346;AGIWUR39763                                                |    |    |         |         |                |           |           |                     |             |
| N2                                                                     | HS | IV | 9155079 | 9159019 | WBGene00003958 | pcp-3     | F23B2.11  | 0.3469020847133     | AGIWUR14667 |
| N2                                                                     | HS | IV | 9160640 | 9165127 | WBGene00003957 | pcp-2     | F23B2.12  | 0.118257192828114   |             |
| AGIWUR25329                                                            |    |    |         |         |                |           |           |                     |             |
| N2                                                                     | HS | IV | 9185064 | 9186023 | WBGene00007411 | C07C7.1   | C07C7.1   | 0.0251425272807486  | AGIWUR28190 |
| N2                                                                     | HS | IV | 9186815 | 9191122 | WBGene00008112 | C46C2.4   | C46C2.4   | -0.189530090057035  | AGIWUR34546 |
| N2                                                                     | HS | IV | 9191639 | 9192622 | WBGene00008113 | C46C2.5   | C46C2.5   | 0.300988352946536   | AGIWUR15595 |
| N2                                                                     | HS | IV | 9200102 | 9212235 | WBGene00006941 | wnk-1     | C46C2.1   | -0.434491077834409  | AGIWUR29399 |
| N2                                                                     | HS | IV | 9212375 | 9214236 | WBGene00008114 | C46C2.6   | C46C2.6   | 0.0303956818353326  |             |
| AGIWUR1073;AGIWUR10519;AGIWUR11852;AGIWUR15701;AGIWUR29304;AGIWUR30848 |    |    |         |         |                |           |           |                     |             |
| N2                                                                     | HS | IV | 9216952 | 9220397 | WBGene00008110 | C46C2.2   | C46C2.2   | 0.169007889567634   | AGIWUR14022 |
| N2                                                                     | HS | IV | 9225125 | 9227781 | WBGene00008111 | C46C2.3   | C46C2.3   | 0.136434084926591   | AGIWUR26119 |
| N2                                                                     | HS | IV | 9228277 | 9231051 | WBGene00012426 | Y11D7A.1  | Y11D7A.1  | 0.0190822008271088  |             |
| AGIWUR3515;AGIWUR25965                                                 |    |    |         |         |                |           |           |                     |             |
| N2                                                                     | HS | IV | 9233028 | 9241387 | WBGene00012428 | Y11D7A.3  | Y11D7A.3  | -0.0831945741671571 |             |
| AGIWUR29448                                                            |    |    |         |         |                |           |           |                     |             |
| N2                                                                     | HS | IV | 9242225 | 9243999 | WBGene00004281 | rab-28    | Y11D7A.4  | -0.0126609381637106 |             |
| AGIWUR8803                                                             |    |    |         |         |                |           |           |                     |             |
| N2                                                                     | HS | IV | 9244520 | 9245523 | WBGene00012429 | Y11D7A.5  | Y11D7A.5  | 0.259330961142491   |             |
| AGIWUR33747;AGIWUR38826                                                |    |    |         |         |                |           |           |                     |             |
| N2                                                                     | HS | IV | 9247156 | 9248088 | WBGene00014863 | Y11D7A.16 | Y11D7A.16 | 0.0013010730831593  |             |
| AGIWUR12333;AGIWUR24561                                                |    |    |         |         |                |           |           |                     |             |
| N2                                                                     | HS | IV | 9251379 | 9253913 | WBGene00012432 | Y11D7A.8  | Y11D7A.8  | 0.219436482188389   |             |
| AGIWUR23676;AGIWUR37799;AGIWUR40803                                    |    |    |         |         |                |           |           |                     |             |
| N2                                                                     | HS | IV | 9253979 | 9256117 | WBGene00012433 | Y11D7A.9  | Y11D7A.9  | 0.355440376833331   |             |
| AGIWUR1652                                                             |    |    |         |         |                |           |           |                     |             |
| N2                                                                     | HS | IV | 9258913 | 9259764 | WBGene00012434 | Y11D7A.10 | Y11D7A.10 | 0.127836140385984   |             |
| AGIWUR39649                                                            |    |    |         |         |                |           |           |                     |             |
| N2                                                                     | HS | IV | 9260610 | 9261787 | WBGene00000694 | col-120   | Y11D7A.11 | 0.0164162482235426  |             |
| AGIWUR34720                                                            |    |    |         |         |                |           |           |                     |             |
| N2                                                                     | HS | IV | 9261808 | 9264265 | WBGene00012435 | flh-1     | Y11D7A.12 | -0.0403397068980347 |             |
| AGIWUR26190                                                            |    |    |         |         |                |           |           |                     |             |
| N2                                                                     | HS | IV | 9270096 | 9271935 | WBGene00012436 | flh-3     | Y11D7A.13 | -0.125985090223645  |             |
| AGIWUR12856                                                            |    |    |         |         |                |           |           |                     |             |
| N2                                                                     | HS | IV | 9272582 | 9273639 | WBGene00045309 | srg-52    | Y11D7A.18 | -0.118940064492485  |             |
| AGIWUR14678;AGIWUR16760                                                |    |    |         |         |                |           |           |                     |             |

|                                                                                  |    |    |         |         |                |           |           |                     |             |
|----------------------------------------------------------------------------------|----|----|---------|---------|----------------|-----------|-----------|---------------------|-------------|
| N2                                                                               | HS | IV | 9274416 | 9283113 | WBGene00012437 | hum-9     | Y11D7A.14 | 0.240006554823178   |             |
| AGIWUR20979                                                                      |    |    |         |         |                |           |           |                     |             |
| N2                                                                               | HS | IV | 9292296 | 9293925 | WBGene00008778 | nhr-264   | F14A5.1   | 0.363404257866044   | AGIWUR42246 |
| N2                                                                               | HS | IV | 9294899 | 9296406 | WBGene00009871 | F49C12.1  | F49C12.1  | -0.0494906293588713 |             |
| AGIWUR18302                                                                      |    |    |         |         |                |           |           |                     |             |
| N2                                                                               | HS | IV | 9298024 | 9299220 | WBGene00009872 | F49C12.2  | F49C12.2  | -0.0188781813785521 |             |
| AGIWUR7653                                                                       |    |    |         |         |                |           |           |                     |             |
| N2                                                                               | HS | IV | 9300427 | 9301951 | WBGene00009873 | F49C12.3  | F49C12.3  | -0.146294228352718  |             |
| AGIWUR10306                                                                      |    |    |         |         |                |           |           |                     |             |
| N2                                                                               | HS | IV | 9302665 | 9304094 | WBGene00009874 | F49C12.4  | F49C12.4  | 0.109560554010444   |             |
| AGIWUR44441                                                                      |    |    |         |         |                |           |           |                     |             |
| N2                                                                               | HS | IV | 9304917 | 9307165 | WBGene00009875 | F49C12.5  | F49C12.5  | 0.2265586133683     |             |
| AGIWUR36045                                                                      |    |    |         |         |                |           |           |                     |             |
| N2                                                                               | HS | IV | 9307338 | 9309109 | WBGene00009876 | F49C12.6  | F49C12.6  | 0.484904356387869   |             |
| AGIWUR22142                                                                      |    |    |         |         |                |           |           |                     |             |
| N2                                                                               | HS | IV | 9309108 | 9312927 | WBGene00009877 | F49C12.7  | F49C12.7  | -0.463329870633324  |             |
| AGIWUR25176                                                                      |    |    |         |         |                |           |           |                     |             |
| N2                                                                               | HS | IV | 9314810 | 9316215 | WBGene00009878 | F49C12.9  | F49C12.9  | -0.103910232914037  |             |
| AGIWUR30770                                                                      |    |    |         |         |                |           |           |                     |             |
| N2                                                                               | HS | IV | 9316639 | 9318632 | WBGene00004463 | rpn-7     | F49C12.8  | -0.173755176250082  |             |
| AGIWUR30692;AGIWUR41894                                                          |    |    |         |         |                |           |           |                     |             |
| N2                                                                               | HS | IV | 9319380 | 9320143 | WBGene00009880 | F49C12.11 | F49C12.11 | 0.00231286888872262 |             |
| AGIWUR5414                                                                       |    |    |         |         |                |           |           |                     |             |
| N2                                                                               | HS | IV | 9320122 | 9321089 | WBGene00009881 | F49C12.12 | F49C12.12 | 0.135908449895771   |             |
| AGIWUR29619                                                                      |    |    |         |         |                |           |           |                     |             |
| N2                                                                               | HS | IV | 9321801 | 9322528 | WBGene00009882 | vha-17    | F49C12.13 | -0.0682269053436153 |             |
| AGIWUR10460;AGIWUR33594                                                          |    |    |         |         |                |           |           |                     |             |
| N2                                                                               | HS | IV | 9324435 | 9327516 | WBGene00009884 | F49C12.15 | F49C12.15 | 0.0526343574545436  |             |
| AGIWUR1749                                                                       |    |    |         |         |                |           |           |                     |             |
| N2                                                                               | HS | IV | 9328010 | 9328745 | WBGene00011855 | clec-183  | T20D3.1   | 0.0836925603217544  |             |
| AGIWUR27131                                                                      |    |    |         |         |                |           |           |                     |             |
| N2                                                                               | HS | IV | 9328973 | 9330855 | WBGene00011856 | T20D3.2   | T20D3.2   | -0.212297802355439  |             |
| AGIWUR37376;AGIWUR43822                                                          |    |    |         |         |                |           |           |                     |             |
| N2                                                                               | HS | IV | 9333342 | 9335916 | WBGene00011857 | T20D3.3   | T20D3.3   | 0.0653736891579388  |             |
| AGIWUR640;AGIWUR2173;AGIWUR11482;AGIWUR21374;AGIWUR24100;AGIWUR25036;AGIWUR34649 |    |    |         |         |                |           |           |                     |             |
| N2                                                                               | HS | IV | 9337044 | 9338567 | WBGene00011858 | T20D3.5   | T20D3.5   | 0.131985518294899   |             |
| AGIWUR6055;AGIWUR15510;AGIWUR24330                                               |    |    |         |         |                |           |           |                     |             |
| N2                                                                               | HS | IV | 9338587 | 9339305 | WBGene00011859 | T20D3.6   | T20D3.6   | 0.0062201214754829  | AGIWUR10001 |
| N2                                                                               | HS | IV | 9339403 | 9341790 | WBGene00006931 | vps-26    | T20D3.7   | 0.172530395037775   | AGIWUR22148 |



|                                                                        |    |    |         |         |                |          |           |                     |             |
|------------------------------------------------------------------------|----|----|---------|---------|----------------|----------|-----------|---------------------|-------------|
| N2                                                                     | HS | IV | 9341964 | 9343152 | WBGene00011860 | T20D3.8  | T20D3.8   | 0.00862968504441142 | AGIWUR6522  |
| N2                                                                     | HS | IV | 9343358 | 9366506 | WBGene00007505 | pezo-1   | C10C5.1   | 0.111958918478012   |             |
| AGIWUR3741;AGIWUR15461;AGIWUR19565;AGIWUR37952                         |    |    |         |         |                |          |           |                     |             |
| N2                                                                     | HS | IV | 9371508 | 9373636 | WBGene00007506 | C10C5.2  | C10C5.2   | 0.222001127796019   |             |
| AGIWUR14726;AGIWUR25513                                                |    |    |         |         |                |          |           |                     |             |
| N2                                                                     | HS | IV | 9374733 | 9376492 | WBGene00007507 | C10C5.3  | C10C5.3   | 0.380103126792065   | AGIWUR3415  |
| N2                                                                     | HS | IV | 9378552 | 9380450 | WBGene00007508 | C10C5.4  | C10C5.4   | 0.502724345808108   | AGIWUR32390 |
| N2                                                                     | HS | IV | 9381515 | 9383115 | WBGene00007509 | C10C5.5  | C10C5.5   | 0.248545551812002   | AGIWUR3133  |
| N2                                                                     | HS | IV | 9385126 | 9385713 | WBGene00007511 | C10C5.7  | C10C5.7   | -0.014034336986585  | AGIWUR28883 |
| N2                                                                     | HS | IV | 9386208 | 9394930 | WBGene00000911 | daf-15   | C10C5.6   | -0.138400365804726  |             |
| AGIWUR15043;AGIWUR24389                                                |    |    |         |         |                |          |           |                     |             |
| N2                                                                     | HS | IV | 9394934 | 9396218 | WBGene00000695 | col-121  | F56D5.1   | -0.367171852596025  | AGIWUR43719 |
| N2                                                                     | HS | IV | 9396920 | 9398603 | WBGene00010147 | F56D5.2  | F56D5.2   | 0.226069718658185   | AGIWUR29719 |
| N2                                                                     | HS | IV | 9399653 | 9401293 | WBGene00010148 | F56D5.3  | F56D5.3   | 0.122736033590204   | AGIWUR947   |
| N2                                                                     | HS | IV | 9401922 | 9412653 | WBGene00010150 | F56D5.6  | F56D5.6   | 0.00836638761929365 | AGIWUR16853 |
| N2                                                                     | HS | IV | 9418432 | 9422506 | WBGene00010152 | F56D5.9  | F56D5.9   | 0.163821984446862   | AGIWUR9437  |
| N2                                                                     | HS | IV | 9423395 | 9424415 | WBGene00010153 | srxa-2   | F56D5.10  | 0.0817541041928713  |             |
| AGIWUR11246                                                            |    |    |         |         |                |          |           |                     |             |
| N2                                                                     | HS | IV | 9428259 | 9439077 | WBGene00010316 | F59B8.1  | F59B8.1   | 0.178564007094506   |             |
| AGIWUR9633;AGIWUR25189;AGIWUR27633                                     |    |    |         |         |                |          |           |                     |             |
| N2                                                                     | HS | IV | 9439043 | 9440893 | WBGene00010317 | idh-1    | F59B8.2   | 0.191071996011676   | AGIWUR21726 |
| N2                                                                     | HS | IV | 9442877 | 9444516 | WBGene00009544 | F38E11.9 | F38E11.9  | -0.0150912973411064 |             |
| AGIWUR6817                                                             |    |    |         |         |                |          |           |                     |             |
| N2                                                                     | HS | IV | 9444791 | 9445507 | WBGene00002012 | hsp-12.3 | F38E11.1  | 0.14347654921417    |             |
| AGIWUR5661;AGIWUR7122;AGIWUR9794;AGIWUR13490;AGIWUR20005;AGIWUR20124   |    |    |         |         |                |          |           |                     |             |
| N2                                                                     | HS | IV | 9446385 | 9446884 | WBGene00002013 | hsp-12.6 | F38E11.2  | 0.0634913940023196  |             |
| AGIWUR6281;AGIWUR11904;AGIWUR17211;AGIWUR25673;AGIWUR30513;AGIWUR35348 |    |    |         |         |                |          |           |                     |             |
| N2                                                                     | HS | IV | 9449473 | 9457501 | WBGene00009541 | cutl-17  | F38E11.4  | -0.0538303804001137 |             |
| AGIWUR12258;AGIWUR20388;AGIWUR31001;AGIWUR36293                        |    |    |         |         |                |          |           |                     |             |
| N2                                                                     | HS | IV | 9459731 | 9463998 | WBGene00009542 | copb-2   | F38E11.5  | 0.10406649734666    |             |
| AGIWUR4755;AGIWUR16599;AGIWUR26454;AGIWUR34313;AGIWUR34549;AGIWUR40798 |    |    |         |         |                |          |           |                     |             |
| N2                                                                     | HS | IV | 9463951 | 9467518 | WBGene00009543 | F38E11.6 | F38E11.6  | 0.066618138630739   |             |
| AGIWUR2349                                                             |    |    |         |         |                |          |           |                     |             |
| N2                                                                     | HS | IV | 9473680 | 9475365 | WBGene00014752 | F38E11.8 | F38E11.8  | -0.032231334132149  |             |
| AGIWUR40862                                                            |    |    |         |         |                |          |           |                     |             |
| N2                                                                     | HS | IV | 9475863 | 9477446 | WBGene00006949 | wrt-3    | F38E11.7  | 0.202272192008589   |             |
| AGIWUR3094;AGIWUR9220;AGIWUR33893;AGIWUR39063                          |    |    |         |         |                |          |           |                     |             |
| N2                                                                     | HS | IV | 9482053 | 9485140 | WBGene00007887 | gadr-2   | C33A12.12 | -0.280592335992846  |             |
| AGIWUR36875                                                            |    |    |         |         |                |          |           |                     |             |

|                                     |    |    |         |         |                |           |           |                     |
|-------------------------------------|----|----|---------|---------|----------------|-----------|-----------|---------------------|
| N2                                  | HS | IV | 9486272 | 9487631 | WBGene00005665 | sru-2     | C33A12.13 | 0.109175557901676   |
| AGIWUR3401;AGIWUR6766;AGIWUR23330   |    |    |         |         |                |           |           |                     |
| N2                                  | HS | IV | 9488670 | 9490194 | WBGene00005664 | sru-1     | C33A12.14 | -0.0440381964751282 |
| AGIWUR1098                          |    |    |         |         |                |           |           |                     |
| N2                                  | HS | IV | 9490620 | 9491991 | WBGene00005669 | sru-6     | C33A12.8  | 0.0642406434206002  |
| AGIWUR6449                          |    |    |         |         |                |           |           |                     |
| N2                                  | HS | IV | 9492576 | 9493220 | WBGene00014693 | C33A12.18 | C33A12.18 | 0.0173182734625046  |
| AGIWUR3246;AGIWUR34967              |    |    |         |         |                |           |           |                     |
| N2                                  | HS | IV | 9494032 | 9495519 | WBGene00005668 | sru-5     | C33A12.9  | -0.0237842080869144 |
| AGIWUR15262;AGIWUR38061             |    |    |         |         |                |           |           |                     |
| N2                                  | HS | IV | 9496606 | 9497888 | WBGene00005666 | sru-3     | C33A12.11 | 0.146643587489164   |
| AGIWUR19248                         |    |    |         |         |                |           |           |                     |
| N2                                  | HS | IV | 9498388 | 9499588 | WBGene00005667 | sru-4     | C33A12.10 | 0.0172644620651878  |
| AGIWUR18393                         |    |    |         |         |                |           |           |                     |
| N2                                  | HS | IV | 9500311 | 9502568 | WBGene00007885 | ugt-21    | C33A12.6  | 0.419644057651221   |
| AGIWUR7536;AGIWUR29751              |    |    |         |         |                |           |           |                     |
| N2                                  | HS | IV | 9502572 | 9505292 | WBGene00007889 | C33A12.16 | C33A12.16 | -0.0561559393050661 |
| AGIWUR21842;AGIWUR26855;AGIWUR30931 |    |    |         |         |                |           |           |                     |
| N2                                  | HS | IV | 9505615 | 9506326 | WBGene00007888 | ttr-9     | C33A12.15 | 0.160461000166046   |
| AGIWUR33075                         |    |    |         |         |                |           |           |                     |
| N2                                  | HS | IV | 9506936 | 9508779 | WBGene00007886 | ethe-1    | C33A12.7  | 0.0447991783267696  |
| AGIWUR27815                         |    |    |         |         |                |           |           |                     |
| N2                                  | HS | IV | 9510055 | 9510594 | WBGene00007883 | C33A12.4  | C33A12.4  | 0.223245603518595   |
| AGIWUR14783                         |    |    |         |         |                |           |           |                     |
| N2                                  | HS | IV | 9510748 | 9513002 | WBGene00007882 | C33A12.3  | C33A12.3  | -0.189408484544554  |
| AGIWUR38679                         |    |    |         |         |                |           |           |                     |
| N2                                  | HS | IV | 9516992 | 9518410 | WBGene00007890 | C33A12.19 | C33A12.19 | -0.19554178950731   |
| AGIWUR12496                         |    |    |         |         |                |           |           |                     |
| N2                                  | HS | IV | 9518367 | 9518927 | WBGene00007881 | nlp-35    | C33A12.2  | 0.174343106853131   |
| AGIWUR14739                         |    |    |         |         |                |           |           |                     |
| N2                                  | HS | IV | 9523764 | 9524895 | WBGene00007880 | C33A12.1  | C33A12.1  | 0.201397660360763   |
| AGIWUR15621                         |    |    |         |         |                |           |           |                     |
| N2                                  | HS | IV | 9526359 | 9528350 | WBGene00001239 | elo-1     | F56H11.4  | 0.0880382531655375  |
| AGIWUR19591;AGIWUR20671;AGIWUR26778 |    |    |         |         |                |           |           |                     |
| N2                                  | HS | IV | 9528355 | 9529569 | WBGene00010176 | F56H11.6  | F56H11.6  | 0.0602058511096475  |
| AGIWUR44359                         |    |    |         |         |                |           |           |                     |
| N2                                  | HS | IV | 9529947 | 9531378 | WBGene00001245 | elo-7     | F56H11.3  | 0.0967201432003222  |
| AGIWUR10588;AGIWUR38339;AGIWUR44859 |    |    |         |         |                |           |           |                     |
| N2                                  | HS | IV | 9531357 | 9533171 | WBGene00010175 | F56H11.2  | F56H11.2  | 0.183650902437655   |

AGIWUR38244  
N2 HS IV 9540808 9546250 WBGene00001403 fbl-1 F56H11.1 0.11294215880499  
AGIWUR3088;AGIWUR21630;AGIWUR27626;AGIWUR31406;AGIWUR35333;AGIWUR35815  
N2 HS IV 9546286 9560428 WBGene00011456 T05A1.5 T05A1.5 -0.00918759981350092  
AGIWUR30574;AGIWUR36667;AGIWUR36862  
N2 HS IV 9568828 9580071 WBGene00003808 npr-2 T05A1.1 -0.169631573934748 AGIWUR9649  
N2 HS IV 9587100 9588834 WBGene00009186 trcs-1 F27C8.6 0.0606622601616174  
AGIWUR23993;AGIWUR24542;AGIWUR43108  
N2 HS IV 9589795 9592529 WBGene00009185 F27C8.5 F27C8.5 0.0582581832482916 AGIWUR25567  
N2 HS IV 9593667 9594425 WBGene00005003 spp-18 F27C8.4 0.028582880559636 AGIWUR21130  
N2 HS IV 9595088 9595933 WBGene00009184 F27C8.3 F27C8.3 0.0236249534777064  
AGIWUR17532;AGIWUR18902;AGIWUR31320;AGIWUR33452;AGIWUR35776  
N2 HS IV 9596497 9599081 WBGene00009183 F27C8.2 F27C8.2 0.113137075667119  
AGIWUR11750;AGIWUR19540;AGIWUR21046;AGIWUR26418  
N2 HS IV 9598986 9601695 WBGene00000002 aat-1 F27C8.1 0.270627375024626 AGIWUR12999  
N2 HS IV 9614970 9620140 WBGene00001249 elt-1 W09C2.1 0.164333371356891 AGIWUR18559  
N2 HS IV 9625910 9634948 WBGene00003151 mca-1 W09C2.3 -0.00627998913229355  
AGIWUR8635;AGIWUR13889;AGIWUR15173;AGIWUR23235;AGIWUR27015;AGIWUR29670  
N2 HS IV 9636980 9642003 WBGene00000953 del-2 F58G6.6 0.152082695977176 AGIWUR33261  
N2 HS IV 9643422 9644268 WBGene00010278 F58G6.8 F58G6.8 0.146531091374546 AGIWUR25483  
N2 HS IV 9644245 9647934 WBGene00010272 amph-1 F58G6.1 -0.0547628036170185  
AGIWUR8192;AGIWUR9748;AGIWUR15924;AGIWUR32381;AGIWUR43634  
N2 HS IV 9649043 9650490 WBGene00010273 srm-3 F58G6.2 0.0309810846450653  
AGIWUR28922;AGIWUR39645  
N2 HS IV 9651394 9652484 WBGene00044107 F58G6.9 F58G6.9 0.213318723332174  
AGIWUR735;AGIWUR3220;AGIWUR14260;AGIWUR23851;AGIWUR29022  
N2 HS IV 9653535 9654175 WBGene00010274 F58G6.3 F58G6.3 0.555922248397692 AGIWUR40504  
N2 HS IV 9654317 9655588 WBGene00010277 F58G6.7 F58G6.7 0.081366253508067 AGIWUR22873  
N2 HS IV 9658053 9663941 WBGene00010275 acc-1 F58G6.4 0.270946635813445 AGIWUR29262  
N2 HS IV 9664365 9675672 WBGene00003627 nhr-34 F58G6.5 -0.0417640928320742  
AGIWUR3607;AGIWUR9087;AGIWUR9865;AGIWUR17700;AGIWUR20213;AGIWUR38487;AGIWUR39401;AGIWUR43484  
N2 HS IV 9680387 9680941 WBGene00002091 ins-8 ZK1251.11 0.199301860128912  
AGIWUR12964  
N2 HS IV 9682013 9682826 WBGene00002090 ins-7 ZK1251.2 0.14885450077243  
AGIWUR35925  
N2 HS IV 9682984 9683533 WBGene00014240 htas-1 ZK1251.1 0.0698129765037034  
AGIWUR13934  
N2 HS IV 9683617 9684473 WBGene00014241 ZK1251.3 ZK1251.3 0.159607351918945  
AGIWUR19628

|                                                                         |    |    |         |         |                |          |          |                     |             |
|-------------------------------------------------------------------------|----|----|---------|---------|----------------|----------|----------|---------------------|-------------|
| N2                                                                      | HS | IV | 9687049 | 9688392 | WBGene00014996 | ZK1251.5 | ZK1251.5 | 0.00261241681546043 |             |
| AGIWUR16631;AGIWUR36524                                                 |    |    |         |         |                |          |          |                     |             |
| N2                                                                      | HS | IV | 9690932 | 9691465 | WBGene00014242 | sdz-36   | ZK1251.7 | -0.250318888703926  |             |
| AGIWUR42072                                                             |    |    |         |         |                |          |          |                     |             |
| N2                                                                      | HS | IV | 9693202 | 9697005 | WBGene00006664 | twk-9    | ZK1251.8 | 0.0393777351944404  |             |
| AGIWUR5316;AGIWUR12010;AGIWUR41514                                      |    |    |         |         |                |          |          |                     |             |
| N2                                                                      | HS | IV | 9696989 | 9706723 | WBGene00014243 | dcaf-1   | ZK1251.9 | -0.0892628304136664 |             |
| AGIWUR40370                                                             |    |    |         |         |                |          |          |                     |             |
| N2                                                                      | HS | IV | 9707148 | 9707764 | WBGene00010484 | dph-3    | K01H12.1 | -0.136900878332442  |             |
| AGIWUR11984;AGIWUR15311;AGIWUR21907;AGIWUR29882;AGIWUR39442;AGIWUR44342 |    |    |         |         |                |          |          |                     |             |
| N2                                                                      | HS | IV | 9708170 | 9709305 | WBGene00010485 | ant-1.3  | K01H12.2 | 0.0485350296304272  |             |
| AGIWUR22865                                                             |    |    |         |         |                |          |          |                     |             |
| N2                                                                      | HS | IV | 9710202 | 9712419 | WBGene00003629 | nhr-38   | K01H12.3 | 0.0636760531217941  |             |
| AGIWUR15627;AGIWUR30641;AGIWUR42905                                     |    |    |         |         |                |          |          |                     |             |
| N2                                                                      | HS | IV | 9713082 | 9714886 | WBGene00010486 | K01H12.4 | K01H12.4 | -0.0363725948761413 |             |
| AGIWUR42932                                                             |    |    |         |         |                |          |          |                     |             |
| N2                                                                      | HS | IV | 9725251 | 9728576 | WBGene00003728 | nhr-138  | C28D4.9  | -0.0486692926186105 | AGIWUR5703  |
| N2                                                                      | HS | IV | 9728676 | 9731314 | WBGene00003690 | nhr-100  | C28D4.1  | 0.385123600766242   | AGIWUR14259 |
| N2                                                                      | HS | IV | 9731737 | 9737621 | WBGene00000509 | cka-1    | C28D4.2  | -0.0992876200975843 | AGIWUR39127 |
| N2                                                                      | HS | IV | 9738510 | 9739220 | WBGene00007796 | C28D4.10 | C28D4.10 | 0.327864136452845   |             |
| AGIWUR28516                                                             |    |    |         |         |                |          |          |                     |             |
| N2                                                                      | HS | IV | 9739219 | 9740908 | WBGene00001607 | gln-6    | C28D4.3  | -0.196534658690126  |             |
| AGIWUR8252;AGIWUR27183;AGIWUR32269                                      |    |    |         |         |                |          |          |                     |             |
| N2                                                                      | HS | IV | 9741875 | 9743147 | WBGene00007794 | C28D4.7  | C28D4.7  | 0.0484570108914273  | AGIWUR7363  |
| N2                                                                      | HS | IV | 9743765 | 9745003 | WBGene00007792 | C28D4.4  | C28D4.4  | 0.0366682254762249  | AGIWUR43339 |
| N2                                                                      | HS | IV | 9745555 | 9746862 | WBGene00007793 | C28D4.5  | C28D4.5  | -0.304942017105944  |             |
| AGIWUR8420;AGIWUR34963                                                  |    |    |         |         |                |          |          |                     |             |
| N2                                                                      | HS | IV | 9757648 | 9764494 | WBGene00003687 | nhr-97   | H27C11.1 | 0.0499490232410658  |             |
| AGIWUR10437;AGIWUR25208;AGIWUR26811;AGIWUR42455;AGIWUR44637             |    |    |         |         |                |          |          |                     |             |
| N2                                                                      | HS | IV | 9765669 | 9766436 | WBGene00011749 | ssp-36   | T13F2.12 | -0.200663178570101  |             |
| AGIWUR11597                                                             |    |    |         |         |                |          |          |                     |             |
| N2                                                                      | HS | IV | 9772510 | 9773470 | WBGene00000301 | cav-1    | T13F2.8  | -0.0984019859217362 |             |
| AGIWUR3025;AGIWUR6303;AGIWUR17426;AGIWUR24603;AGIWUR43155               |    |    |         |         |                |          |          |                     |             |
| N2                                                                      | HS | IV | 9774563 | 9777634 | WBGene00011747 | sna-2    | T13F2.7  | 0.0150171524287419  | AGIWUR32315 |
| N2                                                                      | HS | IV | 9778288 | 9781203 | WBGene00011746 | T13F2.6  | T13F2.6  | 0.0405026617701711  | AGIWUR39516 |
| N2                                                                      | HS | IV | 9789808 | 9791917 | WBGene00011744 | T13F2.4  | T13F2.4  | -0.320590916617506  | AGIWUR39540 |
| N2                                                                      | HS | IV | 9791945 | 9796592 | WBGene00004031 | pis-1    | T13F2.3  | -0.0964023136537548 | AGIWUR17460 |
| N2                                                                      | HS | IV | 9796688 | 9797354 | WBGene00011743 | T13F2.2  | T13F2.2  | 0.0403338622155225  |             |
| AGIWUR2648;AGIWUR40457                                                  |    |    |         |         |                |          |          |                     |             |

|                                                           |    |    |         |         |                |          |          |                      |                     |
|-----------------------------------------------------------|----|----|---------|---------|----------------|----------|----------|----------------------|---------------------|
| N2                                                        | HS | IV | 9799429 | 9802638 | WBGene00001396 | fat-4    | T13F2.1  | 0.210321014066629    |                     |
| AGIWUR13144;AGIWUR23506;AGIWUR33115                       |    |    |         |         |                |          |          |                      |                     |
| N2                                                        | HS | IV | 9803023 | 9806119 | WBGene00001395 | fat-3    | W08D2.4  | 0.37831000911045     | AGIWUR19711         |
| N2                                                        | HS | IV | 9806416 | 9810733 | WBGene00012340 | dct-15   | W08D2.3  | 0.212028884033375    | AGIWUR20257         |
| N2                                                        | HS | IV | 9812444 | 9815526 | WBGene00001188 | egl-20   | W08D2.1  | 0.0464838067232383   |                     |
| AGIWUR16385;AGIWUR23531;AGIWUR27673;AGIWUR33623           |    |    |         |         |                |          |          |                      |                     |
| N2                                                        | HS | IV | 9817412 | 9824632 | WBGene00012341 | catp-6   | W08D2.5  | -0.12436421442388    |                     |
| AGIWUR6997;AGIWUR17095;AGIWUR22958;AGIWUR43986            |    |    |         |         |                |          |          |                      |                     |
| N2                                                        | HS | IV | 9825694 | 9830620 | WBGene00012342 | mtr-4    | W08D2.7  | 0.0350993927166208   | AGIWUR36980         |
| N2                                                        | HS | IV | 9832935 | 9834822 | WBGene00002204 | kin-21   | W08D2.8  | 0.0241116218204276   | AGIWUR37340         |
| N2                                                        | HS | IV | 9839057 | 9841084 | WBGene00002206 | kin-24   | K07F5.4  | 0.0163108137894383   | AGIWUR26938         |
| N2                                                        | HS | IV | 9842371 | 9842992 | WBGene00045180 | K07F5.17 |          | K07F5.17             | 0.104665863321307   |
| AGIWUR7217;AGIWUR9095;AGIWUR18583                         |    |    |         |         |                |          |          |                      |                     |
| N2                                                        | HS | IV | 9844014 | 9844344 | WBGene00010633 | nspd-2   | K07F5.5  | -0.00583704690210496 | AGIWUR17317         |
| N2                                                        | HS | IV | 9844989 | 9846674 | WBGene00010634 | K07F5.6  | K07F5.6  | 0.15592600207405     | AGIWUR23014         |
| N2                                                        | HS | IV | 9847724 | 9848175 | WBGene00010635 | K07F5.7  | K07F5.7  | 0.0514669568843251   | AGIWUR25972         |
| N2                                                        | HS | IV | 9848491 | 9849796 | WBGene00010636 | K07F5.8  | K07F5.8  | 0.0354701560028321   |                     |
| AGIWUR2188;AGIWUR2399;AGIWUR24222                         |    |    |         |         |                |          |          |                      |                     |
| N2                                                        | HS | IV | 9852550 | 9853609 | WBGene00006050 | ssq-1    | K07F5.11 |                      | -0.421199778848464  |
| AGIWUR10720                                               |    |    |         |         |                |          |          |                      |                     |
| N2                                                        | HS | IV | 9856012 | 9858067 | WBGene00010637 | K07F5.12 |          | K07F5.12             | 0.322378785283516   |
| AGIWUR15523;AGIWUR22601                                   |    |    |         |         |                |          |          |                      |                     |
| N2                                                        | HS | IV | 9858488 | 9862118 | WBGene00003787 | npp-1    | K07F5.13 |                      | 0.116034584125284   |
| AGIWUR8201;AGIWUR16295;AGIWUR35932                        |    |    |         |         |                |          |          |                      |                     |
| N2                                                        | HS | IV | 9862221 | 9864076 | WBGene00010638 | K07F5.14 |          | K07F5.14             | 0.106176519986686   |
| AGIWUR39713                                               |    |    |         |         |                |          |          |                      |                     |
| N2                                                        | HS | IV | 9864179 | 9864954 | WBGene00010640 | K07F5.16 |          | K07F5.16             | -0.0610681405068956 |
| AGIWUR43013                                               |    |    |         |         |                |          |          |                      |                     |
| N2                                                        | HS | IV | 9865078 | 9866163 | WBGene00010639 | K07F5.15 |          | K07F5.15             | 0.228575113078167   |
| AGIWUR2940;AGIWUR3047;AGIWUR17907;AGIWUR19206;AGIWUR41539 |    |    |         |         |                |          |          |                      |                     |
| N2                                                        | HS | IV | 9879329 | 9882152 | WBGene00003603 | nhr-4    | F32B6.1  | 0.21197050001823     | AGIWUR40095         |
| N2                                                        | HS | IV | 9882132 | 9884383 | WBGene00009320 | F32B6.3  | F32B6.3  | 0.148216474720085    | AGIWUR38724         |
| N2                                                        | HS | IV | 9884556 | 9887150 | WBGene00009319 | mccc-1   | F32B6.2  | 0.114957977438982    |                     |
| AGIWUR14175;AGIWUR25051;AGIWUR30913;AGIWUR44689           |    |    |         |         |                |          |          |                      |                     |
| N2                                                        | HS | IV | 9887190 | 9889929 | WBGene00009324 | F32B6.10 |          | F32B6.10             | -0.0244230043677316 |
| AGIWUR12556                                               |    |    |         |         |                |          |          |                      |                     |
| N2                                                        | HS | IV | 9890585 | 9892038 | WBGene00009321 | F32B6.4  | F32B6.4  | -0.127650120953396   | AGIWUR10939         |
| N2                                                        | HS | IV | 9892739 | 9893779 | WBGene00006056 | sss-1    | F32B6.5  | -0.0585763717506396  | AGIWUR38254         |
| N2                                                        | HS | IV | 9895388 | 9896147 | WBGene00006049 | ssp-32   | F32B6.7  | 0.15437805935554     | AGIWUR1266          |

|                                                                                                             |    |    |         |          |                |           |           |                     |             |
|-------------------------------------------------------------------------------------------------------------|----|----|---------|----------|----------------|-----------|-----------|---------------------|-------------|
| N2                                                                                                          | HS | IV | 9899012 | 9902513  | WBGene00009322 | tbc-3     | F32B6.8   | -0.0928970855211322 | AGIWUR19284 |
| N2                                                                                                          | HS | IV | 9903908 | 9905903  | WBGene00009323 | best-13   | F32B6.9   | 0.0205628028634184  | AGIWUR3199  |
| N2                                                                                                          | HS | IV | 9916530 | 9921996  | WBGene00009133 | bed-3     | F25H8.6   | -0.115143537586476  | AGIWUR41049 |
| N2                                                                                                          | HS | IV | 9921955 | 9928223  | WBGene00001113 | dur-1     | F25H8.5   | -0.084962697235742  |             |
| AGIWUR18088;AGIWUR37175;AGIWUR44758                                                                         |    |    |         |          |                |           |           |                     |             |
| N2                                                                                                          | HS | IV | 9930899 | 9932240  | WBGene00009131 | F25H8.1   | F25H8.1   | -0.220015161206488  |             |
| AGIWUR3558;AGIWUR13798;AGIWUR38273                                                                          |    |    |         |          |                |           |           |                     |             |
| N2                                                                                                          | HS | IV | 9932235 | 9933879  | WBGene00009132 | F25H8.2   | F25H8.2   | 0.0671611409881603  | AGIWUR23509 |
| N2                                                                                                          | HS | IV | 9933910 | 9934285  | WBGene00004974 | spe-29    | F25H8.7   | 0.22919258842231    |             |
| AGIWUR12135;AGIWUR14054;AGIWUR16647;AGIWUR19696;AGIWUR25093;AGIWUR25417                                     |    |    |         |          |                |           |           |                     |             |
| N2                                                                                                          | HS | IV | 9934767 | 9953433  | WBGene00001650 | gon-1     | F25H8.3   | 0.00103505499757794 |             |
| AGIWUR15816;AGIWUR29887;AGIWUR40536                                                                         |    |    |         |          |                |           |           |                     |             |
| N2                                                                                                          | HS | IV | 9964245 | 9966630  | WBGene00011762 | T13H10.2  | T13H10.2  | -0.0499386351647431 |             |
| AGIWUR3038;AGIWUR9024;AGIWUR17513;AGIWUR18569                                                               |    |    |         |          |                |           |           |                     |             |
| N2                                                                                                          | HS | IV | 9967095 | 9969181  | WBGene00002193 | kin-5     | T13H10.1  | -0.0651793032794288 |             |
| AGIWUR4224                                                                                                  |    |    |         |          |                |           |           |                     |             |
| N2                                                                                                          | HS | IV | 9969400 | 9971200  | WBGene00008154 | C47E12.11 | C47E12.11 | 0.36057472709469    |             |
| AGIWUR13467                                                                                                 |    |    |         |          |                |           |           |                     |             |
| N2                                                                                                          | HS | IV | 9972037 | 9972652  | WBGene00008155 | C47E12.12 | C47E12.12 | 0.16802235033791    |             |
| AGIWUR27207                                                                                                 |    |    |         |          |                |           |           |                     |             |
| N2                                                                                                          | HS | IV | 9972800 | 9973984  | WBGene00008153 | C47E12.10 | C47E12.10 | -0.0458585543200982 |             |
| AGIWUR34366                                                                                                 |    |    |         |          |                |           |           |                     |             |
| N2                                                                                                          | HS | IV | 9974672 | 9975484  | WBGene00008152 | C47E12.9  | C47E12.9  | -0.0119057050961668 |             |
| AGIWUR29301                                                                                                 |    |    |         |          |                |           |           |                     |             |
| N2                                                                                                          | HS | IV | 9975496 | 9976384  | WBGene00044240 | C47E12.14 | C47E12.14 | 0.0395798111469938  |             |
| AGIWUR30214;AGIWUR33392;AGIWUR34516                                                                         |    |    |         |          |                |           |           |                     |             |
| N2                                                                                                          | HS | IV | 9978122 | 9980770  | WBGene00000964 | dhp-2     | C47E12.8  | -0.185541533651282  |             |
| AGIWUR34299                                                                                                 |    |    |         |          |                |           |           |                     |             |
| N2                                                                                                          | HS | IV | 9980724 | 9982276  | WBGene00008151 | C47E12.7  | C47E12.7  | 0.294829397439919   |             |
| AGIWUR18656                                                                                                 |    |    |         |          |                |           |           |                     |             |
| N2                                                                                                          | HS | IV | 9983195 | 9989678  | WBGene00008150 | mam-2     | C47E12.6  | 0.27158067246636    |             |
| AGIWUR29556                                                                                                 |    |    |         |          |                |           |           |                     |             |
| N2                                                                                                          | HS | IV | 9989670 | 9995034  | WBGene00006699 | uba-1     | C47E12.5  | -0.176071599431741  |             |
| AGIWUR10534;AGIWUR11941;AGIWUR17729;AGIWUR18720;AGIWUR28621;AGIWUR29207;AGIWUR32686;AGIWUR34505;AGIWUR35578 |    |    |         |          |                |           |           |                     |             |
| ;AGIWUR41605                                                                                                |    |    |         |          |                |           |           |                     |             |
| N2                                                                                                          | HS | IV | 9995472 | 9999032  | WBGene00008149 | pyp-1     | C47E12.4  | 0.03276753413388    |             |
| AGIWUR3161;AGIWUR26414                                                                                      |    |    |         |          |                |           |           |                     |             |
| N2                                                                                                          | HS | IV | 9999047 | 10001846 | WBGene00008148 | C47E12.3  | C47E12.3  |                     |             |
| 0.114295414498136 AGIWUR23502                                                                               |    |    |         |          |                |           |           |                     |             |

|                                                                                                                                   |    |    |                                               |          |                |           |                             |
|-----------------------------------------------------------------------------------------------------------------------------------|----|----|-----------------------------------------------|----------|----------------|-----------|-----------------------------|
| N2                                                                                                                                | HS | IV | 10001972                                      | 10003534 | WBGene00008147 | C47E12.2  | C47E12.2                    |
| 0.399488419543136                                                                                                                 |    |    | AGIWUR44403                                   |          |                |           |                             |
| N2                                                                                                                                | HS | IV | 10003726                                      | 10005599 | WBGene00005663 | sars-1    | C47E12.1                    |
| -0.00817036753215827                                                                                                              |    |    | AGIWUR1796;AGIWUR5322;AGIWUR11890;AGIWUR31242 |          |                |           |                             |
| N2                                                                                                                                | HS | IV | 10009354                                      | 10014187 | WBGene00009678 | magu-4    | F44D12.1                    |
| 0.353078206107458                                                                                                                 |    |    | AGIWUR3382                                    |          |                |           |                             |
| N2                                                                                                                                | HS | IV | 10013958                                      | 10016398 | WBGene00009679 | F44D12.2  | F44D12.2                    |
| -0.0507514676939635                                                                                                               |    |    | AGIWUR6307                                    |          |                |           |                             |
| N2                                                                                                                                | HS | IV | 10017425                                      | 10021286 | WBGene00009686 | ent-7     | F44D12.9                    |
| 0.391253986773838                                                                                                                 |    |    | AGIWUR21559                                   |          |                |           |                             |
| N2                                                                                                                                | HS | IV | 10023291                                      | 10025226 | WBGene00009685 | F44D12.8  | F44D12.8                    |
| 0.0142678913954679                                                                                                                |    |    | AGIWUR19688                                   |          |                |           |                             |
| N2                                                                                                                                | HS | IV | 10026413                                      | 10027666 | WBGene00009681 | gipc-2    | F44D12.4                    |
| -0.111264233619007                                                                                                                |    |    | AGIWUR34255                                   |          |                |           |                             |
| N2                                                                                                                                | HS | IV | 10032972                                      | 10033155 | WBGene00045002 | F44D12.12 | F44D12.12                   |
| -0.0870042920154432                                                                                                               |    |    | AGIWUR20102                                   |          |                |           |                             |
| N2                                                                                                                                | HS | IV | 10033363                                      | 10034820 | WBGene00009683 | F44D12.6  | F44D12.6                    |
| -0.0963228387492574                                                                                                               |    |    | AGIWUR8676;AGIWUR30156;AGIWUR38109            |          |                |           |                             |
| N2                                                                                                                                | HS | IV | 10036627                                      | 10037066 | WBGene00009687 | F44D12.10 | F44D12.10                   |
| -0.023158961418341                                                                                                                |    |    |                                               |          |                |           |                             |
| AGIWUR7081;AGIWUR7294;AGIWUR15394;AGIWUR18459;AGIWUR19867;AGIWUR22633;AGIWUR27241;AGIWUR33146;AGIWUR34661;AGIWUR40121;AGIWUR40462 |    |    |                                               |          |                |           |                             |
| N2                                                                                                                                | HS | IV | 10037452                                      | 10039043 | WBGene00014375 | F44D12.11 | F44D12.11                   |
| -0.0542029131425785                                                                                                               |    |    | AGIWUR25592                                   |          |                |           |                             |
| N2                                                                                                                                | HS | IV | 10039773                                      | 10040903 | WBGene00011424 | dhs-31    | T04B2.6 -0.104029281214668  |
| AGIWUR19849;AGIWUR41560                                                                                                           |    |    |                                               |          |                |           |                             |
| N2                                                                                                                                | HS | IV | 10041130                                      | 10042432 | WBGene00011421 | T04B2.1   | T04B2.1 -0.0840751383925071 |
| AGIWUR7713;AGIWUR10342;AGIWUR36383;AGIWUR38194                                                                                    |    |    |                                               |          |                |           |                             |
| N2                                                                                                                                | HS | IV | 10043183                                      | 10045739 | WBGene00001487 | frk-1     | T04B2.2 0.208483133136735   |
| AGIWUR40759                                                                                                                       |    |    |                                               |          |                |           |                             |
| N2                                                                                                                                | HS | IV | 10047408                                      | 10050554 | WBGene00011422 | T04B2.3   | T04B2.3 0.374591455740863   |
| AGIWUR18224                                                                                                                       |    |    |                                               |          |                |           |                             |
| N2                                                                                                                                | HS | IV | 10050581                                      | 10051188 | WBGene00044018 | T04B2.8   | T04B2.8 0.293001712463431   |
| AGIWUR4874;AGIWUR8285;AGIWUR24191;AGIWUR35191;AGIWUR38908                                                                         |    |    |                                               |          |                |           |                             |
| N2                                                                                                                                | HS | IV | 10051286                                      | 10053650 | WBGene00005723 | srv-12    | T04B2.4 -0.120822009309784  |
| AGIWUR15022                                                                                                                       |    |    |                                               |          |                |           |                             |
| N2                                                                                                                                | HS | IV | 10054036                                      | 10056250 | WBGene00011425 | T04B2.7   | T04B2.7 -0.0236178355103132 |
| AGIWUR36502                                                                                                                       |    |    |                                               |          |                |           |                             |
| N2                                                                                                                                | HS | IV | 10056591                                      | 10062849 | WBGene00011423 | ipla-7    | T04B2.5 -0.0342746521055246 |

AGIWUR712;AGIWUR11375;AGIWUR21307;AGIWUR21939;AGIWUR30091;AGIWUR33006;AGIWUR41031;AGIWUR44901  
 N2 HS IV 10067824 10070251 WBGene00000858 cwn-2 W01B6.1 0.0760844758436861  
 AGIWUR9085;AGIWUR12598;AGIWUR15419;AGIWUR28973;AGIWUR37317  
 N2 HS IV 10070270 10072626 WBGene00012170 W01B6.3 W01B6.3 0.211752572911601  
 AGIWUR22414  
 N2 HS IV 10075414 10075775 WBGene00012171 W01B6.4 W01B6.4 0.0894424014155106  
 AGIWUR5168  
 N2 HS IV 10076325 10078705 WBGene00012172 W01B6.5 W01B6.5 0.246561007468872  
 AGIWUR27903  
 N2 HS IV 10081155 10082610 WBGene00012173 W01B6.6 W01B6.6 0.127197394714156  
 AGIWUR5015;AGIWUR41383  
 N2 HS IV 10082867 10082962 WBGene00045182 W01B6.10 W01B6.10  
 -0.22808373377628 AGIWUR29759  
 N2 HS IV 10083491 10084440 WBGene00012174 W01B6.8 W01B6.8 0.107708541206687  
 AGIWUR34753  
 N2 HS IV 10084454 10085438 WBGene00000593 col-2 W01B6.7 0.0996230200045654  
 AGIWUR30833  
 N2 HS IV 10086137 10088437 WBGene00003576 ndc-80 W01B6.9 0.0640262430488683  
 AGIWUR293;AGIWUR3177;AGIWUR28049  
 N2 HS IV 10088367 10089894 WBGene00007304 ttr-39 C04G2.1 -0.0295887255646434  
 AGIWUR35819  
 N2 HS IV 10090658 10092379 WBGene00007305 C04G2.2 C04G2.2 0.00267357306969274  
 AGIWUR3541  
 N2 HS IV 10094198 10095259 WBGene00007306 C04G2.5 C04G2.5 0.0965931023250768  
 AGIWUR33346  
 N2 HS IV 10097196 10106556 WBGene00001001 dis-3 C04G2.6 0.176296646664527  
 AGIWUR33485  
 N2 HS IV 10106917 10110412 WBGene00001204 egl-38 C04G2.7 -0.0255813137437437  
 AGIWUR43499  
 N2 HS IV 10110347 10111577 WBGene00007307 spch-1 C04G2.8 0.167595635378373  
 AGIWUR2944  
 N2 HS IV 10111721 10112028 WBGene00045104 C04G2.12 C04G2.12  
 0.394562731939914 AGIWUR10102;AGIWUR30391  
 N2 HS IV 10112870 10114287 WBGene00007308 C04G2.9 C04G2.9 -0.0679982397203407  
 AGIWUR3561  
 N2 HS IV 10115389 10118084 WBGene00007309 C04G2.10 C04G2.10  
 0.0642179509000904 AGIWUR41110  
 N2 HS IV 10119460 10122305 WBGene00007310 irld-21 C04G2.11  
 0.260871750117996 AGIWUR43001



|                                                                                |    |    |          |          |                |          |          |                     |
|--------------------------------------------------------------------------------|----|----|----------|----------|----------------|----------|----------|---------------------|
| N2                                                                             | HS | IV | 10122120 | 10126675 | WBGene00010676 | K08F4.1  | K08F4.1  | 0.0407802101253303  |
| AGIWUR6421;AGIWUR24373;AGIWUR44754                                             |    |    |          |          |                |          |          |                     |
| N2                                                                             | HS | IV | 10126749 | 10128956 | WBGene00010677 | gtbp-1   | K08F4.2  | -0.248279677090387  |
| AGIWUR444;AGIWUR1140;AGIWUR31820;AGIWUR42248                                   |    |    |          |          |                |          |          |                     |
| N2                                                                             | HS | IV | 10129257 | 10130244 | WBGene00010678 | K08F4.3  | K08F4.3  | 0.209018308903847   |
| AGIWUR6612                                                                     |    |    |          |          |                |          |          |                     |
| N2                                                                             | HS | IV | 10130257 | 10133283 | WBGene00001621 | glt-3    | K08F4.4  | -0.285234548406724  |
| AGIWUR13198                                                                    |    |    |          |          |                |          |          |                     |
| N2                                                                             | HS | IV | 10134932 | 10135887 | WBGene00010679 | K08F4.5  | K08F4.5  | 0.0647306576450593  |
| AGIWUR28659                                                                    |    |    |          |          |                |          |          |                     |
| N2                                                                             | HS | IV | 10138124 | 10139104 | WBGene00010680 | K08F4.12 |          | K08F4.12            |
| 0.240813537741481 AGIWUR43473                                                  |    |    |          |          |                |          |          |                     |
| N2                                                                             | HS | IV | 10139380 | 10140285 | WBGene00001751 | gst-3    | K08F4.11 |                     |
| 0.194631868810976 AGIWUR15799                                                  |    |    |          |          |                |          |          |                     |
| N2                                                                             | HS | IV | 10145249 | 10146222 | WBGene00000975 | dhs-12   | K08F4.9  | -0.196171225183893  |
| AGIWUR15183;AGIWUR15296;AGIWUR17821;AGIWUR17973                                |    |    |          |          |                |          |          |                     |
| N2                                                                             | HS | IV | 10146226 | 10147105 | WBGene00011777 | T14G10.8 |          | T14G10.8            |
| 0.0227612236478958 AGIWUR34844                                                 |    |    |          |          |                |          |          |                     |
| N2                                                                             | HS | IV | 10147031 | 10149038 | WBGene00011776 | hpo-5    | T14G10.7 |                     |
| 0.146351249404574 AGIWUR43385                                                  |    |    |          |          |                |          |          |                     |
| N2                                                                             | HS | IV | 10149166 | 10150602 | WBGene00006638 | tsp-12   | T14G10.6 |                     |
| -0.0894516998413604 AGIWUR33375                                                |    |    |          |          |                |          |          |                     |
| N2                                                                             | HS | IV | 10151949 | 10155636 | WBGene00011775 | T14G10.5 |          | T14G10.5            |
| -0.00293637301022542 AGIWUR16222;AGIWUR42213;AGIWUR44173                       |    |    |          |          |                |          |          |                     |
| N2                                                                             | HS | IV | 10155775 | 10156771 | WBGene00011774 | ttr-54   | T14G10.4 |                     |
| 0.22294617095806 AGIWUR25565                                                   |    |    |          |          |                |          |          |                     |
| N2                                                                             | HS | IV | 10158038 | 10159243 | WBGene00011773 | ttr-53   | T14G10.3 |                     |
| -0.0357673621175572 AGIWUR43146                                                |    |    |          |          |                |          |          |                     |
| N2                                                                             | HS | IV | 10162008 | 10164390 | WBGene00004091 | pps-1    | T14G10.1 |                     |
| -0.126074627373645 AGIWUR14039                                                 |    |    |          |          |                |          |          |                     |
| N2                                                                             | HS | IV | 10164331 | 10174341 | WBGene00004254 | pxf-1    | T14G10.2 |                     |
| -0.160656424903774 AGIWUR18067;AGIWUR19827;AGIWUR21600;AGIWUR27870;AGIWUR36386 |    |    |          |          |                |          |          |                     |
| N2                                                                             | HS | IV | 10176680 | 10178099 | WBGene00010556 | rack-1   | K04D7.1  | 0.0818071595305661  |
| AGIWUR2243;AGIWUR11655;AGIWUR14450;AGIWUR16648;AGIWUR24842;AGIWUR43131         |    |    |          |          |                |          |          |                     |
| N2                                                                             | HS | IV | 10177968 | 10180304 | WBGene00010557 | mspn-1   | K04D7.2  | 0.118219997841915   |
| AGIWUR29722;AGIWUR30885                                                        |    |    |          |          |                |          |          |                     |
| N2                                                                             | HS | IV | 10180660 | 10183939 | WBGene00001794 | gta-1    | K04D7.3  | -0.163317128439278  |
| AGIWUR3779;AGIWUR5118;AGIWUR12585                                              |    |    |          |          |                |          |          |                     |
| N2                                                                             | HS | IV | 10183851 | 10194424 | WBGene00010558 | ptp-4    | K04D7.4  | -0.0373554972224333 |

|                                                                                                |    |    |          |          |                |           |          |                     |  |
|------------------------------------------------------------------------------------------------|----|----|----------|----------|----------------|-----------|----------|---------------------|--|
| AGIWUR7030;AGIWUR11134;AGIWUR22388;AGIWUR24476;AGIWUR27283;AGIWUR40206;AGIWUR41498;AGIWUR42425 |    |    |          |          |                |           |          |                     |  |
| N2                                                                                             | HS | IV | 10197820 | 10202993 | WBGene00001653 | gon-4     | K04D7.5  | 0.21507250786231    |  |
| AGIWUR17084                                                                                    |    |    |          |          |                |           |          |                     |  |
| N2                                                                                             | HS | IV | 10203729 | 10203964 | WBGene00045022 | K04D7.7   | K04D7.7  | -0.0583345484790745 |  |
| AGIWUR28428;AGIWUR30611                                                                        |    |    |          |          |                |           |          |                     |  |
| N2                                                                                             | HS | IV | 10204185 | 10206073 | WBGene00010559 | K04D7.6   | K04D7.6  | 0.0244344582963132  |  |
| AGIWUR27252;AGIWUR44586                                                                        |    |    |          |          |                |           |          |                     |  |
| N2                                                                                             | HS | IV | 10206189 | 10214911 | WBGene00000019 | abt-1     | C24F3.5  | 0.154263769504404   |  |
| AGIWUR25441                                                                                    |    |    |          |          |                |           |          |                     |  |
| N2                                                                                             | HS | IV | 10214986 | 10219308 | WBGene00007698 | qns-1     | C24F3.4  | -0.0999935471416036 |  |
| AGIWUR200;AGIWUR9742;AGIWUR16857;AGIWUR29306                                                   |    |    |          |          |                |           |          |                     |  |
| N2                                                                                             | HS | IV | 10219373 | 10221281 | WBGene00007696 | tram-1    | C24F3.1  | -0.232495983791988  |  |
| AGIWUR296;AGIWUR3729;AGIWUR4771;AGIWUR13767;AGIWUR14881;AGIWUR20042;AGIWUR32443;AGIWUR32814    |    |    |          |          |                |           |          |                     |  |
| N2                                                                                             | HS | IV | 10222472 | 10223745 | WBGene00007697 | C24F3.2   | C24F3.2  | 0.0409509635516372  |  |
| AGIWUR16729                                                                                    |    |    |          |          |                |           |          |                     |  |
| N2                                                                                             | HS | IV | 10224023 | 10226342 | WBGene00003531 | nas-12    | C24F3.3  | 0.306715935819344   |  |
| AGIWUR9183;AGIWUR18486;AGIWUR23887;AGIWUR39103;AGIWUR42188;AGIWUR44445                         |    |    |          |          |                |           |          |                     |  |
| N2                                                                                             | HS | IV | 10226334 | 10227639 | WBGene00008509 | F01G10.6  |          | F01G10.6            |  |
| 0.356105942986375 AGIWUR38080                                                                  |    |    |          |          |                |           |          |                     |  |
| N2                                                                                             | HS | IV | 10227987 | 10231060 | WBGene00008508 | F01G10.5  |          | F01G10.5            |  |
| 0.14145809362665 AGIWUR18121                                                                   |    |    |          |          |                |           |          |                     |  |
| N2                                                                                             | HS | IV | 10231375 | 10232552 | WBGene00008507 | F01G10.4  |          | F01G10.4            |  |
| 0.88990690602523 AGIWUR16428                                                                   |    |    |          |          |                |           |          |                     |  |
| N2                                                                                             | HS | IV | 10233321 | 10235329 | WBGene00001158 | ech-9     | F01G10.3 |                     |  |
| 0.0505695190787847 AGIWUR33647                                                                 |    |    |          |          |                |           |          |                     |  |
| N2                                                                                             | HS | IV | 10236626 | 10239176 | WBGene00001157 | ech-8     | F01G10.2 |                     |  |
| 0.141446520206745 AGIWUR30960                                                                  |    |    |          |          |                |           |          |                     |  |
| N2                                                                                             | HS | IV | 10239278 | 10241859 | WBGene00008510 | lip1-7    | F01G10.7 |                     |  |
| -0.0245298166669778 AGIWUR3315;AGIWUR11327                                                     |    |    |          |          |                |           |          |                     |  |
| N2                                                                                             | HS | IV | 10243591 | 10245752 | WBGene00008506 | tk1-1     | F01G10.1 |                     |  |
| -0.0551667576835015 AGIWUR22815;AGIWUR24020;AGIWUR41119;AGIWUR43337                            |    |    |          |          |                |           |          |                     |  |
| N2                                                                                             | HS | IV | 10246160 | 10249785 | WBGene00008512 | F01G10.10 |          | F01G10.10           |  |
| 0.196191758881449 AGIWUR10003                                                                  |    |    |          |          |                |           |          |                     |  |
| N2                                                                                             | HS | IV | 10250646 | 10255844 | WBGene00000910 | daf-14    | F01G10.8 |                     |  |
| 0.360566267363982 AGIWUR20358                                                                  |    |    |          |          |                |           |          |                     |  |
| N2                                                                                             | HS | IV | 10255755 | 10259657 | WBGene00008511 | F01G10.9  |          | F01G10.9            |  |
| 0.0429254893250359 AGIWUR6188;AGIWUR9546;AGIWUR10240;AGIWUR14914;AGIWUR44928                   |    |    |          |          |                |           |          |                     |  |
| N2                                                                                             | HS | IV | 10268882 | 10269228 | WBGene00012781 | nspd-7    | Y43C5A.1 |                     |  |
| 0.26210023695629 AGIWUR14919                                                                   |    |    |          |          |                |           |          |                     |  |

|                                                                                                                                                                                                                                          |    |    |                                                 |          |                |           |                             |
|------------------------------------------------------------------------------------------------------------------------------------------------------------------------------------------------------------------------------------------|----|----|-------------------------------------------------|----------|----------------|-----------|-----------------------------|
| N2                                                                                                                                                                                                                                       | HS | IV | 10269883                                        | 10272691 | WBGene00012782 | Y43C5A.2  | Y43C5A.2                    |
| 0.124502825634719                                                                                                                                                                                                                        |    |    | AGIWUR16256;AGIWUR17505;AGIWUR22870;AGIWUR44812 |          |                |           |                             |
| N2                                                                                                                                                                                                                                       | HS | IV | 10274036                                        | 10275411 | WBGene00012783 | Y43C5A.3  | Y43C5A.3                    |
| -0.224907028317068                                                                                                                                                                                                                       |    |    | AGIWUR4497;AGIWUR10434;AGIWUR13683              |          |                |           |                             |
| N2                                                                                                                                                                                                                                       | HS | IV | 10277264                                        | 10277918 | WBGene00044922 | Y43C5A.7  | Y43C5A.7                    |
| 0.19957526360407                                                                                                                                                                                                                         |    |    | AGIWUR34336                                     |          |                |           |                             |
| N2                                                                                                                                                                                                                                       | HS | IV | 10277989                                        | 10279501 | WBGene00012784 | Y43C5A.4  | Y43C5A.4                    |
| -0.181429696996483                                                                                                                                                                                                                       |    |    | AGIWUR28573                                     |          |                |           |                             |
| N2                                                                                                                                                                                                                                       | HS | IV | 10279457                                        | 10281582 | WBGene00006568 | thk-1     | Y43C5A.5                    |
| -0.0642938539058022                                                                                                                                                                                                                      |    |    | AGIWUR5016                                      |          |                |           |                             |
| N2                                                                                                                                                                                                                                       | HS | IV | 10281637                                        | 10284244 | WBGene00004297 | rad-51    | Y43C5A.6                    |
| -0.0885592172921612                                                                                                                                                                                                                      |    |    | AGIWUR18645;AGIWUR33535;AGIWUR36015             |          |                |           |                             |
| N2                                                                                                                                                                                                                                       | HS | IV | 10286955                                        | 10293013 | WBGene00004140 | ebax-1    | R09E10.7                    |
| -0.109563329124239                                                                                                                                                                                                                       |    |    | AGIWUR43680                                     |          |                |           |                             |
| N2                                                                                                                                                                                                                                       | HS | IV | 10292928                                        | 10294130 | WBGene00011176 | R09E10.6  | R09E10.6                    |
| 0.0478237009248943                                                                                                                                                                                                                       |    |    | AGIWUR21841                                     |          |                |           |                             |
| N2                                                                                                                                                                                                                                       | HS | IV | 10296046                                        | 10302310 | WBGene00011175 | R09E10.5  | R09E10.5                    |
| -0.14246926410275                                                                                                                                                                                                                        |    |    | AGIWUR27517                                     |          |                |           |                             |
| N2                                                                                                                                                                                                                                       | HS | IV | 10304845                                        | 10307880 | WBGene00011174 | acs-23    | R09E10.4                    |
| 0.108116460361376                                                                                                                                                                                                                        |    |    | AGIWUR1309;AGIWUR21443;AGIWUR21599              |          |                |           |                             |
| N2                                                                                                                                                                                                                                       | HS | IV | 10310116                                        | 10310429 | WBGene00011177 | R09E10.8  | R09E10.8                    |
| 0.279414311511125                                                                                                                                                                                                                        |    |    | AGIWUR29195                                     |          |                |           |                             |
| N2                                                                                                                                                                                                                                       | HS | IV | 10310772                                        | 10313670 | WBGene00011173 | acs-18    | R09E10.3                    |
| -0.389391143042552                                                                                                                                                                                                                       |    |    | AGIWUR13284                                     |          |                |           |                             |
| N2                                                                                                                                                                                                                                       | HS | IV | 10314139                                        | 10314576 | WBGene00044254 | R09E10.10 | R09E10.10                   |
| 0.038945428444908                                                                                                                                                                                                                        |    |    | AGIWUR31311;AGIWUR33716;AGIWUR36979             |          |                |           |                             |
| N2                                                                                                                                                                                                                                       | HS | IV | 10314989                                        | 10317377 | WBGene00011178 | R09E10.9  | R09E10.9                    |
| -0.0689630671796406                                                                                                                                                                                                                      |    |    | AGIWUR3962                                      |          |                |           |                             |
| N2                                                                                                                                                                                                                                       | HS | IV | 10317558                                        | 10318293 | WBGene00011172 | R09E10.2  | R09E10.2                    |
| -0.07456413452406                                                                                                                                                                                                                        |    |    | AGIWUR38681                                     |          |                |           |                             |
| N2                                                                                                                                                                                                                                       | HS | IV | 10319351                                        | 10321170 | WBGene00011171 | R09E10.1  | R09E10.1                    |
| 0.00192743642194415                                                                                                                                                                                                                      |    |    | AGIWUR35003                                     |          |                |           |                             |
| N2                                                                                                                                                                                                                                       | HS | IV | 10324255                                        | 10350217 | WBGene00006779 | unc-43    | K11E8.1 -0.0856261056194025 |
| AGIWUR4340;AGIWUR6349;AGIWUR7878;AGIWUR7921;AGIWUR8651;AGIWUR9769;AGIWUR9871;AGIWUR10142;AGIWUR10176;AGIWUR11503;AGIWUR12155;AGIWUR18114;AGIWUR20811;AGIWUR30344;AGIWUR37623;AGIWUR39280;AGIWUR39753;AGIWUR41763;AGIWUR42419;AGIWUR44510 |    |    |                                                 |          |                |           |                             |
| N2                                                                                                                                                                                                                                       | HS | IV | 10351445                                        | 10352343 | WBGene00012785 | Y43C5B.2  | Y43C5B.2                    |
| 0.148579505202711                                                                                                                                                                                                                        |    |    | AGIWUR22600                                     |          |                |           |                             |
| N2                                                                                                                                                                                                                                       | HS | IV | 10353167                                        | 10355120 | WBGene00012786 | Y43C5B.3  | Y43C5B.3                    |

|                                                                                                         |                                     |          |                |          |          |                     |  |
|---------------------------------------------------------------------------------------------------------|-------------------------------------|----------|----------------|----------|----------|---------------------|--|
| 0.155320020748874                                                                                       | AGIWUR29043                         |          |                |          |          |                     |  |
| N2 HS IV                                                                                                | 10355046                            | 10357170 | WBGene00011236 | R11A8.1  | R11A8.1  | -0.0156417367043957 |  |
| AGIWUR20547                                                                                             |                                     |          |                |          |          |                     |  |
| N2 HS IV                                                                                                | 10358141                            | 10360219 | WBGene00011237 | gkow-1   | R11A8.2  | 0.198786783608689   |  |
| AGIWUR16364                                                                                             |                                     |          |                |          |          |                     |  |
| N2 HS IV                                                                                                | 10360800                            | 10363331 | WBGene00011238 | ugt-59   | R11A8.3  | 0.148878416992464   |  |
| AGIWUR31384                                                                                             |                                     |          |                |          |          |                     |  |
| N2 HS IV                                                                                                | 10366333                            | 10367790 | WBGene00011239 | pges-2   | R11A8.5  | 0.332661831290146   |  |
| AGIWUR18136                                                                                             |                                     |          |                |          |          |                     |  |
| N2 HS IV                                                                                                | 10368607                            | 10373136 | WBGene00002152 | iars-1   | R11A8.6  | -0.158624964403922  |  |
| AGIWUR822;AGIWUR2745;AGIWUR7114                                                                         |                                     |          |                |          |          |                     |  |
| N2 HS IV                                                                                                | 10372638                            | 10373821 | WBGene00011241 | mpz-5    | R11A8.8  | -0.0151020357661076 |  |
| AGIWUR16355;AGIWUR25461                                                                                 |                                     |          |                |          |          |                     |  |
| N2 HS IV                                                                                                | 10374905                            | 10387318 | WBGene00011240 | R11A8.7  | R11A8.7  | -0.299422137560739  |  |
| AGIWUR902;AGIWUR3127;AGIWUR9042;AGIWUR10806;AGIWUR18248;AGIWUR18961;AGIWUR24502;AGIWUR29166;AGIWUR43502 |                                     |          |                |          |          |                     |  |
| N2 HS IV                                                                                                | 10387413                            | 10388345 | WBGene00003064 | lpd-8    | R10H10.1 |                     |  |
| 0.272852485885331                                                                                       | AGIWUR20350                         |          |                |          |          |                     |  |
| N2 HS IV                                                                                                | 10388483                            | 10393294 | WBGene00011222 | R10H10.3 |          | R10H10.3            |  |
| 0.263014452949974                                                                                       | AGIWUR6660;AGIWUR15226;AGIWUR31267  |          |                |          |          |                     |  |
| N2 HS IV                                                                                                | 10394591                            | 10394958 | WBGene00011223 | R10H10.4 |          | R10H10.4            |  |
| 0.286885296177604                                                                                       | AGIWUR22287                         |          |                |          |          |                     |  |
| N2 HS IV                                                                                                | 10404012                            | 10408530 | WBGene00001669 | gpa-7    | R10H10.5 |                     |  |
| 0.034330258482381                                                                                       | AGIWUR26769                         |          |                |          |          |                     |  |
| N2 HS IV                                                                                                | 10408703                            | 10409477 | WBGene00011224 | R10H10.6 |          | R10H10.6            |  |
| 0.294734384548065                                                                                       | AGIWUR6359                          |          |                |          |          |                     |  |
| N2 HS IV                                                                                                | 10409985                            | 10413928 | WBGene00011225 | R10H10.7 |          | R10H10.7            |  |
| -0.0461906005100978                                                                                     | AGIWUR12860                         |          |                |          |          |                     |  |
| N2 HS IV                                                                                                | 10414030                            | 10417881 | WBGene00008733 | F13B12.6 |          | F13B12.6            |  |
| -0.201959749017531                                                                                      | AGIWUR8525;AGIWUR10975;AGIWUR19192  |          |                |          |          |                     |  |
| N2 HS IV                                                                                                | 10422610                            | 10424635 | WBGene00008729 | F13B12.1 |          | F13B12.1            |  |
| 0.0362748346059032                                                                                      | AGIWUR21607;AGIWUR33993;AGIWUR37529 |          |                |          |          |                     |  |
| N2 HS IV                                                                                                | 10426231                            | 10429110 | WBGene00008730 | F13B12.2 |          | F13B12.2            |  |
| 0.224729160834796                                                                                       | AGIWUR28816;AGIWUR37040;AGIWUR38086 |          |                |          |          |                     |  |
| N2 HS IV                                                                                                | 10436708                            | 10438410 | WBGene00002084 | ins-1    | F13B12.5 |                     |  |
| -0.0354331923225919                                                                                     | AGIWUR33522;AGIWUR34508;AGIWUR37691 |          |                |          |          |                     |  |
| N2 HS IV                                                                                                | 10439123                            | 10443819 | WBGene00008731 | F13B12.3 |          | F13B12.3            |  |
| 0.166569194470756                                                                                       | AGIWUR6185;AGIWUR43439              |          |                |          |          |                     |  |
| N2 HS IV                                                                                                | 10444094                            | 10444584 | WBGene00008734 | F13B12.7 |          | F13B12.7            |  |
| 0.218096334549064                                                                                       | AGIWUR41881                         |          |                |          |          |                     |  |

|    |    |    |                                                                         |                                                                       |                |          |                             |
|----|----|----|-------------------------------------------------------------------------|-----------------------------------------------------------------------|----------------|----------|-----------------------------|
| N2 | HS | IV | 10444583                                                                | 10449899                                                              | WBGene00008732 | F13B12.4 | F13B12.4                    |
|    |    |    | 0.317515223304326                                                       | AGIWUR16795                                                           |                |          |                             |
| N2 | HS | IV | 10450802                                                                | 10453098                                                              | WBGene00008490 | F01D4.8  | F01D4.8 0.100415594597835   |
|    |    |    | AGIWUR41212                                                             |                                                                       |                |          |                             |
| N2 | HS | IV | 10454432                                                                | 10457237                                                              | WBGene00008489 | srb-17   | F01D4.7 0.0445963889551146  |
|    |    |    | AGIWUR4263;AGIWUR34342;AGIWUR35770                                      |                                                                       |                |          |                             |
| N2 | HS | IV | 10458863                                                                | 10461766                                                              | WBGene00003167 | mec-3    | F01D4.6 0.180363907411949   |
|    |    |    | AGIWUR1570;AGIWUR4280;AGIWUR9851;AGIWUR12694                            |                                                                       |                |          |                             |
| N2 | HS | IV | 10464588                                                                | 10467240                                                              | WBGene00008485 | ugt-43   | F01D4.1 -0.0111615964341336 |
|    |    |    | AGIWUR3944;AGIWUR9096;AGIWUR16273;AGIWUR17471;AGIWUR27317;AGIWUR30495   |                                                                       |                |          |                             |
| N2 | HS | IV | 10469741                                                                | 10471899                                                              | WBGene00008486 | ugt-44   | F01D4.2 0.47105891501938    |
|    |    |    | AGIWUR4885                                                              |                                                                       |                |          |                             |
| N2 | HS | IV | 10472778                                                                | 10478168                                                              | WBGene00008491 | bgnt-1.1 | F01D4.9                     |
|    |    |    | 0.114677385858608                                                       | AGIWUR42817                                                           |                |          |                             |
| N2 | HS | IV | 10478450                                                                | 10481844                                                              | WBGene00001189 | egl-21   | F01D4.4 -0.143597875993833  |
|    |    |    | AGIWUR782;AGIWUR10945;AGIWUR21638;AGIWUR30012                           |                                                                       |                |          |                             |
| N2 | HS | IV | 10482629                                                                | 10483655                                                              | WBGene00008488 | F01D4.5  | F01D4.5 0.116360284578573   |
|    |    |    | AGIWUR31233;AGIWUR39452                                                 |                                                                       |                |          |                             |
| N2 | HS | IV | 10484110                                                                | 10492952                                                              | WBGene00000419 | ced-5    | C02F4.1 -0.0513370124410901 |
|    |    |    | AGIWUR14004;AGIWUR17614;AGIWUR20229;AGIWUR21408;AGIWUR36560;AGIWUR37218 |                                                                       |                |          |                             |
| N2 | HS | IV | 10493071                                                                | 10501599                                                              | WBGene00006527 | tax-6    | C02F4.2 -0.0948697063608686 |
|    |    |    | AGIWUR16185;AGIWUR24485                                                 |                                                                       |                |          |                             |
| N2 | HS | IV | 10513887                                                                | 10515228                                                              | WBGene00007264 | C02F4.4  | C02F4.4 0.221622716920734   |
|    |    |    | AGIWUR24466                                                             |                                                                       |                |          |                             |
| N2 | HS | IV | 10521422                                                                | 10530597                                                              | WBGene00000288 | cal-4    | T07G12.1                    |
|    |    |    | 0.0123675105558361                                                      | AGIWUR9574;AGIWUR15671;AGIWUR30680                                    |                |          |                             |
| N2 | HS | IV | 10533943                                                                | 10536442                                                              | WBGene00011594 | T07G12.3 | T07G12.3                    |
|    |    |    | 0.229499743238819                                                       | AGIWUR2713                                                            |                |          |                             |
| N2 | HS | IV | 10541495                                                                | 10545091                                                              | WBGene00011596 | T07G12.5 | T07G12.5                    |
|    |    |    | -0.0445532850033423                                                     | AGIWUR14244                                                           |                |          |                             |
| N2 | HS | IV | 10547088                                                                | 10555442                                                              | WBGene00011597 | zim-1    | T07G12.6                    |
|    |    |    | -0.0322196895852302                                                     | AGIWUR9315;AGIWUR9412;AGIWUR20517;AGIWUR36426;AGIWUR43050;AGIWUR45065 |                |          |                             |
| N2 | HS | IV | 10555247                                                                | 10558221                                                              | WBGene00011600 | zim-2    | T07G12.10                   |
|    |    |    | 0.135220499345508                                                       | AGIWUR17323                                                           |                |          |                             |
| N2 | HS | IV | 10558721                                                                | 10561130                                                              | WBGene00011601 | zim-3    | T07G12.11                   |
|    |    |    | 0.158196793207182                                                       | AGIWUR20579                                                           |                |          |                             |
| N2 | HS | IV | 10561905                                                                | 10563947                                                              | WBGene00001867 | him-8    | T07G12.12                   |
|    |    |    | -0.0488299330605422                                                     | AGIWUR11669;AGIWUR17932;AGIWUR29184                                   |                |          |                             |
| N2 | HS | IV | 10576350                                                                | 10578288                                                              | WBGene00001163 | efn-2    | C43F9.8 0.0989997470523196  |

|                                                                                                                                                                     |    |    |                    |                                    |                |          |                             |
|---------------------------------------------------------------------------------------------------------------------------------------------------------------------|----|----|--------------------|------------------------------------|----------------|----------|-----------------------------|
| AGIWUR576                                                                                                                                                           |    |    |                    |                                    |                |          |                             |
| N2                                                                                                                                                                  | HS | IV | 10578667           | 10581786                           | WBGene00008076 | lgc-43   | C43F9.9 0.251469149525178   |
| AGIWUR35328                                                                                                                                                         |    |    |                    |                                    |                |          |                             |
| N2                                                                                                                                                                  | HS | IV | 10584537           | 10587400                           | WBGene00008077 | oac-8    | C43F9.10                    |
|                                                                                                                                                                     |    |    | 0.215027280405347  | AGIWUR11560                        |                |          |                             |
| N2                                                                                                                                                                  | HS | IV | 10587553           | 10589147                           | WBGene00008072 | C43F9.4  | C43F9.4 0.00287974399174207 |
| AGIWUR21238;AGIWUR31087;AGIWUR37630                                                                                                                                 |    |    |                    |                                    |                |          |                             |
| N2                                                                                                                                                                  | HS | IV | 10589294           | 10590749                           | WBGene00008073 | C43F9.5  | C43F9.5 0.0392691584254194  |
| AGIWUR26479                                                                                                                                                         |    |    |                    |                                    |                |          |                             |
| N2                                                                                                                                                                  | HS | IV | 10590925           | 10593042                           | WBGene00008074 | nkb-2    | C43F9.6 0.0476178421421647  |
| AGIWUR40207                                                                                                                                                         |    |    |                    |                                    |                |          |                             |
| N2                                                                                                                                                                  | HS | IV | 10593068           | 10593575                           | WBGene00008075 | C43F9.7  | C43F9.7 0.0593819289847808  |
| AGIWUR30846                                                                                                                                                         |    |    |                    |                                    |                |          |                             |
| N2                                                                                                                                                                  | HS | IV | 10596805           | 10600030                           | WBGene00045024 | C43F9.11 | C43F9.11                    |
| 0.0288274320490389                                                                                                                                                  |    |    |                    |                                    |                |          |                             |
| AGIWUR2244;AGIWUR3422;AGIWUR3911;AGIWUR5466;AGIWUR11308;AGIWUR17380;AGIWUR17551;AGIWUR20450;AGIWUR20607;AGIWUR29357;AGIWUR34540;AGIWUR36202;AGIWUR36488;AGIWUR40584 |    |    |                    |                                    |                |          |                             |
| N2                                                                                                                                                                  | HS | IV | 10600314           | 10601852                           | WBGene00011179 | R09H10.1 | R09H10.1                    |
|                                                                                                                                                                     |    |    | 0.198352054987554  | AGIWUR43641                        |                |          |                             |
| N2                                                                                                                                                                  | HS | IV | 10602944           | 10606894                           | WBGene00011180 | R09H10.2 | R09H10.2                    |
|                                                                                                                                                                     |    |    | 0.158875108832929  | AGIWUR447                          |                |          |                             |
| N2                                                                                                                                                                  | HS | IV | 10606902           | 10608861                           | WBGene00011181 | R09H10.3 | R09H10.3                    |
|                                                                                                                                                                     |    |    | 0.110524784486968  | AGIWUR27996                        |                |          |                             |
| N2                                                                                                                                                                  | HS | IV | 10608575           | 10609744                           | WBGene00011183 | R09H10.6 | R09H10.6                    |
|                                                                                                                                                                     |    |    | 0.256195595514401  | AGIWUR20822                        |                |          |                             |
| N2                                                                                                                                                                  | HS | IV | 10615427           | 10620958                           | WBGene00004228 | ptr-14   | R09H10.4                    |
|                                                                                                                                                                     |    |    | -0.150566285750365 | AGIWUR26151                        |                |          |                             |
| N2                                                                                                                                                                  | HS | IV | 10621111           | 10621832                           | WBGene00011184 | R09H10.7 | R09H10.7                    |
|                                                                                                                                                                     |    |    | 0.125454941511288  | AGIWUR33527                        |                |          |                             |
| N2                                                                                                                                                                  | HS | IV | 10621684           | 10628861                           | WBGene00011182 | R09H10.5 | R09H10.5                    |
|                                                                                                                                                                     |    |    | -0.101355749855453 | AGIWUR7981;AGIWUR11151;AGIWUR18797 |                |          |                             |
| N2                                                                                                                                                                  | HS | IV | 10629431           | 10631245                           | WBGene00044977 | F56C4.4  | F56C4.4 0.00464777012767259 |
| AGIWUR4833;AGIWUR11064;AGIWUR20553;AGIWUR32137                                                                                                                      |    |    |                    |                                    |                |          |                             |
| N2                                                                                                                                                                  | HS | IV | 10637060           | 10639213                           | WBGene00010144 | F56C4.1  | F56C4.1 0.124655951027233   |
| AGIWUR2736                                                                                                                                                          |    |    |                    |                                    |                |          |                             |
| N2                                                                                                                                                                  | HS | IV | 10639277           | 10642690                           | WBGene00010145 | F56C4.2  | F56C4.2 0.0183125895770706  |
| AGIWUR21153                                                                                                                                                         |    |    |                    |                                    |                |          |                             |
| N2                                                                                                                                                                  | HS | IV | 10642912           | 10654147                           | WBGene00010146 | glb-19   | F56C4.3 0.135128827463589   |
| AGIWUR12731                                                                                                                                                         |    |    |                    |                                    |                |          |                             |

|                                                                       |    |    |          |          |                |         |         |                     |
|-----------------------------------------------------------------------|----|----|----------|----------|----------------|---------|---------|---------------------|
| N2                                                                    | HS | IV | 10656874 | 10660774 | WBGene00010646 | K08C7.1 | K08C7.1 | 0.0358889284539998  |
| AGIWUR7095                                                            |    |    |          |          |                |         |         |                     |
| N2                                                                    | HS | IV | 10661857 | 10664404 | WBGene00001476 | fmo-1   | K08C7.2 | 0.494924901832899   |
| AGIWUR44143                                                           |    |    |          |          |                |         |         |                     |
| N2                                                                    | HS | IV | 10664412 | 10665685 | WBGene00010649 | K08C7.7 | K08C7.7 | 0.334973184296945   |
| AGIWUR3375                                                            |    |    |          |          |                |         |         |                     |
| N2                                                                    | HS | IV | 10666827 | 10679289 | WBGene00001328 | epi-1   | K08C7.3 | 0.0223930303227817  |
| AGIWUR26700                                                           |    |    |          |          |                |         |         |                     |
| N2                                                                    | HS | IV | 10679383 | 10680475 | WBGene00010647 | K08C7.4 | K08C7.4 | 0.118391139287589   |
| AGIWUR4296;AGIWUR4337;AGIWUR23573;AGIWUR30664;AGIWUR41434;AGIWUR43000 |    |    |          |          |                |         |         |                     |
| N2                                                                    | HS | IV | 10682524 | 10684385 | WBGene00001477 | fmo-2   | K08C7.5 | -0.653524011550946  |
| AGIWUR10619;AGIWUR14319                                               |    |    |          |          |                |         |         |                     |
| N2                                                                    | HS | IV | 10684432 | 10685894 | WBGene00010648 | K08C7.6 | K08C7.6 | 0.220512351328148   |
| AGIWUR34138                                                           |    |    |          |          |                |         |         |                     |
| N2                                                                    | HS | IV | 10687592 | 10688135 | WBGene00011289 | R102.2  | R102.2  | 0.11333670775274    |
| AGIWUR40102                                                           |    |    |          |          |                |         |         |                     |
| N2                                                                    | HS | IV | 10689640 | 10690309 | WBGene00194984 | R102.15 | R102.15 | -0.140334385676296  |
| AGIWUR2156;AGIWUR35917;AGIWUR40196                                    |    |    |          |          |                |         |         |                     |
| N2                                                                    | HS | IV | 10690444 | 10691789 | WBGene00011290 | R102.3  | R102.3  | 0.355430513135087   |
| AGIWUR24495;AGIWUR25359;AGIWUR30903                                   |    |    |          |          |                |         |         |                     |
| N2                                                                    | HS | IV | 10691991 | 10695303 | WBGene00011291 | R102.4  | R102.4  | 0.210313085126813   |
| AGIWUR37470                                                           |    |    |          |          |                |         |         |                     |
| N2                                                                    | HS | IV | 10695309 | 10697071 | WBGene00011292 | R102.5  | R102.5  | 0.0844221119724811  |
| AGIWUR29945                                                           |    |    |          |          |                |         |         |                     |
| N2                                                                    | HS | IV | 10705463 | 10707313 | WBGene00011297 | R102.10 | R102.10 | 0.151160895500791   |
| AGIWUR149                                                             |    |    |          |          |                |         |         |                     |
| N2                                                                    | HS | IV | 10710057 | 10711794 | WBGene00011296 | glb-21  | R102.9  | -0.0376529926530287 |
| AGIWUR23699                                                           |    |    |          |          |                |         |         |                     |
| N2                                                                    | HS | IV | 10716648 | 10721755 | WBGene00003568 | ncx-3   | ZC168.1 | -0.0832832064658753 |
| AGIWUR15067                                                           |    |    |          |          |                |         |         |                     |
| N2                                                                    | HS | IV | 10728572 | 10729003 | WBGene00013856 | ZC168.2 | ZC168.2 |                     |
| -0.00251372547846884 AGIWUR30191                                      |    |    |          |          |                |         |         |                     |
| N2                                                                    | HS | IV | 10732832 | 10734632 | WBGene00013857 | orc-5   | ZC168.3 | 0.0757940583544414  |
| AGIWUR27343                                                           |    |    |          |          |                |         |         |                     |
| N2                                                                    | HS | IV | 10735259 | 10737177 | WBGene00000865 | cyb-1   | ZC168.4 | 0.0783790946225871  |
| AGIWUR26407                                                           |    |    |          |          |                |         |         |                     |
| N2                                                                    | HS | IV | 10737474 | 10738189 | WBGene00001730 | grl-21  | ZC168.5 | 0.202748290875366   |
| AGIWUR10750;AGIWUR29076;AGIWUR30387;AGIWUR33665;AGIWUR33768           |    |    |          |          |                |         |         |                     |
| N2                                                                    | HS | IV | 10738204 | 10738658 | WBGene00013858 | ssp-34  | ZC168.6 | -0.132911936184     |





|                                                     |    |    |          |          |                |          |         |                     |
|-----------------------------------------------------|----|----|----------|----------|----------------|----------|---------|---------------------|
| N2                                                  | HS | IV | 10852669 | 10855366 | WBGene00011718 | T11G6.3  | T11G6.3 | 0.646253361542072   |
| AGIWUR28703                                         |    |    |          |          |                |          |         |                     |
| N2                                                  | HS | IV | 10855485 | 10858559 | WBGene00011717 | T11G6.2  | T11G6.2 | 0.253479706613646   |
| AGIWUR12551                                         |    |    |          |          |                |          |         |                     |
| N2                                                  | HS | IV | 10858957 | 10861295 | WBGene00002001 | hars-1   | T11G6.1 | -0.111310785826209  |
| AGIWUR14510;AGIWUR14542;AGIWUR22495                 |    |    |          |          |                |          |         |                     |
| N2                                                  | HS | IV | 10861402 | 10864232 | WBGene00011722 | T11G6.8  | T11G6.8 |                     |
| -0.00252580360285393 AGIWUR34117                    |    |    |          |          |                |          |         |                     |
| N2                                                  | HS | IV | 10864331 | 10873632 | WBGene00008750 | F13E9.1  | F13E9.1 | -0.0529085379573546 |
| AGIWUR12104;AGIWUR13811;AGIWUR16606                 |    |    |          |          |                |          |         |                     |
| N2                                                  | HS | IV | 10873673 | 10874627 | WBGene00008761 | F13E9.12 |         | F13E9.12            |
| 0.258528883252799 AGIWUR31437                       |    |    |          |          |                |          |         |                     |
| N2                                                  | HS | IV | 10877144 | 10877296 | WBGene00008751 | fipr-14  | F13E9.2 | 0.0116812294870812  |
| AGIWUR28316                                         |    |    |          |          |                |          |         |                     |
| N2                                                  | HS | IV | 10877836 | 10879727 | WBGene00008755 | sdz-13   | F13E9.6 | -0.0488524978639573 |
| AGIWUR10549                                         |    |    |          |          |                |          |         |                     |
| N2                                                  | HS | IV | 10881549 | 10882523 | WBGene00044797 | F13E9.13 |         | F13E9.13            |
| -0.240259302848973 AGIWUR13634                      |    |    |          |          |                |          |         |                     |
| N2                                                  | HS | IV | 10882972 | 10884363 | WBGene00008754 | F13E9.5  | F13E9.5 | 0.0198086939113296  |
| AGIWUR4319                                          |    |    |          |          |                |          |         |                     |
| N2                                                  | HS | IV | 10885238 | 10886015 | WBGene00008759 | F13E9.10 |         | F13E9.10            |
| 0.199685106156219 AGIWUR20583                       |    |    |          |          |                |          |         |                     |
| N2                                                  | HS | IV | 10889471 | 10889878 | WBGene00045208 | F13E9.15 |         | F13E9.15            |
| -0.132801711054015 AGIWUR34664                      |    |    |          |          |                |          |         |                     |
| N2                                                  | HS | IV | 10891333 | 10892093 | WBGene00045207 | F13E9.14 |         | F13E9.14            |
| 0.134840137687773 AGIWUR7566;AGIWUR9516;AGIWUR42487 |    |    |          |          |                |          |         |                     |
| N2                                                  | HS | IV | 10893648 | 10894355 | WBGene00008757 | F13E9.8  | F13E9.8 | -0.0151087895866944 |
| AGIWUR24368                                         |    |    |          |          |                |          |         |                     |
| N2                                                  | HS | IV | 10895225 | 10896612 | WBGene00008753 | F13E9.4  | F13E9.4 | -0.0249571573881422 |
| AGIWUR12837                                         |    |    |          |          |                |          |         |                     |
| N2                                                  | HS | IV | 10897655 | 10899180 | WBGene00008758 | F13E9.9  | F13E9.9 | 0.114752636412794   |
| AGIWUR22978                                         |    |    |          |          |                |          |         |                     |
| N2                                                  | HS | IV | 10900370 | 10901386 | WBGene00014006 | ZK596.1  | ZK596.1 | -0.387817167099744  |
| AGIWUR11142                                         |    |    |          |          |                |          |         |                     |
| N2                                                  | HS | IV | 10901913 | 10904382 | WBGene00014008 | ZK596.3  | ZK596.3 | 0.113514137047284   |
| AGIWUR13858                                         |    |    |          |          |                |          |         |                     |
| N2                                                  | HS | IV | 10908131 | 10909306 | WBGene00014007 | ZK596.2  | ZK596.2 | -0.109091555314345  |
| AGIWUR43993                                         |    |    |          |          |                |          |         |                     |
| N2                                                  | HS | IV | 10909915 | 10913078 | WBGene00014001 | pyk-2    | ZK593.1 | 0.246385801112826   |

|                                                                                                           |    |    |          |          |                |           |                             |
|-----------------------------------------------------------------------------------------------------------|----|----|----------|----------|----------------|-----------|-----------------------------|
| AGIWUR19204                                                                                               |    |    |          |          |                |           |                             |
| N2                                                                                                        | HS | IV | 10913361 | 10914582 | WBGene00014002 | ZK593.2   | ZK593.2 0.160568720142027   |
| AGIWUR208                                                                                                 |    |    |          |          |                |           |                             |
| N2                                                                                                        | HS | IV | 10916597 | 10917718 | WBGene00014003 | ZK593.3   | ZK593.3 0.365167803106505   |
| AGIWUR15333                                                                                               |    |    |          |          |                |           |                             |
| N2                                                                                                        | HS | IV | 10920075 | 10926807 | WBGene00004319 | rbr-2     | ZK593.4 -0.268941143562837  |
| AGIWUR10324;AGIWUR33503                                                                                   |    |    |          |          |                |           |                             |
| N2                                                                                                        | HS | IV | 10926730 | 10933203 | WBGene00001017 | dnc-1     | ZK593.5 0.0144756682480232  |
| AGIWUR4036;AGIWUR15883;AGIWUR30150                                                                        |    |    |          |          |                |           |                             |
| N2                                                                                                        | HS | IV | 10933502 | 10934200 | WBGene00003081 | lsm-7     | ZK593.7 0.33490105184362    |
| AGIWUR7816                                                                                                |    |    |          |          |                |           |                             |
| N2                                                                                                        | HS | IV | 10934186 | 10935914 | WBGene00002981 | lgg-2     | ZK593.6 -0.0608758929538826 |
| AGIWUR5996;AGIWUR9128;AGIWUR16430;AGIWUR18825;AGIWUR28298;AGIWUR28809;AGIWUR32345;AGIWUR36092;AGIWUR37432 |    |    |          |          |                |           |                             |
| N2                                                                                                        | HS | IV | 10937454 | 10939935 | WBGene00014004 | fic-1     | ZK593.8 -0.37516256970572   |
| AGIWUR10636                                                                                               |    |    |          |          |                |           |                             |
| N2                                                                                                        | HS | IV | 10940959 | 10942869 | WBGene00014005 | ZK593.9   | ZK593.9 0.0947042318580635  |
| AGIWUR27344                                                                                               |    |    |          |          |                |           |                             |
| N2                                                                                                        | HS | IV | 10949767 | 10951133 | WBGene00013474 | Y69E1A.2  | Y69E1A.2                    |
| 0.138885074938258 AGIWUR34021                                                                             |    |    |          |          |                |           |                             |
| N2                                                                                                        | HS | IV | 10956863 | 10957698 | WBGene00013477 | Y69E1A.5  | Y69E1A.5                    |
| 0.107839015573003 AGIWUR15234                                                                             |    |    |          |          |                |           |                             |
| N2                                                                                                        | HS | IV | 10958372 | 10961208 | WBGene00005531 | sri-19    | Y69E1A.6                    |
| -0.0827588849306333 AGIWUR24828;AGIWUR40891                                                               |    |    |          |          |                |           |                             |
| N2                                                                                                        | HS | IV | 10961355 | 10966459 | WBGene00000171 | aqp-3     | Y69E1A.7                    |
| 0.251339883860702 AGIWUR16033                                                                             |    |    |          |          |                |           |                             |
| N2                                                                                                        | HS | IV | 10966590 | 10968166 | WBGene00013478 | Y69E1A.8  | Y69E1A.8                    |
| 0.131988505318409 AGIWUR36844                                                                             |    |    |          |          |                |           |                             |
| N2                                                                                                        | HS | IV | 10982068 | 10985030 | WBGene00012794 | Y43E12A.2 | Y43E12A.2                   |
| 0.0554059151335755 AGIWUR19508;AGIWUR21438                                                                |    |    |          |          |                |           |                             |
| N2                                                                                                        | HS | IV | 10990999 | 10994137 | WBGene00008776 | F13H10.5  | F13H10.5                    |
| -0.111591200708965 AGIWUR23815;AGIWUR29827;AGIWUR37699                                                    |    |    |          |          |                |           |                             |
| N2                                                                                                        | HS | IV | 11002119 | 11003801 | WBGene00045056 | F13H10.9  | F13H10.9                    |
| 0.200721942924165 AGIWUR837;AGIWUR25734;AGIWUR43446                                                       |    |    |          |          |                |           |                             |
| N2                                                                                                        | HS | IV | 11004573 | 11005070 | WBGene00008773 | F13H10.1  | F13H10.1                    |
| 0.0903052988459523 AGIWUR8767                                                                             |    |    |          |          |                |           |                             |
| N2                                                                                                        | HS | IV | 11009296 | 11010103 | WBGene00008777 | F13H10.6  | F13H10.6                    |
| 0.0316234789427874 AGIWUR18010                                                                            |    |    |          |          |                |           |                             |
| N2                                                                                                        | HS | IV | 11009981 | 11012020 | WBGene00003586 | ndx-9     | F13H10.2                    |
| -0.265971104037959 AGIWUR43255                                                                            |    |    |          |          |                |           |                             |

|    |    |    |                                                                                                                                                  |                                                           |                |          |                             |
|----|----|----|--------------------------------------------------------------------------------------------------------------------------------------------------|-----------------------------------------------------------|----------------|----------|-----------------------------|
| N2 | HS | IV | 11012119                                                                                                                                         | 11015883                                                  | WBGene00008774 | F13H10.3 | F13H10.3                    |
|    |    |    | 0.226739655813347                                                                                                                                | AGIWUR736                                                 |                |          |                             |
| N2 | HS | IV | 11016229                                                                                                                                         | 11021902                                                  | WBGene00008775 | mogs-1   | F13H10.4                    |
|    |    |    | -0.0680694883205719                                                                                                                              | AGIWUR8586;AGIWUR8727;AGIWUR15668;AGIWUR24442;AGIWUR44599 |                |          |                             |
| N2 | HS | IV | 11022603                                                                                                                                         | 11025870                                                  | WBGene00000109 | alh-3    | F36H1.6 -0.18944144203735   |
|    |    |    | AGIWUR5136;AGIWUR12312;AGIWUR17773;AGIWUR30861;AGIWUR35885;AGIWUR37536                                                                           |                                                           |                |          |                             |
| N2 | HS | IV | 11028477                                                                                                                                         | 11029105                                                  | WBGene00009494 | hrg-5    | F36H1.9 0.0263460834031903  |
|    |    |    | AGIWUR23826                                                                                                                                      |                                                           |                |          |                             |
| N2 | HS | IV | 11030160                                                                                                                                         | 11031082                                                  | WBGene00009493 | hrg-4    | F36H1.5 0.469314105062272   |
|    |    |    | AGIWUR2400                                                                                                                                       |                                                           |                |          |                             |
| N2 | HS | IV | 11031171                                                                                                                                         | 11033581                                                  | WBGene00009495 | hrg-6    | F36H1.10                    |
|    |    |    | 0.0634540783170188                                                                                                                               | AGIWUR18494                                               |                |          |                             |
| N2 | HS | IV | 11036548                                                                                                                                         | 11038148                                                  | WBGene00001426 | fkf-1    | F36H1.1 0.0445792252624226  |
|    |    |    | AGIWUR3040;AGIWUR12315;AGIWUR21537;AGIWUR37162                                                                                                   |                                                           |                |          |                             |
| N2 | HS | IV | 11038662                                                                                                                                         | 11047422                                                  | WBGene00006490 | kdn-1    | F36H1.2 0.0213723722523795  |
|    |    |    | AGIWUR7040;AGIWUR17878;AGIWUR22372;AGIWUR28170;AGIWUR36853;AGIWUR43480                                                                           |                                                           |                |          |                             |
| N2 | HS | IV | 11049171                                                                                                                                         | 11049632                                                  | WBGene00009496 | F36H1.11 | F36H1.11                    |
|    |    |    | 0.146923993646793                                                                                                                                | AGIWUR32032                                               |                |          |                             |
| N2 | HS | IV | 11050128                                                                                                                                         | 11052430                                                  | WBGene00009492 | F36H1.3  | F36H1.3 -0.112620308394291  |
|    |    |    | AGIWUR19348                                                                                                                                      |                                                           |                |          |                             |
| N2 | HS | IV | 11052816                                                                                                                                         | 11053634                                                  | WBGene00009497 | F36H1.12 | F36H1.12                    |
|    |    |    | -0.0958483145253251                                                                                                                              | AGIWUR34392                                               |                |          |                             |
| N2 | HS | IV | 11054308                                                                                                                                         | 11063613                                                  | WBGene00002992 | lin-3    | F36H1.4 -0.0376999882022577 |
|    |    |    | AGIWUR54;AGIWUR748;AGIWUR2711;AGIWUR5458;AGIWUR5804;AGIWUR6726;AGIWUR7349;AGIWUR8580;AGIWUR16415;AGIWUR26047;AGIWUR26767;AGIWUR40552;AGIWUR42101 |                                                           |                |          |                             |
| N2 | HS | IV | 11063512                                                                                                                                         | 11064152                                                  | WBGene00012382 | ttr-16   | Y5F2A.1 0.209492279534398   |
|    |    |    | AGIWUR35777                                                                                                                                      |                                                           |                |          |                             |
| N2 | HS | IV | 11066018                                                                                                                                         | 11067072                                                  | WBGene00012383 | ttr-17   | Y5F2A.2 -0.0151236192058803 |
|    |    |    | AGIWUR20365;AGIWUR35910;AGIWUR38875                                                                                                              |                                                           |                |          |                             |
| N2 | HS | IV | 11069387                                                                                                                                         | 11070950                                                  | WBGene00012384 | Y5F2A.3  | Y5F2A.3 -0.0112848350317636 |
|    |    |    | AGIWUR8611;AGIWUR10963;AGIWUR19805;AGIWUR20173;AGIWUR21012;AGIWUR29326;AGIWUR35458;AGIWUR43963                                                   |                                                           |                |          |                             |
| N2 | HS | IV | 11076085                                                                                                                                         | 11078582                                                  | WBGene00012385 | Y5F2A.4  | Y5F2A.4 0.092060581235021   |
|    |    |    | AGIWUR43902                                                                                                                                      |                                                           |                |          |                             |
| N2 | HS | IV | 11078677                                                                                                                                         | 11081055                                                  | WBGene00010882 | atg-7    | M7.5 0.0268527749733076     |
|    |    |    | AGIWUR36657;AGIWUR43525                                                                                                                          |                                                           |                |          |                             |
| N2 | HS | IV | 11080989                                                                                                                                         | 11082253                                                  | WBGene00002344 | let-70   | M7.1 -0.137469686319617     |
|    |    |    | AGIWUR11476;AGIWUR18418;AGIWUR19817;AGIWUR24836;AGIWUR40767;AGIWUR43507                                                                          |                                                           |                |          |                             |
| N2 | HS | IV | 11083735                                                                                                                                         | 11086050                                                  | WBGene00002214 | klc-1    | M7.2 0.0253444089809673     |
|    |    |    | AGIWUR2976;AGIWUR21767;AGIWUR40967;AGIWUR41854                                                                                                   |                                                           |                |          |                             |

|                                                                         |    |    |          |          |                |          |          |                     |
|-------------------------------------------------------------------------|----|----|----------|----------|----------------|----------|----------|---------------------|
| N2                                                                      | HS | IV | 11086074 | 11092552 | WBGene00000246 | bcc-1    | M7.3     |                     |
| 0.000517558394097506 AGIWUR38663                                        |    |    |          |          |                |          |          |                     |
| N2                                                                      | HS | IV | 11093843 | 11095085 | WBGene00010884 | M7.8     | M7.8     | 0.0810834982727613  |
| AGIWUR42600                                                             |    |    |          |          |                |          |          |                     |
| N2                                                                      | HS | IV | 11096724 | 11097982 | WBGene00010887 | M7.12    | M7.12    | 0.223517602523815   |
| AGIWUR32734                                                             |    |    |          |          |                |          |          |                     |
| N2                                                                      | HS | IV | 11098448 | 11100371 | WBGene00006071 | str-3    | M7.13    | -0.0865083879668962 |
| AGIWUR28180                                                             |    |    |          |          |                |          |          |                     |
| N2                                                                      | HS | IV | 11100631 | 11101478 | WBGene00010885 | M7.9     | M7.9     | 0.22710126400897    |
| AGIWUR41741                                                             |    |    |          |          |                |          |          |                     |
| N2                                                                      | HS | IV | 11101962 | 11102695 | WBGene00010886 | M7.10    | M7.10    | -0.0190742313071679 |
| AGIWUR13450                                                             |    |    |          |          |                |          |          |                     |
| N2                                                                      | HS | IV | 11103255 | 11104262 | WBGene00011483 | T05E11.7 |          | T05E11.7            |
| 0.301631071509591 AGIWUR19919                                           |    |    |          |          |                |          |          |                     |
| N2                                                                      | HS | IV | 11104743 | 11105820 | WBGene00011484 | T05E11.8 |          | T05E11.8            |
| -0.0379754077418788 AGIWUR34023                                         |    |    |          |          |                |          |          |                     |
| N2                                                                      | HS | IV | 11108494 | 11110017 | WBGene00011482 | hpo-4    | T05E11.6 |                     |
| -0.0576613139135436 AGIWUR2772                                          |    |    |          |          |                |          |          |                     |
| N2                                                                      | HS | IV | 11110102 | 11111045 | WBGene00004474 | rps-5    | T05E11.1 |                     |
| -0.0903037689767068 AGIWUR15009;AGIWUR19637                             |    |    |          |          |                |          |          |                     |
| N2                                                                      | HS | IV | 11112999 | 11116754 | WBGene00011479 | T05E11.2 |          | T05E11.2            |
| 0.0317145011023801 AGIWUR5936                                           |    |    |          |          |                |          |          |                     |
| N2                                                                      | HS | IV | 11116732 | 11118887 | WBGene00011481 | imp-2    | T05E11.5 |                     |
| -0.144343029176234 AGIWUR34176                                          |    |    |          |          |                |          |          |                     |
| N2                                                                      | HS | IV | 11119298 | 11123155 | WBGene00011480 | enpl-1   | T05E11.3 |                     |
| -0.261114836808794 AGIWUR8786                                           |    |    |          |          |                |          |          |                     |
| N2                                                                      | HS | IV | 11123133 | 11124862 | WBGene00004985 | spo-11   | T05E11.4 |                     |
| 0.244305012908898 AGIWUR29114                                           |    |    |          |          |                |          |          |                     |
| N2                                                                      | HS | IV | 11126024 | 11131162 | WBGene00004204 | swsn-4   | F01G4.1  | -0.0875594780102253 |
| AGIWUR11401;AGIWUR19740;AGIWUR26530;AGIWUR29970;AGIWUR39043;AGIWUR39371 |    |    |          |          |                |          |          |                     |
| N2                                                                      | HS | IV | 11131279 | 11133785 | WBGene00000181 | ard-1    | F01G4.2  | 0.0807490351307472  |
| AGIWUR9929;AGIWUR40487;AGIWUR41787                                      |    |    |          |          |                |          |          |                     |
| N2                                                                      | HS | IV | 11135566 | 11142360 | WBGene00008502 | skih-2   | F01G4.3  | 0.0847200546734577  |
| AGIWUR33640                                                             |    |    |          |          |                |          |          |                     |
| N2                                                                      | HS | IV | 11143345 | 11145923 | WBGene00008503 | F01G4.4  | F01G4.4  | -0.394137544292082  |
| AGIWUR41438                                                             |    |    |          |          |                |          |          |                     |
| N2                                                                      | HS | IV | 11146106 | 11147247 | WBGene00008504 | F01G4.5  | F01G4.5  | 0.088376698328819   |
| AGIWUR42508                                                             |    |    |          |          |                |          |          |                     |
| N2                                                                      | HS | IV | 11146940 | 11149504 | WBGene00008505 | F01G4.6  | F01G4.6  | -0.270024447625763  |

AGIWUR886;AGIWUR1602;AGIWUR3823;AGIWUR7003;AGIWUR7501;AGIWUR15287;AGIWUR15503;AGIWUR17652;AGIWUR23154;AGIWUR25021;AGIWUR29635;AGIWUR34643;AGIWUR36572

|                                    |    |    |                       |                                    |                |          |          |                     |
|------------------------------------|----|----|-----------------------|------------------------------------|----------------|----------|----------|---------------------|
| N2                                 | HS | IV | 11149189              | 11154334                           | WBGene00007444 | C08F8.2  | C08F8.2  | 0.219964934057867   |
| AGIWUR32022                        |    |    |                       |                                    |                |          |          |                     |
| N2                                 | HS | IV | 11155029              | 11156634                           | WBGene00007445 | C08F8.3  | C08F8.3  | 0.0784007194659537  |
| AGIWUR20028                        |    |    |                       |                                    |                |          |          |                     |
| N2                                 | HS | IV | 11157102              | 11159492                           | WBGene00007446 | mboa-4   | C08F8.4  | 0.211608519237661   |
| AGIWUR35424                        |    |    |                       |                                    |                |          |          |                     |
| N2                                 | HS | IV | 11159570              | 11160807                           | WBGene00219217 | C08F8.15 |          | C08F8.15            |
|                                    |    |    | -0.0796033488649819   | AGIWUR36439                        |                |          |          |                     |
| N2                                 | HS | IV | 11162768              | 11164622                           | WBGene00007448 | C08F8.6  | C08F8.6  | -0.471675146633943  |
| AGIWUR10293                        |    |    |                       |                                    |                |          |          |                     |
| N2                                 | HS | IV | 11169834              | 11174783                           | WBGene00003657 | nhr-67   | C08F8.8  | -0.100555019948269  |
| AGIWUR32104                        |    |    |                       |                                    |                |          |          |                     |
| N2                                 | HS | IV | 11177286              | 11178200                           | WBGene00004309 | rap-3    | C08F8.7  | 0 AGIWUR40303       |
| N2                                 | HS | IV | 11179645              | 11183001                           | WBGene00011122 | cpt-2    | R07H5.2  | -0.0216468246504995 |
| AGIWUR7927                         |    |    |                       |                                    |                |          |          |                     |
| N2                                 | HS | IV | 11183132              | 11184310                           | WBGene00004199 | prx-14   | R07H5.1  | -0.160748351834908  |
| AGIWUR7532                         |    |    |                       |                                    |                |          |          |                     |
| N2                                 | HS | IV | 11184243              | 11186000                           | WBGene00011123 | nuaf-3   | R07H5.3  | -0.0547298450696641 |
| AGIWUR41396                        |    |    |                       |                                    |                |          |          |                     |
| N2                                 | HS | IV | 11187012              | 11188264                           | WBGene00011124 | sdz-27   | R07H5.4  | 0.303353495672598   |
| AGIWUR7288                         |    |    |                       |                                    |                |          |          |                     |
| N2                                 | HS | IV | 11188891              | 11189613                           | WBGene00011127 | fbxb-79  | R07H5.7  | -0.138947984391697  |
| AGIWUR16050                        |    |    |                       |                                    |                |          |          |                     |
| N2                                 | HS | IV | 11207531              | 11209359                           | WBGene00011129 | R07H5.9  | R07H5.9  |                     |
|                                    |    |    | -0.000325745139114986 | AGIWUR30176                        |                |          |          |                     |
| N2                                 | HS | IV | 11209309              | 11210831                           | WBGene00011128 | R07H5.8  | R07H5.8  | -0.172791568980815  |
| AGIWUR8968;AGIWUR15795;AGIWUR30053 |    |    |                       |                                    |                |          |          |                     |
| N2                                 | HS | IV | 11213651              | 11218137                           | WBGene00011130 | zip-6    | R07H5.10 |                     |
|                                    |    |    | -0.062788677568931    | AGIWUR28427                        |                |          |          |                     |
| N2                                 | HS | IV | 11220727              | 11221755                           | WBGene00045197 | C29F4.4  | C29F4.4  | -0.0350483718798298 |
| AGIWUR19584;AGIWUR24136            |    |    |                       |                                    |                |          |          |                     |
| N2                                 | HS | IV | 11222048              | 11223936                           | WBGene00007809 | C29F4.3  | C29F4.3  |                     |
|                                    |    |    | -0.00130474492313404  | AGIWUR2326;AGIWUR18475;AGIWUR33132 |                |          |          |                     |
| N2                                 | HS | IV | 11226502              | 11230307                           | WBGene00007808 | best-7   | C29F4.2  | -0.185525572352365  |
| AGIWUR9612                         |    |    |                       |                                    |                |          |          |                     |
| N2                                 | HS | IV | 11231670              | 11233124                           | WBGene00007338 | C05C12.6 |          | C05C12.6            |
|                                    |    |    | 0.00864039214557755   | AGIWUR18612;AGIWUR23713            |                |          |          |                     |

|                                                            |    |    |                                                                     |          |                |          |                             |
|------------------------------------------------------------|----|----|---------------------------------------------------------------------|----------|----------------|----------|-----------------------------|
| N2                                                         | HS | IV | 11246451                                                            | 11248081 | WBGene00007336 | C05C12.4 | C05C12.4                    |
| 0.327315526988873                                          |    |    | AGIWUR5435;AGIWUR7534;AGIWUR8031;AGIWUR9057;AGIWUR27100;AGIWUR28815 |          |                |          |                             |
| N2                                                         | HS | IV | 11248884                                                            | 11259535 | WBGene00001795 | gtl-1    | C05C12.3                    |
| -0.229659361408631                                         |    |    | AGIWUR22273                                                         |          |                |          |                             |
| N2                                                         | HS | IV | 11260412                                                            | 11261185 | WBGene00007337 | C05C12.5 | C05C12.5                    |
| -0.223309023618384                                         |    |    | AGIWUR44003                                                         |          |                |          |                             |
| N2                                                         | HS | IV | 11261844                                                            | 11263075 | WBGene00010046 | F54D1.1  | F54D1.1 -0.256028359188127  |
| AGIWUR12500                                                |    |    |                                                                     |          |                |          |                             |
| N2                                                         | HS | IV | 11266290                                                            | 11271352 | WBGene00003606 | nhr-7    | F54D1.4 -0.0443541091894222 |
| AGIWUR30721                                                |    |    |                                                                     |          |                |          |                             |
| N2                                                         | HS | IV | 11273483                                                            | 11281924 | WBGene00001796 | gtl-2    | F54D1.5 0.159190488741558   |
| AGIWUR24761                                                |    |    |                                                                     |          |                |          |                             |
| N2                                                         | HS | IV | 11287811                                                            | 11294913 | WBGene00010047 | F54D1.6  | F54D1.6 0.214167899105682   |
| AGIWUR32639                                                |    |    |                                                                     |          |                |          |                             |
| N2                                                         | HS | IV | 11295074                                                            | 11296887 | WBGene00007114 | mttu-1   | B0035.16                    |
| 0.059258516781254                                          |    |    | AGIWUR8709                                                          |          |                |          |                             |
| N2                                                         | HS | IV | 11296952                                                            | 11298388 | WBGene00007113 | B0035.15 | B0035.15                    |
| 0.0889409835201924                                         |    |    | AGIWUR19989                                                         |          |                |          |                             |
| N2                                                         | HS | IV | 11299008                                                            | 11304789 | WBGene00001019 | dnj-1    | B0035.14                    |
| 0.0483708175359538                                         |    |    | AGIWUR32054;AGIWUR41709                                             |          |                |          |                             |
| N2                                                         | HS | IV | 11304721                                                            | 11306762 | WBGene00007112 | B0035.13 | B0035.13                    |
| -0.0592891005600249                                        |    |    | AGIWUR33214;AGIWUR41564;AGIWUR42935                                 |          |                |          |                             |
| N2                                                         | HS | IV | 11310972                                                            | 11312515 | WBGene00007105 | B0035.1  | B0035.1 -0.0956000526651986 |
| AGIWUR6910;AGIWUR24062;AGIWUR36481;AGIWUR37302             |    |    |                                                                     |          |                |          |                             |
| N2                                                         | HS | IV | 11312437                                                            | 11313980 | WBGene00001020 | dnj-2    | B0035.2 0.237367141335348   |
| AGIWUR39962                                                |    |    |                                                                     |          |                |          |                             |
| N2                                                         | HS | IV | 11314078                                                            | 11315116 | WBGene00007106 | B0035.3  | B0035.3 0.0639072677113113  |
| AGIWUR7573                                                 |    |    |                                                                     |          |                |          |                             |
| N2                                                         | HS | IV | 11315142                                                            | 11315877 | WBGene00007107 | pfd-4    | B0035.4 0.198298289268944   |
| AGIWUR34374;AGIWUR43014;AGIWUR44476                        |    |    |                                                                     |          |                |          |                             |
| N2                                                         | HS | IV | 11317419                                                            | 11319951 | WBGene00007108 | gsdpd-1  | B0035.5 0.097662015242431   |
| AGIWUR239;AGIWUR15655;AGIWUR34155                          |    |    |                                                                     |          |                |          |                             |
| N2                                                         | HS | IV | 11320320                                                            | 11320697 | WBGene00044290 | B0035.18 | B0035.18                    |
| -0.00990874990905688                                       |    |    | AGIWUR42866                                                         |          |                |          |                             |
| N2                                                         | HS | IV | 11320800                                                            | 11323634 | WBGene00007109 | B0035.6  | B0035.6 -0.0122387052951201 |
| AGIWUR28931                                                |    |    |                                                                     |          |                |          |                             |
| N2                                                         | HS | IV | 11323885                                                            | 11324470 | WBGene00001921 | his-47   | B0035.7 0.144570987998936   |
| AGIWUR2738;AGIWUR21949;AGIWUR27672;AGIWUR30476;AGIWUR39690 |    |    |                                                                     |          |                |          |                             |
| N2                                                         | HS | IV | 11327356                                                            | 11327569 | WBGene00235095 | B0035.21 | B0035.21                    |

|                                                                                                        |                                              |          |                |          |          |                     |
|--------------------------------------------------------------------------------------------------------|----------------------------------------------|----------|----------------|----------|----------|---------------------|
| 0.185088231001052                                                                                      | AGIWUR7626                                   |          |                |          |          |                     |
| N2 HS IV                                                                                               | 11327576                                     | 11329369 | WBGene00007110 | leo-1    | B0035.11 |                     |
| 0.204020461029153                                                                                      | AGIWUR878;AGIWUR4853;AGIWUR30506;AGIWUR39319 |          |                |          |          |                     |
| N2 HS IV                                                                                               | 11329466                                     | 11332969 | WBGene00007111 | sart-3   | B0035.12 |                     |
| 0.0811554560562584                                                                                     | AGIWUR40276                                  |          |                |          |          |                     |
| N2 HS IV                                                                                               | 11333079                                     | 11337184 | WBGene00010061 | F54E12.2 | F54E12.2 |                     |
| -0.0038672320293065                                                                                    | AGIWUR14228;AGIWUR28750                      |          |                |          |          |                     |
| N2 HS IV                                                                                               | 11341325                                     | 11359863 | WBGene00002223 | k1p-12   | T01G1.1  | 0.118464612066527   |
| AGIWUR4114;AGIWUR19671;AGIWUR23903                                                                     |                                              |          |                |          |          |                     |
| N2 HS IV                                                                                               | 11359864                                     | 11361509 | WBGene00044025 | T01G1.4  | T01G1.4  | 0.319673191101522   |
| AGIWUR18422                                                                                            |                                              |          |                |          |          |                     |
| N2 HS IV                                                                                               | 11365605                                     | 11371836 | WBGene00011338 | sec-31   | T01G1.3  | -0.0123806572875935 |
| AGIWUR30781                                                                                            |                                              |          |                |          |          |                     |
| N2 HS IV                                                                                               | 11372991                                     | 11377627 | WBGene00010351 | cbd-1    | H02I12.1 |                     |
| -0.0451473997608431                                                                                    | AGIWUR1977                                   |          |                |          |          |                     |
| N2 HS IV                                                                                               | 11378174                                     | 11379348 | WBGene00010352 | fbxb-76  | H02I12.2 |                     |
| -0.376945877853293                                                                                     | AGIWUR41180                                  |          |                |          |          |                     |
| N2 HS IV                                                                                               | 11394543                                     | 11396728 | WBGene00006459 | tag-89   | H02I12.3 |                     |
| 0.0302560476401368                                                                                     | AGIWUR8649;AGIWUR21996;AGIWUR42002           |          |                |          |          |                     |
| N2 HS IV                                                                                               | 11396788                                     | 11398317 | WBGene00001108 | dsl-6    | H02I12.4 |                     |
| -0.313138648271659                                                                                     | AGIWUR3759                                   |          |                |          |          |                     |
| N2 HS IV                                                                                               | 11401884                                     | 11403338 | WBGene00010353 | memi-3   | H02I12.5 |                     |
| -0.17904910439364                                                                                      | AGIWUR44329                                  |          |                |          |          |                     |
| N2 HS IV                                                                                               | 11403961                                     | 11406066 | WBGene00010354 | cyp-31A2 | H02I12.8 |                     |
| 0.133524500028241                                                                                      | AGIWUR1332                                   |          |                |          |          |                     |
| N2 HS IV                                                                                               | 11410228                                     | 11413001 | WBGene00009035 | gfat-2   | F22B3.4  | -0.417963713375481  |
| AGIWUR910;AGIWUR3963;AGIWUR6608;AGIWUR8102;AGIWUR15198;AGIWUR18863;AGIWUR32594;AGIWUR40623;AGIWUR43992 |                                              |          |                |          |          |                     |
| N2 HS IV                                                                                               | 11413208                                     | 11415020 | WBGene00045122 | F22B3.10 | F22B3.10 |                     |
| -0.0487458756962713                                                                                    | AGIWUR37720                                  |          |                |          |          |                     |
| N2 HS IV                                                                                               | 11415598                                     | 11416824 | WBGene00009036 | F22B3.5  | F22B3.5  | -0.229627385196873  |
| AGIWUR8998;AGIWUR21522;AGIWUR32760;AGIWUR38677                                                         |                                              |          |                |          |          |                     |
| N2 HS IV                                                                                               | 11417581                                     | 11421796 | WBGene00009038 | F22B3.7  | F22B3.7  | 0.28927893713781    |
| AGIWUR44684                                                                                            |                                              |          |                |          |          |                     |
| N2 HS IV                                                                                               | 11422711                                     | 11425251 | WBGene00009039 | F22B3.8  | F22B3.8  | 0.0381385116569253  |
| AGIWUR9347;AGIWUR15133;AGIWUR19339;AGIWUR27538                                                         |                                              |          |                |          |          |                     |
| N2 HS IV                                                                                               | 11425742                                     | 11447060 | WBGene00002192 | kin-4    | C10C6.1  | -0.114889464212515  |
| AGIWUR13495;AGIWUR36397                                                                                |                                              |          |                |          |          |                     |
| N2 HS IV                                                                                               | 11459984                                     | 11463195 | WBGene00007006 | npr-3    | C10C6.2  | 0.0141092548111938  |
| AGIWUR4533                                                                                             |                                              |          |                |          |          |                     |

|                                                                                           |    |    |          |          |                |          |          |                     |
|-------------------------------------------------------------------------------------------|----|----|----------|----------|----------------|----------|----------|---------------------|
| N2                                                                                        | HS | IV | 11463609 | 11465189 | WBGene00007512 | C10C6.3  | C10C6.3  | 0.197060384649363   |
| AGIWUR17673;AGIWUR28120                                                                   |    |    |          |          |                |          |          |                     |
| N2                                                                                        | HS | IV | 11465433 | 11467239 | WBGene00007515 | C10C6.7  | C10C6.7  | 0.0710074387091009  |
| AGIWUR1267;AGIWUR1584;AGIWUR20291                                                         |    |    |          |          |                |          |          |                     |
| N2                                                                                        | HS | IV | 11470185 | 11473419 | WBGene00007513 | wht-2    | C10C6.5  | -0.0716639216951451 |
| AGIWUR1848;AGIWUR11284;AGIWUR22623;AGIWUR29007;AGIWUR39331;AGIWUR45150                    |    |    |          |          |                |          |          |                     |
| N2                                                                                        | HS | IV | 11473363 | 11479251 | WBGene00007514 | catp-8   | C10C6.6  | -0.09471624238682   |
| AGIWUR10656;AGIWUR17810;AGIWUR31938                                                       |    |    |          |          |                |          |          |                     |
| N2                                                                                        | HS | IV | 11479358 | 11480369 | WBGene00003148 | mbf-1    | H21P03.1 |                     |
| -0.0872250764567166 AGIWUR28512                                                           |    |    |          |          |                |          |          |                     |
| N2                                                                                        | HS | IV | 11480846 | 11482437 | WBGene00010409 | H21P03.2 |          | H21P03.2            |
| 0.124416112064621 AGIWUR27589                                                             |    |    |          |          |                |          |          |                     |
| N2                                                                                        | HS | IV | 11482668 | 11498167 | WBGene00004892 | sms-1    | H21P03.3 |                     |
| -0.143001250801976 AGIWUR6928;AGIWUR20047;AGIWUR27142;AGIWUR32836;AGIWUR41669;AGIWUR44350 |    |    |          |          |                |          |          |                     |
| N2                                                                                        | HS | IV | 11504716 | 11509723 | WBGene00006678 | twk-25   | M04B2.5  | -0.0609805099816505 |
| AGIWUR24160                                                                               |    |    |          |          |                |          |          |                     |
| N2                                                                                        | HS | IV | 11509726 | 11510764 | WBGene00010848 | M04B2.6  | M04B2.6  | -0.353076579828894  |
| AGIWUR43084                                                                               |    |    |          |          |                |          |          |                     |
| N2                                                                                        | HS | IV | 11517186 | 11517620 | WBGene00045319 | M04B2.8  | M04B2.8  | -0.0810584516340191 |
| AGIWUR8716;AGIWUR25069;AGIWUR38609;AGIWUR40846                                            |    |    |          |          |                |          |          |                     |
| N2                                                                                        | HS | IV | 11518422 | 11521031 | WBGene00010847 | M04B2.4  | M04B2.4  | 0.248976764458245   |
| AGIWUR40957                                                                               |    |    |          |          |                |          |          |                     |
| N2                                                                                        | HS | IV | 11521290 | 11522214 | WBGene00001585 | gfl-1    | M04B2.3  | 0 AGIWUR38859       |
| N2                                                                                        | HS | IV | 11524642 | 11527954 | WBGene00003218 | mep-1    | M04B2.1  | 0.0284331187215319  |
| AGIWUR26739                                                                               |    |    |          |          |                |          |          |                     |
| N2                                                                                        | HS | IV | 11528052 | 11530715 | WBGene00010846 | M04B2.2  | M04B2.2  | 0.0484224220010958  |
| AGIWUR2719                                                                                |    |    |          |          |                |          |          |                     |
| N2                                                                                        | HS | IV | 11530650 | 11548586 | WBGene00010849 | M04B2.7  | M04B2.7  | -0.0544191988631972 |
| AGIWUR40341                                                                               |    |    |          |          |                |          |          |                     |
| N2                                                                                        | HS | IV | 11550002 | 11551987 | WBGene00000702 | col-128  | F12F6.9  | 0.207476933773918   |
| AGIWUR26388                                                                               |    |    |          |          |                |          |          |                     |
| N2                                                                                        | HS | IV | 11554489 | 11558261 | WBGene00008723 | F12F6.8  | F12F6.8  | -0.0385745477294526 |
| AGIWUR31855                                                                               |    |    |          |          |                |          |          |                     |
| N2                                                                                        | HS | IV | 11558737 | 11561891 | WBGene00008722 | F12F6.7  | F12F6.7  | 0.13658518277323    |
| AGIWUR18979                                                                               |    |    |          |          |                |          |          |                     |
| N2                                                                                        | HS | IV | 11561986 | 11566194 | WBGene00004755 | sec-24.1 |          | F12F6.6             |
| -0.0148252385671217 AGIWUR11185;AGIWUR12547;AGIWUR14071;AGIWUR40393                       |    |    |          |          |                |          |          |                     |
| N2                                                                                        | HS | IV | 11570500 | 11578699 | WBGene00006406 | srgp-1   | F12F6.5  | -0.282049734665673  |
| AGIWUR5747                                                                                |    |    |          |          |                |          |          |                     |



|                                                                               |    |    |          |          |                |           |           |                     |
|-------------------------------------------------------------------------------|----|----|----------|----------|----------------|-----------|-----------|---------------------|
| N2                                                                            | HS | IV | 11578757 | 11584066 | WBGene00004360 | rib-1     | F12F6.3   | -0.229178835918409  |
| AGIWUR21192;AGIWUR34748                                                       |    |    |          |          |                |           |           |                     |
| N2                                                                            | HS | IV | 11585224 | 11588321 | WBGene00008720 | F12F6.1   | F12F6.1   | -0.117058077056374  |
| AGIWUR20751                                                                   |    |    |          |          |                |           |           |                     |
| N2                                                                            | HS | IV | 11588263 | 11592240 | WBGene00009589 | F40F11.4  |           | F40F11.4            |
| 0.117290500464613 AGIWUR22717                                                 |    |    |          |          |                |           |           |                     |
| N2                                                                            | HS | IV | 11592351 | 11594003 | WBGene00009588 | F40F11.3  |           | F40F11.3            |
| 0.0844031252227406 AGIWUR10426                                                |    |    |          |          |                |           |           |                     |
| N2                                                                            | HS | IV | 11594244 | 11601695 | WBGene00009587 | mig-38    | F40F11.2  |                     |
| -0.139829329950132 AGIWUR15204                                                |    |    |          |          |                |           |           |                     |
| N2                                                                            | HS | IV | 11602641 | 11603283 | WBGene00004480 | rps-11    | F40F11.1  |                     |
| 0.0612995370547083 AGIWUR3267;AGIWUR24771;AGIWUR29833;AGIWUR41945;AGIWUR42716 |    |    |          |          |                |           |           |                     |
| N2                                                                            | HS | IV | 11603613 | 11604927 | WBGene00012497 | ragc-1    | Y24F12A.2 |                     |
| -0.207546542022957 AGIWUR10140                                                |    |    |          |          |                |           |           |                     |
| N2                                                                            | HS | IV | 11605254 | 11607457 | WBGene00012496 | Y24F12A.1 |           | Y24F12A.1           |
| -0.0405547705302887 AGIWUR38440                                               |    |    |          |          |                |           |           |                     |
| N2                                                                            | HS | IV | 11619502 | 11620938 | WBGene00001107 | ds1-5     | F58B3.8   | 0.0568050613462128  |
| AGIWUR547;AGIWUR15690                                                         |    |    |          |          |                |           |           |                     |
| N2                                                                            | HS | IV | 11621443 | 11623174 | WBGene00003093 | lys-4     | F58B3.1   | 0.532296181863993   |
| AGIWUR39966                                                                   |    |    |          |          |                |           |           |                     |
| N2                                                                            | HS | IV | 11624255 | 11625582 | WBGene00003094 | lys-5     | F58B3.2   | 0.368594568594977   |
| AGIWUR19394                                                                   |    |    |          |          |                |           |           |                     |
| N2                                                                            | HS | IV | 11626910 | 11627947 | WBGene00003095 | lys-6     | F58B3.3   | 0.267000270147211   |
| AGIWUR36906                                                                   |    |    |          |          |                |           |           |                     |
| N2                                                                            | HS | IV | 11628757 | 11631850 | WBGene00010231 | F58B3.4   | F58B3.4   | 0.14100311069468    |
| AGIWUR6455                                                                    |    |    |          |          |                |           |           |                     |
| N2                                                                            | HS | IV | 11631941 | 11635487 | WBGene00003415 | mars-1    | F58B3.5   | -0.0459847270247788 |
| AGIWUR12127;AGIWUR12383;AGIWUR19727                                           |    |    |          |          |                |           |           |                     |
| N2                                                                            | HS | IV | 11636648 | 11638208 | WBGene00010232 | F58B3.6   | F58B3.6   | 0.00171555744737262 |
| AGIWUR1821;AGIWUR13189;AGIWUR24826                                            |    |    |          |          |                |           |           |                     |
| N2                                                                            | HS | IV | 11638316 | 11640097 | WBGene00010233 | F58B3.7   | F58B3.7   | -0.0603892758629243 |
| AGIWUR25433                                                                   |    |    |          |          |                |           |           |                     |
| N2                                                                            | HS | IV | 11640047 | 11641015 | WBGene00010234 | ttr-50    | F58B3.9   | -0.144343139088992  |
| AGIWUR38959                                                                   |    |    |          |          |                |           |           |                     |
| N2                                                                            | HS | IV | 11645597 | 11648893 | WBGene00014088 | ZK809.8   | ZK809.8   | -0.31846465114592   |
| AGIWUR6247                                                                    |    |    |          |          |                |           |           |                     |
| N2                                                                            | HS | IV | 11650715 | 11652033 | WBGene00006491 | ac1-3     | ZK809.2   | 0.0628456158813648  |
| AGIWUR44861                                                                   |    |    |          |          |                |           |           |                     |
| N2                                                                            | HS | IV | 11652403 | 11653461 | WBGene00014086 | ZK809.3   | ZK809.3   | 0.0985257578615011  |

|                                                                                    |    |    |          |          |                |         |         |                     |  |
|------------------------------------------------------------------------------------|----|----|----------|----------|----------------|---------|---------|---------------------|--|
| AGIWUR10668;AGIWUR32126;AGIWUR34914;AGIWUR37719                                    |    |    |          |          |                |         |         |                     |  |
| N2                                                                                 | HS | IV | 11653422 | 11655470 | WBGene00001320 | ent-1   | ZK809.4 | 0.00814804938932845 |  |
| AGIWUR14683                                                                        |    |    |          |          |                |         |         |                     |  |
| N2                                                                                 | HS | IV | 11656730 | 11659425 | WBGene00014087 | ZK809.5 | ZK809.5 | 0.0401450430029353  |  |
| AGIWUR4363                                                                         |    |    |          |          |                |         |         |                     |  |
| N2                                                                                 | HS | IV | 11659800 | 11665203 | WBGene00014076 | ZK792.1 | ZK792.1 | 0.256104071928625   |  |
| AGIWUR15773                                                                        |    |    |          |          |                |         |         |                     |  |
| N2                                                                                 | HS | IV | 11665310 | 11667989 | WBGene00194934 | ZK809.9 | ZK809.9 | -0.111190550822355  |  |
| AGIWUR32942                                                                        |    |    |          |          |                |         |         |                     |  |
| N2                                                                                 | HS | IV | 11668024 | 11671505 | WBGene00014080 | atg-4.2 | ZK792.8 | 0.147865752581499   |  |
| AGIWUR33183                                                                        |    |    |          |          |                |         |         |                     |  |
| N2                                                                                 | HS | IV | 11673816 | 11675635 | WBGene00002130 | inx-8   | ZK792.2 | -0.308781386243062  |  |
| AGIWUR42581                                                                        |    |    |          |          |                |         |         |                     |  |
| N2                                                                                 | HS | IV | 11676354 | 11678497 | WBGene00002131 | inx-9   | ZK792.3 | 0.0461527051605408  |  |
| AGIWUR16911                                                                        |    |    |          |          |                |         |         |                     |  |
| N2                                                                                 | HS | IV | 11678440 | 11682005 | WBGene00014077 | ZK792.4 | ZK792.4 | 0.220096092192954   |  |
| AGIWUR14826                                                                        |    |    |          |          |                |         |         |                     |  |
| N2                                                                                 | HS | IV | 11684975 | 11688118 | WBGene00014078 | ZK792.5 | ZK792.5 | 0.535931833024264   |  |
| AGIWUR21899                                                                        |    |    |          |          |                |         |         |                     |  |
| N2                                                                                 | HS | IV | 11688227 | 11691088 | WBGene00002335 | let-60  | ZK792.6 | -0.0534780547219018 |  |
| AGIWUR34480                                                                        |    |    |          |          |                |         |         |                     |  |
| N2                                                                                 | HS | IV | 11694359 | 11696464 | WBGene00014079 | ZK792.7 | ZK792.7 | 0.0266249931665534  |  |
| AGIWUR44766                                                                        |    |    |          |          |                |         |         |                     |  |
| N2                                                                                 | HS | IV | 11696443 | 11699895 | WBGene00001079 | dpy-20  | T22B3.1 | 0.204049998516368   |  |
| AGIWUR28561                                                                        |    |    |          |          |                |         |         |                     |  |
| N2                                                                                 | HS | IV | 11703185 | 11704016 | WBGene00011911 | T22B3.3 | T22B3.3 | -0.285912009612069  |  |
| AGIWUR45199                                                                        |    |    |          |          |                |         |         |                     |  |
| N2                                                                                 | HS | IV | 11704246 | 11708264 | WBGene00011910 | alg-3   | T22B3.2 | -0.206296179734007  |  |
| AGIWUR42929                                                                        |    |    |          |          |                |         |         |                     |  |
| N2                                                                                 | HS | IV | 11715039 | 11729276 | WBGene00010444 | magi-1  | K01A6.2 | -0.222894180934768  |  |
| AGIWUR7822;AGIWUR13519;AGIWUR17756;AGIWUR24742;AGIWUR27030;AGIWUR34487;AGIWUR43990 |    |    |          |          |                |         |         |                     |  |
| N2                                                                                 | HS | IV | 11735325 | 11742305 | WBGene00010448 | K01A6.6 | K01A6.6 | 0.201160017377664   |  |
| AGIWUR29459                                                                        |    |    |          |          |                |         |         |                     |  |
| N2                                                                                 | HS | IV | 11742706 | 11743789 | WBGene00010447 | K01A6.5 | K01A6.5 | 0.24213180086803    |  |
| AGIWUR16888                                                                        |    |    |          |          |                |         |         |                     |  |
| N2                                                                                 | HS | IV | 11745640 | 11748640 | WBGene00001577 | gem-4   | T12A7.1 | 0.0963145747944036  |  |
| AGIWUR14415                                                                        |    |    |          |          |                |         |         |                     |  |
| N2                                                                                 | HS | IV | 11749154 | 11751074 | WBGene00011727 | T12A7.6 | T12A7.6 | 0.0524632203424167  |  |
| AGIWUR14379                                                                        |    |    |          |          |                |         |         |                     |  |

|                                                                                  |    |    |          |          |                |          |          |                     |
|----------------------------------------------------------------------------------|----|----|----------|----------|----------------|----------|----------|---------------------|
| N2                                                                               | HS | IV | 11751872 | 11752945 | WBGene00011728 | T12A7.7  | T12A7.7  | 0.0514136793094142  |
| AGIWUR3767                                                                       |    |    |          |          |                |          |          |                     |
| N2                                                                               | HS | IV | 11752987 | 11754387 | WBGene00011724 | sc1-18   | T12A7.3  | 0.219725616600554   |
| AGIWUR26905                                                                      |    |    |          |          |                |          |          |                     |
| N2                                                                               | HS | IV | 11755274 | 11755970 | WBGene00185100 | T12A7.9  | T12A7.9  | -0.105999417549774  |
| AGIWUR37943                                                                      |    |    |          |          |                |          |          |                     |
| N2                                                                               | HS | IV | 11756381 | 11761064 | WBGene00011723 | T12A7.2  | T12A7.2  | 0.0265824148535891  |
| AGIWUR3478;AGIWUR5238;AGIWUR7874;AGIWUR16576;AGIWUR22434;AGIWUR34793;AGIWUR37106 |    |    |          |          |                |          |          |                     |
| N2                                                                               | HS | IV | 11768639 | 11773742 | WBGene00011725 | lips-5   | T12A7.4  | -0.0115641549810945 |
| AGIWUR10418;AGIWUR26358;AGIWUR39694                                              |    |    |          |          |                |          |          |                     |
| N2                                                                               | HS | IV | 11779216 | 11786969 | WBGene00011726 | lpr-2    | T12A7.5  | -0.168913037849283  |
| AGIWUR8854;AGIWUR12875                                                           |    |    |          |          |                |          |          |                     |
| N2                                                                               | HS | IV | 11783941 | 11792593 | WBGene00010350 | H01G02.3 |          | H01G02.3            |
| 0.0563647452444416 AGIWUR13502;AGIWUR21251;AGIWUR40362                           |    |    |          |          |                |          |          |                     |
| N2                                                                               | HS | IV | 11798667 | 11801088 | WBGene00010349 | dyf-18   | H01G02.2 |                     |
| -0.0596917905900964 AGIWUR32927                                                  |    |    |          |          |                |          |          |                     |
| N2                                                                               | HS | IV | 11801697 | 11803144 | WBGene00045108 | H01G02.4 |          | H01G02.4            |
| 0.0364489372960985 AGIWUR9688;AGIWUR24665                                        |    |    |          |          |                |          |          |                     |
| N2                                                                               | HS | IV | 11803273 | 11804152 | WBGene00010348 | H01G02.1 |          | H01G02.1            |
| 0.018865796062407 AGIWUR1707;AGIWUR8257;AGIWUR23953;AGIWUR25577                  |    |    |          |          |                |          |          |                     |
| N2                                                                               | HS | IV | 11814247 | 11819612 | WBGene00010918 | M117.1   | M117.1   | 0.0631684679224147  |
| AGIWUR3124                                                                       |    |    |          |          |                |          |          |                     |
| N2                                                                               | HS | IV | 11820505 | 11821917 | WBGene00003920 | par-5    | M117.2   | -0.112899597523519  |
| AGIWUR5263;AGIWUR5896;AGIWUR26028;AGIWUR34257                                    |    |    |          |          |                |          |          |                     |
| N2                                                                               | HS | IV | 11823516 | 11823938 | WBGene00010919 | M117.3   | M117.3   | 0.137581421778793   |
| AGIWUR43702                                                                      |    |    |          |          |                |          |          |                     |
| N2                                                                               | HS | IV | 11828973 | 11830446 | WBGene00010921 | fbxb-4   | M117.5   | 0.00831885162385504 |
| AGIWUR5287;AGIWUR17122;AGIWUR27546                                               |    |    |          |          |                |          |          |                     |
| N2                                                                               | HS | IV | 11830799 | 11833556 | WBGene00010920 | M117.4   | M117.4   | 0.0422133855533566  |
| AGIWUR6805                                                                       |    |    |          |          |                |          |          |                     |
| N2                                                                               | HS | IV | 11834390 | 11836020 | WBGene00044768 | M117.7   | M117.7   | -0.280674335817356  |
| AGIWUR38728                                                                      |    |    |          |          |                |          |          |                     |
| N2                                                                               | HS | IV | 11838980 | 11840423 | WBGene00009546 | fbxb-3   | F38H4.2  | -0.345605615059777  |
| AGIWUR38113                                                                      |    |    |          |          |                |          |          |                     |
| N2                                                                               | HS | IV | 11842421 | 11846350 | WBGene00009547 | F38H4.3  | F38H4.3  | 0.151660674575771   |
| AGIWUR6905                                                                       |    |    |          |          |                |          |          |                     |
| N2                                                                               | HS | IV | 11847009 | 11847871 | WBGene00009550 | F38H4.6  | F38H4.6  | 0 AGIWUR21232       |
| N2                                                                               | HS | IV | 11848232 | 11850309 | WBGene00009548 | F38H4.4  | F38H4.4  | -0.0149480587877324 |
| AGIWUR3661                                                                       |    |    |          |          |                |          |          |                     |

|                                                                     |    |    |          |          |                |           |           |                     |
|---------------------------------------------------------------------|----|----|----------|----------|----------------|-----------|-----------|---------------------|
| N2                                                                  | HS | IV | 11850950 | 11855159 | WBGene00006415 | tag-30    | F38H4.7   | 0.018182273088847   |
| AGIWUR2752                                                          |    |    |          |          |                |           |           |                     |
| N2                                                                  | HS | IV | 11854828 | 11856376 | WBGene00001151 | ech-2     | F38H4.8   | 0.197159287798041   |
| AGIWUR23837                                                         |    |    |          |          |                |           |           |                     |
| N2                                                                  | HS | IV | 11856629 | 11860460 | WBGene00002363 | let-92    | F38H4.9   | -0.23643923614639   |
| AGIWUR5253;AGIWUR5272;AGIWUR5474;AGIWUR5480;AGIWUR11755;AGIWUR36054 |    |    |          |          |                |           |           |                     |
| N2                                                                  | HS | IV | 11860555 | 11862498 | WBGene00009551 | F38H4.10  | F38H4.10  |                     |
| -0.177305106789749 AGIWUR7377                                       |    |    |          |          |                |           |           |                     |
| N2                                                                  | HS | IV | 11864532 | 11875738 | WBGene00007801 | trpa-1    | C29E6.2   | 0.15669360704927    |
| AGIWUR16343;AGIWUR19719;AGIWUR26134;AGIWUR40717                     |    |    |          |          |                |           |           |                     |
| N2                                                                  | HS | IV | 11878549 | 11883407 | WBGene00007802 | cut1-27   | C29E6.4   | 0.164164469969153   |
| AGIWUR40702                                                         |    |    |          |          |                |           |           |                     |
| N2                                                                  | HS | IV | 11885530 | 11891081 | WBGene00002827 | let-653   | C29E6.1   | -0.0952479736785605 |
| AGIWUR20827                                                         |    |    |          |          |                |           |           |                     |
| N2                                                                  | HS | IV | 11899683 | 11902910 | WBGene00003633 | nhr-43    | C29E6.5   | 0.116978882392175   |
| AGIWUR3447                                                          |    |    |          |          |                |           |           |                     |
| N2                                                                  | HS | IV | 11912005 | 11913245 | WBGene00012163 | VZK822L.2 | VZK822L.2 |                     |
| 0.21594234432059 AGIWUR895                                          |    |    |          |          |                |           |           |                     |
| N2                                                                  | HS | IV | 11913691 | 11915796 | WBGene00001398 | fat-6     | VZK822L.1 |                     |
| -0.162500939029995 AGIWUR11968;AGIWUR32999;AGIWUR39182              |    |    |          |          |                |           |           |                     |
| N2                                                                  | HS | IV | 11922358 | 11923174 | WBGene00014090 | ZK822.2   | ZK822.2   | 0.391071116493563   |
| AGIWUR13802                                                         |    |    |          |          |                |           |           |                     |
| N2                                                                  | HS | IV | 11924685 | 11925397 | WBGene00044009 | ZK822.6   | ZK822.6   | 0.135492470822266   |
| AGIWUR16060;AGIWUR25195;AGIWUR36482                                 |    |    |          |          |                |           |           |                     |
| N2                                                                  | HS | IV | 11926023 | 11928415 | WBGene00014091 | ZK822.4   | ZK822.4   | 0.153038647166248   |
| AGIWUR4838                                                          |    |    |          |          |                |           |           |                     |
| N2                                                                  | HS | IV | 11930872 | 11935718 | WBGene00003736 | nhx-9     | ZK822.3   | 0.00265561716551233 |
| AGIWUR30705;AGIWUR32431;AGIWUR41714                                 |    |    |          |          |                |           |           |                     |
| N2                                                                  | HS | IV | 11937384 | 11940604 | WBGene00014092 | ZK822.5   | ZK822.5   | 0.358218597157197   |
| AGIWUR14263;AGIWUR25076;AGIWUR28171                                 |    |    |          |          |                |           |           |                     |
| N2                                                                  | HS | IV | 11940603 | 11942385 | WBGene00014093 | ZK829.1   | ZK829.1   | -0.159363027487652  |
| AGIWUR980;AGIWUR26330;AGIWUR43730                                   |    |    |          |          |                |           |           |                     |
| N2                                                                  | HS | IV | 11943314 | 11945721 | WBGene00014094 | ZK829.3   | ZK829.3   | 0.284171497047939   |
| AGIWUR18368                                                         |    |    |          |          |                |           |           |                     |
| N2                                                                  | HS | IV | 11946106 | 11949817 | WBGene00001839 | hdl-1     | ZK829.2   |                     |
| -0.00323221947063956 AGIWUR17660                                    |    |    |          |          |                |           |           |                     |
| N2                                                                  | HS | IV | 11950570 | 11952208 | WBGene00006555 | tbx-36    | ZK829.5   | -0.126745904523421  |
| AGIWUR30920                                                         |    |    |          |          |                |           |           |                     |
| N2                                                                  | HS | IV | 11953249 | 11955541 | WBGene00014095 | gdh-1     | ZK829.4   | -0.32374881134821   |

AGIWUR3935;AGIWUR10461;AGIWUR14208;AGIWUR20797;AGIWUR40982

|                                                                        |    |    |          |          |                |         |          |                     |
|------------------------------------------------------------------------|----|----|----------|----------|----------------|---------|----------|---------------------|
| N2                                                                     | HS | IV | 11957547 | 11959804 | WBGene00006566 | tgt-1   | ZK829.6  | 0.163708656755004   |
| AGIWUR1767                                                             |    |    |          |          |                |         |          |                     |
| N2                                                                     | HS | IV | 11959823 | 11961535 | WBGene00014096 | ZK829.7 | ZK829.7  | 0.0245497063662281  |
| AGIWUR14518                                                            |    |    |          |          |                |         |          |                     |
| N2                                                                     | HS | IV | 11963910 | 11965427 | WBGene00005591 | srj-1   | ZK829.8  | -0.0367391964306876 |
| AGIWUR2300                                                             |    |    |          |          |                |         |          |                     |
| N2                                                                     | HS | IV | 11965665 | 11968703 | WBGene00004907 | snf-8   | ZK829.10 |                     |
| 0.00288791508383568 AGIWUR38948                                        |    |    |          |          |                |         |          |                     |
| N2                                                                     | HS | IV | 11970534 | 11972789 | WBGene00014097 | ZK829.9 | ZK829.9  | -0.084214833028085  |
| AGIWUR8490                                                             |    |    |          |          |                |         |          |                     |
| N2                                                                     | HS | IV | 11972697 | 12011007 | WBGene00006759 | unc-22  | ZK617.1  | 0.0946331596525667  |
| AGIWUR3562;AGIWUR13699;AGIWUR28418;AGIWUR39579                         |    |    |          |          |                |         |          |                     |
| N2                                                                     | HS | IV | 12013420 | 12014045 | WBGene00004971 | spe-17  | ZK617.3  | 0.0762528614444449  |
| AGIWUR42758                                                            |    |    |          |          |                |         |          |                     |
| N2                                                                     | HS | IV | 12014189 | 12015686 | WBGene00014009 | lips-6  | ZK617.2  | -0.0377724078032102 |
| AGIWUR5897                                                             |    |    |          |          |                |         |          |                     |
| N2                                                                     | HS | IV | 12026882 | 12029174 | WBGene00011742 | tgn-38  | T12G3.7  | -0.0977497257673381 |
| AGIWUR3714;AGIWUR14906;AGIWUR17093;AGIWUR20016;AGIWUR24430;AGIWUR44919 |    |    |          |          |                |         |          |                     |
| N2                                                                     | HS | IV | 12030047 | 12031271 | WBGene00011741 | T12G3.6 | T12G3.6  | 0.0416829035096171  |
| AGIWUR28845                                                            |    |    |          |          |                |         |          |                     |
| N2                                                                     | HS | IV | 12031314 | 12032154 | WBGene00011740 | mrpl-51 | T12G3.5  | -0.0440873626644525 |
| AGIWUR4307;AGIWUR6927;AGIWUR43099                                      |    |    |          |          |                |         |          |                     |
| N2                                                                     | HS | IV | 12034252 | 12037051 | WBGene00011737 | sqst-1  | T12G3.1  | 0.106352309348491   |
| AGIWUR1200                                                             |    |    |          |          |                |         |          |                     |
| N2                                                                     | HS | IV | 12038985 | 12046967 | WBGene00011738 | T12G3.2 | T12G3.2  | -0.0229260593570384 |
| AGIWUR16765;AGIWUR33601;AGIWUR44249                                    |    |    |          |          |                |         |          |                     |
| N2                                                                     | HS | IV | 12048256 | 12049943 | WBGene00011739 | T12G3.4 | T12G3.4  | -0.122350052423814  |
| AGIWUR36660                                                            |    |    |          |          |                |         |          |                     |
| N2                                                                     | HS | IV | 12049862 | 12051226 | WBGene00000270 | bre-5   | T12G3.8  | 0.255200330512869   |
| AGIWUR24329                                                            |    |    |          |          |                |         |          |                     |
| N2                                                                     | HS | IV | 12051484 | 12055785 | WBGene00005015 | spt-5   | K08E4.1  | 0.0175655564942474  |
| AGIWUR6774                                                             |    |    |          |          |                |         |          |                     |
| N2                                                                     | HS | IV | 12055670 | 12056656 | WBGene00010666 | K08E4.2 | K08E4.2  | 0.214639735720397   |
| AGIWUR24105                                                            |    |    |          |          |                |         |          |                     |
| N2                                                                     | HS | IV | 12057626 | 12059951 | WBGene00010667 | K08E4.3 | K08E4.3  | 0.161264146384575   |
| AGIWUR26770                                                            |    |    |          |          |                |         |          |                     |
| N2                                                                     | HS | IV | 12060397 | 12061329 | WBGene00045283 | K08E4.8 | K08E4.8  | -0.0785056591799824 |
| AGIWUR35311;AGIWUR41068                                                |    |    |          |          |                |         |          |                     |

|                                                       |    |    |          |          |                |          |          |                     |
|-------------------------------------------------------|----|----|----------|----------|----------------|----------|----------|---------------------|
| N2                                                    | HS | IV | 12066572 | 12066884 | WBGene00010668 | K08E4.4  | K08E4.4  | 0.868923536603704   |
| AGIWUR16321                                           |    |    |          |          |                |          |          |                     |
| N2                                                    | HS | IV | 12068890 | 12074914 | WBGene00010669 | bath-37  | K08E4.5  | 0.0270792800333854  |
| AGIWUR5644;AGIWUR10958                                |    |    |          |          |                |          |          |                     |
| N2                                                    | HS | IV | 12075744 | 12076950 | WBGene00045036 | K08E4.7  | K08E4.7  | -0.150281406781108  |
| AGIWUR10309                                           |    |    |          |          |                |          |          |                     |
| N2                                                    | HS | IV | 12077107 | 12078162 | WBGene00010670 | K08E4.6  | K08E4.6  | -0.056731326854548  |
| AGIWUR20378                                           |    |    |          |          |                |          |          |                     |
| N2                                                    | HS | IV | 12079463 | 12084362 | WBGene00008682 | lex-1    | F11A10.1 |                     |
| -0.0245979918707651 AGIWUR18425;AGIWUR36995           |    |    |          |          |                |          |          |                     |
| N2                                                    | HS | IV | 12084478 | 12085320 | WBGene00008683 | repo-1   | F11A10.2 |                     |
| 0.10790577407985 AGIWUR23785                          |    |    |          |          |                |          |          |                     |
| N2                                                    | HS | IV | 12085423 | 12087060 | WBGene00008688 | F11A10.7 |          | F11A10.7            |
| 0.0391075406217922 AGIWUR34296                        |    |    |          |          |                |          |          |                     |
| N2                                                    | HS | IV | 12087017 | 12089095 | WBGene00008687 | F11A10.6 |          | F11A10.6            |
| 0.0799013135549416 AGIWUR28237                        |    |    |          |          |                |          |          |                     |
| N2                                                    | HS | IV | 12089247 | 12092213 | WBGene00008684 | mig-32   | F11A10.3 |                     |
| 0.0299833951379398 AGIWUR38996                        |    |    |          |          |                |          |          |                     |
| N2                                                    | HS | IV | 12092322 | 12093472 | WBGene00044329 | cpsf-4   | F11A10.8 |                     |
| 0.103373523020263 AGIWUR15808;AGIWUR22988             |    |    |          |          |                |          |          |                     |
| N2                                                    | HS | IV | 12094372 | 12096692 | WBGene00008686 | F11A10.5 |          | F11A10.5            |
| 0.164305325427645 AGIWUR17214                         |    |    |          |          |                |          |          |                     |
| N2                                                    | HS | IV | 12096779 | 12105762 | WBGene00008685 | mon-2    | F11A10.4 |                     |
| -0.124690004377278 AGIWUR9219;AGIWUR38240;AGIWUR38547 |    |    |          |          |                |          |          |                     |
| N2                                                    | HS | IV | 12105858 | 12108388 | WBGene00010889 | M18.3    | M18.3    | 0.0836883062321405  |
| AGIWUR41362                                           |    |    |          |          |                |          |          |                     |
| N2                                                    | HS | IV | 12108672 | 12110275 | WBGene00000703 | col-129  | M18.1    | -0.0281080843631472 |
| AGIWUR8374                                            |    |    |          |          |                |          |          |                     |
| N2                                                    | HS | IV | 12110586 | 12111577 | WBGene00010888 | d1c-2    | M18.2    | 0.357748233630485   |
| AGIWUR14688;AGIWUR15276;AGIWUR15586                   |    |    |          |          |                |          |          |                     |
| N2                                                    | HS | IV | 12114810 | 12121183 | WBGene00010890 | ddb-1    | M18.5    | -0.269460851543494  |
| AGIWUR10292                                           |    |    |          |          |                |          |          |                     |
| N2                                                    | HS | IV | 12121266 | 12122881 | WBGene00010891 | M18.6    | M18.6    | 0.0930011954800474  |
| AGIWUR34671;AGIWUR40569;AGIWUR42513                   |    |    |          |          |                |          |          |                     |
| N2                                                    | HS | IV | 12123155 | 12124807 | WBGene00000122 | aly-3    | M18.7    | 0.158399653303244   |
| AGIWUR20179;AGIWUR27251                               |    |    |          |          |                |          |          |                     |
| N2                                                    | HS | IV | 12124952 | 12126785 | WBGene00010892 | dhhc-6   | M18.8    | 0.0534312687411216  |
| AGIWUR26917                                           |    |    |          |          |                |          |          |                     |
| N2                                                    | HS | IV | 12129504 | 12135096 | WBGene00003010 | lin-24   | B0001.1  | -0.0807721212232693 |

|                                                             |    |    |                                                            |          |                |            |           |                     |
|-------------------------------------------------------------|----|----|------------------------------------------------------------|----------|----------------|------------|-----------|---------------------|
| AGIWUR998                                                   |    |    |                                                            |          |                |            |           |                     |
| N2                                                          | HS | IV | 12135074                                                   | 12138193 | WBGene00007089 | B0001.4    | B0001.4   | -0.027156114456087  |
| AGIWUR34195                                                 |    |    |                                                            |          |                |            |           |                     |
| N2                                                          | HS | IV | 12138847                                                   | 12141057 | WBGene00007093 | B0001.8    | B0001.8   | 0.0206717138209314  |
| AGIWUR38687                                                 |    |    |                                                            |          |                |            |           |                     |
| N2                                                          | HS | IV | 12141161                                                   | 12143331 | WBGene00007090 | B0001.5    | B0001.5   | -0.0922943361291626 |
| AGIWUR38103                                                 |    |    |                                                            |          |                |            |           |                     |
| N2                                                          | HS | IV | 12143431                                                   | 12145731 | WBGene00007088 | B0001.3    | B0001.3   | -0.0971060933348049 |
| AGIWUR14977;AGIWUR37338;AGIWUR44425                         |    |    |                                                            |          |                |            |           |                     |
| N2                                                          | HS | IV | 12146486                                                   | 12150975 | WBGene00007087 | B0001.2    | B0001.2   | 0.368952348721905   |
| AGIWUR25713                                                 |    |    |                                                            |          |                |            |           |                     |
| N2                                                          | HS | IV | 12151170                                                   | 12154245 | WBGene00007092 | B0001.7    | B0001.7   | -0.300318829908358  |
| AGIWUR41334                                                 |    |    |                                                            |          |                |            |           |                     |
| N2                                                          | HS | IV | 12156838                                                   | 12164266 | WBGene00007091 | eri-12     | B0001.6   | -0.0954587893708165 |
| AGIWUR36393                                                 |    |    |                                                            |          |                |            |           |                     |
| N2                                                          | HS | IV | 12168244                                                   | 12169216 | WBGene00008967 | F20B10.3   |           | F20B10.3            |
| 0.0107171300194846                                          |    |    | AGIWUR43417                                                |          |                |            |           |                     |
| N2                                                          | HS | IV | 12170824                                                   | 12178335 | WBGene00003772 | nlr-1      | F20B10.1  |                     |
| 0.160733030906952                                           |    |    | AGIWUR2056                                                 |          |                |            |           |                     |
| N2                                                          | HS | IV | 12200978                                                   | 12207956 | WBGene00009435 | F35G2.1    | F35G2.1   | -0.265019502362399  |
| AGIWUR2732;AGIWUR28383;AGIWUR39547                          |    |    |                                                            |          |                |            |           |                     |
| N2                                                          | HS | IV | 12208192                                                   | 12209010 | WBGene00009436 | marb-1     | F35G2.2   | -0.0596414677677188 |
| AGIWUR18307;AGIWUR25328;AGIWUR26517;AGIWUR34553;AGIWUR42977 |    |    |                                                            |          |                |            |           |                     |
| N2                                                          | HS | IV | 12209708                                                   | 12210737 | WBGene00009437 | F35G2.3    | F35G2.3   | 0.0743936597224488  |
| AGIWUR26562                                                 |    |    |                                                            |          |                |            |           |                     |
| N2                                                          | HS | IV | 12211098                                                   | 12215987 | WBGene00004025 | phy-2      | F35G2.4   | 0.0230534147574275  |
| AGIWUR7106                                                  |    |    |                                                            |          |                |            |           |                     |
| N2                                                          | HS | IV | 12219609                                                   | 12222889 | WBGene00009438 | F35G2.5    | F35G2.5   | 0.217237804642488   |
| AGIWUR10427;AGIWUR24979;AGIWUR25805                         |    |    |                                                            |          |                |            |           |                     |
| N2                                                          | HS | IV | 12222872                                                   | 12227112 | WBGene00012704 | mlt-3      | Y39C12A.1 |                     |
| 0.386517497813969                                           |    |    | AGIWUR25518                                                |          |                |            |           |                     |
| N2                                                          | HS | IV | 12227910                                                   | 12229779 | WBGene00012705 | sre-18     | Y39C12A.3 |                     |
| 0.066753962329491                                           |    |    | AGIWUR22014                                                |          |                |            |           |                     |
| N2                                                          | HS | IV | 12231310                                                   | 12231631 | WBGene00045314 | Y39C12A.10 |           | Y39C12A.10          |
| -0.0326698537181933                                         |    |    | AGIWUR4014;AGIWUR15890;AGIWUR23137;AGIWUR25704;AGIWUR38992 |          |                |            |           |                     |
| N2                                                          | HS | IV | 12232489                                                   | 12233408 | WBGene00012706 | sre-17     | Y39C12A.4 |                     |
| -0.153107364294028                                          |    |    | AGIWUR6305;AGIWUR6896                                      |          |                |            |           |                     |
| N2                                                          | HS | IV | 12234139                                                   | 12236111 | WBGene00012707 | sre-16     | Y39C12A.5 |                     |
| 0.0713834157859132                                          |    |    | AGIWUR7617;AGIWUR22914;AGIWUR39281                         |          |                |            |           |                     |

|                         |    |    |                                                 |          |                |           |                             |
|-------------------------|----|----|-------------------------------------------------|----------|----------------|-----------|-----------------------------|
| N2                      | HS | IV | 12237175                                        | 12238951 | WBGene00012708 | sre-19    | Y39C12A.6                   |
| -0.0272389883808888     |    |    | AGIWUR11239                                     |          |                |           |                             |
| N2                      | HS | IV | 12241363                                        | 12244806 | WBGene00012709 | sre-15    | Y39C12A.7                   |
| 0.153349675128315       |    |    | AGIWUR8094                                      |          |                |           |                             |
| N2                      | HS | IV | 12251111                                        | 12252663 | WBGene00001044 | dnj-26    | Y39C12A.8                   |
| 0.297109354177692       |    |    | AGIWUR15323                                     |          |                |           |                             |
| N2                      | HS | IV | 12257637                                        | 12259192 | WBGene00012710 | Y39C12A.9 | Y39C12A.9                   |
| 0.18751819061047        |    |    | AGIWUR9675                                      |          |                |           |                             |
| N2                      | HS | IV | 12259797                                        | 12261449 | WBGene00016579 | sre-14    | C42C1.1 0.111975969601056   |
| AGIWUR9188              |    |    |                                                 |          |                |           |                             |
| N2                      | HS | IV | 12265526                                        | 12268306 | WBGene00016580 | C42C1.2   | C42C1.2 0.0234059279547338  |
| AGIWUR27865             |    |    |                                                 |          |                |           |                             |
| N2                      | HS | IV | 12268995                                        | 12269533 | WBGene00004448 | rpl-34    | C42C1.14                    |
| 0.0293447018253374      |    |    | AGIWUR8628                                      |          |                |           |                             |
| N2                      | HS | IV | 12269594                                        | 12270492 | WBGene00016581 | C42C1.3   | C42C1.3 0.228666848449903   |
| AGIWUR17440             |    |    |                                                 |          |                |           |                             |
| N2                      | HS | IV | 12270490                                        | 12275992 | WBGene00016582 | C42C1.4   | C42C1.4 -0.101773729258856  |
| AGIWUR1169              |    |    |                                                 |          |                |           |                             |
| N2                      | HS | IV | 12276083                                        | 12278059 | WBGene00016583 | tag-335   | C42C1.5 0.0407971108100433  |
| AGIWUR1600              |    |    |                                                 |          |                |           |                             |
| N2                      | HS | IV | 12278729                                        | 12279546 | WBGene00016591 | C42C1.13  | C42C1.13                    |
| 0.153323769324103       |    |    | AGIWUR38119                                     |          |                |           |                             |
| N2                      | HS | IV | 12279659                                        | 12281917 | WBGene00016589 | C42C1.11  | C42C1.11                    |
| -0.15512067474331       |    |    | AGIWUR9093;AGIWUR25940;AGIWUR37458;AGIWUR41625  |          |                |           |                             |
| N2                      | HS | IV | 12282739                                        | 12287820 | WBGene00016588 | hpo-12    | C42C1.10                    |
| 0.24159563735422        |    |    | AGIWUR12191;AGIWUR14023;AGIWUR25224;AGIWUR43531 |          |                |           |                             |
| N2                      | HS | IV | 12287928                                        | 12289392 | WBGene00016592 | erl-1     | C42C1.15                    |
| -0.321366560435935      |    |    | AGIWUR8866                                      |          |                |           |                             |
| N2                      | HS | IV | 12289449                                        | 12290994 | WBGene00016587 | C42C1.9   | C42C1.9 0.253442854141859   |
| AGIWUR18105             |    |    |                                                 |          |                |           |                             |
| N2                      | HS | IV | 12291046                                        | 12293317 | WBGene00016586 | C42C1.8   | C42C1.8 -0.0713189340510141 |
| AGIWUR41507             |    |    |                                                 |          |                |           |                             |
| N2                      | HS | IV | 12293234                                        | 12301280 | WBGene00016585 | oac-59    | C42C1.7 0.0475220005687169  |
| AGIWUR32855;AGIWUR37511 |    |    |                                                 |          |                |           |                             |
| N2                      | HS | IV | 12304462                                        | 12307820 | WBGene00019579 | oac-57    | K09E10.1                    |
| -0.118761376688782      |    |    | AGIWUR4366                                      |          |                |           |                             |
| N2                      | HS | IV | 12308293                                        | 12311606 | WBGene00019580 | oac-58    | K09E10.2                    |
| 0.116198125615205       |    |    | AGIWUR12521;AGIWUR19198                         |          |                |           |                             |
| N2                      | HS | IV | 12327190                                        | 12328718 | WBGene00008949 | F19B6.3   | F19B6.3 0.141735610306016   |



|                                                                                         |    |    |          |          |                |          |          |                     |  |
|-----------------------------------------------------------------------------------------|----|----|----------|----------|----------------|----------|----------|---------------------|--|
| AGIWUR9173                                                                              |    |    |          |          |                |          |          |                     |  |
| N2                                                                                      | HS | IV | 12329407 | 12331054 | WBGene00006733 | ufd-1    | F19B6.2  | 0.218323596955307   |  |
| AGIWUR14233;AGIWUR22664                                                                 |    |    |          |          |                |          |          |                     |  |
| N2                                                                                      | HS | IV | 12330984 | 12336041 | WBGene00008948 | F19B6.1  | F19B6.1  | -0.041746338565539  |  |
| AGIWUR7069;AGIWUR8219;AGIWUR16393;AGIWUR19254;AGIWUR20477;AGIWUR24504;AGIWUR37312       |    |    |          |          |                |          |          |                     |  |
| N2                                                                                      | HS | IV | 12337577 | 12340436 | WBGene00008950 | wht-5    | F19B6.4  | 0.228513762130662   |  |
| AGIWUR16742                                                                             |    |    |          |          |                |          |          |                     |  |
| N2                                                                                      | HS | IV | 12349946 | 12355724 | WBGene00013921 | best-22  | ZC518.1  | -0.202207020170209  |  |
| AGIWUR7513;AGIWUR23782;AGIWUR28936;AGIWUR30454;AGIWUR37902;AGIWUR39697;AGIWUR40257      |    |    |          |          |                |          |          |                     |  |
| N2                                                                                      | HS | IV | 12355604 | 12360792 | WBGene00004756 | sec-24.2 |          | ZC518.2             |  |
| -0.0498557151197003 AGIWUR2099;AGIWUR8661                                               |    |    |          |          |                |          |          |                     |  |
| N2                                                                                      | HS | IV | 12361542 | 12371852 | WBGene00000376 | ccr-4    | ZC518.3  | -0.102820817722668  |  |
| AGIWUR10657;AGIWUR14172;AGIWUR15335;AGIWUR16124;AGIWUR26381;AGIWUR34290;AGIWUR39356     |    |    |          |          |                |          |          |                     |  |
| N2                                                                                      | HS | IV | 12372253 | 12374908 | WBGene00009211 | wdr-46   | F28D1.1  | -0.0489327324949951 |  |
| AGIWUR3214;AGIWUR10643;AGIWUR30836;AGIWUR37610;AGIWUR39901                              |    |    |          |          |                |          |          |                     |  |
| N2                                                                                      | HS | IV | 12374709 | 12376121 | WBGene00009212 | F28D1.2  | F28D1.2  | -0.114553222109704  |  |
| AGIWUR1712;AGIWUR9248;AGIWUR12535;AGIWUR43721                                           |    |    |          |          |                |          |          |                     |  |
| N2                                                                                      | HS | IV | 12376869 | 12378050 | WBGene00044285 | thn-8    | F28D1.12 |                     |  |
| -0.161157683222123 AGIWUR7166;AGIWUR25211                                               |    |    |          |          |                |          |          |                     |  |
| N2                                                                                      | HS | IV | 12380104 | 12380857 | WBGene00009213 | thn-1    | F28D1.3  | 0.0686057965127631  |  |
| AGIWUR40381                                                                             |    |    |          |          |                |          |          |                     |  |
| N2                                                                                      | HS | IV | 12381592 | 12382339 | WBGene00009214 | thn-3    | F28D1.4  | -0.120854532655159  |  |
| AGIWUR32234                                                                             |    |    |          |          |                |          |          |                     |  |
| N2                                                                                      | HS | IV | 12383170 | 12384019 | WBGene00009215 | thn-2    | F28D1.5  | -0.170570332731341  |  |
| AGIWUR9895                                                                              |    |    |          |          |                |          |          |                     |  |
| N2                                                                                      | HS | IV | 12384507 | 12385161 | WBGene00009216 | F28D1.6  | F28D1.6  | 0.0852219790087894  |  |
| AGIWUR43733                                                                             |    |    |          |          |                |          |          |                     |  |
| N2                                                                                      | HS | IV | 12387720 | 12390095 | WBGene00009217 | spe-45   | F28D1.8  | 0.314274376443548   |  |
| AGIWUR28423                                                                             |    |    |          |          |                |          |          |                     |  |
| N2                                                                                      | HS | IV | 12390264 | 12391396 | WBGene00004492 | rps-23   | F28D1.7  |                     |  |
| -0.00710409654366195 AGIWUR15756;AGIWUR39218                                            |    |    |          |          |                |          |          |                     |  |
| N2                                                                                      | HS | IV | 12391591 | 12392120 | WBGene00009219 | dpm-3    | F28D1.11 |                     |  |
| 0.016821635502005 AGIWUR3122;AGIWUR6771;AGIWUR17201;AGIWUR23209;AGIWUR32254;AGIWUR34150 |    |    |          |          |                |          |          |                     |  |
| N2                                                                                      | HS | IV | 12392121 | 12398706 | WBGene00009218 | acs-20   | F28D1.9  | 0.0527711333654399  |  |
| AGIWUR6360;AGIWUR11480;AGIWUR27506;AGIWUR34666;AGIWUR37887;AGIWUR43532                  |    |    |          |          |                |          |          |                     |  |
| N2                                                                                      | HS | IV | 12404374 | 12408697 | WBGene00001580 | gex-3    | F28D1.10 |                     |  |
| -0.10083020699625 AGIWUR23995;AGIWUR30797;AGIWUR40839                                   |    |    |          |          |                |          |          |                     |  |
| N2                                                                                      | HS | IV | 12408895 | 12410468 | WBGene00008580 | dsb-1    | F08G5.1  | -0.360035392929124  |  |
| AGIWUR7802                                                                              |    |    |          |          |                |          |          |                     |  |

|                                                         |    |    |          |          |                |           |           |                     |
|---------------------------------------------------------|----|----|----------|----------|----------------|-----------|-----------|---------------------|
| N2                                                      | HS | IV | 12410467 | 12412219 | WBGene00008581 | ac1-13    | F08G5.2   | 0.250073430434583   |
| AGIWUR15747                                             |    |    |          |          |                |           |           |                     |
| N2                                                      | HS | IV | 12412923 | 12417582 | WBGene00008582 | F08G5.3   | F08G5.3   | 0.0347103579365822  |
| AGIWUR1489;AGIWUR11150;AGIWUR22785;AGIWUR39630          |    |    |          |          |                |           |           |                     |
| N2                                                      | HS | IV | 12425217 | 12432533 | WBGene00008583 | ugt-65    | F08G5.5   | -0.127106205815033  |
| AGIWUR12087;AGIWUR17157;AGIWUR24039;AGIWUR37416         |    |    |          |          |                |           |           |                     |
| N2                                                      | HS | IV | 12432640 | 12435001 | WBGene00023502 | cllec-184 | F08G5.7   |                     |
| -0.00436025244420968 AGIWUR18437                        |    |    |          |          |                |           |           |                     |
| N2                                                      | HS | IV | 12435802 | 12438274 | WBGene00008584 | irg-4     | F08G5.6   | 0.305494329423325   |
| AGIWUR38591                                             |    |    |          |          |                |           |           |                     |
| N2                                                      | HS | IV | 12442068 | 12443035 | WBGene00255469 | C25G4.17  | C25G4.17  |                     |
| 0.0775105087902279 AGIWUR25856                          |    |    |          |          |                |           |           |                     |
| N2                                                      | HS | IV | 12443236 | 12444046 | WBGene00007730 | C25G4.2   | C25G4.2   | 0.29328755767089    |
| AGIWUR13600                                             |    |    |          |          |                |           |           |                     |
| N2                                                      | HS | IV | 12444450 | 12445884 | WBGene00007731 | C25G4.3   | C25G4.3   | -0.242633465126326  |
| AGIWUR12772                                             |    |    |          |          |                |           |           |                     |
| N2                                                      | HS | IV | 12445801 | 12451299 | WBGene00001085 | dpy-26    | C25G4.5   |                     |
| -0.00367034665640098 AGIWUR4086;AGIWUR33667;AGIWUR34816 |    |    |          |          |                |           |           |                     |
| N2                                                      | HS | IV | 12452066 | 12454215 | WBGene00007732 | spe-44    | C25G4.4   | -0.0345383888581967 |
| AGIWUR9240                                              |    |    |          |          |                |           |           |                     |
| N2                                                      | HS | IV | 12455097 | 12456175 | WBGene00007733 | smz-1     | C25G4.6   | 0.160563404050448   |
| AGIWUR21117                                             |    |    |          |          |                |           |           |                     |
| N2                                                      | HS | IV | 12456913 | 12458561 | WBGene00007734 | C25G4.7   | C25G4.7   | 0.129400089137356   |
| AGIWUR28094                                             |    |    |          |          |                |           |           |                     |
| N2                                                      | HS | IV | 12459819 | 12463412 | WBGene00007735 | C25G4.8   | C25G4.8   | -0.101055583965699  |
| AGIWUR12518;AGIWUR34070                                 |    |    |          |          |                |           |           |                     |
| N2                                                      | HS | IV | 12468658 | 12474889 | WBGene00007736 | igdb-2    | C25G4.10  |                     |
| -0.210989314611492 AGIWUR26780                          |    |    |          |          |                |           |           |                     |
| N2                                                      | HS | IV | 12487579 | 12489721 | WBGene00005689 | sru-26    | T04A11.12 |                     |
| -0.111972339876681 AGIWUR37757                          |    |    |          |          |                |           |           |                     |
| N2                                                      | HS | IV | 12490791 | 12495298 | WBGene00001865 | him-6     | T04A11.6  |                     |
| -0.0861605153201008 AGIWUR44976                         |    |    |          |          |                |           |           |                     |
| N2                                                      | HS | IV | 12496065 | 12497844 | WBGene00005683 | sru-20    | T04A11.7  |                     |
| 0.25720346813612 AGIWUR43611                            |    |    |          |          |                |           |           |                     |
| N2                                                      | HS | IV | 12498538 | 12500413 | WBGene00005682 | sru-19    | T04A11.8  |                     |
| -0.125349157401924 AGIWUR38884                          |    |    |          |          |                |           |           |                     |
| N2                                                      | HS | IV | 12502256 | 12504055 | WBGene00005681 | sru-18    | T04A11.9  |                     |
| -0.14253039929127 AGIWUR22213                           |    |    |          |          |                |           |           |                     |
| N2                                                      | HS | IV | 12507409 | 12507566 | WBGene00045131 | T04A11.14 | T04A11.14 |                     |

|                                                                                                                                  |             |                |          |         |                     |  |  |  |
|----------------------------------------------------------------------------------------------------------------------------------|-------------|----------------|----------|---------|---------------------|--|--|--|
| -0.363613985028163                                                                                                               | AGIWUR14695 |                |          |         |                     |  |  |  |
| N2 HS IV 12517110                                                                                                                | 12518128    | WBGene00009954 | F53B2.1  | F53B2.1 | -0.0737561885961107 |  |  |  |
| AGIWUR10830                                                                                                                      |             |                |          |         |                     |  |  |  |
| N2 HS IV 12521239                                                                                                                | 12522621    | WBGene00005676 | sru-13   | F53B2.4 | -0.137830544480224  |  |  |  |
| AGIWUR38780                                                                                                                      |             |                |          |         |                     |  |  |  |
| N2 HS IV 12524478                                                                                                                | 12525509    | WBGene00009955 | eak-4    | F53B2.3 | -0.103061690545491  |  |  |  |
| AGIWUR40563                                                                                                                      |             |                |          |         |                     |  |  |  |
| N2 HS IV 12526260                                                                                                                | 12527339    | WBGene00009957 | F53B2.8  | F53B2.8 | -0.410214601319655  |  |  |  |
| AGIWUR11000                                                                                                                      |             |                |          |         |                     |  |  |  |
| N2 HS IV 12528529                                                                                                                | 12531166    | WBGene00009956 | F53B2.5  | F53B2.5 | 0.0460179045922615  |  |  |  |
| AGIWUR2861;AGIWUR19916;AGIWUR28988                                                                                               |             |                |          |         |                     |  |  |  |
| N2 HS IV 12542034                                                                                                                | 12545729    | WBGene00001820 | ham-1    | F53B2.6 | -0.0906499604473261 |  |  |  |
| AGIWUR1006;AGIWUR4237;AGIWUR6168;AGIWUR14548;AGIWUR16905;AGIWUR17346;AGIWUR23386;AGIWUR25307;AGIWUR33707;AGIWUR34203;AGIWUR41967 |             |                |          |         |                     |  |  |  |
| N2 HS IV 12548129                                                                                                                | 12554681    | WBGene00014081 | ZK795.1  | ZK795.1 | -0.0602540524198325 |  |  |  |
| AGIWUR38827                                                                                                                      |             |                |          |         |                     |  |  |  |
| N2 HS IV 12557072                                                                                                                | 12558975    | WBGene00014082 | ZK795.2  | ZK795.2 | 0.101101155482544   |  |  |  |
| AGIWUR8412;AGIWUR17586;AGIWUR33634                                                                                               |             |                |          |         |                     |  |  |  |
| N2 HS IV 12559365                                                                                                                | 12560719    | WBGene00014083 | ZK795.3  | ZK795.3 | -0.0526128734927056 |  |  |  |
| AGIWUR11867                                                                                                                      |             |                |          |         |                     |  |  |  |
| N2 HS IV 12560749                                                                                                                | 12561201    | WBGene00014084 | snb-7    | ZK795.4 | 0.252983342681839   |  |  |  |
| AGIWUR15016;AGIWUR39153                                                                                                          |             |                |          |         |                     |  |  |  |
| N2 HS IV 12563775                                                                                                                | 12566111    | WBGene00010671 | eak-7    | K08E7.1 | -0.183980960872891  |  |  |  |
| AGIWUR8409                                                                                                                       |             |                |          |         |                     |  |  |  |
| N2 HS IV 12565983                                                                                                                | 12567226    | WBGene00002002 | hsb-1    | K08E7.2 | -0.317057196813947  |  |  |  |
| AGIWUR9703                                                                                                                       |             |                |          |         |                     |  |  |  |
| N2 HS IV 12567842                                                                                                                | 12570622    | WBGene00002368 | let-99   | K08E7.3 | -0.168427129260014  |  |  |  |
| AGIWUR12809                                                                                                                      |             |                |          |         |                     |  |  |  |
| N2 HS IV 12573370                                                                                                                | 12578870    | WBGene00010673 | K08E7.5  | K08E7.5 | -0.0398057678142694 |  |  |  |
| AGIWUR8564;AGIWUR19836;AGIWUR31015;AGIWUR31638;AGIWUR38386;AGIWUR39800;AGIWUR40401                                               |             |                |          |         |                     |  |  |  |
| N2 HS IV 12579055                                                                                                                | 12581128    | WBGene00010674 | K08E7.6  | K08E7.6 | -0.207393464614665  |  |  |  |
| AGIWUR39385                                                                                                                      |             |                |          |         |                     |  |  |  |
| N2 HS IV 12585192                                                                                                                | 12586216    | WBGene00010675 | K08E7.8  | K08E7.8 | 0.331552218141058   |  |  |  |
| AGIWUR21419                                                                                                                      |             |                |          |         |                     |  |  |  |
| N2 HS IV 12586511                                                                                                                | 12590428    | WBGene00000841 | cul-6    | K08E7.7 | 0.592981244370174   |  |  |  |
| AGIWUR28440                                                                                                                      |             |                |          |         |                     |  |  |  |
| N2 HS IV 12591697                                                                                                                | 12599169    | WBGene00003995 | pgp-1    | K08E7.9 | 0.15331788870526    |  |  |  |
| AGIWUR12495                                                                                                                      |             |                |          |         |                     |  |  |  |
| N2 HS IV 12601126                                                                                                                | 12605425    | WBGene00013224 | Y55D9A.2 |         | Y55D9A.2            |  |  |  |

|                                                                                                                     |                                                             |    |                        |          |                |                 |                            |
|---------------------------------------------------------------------------------------------------------------------|-------------------------------------------------------------|----|------------------------|----------|----------------|-----------------|----------------------------|
| -0.0469368067883176                                                                                                 |                                                             |    | AGIWUR8804;AGIWUR26146 |          |                |                 |                            |
| N2                                                                                                                  | HS                                                          | IV | 12605700               | 12614723 | WBGene00013223 | efa-6           | Y55D9A.1                   |
| -0.117399370890768                                                                                                  |                                                             |    |                        |          |                |                 |                            |
| AGIWUR231;AGIWUR5658;AGIWUR8719;AGIWUR14800;AGIWUR29089;AGIWUR32656;AGIWUR33205;AGIWUR34962;AGIWUR36389;AGIWUR45118 |                                                             |    |                        |          |                |                 |                            |
| N2                                                                                                                  | HS                                                          | IV | 12622093               | 12631022 | WBGene00000186 | ark-1           | C01C7.1 0.0870719502227359 |
| AGIWUR6011                                                                                                          |                                                             |    |                        |          |                |                 |                            |
| N2                                                                                                                  | HS                                                          | IV | 12640447               | 12650652 | WBGene00006916 | vha-7           | C26H9A.1                   |
| -0.198148931828456                                                                                                  | AGIWUR10849;AGIWUR20516;AGIWUR33193;AGIWUR40517;AGIWUR43760 |    |                        |          |                |                 |                            |
| N2                                                                                                                  | HS                                                          | IV | 12653403               | 12674773 | WBGene00007752 | wdfy-3          | C26H9A.2                   |
| 0.00889449091010874                                                                                                 | AGIWUR6728;AGIWUR14116;AGIWUR23638;AGIWUR41522;AGIWUR41680  |    |                        |          |                |                 |                            |
| N2                                                                                                                  | HS                                                          | IV | 12675207               | 12676000 | WBGene00011941 | T23B5.4 T23B5.4 | 0.0410540529156087         |
| AGIWUR7224                                                                                                          |                                                             |    |                        |          |                |                 |                            |
| N2                                                                                                                  | HS                                                          | IV | 12677398               | 12684378 | WBGene00011939 | prmt-9 T23B5.1  | -0.141460519964058         |
| AGIWUR15729;AGIWUR21183;AGIWUR36147                                                                                 |                                                             |    |                        |          |                |                 |                            |
| N2                                                                                                                  | HS                                                          | IV | 12688655               | 12703991 | WBGene00011940 | T23B5.3 T23B5.3 | -0.336502170967711         |
| AGIWUR2290;AGIWUR2511;AGIWUR8373;AGIWUR17180;AGIWUR29168;AGIWUR32930;AGIWUR32938                                    |                                                             |    |                        |          |                |                 |                            |
| N2                                                                                                                  | HS                                                          | IV | 12704111               | 12706755 | WBGene00007780 | C27D8.4 C27D8.4 | 0.0804410749248099         |
| AGIWUR3968                                                                                                          |                                                             |    |                        |          |                |                 |                            |
| N2                                                                                                                  | HS                                                          | IV | 12706714               | 12711744 | WBGene00007779 | C27D8.3 C27D8.3 | -0.0815200054780476        |
| AGIWUR7885                                                                                                          |                                                             |    |                        |          |                |                 |                            |
| N2                                                                                                                  | HS                                                          | IV | 12712765               | 12714771 | WBGene00007778 | C27D8.2 C27D8.2 | -0.180302561260199         |
| AGIWUR37386                                                                                                         |                                                             |    |                        |          |                |                 |                            |
| N2                                                                                                                  | HS                                                          | IV | 12717831               | 12719391 | WBGene00007777 | C27D8.1 C27D8.1 | 0.139981367096404          |
| AGIWUR19597                                                                                                         |                                                             |    |                        |          |                |                 |                            |
| N2                                                                                                                  | HS                                                          | IV | 12719960               | 12720997 | WBGene00011949 | T23F6.1 T23F6.1 | 0.239653492181125          |
| AGIWUR555;AGIWUR21553;AGIWUR25722;AGIWUR27233;AGIWUR42033;AGIWUR44778                                               |                                                             |    |                        |          |                |                 |                            |
| N2                                                                                                                  | HS                                                          | IV | 12721356               | 12723015 | WBGene00011950 | T23F6.2 T23F6.2 |                            |
| -0.00306047640188289                                                                                                | AGIWUR6919                                                  |    |                        |          |                |                 |                            |
| N2                                                                                                                  | HS                                                          | IV | 12723103               | 12724651 | WBGene00011951 | T23F6.3 T23F6.3 | -0.0409335923105729        |
| AGIWUR6892                                                                                                          |                                                             |    |                        |          |                |                 |                            |
| N2                                                                                                                  | HS                                                          | IV | 12724948               | 12730095 | WBGene00004315 | rbd-1 T23F6.4   | 0.0731399632277316         |
| AGIWUR7447;AGIWUR20940;AGIWUR22173;AGIWUR25199;AGIWUR27648;AGIWUR29331;AGIWUR34066;AGIWUR35698;AGIWUR39765          |                                                             |    |                        |          |                |                 |                            |
| N2                                                                                                                  | HS                                                          | IV | 12734262               | 12734895 | WBGene00045184 | T23F6.7 T23F6.7 | 0.0521536008568209         |
| AGIWUR9615;AGIWUR15641;AGIWUR31164;AGIWUR31497;AGIWUR33297                                                          |                                                             |    |                        |          |                |                 |                            |
| N2                                                                                                                  | HS                                                          | IV | 12735187               | 12741523 | WBGene00011952 | T23F6.5 T23F6.5 | 0.19969498085535           |
| AGIWUR36912                                                                                                         |                                                             |    |                        |          |                |                 |                            |
| N2                                                                                                                  | HS                                                          | IV | 12743039               | 12744813 | WBGene00007987 | C36H8.1 C36H8.1 | 0.0163376863775007         |
| AGIWUR11471;AGIWUR16086;AGIWUR26266                                                                                 |                                                             |    |                        |          |                |                 |                            |

|                                                                                                 |    |    |          |          |                |          |         |                     |
|-------------------------------------------------------------------------------------------------|----|----|----------|----------|----------------|----------|---------|---------------------|
| N2                                                                                              | HS | IV | 12746584 | 12749721 | WBGene00002128 | inx-6    | C36H8.2 | -0.0360256750993226 |
| AGIWUR8891;AGIWUR37533;AGIWUR44695                                                              |    |    |          |          |                |          |         |                     |
| N2                                                                                              | HS | IV | 12754558 | 12757673 | WBGene00001452 | flp-9    | C36H8.3 | -0.0929373252986361 |
| AGIWUR15622;AGIWUR17526;AGIWUR21930;AGIWUR25621;AGIWUR28951;AGIWUR31273;AGIWUR34191;AGIWUR34712 |    |    |          |          |                |          |         |                     |
| N2                                                                                              | HS | IV | 12773862 | 12787513 | WBGene00006767 | unc-31   | ZK897.1 | 0.208982729462555   |
| AGIWUR40041                                                                                     |    |    |          |          |                |          |         |                     |
| N2                                                                                              | HS | IV | 12789041 | 12790512 | WBGene00008554 | F07C6.3  | F07C6.3 | 0.183501250812485   |
| AGIWUR872                                                                                       |    |    |          |          |                |          |         |                     |
| N2                                                                                              | HS | IV | 12791171 | 12791685 | WBGene00008553 | F07C6.2  | F07C6.2 | 0.120268184891131   |
| AGIWUR329;AGIWUR28099;AGIWUR28140;AGIWUR32182;AGIWUR39821                                       |    |    |          |          |                |          |         |                     |
| N2                                                                                              | HS | IV | 12792795 | 12793274 | WBGene00045067 | F07C6.6  | F07C6.6 | 0.137514360711364   |
| AGIWUR17651;AGIWUR27327;AGIWUR27461;AGIWUR32761;AGIWUR42888                                     |    |    |          |          |                |          |         |                     |
| N2                                                                                              | HS | IV | 12793816 | 12796164 | WBGene00004030 | pin-2    | F07C6.1 | 0.146956444458102   |
| AGIWUR12942                                                                                     |    |    |          |          |                |          |         |                     |
| N2                                                                                              | HS | IV | 12805931 | 12830112 | WBGene00008555 | F07C6.4  | F07C6.4 | -0.11280747080928   |
| AGIWUR5109;AGIWUR10157;AGIWUR13724;AGIWUR35786                                                  |    |    |          |          |                |          |         |                     |
| N2                                                                                              | HS | IV | 12836510 | 12840674 | WBGene00010828 | M02B1.3  | M02B1.3 | -0.0195078641038329 |
| AGIWUR28765;AGIWUR40819;AGIWUR42206                                                             |    |    |          |          |                |          |         |                     |
| N2                                                                                              | HS | IV | 12845696 | 12848428 | WBGene00010827 | M02B1.2  | M02B1.2 | -0.0644231699281086 |
| AGIWUR34338                                                                                     |    |    |          |          |                |          |         |                     |
| N2                                                                                              | HS | IV | 12849506 | 12854408 | WBGene00005153 | srp-3    | M02B1.1 | -0.0413711556418201 |
| AGIWUR41492                                                                                     |    |    |          |          |                |          |         |                     |
| N2                                                                                              | HS | IV | 12855549 | 12859928 | WBGene00014139 | nstp-5   | ZK896.9 | -0.0936562685364057 |
| AGIWUR18936                                                                                     |    |    |          |          |                |          |         |                     |
| N2                                                                                              | HS | IV | 12860137 | 12865935 | WBGene00001543 | gcy-18   | ZK896.8 | -0.398994194786443  |
| AGIWUR29403                                                                                     |    |    |          |          |                |          |         |                     |
| N2                                                                                              | HS | IV | 12869270 | 12871513 | WBGene00014137 | clcc-187 |         | ZK896.6             |
| -0.216349139516399 AGIWUR9398                                                                   |    |    |          |          |                |          |         |                     |
| N2                                                                                              | HS | IV | 12872829 | 12875360 | WBGene00014132 | ZK896.1  | ZK896.1 | 0.270138229888807   |
| AGIWUR32204                                                                                     |    |    |          |          |                |          |         |                     |
| N2                                                                                              | HS | IV | 12876965 | 12879667 | WBGene00014136 | ZK896.5  | ZK896.5 | 0.0984708511419488  |
| AGIWUR21817                                                                                     |    |    |          |          |                |          |         |                     |
| N2                                                                                              | HS | IV | 12880634 | 12883146 | WBGene00014135 | ZK896.4  | ZK896.4 | 0.0674643060238225  |
| AGIWUR34775                                                                                     |    |    |          |          |                |          |         |                     |
| N2                                                                                              | HS | IV | 12883505 | 12886127 | WBGene00014134 | ZK896.3  | ZK896.3 | 0.0431166138388628  |
| AGIWUR4993;AGIWUR16444;AGIWUR24848                                                              |    |    |          |          |                |          |         |                     |
| N2                                                                                              | HS | IV | 12887102 | 12890508 | WBGene00010660 | K08D8.6  | K08D8.6 | -0.0156713215870106 |
| AGIWUR3610;AGIWUR16326;AGIWUR20149;AGIWUR20866;AGIWUR21444                                      |    |    |          |          |                |          |         |                     |
| N2                                                                                              | HS | IV | 12892513 | 12893283 | WBGene00010655 | K08D8.1  | K08D8.1 | -0.04360977160826   |

AGIWUR25160;AGIWUR34928;AGIWUR42392;AGIWUR43870;AGIWUR44833

|                                                                               |    |    |          |          |                |          |                            |
|-------------------------------------------------------------------------------|----|----|----------|----------|----------------|----------|----------------------------|
| N2                                                                            | HS | IV | 12893773 | 12894724 | WBGene00194926 | K08D8.12 | K08D8.12                   |
| 0.273248154602375 AGIWUR11140;AGIWUR27285;AGIWUR30099;AGIWUR39581;AGIWUR39736 |    |    |          |          |                |          |                            |
| N2                                                                            | HS | IV | 12903785 | 12906659 | WBGene00010657 | K08D8.3  | K08D8.3 0.391124734164963  |
| AGIWUR5630                                                                    |    |    |          |          |                |          |                            |
| N2                                                                            | HS | IV | 12907469 | 12909998 | WBGene00010658 | K08D8.4  | K08D8.4 0.322196709987203  |
| AGIWUR633;AGIWUR4055;AGIWUR20476                                              |    |    |          |          |                |          |                            |
| N2                                                                            | HS | IV | 12910647 | 12912145 | WBGene00010659 | K08D8.5  | K08D8.5 0.0484929206272824 |
| AGIWUR5854;AGIWUR9526;AGIWUR32040;AGIWUR33244;AGIWUR40070                     |    |    |          |          |                |          |                            |
| N2                                                                            | HS | IV | 12912790 | 12914969 | WBGene00007864 | irg-6    | C32H11.1                   |
| -0.0297153397170167 AGIWUR10713;AGIWUR12335;AGIWUR31481                       |    |    |          |          |                |          |                            |
| N2                                                                            | HS | IV | 12916043 | 12917293 | WBGene00007865 | srz-15   | C32H11.2                   |
| 0.0458125793538358 AGIWUR4336                                                 |    |    |          |          |                |          |                            |
| N2                                                                            | HS | IV | 12918611 | 12920393 | WBGene00007866 | C32H11.3 | C32H11.3                   |
| -0.0615572077927595 AGIWUR563                                                 |    |    |          |          |                |          |                            |
| N2                                                                            | HS | IV | 12921264 | 12923288 | WBGene00007867 | C32H11.4 | C32H11.4                   |
| -0.468945522588218 AGIWUR12257                                                |    |    |          |          |                |          |                            |
| N2                                                                            | HS | IV | 12923525 | 12924432 | WBGene00007868 | C32H11.5 | C32H11.5                   |
| 0.0210320925995262 AGIWUR971;AGIWUR25407                                      |    |    |          |          |                |          |                            |
| N2                                                                            | HS | IV | 12925866 | 12926805 | WBGene00007869 | C32H11.6 | C32H11.6                   |
| 0.155699277226421 AGIWUR15139                                                 |    |    |          |          |                |          |                            |
| N2                                                                            | HS | IV | 12930707 | 12931514 | WBGene00007870 | C32H11.7 | C32H11.7                   |
| 0.132415874464819 AGIWUR18444                                                 |    |    |          |          |                |          |                            |
| N2                                                                            | HS | IV | 12940106 | 12941405 | WBGene00007875 | dod-24   | C32H11.12                  |
| -0.247231869577863 AGIWUR33110                                                |    |    |          |          |                |          |                            |
| N2                                                                            | HS | IV | 12942933 | 12944526 | WBGene00007876 | dct-19   | C32H11.13                  |
| -0.132722962060848 AGIWUR9992                                                 |    |    |          |          |                |          |                            |
| N2                                                                            | HS | IV | 12944887 | 12946577 | WBGene00010122 | F55G11.1 | F55G11.1                   |
| -0.0999260359519578 AGIWUR12449                                               |    |    |          |          |                |          |                            |
| N2                                                                            | HS | IV | 12950315 | 12957128 | WBGene00000021 | abt-3    | F55G11.9                   |
| 0.039364322304162 AGIWUR38787                                                 |    |    |          |          |                |          |                            |
| N2                                                                            | HS | IV | 12958030 | 12959594 | WBGene00010126 | F55G11.6 | F55G11.6                   |
| 0.168344628682702 AGIWUR8760                                                  |    |    |          |          |                |          |                            |
| N2                                                                            | HS | IV | 12960436 | 12962120 | WBGene00010127 | F55G11.7 | F55G11.7                   |
| -0.331257049717544 AGIWUR9714                                                 |    |    |          |          |                |          |                            |
| N2                                                                            | HS | IV | 12962808 | 12964625 | WBGene00010128 | F55G11.8 | F55G11.8                   |
| 0.130167674358045 AGIWUR22605                                                 |    |    |          |          |                |          |                            |
| N2                                                                            | HS | IV | 12965387 | 12967318 | WBGene00010125 | dod-22   | F55G11.5                   |
| 0.175993047221972 AGIWUR25463                                                 |    |    |          |          |                |          |                            |

|                     |    |    |                                                                                                                                                                                                                                                                                                                                                                |          |                |          |          |
|---------------------|----|----|----------------------------------------------------------------------------------------------------------------------------------------------------------------------------------------------------------------------------------------------------------------------------------------------------------------------------------------------------------------|----------|----------------|----------|----------|
| N2                  | HS | IV | 12967448                                                                                                                                                                                                                                                                                                                                                       | 12969289 | WBGene00010123 | F55G11.2 | F55G11.2 |
| 0.313723698375668   |    |    | AGIWUR27920                                                                                                                                                                                                                                                                                                                                                    |          |                |          |          |
| N2                  | HS | IV | 12970270                                                                                                                                                                                                                                                                                                                                                       | 12971974 | WBGene00014771 | F55G11.3 | F55G11.3 |
| -0.0260544410679602 |    |    | AGIWUR2906;AGIWUR28495;AGIWUR33446;AGIWUR34281;AGIWUR34577;AGIWUR40510                                                                                                                                                                                                                                                                                         |          |                |          |          |
| N2                  | HS | IV | 12973624                                                                                                                                                                                                                                                                                                                                                       | 12975591 | WBGene00010124 | F55G11.4 | F55G11.4 |
| -0.102495295300738  |    |    | AGIWUR16709                                                                                                                                                                                                                                                                                                                                                    |          |                |          |          |
| N2                  | HS | IV | 12976231                                                                                                                                                                                                                                                                                                                                                       | 12978343 | WBGene00010745 | dod-17   | K10D11.1 |
| 0.136886758123126   |    |    | AGIWUR40735                                                                                                                                                                                                                                                                                                                                                    |          |                |          |          |
| N2                  | HS | IV | 12979017                                                                                                                                                                                                                                                                                                                                                       | 12981940 | WBGene00010746 | K10D11.2 | K10D11.2 |
| 0.0523778705014388  |    |    | AGIWUR16720;AGIWUR27060                                                                                                                                                                                                                                                                                                                                        |          |                |          |          |
| N2                  | HS | IV | 12982119                                                                                                                                                                                                                                                                                                                                                       | 12986088 | WBGene00010747 | K10D11.3 | K10D11.3 |
| 0.139539613277549   |    |    | AGIWUR375                                                                                                                                                                                                                                                                                                                                                      |          |                |          |          |
| N2                  | HS | IV | 12986726                                                                                                                                                                                                                                                                                                                                                       | 12989455 | WBGene00010750 | K10D11.6 | K10D11.6 |
| 0.206091656829292   |    |    | AGIWUR38923                                                                                                                                                                                                                                                                                                                                                    |          |                |          |          |
| N2                  | HS | IV | 12989685                                                                                                                                                                                                                                                                                                                                                       | 12991843 | WBGene00010749 | K10D11.5 | K10D11.5 |
| 0.226619197199426   |    |    | AGIWUR32026                                                                                                                                                                                                                                                                                                                                                    |          |                |          |          |
| N2                  | HS | IV | 12992157                                                                                                                                                                                                                                                                                                                                                       | 12994462 | WBGene00010748 | K10D11.4 | K10D11.4 |
| 0.192726309710448   |    |    | AGIWUR23605                                                                                                                                                                                                                                                                                                                                                    |          |                |          |          |
| N2                  | HS | IV | 12994676                                                                                                                                                                                                                                                                                                                                                       | 12995924 | WBGene00045198 | K10D11.7 | K10D11.7 |
| -0.0469032871206334 |    |    | AGIWUR9382;AGIWUR15214;AGIWUR16890;AGIWUR33905;AGIWUR34781                                                                                                                                                                                                                                                                                                     |          |                |          |          |
| N2                  | HS | IV | 13009116                                                                                                                                                                                                                                                                                                                                                       | 13035955 | WBGene00003150 | mbk-2    | F49E11.1 |
| -0.0729795595888403 |    |    | AGIWUR1792;AGIWUR5161;AGIWUR6014;AGIWUR7031;AGIWUR7450;AGIWUR7488;AGIWUR8472;AGIWUR8614;AGIWUR9221;AGIWUR11544;AGIWUR14795;AGIWUR17676;AGIWUR17802;AGIWUR18717;AGIWUR18810;AGIWUR19747;AGIWUR20031;AGIWUR20460;AGIWUR21573;AGIWUR21792;AGIWUR22205;AGIWUR25369;AGIWUR26815;AGIWUR28415;AGIWUR30531;AGIWUR31681;AGIWUR33258;AGIWUR34682;AGIWUR35026;AGIWUR44228 |          |                |          |          |
| N2                  | HS | IV | 13035956                                                                                                                                                                                                                                                                                                                                                       | 13039021 | WBGene00009889 | F49E11.2 | F49E11.2 |
| 0.119765037770133   |    |    | AGIWUR885;AGIWUR18578;AGIWUR28259;AGIWUR32335                                                                                                                                                                                                                                                                                                                  |          |                |          |          |
| N2                  | HS | IV | 13042391                                                                                                                                                                                                                                                                                                                                                       | 13046858 | WBGene00000134 | amt-2    | F49E11.3 |
| 0.00545562205449635 |    |    | AGIWUR13890                                                                                                                                                                                                                                                                                                                                                    |          |                |          |          |
| N2                  | HS | IV | 13047197                                                                                                                                                                                                                                                                                                                                                       | 13048262 | WBGene00009890 | sc1-9    | F49E11.4 |
| 0.108902269158974   |    |    | AGIWUR5966                                                                                                                                                                                                                                                                                                                                                     |          |                |          |          |
| N2                  | HS | IV | 13048457                                                                                                                                                                                                                                                                                                                                                       | 13049835 | WBGene00009891 | sc1-10   | F49E11.5 |
| 0.257797890717907   |    |    | AGIWUR31865                                                                                                                                                                                                                                                                                                                                                    |          |                |          |          |
| N2                  | HS | IV | 13051377                                                                                                                                                                                                                                                                                                                                                       | 13052149 | WBGene00009892 | sc1-11   | F49E11.6 |
| 0.0510381269412203  |    |    | AGIWUR843                                                                                                                                                                                                                                                                                                                                                      |          |                |          |          |
| N2                  | HS | IV | 13053297                                                                                                                                                                                                                                                                                                                                                       | 13055154 | WBGene00009893 | F49E11.7 | F49E11.7 |
| -0.0815609899786667 |    |    | AGIWUR44526                                                                                                                                                                                                                                                                                                                                                    |          |                |          |          |
| N2                  | HS | IV | 13055357                                                                                                                                                                                                                                                                                                                                                       | 13055768 | WBGene00009894 | F49E11.8 | F49E11.8 |

|                       |                                               |          |                |          |           |                     |
|-----------------------|-----------------------------------------------|----------|----------------|----------|-----------|---------------------|
| -0.127237287058218    | AGIWUR30147                                   |          |                |          |           |                     |
| N2 HS IV              | 13056376                                      | 13057271 | WBGene00004742 | sc1-1    | F49E11.9  |                     |
| 0.0208867527505596    | AGIWUR25578                                   |          |                |          |           |                     |
| N2 HS IV              | 13057678                                      | 13059085 | WBGene00009895 | sc1-2    | F49E11.10 |                     |
| 0.394497071833037     | AGIWUR22496                                   |          |                |          |           |                     |
| N2 HS IV              | 13059618                                      | 13060695 | WBGene00009896 | sc1-3    | F49E11.11 |                     |
| 0.0500274189897461    | AGIWUR1835                                    |          |                |          |           |                     |
| N2 HS IV              | 13061774                                      | 13063205 | WBGene00008026 | sc1-4    | C39E9.1   | 0.0180309833160255  |
| AGIWUR40780           |                                               |          |                |          |           |                     |
| N2 HS IV              | 13064003                                      | 13065159 | WBGene00008027 | sc1-5    | C39E9.2   | -0.0183204152096579 |
| AGIWUR16531           |                                               |          |                |          |           |                     |
| N2 HS IV              | 13065766                                      | 13067300 | WBGene00000705 | col-131  | C39E9.3   | 0.0617452018328093  |
| AGIWUR12644           |                                               |          |                |          |           |                     |
| N2 HS IV              | 13068751                                      | 13070290 | WBGene00008028 | sc1-6    | C39E9.4   | 0.197165476913279   |
| AGIWUR458             |                                               |          |                |          |           |                     |
| N2 HS IV              | 13070479                                      | 13071221 | WBGene00008029 | sc1-7    | C39E9.5   |                     |
| -0.00723745691216582  | AGIWUR12072                                   |          |                |          |           |                     |
| N2 HS IV              | 13071754                                      | 13072478 | WBGene00008030 | sc1-8    | C39E9.6   | 0.00403092050734433 |
| AGIWUR44929           |                                               |          |                |          |           |                     |
| N2 HS IV              | 13072660                                      | 13076720 | WBGene00008031 | C39E9.7  | C39E9.7   | -0.0282219632209566 |
| AGIWUR36436           |                                               |          |                |          |           |                     |
| N2 HS IV              | 13079446                                      | 13082781 | WBGene00008032 | C39E9.8  | C39E9.8   | 0.227183763127809   |
| AGIWUR612;AGIWUR22734 |                                               |          |                |          |           |                     |
| N2 HS IV              | 13087005                                      | 13089619 | WBGene00008033 | spin-2   | C39E9.10  |                     |
| 0.0859211062516785    | AGIWUR29849                                   |          |                |          |           |                     |
| N2 HS IV              | 13089578                                      | 13091067 | WBGene00000706 | col-132  | C39E9.9   | -0.196711375507346  |
| AGIWUR15066           |                                               |          |                |          |           |                     |
| N2 HS IV              | 13091187                                      | 13093853 | WBGene00008034 | C39E9.11 |           | C39E9.11            |
| 0.0969487244464258    | AGIWUR17054                                   |          |                |          |           |                     |
| N2 HS IV              | 13094007                                      | 13095490 | WBGene00008035 | C39E9.12 |           | C39E9.12            |
| 0.0325124655184119    | AGIWUR24925                                   |          |                |          |           |                     |
| N2 HS IV              | 13095762                                      | 13097065 | WBGene00004339 | rfc-3    | C39E9.13  |                     |
| -0.121928501975292    | AGIWUR144;AGIWUR10555;AGIWUR13424;AGIWUR40682 |          |                |          |           |                     |
| N2 HS IV              | 13096958                                      | 13098836 | WBGene00001007 | dli-1    | C39E9.14  |                     |
| -0.0933250145060276   | AGIWUR3418;AGIWUR7426;AGIWUR35722;AGIWUR37928 |          |                |          |           |                     |
| N2 HS IV              | 13099378                                      | 13100608 | WBGene00007201 | exos-4.1 |           | B0564.1             |
| 0.0619058381982578    | AGIWUR27813;AGIWUR33869                       |          |                |          |           |                     |
| N2 HS IV              | 13100715                                      | 13104641 | WBGene00007207 | B0564.7  | B0564.7   | 0.285757174035112   |
| AGIWUR2841            |                                               |          |                |          |           |                     |



|                                                                                           |    |    |          |          |                |         |          |                     |
|-------------------------------------------------------------------------------------------|----|----|----------|----------|----------------|---------|----------|---------------------|
| N2                                                                                        | HS | IV | 13105323 | 13106927 | WBGene00023421 | rde-11  | B0564.11 |                     |
| -0.0583052747564992 AGIWUR1580                                                            |    |    |          |          |                |         |          |                     |
| N2                                                                                        | HS | IV | 13107659 | 13111500 | WBGene00007202 | B0564.2 | B0564.2  | -0.0968206852476596 |
| AGIWUR9047;AGIWUR11732                                                                    |    |    |          |          |                |         |          |                     |
| N2                                                                                        | HS | IV | 13119096 | 13124387 | WBGene00006766 | unc-30  | B0564.10 |                     |
| -0.0733726341256622 AGIWUR1590;AGIWUR3331;AGIWUR27447;AGIWUR33252;AGIWUR35405;AGIWUR36465 |    |    |          |          |                |         |          |                     |
| N2                                                                                        | HS | IV | 13138991 | 13142354 | WBGene00008623 | F09E8.1 | F09E8.1  | 0.118850893656479   |
| AGIWUR42795                                                                               |    |    |          |          |                |         |          |                     |
| N2                                                                                        | HS | IV | 13149576 | 13150569 | WBGene00008626 | F09E8.8 | F09E8.8  | -0.0765222617382726 |
| AGIWUR38329                                                                               |    |    |          |          |                |         |          |                     |
| N2                                                                                        | HS | IV | 13150552 | 13154441 | WBGene00008624 | F09E8.2 | F09E8.2  | 0.0206237326457774  |
| AGIWUR3879;AGIWUR41374;AGIWUR44977                                                        |    |    |          |          |                |         |          |                     |
| N2                                                                                        | HS | IV | 13155228 | 13164056 | WBGene00003421 | msh-5   | F09E8.3  | -0.0252584138112031 |
| AGIWUR6808;AGIWUR7907;AGIWUR22916                                                         |    |    |          |          |                |         |          |                     |
| N2                                                                                        | HS | IV | 13165516 | 13166815 | WBGene00008625 | sc1-14  | F09E8.5  | 0.00206788176598316 |
| AGIWUR19778;AGIWUR27818                                                                   |    |    |          |          |                |         |          |                     |
| N2                                                                                        | HS | IV | 13170544 | 13173694 | WBGene00003533 | nas-14  | F09E8.6  | 0.0273085695632114  |
| AGIWUR5805;AGIWUR19870;AGIWUR28940                                                        |    |    |          |          |                |         |          |                     |
| N2                                                                                        | HS | IV | 13174157 | 13179457 | WBGene00002974 | lev-1   | F09E8.7  | 0.347849107068324   |
| AGIWUR20176                                                                               |    |    |          |          |                |         |          |                     |
| N2                                                                                        | HS | IV | 13180179 | 13180911 | WBGene00044978 | F58D2.3 | F58D2.3  | -0.174525379736169  |
| AGIWUR31280                                                                               |    |    |          |          |                |         |          |                     |
| N2                                                                                        | HS | IV | 13183072 | 13186984 | WBGene00010240 | gadr-1  | F58D2.1  | -0.119267502194734  |
| AGIWUR28122                                                                               |    |    |          |          |                |         |          |                     |
| N2                                                                                        | HS | IV | 13193563 | 13197382 | WBGene00008177 | C48D1.1 | C48D1.1  | -0.0921434637525849 |
| AGIWUR2280                                                                                |    |    |          |          |                |         |          |                     |
| N2                                                                                        | HS | IV | 13206783 | 13207278 | WBGene00044909 | C48D1.7 | C48D1.7  | 0.269087256743545   |
| AGIWUR16247;AGIWUR19522;AGIWUR20384;AGIWUR37541;AGIWUR42217                               |    |    |          |          |                |         |          |                     |
| N2                                                                                        | HS | IV | 13209729 | 13214566 | WBGene00000501 | cho-1   | C48D1.3  | 0.133592842725006   |
| AGIWUR26521                                                                               |    |    |          |          |                |         |          |                     |
| N2                                                                                        | HS | IV | 13221961 | 13232974 | WBGene00008178 | C48D1.5 | C48D1.5  | -0.0191606961881945 |
| AGIWUR9021;AGIWUR9601;AGIWUR33314                                                         |    |    |          |          |                |         |          |                     |
| N2                                                                                        | HS | IV | 13232943 | 13236585 | WBGene00010435 | JC8.2   | JC8.2    | 0.217575717714514   |
| AGIWUR24175                                                                               |    |    |          |          |                |         |          |                     |
| N2                                                                                        | HS | IV | 13237281 | 13239441 | WBGene00006466 | tag-115 | JC8.13   | -0.184619663915871  |
| AGIWUR9056                                                                                |    |    |          |          |                |         |          |                     |
| N2                                                                                        | HS | IV | 13239588 | 13240651 | WBGene00004424 | rp1-12  | JC8.3    | -0.0832787173233953 |
| AGIWUR4632;AGIWUR6964;AGIWUR7060;AGIWUR9613;AGIWUR11217;AGIWUR13131                       |    |    |          |          |                |         |          |                     |
| N2                                                                                        | HS | IV | 13241051 | 13243401 | WBGene00003037 | lin-54  | JC8.6    | -0.149391497856584  |

|                                                                                          |    |    |          |          |                |           |          |                    |
|------------------------------------------------------------------------------------------|----|----|----------|----------|----------------|-----------|----------|--------------------|
| AGIWUR35358                                                                              |    |    |          |          |                |           |          |                    |
| N2                                                                                       | HS | IV | 13243673 | 13244296 | WBGene00010436 | JC8.4     | JC8.4    | 0.43739864825184   |
| AGIWUR18188                                                                              |    |    |          |          |                |           |          |                    |
| N2                                                                                       | HS | IV | 13244324 | 13247160 | WBGene00010437 | cox-11    | JC8.5    | 0.15690676340815   |
| AGIWUR39629                                                                              |    |    |          |          |                |           |          |                    |
| N2                                                                                       | HS | IV | 13247261 | 13250699 | WBGene00010439 | JC8.7     | JC8.7    | 0.0168837073498462 |
| AGIWUR3986;AGIWUR23796;AGIWUR29016                                                       |    |    |          |          |                |           |          |                    |
| N2                                                                                       | HS | IV | 13250648 | 13252311 | WBGene00010440 | ttr-51    | JC8.8    | 0.404972415450978  |
| AGIWUR1763;AGIWUR9407;AGIWUR17465;AGIWUR24987;AGIWUR39926;AGIWUR40897                    |    |    |          |          |                |           |          |                    |
| N2                                                                                       | HS | IV | 13254225 | 13255538 | WBGene00044737 | ttr-45    | JC8.14   | 0.176176708272113  |
| AGIWUR7141;AGIWUR15386;AGIWUR23834;AGIWUR25802;AGIWUR36581                               |    |    |          |          |                |           |          |                    |
| N2                                                                                       | HS | IV | 13256051 | 13259076 | WBGene00010442 | bus-12    | JC8.12   | 0.178956213586815  |
| AGIWUR24223                                                                              |    |    |          |          |                |           |          |                    |
| N2                                                                                       | HS | IV | 13261556 | 13272514 | WBGene00006763 | unc-26    | JC8.10   | 0.145945611951836  |
| AGIWUR3166;AGIWUR31782;AGIWUR33371                                                       |    |    |          |          |                |           |          |                    |
| N2                                                                                       | HS | IV | 13273911 | 13282878 | WBGene00013460 | cpsf-3    | Y67H2A.1 |                    |
| 0.2506775661248 AGIWUR210                                                                |    |    |          |          |                |           |          |                    |
| N2                                                                                       | HS | IV | 13283002 | 13289536 | WBGene00013465 | Y67H2A.10 |          | Y67H2A.10          |
| -0.109571508286901 AGIWUR36969                                                           |    |    |          |          |                |           |          |                    |
| N2                                                                                       | HS | IV | 13289776 | 13297869 | WBGene00013461 | Y67H2A.2  |          | Y67H2A.2           |
| 0.163949918118943 AGIWUR41344                                                            |    |    |          |          |                |           |          |                    |
| N2                                                                                       | HS | IV | 13297926 | 13300066 | WBGene00013462 | micu-1    | Y67H2A.4 |                    |
| 0.0978646565519754 AGIWUR5915;AGIWUR6075                                                 |    |    |          |          |                |           |          |                    |
| N2                                                                                       | HS | IV | 13300179 | 13300720 | WBGene00013463 | kdp-1     | Y67H2A.5 |                    |
| -0.011348355506497 AGIWUR747                                                             |    |    |          |          |                |           |          |                    |
| N2                                                                                       | HS | IV | 13300828 | 13304145 | WBGene00000818 | csn-6     | Y67H2A.6 |                    |
| -0.0252332733207652 AGIWUR12038                                                          |    |    |          |          |                |           |          |                    |
| N2                                                                                       | HS | IV | 13303746 | 13310818 | WBGene00013464 | Y67H2A.7  |          | Y67H2A.7           |
| 0.0814083802788339 AGIWUR15280                                                           |    |    |          |          |                |           |          |                    |
| N2                                                                                       | HS | IV | 13315644 | 13318811 | WBGene00001393 | fat-1     | Y67H2A.8 |                    |
| -0.0606887373941749 AGIWUR12237;AGIWUR36063                                              |    |    |          |          |                |           |          |                    |
| N2                                                                                       | HS | IV | 13320158 | 13321831 | WBGene00014941 | Y67H2A.9  |          | Y67H2A.9           |
| -0.132564378340388 AGIWUR1097;AGIWUR1417;AGIWUR12240;AGIWUR18964;AGIWUR22391;AGIWUR43346 |    |    |          |          |                |           |          |                    |
| N2                                                                                       | HS | IV | 13323850 | 13326394 | WBGene00001394 | fat-2     | W02A2.1  | 0.0914771599590622 |
| AGIWUR34363                                                                              |    |    |          |          |                |           |          |                    |
| N2                                                                                       | HS | IV | 13328359 | 13329497 | WBGene00001390 | far-6     | W02A2.2  | 0.0678464551527469 |
| AGIWUR29425                                                                              |    |    |          |          |                |           |          |                    |
| N2                                                                                       | HS | IV | 13329508 | 13331406 | WBGene00004156 | pqn-74    | W02A2.3  | -0.27460017433715  |
| AGIWUR7098                                                                               |    |    |          |          |                |           |          |                    |

|                                                                                                                  |    |    |          |          |                |            |            |                    |
|------------------------------------------------------------------------------------------------------------------|----|----|----------|----------|----------------|------------|------------|--------------------|
| N2                                                                                                               | HS | IV | 13342858 | 13346189 | WBGene00012190 | W02A2.5    | W02A2.5    | 0.104906432665612  |
| AGIWUR2236;AGIWUR38536                                                                                           |    |    |          |          |                |            |            |                    |
| N2                                                                                                               | HS | IV | 13347665 | 13348599 | WBGene00044280 | W02A2.9    | W02A2.9    | 0.191392853981029  |
| AGIWUR39519                                                                                                      |    |    |          |          |                |            |            |                    |
| N2                                                                                                               | HS | IV | 13348870 | 13353193 | WBGene00004333 | rec-8      | W02A2.6    | 0.0736022625949815 |
| AGIWUR6839                                                                                                       |    |    |          |          |                |            |            |                    |
| N2                                                                                                               | HS | IV | 13353723 | 13356104 | WBGene00003230 | mex-5      | W02A2.7    | -0.165029158140344 |
| AGIWUR24629                                                                                                      |    |    |          |          |                |            |            |                    |
| N2                                                                                                               | HS | IV | 13356113 | 13358601 | WBGene00012191 | W02A2.8    | W02A2.8    | 0.0609510472564505 |
| AGIWUR29239                                                                                                      |    |    |          |          |                |            |            |                    |
| N2                                                                                                               | HS | IV | 13365169 | 13368435 | WBGene00013375 | srsx-25    | Y62E10A.4  |                    |
| 0.0661425555670778 AGIWUR37939                                                                                   |    |    |          |          |                |            |            |                    |
| N2                                                                                                               | HS | IV | 13368368 | 13369417 | WBGene00000093 | agt-1      | Y62E10A.5  |                    |
| -0.0988069592823742 AGIWUR14160;AGIWUR35728;AGIWUR37488                                                          |    |    |          |          |                |            |            |                    |
| N2                                                                                                               | HS | IV | 13369424 | 13370285 | WBGene00004410 | r1a-2      | Y62E10A.1  |                    |
| 0.00830683707171076 AGIWUR9256;AGIWUR30171;AGIWUR41654                                                           |    |    |          |          |                |            |            |                    |
| N2                                                                                                               | HS | IV | 13370653 | 13371613 | WBGene00013373 | Y62E10A.2  |            | Y62E10A.2          |
| 0.10725895520144 AGIWUR32819                                                                                     |    |    |          |          |                |            |            |                    |
| N2                                                                                                               | HS | IV | 13371999 | 13377383 | WBGene00013376 | Y62E10A.6  |            | Y62E10A.6          |
| 0.152652152410013 AGIWUR36222                                                                                    |    |    |          |          |                |            |            |                    |
| N2                                                                                                               | HS | IV | 13378016 | 13380407 | WBGene00003142 | mau-8      | Y62E10A.8  |                    |
| 0.139914585248984 AGIWUR11971                                                                                    |    |    |          |          |                |            |            |                    |
| N2                                                                                                               | HS | IV | 13380387 | 13381923 | WBGene00013378 | emc-3      | Y62E10A.10 |                    |
| 0.146609487745518 AGIWUR43645                                                                                    |    |    |          |          |                |            |            |                    |
| N2                                                                                                               | HS | IV | 13382055 | 13384316 | WBGene00004278 | rab-19     | Y62E10A.9  |                    |
| -0.171741855658778 AGIWUR22027;AGIWUR43076;AGIWUR44348                                                           |    |    |          |          |                |            |            |                    |
| N2                                                                                                               | HS | IV | 13383905 | 13386091 | WBGene00044745 | Y62E10A.20 |            | Y62E10A.20         |
| 0.291083689511697 AGIWUR15148;AGIWUR29097                                                                        |    |    |          |          |                |            |            |                    |
| N2                                                                                                               | HS | IV | 13386294 | 13387358 | WBGene00014938 | mdt-9      | Y62E10A.11 |                    |
| 0.199196169366018 AGIWUR19242;AGIWUR26065                                                                        |    |    |          |          |                |            |            |                    |
| N2                                                                                                               | HS | IV | 13387469 | 13389209 | WBGene00003077 | lsm-3      | Y62E10A.12 |                    |
| 0.0193379517990264 AGIWUR5031;AGIWUR29539;AGIWUR33021;AGIWUR35748;AGIWUR38348;AGIWUR40337                        |    |    |          |          |                |            |            |                    |
| N2                                                                                                               | HS | IV | 13389146 | 13398799 | WBGene00013379 | Y62E10A.13 |            | Y62E10A.13         |
| 0.0938185903212876 AGIWUR1459;AGIWUR1661;AGIWUR21061;AGIWUR32539;AGIWUR32818;AGIWUR34098;AGIWUR35714;AGIWUR43565 |    |    |          |          |                |            |            |                    |
| N2                                                                                                               | HS | IV | 13399068 | 13400506 | WBGene00013380 | memi-2     | Y62E10A.14 |                    |
| -0.258230673758373 AGIWUR5865;AGIWUR34235                                                                        |    |    |          |          |                |            |            |                    |
| N2                                                                                                               | HS | IV | 13401306 | 13403831 | WBGene00013381 | cyp-31A5   |            | Y62E10A.15         |
| 0.123139822648771 AGIWUR28184                                                                                    |    |    |          |          |                |            |            |                    |

|                                     |    |    |                                                                                     |          |                |            |                             |
|-------------------------------------|----|----|-------------------------------------------------------------------------------------|----------|----------------|------------|-----------------------------|
| N2                                  | HS | IV | 13403769                                                                            | 13408306 | WBGene00013385 | Y62E10A.19 | Y62E10A.19                  |
| -0.111056120537915                  |    |    | AGIWUR10040;AGIWUR18675;AGIWUR20403;AGIWUR23523;AGIWUR39058;AGIWUR42855;AGIWUR44771 |          |                |            |                             |
| N2                                  | HS | IV | 13408606                                                                            | 13412895 | WBGene00013382 | gcl-1      | Y62E10A.16                  |
| 0.206411165986987                   |    |    | AGIWUR39074                                                                         |          |                |            |                             |
| N2                                  | HS | IV | 13413560                                                                            | 13415954 | WBGene00013383 | aptf-2     | Y62E10A.17                  |
| -0.0982772908317733                 |    |    | AGIWUR2952;AGIWUR10679                                                              |          |                |            |                             |
| N2                                  | HS | IV | 13416041                                                                            | 13421927 | WBGene00004029 | pik-1      | K09B11.1                    |
| 0.140309288753707                   |    |    | AGIWUR40481                                                                         |          |                |            |                             |
| N2                                  | HS | IV | 13422500                                                                            | 13429379 | WBGene00010709 | noi-9      | K09B11.2                    |
| -0.0509897514742477                 |    |    | AGIWUR32343                                                                         |          |                |            |                             |
| N2                                  | HS | IV | 13431288                                                                            | 13434068 | WBGene00010712 | K09B11.5   | K09B11.5                    |
| -0.206362489111613                  |    |    | AGIWUR1133;AGIWUR37524                                                              |          |                |            |                             |
| N2                                  | HS | IV | 13434188                                                                            | 13445375 | WBGene00010714 | mam-3      | K09B11.10                   |
| 0.267314871495728                   |    |    | AGIWUR34784                                                                         |          |                |            |                             |
| N2                                  | HS | IV | 13445819                                                                            | 13454954 | WBGene00010713 | uso-1      | K09B11.9                    |
| 0.123616343611675                   |    |    | AGIWUR22969                                                                         |          |                |            |                             |
| N2                                  | HS | IV | 13456976                                                                            | 13458841 | WBGene00045062 | Y38H8A.8   | Y38H8A.8                    |
| 0.118035473080289                   |    |    | AGIWUR24056                                                                         |          |                |            |                             |
| N2                                  | HS | IV | 13466139                                                                            | 13469402 | WBGene00012639 | fezf-1     | Y38H8A.5                    |
| -0.0307308776425703                 |    |    | AGIWUR31080                                                                         |          |                |            |                             |
| N2                                  | HS | IV | 13474432                                                                            | 13476225 | WBGene00012636 | Y38H8A.2   | Y38H8A.2                    |
| -0.00445776000709586                |    |    | AGIWUR3266;AGIWUR12111;AGIWUR37091;AGIWUR38610;AGIWUR44125;AGIWUR44481              |          |                |            |                             |
| N2                                  | HS | IV | 13476935                                                                            | 13502852 | WBGene00012868 | tbc-9      | Y45F10A.6                   |
| 0.142779327162081                   |    |    | AGIWUR31457                                                                         |          |                |            |                             |
| N2                                  | HS | IV | 13505270                                                                            | 13505762 | WBGene00003755 | nlp-17     | Y45F10A.5                   |
| 0.0656152525937594                  |    |    | AGIWUR8556;AGIWUR23648                                                              |          |                |            |                             |
| N2                                  | HS | IV | 13506079                                                                            | 13509225 | WBGene00012867 | seld-1     | Y45F10A.4                   |
| -0.301219944876131                  |    |    | AGIWUR10820                                                                         |          |                |            |                             |
| N2                                  | HS | IV | 13509224                                                                            | 13513426 | WBGene00012866 | afmd-2     | Y45F10A.3                   |
| 0.249752171062266                   |    |    | AGIWUR33223                                                                         |          |                |            |                             |
| N2                                  | HS | IV | 13513369                                                                            | 13521870 | WBGene00003582 | dcap-2     | F52G2.1 -0.0158334902944404 |
| AGIWUR14135;AGIWUR28797;AGIWUR33187 |    |    |                                                                                     |          |                |            |                             |
| N2                                  | HS | IV | 13521970                                                                            | 13540271 | WBGene00004681 | rsd-2      | F52G2.2 -0.180191150077789  |
| AGIWUR42570                         |    |    |                                                                                     |          |                |            |                             |
| N2                                  | HS | IV | 13543402                                                                            | 13548230 | WBGene00009943 | F52G2.3    | F52G2.3                     |
| -0.00554378712951653                |    |    | AGIWUR43070                                                                         |          |                |            |                             |
| N2                                  | HS | IV | 13549605                                                                            | 13561729 | WBGene00012875 | Y45F10B.13 | Y45F10B.13                  |
| 0.135879374881948                   |    |    | AGIWUR1433;AGIWUR1775;AGIWUR16615;AGIWUR37079                                       |          |                |            |                             |
| N2                                  | HS | IV | 13561861                                                                            | 13574440 | WBGene00004265 | qui-1      | Y45F10B.10                  |

|                     |                                                            |                |            |            |
|---------------------|------------------------------------------------------------|----------------|------------|------------|
| -0.125750743076189  | AGIWUR414;AGIWUR5539;AGIWUR38295                           |                |            |            |
| N2 HS IV            | 13575058 13576740                                          | WBGene00005088 | srd-10     | Y45F10B.14 |
| -0.190458070747192  | AGIWUR31343                                                |                |            |            |
| N2 HS IV            | 13579253 13582112                                          | WBGene00005679 | sru-16     | Y45F10B.4  |
| 0.0299252363673661  | AGIWUR16693;AGIWUR38014                                    |                |            |            |
| N2 HS IV            | 13583209 13584479                                          | WBGene00005675 | sru-12     | Y45F10B.5  |
| -0.223464267994885  | AGIWUR43576                                                |                |            |            |
| N2 HS IV            | 13584946 13587288                                          | WBGene00005674 | sru-11     | Y45F10B.6  |
| 0.055542638805183   | AGIWUR21838                                                |                |            |            |
| N2 HS IV            | 13587475 13588237                                          | WBGene00012874 | Y45F10B.12 | Y45F10B.12 |
| 0.00708113556343015 | AGIWUR35600                                                |                |            |            |
| N2 HS IV            | 13588993 13590337                                          | WBGene00005672 | sru-9      | Y45F10B.11 |
| -0.0707556055163208 | AGIWUR34417                                                |                |            |            |
| N2 HS IV            | 13594517 13596279                                          | WBGene00012870 | Y45F10B.2  | Y45F10B.2  |
| 0.259858527901726   | AGIWUR36105;AGIWUR41860                                    |                |            |            |
| N2 HS IV            | 13598755 13600436                                          | WBGene00045045 | Y45F10B.17 | Y45F10B.17 |
| 0.135447532226686   | AGIWUR21237                                                |                |            |            |
| N2 HS IV            | 13603549 13604197                                          | WBGene00012876 | Y45F10B.15 | Y45F10B.15 |
| 0.0618719151603315  | AGIWUR4125                                                 |                |            |            |
| N2 HS IV            | 13604969 13607263                                          | WBGene00045059 | Y45F10B.18 | Y45F10B.18 |
| -0.034828696596048  | AGIWUR6109;AGIWUR28546                                     |                |            |            |
| N2 HS IV            | 13607436 13609892                                          | WBGene00007460 | C08F11.13  | C08F11.13  |
| -0.0550045650251194 | AGIWUR8724;AGIWUR37159                                     |                |            |            |
| N2 HS IV            | 13611328 13611579                                          | WBGene00045286 | C08F11.19  | C08F11.19  |
| -0.0977146174611025 | AGIWUR5449;AGIWUR14418;AGIWUR21976;AGIWUR24286;AGIWUR27726 |                |            |            |
| N2 HS IV            | 13611812 13612210                                          | WBGene00045285 | C08F11.18  | C08F11.18  |
| 0.0657616520335527  | AGIWUR5645;AGIWUR11696;AGIWUR15085;AGIWUR23111;AGIWUR33000 |                |            |            |
| N2 HS IV            | 13612805 13618061                                          | WBGene00007461 | C08F11.14  | C08F11.14  |
| 0.118351201971588   | AGIWUR961                                                  |                |            |            |
| N2 HS IV            | 13619508 13621513                                          | WBGene00007452 | C08F11.3   | C08F11.3   |
| 0.120619796564345   | AGIWUR13220;AGIWUR13316;AGIWUR20736;AGIWUR33351            |                |            |            |
| N2 HS IV            | 13621987 13623134                                          | WBGene00007451 | C08F11.2   | C08F11.2   |
| -0.09501080216803   | AGIWUR638;AGIWUR12018;AGIWUR15459;AGIWUR39370              |                |            |            |
| N2 HS IV            | 13633499 13635179                                          | WBGene00007453 | fbxa-98    | C08F11.5   |
| 0.355950702510367   | AGIWUR5958                                                 |                |            |            |
| N2 HS IV            | 13637288 13638525                                          | WBGene00007454 | C08F11.7   | C08F11.7   |
| 0.178196408342016   | AGIWUR19769                                                |                |            |            |
| N2 HS IV            | 13639260 13644402                                          | WBGene00007455 | ugt-22     | C08F11.8   |
| 0.308441099113928   | AGIWUR2529                                                 |                |            |            |

|                                                                    |    |    |          |          |                |           |            |                    |
|--------------------------------------------------------------------|----|----|----------|----------|----------------|-----------|------------|--------------------|
| N2                                                                 | HS | IV | 13644463 | 13645923 | WBGene00007456 | srz-29    | C08F11.9   |                    |
| 0.112207176725521 AGIWUR41021                                      |    |    |          |          |                |           |            |                    |
| N2                                                                 | HS | IV | 13646735 | 13647658 | WBGene00007458 | ule-4     | C08F11.11  |                    |
| 0.379547329428817 AGIWUR11720                                      |    |    |          |          |                |           |            |                    |
| N2                                                                 | HS | IV | 13648039 | 13649335 | WBGene00007457 | C08F11.10 | C08F11.10  |                    |
| -0.0121528595692375 AGIWUR11031                                    |    |    |          |          |                |           |            |                    |
| N2                                                                 | HS | IV | 13649836 | 13650338 | WBGene00045069 | C08F11.17 | C08F11.17  |                    |
| 0.0168764488901214 AGIWUR16107;AGIWUR16421;AGIWUR19761;AGIWUR37431 |    |    |          |          |                |           |            |                    |
| N2                                                                 | HS | IV | 13651014 | 13651512 | WBGene00007459 | C08F11.12 | C08F11.12  |                    |
| 0.178607469498925 AGIWUR9420                                       |    |    |          |          |                |           |            |                    |
| N2                                                                 | HS | IV | 13653955 | 13655851 | WBGene00044256 | Y45F10C.6 | Y45F10C.6  |                    |
| 0.133848160430014 AGIWUR23085                                      |    |    |          |          |                |           |            |                    |
| N2                                                                 | HS | IV | 13662116 | 13662671 | WBGene00012878 | Y45F10C.2 | Y45F10C.2  |                    |
| 0.0880016529529577 AGIWUR37828                                     |    |    |          |          |                |           |            |                    |
| N2                                                                 | HS | IV | 13663398 | 13664190 | WBGene00012880 | Y45F10C.4 | Y45F10C.4  |                    |
| 0.308411727330071 AGIWUR23361                                      |    |    |          |          |                |           |            |                    |
| N2                                                                 | HS | IV | 13665345 | 13666909 | WBGene00012879 | fbxa-215  | Y45F10C.3  |                    |
| 0.138954200505065 AGIWUR42106                                      |    |    |          |          |                |           |            |                    |
| N2                                                                 | HS | IV | 13673804 | 13677823 | WBGene00011960 | oac-48    | T23G4.4    | 0.0972017303639454 |
| AGIWUR10707;AGIWUR24857;AGIWUR40749                                |    |    |          |          |                |           |            |                    |
| N2                                                                 | HS | IV | 13678951 | 13680333 | WBGene00011961 | T23G4.5   | T23G4.5    |                    |
| -0.00132373156775945 AGIWUR35188                                   |    |    |          |          |                |           |            |                    |
| N2                                                                 | HS | IV | 13685076 | 13687016 | WBGene00011959 | nyn-1     | T23G4.3    | 0.0683685931477331 |
| AGIWUR1504                                                         |    |    |          |          |                |           |            |                    |
| N2                                                                 | HS | IV | 13688324 | 13689131 | WBGene00011958 | T23G4.2   | T23G4.2    | 0.0504991089891424 |
| AGIWUR41972                                                        |    |    |          |          |                |           |            |                    |
| N2                                                                 | HS | IV | 13701240 | 13704082 | WBGene00006580 | tlp-1     | T23G4.1    | 0.0960345428521965 |
| AGIWUR28090                                                        |    |    |          |          |                |           |            |                    |
| N2                                                                 | HS | IV | 13726930 | 13732829 | WBGene00008123 | ent-4     | C47A4.2    | 0.0143330991426556 |
| AGIWUR21058                                                        |    |    |          |          |                |           |            |                    |
| N2                                                                 | HS | IV | 13740951 | 13742344 | WBGene00008124 | C47A4.3   | C47A4.3    | -0.224201582088368 |
| AGIWUR42090                                                        |    |    |          |          |                |           |            |                    |
| N2                                                                 | HS | IV | 13742550 | 13742985 | WBGene00045287 | C47A4.7   | C47A4.7    | 0.146519281001902  |
| AGIWUR25662                                                        |    |    |          |          |                |           |            |                    |
| N2                                                                 | HS | IV | 13744155 | 13744988 | WBGene00014703 | C47A4.4   | C47A4.4    | 0.0120625928163447 |
| AGIWUR17605                                                        |    |    |          |          |                |           |            |                    |
| N2                                                                 | HS | IV | 13745709 | 13745967 | WBGene00008125 | C47A4.5   | C47A4.5    | -0.299214719428896 |
| AGIWUR36297                                                        |    |    |          |          |                |           |            |                    |
| N2                                                                 | HS | IV | 13750334 | 13770495 | WBGene00012891 | sorb-1    | Y45F10D.13 |                    |

|                                                                                                                                              |                                                                     |          |                |            |                            |
|----------------------------------------------------------------------------------------------------------------------------------------------|---------------------------------------------------------------------|----------|----------------|------------|----------------------------|
| -0.0401266215690796                                                                                                                          | AGIWUR13231;AGIWUR15599;AGIWUR20295;AGIWUR24204;AGIWUR26844         |          |                |            |                            |
| N2 HS IV                                                                                                                                     | 13773548                                                            | 13774678 | WBGene00012883 | Y45F10D.2  | Y45F10D.2                  |
| -0.126895411588002                                                                                                                           | AGIWUR13053                                                         |          |                |            |                            |
| N2 HS IV                                                                                                                                     | 13776415                                                            | 13777149 | WBGene00044257 | Y45F10D.16 | Y45F10D.16                 |
| 0.224785313880558                                                                                                                            | AGIWUR729;AGIWUR6269;AGIWUR9214                                     |          |                |            |                            |
| N2 HS IV                                                                                                                                     | 13777808                                                            | 13778812 | WBGene00004430 | rp1-18     | Y45F10D.12                 |
| 0.0125823258517794                                                                                                                           | AGIWUR319;AGIWUR4112;AGIWUR9238;AGIWUR37931;AGIWUR41838;AGIWUR44465 |          |                |            |                            |
| N2 HS IV                                                                                                                                     | 13778866                                                            | 13782396 | WBGene00001635 | gly-10     | Y45F10D.3                  |
| -0.158653858711519                                                                                                                           | AGIWUR9113                                                          |          |                |            |                            |
| N2 HS IV                                                                                                                                     | 13782385                                                            | 13785646 | WBGene00012890 | lact-9     | Y45F10D.11                 |
| 0.054465507965471                                                                                                                            | AGIWUR40217                                                         |          |                |            |                            |
| N2 HS IV                                                                                                                                     | 13785743                                                            | 13786961 | WBGene00012889 | Y45F10D.10 | Y45F10D.10                 |
| 0.0434990832936055                                                                                                                           | AGIWUR23138;AGIWUR33058;AGIWUR36898;AGIWUR39358                     |          |                |            |                            |
| N2 HS IV                                                                                                                                     | 13786945                                                            | 13788727 | WBGene00012888 | sas-6      | Y45F10D.9                  |
| -0.311769549872373                                                                                                                           | AGIWUR12327                                                         |          |                |            |                            |
| N2 HS IV                                                                                                                                     | 13788936                                                            | 13796224 | WBGene00012887 | Y45F10D.7  | Y45F10D.7                  |
| 0.338704078447314                                                                                                                            | AGIWUR26040                                                         |          |                |            |                            |
| N2 HS IV                                                                                                                                     | 13796255                                                            | 13797904 | WBGene00012886 | Y45F10D.6  | Y45F10D.6                  |
| 0.205679622265068                                                                                                                            | AGIWUR33489                                                         |          |                |            |                            |
| N2 HS IV                                                                                                                                     | 13804206                                                            | 13807777 | WBGene00012892 | Y45F10D.14 | Y45F10D.14                 |
| 0.099293570770997                                                                                                                            | AGIWUR25961                                                         |          |                |            |                            |
| N2 HS IV                                                                                                                                     | 13817487                                                            | 13820962 | WBGene00012893 | Y45F10D.15 | Y45F10D.15                 |
| -0.0180835177864616                                                                                                                          | AGIWUR3598                                                          |          |                |            |                            |
| N2 HS IV                                                                                                                                     | 13827886                                                            | 13844997 | WBGene00010374 | rga-5      | H08M01.2                   |
| 0.111591852985388                                                                                                                            |                                                                     |          |                |            |                            |
| AGIWUR1256;AGIWUR6570;AGIWUR6804;AGIWUR16603;AGIWUR18694;AGIWUR19134;AGIWUR25806;AGIWUR34783;AGIWUR35545;AGIWUR39495;AGIWUR43718;AGIWUR44172 |                                                                     |          |                |            |                            |
| N2 HS IV                                                                                                                                     | 13847777                                                            | 13852712 | WBGene00007199 | B0513.7    | B0513.7 0.183352949575205  |
| AGIWUR5510;AGIWUR40527                                                                                                                       |                                                                     |          |                |            |                            |
| N2 HS IV                                                                                                                                     | 13880138                                                            | 13881546 | WBGene00007196 | B0513.4    | B0513.4 -0.396028953917824 |
| AGIWUR10382                                                                                                                                  |                                                                     |          |                |            |                            |
| N2 HS IV                                                                                                                                     | 13882225                                                            | 13882620 | WBGene00004443 | rp1-29     | B0513.3 0.0133637722342854 |
| AGIWUR3930;AGIWUR14691;AGIWUR15375;AGIWUR30112;AGIWUR30805;AGIWUR35741;AGIWUR42921                                                           |                                                                     |          |                |            |                            |
| N2 HS IV                                                                                                                                     | 13882734                                                            | 13884177 | WBGene00007195 | B0513.2    | B0513.2 0.0146223352760617 |
| AGIWUR4762;AGIWUR15258;AGIWUR30424;AGIWUR32810                                                                                               |                                                                     |          |                |            |                            |
| N2 HS IV                                                                                                                                     | 13888089                                                            | 13893985 | WBGene00001562 | lin-66     | B0513.1 -0.153124533559252 |
| AGIWUR19479;AGIWUR20559;AGIWUR42857;AGIWUR43601                                                                                              |                                                                     |          |                |            |                            |
| N2 HS IV                                                                                                                                     | 13897817                                                            | 13902874 | WBGene00012536 | Y37A1A.3   | Y37A1A.3                   |
| 0.391088961982011                                                                                                                            | AGIWUR7072                                                          |          |                |            |                            |

|    |    |    |                                                                                                                                                                              |          |                |           |           |
|----|----|----|------------------------------------------------------------------------------------------------------------------------------------------------------------------------------|----------|----------------|-----------|-----------|
| N2 | HS | IV | 13905991                                                                                                                                                                     | 13912297 | WBGene00012535 | Y37A1A.2  | Y37A1A.2  |
|    |    |    | 0.14150525686888 AGIWUR23675;AGIWUR39180;AGIWUR42520                                                                                                                         |          |                |           |           |
| N2 | HS | IV | 13934445                                                                                                                                                                     | 13964001 | WBGene00045063 | Y37A1A.4  | Y37A1A.4  |
|    |    |    | 0.0247698482739871 AGIWUR6496;AGIWUR7639;AGIWUR12903;AGIWUR16192;AGIWUR20473;AGIWUR20664;AGIWUR21287;AGIWUR22079;AGIWUR26424;AGIWUR28173;AGIWUR29843;AGIWUR38442;AGIWUR38689 |          |                |           |           |
| N2 | HS | IV | 13964359                                                                                                                                                                     | 13979847 | WBGene00044989 | Y37A1B.17 | Y37A1B.17 |
|    |    |    | -0.0632561582482936 AGIWUR3355;AGIWUR8863;AGIWUR21633;AGIWUR27631;AGIWUR29167                                                                                                |          |                |           |           |
| N2 | HS | IV | 13981087                                                                                                                                                                     | 13982525 | WBGene00001575 | gei-18    | Y37A1B.15 |
|    |    |    | 0.096727314889355 AGIWUR19287;AGIWUR27437                                                                                                                                    |          |                |           |           |
| N2 | HS | IV | 13982636                                                                                                                                                                     | 13984141 | WBGene00006598 | tor-2     | Y37A1B.13 |
|    |    |    | 0.281086290864137 AGIWUR21555                                                                                                                                                |          |                |           |           |
| N2 | HS | IV | 13989094                                                                                                                                                                     | 14012026 | WBGene00001190 | egl-23    | Y37A1B.11 |
|    |    |    | 0.260139481615266 AGIWUR25296                                                                                                                                                |          |                |           |           |
| N2 | HS | IV | 14014024                                                                                                                                                                     | 14015944 | WBGene00005810 | srw-63    | Y37A1B.10 |
|    |    |    | 0.0456944983167817 AGIWUR34340                                                                                                                                               |          |                |           |           |
| N2 | HS | IV | 14016099                                                                                                                                                                     | 14019983 | WBGene00012542 | irld-56   | Y37A1B.9  |
|    |    |    | -0.0414312074538508 AGIWUR18144                                                                                                                                              |          |                |           |           |
| N2 | HS | IV | 14020198                                                                                                                                                                     | 14024628 | WBGene00012541 | irld-55   | Y37A1B.8  |
|    |    |    | 0.0716119358488765 AGIWUR38811                                                                                                                                               |          |                |           |           |
| N2 | HS | IV | 14042595                                                                                                                                                                     | 14043780 | WBGene00012540 | Y37A1B.7  | Y37A1B.7  |
|    |    |    | 0.541276921357959 AGIWUR38138                                                                                                                                                |          |                |           |           |
| N2 | HS | IV | 14051200                                                                                                                                                                     | 14056676 | WBGene00012538 | Y37A1B.5  | Y37A1B.5  |
|    |    |    | -0.00178513682867631 AGIWUR6852;AGIWUR40734                                                                                                                                  |          |                |           |           |
| N2 | HS | IV | 14059551                                                                                                                                                                     | 14060712 | WBGene00012537 | Y37A1B.4  | Y37A1B.4  |
|    |    |    | 0.0949211783553801 AGIWUR1505;AGIWUR10911;AGIWUR16676;AGIWUR44769                                                                                                            |          |                |           |           |
| N2 | HS | IV | 14061005                                                                                                                                                                     | 14069854 | WBGene00003086 | lst-4     | Y37A1B.2  |
|    |    |    | -0.0975185335142292 AGIWUR3964;AGIWUR20485;AGIWUR37987                                                                                                                       |          |                |           |           |
| N2 | HS | IV | 14071503                                                                                                                                                                     | 14076743 | WBGene00003085 | ccar-1    | Y37A1B.1  |
|    |    |    | 0.0415676579661515 AGIWUR19476;AGIWUR27341                                                                                                                                   |          |                |           |           |
| N2 | HS | IV | 14077441                                                                                                                                                                     | 14083559 | WBGene00009924 | cfp-1     | F52B11.1  |
|    |    |    | -0.0708233467470727 AGIWUR34871                                                                                                                                              |          |                |           |           |
| N2 | HS | IV | 14083318                                                                                                                                                                     | 14084695 | WBGene00009925 | F52B11.2  | F52B11.2  |
|    |    |    | 0.240167968812059 AGIWUR6410                                                                                                                                                 |          |                |           |           |
| N2 | HS | IV | 14091254                                                                                                                                                                     | 14096617 | WBGene00009926 | noah-2    | F52B11.3  |
|    |    |    | 0.114711817889884 AGIWUR42435                                                                                                                                                |          |                |           |           |
| N2 | HS | IV | 14098325                                                                                                                                                                     | 14099368 | WBGene00000707 | col-133   | F52B11.4  |
|    |    |    | -0.0175853460997164 AGIWUR23056                                                                                                                                              |          |                |           |           |
| N2 | HS | IV | 14102095                                                                                                                                                                     | 14103231 | WBGene00009927 | F52B11.5  | F52B11.5  |



|                       |                                                                        |                |                 |                    |
|-----------------------|------------------------------------------------------------------------|----------------|-----------------|--------------------|
| 0.096312043910336     | AGIWUR2614;AGIWUR25317;AGIWUR39751                                     |                |                 |                    |
| N2 HS IV              | 14106584 14107715                                                      | WBGene00002117 | ins-34          | F52B11.6           |
| -0.120978173939256    | AGIWUR41432                                                            |                |                 |                    |
| N2 HS IV              | 14107721 14116034                                                      | WBGene00012543 | nkcc-1          | Y37A1C.1           |
| -0.11170115335195     | AGIWUR2790;AGIWUR15781;AGIWUR21124;AGIWUR37379;AGIWUR39725             |                |                 |                    |
| N2 HS IV              | 14129391 14131061                                                      | WBGene00010388 | srz-42          | H12I19.1           |
| -0.121269837396289    | AGIWUR30887                                                            |                |                 |                    |
| N2 HS IV              | 14132070 14134330                                                      | WBGene00010394 | srz-59          | H12I19.7           |
| 0.0358321740294283    | AGIWUR36275                                                            |                |                 |                    |
| N2 HS IV              | 14142081 14143873                                                      | WBGene00010390 | srz-30          | H12I19.3           |
| 0.018388886271425     | AGIWUR3130;AGIWUR15872;AGIWUR25242;AGIWUR29676;AGIWUR32133;AGIWUR42099 |                |                 |                    |
| N2 HS IV              | 14145665 14148869                                                      | WBGene00010391 | oac-37          | H12I19.4           |
| 0.253851458161826     | AGIWUR12381                                                            |                |                 |                    |
| N2 HS IV              | 14150331 14153361                                                      | WBGene00010392 | oac-38          | H12I19.5           |
| -0.00387332714865796  | AGIWUR26448                                                            |                |                 |                    |
| N2 HS IV              | 14154511 14154913                                                      | WBGene00010395 | H12I19.8        | H12I19.8           |
| 0.06661426875438      | AGIWUR15654                                                            |                |                 |                    |
| N2 HS IV              | 14155270 14158048                                                      | WBGene00011025 | R05A10.8        | R05A10.8           |
| -0.0665686688486771   | AGIWUR20126;AGIWUR41257                                                |                |                 |                    |
| N2 HS IV              | 14160354 14162872                                                      | WBGene00011024 | R05A10.7        | R05A10.7           |
| -0.317954212365712    | AGIWUR13597                                                            |                |                 |                    |
| N2 HS IV              | 14165776 14168487                                                      | WBGene00011023 | R05A10.6        | R05A10.6           |
| 0.235719357095409     | AGIWUR7296                                                             |                |                 |                    |
| N2 HS IV              | 14168906 14170838                                                      | WBGene00011022 | R05A10.5        | R05A10.5           |
| 0.290552135601012     | AGIWUR17174                                                            |                |                 |                    |
| N2 HS IV              | 14172481 14173216                                                      | WBGene00011021 | R05A10.4        | R05A10.4           |
| -0.0141034289218211   | AGIWUR13880                                                            |                |                 |                    |
| N2 HS IV              | 14173642 14176473                                                      | WBGene00011020 | R05A10.3        | R05A10.3           |
| 0.212185730363982     | AGIWUR1079                                                             |                |                 |                    |
| N2 HS IV              | 14177200 14178940                                                      | WBGene00011019 | R05A10.2        | R05A10.2           |
| 0.293067740908981     | AGIWUR9589                                                             |                |                 |                    |
| N2 HS IV              | 14182377 14192674                                                      | WBGene00011018 | R05A10.1        | R05A10.1           |
| -0.0343113325430533   | AGIWUR11624;AGIWUR43235                                                |                |                 |                    |
| N2 HS IV              | 14193430 14195989                                                      | WBGene00010483 | K01G12.3        | K01G12.3           |
| 0.0784106187295519    | AGIWUR23314;AGIWUR30947                                                |                |                 |                    |
| N2 HS IV              | 14196440 14198824                                                      | WBGene00008535 | F02H6.2 F02H6.2 | 0.0105397126896332 |
| AGIWUR3140;AGIWUR7706 |                                                                        |                |                 |                    |
| N2 HS IV              | 14199263 14201780                                                      | WBGene00008534 | F02H6.1 F02H6.1 | 0.0539065000153442 |
| AGIWUR21214           |                                                                        |                |                 |                    |

|                                                                                            |    |    |          |          |                |            |           |                     |
|--------------------------------------------------------------------------------------------|----|----|----------|----------|----------------|------------|-----------|---------------------|
| N2                                                                                         | HS | IV | 14203427 | 14205357 | WBGene00008536 | F02H6.3    | F02H6.3   | 0.100907570041874   |
| AGIWUR10428;AGIWUR21966;AGIWUR28377;AGIWUR31985                                            |    |    |          |          |                |            |           |                     |
| N2                                                                                         | HS | IV | 14207564 | 14219159 | WBGene00008537 | F02H6.4    | F02H6.4   | -0.0136499382528852 |
| AGIWUR12439                                                                                |    |    |          |          |                |            |           |                     |
| N2                                                                                         | HS | IV | 14219871 | 14224439 | WBGene00008538 | sqr-d-1    | F02H6.5   | 0.0897787684629812  |
| AGIWUR17864                                                                                |    |    |          |          |                |            |           |                     |
| N2                                                                                         | HS | IV | 14225918 | 14228169 | WBGene00008540 | F02H6.7    | F02H6.7   | 0.0781661530806925  |
| AGIWUR14179                                                                                |    |    |          |          |                |            |           |                     |
| N2                                                                                         | HS | IV | 14229336 | 14230899 | WBGene00008539 | F02H6.6    | F02H6.6   | -0.173635446392582  |
| AGIWUR2933;AGIWUR31731;AGIWUR36044                                                         |    |    |          |          |                |            |           |                     |
| N2                                                                                         | HS | IV | 14234341 | 14239076 | WBGene00013411 | Y64G10A.1  |           | Y64G10A.1           |
| -0.0440947017663076 AGIWUR24728                                                            |    |    |          |          |                |            |           |                     |
| N2                                                                                         | HS | IV | 14245439 | 14250213 | WBGene00013417 | srab-24    | Y64G10A.8 |                     |
| 0.079807707573595 AGIWUR31275;AGIWUR33166;AGIWUR42828                                      |    |    |          |          |                |            |           |                     |
| N2                                                                                         | HS | IV | 14276466 | 14285523 | WBGene00013415 | ilcr-1     | Y64G10A.6 |                     |
| 0.0373621906066948 AGIWUR37644                                                             |    |    |          |          |                |            |           |                     |
| N2                                                                                         | HS | IV | 14291901 | 14319564 | WBGene00013416 | Y64G10A.7  |           | Y64G10A.7           |
| 0.0807090488955269 AGIWUR16745;AGIWUR24103;AGIWUR27809;AGIWUR41358;AGIWUR41377;AGIWUR42644 |    |    |          |          |                |            |           |                     |
| N2                                                                                         | HS | IV | 14319834 | 14321755 | WBGene00013454 | fbxa-126   |           | Y67A10A.5           |
| 0.0259694397172137 AGIWUR8515                                                              |    |    |          |          |                |            |           |                     |
| N2                                                                                         | HS | IV | 14323244 | 14325665 | WBGene00013453 | fbxa-83    | Y67A10A.4 |                     |
| -0.0318290680111701 AGIWUR15944                                                            |    |    |          |          |                |            |           |                     |
| N2                                                                                         | HS | IV | 14328995 | 14334459 | WBGene00013452 | Y67A10A.3  |           | Y67A10A.3           |
| -0.0461857734905315 AGIWUR42727                                                            |    |    |          |          |                |            |           |                     |
| N2                                                                                         | HS | IV | 14335194 | 14336491 | WBGene00045099 | Y67A10A.13 |           | Y67A10A.13          |
| -0.00020368229541079 AGIWUR19281;AGIWUR37071                                               |    |    |          |          |                |            |           |                     |
| N2                                                                                         | HS | IV | 14338057 | 14339279 | WBGene00013451 | Y67A10A.2  |           | Y67A10A.2           |
| -0.247149805879355 AGIWUR26715;AGIWUR40793                                                 |    |    |          |          |                |            |           |                     |
| N2                                                                                         | HS | IV | 14339968 | 14342112 | WBGene00044906 | Y67A10A.11 |           | Y67A10A.11          |
| 0.143078540917245 AGIWUR5989                                                               |    |    |          |          |                |            |           |                     |
| N2                                                                                         | HS | IV | 14342660 | 14343856 | WBGene00013459 | Y67A10A.10 |           | Y67A10A.10          |
| 0.354191125640012 AGIWUR41956                                                              |    |    |          |          |                |            |           |                     |
| N2                                                                                         | HS | IV | 14345435 | 14350751 | WBGene00013450 | oac-56     | Y67A10A.1 |                     |
| 0.102330944398626 AGIWUR22040                                                              |    |    |          |          |                |            |           |                     |
| N2                                                                                         | HS | IV | 14374114 | 14379643 | WBGene00013456 | Y67A10A.7  |           | Y67A10A.7           |
| -0.268032617498688 AGIWUR10747;AGIWUR41785                                                 |    |    |          |          |                |            |           |                     |
| N2                                                                                         | HS | IV | 14379953 | 14383701 | WBGene00013457 | paqr-3     | Y67A10A.8 |                     |
| 0.239974565912369 AGIWUR12238                                                              |    |    |          |          |                |            |           |                     |
| N2                                                                                         | HS | IV | 14394138 | 14400368 | WBGene00013458 | Y67A10A.9  |           | Y67A10A.9           |

|                                    |                                                           |          |                |           |           |                     |
|------------------------------------|-----------------------------------------------------------|----------|----------------|-----------|-----------|---------------------|
| -0.007912303765929                 | AGIWUR35244                                               |          |                |           |           |                     |
| N2 HS IV                           | 14419711                                                  | 14422038 | WBGene00045060 | F55B11.7  | F55B11.7  |                     |
| 0.448823990558101                  | AGIWUR20609;AGIWUR37396                                   |          |                |           |           |                     |
| N2 HS IV                           | 14422268                                                  | 14423294 | WBGene00010084 | F55B11.2  | F55B11.2  |                     |
| 0.190706185810495                  | AGIWUR9340                                                |          |                |           |           |                     |
| N2 HS IV                           | 14424693                                                  | 14425859 | WBGene00010085 | F55B11.3  | F55B11.3  |                     |
| 0.0357301938566046                 | AGIWUR26421                                               |          |                |           |           |                     |
| N2 HS IV                           | 14427695                                                  | 14428464 | WBGene00010087 | F55B11.5  | F55B11.5  |                     |
| 0.101287128172061                  | AGIWUR37102                                               |          |                |           |           |                     |
| N2 HS IV                           | 14429574                                                  | 14430920 | WBGene00010086 | F55B11.4  | F55B11.4  |                     |
| 0.05530602525298                   | AGIWUR5871;AGIWUR7295;AGIWUR13797;AGIWUR39876;AGIWUR41646 |          |                |           |           |                     |
| N2 HS IV                           | 14436367                                                  | 14444183 | WBGene00006606 | tra-3     | LLC1.1    | 0.287236397731398   |
| AGIWUR18748                        |                                                           |          |                |           |           |                     |
| N2 HS IV                           | 14456900                                                  | 14464098 | WBGene00010793 | LLC1.2    | LLC1.2    | 0.20037351900509    |
| AGIWUR19648                        |                                                           |          |                |           |           |                     |
| N2 HS IV                           | 14464517                                                  | 14469136 | WBGene00010794 | dld-1     | LLC1.3    | 0.00556058013811622 |
| AGIWUR1832;AGIWUR15974;AGIWUR42021 |                                                           |          |                |           |           |                     |
| N2 HS IV                           | 14482334                                                  | 14486439 | WBGene00013292 | Y57G11A.4 | Y57G11A.4 |                     |
| 0.191131671781672                  | AGIWUR25101                                               |          |                |           |           |                     |
| N2 HS IV                           | 14487086                                                  | 14505166 | WBGene00013289 | tag-273   | Y57G11A.1 |                     |
| 0.230439403904836                  | AGIWUR3903;AGIWUR7605;AGIWUR27692                         |          |                |           |           |                     |
| N2 HS IV                           | 14511884                                                  | 14512505 | WBGene00013293 | Y57G11A.5 | Y57G11A.5 |                     |
| 0.388800501767865                  | AGIWUR30207                                               |          |                |           |           |                     |
| N2 HS IV                           | 14514376                                                  | 14515118 | WBGene00044097 | srh-64    | Y57G11A.6 |                     |
| -0.112149364241433                 | AGIWUR28692                                               |          |                |           |           |                     |
| N2 HS IV                           | 14517022                                                  | 14519539 | WBGene00013290 | Y57G11A.2 | Y57G11A.2 |                     |
| 0.0574984325616246                 | AGIWUR16288                                               |          |                |           |           |                     |
| N2 HS IV                           | 14519759                                                  | 14520999 | WBGene00012087 | T27E7.1   | T27E7.1   | -0.14735325236833   |
| AGIWUR4550                         |                                                           |          |                |           |           |                     |
| N2 HS IV                           | 14522464                                                  | 14523677 | WBGene00005286 | srh-65    | T27E7.2   | 0.209849540519677   |
| AGIWUR5005                         |                                                           |          |                |           |           |                     |
| N2 HS IV                           | 14523868                                                  | 14525197 | WBGene00005285 | srh-63    | T27E7.8   | -0.0343127150325442 |
| AGIWUR20602                        |                                                           |          |                |           |           |                     |
| N2 HS IV                           | 14527093                                                  | 14527343 | WBGene00045313 | T27E7.12  | T27E7.12  |                     |
| -0.0870137479250666                | AGIWUR32313                                               |          |                |           |           |                     |
| N2 HS IV                           | 14529018                                                  | 14530809 | WBGene00012088 | T27E7.3   | T27E7.3   | 0.0160792257889941  |
| AGIWUR32906                        |                                                           |          |                |           |           |                     |
| N2 HS IV                           | 14531180                                                  | 14531646 | WBGene00044268 | T27E7.10  | T27E7.10  |                     |
| -0.235500561351908                 | AGIWUR17144;AGIWUR40545                                   |          |                |           |           |                     |

|                                            |    |    |          |          |                |             |            |                     |
|--------------------------------------------|----|----|----------|----------|----------------|-------------|------------|---------------------|
| N2                                         | HS | IV | 14533518 | 14535067 | WBGene00012089 | T27E7.4     | T27E7.4    | -0.0659402009420358 |
| AGIWUR36082                                |    |    |          |          |                |             |            |                     |
| N2                                         | HS | IV | 14537163 | 14538325 | WBGene00012090 | T27E7.5     | T27E7.5    | 0.00773833340210928 |
| AGIWUR17253                                |    |    |          |          |                |             |            |                     |
| N2                                         | HS | IV | 14539762 | 14542602 | WBGene00012091 | pals-29     | T27E7.6    | 1.55711868505179    |
| AGIWUR2847;AGIWUR6198;AGIWUR10921          |    |    |          |          |                |             |            |                     |
| N2                                         | HS | IV | 14546933 | 14549386 | WBGene00012093 | T27E7.9     | T27E7.9    | -0.121306345895452  |
| AGIWUR33290                                |    |    |          |          |                |             |            |                     |
| N2                                         | HS | IV | 14549827 | 14551957 | WBGene00013294 | pals-30     | Y57G11B.1  |                     |
| 0.481824701736515 AGIWUR43995              |    |    |          |          |                |             |            |                     |
| N2                                         | HS | IV | 14553598 | 14554883 | WBGene00013298 | Y57G11B.6   |            | Y57G11B.6           |
| -0.00622518699599262 AGIWUR21498           |    |    |          |          |                |             |            |                     |
| N2                                         | HS | IV | 14565330 | 14567331 | WBGene00013295 | Y57G11B.2   |            | Y57G11B.2           |
| 0.197368553328237 AGIWUR36699              |    |    |          |          |                |             |            |                     |
| N2                                         | HS | IV | 14570160 | 14572721 | WBGene00077763 | Y57G11B.97  |            | Y57G11B.97          |
| 0.163101474552038 AGIWUR12079;AGIWUR37121  |    |    |          |          |                |             |            |                     |
| N2                                         | HS | IV | 14574819 | 14576580 | WBGene00013297 | Y57G11B.5   |            | Y57G11B.5           |
| 0.362976402350295 AGIWUR33753              |    |    |          |          |                |             |            |                     |
| N2                                         | HS | IV | 14577004 | 14577273 | WBGene00255522 | Y57G11B.223 |            | Y57G11B.223         |
| 0.170014455208311 AGIWUR36876              |    |    |          |          |                |             |            |                     |
| N2                                         | HS | IV | 14616603 | 14623961 | WBGene00007058 | dmd-6       | F13G11.1   |                     |
| -0.342759941873141 AGIWUR18122;AGIWUR41975 |    |    |          |          |                |             |            |                     |
| N2                                         | HS | IV | 14633099 | 14634405 | WBGene00008772 | irld-4      | F13G11.2   |                     |
| 0.323360717748676 AGIWUR19940              |    |    |          |          |                |             |            |                     |
| N2                                         | HS | IV | 14635126 | 14636051 | WBGene00045038 | ule-2       | F13G11.3   |                     |
| 0.541387427729713 AGIWUR16361              |    |    |          |          |                |             |            |                     |
| N2                                         | HS | IV | 14637751 | 14641229 | WBGene00013328 | Y57G11C.39  |            | Y57G11C.39          |
| 0.0911466129061358 AGIWUR36645             |    |    |          |          |                |             |            |                     |
| N2                                         | HS | IV | 14643025 | 14653376 | WBGene00013322 | Y57G11C.32  |            | Y57G11C.32          |
| 0.00180063788163132 AGIWUR13955            |    |    |          |          |                |             |            |                     |
| N2                                         | HS | IV | 14655535 | 14655916 | WBGene00045282 | Y57G11C.56  |            | Y57G11C.56          |
| -0.193228174771578 AGIWUR27072;AGIWUR40230 |    |    |          |          |                |             |            |                     |
| N2                                         | HS | IV | 14657081 | 14658165 | WBGene00013323 | Y57G11C.33  |            | Y57G11C.33          |
| -0.10300671093015 AGIWUR11773;AGIWUR31272  |    |    |          |          |                |             |            |                     |
| N2                                         | HS | IV | 14658319 | 14675141 | WBGene00013326 | anoh-2      | Y57G11C.37 |                     |
| 0.106657019858811 AGIWUR43237              |    |    |          |          |                |             |            |                     |
| N2                                         | HS | IV | 14683043 | 14687405 | WBGene00013321 | Y57G11C.31  |            | Y57G11C.31          |
| 0.458668827945814 AGIWUR12323              |    |    |          |          |                |             |            |                     |
| N2                                         | HS | IV | 14694032 | 14699940 | WBGene00001818 | haf-8       | Y57G11C.1  |                     |

|                                                                                                 |                                     |          |                 |                   |              |
|-------------------------------------------------------------------------------------------------|-------------------------------------|----------|-----------------|-------------------|--------------|
| -0.0588245954678763                                                                             | AGIWUR32154                         |          |                 |                   |              |
| N2 HS IV                                                                                        | 14703209                            | 14704255 | WBGene00013329  | Y57G11C.40        | Y57G11C.40   |
| 0.21883915864565                                                                                | AGIWUR30195                         |          |                 |                   |              |
| N2 HS IV                                                                                        | 14705536                            | 14706402 | WBGene00013330  | Y57G11C.41        | Y57G11C.41   |
| 0.376070693780106                                                                               | AGIWUR28191                         |          |                 |                   |              |
| N2 HS IV                                                                                        | 14728534                            | 14745676 | WBGene00013331  | Y57G11C.42        | Y57G11C.42   |
| 0.293483718785136                                                                               | AGIWUR6177;AGIWUR42172;AGIWUR44605  |          |                 |                   |              |
| N2 HS IV                                                                                        | 14754089                            | 14754969 | WBGene00077762  | Y57G11C.499       | Y57G11C.499  |
| 0.0972098013094937                                                                              | AGIWUR36923                         |          |                 |                   |              |
| N2 HS IV                                                                                        | 14758362                            | 14760945 | WBGene00013304  | Y57G11C.6         | Y57G11C.6    |
| -0.015382059249184                                                                              | AGIWUR5415;AGIWUR6344               |          |                 |                   |              |
| N2 HS IV                                                                                        | 14761818                            | 14765434 | WBGene00013303  | Y57G11C.5         | Y57G11C.5    |
| -0.0457170026618527                                                                             | AGIWUR557                           |          |                 |                   |              |
| N2 HS IV                                                                                        | 14765629                            | 14766665 | WBGene00013302  | vti-1 Y57G11C.4   |              |
| 0.262909741625194                                                                               | AGIWUR18568                         |          |                 |                   |              |
| N2 HS IV                                                                                        | 14766773                            | 14767730 | WBGene00013324  | mrps-7 Y57G11C.34 |              |
| 0.250023918765049                                                                               | AGIWUR41282                         |          |                 |                   |              |
| N2 HS IV                                                                                        | 14768155                            | 14769282 | WBGene00013301  | Y57G11C.3         | Y57G11C.3    |
| 0.0750385264218743                                                                              | AGIWUR1560;AGIWUR3449;AGIWUR5876    |          |                 |                   |              |
| N2 HS IV                                                                                        | 14769441                            | 14770719 | WBGene00013332  | Y57G11C.43        | Y57G11C.43   |
| -0.412140281161786                                                                              | AGIWUR11667                         |          |                 |                   |              |
| N2 HS IV                                                                                        | 14770654                            | 14771425 | WBGene00013333  | Y57G11C.44        | Y57G11C.44   |
| 0.0445596867627618                                                                              | AGIWUR25285                         |          |                 |                   |              |
| N2 HS IV                                                                                        | 14771419                            | 14773535 | WBGene00013325  | Y57G11C.36        | Y57G11C.36   |
| -0.165619920334464                                                                              | AGIWUR44730                         |          |                 |                   |              |
| N2 HS IV                                                                                        | 14773598                            | 14774634 | WBGene00044258  | Y57G11C.51        | Y57G11C.51   |
| -0.072817193388623                                                                              | AGIWUR44818                         |          |                 |                   |              |
| N2 HS IV                                                                                        | 14780940                            | 14781266 | WBGene00045311  | Y57G11C.57        | Y57G11C.57   |
| -0.19576868014385                                                                               | AGIWUR23356                         |          |                 |                   |              |
| N2 HS IV                                                                                        | 14782644                            | 14783342 | WBGene000194649 | Y57G11C.1130      | Y57G11C.1130 |
| -0.0727032491107362                                                                             | AGIWUR29716                         |          |                 |                   |              |
| N2 HS IV                                                                                        | 14783341                            | 14784252 | WBGene00013334  | nlp-56 Y57G11C.45 |              |
| -0.119646507284317                                                                              | AGIWUR32710                         |          |                 |                   |              |
| N2 HS IV                                                                                        | 14787168                            | 14790843 | WBGene00013307  | Y57G11C.9         | Y57G11C.9    |
| -0.0140894278078005                                                                             |                                     |          |                 |                   |              |
| AGIWUR12676;AGIWUR14588;AGIWUR17507;AGIWUR18185;AGIWUR18687;AGIWUR32905;AGIWUR40587;AGIWUR43681 |                                     |          |                 |                   |              |
| N2 HS IV                                                                                        | 14790818                            | 14792887 | WBGene00001558  | gdi-1 Y57G11C.10  |              |
| -0.306557743792698                                                                              | AGIWUR20763;AGIWUR35736;AGIWUR44186 |          |                 |                   |              |
| N2 HS IV                                                                                        | 14793119                            | 14796375 | WBGene00000763  | coq-3 Y57G11C.11  |              |

|                                                                                                                                  |                                                            |          |                |            |            |
|----------------------------------------------------------------------------------------------------------------------------------|------------------------------------------------------------|----------|----------------|------------|------------|
| 0.0388209619937658                                                                                                               | AGIWUR3632;AGIWUR32574;AGIWUR39151;AGIWUR42391;AGIWUR43225 |          |                |            |            |
| N2 HS IV                                                                                                                         | 14796417                                                   | 14797544 | WBGene00013308 | nuo-3      | Y57G11C.12 |
| -0.036425804780329                                                                                                               |                                                            |          |                |            |            |
| AGIWUR900;AGIWUR4845;AGIWUR13485;AGIWUR14053;AGIWUR19896;AGIWUR20504;AGIWUR26997;AGIWUR35472;AGIWUR38753;AGIWUR41292;AGIWUR42681 |                                                            |          |                |            |            |
| N2 HS IV                                                                                                                         | 14798149                                                   | 14799229 | WBGene00000192 | arl-8      | Y57G11C.13 |
| 0.111807348716776                                                                                                                |                                                            |          |                |            |            |
| AGIWUR2999;AGIWUR15427;AGIWUR15779;AGIWUR17064;AGIWUR28321;AGIWUR41048                                                           |                                                            |          |                |            |            |
| N2 HS IV                                                                                                                         | 14799311                                                   | 14801063 | WBGene00013310 | Y57G11C.14 | Y57G11C.14 |
| 0.155773094563635                                                                                                                |                                                            |          |                |            |            |
| AGIWUR26615                                                                                                                      |                                                            |          |                |            |            |
| N2 HS IV                                                                                                                         | 14803103                                                   | 14803480 | WBGene00045029 | Y57G11C.54 | Y57G11C.54 |
| 0.141491065302643                                                                                                                |                                                            |          |                |            |            |
| AGIWUR4085;AGIWUR6020;AGIWUR12212;AGIWUR20576;AGIWUR28328                                                                        |                                                            |          |                |            |            |
| N2 HS IV                                                                                                                         | 14807189                                                   | 14809958 | WBGene00023520 | oig-5      | Y57G11C.50 |
| 0.0705458262363869                                                                                                               |                                                            |          |                |            |            |
| AGIWUR17302;AGIWUR29275                                                                                                          |                                                            |          |                |            |            |
| N2 HS IV                                                                                                                         | 14822540                                                   | 14825264 | WBGene00013311 | sec-61     | Y57G11C.15 |
| 0.12567990485444                                                                                                                 |                                                            |          |                |            |            |
| AGIWUR26320                                                                                                                      |                                                            |          |                |            |            |
| N2 HS IV                                                                                                                         | 14825679                                                   | 14826448 | WBGene00004487 | rps-18     | Y57G11C.16 |
| -0.0324621390695334                                                                                                              |                                                            |          |                |            |            |
| AGIWUR31968;AGIWUR37362                                                                                                          |                                                            |          |                |            |            |
| N2 HS IV                                                                                                                         | 14826449                                                   | 14829115 | WBGene00013312 | hhat-2     | Y57G11C.17 |
| 0.00291387936222876                                                                                                              |                                                            |          |                |            |            |
| AGIWUR33555                                                                                                                      |                                                            |          |                |            |            |
| N2 HS IV                                                                                                                         | 14837112                                                   | 14853662 | WBGene00013317 | Y57G11C.22 | Y57G11C.22 |
| 0.00782231760272367                                                                                                              |                                                            |          |                |            |            |
| AGIWUR3328;AGIWUR9873                                                                                                            |                                                            |          |                |            |            |
| N2 HS IV                                                                                                                         | 14854003                                                   | 14854426 | WBGene00044741 | Y57G11C.52 | Y57G11C.52 |
| -0.0401351546603887                                                                                                              |                                                            |          |                |            |            |
| AGIWUR2076;AGIWUR10413;AGIWUR32636;AGIWUR36749;AGIWUR37684                                                                       |                                                            |          |                |            |            |
| N2 HS IV                                                                                                                         | 14855331                                                   | 14861791 | WBGene00013318 | Y57G11C.23 | Y57G11C.23 |
| 0.00550608839602695                                                                                                              |                                                            |          |                |            |            |
| AGIWUR4719                                                                                                                       |                                                            |          |                |            |            |
| N2 HS IV                                                                                                                         | 14862447                                                   | 14869951 | WBGene00013327 | Y57G11C.38 | Y57G11C.38 |
| 0.0956304399640953                                                                                                               |                                                            |          |                |            |            |
| AGIWUR15936                                                                                                                      |                                                            |          |                |            |            |
| N2 HS IV                                                                                                                         | 14879490                                                   | 14900652 | WBGene00001330 | eps-8      | Y57G11C.24 |
| 0.0117291544384397                                                                                                               |                                                            |          |                |            |            |
| AGIWUR641;AGIWUR27191;AGIWUR32076;AGIWUR35401;AGIWUR36433                                                                        |                                                            |          |                |            |            |
| N2 HS IV                                                                                                                         | 14904994                                                   | 14909686 | WBGene00013336 | pnc-2      | Y57G11C.47 |
| 0.27927531468813                                                                                                                 |                                                            |          |                |            |            |
| AGIWUR24181                                                                                                                      |                                                            |          |                |            |            |
| N2 HS IV                                                                                                                         | 14919610                                                   | 14920421 | WBGene00013319 | ccch-5     | Y57G11C.25 |
| 0.0505580059059483                                                                                                               |                                                            |          |                |            |            |
| AGIWUR21538                                                                                                                      |                                                            |          |                |            |            |
| N2 HS IV                                                                                                                         | 14924444                                                   | 14926046 | WBGene00014923 | Y57G11C.26 | Y57G11C.26 |
| -0.01966900422984                                                                                                                |                                                            |          |                |            |            |
| AGIWUR14344;AGIWUR26021                                                                                                          |                                                            |          |                |            |            |
| N2 HS IV                                                                                                                         | 14927059                                                   | 14928623 | WBGene00014925 | Y57G11C.29 | Y57G11C.29 |
| 0.0145735380228711                                                                                                               |                                                            |          |                |            |            |
| AGIWUR7530;AGIWUR39249                                                                                                           |                                                            |          |                |            |            |
| N2 HS IV                                                                                                                         | 14929721                                                   | 14931931 | WBGene00014924 | Y57G11C.28 | Y57G11C.28 |
| -0.021844938026331                                                                                                               |                                                            |          |                |            |            |
| AGIWUR40086                                                                                                                      |                                                            |          |                |            |            |

|                                                |    |    |                                                                       |          |                |            |                             |
|------------------------------------------------|----|----|-----------------------------------------------------------------------|----------|----------------|------------|-----------------------------|
| N2                                             | HS | IV | 14938896                                                              | 14941898 | WBGene00014926 | Y57G11C.30 | Y57G11C.30                  |
| 0.167792904933641                              |    |    | AGIWUR37285                                                           |          |                |            |                             |
| N2                                             | HS | IV | 14942286                                                              | 14945328 | WBGene00013337 | Y57G11C.48 | Y57G11C.48                  |
| 0.00936943348110475                            |    |    | AGIWUR33033                                                           |          |                |            |                             |
| N2                                             | HS | IV | 14950652                                                              | 14954226 | WBGene00045146 | Y41E3.22   | Y41E3.22                    |
| 0.152398397181276                              |    |    | AGIWUR11004;AGIWUR13696;AGIWUR31781;AGIWUR44633                       |          |                |            |                             |
| N2                                             | HS | IV | 14954206                                                              | 14958914 | WBGene00012762 | Y41E3.1    | Y41E3.1 -0.0614456847772651 |
| AGIWUR33798                                    |    |    |                                                                       |          |                |            |                             |
| N2                                             | HS | IV | 14974292                                                              | 14974561 | WBGene00045000 | Y41E3.20   | Y41E3.20                    |
| 0.0520622319537276                             |    |    | AGIWUR5211                                                            |          |                |            |                             |
| N2                                             | HS | IV | 14981609                                                              | 14996306 | WBGene00012763 | atln-2     | Y41E3.3 -0.635424539893159  |
| AGIWUR39088                                    |    |    |                                                                       |          |                |            |                             |
| N2                                             | HS | IV | 15008503                                                              | 15013183 | WBGene00001336 | qars-1     | Y41E3.4 0.124449186077381   |
| AGIWUR33851                                    |    |    |                                                                       |          |                |            |                             |
| N2                                             | HS | IV | 15014042                                                              | 15025513 | WBGene00012765 | Y41E3.7    | Y41E3.7 0.075139136076217   |
| AGIWUR7796;AGIWUR32310;AGIWUR32659;AGIWUR37732 |    |    |                                                                       |          |                |            |                             |
| N2                                             | HS | IV | 15025710                                                              | 15037036 | WBGene00012767 | fcd-2      | Y41E3.9 0.334577621485115   |
| AGIWUR24036                                    |    |    |                                                                       |          |                |            |                             |
| N2                                             | HS | IV | 15037321                                                              | 15039551 | WBGene00012768 | eef-1B.2   | Y41E3.10                    |
| 0.142020170189523                              |    |    | AGIWUR22719;AGIWUR28123;AGIWUR37620                                   |          |                |            |                             |
| N2                                             | HS | IV | 15039619                                                              | 15049273 | WBGene00012769 | Y41E3.11   | Y41E3.11                    |
| -0.0991138424431668                            |    |    | AGIWUR7425;AGIWUR12350;AGIWUR28909;AGIWUR36823                        |          |                |            |                             |
| N2                                             | HS | IV | 15049411                                                              | 15053371 | WBGene00012770 | srt-47     | Y41E3.12                    |
| -0.0286621025140352                            |    |    | AGIWUR5695                                                            |          |                |            |                             |
| N2                                             | HS | IV | 15056131                                                              | 15057889 | WBGene00044979 | Y41E3.19   | Y41E3.19                    |
| 0.185510814968008                              |    |    | AGIWUR38414                                                           |          |                |            |                             |
| N2                                             | HS | IV | 15058294                                                              | 15058694 | WBGene00012771 | Y41E3.13   | Y41E3.13                    |
| 0.0913316058834752                             |    |    | AGIWUR39152                                                           |          |                |            |                             |
| N2                                             | HS | IV | 15061929                                                              | 15065748 | WBGene00044003 | Y41E3.18   | Y41E3.18                    |
| -0.207052471374978                             |    |    | AGIWUR10034;AGIWUR15352                                               |          |                |            |                             |
| N2                                             | HS | IV | 15065866                                                              | 15068918 | WBGene00012773 | srt-48     | Y41E3.15                    |
| 0.123053411501114                              |    |    | AGIWUR37577;AGIWUR44448                                               |          |                |            |                             |
| N2                                             | HS | IV | 15074692                                                              | 15088581 | WBGene00012775 | srt-50     | Y41E3.17                    |
| 0.0423610586667973                             |    |    | AGIWUR4268;AGIWUR5689;AGIWUR13957;AGIWUR21801;AGIWUR28319;AGIWUR36582 |          |                |            |                             |
| N2                                             | HS | IV | 15092881                                                              | 15098376 | WBGene00012772 | srt-49     | Y41E3.14                    |
| -0.0315648453418857                            |    |    | AGIWUR25669                                                           |          |                |            |                             |
| N2                                             | HS | IV | 15103629                                                              | 15106483 | WBGene00010950 | srt-44     | M199.1 -0.193967650045783   |
| AGIWUR28281                                    |    |    |                                                                       |          |                |            |                             |
| N2                                             | HS | IV | 15108775                                                              | 15110915 | WBGene00010951 | M199.2     | M199.2 -0.0721549279518481  |

|                                                                                                |    |    |          |          |                |                 |                     |
|------------------------------------------------------------------------------------------------|----|----|----------|----------|----------------|-----------------|---------------------|
| AGIWUR10267                                                                                    |    |    |          |          |                |                 |                     |
| N2                                                                                             | HS | IV | 15115569 | 15117823 | WBGene00010952 | clec-188        | M199.3              |
| 0.00662666841045656 AGIWUR27564                                                                |    |    |          |          |                |                 |                     |
| N2                                                                                             | HS | IV | 15120519 | 15122548 | WBGene00010954 | clec-189        | M199.6              |
| -0.0740270928812183 AGIWUR32713                                                                |    |    |          |          |                |                 |                     |
| N2                                                                                             | HS | IV | 15123182 | 15124393 | WBGene00010955 | M199.7 M199.7   | -0.0315683698267186 |
| AGIWUR22985                                                                                    |    |    |          |          |                |                 |                     |
| N2                                                                                             | HS | IV | 15124931 | 15126122 | WBGene00010953 | clec-190        | M199.4              |
| 0.27776987051381 AGIWUR10019                                                                   |    |    |          |          |                |                 |                     |
| N2                                                                                             | HS | IV | 15127491 | 15127794 | WBGene00044998 | M199.9 M199.9   | 0.0488236688018668  |
| AGIWUR14687;AGIWUR16889;AGIWUR27904;AGIWUR31600;AGIWUR42202                                    |    |    |          |          |                |                 |                     |
| N2                                                                                             | HS | IV | 15129666 | 15131797 | WBGene00000708 | col-135 M199.5  | -0.287209315145128  |
| AGIWUR42402                                                                                    |    |    |          |          |                |                 |                     |
| N2                                                                                             | HS | IV | 15139101 | 15140932 | WBGene00005208 | srg-51 Y40H7A.8 |                     |
| 0.0179080978349697 AGIWUR28884                                                                 |    |    |          |          |                |                 |                     |
| N2                                                                                             | HS | IV | 15143773 | 15147204 | WBGene00006138 | str-78 Y40H7A.1 |                     |
| 0.0675570280625619 AGIWUR5149                                                                  |    |    |          |          |                |                 |                     |
| N2                                                                                             | HS | IV | 15167800 | 15175536 | WBGene00012744 | Y40H7A.4        | Y40H7A.4            |
| 0.0973269767296663                                                                             |    |    |          |          |                |                 |                     |
| AGIWUR1824;AGIWUR18651;AGIWUR20328;AGIWUR20976;AGIWUR27625;AGIWUR34304;AGIWUR40849;AGIWUR41662 |    |    |          |          |                |                 |                     |
| N2                                                                                             | HS | IV | 15179922 | 15182953 | WBGene00005101 | srd-23 Y40H7A.5 |                     |
| -0.0566024188206811 AGIWUR6509                                                                 |    |    |          |          |                |                 |                     |
| N2                                                                                             | HS | IV | 15192299 | 15203023 | WBGene00005056 | sra-30 Y40H7A.6 |                     |
| -0.113859571488441 AGIWUR24500                                                                 |    |    |          |          |                |                 |                     |
| N2                                                                                             | HS | IV | 15207593 | 15209522 | WBGene00012746 | Y40H7A.9        | Y40H7A.9            |
| -0.145256085844817 AGIWUR21815                                                                 |    |    |          |          |                |                 |                     |
| N2                                                                                             | HS | IV | 15210123 | 15215626 | WBGene00012747 | Y40H7A.10       | Y40H7A.10           |
| -0.178284830489613 AGIWUR12949                                                                 |    |    |          |          |                |                 |                     |
| N2                                                                                             | HS | IV | 15219686 | 15220346 | WBGene00012748 | Y40H7A.11       | Y40H7A.11           |
| -0.0127407910100867 AGIWUR36967                                                                |    |    |          |          |                |                 |                     |
| N2                                                                                             | HS | IV | 15236251 | 15243675 | WBGene00013517 | lgc-52 Y73F8A.2 |                     |
| -0.0452216428128214 AGIWUR9569                                                                 |    |    |          |          |                |                 |                     |
| N2                                                                                             | HS | IV | 15245955 | 15246371 | WBGene00044259 | Y73F8A.36       | Y73F8A.36           |
| 0.061077303676603 AGIWUR13828;AGIWUR18916;AGIWUR29753;AGIWUR30089;AGIWUR40751                  |    |    |          |          |                |                 |                     |
| N2                                                                                             | HS | IV | 15250152 | 15252257 | WBGene00005625 | srj-42 Y73F8A.3 |                     |
| 0.095925696972273 AGIWUR32614;AGIWUR37734;AGIWUR41029                                          |    |    |          |          |                |                 |                     |
| N2                                                                                             | HS | IV | 15255690 | 15257628 | WBGene00014948 | Y73F8A.4        | Y73F8A.4            |
| -0.208592354444658 AGIWUR6659;AGIWUR23773                                                      |    |    |          |          |                |                 |                     |
| N2                                                                                             | HS | IV | 15259879 | 15269045 | WBGene00013518 | Y73F8A.5        | Y73F8A.5            |



|                                                                                                                                   |                                                                        |          |                |           |           |  |
|-----------------------------------------------------------------------------------------------------------------------------------|------------------------------------------------------------------------|----------|----------------|-----------|-----------|--|
| -0.000228823087327967                                                                                                             | AGIWUR5580                                                             |          |                |           |           |  |
| N2 HS IV                                                                                                                          | 15270160                                                               | 15275835 | WBGene00000370 | ccg-1     | Y73F8A.6  |  |
| -0.117889887408701                                                                                                                | AGIWUR40979                                                            |          |                |           |           |  |
| N2 HS IV                                                                                                                          | 15288019                                                               | 15289505 | WBGene00006079 | str-11    | Y73F8A.7  |  |
| -0.0661733024938842                                                                                                               | AGIWUR13196;AGIWUR43672                                                |          |                |           |           |  |
| N2 HS IV                                                                                                                          | 15294340                                                               | 15295297 | WBGene00013519 | Y73F8A.10 | Y73F8A.10 |  |
| 0.0402998682553388                                                                                                                | AGIWUR2474                                                             |          |                |           |           |  |
| N2 HS IV                                                                                                                          | 15302421                                                               | 15309408 | WBGene00013520 | best-21   | Y73F8A.11 |  |
| 0.123280150140531                                                                                                                 | AGIWUR25474                                                            |          |                |           |           |  |
| N2 HS IV                                                                                                                          | 15312247                                                               | 15313982 | WBGene00013522 | Y73F8A.13 | Y73F8A.13 |  |
| 0.366892470634239                                                                                                                 | AGIWUR16964                                                            |          |                |           |           |  |
| N2 HS IV                                                                                                                          | 15321579                                                               | 15322183 | WBGene00013524 | Y73F8A.15 | Y73F8A.15 |  |
| 0.323137542144618                                                                                                                 | AGIWUR25245                                                            |          |                |           |           |  |
| N2 HS IV                                                                                                                          | 15323893                                                               | 15325189 | WBGene00006558 | tbx-39    | Y73F8A.16 |  |
| -0.095272618250072                                                                                                                | AGIWUR40555                                                            |          |                |           |           |  |
| N2 HS IV                                                                                                                          | 15326939                                                               | 15328186 | WBGene00006559 | tbx-40    | Y73F8A.17 |  |
| -0.155593109453983                                                                                                                | AGIWUR22353                                                            |          |                |           |           |  |
| N2 HS IV                                                                                                                          | 15337078                                                               | 15339821 | WBGene00013525 | irld-59   | Y73F8A.18 |  |
| -0.29529785040847                                                                                                                 | AGIWUR27948                                                            |          |                |           |           |  |
| N2 HS IV                                                                                                                          | 15361555                                                               | 15368260 | WBGene00006441 | cpna-4    | Y73F8A.19 |  |
| 0.0151135716880262                                                                                                                | AGIWUR10706                                                            |          |                |           |           |  |
| N2 HS IV                                                                                                                          | 15378460                                                               | 15381686 | WBGene00013526 | Y73F8A.20 | Y73F8A.20 |  |
| 0.0316762302239049                                                                                                                | AGIWUR35971                                                            |          |                |           |           |  |
| N2 HS IV                                                                                                                          | 15423920                                                               | 15424366 | WBGene00045025 | Y73F8A.39 | Y73F8A.39 |  |
| -0.0768186095342509                                                                                                               | AGIWUR8018;AGIWUR20983;AGIWUR30345;AGIWUR42566;AGIWUR43731             |          |                |           |           |  |
| N2 HS IV                                                                                                                          | 15442960                                                               | 15444581 | WBGene00013528 | Y73F8A.23 | Y73F8A.23 |  |
| -0.144551564488491                                                                                                                | AGIWUR39226                                                            |          |                |           |           |  |
| N2 HS IV                                                                                                                          | 15445368                                                               | 15453187 | WBGene00013529 | Y73F8A.24 | Y73F8A.24 |  |
| -0.0680561118608765                                                                                                               | AGIWUR6088                                                             |          |                |           |           |  |
| N2 HS IV                                                                                                                          | 15455137                                                               | 15471488 | WBGene00013530 | ntl-11    | Y73F8A.25 |  |
| 0.137453056330884                                                                                                                 |                                                                        |          |                |           |           |  |
| AGIWUR1774;AGIWUR2229;AGIWUR11645;AGIWUR12402;AGIWUR18303;AGIWUR25732;AGIWUR28053;AGIWUR29737;AGIWUR35606;AGIWUR37418;AGIWUR42623 |                                                                        |          |                |           |           |  |
| N2 HS IV                                                                                                                          | 15472809                                                               | 15473682 | WBGene00013532 | Y73F8A.27 | Y73F8A.27 |  |
| -0.130550685638906                                                                                                                | AGIWUR8366;AGIWUR15188;AGIWUR20529;AGIWUR21845;AGIWUR23023;AGIWUR31382 |          |                |           |           |  |
| N2 HS IV                                                                                                                          | 15473660                                                               | 15477512 | WBGene00013531 | Y73F8A.26 | Y73F8A.26 |  |
| 0.134004712654105                                                                                                                 | AGIWUR6318;AGIWUR34926                                                 |          |                |           |           |  |
| N2 HS IV                                                                                                                          | 15497567                                                               | 15510980 | WBGene00013534 | acr-24    | Y73F8A.30 |  |
| 0.151558432721801                                                                                                                 | AGIWUR3707                                                             |          |                |           |           |  |

|                       |    |    |                                                                                    |          |                |              |              |
|-----------------------|----|----|------------------------------------------------------------------------------------|----------|----------------|--------------|--------------|
| N2                    | HS | IV | 15513786                                                                           | 15514464 | WBGene00013535 | gyg-3        | Y73F8A.31    |
| -0.00585255372846571  |    |    | AGIWUR1385;AGIWUR8902;AGIWUR21518;AGIWUR34407                                      |          |                |              |              |
| N2                    | HS | IV | 15514537                                                                           | 15521258 | WBGene00013536 | Y73F8A.32    | Y73F8A.32    |
| -0.0721914444653358   |    |    | AGIWUR2334;AGIWUR33625                                                             |          |                |              |              |
| N2                    | HS | IV | 15533167                                                                           | 15539959 | WBGene00013539 | Y73F8A.35    | Y73F8A.35    |
| -0.0699096482209161   |    |    | AGIWUR42953                                                                        |          |                |              |              |
| N2                    | HS | IV | 15550854                                                                           | 15554721 | WBGene00013632 | Y105C5A.1    | Y105C5A.1    |
| -0.0848189369773742   |    |    | AGIWUR3354;AGIWUR13296;AGIWUR13372;AGIWUR23799;AGIWUR23986;AGIWUR28284;AGIWUR43025 |          |                |              |              |
| N2                    | HS | IV | 15591973                                                                           | 15592386 | WBGene00045016 | Y105C5A.30   | Y105C5A.30   |
| 0.0420170500378774    |    |    | AGIWUR25604;AGIWUR37634;AGIWUR39230                                                |          |                |              |              |
| N2                    | HS | IV | 15612768                                                                           | 15617087 | WBGene00013633 | Y105C5A.8    | Y105C5A.8    |
| 0.0566740617050172    |    |    | AGIWUR28785                                                                        |          |                |              |              |
| N2                    | HS | IV | 15646031                                                                           | 15646433 | WBGene00185102 | Y105C5A.1268 | Y105C5A.1268 |
| -0.100073022584173    |    |    | AGIWUR29947                                                                        |          |                |              |              |
| N2                    | HS | IV | 15689201                                                                           | 15722267 | WBGene00013639 | Y105C5A.15   | Y105C5A.15   |
| 0.0399389138042139    |    |    | AGIWUR7273;AGIWUR15147;AGIWUR15364;AGIWUR16294;AGIWUR25313                         |          |                |              |              |
| N2                    | HS | IV | 15820059                                                                           | 15825617 | WBGene00013642 | daf-38       | Y105C5A.23   |
| -0.105644682336191    |    |    | AGIWUR18586                                                                        |          |                |              |              |
| N2                    | HS | IV | 15849875                                                                           | 15852905 | WBGene00013643 | Y105C5A.24   | Y105C5A.24   |
| 0.339487090889788     |    |    | AGIWUR15451                                                                        |          |                |              |              |
| N2                    | HS | IV | 15860221                                                                           | 15861442 | WBGene00013644 | Y105C5A.25   | Y105C5A.25   |
| 0.228415623231793     |    |    | AGIWUR14488                                                                        |          |                |              |              |
| N2                    | HS | IV | 15870643                                                                           | 15872221 | WBGene00013645 | Y105C5B.1    | Y105C5B.1    |
| 0.0483972702016633    |    |    | AGIWUR22250                                                                        |          |                |              |              |
| N2                    | HS | IV | 15872933                                                                           | 15882377 | WBGene00001549 | gcy-25       | Y105C5B.2    |
| 0.082772175847142     |    |    | AGIWUR4121;AGIWUR28709                                                             |          |                |              |              |
| N2                    | HS | IV | 15899935                                                                           | 15901225 | WBGene00013647 | Y105C5B.5    | Y105C5B.5    |
| 0.25822463180609      |    |    | AGIWUR10199                                                                        |          |                |              |              |
| N2                    | HS | IV | 15906582                                                                           | 15910091 | WBGene00005726 | srv-15       | Y105C5B.6    |
| -0.000879178718223628 |    |    | AGIWUR43627                                                                        |          |                |              |              |
| N2                    | HS | IV | 15914997                                                                           | 15919234 | WBGene00013648 | Y105C5B.7    | Y105C5B.7    |
| 0.0521839786327352    |    |    | AGIWUR5491                                                                         |          |                |              |              |
| N2                    | HS | IV | 15930581                                                                           | 15931813 | WBGene00013650 | Y105C5B.9    | Y105C5B.9    |
| -0.40999968968003     |    |    | AGIWUR9620                                                                         |          |                |              |              |
| N2                    | HS | IV | 15937112                                                                           | 15941491 | WBGene00013651 | Y105C5B.11   | Y105C5B.11   |
| 0.185537789849359     |    |    | AGIWUR4903;AGIWUR15594;AGIWUR21513                                                 |          |                |              |              |
| N2                    | HS | IV | 15942535                                                                           | 15944430 | WBGene00013652 | sams-2       | Y105C5B.12   |
| -0.12060214953804     |    |    | AGIWUR43488                                                                        |          |                |              |              |
| N2                    | HS | IV | 15946784                                                                           | 15947438 | WBGene00004816 | skr-10       | Y105C5B.13   |

|                      |                                                                                    |          |                |              |                           |
|----------------------|------------------------------------------------------------------------------------|----------|----------------|--------------|---------------------------|
| -0.0119728908001626  | AGIWUR4957                                                                         |          |                |              |                           |
| N2 HS IV             | 15949725                                                                           | 15950861 | WBGene00013653 | Y105C5B.14   | Y105C5B.14                |
| 0.141184921551781    | AGIWUR42421                                                                        |          |                |              |                           |
| N2 HS IV             | 15951909                                                                           | 15954836 | WBGene00013654 | Y105C5B.15   | Y105C5B.15                |
| 0.29014226777082     | AGIWUR569                                                                          |          |                |              |                           |
| N2 HS IV             | 15956571                                                                           | 15962712 | WBGene00013655 | lgc-19       | Y105C5B.16                |
| 0.129813568938191    | AGIWUR44188                                                                        |          |                |              |                           |
| N2 HS IV             | 15963124                                                                           | 15964425 | WBGene00013656 | Y105C5B.17   | Y105C5B.17                |
| 0.321412144364007    | AGIWUR25817                                                                        |          |                |              |                           |
| N2 HS IV             | 15964640                                                                           | 15965679 | WBGene00013657 | Y105C5B.18   | Y105C5B.18                |
| 0.00640008182863694  | AGIWUR24962;AGIWUR28919;AGIWUR31362;AGIWUR33863                                    |          |                |              |                           |
| N2 HS IV             | 15981575                                                                           | 15983970 | WBGene00013658 | Y105C5B.19   | Y105C5B.19                |
| -0.24129668895446    | AGIWUR13191                                                                        |          |                |              |                           |
| N2 HS IV             | 15993454                                                                           | 15994605 | WBGene00013659 | Y105C5B.20   | Y105C5B.20                |
| -0.205306933968284   | AGIWUR44271                                                                        |          |                |              |                           |
| N2 HS IV             | 15997858                                                                           | 16026847 | WBGene00002175 | jac-1        | Y105C5B.21                |
| 0.08259934908377     | AGIWUR19039;AGIWUR20231                                                            |          |                |              |                           |
| N2 HS IV             | 16057283                                                                           | 16061358 | WBGene00013661 | Y105C5B.23   | Y105C5B.23                |
| -0.0830630734850279  | AGIWUR25871                                                                        |          |                |              |                           |
| N2 HS IV             | 16063326                                                                           | 16064132 | WBGene00005220 | srg-63       | Y105C5B.24                |
| 0.016792463698327    | AGIWUR7527;AGIWUR22419;AGIWUR32294;AGIWUR38092                                     |          |                |              |                           |
| N2 HS IV             | 16090484                                                                           | 16091939 | WBGene00044085 | Y105C5B.30   | Y105C5B.30                |
| 0.318723714417203    | AGIWUR13023;AGIWUR28227                                                            |          |                |              |                           |
| N2 HS IV             | 16132464                                                                           | 16134179 | WBGene00013665 | hlh-32       | Y105C5B.29                |
| -0.00622735141144481 | AGIWUR21888                                                                        |          |                |              |                           |
| N2 HS IV             | 16142544                                                                           | 16147155 | WBGene00013662 | Y105C5B.25   | Y105C5B.25                |
| 0.090933096839132    | AGIWUR6295                                                                         |          |                |              |                           |
| N2 HS IV             | 16156908                                                                           | 16165267 | WBGene00220260 | Y105C5B.1420 | Y105C5B.1420              |
| -0.103742849880894   | AGIWUR30234;AGIWUR35772                                                            |          |                |              |                           |
| N2 HS IV             | 16167785                                                                           | 16170859 | WBGene00001604 | gln-3        | Y105C5B.28                |
| 0.25364242653519     | AGIWUR3320;AGIWUR11501;AGIWUR13974;AGIWUR21293;AGIWUR27036;AGIWUR32466;AGIWUR38304 |          |                |              |                           |
| N2 HS IV             | 16197048                                                                           | 16201417 | WBGene00012416 | Y7A9A.1      | Y7A9A.1 0.280678188201275 |
| AGIWUR22558          |                                                                                    |          |                |              |                           |
| N2 HS IV             | 16202374                                                                           | 16205321 | WBGene00010411 | H25K10.1     | H25K10.1                  |
| 0.177510697753983    | AGIWUR28701;AGIWUR41997                                                            |          |                |              |                           |
| N2 HS IV             | 16210723                                                                           | 16211013 | WBGene00010412 | H25K10.2     | H25K10.2                  |
| 0.437197548918579    | AGIWUR41059                                                                        |          |                |              |                           |
| N2 HS IV             | 16219652                                                                           | 16221659 | WBGene00005722 | srv-11       | H25K10.3                  |
| 0.299509719149251    | AGIWUR41993                                                                        |          |                |              |                           |

|                                                             |    |    |          |          |                |           |                             |
|-------------------------------------------------------------|----|----|----------|----------|----------------|-----------|-----------------------------|
| N2                                                          | HS | IV | 16226047 | 16227122 | WBGene00010413 | H25K10.4  | H25K10.4                    |
| 0.135624212209407 AGIWUR19112                               |    |    |          |          |                |           |                             |
| N2                                                          | HS | IV | 16230452 | 16233128 | WBGene00010414 | hpa-1     | H25K10.5                    |
| -0.0439264650349713 AGIWUR1004                              |    |    |          |          |                |           |                             |
| N2                                                          | HS | IV | 16233148 | 16236555 | WBGene00010415 | irld-39   | H25K10.6                    |
| 0.0984913766072042 AGIWUR12877                              |    |    |          |          |                |           |                             |
| N2                                                          | HS | IV | 16236732 | 16238655 | WBGene00005808 | srw-61    | H25K10.7                    |
| -0.150159392010895 AGIWUR20698                              |    |    |          |          |                |           |                             |
| N2                                                          | HS | IV | 16247431 | 16251790 | WBGene00009535 | F38C2.1   | F38C2.1 0.135077058255903   |
| AGIWUR1967                                                  |    |    |          |          |                |           |                             |
| N2                                                          | HS | IV | 16254764 | 16256274 | WBGene00001961 | hlh-17    | F38C2.2 0.213593606937822   |
| AGIWUR39384                                                 |    |    |          |          |                |           |                             |
| N2                                                          | HS | IV | 16257668 | 16259417 | WBGene00009540 | hlh-31    | F38C2.8 -0.15089302297846   |
| AGIWUR14645;AGIWUR37847                                     |    |    |          |          |                |           |                             |
| N2                                                          | HS | IV | 16271263 | 16273187 | WBGene00009536 | F38C2.4   | F38C2.4 0.0687343142059209  |
| AGIWUR16881                                                 |    |    |          |          |                |           |                             |
| N2                                                          | HS | IV | 16276647 | 16277391 | WBGene00009539 | F38C2.7   | F38C2.7 0.0291499579113212  |
| AGIWUR36786                                                 |    |    |          |          |                |           |                             |
| N2                                                          | HS | IV | 16278202 | 16279018 | WBGene00009537 | ccch-2    | F38C2.5 -0.103292802300824  |
| AGIWUR2753                                                  |    |    |          |          |                |           |                             |
| N2                                                          | HS | IV | 16279634 | 16280714 | WBGene00009538 | cllec-191 | F38C2.6                     |
| 0.0208081223096581 AGIWUR43506                              |    |    |          |          |                |           |                             |
| N2                                                          | HS | IV | 16281520 | 16283423 | WBGene00045026 | Y7A9C.10  | Y7A9C.10                    |
| -0.10292312990547 AGIWUR25908                               |    |    |          |          |                |           |                             |
| N2                                                          | HS | IV | 16286655 | 16287825 | WBGene00023517 | srz-75    | Y7A9C.9 0.0310440852702394  |
| AGIWUR5516;AGIWUR11469                                      |    |    |          |          |                |           |                             |
| N2                                                          | HS | IV | 16288113 | 16289310 | WBGene00023518 | srz-76    | Y7A9C.8 -0.0749181155303145 |
| AGIWUR29943                                                 |    |    |          |          |                |           |                             |
| N2                                                          | HS | IV | 16289558 | 16290835 | WBGene00012419 | srz-73    | Y7A9C.3 -0.0466109224497409 |
| AGIWUR4987;AGIWUR29474;AGIWUR31684                          |    |    |          |          |                |           |                             |
| N2                                                          | HS | IV | 16291988 | 16293070 | WBGene00023510 | srz-40    | Y7A9C.5 -0.0561877335238359 |
| AGIWUR3818                                                  |    |    |          |          |                |           |                             |
| N2                                                          | HS | IV | 16293199 | 16293482 | WBGene00045105 | Y7A9C.11  | Y7A9C.11                    |
| -0.673802915984776 AGIWUR1833                               |    |    |          |          |                |           |                             |
| N2                                                          | HS | IV | 16293619 | 16293923 | WBGene00045106 | Y7A9C.12  | Y7A9C.12                    |
| -0.0176177241713571 AGIWUR18794;AGIWUR27829;AGIWUR41685     |    |    |          |          |                |           |                             |
| N2                                                          | HS | IV | 16294154 | 16298479 | WBGene00012418 | Y7A9C.1   | Y7A9C.1 -0.011104540189617  |
| AGIWUR10327;AGIWUR12900;AGIWUR29256;AGIWUR40799;AGIWUR44868 |    |    |          |          |                |           |                             |
| N2                                                          | HS | IV | 16298813 | 16299012 | WBGene00045107 | Y7A9C.13  | Y7A9C.13                    |

|                                                                     |                                                             |
|---------------------------------------------------------------------|-------------------------------------------------------------|
| 0.104989472917748                                                   | AGIWUR10892;AGIWUR11887;AGIWUR12721;AGIWUR22530;AGIWUR23429 |
| N2 HS IV 16299151 16300272                                          | WBGene00023514 srz-72 Y7A9C.7 -0.0646877233316001           |
| AGIWUR953;AGIWUR34466                                               |                                                             |
| N2 HS IV 16300588 16301746                                          | WBGene00023511 srz-41 Y7A9C.6 -0.0748714981973113           |
| AGIWUR22366;AGIWUR29053                                             |                                                             |
| N2 HS IV 16303614 16306235                                          | WBGene00014862 Y7A9C.2 Y7A9C.2 -0.100757730595542           |
| AGIWUR2421;AGIWUR8717                                               |                                                             |
| N2 HS IV 16306312 16306839                                          | WBGene00023509 srz-39 Y7A9C.4 -0.0918680175227751           |
| AGIWUR19605;AGIWUR25345;AGIWUR35351;AGIWUR39465;AGIWUR42243         |                                                             |
| N2 HS IV 16308225 16309829                                          | WBGene00004287 rac-2 K03D3.10                               |
| -0.0694093102561695 AGIWUR1338                                      |                                                             |
| N2 HS IV 16311079 16319703                                          | WBGene00044670 rac-3 K03D3.13                               |
| -0.0104560500494002 AGIWUR12250;AGIWUR12813;AGIWUR35498;AGIWUR44020 |                                                             |
| N2 HS IV 16320139 16320506                                          | WBGene00010531 K03D3.5 K03D3.5 0.247408356820534            |
| AGIWUR6101                                                          |                                                             |
| N2 HS IV 16321166 16323195                                          | WBGene00010530 srz-61 K03D3.4 0.164089163172842             |
| AGIWUR38770;AGIWUR43421                                             |                                                             |
| N2 HS IV 16323673 16324973                                          | WBGene00043052 srz-104 K03D3.11                             |
| 0.102637027310937 AGIWUR19731                                       |                                                             |
| N2 HS IV 16325172 16326601                                          | WBGene00044587 srz-105 K03D3.12                             |
| -0.434902936495728 AGIWUR40134                                      |                                                             |
| N2 HS IV 16326718 16327965                                          | WBGene00010529 srz-21 K03D3.3 -0.0309322010045276           |
| AGIWUR40769                                                         |                                                             |
| N2 HS IV 16328135 16328614                                          | WBGene00010528 K03D3.2 K03D3.2 0.28814532696387             |
| AGIWUR13565                                                         |                                                             |
| N2 HS IV 16329459 16331059                                          | WBGene00010527 srz-74 K03D3.1 0.109731212321118             |
| AGIWUR13697                                                         |                                                             |
| N2 HS IV 16331365 16332611                                          | WBGene00045100 K03D3.14 K03D3.14                            |
| 0.0247189636460874 AGIWUR7604                                       |                                                             |
| N2 HS IV 16332885 16334461                                          | WBGene00023513 srz-71 C35D6.10                              |
| 0.110597816516051 AGIWUR20690                                       |                                                             |
| N2 HS IV 16335337 16336503                                          | WBGene00023508 srz-38 C35D6.9 -0.0656176112044742           |
| AGIWUR21322;AGIWUR27500                                             |                                                             |
| N2 HS IV 16337021 16338502                                          | WBGene00045101 C35D6.13 C35D6.13                            |
| -0.129473266852591 AGIWUR22054;AGIWUR25308                          |                                                             |
| N2 HS IV 16338562 16339098                                          | WBGene00045040 C35D6.12 C35D6.12                            |
| -0.0389583918707812 AGIWUR33321                                     |                                                             |
| N2 HS IV 16341625 16345442                                          | WBGene00005434 srh-224 C35D6.8 0.17459437820178             |
| AGIWUR7329;AGIWUR13640                                              |                                                             |

|                                                                                |    |    |          |          |                |            |           |                     |
|--------------------------------------------------------------------------------|----|----|----------|----------|----------------|------------|-----------|---------------------|
| N2                                                                             | HS | IV | 16347168 | 16347430 | WBGene00007960 | C35D6.3    | C35D6.3   | -0.225085797517547  |
| AGIWUR40446                                                                    |    |    |          |          |                |            |           |                     |
| N2                                                                             | HS | IV | 16348409 | 16348751 | WBGene00045028 | C35D6.11   |           | C35D6.11            |
| 0.0505024022632803 AGIWUR2973;AGIWUR5282;AGIWUR16135;AGIWUR20681;AGIWUR36159   |    |    |          |          |                |            |           |                     |
| N2                                                                             | HS | IV | 16350990 | 16351601 | WBGene00007961 | C35D6.4    | C35D6.4   | 0.00358265052861828 |
| AGIWUR5086                                                                     |    |    |          |          |                |            |           |                     |
| N2                                                                             | HS | IV | 16366996 | 16368943 | WBGene00007962 | C35D6.5    | C35D6.5   | 0.553778857160138   |
| AGIWUR5610                                                                     |    |    |          |          |                |            |           |                     |
| N2                                                                             | HS | IV | 16381378 | 16382235 | WBGene00012420 | Y7A9D.1    | Y7A9D.1   | -0.118852863348025  |
| AGIWUR32721;AGIWUR33229;AGIWUR37237;AGIWUR41776;AGIWUR43445;AGIWUR45148        |    |    |          |          |                |            |           |                     |
| N2                                                                             | HS | IV | 16398839 | 16399875 | WBGene00013418 | Y65A5A.1   |           | Y65A5A.1            |
| 0.014868218771019 AGIWUR30411                                                  |    |    |          |          |                |            |           |                     |
| N2                                                                             | HS | IV | 16412020 | 16416808 | WBGene00013419 | Y65A5A.2   |           | Y65A5A.2            |
| -0.10779655988358 AGIWUR26456                                                  |    |    |          |          |                |            |           |                     |
| N2                                                                             | HS | IV | 16424637 | 16429895 | WBGene00012423 | Y10G11A.1  |           | Y10G11A.1           |
| 0.218818859032557 AGIWUR5130;AGIWUR7085                                        |    |    |          |          |                |            |           |                     |
| N2                                                                             | HS | IV | 16432231 | 16437953 | WBGene00012424 | dlc-3      | Y10G11A.2 |                     |
| 0.431640401927137 AGIWUR19845                                                  |    |    |          |          |                |            |           |                     |
| N2                                                                             | HS | IV | 16443263 | 16446683 | WBGene00012425 | dlc-4      | Y10G11A.3 |                     |
| 0.00620971206274934 AGIWUR23539                                                |    |    |          |          |                |            |           |                     |
| N2                                                                             | HS | IV | 16454270 | 16454579 | WBGene00045185 | VY10G11R.4 |           | VY10G11R.4          |
| 0.0330792042826182 AGIWUR10617;AGIWUR13766;AGIWUR19304;AGIWUR37200;AGIWUR40802 |    |    |          |          |                |            |           |                     |
| N2                                                                             | HS | IV | 16468723 | 16469064 | WBGene00045097 | VY10G11R.2 |           | VY10G11R.2          |
| -0.119072707046596 AGIWUR6952;AGIWUR14946;AGIWUR15445;AGIWUR29398;AGIWUR36369  |    |    |          |          |                |            |           |                     |
| N2                                                                             | HS | IV | 16469580 | 16470881 | WBGene00012159 | VY10G11R.1 |           | VY10G11R.1          |
| 0.0798318771381421 AGIWUR4731                                                  |    |    |          |          |                |            |           |                     |
| N2                                                                             | HS | IV | 16474044 | 16477192 | WBGene00013098 | Y51H4A.1   |           | Y51H4A.1            |
| 0.000877175644099282 AGIWUR13939                                               |    |    |          |          |                |            |           |                     |
| N2                                                                             | HS | IV | 16482784 | 16489021 | WBGene00004357 | rho-1      | Y51H4A.3  |                     |
| -0.138760836168443 AGIWUR2147;AGIWUR39259                                      |    |    |          |          |                |            |           |                     |
| N2                                                                             | HS | IV | 16493428 | 16494510 | WBGene00013099 | Y51H4A.2   |           | Y51H4A.2            |
| -0.349243985032841 AGIWUR5454                                                  |    |    |          |          |                |            |           |                     |
| N2                                                                             | HS | IV | 16503249 | 16505682 | WBGene00013100 | zip-7      | Y51H4A.4  |                     |
| 0.128325567185601 AGIWUR8385;AGIWUR41524                                       |    |    |          |          |                |            |           |                     |
| N2                                                                             | HS | IV | 16522529 | 16526132 | WBGene00013101 | Y51H4A.5   |           | Y51H4A.5            |
| -0.292922410982425 AGIWUR31950                                                 |    |    |          |          |                |            |           |                     |
| N2                                                                             | HS | IV | 16533661 | 16533962 | WBGene00013102 | Y51H4A.6   |           | Y51H4A.6            |
| -0.0810631275740681 AGIWUR42976                                                |    |    |          |          |                |            |           |                     |
| N2                                                                             | HS | IV | 16535730 | 16542894 | WBGene00013103 | Y51H4A.7   |           | Y51H4A.7            |

|                                                                                             |                                                 |          |                |           |           |
|---------------------------------------------------------------------------------------------|-------------------------------------------------|----------|----------------|-----------|-----------|
| 0.301465916390685                                                                           | AGIWUR18320                                     |          |                |           |           |
| N2 HS IV                                                                                    | 16551492                                        | 16554348 | WBGene00000709 | col-136   | Y51H4A.28 |
| -0.157085871993332                                                                          | AGIWUR28306;AGIWUR33242                         |          |                |           |           |
| N2 HS IV                                                                                    | 16575102                                        | 16578549 | WBGene00013104 | Y51H4A.8  | Y51H4A.8  |
| -0.158805020272573                                                                          | AGIWUR43151                                     |          |                |           |           |
| N2 HS IV                                                                                    | 16601480                                        | 16602776 | WBGene00000710 | col-137   | Y51H4A.9  |
| 0.11402338799954                                                                            | AGIWUR17787                                     |          |                |           |           |
| N2 HS IV                                                                                    | 16627976                                        | 16628441 | WBGene00013120 | fipr-28   | Y51H4A.26 |
| 0.00356115701213788                                                                         | AGIWUR12842                                     |          |                |           |           |
| N2 HS IV                                                                                    | 16656613                                        | 16657359 | WBGene00013109 | Y51H4A.15 | Y51H4A.15 |
| 0.0218016348358852                                                                          | AGIWUR26764                                     |          |                |           |           |
| N2 HS IV                                                                                    | 16664320                                        | 16671467 | WBGene00013111 | sta-1     | Y51H4A.17 |
| 0.0232606517444616                                                                          |                                                 |          |                |           |           |
| AGIWUR1252;AGIWUR2004;AGIWUR3505;AGIWUR5230;AGIWUR21787;AGIWUR22093;AGIWUR26957;AGIWUR34933 |                                                 |          |                |           |           |
| N2 HS IV                                                                                    | 16720715                                        | 16722736 | WBGene00013116 | Y51H4A.22 | Y51H4A.22 |
| 0.0823638000192126                                                                          | AGIWUR3435                                      |          |                |           |           |
| N2 HS IV                                                                                    | 16722916                                        | 16723892 | WBGene00013117 | Y51H4A.23 | Y51H4A.23 |
| -0.34655250663131                                                                           | AGIWUR39803                                     |          |                |           |           |
| N2 HS IV                                                                                    | 16736329                                        | 16743178 | WBGene00013119 | Y51H4A.25 | Y51H4A.25 |
| -0.0882191475893359                                                                         | AGIWUR25777;AGIWUR38342                         |          |                |           |           |
| N2 HS IV                                                                                    | 16758420                                        | 16758769 | WBGene00045321 | Y43D4A.10 | Y43D4A.10 |
| -0.0297835944461298                                                                         | AGIWUR15417;AGIWUR20545;AGIWUR31612;AGIWUR34955 |          |                |           |           |
| N2 HS IV                                                                                    | 16775827                                        | 16785172 | WBGene00012791 | Y43D4A.5  | Y43D4A.5  |
| 0.0110668487286318                                                                          | AGIWUR9735                                      |          |                |           |           |
| N2 HS IV                                                                                    | 16787327                                        | 16788510 | WBGene00012792 | Y43D4A.6  | Y43D4A.6  |
| -0.140557534259493                                                                          | AGIWUR21279;AGIWUR36471;AGIWUR42890             |          |                |           |           |
| N2 HS IV                                                                                    | 16826324                                        | 16828020 | WBGene00013776 | Y116A8A.6 | Y116A8A.6 |
| 0.0335389282080829                                                                          | AGIWUR7119                                      |          |                |           |           |
| N2 HS IV                                                                                    | 16831666                                        | 16832984 | WBGene00013778 | cllec-194 | Y116A8A.8 |
| 0.307445213181165                                                                           | AGIWUR35391                                     |          |                |           |           |
| N2 HS IV                                                                                    | 16847829                                        | 16854943 | WBGene00003130 | map-2     | Y116A8A.9 |
| -0.392199555271825                                                                          | AGIWUR9535                                      |          |                |           |           |
| N2 HS IV                                                                                    | 16855044                                        | 16863443 | WBGene00020284 | mel-46    | T06A10.1  |
| 0.25578592750432                                                                            | AGIWUR38585                                     |          |                |           |           |
| N2 HS IV                                                                                    | 16862396                                        | 16865479 | WBGene00020287 | lsy-13    | T06A10.4  |
| 0.229459675259637                                                                           | AGIWUR21297                                     |          |                |           |           |
| N2 HS IV                                                                                    | 16865838                                        | 16866504 | WBGene00020286 | T06A10.3  | T06A10.3  |
| 0.10459560516307                                                                            | AGIWUR18852                                     |          |                |           |           |
| N2 HS IV                                                                                    | 16920341                                        | 16924071 | WBGene00013785 | nep-23    | Y116A8C.4 |

|                     |                                                                                   |    |          |          |                |            |
|---------------------|-----------------------------------------------------------------------------------|----|----------|----------|----------------|------------|
| 0.10293095306       | AGIWUR7228                                                                        |    |          |          |                |            |
| N2                  | HS                                                                                | IV | 16928334 | 16929067 | WBGene00014976 | Y116A8C.7  |
| -0.0892462876242321 | AGIWUR6180;AGIWUR11548;AGIWUR21776;AGIWUR22996;AGIWUR37782                        |    |          |          |                | Y116A8C.7  |
| N2                  | HS                                                                                | IV | 16930837 | 16931177 | WBGene00045128 | Y116A8C.49 |
| -0.0918204476035438 | AGIWUR4096                                                                        |    |          |          |                | Y116A8C.49 |
| N2                  | HS                                                                                | IV | 16931990 | 16933113 | WBGene00013788 | Y116A8C.8  |
| 0.195821511181928   | AGIWUR929;AGIWUR9903                                                              |    |          |          |                | Y116A8C.8  |
| N2                  | HS                                                                                | IV | 16934266 | 16939111 | WBGene00013790 | Y116A8C.10 |
| -0.0789766511080634 | AGIWUR1366;AGIWUR8901;AGIWUR28542;AGIWUR34521;AGIWUR40850;AGIWUR42572;AGIWUR44503 |    |          |          |                | Y116A8C.10 |
| N2                  | HS                                                                                | IV | 16939804 | 16946910 | WBGene00013789 | Y116A8C.9  |
| 0.317884173615278   | AGIWUR37459                                                                       |    |          |          |                | Y116A8C.9  |
| N2                  | HS                                                                                | IV | 16947120 | 16949734 | WBGene00000184 | arf-6      |
| 0.127706685148084   | AGIWUR22709                                                                       |    |          |          |                | Y116A8C.12 |
| N2                  | HS                                                                                | IV | 16950065 | 16962868 | WBGene00013792 | Y116A8C.13 |
| 0.0639474149250212  | AGIWUR12465                                                                       |    |          |          |                | Y116A8C.13 |
| N2                  | HS                                                                                | IV | 16965284 | 16970490 | WBGene00004402 | rom-3      |
| 0.250438526099003   | AGIWUR10932                                                                       |    |          |          |                | Y116A8C.14 |
| N2                  | HS                                                                                | IV | 16988828 | 16989771 | WBGene00013791 | Y116A8C.11 |
| -0.132408357108774  | AGIWUR673;AGIWUR30500;AGIWUR33757;AGIWUR38152;AGIWUR41182;AGIWUR42358             |    |          |          |                | Y116A8C.11 |
| N2                  | HS                                                                                | IV | 16995777 | 17014953 | WBGene00004403 | rom-4      |
| 0.141123025514922   | AGIWUR5163;AGIWUR22741;AGIWUR30005                                                |    |          |          |                | Y116A8C.16 |
| N2                  | HS                                                                                | IV | 17022990 | 17023922 | WBGene00045315 | Y116A8C.52 |
| -0.0655736867696568 | AGIWUR38540                                                                       |    |          |          |                | Y116A8C.52 |
| N2                  | HS                                                                                | IV | 17024318 | 17025132 | WBGene00013794 | dct-13     |
| -0.122494451973425  | AGIWUR4796                                                                        |    |          |          |                | Y116A8C.17 |
| N2                  | HS                                                                                | IV | 17028931 | 17030594 | WBGene00013795 | nhr-229    |
| 0.00118807326056602 | AGIWUR8246;AGIWUR27868                                                            |    |          |          |                | Y116A8C.18 |
| N2                  | HS                                                                                | IV | 17038923 | 17039667 | WBGene00013796 | Y116A8C.19 |
| 0.0140207231126936  | AGIWUR10845                                                                       |    |          |          |                | Y116A8C.19 |
| N2                  | HS                                                                                | IV | 17040913 | 17041523 | WBGene00013797 | Y116A8C.20 |
| -0.119741903396744  | AGIWUR14834                                                                       |    |          |          |                | Y116A8C.20 |
| N2                  | HS                                                                                | IV | 17046470 | 17048357 | WBGene00013799 | athp-3     |
| -0.0721556388636486 | AGIWUR26399                                                                       |    |          |          |                | Y116A8C.22 |
| N2                  | HS                                                                                | IV | 17053594 | 17055513 | WBGene00013800 | Y116A8C.23 |
| -0.110513038519183  | AGIWUR13331                                                                       |    |          |          |                | Y116A8C.23 |
| N2                  | HS                                                                                | IV | 17056746 | 17057831 | WBGene00045280 | Y116A8C.51 |
| 0.0191433946611115  | AGIWUR4143;AGIWUR15519;AGIWUR36264                                                |    |          |          |                | Y116A8C.51 |
| N2                  | HS                                                                                | IV | 17068795 | 17070903 | WBGene00013801 | Y116A8C.24 |
| -0.0894593816013884 | AGIWUR12026                                                                       |    |          |          |                | Y116A8C.24 |



|                      |    |    |                                                                                               |          |                |            |            |
|----------------------|----|----|-----------------------------------------------------------------------------------------------|----------|----------------|------------|------------|
| N2                   | HS | IV | 17079606                                                                                      | 17087438 | WBGene00013803 | snx-13     | Y116A8C.26 |
| -0.0296949314329158  |    |    | AGIWUR1253;AGIWUR16582;AGIWUR22196;AGIWUR30792;AGIWUR39567;AGIWUR41148                        |          |                |            |            |
| N2                   | HS | IV | 17088058                                                                                      | 17088834 | WBGene00004914 | snr-1      | Y116A8C.42 |
| -0.0385910814846069  |    |    | AGIWUR2910;AGIWUR2945;AGIWUR15577;AGIWUR21296;AGIWUR22559;AGIWUR27398;AGIWUR34517;AGIWUR40521 |          |                |            |            |
| N2                   | HS | IV | 17088851                                                                                      | 17090646 | WBGene00013814 | Y116A8C.43 | Y116A8C.43 |
| 0.020432944614317    |    |    | AGIWUR9877                                                                                    |          |                |            |            |
| N2                   | HS | IV | 17090630                                                                                      | 17096286 | WBGene00013804 | Y116A8C.27 | Y116A8C.27 |
| -0.00995933692522399 |    |    | AGIWUR14712                                                                                   |          |                |            |            |
| N2                   | HS | IV | 17096386                                                                                      | 17100246 | WBGene00013805 | bca-2      | Y116A8C.28 |
| -0.00112339497318548 |    |    | AGIWUR8202;AGIWUR34891                                                                        |          |                |            |            |
| N2                   | HS | IV | 17100225                                                                                      | 17103715 | WBGene00013807 | Y116A8C.30 | Y116A8C.30 |
| 0.303107524963025    |    |    | AGIWUR15694                                                                                   |          |                |            |            |
| N2                   | HS | IV | 17104179                                                                                      | 17110982 | WBGene00013808 | sfa-1      | Y116A8C.32 |
| -0.0585915205400784  |    |    | AGIWUR19437                                                                                   |          |                |            |            |
| N2                   | HS | IV | 17111082                                                                                      | 17116666 | WBGene00000889 | cyn-13     | Y116A8C.34 |
| 0.134173405126397    |    |    | AGIWUR20202                                                                                   |          |                |            |            |
| N2                   | HS | IV | 17116763                                                                                      | 17118760 | WBGene00006698 | uaf-2      | Y116A8C.35 |
| 0.133183530398867    |    |    | AGIWUR22742                                                                                   |          |                |            |            |
| N2                   | HS | IV | 17119684                                                                                      | 17126266 | WBGene00006405 | itsn-1     | Y116A8C.36 |
| -0.143908850758367   |    |    | AGIWUR25288;AGIWUR26969;AGIWUR31401;AGIWUR32319                                               |          |                |            |            |
| N2                   | HS | IV | 17130066                                                                                      | 17131075 | WBGene00013810 | Y116A8C.37 | Y116A8C.37 |
| -0.205382625692739   |    |    | AGIWUR9715                                                                                    |          |                |            |            |
| N2                   | HS | IV | 17137348                                                                                      | 17142989 | WBGene00045043 | Y116A8C.48 | Y116A8C.48 |
| 0.00487778165894603  |    |    | AGIWUR3839;AGIWUR13359;AGIWUR17919;AGIWUR22945                                                |          |                |            |            |
| N2                   | HS | IV | 17144355                                                                                      | 17150971 | WBGene00013812 | Y116A8C.40 | Y116A8C.40 |
| 0.114433536547124    |    |    | AGIWUR9796;AGIWUR10092                                                                        |          |                |            |            |
| N2                   | HS | IV | 17162024                                                                                      | 17162634 | WBGene00004819 | skr-13     | C52D10.8   |
| -0.0737886898113036  |    |    | AGIWUR30480                                                                                   |          |                |            |            |
| N2                   | HS | IV | 17163554                                                                                      | 17164226 | WBGene00004815 | skr-9      | C52D10.7   |
| -0.0155696585545471  |    |    | AGIWUR42025                                                                                   |          |                |            |            |
| N2                   | HS | IV | 17167253                                                                                      | 17168051 | WBGene00004818 | skr-12     | C52D10.6   |
| -0.195786153446438   |    |    | AGIWUR11514                                                                                   |          |                |            |            |
| N2                   | HS | IV | 17176477                                                                                      | 17189805 | WBGene00016877 | C52D10.3   | C52D10.3   |
| -0.00700984341799771 |    |    | AGIWUR28085;AGIWUR36872;AGIWUR39260                                                           |          |                |            |            |
| N2                   | HS | IV | 17190177                                                                                      | 17191891 | WBGene00001460 | flp-17     | C52D10.11  |
| 0.157466420687278    |    |    | AGIWUR23495                                                                                   |          |                |            |            |
| N2                   | HS | IV | 17197905                                                                                      | 17206845 | WBGene00016879 | cnm-1      | C52D10.12  |
| 0.0870311193565563   |    |    | AGIWUR25040                                                                                   |          |                |            |            |

|                                                                                                                                    |    |    |                                                                       |          |                |           |                            |
|------------------------------------------------------------------------------------------------------------------------------------|----|----|-----------------------------------------------------------------------|----------|----------------|-----------|----------------------------|
| N2                                                                                                                                 | HS | IV | 17216333                                                              | 17217368 | WBGene00013779 | Y116A8B.1 | Y116A8B.1                  |
| -0.100440195675693                                                                                                                 |    |    | AGIWUR6796                                                            |          |                |           |                            |
| N2                                                                                                                                 | HS | IV | 17223774                                                              | 17225019 | WBGene00013781 | Y116A8B.4 | Y116A8B.4                  |
| 0.0594276489066807                                                                                                                 |    |    | AGIWUR5030;AGIWUR6033;AGIWUR28449;AGIWUR32021;AGIWUR35102;AGIWUR37333 |          |                |           |                            |
| N2                                                                                                                                 | HS | IV | 17226014                                                              | 17231056 | WBGene00013782 | npr-32    | Y116A8B.5                  |
| 0.0767741330879081                                                                                                                 |    |    | AGIWUR8559                                                            |          |                |           |                            |
| N2                                                                                                                                 | HS | IV | 17239941                                                              | 17243212 | WBGene00013995 | mboa-5    | ZK550.1 0.269646485686785  |
| AGIWUR11027;AGIWUR21565;AGIWUR26813                                                                                                |    |    |                                                                       |          |                |           |                            |
| N2                                                                                                                                 | HS | IV | 17245584                                                              | 17249750 | WBGene00013996 | ZK550.2   | ZK550.2 0.264572270423244  |
| AGIWUR37560                                                                                                                        |    |    |                                                                       |          |                |           |                            |
| N2                                                                                                                                 | HS | IV | 17250131                                                              | 17254964 | WBGene00013997 | ZK550.3   | ZK550.3 0.114365136551315  |
| AGIWUR13238                                                                                                                        |    |    |                                                                       |          |                |           |                            |
| N2                                                                                                                                 | HS | IV | 17255301                                                              | 17257562 | WBGene00013998 | ZK550.4   | ZK550.4 -0.162367964487959 |
| AGIWUR2456;AGIWUR42569                                                                                                             |    |    |                                                                       |          |                |           |                            |
| N2                                                                                                                                 | HS | IV | 17257504                                                              | 17259410 | WBGene00013999 | ZK550.5   | ZK550.5 -0.18787264403848  |
| AGIWUR2165;AGIWUR11834;AGIWUR37733                                                                                                 |    |    |                                                                       |          |                |           |                            |
| N2                                                                                                                                 | HS | IV | 17260307                                                              | 17262485 | WBGene00014000 | ZK550.6   | ZK550.6 0.0653588834828129 |
| AGIWUR2507;AGIWUR7827                                                                                                              |    |    |                                                                       |          |                |           |                            |
| N2                                                                                                                                 | HS | IV | 17264297                                                              | 17264814 | WBGene00044244 | F26D10.13 | F26D10.13                  |
| 0.28333721139918                                                                                                                   |    |    | AGIWUR8280;AGIWUR10704;AGIWUR24795;AGIWUR25868                        |          |                |           |                            |
| N2                                                                                                                                 | HS | IV | 17265579                                                              | 17266926 | WBGene00006229 | str-187   | F26D10.8                   |
| 0.0653102492548294                                                                                                                 |    |    | AGIWUR1710                                                            |          |                |           |                            |
| N2                                                                                                                                 | HS | IV | 17269342                                                              | 17272183 | WBGene00000224 | atgp-1    | F26D10.9                   |
| 0.0198567947974126                                                                                                                 |    |    | AGIWUR31914                                                           |          |                |           |                            |
| N2                                                                                                                                 | HS | IV | 17272231                                                              | 17273652 | WBGene00001606 | gln-5     | F26D10.10                  |
| -0.129312817460228                                                                                                                 |    |    | AGIWUR34181                                                           |          |                |           |                            |
| N2                                                                                                                                 | HS | IV | 17275581                                                              | 17276864 | WBGene00009155 | lhfp-4    | F26D10.11                  |
| -0.0764156655043617                                                                                                                |    |    | AGIWUR42728                                                           |          |                |           |                            |
| N2                                                                                                                                 | HS | IV | 17276956                                                              | 17277748 | WBGene00009156 | cllec-196 | F26D10.12                  |
| -0.532189120288952                                                                                                                 |    |    | AGIWUR7487                                                            |          |                |           |                            |
| N2                                                                                                                                 | HS | IV | 17278959                                                              | 17281330 | WBGene00002005 | hsp-1     | F26D10.3                   |
| -0.489968498598017                                                                                                                 |    |    |                                                                       |          |                |           |                            |
| AGIWUR6894;AGIWUR15751;AGIWUR17478;AGIWUR18500;AGIWUR21587;AGIWUR23964;AGIWUR26492;AGIWUR28010;AGIWUR33671;AGIWUR41303;AGIWUR41534 |    |    |                                                                       |          |                |           |                            |
| N2                                                                                                                                 | HS | IV | 17281456                                                              | 17284199 | WBGene00012128 | nra-1     | T28F3.1 0.118828094813228  |
| AGIWUR2747                                                                                                                         |    |    |                                                                       |          |                |           |                            |
| N2                                                                                                                                 | HS | IV | 17285733                                                              | 17287454 | WBGene00044067 | zipt-7.1  | T28F3.3                    |
| 0.014689379521549                                                                                                                  |    |    | AGIWUR20648                                                           |          |                |           |                            |
| N2                                                                                                                                 | HS | IV | 17288171                                                              | 17291733 | WBGene00012130 | slc-17.4  | T28F3.4                    |

|                                                |                         |                |           |          |                     |
|------------------------------------------------|-------------------------|----------------|-----------|----------|---------------------|
| 0.204875766939749                              | AGIWUR18244;AGIWUR18531 | WBGene00012131 | T28F3.5   | T28F3.5  | 0.243623561716104   |
| N2 HS IV 17294793 17300629                     |                         |                |           |          |                     |
| AGIWUR41791                                    |                         |                |           |          |                     |
| N2 HS IV 17300809 17302033                     |                         | WBGene00012132 | ifta-2    | T28F3.6  | -0.0356546609027202 |
| AGIWUR19088                                    |                         |                |           |          |                     |
| N2 HS IV 17302242 17304370                     |                         | WBGene00012133 | T28F3.7   | T28F3.7  |                     |
| -0.00779823779596533                           | AGIWUR43806             |                |           |          |                     |
| N2 HS IV 17308525 17311695                     |                         | WBGene00012135 | T28F3.9   | T28F3.9  | 0.144713271766229   |
| AGIWUR31439                                    |                         |                |           |          |                     |
| N2 HS IV 17312141 17315462                     |                         | WBGene00004908 | snf-9     | C49C3.1  | 0.110521489194763   |
| AGIWUR27569                                    |                         |                |           |          |                     |
| N2 HS IV 17316710 17318246                     |                         | WBGene00008192 | C49C3.2   | C49C3.2  | 0.163738653540102   |
| AGIWUR38738                                    |                         |                |           |          |                     |
| N2 HS IV 17319353 17320027                     |                         | WBGene00008193 | C49C3.3   | C49C3.3  | 0.179993189566645   |
| AGIWUR29862;AGIWUR35793                        |                         |                |           |          |                     |
| N2 HS IV 17320795 17328662                     |                         | WBGene00008194 | C49C3.4   | C49C3.4  | -0.0945588225984988 |
| AGIWUR38518                                    |                         |                |           |          |                     |
| N2 HS IV 17329192 17330737                     |                         | WBGene00008195 | ceh-88    | C49C3.5  | -0.238207676352029  |
| AGIWUR8331;AGIWUR13535;AGIWUR24087;AGIWUR35702 |                         |                |           |          |                     |
| N2 HS IV 17331527 17332447                     |                         | WBGene00008196 | C49C3.6   | C49C3.6  | -0.2917814784788    |
| AGIWUR10924                                    |                         |                |           |          |                     |
| N2 HS IV 17332573 17333645                     |                         | WBGene00008197 | C49C3.7   | C49C3.7  | -0.281258952197554  |
| AGIWUR42814                                    |                         |                |           |          |                     |
| N2 HS IV 17334193 17335094                     |                         | WBGene00008204 | C49C3.15  | C49C3.15 |                     |
| -0.0526805075381009                            | AGIWUR31876;AGIWUR40425 |                |           |          |                     |
| N2 HS IV 17335203 17336681                     |                         | WBGene00008198 | C49C3.8   | C49C3.8  | 0.174770438867125   |
| AGIWUR42771                                    |                         |                |           |          |                     |
| N2 HS IV 17336800 17338984                     |                         | WBGene00008200 | C49C3.10  | C49C3.10 |                     |
| 0.431065446479717                              | AGIWUR30175             |                |           |          |                     |
| N2 HS IV 17339640 17342314                     |                         | WBGene00008199 | C49C3.9   | C49C3.9  | 0.245944891009264   |
| AGIWUR35239                                    |                         |                |           |          |                     |
| N2 HS IV 17343782 17344805                     |                         | WBGene00008201 | C49C3.11  | C49C3.11 |                     |
| 0.256639604499179                              | AGIWUR37871             |                |           |          |                     |
| N2 HS IV 17345568 17346695                     |                         | WBGene00008202 | cllec-197 | C49C3.12 |                     |
| 0.155735279554303                              | AGIWUR31392             |                |           |          |                     |
| N2 HS IV 17347168 17351076                     |                         | WBGene00008203 | cllec-198 | C49C3.13 |                     |
| 0.108222005082924                              | AGIWUR33042             |                |           |          |                     |
| N2 HS IV 17351886 17357895                     |                         | WBGene00007820 | cllec-199 | C30H6.1  |                     |
| 0.0783731400693162                             | AGIWUR19025;AGIWUR33156 |                |           |          |                     |

|                                                                             |    |    |          |          |                |          |                             |
|-----------------------------------------------------------------------------|----|----|----------|----------|----------------|----------|-----------------------------|
| N2                                                                          | HS | IV | 17358139 | 17360635 | WBGene00007821 | clec-201 | C30H6.3                     |
| 0.0110560278946696 AGIWUR43767                                              |    |    |          |          |                |          |                             |
| N2                                                                          | HS | IV | 17361443 | 17364583 | WBGene00007822 | clec-202 | C30H6.4                     |
| 0.0767627125284829 AGIWUR8247                                               |    |    |          |          |                |          |                             |
| N2                                                                          | HS | IV | 17364791 | 17366491 | WBGene00006487 | zipt-22  | C30H6.2 0.200032093612599   |
| AGIWUR20952                                                                 |    |    |          |          |                |          |                             |
| N2                                                                          | HS | IV | 17368592 | 17370618 | WBGene00007827 | nlp-54   | C30H6.10                    |
| -0.0224121394230217 AGIWUR11946;AGIWUR16831;AGIWUR19598;AGIWUR29665         |    |    |          |          |                |          |                             |
| N2                                                                          | HS | IV | 17371769 | 17375638 | WBGene00007823 | C30H6.5  | C30H6.5 0.38681837426793    |
| AGIWUR18277;AGIWUR21420;AGIWUR21814                                         |    |    |          |          |                |          |                             |
| N2                                                                          | HS | IV | 17376427 | 17379317 | WBGene00001811 | haf-1    | C30H6.6 0.154560570846229   |
| AGIWUR2043;AGIWUR5177;AGIWUR21139                                           |    |    |          |          |                |          |                             |
| N2                                                                          | HS | IV | 17379247 | 17380188 | WBGene00007826 | C30H6.9  | C30H6.9 -0.0640950306441113 |
| AGIWUR21945                                                                 |    |    |          |          |                |          |                             |
| N2                                                                          | HS | IV | 17380626 | 17382225 | WBGene00007824 | dlat-2   | C30H6.7 -0.0666137112012439 |
| AGIWUR33786                                                                 |    |    |          |          |                |          |                             |
| N2                                                                          | HS | IV | 17382298 | 17383087 | WBGene00007825 | C30H6.8  | C30H6.8 0.0709725782425608  |
| AGIWUR8005;AGIWUR25239;AGIWUR26763;AGIWUR40999                              |    |    |          |          |                |          |                             |
| N2                                                                          | HS | IV | 17383370 | 17386783 | WBGene00044238 | C30H6.12 | C30H6.12                    |
| 0.0795166285640363 AGIWUR303;AGIWUR4607;AGIWUR11706;AGIWUR32487;AGIWUR34320 |    |    |          |          |                |          |                             |
| N2                                                                          | HS | IV | 17386763 | 17387492 | WBGene00011374 | T02D1.8  | T02D1.8 0.30474842179688    |
| AGIWUR20749;AGIWUR36007;AGIWUR36236                                         |    |    |          |          |                |          |                             |
| N2                                                                          | HS | IV | 17393974 | 17395333 | WBGene00005677 | sru-14   | T02D1.2 0.0153251150656271  |
| AGIWUR1863;AGIWUR12530                                                      |    |    |          |          |                |          |                             |
| N2                                                                          | HS | IV | 17396210 | 17397491 | WBGene00005678 | sru-15   | T02D1.3 -0.0119296489241574 |
| AGIWUR43037                                                                 |    |    |          |          |                |          |                             |
| N2                                                                          | HS | IV | 17399776 | 17402336 | WBGene00011371 | T02D1.4  | T02D1.4 -0.180739634055028  |
| AGIWUR37043                                                                 |    |    |          |          |                |          |                             |
| N2                                                                          | HS | IV | 17402463 | 17405630 | WBGene00004061 | pmp-4    | T02D1.5 0.071740423373515   |
| AGIWUR9352;AGIWUR13782;AGIWUR30490;AGIWUR37445                              |    |    |          |          |                |          |                             |
| N2                                                                          | HS | IV | 17408231 | 17417794 | WBGene00011372 | npr-26   | T02D1.6 0.114569569369158   |
| AGIWUR6871                                                                  |    |    |          |          |                |          |                             |
| N2                                                                          | HS | IV | 17427717 | 17429602 | WBGene00007357 | C06A12.3 | C06A12.3                    |
| 0.112310604280765 AGIWUR31400                                               |    |    |          |          |                |          |                             |
| N2                                                                          | HS | IV | 17429637 | 17431968 | WBGene00007358 | lact-6   | C06A12.5                    |
| -0.164306993405265 AGIWUR4456;AGIWUR12935                                   |    |    |          |          |                |          |                             |
| N2                                                                          | HS | IV | 17432977 | 17436652 | WBGene00001550 | gcy-27   | C06A12.4                    |
| 0.0747976259223941 AGIWUR31564                                              |    |    |          |          |                |          |                             |
| N2                                                                          | HS | IV | 17437338 | 17438155 | WBGene00007359 | C06A12.8 | C06A12.8                    |

|                                                            |             |          |                |          |         |                    |  |  |
|------------------------------------------------------------|-------------|----------|----------------|----------|---------|--------------------|--|--|
| -0.00618610565962907                                       | AGIWUR32750 |          |                |          |         |                    |  |  |
| N2 HS IV                                                   | 17440642    | 17442125 | WBGene00045013 | F08A7.1  | F08A7.1 | 0.353252164139555  |  |  |
| AGIWUR6277;AGIWUR17924;AGIWUR26032;AGIWUR39716;AGIWUR45208 |             |          |                |          |         |                    |  |  |
| N2 HS IV                                                   | 17442827    | 17443738 | WBGene00023501 | F11E6.11 |         | F11E6.11           |  |  |
| 0.0146661588292254                                         | AGIWUR41389 |          |                |          |         |                    |  |  |
| N2 HS IV                                                   | 17444125    | 17450543 | WBGene00008711 | F11E6.8  | F11E6.8 | 0.103854533537273  |  |  |
| AGIWUR924                                                  |             |          |                |          |         |                    |  |  |
| N2 HS IV                                                   | 17457834    | 17461272 | WBGene00008710 | F11E6.7  | F11E6.7 | 0.0127741999101048 |  |  |
| AGIWUR37764                                                |             |          |                |          |         |                    |  |  |
| N2 HS IV                                                   | 17461909    | 17463158 | WBGene00008713 | F11E6.10 |         | F11E6.10           |  |  |
| -0.0679825791871664 AGIWUR15528;AGIWUR19371;AGIWUR28688    |             |          |                |          |         |                    |  |  |
| N2 HS IV                                                   | 17464451    | 17465986 | WBGene00008709 | F11E6.6  | F11E6.6 | 0.125515034696097  |  |  |
| AGIWUR38814                                                |             |          |                |          |         |                    |  |  |
| N2 HS IV                                                   | 17466060    | 17467408 | WBGene00001240 | elo-2    | F11E6.5 | 0.043463800885311  |  |  |
| AGIWUR15442                                                |             |          |                |          |         |                    |  |  |
| N2 HS IV                                                   | 17469347    | 17470387 | WBGene00008708 | F11E6.4  | F11E6.4 | 0.0584749633722836 |  |  |
| AGIWUR25207                                                |             |          |                |          |         |                    |  |  |
| N2 HS IV                                                   | 17470510    | 17472025 | WBGene00008707 | F11E6.3  | F11E6.3 | -0.267201962697895 |  |  |
| AGIWUR753;AGIWUR11490                                      |             |          |                |          |         |                    |  |  |
| N2 HS IV                                                   | 17473334    | 17479397 | WBGene00008706 | gba-3    | F11E6.1 | 0.254715638015612  |  |  |
| AGIWUR26597;AGIWUR26714                                    |             |          |                |          |         |                    |  |  |
| N2 HS IV                                                   | 17480396    | 17483332 | WBGene00007067 | 4R79.2   | 4R79.2  | 0.120751779292097  |  |  |
| AGIWUR14144                                                |             |          |                |          |         |                    |  |  |
| N2 HS IV                                                   | 17486871    | 17490779 | WBGene00003525 | nas-6    | 4R79.1  | 0.28793691201748   |  |  |
| AGIWUR30655                                                |             |          |                |          |         |                    |  |  |
| N2 HS MtDNA                                                | 113         | 549      | WBGene00010957 | nduo-6   | MTCE.3  | 0.521761042442111  |  |  |
| AGIWUR24989;AGIWUR35041                                    |             |          |                |          |         |                    |  |  |
| N2 HS MtDNA                                                | 549         | 783      | WBGene00010958 | ndf1-4   | MTCE.4  | 0.326708318121299  |  |  |
| AGIWUR23526;AGIWUR34575                                    |             |          |                |          |         |                    |  |  |
| N2 HS MtDNA                                                | 898         | 1593     | WBGene00014454 | MTCE.7   | MTCE.7  | 0.0910753058894613 |  |  |
| AGIWUR7913;AGIWUR13747;AGIWUR22917;AGIWUR36868;AGIWUR41384 |             |          |                |          |         |                    |  |  |
| N2 HS MtDNA                                                | 1763        | 2635     | WBGene00010959 | nduo-1   | MTCE.11 | 0.512786140393412  |  |  |
| AGIWUR28777;AGIWUR31173                                    |             |          |                |          |         |                    |  |  |
| N2 HS MtDNA                                                | 2634        | 3235     | WBGene00010960 | atp-6    | MTCE.12 | 0.454445508809772  |  |  |
| AGIWUR4315;AGIWUR23319                                     |             |          |                |          |         |                    |  |  |
| N2 HS MtDNA                                                | 3389        | 4269     | WBGene00010961 | nduo-2   | MTCE.16 | 0.92185770441462   |  |  |
| AGIWUR13582;AGIWUR27453;AGIWUR34174                        |             |          |                |          |         |                    |  |  |
| N2 HS MtDNA                                                | 4504        | 5621     | WBGene00000829 | ctb-1    | MTCE.21 | 0.322738256662142  |  |  |
| AGIWUR13075;AGIWUR32293                                    |             |          |                |          |         |                    |  |  |

|                                                                                              |    |       |        |        |                |          |          |                      |             |
|----------------------------------------------------------------------------------------------|----|-------|--------|--------|----------------|----------|----------|----------------------|-------------|
| N2                                                                                           | HS | MtDNA | 5678   | 6449   | WBGene00010962 | ctc-3    | MTCE.23  | 0.108448937437927    |             |
| AGIWUR16275;AGIWUR21151;AGIWUR33004                                                          |    |       |        |        |                |          |          |                      |             |
| N2                                                                                           | HS | MtDNA | 6506   | 7808   | WBGene00010963 | nduo-4   | MTCE.25  | 0.267636258405673    |             |
| AGIWUR2185;AGIWUR25147;AGIWUR28528;AGIWUR32111;AGIWUR33776;AGIWUR38430;AGIWUR43128           |    |       |        |        |                |          |          |                      |             |
| N2                                                                                           | HS | MtDNA | 7827   | 9428   | WBGene00010964 | ctc-1    | MTCE.26  | 0.185502936791134    |             |
| AGIWUR14543;AGIWUR27788;AGIWUR34673;AGIWUR38561;AGIWUR40016                                  |    |       |        |        |                |          |          |                      |             |
| N2                                                                                           | HS | MtDNA | 9649   | 10348  | WBGene00010965 | ctc-2    | MTCE.31  | 0.166826919866586    |             |
| AGIWUR3817;AGIWUR15036                                                                       |    |       |        |        |                |          |          |                      |             |
| N2                                                                                           | HS | MtDNA | 10403  | 11354  | WBGene00014472 | MTCE.33  | MTCE.33  | 0.120213433189503    |             |
| AGIWUR35310;AGIWUR39867                                                                      |    |       |        |        |                |          |          |                      |             |
| N2                                                                                           | HS | MtDNA | 11356  | 11691  | WBGene00010966 | nduo-3   | MTCE.34  | 0.0510651859394557   |             |
| AGIWUR35958;AGIWUR36046                                                                      |    |       |        |        |                |          |          |                      |             |
| N2                                                                                           | HS | MtDNA | 11691  | 13272  | WBGene00010967 | nduo-5   | MTCE.35  | 0.797070908814433    |             |
| AGIWUR5384;AGIWUR5608;AGIWUR6469;AGIWUR27940;AGIWUR29535;AGIWUR34029                         |    |       |        |        |                |          |          |                      |             |
| N2                                                                                           | HS | V     | 1663   | 6632   | WBGene00015153 | B0348.5  | B0348.5  | -0.0854445129205574  | AGIWUR43464 |
| N2                                                                                           | HS | V     | 6588   | 7822   | WBGene00002061 | ife-3    | B0348.6  | -0.0423443068591638  |             |
| AGIWUR1089;AGIWUR2583;AGIWUR3915;AGIWUR15574;AGIWUR31428;AGIWUR34420;AGIWUR35684;AGIWUR40770 |    |       |        |        |                |          |          |                      |             |
| N2                                                                                           | HS | V     | 20825  | 43697  | WBGene00001177 | egl-8    | B0348.4  | 0.0431760247646924   |             |
| AGIWUR27169;AGIWUR28430;AGIWUR43926                                                          |    |       |        |        |                |          |          |                      |             |
| N2                                                                                           | HS | V     | 45310  | 46916  | WBGene00015152 | B0348.2  | B0348.2  | 0.0890281455317439   | AGIWUR29175 |
| N2                                                                                           | HS | V     | 48922  | 49619  | WBGene00015151 | B0348.1  | B0348.1  | 0.0517771608118727   |             |
| AGIWUR7437;AGIWUR12945;AGIWUR15241;AGIWUR19933;AGIWUR38670;AGIWUR42802                       |    |       |        |        |                |          |          |                      |             |
| N2                                                                                           | HS | V     | 49956  | 56046  | WBGene00021413 | srt-52   | Y38C9B.2 | -0.0985711832107512  |             |
| AGIWUR8074                                                                                   |    |       |        |        |                |          |          |                      |             |
| N2                                                                                           | HS | V     | 59239  | 63509  | WBGene00021412 | cyp-29A3 | Y38C9B.1 | -0.241026845786173   |             |
| AGIWUR1490                                                                                   |    |       |        |        |                |          |          |                      |             |
| N2                                                                                           | HS | V     | 63726  | 64503  | WBGene00021414 | Y38C9B.3 | Y38C9B.3 | -0.0717907204125705  |             |
| AGIWUR15767                                                                                  |    |       |        |        |                |          |          |                      |             |
| N2                                                                                           | HS | V     | 64564  | 83831  | WBGene00018976 | daam-1   | F56E10.2 | -0.00885620550132149 |             |
| AGIWUR12745;AGIWUR21333                                                                      |    |       |        |        |                |          |          |                      |             |
| N2                                                                                           | HS | V     | 103394 | 104064 | WBGene00004496 | rps-27   | F56E10.4 | 0.207840205793698    |             |
| AGIWUR15986                                                                                  |    |       |        |        |                |          |          |                      |             |
| N2                                                                                           | HS | V     | 104826 | 118188 | WBGene00018975 | F56E10.1 | F56E10.1 | 0.0540437762697206   |             |
| AGIWUR30224;AGIWUR37479                                                                      |    |       |        |        |                |          |          |                      |             |
| N2                                                                                           | HS | V     | 118043 | 122966 | WBGene00000480 | cgp-1    | Y38C9A.2 | -0.0552033253126467  |             |
| AGIWUR7387;AGIWUR17842;AGIWUR23609                                                           |    |       |        |        |                |          |          |                      |             |
| N2                                                                                           | HS | V     | 124010 | 126758 | WBGene00020999 | W03F9.1  | W03F9.1  | -0.211424796397853   | AGIWUR40968 |
| N2                                                                                           | HS | V     | 127000 | 128034 | WBGene00021000 | W03F9.2  | W03F9.2  | 0.0282706052142156   |             |
| AGIWUR413;AGIWUR3259;AGIWUR9935;AGIWUR38374                                                  |    |       |        |        |                |          |          |                      |             |

|                                                            |    |   |        |        |                |          |            |                      |             |
|------------------------------------------------------------|----|---|--------|--------|----------------|----------|------------|----------------------|-------------|
| N2                                                         | HS | V | 128237 | 131754 | WBGene00021004 | sftb-2   | W03F9.10   | -0.0471051279940529  |             |
| AGIWUR1576;AGIWUR40301                                     |    |   |        |        |                |          |            |                      |             |
| N2                                                         | HS | V | 132450 | 134993 | WBGene00021001 | W03F9.3  | W03F9.3    | -0.443767563301709   | AGIWUR9969  |
| N2                                                         | HS | V | 137177 | 141370 | WBGene00044512 | W03F9.11 | W03F9.11   | 0.103265033896431    |             |
| AGIWUR452                                                  |    |   |        |        |                |          |            |                      |             |
| N2                                                         | HS | V | 142449 | 142799 | WBGene00023356 | W03F9.8  | W03F9.8    | 0.0674148076137016   |             |
| AGIWUR15929;AGIWUR34727                                    |    |   |        |        |                |          |            |                      |             |
| N2                                                         | HS | V | 143047 | 144617 | WBGene00005302 | srh-81   | W03F9.7    | 0.0287924560480635   |             |
| AGIWUR8210;AGIWUR27656;AGIWUR28230                         |    |   |        |        |                |          |            |                      |             |
| N2                                                         | HS | V | 145194 | 146931 | WBGene00005303 | srh-82   | W03F9.6    | -0.144935487074443   | AGIWUR27502 |
| N2                                                         | HS | V | 147538 | 152104 | WBGene00021002 | W03F9.4  | W03F9.4    | -1.02824905699258    | AGIWUR22684 |
| N2                                                         | HS | V | 156825 | 166866 | WBGene00006648 | ttb-1    | W03F9.5    | -0.0597352546155356  | AGIWUR17082 |
| N2                                                         | HS | V | 177421 | 184966 | WBGene00000838 | cul-3    | Y108G3AL.1 | -0.129898060327154   |             |
| AGIWUR7760;AGIWUR19520;AGIWUR25925;AGIWUR29443;AGIWUR44731 |    |   |        |        |                |          |            |                      |             |
| N2                                                         | HS | V | 186169 | 200777 | WBGene00044689 | arid-1   | Y108G3AL.7 | -0.124225570567182   |             |
| AGIWUR8634;AGIWUR41275                                     |    |   |        |        |                |          |            |                      |             |
| N2                                                         | HS | V | 201600 | 204279 | WBGene00077643 | trpp-1   | DC2.8      | -0.00943442023546837 | AGIWUR13239 |
| N2                                                         | HS | V | 204382 | 209758 | WBGene00017080 | lec-12   | DC2.3      | -0.189021143008308   | AGIWUR11135 |
| N2                                                         | HS | V | 210148 | 212787 | WBGene00017082 | DC2.5    | DC2.5      | 0.0578300058596479   | AGIWUR26784 |
| N2                                                         | HS | V | 217154 | 219473 | WBGene00005299 | srh-78   | DC2.2      | -0.0859526201583156  | AGIWUR34036 |
| N2                                                         | HS | V | 219932 | 222776 | WBGene00005301 | srh-80   | DC2.1      | 0.040825425948869    | AGIWUR15830 |
| N2                                                         | HS | V | 222995 | 226947 | WBGene00005298 | srh-77   | DC2.6      | 0.0106616853985866   | AGIWUR24387 |
| N2                                                         | HS | V | 228858 | 234672 | WBGene00017083 | kin-33   | DC2.7      | 0.0165303105171231   |             |
| AGIWUR2580;AGIWUR6254;AGIWUR15785;AGIWUR20620              |    |   |        |        |                |          |            |                      |             |
| N2                                                         | HS | V | 236750 | 238192 | WBGene00019814 | R02C2.1  | R02C2.1    | 0.0321113224241554   | AGIWUR19767 |
| N2                                                         | HS | V | 238963 | 240362 | WBGene00019817 | R02C2.6  | R02C2.6    | -0.125518061400403   | AGIWUR5843  |
| N2                                                         | HS | V | 241326 | 242618 | WBGene00019818 | R02C2.7  | R02C2.7    | 0.0395229763396205   | AGIWUR28807 |
| N2                                                         | HS | V | 244469 | 245846 | WBGene00019815 | kin-34   | R02C2.2    | 0.19107457473657     | AGIWUR21942 |
| N2                                                         | HS | V | 246618 | 251756 | WBGene00006419 | oac-39   | R02C2.3    | -0.233338357153296   | AGIWUR18420 |
| N2                                                         | HS | V | 252364 | 254691 | WBGene00006172 | str-121  | R02C2.5    | -0.0583409337446561  | AGIWUR29847 |
| N2                                                         | HS | V | 254912 | 257992 | WBGene00019816 | nhr-204  | R02C2.4    | 0.00292520775678184  | AGIWUR43394 |
| N2                                                         | HS | V | 268238 | 271419 | WBGene00021981 | lgc-26   | Y58G8A.1   | 0.0187970327269449   |             |
| AGIWUR1175                                                 |    |   |        |        |                |          |            |                      |             |
| N2                                                         | HS | V | 271984 | 272937 | WBGene00044513 | Y58G8A.5 | Y58G8A.5   | 0.0894845532468143   |             |
| AGIWUR3273;AGIWUR7079;AGIWUR9802;AGIWUR25645;AGIWUR36238   |    |   |        |        |                |          |            |                      |             |
| N2                                                         | HS | V | 276989 | 281716 | WBGene00021983 | npr-5    | Y58G8A.4   | 0.00804967525849598  |             |
| AGIWUR6860;AGIWUR37723;AGIWUR42426                         |    |   |        |        |                |          |            |                      |             |
| N2                                                         | HS | V | 297949 | 300005 | WBGene00018010 | F33E11.2 | F33E11.2   | -0.168942924084838   |             |
| AGIWUR15878                                                |    |   |        |        |                |          |            |                      |             |

|                                                                                                                      |    |   |        |        |                |          |          |                      |             |
|----------------------------------------------------------------------------------------------------------------------|----|---|--------|--------|----------------|----------|----------|----------------------|-------------|
| N2                                                                                                                   | HS | V | 300015 | 304713 | WBGene00018011 | F33E11.3 | F33E11.3 | -0.302370252625224   |             |
| AGIWUR16662                                                                                                          |    |   |        |        |                |          |          |                      |             |
| N2                                                                                                                   | HS | V | 305457 | 311565 | WBGene00018013 | phf-10   | F33E11.6 | -0.0660312318990992  |             |
| AGIWUR7995;AGIWUR39428                                                                                               |    |   |        |        |                |          |          |                      |             |
| N2                                                                                                                   | HS | V | 320204 | 323647 | WBGene00003614 | nhr-15   | F33E11.1 | -0.104640439936486   |             |
| AGIWUR9738;AGIWUR22028;AGIWUR23891;AGIWUR36943;AGIWUR43837                                                           |    |   |        |        |                |          |          |                      |             |
| N2                                                                                                                   | HS | V | 323774 | 330725 | WBGene00000022 | abt-4    | Y39D8C.1 | -0.130144027817854   |             |
| AGIWUR5072                                                                                                           |    |   |        |        |                |          |          |                      |             |
| N2                                                                                                                   | HS | V | 334646 | 336861 | WBGene00020708 | dmd-8    | T22H9.4  | 0.215100006882849    | AGIWUR27406 |
| N2                                                                                                                   | HS | V | 343428 | 347623 | WBGene00020707 | wago-10  | T22H9.3  | -0.00767302705341821 |             |
| AGIWUR2687;AGIWUR8699;AGIWUR10606;AGIWUR26893;AGIWUR28965;AGIWUR40430                                                |    |   |        |        |                |          |          |                      |             |
| N2                                                                                                                   | HS | V | 349374 | 359016 | WBGene00020706 | atg-9    | T22H9.2  | -0.107752370232495   |             |
| AGIWUR12285;AGIWUR27158                                                                                              |    |   |        |        |                |          |          |                      |             |
| N2                                                                                                                   | HS | V | 359766 | 363705 | WBGene00020705 | T22H9.1  | T22H9.1  | -0.110481358350004   | AGIWUR40024 |
| N2                                                                                                                   | HS | V | 364950 | 369088 | WBGene00021450 | mltn-6   | Y39D8B.2 | -0.0824221534725886  |             |
| AGIWUR25789                                                                                                          |    |   |        |        |                |          |          |                      |             |
| N2                                                                                                                   | HS | V | 374408 | 379672 | WBGene00021451 | mltn-8   | Y39D8B.3 | 0.491426492056871    |             |
| AGIWUR24991                                                                                                          |    |   |        |        |                |          |          |                      |             |
| N2                                                                                                                   | HS | V | 381901 | 384688 | WBGene00022643 | ZK6.8    | ZK6.8    | 0.0563841062935317   | AGIWUR3417  |
| N2                                                                                                                   | HS | V | 385713 | 388090 | WBGene00022642 | lip1-5   | ZK6.7    | -0.2679671303846     | AGIWUR40960 |
| N2                                                                                                                   | HS | V | 388697 | 391598 | WBGene00022641 | ZK6.6    | ZK6.6    | 0.290628926684013    | AGIWUR42231 |
| N2                                                                                                                   | HS | V | 392628 | 395117 | WBGene00022640 | nhr-254  | ZK6.5    | -0.0433451496269406  | AGIWUR28089 |
| N2                                                                                                                   | HS | V | 396827 | 398756 | WBGene00022639 | nhr-253  | ZK6.4    | -0.111131233956185   | AGIWUR19862 |
| N2                                                                                                                   | HS | V | 400192 | 401602 | WBGene00022638 | sc1-27   | ZK6.3    | 0.00872302459773699  | AGIWUR22678 |
| N2                                                                                                                   | HS | V | 401688 | 403128 | WBGene00005284 | srh-62   | ZK6.9    | 0.262790002258917    | AGIWUR9555  |
| N2                                                                                                                   | HS | V | 404619 | 405997 | WBGene00022637 | nhr-252  | ZK6.2    | -0.0740018614508262  | AGIWUR27857 |
| N2                                                                                                                   | HS | V | 408265 | 410080 | WBGene00022636 | nhr-278  | ZK6.1    | -0.00613566707740354 | AGIWUR41645 |
| N2                                                                                                                   | HS | V | 411782 | 414760 | WBGene00022644 | dod-19   | ZK6.10   | 0.0364901286097261   | AGIWUR35435 |
| N2                                                                                                                   | HS | V | 415713 | 417708 | WBGene00022645 | ZK6.11   | ZK6.11   | 0.382894687759064    | AGIWUR21388 |
| N2                                                                                                                   | HS | V | 419435 | 421839 | WBGene00021448 | Y39D8A.1 | Y39D8A.1 | -0.080916469489078   |             |
| AGIWUR327;AGIWUR8494;AGIWUR13402;AGIWUR17855;AGIWUR18239;AGIWUR18452;AGIWUR22056;AGIWUR35812;AGIWUR41891;AGIWUR43529 |    |   |        |        |                |          |          |                      |             |
| N2                                                                                                                   | HS | V | 422498 | 424064 | WBGene00015259 | dod-20   | B0554.6  | 0.071150336581626    | AGIWUR38983 |
| N2                                                                                                                   | HS | V | 424440 | 426560 | WBGene00015258 | B0554.5  | B0554.5  | -0.26349385395607    | AGIWUR9976  |
| N2                                                                                                                   | HS | V | 429144 | 433574 | WBGene00015257 | B0554.4  | B0554.4  | 0.0586134688332436   |             |
| AGIWUR2740;AGIWUR5771;AGIWUR24531                                                                                    |    |   |        |        |                |          |          |                      |             |
| N2                                                                                                                   | HS | V | 434198 | 436726 | WBGene00015255 | B0554.2  | B0554.2  | -0.0398433294215246  |             |
| AGIWUR11783;AGIWUR41253                                                                                              |    |   |        |        |                |          |          |                      |             |
| N2                                                                                                                   | HS | V | 437576 | 441023 | WBGene00015260 | B0554.7  | B0554.7  | 0.0520073754564585   | AGIWUR16317 |



|                                     |    |   |        |        |                |          |           |                      |             |
|-------------------------------------|----|---|--------|--------|----------------|----------|-----------|----------------------|-------------|
| N2                                  | HS | V | 441820 | 443293 | WBGene00005256 | srh-33   | M02H5.9   | -0.0601381693877885  | AGIWUR7920  |
| N2                                  | HS | V | 444893 | 446674 | WBGene00005257 | srh-34   | M02H5.10  | -0.00309441925886667 |             |
| AGIWUR28651                         |    |   |        |        |                |          |           |                      |             |
| N2                                  | HS | V | 447569 | 449230 | WBGene00005258 | srh-35   | M02H5.11  | -0.0547503707700692  |             |
| AGIWUR18900                         |    |   |        |        |                |          |           |                      |             |
| N2                                  | HS | V | 449915 | 450438 | WBGene00019744 | M02H5.8  | M02H5.8   | 0.375517478068257    | AGIWUR37280 |
| N2                                  | HS | V | 451451 | 453746 | WBGene00003713 | nhr-123  | M02H5.7   | -0.185979718657608   | AGIWUR38106 |
| N2                                  | HS | V | 454009 | 456772 | WBGene00003688 | nhr-98   | M02H5.6   | -0.395758796929968   | AGIWUR11409 |
| N2                                  | HS | V | 459734 | 461899 | WBGene00019743 | nhr-203  | M02H5.5   | 0.231636476649737    | AGIWUR39587 |
| N2                                  | HS | V | 462600 | 464963 | WBGene00019742 | nhr-202  | M02H5.4   | 0.0419103210648721   | AGIWUR16331 |
| N2                                  | HS | V | 465757 | 467491 | WBGene00019741 | nhr-201  | M02H5.3   | 0.302477998370428    | AGIWUR3037  |
| N2                                  | HS | V | 467567 | 468560 | WBGene00019745 | srbc-57  | M02H5.12  | 0.0045451181517322   |             |
| AGIWUR15097                         |    |   |        |        |                |          |           |                      |             |
| N2                                  | HS | V | 472889 | 474631 | WBGene00019740 | srt-31   | M02H5.2   | -0.148988387806214   | AGIWUR43022 |
| N2                                  | HS | V | 474791 | 477150 | WBGene00003689 | nhr-99   | M02H5.1   | 0.0874422879413501   |             |
| AGIWUR14192;AGIWUR23003;AGIWUR43277 |    |   |        |        |                |          |           |                      |             |
| N2                                  | HS | V | 478162 | 480710 | WBGene00003645 | nhr-55   | T01G6.7   | 0.067786473837149    | AGIWUR25933 |
| N2                                  | HS | V | 480811 | 483355 | WBGene00003720 | nhr-130  | T01G6.8   | 0.282420453254909    | AGIWUR34491 |
| N2                                  | HS | V | 484901 | 486895 | WBGene00020153 | nhr-212  | T01G6.6   | 0.21411624439744     | AGIWUR23170 |
| N2                                  | HS | V | 486990 | 489104 | WBGene00020152 | nhr-211  | T01G6.5   | 0.316840001003838    |             |
| AGIWUR16625;AGIWUR39859;AGIWUR39924 |    |   |        |        |                |          |           |                      |             |
| N2                                  | HS | V | 489647 | 491430 | WBGene00003696 | nhr-106  | T01G6.4   | 0.240368134091003    | AGIWUR18097 |
| N2                                  | HS | V | 491732 | 493641 | WBGene00006233 | str-196  | T01G6.3   | 0.0291813188636851   | AGIWUR30475 |
| N2                                  | HS | V | 494499 | 497287 | WBGene00003721 | nhr-131  | T01G6.2   | 0.182596388432771    | AGIWUR5940  |
| N2                                  | HS | V | 497839 | 498943 | WBGene00020151 | T01G6.1  | T01G6.1   | -0.0966076320034368  | AGIWUR24893 |
| N2                                  | HS | V | 499770 | 501330 | WBGene00006282 | str-256  | T01G6.9   | -0.114250862938013   | AGIWUR27783 |
| N2                                  | HS | V | 502142 | 503223 | WBGene00020154 | T01G6.10 | T01G6.10  | 0.0320160425371032   |             |
| AGIWUR4126;AGIWUR17221;AGIWUR38447  |    |   |        |        |                |          |           |                      |             |
| N2                                  | HS | V | 504028 | 504616 | WBGene00004144 | pqn-60   | R11G11.7  | 0.0219400604592916   |             |
| AGIWUR13341                         |    |   |        |        |                |          |           |                      |             |
| N2                                  | HS | V | 505491 | 506068 | WBGene00020014 | R11G11.6 | R11G11.6  | 0.316441149038985    |             |
| AGIWUR21543                         |    |   |        |        |                |          |           |                      |             |
| N2                                  | HS | V | 508112 | 509803 | WBGene00005851 | srw-104  | R11G11.8  | -0.00256922879556409 |             |
| AGIWUR15163;AGIWUR43712             |    |   |        |        |                |          |           |                      |             |
| N2                                  | HS | V | 511194 | 512520 | WBGene00005260 | srh-37   | R11G11.9  | 0.0399420332204947   |             |
| AGIWUR6632                          |    |   |        |        |                |          |           |                      |             |
| N2                                  | HS | V | 513390 | 515226 | WBGene00005852 | srw-105  | R11G11.10 | -0.111928792620185   |             |
| AGIWUR41200                         |    |   |        |        |                |          |           |                      |             |
| N2                                  | HS | V | 515787 | 517388 | WBGene00005853 | srw-106  | R11G11.11 | -0.00581508221262883 |             |

|                         |    |   |        |        |                |          |           |                     |                      |
|-------------------------|----|---|--------|--------|----------------|----------|-----------|---------------------|----------------------|
| AGIWUR15100             |    |   |        |        |                |          |           |                     |                      |
| N2                      | HS | V | 519852 | 521617 | WBGene00005854 | srw-107  | R11G11.13 |                     | 0.0909582601424193   |
| AGIWUR24048             |    |   |        |        |                |          |           |                     |                      |
| N2                      | HS | V | 521702 | 524218 | WBGene00020016 | lip1-3   | R11G11.14 |                     | -0.165107227257595   |
| AGIWUR43454             |    |   |        |        |                |          |           |                     |                      |
| N2                      | HS | V | 525666 | 526691 | WBGene00006119 | str-54   | R11G11.15 |                     | 0.0899419738905047   |
| AGIWUR10962;AGIWUR38855 |    |   |        |        |                |          |           |                     |                      |
| N2                      | HS | V | 527902 | 528869 | WBGene00005855 | srw-108  | R11G11.5  |                     | -0.265711624225364   |
| AGIWUR42181             |    |   |        |        |                |          |           |                     |                      |
| N2                      | HS | V | 529277 | 530557 | WBGene00005600 | srj-12   | R11G11.4  |                     | -0.00777088274056048 |
| AGIWUR9716;AGIWUR30691  |    |   |        |        |                |          |           |                     |                      |
| N2                      | HS | V | 530799 | 532024 | WBGene00020013 | R11G11.3 | R11G11.3  |                     | -0.314419090184133   |
| AGIWUR39705             |    |   |        |        |                |          |           |                     |                      |
| N2                      | HS | V | 532290 | 534064 | WBGene00003648 | nhr-58   | R11G11.2  |                     | -0.124488609624759   |
| AGIWUR814;AGIWUR43924   |    |   |        |        |                |          |           |                     |                      |
| N2                      | HS | V | 534446 | 536226 | WBGene00003722 | nhr-132  | R11G11.1  |                     | -0.18450623776558    |
| AGIWUR30967             |    |   |        |        |                |          |           |                     |                      |
| N2                      | HS | V | 536628 | 537418 | WBGene00015759 | C14C6.5  | C14C6.5   |                     | -0.0545855736167749  |
| AGIWUR33256;AGIWUR33998 |    |   |        |        |                |          |           |                     |                      |
| N2                      | HS | V | 539460 | 541485 | WBGene00015758 | nhr-155  | C14C6.4   | -0.0614144555428666 | AGIWUR27454          |
| N2                      | HS | V | 543469 | 545359 | WBGene00015757 | C14C6.3  | C14C6.3   | -0.0855402156885372 | AGIWUR38250          |
| N2                      | HS | V | 545844 | 548080 | WBGene00015760 | C14C6.6  | C14C6.6   | -0.0842165061168174 | AGIWUR30450          |
| N2                      | HS | V | 548713 | 550619 | WBGene00015761 | C14C6.7  | C14C6.7   | -0.0292736852621571 | AGIWUR41855          |
| N2                      | HS | V | 554374 | 556155 | WBGene00005899 | srx-8    | C14C6.9   | -0.0444980813948579 | AGIWUR30075          |
| N2                      | HS | V | 560195 | 562956 | WBGene00005898 | srx-7    | C14C6.1   | -0.124151552021077  | AGIWUR985            |
| N2                      | HS | V | 563134 | 564446 | WBGene00015756 | C14C6.2  | C14C6.2   | -0.0523857929030207 | AGIWUR44552          |
| N2                      | HS | V | 564391 | 566084 | WBGene00005585 | sri-73   | C14C6.10  | -0.023740183185712  |                      |
| AGIWUR19650             |    |   |        |        |                |          |           |                     |                      |
| N2                      | HS | V | 566719 | 568205 | WBGene00005584 | sri-72   | C14C6.11  | -0.0287879996637184 |                      |
| AGIWUR20755             |    |   |        |        |                |          |           |                     |                      |
| N2                      | HS | V | 570571 | 571205 | WBGene00015763 | C14C6.12 | C14C6.12  | -0.0809570571199298 |                      |
| AGIWUR2344              |    |   |        |        |                |          |           |                     |                      |
| N2                      | HS | V | 572031 | 574739 | WBGene00015764 | C14C6.13 | C14C6.13  | 0.0775304164993393  |                      |
| AGIWUR20391             |    |   |        |        |                |          |           |                     |                      |
| N2                      | HS | V | 576370 | 578428 | WBGene00019453 | K06H6.5  | K06H6.5   | 0.0260501527778452  | AGIWUR27993          |
| N2                      | HS | V | 581916 | 583431 | WBGene00019451 | nstp-7   | K06H6.3   | 0.0300269253762337  | AGIWUR29404          |
| N2                      | HS | V | 583801 | 585308 | WBGene00019454 | K06H6.6  | K06H6.6   | -0.181918866991105  | AGIWUR29139          |
| N2                      | HS | V | 585848 | 587250 | WBGene00019450 | K06H6.2  | K06H6.2   | 0.44813601731722    | AGIWUR32952          |
| N2                      | HS | V | 588135 | 589646 | WBGene00019449 | K06H6.1  | K06H6.1   | 0.658226047352992   | AGIWUR36953          |

|                         |    |   |        |        |                |          |          |                     |             |
|-------------------------|----|---|--------|--------|----------------|----------|----------|---------------------|-------------|
| N2                      | HS | V | 590482 | 592463 | WBGene00022758 | ZK488.6  | ZK488.6  | 0.0429917509530098  | AGIWUR10298 |
| N2                      | HS | V | 593259 | 595677 | WBGene00022757 | ZK488.5  | ZK488.5  | 0.0545764732999041  | AGIWUR11121 |
| N2                      | HS | V | 600595 | 602482 | WBGene00022756 | nhr-251  | ZK488.4  | -0.317934073960645  | AGIWUR21345 |
| N2                      | HS | V | 603665 | 604205 | WBGene00004177 | pqn-98   | ZK488.7  | -0.0358496162485347 | AGIWUR12119 |
| N2                      | HS | V | 604723 | 606183 | WBGene00005857 | srw-110  | ZK488.8  | 0.071313893582277   |             |
| AGIWUR4227;AGIWUR21610  |    |   |        |        |                |          |          |                     |             |
| N2                      | HS | V | 606781 | 608944 | WBGene00005856 | srw-109  | ZK488.9  | 0.200285795706648   | AGIWUR43361 |
| N2                      | HS | V | 609144 | 609726 | WBGene00004176 | pqn-97   | ZK488.10 | -0.0474322853090321 |             |
| AGIWUR11417             |    |   |        |        |                |          |          |                     |             |
| N2                      | HS | V | 610445 | 612513 | WBGene00003680 | nhr-90   | ZK488.2  | 0.112191044472684   | AGIWUR33832 |
| N2                      | HS | V | 612781 | 614908 | WBGene00022755 | nhr-250  | ZK488.1  | 0.0776812149356889  | AGIWUR20154 |
| N2                      | HS | V | 615576 | 616728 | WBGene00018624 | F48G7.13 | F48G7.13 | -0.0742381371791314 |             |
| AGIWUR8576              |    |   |        |        |                |          |          |                     |             |
| N2                      | HS | V | 619434 | 621679 | WBGene00018615 | F48G7.4  | F48G7.4  | 0.0408828498892522  | AGIWUR43563 |
| N2                      | HS | V | 622170 | 622951 | WBGene00018616 | F48G7.5  | F48G7.5  | 0.190940857308341   | AGIWUR20604 |
| N2                      | HS | V | 623298 | 625022 | WBGene00018617 | srt-17   | F48G7.6  | 0.112323077261347   | AGIWUR22569 |
| N2                      | HS | V | 625752 | 626390 | WBGene00018618 | F48G7.7  | F48G7.7  | -0.193390185452406  | AGIWUR42807 |
| N2                      | HS | V | 627095 | 627650 | WBGene00018619 | F48G7.8  | F48G7.8  | 0.234832608706611   | AGIWUR25428 |
| N2                      | HS | V | 628059 | 628623 | WBGene00018620 | F48G7.9  | F48G7.9  | -0.223282956870801  | AGIWUR23150 |
| N2                      | HS | V | 634142 | 634893 | WBGene00018621 | F48G7.10 | F48G7.10 | 0.0969413636979048  |             |
| AGIWUR39400             |    |   |        |        |                |          |          |                     |             |
| N2                      | HS | V | 636587 | 637501 | WBGene00018614 | pals-31  | F48G7.2  | 0.0827169519666544  | AGIWUR42892 |
| N2                      | HS | V | 638628 | 639928 | WBGene00005621 | srj-37   | F48G7.1  | 0.154930794842046   | AGIWUR42858 |
| N2                      | HS | V | 640799 | 642893 | WBGene00018622 | nhr-190  | F48G7.11 | 0.0773333151760376  |             |
| AGIWUR20655             |    |   |        |        |                |          |          |                     |             |
| N2                      | HS | V | 643762 | 646199 | WBGene00018623 | F48G7.12 | F48G7.12 | 0.340033316147069   |             |
| AGIWUR5201              |    |   |        |        |                |          |          |                     |             |
| N2                      | HS | V | 647188 | 649741 | WBGene00017959 | ugt-42   | F31F4.7  | 0.264766164878559   | AGIWUR22094 |
| N2                      | HS | V | 651837 | 653040 | WBGene00005593 | srj-5    | F31F4.16 | 0.11216764954011    |             |
| AGIWUR33839             |    |   |        |        |                |          |          |                     |             |
| N2                      | HS | V | 653303 | 654502 | WBGene00005594 | srj-6    | F31F4.8  | -0.0783101654968883 | AGIWUR31845 |
| N2                      | HS | V | 654727 | 655923 | WBGene00005451 | srh-245  | F31F4.9  | -0.0418740200059684 | AGIWUR1794  |
| N2                      | HS | V | 656499 | 657778 | WBGene00005452 | srh-246  | F31F4.18 | -0.57512018016439   |             |
| AGIWUR12239             |    |   |        |        |                |          |          |                     |             |
| N2                      | HS | V | 658476 | 660310 | WBGene00017963 | F31F4.17 | F31F4.17 | 0.0906141529349904  |             |
| AGIWUR26694             |    |   |        |        |                |          |          |                     |             |
| N2                      | HS | V | 660681 | 661954 | WBGene00005320 | srh-101  | F31F4.10 | -0.0167271934859912 |             |
| AGIWUR14309;AGIWUR23039 |    |   |        |        |                |          |          |                     |             |
| N2                      | HS | V | 662479 | 664443 | WBGene00017960 | F31F4.11 | F31F4.11 | 0.14202761718141    |             |

AGIWUR28684  
N2 HS V 664797 665923 WBGene00005472 srh-266 F31F4.6 -0.278842776192526 AGIWUR12540  
N2 HS V 665919 667494 WBGene00017961 nhr-180 F31F4.12 0.205639008859333  
AGIWUR13553;AGIWUR38977;AGIWUR39200  
N2 HS V 667896 671442 WBGene00005687 sru-24 F31F4.13 -0.0222405001779116  
AGIWUR1691;AGIWUR6096;AGIWUR7045;AGIWUR16318;AGIWUR18111  
N2 HS V 672245 674313 WBGene00005688 sru-25 F31F4.14 0.197635989918524  
AGIWUR29944  
N2 HS V 674911 676754 WBGene00017962 fbxa-72 F31F4.15 0.335552480817926  
AGIWUR29718  
N2 HS V 677034 678920 WBGene00005912 srx-21 F31F4.4 -0.0806330272902311 AGIWUR21802  
N2 HS V 679963 681465 WBGene00005913 srx-22 F31F4.3 -0.123521080155216  
AGIWUR42097;AGIWUR43628  
N2 HS V 682331 683970 WBGene00005914 srx-23 F31F4.2 0.0381056531820265 AGIWUR41650  
N2 HS V 684060 686289 WBGene00017957 F31F4.1 F31F4.1 -0.320826522375969 AGIWUR15879  
N2 HS V 687684 690004 WBGene00019244 H25P19.1 H25P19.1 -0.227628039565335  
AGIWUR40390  
N2 HS V 690875 692770 WBGene00005895 srx-4 Y49C4A.5 -0.00630370706728112  
AGIWUR19415  
N2 HS V 696523 699614 WBGene00021709 ugt-29 Y49C4A.8 0.241446822558012  
AGIWUR1072;AGIWUR38841  
N2 HS V 700079 701669 WBGene00005896 srx-5 Y49C4A.4 -0.126258333702191  
AGIWUR28320  
N2 HS V 702560 703745 WBGene00021708 srbc-37 Y49C4A.3 -0.0611530485952887  
AGIWUR3871;AGIWUR30163  
N2 HS V 707218 708453 WBGene00021707 srbc-38 Y49C4A.2 0.037451570984854  
AGIWUR5061;AGIWUR12514;AGIWUR28023  
N2 HS V 709108 710566 WBGene00021706 srbc-39 Y49C4A.1 0.0881756875524076  
AGIWUR2939  
N2 HS V 710642 712921 WBGene00021710 cyp-33C11 Y49C4A.9 -0.247865907062453  
AGIWUR24386  
N2 HS V 715833 719831 WBGene00019242 srbc-40 H24009.1 0.101708138993025  
AGIWUR36794  
N2 HS V 722695 723827 WBGene00019243 fbxb-72 H24009.2 0.213267921929932  
AGIWUR15315  
N2 HS V 724207 728103 WBGene00001564 icl-1 C05E4.9 -0.145968036963096  
AGIWUR3072;AGIWUR10341;AGIWUR12073;AGIWUR15664;AGIWUR16363;AGIWUR22644;AGIWUR33040;AGIWUR42667  
N2 HS V 728312 734279 WBGene00005228 srh-2 C05E4.14 0.0504628136063197  
AGIWUR538;AGIWUR4676;AGIWUR34038

|                                     |    |   |        |        |                |          |          |                      |             |
|-------------------------------------|----|---|--------|--------|----------------|----------|----------|----------------------|-------------|
| N2                                  | HS | V | 734420 | 736271 | WBGene00005613 | srj-25   | C05E4.10 | -0.0393309853573207  |             |
| AGIWUR37614                         |    |   |        |        |                |          |          |                      |             |
| N2                                  | HS | V | 736803 | 738870 | WBGene00005612 | srj-24   | C05E4.11 | 0.0404674111549808   |             |
| AGIWUR42876                         |    |   |        |        |                |          |          |                      |             |
| N2                                  | HS | V | 742120 | 743273 | WBGene00015489 | C05E4.7  | C05E4.7  | -0.227022115410165   | AGIWUR5225  |
| N2                                  | HS | V | 743648 | 745475 | WBGene00006182 | str-134  | C05E4.6  | -0.0238881449107193  | AGIWUR31792 |
| N2                                  | HS | V | 746397 | 747649 | WBGene00006181 | str-133  | C05E4.5  | 0.0216023970538508   | AGIWUR2230  |
| N2                                  | HS | V | 748344 | 750467 | WBGene00005516 | sri-4    | C05E4.4  | -0.0985112303737949  | AGIWUR39397 |
| N2                                  | HS | V | 751326 | 752779 | WBGene00006288 | str-262  | C05E4.13 | -0.140110330272301   |             |
| AGIWUR34956                         |    |   |        |        |                |          |          |                      |             |
| N2                                  | HS | V | 753283 | 755124 | WBGene00005642 | srp-1    | C05E4.3  | -0.112564449489312   | AGIWUR27054 |
| N2                                  | HS | V | 756469 | 757892 | WBGene00006087 | str-20   | C05E4.2  | 0.180199386241136    | AGIWUR33476 |
| N2                                  | HS | V | 762734 | 764593 | WBGene00005643 | srp-2    | C05E4.1  | -0.0532437444534999  | AGIWUR41978 |
| N2                                  | HS | V | 765032 | 772585 | WBGene00006266 | str-238  | R09E12.4 | 0.00514784406130531  |             |
| AGIWUR4387                          |    |   |        |        |                |          |          |                      |             |
| N2                                  | HS | V | 773518 | 774854 | WBGene00019983 | sti-1    | R09E12.3 | -0.490735270193823   |             |
| AGIWUR10844;AGIWUR12820             |    |   |        |        |                |          |          |                      |             |
| N2                                  | HS | V | 774995 | 777272 | WBGene00019982 | srbc-58  | R09E12.2 | -0.0244619292504922  |             |
| AGIWUR39807                         |    |   |        |        |                |          |          |                      |             |
| N2                                  | HS | V | 777571 | 778235 | WBGene00044514 | R09E12.9 | R09E12.9 | 0.229730761541639    |             |
| AGIWUR2083;AGIWUR5324;AGIWUR43324   |    |   |        |        |                |          |          |                      |             |
| N2                                  | HS | V | 778639 | 780223 | WBGene00019981 | srbc-59  | R09E12.1 | 0.00556805962584228  |             |
| AGIWUR13673;AGIWUR16438             |    |   |        |        |                |          |          |                      |             |
| N2                                  | HS | V | 780299 | 781803 | WBGene00044091 | srbc-60  | R09E12.8 | 0.163785773324388    |             |
| AGIWUR11174                         |    |   |        |        |                |          |          |                      |             |
| N2                                  | HS | V | 782732 | 784763 | WBGene00020060 | srab-16  | R13D11.6 | 0.0806651720592146   |             |
| AGIWUR39334                         |    |   |        |        |                |          |          |                      |             |
| N2                                  | HS | V | 787431 | 789888 | WBGene00020059 | srab-15  | R13D11.5 | -0.00520152480900027 |             |
| AGIWUR26822;AGIWUR31101;AGIWUR41356 |    |   |        |        |                |          |          |                      |             |
| N2                                  | HS | V | 802550 | 804741 | WBGene00020062 | nhr-270  | R13D11.8 | -0.135798481928026   |             |
| AGIWUR7489                          |    |   |        |        |                |          |          |                      |             |
| N2                                  | HS | V | 810793 | 814726 | WBGene00020058 | R13D11.4 | R13D11.4 | -0.205678599400311   |             |
| AGIWUR25263                         |    |   |        |        |                |          |          |                      |             |
| N2                                  | HS | V | 815016 | 816873 | WBGene00020057 | R13D11.3 | R13D11.3 | 0.0484184618431236   |             |
| AGIWUR20422                         |    |   |        |        |                |          |          |                      |             |
| N2                                  | HS | V | 817482 | 818733 | WBGene00020056 | R13D11.1 | R13D11.1 | -0.142250365635013   |             |
| AGIWUR27687                         |    |   |        |        |                |          |          |                      |             |
| N2                                  | HS | V | 823156 | 824972 | WBGene00005921 | srx-30   | F41H8.3  | -0.082997535563845   |             |
| AGIWUR13632;AGIWUR38148             |    |   |        |        |                |          |          |                      |             |

|                                                                                                           |    |   |        |        |                |          |          |                     |             |
|-----------------------------------------------------------------------------------------------------------|----|---|--------|--------|----------------|----------|----------|---------------------|-------------|
| N2                                                                                                        | HS | V | 826411 | 828761 | WBGene00018313 | F41H8.2  | F41H8.2  | 0.0462538382725013  | AGIWUR34562 |
| N2                                                                                                        | HS | V | 833668 | 835463 | WBGene00018312 | F41H8.1  | F41H8.1  | 0.0557225016366658  | AGIWUR32946 |
| N2                                                                                                        | HS | V | 839421 | 839934 | WBGene00044778 | K09C6.10 | K09C6.10 | 0.0273873759840262  |             |
| AGIWUR2115                                                                                                |    |   |        |        |                |          |          |                     |             |
| N2                                                                                                        | HS | V | 844450 | 845373 | WBGene00019560 | K09C6.6  | K09C6.6  | -0.0985651133524694 | AGIWUR19380 |
| N2                                                                                                        | HS | V | 846715 | 848858 | WBGene00019559 | srbc-13  | K09C6.5  | 0.156993205847579   | AGIWUR23450 |
| N2                                                                                                        | HS | V | 849499 | 851332 | WBGene00019558 | srbc-12  | K09C6.4  | -0.0851185024658951 | AGIWUR39150 |
| N2                                                                                                        | HS | V | 852484 | 853126 | WBGene00019557 | K09C6.3  | K09C6.3  | 0.191473421438552   | AGIWUR19218 |
| N2                                                                                                        | HS | V | 853436 | 855082 | WBGene00019563 | K09C6.9  | K09C6.9  | 0.16740666920786    | AGIWUR1931  |
| N2                                                                                                        | HS | V | 856849 | 862061 | WBGene00019556 | K09C6.2  | K09C6.2  | 0.185729720983812   |             |
| AGIWUR23309;AGIWUR31796                                                                                   |    |   |        |        |                |          |          |                     |             |
| N2                                                                                                        | HS | V | 865074 | 866829 | WBGene00020155 | T02B11.3 | T02B11.3 | -0.0925353298549254 |             |
| AGIWUR9089;AGIWUR9821;AGIWUR16661;AGIWUR23990;AGIWUR26089;AGIWUR29584;AGIWUR40374;AGIWUR41779;AGIWUR44136 |    |   |        |        |                |          |          |                     |             |
| N2                                                                                                        | HS | V | 869481 | 871129 | WBGene00020156 | T02B11.4 | T02B11.4 | 0.107428706469474   |             |
| AGIWUR4354;AGIWUR20286;AGIWUR37778                                                                        |    |   |        |        |                |          |          |                     |             |
| N2                                                                                                        | HS | V | 874008 | 875728 | WBGene00006118 | str-53   | T02B11.2 | 0.047763758945444   |             |
| AGIWUR25762;AGIWUR42040                                                                                   |    |   |        |        |                |          |          |                     |             |
| N2                                                                                                        | HS | V | 876245 | 877265 | WBGene00044777 | T02B11.9 | T02B11.9 | -0.122270971341045  |             |
| AGIWUR7027;AGIWUR16432;AGIWUR24052                                                                        |    |   |        |        |                |          |          |                     |             |
| N2                                                                                                        | HS | V | 877530 | 878667 | WBGene00044776 | T02B11.8 | T02B11.8 | -0.0783539882398792 |             |
| AGIWUR5303;AGIWUR25999;AGIWUR31851;AGIWUR40465;AGIWUR41074                                                |    |   |        |        |                |          |          |                     |             |
| N2                                                                                                        | HS | V | 879793 | 881574 | WBGene00005210 | srg-53   | T02B11.1 | 0.0612281583646013  |             |
| AGIWUR879                                                                                                 |    |   |        |        |                |          |          |                     |             |
| N2                                                                                                        | HS | V | 882176 | 884424 | WBGene00005622 | srj-38   | T02B11.5 | -0.0386911688682998 |             |
| AGIWUR650                                                                                                 |    |   |        |        |                |          |          |                     |             |
| N2                                                                                                        | HS | V | 884881 | 889274 | WBGene00020157 | T02B11.6 | T02B11.6 | 0.0647613241792877  |             |
| AGIWUR2914;AGIWUR43173                                                                                    |    |   |        |        |                |          |          |                     |             |
| N2                                                                                                        | HS | V | 894930 | 899187 | WBGene00003550 | nas-32   | T02B11.7 | -0.056974878810653  |             |
| AGIWUR18338;AGIWUR20939;AGIWUR32505;AGIWUR38638;AGIWUR39727;AGIWUR42992                                   |    |   |        |        |                |          |          |                     |             |
| N2                                                                                                        | HS | V | 899310 | 903665 | WBGene00001480 | fmo-5    | H24K24.5 | -0.231430458581325  |             |
| AGIWUR16238                                                                                               |    |   |        |        |                |          |          |                     |             |
| N2                                                                                                        | HS | V | 904950 | 911214 | WBGene00019241 | H24K24.4 | H24K24.4 | 0.309262698155054   |             |
| AGIWUR38390                                                                                               |    |   |        |        |                |          |          |                     |             |
| N2                                                                                                        | HS | V | 911776 | 916315 | WBGene00019240 | H24K24.3 | H24K24.3 | 0.022099619114929   |             |
| AGIWUR3416;AGIWUR23565                                                                                    |    |   |        |        |                |          |          |                     |             |
| N2                                                                                                        | HS | V | 917817 | 925945 | WBGene00019239 | H24K24.2 | H24K24.2 | -0.030489973519872  |             |
| AGIWUR26433                                                                                               |    |   |        |        |                |          |          |                     |             |
| N2                                                                                                        | HS | V | 936464 | 939228 | WBGene00021747 | Y50D4C.2 | Y50D4C.2 | -0.0770193221581383 |             |
| AGIWUR14286                                                                                               |    |   |        |        |                |          |          |                     |             |

|                                                                         |    |   |         |         |                |           |          |                     |             |
|-------------------------------------------------------------------------|----|---|---------|---------|----------------|-----------|----------|---------------------|-------------|
| N2                                                                      | HS | V | 939391  | 945244  | WBGene00021748 | Y50D4C.3  | Y50D4C.3 | -0.0539071963493321 |             |
| AGIWUR37729                                                             |    |   |         |         |                |           |          |                     |             |
| N2                                                                      | HS | V | 946732  | 949860  | WBGene00021750 | Y50D4C.6  | Y50D4C.6 | 0.12207264262342    |             |
| AGIWUR25709                                                             |    |   |         |         |                |           |          |                     |             |
| N2                                                                      | HS | V | 951454  | 964800  | WBGene00005024 | sqv-6     | Y50D4C.4 | -0.0891784438771799 |             |
| AGIWUR5529                                                              |    |   |         |         |                |           |          |                     |             |
| N2                                                                      | HS | V | 982534  | 996207  | WBGene00006770 | unc-34    | Y50D4C.1 | -0.138007049252457  |             |
| AGIWUR16552;AGIWUR41806                                                 |    |   |         |         |                |           |          |                     |             |
| N2                                                                      | HS | V | 998289  | 1003753 | WBGene00021749 | Y50D4C.5  | Y50D4C.5 | -0.207459145920359  |             |
| AGIWUR35566                                                             |    |   |         |         |                |           |          |                     |             |
| N2                                                                      | HS | V | 1008803 | 1018350 | WBGene00019971 | ergo-1    | R09A1.1  | -0.0925658482250462 | AGIWUR24215 |
| N2                                                                      | HS | V | 1018337 | 1023144 | WBGene00019972 | R09A1.2   | R09A1.2  | 0.149392853119192   | AGIWUR32045 |
| N2                                                                      | HS | V | 1023782 | 1027073 | WBGene00019973 | R09A1.3   | R09A1.3  | 0.359887078552811   | AGIWUR40489 |
| N2                                                                      | HS | V | 1027904 | 1033385 | WBGene00019975 | flp-34    | R09A1.5  | -0.018848643395009  |             |
| AGIWUR18884;AGIWUR30787                                                 |    |   |         |         |                |           |          |                     |             |
| N2                                                                      | HS | V | 1042692 | 1048580 | WBGene00015344 | nra-4     | C02E11.1 | 0.00355204702751344 |             |
| AGIWUR11453;AGIWUR24900;AGIWUR31213;AGIWUR39654                         |    |   |         |         |                |           |          |                     |             |
| N2                                                                      | HS | V | 1050126 | 1053014 | WBGene00019625 | K10C9.4   | K10C9.4  | 0.22538624690199    | AGIWUR13036 |
| N2                                                                      | HS | V | 1054602 | 1055773 | WBGene00044515 | K10C9.9   | K10C9.9  | -0.111676808173406  |             |
| AGIWUR16400;AGIWUR22203;AGIWUR27064;AGIWUR31901;AGIWUR40912             |    |   |         |         |                |           |          |                     |             |
| N2                                                                      | HS | V | 1056548 | 1058987 | WBGene00006255 | str-224   | K10C9.8  | 0.0203248620396508  | AGIWUR16313 |
| N2                                                                      | HS | V | 1061595 | 1067908 | WBGene00019624 | K10C9.3   | K10C9.3  | -0.023386633523387  |             |
| AGIWUR40890;AGIWUR44492                                                 |    |   |         |         |                |           |          |                     |             |
| N2                                                                      | HS | V | 1075200 | 1079597 | WBGene00019623 | K10C9.1   | K10C9.1  | -0.0884047845199305 |             |
| AGIWUR25743;AGIWUR26540;AGIWUR29157;AGIWUR32093;AGIWUR32144;AGIWUR38999 |    |   |         |         |                |           |          |                     |             |
| N2                                                                      | HS | V | 1081483 | 1082372 | WBGene00268189 | Y50D4B.9  | Y50D4B.9 | -0.0108339024270521 |             |
| AGIWUR36491                                                             |    |   |         |         |                |           |          |                     |             |
| N2                                                                      | HS | V | 1084316 | 1087272 | WBGene00021745 | Y50D4B.6  | Y50D4B.6 | 0.219695294967203   |             |
| AGIWUR26156                                                             |    |   |         |         |                |           |          |                     |             |
| N2                                                                      | HS | V | 1088283 | 1089891 | WBGene00021744 | cllec-203 | Y50D4B.5 | -0.0303003696151061 |             |
| AGIWUR24505                                                             |    |   |         |         |                |           |          |                     |             |
| N2                                                                      | HS | V | 1092657 | 1098951 | WBGene00021743 | Y50D4B.4  | Y50D4B.4 | 0.0574716214437379  |             |
| AGIWUR42320;AGIWUR44641                                                 |    |   |         |         |                |           |          |                     |             |
| N2                                                                      | HS | V | 1101186 | 1104046 | WBGene00021741 | Y50D4B.2  | Y50D4B.2 | -0.5344449455090529 |             |
| AGIWUR11172                                                             |    |   |         |         |                |           |          |                     |             |
| N2                                                                      | HS | V | 1112933 | 1129360 | WBGene00021740 | Y50D4B.1  | Y50D4B.1 | -0.194886449463437  |             |
| AGIWUR41609;AGIWUR44635                                                 |    |   |         |         |                |           |          |                     |             |
| N2                                                                      | HS | V | 1130088 | 1131942 | WBGene00021072 | W07B8.4   | W07B8.4  | 0.109898786442162   | AGIWUR31431 |
| N2                                                                      | HS | V | 1132598 | 1134036 | WBGene00000785 | cpr-5     | W07B8.5  | -0.0340912793545414 |             |

AGIWUR9037;AGIWUR27737;AGIWUR39996

|                                                                                                                                             |    |   |         |         |                |           |           |                     |                    |
|---------------------------------------------------------------------------------------------------------------------------------------------|----|---|---------|---------|----------------|-----------|-----------|---------------------|--------------------|
| N2                                                                                                                                          | HS | V | 1134485 | 1139172 | WBGene00021070 | cpr-8     | W07B8.1   | 0.147967480808774   | AGIWUR5094         |
| N2                                                                                                                                          | HS | V | 1141770 | 1146498 | WBGene00020663 | cutl-22   | T21H3.4   | 0.186705620147992   | AGIWUR17117        |
| N2                                                                                                                                          | HS | V | 1156271 | 1158174 | WBGene00000552 | cmd-1     | T21H3.3   | 0.02584444404543807 |                    |
| AGIWUR2590;AGIWUR9349;AGIWUR13292;AGIWUR33879;AGIWUR34932;AGIWUR37455;AGIWUR40916;AGIWUR45191                                               |    |   |         |         |                |           |           |                     |                    |
| N2                                                                                                                                          | HS | V | 1165673 | 1174969 | WBGene00004230 | ptr-16    | T21H3.2   | 0.0470447716748996  | AGIWUR7971         |
| N2                                                                                                                                          | HS | V | 1176724 | 1178864 | WBGene00020662 | T21H3.1   | T21H3.1   | 0.0122140955174537  |                    |
| AGIWUR5708;AGIWUR6366;AGIWUR13610;AGIWUR28256;AGIWUR28832;AGIWUR36759                                                                       |    |   |         |         |                |           |           |                     |                    |
| N2                                                                                                                                          | HS | V | 1179604 | 1181548 | WBGene00017764 | F25A2.1   | F25A2.1   | -0.0959734732387689 |                    |
| AGIWUR19707;AGIWUR22186;AGIWUR32036;AGIWUR37356                                                                                             |    |   |         |         |                |           |           |                     |                    |
| N2                                                                                                                                          | HS | V | 1182806 | 1184644 | WBGene00021737 | Y50D4A.3  |           | Y50D4A.3            |                    |
| -0.00942574283018338 AGIWUR37975                                                                                                            |    |   |         |         |                |           |           |                     |                    |
| N2                                                                                                                                          | HS | V | 1196072 | 1207792 | WBGene00021736 | wrb-1     | Y50D4A.2  | 0.0166806478286343  |                    |
| AGIWUR29205                                                                                                                                 |    |   |         |         |                |           |           |                     |                    |
| N2                                                                                                                                          | HS | V | 1207889 | 1219874 | WBGene00021735 | Y50D4A.1  |           | Y50D4A.1            | 0.0572639464415605 |
| AGIWUR17146                                                                                                                                 |    |   |         |         |                |           |           |                     |                    |
| N2                                                                                                                                          | HS | V | 1223901 | 1235445 | WBGene00016539 | madd-2    | C39F7.2   | 0.0307512576015405  | AGIWUR12478        |
| N2                                                                                                                                          | HS | V | 1260465 | 1262616 | WBGene00016538 | C39F7.1   | C39F7.1   | 0.163947219620573   | AGIWUR27762        |
| N2                                                                                                                                          | HS | V | 1262628 | 1263989 | WBGene00004266 | rab-1     | C39F7.4   | -0.0572281398935406 |                    |
| AGIWUR8106;AGIWUR10175;AGIWUR15670;AGIWUR20977;AGIWUR30892;AGIWUR40582;AGIWUR43515                                                          |    |   |         |         |                |           |           |                     |                    |
| N2                                                                                                                                          | HS | V | 1264773 | 1270160 | WBGene00016540 | C39F7.5   | C39F7.5   | 0.0490360798375988  | AGIWUR14855        |
| N2                                                                                                                                          | HS | V | 1270911 | 1273043 | WBGene00022288 | Y75B7B.1  |           | Y75B7B.1            | -0.239718785829826 |
| AGIWUR43411                                                                                                                                 |    |   |         |         |                |           |           |                     |                    |
| N2                                                                                                                                          | HS | V | 1274210 | 1276006 | WBGene00022289 | Y75B7B.2  |           | Y75B7B.2            | 0.185711279867689  |
| AGIWUR15950                                                                                                                                 |    |   |         |         |                |           |           |                     |                    |
| N2                                                                                                                                          | HS | V | 1276420 | 1285700 | WBGene00004053 | tank-1    | ZK1005.1  | -0.169398102719841  |                    |
| AGIWUR2481;AGIWUR29658;AGIWUR32914                                                                                                          |    |   |         |         |                |           |           |                     |                    |
| N2                                                                                                                                          | HS | V | 1288841 | 1299332 | WBGene00001171 | egl-2     | F16B3.1   | 0.147274927090066   | AGIWUR41827        |
| N2                                                                                                                                          | HS | V | 1315105 | 1315524 | WBGene00017502 | F16B3.2   | F16B3.2   | -0.0060182698579192 | AGIWUR34396        |
| N2                                                                                                                                          | HS | V | 1315643 | 1317919 | WBGene00044774 | F16B3.3   | F16B3.3   | 0.127124131114686   |                    |
| AGIWUR2659;AGIWUR2880;AGIWUR5172;AGIWUR5984;AGIWUR14866;AGIWUR18012;AGIWUR23552;AGIWUR24334;AGIWUR24824;AGIWUR30074;AGIWUR33277;AGIWUR37172 |    |   |         |         |                |           |           |                     |                    |
| N2                                                                                                                                          | HS | V | 1332275 | 1358164 | WBGene00022285 | Y75B7AL.2 |           | Y75B7AL.2           | -0.061056062354321 |
| AGIWUR8365;AGIWUR16645;AGIWUR25866;AGIWUR41586                                                                                              |    |   |         |         |                |           |           |                     |                    |
| N2                                                                                                                                          | HS | V | 1373120 | 1383254 | WBGene00022286 | rga-4     | Y75B7AL.4 | -0.119481812014481  |                    |
| AGIWUR36713                                                                                                                                 |    |   |         |         |                |           |           |                     |                    |
| N2                                                                                                                                          | HS | V | 1391163 | 1392103 | WBGene00022287 | Y75B7AR.1 |           | Y75B7AR.1           | -0.356159872761083 |
| AGIWUR8594                                                                                                                                  |    |   |         |         |                |           |           |                     |                    |
| N2                                                                                                                                          | HS | V | 1393112 | 1411616 | WBGene00004925 | snt-5     | R12A1.2   | 0.0804172773352754  |                    |



AGIWUR15426;AGIWUR26619;AGIWUR28167

N2 HS V 1422796 1425794 WBGene00020017 R12A1.3 R12A1.3 -0.154513562344121

AGIWUR1907;AGIWUR36237

N2 HS V 1427653 1432137 WBGene00001578 ges-1 R12A1.4 0.246453967785069 AGIWUR39263

N2 HS V 1434339 1435804 WBGene00019976 fbxa-195 R09B5.1 0.21537571027526

AGIWUR15706

N2 HS V 1439179 1441871 WBGene00019979 R09B5.11 R09B5.11 0.115436118314811

AGIWUR21597

N2 HS V 1442588 1442876 WBGene00044900 cnc-11 R09B5.13 0.266537250374968

AGIWUR2922;AGIWUR7262;AGIWUR9640;AGIWUR41712;AGIWUR43465

N2 HS V 1444044 1444280 WBGene00000555 cnc-1 R09B5.2 -0.216131477541893 AGIWUR36656

N2 HS V 1445381 1445832 WBGene00000559 cnc-5 R09B5.10 0.317127505006471

AGIWUR14026

N2 HS V 1447195 1447707 WBGene00000558 cnc-4 R09B5.9 -0.419954347324806 AGIWUR28592

N2 HS V 1448004 1448790 WBGene00000557 cnc-3 R09B5.8 0.337975049930444 AGIWUR39532

N2 HS V 1449665 1450189 WBGene00000556 cnc-2 R09B5.3 -0.284148815192855

AGIWUR1432;AGIWUR12946;AGIWUR14737;AGIWUR38057;AGIWUR40413;AGIWUR45034

N2 HS V 1451634 1454340 WBGene00005611 srj-23 R09B5.7 -0.0840591054245197

AGIWUR498;AGIWUR28473;AGIWUR36052

N2 HS V 1455062 1456646 WBGene00019980 chil-14 R09B5.12 0.0614972330928039

AGIWUR44056

N2 HS V 1460369 1461613 WBGene00019978 hacd-1 R09B5.6 -0.0345899425765879

AGIWUR5379;AGIWUR19041;AGIWUR34145

N2 HS V 1462063 1464699 WBGene00019977 fpn-1.2 R09B5.4 0.151260905635052 AGIWUR31821

N2 HS V 1464990 1466360 WBGene00004139 pqn-54 R09B5.5 -0.161506016792465 AGIWUR41618

N2 HS V 1467744 1471105 WBGene00018757 tag-304 F53E2.1 -0.0411625381710436 AGIWUR29558

N2 HS V 1475072 1479576 WBGene00006794 unc-60 C38C3.5 -0.165938499580097

AGIWUR324;AGIWUR2449;AGIWUR2803;AGIWUR4564;AGIWUR7681;AGIWUR10222;AGIWUR18543;AGIWUR20925;AGIWUR26152;AGIWUR28373;AGIWUR29218;AGIWUR39824;AGIWUR42409

N2 HS V 1482042 1484015 WBGene00016513 C38C3.4 C38C3.4 0.0968089809580155

AGIWUR1850;AGIWUR9335;AGIWUR14308

N2 HS V 1484828 1491604 WBGene00016514 C38C3.6 C38C3.6 -0.0546907929264915 AGIWUR43075

N2 HS V 1494769 1495453 WBGene00045390 C38C3.10 C38C3.10 -0.126932252593408

AGIWUR32515

N2 HS V 1495634 1497985 WBGene00016512 C38C3.3 C38C3.3 -0.216891491893769 AGIWUR42559

N2 HS V 1499440 1500687 WBGene00005690 sru-27 C38C3.2 0.0850033342575447 AGIWUR29744

N2 HS V 1501420 1505310 WBGene00016516 C38C3.8 C38C3.8 -0.218239134747661

AGIWUR29041;AGIWUR31012

N2 HS V 1510024 1511630 WBGene00016517 nhr-260 C38C3.9 -0.0948237452619551 AGIWUR14282

|                                                                         |    |   |         |         |                |          |          |                     |             |
|-------------------------------------------------------------------------|----|---|---------|---------|----------------|----------|----------|---------------------|-------------|
| N2                                                                      | HS | V | 1518736 | 1519807 | WBGene00023317 | K02H11.8 | K02H11.8 | 0.125571817285148   |             |
| AGIWUR4057                                                              |    |   |         |         |                |          |          |                     |             |
| N2                                                                      | HS | V | 1520463 | 1521945 | WBGene00006268 | str-240  | K02H11.2 | 0.610132853220324   |             |
| AGIWUR41821                                                             |    |   |         |         |                |          |          |                     |             |
| N2                                                                      | HS | V | 1522785 | 1524224 | WBGene00006270 | str-243  | K02H11.7 | -0.0680572248927644 |             |
| AGIWUR35522                                                             |    |   |         |         |                |          |          |                     |             |
| N2                                                                      | HS | V | 1524502 | 1525687 | WBGene00006267 | str-239  | K02H11.1 | -0.168165817070717  |             |
| AGIWUR17216;AGIWUR44671                                                 |    |   |         |         |                |          |          |                     |             |
| N2                                                                      | HS | V | 1526467 | 1528085 | WBGene00006265 | str-236  | K02H11.3 | 0.110572737686864   |             |
| AGIWUR25872                                                             |    |   |         |         |                |          |          |                     |             |
| N2                                                                      | HS | V | 1528824 | 1531259 | WBGene00019348 | K02H11.4 | K02H11.4 | -0.0261938267976642 |             |
| AGIWUR31621                                                             |    |   |         |         |                |          |          |                     |             |
| N2                                                                      | HS | V | 1532030 | 1533304 | WBGene00006248 | str-216  | K02H11.5 | 0.0121807751107319  |             |
| AGIWUR16290;AGIWUR33379                                                 |    |   |         |         |                |          |          |                     |             |
| N2                                                                      | HS | V | 1533892 | 1534415 | WBGene00019349 | trx-5    | K02H11.6 | -0.111214386608431  |             |
| AGIWUR5711                                                              |    |   |         |         |                |          |          |                     |             |
| N2                                                                      | HS | V | 1535224 | 1537079 | WBGene00019350 | K02H11.9 | K02H11.9 | -0.0302622891322555 |             |
| AGIWUR7169                                                              |    |   |         |         |                |          |          |                     |             |
| N2                                                                      | HS | V | 1538364 | 1541824 | WBGene00018707 | oac-31   | F52F10.3 | 0.0486456397299522  |             |
| AGIWUR3780                                                              |    |   |         |         |                |          |          |                     |             |
| N2                                                                      | HS | V | 1542517 | 1545791 | WBGene00018708 | oac-32   | F52F10.4 | 0.204802982782851   |             |
| AGIWUR37337                                                             |    |   |         |         |                |          |          |                     |             |
| N2                                                                      | HS | V | 1548143 | 1550701 | WBGene00018706 | F52F10.2 | F52F10.2 | 0.0777338574565754  |             |
| AGIWUR30363                                                             |    |   |         |         |                |          |          |                     |             |
| N2                                                                      | HS | V | 1551044 | 1553102 | WBGene00018709 | srsx-8   | F52F10.5 | -0.065108361190207  |             |
| AGIWUR4739                                                              |    |   |         |         |                |          |          |                     |             |
| N2                                                                      | HS | V | 1567076 | 1585532 | WBGene00000387 | cdc-25.2 | F16B4.8  | -0.193084796915089  |             |
| AGIWUR22718;AGIWUR23475;AGIWUR34143;AGIWUR38017;AGIWUR40845             |    |   |         |         |                |          |          |                     |             |
| N2                                                                      | HS | V | 1585722 | 1586028 | WBGene00017509 | F16B4.7  | F16B4.7  | -0.293552158615669  |             |
| AGIWUR2074;AGIWUR36242                                                  |    |   |         |         |                |          |          |                     |             |
| N2                                                                      | HS | V | 1588548 | 1591727 | WBGene00017507 | F16B4.5  | F16B4.5  | 0.0325346252168508  |             |
| AGIWUR22275;AGIWUR23024;AGIWUR35644                                     |    |   |         |         |                |          |          |                     |             |
| N2                                                                      | HS | V | 1594019 | 1594665 | WBGene00017506 | F16B4.4  | F16B4.4  | -0.28976865367329   |             |
| AGIWUR14436;AGIWUR21983;AGIWUR24255;AGIWUR25347;AGIWUR31339;AGIWUR42496 |    |   |         |         |                |          |          |                     |             |
| N2                                                                      | HS | V | 1596144 | 1598689 | WBGene00017505 | F16B4.3  | F16B4.3  | 0.0260316308150852  | AGIWUR20497 |
| N2                                                                      | HS | V | 1601038 | 1603916 | WBGene00017504 | F16B4.2  | F16B4.2  | 0.306140233600981   | AGIWUR28708 |
| N2                                                                      | HS | V | 1603934 | 1607846 | WBGene00017510 | nhr-178  | F16B4.9  | 0.0176669313772919  | AGIWUR31021 |
| N2                                                                      | HS | V | 1610263 | 1612747 | WBGene00017503 | nhr-177  | F16B4.1  | 0.19900123017071    | AGIWUR1914  |
| N2                                                                      | HS | V | 1612803 | 1614826 | WBGene00017511 | srbc-41  | F16B4.10 | 0.118227779425251   |             |

|                                                                                    |    |   |         |         |                |                   |                                 |
|------------------------------------------------------------------------------------|----|---|---------|---------|----------------|-------------------|---------------------------------|
| AGIWUR42512                                                                        |    |   |         |         |                |                   |                                 |
| N2                                                                                 | HS | V | 1615723 | 1618072 | WBGene00017512 | nhr-179 F16B4.11  | -0.170896702981841              |
| AGIWUR12425                                                                        |    |   |         |         |                |                   |                                 |
| N2                                                                                 | HS | V | 1619194 | 1621536 | WBGene00003707 | nhr-117 F16B4.12  | 0.0990439468491537              |
| AGIWUR11701;AGIWUR28007;AGIWUR41153;AGIWUR42311                                    |    |   |         |         |                |                   |                                 |
| N2                                                                                 | HS | V | 1622636 | 1624433 | WBGene00003700 | nhr-110 Y46H3D.5  | -0.114013074858702              |
| AGIWUR16766                                                                        |    |   |         |         |                |                   |                                 |
| N2                                                                                 | HS | V | 1625225 | 1626818 | WBGene00021610 | nhr-237 Y46H3D.6  | -0.0474721462320904             |
| AGIWUR3104                                                                         |    |   |         |         |                |                   |                                 |
| N2                                                                                 | HS | V | 1628106 | 1629432 | WBGene00021611 | nhr-238 Y46H3D.7  | 0.208746440248019               |
| AGIWUR1379                                                                         |    |   |         |         |                |                   |                                 |
| N2                                                                                 | HS | V | 1630309 | 1631248 | WBGene00021612 | Y46H3D.8 Y46H3D.8 | 0.0583788873504165              |
| AGIWUR27368                                                                        |    |   |         |         |                |                   |                                 |
| N2                                                                                 | HS | V | 1632017 | 1635883 | WBGene00021609 | irld-17 Y46H3D.4  | 0.017489559730862               |
| AGIWUR27296                                                                        |    |   |         |         |                |                   |                                 |
| N2                                                                                 | HS | V | 1636159 | 1639281 | WBGene00006253 | str-222 Y46H3D.3  | -0.00963485493220251            |
| AGIWUR13494;AGIWUR21212;AGIWUR21818                                                |    |   |         |         |                |                   |                                 |
| N2                                                                                 | HS | V | 1640308 | 1642287 | WBGene00006252 | str-221 Y46H3D.2  | -0.0586081300377694             |
| AGIWUR10629;AGIWUR12769;AGIWUR24631                                                |    |   |         |         |                |                   |                                 |
| N2                                                                                 | HS | V | 1642499 | 1643121 | WBGene00021608 | Y46H3D.1 Y46H3D.1 | 0.14767442999683                |
| AGIWUR2223;AGIWUR11726;AGIWUR13295;AGIWUR14828;AGIWUR29088;AGIWUR32631;AGIWUR39494 |    |   |         |         |                |                   |                                 |
| N2                                                                                 | HS | V | 1644169 | 1647728 | WBGene00000108 | alh-2 K04F1.15    | -0.179417772316758              |
| AGIWUR6897                                                                         |    |   |         |         |                |                   |                                 |
| N2                                                                                 | HS | V | 1648300 | 1651143 | WBGene00019393 | irld-45 K04F1.14  | 0.0598490149741551              |
| AGIWUR7514                                                                         |    |   |         |         |                |                   |                                 |
| N2                                                                                 | HS | V | 1651345 | 1654444 | WBGene00019392 | irld-44 K04F1.13  | -0.0546815146118265             |
| AGIWUR8683                                                                         |    |   |         |         |                |                   |                                 |
| N2                                                                                 | HS | V | 1655090 | 1657364 | WBGene00019391 | irld-11 K04F1.12  | -0.000502139020226444           |
| AGIWUR2258                                                                         |    |   |         |         |                |                   |                                 |
| N2                                                                                 | HS | V | 1658072 | 1659636 | WBGene00019384 | K04F1.1 K04F1.1   | 0.211460054357365 AGIWUR27851   |
| N2                                                                                 | HS | V | 1660297 | 1662150 | WBGene00019390 | irld-43 K04F1.11  | -0.14590556015451               |
| AGIWUR17985;AGIWUR42790                                                            |    |   |         |         |                |                   |                                 |
| N2                                                                                 | HS | V | 1662570 | 1664503 | WBGene00019389 | irld-40 K04F1.10  | -0.0631039898256001             |
| AGIWUR26847                                                                        |    |   |         |         |                |                   |                                 |
| N2                                                                                 | HS | V | 1664650 | 1665950 | WBGene00019388 | K04F1.9 K04F1.9   | -0.0403691280783569 AGIWUR20834 |
| N2                                                                                 | HS | V | 1667204 | 1667813 | WBGene00019387 | K04F1.8 K04F1.8   | -0.159161965505666 AGIWUR38947  |
| N2                                                                                 | HS | V | 1668516 | 1670630 | WBGene00019386 | irld-42 K04F1.7   | -0.0681003167698471 AGIWUR31674 |
| N2                                                                                 | HS | V | 1670973 | 1673439 | WBGene00019385 | irld-41 K04F1.6   | -0.100057605941723 AGIWUR21923  |
| N2                                                                                 | HS | V | 1673543 | 1675613 | WBGene00005843 | srw-96 K04F1.2    | 0.145163331312044 AGIWUR42752   |

|                                                 |    |   |         |         |                |          |          |                     |                    |
|-------------------------------------------------|----|---|---------|---------|----------------|----------|----------|---------------------|--------------------|
| N2                                              | HS | V | 1676474 | 1678328 | WBGene00005845 | srw-98   | K04F1.3  | 0.0492072422197944  | AGIWUR42917        |
| N2                                              | HS | V | 1679208 | 1680870 | WBGene00005838 | srw-91   | K04F1.4  | 0.0150736612316944  | AGIWUR23336        |
| N2                                              | HS | V | 1682579 | 1685089 | WBGene00005229 | srh-3    | K04F1.5  | 0.535557575585852   | AGIWUR13668        |
| N2                                              | HS | V | 1685628 | 1686864 | WBGene00005231 | srh-5    | K04F1.16 | 0.523318742422683   |                    |
| AGIWUR20402                                     |    |   |         |         |                |          |          |                     |                    |
| N2                                              | HS | V | 1687495 | 1689687 | WBGene00021604 | Y46H3C.4 |          | Y46H3C.4            | -0.126462318239456 |
| AGIWUR18415                                     |    |   |         |         |                |          |          |                     |                    |
| N2                                              | HS | V | 1691029 | 1692052 | WBGene00021605 | Y46H3C.5 |          | Y46H3C.5            | -0.177895490755885 |
| AGIWUR3831                                      |    |   |         |         |                |          |          |                     |                    |
| N2                                              | HS | V | 1697889 | 1701617 | WBGene00021606 | Y46H3C.6 |          | Y46H3C.6            | -0.110457051815921 |
| AGIWUR43236                                     |    |   |         |         |                |          |          |                     |                    |
| N2                                              | HS | V | 1702051 | 1704053 | WBGene00005837 | srw-90   | Y46H3C.3 |                     | -0.200795861870136 |
| AGIWUR9837                                      |    |   |         |         |                |          |          |                     |                    |
| N2                                              | HS | V | 1708741 | 1710663 | WBGene00005846 | srw-99   | Y46H3C.2 |                     | 0.183948409853084  |
| AGIWUR13161                                     |    |   |         |         |                |          |          |                     |                    |
| N2                                              | HS | V | 1711209 | 1715399 | WBGene00005847 | srw-100  | Y46H3C.1 |                     | 0.0230755051697082 |
| AGIWUR25705                                     |    |   |         |         |                |          |          |                     |                    |
| N2                                              | HS | V | 1717243 | 1719464 | WBGene00005850 | srw-103  | ZK697.5  | 0.113669009700932   | AGIWUR13701        |
| N2                                              | HS | V | 1720227 | 1721973 | WBGene00005849 | srw-102  | ZK697.12 |                     | -0.116586980432395 |
| AGIWUR23406                                     |    |   |         |         |                |          |          |                     |                    |
| N2                                              | HS | V | 1722266 | 1725261 | WBGene00005848 | srw-101  | ZK697.13 |                     | 0.0490968383648678 |
| AGIWUR6004                                      |    |   |         |         |                |          |          |                     |                    |
| N2                                              | HS | V | 1725653 | 1727632 | WBGene00005539 | sri-27   | ZK697.4  | -0.0732581446510032 | AGIWUR23655        |
| N2                                              | HS | V | 1729116 | 1730649 | WBGene00022806 | ZK697.3  | ZK697.3  | -0.0100193650178113 | AGIWUR32139        |
| N2                                              | HS | V | 1730759 | 1732000 | WBGene00001769 | gst-21   | ZK697.6  | 0.212627174445105   | AGIWUR36708        |
| N2                                              | HS | V | 1734869 | 1736767 | WBGene00006205 | str-160  | ZK697.10 |                     | 0.0427231044060292 |
| AGIWUR1209                                      |    |   |         |         |                |          |          |                     |                    |
| N2                                              | HS | V | 1738927 | 1741157 | WBGene00022807 | srab-25  | ZK697.7  | 0.125811596746721   | AGIWUR16633        |
| N2                                              | HS | V | 1743771 | 1747969 | WBGene00022805 | nhr-256  | ZK697.2  | -0.0962854575747336 |                    |
| AGIWUR7017;AGIWUR8600;AGIWUR28647               |    |   |         |         |                |          |          |                     |                    |
| N2                                              | HS | V | 1748432 | 1749153 | WBGene00022808 | ZK697.8  | ZK697.8  | -0.0262032135206423 |                    |
| AGIWUR17448;AGIWUR25011;AGIWUR27665;AGIWUR31649 |    |   |         |         |                |          |          |                     |                    |
| N2                                              | HS | V | 1750001 | 1751549 | WBGene00005410 | srh-199  | ZK697.11 |                     | -0.679957471225257 |
| AGIWUR10138;AGIWUR40344;AGIWUR44497             |    |   |         |         |                |          |          |                     |                    |
| N2                                              | HS | V | 1752796 | 1753856 | WBGene00022804 | ZK697.1  | ZK697.1  | 0.0307918773674336  | AGIWUR8405         |
| N2                                              | HS | V | 1754238 | 1755689 | WBGene00022809 | ZK697.14 |          | ZK697.14            | 0.0839141172505169 |
| AGIWUR31379                                     |    |   |         |         |                |          |          |                     |                    |
| N2                                              | HS | V | 1760861 | 1765305 | WBGene00021602 | clcc-205 |          | Y46H3B.1            | -0.293969961568368 |
| AGIWUR8341                                      |    |   |         |         |                |          |          |                     |                    |

|                                                                         |    |   |         |         |                |           |          |                      |             |
|-------------------------------------------------------------------------|----|---|---------|---------|----------------|-----------|----------|----------------------|-------------|
| N2                                                                      | HS | V | 1765311 | 1771734 | WBGene00000976 | dhs-13    | F36H9.3  | -0.226629775686783   |             |
| AGIWUR16906;AGIWUR23989;AGIWUR24571;AGIWUR29221;AGIWUR33084;AGIWUR37543 |    |   |         |         |                |           |          |                      |             |
| N2                                                                      | HS | V | 1773826 | 1774918 | WBGene00018115 | F36H9.7   | F36H9.7  | -0.0377767531026647  |             |
| AGIWUR6284;AGIWUR24760;AGIWUR25424;AGIWUR26480                          |    |   |         |         |                |           |          |                      |             |
| N2                                                                      | HS | V | 1779657 | 1782022 | WBGene00018113 | F36H9.5   | F36H9.5  | -0.162079676640712   | AGIWUR32450 |
| N2                                                                      | HS | V | 1788511 | 1793250 | WBGene00018111 | F36H9.2   | F36H9.2  | 0.182890563807463    | AGIWUR7637  |
| N2                                                                      | HS | V | 1798200 | 1799694 | WBGene00268194 | F36H9.10  | F36H9.10 | 0.101301276046467    |             |
| AGIWUR33123                                                             |    |   |         |         |                |           |          |                      |             |
| N2                                                                      | HS | V | 1799726 | 1803143 | WBGene00018114 | srt-41    | F36H9.6  | -0.131773111989958   |             |
| AGIWUR1923;AGIWUR21739;AGIWUR39411                                      |    |   |         |         |                |           |          |                      |             |
| N2                                                                      | HS | V | 1804334 | 1804971 | WBGene00002016 | hsp-16.2  | Y46H3A.3 | 0.270525575099185    |             |
| AGIWUR33481                                                             |    |   |         |         |                |           |          |                      |             |
| N2                                                                      | HS | V | 1805178 | 1805875 | WBGene00002018 | hsp-16.41 | Y46H3A.2 | 0.0754320215946054   |             |
| AGIWUR5399;AGIWUR40972                                                  |    |   |         |         |                |           |          |                      |             |
| N2                                                                      | HS | V | 1807450 | 1809468 | WBGene00021599 | srt-42    | Y46H3A.1 | 0.153521863009805    |             |
| AGIWUR28255;AGIWUR43360                                                 |    |   |         |         |                |           |          |                      |             |
| N2                                                                      | HS | V | 1809560 | 1811135 | WBGene00021600 | Y46H3A.4  | Y46H3A.4 | -0.214503795212464   |             |
| AGIWUR20038                                                             |    |   |         |         |                |           |          |                      |             |
| N2                                                                      | HS | V | 1811423 | 1814116 | WBGene00021601 | Y46H3A.5  | Y46H3A.5 | -0.0020174730607323  |             |
| AGIWUR26944;AGIWUR42495                                                 |    |   |         |         |                |           |          |                      |             |
| N2                                                                      | HS | V | 1815852 | 1821323 | WBGene00001632 | gly-7     | Y46H3A.6 | -0.299262934660531   |             |
| AGIWUR9988                                                              |    |   |         |         |                |           |          |                      |             |
| N2                                                                      | HS | V | 1821579 | 1823096 | WBGene00044344 | mrp1-39   | Y46H3A.7 | 0.320135947098425    |             |
| AGIWUR20002                                                             |    |   |         |         |                |           |          |                      |             |
| N2                                                                      | HS | V | 1823077 | 1830073 | WBGene00021309 | Y32G9B.1  | Y32G9B.1 | -0.0574393987582837  |             |
| AGIWUR23123                                                             |    |   |         |         |                |           |          |                      |             |
| N2                                                                      | HS | V | 1842044 | 1844807 | WBGene00020394 | T10B5.8   | T10B5.8  | -0.125287461869487   |             |
| AGIWUR20519;AGIWUR29587                                                 |    |   |         |         |                |           |          |                      |             |
| N2                                                                      | HS | V | 1846201 | 1848015 | WBGene00020393 | T10B5.7   | T10B5.7  | 0.305317334913124    | AGIWUR22131 |
| N2                                                                      | HS | V | 1848073 | 1851445 | WBGene00020388 | T10B5.2   | T10B5.2  | -0.00274404844756226 | AGIWUR27215 |
| N2                                                                      | HS | V | 1852449 | 1856276 | WBGene00020396 | T10B5.10  | T10B5.10 | 0.164114832382265    |             |
| AGIWUR30645                                                             |    |   |         |         |                |           |          |                      |             |
| N2                                                                      | HS | V | 1864181 | 1868571 | WBGene00020389 | T10B5.3   | T10B5.3  | -0.0502566231295694  |             |
| AGIWUR38;AGIWUR4999;AGIWUR9987;AGIWUR31559                              |    |   |         |         |                |           |          |                      |             |
| N2                                                                      | HS | V | 1869213 | 1870558 | WBGene00020392 | kn1-3     | T10B5.6  | -0.155788590248459   | AGIWUR5520  |
| N2                                                                      | HS | V | 1870421 | 1871789 | WBGene00020390 | T10B5.4   | T10B5.4  | 0.108221904706296    | AGIWUR20357 |
| N2                                                                      | HS | V | 1872246 | 1875526 | WBGene00020391 | cct-7     | T10B5.5  | -0.240327611491677   |             |
| AGIWUR3536;AGIWUR13115;AGIWUR17600;AGIWUR24679;AGIWUR37923              |    |   |         |         |                |           |          |                      |             |
| N2                                                                      | HS | V | 1875478 | 1882265 | WBGene00021305 | zig-11    | Y32G9A.8 | -0.0103084666807174  |             |

|                                                                                                                                |    |   |         |         |                |           |           |                     |             |
|--------------------------------------------------------------------------------------------------------------------------------|----|---|---------|---------|----------------|-----------|-----------|---------------------|-------------|
| AGIWUR22727                                                                                                                    |    |   |         |         |                |           |           |                     |             |
| N2                                                                                                                             | HS | V | 1895797 | 1906560 | WBGene00021304 | nph-2     | Y32G9A.6  | -0.0811867276370677 |             |
| AGIWUR40867                                                                                                                    |    |   |         |         |                |           |           |                     |             |
| N2                                                                                                                             | HS | V | 1907654 | 1908528 | WBGene00021303 | Y32G9A.5  | Y32G9A.5  | -0.0662775188195228 |             |
| AGIWUR12249                                                                                                                    |    |   |         |         |                |           |           |                     |             |
| N2                                                                                                                             | HS | V | 1908855 | 1910692 | WBGene00005644 | srp-3     | Y32G9A.4  | 0.225338728584429   |             |
| AGIWUR13979                                                                                                                    |    |   |         |         |                |           |           |                     |             |
| N2                                                                                                                             | HS | V | 1911402 | 1913572 | WBGene00021302 | Y32G9A.3  | Y32G9A.3  | -0.0133191227020504 |             |
| AGIWUR15769                                                                                                                    |    |   |         |         |                |           |           |                     |             |
| N2                                                                                                                             | HS | V | 1913627 | 1917986 | WBGene00044517 | Y32G9A.13 | Y32G9A.13 | 0.0271456817974531  |             |
| AGIWUR6335;AGIWUR14178;AGIWUR20443;AGIWUR22055;AGIWUR33726;AGIWUR37482                                                         |    |   |         |         |                |           |           |                     |             |
| N2                                                                                                                             | HS | V | 1918539 | 1921029 | WBGene00021301 | Y32G9A.2  | Y32G9A.2  | 0.151571183116038   |             |
| AGIWUR19923                                                                                                                    |    |   |         |         |                |           |           |                     |             |
| N2                                                                                                                             | HS | V | 1921621 | 1922381 | WBGene00001785 | gst-37    | Y32G9A.1  | -0.0926913750804306 |             |
| AGIWUR4468;AGIWUR15840                                                                                                         |    |   |         |         |                |           |           |                     |             |
| N2                                                                                                                             | HS | V | 1923116 | 1925565 | WBGene00020277 | T06A1.1   | T06A1.1   | 0.0967024803969361  | AGIWUR34808 |
| N2                                                                                                                             | HS | V | 1927223 | 1931413 | WBGene00020280 | T06A1.5   | T06A1.5   | 0.0977844434049615  | AGIWUR21341 |
| N2                                                                                                                             | HS | V | 1944955 | 1953349 | WBGene00020279 | glb-25    | T06A1.4   | 0.0620981931208338  |             |
| AGIWUR627;AGIWUR1111;AGIWUR4223;AGIWUR7808;AGIWUR17908;AGIWUR20988;AGIWUR21891;AGIWUR23733;AGIWUR24723;AGIWUR37834;AGIWUR45105 |    |   |         |         |                |           |           |                     |             |
| N2                                                                                                                             | HS | V | 1953912 | 1956560 | WBGene00005604 | srj-16    | T06A1.2   | -0.0275820560279705 | AGIWUR33567 |
| N2                                                                                                                             | HS | V | 1957417 | 1957932 | WBGene00044518 | fipr-25   | T06A1.7   | 0.0214147739395116  |             |
| AGIWUR1522;AGIWUR16811;AGIWUR24089;AGIWUR29190;AGIWUR41979                                                                     |    |   |         |         |                |           |           |                     |             |
| N2                                                                                                                             | HS | V | 1960137 | 1961403 | WBGene00021494 | Y40B10B.1 | Y40B10B.1 | -0.152748247384998  |             |
| AGIWUR15579                                                                                                                    |    |   |         |         |                |           |           |                     |             |
| N2                                                                                                                             | HS | V | 1962815 | 1964906 | WBGene00005603 | srj-15    | Y40B10B.2 | -0.130038816589365  |             |
| AGIWUR9421;AGIWUR25828                                                                                                         |    |   |         |         |                |           |           |                     |             |
| N2                                                                                                                             | HS | V | 1969528 | 1974514 | WBGene00020343 | acs-3     | T08B1.6   | 0.0732724487474172  | AGIWUR39853 |
| N2                                                                                                                             | HS | V | 1975418 | 1977261 | WBGene00020342 | fbxa-201  | T08B1.5   | 0.17762154884948    |             |
| AGIWUR23246;AGIWUR29026;AGIWUR35886                                                                                            |    |   |         |         |                |           |           |                     |             |
| N2                                                                                                                             | HS | V | 1979435 | 1982664 | WBGene00020341 | T08B1.4   | T08B1.4   | -0.0835478299096    |             |
| AGIWUR13175;AGIWUR14799;AGIWUR20161;AGIWUR27409;AGIWUR38153;AGIWUR43363                                                        |    |   |         |         |                |           |           |                     |             |
| N2                                                                                                                             | HS | V | 1982631 | 1987045 | WBGene00020340 | T08B1.1   | T08B1.1   | 0.00409110497352927 | AGIWUR23266 |
| N2                                                                                                                             | HS | V | 1989476 | 1992918 | WBGene00006589 | tnt-4     | T08B1.2   | -0.0677089480353619 |             |
| AGIWUR21520;AGIWUR45074                                                                                                        |    |   |         |         |                |           |           |                     |             |
| N2                                                                                                                             | HS | V | 1996100 | 1999581 | WBGene00000111 | alh-5     | T08B1.3   | -0.217739895880275  | AGIWUR37322 |
| N2                                                                                                                             | HS | V | 2000418 | 2004329 | WBGene00019089 | cllec-206 | F59A7.1   | 0.171685356791527   |             |
| AGIWUR8715                                                                                                                     |    |   |         |         |                |           |           |                     |             |
| N2                                                                                                                             | HS | V | 2005057 | 2006804 | WBGene00019096 | cysl-4    | F59A7.9   | -0.0850464463909173 | AGIWUR38987 |

|                                                                                                                                                           |    |   |         |         |                |           |           |                     |
|-----------------------------------------------------------------------------------------------------------------------------------------------------------|----|---|---------|---------|----------------|-----------|-----------|---------------------|
| N2                                                                                                                                                        | HS | V | 2007360 | 2007709 | WBGene00023306 | F59A7.10  | F59A7.10  | 0.126031019415976   |
| AGIWUR28358                                                                                                                                               |    |   |         |         |                |           |           |                     |
| N2                                                                                                                                                        | HS | V | 2008609 | 2011620 | WBGene00019095 | F59A7.8   | F59A7.8   | -0.319626565343935  |
| N2                                                                                                                                                        | HS | V | 2013418 | 2013860 | WBGene00044519 | F59A7.11  | F59A7.11  | -0.0141965992667821 |
| AGIWUR11090;AGIWUR18576                                                                                                                                   |    |   |         |         |                |           |           |                     |
| N2                                                                                                                                                        | HS | V | 2015836 | 2016541 | WBGene00019090 | F59A7.2   | F59A7.2   | -0.0181044337274754 |
| AGIWUR3374;AGIWUR38564                                                                                                                                    |    |   |         |         |                |           |           |                     |
| N2                                                                                                                                                        | HS | V | 2022674 | 2024710 | WBGene00019092 | F59A7.5   | F59A7.5   | -0.0606579224020773 |
| AGIWUR8988;AGIWUR21220                                                                                                                                    |    |   |         |         |                |           |           |                     |
| N2                                                                                                                                                        | HS | V | 2030177 | 2030407 | WBGene00044520 | F59A7.12  | F59A7.12  | -0.277664982397617  |
| AGIWUR13534                                                                                                                                               |    |   |         |         |                |           |           |                     |
| N2                                                                                                                                                        | HS | V | 2030619 | 2031475 | WBGene00001857 | hil-6     | F59A7.4   | -0.0264979494552513 |
| AGIWUR4410;AGIWUR41283                                                                                                                                    |    |   |         |         |                |           |           |                     |
| N2                                                                                                                                                        | HS | V | 2033792 | 2035645 | WBGene00021488 | srab-23   | Y40B10A.3 | 0.0276516820765274  |
| AGIWUR34938;AGIWUR35892;AGIWUR36570                                                                                                                       |    |   |         |         |                |           |           |                     |
| N2                                                                                                                                                        | HS | V | 2038193 | 2042359 | WBGene00021489 | Y40B10A.4 | Y40B10A.4 | 0.0855835107285365  |
| AGIWUR1482                                                                                                                                                |    |   |         |         |                |           |           |                     |
| N2                                                                                                                                                        | HS | V | 2043352 | 2046253 | WBGene00021490 | Y40B10A.5 | Y40B10A.5 | 0.0107434541851266  |
| AGIWUR16333                                                                                                                                               |    |   |         |         |                |           |           |                     |
| N2                                                                                                                                                        | HS | V | 2049223 | 2050172 | WBGene00021491 | comt-4    | Y40B10A.6 | -0.217266444771257  |
| AGIWUR40501                                                                                                                                               |    |   |         |         |                |           |           |                     |
| N2                                                                                                                                                        | HS | V | 2052231 | 2053600 | WBGene00021492 | comt-5    | Y40B10A.7 | -0.180071032123083  |
| AGIWUR41205                                                                                                                                               |    |   |         |         |                |           |           |                     |
| N2                                                                                                                                                        | HS | V | 2057537 | 2061129 | WBGene00021487 | comt-3    | Y40B10A.2 | 0.186117676465996   |
| AGIWUR4448                                                                                                                                                |    |   |         |         |                |           |           |                     |
| N2                                                                                                                                                        | HS | V | 2061111 | 2066844 | WBGene00003676 | nhr-86    | Y40B10A.8 | 0.128462130454587   |
| AGIWUR16383                                                                                                                                               |    |   |         |         |                |           |           |                     |
| N2                                                                                                                                                        | HS | V | 2068449 | 2069143 | WBGene00021486 | lbp-9     | Y40B10A.1 | -0.136308717661932  |
| AGIWUR759;AGIWUR42829                                                                                                                                     |    |   |         |         |                |           |           |                     |
| N2                                                                                                                                                        | HS | V | 2069207 | 2072896 | WBGene00021493 | Y40B10A.9 | Y40B10A.9 | -0.395437220469148  |
| AGIWUR9779                                                                                                                                                |    |   |         |         |                |           |           |                     |
| N2                                                                                                                                                        | HS | V | 2086279 | 2089819 | WBGene00018094 | F36F12.3  | F36F12.3  | -0.139034489946782  |
| AGIWUR2494;AGIWUR8943;AGIWUR11717;AGIWUR13195;AGIWUR14727;AGIWUR15308;AGIWUR15958;AGIWUR17370;AGIWUR21645;AGIWUR21769;AGIWUR24549;AGIWUR30250;AGIWUR30745 |    |   |         |         |                |           |           |                     |
| N2                                                                                                                                                        | HS | V | 2090669 | 2091735 | WBGene00018099 | ztf-28    | F36F12.8  | 0.0384216627037297  |
| AGIWUR35689                                                                                                                                               |    |   |         |         |                |           |           |                     |
| N2                                                                                                                                                        | HS | V | 2096072 | 2097257 | WBGene00018096 | cllec-207 | F36F12.5  | 0.0872152528170238  |
| AGIWUR13902                                                                                                                                               |    |   |         |         |                |           |           |                     |
| N2                                                                                                                                                        | HS | V | 2097953 | 2099153 | WBGene00018097 | cllec-208 | F36F12.6  | 0.324659720626547   |

|                                     |    |   |         |         |                |          |          |                     |
|-------------------------------------|----|---|---------|---------|----------------|----------|----------|---------------------|
| AGIWUR17623                         |    |   |         |         |                |          |          |                     |
| N2                                  | HS | V | 2099349 | 2100051 | WBGene00018098 | F36F12.7 | F36F12.7 | 0.0541365040989366  |
| AGIWUR13503                         |    |   |         |         |                |          |          |                     |
| N2                                  | HS | V | 2100062 | 2103218 | WBGene00018092 | F36F12.1 | F36F12.1 | -0.193383755045503  |
| AGIWUR13743                         |    |   |         |         |                |          |          |                     |
| N2                                  | HS | V | 2103658 | 2106076 | WBGene00017722 | F22F7.4  | F22F7.4  | 0.0833268968240919  |
| N2                                  | HS | V | 2106398 | 2109418 | WBGene00000514 | ckb-4    | F22F7.5  | 0.1560881987714     |
| AGIWUR17305;AGIWUR28551;AGIWUR34233 |    |   |         |         |                |          |          |                     |
| N2                                  | HS | V | 2115490 | 2118644 | WBGene00017723 | bgnt-1.2 | F22F7.6  | -0.0644762621021329 |
| AGIWUR5028                          |    |   |         |         |                |          |          |                     |
| N2                                  | HS | V | 2122866 | 2127299 | WBGene00017720 | F22F7.2  | F22F7.2  | -0.104401704556881  |
| AGIWUR13725;AGIWUR30695             |    |   |         |         |                |          |          |                     |
| N2                                  | HS | V | 2127535 | 2130100 | WBGene00017719 | ldp-1    | F22F7.1  | -0.155758267440156  |
| N2                                  | HS | V | 2131476 | 2140042 | WBGene00017724 | F22F7.7  | F22F7.7  | 0.135317887965169   |
| N2                                  | HS | V | 2144020 | 2144508 | WBGene00268198 | F22F7.12 | F22F7.12 | -0.0290735710439254 |
| AGIWUR29493                         |    |   |         |         |                |          |          |                     |
| N2                                  | HS | V | 2147095 | 2148626 | WBGene00016693 | srbc-20  | C45H4.11 | 0.356099454870145   |
| AGIWUR11502                         |    |   |         |         |                |          |          |                     |
| N2                                  | HS | V | 2151762 | 2153010 | WBGene00016692 | srbc-24  | C45H4.10 | 0.0665232920788315  |
| AGIWUR29865                         |    |   |         |         |                |          |          |                     |
| N2                                  | HS | V | 2153574 | 2155112 | WBGene00016691 | srbc-23  | C45H4.9  | 0.0590194599907736  |
| N2                                  | HS | V | 2155532 | 2156635 | WBGene00016689 | srbc-21  | C45H4.7  | -0.0556616356387254 |
| N2                                  | HS | V | 2157130 | 2158274 | WBGene00016690 | srbc-22  | C45H4.8  | 0.0311656023716687  |
| N2                                  | HS | V | 2158674 | 2159427 | WBGene00016695 | C45H4.14 | C45H4.14 | 0.115100185012709   |
| AGIWUR5246;AGIWUR27391;AGIWUR40317  |    |   |         |         |                |          |          |                     |
| N2                                  | HS | V | 2161500 | 2163835 | WBGene00006281 | str-255  | C45H4.15 | -0.180206054405966  |
| AGIWUR39636                         |    |   |         |         |                |          |          |                     |
| N2                                  | HS | V | 2164826 | 2166779 | WBGene00016696 | srbc-19  | C45H4.16 | -0.0747602255130015 |
| AGIWUR16474;AGIWUR35248;AGIWUR37129 |    |   |         |         |                |          |          |                     |
| N2                                  | HS | V | 2169306 | 2170668 | WBGene00016688 | srbc-18  | C45H4.6  | -0.0269872721555569 |
| N2                                  | HS | V | 2171418 | 2174412 | WBGene00005709 | sru-46   | C45H4.5  | 0.0278466929784873  |
| N2                                  | HS | V | 2175542 | 2177503 | WBGene00044087 | C45H4.18 | C45H4.18 | -0.15497721357019   |
| AGIWUR4518;AGIWUR36492              |    |   |         |         |                |          |          |                     |
| N2                                  | HS | V | 2177714 | 2179116 | WBGene00016687 | srbc-17  | C45H4.3  | 0.0221010268626545  |
| N2                                  | HS | V | 2179586 | 2181759 | WBGene00016686 | cyp-33C1 | C45H4.2  | -0.139440686526715  |
| AGIWUR43067                         |    |   |         |         |                |          |          |                     |
| N2                                  | HS | V | 2182038 | 2183191 | WBGene00016685 | srbc-16  | C45H4.1  | 0.115186763259771   |
| N2                                  | HS | V | 2183521 | 2186535 | WBGene00016697 | cyp-33C2 | C45H4.17 | -0.718112399435988  |
| AGIWUR13520                         |    |   |         |         |                |          |          |                     |



|                                                             |    |   |         |         |                |           |          |                     |             |
|-------------------------------------------------------------|----|---|---------|---------|----------------|-----------|----------|---------------------|-------------|
| N2                                                          | HS | V | 2188280 | 2189062 | WBGene00021165 | Y5H2B.3   | Y5H2B.3  | -0.0230325554912127 | AGIWUR30403 |
| N2                                                          | HS | V | 2189586 | 2191222 | WBGene00021166 | srbc-42   | Y5H2B.4  | 0.0230200509829999  | AGIWUR16020 |
| N2                                                          | HS | V | 2192477 | 2196823 | WBGene00003612 | nhr-13    | Y5H2B.2  | -0.092763828552183  | AGIWUR31918 |
| N2                                                          | HS | V | 2198059 | 2201415 | WBGene00021167 | cyp-32B1  | Y5H2B.5  | -0.418033644191624  |             |
| AGIWUR20546                                                 |    |   |         |         |                |           |          |                     |             |
| N2                                                          | HS | V | 2201581 | 2204397 | WBGene00021168 | cyp-33C12 | Y5H2B.6  | 0.0220239581769004  |             |
| AGIWUR27493                                                 |    |   |         |         |                |           |          |                     |             |
| N2                                                          | HS | V | 2205030 | 2206281 | WBGene00021169 | srt-40    | Y5H2B.7  | -0.100674566320961  |             |
| AGIWUR17162;AGIWUR26968;AGIWUR27794                         |    |   |         |         |                |           |          |                     |             |
| N2                                                          | HS | V | 2207180 | 2210209 | WBGene00021164 | Y5H2B.1   | Y5H2B.1  | 0.143681117595483   | AGIWUR20260 |
| N2                                                          | HS | V | 2210516 | 2212114 | WBGene00003723 | nhr-133   | F44C8.8  | 0.177448470051591   | AGIWUR22577 |
| N2                                                          | HS | V | 2212899 | 2214460 | WBGene00018415 | nhr-184   | F44C8.9  | 0.0391916716154768  |             |
| AGIWUR15480;AGIWUR20409;AGIWUR32815;AGIWUR32949;AGIWUR33909 |    |   |         |         |                |           |          |                     |             |
| N2                                                          | HS | V | 2215724 | 2218091 | WBGene00018414 | nstp-8    | F44C8.7  | 0.130190829442737   | AGIWUR5605  |
| N2                                                          | HS | V | 2219004 | 2221305 | WBGene00003646 | nhr-56    | F44C8.6  | 0.0890090560339765  | AGIWUR16627 |
| N2                                                          | HS | V | 2221948 | 2225296 | WBGene00003718 | nhr-128   | F44C8.5  | 0.116642318473526   |             |
| AGIWUR14749;AGIWUR18311;AGIWUR25768;AGIWUR26935             |    |   |         |         |                |           |          |                     |             |
| N2                                                          | HS | V | 2225430 | 2227042 | WBGene00003693 | nhr-103   | F44C8.4  | 0.0920116793179897  | AGIWUR14265 |
| N2                                                          | HS | V | 2227203 | 2228981 | WBGene00003617 | nhr-18    | F44C8.3  | 0.276409615229394   | AGIWUR23493 |
| N2                                                          | HS | V | 2229081 | 2230984 | WBGene00003716 | nhr-126   | F44C8.10 | 0.0778480698693613  |             |
| AGIWUR3148;AGIWUR9146;AGIWUR11153;AGIWUR13084               |    |   |         |         |                |           |          |                     |             |
| N2                                                          | HS | V | 2231124 | 2233381 | WBGene00003724 | nhr-134   | F44C8.2  | 0.105031311859499   | AGIWUR787   |
| N2                                                          | HS | V | 2233482 | 2235138 | WBGene00003686 | nhr-96    | F44C8.11 | 0.22168902639795    |             |
| AGIWUR29784                                                 |    |   |         |         |                |           |          |                     |             |
| N2                                                          | HS | V | 2236162 | 2237937 | WBGene00018413 | cyp-33C4  | F44C8.1  | 0.221618047725532   |             |
| AGIWUR1806;AGIWUR8637                                       |    |   |         |         |                |           |          |                     |             |
| N2                                                          | HS | V | 2242196 | 2242772 | WBGene00023039 | F41B5.11  | F41B5.11 | -0.0500751417727336 |             |
| AGIWUR16567                                                 |    |   |         |         |                |           |          |                     |             |
| N2                                                          | HS | V | 2242778 | 2244871 | WBGene00018262 | cyp-33C3  | F41B5.4  | -0.218315397154594  |             |
| AGIWUR43831                                                 |    |   |         |         |                |           |          |                     |             |
| N2                                                          | HS | V | 2245015 | 2247015 | WBGene00018261 | cyp-33C5  | F41B5.3  | 0.287078509046717   |             |
| AGIWUR42271                                                 |    |   |         |         |                |           |          |                     |             |
| N2                                                          | HS | V | 2247472 | 2249335 | WBGene00018264 | cyp-33C6  | F41B5.7  | 0.0927048711571263  |             |
| AGIWUR36205                                                 |    |   |         |         |                |           |          |                     |             |
| N2                                                          | HS | V | 2250545 | 2252553 | WBGene00018260 | cyp-33C7  | F41B5.2  | -0.180907619381346  |             |
| AGIWUR39759                                                 |    |   |         |         |                |           |          |                     |             |
| N2                                                          | HS | V | 2252804 | 2254603 | WBGene00006279 | str-253   | F41B5.8  | 0.214749665770528   | AGIWUR43104 |
| N2                                                          | HS | V | 2255533 | 2256658 | WBGene00023284 | F41B5.1   | F41B5.1  | -0.0664343012242146 | AGIWUR11202 |
| N2                                                          | HS | V | 2257420 | 2259913 | WBGene00018265 | nhr-182   | F41B5.9  | -0.0853425671874852 | AGIWUR41433 |

|                                                |    |   |         |         |                |           |            |                     |             |
|------------------------------------------------|----|---|---------|---------|----------------|-----------|------------|---------------------|-------------|
| N2                                             | HS | V | 2262489 | 2264634 | WBGene00018266 | nhr-183   | F41B5.10   | 0.0933552799752588  |             |
| AGIWUR34818;AGIWUR34908                        |    |   |         |         |                |           |            |                     |             |
| N2                                             | HS | V | 2264909 | 2267058 | WBGene00021163 | nhr-275   | Y5H2A.2    | 0.0107874267030921  | AGIWUR10872 |
| N2                                             | HS | V | 2271175 | 2271861 | WBGene00021162 | Y5H2A.1   | Y5H2A.1    | 0.06307786796524    | AGIWUR20420 |
| N2                                             | HS | V | 2272441 | 2274353 | WBGene00044521 | Y5H2A.4   | Y5H2A.4    | 0.129840098302612   | AGIWUR553   |
| N2                                             | HS | V | 2274842 | 2275977 | WBGene00000027 | abu-4     | Y5H2A.3    | -0.353838806452838  | AGIWUR11350 |
| N2                                             | HS | V | 2276018 | 2278246 | WBGene00003649 | nhr-59    | T27B7.1    | -0.0304222503260885 | AGIWUR5243  |
| N2                                             | HS | V | 2278826 | 2281387 | WBGene00020853 | fbxa-137  | T27B7.7    | 0.124594989399898   |             |
| AGIWUR29600                                    |    |   |         |         |                |           |            |                     |             |
| N2                                             | HS | V | 2281828 | 2284963 | WBGene00020852 | nhr-228   | T27B7.6    | -0.0179899679278108 | AGIWUR36659 |
| N2                                             | HS | V | 2285279 | 2287520 | WBGene00020851 | nhr-227   | T27B7.5    | 0.343465546212083   | AGIWUR14453 |
| N2                                             | HS | V | 2288328 | 2290468 | WBGene00020849 | nhr-225   | T27B7.2    | 0.194470643882761   | AGIWUR19641 |
| N2                                             | HS | V | 2288487 | 2294798 | WBGene00003705 | nhr-115   | T27B7.4    | 0.489233271209997   | AGIWUR29278 |
| N2                                             | HS | V | 2294822 | 2296967 | WBGene00020850 | nhr-226   | T27B7.3    | 0.27247802855358    | AGIWUR5248  |
| N2                                             | HS | V | 2298945 | 2301005 | WBGene00235117 | Y19D10B.8 | Y19D10B.8  | 0.10540457463844    |             |
| AGIWUR33818                                    |    |   |         |         |                |           |            |                     |             |
| N2                                             | HS | V | 2301743 | 2303868 | WBGene00021232 | irld-15   | Y19D10B.3  | -0.0873418336787335 |             |
| AGIWUR1695                                     |    |   |         |         |                |           |            |                     |             |
| N2                                             | HS | V | 2304355 | 2309159 | WBGene00021233 | Y19D10B.4 | Y19D10B.4  | -0.0310497646958563 |             |
| AGIWUR30881                                    |    |   |         |         |                |           |            |                     |             |
| N2                                             | HS | V | 2311291 | 2313809 | WBGene00021230 | Y19D10B.1 | Y19D10B.1  | -0.200982058554397  |             |
| AGIWUR23689                                    |    |   |         |         |                |           |            |                     |             |
| N2                                             | HS | V | 2313962 | 2318163 | WBGene00021234 | irld-16   | Y19D10B.5  | 0.253867852021123   |             |
| AGIWUR19389                                    |    |   |         |         |                |           |            |                     |             |
| N2                                             | HS | V | 2324510 | 2326827 | WBGene00017501 | pud-3     | F15E11.15  | -1.6378794001614    |             |
| AGIWUR26728                                    |    |   |         |         |                |           |            |                     |             |
| N2                                             | HS | V | 2326678 | 2327262 | WBGene00017498 | pud-4     | F15E11.12  | -1.56978155541457   |             |
| AGIWUR26194                                    |    |   |         |         |                |           |            |                     |             |
| N2                                             | HS | V | 2339567 | 2341408 | WBGene00017493 | irld-30   | F15E11.4   | -0.253166741293541  |             |
| AGIWUR10991                                    |    |   |         |         |                |           |            |                     |             |
| N2                                             | HS | V | 2342016 | 2344508 | WBGene00017494 | irld-31   | F15E11.5   | -0.117703663518709  |             |
| AGIWUR16975                                    |    |   |         |         |                |           |            |                     |             |
| N2                                             | HS | V | 2453414 | 2456147 | WBGene00018911 | F56A4.3   | F56A4.3    | -0.0189931105831169 | AGIWUR27891 |
| N2                                             | HS | V | 2561690 | 2564701 | WBGene00001758 | gst-10    | Y45G12C.2  | 0.212254390658341   |             |
| AGIWUR3108;AGIWUR12703;AGIWUR23562;AGIWUR42382 |    |   |         |         |                |           |            |                     |             |
| N2                                             | HS | V | 2565683 | 2568878 | WBGene00021565 | Y45G12C.1 | Y45G12C.1  | 0.00736785767773185 |             |
| AGIWUR33496                                    |    |   |         |         |                |           |            |                     |             |
| N2                                             | HS | V | 2568876 | 2570743 | WBGene00005607 | srj-19    | Y45G12C.14 | 0.103978540021502   |             |
| AGIWUR27902;AGIWUR41936                        |    |   |         |         |                |           |            |                     |             |

|                                                                                               |    |   |         |         |                |           |            |                     |             |
|-----------------------------------------------------------------------------------------------|----|---|---------|---------|----------------|-----------|------------|---------------------|-------------|
| N2                                                                                            | HS | V | 2571527 | 2573208 | WBGene00005608 | srj-20    | Y45G12C.15 | -0.155966099512636  |             |
| AGIWUR27705                                                                                   |    |   |         |         |                |           |            |                     |             |
| N2                                                                                            | HS | V | 2577903 | 2579816 | WBGene00016232 | srt-4     | C29G2.4    | -0.182861853984315  | AGIWUR20535 |
| N2                                                                                            | HS | V | 2580872 | 2582939 | WBGene00016231 | C29G2.3   | C29G2.3    | -0.0212006327784451 | AGIWUR37256 |
| N2                                                                                            | HS | V | 2582867 | 2585908 | WBGene00016234 | C29G2.6   | C29G2.6    | 0.227092203999902   | AGIWUR28534 |
| N2                                                                                            | HS | V | 2590393 | 2591758 | WBGene00016230 | C29G2.2   | C29G2.2    | 0.0241449643527121  |             |
| AGIWUR19539;AGIWUR20711;AGIWUR24384;AGIWUR28086;AGIWUR35312;AGIWUR36193;AGIWUR41857           |    |   |         |         |                |           |            |                     |             |
| N2                                                                                            | HS | V | 2592487 | 2595062 | WBGene00018760 | irg-3     | F53E10.4   | -0.0366075596374156 |             |
| AGIWUR34840                                                                                   |    |   |         |         |                |           |            |                     |             |
| N2                                                                                            | HS | V | 2596020 | 2598930 | WBGene00018761 | F53E10.5  | F53E10.5   | -0.422852691902319  |             |
| AGIWUR19102                                                                                   |    |   |         |         |                |           |            |                     |             |
| N2                                                                                            | HS | V | 2602153 | 2603063 | WBGene00018762 | F53E10.6  | F53E10.6   | 0.122062332351835   |             |
| AGIWUR3618                                                                                    |    |   |         |         |                |           |            |                     |             |
| N2                                                                                            | HS | V | 2608656 | 2615247 | WBGene00000056 | acr-17    | F53E10.2   | -0.15577661827033   |             |
| AGIWUR21260                                                                                   |    |   |         |         |                |           |            |                     |             |
| N2                                                                                            | HS | V | 2615790 | 2618554 | WBGene00018758 | F53E10.1  | F53E10.1   |                     |             |
| -0.00224389029965533 AGIWUR8011;AGIWUR15797                                                   |    |   |         |         |                |           |            |                     |             |
| N2                                                                                            | HS | V | 2618999 | 2620714 | WBGene00005477 | srh-271   | W02H5.6    | 0.0809472872950501  |             |
| AGIWUR10433;AGIWUR18408;AGIWUR35984                                                           |    |   |         |         |                |           |            |                     |             |
| N2                                                                                            | HS | V | 2638843 | 2646620 | WBGene00020957 | W02H5.2   | W02H5.2    | 0.0726588136947175  |             |
| AGIWUR11330;AGIWUR17167;AGIWUR19063                                                           |    |   |         |         |                |           |            |                     |             |
| N2                                                                                            | HS | V | 2647037 | 2652712 | WBGene00020962 | W02H5.8   | W02H5.8    | 0.0418766850391634  | AGIWUR17071 |
| N2                                                                                            | HS | V | 2653079 | 2662655 | WBGene00020955 | angl-1    | W02G9.5    | -0.409381270768735  | AGIWUR10994 |
| N2                                                                                            | HS | V | 2662964 | 2665003 | WBGene00003579 | ndx-2     | W02G9.1    | 0.0240740322331163  | AGIWUR24002 |
| N2                                                                                            | HS | V | 2666866 | 2670234 | WBGene00020954 | W02G9.4   | W02G9.4    | -0.197386061156273  | AGIWUR29410 |
| N2                                                                                            | HS | V | 2671464 | 2688500 | WBGene00020952 | kel-8     | W02G9.2    | -0.179503185158619  |             |
| AGIWUR3574;AGIWUR4374;AGIWUR14073;AGIWUR18975;AGIWUR23190;AGIWUR25226;AGIWUR30569;AGIWUR37100 |    |   |         |         |                |           |            |                     |             |
| N2                                                                                            | HS | V | 2688461 | 2694430 | WBGene00021564 | Y45G12B.3 | Y45G12B.3  | -0.336741245995192  |             |
| AGIWUR43901                                                                                   |    |   |         |         |                |           |            |                     |             |
| N2                                                                                            | HS | V | 2694768 | 2698864 | WBGene00021563 | Y45G12B.2 | Y45G12B.2  | 0.0617822289137879  |             |
| AGIWUR18287;AGIWUR25218                                                                       |    |   |         |         |                |           |            |                     |             |
| N2                                                                                            | HS | V | 2698972 | 2707024 | WBGene00021562 | nuo-5     | Y45G12B.1  | -0.018060778141022  |             |
| AGIWUR20241;AGIWUR25712;AGIWUR38658;AGIWUR42997                                               |    |   |         |         |                |           |            |                     |             |
| N2                                                                                            | HS | V | 2706781 | 2711599 | WBGene00016048 | C24B9.3   | C24B9.3    | 0.0181220205651313  |             |
| AGIWUR966;AGIWUR17192;AGIWUR41142;AGIWUR41995                                                 |    |   |         |         |                |           |            |                     |             |
| N2                                                                                            | HS | V | 2712034 | 2713632 | WBGene00016049 | srt-28    | C24B9.4    | 0.0530172306770531  | AGIWUR19236 |
| N2                                                                                            | HS | V | 2715274 | 2717000 | WBGene00016047 | srt-26    | C24B9.2    | -0.0196986703401265 | AGIWUR15766 |
| N2                                                                                            | HS | V | 2717395 | 2719135 | WBGene00016050 | srt-29    | C24B9.5    | -0.210537858962129  | AGIWUR16487 |
| N2                                                                                            | HS | V | 2719696 | 2720863 | WBGene00016051 | srt-27    | C24B9.6    | 0.0542426026277596  | AGIWUR9939  |

|                                                                                   |    |   |         |         |                |          |          |                     |             |
|-----------------------------------------------------------------------------------|----|---|---------|---------|----------------|----------|----------|---------------------|-------------|
| N2                                                                                | HS | V | 2721290 | 2722655 | WBGene00005217 | srg-60   | C24B9.15 | 0.0054859147134696  |             |
| AGIWUR14062                                                                       |    |   |         |         |                |          |          |                     |             |
| N2                                                                                | HS | V | 2722903 | 2725325 | WBGene00005216 | srg-59   | C24B9.7  | -0.167576826823511  | AGIWUR30333 |
| N2                                                                                | HS | V | 2725902 | 2727201 | WBGene00006081 | str-13   | C24B9.8  | 0.0258710664444752  | AGIWUR5432  |
| N2                                                                                | HS | V | 2728536 | 2730243 | WBGene00006099 | str-33   | C24B9.1  | 0.139879559423241   | AGIWUR17470 |
| N2                                                                                | HS | V | 2730594 | 2731098 | WBGene00016052 | dod-3    | C24B9.9  | -0.157241958841155  | AGIWUR30647 |
| N2                                                                                | HS | V | 2732177 | 2734460 | WBGene00005214 | srg-57   | C24B9.14 | -0.0749752739883203 |             |
| AGIWUR28096                                                                       |    |   |         |         |                |          |          |                     |             |
| N2                                                                                | HS | V | 2735531 | 2738274 | WBGene00005213 | srg-56   | C24B9.10 | 0.160487912657808   |             |
| AGIWUR39080                                                                       |    |   |         |         |                |          |          |                     |             |
| N2                                                                                | HS | V | 2740444 | 2744326 | WBGene00005219 | srg-62   | C24B9.12 | 0.265906481797526   |             |
| AGIWUR2554                                                                        |    |   |         |         |                |          |          |                     |             |
| N2                                                                                | HS | V | 2745013 | 2746947 | WBGene00005916 | srx-25   | C24B9.13 | 0.113631976298881   |             |
| AGIWUR10481                                                                       |    |   |         |         |                |          |          |                     |             |
| N2                                                                                | HS | V | 2748152 | 2750106 | WBGene00005915 | srx-24   | C24B9.16 | 0.0234127325208719  |             |
| AGIWUR13684                                                                       |    |   |         |         |                |          |          |                     |             |
| N2                                                                                | HS | V | 2751256 | 2753107 | WBGene00005917 | srx-26   | R05D8.4  | -0.0580518429124908 | AGIWUR33456 |
| N2                                                                                | HS | V | 2753306 | 2755158 | WBGene00005918 | srx-27   | R05D8.12 | -0.0496429272755119 |             |
| AGIWUR5205;AGIWUR11166;AGIWUR30165                                                |    |   |         |         |                |          |          |                     |             |
| N2                                                                                | HS | V | 2755701 | 2757276 | WBGene00005919 | srx-28   | R05D8.5  | -0.119720065903114  | AGIWUR31039 |
| N2                                                                                | HS | V | 2758174 | 2759556 | WBGene00005215 | srg-58   | R05D8.6  | -0.166909308593155  | AGIWUR6399  |
| N2                                                                                | HS | V | 2761825 | 2763208 | WBGene00019885 | R05D8.7  | R05D8.7  | 0.165219593931113   | AGIWUR20612 |
| N2                                                                                | HS | V | 2763981 | 2765274 | WBGene00000977 | dhs-14   | R05D8.8  | 0.230991781988201   |             |
| AGIWUR14412;AGIWUR30446                                                           |    |   |         |         |                |          |          |                     |             |
| N2                                                                                | HS | V | 2766271 | 2767503 | WBGene00019886 | R05D8.9  | R05D8.9  | -0.141872531398214  | AGIWUR42273 |
| N2                                                                                | HS | V | 2768419 | 2769854 | WBGene00000978 | dhs-15   | R05D8.10 | -0.148783064725848  |             |
| AGIWUR36965                                                                       |    |   |         |         |                |          |          |                     |             |
| N2                                                                                | HS | V | 2771860 | 2773519 | WBGene00005279 | srh-56   | R05D8.3  | -0.0450968676822789 |             |
| AGIWUR17184;AGIWUR31165;AGIWUR34838                                               |    |   |         |         |                |          |          |                     |             |
| N2                                                                                | HS | V | 2774342 | 2776258 | WBGene00005606 | srj-18   | R05D8.2  | -0.0893928574044729 |             |
| AGIWUR22116;AGIWUR30340;AGIWUR37772                                               |    |   |         |         |                |          |          |                     |             |
| N2                                                                                | HS | V | 2776442 | 2779233 | WBGene00005605 | srj-17   | R05D8.1  | 0.0240785962817585  |             |
| AGIWUR18696;AGIWUR37375                                                           |    |   |         |         |                |          |          |                     |             |
| N2                                                                                | HS | V | 2779384 | 2780845 | WBGene00019887 | R05D8.11 | R05D8.11 | -0.0998575432757782 |             |
| AGIWUR37072                                                                       |    |   |         |         |                |          |          |                     |             |
| N2                                                                                | HS | V | 2781943 | 2807934 | WBGene00004130 | ketn-1   | F54E2.3  | -0.0859093279284435 |             |
| AGIWUR1666;AGIWUR8340;AGIWUR14563;AGIWUR30694;AGIWUR35122;AGIWUR39274;AGIWUR40581 |    |   |         |         |                |          |          |                     |             |
| N2                                                                                | HS | V | 2810398 | 2812017 | WBGene00018823 | F54E2.1  | F54E2.1  | -0.0112673714984197 | AGIWUR29760 |
| N2                                                                                | HS | V | 2812531 | 2813948 | WBGene00268206 | F54E2.9  | F54E2.9  | -0.0890561788317275 | AGIWUR14121 |

|                                                                                               |    |   |         |         |                |          |           |                     |             |
|-----------------------------------------------------------------------------------------------|----|---|---------|---------|----------------|----------|-----------|---------------------|-------------|
| N2                                                                                            | HS | V | 2816883 | 2818217 | WBGene00018826 | srt-34   | F54E2.6   | -0.0461166248130667 | AGIWUR25520 |
| N2                                                                                            | HS | V | 2819581 | 2821668 | WBGene00005259 | srh-36   | T03D3.4   | 0.0375093149018006  |             |
| AGIWUR3593;AGIWUR4361;AGIWUR7859                                                              |    |   |         |         |                |          |           |                     |             |
| N2                                                                                            | HS | V | 2823806 | 2826831 | WBGene00020183 | T03D3.5  | T03D3.5   | -0.13323829914113   | AGIWUR3087  |
| N2                                                                                            | HS | V | 2832966 | 2834921 | WBGene00005629 | srj-50   | T03D3.2   | 0.0571813332527338  | AGIWUR22775 |
| N2                                                                                            | HS | V | 2835411 | 2836601 | WBGene00005627 | srj-45   | T03D3.6   | 0.0607664630895854  | AGIWUR33727 |
| N2                                                                                            | HS | V | 2837634 | 2838805 | WBGene00023335 | T03D3.7  | T03D3.7   | -0.0240703578075161 | AGIWUR15810 |
| N2                                                                                            | HS | V | 2839154 | 2840318 | WBGene00023336 | T03D3.8  | T03D3.8   | -0.101187484039394  | AGIWUR29605 |
| N2                                                                                            | HS | V | 2841018 | 2842241 | WBGene00023337 | T03D3.9  | T03D3.9   | 0.0435131687285231  |             |
| AGIWUR19942;AGIWUR44223                                                                       |    |   |         |         |                |          |           |                     |             |
| N2                                                                                            | HS | V | 2842946 | 2844240 | WBGene00023338 | T03D3.10 | T03D3.10  | -0.0764409301897278 |             |
| AGIWUR12011;AGIWUR26145                                                                       |    |   |         |         |                |          |           |                     |             |
| N2                                                                                            | HS | V | 2844563 | 2845871 | WBGene00005626 | srj-44   | T03D3.11  | -0.331581764648099  |             |
| AGIWUR10080                                                                                   |    |   |         |         |                |          |           |                     |             |
| N2                                                                                            | HS | V | 2846250 | 2848340 | WBGene00005628 | srj-49   | T03D3.12  | -0.0493535522013193 |             |
| AGIWUR8827                                                                                    |    |   |         |         |                |          |           |                     |             |
| N2                                                                                            | HS | V | 2849343 | 2852031 | WBGene00020182 | ugt-53   | T03D3.1   | 0.0602315465976027  | AGIWUR43938 |
| N2                                                                                            | HS | V | 2852425 | 2853605 | WBGene00023339 | T03D3.13 | T03D3.13  | 0.0416418533725356  |             |
| AGIWUR40784                                                                                   |    |   |         |         |                |          |           |                     |             |
| N2                                                                                            | HS | V | 2854393 | 2855573 | WBGene00005635 | srj-57   | T03D3.14  | -0.0735609721247643 |             |
| AGIWUR481                                                                                     |    |   |         |         |                |          |           |                     |             |
| N2                                                                                            | HS | V | 2856082 | 2857942 | WBGene00005634 | srj-55   | Y45G12A.1 | -0.0896744127825597 |             |
| AGIWUR42694                                                                                   |    |   |         |         |                |          |           |                     |             |
| N2                                                                                            | HS | V | 2858660 | 2859838 | WBGene00005633 | srj-54   | F37B4.11  | 0.0178438023463743  |             |
| AGIWUR8532                                                                                    |    |   |         |         |                |          |           |                     |             |
| N2                                                                                            | HS | V | 2860130 | 2861605 | WBGene00005476 | srh-270  | F37B4.5   | -0.0785212065836642 | AGIWUR30782 |
| N2                                                                                            | HS | V | 2863333 | 2865001 | WBGene00005478 | srh-272  | F37B4.4   | 0.0394403421621705  | AGIWUR6780  |
| N2                                                                                            | HS | V | 2865199 | 2867284 | WBGene00005447 | srh-240  | F37B4.13  | 0.123705290060341   |             |
| AGIWUR1223                                                                                    |    |   |         |         |                |          |           |                     |             |
| N2                                                                                            | HS | V | 2867792 | 2869603 | WBGene00005448 | srh-241  | F37B4.6   | -0.0192479471591858 | AGIWUR3234  |
| N2                                                                                            | HS | V | 2870427 | 2872106 | WBGene00005449 | srh-243  | F37B4.3   | 0.126417269045007   | AGIWUR44846 |
| N2                                                                                            | HS | V | 2872465 | 2875600 | WBGene00018138 | folr-2   | F37B4.7   | 0.144918587445777   |             |
| AGIWUR5700;AGIWUR9537;AGIWUR14965;AGIWUR15205;AGIWUR27435;AGIWUR30621;AGIWUR32404;AGIWUR43045 |    |   |         |         |                |          |           |                     |             |
| N2                                                                                            | HS | V | 2875734 | 2877609 | WBGene00018140 | F37B4.10 | F37B4.10  | 0.0647525909892028  |             |
| AGIWUR38144                                                                                   |    |   |         |         |                |          |           |                     |             |
| N2                                                                                            | HS | V | 2877804 | 2879901 | WBGene00006104 | str-39   | F37B4.12  | 0.0271689383955493  |             |
| AGIWUR16037                                                                                   |    |   |         |         |                |          |           |                     |             |
| N2                                                                                            | HS | V | 2881393 | 2883753 | WBGene00002055 | ifc-1    | F37B4.2   | 0.48969436383152    | AGIWUR20904 |
| N2                                                                                            | HS | V | 2884711 | 2886425 | WBGene00018139 | sre-24   | F37B4.9   | -0.070472121587934  | AGIWUR25959 |

|                                                                                              |    |   |         |         |                |          |          |                      |             |
|----------------------------------------------------------------------------------------------|----|---|---------|---------|----------------|----------|----------|----------------------|-------------|
| N2                                                                                           | HS | V | 2887191 | 2888781 | WBGene00005751 | srw-4    | F37B4.8  | -0.0855130337259666  | AGIWUR17156 |
| N2                                                                                           | HS | V | 2889302 | 2890029 | WBGene00044523 | F37B4.14 | F37B4.14 |                      |             |
| -0.000538873586718669 AGIWUR7633;AGIWUR13078;AGIWUR13575;AGIWUR31735                         |    |   |         |         |                |          |          |                      |             |
| N2                                                                                           | HS | V | 2893276 | 2895584 | WBGene00005344 | srh-127  | F37B4.1  | 0.097101878189072    | AGIWUR1744  |
| N2                                                                                           | HS | V | 2896637 | 2898434 | WBGene00016281 | pals-32  | C31B8.4  | 0.481215994588357    |             |
| AGIWUR7768;AGIWUR16666;AGIWUR29442                                                           |    |   |         |         |                |          |          |                      |             |
| N2                                                                                           | HS | V | 2898436 | 2899967 | WBGene00006111 | str-46   | C31B8.6  | -0.0531559713519441  | AGIWUR23220 |
| N2                                                                                           | HS | V | 2900448 | 2903355 | WBGene00016282 | C31B8.7  | C31B8.7  | 0.0915396628568592   | AGIWUR647   |
| N2                                                                                           | HS | V | 2905767 | 2909698 | WBGene00016283 | zmp-3    | C31B8.8  | -0.0125897852550381  | AGIWUR28295 |
| N2                                                                                           | HS | V | 2911082 | 2913001 | WBGene00016284 | C31B8.9  | C31B8.9  | -0.140043893825452   | AGIWUR31880 |
| N2                                                                                           | HS | V | 2914248 | 2916172 | WBGene00005362 | srh-146  | C31B8.3  | -0.0279066315109135  |             |
| AGIWUR10530;AGIWUR20427;AGIWUR23935;AGIWUR23968;AGIWUR32765                                  |    |   |         |         |                |          |          |                      |             |
| N2                                                                                           | HS | V | 2916523 | 2918034 | WBGene00016280 | C31B8.2  | C31B8.2  | -0.0417742166826485  |             |
| AGIWUR4147;AGIWUR9281;AGIWUR9646;AGIWUR12282;AGIWUR15923;AGIWUR18521;AGIWUR19038;AGIWUR43160 |    |   |         |         |                |          |          |                      |             |
| N2                                                                                           | HS | V | 2918830 | 2920008 | WBGene00005630 | srj-51   | C31B8.10 | -0.00323944875793281 |             |
| AGIWUR20464;AGIWUR28135;AGIWUR28956;AGIWUR32501;AGIWUR33894                                  |    |   |         |         |                |          |          |                      |             |
| N2                                                                                           | HS | V | 2920600 | 2922694 | WBGene00005261 | srh-38   | C31B8.11 | -0.177566359747173   |             |
| AGIWUR43647                                                                                  |    |   |         |         |                |          |          |                      |             |
| N2                                                                                           | HS | V | 2925193 | 2927722 | WBGene00016285 | C31B8.12 | C31B8.12 | 0.141994717242737    |             |
| AGIWUR15874                                                                                  |    |   |         |         |                |          |          |                      |             |
| N2                                                                                           | HS | V | 2930053 | 2931170 | WBGene00044602 | C31B8.16 | C31B8.16 | -0.0447541964331735  |             |
| AGIWUR3699;AGIWUR42580                                                                       |    |   |         |         |                |          |          |                      |             |
| N2                                                                                           | HS | V | 2931552 | 2932988 | WBGene00016279 | C31B8.1  | C31B8.1  | -0.0278384433532963  | AGIWUR38619 |
| N2                                                                                           | HS | V | 2933143 | 2934175 | WBGene00005453 | srh-247  | C31B8.13 | -0.102938091063612   |             |
| AGIWUR18435                                                                                  |    |   |         |         |                |          |          |                      |             |
| N2                                                                                           | HS | V | 2935178 | 2936199 | WBGene00005455 | srh-249  | C31B8.14 | -0.118207708043728   |             |
| AGIWUR23607                                                                                  |    |   |         |         |                |          |          |                      |             |
| N2                                                                                           | HS | V | 2937311 | 2938597 | WBGene00005888 | srw-141  | H27D07.2 | -0.0367877872421123  |             |
| AGIWUR4724;AGIWUR39410                                                                       |    |   |         |         |                |          |          |                      |             |
| N2                                                                                           | HS | V | 2939603 | 2941505 | WBGene00005890 | srw-143  | H27D07.3 | -0.100210353195207   |             |
| AGIWUR2779                                                                                   |    |   |         |         |                |          |          |                      |             |
| N2                                                                                           | HS | V | 2942571 | 2943959 | WBGene00005884 | srw-137  | H27D07.4 | -0.0827136791405643  |             |
| AGIWUR8026                                                                                   |    |   |         |         |                |          |          |                      |             |
| N2                                                                                           | HS | V | 2944379 | 2945682 | WBGene00005308 | srh-87   | H27D07.6 | 0.16871302162258     |             |
| AGIWUR13211                                                                                  |    |   |         |         |                |          |          |                      |             |
| N2                                                                                           | HS | V | 2946813 | 2948416 | WBGene00005875 | srw-128  | H27D07.1 | -0.124563312002068   |             |
| AGIWUR26758                                                                                  |    |   |         |         |                |          |          |                      |             |
| N2                                                                                           | HS | V | 2950712 | 2952202 | WBGene00005869 | srw-122  | H27D07.5 | -0.145091632937337   |             |
| AGIWUR25472                                                                                  |    |   |         |         |                |          |          |                      |             |

|                                    |    |   |         |         |                |         |          |                      |             |
|------------------------------------|----|---|---------|---------|----------------|---------|----------|----------------------|-------------|
| N2                                 | HS | V | 2953193 | 2954289 | WBGene00005873 | srw-126 | H05B21.1 | 0.0518675023288964   |             |
| AGIWUR1897;AGIWUR37067             |    |   |         |         |                |         |          |                      |             |
| N2                                 | HS | V | 2954404 | 2955442 | WBGene00005454 | srh-248 | H05B21.2 | 0.000217724234010674 |             |
| AGIWUR39328                        |    |   |         |         |                |         |          |                      |             |
| N2                                 | HS | V | 2957016 | 2958302 | WBGene00005889 | srw-142 | H05B21.3 | 0.132289315973804    |             |
| AGIWUR29592                        |    |   |         |         |                |         |          |                      |             |
| N2                                 | HS | V | 2961632 | 2963060 | WBGene00005885 | srw-138 | C44C3.3  | 0.0209724079526952   | AGIWUR39049 |
| N2                                 | HS | V | 2965422 | 2966702 | WBGene00005863 | srw-116 | C44C3.10 | -0.0969573637368777  |             |
| AGIWUR13677;AGIWUR28717            |    |   |         |         |                |         |          |                      |             |
| N2                                 | HS | V | 2969349 | 2971164 | WBGene00005307 | srh-86  | C44C3.4  | 0.0151565464026331   |             |
| AGIWUR9864;AGIWUR24809             |    |   |         |         |                |         |          |                      |             |
| N2                                 | HS | V | 2971949 | 2973485 | WBGene00005876 | srw-129 | C44C3.2  | -0.0383518107068337  | AGIWUR12878 |
| N2                                 | HS | V | 2974029 | 2975385 | WBGene00005870 | srw-123 | C44C3.11 | -0.115094011345285   |             |
| AGIWUR33523                        |    |   |         |         |                |         |          |                      |             |
| N2                                 | HS | V | 2976587 | 2977886 | WBGene00005871 | srw-124 | C44C3.1  | -0.0278338225889438  | AGIWUR15851 |
| N2                                 | HS | V | 2978760 | 2980078 | WBGene00005865 | srw-118 | C44C3.5  | -0.0570218729914886  | AGIWUR29350 |
| N2                                 | HS | V | 2982152 | 2983451 | WBGene00005864 | srw-117 | C44C3.6  | -0.0150360841983144  | AGIWUR23329 |
| N2                                 | HS | V | 2984077 | 2985409 | WBGene00005886 | srw-139 | C44C3.7  | -0.13790343437099    |             |
| AGIWUR23695;AGIWUR44571            |    |   |         |         |                |         |          |                      |             |
| N2                                 | HS | V | 2986192 | 2987507 | WBGene00005306 | srh-85  | C44C3.8  | 0.0046038419612966   | AGIWUR31725 |
| N2                                 | HS | V | 2988460 | 2990091 | WBGene00005305 | srh-84  | K12D9.2  | 0.0373265086761769   |             |
| AGIWUR2561;AGIWUR25386;AGIWUR32591 |    |   |         |         |                |         |          |                      |             |
| N2                                 | HS | V | 2990313 | 2991585 | WBGene00005868 | srw-121 | K12D9.3  | -0.124206395801224   | AGIWUR8427  |
| N2                                 | HS | V | 2992622 | 2993916 | WBGene00005862 | srw-115 | K12D9.4  | -0.0780219067669545  | AGIWUR18613 |
| N2                                 | HS | V | 2994899 | 2996205 | WBGene00005867 | srw-120 | K12D9.5  | -0.134769145576522   | AGIWUR28704 |
| N2                                 | HS | V | 2997092 | 2997917 | WBGene00005872 | srw-125 | K12D9.6  | 0.0653349387194915   | AGIWUR18143 |
| N2                                 | HS | V | 2998542 | 2999836 | WBGene00005866 | srw-119 | K12D9.7  | -0.123428128097828   | AGIWUR20695 |
| N2                                 | HS | V | 3000426 | 3002016 | WBGene00005861 | srw-114 | K12D9.8  | 0.200386846190411    |             |
| AGIWUR11996;AGIWUR30855            |    |   |         |         |                |         |          |                      |             |
| N2                                 | HS | V | 3004141 | 3006064 | WBGene00005859 | srw-112 | K12D9.9  | 0.0696072245092729   | AGIWUR21370 |
| N2                                 | HS | V | 3006728 | 3008123 | WBGene00005878 | srw-131 | K12D9.13 | 0.0285492778931582   |             |
| AGIWUR23697;AGIWUR25350            |    |   |         |         |                |         |          |                      |             |
| N2                                 | HS | V | 3008907 | 3010568 | WBGene00005883 | srw-136 | K12D9.10 | -0.19680110813421    |             |
| AGIWUR6161                         |    |   |         |         |                |         |          |                      |             |
| N2                                 | HS | V | 3010927 | 3011671 | WBGene00005882 | srw-135 | K12D9.11 | -0.267112446675868   |             |
| AGIWUR15455;AGIWUR35172            |    |   |         |         |                |         |          |                      |             |
| N2                                 | HS | V | 3014485 | 3016034 | WBGene00019675 | K12D9.1 | K12D9.1  | 0.18675793426474     | AGIWUR7110  |
| N2                                 | HS | V | 3018361 | 3021406 | WBGene00077758 | irld-12 | K12D9.14 | -0.0193195752426352  |             |
| AGIWUR16081                        |    |   |         |         |                |         |          |                      |             |

|                                               |    |   |         |         |                |           |           |                     |             |
|-----------------------------------------------|----|---|---------|---------|----------------|-----------|-----------|---------------------|-------------|
| N2                                            | HS | V | 3024520 | 3027931 | WBGene00019105 | asp-8     | F59D6.3   | 0.461988070677393   | AGIWUR35580 |
| N2                                            | HS | V | 3028294 | 3029583 | WBGene00019104 | asp-7     | F59D6.2   | 0.840614677486265   | AGIWUR31111 |
| N2                                            | HS | V | 3029655 | 3032443 | WBGene00019106 | irld-38   | F59D6.4   | 0.0420147007968934  | AGIWUR24135 |
| N2                                            | HS | V | 3032578 | 3034336 | WBGene00005755 | srw-8     | F59D6.5   | 0.00781493130139665 | AGIWUR2680  |
| N2                                            | HS | V | 3035130 | 3037689 | WBGene00019107 | irld-10   | F59D6.6   | -0.0730746640638662 | AGIWUR22111 |
| N2                                            | HS | V | 3037812 | 3039382 | WBGene00019108 | chpf-2    | F59D6.7   | -0.0754052077076821 | AGIWUR34475 |
| N2                                            | HS | V | 3045144 | 3052149 | WBGene00019103 | F59D6.1   | F59D6.1   | 0.00819519859445883 | AGIWUR3414  |
| N2                                            | HS | V | 3054553 | 3055667 | WBGene00016855 | C50H11.8  | C50H11.8  | -0.13196343955329   |             |
| AGIWUR27749                                   |    |   |         |         |                |           |           |                     |             |
| N2                                            | HS | V | 3057699 | 3059096 | WBGene00006271 | str-244   | C50H11.9  | -0.0752838205573942 |             |
| AGIWUR750                                     |    |   |         |         |                |           |           |                     |             |
| N2                                            | HS | V | 3059640 | 3062178 | WBGene00016856 | srt-15    | C50H11.10 | -0.0794982441024068 |             |
| AGIWUR24385                                   |    |   |         |         |                |           |           |                     |             |
| N2                                            | HS | V | 3063160 | 3064518 | WBGene00016857 | srt-16    | C50H11.11 | -0.0850809887107005 |             |
| AGIWUR21675                                   |    |   |         |         |                |           |           |                     |             |
| N2                                            | HS | V | 3066228 | 3067497 | WBGene00005400 | srh-185   | C50H11.7  | -0.107588220094896  |             |
| AGIWUR8079                                    |    |   |         |         |                |           |           |                     |             |
| N2                                            | HS | V | 3068135 | 3069201 | WBGene00006105 | str-40    | C50H11.12 | -0.197231577221442  |             |
| AGIWUR10195                                   |    |   |         |         |                |           |           |                     |             |
| N2                                            | HS | V | 3069898 | 3071648 | WBGene00016858 | C50H11.13 | C50H11.13 | -0.0724519130842012 |             |
| AGIWUR5643;AGIWUR9917;AGIWUR18242;AGIWUR24776 |    |   |         |         |                |           |           |                     |             |
| N2                                            | HS | V | 3075407 | 3077173 | WBGene00016854 | srt-10    | C50H11.6  | -0.0567305047597468 |             |
| AGIWUR36442                                   |    |   |         |         |                |           |           |                     |             |
| N2                                            | HS | V | 3078072 | 3079300 | WBGene00016853 | srt-9     | C50H11.5  | 0.133091983889924   |             |
| AGIWUR7906                                    |    |   |         |         |                |           |           |                     |             |
| N2                                            | HS | V | 3079449 | 3080892 | WBGene00016859 | srt-5     | C50H11.14 | 0.140342655512921   |             |
| AGIWUR35025                                   |    |   |         |         |                |           |           |                     |             |
| N2                                            | HS | V | 3081771 | 3083027 | WBGene00016852 | srt-7     | C50H11.4  | 0.0750951821540999  |             |
| AGIWUR42233                                   |    |   |         |         |                |           |           |                     |             |
| N2                                            | HS | V | 3083645 | 3085127 | WBGene00016851 | srt-71    | C50H11.3  | 0.0880201518656181  |             |
| AGIWUR15342;AGIWUR18706                       |    |   |         |         |                |           |           |                     |             |
| N2                                            | HS | V | 3086560 | 3087986 | WBGene00016850 | srt-8     | C50H11.2  | 0.354966570112789   |             |
| AGIWUR25845                                   |    |   |         |         |                |           |           |                     |             |
| N2                                            | HS | V | 3089074 | 3091351 | WBGene00016849 | acs-21    | C50H11.1  | -0.140058402663202  |             |
| AGIWUR12607;AGIWUR13127;AGIWUR34615           |    |   |         |         |                |           |           |                     |             |
| N2                                            | HS | V | 3091815 | 3094501 | WBGene00016860 | cyp-33C9  | C50H11.15 | -0.0241083863807958 |             |
| AGIWUR35734                                   |    |   |         |         |                |           |           |                     |             |
| N2                                            | HS | V | 3095090 | 3096177 | WBGene00006132 | str-70    | C50H11.16 | -0.0746648029532242 |             |
| AGIWUR12740;AGIWUR36852                       |    |   |         |         |                |           |           |                     |             |



|                                                                                 |    |   |         |         |                |           |           |                                 |
|---------------------------------------------------------------------------------|----|---|---------|---------|----------------|-----------|-----------|---------------------------------|
| N2                                                                              | HS | V | 3097130 | 3098688 | WBGene00016861 | C50H11.17 | C50H11.17 | -0.148980253887095              |
| AGIWUR26203                                                                     |    |   |         |         |                |           |           |                                 |
| N2                                                                              | HS | V | 3103128 | 3104234 | WBGene00006128 | str-66    | Y73C8C.5  | -0.125453265896332              |
| AGIWUR21799                                                                     |    |   |         |         |                |           |           |                                 |
| N2                                                                              | HS | V | 3104790 | 3105910 | WBGene00006131 | str-69    | Y73C8C.11 | 0.439032435901616               |
| AGIWUR16419                                                                     |    |   |         |         |                |           |           |                                 |
| N2                                                                              | HS | V | 3106228 | 3107550 | WBGene00006130 | str-68    | Y73C8C.6  | -0.0279956535825399             |
| AGIWUR38915                                                                     |    |   |         |         |                |           |           |                                 |
| N2                                                                              | HS | V | 3107792 | 3109664 | WBGene00022264 | sdz-34    | Y73C8C.7  | 0.00664496550617422             |
| AGIWUR9429                                                                      |    |   |         |         |                |           |           |                                 |
| N2                                                                              | HS | V | 3110089 | 3113851 | WBGene00022265 | Y73C8C.8  | Y73C8C.8  | -0.267169348208952              |
| AGIWUR8522                                                                      |    |   |         |         |                |           |           |                                 |
| N2                                                                              | HS | V | 3115303 | 3118128 | WBGene00022262 | Y73C8C.3  | Y73C8C.3  | 0.019622854291292               |
| AGIWUR20824                                                                     |    |   |         |         |                |           |           |                                 |
| N2                                                                              | HS | V | 3118377 | 3120323 | WBGene00022261 | clec-210  | Y73C8C.2  | -0.121874611037789              |
| AGIWUR326                                                                       |    |   |         |         |                |           |           |                                 |
| N2                                                                              | HS | V | 3122969 | 3124222 | WBGene00006269 | str-242   | Y73C8C.1  | -0.144777215547911              |
| AGIWUR33082;AGIWUR37993                                                         |    |   |         |         |                |           |           |                                 |
| N2                                                                              | HS | V | 3125212 | 3125469 | WBGene00044524 | Y73C8C.12 | Y73C8C.12 |                                 |
| -0.00400807636333589 AGIWUR1216;AGIWUR12325;AGIWUR26265;AGIWUR28602;AGIWUR39102 |    |   |         |         |                |           |           |                                 |
| N2                                                                              | HS | V | 3125566 | 3127770 | WBGene00022267 | Y73C8C.10 | Y73C8C.10 | -0.0865609563831402             |
| AGIWUR10724;AGIWUR12344;AGIWUR40970                                             |    |   |         |         |                |           |           |                                 |
| N2                                                                              | HS | V | 3129125 | 3133406 | WBGene00017174 | tat-6     | F02C9.3   | -0.317882012275237              |
| AGIWUR38702;AGIWUR40033;AGIWUR44141                                             |    |   |         |         |                |           |           |                                 |
| N2                                                                              | HS | V | 3133705 | 3137382 | WBGene00017173 | F02C9.2   | F02C9.2   | 0.185356876585765               |
| AGIWUR2321;AGIWUR4262;AGIWUR29080                                               |    |   |         |         |                |           |           |                                 |
| N2                                                                              | HS | V | 3137431 | 3138588 | WBGene00017175 | irld-3    | F02C9.4   | 0.236629829823237 AGIWUR39610   |
| N2                                                                              | HS | V | 3138703 | 3139090 | WBGene00017172 | F02C9.1   | F02C9.1   | 0.347286974929848 AGIWUR34685   |
| N2                                                                              | HS | V | 3139931 | 3141290 | WBGene00016475 | srab-9    | C36C5.6   | -0.0872583460880794             |
| AGIWUR11504;AGIWUR26115;AGIWUR32463                                             |    |   |         |         |                |           |           |                                 |
| N2                                                                              | HS | V | 3143094 | 3144597 | WBGene00016476 | srab-10   | C36C5.7   | 0.0780505016559072 AGIWUR23471  |
| N2                                                                              | HS | V | 3145203 | 3147032 | WBGene00016477 | srab-11   | C36C5.8   | -0.016148428144759 AGIWUR35579  |
| N2                                                                              | HS | V | 3148215 | 3149489 | WBGene00016478 | srt-72    | C36C5.9   | -0.0790314755894883 AGIWUR19941 |
| N2                                                                              | HS | V | 3150488 | 3151962 | WBGene00016479 | srab-6    | C36C5.10  | -0.137615643240584              |
| AGIWUR37693                                                                     |    |   |         |         |                |           |           |                                 |
| N2                                                                              | HS | V | 3153485 | 3155172 | WBGene00016480 | srab-7    | C36C5.11  | 0.0858910196276046              |
| AGIWUR42020                                                                     |    |   |         |         |                |           |           |                                 |
| N2                                                                              | HS | V | 3157077 | 3157870 | WBGene00016474 | C36C5.5   | C36C5.5   | 0.197853262649307 AGIWUR24051   |
| N2                                                                              | HS | V | 3158406 | 3159165 | WBGene00016481 | C36C5.12  | C36C5.12  | 0.345535519322212               |

|                                                            |    |   |         |         |                |           |           |                     |                     |
|------------------------------------------------------------|----|---|---------|---------|----------------|-----------|-----------|---------------------|---------------------|
| AGIWUR4426                                                 |    |   |         |         |                |           |           |                     |                     |
| N2                                                         | HS | V | 3166560 | 3167268 | WBGene00016473 | C36C5.4   | C36C5.4   | 0.0301123550877351  | AGIWUR29268         |
| N2                                                         | HS | V | 3167968 | 3168750 | WBGene00016484 | C36C5.15  |           | C36C5.15            | 0.386774067889725   |
| AGIWUR21646                                                |    |   |         |         |                |           |           |                     |                     |
| N2                                                         | HS | V | 3170138 | 3171408 | WBGene00016472 | srbc-6    | C36C5.3   | 0.0270175848941285  | AGIWUR19765         |
| N2                                                         | HS | V | 3176461 | 3177978 | WBGene00016471 | srab-8    | C36C5.2   | -0.195845452144384  | AGIWUR31318         |
| N2                                                         | HS | V | 3179527 | 3181064 | WBGene00016470 | srab-5    | C36C5.1   | -0.647728413747883  | AGIWUR38960         |
| N2                                                         | HS | V | 3188350 | 3189841 | WBGene00002246 | lag-2     | Y73C8B.4  |                     | -0.0855549034435237 |
| AGIWUR4259                                                 |    |   |         |         |                |           |           |                     |                     |
| N2                                                         | HS | V | 3191302 | 3193233 | WBGene00022260 | Y73C8B.3  |           | Y73C8B.3            | 0.185008681114194   |
| AGIWUR26298                                                |    |   |         |         |                |           |           |                     |                     |
| N2                                                         | HS | V | 3193394 | 3195002 | WBGene00022259 | Y73C8B.2  |           | Y73C8B.2            | -0.100387479346786  |
| AGIWUR43261                                                |    |   |         |         |                |           |           |                     |                     |
| N2                                                         | HS | V | 3197268 | 3198333 | WBGene00044525 | Y73C8B.5  |           | Y73C8B.5            | -0.149099389416923  |
| AGIWUR5299;AGIWUR26367;AGIWUR32194;AGIWUR34388;AGIWUR40466 |    |   |         |         |                |           |           |                     |                     |
| N2                                                         | HS | V | 3210189 | 3223218 | WBGene00000168 | apx-1     | K08D9.3   | -0.157856537593286  | AGIWUR37888         |
| N2                                                         | HS | V | 3223612 | 3227058 | WBGene00019526 | K08D9.5   | K08D9.5   | -0.0649084773886188 |                     |
| AGIWUR6970;AGIWUR8617;AGIWUR19552;AGIWUR20987              |    |   |         |         |                |           |           |                     |                     |
| N2                                                         | HS | V | 3227796 | 3230128 | WBGene00019524 | K08D9.2   | K08D9.2   | 0.112713200498376   | AGIWUR21368         |
| N2                                                         | HS | V | 3231398 | 3234987 | WBGene00019527 | K08D9.6   | K08D9.6   | 0.110029521544995   | AGIWUR23029         |
| N2                                                         | HS | V | 3236874 | 3240436 | WBGene00006084 | str-16    | Y73C8A.1  |                     | -0.0226920129733106 |
| AGIWUR24411;AGIWUR28177                                    |    |   |         |         |                |           |           |                     |                     |
| N2                                                         | HS | V | 3241424 | 3242636 | WBGene00005599 | srj-11    | T28A11.12 |                     | -0.212015420381386  |
| AGIWUR41289                                                |    |   |         |         |                |           |           |                     |                     |
| N2                                                         | HS | V | 3243287 | 3244495 | WBGene00001771 | gst-23    | T28A11.11 |                     | -0.0324537468032489 |
| AGIWUR10803;AGIWUR16486;AGIWUR36289;AGIWUR37107            |    |   |         |         |                |           |           |                     |                     |
| N2                                                         | HS | V | 3245003 | 3246722 | WBGene00005595 | srj-7     | T28A11.10 |                     | -0.249029987569395  |
| AGIWUR19781                                                |    |   |         |         |                |           |           |                     |                     |
| N2                                                         | HS | V | 3247815 | 3249140 | WBGene00005596 | srj-8     | T28A11.9  |                     | -0.164723432617341  |
| AGIWUR41430                                                |    |   |         |         |                |           |           |                     |                     |
| N2                                                         | HS | V | 3249743 | 3250205 | WBGene00020875 | T28A11.13 |           | T28A11.13           |                     |
| 0.000379334070748527 AGIWUR12351                           |    |   |         |         |                |           |           |                     |                     |
| N2                                                         | HS | V | 3253469 | 3254590 | WBGene00006123 | str-58    | T28A11.8  |                     | 0.054673520041046   |
| AGIWUR28675;AGIWUR34848                                    |    |   |         |         |                |           |           |                     |                     |
| N2                                                         | HS | V | 3254602 | 3256151 | WBGene00020877 | srt-63    | T28A11.15 |                     | -0.126388958601722  |
| AGIWUR20639                                                |    |   |         |         |                |           |           |                     |                     |
| N2                                                         | HS | V | 3257577 | 3258289 | WBGene00044526 | T28A11.22 |           | T28A11.22           | -0.206281464121105  |
| AGIWUR8845;AGIWUR24114;AGIWUR31464;AGIWUR39416             |    |   |         |         |                |           |           |                     |                     |
| N2                                                         | HS | V | 3258372 | 3259218 | WBGene00020878 | T28A11.16 |           | T28A11.16           | 0.084716333931258   |



|                                                |    |   |         |         |                |           |           |                     |             |
|------------------------------------------------|----|---|---------|---------|----------------|-----------|-----------|---------------------|-------------|
| N2                                             | HS | V | 3310123 | 3312117 | WBGene00018060 | arrd-18   | F35F10.11 | -0.12337885967044   |             |
| AGIWUR34169                                    |    |   |         |         |                |           |           |                     |             |
| N2                                             | HS | V | 3313286 | 3315516 | WBGene00018061 | arrd-19   | F35F10.12 | -0.0931011792327423 |             |
| AGIWUR3862;AGIWUR22827                         |    |   |         |         |                |           |           |                     |             |
| N2                                             | HS | V | 3320720 | 3324279 | WBGene00015882 | C17B7.8   | C17B7.8   | -0.0724836241526976 | AGIWUR4566  |
| N2                                             | HS | V | 3330915 | 3332113 | WBGene00015883 | C17B7.9   | C17B7.9   | 0.154743662028876   | AGIWUR42983 |
| N2                                             | HS | V | 3333635 | 3339070 | WBGene00015879 | C17B7.5   | C17B7.5   | 0.188798110587618   | AGIWUR30643 |
| N2                                             | HS | V | 3339348 | 3340092 | WBGene00015878 | C17B7.4   | C17B7.4   | 0.189249933906299   |             |
| AGIWUR14925;AGIWUR28398                        |    |   |         |         |                |           |           |                     |             |
| N2                                             | HS | V | 3340179 | 3342006 | WBGene00015884 | C17B7.10  | C17B7.10  | -0.0273042436278921 |             |
| AGIWUR25791                                    |    |   |         |         |                |           |           |                     |             |
| N2                                             | HS | V | 3345307 | 3346484 | WBGene00015885 | fbxa-65   | C17B7.11  | 0.186929269715325   |             |
| AGIWUR19694                                    |    |   |         |         |                |           |           |                     |             |
| N2                                             | HS | V | 3350177 | 3350967 | WBGene00268213 | C17B7.15  | C17B7.15  | 0.10083742889928    |             |
| AGIWUR5840                                     |    |   |         |         |                |           |           |                     |             |
| N2                                             | HS | V | 3354667 | 3355513 | WBGene00015436 | C04E12.6  | C04E12.6  | 0.205821941317149   |             |
| AGIWUR22660                                    |    |   |         |         |                |           |           |                     |             |
| N2                                             | HS | V | 3355848 | 3357193 | WBGene00015437 | scrm-3    | C04E12.7  | -0.0101100354627954 |             |
| AGIWUR284;AGIWUR27159;AGIWUR40065              |    |   |         |         |                |           |           |                     |             |
| N2                                             | HS | V | 3358567 | 3361093 | WBGene00015435 | C04E12.5  | C04E12.5  | 0.141943746101798   |             |
| AGIWUR14815                                    |    |   |         |         |                |           |           |                     |             |
| N2                                             | HS | V | 3362775 | 3368340 | WBGene00015434 | C04E12.4  | C04E12.4  | 0.0108657872102391  |             |
| AGIWUR40921                                    |    |   |         |         |                |           |           |                     |             |
| N2                                             | HS | V | 3370942 | 3372773 | WBGene00006012 | srx-121   | C04E12.8  | 0.101827073916565   |             |
| AGIWUR41071                                    |    |   |         |         |                |           |           |                     |             |
| N2                                             | HS | V | 3374362 | 3377073 | WBGene00015438 | srbc-2    | C04E12.9  | 0.0905669383671475  |             |
| AGIWUR9314;AGIWUR10084;AGIWUR15107;AGIWUR26825 |    |   |         |         |                |           |           |                     |             |
| N2                                             | HS | V | 3377536 | 3382850 | WBGene00015439 | C04E12.10 | C04E12.10 | 0.068153814316938   |             |
| AGIWUR28568                                    |    |   |         |         |                |           |           |                     |             |
| N2                                             | HS | V | 3385695 | 3388156 | WBGene00015440 | arrd-20   | C04E12.11 | -0.305234942480404  |             |
| AGIWUR9441                                     |    |   |         |         |                |           |           |                     |             |
| N2                                             | HS | V | 3392111 | 3393296 | WBGene00020619 | T20D4.13  | T20D4.13  | 0.166373083705462   |             |
| AGIWUR32543;AGIWUR44356;AGIWUR44364            |    |   |         |         |                |           |           |                     |             |
| N2                                             | HS | V | 3393478 | 3394688 | WBGene00020620 | T20D4.15  | T20D4.15  | 0.119270554957899   |             |
| AGIWUR13888;AGIWUR26446;AGIWUR32049            |    |   |         |         |                |           |           |                     |             |
| N2                                             | HS | V | 3395275 | 3395966 | WBGene00020622 | T20D4.17  | T20D4.17  | 0.0131501505255907  |             |
| AGIWUR9905                                     |    |   |         |         |                |           |           |                     |             |
| N2                                             | HS | V | 3397065 | 3397800 | WBGene00020618 | T20D4.12  | T20D4.12  | -0.201518987301391  |             |
| AGIWUR10809                                    |    |   |         |         |                |           |           |                     |             |

|                                                                                  |    |   |         |         |                |          |           |                     |             |
|----------------------------------------------------------------------------------|----|---|---------|---------|----------------|----------|-----------|---------------------|-------------|
| N2                                                                               | HS | V | 3398690 | 3399640 | WBGene00020617 | T20D4.11 | T20D4.11  | 0.28096606033564    |             |
| AGIWUR32038                                                                      |    |   |         |         |                |          |           |                     |             |
| N2                                                                               | HS | V | 3400252 | 3401063 | WBGene00020616 | T20D4.10 | T20D4.10  | 0.205728929059937   |             |
| AGIWUR23484                                                                      |    |   |         |         |                |          |           |                     |             |
| N2                                                                               | HS | V | 3401645 | 3402356 | WBGene00044718 | T20D4.20 | T20D4.20  | -0.0502645560653487 |             |
| AGIWUR29094                                                                      |    |   |         |         |                |          |           |                     |             |
| N2                                                                               | HS | V | 3405709 | 3407893 | WBGene00020614 | T20D4.8  | T20D4.8   | -0.155400455355949  | AGIWUR34715 |
| N2                                                                               | HS | V | 3408912 | 3409519 | WBGene00020613 | T20D4.7  | T20D4.7   | 0.605576251316398   | AGIWUR41765 |
| N2                                                                               | HS | V | 3410520 | 3412858 | WBGene00020612 | arrd-22  | T20D4.6   | -0.0311643811718731 | AGIWUR24818 |
| N2                                                                               | HS | V | 3413344 | 3417770 | WBGene00020611 | T20D4.5  | T20D4.5   | 0.218733882769816   |             |
| AGIWUR18362;AGIWUR36984                                                          |    |   |         |         |                |          |           |                     |             |
| N2                                                                               | HS | V | 3418263 | 3422733 | WBGene00020609 | T20D4.3  | T20D4.3   | 0.230844712760449   |             |
| AGIWUR14715;AGIWUR23453                                                          |    |   |         |         |                |          |           |                     |             |
| N2                                                                               | HS | V | 3422949 | 3424441 | WBGene00020623 | srab-21  | T20D4.18  | -0.166464878726011  |             |
| AGIWUR23103                                                                      |    |   |         |         |                |          |           |                     |             |
| N2                                                                               | HS | V | 3426376 | 3427733 | WBGene00020608 | srab-22  | T20D4.2   | -0.0152104612069621 | AGIWUR42868 |
| N2                                                                               | HS | V | 3428999 | 3430408 | WBGene00020607 | srab-20  | T20D4.1   | 0.32982084494202    | AGIWUR3585  |
| N2                                                                               | HS | V | 3430669 | 3431446 | WBGene00020624 | T20D4.19 | T20D4.19  | -0.0825632212974288 |             |
| AGIWUR15291                                                                      |    |   |         |         |                |          |           |                     |             |
| N2                                                                               | HS | V | 3432259 | 3433658 | WBGene00005597 | srj-9    | T20C4.1   | 0.672193568691625   | AGIWUR11391 |
| N2                                                                               | HS | V | 3441504 | 3444877 | WBGene00000478 | cfz-2    | F27E11.3  | -0.117992086261094  |             |
| AGIWUR757;AGIWUR7380;AGIWUR10239;AGIWUR15707;AGIWUR27031;AGIWUR28201;AGIWUR30282 |    |   |         |         |                |          |           |                     |             |
| N2                                                                               | HS | V | 3459740 | 3463071 | WBGene00017868 | slc-28.2 | F27E11.2  | 0.188443124008117   |             |
| AGIWUR6289                                                                       |    |   |         |         |                |          |           |                     |             |
| N2                                                                               | HS | V | 3463814 | 3466150 | WBGene00017867 | slc-28.1 | F27E11.1  | 0.0997296947657524  |             |
| AGIWUR29163                                                                      |    |   |         |         |                |          |           |                     |             |
| N2                                                                               | HS | V | 3467453 | 3468545 | WBGene00001781 | gst-33   | C02A12.1  | 0.0671598330412753  |             |
| AGIWUR37263                                                                      |    |   |         |         |                |          |           |                     |             |
| N2                                                                               | HS | V | 3469445 | 3470882 | WBGene00015315 | srbc-29  | C02A12.2  | -0.0239423618842665 |             |
| AGIWUR20182                                                                      |    |   |         |         |                |          |           |                     |             |
| N2                                                                               | HS | V | 3471870 | 3475121 | WBGene00044088 | oac-2    | C02A12.8  | 0.042993721298656   |             |
| AGIWUR9707;AGIWUR37879                                                           |    |   |         |         |                |          |           |                     |             |
| N2                                                                               | HS | V | 3476405 | 3477596 | WBGene00044089 | srbc-31  | C02A12.9  | 0.019951622305185   |             |
| AGIWUR25970                                                                      |    |   |         |         |                |          |           |                     |             |
| N2                                                                               | HS | V | 3478031 | 3480446 | WBGene00015316 | srbc-30  | C02A12.3  | -0.195218782996431  |             |
| AGIWUR22138;AGIWUR22731                                                          |    |   |         |         |                |          |           |                     |             |
| N2                                                                               | HS | V | 3481421 | 3482600 | WBGene00003096 | lys-7    | C02A12.4  | 0.0970037454028017  |             |
| AGIWUR21327                                                                      |    |   |         |         |                |          |           |                     |             |
| N2                                                                               | HS | V | 3483091 | 3484781 | WBGene00044090 | srbc-33  | C02A12.10 | 0.4983353604663     | AGIWUR15981 |

|                                                                        |    |   |         |         |                |          |          |                      |             |
|------------------------------------------------------------------------|----|---|---------|---------|----------------|----------|----------|----------------------|-------------|
| N2                                                                     | HS | V | 3485549 | 3486957 | WBGene00015317 | srbc-32  | C02A12.5 | -0.0720133082893586  |             |
| AGIWUR13444;AGIWUR26033                                                |    |   |         |         |                |          |          |                      |             |
| N2                                                                     | HS | V | 3489228 | 3490535 | WBGene00015318 | srbc-36  | C02A12.6 | -0.102884454893962   |             |
| AGIWUR44918                                                            |    |   |         |         |                |          |          |                      |             |
| N2                                                                     | HS | V | 3491361 | 3492598 | WBGene00015575 | srbc-35  | C07G3.7  | 0.0614786135345344   | AGIWUR14490 |
| N2                                                                     | HS | V | 3493637 | 3496943 | WBGene00269378 | C07G3.15 | C07G3.15 | -0.110298925651303   |             |
| AGIWUR44418                                                            |    |   |         |         |                |          |          |                      |             |
| N2                                                                     | HS | V | 3502307 | 3503077 | WBGene00015578 | C07G3.10 | C07G3.10 | 0.0262094086022584   |             |
| AGIWUR38399                                                            |    |   |         |         |                |          |          |                      |             |
| N2                                                                     | HS | V | 3503130 | 3506352 | WBGene00015577 | ugt-64   | C07G3.9  | -0.165980751344557   |             |
| AGIWUR4206;AGIWUR16194;AGIWUR27047                                     |    |   |         |         |                |          |          |                      |             |
| N2                                                                     | HS | V | 3507822 | 3509251 | WBGene00006256 | str-225  | C07G3.6  | 0.0140973517432741   | AGIWUR1173  |
| N2                                                                     | HS | V | 3510178 | 3512038 | WBGene00006259 | str-228  | C07G3.5  | 0.148057680717983    | AGIWUR27547 |
| N2                                                                     | HS | V | 3512681 | 3514343 | WBGene00006257 | str-226  | C07G3.4  | 0.200066816315871    | AGIWUR29424 |
| N2                                                                     | HS | V | 3518189 | 3519801 | WBGene00006258 | str-227  | C07G3.3  | -0.0700478095947989  | AGIWUR20857 |
| N2                                                                     | HS | V | 3522496 | 3523373 | WBGene00044119 | srh-191  | C07G3.11 | -0.0950299387253084  |             |
| AGIWUR3466;AGIWUR20550                                                 |    |   |         |         |                |          |          |                      |             |
| N2                                                                     | HS | V | 3523587 | 3524575 | WBGene00015574 | irg-1    | C07G3.2  | -0.164248896616528   |             |
| AGIWUR3896;AGIWUR15501;AGIWUR26755;AGIWUR27297;AGIWUR35590;AGIWUR39514 |    |   |         |         |                |          |          |                      |             |
| N2                                                                     | HS | V | 3525274 | 3526178 | WBGene00020747 | T24A6.7  | T24A6.7  | -0.0243494946056559  | AGIWUR2091  |
| N2                                                                     | HS | V | 3527182 | 3530413 | WBGene00006286 | str-260  | T24A6.6  | 0.0989262156559594   | AGIWUR17196 |
| N2                                                                     | HS | V | 3530703 | 3532380 | WBGene00020746 | srbc-66  | T24A6.5  | 0.094859586537277    | AGIWUR11780 |
| N2                                                                     | HS | V | 3533003 | 3535235 | WBGene00020748 | nhr-221  | T24A6.8  | -0.0733950159710508  | AGIWUR27511 |
| N2                                                                     | HS | V | 3536196 | 3538407 | WBGene00003683 | nhr-93   | T24A6.9  | 0.0374992910209011   |             |
| AGIWUR14893;AGIWUR35485                                                |    |   |         |         |                |          |          |                      |             |
| N2                                                                     | HS | V | 3538929 | 3540329 | WBGene00020749 | srbc-67  | T24A6.10 | -0.0521635860857383  |             |
| AGIWUR29858                                                            |    |   |         |         |                |          |          |                      |             |
| N2                                                                     | HS | V | 3541586 | 3543444 | WBGene00020750 | nhr-222  | T24A6.11 | -0.00346249099469809 |             |
| AGIWUR45167                                                            |    |   |         |         |                |          |          |                      |             |
| N2                                                                     | HS | V | 3544081 | 3544969 | WBGene00020751 | srbc-69  | T24A6.12 | 0.103632735862452    |             |
| AGIWUR18305                                                            |    |   |         |         |                |          |          |                      |             |
| N2                                                                     | HS | V | 3545677 | 3546617 | WBGene00020752 | srbc-68  | T24A6.13 | -0.0986781446597274  |             |
| AGIWUR22134                                                            |    |   |         |         |                |          |          |                      |             |
| N2                                                                     | HS | V | 3546969 | 3549685 | WBGene00005877 | srw-130  | T24A6.14 | -0.188341066717068   |             |
| AGIWUR40579                                                            |    |   |         |         |                |          |          |                      |             |
| N2                                                                     | HS | V | 3549853 | 3551269 | WBGene00005533 | sri-21   | T24A6.4  | -0.00613203162536635 | AGIWUR24721 |
| N2                                                                     | HS | V | 3551346 | 3551865 | WBGene00001737 | gr1-28   | T24A6.15 | 0.314565192249486    |             |
| AGIWUR25251                                                            |    |   |         |         |                |          |          |                      |             |
| N2                                                                     | HS | V | 3553134 | 3554568 | WBGene00020756 | T24A6.20 | T24A6.20 | -0.261397995441571   |             |

AGIWUR993;AGIWUR6754;AGIWUR17149;AGIWUR29084

N2 HS V 3554611 3555236 WBGene00001738 gr1-29 T24A6.18 -0.0905853814978297

AGIWUR36854

N2 HS V 3556286 3556804 WBGene00001739 gr1-30 T24A6.3 0.213102444887866

AGIWUR11277;AGIWUR13308;AGIWUR16687;AGIWUR26402;AGIWUR30986;AGIWUR32654;AGIWUR40692;AGIWUR44446

N2 HS V 3557206 3557778 WBGene00020755 gr1-31 T24A6.19 -0.11108395490664

AGIWUR44762

N2 HS V 3575055 3575874 WBGene00001736 gr1-27 F40C5.3 0.0394534525333832 AGIWUR25823

N2 HS V 3579023 3585042 WBGene00020696 T22F3.3 T22F3.3 -0.390327773513546

AGIWUR8623;AGIWUR10935

N2 HS V 3585313 3586064 WBGene00004422 rp1-11.1 T22F3.4 0.134609749423941

AGIWUR6406;AGIWUR22697;AGIWUR26264

N2 HS V 3586639 3589015 WBGene00020695 T22F3.2 T22F3.2 -0.396458898339795 AGIWUR7830

N2 HS V 3589029 3592199 WBGene00044705 T22F3.12 T22F3.12 0.201521264555037

AGIWUR15774;AGIWUR32295

N2 HS V 3592768 3594973 WBGene00005423 srh-213 T22F3.5 0.088024635843527 AGIWUR3939

N2 HS V 3595191 3597152 WBGene00005422 srh-212 T22F3.6 -0.152240427236031 AGIWUR13236

N2 HS V 3597753 3601021 WBGene00020697 T22F3.7 T22F3.7 -0.017926115642652 AGIWUR44509

N2 HS V 3602052 3605425 WBGene00020698 T22F3.8 T22F3.8 0.0480680082431828 AGIWUR21890

N2 HS V 3606818 3610927 WBGene00020699 T22F3.10 T22F3.10

-0.00253419238439356

N2 HS V 3612173 3614551 WBGene00020700 T22F3.11 T22F3.11 -1.08959598191785

AGIWUR707;AGIWUR22769

N2 HS V 3622382 3623698 WBGene00005985 srx-94 F59B1.5 -0.127582523897775 AGIWUR22337

N2 HS V 3625022 3627044 WBGene00019098 F59B1.4 F59B1.4 0.100345299267286 AGIWUR36888

N2 HS V 3629473 3631691 WBGene00019099 F59B1.6 F59B1.6 -0.216925231962533 AGIWUR21295

N2 HS V 3633341 3634683 WBGene00019097 F59B1.2 F59B1.2 -0.235167446539213

AGIWUR6873;AGIWUR19168;AGIWUR41274;AGIWUR41970;AGIWUR43406

N2 HS V 3634688 3637173 WBGene00005932 srx-41 F59B1.7 -0.207741012209938 AGIWUR40658

N2 HS V 3641858 3644243 WBGene00019100 F59B1.8 F59B1.8 0.0967820219063675 AGIWUR25579

N2 HS V 3644745 3647954 WBGene00019101 F59B1.10 F59B1.10 -0.0265833017236385

AGIWUR11522

N2 HS V 3649773 3651457 WBGene00006165 str-114 F59B1.1 -0.0811944389992139 AGIWUR26857

N2 HS V 3651686 3659499 WBGene00000062 acr-23 F59B1.9 -0.106621854838695 AGIWUR24298

N2 HS V 3664871 3666987 WBGene00006164 str-113 Y39H10B.1 0.0804289860501886

AGIWUR42664

N2 HS V 3668728 3670631 WBGene00044527 Y39H10B.2 Y39H10B.2 0.142878884172124

AGIWUR1568;AGIWUR10702

N2 HS V 3673380 3676632 WBGene00021081 pals-33 W08A12.4 1.6998307835758 AGIWUR25982

|                                                                                    |    |   |         |         |                |           |           |                       |
|------------------------------------------------------------------------------------|----|---|---------|---------|----------------|-----------|-----------|-----------------------|
| N2                                                                                 | HS | V | 3682853 | 3686474 | WBGene00021080 | W08A12.3  | W08A12.3  | 0.0425754820671944    |
| AGIWUR23717                                                                        |    |   |         |         |                |           |           |                       |
| N2                                                                                 | HS | V | 3687110 | 3701864 | WBGene00021078 | unc-132   | W08A12.1  | -0.239910022034421    |
| AGIWUR10957                                                                        |    |   |         |         |                |           |           |                       |
| N2                                                                                 | HS | V | 3704988 | 3712796 | WBGene00003025 | lin-40    | T27C4.4   | -0.307426443234617    |
| AGIWUR6346;AGIWUR11359;AGIWUR19273;AGIWUR20650;AGIWUR24147;AGIWUR30880;AGIWUR43792 |    |   |         |         |                |           |           |                       |
| N2                                                                                 | HS | V | 3712779 | 3715969 | WBGene00020854 | T27C4.1   | T27C4.1   | -0.116789131739261    |
| AGIWUR5398;AGIWUR38936;AGIWUR42805;AGIWUR44078                                     |    |   |         |         |                |           |           |                       |
| N2                                                                                 | HS | V | 3725072 | 3726775 | WBGene00006096 | str-30    | T27C4.3   | 0.0593632146916363    |
| N2                                                                                 | HS | V | 3727482 | 3739398 | WBGene00020855 | hpo-36    | T27C4.2   | -0.000560881175216466 |
| AGIWUR10356;AGIWUR40347;AGIWUR42612                                                |    |   |         |         |                |           |           |                       |
| N2                                                                                 | HS | V | 3743576 | 3749401 | WBGene00003479 | mtm-9     | Y39H10A.3 | 0.0723282980010449    |
| AGIWUR25442;AGIWUR36850;AGIWUR39616                                                |    |   |         |         |                |           |           |                       |
| N2                                                                                 | HS | V | 3749494 | 3757074 | WBGene00021482 | Y39H10A.6 | Y39H10A.6 | 0.0323586741862876    |
| AGIWUR15606                                                                        |    |   |         |         |                |           |           |                       |
| N2                                                                                 | HS | V | 3757047 | 3759469 | WBGene00000498 | chk-1     | Y39H10A.7 | 0.00170224091776205   |
| AGIWUR1558;AGIWUR23006;AGIWUR31592;AGIWUR32015;AGIWUR42878                         |    |   |         |         |                |           |           |                       |
| N2                                                                                 | HS | V | 3761139 | 3766306 | WBGene00021479 | oac-55    | Y39H10A.2 | -0.133233391477122    |
| AGIWUR21286                                                                        |    |   |         |         |                |           |           |                       |
| N2                                                                                 | HS | V | 3767204 | 3767734 | WBGene00021478 | Y39H10A.1 | Y39H10A.1 | 0.0377399337532704    |
| AGIWUR30517                                                                        |    |   |         |         |                |           |           |                       |
| N2                                                                                 | HS | V | 3768570 | 3769776 | WBGene00019964 | R08E5.4   | R08E5.4   | -0.0416461262373495   |
| N2                                                                                 | HS | V | 3769801 | 3771518 | WBGene00019961 | R08E5.1   | R08E5.1   | 0.00370945519322596   |
| AGIWUR22836;AGIWUR35303;AGIWUR37563                                                |    |   |         |         |                |           |           |                       |
| N2                                                                                 | HS | V | 3772021 | 3775546 | WBGene00019963 | R08E5.3   | R08E5.3   | 0.289891611445393     |
| N2                                                                                 | HS | V | 3774533 | 3776136 | WBGene00019962 | cys1-3    | R08E5.2   | -0.194408484784771    |
| AGIWUR7833;AGIWUR18152;AGIWUR20551;AGIWUR20799                                     |    |   |         |         |                |           |           |                       |
| N2                                                                                 | HS | V | 3777553 | 3784213 | WBGene00019965 | R08F11.1  | R08F11.1  | -0.193196581854417    |
| AGIWUR4405                                                                         |    |   |         |         |                |           |           |                       |
| N2                                                                                 | HS | V | 3790133 | 3793766 | WBGene00019970 | R08F11.7  | R08F11.7  | -0.126930641762614    |
| AGIWUR24390                                                                        |    |   |         |         |                |           |           |                       |
| N2                                                                                 | HS | V | 3794733 | 3798587 | WBGene00019969 | fpn-1.3   | R08F11.6  | -0.187488335323012    |
| AGIWUR18782                                                                        |    |   |         |         |                |           |           |                       |
| N2                                                                                 | HS | V | 3798605 | 3800478 | WBGene00019966 | srt-30    | R08F11.2  | 0.0314006240429379    |
| AGIWUR24318                                                                        |    |   |         |         |                |           |           |                       |
| N2                                                                                 | HS | V | 3800782 | 3803531 | WBGene00019967 | cyp-33C8  | R08F11.3  | 0.401976905576529     |
| AGIWUR2301                                                                         |    |   |         |         |                |           |           |                       |
| N2                                                                                 | HS | V | 3803845 | 3805531 | WBGene00019968 | R08F11.4  | R08F11.4  | 0.221279794131942     |
| AGIWUR3076                                                                         |    |   |         |         |                |           |           |                       |



|                                                                        |    |   |         |         |                |          |          |                      |             |
|------------------------------------------------------------------------|----|---|---------|---------|----------------|----------|----------|----------------------|-------------|
| N2                                                                     | HS | V | 3806261 | 3807752 | WBGene00005754 | srw-7    | R08F11.5 | -0.0296454930125876  |             |
| AGIWUR27147                                                            |    |   |         |         |                |          |          |                      |             |
| N2                                                                     | HS | V | 3808636 | 3810708 | WBGene00005753 | srw-6    | H10D18.3 | 0.111429275752148    |             |
| AGIWUR12194                                                            |    |   |         |         |                |          |          |                      |             |
| N2                                                                     | HS | V | 3810786 | 3811634 | WBGene00019179 | sc1-13   | H10D18.4 | 0.000341023402393503 |             |
| AGIWUR5987                                                             |    |   |         |         |                |          |          |                      |             |
| N2                                                                     | HS | V | 3812596 | 3813363 | WBGene00019178 | sc1-12   | H10D18.2 | 0.0887505536040933   |             |
| AGIWUR34033                                                            |    |   |         |         |                |          |          |                      |             |
| N2                                                                     | HS | V | 3813737 | 3831659 | WBGene00019180 | H10D18.5 | H10D18.5 | 0.0165405333589406   |             |
| AGIWUR1798;AGIWUR17439;AGIWUR39972;AGIWUR40273;AGIWUR42309;AGIWUR43558 |    |   |         |         |                |          |          |                      |             |
| N2                                                                     | HS | V | 3841859 | 3844007 | WBGene00018543 | ugt-32   | F47C10.6 | 0.0492848729171467   |             |
| AGIWUR43683                                                            |    |   |         |         |                |          |          |                      |             |
| N2                                                                     | HS | V | 3844645 | 3847151 | WBGene00018539 | nhr-185  | F47C10.1 | 0.035297025511527    |             |
| AGIWUR24112                                                            |    |   |         |         |                |          |          |                      |             |
| N2                                                                     | HS | V | 3850127 | 3851796 | WBGene00018540 | btb-21   | F47C10.2 | -0.0738202792104907  |             |
| AGIWUR37295                                                            |    |   |         |         |                |          |          |                      |             |
| N2                                                                     | HS | V | 3852286 | 3854947 | WBGene00018541 | nhr-186  | F47C10.3 | 0.00723258279489158  |             |
| AGIWUR37709                                                            |    |   |         |         |                |          |          |                      |             |
| N2                                                                     | HS | V | 3856329 | 3857861 | WBGene00018544 | nhr-188  | F47C10.7 | -0.178026526302849   |             |
| AGIWUR32751                                                            |    |   |         |         |                |          |          |                      |             |
| N2                                                                     | HS | V | 3858461 | 3860243 | WBGene00018545 | nhr-189  | F47C10.8 | 0.133982108448276    |             |
| AGIWUR23666                                                            |    |   |         |         |                |          |          |                      |             |
| N2                                                                     | HS | V | 3861089 | 3862933 | WBGene00018542 | nhr-187  | F47C10.4 | -0.0544543648430302  |             |
| AGIWUR31141                                                            |    |   |         |         |                |          |          |                      |             |
| N2                                                                     | HS | V | 3866556 | 3869005 | WBGene00015900 | nhr-157  | C17E7.5  | 0.00490863651908846  | AGIWUR31162 |
| N2                                                                     | HS | V | 3871174 | 3873216 | WBGene00015901 | nhr-158  | C17E7.6  | -0.0750441838789939  | AGIWUR18937 |
| N2                                                                     | HS | V | 3875245 | 3878382 | WBGene00015902 | nhr-159  | C17E7.7  | 0.0560606346341928   | AGIWUR34504 |
| N2                                                                     | HS | V | 3880798 | 3886204 | WBGene00003714 | nhr-124  | C17E7.8  | -0.128189768445948   | AGIWUR12597 |
| N2                                                                     | HS | V | 3887750 | 3889286 | WBGene00015906 | C17E7.13 | C17E7.13 | 0.0345203588437926   |             |
| AGIWUR26604                                                            |    |   |         |         |                |          |          |                      |             |
| N2                                                                     | HS | V | 3889287 | 3890861 | WBGene00015903 | C17E7.9  | C17E7.9  | -0.688309749958318   | AGIWUR10808 |
| N2                                                                     | HS | V | 3890968 | 3892026 | WBGene00015905 | C17E7.12 | C17E7.12 | -0.095819914196472   |             |
| AGIWUR20122                                                            |    |   |         |         |                |          |          |                      |             |
| N2                                                                     | HS | V | 3892856 | 3894573 | WBGene00015899 | C17E7.4  | C17E7.4  | -0.409445849746882   | AGIWUR36235 |
| N2                                                                     | HS | V | 3894961 | 3898208 | WBGene00015898 | sre-9    | C17E7.3  | -0.172219625112931   |             |
| AGIWUR1726;AGIWUR23776;AGIWUR40013                                     |    |   |         |         |                |          |          |                      |             |
| N2                                                                     | HS | V | 3898800 | 3900202 | WBGene00015904 | ir1d-22  | C17E7.10 | -0.234395748135638   |             |
| AGIWUR29385                                                            |    |   |         |         |                |          |          |                      |             |
| N2                                                                     | HS | V | 3900497 | 3902558 | WBGene00006260 | str-229  | C17E7.11 | -0.181366115875631   |             |

|                                                                                   |    |   |         |         |                |          |          |                     |             |
|-----------------------------------------------------------------------------------|----|---|---------|---------|----------------|----------|----------|---------------------|-------------|
| AGIWUR39812                                                                       |    |   |         |         |                |          |          |                     |             |
| N2                                                                                | HS | V | 3903107 | 3904545 | WBGene00005404 | srh-190  | C17E7.2  | 0.0442237432243848  | AGIWUR3000  |
| N2                                                                                | HS | V | 3906141 | 3908435 | WBGene00015897 | nhr-156  | C17E7.1  | 0.385593411500955   |             |
| AGIWUR558;AGIWUR5994;AGIWUR33341;AGIWUR41453                                      |    |   |         |         |                |          |          |                     |             |
| N2                                                                                | HS | V | 3909098 | 3910945 | WBGene00005952 | srx-61   | T20C7.1  | -0.522034036080435  | AGIWUR14959 |
| N2                                                                                | HS | V | 3912772 | 3914597 | WBGene00005959 | srx-68   | K07C6.11 | 0.116537018961168   |             |
| AGIWUR25156                                                                       |    |   |         |         |                |          |          |                     |             |
| N2                                                                                | HS | V | 3916839 | 3918446 | WBGene00005958 | srx-67   | K07C6.10 | -0.311677737102817  |             |
| AGIWUR12123                                                                       |    |   |         |         |                |          |          |                     |             |
| N2                                                                                | HS | V | 3919589 | 3920825 | WBGene00005957 | srx-66   | K07C6.9  | -0.297468469446606  | AGIWUR27346 |
| N2                                                                                | HS | V | 3921935 | 3922964 | WBGene00005956 | srx-65   | K07C6.8  | -0.115087194957228  | AGIWUR41357 |
| N2                                                                                | HS | V | 3923376 | 3926642 | WBGene00005960 | srx-69   | K07C6.13 | 0.182610429482867   |             |
| AGIWUR20121                                                                       |    |   |         |         |                |          |          |                     |             |
| N2                                                                                | HS | V | 3929399 | 3930678 | WBGene00005955 | srx-64   | K07C6.7  | -0.281243576700512  | AGIWUR27079 |
| N2                                                                                | HS | V | 3931626 | 3933394 | WBGene00005954 | srx-63   | K07C6.6  | -0.0623639029101066 |             |
| AGIWUR24551;AGIWUR26628                                                           |    |   |         |         |                |          |          |                     |             |
| N2                                                                                | HS | V | 3933960 | 3934950 | WBGene00005961 | srx-70   | K07C6.15 | -0.0695578047817835 |             |
| AGIWUR30774;AGIWUR36074                                                           |    |   |         |         |                |          |          |                     |             |
| N2                                                                                | HS | V | 3936326 | 3938496 | WBGene00019473 | cyp-35A5 | K07C6.5  | -0.0487791759497984 |             |
| AGIWUR1573;AGIWUR21781;AGIWUR22277;AGIWUR42606                                    |    |   |         |         |                |          |          |                     |             |
| N2                                                                                | HS | V | 3939032 | 3941235 | WBGene00019472 | cyp-35B1 | K07C6.4  | -0.142744272644844  |             |
| AGIWUR32263                                                                       |    |   |         |         |                |          |          |                     |             |
| N2                                                                                | HS | V | 3942215 | 3944457 | WBGene00019471 | cyp-35B2 | K07C6.3  | -0.0834260558124598 |             |
| AGIWUR11302                                                                       |    |   |         |         |                |          |          |                     |             |
| N2                                                                                | HS | V | 3945353 | 3947044 | WBGene00019470 | cyp-35B3 | K07C6.2  | 0.0376481483312663  |             |
| AGIWUR44312                                                                       |    |   |         |         |                |          |          |                     |             |
| N2                                                                                | HS | V | 3947365 | 3948952 | WBGene00019469 | srz-89   | K07C6.1  | -0.104252098722172  | AGIWUR17566 |
| N2                                                                                | HS | V | 3950027 | 3952097 | WBGene00020386 | cyp-34A4 | T09H2.1  | -0.140629687447987  |             |
| AGIWUR16851                                                                       |    |   |         |         |                |          |          |                     |             |
| N2                                                                                | HS | V | 3954039 | 3955460 | WBGene00006274 | str-247  | B0213.9  | -0.0833636442950638 |             |
| AGIWUR29066;AGIWUR30225;AGIWUR30460                                               |    |   |         |         |                |          |          |                     |             |
| N2                                                                                | HS | V | 3955766 | 3957715 | WBGene00015040 | cyp-34A5 | B0213.10 | -0.0726290765589717 |             |
| AGIWUR2873;AGIWUR4685;AGIWUR10311;AGIWUR11935;AGIWUR17491;AGIWUR28198;AGIWUR39604 |    |   |         |         |                |          |          |                     |             |
| N2                                                                                | HS | V | 3958160 | 3961358 | WBGene00015041 | cyp-34A6 | B0213.11 | -0.0975691146307707 |             |
| AGIWUR10465                                                                       |    |   |         |         |                |          |          |                     |             |
| N2                                                                                | HS | V | 3961760 | 3963815 | WBGene00015042 | cyp-34A7 | B0213.12 | 0.0760554326530247  |             |
| AGIWUR36195                                                                       |    |   |         |         |                |          |          |                     |             |
| N2                                                                                | HS | V | 3964779 | 3967880 | WBGene00015043 | cyp-34A8 | B0213.14 | -0.0872082914926047 |             |
| AGIWUR14373                                                                       |    |   |         |         |                |          |          |                     |             |

|                                                                                                                      |    |   |         |         |                |           |                              |                    |
|----------------------------------------------------------------------------------------------------------------------|----|---|---------|---------|----------------|-----------|------------------------------|--------------------|
| N2                                                                                                                   | HS | V | 3968134 | 3970514 | WBGene00015044 | cyp-34A9  | B0213.15                     | -0.417344050421476 |
| AGIWUR2584;AGIWUR10028;AGIWUR10829;AGIWUR16241;AGIWUR18901;AGIWUR23794                                               |    |   |         |         |                |           |                              |                    |
| N2                                                                                                                   | HS | V | 3970712 | 3973001 | WBGene00015045 | cyp-34A10 | B0213.16                     | -0.15498553045856  |
| AGIWUR35138                                                                                                          |    |   |         |         |                |           |                              |                    |
| N2                                                                                                                   | HS | V | 3974661 | 3976264 | WBGene00006141 | str-82    | B0213.8 0.089727293857095    | AGIWUR36544        |
| N2                                                                                                                   | HS | V | 3977264 | 3978811 | WBGene00006142 | str-83    | B0213.7 -0.175431796583709   | AGIWUR26623        |
| N2                                                                                                                   | HS | V | 3978836 | 3979134 | WBGene00015046 | nlp-34    | B0213.17 -0.511687185200429  |                    |
| AGIWUR5401                                                                                                           |    |   |         |         |                |           |                              |                    |
| N2                                                                                                                   | HS | V | 3980055 | 3980622 | WBGene00003769 | nlp-31    | B0213.6 0.16524708588895     | AGIWUR18556        |
| N2                                                                                                                   | HS | V | 3981980 | 3982741 | WBGene00003768 | nlp-30    | B0213.5 -0.18719227646654    | AGIWUR27472        |
| N2                                                                                                                   | HS | V | 3984413 | 3984847 | WBGene00003767 | nlp-29    | B0213.4 -0.0744787365519066  |                    |
| AGIWUR3874;AGIWUR24246;AGIWUR25364;AGIWUR35635;AGIWUR36359                                                           |    |   |         |         |                |           |                              |                    |
| N2                                                                                                                   | HS | V | 3987900 | 3988312 | WBGene00003766 | nlp-28    | B0213.3 0.000386470112010429 |                    |
| AGIWUR1823;AGIWUR3034;AGIWUR3079;AGIWUR11292;AGIWUR12737;AGIWUR20737;AGIWUR31288;AGIWUR32617;AGIWUR33370;AGIWUR33926 |    |   |         |         |                |           |                              |                    |
| N2                                                                                                                   | HS | V | 3989377 | 3989770 | WBGene00003765 | nlp-27    | B0213.2 0.19782955151905     |                    |
| AGIWUR23726;AGIWUR25464                                                                                              |    |   |         |         |                |           |                              |                    |
| N2                                                                                                                   | HS | V | 3992655 | 3994180 | WBGene00019567 | K09D9.9   | K09D9.9 0.41248325377668     | AGIWUR20835        |
| N2                                                                                                                   | HS | V | 3994780 | 3995938 | WBGene00005953 | srx-62    | K09D9.10 0.0475368745564033  |                    |
| AGIWUR14251                                                                                                          |    |   |         |         |                |           |                              |                    |
| N2                                                                                                                   | HS | V | 3997124 | 4001465 | WBGene00019568 | K09D9.11  | K09D9.11 0.0990329215243513  |                    |
| AGIWUR4967                                                                                                           |    |   |         |         |                |           |                              |                    |
| N2                                                                                                                   | HS | V | 4002327 | 4004309 | WBGene00019569 | K09D9.12  | K09D9.12 -0.113277526198083  |                    |
| AGIWUR11640                                                                                                          |    |   |         |         |                |           |                              |                    |
| N2                                                                                                                   | HS | V | 4005567 | 4007517 | WBGene00005234 | srh-8     | K09D9.8 -0.150852183466048   | AGIWUR42726        |
| N2                                                                                                                   | HS | V | 4008227 | 4009818 | WBGene00005233 | srh-7     | K09D9.7 0.0357604128659315   | AGIWUR28976        |
| N2                                                                                                                   | HS | V | 4010470 | 4011966 | WBGene00005230 | srh-4     | K09D9.6 0.116565549355528    | AGIWUR42420        |
| N2                                                                                                                   | HS | V | 4013021 | 4014628 | WBGene00006107 | str-42    | K09D9.5 -0.153732944989389   |                    |
| AGIWUR22127;AGIWUR24418                                                                                              |    |   |         |         |                |           |                              |                    |
| N2                                                                                                                   | HS | V | 4015587 | 4016938 | WBGene00005232 | srh-6     | K09D9.4 0.00652079851518383  |                    |
| AGIWUR28540;AGIWUR41631                                                                                              |    |   |         |         |                |           |                              |                    |
| N2                                                                                                                   | HS | V | 4017080 | 4019026 | WBGene00005836 | srw-89    | K09D9.13 -0.118603970799231  |                    |
| AGIWUR9432                                                                                                           |    |   |         |         |                |           |                              |                    |
| N2                                                                                                                   | HS | V | 4019488 | 4020601 | WBGene00019566 | K09D9.3   | K09D9.3 -0.124231197453934   | AGIWUR17366        |
| N2                                                                                                                   | HS | V | 4022609 | 4024475 | WBGene00019565 | cyp-35A3  | K09D9.2 0.0720611599175318   |                    |
| AGIWUR21092;AGIWUR23742;AGIWUR29860;AGIWUR40665                                                                      |    |   |         |         |                |           |                              |                    |
| N2                                                                                                                   | HS | V | 4025091 | 4026212 | WBGene00019564 | K09D9.1   | K09D9.1 0.362965859445801    | AGIWUR30594        |
| N2                                                                                                                   | HS | V | 4031619 | 4033446 | WBGene00016786 | cyp-35A4  | C49G7.8 0.171333785530698    |                    |
| AGIWUR16323;AGIWUR38020;AGIWUR39215                                                                                  |    |   |         |         |                |           |                              |                    |

|                                                                                   |    |   |         |         |                |          |          |                     |             |
|-----------------------------------------------------------------------------------|----|---|---------|---------|----------------|----------|----------|---------------------|-------------|
| N2                                                                                | HS | V | 4038821 | 4039934 | WBGene00077593 | C49G7.12 | C49G7.12 | 0.301088802712433   |             |
| AGIWUR1545                                                                        |    |   |         |         |                |          |          |                     |             |
| N2                                                                                | HS | V | 4040409 | 4042004 | WBGene00016788 | C49G7.10 | C49G7.10 | 0.144064454541979   |             |
| AGIWUR1228;AGIWUR4669;AGIWUR11163;AGIWUR13514;AGIWUR28269;AGIWUR31558;AGIWUR39242 |    |   |         |         |                |          |          |                     |             |
| N2                                                                                | HS | V | 4042404 | 4043599 | WBGene00016783 | irg-2    | C49G7.5  | 0.511036294061784   | AGIWUR19682 |
| N2                                                                                | HS | V | 4047841 | 4049354 | WBGene00005385 | srh-169  | C49G7.2  | -0.19412720544759   | AGIWUR21978 |
| N2                                                                                | HS | V | 4054191 | 4055109 | WBGene00016789 | djr-1.2  | C49G7.11 | 0.0580187570514763  |             |
| AGIWUR30122                                                                       |    |   |         |         |                |          |          |                     |             |
| N2                                                                                | HS | V | 4056165 | 4062184 | WBGene00017035 | D1065.3  | D1065.3  | 0.0856389266199225  |             |
| AGIWUR9655;AGIWUR15863;AGIWUR37113;AGIWUR40042                                    |    |   |         |         |                |          |          |                     |             |
| N2                                                                                | HS | V | 4062497 | 4068573 | WBGene00023264 | D1065.2  | D1065.2  | 0.0975679954635691  | AGIWUR24744 |
| N2                                                                                | HS | V | 4069424 | 4071542 | WBGene00005420 | srh-210  | D1065.4  | 0.030394292737121   | AGIWUR36401 |
| N2                                                                                | HS | V | 4073755 | 4077548 | WBGene00017034 | otpl-2   | D1065.1  | 0.218007160423666   | AGIWUR30779 |
| N2                                                                                | HS | V | 4078061 | 4079813 | WBGene00005421 | srh-211  | D1065.5  | 0.215613089251828   | AGIWUR12980 |
| N2                                                                                | HS | V | 4081228 | 4083052 | WBGene00018190 | F38H12.5 | F38H12.5 | -0.21551981254362   |             |
| AGIWUR6655;AGIWUR32282;AGIWUR40051                                                |    |   |         |         |                |          |          |                     |             |
| N2                                                                                | HS | V | 4095040 | 4100541 | WBGene00018189 | nhr-181  | F38H12.3 | -0.0393566885077874 |             |
| AGIWUR23566                                                                       |    |   |         |         |                |          |          |                     |             |
| N2                                                                                | HS | V | 4101867 | 4103893 | WBGene00005624 | srj-40   | F38H12.2 | 0.0828138312356064  |             |
| AGIWUR1960                                                                        |    |   |         |         |                |          |          |                     |             |
| N2                                                                                | HS | V | 4104598 | 4106244 | WBGene00005623 | srj-39   | F38H12.1 | 0.0873912306955047  |             |
| AGIWUR19120                                                                       |    |   |         |         |                |          |          |                     |             |
| N2                                                                                | HS | V | 4106373 | 4108138 | WBGene00005879 | srw-132  | T05B4.5  | -0.0513233444419168 | AGIWUR44738 |
| N2                                                                                | HS | V | 4110634 | 4112616 | WBGene00005881 | srw-134  | T05B4.7  | -0.130691537595228  | AGIWUR38922 |
| N2                                                                                | HS | V | 4113335 | 4114727 | WBGene00005880 | srw-133  | T05B4.6  | 0.284801928727815   | AGIWUR11913 |
| N2                                                                                | HS | V | 4117585 | 4118432 | WBGene00020240 | T05B4.9  | T05B4.9  | -0.157471808614575  | AGIWUR20216 |
| N2                                                                                | HS | V | 4119890 | 4120729 | WBGene00020241 | T05B4.10 | T05B4.10 | -0.226014432842744  |             |
| AGIWUR25881                                                                       |    |   |         |         |                |          |          |                     |             |
| N2                                                                                | HS | V | 4121489 | 4122517 | WBGene00020242 | phat-5   | T05B4.11 | 0.115839720306099   |             |
| AGIWUR8147;AGIWUR9076;AGIWUR14271;AGIWUR30063;AGIWUR41290;AGIWUR44095             |    |   |         |         |                |          |          |                     |             |
| N2                                                                                | HS | V | 4123329 | 4124862 | WBGene00020243 | T05B4.12 | T05B4.12 | -0.240821934556614  |             |
| AGIWUR35874                                                                       |    |   |         |         |                |          |          |                     |             |
| N2                                                                                | HS | V | 4126319 | 4127535 | WBGene00020244 | T05B4.13 | T05B4.13 | 0.119564605065873   |             |
| AGIWUR21784                                                                       |    |   |         |         |                |          |          |                     |             |
| N2                                                                                | HS | V | 4127868 | 4129602 | WBGene00020238 | T05B4.4  | T05B4.4  | -0.181749103200881  | AGIWUR27590 |
| N2                                                                                | HS | V | 4129904 | 4130909 | WBGene00020237 | phat-4   | T05B4.3  | 0.193872373956455   |             |
| AGIWUR24108;AGIWUR28429                                                           |    |   |         |         |                |          |          |                     |             |
| N2                                                                                | HS | V | 4131925 | 4134981 | WBGene00003647 | nhr-57   | T05B4.2  | -0.0503619320162523 |             |
| AGIWUR4984;AGIWUR6609;AGIWUR9301;AGIWUR10813;AGIWUR15809;AGIWUR19457;AGIWUR36903  |    |   |         |         |                |          |          |                     |             |

|                                     |    |   |         |         |                |           |           |                      |             |
|-------------------------------------|----|---|---------|---------|----------------|-----------|-----------|----------------------|-------------|
| N2                                  | HS | V | 4134968 | 4138825 | WBGene00020236 | lgc-1     | T05B4.1   | 0.0677103018943352   |             |
| AGIWUR12300;AGIWUR14909             |    |   |         |         |                |           |           |                      |             |
| N2                                  | HS | V | 4139008 | 4143120 | WBGene00044528 | lgc-29    | Y45G5AL.2 | -0.104539339851501   |             |
| AGIWUR6685;AGIWUR40865              |    |   |         |         |                |           |           |                      |             |
| N2                                  | HS | V | 4144505 | 4147571 | WBGene00021554 | Y45G5AL.1 | Y45G5AL.1 | -0.28569123152052    |             |
| AGIWUR44946                         |    |   |         |         |                |           |           |                      |             |
| N2                                  | HS | V | 4147550 | 4152296 | WBGene00021558 | Y45G5AM.6 | Y45G5AM.6 |                      |             |
| -0.00598136653128734 AGIWUR15909    |    |   |         |         |                |           |           |                      |             |
| N2                                  | HS | V | 4160383 | 4160889 | WBGene00021557 | Y45G5AM.5 | Y45G5AM.5 | 0.0170444653058475   |             |
| AGIWUR43106                         |    |   |         |         |                |           |           |                      |             |
| N2                                  | HS | V | 4163222 | 4163611 | WBGene00043666 | Y45G5AM.4 | Y45G5AM.4 | 0.14158702696187     |             |
| AGIWUR36153                         |    |   |         |         |                |           |           |                      |             |
| N2                                  | HS | V | 4164554 | 4166825 | WBGene00021556 | Y45G5AM.3 | Y45G5AM.3 | 0.223994968346002    |             |
| AGIWUR26169                         |    |   |         |         |                |           |           |                      |             |
| N2                                  | HS | V | 4166796 | 4169837 | WBGene00021559 | Y45G5AM.7 | Y45G5AM.7 | 0.00973736053054353  |             |
| AGIWUR22011                         |    |   |         |         |                |           |           |                      |             |
| N2                                  | HS | V | 4175882 | 4181357 | WBGene00021555 | Y45G5AM.2 | Y45G5AM.2 | 0.157146919213423    |             |
| AGIWUR12069                         |    |   |         |         |                |           |           |                      |             |
| N2                                  | HS | V | 4181332 | 4191515 | WBGene00021561 | Y45G5AM.9 | Y45G5AM.9 | -0.288648552775282   |             |
| AGIWUR11428;AGIWUR18622;AGIWUR43252 |    |   |         |         |                |           |           |                      |             |
| N2                                  | HS | V | 4195577 | 4199399 | WBGene00019276 | H43I07.3  | H43I07.3  | 0.190316642132318    |             |
| AGIWUR27848                         |    |   |         |         |                |           |           |                      |             |
| N2                                  | HS | V | 4199485 | 4203696 | WBGene00019275 | rpac-40   | H43I07.2  | 0.037491003399488    |             |
| AGIWUR7057                          |    |   |         |         |                |           |           |                      |             |
| N2                                  | HS | V | 4204721 | 4209303 | WBGene00019274 | H43I07.1  | H43I07.1  | -0.100896931847355   |             |
| AGIWUR18443                         |    |   |         |         |                |           |           |                      |             |
| N2                                  | HS | V | 4219643 | 4222197 | WBGene00003747 | nlp-9     | E03D2.2   | -0.155251125143536   | AGIWUR39554 |
| N2                                  | HS | V | 4236418 | 4238056 | WBGene00003751 | nlp-13    | E03D2.1   | 0.0507826087636545   | AGIWUR6822  |
| N2                                  | HS | V | 4239150 | 4240392 | WBGene00005415 | srh-204   | E03D2.3   | -0.00529757169735312 | AGIWUR34830 |
| N2                                  | HS | V | 4240952 | 4242531 | WBGene00017107 | srt-12    | E03D2.4   | -0.0943270762077386  | AGIWUR44820 |
| N2                                  | HS | V | 4247969 | 4250147 | WBGene00022528 | srt-13    | ZC142.1   | 0.120795131510819    | AGIWUR2916  |
| N2                                  | HS | V | 4253502 | 4256574 | WBGene00022529 | srt-14    | ZC142.2   | -0.0359101252856515  | AGIWUR28474 |
| N2                                  | HS | V | 4257957 | 4260190 | WBGene00018554 | srt-3     | F47D2.3   | 0.129525664783903    | AGIWUR40923 |
| N2                                  | HS | V | 4261485 | 4264616 | WBGene00018555 | srt-35    | F47D2.4   | 0.0539760775118463   | AGIWUR26325 |
| N2                                  | HS | V | 4269486 | 4271358 | WBGene00018557 | srt-38    | F47D2.6   | -0.0115254141665533  | AGIWUR30244 |
| N2                                  | HS | V | 4288412 | 4290193 | WBGene00005406 | srh-193   | F47D2.9   | 0.058241522197223    | AGIWUR36547 |
| N2                                  | HS | V | 4291836 | 4293525 | WBGene00005407 | srh-194   | F47D2.10  | 0.0706570277904186   |             |
| AGIWUR29375                         |    |   |         |         |                |           |           |                      |             |
| N2                                  | HS | V | 4296721 | 4298089 | WBGene00269432 | ZC132.11  | ZC132.11  | -0.0611283899768775  |             |

|                                                             |    |   |         |         |                |          |          |                     |             |
|-------------------------------------------------------------|----|---|---------|---------|----------------|----------|----------|---------------------|-------------|
| AGIWUR1308;AGIWUR24756;AGIWUR30767;AGIWUR35418              |    |   |         |         |                |          |          |                     |             |
| N2                                                          | HS | V | 4300626 | 4311784 | WBGene00022521 | ZC132.2  | ZC132.2  | -0.139626415857087  |             |
| AGIWUR3578;AGIWUR5811;AGIWUR38417                           |    |   |         |         |                |          |          |                     |             |
| N2                                                          | HS | V | 4311993 | 4315157 | WBGene00005405 | srh-192  | ZC132.7  | -0.0919930325842273 | AGIWUR31160 |
| N2                                                          | HS | V | 4315725 | 4317713 | WBGene00022526 | ZC132.8  | ZC132.8  | 0.0533400121282881  | AGIWUR24614 |
| N2                                                          | HS | V | 4317920 | 4320001 | WBGene00022527 | ZC132.9  | ZC132.9  | 0.187146636479794   | AGIWUR4580  |
| N2                                                          | HS | V | 4320460 | 4322218 | WBGene00235310 | R02D1.2  | R02D1.2  | -0.0735801071141644 |             |
| AGIWUR24861;AGIWUR42264                                     |    |   |         |         |                |          |          |                     |             |
| N2                                                          | HS | V | 4327121 | 4328736 | WBGene00017060 | D2063.1  | D2063.1  | -0.0803456447503854 |             |
| AGIWUR2289;AGIWUR6390;AGIWUR22124;AGIWUR40360               |    |   |         |         |                |          |          |                     |             |
| N2                                                          | HS | V | 4329039 | 4332550 | WBGene00017061 | oac-12   | D2063.2  | 0.00109326482130712 | AGIWUR6604  |
| N2                                                          | HS | V | 4336762 | 4338925 | WBGene00044529 | irl-1    | D2063.4  | -0.0870687499139056 |             |
| AGIWUR17360;AGIWUR26355                                     |    |   |         |         |                |          |          |                     |             |
| N2                                                          | HS | V | 4338854 | 4341308 | WBGene00017062 | glrx-3   | D2063.3  | 0.157813764856503   | AGIWUR5206  |
| N2                                                          | HS | V | 4341443 | 4346050 | WBGene00017981 | figl-1   | F32D1.1  | -0.0118547356801031 | AGIWUR37838 |
| N2                                                          | HS | V | 4346089 | 4346425 | WBGene00017982 | hpo-18   | F32D1.2  | 0.22248771333041    |             |
| AGIWUR18888;AGIWUR34489                                     |    |   |         |         |                |          |          |                     |             |
| N2                                                          | HS | V | 4347166 | 4349768 | WBGene00003159 | mcm-7    | F32D1.10 | -0.0681042879592502 |             |
| AGIWUR26538;AGIWUR27545                                     |    |   |         |         |                |          |          |                     |             |
| N2                                                          | HS | V | 4349774 | 4361552 | WBGene00017983 | F32D1.3  | F32D1.3  | -0.0316060509541654 | AGIWUR39251 |
| N2                                                          | HS | V | 4362722 | 4364650 | WBGene00001722 | grl-13   | F32D1.4  | 0.0102068707425431  | AGIWUR27074 |
| N2                                                          | HS | V | 4365447 | 4366483 | WBGene00044530 | F32D1.11 | F32D1.11 | 0.527091035402702   |             |
| AGIWUR14449;AGIWUR19290;AGIWUR22820                         |    |   |         |         |                |          |          |                     |             |
| N2                                                          | HS | V | 4369351 | 4371383 | WBGene00017984 | F32D1.5  | F32D1.5  | -0.0115584931739505 |             |
| AGIWUR12479;AGIWUR18525;AGIWUR24068                         |    |   |         |         |                |          |          |                     |             |
| N2                                                          | HS | V | 4371807 | 4373811 | WBGene00017988 | fipp-1   | F32D1.9  | 0.0560945684151086  | AGIWUR17104 |
| N2                                                          | HS | V | 4373760 | 4374874 | WBGene00017985 | neg-1    | F32D1.6  | -0.109782282712043  | AGIWUR35653 |
| N2                                                          | HS | V | 4374974 | 4376173 | WBGene00017986 | F32D1.7  | F32D1.7  | 0.0791211220066188  | AGIWUR15298 |
| N2                                                          | HS | V | 4376619 | 4377722 | WBGene00017987 | F32D1.8  | F32D1.8  | -0.0100375507770725 |             |
| AGIWUR9211;AGIWUR17294;AGIWUR17529;AGIWUR23378;AGIWUR26753  |    |   |         |         |                |          |          |                     |             |
| N2                                                          | HS | V | 4379643 | 4381592 | WBGene00269436 | F13A2.14 | F13A2.14 | -0.166836120819612  |             |
| AGIWUR4194                                                  |    |   |         |         |                |          |          |                     |             |
| N2                                                          | HS | V | 4382916 | 4385242 | WBGene00017411 | F13A2.2  | F13A2.2  | -0.059657525155691  | AGIWUR6317  |
| N2                                                          | HS | V | 4386808 | 4387502 | WBGene00044531 | F13A2.9  | F13A2.9  | -0.0829460562566009 |             |
| AGIWUR12461;AGIWUR18733;AGIWUR36382;AGIWUR40455;AGIWUR41304 |    |   |         |         |                |          |          |                     |             |
| N2                                                          | HS | V | 4393540 | 4396357 | WBGene00017412 | F13A2.3  | F13A2.3  | -0.0894779513217401 | AGIWUR8025  |
| N2                                                          | HS | V | 4398635 | 4400218 | WBGene00017413 | F13A2.4  | F13A2.4  | -0.162962247467441  | AGIWUR7096  |
| N2                                                          | HS | V | 4401298 | 4401940 | WBGene00017414 | F13A2.5  | F13A2.5  | 0.0243400552683521  | AGIWUR2818  |
| N2                                                          | HS | V | 4402749 | 4404530 | WBGene00017415 | F13A2.6  | F13A2.6  | 0.257176743032874   | AGIWUR43256 |

|                                                                                                                   |    |   |         |         |                |           |           |                       |
|-------------------------------------------------------------------------------------------------------------------|----|---|---------|---------|----------------|-----------|-----------|-----------------------|
| N2                                                                                                                | HS | V | 4407819 | 4410280 | WBGene00003708 | nhp-118   | F13A2.8   | -0.000402957805500037 |
| AGIWUR5659;AGIWUR18832;AGIWUR26406;AGIWUR33940;AGIWUR39095                                                        |    |   |         |         |                |           |           |                       |
| N2                                                                                                                | HS | V | 4410943 | 4412401 | WBGene00021617 | Y47D7A.3  | Y47D7A.3  | -0.0720798837856984   |
| AGIWUR407                                                                                                         |    |   |         |         |                |           |           |                       |
| N2                                                                                                                | HS | V | 4412748 | 4414663 | WBGene00001714 | grl-5     | Y47D7A.5  | 0.412435339996419     |
| AGIWUR456                                                                                                         |    |   |         |         |                |           |           |                       |
| N2                                                                                                                | HS | V | 4416022 | 4416814 | WBGene00235165 | Y47D7A.18 | Y47D7A.18 | -0.0840535622670018   |
| AGIWUR35916                                                                                                       |    |   |         |         |                |           |           |                       |
| N2                                                                                                                | HS | V | 4419454 | 4419867 | WBGene00021620 | Y47D7A.7  | Y47D7A.7  | -0.351038433097763    |
| AGIWUR9054                                                                                                        |    |   |         |         |                |           |           |                       |
| N2                                                                                                                | HS | V | 4420275 | 4420746 | WBGene00021616 | Y47D7A.2  | Y47D7A.2  | -0.18773294225428     |
| AGIWUR14377                                                                                                       |    |   |         |         |                |           |           |                       |
| N2                                                                                                                | HS | V | 4420997 | 4421596 | WBGene00004820 | skr-14    | Y47D7A.8  | -0.144769334159145    |
| AGIWUR20702                                                                                                       |    |   |         |         |                |           |           |                       |
| N2                                                                                                                | HS | V | 4422406 | 4423065 | WBGene00004813 | skr-7     | Y47D7A.1  | -0.118910841915538    |
| AGIWUR38009                                                                                                       |    |   |         |         |                |           |           |                       |
| N2                                                                                                                | HS | V | 4423609 | 4423968 | WBGene00021621 | Y47D7A.9  | Y47D7A.9  | -0.0717555569801043   |
| AGIWUR12979                                                                                                       |    |   |         |         |                |           |           |                       |
| N2                                                                                                                | HS | V | 4427769 | 4428302 | WBGene00021623 | Y47D7A.11 | Y47D7A.11 | 0.13385875090589      |
| AGIWUR626;AGIWUR1575;AGIWUR3659;AGIWUR6144;AGIWUR8714;AGIWUR19752;AGIWUR36378;AGIWUR38334;AGIWUR38504;AGIWUR43833 |    |   |         |         |                |           |           |                       |
| N2                                                                                                                | HS | V | 4428950 | 4429676 | WBGene00021624 | Y47D7A.12 | Y47D7A.12 | -0.316417558978591    |
| AGIWUR3137                                                                                                        |    |   |         |         |                |           |           |                       |
| N2                                                                                                                | HS | V | 4431791 | 4433185 | WBGene00021627 | Y47D7A.15 | Y47D7A.15 | -0.150739399674583    |
| AGIWUR1754;AGIWUR7726;AGIWUR11111;AGIWUR23580;AGIWUR27475                                                         |    |   |         |         |                |           |           |                       |
| N2                                                                                                                | HS | V | 4434883 | 4435928 | WBGene00021625 | Y47D7A.13 | Y47D7A.13 | -0.347532073377577    |
| AGIWUR10566                                                                                                       |    |   |         |         |                |           |           |                       |
| N2                                                                                                                | HS | V | 4438932 | 4443223 | WBGene00044637 | rft-1     | Y47D7A.16 | 0.0879522115921878    |
| AGIWUR20975;AGIWUR25736                                                                                           |    |   |         |         |                |           |           |                       |
| N2                                                                                                                | HS | V | 4443110 | 4450555 | WBGene00021626 | rft-2     | Y47D7A.14 | -0.202656754566612    |
| AGIWUR10755;AGIWUR11742;AGIWUR12084;AGIWUR23538;AGIWUR28386;AGIWUR30389;AGIWUR33218;AGIWUR39710                   |    |   |         |         |                |           |           |                       |
| N2                                                                                                                | HS | V | 4451049 | 4454734 | WBGene00019224 | gnrr-5    | H22D07.1  | -0.0687843153619276   |
| AGIWUR44776                                                                                                       |    |   |         |         |                |           |           |                       |
| N2                                                                                                                | HS | V | 4471365 | 4473602 | WBGene00020370 | T08H10.3  | T08H10.3  | 0.0519752086789254    |
| AGIWUR30288                                                                                                       |    |   |         |         |                |           |           |                       |
| N2                                                                                                                | HS | V | 4474843 | 4476996 | WBGene00006101 | str-35    | T08H10.2  | 0.0591801338620059    |
| AGIWUR27901;AGIWUR32256                                                                                           |    |   |         |         |                |           |           |                       |
| N2                                                                                                                | HS | V | 4477561 | 4479191 | WBGene00006100 | str-34    | T08H10.5  | -0.0177260377191564   |
| AGIWUR19786                                                                                                       |    |   |         |         |                |           |           |                       |

|                                                                                                                                     |    |   |         |         |                |            |            |                      |             |
|-------------------------------------------------------------------------------------------------------------------------------------|----|---|---------|---------|----------------|------------|------------|----------------------|-------------|
| N2                                                                                                                                  | HS | V | 4480680 | 4481546 | WBGene00020371 | T08H10.4   | T08H10.4   | 0.346471806284596    |             |
| AGIWUR43086                                                                                                                         |    |   |         |         |                |            |            |                      |             |
| N2                                                                                                                                  | HS | V | 4483459 | 4486543 | WBGene00020369 | T08H10.1   | T08H10.1   | 0.0707599102962391   |             |
| AGIWUR990                                                                                                                           |    |   |         |         |                |            |            |                      |             |
| N2                                                                                                                                  | HS | V | 4497463 | 4511449 | WBGene00006796 | unc-62     | T28F12.2   | -0.0374063373046347  |             |
| AGIWUR15699;AGIWUR16484;AGIWUR18052;AGIWUR21053;AGIWUR21660;AGIWUR22015;AGIWUR25612;AGIWUR26913;AGIWUR30675;AGIWUR35589;AGIWUR41385 |    |   |         |         |                |            |            |                      |             |
| N2                                                                                                                                  | HS | V | 4511977 | 4516947 | WBGene00020904 | T28F12.1   | T28F12.1   | 0.177293037772474    |             |
| AGIWUR17708                                                                                                                         |    |   |         |         |                |            |            |                      |             |
| N2                                                                                                                                  | HS | V | 4517643 | 4549291 | WBGene00004947 | sos-1      | T28F12.3   | -0.180960050093134   |             |
| AGIWUR4204                                                                                                                          |    |   |         |         |                |            |            |                      |             |
| N2                                                                                                                                  | HS | V | 4556055 | 4557114 | WBGene00022017 | Y61A9LA.5  | Y61A9LA.5  | 0.139766001562487    |             |
| AGIWUR15931                                                                                                                         |    |   |         |         |                |            |            |                      |             |
| N2                                                                                                                                  | HS | V | 4558318 | 4559801 | WBGene00022018 | Y61A9LA.7  | Y61A9LA.7  | 0.237332585877494    |             |
| AGIWUR8198;AGIWUR13524;AGIWUR17992;AGIWUR19357;AGIWUR39108;AGIWUR41819                                                              |    |   |         |         |                |            |            |                      |             |
| N2                                                                                                                                  | HS | V | 4562215 | 4570043 | WBGene00022019 | sut-2      | Y61A9LA.8  | -0.116901632261545   |             |
| AGIWUR20263;AGIWUR29703;AGIWUR34769;AGIWUR39327;AGIWUR39758;AGIWUR44236;AGIWUR45069                                                 |    |   |         |         |                |            |            |                      |             |
| N2                                                                                                                                  | HS | V | 4571143 | 4585167 | WBGene00022015 | Y61A9LA.3  | Y61A9LA.3  | -0.0721308570315502  |             |
| AGIWUR3402;AGIWUR4011;AGIWUR10244;AGIWUR10368                                                                                       |    |   |         |         |                |            |            |                      |             |
| N2                                                                                                                                  | HS | V | 4592838 | 4602014 | WBGene00022014 | Y61A9LA.1  | Y61A9LA.1  | -0.0898789305245451  |             |
| AGIWUR28333                                                                                                                         |    |   |         |         |                |            |            |                      |             |
| N2                                                                                                                                  | HS | V | 4605004 | 4606926 | WBGene00022022 | Y61A9LA.11 | Y61A9LA.11 | 0.0996794951602009   |             |
| AGIWUR34478                                                                                                                         |    |   |         |         |                |            |            |                      |             |
| N2                                                                                                                                  | HS | V | 4607039 | 4615817 | WBGene00022021 | Y61A9LA.10 | Y61A9LA.10 | 0.360407688358904    |             |
| AGIWUR16782                                                                                                                         |    |   |         |         |                |            |            |                      |             |
| N2                                                                                                                                  | HS | V | 4616156 | 4617766 | WBGene00018814 | F54D11.4   | F54D11.4   | -0.387143805751855   |             |
| AGIWUR40577                                                                                                                         |    |   |         |         |                |            |            |                      |             |
| N2                                                                                                                                  | HS | V | 4617938 | 4628510 | WBGene00018812 | sumv-2     | F54D11.2   | -0.0411200376604697  |             |
| AGIWUR7205;AGIWUR11926;AGIWUR16823;AGIWUR22271;AGIWUR34312;AGIWUR35666                                                              |    |   |         |         |                |            |            |                      |             |
| N2                                                                                                                                  | HS | V | 4628580 | 4635263 | WBGene00018811 | pmt-2      | F54D11.1   | 0.042909871255004    |             |
| AGIWUR42429;AGIWUR44478                                                                                                             |    |   |         |         |                |            |            |                      |             |
| N2                                                                                                                                  | HS | V | 4635327 | 4637145 | WBGene00018813 | F54D11.3   | F54D11.3   | -0.338222503782728   |             |
| AGIWUR10374                                                                                                                         |    |   |         |         |                |            |            |                      |             |
| N2                                                                                                                                  | HS | V | 4642952 | 4646931 | WBGene00004928 | soc-1      | F41F3.2    | 0.0329248372864228   | AGIWUR29213 |
| N2                                                                                                                                  | HS | V | 4647665 | 4648241 | WBGene00018297 | F41F3.3    | F41F3.3    | -0.00956052800149365 | AGIWUR8735  |
| N2                                                                                                                                  | HS | V | 4648832 | 4650726 | WBGene00044533 | F41F3.8    | F41F3.8    | -0.106100664915407   |             |
| AGIWUR3540;AGIWUR11934;AGIWUR30905;AGIWUR34907;AGIWUR43347                                                                          |    |   |         |         |                |            |            |                      |             |
| N2                                                                                                                                  | HS | V | 4652863 | 4654007 | WBGene00000712 | col-139    | F41F3.4    | -0.333489603987918   | AGIWUR17250 |
| N2                                                                                                                                  | HS | V | 4655475 | 4655786 | WBGene00269385 | F41F3.9    | F41F3.9    | 0.277258845045779    | AGIWUR18253 |



|                                                                        |    |   |         |         |                |          |         |                              |             |
|------------------------------------------------------------------------|----|---|---------|---------|----------------|----------|---------|------------------------------|-------------|
| N2                                                                     | HS | V | 4656158 | 4657812 | WBGene00005966 | srx-75   | F41F3.5 | 0.497685165421037            | AGIWUR38791 |
| N2                                                                     | HS | V | 4658949 | 4662500 | WBGene00005965 | srx-74   | F41F3.6 | -0.0753345177356026          | AGIWUR37537 |
| N2                                                                     | HS | V | 4663616 | 4665751 | WBGene00005964 | srx-73   | F41F3.7 | -0.0330469763689036          | AGIWUR39489 |
| N2                                                                     | HS | V | 4666745 | 4668736 | WBGene00005968 | srx-77   | K03B4.5 | -0.0906909998056715          | AGIWUR36430 |
| N2                                                                     | HS | V | 4671030 | 4672610 | WBGene00219236 | K03B4.9  | K03B4.9 | 0.0205713921393524           | AGIWUR10250 |
| N2                                                                     | HS | V | 4681975 | 4685110 | WBGene00019355 | K03B4.4  | K03B4.4 | 0.0610942052629611           | AGIWUR20172 |
| N2                                                                     | HS | V | 4687107 | 4688028 | WBGene00006392 | taf-10   | K03B4.3 | -0.0604712075827933          | AGIWUR45166 |
| N2                                                                     | HS | V | 4687974 | 4689231 | WBGene00019354 | K03B4.2  | K03B4.2 | -0.267379369752424           | AGIWUR5490  |
| N2                                                                     | HS | V | 4689330 | 4691611 | WBGene00019353 | K03B4.1  | K03B4.1 | 0.0515308127466216           | AGIWUR43290 |
| N2                                                                     | HS | V | 4691605 | 4692433 | WBGene00019357 | cpg-8    | K03B4.7 | 0.00921015466637165          |             |
| AGIWUR20437;AGIWUR38950                                                |    |   |         |         |                |          |         |                              |             |
| N2                                                                     | HS | V | 4694974 | 4700289 | WBGene00022584 | ZC266.1  | ZC266.1 | -0.208722050900004           |             |
| AGIWUR1042;AGIWUR25299                                                 |    |   |         |         |                |          |         |                              |             |
| N2                                                                     | HS | V | 4710764 | 4714911 | WBGene00018211 | oac-24   | F39G3.6 | 0.0369709437557928           | AGIWUR31878 |
| N2                                                                     | HS | V | 4715388 | 4720148 | WBGene00004195 | prx-6    | F39G3.7 | 0.0851057794392531           | AGIWUR44604 |
| N2                                                                     | HS | V | 4722618 | 4724621 | WBGene00018210 | F39G3.5  | F39G3.5 | 0.191376039987599            | AGIWUR29741 |
| N2                                                                     | HS | V | 4724663 | 4726726 | WBGene00018209 | F39G3.4  | F39G3.4 | 0.0873136449063088           | AGIWUR3506  |
| N2                                                                     | HS | V | 4726721 | 4730234 | WBGene00006570 | tig-2    | F39G3.8 | 0.209874350192898            | AGIWUR18954 |
| N2                                                                     | HS | V | 4731911 | 4734723 | WBGene00018208 | F39G3.3  | F39G3.3 | -0.199476600440709           |             |
| AGIWUR460;AGIWUR10436;AGIWUR41800                                      |    |   |         |         |                |          |         |                              |             |
| N2                                                                     | HS | V | 4737834 | 4741169 | WBGene00018207 | F39G3.2  | F39G3.2 | 0.0506185108224901           | AGIWUR7231  |
| N2                                                                     | HS | V | 4742427 | 4745373 | WBGene00018206 | ugt-61   | F39G3.1 | 0.285960069603416            | AGIWUR3749  |
| N2                                                                     | HS | V | 4745569 | 4748089 | WBGene00015985 | C18G1.7  | C18G1.7 | 0.0549658040404601           | AGIWUR40127 |
| N2                                                                     | HS | V | 4750580 | 4753808 | WBGene00015984 | C18G1.6  | C18G1.6 | 0.217701599502589            | AGIWUR27193 |
| N2                                                                     | HS | V | 4754313 | 4755469 | WBGene00001855 | hil-4    | C18G1.5 | -0.00397624422300069         |             |
| AGIWUR2414;AGIWUR12114;AGIWUR20399;AGIWUR21732;AGIWUR40557;AGIWUR42531 |    |   |         |         |                |          |         |                              |             |
| N2                                                                     | HS | V | 4755985 | 4758584 | WBGene00003994 | pgl-3    | C18G1.4 | -0.177500599773055           | AGIWUR829   |
| N2                                                                     | HS | V | 4760974 | 4764179 | WBGene00015982 | bgnt-1.4 |         | C18G1.3 0.288352585692163    |             |
| AGIWUR39744                                                            |    |   |         |         |                |          |         |                              |             |
| N2                                                                     | HS | V | 4764266 | 4766601 | WBGene00015986 | C18G1.8  | C18G1.8 | 0.0367100365778823           | AGIWUR16977 |
| N2                                                                     | HS | V | 4767886 | 4769753 | WBGene00015987 | C18G1.9  | C18G1.9 | -0.0975482978883839          | AGIWUR27591 |
| N2                                                                     | HS | V | 4770670 | 4773091 | WBGene00015981 | elt-7    | C18G1.2 | 0.170327528757765            | AGIWUR25029 |
| N2                                                                     | HS | V | 4777960 | 4780019 | WBGene00015980 | C18G1.1  | C18G1.1 | -0.2052924688661             | AGIWUR10156 |
| N2                                                                     | HS | V | 4783613 | 4786140 | WBGene00022013 | Y60C6A.1 |         | Y60C6A.1 0.258651958821125   |             |
| AGIWUR16948                                                            |    |   |         |         |                |          |         |                              |             |
| N2                                                                     | HS | V | 4794599 | 4796996 | WBGene00019840 | R02F11.2 |         | R02F11.2 -0.0311118469966969 |             |
| AGIWUR2726;AGIWUR5721;AGIWUR23238;AGIWUR35491                          |    |   |         |         |                |          |         |                              |             |
| N2                                                                     | HS | V | 4801094 | 4802626 | WBGene00019839 | R02F11.1 |         | R02F11.1 0.175881403206013   |             |
| AGIWUR29210                                                            |    |   |         |         |                |          |         |                              |             |

|                                                                                  |    |   |         |         |                |           |           |                     |
|----------------------------------------------------------------------------------|----|---|---------|---------|----------------|-----------|-----------|---------------------|
| N2                                                                               | HS | V | 4802647 | 4805947 | WBGene00019841 | R02F11.3  | R02F11.3  | 0.150095316763614   |
| AGIWUR17799;AGIWUR29564                                                          |    |   |         |         |                |           |           |                     |
| N2                                                                               | HS | V | 4810865 | 4818663 | WBGene00019842 | R02F11.4  | R02F11.4  | 0.264524643540291   |
| AGIWUR17550                                                                      |    |   |         |         |                |           |           |                     |
| N2                                                                               | HS | V | 4818701 | 4823344 | WBGene00016509 | adss-1    | C37H5.6   | -0.225024204727664  |
| AGIWUR3440;AGIWUR8948;AGIWUR9961;AGIWUR22132;AGIWUR22362;AGIWUR36251;AGIWUR36473 |    |   |         |         |                |           |           |                     |
| N2                                                                               | HS | V | 4824130 | 4826760 | WBGene00002010 | hsp-6     | C37H5.8   | -0.0308486929159857 |
| AGIWUR10444;AGIWUR26791                                                          |    |   |         |         |                |           |           |                     |
| N2                                                                               | HS | V | 4827360 | 4836025 | WBGene00016508 | C37H5.5   | C37H5.5   | 0.0137905079526472  |
| AGIWUR32683                                                                      |    |   |         |         |                |           |           |                     |
| N2                                                                               | HS | V | 4836027 | 4840010 | WBGene00003528 | nas-9     | C37H5.9   | -0.502806352970198  |
| AGIWUR7821                                                                       |    |   |         |         |                |           |           |                     |
| N2                                                                               | HS | V | 4840619 | 4841269 | WBGene00000859 | cwp-1     | C37H5.10  | 0.144606119365438   |
| AGIWUR10874                                                                      |    |   |         |         |                |           |           |                     |
| N2                                                                               | HS | V | 4841940 | 4842567 | WBGene00000860 | cwp-2     | C37H5.11  | 0.148045334514689   |
| AGIWUR292                                                                        |    |   |         |         |                |           |           |                     |
| N2                                                                               | HS | V | 4842836 | 4843845 | WBGene00000861 | cwp-3     | C37H5.4   | 0.0138983959943584  |
| AGIWUR2144                                                                       |    |   |         |         |                |           |           |                     |
| N2                                                                               | HS | V | 4844685 | 4846984 | WBGene00016507 | abhd-5.2  | C37H5.3   | 0.202613363688681   |
| AGIWUR26648;AGIWUR36638                                                          |    |   |         |         |                |           |           |                     |
| N2                                                                               | HS | V | 4847653 | 4849838 | WBGene00016506 | abhd-5.1  | C37H5.2   | 0.100272198731592   |
| AGIWUR25974                                                                      |    |   |         |         |                |           |           |                     |
| N2                                                                               | HS | V | 4851472 | 4857260 | WBGene00003591 | nex-4     | C37H5.1   | -0.0536761030724797 |
| AGIWUR22444                                                                      |    |   |         |         |                |           |           |                     |
| N2                                                                               | HS | V | 4857149 | 4862965 | WBGene00016511 | C37H5.13  | C37H5.13  | 0.00495002294677782 |
| AGIWUR894;AGIWUR6151;AGIWUR15127;AGIWUR17736;AGIWUR20020;AGIWUR22385;AGIWUR27555 |    |   |         |         |                |           |           |                     |
| N2                                                                               | HS | V | 4865648 | 4870355 | WBGene00005110 | srd-32    | T19H12.5  | -0.0746563552767103 |
| AGIWUR40248                                                                      |    |   |         |         |                |           |           |                     |
| N2                                                                               | HS | V | 4872303 | 4874200 | WBGene00005111 | srd-33    | T19H12.4  | 0.11365603482078    |
| AGIWUR15862                                                                      |    |   |         |         |                |           |           |                     |
| N2                                                                               | HS | V | 4874923 | 4879319 | WBGene00020590 | T19H12.6  | T19H12.6  | 0.133137273363207   |
| AGIWUR28964                                                                      |    |   |         |         |                |           |           |                     |
| N2                                                                               | HS | V | 4879945 | 4881477 | WBGene00006098 | str-32    | T19H12.7  | 0.0289269892534225  |
| AGIWUR24416                                                                      |    |   |         |         |                |           |           |                     |
| N2                                                                               | HS | V | 4882178 | 4884319 | WBGene00020591 | nhr-220   | T19H12.8  | 0.145354696774708   |
| AGIWUR21627                                                                      |    |   |         |         |                |           |           |                     |
| N2                                                                               | HS | V | 4884790 | 4885420 | WBGene00044282 | T19H12.12 | T19H12.12 | 0.128874452242183   |
| AGIWUR7237                                                                       |    |   |         |         |                |           |           |                     |
| N2                                                                               | HS | V | 4885672 | 4886809 | WBGene00020589 | T19H12.3  | T19H12.3  | 0.287302902014339   |
| AGIWUR21961                                                                      |    |   |         |         |                |           |           |                     |
| N2                                                                               | HS | V | 4887187 | 4889629 | WBGene00020592 | ugt-12    | T19H12.9  | 0.411090296579781   |
| AGIWUR26207                                                                      |    |   |         |         |                |           |           |                     |
| N2                                                                               | HS | V | 4890429 | 4891422 | WBGene00020588 | T19H12.2  | T19H12.2  | -0.126389561474341  |

|                                                                                   |    |   |         |         |                |          |           |                      |             |
|-----------------------------------------------------------------------------------|----|---|---------|---------|----------------|----------|-----------|----------------------|-------------|
| AGIWUR8639;AGIWUR8820                                                             |    |   |         |         |                |          |           |                      |             |
| N2                                                                                | HS | V | 4892588 | 4895071 | WBGene00020593 | ugt-11   | T19H12.10 | 0.130453913031026    |             |
| AGIWUR33007                                                                       |    |   |         |         |                |          |           |                      |             |
| N2                                                                                | HS | V | 4896028 | 4897969 | WBGene00020587 | ugt-9    | T19H12.1  | 0.206613566505224    |             |
| AGIWUR1830                                                                        |    |   |         |         |                |          |           |                      |             |
| N2                                                                                | HS | V | 4898217 | 4900082 | WBGene00020594 | ugt-10   | T19H12.11 | 0.000132278688075971 |             |
| AGIWUR2113                                                                        |    |   |         |         |                |          |           |                      |             |
| N2                                                                                | HS | V | 4901374 | 4903010 | WBGene00019235 | H23N18.4 | H23N18.4  | -0.0278109985415265  |             |
| AGIWUR15965;AGIWUR37437;AGIWUR41886                                               |    |   |         |         |                |          |           |                      |             |
| N2                                                                                | HS | V | 4903930 | 4905918 | WBGene00019234 | ugt-8    | H23N18.3  | 0.277487738801199    |             |
| AGIWUR35284                                                                       |    |   |         |         |                |          |           |                      |             |
| N2                                                                                | HS | V | 4906253 | 4908258 | WBGene00019233 | ugt-14   | H23N18.2  | -0.18240656987957    |             |
| AGIWUR1674                                                                        |    |   |         |         |                |          |           |                      |             |
| N2                                                                                | HS | V | 4908868 | 4911399 | WBGene00019232 | ugt-13   | H23N18.1  | 0.0241006483550841   |             |
| AGIWUR10867;AGIWUR24424;AGIWUR29728                                               |    |   |         |         |                |          |           |                      |             |
| N2                                                                                | HS | V | 4911712 | 4912381 | WBGene00019236 | H23N18.5 | H23N18.5  | 0.256069619483071    |             |
| AGIWUR19342                                                                       |    |   |         |         |                |          |           |                      |             |
| N2                                                                                | HS | V | 4913061 | 4915079 | WBGene00044534 | H23N18.6 | H23N18.6  | 0.0882662524211728   |             |
| AGIWUR26450;AGIWUR31107;AGIWUR36453                                               |    |   |         |         |                |          |           |                      |             |
| N2                                                                                | HS | V | 4918154 | 4918585 | WBGene00015340 | C02E7.7  | C02E7.7   | 0.496839343242986    | AGIWUR24668 |
| N2                                                                                | HS | V | 4919207 | 4919586 | WBGene00015339 | C02E7.6  | C02E7.6   | -0.32352403918272    |             |
| AGIWUR2706;AGIWUR4643;AGIWUR16815;AGIWUR18589;AGIWUR20623;AGIWUR37703;AGIWUR43853 |    |   |         |         |                |          |           |                      |             |
| N2                                                                                | HS | V | 4920342 | 4920790 | WBGene00015341 | C02E7.8  | C02E7.8   | 0.186960086107034    | AGIWUR11061 |
| N2                                                                                | HS | V | 4921102 | 4922616 | WBGene00005248 | srh-23   | C02E7.5   | -0.00650002194764188 | AGIWUR18669 |
| N2                                                                                | HS | V | 4923292 | 4924594 | WBGene00005247 | srh-22   | C02E7.4   | -0.0226688194155606  | AGIWUR33717 |
| N2                                                                                | HS | V | 4924918 | 4926224 | WBGene00005245 | srh-20   | C02E7.3   | 0.000898945451794475 | AGIWUR34535 |
| N2                                                                                | HS | V | 4926671 | 4928181 | WBGene00005246 | srh-21   | C02E7.2   | -0.14459281446688    | AGIWUR37003 |
| N2                                                                                | HS | V | 4928278 | 4929942 | WBGene00006238 | str-205  | C02E7.9   | -0.0410900908959082  | AGIWUR22281 |
| N2                                                                                | HS | V | 4930817 | 4933027 | WBGene00015342 | C02E7.10 | C02E7.10  | -0.0665637881050092  |             |
| AGIWUR2084                                                                        |    |   |         |         |                |          |           |                      |             |
| N2                                                                                | HS | V | 4934706 | 4939085 | WBGene00015338 | catp-2   | C02E7.1   | -0.00856848202629834 | AGIWUR11404 |
| N2                                                                                | HS | V | 4939260 | 4940641 | WBGene00006246 | str-213  | C02E7.11  | -0.0624200924830243  |             |
| AGIWUR9176                                                                        |    |   |         |         |                |          |           |                      |             |
| N2                                                                                | HS | V | 4941196 | 4942414 | WBGene00006245 | str-212  | C02E7.12  | 0.343513309034321    |             |
| AGIWUR13654;AGIWUR26919                                                           |    |   |         |         |                |          |           |                      |             |
| N2                                                                                | HS | V | 4943116 | 4944319 | WBGene00006244 | str-211  | C02E7.13  | -0.0336293415931568  |             |
| AGIWUR19419                                                                       |    |   |         |         |                |          |           |                      |             |
| N2                                                                                | HS | V | 4945662 | 4948299 | WBGene00006243 | str-210  | F26G5.11  | 0.0352858364024797   |             |
| AGIWUR5249;AGIWUR20666                                                            |    |   |         |         |                |          |           |                      |             |

|                                                                                    |    |   |         |         |                |           |           |                     |             |
|------------------------------------------------------------------------------------|----|---|---------|---------|----------------|-----------|-----------|---------------------|-------------|
| N2                                                                                 | HS | V | 4948935 | 4951024 | WBGene00006242 | str-209   | F26G5.5   | -0.0686226361664275 | AGIWUR31438 |
| N2                                                                                 | HS | V | 4951734 | 4953035 | WBGene00006240 | str-207   | F26G5.4   | 0.0998594877042471  | AGIWUR2049  |
| N2                                                                                 | HS | V | 4954250 | 4955989 | WBGene00005100 | srd-22    | F26G5.3   | 0.075126961464175   | AGIWUR12411 |
| N2                                                                                 | HS | V | 4956829 | 4958572 | WBGene00006241 | str-208   | F26G5.2   | 0.147871271424821   | AGIWUR12648 |
| N2                                                                                 | HS | V | 4958603 | 4963098 | WBGene00006523 | tam-1     | F26G5.9   | -0.108807582612186  |             |
| AGIWUR8886;AGIWUR16292;AGIWUR16850;AGIWUR17900;AGIWUR35397;AGIWUR35895;AGIWUR38065 |    |   |         |         |                |           |           |                     |             |
| N2                                                                                 | HS | V | 4971770 | 4973043 | WBGene00017845 | srsx-9    | F26G5.10  | 0.131902754621783   |             |
| AGIWUR35069                                                                        |    |   |         |         |                |           |           |                     |             |
| N2                                                                                 | HS | V | 4973314 | 4974777 | WBGene00044117 | srsx-10   | F26G5.12  | -0.105694414576228  |             |
| AGIWUR29835;AGIWUR29983                                                            |    |   |         |         |                |           |           |                     |             |
| N2                                                                                 | HS | V | 4975485 | 4977502 | WBGene00017843 | F26G5.1   | F26G5.1   | -0.109382890409471  | AGIWUR21735 |
| N2                                                                                 | HS | V | 4977934 | 4979160 | WBGene00015736 | srsx-11   | C13D9.4   | 0.279420440445525   |             |
| AGIWUR6710;AGIWUR18113                                                             |    |   |         |         |                |           |           |                     |             |
| N2                                                                                 | HS | V | 4979947 | 4980973 | WBGene00015737 | srsx-12   | C13D9.5   | -0.0292975326949669 | AGIWUR26886 |
| N2                                                                                 | HS | V | 4981809 | 4983191 | WBGene00015738 | srsx-13   | C13D9.6   | 0.0997893017768652  | AGIWUR42234 |
| N2                                                                                 | HS | V | 4983748 | 4987197 | WBGene00003573 | ncx-8     | C13D9.7   | -0.0788916158219886 |             |
| AGIWUR6415;AGIWUR24815;AGIWUR31203                                                 |    |   |         |         |                |           |           |                     |             |
| N2                                                                                 | HS | V | 4991505 | 4995064 | WBGene00003574 | ncx-9     | C13D9.8   | 0.0804802674179186  | AGIWUR19023 |
| N2                                                                                 | HS | V | 4997048 | 5000558 | WBGene00015739 | ugt-7     | C13D9.9   | 0.383141734962386   | AGIWUR21056 |
| N2                                                                                 | HS | V | 5001686 | 5003414 | WBGene00005659 | srr-8     | C13D9.3   | -0.166635579623371  | AGIWUR3691  |
| N2                                                                                 | HS | V | 5007229 | 5011702 | WBGene00005656 | srr-5     | C13D9.2   | 0.0599357007185741  | AGIWUR31596 |
| N2                                                                                 | HS | V | 5012994 | 5015059 | WBGene00005657 | srr-6     | C13D9.1   | 0.46105984253157    | AGIWUR19957 |
| N2                                                                                 | HS | V | 5019224 | 5022369 | WBGene00005655 | srr-4     | K11D12.3  | 0.200133818707052   |             |
| AGIWUR16882                                                                        |    |   |         |         |                |           |           |                     |             |
| N2                                                                                 | HS | V | 5023706 | 5027723 | WBGene00019644 | cpt-4     | K11D12.4  | -0.996507091500625  |             |
| AGIWUR10491                                                                        |    |   |         |         |                |           |           |                     |             |
| N2                                                                                 | HS | V | 5029324 | 5030811 | WBGene00019645 | swt-7     | K11D12.5  | -0.0382281438540666 |             |
| AGIWUR6855                                                                         |    |   |         |         |                |           |           |                     |             |
| N2                                                                                 | HS | V | 5033398 | 5034171 | WBGene00044535 | K11D12.13 | K11D12.13 | 0.254917252282095   |             |
| AGIWUR6605;AGIWUR23117;AGIWUR31448                                                 |    |   |         |         |                |           |           |                     |             |
| N2                                                                                 | HS | V | 5034528 | 5035169 | WBGene00019646 | K11D12.6  | K11D12.6  | 0.286037318753579   |             |
| AGIWUR6484                                                                         |    |   |         |         |                |           |           |                     |             |
| N2                                                                                 | HS | V | 5035252 | 5036464 | WBGene00019647 | K11D12.7  | K11D12.7  | 0.439687087685575   |             |
| AGIWUR25453                                                                        |    |   |         |         |                |           |           |                     |             |
| N2                                                                                 | HS | V | 5036572 | 5038658 | WBGene00019650 | K11D12.11 | K11D12.11 | 0.00715221766451357 |             |
| AGIWUR11290                                                                        |    |   |         |         |                |           |           |                     |             |
| N2                                                                                 | HS | V | 5039669 | 5041003 | WBGene00019648 | K11D12.8  | K11D12.8  |                     |             |
| -0.00290829041709539 AGIWUR31955                                                   |    |   |         |         |                |           |           |                     |             |
| N2                                                                                 | HS | V | 5042408 | 5046203 | WBGene00019649 | K11D12.9  | K11D12.9  | 0.0529503080757685  |             |

|                                                                                                        |    |   |         |         |                |           |           |                     |             |
|--------------------------------------------------------------------------------------------------------|----|---|---------|---------|----------------|-----------|-----------|---------------------|-------------|
| AGIWUR32970                                                                                            |    |   |         |         |                |           |           |                     |             |
| N2                                                                                                     | HS | V | 5049541 | 5052214 | WBGene00004136 | pqn-51    | K11D12.2  | -0.160514130149618  |             |
| AGIWUR12989;AGIWUR15695;AGIWUR15696;AGIWUR25674;AGIWUR31797                                            |    |   |         |         |                |           |           |                     |             |
| N2                                                                                                     | HS | V | 5052261 | 5053490 | WBGene00019651 | K11D12.12 | K11D12.12 | 0.150404368907072   |             |
| AGIWUR37796                                                                                            |    |   |         |         |                |           |           |                     |             |
| N2                                                                                                     | HS | V | 5053619 | 5056473 | WBGene00000862 | cwp-4     | K11D12.1  | -0.196656013051591  |             |
| AGIWUR40515                                                                                            |    |   |         |         |                |           |           |                     |             |
| N2                                                                                                     | HS | V | 5056378 | 5064803 | WBGene00003374 | mlk-1     | K11D12.10 | -0.107609608357935  |             |
| AGIWUR16397;AGIWUR31783;AGIWUR32510                                                                    |    |   |         |         |                |           |           |                     |             |
| N2                                                                                                     | HS | V | 5067637 | 5069665 | WBGene00021975 | Y58A7A.1  | Y58A7A.1  | 0.0014633621155955  |             |
| AGIWUR8433                                                                                             |    |   |         |         |                |           |           |                     |             |
| N2                                                                                                     | HS | V | 5071695 | 5072231 | WBGene00021976 | Y58A7A.2  | Y58A7A.2  | 0.154419907762859   |             |
| AGIWUR32706                                                                                            |    |   |         |         |                |           |           |                     |             |
| N2                                                                                                     | HS | V | 5077849 | 5080903 | WBGene00021977 | Y58A7A.3  | Y58A7A.3  | 0.0905654318261848  |             |
| AGIWUR2789;AGIWUR17112;AGIWUR33812;AGIWUR39349                                                         |    |   |         |         |                |           |           |                     |             |
| N2                                                                                                     | HS | V | 5082002 | 5085007 | WBGene00021978 | Y58A7A.4  | Y58A7A.4  | 0.168492751606426   |             |
| AGIWUR35117                                                                                            |    |   |         |         |                |           |           |                     |             |
| N2                                                                                                     | HS | V | 5085886 | 5087121 | WBGene00021979 | Y58A7A.5  | Y58A7A.5  | 0.71502822107654    |             |
| AGIWUR37032                                                                                            |    |   |         |         |                |           |           |                     |             |
| N2                                                                                                     | HS | V | 5087601 | 5089484 | WBGene00021980 | glb-32    | Y58A7A.6  | 0.0240475124156578  |             |
| AGIWUR16777                                                                                            |    |   |         |         |                |           |           |                     |             |
| N2                                                                                                     | HS | V | 5093715 | 5096277 | WBGene00015444 | C04F5.2   | C04F5.2   | -0.0290343937302886 | AGIWUR36566 |
| N2                                                                                                     | HS | V | 5097150 | 5098907 | WBGene00006782 | unc-46    | C04F5.3   | 0.0568271952970156  |             |
| AGIWUR3171;AGIWUR5049;AGIWUR16856;AGIWUR35187                                                          |    |   |         |         |                |           |           |                     |             |
| N2                                                                                                     | HS | V | 5100098 | 5102117 | WBGene00015446 | srab-1    | C04F5.4   | -0.192229395199507  | AGIWUR42529 |
| N2                                                                                                     | HS | V | 5103042 | 5105034 | WBGene00015447 | srab-2    | C04F5.5   | 0.0268647175124652  | AGIWUR4344  |
| N2                                                                                                     | HS | V | 5105764 | 5107916 | WBGene00015448 | srab-3    | C04F5.6   | -0.261361689644779  | AGIWUR1011  |
| N2                                                                                                     | HS | V | 5108180 | 5110791 | WBGene00015449 | ugt-63    | C04F5.7   | -0.234128444847156  |             |
| AGIWUR27307;AGIWUR28572;AGIWUR30566;AGIWUR40417                                                        |    |   |         |         |                |           |           |                     |             |
| N2                                                                                                     | HS | V | 5111518 | 5113754 | WBGene00015450 | C04F5.8   | C04F5.8   | -0.0280948831083698 | AGIWUR35055 |
| N2                                                                                                     | HS | V | 5114749 | 5119209 | WBGene00015451 | C04F5.9   | C04F5.9   | 0.141522282445273   | AGIWUR31490 |
| N2                                                                                                     | HS | V | 5119939 | 5126916 | WBGene00004795 | sid-1     | C04F5.1   | -0.145656403431996  | AGIWUR24735 |
| N2                                                                                                     | HS | V | 5127055 | 5130076 | WBGene00017468 | F14F9.5   | F14F9.5   | -0.0934265374788179 | AGIWUR36714 |
| N2                                                                                                     | HS | V | 5130318 | 5131538 | WBGene00044536 | F14F9.8   | F14F9.8   | -0.0320454597075379 |             |
| AGIWUR74;AGIWUR1622;AGIWUR6008;AGIWUR25330;AGIWUR26386;AGIWUR29636;AGIWUR32108;AGIWUR40651;AGIWUR45182 |    |   |         |         |                |           |           |                     |             |
| N2                                                                                                     | HS | V | 5132741 | 5137100 | WBGene00017467 | F14F9.4   | F14F9.4   | 0.321340809554181   | AGIWUR4813  |
| N2                                                                                                     | HS | V | 5142300 | 5143798 | WBGene00005346 | srh-129   | F14F9.7   | -0.0284689841342054 | AGIWUR36675 |
| N2                                                                                                     | HS | V | 5144831 | 5145781 | WBGene00017465 | F14F9.2   | F14F9.2   | -0.105431265083015  | AGIWUR10319 |
| N2                                                                                                     | HS | V | 5146179 | 5150464 | WBGene00017469 | F14F9.6   | F14F9.6   | -0.0676792112816855 | AGIWUR44128 |

|                                                                                    |    |   |         |         |                |          |          |                      |             |
|------------------------------------------------------------------------------------|----|---|---------|---------|----------------|----------|----------|----------------------|-------------|
| N2                                                                                 | HS | V | 5151180 | 5152982 | WBGene00005347 | srh-130  | F14F9.1  | 0.222995515560545    |             |
| AGIWUR15975;AGIWUR23770;AGIWUR45119                                                |    |   |         |         |                |          |          |                      |             |
| N2                                                                                 | HS | V | 5154057 | 5155516 | WBGene00005929 | srx-38   | C03A7.5  | -0.0579999022669533  | AGIWUR24941 |
| N2                                                                                 | HS | V | 5156653 | 5157760 | WBGene00005930 | srx-39   | C03A7.6  | -0.00820393642190886 |             |
| AGIWUR7660;AGIWUR15660                                                             |    |   |         |         |                |          |          |                      |             |
| N2                                                                                 | HS | V | 5163269 | 5194608 | WBGene00000031 | abu-8    | C03A7.14 | 0.124885452647881    |             |
| AGIWUR5374;AGIWUR13664;AGIWUR21378;AGIWUR26006;AGIWUR37231;AGIWUR39433;AGIWUR43459 |    |   |         |         |                |          |          |                      |             |
| N2                                                                                 | HS | V | 5195926 | 5198340 | WBGene00021614 | Y47A7.2  | Y47A7.2  | -0.0631465069296784  | AGIWUR32030 |
| N2                                                                                 | HS | V | 5204481 | 5213468 | WBGene00021613 | Y47A7.1  | Y47A7.1  | -0.0944622682550822  | AGIWUR43172 |
| N2                                                                                 | HS | V | 5223423 | 5230471 | WBGene00021732 | Y49G5B.1 | Y49G5B.1 | -0.154910545352093   |             |
| AGIWUR10915;AGIWUR30491;AGIWUR42762                                                |    |   |         |         |                |          |          |                      |             |
| N2                                                                                 | HS | V | 5230475 | 5233891 | WBGene00016862 | C52A10.1 | C52A10.1 | 0.093666107800443    |             |
| AGIWUR38429                                                                        |    |   |         |         |                |          |          |                      |             |
| N2                                                                                 | HS | V | 5237417 | 5239440 | WBGene00016864 | C52A10.3 | C52A10.3 | -0.0957709613077551  |             |
| AGIWUR9942;AGIWUR17072;AGIWUR18741;AGIWUR27518;AGIWUR32753;AGIWUR35543             |    |   |         |         |                |          |          |                      |             |
| N2                                                                                 | HS | V | 5240203 | 5240451 | WBGene00044537 | B0238.15 | B0238.15 | -0.0791802714188838  |             |
| AGIWUR20789                                                                        |    |   |         |         |                |          |          |                      |             |
| N2                                                                                 | HS | V | 5240768 | 5243136 | WBGene00015067 | B0238.1  | B0238.1  | 0.254638100146789    | AGIWUR23849 |
| N2                                                                                 | HS | V | 5243815 | 5248021 | WBGene00015077 | B0238.13 | B0238.13 | 0.0273041995548589   |             |
| AGIWUR7988;AGIWUR21729;AGIWUR22553;AGIWUR24752;AGIWUR44017                         |    |   |         |         |                |          |          |                      |             |
| N2                                                                                 | HS | V | 5249037 | 5249873 | WBGene00015078 | srt-66   | B0238.14 | -0.0679613699398178  |             |
| AGIWUR4331                                                                         |    |   |         |         |                |          |          |                      |             |
| N2                                                                                 | HS | V | 5250604 | 5252116 | WBGene00015068 | srt-68   | B0238.3  | 0.0198301056988903   |             |
| AGIWUR6333;AGIWUR7946;AGIWUR27879                                                  |    |   |         |         |                |          |          |                      |             |
| N2                                                                                 | HS | V | 5256142 | 5257458 | WBGene00015069 | srt-67   | B0238.5  | 0.170535975520005    | AGIWUR13781 |
| N2                                                                                 | HS | V | 5258036 | 5259548 | WBGene00015070 | srt-70   | B0238.6  | 0.0685365630805412   |             |
| AGIWUR7541;AGIWUR44643                                                             |    |   |         |         |                |          |          |                      |             |
| N2                                                                                 | HS | V | 5260332 | 5263099 | WBGene00015071 | B0238.7  | B0238.7  | -0.0212011006579873  |             |
| AGIWUR18267;AGIWUR28110                                                            |    |   |         |         |                |          |          |                      |             |
| N2                                                                                 | HS | V | 5263951 | 5265776 | WBGene00015072 | srt-69   | B0238.8  | 0.0621922494069116   | AGIWUR1864  |
| N2                                                                                 | HS | V | 5267822 | 5268823 | WBGene00015076 | B0238.12 | B0238.12 | -0.0782067500799277  |             |
| AGIWUR2000;AGIWUR4711;AGIWUR8300;AGIWUR10378;AGIWUR21191;AGIWUR31864               |    |   |         |         |                |          |          |                      |             |
| N2                                                                                 | HS | V | 5269485 | 5270744 | WBGene00015075 | B0238.11 | B0238.11 | 0.0183790331172613   |             |
| AGIWUR5198;AGIWUR8055;AGIWUR32992                                                  |    |   |         |         |                |          |          |                      |             |
| N2                                                                                 | HS | V | 5274074 | 5275615 | WBGene00015074 | natc-2   | B0238.10 | -0.0581194755310541  |             |
| AGIWUR18864                                                                        |    |   |         |         |                |          |          |                      |             |
| N2                                                                                 | HS | V | 5275554 | 5278101 | WBGene00015073 | B0238.9  | B0238.9  | -0.155726495478643   | AGIWUR26181 |
| N2                                                                                 | HS | V | 5286407 | 5287360 | WBGene00021731 | Y49G5A.1 | Y49G5A.1 | -0.14511362232094    |             |
| AGIWUR10627                                                                        |    |   |         |         |                |          |          |                      |             |

|                                                                         |    |   |         |         |                |          |          |                     |             |
|-------------------------------------------------------------------------|----|---|---------|---------|----------------|----------|----------|---------------------|-------------|
| N2                                                                      | HS | V | 5303689 | 5311246 | WBGene00003567 | ncx-2    | C10G8.5  | -0.175870449848177  |             |
| AGIWUR16673;AGIWUR28589;AGIWUR39724;AGIWUR40302                         |    |   |         |         |                |          |          |                     |             |
| N2                                                                      | HS | V | 5311935 | 5312349 | WBGene00015683 | C10G8.4  | C10G8.4  | 0.0933275608728001  |             |
| AGIWUR16031;AGIWUR16827;AGIWUR17490                                     |    |   |         |         |                |          |          |                     |             |
| N2                                                                      | HS | V | 5312890 | 5314289 | WBGene00015682 | C10G8.3  | C10G8.3  | 0.352558395582928   | AGIWUR6462  |
| N2                                                                      | HS | V | 5314404 | 5315589 | WBGene00015681 | C10G8.2  | C10G8.2  | -0.157536490366156  | AGIWUR37429 |
| N2                                                                      | HS | V | 5315513 | 5319577 | WBGene00000455 | ceh-34   | C10G8.6  | -0.0709841015948509 | AGIWUR37117 |
| N2                                                                      | HS | V | 5323204 | 5324616 | WBGene00000454 | ceh-33   | C10G8.7  | -0.0846225165662808 | AGIWUR5584  |
| N2                                                                      | HS | V | 5324806 | 5328470 | WBGene00015684 | C10G8.8  | C10G8.8  | 0.317040739977766   |             |
| AGIWUR1144;AGIWUR21620                                                  |    |   |         |         |                |          |          |                     |             |
| N2                                                                      | HS | V | 5331267 | 5333055 | WBGene00005183 | srg-26   | C10G8.1  | 0.0642105135380806  | AGIWUR38452 |
| N2                                                                      | HS | V | 5334888 | 5336329 | WBGene00005185 | srg-28   | T09D3.2  | -0.0838024855066273 | AGIWUR7914  |
| N2                                                                      | HS | V | 5337184 | 5339013 | WBGene00005186 | srg-29   | T09D3.6  | -0.231206814055854  | AGIWUR18570 |
| N2                                                                      | HS | V | 5339797 | 5341309 | WBGene00005184 | srg-27   | T09D3.7  | -0.0757804780998228 | AGIWUR20874 |
| N2                                                                      | HS | V | 5342139 | 5344365 | WBGene00005182 | srg-25   | T09D3.5  | -0.104863891831227  | AGIWUR33862 |
| N2                                                                      | HS | V | 5346619 | 5349571 | WBGene00020384 | T09D3.3  | T09D3.3  | -0.208479861865992  | AGIWUR21034 |
| N2                                                                      | HS | V | 5351783 | 5353067 | WBGene00005087 | srd-9    | T09D3.1  | -0.303328366746692  | AGIWUR34801 |
| N2                                                                      | HS | V | 5354062 | 5358225 | WBGene00020385 | nhr-216  | T09D3.4  | -0.185385774687407  | AGIWUR17754 |
| N2                                                                      | HS | V | 5365163 | 5366792 | WBGene00044538 | T09D3.8  | T09D3.8  | 0.20227222333666    |             |
| AGIWUR11112;AGIWUR28461;AGIWUR31607                                     |    |   |         |         |                |          |          |                     |             |
| N2                                                                      | HS | V | 5372418 | 5377500 | WBGene00016430 | C35A11.3 | C35A11.3 | 0.0310560094545274  |             |
| AGIWUR6176                                                              |    |   |         |         |                |          |          |                     |             |
| N2                                                                      | HS | V | 5386110 | 5389409 | WBGene00016429 | C35A11.2 | C35A11.2 | 0.25809848756676    |             |
| AGIWUR35099                                                             |    |   |         |         |                |          |          |                     |             |
| N2                                                                      | HS | V | 5389480 | 5393148 | WBGene00016431 | C35A11.4 | C35A11.4 | 0.192948982733885   |             |
| AGIWUR5955                                                              |    |   |         |         |                |          |          |                     |             |
| N2                                                                      | HS | V | 5405358 | 5408386 | WBGene00016428 | dmsr-7   | C35A11.1 | 0.0326949608904847  |             |
| AGIWUR31595                                                             |    |   |         |         |                |          |          |                     |             |
| N2                                                                      | HS | V | 5410955 | 5413001 | WBGene00017262 | F08F3.4  | F08F3.4  | 0.262183682862576   | AGIWUR23133 |
| N2                                                                      | HS | V | 5413320 | 5415073 | WBGene00017266 | F08F3.10 | F08F3.10 | 0.275136894247625   |             |
| AGIWUR16702                                                             |    |   |         |         |                |          |          |                     |             |
| N2                                                                      | HS | V | 5418044 | 5420067 | WBGene00017263 | F08F3.6  | F08F3.6  | 0.0163825714952601  |             |
| AGIWUR143;AGIWUR10790;AGIWUR29581                                       |    |   |         |         |                |          |          |                     |             |
| N2                                                                      | HS | V | 5421018 | 5423488 | WBGene00000373 | cyp-14A5 | F08F3.7  | -0.121803212621941  |             |
| AGIWUR43753                                                             |    |   |         |         |                |          |          |                     |             |
| N2                                                                      | HS | V | 5428160 | 5430431 | WBGene00004358 | rhr-1    | F08F3.3  | -0.321928766623814  |             |
| AGIWUR15061;AGIWUR22455;AGIWUR28598;AGIWUR30549;AGIWUR31196;AGIWUR43016 |    |   |         |         |                |          |          |                     |             |
| N2                                                                      | HS | V | 5431316 | 5432557 | WBGene00017264 | F08F3.8  | F08F3.8  | 0.343205925996989   | AGIWUR15174 |
| N2                                                                      | HS | V | 5433392 | 5437066 | WBGene00017261 | ac1-6    | F08F3.2  | 0.115871235565049   | AGIWUR43644 |

|                                                                        |    |   |         |         |                |          |          |                      |             |
|------------------------------------------------------------------------|----|---|---------|---------|----------------|----------|----------|----------------------|-------------|
| N2                                                                     | HS | V | 5437084 | 5439161 | WBGene00017265 | snpC-1.3 | F08F3.9  | -0.138026303029553   |             |
| AGIWUR14435                                                            |    |   |         |         |                |          |          |                      |             |
| N2                                                                     | HS | V | 5446138 | 5448721 | WBGene00017260 | F08F3.1  | F08F3.1  | 0.014200010410768    |             |
| AGIWUR13926;AGIWUR43486                                                |    |   |         |         |                |          |          |                      |             |
| N2                                                                     | HS | V | 5449287 | 5453715 | WBGene00001593 | glc-3    | ZC317.3  | 0.0443286120156916   | AGIWUR2075  |
| N2                                                                     | HS | V | 5460106 | 5461438 | WBGene00022588 | ZC317.2  | ZC317.2  | 0.110912314341285    | AGIWUR27671 |
| N2                                                                     | HS | V | 5461528 | 5462994 | WBGene00005224 | srg-67   | ZC317.4  | -0.150400908183309   | AGIWUR10677 |
| N2                                                                     | HS | V | 5463791 | 5465435 | WBGene00005225 | srg-68   | ZC317.5  | 0.00660045868381243  | AGIWUR23244 |
| N2                                                                     | HS | V | 5471779 | 5473144 | WBGene00022587 | ZC317.1  | ZC317.1  | -0.0136297294932994  | AGIWUR23867 |
| N2                                                                     | HS | V | 5480750 | 5482415 | WBGene00005223 | srg-66   | T05C3.7  | -0.0666396241884639  | AGIWUR30145 |
| N2                                                                     | HS | V | 5483086 | 5484966 | WBGene00005222 | srg-65   | T05C3.8  | 0.0666740377352717   | AGIWUR24244 |
| N2                                                                     | HS | V | 5485697 | 5488866 | WBGene00001727 | grl-18   | T05C3.4  | 0.130606449243407    | AGIWUR3326  |
| N2                                                                     | HS | V | 5490370 | 5493646 | WBGene00020256 | T05C3.6  | T05C3.6  | -0.0475128222424193  | AGIWUR20647 |
| N2                                                                     | HS | V | 5493747 | 5503010 | WBGene00020254 | T05C3.2  | T05C3.2  | -0.00182588488200164 | AGIWUR30515 |
| N2                                                                     | HS | V | 5503033 | 5504856 | WBGene00001037 | dnj-19   | T05C3.5  | -0.114567368530532   |             |
| AGIWUR6756;AGIWUR15692;AGIWUR18960;AGIWUR39985;AGIWUR40578;AGIWUR44931 |    |   |         |         |                |          |          |                      |             |
| N2                                                                     | HS | V | 5505253 | 5509956 | WBGene00003637 | nhr-47   | C24G6.4  | 0.0715393270831495   |             |
| AGIWUR39007;AGIWUR40807                                                |    |   |         |         |                |          |          |                      |             |
| N2                                                                     | HS | V | 5509934 | 5513830 | WBGene00016061 | hpo-15   | C24G6.6  | 0.129528065743254    |             |
| AGIWUR5425;AGIWUR7430;AGIWUR10964                                      |    |   |         |         |                |          |          |                      |             |
| N2                                                                     | HS | V | 5514348 | 5520458 | WBGene00016060 | mms-19   | C24G6.3  | -0.183276241836829   | AGIWUR12501 |
| N2                                                                     | HS | V | 5523727 | 5530733 | WBGene00016059 | C24G6.2  | C24G6.2  | 0.105133687254057    | AGIWUR41996 |
| N2                                                                     | HS | V | 5530725 | 5533845 | WBGene00001710 | grl-1    | C24G6.7  | -0.0579349248942211  | AGIWUR32944 |
| N2                                                                     | HS | V | 5534101 | 5536243 | WBGene00016062 | C24G6.8  | C24G6.8  | 0.106753326997467    |             |
| AGIWUR4807;AGIWUR34241;AGIWUR34262                                     |    |   |         |         |                |          |          |                      |             |
| N2                                                                     | HS | V | 5536681 | 5537713 | WBGene00006376 | syp-2    | C24G6.1  | 0.0672725963807714   | AGIWUR15027 |
| N2                                                                     | HS | V | 5538800 | 5545766 | WBGene00000477 | cft-1    | C18C4.2  | 0.00125355479644362  | AGIWUR14907 |
| N2                                                                     | HS | V | 5545669 | 5548073 | WBGene00015965 | ugt-48   | C18C4.3  | 0.100392710275047    |             |
| AGIWUR1728;AGIWUR19654;AGIWUR22191                                     |    |   |         |         |                |          |          |                      |             |
| N2                                                                     | HS | V | 5550315 | 5557281 | WBGene00015966 | C18C4.5  | C18C4.5  | -0.254955906130849   | AGIWUR35146 |
| N2                                                                     | HS | V | 5558890 | 5564298 | WBGene00015964 | glb-5    | C18C4.1  | 0.0033736397453854   | AGIWUR36782 |
| N2                                                                     | HS | V | 5564306 | 5567219 | WBGene00015968 | C18C4.7  | C18C4.7  | 0.15606771138736     |             |
| AGIWUR6245;AGIWUR44207                                                 |    |   |         |         |                |          |          |                      |             |
| N2                                                                     | HS | V | 5568209 | 5570533 | WBGene00015969 | glb-6    | C18C4.9  | -0.0217214781518349  |             |
| AGIWUR5075;AGIWUR34571;AGIWUR42521                                     |    |   |         |         |                |          |          |                      |             |
| N2                                                                     | HS | V | 5575410 | 5581713 | WBGene00002215 | klc-2    | C18C4.10 | 0.070880985815954    |             |
| AGIWUR16149;AGIWUR18996;AGIWUR28335;AGIWUR33837                        |    |   |         |         |                |          |          |                      |             |
| N2                                                                     | HS | V | 5583161 | 5584343 | WBGene00003927 | pas-6    | CD4.6    | 0.00851929332370105  | AGIWUR23093 |
| N2                                                                     | HS | V | 5585182 | 5586500 | WBGene00044542 | CD4.11   | CD4.11   | 0.0925830272136583   | AGIWUR10838 |



|                                                                        |    |   |         |         |                |          |          |                      |             |
|------------------------------------------------------------------------|----|---|---------|---------|----------------|----------|----------|----------------------|-------------|
| N2                                                                     | HS | V | 5589652 | 5591838 | WBGene00016991 | CD4.5    | CD4.5    | 0.139238576575009    | AGIWUR15443 |
| N2                                                                     | HS | V | 5592685 | 5593612 | WBGene00016990 | vps-37   | CD4.4    | -0.00598877380973661 | AGIWUR41592 |
| N2                                                                     | HS | V | 5593706 | 5594499 | WBGene00016989 | CD4.3    | CD4.3    | -0.0450945604537072  |             |
| AGIWUR5478;AGIWUR13375                                                 |    |   |         |         |                |          |          |                      |             |
| N2                                                                     | HS | V | 5594615 | 5595842 | WBGene00000795 | crn-2    | CD4.2    | -0.0177095710580417  | AGIWUR2005  |
| N2                                                                     | HS | V | 5595653 | 5596551 | WBGene00016992 | zhit-1   | CD4.7    | 0.0452332798750206   |             |
| AGIWUR26205;AGIWUR29405;AGIWUR29560                                    |    |   |         |         |                |          |          |                      |             |
| N2                                                                     | HS | V | 5597061 | 5597450 | WBGene00022970 | CD4.10   | CD4.10   | -0.135323190825307   |             |
| AGIWUR2884;AGIWUR10510;AGIWUR37326;AGIWUR37399;AGIWUR38444             |    |   |         |         |                |          |          |                      |             |
| N2                                                                     | HS | V | 5606555 | 5609368 | WBGene00016988 | CD4.1    | CD4.1    | -0.0878831341614648  |             |
| AGIWUR3887;AGIWUR12184;AGIWUR16190;AGIWUR22946                         |    |   |         |         |                |          |          |                      |             |
| N2                                                                     | HS | V | 5609414 | 5613219 | WBGene00019756 | M03E7.4  | M03E7.4  | 0.154528603109905    |             |
| AGIWUR1269;AGIWUR7806;AGIWUR36925                                      |    |   |         |         |                |          |          |                      |             |
| N2                                                                     | HS | V | 5617601 | 5618319 | WBGene00019754 | M03E7.2  | M03E7.2  | 0.266100984958909    | AGIWUR15374 |
| N2                                                                     | HS | V | 5618291 | 5620140 | WBGene00019757 | mem-2    | M03E7.5  | 0.265842114598923    | AGIWUR23665 |
| N2                                                                     | HS | V | 5623642 | 5624637 | WBGene00019753 | M03E7.1  | M03E7.1  | -0.0871187340552666  | AGIWUR18874 |
| N2                                                                     | HS | V | 5624727 | 5630892 | WBGene00000071 | acy-4    | T01C2.1  | 0.488390137115548    | AGIWUR6301  |
| N2                                                                     | HS | V | 5644487 | 5646231 | WBGene00006008 | srx-117  | C14C11.5 | -0.0611649202153188  |             |
| AGIWUR26107;AGIWUR33030;AGIWUR41327                                    |    |   |         |         |                |          |          |                      |             |
| N2                                                                     | HS | V | 5647564 | 5651040 | WBGene00015768 | C14C11.4 | C14C11.4 | -0.372078911577017   |             |
| AGIWUR5796                                                             |    |   |         |         |                |          |          |                      |             |
| N2                                                                     | HS | V | 5654449 | 5658699 | WBGene00015767 | hex-2    | C14C11.3 | 0.245722939773909    |             |
| AGIWUR28993                                                            |    |   |         |         |                |          |          |                      |             |
| N2                                                                     | HS | V | 5658713 | 5660704 | WBGene00003507 | mut-14   | C14C11.6 | 0.195718293213147    |             |
| AGIWUR17638                                                            |    |   |         |         |                |          |          |                      |             |
| N2                                                                     | HS | V | 5665242 | 5666082 | WBGene00015769 | C14C11.7 | C14C11.7 | -0.139684249833614   |             |
| AGIWUR15135                                                            |    |   |         |         |                |          |          |                      |             |
| N2                                                                     | HS | V | 5669611 | 5676111 | WBGene00004104 | pqn-13   | C14C11.8 | 0.0476460017018674   |             |
| AGIWUR30520                                                            |    |   |         |         |                |          |          |                      |             |
| N2                                                                     | HS | V | 5678600 | 5682630 | WBGene00017768 | F25B4.5  | F25B4.5  | -0.241487212039495   | AGIWUR37076 |
| N2                                                                     | HS | V | 5682721 | 5684589 | WBGene00017769 | hmg-1    | F25B4.6  | 0.182377549433475    | AGIWUR30393 |
| N2                                                                     | HS | V | 5684875 | 5685728 | WBGene00017767 | F25B4.4  | F25B4.4  | 0.088137291919713    | AGIWUR17106 |
| N2                                                                     | HS | V | 5685726 | 5687381 | WBGene00017770 | F25B4.7  | F25B4.7  | 0.156055719890422    |             |
| AGIWUR7148;AGIWUR16812;AGIWUR20659;AGIWUR31628;AGIWUR32518;AGIWUR34484 |    |   |         |         |                |          |          |                      |             |
| N2                                                                     | HS | V | 5690103 | 5691715 | WBGene00017771 | F25B4.8  | F25B4.8  | 0.239024528683036    |             |
| AGIWUR8731;AGIWUR13190;AGIWUR19738;AGIWUR20436;AGIWUR21867;AGIWUR31668 |    |   |         |         |                |          |          |                      |             |
| N2                                                                     | HS | V | 5700010 | 5701080 | WBGene00017772 | clec-1   | F25B4.9  | 0.141135771105358    | AGIWUR31369 |
| N2                                                                     | HS | V | 5709418 | 5712335 | WBGene00017766 | peli-1   | F25B4.2  | -0.0174862452485525  |             |
| AGIWUR7805;AGIWUR31214                                                 |    |   |         |         |                |          |          |                      |             |

|                                                                      |    |   |         |         |                |           |           |                      |             |
|----------------------------------------------------------------------|----|---|---------|---------|----------------|-----------|-----------|----------------------|-------------|
| N2                                                                   | HS | V | 5712818 | 5714756 | WBGene00017765 | gcst-1    | F25B4.1   | 0.351732241166664    |             |
| AGIWUR11264;AGIWUR16183;AGIWUR16623                                  |    |   |         |         |                |           |           |                      |             |
| N2                                                                   | HS | V | 5714760 | 5716581 | WBGene00044539 | K09H11.9  | K09H11.9  | 0.122588837955649    |             |
| AGIWUR370;AGIWUR8555;AGIWUR16863                                     |    |   |         |         |                |           |           |                      |             |
| N2                                                                   | HS | V | 5723079 | 5726545 | WBGene00019601 | K09H11.4  | K09H11.4  | 0.0645193036331762   |             |
| AGIWUR37085                                                          |    |   |         |         |                |           |           |                      |             |
| N2                                                                   | HS | V | 5727290 | 5729593 | WBGene00006015 | srx-124   | K09H11.8  | 0.276358030986431    |             |
| AGIWUR20319                                                          |    |   |         |         |                |           |           |                      |             |
| N2                                                                   | HS | V | 5731312 | 5734595 | WBGene00006014 | srx-123   | K09H11.2  | 0.00512120998212584  |             |
| AGIWUR35596                                                          |    |   |         |         |                |           |           |                      |             |
| N2                                                                   | HS | V | 5734844 | 5735984 | WBGene00019603 | K09H11.6  | K09H11.6  |                      |             |
| -0.00758635800943797 AGIWUR198;AGIWUR28113                           |    |   |         |         |                |           |           |                      |             |
| N2                                                                   | HS | V | 5747723 | 5752033 | WBGene00019599 | K09H11.1  | K09H11.1  | -0.0369328770498392  |             |
| AGIWUR6658;AGIWUR25254;AGIWUR40166                                   |    |   |         |         |                |           |           |                      |             |
| N2                                                                   | HS | V | 5754670 | 5755558 | WBGene00044541 | K09H11.11 | K09H11.11 | 0.0320037214665625   |             |
| AGIWUR3096;AGIWUR11398;AGIWUR36361;AGIWUR37461;AGIWUR41423           |    |   |         |         |                |           |           |                      |             |
| N2                                                                   | HS | V | 5758224 | 5760232 | WBGene00016891 | C53A3.1   | C53A3.1   | 0.537969930384344    |             |
| AGIWUR3869;AGIWUR8455;AGIWUR10857                                    |    |   |         |         |                |           |           |                      |             |
| N2                                                                   | HS | V | 5770456 | 5771767 | WBGene00018424 | F44E7.2   | F44E7.2   | -0.221627228849785   |             |
| AGIWUR39531;AGIWUR43941                                              |    |   |         |         |                |           |           |                      |             |
| N2                                                                   | HS | V | 5771945 | 5772497 | WBGene00018425 | F44E7.3   | F44E7.3   | 0.51186022583286     | AGIWUR27519 |
| N2                                                                   | HS | V | 5772831 | 5777034 | WBGene00018426 | F44E7.4   | F44E7.4   | -0.150179766162116   |             |
| AGIWUR6258;AGIWUR7214;AGIWUR10257;AGIWUR17718;AGIWUR37927            |    |   |         |         |                |           |           |                      |             |
| N2                                                                   | HS | V | 5778818 | 5780947 | WBGene00018427 | F44E7.5   | F44E7.5   | -0.0460668778865938  |             |
| AGIWUR4722;AGIWUR5044;AGIWUR5808;AGIWUR15449;AGIWUR16199;AGIWUR28981 |    |   |         |         |                |           |           |                      |             |
| N2                                                                   | HS | V | 5781317 | 5782787 | WBGene00018428 | fbxa-183  | F44E7.6   | 0.322922737281191    |             |
| AGIWUR22543                                                          |    |   |         |         |                |           |           |                      |             |
| N2                                                                   | HS | V | 5782893 | 5785648 | WBGene00018429 | F44E7.7   | F44E7.7   | 0.266952031811401    | AGIWUR13903 |
| N2                                                                   | HS | V | 5785959 | 5790066 | WBGene00018430 | nhr-142   | F44E7.8   | -0.0311888393543991  |             |
| AGIWUR35477;AGIWUR37111                                              |    |   |         |         |                |           |           |                      |             |
| N2                                                                   | HS | V | 5791230 | 5792122 | WBGene00018431 | F44E7.9   | F44E7.9   | -0.00558460239562919 | AGIWUR43388 |
| N2                                                                   | HS | V | 5792331 | 5794857 | WBGene00022576 | ZC250.2   | ZC250.2   | 0.242772971182284    | AGIWUR34319 |
| N2                                                                   | HS | V | 5794688 | 5798232 | WBGene00022577 | nstp-3    | ZC250.3   | 0.130667476432118    | AGIWUR3913  |
| N2                                                                   | HS | V | 5799673 | 5805666 | WBGene00000893 | cyn-17    | ZC250.1   | 0.2892512588334      |             |
| AGIWUR16547;AGIWUR26654                                              |    |   |         |         |                |           |           |                      |             |
| N2                                                                   | HS | V | 5805767 | 5807532 | WBGene00045306 | ZC250.5   | ZC250.5   | 0.107365865103215    | AGIWUR35199 |
| N2                                                                   | HS | V | 5812316 | 5813157 | WBGene00045305 | ZC250.4   | ZC250.4   | -0.095107248994041   |             |
| AGIWUR1578;AGIWUR13681;AGIWUR26046;AGIWUR43378                       |    |   |         |         |                |           |           |                      |             |
| N2                                                                   | HS | V | 5826833 | 5832866 | WBGene00002637 | let-418   | F26F12.7  | -0.0629950674557849  |             |

|                                                                                                |    |   |         |         |                |          |          |                     |             |
|------------------------------------------------------------------------------------------------|----|---|---------|---------|----------------|----------|----------|---------------------|-------------|
| AGIWUR6725;AGIWUR13247;AGIWUR14742;AGIWUR30477;AGIWUR34699;AGIWUR43629                         |    |   |         |         |                |          |          |                     |             |
| N2                                                                                             | HS | V | 5833831 | 5835183 | WBGene00005297 | srh-76   | F26F12.6 | -0.0351775835598955 |             |
| AGIWUR2120                                                                                     |    |   |         |         |                |          |          |                     |             |
| N2                                                                                             | HS | V | 5835855 | 5836871 | WBGene00000713 | col-140  | F26F12.1 | 0.167223241537613   |             |
| AGIWUR18993                                                                                    |    |   |         |         |                |          |          |                     |             |
| N2                                                                                             | HS | V | 5837572 | 5838613 | WBGene00017833 | F26F12.2 | F26F12.2 | 0.236584412624481   |             |
| AGIWUR15256                                                                                    |    |   |         |         |                |          |          |                     |             |
| N2                                                                                             | HS | V | 5838960 | 5845739 | WBGene00017834 | F26F12.3 | F26F12.3 | -0.048876428088783  |             |
| AGIWUR290;AGIWUR8936;AGIWUR9237;AGIWUR16429;AGIWUR17239;AGIWUR19312;AGIWUR28755;AGIWUR42064    |    |   |         |         |                |          |          |                     |             |
| N2                                                                                             | HS | V | 5854848 | 5856414 | WBGene00044544 | F26F12.8 | F26F12.8 | 0.397315663059038   |             |
| AGIWUR1899;AGIWUR8610;AGIWUR12476;AGIWUR24453;AGIWUR34690                                      |    |   |         |         |                |          |          |                     |             |
| N2                                                                                             | HS | V | 5863984 | 5865149 | WBGene00017836 | F26F12.5 | F26F12.5 | 0.0310488805038531  |             |
| AGIWUR289;AGIWUR1983;AGIWUR2375;AGIWUR2704;AGIWUR33158                                         |    |   |         |         |                |          |          |                     |             |
| N2                                                                                             | HS | V | 5866134 | 5867952 | WBGene00017835 | F26F12.4 | F26F12.4 | -0.228494597456258  |             |
| AGIWUR9893                                                                                     |    |   |         |         |                |          |          |                     |             |
| N2                                                                                             | HS | V | 5872084 | 5874914 | WBGene00015360 | C02G6.2  | C02G6.2  | 0.137738457118367   |             |
| AGIWUR18549;AGIWUR32969;AGIWUR35538;AGIWUR39767                                                |    |   |         |         |                |          |          |                     |             |
| N2                                                                                             | HS | V | 5876370 | 5879942 | WBGene00015359 | C02G6.1  | C02G6.1  | 0.0583775518607261  | AGIWUR15967 |
| N2                                                                                             | HS | V | 5881052 | 5882450 | WBGene00044803 | C02G6.3  | C02G6.3  | 0.0854818540512827  |             |
| AGIWUR3176;AGIWUR25574;AGIWUR28650                                                             |    |   |         |         |                |          |          |                     |             |
| N2                                                                                             | HS | V | 5882665 | 5883835 | WBGene00015424 | C04E6.8  | C04E6.8  | -0.0274445743493343 |             |
| AGIWUR2858;AGIWUR5076;AGIWUR11028;AGIWUR19894;AGIWUR31647;AGIWUR40369                          |    |   |         |         |                |          |          |                     |             |
| N2                                                                                             | HS | V | 5893312 | 5895208 | WBGene00015423 | C04E6.7  | C04E6.7  | 0.178267665588494   |             |
| AGIWUR2831;AGIWUR4042;AGIWUR17377                                                              |    |   |         |         |                |          |          |                     |             |
| N2                                                                                             | HS | V | 5895388 | 5898602 | WBGene00001698 | grd-9    | C04E6.6  | 0.244242649873701   | AGIWUR37827 |
| N2                                                                                             | HS | V | 5902133 | 5904831 | WBGene00015422 | C04E6.5  | C04E6.5  | 0.150632757680198   | AGIWUR16915 |
| N2                                                                                             | HS | V | 5904917 | 5906352 | WBGene00005093 | srd-15   | C04E6.10 | 0.058582078488401   |             |
| AGIWUR25561                                                                                    |    |   |         |         |                |          |          |                     |             |
| N2                                                                                             | HS | V | 5907408 | 5909620 | WBGene00015421 | C04E6.4  | C04E6.4  | 0.0155501628320369  | AGIWUR38659 |
| N2                                                                                             | HS | V | 5912726 | 5913757 | WBGene00015427 | C04E6.13 | C04E6.13 | 0.125081032838565   |             |
| AGIWUR30644                                                                                    |    |   |         |         |                |          |          |                     |             |
| N2                                                                                             | HS | V | 5914097 | 5917891 | WBGene00015425 | C04E6.11 | C04E6.11 | 0.00233538927909338 |             |
| AGIWUR4820;AGIWUR13300;AGIWUR16133;AGIWUR18878;AGIWUR25001;AGIWUR33865;AGIWUR34856;AGIWUR41339 |    |   |         |         |                |          |          |                     |             |
| N2                                                                                             | HS | V | 5918062 | 5919835 | WBGene00015426 | C04E6.12 | C04E6.12 | 0.0952123054747771  |             |
| AGIWUR19866                                                                                    |    |   |         |         |                |          |          |                     |             |
| N2                                                                                             | HS | V | 5920121 | 5920395 | WBGene00015420 | C04E6.3  | C04E6.3  | 0.0251079204853717  |             |
| AGIWUR4955;AGIWUR10644;AGIWUR19172;AGIWUR27814;AGIWUR40512                                     |    |   |         |         |                |          |          |                     |             |
| N2                                                                                             | HS | V | 5922545 | 5924297 | WBGene00015419 | srsx-18  | C04E6.2  | 0.0463513594926592  | AGIWUR18814 |
| N2                                                                                             | HS | V | 5927647 | 5930417 | WBGene00019032 | srsx-17  | F58D7.1  | -0.298907785425216  | AGIWUR41420 |

|                                                                                              |    |   |         |         |                |           |           |                     |             |
|----------------------------------------------------------------------------------------------|----|---|---------|---------|----------------|-----------|-----------|---------------------|-------------|
| N2                                                                                           | HS | V | 5930847 | 5933435 | WBGene00019763 | galt-1    | M03F8.4   | 0.0762365809091587  |             |
| AGIWUR21765;AGIWUR37492                                                                      |    |   |         |         |                |           |           |                     |             |
| N2                                                                                           | HS | V | 5933662 | 5936791 | WBGene00019764 | M03F8.5   | M03F8.5   | -0.0459410604551849 | AGIWUR31881 |
| N2                                                                                           | HS | V | 5940024 | 5943362 | WBGene00019762 | M03F8.3   | M03F8.3   | 0.175336987215447   |             |
| AGIWUR17052;AGIWUR27293                                                                      |    |   |         |         |                |           |           |                     |             |
| N2                                                                                           | HS | V | 5943474 | 5950991 | WBGene00004206 | pst-1     | M03F8.2   | -0.296310174455874  |             |
| AGIWUR2524;AGIWUR6470;AGIWUR8666;AGIWUR11767;AGIWUR17252;AGIWUR22609                         |    |   |         |         |                |           |           |                     |             |
| N2                                                                                           | HS | V | 5951433 | 5953872 | WBGene00019761 | M03F8.1   | M03F8.1   | 0.150814090423026   | AGIWUR14350 |
| N2                                                                                           | HS | V | 5953831 | 5954840 | WBGene00019765 | M03F8.6   | M03F8.6   | 0.0102542672328392  |             |
| AGIWUR29423;AGIWUR41081                                                                      |    |   |         |         |                |           |           |                     |             |
| N2                                                                                           | HS | V | 5960585 | 5963882 | WBGene00003954 | pcm-1     | C10F3.5   | 0.0989110448777915  |             |
| AGIWUR9721;AGIWUR22533;AGIWUR32790;AGIWUR39510                                               |    |   |         |         |                |           |           |                     |             |
| N2                                                                                           | HS | V | 5961813 | 5969175 | WBGene00015678 | mcp-1     | C10F3.4   | -0.213882261325063  | AGIWUR6540  |
| N2                                                                                           | HS | V | 5976029 | 5981513 | WBGene00000069 | acy-2     | C10F3.3   | 0.0927759619514195  | AGIWUR29420 |
| N2                                                                                           | HS | V | 5983745 | 5985473 | WBGene00000979 | dhs-16    | C10F3.2   | 0.156387282467092   | AGIWUR25144 |
| N2                                                                                           | HS | V | 5985440 | 5986855 | WBGene00015679 | C10F3.7   | C10F3.7   | 0.286096941784946   | AGIWUR30945 |
| N2                                                                                           | HS | V | 5987003 | 5990252 | WBGene00001508 | fut-8     | C10F3.6   | 0.300547454068889   | AGIWUR8362  |
| N2                                                                                           | HS | V | 5996323 | 5999344 | WBGene00015677 | cpg-4     | C10F3.1   | -0.0215225834926809 | AGIWUR29999 |
| N2                                                                                           | HS | V | 6003601 | 6016087 | WBGene00001345 | fos-1     | F29G9.4   | -0.171216748151226  | AGIWUR34164 |
| N2                                                                                           | HS | V | 6016049 | 6017669 | WBGene00004502 | rpt-2     | F29G9.5   | -0.0480026168404919 | AGIWUR8467  |
| N2                                                                                           | HS | V | 6017970 | 6018886 | WBGene00000159 | aps-1     | F29G9.3   | -0.183095488958696  |             |
| AGIWUR5131;AGIWUR10646;AGIWUR26206                                                           |    |   |         |         |                |           |           |                     |             |
| N2                                                                                           | HS | V | 6018994 | 6026337 | WBGene00017931 | picc-1    | F29G9.2   | -0.200413464169736  |             |
| AGIWUR14915;AGIWUR30183;AGIWUR39248                                                          |    |   |         |         |                |           |           |                     |             |
| N2                                                                                           | HS | V | 6026330 | 6034923 | WBGene00000980 | dhs-17    | F29G9.6   | -0.355008436202334  | AGIWUR9125  |
| N2                                                                                           | HS | V | 6041196 | 6043185 | WBGene00019804 | R01B10.2  | R01B10.2  | -0.374956275700495  |             |
| AGIWUR39768                                                                                  |    |   |         |         |                |           |           |                     |             |
| N2                                                                                           | HS | V | 6044028 | 6045671 | WBGene00000534 | cpi-2     | R01B10.1  | 0.0922966929188642  |             |
| AGIWUR363;AGIWUR9475;AGIWUR13614;AGIWUR15479;AGIWUR17723;AGIWUR37763;AGIWUR40451;AGIWUR43366 |    |   |         |         |                |           |           |                     |             |
| N2                                                                                           | HS | V | 6045640 | 6047908 | WBGene00019806 | R01B10.4  | R01B10.4  | -0.0864540092119146 |             |
| AGIWUR5448                                                                                   |    |   |         |         |                |           |           |                     |             |
| N2                                                                                           | HS | V | 6047922 | 6051259 | WBGene00019807 | jamp-1    | R01B10.5  | -0.190399571596307  |             |
| AGIWUR6308;AGIWUR24410;AGIWUR39284;AGIWUR42295                                               |    |   |         |         |                |           |           |                     |             |
| N2                                                                                           | HS | V | 6055589 | 6056743 | WBGene00005098 | srd-20    | Y38A10A.1 | -0.056571004325968  |             |
| AGIWUR5427                                                                                   |    |   |         |         |                |           |           |                     |             |
| N2                                                                                           | HS | V | 6057366 | 6063430 | WBGene00021389 | Y38A10A.2 | Y38A10A.2 | 0.278461236204563   |             |
| AGIWUR24984                                                                                  |    |   |         |         |                |           |           |                     |             |
| N2                                                                                           | HS | V | 6065507 | 6067089 | WBGene00005236 | srh-10    | Y38A10A.3 | -0.0975511443291586 |             |
| AGIWUR32924                                                                                  |    |   |         |         |                |           |           |                     |             |

|                                                                                                                                                                                  |    |   |         |         |                |           |           |                      |             |
|----------------------------------------------------------------------------------------------------------------------------------------------------------------------------------|----|---|---------|---------|----------------|-----------|-----------|----------------------|-------------|
| N2                                                                                                                                                                               | HS | V | 6067811 | 6070068 | WBGene00021390 | fbxa-214  | Y38A10A.4 | -0.168742063226124   |             |
| AGIWUR4835;AGIWUR25614;AGIWUR35294                                                                                                                                               |    |   |         |         |                |           |           |                      |             |
| N2                                                                                                                                                                               | HS | V | 6096028 | 6096903 | WBGene00021392 | Y38A10A.7 | Y38A10A.7 | 0.143662690911533    |             |
| AGIWUR40565                                                                                                                                                                      |    |   |         |         |                |           |           |                      |             |
| N2                                                                                                                                                                               | HS | V | 6097105 | 6099083 | WBGene00021391 | smut-1    | Y38A10A.6 | 0.0469512564279384   |             |
| AGIWUR34126                                                                                                                                                                      |    |   |         |         |                |           |           |                      |             |
| N2                                                                                                                                                                               | HS | V | 6098993 | 6100553 | WBGene00000802 | crt-1     | Y38A10A.5 | -0.096417778207492   |             |
| AGIWUR5761;AGIWUR21954;AGIWUR27741;AGIWUR42525;AGIWUR42873                                                                                                                       |    |   |         |         |                |           |           |                      |             |
| N2                                                                                                                                                                               | HS | V | 6105607 | 6107530 | WBGene00017535 | atf-8     | F17A9.3   | -0.0249858468606021  | AGIWUR8129  |
| N2                                                                                                                                                                               | HS | V | 6107828 | 6114856 | WBGene00017534 | F17A9.2   | F17A9.2   | 0.120624787402768    | AGIWUR1903  |
| N2                                                                                                                                                                               | HS | V | 6116521 | 6117849 | WBGene00017533 | fbxa-178  | F17A9.1   | -0.00910597836623062 |             |
| AGIWUR12696;AGIWUR27014;AGIWUR43258                                                                                                                                              |    |   |         |         |                |           |           |                      |             |
| N2                                                                                                                                                                               | HS | V | 6118332 | 6120206 | WBGene00017538 | ceh-49    | F17A9.6   | 0.059217331951098    | AGIWUR6485  |
| N2                                                                                                                                                                               | HS | V | 6120909 | 6202626 | WBGene00006436 | ttn-1     | W06H8.8   | 0.0273070285201964   |             |
| AGIWUR467;AGIWUR2055;AGIWUR18482;AGIWUR20833;AGIWUR24654;AGIWUR27263;AGIWUR27556;AGIWUR28812;AGIWUR29196;AGIWUR30343;AGIWUR31761;AGIWUR35868;AGIWUR38312;AGIWUR39023;AGIWUR40449 |    |   |         |         |                |           |           |                      |             |
| N2                                                                                                                                                                               | HS | V | 6204875 | 6206134 | WBGene00021067 | W06H8.4   | W06H8.4   | 0.346917128321823    | AGIWUR32308 |
| N2                                                                                                                                                                               | HS | V | 6206755 | 6208551 | WBGene00021066 | W06H8.2   | W06H8.2   | 0.0765304338049084   | AGIWUR36532 |
| N2                                                                                                                                                                               | HS | V | 6208840 | 6217647 | WBGene00004373 | rme-1     | W06H8.1   | 0.160777835077693    |             |
| AGIWUR7403;AGIWUR21968;AGIWUR28544;AGIWUR35361;AGIWUR35611;AGIWUR40187                                                                                                           |    |   |         |         |                |           |           |                      |             |
| N2                                                                                                                                                                               | HS | V | 6218134 | 6219562 | WBGene00006239 | str-206   | W06H8.7   | 0.0155162310611221   | AGIWUR20590 |
| N2                                                                                                                                                                               | HS | V | 6221249 | 6227047 | WBGene00021068 | W06H8.6   | W06H8.6   | -0.177902234251569   | AGIWUR39330 |
| N2                                                                                                                                                                               | HS | V | 6235176 | 6237807 | WBGene00019522 | K08B12.3  | K08B12.3  | 0.0506092232973216   |             |
| AGIWUR32080                                                                                                                                                                      |    |   |         |         |                |           |           |                      |             |
| N2                                                                                                                                                                               | HS | V | 6249172 | 6252453 | WBGene00019521 | dmd-7     | K08B12.2  | 0.0611729795202152   |             |
| AGIWUR4928;AGIWUR11191;AGIWUR24510;AGIWUR30182;AGIWUR41338                                                                                                                       |    |   |         |         |                |           |           |                      |             |
| N2                                                                                                                                                                               | HS | V | 6268565 | 6270481 | WBGene00017966 | F31F7.3   | F31F7.3   | -0.12924636981619    | AGIWUR14173 |
| N2                                                                                                                                                                               | HS | V | 6270852 | 6274911 | WBGene00017965 | F31F7.2   | F31F7.2   | 0.282618653179005    | AGIWUR26123 |
| N2                                                                                                                                                                               | HS | V | 6276439 | 6278160 | WBGene00017964 | F31F7.1   | F31F7.1   | 0.136660272254462    |             |
| AGIWUR7941;AGIWUR24895;AGIWUR30996                                                                                                                                               |    |   |         |         |                |           |           |                      |             |
| N2                                                                                                                                                                               | HS | V | 6279005 | 6280146 | WBGene00019668 | fil-2     | K12B6.3   | -0.433005224276037   | AGIWUR22934 |
| N2                                                                                                                                                                               | HS | V | 6280380 | 6281136 | WBGene00019669 | K12B6.4   | K12B6.4   | 0.0187360331488904   | AGIWUR1920  |
| N2                                                                                                                                                                               | HS | V | 6281359 | 6284865 | WBGene00019667 | K12B6.2   | K12B6.2   | 0.090542611209675    |             |
| AGIWUR5809;AGIWUR7245;AGIWUR34843                                                                                                                                                |    |   |         |         |                |           |           |                      |             |
| N2                                                                                                                                                                               | HS | V | 6284920 | 6286434 | WBGene00005640 | srn-1     | K12B6.5   | -0.200900286829985   | AGIWUR6389  |
| N2                                                                                                                                                                               | HS | V | 6291390 | 6292666 | WBGene00023432 | K12B6.9   | K12B6.9   | 0.0259511848112588   |             |
| AGIWUR4049;AGIWUR4367;AGIWUR38219                                                                                                                                                |    |   |         |         |                |           |           |                      |             |
| N2                                                                                                                                                                               | HS | V | 6293920 | 6294342 | WBGene00019670 | K12B6.6   | K12B6.6   | -0.00954348372074421 | AGIWUR36632 |
| N2                                                                                                                                                                               | HS | V | 6303771 | 6308337 | WBGene00019666 | sago-1    | K12B6.1   | -0.188589625679262   | AGIWUR3629  |

|                                                            |    |   |         |         |                |          |          |                     |             |
|------------------------------------------------------------|----|---|---------|---------|----------------|----------|----------|---------------------|-------------|
| N2                                                         | HS | V | 6308811 | 6312001 | WBGene00019672 | K12B6.8  | K12B6.8  | -0.118680811394571  |             |
| AGIWUR2931;AGIWUR42737                                     |    |   |         |         |                |          |          |                     |             |
| N2                                                         | HS | V | 6314176 | 6316467 | WBGene00020892 | T28C12.5 | T28C12.5 | -0.093490056552084  |             |
| AGIWUR9229                                                 |    |   |         |         |                |          |          |                     |             |
| N2                                                         | HS | V | 6316932 | 6326390 | WBGene00020891 | T28C12.4 | T28C12.4 | 0.051238983015363   |             |
| AGIWUR30512                                                |    |   |         |         |                |          |          |                     |             |
| N2                                                         | HS | V | 6327223 | 6328865 | WBGene00020890 | fbxa-202 | T28C12.3 | 0.0882364807711191  |             |
| AGIWUR33622                                                |    |   |         |         |                |          |          |                     |             |
| N2                                                         | HS | V | 6329197 | 6331074 | WBGene00020889 | T28C12.2 | T28C12.2 | 0.205824305595087   |             |
| AGIWUR3720                                                 |    |   |         |         |                |          |          |                     |             |
| N2                                                         | HS | V | 6331907 | 6334008 | WBGene00020888 | T28C12.1 | T28C12.1 | -0.106887842495452  |             |
| AGIWUR19956                                                |    |   |         |         |                |          |          |                     |             |
| N2                                                         | HS | V | 6334014 | 6336119 | WBGene00020893 | T28C12.6 | T28C12.6 | 0.273423357239503   |             |
| AGIWUR4707                                                 |    |   |         |         |                |          |          |                     |             |
| N2                                                         | HS | V | 6356025 | 6362997 | WBGene00017430 | bcl-11   | F13H6.1  | 0.00773129944674977 |             |
| AGIWUR5640;AGIWUR13167;AGIWUR19155;AGIWUR27208;AGIWUR28028 |    |   |         |         |                |          |          |                     |             |
| N2                                                         | HS | V | 6363408 | 6365671 | WBGene00017431 | F13H6.3  | F13H6.3  | 0.214174925020425   | AGIWUR2859  |
| N2                                                         | HS | V | 6366433 | 6368533 | WBGene00017432 | F13H6.4  | F13H6.4  | 0.125672287604234   | AGIWUR19816 |
| N2                                                         | HS | V | 6372114 | 6374933 | WBGene00017433 | F13H6.5  | F13H6.5  | -0.126199148955444  | AGIWUR29519 |
| N2                                                         | HS | V | 6386550 | 6389734 | WBGene00019016 | F57F4.2  | F57F4.2  | 0.120672755619056   | AGIWUR38900 |
| N2                                                         | HS | V | 6390463 | 6392523 | WBGene00019015 | F57F4.1  | F57F4.1  | -0.16502849991971   |             |
| AGIWUR39573;AGIWUR44431                                    |    |   |         |         |                |          |          |                     |             |
| N2                                                         | HS | V | 6414993 | 6417494 | WBGene00020270 | T05H4.7  | T05H4.7  | -0.0925998355565536 |             |
| AGIWUR11848;AGIWUR13753;AGIWUR27899                        |    |   |         |         |                |          |          |                     |             |
| N2                                                         | HS | V | 6417495 | 6424155 | WBGene00020273 | T05H4.10 | T05H4.10 | 0.0649920028545288  |             |
| AGIWUR14056;AGIWUR28336                                    |    |   |         |         |                |          |          |                     |             |
| N2                                                         | HS | V | 6424252 | 6425952 | WBGene00020274 | T05H4.11 | T05H4.11 | -0.140757860252048  |             |
| AGIWUR4559                                                 |    |   |         |         |                |          |          |                     |             |
| N2                                                         | HS | V | 6426193 | 6427112 | WBGene00020275 | atp-4    | T05H4.12 | -0.0301683105491017 |             |
| AGIWUR11354;AGIWUR39237                                    |    |   |         |         |                |          |          |                     |             |
| N2                                                         | HS | V | 6427212 | 6429927 | WBGene00000110 | alh-4    | T05H4.13 | 0.0226612739631307  |             |
| AGIWUR2450;AGIWUR15252;AGIWUR16978;AGIWUR26494;AGIWUR42388 |    |   |         |         |                |          |          |                     |             |
| N2                                                         | HS | V | 6431331 | 6433496 | WBGene00001513 | gad-1    | T05H4.14 | 0.160369605264737   |             |
| AGIWUR27490                                                |    |   |         |         |                |          |          |                     |             |
| N2                                                         | HS | V | 6434130 | 6436401 | WBGene00020269 | erfa-1   | T05H4.6  | -0.0832705652722066 |             |
| AGIWUR19051;AGIWUR41329                                    |    |   |         |         |                |          |          |                     |             |
| N2                                                         | HS | V | 6436578 | 6437884 | WBGene00020268 | hpo-19   | T05H4.5  | -0.0831586672619498 |             |
| AGIWUR2866;AGIWUR12634;AGIWUR23152;AGIWUR29714;AGIWUR29872 |    |   |         |         |                |          |          |                     |             |
| N2                                                         | HS | V | 6438913 | 6440036 | WBGene00020267 | T05H4.4  | T05H4.4  | -0.113205438999774  | AGIWUR7136  |

|                                                                                 |    |   |         |         |                |          |           |                      |             |
|---------------------------------------------------------------------------------|----|---|---------|---------|----------------|----------|-----------|----------------------|-------------|
| N2                                                                              | HS | V | 6440202 | 6441711 | WBGene00020276 | T05H4.15 | T05H4.15  | 0.157853594114357    |             |
| AGIWUR9764;AGIWUR14615;AGIWUR31804                                              |    |   |         |         |                |          |           |                      |             |
| N2                                                                              | HS | V | 6442337 | 6447556 | WBGene00020266 | T05H4.3  | T05H4.3   | 0.0253746041741518   | AGIWUR10846 |
| N2                                                                              | HS | V | 6448656 | 6450217 | WBGene00020265 | fbxa-196 | T05H4.2   | 0.128080178936802    |             |
| AGIWUR11813                                                                     |    |   |         |         |                |          |           |                      |             |
| N2                                                                              | HS | V | 6450898 | 6452231 | WBGene00020264 | ac1-8    | T05H4.1   | -0.506981893766373   | AGIWUR9693  |
| N2                                                                              | HS | V | 6453196 | 6454973 | WBGene00022646 | ac1-9    | ZK40.1    | -0.13311820333937    |             |
| AGIWUR1627;AGIWUR3340;AGIWUR5728;AGIWUR8126;AGIWUR14958;AGIWUR27729;AGIWUR36534 |    |   |         |         |                |          |           |                      |             |
| N2                                                                              | HS | V | 6465065 | 6487880 | WBGene00006815 | unc-83   | W01A11.3  | 0.0359230811498161   |             |
| AGIWUR16191;AGIWUR27240;AGIWUR35896;AGIWUR39953                                 |    |   |         |         |                |          |           |                      |             |
| N2                                                                              | HS | V | 6488203 | 6489120 | WBGene00002273 | lec-10   | W01A11.4  | -0.0577848895362258  |             |
| AGIWUR24405                                                                     |    |   |         |         |                |          |           |                      |             |
| N2                                                                              | HS | V | 6490068 | 6493921 | WBGene00020911 | cpt-6    | W01A11.5  | -0.0917537377290181  |             |
| AGIWUR6635                                                                      |    |   |         |         |                |          |           |                      |             |
| N2                                                                              | HS | V | 6497110 | 6498484 | WBGene00020910 | dgtr-1   | W01A11.2  | -0.330031453976993   |             |
| AGIWUR41901                                                                     |    |   |         |         |                |          |           |                      |             |
| N2                                                                              | HS | V | 6499224 | 6502428 | WBGene00020909 | W01A11.1 | W01A11.1  | 0.0310405734979682   |             |
| AGIWUR19791                                                                     |    |   |         |         |                |          |           |                      |             |
| N2                                                                              | HS | V | 6502369 | 6504181 | WBGene00003385 | moc-2    | W01A11.6  | 0.134912433364382    |             |
| AGIWUR8181;AGIWUR17085                                                          |    |   |         |         |                |          |           |                      |             |
| N2                                                                              | HS | V | 6504538 | 6505500 | WBGene00020912 | W01A11.7 | W01A11.7  | 0.0384082883467149   |             |
| AGIWUR9030;AGIWUR22292                                                          |    |   |         |         |                |          |           |                      |             |
| N2                                                                              | HS | V | 6506752 | 6508803 | WBGene00006723 | ubh-3    | Y40G12A.1 | 0.106417761018188    |             |
| AGIWUR32889                                                                     |    |   |         |         |                |          |           |                      |             |
| N2                                                                              | HS | V | 6508831 | 6509884 | WBGene00006722 | ubh-2    | Y40G12A.2 | 0.0771402152280096   |             |
| AGIWUR21082                                                                     |    |   |         |         |                |          |           |                      |             |
| N2                                                                              | HS | V | 6509910 | 6511409 | WBGene00006721 | ubh-1    | F46E10.8  | -0.00652510806512652 |             |
| AGIWUR1295;AGIWUR2582;AGIWUR31493                                               |    |   |         |         |                |          |           |                      |             |
| N2                                                                              | HS | V | 6511588 | 6515240 | WBGene00001073 | dpy-11   | F46E10.9  | 0.0463253687709795   |             |
| AGIWUR4187;AGIWUR9323;AGIWUR27533                                               |    |   |         |         |                |          |           |                      |             |
| N2                                                                              | HS | V | 6515276 | 6516526 | WBGene00018491 | mdh-1    | F46E10.10 | -0.12030384607748    |             |
| AGIWUR17671;AGIWUR18530;AGIWUR23213;AGIWUR25558                                 |    |   |         |         |                |          |           |                      |             |
| N2                                                                              | HS | V | 6520435 | 6521099 | WBGene00018489 | F46E10.2 | F46E10.2  | -0.189439790448317   |             |
| AGIWUR21257;AGIWUR44482                                                         |    |   |         |         |                |          |           |                      |             |
| N2                                                                              | HS | V | 6524989 | 6532089 | WBGene00018488 | acs-1    | F46E10.1  | -0.0698302359600786  |             |
| AGIWUR5838;AGIWUR11960;AGIWUR12542;AGIWUR35496;AGIWUR41551                      |    |   |         |         |                |          |           |                      |             |
| N2                                                                              | HS | V | 6532071 | 6533074 | WBGene00018492 | hpo-26   | F46E10.11 | 0.213447943475826    |             |
| AGIWUR13002                                                                     |    |   |         |         |                |          |           |                      |             |
| N2                                                                              | HS | V | 6533614 | 6546491 | WBGene00001089 | dre-1    | K04A8.6   | -0.0832934055851631  | AGIWUR39647 |

|                                                             |    |   |         |         |                |          |          |                      |             |
|-------------------------------------------------------------|----|---|---------|---------|----------------|----------|----------|----------------------|-------------|
| N2                                                          | HS | V | 6550171 | 6551817 | WBGene00019376 | lip1-4   | K04A8.5  | 0.289398418849557    | AGIWUR28247 |
| N2                                                          | HS | V | 6552348 | 6560196 | WBGene00006665 | twk-10   | K04A8.4  | -0.0668485369945646  |             |
| AGIWUR20906;AGIWUR24464;AGIWUR32424;AGIWUR34785;AGIWUR35009 |    |   |         |         |                |          |          |                      |             |
| N2                                                          | HS | V | 6562048 | 6564181 | WBGene00019374 | K04A8.2  | K04A8.2  | -0.00554979333262295 | AGIWUR12303 |
| N2                                                          | HS | V | 6566336 | 6568747 | WBGene00019373 | K04A8.1  | K04A8.1  | 0.248583026748275    | AGIWUR25697 |
| N2                                                          | HS | V | 6573983 | 6575797 | WBGene00001506 | fut-2    | EGAP9.2  | 0.267228065527689    | AGIWUR15948 |
| N2                                                          | HS | V | 6576867 | 6577541 | WBGene00044545 | EGAP9.4  | EGAP9.4  | 0.142397286132587    | AGIWUR3584  |
| N2                                                          | HS | V | 6578185 | 6580182 | WBGene00017151 | EGAP9.3  | EGAP9.3  | 0.256895015286698    | AGIWUR32024 |
| N2                                                          | HS | V | 6580843 | 6584390 | WBGene00022846 | ZK1055.5 | ZK1055.5 | 0.273138938905611    |             |
| AGIWUR17780                                                 |    |   |         |         |                |          |          |                      |             |
| N2                                                          | HS | V | 6585632 | 6587421 | WBGene00022845 | ZK1055.4 | ZK1055.4 | 0.371514977909612    |             |
| AGIWUR17432                                                 |    |   |         |         |                |          |          |                      |             |
| N2                                                          | HS | V | 6590583 | 6593634 | WBGene00022843 | ZK1055.2 | ZK1055.2 | 0.0925451023801194   |             |
| AGIWUR3803;AGIWUR37365                                      |    |   |         |         |                |          |          |                      |             |
| N2                                                          | HS | V | 6594194 | 6599208 | WBGene00001829 | hcp-1    | ZK1055.1 | -0.254070114325907   |             |
| AGIWUR35243                                                 |    |   |         |         |                |          |          |                      |             |
| N2                                                          | HS | V | 6599190 | 6602604 | WBGene00022847 | ZK1055.6 | ZK1055.6 | 0.0859198730485407   |             |
| AGIWUR6987;AGIWUR12831;AGIWUR22387;AGIWUR34246              |    |   |         |         |                |          |          |                      |             |
| N2                                                          | HS | V | 6602728 | 6605375 | WBGene00022848 | ZK1055.7 | ZK1055.7 | 0.096960598224145    |             |
| AGIWUR2670                                                  |    |   |         |         |                |          |          |                      |             |
| N2                                                          | HS | V | 6606439 | 6611158 | WBGene00002148 | gon-14   | F44C4.4  | -0.0345110404703641  |             |
| AGIWUR14569;AGIWUR23270                                     |    |   |         |         |                |          |          |                      |             |
| N2                                                          | HS | V | 6614674 | 6615845 | WBGene00000784 | cpr-4    | F44C4.3  | 0.632083061306304    | AGIWUR3924  |
| N2                                                          | HS | V | 6622268 | 6624694 | WBGene00018412 | nhr-37   | F44C4.2  | -0.241580128497675   | AGIWUR9206  |
| N2                                                          | HS | V | 6624702 | 6626344 | WBGene00004092 | ppt-1    | F44C4.5  | 0.371526816187477    |             |
| AGIWUR1731;AGIWUR34415;AGIWUR35478                          |    |   |         |         |                |          |          |                      |             |
| N2                                                          | HS | V | 6633269 | 6639665 | WBGene00004740 | scd-2    | T10H9.2  | -0.128897700339483   | AGIWUR40660 |
| N2                                                          | HS | V | 6649617 | 6652050 | WBGene00020424 | T10H9.1  | T10H9.1  | -0.0381222575087588  | AGIWUR5182  |
| N2                                                          | HS | V | 6652353 | 6653742 | WBGene00044779 | T10H9.8  | T10H9.8  | -0.143529001749473   |             |
| AGIWUR8114;AGIWUR33853;AGIWUR35324;AGIWUR44021              |    |   |         |         |                |          |          |                      |             |
| N2                                                          | HS | V | 6653613 | 6655449 | WBGene00020425 | syx-18   | T10H9.3  | 0.0174071013516865   | AGIWUR31028 |
| N2                                                          | HS | V | 6655562 | 6656501 | WBGene00004897 | snb-1    | T10H9.4  | -0.0137020870240221  | AGIWUR27645 |
| N2                                                          | HS | V | 6662191 | 6665813 | WBGene00004062 | pmp-5    | T10H9.5  | 0.153634764783606    |             |
| AGIWUR4313;AGIWUR10836;AGIWUR26677;AGIWUR39783              |    |   |         |         |                |          |          |                      |             |
| N2                                                          | HS | V | 6667400 | 6668841 | WBGene00006224 | str-180  | T10H9.6  | 0.173727315698965    | AGIWUR37919 |
| N2                                                          | HS | V | 6669823 | 6672036 | WBGene00019654 | K11G9.3  | K11G9.3  | 0.195857114580272    | AGIWUR27046 |
| N2                                                          | HS | V | 6674267 | 6676426 | WBGene00019653 | K11G9.2  | K11G9.2  | 0.148621244023373    |             |
| AGIWUR7173;AGIWUR12294;AGIWUR20235                          |    |   |         |         |                |          |          |                      |             |
| N2                                                          | HS | V | 6676799 | 6679072 | WBGene00019652 | K11G9.1  | K11G9.1  | 0.00139511402768022  | AGIWUR25997 |



|                                                                                              |    |   |         |         |                |          |          |                     |             |
|----------------------------------------------------------------------------------------------|----|---|---------|---------|----------------|----------|----------|---------------------|-------------|
| N2                                                                                           | HS | V | 6679317 | 6681573 | WBGene00001210 | egl-46   | K11G9.4  | -0.439888856066342  |             |
| AGIWUR43254;AGIWUR44810                                                                      |    |   |         |         |                |          |          |                     |             |
| N2                                                                                           | HS | V | 6685807 | 6688492 | WBGene00019655 | K11G9.5  | K11G9.5  | 0.239552288165132   | AGIWUR27658 |
| N2                                                                                           | HS | V | 6691371 | 6691863 | WBGene00003473 | mtl-1    | K11G9.6  | -0.571858890479836  | AGIWUR30106 |
| N2                                                                                           | HS | V | 6692247 | 6694768 | WBGene00175027 | W02F12.8 | W02F12.8 | 0.134986273184538   |             |
| AGIWUR7094;AGIWUR16478;AGIWUR25256;AGIWUR25915;AGIWUR27056                                   |    |   |         |         |                |          |          |                     |             |
| N2                                                                                           | HS | V | 6695147 | 6697652 | WBGene00020947 | W02F12.2 | W02F12.2 | 0.172982806716766   |             |
| AGIWUR16259;AGIWUR29622                                                                      |    |   |         |         |                |          |          |                     |             |
| N2                                                                                           | HS | V | 6703057 | 6704573 | WBGene00020948 | era-1    | W02F12.3 | -0.214902185268569  |             |
| AGIWUR2317;AGIWUR14785                                                                       |    |   |         |         |                |          |          |                     |             |
| N2                                                                                           | HS | V | 6704551 | 6706932 | WBGene00020949 | W02F12.4 | W02F12.4 | -0.0802730718900477 |             |
| AGIWUR4588;AGIWUR5119;AGIWUR7662;AGIWUR14147;AGIWUR32770;AGIWUR42348;AGIWUR43423;AGIWUR44413 |    |   |         |         |                |          |          |                     |             |
| N2                                                                                           | HS | V | 6707058 | 6709101 | WBGene00020950 | dlst-1   | W02F12.5 | -0.132409927052077  |             |
| AGIWUR25914;AGIWUR28729;AGIWUR41820                                                          |    |   |         |         |                |          |          |                     |             |
| N2                                                                                           | HS | V | 6709579 | 6710679 | WBGene00020951 | sna-1    | W02F12.6 | -0.0372514398401638 |             |
| AGIWUR32989                                                                                  |    |   |         |         |                |          |          |                     |             |
| N2                                                                                           | HS | V | 6714990 | 6716302 | WBGene00023355 | W02F12.1 | W02F12.1 |                     |             |
| -0.000451452689926413 AGIWUR37104                                                            |    |   |         |         |                |          |          |                     |             |
| N2                                                                                           | HS | V | 6716855 | 6718297 | WBGene00005187 | srg-30   | W02F12.7 | -0.0717895078659967 |             |
| AGIWUR4155;AGIWUR7870                                                                        |    |   |         |         |                |          |          |                     |             |
| N2                                                                                           | HS | V | 6720397 | 6723005 | WBGene00022624 | ZC487.2  | ZC487.2  | 0.0684125514068423  | AGIWUR22572 |
| N2                                                                                           | HS | V | 6723466 | 6723764 | WBGene00022625 | ZC487.3  | ZC487.3  | -0.0777083034846049 | AGIWUR39508 |
| N2                                                                                           | HS | V | 6727812 | 6730262 | WBGene00022623 | ZC487.1  | ZC487.1  | 0.189704336780652   |             |
| AGIWUR2837;AGIWUR31367;AGIWUR40962                                                           |    |   |         |         |                |          |          |                     |             |
| N2                                                                                           | HS | V | 6730281 | 6731694 | WBGene00001718 | grl-9    | ZC487.4  | 0.0114390742815544  | AGIWUR23579 |
| N2                                                                                           | HS | V | 6731831 | 6733092 | WBGene00001717 | grl-8    | ZC487.5  | -0.207959653472383  | AGIWUR7134  |
| N2                                                                                           | HS | V | 6745039 | 6748613 | WBGene00020806 | T25F10.3 | T25F10.3 | -0.0825196817075842 |             |
| AGIWUR8750                                                                                   |    |   |         |         |                |          |          |                     |             |
| N2                                                                                           | HS | V | 6758135 | 6760418 | WBGene00000936 | dbl-1    | T25F10.2 | 0.00377483633637787 |             |
| AGIWUR23643;AGIWUR28633                                                                      |    |   |         |         |                |          |          |                     |             |
| N2                                                                                           | HS | V | 6760442 | 6762461 | WBGene00020807 | T25F10.4 | T25F10.4 | 0.26120170569313    |             |
| AGIWUR39846                                                                                  |    |   |         |         |                |          |          |                     |             |
| N2                                                                                           | HS | V | 6762476 | 6765072 | WBGene00000244 | bbs-8    | T25F10.5 | 0.179417814245525   |             |
| AGIWUR14361                                                                                  |    |   |         |         |                |          |          |                     |             |
| N2                                                                                           | HS | V | 6765560 | 6768732 | WBGene00020808 | clik-1   | T25F10.6 | 0.0409970111083346  |             |
| AGIWUR2591;AGIWUR4800;AGIWUR6940;AGIWUR20249;AGIWUR35744;AGIWUR37233;AGIWUR37861             |    |   |         |         |                |          |          |                     |             |
| N2                                                                                           | HS | V | 6768429 | 6768788 | WBGene00020805 | T25F10.1 | T25F10.1 | -0.387870310070285  |             |
| AGIWUR11123                                                                                  |    |   |         |         |                |          |          |                     |             |
| N2                                                                                           | HS | V | 6769662 | 6771704 | WBGene00005253 | srh-30   | ZC404.12 | 0.143008944967974   |             |

AGIWUR35108  
N2 HS V 6774351 6776196 WBGene00005251 srh-28 ZC404.5 0.0651475721435588  
AGIWUR20842;AGIWUR25637;AGIWUR33788  
N2 HS V 6778551 6779700 WBGene00022602 ZC404.7 ZC404.7 0.00984799625814148 AGIWUR31102  
N2 HS V 6783187 6784922 WBGene00004984 spn-4 ZC404.8 -0.0606151028840323 AGIWUR39701  
N2 HS V 6785457 6787866 WBGene00004975 spe-39 ZC404.3 0.0539846773032533  
AGIWUR16328;AGIWUR19002;AGIWUR26551  
N2 HS V 6788449 6792665 WBGene00022603 gck-2 ZC404.9 -0.049644765310811 AGIWUR1270  
N2 HS V 6793936 6795130 WBGene00022601 ZC404.1 ZC404.1 0.0297069943429156 AGIWUR30969  
N2 HS V 6798151 6799664 WBGene00022606 dmsr-9 ZC404.13 -0.213850388005655  
AGIWUR43059  
N2 HS V 6800724 6801950 WBGene00022604 dmsr-10 ZC404.10 -0.139869818247804  
AGIWUR16456  
N2 HS V 6802412 6804096 WBGene00022605 dmsr-11 ZC404.11 0.0782011609902078  
AGIWUR11218  
N2 HS V 6804512 6806440 WBGene00019262 dmsr-12 H34P18.1 -0.278053154110827  
AGIWUR24451  
N2 HS V 6810421 6813449 WBGene00020522 T15B7.10 T15B7.10 -0.0859049438467956  
AGIWUR30507  
N2 HS V 6813700 6815016 WBGene00020529 T15B7.17 T15B7.17 0.230096021184511  
AGIWUR1853  
N2 HS V 6815666 6817284 WBGene00020523 dmsr-14 T15B7.11 0.0630703914878534  
AGIWUR43501  
N2 HS V 6817890 6819912 WBGene00020524 dmsr-13 T15B7.12 0.0524015444833026  
AGIWUR552  
N2 HS V 6821809 6826872 WBGene00020520 T15B7.8 T15B7.8 0.123713702867977  
AGIWUR2448;AGIWUR29808;AGIWUR37151  
N2 HS V 6827146 6828886 WBGene00020525 dmsr-15 T15B7.13 0.0320601702979371  
AGIWUR34598  
N2 HS V 6829666 6830721 WBGene00000714 col-141 T15B7.5 0.571970521226445 AGIWUR38706  
N2 HS V 6831163 6832256 WBGene00000715 col-142 T15B7.4 -0.0884524870806302 AGIWUR2207  
N2 HS V 6832290 6835342 WBGene00020526 T15B7.14 T15B7.14 0.195571251854053  
AGIWUR1085  
N2 HS V 6835635 6836700 WBGene00000716 col-143 T15B7.3 -0.237107935517084  
AGIWUR14313;AGIWUR35443  
N2 HS V 6836725 6838630 WBGene00020527 T15B7.15 T15B7.15 -0.1769205338286  
AGIWUR28460  
N2 HS V 6839256 6840254 WBGene00020517 hpo-8 T15B7.2 -0.0888541405701009  
AGIWUR8620;AGIWUR16296;AGIWUR22235

|                                                                                                                                                                                                                                                                                                                                                                                                                                                                                                                                                                                                                                                                                                                                                                                                                                                                                                                                                                                                                          |    |   |         |         |                |           |           |                      |             |
|--------------------------------------------------------------------------------------------------------------------------------------------------------------------------------------------------------------------------------------------------------------------------------------------------------------------------------------------------------------------------------------------------------------------------------------------------------------------------------------------------------------------------------------------------------------------------------------------------------------------------------------------------------------------------------------------------------------------------------------------------------------------------------------------------------------------------------------------------------------------------------------------------------------------------------------------------------------------------------------------------------------------------|----|---|---------|---------|----------------|-----------|-----------|----------------------|-------------|
| N2                                                                                                                                                                                                                                                                                                                                                                                                                                                                                                                                                                                                                                                                                                                                                                                                                                                                                                                                                                                                                       | HS | V | 6840217 | 6842970 | WBGene00020528 | lgc-54    | T15B7.16  | 0.397823641902486    |             |
| AGIWUR22007                                                                                                                                                                                                                                                                                                                                                                                                                                                                                                                                                                                                                                                                                                                                                                                                                                                                                                                                                                                                              |    |   |         |         |                |           |           |                      |             |
| N2                                                                                                                                                                                                                                                                                                                                                                                                                                                                                                                                                                                                                                                                                                                                                                                                                                                                                                                                                                                                                       | HS | V | 6842737 | 6846652 | WBGene00020516 | T15B7.1   | T15B7.1   | 0.23132852135941     |             |
| AGIWUR1514;AGIWUR38289                                                                                                                                                                                                                                                                                                                                                                                                                                                                                                                                                                                                                                                                                                                                                                                                                                                                                                                                                                                                   |    |   |         |         |                |           |           |                      |             |
| N2                                                                                                                                                                                                                                                                                                                                                                                                                                                                                                                                                                                                                                                                                                                                                                                                                                                                                                                                                                                                                       | HS | V | 6850538 | 6851900 | WBGene00016959 | C55H1.1   | C55H1.1   | -0.0300546931606069  | AGIWUR44315 |
| N2                                                                                                                                                                                                                                                                                                                                                                                                                                                                                                                                                                                                                                                                                                                                                                                                                                                                                                                                                                                                                       | HS | V | 6852568 | 6854803 | WBGene00001672 | gpa-10    | C55H1.2   | 0.0915893341044773   | AGIWUR35673 |
| N2                                                                                                                                                                                                                                                                                                                                                                                                                                                                                                                                                                                                                                                                                                                                                                                                                                                                                                                                                                                                                       | HS | V | 6870304 | 6873809 | WBGene00020586 | frpr-18   | T19F4.1   | 0.118770595199592    |             |
| AGIWUR16517;AGIWUR27580;AGIWUR38008;AGIWUR43783                                                                                                                                                                                                                                                                                                                                                                                                                                                                                                                                                                                                                                                                                                                                                                                                                                                                                                                                                                          |    |   |         |         |                |           |           |                      |             |
| N2                                                                                                                                                                                                                                                                                                                                                                                                                                                                                                                                                                                                                                                                                                                                                                                                                                                                                                                                                                                                                       | HS | V | 6881340 | 6891836 | WBGene00006803 | unc-70    | K11C4.3   | -0.00504945747733831 |             |
| AGIWUR18280;AGIWUR30869                                                                                                                                                                                                                                                                                                                                                                                                                                                                                                                                                                                                                                                                                                                                                                                                                                                                                                                                                                                                  |    |   |         |         |                |           |           |                      |             |
| N2                                                                                                                                                                                                                                                                                                                                                                                                                                                                                                                                                                                                                                                                                                                                                                                                                                                                                                                                                                                                                       | HS | V | 6895078 | 6896922 | WBGene00019643 | K11C4.2   | K11C4.2   | 0.0077903288812351   | AGIWUR8851  |
| N2                                                                                                                                                                                                                                                                                                                                                                                                                                                                                                                                                                                                                                                                                                                                                                                                                                                                                                                                                                                                                       | HS | V | 6896999 | 6898497 | WBGene00019642 | K11C4.1   | K11C4.1   | 0.021429993191644    | AGIWUR38868 |
| N2                                                                                                                                                                                                                                                                                                                                                                                                                                                                                                                                                                                                                                                                                                                                                                                                                                                                                                                                                                                                                       | HS | V | 6898540 | 6900223 | WBGene00003844 | odc-1     | K11C4.4   | -0.126555587696362   |             |
| AGIWUR2487;AGIWUR11379                                                                                                                                                                                                                                                                                                                                                                                                                                                                                                                                                                                                                                                                                                                                                                                                                                                                                                                                                                                                   |    |   |         |         |                |           |           |                      |             |
| N2                                                                                                                                                                                                                                                                                                                                                                                                                                                                                                                                                                                                                                                                                                                                                                                                                                                                                                                                                                                                                       | HS | V | 6901697 | 6929038 | WBGene00006801 | unc-68    | K11C4.5   | -0.0631319369466907  |             |
| AGIWUR14992;AGIWUR39287                                                                                                                                                                                                                                                                                                                                                                                                                                                                                                                                                                                                                                                                                                                                                                                                                                                                                                                                                                                                  |    |   |         |         |                |           |           |                      |             |
| N2                                                                                                                                                                                                                                                                                                                                                                                                                                                                                                                                                                                                                                                                                                                                                                                                                                                                                                                                                                                                                       | HS | V | 6931539 | 6934288 | WBGene00021963 | lip1-6    | Y57E12B.3 | 0.223365727236649    |             |
| AGIWUR4700                                                                                                                                                                                                                                                                                                                                                                                                                                                                                                                                                                                                                                                                                                                                                                                                                                                                                                                                                                                                               |    |   |         |         |                |           |           |                      |             |
| N2                                                                                                                                                                                                                                                                                                                                                                                                                                                                                                                                                                                                                                                                                                                                                                                                                                                                                                                                                                                                                       | HS | V | 6945711 | 6947547 | WBGene00021964 | Y57E12B.4 | Y57E12B.4 | 0.021345911929588    |             |
| AGIWUR1238;AGIWUR29950;AGIWUR43060                                                                                                                                                                                                                                                                                                                                                                                                                                                                                                                                                                                                                                                                                                                                                                                                                                                                                                                                                                                       |    |   |         |         |                |           |           |                      |             |
| N2                                                                                                                                                                                                                                                                                                                                                                                                                                                                                                                                                                                                                                                                                                                                                                                                                                                                                                                                                                                                                       | HS | V | 6948543 | 6948831 | WBGene00021961 | Y57E12B.1 | Y57E12B.1 | -0.136343279828617   |             |
| AGIWUR26340                                                                                                                                                                                                                                                                                                                                                                                                                                                                                                                                                                                                                                                                                                                                                                                                                                                                                                                                                                                                              |    |   |         |         |                |           |           |                      |             |
| N2                                                                                                                                                                                                                                                                                                                                                                                                                                                                                                                                                                                                                                                                                                                                                                                                                                                                                                                                                                                                                       | HS | V | 6950835 | 6953897 | WBGene00005188 | srg-31    | T07H8.5   | 0.0990284171821552   | AGIWUR25906 |
| N2                                                                                                                                                                                                                                                                                                                                                                                                                                                                                                                                                                                                                                                                                                                                                                                                                                                                                                                                                                                                                       | HS | V | 6956537 | 6966422 | WBGene00003165 | mec-1     | T07H8.4   | 0.0340454705425146   |             |
| AGIWUR183;AGIWUR1152;AGIWUR1352;AGIWUR1406;AGIWUR2128;AGIWUR2365;AGIWUR3217;AGIWUR3635;AGIWUR4131;AGIWUR4455;AGIWUR4803;AGIWUR5260;AGIWUR5262;AGIWUR5882;AGIWUR6045;AGIWUR6798;AGIWUR6876;AGIWUR7189;AGIWUR7519;AGIWUR7826;AGIWUR8269;AGIWUR8453;AGIWUR10141;AGIWUR10410;AGIWUR10495;AGIWUR11070;AGIWUR12307;AGIWUR13928;AGIWUR14095;AGIWUR14680;AGIWUR15177;AGIWUR15278;AGIWUR15432;AGIWUR15854;AGIWUR16054;AGIWUR16955;AGIWUR17421;AGIWUR17962;AGIWUR17979;AGIWUR18581;AGIWUR19416;AGIWUR19924;AGIWUR23324;AGIWUR24879;AGIWUR25606;AGIWUR25850;AGIWUR25949;AGIWUR26192;AGIWUR26221;AGIWUR26245;AGIWUR26710;AGIWUR26836;AGIWUR26958;AGIWUR28366;AGIWUR28379;AGIWUR28699;AGIWUR28906;AGIWUR29899;AGIWUR29988;AGIWUR30069;AGIWUR32078;AGIWUR32276;AGIWUR32477;AGIWUR32711;AGIWUR33705;AGIWUR34629;AGIWUR34984;AGIWUR37874;AGIWUR38167;AGIWUR38861;AGIWUR39597;AGIWUR39601;AGIWUR39607;AGIWUR40195;AGIWUR41223;AGIWUR41367;AGIWUR41615;AGIWUR42408;AGIWUR42450;AGIWUR43092;AGIWUR43763;AGIWUR43791;AGIWUR45104;AGIWUR45161 |    |   |         |         |                |           |           |                      |             |
| N2                                                                                                                                                                                                                                                                                                                                                                                                                                                                                                                                                                                                                                                                                                                                                                                                                                                                                                                                                                                                                       | HS | V | 6966396 | 6970127 | WBGene00004229 | ptr-15    | T07H8.6   | 0.098923962150673    | AGIWUR38294 |
| N2                                                                                                                                                                                                                                                                                                                                                                                                                                                                                                                                                                                                                                                                                                                                                                                                                                                                                                                                                                                                                       | HS | V | 6971867 | 6973149 | WBGene00005950 | srx-59    | T07H8.3   | -0.136692922472719   | AGIWUR9812  |
| N2                                                                                                                                                                                                                                                                                                                                                                                                                                                                                                                                                                                                                                                                                                                                                                                                                                                                                                                                                                                                                       | HS | V | 6973523 | 6974832 | WBGene00006029 | srx-138   | T07H8.2   | -0.153644780077778   |             |
| AGIWUR5395;AGIWUR15714;AGIWUR23100;AGIWUR38964;AGIWUR40330                                                                                                                                                                                                                                                                                                                                                                                                                                                                                                                                                                                                                                                                                                                                                                                                                                                                                                                                                               |    |   |         |         |                |           |           |                      |             |
| N2                                                                                                                                                                                                                                                                                                                                                                                                                                                                                                                                                                                                                                                                                                                                                                                                                                                                                                                                                                                                                       | HS | V | 6976347 | 6977387 | WBGene00005907 | srx-16    | T07H8.1   | 0.0513498078107277   |             |

AGIWUR3703;AGIWUR34635

|    |    |   |         |         |                |         |          |                    |             |
|----|----|---|---------|---------|----------------|---------|----------|--------------------|-------------|
| N2 | HS | V | 6977754 | 6979116 | WBGene00020333 | sre-12  | T07H8.7  | -0.177973737850493 | AGIWUR40082 |
| N2 | HS | V | 6980595 | 6982913 | WBGene00016364 | nhr-161 | C33G8.7  | -0.084957099867486 | AGIWUR40108 |
| N2 | HS | V | 6983411 | 6986043 | WBGene00016368 | nhr-163 | C33G8.12 | 0.292004712697977  |             |

AGIWUR12632

|    |    |   |         |         |                |         |          |                    |             |
|----|----|---|---------|---------|----------------|---------|----------|--------------------|-------------|
| N2 | HS | V | 6986141 | 6987773 | WBGene00016365 | nhr-139 | C33G8.8  | 0.0039853089130748 | AGIWUR32935 |
| N2 | HS | V | 6987864 | 6989676 | WBGene00016366 | nhr-140 | C33G8.9  | 0.443614248551973  | AGIWUR40078 |
| N2 | HS | V | 6990148 | 6991863 | WBGene00016367 | nhr-162 | C33G8.10 | 0.112252907034618  |             |

AGIWUR9428

|    |    |   |         |         |                |          |          |                    |             |
|----|----|---|---------|---------|----------------|----------|----------|--------------------|-------------|
| N2 | HS | V | 6995215 | 6997123 | WBGene00003697 | nhr-107  | C33G8.11 | 0.1384226075103    | AGIWUR39250 |
| N2 | HS | V | 6998819 | 7000651 | WBGene00003632 | nhr-42   | C33G8.6  | 0.320325438685632  | AGIWUR147   |
| N2 | HS | V | 7004150 | 7005825 | WBGene00016363 | srab-4   | C33G8.5  | 0.0520446987212075 | AGIWUR23745 |
| N2 | HS | V | 7006264 | 7006818 | WBGene00016362 | C33G8.4  | C33G8.4  | 0.219300363222455  | AGIWUR4418  |
| N2 | HS | V | 7009761 | 7012244 | WBGene00016360 | C33G8.2  | C33G8.2  | 0.0632536961104648 | AGIWUR21137 |
| N2 | HS | V | 7012917 | 7014412 | WBGene00005874 | srw-127  | C33G8.1  | 0.0371273181467489 | AGIWUR16566 |
| N2 | HS | V | 7014462 | 7015972 | WBGene00016369 | C33G8.13 | C33G8.13 | 0.025984424750721  |             |

AGIWUR31072

|    |    |   |         |         |                |         |         |                     |             |
|----|----|---|---------|---------|----------------|---------|---------|---------------------|-------------|
| N2 | HS | V | 7017359 | 7018851 | WBGene00017615 | srsx-32 | F20A1.3 | -0.0934617697629614 | AGIWUR30545 |
| N2 | HS | V | 7018901 | 7021803 | WBGene00017616 | F20A1.4 | F20A1.4 | 0.0161351521971524  |             |

AGIWUR24840;AGIWUR41280

|    |    |   |         |         |                |         |         |                    |  |
|----|----|---|---------|---------|----------------|---------|---------|--------------------|--|
| N2 | HS | V | 7024632 | 7027083 | WBGene00017618 | F20A1.6 | F20A1.6 | 0.0232737450435265 |  |
|----|----|---|---------|---------|----------------|---------|---------|--------------------|--|

AGIWUR12474;AGIWUR24968

|    |    |   |         |         |                |        |         |                    |  |
|----|----|---|---------|---------|----------------|--------|---------|--------------------|--|
| N2 | HS | V | 7028329 | 7036570 | WBGene00006666 | twk-11 | F20A1.7 | 0.0890920735028295 |  |
|----|----|---|---------|---------|----------------|--------|---------|--------------------|--|

AGIWUR1314;AGIWUR5939;AGIWUR10417;AGIWUR31941

|    |    |   |         |         |                |          |          |                    |             |
|----|----|---|---------|---------|----------------|----------|----------|--------------------|-------------|
| N2 | HS | V | 7046312 | 7049250 | WBGene00017614 | F20A1.2  | F20A1.2  | -0.216903928362015 | AGIWUR26504 |
| N2 | HS | V | 7049434 | 7051311 | WBGene00017620 | tofu-2   | F20A1.9  | 0.066330415956589  | AGIWUR11374 |
| N2 | HS | V | 7051679 | 7052179 | WBGene00017613 | F20A1.1  | F20A1.1  | 0.10565020940156   | AGIWUR18795 |
| N2 | HS | V | 7052717 | 7053200 | WBGene00017621 | F20A1.10 | F20A1.10 | 0.102515634543803  |             |

AGIWUR22725

|    |    |   |         |         |                |            |            |                  |  |
|----|----|---|---------|---------|----------------|------------|------------|------------------|--|
| N2 | HS | V | 7054738 | 7055410 | WBGene00021958 | Y57E12AL.4 | Y57E12AL.4 | 0.10475203002159 |  |
|----|----|---|---------|---------|----------------|------------|------------|------------------|--|

AGIWUR14197

|    |    |   |         |         |                |            |            |                     |  |
|----|----|---|---------|---------|----------------|------------|------------|---------------------|--|
| N2 | HS | V | 7058095 | 7058507 | WBGene00021957 | Y57E12AL.2 | Y57E12AL.2 | -0.0124892104197674 |  |
|----|----|---|---------|---------|----------------|------------|------------|---------------------|--|

AGIWUR14838

|    |    |   |         |         |                |       |            |                    |  |
|----|----|---|---------|---------|----------------|-------|------------|--------------------|--|
| N2 | HS | V | 7058547 | 7059624 | WBGene00003164 | mdt-6 | Y57E12AL.5 | 0.0778077313427445 |  |
|----|----|---|---------|---------|----------------|-------|------------|--------------------|--|

AGIWUR41027

|    |    |   |         |         |                |            |            |                     |  |
|----|----|---|---------|---------|----------------|------------|------------|---------------------|--|
| N2 | HS | V | 7059698 | 7060470 | WBGene00021959 | Y57E12AL.6 | Y57E12AL.6 | -0.0955471062740116 |  |
|----|----|---|---------|---------|----------------|------------|------------|---------------------|--|

AGIWUR8481

|    |    |   |         |         |                |            |            |                    |  |
|----|----|---|---------|---------|----------------|------------|------------|--------------------|--|
| N2 | HS | V | 7060811 | 7062695 | WBGene00021956 | Y57E12AL.1 | Y57E12AL.1 | -0.235032981495387 |  |
|----|----|---|---------|---------|----------------|------------|------------|--------------------|--|

AGIWUR34298

|                                                                                                |    |   |         |         |                |            |            |                     |
|------------------------------------------------------------------------------------------------|----|---|---------|---------|----------------|------------|------------|---------------------|
| N2                                                                                             | HS | V | 7063174 | 7063718 | WBGene00021960 | Y57E12AM.1 | Y57E12AM.1 | 0.0576476487895334  |
| AGIWUR2965;AGIWUR29220;AGIWUR31548;AGIWUR36754;AGIWUR39340;AGIWUR40810                         |    |   |         |         |                |            |            |                     |
| N2                                                                                             | HS | V | 7063703 | 7065322 | WBGene00044612 | Y57E12AR.1 | Y57E12AR.1 | 0.134963069399223   |
| AGIWUR20069;AGIWUR42428;AGIWUR45178                                                            |    |   |         |         |                |            |            |                     |
| N2                                                                                             | HS | V | 7072585 | 7075835 | WBGene00017850 | F27B10.1   | F27B10.1   | 0.181120020016593   |
| AGIWUR41140                                                                                    |    |   |         |         |                |            |            |                     |
| N2                                                                                             | HS | V | 7075877 | 7081569 | WBGene00003786 | npa-1      | VC5.3      | 0.136065024182466   |
| AGIWUR3667;AGIWUR14589;AGIWUR16472;AGIWUR29431;AGIWUR32224;AGIWUR34728;AGIWUR35446;AGIWUR36991 |    |   |         |         |                |            |            |                     |
| N2                                                                                             | HS | V | 7081537 | 7084662 | WBGene00007029 | mys-1      | VC5.4      | -0.299372017794791  |
| AGIWUR13192                                                                                    |    |   |         |         |                |            |            |                     |
| N2                                                                                             | HS | V | 7085916 | 7088854 | WBGene00020908 | VC5.2      | VC5.2      | 0.151207703725138   |
| AGIWUR24342                                                                                    |    |   |         |         |                |            |            |                     |
| N2                                                                                             | HS | V | 7089498 | 7091601 | WBGene00044699 | nhr-286    | VC5.6      | 0.184092418710987   |
| AGIWUR9847                                                                                     |    |   |         |         |                |            |            |                     |
| N2                                                                                             | HS | V | 7091714 | 7093770 | WBGene00003725 | nhr-135    | VC5.5      | -0.124223423681002  |
| AGIWUR10215                                                                                    |    |   |         |         |                |            |            |                     |
| N2                                                                                             | HS | V | 7102478 | 7103442 | WBGene00020907 | VC5.1      | VC5.1      | -0.0326153636329654 |
| AGIWUR22964                                                                                    |    |   |         |         |                |            |            |                     |
| N2                                                                                             | HS | V | 7103697 | 7114436 | WBGene00003849 | odr-2      | T01C4.2    | -0.0138129719164404 |
| AGIWUR17952;AGIWUR24443;AGIWUR32476                                                            |    |   |         |         |                |            |            |                     |
| N2                                                                                             | HS | V | 7117452 | 7118896 | WBGene00005924 | srx-33     | T01C4.3    | -0.0335237358082381 |
| AGIWUR29466                                                                                    |    |   |         |         |                |            |            |                     |
| N2                                                                                             | HS | V | 7119063 | 7120268 | WBGene00005925 | srx-34     | T01C4.4    | 0.533691835549591   |
| AGIWUR11889                                                                                    |    |   |         |         |                |            |            |                     |
| N2                                                                                             | HS | V | 7120717 | 7122495 | WBGene00005926 | srx-35     | T01C4.5    | -0.0672069791645038 |
| AGIWUR12316                                                                                    |    |   |         |         |                |            |            |                     |
| N2                                                                                             | HS | V | 7123658 | 7128890 | WBGene00020141 | lmd-5      | T01C4.1    | -0.0230718094198306 |
| AGIWUR29072                                                                                    |    |   |         |         |                |            |            |                     |
| N2                                                                                             | HS | V | 7129146 | 7129560 | WBGene00044546 | T01C4.8    | T01C4.8    | -0.0938647090997993 |
| AGIWUR22183                                                                                    |    |   |         |         |                |            |            |                     |
| N2                                                                                             | HS | V | 7129707 | 7131074 | WBGene00005927 | srx-36     | T01C4.6    | -0.095287316325507  |
| AGIWUR30051                                                                                    |    |   |         |         |                |            |            |                     |
| N2                                                                                             | HS | V | 7131595 | 7132324 | WBGene00005928 | srx-37     | T01C4.7    | 0.365195005563205   |
| AGIWUR38511;AGIWUR40716                                                                        |    |   |         |         |                |            |            |                     |
| N2                                                                                             | HS | V | 7134263 | 7135682 | WBGene00271437 | F10D2.16   | F10D2.16   | -0.155178389099955  |
| AGIWUR25074                                                                                    |    |   |         |         |                |            |            |                     |
| N2                                                                                             | HS | V | 7136277 | 7138417 | WBGene00006163 | str-112    | F10D2.4    | -0.181934212127741  |
| AGIWUR35411                                                                                    |    |   |         |         |                |            |            |                     |
| N2                                                                                             | HS | V | 7139477 | 7141964 | WBGene00017331 | ugt-40     | F10D2.5    | 0.0642878387138106  |
| AGIWUR19001                                                                                    |    |   |         |         |                |            |            |                     |
| N2                                                                                             | HS | V | 7141942 | 7145318 | WBGene00017332 | ugt-37     | F10D2.6    | -0.458578656055581  |
| AGIWUR35557                                                                                    |    |   |         |         |                |            |            |                     |
| N2                                                                                             | HS | V | 7145656 | 7147470 | WBGene00017333 | ugt-38     | F10D2.7    | -0.307132856591982  |
| AGIWUR35761                                                                                    |    |   |         |         |                |            |            |                     |
| N2                                                                                             | HS | V | 7148688 | 7150692 | WBGene00017334 | F10D2.8    | F10D2.8    | 0.0404388362892045  |
| AGIWUR20425;AGIWUR31721                                                                        |    |   |         |         |                |            |            |                     |
| N2                                                                                             | HS | V | 7151353 | 7153146 | WBGene00001399 | fat-7      | F10D2.9    | 0.103100117997805   |
| AGIWUR40290                                                                                    |    |   |         |         |                |            |            |                     |
| N2                                                                                             | HS | V | 7154503 | 7156224 | WBGene00017335 | F10D2.10   | F10D2.10   | -0.046954429439376  |
| AGIWUR33513                                                                                    |    |   |         |         |                |            |            |                     |
| N2                                                                                             | HS | V | 7157142 | 7159190 | WBGene00017329 | ugt-39     | F10D2.2    | 0.0249089019110968  |
| AGIWUR8332;AGIWUR25276;AGIWUR40193                                                             |    |   |         |         |                |            |            |                     |
| N2                                                                                             | HS | V | 7159691 | 7161016 | WBGene00006237 | str-204    | F10D2.1    | -0.128535055575188  |
| AGIWUR22344                                                                                    |    |   |         |         |                |            |            |                     |
| N2                                                                                             | HS | V | 7161068 | 7163595 | WBGene00017336 | ugt-41     | F10D2.11   | 0.246864653398376   |
| AGIWUR39992                                                                                    |    |   |         |         |                |            |            |                     |

|                                                                        |    |   |         |         |                |          |          |                      |             |
|------------------------------------------------------------------------|----|---|---------|---------|----------------|----------|----------|----------------------|-------------|
| N2                                                                     | HS | V | 7164510 | 7165895 | WBGene00005304 | srh-83   | F09G2.7  | -0.15276727861729    | AGIWUR25097 |
| N2                                                                     | HS | V | 7167009 | 7169281 | WBGene00017315 | ugt-36   | F09G2.6  | -0.1856010959092     | AGIWUR43649 |
| N2                                                                     | HS | V | 7175501 | 7178783 | WBGene00017314 | lgc-39   | F09G2.5  | 0.0533672872688946   | AGIWUR13218 |
| N2                                                                     | HS | V | 7179172 | 7182853 | WBGene00017313 | cpsf-2   | F09G2.4  | 0.0889977814081782   | AGIWUR10595 |
| N2                                                                     | HS | V | 7184910 | 7188483 | WBGene00017312 | pitr-5   | F09G2.3  | -0.155340745427353   | AGIWUR38058 |
| N2                                                                     | HS | V | 7188332 | 7193662 | WBGene00017316 | F09G2.8  | F09G2.8  | 0.0577157319432846   | AGIWUR31237 |
| N2                                                                     | HS | V | 7193766 | 7196137 | WBGene00017317 | attf-2   | F09G2.9  | -0.0805635817944133  |             |
| AGIWUR9026;AGIWUR17703;AGIWUR19961;AGIWUR24522;AGIWUR29842;AGIWUR38507 |    |   |         |         |                |          |          |                      |             |
| N2                                                                     | HS | V | 7196916 | 7198437 | WBGene00017311 | F09G2.2  | F09G2.2  | -0.100850106346833   | AGIWUR36789 |
| N2                                                                     | HS | V | 7200224 | 7205609 | WBGene00017310 | F09G2.1  | F09G2.1  | -0.170852040218115   | AGIWUR11948 |
| N2                                                                     | HS | V | 7205626 | 7214903 | WBGene00015743 | soap-1   | C13F10.4 | 0.0338541896448703   |             |
| AGIWUR35914                                                            |    |   |         |         |                |          |          |                      |             |
| N2                                                                     | HS | V | 7215010 | 7219088 | WBGene00015744 | C13F10.5 | C13F10.5 |                      |             |
| -0.00535585284380069 AGIWUR4255;AGIWUR25008;AGIWUR34248;AGIWUR38845    |    |   |         |         |                |          |          |                      |             |
| N2                                                                     | HS | V | 7219054 | 7221039 | WBGene00015745 | C13F10.6 | C13F10.6 | 0.165658798233657    |             |
| AGIWUR13009;AGIWUR21878;AGIWUR40522                                    |    |   |         |         |                |          |          |                      |             |
| N2                                                                     | HS | V | 7221473 | 7222156 | WBGene00015742 | kxd-1    | C13F10.2 | 0.270331921955629    |             |
| AGIWUR14508                                                            |    |   |         |         |                |          |          |                      |             |
| N2                                                                     | HS | V | 7222049 | 7223279 | WBGene00015746 | C13F10.7 | C13F10.7 | 0.232970238652644    |             |
| AGIWUR38641                                                            |    |   |         |         |                |          |          |                      |             |
| N2                                                                     | HS | V | 7224078 | 7225204 | WBGene00015741 | C13F10.1 | C13F10.1 |                      |             |
| -0.00432940582287866 AGIWUR38607;AGIWUR42008                           |    |   |         |         |                |          |          |                      |             |
| N2                                                                     | HS | V | 7225223 | 7226320 | WBGene00001428 | fkf-3    | C05C8.3  | 0.0418000482806455   | AGIWUR9907  |
| N2                                                                     | HS | V | 7226376 | 7230848 | WBGene00001563 | gei-6    | C05C8.4  | -0.286577347769104   | AGIWUR15203 |
| N2                                                                     | HS | V | 7232434 | 7234826 | WBGene00015462 | C05C8.5  | C05C8.5  | 0.149724095708663    | AGIWUR31801 |
| N2                                                                     | HS | V | 7234922 | 7237130 | WBGene00015463 | hpo-9    | C05C8.6  | -0.00480509588726452 |             |
| AGIWUR2698;AGIWUR3991;AGIWUR12483;AGIWUR16790                          |    |   |         |         |                |          |          |                      |             |
| N2                                                                     | HS | V | 7237381 | 7239658 | WBGene00015466 | hys-1    | C05C8.9  | -0.0547424537835659  |             |
| AGIWUR11456;AGIWUR25540;AGIWUR31894;AGIWUR37578                        |    |   |         |         |                |          |          |                      |             |
| N2                                                                     | HS | V | 7239771 | 7241366 | WBGene00015460 | C05C8.1  | C05C8.1  | 0.208073697996713    | AGIWUR26908 |
| N2                                                                     | HS | V | 7242907 | 7247321 | WBGene00015464 | C05C8.7  | C05C8.7  | 0.0560701793507627   |             |
| AGIWUR1752;AGIWUR8368;AGIWUR16592;AGIWUR22581;AGIWUR36915;AGIWUR40208  |    |   |         |         |                |          |          |                      |             |
| N2                                                                     | HS | V | 7252325 | 7255157 | WBGene00015465 | C05C8.8  | C05C8.8  | 0.125942672062261    | AGIWUR39223 |
| N2                                                                     | HS | V | 7258808 | 7260157 | WBGene00044547 | C13A2.12 | C13A2.12 | 0.00268906952596604  |             |
| AGIWUR12736;AGIWUR45175                                                |    |   |         |         |                |          |          |                      |             |
| N2                                                                     | HS | V | 7262565 | 7264148 | WBGene00015725 | C13A2.9  | C13A2.9  | -0.135738745009244   | AGIWUR21866 |
| N2                                                                     | HS | V | 7264576 | 7265377 | WBGene00023235 | C13A2.8  | C13A2.8  | 0.0255820922980732   |             |
| AGIWUR1246;AGIWUR26717;AGIWUR31889;AGIWUR33907;AGIWUR43367             |    |   |         |         |                |          |          |                      |             |
| N2                                                                     | HS | V | 7266353 | 7268806 | WBGene00015724 | C13A2.7  | C13A2.7  | -0.0281699468889691  |             |

AGIWUR13134;AGIWUR23165;AGIWUR32284

|    |    |   |         |         |                |          |          |                      |             |
|----|----|---|---------|---------|----------------|----------|----------|----------------------|-------------|
| N2 | HS | V | 7269731 | 7272787 | WBGene00015723 | C13A2.6  | C13A2.6  | 0.167009925240157    | AGIWUR4210  |
| N2 | HS | V | 7275791 | 7278472 | WBGene00015722 | C13A2.5  | C13A2.5  | -0.0681020511752664  | AGIWUR16539 |
| N2 | HS | V | 7279310 | 7280530 | WBGene00015721 | C13A2.4  | C13A2.4  | -0.165809058960981   | AGIWUR20014 |
| N2 | HS | V | 7282337 | 7284667 | WBGene00015720 | C13A2.3  | C13A2.3  | -0.00252441385243785 | AGIWUR37246 |
| N2 | HS | V | 7286185 | 7287399 | WBGene00015719 | C13A2.2  | C13A2.2  | 0.031444391384519    | AGIWUR24599 |
| N2 | HS | V | 7289027 | 7291831 | WBGene00015718 | C13A2.1  | C13A2.1  | 0.127083122457936    | AGIWUR21997 |
| N2 | HS | V | 7292754 | 7295381 | WBGene00017231 | F07G11.4 | F07G11.4 | 0.167866195354115    |             |

AGIWUR33430

|    |    |   |         |         |                |        |          |                    |  |
|----|----|---|---------|---------|----------------|--------|----------|--------------------|--|
| N2 | HS | V | 7296300 | 7297363 | WBGene00005617 | srj-32 | F07G11.5 | 0.0893614460067784 |  |
|----|----|---|---------|---------|----------------|--------|----------|--------------------|--|

AGIWUR2894

|    |    |   |         |         |                |          |          |                     |  |
|----|----|---|---------|---------|----------------|----------|----------|---------------------|--|
| N2 | HS | V | 7298771 | 7301472 | WBGene00017230 | F07G11.3 | F07G11.3 | -0.0879465681485687 |  |
|----|----|---|---------|---------|----------------|----------|----------|---------------------|--|

AGIWUR25605

|    |    |   |         |         |                |          |          |                    |  |
|----|----|---|---------|---------|----------------|----------|----------|--------------------|--|
| N2 | HS | V | 7307389 | 7309556 | WBGene00017228 | F07G11.1 | F07G11.1 | 0.0913932412756093 |  |
|----|----|---|---------|---------|----------------|----------|----------|--------------------|--|

AGIWUR9956

|    |    |   |         |         |                |       |          |                   |  |
|----|----|---|---------|---------|----------------|-------|----------|-------------------|--|
| N2 | HS | V | 7311726 | 7313333 | WBGene00005897 | srx-6 | F07G11.8 | 0.106618506275753 |  |
|----|----|---|---------|---------|----------------|-------|----------|-------------------|--|

AGIWUR38568

|    |    |   |         |         |                |       |          |                    |  |
|----|----|---|---------|---------|----------------|-------|----------|--------------------|--|
| N2 | HS | V | 7314136 | 7321009 | WBGene00017233 | lmd-4 | F07G11.9 | -0.183570191886977 |  |
|----|----|---|---------|---------|----------------|-------|----------|--------------------|--|

AGIWUR7636

|    |    |   |         |         |                |        |         |                     |             |
|----|----|---|---------|---------|----------------|--------|---------|---------------------|-------------|
| N2 | HS | V | 7324038 | 7325385 | WBGene00005983 | srx-92 | F10G2.6 | -0.0710996507263886 | AGIWUR32095 |
|----|----|---|---------|---------|----------------|--------|---------|---------------------|-------------|

|    |    |   |         |         |                |         |         |                    |             |
|----|----|---|---------|---------|----------------|---------|---------|--------------------|-------------|
| N2 | HS | V | 7327135 | 7327755 | WBGene00017365 | F10G2.4 | F10G2.4 | -0.345323444376728 | AGIWUR43997 |
|----|----|---|---------|---------|----------------|---------|---------|--------------------|-------------|

|    |    |   |         |         |                |        |         |                    |             |
|----|----|---|---------|---------|----------------|--------|---------|--------------------|-------------|
| N2 | HS | V | 7328392 | 7330001 | WBGene00017364 | clec-7 | F10G2.3 | -0.111635769853214 | AGIWUR26607 |
|----|----|---|---------|---------|----------------|--------|---------|--------------------|-------------|

|    |    |   |         |         |                |         |         |                       |             |
|----|----|---|---------|---------|----------------|---------|---------|-----------------------|-------------|
| N2 | HS | V | 7331168 | 7331779 | WBGene00017363 | F10G2.2 | F10G2.2 | -0.000306273122308909 | AGIWUR45026 |
|----|----|---|---------|---------|----------------|---------|---------|-----------------------|-------------|

|    |    |   |         |         |                |         |         |                   |            |
|----|----|---|---------|---------|----------------|---------|---------|-------------------|------------|
| N2 | HS | V | 7332562 | 7333424 | WBGene00017362 | F10G2.1 | F10G2.1 | 0.225595425384185 | AGIWUR5849 |
|----|----|---|---------|---------|----------------|---------|---------|-------------------|------------|

|    |    |   |         |         |                |         |         |                     |             |
|----|----|---|---------|---------|----------------|---------|---------|---------------------|-------------|
| N2 | HS | V | 7333774 | 7337168 | WBGene00017366 | F10G2.7 | F10G2.7 | -0.0188897709437601 | AGIWUR18051 |
|----|----|---|---------|---------|----------------|---------|---------|---------------------|-------------|

|    |    |   |         |         |                |         |         |                   |             |
|----|----|---|---------|---------|----------------|---------|---------|-------------------|-------------|
| N2 | HS | V | 7338633 | 7339831 | WBGene00005402 | srh-187 | F10G2.8 | 0.103838042661911 | AGIWUR19069 |
|----|----|---|---------|---------|----------------|---------|---------|-------------------|-------------|

|    |    |   |         |         |                |         |         |                    |  |
|----|----|---|---------|---------|----------------|---------|---------|--------------------|--|
| N2 | HS | V | 7340436 | 7341484 | WBGene00017367 | nhr-263 | F10G2.9 | -0.172263449300625 |  |
|----|----|---|---------|---------|----------------|---------|---------|--------------------|--|

AGIWUR27218;AGIWUR32274

|    |    |   |         |         |                |         |          |                   |  |
|----|----|---|---------|---------|----------------|---------|----------|-------------------|--|
| N2 | HS | V | 7342156 | 7343838 | WBGene00015396 | nhr-148 | C03G6.10 | 0.105300555402538 |  |
|----|----|---|---------|---------|----------------|---------|----------|-------------------|--|

AGIWUR1793

|    |    |   |         |         |                |         |         |                   |            |
|----|----|---|---------|---------|----------------|---------|---------|-------------------|------------|
| N2 | HS | V | 7344061 | 7345234 | WBGene00005450 | srh-244 | C03G6.9 | -0.13768106857389 | AGIWUR1764 |
|----|----|---|---------|---------|----------------|---------|---------|-------------------|------------|

|    |    |   |         |         |                |         |         |                     |  |
|----|----|---|---------|---------|----------------|---------|---------|---------------------|--|
| N2 | HS | V | 7346301 | 7348135 | WBGene00015395 | nhr-147 | C03G6.8 | -0.0709049052140109 |  |
|----|----|---|---------|---------|----------------|---------|---------|---------------------|--|

AGIWUR6976;AGIWUR17637;AGIWUR20992

|    |    |   |         |         |                |         |          |                    |  |
|----|----|---|---------|---------|----------------|---------|----------|--------------------|--|
| N2 | HS | V | 7348211 | 7349664 | WBGene00015397 | nhr-149 | C03G6.12 | -0.096554807183999 |  |
|----|----|---|---------|---------|----------------|---------|----------|--------------------|--|

AGIWUR44680

|    |    |   |         |         |                |         |          |                    |  |
|----|----|---|---------|---------|----------------|---------|----------|--------------------|--|
| N2 | HS | V | 7350881 | 7352236 | WBGene00005439 | srh-231 | C03G6.11 | 0.0317790285070565 |  |
|----|----|---|---------|---------|----------------|---------|----------|--------------------|--|

AGIWUR34403

|    |    |   |         |         |                |         |         |                    |            |
|----|----|---|---------|---------|----------------|---------|---------|--------------------|------------|
| N2 | HS | V | 7353040 | 7354254 | WBGene00005480 | srh-275 | C03G6.7 | -0.181263660161187 | AGIWUR3671 |
|----|----|---|---------|---------|----------------|---------|---------|--------------------|------------|

|    |    |   |         |         |                |         |          |                     |  |
|----|----|---|---------|---------|----------------|---------|----------|---------------------|--|
| N2 | HS | V | 7354445 | 7355510 | WBGene00015398 | tag-293 | C03G6.13 | -0.0528627622970994 |  |
|----|----|---|---------|---------|----------------|---------|----------|---------------------|--|

|                                   |    |   |         |         |                |          |          |                     |             |
|-----------------------------------|----|---|---------|---------|----------------|----------|----------|---------------------|-------------|
| AGIWUR31359                       |    |   |         |         |                |          |          |                     |             |
| N2                                | HS | V | 7357451 | 7358882 | WBGene00015394 | C03G6.6  | C03G6.6  | 0.0986331488197267  | AGIWUR4749  |
| N2                                | HS | V | 7359997 | 7361773 | WBGene00015399 | cyp-35A1 | C03G6.14 | 0.0342770887777166  |             |
| AGIWUR26541;AGIWUR41697           |    |   |         |         |                |          |          |                     |             |
| N2                                | HS | V | 7365251 | 7366204 | WBGene00015393 | C03G6.5  | C03G6.5  | -0.149869776352916  | AGIWUR1692  |
| N2                                | HS | V | 7366534 | 7367619 | WBGene00005403 | srh-189  | C03G6.20 | 0.00534448609549543 |             |
| AGIWUR5041;AGIWUR36294            |    |   |         |         |                |          |          |                     |             |
| N2                                | HS | V | 7369759 | 7372131 | WBGene00005602 | srj-14   | C03G6.3  | -0.122642174781912  |             |
| AGIWUR3412;AGIWUR3516;AGIWUR34953 |    |   |         |         |                |          |          |                     |             |
| N2                                | HS | V | 7374390 | 7375594 | WBGene00005947 | srx-56   | C03G6.2  | -0.201804165579285  |             |
| AGIWUR5407;AGIWUR32097            |    |   |         |         |                |          |          |                     |             |
| N2                                | HS | V | 7376409 | 7377742 | WBGene00005948 | srx-57   | C03G6.1  | -0.0604781193291037 | AGIWUR19687 |
| N2                                | HS | V | 7377897 | 7379484 | WBGene00015401 | srsx-24  | C03G6.16 | -0.16639422123499   |             |
| AGIWUR31434                       |    |   |         |         |                |          |          |                     |             |
| N2                                | HS | V | 7379745 | 7381069 | WBGene00015402 | C03G6.17 | C03G6.17 | -0.0228930034941968 |             |
| AGIWUR32749                       |    |   |         |         |                |          |          |                     |             |
| N2                                | HS | V | 7382021 | 7383309 | WBGene00005646 | srp-5    | C03G6.18 | 0.0260037973980047  |             |
| AGIWUR4547                        |    |   |         |         |                |          |          |                     |             |
| N2                                | HS | V | 7384232 | 7386173 | WBGene00005647 | srp-6    | C03G6.19 | 0.0744629035211606  |             |
| AGIWUR1521                        |    |   |         |         |                |          |          |                     |             |
| N2                                | HS | V | 7388390 | 7389871 | WBGene00015361 | C02H6.1  | C02H6.1  | 0.159265406552227   | AGIWUR15685 |
| N2                                | HS | V | 7390529 | 7392111 | WBGene00015362 | fbxa-105 | C02H6.2  | -0.157973131768815  |             |
| AGIWUR44525                       |    |   |         |         |                |          |          |                     |             |
| N2                                | HS | V | 7393550 | 7395459 | WBGene00005900 | srx-9    | R13D7.6  | -0.15397188658897   | AGIWUR37970 |
| N2                                | HS | V | 7398390 | 7399302 | WBGene00001789 | gst-41   | R13D7.7  | 0.124680023922865   | AGIWUR42946 |
| N2                                | HS | V | 7399904 | 7400199 | WBGene00044548 | cnc-9    | R13D7.11 | 0.0180815085339328  |             |
| AGIWUR6901;AGIWUR8643;AGIWUR11457 |    |   |         |         |                |          |          |                     |             |
| N2                                | HS | V | 7400888 | 7402192 | WBGene00005951 | srx-60   | R13D7.4  | -0.0991934839755695 | AGIWUR37472 |
| N2                                | HS | V | 7402655 | 7403910 | WBGene00005601 | srj-13   | R13D7.3  | 0.0109775421330669  | AGIWUR29550 |
| N2                                | HS | V | 7404821 | 7405871 | WBGene00006091 | str-24   | R13D7.9  | -0.0479825313667295 |             |
| AGIWUR4229;AGIWUR12780            |    |   |         |         |                |          |          |                     |             |
| N2                                | HS | V | 7407547 | 7408814 | WBGene00020055 | srt-6    | R13D7.10 | 0.00338068189199792 |             |
| AGIWUR18133                       |    |   |         |         |                |          |          |                     |             |
| N2                                | HS | V | 7409899 | 7411253 | WBGene00020054 | R13D7.2  | R13D7.2  | 0.116605647867154   | AGIWUR23364 |
| N2                                | HS | V | 7411995 | 7413059 | WBGene00006106 | str-41   | R13D7.1  | -0.0186379720024332 | AGIWUR39155 |
| N2                                | HS | V | 7413437 | 7413840 | WBGene00017567 | F18E3.11 | F18E3.11 | 0.139021120127057   |             |
| AGIWUR16027;AGIWUR28494           |    |   |         |         |                |          |          |                     |             |
| N2                                | HS | V | 7414941 | 7415344 | WBGene00045275 | F18E3.12 | F18E3.12 | 0.324630884482667   |             |
| AGIWUR26393;AGIWUR34940           |    |   |         |         |                |          |          |                     |             |



|                                                                                    |    |   |         |         |                |          |          |                      |             |
|------------------------------------------------------------------------------------|----|---|---------|---------|----------------|----------|----------|----------------------|-------------|
| N2                                                                                 | HS | V | 7416116 | 7416628 | WBGene00045276 | F18E3.13 | F18E3.13 | 0.326553999762647    |             |
| AGIWUR790                                                                          |    |   |         |         |                |          |          |                      |             |
| N2                                                                                 | HS | V | 7417660 | 7419828 | WBGene00005814 | srw-67   | F18E3.2  | -0.22417374901275    | AGIWUR22042 |
| N2                                                                                 | HS | V | 7420462 | 7421713 | WBGene00017564 | srxa-4   | F18E3.1  | 0.0460876358806015   | AGIWUR22088 |
| N2                                                                                 | HS | V | 7421855 | 7422937 | WBGene00005343 | srh-126  | F18E3.3  | 0.013785713077656    |             |
| AGIWUR3174;AGIWUR10542;AGIWUR11741;AGIWUR22896;AGIWUR25510;AGIWUR35121;AGIWUR39022 |    |   |         |         |                |          |          |                      |             |
| N2                                                                                 | HS | V | 7423573 | 7424578 | WBGene00017566 | F18E3.10 | F18E3.10 | -0.197975076968727   |             |
| AGIWUR24955                                                                        |    |   |         |         |                |          |          |                      |             |
| N2                                                                                 | HS | V | 7425259 | 7426694 | WBGene00005815 | srw-68   | F18E3.4  | -0.00930674715286361 | AGIWUR25357 |
| N2                                                                                 | HS | V | 7427326 | 7428980 | WBGene00005816 | srw-69   | F18E3.5  | 0.116498533472288    | AGIWUR18382 |
| N2                                                                                 | HS | V | 7429684 | 7431116 | WBGene00005818 | srw-71   | F18E3.6  | 0.0172567221679456   | AGIWUR31118 |
| N2                                                                                 | HS | V | 7431822 | 7433160 | WBGene00005825 | srw-78   | F18E3.9  | 0.0276014865751524   |             |
| AGIWUR1755;AGIWUR3992;AGIWUR8503;AGIWUR12691;AGIWUR15111;AGIWUR29806;AGIWUR31635   |    |   |         |         |                |          |          |                      |             |
| N2                                                                                 | HS | V | 7433401 | 7435650 | WBGene00017565 | ddo-2    | F18E3.7  | -0.0830898759417078  |             |
| AGIWUR31689;AGIWUR40261;AGIWUR42918;AGIWUR43676                                    |    |   |         |         |                |          |          |                      |             |
| N2                                                                                 | HS | V | 7435413 | 7436962 | WBGene00017789 | F25E5.8  | F25E5.8  | -0.0539943552223683  |             |
| AGIWUR5670;AGIWUR27478;AGIWUR29340;AGIWUR42027                                     |    |   |         |         |                |          |          |                      |             |
| N2                                                                                 | HS | V | 7437506 | 7437919 | WBGene00017790 | F25E5.9  | F25E5.9  | -0.0166103305144665  |             |
| AGIWUR4161;AGIWUR18222;AGIWUR20571;AGIWUR21570;AGIWUR30302;AGIWUR35467             |    |   |         |         |                |          |          |                      |             |
| N2                                                                                 | HS | V | 7438285 | 7439933 | WBGene00017792 | F25E5.16 | F25E5.16 | 0.121023500589274    |             |
| AGIWUR26187                                                                        |    |   |         |         |                |          |          |                      |             |
| N2                                                                                 | HS | V | 7440107 | 7441483 | WBGene00017788 | F25E5.7  | F25E5.7  | 0.162814248926553    | AGIWUR16933 |
| N2                                                                                 | HS | V | 7445065 | 7446712 | WBGene00017787 | nhr-141  | F25E5.6  | -0.163147375905285   | AGIWUR40405 |
| N2                                                                                 | HS | V | 7447273 | 7448884 | WBGene00017786 | F25E5.5  | F25E5.5  | 0.123701172204964    |             |
| AGIWUR3591;AGIWUR4736;AGIWUR41263                                                  |    |   |         |         |                |          |          |                      |             |
| N2                                                                                 | HS | V | 7449353 | 7451149 | WBGene00017785 | F25E5.4  | F25E5.4  | -0.339299505086423   | AGIWUR3460  |
| N2                                                                                 | HS | V | 7451721 | 7452899 | WBGene00017784 | F25E5.3  | F25E5.3  | 0.0478691957706481   | AGIWUR44505 |
| N2                                                                                 | HS | V | 7452946 | 7454318 | WBGene00017791 | try-8    | F25E5.10 | -0.0190929215798494  |             |
| AGIWUR13538                                                                        |    |   |         |         |                |          |          |                      |             |
| N2                                                                                 | HS | V | 7455819 | 7457597 | WBGene00017783 | F25E5.2  | F25E5.2  | 0.152403143761415    | AGIWUR35524 |
| N2                                                                                 | HS | V | 7458252 | 7459150 | WBGene00005314 | srh-93   | F25E5.15 | 0.0764462390325829   |             |
| AGIWUR42344                                                                        |    |   |         |         |                |          |          |                      |             |
| N2                                                                                 | HS | V | 7459685 | 7460998 | WBGene00005313 | srh-92   | F25E5.13 | -0.0588931717753951  |             |
| AGIWUR8682                                                                         |    |   |         |         |                |          |          |                      |             |
| N2                                                                                 | HS | V | 7461750 | 7462949 | WBGene00005312 | srh-91   | F25E5.11 | 0.116012762601151    |             |
| AGIWUR5456;AGIWUR11180                                                             |    |   |         |         |                |          |          |                      |             |
| N2                                                                                 | HS | V | 7465889 | 7471223 | WBGene00017782 | F25E5.1  | F25E5.1  | -0.159132038836155   | AGIWUR4137  |
| N2                                                                                 | HS | V | 7471651 | 7472915 | WBGene00006094 | str-28   | F25E5.12 | 0.131935183327982    |             |
| AGIWUR9253                                                                         |    |   |         |         |                |          |          |                      |             |

|                                                            |    |   |         |         |                |          |           |                      |             |
|------------------------------------------------------------|----|---|---------|---------|----------------|----------|-----------|----------------------|-------------|
| N2                                                         | HS | V | 7473299 | 7475013 | WBGene00006095 | str-29   | C18B10.9  | -0.0138433404337528  |             |
| AGIWUR4836;AGIWUR23362                                     |    |   |         |         |                |          |           |                      |             |
| N2                                                         | HS | V | 7475626 | 7476866 | WBGene00005342 | srh-125  | C18B10.8  | 0.065028090876547    |             |
| AGIWUR21451                                                |    |   |         |         |                |          |           |                      |             |
| N2                                                         | HS | V | 7477241 | 7478504 | WBGene00006231 | str-190  | C18B10.7  | -0.11814873816597    |             |
| AGIWUR10689                                                |    |   |         |         |                |          |           |                      |             |
| N2                                                         | HS | V | 7479217 | 7481049 | WBGene00015963 | C18B10.6 | C18B10.6  | -0.207365228044845   |             |
| AGIWUR838;AGIWUR10121;AGIWUR43551                          |    |   |         |         |                |          |           |                      |             |
| N2                                                         | HS | V | 7481868 | 7483171 | WBGene00006285 | str-259  | C18B10.10 | 0.0451989884418054   |             |
| AGIWUR6434;AGIWUR33505                                     |    |   |         |         |                |          |           |                      |             |
| N2                                                         | HS | V | 7483316 | 7485100 | WBGene00015962 | srbc-8   | C18B10.5  | 0.0824180379835884   |             |
| AGIWUR2319;AGIWUR21711                                     |    |   |         |         |                |          |           |                      |             |
| N2                                                         | HS | V | 7486131 | 7487618 | WBGene00015961 | srbc-7   | C18B10.4  | -0.330417011813978   |             |
| AGIWUR18606                                                |    |   |         |         |                |          |           |                      |             |
| N2                                                         | HS | V | 7489134 | 7490440 | WBGene00015960 | srbc-9   | C18B10.3  | 0.0662219802708437   |             |
| AGIWUR15347;AGIWUR27013                                    |    |   |         |         |                |          |           |                      |             |
| N2                                                         | HS | V | 7491875 | 7493024 | WBGene00015959 | srbc-10  | C18B10.2  | 0.169647887443209    |             |
| AGIWUR44235                                                |    |   |         |         |                |          |           |                      |             |
| N2                                                         | HS | V | 7493880 | 7495289 | WBGene00015958 | srbc-11  | C18B10.1  | -0.0375098120387243  |             |
| AGIWUR38818                                                |    |   |         |         |                |          |           |                      |             |
| N2                                                         | HS | V | 7497740 | 7499055 | WBGene00005300 | srh-79   | C04F2.1   | 0.0270335610972925   | AGIWUR34383 |
| N2                                                         | HS | V | 7499652 | 7500958 | WBGene00005431 | srh-221  | C04F2.2   | -0.124537670743432   |             |
| AGIWUR22231;AGIWUR40815                                    |    |   |         |         |                |          |           |                      |             |
| N2                                                         | HS | V | 7501534 | 7502673 | WBGene00005438 | srh-230  | C04F2.3   | 0.146381600817421    |             |
| AGIWUR36299;AGIWUR42880                                    |    |   |         |         |                |          |           |                      |             |
| N2                                                         | HS | V | 7502840 | 7504371 | WBGene00005437 | srh-229  | C04F2.4   | 0.0535598596128626   |             |
| AGIWUR4123;AGIWUR13226;AGIWUR20592                         |    |   |         |         |                |          |           |                      |             |
| N2                                                         | HS | V | 7504653 | 7505945 | WBGene00005473 | srh-267  | C04F2.5   | 0.114367294316752    |             |
| AGIWUR12092;AGIWUR19173                                    |    |   |         |         |                |          |           |                      |             |
| N2                                                         | HS | V | 7506914 | 7508265 | WBGene00006097 | str-31   | C54F6.10  | -0.0935810196850539  |             |
| AGIWUR37093                                                |    |   |         |         |                |          |           |                      |             |
| N2                                                         | HS | V | 7508994 | 7510602 | WBGene00016927 | nhr-172  | C54F6.9   | -0.0620607150815724  | AGIWUR8052  |
| N2                                                         | HS | V | 7511765 | 7513684 | WBGene00016926 | nhr-171  | C54F6.8   | -0.00261549861626698 | AGIWUR21182 |
| N2                                                         | HS | V | 7515245 | 7517307 | WBGene00016925 | srb-18   | C54F6.7   | 0.0289103602448861   | AGIWUR22330 |
| N2                                                         | HS | V | 7517685 | 7520177 | WBGene00016928 | srb-19   | C54F6.11  | -0.162593937124047   |             |
| AGIWUR6103                                                 |    |   |         |         |                |          |           |                      |             |
| N2                                                         | HS | V | 7522032 | 7522364 | WBGene00044113 | C54F6.15 | C54F6.15  | -0.0403034849878789  |             |
| AGIWUR3238;AGIWUR29620;AGIWUR37411;AGIWUR39092;AGIWUR40472 |    |   |         |         |                |          |           |                      |             |
| N2                                                         | HS | V | 7523692 | 7525421 | WBGene00016924 | C54F6.6  | C54F6.6   | 0.034279963894436    | AGIWUR42339 |

|                                                 |    |   |         |         |                |           |           |                       |             |
|-------------------------------------------------|----|---|---------|---------|----------------|-----------|-----------|-----------------------|-------------|
| N2                                              | HS | V | 7529116 | 7529450 | WBGene00016923 | C54F6.5   | C54F6.5   | -0.215570316390198    | AGIWUR8243  |
| N2                                              | HS | V | 7530261 | 7531463 | WBGene00016922 | swt-2     | C54F6.4   | -0.000692144116913873 | AGIWUR34665 |
| N2                                              | HS | V | 7533247 | 7535074 | WBGene00016921 | C54F6.3   | C54F6.3   | 0.00620242072898236   | AGIWUR10479 |
| N2                                              | HS | V | 7536919 | 7537909 | WBGene00016929 | C54F6.12  | C54F6.12  | 0.0463328671086005    |             |
| AGIWUR901                                       |    |   |         |         |                |           |           |                       |             |
| N2                                              | HS | V | 7539315 | 7540891 | WBGene00005474 | srh-268   | C54F6.1   | 0.101451856128283     | AGIWUR38594 |
| N2                                              | HS | V | 7540890 | 7544838 | WBGene00003731 | nhx-3     | C54F6.13  | 0.156552453374653     |             |
| AGIWUR24901                                     |    |   |         |         |                |           |           |                       |             |
| N2                                              | HS | V | 7546468 | 7548012 | WBGene00001500 | ftn-1     | C54F6.14  | -0.0334599004556146   |             |
| AGIWUR4104;AGIWUR10941;AGIWUR19302;AGIWUR25571  |    |   |         |         |                |           |           |                       |             |
| N2                                              | HS | V | 7552121 | 7552708 | WBGene00017599 | F19F10.3  | F19F10.3  | 0.0625719219537704    |             |
| AGIWUR17858                                     |    |   |         |         |                |           |           |                       |             |
| N2                                              | HS | V | 7552756 | 7553923 | WBGene00017600 | ttr-10    | F19F10.4  | 0.250307167327623     |             |
| AGIWUR205                                       |    |   |         |         |                |           |           |                       |             |
| N2                                              | HS | V | 7555810 | 7557387 | WBGene00005534 | sri-22    | F19F10.2  | 0.174048688772046     |             |
| AGIWUR26691;AGIWUR41410                         |    |   |         |         |                |           |           |                       |             |
| N2                                              | HS | V | 7557541 | 7558783 | WBGene00017601 | ets-7     | F19F10.5  | -0.135891601743769    |             |
| AGIWUR4260                                      |    |   |         |         |                |           |           |                       |             |
| N2                                              | HS | V | 7560252 | 7561615 | WBGene00017602 | cllec-211 | F19F10.6  | 0.0621908687405481    |             |
| AGIWUR30534                                     |    |   |         |         |                |           |           |                       |             |
| N2                                              | HS | V | 7562714 | 7564245 | WBGene00017598 | F19F10.1  | F19F10.1  | 0.047418131997448     |             |
| AGIWUR44088                                     |    |   |         |         |                |           |           |                       |             |
| N2                                              | HS | V | 7566232 | 7567059 | WBGene00017603 | cllec-212 | F19F10.7  |                       |             |
| 0.000316797687608172 AGIWUR868                  |    |   |         |         |                |           |           |                       |             |
| N2                                              | HS | V | 7569696 | 7570390 | WBGene00017604 | F19F10.8  | F19F10.8  | -0.194840085507368    |             |
| AGIWUR12944;AGIWUR17120;AGIWUR21096;AGIWUR29979 |    |   |         |         |                |           |           |                       |             |
| N2                                              | HS | V | 7571950 | 7575715 | WBGene00017605 | F19F10.9  | F19F10.9  | 0.0927676168371043    |             |
| AGIWUR36257                                     |    |   |         |         |                |           |           |                       |             |
| N2                                              | HS | V | 7575750 | 7581532 | WBGene00017608 | F19F10.12 | F19F10.12 | -0.204631328764516    |             |
| AGIWUR21931;AGIWUR36890;AGIWUR40367             |    |   |         |         |                |           |           |                       |             |
| N2                                              | HS | V | 7581473 | 7587698 | WBGene00017607 | F19F10.11 | F19F10.11 | 0.0410878762839513    |             |
| AGIWUR22956;AGIWUR25815                         |    |   |         |         |                |           |           |                       |             |
| N2                                              | HS | V | 7587996 | 7594740 | WBGene00016816 | C50E3.5   | C50E3.5   | -0.0782360111999338   | AGIWUR38076 |
| N2                                              | HS | V | 7594875 | 7596409 | WBGene00016818 | C50E3.7   | C50E3.7   | -0.139915360767791    | AGIWUR27300 |
| N2                                              | HS | V | 7598029 | 7598369 | WBGene00016819 | C50E3.8   | C50E3.8   | 0.144640023539296     | AGIWUR20841 |
| N2                                              | HS | V | 7599257 | 7600424 | WBGene00016820 | C50E3.9   | C50E3.9   | -0.0200650271565852   | AGIWUR37388 |
| N2                                              | HS | V | 7600609 | 7601543 | WBGene00016821 | sc1-26    | C50E3.10  | -0.213897545769949    |             |
| AGIWUR39347                                     |    |   |         |         |                |           |           |                       |             |
| N2                                              | HS | V | 7602213 | 7603486 | WBGene00016822 | C50E3.11  | C50E3.11  | -0.170840762432154    |             |

AGIWUR3880;AGIWUR6076;AGIWUR9166;AGIWUR9454;AGIWUR18332;AGIWUR20959  
N2 HS V 7603806 7609946 WBGene00044738 folt-3 C50E3.16 0.0692606755836742  
AGIWUR7594;AGIWUR28960  
N2 HS V 7610370 7610963 WBGene00016814 C50E3.2 C50E3.2 0.194482309716497 AGIWUR43867  
N2 HS V 7611267 7611905 WBGene00016813 clec-214 C50E3.1 -0.156447886537794  
AGIWUR9667  
N2 HS V 7612344 7615648 WBGene00044549 clec-215 C50E3.14 -0.194811231283633  
AGIWUR7336;AGIWUR28371  
N2 HS V 7618414 7620349 WBGene00044550 C50E3.15 C50E3.15 0.150323577177137  
AGIWUR35919;AGIWUR36118  
N2 HS V 7620504 7622061 WBGene00016823 C50E3.12 C50E3.12 -0.0296478739591457  
AGIWUR7090;AGIWUR16388;AGIWUR17311  
N2 HS V 7622335 7624252 WBGene00016824 C50E3.13 C50E3.13 -0.145075733559441  
AGIWUR29608  
N2 HS V 7624952 7626453 WBGene00017201 grsp-4 F07C4.7 -0.0342428518088873 AGIWUR10100  
N2 HS V 7626850 7627780 WBGene00017200 F07C4.6 F07C4.6 0.055819001833183 AGIWUR39813  
N2 HS V 7629804 7631298 WBGene00005108 srd-30 F07C4.5 -0.616648790787663 AGIWUR14520  
N2 HS V 7632032 7633172 WBGene00005103 srd-25 F07C4.4 -0.101776389622396 AGIWUR30077  
N2 HS V 7633399 7634757 WBGene00005109 srd-31 F07C4.8 -0.00530401060059305 AGIWUR41386  
N2 HS V 7635769 7636882 WBGene00005107 srd-29 F07C4.3 -0.0935747472009449 AGIWUR1831  
N2 HS V 7637277 7637792 WBGene00017202 clec-46 F07C4.9 -0.0149874266454422 AGIWUR9953  
N2 HS V 7638105 7638622 WBGene00017199 clec-45 F07C4.2 -0.0262869762082767 AGIWUR24928  
N2 HS V 7638944 7639869 WBGene00017203 F07C4.10 F07C4.10 -0.0263988125464367  
AGIWUR22824  
N2 HS V 7642558 7643516 WBGene00017204 F07C4.11 F07C4.11 -0.234484490616515  
AGIWUR37360  
N2 HS V 7645754 7647069 WBGene00006112 str-47 F07C4.1 -0.0303117680112353 AGIWUR28091  
N2 HS V 7647836 7649817 WBGene00017205 F07C4.12 F07C4.12 0.0290187804326338  
AGIWUR14177;AGIWUR21706  
N2 HS V 7650242 7651857 WBGene00005441 srh-234 F07C4.14 -0.0409812688147966  
AGIWUR30304  
N2 HS V 7652338 7653667 WBGene00005411 srh-200 F07C4.13 0.171347997931367  
AGIWUR44692  
N2 HS V 7668240 7669000 WBGene00015708 C12D5.5 C12D5.5 -0.239876413497755 AGIWUR34402  
N2 HS V 7672089 7673253 WBGene00015707 C12D5.4 C12D5.4 0.0715477471445745  
AGIWUR2897;AGIWUR42966;AGIWUR44218  
N2 HS V 7676204 7676965 WBGene00015706 C12D5.3 C12D5.3 -0.0520021563266759 AGIWUR1116  
N2 HS V 7679314 7681615 WBGene00015709 cyp-33A1 C12D5.7 0.18707760280407  
AGIWUR36221

|                                                                         |    |   |         |         |                 |           |           |                      |             |
|-------------------------------------------------------------------------|----|---|---------|---------|-----------------|-----------|-----------|----------------------|-------------|
| N2                                                                      | HS | V | 7681820 | 7683957 | WBGene00015712  | sre-11    | C12D5.11  | -0.0539872285447798  |             |
| AGIWUR29774                                                             |    |   |         |         |                 |           |           |                      |             |
| N2                                                                      | HS | V | 7684363 | 7686335 | WBGene00003684  | nhr-94    | C12D5.8   | 0.266204852760991    |             |
| AGIWUR17409;AGIWUR18470;AGIWUR24192;AGIWUR38643;AGIWUR40479;AGIWUR43922 |    |   |         |         |                 |           |           |                      |             |
| N2                                                                      | HS | V | 7686350 | 7688228 | WBGene00015705  | nhr-152   | C12D5.2   | 0.494950521660323    | AGIWUR41171 |
| N2                                                                      | HS | V | 7688237 | 7689988 | WBGene00015710  | C12D5.9   | C12D5.9   | -0.00133368564315717 | AGIWUR41038 |
| N2                                                                      | HS | V | 7690594 | 7692043 | WBGene00006194  | str-147   | C12D5.1   | -0.0211778953217219  |             |
| AGIWUR29458;AGIWUR43240                                                 |    |   |         |         |                 |           |           |                      |             |
| N2                                                                      | HS | V | 7692071 | 7693488 | WBGene00015711  | C12D5.10  | C12D5.10  | -0.0591267309541443  |             |
| AGIWUR4130;AGIWUR17148;AGIWUR35652                                      |    |   |         |         |                 |           |           |                      |             |
| N2                                                                      | HS | V | 7697142 | 7700760 | WBGene00022654  | ZK105.3   | ZK105.3   | 0.264704114575666    | AGIWUR26366 |
| N2                                                                      | HS | V | 7701048 | 7703636 | WBGene00022655  | srsx-40   | ZK105.4   | 0.07614407027509     | AGIWUR24681 |
| N2                                                                      | HS | V | 7705616 | 7706955 | WBGene00005750  | srw-3     | ZK105.2   | 0.257309948392349    | AGIWUR44099 |
| N2                                                                      | HS | V | 7709050 | 7710037 | WBGene00022658  | srh-188   | ZK105.7   | -0.0471423118458505  |             |
| AGIWUR17472;AGIWUR35760                                                 |    |   |         |         |                 |           |           |                      |             |
| N2                                                                      | HS | V | 7712239 | 7713168 | WBGene000235114 | ZK105.13  | ZK105.13  | -0.0273702572998928  |             |
| AGIWUR5750                                                              |    |   |         |         |                 |           |           |                      |             |
| N2                                                                      | HS | V | 7713990 | 7714698 | WBGene00022653  | ZK105.1   | ZK105.1   | 0.0536758900964092   | AGIWUR5908  |
| N2                                                                      | HS | V | 7721181 | 7724065 | WBGene00022657  | ZK105.6   | ZK105.6   | 0.351455941054473    | AGIWUR40107 |
| N2                                                                      | HS | V | 7724494 | 7726110 | WBGene00044551  | ZK105.8   | ZK105.8   | -0.0165718313381955  |             |
| AGIWUR6482;AGIWUR39137;AGIWUR42851                                      |    |   |         |         |                 |           |           |                      |             |
| N2                                                                      | HS | V | 7728813 | 7730317 | WBGene00022410  | Y97E10C.1 | Y97E10C.1 | 0.193999998111629    |             |
| AGIWUR23151                                                             |    |   |         |         |                 |           |           |                      |             |
| N2                                                                      | HS | V | 7731839 | 7733495 | WBGene00044342  | T05B11.7  | T05B11.7  | 0.0187561858058589   |             |
| AGIWUR3311;AGIWUR35193                                                  |    |   |         |         |                 |           |           |                      |             |
| N2                                                                      | HS | V | 7735619 | 7737024 | WBGene00005661  | srr-10    | T05B11.6  | 0.1017944444488743   |             |
| AGIWUR44351                                                             |    |   |         |         |                 |           |           |                      |             |
| N2                                                                      | HS | V | 7738010 | 7739596 | WBGene00005660  | srr-9     | T05B11.2  | -0.0255044696066804  |             |
| AGIWUR42129                                                             |    |   |         |         |                 |           |           |                      |             |
| N2                                                                      | HS | V | 7748863 | 7751368 | WBGene00020245  | T05B11.1  | T05B11.1  | -0.0985282235462321  |             |
| AGIWUR26544                                                             |    |   |         |         |                 |           |           |                      |             |
| N2                                                                      | HS | V | 7751901 | 7754139 | WBGene00020247  | T05B11.4  | T05B11.4  | 0.177677038568984    |             |
| AGIWUR36773                                                             |    |   |         |         |                 |           |           |                      |             |
| N2                                                                      | HS | V | 7756749 | 7757854 | WBGene00023340  | T05B11.5  | T05B11.5  | 0.0673070151265671   |             |
| AGIWUR12624;AGIWUR27525;AGIWUR40406                                     |    |   |         |         |                 |           |           |                      |             |
| N2                                                                      | HS | V | 7760474 | 7761633 | WBGene00016150  | hint-3    | C26F1.7   | 0.112639898046224    | AGIWUR28712 |
| N2                                                                      | HS | V | 7771328 | 7773273 | WBGene00016149  | frpr-3    | C26F1.6   | -0.0451464185243093  | AGIWUR21381 |
| N2                                                                      | HS | V | 7774441 | 7775759 | WBGene00001719  | grl-10    | C26F1.5   | 0.286322630852336    | AGIWUR700   |
| N2                                                                      | HS | V | 7775742 | 7776079 | WBGene00004453  | rpl-39    | C26F1.9   | 0.0609504592940766   | AGIWUR17213 |

|                                                                                                                                                         |    |   |         |         |                |          |           |                     |             |
|---------------------------------------------------------------------------------------------------------------------------------------------------------|----|---|---------|---------|----------------|----------|-----------|---------------------|-------------|
| N2                                                                                                                                                      | HS | V | 7776576 | 7777236 | WBGene00004499 | rps-30   | C26F1.4   | 0.105528044053685   |             |
| AGIWUR2827;AGIWUR13715;AGIWUR20076;AGIWUR25322;AGIWUR32322;AGIWUR33401;AGIWUR40641                                                                      |    |   |         |         |                |          |           |                     |             |
| N2                                                                                                                                                      | HS | V | 7777300 | 7778985 | WBGene00016148 | C26F1.3  | C26F1.3   | -0.0201266480551077 |             |
| AGIWUR60;AGIWUR12951;AGIWUR33169;AGIWUR36881                                                                                                            |    |   |         |         |                |          |           |                     |             |
| N2                                                                                                                                                      | HS | V | 7781811 | 7784595 | WBGene00016147 | cyp-32A1 | C26F1.2   | -0.0418172650230542 |             |
| AGIWUR44527                                                                                                                                             |    |   |         |         |                |          |           |                     |             |
| N2                                                                                                                                                      | HS | V | 7785417 | 7787712 | WBGene00016146 | C26F1.1  | C26F1.1   | -0.0322132471160996 |             |
| AGIWUR6041;AGIWUR11348;AGIWUR18024;AGIWUR29985;AGIWUR33124;AGIWUR33236                                                                                  |    |   |         |         |                |          |           |                     |             |
| N2                                                                                                                                                      | HS | V | 7793367 | 7794025 | WBGene00001464 | flp-21   | C26F1.10  | -0.348061747746378  |             |
| AGIWUR8251                                                                                                                                              |    |   |         |         |                |          |           |                     |             |
| N2                                                                                                                                                      | HS | V | 7801518 | 7803727 | WBGene00022812 | uvs-1    | ZK742.2   | 0.0406083069860124  | AGIWUR34269 |
| N2                                                                                                                                                      | HS | V | 7805064 | 7814656 | WBGene00002078 | xpo-1    | ZK742.1   | -0.149222554639142  |             |
| AGIWUR721;AGIWUR1219;AGIWUR5682;AGIWUR11323;AGIWUR14384;AGIWUR15800;AGIWUR23048;AGIWUR23160;AGIWUR26928;AGIWUR28172;AGIWUR34718;AGIWUR39925;AGIWUR40454 |    |   |         |         |                |          |           |                     |             |
| N2                                                                                                                                                      | HS | V | 7820578 | 7821477 | WBGene00002256 | lbp-4    | ZK742.5   | 0.146936902186523   | AGIWUR42605 |
| N2                                                                                                                                                      | HS | V | 7827201 | 7842388 | WBGene00003242 | mig-6    | C37C3.6   | -0.146638716392914  |             |
| AGIWUR27540;AGIWUR30637;AGIWUR44675                                                                                                                     |    |   |         |         |                |          |           |                     |             |
| N2                                                                                                                                                      | HS | V | 7842543 | 7844299 | WBGene00001697 | grd-8    | C37C3.4   | -0.195512260594949  | AGIWUR13235 |
| N2                                                                                                                                                      | HS | V | 7844343 | 7847164 | WBGene00016500 | memo-1   | C37C3.8   | -0.0521429869335854 |             |
| AGIWUR21318;AGIWUR38933;AGIWUR42472;AGIWUR43233                                                                                                         |    |   |         |         |                |          |           |                     |             |
| N2                                                                                                                                                      | HS | V | 7849984 | 7851029 | WBGene00016497 | vps-32.2 | C37C3.3   | -0.171536580868702  |             |
| AGIWUR16738                                                                                                                                             |    |   |         |         |                |          |           |                     |             |
| N2                                                                                                                                                      | HS | V | 7852286 | 7853975 | WBGene00016501 | C37C3.9  | C37C3.9   | 0.0591270860678463  | AGIWUR18544 |
| N2                                                                                                                                                      | HS | V | 7854991 | 7857925 | WBGene00016496 | C37C3.2  | C37C3.2   | 0.0398254760232124  |             |
| AGIWUR10421;AGIWUR15189;AGIWUR29926;AGIWUR38035                                                                                                         |    |   |         |         |                |          |           |                     |             |
| N2                                                                                                                                                      | HS | V | 7857963 | 7859909 | WBGene00016495 | C37C3.1  | C37C3.1   | 0.252835080658585   | AGIWUR30764 |
| N2                                                                                                                                                      | HS | V | 7862275 | 7863070 | WBGene00016502 | C37C3.10 | C37C3.10  | 0.446122450674054   |             |
| AGIWUR21569                                                                                                                                             |    |   |         |         |                |          |           |                     |             |
| N2                                                                                                                                                      | HS | V | 7863458 | 7864731 | WBGene00016503 | C37C3.11 | C37C3.11  | 0.132854957440752   |             |
| AGIWUR13987                                                                                                                                             |    |   |         |         |                |          |           |                     |             |
| N2                                                                                                                                                      | HS | V | 7868470 | 7870807 | WBGene00077712 | nipi-4   | F40A3.5   | -0.0530613636419472 | AGIWUR32728 |
| N2                                                                                                                                                      | HS | V | 7875756 | 7876789 | WBGene00018219 | F40A3.4  | F40A3.4   | 0.0255084016185911  |             |
| AGIWUR390;AGIWUR13174;AGIWUR23869                                                                                                                       |    |   |         |         |                |          |           |                     |             |
| N2                                                                                                                                                      | HS | V | 7877490 | 7878514 | WBGene00018218 | F40A3.3  | F40A3.3   | -0.0199322262472101 | AGIWUR4725  |
| N2                                                                                                                                                      | HS | V | 7878914 | 7881403 | WBGene00018217 | F40A3.2  | F40A3.2   | -0.324114600606059  | AGIWUR10577 |
| N2                                                                                                                                                      | HS | V | 7891530 | 7895518 | WBGene00018216 | F40A3.1  | F40A3.1   | -0.203031367220831  | AGIWUR36055 |
| N2                                                                                                                                                      | HS | V | 7895465 | 7899861 | WBGene00018222 | F40A3.7  | F40A3.7   | -0.224511674255231  | AGIWUR45014 |
| N2                                                                                                                                                      | HS | V | 7914420 | 7915728 | WBGene00005902 | srx-11   | Y97E10B.6 | -0.0192886605178337 |             |
| AGIWUR27174                                                                                                                                             |    |   |         |         |                |          |           |                     |             |

|                                     |    |   |         |         |                |            |            |                      |
|-------------------------------------|----|---|---------|---------|----------------|------------|------------|----------------------|
| N2                                  | HS | V | 7925783 | 7926756 | WBGene00022406 | srsx-7     | Y97E10B.4  | 0.126091509437808    |
| AGIWUR17411                         |    |   |         |         |                |            |            |                      |
| N2                                  | HS | V | 7927084 | 7928451 | WBGene00022405 | srsx-6     | Y97E10B.3  | 0.0705361428701607   |
| AGIWUR18933                         |    |   |         |         |                |            |            |                      |
| N2                                  | HS | V | 7928960 | 7930337 | WBGene00022404 | srsx-5     | Y97E10B.2  | -0.0403865469016624  |
| AGIWUR15793                         |    |   |         |         |                |            |            |                      |
| N2                                  | HS | V | 7930475 | 7933098 | WBGene00003575 | ncx-10     | Y97E10B.7  | 0.129079024040179    |
| AGIWUR25969                         |    |   |         |         |                |            |            |                      |
| N2                                  | HS | V | 7934457 | 7935113 | WBGene00022407 | srsx-4     | Y97E10B.8  | 0.0126617556866488   |
| AGIWUR8695                          |    |   |         |         |                |            |            |                      |
| N2                                  | HS | V | 7936144 | 7937252 | WBGene00022408 | srsx-3     | Y97E10B.9  | 0.056183512442125    |
| AGIWUR41183                         |    |   |         |         |                |            |            |                      |
| N2                                  | HS | V | 7938605 | 7940383 | WBGene00022409 | srt-53     | Y97E10B.10 | 0.0681894600796076   |
| AGIWUR12412;AGIWUR36109;AGIWUR44229 |    |   |         |         |                |            |            |                      |
| N2                                  | HS | V | 7943868 | 7946857 | WBGene00022403 | Y97E10B.1  | Y97E10B.1  | -0.0283983731471169  |
| AGIWUR9706                          |    |   |         |         |                |            |            |                      |
| N2                                  | HS | V | 7947231 | 7948615 | WBGene00017821 | F26D11.4   | F26D11.4   | -0.0289832873187237  |
| AGIWUR33936                         |    |   |         |         |                |            |            |                      |
| N2                                  | HS | V | 7951625 | 7952955 | WBGene00017822 | cllec-216  | F26D11.5   | 0.0244879779969613   |
| AGIWUR19386;AGIWUR35862;AGIWUR41728 |    |   |         |         |                |            |            |                      |
| N2                                  | HS | V | 7953354 | 7954652 | WBGene00045393 | F26D11.13  | F26D11.13  | 0.587021347677601    |
| AGIWUR5740                          |    |   |         |         |                |            |            |                      |
| N2                                  | HS | V | 7954793 | 7955363 | WBGene00045392 | pals-35    | F26D11.12  | 0.364894832051007    |
| AGIWUR21854                         |    |   |         |         |                |            |            |                      |
| N2                                  | HS | V | 7955404 | 7956497 | WBGene00017823 | pals-34    | F26D11.6   | 0.600943831361437    |
| AGIWUR4877;AGIWUR18296              |    |   |         |         |                |            |            |                      |
| N2                                  | HS | V | 7957277 | 7958840 | WBGene00017824 | cllec-217  | F26D11.9   | 0.107632742161844    |
| AGIWUR38445                         |    |   |         |         |                |            |            |                      |
| N2                                  | HS | V | 7959270 | 7960958 | WBGene00017819 | F26D11.2   | F26D11.2   | 0.156741087719254    |
| AGIWUR14036                         |    |   |         |         |                |            |            |                      |
| N2                                  | HS | V | 7961539 | 7968899 | WBGene00000488 | che-7      | F26D11.10  | -0.181007367511922   |
| AGIWUR33539                         |    |   |         |         |                |            |            |                      |
| N2                                  | HS | V | 7972924 | 7977774 | WBGene00002632 | let-413    | F26D11.11  | -0.00201135495447247 |
| AGIWUR7383;AGIWUR44679              |    |   |         |         |                |            |            |                      |
| N2                                  | HS | V | 7981545 | 7982662 | WBGene00017818 | F26D11.1   | F26D11.1   | -0.0413335744986512  |
| AGIWUR42437                         |    |   |         |         |                |            |            |                      |
| N2                                  | HS | V | 7982656 | 7983431 | WBGene00022394 | Y97E10AL.3 | Y97E10AL.3 | 0.061861294593772    |
| AGIWUR7366                          |    |   |         |         |                |            |            |                      |
| N2                                  | HS | V | 7983849 | 7985954 | WBGene00022393 | abhd-12    | Y97E10AL.2 | 0.101058840541397    |

|                                                                                             |    |   |         |         |                |            |            |                     |             |
|---------------------------------------------------------------------------------------------|----|---|---------|---------|----------------|------------|------------|---------------------|-------------|
| AGIWUR23178                                                                                 |    |   |         |         |                |            |            |                     |             |
| N2                                                                                          | HS | V | 7993789 | 7994666 | WBGene00022395 | ceh-76     | Y97E10AM.1 | -0.200287176500741  |             |
| AGIWUR36575                                                                                 |    |   |         |         |                |            |            |                     |             |
| N2                                                                                          | HS | V | 7996178 | 8000233 | WBGene00022397 | Y97E10AR.2 | Y97E10AR.2 | 0.0377751822864516  |             |
| AGIWUR41368                                                                                 |    |   |         |         |                |            |            |                     |             |
| N2                                                                                          | HS | V | 8001451 | 8004690 | WBGene00022396 | Y97E10AR.1 | Y97E10AR.1 |                     |             |
| -0.00816848558933714 AGIWUR6325;AGIWUR21011;AGIWUR26692;AGIWUR31456;AGIWUR38523;AGIWUR39332 |    |   |         |         |                |            |            |                     |             |
| N2                                                                                          | HS | V | 8005326 | 8005692 | WBGene00044552 | Y97E10AR.8 | Y97E10AR.8 | -0.0080157121484028 |             |
| AGIWUR24477;AGIWUR28438;AGIWUR30489;AGIWUR37606;AGIWUR41982                                 |    |   |         |         |                |            |            |                     |             |
| N2                                                                                          | HS | V | 8006179 | 8007510 | WBGene00022398 | Y97E10AR.3 | Y97E10AR.3 | -0.0429511930074113 |             |
| AGIWUR4548                                                                                  |    |   |         |         |                |            |            |                     |             |
| N2                                                                                          | HS | V | 8008028 | 8010443 | WBGene00022399 | Y97E10AR.4 | Y97E10AR.4 | 0.153617453247231   |             |
| AGIWUR31544                                                                                 |    |   |         |         |                |            |            |                     |             |
| N2                                                                                          | HS | V | 8010475 | 8011108 | WBGene00022402 | lmtr-2     | Y97E10AR.7 | 0.159004826870573   |             |
| AGIWUR44898                                                                                 |    |   |         |         |                |            |            |                     |             |
| N2                                                                                          | HS | V | 8011219 | 8012345 | WBGene00022400 | rpb-9      | Y97E10AR.5 | 0.143041081402949   |             |
| AGIWUR14983                                                                                 |    |   |         |         |                |            |            |                     |             |
| N2                                                                                          | HS | V | 8012401 | 8014182 | WBGene00022401 | Y97E10AR.6 | Y97E10AR.6 | 0.0488868702011693  |             |
| AGIWUR2712                                                                                  |    |   |         |         |                |            |            |                     |             |
| N2                                                                                          | HS | V | 8017947 | 8021715 | WBGene00018398 | spt1-2     | F43H9.2    | -0.157700439986371  |             |
| AGIWUR12380;AGIWUR16581;AGIWUR21967;AGIWUR31278                                             |    |   |         |         |                |            |            |                     |             |
| N2                                                                                          | HS | V | 8022218 | 8023308 | WBGene00001152 | ech-3      | F43H9.1    | 0.305521136068986   | AGIWUR38133 |
| N2                                                                                          | HS | V | 8023195 | 8024940 | WBGene00018399 | F43H9.3    | F43H9.3    | -0.092665675380367  | AGIWUR30800 |
| N2                                                                                          | HS | V | 8026691 | 8028789 | WBGene00018400 | F43H9.4    | F43H9.4    | 0.140534375935324   | AGIWUR2161  |
| N2                                                                                          | HS | V | 8029439 | 8031214 | WBGene00003865 | oma-2      | ZC513.6    | -0.338609438957281  | AGIWUR10685 |
| N2                                                                                          | HS | V | 8031411 | 8035014 | WBGene00006935 | vars-1     | ZC513.4    | -0.0519623224100445 |             |
| AGIWUR21496;AGIWUR24632;AGIWUR29054;AGIWUR39461                                             |    |   |         |         |                |            |            |                     |             |
| N2                                                                                          | HS | V | 8035111 | 8039506 | WBGene00022629 | ZC513.5    | ZC513.5    | 0.0180932200937143  | AGIWUR6084  |
| N2                                                                                          | HS | V | 8039469 | 8040387 | WBGene00023209 | ZC513.7    | ZC513.7    | -0.451641916199954  |             |
| AGIWUR11496;AGIWUR17404;AGIWUR38696                                                         |    |   |         |         |                |            |            |                     |             |
| N2                                                                                          | HS | V | 8047044 | 8049528 | WBGene00022628 | ZC513.3    | ZC513.3    | 0.0240728669366135  | AGIWUR33455 |
| N2                                                                                          | HS | V | 8049744 | 8050893 | WBGene00000620 | col-43     | ZC513.8    | 0.0970483359113228  | AGIWUR957   |
| N2                                                                                          | HS | V | 8052137 | 8053730 | WBGene00006060 | sth-1      | ZC513.12   | 0.652843416970759   |             |
| AGIWUR27227                                                                                 |    |   |         |         |                |            |            |                     |             |
| N2                                                                                          | HS | V | 8054430 | 8057558 | WBGene00022627 | ZC513.2    | ZC513.2    | 0.175578219957735   |             |
| AGIWUR27743;AGIWUR44063                                                                     |    |   |         |         |                |            |            |                     |             |
| N2                                                                                          | HS | V | 8058659 | 8060317 | WBGene00006187 | str-138    | ZC513.11   | -0.0551693308541612 |             |
| AGIWUR36260                                                                                 |    |   |         |         |                |            |            |                     |             |
| N2                                                                                          | HS | V | 8060873 | 8062174 | WBGene00006186 | str-139    | ZC513.9    | -0.0478536478605367 | AGIWUR8996  |



|                                                 |    |   |         |         |                |          |          |                      |             |
|-------------------------------------------------|----|---|---------|---------|----------------|----------|----------|----------------------|-------------|
| N2                                              | HS | V | 8063247 | 8065079 | WBGene00022630 | fbxa-223 | ZC513.10 | 0.20887653000204     |             |
| AGIWUR41957                                     |    |   |         |         |                |          |          |                      |             |
| N2                                              | HS | V | 8065780 | 8067900 | WBGene00006188 | str-140  | C09H5.3  | 0.0117923635573378   | AGIWUR12899 |
| N2                                              | HS | V | 8068152 | 8069737 | WBGene00006190 | str-143  | C09H5.4  | 0.0288864850715305   | AGIWUR22797 |
| N2                                              | HS | V | 8070643 | 8072266 | WBGene00006191 | str-144  | C09H5.5  | -0.258977286382388   | AGIWUR24395 |
| N2                                              | HS | V | 8076012 | 8079914 | WBGene00015660 | catp-3   | C09H5.2  | 0.0478494437825105   |             |
| AGIWUR20050;AGIWUR41311                         |    |   |         |         |                |          |          |                      |             |
| N2                                              | HS | V | 8080367 | 8081678 | WBGene00006180 | str-131  | C09H5.6  | 0.161363341949582    | AGIWUR14503 |
| N2                                              | HS | V | 8082367 | 8082767 | WBGene00015659 | C09H5.1  | C09H5.1  | -0.0658432033178116  | AGIWUR15945 |
| N2                                              | HS | V | 8084120 | 8085241 | WBGene00015661 | C09H5.7  | C09H5.7  | 0.22789977834131     | AGIWUR19755 |
| N2                                              | HS | V | 8085884 | 8087283 | WBGene00006177 | str-128  | C09H5.8  | -0.00142641662973197 | AGIWUR39552 |
| N2                                              | HS | V | 8089319 | 8090695 | WBGene00006179 | str-130  | C09H5.9  | -0.00856035010317147 | AGIWUR20800 |
| N2                                              | HS | V | 8090973 | 8092485 | WBGene00006178 | str-129  | F58G4.5  | -0.105570643645919   | AGIWUR24912 |
| N2                                              | HS | V | 8093335 | 8095468 | WBGene00006193 | str-146  | F58G4.6  | 0.163791425752755    | AGIWUR34556 |
| N2                                              | HS | V | 8096394 | 8098339 | WBGene00006192 | str-145  | F58G4.7  | -0.119490228971061   | AGIWUR31757 |
| N2                                              | HS | V | 8099621 | 8100484 | WBGene00019066 | sdz-23   | F58G4.4  | -0.105048418726256   | AGIWUR33239 |
| N2                                              | HS | V | 8102484 | 8106905 | WBGene00006149 | str-90   | F58G4.2  | -0.00942346750085576 | AGIWUR24341 |
| N2                                              | HS | V | 8108970 | 8118131 | WBGene00019064 | myo-5    | F58G4.1  | -0.131597417738346   | AGIWUR42109 |
| N2                                              | HS | V | 8118264 | 8120351 | WBGene00017020 | D1014.7  | D1014.7  | -0.0533061996954576  | AGIWUR28183 |
| N2                                              | HS | V | 8121168 | 8123470 | WBGene00017019 | D1014.6  | D1014.6  | -0.124206405791288   | AGIWUR10069 |
| N2                                              | HS | V | 8123684 | 8126710 | WBGene00017018 | D1014.5  | D1014.5  | 0.248746780404026    | AGIWUR26747 |
| N2                                              | HS | V | 8126663 | 8129352 | WBGene00005006 | spr-1    | D1014.8  | 0.123370374681755    |             |
| AGIWUR2032;AGIWUR11463;AGIWUR13038              |    |   |         |         |                |          |          |                      |             |
| N2                                              | HS | V | 8130388 | 8133329 | WBGene00017016 | snap-1   | D1014.3  | 0.0208405208893652   | AGIWUR11044 |
| N2                                              | HS | V | 8133432 | 8134985 | WBGene00017017 | D1014.4  | D1014.4  | 0.156871520883233    |             |
| AGIWUR1511;AGIWUR18218;AGIWUR39125;AGIWUR39914  |    |   |         |         |                |          |          |                      |             |
| N2                                              | HS | V | 8143761 | 8147782 | WBGene00017015 | D1014.2  | D1014.2  | -0.208909705383466   | AGIWUR18107 |
| N2                                              | HS | V | 8157746 | 8159844 | WBGene00006309 | sul-2    | D1014.1  | -0.254626664815195   | AGIWUR14310 |
| N2                                              | HS | V | 8159929 | 8161643 | WBGene00017636 | F20D6.6  | F20D6.6  | -0.554514748086078   | AGIWUR12077 |
| N2                                              | HS | V | 8177093 | 8177449 | WBGene00017638 | F20D6.9  | F20D6.9  | -0.114512416448351   | AGIWUR25233 |
| N2                                              | HS | V | 8179131 | 8183442 | WBGene00005648 | srp-7    | F20D6.4  | -0.102751793230889   |             |
| AGIWUR10926;AGIWUR15736;AGIWUR41757             |    |   |         |         |                |          |          |                      |             |
| N2                                              | HS | V | 8183730 | 8185772 | WBGene00005649 | srp-8    | F20D6.3  | 0.217629038809038    |             |
| AGIWUR14471;AGIWUR14902;AGIWUR23568;AGIWUR43404 |    |   |         |         |                |          |          |                      |             |
| N2                                              | HS | V | 8186039 | 8187319 | WBGene00017634 | F20D6.2  | F20D6.2  | 0.153915659539116    | AGIWUR9313  |
| N2                                              | HS | V | 8187803 | 8190116 | WBGene00043069 | F20D6.12 | F20D6.12 | 0.0550883561314084   |             |
| AGIWUR12284                                     |    |   |         |         |                |          |          |                      |             |
| N2                                              | HS | V | 8190699 | 8192050 | WBGene00017633 | F20D6.1  | F20D6.1  | 0.177435078691863    | AGIWUR6718  |
| N2                                              | HS | V | 8192060 | 8195937 | WBGene00017639 | F20D6.10 | F20D6.10 | 0.191869501847181    |             |

|                                                                                                            |    |   |         |         |                |           |           |                     |             |
|------------------------------------------------------------------------------------------------------------|----|---|---------|---------|----------------|-----------|-----------|---------------------|-------------|
| AGIWUR8103                                                                                                 |    |   |         |         |                |           |           |                     |             |
| N2                                                                                                         | HS | V | 8196774 | 8199094 | WBGene00017640 | F20D6.11  | F20D6.11  | 0.0818369313799678  |             |
| AGIWUR5525                                                                                                 |    |   |         |         |                |           |           |                     |             |
| N2                                                                                                         | HS | V | 8201808 | 8202546 | WBGene00019478 | cri-2     | K07C11.5  | 0.128591746513726   |             |
| AGIWUR42010                                                                                                |    |   |         |         |                |           |           |                     |             |
| N2                                                                                                         | HS | V | 8203379 | 8205986 | WBGene00019477 | K07C11.4  | K07C11.4  |                     |             |
| 0.000285272170247097 AGIWUR17869                                                                           |    |   |         |         |                |           |           |                     |             |
| N2                                                                                                         | HS | V | 8207235 | 8208013 | WBGene00019476 | K07C11.3  | K07C11.3  | -0.180224585548498  |             |
| AGIWUR5481                                                                                                 |    |   |         |         |                |           |           |                     |             |
| N2                                                                                                         | HS | V | 8207930 | 8213968 | WBGene00019479 | K07C11.7  | K07C11.7  | -0.0261907642388977 |             |
| AGIWUR1879;AGIWUR11564;AGIWUR41258                                                                         |    |   |         |         |                |           |           |                     |             |
| N2                                                                                                         | HS | V | 8215534 | 8217884 | WBGene00019480 | K07C11.8  | K07C11.8  | 0.149736656667423   |             |
| AGIWUR703                                                                                                  |    |   |         |         |                |           |           |                     |             |
| N2                                                                                                         | HS | V | 8218279 | 8221316 | WBGene00019481 | cogc-6    | K07C11.9  | -0.0570720720932396 |             |
| AGIWUR44423                                                                                                |    |   |         |         |                |           |           |                     |             |
| N2                                                                                                         | HS | V | 8221410 | 8223587 | WBGene00000098 | air-1     | K07C11.2  | -0.0454014735925519 |             |
| AGIWUR1464;AGIWUR10508;AGIWUR24452                                                                         |    |   |         |         |                |           |           |                     |             |
| N2                                                                                                         | HS | V | 8224965 | 8226037 | WBGene00003937 | pax-1     | K07C11.1  | -0.293295734898869  |             |
| AGIWUR6074                                                                                                 |    |   |         |         |                |           |           |                     |             |
| N2                                                                                                         | HS | V | 8226061 | 8226852 | WBGene00019482 | K07C11.10 | K07C11.10 | 0.0935963873446131  |             |
| AGIWUR23380                                                                                                |    |   |         |         |                |           |           |                     |             |
| N2                                                                                                         | HS | V | 8228300 | 8238409 | WBGene00004395 | rol-3     | C16D9.2   | 0.0647488429152703  |             |
| AGIWUR28970;AGIWUR41147                                                                                    |    |   |         |         |                |           |           |                     |             |
| N2                                                                                                         | HS | V | 8238959 | 8240021 | WBGene00015858 | C16D9.3   | C16D9.3   | 0.0801708917667678  |             |
| AGIWUR2918;AGIWUR12819;AGIWUR13836;AGIWUR22036;AGIWUR25212;AGIWUR26109;AGIWUR37663;AGIWUR40907;AGIWUR41937 |    |   |         |         |                |           |           |                     |             |
| N2                                                                                                         | HS | V | 8240928 | 8242898 | WBGene00015859 | C16D9.4   | C16D9.4   | 0.147828256039931   | AGIWUR39886 |
| N2                                                                                                         | HS | V | 8243709 | 8245400 | WBGene00015860 | C16D9.5   | C16D9.5   | 0.295924069395765   |             |
| AGIWUR7962;AGIWUR25590;AGIWUR41064                                                                         |    |   |         |         |                |           |           |                     |             |
| N2                                                                                                         | HS | V | 8248123 | 8250289 | WBGene00015861 | C16D9.6   | C16D9.6   | 0.0369489462769561  | AGIWUR15092 |
| N2                                                                                                         | HS | V | 8256831 | 8258076 | WBGene00015862 | srt-25    | C16D9.7   | -0.0582939273969609 | AGIWUR9495  |
| N2                                                                                                         | HS | V | 8259316 | 8261315 | WBGene00015857 | C16D9.1   | C16D9.1   | 0.0109155554006719  | AGIWUR16555 |
| N2                                                                                                         | HS | V | 8261390 | 8263566 | WBGene00015863 | C16D9.8   | C16D9.8   | 0.115284787891889   | AGIWUR11845 |
| N2                                                                                                         | HS | V | 8264241 | 8264663 | WBGene00015864 | C16D9.9   | C16D9.9   | -0.51794603701834   | AGIWUR40396 |
| N2                                                                                                         | HS | V | 8265202 | 8266385 | WBGene00017679 | F21F8.5   | F21F8.5   | 0.0425575060194134  | AGIWUR890   |
| N2                                                                                                         | HS | V | 8267511 | 8268937 | WBGene00000219 | asp-6     | F21F8.7   | 0.227914262276329   | AGIWUR29921 |
| N2                                                                                                         | HS | V | 8269254 | 8272058 | WBGene00017678 | asp-12    | F21F8.4   | -0.54869197637278   | AGIWUR24711 |
| N2                                                                                                         | HS | V | 8272375 | 8274046 | WBGene00000218 | asp-5     | F21F8.3   | 0.181255572724869   |             |
| AGIWUR5560;AGIWUR23001;AGIWUR28611;AGIWUR31817                                                             |    |   |         |         |                |           |           |                     |             |
| N2                                                                                                         | HS | V | 8274353 | 8275757 | WBGene00017677 | asp-11    | F21F8.2   | -0.184016613265419  | AGIWUR24174 |

|                                                                               |    |   |         |         |                |          |          |                     |             |
|-------------------------------------------------------------------------------|----|---|---------|---------|----------------|----------|----------|---------------------|-------------|
| N2                                                                            | HS | V | 8275898 | 8277041 | WBGene00006185 | str-137  | F21F8.8  | -0.051027796365799  |             |
| AGIWUR20524;AGIWUR37534                                                       |    |   |         |         |                |          |          |                     |             |
| N2                                                                            | HS | V | 8277516 | 8278930 | WBGene00006184 | str-136  | F21F8.9  | -0.157474082732655  | AGIWUR42835 |
| N2                                                                            | HS | V | 8279375 | 8282167 | WBGene00006183 | str-135  | F21F8.10 | -0.0031539189496117 |             |
| AGIWUR22082                                                                   |    |   |         |         |                |          |          |                     |             |
| N2                                                                            | HS | V | 8282333 | 8284900 | WBGene00017681 | slc-17.5 | F21F8.11 | -0.20593442412178   |             |
| AGIWUR9561                                                                    |    |   |         |         |                |          |          |                     |             |
| N2                                                                            | HS | V | 8292064 | 8293516 | WBGene00005190 | srg-33   | F21F8.1  | -0.0522282088869179 | AGIWUR38187 |
| N2                                                                            | HS | V | 8293809 | 8294900 | WBGene00020939 | W02D7.3  | W02D7.3  | -0.0517318492757539 | AGIWUR37768 |
| N2                                                                            | HS | V | 8296558 | 8297604 | WBGene00020940 | W02D7.4  | W02D7.4  | 0.263775995988393   | AGIWUR7250  |
| N2                                                                            | HS | V | 8297700 | 8299244 | WBGene00020941 | W02D7.5  | W02D7.5  | 0.121566147758218   | AGIWUR41016 |
| N2                                                                            | HS | V | 8299753 | 8301507 | WBGene00020942 | W02D7.6  | W02D7.6  | -0.0632962586706327 | AGIWUR2754  |
| N2                                                                            | HS | V | 8301490 | 8302580 | WBGene00004766 | sel-9    | W02D7.7  | 0.0540799081065302  |             |
| AGIWUR305;AGIWUR3250;AGIWUR5175;AGIWUR6945;AGIWUR8272;AGIWUR17351;AGIWUR19473 |    |   |         |         |                |          |          |                     |             |
| N2                                                                            | HS | V | 8302887 | 8304469 | WBGene00020946 | W02D7.11 | W02D7.11 | 0.00471426464460034 |             |
| AGIWUR13639                                                                   |    |   |         |         |                |          |          |                     |             |
| N2                                                                            | HS | V | 8305120 | 8306460 | WBGene00020943 | W02D7.8  | W02D7.8  | 0.0540386706775777  | AGIWUR28197 |
| N2                                                                            | HS | V | 8307942 | 8310766 | WBGene00020938 | clcc-218 | W02D7.2  | -0.0261064230721582 |             |
| AGIWUR39060;AGIWUR41065                                                       |    |   |         |         |                |          |          |                     |             |
| N2                                                                            | HS | V | 8311510 | 8312041 | WBGene00044356 | W02D7.12 | W02D7.12 | 0.175014721212079   |             |
| AGIWUR27526                                                                   |    |   |         |         |                |          |          |                     |             |
| N2                                                                            | HS | V | 8318435 | 8322863 | WBGene00020945 | clcc-219 | W02D7.10 | 0.367178095616957   |             |
| AGIWUR25784                                                                   |    |   |         |         |                |          |          |                     |             |
| N2                                                                            | HS | V | 8323426 | 8323885 | WBGene00023354 | W02D7.1  | W02D7.1  | -0.0781766041014604 |             |
| AGIWUR5151;AGIWUR11873;AGIWUR23778;AGIWUR28332                                |    |   |         |         |                |          |          |                     |             |
| N2                                                                            | HS | V | 8326191 | 8326514 | WBGene00020944 | W02D7.9  | W02D7.9  | 0.0266996759358662  | AGIWUR41935 |
| N2                                                                            | HS | V | 8336658 | 8340675 | WBGene00006582 | tmd-2    | C08D8.2  | -0.0274228304370698 |             |
| AGIWUR24109;AGIWUR37546                                                       |    |   |         |         |                |          |          |                     |             |
| N2                                                                            | HS | V | 8345759 | 8349909 | WBGene00015592 | C08D8.1  | C08D8.1  | 0.0947432013205862  | AGIWUR31565 |
| N2                                                                            | HS | V | 8351671 | 8353085 | WBGene00018180 | srsx-22  | F38E1.8  | 0.167395218576257   | AGIWUR42326 |
| N2                                                                            | HS | V | 8353793 | 8355008 | WBGene00044126 | srsx-23  | F38E1.12 | -0.0793414260649756 |             |
| AGIWUR32398;AGIWUR33303                                                       |    |   |         |         |                |          |          |                     |             |
| N2                                                                            | HS | V | 8355953 | 8358185 | WBGene00003395 | mom-2    | F38E1.7  | -0.0385848820463881 |             |
| AGIWUR9372;AGIWUR18335;AGIWUR22584;AGIWUR36859;AGIWUR40063                    |    |   |         |         |                |          |          |                     |             |
| N2                                                                            | HS | V | 8358203 | 8359163 | WBGene00018181 | F38E1.9  | F38E1.9  | 0.0240138998267798  |             |
| AGIWUR17431;AGIWUR24194                                                       |    |   |         |         |                |          |          |                     |             |
| N2                                                                            | HS | V | 8359818 | 8361394 | WBGene00018179 | F38E1.6  | F38E1.6  | -0.0322137441531991 | AGIWUR11093 |
| N2                                                                            | HS | V | 8371014 | 8374027 | WBGene00001664 | gpa-2    | F38E1.5  | -0.0534132985845979 | AGIWUR29092 |
| N2                                                                            | HS | V | 8374027 | 8375474 | WBGene00018182 | F38E1.10 | F38E1.10 | 0.164175805822418   |             |

|                                                                       |    |   |         |         |                |           |          |                     |                    |
|-----------------------------------------------------------------------|----|---|---------|---------|----------------|-----------|----------|---------------------|--------------------|
| AGIWUR12738                                                           |    |   |         |         |                |           |          |                     |                    |
| N2                                                                    | HS | V | 8376117 | 8377944 | WBGene00018178 | F38E1.3   | F38E1.3  | 0.144719247960438   | AGIWUR6638         |
| N2                                                                    | HS | V | 8378903 | 8379925 | WBGene00018183 | F38E1.11  |          | F38E1.11            | -0.171962823403264 |
| AGIWUR34757                                                           |    |   |         |         |                |           |          |                     |                    |
| N2                                                                    | HS | V | 8379474 | 8383747 | WBGene00018694 | F52E1.5   | F52E1.5  | -0.236552842807445  |                    |
| AGIWUR9540;AGIWUR37783                                                |    |   |         |         |                |           |          |                     |                    |
| N2                                                                    | HS | V | 8383922 | 8384867 | WBGene00044696 | F52E1.14  |          | F52E1.14            | 0.0453276551118655 |
| AGIWUR8044;AGIWUR9472;AGIWUR17987;AGIWUR34787;AGIWUR37989;AGIWUR42621 |    |   |         |         |                |           |          |                     |                    |
| N2                                                                    | HS | V | 8384774 | 8386268 | WBGene00002021 | hsp-17    | F52E1.7  | -0.204708667942489  | AGIWUR43590        |
| N2                                                                    | HS | V | 8387356 | 8392324 | WBGene00001534 | gcy-7     | F52E1.4  | -0.0459704576376749 | AGIWUR37358        |
| N2                                                                    | HS | V | 8392357 | 8394383 | WBGene00018696 | pho-6     | F52E1.8  | -0.291396352298991  | AGIWUR24061        |
| N2                                                                    | HS | V | 8394800 | 8396344 | WBGene00018693 | F52E1.3   | F52E1.3  | -0.178531517610146  | AGIWUR42980        |
| N2                                                                    | HS | V | 8398145 | 8402669 | WBGene00018697 | F52E1.9   | F52E1.9  | 0.189528377735065   | AGIWUR32593        |
| N2                                                                    | HS | V | 8410595 | 8411831 | WBGene00018692 | F52E1.2   | F52E1.2  | 0.104672532560613   | AGIWUR18541        |
| N2                                                                    | HS | V | 8411775 | 8413513 | WBGene00018698 | vha-18    | F52E1.10 | -0.0378834491730586 |                    |
| AGIWUR24887                                                           |    |   |         |         |                |           |          |                     |                    |
| N2                                                                    | HS | V | 8414085 | 8415254 | WBGene00004078 | pos-1     | F52E1.1  | -0.142548703460033  | AGIWUR7897         |
| N2                                                                    | HS | V | 8415687 | 8444773 | WBGene00018700 | lmd-3     | F52E1.13 | -0.072613844800677  |                    |
| AGIWUR2888;AGIWUR29288;AGIWUR40480;AGIWUR43671                        |    |   |         |         |                |           |          |                     |                    |
| N2                                                                    | HS | V | 8446608 | 8448009 | WBGene00020720 | T23B12.5  |          | T23B12.5            | 0.179768816336436  |
| AGIWUR43508                                                           |    |   |         |         |                |           |          |                     |                    |
| N2                                                                    | HS | V | 8455396 | 8457606 | WBGene00044553 | T23B12.11 |          | T23B12.11           | 0.153785295423368  |
| AGIWUR21695;AGIWUR33424                                               |    |   |         |         |                |           |          |                     |                    |
| N2                                                                    | HS | V | 8457616 | 8460419 | WBGene00020721 | T23B12.6  |          | T23B12.6            | -0.153293265949257 |
| AGIWUR33383;AGIWUR39766;AGIWUR45189                                   |    |   |         |         |                |           |          |                     |                    |
| N2                                                                    | HS | V | 8461096 | 8462116 | WBGene00001040 | dnj-22    | T23B12.7 | 0.214559659945035   |                    |
| AGIWUR4124                                                            |    |   |         |         |                |           |          |                     |                    |
| N2                                                                    | HS | V | 8462327 | 8465569 | WBGene00020719 | natc-1    | T23B12.4 | -0.0878781639858062 |                    |
| AGIWUR41325                                                           |    |   |         |         |                |           |          |                     |                    |
| N2                                                                    | HS | V | 8465617 | 8467159 | WBGene00020718 | mrps-2    | T23B12.3 | 0.10055852033388    |                    |
| AGIWUR42622                                                           |    |   |         |         |                |           |          |                     |                    |
| N2                                                                    | HS | V | 8467265 | 8468943 | WBGene00020717 | mrpl-4    | T23B12.2 | -0.0556560827192811 |                    |
| AGIWUR1921;AGIWUR3134;AGIWUR8568;AGIWUR26621                          |    |   |         |         |                |           |          |                     |                    |
| N2                                                                    | HS | V | 8469040 | 8470072 | WBGene00020716 | phf-30    | T23B12.1 | -0.0497416986998225 |                    |
| AGIWUR4944;AGIWUR7828;AGIWUR43934                                     |    |   |         |         |                |           |          |                     |                    |
| N2                                                                    | HS | V | 8470013 | 8471244 | WBGene00020722 | T23B12.8  |          | T23B12.8            | 0.205543637956826  |
| AGIWUR3007;AGIWUR8513                                                 |    |   |         |         |                |           |          |                     |                    |
| N2                                                                    | HS | V | 8494889 | 8502336 | WBGene00004256 | pxn-1     | ZK994.3  | 0.0603811424516691  |                    |
| AGIWUR29049;AGIWUR39160                                               |    |   |         |         |                |           |          |                     |                    |

|                                                                                                                      |    |   |         |         |                |          |         |                           |                    |
|----------------------------------------------------------------------------------------------------------------------|----|---|---------|---------|----------------|----------|---------|---------------------------|--------------------|
| N2                                                                                                                   | HS | V | 8502591 | 8504591 | WBGene00022842 | ZK994.6  | ZK994.6 | -0.158570121661967        | AGIWUR38282        |
| N2                                                                                                                   | HS | V | 8510237 | 8512663 | WBGene00022840 | ZK994.1  | ZK994.1 | -0.0181892934508037       | AGIWUR26288        |
| N2                                                                                                                   | HS | V | 8512689 | 8513463 | WBGene00018481 | F45F2.9  | F45F2.9 | 0.226022193195069         |                    |
| AGIWUR3538;AGIWUR12227;AGIWUR14370;AGIWUR18337;AGIWUR30838;AGIWUR37139                                               |    |   |         |         |                |          |         |                           |                    |
| N2                                                                                                                   | HS | V | 8513577 | 8518764 | WBGene00018482 | F45F2.10 |         | F45F2.10                  | -0.151639709820714 |
| AGIWUR20897                                                                                                          |    |   |         |         |                |          |         |                           |                    |
| N2                                                                                                                   | HS | V | 8519346 | 8520896 | WBGene00018483 | F45F2.11 |         | F45F2.11                  | -0.239500867859022 |
| AGIWUR34803                                                                                                          |    |   |         |         |                |          |         |                           |                    |
| N2                                                                                                                   | HS | V | 8521503 | 8524555 | WBGene00018480 | otpl-7   | F45F2.7 | 0.0755015898195115        | AGIWUR1825         |
| N2                                                                                                                   | HS | V | 8525908 | 8528580 | WBGene00018479 | otpl-6   | F45F2.6 | -0.177069817440071        | AGIWUR1512         |
| N2                                                                                                                   | HS | V | 8529519 | 8532465 | WBGene00018478 | otpl-5   | F45F2.5 | 0.0883510867760862        | AGIWUR999          |
| N2                                                                                                                   | HS | V | 8537331 | 8539614 | WBGene00018477 | otpl-4   | F45F2.1 | -0.14223730545031         | AGIWUR5463         |
| N2                                                                                                                   | HS | V | 8539728 | 8545566 | WBGene00017798 | slc-17.8 |         | F25G6.7 0.228841997318785 |                    |
| AGIWUR40015                                                                                                          |    |   |         |         |                |          |         |                           |                    |
| N2                                                                                                                   | HS | V | 8546128 | 8548880 | WBGene00003816 | asns-1   | F25G6.6 | 0.0901126184553309        | AGIWUR24276        |
| N2                                                                                                                   | HS | V | 8549289 | 8551165 | WBGene00006435 | stdh-4   | F25G6.5 | -0.149961845183011        | AGIWUR23729        |
| N2                                                                                                                   | HS | V | 8552695 | 8555388 | WBGene00000054 | acr-15   | F25G6.4 | -0.0908294699877459       | AGIWUR44252        |
| N2                                                                                                                   | HS | V | 8561216 | 8564345 | WBGene00000055 | acr-16   | F25G6.3 | 0.0570237858095242        |                    |
| AGIWUR16589;AGIWUR21014;AGIWUR42576                                                                                  |    |   |         |         |                |          |         |                           |                    |
| N2                                                                                                                   | HS | V | 8564303 | 8565175 | WBGene00017799 | F25G6.8  | F25G6.8 | 0.0887070206671954        | AGIWUR39719        |
| N2                                                                                                                   | HS | V | 8565275 | 8570077 | WBGene00017800 | F25G6.9  | F25G6.9 | -0.493439537680853        | AGIWUR11988        |
| N2                                                                                                                   | HS | V | 8570311 | 8581397 | WBGene00017797 | symk-1   | F25G6.2 | 0.136989260851893         |                    |
| AGIWUR4549;AGIWUR20084                                                                                               |    |   |         |         |                |          |         |                           |                    |
| N2                                                                                                                   | HS | V | 8581261 | 8583576 | WBGene00015670 | C10B5.1  | C10B5.1 | 0.177402104474735         | AGIWUR36163        |
| N2                                                                                                                   | HS | V | 8583553 | 8584554 | WBGene00015671 | C10B5.3  | C10B5.3 | 0.262369231929354         | AGIWUR28344        |
| N2                                                                                                                   | HS | V | 8594914 | 8597500 | WBGene00007055 | tag-196  | F41E6.6 | 0.0542337882367789        | AGIWUR30420        |
| N2                                                                                                                   | HS | V | 8597851 | 8599292 | WBGene00018288 | F41E6.7  | F41E6.7 | 7.58684873840565e-05      | AGIWUR17625        |
| N2                                                                                                                   | HS | V | 8599584 | 8601412 | WBGene00018289 | F41E6.8  | F41E6.8 | -0.217916134469769        | AGIWUR31859        |
| N2                                                                                                                   | HS | V | 8602084 | 8602825 | WBGene00044554 | F41E6.15 |         | F41E6.15                  | 0.0238480765535591 |
| AGIWUR12689;AGIWUR20045;AGIWUR24139;AGIWUR36787;AGIWUR37343                                                          |    |   |         |         |                |          |         |                           |                    |
| N2                                                                                                                   | HS | V | 8603480 | 8605469 | WBGene00018286 | F41E6.5  | F41E6.5 | -0.249560941415147        | AGIWUR16835        |
| N2                                                                                                                   | HS | V | 8607800 | 8615841 | WBGene00018285 | smk-1    | F41E6.4 | 0.0372579666448032        |                    |
| AGIWUR654;AGIWUR5459;AGIWUR13596;AGIWUR14276;AGIWUR14346;AGIWUR15894;AGIWUR18138;AGIWUR18721;AGIWUR22723;AGIWUR22728 |    |   |         |         |                |          |         |                           |                    |
| N2                                                                                                                   | HS | V | 8619032 | 8619869 | WBGene00001694 | grd-5    | F41E6.2 | 0.266420279068907         | AGIWUR25134        |
| N2                                                                                                                   | HS | V | 8619925 | 8621348 | WBGene00018292 | F41E6.11 |         | F41E6.11                  | -0.158185255323032 |
| AGIWUR16678                                                                                                          |    |   |         |         |                |          |         |                           |                    |
| N2                                                                                                                   | HS | V | 8626900 | 8629129 | WBGene00018293 | F41E6.12 |         | F41E6.12                  | 0.358137679667248  |
| AGIWUR31874                                                                                                          |    |   |         |         |                |          |         |                           |                    |

|                                     |    |   |         |         |                |          |          |                     |             |
|-------------------------------------|----|---|---------|---------|----------------|----------|----------|---------------------|-------------|
| N2                                  | HS | V | 8629223 | 8631325 | WBGene00018294 | atg-18   | F41E6.13 | -0.359893713243356  |             |
| AGIWUR9216;AGIWUR10459;AGIWUR27595  |    |   |         |         |                |          |          |                     |             |
| N2                                  | HS | V | 8631871 | 8635675 | WBGene00018295 | oac-29   | F41E6.14 | -0.106728897069297  |             |
| AGIWUR6170                          |    |   |         |         |                |          |          |                     |             |
| N2                                  | HS | V | 8635820 | 8637006 | WBGene00001721 | grl-12   | F28A12.2 | 0.330285682356232   |             |
| AGIWUR39621                         |    |   |         |         |                |          |          |                     |             |
| N2                                  | HS | V | 8638237 | 8640585 | WBGene00017879 | acd-4    | F28A12.1 | 0.101144289094062   |             |
| AGIWUR23065                         |    |   |         |         |                |          |          |                     |             |
| N2                                  | HS | V | 8640596 | 8641344 | WBGene00017880 | F28A12.3 | F28A12.3 | 0.370053029740244   |             |
| AGIWUR39240                         |    |   |         |         |                |          |          |                     |             |
| N2                                  | HS | V | 8641491 | 8643225 | WBGene00017881 | asp-13   | F28A12.4 | 0.557280219420656   |             |
| AGIWUR6336                          |    |   |         |         |                |          |          |                     |             |
| N2                                  | HS | V | 8666065 | 8671680 | WBGene00022538 | ZC190.4  | ZC190.4  | 0.0504409615856956  | AGIWUR3159  |
| N2                                  | HS | V | 8674602 | 8677293 | WBGene00022540 | ZC190.6  | ZC190.6  | 0.0382281452873112  | AGIWUR4434  |
| N2                                  | HS | V | 8681350 | 8682939 | WBGene00022537 | ZC190.2  | ZC190.2  | 0.139333201063604   | AGIWUR22064 |
| N2                                  | HS | V | 8682955 | 8686160 | WBGene00000541 | cln-3.3  | ZC190.1  | -0.499070402596761  | AGIWUR40054 |
| N2                                  | HS | V | 8686071 | 8686864 | WBGene00022541 | ZC190.7  | ZC190.7  | -0.0809160217877505 | AGIWUR30409 |
| N2                                  | HS | V | 8686958 | 8688435 | WBGene00022542 | ZC190.8  | ZC190.8  | 0.141893820917137   | AGIWUR41198 |
| N2                                  | HS | V | 8694329 | 8696507 | WBGene00022544 | ZC190.10 | ZC190.10 | -0.15935261654708   |             |
| AGIWUR30061                         |    |   |         |         |                |          |          |                     |             |
| N2                                  | HS | V | 8701432 | 8703060 | WBGene00022535 | ZC178.1  | ZC178.1  | 0.174366678623817   | AGIWUR35182 |
| N2                                  | HS | V | 8705437 | 8709880 | WBGene00022536 | ZC178.2  | ZC178.2  | 0.0951144167792286  | AGIWUR19531 |
| N2                                  | HS | V | 8716495 | 8720893 | WBGene00001616 | glr-5    | ZC196.7  | 0.0042986278576409  |             |
| AGIWUR8923;AGIWUR33190              |    |   |         |         |                |          |          |                     |             |
| N2                                  | HS | V | 8721198 | 8722260 | WBGene00022551 | ZC196.8  | ZC196.8  | 0.2719701605422     | AGIWUR10032 |
| N2                                  | HS | V | 8726516 | 8728894 | WBGene00022550 | droe-8   | ZC196.6  | 1.12210160878768    |             |
| AGIWUR16914;AGIWUR36682;AGIWUR37378 |    |   |         |         |                |          |          |                     |             |
| N2                                  | HS | V | 8729458 | 8732789 | WBGene00022549 | ZC196.5  | ZC196.5  | -0.139864431799477  | AGIWUR34777 |
| N2                                  | HS | V | 8733106 | 8735781 | WBGene00022548 | ZC196.4  | ZC196.4  | 0.111426089667356   | AGIWUR8712  |
| N2                                  | HS | V | 8736674 | 8738437 | WBGene00022547 | ZC196.3  | ZC196.3  | 0.418501581366877   | AGIWUR38070 |
| N2                                  | HS | V | 8739437 | 8742259 | WBGene00022546 | ZC196.2  | ZC196.2  | -0.155130833137985  | AGIWUR26730 |
| N2                                  | HS | V | 8742804 | 8745045 | WBGene00022545 | ZC196.1  | ZC196.1  | 0.178161752138966   |             |
| AGIWUR21259;AGIWUR38916;AGIWUR39614 |    |   |         |         |                |          |          |                     |             |
| N2                                  | HS | V | 8753695 | 8754873 | WBGene00015222 | B0507.5  | B0507.5  | -0.0130177053710119 | AGIWUR12863 |
| N2                                  | HS | V | 8754970 | 8755759 | WBGene00015221 | B0507.4  | B0507.4  | 0.0475974747576888  | AGIWUR44217 |
| N2                                  | HS | V | 8755897 | 8757098 | WBGene00235307 | B0507.17 | B0507.17 | -0.079148874204046  |             |
| AGIWUR20645                         |    |   |         |         |                |          |          |                     |             |
| N2                                  | HS | V | 8760687 | 8763194 | WBGene00015225 | B0507.8  | B0507.8  | 3.33149287068722    | AGIWUR2410  |
| N2                                  | HS | V | 8764888 | 8766038 | WBGene00015226 | B0507.9  | B0507.9  | 0.524730587786148   | AGIWUR25026 |

|                                                                                    |    |   |         |         |                |           |           |                      |             |
|------------------------------------------------------------------------------------|----|---|---------|---------|----------------|-----------|-----------|----------------------|-------------|
| N2                                                                                 | HS | V | 8768909 | 8770876 | WBGene00015220 | B0507.3   | B0507.3   | 0.0903836799704933   | AGIWUR10104 |
| N2                                                                                 | HS | V | 8771899 | 8773781 | WBGene00006006 | srx-115   | B0507.11  | 0.0691247623844609   |             |
| AGIWUR14341;AGIWUR19285                                                            |    |   |         |         |                |           |           |                      |             |
| N2                                                                                 | HS | V | 8774332 | 8776630 | WBGene00015219 | B0507.2   | B0507.2   | -0.00940314376255458 | AGIWUR12931 |
| N2                                                                                 | HS | V | 8776570 | 8779318 | WBGene00015218 | B0507.1   | B0507.1   | -0.29137483498012    | AGIWUR10922 |
| N2                                                                                 | HS | V | 8783422 | 8784165 | WBGene00015275 | C01B7.3   | C01B7.3   | -0.266953133199151   | AGIWUR6935  |
| N2                                                                                 | HS | V | 8786551 | 8792771 | WBGene00006342 | sup-37    | C01B7.1   | 0.0129475526946887   |             |
| AGIWUR12890;AGIWUR24197;AGIWUR33572                                                |    |   |         |         |                |           |           |                      |             |
| N2                                                                                 | HS | V | 8792696 | 8795567 | WBGene00006467 | magu-2    | C01B7.4   | -0.031284957825001   |             |
| AGIWUR6705;AGIWUR7116;AGIWUR29311                                                  |    |   |         |         |                |           |           |                      |             |
| N2                                                                                 | HS | V | 8800151 | 8800996 | WBGene00015276 | C01B7.5   | C01B7.5   | 0.241157364433967    | AGIWUR31037 |
| N2                                                                                 | HS | V | 8805416 | 8819955 | WBGene00004457 | rpm-1     | C01B7.6   | -0.0800763674443878  | AGIWUR13055 |
| N2                                                                                 | HS | V | 8865351 | 8867297 | WBGene00017192 | F07B7.14  | F07B7.14  | 0.0451685086698621   |             |
| AGIWUR21155                                                                        |    |   |         |         |                |           |           |                      |             |
| N2                                                                                 | HS | V | 8876035 | 8877015 | WBGene00017152 | EGAP798.1 | EGAP798.1 | -0.189309321353316   |             |
| AGIWUR42453                                                                        |    |   |         |         |                |           |           |                      |             |
| N2                                                                                 | HS | V | 8898195 | 8898645 | WBGene00001892 | his-18    | K06C4.10  | 0.249618272090809    |             |
| AGIWUR14430                                                                        |    |   |         |         |                |           |           |                      |             |
| N2                                                                                 | HS | V | 8899276 | 8902221 | WBGene00019448 | frpr-13   | K06C4.17  | -0.0603313987931733  |             |
| AGIWUR41740                                                                        |    |   |         |         |                |           |           |                      |             |
| N2                                                                                 | HS | V | 8902339 | 8905364 | WBGene00019445 | frpr-12   | K06C4.9   | -0.047248980832193   | AGIWUR17925 |
| N2                                                                                 | HS | V | 8907629 | 8909442 | WBGene00019444 | frpr-11   | K06C4.8   | 0.201991195302025    | AGIWUR7490  |
| N2                                                                                 | HS | V | 8909725 | 8914033 | WBGene00003386 | mod-1     | K06C4.6   | -0.09694828532926    |             |
| AGIWUR19981;AGIWUR24514;AGIWUR44071                                                |    |   |         |         |                |           |           |                      |             |
| N2                                                                                 | HS | V | 8914915 | 8916795 | WBGene00019443 | K06C4.7   | K06C4.7   | -0.0757647704968036  | AGIWUR14865 |
| N2                                                                                 | HS | V | 8923088 | 8923936 | WBGene00019203 | ttr-47    | H14N18.3  | 0.500079795339456    |             |
| AGIWUR16282                                                                        |    |   |         |         |                |           |           |                      |             |
| N2                                                                                 | HS | V | 8923900 | 8928938 | WBGene00019204 | H14N18.4  | H14N18.4  | -0.135596310978906   |             |
| AGIWUR4412;AGIWUR22862;AGIWUR24807;AGIWUR27204;AGIWUR33845;AGIWUR35410             |    |   |         |         |                |           |           |                      |             |
| N2                                                                                 | HS | V | 8932618 | 8934265 | WBGene00019202 | H14N18.2  | H14N18.2  | 0.277548117265449    |             |
| AGIWUR19763                                                                        |    |   |         |         |                |           |           |                      |             |
| N2                                                                                 | HS | V | 8936359 | 8939676 | WBGene00006760 | unc-23    | H14N18.1  | 0.203859918785518    |             |
| AGIWUR36885                                                                        |    |   |         |         |                |           |           |                      |             |
| N2                                                                                 | HS | V | 8939592 | 8944063 | WBGene00020554 | T19A5.3   | T19A5.3   | 0.167946333607196    |             |
| AGIWUR9403;AGIWUR21691;AGIWUR24644;AGIWUR24708;AGIWUR26711;AGIWUR39995;AGIWUR40351 |    |   |         |         |                |           |           |                      |             |
| N2                                                                                 | HS | V | 8947799 | 8956294 | WBGene00001526 | gck-1     | T19A5.2   | 0.0193488482927151   |             |
| AGIWUR7524;AGIWUR14367;AGIWUR20465;AGIWUR25186;AGIWUR39460;AGIWUR40989             |    |   |         |         |                |           |           |                      |             |
| N2                                                                                 | HS | V | 8957045 | 8961935 | WBGene00020553 | T19A5.1   | T19A5.1   | -0.0301605997340957  | AGIWUR27563 |
| N2                                                                                 | HS | V | 8961915 | 8964099 | WBGene00003634 | nhr-44    | T19A5.4   | 0.419296964645367    | AGIWUR18736 |

|                                                                                           |    |   |         |         |                |          |           |                      |             |
|-------------------------------------------------------------------------------------------|----|---|---------|---------|----------------|----------|-----------|----------------------|-------------|
| N2                                                                                        | HS | V | 8964711 | 8968406 | WBGene00020555 | nhr-219  | T19A5.5   | -0.0316695412497507  | AGIWUR15634 |
| N2                                                                                        | HS | V | 8968737 | 8969955 | WBGene00019114 | nhr-194  | F59E11.8  | -0.206337828503012   |             |
| AGIWUR42742                                                                               |    |   |         |         |                |          |           |                      |             |
| N2                                                                                        | HS | V | 8970744 | 8972364 | WBGene00019115 | nhr-195  | F59E11.10 | -0.0527098714442644  |             |
| AGIWUR42909                                                                               |    |   |         |         |                |          |           |                      |             |
| N2                                                                                        | HS | V | 8973182 | 8974943 | WBGene00019116 | nhr-143  | F59E11.11 | 0.201939284059988    |             |
| AGIWUR26665                                                                               |    |   |         |         |                |          |           |                      |             |
| N2                                                                                        | HS | V | 8975698 | 8977465 | WBGene00019117 | nhr-144  | F59E11.12 | 0.0705285383995768   |             |
| AGIWUR2070;AGIWUR5823;AGIWUR7596;AGIWUR21861;AGIWUR25053;AGIWUR41239                      |    |   |         |         |                |          |           |                      |             |
| N2                                                                                        | HS | V | 8979522 | 8980929 | WBGene00006143 | str-84   | F59E11.13 | 0.258144348613213    |             |
| AGIWUR27796                                                                               |    |   |         |         |                |          |           |                      |             |
| N2                                                                                        | HS | V | 8982387 | 8983689 | WBGene00006145 | str-86   | F59E11.14 | 0.0334607336804416   |             |
| AGIWUR12913                                                                               |    |   |         |         |                |          |           |                      |             |
| N2                                                                                        | HS | V | 8984525 | 8985840 | WBGene00006144 | str-85   | F59E11.15 | 0.125557355691948    |             |
| AGIWUR44467                                                                               |    |   |         |         |                |          |           |                      |             |
| N2                                                                                        | HS | V | 8986694 | 8987965 | WBGene00006146 | str-87   | F59E11.16 | -0.0801595767309795  |             |
| AGIWUR3731                                                                                |    |   |         |         |                |          |           |                      |             |
| N2                                                                                        | HS | V | 8990244 | 8991664 | WBGene00019113 | F59E11.7 | F59E11.7  |                      |             |
| -0.00494671050361273 AGIWUR3934;AGIWUR7034;AGIWUR9590;AGIWUR10453;AGIWUR16102;AGIWUR30847 |    |   |         |         |                |          |           |                      |             |
| N2                                                                                        | HS | V | 8991789 | 8993142 | WBGene00019112 | F59E11.6 | F59E11.6  | 0.301337881269806    |             |
| AGIWUR14515                                                                               |    |   |         |         |                |          |           |                      |             |
| N2                                                                                        | HS | V | 8995101 | 8996664 | WBGene00019111 | F59E11.5 | F59E11.5  | 0.231546371602821    |             |
| AGIWUR21952                                                                               |    |   |         |         |                |          |           |                      |             |
| N2                                                                                        | HS | V | 8998599 | 9001352 | WBGene00005535 | sri-23   | F59E11.3  | -0.00312276711741077 |             |
| AGIWUR44649                                                                               |    |   |         |         |                |          |           |                      |             |
| N2                                                                                        | HS | V | 9001475 | 9003100 | WBGene00019109 | F59E11.2 | F59E11.2  | 0.145725078571306    |             |
| AGIWUR9207;AGIWUR11718;AGIWUR41284                                                        |    |   |         |         |                |          |           |                      |             |
| N2                                                                                        | HS | V | 9003709 | 9004967 | WBGene00005892 | srx-1    | F59E11.1  | -0.011381993079703   |             |
| AGIWUR9999                                                                                |    |   |         |         |                |          |           |                      |             |
| N2                                                                                        | HS | V | 9005543 | 9006931 | WBGene00005894 | srx-3    | R03H4.3   | 0.0398489579453365   | AGIWUR26052 |
| N2                                                                                        | HS | V | 9009475 | 9010788 | WBGene00005893 | srx-2    | R03H4.2   | -0.0559792228453126  | AGIWUR9140  |
| N2                                                                                        | HS | V | 9011244 | 9011565 | WBGene00023327 | R03H4.8  | R03H4.8   | -0.0432416917338312  |             |
| AGIWUR7761;AGIWUR13453;AGIWUR19516;AGIWUR25492;AGIWUR37990                                |    |   |         |         |                |          |           |                      |             |
| N2                                                                                        | HS | V | 9012199 | 9013865 | WBGene00005412 | srh-201  | R03H4.9   | -0.0709327421427206  | AGIWUR3855  |
| N2                                                                                        | HS | V | 9014408 | 9015640 | WBGene00019850 | srt-18   | R03H4.4   | -0.0392933485539011  | AGIWUR6053  |
| N2                                                                                        | HS | V | 9016864 | 9019318 | WBGene00019849 | oac-40   | R03H4.1   | -0.051394843431174   | AGIWUR14055 |
| N2                                                                                        | HS | V | 9019595 | 9022178 | WBGene00019851 | oac-41   | R03H4.5   | -0.00159923591103706 | AGIWUR13765 |
| N2                                                                                        | HS | V | 9022361 | 9024806 | WBGene00044617 | bus-1    | R03H4.6   | 0.135248364290677    |             |
| AGIWUR6644;AGIWUR9344                                                                     |    |   |         |         |                |          |           |                      |             |



|                                                                       |    |   |         |         |                |           |           |                     |             |
|-----------------------------------------------------------------------|----|---|---------|---------|----------------|-----------|-----------|---------------------|-------------|
| N2                                                                    | HS | V | 9025513 | 9026540 | WBGene00019853 | srsx-20   | R03H4.7   | 0.0183529002452496  |             |
| AGIWUR2800;AGIWUR18747;AGIWUR30131;AGIWUR35466                        |    |   |         |         |                |           |           |                     |             |
| N2                                                                    | HS | V | 9030548 | 9032593 | WBGene00016095 | C25E10.5  | C25E10.5  | -0.0771914184019877 |             |
| AGIWUR32429                                                           |    |   |         |         |                |           |           |                     |             |
| N2                                                                    | HS | V | 9033567 | 9035605 | WBGene00016094 | C25E10.4  | C25E10.4  | 0.355805584439416   |             |
| AGIWUR5021                                                            |    |   |         |         |                |           |           |                     |             |
| N2                                                                    | HS | V | 9036236 | 9040289 | WBGene00016093 | srsx-34   | C25E10.3  | 0.30306215724692    |             |
| AGIWUR14246;AGIWUR22371;AGIWUR42503;AGIWUR42809                       |    |   |         |         |                |           |           |                     |             |
| N2                                                                    | HS | V | 9041330 | 9043677 | WBGene00016092 | cyp-33B1  | C25E10.2  |                     |             |
| -0.00665324298232051 AGIWUR816;AGIWUR6140;AGIWUR39399                 |    |   |         |         |                |           |           |                     |             |
| N2                                                                    | HS | V | 9045171 | 9046967 | WBGene00016091 | nhr-30    | C25E10.1  | -0.185142239163434  |             |
| AGIWUR17500                                                           |    |   |         |         |                |           |           |                     |             |
| N2                                                                    | HS | V | 9050102 | 9051191 | WBGene00016096 | C25E10.7  | C25E10.7  | 0.00376160518948065 |             |
| AGIWUR44248                                                           |    |   |         |         |                |           |           |                     |             |
| N2                                                                    | HS | V | 9053322 | 9053995 | WBGene00016097 | C25E10.8  | C25E10.8  | 0.09710711176497    |             |
| AGIWUR386;AGIWUR11321;AGIWUR12719;AGIWUR26576                         |    |   |         |         |                |           |           |                     |             |
| N2                                                                    | HS | V | 9054268 | 9054844 | WBGene00023417 | swm-1     | C25E10.9  | 0.115788186425172   |             |
| AGIWUR435;AGIWUR3111;AGIWUR11880;AGIWUR15292                          |    |   |         |         |                |           |           |                     |             |
| N2                                                                    | HS | V | 9055326 | 9056392 | WBGene00016099 | C25E10.10 | C25E10.10 | 0.31670273620859    |             |
| AGIWUR16698                                                           |    |   |         |         |                |           |           |                     |             |
| N2                                                                    | HS | V | 9057543 | 9058332 | WBGene00016100 | C25E10.11 | C25E10.11 | 0.111883757532782   |             |
| AGIWUR35724                                                           |    |   |         |         |                |           |           |                     |             |
| N2                                                                    | HS | V | 9059750 | 9060481 | WBGene00023431 | C25E10.13 | C25E10.13 | 0.101253942247787   |             |
| AGIWUR10531;AGIWUR28693;AGIWUR31323;AGIWUR40791;AGIWUR41640           |    |   |         |         |                |           |           |                     |             |
| N2                                                                    | HS | V | 9060494 | 9062441 | WBGene00016101 | C25E10.12 | C25E10.12 | -0.159290511413516  |             |
| AGIWUR18021                                                           |    |   |         |         |                |           |           |                     |             |
| N2                                                                    | HS | V | 9067976 | 9068390 | WBGene00020862 | fip-2     | T27E4.4   | 0.255092029708013   | AGIWUR28034 |
| N2                                                                    | HS | V | 9068368 | 9069694 | WBGene00020863 | T27E4.5   | T27E4.5   | 0.113126534843667   |             |
| AGIWUR1035;AGIWUR8082;AGIWUR15817;AGIWUR22970                         |    |   |         |         |                |           |           |                     |             |
| N2                                                                    | HS | V | 9069865 | 9073528 | WBGene00020864 | oac-50    | T27E4.6   | 0.033442244768338   | AGIWUR36336 |
| N2                                                                    | HS | V | 9074784 | 9076322 | WBGene00020865 | T27E4.7   | T27E4.7   | 0.032289358818705   |             |
| AGIWUR34270;AGIWUR35657;AGIWUR37836                                   |    |   |         |         |                |           |           |                     |             |
| N2                                                                    | HS | V | 9092345 | 9094345 | WBGene00020861 | T27E4.1   | T27E4.1   | 0.0889596151537644  |             |
| AGIWUR639;AGIWUR19829;AGIWUR29731                                     |    |   |         |         |                |           |           |                     |             |
| N2                                                                    | HS | V | 9096007 | 9097233 | WBGene00017659 | F21C10.10 | F21C10.10 | 0.0849060757679716  |             |
| AGIWUR25059                                                           |    |   |         |         |                |           |           |                     |             |
| N2                                                                    | HS | V | 9097121 | 9098696 | WBGene00017658 | F21C10.9  | F21C10.9  | -0.0318694929496153 |             |
| AGIWUR7021;AGIWUR8613;AGIWUR11231;AGIWUR12515;AGIWUR12623;AGIWUR44908 |    |   |         |         |                |           |           |                     |             |
| N2                                                                    | HS | V | 9099638 | 9101133 | WBGene00017661 | frpr-6    | F21C10.12 | 0.0380884210929953  |             |

|                                                                     |    |   |         |         |                |           |           |                      |             |
|---------------------------------------------------------------------|----|---|---------|---------|----------------|-----------|-----------|----------------------|-------------|
| AGIWUR11739                                                         |    |   |         |         |                |           |           |                      |             |
| N2                                                                  | HS | V | 9109584 | 9111013 | WBGene00004119 | pgn-31    | F21C10.8  | -0.643040513169744   |             |
| AGIWUR10968                                                         |    |   |         |         |                |           |           |                      |             |
| N2                                                                  | HS | V | 9112767 | 9122180 | WBGene00017657 | F21C10.7  | F21C10.7  | 0.00645726376102651  |             |
| AGIWUR43657                                                         |    |   |         |         |                |           |           |                      |             |
| N2                                                                  | HS | V | 9123489 | 9123809 | WBGene00017660 | F21C10.11 | F21C10.11 | 0.220265690349225    |             |
| AGIWUR1058;AGIWUR5369;AGIWUR7951;AGIWUR8268;AGIWUR14237;AGIWUR24278 |    |   |         |         |                |           |           |                      |             |
| N2                                                                  | HS | V | 9124480 | 9124994 | WBGene00017656 | F21C10.6  | F21C10.6  | -0.212716645285295   |             |
| AGIWUR43227                                                         |    |   |         |         |                |           |           |                      |             |
| N2                                                                  | HS | V | 9125645 | 9126006 | WBGene00017655 | F21C10.5  | F21C10.5  | -0.0152809537794418  |             |
| AGIWUR34079                                                         |    |   |         |         |                |           |           |                      |             |
| N2                                                                  | HS | V | 9126679 | 9127593 | WBGene00017654 | F21C10.4  | F21C10.4  | 0.287603510533641    |             |
| AGIWUR25641                                                         |    |   |         |         |                |           |           |                      |             |
| N2                                                                  | HS | V | 9128710 | 9130943 | WBGene00017653 | F21C10.3  | F21C10.3  | 0.0763321202132516   |             |
| AGIWUR3740                                                          |    |   |         |         |                |           |           |                      |             |
| N2                                                                  | HS | V | 9132384 | 9133275 | WBGene00017652 | F21C10.1  | F21C10.1  | 0.0305935827744648   |             |
| AGIWUR35855                                                         |    |   |         |         |                |           |           |                      |             |
| N2                                                                  | HS | V | 9134255 | 9135347 | WBGene00015053 | B0222.1   | B0222.1   | 0.0941763204633084   | AGIWUR14873 |
| N2                                                                  | HS | V | 9135656 | 9137718 | WBGene00015054 | pitr-2    | B0222.2   | 0.0982527205892474   | AGIWUR11677 |
| N2                                                                  | HS | V | 9138946 | 9141397 | WBGene00015055 | pitr-3    | B0222.3   | 0.0401418464367422   |             |
| AGIWUR12154;AGIWUR17374;AGIWUR25525;AGIWUR26220                     |    |   |         |         |                |           |           |                      |             |
| N2                                                                  | HS | V | 9144630 | 9146899 | WBGene00006418 | tag-38    | B0222.4   | -0.110557583642375   | AGIWUR12107 |
| N2                                                                  | HS | V | 9152321 | 9154872 | WBGene00015056 | B0222.5   | B0222.5   | 0.136811550785218    | AGIWUR11803 |
| N2                                                                  | HS | V | 9162051 | 9163005 | WBGene00000718 | col-145   | B0222.7   | -0.53453582659975    | AGIWUR11578 |
| N2                                                                  | HS | V | 9164297 | 9165307 | WBGene00000599 | col-10    | B0222.8   | -0.192219334554787   | AGIWUR33641 |
| N2                                                                  | HS | V | 9165820 | 9168041 | WBGene00044582 | B0222.11  | B0222.11  | 0.0624780317376739   |             |
| AGIWUR15091;AGIWUR20798                                             |    |   |         |         |                |           |           |                      |             |
| N2                                                                  | HS | V | 9168393 | 9173024 | WBGene00015057 | gad-3     | B0222.9   | 0.088163049379725    | AGIWUR35004 |
| N2                                                                  | HS | V | 9174089 | 9175250 | WBGene00004107 | pgn-16    | C24B5.5   | -0.033822068720001   | AGIWUR31890 |
| N2                                                                  | HS | V | 9175798 | 9177997 | WBGene00016045 | spas-1    | C24B5.2   | 0.120284113352948    |             |
| AGIWUR5281;AGIWUR20143                                              |    |   |         |         |                |           |           |                      |             |
| N2                                                                  | HS | V | 9177949 | 9181719 | WBGene00004216 | ptr-1     | C24B5.3   | 0.267677436364748    | AGIWUR9758  |
| N2                                                                  | HS | V | 9191617 | 9195877 | WBGene00016044 | C24B5.1   | C24B5.1   | -0.137716768619548   | AGIWUR35120 |
| N2                                                                  | HS | V | 9195821 | 9197326 | WBGene00016046 | C24B5.4   | C24B5.4   | 0.0614606407391136   | AGIWUR28612 |
| N2                                                                  | HS | V | 9197751 | 9198987 | WBGene00006221 | str-177   | T18H9.4   | 0.0480127805966672   |             |
| AGIWUR2394;AGIWUR11610;AGIWUR18614;AGIWUR33614                      |    |   |         |         |                |           |           |                      |             |
| N2                                                                  | HS | V | 9199680 | 9204734 | WBGene00000215 | asp-2     | T18H9.2   | 0.248519242498382    | AGIWUR17206 |
| N2                                                                  | HS | V | 9204703 | 9207467 | WBGene00002132 | inx-10    | T18H9.5   | -0.00284534347664334 |             |
| AGIWUR9782;AGIWUR15209;AGIWUR34590                                  |    |   |         |         |                |           |           |                      |             |

|                                                                                                                        |    |   |         |         |                |          |          |                      |             |
|------------------------------------------------------------------------------------------------------------------------|----|---|---------|---------|----------------|----------|----------|----------------------|-------------|
| N2                                                                                                                     | HS | V | 9209463 | 9213654 | WBGene00007023 | mdt-27   | T18H9.6  | 0.103960487437396    | AGIWUR33734 |
| N2                                                                                                                     | HS | V | 9213746 | 9217243 | WBGene00044077 | tag-232  | T18H9.7  | -0.115839663865781   | AGIWUR15379 |
| N2                                                                                                                     | HS | V | 9221866 | 9224354 | WBGene00001695 | grd-6    | T18H9.1  | 0.57373804959558     | AGIWUR8669  |
| N2                                                                                                                     | HS | V | 9226094 | 9227523 | WBGene00017193 | F07C3.2  | F07C3.2  | 0.273182937795815    | AGIWUR28489 |
| N2                                                                                                                     | HS | V | 9227710 | 9232396 | WBGene00017194 | F07C3.3  | F07C3.3  | 0.22509641817704     | AGIWUR2492  |
| N2                                                                                                                     | HS | V | 9234610 | 9243221 | WBGene00017195 | glo-4    | F07C3.4  | -0.0547778559756154  |             |
| AGIWUR18442;AGIWUR21236;AGIWUR30949;AGIWUR33447;AGIWUR35250;AGIWUR39020                                                |    |   |         |         |                |          |          |                      |             |
| N2                                                                                                                     | HS | V | 9244402 | 9246360 | WBGene00000003 | aat-2    | F07C3.7  | -0.00192829615012435 |             |
| AGIWUR8898;AGIWUR30371;AGIWUR33955;AGIWUR43403                                                                         |    |   |         |         |                |          |          |                      |             |
| N2                                                                                                                     | HS | V | 9250275 | 9254223 | WBGene00004211 | ptd-2    | F07C3.1  | 0.18486160944173     | AGIWUR19663 |
| N2                                                                                                                     | HS | V | 9254219 | 9254632 | WBGene00017197 | F07C3.9  | F07C3.9  | -0.148013256321349   | AGIWUR36578 |
| N2                                                                                                                     | HS | V | 9256864 | 9261124 | WBGene00017198 | nhr-36   | F07C3.10 | 0.058761382440923    |             |
| AGIWUR5452                                                                                                             |    |   |         |         |                |          |          |                      |             |
| N2                                                                                                                     | HS | V | 9263800 | 9266499 | WBGene00022788 | slc-17.7 | ZK682.2  | -0.181357974753356   |             |
| AGIWUR27401                                                                                                            |    |   |         |         |                |          |          |                      |             |
| N2                                                                                                                     | HS | V | 9280702 | 9282154 | WBGene00001954 | hlh-10   | ZK682.4  | -0.0361431510317765  | AGIWUR4665  |
| N2                                                                                                                     | HS | V | 9284129 | 9287617 | WBGene00022789 | lron-2   | ZK682.5  | -0.0631487197720038  | AGIWUR4188  |
| N2                                                                                                                     | HS | V | 9290683 | 9292118 | WBGene00022790 | ZK682.7  | ZK682.7  | -0.0380516401792228  | AGIWUR7624  |
| N2                                                                                                                     | HS | V | 9297632 | 9302158 | WBGene00018405 | F44A2.5  | F44A2.5  | -0.169765995630057   |             |
| AGIWUR10464;AGIWUR10630;AGIWUR43500                                                                                    |    |   |         |         |                |          |          |                      |             |
| N2                                                                                                                     | HS | V | 9303326 | 9304622 | WBGene00018404 | nhr-39   | F44A2.4  | 0.0141369277179813   | AGIWUR25387 |
| N2                                                                                                                     | HS | V | 9305416 | 9310926 | WBGene00018403 | F44A2.3  | F44A2.3  | 0.1374994615182      | AGIWUR5487  |
| N2                                                                                                                     | HS | V | 9318311 | 9320995 | WBGene00018402 | kvs-3    | F44A2.2  | -0.0678689271061277  | AGIWUR34457 |
| N2                                                                                                                     | HS | V | 9321503 | 9322905 | WBGene00018406 | F44A2.7  | F44A2.7  | -0.0365511931778491  | AGIWUR39794 |
| N2                                                                                                                     | HS | V | 9323085 | 9327209 | WBGene00006499 | tag-153  | F44A2.1  | -0.0373726839856925  |             |
| AGIWUR3118;AGIWUR11728;AGIWUR21919;AGIWUR31459;AGIWUR34827;AGIWUR41537                                                 |    |   |         |         |                |          |          |                      |             |
| N2                                                                                                                     | HS | V | 9327145 | 9333062 | WBGene00019465 | ac1-14   | K07B1.5  | 0.0236562243065848   |             |
| AGIWUR5902;AGIWUR21744;AGIWUR42125                                                                                     |    |   |         |         |                |          |          |                      |             |
| N2                                                                                                                     | HS | V | 9334773 | 9336668 | WBGene00006729 | ucp-4    | K07B1.3  | -0.0819050616164905  | AGIWUR23287 |
| N2                                                                                                                     | HS | V | 9336762 | 9338858 | WBGene00000766 | coq-6    | K07B1.2  | 0.22861992998037     | AGIWUR24967 |
| N2                                                                                                                     | HS | V | 9338859 | 9344218 | WBGene00019466 | tos-1    | K07B1.6  | 0.0661892525023475   |             |
| AGIWUR7103;AGIWUR19971;AGIWUR23532;AGIWUR25576;AGIWUR27157;AGIWUR29383;AGIWUR30086;AGIWUR30658;AGIWUR33209;AGIWUR36988 |    |   |         |         |                |          |          |                      |             |
| N2                                                                                                                     | HS | V | 9345022 | 9346962 | WBGene00019467 | K07B1.7  | K07B1.7  | -0.170863795763011   |             |
| AGIWUR11067;AGIWUR29876                                                                                                |    |   |         |         |                |          |          |                      |             |
| N2                                                                                                                     | HS | V | 9345772 | 9348687 | WBGene00006623 | try-5    | K07B1.1  | 0.284307709377028    | AGIWUR40119 |
| N2                                                                                                                     | HS | V | 9349987 | 9351332 | WBGene00005938 | srx-47   | E02C12.3 | -0.0923845667100904  |             |
| AGIWUR30857                                                                                                            |    |   |         |         |                |          |          |                      |             |
| N2                                                                                                                     | HS | V | 9353247 | 9354497 | WBGene00005937 | srx-46   | E02C12.2 | 0.1260457618782      | AGIWUR39729 |

|                                                                                              |    |   |         |         |                |           |           |                     |             |
|----------------------------------------------------------------------------------------------|----|---|---------|---------|----------------|-----------|-----------|---------------------|-------------|
| N2                                                                                           | HS | V | 9354512 | 9355471 | WBGene00017091 | ttr-40    | E02C12.4  | 0.297121995838879   |             |
| AGIWUR41676                                                                                  |    |   |         |         |                |           |           |                     |             |
| N2                                                                                           | HS | V | 9355505 | 9356541 | WBGene00023485 | ttr-49    | E02C12.13 | 0.140235647677951   |             |
| AGIWUR9606;AGIWUR10008;AGIWUR23715                                                           |    |   |         |         |                |           |           |                     |             |
| N2                                                                                           | HS | V | 9356750 | 9359774 | WBGene00001665 | gpa-3     | E02C12.5  | 0.0261280989373613  |             |
| AGIWUR30793                                                                                  |    |   |         |         |                |           |           |                     |             |
| N2                                                                                           | HS | V | 9369549 | 9371086 | WBGene00017092 | E02C12.6  | E02C12.6  | 0.0927457478234199  |             |
| AGIWUR25049                                                                                  |    |   |         |         |                |           |           |                     |             |
| N2                                                                                           | HS | V | 9371620 | 9373613 | WBGene00017093 | E02C12.8  | E02C12.8  | 0.463233010903274   |             |
| AGIWUR16233;AGIWUR41103                                                                      |    |   |         |         |                |           |           |                     |             |
| N2                                                                                           | HS | V | 9373954 | 9374842 | WBGene00017094 | E02C12.9  | E02C12.9  | -0.0107746704113918 |             |
| AGIWUR5285                                                                                   |    |   |         |         |                |           |           |                     |             |
| N2                                                                                           | HS | V | 9375099 | 9378404 | WBGene00017095 | E02C12.10 | E02C12.10 | 0.503466250794458   |             |
| AGIWUR5101                                                                                   |    |   |         |         |                |           |           |                     |             |
| N2                                                                                           | HS | V | 9379435 | 9379908 | WBGene00017096 | E02C12.11 | E02C12.11 | 0.0552127902653581  |             |
| AGIWUR34551                                                                                  |    |   |         |         |                |           |           |                     |             |
| N2                                                                                           | HS | V | 9386179 | 9400062 | WBGene00002036 | hum-2     | F36D4.3   | -0.0775350338286174 |             |
| AGIWUR15165;AGIWUR16315;AGIWUR25547                                                          |    |   |         |         |                |           |           |                     |             |
| N2                                                                                           | HS | V | 9400327 | 9401855 | WBGene00018088 | trpp-4    | F36D4.2   | 0.00501758204095637 | AGIWUR33543 |
| N2                                                                                           | HS | V | 9401805 | 9406360 | WBGene00018089 | F36D4.4   | F36D4.4   | 0.200024974774642   | AGIWUR1817  |
| N2                                                                                           | HS | V | 9417056 | 9419298 | WBGene00018087 | F36D4.1   | F36D4.1   | 0.0533405823668947  | AGIWUR36788 |
| N2                                                                                           | HS | V | 9419292 | 9425762 | WBGene00018090 | F36D4.5   | F36D4.5   | -0.128828168925376  |             |
| AGIWUR6465;AGIWUR6807;AGIWUR7542;AGIWUR11462;AGIWUR23487;AGIWUR27935;AGIWUR35955;AGIWUR39168 |    |   |         |         |                |           |           |                     |             |
| N2                                                                                           | HS | V | 9426852 | 9427523 | WBGene00018091 | F36D4.6   | F36D4.6   | 0.0912275557913595  | AGIWUR18771 |
| N2                                                                                           | HS | V | 9444050 | 9460639 | WBGene00019237 | H24G06.1  | H24G06.1  | -0.0904659226375628 |             |
| AGIWUR8707;AGIWUR38127;AGIWUR44261                                                           |    |   |         |         |                |           |           |                     |             |
| N2                                                                                           | HS | V | 9460686 | 9462705 | WBGene00008556 | F07D3.3   | F07D3.3   | -0.0697006114804521 | AGIWUR9046  |
| N2                                                                                           | HS | V | 9471975 | 9473796 | WBGene00001449 | flp-6     | F07D3.2   | 0.0405280732864668  | AGIWUR27152 |
| N2                                                                                           | HS | V | 9478163 | 9479601 | WBGene00003522 | nas-3     | K06A4.1   | -0.114010691165662  |             |
| AGIWUR1048;AGIWUR7670;AGIWUR13476;AGIWUR13931;AGIWUR17705;AGIWUR33871                        |    |   |         |         |                |           |           |                     |             |
| N2                                                                                           | HS | V | 9484206 | 9489033 | WBGene00010592 | K06A4.2   | K06A4.2   | -0.0646145271133474 | AGIWUR5894  |
| N2                                                                                           | HS | V | 9490028 | 9491715 | WBGene00010597 | K06A4.7   | K06A4.7   | 0.270117543407471   | AGIWUR17974 |
| N2                                                                                           | HS | V | 9497042 | 9499372 | WBGene00010593 | gsn1-1    | K06A4.3   | 0.27027244282797    | AGIWUR4604  |
| N2                                                                                           | HS | V | 9501401 | 9504580 | WBGene00010594 | swt-5     | K06A4.4   | 0.0628151785940467  | AGIWUR10451 |
| N2                                                                                           | HS | V | 9505603 | 9507049 | WBGene00010595 | haao-1    | K06A4.5   | 0.180472311257885   | AGIWUR4297  |
| N2                                                                                           | HS | V | 9508079 | 9510476 | WBGene00008669 | acs-14    | F11A3.1   | 0.164072581474775   | AGIWUR34411 |
| N2                                                                                           | HS | V | 9510406 | 9510719 | WBGene00077496 | F11A3.4   | F11A3.4   | -0.133907603115063  | AGIWUR18321 |
| N2                                                                                           | HS | V | 9512506 | 9513466 | WBGene00014734 | F11A3.3   | F11A3.3   | -0.132918329934413  |             |
| AGIWUR5652;AGIWUR23491                                                                       |    |   |         |         |                |           |           |                     |             |

|                                                                      |    |   |         |         |                |             |          |                     |             |
|----------------------------------------------------------------------|----|---|---------|---------|----------------|-------------|----------|---------------------|-------------|
| N2                                                                   | HS | V | 9513824 | 9517585 | WBGene00008670 | eif-2Bdelta | F11A3.2  | -0.148812396425903  |             |
| AGIWUR6022                                                           |    |   |         |         |                |             |          |                     |             |
| N2                                                                   | HS | V | 9517519 | 9518933 | WBGene00008233 | C50F4.8     | C50F4.8  | 0.106410102474397   | AGIWUR9165  |
| N2                                                                   | HS | V | 9521676 | 9523036 | WBGene00014711 | C50F4.15    | C50F4.15 | 0.0385703306219773  |             |
| AGIWUR4792;AGIWUR8304                                                |    |   |         |         |                |             |          |                     |             |
| N2                                                                   | HS | V | 9523167 | 9524199 | WBGene00008234 | C50F4.9     | C50F4.9  | 0.030428449628932   | AGIWUR3907  |
| N2                                                                   | HS | V | 9526698 | 9529259 | WBGene00008229 | C50F4.1     | C50F4.1  | 0.273698489853412   | AGIWUR39754 |
| N2                                                                   | HS | V | 9529951 | 9531577 | WBGene00008235 | C50F4.10    | C50F4.10 | -0.150338762815835  |             |
| AGIWUR42661                                                          |    |   |         |         |                |             |          |                     |             |
| N2                                                                   | HS | V | 9531819 | 9534537 | WBGene00008230 | pfk-1.2     | C50F4.2  | 0.0829261133534871  | AGIWUR26495 |
| N2                                                                   | HS | V | 9534926 | 9536404 | WBGene00008231 | tag-329     | C50F4.3  | 0.12362334556587    |             |
| AGIWUR15122;AGIWUR19502;AGIWUR39574                                  |    |   |         |         |                |             |          |                     |             |
| N2                                                                   | HS | V | 9536771 | 9537769 | WBGene00008232 | C50F4.4     | C50F4.4  | 0.169987400809145   | AGIWUR16123 |
| N2                                                                   | HS | V | 9537672 | 9539738 | WBGene00008236 | C50F4.12    | C50F4.12 | -0.116237686077159  |             |
| AGIWUR24897;AGIWUR34125;AGIWUR34467;AGIWUR37554                      |    |   |         |         |                |             |          |                     |             |
| N2                                                                   | HS | V | 9539844 | 9541606 | WBGene00008238 | C50F4.16    | C50F4.16 | 0.0389547261499867  |             |
| AGIWUR2870                                                           |    |   |         |         |                |             |          |                     |             |
| N2                                                                   | HS | V | 9541782 | 9544226 | WBGene00003160 | mdf-1       | C50F4.11 | 0.27625109013559    |             |
| AGIWUR2261                                                           |    |   |         |         |                |             |          |                     |             |
| N2                                                                   | HS | V | 9544611 | 9545398 | WBGene00001909 | his-35      | C50F4.13 | 0.113569246367184   |             |
| AGIWUR5006;AGIWUR6688;AGIWUR9765;AGIWUR19176;AGIWUR25348;AGIWUR38982 |    |   |         |         |                |             |          |                     |             |
| N2                                                                   | HS | V | 9546092 | 9546838 | WBGene00001910 | C50F4.6     | C50F4.6  | 0.378586159490148   | AGIWUR818   |
| N2                                                                   | HS | V | 9547083 | 9547607 | WBGene00001911 | his-37      | C50F4.7  | 0.222837165936302   |             |
| AGIWUR5363;AGIWUR6028                                                |    |   |         |         |                |             |          |                     |             |
| N2                                                                   | HS | V | 9547606 | 9549836 | WBGene00008237 | nstp-10     | C50F4.14 | -0.0273113027924641 |             |
| AGIWUR10756;AGIWUR24316;AGIWUR40160                                  |    |   |         |         |                |             |          |                     |             |
| N2                                                                   | HS | V | 9550644 | 9556064 | WBGene00009098 | ehbp-1      | F25B3.1  | -0.027401653806848  | AGIWUR7819  |
| N2                                                                   | HS | V | 9556226 | 9561643 | WBGene00009100 | rgef-1      | F25B3.3  | 0.103284325202678   |             |
| AGIWUR23351;AGIWUR35083;AGIWUR44618                                  |    |   |         |         |                |             |          |                     |             |
| N2                                                                   | HS | V | 9568749 | 9570295 | WBGene00009102 | F25B3.5     | F25B3.5  | 0.0272516518395616  | AGIWUR39474 |
| N2                                                                   | HS | V | 9577128 | 9579946 | WBGene00009099 | F25B3.2     | F25B3.2  | 0.0714070113664542  | AGIWUR27474 |
| N2                                                                   | HS | V | 9580041 | 9582644 | WBGene00009103 | rtfo-1      | F25B3.6  | -0.195914573583464  | AGIWUR32432 |
| N2                                                                   | HS | V | 9583545 | 9590523 | WBGene00010727 | K09G1.1     | K09G1.1  | 0.111746819614275   |             |
| AGIWUR9171;AGIWUR25494;AGIWUR35434                                   |    |   |         |         |                |             |          |                     |             |
| N2                                                                   | HS | V | 9590617 | 9591255 | WBGene00010728 | K09G1.2     | K09G1.2  | 0.157373963458264   | AGIWUR21454 |
| N2                                                                   | HS | V | 9597351 | 9597566 | WBGene00010729 | K09G1.3     | K09G1.3  | -0.0152561442645069 | AGIWUR34774 |
| N2                                                                   | HS | V | 9608562 | 9614942 | WBGene00001053 | dop-2       | K09G1.4  | 0.165773518446114   | AGIWUR40950 |
| N2                                                                   | HS | V | 9616031 | 9617654 | WBGene00004146 | pqn-63      | T06E4.11 | -0.017632249342018  |             |
| AGIWUR39956                                                          |    |   |         |         |                |             |          |                     |             |

|                                                                                                                      |    |   |         |         |                |          |          |                      |             |
|----------------------------------------------------------------------------------------------------------------------|----|---|---------|---------|----------------|----------|----------|----------------------|-------------|
| N2                                                                                                                   | HS | V | 9618233 | 9619019 | WBGene00011537 | T06E4.10 | T06E4.10 | -0.0670479767623675  |             |
| AGIWUR42536                                                                                                          |    |   |         |         |                |          |          |                      |             |
| N2                                                                                                                   | HS | V | 9620150 | 9621036 | WBGene00011536 | T06E4.9  | T06E4.9  | 0.193994727591142    |             |
| AGIWUR17247;AGIWUR19509;AGIWUR27759;AGIWUR36271;AGIWUR41455;AGIWUR43957                                              |    |   |         |         |                |          |          |                      |             |
| N2                                                                                                                   | HS | V | 9622105 | 9622934 | WBGene00011535 | T06E4.8  | T06E4.8  | -0.102966131997437   |             |
| AGIWUR5829;AGIWUR8168;AGIWUR9243;AGIWUR10103;AGIWUR31043                                                             |    |   |         |         |                |          |          |                      |             |
| N2                                                                                                                   | HS | V | 9626404 | 9628143 | WBGene00011534 | T06E4.7  | T06E4.7  | 0.000765427732119406 | AGIWUR9548  |
| N2                                                                                                                   | HS | V | 9628314 | 9629110 | WBGene00044011 | T06E4.12 | T06E4.12 | -0.0786866162108897  |             |
| AGIWUR411;AGIWUR3675;AGIWUR14554;AGIWUR26188;AGIWUR31848                                                             |    |   |         |         |                |          |          |                      |             |
| N2                                                                                                                   | HS | V | 9629943 | 9631012 | WBGene00000719 | col-146  | T06E4.6  | 0.177887078392125    |             |
| AGIWUR823;AGIWUR3653;AGIWUR6351;AGIWUR15529;AGIWUR28793                                                              |    |   |         |         |                |          |          |                      |             |
| N2                                                                                                                   | HS | V | 9632029 | 9633338 | WBGene00000720 | col-147  | T06E4.4  | 0.0143017732025434   | AGIWUR7879  |
| N2                                                                                                                   | HS | V | 9634861 | 9645595 | WBGene00000226 | atl-1    | T06E4.3  | 0.0577390875709476   |             |
| AGIWUR10638;AGIWUR18456;AGIWUR41912                                                                                  |    |   |         |         |                |          |          |                      |             |
| N2                                                                                                                   | HS | V | 9645746 | 9650297 | WBGene00001830 | hcp-2    | T06E4.1  | 0.0969341833449029   |             |
| AGIWUR1535;AGIWUR38072                                                                                               |    |   |         |         |                |          |          |                      |             |
| N2                                                                                                                   | HS | V | 9654755 | 9657975 | WBGene00007140 | cyp-29A4 | B0331.1  | -0.215481018872568   |             |
| AGIWUR26929                                                                                                          |    |   |         |         |                |          |          |                      |             |
| N2                                                                                                                   | HS | V | 9658931 | 9661614 | WBGene00007141 | pit-4    | B0331.2  | 0.320889180729629    | AGIWUR21848 |
| N2                                                                                                                   | HS | V | 9666700 | 9670050 | WBGene00013962 | ZK287.1  | ZK287.1  | 0.139334865918329    | AGIWUR5092  |
| N2                                                                                                                   | HS | V | 9670028 | 9673630 | WBGene00013963 | sul-8    | ZK287.2  | 0.0751458269013163   | AGIWUR23963 |
| N2                                                                                                                   | HS | V | 9678277 | 9679302 | WBGene00013964 | ZK287.3  | ZK287.3  | -0.0194459055442486  | AGIWUR14407 |
| N2                                                                                                                   | HS | V | 9679357 | 9680215 | WBGene00013968 | ZK287.9  | ZK287.9  | 0.236149225010024    |             |
| AGIWUR3299;AGIWUR3857;AGIWUR4248;AGIWUR19258;AGIWUR24574;AGIWUR26804;AGIWUR27249;AGIWUR30486;AGIWUR31680;AGIWUR37264 |    |   |         |         |                |          |          |                      |             |
| N2                                                                                                                   | HS | V | 9680173 | 9685715 | WBGene00013965 | ZK287.4  | ZK287.4  | 0.0945541604993752   | AGIWUR8288  |
| N2                                                                                                                   | HS | V | 9689686 | 9690615 | WBGene00004320 | rbx-1    | ZK287.5  | 0.0205945822536746   |             |
| AGIWUR1130;AGIWUR15983;AGIWUR18688;AGIWUR21768;AGIWUR27088;AGIWUR41715                                               |    |   |         |         |                |          |          |                      |             |
| N2                                                                                                                   | HS | V | 9691039 | 9692159 | WBGene00013966 | ztf-9    | ZK287.6  | 0.194288961291943    |             |
| AGIWUR11148;AGIWUR11795;AGIWUR15603;AGIWUR16629                                                                      |    |   |         |         |                |          |          |                      |             |
| N2                                                                                                                   | HS | V | 9692899 | 9694785 | WBGene00013967 | ZK287.7  | ZK287.7  | -0.0885301676409451  | AGIWUR43503 |
| N2                                                                                                                   | HS | V | 9697129 | 9701552 | WBGene00001842 | her-1    | ZK287.8  | 0.0102193820103165   |             |
| AGIWUR2045;AGIWUR11114;AGIWUR12264;AGIWUR22029;AGIWUR33994;AGIWUR34851                                               |    |   |         |         |                |          |          |                      |             |
| N2                                                                                                                   | HS | V | 9711447 | 9713632 | WBGene00009586 | F40F9.10 | F40F9.10 | 0.123767380463256    |             |
| AGIWUR3196                                                                                                           |    |   |         |         |                |          |          |                      |             |
| N2                                                                                                                   | HS | V | 9715209 | 9716380 | WBGene00009581 | F40F9.3  | F40F9.3  | -0.0830168604523491  |             |
| AGIWUR3237;AGIWUR12679;AGIWUR24727;AGIWUR42854                                                                       |    |   |         |         |                |          |          |                      |             |
| N2                                                                                                                   | HS | V | 9716697 | 9718051 | WBGene00006230 | str-188  | F40F9.4  | -0.0335175498203002  | AGIWUR9381  |
| N2                                                                                                                   | HS | V | 9718462 | 9719724 | WBGene00014754 | F40F9.11 | F40F9.11 | -0.187771729832544   |             |

AGIWUR367;AGIWUR4670;AGIWUR8858;AGIWUR8900;AGIWUR17425;AGIWUR30807;AGIWUR40618  
 N2 HS V 9719743 9724118 WBGene00009582 F40F9.5 F40F9.5 -0.221839598894039 AGIWUR12858  
 N2 HS V 9725972 9729510 WBGene00009583 aagr-3 F40F9.6 -0.0418862920036425 AGIWUR8286  
 N2 HS V 9730110 9734022 WBGene00009584 drap-1 F40F9.7 -0.0828713060103814  
 AGIWUR6724;AGIWUR11997;AGIWUR15401;AGIWUR15476;AGIWUR22214;AGIWUR34305  
 N2 HS V 9734103 9735316 WBGene00009585 cal-7 F40F9.8 0.0312817664785925 AGIWUR40235  
 N2 HS V 9737556 9739740 WBGene00000172 aqp-4 F40F9.9 0.127002820423783 AGIWUR18766  
 N2 HS V 9741206 9744326 WBGene00010251 sta-2 F58E6.1 0.0108540822817433  
 AGIWUR6189;AGIWUR14897;AGIWUR16493;AGIWUR18977;AGIWUR39584;AGIWUR43036  
 N2 HS V 9745240 9749228 WBGene00077697 F58E6.13 F58E6.13 0.0611560647660987  
 AGIWUR2338;AGIWUR12430  
 N2 HS V 9749971 9750408 WBGene00010253 F58E6.4 F58E6.4 -0.0499399300915826 AGIWUR1069  
 N2 HS V 9752076 9752861 WBGene00010255 F58E6.6 F58E6.6 -0.00315589119334625 AGIWUR24247  
 N2 HS V 9753423 9754581 WBGene00010254 F58E6.5 F58E6.5 0.0965023445046462 AGIWUR18939  
 N2 HS V 9755076 9755808 WBGene00010257 F58E6.8 F58E6.8 0.142891927446487  
 AGIWUR2576;AGIWUR16776;AGIWUR17087;AGIWUR36175  
 N2 HS V 9756954 9757984 WBGene00010258 F58E6.11 F58E6.11 0.31856926884287  
 AGIWUR10045  
 N2 HS V 9764645 9769361 WBGene00006778 unc-42 F58E6.10 -0.207448800925353  
 AGIWUR40416  
 N2 HS V 9772430 9774881 WBGene00009768 F46B6.2 F46B6.2 0.0101518277591843 AGIWUR14437  
 N2 HS V 9774897 9775834 WBGene00009776 F46B6.12 F46B6.12 -0.0364163037172345  
 AGIWUR24747;AGIWUR42292  
 N2 HS V 9775935 9777743 WBGene00004882 smg-4 F46B6.3 0.117284473438628  
 AGIWUR15546;AGIWUR24438;AGIWUR29576;AGIWUR35194;AGIWUR44130  
 N2 HS V 9777863 9779518 WBGene00009769 F46B6.4 F46B6.4 0.218452791998779 AGIWUR28824  
 N2 HS V 9779550 9783062 WBGene00009770 F46B6.5 F46B6.5 -0.0721767454278766  
 AGIWUR3043;AGIWUR9088;AGIWUR12125;AGIWUR22800;AGIWUR24084;AGIWUR24726;AGIWUR29962;AGIWUR31112;AGIWUR32190  
 N2 HS V 9783167 9786868 WBGene00009771 F46B6.6 F46B6.6 0.149994260436239 AGIWUR17683  
 N2 HS V 9786949 9789707 WBGene00009772 ztf-7 F46B6.7 -0.179793668539091  
 AGIWUR2863;AGIWUR4966;AGIWUR6956;AGIWUR7130;AGIWUR9529;AGIWUR10038;AGIWUR14760;AGIWUR15597;AGIWUR19058;AGIWUR23791;AGIWUR25977;AGIWUR29172;AGIWUR29972;AGIWUR31314;AGIWUR33929;AGIWUR35152;AGIWUR40593  
 N2 HS V 9791567 9793234 WBGene00009773 lip1-2 F46B6.8 -0.602274992395177 AGIWUR21540  
 N2 HS V 9796862 9798270 WBGene00009774 F46B6.9 F46B6.9 0.104629622921263  
 AGIWUR4462;AGIWUR18178  
 N2 HS V 9798926 9799179 WBGene00044192 F46B6.13 F46B6.13 0.373793655471687  
 AGIWUR313;AGIWUR12061;AGIWUR17444;AGIWUR18951;AGIWUR39217  
 N2 HS V 9801463 9802028 WBGene00009775 F46B6.10 F46B6.10 -0.0969048881733934  
 AGIWUR5952;AGIWUR39386

|                                                                                                            |    |   |         |         |                |         |          |                     |             |
|------------------------------------------------------------------------------------------------------------|----|---|---------|---------|----------------|---------|----------|---------------------|-------------|
| N2                                                                                                         | HS | V | 9803476 | 9804607 | WBGene00005702 | sru-39  | F46B6.11 | 0.215229935365807   |             |
| AGIWUR39929                                                                                                |    |   |         |         |                |         |          |                     |             |
| N2                                                                                                         | HS | V | 9805461 | 9806600 | WBGene00005700 | sru-37  | C50C10.1 | -0.183894184220069  |             |
| AGIWUR24732                                                                                                |    |   |         |         |                |         |          |                     |             |
| N2                                                                                                         | HS | V | 9807635 | 9809432 | WBGene00005696 | sru-33  | C50C10.8 | -0.0262673673896652 |             |
| AGIWUR25941                                                                                                |    |   |         |         |                |         |          |                     |             |
| N2                                                                                                         | HS | V | 9811461 | 9812619 | WBGene00005692 | sru-29  | C50C10.2 | 0.100664414253671   |             |
| AGIWUR7544                                                                                                 |    |   |         |         |                |         |          |                     |             |
| N2                                                                                                         | HS | V | 9813838 | 9815007 | WBGene00005693 | sru-30  | C50C10.3 | -0.0392210924426868 |             |
| AGIWUR36392                                                                                                |    |   |         |         |                |         |          |                     |             |
| N2                                                                                                         | HS | V | 9816690 | 9817862 | WBGene00005694 | sru-31  | C50C10.4 | 0.370140210158731   |             |
| AGIWUR12905                                                                                                |    |   |         |         |                |         |          |                     |             |
| N2                                                                                                         | HS | V | 9819279 | 9820210 | WBGene00005695 | sru-32  | C50C10.5 | 0.0154860397163699  |             |
| AGIWUR7644;AGIWUR12393;AGIWUR12687;AGIWUR13938;AGIWUR24740;AGIWUR24921;AGIWUR28299;AGIWUR38405;AGIWUR44059 |    |   |         |         |                |         |          |                     |             |
| N2                                                                                                         | HS | V | 9820554 | 9821824 | WBGene00006232 | str-193 | C50C10.6 | 0.196090315424362   |             |
| AGIWUR6862                                                                                                 |    |   |         |         |                |         |          |                     |             |
| N2                                                                                                         | HS | V | 9822619 | 9824249 | WBGene00006070 | str-2   | C50C10.7 | -0.155531217077209  |             |
| AGIWUR28381                                                                                                |    |   |         |         |                |         |          |                     |             |
| N2                                                                                                         | HS | V | 9827156 | 9828401 | WBGene00005697 | sru-34  | C50C10.9 | -0.0960865151709203 |             |
| AGIWUR1612;AGIWUR26289                                                                                     |    |   |         |         |                |         |          |                     |             |
| N2                                                                                                         | HS | V | 9829068 | 9830444 | WBGene00014817 | R07B5.1 | R07B5.1  | 0.0659077147626541  |             |
| AGIWUR5180;AGIWUR9324                                                                                      |    |   |         |         |                |         |          |                     |             |
| N2                                                                                                         | HS | V | 9830978 | 9831908 | WBGene00014818 | R07B5.2 | R07B5.2  | -0.0063032777742773 |             |
| AGIWUR5210;AGIWUR38357                                                                                     |    |   |         |         |                |         |          |                     |             |
| N2                                                                                                         | HS | V | 9832742 | 9834000 | WBGene00005703 | sru-40  | R07B5.3  | 0.0720133391310034  | AGIWUR10727 |
| N2                                                                                                         | HS | V | 9834463 | 9836088 | WBGene00005701 | sru-38  | R07B5.4  | -0.0916915253327444 | AGIWUR15518 |
| N2                                                                                                         | HS | V | 9837979 | 9839588 | WBGene00011084 | srsx-21 | R07B5.5  | -0.044201422535898  | AGIWUR25575 |
| N2                                                                                                         | HS | V | 9841676 | 9843179 | WBGene00005699 | sru-36  | R07B5.6  | 0.34074266972689    | AGIWUR8930  |
| N2                                                                                                         | HS | V | 9843866 | 9846161 | WBGene00005671 | sru-8   | R07B5.7  | -0.063984242649946  | AGIWUR21957 |
| N2                                                                                                         | HS | V | 9846158 | 9859963 | WBGene00045419 | lsy-12  | R07B5.9  | 0.0667014612323467  |             |
| AGIWUR7788;AGIWUR14451;AGIWUR18405;AGIWUR18991;AGIWUR21009;AGIWUR22924;AGIWUR27328;AGIWUR30577             |    |   |         |         |                |         |          |                     |             |
| N2                                                                                                         | HS | V | 9866628 | 9868411 | WBGene00011701 | srab-17 | T11A5.2  | -0.0246775571628284 |             |
| AGIWUR26966;AGIWUR29976;AGIWUR37974                                                                        |    |   |         |         |                |         |          |                     |             |
| N2                                                                                                         | HS | V | 9869887 | 9871439 | WBGene00011702 | srab-18 | T11A5.3  | -0.0193343967449522 | AGIWUR44934 |
| N2                                                                                                         | HS | V | 9874009 | 9875899 | WBGene00011703 | srab-19 | T11A5.4  | 0.0597034622070289  | AGIWUR44659 |
| N2                                                                                                         | HS | V | 9876687 | 9879504 | WBGene00043059 | srab-26 | T11A5.7  | -0.0625556833654692 |             |
| AGIWUR12889;AGIWUR32842                                                                                    |    |   |         |         |                |         |          |                     |             |
| N2                                                                                                         | HS | V | 9880114 | 9881181 | WBGene00011704 | sdz-31  | T11A5.5  | -0.250729441778359  | AGIWUR30501 |
| N2                                                                                                         | HS | V | 9882034 | 9885960 | WBGene00011705 | T11A5.6 | T11A5.6  | 0.132854013191509   |             |



AGIWUR4479;AGIWUR12299;AGIWUR17100;AGIWUR20013;AGIWUR22364  
N2 HS V 9889839 9894849 WBGene00008239 fshr-1 C50H2.1 -0.0459102058122767  
AGIWUR15231;AGIWUR21400;AGIWUR23775  
N2 HS V 9899587 9907644 WBGene00001211 eg1-47 C50H2.2 -0.0510455201051547  
AGIWUR1630;AGIWUR25213  
N2 HS V 9907632 9915103 WBGene00003173 mec-9 C50H2.3 0.278929131600745  
AGIWUR8109;AGIWUR20278  
N2 HS V 9916975 9919167 WBGene00008240 C50H2.4 C50H2.4 -0.196449237659951  
AGIWUR6240;AGIWUR13906;AGIWUR34958  
N2 HS V 9918770 9919790 WBGene00008241 C50H2.5 C50H2.5 -0.0242988984883379 AGIWUR4106  
N2 HS V 9921337 9922194 WBGene00008242 ceh-75 C50H2.6 0.200072507386729 AGIWUR44098  
N2 HS V 9923285 9923936 WBGene00008243 C50H2.7 C50H2.7 0.293028788554603 AGIWUR26387  
N2 HS V 9926544 9927884 WBGene00008246 C50H2.13 C50H2.13 -0.13708187585625  
AGIWUR37920  
N2 HS V 9927782 9930775 WBGene00011576 rmh-2 T07C12.12 0.22146896446322  
AGIWUR26741  
N2 HS V 9931019 9932368 WBGene00044204 suds-3 T07C12.14 -0.137851564569416  
AGIWUR11628;AGIWUR14798;AGIWUR38926  
N2 HS V 9935548 9937535 WBGene00005618 srj-33 T07C12.1 -0.00105894962204367  
AGIWUR9624  
N2 HS V 9937804 9940885 WBGene00014833 T07C12.4 T07C12.4 0.0296872033957989  
AGIWUR12419;AGIWUR17109;AGIWUR34432  
N2 HS V 9941691 9942999 WBGene00005619 srj-34 T07C12.5 -0.127364693581462  
AGIWUR30726;AGIWUR40882  
N2 HS V 9944393 9945895 WBGene00011570 sre-28 T07C12.6 -0.0359290588083105  
AGIWUR27875  
N2 HS V 9951233 9952182 WBGene00011571 ttr-46 T07C12.7 0.101999539223985  
AGIWUR3342;AGIWUR14268  
N2 HS V 9952699 9956883 WBGene00011572 mam-5 T07C12.8 0.305371533693296  
AGIWUR5217  
N2 HS V 9956879 9958331 WBGene00011573 anmt-3 T07C12.9 -0.461624165033312  
AGIWUR20955;AGIWUR23694;AGIWUR38361  
N2 HS V 9959997 9960337 WBGene00011574 T07C12.10 T07C12.10 0.100323086159548  
AGIWUR36362  
N2 HS V 9966404 9976226 WBGene00006777 unc-41 C27H6.1 0.0169142502207542  
AGIWUR15466;AGIWUR44126  
N2 HS V 9978791 9980802 WBGene00007784 ruvb-1 C27H6.2 -0.152065529211254  
AGIWUR21285;AGIWUR38782  
N2 HS V 9981249 9982766 WBGene00007785 tofu-1 C27H6.3 0.0927986815371771

|                                                                                |    |   |          |          |                |           |           |                      |            |
|--------------------------------------------------------------------------------|----|---|----------|----------|----------------|-----------|-----------|----------------------|------------|
| AGIWUR8036;AGIWUR34372                                                         |    |   |          |          |                |           |           |                      |            |
| N2                                                                             | HS | V | 9982868  | 9983932  | WBGene00077500 | C27H6.9   | C27H6.9   | 0.00947796879968266  |            |
| AGIWUR8798;AGIWUR30656;AGIWUR37688                                             |    |   |          |          |                |           |           |                      |            |
| N2                                                                             | HS | V | 9983924  | 9986277  | WBGene00007786 | rmd-2     | C27H6.4   | 0.00784532425223716  | AGIWUR2085 |
| N2                                                                             | HS | V | 9986330  | 9987788  | WBGene00007787 | C27H6.8   | C27H6.8   | -0.188546194854334   |            |
| AGIWUR23276;AGIWUR30527;AGIWUR31051;AGIWUR31999;AGIWUR35154;AGIWUR37913        |    |   |          |          |                |           |           |                      |            |
| N2                                                                             | HS | V | 9987916  | 9991642  | WBGene00004323 | rde-1     | K08H10.7  | -0.00982032788360954 |            |
| AGIWUR8121                                                                     |    |   |          |          |                |           |           |                      |            |
| N2                                                                             | HS | V | 9991812  | 9992792  | WBGene00010699 | trpp-6    | K08H10.9  | 0.167305918903871    |            |
| AGIWUR41394                                                                    |    |   |          |          |                |           |           |                      |            |
| N2                                                                             | HS | V | 9993732  | 9995883  | WBGene00010698 | K08H10.6  | K08H10.6  | 0.0450161178713433   |            |
| AGIWUR583                                                                      |    |   |          |          |                |           |           |                      |            |
| N2                                                                             | HS | V | 9997094  | 9998481  | WBGene00014805 | K08H10.5  | K08H10.5  | 0.178904131756083    |            |
| AGIWUR9000                                                                     |    |   |          |          |                |           |           |                      |            |
| N2                                                                             | HS | V | 10001118 | 10002766 | WBGene00077491 | K08H10.10 | K08H10.10 |                      |            |
| -0.185488561145065 AGIWUR13436;AGIWUR30142;AGIWUR34222                         |    |   |          |          |                |           |           |                      |            |
| N2                                                                             | HS | V | 10004755 | 10007482 | WBGene00010697 | uda-1     | K08H10.4  |                      |            |
| 0.118169561205265 AGIWUR13430;AGIWUR19067;AGIWUR40611                          |    |   |          |          |                |           |           |                      |            |
| N2                                                                             | HS | V | 10011871 | 10028158 | WBGene00002263 | lea-1     | K08H10.1  |                      |            |
| -0.015436063751741 AGIWUR11182;AGIWUR11697;AGIWUR17882;AGIWUR38029;AGIWUR39700 |    |   |          |          |                |           |           |                      |            |
| N2                                                                             | HS | V | 10028150 | 10031094 | WBGene00011543 | ac1-2     | T06E8.1   | -0.193977830849445   |            |
| AGIWUR9552;AGIWUR14141;AGIWUR39235                                             |    |   |          |          |                |           |           |                      |            |
| N2                                                                             | HS | V | 10035746 | 10036413 | WBGene00011544 | T06E8.2   | T06E8.2   | -0.0789423818822304  |            |
| AGIWUR36746                                                                    |    |   |          |          |                |           |           |                      |            |
| N2                                                                             | HS | V | 10037340 | 10048726 | WBGene00010177 | F57A8.1   | F57A8.1   | -0.0426939519518976  |            |
| AGIWUR9377;AGIWUR19620;AGIWUR26218;AGIWUR41504                                 |    |   |          |          |                |           |           |                      |            |
| N2                                                                             | HS | V | 10050047 | 10054913 | WBGene00010178 | yif-1     | F57A8.2   | 0.159384652122923    |            |
| AGIWUR4863;AGIWUR17667                                                         |    |   |          |          |                |           |           |                      |            |
| N2                                                                             | HS | V | 10064503 | 10064939 | WBGene00010183 | fipr-13   | F57A8.8   | 0.12706097768935     |            |
| AGIWUR19773                                                                    |    |   |          |          |                |           |           |                      |            |
| N2                                                                             | HS | V | 10067087 | 10068818 | WBGene00010179 | F57A8.4   | F57A8.4   | -0.0087727688747723  |            |
| AGIWUR12584                                                                    |    |   |          |          |                |           |           |                      |            |
| N2                                                                             | HS | V | 10069369 | 10070641 | WBGene00010180 | nhr-192   | F57A8.5   | -0.258892769109012   |            |
| AGIWUR13885                                                                    |    |   |          |          |                |           |           |                      |            |
| N2                                                                             | HS | V | 10071945 | 10073893 | WBGene00010181 | F57A8.6   | F57A8.6   | 0.161544208977299    |            |
| AGIWUR33295;AGIWUR38993;AGIWUR44089                                            |    |   |          |          |                |           |           |                      |            |
| N2                                                                             | HS | V | 10075749 | 10077804 | WBGene00010182 | F57A8.7   | F57A8.7   | -0.0078047803233563  |            |
| AGIWUR23052                                                                    |    |   |          |          |                |           |           |                      |            |
| N2                                                                             | HS | V | 10077905 | 10078344 | WBGene00011001 | R04B5.1   | R04B5.1   | 0.351297312686817    |            |



|                                                                              |    |   |          |          |                |          |          |                     |
|------------------------------------------------------------------------------|----|---|----------|----------|----------------|----------|----------|---------------------|
| N2                                                                           | HS | V | 10130405 | 10134148 | WBGene00007428 | wdr-20   | C08B6.7  | 0.01852439262223    |
| AGIWUR4283;AGIWUR10640;AGIWUR12917;AGIWUR19139;AGIWUR20882;AGIWUR24602       |    |   |          |          |                |          |          |                     |
| N2                                                                           | HS | V | 10134643 | 10143081 | WBGene00007429 | C08B6.8  | C08B6.8  | 0.157782064670488   |
| AGIWUR20990;AGIWUR33580                                                      |    |   |          |          |                |          |          |                     |
| N2                                                                           | HS | V | 10143936 | 10144192 | WBGene00077449 | C08B6.15 | C08B6.15 |                     |
| -0.0179203133246002 AGIWUR717;AGIWUR3577;AGIWUR20236;AGIWUR38212;AGIWUR43073 |    |   |          |          |                |          |          |                     |
| N2                                                                           | HS | V | 10144408 | 10145251 | WBGene00008253 | C51E3.8  | C51E3.8  | -0.189115280919356  |
| AGIWUR30989                                                                  |    |   |          |          |                |          |          |                     |
| N2                                                                           | HS | V | 10145905 | 10148977 | WBGene00008254 | C51E3.9  | C51E3.9  | 0.184332140829287   |
| AGIWUR22043                                                                  |    |   |          |          |                |          |          |                     |
| N2                                                                           | HS | V | 10150066 | 10152159 | WBGene00008248 | srsx-27  | C51E3.2  | -0.171268417332369  |
| AGIWUR23884;AGIWUR25522                                                      |    |   |          |          |                |          |          |                     |
| N2                                                                           | HS | V | 10152583 | 10154756 | WBGene00008249 | srsx-28  | C51E3.3  | 0.045774074392396   |
| AGIWUR10539;AGIWUR19267;AGIWUR25349                                          |    |   |          |          |                |          |          |                     |
| N2                                                                           | HS | V | 10154998 | 10156381 | WBGene00008250 | srsx-29  | C51E3.4  | -0.133352314248981  |
| AGIWUR5433                                                                   |    |   |          |          |                |          |          |                     |
| N2                                                                           | HS | V | 10158833 | 10160297 | WBGene00008251 | srsx-30  | C51E3.5  | 0.319602366052971   |
| AGIWUR13139;AGIWUR18898                                                      |    |   |          |          |                |          |          |                     |
| N2                                                                           | HS | V | 10160439 | 10161161 | WBGene00008255 | C51E3.10 | C51E3.10 |                     |
| -0.108664131160719 AGIWUR5502                                                |    |   |          |          |                |          |          |                     |
| N2                                                                           | HS | V | 10164135 | 10166463 | WBGene00008252 | C51E3.6  | C51E3.6  | 0.249315971370335   |
| AGIWUR15393;AGIWUR33155;AGIWUR38537                                          |    |   |          |          |                |          |          |                     |
| N2                                                                           | HS | V | 10169197 | 10173753 | WBGene00001172 | egl-3    | C51E3.7  | -0.373953206967598  |
| AGIWUR1410;AGIWUR10673;AGIWUR10823;AGIWUR32937                               |    |   |          |          |                |          |          |                     |
| N2                                                                           | HS | V | 10179535 | 10183154 | WBGene00000840 | cul-5    | ZK856.1  | -0.41386149499708   |
| AGIWUR10749                                                                  |    |   |          |          |                |          |          |                     |
| N2                                                                           | HS | V | 10183284 | 10184446 | WBGene00014105 | ZK856.4  | ZK856.4  | 0.0945483921632828  |
| AGIWUR1992                                                                   |    |   |          |          |                |          |          |                     |
| N2                                                                           | HS | V | 10184689 | 10186007 | WBGene00194912 | ZK856.18 | ZK856.18 |                     |
| 0.0352416278605645 AGIWUR11214                                               |    |   |          |          |                |          |          |                     |
| N2                                                                           | HS | V | 10198704 | 10199942 | WBGene00014107 | ZK856.6  | ZK856.6  | -0.0486053152416712 |
| AGIWUR24559                                                                  |    |   |          |          |                |          |          |                     |
| N2                                                                           | HS | V | 10201856 | 10202610 | WBGene00014108 | ZK856.7  | ZK856.7  | 0.290910516733391   |
| AGIWUR4691;AGIWUR21535;AGIWUR29202;AGIWUR31126                               |    |   |          |          |                |          |          |                     |
| N2                                                                           | HS | V | 10202538 | 10203485 | WBGene00014109 | chpf-1   | ZK856.8  | -0.0455640130543911 |
| AGIWUR8017;AGIWUR29777;AGIWUR42156;AGIWUR44854                               |    |   |          |          |                |          |          |                     |
| N2                                                                           | HS | V | 10203772 | 10205587 | WBGene00014112 | ZK856.11 | ZK856.11 |                     |
| -0.0423471754699616 AGIWUR11220                                              |    |   |          |          |                |          |          |                     |
| N2                                                                           | HS | V | 10205683 | 10206602 | WBGene00014111 | rpc-25   | ZK856.10 |                     |

|                                                                                                                      |                                               |          |                |          |          |                     |
|----------------------------------------------------------------------------------------------------------------------|-----------------------------------------------|----------|----------------|----------|----------|---------------------|
| 0.148007090583622                                                                                                    | AGIWUR35370                                   |          |                |          |          |                     |
| N2 HS V                                                                                                              | 10206619                                      | 10210344 | WBGene00014114 | tftc-3   | ZK856.13 |                     |
| 0.223376408391651                                                                                                    | AGIWUR11722                                   |          |                |          |          |                     |
| N2 HS V                                                                                                              | 10210444                                      | 10212127 | WBGene00006489 | zhit-3   | ZK856.9  | 0.0640284649835952  |
| AGIWUR41962                                                                                                          |                                               |          |                |          |          |                     |
| N2 HS V                                                                                                              | 10212929                                      | 10216305 | WBGene00014113 | hpo-40   | ZK856.12 |                     |
| -0.158684419893916                                                                                                   | AGIWUR20340;AGIWUR26577;AGIWUR37582           |          |                |          |          |                     |
| N2 HS V                                                                                                              | 10217079                                      | 10219022 | WBGene00044020 | ZK856.14 |          | ZK856.14            |
| -0.0628598194736085                                                                                                  | AGIWUR1092;AGIWUR14205;AGIWUR31390            |          |                |          |          |                     |
| N2 HS V                                                                                                              | 10219455                                      | 10220470 | WBGene00007540 | C12D8.13 |          | C12D8.13            |
| 0.0406060944594557                                                                                                   | AGIWUR15994                                   |          |                |          |          |                     |
| N2 HS V                                                                                                              | 10223513                                      | 10225760 | WBGene00007536 | daf-36   | C12D8.5  | 0.0859500057278897  |
| AGIWUR24683                                                                                                          |                                               |          |                |          |          |                     |
| N2 HS V                                                                                                              | 10226885                                      | 10227434 | WBGene00007535 | ttr-19   | C12D8.4  | -0.0730074813205368 |
| AGIWUR25644                                                                                                          |                                               |          |                |          |          |                     |
| N2 HS V                                                                                                              | 10228043                                      | 10228460 | WBGene00007541 | fipr-4   | C12D8.14 |                     |
| 0.541396299634588                                                                                                    | AGIWUR16878                                   |          |                |          |          |                     |
| N2 HS V                                                                                                              | 10228641                                      | 10229322 | WBGene00007542 | C12D8.15 |          | C12D8.15            |
| 0.0966011765215811                                                                                                   | AGIWUR24231                                   |          |                |          |          |                     |
| N2 HS V                                                                                                              | 10231821                                      | 10233430 | WBGene00006226 | str-182  | C12D8.12 |                     |
| -0.0141882648957656                                                                                                  | AGIWUR41878                                   |          |                |          |          |                     |
| N2 HS V                                                                                                              | 10236160                                      | 10238902 | WBGene00007534 | C12D8.1  | C12D8.1  | -0.0807715537955462 |
| AGIWUR1056;AGIWUR7083;AGIWUR9511;AGIWUR14024;AGIWUR18462;AGIWUR22716;AGIWUR25429;AGIWUR27421;AGIWUR35675;AGIWUR39350 |                                               |          |                |          |          |                     |
| N2 HS V                                                                                                              | 10240573                                      | 10241188 | WBGene00195157 | C12D8.21 |          | C12D8.21            |
| -0.0418009018994772                                                                                                  | AGIWUR15826                                   |          |                |          |          |                     |
| N2 HS V                                                                                                              | 10241784                                      | 10242718 | WBGene00000721 | col-148  | C12D8.8  | 0.174136905839354   |
| AGIWUR13025                                                                                                          |                                               |          |                |          |          |                     |
| N2 HS V                                                                                                              | 10242787                                      | 10243205 | WBGene00007538 | C12D8.9  | C12D8.9  | 0.18650847702609    |
| AGIWUR8119                                                                                                           |                                               |          |                |          |          |                     |
| N2 HS V                                                                                                              | 10248907                                      | 10252895 | WBGene00000102 | akt-1    | C12D8.10 |                     |
| -0.212463074718589                                                                                                   | AGIWUR3065;AGIWUR5113;AGIWUR14046;AGIWUR43925 |          |                |          |          |                     |
| N2 HS V                                                                                                              | 10252821                                      | 10255055 | WBGene00004405 | rop-1    | C12D8.11 |                     |
| -0.0235725552621782                                                                                                  | AGIWUR2067;AGIWUR16535;AGIWUR21656            |          |                |          |          |                     |
| N2 HS V                                                                                                              | 10256360                                      | 10258654 | WBGene00012494 | nhr-232  | Y22F5A.1 |                     |
| 0.283744657650647                                                                                                    | AGIWUR2700                                    |          |                |          |          |                     |
| N2 HS V                                                                                                              | 10258661                                      | 10260554 | WBGene00005530 | sri-18   | Y22F5A.2 |                     |
| 0.134384700338985                                                                                                    | AGIWUR12538                                   |          |                |          |          |                     |
| N2 HS V                                                                                                              | 10261131                                      | 10270314 | WBGene00004364 | ric-4    | Y22F5A.3 |                     |

|                     |                                                                         |
|---------------------|-------------------------------------------------------------------------|
| 0.124860753705407   | AGIWUR13824;AGIWUR14867;AGIWUR17495;AGIWUR21980                         |
| N2 HS V             | 10277827 10279127 WBGene00003090 lys-1 Y22F5A.4                         |
| 0.148893641444244   | AGIWUR13848;AGIWUR17373;AGIWUR20455;AGIWUR29828;AGIWUR30263;AGIWUR33540 |
| N2 HS V             | 10280310 10281474 WBGene00003091 lys-2 Y22F5A.5                         |
| 0.14519150377831    | AGIWUR37008                                                             |
| N2 HS V             | 10282204 10283544 WBGene00003092 lys-3 Y22F5A.6                         |
| 0.808315743761299   | AGIWUR44748                                                             |
| N2 HS V             | 10287564 10289272 WBGene00007096 B0024.3 B0024.3 0.0604246220902347     |
| AGIWUR8921          |                                                                         |
| N2 HS V             | 10289721 10291710 WBGene00007104 B0024.15 B0024.15                      |
| 0.172751229280347   | AGIWUR36356                                                             |
| N2 HS V             | 10291697 10292869 WBGene00000722 col-149 B0024.1 0.194527087792222      |
| AGIWUR37769         |                                                                         |
| N2 HS V             | 10293563 10294623 WBGene00000723 col-150 B0024.2 0.0558479510927405     |
| AGIWUR37941         |                                                                         |
| N2 HS V             | 10297399 10298865 WBGene00007097 B0024.4 B0024.4 0.413162894803072      |
| AGIWUR44276         |                                                                         |
| N2 HS V             | 10299473 10307354 WBGene00000491 che-12 B0024.8 0.0786356447770675      |
| AGIWUR3900          |                                                                         |
| N2 HS V             | 10308291 10314053 WBGene00001533 gcy-6 B0024.6 -0.135667015878539       |
| AGIWUR18920         |                                                                         |
| N2 HS V             | 10314641 10315304 WBGene00007099 trx-2 B0024.9 0.247988872929895        |
| AGIWUR37553         |                                                                         |
| N2 HS V             | 10315245 10317394 WBGene00007100 B0024.10 B0024.10                      |
| 0.0419361831948919  | AGIWUR4937                                                              |
| N2 HS V             | 10317490 10319534 WBGene00007101 B0024.11 B0024.11                      |
| 0.0829453430021161  | AGIWUR40598                                                             |
| N2 HS V             | 10319535 10320158 WBGene00001646 gna-1 B0024.12                         |
| 0.00308360477358427 | AGIWUR36410                                                             |
| N2 HS V             | 10320715 10322304 WBGene00007102 B0024.13 B0024.13                      |
| -0.126908644926157  | AGIWUR19097;AGIWUR26092;AGIWUR29028;AGIWUR32735                         |
| N2 HS V             | 10322288 10332112 WBGene00007103 crm-1 B0024.14                         |
| 0.173451097288607   | AGIWUR4802;AGIWUR12222;AGIWUR14025;AGIWUR21491;AGIWUR22518;AGIWUR40898  |
| N2 HS V             | 10335443 10338355 WBGene00000200 arx-2 K07C5.1 -0.203156466038291       |
| AGIWUR20870         |                                                                         |
| N2 HS V             | 10339500 10340971 WBGene00010625 K07C5.2 K07C5.2 0.191169135930991      |
| AGIWUR5598          |                                                                         |
| N2 HS V             | 10343032 10345489 WBGene00010626 K07C5.3 K07C5.3 0.154987920829083      |
| AGIWUR28656         |                                                                         |

|                                                                                         |    |   |          |          |                |          |         |                     |
|-----------------------------------------------------------------------------------------|----|---|----------|----------|----------------|----------|---------|---------------------|
| N2                                                                                      | HS | V | 10346662 | 10350154 | WBGene00010632 | K07C5.9  | K07C5.9 | 0.00254418344807306 |
| AGIWUR3318;AGIWUR7900;AGIWUR14780;AGIWUR17856;AGIWUR27080                               |    |   |          |          |                |          |         |                     |
| N2                                                                                      | HS | V | 10350471 | 10352978 | WBGene00010627 | K07C5.4  | K07C5.4 | -0.251015780188116  |
| AGIWUR11758;AGIWUR13751;AGIWUR31089;AGIWUR36058                                         |    |   |          |          |                |          |         |                     |
| N2                                                                                      | HS | V | 10353584 | 10355837 | WBGene00010629 | K07C5.6  | K07C5.6 | 0.114765338169128   |
| AGIWUR35576                                                                             |    |   |          |          |                |          |         |                     |
| N2                                                                                      | HS | V | 10356285 | 10357903 | WBGene00010628 | ceeh-2   | K07C5.5 | 0.0658372605190198  |
| AGIWUR2367;AGIWUR11689;AGIWUR43744                                                      |    |   |          |          |                |          |         |                     |
| N2                                                                                      | HS | V | 10358544 | 10361430 | WBGene00010630 | ttl1-15  | K07C5.7 | 0.423606516124185   |
| AGIWUR2920                                                                              |    |   |          |          |                |          |         |                     |
| N2                                                                                      | HS | V | 10362261 | 10366014 | WBGene00010631 | cash-1   | K07C5.8 | -0.0963135529869046 |
| AGIWUR7634;AGIWUR18426;AGIWUR20669                                                      |    |   |          |          |                |          |         |                     |
| N2                                                                                      | HS | V | 10368556 | 10369868 | WBGene00005532 | sri-20   | AC3.1   | -0.0354361687155089 |
| AGIWUR10661                                                                             |    |   |          |          |                |          |         |                     |
| N2                                                                                      | HS | V | 10372325 | 10374245 | WBGene00007070 | ugt-49   | AC3.2   | 0.209847865176961   |
| AGIWUR29691                                                                             |    |   |          |          |                |          |         |                     |
| N2                                                                                      | HS | V | 10374851 | 10376884 | WBGene00044022 | AC3.9    | AC3.9   | -0.207915653263478  |
| AGIWUR28600                                                                             |    |   |          |          |                |          |         |                     |
| N2                                                                                      | HS | V | 10376985 | 10377317 | WBGene00077502 | AC3.11   | AC3.11  | -0.0921120651765142 |
| AGIWUR6781;AGIWUR26582;AGIWUR29815;AGIWUR32777;AGIWUR40707                              |    |   |          |          |                |          |         |                     |
| N2                                                                                      | HS | V | 10378982 | 10379364 | WBGene00077503 | AC3.12   | AC3.12  | 0.0603409345873587  |
| AGIWUR3223;AGIWUR15051;AGIWUR27034;AGIWUR43064;AGIWUR43093                              |    |   |          |          |                |          |         |                     |
| N2                                                                                      | HS | V | 10384157 | 10385711 | WBGene00004964 | spe-10   | AC3.10  | 0.247200218585894   |
| AGIWUR21504                                                                             |    |   |          |          |                |          |         |                     |
| N2                                                                                      | HS | V | 10388402 | 10393504 | WBGene00007071 | AC3.5    | AC3.5   | 0.0156800987036245  |
| AGIWUR3186;AGIWUR10575;AGIWUR24403;AGIWUR35180                                          |    |   |          |          |                |          |         |                     |
| N2                                                                                      | HS | V | 10393531 | 10395232 | WBGene00000724 | col-151  | AC3.6   | 0.0754001605015153  |
| AGIWUR37545                                                                             |    |   |          |          |                |          |         |                     |
| N2                                                                                      | HS | V | 10395663 | 10397817 | WBGene00007072 | ugt-1    | AC3.7   | 0.224256293869548   |
| AGIWUR6758                                                                              |    |   |          |          |                |          |         |                     |
| N2                                                                                      | HS | V | 10398717 | 10401307 | WBGene00007073 | ugt-2    | AC3.8   | 0.40338531607318    |
| AGIWUR24429                                                                             |    |   |          |          |                |          |         |                     |
| N2                                                                                      | HS | V | 10401447 | 10402904 | WBGene00008875 | F15H10.8 |         | F15H10.8            |
| 0.0841456702677097 AGIWUR3582;AGIWUR4498;AGIWUR5126;AGIWUR15892;AGIWUR20758;AGIWUR39123 |    |   |          |          |                |          |         |                     |
| N2                                                                                      | HS | V | 10403184 | 10406424 | WBGene00008874 | F15H10.7 |         | F15H10.7            |
| 0.206977641541734 AGIWUR6174                                                            |    |   |          |          |                |          |         |                     |
| N2                                                                                      | HS | V | 10410240 | 10412149 | WBGene00008873 | F15H10.6 |         | F15H10.6            |
| -0.110731046952136 AGIWUR40937                                                          |    |   |          |          |                |          |         |                     |
| N2                                                                                      | HS | V | 10413332 | 10414692 | WBGene00044013 | F15H10.9 |         | F15H10.9            |

|                                                                                                                                    |                                                                         |          |                |           |                           |
|------------------------------------------------------------------------------------------------------------------------------------|-------------------------------------------------------------------------|----------|----------------|-----------|---------------------------|
| 0.0992113929693907                                                                                                                 | AGIWUR2037                                                              |          |                |           |                           |
| N2 HS V                                                                                                                            | 10415734                                                                | 10417025 | WBGene00044014 | F15H10.10 | F15H10.10                 |
| 0.794815887273994                                                                                                                  | AGIWUR29823;AGIWUR44691                                                 |          |                |           |                           |
| N2 HS V                                                                                                                            | 10417617                                                                | 10419053 | WBGene00008872 | F15H10.5  | F15H10.5                  |
| 0.304093439747661                                                                                                                  | AGIWUR4994;AGIWUR14497                                                  |          |                |           |                           |
| N2 HS V                                                                                                                            | 10423907                                                                | 10425092 | WBGene00000601 | col-12    | F15H10.1                  |
| 0.0682107180155604                                                                                                                 | AGIWUR4286                                                              |          |                |           |                           |
| N2 HS V                                                                                                                            | 10425362                                                                | 10426399 | WBGene00000144 | apc-10    | F15H10.3                  |
| 0.00674429388147058                                                                                                                | AGIWUR26869;AGIWUR44725                                                 |          |                |           |                           |
| N2 HS V                                                                                                                            | 10426633                                                                | 10428731 | WBGene00008871 | tag-314   | F15H10.4                  |
| 0.0559807808050401                                                                                                                 | AGIWUR40256                                                             |          |                |           |                           |
| N2 HS V                                                                                                                            | 10428726                                                                | 10433604 | WBGene00012529 | Y32F6A.4  | Y32F6A.4                  |
| -0.105145075601143                                                                                                                 | AGIWUR11049;AGIWUR15338;AGIWUR22164;AGIWUR27644;AGIWUR28480;AGIWUR32635 |          |                |           |                           |
| N2 HS V                                                                                                                            | 10436912                                                                | 10441149 | WBGene00012527 | set-22    | Y32F6A.1                  |
| -0.037137134659277                                                                                                                 | AGIWUR21850                                                             |          |                |           |                           |
| N2 HS V                                                                                                                            | 10441979                                                                | 10446459 | WBGene00012528 | pap-1     | Y32F6A.3                  |
| -0.027637408455659                                                                                                                 | AGIWUR12613;AGIWUR17884                                                 |          |                |           |                           |
| N2 HS V                                                                                                                            | 10446534                                                                | 10453781 | WBGene00012530 | Y32F6A.5  | Y32F6A.5                  |
| -0.0360435695127546                                                                                                                | AGIWUR31672                                                             |          |                |           |                           |
| N2 HS V                                                                                                                            | 10453748                                                                | 10457347 | WBGene00009058 | F22E12.1  | F22E12.1                  |
| 0.0190663369453432                                                                                                                 | AGIWUR3370                                                              |          |                |           |                           |
| N2 HS V                                                                                                                            | 10459188                                                                | 10463364 | WBGene00009060 | F22E12.3  | F22E12.3                  |
| 0.383432093584469                                                                                                                  | AGIWUR16080                                                             |          |                |           |                           |
| N2 HS V                                                                                                                            | 10462282                                                                | 10464660 | WBGene00009059 | chw-1     | F22E12.2                  |
| 0.173228903355071                                                                                                                  | AGIWUR32911                                                             |          |                |           |                           |
| N2 HS V                                                                                                                            | 10468411                                                                | 10476952 | WBGene00001178 | egl-9     | F22E12.4                  |
| -0.203859806253329                                                                                                                 |                                                                         |          |                |           |                           |
| AGIWUR8432;AGIWUR12790;AGIWUR13943;AGIWUR16371;AGIWUR18187;AGIWUR21119;AGIWUR21574;AGIWUR31407;AGIWUR33133;AGIWUR36086;AGIWUR36899 |                                                                         |          |                |           |                           |
| N2 HS V                                                                                                                            | 10478566                                                                | 10480963 | WBGene00012532 | crp-1     | Y32F6B.3                  |
| 0.310184759691266                                                                                                                  | AGIWUR5221                                                              |          |                |           |                           |
| N2 HS V                                                                                                                            | 10480949                                                                | 10484740 | WBGene00012531 | Y32F6B.1  | Y32F6B.1                  |
| 0.253002436220857                                                                                                                  | AGIWUR41958                                                             |          |                |           |                           |
| N2 HS V                                                                                                                            | 10486473                                                                | 10490048 | WBGene00003570 | ncx-5     | Y32F6B.2                  |
| -0.0141831876886753                                                                                                                | AGIWUR33541                                                             |          |                |           |                           |
| N2 HS V                                                                                                                            | 10491743                                                                | 10493268 | WBGene00000173 | aqp-5     | C35A5.1 0.144496613674556 |
| AGIWUR18028                                                                                                                        |                                                                         |          |                |           |                           |
| N2 HS V                                                                                                                            | 10493406                                                                | 10496477 | WBGene00007946 | ugt-33    | C35A5.2 0.106927748867404 |
| AGIWUR25829                                                                                                                        |                                                                         |          |                |           |                           |



|                                                                |    |   |          |          |                |          |          |                     |
|----------------------------------------------------------------|----|---|----------|----------|----------------|----------|----------|---------------------|
| N2                                                             | HS | V | 10497059 | 10499324 | WBGene00007948 | C35A5.4  | C35A5.4  | 0.175953089171609   |
| AGIWUR30625                                                    |    |   |          |          |                |          |          |                     |
| N2                                                             | HS | V | 10499355 | 10501395 | WBGene00007947 | C35A5.3  | C35A5.3  | 0.00527916716844867 |
| AGIWUR12046;AGIWUR35018;AGIWUR44995                            |    |   |          |          |                |          |          |                     |
| N2                                                             | HS | V | 10502116 | 10503111 | WBGene00044024 | C35A5.11 | C35A5.11 |                     |
| 0.271090727516879 AGIWUR730;AGIWUR7265;AGIWUR11026;AGIWUR30955 |    |   |          |          |                |          |          |                     |
| N2                                                             | HS | V | 10504193 | 10505401 | WBGene00044016 | C35A5.10 | C35A5.10 |                     |
| 0.282283623936748 AGIWUR22038;AGIWUR24479                      |    |   |          |          |                |          |          |                     |
| N2                                                             | HS | V | 10505850 | 10507829 | WBGene00007949 | C35A5.5  | C35A5.5  | 0.242832511363763   |
| AGIWUR30308                                                    |    |   |          |          |                |          |          |                     |
| N2                                                             | HS | V | 10509055 | 10510451 | WBGene00007950 | C35A5.6  | C35A5.6  | 0.339247474846516   |
| AGIWUR13574                                                    |    |   |          |          |                |          |          |                     |
| N2                                                             | HS | V | 10510684 | 10514371 | WBGene00007951 | dmsr-8   | C35A5.7  | 0.130026320942326   |
| AGIWUR14579;AGIWUR39136;AGIWUR44611                            |    |   |          |          |                |          |          |                     |
| N2                                                             | HS | V | 10521992 | 10525908 | WBGene00007952 | C35A5.8  | C35A5.8  | -0.0971869230898754 |
| AGIWUR6377;AGIWUR17776;AGIWUR23357;AGIWUR34779;AGIWUR36167     |    |   |          |          |                |          |          |                     |
| N2                                                             | HS | V | 10526298 | 10528396 | WBGene00007953 | hda-11   | C35A5.9  | 0.189830454321557   |
| AGIWUR13484;AGIWUR23917;AGIWUR33306                            |    |   |          |          |                |          |          |                     |
| N2                                                             | HS | V | 10528754 | 10530568 | WBGene00009108 | F25D1.3  | F25D1.3  | 0.0219115422361842  |
| AGIWUR27819                                                    |    |   |          |          |                |          |          |                     |
| N2                                                             | HS | V | 10530641 | 10532848 | WBGene00009107 | F25D1.2  | F25D1.2  | 0.170076776260656   |
| AGIWUR14084                                                    |    |   |          |          |                |          |          |                     |
| N2                                                             | HS | V | 10532894 | 10536388 | WBGene00006460 | ppm-1    | F25D1.1  | 0.0500464919376906  |
| AGIWUR38079                                                    |    |   |          |          |                |          |          |                     |
| N2                                                             | HS | V | 10538493 | 10538788 | WBGene00077506 | F25D1.7  | F25D1.7  | -0.107221107902516  |
| AGIWUR3338;AGIWUR15506;AGIWUR20953;AGIWUR28164;AGIWUR28456     |    |   |          |          |                |          |          |                     |
| N2                                                             | HS | V | 10540324 | 10545742 | WBGene00009109 | degt-1   | F25D1.4  | 0.144330200112778   |
| AGIWUR27927                                                    |    |   |          |          |                |          |          |                     |
| N2                                                             | HS | V | 10545741 | 10546799 | WBGene00009110 | F25D1.5  | F25D1.5  | 0.0835014457170598  |
| AGIWUR36901                                                    |    |   |          |          |                |          |          |                     |
| N2                                                             | HS | V | 10547598 | 10549081 | WBGene00005112 | srd-34   | F32G8.1  | 0.0493339713113015  |
| AGIWUR11030                                                    |    |   |          |          |                |          |          |                     |
| N2                                                             | HS | V | 10550017 | 10554493 | WBGene00009338 | F32G8.2  | F32G8.2  |                     |
| -0.00834464408005431 AGIWUR24079;AGIWUR31469;AGIWUR33558       |    |   |          |          |                |          |          |                     |
| N2                                                             | HS | V | 10554616 | 10555238 | WBGene00009339 | F32G8.3  | F32G8.3  | 0.0380968262245638  |
| AGIWUR21055                                                    |    |   |          |          |                |          |          |                     |
| N2                                                             | HS | V | 10557976 | 10560793 | WBGene00009340 | best-14  | F32G8.4  | 0.0337715554692655  |
| AGIWUR10997;AGIWUR24165;AGIWUR30762;AGIWUR38864                |    |   |          |          |                |          |          |                     |
| N2                                                             | HS | V | 10560921 | 10562150 | WBGene00000725 | col-152  | F32G8.5  | 0.205324677896419   |

|                                                                         |    |   |                         |          |                |          |          |                     |
|-------------------------------------------------------------------------|----|---|-------------------------|----------|----------------|----------|----------|---------------------|
| AGIWUR6215                                                              |    |   |                         |          |                |          |          |                     |
| N2                                                                      | HS | V | 10564880                | 10566445 | WBGene00000298 | cat-4    | F32G8.6  | -0.0200676624373557 |
| AGIWUR23788                                                             |    |   |                         |          |                |          |          |                     |
| N2                                                                      | HS | V | 10566365                | 10576419 | WBGene00006934 | vps-54   | T21C9.2  | -0.0708258168324236 |
| AGIWUR6454;AGIWUR10348;AGIWUR12955;AGIWUR14416;AGIWUR17131;AGIWUR25888  |    |   |                         |          |                |          |          |                     |
| N2                                                                      | HS | V | 10576513                | 10578322 | WBGene00011890 | mics-1   | T21C9.1  | -0.319422745918603  |
| AGIWUR12337                                                             |    |   |                         |          |                |          |          |                     |
| N2                                                                      | HS | V | 10578428                | 10579141 | WBGene00011892 | T21C9.4  | T21C9.4  | -0.124733660658539  |
| AGIWUR13694                                                             |    |   |                         |          |                |          |          |                     |
| N2                                                                      | HS | V | 10579309                | 10580693 | WBGene00003065 | lpd-9    | T21C9.5  | 0.0670007077510526  |
| AGIWUR30951                                                             |    |   |                         |          |                |          |          |                     |
| N2                                                                      | HS | V | 10581887                | 10587164 | WBGene00011893 | T21C9.6  | T21C9.6  | -0.0863724928392706 |
| AGIWUR12083                                                             |    |   |                         |          |                |          |          |                     |
| N2                                                                      | HS | V | 10587167                | 10588794 | WBGene00005189 | srg-32   | T21C9.7  | 0.0404058623925394  |
| AGIWUR6145                                                              |    |   |                         |          |                |          |          |                     |
| N2                                                                      | HS | V | 10590548                | 10592653 | WBGene00011895 | T21C9.9  | T21C9.9  | 0.280216732462613   |
| AGIWUR34880                                                             |    |   |                         |          |                |          |          |                     |
| N2                                                                      | HS | V | 10593936                | 10594906 | WBGene00011896 | T21C9.11 |          | T21C9.11            |
| -0.183510877375506                                                      |    |   | AGIWUR32886             |          |                |          |          |                     |
| N2                                                                      | HS | V | 10597266                | 10598666 | WBGene00011898 | T21C9.13 |          | T21C9.13            |
| -0.104150068547936                                                      |    |   | AGIWUR14188             |          |                |          |          |                     |
| N2                                                                      | HS | V | 10599105                | 10602147 | WBGene00011897 | scpl-4   | T21C9.12 |                     |
| -0.347268697573067                                                      |    |   | AGIWUR10563             |          |                |          |          |                     |
| N2                                                                      | HS | V | 10602458                | 10605568 | WBGene00010418 | H27A22.1 |          | H27A22.1            |
| -0.157273769643531                                                      |    |   | AGIWUR33284             |          |                |          |          |                     |
| N2                                                                      | HS | V | 10612926                | 10615511 | WBGene00010375 | H09F14.1 |          | H09F14.1            |
| 0.0638851121067674                                                      |    |   | AGIWUR24872             |          |                |          |          |                     |
| N2                                                                      | HS | V | 10633058                | 10635411 | WBGene00003114 | mab-23   | C32C4.5  | 0.128239709776351   |
| AGIWUR21001;AGIWUR26989;AGIWUR29956;AGIWUR34519;AGIWUR44313;AGIWUR44808 |    |   |                         |          |                |          |          |                     |
| N2                                                                      | HS | V | 10636022                | 10645135 | WBGene00007862 | C32C4.1  | C32C4.1  | 0.113036770055907   |
| AGIWUR36603                                                             |    |   |                         |          |                |          |          |                     |
| N2                                                                      | HS | V | 10645020                | 10646963 | WBGene00007863 | C32C4.3  | C32C4.3  | 0.0959008253330351  |
| AGIWUR5767;AGIWUR27045                                                  |    |   |                         |          |                |          |          |                     |
| N2                                                                      | HS | V | 10648446                | 10651952 | WBGene00000174 | aqp-6    | C32C4.2  | 0.0490064786643387  |
| AGIWUR9151                                                              |    |   |                         |          |                |          |          |                     |
| N2                                                                      | HS | V | 10651995                | 10654265 | WBGene00044286 | ugt-35   | C32C4.7  | 0.145583225102979   |
| AGIWUR29194                                                             |    |   |                         |          |                |          |          |                     |
| N2                                                                      | HS | V | 10654417                | 10656976 | WBGene00009255 | ugt-34   | F29F11.2 |                     |
| 0.00649042150632528                                                     |    |   | AGIWUR34667;AGIWUR40200 |          |                |          |          |                     |

|                                                            |    |   |                                                                         |          |                |          |          |                     |
|------------------------------------------------------------|----|---|-------------------------------------------------------------------------|----------|----------------|----------|----------|---------------------|
| N2                                                         | HS | V | 10658194                                                                | 10659658 | WBGene00009256 | tut-2    | F29F11.3 |                     |
| -0.100412417582152                                         |    |   | AGIWUR33697                                                             |          |                |          |          |                     |
| N2                                                         | HS | V | 10659635                                                                | 10661467 | WBGene00005022 | sqv-4    | F29F11.1 |                     |
| 0.104536271298918                                          |    |   | AGIWUR17812;AGIWUR20431;AGIWUR22370;AGIWUR37842;AGIWUR39068;AGIWUR41179 |          |                |          |          |                     |
| N2                                                         | HS | V | 10667586                                                                | 10670860 | WBGene00006667 | twk-12   | F29F11.4 |                     |
| 0.355736451698323                                          |    |   | AGIWUR24447                                                             |          |                |          |          |                     |
| N2                                                         | HS | V | 10672459                                                                | 10675644 | WBGene00000445 | ceh-22   | F29F11.5 |                     |
| -0.0353881750346119                                        |    |   | AGIWUR12965;AGIWUR20993;AGIWUR30917                                     |          |                |          |          |                     |
| N2                                                         | HS | V | 10682422                                                                | 10686537 | WBGene00001747 | gsp-1    | F29F11.6 |                     |
| 0.091196585621951                                          |    |   | AGIWUR17355                                                             |          |                |          |          |                     |
| N2                                                         | HS | V | 10702549                                                                | 10704906 | WBGene00004083 | pph-1    | C05A2.1  | -0.0487486933790056 |
| AGIWUR9032;AGIWUR15633;AGIWUR16147;AGIWUR22418;AGIWUR24808 |    |   |                                                                         |          |                |          |          |                     |
| N2                                                         | HS | V | 10712165                                                                | 10732507 | WBGene00012117 | T28B11.1 |          | T28B11.1            |
| -0.12978324578015                                          |    |   | AGIWUR585;AGIWUR14500;AGIWUR41017                                       |          |                |          |          |                     |
| N2                                                         | HS | V | 10733931                                                                | 10736892 | WBGene00003405 | mre-11   | ZC302.1  | -0.0917671721942916 |
| AGIWUR33458                                                |    |   |                                                                         |          |                |          |          |                     |
| N2                                                         | HS | V | 10737116                                                                | 10739350 | WBGene00013862 | wdr-5.3  | ZC302.2  | -0.138573618561718  |
| AGIWUR14638                                                |    |   |                                                                         |          |                |          |          |                     |
| N2                                                         | HS | V | 10742466                                                                | 10743749 | WBGene00005610 | srj-22   | F28H7.1  | 0.173254517747438   |
| AGIWUR40243                                                |    |   |                                                                         |          |                |          |          |                     |
| N2                                                         | HS | V | 10744642                                                                | 10746469 | WBGene00005609 | srj-21   | F28H7.11 |                     |
| 0.605158995453763                                          |    |   | AGIWUR12071                                                             |          |                |          |          |                     |
| N2                                                         | HS | V | 10746548                                                                | 10747337 | WBGene00009238 | selt-1.2 |          | F28H7.4             |
| 0.286637246496604                                          |    |   | AGIWUR38788                                                             |          |                |          |          |                     |
| N2                                                         | HS | V | 10747944                                                                | 10748938 | WBGene00009236 | F28H7.2  | F28H7.2  | 0.166832408495989   |
| AGIWUR3011                                                 |    |   |                                                                         |          |                |          |          |                     |
| N2                                                         | HS | V | 10749607                                                                | 10750788 | WBGene00009237 | F28H7.3  | F28H7.3  | -0.056873771521186  |
| AGIWUR35986                                                |    |   |                                                                         |          |                |          |          |                     |
| N2                                                         | HS | V | 10751057                                                                | 10754147 | WBGene00009240 | F28H7.7  | F28H7.7  | 0.203230534753176   |
| AGIWUR2905                                                 |    |   |                                                                         |          |                |          |          |                     |
| N2                                                         | HS | V | 10754469                                                                | 10756664 | WBGene00009239 | irld-6   | F28H7.6  | 0.14838685370116    |
| AGIWUR1059                                                 |    |   |                                                                         |          |                |          |          |                     |
| N2                                                         | HS | V | 10758958                                                                | 10760663 | WBGene00009241 | F28H7.8  | F28H7.8  | 0.365207160229811   |
| AGIWUR9083                                                 |    |   |                                                                         |          |                |          |          |                     |
| N2                                                         | HS | V | 10760658                                                                | 10762790 | WBGene00009242 | sre-6    | F28H7.9  | 0.108711872348709   |
| AGIWUR41255;AGIWUR42176                                    |    |   |                                                                         |          |                |          |          |                     |
| N2                                                         | HS | V | 10764366                                                                | 10768454 | WBGene00003838 | ocr-1    | F28H7.10 |                     |
| -0.00319806856251592                                       |    |   | AGIWUR35218                                                             |          |                |          |          |                     |
| N2                                                         | HS | V | 10768465                                                                | 10770217 | WBGene00008370 | D1054.1  | D1054.1  | 0.0788989874402262  |

|                                                                                                             |    |   |          |          |                |           |          |                    |
|-------------------------------------------------------------------------------------------------------------|----|---|----------|----------|----------------|-----------|----------|--------------------|
| AGIWUR44989                                                                                                 |    |   |          |          |                |           |          |                    |
| N2                                                                                                          | HS | V | 10770321 | 10771351 | WBGene00003923 | pas-2     | D1054.2  | -0.203205981091088 |
| AGIWUR20271;AGIWUR21995;AGIWUR34386;AGIWUR40199                                                             |    |   |          |          |                |           |          |                    |
| N2                                                                                                          | HS | V | 10771451 | 10772832 | WBGene00008371 | D1054.3   | D1054.3  | -0.233812205093963 |
| AGIWUR3336;AGIWUR4673;AGIWUR15639;AGIWUR16549                                                               |    |   |          |          |                |           |          |                    |
| N2                                                                                                          | HS | V | 10772819 | 10776578 | WBGene00008372 | D1054.5   | D1054.5  | 0.17130230729412   |
| AGIWUR41456                                                                                                 |    |   |          |          |                |           |          |                    |
| N2                                                                                                          | HS | V | 10778475 | 10780019 | WBGene00008373 | D1054.6   | D1054.6  | -0.350072661545095 |
| AGIWUR39343                                                                                                 |    |   |          |          |                |           |          |                    |
| N2                                                                                                          | HS | V | 10781459 | 10783380 | WBGene00008374 | cllec-220 |          | D1054.7            |
| 0.0295214819603578 AGIWUR32354;AGIWUR38925                                                                  |    |   |          |          |                |           |          |                    |
| N2                                                                                                          | HS | V | 10784236 | 10785367 | WBGene00008375 | D1054.8   | D1054.8  | 0.414096012764661  |
| AGIWUR20991                                                                                                 |    |   |          |          |                |           |          |                    |
| N2                                                                                                          | HS | V | 10785801 | 10791057 | WBGene00008376 | D1054.9   | D1054.9  | 0.104450307197612  |
| AGIWUR3559;AGIWUR5305;AGIWUR10996;AGIWUR13468;AGIWUR13746;AGIWUR19183;AGIWUR28311;AGIWUR34506               |    |   |          |          |                |           |          |                    |
| N2                                                                                                          | HS | V | 10791975 | 10792830 | WBGene00008377 | D1054.10  |          | D1054.10           |
| 0.137463163900392 AGIWUR31296                                                                               |    |   |          |          |                |           |          |                    |
| N2                                                                                                          | HS | V | 10793793 | 10794924 | WBGene00008378 | ule-3     | D1054.11 |                    |
| 0.0702496278270317 AGIWUR7075                                                                               |    |   |          |          |                |           |          |                    |
| N2                                                                                                          | HS | V | 10796863 | 10798157 | WBGene00005399 | srh-184   | D1054.12 |                    |
| 0.193055459162754 AGIWUR26639                                                                               |    |   |          |          |                |           |          |                    |
| N2                                                                                                          | HS | V | 10798360 | 10799475 | WBGene00005379 | srh-163   | D1054.16 |                    |
| -0.0405974951864119 AGIWUR15060;AGIWUR25635                                                                 |    |   |          |          |                |           |          |                    |
| N2                                                                                                          | HS | V | 10802336 | 10804474 | WBGene00008379 | secs-1    | D1054.13 |                    |
| 0.0982751542585767 AGIWUR31281                                                                              |    |   |          |          |                |           |          |                    |
| N2                                                                                                          | HS | V | 10804721 | 10806034 | WBGene00008380 | prp-38    | D1054.14 |                    |
| -0.0509309779806575 AGIWUR30839;AGIWUR36917                                                                 |    |   |          |          |                |           |          |                    |
| N2                                                                                                          | HS | V | 10806131 | 10807973 | WBGene00006481 | plrg-1    | D1054.15 |                    |
| 0.112953016178187 AGIWUR34148                                                                               |    |   |          |          |                |           |          |                    |
| N2                                                                                                          | HS | V | 10812343 | 10813487 | WBGene00007797 | C29A12.1  |          | C29A12.1           |
| -0.173059466661613 AGIWUR4242                                                                               |    |   |          |          |                |           |          |                    |
| N2                                                                                                          | HS | V | 10814113 | 10816718 | WBGene00002985 | lig-1     | C29A12.3 |                    |
| 0.0537874805203584 AGIWUR1609;AGIWUR22411                                                                   |    |   |          |          |                |           |          |                    |
| N2                                                                                                          | HS | V | 10825012 | 10846695 | WBGene00007799 | nrx-1     | C29A12.4 |                    |
| -0.0332401316820254                                                                                         |    |   |          |          |                |           |          |                    |
| AGIWUR9816;AGIWUR10025;AGIWUR14320;AGIWUR17861;AGIWUR18536;AGIWUR19055;AGIWUR36206;AGIWUR36484;AGIWUR37045; |    |   |          |          |                |           |          |                    |
| AGIWUR38337;AGIWUR38411;AGIWUR41061;AGIWUR43338                                                             |    |   |          |          |                |           |          |                    |
| N2                                                                                                          | HS | V | 10847193 | 10852502 | WBGene00007800 | C29A12.6  |          | C29A12.6           |
| -0.30430908958269 AGIWUR7641                                                                                |    |   |          |          |                |           |          |                    |

|                                                                        |    |   |                                                             |          |                |          |          |                     |
|------------------------------------------------------------------------|----|---|-------------------------------------------------------------|----------|----------------|----------|----------|---------------------|
| N2                                                                     | HS | V | 10852519                                                    | 10865792 | WBGene00010012 | saeg-1   | F53H10.2 |                     |
| 0.0370089342349971                                                     |    |   | AGIWUR15318;AGIWUR22336;AGIWUR24998;AGIWUR35859;AGIWUR37415 |          |                |          |          |                     |
| N2                                                                     | HS | V | 10880837                                                    | 10883399 | WBGene00009326 | F32D8.1  | F32D8.1  | 0.0534453267349306  |
| AGIWUR7811                                                             |    |   |                                                             |          |                |          |          |                     |
| N2                                                                     | HS | V | 10883778                                                    | 10886102 | WBGene00009327 | F32D8.2  | F32D8.2  | 0.140032780607039   |
| AGIWUR40386                                                            |    |   |                                                             |          |                |          |          |                     |
| N2                                                                     | HS | V | 10886837                                                    | 10887965 | WBGene00009328 | F32D8.3  | F32D8.3  | 0.269977479939985   |
| AGIWUR42274                                                            |    |   |                                                             |          |                |          |          |                     |
| N2                                                                     | HS | V | 10887873                                                    | 10889004 | WBGene00043302 | F32D8.11 | F32D8.11 |                     |
| 0.315621333113803                                                      |    |   | AGIWUR2373;AGIWUR10990;AGIWUR29778;AGIWUR42702;AGIWUR45151  |          |                |          |          |                     |
| N2                                                                     | HS | V | 10888572                                                    | 10891030 | WBGene00009334 | F32D8.12 | F32D8.12 |                     |
| 0.0750645973400155                                                     |    |   | AGIWUR31365;AGIWUR36246                                     |          |                |          |          |                     |
| N2                                                                     | HS | V | 10891338                                                    | 10893560 | WBGene00009329 | F32D8.4  | F32D8.4  | 0.0996825187938253  |
| AGIWUR39233                                                            |    |   |                                                             |          |                |          |          |                     |
| N2                                                                     | HS | V | 10893649                                                    | 10894788 | WBGene00009336 | F32D8.14 | F32D8.14 |                     |
| 0.103328900366952                                                      |    |   | AGIWUR4301;AGIWUR30461                                      |          |                |          |          |                     |
| N2                                                                     | HS | V | 10896658                                                    | 10897143 | WBGene00001303 | emo-1    | F32D8.6  | 0.203762029226256   |
| AGIWUR34849                                                            |    |   |                                                             |          |                |          |          |                     |
| N2                                                                     | HS | V | 10898435                                                    | 10900701 | WBGene00009331 | F32D8.7  | F32D8.7  | 0.485926919802477   |
| AGIWUR27643                                                            |    |   |                                                             |          |                |          |          |                     |
| N2                                                                     | HS | V | 10900563                                                    | 10901303 | WBGene00005001 | spp-16   | F32D8.9  | 0.2477400325091     |
| AGIWUR36125                                                            |    |   |                                                             |          |                |          |          |                     |
| N2                                                                     | HS | V | 10901480                                                    | 10902782 | WBGene00009332 | F32D8.8  | F32D8.8  | 0.338035168697147   |
| AGIWUR44171                                                            |    |   |                                                             |          |                |          |          |                     |
| N2                                                                     | HS | V | 10904059                                                    | 10906774 | WBGene00009325 | F32D8.15 | F32D8.15 |                     |
| 0.0793555766881049                                                     |    |   | AGIWUR5514                                                  |          |                |          |          |                     |
| N2                                                                     | HS | V | 10906755                                                    | 10909171 | WBGene00009333 | F32D8.10 | F32D8.10 |                     |
| 0.219026137611723                                                      |    |   | AGIWUR1368                                                  |          |                |          |          |                     |
| N2                                                                     | HS | V | 10917648                                                    | 10918401 | WBGene00010235 | F58B4.2  | F58B4.2  | 0.239818457833855   |
| AGIWUR12490                                                            |    |   |                                                             |          |                |          |          |                     |
| N2                                                                     | HS | V | 10918861                                                    | 10921847 | WBGene00003549 | nas-31   | F58B4.1  | 0.0270506035452978  |
| AGIWUR9906;AGIWUR11402;AGIWUR21749;AGIWUR23262;AGIWUR23820;AGIWUR40710 |    |   |                                                             |          |                |          |          |                     |
| N2                                                                     | HS | V | 10925322                                                    | 10926796 | WBGene00010239 | F58B4.6  | F58B4.6  | 0.0447859902734802  |
| AGIWUR8914                                                             |    |   |                                                             |          |                |          |          |                     |
| N2                                                                     | HS | V | 10929811                                                    | 10930774 | WBGene00010236 | F58B4.3  | F58B4.3  | 0.00813525140483051 |
| AGIWUR359                                                              |    |   |                                                             |          |                |          |          |                     |
| N2                                                                     | HS | V | 10930778                                                    | 10931289 | WBGene00010237 | scvp-1   | F58B4.4  | 0.140987492919542   |
| AGIWUR33317                                                            |    |   |                                                             |          |                |          |          |                     |
| N2                                                                     | HS | V | 10932647                                                    | 10934245 | WBGene00010238 | F58B4.5  | F58B4.5  | 0.173279675265205   |

|                                                                                                      |    |   |          |          |                |                                     |
|------------------------------------------------------------------------------------------------------|----|---|----------|----------|----------------|-------------------------------------|
| AGIWUR16464                                                                                          |    |   |          |          |                |                                     |
| N2                                                                                                   | HS | V | 10934228 | 10936920 | WBGene00008923 | F17C11.12 F17C11.12                 |
| 0.269072348288841 AGIWUR4805                                                                         |    |   |          |          |                |                                     |
| N2                                                                                                   | HS | V | 10937633 | 10938849 | WBGene00008922 | F17C11.11 F17C11.11                 |
| -0.107261910234495 AGIWUR8176                                                                        |    |   |          |          |                |                                     |
| N2                                                                                                   | HS | V | 10939245 | 10939612 | WBGene00050890 | F17C11.16 F17C11.16                 |
| 0.108211927508958 AGIWUR4887;AGIWUR9224;AGIWUR13452;AGIWUR13645;AGIWUR41559                          |    |   |          |          |                |                                     |
| N2                                                                                                   | HS | V | 10941450 | 10944302 | WBGene00077761 | zip-9 F17C11.17                     |
| -0.257179820262351 AGIWUR2242;AGIWUR6734;AGIWUR25942;AGIWUR34136;AGIWUR38340;AGIWUR38704;AGIWUR39056 |    |   |          |          |                |                                     |
| N2                                                                                                   | HS | V | 10948212 | 10949129 | WBGene00008914 | F17C11.2 F17C11.2                   |
| -0.0463128893944731 AGIWUR20468                                                                      |    |   |          |          |                |                                     |
| N2                                                                                                   | HS | V | 10949857 | 10951821 | WBGene00000726 | col-153 F17C11.3                    |
| 0.103165145889534 AGIWUR22834                                                                        |    |   |          |          |                |                                     |
| N2                                                                                                   | HS | V | 10951818 | 10953472 | WBGene00008915 | F17C11.4 F17C11.4                   |
| 0.0678153679510771 AGIWUR37270                                                                       |    |   |          |          |                |                                     |
| N2                                                                                                   | HS | V | 10953501 | 10954434 | WBGene00008916 | cllec-221 F17C11.5                  |
| 0.0850282175532602 AGIWUR11860                                                                       |    |   |          |          |                |                                     |
| N2                                                                                                   | HS | V | 10955091 | 10955952 | WBGene00008917 | F17C11.6 F17C11.6                   |
| -0.114111483283883 AGIWUR7977;AGIWUR14608;AGIWUR23095                                                |    |   |          |          |                |                                     |
| N2                                                                                                   | HS | V | 10955923 | 10957020 | WBGene00023503 | F17C11.13 F17C11.13                 |
| 0.431268260136799 AGIWUR13427                                                                        |    |   |          |          |                |                                     |
| N2                                                                                                   | HS | V | 10956910 | 10958821 | WBGene00008918 | F17C11.7 F17C11.7                   |
| -0.036053189304365 AGIWUR13347;AGIWUR36662                                                           |    |   |          |          |                |                                     |
| N2                                                                                                   | HS | V | 10958928 | 10960919 | WBGene00008919 | vps-36 F17C11.8                     |
| -0.210961328689906 AGIWUR5553;AGIWUR23059;AGIWUR28557;AGIWUR40486                                    |    |   |          |          |                |                                     |
| N2                                                                                                   | HS | V | 10961722 | 10965562 | WBGene00008921 | F17C11.10 F17C11.10                 |
| -0.0490111165545848 AGIWUR6666;AGIWUR29011;AGIWUR36798                                               |    |   |          |          |                |                                     |
| N2                                                                                                   | HS | V | 10965675 | 10968070 | WBGene00008920 | eef-1G F17C11.9                     |
| -0.343332930649261 AGIWUR5607;AGIWUR10732;AGIWUR16495;AGIWUR20982;AGIWUR42601                        |    |   |          |          |                |                                     |
| N2                                                                                                   | HS | V | 10970399 | 10981213 | WBGene00009968 | fig-1 F53B7.5 -0.12939939132424     |
| AGIWUR14199                                                                                          |    |   |          |          |                |                                     |
| N2                                                                                                   | HS | V | 10992099 | 10994817 | WBGene00009965 | frpr-9 F53B7.2                      |
| -0.00602852908637619 AGIWUR38039                                                                     |    |   |          |          |                |                                     |
| N2                                                                                                   | HS | V | 10999102 | 10999642 | WBGene00009969 | F53B7.7 F53B7.7 -0.102195292501378  |
| AGIWUR29607                                                                                          |    |   |          |          |                |                                     |
| N2                                                                                                   | HS | V | 10999658 | 11000713 | WBGene00009966 | F53B7.3 F53B7.3 0.276490858553881   |
| AGIWUR31116                                                                                          |    |   |          |          |                |                                     |
| N2                                                                                                   | HS | V | 11000957 | 11002534 | WBGene00009967 | F53B7.4 F53B7.4 -0.0293826676679179 |
| AGIWUR15378;AGIWUR32446                                                                              |    |   |          |          |                |                                     |

|                                                                                            |    |   |          |          |                |           |          |                    |
|--------------------------------------------------------------------------------------------|----|---|----------|----------|----------------|-----------|----------|--------------------|
| N2                                                                                         | HS | V | 11011589 | 11012465 | WBGene00007553 | C13G3.1   | C13G3.1  | 0.0558376128734324 |
| AGIWUR5612                                                                                 |    |   |          |          |                |           |          |                    |
| N2                                                                                         | HS | V | 11021069 | 11022884 | WBGene00001991 | hot-6     | C13G3.2  |                    |
| -0.00352484644399098 AGIWUR35399                                                           |    |   |          |          |                |           |          |                    |
| N2                                                                                         | HS | V | 11027153 | 11030845 | WBGene00007554 | pptr-2    | C13G3.3  | -0.177283470250545 |
| AGIWUR6753;AGIWUR10456;AGIWUR15563;AGIWUR23456                                             |    |   |          |          |                |           |          |                    |
| N2                                                                                         | HS | V | 11036462 | 11039425 | WBGene00006443 | pak-2     | C45B11.1 |                    |
| -0.110686873307586 AGIWUR4837;AGIWUR12671                                                  |    |   |          |          |                |           |          |                    |
| N2                                                                                         | HS | V | 11041824 | 11042301 | WBGene00008106 | C45B11.5  |          | C45B11.5           |
| 0.0985499832018446 AGIWUR45002                                                             |    |   |          |          |                |           |          |                    |
| N2                                                                                         | HS | V | 11042817 | 11043855 | WBGene00008105 | C45B11.2  |          | C45B11.2           |
| 0.365663988387083 AGIWUR2224;AGIWUR5947                                                    |    |   |          |          |                |           |          |                    |
| N2                                                                                         | HS | V | 11044067 | 11045734 | WBGene00045379 | C45B11.6  |          | C45B11.6           |
| 0.0542094921908869 AGIWUR9924;AGIWUR28606;AGIWUR30898;AGIWUR32180;AGIWUR37183;AGIWUR43770  |    |   |          |          |                |           |          |                    |
| N2                                                                                         | HS | V | 11045696 | 11046899 | WBGene00000981 | dhs-18    | C45B11.3 |                    |
| 0.0882357623453736 AGIWUR38705                                                             |    |   |          |          |                |           |          |                    |
| N2                                                                                         | HS | V | 11047227 | 11048744 | WBGene00005295 | srh-74    | C45B11.4 |                    |
| -0.048161958599501 AGIWUR14311;AGIWUR26356                                                 |    |   |          |          |                |           |          |                    |
| N2                                                                                         | HS | V | 11052457 | 11053107 | WBGene00271444 | T04C12.33 |          | T04C12.33          |
| -0.0255038889251189 AGIWUR36779                                                            |    |   |          |          |                |           |          |                    |
| N2                                                                                         | HS | V | 11054127 | 11055142 | WBGene00011429 | T04C12.7  |          | T04C12.7           |
| 0.227948794749887 AGIWUR19762                                                              |    |   |          |          |                |           |          |                    |
| N2                                                                                         | HS | V | 11055306 | 11057143 | WBGene00005296 | srh-75    | T04C12.2 |                    |
| -0.0806979918722064 AGIWUR13499                                                            |    |   |          |          |                |           |          |                    |
| N2                                                                                         | HS | V | 11058649 | 11059264 | WBGene00011427 | T04C12.1  |          | T04C12.1           |
| -0.270309436368711 AGIWUR14776;AGIWUR18085;AGIWUR19163;AGIWUR26042;AGIWUR26550;AGIWUR38351 |    |   |          |          |                |           |          |                    |
| N2                                                                                         | HS | V | 11062439 | 11063245 | WBGene00050889 | T04C12.9  |          | T04C12.9           |
| -0.0154054994806359 AGIWUR2246;AGIWUR4116;AGIWUR21052;AGIWUR38044;AGIWUR42482              |    |   |          |          |                |           |          |                    |
| N2                                                                                         | HS | V | 11064954 | 11065634 | WBGene00011428 | T04C12.3  |          | T04C12.3           |
| 0.108068492452869 AGIWUR5731;AGIWUR6696;AGIWUR6992;AGIWUR24917;AGIWUR28081;AGIWUR40873     |    |   |          |          |                |           |          |                    |
| N2                                                                                         | HS | V | 11068069 | 11069358 | WBGene00011430 | T04C12.8  |          | T04C12.8           |
| 0.115685852148671 AGIWUR42678                                                              |    |   |          |          |                |           |          |                    |
| N2                                                                                         | HS | V | 11071690 | 11074498 | WBGene00000065 | act-3     | T04C12.4 |                    |
| 0.00142040622883499 AGIWUR13229;AGIWUR23078;AGIWUR29810;AGIWUR42315                        |    |   |          |          |                |           |          |                    |
| N2                                                                                         | HS | V | 11076723 | 11078168 | WBGene00000064 | act-2     | T04C12.5 |                    |
| -0.0687119344742158 AGIWUR9001                                                             |    |   |          |          |                |           |          |                    |
| N2                                                                                         | HS | V | 11079167 | 11082497 | WBGene00000063 | act-1     | T04C12.6 |                    |
| -0.285588445215996 AGIWUR9269                                                              |    |   |          |          |                |           |          |                    |
| N2                                                                                         | HS | V | 11088154 | 11097970 | WBGene00012776 | Y42A5A.1  |          | Y42A5A.1           |

|                                                                         |                        |          |                |          |                             |
|-------------------------------------------------------------------------|------------------------|----------|----------------|----------|-----------------------------|
| 0.304749126722253                                                       | AGIWUR16408            |          |                |          |                             |
| N2 HS V                                                                 | 11098950               | 11107288 | WBGene00012779 | cdk1-1   | Y42A5A.4                    |
| 0.183473521055035                                                       | AGIWUR22818            |          |                |          |                             |
| N2 HS V                                                                 | 11107535               | 11109747 | WBGene00012780 | Y42A5A.5 | Y42A5A.5                    |
| 0.173194768681782                                                       | AGIWUR31100            |          |                |          |                             |
| N2 HS V                                                                 | 11110063               | 11113103 | WBGene00010405 | erfa-3   | H19N07.1                    |
| 0.0836208890311241                                                      | AGIWUR16557            |          |                |          |                             |
| N2 HS V                                                                 | 11113914               | 11118818 | WBGene00010406 | math-33  | H19N07.2                    |
| -0.0660526268601034                                                     | AGIWUR9079;AGIWUR13855 |          |                |          |                             |
| N2 HS V                                                                 | 11118721               | 11119730 | WBGene00010407 | H19N07.3 | H19N07.3                    |
| -0.155386699346362                                                      | AGIWUR9792             |          |                |          |                             |
| N2 HS V                                                                 | 11119813               | 11122579 | WBGene00010408 | mboa-2   | H19N07.4                    |
| 0.257596724582623                                                       | AGIWUR25266            |          |                |          |                             |
| N2 HS V                                                                 | 11122820               | 11123867 | WBGene00007385 | atp-5    | C06H2.1 -0.0961804502361403 |
| AGIWUR18502;AGIWUR24548;AGIWUR30030;AGIWUR39039;AGIWUR39317;AGIWUR40026 |                        |          |                |          |                             |
| N2 HS V                                                                 | 11124303               | 11125053 | WBGene00007390 | lmtr-3   | C06H2.6 -0.055186927950003  |
| AGIWUR18923;AGIWUR20009                                                 |                        |          |                |          |                             |
| N2 HS V                                                                 | 11125222               | 11127306 | WBGene00007386 | C06H2.2  | C06H2.2                     |
| -0.00905636011888689                                                    | AGIWUR30603            |          |                |          |                             |
| N2 HS V                                                                 | 11127497               | 11130085 | WBGene00007387 | jmjd-5   | C06H2.3                     |
| -0.00270826436878302                                                    | AGIWUR9255             |          |                |          |                             |
| N2 HS V                                                                 | 11134609               | 11140323 | WBGene00007389 | glb-3    | C06H2.5 -0.0182124401751942 |
| AGIWUR780                                                               |                        |          |                |          |                             |
| N2 HS V                                                                 | 11141498               | 11143121 | WBGene00007388 | fol1-1   | C06H2.4 -0.0283801891054623 |
| AGIWUR43335                                                             |                        |          |                |          |                             |
| N2 HS V                                                                 | 11143062               | 11144758 | WBGene00007391 | C06H2.7  | C06H2.7 -0.0464074244596393 |
| AGIWUR29570                                                             |                        |          |                |          |                             |
| N2 HS V                                                                 | 11149705               | 11151309 | WBGene00011838 | T19C4.1  | T19C4.1                     |
| -0.00109696899164735                                                    | AGIWUR8258             |          |                |          |                             |
| N2 HS V                                                                 | 11151339               | 11152430 | WBGene00005196 | srg-39   | T19C4.2 -0.0306197964038439 |
| AGIWUR13750                                                             |                        |          |                |          |                             |
| N2 HS V                                                                 | 11152575               | 11155653 | WBGene00005195 | srg-38   | T19C4.8 0.0337898631381046  |
| AGIWUR26785                                                             |                        |          |                |          |                             |
| N2 HS V                                                                 | 11157090               | 11158706 | WBGene00005199 | srg-42   | T19C4.9 0.0487682581203845  |
| AGIWUR13312                                                             |                        |          |                |          |                             |
| N2 HS V                                                                 | 11160452               | 11161891 | WBGene00005198 | srg-41   | T19C4.3 -0.0329866617007921 |
| AGIWUR30808                                                             |                        |          |                |          |                             |
| N2 HS V                                                                 | 11163036               | 11164575 | WBGene00005197 | srg-40   | T19C4.4 0.460764644428817   |
| AGIWUR38932                                                             |                        |          |                |          |                             |



|                                                             |    |   |                                                                        |          |                |           |                            |
|-------------------------------------------------------------|----|---|------------------------------------------------------------------------|----------|----------------|-----------|----------------------------|
| N2                                                          | HS | V | 11165853                                                               | 11167640 | WBGene00014841 | T19C4.10  | T19C4.10                   |
| 0.0329999717632066                                          |    |   | AGIWUR28571;AGIWUR44720                                                |          |                |           |                            |
| N2                                                          | HS | V | 11172215                                                               | 11174452 | WBGene00011839 | T19C4.5   | T19C4.5 0.186281044555873  |
| AGIWUR44772                                                 |    |   |                                                                        |          |                |           |                            |
| N2                                                          | HS | V | 11174567                                                               | 11177559 | WBGene00001663 | gpa-1     | T19C4.6 0.0445782756616495 |
| AGIWUR42384                                                 |    |   |                                                                        |          |                |           |                            |
| N2                                                          | HS | V | 11183224                                                               | 11183643 | WBGene00012152 | cnc-10    | VK10D6R.1                  |
| -0.201170300968643                                          |    |   | AGIWUR4385                                                             |          |                |           |                            |
| N2                                                          | HS | V | 11191283                                                               | 11193638 | WBGene00010741 | lgc-49    | K10D6.1 0.168048935701954  |
| AGIWUR8747                                                  |    |   |                                                                        |          |                |           |                            |
| N2                                                          | HS | V | 11193733                                                               | 11196010 | WBGene00010742 | K10D6.2   | K10D6.2 -0.138753766057171 |
| AGIWUR9438;AGIWUR26231;AGIWUR43418                          |    |   |                                                                        |          |                |           |                            |
| N2                                                          | HS | V | 11200665                                                               | 11201392 | WBGene00010743 | K10D6.3   | K10D6.3 0.171309371221788  |
| AGIWUR15976;AGIWUR19250;AGIWUR20801;AGIWUR22472;AGIWUR38353 |    |   |                                                                        |          |                |           |                            |
| N2                                                          | HS | V | 11201905                                                               | 11216774 | WBGene00010744 | K10D6.4   | K10D6.4 -0.120441333285946 |
| AGIWUR23468                                                 |    |   |                                                                        |          |                |           |                            |
| N2                                                          | HS | V | 11217583                                                               | 11219902 | WBGene00011830 | cyp-29A2  | T19B10.1                   |
| -0.163616735757262                                          |    |   | AGIWUR36091                                                            |          |                |           |                            |
| N2                                                          | HS | V | 11221302                                                               | 11222834 | WBGene00011831 | T19B10.2  | T19B10.2                   |
| 0.00605018526248324                                         |    |   | AGIWUR3115;AGIWUR10805;AGIWUR11521;AGIWUR25739;AGIWUR29837;AGIWUR39360 |          |                |           |                            |
| N2                                                          | HS | V | 11222772                                                               | 11226018 | WBGene00011832 | bgal-1    | T19B10.3                   |
| 0.00985575192237587                                         |    |   | AGIWUR14003;AGIWUR17301;AGIWUR27843                                    |          |                |           |                            |
| N2                                                          | HS | V | 11226314                                                               | 11228703 | WBGene00004152 | pqn-70    | T19B10.4                   |
| -0.136005788335836                                          |    |   | AGIWUR3150;AGIWUR23106                                                 |          |                |           |                            |
| N2                                                          | HS | V | 11234650                                                               | 11237428 | WBGene00011833 | T19B10.5  | T19B10.5                   |
| -0.0137998592710495                                         |    |   | AGIWUR22092                                                            |          |                |           |                            |
| N2                                                          | HS | V | 11237438                                                               | 11239331 | WBGene00011834 | dvc-1     | T19B10.6                   |
| -0.0937798094249302                                         |    |   | AGIWUR13415;AGIWUR15411;AGIWUR41047                                    |          |                |           |                            |
| N2                                                          | HS | V | 11239675                                                               | 11241780 | WBGene00002072 | ima-1     | T19B10.7                   |
| -0.115479238169526                                          |    |   | AGIWUR5907;AGIWUR8615;AGIWUR15144                                      |          |                |           |                            |
| N2                                                          | HS | V | 11241879                                                               | 11244726 | WBGene00011835 | T19B10.8  | T19B10.8                   |
| -0.152674153572575                                          |    |   | AGIWUR7678;AGIWUR38740                                                 |          |                |           |                            |
| N2                                                          | HS | V | 11244839                                                               | 11245927 | WBGene00003509 | mxl-1     | T19B10.11                  |
| 0.0611500321542024                                          |    |   | AGIWUR42940                                                            |          |                |           |                            |
| N2                                                          | HS | V | 11248146                                                               | 11250866 | WBGene00011836 | mam-4     | T19B10.9                   |
| -0.108087998051388                                          |    |   | AGIWUR1265;AGIWUR8663;AGIWUR13972;AGIWUR22475;AGIWUR23365;AGIWUR31468  |          |                |           |                            |
| N2                                                          | HS | V | 11251035                                                               | 11251211 | WBGene00050898 | T19B10.12 | T19B10.12                  |
| 0.178218871863265                                           |    |   | AGIWUR487;AGIWUR6099;AGIWUR24637;AGIWUR29982;AGIWUR40878               |          |                |           |                            |
| N2                                                          | HS | V | 11251415                                                               | 11252529 | WBGene00011837 | srsx-33   | T19B10.10                  |

|                         |                                     |          |                |           |                             |
|-------------------------|-------------------------------------|----------|----------------|-----------|-----------------------------|
| -0.0019375469421572     | AGIWUR40610                         |          |                |           |                             |
| N2 HS V                 | 11254013                            | 11255080 | WBGene00008552 | srsx-31   | F07B10.6                    |
| -0.0673751007917316     | AGIWUR24817;AGIWUR36194             |          |                |           |                             |
| N2 HS V                 | 11256521                            | 11258996 | WBGene00008551 | lgc-36    | F07B10.5                    |
| -0.0744494358743681     | AGIWUR12869                         |          |                |           |                             |
| N2 HS V                 | 11259312                            | 11260722 | WBGene00077514 | F07B10.7  | F07B10.7                    |
| -0.0300692639852267     | AGIWUR17989                         |          |                |           |                             |
| N2 HS V                 | 11261264                            | 11263116 | WBGene00008550 | F07B10.4  | F07B10.4                    |
| 0.128883773300279       | AGIWUR18448;AGIWUR26396             |          |                |           |                             |
| N2 HS V                 | 11263523                            | 11265711 | WBGene00000539 | cln-3.1   | F07B10.1                    |
| 0.140377170454627       | AGIWUR23122                         |          |                |           |                             |
| N2 HS V                 | 11266981                            | 11268323 | WBGene00006167 | str-116   | F07B10.2                    |
| -0.229267784361213      | AGIWUR32627                         |          |                |           |                             |
| N2 HS V                 | 11269091                            | 11270426 | WBGene00006166 | str-115   | F07B10.3                    |
| 0.0887862763626313      | AGIWUR8426                          |          |                |           |                             |
| N2 HS V                 | 11271351                            | 11272467 | WBGene00007283 | cllec-222 | C03E10.6                    |
| 0.0151261779026974      | AGIWUR34617                         |          |                |           |                             |
| N2 HS V                 | 11273148                            | 11278161 | WBGene00007282 | cllec-223 | C03E10.5                    |
| -0.0767847422773187     | AGIWUR34212                         |          |                |           |                             |
| N2 HS V                 | 11282572                            | 11286039 | WBGene00001645 | gly-20    | C03E10.4                    |
| -0.0216763479594135     | AGIWUR10498;AGIWUR14558;AGIWUR31763 |          |                |           |                             |
| N2 HS V                 | 11286602                            | 11288412 | WBGene00007281 | C03E10.3  | C03E10.3                    |
| -0.026009592164689      | AGIWUR22175;AGIWUR35237;AGIWUR43907 |          |                |           |                             |
| N2 HS V                 | 11291188                            | 11292569 | WBGene00007279 | C03E10.1  | C03E10.1                    |
| 0.023816604659781       | AGIWUR31775                         |          |                |           |                             |
| N2 HS V                 | 11294693                            | 11296562 | WBGene00011403 | T03F7.6   | T03F7.6 -0.0695632597235685 |
| AGIWUR30648             |                                     |          |                |           |                             |
| N2 HS V                 | 11296696                            | 11298732 | WBGene00011402 | T03F7.5   | T03F7.5 0.160202223078617   |
| AGIWUR25048             |                                     |          |                |           |                             |
| N2 HS V                 | 11299373                            | 11300639 | WBGene00005270 | srh-47    | T03F7.4 -0.0442246078365667 |
| AGIWUR8046;AGIWUR39403  |                                     |          |                |           |                             |
| N2 HS V                 | 11301607                            | 11302886 | WBGene00005269 | srh-46    | T03F7.3 0.00809340751996324 |
| AGIWUR18968             |                                     |          |                |           |                             |
| N2 HS V                 | 11303651                            | 11304979 | WBGene00005268 | srh-45    | T03F7.2 0.371214277723235   |
| AGIWUR15350;AGIWUR19467 |                                     |          |                |           |                             |
| N2 HS V                 | 11305070                            | 11308446 | WBGene00004910 | snf-11    | T03F7.1 0.210260782521319   |
| AGIWUR20858             |                                     |          |                |           |                             |
| N2 HS V                 | 11311456                            | 11313445 | WBGene00011404 | T03F7.7   | T03F7.7 0.210681175653644   |
| AGIWUR17896;AGIWUR18547 |                                     |          |                |           |                             |

|                                                                       |    |   |          |          |                |          |          |                     |
|-----------------------------------------------------------------------|----|---|----------|----------|----------------|----------|----------|---------------------|
| N2                                                                    | HS | V | 11313400 | 11316901 | WBGene00009830 | cut1-18  | F47G9.3  | 0.545747380678028   |
| AGIWUR31545                                                           |    |   |          |          |                |          |          |                     |
| N2                                                                    | HS | V | 11317214 | 11321786 | WBGene00009831 | F47G9.4  | F47G9.4  | -0.0445858054615389 |
| AGIWUR4717;AGIWUR9709;AGIWUR14335;AGIWUR21384;AGIWUR42673             |    |   |          |          |                |          |          |                     |
| N2                                                                    | HS | V | 11322322 | 11323820 | WBGene00006189 | str-141  | F47G9.2  | 0.159770934470224   |
| AGIWUR9795                                                            |    |   |          |          |                |          |          |                     |
| N2                                                                    | HS | V | 11323965 | 11326964 | WBGene00009829 | F47G9.1  | F47G9.1  | -0.0726519077724923 |
| AGIWUR8533;AGIWUR11906;AGIWUR24323                                    |    |   |          |          |                |          |          |                     |
| N2                                                                    | HS | V | 11329400 | 11330775 | WBGene00009833 | F47G9.6  | F47G9.6  | 0.0511265278818165  |
| AGIWUR24729                                                           |    |   |          |          |                |          |          |                     |
| N2                                                                    | HS | V | 11332987 | 11334293 | WBGene00044203 | T02E9.6  | T02E9.6  | 0.0512602353706257  |
| AGIWUR1151;AGIWUR30893                                                |    |   |          |          |                |          |          |                     |
| N2                                                                    | HS | V | 11342233 | 11344773 | WBGene00011383 | T02E9.5  | T02E9.5  | -0.13717785464621   |
| AGIWUR4132;AGIWUR6704;AGIWUR13819;AGIWUR22708;AGIWUR22756;AGIWUR24772 |    |   |          |          |                |          |          |                     |
| N2                                                                    | HS | V | 11344831 | 11347012 | WBGene00001716 | gr1-7    | T02E9.2  | 0.151155182054686   |
| AGIWUR14923;AGIWUR42462                                               |    |   |          |          |                |          |          |                     |
| N2                                                                    | HS | V | 11349310 | 11352993 | WBGene00011381 | npr-25   | T02E9.1  | 0.0589903749242335  |
| AGIWUR27897                                                           |    |   |          |          |                |          |          |                     |
| N2                                                                    | HS | V | 11362453 | 11366221 | WBGene00011382 | dop-5    | T02E9.3  | 0.201287381887562   |
| AGIWUR6998                                                            |    |   |          |          |                |          |          |                     |
| N2                                                                    | HS | V | 11375742 | 11377990 | WBGene00000554 | cnb-1    | F55C10.1 |                     |
| 0.0727804947980637 AGIWUR15966                                        |    |   |          |          |                |          |          |                     |
| N2                                                                    | HS | V | 11383105 | 11384353 | WBGene00010109 | F55C10.5 |          | F55C10.5            |
| 0.407913572599302 AGIWUR28132                                         |    |   |          |          |                |          |          |                     |
| N2                                                                    | HS | V | 11385360 | 11386529 | WBGene00000727 | col-154  | F55C10.2 |                     |
| -0.0541423246022923 AGIWUR18601                                       |    |   |          |          |                |          |          |                     |
| N2                                                                    | HS | V | 11386698 | 11388678 | WBGene00010108 | F55C10.4 |          | F55C10.4            |
| 0.249742160319242 AGIWUR44361                                         |    |   |          |          |                |          |          |                     |
| N2                                                                    | HS | V | 11390273 | 11390494 | WBGene00010526 | K03B8.11 |          | K03B8.11            |
| 0.221426626399529 AGIWUR10764                                         |    |   |          |          |                |          |          |                     |
| N2                                                                    | HS | V | 11392320 | 11393508 | WBGene00003535 | nas-16   | K03B8.1  | 0.00251943764745555 |
| AGIWUR5158;AGIWUR9549                                                 |    |   |          |          |                |          |          |                     |
| N2                                                                    | HS | V | 11398916 | 11400528 | WBGene00003536 | nas-17   | K03B8.2  | 0.0871249083560643  |
| AGIWUR16781                                                           |    |   |          |          |                |          |          |                     |
| N2                                                                    | HS | V | 11401195 | 11402690 | WBGene00003538 | nas-19   | K03B8.5  | 0.116236800907842   |
| AGIWUR2377                                                            |    |   |          |          |                |          |          |                     |
| N2                                                                    | HS | V | 11407523 | 11409543 | WBGene00010524 | K03B8.6  | K03B8.6  | -0.225736032670962  |
| AGIWUR9809;AGIWUR37619                                                |    |   |          |          |                |          |          |                     |
| N2                                                                    | HS | V | 11409467 | 11411019 | WBGene00010525 | K03B8.8  | K03B8.8  | 0.0457484312984828  |

|                                                                                              |    |   |          |          |                |          |          |                     |  |
|----------------------------------------------------------------------------------------------|----|---|----------|----------|----------------|----------|----------|---------------------|--|
| AGIWUR796;AGIWUR8221;AGIWUR10078;AGIWUR13769;AGIWUR34518;AGIWUR40338;AGIWUR44676             |    |   |          |          |                |          |          |                     |  |
| N2                                                                                           | HS | V | 11411511 | 11412769 | WBGene00001712 | gr1-3    | K03B8.7  | 0.0686821054596294  |  |
| AGIWUR3545                                                                                   |    |   |          |          |                |          |          |                     |  |
| N2                                                                                           | HS | V | 11412870 | 11415159 | WBGene00000951 | deg-3    | K03B8.9  | -0.0461365196168106 |  |
| AGIWUR33003                                                                                  |    |   |          |          |                |          |          |                     |  |
| N2                                                                                           | HS | V | 11415342 | 11420293 | WBGene00000955 | des-2    | T26H10.1 |                     |  |
| 0.208815574825954 AGIWUR24189                                                                |    |   |          |          |                |          |          |                     |  |
| N2                                                                                           | HS | V | 11438770 | 11441618 | WBGene00010191 | dmsr-1   | F57B7.1  | -0.190842434451426  |  |
| AGIWUR10396;AGIWUR16007                                                                      |    |   |          |          |                |          |          |                     |  |
| N2                                                                                           | HS | V | 11441925 | 11443603 | WBGene00010192 | F57B7.2  | F57B7.2  | 0.00996205960996654 |  |
| AGIWUR12817                                                                                  |    |   |          |          |                |          |          |                     |  |
| N2                                                                                           | HS | V | 11446633 | 11449245 | WBGene00003248 | mig-17   | F57B7.4  | 0.327186770608332   |  |
| AGIWUR40715                                                                                  |    |   |          |          |                |          |          |                     |  |
| N2                                                                                           | HS | V | 11449223 | 11450357 | WBGene00000729 | col-156  | F57B7.3  | -0.118888915302538  |  |
| AGIWUR10540                                                                                  |    |   |          |          |                |          |          |                     |  |
| N2                                                                                           | HS | V | 11462999 | 11466770 | WBGene00006486 | zipt-21  | T11F9.2  | 0.0223930982871927  |  |
| AGIWUR1480                                                                                   |    |   |          |          |                |          |          |                     |  |
| N2                                                                                           | HS | V | 11466844 | 11470663 | WBGene00000007 | aat-6    | T11F9.4  | 0.137200495009784   |  |
| AGIWUR20033                                                                                  |    |   |          |          |                |          |          |                     |  |
| N2                                                                                           | HS | V | 11470868 | 11472349 | WBGene00003539 | nas-20   | T11F9.3  | 0.13082884703994    |  |
| AGIWUR1380;AGIWUR5186;AGIWUR11424;AGIWUR18119                                                |    |   |          |          |                |          |          |                     |  |
| N2                                                                                           | HS | V | 11472561 | 11473973 | WBGene00003540 | nas-21   | T11F9.5  | 0.00220716888493744 |  |
| AGIWUR4677;AGIWUR5223;AGIWUR9699;AGIWUR11738;AGIWUR12453;AGIWUR17204;AGIWUR18508;AGIWUR43832 |    |   |          |          |                |          |          |                     |  |
| N2                                                                                           | HS | V | 11474699 | 11477951 | WBGene00003541 | nas-22   | T11F9.6  | 0.154765449827774   |  |
| AGIWUR3819;AGIWUR8826;AGIWUR9112;AGIWUR26329;AGIWUR36117;AGIWUR37505;AGIWUR42006             |    |   |          |          |                |          |          |                     |  |
| N2                                                                                           | HS | V | 11478413 | 11479243 | WBGene00005235 | srh-9    | T11F9.17 |                     |  |
| 0.170703409613184 AGIWUR24741;AGIWUR43754;AGIWUR44860                                        |    |   |          |          |                |          |          |                     |  |
| N2                                                                                           | HS | V | 11485858 | 11487266 | WBGene00005227 | srh-1    | T11F9.18 |                     |  |
| -0.105813187079535 AGIWUR24579                                                               |    |   |          |          |                |          |          |                     |  |
| N2                                                                                           | HS | V | 11487152 | 11488275 | WBGene00011712 | T11F9.10 |          | T11F9.10            |  |
| 0.243381522801355 AGIWUR16276                                                                |    |   |          |          |                |          |          |                     |  |
| N2                                                                                           | HS | V | 11489050 | 11490328 | WBGene00000982 | dhs-19   | T11F9.11 |                     |  |
| 0.0514124952830084 AGIWUR39451                                                               |    |   |          |          |                |          |          |                     |  |
| N2                                                                                           | HS | V | 11491829 | 11492590 | WBGene00011716 | T11F9.19 |          | T11F9.19            |  |
| -0.212299060033299 AGIWUR31163                                                               |    |   |          |          |                |          |          |                     |  |
| N2                                                                                           | HS | V | 11493556 | 11496379 | WBGene00011713 | T11F9.12 |          | T11F9.12            |  |
| 0.0522263905603317 AGIWUR14163                                                               |    |   |          |          |                |          |          |                     |  |
| N2                                                                                           | HS | V | 11501444 | 11503127 | WBGene00044019 | C55A6.12 |          | C55A6.12            |  |
| 0.0820972194190537 AGIWUR10900                                                               |    |   |          |          |                |          |          |                     |  |

|                                                                                    |    |   |          |          |                |          |         |                     |
|------------------------------------------------------------------------------------|----|---|----------|----------|----------------|----------|---------|---------------------|
| N2                                                                                 | HS | V | 11503811 | 11504884 | WBGene00008330 | C55A6.1  | C55A6.1 | 0.181129445059541   |
| AGIWUR2304;AGIWUR41867                                                             |    |   |          |          |                |          |         |                     |
| N2                                                                                 | HS | V | 11505352 | 11508271 | WBGene00008339 | C55A6.10 |         | C55A6.10            |
| -0.194135569942596 AGIWUR2761                                                      |    |   |          |          |                |          |         |                     |
| N2                                                                                 | HS | V | 11509068 | 11512318 | WBGene00008331 | ttl1-5   | C55A6.2 | 0.013401783401926   |
| AGIWUR31123;AGIWUR43920                                                            |    |   |          |          |                |          |         |                     |
| N2                                                                                 | HS | V | 11512313 | 11513436 | WBGene00008332 | C55A6.3  | C55A6.3 | 0.124818010210806   |
| AGIWUR30062                                                                        |    |   |          |          |                |          |         |                     |
| N2                                                                                 | HS | V | 11513665 | 11514737 | WBGene00008335 | C55A6.6  | C55A6.6 | 0.282255257617697   |
| AGIWUR7253                                                                         |    |   |          |          |                |          |         |                     |
| N2                                                                                 | HS | V | 11515084 | 11516191 | WBGene00008334 | sdz-8    | C55A6.5 | -0.0684461101559251 |
| AGIWUR44215                                                                        |    |   |          |          |                |          |         |                     |
| N2                                                                                 | HS | V | 11516445 | 11517889 | WBGene00008333 | C55A6.4  | C55A6.4 | 0.296799390941651   |
| AGIWUR12044                                                                        |    |   |          |          |                |          |         |                     |
| N2                                                                                 | HS | V | 11518100 | 11518702 | WBGene00008337 | C55A6.8  | C55A6.8 | -0.0447733863609683 |
| AGIWUR3620;AGIWUR12782;AGIWUR19330                                                 |    |   |          |          |                |          |         |                     |
| N2                                                                                 | HS | V | 11519335 | 11520530 | WBGene00008336 | C55A6.7  | C55A6.7 | 0.137122908004276   |
| AGIWUR4983;AGIWUR10473;AGIWUR12082;AGIWUR43879                                     |    |   |          |          |                |          |         |                     |
| N2                                                                                 | HS | V | 11520515 | 11521554 | WBGene00008340 | C55A6.11 |         | C55A6.11            |
| 0.406796906540599 AGIWUR17876                                                      |    |   |          |          |                |          |         |                     |
| N2                                                                                 | HS | V | 11521653 | 11523384 | WBGene00008338 | pafo-1   | C55A6.9 | 0.157172928159124   |
| AGIWUR4256                                                                         |    |   |          |          |                |          |         |                     |
| N2                                                                                 | HS | V | 11527831 | 11541219 | WBGene00009532 | ccch-1   | F38B7.1 | -0.0258692450229656 |
| AGIWUR1888;AGIWUR15184;AGIWUR18653;AGIWUR21592;AGIWUR31708;AGIWUR35392;AGIWUR38363 |    |   |          |          |                |          |         |                     |
| N2                                                                                 | HS | V | 11543857 | 11545290 | WBGene00009533 | F38B7.2  | F38B7.2 | 0.0766697344318139  |
| AGIWUR5222;AGIWUR12757;AGIWUR16809;AGIWUR30377;AGIWUR33388                         |    |   |          |          |                |          |         |                     |
| N2                                                                                 | HS | V | 11545536 | 11546376 | WBGene00077536 | F38B7.10 |         | F38B7.10            |
| -0.0850852060433347 AGIWUR1421;AGIWUR14756;AGIWUR33638                             |    |   |          |          |                |          |         |                     |
| N2                                                                                 | HS | V | 11549107 | 11551560 | WBGene00009534 | F38B7.3  | F38B7.3 | -0.116433844230633  |
| AGIWUR33781                                                                        |    |   |          |          |                |          |         |                     |
| N2                                                                                 | HS | V | 11552679 | 11554222 | WBGene00005976 | srx-85   | F38B7.4 | -0.185265046979964  |
| AGIWUR36588                                                                        |    |   |          |          |                |          |         |                     |
| N2                                                                                 | HS | V | 11554635 | 11558127 | WBGene00001110 | duo-1    | F38B7.5 | -0.022693283895677  |
| AGIWUR6255;AGIWUR23547;AGIWUR41872                                                 |    |   |          |          |                |          |         |                     |
| N2                                                                                 | HS | V | 11558319 | 11559881 | WBGene00005962 | srx-71   | F38B7.6 | 0.0845249817755551  |
| AGIWUR33725                                                                        |    |   |          |          |                |          |         |                     |
| N2                                                                                 | HS | V | 11560078 | 11561650 | WBGene00005963 | srx-72   | F38B7.9 | -0.0318255487883845 |
| AGIWUR5244;AGIWUR41450                                                             |    |   |          |          |                |          |         |                     |
| N2                                                                                 | HS | V | 11562943 | 11564508 | WBGene00005977 | srx-86   | F38B7.7 | -0.0784043651617972 |

AGIWUR22026;AGIWUR22798

|    |    |   |          |          |                |        |         |                    |
|----|----|---|----------|----------|----------------|--------|---------|--------------------|
| N2 | HS | V | 11564873 | 11566771 | WBGene00005978 | srx-87 | F38B7.8 | -0.100513287124071 |
|----|----|---|----------|----------|----------------|--------|---------|--------------------|

AGIWUR5096;AGIWUR11440;AGIWUR14755

|    |    |   |          |          |                |       |          |  |
|----|----|---|----------|----------|----------------|-------|----------|--|
| N2 | HS | V | 11566804 | 11573091 | WBGene00004064 | pms-2 | H12C20.2 |  |
|----|----|---|----------|----------|----------------|-------|----------|--|

0.0595801324857277 AGIWUR22401;AGIWUR36857;AGIWUR38193

|    |    |   |          |          |                |        |          |  |
|----|----|---|----------|----------|----------------|--------|----------|--|
| N2 | HS | V | 11573440 | 11575709 | WBGene00003658 | nhr-68 | H12C20.3 |  |
|----|----|---|----------|----------|----------------|--------|----------|--|

0.330350887721654 AGIWUR12727

|    |    |   |          |          |                |        |          |  |
|----|----|---|----------|----------|----------------|--------|----------|--|
| N2 | HS | V | 11576631 | 11577911 | WBGene00005982 | srx-91 | H12C20.4 |  |
|----|----|---|----------|----------|----------------|--------|----------|--|

-0.0251921473322874 AGIWUR1007;AGIWUR11759;AGIWUR22109;AGIWUR31195;AGIWUR31842

|    |    |   |          |          |                |        |          |  |
|----|----|---|----------|----------|----------------|--------|----------|--|
| N2 | HS | V | 11581126 | 11582458 | WBGene00005981 | srx-90 | H12C20.5 |  |
|----|----|---|----------|----------|----------------|--------|----------|--|

-0.111863331462382 AGIWUR28808

|    |    |   |          |          |                |        |          |  |
|----|----|---|----------|----------|----------------|--------|----------|--|
| N2 | HS | V | 11583512 | 11585115 | WBGene00005979 | srx-88 | F43A11.1 |  |
|----|----|---|----------|----------|----------------|--------|----------|--|

-0.0347614896540476 AGIWUR12245

|    |    |   |          |          |                |        |          |  |
|----|----|---|----------|----------|----------------|--------|----------|--|
| N2 | HS | V | 11586259 | 11588133 | WBGene00005980 | srx-89 | F43A11.3 |  |
|----|----|---|----------|----------|----------------|--------|----------|--|

0.0499130943058801 AGIWUR8733;AGIWUR29031;AGIWUR33331;AGIWUR35615

|    |    |   |          |          |                |        |          |  |
|----|----|---|----------|----------|----------------|--------|----------|--|
| N2 | HS | V | 11589733 | 11592931 | WBGene00005973 | srx-82 | F43A11.6 |  |
|----|----|---|----------|----------|----------------|--------|----------|--|

-0.090693701629605 AGIWUR5392;AGIWUR12579

|    |    |   |          |          |                |        |          |  |
|----|----|---|----------|----------|----------------|--------|----------|--|
| N2 | HS | V | 11593727 | 11594971 | WBGene00005971 | srx-80 | F43A11.4 |  |
|----|----|---|----------|----------|----------------|--------|----------|--|

-0.034278450564269 AGIWUR26018

|    |    |   |          |          |                |        |          |  |
|----|----|---|----------|----------|----------------|--------|----------|--|
| N2 | HS | V | 11595919 | 11597096 | WBGene00005972 | srx-81 | F43A11.5 |  |
|----|----|---|----------|----------|----------------|--------|----------|--|

0.021830691642549 AGIWUR1854;AGIWUR40726

|    |    |   |          |          |                |        |          |  |
|----|----|---|----------|----------|----------------|--------|----------|--|
| N2 | HS | V | 11597346 | 11598897 | WBGene00005974 | srx-83 | F43A11.7 |  |
|----|----|---|----------|----------|----------------|--------|----------|--|

0.0112876671540736 AGIWUR31700

|    |    |   |          |          |                |        |          |  |
|----|----|---|----------|----------|----------------|--------|----------|--|
| N2 | HS | V | 11599107 | 11600628 | WBGene00005975 | srx-84 | F35B12.1 |  |
|----|----|---|----------|----------|----------------|--------|----------|--|

-0.017186816012329 AGIWUR17845;AGIWUR35416

|    |    |   |          |          |                |          |          |  |
|----|----|---|----------|----------|----------------|----------|----------|--|
| N2 | HS | V | 11601119 | 11602358 | WBGene00009388 | F35B12.9 | F35B12.9 |  |
|----|----|---|----------|----------|----------------|----------|----------|--|

0.0106205014788188 AGIWUR1481;AGIWUR14629;AGIWUR18779;AGIWUR43752

|    |    |   |          |          |                |        |          |  |
|----|----|---|----------|----------|----------------|--------|----------|--|
| N2 | HS | V | 11602294 | 11604563 | WBGene00000983 | dhs-20 | F35B12.2 |  |
|----|----|---|----------|----------|----------------|--------|----------|--|

0.122743345449578 AGIWUR1985

|    |    |   |          |          |                |        |          |  |
|----|----|---|----------|----------|----------------|--------|----------|--|
| N2 | HS | V | 11609096 | 11610149 | WBGene00009384 | piit-1 | F35B12.4 |  |
|----|----|---|----------|----------|----------------|--------|----------|--|

0.119884792552732 AGIWUR44326

|    |    |   |          |          |                |       |          |  |
|----|----|---|----------|----------|----------------|-------|----------|--|
| N2 | HS | V | 11610708 | 11613054 | WBGene00009385 | sas-5 | F35B12.5 |  |
|----|----|---|----------|----------|----------------|-------|----------|--|

0.143809293594802 AGIWUR12489

|    |    |   |          |          |                |         |          |  |
|----|----|---|----------|----------|----------------|---------|----------|--|
| N2 | HS | V | 11613307 | 11614888 | WBGene00009386 | tag-290 | F35B12.6 |  |
|----|----|---|----------|----------|----------------|---------|----------|--|

0.199522114653 AGIWUR13593

|    |    |   |          |          |                |        |          |  |
|----|----|---|----------|----------|----------------|--------|----------|--|
| N2 | HS | V | 11616283 | 11616829 | WBGene00003762 | nlp-24 | F35B12.7 |  |
|----|----|---|----------|----------|----------------|--------|----------|--|

0.258316642273417 AGIWUR2533;AGIWUR13008;AGIWUR22163;AGIWUR24238;AGIWUR32188;AGIWUR39141

|    |    |   |          |          |                |        |          |  |
|----|----|---|----------|----------|----------------|--------|----------|--|
| N2 | HS | V | 11616812 | 11618266 | WBGene00009387 | glb-15 | F35B12.8 |  |
|----|----|---|----------|----------|----------------|--------|----------|--|

-0.122929517409428 AGIWUR37261

|                                                                                                |    |   |          |          |                |           |                             |
|------------------------------------------------------------------------------------------------|----|---|----------|----------|----------------|-----------|-----------------------------|
| N2                                                                                             | HS | V | 11625954 | 11629322 | WBGene00009389 | F35B12.10 | F35B12.10                   |
| 0.0217844877645348 AGIWUR31419                                                                 |    |   |          |          |                |           |                             |
| N2                                                                                             | HS | V | 11631434 | 11637291 | WBGene00012100 | sipa-1    | T27F2.2 0.0299866950238048  |
| AGIWUR40216                                                                                    |    |   |          |          |                |           |                             |
| N2                                                                                             | HS | V | 11644760 | 11645370 | WBGene00000249 | bir-1     | T27F2.3 -0.256115675211348  |
| AGIWUR10307                                                                                    |    |   |          |          |                |           |                             |
| N2                                                                                             | HS | V | 11645481 | 11650090 | WBGene00004806 | skp-1     | T27F2.1 0.0765062703395021  |
| AGIWUR2641                                                                                     |    |   |          |          |                |           |                             |
| N2                                                                                             | HS | V | 11650079 | 11650774 | WBGene00012101 | zip-10    | T27F2.4 0.0453581422208233  |
| AGIWUR6110;AGIWUR19171;AGIWUR21334;AGIWUR34172                                                 |    |   |          |          |                |           |                             |
| N2                                                                                             | HS | V | 11661670 | 11665085 | WBGene00000449 | ceh-27    | F46F3.1 -0.212966781703686  |
| AGIWUR17161                                                                                    |    |   |          |          |                |           |                             |
| N2                                                                                             | HS | V | 11667476 | 11669390 | WBGene00009791 | F46F3.3   | F46F3.3 0.399776614129587   |
| AGIWUR8266;AGIWUR11650;AGIWUR14168;AGIWUR16448;AGIWUR26148;AGIWUR36536;AGIWUR42656;AGIWUR42960 |    |   |          |          |                |           |                             |
| N2                                                                                             | HS | V | 11669348 | 11672594 | WBGene00009790 | lgc-44    | F46F3.2 0.0595813470881659  |
| AGIWUR7570                                                                                     |    |   |          |          |                |           |                             |
| N2                                                                                             | HS | V | 11675942 | 11685268 | WBGene00000146 | ape-1     | F46F3.4 0.0935620107161199  |
| AGIWUR2585                                                                                     |    |   |          |          |                |           |                             |
| N2                                                                                             | HS | V | 11687426 | 11689174 | WBGene00012281 | W05E10.2  | W05E10.2                    |
| 0.0878529042164828 AGIWUR16303                                                                 |    |   |          |          |                |           |                             |
| N2                                                                                             | HS | V | 11689413 | 11691691 | WBGene00012280 | W05E10.1  | W05E10.1                    |
| 0.314236887974348 AGIWUR31908                                                                  |    |   |          |          |                |           |                             |
| N2                                                                                             | HS | V | 11693188 | 11695697 | WBGene00012282 | W05E10.5  | W05E10.5                    |
| 0.21701260103682 AGIWUR304                                                                     |    |   |          |          |                |           |                             |
| N2                                                                                             | HS | V | 11701764 | 11705400 | WBGene00000453 | ceh-32    | W05E10.3                    |
| -0.120218823627297 AGIWUR16411;AGIWUR39527;AGIWUR43749                                         |    |   |          |          |                |           |                             |
| N2                                                                                             | HS | V | 11709775 | 11715903 | WBGene00006609 | tre-3     | W05E10.4                    |
| 0.0328835993729353 AGIWUR17988;AGIWUR19737;AGIWUR37150                                         |    |   |          |          |                |           |                             |
| N2                                                                                             | HS | V | 11718089 | 11725652 | WBGene00000907 | daf-11    | B0240.3 0.00966460651156531 |
| AGIWUR23822                                                                                    |    |   |          |          |                |           |                             |
| N2                                                                                             | HS | V | 11727900 | 11730160 | WBGene00004359 | rhr-2     | B0240.1 0.197873690243085   |
| AGIWUR10193                                                                                    |    |   |          |          |                |           |                             |
| N2                                                                                             | HS | V | 11731120 | 11733472 | WBGene00007118 | npp-22    | B0240.4 -0.0829768889095472 |
| AGIWUR10766                                                                                    |    |   |          |          |                |           |                             |
| N2                                                                                             | HS | V | 11733733 | 11736968 | WBGene00007117 | spe-42    | B0240.2 0.0839917637573375  |
| AGIWUR9063                                                                                     |    |   |          |          |                |           |                             |
| N2                                                                                             | HS | V | 11740065 | 11754109 | WBGene00011436 | T04F3.1   | T04F3.1 -0.392667077786225  |
| AGIWUR37668                                                                                    |    |   |          |          |                |           |                             |
| N2                                                                                             | HS | V | 11757668 | 11758598 | WBGene00011437 | T04F3.2   | T04F3.2 -0.0751916385730089 |

|                                                                                                                                                                                           |    |   |                                                                       |          |                |           |          |                     |
|-------------------------------------------------------------------------------------------------------------------------------------------------------------------------------------------|----|---|-----------------------------------------------------------------------|----------|----------------|-----------|----------|---------------------|
| AGIWUR37822                                                                                                                                                                               |    |   |                                                                       |          |                |           |          |                     |
| N2                                                                                                                                                                                        | HS | V | 11758935                                                              | 11760570 | WBGene00011438 | T04F3.3   | T04F3.3  | 0.151601853918443   |
| AGIWUR2595;AGIWUR18129;AGIWUR40947                                                                                                                                                        |    |   |                                                                       |          |                |           |          |                     |
| N2                                                                                                                                                                                        | HS | V | 11760671                                                              | 11761894 | WBGene00077538 | T04F3.5   | T04F3.5  | -0.141358336535891  |
| AGIWUR8529                                                                                                                                                                                |    |   |                                                                       |          |                |           |          |                     |
| N2                                                                                                                                                                                        | HS | V | 11761893                                                              | 11763152 | WBGene00011439 | T04F3.4   | T04F3.4  | 0.503373185595738   |
| AGIWUR40120                                                                                                                                                                               |    |   |                                                                       |          |                |           |          |                     |
| N2                                                                                                                                                                                        | HS | V | 11763140                                                              | 11764382 | WBGene00010075 | F55A11.1  |          | F55A11.1            |
| -0.0244135827478473                                                                                                                                                                       |    |   | AGIWUR6498                                                            |          |                |           |          |                     |
| N2                                                                                                                                                                                        | HS | V | 11764904                                                              | 11767222 | WBGene00006373 | syx-5     | F55A11.2 |                     |
| 0.102407338048046                                                                                                                                                                         |    |   | AGIWUR44160                                                           |          |                |           |          |                     |
| N2                                                                                                                                                                                        | HS | V | 11767328                                                              | 11769899 | WBGene00004768 | sel-11    | F55A11.3 |                     |
| 0.00371434995284048                                                                                                                                                                       |    |   | AGIWUR15843                                                           |          |                |           |          |                     |
| N2                                                                                                                                                                                        | HS | V | 11770456                                                              | 11773495 | WBGene00010077 | F55A11.4  |          | F55A11.4            |
| -0.144139698601393                                                                                                                                                                        |    |   | AGIWUR5298;AGIWUR7111;AGIWUR18868                                     |          |                |           |          |                     |
| N2                                                                                                                                                                                        | HS | V | 11773720                                                              | 11776631 | WBGene00044631 | bus-18    | F55A11.5 |                     |
| 0.184741450816686                                                                                                                                                                         |    |   | AGIWUR15849;AGIWUR24966;AGIWUR28370;AGIWUR28599;AGIWUR31508           |          |                |           |          |                     |
| N2                                                                                                                                                                                        | HS | V | 11776838                                                              | 11783422 | WBGene00010079 | F55A11.6  |          | F55A11.6            |
| 0.197438315878756                                                                                                                                                                         |    |   | AGIWUR34008                                                           |          |                |           |          |                     |
| N2                                                                                                                                                                                        | HS | V | 11783340                                                              | 11784616 | WBGene00010082 | F55A11.11 |          | F55A11.11           |
| -0.063094163883882                                                                                                                                                                        |    |   | AGIWUR13045                                                           |          |                |           |          |                     |
| N2                                                                                                                                                                                        | HS | V | 11784573                                                              | 11787443 | WBGene00010080 | F55A11.7  |          | F55A11.7            |
| -0.185565267257651                                                                                                                                                                        |    |   | AGIWUR11196                                                           |          |                |           |          |                     |
| N2                                                                                                                                                                                        | HS | V | 11788157                                                              | 11789121 | WBGene00010081 | F55A11.8  |          | F55A11.8            |
| -0.0245915068004621                                                                                                                                                                       |    |   | AGIWUR34175                                                           |          |                |           |          |                     |
| N2                                                                                                                                                                                        | HS | V | 11789550                                                              | 11800544 | WBGene00014300 | D2023.1   | D2023.1  | -0.167989029440746  |
| AGIWUR536;AGIWUR3337;AGIWUR6597;AGIWUR7176;AGIWUR7685;AGIWUR12399;AGIWUR14258;AGIWUR20071;AGIWUR22319;AGIWUR22876;AGIWUR27785;AGIWUR29680;AGIWUR30851;AGIWUR30970;AGIWUR37689;AGIWUR41203 |    |   |                                                                       |          |                |           |          |                     |
| N2                                                                                                                                                                                        | HS | V | 11802105                                                              | 11811943 | WBGene00008407 | D2023.3   | D2023.3  | 0.118863115214572   |
| AGIWUR13552                                                                                                                                                                               |    |   |                                                                       |          |                |           |          |                     |
| N2                                                                                                                                                                                        | HS | V | 11817783                                                              | 11822529 | WBGene00004258 | pyc-1     | D2023.2  |                     |
| -0.00557452167099814                                                                                                                                                                      |    |   | AGIWUR3941;AGIWUR5430;AGIWUR24488;AGIWUR26160;AGIWUR38320;AGIWUR39419 |          |                |           |          |                     |
| N2                                                                                                                                                                                        | HS | V | 11825033                                                              | 11825762 | WBGene00008408 | D2023.4   | D2023.4  | 0.547600009227649   |
| AGIWUR28004                                                                                                                                                                               |    |   |                                                                       |          |                |           |          |                     |
| N2                                                                                                                                                                                        | HS | V | 11825897                                                              | 11827067 | WBGene00008409 | mpst-1    | D2023.5  | 0.0338592647091787  |
| AGIWUR2371                                                                                                                                                                                |    |   |                                                                       |          |                |           |          |                     |
| N2                                                                                                                                                                                        | HS | V | 11827306                                                              | 11829370 | WBGene00008410 | D2023.6   | D2023.6  | 0.012369994041272   |
| AGIWUR39106                                                                                                                                                                               |    |   |                                                                       |          |                |           |          |                     |
| N2                                                                                                                                                                                        | HS | V | 11829582                                                              | 11831220 | WBGene00000731 | col-158   | D2023.7  | 0.00797938702283041 |



|                                                                         |    |   |          |          |                |          |          |                     |  |
|-------------------------------------------------------------------------|----|---|----------|----------|----------------|----------|----------|---------------------|--|
| AGIWUR34847                                                             |    |   |          |          |                |          |          |                     |  |
| N2                                                                      | HS | V | 11831203 | 11843625 | WBGene00011261 | nphp-4   | R13H4.1  | 0.119004624514065   |  |
| AGIWUR34994                                                             |    |   |          |          |                |          |          |                     |  |
| N2                                                                      | HS | V | 11845877 | 11852165 | WBGene00001978 | hmp-1    | R13H4.4  | -0.233393604431591  |  |
| AGIWUR6777;AGIWUR24555                                                  |    |   |          |          |                |          |          |                     |  |
| N2                                                                      | HS | V | 11860675 | 11862289 | WBGene00011263 | R13H4.5  | R13H4.5  | 0.149662748613594   |  |
| AGIWUR27117                                                             |    |   |          |          |                |          |          |                     |  |
| N2                                                                      | HS | V | 11863117 | 11864913 | WBGene00011264 | R13H4.6  | R13H4.6  | 0.159082853731244   |  |
| AGIWUR14613                                                             |    |   |          |          |                |          |          |                     |  |
| N2                                                                      | HS | V | 11866438 | 11868234 | WBGene00011265 | R13H4.7  | R13H4.7  | -0.229955043538633  |  |
| AGIWUR35907                                                             |    |   |          |          |                |          |          |                     |  |
| N2                                                                      | HS | V | 11875360 | 11879141 | WBGene00010788 | sulp-4   | K12G11.1 |                     |  |
| 0.150024810176767                                                       |    |   |          |          |                |          |          |                     |  |
| N2                                                                      | HS | V | 11880068 | 11883160 | WBGene00010789 | sulp-5   | K12G11.2 |                     |  |
| 0.00219641418284233                                                     |    |   |          |          |                |          |          |                     |  |
| N2                                                                      | HS | V | 11888236 | 11889634 | WBGene00010790 | sodh-1   | K12G11.3 |                     |  |
| -0.20331037151969                                                       |    |   |          |          |                |          |          |                     |  |
| N2                                                                      | HS | V | 11889719 | 11891194 | WBGene00010791 | sodh-2   | K12G11.4 |                     |  |
| 0.245184183321645                                                       |    |   |          |          |                |          |          |                     |  |
| N2                                                                      | HS | V | 11891812 | 11893451 | WBGene00005967 | srx-76   | K12G11.5 |                     |  |
| -0.114069883629169                                                      |    |   |          |          |                |          |          |                     |  |
| N2                                                                      | HS | V | 11894331 | 11895808 | WBGene00010792 | K12G11.6 | K12G11.6 |                     |  |
| 0.0789190659767156                                                      |    |   |          |          |                |          |          |                     |  |
| N2                                                                      | HS | V | 11899072 | 11916623 | WBGene00004855 | sma-1    | R31.1    | 0.0687306654200883  |  |
| AGIWUR10020;AGIWUR22705;AGIWUR35546;AGIWUR37626;AGIWUR42804;AGIWUR45024 |    |   |          |          |                |          |          |                     |  |
| N2                                                                      | HS | V | 11917564 | 11924654 | WBGene00011270 | R31.2    | R31.2    | 0.0128694818952102  |  |
| AGIWUR240;AGIWUR32724                                                   |    |   |          |          |                |          |          |                     |  |
| N2                                                                      | HS | V | 11924632 | 11927406 | WBGene00003886 | osm-6    | R31.3    | 0.198580499668395   |  |
| AGIWUR28117                                                             |    |   |          |          |                |          |          |                     |  |
| N2                                                                      | HS | V | 11927661 | 11933246 | WBGene00010284 | aman-2   | F58H1.1  | -0.107937370980043  |  |
| AGIWUR18036;AGIWUR33704;AGIWUR35490                                     |    |   |          |          |                |          |          |                     |  |
| N2                                                                      | HS | V | 11933881 | 11935052 | WBGene00010286 | F58H1.3  | F58H1.3  | -0.0293347706093581 |  |
| AGIWUR9064;AGIWUR15551;AGIWUR22696;AGIWUR33803                          |    |   |          |          |                |          |          |                     |  |
| N2                                                                      | HS | V | 11935148 | 11936528 | WBGene00138720 | F58H1.8  | F58H1.8  | 0.221065335517135   |  |
| AGIWUR9603                                                              |    |   |          |          |                |          |          |                     |  |
| N2                                                                      | HS | V | 11936505 | 11937794 | WBGene00001466 | flr-2    | F58H1.4  | 0.0576612556629565  |  |
| AGIWUR5295;AGIWUR13263;AGIWUR24230;AGIWUR38451                          |    |   |          |          |                |          |          |                     |  |
| N2                                                                      | HS | V | 11942625 | 11944656 | WBGene00010289 | F58H1.6  | F58H1.6  | 0.0481183773740668  |  |
| AGIWUR2655;AGIWUR8435;AGIWUR29734                                       |    |   |          |          |                |          |          |                     |  |

|                                                                        |    |   |          |          |                |         |         |                     |
|------------------------------------------------------------------------|----|---|----------|----------|----------------|---------|---------|---------------------|
| N2                                                                     | HS | V | 11958393 | 11962699 | WBGene00010288 | F58H1.5 | F58H1.5 | 0.0108017572002499  |
| AGIWUR13260;AGIWUR22778;AGIWUR23737                                    |    |   |          |          |                |         |         |                     |
| N2                                                                     | HS | V | 11963007 | 11964821 | WBGene00010290 | F58H1.7 | F58H1.7 | 0.0442708253566568  |
| AGIWUR2934;AGIWUR9376;AGIWUR13051;AGIWUR13113;AGIWUR19170;AGIWUR20927  |    |   |          |          |                |         |         |                     |
| N2                                                                     | HS | V | 11975515 | 11976756 | WBGene00000781 | cpr-1   | C52E4.1 | 0.317615783241379   |
| AGIWUR38171;AGIWUR44556                                                |    |   |          |          |                |         |         |                     |
| N2                                                                     | HS | V | 11976777 | 11978459 | WBGene00003235 | mif-2   | C52E4.2 | 0.210840747723266   |
| AGIWUR17960                                                            |    |   |          |          |                |         |         |                     |
| N2                                                                     | HS | V | 11978518 | 11979970 | WBGene00004917 | snr-4   | C52E4.3 | -0.0300465255305831 |
| AGIWUR9177                                                             |    |   |          |          |                |         |         |                     |
| N2                                                                     | HS | V | 11980502 | 11982450 | WBGene00004501 | rpt-1   | C52E4.4 |                     |
| -0.00829466674618828 AGIWUR64;AGIWUR28575;AGIWUR40117                  |    |   |          |          |                |         |         |                     |
| N2                                                                     | HS | V | 11982901 | 11986115 | WBGene00008258 | mans-2  | C52E4.5 | 0.066919567959399   |
| AGIWUR8557                                                             |    |   |          |          |                |         |         |                     |
| N2                                                                     | HS | V | 11991011 | 11993767 | WBGene00000876 | cyl-1   | C52E4.6 | -0.201052625519247  |
| AGIWUR19976;AGIWUR44208                                                |    |   |          |          |                |         |         |                     |
| N2                                                                     | HS | V | 11994295 | 11995858 | WBGene00008259 | C52E4.7 | C52E4.7 | 0.102194490936203   |
| AGIWUR33143                                                            |    |   |          |          |                |         |         |                     |
| N2                                                                     | HS | V | 11995868 | 12001965 | WBGene00001553 | gcy-33  | F57F5.2 | 0.19375713607786    |
| AGIWUR6682                                                             |    |   |          |          |                |         |         |                     |
| N2                                                                     | HS | V | 12003028 | 12004600 | WBGene00010204 | F57F5.1 | F57F5.1 | -0.146742379470361  |
| AGIWUR12276;AGIWUR20040;AGIWUR32898                                    |    |   |          |          |                |         |         |                     |
| N2                                                                     | HS | V | 12004616 | 12006605 | WBGene00010205 | F57F5.3 | F57F5.3 | 0.110285479174008   |
| AGIWUR39013                                                            |    |   |          |          |                |         |         |                     |
| N2                                                                     | HS | V | 12009537 | 12013605 | WBGene00000073 | add-2   | F57F5.4 | 0.256181098762333   |
| AGIWUR9329;AGIWUR31353;AGIWUR39004                                     |    |   |          |          |                |         |         |                     |
| N2                                                                     | HS | V | 12014385 | 12032131 | WBGene00004032 | pkc-1   | F57F5.5 | 0.0517331734301596  |
| AGIWUR8741;AGIWUR15869;AGIWUR21697;AGIWUR35101;AGIWUR39298;AGIWUR41185 |    |   |          |          |                |         |         |                     |
| N2                                                                     | HS | V | 12032257 | 12040873 | WBGene00002241 | kup-1   | F10C2.2 | 0.0805562778532867  |
| AGIWUR7433                                                             |    |   |          |          |                |         |         |                     |
| N2                                                                     | HS | V | 12041556 | 12045347 | WBGene00008645 | F10C2.4 | F10C2.4 | -0.0792322882288854 |
| AGIWUR15408                                                            |    |   |          |          |                |         |         |                     |
| N2                                                                     | HS | V | 12045432 | 12048631 | WBGene00008646 | F10C2.5 | F10C2.5 | 0.219726243213408   |
| AGIWUR42690                                                            |    |   |          |          |                |         |         |                     |
| N2                                                                     | HS | V | 12048745 | 12052182 | WBGene00001095 | dars-2  | F10C2.6 | 0.0135141979542972  |
| AGIWUR15266;AGIWUR20285;AGIWUR42451                                    |    |   |          |          |                |         |         |                     |
| N2                                                                     | HS | V | 12053952 | 12056320 | WBGene00008647 | F10C2.7 | F10C2.7 | 0.106262109784184   |
| AGIWUR18774                                                            |    |   |          |          |                |         |         |                     |
| N2                                                                     | HS | V | 12056575 | 12059747 | WBGene00011087 | R07B7.2 | R07B7.2 | 0.159088492912446   |



|                                                                   |    |   |          |          |                |           |         |                     |
|-------------------------------------------------------------------|----|---|----------|----------|----------------|-----------|---------|---------------------|
| N2                                                                | HS | V | 12118828 | 12120814 | WBGene00007551 | C13C4.7   | C13C4.7 | 0.0337536096702404  |
| AGIWUR3454                                                        |    |   |          |          |                |           |         |                     |
| N2                                                                | HS | V | 12121587 | 12125096 | WBGene00007550 | C13C4.6   | C13C4.6 | 0.218312625572199   |
| AGIWUR31466                                                       |    |   |          |          |                |           |         |                     |
| N2                                                                | HS | V | 12124850 | 12130788 | WBGene00007757 | C27A7.6   | C27A7.6 | -0.246498696455513  |
| AGIWUR40902                                                       |    |   |          |          |                |           |         |                     |
| N2                                                                | HS | V | 12131442 | 12137395 | WBGene00007753 | C27A7.1   | C27A7.1 | 0.278564115903908   |
| AGIWUR29919                                                       |    |   |          |          |                |           |         |                     |
| N2                                                                | HS | V | 12138354 | 12140322 | WBGene00007754 | C27A7.2   | C27A7.2 | 0.0967099704216325  |
| AGIWUR35166                                                       |    |   |          |          |                |           |         |                     |
| N2                                                                | HS | V | 12140876 | 12144259 | WBGene00007755 | C27A7.3   | C27A7.3 | 0.25265259127556    |
| AGIWUR1656;AGIWUR4008;AGIWUR17633                                 |    |   |          |          |                |           |         |                     |
| N2                                                                | HS | V | 12144295 | 12150689 | WBGene00000490 | che-11    | C27A7.4 | -0.0210367750010834 |
| AGIWUR4075                                                        |    |   |          |          |                |           |         |                     |
| N2                                                                | HS | V | 12153076 | 12154264 | WBGene00007758 | C27A7.8   | C27A7.8 | 0.0829416676782078  |
| AGIWUR21800;AGIWUR23789                                           |    |   |          |          |                |           |         |                     |
| N2                                                                | HS | V | 12154263 | 12154654 | WBGene00007759 | C27A7.9   | C27A7.9 | 0.053613763211958   |
| AGIWUR18457                                                       |    |   |          |          |                |           |         |                     |
| N2                                                                | HS | V | 12154875 | 12162299 | WBGene00007756 | C27A7.5   | C27A7.5 | -0.0456031928586196 |
| AGIWUR4399                                                        |    |   |          |          |                |           |         |                     |
| N2                                                                | HS | V | 12163206 | 12164535 | WBGene00005592 | srj-4     | C27A7.7 | -0.175656592553961  |
| AGIWUR26885                                                       |    |   |          |          |                |           |         |                     |
| N2                                                                | HS | V | 12165212 | 12166662 | WBGene00012147 | VC27A7L.1 |         | VC27A7L.1           |
| -0.0899647640337538 AGIWUR16217                                   |    |   |          |          |                |           |         |                     |
| N2                                                                | HS | V | 12166706 | 12167753 | WBGene00000614 | col-37    | ZK863.2 | 0.145944642951026   |
| AGIWUR43462                                                       |    |   |          |          |                |           |         |                     |
| N2                                                                | HS | V | 12168222 | 12170208 | WBGene00014122 | ZK863.1   | ZK863.1 | -0.0507042086484235 |
| AGIWUR734;AGIWUR13262;AGIWUR31650                                 |    |   |          |          |                |           |         |                     |
| N2                                                                | HS | V | 12177088 | 12179438 | WBGene00044790 | cllec-224 |         | ZK863.9             |
| 0.0422426331665329 AGIWUR9415;AGIWUR27979;AGIWUR28764;AGIWUR32666 |    |   |          |          |                |           |         |                     |
| N2                                                                | HS | V | 12179503 | 12181410 | WBGene00014123 | elpc-3    | ZK863.3 | 0.0639967692566241  |
| AGIWUR36908                                                       |    |   |          |          |                |           |         |                     |
| N2                                                                | HS | V | 12181501 | 12184194 | WBGene00014124 | usip-1    | ZK863.4 | -0.175246840242483  |
| AGIWUR10858                                                       |    |   |          |          |                |           |         |                     |
| N2                                                                | HS | V | 12184949 | 12186245 | WBGene00005082 | srd-4     | ZK863.5 | -0.132430602524128  |
| AGIWUR4801                                                        |    |   |          |          |                |           |         |                     |
| N2                                                                | HS | V | 12186335 | 12187496 | WBGene00014125 | ZK863.8   | ZK863.8 | 0.0234345207799773  |
| AGIWUR2181                                                        |    |   |          |          |                |           |         |                     |
| N2                                                                | HS | V | 12191519 | 12192211 | WBGene00001088 | dpy-30    | ZK863.6 | 0.0504224361738554  |

|                                                            |    |   |          |             |                |         |          |                     |  |
|------------------------------------------------------------|----|---|----------|-------------|----------------|---------|----------|---------------------|--|
| AGIWUR14525;AGIWUR23895;AGIWUR28944;AGIWUR35982            |    |   |          |             |                |         |          |                     |  |
| N2                                                         | HS | V | 12192273 | 12194445    | WBGene00004384 | rnp-1   | ZK863.7  | -0.115225949637322  |  |
| AGIWUR10525;AGIWUR31476;AGIWUR42654                        |    |   |          |             |                |         |          |                     |  |
| N2                                                         | HS | V | 12194457 | 12205494    | WBGene00014098 | ogdh-2  | ZK836.2  | -0.159980674342709  |  |
| AGIWUR6700;AGIWUR15933;AGIWUR32427                         |    |   |          |             |                |         |          |                     |  |
| N2                                                         | HS | V | 12213327 | 12225935    | WBGene00006874 | vab-8   | K12F2.2  | 0.0819584641716062  |  |
| AGIWUR29761                                                |    |   |          |             |                |         |          |                     |  |
| N2                                                         | HS | V | 12226816 | 12234343    | WBGene00003515 | myo-3   | K12F2.1  | -0.0175048742546515 |  |
| AGIWUR39311                                                |    |   |          |             |                |         |          |                     |  |
| N2                                                         | HS | V | 12236895 | 12238599    | WBGene00011448 | tag-348 | T04H1.1  |                     |  |
| 0.000594861114506351                                       |    |   |          | AGIWUR7345  |                |         |          |                     |  |
| N2                                                         | HS | V | 12238938 | 12240316    | WBGene00005827 | srw-80  | T04H1.10 |                     |  |
| -0.226525162628446                                         |    |   |          | AGIWUR21658 |                |         |          |                     |  |
| N2                                                         | HS | V | 12241409 | 12241945    | WBGene00011450 | ttr-22  | T04H1.3  | 0.188491110698187   |  |
| AGIWUR3349;AGIWUR4769;AGIWUR13278;AGIWUR25891              |    |   |          |             |                |         |          |                     |  |
| N2                                                         | HS | V | 12241962 | 12245059    | WBGene00011449 | T04H1.2 | T04H1.2  | -0.182039425045737  |  |
| AGIWUR2792;AGIWUR12771;AGIWUR16025;AGIWUR31410;AGIWUR38140 |    |   |          |             |                |         |          |                     |  |
| N2                                                         | HS | V | 12245594 | 12251246    | WBGene00004296 | rad-50  | T04H1.4  | 0.381640692712782   |  |
| AGIWUR21464                                                |    |   |          |             |                |         |          |                     |  |
| N2                                                         | HS | V | 12251341 | 12252407    | WBGene00011451 | T04H1.5 | T04H1.5  | -0.327888749540161  |  |
| AGIWUR10392                                                |    |   |          |             |                |         |          |                     |  |
| N2                                                         | HS | V | 12252623 | 12255450    | WBGene00003075 | lrx-1   | T04H1.6  | 0.267562272303332   |  |
| AGIWUR1303                                                 |    |   |          |             |                |         |          |                     |  |
| N2                                                         | HS | V | 12255547 | 12258804    | WBGene00011452 | ugt-55  | T04H1.7  | -0.22509520854534   |  |
| AGIWUR11839                                                |    |   |          |             |                |         |          |                     |  |
| N2                                                         | HS | V | 12258982 | 12261205    | WBGene00011453 | ugt-56  | T04H1.8  | 0.0656086575316372  |  |
| AGIWUR34483;AGIWUR37835                                    |    |   |          |             |                |         |          |                     |  |
| N2                                                         | HS | V | 12261804 | 12263368    | WBGene00006539 | tbb-6   | T04H1.9  | -0.0775948760133218 |  |
| AGIWUR44382                                                |    |   |          |             |                |         |          |                     |  |
| N2                                                         | HS | V | 12263369 | 12263896    | WBGene00010091 | ssp-35  | F55C5.1  | 0.122005614633084   |  |
| AGIWUR39324                                                |    |   |          |             |                |         |          |                     |  |
| N2                                                         | HS | V | 12264002 | 12265492    | WBGene00010092 | F55C5.2 | F55C5.2  | 0.469266619307438   |  |
| AGIWUR41701                                                |    |   |          |             |                |         |          |                     |  |
| N2                                                         | HS | V | 12265707 | 12269549    | WBGene00006677 | twk-24  | F55C5.3  | 0.253867909502321   |  |
| AGIWUR23192                                                |    |   |          |             |                |         |          |                     |  |
| N2                                                         | HS | V | 12270271 | 12271551    | WBGene00010094 | tsfm-1  | F55C5.5  | 0.0158328910713532  |  |
| AGIWUR2050;AGIWUR9824;AGIWUR31526                          |    |   |          |             |                |         |          |                     |  |
| N2                                                         | HS | V | 12271873 | 12275676    | WBGene00010093 | capg-2  | F55C5.4  | -0.0197109091099925 |  |
| AGIWUR40113                                                |    |   |          |             |                |         |          |                     |  |

|                                                                        |    |   |                                                                                     |          |                |           |                            |
|------------------------------------------------------------------------|----|---|-------------------------------------------------------------------------------------|----------|----------------|-----------|----------------------------|
| N2                                                                     | HS | V | 12275625                                                                            | 12277046 | WBGene00044791 | bnc-1     | F55C5.11                   |
| 0.144686804082108                                                      |    |   | AGIWUR24922                                                                         |          |                |           |                            |
| N2                                                                     | HS | V | 12279506                                                                            | 12281461 | WBGene00010095 | F55C5.6   | F55C5.6 0.0942642506128291 |
| AGIWUR36761                                                            |    |   |                                                                                     |          |                |           |                            |
| N2                                                                     | HS | V | 12283487                                                                            | 12283999 | WBGene00010098 | F55C5.10  | F55C5.10                   |
| -0.170066558005226                                                     |    |   | AGIWUR24288                                                                         |          |                |           |                            |
| N2                                                                     | HS | V | 12284060                                                                            | 12288615 | WBGene00010096 | rskd-1    | F55C5.7 0.0293469273599953 |
| AGIWUR20265;AGIWUR20565;AGIWUR36910;AGIWUR40876                        |    |   |                                                                                     |          |                |           |                            |
| N2                                                                     | HS | V | 12288922                                                                            | 12291658 | WBGene00010097 | srpa-68   | F55C5.8 -0.110031369009447 |
| AGIWUR4738;AGIWUR11042;AGIWUR28005;AGIWUR30627;AGIWUR33642;AGIWUR44914 |    |   |                                                                                     |          |                |           |                            |
| N2                                                                     | HS | V | 12292214                                                                            | 12293802 | WBGene00005241 | srh-16    | F55C5.9 0.08772154156207   |
| AGIWUR30040                                                            |    |   |                                                                                     |          |                |           |                            |
| N2                                                                     | HS | V | 12302484                                                                            | 12306978 | WBGene00001493 | frm-7     | C51F7.1 0.137044864083439  |
| AGIWUR18582                                                            |    |   |                                                                                     |          |                |           |                            |
| N2                                                                     | HS | V | 12307490                                                                            | 12308658 | WBGene00005202 | srg-45    | C51F7.2 0.1058151878691    |
| AGIWUR10609                                                            |    |   |                                                                                     |          |                |           |                            |
| N2                                                                     | HS | V | 12308849                                                                            | 12310342 | WBGene00011014 | hpo-30    | R04F11.1                   |
| 0.211658487114976                                                      |    |   | AGIWUR27617                                                                         |          |                |           |                            |
| N2                                                                     | HS | V | 12314919                                                                            | 12317180 | WBGene00011016 | R04F11.3  | R04F11.3                   |
| -0.0311287339431487                                                    |    |   | AGIWUR28374                                                                         |          |                |           |                            |
| N2                                                                     | HS | V | 12317278                                                                            | 12318019 | WBGene00011017 | R04F11.5  | R04F11.5                   |
| 0.248470364650117                                                      |    |   | AGIWUR26518                                                                         |          |                |           |                            |
| N2                                                                     | HS | V | 12318385                                                                            | 12320229 | WBGene00011015 | R04F11.2  | R04F11.2                   |
| 0.168061956339973                                                      |    |   | AGIWUR549;AGIWUR9276;AGIWUR21822;AGIWUR24633;AGIWUR37581;AGIWUR41818                |          |                |           |                            |
| N2                                                                     | HS | V | 12320187                                                                            | 12337744 | WBGene00006668 | twk-13    | R04F11.4                   |
| 0.088172464858153                                                      |    |   | AGIWUR28680;AGIWUR39921;AGIWUR40661                                                 |          |                |           |                            |
| N2                                                                     | HS | V | 12342314                                                                            | 12343469 | WBGene00009092 | tomm-20   | F23H12.2                   |
| 0.116151237001173                                                      |    |   | AGIWUR10782                                                                         |          |                |           |                            |
| N2                                                                     | HS | V | 12344188                                                                            | 12345919 | WBGene00004898 | snb-2     | F23H12.1                   |
| 0.10166527705481                                                       |    |   | AGIWUR13735;AGIWUR22688;AGIWUR24346;AGIWUR26228;AGIWUR32107;AGIWUR39035;AGIWUR41382 |          |                |           |                            |
| N2                                                                     | HS | V | 12345935                                                                            | 12350451 | WBGene00009093 | F23H12.3  | F23H12.3                   |
| 0.39195810292583                                                       |    |   | AGIWUR18327                                                                         |          |                |           |                            |
| N2                                                                     | HS | V | 12352994                                                                            | 12354314 | WBGene00005018 | sqt-3     | F23H12.4                   |
| -0.194028452917516                                                     |    |   | AGIWUR30261;AGIWUR42458                                                             |          |                |           |                            |
| N2                                                                     | HS | V | 12356256                                                                            | 12357309 | WBGene00050938 | F23H12.11 | F23H12.11                  |
| 0.0573540010668934                                                     |    |   | AGIWUR12590;AGIWUR34990                                                             |          |                |           |                            |
| N2                                                                     | HS | V | 12358647                                                                            | 12363691 | WBGene00009094 | F23H12.5  | F23H12.5                   |
| 0.253617097783259                                                      |    |   | AGIWUR40074                                                                         |          |                |           |                            |
| N2                                                                     | HS | V | 12363754                                                                            | 12369537 | WBGene00001539 | gcy-13    | F23H12.6                   |

|                     |                                                             |          |                |                 |           |
|---------------------|-------------------------------------------------------------|----------|----------------|-----------------|-----------|
| -0.023369263930423  | AGIWUR26383                                                 |          |                |                 |           |
| N2 HS V             | 12371730                                                    | 12372870 | WBGene00009095 | F23H12.7        | F23H12.7  |
| -0.18798975168523   | AGIWUR33584                                                 |          |                |                 |           |
| N2 HS V             | 12377556                                                    | 12378832 | WBGene00010461 | K01D12.1        | K01D12.1  |
| 0.0300134108484791  | AGIWUR30600                                                 |          |                |                 |           |
| N2 HS V             | 12381254                                                    | 12385623 | WBGene00010463 | K01D12.3        | K01D12.3  |
| 0.0240561102199015  | AGIWUR38470                                                 |          |                |                 |           |
| N2 HS V             | 12387041                                                    | 12395706 | WBGene00006669 | twk-14 K01D12.4 |           |
| -0.0580958179876285 | AGIWUR11110;AGIWUR24894;AGIWUR31992                         |          |                |                 |           |
| N2 HS V             | 12397845                                                    | 12398783 | WBGene00010464 | K01D12.5        | K01D12.5  |
| 0.104622707692187   | AGIWUR7580                                                  |          |                |                 |           |
| N2 HS V             | 12398759                                                    | 12400859 | WBGene00010465 | K01D12.6        | K01D12.6  |
| -0.0674478387072623 | AGIWUR951;AGIWUR1257;AGIWUR19449;AGIWUR39885                |          |                |                 |           |
| N2 HS V             | 12402655                                                    | 12403234 | WBGene00010467 | K01D12.8        | K01D12.8  |
| -0.0294999821090909 | AGIWUR5069;AGIWUR9752;AGIWUR18695;AGIWUR44052               |          |                |                 |           |
| N2 HS V             | 12403942                                                    | 12404651 | WBGene00010468 | K01D12.9        | K01D12.9  |
| 0.349532116543902   | AGIWUR35425                                                 |          |                |                 |           |
| N2 HS V             | 12406229                                                    | 12407017 | WBGene00010469 | K01D12.10       | K01D12.10 |
| 0.132958662671906   | AGIWUR443                                                   |          |                |                 |           |
| N2 HS V             | 12407428                                                    | 12408592 | WBGene00010470 | cdr-4 K01D12.11 |           |
| 0.100735232582723   | AGIWUR3045                                                  |          |                |                 |           |
| N2 HS V             | 12409369                                                    | 12410513 | WBGene00010473 | hrg-2 K01D12.14 |           |
| 0.425661871747963   | AGIWUR26565                                                 |          |                |                 |           |
| N2 HS V             | 12410879                                                    | 12412091 | WBGene00010472 | cdr-7 K01D12.13 |           |
| 0.170525774790885   | AGIWUR13221                                                 |          |                |                 |           |
| N2 HS V             | 12412506                                                    | 12413698 | WBGene00010471 | cdr-6 K01D12.12 |           |
| -0.176454607090168  | AGIWUR43496                                                 |          |                |                 |           |
| N2 HS V             | 12414640                                                    | 12415709 | WBGene00008296 | cdr-2 C54D10.1  |           |
| 0.450206136133499   | AGIWUR22071                                                 |          |                |                 |           |
| N2 HS V             | 12416358                                                    | 12417377 | WBGene00008297 | cdr-3 C54D10.2  |           |
| 0.0890046440653496  | AGIWUR40901                                                 |          |                |                 |           |
| N2 HS V             | 12418592                                                    | 12419428 | WBGene00008298 | C54D10.3        | C54D10.3  |
| 0.113972025182138   | AGIWUR16125;AGIWUR29602;AGIWUR33587;AGIWUR35265;AGIWUR38616 |          |                |                 |           |
| N2 HS V             | 12419492                                                    | 12420944 | WBGene00008299 | C54D10.4        | C54D10.4  |
| -0.201341408527899  | AGIWUR12106                                                 |          |                |                 |           |
| N2 HS V             | 12429357                                                    | 12431196 | WBGene00008300 | C54D10.5        | C54D10.5  |
| 0.11482332069722    | AGIWUR5470                                                  |          |                |                 |           |
| N2 HS V             | 12431368                                                    | 12432289 | WBGene00045400 | C54D10.13       | C54D10.13 |
| 0.235334829200941   | AGIWUR3457                                                  |          |                |                 |           |

|    |    |   |                                                                        |                                                             |                |           |           |                     |
|----|----|---|------------------------------------------------------------------------|-------------------------------------------------------------|----------------|-----------|-----------|---------------------|
| N2 | HS | V | 12432365                                                               | 12433817                                                    | WBGene00005249 | srh-25    | C54D10.6  |                     |
|    |    |   | -0.119961575346352                                                     | AGIWUR17191                                                 |                |           |           |                     |
| N2 | HS | V | 12434361                                                               | 12436952                                                    | WBGene00044787 | pals-36   | C54D10.12 |                     |
|    |    |   | 0.712841671702597                                                      | AGIWUR21228                                                 |                |           |           |                     |
| N2 | HS | V | 12437499                                                               | 12441266                                                    | WBGene00138721 | pals-37   | C54D10.14 |                     |
|    |    |   | 1.81416307026647                                                       | AGIWUR22417                                                 |                |           |           |                     |
| N2 | HS | V | 12445184                                                               | 12446956                                                    | WBGene00008302 | pals-38   | C54D10.8  |                     |
|    |    |   | 0.356765162981817                                                      | AGIWUR44320                                                 |                |           |           |                     |
| N2 | HS | V | 12447499                                                               | 12448661                                                    | WBGene00008303 | C54D10.9  |           | C54D10.9            |
|    |    |   | 0.267113219734943                                                      | AGIWUR2442                                                  |                |           |           |                     |
| N2 | HS | V | 12448685                                                               | 12450002                                                    | WBGene00008304 | C54D10.10 |           | C54D10.10           |
|    |    |   | 0.549091472141644                                                      | AGIWUR21029                                                 |                |           |           |                     |
| N2 | HS | V | 12450807                                                               | 12453336                                                    | WBGene00009200 | F28C1.1   | F28C1.1   | 0.0219100469347033  |
|    |    |   | AGIWUR34773                                                            |                                                             |                |           |           |                     |
| N2 | HS | V | 12453955                                                               | 12463008                                                    | WBGene00001179 | egl-10    | F28C1.2   | -0.068216529798129  |
|    |    |   | AGIWUR5517;AGIWUR14567;AGIWUR19931;AGIWUR28668;AGIWUR29452;AGIWUR33579 |                                                             |                |           |           |                     |
| N2 | HS | V | 12468683                                                               | 12473533                                                    | WBGene00009201 | F28C1.3   | F28C1.3   | -0.139270465090457  |
|    |    |   | AGIWUR4004;AGIWUR7132;AGIWUR13049;AGIWUR17663;AGIWUR36408              |                                                             |                |           |           |                     |
| N2 | HS | V | 12478413                                                               | 12484442                                                    | WBGene00000228 | atn-1     | W04D2.1   | 0.0311553624040206  |
|    |    |   | AGIWUR26457;AGIWUR30926                                                |                                                             |                |           |           |                     |
| N2 | HS | V | 12484885                                                               | 12486068                                                    | WBGene00012242 | srt-39    | W04D2.2   | -0.284078456014326  |
|    |    |   | AGIWUR42463                                                            |                                                             |                |           |           |                     |
| N2 | HS | V | 12487266                                                               | 12493264                                                    | WBGene00002133 | inx-11    | W04D2.3   | 0.170970361246869   |
|    |    |   | AGIWUR21702                                                            |                                                             |                |           |           |                     |
| N2 | HS | V | 12493239                                                               | 12494622                                                    | WBGene00012244 | mrps-11   | W04D2.5   | 0.0955687521020199  |
|    |    |   | AGIWUR5065;AGIWUR13820;AGIWUR15166                                     |                                                             |                |           |           |                     |
| N2 | HS | V | 12494728                                                               | 12497755                                                    | WBGene00012243 | W04D2.4   | W04D2.4   | 0.12830056378851    |
|    |    |   | AGIWUR26542                                                            |                                                             |                |           |           |                     |
| N2 | HS | V | 12498213                                                               | 12503738                                                    | WBGene00012245 | W04D2.6   | W04D2.6   | -0.0143733352287803 |
|    |    |   | AGIWUR19864;AGIWUR37066                                                |                                                             |                |           |           |                     |
| N2 | HS | V | 12505244                                                               | 12506260                                                    | WBGene00012145 | nlp-46    | T28H10.4  |                     |
|    |    |   | 0.262723935360769                                                      | AGIWUR16141                                                 |                |           |           |                     |
| N2 | HS | V | 12510645                                                               | 12512201                                                    | WBGene00012143 | T28H10.2  |           | T28H10.2            |
|    |    |   | 0.181541145071902                                                      | AGIWUR10112;AGIWUR28923;AGIWUR29056;AGIWUR36962             |                |           |           |                     |
| N2 | HS | V | 12512986                                                               | 12514941                                                    | WBGene00012144 | T28H10.3  |           | T28H10.3            |
|    |    |   | 0.0390496103077478                                                     | AGIWUR15495;AGIWUR21042;AGIWUR21714;AGIWUR33773;AGIWUR42383 |                |           |           |                     |
| N2 | HS | V | 12514875                                                               | 12517205                                                    | WBGene00000285 | cal-1     | C13C12.1  |                     |
|    |    |   | 0.0756945844158441                                                     | AGIWUR31413                                                 |                |           |           |                     |
| N2 | HS | V | 12523647                                                               | 12525656                                                    | WBGene00007552 | C13C12.2  |           | C13C12.2            |



|    |    |   |                                                                                                                         |                                     |          |                |          |                             |
|----|----|---|-------------------------------------------------------------------------------------------------------------------------|-------------------------------------|----------|----------------|----------|-----------------------------|
| N2 | HS | V | 0.17471537146953<br>AGIWUR12145                                                                                         | AGIUR2397; AGIWUR13466; AGIWUR39611 |          |                |          |                             |
| N2 | HS | V | 0.0638657401252587<br>AGIWUR13978                                                                                       | 12527058                            | 12528023 | WBGene00009721 | F45D3.1  | F45D3.1 -0.169823617225411  |
| N2 | HS | V | 0.087051966717409<br>AGIWUR7531                                                                                         | 12541040                            | 12542973 | WBGene00009722 | F45D3.2  | F45D3.2 0.0618551338332747  |
| N2 | HS | V | 0.204445569435162<br>AGIWUR10584; AGIWUR22383                                                                           | 12549216                            | 12550385 | WBGene00009723 | F45D3.3  | F45D3.3 -0.0237296862481564 |
| N2 | HS | V | 0.0131257230511679<br>AGIWUR12278; AGIWUR20293; AGIWUR29900                                                             | 12552211                            | 12553301 | WBGene00009724 | F45D3.4  | F45D3.4 0.0118067634597283  |
| N2 | HS | V | 0.214522969956683<br>AGIWUR14293                                                                                        | 12560710                            | 12563383 | WBGene00004759 | sel-1    | F45D3.5 -0.114687938635515  |
| N2 | HS | V | 0.050359650147854<br>AGIWUR12278; AGIWUR20293; AGIWUR29900                                                              | 12563487                            | 12565785 | WBGene00008452 | mrps-5   | E02A10.1                    |
| N2 | HS | V | 0.244672882122202<br>AGIWUR21249                                                                                        | 12566016                            | 12567951 | WBGene00008454 | E02A10.4 | E02A10.4                    |
| N2 | HS | V | 0.0364236731161895<br>AGIWUR35126                                                                                       | 12575308                            | 12576895 | WBGene00001732 | grl-23   | E02A10.2                    |
| N2 | HS | V | -0.203586279194708<br>AGIWUR1496; AGIWUR3722; AGIWUR18897                                                               | 12583726                            | 12587991 | WBGene00008453 | E02A10.3 | E02A10.3                    |
| N2 | HS | V | 0.221981375583661<br>AGIWUR1496; AGIWUR3722; AGIWUR18897                                                                | 12588309                            | 12589644 | WBGene00007584 | C14C10.1 | C14C10.1                    |
| N2 | HS | V | 0.154653471551107<br>AGIWUR2794                                                                                         | 12589633                            | 12590717 | WBGene00007590 | ttr-43   | C14C10.7                    |
| N2 | HS | V | 0.0683499740348408<br>AGIWUR29794                                                                                       | 12590979                            | 12592477 | WBGene00007585 | C14C10.2 | C14C10.2                    |
| N2 | HS | V | 0.154653471551107<br>AGIWUR2163; AGIWUR9585; AGIWUR29812; AGIWUR36093; AGIWUR40434; AGIWUR44127                         | 12592568                            | 12596296 | WBGene00007587 | mma-1    | C14C10.4                    |
| N2 | HS | V | 0.154653471551107<br>AGIWUR23046                                                                                        | 12596393                            | 12599151 | WBGene00007586 | ril-2    | C14C10.3                    |
| N2 | HS | V | 0.154653471551107<br>AGIWUR6809; AGIWUR15074; AGIWUR31193; AGIWUR31739                                                  | 12600192                            | 12607304 | WBGene00007588 | C14C10.5 | C14C10.5                    |
| N2 | HS | V | 0.154653471551107<br>AGIWUR13491; AGIWUR21045; AGIWUR34022; AGIWUR39851                                                 | 12607413                            | 12608107 | WBGene00007589 | erg-28   | C14C10.6                    |
| N2 | HS | V | 0.154653471551107<br>AGIWUR24094                                                                                        | 12609826                            | 12610857 | WBGene00013853 | ZC116.1  | ZC116.1 -0.0402189003144002 |
| N2 | HS | V | 0.154653471551107<br>AGIWUR38261                                                                                        | 12611329                            | 12628738 | WBGene00013855 | ZC116.3  | ZC116.3 0.0683499740348408  |
| N2 | HS | V | 0.154653471551107<br>AGIWUR14; AGIWUR5873; AGIWUR10800; AGIWUR12287; AGIWUR13102; AGIWUR21054; AGIWUR30097; AGIWUR30478 | 12628957                            | 12629905 | WBGene00044198 | F56H9.6  | F56H9.6 0.154653471551107   |
| N2 | HS | V | 0.154653471551107<br>AGIWUR33770                                                                                        |                                     |          |                |          |                             |

|                                                                                                                        |    |   |          |          |                |          |          |                     |
|------------------------------------------------------------------------------------------------------------------------|----|---|----------|----------|----------------|----------|----------|---------------------|
| N2                                                                                                                     | HS | V | 12630170 | 12632148 | WBGene00006004 | srx-113  | F56H9.1  | -0.0758038060535022 |
| AGIWUR6265;AGIWUR43399                                                                                                 |    |   |          |          |                |          |          |                     |
| N2                                                                                                                     | HS | V | 12632490 | 12633638 | WBGene00050977 | F56H9.7  | F56H9.7  | 0.236117123439774   |
| AGIWUR8350;AGIWUR11631;AGIWUR21197                                                                                     |    |   |          |          |                |          |          |                     |
| N2                                                                                                                     | HS | V | 12637663 | 12638237 | WBGene00010174 | F56H9.2  | F56H9.2  | -0.0439911665449877 |
| AGIWUR42483                                                                                                            |    |   |          |          |                |          |          |                     |
| N2                                                                                                                     | HS | V | 12638852 | 12640470 | WBGene00001670 | gpa-8    | F56H9.3  | 0.122799945021595   |
| AGIWUR36549                                                                                                            |    |   |          |          |                |          |          |                     |
| N2                                                                                                                     | HS | V | 12646827 | 12649313 | WBGene00001671 | gpa-9    | F56H9.4  | 0.263456826877945   |
| AGIWUR41400                                                                                                            |    |   |          |          |                |          |          |                     |
| N2                                                                                                                     | HS | V | 12649858 | 12658718 | WBGene00003011 | lin-25   | F56H9.5  | 0.137252086302587   |
| AGIWUR40170                                                                                                            |    |   |          |          |                |          |          |                     |
| N2                                                                                                                     | HS | V | 12658668 | 12659687 | WBGene00012277 | ccch-3   | W05B10.2 |                     |
| 0.0626333324909636 AGIWUR913;AGIWUR4527;AGIWUR37880;AGIWUR44491                                                        |    |   |          |          |                |          |          |                     |
| N2                                                                                                                     | HS | V | 12659704 | 12660330 | WBGene00012276 | his-74   | W05B10.1 |                     |
| -0.20803359202705 AGIWUR21591                                                                                          |    |   |          |          |                |          |          |                     |
| N2                                                                                                                     | HS | V | 12661304 | 12661659 | WBGene00012278 | W05B10.3 | W05B10.3 |                     |
| 0.202532155983281                                                                                                      |    |   |          |          |                |          |          |                     |
| AGIWUR5588;AGIWUR11557;AGIWUR17691;AGIWUR29657;AGIWUR30731;AGIWUR31536;AGIWUR32212;AGIWUR34463;AGIWUR43549;AGIWUR44193 |    |   |          |          |                |          |          |                     |
| N2                                                                                                                     | HS | V | 12668226 | 12669689 | WBGene00012279 | W05B10.4 | W05B10.4 |                     |
| 0.133786441360577 AGIWUR32489                                                                                          |    |   |          |          |                |          |          |                     |
| N2                                                                                                                     | HS | V | 12670907 | 12672726 | WBGene00006007 | srx-116  | W05B10.5 |                     |
| -0.209265648940246 AGIWUR42124                                                                                         |    |   |          |          |                |          |          |                     |
| N2                                                                                                                     | HS | V | 12680107 | 12692364 | WBGene00010735 | frpr-15  | K10C8.2  | 0.092980466054565   |
| AGIWUR19256;AGIWUR21031                                                                                                |    |   |          |          |                |          |          |                     |
| N2                                                                                                                     | HS | V | 12692486 | 12695255 | WBGene00010734 | parn-1   | K10C8.1  | 0.163387709132988   |
| AGIWUR5380;AGIWUR29696                                                                                                 |    |   |          |          |                |          |          |                     |
| N2                                                                                                                     | HS | V | 12696225 | 12696877 | WBGene00010737 | K10C8.4  | K10C8.4  | 0.147687415347023   |
| AGIWUR3597                                                                                                             |    |   |          |          |                |          |          |                     |
| N2                                                                                                                     | HS | V | 12697794 | 12704273 | WBGene00010736 | istr-1   | K10C8.3  | -0.136086534433582  |
| AGIWUR17103;AGIWUR21085;AGIWUR33300;AGIWUR35232                                                                        |    |   |          |          |                |          |          |                     |
| N2                                                                                                                     | HS | V | 12704382 | 12707761 | WBGene00011242 | R11D1.1  | R11D1.1  | 0.0607773264919729  |
| AGIWUR39860                                                                                                            |    |   |          |          |                |          |          |                     |
| N2                                                                                                                     | HS | V | 12708678 | 12710700 | WBGene00011243 | R11D1.2  | R11D1.2  | 0.0252173909426494  |
| AGIWUR7737                                                                                                             |    |   |          |          |                |          |          |                     |
| N2                                                                                                                     | HS | V | 12711293 | 12712109 | WBGene00011244 | R11D1.3  | R11D1.3  | 0.359375310129654   |
| AGIWUR19840                                                                                                            |    |   |          |          |                |          |          |                     |
| N2                                                                                                                     | HS | V | 12713035 | 12714220 | WBGene00011245 | R11D1.4  | R11D1.4  | 0.155470182218392   |

|                                                           |    |   |                                                                                 |          |                |          |          |                     |  |
|-----------------------------------------------------------|----|---|---------------------------------------------------------------------------------|----------|----------------|----------|----------|---------------------|--|
| AGIWUR9359                                                |    |   |                                                                                 |          |                |          |          |                     |  |
| N2                                                        | HS | V | 12714503                                                                        | 12716549 | WBGene00006222 | str-178  | R11D1.5  | 0.0306984248272189  |  |
| AGIWUR3222                                                |    |   |                                                                                 |          |                |          |          |                     |  |
| N2                                                        | HS | V | 12716616                                                                        | 12718722 | WBGene00006225 | str-181  | R11D1.6  | 0.0293387036570323  |  |
| AGIWUR5561                                                |    |   |                                                                                 |          |                |          |          |                     |  |
| N2                                                        | HS | V | 12720058                                                                        | 12722727 | WBGene00011246 | R11D1.7  | R11D1.7  | -0.0630036670335645 |  |
| AGIWUR24869                                               |    |   |                                                                                 |          |                |          |          |                     |  |
| N2                                                        | HS | V | 12724562                                                                        | 12725993 | WBGene00045336 | R11D1.12 |          | R11D1.12            |  |
|                                                           |    |   | 0.00260656691330396 AGIWUR14180;AGIWUR14693;AGIWUR16055;AGIWUR24942;AGIWUR26376 |          |                |          |          |                     |  |
| N2                                                        | HS | V | 12727171                                                                        | 12727621 | WBGene00045517 | R11D1.13 |          | R11D1.13            |  |
|                                                           |    |   | 0.249733514552379 AGIWUR16530;AGIWUR29414;AGIWUR33362;AGIWUR36100               |          |                |          |          |                     |  |
| N2                                                        | HS | V | 12727593                                                                        | 12728112 | WBGene00004442 | rpl-28   | R11D1.8  | -0.0995730202773828 |  |
| AGIWUR32903;AGIWUR35759                                   |    |   |                                                                                 |          |                |          |          |                     |  |
| N2                                                        | HS | V | 12728631                                                                        | 12729416 | WBGene00011247 | mrp1-49  | R11D1.9  | 0.0891336839127854  |  |
| AGIWUR19366;AGIWUR34528;AGIWUR44439                       |    |   |                                                                                 |          |                |          |          |                     |  |
| N2                                                        | HS | V | 12729520                                                                        | 12731801 | WBGene00011248 | R11D1.10 |          | R11D1.10            |  |
|                                                           |    |   | 0.0929925279794546 AGIWUR18000                                                  |          |                |          |          |                     |  |
| N2                                                        | HS | V | 12731772                                                                        | 12733645 | WBGene00000984 | dhs-21   | R11D1.11 |                     |  |
|                                                           |    |   | 0.00318069435512758 AGIWUR471;AGIWUR5236;AGIWUR10383                            |          |                |          |          |                     |  |
| N2                                                        | HS | V | 12734183                                                                        | 12736041 | WBGene00007604 | xbx-9    | C15C8.1  | -0.155038176356335  |  |
| AGIWUR42554                                               |    |   |                                                                                 |          |                |          |          |                     |  |
| N2                                                        | HS | V | 12736703                                                                        | 12741211 | WBGene00000521 | cky-1    | C15C8.2  | 0.0322411937311546  |  |
| AGIWUR14255;AGIWUR27971;AGIWUR29840                       |    |   |                                                                                 |          |                |          |          |                     |  |
| N2                                                        | HS | V | 12742041                                                                        | 12744207 | WBGene00007605 | asp-10   | C15C8.3  | 0.571551886981876   |  |
| AGIWUR21210                                               |    |   |                                                                                 |          |                |          |          |                     |  |
| N2                                                        | HS | V | 12745201                                                                        | 12747463 | WBGene00007606 | C15C8.4  | C15C8.4  | 0.164951928337294   |  |
| AGIWUR16153;AGIWUR25403;AGIWUR26667                       |    |   |                                                                                 |          |                |          |          |                     |  |
| N2                                                        | HS | V | 12748292                                                                        | 12749963 | WBGene00007607 | C15C8.5  | C15C8.5  | 0.0493000005235302  |  |
| AGIWUR10751                                               |    |   |                                                                                 |          |                |          |          |                     |  |
| N2                                                        | HS | V | 12750030                                                                        | 12751545 | WBGene00007608 | C15C8.6  | C15C8.6  | 0.0258820986811363  |  |
| AGIWUR26274                                               |    |   |                                                                                 |          |                |          |          |                     |  |
| N2                                                        | HS | V | 12751603                                                                        | 12752507 | WBGene00045460 | C15C8.8  | C15C8.8  | -0.0237809983254849 |  |
| AGIWUR4939;AGIWUR8729;AGIWUR13587;AGIWUR39928;AGIWUR40646 |    |   |                                                                                 |          |                |          |          |                     |  |
| N2                                                        | HS | V | 12752762                                                                        | 12754893 | WBGene00001675 | gpa-13   | F18E2.5  | 0.0623066699632782  |  |
| AGIWUR35469                                               |    |   |                                                                                 |          |                |          |          |                     |  |
| N2                                                        | HS | V | 12757591                                                                        | 12760227 | WBGene00008936 | pap1-1   | F18E2.1  | 0.529830161061543   |  |
| AGIWUR19152                                               |    |   |                                                                                 |          |                |          |          |                     |  |
| N2                                                        | HS | V | 12761044                                                                        | 12763375 | WBGene00006512 | abcf-1   | F18E2.2  | 0.346562010966877   |  |
| AGIWUR107;AGIWUR5368;AGIWUR41006;AGIWUR43678              |    |   |                                                                                 |          |                |          |          |                     |  |

|                                                                               |    |   |          |          |                |         |          |                     |
|-------------------------------------------------------------------------------|----|---|----------|----------|----------------|---------|----------|---------------------|
| N2                                                                            | HS | V | 12763945 | 12767933 | WBGene00004738 | scc-3   | F18E2.3  | 0.0138513702364413  |
| AGIWUR20773                                                                   |    |   |          |          |                |         |          |                     |
| N2                                                                            | HS | V | 12769268 | 12770845 | WBGene00008937 | srt-43  | F18E2.4  | 0.0928838734191135  |
| AGIWUR45016                                                                   |    |   |          |          |                |         |          |                     |
| N2                                                                            | HS | V | 12773522 | 12783063 | WBGene00013902 | ZC455.1 | ZC455.1  | 0.0876405045718887  |
| AGIWUR5386;AGIWUR43768                                                        |    |   |          |          |                |         |          |                     |
| N2                                                                            | HS | V | 12783222 | 12784864 | WBGene00013907 | sre-20  | ZC455.7  | 0.0292601455177905  |
| AGIWUR19270                                                                   |    |   |          |          |                |         |          |                     |
| N2                                                                            | HS | V | 12785154 | 12787126 | WBGene00001429 | fkf-4   | ZC455.10 |                     |
| 0.335419126046618 AGIWUR2842                                                  |    |   |          |          |                |         |          |                     |
| N2                                                                            | HS | V | 12787269 | 12788551 | WBGene00013909 | srbc-44 | ZC455.9  | 0.1143017428436     |
| AGIWUR23977                                                                   |    |   |          |          |                |         |          |                     |
| N2                                                                            | HS | V | 12789197 | 12790518 | WBGene00013908 | srbc-43 | ZC455.8  | -0.124594901042505  |
| AGIWUR31402                                                                   |    |   |          |          |                |         |          |                     |
| N2                                                                            | HS | V | 12790698 | 12792965 | WBGene00013906 | ugt-5   | ZC455.6  | -0.0773757127527874 |
| AGIWUR26588;AGIWUR32844;AGIWUR35067;AGIWUR35571;AGIWUR42083;AGIWUR44576       |    |   |          |          |                |         |          |                     |
| N2                                                                            | HS | V | 12793020 | 12795336 | WBGene00013905 | ugt-4   | ZC455.5  | -0.025574753044117  |
| AGIWUR17590;AGIWUR32025;AGIWUR37226;AGIWUR44616                               |    |   |          |          |                |         |          |                     |
| N2                                                                            | HS | V | 12795484 | 12798154 | WBGene00013904 | ugt-6   | ZC455.4  | 0.385344132624915   |
| AGIWUR2287                                                                    |    |   |          |          |                |         |          |                     |
| N2                                                                            | HS | V | 12798327 | 12800193 | WBGene00013903 | ugt-3   | ZC455.3  |                     |
| -0.00836696959122563 AGIWUR23933                                              |    |   |          |          |                |         |          |                     |
| N2                                                                            | HS | V | 12803574 | 12804550 | WBGene00013910 | srbc-45 | ZC455.11 |                     |
| -0.154336248307994 AGIWUR5861;AGIWUR24206;AGIWUR34533;AGIWUR37594;AGIWUR41557 |    |   |          |          |                |         |          |                     |
| N2                                                                            | HS | V | 12805149 | 12806128 | WBGene00044102 | srbc-46 | ZC455.12 |                     |
| 0.0314228725574832 AGIWUR5830                                                 |    |   |          |          |                |         |          |                     |
| N2                                                                            | HS | V | 12806490 | 12808277 | WBGene00077562 | ZC443.7 | ZC443.7  | 0.00554938726318044 |
| AGIWUR3475;AGIWUR31113                                                        |    |   |          |          |                |         |          |                     |
| N2                                                                            | HS | V | 12808422 | 12810080 | WBGene00013896 | ZC443.1 | ZC443.1  | -0.0638135321117694 |
| AGIWUR20062                                                                   |    |   |          |          |                |         |          |                     |
| N2                                                                            | HS | V | 12812258 | 12814122 | WBGene00013898 | ZC443.3 | ZC443.3  | 0.0193204662336015  |
| AGIWUR17607                                                                   |    |   |          |          |                |         |          |                     |
| N2                                                                            | HS | V | 12816912 | 12819545 | WBGene00013899 | ZC443.4 | ZC443.4  | -0.173674091976196  |
| AGIWUR34599                                                                   |    |   |          |          |                |         |          |                     |
| N2                                                                            | HS | V | 12820265 | 12822758 | WBGene00013900 | ugt-18  | ZC443.5  | -0.0526821232672159 |
| AGIWUR10265                                                                   |    |   |          |          |                |         |          |                     |
| N2                                                                            | HS | V | 12825024 | 12827432 | WBGene00013901 | ugt-16  | ZC443.6  | 0.224088379997259   |
| AGIWUR4668                                                                    |    |   |          |          |                |         |          |                     |
| N2                                                                            | HS | V | 12827770 | 12830109 | WBGene00008097 | ugt-15  | C44H9.1  | 0.372161236476162   |

|                                                                                         |    |   |          |          |                |          |                             |
|-----------------------------------------------------------------------------------------|----|---|----------|----------|----------------|----------|-----------------------------|
| AGIWUR39382                                                                             |    |   |          |          |                |          |                             |
| N2                                                                                      | HS | V | 12830804 | 12834438 | WBGene00008098 | C44H9.2  | C44H9.2 0.120953495411499   |
| AGIWUR13206                                                                             |    |   |          |          |                |          |                             |
| N2                                                                                      | HS | V | 12835708 | 12839783 | WBGene00008099 | C44H9.4  | C44H9.4 0.174295589327443   |
| AGIWUR41365                                                                             |    |   |          |          |                |          |                             |
| N2                                                                                      | HS | V | 12842494 | 12845330 | WBGene00008101 | C44H9.6  | C44H9.6 0.152884682591408   |
| AGIWUR44468                                                                             |    |   |          |          |                |          |                             |
| N2                                                                                      | HS | V | 12846721 | 12849864 | WBGene00008100 | C44H9.5  | C44H9.5 0.0141878121511567  |
| AGIWUR12662;AGIWUR43467                                                                 |    |   |          |          |                |          |                             |
| N2                                                                                      | HS | V | 12853015 | 12854839 | WBGene00008102 | C44H9.7  | C44H9.7 0.0962257546657455  |
| AGIWUR18702;AGIWUR19111;AGIWUR29062                                                     |    |   |          |          |                |          |                             |
| N2                                                                                      | HS | V | 12859381 | 12863833 | WBGene00011587 | T07F10.1 | T07F10.1                    |
| -0.170346704806228 AGIWUR12497                                                          |    |   |          |          |                |          |                             |
| N2                                                                                      | HS | V | 12868026 | 12870035 | WBGene00011589 | T07F10.3 | T07F10.3                    |
| -0.176626030337167 AGIWUR5418;AGIWUR8235;AGIWUR9659;AGIWUR10901;AGIWUR13177;AGIWUR33700 |    |   |          |          |                |          |                             |
| N2                                                                                      | HS | V | 12872053 | 12882108 | WBGene00011590 | bus-19   | T07F10.4                    |
| 0.181866922717319 AGIWUR573;AGIWUR18516;AGIWUR42616                                     |    |   |          |          |                |          |                             |
| N2                                                                                      | HS | V | 12882078 | 12885960 | WBGene00011287 | glb-24   | R90.5 0.0910052057608528    |
| AGIWUR12824;AGIWUR18804;AGIWUR38495                                                     |    |   |          |          |                |          |                             |
| N2                                                                                      | HS | V | 12891523 | 12895872 | WBGene00011283 | R90.1    | R90.1 0.148682373798191     |
| AGIWUR14152;AGIWUR38711                                                                 |    |   |          |          |                |          |                             |
| N2                                                                                      | HS | V | 12903551 | 12904160 | WBGene00011284 | ttr-27   | R90.2 0.77863057894761      |
| AGIWUR18386                                                                             |    |   |          |          |                |          |                             |
| N2                                                                                      | HS | V | 12904213 | 12905168 | WBGene00011285 | ttr-28   | R90.3 0.145659451780945     |
| AGIWUR1453                                                                              |    |   |          |          |                |          |                             |
| N2                                                                                      | HS | V | 12906131 | 12906746 | WBGene00011286 | ttr-29   | R90.4 0.00884535636721928   |
| AGIWUR25178                                                                             |    |   |          |          |                |          |                             |
| N2                                                                                      | HS | V | 12910113 | 12917198 | WBGene00003738 | nid-1    | F54F3.1 0.0115052988308531  |
| AGIWUR44234                                                                             |    |   |          |          |                |          |                             |
| N2                                                                                      | HS | V | 12917450 | 12918902 | WBGene00014770 | F54F3.2  | F54F3.2 -0.2664213841262    |
| AGIWUR20453;AGIWUR24291                                                                 |    |   |          |          |                |          |                             |
| N2                                                                                      | HS | V | 12919952 | 12921692 | WBGene00010062 | lip1-1   | F54F3.3 -0.668172994540758  |
| AGIWUR44387                                                                             |    |   |          |          |                |          |                             |
| N2                                                                                      | HS | V | 12922608 | 12924156 | WBGene00010063 | dhrrs-4  | F54F3.4 0.301287750245088   |
| AGIWUR2741                                                                              |    |   |          |          |                |          |                             |
| N2                                                                                      | HS | V | 12924441 | 12928173 | WBGene00004150 | pqn-67   | T16G1.1 -0.0510617870151684 |
| AGIWUR806;AGIWUR25408;AGIWUR26872                                                       |    |   |          |          |                |          |                             |
| N2                                                                                      | HS | V | 12929478 | 12932966 | WBGene00011796 | T16G1.2  | T16G1.2 0.140341550979151   |
| AGIWUR33                                                                                |    |   |          |          |                |          |                             |

|                                                                                                            |    |   |          |          |                |         |          |                     |
|------------------------------------------------------------------------------------------------------------|----|---|----------|----------|----------------|---------|----------|---------------------|
| N2                                                                                                         | HS | V | 12932941 | 12935112 | WBGene00011801 | T16G1.7 | T16G1.7  | 0.461056597840026   |
| AGIWUR18524                                                                                                |    |   |          |          |                |         |          |                     |
| N2                                                                                                         | HS | V | 12935538 | 12937263 | WBGene00011800 | T16G1.6 | T16G1.6  | 0.0825866017551355  |
| AGIWUR22206;AGIWUR22875;AGIWUR25143                                                                        |    |   |          |          |                |         |          |                     |
| N2                                                                                                         | HS | V | 12937654 | 12939506 | WBGene00011799 | T16G1.5 | T16G1.5  | 0.366358239191944   |
| AGIWUR22764                                                                                                |    |   |          |          |                |         |          |                     |
| N2                                                                                                         | HS | V | 12940038 | 12941847 | WBGene00011798 | T16G1.4 | T16G1.4  | 0.123709268830227   |
| AGIWUR4039;AGIWUR26972;AGIWUR30778                                                                         |    |   |          |          |                |         |          |                     |
| N2                                                                                                         | HS | V | 12942365 | 12944329 | WBGene00011797 | T16G1.3 | T16G1.3  | -0.103996443803185  |
| AGIWUR9650                                                                                                 |    |   |          |          |                |         |          |                     |
| N2                                                                                                         | HS | V | 12944861 | 12946853 | WBGene00001711 | grl-2   | T16G1.8  | 0.339368340196291   |
| AGIWUR39625                                                                                                |    |   |          |          |                |         |          |                     |
| N2                                                                                                         | HS | V | 12946815 | 12950658 | WBGene00011802 | T16G1.9 | T16G1.9  | 0.0544627422732624  |
| AGIWUR42413                                                                                                |    |   |          |          |                |         |          |                     |
| N2                                                                                                         | HS | V | 12952636 | 12953208 | WBGene00004151 | pqn-68  | T16G1.10 |                     |
| 0.41459863103907 AGIWUR24781                                                                               |    |   |          |          |                |         |          |                     |
| N2                                                                                                         | HS | V | 12954002 | 12955229 | WBGene00001233 | eif-3.K | T16G1.11 |                     |
| 0.0301826594531747 AGIWUR12786;AGIWUR16029;AGIWUR16352                                                     |    |   |          |          |                |         |          |                     |
| N2                                                                                                         | HS | V | 12955203 | 12961149 | WBGene00011307 | mpst-7  | R186.6   |                     |
| -0.00203487076810482 AGIWUR36157                                                                           |    |   |          |          |                |         |          |                     |
| N2                                                                                                         | HS | V | 12961474 | 12963336 | WBGene00011305 | R186.1  | R186.1   | -0.0921251907739649 |
| AGIWUR27464                                                                                                |    |   |          |          |                |         |          |                     |
| N2                                                                                                         | HS | V | 12964376 | 12966022 | WBGene00005113 | srd-35  | R186.2   | -0.0104446907024975 |
| AGIWUR7784;AGIWUR33653;AGIWUR35769;AGIWUR44051;AGIWUR45110                                                 |    |   |          |          |                |         |          |                     |
| N2                                                                                                         | HS | V | 12966000 | 12967210 | WBGene00011306 | R186.3  | R186.3   | -0.108169794173094  |
| AGIWUR12413                                                                                                |    |   |          |          |                |         |          |                     |
| N2                                                                                                         | HS | V | 12967309 | 12967982 | WBGene00011309 | R186.8  | R186.8   | 0.029160841264062   |
| AGIWUR8865;AGIWUR11438;AGIWUR14545;AGIWUR19202;AGIWUR28961;AGIWUR29160;AGIWUR36476;AGIWUR40001;AGIWUR43571 |    |   |          |          |                |         |          |                     |
| N2                                                                                                         | HS | V | 12968855 | 12970730 | WBGene00003031 | lin-46  | R186.4   | 0.20763843063394    |
| AGIWUR25766                                                                                                |    |   |          |          |                |         |          |                     |
| N2                                                                                                         | HS | V | 12971110 | 12973282 | WBGene00011308 | R186.7  | R186.7   | 0.165008274642304   |
| AGIWUR34982                                                                                                |    |   |          |          |                |         |          |                     |
| N2                                                                                                         | HS | V | 12973261 | 12976704 | WBGene00004793 | shw-3   | R186.5   | -0.0210811244715909 |
| AGIWUR30708                                                                                                |    |   |          |          |                |         |          |                     |
| N2                                                                                                         | HS | V | 12988543 | 12992185 | WBGene00008851 | F15B9.8 | F15B9.8  | 0.0172889898696003  |
| AGIWUR9286;AGIWUR19700;AGIWUR20843                                                                         |    |   |          |          |                |         |          |                     |
| N2                                                                                                         | HS | V | 12993180 | 12994822 | WBGene00001109 | ds1-7   | F15B9.9  | 0.142414620880563   |
| AGIWUR34207                                                                                                |    |   |          |          |                |         |          |                     |
| N2                                                                                                         | HS | V | 12995569 | 12996836 | WBGene00001389 | far-5   | F15B9.3  | -0.0578847851367317 |

AGIWUR5382;AGIWUR7263;AGIWUR41491;AGIWUR45201

N2 HS V 12996787 12997524

AGIWUR34379

N2 HS V 12998427 12999659

AGIWUR39090

N2 HS V 13002317 13006987

AGIWUR36918

N2 HS V 13006981 13008925

-0.181150575415339 AGIWUR7185

N2 HS V 13014144 13016641

AGIWUR13550

N2 HS V 13019068 13033373

AGIWUR21662;AGIWUR42470;AGIWUR43120

N2 HS V 13033529 13034164

AGIWUR6064;AGIWUR28273

N2 HS V 13034267 13034704

AGIWUR11268

N2 HS V 13036996 13041879

AGIWUR1071;AGIWUR12298;AGIWUR14469;AGIWUR14495;AGIWUR31800;AGIWUR32655;AGIWUR43836

N2 HS V 13043712 13046355

AGIWUR38316

N2 HS V 13047980 13049238

-0.00452980630398514 AGIWUR3319

N2 HS V 13049730 13053910

AGIWUR30904

N2 HS V 13065461 13065794

AGIWUR41554

N2 HS V 13066640 13071152

AGIWUR9410;AGIWUR40112

N2 HS V 13083055 13090260

AGIWUR14470;AGIWUR23901;AGIWUR38007

N2 HS V 13089803 13092512

AGIWUR26382;AGIWUR37670

N2 HS V 13092666 13094446

AGIWUR5631;AGIWUR11097

N2 HS V 13095954 13097457

-0.00140538034861137 AGIWUR38581

N2 HS V 13098910 13110337

AGIWUR39031

WBGene00001387 far-3 F15B9.1 -0.40184605231644

WBGene00001388 far-4 F15B9.2 -0.167632947973525

WBGene00008848 inft-2 F15B9.4 -0.187697364086896

WBGene00045418 F15B9.10 F15B9.10

WBGene00008850 F15B9.6 F15B9.6 0.183448304879546

WBGene00001475 fmi-1 F15B9.7 0.107457748868992

WBGene00012335 W07G4.1 W07G4.1 0.01592215285614

WBGene00077565 W07G4.7 W07G4.7 -0.186950768407715

WBGene00012337 W07G4.3 W07G4.3 -0.121650898619396

WBGene00002250 lap-2 W07G4.4 -0.113699592731178

WBGene00012339 W07G4.5 W07G4.5

WBGene00005652 srr-1 W07G4.6 0.0613869654420753

WBGene00009631 F42E8.2 F42E8.2 -0.178759260530345

WBGene00007908 C34B4.3 C34B4.3 0.0322765370980935

WBGene00007907 C34B4.2 C34B4.2 -0.051341963461601

WBGene00007909 C34B4.4 C34B4.4 0.087939008224454

WBGene00077698 lurp-4 C34B4.7 -0.0378871441677213

WBGene00007910 C34B4.5 C34B4.5

WBGene00003143 max-1 C34B4.1 0.189495334641357

|                                                                                              |    |   |          |          |                |         |         |                     |
|----------------------------------------------------------------------------------------------|----|---|----------|----------|----------------|---------|---------|---------------------|
| N2                                                                                           | HS | V | 13116488 | 13120167 | WBGene00007150 | acly-2  | B0365.1 | -0.111148442448842  |
| AGIWUR4217                                                                                   |    |   |          |          |                |         |         |                     |
| N2                                                                                           | HS | V | 13120676 | 13123421 | WBGene00007151 | B0365.2 | B0365.2 | -0.0561001305572191 |
| AGIWUR14820                                                                                  |    |   |          |          |                |         |         |                     |
| N2                                                                                           | HS | V | 13126414 | 13129995 | WBGene00001137 | eat-6   | B0365.3 | -0.225722870985466  |
| AGIWUR190;AGIWUR311;AGIWUR2417;AGIWUR3481;AGIWUR3982;AGIWUR25633;AGIWUR27717;AGIWUR33762     |    |   |          |          |                |         |         |                     |
| N2                                                                                           | HS | V | 13131873 | 13133565 | WBGene00219208 | B0365.9 | B0365.9 | 0.32389332871373    |
| AGIWUR34951                                                                                  |    |   |          |          |                |         |         |                     |
| N2                                                                                           | HS | V | 13134965 | 13138101 | WBGene00007153 | clcc-41 | B0365.6 | 0.0461326886523699  |
| AGIWUR3662;AGIWUR18488;AGIWUR26592;AGIWUR36559;AGIWUR44784                                   |    |   |          |          |                |         |         |                     |
| N2                                                                                           | HS | V | 13138981 | 13152466 | WBGene00007154 | dhc-3   | B0365.7 | 0.0632360642728864  |
| AGIWUR24444;AGIWUR29005                                                                      |    |   |          |          |                |         |         |                     |
| N2                                                                                           | HS | V | 13152894 | 13176111 | WBGene00011647 | noca-1  | T09E8.1 | -0.143581699328534  |
| AGIWUR2137;AGIWUR2843;AGIWUR4645;AGIWUR19230;AGIWUR24927;AGIWUR34375;AGIWUR42573;AGIWUR43631 |    |   |          |          |                |         |         |                     |
| N2                                                                                           | HS | V | 13176711 | 13180189 | WBGene00001874 | him-17  | T09E8.2 | -0.232033887477627  |
| AGIWUR42908                                                                                  |    |   |          |          |                |         |         |                     |
| N2                                                                                           | HS | V | 13180330 | 13181534 | WBGene00011648 | cni-1   | T09E8.3 | -0.155950772984001  |
| AGIWUR7422;AGIWUR16265;AGIWUR18132;AGIWUR37833                                               |    |   |          |          |                |         |         |                     |
| N2                                                                                           | HS | V | 13181580 | 13184237 | WBGene00011649 | T09E8.4 | T09E8.4 | -0.112893417380176  |
| AGIWUR146                                                                                    |    |   |          |          |                |         |         |                     |
| N2                                                                                           | HS | V | 13185684 | 13187428 | WBGene00005518 | sri-6   | T09E8.5 | -0.166369006644212  |
| AGIWUR29710                                                                                  |    |   |          |          |                |         |         |                     |
| N2                                                                                           | HS | V | 13188025 | 13189406 | WBGene00044199 | F57B1.8 | F57B1.8 | 0.00311183093988099 |
| AGIWUR1263;AGIWUR10046;AGIWUR29953                                                           |    |   |          |          |                |         |         |                     |
| N2                                                                                           | HS | V | 13191707 | 13193538 | WBGene00006311 | sun-1   | F57B1.2 | -0.198849726996324  |
| AGIWUR36486                                                                                  |    |   |          |          |                |         |         |                     |
| N2                                                                                           | HS | V | 13193933 | 13195648 | WBGene00010187 | F57B1.1 | F57B1.1 | 0.0929754073236713  |
| AGIWUR12797;AGIWUR18184;AGIWUR21634;AGIWUR24778;AGIWUR26707;AGIWUR39169                      |    |   |          |          |                |         |         |                     |
| N2                                                                                           | HS | V | 13196088 | 13197923 | WBGene00045488 | F57B1.9 | F57B1.9 | -0.0722771181507795 |
| AGIWUR11389;AGIWUR18594;AGIWUR29360;AGIWUR32520;AGIWUR36306;AGIWUR38732                      |    |   |          |          |                |         |         |                     |
| N2                                                                                           | HS | V | 13200982 | 13202192 | WBGene00000733 | col-160 | F57B1.4 | 0.0874985507433053  |
| AGIWUR7499                                                                                   |    |   |          |          |                |         |         |                     |
| N2                                                                                           | HS | V | 13207763 | 13208762 | WBGene00010188 | F57B1.5 | F57B1.5 | 0.0051532596802879  |
| AGIWUR35756                                                                                  |    |   |          |          |                |         |         |                     |
| N2                                                                                           | HS | V | 13209645 | 13213462 | WBGene00010189 | F57B1.6 | F57B1.6 | -0.161030533992408  |
| AGIWUR3188                                                                                   |    |   |          |          |                |         |         |                     |
| N2                                                                                           | HS | V | 13222620 | 13225941 | WBGene00007929 | dmd-10  | C34D1.1 | -0.243484021042631  |
| AGIWUR28168;AGIWUR36450                                                                      |    |   |          |          |                |         |         |                     |
| N2                                                                                           | HS | V | 13236171 | 13236604 | WBGene00007930 | dmd-11  | C34D1.2 | -0.0231668988536278 |



[illegible]

|                                                                                                           |    |   |          |          |                |         |                             |
|-----------------------------------------------------------------------------------------------------------|----|---|----------|----------|----------------|---------|-----------------------------|
| N2                                                                                                        | HS | V | 13340240 | 13343040 | WBGene00008223 | lgc-48  | C50B6.11                    |
| 0.170090976825462 AGIWUR4680                                                                              |    |   |          |          |                |         |                             |
| N2                                                                                                        | HS | V | 13346278 | 13356101 | WBGene00006693 | twk-43  | F32H5.7 -0.0595903911949005 |
| AGIWUR1564;AGIWUR6551;AGIWUR16179;AGIWUR26578;AGIWUR32931;AGIWUR33454;AGIWUR35141;AGIWUR37747;AGIWUR40696 |    |   |          |          |                |         |                             |
| N2                                                                                                        | HS | V | 13356101 | 13358079 | WBGene00009347 | F32H5.1 | F32H5.1 0.166920453964982   |
| AGIWUR3189                                                                                                |    |   |          |          |                |         |                             |
| N2                                                                                                        | HS | V | 13359334 | 13360024 | WBGene00009349 | F32H5.3 | F32H5.3 -0.188284327627652  |
| AGIWUR33526;AGIWUR33920                                                                                   |    |   |          |          |                |         |                             |
| N2                                                                                                        | HS | V | 13361203 | 13363357 | WBGene00009350 | F32H5.4 | F32H5.4 0.120406584130329   |
| AGIWUR693;AGIWUR24348;AGIWUR36416                                                                         |    |   |          |          |                |         |                             |
| N2                                                                                                        | HS | V | 13363715 | 13364728 | WBGene00005203 | srg-46  | F32H5.5 0.00344778378797628 |
| AGIWUR23784                                                                                               |    |   |          |          |                |         |                             |
| N2                                                                                                        | HS | V | 13367252 | 13369990 | WBGene00006016 | srx-125 | F32H5.6 0.0172384969407591  |
| AGIWUR7412;AGIWUR9295;AGIWUR12807;AGIWUR17136;AGIWUR28275;AGIWUR43239                                     |    |   |          |          |                |         |                             |
| N2                                                                                                        | HS | V | 13370083 | 13380262 | WBGene00010867 | tag-260 | M04G12.1                    |
| -0.0894704253207443 AGIWUR22793                                                                           |    |   |          |          |                |         |                             |
| N2                                                                                                        | HS | V | 13381189 | 13383077 | WBGene00000789 | cpz-2   | M04G12.2                    |
| 0.12176473926718 AGIWUR646;AGIWUR7308;AGIWUR35528                                                         |    |   |          |          |                |         |                             |
| N2                                                                                                        | HS | V | 13383019 | 13385898 | WBGene00001554 | gcy-34  | M04G12.3                    |
| 0.179661210255747 AGIWUR44723                                                                             |    |   |          |          |                |         |                             |
| N2                                                                                                        | HS | V | 13386065 | 13391393 | WBGene00010868 | somi-1  | M04G12.4                    |
| -0.379732207547111 AGIWUR33719;AGIWUR38576                                                                |    |   |          |          |                |         |                             |
| N2                                                                                                        | HS | V | 13404031 | 13406014 | WBGene00009979 | cutl-1  | F53F1.1 0.291090941746457   |
| AGIWUR27799                                                                                               |    |   |          |          |                |         |                             |
| N2                                                                                                        | HS | V | 13406816 | 13408265 | WBGene00009980 | F53F1.2 | F53F1.2 0.39575678630591    |
| AGIWUR5471                                                                                                |    |   |          |          |                |         |                             |
| N2                                                                                                        | HS | V | 13408242 | 13409832 | WBGene00009981 | F53F1.3 | F53F1.3 0.133380654964379   |
| AGIWUR392                                                                                                 |    |   |          |          |                |         |                             |
| N2                                                                                                        | HS | V | 13411077 | 13411717 | WBGene00009982 | F53F1.4 | F53F1.4 0.434539399057432   |
| AGIWUR6086;AGIWUR23571                                                                                    |    |   |          |          |                |         |                             |
| N2                                                                                                        | HS | V | 13414902 | 13416121 | WBGene00009983 | cut-2   | F53F1.5 0.406987843722019   |
| AGIWUR19257                                                                                               |    |   |          |          |                |         |                             |
| N2                                                                                                        | HS | V | 13416103 | 13417604 | WBGene00009984 | F53F1.6 | F53F1.6 0.108061412893295   |
| AGIWUR40851                                                                                               |    |   |          |          |                |         |                             |
| N2                                                                                                        | HS | V | 13419217 | 13420740 | WBGene00005719 | srv-8   | F53F1.7 0.151079480780348   |
| AGIWUR23144                                                                                               |    |   |          |          |                |         |                             |
| N2                                                                                                        | HS | V | 13421140 | 13423147 | WBGene00005720 | srv-9   | F53F1.8 -0.134130166791325  |
| AGIWUR31461                                                                                               |    |   |          |          |                |         |                             |
| N2                                                                                                        | HS | V | 13423908 | 13425266 | WBGene00005721 | srv-10  | F53F1.9 0.124629852026577   |

|                                                                                                |    |   |          |          |                        |         |          |                     |
|------------------------------------------------------------------------------------------------|----|---|----------|----------|------------------------|---------|----------|---------------------|
| AGIWUR11420                                                                                    |    |   |          |          |                        |         |          |                     |
| N2                                                                                             | HS | V | 13425572 | 13426882 | WBGene00005096         | srd-18  | F53F1.10 |                     |
| -0.251928207028499                                                                             |    |   |          |          | AGIWUR9433             |         |          |                     |
| N2                                                                                             | HS | V | 13430651 | 13432714 | WBGene00005095         | srd-17  | Y2H9A.2  | -0.0573339680524145 |
| AGIWUR19936;AGIWUR39164                                                                        |    |   |          |          |                        |         |          |                     |
| N2                                                                                             | HS | V | 13433050 | 13437545 | WBGene00003222         | mes-4   | Y2H9A.1  | -0.0211416615117761 |
| AGIWUR3310;AGIWUR3946;AGIWUR40132                                                              |    |   |          |          |                        |         |          |                     |
| N2                                                                                             | HS | V | 13445745 | 13448815 | WBGene00012381         | Y2H9A.4 | Y2H9A.4  | 0.167267706041455   |
| AGIWUR16927                                                                                    |    |   |          |          |                        |         |          |                     |
| N2                                                                                             | HS | V | 13451197 | 13452968 | WBGene00014744         | F25H9.9 | F25H9.9  | -0.0288116119000477 |
| AGIWUR18861;AGIWUR19729                                                                        |    |   |          |          |                        |         |          |                     |
| N2                                                                                             | HS | V | 13453634 | 13455447 | WBGene00009134         | lurp-2  | F25H9.1  | 0.0109334476251988  |
| AGIWUR10925                                                                                    |    |   |          |          |                        |         |          |                     |
| N2                                                                                             | HS | V | 13455748 | 13457506 | WBGene00009136         | lurp-3  | F25H9.3  | -0.17468637639027   |
| AGIWUR12404                                                                                    |    |   |          |          |                        |         |          |                     |
| N2                                                                                             | HS | V | 13458083 | 13459504 | WBGene00009135         | F25H9.2 | F25H9.2  | -0.237465988098579  |
| AGIWUR44437                                                                                    |    |   |          |          |                        |         |          |                     |
| N2                                                                                             | HS | V | 13459525 | 13461803 | WBGene00009137         | bath-39 | F25H9.4  | 0.219743125119416   |
| AGIWUR26645;AGIWUR30359;AGIWUR38033                                                            |    |   |          |          |                        |         |          |                     |
| N2                                                                                             | HS | V | 13463128 | 13467131 | WBGene00001496         | frm-10  | F25H9.5  | 0.137197087021262   |
| AGIWUR33216                                                                                    |    |   |          |          |                        |         |          |                     |
| N2                                                                                             | HS | V | 13466924 | 13468361 | WBGene00009138         | F25H9.6 | F25H9.6  | -0.101020367400956  |
| AGIWUR32693                                                                                    |    |   |          |          |                        |         |          |                     |
| N2                                                                                             | HS | V | 13468376 | 13469087 | WBGene00009139         | F25H9.7 | F25H9.7  | -0.0505922846477631 |
| AGIWUR43654                                                                                    |    |   |          |          |                        |         |          |                     |
| N2                                                                                             | HS | V | 13469066 | 13473679 | WBGene00011692         | T10G3.1 | T10G3.1  | 0.336045868905154   |
| AGIWUR7241                                                                                     |    |   |          |          |                        |         |          |                     |
| N2                                                                                             | HS | V | 13474228 | 13476382 | WBGene00045340         | T10G3.8 | T10G3.8  | -0.0908722012299905 |
| AGIWUR14677;AGIWUR41060                                                                        |    |   |          |          |                        |         |          |                     |
| N2                                                                                             | HS | V | 13477384 | 13479858 | WBGene00011693         | T10G3.2 | T10G3.2  |                     |
| -0.00815375578211741                                                                           |    |   |          |          | AGIWUR8086;AGIWUR22954 |         |          |                     |
| N2                                                                                             | HS | V | 13482075 | 13484435 | WBGene00011695         | T10G3.4 | T10G3.4  | -0.130851287157265  |
| AGIWUR35537                                                                                    |    |   |          |          |                        |         |          |                     |
| N2                                                                                             | HS | V | 13487026 | 13489626 | WBGene00011694         | T10G3.3 | T10G3.3  | 0.471301719967082   |
| AGIWUR26800                                                                                    |    |   |          |          |                        |         |          |                     |
| N2                                                                                             | HS | V | 13491068 | 13497372 | WBGene00011696         | eea-1   | T10G3.5  | -0.0730240882174953 |
| AGIWUR8015;AGIWUR12733;AGIWUR12749;AGIWUR19148;AGIWUR20934;AGIWUR24622;AGIWUR29618;AGIWUR33391 |    |   |          |          |                        |         |          |                     |
| N2                                                                                             | HS | V | 13497690 | 13498819 | WBGene00001808         | gut-2   | T10G3.6  | 0.026250546648285   |
| AGIWUR7892;AGIWUR22967;AGIWUR32644;AGIWUR40313;AGIWUR43259;AGIWUR44390                         |    |   |          |          |                        |         |          |                     |

|    |    |   |                                                 |          |                |          |          |                     |
|----|----|---|-------------------------------------------------|----------|----------------|----------|----------|---------------------|
| N2 | HS | V | 13498786                                        | 13511718 | WBGene00000233 | avr-15   | R11G10.1 |                     |
|    |    |   | AGIWUR30125;AGIWUR36531;AGIWUR42208             |          |                |          |          |                     |
| N2 | HS | V | 13511905                                        | 13515215 | WBGene00011249 | R11G10.2 |          | R11G10.2            |
|    |    |   | AGIWUR5998;AGIWUR9152;AGIWUR37805               |          |                |          |          |                     |
| N2 | HS | V | 13523530                                        | 13529658 | WBGene00044045 | R11G10.3 |          | R11G10.3            |
|    |    |   | AGIWUR15842;AGIWUR24465                         |          |                |          |          |                     |
| N2 | HS | V | 13529562                                        | 13530744 | WBGene00008341 | ttr-44   | C56A3.2  | 0.0876707990653589  |
|    |    |   | AGIWUR16445                                     |          |                |          |          |                     |
| N2 | HS | V | 13531743                                        | 13536105 | WBGene00008342 | frpr-5   | C56A3.3  | 0.0128888265457512  |
|    |    |   | AGIWUR41300                                     |          |                |          |          |                     |
| N2 | HS | V | 13550520                                        | 13551810 | WBGene00008343 | C56A3.4  | C56A3.4  | -0.246763532771463  |
|    |    |   | AGIWUR30441;AGIWUR34820;AGIWUR37682;AGIWUR38750 |          |                |          |          |                     |
| N2 | HS | V | 13551911                                        | 13553373 | WBGene00008344 | C56A3.5  | C56A3.5  | 0.172808670475714   |
|    |    |   | AGIWUR15348                                     |          |                |          |          |                     |
| N2 | HS | V | 13553374                                        | 13556408 | WBGene00008345 | C56A3.6  | C56A3.6  | 0.00148921108327826 |
|    |    |   | AGIWUR25755                                     |          |                |          |          |                     |
| N2 | HS | V | 13557104                                        | 13559922 | WBGene00000302 | cav-2    | C56A3.7  | 0.0109473994477209  |
|    |    |   | AGIWUR36224                                     |          |                |          |          |                     |
| N2 | HS | V | 13560278                                        | 13561992 | WBGene00008346 | C56A3.8  | C56A3.8  | -0.0858368316361524 |
|    |    |   | AGIWUR2902;AGIWUR12612;AGIWUR22047              |          |                |          |          |                     |
| N2 | HS | V | 13562105                                        | 13563913 | WBGene00001726 | gr1-17   | C56A3.1  | 0.32769064213451    |
|    |    |   | AGIWUR20018                                     |          |                |          |          |                     |
| N2 | HS | V | 13565863                                        | 13566968 | WBGene00008224 | C50B8.1  | C50B8.1  | 0.156033928619385   |
|    |    |   | AGIWUR40609                                     |          |                |          |          |                     |
| N2 | HS | V | 13566931                                        | 13568657 | WBGene00008225 | nuaf-1   | C50B8.3  | 0.235615132250629   |
|    |    |   | AGIWUR31957                                     |          |                |          |          |                     |
| N2 | HS | V | 13568850                                        | 13570030 | WBGene00000250 | bir-2    | C50B8.2  | -0.235731024391566  |
|    |    |   | AGIWUR40461                                     |          |                |          |          |                     |
| N2 | HS | V | 13572037                                        | 13573423 | WBGene00008226 | C50B8.4  | C50B8.4  | -0.0972520700755908 |
|    |    |   | AGIWUR13777                                     |          |                |          |          |                     |
| N2 | HS | V | 13578972                                        | 13580807 | WBGene00008228 | C50B8.6  | C50B8.6  | 0.0904826950886939  |
|    |    |   | AGIWUR10703                                     |          |                |          |          |                     |
| N2 | HS | V | 13580993                                        | 13584643 | WBGene00008227 | C50B8.5  | C50B8.5  |                     |
|    |    |   | -0.000952460845591752 AGIWUR40816               |          |                |          |          |                     |
| N2 | HS | V | 13584903                                        | 13585369 | WBGene00009985 | F53F4.1  | F53F4.1  | -0.0930893622822708 |
|    |    |   | AGIWUR26165                                     |          |                |          |          |                     |
| N2 | HS | V | 13588206                                        | 13588479 | WBGene00045195 | F53F4.17 |          | F53F4.17            |
|    |    |   | 0.35327883103459 AGIWUR30395                    |          |                |          |          |                     |
| N2 | HS | V | 13588612                                        | 13589585 | WBGene00009986 | F53F4.2  | F53F4.2  | -0.162182605604981  |

|                                                                                                          |    |   |          |          |                |                                     |
|----------------------------------------------------------------------------------------------------------|----|---|----------|----------|----------------|-------------------------------------|
| AGIWUR10582                                                                                              |    |   |          |          |                |                                     |
| N2                                                                                                       | HS | V | 13592124 | 13593183 | WBGene00009987 | tbcb-1 F53F4.3 0.0507467619080879   |
| AGIWUR11278;AGIWUR24957;AGIWUR31578;AGIWUR38807                                                          |    |   |          |          |                |                                     |
| N2                                                                                                       | HS | V | 13593383 | 13598269 | WBGene00009988 | F53F4.4 F53F4.4 0.0595708061117417  |
| AGIWUR5440;AGIWUR29243;AGIWUR30894                                                                       |    |   |          |          |                |                                     |
| N2                                                                                                       | HS | V | 13598331 | 13600982 | WBGene00004328 | rdy-2 F53F4.6 -0.0458589405979897   |
| AGIWUR10827                                                                                              |    |   |          |          |                |                                     |
| N2                                                                                                       | HS | V | 13603276 | 13606701 | WBGene00001479 | fmo-4 F53F4.5 0.142499113309205     |
| AGIWUR8267;AGIWUR11593;AGIWUR14457;AGIWUR15870;AGIWUR23166;AGIWUR32253                                   |    |   |          |          |                |                                     |
| N2                                                                                                       | HS | V | 13611337 | 13611888 | WBGene00009995 | F53F4.13 F53F4.13                   |
| 0.118984841122588 AGIWUR23892                                                                            |    |   |          |          |                |                                     |
| N2                                                                                                       | HS | V | 13612439 | 13613979 | WBGene00009990 | F53F4.7 F53F4.7 -0.0515627917496109 |
| AGIWUR7953;AGIWUR24081;AGIWUR27468;AGIWUR28108;AGIWUR31833;AGIWUR33916                                   |    |   |          |          |                |                                     |
| N2                                                                                                       | HS | V | 13614236 | 13617723 | WBGene00009991 | F53F4.8 F53F4.8 0.0789225490819252  |
| AGIWUR14887                                                                                              |    |   |          |          |                |                                     |
| N2                                                                                                       | HS | V | 13617851 | 13619686 | WBGene00005089 | srd-11 F53F4.9 -0.0864369686606725  |
| AGIWUR30493                                                                                              |    |   |          |          |                |                                     |
| N2                                                                                                       | HS | V | 13620976 | 13621459 | WBGene00009997 | F53F4.15 F53F4.15                   |
| 0.432391638284331 AGIWUR2105                                                                             |    |   |          |          |                |                                     |
| N2                                                                                                       | HS | V | 13621371 | 13621820 | WBGene00023419 | F53F4.16 F53F4.16                   |
| 0.119535272124283 AGIWUR33852;AGIWUR39333                                                                |    |   |          |          |                |                                     |
| N2                                                                                                       | HS | V | 13622107 | 13624525 | WBGene00009993 | F53F4.11 F53F4.11                   |
| 0.109688854652937 AGIWUR5780                                                                             |    |   |          |          |                |                                     |
| N2                                                                                                       | HS | V | 13626031 | 13627482 | WBGene00009994 | F53F4.12 F53F4.12                   |
| -0.453155700892767 AGIWUR9467                                                                            |    |   |          |          |                |                                     |
| N2                                                                                                       | HS | V | 13627573 | 13629831 | WBGene00009996 | F53F4.14 F53F4.14                   |
| -0.434425398504462 AGIWUR9184                                                                            |    |   |          |          |                |                                     |
| N2                                                                                                       | HS | V | 13629798 | 13634220 | WBGene00010426 | H37A05.2 H37A05.2                   |
| -0.162086958687108 AGIWUR38170                                                                           |    |   |          |          |                |                                     |
| N2                                                                                                       | HS | V | 13646884 | 13648397 | WBGene00044200 | H37A05.4 H37A05.4                   |
| 0.00259078617095199 AGIWUR575;AGIWUR1900;AGIWUR15836;AGIWUR21231;AGIWUR35946;AGIWUR38688;AGIWUR44826     |    |   |          |          |                |                                     |
| N2                                                                                                       | HS | V | 13650262 | 13654129 | WBGene00010425 | lpin-1 H37A05.1                     |
| -0.0180218672167474                                                                                      |    |   |          |          |                |                                     |
| AGIWUR2643;AGIWUR4507;AGIWUR9267;AGIWUR16504;AGIWUR18966;AGIWUR23328;AGIWUR29667;AGIWUR30580;AGIWUR31663 |    |   |          |          |                |                                     |
| N2                                                                                                       | HS | V | 13661261 | 13664233 | WBGene00010279 | letm-1 F58G11.1                     |
| 0.075715505690912 AGIWUR2941                                                                             |    |   |          |          |                |                                     |
| N2                                                                                                       | HS | V | 13665397 | 13669292 | WBGene00010280 | rde-12 F58G11.2                     |
| -0.16594419072411 AGIWUR4244;AGIWUR13280;AGIWUR18784;AGIWUR25411;AGIWUR28193;AGIWUR32694;AGIWUR43200     |    |   |          |          |                |                                     |
| N2                                                                                                       | HS | V | 13669353 | 13671958 | WBGene00010281 | F58G11.3 F58G11.3                   |

|                                                                         |                                     |          |                |           |                             |
|-------------------------------------------------------------------------|-------------------------------------|----------|----------------|-----------|-----------------------------|
| -0.0435150532211246                                                     | AGIWUR7764                          |          |                |           |                             |
| N2 HS V                                                                 | 13672597                            | 13676024 | WBGene00010282 | F58G11.4  | F58G11.4                    |
| -0.0650910575952928                                                     | AGIWUR45194                         |          |                |           |                             |
| N2 HS V                                                                 | 13675988                            | 13678598 | WBGene00006442 | tag-65    | F58G11.5                    |
| 0.0894137444349177                                                      | AGIWUR25787;AGIWUR34042;AGIWUR42886 |          |                |           |                             |
| N2 HS V                                                                 | 13678875                            | 13681539 | WBGene00010283 | ccz-1     | F58G11.6                    |
| -0.18355018522665                                                       | AGIWUR38090                         |          |                |           |                             |
| N2 HS V                                                                 | 13689892                            | 13703330 | WBGene00011326 | T01D3.1   | T01D3.1 -0.0314753853338701 |
| AGIWUR6558;AGIWUR11831;AGIWUR40023                                      |                                     |          |                |           |                             |
| N2 HS V                                                                 | 13704929                            | 13711085 | WBGene00011328 | T01D3.3   | T01D3.3 -0.0593958651641922 |
| AGIWUR15077;AGIWUR42302                                                 |                                     |          |                |           |                             |
| N2 HS V                                                                 | 13712854                            | 13716624 | WBGene00011329 | zipt-9    | T01D3.5 0.0186057350371001  |
| AGIWUR16842;AGIWUR19607                                                 |                                     |          |                |           |                             |
| N2 HS V                                                                 | 13716824                            | 13720402 | WBGene00011330 | T01D3.6   | T01D3.6 -0.0257282494648301 |
| AGIWUR15921;AGIWUR25854;AGIWUR27027;AGIWUR29108;AGIWUR29892;AGIWUR30923 |                                     |          |                |           |                             |
| N2 HS V                                                                 | 13721249                            | 13722196 | WBGene00009425 | scl-16    | F35E12.1                    |
| -0.0702967550533771                                                     | AGIWUR6100                          |          |                |           |                             |
| N2 HS V                                                                 | 13722254                            | 13724881 | WBGene00009426 | F35E12.2  | F35E12.2                    |
| 0.121663619653267                                                       | AGIWUR16340                         |          |                |           |                             |
| N2 HS V                                                                 | 13725905                            | 13727014 | WBGene00009427 | fbxa-181  | F35E12.3                    |
| -0.0228825483767974                                                     | AGIWUR28078                         |          |                |           |                             |
| N2 HS V                                                                 | 13727763                            | 13730776 | WBGene00009431 | dct-17    | F35E12.7                    |
| -0.105297779378304                                                      | AGIWUR32743                         |          |                |           |                             |
| N2 HS V                                                                 | 13731506                            | 13733387 | WBGene00009428 | F35E12.4  | F35E12.4                    |
| 0.0170788770301105                                                      | AGIWUR23886                         |          |                |           |                             |
| N2 HS V                                                                 | 13734118                            | 13736247 | WBGene00009430 | F35E12.6  | F35E12.6                    |
| 0.323432262927451                                                       | AGIWUR2036                          |          |                |           |                             |
| N2 HS V                                                                 | 13737007                            | 13738474 | WBGene00009429 | irg-5     | F35E12.5                    |
| -0.120851608668435                                                      | AGIWUR30275                         |          |                |           |                             |
| N2 HS V                                                                 | 13741321                            | 13745127 | WBGene00009433 | F35E12.9  | F35E12.9                    |
| 0.47957647820905                                                        | AGIWUR35609;AGIWUR36025             |          |                |           |                             |
| N2 HS V                                                                 | 13745696                            | 13748758 | WBGene00009434 | F35E12.10 | F35E12.10                   |
| 0.108020615736269                                                       | AGIWUR6787                          |          |                |           |                             |
| N2 HS V                                                                 | 13749181                            | 13751972 | WBGene00009432 | cld-9     | F35E12.8                    |
| 0.0453028853978985                                                      | AGIWUR25822                         |          |                |           |                             |
| N2 HS V                                                                 | 13755011                            | 13756409 | WBGene00008986 | F20G2.2   | F20G2.2 -0.0560312403078846 |
| AGIWUR38701                                                             |                                     |          |                |           |                             |
| N2 HS V                                                                 | 13758090                            | 13759945 | WBGene00044920 | F20G2.7   | F20G2.7 -0.122613343289032  |
| AGIWUR6299;AGIWUR17995;AGIWUR22254;AGIWUR33333;AGIWUR37779;AGIWUR44262  |                                     |          |                |           |                             |

|                                                                                                                   |    |   |          |          |                |          |          |                     |
|-------------------------------------------------------------------------------------------------------------------|----|---|----------|----------|----------------|----------|----------|---------------------|
| N2                                                                                                                | HS | V | 13763077 | 13765980 | WBGene00008989 | F20G2.6  | F20G2.6  | 0.139667619035567   |
| AGIWUR30925                                                                                                       |    |   |          |          |                |          |          |                     |
| N2                                                                                                                | HS | V | 13765926 | 13768552 | WBGene00008987 | F20G2.3  | F20G2.3  | 0.103988298115521   |
| AGIWUR23110                                                                                                       |    |   |          |          |                |          |          |                     |
| N2                                                                                                                | HS | V | 13769669 | 13771279 | WBGene00003543 | nas-24   | F20G2.4  | -0.181512990497669  |
| AGIWUR9822                                                                                                        |    |   |          |          |                |          |          |                     |
| N2                                                                                                                | HS | V | 13771508 | 13773695 | WBGene00008988 | F20G2.5  | F20G2.5  | -0.0173444866870529 |
| AGIWUR967;AGIWUR2052;AGIWUR2758;AGIWUR5251;AGIWUR8818;AGIWUR31389;AGIWUR32219;AGIWUR33248;AGIWUR34200;AGIWUR38036 |    |   |          |          |                |          |          |                     |
| N2                                                                                                                | HS | V | 13775751 | 13777767 | WBGene00009971 | F53C11.1 |          | F53C11.1            |
| 0.0151193372308196 AGIWUR41401                                                                                    |    |   |          |          |                |          |          |                     |
| N2                                                                                                                | HS | V | 13778015 | 13778592 | WBGene00044921 | F53C11.9 |          | F53C11.9            |
| 0.0700022416560024 AGIWUR658;AGIWUR7729;AGIWUR17506                                                               |    |   |          |          |                |          |          |                     |
| N2                                                                                                                | HS | V | 13778633 | 13781625 | WBGene00009972 | oac-33   | F53C11.2 |                     |
| 0.00252212072505653 AGIWUR43622                                                                                   |    |   |          |          |                |          |          |                     |
| N2                                                                                                                | HS | V | 13782399 | 13784102 | WBGene00009973 | F53C11.3 |          | F53C11.3            |
| -0.0389462778710783 AGIWUR21156                                                                                   |    |   |          |          |                |          |          |                     |
| N2                                                                                                                | HS | V | 13784095 | 13787712 | WBGene00009974 | F53C11.4 |          | F53C11.4            |
| -0.0755619322632555 AGIWUR6856;AGIWUR16078;AGIWUR17928                                                            |    |   |          |          |                |          |          |                     |
| N2                                                                                                                | HS | V | 13787536 | 13796254 | WBGene00009975 | F53C11.5 |          | F53C11.5            |
| -0.138139726876028 AGIWUR14374                                                                                    |    |   |          |          |                |          |          |                     |
| N2                                                                                                                | HS | V | 13796641 | 13800577 | WBGene00006684 | twk-32   | F53C11.6 |                     |
| 0.0691197744527265 AGIWUR19031                                                                                    |    |   |          |          |                |          |          |                     |
| N2                                                                                                                | HS | V | 13800976 | 13804282 | WBGene00009976 | swan-2   | F53C11.7 |                     |
| -0.110234207666274 AGIWUR2857                                                                                     |    |   |          |          |                |          |          |                     |
| N2                                                                                                                | HS | V | 13804395 | 13807237 | WBGene00009977 | swan-1   | F53C11.8 |                     |
| 0.00812182638319436 AGIWUR2829;AGIWUR14332;AGIWUR14646;AGIWUR26673;AGIWUR34285;AGIWUR41780                        |    |   |          |          |                |          |          |                     |
| N2                                                                                                                | HS | V | 13813309 | 13815272 | WBGene00000447 | ceh-24   | F55B12.1 |                     |
| -0.0645912059860949 AGIWUR29993                                                                                   |    |   |          |          |                |          |          |                     |
| N2                                                                                                                | HS | V | 13815374 | 13816977 | WBGene00010088 | F55B12.2 |          | F55B12.2            |
| 0.186040155174713 AGIWUR6477                                                                                      |    |   |          |          |                |          |          |                     |
| N2                                                                                                                | HS | V | 13818132 | 13822980 | WBGene00004767 | sel-10   | F55B12.3 |                     |
| -0.0242313980643036 AGIWUR41;AGIWUR9842;AGIWUR13814;AGIWUR27608;AGIWUR34431;AGIWUR37471;AGIWUR39533               |    |   |          |          |                |          |          |                     |
| N2                                                                                                                | HS | V | 13823052 | 13825222 | WBGene00010089 | hpo-31   | F55B12.4 |                     |
| 0.00772554964494443 AGIWUR17921;AGIWUR28404;AGIWUR28902;AGIWUR39706                                               |    |   |          |          |                |          |          |                     |
| N2                                                                                                                | HS | V | 13828208 | 13831040 | WBGene00003812 | nr-f-5   | F55B12.5 |                     |
| 0.298708061793164 AGIWUR14186                                                                                     |    |   |          |          |                |          |          |                     |
| N2                                                                                                                | HS | V | 13831113 | 13832905 | WBGene00006210 | str-165  | F55B12.6 |                     |
| -0.10038860235777 AGIWUR23102                                                                                     |    |   |          |          |                |          |          |                     |

|    |    |   |                                                             |          |                |           |                             |
|----|----|---|-------------------------------------------------------------|----------|----------------|-----------|-----------------------------|
| N2 | HS | V | 13834251                                                    | 13836581 | WBGene00006020 | srx-129   | F55B12.9                    |
|    |    |   | AGIWUR19811;AGIWUR37331                                     |          |                |           |                             |
| N2 | HS | V | 13837473                                                    | 13838682 | WBGene00006019 | srx-128   | F55B12.7                    |
|    |    |   | AGIWUR22941                                                 |          |                |           |                             |
| N2 | HS | V | 13839769                                                    | 13840281 | WBGene00077439 | F55B12.10 | F55B12.10                   |
|    |    |   | AGIWUR14927;AGIWUR31593;AGIWUR32913;AGIWUR36567;AGIWUR37092 |          |                |           |                             |
| N2 | HS | V | 13840741                                                    | 13842187 | WBGene00005908 | srx-17    | F55B12.8                    |
|    |    |   | AGIWUR16351                                                 |          |                |           |                             |
| N2 | HS | V | 13843447                                                    | 13844962 | WBGene00006021 | srx-130   | F09F3.1 0.0711603419548741  |
|    |    |   | AGIWUR12608;AGIWUR12670;AGIWUR20875;AGIWUR44651             |          |                |           |                             |
| N2 | HS | V | 13845436                                                    | 13846727 | WBGene00006022 | srx-131   | F09F3.2 0.0203915258678116  |
|    |    |   | AGIWUR14507                                                 |          |                |           |                             |
| N2 | HS | V | 13847230                                                    | 13848414 | WBGene00006023 | srx-132   | F09F3.3 -0.0889657528120011 |
|    |    |   | AGIWUR7957                                                  |          |                |           |                             |
| N2 | HS | V | 13848679                                                    | 13849969 | WBGene00006024 | srx-133   | F09F3.4 -0.114629390714515  |
|    |    |   | AGIWUR2081                                                  |          |                |           |                             |
| N2 | HS | V | 13850470                                                    | 13853199 | WBGene00008627 | F09F3.5   | F09F3.5 0.30078013373199    |
|    |    |   | AGIWUR16921                                                 |          |                |           |                             |
| N2 | HS | V | 13853834                                                    | 13855260 | WBGene00008628 | ttr-21    | F09F3.6 -0.114280080257172  |
|    |    |   | AGIWUR29376;AGIWUR31698;AGIWUR33752;AGIWUR34397;AGIWUR39923 |          |                |           |                             |
| N2 | HS | V | 13854878                                                    | 13856476 | WBGene00006025 | srx-134   | F09F3.7 0.1672494878427     |
|    |    |   | AGIWUR3077                                                  |          |                |           |                             |
| N2 | HS | V | 13857448                                                    | 13858942 | WBGene00006027 | srx-136   | F09F3.12                    |
|    |    |   | AGIWUR12174;AGIWUR19548;AGIWUR37830                         |          |                |           |                             |
| N2 | HS | V | 13859301                                                    | 13861321 | WBGene00006026 | srx-135   | F09F3.11                    |
|    |    |   | AGIWUR21897                                                 |          |                |           |                             |
| N2 | HS | V | 13862805                                                    | 13864110 | WBGene00006028 | srx-137   | F09F3.13                    |
|    |    |   | AGIWUR21439                                                 |          |                |           |                             |
| N2 | HS | V | 13866706                                                    | 13868473 | WBGene00008630 | nhr-175   | F09F3.10                    |
|    |    |   | AGIWUR37589                                                 |          |                |           |                             |
| N2 | HS | V | 13869888                                                    | 13872529 | WBGene00014732 | F09F3.8   | F09F3.8 0.0373634881123293  |
|    |    |   | AGIWUR18228                                                 |          |                |           |                             |
| N2 | HS | V | 13873153                                                    | 13875891 | WBGene00008629 | cpt-5     | F09F3.9 0.324619111287989   |
|    |    |   | AGIWUR27803                                                 |          |                |           |                             |
| N2 | HS | V | 13876837                                                    | 13877949 | WBGene00011929 | T22G5.1   | T22G5.1 0.126419216361139   |
|    |    |   | AGIWUR38579                                                 |          |                |           |                             |
| N2 | HS | V | 13879552                                                    | 13880213 | WBGene00002259 | lbp-7     | T22G5.2 0.0940739009205735  |
|    |    |   | AGIWUR5469                                                  |          |                |           |                             |
| N2 | HS | V | 13880908                                                    | 13883937 | WBGene00011930 | T22G5.3   | T22G5.3 -0.0354672971348862 |



|                                              |    |   |                                     |          |                |          |          |                     |
|----------------------------------------------|----|---|-------------------------------------|----------|----------------|----------|----------|---------------------|
| AGIWUR10007                                  |    |   |                                     |          |                |          |          |                     |
| N2                                           | HS | V | 13887658                            | 13889458 | WBGene00011931 | srsx-19  | T22G5.4  | 0.104123630021236   |
| AGIWUR39026                                  |    |   |                                     |          |                |          |          |                     |
| N2                                           | HS | V | 13889918                            | 13890295 | WBGene00004997 | spp-12   | T22G5.7  | 0.283163713864568   |
| AGIWUR10860                                  |    |   |                                     |          |                |          |          |                     |
| N2                                           | HS | V | 13890679                            | 13891364 | WBGene00002260 | lbp-8    | T22G5.6  | 0.0626688233197559  |
| AGIWUR7757;AGIWUR22889                       |    |   |                                     |          |                |          |          |                     |
| N2                                           | HS | V | 13893325                            | 13896405 | WBGene00011932 | spt1-3   | T22G5.5  | 0.180854985430206   |
| AGIWUR2196;AGIWUR2376;AGIWUR4449;AGIWUR23193 |    |   |                                     |          |                |          |          |                     |
| N2                                           | HS | V | 13896663                            | 13898488 | WBGene00007362 | cyp-35C1 |          | C06B3.3             |
| 0.388338058280979                            |    |   | AGIWUR23062                         |          |                |          |          |                     |
| N2                                           | HS | V | 13899513                            | 13902653 | WBGene00007361 | oac-3    | C06B3.2  | -0.117108500202786  |
| AGIWUR19326;AGIWUR20418;AGIWUR25380          |    |   |                                     |          |                |          |          |                     |
| N2                                           | HS | V | 13902795                            | 13903886 | WBGene00007360 | C06B3.1  | C06B3.1  | -0.0981215513921807 |
| AGIWUR38921                                  |    |   |                                     |          |                |          |          |                     |
| N2                                           | HS | V | 13904611                            | 13905996 | WBGene00007364 | stdh-3   | C06B3.5  | -0.0538777369473422 |
| AGIWUR33232                                  |    |   |                                     |          |                |          |          |                     |
| N2                                           | HS | V | 13906492                            | 13908135 | WBGene00007363 | stdh-1   | C06B3.4  | 0.0913931548181832  |
| AGIWUR6267                                   |    |   |                                     |          |                |          |          |                     |
| N2                                           | HS | V | 13908133                            | 13909513 | WBGene00007365 | C06B3.6  | C06B3.6  | 0.536726683372123   |
| AGIWUR1890                                   |    |   |                                     |          |                |          |          |                     |
| N2                                           | HS | V | 13909686                            | 13911524 | WBGene00007366 | C06B3.7  | C06B3.7  | 0.00373347290716808 |
| AGIWUR10558                                  |    |   |                                     |          |                |          |          |                     |
| N2                                           | HS | V | 13912080                            | 13915436 | WBGene00001552 | gcy-32   | C06B3.8  | 0.187464209838978   |
| AGIWUR43888                                  |    |   |                                     |          |                |          |          |                     |
| N2                                           | HS | V | 13916496                            | 13918051 | WBGene00006278 | str-252  | C06B3.9  | 0.0213714447481523  |
| AGIWUR25893                                  |    |   |                                     |          |                |          |          |                     |
| N2                                           | HS | V | 13918641                            | 13920032 | WBGene00006277 | str-250  | C06B3.10 |                     |
| 0.0941962482786254                           |    |   | AGIWUR13257                         |          |                |          |          |                     |
| N2                                           | HS | V | 13921030                            | 13922404 | WBGene00005933 | srx-42   | C06B3.11 |                     |
| -0.0316837305442941                          |    |   | AGIWUR21430;AGIWUR25384             |          |                |          |          |                     |
| N2                                           | HS | V | 13924151                            | 13925807 | WBGene00044114 | srxa-11  | C06B3.12 |                     |
| -0.0927221241335676                          |    |   | AGIWUR25293;AGIWUR27699             |          |                |          |          |                     |
| N2                                           | HS | V | 13926698                            | 13929320 | WBGene00044115 | srxa-12  | C06B3.13 |                     |
| -0.0500978100944822                          |    |   | AGIWUR29606;AGIWUR36139;AGIWUR41790 |          |                |          |          |                     |
| N2                                           | HS | V | 13929803                            | 13931252 | WBGene00044116 | srxa-13  | C06B3.14 |                     |
| 0.300409136569415                            |    |   | AGIWUR11485;AGIWUR26810             |          |                |          |          |                     |
| N2                                           | HS | V | 13931525                            | 13932198 | WBGene00189947 | C06B3.16 |          | C06B3.16            |
| 0.0376418638258746                           |    |   | AGIWUR3507                          |          |                |          |          |                     |

|                                                                                                 |    |   |                                                 |          |                |                 |                          |
|-------------------------------------------------------------------------------------------------|----|---|-------------------------------------------------|----------|----------------|-----------------|--------------------------|
| N2                                                                                              | HS | V | 13932575                                        | 13934645 | WBGene00011185 | R10D12.1        | R10D12.1                 |
| 0.378086520890463                                                                               |    |   | AGIWUR1456                                      |          |                |                 |                          |
| N2                                                                                              | HS | V | 13937223                                        | 13939602 | WBGene00011197 | srw-145         | R10D12.17                |
| -0.17666851981316                                                                               |    |   | AGIWUR27930                                     |          |                |                 |                          |
| N2                                                                                              | HS | V | 13940139                                        | 13942182 | WBGene00001062 | dpr-1           | R10D12.2                 |
| 0.143008285766518                                                                               |    |   | AGIWUR18986                                     |          |                |                 |                          |
| N2                                                                                              | HS | V | 13943462                                        | 13944589 | WBGene00006018 | srx-127         | R10D12.3                 |
| 0.0653510276515368                                                                              |    |   | AGIWUR28843                                     |          |                |                 |                          |
| N2                                                                                              | HS | V | 13945248                                        | 13946485 | WBGene00005901 | srx-10          | R10D12.4                 |
| 0.131260490988089                                                                               |    |   | AGIWUR36137                                     |          |                |                 |                          |
| N2                                                                                              | HS | V | 13946969                                        | 13948799 | WBGene00011186 | cllec-226       | R10D12.5                 |
| -0.103997367709406                                                                              |    |   | AGIWUR14296                                     |          |                |                 |                          |
| N2                                                                                              | HS | V | 13949319                                        | 13949640 | WBGene00011187 | R10D12.6        | R10D12.6                 |
| 0.0965836116958787                                                                              |    |   | AGIWUR31172                                     |          |                |                 |                          |
| N2                                                                                              | HS | V | 13950066                                        | 13950394 | WBGene00011188 | R10D12.7        | R10D12.7                 |
| 0.0164012239338041                                                                              |    |   | AGIWUR23207                                     |          |                |                 |                          |
| N2                                                                                              | HS | V | 13950733                                        | 13953291 | WBGene00011189 | R10D12.8        | R10D12.8                 |
| -0.0306700154365647                                                                             |    |   | AGIWUR6538                                      |          |                |                 |                          |
| N2                                                                                              | HS | V | 13954277                                        | 13956176 | WBGene00011190 | swt-6           | R10D12.9                 |
| 0.136647114341894                                                                               |    |   | AGIWUR4056;AGIWUR12190;AGIWUR26090              |          |                |                 |                          |
| N2                                                                                              | HS | V | 13956161                                        | 13958347 | WBGene00011191 | R10D12.10       | R10D12.10                |
| 0.11015186924136                                                                                |    |   | AGIWUR7758;AGIWUR23659                          |          |                |                 |                          |
| N2                                                                                              | HS | V | 13958746                                        | 13961016 | WBGene00011192 | srh-24          | R10D12.11                |
| -0.0889747601152315                                                                             |    |   | AGIWUR2603;AGIWUR4584;AGIWUR9879                |          |                |                 |                          |
| N2                                                                                              | HS | V | 13961265                                        | 13961977 | WBGene00011193 | algn-13         | R10D12.12                |
| 0.35293920384219                                                                                |    |   | AGIWUR1988                                      |          |                |                 |                          |
| N2                                                                                              | HS | V | 13962417                                        | 13963840 | WBGene00011194 | R10D12.13       | R10D12.13                |
| -0.0295659499739984                                                                             |    |   | AGIWUR9954;AGIWUR10705;AGIWUR18062;AGIWUR43283  |          |                |                 |                          |
| N2                                                                                              | HS | V | 13963734                                        | 13965797 | WBGene00011195 | sao-1           | R10D12.14                |
| -0.366738088330554                                                                              |    |   | AGIWUR18990;AGIWUR31397;AGIWUR34082;AGIWUR39963 |          |                |                 |                          |
| N2                                                                                              | HS | V | 13979571                                        | 13980907 | WBGene00045401 | eol-1           | T26F2.3 3.13983090571576 |
| AGIWUR22948                                                                                     |    |   |                                                 |          |                |                 |                          |
| N2                                                                                              | HS | V | 13981568                                        | 13982971 | WBGene00012058 | T26F2.2 T26F2.2 | -0.116760480745912       |
| AGIWUR15010                                                                                     |    |   |                                                 |          |                |                 |                          |
| N2                                                                                              | HS | V | 13985137                                        | 13987072 | WBGene00001310 | end-1           | F58E10.2                 |
| -0.0527732167686272                                                                             |    |   | AGIWUR8175                                      |          |                |                 |                          |
| N2                                                                                              | HS | V | 13987166                                        | 14006079 | WBGene00010259 | ric-7           | F58E10.1                 |
| -0.038944934612255                                                                              |    |   |                                                 |          |                |                 |                          |
| AGIWUR11260;AGIWUR19271;AGIWUR22169;AGIWUR22854;AGIWUR33583;AGIWUR34027;AGIWUR36597;AGIWUR42820 |    |   |                                                 |          |                |                 |                          |

|    |    |   |                                                                               |          |                |          |                            |
|----|----|---|-------------------------------------------------------------------------------|----------|----------------|----------|----------------------------|
| N2 | HS | V | 14008768                                                                      | 14012218 | WBGene00010260 | ddx-17   | F58E10.3                   |
|    |    |   | -0.158766076964287 AGIWUR7766;AGIWUR10134;AGIWUR28864;AGIWUR33511;AGIWUR38214 |          |                |          |                            |
| N2 | HS | V | 14012333                                                                      | 14013644 | WBGene00000097 | aip-1    | F58E10.4                   |
|    |    |   | -0.245079986876217 AGIWUR42494                                                |          |                |          |                            |
| N2 | HS | V | 14014701                                                                      | 14015850 | WBGene00001311 | end-3    | F58E10.5                   |
|    |    |   | -0.229420827819062 AGIWUR20810                                                |          |                |          |                            |
| N2 | HS | V | 14015978                                                                      | 14017576 | WBGene00010261 | srh-308  | F58E10.6                   |
|    |    |   | -0.0380827512179707 AGIWUR22290                                               |          |                |          |                            |
| N2 | HS | V | 14018270                                                                      | 14018673 | WBGene00003474 | mtl-2    | T08G5.10                   |
|    |    |   | 0.461923553408463 AGIWUR31900                                                 |          |                |          |                            |
| N2 | HS | V | 14018766                                                                      | 14020332 | WBGene00011622 | T08G5.1  | T08G5.1 0.197388847853386  |
|    |    |   | AGIWUR41045                                                                   |          |                |          |                            |
| N2 | HS | V | 14020628                                                                      | 14021737 | WBGene00077572 | T08G5.14 | T08G5.14                   |
|    |    |   | 0.0817316097627998 AGIWUR39576                                                |          |                |          |                            |
| N2 | HS | V | 14026336                                                                      | 14027484 | WBGene00011624 | T08G5.3  | T08G5.3 0.255765919457348  |
|    |    |   | AGIWUR99;AGIWUR1082;AGIWUR19837;AGIWUR20924;AGIWUR35998                       |          |                |          |                            |
| N2 | HS | V | 14030184                                                                      | 14032584 | WBGene00014834 | T08G5.4  | T08G5.4 0.0841606831709769 |
|    |    |   | AGIWUR9751;AGIWUR42190                                                        |          |                |          |                            |
| N2 | HS | V | 14033950                                                                      | 14034393 | WBGene00002093 | ins-10   | T08G5.12                   |
|    |    |   | -0.0202200941503499 AGIWUR40111                                               |          |                |          |                            |
| N2 | HS | V | 14034323                                                                      | 14038372 | WBGene00011625 | vps-39   | T08G5.5 -0.13872495555426  |
|    |    |   | AGIWUR2812;AGIWUR16018;AGIWUR25794;AGIWUR38233;AGIWUR44385                    |          |                |          |                            |
| N2 | HS | V | 14038896                                                                      | 14040234 | WBGene00050930 | T08G5.13 | T08G5.13                   |
|    |    |   | 0.0852883337903645 AGIWUR11059;AGIWUR16384;AGIWUR30398                        |          |                |          |                            |
| N2 | HS | V | 14057840                                                                      | 14064529 | WBGene00010250 | F58D12.3 | F58D12.3                   |
|    |    |   | 0.0143034147368981 AGIWUR1597;AGIWUR31940;AGIWUR35221;AGIWUR43868             |          |                |          |                            |
| N2 | HS | V | 14067819                                                                      | 14071215 | WBGene00045355 | D1086.17 | D1086.17                   |
|    |    |   | 0.162598933063519 AGIWUR12879;AGIWUR16108;AGIWUR34946;AGIWUR35308             |          |                |          |                            |
| N2 | HS | V | 14071646                                                                      | 14073719 | WBGene00077448 | D1086.20 | D1086.20                   |
|    |    |   | -0.131154352808265 AGIWUR546;AGIWUR21272                                      |          |                |          |                            |
| N2 | HS | V | 14074456                                                                      | 14076725 | WBGene00044081 | D1086.11 | D1086.11                   |
|    |    |   | 0.157130554054968 AGIWUR9110;AGIWUR31787                                      |          |                |          |                            |
| N2 | HS | V | 14079801                                                                      | 14081766 | WBGene00008393 | D1086.6  | D1086.6 0.150673052331057  |
|    |    |   | AGIWUR6916;AGIWUR27761                                                        |          |                |          |                            |
| N2 | HS | V | 14082753                                                                      | 14083584 | WBGene00044080 | D1086.10 | D1086.10                   |
|    |    |   | 0.481603269820171 AGIWUR5549                                                  |          |                |          |                            |
| N2 | HS | V | 14084270                                                                      | 14085811 | WBGene00008394 | D1086.7  | D1086.7 0.306220245156053  |
|    |    |   | AGIWUR3028;AGIWUR13342                                                        |          |                |          |                            |
| N2 | HS | V | 14085889                                                                      | 14087169 | WBGene00045405 | D1086.18 | D1086.18                   |

|                         |    |   |                                                                                 |          |                |          |          |                     |
|-------------------------|----|---|---------------------------------------------------------------------------------|----------|----------------|----------|----------|---------------------|
| -0.082582959204192      |    |   | AGIWUR34218                                                                     |          |                |          |          |                     |
| N2                      | HS | V | 14088351                                                                        | 14088704 | WBGene00045406 | D1086.19 |          | D1086.19            |
| -0.0310700449014281     |    |   | AGIWUR8143;AGIWUR14209;AGIWUR16516;AGIWUR22654;AGIWUR29990                      |          |                |          |          |                     |
| N2                      | HS | V | 14088893                                                                        | 14090359 | WBGene00008392 | D1086.5  | D1086.5  | 0.00655410661006783 |
| AGIWUR23610             |    |   |                                                                                 |          |                |          |          |                     |
| N2                      | HS | V | 14090719                                                                        | 14092435 | WBGene00001864 | him-5    | D1086.4  | -0.0740574123837057 |
| AGIWUR44490             |    |   |                                                                                 |          |                |          |          |                     |
| N2                      | HS | V | 14092792                                                                        | 14093986 | WBGene00008390 | D1086.3  | D1086.3  | 0.3370521710535     |
| AGIWUR14700             |    |   |                                                                                 |          |                |          |          |                     |
| N2                      | HS | V | 14094105                                                                        | 14097088 | WBGene00008395 | D1086.8  | D1086.8  | 0.135223966022465   |
| AGIWUR12365             |    |   |                                                                                 |          |                |          |          |                     |
| N2                      | HS | V | 14097038                                                                        | 14098668 | WBGene00008389 | D1086.2  | D1086.2  | 0.1856824196531     |
| AGIWUR4031              |    |   |                                                                                 |          |                |          |          |                     |
| N2                      | HS | V | 14098858                                                                        | 14100390 | WBGene00008388 | D1086.1  | D1086.1  | 0.0543658154195779  |
| AGIWUR34537             |    |   |                                                                                 |          |                |          |          |                     |
| N2                      | HS | V | 14101186                                                                        | 14102821 | WBGene00044082 | D1086.12 |          | D1086.12            |
| 0.243626658394849       |    |   | AGIWUR36541                                                                     |          |                |          |          |                     |
| N2                      | HS | V | 14104270                                                                        | 14106416 | WBGene00008396 | D1086.9  | D1086.9  | -0.399390816598639  |
| AGIWUR22373;AGIWUR29291 |    |   |                                                                                 |          |                |          |          |                     |
| N2                      | HS | V | 14107811                                                                        | 14110151 | WBGene00044201 | H39E23.3 |          | H39E23.3            |
| 0.169941084853058       |    |   | AGIWUR7418;AGIWUR8050;AGIWUR9150;AGIWUR9268;AGIWUR17164;AGIWUR29655;AGIWUR40848 |          |                |          |          |                     |
| N2                      | HS | V | 14110361                                                                        | 14112027 | WBGene00010432 | H39E23.2 |          | H39E23.2            |
| -0.223731765637037      |    |   | AGIWUR10876                                                                     |          |                |          |          |                     |
| N2                      | HS | V | 14112039                                                                        | 14141119 | WBGene00003916 | par-1    | H39E23.1 |                     |
| -0.246250370418526      |    |   | AGIWUR16278;AGIWUR16410;AGIWUR19436;AGIWUR27928;AGIWUR32541;AGIWUR41271         |          |                |          |          |                     |
| N2                      | HS | V | 14144030                                                                        | 14145411 | WBGene00007084 | AH10.3   | AH10.3   | -0.414413387170998  |
| AGIWUR30614             |    |   |                                                                                 |          |                |          |          |                     |
| N2                      | HS | V | 14146499                                                                        | 14148784 | WBGene00007082 | acs-10   | AH10.1   | -0.342721977915129  |
| AGIWUR12516             |    |   |                                                                                 |          |                |          |          |                     |
| N2                      | HS | V | 14156831                                                                        | 14157622 | WBGene00007083 | AH10.2   | AH10.2   | -0.0124889566108743 |
| AGIWUR34461             |    |   |                                                                                 |          |                |          |          |                     |
| N2                      | HS | V | 14157663                                                                        | 14160862 | WBGene00011364 | T02B5.3  | T02B5.3  | 0.588074867049279   |
| AGIWUR26497             |    |   |                                                                                 |          |                |          |          |                     |
| N2                      | HS | V | 14161551                                                                        | 14162841 | WBGene00005104 | srd-26   | T02B5.4  | 0.172463552990752   |
| AGIWUR8800              |    |   |                                                                                 |          |                |          |          |                     |
| N2                      | HS | V | 14163260                                                                        | 14166730 | WBGene00011362 | T02B5.1  | T02B5.1  | 0.220138456447991   |
| AGIWUR16187             |    |   |                                                                                 |          |                |          |          |                     |
| N2                      | HS | V | 14167228                                                                        | 14167729 | WBGene00011363 | ocam-1   | T02B5.2  | 0.0895001005091061  |
| AGIWUR27567             |    |   |                                                                                 |          |                |          |          |                     |

|                                                                  |    |   |          |          |                |           |          |                     |
|------------------------------------------------------------------|----|---|----------|----------|----------------|-----------|----------|---------------------|
| N2                                                               | HS | V | 14168362 | 14171481 | WBGene00013875 | ZC376.3   | ZC376.3  | 0.206976580164941   |
| AGIWUR44554                                                      |    |   |          |          |                |           |          |                     |
| N2                                                               | HS | V | 14171645 | 14175355 | WBGene00013874 | ZC376.2   | ZC376.2  | 0.214698105858428   |
| AGIWUR25072                                                      |    |   |          |          |                |           |          |                     |
| N2                                                               | HS | V | 14175517 | 14182960 | WBGene00013873 | ZC376.1   | ZC376.1  |                     |
| -0.00910326360938996 AGIWUR25901                                 |    |   |          |          |                |           |          |                     |
| N2                                                               | HS | V | 14183124 | 14185667 | WBGene00006613 | trm-1     | ZC376.5  | 0.109083065620434   |
| AGIWUR20951                                                      |    |   |          |          |                |           |          |                     |
| N2                                                               | HS | V | 14185691 | 14192156 | WBGene00013877 | ZC376.6   | ZC376.6  | -0.0420383958823738 |
| AGIWUR30098                                                      |    |   |          |          |                |           |          |                     |
| N2                                                               | HS | V | 14193685 | 14197695 | WBGene00013878 | atfs-1    | ZC376.7  | -0.0358910643072434 |
| AGIWUR14731                                                      |    |   |          |          |                |           |          |                     |
| N2                                                               | HS | V | 14205776 | 14209010 | WBGene00011793 | T16A9.3   | T16A9.3  | 0.0197906606806626  |
| AGIWUR801;AGIWUR8622;AGIWUR32892                                 |    |   |          |          |                |           |          |                     |
| N2                                                               | HS | V | 14209170 | 14210873 | WBGene00006261 | str-230   | T16A9.2  | -0.140756237025391  |
| AGIWUR11289                                                      |    |   |          |          |                |           |          |                     |
| N2                                                               | HS | V | 14215343 | 14220730 | WBGene00011794 | nep-21    | T16A9.4  | -0.0102312840669505 |
| AGIWUR27727                                                      |    |   |          |          |                |           |          |                     |
| N2                                                               | HS | V | 14225397 | 14226414 | WBGene00050975 | K02E11.11 |          | K02E11.11           |
| 0.100338374575093 AGIWUR642;AGIWUR3294;AGIWUR20831               |    |   |          |          |                |           |          |                     |
| N2                                                               | HS | V | 14232281 | 14236076 | WBGene00010510 | ent-3     | K02E11.1 |                     |
| 0.0233447192491667 AGIWUR24207                                   |    |   |          |          |                |           |          |                     |
| N2                                                               | HS | V | 14239942 | 14241151 | WBGene00044109 | K02E11.10 |          | K02E11.10           |
| -0.0793852074721251 AGIWUR33374                                  |    |   |          |          |                |           |          |                     |
| N2                                                               | HS | V | 14244204 | 14246104 | WBGene00010511 | sre-7     | K02E11.2 |                     |
| -0.144687979196822 AGIWUR19699                                   |    |   |          |          |                |           |          |                     |
| N2                                                               | HS | V | 14246276 | 14246909 | WBGene00010512 | K02E11.3  |          | K02E11.3            |
| 0.245259954899085 AGIWUR42262                                    |    |   |          |          |                |           |          |                     |
| N2                                                               | HS | V | 14247476 | 14248137 | WBGene00010513 | K02E11.4  |          | K02E11.4            |
| 0.076203126095554 AGIWUR8828;AGIWUR19022;AGIWUR19695;AGIWUR20713 |    |   |          |          |                |           |          |                     |
| N2                                                               | HS | V | 14250627 | 14251510 | WBGene00010515 | K02E11.6  |          | K02E11.6            |
| 0.20123257643785 AGIWUR8194;AGIWUR14347;AGIWUR17081              |    |   |          |          |                |           |          |                     |
| N2                                                               | HS | V | 14253488 | 14254321 | WBGene00010516 | K02E11.7  |          | K02E11.7            |
| 0.0828038329892422 AGIWUR15018                                   |    |   |          |          |                |           |          |                     |
| N2                                                               | HS | V | 14257107 | 14259231 | WBGene00009596 | sre-8     | F40G12.1 |                     |
| -0.100139011837562 AGIWUR44907                                   |    |   |          |          |                |           |          |                     |
| N2                                                               | HS | V | 14259544 | 14260931 | WBGene00009597 | F40G12.2  |          | F40G12.2            |
| 0.318520031554031 AGIWUR20587                                    |    |   |          |          |                |           |          |                     |
| N2                                                               | HS | V | 14261990 | 14267317 | WBGene00009598 | F40G12.3  |          | F40G12.3            |

|                                   |                                                            |          |                |                  |                     |
|-----------------------------------|------------------------------------------------------------|----------|----------------|------------------|---------------------|
| -0.221648470981208                | AGIWUR8470                                                 |          |                |                  |                     |
| N2 HS V                           | 14267761                                                   | 14268639 | WBGene00009599 | F40G12.4         | F40G12.4            |
| -0.0993330268114576               | AGIWUR13152                                                |          |                |                  |                     |
| N2 HS V                           | 14269182                                                   | 14270636 | WBGene00009600 | F40G12.5         | F40G12.5            |
| -0.316535636318258                | AGIWUR14463                                                |          |                |                  |                     |
| N2 HS V                           | 14271143                                                   | 14273047 | WBGene00009601 | F40G12.6         | F40G12.6            |
| 0.11773208742013                  | AGIWUR11143                                                |          |                |                  |                     |
| N2 HS V                           | 14275669                                                   | 14276343 | WBGene00009602 | F40G12.7         | F40G12.7            |
| 0.0976898684826555                | AGIWUR28116                                                |          |                |                  |                     |
| N2 HS V                           | 14278312                                                   | 14279877 | WBGene00009603 | srt-33 F40G12.8  |                     |
| -0.146494578157331                | AGIWUR32323                                                |          |                |                  |                     |
| N2 HS V                           | 14281120                                                   | 14282322 | WBGene00044002 | srt-74 F40G12.15 |                     |
| -0.0858196334519761               | AGIWUR10878;AGIWUR27270                                    |          |                |                  |                     |
| N2 HS V                           | 14282482                                                   | 14282997 | WBGene00009604 | F40G12.9         | F40G12.9            |
| 0.142899152499282                 | AGIWUR13071                                                |          |                |                  |                     |
| N2 HS V                           | 14283528                                                   | 14285327 | WBGene00009605 | F40G12.10        | F40G12.10           |
| 0.15200342697565                  | AGIWUR42439                                                |          |                |                  |                     |
| N2 HS V                           | 14286171                                                   | 14288056 | WBGene00009606 | F40G12.11        | F40G12.11           |
| -0.138026186009412                | AGIWUR11643                                                |          |                |                  |                     |
| N2 HS V                           | 14288733                                                   | 14289718 | WBGene00008788 | F14D7.1 F14D7.1  | 0.257440402533518   |
| AGIWUR224;AGIWUR11807;AGIWUR17635 |                                                            |          |                |                  |                     |
| N2 HS V                           | 14291910                                                   | 14293712 | WBGene00008789 | F14D7.2 F14D7.2  | -0.0663496837917563 |
| AGIWUR29824                       |                                                            |          |                |                  |                     |
| N2 HS V                           | 14295828                                                   | 14298132 | WBGene00008791 | F14D7.4 F14D7.4  | -0.0395850377515665 |
| AGIWUR2077;AGIWUR35633            |                                                            |          |                |                  |                     |
| N2 HS V                           | 14299180                                                   | 14299642 | WBGene00008792 | F14D7.5 F14D7.5  | 0.234851224153784   |
| AGIWUR1779                        |                                                            |          |                |                  |                     |
| N2 HS V                           | 14300014                                                   | 14300561 | WBGene00045331 | F14D7.12         | F14D7.12            |
| -0.0278417683980567               | AGIWUR7767;AGIWUR25853;AGIWUR35920;AGIWUR36552;AGIWUR37897 |          |                |                  |                     |
| N2 HS V                           | 14301413                                                   | 14306444 | WBGene00008793 | F14D7.6 F14D7.6  | -0.0977425088823907 |
| AGIWUR15208                       |                                                            |          |                |                  |                     |
| N2 HS V                           | 14310389                                                   | 14311236 | WBGene00008798 | F14D7.11         | F14D7.11            |
| -0.036494954174433                | AGIWUR2201                                                 |          |                |                  |                     |
| N2 HS V                           | 14311882                                                   | 14312788 | WBGene00008795 | F14D7.8 F14D7.8  | 0.191659878853443   |
| AGIWUR10018                       |                                                            |          |                |                  |                     |
| N2 HS V                           | 14313759                                                   | 14314333 | WBGene00009802 | F47B8.1 F47B8.1  | -0.0108143241908696 |
| AGIWUR30750                       |                                                            |          |                |                  |                     |
| N2 HS V                           | 14315859                                                   | 14316625 | WBGene00009803 | F47B8.2 F47B8.2  | -0.0231322909770846 |
| AGIWUR41770                       |                                                            |          |                |                  |                     |

|                                                                                                                                             |    |   |          |          |                |           |                            |
|---------------------------------------------------------------------------------------------------------------------------------------------|----|---|----------|----------|----------------|-----------|----------------------------|
| N2                                                                                                                                          | HS | V | 14320546 | 14321313 | WBGene00044194 | F47B8.14  | F47B8.14                   |
| -0.0775206928915768 AGIWUR7504;AGIWUR9913;AGIWUR32975;AGIWUR38665;AGIWUR41324                                                               |    |   |          |          |                |           |                            |
| N2                                                                                                                                          | HS | V | 14329069 | 14330080 | WBGene00009807 | pepm-1    | F47B8.6 -0.117117073354831 |
| AGIWUR10391                                                                                                                                 |    |   |          |          |                |           |                            |
| N2                                                                                                                                          | HS | V | 14331674 | 14332667 | WBGene00009809 | F47B8.8   | F47B8.8 0.247777306644059  |
| AGIWUR38545                                                                                                                                 |    |   |          |          |                |           |                            |
| N2                                                                                                                                          | HS | V | 14333416 | 14334803 | WBGene00009808 | srm-4     | F47B8.7 0.051250247376311  |
| AGIWUR33260                                                                                                                                 |    |   |          |          |                |           |                            |
| N2                                                                                                                                          | HS | V | 14337049 | 14338808 | WBGene00009810 | srm-6     | F47B8.9 0.019822740514388  |
| AGIWUR8149;AGIWUR29529                                                                                                                      |    |   |          |          |                |           |                            |
| N2                                                                                                                                          | HS | V | 14343068 | 14346964 | WBGene00009811 | F47B8.10  | F47B8.10                   |
| -0.0253984973714987 AGIWUR30997                                                                                                             |    |   |          |          |                |           |                            |
| N2                                                                                                                                          | HS | V | 14347731 | 14350776 | WBGene00013024 | cept-2    | Y49A3A.1                   |
| 0.0521526208369156 AGIWUR16913;AGIWUR33405;AGIWUR42443                                                                                      |    |   |          |          |                |           |                            |
| N2                                                                                                                                          | HS | V | 14351207 | 14354421 | WBGene00013025 | vha-13    | Y49A3A.2                   |
| -0.298360541213588                                                                                                                          |    |   |          |          |                |           |                            |
| AGIWUR2828;AGIWUR4109;AGIWUR6352;AGIWUR7215;AGIWUR12423;AGIWUR12812;AGIWUR18412;AGIWUR19376;AGIWUR33598;AGIWUR33706;AGIWUR38557;AGIWUR44816 |    |   |          |          |                |           |                            |
| N2                                                                                                                                          | HS | V | 14354410 | 14355754 | WBGene00013026 | Y49A3A.3  | Y49A3A.3                   |
| -0.309662385804854 AGIWUR9557                                                                                                               |    |   |          |          |                |           |                            |
| N2                                                                                                                                          | HS | V | 14356076 | 14356823 | WBGene00000877 | cyn-1     | Y49A3A.5                   |
| -0.192031175154749 AGIWUR2731;AGIWUR19749;AGIWUR22880;AGIWUR24716;AGIWUR26930;AGIWUR32649                                                   |    |   |          |          |                |           |                            |
| N2                                                                                                                                          | HS | V | 14356900 | 14358390 | WBGene00013027 | Y49A3A.4  | Y49A3A.4                   |
| 0.221157947084926 AGIWUR38068                                                                                                               |    |   |          |          |                |           |                            |
| N2                                                                                                                                          | HS | V | 14373389 | 14375799 | WBGene00006775 | unc-39    | F56A12.1                   |
| -0.314162531092445 AGIWUR35843                                                                                                              |    |   |          |          |                |           |                            |
| N2                                                                                                                                          | HS | V | 14376099 | 14379066 | WBGene00010143 | F56A12.2  | F56A12.2                   |
| -0.103889156631293 AGIWUR35255                                                                                                              |    |   |          |          |                |           |                            |
| N2                                                                                                                                          | HS | V | 14392240 | 14392772 | WBGene00007618 | C15H11.10 | C15H11.10                  |
| 0.246045148982685 AGIWUR28622                                                                                                               |    |   |          |          |                |           |                            |
| N2                                                                                                                                          | HS | V | 14395070 | 14395749 | WBGene00077576 | C15H11.13 | C15H11.13                  |
| 0.0249439997312919 AGIWUR2315                                                                                                               |    |   |          |          |                |           |                            |
| N2                                                                                                                                          | HS | V | 14409078 | 14411986 | WBGene00007614 | gnrr-2    | C15H11.2                   |
| 0.105639121570182 AGIWUR36691                                                                                                               |    |   |          |          |                |           |                            |
| N2                                                                                                                                          | HS | V | 14412400 | 14415792 | WBGene00003834 | nx-f-1    | C15H11.3                   |
| -0.406579129146412 AGIWUR12693                                                                                                              |    |   |          |          |                |           |                            |
| N2                                                                                                                                          | HS | V | 14415814 | 14416176 | WBGene00007619 | C15H11.11 | C15H11.11                  |
| 0.0853713381838048 AGIWUR30610                                                                                                              |    |   |          |          |                |           |                            |
| N2                                                                                                                                          | HS | V | 14416067 | 14417835 | WBGene00003835 | nx-f-2    | C15H11.6                   |

|                                                                                   |                                                 |          |                |           |          |                    |
|-----------------------------------------------------------------------------------|-------------------------------------------------|----------|----------------|-----------|----------|--------------------|
| 0.0523683466026217                                                                | AGIWUR19959                                     |          |                |           |          |                    |
| N2 HS V                                                                           | 14417903                                        | 14420096 | WBGene00007615 | set-31    | C15H11.5 |                    |
| 0.116348234358426                                                                 | AGIWUR27949                                     |          |                |           |          |                    |
| N2 HS V                                                                           | 14420071                                        | 14421450 | WBGene00000985 | dhs-22    | C15H11.4 |                    |
| -0.172900155406924                                                                | AGIWUR10213;AGIWUR15538;AGIWUR27388;AGIWUR40728 |          |                |           |          |                    |
| N2 HS V                                                                           | 14421566                                        | 14422618 | WBGene00003922 | pas-1     | C15H11.7 |                    |
| -0.0262213682565946                                                               | AGIWUR30109;AGIWUR43121;AGIWUR44076             |          |                |           |          |                    |
| N2 HS V                                                                           | 14422720                                        | 14423383 | WBGene00007616 | rpoa-12   | C15H11.8 |                    |
| 0.156861773689065                                                                 | AGIWUR9582;AGIWUR11619;AGIWUR13169              |          |                |           |          |                    |
| N2 HS V                                                                           | 14423776                                        | 14425008 | WBGene00007617 | rrbs-1    | C15H11.9 |                    |
| 0.0812952464286263                                                                | AGIWUR2187;AGIWUR22700;AGIWUR35444;AGIWUR37023  |          |                |           |          |                    |
| N2 HS V                                                                           | 14429165                                        | 14430500 | WBGene00009079 | F23B12.1  | F23B12.1 |                    |
| 0.282783801586145                                                                 | AGIWUR17727                                     |          |                |           |          |                    |
| N2 HS V                                                                           | 14431310                                        | 14432359 | WBGene00001170 | egl-1     | F23B12.9 |                    |
| -0.16182732058358                                                                 | AGIWUR33982                                     |          |                |           |          |                    |
| N2 HS V                                                                           | 14434563                                        | 14435743 | WBGene00005706 | sru-43    | F23B12.2 |                    |
| -0.00422182205164878                                                              | AGIWUR30624;AGIWUR42345                         |          |                |           |          |                    |
| N2 HS V                                                                           | 14441057                                        | 14445346 | WBGene00009081 | F23B12.4  | F23B12.4 |                    |
| 0.136663341462981                                                                 | AGIWUR26802;AGIWUR27323;AGIWUR44559             |          |                |           |          |                    |
| N2 HS V                                                                           | 14445324                                        | 14447608 | WBGene00009082 | dlat-1    | F23B12.5 |                    |
| -0.247021224601722                                                                | AGIWUR13860                                     |          |                |           |          |                    |
| N2 HS V                                                                           | 14447629                                        | 14449587 | WBGene00006465 | fntb-1    | F23B12.6 |                    |
| 0.0785298026977461                                                                | AGIWUR6698;AGIWUR21483;AGIWUR30837              |          |                |           |          |                    |
| N2 HS V                                                                           | 14449697                                        | 14452971 | WBGene00009084 | F23B12.7  | F23B12.7 |                    |
| 0.0259112778179382                                                                | AGIWUR4829;AGIWUR35599                          |          |                |           |          |                    |
| N2 HS V                                                                           | 14453305                                        | 14456998 | WBGene00000257 | bmk-1     | F23B12.8 |                    |
| 0.0603302142841144                                                                | AGIWUR3443;AGIWUR36706                          |          |                |           |          |                    |
| N2 HS V                                                                           | 14460624                                        | 14461132 | WBGene00008590 | F08H9.2   | F08H9.2  | 0.0712577575643039 |
| AGIWUR5738;AGIWUR9504;AGIWUR13305;AGIWUR15895;AGIWUR18011;AGIWUR38364;AGIWUR39285 |                                                 |          |                |           |          |                    |
| N2 HS V                                                                           | 14461943                                        | 14462809 | WBGene00008591 | F08H9.3   | F08H9.3  | 0.112740191956446  |
| AGIWUR42607                                                                       |                                                 |          |                |           |          |                    |
| N2 HS V                                                                           | 14463588                                        | 14464428 | WBGene00008592 | F08H9.4   | F08H9.4  | 0.0990896570253952 |
| AGIWUR12207                                                                       |                                                 |          |                |           |          |                    |
| N2 HS V                                                                           | 14465095                                        | 14468246 | WBGene00023515 | srz-97    | F08H9.12 |                    |
| -0.105853254138256                                                                | AGIWUR16877;AGIWUR39019;AGIWUR43230             |          |                |           |          |                    |
| N2 HS V                                                                           | 14469191                                        | 14472448 | WBGene00008594 | cllec-57  | F08H9.6  | 0.226098268054703  |
| AGIWUR25819;AGIWUR26410                                                           |                                                 |          |                |           |          |                    |
| N2 HS V                                                                           | 14472529                                        | 14474374 | WBGene00008593 | cllec-227 | F08H9.5  |                    |
| 0.0444246663802961                                                                | AGIWUR12601;AGIWUR28943;AGIWUR34139             |          |                |           |          |                    |



|                                                                                                     |    |   |          |          |                |          |          |                     |
|-----------------------------------------------------------------------------------------------------|----|---|----------|----------|----------------|----------|----------|---------------------|
| N2                                                                                                  | HS | V | 14474399 | 14476794 | WBGene00008595 | clec-56  | F08H9.7  | -0.225696173002834  |
| AGIWUR8691                                                                                          |    |   |          |          |                |          |          |                     |
| N2                                                                                                  | HS | V | 14476903 | 14479003 | WBGene00008596 | clec-54  | F08H9.8  | -0.204639779651382  |
| AGIWUR43177                                                                                         |    |   |          |          |                |          |          |                     |
| N2                                                                                                  | HS | V | 14479284 | 14482195 | WBGene00008597 | clec-55  | F08H9.9  | 0.0271325092356012  |
| AGIWUR30079                                                                                         |    |   |          |          |                |          |          |                     |
| N2                                                                                                  | HS | V | 14482287 | 14482836 | WBGene00194788 | R02D5.10 |          | R02D5.10            |
| -0.0246615988705745 AGIWUR13960;AGIWUR22681;AGIWUR27498;AGIWUR31073;AGIWUR40594                     |    |   |          |          |                |          |          |                     |
| N2                                                                                                  | HS | V | 14483160 | 14484346 | WBGene00010977 | R02D5.3  | R02D5.3  | 0.426857028448374   |
| AGIWUR16897                                                                                         |    |   |          |          |                |          |          |                     |
| N2                                                                                                  | HS | V | 14508249 | 14509655 | WBGene00010976 | R02D5.1  | R02D5.1  | -0.178586191257341  |
| AGIWUR12339;AGIWUR42123                                                                             |    |   |          |          |                |          |          |                     |
| N2                                                                                                  | HS | V | 14509738 | 14511123 | WBGene00077577 | R02D5.9  | R02D5.9  | 0.238054871559965   |
| AGIWUR21673                                                                                         |    |   |          |          |                |          |          |                     |
| N2                                                                                                  | HS | V | 14518351 | 14519368 | WBGene00050937 | R02D5.8  | R02D5.8  | 0.149221003509318   |
| AGIWUR38956                                                                                         |    |   |          |          |                |          |          |                     |
| N2                                                                                                  | HS | V | 14519371 | 14521100 | WBGene00194707 | C53A5.17 |          | C53A5.17            |
| 0.110532306389231 AGIWUR3775;AGIWUR8040;AGIWUR11708;AGIWUR13521;AGIWUR25149;AGIWUR25297;AGIWUR29485 |    |   |          |          |                |          |          |                     |
| N2                                                                                                  | HS | V | 14523329 | 14524129 | WBGene00008262 | ril-1    | C53A5.1  | 0.243100343580913   |
| AGIWUR2119;AGIWUR4729;AGIWUR20901;AGIWUR21355;AGIWUR42930;AGIWUR43238                               |    |   |          |          |                |          |          |                     |
| N2                                                                                                  | HS | V | 14525389 | 14527411 | WBGene00001834 | hda-1    | C53A5.3  | -0.148811238803654  |
| AGIWUR5903                                                                                          |    |   |          |          |                |          |          |                     |
| N2                                                                                                  | HS | V | 14531115 | 14542893 | WBGene00008265 | kcn1-4   | C53A5.5  | 0.160247607456892   |
| AGIWUR4093                                                                                          |    |   |          |          |                |          |          |                     |
| N2                                                                                                  | HS | V | 14543588 | 14545866 | WBGene00008266 | C53A5.6  | C53A5.6  | -0.134069205389775  |
| AGIWUR12806                                                                                         |    |   |          |          |                |          |          |                     |
| N2                                                                                                  | HS | V | 14546873 | 14554546 | WBGene00008270 | C53A5.13 |          | C53A5.13            |
| 0.325413555192057 AGIWUR22437                                                                       |    |   |          |          |                |          |          |                     |
| N2                                                                                                  | HS | V | 14554980 | 14556287 | WBGene00005204 | srg-47   | C53A5.8  | -0.0526822498415136 |
| AGIWUR29829                                                                                         |    |   |          |          |                |          |          |                     |
| N2                                                                                                  | HS | V | 14557038 | 14558866 | WBGene00008267 | C53A5.9  | C53A5.9  | 0.866928576343112   |
| AGIWUR3180                                                                                          |    |   |          |          |                |          |          |                     |
| N2                                                                                                  | HS | V | 14559612 | 14561293 | WBGene00008268 | srt-32   | C53A5.10 |                     |
| -0.015159130368894 AGIWUR6672                                                                       |    |   |          |          |                |          |          |                     |
| N2                                                                                                  | HS | V | 14562565 | 14564639 | WBGene00008269 | C53A5.11 |          | C53A5.11            |
| 2.69615593798635 AGIWUR19518                                                                        |    |   |          |          |                |          |          |                     |
| N2                                                                                                  | HS | V | 14564752 | 14579719 | WBGene00001519 | gar-3    | Y40H4A.1 |                     |
| 0.00550888821755446 AGIWUR19736;AGIWUR36424;AGIWUR39730                                             |    |   |          |          |                |          |          |                     |
| N2                                                                                                  | HS | V | 14583306 | 14585451 | WBGene00012741 | Y40H4A.2 |          | Y40H4A.2            |

|                                                                                                                                                                                |                                                                      |          |                |           |          |                     |  |
|--------------------------------------------------------------------------------------------------------------------------------------------------------------------------------|----------------------------------------------------------------------|----------|----------------|-----------|----------|---------------------|--|
| 0.049512249735761                                                                                                                                                              | AGIWUR37624                                                          |          |                |           |          |                     |  |
| N2 HS V                                                                                                                                                                        | 14591474                                                             | 14593642 | WBGene00014822 | R11H6.6   | R11H6.6  | -0.105667042471394  |  |
| AGIWUR37957                                                                                                                                                                    |                                                                      |          |                |           |          |                     |  |
| N2 HS V                                                                                                                                                                        | 14595268                                                             | 14597067 | WBGene00003982 | pes-9     | R11H6.1  |                     |  |
| 0.000663520419255548                                                                                                                                                           | AGIWUR912;AGIWUR12621;AGIWUR13853;AGIWUR21199;AGIWUR22229            |          |                |           |          |                     |  |
| N2 HS V                                                                                                                                                                        | 14597939                                                             | 14600092 | WBGene00011250 | R11H6.2   | R11H6.2  | 0.00513501630683066 |  |
| AGIWUR26564                                                                                                                                                                    |                                                                      |          |                |           |          |                     |  |
| N2 HS V                                                                                                                                                                        | 14600272                                                             | 14606535 | WBGene00011251 | glb-22    | R11H6.3  | -0.0948301831485274 |  |
| AGIWUR38644                                                                                                                                                                    |                                                                      |          |                |           |          |                     |  |
| N2 HS V                                                                                                                                                                        | 14609943                                                             | 14610705 | WBGene00011252 | R11H6.4   | R11H6.4  | 0.0645097427673704  |  |
| AGIWUR28376                                                                                                                                                                    |                                                                      |          |                |           |          |                     |  |
| N2 HS V                                                                                                                                                                        | 14610734                                                             | 14612222 | WBGene00011253 | R11H6.5   | R11H6.5  | -0.0161206410037842 |  |
| AGIWUR40698                                                                                                                                                                    |                                                                      |          |                |           |          |                     |  |
| N2 HS V                                                                                                                                                                        | 14612432                                                             | 14613706 | WBGene00009650 | ccnk-1    | F43D2.1  | 0.0120655141415682  |  |
| AGIWUR32184                                                                                                                                                                    |                                                                      |          |                |           |          |                     |  |
| N2 HS V                                                                                                                                                                        | 14621135                                                             | 14629384 | WBGene00001986 | hot-1     | F43D2.4  | -0.125476338038681  |  |
| AGIWUR27200                                                                                                                                                                    |                                                                      |          |                |           |          |                     |  |
| N2 HS V                                                                                                                                                                        | 14629377                                                             | 14635180 | WBGene00044191 | F43D2.6   | F43D2.6  | -0.0772810446910199 |  |
| AGIWUR23;AGIWUR4702;AGIWUR8799;AGIWUR11684;AGIWUR13617;AGIWUR14871;AGIWUR23346;AGIWUR30060;AGIWUR30678;AGIWUR30858;AGIWUR31003;AGIWUR31315;AGIWUR31350;AGIWUR32612;AGIWUR34854 |                                                                      |          |                |           |          |                     |  |
| N2 HS V                                                                                                                                                                        | 14635582                                                             | 14637751 | WBGene00009651 | F43D2.2   | F43D2.2  | 0.395651847984732   |  |
| AGIWUR14791                                                                                                                                                                    |                                                                      |          |                |           |          |                     |  |
| N2 HS V                                                                                                                                                                        | 14638945                                                             | 14640015 | WBGene00045516 | F43D2.7   | F43D2.7  | -0.137334344882971  |  |
| AGIWUR20996;AGIWUR22378;AGIWUR28161;AGIWUR31836;AGIWUR40482                                                                                                                    |                                                                      |          |                |           |          |                     |  |
| N2 HS V                                                                                                                                                                        | 14641101                                                             | 14641382 | WBGene00008319 | C54G10.1  |          | C54G10.1            |  |
| -0.202609713111759                                                                                                                                                             | AGIWUR16483                                                          |          |                |           |          |                     |  |
| N2 HS V                                                                                                                                                                        | 14642739                                                             | 14645979 | WBGene00004337 | rhc-1     | C54G10.2 |                     |  |
| 0.0164959866426635                                                                                                                                                             | AGIWUR2489;AGIWUR8541;AGIWUR9916;AGIWUR13984;AGIWUR27850;AGIWUR37721 |          |                |           |          |                     |  |
| N2 HS V                                                                                                                                                                        | 14646739                                                             | 14653464 | WBGene00004060 | pmp-3     | C54G10.3 |                     |  |
| 0.157949260795149                                                                                                                                                              | AGIWUR27604                                                          |          |                |           |          |                     |  |
| N2 HS V                                                                                                                                                                        | 14653491                                                             | 14658174 | WBGene00008320 | slc-25A29 |          | C54G10.4            |  |
| -0.246327743200423                                                                                                                                                             |                                                                      |          |                |           |          |                     |  |
| AGIWUR4735;AGIWUR15437;AGIWUR24609;AGIWUR28968;AGIWUR33112;AGIWUR38903;AGIWUR39305;AGIWUR40437;AGIWUR40699                                                                     |                                                                      |          |                |           |          |                     |  |
| N2 HS V                                                                                                                                                                        | 14661305                                                             | 14662928 | WBGene00005242 | srh-17    | C47E8.2  | -0.0546192296516601 |  |
| AGIWUR38401                                                                                                                                                                    |                                                                      |          |                |           |          |                     |  |
| N2 HS V                                                                                                                                                                        | 14663306                                                             | 14665927 | WBGene00008146 | C47E8.9   | C47E8.9  | 0.106144510033189   |  |
| AGIWUR16984;AGIWUR29136;AGIWUR33718                                                                                                                                            |                                                                      |          |                |           |          |                     |  |
| N2 HS V                                                                                                                                                                        | 14666005                                                             | 14667158 | WBGene00008141 | C47E8.1   | C47E8.1  | 0.0304878849893786  |  |
| AGIWUR3716;AGIWUR6200;AGIWUR12161;AGIWUR42797                                                                                                                                  |                                                                      |          |                |           |          |                     |  |

|                                                                        |    |   |                                                          |          |                |          |                             |
|------------------------------------------------------------------------|----|---|----------------------------------------------------------|----------|----------------|----------|-----------------------------|
| N2                                                                     | HS | V | 14667897                                                 | 14668743 | WBGene00044216 | C47E8.10 | C47E8.10                    |
| 0.196774198795049                                                      |    |   | AGIWUR377;AGIWUR3153;AGIWUR17976;AGIWUR22180;AGIWUR31385 |          |                |          |                             |
| N2                                                                     | HS | V | 14680314                                                 | 14683751 | WBGene00008142 | C47E8.3  | C47E8.3 0.052908394758683   |
| AGIWUR16754                                                            |    |   |                                                          |          |                |          |                             |
| N2                                                                     | HS | V | 14683706                                                 | 14685528 | WBGene00008143 | C47E8.4  | C47E8.4 -0.0868718895145868 |
| AGIWUR36395                                                            |    |   |                                                          |          |                |          |                             |
| N2                                                                     | HS | V | 14684918                                                 | 14688543 | WBGene00000915 | daf-21   | C47E8.5 -0.503126949955037  |
| AGIWUR9991;AGIWUR14975;AGIWUR21712;AGIWUR29884;AGIWUR30998;AGIWUR37657 |    |   |                                                          |          |                |          |                             |
| N2                                                                     | HS | V | 14688616                                                 | 14688959 | WBGene00044180 | C47E8.11 | C47E8.11                    |
| 0.0229834094352626                                                     |    |   | AGIWUR297;AGIWUR6077;AGIWUR42319;AGIWUR42457;AGIWUR43490 |          |                |          |                             |
| N2                                                                     | HS | V | 14689154                                                 | 14691861 | WBGene00008144 | gasr-8   | C47E8.6 0.146271015735335   |
| AGIWUR32623                                                            |    |   |                                                          |          |                |          |                             |
| N2                                                                     | HS | V | 14691854                                                 | 14697107 | WBGene00006836 | unc-112  | C47E8.7 0.114984606158991   |
| AGIWUR188;AGIWUR26949;AGIWUR36523                                      |    |   |                                                          |          |                |          |                             |
| N2                                                                     | HS | V | 14698957                                                 | 14707601 | WBGene00008145 | set-5    | C47E8.8 0.182036598144585   |
| AGIWUR23099                                                            |    |   |                                                          |          |                |          |                             |
| N2                                                                     | HS | V | 14711949                                                 | 14712296 | WBGene00014819 | R08A2.6  | R08A2.6 0.0039127586960781  |
| AGIWUR8279;AGIWUR14356;AGIWUR25788;AGIWUR32369;AGIWUR34440             |    |   |                                                          |          |                |          |                             |
| N2                                                                     | HS | V | 14712663                                                 | 14714072 | WBGene00011136 | R08A2.5  | R08A2.5 0.238415827836755   |
| AGIWUR32248                                                            |    |   |                                                          |          |                |          |                             |
| N2                                                                     | HS | V | 14714207                                                 | 14715720 | WBGene00011133 | R08A2.2  | R08A2.2 -0.243227020814387  |
| AGIWUR28225;AGIWUR36004                                                |    |   |                                                          |          |                |          |                             |
| N2                                                                     | HS | V | 14718601                                                 | 14719591 | WBGene00011132 | R08A2.1  | R08A2.1 0.0361311980955783  |
| AGIWUR23398                                                            |    |   |                                                          |          |                |          |                             |
| N2                                                                     | HS | V | 14723324                                                 | 14724766 | WBGene00011137 | R08A2.7  | R08A2.7 -0.411693487535407  |
| AGIWUR11484                                                            |    |   |                                                          |          |                |          |                             |
| N2                                                                     | HS | V | 14726907                                                 | 14727328 | WBGene00013046 | Y50E8A.1 | Y50E8A.1                    |
| 0.0981708056850792                                                     |    |   | AGIWUR10947                                              |          |                |          |                             |
| N2                                                                     | HS | V | 14728441                                                 | 14728854 | WBGene00013047 | Y50E8A.2 | Y50E8A.2                    |
| 0.306263226596723                                                      |    |   | AGIWUR18648                                              |          |                |          |                             |
| N2                                                                     | HS | V | 14729643                                                 | 14731129 | WBGene00003861 | oig-3    | Y50E8A.3                    |
| 0.161975938233581                                                      |    |   | AGIWUR18726                                              |          |                |          |                             |
| N2                                                                     | HS | V | 14731095                                                 | 14734237 | WBGene00006795 | unc-61   | Y50E8A.4                    |
| -0.0221847640672843                                                    |    |   | AGIWUR12148;AGIWUR21715;AGIWUR34974;AGIWUR39479          |          |                |          |                             |
| N2                                                                     | HS | V | 14734660                                                 | 14736169 | WBGene00013048 | Y50E8A.5 | Y50E8A.5                    |
| 0.324730349384312                                                      |    |   | AGIWUR25169                                              |          |                |          |                             |
| N2                                                                     | HS | V | 14738542                                                 | 14741326 | WBGene00013049 | Y50E8A.6 | Y50E8A.6                    |
| 0.1734050682687                                                        |    |   | AGIWUR24930                                              |          |                |          |                             |
| N2                                                                     | HS | V | 14745684                                                 | 14748708 | WBGene00013050 | lip1-8   | Y50E8A.7                    |

|                                                                       |                                                             |          |                |           |                             |
|-----------------------------------------------------------------------|-------------------------------------------------------------|----------|----------------|-----------|-----------------------------|
| 0.0991036646088235                                                    | AGIWUR39197                                                 |          |                |           |                             |
| N2 HS V                                                               | 14758785                                                    | 14765831 | WBGene00013056 | Y50E8A.14 | Y50E8A.14                   |
| -0.157232914746551                                                    | AGIWUR27161;AGIWUR30646                                     |          |                |           |                             |
| N2 HS V                                                               | 14773258                                                    | 14777697 | WBGene00001817 | haf-7     | Y50E8A.16                   |
| 0.0475080857828676                                                    | AGIWUR43772                                                 |          |                |           |                             |
| N2 HS V                                                               | 14778336                                                    | 14779714 | WBGene00013052 | scrm-7    | Y50E8A.9                    |
| 0.511108416435722                                                     | AGIWUR24090                                                 |          |                |           |                             |
| N2 HS V                                                               | 14779996                                                    | 14781078 | WBGene00013053 | Y50E8A.10 | Y50E8A.10                   |
| 0.110200331121703                                                     | AGIWUR40189                                                 |          |                |           |                             |
| N2 HS V                                                               | 14781493                                                    | 14782209 | WBGene00013054 | Y50E8A.11 | Y50E8A.11                   |
| 0.0646640940393377                                                    | AGIWUR3125;AGIWUR4148;AGIWUR20735;AGIWUR22683               |          |                |           |                             |
| N2 HS V                                                               | 14782658                                                    | 14784065 | WBGene00013055 | Y50E8A.12 | Y50E8A.12                   |
| 0.0492027380895053                                                    | AGIWUR9036                                                  |          |                |           |                             |
| N2 HS V                                                               | 14784167                                                    | 14815659 | WBGene00008183 | rin-1     | C48G7.3 -0.116993168662683  |
| AGIWUR11451;AGIWUR18250;AGIWUR32306                                   |                                                             |          |                |           |                             |
| N2 HS V                                                               | 14821853                                                    | 14824453 | WBGene00012291 | W06A7.2   | W06A7.2 0.0876343313787906  |
| AGIWUR26273                                                           |                                                             |          |                |           |                             |
| N2 HS V                                                               | 14824664                                                    | 14829533 | WBGene00012293 | W06A7.4   | W06A7.4 -0.0988733345001087 |
| AGIWUR11198                                                           |                                                             |          |                |           |                             |
| N2 HS V                                                               | 14829177                                                    | 14847413 | WBGene00004336 | ret-1     | W06A7.3 -0.0677891746749442 |
| AGIWUR4614;AGIWUR9051;AGIWUR32940;AGIWUR33542;AGIWUR39865;AGIWUR43561 |                                                             |          |                |           |                             |
| N2 HS V                                                               | 14852826                                                    | 14858596 | WBGene00013883 | npr-13    | ZC412.1 -0.0519217062804831 |
| AGIWUR24587                                                           |                                                             |          |                |           |                             |
| N2 HS V                                                               | 14863168                                                    | 14867992 | WBGene00001540 | gcy-14    | ZC412.2 0.250945508311468   |
| AGIWUR25373                                                           |                                                             |          |                |           |                             |
| N2 HS V                                                               | 14868645                                                    | 14871547 | WBGene00013884 | ZC412.3   | ZC412.3 0.206943355290731   |
| AGIWUR22737;AGIWUR26775;AGIWUR32462;AGIWUR32846;AGIWUR41774           |                                                             |          |                |           |                             |
| N2 HS V                                                               | 14874198                                                    | 14875470 | WBGene00013886 | ZC412.5   | ZC412.5 -0.448471938656033  |
| AGIWUR9631                                                            |                                                             |          |                |           |                             |
| N2 HS V                                                               | 14875945                                                    | 14876824 | WBGene00050943 | ZC412.10  | ZC412.10                    |
| 0.170574730225727                                                     | AGIWUR19669;AGIWUR20199;AGIWUR25392;AGIWUR38413;AGIWUR41778 |          |                |           |                             |
| N2 HS V                                                               | 14884585                                                    | 14884880 | WBGene00044272 | nsps-4    | H12D21.13                   |
| -0.0622210853400365                                                   | AGIWUR1631;AGIWUR9028;AGIWUR23094;AGIWUR23657;AGIWUR31671   |          |                |           |                             |
| N2 HS V                                                               | 14891450                                                    | 14893435 | WBGene00010380 | mpst-2    | H12D21.4                    |
| -0.180733970954022                                                    | AGIWUR3938                                                  |          |                |           |                             |
| N2 HS V                                                               | 14894053                                                    | 14894798 | WBGene00010381 | H12D21.5  | H12D21.5                    |
| 0.00762323635566631                                                   | AGIWUR18903;AGIWUR37094;AGIWUR42491                         |          |                |           |                             |
| N2 HS V                                                               | 14895647                                                    | 14899013 | WBGene00010383 | mpst-3    | H12D21.7                    |
| 0.0541565811618021                                                    | AGIWUR7967                                                  |          |                |           |                             |

|                                                             |    |   |                                                                      |          |                |           |                             |
|-------------------------------------------------------------|----|---|----------------------------------------------------------------------|----------|----------------|-----------|-----------------------------|
| N2                                                          | HS | V | 14899791                                                             | 14911929 | WBGene00010386 | H12D21.10 | H12D21.10                   |
| 0.00811561531736915                                         |    |   | AGIWUR4311;AGIWUR6332;AGIWUR9362;AGIWUR10420;AGIWUR32434;AGIWUR38707 |          |                |           |                             |
| N2                                                          | HS | V | 14915906                                                             | 14917682 | WBGene00010387 | H12D21.11 | H12D21.11                   |
| -0.159957695945903                                          |    |   | AGIWUR28713                                                          |          |                |           |                             |
| N2                                                          | HS | V | 14917735                                                             | 14921609 | WBGene00012364 | zmp-4     | W09D12.1                    |
| 0.136278426916451                                           |    |   | AGIWUR31014                                                          |          |                |           |                             |
| N2                                                          | HS | V | 14921988                                                             | 14924204 | WBGene00005211 | srg-54    | W09D12.3                    |
| 0.00811267566005824                                         |    |   | AGIWUR10044;AGIWUR13039;AGIWUR19865                                  |          |                |           |                             |
| N2                                                          | HS | V | 14926710                                                             | 14928342 | WBGene00005212 | srg-55    | W09D12.2                    |
| 0.0546347889216658                                          |    |   | AGIWUR15180                                                          |          |                |           |                             |
| N2                                                          | HS | V | 14936898                                                             | 14939367 | WBGene00044176 | C30G7.2   | C30G7.2 0.173617484341099   |
| AGIWUR15345;AGIWUR19514;AGIWUR20514;AGIWUR20840;AGIWUR40778 |    |   |                                                                      |          |                |           |                             |
| N2                                                          | HS | V | 14942137                                                             | 14945704 | WBGene00044177 | C30G7.3   | C30G7.3                     |
| -0.000640737753373699                                       |    |   | AGIWUR41197                                                          |          |                |           |                             |
| N2                                                          | HS | V | 14946622                                                             | 14947229 | WBGene00044178 | C30G7.4   | C30G7.4 0.202299114576489   |
| AGIWUR30727;AGIWUR32223;AGIWUR44853                         |    |   |                                                                      |          |                |           |                             |
| N2                                                          | HS | V | 14949777                                                             | 14952796 | WBGene00001852 | hil-1     | C30G7.1 -0.0802625276502873 |
| AGIWUR6850                                                  |    |   |                                                                      |          |                |           |                             |
| N2                                                          | HS | V | 14953115                                                             | 14954733 | WBGene00044179 | C30G7.5   | C30G7.5 -0.148585651255677  |
| AGIWUR13663;AGIWUR24010                                     |    |   |                                                                      |          |                |           |                             |
| N2                                                          | HS | V | 14971436                                                             | 14972419 | WBGene00008522 | F02D8.5   | F02D8.5 0.0549680868240827  |
| AGIWUR7448                                                  |    |   |                                                                      |          |                |           |                             |
| N2                                                          | HS | V | 14972907                                                             | 14978779 | WBGene00008520 | F02D8.1   | F02D8.1 -0.0855610925315755 |
| AGIWUR14274                                                 |    |   |                                                                      |          |                |           |                             |
| N2                                                          | HS | V | 14978505                                                             | 14980159 | WBGene00001701 | grd-12    | F02D8.2 0.440070054932514   |
| AGIWUR8753                                                  |    |   |                                                                      |          |                |           |                             |
| N2                                                          | HS | V | 14980354                                                             | 14982626 | WBGene00006960 | xbx-1     | F02D8.3 -0.0178309335168461 |
| AGIWUR25693                                                 |    |   |                                                                      |          |                |           |                             |
| N2                                                          | HS | V | 14984893                                                             | 14987571 | WBGene00008521 | F02D8.4   | F02D8.4 0.185174718248451   |
| AGIWUR34606                                                 |    |   |                                                                      |          |                |           |                             |
| N2                                                          | HS | V | 14987556                                                             | 14991024 | WBGene00011318 | cdt-2     | T01C3.1 0.0191093785117253  |
| AGIWUR15169                                                 |    |   |                                                                      |          |                |           |                             |
| N2                                                          | HS | V | 14991168                                                             | 14991649 | WBGene00011319 | T01C3.2   | T01C3.2 0.37619934977122    |
| AGIWUR38466                                                 |    |   |                                                                      |          |                |           |                             |
| N2                                                          | HS | V | 14991707                                                             | 14992677 | WBGene00011320 | T01C3.3   | T01C3.3 -0.100293457692942  |
| AGIWUR20486                                                 |    |   |                                                                      |          |                |           |                             |
| N2                                                          | HS | V | 14993838                                                             | 14995201 | WBGene00011321 | fil-1     | T01C3.4 -0.668590009118091  |
| AGIWUR31420                                                 |    |   |                                                                      |          |                |           |                             |
| N2                                                          | HS | V | 14996536                                                             | 14998121 | WBGene00011322 | irld-14   | T01C3.5 0.156511732359627   |

|                                                                       |    |   |                                                         |          |                |          |                             |
|-----------------------------------------------------------------------|----|---|---------------------------------------------------------|----------|----------------|----------|-----------------------------|
| AGIWUR1135                                                            |    |   |                                                         |          |                |          |                             |
| N2                                                                    | HS | V | 14998991                                                | 15000029 | WBGene00011325 | T01C3.11 | T01C3.11                    |
| 0.285725221138385                                                     |    |   | AGIWUR35806                                             |          |                |          |                             |
| N2                                                                    | HS | V | 15000011                                                | 15000594 | WBGene00004485 | rps-16   | T01C3.6 0.150329050252799   |
| AGIWUR8459;AGIWUR18895                                                |    |   |                                                         |          |                |          |                             |
| N2                                                                    | HS | V | 15000653                                                | 15002273 | WBGene00001423 | fib-1    | T01C3.7 -0.0786977977964192 |
| AGIWUR20438;AGIWUR21536;AGIWUR25217                                   |    |   |                                                         |          |                |          |                             |
| N2                                                                    | HS | V | 15002543                                                | 15005055 | WBGene00011323 | mut-15   | T01C3.8 0.138949808512169   |
| AGIWUR16375                                                           |    |   |                                                         |          |                |          |                             |
| N2                                                                    | HS | V | 15005100                                                | 15006400 | WBGene00011324 | T01C3.9  | T01C3.9 -0.0732534558619111 |
| AGIWUR28084                                                           |    |   |                                                         |          |                |          |                             |
| N2                                                                    | HS | V | 15006412                                                | 15011660 | WBGene00003775 | nmr-2    | T01C3.10                    |
| -0.045338355664664                                                    |    |   | AGIWUR2690;AGIWUR21972                                  |          |                |          |                             |
| N2                                                                    | HS | V | 15011870                                                | 15014222 | WBGene00008832 | obr-2    | F14H8.1 0.0580442917371613  |
| AGIWUR36992                                                           |    |   |                                                         |          |                |          |                             |
| N2                                                                    | HS | V | 15019224                                                | 15020325 | WBGene00008833 | F14H8.2  | F14H8.2 0.151991608111006   |
| AGIWUR22268                                                           |    |   |                                                         |          |                |          |                             |
| N2                                                                    | HS | V | 15021032                                                | 15022049 | WBGene00008835 | F14H8.5  | F14H8.5 -0.180817491907504  |
| AGIWUR36821                                                           |    |   |                                                         |          |                |          |                             |
| N2                                                                    | HS | V | 15023844                                                | 15025150 | WBGene00008834 | F14H8.4  | F14H8.4 -0.0937899783020093 |
| AGIWUR23604                                                           |    |   |                                                         |          |                |          |                             |
| N2                                                                    | HS | V | 15025740                                                | 15031473 | WBGene00000562 | cng-1    | F14H8.6 -0.0706058389863369 |
| AGIWUR33769                                                           |    |   |                                                         |          |                |          |                             |
| N2                                                                    | HS | V | 15039152                                                | 15048207 | WBGene00004747 | sdh-3    | C25D7.3 -0.0477017511002087 |
| AGIWUR2845                                                            |    |   |                                                         |          |                |          |                             |
| N2                                                                    | HS | V | 15051011                                                | 15052530 | WBGene00007716 | fbxa-82  | C25D7.4 0.217160877154485   |
| AGIWUR10372                                                           |    |   |                                                         |          |                |          |                             |
| N2                                                                    | HS | V | 15053765                                                | 15056280 | WBGene00007717 | C25D7.5  | C25D7.5 0.310631075110351   |
| AGIWUR24839                                                           |    |   |                                                         |          |                |          |                             |
| N2                                                                    | HS | V | 15056289                                                | 15056744 | WBGene00050940 | C25D7.16 | C25D7.16                    |
| -0.159398772355871                                                    |    |   | AGIWUR9975                                              |          |                |          |                             |
| N2                                                                    | HS | V | 15056719                                                | 15059599 | WBGene00003155 | mcm-3    | C25D7.6 -0.325067911897178  |
| AGIWUR8062;AGIWUR8850;AGIWUR19068;AGIWUR40939;AGIWUR41661;AGIWUR43165 |    |   |                                                         |          |                |          |                             |
| N2                                                                    | HS | V | 15060249                                                | 15061530 | WBGene00007722 | C25D7.15 | C25D7.15                    |
| 0.0129776070764365                                                    |    |   | AGIWUR122;AGIWUR3050;AGIWUR3052;AGIWUR26496;AGIWUR34917 |          |                |          |                             |
| N2                                                                    | HS | V | 15061488                                                | 15064087 | WBGene00004308 | rap-2    | C25D7.7 0.170636552853633   |
| AGIWUR28629                                                           |    |   |                                                         |          |                |          |                             |
| N2                                                                    | HS | V | 15066298                                                | 15067464 | WBGene00007718 | otub-1   | C25D7.8 0.114741054463725   |
| AGIWUR22406                                                           |    |   |                                                         |          |                |          |                             |

|                     |    |   |                                                             |          |                |           |                            |
|---------------------|----|---|-------------------------------------------------------------|----------|----------------|-----------|----------------------------|
| N2                  | HS | V | 15067465                                                    | 15068581 | WBGene00007720 | C25D7.10  | C25D7.10                   |
| -0.0164398207030541 |    |   | AGIWUR30033                                                 |          |                |           |                            |
| N2                  | HS | V | 15068678                                                    | 15069504 | WBGene00001021 | dnj-3     | C01G10.12                  |
| 0.20276747777821    |    |   | AGIWUR17693                                                 |          |                |           |                            |
| N2                  | HS | V | 15071748                                                    | 15080152 | WBGene00006808 | unc-76    | C01G10.11                  |
| -0.0388843624086972 |    |   | AGIWUR3430;AGIWUR13249;AGIWUR13398;AGIWUR42081              |          |                |           |                            |
| N2                  | HS | V | 15080134                                                    | 15082533 | WBGene00007237 | C01G10.10 | C01G10.10                  |
| -0.0173946446515334 |    |   | AGIWUR17288                                                 |          |                |           |                            |
| N2                  | HS | V | 15082530                                                    | 15084139 | WBGene00007236 | C01G10.9  | C01G10.9                   |
| -0.121867968461183  |    |   | AGIWUR42749                                                 |          |                |           |                            |
| N2                  | HS | V | 15084059                                                    | 15085382 | WBGene00007235 | C01G10.8  | C01G10.8                   |
| -0.0622478922180782 |    |   | AGIWUR24212;AGIWUR27098;AGIWUR27860;AGIWUR40458;AGIWUR43962 |          |                |           |                            |
| N2                  | HS | V | 15085747                                                    | 15087064 | WBGene00007234 | C01G10.7  | C01G10.7                   |
| 0.0435207476509394  |    |   | AGIWUR22086                                                 |          |                |           |                            |
| N2                  | HS | V | 15087656                                                    | 15088336 | WBGene00007233 | C01G10.6  | C01G10.6                   |
| -0.105560043740034  |    |   | AGIWUR21700                                                 |          |                |           |                            |
| N2                  | HS | V | 15088427                                                    | 15088699 | WBGene00077583 | C01G10.18 | C01G10.18                  |
| -0.0180008722389084 |    |   | AGIWUR32231                                                 |          |                |           |                            |
| N2                  | HS | V | 15090757                                                    | 15091062 | WBGene00044658 | C01G10.17 | C01G10.17                  |
| -0.0651721109241148 |    |   | AGIWUR31764                                                 |          |                |           |                            |
| N2                  | HS | V | 15092966                                                    | 15094338 | WBGene00007241 | C01G10.16 | C01G10.16                  |
| -0.0711918917257748 |    |   | AGIWUR38976                                                 |          |                |           |                            |
| N2                  | HS | V | 15095049                                                    | 15097452 | WBGene00005969 | srx-78    | C01G10.3                   |
| -0.158013674693223  |    |   | AGIWUR38301                                                 |          |                |           |                            |
| N2                  | HS | V | 15097674                                                    | 15099554 | WBGene00005970 | srx-79    | C01G10.2                   |
| -0.0584658988669124 |    |   | AGIWUR43742                                                 |          |                |           |                            |
| N2                  | HS | V | 15099747                                                    | 15104389 | WBGene00007230 | C01G10.1  | C01G10.1                   |
| 0.219693624759371   |    |   | AGIWUR43126                                                 |          |                |           |                            |
| N2                  | HS | V | 15104724                                                    | 15105197 | WBGene00077584 | C01G10.19 | C01G10.19                  |
| 0.172754611975261   |    |   | AGIWUR22856                                                 |          |                |           |                            |
| N2                  | HS | V | 15106094                                                    | 15106473 | WBGene00007238 | C01G10.13 | C01G10.13                  |
| -0.0656637841082386 |    |   | AGIWUR36941                                                 |          |                |           |                            |
| N2                  | HS | V | 15109577                                                    | 15110345 | WBGene00013566 | Y75B12A.2 | Y75B12A.2                  |
| -0.026720098120304  |    |   | AGIWUR5674                                                  |          |                |           |                            |
| N2                  | HS | V | 15111960                                                    | 15113628 | WBGene00011342 | T01G5.7   | T01G5.7 -0.244869230745001 |
| AGIWUR41464         |    |   |                                                             |          |                |           |                            |
| N2                  | HS | V | 15113781                                                    | 15114092 | WBGene00011341 | T01G5.6   | T01G5.6 0.280388447849276  |
| AGIWUR38981         |    |   |                                                             |          |                |           |                            |
| N2                  | HS | V | 15116844                                                    | 15119617 | WBGene00011339 | T01G5.1   | T01G5.1 0.120557581450836  |

[illegible]



|    |    |   |                                    |                                                                        |                |            |                             |
|----|----|---|------------------------------------|------------------------------------------------------------------------|----------------|------------|-----------------------------|
| N2 | HS | V | 15173635                           | 15174856                                                               | WBGene00014837 | T09F5.13   | T09F5.13                    |
|    |    |   | -0.163201101103219                 | AGIWUR15078                                                            |                |            |                             |
| N2 | HS | V | 15175673                           | 15176324                                                               | WBGene00011668 | clcc-47    | T09F5.9 0.19594146930546    |
|    |    |   | AGIWUR4783;AGIWUR31179;AGIWUR31331 |                                                                        |                |            |                             |
| N2 | HS | V | 15176768                           | 15179484                                                               | WBGene00005772 | srw-25     | T09F5.14                    |
|    |    |   | -0.0575000757293367                | AGIWUR23703;AGIWUR41505                                                |                |            |                             |
| N2 | HS | V | 15180057                           | 15181785                                                               | WBGene00011669 | T09F5.10   | T09F5.10                    |
|    |    |   | -0.130201062303035                 | AGIWUR27301                                                            |                |            |                             |
| N2 | HS | V | 15182440                           | 15184125                                                               | WBGene00011670 | fbxa-84    | T09F5.11                    |
|    |    |   | -0.266035486833324                 | AGIWUR34280                                                            |                |            |                             |
| N2 | HS | V | 15184706                           | 15185878                                                               | WBGene00013567 | Y75B12B.1  | Y75B12B.1                   |
|    |    |   | -0.169773428084371                 | AGIWUR7998;AGIWUR34678                                                 |                |            |                             |
| N2 | HS | V | 15185891                           | 15186300                                                               | WBGene00013568 | Y75B12B.3  | Y75B12B.3                   |
|    |    |   | 0.248888438035422                  | AGIWUR7577;AGIWUR19953;AGIWUR29967;AGIWUR31867;AGIWUR38866;AGIWUR41247 |                |            |                             |
| N2 | HS | V | 15186582                           | 15187787                                                               | WBGene00000883 | cyn-7      | Y75B12B.2                   |
|    |    |   | -0.105585937033171                 | AGIWUR14782;AGIWUR26242                                                |                |            |                             |
| N2 | HS | V | 15187989                           | 15189588                                                               | WBGene00013569 | bath-36    | Y75B12B.4                   |
|    |    |   | -0.0916820138041512                | AGIWUR4808                                                             |                |            |                             |
| N2 | HS | V | 15189927                           | 15190926                                                               | WBGene00000879 | cyn-3      | Y75B12B.5                   |
|    |    |   | 0.0665405812968256                 | AGIWUR29379;AGIWUR29942                                                |                |            |                             |
| N2 | HS | V | 15191296                           | 15191836                                                               | WBGene00013573 | Y75B12B.11 | Y75B12B.11                  |
|    |    |   | 0.214928712879157                  | AGIWUR1882;AGIWUR21973;AGIWUR35511;AGIWUR36041;AGIWUR40308             |                |            |                             |
| N2 | HS | V | 15192572                           | 15197661                                                               | WBGene00004037 | plc-2      | Y75B12B.6                   |
|    |    |   | -0.0480623931922928                | AGIWUR37464                                                            |                |            |                             |
| N2 | HS | V | 15198255                           | 15199396                                                               | WBGene00005748 | srw-1      | Y75B12B.7                   |
|    |    |   | 0.389400205433582                  | AGIWUR11483                                                            |                |            |                             |
| N2 | HS | V | 15205095                           | 15206552                                                               | WBGene00077440 | Y75B12B.14 | Y75B12B.14                  |
|    |    |   | -0.0758681580105112                | AGIWUR4002;AGIWUR4181                                                  |                |            |                             |
| N2 | HS | V | 15212169                           | 15213706                                                               | WBGene00005536 | sri-24     | C41G6.11                    |
|    |    |   | -0.144403343264379                 | AGIWUR30590                                                            |                |            |                             |
| N2 | HS | V | 15215475                           | 15216889                                                               | WBGene00005538 | sri-26     | C41G6.14                    |
|    |    |   | -0.187168312794459                 | AGIWUR34017                                                            |                |            |                             |
| N2 | HS | V | 15217005                           | 15219320                                                               | WBGene00005537 | sri-25     | C41G6.10                    |
|    |    |   | -0.0847402448544177                | AGIWUR41083                                                            |                |            |                             |
| N2 | HS | V | 15219946                           | 15221377                                                               | WBGene00005381 | srh-165    | C41G6.9 -0.0393333321243805 |
|    |    |   | AGIWUR17371                        |                                                                        |                |            |                             |
| N2 | HS | V | 15221682                           | 15223114                                                               | WBGene00008057 | irld-25    | C41G6.6 0.0475080729316328  |
|    |    |   | AGIWUR10550                        |                                                                        |                |            |                             |
| N2 | HS | V | 15223968                           | 15225359                                                               | WBGene00005771 | srw-24     | C41G6.7                     |

|                                     |                         |          |                |          |          |                    |
|-------------------------------------|-------------------------|----------|----------------|----------|----------|--------------------|
| -0.00354581054130154                | AGIWUR35860             |          |                |          |          |                    |
| N2 HS V                             | 15225950                | 15227472 | WBGene00005761 | srw-14   | C41G6.8  | 0.0113195122276242 |
| AGIWUR17235                         |                         |          |                |          |          |                    |
| N2 HS V                             | 15228092                | 15230075 | WBGene00008055 | cyp-34A3 |          | C41G6.1            |
| 0.157001153698316                   | AGIWUR27581             |          |                |          |          |                    |
| N2 HS V                             | 15230543                | 15231893 | WBGene00005762 | srw-15   | C41G6.3  |                    |
| -0.00332644252495218                | AGIWUR7178              |          |                |          |          |                    |
| N2 HS V                             | 15232500                | 15233844 | WBGene00005760 | srw-13   | C41G6.15 |                    |
| 0.106975721914051                   | AGIWUR17125             |          |                |          |          |                    |
| N2 HS V                             | 15233894                | 15235761 | WBGene00008056 | nhr-164  | C41G6.5  | -0.109292889741694 |
| AGIWUR41753                         |                         |          |                |          |          |                    |
| N2 HS V                             | 15237334                | 15238650 | WBGene00005759 | srw-12   | C41G6.2  | 0.0325349253979921 |
| AGIWUR1197                          |                         |          |                |          |          |                    |
| N2 HS V                             | 15239070                | 15240315 | WBGene00005758 | srw-11   | M01B2.11 |                    |
| -0.0473578301121691                 | AGIWUR1583              |          |                |          |          |                    |
| N2 HS V                             | 15241584                | 15243943 | WBGene00010799 | chil-12  | M01B2.6  | 0.106346708382915  |
| AGIWUR28079                         |                         |          |                |          |          |                    |
| N2 HS V                             | 15244756                | 15247707 | WBGene00002211 | kin-30   | M01B2.1  | 0.10425301445078   |
| AGIWUR2872;AGIWUR26412;AGIWUR37435  |                         |          |                |          |          |                    |
| N2 HS V                             | 15252382                | 15253291 | WBGene00010798 | srbc-76  | M01B2.4  | 0.0226006523845852 |
| AGIWUR28878                         |                         |          |                |          |          |                    |
| N2 HS V                             | 15253829                | 15254805 | WBGene00010797 | srbc-75  | M01B2.3  | 0.0441004238815736 |
| AGIWUR7779                          |                         |          |                |          |          |                    |
| N2 HS V                             | 15257581                | 15259149 | WBGene00010800 | srsx-37  | M01B2.7  |                    |
| -0.00842549978874274                | AGIWUR25045             |          |                |          |          |                    |
| N2 HS V                             | 15260238                | 15260786 | WBGene00010801 | M01B2.8  | M01B2.8  | -0.201783662772064 |
| AGIWUR34144                         |                         |          |                |          |          |                    |
| N2 HS V                             | 15260890                | 15262244 | WBGene00010803 | M01B2.10 |          | M01B2.10           |
| -0.340930163260493                  | AGIWUR12440             |          |                |          |          |                    |
| N2 HS V                             | 15263005                | 15264231 | WBGene00045337 | M01B2.12 |          | M01B2.12           |
| -0.0450307857665644                 | AGIWUR23366;AGIWUR39919 |          |                |          |          |                    |
| N2 HS V                             | 15264653                | 15265786 | WBGene00045338 | M01B2.13 |          | M01B2.13           |
| 0.370489668766756                   | AGIWUR22195;AGIWUR36262 |          |                |          |          |                    |
| N2 HS V                             | 15266436                | 15267505 | WBGene00045339 | T10H4.13 |          | T10H4.13           |
| -0.0948835456750632                 | AGIWUR15224;AGIWUR29329 |          |                |          |          |                    |
| N2 HS V                             | 15270147                | 15272363 | WBGene00011697 | T10H4.4  | T10H4.4  | 0.359646727261209  |
| AGIWUR11665                         |                         |          |                |          |          |                    |
| N2 HS V                             | 15273383                | 15274857 | WBGene00005763 | srw-16   | T10H4.5  | -0.073506667017198 |
| AGIWUR21435;AGIWUR32739;AGIWUR38813 |                         |          |                |          |          |                    |

|                                                |    |   |                     |          |                                                           |           |           |                    |
|------------------------------------------------|----|---|---------------------|----------|-----------------------------------------------------------|-----------|-----------|--------------------|
| N2                                             | HS | V | 15275443            | 15276900 | WBGene00005764                                            | srw-17    | T10H4.6   | 0.0779272386362084 |
| AGIWUR36781                                    |    |   |                     |          |                                                           |           |           |                    |
| N2                                             | HS | V | 15277612            | 15278972 | WBGene00005765                                            | srw-18    | T10H4.7   | -0.256670819223837 |
| AGIWUR40153;AGIWUR42041                        |    |   |                     |          |                                                           |           |           |                    |
| N2                                             | HS | V | 15279782            | 15281395 | WBGene00005766                                            | srw-19    | T10H4.8   | 0.0180337016975223 |
| AGIWUR25938                                    |    |   |                     |          |                                                           |           |           |                    |
| N2                                             | HS | V | 15281899            | 15283562 | WBGene00005942                                            | srx-51    | T10H4.9   | -0.10610285250295  |
| AGIWUR5846;AGIWUR18176;AGIWUR22189;AGIWUR23255 |    |   |                     |          |                                                           |           |           |                    |
| N2                                             | HS | V | 15284242            | 15285551 | WBGene00014839                                            | T10H4.1   | T10H4.1   | -0.166993338605097 |
| AGIWUR20134;AGIWUR27880                        |    |   |                     |          |                                                           |           |           |                    |
| N2                                             | HS | V | 15285605            | 15287925 | WBGene00011698                                            | cyp-34A1  |           | T10H4.10           |
|                                                |    |   | 0.0141704720612337  |          | AGIWUR34196;AGIWUR36752                                   |           |           |                    |
| N2                                             | HS | V | 15288924            | 15291107 | WBGene00011699                                            | cyp-34A2  |           | T10H4.11           |
|                                                |    |   | 0.195235353819506   |          | AGIWUR9841;AGIWUR12717;AGIWUR25983;AGIWUR37300            |           |           |                    |
| N2                                             | HS | V | 15292490            | 15293965 | WBGene00006153                                            | str-96    | T10H4.2   | -0.049768130569209 |
| AGIWUR28458                                    |    |   |                     |          |                                                           |           |           |                    |
| N2                                             | HS | V | 15296853            | 15298700 | WBGene00000783                                            | cpr-3     | T10H4.12  |                    |
|                                                |    |   | 0.00787897673007976 |          | AGIWUR17997                                               |           |           |                    |
| N2                                             | HS | V | 15299190            | 15301890 | WBGene00005940                                            | srx-49    | T26H8.3   | 0.0515676467773991 |
| AGIWUR10126                                    |    |   |                     |          |                                                           |           |           |                    |
| N2                                             | HS | V | 15302371            | 15303725 | WBGene00005939                                            | srx-48    | T26H8.2   | 0.0487730229050101 |
| AGIWUR31605                                    |    |   |                     |          |                                                           |           |           |                    |
| N2                                             | HS | V | 15304607            | 15305602 | WBGene00077588                                            | T26H8.5   | T26H8.5   | -0.221347181775537 |
| AGIWUR36665                                    |    |   |                     |          |                                                           |           |           |                    |
| N2                                             | HS | V | 15307562            | 15309063 | WBGene00014195                                            | srz-10    | ZK1037.11 |                    |
|                                                |    |   | -0.036615990060497  |          | AGIWUR35045                                               |           |           |                    |
| N2                                             | HS | V | 15310120            | 15310437 | WBGene00045514                                            | ZK1037.12 |           | ZK1037.12          |
|                                                |    |   | 0.00394214541816851 |          | AGIWUR3212;AGIWUR5803;AGIWUR13301;AGIWUR18102;AGIWUR41748 |           |           |                    |
| N2                                             | HS | V | 15311080            | 15312536 | WBGene00014190                                            | irld-62   | ZK1037.1  |                    |
|                                                |    |   | -0.147668680203537  |          | AGIWUR1413;AGIWUR6378;AGIWUR44594                         |           |           |                    |
| N2                                             | HS | V | 15312982            | 15314230 | WBGene00014993                                            | ZK1037.2  |           | ZK1037.2           |
|                                                |    |   | 0.0490959177006363  |          | AGIWUR24023;AGIWUR27900                                   |           |           |                    |
| N2                                             | HS | V | 15314668            | 15315927 | WBGene00014191                                            | srt-22    | ZK1037.3  |                    |
|                                                |    |   | -0.0164854211181451 |          | AGIWUR27698                                               |           |           |                    |
| N2                                             | HS | V | 15316497            | 15318425 | WBGene00014192                                            | nhp-246   | ZK1037.4  |                    |
|                                                |    |   | 0.0800588953594268  |          | AGIWUR12217                                               |           |           |                    |
| N2                                             | HS | V | 15318961            | 15320553 | WBGene00045515                                            | ZK1037.13 |           | ZK1037.13          |
|                                                |    |   | -0.04247546298991   |          | AGIWUR28286                                               |           |           |                    |
| N2                                             | HS | V | 15323853            | 15325351 | WBGene00014193                                            | nhp-247   | ZK1037.5  |                    |

|                      |                                                                       |          |                |           |                             |
|----------------------|-----------------------------------------------------------------------|----------|----------------|-----------|-----------------------------|
| 0.100130427497948    | AGIWUR3093                                                            |          |                |           |                             |
| N2 HS V              | 15325822                                                              | 15327795 | WBGene00014194 | ZK1037.6  | ZK1037.6                    |
| 0.206885956293894    | AGIWUR30444                                                           |          |                |           |                             |
| N2 HS V              | 15328656                                                              | 15330064 | WBGene00005817 | srw-70    | ZK1037.7                    |
| -0.0744246268683142  | AGIWUR1333                                                            |          |                |           |                             |
| N2 HS V              | 15330614                                                              | 15332774 | WBGene00005499 | srh-295   | ZK1037.8                    |
| -0.0282400067575441  | AGIWUR8748                                                            |          |                |           |                             |
| N2 HS V              | 15333151                                                              | 15334571 | WBGene00005860 | srw-113   | ZK1037.9                    |
| 0.0814291519756551   | AGIWUR28439                                                           |          |                |           |                             |
| N2 HS V              | 15334782                                                              | 15337505 | WBGene00006953 | wrt-7     | ZK1037.10                   |
| -0.130773249908511   | AGIWUR34552                                                           |          |                |           |                             |
| N2 HS V              | 15338569                                                              | 15339482 | WBGene00044086 | cllec-228 | H02K04.2                    |
| 0.119373270951048    | AGIWUR23656                                                           |          |                |           |                             |
| N2 HS V              | 15340136                                                              | 15341446 | WBGene00010355 | cllec-229 | H02K04.1                    |
| -0.138580694150024   | AGIWUR13041                                                           |          |                |           |                             |
| N2 HS V              | 15342056                                                              | 15344572 | WBGene00006954 | wrt-8     | C29F3.2 0.165616409509415   |
| AGIWUR24077          |                                                                       |          |                |           |                             |
| N2 HS V              | 15346674                                                              | 15347411 | WBGene00007804 | C29F3.3   | C29F3.3 -0.0503954629048913 |
| AGIWUR15493          |                                                                       |          |                |           |                             |
| N2 HS V              | 15347847                                                              | 15349144 | WBGene00007806 | cllec-230 | C29F3.5                     |
| 0.0159643013338577   | AGIWUR153;AGIWUR19005;AGIWUR25227;AGIWUR32717;AGIWUR41233;AGIWUR45193 |          |                |           |                             |
| N2 HS V              | 15349449                                                              | 15350662 | WBGene00007805 | cllec-231 | C29F3.4                     |
| 0.106188334205172    | AGIWUR37420                                                           |          |                |           |                             |
| N2 HS V              | 15352574                                                              | 15353862 | WBGene00005949 | srh-58    | C29F3.6 0.0762378483615596  |
| AGIWUR41130          |                                                                       |          |                |           |                             |
| N2 HS V              | 15354833                                                              | 15357572 | WBGene00007807 | C29F3.7   | C29F3.7 0.214096285521983   |
| AGIWUR39682          |                                                                       |          |                |           |                             |
| N2 HS V              | 15357696                                                              | 15360738 | WBGene00001150 | ech-1.1   | C29F3.1 -0.106075606466485  |
| AGIWUR34719          |                                                                       |          |                |           |                             |
| N2 HS V              | 15363604                                                              | 15365013 | WBGene00005325 | srh-106   | R08H2.14                    |
| 0.0505149632275854   | AGIWUR529;AGIWUR43325                                                 |          |                |           |                             |
| N2 HS V              | 15365298                                                              | 15366825 | WBGene00005326 | srh-107   | R08H2.12                    |
| 0.0108981321730699   | AGIWUR8881;AGIWUR12553;AGIWUR26384;AGIWUR26419;AGIWUR33182            |          |                |           |                             |
| N2 HS V              | 15367159                                                              | 15368289 | WBGene00005327 | srh-108   | R08H2.11                    |
| 0.0353731238763118   | AGIWUR6959;AGIWUR10639;AGIWUR15625                                    |          |                |           |                             |
| N2 HS V              | 15368470                                                              | 15370215 | WBGene00011150 | nhr-269   | R08H2.9 -0.0960433263172842 |
| AGIWUR22961          |                                                                       |          |                |           |                             |
| N2 HS V              | 15370867                                                              | 15372950 | WBGene00011149 | R08H2.8   | R08H2.8                     |
| -0.00799081712172622 | AGIWUR35406                                                           |          |                |           |                             |

|    |    |   |                                                                                                 |                                                |                |          |                             |
|----|----|---|-------------------------------------------------------------------------------------------------|------------------------------------------------|----------------|----------|-----------------------------|
| N2 | HS | V | 15373676                                                                                        | 15374113                                       | WBGene00011151 | R08H2.10 | R08H2.10                    |
|    |    |   | -0.0595398128108489                                                                             | AGIWUR37438                                    |                |          |                             |
| N2 | HS | V | 15374900                                                                                        | 15376323                                       | WBGene00005275 | srh-52   | R08H2.7 0.0378631745018181  |
|    |    |   | AGIWUR25436                                                                                     |                                                |                |          |                             |
| N2 | HS | V | 15376501                                                                                        | 15378003                                       | WBGene00005340 | srh-122  | R08H2.5 -0.0109055890286713 |
|    |    |   | AGIWUR24573                                                                                     |                                                |                |          |                             |
| N2 | HS | V | 15378367                                                                                        | 15379917                                       | WBGene00005457 | srh-251  | R08H2.4 -0.0372088618268984 |
|    |    |   | AGIWUR18065                                                                                     |                                                |                |          |                             |
| N2 | HS | V | 15381097                                                                                        | 15382305                                       | WBGene00000986 | dhs-23   | R08H2.1 0.372972963316696   |
|    |    |   | AGIWUR35197                                                                                     |                                                |                |          |                             |
| N2 | HS | V | 15382439                                                                                        | 15383839                                       | WBGene00006147 | str-88   | R08H2.2 0.174173359705878   |
|    |    |   | AGIWUR2182                                                                                      |                                                |                |          |                             |
| N2 | HS | V | 15385033                                                                                        | 15386653                                       | WBGene00006157 | str-102  | R08H2.13                    |
|    |    |   | 0.18353031283343                                                                                | AGIWUR25002                                    |                |          |                             |
| N2 | HS | V | 15386923                                                                                        | 15388870                                       | WBGene00005386 | srh-170  | R08H2.3 -0.0935947051422898 |
|    |    |   | AGIWUR34041                                                                                     |                                                |                |          |                             |
| N2 | HS | V | 15393108                                                                                        | 15394957                                       | WBGene00011538 | T06E6.1  | T06E6.1 0.258558412136209   |
|    |    |   | AGIWUR3213                                                                                      |                                                |                |          |                             |
| N2 | HS | V | 15395696                                                                                        | 15397348                                       | WBGene00000868 | cyb-3    | T06E6.2 -0.178305617910986  |
|    |    |   | AGIWUR10457;AGIWUR11193;AGIWUR18348;AGIWUR18947;AGIWUR19045;AGIWUR22627;AGIWUR36099;AGIWUR44565 |                                                |                |          |                             |
| N2 | HS | V | 15397385                                                                                        | 15398828                                       | WBGene00005931 | fbxa-199 | T06E6.3                     |
|    |    |   | -0.0816616665007857                                                                             | AGIWUR8885                                     |                |          |                             |
| N2 | HS | V | 15398939                                                                                        | 15399791                                       | WBGene00044759 | T06E6.15 | T06E6.15                    |
|    |    |   | 0.0512809425776863                                                                              | AGIWUR14475;AGIWUR43886                        |                |          |                             |
| N2 | HS | V | 15400327                                                                                        | 15401820                                       | WBGene00005519 | sri-7    | T06E6.4 0.109556570642154   |
|    |    |   | AGIWUR28308;AGIWUR32085;AGIWUR44685                                                             |                                                |                |          |                             |
| N2 | HS | V | 15402277                                                                                        | 15404385                                       | WBGene00011539 | fbxa-135 | T06E6.5                     |
|    |    |   | 0.235834046148206                                                                               | AGIWUR9210;AGIWUR29642;AGIWUR36860;AGIWUR41930 |                |          |                             |
| N2 | HS | V | 15405159                                                                                        | 15406760                                       | WBGene00005464 | srh-258  | T06E6.7 0.0794684670645616  |
|    |    |   | AGIWUR3933                                                                                      |                                                |                |          |                             |
| N2 | HS | V | 15407228                                                                                        | 15411380                                       | WBGene00005463 | srh-257  | T06E6.6 -0.0562154243953747 |
|    |    |   | AGIWUR5150;AGIWUR6121;AGIWUR9002                                                                |                                                |                |          |                             |
| N2 | HS | V | 15411433                                                                                        | 15412725                                       | WBGene00011541 | srbc-63  | T06E6.11                    |
|    |    |   | 0.0194240713694365                                                                              | AGIWUR20907                                    |                |          |                             |
| N2 | HS | V | 15414147                                                                                        | 15415349                                       | WBGene00005470 | srh-264  | T06E6.8 0.26731011407469    |
|    |    |   | AGIWUR11829                                                                                     |                                                |                |          |                             |
| N2 | HS | V | 15416251                                                                                        | 15417616                                       | WBGene00005471 | srh-265  | T06E6.9 -0.0679329438530614 |
|    |    |   | AGIWUR37761                                                                                     |                                                |                |          |                             |
| N2 | HS | V | 15418131                                                                                        | 15419395                                       | WBGene00011540 | T06E6.10 | T06E6.10                    |



|                                                                                                |    |   |          |          |                |          |          |                     |
|------------------------------------------------------------------------------------------------|----|---|----------|----------|----------------|----------|----------|---------------------|
| N2                                                                                             | HS | V | 15479398 | 15481677 | WBGene00007367 | nhr-150  | C06B8.1  | -0.0472920992236254 |
| AGIWUR11858                                                                                    |    |   |          |          |                |          |          |                     |
| N2                                                                                             | HS | V | 15482149 | 15483665 | WBGene00077594 | nhr-151  | C06B8.12 |                     |
| 0.0266000946373239 AGIWUR37535                                                                 |    |   |          |          |                |          |          |                     |
| N2                                                                                             | HS | V | 15486388 | 15487118 | WBGene00007373 | C06B8.11 | C06B8.11 |                     |
| 0.0872947759250469 AGIWUR19586                                                                 |    |   |          |          |                |          |          |                     |
| N2                                                                                             | HS | V | 15488064 | 15489401 | WBGene00005768 | srw-21   | C06B8.9  |                     |
| -0.00521528455104203 AGIWUR22410                                                               |    |   |          |          |                |          |          |                     |
| N2                                                                                             | HS | V | 15491003 | 15492770 | WBGene00007370 | str-264  | C06B8.4  | 0.159958739031568   |
| AGIWUR6224                                                                                     |    |   |          |          |                |          |          |                     |
| N2                                                                                             | HS | V | 15493980 | 15495761 | WBGene00005428 | srh-218  | C06B8.10 |                     |
| -0.125233797743948 AGIWUR17980                                                                 |    |   |          |          |                |          |          |                     |
| N2                                                                                             | HS | V | 15496269 | 15497567 | WBGene00005429 | srh-219  | C06B8.6  | -0.10112827449155   |
| AGIWUR42051                                                                                    |    |   |          |          |                |          |          |                     |
| N2                                                                                             | HS | V | 15498743 | 15511421 | WBGene00007372 | C06B8.7  | C06B8.7  | -0.0150115915500919 |
| AGIWUR30713                                                                                    |    |   |          |          |                |          |          |                     |
| N2                                                                                             | HS | V | 15512166 | 15512780 | WBGene00004452 | rp1-38   | C06B8.8  | -0.0925435522203042 |
| AGIWUR2954;AGIWUR10276;AGIWUR18225;AGIWUR19497;AGIWUR29421;AGIWUR36954;AGIWUR39941             |    |   |          |          |                |          |          |                     |
| N2                                                                                             | HS | V | 15512765 | 15522020 | WBGene00008997 | lgc-31   | F21A3.7  | 0.0124820421580139  |
| AGIWUR2141;AGIWUR5441;AGIWUR11882;AGIWUR22753;AGIWUR25835;AGIWUR32893;AGIWUR35667;AGIWUR43072  |    |   |          |          |                |          |          |                     |
| N2                                                                                             | HS | V | 15529369 | 15530767 | WBGene00005481 | srh-276  | F21A3.1  | 0.099650564100946   |
| AGIWUR14696                                                                                    |    |   |          |          |                |          |          |                     |
| N2                                                                                             | HS | V | 15530783 | 15533251 | WBGene00219316 | F21A3.11 | F21A3.11 |                     |
| 0.0974526531450977 AGIWUR7750                                                                  |    |   |          |          |                |          |          |                     |
| N2                                                                                             | HS | V | 15536620 | 15537986 | WBGene00008994 | F21A3.4  | F21A3.4  | 0.312460198517474   |
| AGIWUR18374                                                                                    |    |   |          |          |                |          |          |                     |
| N2                                                                                             | HS | V | 15538244 | 15547020 | WBGene00008995 | prde-1   | F21A3.5  | 0.243529891232499   |
| AGIWUR27874;AGIWUR36842                                                                        |    |   |          |          |                |          |          |                     |
| N2                                                                                             | HS | V | 15551155 | 15559147 | WBGene00000057 | acr-18   | F28F8.1  | 0.0142379718270025  |
| AGIWUR12480                                                                                    |    |   |          |          |                |          |          |                     |
| N2                                                                                             | HS | V | 15567394 | 15569889 | WBGene00009221 | acs-2    | F28F8.2  | -0.636990030679805  |
| AGIWUR7908;AGIWUR28624;AGIWUR29438;AGIWUR30410;AGIWUR38477;AGIWUR41007;AGIWUR42897;AGIWUR44518 |    |   |          |          |                |          |          |                     |
| N2                                                                                             | HS | V | 15569935 | 15570742 | WBGene00003079 | lsm-5    | F28F8.3  | 0.00239036671043991 |
| AGIWUR4058;AGIWUR18048;AGIWUR26535;AGIWUR35988;AGIWUR37591;AGIWUR38266;AGIWUR42575             |    |   |          |          |                |          |          |                     |
| N2                                                                                             | HS | V | 15571490 | 15574106 | WBGene00009225 | fbxa-94  | F28F8.8  | -0.0884499338169391 |
| AGIWUR41240                                                                                    |    |   |          |          |                |          |          |                     |
| N2                                                                                             | HS | V | 15574098 | 15575403 | WBGene00009223 | mdt-28   | F28F8.5  | 0.106236614018268   |
| AGIWUR1213                                                                                     |    |   |          |          |                |          |          |                     |
| N2                                                                                             | HS | V | 15575498 | 15577443 | WBGene00006446 | atx-3    | F28F8.6  | -0.0528421116445159 |

|                                                                                                   |    |   |          |          |                |                                     |
|---------------------------------------------------------------------------------------------------|----|---|----------|----------|----------------|-------------------------------------|
| AGIWUR34792                                                                                       |    |   |          |          |                |                                     |
| N2                                                                                                | HS | V | 15577569 | 15578486 | WBGene00044188 | F28F8.9 F28F8.9 0.0327197799920338  |
| AGIWUR6762;AGIWUR33145;AGIWUR41510                                                                |    |   |          |          |                |                                     |
| N2                                                                                                | HS | V | 15578984 | 15590617 | WBGene00009224 | F28F8.7 F28F8.7 -0.0760862060099363 |
| AGIWUR39186                                                                                       |    |   |          |          |                |                                     |
| N2                                                                                                | HS | V | 15585067 | 15593185 | WBGene00007165 | B0391.10 B0391.10                   |
| 0.0981099011113535 AGIWUR10516                                                                    |    |   |          |          |                |                                     |
| N2                                                                                                | HS | V | 15593462 | 15593799 | WBGene00007164 | fbxa-139 B0391.9                    |
| 0.193989113255785 AGIWUR119;AGIWUR1454;AGIWUR3371;AGIWUR16116;AGIWUR19563;AGIWUR27242;AGIWUR42247 |    |   |          |          |                |                                     |
| N2                                                                                                | HS | V | 15595055 | 15596466 | WBGene00014643 | B0391.8 B0391.8 0.083715031507257   |
| AGIWUR37846                                                                                       |    |   |          |          |                |                                     |
| N2                                                                                                | HS | V | 15600400 | 15602345 | WBGene00007166 | fbxa-152 B0391.11                   |
| -0.0820741920877541 AGIWUR35465                                                                   |    |   |          |          |                |                                     |
| N2                                                                                                | HS | V | 15605673 | 15610384 | WBGene00007162 | fbxa-153 B0391.5                    |
| -0.133003712904577 AGIWUR17241;AGIWUR31489;AGIWUR37968                                            |    |   |          |          |                |                                     |
| N2                                                                                                | HS | V | 15610890 | 15612591 | WBGene00006080 | str-12 B0391.4 -0.0985687798023953  |
| AGIWUR35912                                                                                       |    |   |          |          |                |                                     |
| N2                                                                                                | HS | V | 15613186 | 15614968 | WBGene00006289 | str-263 B0391.12                    |
| -0.127433879486283 AGIWUR28380                                                                    |    |   |          |          |                |                                     |
| N2                                                                                                | HS | V | 15614937 | 15617611 | WBGene00007161 | B0391.3 B0391.3 0.0187050233462216  |
| AGIWUR24303                                                                                       |    |   |          |          |                |                                     |
| N2                                                                                                | HS | V | 15618180 | 15619395 | WBGene00007160 | B0391.1 B0391.1 -0.0714056329139083 |
| AGIWUR23157                                                                                       |    |   |          |          |                |                                     |
| N2                                                                                                | HS | V | 15620022 | 15621232 | WBGene00014722 | C55A1.13 C55A1.13                   |
| 0.0203873739878917 AGIWUR18236;AGIWUR31370                                                        |    |   |          |          |                |                                     |
| N2                                                                                                | HS | V | 15621818 | 15623077 | WBGene00008321 | C55A1.1 C55A1.1 -0.166824383304089  |
| AGIWUR8124                                                                                        |    |   |          |          |                |                                     |
| N2                                                                                                | HS | V | 15624355 | 15625515 | WBGene00005192 | srg-35 C55A1.2 -0.0537774603519807  |
| AGIWUR14553;AGIWUR44396                                                                           |    |   |          |          |                |                                     |
| N2                                                                                                | HS | V | 15625861 | 15626223 | WBGene00008326 | C55A1.11 C55A1.11                   |
| 0.0742676011082724 AGIWUR13748                                                                    |    |   |          |          |                |                                     |
| N2                                                                                                | HS | V | 15626452 | 15627238 | WBGene00008325 | C55A1.9 C55A1.9 0.0420889478415631  |
| AGIWUR21342                                                                                       |    |   |          |          |                |                                     |
| N2                                                                                                | HS | V | 15628125 | 15629643 | WBGene00006275 | str-248 C55A1.3 -0.046432585771659  |
| AGIWUR32115                                                                                       |    |   |          |          |                |                                     |
| N2                                                                                                | HS | V | 15630204 | 15631509 | WBGene00014723 | srz-49 C55A1.16                     |
| -0.0267180625026238 AGIWUR19030;AGIWUR20618                                                       |    |   |          |          |                |                                     |
| N2                                                                                                | HS | V | 15632718 | 15635277 | WBGene00008329 | C55A1.15 C55A1.15                   |
| -0.0251156593087485 AGIWUR3100;AGIWUR4333;AGIWUR30124;AGIWUR38191;AGIWUR40753                     |    |   |          |          |                |                                     |



|    |    |   |                                                                                |          |                        |          |                             |
|----|----|---|--------------------------------------------------------------------------------|----------|------------------------|----------|-----------------------------|
| N2 | HS | V | 15635565                                                                       | 15637240 | WBGene00008328         | srz-43   | C55A1.14                    |
|    |    |   | -0.0619142161804946                                                            |          | AGIWUR7007;AGIWUR13658 |          |                             |
| N2 | HS | V | 15637416                                                                       | 15638953 | WBGene00008327         | srz-44   | C55A1.12                    |
|    |    |   | -0.171162334000947                                                             |          | AGIWUR40530            |          |                             |
| N2 | HS | V | 15639678                                                                       | 15642499 | WBGene00005384         | srh-168  | C55A1.10                    |
|    |    |   | -0.0488304673813671                                                            |          | AGIWUR4275;AGIWUR44912 |          |                             |
| N2 | HS | V | 15644875                                                                       | 15646478 | WBGene00006090         | str-23   | C55A1.5 0.844933761110456   |
|    |    |   | AGIWUR20741                                                                    |          |                        |          |                             |
| N2 | HS | V | 15648102                                                                       | 15648848 | WBGene00008323         | C55A1.6  | C55A1.6 0.0919317762108278  |
|    |    |   | AGIWUR2288;AGIWUR7298;AGIWUR18106;AGIWUR26132;AGIWUR32979;AGIWUR38974          |          |                        |          |                             |
| N2 | HS | V | 15650467                                                                       | 15652413 | WBGene00005705         | sru-42   | C55A1.8 0.0821074000111626  |
|    |    |   | AGIWUR38344                                                                    |          |                        |          |                             |
| N2 | HS | V | 15652438                                                                       | 15659079 | WBGene00009978         | F53E4.1  | F53E4.1 0.0690295023368765  |
|    |    |   | AGIWUR625;AGIWUR1120;AGIWUR7353;AGIWUR9791;AGIWUR17711;AGIWUR31888;AGIWUR32784 |          |                        |          |                             |
| N2 | HS | V | 15669170                                                                       | 15670091 | WBGene00010599         | K06B4.4  | K06B4.4 0.047763072041541   |
|    |    |   | AGIWUR1472;AGIWUR14005                                                         |          |                        |          |                             |
| N2 | HS | V | 15670472                                                                       | 15671784 | WBGene00077450         | K06B4.15 | K06B4.15                    |
|    |    |   | 0.0153650021390046                                                             |          | AGIWUR31005            |          |                             |
| N2 | HS | V | 15672666                                                                       | 15673236 | WBGene00010598         | K06B4.3  | K06B4.3 -0.174548939868093  |
|    |    |   | AGIWUR27844                                                                    |          |                        |          |                             |
| N2 | HS | V | 15674026                                                                       | 15675620 | WBGene00003641         | nhr-51   | K06B4.1 -0.10664180162963   |
|    |    |   | AGIWUR10709;AGIWUR13389                                                        |          |                        |          |                             |
| N2 | HS | V | 15677582                                                                       | 15680074 | WBGene00003642         | nhr-52   | K06B4.2 -0.0690847903320391 |
|    |    |   | AGIWUR33467                                                                    |          |                        |          |                             |
| N2 | HS | V | 15686090                                                                       | 15687590 | WBGene00010600         | nhr-196  | K06B4.5 0.10405765330489    |
|    |    |   | AGIWUR20684                                                                    |          |                        |          |                             |
| N2 | HS | V | 15687960                                                                       | 15689759 | WBGene00010602         | nhr-197  | K06B4.7 -0.0603945150066636 |
|    |    |   | AGIWUR18830                                                                    |          |                        |          |                             |
| N2 | HS | V | 15690204                                                                       | 15691606 | WBGene00010601         | nhr-268  | K06B4.6 -0.0462986437190596 |
|    |    |   | AGIWUR26445                                                                    |          |                        |          |                             |
| N2 | HS | V | 15691999                                                                       | 15693161 | WBGene00014800         | nhr-200  | K06B4.13                    |
|    |    |   | 0.0697059213550855                                                             |          | AGIWUR15076            |          |                             |
| N2 | HS | V | 15693994                                                                       | 15696217 | WBGene00010603         | nhr-198  | K06B4.8 -0.145201401517157  |
|    |    |   | AGIWUR7936                                                                     |          |                        |          |                             |
| N2 | HS | V | 15696785                                                                       | 15698199 | WBGene00005920         | srx-29   | K06B4.9 0.137241697189669   |
|    |    |   | AGIWUR3617                                                                     |          |                        |          |                             |
| N2 | HS | V | 15698528                                                                       | 15699899 | WBGene00010604         | nhr-199  | K06B4.10                    |
|    |    |   | 0.086233347578463                                                              |          | AGIWUR6613             |          |                             |
| N2 | HS | V | 15700606                                                                       | 15702363 | WBGene00003643         | nhr-53   | K06B4.11                    |

|                                     |                                                             |          |                |          |                             |
|-------------------------------------|-------------------------------------------------------------|----------|----------------|----------|-----------------------------|
| 0.0541495775025123                  | AGIWUR42551                                                 |          |                |          |                             |
| N2 HS V                             | 15704960                                                    | 15709528 | WBGene00006686 | twk-34   | K06B4.12                    |
| 0.108766698509464                   | AGIWUR42155                                                 |          |                |          |                             |
| N2 HS V                             | 15709578                                                    | 15710501 | WBGene00012397 | Y6E2A.1  | Y6E2A.1 0.00114637270932949 |
| AGIWUR21730                         |                                                             |          |                |          |                             |
| N2 HS V                             | 15710787                                                    | 15711998 | WBGene00006156 | str-101  | Y6E2A.2 0.0670368495012132  |
| AGIWUR2563                          |                                                             |          |                |          |                             |
| N2 HS V                             | 15712248                                                    | 15715644 | WBGene00012398 | Y6E2A.4  | Y6E2A.4 -0.0633080149731908 |
| AGIWUR2462                          |                                                             |          |                |          |                             |
| N2 HS V                             | 15716419                                                    | 15718660 | WBGene00012399 | Y6E2A.5  | Y6E2A.5 0.439290629080178   |
| AGIWUR3329;AGIWUR44726;AGIWUR44897  |                                                             |          |                |          |                             |
| N2 HS V                             | 15719870                                                    | 15721292 | WBGene00012400 | Y6E2A.7  | Y6E2A.7 0.44240964713046    |
| AGIWUR23084                         |                                                             |          |                |          |                             |
| N2 HS V                             | 15722188                                                    | 15723999 | WBGene00005357 | srh-140  | Y6E2A.6 0.0841150516031961  |
| AGIWUR44528                         |                                                             |          |                |          |                             |
| N2 HS V                             | 15724849                                                    | 15726702 | WBGene00012401 | ir1d-57  | Y6E2A.8 0.0865585349367546  |
| AGIWUR40186                         |                                                             |          |                |          |                             |
| N2 HS V                             | 15726841                                                    | 15728353 | WBGene00012402 | sfxn-1.3 | Y6E2A.9                     |
| 0.106145827603726                   | AGIWUR26428;AGIWUR29355;AGIWUR41643                         |          |                |          |                             |
| N2 HS V                             | 15729238                                                    | 15730532 | WBGene00050915 | Y6E2A.10 | Y6E2A.10                    |
| 0.0761088030664467                  | AGIWUR40704                                                 |          |                |          |                             |
| N2 HS V                             | 15730779                                                    | 15732309 | WBGene00006103 | str-38   | T23D5.2 -0.187283963970708  |
| AGIWUR24345;AGIWUR36279;AGIWUR40640 |                                                             |          |                |          |                             |
| N2 HS V                             | 15732863                                                    | 15733668 | WBGene00011942 | T23D5.3  | T23D5.3 -0.0567427921547861 |
| AGIWUR3432                          |                                                             |          |                |          |                             |
| N2 HS V                             | 15734023                                                    | 15735820 | WBGene00006093 | str-27   | T23D5.1                     |
| -0.00213375232200619                | AGIWUR28342                                                 |          |                |          |                             |
| N2 HS V                             | 15737020                                                    | 15739659 | WBGene00014844 | T23D5.5  | T23D5.5 0.164098403260317   |
| AGIWUR19384                         |                                                             |          |                |          |                             |
| N2 HS V                             | 15740517                                                    | 15741951 | WBGene00006085 | str-18   | T23D5.6 -0.246825329031349  |
| AGIWUR32407                         |                                                             |          |                |          |                             |
| N2 HS V                             | 15743260                                                    | 15744478 | WBGene00006086 | str-19   | T23D5.7 0.0611848135053528  |
| AGIWUR17721;AGIWUR43854             |                                                             |          |                |          |                             |
| N2 HS V                             | 15745404                                                    | 15745652 | WBGene00077456 | T23D5.14 | T23D5.14                    |
| 0.0312360197000752                  | AGIWUR24664;AGIWUR26354;AGIWUR26713;AGIWUR29651;AGIWUR44216 |          |                |          |                             |
| N2 HS V                             | 15750932                                                    | 15752149 | WBGene00006108 | str-43   | T23D5.9 0.0859113009301584  |
| AGIWUR15500                         |                                                             |          |                |          |                             |
| N2 HS V                             | 15755031                                                    | 15756394 | WBGene00006076 | str-8    | T23D5.11                    |
| -0.146895747534135                  | AGIWUR21147                                                 |          |                |          |                             |

|                                                                                                                                   |    |   |          |          |                |          |                             |
|-----------------------------------------------------------------------------------------------------------------------------------|----|---|----------|----------|----------------|----------|-----------------------------|
| N2                                                                                                                                | HS | V | 15758749 | 15760417 | WBGene00006077 | str-9    | F57A10.1                    |
| 0.00198078188480366 AGIWUR18310                                                                                                   |    |   |          |          |                |          |                             |
| N2                                                                                                                                | HS | V | 15760426 | 15766172 | WBGene00001813 | haf-3    | F57A10.3                    |
| -0.087582253571906 AGIWUR38570                                                                                                    |    |   |          |          |                |          |                             |
| N2                                                                                                                                | HS | V | 15766575 | 15767272 | WBGene00010184 | F57A10.2 | F57A10.2                    |
| -0.0669043274080634 AGIWUR45066                                                                                                   |    |   |          |          |                |          |                             |
| N2                                                                                                                                | HS | V | 15769438 | 15770371 | WBGene00010185 | F57A10.4 | F57A10.4                    |
| 0.0142623759632077 AGIWUR19566                                                                                                    |    |   |          |          |                |          |                             |
| N2                                                                                                                                | HS | V | 15770302 | 15773239 | WBGene00003650 | nhr-60   | F57A10.5                    |
| -0.136828985875114 AGIWUR31604                                                                                                    |    |   |          |          |                |          |                             |
| N2                                                                                                                                | HS | V | 15774946 | 15776676 | WBGene00010186 | nhr-283  | F57A10.6                    |
| -0.121945592749947 AGIWUR22663                                                                                                    |    |   |          |          |                |          |                             |
| N2                                                                                                                                | HS | V | 15777718 | 15779247 | WBGene00012056 | nhr-285  | T26E4.16                    |
| 0.0308785904277844 AGIWUR25482                                                                                                    |    |   |          |          |                |          |                             |
| N2                                                                                                                                | HS | V | 15779693 | 15781082 | WBGene00012043 | ir1d-52  | T26E4.1 0.287475420829658   |
| AGIWUR19642                                                                                                                       |    |   |          |          |                |          |                             |
| N2                                                                                                                                | HS | V | 15781401 | 15782011 | WBGene00012044 | T26E4.2  | T26E4.2 -0.15447910461972   |
| AGIWUR39816                                                                                                                       |    |   |          |          |                |          |                             |
| N2                                                                                                                                | HS | V | 15782794 | 15784470 | WBGene00012045 | T26E4.3  | T26E4.3 0.118011790728776   |
| AGIWUR44007                                                                                                                       |    |   |          |          |                |          |                             |
| N2                                                                                                                                | HS | V | 15784929 | 15786597 | WBGene00012048 | srxa-17  | T26E4.6 -0.0231114342966272 |
| AGIWUR8380                                                                                                                        |    |   |          |          |                |          |                             |
| N2                                                                                                                                | HS | V | 15790476 | 15792583 | WBGene00012046 | T26E4.4  | T26E4.4 0.012739462263184   |
| AGIWUR1297;AGIWUR22296                                                                                                            |    |   |          |          |                |          |                             |
| N2                                                                                                                                | HS | V | 15793570 | 15795194 | WBGene00012049 | T26E4.7  | T26E4.7 0.171041519885966   |
| AGIWUR39128                                                                                                                       |    |   |          |          |                |          |                             |
| N2                                                                                                                                | HS | V | 15799212 | 15802723 | WBGene00012051 | T26E4.9  | T26E4.9 0.408539098845553   |
| AGIWUR16925                                                                                                                       |    |   |          |          |                |          |                             |
| N2                                                                                                                                | HS | V | 15804843 | 15805750 | WBGene00012053 | srbc-74  | T26E4.13                    |
| -0.0439594688680405 AGIWUR8264                                                                                                    |    |   |          |          |                |          |                             |
| N2                                                                                                                                | HS | V | 15808119 | 15810036 | WBGene00012055 | srsx-36  | T26E4.15                    |
| 0.053793421228308 AGIWUR23418                                                                                                     |    |   |          |          |                |          |                             |
| N2                                                                                                                                | HS | V | 15810784 | 15811330 | WBGene00010016 | F54B8.1  | F54B8.1 0.0398036627530747  |
| AGIWUR958                                                                                                                         |    |   |          |          |                |          |                             |
| N2                                                                                                                                | HS | V | 15814237 | 15815659 | WBGene00010018 | fbxa-69  | F54B8.3 0.153683803353708   |
| AGIWUR21915                                                                                                                       |    |   |          |          |                |          |                             |
| N2                                                                                                                                | HS | V | 15816464 | 15817143 | WBGene00010019 | F54B8.4  | F54B8.4 -0.194229499800887  |
| AGIWUR1221;AGIWUR1619;AGIWUR11144;AGIWUR22397;AGIWUR31675;AGIWUR33561;AGIWUR33604;AGIWUR35475;AGIWUR38821;AGIWUR40872;AGIWUR44858 |    |   |          |          |                |          |                             |

|                                                                                 |    |   |          |          |                |          |          |                     |
|---------------------------------------------------------------------------------|----|---|----------|----------|----------------|----------|----------|---------------------|
| N2                                                                              | HS | V | 15817410 | 15817846 | WBGene00000014 | abf-3    | F54B8.5  | 0.0070661168092947  |
| AGIWUR35529                                                                     |    |   |          |          |                |          |          |                     |
| N2                                                                              | HS | V | 15818427 | 15819827 | WBGene00044103 | srbc-47  | F54B8.14 |                     |
| -0.0151631491674076 AGIWUR16708;AGIWUR36182                                     |    |   |          |          |                |          |          |                     |
| N2                                                                              | HS | V | 15820283 | 15821383 | WBGene00010020 | srbc-48  | F54B8.6  | 0.33452947256043    |
| AGIWUR42422                                                                     |    |   |          |          |                |          |          |                     |
| N2                                                                              | HS | V | 15821698 | 15822884 | WBGene00010021 | srbc-49  | F54B8.7  | -0.0252444685110511 |
| AGIWUR20962                                                                     |    |   |          |          |                |          |          |                     |
| N2                                                                              | HS | V | 15823898 | 15824966 | WBGene00010022 | srbc-50  | F54B8.8  | 0.202937226557497   |
| AGIWUR7657                                                                      |    |   |          |          |                |          |          |                     |
| N2                                                                              | HS | V | 15826410 | 15827429 | WBGene00010023 | srbc-51  | F54B8.9  | 0.107960352275652   |
| AGIWUR31717                                                                     |    |   |          |          |                |          |          |                     |
| N2                                                                              | HS | V | 15827823 | 15828882 | WBGene00010024 | srbc-52  | F54B8.10 |                     |
| -0.0877125866245052 AGIWUR35751                                                 |    |   |          |          |                |          |          |                     |
| N2                                                                              | HS | V | 15829022 | 15830007 | WBGene00044105 | srbc-55  | F54B8.16 |                     |
| -0.0378784004531294 AGIWUR26313                                                 |    |   |          |          |                |          |          |                     |
| N2                                                                              | HS | V | 15830586 | 15831686 | WBGene00010026 | srbc-56  | F54B8.12 |                     |
| -0.0832245494933961 AGIWUR4572;AGIWUR45179                                      |    |   |          |          |                |          |          |                     |
| N2                                                                              | HS | V | 15832436 | 15833722 | WBGene00010025 | srbc-54  | F54B8.11 |                     |
| 0.142395353013986 AGIWUR13949                                                   |    |   |          |          |                |          |          |                     |
| N2                                                                              | HS | V | 15834745 | 15837403 | WBGene00044104 | srbc-53  | F54B8.15 |                     |
| -0.0258888608855283 AGIWUR13012;AGIWUR24832                                     |    |   |          |          |                |          |          |                     |
| N2                                                                              | HS | V | 15837524 | 15839522 | WBGene00003556 | nas-40   | F54B8.13 |                     |
| 0.0237048172272241 AGIWUR34477;AGIWUR39894                                      |    |   |          |          |                |          |          |                     |
| N2                                                                              | HS | V | 15839967 | 15841195 | WBGene00005365 | srh-149  | K08G2.13 |                     |
| -0.127053923256263 AGIWUR15882                                                  |    |   |          |          |                |          |          |                     |
| N2                                                                              | HS | V | 15841837 | 15844214 | WBGene00005368 | srh-152  | K08G2.3  | -0.0775778672075411 |
| AGIWUR23740                                                                     |    |   |          |          |                |          |          |                     |
| N2                                                                              | HS | V | 15844453 | 15844768 | WBGene00050949 | K08G2.16 | K08G2.16 |                     |
| -0.0605814666627502 AGIWUR19175;AGIWUR26507;AGIWUR29082;AGIWUR39015;AGIWUR41335 |    |   |          |          |                |          |          |                     |
| N2                                                                              | HS | V | 15845931 | 15847306 | WBGene00005366 | srh-150  | K08G2.2  | -0.170596858195423  |
| AGIWUR38885                                                                     |    |   |          |          |                |          |          |                     |
| N2                                                                              | HS | V | 15855012 | 15856148 | WBGene00005369 | srh-153  | K08G2.11 |                     |
| 0.0465652016703064 AGIWUR27955                                                  |    |   |          |          |                |          |          |                     |
| N2                                                                              | HS | V | 15858838 | 15859227 | WBGene00014803 | K08G2.14 | K08G2.14 |                     |
| 0.146609665123095 AGIWUR7388;AGIWUR25421                                        |    |   |          |          |                |          |          |                     |
| N2                                                                              | HS | V | 15859960 | 15860985 | WBGene00005367 | srh-151  | K08G2.6  | 0.302759899360341   |
| AGIWUR24228                                                                     |    |   |          |          |                |          |          |                     |
| N2                                                                              | HS | V | 15861452 | 15862699 | WBGene00010688 | srz-12   | K08G2.7  |                     |

|                         |                                     |          |                |                  |                             |
|-------------------------|-------------------------------------|----------|----------------|------------------|-----------------------------|
| -0.00662174811682092    | AGIWUR2579                          |          |                |                  |                             |
| N2 HS V                 | 15863342                            | 15864458 | WBGene00005503 | srh-299 K08G2.9  | 0.0751889069932421          |
| AGIWUR22771             |                                     |          |                |                  |                             |
| N2 HS V                 | 15865088                            | 15865811 | WBGene00005498 | srh-294 K08G2.10 |                             |
| 0.061337159594717       | AGIWUR5785;AGIWUR24066;AGIWUR27707  |          |                |                  |                             |
| N2 HS V                 | 15866139                            | 15867333 | WBGene00005497 | srh-293 K08G2.8  | 0.0223169914562691          |
| AGIWUR25448             |                                     |          |                |                  |                             |
| N2 HS V                 | 15867683                            | 15869051 | WBGene00011513 | fbxa-197         | T06C12.4                    |
| 0.163484505664712       | AGIWUR25587                         |          |                |                  |                             |
| N2 HS V                 | 15869311                            | 15870636 | WBGene00011514 | fbxa-198         | T06C12.5                    |
| 0.0450037677511528      | AGIWUR22215;AGIWUR24784;AGIWUR35646 |          |                |                  |                             |
| N2 HS V                 | 15871170                            | 15872351 | WBGene00006122 | str-57           | T06C12.2                    |
| 0.00814062542311333     | AGIWUR3263                          |          |                |                  |                             |
| N2 HS V                 | 15872573                            | 15873770 | WBGene00006121 | str-56           | T06C12.3                    |
| -0.0280879840289154     | AGIWUR4744                          |          |                |                  |                             |
| N2 HS V                 | 15874093                            | 15876408 | WBGene00003692 | nhr-102          | T06C12.6                    |
| 0.19128657146417        | AGIWUR17090                         |          |                |                  |                             |
| N2 HS V                 | 15876732                            | 15879619 | WBGene00003674 | nhr-84           | T06C12.7                    |
| -0.0217226263134496     | AGIWUR11870                         |          |                |                  |                             |
| N2 HS V                 | 15885662                            | 15886059 | WBGene00011516 | T06C12.9         | T06C12.9                    |
| -0.114619299234572      | AGIWUR29957                         |          |                |                  |                             |
| N2 HS V                 | 15886719                            | 15888851 | WBGene00011517 | cgt-1            | T06C12.10                   |
| 0.111575812392791       | AGIWUR26795                         |          |                |                  |                             |
| N2 HS V                 | 15892061                            | 15892520 | WBGene00011519 | T06C12.12        | T06C12.12                   |
| 0.0999543288151337      | AGIWUR22023                         |          |                |                  |                             |
| N2 HS V                 | 15892996                            | 15894160 | WBGene00011518 | T06C12.11        | T06C12.11                   |
| 0.107474390789781       | AGIWUR41573                         |          |                |                  |                             |
| N2 HS V                 | 15894454                            | 15896765 | WBGene00011520 | nhr-213          | T06C12.13                   |
| 0.196072613658727       | AGIWUR5439                          |          |                |                  |                             |
| N2 HS V                 | 15897996                            | 15899415 | WBGene00006124 | str-60           | T06C12.1                    |
| 0.102591888749351       | AGIWUR44430                         |          |                |                  |                             |
| N2 HS V                 | 15899996                            | 15900900 | WBGene00011521 | T06C12.14        | T06C12.14                   |
| -0.137633845990079      | AGIWUR9101                          |          |                |                  |                             |
| N2 HS V                 | 15901142                            | 15902166 | WBGene00014832 | srab-27          | T06C12.15                   |
| -0.0127559913979973     | AGIWUR14272;AGIWUR26824             |          |                |                  |                             |
| N2 HS V                 | 15905620                            | 15907032 | WBGene00009418 | F35E8.2          | F35E8.2 0.0103071818301466  |
| AGIWUR12319;AGIWUR42594 |                                     |          |                |                  |                             |
| N2 HS V                 | 15912148                            | 15913056 | WBGene00009420 | F35E8.6          | F35E8.6 -0.0313518529287844 |
| AGIWUR6094              |                                     |          |                |                  |                             |

|                                            |    |   |          |          |                |         |          |                     |
|--------------------------------------------|----|---|----------|----------|----------------|---------|----------|---------------------|
| N2                                         | HS | V | 15914014 | 15915142 | WBGene00009421 | F35E8.7 | F35E8.7  | -0.0398318209804405 |
| AGIWUR36084                                |    |   |          |          |                |         |          |                     |
| N2                                         | HS | V | 15915216 | 15916079 | WBGene00001786 | gst-38  | F35E8.8  | -0.155912733696805  |
| AGIWUR4624                                 |    |   |          |          |                |         |          |                     |
| N2                                         | HS | V | 15916334 | 15917558 | WBGene00009422 | F35E8.9 | F35E8.9  | -0.0383185191691773 |
| AGIWUR3483                                 |    |   |          |          |                |         |          |                     |
| N2                                         | HS | V | 15921309 | 15922818 | WBGene00000412 | cdr-1   | F35E8.11 |                     |
| 0.104054087905121 AGIWUR32534              |    |   |          |          |                |         |          |                     |
| N2                                         | HS | V | 15922939 | 15924471 | WBGene00003698 | nhr-108 | F35E8.12 |                     |
| 0.520583189491676 AGIWUR15760              |    |   |          |          |                |         |          |                     |
| N2                                         | HS | V | 15926425 | 15928425 | WBGene00011505 | pzf-1   | T05G11.1 |                     |
| -0.0443278270685177 AGIWUR19186            |    |   |          |          |                |         |          |                     |
| N2                                         | HS | V | 15930182 | 15931084 | WBGene00011506 | srbc-77 | T05G11.2 |                     |
| 0.117454907150015 AGIWUR5982               |    |   |          |          |                |         |          |                     |
| N2                                         | HS | V | 15931292 | 15932490 | WBGene00005773 | srw-26  | T05G11.3 |                     |
| 0.0234331191381241 AGIWUR30587             |    |   |          |          |                |         |          |                     |
| N2                                         | HS | V | 15933267 | 15934976 | WBGene00005774 | srw-27  | T05G11.4 |                     |
| 0.0210124560954066 AGIWUR37244             |    |   |          |          |                |         |          |                     |
| N2                                         | HS | V | 15935948 | 15937110 | WBGene00005775 | srw-28  | T05G11.5 |                     |
| 0.0548780839734708 AGIWUR36679;AGIWUR39032 |    |   |          |          |                |         |          |                     |
| N2                                         | HS | V | 15937194 | 15938538 | WBGene00005799 | srw-52  | T05G11.8 |                     |
| -0.0918975883940405 AGIWUR4369             |    |   |          |          |                |         |          |                     |
| N2                                         | HS | V | 15938776 | 15940354 | WBGene00005802 | srw-55  | T05G11.6 |                     |
| -0.080832965127164 AGIWUR4347              |    |   |          |          |                |         |          |                     |
| N2                                         | HS | V | 15943425 | 15944854 | WBGene00005800 | srw-53  | T05G11.7 |                     |
| -0.0963409628295722 AGIWUR16562            |    |   |          |          |                |         |          |                     |
| N2                                         | HS | V | 15947299 | 15948461 | WBGene00005805 | srw-58  | H24D24.2 |                     |
| -0.17829788615167 AGIWUR27357              |    |   |          |          |                |         |          |                     |
| N2                                         | HS | V | 15949716 | 15951003 | WBGene00005806 | srw-59  | H24D24.1 |                     |
| 0.0810014018248193 AGIWUR21694             |    |   |          |          |                |         |          |                     |
| N2                                         | HS | V | 15951432 | 15952862 | WBGene00005803 | srw-56  | F36G9.16 |                     |
| 0.464543696065723 AGIWUR36809              |    |   |          |          |                |         |          |                     |
| N2                                         | HS | V | 15953595 | 15955032 | WBGene00005804 | srw-57  | F36G9.1  | -0.0485181484395421 |
| AGIWUR34845                                |    |   |          |          |                |         |          |                     |
| N2                                         | HS | V | 15955797 | 15957028 | WBGene00005401 | srh-186 | F36G9.2  | -0.0027051520097281 |
| AGIWUR8604                                 |    |   |          |          |                |         |          |                     |
| N2                                         | HS | V | 15957406 | 15959554 | WBGene00009485 | F36G9.3 | F36G9.3  | 0.0967091987824649  |
| AGIWUR19685                                |    |   |          |          |                |         |          |                     |
| N2                                         | HS | V | 15959808 | 15961915 | WBGene00014751 | F36G9.4 | F36G9.4  | 0.042402422981259   |

|                                    |    |   |                                     |          |                |                 |                            |
|------------------------------------|----|---|-------------------------------------|----------|----------------|-----------------|----------------------------|
| AGIWUR31171                        |    |   |                                     |          |                |                 |                            |
| N2                                 | HS | V | 15962086                            | 15963232 | WBGene00005515 | sri-3           | F36G9.10                   |
| 0.232338720594058                  |    |   | AGIWUR15677;AGIWUR17012;AGIWUR28051 |          |                |                 |                            |
| N2                                 | HS | V | 15963849                            | 15965212 | WBGene00005514 | sri-2           | F36G9.9 0.0434949811891121 |
| AGIWUR1372                         |    |   |                                     |          |                |                 |                            |
| N2                                 | HS | V | 15966245                            | 15967642 | WBGene00005513 | sri-1           | F36G9.8 0.0630202297336062 |
| AGIWUR26153                        |    |   |                                     |          |                |                 |                            |
| N2                                 | HS | V | 15968474                            | 15969753 | WBGene00009486 | F36G9.7 F36G9.7 | 0.155215326932661          |
| AGIWUR35022                        |    |   |                                     |          |                |                 |                            |
| N2                                 | HS | V | 15970433                            | 15972579 | WBGene00005686 | sru-23          | F36G9.6 -0.34374297007374  |
| AGIWUR22156                        |    |   |                                     |          |                |                 |                            |
| N2                                 | HS | V | 15972907                            | 15974936 | WBGene00005685 | sru-22          | F36G9.5 -0.178874852154426 |
| AGIWUR28181                        |    |   |                                     |          |                |                 |                            |
| N2                                 | HS | V | 15978714                            | 15981666 | WBGene00009488 | oac-20          | F36G9.12                   |
| 0.498377600942458                  |    |   | AGIWUR23069                         |          |                |                 |                            |
| N2                                 | HS | V | 15981691                            | 15982854 | WBGene00009490 | fbxa-99         | F36G9.14                   |
| 0.0386723011679333                 |    |   | AGIWUR27467                         |          |                |                 |                            |
| N2                                 | HS | V | 15983294                            | 15986640 | WBGene00009489 | F36G9.13        | F36G9.13                   |
| -0.22409950427194                  |    |   | AGIWUR30823                         |          |                |                 |                            |
| N2                                 | HS | V | 15987494                            | 15988174 | WBGene00009491 | F36G9.15        | F36G9.15                   |
| 0.0860559182362515                 |    |   | AGIWUR25824;AGIWUR39952             |          |                |                 |                            |
| N2                                 | HS | V | 15988754                            | 15991607 | WBGene00007380 | C06C6.6 C06C6.6 | 0.00720502659693345        |
| AGIWUR5010                         |    |   |                                     |          |                |                 |                            |
| N2                                 | HS | V | 15992150                            | 15995607 | WBGene00007381 | C06C6.7 C06C6.7 | -0.24501524792735          |
| AGIWUR11685                        |    |   |                                     |          |                |                 |                            |
| N2                                 | HS | V | 15996214                            | 15996745 | WBGene00007383 | C06C6.9 C06C6.9 | 0.279598146756468          |
| AGIWUR44824                        |    |   |                                     |          |                |                 |                            |
| N2                                 | HS | V | 15997136                            | 15997768 | WBGene00007382 | C06C6.8 C06C6.8 | -0.093136528400108         |
| AGIWUR6150                         |    |   |                                     |          |                |                 |                            |
| N2                                 | HS | V | 15997761                            | 16000653 | WBGene00003640 | nhr-50          | C06C6.5 0.0518880730167304 |
| AGIWUR4454;AGIWUR26657;AGIWUR29520 |    |   |                                     |          |                |                 |                            |
| N2                                 | HS | V | 16002588                            | 16004728 | WBGene00003653 | nhr-63          | C06C6.4 0.125160011471483  |
| AGIWUR17261                        |    |   |                                     |          |                |                 |                            |
| N2                                 | HS | V | 16006304                            | 16007605 | WBGene00006262 | str-231         | C06C6.3 -0.183984877626054 |
| AGIWUR41558                        |    |   |                                     |          |                |                 |                            |
| N2                                 | HS | V | 16008332                            | 16009664 | WBGene00006264 | str-233         | C06C6.2                    |
| -0.00817162705403618               |    |   | AGIWUR18585                         |          |                |                 |                            |
| N2                                 | HS | V | 16010710                            | 16012112 | WBGene00007379 | C06C6.1 C06C6.1 | -0.097509407805541         |
| AGIWUR45005                        |    |   |                                     |          |                |                 |                            |

|                                                        |    |   |          |          |                |          |          |                     |
|--------------------------------------------------------|----|---|----------|----------|----------------|----------|----------|---------------------|
| N2                                                     | HS | V | 16012537 | 16014226 | WBGene00011686 | T10C6.2  | T10C6.2  | -0.0317699845002082 |
| AGIWUR29743                                            |    |   |          |          |                |          |          |                     |
| N2                                                     | HS | V | 16014509 | 16015752 | WBGene00006263 | str-232  | T10C6.1  | -0.107241181541946  |
| AGIWUR21772                                            |    |   |          |          |                |          |          |                     |
| N2                                                     | HS | V | 16017971 | 16019862 | WBGene00005934 | srx-43   | T10C6.3  | 0.0451020446557919  |
| AGIWUR6572;AGIWUR7974                                  |    |   |          |          |                |          |          |                     |
| N2                                                     | HS | V | 16020342 | 16022652 | WBGene00005935 | srx-44   | T10C6.4  | 0.00989223088300584 |
| AGIWUR22415                                            |    |   |          |          |                |          |          |                     |
| N2                                                     | HS | V | 16023351 | 16024185 | WBGene00011687 | T10C6.5  | T10C6.5  | 0.0857625063337775  |
| AGIWUR13803;AGIWUR29687                                |    |   |          |          |                |          |          |                     |
| N2                                                     | HS | V | 16024326 | 16027454 | WBGene00011688 | T10C6.6  | T10C6.6  | -0.413745726864474  |
| AGIWUR11648;AGIWUR33048                                |    |   |          |          |                |          |          |                     |
| N2                                                     | HS | V | 16027449 | 16031713 | WBGene00011689 | T10C6.7  | T10C6.7  | -0.195514509422002  |
| AGIWUR38717                                            |    |   |          |          |                |          |          |                     |
| N2                                                     | HS | V | 16036413 | 16038293 | WBGene00011691 | T10C6.10 |          | T10C6.10            |
| -0.0820325832729818 AGIWUR7120;AGIWUR17168;AGIWUR30370 |    |   |          |          |                |          |          |                     |
| N2                                                     | HS | V | 16041828 | 16042283 | WBGene00001876 | his-2    | T10C6.13 |                     |
| -0.000556249731580749 AGIWUR18145                      |    |   |          |          |                |          |          |                     |
| N2                                                     | HS | V | 16044296 | 16045874 | WBGene00050899 | T10C6.15 |          | T10C6.15            |
| 0.437605655881713 AGIWUR44157                          |    |   |          |          |                |          |          |                     |
| N2                                                     | HS | V | 16046873 | 16047446 | WBGene00013961 | ZK285.2  | ZK285.2  | 0.0960397881017343  |
| AGIWUR44047                                            |    |   |          |          |                |          |          |                     |
| N2                                                     | HS | V | 16047808 | 16049147 | WBGene00006234 | str-198  | ZK285.1  |                     |
| -0.00865273034934155 AGIWUR35495                       |    |   |          |          |                |          |          |                     |
| N2                                                     | HS | V | 16049492 | 16051554 | WBGene00008821 | best-12  | F14H3.2  | 0.181253845347493   |
| AGIWUR39204                                            |    |   |          |          |                |          |          |                     |
| N2                                                     | HS | V | 16051923 | 16053510 | WBGene00008822 | F14H3.3  | F14H3.3  | -0.371973502497127  |
| AGIWUR44849                                            |    |   |          |          |                |          |          |                     |
| N2                                                     | HS | V | 16053900 | 16055072 | WBGene00008823 | F14H3.4  | F14H3.4  | -0.0495710019491824 |
| AGIWUR3490                                             |    |   |          |          |                |          |          |                     |
| N2                                                     | HS | V | 16055806 | 16057054 | WBGene00008824 | F14H3.5  | F14H3.5  | -0.117750660122963  |
| AGIWUR2701                                             |    |   |          |          |                |          |          |                     |
| N2                                                     | HS | V | 16057322 | 16058892 | WBGene00008825 | F14H3.6  | F14H3.6  | 0.0456949780193501  |
| AGIWUR24313                                            |    |   |          |          |                |          |          |                     |
| N2                                                     | HS | V | 16059781 | 16060235 | WBGene00219414 | F14H3.15 |          | F14H3.15            |
| 0.0547891918325352 AGIWUR36744                         |    |   |          |          |                |          |          |                     |
| N2                                                     | HS | V | 16063551 | 16064108 | WBGene00014735 | cyp-35D2 |          | F14H3.13            |
| 0.125320299596859 AGIWUR43917                          |    |   |          |          |                |          |          |                     |
| N2                                                     | HS | V | 16064447 | 16067002 | WBGene00008827 | F14H3.8  | F14H3.8  |                     |



|                                                           |                         |          |                |                 |                             |
|-----------------------------------------------------------|-------------------------|----------|----------------|-----------------|-----------------------------|
| -0.000729464500746069                                     | AGIWUR4110              |          |                |                 |                             |
| N2 HS V                                                   | 16067949                | 16068763 | WBGene00008828 | F14H3.9 F14H3.9 | 0.199778716805071           |
| AGIWUR20501                                               |                         |          |                |                 |                             |
| N2 HS V                                                   | 16069238                | 16071301 | WBGene00008829 | cyp-35D1        | F14H3.10                    |
| 0.648544071110973                                         | AGIWUR18064             |          |                |                 |                             |
| N2 HS V                                                   | 16071325                | 16072738 | WBGene00008830 | nhr-176         | F14H3.11                    |
| 0.175065404594968                                         | AGIWUR13486;AGIWUR17452 |          |                |                 |                             |
| N2 HS V                                                   | 16072765                | 16073956 | WBGene00005598 | srj-10          | F14H3.1 -0.0230710098852676 |
| AGIWUR29645                                               |                         |          |                |                 |                             |
| N2 HS V                                                   | 16074113                | 16075323 | WBGene00008831 | F14H3.12        | F14H3.12                    |
| 0.111186335743396                                         | AGIWUR2204              |          |                |                 |                             |
| N2 HS V                                                   | 16075659                | 16077308 | WBGene00005616 | srj-29          | F22B8.1 -0.0019690334532223 |
| AGIWUR36282                                               |                         |          |                |                 |                             |
| N2 HS V                                                   | 16077979                | 16079234 | WBGene00014741 | F22B8.2         | F22B8.2 0.0172417464966115  |
| AGIWUR15244                                               |                         |          |                |                 |                             |
| N2 HS V                                                   | 16086572                | 16088217 | WBGene00009047 | F22B8.4         | F22B8.4 -0.223993359679822  |
| AGIWUR44672                                               |                         |          |                |                 |                             |
| N2 HS V                                                   | 16090985                | 16092117 | WBGene00009046 | F22B8.3         | F22B8.3                     |
| -0.00775316607099708                                      | AGIWUR21008             |          |                |                 |                             |
| N2 HS V                                                   | 16094584                | 16097320 | WBGene00009049 | F22B8.7         | F22B8.7 -0.0203644752459056 |
| AGIWUR15062                                               |                         |          |                |                 |                             |
| N2 HS V                                                   | 16097985                | 16100209 | WBGene00006075 | str-7           | F22B8.5 -0.0816564977278791 |
| AGIWUR15383;AGIWUR19926;AGIWUR42258                       |                         |          |                |                 |                             |
| N2 HS V                                                   | 16100627                | 16102750 | WBGene00009048 | cth-1           | F22B8.6 -0.267204520176101  |
| AGIWUR9763;AGIWUR36127;AGIWUR42001                        |                         |          |                |                 |                             |
| N2 HS V                                                   | 16103894                | 16105950 | WBGene00009706 | argk-1          | F44G3.2 -0.296541346531778  |
| AGIWUR1153;AGIWUR5200;AGIWUR18061;AGIWUR18759;AGIWUR36128 |                         |          |                |                 |                             |
| N2 HS V                                                   | 16112237                | 16112968 | WBGene00014757 | F44G3.4         | F44G3.4 -0.179399821496     |
| AGIWUR14212;AGIWUR36160                                   |                         |          |                |                 |                             |
| N2 HS V                                                   | 16112992                | 16114337 | WBGene00009707 | srxa-16         | F44G3.5 -0.0283336157477452 |
| AGIWUR36396                                               |                         |          |                |                 |                             |
| N2 HS V                                                   | 16115681                | 16116897 | WBGene00006092 | str-25          | F44G3.11                    |
| -0.0349109069210431                                       | AGIWUR7233              |          |                |                 |                             |
| N2 HS V                                                   | 16117363                | 16118701 | WBGene00006158 | str-103         | F44G3.1 -0.0480980965292357 |
| AGIWUR41093                                               |                         |          |                |                 |                             |
| N2 HS V                                                   | 16121824                | 16122648 | WBGene00004809 | skr-3           | F44G3.6 0.0802241942702473  |
| AGIWUR29757                                               |                         |          |                |                 |                             |
| N2 HS V                                                   | 16125811                | 16127497 | WBGene00044661 | fbxa-143        | F44G3.14                    |
| -0.00303609890556267                                      | AGIWUR21812             |          |                |                 |                             |

|                                     |    |   |                                    |          |                |          |                             |
|-------------------------------------|----|---|------------------------------------|----------|----------------|----------|-----------------------------|
| N2                                  | HS | V | 16128131                           | 16129089 | WBGene00044660 | fbxa-87  | F44G3.13                    |
| 0.0271476950821841                  |    |   | AGIWUR7460;AGIWUR29772             |          |                |          |                             |
| N2                                  | HS | V | 16129409                           | 16130979 | WBGene00044659 | fbxa-142 | F44G3.12                    |
| -0.0420531188420732                 |    |   | AGIWUR14461                        |          |                |          |                             |
| N2                                  | HS | V | 16131180                           | 16133283 | WBGene00009709 | fbxa-144 | F44G3.8                     |
| 0.119099848917235                   |    |   | AGIWUR29526;AGIWUR33518            |          |                |          |                             |
| N2                                  | HS | V | 16133781                           | 16137143 | WBGene00009708 | F44G3.7  | F44G3.7 0.324002165400032   |
| AGIWUR25611                         |    |   |                                    |          |                |          |                             |
| N2                                  | HS | V | 16138846                           | 16139627 | WBGene00009710 | F44G3.10 | F44G3.10                    |
| 0.010416987939081                   |    |   | AGIWUR7611;AGIWUR37760;AGIWUR40817 |          |                |          |                             |
| N2                                  | HS | V | 16140314                           | 16141164 | WBGene00008631 | F10A3.1  | F10A3.1 -0.215684742359398  |
| AGIWUR34865                         |    |   |                                    |          |                |          |                             |
| N2                                  | HS | V | 16142008                           | 16143116 | WBGene00008632 | fbxa-88  | F10A3.2 -0.0271212833265082 |
| AGIWUR31979                         |    |   |                                    |          |                |          |                             |
| N2                                  | HS | V | 16143615                           | 16144653 | WBGene00008633 | fbxa-18  | F10A3.3 -0.25382547796875   |
| AGIWUR10313                         |    |   |                                    |          |                |          |                             |
| N2                                  | HS | V | 16144986                           | 16146263 | WBGene00008638 | F10A3.16 | F10A3.16                    |
| 0.134094638085882                   |    |   | AGIWUR14428                        |          |                |          |                             |
| N2                                  | HS | V | 16147039                           | 16148327 | WBGene00014733 | F10A3.10 | F10A3.10                    |
| -0.0911860739470427                 |    |   | AGIWUR582                          |          |                |          |                             |
| N2                                  | HS | V | 16149125                           | 16151870 | WBGene00008634 | F10A3.4  | F10A3.4 -0.0703841560241933 |
| AGIWUR18361                         |    |   |                                    |          |                |          |                             |
| N2                                  | HS | V | 16151978                           | 16153475 | WBGene00006280 | str-254  | F10A3.9 0.0548757888992051  |
| AGIWUR7211;AGIWUR44010              |    |   |                                    |          |                |          |                             |
| N2                                  | HS | V | 16153855                           | 16155211 | WBGene00006154 | str-97   | F10A3.8 -0.0223208488107325 |
| AGIWUR13410;AGIWUR25754;AGIWUR37364 |    |   |                                    |          |                |          |                             |
| N2                                  | HS | V | 16155451                           | 16156722 | WBGene00008635 | F10A3.7  | F10A3.7 -0.022966739203568  |
| AGIWUR32120                         |    |   |                                    |          |                |          |                             |
| N2                                  | HS | V | 16157335                           | 16158491 | WBGene00006155 | str-99   | F10A3.6 0.0495798297686214  |
| AGIWUR1542                          |    |   |                                    |          |                |          |                             |
| N2                                  | HS | V | 16158679                           | 16159694 | WBGene00045507 | F10A3.17 | F10A3.17                    |
| 0.345599650022091                   |    |   | AGIWUR32356                        |          |                |          |                             |
| N2                                  | HS | V | 16160685                           | 16162224 | WBGene00006161 | str-109  | F10A3.5 0.047782858703445   |
| AGIWUR3013                          |    |   |                                    |          |                |          |                             |
| N2                                  | HS | V | 16162685                           | 16163795 | WBGene00008636 | F10A3.11 | F10A3.11                    |
| 0.0820718370040439                  |    |   | AGIWUR12243                        |          |                |          |                             |
| N2                                  | HS | V | 16164019                           | 16165473 | WBGene00008637 | F10A3.12 | F10A3.12                    |
| -0.108314384191941                  |    |   | AGIWUR37426                        |          |                |          |                             |
| N2                                  | HS | V | 16166236                           | 16167409 | WBGene00006160 | str-108  | F10A3.13                    |

|                                                        |                                                 |          |                |          |                             |
|--------------------------------------------------------|-------------------------------------------------|----------|----------------|----------|-----------------------------|
| -0.234667618138006                                     | AGIWUR15968                                     |          |                |          |                             |
| N2 HS V                                                | 16167875                                        | 16169126 | WBGene00006162 | str-111  | F10A3.15                    |
| 0.13968081346103                                       | AGIWUR15156                                     |          |                |          |                             |
| N2 HS V                                                | 16173743                                        | 16175857 | WBGene00010589 | cyp-33D1 | K05D4.4                     |
| 0.131539607343353                                      | AGIWUR15132;AGIWUR26937;AGIWUR28056;AGIWUR32245 |          |                |          |                             |
| N2 HS V                                                | 16176287                                        | 16177491 | WBGene00014799 | K05D4.5  | K05D4.5 0.0488409449987346  |
| AGIWUR19570;AGIWUR25619;AGIWUR36956                    |                                                 |          |                |          |                             |
| N2 HS V                                                | 16178532                                        | 16179966 | WBGene00014798 | K05D4.1  | K05D4.1 -0.0117931393805035 |
| AGIWUR13418;AGIWUR22857                                |                                                 |          |                |          |                             |
| N2 HS V                                                | 16180650                                        | 16181861 | WBGene00006159 | str-106  | K05D4.2 -0.113870132724786  |
| AGIWUR36320                                            |                                                 |          |                |          |                             |
| N2 HS V                                                | 16182410                                        | 16183540 | WBGene00010590 | srz-13   | K05D4.8 -0.0926291954267455 |
| AGIWUR9886                                             |                                                 |          |                |          |                             |
| N2 HS V                                                | 16185403                                        | 16186920 | WBGene00005482 | srh-277  | K05D4.6 0.0284325121758346  |
| AGIWUR114;AGIWUR2111;AGIWUR2913;AGIWUR7866;AGIWUR39691 |                                                 |          |                |          |                             |
| N2 HS V                                                | 16187728                                        | 16189129 | WBGene00005485 | srh-280  | K05D4.7 -0.117103416618851  |
| AGIWUR4413;AGIWUR6895;AGIWUR19136;AGIWUR25620          |                                                 |          |                |          |                             |
| N2 HS V                                                | 16190785                                        | 16192262 | WBGene00005486 | srh-281  | F11A5.1 0.243662976559722   |
| AGIWUR15987                                            |                                                 |          |                |          |                             |
| N2 HS V                                                | 16193356                                        | 16194581 | WBGene00005484 | srh-279  | F11A5.2 -0.228308090160415  |
| AGIWUR40342                                            |                                                 |          |                |          |                             |
| N2 HS V                                                | 16194939                                        | 16195544 | WBGene00008671 | F11A5.3  | F11A5.3 -0.0403114249731198 |
| AGIWUR28861                                            |                                                 |          |                |          |                             |
| N2 HS V                                                | 16195679                                        | 16196290 | WBGene00008672 | F11A5.4  | F11A5.4                     |
| -0.00269758421528099                                   | AGIWUR37086                                     |          |                |          |                             |
| N2 HS V                                                | 16198379                                        | 16201045 | WBGene00008673 | F11A5.5  | F11A5.5 -0.0485333290556103 |
| AGIWUR44997                                            |                                                 |          |                |          |                             |
| N2 HS V                                                | 16202030                                        | 16202740 | WBGene00045510 | F11A5.17 | F11A5.17                    |
| 0.0688798144358778                                     | AGIWUR5781;AGIWUR36739;AGIWUR40497              |          |                |          |                             |
| N2 HS V                                                | 16202809                                        | 16204862 | WBGene00045511 | F11A5.18 | F11A5.18                    |
| 0.0595231429561283                                     | AGIWUR12498;AGIWUR15612;AGIWUR25301;AGIWUR40184 |          |                |          |                             |
| N2 HS V                                                | 16205188                                        | 16206818 | WBGene00008675 | irld-26  | F11A5.7 -0.0669976565759178 |
| AGIWUR991                                              |                                                 |          |                |          |                             |
| N2 HS V                                                | 16206943                                        | 16209916 | WBGene00008676 | oac-15   | F11A5.8 0.0480535069573484  |
| AGIWUR43379                                            |                                                 |          |                |          |                             |
| N2 HS V                                                | 16210952                                        | 16211454 | WBGene00044184 | F11A5.16 | F11A5.16                    |
| 0.00740482885608218                                    | AGIWUR13277;AGIWUR19353;AGIWUR36561;AGIWUR43875 |          |                |          |                             |
| N2 HS V                                                | 16214890                                        | 16217706 | WBGene00008677 | F11A5.9  | F11A5.9 -0.240877084111546  |
| AGIWUR17833                                            |                                                 |          |                |          |                             |

|                         |    |   |                                     |          |                |          |                             |
|-------------------------|----|---|-------------------------------------|----------|----------------|----------|-----------------------------|
| N2                      | HS | V | 16217701                            | 16218605 | WBGene00008680 | F11A5.15 | F11A5.15                    |
| -0.0669419806586014     |    |   | AGIWUR37713                         |          |                |          |                             |
| N2                      | HS | V | 16219541                            | 16221948 | WBGene00001591 | glc-1    | F11A5.10                    |
| 0.179627194189898       |    |   | AGIWUR29186                         |          |                |          |                             |
| N2                      | HS | V | 16222323                            | 16223415 | WBGene00005547 | sri-35   | F11A5.11                    |
| -0.0826768013022763     |    |   | AGIWUR6562;AGIWUR31026;AGIWUR32138  |          |                |          |                             |
| N2                      | HS | V | 16224327                            | 16225540 | WBGene00008678 | stdh-2   | F11A5.12                    |
| -0.102866777308332      |    |   | AGIWUR16829                         |          |                |          |                             |
| N2                      | HS | V | 16225701                            | 16225887 | WBGene00014322 | F11A5.14 | F11A5.14                    |
| 0.122422371106299       |    |   | AGIWUR15158                         |          |                |          |                             |
| N2                      | HS | V | 16226013                            | 16226681 | WBGene00008679 | F11A5.13 | F11A5.13                    |
| 0.198308280289929       |    |   | AGIWUR21002                         |          |                |          |                             |
| N2                      | HS | V | 16227127                            | 16229893 | WBGene00009028 | F21H7.2  | F21H7.2 0.175903448262769   |
| AGIWUR23420             |    |   |                                     |          |                |          |                             |
| N2                      | HS | V | 16230203                            | 16231043 | WBGene00009033 | F21H7.12 | F21H7.12                    |
| 0.0472047005736442      |    |   | AGIWUR43397                         |          |                |          |                             |
| N2                      | HS | V | 16231032                            | 16232317 | WBGene00001770 | gst-22   | F21H7.1 0.641708355759542   |
| AGIWUR20527             |    |   |                                     |          |                |          |                             |
| N2                      | HS | V | 16232652                            | 16233335 | WBGene00009029 | F21H7.3  | F21H7.3 0.322530625545127   |
| AGIWUR18667             |    |   |                                     |          |                |          |                             |
| N2                      | HS | V | 16233924                            | 16234896 | WBGene00009030 | clcc-233 | F21H7.4                     |
| 0.197005357080107       |    |   | AGIWUR23753                         |          |                |          |                             |
| N2                      | HS | V | 16235171                            | 16235747 | WBGene00005317 | srh-98   | F21H7.14                    |
| 0.0338316276903141      |    |   | AGIWUR15119                         |          |                |          |                             |
| N2                      | HS | V | 16237523                            | 16238824 | WBGene00009031 | F21H7.5  | F21H7.5 -0.0305785155677594 |
| AGIWUR30066             |    |   |                                     |          |                |          |                             |
| N2                      | HS | V | 16239333                            | 16240447 | WBGene00014740 | F21H7.6  | F21H7.6 -0.0615590344386638 |
| AGIWUR22044;AGIWUR35030 |    |   |                                     |          |                |          |                             |
| N2                      | HS | V | 16241217                            | 16242445 | WBGene00005322 | srh-103  | F21H7.13                    |
| -0.106808226955163      |    |   | AGIWUR7209                          |          |                |          |                             |
| N2                      | HS | V | 16242818                            | 16244178 | WBGene00005323 | srh-104  | F21H7.7 -0.0237222342528138 |
| AGIWUR26850             |    |   |                                     |          |                |          |                             |
| N2                      | HS | V | 16246879                            | 16248455 | WBGene00005315 | srh-95   | F21H7.11                    |
| 0.165855302566799       |    |   | AGIWUR10690;AGIWUR27139;AGIWUR34427 |          |                |          |                             |
| N2                      | HS | V | 16248583                            | 16253787 | WBGene00001545 | gcy-20   | F21H7.9 -0.163760332080206  |
| AGIWUR34558             |    |   |                                     |          |                |          |                             |
| N2                      | HS | V | 16254301                            | 16256398 | WBGene00009032 | bgnt-1.3 | F21H7.10                    |
| 0.00161615580789309     |    |   | AGIWUR37791                         |          |                |          |                             |
| N2                      | HS | V | 16258442                            | 16260686 | WBGene00011750 | nhr-218  | T13F3.2 -0.068735413260903  |

|                                                                                             |    |   |          |          |                |                                     |
|---------------------------------------------------------------------------------------------|----|---|----------|----------|----------------|-------------------------------------|
| AGIWUR988                                                                                   |    |   |          |          |                |                                     |
| N2                                                                                          | HS | V | 16261647 | 16263953 | WBGene00003717 | nhr-127 T13F3.3 -0.0378659448627907 |
| AGIWUR40703                                                                                 |    |   |          |          |                |                                     |
| N2                                                                                          | HS | V | 16265097 | 16265607 | WBGene00011751 | T13F3.4 T13F3.4                     |
| -0.00370779902236995 AGIWUR9411;AGIWUR16759;AGIWUR18945;AGIWUR27431;AGIWUR29628;AGIWUR35257 |    |   |          |          |                |                                     |
| N2                                                                                          | HS | V | 16266765 | 16268150 | WBGene00044653 | T13F3.9 T13F3.9 -0.134220691840679  |
| AGIWUR23129;AGIWUR24605;AGIWUR40089                                                         |    |   |          |          |                |                                     |
| N2                                                                                          | HS | V | 16268335 | 16269567 | WBGene00011752 | fbxa-2 T13F3.5 0.105285040160986    |
| AGIWUR17354;AGIWUR22932;AGIWUR34541                                                         |    |   |          |          |                |                                     |
| N2                                                                                          | HS | V | 16270216 | 16271223 | WBGene00011753 | T13F3.6 T13F3.6 0.320661776184665   |
| AGIWUR20125;AGIWUR21281                                                                     |    |   |          |          |                |                                     |
| N2                                                                                          | HS | V | 16271536 | 16272498 | WBGene00044205 | T13F3.8 T13F3.8 -0.13249650325394   |
| AGIWUR12595                                                                                 |    |   |          |          |                |                                     |
| N2                                                                                          | HS | V | 16272686 | 16275410 | WBGene00011754 | T13F3.7 T13F3.7                     |
| -0.00395432460493694 AGIWUR11446                                                            |    |   |          |          |                |                                     |
| N2                                                                                          | HS | V | 16275913 | 16277698 | WBGene00006227 | str-183 T13F3.1 0.14031010423803    |
| AGIWUR17043                                                                                 |    |   |          |          |                |                                     |
| N2                                                                                          | HS | V | 16278191 | 16280612 | WBGene00009226 | cyp-37B1 F28G4.1                    |
| -0.637142430190517 AGIWUR38767                                                              |    |   |          |          |                |                                     |
| N2                                                                                          | HS | V | 16280602 | 16282321 | WBGene00009227 | F28G4.2 F28G4.2 0.354002094785224   |
| AGIWUR29795                                                                                 |    |   |          |          |                |                                     |
| N2                                                                                          | HS | V | 16283018 | 16285894 | WBGene00009229 | F28G4.4 F28G4.4 0.209924740861448   |
| AGIWUR15182;AGIWUR16824;AGIWUR27000                                                         |    |   |          |          |                |                                     |
| N2                                                                                          | HS | V | 16286151 | 16287719 | WBGene00009228 | F28G4.3 F28G4.3 -0.0663644308259581 |
| AGIWUR37528                                                                                 |    |   |          |          |                |                                     |
| N2                                                                                          | HS | V | 16288788 | 16292154 | WBGene00009230 | oac-18 F28G4.5 -0.277003957501382   |
| AGIWUR32845                                                                                 |    |   |          |          |                |                                     |
| N2                                                                                          | HS | V | 16292709 | 16295600 | WBGene00007829 | oac-5 C31A11.1                      |
| -0.0880134936546115 AGIWUR27043                                                             |    |   |          |          |                |                                     |
| N2                                                                                          | HS | V | 16297370 | 16298278 | WBGene00007831 | srbc-83 C31A11.3                    |
| 0.0159034457286036 AGIWUR11713;AGIWUR17091                                                  |    |   |          |          |                |                                     |
| N2                                                                                          | HS | V | 16298969 | 16299862 | WBGene00044106 | srbc-84 C31A11.10                   |
| -0.0183083352822075 AGIWUR7876                                                              |    |   |          |          |                |                                     |
| N2                                                                                          | HS | V | 16300576 | 16301478 | WBGene00007832 | srbc-82 C31A11.4                    |
| -0.0494066405796882 AGIWUR27488                                                             |    |   |          |          |                |                                     |
| N2                                                                                          | HS | V | 16302717 | 16306156 | WBGene00007833 | oac-6 C31A11.5                      |
| 0.217752337734503 AGIWUR21759                                                               |    |   |          |          |                |                                     |
| N2                                                                                          | HS | V | 16307682 | 16309623 | WBGene00007834 | srxa-7 C31A11.6                     |
| -0.209286263985055 AGIWUR6387                                                               |    |   |          |          |                |                                     |

|                                                                                             |    |   |          |          |                |          |                             |
|---------------------------------------------------------------------------------------------|----|---|----------|----------|----------------|----------|-----------------------------|
| N2                                                                                          | HS | V | 16309805 | 16314752 | WBGene00007835 | oac-7    | C31A11.7                    |
| -0.123347873612246 AGIWUR45204                                                              |    |   |          |          |                |          |                             |
| N2                                                                                          | HS | V | 16315304 | 16317226 | WBGene00006247 | str-214  | C31A11.9                    |
| -0.0473317582057495 AGIWUR32118                                                             |    |   |          |          |                |          |                             |
| N2                                                                                          | HS | V | 16317567 | 16318805 | WBGene00005395 | srh-180  | F57G8.1 -0.191036296864755  |
| AGIWUR7163                                                                                  |    |   |          |          |                |          |                             |
| N2                                                                                          | HS | V | 16320797 | 16327477 | WBGene00005747 | srv-36   | F57G8.8 -0.0496662282617786 |
| AGIWUR662;AGIWUR19347;AGIWUR23944                                                           |    |   |          |          |                |          |                             |
| N2                                                                                          | HS | V | 16329370 | 16330242 | WBGene00010216 | F57G8.7  | F57G8.7 0.105088832716165   |
| AGIWUR2979                                                                                  |    |   |          |          |                |          |                             |
| N2                                                                                          | HS | V | 16333712 | 16335063 | WBGene00005383 | srh-167  | F57G8.3 0.125483067819797   |
| AGIWUR21109                                                                                 |    |   |          |          |                |          |                             |
| N2                                                                                          | HS | V | 16336626 | 16338277 | WBGene00005834 | srw-87   | F57G8.4 -0.145665685536973  |
| AGIWUR11621                                                                                 |    |   |          |          |                |          |                             |
| N2                                                                                          | HS | V | 16339024 | 16341536 | WBGene00010214 | F57G8.5  | F57G8.5 0.174277181310032   |
| AGIWUR2510;AGIWUR10277;AGIWUR21099                                                          |    |   |          |          |                |          |                             |
| N2                                                                                          | HS | V | 16342497 | 16344272 | WBGene00010215 | nhr-193  | F57G8.6 0.096402229432929   |
| AGIWUR30592                                                                                 |    |   |          |          |                |          |                             |
| N2                                                                                          | HS | V | 16344375 | 16346506 | WBGene00012349 | W08G11.5 | W08G11.5                    |
| 0.114969105132319 AGIWUR40666                                                               |    |   |          |          |                |          |                             |
| N2                                                                                          | HS | V | 16347060 | 16349833 | WBGene00012346 | W08G11.1 | W08G11.1                    |
| 0.0649717360910085 AGIWUR24072                                                              |    |   |          |          |                |          |                             |
| N2                                                                                          | HS | V | 16357521 | 16367574 | WBGene00012348 | pptr-1   | W08G11.4                    |
| -0.0330633101171234 AGIWUR15748;AGIWUR23092;AGIWUR23926;AGIWUR30777;AGIWUR42165;AGIWUR43390 |    |   |          |          |                |          |                             |
| N2                                                                                          | HS | V | 16367681 | 16372097 | WBGene00012347 | W08G11.3 | W08G11.3                    |
| 0.0532815626946288 AGIWUR18074                                                              |    |   |          |          |                |          |                             |
| N2                                                                                          | HS | V | 16372417 | 16374776 | WBGene00005745 | srv-34   | F13A7.3 -0.197814766424523  |
| AGIWUR3625                                                                                  |    |   |          |          |                |          |                             |
| N2                                                                                          | HS | V | 16376239 | 16377949 | WBGene00008724 | F13A7.1  | F13A7.1 -0.0650193148027434 |
| AGIWUR36448                                                                                 |    |   |          |          |                |          |                             |
| N2                                                                                          | HS | V | 16378892 | 16380488 | WBGene00005746 | srv-35   | F13A7.4 -0.089814421460749  |
| AGIWUR1064;AGIWUR24283                                                                      |    |   |          |          |                |          |                             |
| N2                                                                                          | HS | V | 16382167 | 16383829 | WBGene00008725 | F13A7.7  | F13A7.7 0.213894257822236   |
| AGIWUR8127                                                                                  |    |   |          |          |                |          |                             |
| N2                                                                                          | HS | V | 16384490 | 16386136 | WBGene00005576 | sri-64   | F13A7.6 -0.023764203993105  |
| AGIWUR9997;AGIWUR25215;AGIWUR29874                                                          |    |   |          |          |                |          |                             |
| N2                                                                                          | HS | V | 16386662 | 16388368 | WBGene00005577 | sri-65   | F13A7.8 -0.119584097337318  |
| AGIWUR25201                                                                                 |    |   |          |          |                |          |                             |
| N2                                                                                          | HS | V | 16389241 | 16389865 | WBGene00004817 | skr-11   | F13A7.9 0.253757291689208   |

|                                                                                    |    |   |                                                                                    |          |                |          |                             |
|------------------------------------------------------------------------------------|----|---|------------------------------------------------------------------------------------|----------|----------------|----------|-----------------------------|
| AGIWUR11715                                                                        |    |   |                                                                                    |          |                |          |                             |
| N2                                                                                 | HS | V | 16390891                                                                           | 16392406 | WBGene00001792 | gst-44   | F13A7.10                    |
| -0.364913414233761                                                                 |    |   | AGIWUR3708                                                                         |          |                |          |                             |
| N2                                                                                 | HS | V | 16392482                                                                           | 16393828 | WBGene00005140 | srd-63   | F13A7.2 0.156445725163898   |
| AGIWUR2129;AGIWUR23449;AGIWUR32161;AGIWUR33690                                     |    |   |                                                                                    |          |                |          |                             |
| N2                                                                                 | HS | V | 16394015                                                                           | 16395075 | WBGene00008726 | F13A7.11 | F13A7.11                    |
| -0.172410238559515                                                                 |    |   | AGIWUR19640                                                                        |          |                |          |                             |
| N2                                                                                 | HS | V | 16396359                                                                           | 16398502 | WBGene00008727 | F13A7.12 | F13A7.12                    |
| 0.220181975919118                                                                  |    |   | AGIWUR39641                                                                        |          |                |          |                             |
| N2                                                                                 | HS | V | 16399688                                                                           | 16401625 | WBGene00008728 | sre-36   | F13A7.13                    |
| 0.103064739425401                                                                  |    |   | AGIWUR14743                                                                        |          |                |          |                             |
| N2                                                                                 | HS | V | 16405751                                                                           | 16407699 | WBGene00006375 | syp-1    | F26D2.2 0.0620875933850566  |
| AGIWUR3001;AGIWUR12902                                                             |    |   |                                                                                    |          |                |          |                             |
| N2                                                                                 | HS | V | 16407963                                                                           | 16410270 | WBGene00009148 | F26D2.3  | F26D2.3 0.112250950351916   |
| AGIWUR1510;AGIWUR11211;AGIWUR21865;AGIWUR24161;AGIWUR27772;AGIWUR40093;AGIWUR44150 |    |   |                                                                                    |          |                |          |                             |
| N2                                                                                 | HS | V | 16410713                                                                           | 16411843 | WBGene00005361 | srh-145  | F26D2.4 0.0832698702493122  |
| AGIWUR9297                                                                         |    |   |                                                                                    |          |                |          |                             |
| N2                                                                                 | HS | V | 16412687                                                                           | 16413786 | WBGene00005360 | srh-144  | F26D2.5 -0.0297368364725807 |
| AGIWUR45095                                                                        |    |   |                                                                                    |          |                |          |                             |
| N2                                                                                 | HS | V | 16414068                                                                           | 16415247 | WBGene00014745 | F26D2.8  | F26D2.8 0.0470521600798861  |
| AGIWUR44;AGIWUR27522                                                               |    |   |                                                                                    |          |                |          |                             |
| N2                                                                                 | HS | V | 16415694                                                                           | 16417114 | WBGene00006120 | str-55   | F26D2.7 -0.0226683981021729 |
| AGIWUR2221                                                                         |    |   |                                                                                    |          |                |          |                             |
| N2                                                                                 | HS | V | 16418433                                                                           | 16420425 | WBGene00009154 | F26D2.16 | F26D2.16                    |
| 0.499671245497043                                                                  |    |   | AGIWUR32894                                                                        |          |                |          |                             |
| N2                                                                                 | HS | V | 16420996                                                                           | 16422774 | WBGene00005795 | srw-48   | F26D2.9 0.0569092508683218  |
| AGIWUR28331                                                                        |    |   |                                                                                    |          |                |          |                             |
| N2                                                                                 | HS | V | 16423099                                                                           | 16424507 | WBGene00005776 | srw-29   | F26D2.11                    |
| -0.0199150608988363                                                                |    |   | AGIWUR31643                                                                        |          |                |          |                             |
| N2                                                                                 | HS | V | 16424854                                                                           | 16429603 | WBGene00009149 | F26D2.10 | F26D2.10                    |
| 0.144062385442682                                                                  |    |   | AGIWUR6760;AGIWUR29245;AGIWUR41595                                                 |          |                |          |                             |
| N2                                                                                 | HS | V | 16430240                                                                           | 16431861 | WBGene00006134 | str-73   | F26D2.1 0.159472841452015   |
| AGIWUR22361                                                                        |    |   |                                                                                    |          |                |          |                             |
| N2                                                                                 | HS | V | 16432009                                                                           | 16433572 | WBGene00009150 | clcc-234 | F26D2.12                    |
| -0.0923493521217162                                                                |    |   | AGIWUR7612;AGIWUR16991;AGIWUR24649;AGIWUR26856;AGIWUR27037;AGIWUR33724;AGIWUR44070 |          |                |          |                             |
| N2                                                                                 | HS | V | 16434722                                                                           | 16435610 | WBGene00009151 | F26D2.13 | F26D2.13                    |
| -0.123915743376124                                                                 |    |   | AGIWUR22570                                                                        |          |                |          |                             |
| N2                                                                                 | HS | V | 16435855                                                                           | 16436736 | WBGene00009152 | F26D2.14 | F26D2.14                    |
| -0.0352417823502429                                                                |    |   | AGIWUR11473;AGIWUR14643                                                            |          |                |          |                             |

|    |    |   |                                    |             |                |           |                             |
|----|----|---|------------------------------------|-------------|----------------|-----------|-----------------------------|
| N2 | HS | V | 16437846                           | 16438934    | WBGene00009153 | F26D2.15  | F26D2.15                    |
|    |    |   | -0.0443050024911171                | AGIWUR15745 |                |           |                             |
| N2 | HS | V | 16439667                           | 16442450    | WBGene00011617 | T08G3.4   | T08G3.4 -0.171267260043987  |
|    |    |   | AGIWUR1245;AGIWUR13961;AGIWUR18166 |             |                |           |                             |
| N2 | HS | V | 16443926                           | 16445734    | WBGene00005358 | srh-141   | T08G3.5 -0.0208586783617344 |
|    |    |   | AGIWUR13063                        |             |                |           |                             |
| N2 | HS | V | 16445976                           | 16447165    | WBGene00011618 | T08G3.6   | T08G3.6 -0.0527041284435672 |
|    |    |   | AGIWUR25599                        |             |                |           |                             |
| N2 | HS | V | 16448035                           | 16449344    | WBGene00011621 | T08G3.13  | T08G3.13                    |
|    |    |   | 0.268318062221437                  | AGIWUR15610 |                |           |                             |
| N2 | HS | V | 16457269                           | 16458814    | WBGene00006083 | str-15    | T08G3.1 0.0606573331938396  |
|    |    |   | AGIWUR34333                        |             |                |           |                             |
| N2 | HS | V | 16459388                           | 16460965    | WBGene00005359 | srh-142   | T08G3.3 0.0266449054374522  |
|    |    |   | AGIWUR21874                        |             |                |           |                             |
| N2 | HS | V | 16462438                           | 16466357    | WBGene00011619 | T08G3.7   | T08G3.7 0.120687639283158   |
|    |    |   | AGIWUR15711                        |             |                |           |                             |
| N2 | HS | V | 16466466                           | 16467940    | WBGene00005707 | sru-44    | T08G3.8 -0.0206870751823516 |
|    |    |   | AGIWUR20001                        |             |                |           |                             |
| N2 | HS | V | 16469367                           | 16471016    | WBGene00005355 | srh-138   | T08G3.12                    |
|    |    |   | 0.0931823344977776                 | AGIWUR37531 |                |           |                             |
| N2 | HS | V | 16471442                           | 16473397    | WBGene00005782 | srw-35    | T08G3.10                    |
|    |    |   | -0.0479145531356728                | AGIWUR13977 |                |           |                             |
| N2 | HS | V | 16475677                           | 16476825    | WBGene00006017 | srx-126   | T08G3.9 -0.118566317298614  |
|    |    |   | AGIWUR32135                        |             |                |           |                             |
| N2 | HS | V | 16478698                           | 16479375    | WBGene00011620 | T08G3.11  | T08G3.11                    |
|    |    |   | -0.0587957849409797                | AGIWUR43715 |                |           |                             |
| N2 | HS | V | 16481580                           | 16482000    | WBGene00010202 | F57E7.1   | F57E7.1 0.091714260739991   |
|    |    |   | AGIWUR31789                        |             |                |           |                             |
| N2 | HS | V | 16482420                           | 16483144    | WBGene00010203 | F57E7.2   | F57E7.2 -0.0194191061376374 |
|    |    |   | AGIWUR13259                        |             |                |           |                             |
| N2 | HS | V | 16483981                           | 16485382    | WBGene00005356 | srh-139   | F57E7.3 0.555422636202501   |
|    |    |   | AGIWUR15646                        |             |                |           |                             |
| N2 | HS | V | 16486978                           | 16487574    | WBGene00012520 | Y32B12A.5 | Y32B12A.5                   |
|    |    |   | 0.0892937896495329                 | AGIWUR3890  |                |           |                             |
| N2 | HS | V | 16488472                           | 16489104    | WBGene00012516 | sqst-4    | Y32B12A.1                   |
|    |    |   | 0.329271030727205                  | AGIWUR20316 |                |           |                             |
| N2 | HS | V | 16489531                           | 16490520    | WBGene00012517 | srbc-73   | Y32B12A.2                   |
|    |    |   | -0.123173395850849                 | AGIWUR22720 |                |           |                             |
| N2 | HS | V | 16490760                           | 16491547    | WBGene00005465 | srh-259   | Y32B12A.6                   |



|                                                 |                                                                                    |                |                                    |
|-------------------------------------------------|------------------------------------------------------------------------------------|----------------|------------------------------------|
| -0.0776563862553612                             | AGIWUR4254;AGIWUR15269;AGIWUR20175                                                 |                |                                    |
| N2 HS V                                         | 16492170 16493458                                                                  | WBGene00005466 | srh-260 Y32B12A.7                  |
| 0.0754675291782769                              | AGIWUR3405;AGIWUR29973                                                             |                |                                    |
| N2 HS V                                         | 16493655 16494449                                                                  | WBGene00012518 | comt-2 Y32B12A.3                   |
| -0.10735194866026                               | AGIWUR3690;AGIWUR15142;AGIWUR25810;AGIWUR27894;AGIWUR28027;AGIWUR28665;AGIWUR35500 |                |                                    |
| N2 HS V                                         | 16494730 16495227                                                                  | WBGene00012519 | Y32B12A.4 Y32B12A.4                |
| 0.144420804280931                               | AGIWUR16079                                                                        |                |                                    |
| N2 HS V                                         | 16495994 16497596                                                                  | WBGene00005353 | srh-136 F36D3.6 0.0233308234565861 |
| AGIWUR4040                                      |                                                                                    |                |                                    |
| N2 HS V                                         | 16499352 16502879                                                                  | WBGene00009469 | F36D3.1 F36D3.1 0.0554946939511538 |
| AGIWUR15881                                     |                                                                                    |                |                                    |
| N2 HS V                                         | 16502947 16503282                                                                  | WBGene00044189 | F36D3.14 F36D3.14                  |
| -0.0384935012028169                             | AGIWUR1797;AGIWUR4391;AGIWUR5212;AGIWUR34875;AGIWUR41228                           |                |                                    |
| N2 HS V                                         | 16503947 16505917                                                                  | WBGene00003644 | nhr-54 F36D3.2 -0.0138719833652647 |
| AGIWUR18110                                     |                                                                                    |                |                                    |
| N2 HS V                                         | 16506897 16508705                                                                  | WBGene00005654 | srr-3 F36D3.3 -0.125192353377805   |
| AGIWUR21200;AGIWUR30737;AGIWUR35699             |                                                                                    |                |                                    |
| N2 HS V                                         | 16516472 16517719                                                                  | WBGene00009470 | F36D3.4 F36D3.4 -0.160252162296375 |
| AGIWUR14766                                     |                                                                                    |                |                                    |
| N2 HS V                                         | 16518183 16520245                                                                  | WBGene00009472 | F36D3.7 F36D3.7 -0.100953588967243 |
| AGIWUR10953;AGIWUR12499;AGIWUR23247;AGIWUR34317 |                                                                                    |                |                                    |
| N2 HS V                                         | 16520600 16522270                                                                  | WBGene00005781 | srw-34 F36D3.13                    |
| 0.00546854048191037                             | AGIWUR4748                                                                         |                |                                    |
| N2 HS V                                         | 16528935 16530213                                                                  | WBGene00219326 | F36D3.16 F36D3.16                  |
| 0.107764027690186                               | AGIWUR3090                                                                         |                |                                    |
| N2 HS V                                         | 16531373 16532690                                                                  | WBGene00009474 | clcc-235 F36D3.10                  |
| -0.232672405670656                              | AGIWUR22246;AGIWUR34028                                                            |                |                                    |
| N2 HS V                                         | 16533004 16534110                                                                  | WBGene00000782 | cpr-2 F36D3.9 -0.207422819664195   |
| AGIWUR7124                                      |                                                                                    |                |                                    |
| N2 HS V                                         | 16537001 16537771                                                                  | WBGene00012521 | Y32B12B.1 Y32B12B.1                |
| -0.127571374361811                              | AGIWUR43482                                                                        |                |                                    |
| N2 HS V                                         | 16538396 16549854                                                                  | WBGene00012522 | Y32B12B.2 Y32B12B.2                |
| -0.176531077251749                              | AGIWUR11254;AGIWUR41877                                                            |                |                                    |
| N2 HS V                                         | 16550980 16552282                                                                  | WBGene00012523 | srbc-65 Y32B12B.3                  |
| 0.094862605332473                               | AGIWUR27274                                                                        |                |                                    |
| N2 HS V                                         | 16553327 16563504                                                                  | WBGene00012524 | Y32B12B.4 Y32B12B.4                |
| -0.000602080599032107                           | AGIWUR28882                                                                        |                |                                    |
| N2 HS V                                         | 16565939 16567572                                                                  | WBGene00005708 | sru-45 Y32B12B.7                   |
| 0.290873875921683                               | AGIWUR43428                                                                        |                |                                    |

|                                    |    |   |                                                |          |                |           |           |                     |
|------------------------------------|----|---|------------------------------------------------|----------|----------------|-----------|-----------|---------------------|
| N2                                 | HS | V | 16569387                                       | 16571340 | WBGene00006471 | nhr-233   | Y32B12B.6 |                     |
| 0.0524969455575564                 |    |   | AGIWUR8446                                     |          |                |           |           |                     |
| N2                                 | HS | V | 16573468                                       | 16574952 | WBGene00006196 | str-149   | Y32B12B.5 |                     |
| -0.12811355554742                  |    |   | AGIWUR31136                                    |          |                |           |           |                     |
| N2                                 | HS | V | 16578459                                       | 16580524 | WBGene00011396 | nhr-271   | T03E6.3   | -0.0650112540276861 |
| AGIWUR4028                         |    |   |                                                |          |                |           |           |                     |
| N2                                 | HS | V | 16581037                                       | 16583175 | WBGene00011395 | T03E6.2   | T03E6.2   | -0.148646668309107  |
| AGIWUR20782                        |    |   |                                                |          |                |           |           |                     |
| N2                                 | HS | V | 16586742                                       | 16588528 | WBGene00005820 | srw-73    | T03E6.6   | -0.0081919474883918 |
| AGIWUR1802                         |    |   |                                                |          |                |           |           |                     |
| N2                                 | HS | V | 16590101                                       | 16592042 | WBGene00005475 | srh-269   | T03E6.5   | -0.0931992526339434 |
| AGIWUR38015                        |    |   |                                                |          |                |           |           |                     |
| N2                                 | HS | V | 16592572                                       | 16595346 | WBGene00000776 | cp1-1     | T03E6.7   | 0.194149173183153   |
| AGIWUR4698;AGIWUR43048;AGIWUR43652 |    |   |                                                |          |                |           |           |                     |
| N2                                 | HS | V | 16598989                                       | 16600723 | WBGene00045356 | T03E6.9   | T03E6.9   | -0.126189168439094  |
| AGIWUR18668;AGIWUR41414            |    |   |                                                |          |                |           |           |                     |
| N2                                 | HS | V | 16600567                                       | 16603369 | WBGene00011397 | T03E6.8   | T03E6.8   | 0.18755137207341    |
| AGIWUR22270                        |    |   |                                                |          |                |           |           |                     |
| N2                                 | HS | V | 16603529                                       | 16610952 | WBGene00194769 | Y32B12C.5 |           | Y32B12C.5           |
| 0.0804975850313907                 |    |   | AGIWUR1181;AGIWUR25930;AGIWUR32738;AGIWUR38459 |          |                |           |           |                     |
| N2                                 | HS | V | 16612792                                       | 16614767 | WBGene00012526 | Y32B12C.3 |           | Y32B12C.3           |
| 0.182250793663603                  |    |   | AGIWUR23808                                    |          |                |           |           |                     |
| N2                                 | HS | V | 16618341                                       | 16620908 | WBGene00050904 | Y70C5A.3  |           | Y70C5A.3            |
| 0.243628011634456                  |    |   | AGIWUR31825                                    |          |                |           |           |                     |
| N2                                 | HS | V | 16621396                                       | 16623211 | WBGene00013490 | Y70C5A.2  |           | Y70C5A.2            |
| 0.111501293742399                  |    |   | AGIWUR12702;AGIWUR30116                        |          |                |           |           |                     |
| N2                                 | HS | V | 16624008                                       | 16627970 | WBGene00012308 | oac-53    | W06G6.1   | -0.121720346858668  |
| AGIWUR25651                        |    |   |                                                |          |                |           |           |                     |
| N2                                 | HS | V | 16629291                                       | 16629648 | WBGene00012309 | W06G6.2   | W06G6.2   | -0.0482979349463069 |
| AGIWUR17424                        |    |   |                                                |          |                |           |           |                     |
| N2                                 | HS | V | 16629900                                       | 16631155 | WBGene00005099 | srd-21    | W06G6.3   | 0.0605023128033064  |
| AGIWUR13478                        |    |   |                                                |          |                |           |           |                     |
| N2                                 | HS | V | 16632737                                       | 16634085 | WBGene00005102 | srd-24    | W06G6.4   | 0.0668448938691197  |
| AGIWUR8474;AGIWUR44750             |    |   |                                                |          |                |           |           |                     |
| N2                                 | HS | V | 16634252                                       | 16635619 | WBGene00005822 | srw-75    | W06G6.13  |                     |
| 0.540539581481029                  |    |   | AGIWUR19212                                    |          |                |           |           |                     |
| N2                                 | HS | V | 16645997                                       | 16646481 | WBGene00012311 | W06G6.9   | W06G6.9   | -0.114436717563709  |
| AGIWUR42180                        |    |   |                                                |          |                |           |           |                     |
| N2                                 | HS | V | 16646791                                       | 16647193 | WBGene00012312 | W06G6.10  |           | W06G6.10            |

|                     |                                                             |          |                |                  |                     |
|---------------------|-------------------------------------------------------------|----------|----------------|------------------|---------------------|
| 0.390346509549044   | AGIWUR9521                                                  |          |                |                  |                     |
| N2 HS V             | 16648027                                                    | 16648480 | WBGene00219308 | W06G6.20         | W06G6.20            |
| 0.0844211848605392  | AGIWUR3552;AGIWUR17521;AGIWUR40622;AGIWUR43972;AGIWUR44176  |          |                |                  |                     |
| N2 HS V             | 16666340                                                    | 16666747 | WBGene00044185 | F14F8.14         | F14F8.14            |
| 0.192462617287196   | AGIWUR10328;AGIWUR15648;AGIWUR18851;AGIWUR42476;AGIWUR44067 |          |                |                  |                     |
| N2 HS V             | 16667691                                                    | 16668573 | WBGene00008817 | F14F8.9 F14F8.9  | 0.0306505343632058  |
| AGIWUR22108         |                                                             |          |                |                  |                     |
| N2 HS V             | 16669339                                                    | 16671290 | WBGene00006125 | str-61 F14F8.1   | -0.0552603055454828 |
| AGIWUR39904         |                                                             |          |                |                  |                     |
| N2 HS V             | 16671622                                                    | 16672186 | WBGene00008816 | F14F8.8 F14F8.8  | -0.344606835127289  |
| AGIWUR4826          |                                                             |          |                |                  |                     |
| N2 HS V             | 16673423                                                    | 16674690 | WBGene00008813 | srz-2 F14F8.2    | 0.104422383991288   |
| AGIWUR6690          |                                                             |          |                |                  |                     |
| N2 HS V             | 16675853                                                    | 16677551 | WBGene00008814 | srz-1 F14F8.3    | 0.075864744079241   |
| AGIWUR21849         |                                                             |          |                |                  |                     |
| N2 HS V             | 16677623                                                    | 16679337 | WBGene00008815 | srz-103 F14F8.4  | -0.383462097129874  |
| AGIWUR41520         |                                                             |          |                |                  |                     |
| N2 HS V             | 16680281                                                    | 16682656 | WBGene00005791 | srw-44 F14F8.6   | 0.0724801097343608  |
| AGIWUR104           |                                                             |          |                |                  |                     |
| N2 HS V             | 16683186                                                    | 16684878 | WBGene00005783 | srw-36 F14F8.7   | -0.0336327471578848 |
| AGIWUR29070         |                                                             |          |                |                  |                     |
| N2 HS V             | 16686025                                                    | 16687083 | WBGene00005790 | srw-43 F14F8.5   | -0.031964402456337  |
| AGIWUR29683         |                                                             |          |                |                  |                     |
| N2 HS V             | 16687527                                                    | 16689866 | WBGene00023505 | srz-102 F14F8.13 |                     |
| 0.204994186322059   | AGIWUR497                                                   |          |                |                  |                     |
| N2 HS V             | 16692125                                                    | 16693832 | WBGene00005789 | srw-42 F14F8.11  |                     |
| -0.16430410759568   | AGIWUR30032                                                 |          |                |                  |                     |
| N2 HS V             | 16697478                                                    | 16699773 | WBGene00005788 | srw-41 F14F8.10  |                     |
| -0.25031730080369   | AGIWUR37516                                                 |          |                |                  |                     |
| N2 HS V             | 16700199                                                    | 16704409 | WBGene00013492 | Y70C5C.1         | Y70C5C.1            |
| -0.139773399100021  | AGIWUR21778                                                 |          |                |                  |                     |
| N2 HS V             | 16705082                                                    | 16706647 | WBGene00013493 | clec-9 Y70C5C.2  |                     |
| -0.173043904162631  | AGIWUR39973                                                 |          |                |                  |                     |
| N2 HS V             | 16709977                                                    | 16710778 | WBGene00023516 | srz-98 Y70C5C.7  |                     |
| -0.0667662259972115 | AGIWUR22402;AGIWUR26467;AGIWUR31812                         |          |                |                  |                     |
| N2 HS V             | 16713449                                                    | 16715195 | WBGene00013494 | ir1d-58 Y70C5C.3 |                     |
| -0.0674641330502563 | AGIWUR6228                                                  |          |                |                  |                     |
| N2 HS V             | 16715480                                                    | 16716718 | WBGene00005354 | srh-137 Y70C5C.4 |                     |
| 0.0899180770934551  | AGIWUR13217                                                 |          |                |                  |                     |

|                                                                      |    |   |                                               |          |                |           |                             |
|----------------------------------------------------------------------|----|---|-----------------------------------------------|----------|----------------|-----------|-----------------------------|
| N2                                                                   | HS | V | 16718418                                      | 16721993 | WBGene00013495 | cllec-236 | Y70C5C.5                    |
| 0.012632538516387                                                    |    |   | AGIWUR15366;AGIWUR24547;AGIWUR25863           |          |                |           |                             |
| N2                                                                   | HS | V | 16722061                                      | 16723844 | WBGene00003702 | nhr-112   | Y70C5C.6                    |
| 0.0841276871263377                                                   |    |   | AGIWUR4411;AGIWUR17712;AGIWUR18788            |          |                |           |                             |
| N2                                                                   | HS | V | 16728731                                      | 16729960 | WBGene00012027 | fbxa-127  | T25E12.12                   |
| -0.167046924912142                                                   |    |   | AGIWUR42116                                   |          |                |           |                             |
| N2                                                                   | HS | V | 16733901                                      | 16735594 | WBGene00012025 | cllec-38  | T25E12.10                   |
| 0.0645110796965875                                                   |    |   | AGIWUR6517                                    |          |                |           |                             |
| N2                                                                   | HS | V | 16735765                                      | 16737404 | WBGene00012023 | cllec-34  | T25E12.8                    |
| -0.0781689558321315                                                  |    |   | AGIWUR1485;AGIWUR8334;AGIWUR32502;AGIWUR34931 |          |                |           |                             |
| N2                                                                   | HS | V | 16737673                                      | 16739200 | WBGene00012024 | cllec-29  | T25E12.9                    |
| 0.0441747432723156                                                   |    |   | AGIWUR41772                                   |          |                |           |                             |
| N2                                                                   | HS | V | 16739268                                      | 16741588 | WBGene00012022 | cllec-39  | T25E12.7                    |
| 0.0992840658731167                                                   |    |   | AGIWUR32712                                   |          |                |           |                             |
| N2                                                                   | HS | V | 16742423                                      | 16744881 | WBGene00012021 | T25E12.6  | T25E12.6                    |
| -0.0740683470468051                                                  |    |   | AGIWUR36964                                   |          |                |           |                             |
| N2                                                                   | HS | V | 16745080                                      | 16746258 | WBGene00012020 | gyg-2     | T25E12.5                    |
| -0.198222319579301                                                   |    |   | AGIWUR36841                                   |          |                |           |                             |
| N2                                                                   | HS | V | 16747559                                      | 16788435 | WBGene00012019 | dkf-2     | T25E12.4                    |
| -0.0712336070401047                                                  |    |   | AGIWUR6610;AGIWUR31450;AGIWUR31584            |          |                |           |                             |
| N2                                                                   | HS | V | 16789267                                      | 16792771 | WBGene00012315 | immt-2    | W06H3.1 -0.256601208093844  |
| AGIWUR148;AGIWUR3517;AGIWUR15542;AGIWUR21222;AGIWUR38953;AGIWUR41677 |    |   |                                               |          |                |           |                             |
| N2                                                                   | HS | V | 16792764                                      | 16795007 | WBGene00004248 | pus-1     | W06H3.2 -0.13941032748329   |
| AGIWUR19463                                                          |    |   |                                               |          |                |           |                             |
| N2                                                                   | HS | V | 16794878                                      | 16802004 | WBGene00012316 | ctps-1    | W06H3.3 -0.192280156539907  |
| AGIWUR41343                                                          |    |   |                                               |          |                |           |                             |
| N2                                                                   | HS | V | 16802874                                      | 16814563 | WBGene00013606 | cand-1    | Y102A5A.1                   |
| -0.0359523683611975                                                  |    |   | AGIWUR30164                                   |          |                |           |                             |
| N2                                                                   | HS | V | 16815567                                      | 16820712 | WBGene00011850 | T20B3.1   | T20B3.1 -0.438651118345391  |
| AGIWUR33326                                                          |    |   |                                               |          |                |           |                             |
| N2                                                                   | HS | V | 16825290                                      | 16827592 | WBGene00005426 | srh-216   | T20B3.5 -0.0820517983872664 |
| AGIWUR7258                                                           |    |   |                                               |          |                |           |                             |
| N2                                                                   | HS | V | 16828235                                      | 16829755 | WBGene00005424 | srh-214   | T20B3.4 0.0820080175117219  |
| AGIWUR12153                                                          |    |   |                                               |          |                |           |                             |
| N2                                                                   | HS | V | 16830557                                      | 16832021 | WBGene00005425 | srh-215   | T20B3.3 -0.152865255924973  |
| AGIWUR25568                                                          |    |   |                                               |          |                |           |                             |
| N2                                                                   | HS | V | 16833316                                      | 16839141 | WBGene00004026 | phy-3     | T20B3.7 -0.097060794140102  |
| AGIWUR19081                                                          |    |   |                                               |          |                |           |                             |
| N2                                                                   | HS | V | 16839145                                      | 16841061 | WBGene00011853 | cllec-40  | T20B3.13                    |

|                                    |                                                             |          |                |                   |                     |  |
|------------------------------------|-------------------------------------------------------------|----------|----------------|-------------------|---------------------|--|
| -0.0957824653894139                | AGIWUR29336                                                 |          |                |                   |                     |  |
| N2 HS V                            | 16841459                                                    | 16842863 | WBGene00011851 | clec-23 T20B3.8   | -0.335694216760221  |  |
| AGIWUR14153                        |                                                             |          |                |                   |                     |  |
| N2 HS V                            | 16843241                                                    | 16844696 | WBGene00044331 | clec-25 T20B3.15  |                     |  |
| -0.12744964167255                  | AGIWUR32341                                                 |          |                |                   |                     |  |
| N2 HS V                            | 16846867                                                    | 16848466 | WBGene00044332 | clec-36 T20B3.16  |                     |  |
| -0.178615568706828                 | AGIWUR9285;AGIWUR17755                                      |          |                |                   |                     |  |
| N2 HS V                            | 16848611                                                    | 16850130 | WBGene00011852 | clec-26 T20B3.12  |                     |  |
| 0.0819242800734141                 | AGIWUR13391                                                 |          |                |                   |                     |  |
| N2 HS V                            | 16850394                                                    | 16852095 | WBGene00013609 | clec-37 Y102A5B.3 |                     |  |
| -0.0309742345450985                | AGIWUR37056                                                 |          |                |                   |                     |  |
| N2 HS V                            | 16852291                                                    | 16854053 | WBGene00013608 | clec-35 Y102A5B.2 |                     |  |
| -0.193895222411237                 | AGIWUR14364;AGIWUR34707                                     |          |                |                   |                     |  |
| N2 HS V                            | 16854646                                                    | 16856152 | WBGene00013607 | clec-27 Y102A5B.1 |                     |  |
| 0.0101641555443237                 | AGIWUR5046                                                  |          |                |                   |                     |  |
| N2 HS V                            | 16856437                                                    | 16858077 | WBGene00009854 | clec-31 F49A5.2   | -0.0171498366559808 |  |
| AGIWUR16982                        |                                                             |          |                |                   |                     |  |
| N2 HS V                            | 16858429                                                    | 16860040 | WBGene00009855 | clec-22 F49A5.3   | 0.0469185725848869  |  |
| AGIWUR1555;AGIWUR6322;AGIWUR16586  |                                                             |          |                |                   |                     |  |
| N2 HS V                            | 16860228                                                    | 16861869 | WBGene00009860 | clec-32 F49A5.9   | 0.0672546653685533  |  |
| AGIWUR25174                        |                                                             |          |                |                   |                     |  |
| N2 HS V                            | 16862012                                                    | 16863890 | WBGene00009856 | clec-24 F49A5.4   | -0.123664054070003  |  |
| AGIWUR7771;AGIWUR14539;AGIWUR16880 |                                                             |          |                |                   |                     |  |
| N2 HS V                            | 16865704                                                    | 16867226 | WBGene00009857 | clec-28 F49A5.5   | 0.0928985388655494  |  |
| AGIWUR34482                        |                                                             |          |                |                   |                     |  |
| N2 HS V                            | 16867678                                                    | 16869845 | WBGene00009859 | clec-33 F49A5.7   | -0.0808405325161612 |  |
| AGIWUR45121                        |                                                             |          |                |                   |                     |  |
| N2 HS V                            | 16870742                                                    | 16871487 | WBGene00009858 | thn-4 F49A5.6     | 0.00560333113837608 |  |
| AGIWUR2062                         |                                                             |          |                |                   |                     |  |
| N2 HS V                            | 16873942                                                    | 16875455 | WBGene00005770 | srw-23 F49A5.8    |                     |  |
| -0.00773743001316163               | AGIWUR9227                                                  |          |                |                   |                     |  |
| N2 HS V                            | 16875877                                                    | 16876144 | WBGene00044195 | F49A5.10          | F49A5.10            |  |
| 0.155632254745971                  | AGIWUR17436;AGIWUR22208;AGIWUR28545;AGIWUR29932;AGIWUR43591 |          |                |                   |                     |  |
| N2 HS V                            | 16878724                                                    | 16880154 | WBGene00008617 | F09C6.3 F09C6.3   | -0.17833076154187   |  |
| AGIWUR41965                        |                                                             |          |                |                   |                     |  |
| N2 HS V                            | 16880994                                                    | 16881336 | WBGene00044278 | F09C6.14          | F09C6.14            |  |
| 0.52224696093901                   | AGIWUR11479;AGIWUR13626;AGIWUR22926;AGIWUR26443;AGIWUR44638 |          |                |                   |                     |  |
| N2 HS V                            | 16881901                                                    | 16882310 | WBGene00044181 | F09C6.11          | F09C6.11            |  |
| 0.119291637640471                  | AGIWUR19891;AGIWUR21290;AGIWUR38265;AGIWUR43218;AGIWUR43793 |          |                |                   |                     |  |

|                                   |    |   |                                                             |          |                |            |                             |
|-----------------------------------|----|---|-------------------------------------------------------------|----------|----------------|------------|-----------------------------|
| N2                                | HS | V | 16882878                                                    | 16883142 | WBGene00044182 | F09C6.12   | F09C6.12                    |
| 0.249137300377483                 |    |   | AGIWUR10485;AGIWUR20232;AGIWUR31606;AGIWUR41910;AGIWUR44596 |          |                |            |                             |
| N2                                | HS | V | 16885075                                                    | 16885403 | WBGene00044183 | F09C6.13   | F09C6.13                    |
| 0.0245841006316603                |    |   | AGIWUR5166;AGIWUR14599;AGIWUR14672;AGIWUR24787;AGIWUR27503  |          |                |            |                             |
| N2                                | HS | V | 16887413                                                    | 16888479 | WBGene00008615 | F09C6.1    | F09C6.1 0.0423541012855715  |
| AGIWUR43328                       |    |   |                                                             |          |                |            |                             |
| N2                                | HS | V | 16889275                                                    | 16890749 | WBGene00008616 | fbxa-44    | F09C6.2 0.0982782350359628  |
| AGIWUR3276;AGIWUR8021;AGIWUR37377 |    |   |                                                             |          |                |            |                             |
| N2                                | HS | V | 16893740                                                    | 16894107 | WBGene00077492 | F09C6.15   | F09C6.15                    |
| -0.10974392837863                 |    |   | AGIWUR1114;AGIWUR25469                                      |          |                |            |                             |
| N2                                | HS | V | 16894230                                                    | 16895553 | WBGene00005650 | srp-9      | F09C6.5 -0.0804019964337206 |
| AGIWUR21568;AGIWUR41911           |    |   |                                                             |          |                |            |                             |
| N2                                | HS | V | 16896358                                                    | 16897728 | WBGene00005651 | srp-10     | F09C6.4 0.0351340363464168  |
| AGIWUR4775                        |    |   |                                                             |          |                |            |                             |
| N2                                | HS | V | 16898457                                                    | 16899455 | WBGene00008618 | fbxa-45    | F09C6.6                     |
| -0.00657772407536683              |    |   | AGIWUR45116                                                 |          |                |            |                             |
| N2                                | HS | V | 16901215                                                    | 16902826 | WBGene00005145 | srd-68     | F09C6.7 -0.210295047444268  |
| AGIWUR9408                        |    |   |                                                             |          |                |            |                             |
| N2                                | HS | V | 16907969                                                    | 16909971 | WBGene00077493 | F09C6.16   | F09C6.16                    |
| -0.0248948710209302               |    |   | AGIWUR3518;AGIWUR14063                                      |          |                |            |                             |
| N2                                | HS | V | 16912234                                                    | 16915350 | WBGene00003706 | nhr-116    | F09C6.9 0.0599523415197272  |
| AGIWUR10178                       |    |   |                                                             |          |                |            |                             |
| N2                                | HS | V | 16915373                                                    | 16916179 | WBGene00008620 | F09C6.10   | F09C6.10                    |
| 0.305337248553151                 |    |   | AGIWUR4409;AGIWUR11154;AGIWUR21121;AGIWUR38731;AGIWUR40439  |          |                |            |                             |
| N2                                | HS | V | 16917196                                                    | 16918478 | WBGene00013610 | fbxa-206   | Y102A5C.1                   |
| 0.207018694398537                 |    |   | AGIWUR32733                                                 |          |                |            |                             |
| N2                                | HS | V | 16918782                                                    | 16919784 | WBGene00013611 | Y102A5C.2  | Y102A5C.2                   |
| 0.0311710045827258                |    |   | AGIWUR16511;AGIWUR35854;AGIWUR38293;AGIWUR44018             |          |                |            |                             |
| N2                                | HS | V | 16919780                                                    | 16921323 | WBGene00013612 | fbxa-207   | Y102A5C.3                   |
| 0.180719218691637                 |    |   | AGIWUR4834;AGIWUR21721;AGIWUR23457;AGIWUR42510              |          |                |            |                             |
| N2                                | HS | V | 16922252                                                    | 16924258 | WBGene00013613 | Y102A5C.4  | Y102A5C.4                   |
| -0.115544342542947                |    |   | AGIWUR2578                                                  |          |                |            |                             |
| N2                                | HS | V | 16924985                                                    | 16926125 | WBGene00044220 | Y102A5C.35 | Y102A5C.35                  |
| 0.27946546382834                  |    |   | AGIWUR8646                                                  |          |                |            |                             |
| N2                                | HS | V | 16926920                                                    | 16927445 | WBGene00044213 | Y102A5C.36 | Y102A5C.36                  |
| 0.0398658578716606                |    |   | AGIWUR1655                                                  |          |                |            |                             |
| N2                                | HS | V | 16928328                                                    | 16928999 | WBGene00014954 | Y102A5C.5  | Y102A5C.5                   |
| -0.207383007807623                |    |   | AGIWUR7475;AGIWUR7938;AGIWUR18033                           |          |                |            |                             |
| N2                                | HS | V | 16929167                                                    | 16930063 | WBGene00014955 | Y102A5C.6  | Y102A5C.6                   |

|                     |                                     |                |            |            |
|---------------------|-------------------------------------|----------------|------------|------------|
| -0.235418010167852  | AGIWUR5552;AGIWUR6206;AGIWUR31531   |                |            |            |
| N2 HS V             | 16943191 16943836                   | WBGene00014956 | Y102A5C.11 | Y102A5C.11 |
| -0.0480129248988987 | AGIWUR11429;AGIWUR21276;AGIWUR30634 |                |            |            |
| N2 HS V             | 16947158 16948111                   | WBGene00013619 | fbxa-112   | Y102A5C.13 |
| 0.232595303109834   | AGIWUR24401                         |                |            |            |
| N2 HS V             | 16956529 16957991                   | WBGene00013621 | clcc-239   | Y102A5C.16 |
| 0.00821161633972256 | AGIWUR5509                          |                |            |            |
| N2 HS V             | 16958657 16965675                   | WBGene00001161 | efl-1      | Y102A5C.18 |
| -0.0594442850890644 | AGIWUR31042;AGIWUR35577             |                |            |            |
| N2 HS V             | 16966814 16968586                   | WBGene00013623 | fbxa-90    | Y102A5C.19 |
| 0.00217801377803628 | AGIWUR14527                         |                |            |            |
| N2 HS V             | 16969039 16970965                   | WBGene00013624 | srbc-80    | Y102A5C.20 |
| -0.101892080462425  | AGIWUR36434                         |                |            |            |
| N2 HS V             | 16972434 16974088                   | WBGene00005338 | srh-119    | Y102A5C.21 |
| -0.200682463352148  | AGIWUR31546                         |                |            |            |
| N2 HS V             | 16975219 16976717                   | WBGene00005945 | srx-54     | Y102A5C.22 |
| -0.0263919290128909 | AGIWUR19658;AGIWUR21218             |                |            |            |
| N2 HS V             | 16977191 16978408                   | WBGene00013625 | srz-53     | Y102A5C.23 |
| -0.0306583343494271 | AGIWUR26238                         |                |            |            |
| N2 HS V             | 16979010 16980244                   | WBGene00005946 | srx-55     | Y102A5C.24 |
| 0.0277245926680401  | AGIWUR36283                         |                |            |            |
| N2 HS V             | 16984044 16985395                   | WBGene00013627 | srz-52     | Y102A5C.26 |
| 0.155338705446475   | AGIWUR19574                         |                |            |            |
| N2 HS V             | 16986460 16987135                   | WBGene00077624 | Y102A5C.40 | Y102A5C.40 |
| -0.103555548382103  | AGIWUR40450                         |                |            |            |
| N2 HS V             | 16990810 16991459                   | WBGene00001706 | grd-17     | Y102A5C.34 |
| -0.316157285913378  | AGIWUR18992;AGIWUR41502             |                |            |            |
| N2 HS V             | 16992034 16993910                   | WBGene00013629 | srz-95     | Y102A5C.33 |
| -0.0414799868015017 | AGIWUR22065                         |                |            |            |
| N2 HS V             | 16998933 17000304                   | WBGene00006249 | str-217    | Y102A5C.28 |
| 0.00942156853428422 | AGIWUR10775                         |                |            |            |
| N2 HS V             | 17001467 17003587                   | WBGene00005521 | sri-9      | Y102A5C.29 |
| 0.135464655722111   | AGIWUR34695                         |                |            |            |
| N2 HS V             | 17003980 17005066                   | WBGene00014957 | Y102A5C.30 | Y102A5C.30 |
| 0.139677546812313   | AGIWUR3275                          |                |            |            |
| N2 HS V             | 17005489 17006753                   | WBGene00005348 | srh-131    | Y102A5C.31 |
| 0.0894249678996939  | AGIWUR42747                         |                |            |            |
| N2 HS V             | 17007232 17008402                   | WBGene00005581 | sri-69     | Y102A5C.32 |
| -0.139708416826062  | AGIWUR40373                         |                |            |            |

|                                                                                  |    |   |                                                                         |          |                |          |                            |
|----------------------------------------------------------------------------------|----|---|-------------------------------------------------------------------------|----------|----------------|----------|----------------------------|
| N2                                                                               | HS | V | 17008673                                                                | 17009388 | WBGene00009914 | F49H6.13 | F49H6.13                   |
| -0.0818785367248829                                                              |    |   | AGIWUR35282                                                             |          |                |          |                            |
| N2                                                                               | HS | V | 17010062                                                                | 17011849 | WBGene00009905 | clec-240 | F49H6.1                    |
| 0.0194625942884832                                                               |    |   | AGIWUR7659                                                              |          |                |          |                            |
| N2                                                                               | HS | V | 17012127                                                                | 17013332 | WBGene00009906 | clec-241 | F49H6.2                    |
| -0.1589311130595                                                                 |    |   | AGIWUR41928                                                             |          |                |          |                            |
| N2                                                                               | HS | V | 17013646                                                                | 17013861 | WBGene00050928 | F49H6.16 | F49H6.16                   |
| 0.109297698543678                                                                |    |   | AGIWUR11947;AGIWUR12220;AGIWUR29541;AGIWUR36769;AGIWUR39561             |          |                |          |                            |
| N2                                                                               | HS | V | 17014408                                                                | 17015326 | WBGene00009907 | F49H6.3  | F49H6.3 0.0276812537146851 |
| AGIWUR44169                                                                      |    |   |                                                                         |          |                |          |                            |
| N2                                                                               | HS | V | 17016175                                                                | 17016446 | WBGene00045502 | F49H6.14 | F49H6.14                   |
| -0.300415647882082                                                               |    |   | AGIWUR9144;AGIWUR19042;AGIWUR28769;AGIWUR39378                          |          |                |          |                            |
| N2                                                                               | HS | V | 17017087                                                                | 17019800 | WBGene00005316 | srh-97   | F49H6.4 0.09410118428824   |
| AGIWUR4678                                                                       |    |   |                                                                         |          |                |          |                            |
| N2                                                                               | HS | V | 17019990                                                                | 17020226 | WBGene00050965 | F49H6.17 | F49H6.17                   |
| 0.0456468200711924                                                               |    |   | AGIWUR21780;AGIWUR22613;AGIWUR30372;AGIWUR35838;AGIWUR43274;AGIWUR43610 |          |                |          |                            |
| N2                                                                               | HS | V | 17020907                                                                | 17021461 | WBGene00009913 | F49H6.12 | F49H6.12                   |
| -0.0412239746781751                                                              |    |   | AGIWUR15422;AGIWUR21659;AGIWUR24462;AGIWUR27313;AGIWUR32570             |          |                |          |                            |
| N2                                                                               | HS | V | 17023473                                                                | 17025347 | WBGene00009908 | F49H6.5  | F49H6.5 0.11049415789911   |
| AGIWUR21039                                                                      |    |   |                                                                         |          |                |          |                            |
| N2                                                                               | HS | V | 17027255                                                                | 17028374 | WBGene00014768 | F49H6.6  | F49H6.6 0.398818295124117  |
| AGIWUR12196;AGIWUR15561                                                          |    |   |                                                                         |          |                |          |                            |
| N2                                                                               | HS | V | 17028884                                                                | 17030448 | WBGene00005784 | srw-37   | F49H6.7                    |
| -0.00290685120610057                                                             |    |   | AGIWUR28075                                                             |          |                |          |                            |
| N2                                                                               | HS | V | 17030738                                                                | 17032772 | WBGene00009910 | srz-92   | F49H6.9 0.0445523039882323 |
| AGIWUR2313;AGIWUR2642;AGIWUR5170;AGIWUR16949;AGIWUR30126;AGIWUR32196;AGIWUR34131 |    |   |                                                                         |          |                |          |                            |
| N2                                                                               | HS | V | 17033218                                                                | 17035950 | WBGene00009912 | srz-94   | F49H6.11                   |
| -0.0021485678299964                                                              |    |   | AGIWUR37649                                                             |          |                |          |                            |
| N2                                                                               | HS | V | 17036410                                                                | 17037862 | WBGene00009911 | srz-93   | F49H6.10                   |
| -0.111015284530751                                                               |    |   | AGIWUR6095                                                              |          |                |          |                            |
| N2                                                                               | HS | V | 17040739                                                                | 17041961 | WBGene00050976 | F28B1.11 | F28B1.11                   |
| -0.167538341828898                                                               |    |   | AGIWUR3533                                                              |          |                |          |                            |
| N2                                                                               | HS | V | 17042592                                                                | 17043783 | WBGene00009195 | hpo-33   | F28B1.1 0.230877776323013  |
| AGIWUR21710                                                                      |    |   |                                                                         |          |                |          |                            |
| N2                                                                               | HS | V | 17044786                                                                | 17049822 | WBGene00009196 | F28B1.2  | F28B1.2 0.146089693490365  |
| AGIWUR29073                                                                      |    |   |                                                                         |          |                |          |                            |
| N2                                                                               | HS | V | 17051015                                                                | 17051617 | WBGene00077494 | F28B1.12 | F28B1.12                   |
| -0.134613163436339                                                               |    |   | AGIWUR29490                                                             |          |                |          |                            |
| N2                                                                               | HS | V | 17052004                                                                | 17055349 | WBGene00009197 | F28B1.3  | F28B1.3 0.151276854632427  |



|                         |    |   |                                                             |          |                |          |          |                     |
|-------------------------|----|---|-------------------------------------------------------------|----------|----------------|----------|----------|---------------------|
| AGIWUR32415             |    |   |                                                             |          |                |          |          |                     |
| N2                      | HS | V | 17055431                                                    | 17057052 | WBGene00009198 | F28B1.4  | F28B1.4  | -0.167376983839397  |
| AGIWUR43815             |    |   |                                                             |          |                |          |          |                     |
| N2                      | HS | V | 17057135                                                    | 17059919 | WBGene00009199 | F28B1.5  | F28B1.5  | 0.0848832018928221  |
| AGIWUR27451             |    |   |                                                             |          |                |          |          |                     |
| N2                      | HS | V | 17060287                                                    | 17061675 | WBGene00005578 | sri-66   | F28B1.6  | -0.0270341726623773 |
| AGIWUR5923              |    |   |                                                             |          |                |          |          |                     |
| N2                      | HS | V | 17061889                                                    | 17063095 | WBGene00045381 | F28B1.9  | F28B1.9  | -0.0189558426680527 |
| AGIWUR26072;AGIWUR42486 |    |   |                                                             |          |                |          |          |                     |
| N2                      | HS | V | 17063417                                                    | 17064823 | WBGene00005462 | srh-256  | F28B1.7  | 0.107712900391384   |
| AGIWUR1913;AGIWUR35236  |    |   |                                                             |          |                |          |          |                     |
| N2                      | HS | V | 17064976                                                    | 17066471 | WBGene00005461 | srh-255  | F28B1.8  | 0.0899568623187612  |
| AGIWUR23182             |    |   |                                                             |          |                |          |          |                     |
| N2                      | HS | V | 17067146                                                    | 17067854 | WBGene00050958 | F28B1.10 |          | F28B1.10            |
| -0.0635065022315038     |    |   | AGIWUR36506                                                 |          |                |          |          |                     |
| N2                      | HS | V | 17068627                                                    | 17069533 | WBGene00045382 | T05E12.8 |          | T05E12.8            |
| -0.0488892020056841     |    |   | AGIWUR15678                                                 |          |                |          |          |                     |
| N2                      | HS | V | 17070527                                                    | 17071678 | WBGene00011485 | srbc-14  | T05E12.2 |                     |
| -0.283855139664322      |    |   | AGIWUR39008                                                 |          |                |          |          |                     |
| N2                      | HS | V | 17074290                                                    | 17076000 | WBGene00006176 | str-125  | T05E12.1 |                     |
| 0.00589951306848757     |    |   | AGIWUR38712                                                 |          |                |          |          |                     |
| N2                      | HS | V | 17076874                                                    | 17077989 | WBGene00011486 | T05E12.3 |          | T05E12.3            |
| 0.397547740283312       |    |   | AGIWUR29382                                                 |          |                |          |          |                     |
| N2                      | HS | V | 17078257                                                    | 17079895 | WBGene00005767 | srw-20   | T05E12.4 |                     |
| -0.0157939456088503     |    |   | AGIWUR43453                                                 |          |                |          |          |                     |
| N2                      | HS | V | 17080492                                                    | 17082818 | WBGene00045500 | T05E12.9 |          | T05E12.9            |
| -0.13820534429329       |    |   | AGIWUR39435;AGIWUR41395                                     |          |                |          |          |                     |
| N2                      | HS | V | 17085002                                                    | 17090023 | WBGene00011487 | T05E12.6 |          | T05E12.6            |
| 0.121768759492733       |    |   | AGIWUR6518;AGIWUR14154;AGIWUR29463;AGIWUR40326;AGIWUR42300  |          |                |          |          |                     |
| N2                      | HS | V | 17090362                                                    | 17091693 | WBGene00005444 | srh-237  | T05E12.7 |                     |
| 0.15671193947307        |    |   | AGIWUR6479;AGIWUR19438;AGIWUR36456                          |          |                |          |          |                     |
| N2                      | HS | V | 17092570                                                    | 17093420 | WBGene00013935 | ZK218.1  | ZK218.1  | 0.199840979268759   |
| AGIWUR24739             |    |   |                                                             |          |                |          |          |                     |
| N2                      | HS | V | 17094180                                                    | 17094485 | WBGene00050963 | ZK218.15 |          | ZK218.15            |
| -0.0236335025381909     |    |   | AGIWUR14594;AGIWUR24596;AGIWUR27095;AGIWUR36385;AGIWUR36538 |          |                |          |          |                     |
| N2                      | HS | V | 17097927                                                    | 17098766 | WBGene00013937 | ZK218.3  | ZK218.3  | 0.00618018721894487 |
| AGIWUR6219              |    |   |                                                             |          |                |          |          |                     |
| N2                      | HS | V | 17099347                                                    | 17100364 | WBGene00013938 | ZK218.4  | ZK218.4  |                     |
| -0.00152373721369958    |    |   | AGIWUR32987                                                 |          |                |          |          |                     |

|                                                            |    |   |          |          |                |          |          |                     |
|------------------------------------------------------------|----|---|----------|----------|----------------|----------|----------|---------------------|
| N2                                                         | HS | V | 17101132 | 17102017 | WBGene00013939 | ZK218.5  | ZK218.5  | -0.0257800002737776 |
| AGIWUR2008                                                 |    |   |          |          |                |          |          |                     |
| N2                                                         | HS | V | 17103410 | 17104627 | WBGene00013940 | nhr-248  | ZK218.6  | -0.191041875706302  |
| AGIWUR1901                                                 |    |   |          |          |                |          |          |                     |
| N2                                                         | HS | V | 17105783 | 17106656 | WBGene00013941 | ZK218.7  | ZK218.7  | 0.0120285842166048  |
| AGIWUR24098                                                |    |   |          |          |                |          |          |                     |
| N2                                                         | HS | V | 17107530 | 17108418 | WBGene00013943 | ZK218.11 |          | ZK218.11            |
| 0.00894488377143965 AGIWUR2994                             |    |   |          |          |                |          |          |                     |
| N2                                                         | HS | V | 17109684 | 17110448 | WBGene00045492 | ZK218.14 |          | ZK218.14            |
| 0.00101346393737245 AGIWUR3949;AGIWUR7949;AGIWUR33943      |    |   |          |          |                |          |          |                     |
| N2                                                         | HS | V | 17114540 | 17114887 | WBGene00014981 | ZK218.9  | ZK218.9  | 0.0793671827043561  |
| AGIWUR2424;AGIWUR15452;AGIWUR22073;AGIWUR28343;AGIWUR39661 |    |   |          |          |                |          |          |                     |
| N2                                                         | HS | V | 17116026 | 17117009 | WBGene00013942 | ZK218.8  | ZK218.8  | -0.118491433312855  |
| AGIWUR24794                                                |    |   |          |          |                |          |          |                     |
| N2                                                         | HS | V | 17146825 | 17153266 | WBGene00014753 | F40D4.14 |          | F40D4.14            |
| 0.0134876677102569 AGIWUR3920;AGIWUR28464                  |    |   |          |          |                |          |          |                     |
| N2                                                         | HS | V | 17159874 | 17162621 | WBGene00009571 | F40D4.12 |          | F40D4.12            |
| -0.0541487907337705 AGIWUR14728;AGIWUR30832;AGIWUR31537    |    |   |          |          |                |          |          |                     |
| N2                                                         | HS | V | 17162900 | 17165509 | WBGene00005321 | srh-102  | F40D4.11 |                     |
| -0.104754775943448 AGIWUR38142                             |    |   |          |          |                |          |          |                     |
| N2                                                         | HS | V | 17166028 | 17167557 | WBGene00009569 | srz-66   | F40D4.9  | -0.0528564321367089 |
| AGIWUR28911                                                |    |   |          |          |                |          |          |                     |
| N2                                                         | HS | V | 17167833 | 17169279 | WBGene00009570 | srz-65   | F40D4.10 |                     |
| -0.0365754792436732 AGIWUR21917                            |    |   |          |          |                |          |          |                     |
| N2                                                         | HS | V | 17169442 | 17170922 | WBGene00005798 | srw-51   | F40D4.8  | 0.0345096286986379  |
| AGIWUR10986                                                |    |   |          |          |                |          |          |                     |
| N2                                                         | HS | V | 17171851 | 17173313 | WBGene00009568 | srbc-26  | F40D4.7  | -0.0924201169243766 |
| AGIWUR43279                                                |    |   |          |          |                |          |          |                     |
| N2                                                         | HS | V | 17174038 | 17175530 | WBGene00009567 | srbc-25  | F40D4.6  | -0.0174017729958518 |
| AGIWUR151;AGIWUR44899                                      |    |   |          |          |                |          |          |                     |
| N2                                                         | HS | V | 17176716 | 17178067 | WBGene00009566 | srsx-1   | F40D4.5  | -0.106300107358066  |
| AGIWUR9027                                                 |    |   |          |          |                |          |          |                     |
| N2                                                         | HS | V | 17178757 | 17180002 | WBGene00005390 | srh-174  | F40D4.1  | -0.0142453082082357 |
| AGIWUR20313;AGIWUR44339                                    |    |   |          |          |                |          |          |                     |
| N2                                                         | HS | V | 17184396 | 17186082 | WBGene00005378 | srh-162  | F40D4.4  |                     |
| -0.00612252395372348 AGIWUR6806;AGIWUR34277                |    |   |          |          |                |          |          |                     |
| N2                                                         | HS | V | 17186873 | 17188680 | WBGene00005413 | srh-202  | Y68A4A.1 |                     |
| -0.109975425706797 AGIWUR18682                             |    |   |          |          |                |          |          |                     |
| N2                                                         | HS | V | 17189186 | 17190499 | WBGene00006235 | str-199  | Y68A4A.3 |                     |

|                                                            |                                                            |          |                |           |                             |
|------------------------------------------------------------|------------------------------------------------------------|----------|----------------|-----------|-----------------------------|
| 0.00771551966251582                                        | AGIWUR34565                                                |          |                |           |                             |
| N2 HS V                                                    | 17193031                                                   | 17199003 | WBGene00013467 | Y68A4A.5  | Y68A4A.5                    |
| -0.0312157154416721                                        | AGIWUR14113;AGIWUR28008                                    |          |                |           |                             |
| N2 HS V                                                    | 17199418                                                   | 17201736 | WBGene00013468 | srz-96    | Y68A4A.6                    |
| -0.380328767042018                                         | AGIWUR40306                                                |          |                |           |                             |
| N2 HS V                                                    | 17205641                                                   | 17207160 | WBGene00005821 | srw-74    | Y68A4A.11                   |
| -0.160583437743362                                         | AGIWUR40920                                                |          |                |           |                             |
| N2 HS V                                                    | 17209065                                                   | 17209955 | WBGene00014944 | Y68A4A.12 | Y68A4A.12                   |
| 0.105701252398509                                          | AGIWUR43560                                                |          |                |           |                             |
| N2 HS V                                                    | 17210716                                                   | 17212039 | WBGene00005443 | srh-236   | Y68A4A.9                    |
| -0.0129357164192676                                        | AGIWUR6236                                                 |          |                |           |                             |
| N2 HS V                                                    | 17213043                                                   | 17214212 | WBGene00005332 | srh-113   | Y68A4A.7                    |
| -0.0724498502079269                                        | AGIWUR42610                                                |          |                |           |                             |
| N2 HS V                                                    | 17215066                                                   | 17216751 | WBGene00014943 | Y68A4A.8  | Y68A4A.8                    |
| -0.0766022169013363                                        | AGIWUR5679                                                 |          |                |           |                             |
| N2 HS V                                                    | 17217990                                                   | 17219004 | WBGene00011840 | srbc-62   | T19C9.1 0.00147521610406809 |
| AGIWUR32160                                                |                                                            |          |                |           |                             |
| N2 HS V                                                    | 17219253                                                   | 17220445 | WBGene00005328 | srh-109   | T19C9.4 -0.155980943537779  |
| AGIWUR39083                                                |                                                            |          |                |           |                             |
| N2 HS V                                                    | 17222386                                                   | 17223405 | WBGene00005458 | srh-252   | T19C9.3 0.0453504692178992  |
| AGIWUR15804                                                |                                                            |          |                |           |                             |
| N2 HS V                                                    | 17225086                                                   | 17226219 | WBGene00005331 | srh-112   | T19C9.2 -0.109404406293026  |
| AGIWUR41950                                                |                                                            |          |                |           |                             |
| N2 HS V                                                    | 17229555                                                   | 17229990 | WBGene00011842 | T19C9.6   | T19C9.6 -0.102023104807963  |
| AGIWUR28;AGIWUR1422;AGIWUR14042;AGIWUR17957;AGIWUR25905    |                                                            |          |                |           |                             |
| N2 HS V                                                    | 17234329                                                   | 17234630 | WBGene00050933 | T19C9.9   | T19C9.9 -0.0330177324056669 |
| AGIWUR4141;AGIWUR19550;AGIWUR26952;AGIWUR34168;AGIWUR36985 |                                                            |          |                |           |                             |
| N2 HS V                                                    | 17236592                                                   | 17238097 | WBGene00050934 | T19C9.10  | T19C9.10                    |
| 0.0114429404331915                                         | AGIWUR4377;AGIWUR19269;AGIWUR26611;AGIWUR41291;AGIWUR42252 |          |                |           |                             |
| N2 HS V                                                    | 17239097                                                   | 17240656 | WBGene00011844 | T19C9.8   | T19C9.8 -0.24423729060139   |
| AGIWUR39193                                                |                                                            |          |                |           |                             |
| N2 HS V                                                    | 17241708                                                   | 17242652 | WBGene00013472 | Y68A4B.3  | Y68A4B.3                    |
| -0.0348080593152305                                        | AGIWUR4089;AGIWUR12735                                     |          |                |           |                             |
| N2 HS V                                                    | 17243767                                                   | 17245506 | WBGene00013471 | cllec-242 | Y68A4B.2                    |
| 0.182755523999024                                          | AGIWUR41908                                                |          |                |           |                             |
| N2 HS V                                                    | 17247325                                                   | 17249015 | WBGene00013470 | cllec-243 | Y68A4B.1                    |
| 0.0815974708682843                                         | AGIWUR4918                                                 |          |                |           |                             |
| N2 HS V                                                    | 17251911                                                   | 17252309 | WBGene00219383 | Y61B8A.6  | Y61B8A.6                    |
| -0.207306810007464                                         | AGIWUR9858;AGIWUR38279                                     |          |                |           |                             |

|                                                                                                                    |    |   |                                                |          |                |          |                             |
|--------------------------------------------------------------------------------------------------------------------|----|---|------------------------------------------------|----------|----------------|----------|-----------------------------|
| N2                                                                                                                 | HS | V | 17252931                                       | 17255128 | WBGene00005335 | srh-116  | Y61B8A.1                    |
| -0.25379928131753                                                                                                  |    |   | AGIWUR22833                                    |          |                |          |                             |
| N2                                                                                                                 | HS | V | 17255754                                       | 17257194 | WBGene00005334 | srh-115  | Y61B8A.2                    |
| 0.180444163381984                                                                                                  |    |   | AGIWUR27892                                    |          |                |          |                             |
| N2                                                                                                                 | HS | V | 17259173                                       | 17260534 | WBGene00044654 | fbxa-85  | Y61B8A.4                    |
| -0.0767845601956365                                                                                                |    |   | AGIWUR32797                                    |          |                |          |                             |
| N2                                                                                                                 | HS | V | 17260674                                       | 17262325 | WBGene00005794 | srw-47   | K10G4.2 0.0790421785229771  |
| AGIWUR42524                                                                                                        |    |   |                                                |          |                |          |                             |
| N2                                                                                                                 | HS | V | 17264066                                       | 17264955 | WBGene00010752 | K10G4.3  | K10G4.3 0.269565940755359   |
| AGIWUR19495                                                                                                        |    |   |                                                |          |                |          |                             |
| N2                                                                                                                 | HS | V | 17271730                                       | 17272888 | WBGene00005336 | srh-117  | K10G4.6 -0.0897897270220929 |
| AGIWUR10777                                                                                                        |    |   |                                                |          |                |          |                             |
| N2                                                                                                                 | HS | V | 17273524                                       | 17275059 | WBGene00044202 | K10G4.10 | K10G4.10                    |
| -0.0772218241163154                                                                                                |    |   | AGIWUR17927;AGIWUR27492                        |          |                |          |                             |
| N2                                                                                                                 | HS | V | 17278367                                       | 17285169 | WBGene00010753 | K10G4.4  | K10G4.4 0.34080538832408    |
| AGIWUR19573                                                                                                        |    |   |                                                |          |                |          |                             |
| N2                                                                                                                 | HS | V | 17292214                                       | 17293729 | WBGene00005793 | srw-46   | K10G4.8                     |
| -0.00558138728646185                                                                                               |    |   | AGIWUR874                                      |          |                |          |                             |
| N2                                                                                                                 | HS | V | 17294413                                       | 17297359 | WBGene00077629 | K10G4.13 | K10G4.13                    |
| 0.212451223492589                                                                                                  |    |   | AGIWUR4790                                     |          |                |          |                             |
| N2                                                                                                                 | HS | V | 17303054                                       | 17304438 | WBGene00005582 | sri-70   | Y61B8B.1                    |
| 0.11939899627715                                                                                                   |    |   | AGIWUR10381                                    |          |                |          |                             |
| N2                                                                                                                 | HS | V | 17316351                                       | 17317719 | WBGene00023507 | srz-26   | F31E9.7 -0.0402191991889609 |
| AGIWUR29264                                                                                                        |    |   |                                                |          |                |          |                             |
| N2                                                                                                                 | HS | V | 17318147                                       | 17319515 | WBGene00009298 | srz-58   | F31E9.5 -0.139806179670053  |
| AGIWUR38599                                                                                                        |    |   |                                                |          |                |          |                             |
| N2                                                                                                                 | HS | V | 17319596                                       | 17322444 | WBGene00009295 | fbxa-180 | F31E9.1                     |
| -0.0306806523356258                                                                                                |    |   | AGIWUR31899                                    |          |                |          |                             |
| N2                                                                                                                 | HS | V | 17322615                                       | 17324518 | WBGene00009296 | F31E9.3  | F31E9.3 0.0131767601884043  |
| AGIWUR2504;AGIWUR3170;AGIWUR4495;AGIWUR7491;AGIWUR7699;AGIWUR16129;AGIWUR18574;AGIWUR30010;AGIWUR39662;AGIWUR44275 |    |   |                                                |          |                |          |                             |
| N2                                                                                                                 | HS | V | 17324907                                       | 17326168 | WBGene00045408 | F31E9.8  | F31E9.8 0.0304857163787187  |
| AGIWUR388                                                                                                          |    |   |                                                |          |                |          |                             |
| N2                                                                                                                 | HS | V | 17326453                                       | 17327967 | WBGene00009297 | sdz-16   | F31E9.4 -0.192095320954482  |
| AGIWUR6249;AGIWUR25089                                                                                             |    |   |                                                |          |                |          |                             |
| N2                                                                                                                 | HS | V | 17331570                                       | 17335546 | WBGene00009836 | fbxa-185 | F47H4.4                     |
| 0.0427134464471624                                                                                                 |    |   | AGIWUR4082;AGIWUR14040;AGIWUR14183;AGIWUR28850 |          |                |          |                             |
| N2                                                                                                                 | HS | V | 17336138                                       | 17338335 | WBGene00009837 | fbxa-186 | F47H4.6                     |
| 0.0155894075441427                                                                                                 |    |   | AGIWUR43890                                    |          |                |          |                             |

|                     |    |   |                                     |          |                |           |                            |
|---------------------|----|---|-------------------------------------|----------|----------------|-----------|----------------------------|
| N2                  | HS | V | 17339084                            | 17342780 | WBGene00009838 | fbxa-187  | F47H4.7                    |
| 0.188984565002282   |    |   | AGIWUR34510                         |          |                |           |                            |
| N2                  | HS | V | 17347922                            | 17348625 | WBGene00004811 | skr-5     | F47H4.10                   |
| 0.513834276002187   |    |   | AGIWUR3296                          |          |                |           |                            |
| N2                  | HS | V | 17348665                            | 17350180 | WBGene00009834 | lsy-27    | F47H4.1 -0.145929102400139 |
| AGIWUR2966          |    |   |                                     |          |                |           |                            |
| N2                  | HS | V | 17350387                            | 17352870 | WBGene00009841 | fbxa-134  | F47H4.11                   |
| 0.0668198034294409  |    |   | AGIWUR726                           |          |                |           |                            |
| N2                  | HS | V | 17353325                            | 17360212 | WBGene00009835 | F47H4.2   | F47H4.2 0.523046527379924  |
| AGIWUR31591         |    |   |                                     |          |                |           |                            |
| N2                  | HS | V | 17369715                            | 17371468 | WBGene00014764 | srz-46    | F47H4.3 0.0746639467361394 |
| AGIWUR5100          |    |   |                                     |          |                |           |                            |
| N2                  | HS | V | 17371544                            | 17376745 | WBGene00012491 | Y20C6A.1  | Y20C6A.1                   |
| 0.222174561236642   |    |   | AGIWUR12193                         |          |                |           |                            |
| N2                  | HS | V | 17377406                            | 17379226 | WBGene00012492 | fbxb-7    | Y20C6A.2                   |
| 0.16324363896592    |    |   | AGIWUR14771                         |          |                |           |                            |
| N2                  | HS | V | 17380232                            | 17381119 | WBGene00077495 | Y20C6A.4  | Y20C6A.4                   |
| -0.0475276780299625 |    |   | AGIWUR4613                          |          |                |           |                            |
| N2                  | HS | V | 17382090                            | 17383373 | WBGene00012493 | Y20C6A.3  | Y20C6A.3                   |
| 0.0246408684189987  |    |   | AGIWUR36562                         |          |                |           |                            |
| N2                  | HS | V | 17395674                            | 17398034 | WBGene00005339 | srh-120   | T27C5.1 0.120023264317743  |
| AGIWUR25062         |    |   |                                     |          |                |           |                            |
| N2                  | HS | V | 17400123                            | 17401774 | WBGene00005944 | srx-53    | T27C5.2 0.0772161479904367 |
| AGIWUR2034          |    |   |                                     |          |                |           |                            |
| N2                  | HS | V | 17404611                            | 17405823 | WBGene00023512 | srz-51    | T27C5.11                   |
| 0.34200707172887    |    |   | AGIWUR11238                         |          |                |           |                            |
| N2                  | HS | V | 17406306                            | 17407503 | WBGene00012078 | srz-50    | T27C5.4 0.180571369771243  |
| AGIWUR42655         |    |   |                                     |          |                |           |                            |
| N2                  | HS | V | 17410255                            | 17411705 | WBGene00005349 | srh-132   | T27C5.5 0.0174701841428266 |
| AGIWUR27579         |    |   |                                     |          |                |           |                            |
| N2                  | HS | V | 17412602                            | 17413098 | WBGene00012079 | T27C5.6   | T27C5.6 0.0566436257418825 |
| AGIWUR37517         |    |   |                                     |          |                |           |                            |
| N2                  | HS | V | 17413546                            | 17414749 | WBGene00012080 | cllec-244 | T27C5.7                    |
| -0.0799602276094209 |    |   | AGIWUR27963;AGIWUR29663;AGIWUR32941 |          |                |           |                            |
| N2                  | HS | V | 17415278                            | 17416743 | WBGene00044059 | T27C5.12  | T27C5.12                   |
| -0.0170936455165336 |    |   | AGIWUR25726                         |          |                |           |                            |
| N2                  | HS | V | 17417133                            | 17418391 | WBGene00012081 | T27C5.8   | T27C5.8 0.0928471589139557 |
| AGIWUR37095         |    |   |                                     |          |                |           |                            |
| N2                  | HS | V | 17419156                            | 17420298 | WBGene00044096 | srh-96    | T27C5.14                   |

|                      |                                    |          |                |           |                            |
|----------------------|------------------------------------|----------|----------------|-----------|----------------------------|
| -0.116979942494625   | AGIWUR40955                        |          |                |           |                            |
| N2 HS V              | 17429701                           | 17430166 | WBGene00012083 | T27C5.10  | T27C5.10                   |
| -0.120332982926719   | AGIWUR4231;AGIWUR13140;AGIWUR38544 |          |                |           |                            |
| N2 HS V              | 17431203                           | 17432501 | WBGene00044100 | srbc-27   | F20E11.15                  |
| -0.023071054283343   | AGIWUR43044                        |          |                |           |                            |
| N2 HS V              | 17432993                           | 17435209 | WBGene00044101 | srbc-28   | F20E11.16                  |
| -0.0189631251515117  | AGIWUR5255                         |          |                |           |                            |
| N2 HS V              | 17435678                           | 17436592 | WBGene00206495 | F20E11.18 | F20E11.18                  |
| 0.0837280505404339   | AGIWUR14662                        |          |                |           |                            |
| N2 HS V              | 17436985                           | 17438417 | WBGene00008982 | srsx-2    | F20E11.2                   |
| 0.676438487811853    | AGIWUR3063                         |          |                |           |                            |
| N2 HS V              | 17442581                           | 17445668 | WBGene00005374 | srh-158   | F20E11.13                  |
| -0.289619523696558   | AGIWUR14378;AGIWUR40459            |          |                |           |                            |
| N2 HS V              | 17446348                           | 17447636 | WBGene00005376 | srh-160   | F20E11.3                   |
| -0.130300263907813   | AGIWUR21027                        |          |                |           |                            |
| N2 HS V              | 17448332                           | 17449590 | WBGene00005373 | srh-157   | F20E11.8                   |
| -0.231652572909109   | AGIWUR8991;AGIWUR31658             |          |                |           |                            |
| N2 HS V              | 17452676                           | 17453805 | WBGene00005377 | srh-161   | F20E11.14                  |
| 0.144654405360253    | AGIWUR10052                        |          |                |           |                            |
| N2 HS V              | 17458533                           | 17460161 | WBGene00008981 | srz-48    | F20E11.1                   |
| -0.147660699705783   | AGIWUR1569                         |          |                |           |                            |
| N2 HS V              | 17460813                           | 17462432 | WBGene00008983 | F20E11.5  | F20E11.5                   |
| -0.0491402777809471  | AGIWUR25782                        |          |                |           |                            |
| N2 HS V              | 17464578                           | 17466730 | WBGene00008984 | F20E11.7  | F20E11.7                   |
| 0.0572342828539263   | AGIWUR36820                        |          |                |           |                            |
| N2 HS V              | 17472319                           | 17473481 | WBGene00005333 | srh-114   | F08E10.8                   |
| 0.0312428680306667   | AGIWUR23613                        |          |                |           |                            |
| N2 HS V              | 17473999                           | 17475471 | WBGene00005341 | srh-123   | F08E10.3                   |
| -0.125963531555644   | AGIWUR43710                        |          |                |           |                            |
| N2 HS V              | 17476790                           | 17478108 | WBGene00008574 | srbc-61   | F08E10.2                   |
| -0.0367053599367164  | AGIWUR37212                        |          |                |           |                            |
| N2 HS V              | 17478333                           | 17479386 | WBGene00005329 | srh-110   | F08E10.4                   |
| 0.00947539507096806  | AGIWUR5026                         |          |                |           |                            |
| N2 HS V              | 17480851                           | 17481855 | WBGene00005459 | srh-253   | F08E10.5                   |
| 0.138689341429899    | AGIWUR44105                        |          |                |           |                            |
| N2 HS V              | 17487346                           | 17488833 | WBGene00010536 | K03D7.9   | K03D7.9                    |
| -0.00923787645129437 | AGIWUR27680                        |          |                |           |                            |
| N2 HS V              | 17489502                           | 17491609 | WBGene00010535 | K03D7.8   | K03D7.8 -0.209712867102963 |
| AGIWUR35923          |                                    |          |                |           |                            |

|                         |    |   |                                                           |          |                |          |                             |
|-------------------------|----|---|-----------------------------------------------------------|----------|----------------|----------|-----------------------------|
| N2                      | HS | V | 17492077                                                  | 17493832 | WBGene00010534 | fbxa-102 | K03D7.7                     |
| -0.159420830330822      |    |   | AGIWUR25951                                               |          |                |          |                             |
| N2                      | HS | V | 17494306                                                  | 17496171 | WBGene00005337 | srh-118  | K03D7.6 -0.0834880796963109 |
| AGIWUR33420             |    |   |                                                           |          |                |          |                             |
| N2                      | HS | V | 17499044                                                  | 17505021 | WBGene00014796 | K03D7.3  | K03D7.3 0.0122375538785349  |
| AGIWUR22757             |    |   |                                                           |          |                |          |                             |
| N2                      | HS | V | 17508793                                                  | 17510214 | WBGene00005779 | srw-32   | K03D7.11                    |
| -0.0445441709537535     |    |   | AGIWUR28798                                               |          |                |          |                             |
| N2                      | HS | V | 17511533                                                  | 17519857 | WBGene00005792 | srw-45   | K03D7.10                    |
| 0.052186978055758       |    |   | AGIWUR3827;AGIWUR5632;AGIWUR10237;AGIWUR11287;AGIWUR42706 |          |                |          |                             |
| N2                      | HS | V | 17521037                                                  | 17527479 | WBGene00007672 | fbxa-136 | C18D4.2                     |
| 0.0545698849673659      |    |   | AGIWUR23664;AGIWUR26139                                   |          |                |          |                             |
| N2                      | HS | V | 17528029                                                  | 17529910 | WBGene00007678 | srz-90   | C18D4.9 -0.0539934996473406 |
| AGIWUR27577             |    |   |                                                           |          |                |          |                             |
| N2                      | HS | V | 17530303                                                  | 17530714 | WBGene00219493 | C18D4.12 | C18D4.12                    |
| 0.345097402515519       |    |   | AGIWUR10696                                               |          |                |          |                             |
| N2                      | HS | V | 17530813                                                  | 17531510 | WBGene00007674 | C18D4.4  | C18D4.4 -0.0833577188005048 |
| AGIWUR29903             |    |   |                                                           |          |                |          |                             |
| N2                      | HS | V | 17532353                                                  | 17532786 | WBGene00007673 | C18D4.3  | C18D4.3 0.0713792640744355  |
| AGIWUR30181             |    |   |                                                           |          |                |          |                             |
| N2                      | HS | V | 17535615                                                  | 17538373 | WBGene00007675 | C18D4.6  | C18D4.6 -0.166497300113778  |
| AGIWUR10351;AGIWUR42998 |    |   |                                                           |          |                |          |                             |
| N2                      | HS | V | 17540595                                                  | 17542272 | WBGene00014679 | srz-25   | C18D4.5 -0.430672314006175  |
| AGIWUR13682             |    |   |                                                           |          |                |          |                             |
| N2                      | HS | V | 17542719                                                  | 17544108 | WBGene00007676 | srz-57   | C18D4.7 -0.0480267390725837 |
| AGIWUR32653             |    |   |                                                           |          |                |          |                             |
| N2                      | HS | V | 17544175                                                  | 17546974 | WBGene00007677 | C18D4.8  | C18D4.8 -0.131906036103731  |
| AGIWUR41632             |    |   |                                                           |          |                |          |                             |
| N2                      | HS | V | 17547383                                                  | 17549288 | WBGene00045293 | fbxa-175 | C38D9.12                    |
| -0.120173068720725      |    |   | AGIWUR34376                                               |          |                |          |                             |
| N2                      | HS | V | 17549675                                                  | 17551196 | WBGene00008017 | fbxa-176 | C38D9.9                     |
| -0.119476132879418      |    |   | AGIWUR14301                                               |          |                |          |                             |
| N2                      | HS | V | 17555854                                                  | 17558477 | WBGene00008015 | fbxa-174 | C38D9.7                     |
| -0.0199894081905123     |    |   | AGIWUR20461                                               |          |                |          |                             |
| N2                      | HS | V | 17563171                                                  | 17566003 | WBGene00008009 | fbxa-171 | C38D9.1                     |
| 0.0680303846055814      |    |   | AGIWUR22354                                               |          |                |          |                             |
| N2                      | HS | V | 17567513                                                  | 17571603 | WBGene00008010 | C38D9.2  | C38D9.2 -0.207730223730278  |
| AGIWUR10796             |    |   |                                                           |          |                |          |                             |
| N2                      | HS | V | 17584793                                                  | 17585876 | WBGene00008012 | fbxa-133 | C38D9.4                     |

|                                                                                                                                              |                                               |          |                 |          |          |                     |  |
|----------------------------------------------------------------------------------------------------------------------------------------------|-----------------------------------------------|----------|-----------------|----------|----------|---------------------|--|
| 0.563164985098838                                                                                                                            | AGIWUR24992                                   |          |                 |          |          |                     |  |
| N2 HS V                                                                                                                                      | 17592387                                      | 17594243 | WBGene00012403  | srz-45   | Y6G8.1   | 0.147828030049157   |  |
| AGIWUR24279                                                                                                                                  |                                               |          |                 |          |          |                     |  |
| N2 HS V                                                                                                                                      | 17594349                                      | 17598971 | WBGene00012404  | Y6G8.2   | Y6G8.2   | 0.36947248975468    |  |
| AGIWUR37650                                                                                                                                  |                                               |          |                 |          |          |                     |  |
| N2 HS V                                                                                                                                      | 17599978                                      | 17600872 | WBGene00050974  | Y6G8.9   | Y6G8.9   | 0.048901746164308   |  |
| AGIWUR2079;AGIWUR23739                                                                                                                       |                                               |          |                 |          |          |                     |  |
| N2 HS V                                                                                                                                      | 17601820                                      | 17602954 | WBGene00012405  | ztf-25   | Y6G8.3   | -0.336050528583089  |  |
| AGIWUR37324                                                                                                                                  |                                               |          |                 |          |          |                     |  |
| N2 HS V                                                                                                                                      | 17603185                                      | 17603945 | WBGene00077459  | Y6G8.10  | Y6G8.10  | 0.159466112486848   |  |
| AGIWUR11426                                                                                                                                  |                                               |          |                 |          |          |                     |  |
| N2 HS V                                                                                                                                      | 17607379                                      | 17607690 | WBGene00077460  | Y6G8.11  | Y6G8.11  | 0.00789028767842836 |  |
| AGIWUR1681;AGIWUR13086;AGIWUR21320;AGIWUR33835;AGIWUR39121                                                                                   |                                               |          |                 |          |          |                     |  |
| N2 HS V                                                                                                                                      | 17608097                                      | 17609597 | WBGene00012406  | srz-91   | Y6G8.4   | -0.0373754000064883 |  |
| AGIWUR13792                                                                                                                                  |                                               |          |                 |          |          |                     |  |
| N2 HS V                                                                                                                                      | 17613792                                      | 17614357 | WBGene000138715 | Y6G8.14  | Y6G8.14  | 0.276459941129812   |  |
| AGIWUR18983;AGIWUR32925                                                                                                                      |                                               |          |                 |          |          |                     |  |
| N2 HS V                                                                                                                                      | 17616473                                      | 17616921 | WBGene00044208  | Y6G8.6   | Y6G8.6   | 0.0265753383887617  |  |
| AGIWUR4430;AGIWUR5423;AGIWUR16001;AGIWUR40934;AGIWUR41144                                                                                    |                                               |          |                 |          |          |                     |  |
| N2 HS V                                                                                                                                      | 17620194                                      | 17622750 | WBGene00045501  | Y6G8.8   | Y6G8.8   | 0.126276556834131   |  |
| AGIWUR7206;AGIWUR18354                                                                                                                       |                                               |          |                 |          |          |                     |  |
| N2 HS V                                                                                                                                      | 17625127                                      | 17627598 | WBGene000195165 | F57G4.11 |          | F57G4.11            |  |
| 0.889113754473001                                                                                                                            | AGIWUR30502                                   |          |                 |          |          |                     |  |
| N2 HS V                                                                                                                                      | 17628866                                      | 17630215 | WBGene00045506  | F57G4.10 |          | F57G4.10            |  |
| -0.00543816538695152                                                                                                                         | AGIWUR2368;AGIWUR2435;AGIWUR18799;AGIWUR20217 |          |                 |          |          |                     |  |
| N2 HS V                                                                                                                                      | 17637982                                      | 17640042 | WBGene00010209  | fbxa-191 |          | F57G4.4             |  |
| -0.187188643937438                                                                                                                           | AGIWUR34789                                   |          |                 |          |          |                     |  |
| N2 HS V                                                                                                                                      | 17640672                                      | 17650527 | WBGene00010212  | fbxa-192 |          | F57G4.8             |  |
| 0.0880965764262389                                                                                                                           |                                               |          |                 |          |          |                     |  |
| AGIWUR4316;AGIWUR4368;AGIWUR7320;AGIWUR14928;AGIWUR17320;AGIWUR20534;AGIWUR22976;AGIWUR25735;AGIWUR27646;AGIWUR31741;AGIWUR41603;AGIWUR42867 |                                               |          |                 |          |          |                     |  |
| N2 HS V                                                                                                                                      | 17653482                                      | 17655281 | WBGene00010295  | fbxa-193 |          | F59A1.9             |  |
| 0.162449305564641                                                                                                                            | AGIWUR276                                     |          |                 |          |          |                     |  |
| N2 HS V                                                                                                                                      | 17655581                                      | 17656654 | WBGene00010294  | fbxa-129 |          | F59A1.8             |  |
| -0.136641603663414                                                                                                                           | AGIWUR9387;AGIWUR44072                        |          |                 |          |          |                     |  |
| N2 HS V                                                                                                                                      | 17656892                                      | 17658198 | WBGene00010293  | fbxa-108 |          | F59A1.7             |  |
| 0.191883053033795                                                                                                                            | AGIWUR17141;AGIWUR41177                       |          |                 |          |          |                     |  |
| N2 HS V                                                                                                                                      | 17660303                                      | 17661810 | WBGene00010296  | dgat-2   | F59A1.10 |                     |  |
| -0.0454074238473865                                                                                                                          | AGIWUR3725                                    |          |                 |          |          |                     |  |



|                         |    |   |                                                 |          |                |          |                             |
|-------------------------|----|---|-------------------------------------------------|----------|----------------|----------|-----------------------------|
| N2                      | HS | V | 17661802                                        | 17665475 | WBGene00010297 | F59A1.11 | F59A1.11                    |
| -0.056558526073176      |    |   | AGIWUR4003                                      |          |                |          |                             |
| N2                      | HS | V | 17668882                                        | 17671330 | WBGene00006148 | str-89   | F59A1.4 0.177815301320287   |
| AGIWUR22398             |    |   |                                                 |          |                |          |                             |
| N2                      | HS | V | 17671700                                        | 17673443 | WBGene00006151 | str-93   | F59A1.14                    |
| 0.265857661979184       |    |   | AGIWUR15703                                     |          |                |          |                             |
| N2                      | HS | V | 17674946                                        | 17676653 | WBGene00006150 | str-92   | F59A1.3 -0.071868626696272  |
| AGIWUR33147             |    |   |                                                 |          |                |          |                             |
| N2                      | HS | V | 17678358                                        | 17680208 | WBGene00014779 | F59A1.2  | F59A1.2 -0.0859845702861226 |
| AGIWUR24205;AGIWUR27684 |    |   |                                                 |          |                |          |                             |
| N2                      | HS | V | 17680661                                        | 17683907 | WBGene00010300 | F59A1.15 | F59A1.15                    |
| -0.043286581767342      |    |   | AGIWUR40297                                     |          |                |          |                             |
| N2                      | HS | V | 17684149                                        | 17684968 | WBGene00010301 | F59A1.16 | F59A1.16                    |
| 0.0340111939330319      |    |   | AGIWUR20039                                     |          |                |          |                             |
| N2                      | HS | V | 17685192                                        | 17686074 | WBGene00010292 | F59A1.6  | F59A1.6 0.190318083123847   |
| AGIWUR24435             |    |   |                                                 |          |                |          |                             |
| N2                      | HS | V | 17687211                                        | 17690994 | WBGene00010299 | F59A1.13 | F59A1.13                    |
| 0.11037096143891        |    |   | AGIWUR39181                                     |          |                |          |                             |
| N2                      | HS | V | 17692502                                        | 17695827 | WBGene00012515 | Y26G10.1 | Y26G10.1                    |
| -0.0678132312762747     |    |   | AGIWUR5760                                      |          |                |          |                             |
| N2                      | HS | V | 17701212                                        | 17703285 | WBGene00005255 | srh-32   | Y26G10.2                    |
| -0.0792752519859361     |    |   | AGIWUR10909                                     |          |                |          |                             |
| N2                      | HS | V | 17704362                                        | 17706117 | WBGene00050973 | Y26G10.3 | Y26G10.3                    |
| 0.129067843785293       |    |   | AGIWUR22451;AGIWUR38578                         |          |                |          |                             |
| N2                      | HS | V | 17706114                                        | 17706875 | WBGene00012305 | W06D12.6 | W06D12.6                    |
| 0.0688715252478023      |    |   | AGIWUR29688                                     |          |                |          |                             |
| N2                      | HS | V | 17707184                                        | 17709823 | WBGene00005254 | srh-31   | W06D12.7                    |
| -0.157040663193913      |    |   | AGIWUR7156                                      |          |                |          |                             |
| N2                      | HS | V | 17710040                                        | 17714377 | WBGene00006685 | twk-33   | W06D12.5                    |
| 0.269637683603115       |    |   | AGIWUR23332;AGIWUR39569;AGIWUR43456             |          |                |          |                             |
| N2                      | HS | V | 17718947                                        | 17721293 | WBGene00006137 | str-77   | W06D12.4                    |
| -0.0583670808324941     |    |   | AGIWUR8320                                      |          |                |          |                             |
| N2                      | HS | V | 17725004                                        | 17726818 | WBGene00001397 | fat-5    | W06D12.3                    |
| -0.07778658307529       |    |   | AGIWUR14736;AGIWUR20562;AGIWUR22243;AGIWUR27469 |          |                |          |                             |
| N2                      | HS | V | 17726799                                        | 17730381 | WBGene00006692 | twk-42   | W06D12.2                    |
| -0.16660303516025       |    |   | AGIWUR35124                                     |          |                |          |                             |
| N2                      | HS | V | 17733568                                        | 17739899 | WBGene00012304 | cut1-4   | W06D12.1                    |
| 0.0207317116787777      |    |   | AGIWUR5269;AGIWUR9713;AGIWUR10938               |          |                |          |                             |
| N2                      | HS | V | 17743651                                        | 17747059 | WBGene00006688 | twk-36   | R12G8.2 0.0989159034531584  |

|                     |    |   |                                                            |          |                |           |                            |
|---------------------|----|---|------------------------------------------------------------|----------|----------------|-----------|----------------------------|
| AGIWUR29554         |    |   |                                                            |          |                |           |                            |
| N2                  | HS | V | 17747966                                                   | 17749243 | WBGene00011254 | R12G8.1   | R12G8.1 -0.127009447948559 |
| AGIWUR20029         |    |   |                                                            |          |                |           |                            |
| N2                  | HS | V | 17755892                                                   | 17764751 | WBGene00004003 | pgp-9     | C47A10.1                   |
| 0.181361827522878   |    |   | AGIWUR15356                                                |          |                |           |                            |
| N2                  | HS | V | 17767549                                                   | 17769621 | WBGene00005489 | srh-284   | C47A10.3                   |
| -0.195693759065138  |    |   | AGIWUR13539                                                |          |                |           |                            |
| N2                  | HS | V | 17769653                                                   | 17773208 | WBGene00008126 | sre-21    | C47A10.4                   |
| 0.112697179137403   |    |   | AGIWUR6720;AGIWUR10002;AGIWUR10999                         |          |                |           |                            |
| N2                  | HS | V | 17774187                                                   | 17777227 | WBGene00008127 | ddo-1     | C47A10.5                   |
| -0.177899913982614  |    |   | AGIWUR14884                                                |          |                |           |                            |
| N2                  | HS | V | 17777924                                                   | 17779487 | WBGene00008129 | C47A10.12 | C47A10.12                  |
| 0.0659785560643211  |    |   | AGIWUR12728                                                |          |                |           |                            |
| N2                  | HS | V | 17780448                                                   | 17783639 | WBGene00008128 | srab-12   | C47A10.6                   |
| -0.0364592251283575 |    |   | AGIWUR29939                                                |          |                |           |                            |
| N2                  | HS | V | 17789494                                                   | 17789738 | WBGene00050897 | C47A10.13 | C47A10.13                  |
| 0.0405323731095599  |    |   | AGIWUR8974;AGIWUR10304;AGIWUR21806;AGIWUR28302;AGIWUR42390 |          |                |           |                            |
| N2                  | HS | V | 17790491                                                   | 17792470 | WBGene00005494 | srh-290   | C47A10.11                  |
| -0.0521189877661588 |    |   | AGIWUR19006                                                |          |                |           |                            |
| N2                  | HS | V | 17792679                                                   | 17794086 | WBGene00005493 | srh-289   | C47A10.10                  |
| -0.136898794990634  |    |   | AGIWUR14885                                                |          |                |           |                            |
| N2                  | HS | V | 17794909                                                   | 17795755 | WBGene00005492 | srh-288   | C47A10.7                   |
| 0.274018537370387   |    |   | AGIWUR9355                                                 |          |                |           |                            |
| N2                  | HS | V | 17796200                                                   | 17798889 | WBGene00005909 | srx-18    | C47A10.8                   |
| -0.0590487111112772 |    |   | AGIWUR744                                                  |          |                |           |                            |
| N2                  | HS | V | 17800838                                                   | 17801906 | WBGene00005491 | srh-287   | C47A10.9                   |
| -0.0617949877300088 |    |   | AGIWUR32425                                                |          |                |           |                            |
| N2                  | HS | V | 17802410                                                   | 17802619 | WBGene00050893 | Y94A7B.11 | Y94A7B.11                  |
| -0.248785682741177  |    |   | AGIWUR8422;AGIWUR35883;AGIWUR43835                         |          |                |           |                            |
| N2                  | HS | V | 17802769                                                   | 17803923 | WBGene00005496 | srh-292   | Y94A7B.1                   |
| -0.230762692705236  |    |   | AGIWUR34250                                                |          |                |           |                            |
| N2                  | HS | V | 17805486                                                   | 17808611 | WBGene00005495 | srh-291   | Y94A7B.3                   |
| -0.176116941449823  |    |   | AGIWUR7471                                                 |          |                |           |                            |
| N2                  | HS | V | 17810353                                                   | 17812794 | WBGene00005500 | srh-296   | Y94A7B.4                   |
| -0.0973059439567461 |    |   | AGIWUR21677                                                |          |                |           |                            |
| N2                  | HS | V | 17818867                                                   | 17821003 | WBGene00005502 | srh-298   | Y94A7B.5                   |
| 0.136635614657546   |    |   | AGIWUR44774                                                |          |                |           |                            |
| N2                  | HS | V | 17822105                                                   | 17823889 | WBGene00005504 | srh-300   | Y94A7B.6                   |
| 0.115739444945294   |    |   | AGIWUR16526                                                |          |                |           |                            |

|                                                                                                                                              |    |   |                                                                                  |          |                |           |                             |
|----------------------------------------------------------------------------------------------------------------------------------------------|----|---|----------------------------------------------------------------------------------|----------|----------------|-----------|-----------------------------|
| N2                                                                                                                                           | HS | V | 17824910                                                                         | 17827774 | WBGene00005505 | srh-301   | Y94A7B.8                    |
| -0.0750089523534978                                                                                                                          |    |   | AGIWUR14106                                                                      |          |                |           |                             |
| N2                                                                                                                                           | HS | V | 17828610                                                                         | 17829983 | WBGene00005508 | srh-304   | Y94A7B.9                    |
| -0.219102257933079                                                                                                                           |    |   | AGIWUR4451                                                                       |          |                |           |                             |
| N2                                                                                                                                           | HS | V | 17831650                                                                         | 17833418 | WBGene00005507 | srh-303   | Y94A7B.7                    |
| 0.0512939891013318                                                                                                                           |    |   | AGIWUR19659                                                                      |          |                |           |                             |
| N2                                                                                                                                           | HS | V | 17837360                                                                         | 17838119 | WBGene00013341 | Y59A8A.7  | Y59A8A.7                    |
| 0.0292490783945034                                                                                                                           |    |   | AGIWUR19908                                                                      |          |                |           |                             |
| N2                                                                                                                                           | HS | V | 17838831                                                                         | 17841188 | WBGene00005506 | srh-302   | Y59A8A.5                    |
| -0.0641466554233858                                                                                                                          |    |   | AGIWUR38418                                                                      |          |                |           |                             |
| N2                                                                                                                                           | HS | V | 17841483                                                                         | 17844206 | WBGene00005490 | srh-286   | Y59A8A.4                    |
| 0.259380270853375                                                                                                                            |    |   | AGIWUR23633                                                                      |          |                |           |                             |
| N2                                                                                                                                           | HS | V | 17845739                                                                         | 17855989 | WBGene00013340 | tcc-1     | Y59A8A.3                    |
| -0.0624184882292482                                                                                                                          |    |   | AGIWUR2535;AGIWUR5566;AGIWUR7194;AGIWUR15447;AGIWUR21458;AGIWUR27254;AGIWUR32170 |          |                |           |                             |
| N2                                                                                                                                           | HS | V | 17861368                                                                         | 17870651 | WBGene00000813 | csn-1     | Y59A8A.1                    |
| 0.320260873977523                                                                                                                            |    |   | AGIWUR10688;AGIWUR14162;AGIWUR37627                                              |          |                |           |                             |
| N2                                                                                                                                           | HS | V | 17871401                                                                         | 17879913 | WBGene00013339 | phf-14    | Y59A8A.2                    |
| 0.0181444709150966                                                                                                                           |    |   | AGIWUR31159                                                                      |          |                |           |                             |
| N2                                                                                                                                           | HS | V | 17879844                                                                         | 17888984 | WBGene00007394 | C06H5.6   | C06H5.6 -0.168156747669982  |
| AGIWUR7896;AGIWUR8502;AGIWUR8823;AGIWUR15190;AGIWUR16651;AGIWUR18629;AGIWUR21138;AGIWUR25545;AGIWUR28925;AGIWUR35720;AGIWUR40621;AGIWUR44512 |    |   |                                                                                  |          |                |           |                             |
| N2                                                                                                                                           | HS | V | 17892426                                                                         | 17892706 | WBGene00045346 | C06H5.9   | C06H5.9 -0.010499152304094  |
| AGIWUR3364;AGIWUR10273;AGIWUR10645;AGIWUR27916;AGIWUR42380                                                                                   |    |   |                                                                                  |          |                |           |                             |
| N2                                                                                                                                           | HS | V | 17895268                                                                         | 17896804 | WBGene00007392 | fbxa-156  | C06H5.1                     |
| 0.0825201591435327                                                                                                                           |    |   | AGIWUR25046                                                                      |          |                |           |                             |
| N2                                                                                                                                           | HS | V | 17897546                                                                         | 17897746 | WBGene00219446 | C06H5.13  | C06H5.13                    |
| 0.0438602422483338                                                                                                                           |    |   | AGIWUR952;AGIWUR14193;AGIWUR20483;AGIWUR22689;AGIWUR33984                        |          |                |           |                             |
| N2                                                                                                                                           | HS | V | 17899803                                                                         | 17901913 | WBGene00007393 | fbxa-157  | C06H5.2                     |
| 0.0607378055039689                                                                                                                           |    |   | AGIWUR32833                                                                      |          |                |           |                             |
| N2                                                                                                                                           | HS | V | 17910304                                                                         | 17917241 | WBGene00007395 | dcar-1    | C06H5.7 -0.0231482202567079 |
| AGIWUR4617;AGIWUR10116;AGIWUR43125                                                                                                           |    |   |                                                                                  |          |                |           |                             |
| N2                                                                                                                                           | HS | V | 17921776                                                                         | 17924185 | WBGene00008442 | E01B7.2   | E01B7.2 0.0312562722864147  |
| AGIWUR9023                                                                                                                                   |    |   |                                                                                  |          |                |           |                             |
| N2                                                                                                                                           | HS | V | 17924916                                                                         | 17934225 | WBGene00008441 | usp-50    | E01B7.1 0.0383798296564937  |
| AGIWUR11877;AGIWUR13337                                                                                                                      |    |   |                                                                                  |          |                |           |                             |
| N2                                                                                                                                           | HS | V | 17936332                                                                         | 17949184 | WBGene00001080 | dpy-21    | Y59A8B.1                    |
| -0.0207990936744551                                                                                                                          |    |   | AGIWUR39389                                                                      |          |                |           |                             |
| N2                                                                                                                                           | HS | V | 17951348                                                                         | 17952820 | WBGene00013356 | Y59A8B.24 | Y59A8B.24                   |
| -0.113165975640916                                                                                                                           |    |   | AGIWUR42293                                                                      |          |                |           |                             |

|                     |    |   |                                                                                   |          |                |           |           |
|---------------------|----|---|-----------------------------------------------------------------------------------|----------|----------------|-----------|-----------|
| N2                  | HS | V | 17954054                                                                          | 17966847 | WBGene00013355 | gck-3     | Y59A8B.23 |
| -0.367417611521264  |    |   | AGIWUR29083                                                                       |          |                |           |           |
| N2                  | HS | V | 17968510                                                                          | 17980082 | WBGene00013354 | snx-6     | Y59A8B.22 |
| -0.121428942996681  |    |   | AGIWUR31388                                                                       |          |                |           |           |
| N2                  | HS | V | 17986260                                                                          | 17994546 | WBGene00013353 | Y59A8B.21 | Y59A8B.21 |
| 0.113356416873486   |    |   | AGIWUR40332                                                                       |          |                |           |           |
| N2                  | HS | V | 17995347                                                                          | 18001368 | WBGene00013352 | lon-8     | Y59A8B.20 |
| 0.112864219751973   |    |   | AGIWUR8675;AGIWUR9102;AGIWUR15282;AGIWUR17603;AGIWUR19833                         |          |                |           |           |
| N2                  | HS | V | 18007230                                                                          | 18009041 | WBGene00013351 | Y59A8B.19 | Y59A8B.19 |
| -0.0417268409994156 |    |   | AGIWUR17315                                                                       |          |                |           |           |
| N2                  | HS | V | 18010017                                                                          | 18010837 | WBGene00045459 | Y59A8B.26 | Y59A8B.26 |
| 0.00860667431049356 |    |   | AGIWUR12442;AGIWUR21434                                                           |          |                |           |           |
| N2                  | HS | V | 18012413                                                                          | 18014216 | WBGene00005350 | srh-133   | Y59A8B.3  |
| -0.19676749451188   |    |   | AGIWUR8992                                                                        |          |                |           |           |
| N2                  | HS | V | 18014641                                                                          | 18017326 | WBGene00005351 | srh-134   | Y59A8B.4  |
| -0.218264147020358  |    |   | AGIWUR5306                                                                        |          |                |           |           |
| N2                  | HS | V | 18017904                                                                          | 18020014 | WBGene00005511 | srh-307   | Y59A8B.5  |
| -0.0714839439595623 |    |   | AGIWUR5710;AGIWUR35581                                                            |          |                |           |           |
| N2                  | HS | V | 18022479                                                                          | 18042353 | WBGene00013343 | prp-6     | Y59A8B.6  |
| 0.241440087486527   |    |   | AGIWUR7680                                                                        |          |                |           |           |
| N2                  | HS | V | 18043571                                                                          | 18052323 | WBGene00013344 | ebp-1     | Y59A8B.7  |
| -0.118991859208194  |    |   | AGIWUR16212                                                                       |          |                |           |           |
| N2                  | HS | V | 18070021                                                                          | 18081957 | WBGene00013347 | Y59A8B.10 | Y59A8B.10 |
| 0.0359096468018869  |    |   | AGIWUR38201                                                                       |          |                |           |           |
| N2                  | HS | V | 18082406                                                                          | 18085127 | WBGene00013348 | fbxa-106  | Y59A8B.11 |
| -0.0806426354479548 |    |   | AGIWUR14652                                                                       |          |                |           |           |
| N2                  | HS | V | 18085630                                                                          | 18086225 | WBGene00013349 | Y59A8B.12 | Y59A8B.12 |
| 0.163620355452947   |    |   | AGIWUR24593                                                                       |          |                |           |           |
| N2                  | HS | V | 18087123                                                                          | 18097996 | WBGene00013350 | slr-2     | Y59A8B.13 |
| -0.0768909554258759 |    |   | AGIWUR5909                                                                        |          |                |           |           |
| N2                  | HS | V | 18098676                                                                          | 18106868 | WBGene00003919 | par-4     | Y59A8B.14 |
| -0.182332673193637  |    |   | AGIWUR43625                                                                       |          |                |           |           |
| N2                  | HS | V | 18108269                                                                          | 18114755 | WBGene00012562 | Y37H2A.1  | Y37H2A.1  |
| 0.0861243674407106  |    |   | AGIWUR15257                                                                       |          |                |           |           |
| N2                  | HS | V | 18115402                                                                          | 18123594 | WBGene00050935 | Y37H2A.16 | Y37H2A.16 |
| 0.0757801335271555  |    |   | AGIWUR5789;AGIWUR9443;AGIWUR11169;AGIWUR17775;AGIWUR27302;AGIWUR29776;AGIWUR41474 |          |                |           |           |
| N2                  | HS | V | 18123939                                                                          | 18125245 | WBGene00012564 | fbxa-107  | Y37H2A.4  |
| -0.0517813556810935 |    |   | AGIWUR43709                                                                       |          |                |           |           |
| N2                  | HS | V | 18125375                                                                          | 18127205 | WBGene00012565 | fbxa-210  | Y37H2A.5  |

|                     |                                             |          |                |                 |                    |
|---------------------|---------------------------------------------|----------|----------------|-----------------|--------------------|
| 0.290295870769778   | AGIWUR20368                                 |          |                |                 |                    |
| N2 HS V             | 18127519                                    | 18128885 | WBGene00012566 | fbxa-211        | Y37H2A.6           |
| -0.0437756504044149 | AGIWUR12070;AGIWUR24650;AGIWUR37600         |          |                |                 |                    |
| N2 HS V             | 18129171                                    | 18131125 | WBGene00044758 | Y37H2A.12       | Y37H2A.12          |
| 0.0899776141558295  | AGIWUR39737                                 |          |                |                 |                    |
| N2 HS V             | 18131667                                    | 18133232 | WBGene00219210 | Y37H2A.18       | Y37H2A.18          |
| 0.0622263034701946  | AGIWUR26503                                 |          |                |                 |                    |
| N2 HS V             | 18134722                                    | 18136022 | WBGene00012568 | fbxa-212        | Y37H2A.8           |
| -0.0121177942881681 | AGIWUR25803;AGIWUR41974                     |          |                |                 |                    |
| N2 HS V             | 18136704                                    | 18137714 | WBGene00012569 | fbxc-46         | Y37H2A.9           |
| 0.0437654905231106  | AGIWUR40984                                 |          |                |                 |                    |
| N2 HS V             | 18138995                                    | 18140687 | WBGene00012570 | Y37H2A.10       | Y37H2A.10          |
| 0.129108855303722   | AGIWUR10504                                 |          |                |                 |                    |
| N2 HS V             | 18141461                                    | 18142577 | WBGene00012571 | Y37H2A.11       | Y37H2A.11          |
| -0.0851694462595454 | AGIWUR28154                                 |          |                |                 |                    |
| N2 HS V             | 18142849                                    | 18143543 | WBGene00045417 | Y37H2A.13       | Y37H2A.13          |
| 0.0156243737398611  | AGIWUR19;AGIWUR2328;AGIWUR27028;AGIWUR27310 |          |                |                 |                    |
| N2 HS V             | 18143716                                    | 18144720 | WBGene00045416 | Y37H2A.14       | Y37H2A.14          |
| 0.149406307285592   | AGIWUR25981                                 |          |                |                 |                    |
| N2 HS V             | 18146965                                    | 18154396 | WBGene00206536 | C14A6.16        | C14A6.16           |
| 0.0274332910723256  | AGIWUR26918                                 |          |                |                 |                    |
| N2 HS V             | 18159652                                    | 18161339 | WBGene00050956 | C14A6.13        | C14A6.13           |
| 0.0540586126016382  | AGIWUR13918                                 |          |                |                 |                    |
| N2 HS V             | 18162034                                    | 18162668 | WBGene00050955 | C14A6.12        | C14A6.12           |
| 0.0780973360259374  | AGIWUR3236;AGIWUR21166;AGIWUR21466          |          |                |                 |                    |
| N2 HS V             | 18163439                                    | 18164858 | WBGene00007569 | C14A6.5 C14A6.5 | -0.366927371703557 |
| AGIWUR38662         |                                             |          |                |                 |                    |
| N2 HS V             | 18165294                                    | 18167261 | WBGene00007570 | C14A6.6 C14A6.6 | 0.0228304079872252 |
| AGIWUR43342         |                                             |          |                |                 |                    |
| N2 HS V             | 18167634                                    | 18168450 | WBGene00007571 | C14A6.7 C14A6.7 | 0.063126385225738  |
| AGIWUR22025         |                                             |          |                |                 |                    |
| N2 HS V             | 18169087                                    | 18171618 | WBGene00007572 | C14A6.8 C14A6.8 | 0.393776400235401  |
| AGIWUR30547         |                                             |          |                |                 |                    |
| N2 HS V             | 18172484                                    | 18178759 | WBGene00007853 | C31G12.4        | C31G12.4           |
| 0.135951863042666   | AGIWUR25686;AGIWUR31906                     |          |                |                 |                    |
| N2 HS V             | 18179943                                    | 18181373 | WBGene00007850 | C31G12.1        | C31G12.1           |
| -0.113292433623918  | AGIWUR44939                                 |          |                |                 |                    |
| N2 HS V             | 18185210                                    | 18185461 | WBGene00007852 | C31G12.3        | C31G12.3           |
| 0.249804301788339   | AGIWUR11940                                 |          |                |                 |                    |

|                                                           |    |   |                                                |          |                |           |                             |
|-----------------------------------------------------------|----|---|------------------------------------------------|----------|----------------|-----------|-----------------------------|
| N2                                                        | HS | V | 18186111                                       | 18188331 | WBGene00007851 | cllec-245 | C31G12.2                    |
| 0.131714517160797                                         |    |   | AGIWUR25381                                    |          |                |           |                             |
| N2                                                        | HS | V | 18189560                                       | 18191047 | WBGene00008892 | cllec-246 | F16H6.2                     |
| 0.0339465400674581                                        |    |   | AGIWUR2615;AGIWUR21493;AGIWUR36344;AGIWUR38574 |          |                |           |                             |
| N2                                                        | HS | V | 18191412                                       | 18194167 | WBGene00008891 | cllec-42  | F16H6.1 0.0414314083404932  |
| AGIWUR6841                                                |    |   |                                                |          |                |           |                             |
| N2                                                        | HS | V | 18195306                                       | 18197863 | WBGene00008893 | F16H6.3   | F16H6.3 0.0301498032676388  |
| AGIWUR7554                                                |    |   |                                                |          |                |           |                             |
| N2                                                        | HS | V | 18198721                                       | 18205815 | WBGene00008894 | F16H6.4   | F16H6.4 0.135927624806183   |
| AGIWUR11811;AGIWUR29561                                   |    |   |                                                |          |                |           |                             |
| N2                                                        | HS | V | 18207064                                       | 18209171 | WBGene00008897 | F16H6.7   | F16H6.7 0.163614358798711   |
| AGIWUR32034                                               |    |   |                                                |          |                |           |                             |
| N2                                                        | HS | V | 18217084                                       | 18222299 | WBGene00008899 | F16H6.9   | F16H6.9 -0.147656948033855  |
| AGIWUR12021                                               |    |   |                                                |          |                |           |                             |
| N2                                                        | HS | V | 18222746                                       | 18224447 | WBGene00008900 | F16H6.10  | F16H6.10                    |
| 0.284321666357158                                         |    |   | AGIWUR29693                                    |          |                |           |                             |
| N2                                                        | HS | V | 18227037                                       | 18231455 | WBGene00012572 | Y37H2B.1  | Y37H2B.1                    |
| 0.166083138962587                                         |    |   | AGIWUR22690                                    |          |                |           |                             |
| N2                                                        | HS | V | 18231635                                       | 18237223 | WBGene00014821 | R10E8.7   | R10E8.7 -0.235663184256501  |
| AGIWUR28066;AGIWUR30825                                   |    |   |                                                |          |                |           |                             |
| N2                                                        | HS | V | 18238122                                       | 18240736 | WBGene00011213 | R10E8.8   | R10E8.8 0.0421128959416635  |
| AGIWUR20037                                               |    |   |                                                |          |                |           |                             |
| N2                                                        | HS | V | 18242339                                       | 18252416 | WBGene00011207 | R10E8.1   | R10E8.1 -0.161100374885798  |
| AGIWUR5910;AGIWUR8723;AGIWUR17037;AGIWUR20949;AGIWUR20966 |    |   |                                                |          |                |           |                             |
| N2                                                        | HS | V | 18253794                                       | 18254403 | WBGene00011208 | R10E8.2   | R10E8.2 -0.0154914495349949 |
| AGIWUR22380                                               |    |   |                                                |          |                |           |                             |
| N2                                                        | HS | V | 18254783                                       | 18257067 | WBGene00011211 | R10E8.5   | R10E8.5 -0.231268917183142  |
| AGIWUR30162                                               |    |   |                                                |          |                |           |                             |
| N2                                                        | HS | V | 18259270                                       | 18266370 | WBGene00011212 | R10E8.6   | R10E8.6 -0.473990867200522  |
| AGIWUR11589                                               |    |   |                                                |          |                |           |                             |
| N2                                                        | HS | V | 18267292                                       | 18268844 | WBGene00012574 | fbxa-213  | Y37H2C.3                    |
| 0.0339945297968782                                        |    |   | AGIWUR33649                                    |          |                |           |                             |
| N2                                                        | HS | V | 18269616                                       | 18269985 | WBGene00004812 | skr-6     | Y37H2C.2                    |
| 0.243966289833121                                         |    |   | AGIWUR27438                                    |          |                |           |                             |
| N2                                                        | HS | V | 18270703                                       | 18272256 | WBGene00012575 | Y37H2C.4  | Y37H2C.4                    |
| 0.483947085688738                                         |    |   | AGIWUR20744                                    |          |                |           |                             |
| N2                                                        | HS | V | 18272889                                       | 18277694 | WBGene00012573 | Y37H2C.1  | Y37H2C.1                    |
| -0.0446179627556722                                       |    |   | AGIWUR17827                                    |          |                |           |                             |
| N2                                                        | HS | V | 18282897                                       | 18290590 | WBGene00013058 | cllec-247 | Y51A2A.1                    |

|                                                                                                |    |   |                                                           |          |                |           |                             |
|------------------------------------------------------------------------------------------------|----|---|-----------------------------------------------------------|----------|----------------|-----------|-----------------------------|
| 0.143718191111593                                                                              |    |   | AGIWUR43134                                               |          |                |           |                             |
| N2                                                                                             | HS | V | 18290942                                                  | 18291348 | WBGene00013060 | Y51A2A.4  | Y51A2A.4                    |
| 0.0291672677544161                                                                             |    |   | AGIWUR16311                                               |          |                |           |                             |
| N2                                                                                             | HS | V | 18292595                                                  | 18292944 | WBGene00077445 | Y51A2A.12 | Y51A2A.12                   |
| 0.0613348291141875                                                                             |    |   | AGIWUR755;AGIWUR23757;AGIWUR31475;AGIWUR41999;AGIWUR42533 |          |                |           |                             |
| N2                                                                                             | HS | V | 18298806                                                  | 18300713 | WBGene00013061 | Y51A2A.5  | Y51A2A.5                    |
| 0.0373900018909943                                                                             |    |   | AGIWUR41693                                               |          |                |           |                             |
| N2                                                                                             | HS | V | 18309386                                                  | 18310203 | WBGene00014906 | fbxa-109  | Y51A2A.8                    |
| 0.0644379274909315                                                                             |    |   | AGIWUR38308;AGIWUR43586                                   |          |                |           |                             |
| N2                                                                                             | HS | V | 18310924                                                  | 18311985 | WBGene00014907 | fbxa-117  | Y51A2A.9                    |
| 0.292005750188409                                                                              |    |   | AGIWUR23063                                               |          |                |           |                             |
| N2                                                                                             | HS | V | 18318595                                                  | 18319744 | WBGene00007182 | fbxb-119  | B0462.3                     |
| -0.105205504046335                                                                             |    |   |                                                           |          |                |           |                             |
| AGIWUR6162;AGIWUR11568;AGIWUR13340;AGIWUR14758;AGIWUR16201;AGIWUR17658;AGIWUR29562;AGIWUR40018 |    |   |                                                           |          |                |           |                             |
| N2                                                                                             | HS | V | 18320110                                                  | 18321527 | WBGene00005580 | sri-68    | B0462.2 -0.0622451945007354 |
| AGIWUR30149;AGIWUR39795                                                                        |    |   |                                                           |          |                |           |                             |
| N2                                                                                             | HS | V | 18325035                                                  | 18328791 | WBGene00007181 | B0462.1   | B0462.1 -0.0580221065210047 |
| AGIWUR32448                                                                                    |    |   |                                                           |          |                |           |                             |
| N2                                                                                             | HS | V | 18329112                                                  | 18331179 | WBGene00007183 | B0462.4   | B0462.4 0.179331475197705   |
| AGIWUR14082                                                                                    |    |   |                                                           |          |                |           |                             |
| N2                                                                                             | HS | V | 18351021                                                  | 18352672 | WBGene00119201 | C08E8.11  | C08E8.11                    |
| -0.114501850209688                                                                             |    |   | AGIWUR33378                                               |          |                |           |                             |
| N2                                                                                             | HS | V | 18353510                                                  | 18355842 | WBGene00007438 | C08E8.2   | C08E8.2 -0.0775010845914199 |
| AGIWUR19655;AGIWUR23477;AGIWUR40483                                                            |    |   |                                                           |          |                |           |                             |
| N2                                                                                             | HS | V | 18358035                                                  | 18359555 | WBGene00045496 | C08E8.8   | C08E8.8 -0.0265631288209054 |
| AGIWUR1498;AGIWUR11590;AGIWUR13685;AGIWUR14012;AGIWUR37565                                     |    |   |                                                           |          |                |           |                             |
| N2                                                                                             | HS | V | 18359818                                                  | 18359988 | WBGene00007441 | C08E8.5   | C08E8.5 -0.23978905785935   |
| AGIWUR31154                                                                                    |    |   |                                                           |          |                |           |                             |
| N2                                                                                             | HS | V | 18361051                                                  | 18362543 | WBGene00007437 | C08E8.1   | C08E8.1 -0.0638332944637945 |
| AGIWUR13037;AGIWUR22262;AGIWUR29468                                                            |    |   |                                                           |          |                |           |                             |
| N2                                                                                             | HS | V | 18364858                                                  | 18365224 | WBGene00050891 | C08E8.9   | C08E8.9 0.129218203159496   |
| AGIWUR12572;AGIWUR29261;AGIWUR38952;AGIWUR42879;AGIWUR44736                                    |    |   |                                                           |          |                |           |                             |
| N2                                                                                             | HS | V | 18368014                                                  | 18368422 | WBGene00007442 | C08E8.6   | C08E8.6 -0.0844430263814271 |
| AGIWUR29226                                                                                    |    |   |                                                           |          |                |           |                             |
| N2                                                                                             | HS | V | 18371846                                                  | 18373528 | WBGene00007440 | C08E8.4   | C08E8.4 0.127694068314575   |
| AGIWUR33396;AGIWUR42447                                                                        |    |   |                                                           |          |                |           |                             |
| N2                                                                                             | HS | V | 18374494                                                  | 18376755 | WBGene00013066 | Y51A2B.2  | Y51A2B.2                    |
| -0.161514615698685                                                                             |    |   | AGIWUR530                                                 |          |                |           |                             |
| N2                                                                                             | HS | V | 18379119                                                  | 18379289 | WBGene00013071 | Y51A2B.8  | Y51A2B.8                    |

|                           |                                                                         |
|---------------------------|-------------------------------------------------------------------------|
| -0.0362185769115571       | AGIWUR11261;AGIWUR15571;AGIWUR26511;AGIWUR35990;AGIWUR37522;AGIWUR43960 |
| N2 HS V 18380620 18382690 | WBGene00013067 nhr-288 Y51A2B.3                                         |
| -0.0618679769969379       | AGIWUR6038                                                              |
| N2 HS V 18386252 18389146 | WBGene00013068 Y51A2B.4 Y51A2B.4                                        |
| 0.0175662948418402        | AGIWUR28115                                                             |
| N2 HS V 18389280 18391337 | WBGene00013069 Y51A2B.5 Y51A2B.5                                        |
| 0.0292833988456724        | AGIWUR3971                                                              |
| N2 HS V 18392007 18394303 | WBGene00013070 Y51A2B.6 Y51A2B.6                                        |
| 0.0263939572225738        | AGIWUR20290                                                             |
| N2 HS V 18395338 18395749 | WBGene00050907 Y51A2B.9 Y51A2B.9                                        |
| 0.147473135178334         | AGIWUR15787;AGIWUR15989;AGIWUR19344;AGIWUR25724;AGIWUR40333             |
| N2 HS V 18398450 18400374 | WBGene00005828 srw-81 Y51A2B.7                                          |
| -0.00248272765287005      | AGIWUR14210                                                             |
| N2 HS V 18406896 18408138 | WBGene00014984 ZK262.12 ZK262.12                                        |
| 0.00684306045708816       | AGIWUR29494;AGIWUR39668                                                 |
| N2 HS V 18409043 18410242 | WBGene00005417 srh-207 ZK262.1 0.0515272076695013                       |
| AGIWUR24982               |                                                                         |
| N2 HS V 18410758 18412987 | WBGene00013949 ZK262.2 ZK262.2 -0.0349270380250939                      |
| AGIWUR1816                |                                                                         |
| N2 HS V 18414351 18416861 | WBGene00013950 ZK262.3 ZK262.3 0.0428641348504062                       |
| AGIWUR39692               |                                                                         |
| N2 HS V 18417749 18419893 | WBGene00005409 srh-198 ZK262.13                                         |
| 0.132829340744854         | AGIWUR10509;AGIWUR15365                                                 |
| N2 HS V 18421097 18423477 | WBGene00005614 srj-26 ZK262.10                                          |
| -0.028885767896826        | AGIWUR12493;AGIWUR38321;AGIWUR40538                                     |
| N2 HS V 18423883 18424207 | WBGene00013951 ZK262.4 ZK262.4 0.352977796252235                        |
| AGIWUR19656               |                                                                         |
| N2 HS V 18426580 18430537 | WBGene00005830 srw-83 ZK262.6 -0.0787817930809807                       |
| AGIWUR18266               |                                                                         |
| N2 HS V 18431750 18434172 | WBGene00005829 srw-82 ZK262.7 0.0831258397272379                        |
| AGIWUR4528                |                                                                         |
| N2 HS V 18440578 18441340 | WBGene00013954 ZK262.9 ZK262.9 -0.0177128818248962                      |
| AGIWUR34089               |                                                                         |
| N2 HS V 18444418 18447019 | WBGene00013944 ZK228.1 ZK228.1                                          |
| -0.00951982353815684      | AGIWUR6424                                                              |
| N2 HS V 18455355 18455934 | WBGene00050900 ZK228.11 ZK228.11                                        |
| 0.22347217966211          | AGIWUR27728                                                             |
| N2 HS V 18458238 18461231 | WBGene00013946 ZK228.3 ZK228.3 0.16811706370253                         |
| AGIWUR704                 |                                                                         |



|                                                                            |    |   |          |          |                |           |           |                    |
|----------------------------------------------------------------------------|----|---|----------|----------|----------------|-----------|-----------|--------------------|
| N2                                                                         | HS | V | 18462804 | 18465320 | WBGene00013947 | ZK228.4   | ZK228.4   | 0.323891530088272  |
| AGIWUR27462                                                                |    |   |          |          |                |           |           |                    |
| N2                                                                         | HS | V | 18471985 | 18473530 | WBGene00005397 | srh-182   | ZK228.5   | 0.18728579815197   |
| AGIWUR27804                                                                |    |   |          |          |                |           |           |                    |
| N2                                                                         | HS | V | 18474523 | 18476268 | WBGene00005396 | srh-181   | ZK228.6   | -0.036888681918775 |
| AGIWUR6220                                                                 |    |   |          |          |                |           |           |                    |
| N2                                                                         | HS | V | 18476390 | 18478061 | WBGene00005394 | srh-179   | ZK228.7   |                    |
| -0.00223555904232331 AGIWUR29334                                           |    |   |          |          |                |           |           |                    |
| N2                                                                         | HS | V | 18478467 | 18480331 | WBGene00005393 | srh-178   | ZK228.8   | -0.051121221666377 |
| AGIWUR6209                                                                 |    |   |          |          |                |           |           |                    |
| N2                                                                         | HS | V | 18481131 | 18487258 | WBGene00013083 | Y51A2D.18 |           | Y51A2D.18          |
| 0.129975131367747 AGIWUR19122                                              |    |   |          |          |                |           |           |                    |
| N2                                                                         | HS | V | 18492265 | 18508201 | WBGene00004830 | slo-1     | Y51A2D.19 |                    |
| 0.0802637359796359 AGIWUR35207;AGIWUR43931                                 |    |   |          |          |                |           |           |                    |
| N2                                                                         | HS | V | 18508873 | 18512632 | WBGene00013072 | Y51A2D.1  |           | Y51A2D.1           |
| -0.0118115090715847 AGIWUR24034                                            |    |   |          |          |                |           |           |                    |
| N2                                                                         | HS | V | 18516789 | 18523875 | WBGene00013073 | hmit-1.1  |           | Y51A2D.4           |
| -0.0668128458883857 AGIWUR9464                                             |    |   |          |          |                |           |           |                    |
| N2                                                                         | HS | V | 18524760 | 18529156 | WBGene00013074 | hmit-1.2  |           | Y51A2D.5           |
| -0.0795843837915449 AGIWUR26939                                            |    |   |          |          |                |           |           |                    |
| N2                                                                         | HS | V | 18533924 | 18549129 | WBGene00013075 | Y51A2D.7  |           | Y51A2D.7           |
| 0.00515233768944334 AGIWUR40539                                            |    |   |          |          |                |           |           |                    |
| N2                                                                         | HS | V | 18550022 | 18553867 | WBGene00013076 | Y51A2D.8  |           | Y51A2D.8           |
| 0.0953677642629174 AGIWUR41015                                             |    |   |          |          |                |           |           |                    |
| N2                                                                         | HS | V | 18555387 | 18556643 | WBGene00013077 | ttr-24    | Y51A2D.9  |                    |
| 0.145361924136905 AGIWUR9673                                               |    |   |          |          |                |           |           |                    |
| N2                                                                         | HS | V | 18556714 | 18558099 | WBGene00013078 | ttr-25    | Y51A2D.10 |                    |
| 0.278570693008048 AGIWUR27649                                              |    |   |          |          |                |           |           |                    |
| N2                                                                         | HS | V | 18558748 | 18560308 | WBGene00013079 | ttr-26    | Y51A2D.11 |                    |
| 0.235859457312845 AGIWUR38389                                              |    |   |          |          |                |           |           |                    |
| N2                                                                         | HS | V | 18562178 | 18564886 | WBGene00005191 | srg-34    | Y51A2D.12 |                    |
| 0.243523945465673 AGIWUR5864;AGIWUR15788;AGIWUR28658                       |    |   |          |          |                |           |           |                    |
| N2                                                                         | HS | V | 18571833 | 18573026 | WBGene00044210 | Y51A2D.21 |           | Y51A2D.21          |
| 0.136104898820228 AGIWUR69;AGIWUR12741;AGIWUR19445;AGIWUR23107;AGIWUR31627 |    |   |          |          |                |           |           |                    |
| N2                                                                         | HS | V | 18573056 | 18579784 | WBGene00013080 | Y51A2D.13 |           | Y51A2D.13          |
| 0.260799237375302 AGIWUR33983                                              |    |   |          |          |                |           |           |                    |
| N2                                                                         | HS | V | 18582658 | 18582963 | WBGene00013081 | Y51A2D.14 |           | Y51A2D.14          |
| -0.0114285768593341 AGIWUR35808                                            |    |   |          |          |                |           |           |                    |
| N2                                                                         | HS | V | 18592754 | 18614101 | WBGene00013082 | grdn-1    | Y51A2D.15 |                    |

|                                                                                     |                                                         |          |                |                                     |
|-------------------------------------------------------------------------------------|---------------------------------------------------------|----------|----------------|-------------------------------------|
| 0.120944448996293                                                                   | AGIWUR699;AGIWUR3278;AGIWUR40624                        |          |                |                                     |
| N2 HS V                                                                             | 18616599                                                | 18620043 | WBGene00003660 | nhr-70 Y51A2D.17                    |
| 0.112987721855131                                                                   | AGIWUR6583                                              |          |                |                                     |
| N2 HS V                                                                             | 18620057                                                | 18623093 | WBGene00013479 | Y69H2.1 Y69H2.1 0.152527910603936   |
| AGIWUR4951                                                                          |                                                         |          |                |                                     |
| N2 HS V                                                                             | 18623198                                                | 18626852 | WBGene00050884 | Y69H2.15 Y69H2.15                   |
| -0.0262441864588894                                                                 | AGIWUR11539;AGIWUR42398                                 |          |                |                                     |
| N2 HS V                                                                             | 18628680                                                | 18636348 | WBGene00013480 | egas-3 Y69H2.2 -0.139699697952161   |
| AGIWUR12373                                                                         |                                                         |          |                |                                     |
| N2 HS V                                                                             | 18638484                                                | 18639591 | WBGene00013489 | col-42 Y69H2.14                     |
| -0.149482406734217                                                                  | AGIWUR4525;AGIWUR33265                                  |          |                |                                     |
| N2 HS V                                                                             | 18640337                                                | 18648392 | WBGene00013486 | egas-1 Y69H2.11                     |
| 0.196062624474576                                                                   | AGIWUR27908                                             |          |                |                                     |
| N2 HS V                                                                             | 18650343                                                | 18656165 | WBGene00013487 | egas-2 Y69H2.12                     |
| 0.26198283599165                                                                    | AGIWUR11285                                             |          |                |                                     |
| N2 HS V                                                                             | 18656094                                                | 18664116 | WBGene00013481 | Y69H2.3 Y69H2.3 -0.0294529852540411 |
| AGIWUR14840;AGIWUR15424;AGIWUR24446;AGIWUR25250;AGIWUR30766;AGIWUR39487;AGIWUR40523 |                                                         |          |                |                                     |
| N2 HS V                                                                             | 18670315                                                | 18684360 | WBGene00013485 | Y69H2.10 Y69H2.10                   |
| -0.0988935335168115                                                                 | AGIWUR10385;AGIWUR23560;AGIWUR34119                     |          |                |                                     |
| N2 HS V                                                                             | 18685060                                                | 18686349 | WBGene00077455 | Y69H2.17 Y69H2.17                   |
| -0.0167076606245935                                                                 | AGIWUR9288;AGIWUR16970;AGIWUR45036                      |          |                |                                     |
| N2 HS V                                                                             | 18686315                                                | 18689843 | WBGene00006714 | ubc-19 Y69H2.6 0.069349540512059    |
| AGIWUR6785                                                                          |                                                         |          |                |                                     |
| N2 HS V                                                                             | 18689989                                                | 18696069 | WBGene00013482 | Y69H2.7 Y69H2.7 -0.0841124575022363 |
| AGIWUR29711;AGIWUR41114                                                             |                                                         |          |                |                                     |
| N2 HS V                                                                             | 18701540                                                | 18706098 | WBGene00013484 | Y69H2.9 Y69H2.9 0.243498965826682   |
| AGIWUR13319                                                                         |                                                         |          |                |                                     |
| N2 HS V                                                                             | 18706031                                                | 18706254 | WBGene00077451 | Y69H2.16 Y69H2.16                   |
| -0.139799121042121                                                                  | AGIWUR12659                                             |          |                |                                     |
| N2 HS V                                                                             | 18709810                                                | 18711696 | WBGene00194680 | Y17D7C.6 Y17D7C.6                   |
| 0.117893072130136                                                                   | AGIWUR37831                                             |          |                |                                     |
| N2 HS V                                                                             | 18713728                                                | 18714612 | WBGene00050903 | Y17D7C.4 Y17D7C.4                   |
| -0.14930565083355                                                                   | AGIWUR689;AGIWUR4289;AGIWUR8035;AGIWUR26888;AGIWUR35127 |          |                |                                     |
| N2 HS V                                                                             | 18716075                                                | 18719944 | WBGene00012456 | Y17D7C.2 Y17D7C.2                   |
| 0.00295461874728797                                                                 | AGIWUR12235                                             |          |                |                                     |
| N2 HS V                                                                             | 18720589                                                | 18723771 | WBGene00045366 | Y17D7C.3 Y17D7C.3                   |
| 0.146069472060595                                                                   | AGIWUR22892;AGIWUR44345                                 |          |                |                                     |
| N2 HS V                                                                             | 18728703                                                | 18729374 | WBGene00077655 | asp-19 ZK384.6                      |
| -0.00289955547646947                                                                | AGIWUR5848                                              |          |                |                                     |

|                                                                              |    |   |          |          |                |           |         |                     |
|------------------------------------------------------------------------------|----|---|----------|----------|----------------|-----------|---------|---------------------|
| N2                                                                           | HS | V | 18731991 | 18732772 | WBGene00013971 | scl-19    | ZK384.1 | 0.00306370892671204 |
| AGIWUR33613                                                                  |    |   |          |          |                |           |         |                     |
| N2                                                                           | HS | V | 18732802 | 18734466 | WBGene00013972 | scl-20    | ZK384.2 | 0.0820719407130266  |
| AGIWUR29469                                                                  |    |   |          |          |                |           |         |                     |
| N2                                                                           | HS | V | 18738955 | 18742208 | WBGene00045364 | cllec-250 |         | F11D11.14           |
| -0.0071180824489776 AGIWUR14561;AGIWUR19691;AGIWUR42947                      |    |   |          |          |                |           |         |                     |
| N2                                                                           | HS | V | 18742427 | 18745266 | WBGene00045363 | F11D11.13 |         | F11D11.13           |
| 0.146401102652197 AGIWUR372;AGIWUR17003                                      |    |   |          |          |                |           |         |                     |
| N2                                                                           | HS | V | 18745718 | 18746987 | WBGene00008703 | cllec-251 |         | F11D11.8            |
| -0.030877195994961 AGIWUR24107                                               |    |   |          |          |                |           |         |                     |
| N2                                                                           | HS | V | 18747943 | 18748826 | WBGene00008702 | cllec-252 |         | F11D11.7            |
| -0.215260420300855 AGIWUR30950                                               |    |   |          |          |                |           |         |                     |
| N2                                                                           | HS | V | 18749579 | 18750199 | WBGene00045362 | F11D11.12 |         | F11D11.12           |
| 0.0677753146522333 AGIWUR1476;AGIWUR2080;AGIWUR33437;AGIWUR41696;AGIWUR44609 |    |   |          |          |                |           |         |                     |
| N2                                                                           | HS | V | 18750163 | 18750691 | WBGene00206492 | F11D11.21 |         | F11D11.21           |
| -0.0174025867619214 AGIWUR1746                                               |    |   |          |          |                |           |         |                     |
| N2                                                                           | HS | V | 18751267 | 18752299 | WBGene00045361 | cllec-253 |         | F11D11.11           |
| 0.0978969900158795 AGIWUR9867;AGIWUR17636                                    |    |   |          |          |                |           |         |                     |
| N2                                                                           | HS | V | 18752482 | 18753136 | WBGene00008701 | F11D11.6  |         | F11D11.6            |
| -0.021697983034028 AGIWUR6810;AGIWUR14978;AGIWUR29426                        |    |   |          |          |                |           |         |                     |
| N2                                                                           | HS | V | 18753500 | 18754428 | WBGene00008700 | cllec-254 |         | F11D11.5            |
| -0.0240875198098376 AGIWUR11388                                              |    |   |          |          |                |           |         |                     |
| N2                                                                           | HS | V | 18755450 | 18756760 | WBGene00050971 | F11D11.15 |         | F11D11.15           |
| 0.0165995915134203 AGIWUR7429;AGIWUR24923                                    |    |   |          |          |                |           |         |                     |
| N2                                                                           | HS | V | 18756846 | 18757678 | WBGene00077442 | F11D11.16 |         | F11D11.16           |
| 0.188762082661087 AGIWUR4444;AGIWUR5749;AGIWUR14017;AGIWUR24396;AGIWUR44023  |    |   |          |          |                |           |         |                     |
| N2                                                                           | HS | V | 18757982 | 18760285 | WBGene00008698 | F11D11.3  |         | F11D11.3            |
| -0.094818471926386 AGIWUR30167                                               |    |   |          |          |                |           |         |                     |
| N2                                                                           | HS | V | 18761378 | 18763526 | WBGene00008699 | F11D11.4  |         | F11D11.4            |
| 0.126697259332836 AGIWUR35106                                                |    |   |          |          |                |           |         |                     |
| N2                                                                           | HS | V | 18767754 | 18768414 | WBGene00077659 | F11D11.19 |         | F11D11.19           |
| -0.0612424030864798 AGIWUR24782                                              |    |   |          |          |                |           |         |                     |
| N2                                                                           | HS | V | 18771690 | 18772639 | WBGene00012454 | cllec-256 |         | Y17D7B.6            |
| 0.0235871126085891 AGIWUR32361;AGIWUR35140                                   |    |   |          |          |                |           |         |                     |
| N2                                                                           | HS | V | 18773061 | 18774024 | WBGene00044892 | cllec-257 |         | Y17D7B.8            |
| 0.313333376845142 AGIWUR43865                                                |    |   |          |          |                |           |         |                     |
| N2                                                                           | HS | V | 18775226 | 18776195 | WBGene00012453 | Y17D7B.5  |         | Y17D7B.5            |
| -0.142915483583526 AGIWUR36694;AGIWUR37221                                   |    |   |          |          |                |           |         |                     |
| N2                                                                           | HS | V | 18776198 | 18780216 | WBGene00012452 | Y17D7B.4  |         | Y17D7B.4            |

|                                                                                                                         |                                    |          |                |          |          |
|-------------------------------------------------------------------------------------------------------------------------|------------------------------------|----------|----------------|----------|----------|
| -0.109723904913405                                                                                                      | AGIWUR2942                         |          |                |          |          |
| N2 HS V                                                                                                                 | 18780490                           | 18782605 | WBGene00014562 | Y17D7B.7 | Y17D7B.7 |
| 0.11889124517992                                                                                                        |                                    |          |                |          |          |
| AGIWUR13145;AGIWUR14363;AGIWUR22346;AGIWUR24800;AGIWUR34763;AGIWUR36743;AGIWUR37503;AGIWUR41056;AGIWUR44064;AGIWUR44944 |                                    |          |                |          |          |
| N2 HS V                                                                                                                 | 18784954                           | 18786788 | WBGene00012451 | Y17D7B.3 | Y17D7B.3 |
| 0.0319418089435661                                                                                                      | AGIWUR11530                        |          |                |          |          |
| N2 HS V                                                                                                                 | 18787806                           | 18789617 | WBGene00012450 | Y17D7B.2 | Y17D7B.2 |
| -0.0350885701816148                                                                                                     | AGIWUR8884                         |          |                |          |          |
| N2 HS V                                                                                                                 | 18790958                           | 18794781 | WBGene00012449 | nhr-231  | Y17D7B.1 |
| 0.174970995004153                                                                                                       | AGIWUR3281;AGIWUR3287              |          |                |          |          |
| N2 HS V                                                                                                                 | 18796106                           | 18800822 | WBGene00008309 | nhr-170  | C54E10.5 |
| 0.289293012393589                                                                                                       | AGIWUR4988                         |          |                |          |          |
| N2 HS V                                                                                                                 | 18804080                           | 18806509 | WBGene00005522 | sri-10   | C54E10.4 |
| -0.308905362915491                                                                                                      | AGIWUR35247                        |          |                |          |          |
| N2 HS V                                                                                                                 | 18808069                           | 18808670 | WBGene00008310 | C54E10.6 | C54E10.6 |
| 0.297817284172019                                                                                                       | AGIWUR20520                        |          |                |          |          |
| N2 HS V                                                                                                                 | 18811005                           | 18813481 | WBGene00008308 | C54E10.3 | C54E10.3 |
| 0.0234963202223941                                                                                                      | AGIWUR32525                        |          |                |          |          |
| N2 HS V                                                                                                                 | 18815036                           | 18818593 | WBGene00008306 | C54E10.1 | C54E10.1 |
| -0.0831252727184806                                                                                                     | AGIWUR12625                        |          |                |          |          |
| N2 HS V                                                                                                                 | 18819766                           | 18831422 | WBGene00008307 | ncs-5    | C54E10.2 |
| 0.00677077487352484                                                                                                     | AGIWUR7427                         |          |                |          |          |
| N2 HS V                                                                                                                 | 18832327                           | 18837214 | WBGene00012448 | cyp-33D3 | Y17D7A.4 |
| -0.100724782127569                                                                                                      | AGIWUR43577                        |          |                |          |          |
| N2 HS V                                                                                                                 | 18839310                           | 18845401 | WBGene00003655 | nhr-65   | Y17D7A.3 |
| 0.181277561388402                                                                                                       | AGIWUR8708                         |          |                |          |          |
| N2 HS V                                                                                                                 | 18846817                           | 18852729 | WBGene00012446 | nhr-230  | Y17D7A.1 |
| 0.173897634427414                                                                                                       | AGIWUR23803;AGIWUR40110            |          |                |          |          |
| N2 HS V                                                                                                                 | 18853127                           | 18859221 | WBGene00006945 | wars-1   | Y80D3A.1 |
| 0.0773362058500044                                                                                                      | AGIWUR39065                        |          |                |          |          |
| N2 HS V                                                                                                                 | 18860287                           | 18894974 | WBGene00001258 | emb-4    | Y80D3A.2 |
| 0.0167048163008312                                                                                                      |                                    |          |                |          |          |
| AGIWUR228;AGIWUR4092;AGIWUR9326;AGIWUR10162;AGIWUR34227;AGIWUR35514;AGIWUR38064;AGIWUR42024                             |                                    |          |                |          |          |
| N2 HS V                                                                                                                 | 18895317                           | 18900532 | WBGene00013584 | nhr-243  | Y80D3A.4 |
| -0.060019265121813                                                                                                      | AGIWUR41496                        |          |                |          |          |
| N2 HS V                                                                                                                 | 18912038                           | 18918109 | WBGene00013585 | cyp-42A1 | Y80D3A.5 |
| 0.307892545055738                                                                                                       | AGIWUR7466;AGIWUR41876;AGIWUR42942 |          |                |          |          |
| N2 HS V                                                                                                                 | 18919296                           | 18931379 | WBGene00004236 | ptr-22   | Y80D3A.7 |

|                     |                                                                                  |          |                |                   |           |
|---------------------|----------------------------------------------------------------------------------|----------|----------------|-------------------|-----------|
| -0.22383892997818   | AGIWUR13202                                                                      |          |                |                   |           |
| N2 HS V             | 18940641                                                                         | 18946905 | WBGene00013586 | Y80D3A.8          | Y80D3A.8  |
| 0.300728485908853   | AGIWUR41159;AGIWUR44894                                                          |          |                |                   |           |
| N2 HS V             | 18953118                                                                         | 18957317 | WBGene00013587 | Y80D3A.9          | Y80D3A.9  |
| 0.206573067559415   | AGIWUR42361                                                                      |          |                |                   |           |
| N2 HS V             | 18958240                                                                         | 18960172 | WBGene00012702 | ztf-20 Y39B6A.46  |           |
| -0.17468617454292   | AGIWUR22117                                                                      |          |                |                   |           |
| N2 HS V             | 18960969                                                                         | 18967842 | WBGene00012701 | Y39B6A.43         | Y39B6A.43 |
| 0.256930330158436   | AGIWUR14234                                                                      |          |                |                   |           |
| N2 HS V             | 18968021                                                                         | 18969640 | WBGene00012700 | Y39B6A.42         | Y39B6A.42 |
| -0.355060092252588  | AGIWUR22324;AGIWUR30146                                                          |          |                |                   |           |
| N2 HS V             | 18970500                                                                         | 18977976 | WBGene00012699 | Y39B6A.41         | Y39B6A.41 |
| 0.171675157252703   | AGIWUR26695                                                                      |          |                |                   |           |
| N2 HS V             | 18979336                                                                         | 18981193 | WBGene00012698 | sws-1 Y39B6A.40   |           |
| 0.201940484138502   | AGIWUR12800                                                                      |          |                |                   |           |
| N2 HS V             | 18981306                                                                         | 18985870 | WBGene00012697 | mrps-35 Y39B6A.39 |           |
| 0.105786247784302   | AGIWUR40852                                                                      |          |                |                   |           |
| N2 HS V             | 18986498                                                                         | 18990421 | WBGene00012696 | reps-1 Y39B6A.38  |           |
| 0.094803665938386   | AGIWUR11454;AGIWUR30291;AGIWUR39000                                              |          |                |                   |           |
| N2 HS V             | 18990850                                                                         | 18993799 | WBGene00012695 | Y39B6A.37         | Y39B6A.37 |
| 0.166376789027771   | AGIWUR27863                                                                      |          |                |                   |           |
| N2 HS V             | 18993940                                                                         | 18998200 | WBGene00012694 | Y39B6A.36         | Y39B6A.36 |
| 0.0396425351841323  | AGIWUR3112                                                                       |          |                |                   |           |
| N2 HS V             | 18998345                                                                         | 19000918 | WBGene00006567 | tgt-2 Y39B6A.35   |           |
| 0.0525444940213085  | AGIWUR30400                                                                      |          |                |                   |           |
| N2 HS V             | 19001018                                                                         | 19001856 | WBGene00012693 | Y39B6A.34         | Y39B6A.34 |
| 0.227952475890429   | AGIWUR4047                                                                       |          |                |                   |           |
| N2 HS V             | 19001956                                                                         | 19006711 | WBGene00012692 | Y39B6A.33         | Y39B6A.33 |
| 0.204337625688053   | AGIWUR11551                                                                      |          |                |                   |           |
| N2 HS V             | 19008635                                                                         | 19013833 | WBGene00012690 | Y39B6A.31         | Y39B6A.31 |
| -0.0340091167272956 | AGIWUR12356                                                                      |          |                |                   |           |
| N2 HS V             | 19014573                                                                         | 19020001 | WBGene00012689 | Y39B6A.30         | Y39B6A.30 |
| 0.0776762195216154  | AGIWUR2723;AGIWUR3868;AGIWUR8560;AGIWUR19395;AGIWUR22745;AGIWUR25998;AGIWUR35972 |          |                |                   |           |
| N2 HS V             | 19020487                                                                         | 19024765 | WBGene00012688 | Y39B6A.29         | Y39B6A.29 |
| 0.246507836727409   | AGIWUR29897                                                                      |          |                |                   |           |
| N2 HS V             | 19031742                                                                         | 19035255 | WBGene00012686 | Y39B6A.27         | Y39B6A.27 |
| 0.141277254574616   | AGIWUR12883;AGIWUR21823;AGIWUR22555                                              |          |                |                   |           |
| N2 HS V             | 19035753                                                                         | 19037320 | WBGene00012683 | asp-17 Y39B6A.24  |           |
| 0.334553945283281   | AGIWUR28496                                                                      |          |                |                   |           |

|                      |    |   |                                                                        |          |                |           |           |
|----------------------|----|---|------------------------------------------------------------------------|----------|----------------|-----------|-----------|
| N2                   | HS | V | 19039058                                                               | 19042605 | WBGene00012682 | asp-16    | Y39B6A.23 |
| -0.0582500415140021  |    |   | AGIWUR29027                                                            |          |                |           |           |
| N2                   | HS | V | 19043215                                                               | 19044853 | WBGene00012681 | asp-15    | Y39B6A.22 |
| 0.183517858583095    |    |   | AGIWUR2429                                                             |          |                |           |           |
| N2                   | HS | V | 19047047                                                               | 19048669 | WBGene00012680 | Y39B6A.21 | Y39B6A.21 |
| 0.471153435131532    |    |   | AGIWUR26567                                                            |          |                |           |           |
| N2                   | HS | V | 19049461                                                               | 19050825 | WBGene00000214 | asp-1     | Y39B6A.20 |
| 0.0328424370243958   |    |   | AGIWUR25099                                                            |          |                |           |           |
| N2                   | HS | V | 19060180                                                               | 19067034 | WBGene00006696 | twk-46    | Y39B6A.19 |
| 0.00222270975928041  |    |   | AGIWUR13015;AGIWUR14878;AGIWUR16757                                    |          |                |           |           |
| N2                   | HS | V | 19068621                                                               | 19074237 | WBGene00012679 | Y39B6A.18 | Y39B6A.18 |
| 0.186175513241466    |    |   | AGIWUR34309                                                            |          |                |           |           |
| N2                   | HS | V | 19076654                                                               | 19082641 | WBGene00003685 | nhr-95    | Y39B6A.17 |
| 0.172570828827408    |    |   | AGIWUR15473;AGIWUR22074;AGIWUR37574                                    |          |                |           |           |
| N2                   | HS | V | 19087723                                                               | 19092668 | WBGene00012703 | nhr-145   | Y39B6A.47 |
| 0.241311743794352    |    |   | AGIWUR17417;AGIWUR35409                                                |          |                |           |           |
| N2                   | HS | V | 19099085                                                               | 19101108 | WBGene00012678 | Y39B6A.16 | Y39B6A.16 |
| -0.162518666167283   |    |   | AGIWUR34959                                                            |          |                |           |           |
| N2                   | HS | V | 19101961                                                               | 19118412 | WBGene00012676 | pro-3     | Y39B6A.14 |
| 0.123077166792849    |    |   | AGIWUR4302;AGIWUR23872                                                 |          |                |           |           |
| N2                   | HS | V | 19118505                                                               | 19119425 | WBGene00012675 | Y39B6A.13 | Y39B6A.13 |
| -0.0667898263091096  |    |   | AGIWUR1697;AGIWUR18271;AGIWUR25659;AGIWUR42276                         |          |                |           |           |
| N2                   | HS | V | 19119527                                                               | 19124915 | WBGene00012674 | bed-1     | Y39B6A.12 |
| -0.122759301933476   |    |   | AGIWUR8314                                                             |          |                |           |           |
| N2                   | HS | V | 19127530                                                               | 19130938 | WBGene00012673 | dyf-17    | Y39B6A.11 |
| -0.146485472445582   |    |   | AGIWUR31302                                                            |          |                |           |           |
| N2                   | HS | V | 19131531                                                               | 19133603 | WBGene00012672 | Y39B6A.10 | Y39B6A.10 |
| 0.188837683431172    |    |   | AGIWUR28432                                                            |          |                |           |           |
| N2                   | HS | V | 19136509                                                               | 19138986 | WBGene00012671 | Y39B6A.9  | Y39B6A.9  |
| -0.0612854265206852  |    |   | AGIWUR37848                                                            |          |                |           |           |
| N2                   | HS | V | 19140795                                                               | 19145542 | WBGene00012670 | Y39B6A.8  | Y39B6A.8  |
| -0.00542922260610822 |    |   | AGIWUR9446;AGIWUR12441;AGIWUR23017;AGIWUR25985;AGIWUR31414;AGIWUR38533 |          |                |           |           |
| N2                   | HS | V | 19145778                                                               | 19149147 | WBGene00012669 | Y39B6A.7  | Y39B6A.7  |
| 0.188295997197384    |    |   | AGIWUR5513;AGIWUR7476                                                  |          |                |           |           |
| N2                   | HS | V | 19154106                                                               | 19157674 | WBGene00006639 | tsp-13    | Y39B6A.6  |
| -0.0287016561084297  |    |   | AGIWUR1772                                                             |          |                |           |           |
| N2                   | HS | V | 19157659                                                               | 19158877 | WBGene00012668 | Y39B6A.5  | Y39B6A.5  |
| 0.125022214262488    |    |   | AGIWUR38840                                                            |          |                |           |           |
| N2                   | HS | V | 19174806                                                               | 19187899 | WBGene00001987 | hot-2     | Y39B6A.48 |

|                                     |                                                 |          |                |          |                             |
|-------------------------------------|-------------------------------------------------|----------|----------------|----------|-----------------------------|
| -0.0456407001440953                 | AGIWUR11607;AGIWUR30465;AGIWUR44669             |          |                |          |                             |
| N2 HS V                             | 19189246                                        | 19190035 | WBGene00012666 | Y39B6A.3 | Y39B6A.3                    |
| 0.0456427396003765                  | AGIWUR4119;AGIWUR9133;AGIWUR19452               |          |                |          |                             |
| N2 HS V                             | 19190547                                        | 19199080 | WBGene00012665 | pph-5    | Y39B6A.2                    |
| -0.266050364474897                  | AGIWUR17724;AGIWUR26103;AGIWUR30573;AGIWUR40282 |          |                |          |                             |
| N2 HS V                             | 19201013                                        | 19203607 | WBGene00012664 | Y39B6A.1 | Y39B6A.1                    |
| -0.0252669016220519                 | AGIWUR381;AGIWUR1405;AGIWUR30522                |          |                |          |                             |
| N2 HS V                             | 19207684                                        | 19211895 | WBGene00003669 | nhr-79   | T26H2.9 0.0602305215483057  |
| AGIWUR33400                         |                                                 |          |                |          |                             |
| N2 HS V                             | 19213685                                        | 19217138 | WBGene00005653 | srr-2    | T26H2.8 -0.0817978281813385 |
| AGIWUR39912                         |                                                 |          |                |          |                             |
| N2 HS V                             | 19217975                                        | 19222908 | WBGene00012068 | oac-49   | T26H2.7 0.1197664505851     |
| AGIWUR12320;AGIWUR34436             |                                                 |          |                |          |                             |
| N2 HS V                             | 19252181                                        | 19253054 | WBGene00219452 | F21D9.11 | F21D9.11                    |
| -0.196436093211064                  | AGIWUR32988                                     |          |                |          |                             |
| N2 HS V                             | 19253820                                        | 19256758 | WBGene00009018 | F21D9.4  | F21D9.4 0.245749635872402   |
| AGIWUR14486;AGIWUR27967;AGIWUR40913 |                                                 |          |                |          |                             |
| N2 HS V                             | 19257583                                        | 19257753 | WBGene00009017 | F21D9.3  | F21D9.3 -0.123445367654323  |
| AGIWUR44583                         |                                                 |          |                |          |                             |
| N2 HS V                             | 19258483                                        | 19262449 | WBGene00009016 | F21D9.2  | F21D9.2 0.0540211617597137  |
| AGIWUR31772                         |                                                 |          |                |          |                             |
| N2 HS V                             | 19264597                                        | 19269661 | WBGene00009015 | F21D9.1  | F21D9.1 0.0651001837625369  |
| AGIWUR11826                         |                                                 |          |                |          |                             |
| N2 HS V                             | 19279218                                        | 19279988 | WBGene00009021 | F21D9.8  | F21D9.8 -0.0406803877681181 |
| AGIWUR27067                         |                                                 |          |                |          |                             |
| N2 HS V                             | 19282614                                        | 19284594 | WBGene00010099 | fbxb-117 | F55C9.1                     |
| 0.460925784554707                   | AGIWUR13275                                     |          |                |          |                             |
| N2 HS V                             | 19287009                                        | 19288173 | WBGene00010100 | F55C9.3  | F55C9.3 -0.116219313136401  |
| AGIWUR494                           |                                                 |          |                |          |                             |
| N2 HS V                             | 19288755                                        | 19289889 | WBGene00010101 | fbxb-57  | F55C9.4 0.205837175728433   |
| AGIWUR24142                         |                                                 |          |                |          |                             |
| N2 HS V                             | 19290616                                        | 19291028 | WBGene00010102 | F55C9.5  | F55C9.5 0.15622411662767    |
| AGIWUR19911                         |                                                 |          |                |          |                             |
| N2 HS V                             | 19299562                                        | 19300461 | WBGene00077663 | F55C9.14 | F55C9.14                    |
| -0.13450902640119                   | AGIWUR6689                                      |          |                |          |                             |
| N2 HS V                             | 19301076                                        | 19302034 | WBGene00010105 | fbxb-62  | F55C9.8 -0.0526987965428489 |
| AGIWUR8848                          |                                                 |          |                |          |                             |
| N2 HS V                             | 19302787                                        | 19303728 | WBGene00044197 | fbxb-63  | F55C9.13                    |
| -0.0311172475275363                 | AGIWUR2799                                      |          |                |          |                             |

|                         |    |   |                                                                         |          |                |          |                             |
|-------------------------|----|---|-------------------------------------------------------------------------|----------|----------------|----------|-----------------------------|
| N2                      | HS | V | 19307242                                                                | 19307583 | WBGene00010107 | F55C9.11 | F55C9.11                    |
| -0.0116023997641563     |    |   | AGIWUR11613;AGIWUR17151;AGIWUR17890;AGIWUR25273;AGIWUR41312;AGIWUR44273 |          |                |          |                             |
| N2                      | HS | V | 19308707                                                                | 19309687 | WBGene00077441 | C43D7.10 | C43D7.10                    |
| -0.0701948188972592     |    |   | AGIWUR30843;AGIWUR31224                                                 |          |                |          |                             |
| N2                      | HS | V | 19310583                                                                | 19311058 | WBGene00008070 | C43D7.8  | C43D7.8 -0.105693901677204  |
| AGIWUR33714             |    |   |                                                                         |          |                |          |                             |
| N2                      | HS | V | 19313275                                                                | 19316512 | WBGene00008071 | fbxb-64  | C43D7.9 -0.141312757167499  |
| AGIWUR31078             |    |   |                                                                         |          |                |          |                             |
| N2                      | HS | V | 19317362                                                                | 19318500 | WBGene00005418 | srh-208  | C43D7.6 0.0088844972277986  |
| AGIWUR23104             |    |   |                                                                         |          |                |          |                             |
| N2                      | HS | V | 19319033                                                                | 19319460 | WBGene00008069 | C43D7.7  | C43D7.7 1.81491923455728    |
| AGIWUR38919             |    |   |                                                                         |          |                |          |                             |
| N2                      | HS | V | 19320624                                                                | 19321203 | WBGene00008068 | sdz-6    | C43D7.5 1.28827573666291    |
| AGIWUR42821             |    |   |                                                                         |          |                |          |                             |
| N2                      | HS | V | 19321901                                                                | 19322487 | WBGene00008067 | C43D7.4  | C43D7.4 2.43713667785826    |
| AGIWUR30874;AGIWUR38230 |    |   |                                                                         |          |                |          |                             |
| N2                      | HS | V | 19324105                                                                | 19325882 | WBGene00014702 | C43D7.3  | C43D7.3 0.137482222394631   |
| AGIWUR12126;AGIWUR22143 |    |   |                                                                         |          |                |          |                             |
| N2                      | HS | V | 19329563                                                                | 19330747 | WBGene00008066 | fbxb-65  | C43D7.2 0.400066543306533   |
| AGIWUR44975             |    |   |                                                                         |          |                |          |                             |
| N2                      | HS | V | 19332425                                                                | 19349495 | WBGene00007583 | C14B4.2  | C14B4.2 0.199121477597739   |
| AGIWUR32835;AGIWUR36110 |    |   |                                                                         |          |                |          |                             |
| N2                      | HS | V | 19370602                                                                | 19371331 | WBGene00012808 | Y43F8A.1 | Y43F8A.1                    |
| 0.00932537183318516     |    |   | AGIWUR26806                                                             |          |                |          |                             |
| N2                      | HS | V | 19371553                                                                | 19376247 | WBGene00012809 | Y43F8A.2 | Y43F8A.2                    |
| -0.0294360479610631     |    |   | AGIWUR28395                                                             |          |                |          |                             |
| N2                      | HS | V | 19377444                                                                | 19381031 | WBGene00012810 | nceh-1   | Y43F8A.3                    |
| -0.0944667399351911     |    |   | AGIWUR31819                                                             |          |                |          |                             |
| N2                      | HS | V | 19381268                                                                | 19384760 | WBGene00005831 | srw-84   | Y43F8A.4                    |
| -0.125739320857898      |    |   | AGIWUR43294                                                             |          |                |          |                             |
| N2                      | HS | V | 19384887                                                                | 19390120 | WBGene00012811 | Y43F8A.5 | Y43F8A.5                    |
| 0.00618492316867592     |    |   | AGIWUR7721;AGIWUR20141;AGIWUR20247;AGIWUR27153;AGIWUR28536;AGIWUR29250  |          |                |          |                             |
| N2                      | HS | V | 19395055                                                                | 19396609 | WBGene00007727 | C25F9.8  | C25F9.8 0.220642511098522   |
| AGIWUR44804             |    |   |                                                                         |          |                |          |                             |
| N2                      | HS | V | 19397828                                                                | 19398982 | WBGene00045413 | C25F9.13 | C25F9.13                    |
| -0.00971817660027163    |    |   | AGIWUR475                                                               |          |                |          |                             |
| N2                      | HS | V | 19400142                                                                | 19400715 | WBGene00005833 | srw-86   | C25F9.7 -0.0765745766638215 |
| AGIWUR6983              |    |   |                                                                         |          |                |          |                             |
| N2                      | HS | V | 19402296                                                                | 19402955 | WBGene00045412 | C25F9.12 | C25F9.12                    |



|                         |                                                                      |
|-------------------------|----------------------------------------------------------------------|
| 0.316186852466329       | AGIWUR1593;AGIWUR18466;AGIWUR19405;AGIWUR25246;AGIWUR28580           |
| N2 HS V                 | 19403530 19405326 WBGene00007726 C25F9.6 C25F9.6 0.107754479294528   |
| AGIWUR21894             |                                                                      |
| N2 HS V                 | 19405685 19406394 WBGene00044291 C25F9.10 C25F9.10                   |
| 0.119358541875142       | AGIWUR2366;AGIWUR17710;AGIWUR42481                                   |
| N2 HS V                 | 19407739 19410857 WBGene00007725 C25F9.5 C25F9.5 0.359335757170976   |
| AGIWUR5091              |                                                                      |
| N2 HS V                 | 19411274 19413914 WBGene00007724 C25F9.4 C25F9.4 0.00739675780863003 |
| AGIWUR26318             |                                                                      |
| N2 HS V                 | 19416633 19418004 WBGene00007728 C25F9.9 C25F9.9 0.250941060846061   |
| AGIWUR14245;AGIWUR39624 |                                                                      |
| N2 HS V                 | 19418212 19418911 WBGene00050967 C25F9.15 C25F9.15                   |
| 0.187133098991366       | AGIWUR2951;AGIWUR35208;AGIWUR39664                                   |
| N2 HS V                 | 19421471 19426774 WBGene00007723 C25F9.2 C25F9.2 -0.0290797191040166 |
| AGIWUR34473             |                                                                      |
| N2 HS V                 | 19429440 19431687 WBGene00005832 srw-85 C25F9.1 0.134450530838271    |
| AGIWUR1639              |                                                                      |
| N2 HS V                 | 19432441 19433072 WBGene00045411 C25F9.11 C25F9.11                   |
| -0.0758392483488519     | AGIWUR27999;AGIWUR36828                                              |
| N2 HS V                 | 19436484 19437217 WBGene00045461 C25F9.14 C25F9.14                   |
| 0.0629005815252324      | AGIWUR9904;AGIWUR27826;AGIWUR29040;AGIWUR42961                       |
| N2 HS V                 | 19437899 19445605 WBGene00010850 M04C3.1 M04C3.1 0.146948766118429   |
| AGIWUR15238;AGIWUR16598 |                                                                      |
| N2 HS V                 | 19445873 19448901 WBGene00010851 M04C3.2 M04C3.2 0.0990207239933154  |
| AGIWUR3985;AGIWUR21107  |                                                                      |
| N2 HS V                 | 19449738 19450914 WBGene00206418 M04C3.5 M04C3.5 -0.0754929178943478 |
| AGIWUR10907             |                                                                      |
| N2 HS V                 | 19452183 19455031 WBGene00012824 Y43F8B.14 Y43F8B.14                 |
| 0.213168901832077       | AGIWUR7744                                                           |
| N2 HS V                 | 19460818 19462102 WBGene00045415 Y43F8B.15 Y43F8B.15                 |
| 0.439172075466839       | AGIWUR1838;AGIWUR3164;AGIWUR37500;AGIWUR41629                        |
| N2 HS V                 | 19462912 19463759 WBGene00195177 Y43F8B.25 Y43F8B.25                 |
| 0.333604611046061       | AGIWUR45162                                                          |
| N2 HS V                 | 19468383 19469554 WBGene00012822 Y43F8B.12 Y43F8B.12                 |
| 0.633814400298647       | AGIWUR15046                                                          |
| N2 HS V                 | 19470694 19472501 WBGene00012821 Y43F8B.11 Y43F8B.11                 |
| -0.0526992274699483     | AGIWUR11074                                                          |
| N2 HS V                 | 19474464 19476942 WBGene00012820 Y43F8B.10 Y43F8B.10                 |
| 0.0841704351435144      | AGIWUR22443                                                          |

|                                                                                                                       |    |   |                                                                                   |          |                |           |                             |
|-----------------------------------------------------------------------------------------------------------------------|----|---|-----------------------------------------------------------------------------------|----------|----------------|-----------|-----------------------------|
| N2                                                                                                                    | HS | V | 19479203                                                                          | 19480459 | WBGene00012819 | Y43F8B.9  | Y43F8B.9                    |
| 0.0763210082974748                                                                                                    |    |   | AGIWUR2851                                                                        |          |                |           |                             |
| N2                                                                                                                    | HS | V | 19483637                                                                          | 19483895 | WBGene00014888 | Y43F8B.8  | Y43F8B.8                    |
| -0.000128178235449639                                                                                                 |    |   | AGIWUR11075;AGIWUR22024;AGIWUR28783;AGIWUR29367;AGIWUR33429                       |          |                |           |                             |
| N2                                                                                                                    | HS | V | 19485319                                                                          | 19485873 | WBGene00219302 | Y43F8B.28 | Y43F8B.28                   |
| -0.202502586876208                                                                                                    |    |   | AGIWUR27524                                                                       |          |                |           |                             |
| N2                                                                                                                    | HS | V | 19485916                                                                          | 19486746 | WBGene00050911 | Y43F8B.18 | Y43F8B.18                   |
| -0.0861586143065276                                                                                                   |    |   | AGIWUR1861;AGIWUR18935                                                            |          |                |           |                             |
| N2                                                                                                                    | HS | V | 19490761                                                                          | 19491231 | WBGene00012818 | Y43F8B.7  | Y43F8B.7                    |
| -0.0296582692743965                                                                                                   |    |   | AGIWUR13017;AGIWUR18716                                                           |          |                |           |                             |
| N2                                                                                                                    | HS | V | 19493885                                                                          | 19494657 | WBGene00012817 | Y43F8B.6  | Y43F8B.6                    |
| -0.0782563099877942                                                                                                   |    |   | AGIWUR42352                                                                       |          |                |           |                             |
| N2                                                                                                                    | HS | V | 19494762                                                                          | 19495687 | WBGene00012816 | sc1-21    | Y43F8B.5                    |
| 0.139369847619565                                                                                                     |    |   | AGIWUR20613                                                                       |          |                |           |                             |
| N2                                                                                                                    | HS | V | 19503108                                                                          | 19519950 | WBGene00012814 | Y43F8B.3  | Y43F8B.3                    |
| 0.218358987787219                                                                                                     |    |   | AGIWUR27061;AGIWUR30319;AGIWUR39677                                               |          |                |           |                             |
| N2                                                                                                                    | HS | V | 19519925                                                                          | 19533110 | WBGene00012813 | Y43F8B.2  | Y43F8B.2                    |
| -0.058256386871065                                                                                                    |    |   |                                                                                   |          |                |           |                             |
| AGIWUR5140;AGIWUR8653;AGIWUR11230;AGIWUR13882;AGIWUR16244;AGIWUR24976;AGIWUR26509;AGIWUR26843;AGIWUR31243;AGIWUR38299 |    |   |                                                                                   |          |                |           |                             |
| N2                                                                                                                    | HS | V | 19534880                                                                          | 19546200 | WBGene00012812 | Y43F8B.1  | Y43F8B.1                    |
| -0.085081312933923                                                                                                    |    |   | AGIWUR4012;AGIWUR9462;AGIWUR20201;AGIWUR20421;AGIWUR20989;AGIWUR35973;AGIWUR40150 |          |                |           |                             |
| N2                                                                                                                    | HS | V | 19548239                                                                          | 19549784 | WBGene00086559 | Y43F8B.20 | Y43F8B.20                   |
| 0.0017562185588833                                                                                                    |    |   | AGIWUR37706                                                                       |          |                |           |                             |
| N2                                                                                                                    | HS | V | 19551008                                                                          | 19555969 | WBGene00007177 | oac-1     | B0399.2 0.0889518714437614  |
| AGIWUR32001;AGIWUR33010                                                                                               |    |   |                                                                                   |          |                |           |                             |
| N2                                                                                                                    | HS | V | 19565386                                                                          | 19606115 | WBGene00007176 | kcn1-1    | B0399.1 -0.0709510015964687 |
| AGIWUR25702;AGIWUR29918                                                                                               |    |   |                                                                                   |          |                |           |                             |
| N2                                                                                                                    | HS | V | 19607511                                                                          | 19608346 | WBGene00003763 | nlp-25    | Y43F8C.1                    |
| 0.129799552424171                                                                                                     |    |   | AGIWUR26743                                                                       |          |                |           |                             |
| N2                                                                                                                    | HS | V | 19609494                                                                          | 19612099 | WBGene00012840 | grsp-1    | Y43F8C.20                   |
| -0.060842279333325                                                                                                    |    |   | AGIWUR5647;AGIWUR38806                                                            |          |                |           |                             |
| N2                                                                                                                    | HS | V | 19613461                                                                          | 19614533 | WBGene00003764 | nlp-26    | Y43F8C.2                    |
| 0.25841576018145                                                                                                      |    |   | AGIWUR26915                                                                       |          |                |           |                             |
| N2                                                                                                                    | HS | V | 19614558                                                                          | 19622551 | WBGene00012825 | Y43F8C.3  | Y43F8C.3                    |
| -0.141026801395968                                                                                                    |    |   | AGIWUR8607;AGIWUR9609                                                             |          |                |           |                             |
| N2                                                                                                                    | HS | V | 19625062                                                                          | 19630753 | WBGene00012826 | dyf-19    | Y43F8C.4                    |
| -0.06681598297242                                                                                                     |    |   | AGIWUR20380                                                                       |          |                |           |                             |
| N2                                                                                                                    | HS | V | 19633062                                                                          | 19640908 | WBGene00012828 | Y43F8C.6  | Y43F8C.6                    |

|                     |                                                                                    |          |                |            |            |
|---------------------|------------------------------------------------------------------------------------|----------|----------------|------------|------------|
| 0.0682673671103551  | AGIWUR7964                                                                         |          |                |            |            |
| N2 HS V             | 19641292                                                                           | 19644083 | WBGene00012829 | Y43F8C.7   | Y43F8C.7   |
| -0.0301843296446673 | AGIWUR32615                                                                        |          |                |            |            |
| N2 HS V             | 19644239                                                                           | 19645758 | WBGene00012830 | mrps-28    | Y43F8C.8   |
| 0.174517795628942   | AGIWUR2235;AGIWUR13361;AGIWUR20245;AGIWUR21105;AGIWUR28455;AGIWUR30763;AGIWUR31409 |          |                |            |            |
| N2 HS V             | 19646088                                                                           | 19647338 | WBGene00012831 | Y43F8C.9   | Y43F8C.9   |
| -0.583455374631761  | AGIWUR11322                                                                        |          |                |            |            |
| N2 HS V             | 19650438                                                                           | 19655251 | WBGene00012832 | dmd-3      | Y43F8C.10  |
| -0.170446163872851  | AGIWUR41418                                                                        |          |                |            |            |
| N2 HS V             | 19670259                                                                           | 19671411 | WBGene00012833 | Y43F8C.11  | Y43F8C.11  |
| -0.090158103900766  | AGIWUR35037                                                                        |          |                |            |            |
| N2 HS V             | 19674843                                                                           | 19693043 | WBGene00003413 | mrp-7      | Y43F8C.12  |
| 0.0667253205949461  | AGIWUR7172;AGIWUR10445;AGIWUR24658;AGIWUR29604;AGIWUR43123                         |          |                |            |            |
| N2 HS V             | 19693896                                                                           | 19697398 | WBGene00012834 | Y43F8C.13  | Y43F8C.13  |
| 0.152159132248272   | AGIWUR15896                                                                        |          |                |            |            |
| N2 HS V             | 19697560                                                                           | 19705212 | WBGene00012835 | ani-3      | Y43F8C.14  |
| -0.124551791879334  | AGIWUR23978                                                                        |          |                |            |            |
| N2 HS V             | 19705205                                                                           | 19706379 | WBGene00012839 | Y43F8C.18  | Y43F8C.18  |
| 0.033162304198679   | AGIWUR6142;AGIWUR28019;AGIWUR32124;AGIWUR32673;AGIWUR34660;AGIWUR44782             |          |                |            |            |
| N2 HS V             | 19706890                                                                           | 19708949 | WBGene00005714 | srv-3      | Y43F8C.19  |
| 0.0893790946428288  | AGIWUR44295                                                                        |          |                |            |            |
| N2 HS V             | 19709775                                                                           | 19710614 | WBGene00012836 | Y43F8C.15  | Y43F8C.15  |
| -0.189533871746034  | AGIWUR32879                                                                        |          |                |            |            |
| N2 HS V             | 19714213                                                                           | 19715519 | WBGene00012837 | Y43F8C.16  | Y43F8C.16  |
| -0.072409720163217  | AGIWUR10556;AGIWUR41075                                                            |          |                |            |            |
| N2 HS V             | 19727481                                                                           | 19727964 | WBGene00013819 | Y116F11A.6 | Y116F11A.6 |
| 0.156161504056726   | AGIWUR17758                                                                        |          |                |            |            |
| N2 HS V             | 19729038                                                                           | 19729590 | WBGene00013817 | Y116F11A.3 | Y116F11A.3 |
| 0.207744249427888   | AGIWUR15941                                                                        |          |                |            |            |
| N2 HS V             | 19730588                                                                           | 19732165 | WBGene00013816 | Y116F11A.1 | Y116F11A.1 |
| 0.177267672973421   | AGIWUR20538;AGIWUR42748                                                            |          |                |            |            |
| N2 HS V             | 19733411                                                                           | 19735075 | WBGene00014615 | Y116F11A.4 | Y116F11A.4 |
| 0.052328994711071   | AGIWUR1684;AGIWUR15569;AGIWUR33436;AGIWUR44464                                     |          |                |            |            |
| N2 HS V             | 19735077                                                                           | 19737607 | WBGene00012252 | W04E12.7   | W04E12.7   |
| 0.131631989447053   | AGIWUR28982;AGIWUR29879;AGIWUR35186                                                |          |                |            |            |
| N2 HS V             | 19738417                                                                           | 19739393 | WBGene00012246 | fbxa-131   | W04E12.1   |
| 0.180625429583881   | AGIWUR27629                                                                        |          |                |            |            |
| N2 HS V             | 19739559                                                                           | 19741117 | WBGene00012247 | W04E12.2   | W04E12.2   |
| -0.0993364147739157 | AGIWUR15328                                                                        |          |                |            |            |

|                         |    |   |                                     |          |                |             |                            |
|-------------------------|----|---|-------------------------------------|----------|----------------|-------------|----------------------------|
| N2                      | HS | V | 19741951                            | 19742312 | WBGene00012248 | W04E12.3    | W04E12.3                   |
| 0.390451854916121       |    |   | AGIWUR25773                         |          |                |             |                            |
| N2                      | HS | V | 19746152                            | 19748540 | WBGene00012250 | W04E12.5    | W04E12.5                   |
| 0.259739000619851       |    |   | AGIWUR39057                         |          |                |             |                            |
| N2                      | HS | V | 19748987                            | 19751212 | WBGene00012251 | clec-49     | W04E12.6                   |
| -0.206949214109013      |    |   | AGIWUR32                            |          |                |             |                            |
| N2                      | HS | V | 19752400                            | 19755368 | WBGene00012253 | clec-50     | W04E12.8                   |
| -0.113003264164991      |    |   | AGIWUR44477                         |          |                |             |                            |
| N2                      | HS | V | 19756553                            | 19758552 | WBGene00012254 | W04E12.9    | W04E12.9                   |
| 0.017250561889826       |    |   | AGIWUR11345                         |          |                |             |                            |
| N2                      | HS | V | 19768261                            | 19770929 | WBGene00050946 | M162.12     | M162.12 0.117731952453441  |
| AGIWUR37664             |    |   |                                     |          |                |             |                            |
| N2                      | HS | V | 19773401                            | 19774975 | WBGene00014811 | M162.9      | M162.9 0.141348078449928   |
| AGIWUR28727;AGIWUR29002 |    |   |                                     |          |                |             |                            |
| N2                      | HS | V | 19777247                            | 19778708 | WBGene00044655 | fbxa-194    | M162.11                    |
| -0.006469064330485      |    |   | AGIWUR5922;AGIWUR35071              |          |                |             |                            |
| N2                      | HS | V | 19780123                            | 19782314 | WBGene00010930 | srt-46      | M162.4 -0.0693199274950462 |
| AGIWUR38377             |    |   |                                     |          |                |             |                            |
| N2                      | HS | V | 19784129                            | 19785961 | WBGene00010929 | srt-45      | M162.3 0.096738519581395   |
| AGIWUR43248             |    |   |                                     |          |                |             |                            |
| N2                      | HS | V | 19788704                            | 19789281 | WBGene00010928 | clec-258    | M162.2                     |
| -0.191716456090553      |    |   | AGIWUR1086                          |          |                |             |                            |
| N2                      | HS | V | 19790043                            | 19791248 | WBGene00010927 | clec-259    | M162.1                     |
| 0.515319829113228       |    |   | AGIWUR15647                         |          |                |             |                            |
| N2                      | HS | V | 19797999                            | 19801133 | WBGene00013820 | Y116F11B.2  | Y116F11B.2                 |
| 0.1733890774939         |    |   | AGIWUR577                           |          |                |             |                            |
| N2                      | HS | V | 19815133                            | 19816451 | WBGene00000920 | daf-28      | Y116F11B.1                 |
| -0.382852568010323      |    |   | AGIWUR14505                         |          |                |             |                            |
| N2                      | HS | V | 19822748                            | 19830099 | WBGene00003959 | pcp-4       | Y116F11B.3                 |
| -0.135577407152002      |    |   | AGIWUR32657                         |          |                |             |                            |
| N2                      | HS | V | 19836442                            | 19839342 | WBGene00005785 | srw-38      | Y116F11B.5                 |
| -0.0461835986777919     |    |   | AGIWUR34111                         |          |                |             |                            |
| N2                      | HS | V | 19839403                            | 19841472 | WBGene00013821 | srz-35      | Y116F11B.4                 |
| -0.0555078978100942     |    |   | AGIWUR11931                         |          |                |             |                            |
| N2                      | HS | V | 19848314                            | 19855250 | WBGene00013823 | Y116F11B.7  | Y116F11B.7                 |
| -0.0323864769272131     |    |   | AGIWUR26854                         |          |                |             |                            |
| N2                      | HS | V | 19855174                            | 19867983 | WBGene00013825 | Y116F11B.9  | Y116F11B.9                 |
| 0.0687501078414279      |    |   | AGIWUR15712;AGIWUR38310;AGIWUR39456 |          |                |             |                            |
| N2                      | HS | V | 19870506                            | 19873931 | WBGene00013826 | Y116F11B.10 | Y116F11B.10                |

|                      |                                     |          |                |           |             |
|----------------------|-------------------------------------|----------|----------------|-----------|-------------|
| 0.00349420939249256  | AGIWUR5727                          |          |                |           |             |
| N2 HS V              | 19881374                            | 19895350 | WBGene00001629 | gly-4     | Y116F11B.12 |
| -0.033192580755335   | AGIWUR44184                         |          |                |           |             |
| N2 HS V              | 19897977                            | 19907434 | WBGene00013361 | fars-2    | Y60A3A.13   |
| 0.148464972311395    | AGIWUR22328;AGIWUR27164;AGIWUR42038 |          |                |           |             |
| N2 HS V              | 19908765                            | 19916023 | WBGene00000499 | chk-2     | Y60A3A.12   |
| -0.161102192940614   | AGIWUR5614                          |          |                |           |             |
| N2 HS V              | 19916557                            | 19919996 | WBGene00013365 | Y60A3A.19 | Y60A3A.19   |
| -0.0357672841229579  | AGIWUR1610;AGIWUR39964              |          |                |           |             |
| N2 HS V              | 19921697                            | 19922600 | WBGene00013364 | Y60A3A.16 | Y60A3A.16   |
| 0.426381553131364    | AGIWUR13571                         |          |                |           |             |
| N2 HS V              | 19922931                            | 19924049 | WBGene00014934 | Y60A3A.17 | Y60A3A.17   |
| -0.19154983925763    | AGIWUR28300                         |          |                |           |             |
| N2 HS V              | 19924224                            | 19925033 | WBGene00004810 | skr-4     | Y60A3A.18   |
| -0.0830204788565894  | AGIWUR21479;AGIWUR23516;AGIWUR37687 |          |                |           |             |
| N2 HS V              | 19927782                            | 19934323 | WBGene00013362 | algn-7    | Y60A3A.14   |
| 0.128737803729818    | AGIWUR37566                         |          |                |           |             |
| N2 HS V              | 19934795                            | 19946629 | WBGene00000987 | dhs-24    | Y60A3A.10   |
| 0.00640255833669645  | AGIWUR26087;AGIWUR37453             |          |                |           |             |
| N2 HS V              | 19946691                            | 19949093 | WBGene00013360 | Y60A3A.9  | Y60A3A.9    |
| 0.159077440999271    | AGIWUR4870                          |          |                |           |             |
| N2 HS V              | 19949982                            | 19955122 | WBGene00013359 | Y60A3A.8  | Y60A3A.8    |
| 0.388124162026408    | AGIWUR21853                         |          |                |           |             |
| N2 HS V              | 19955453                            | 19958912 | WBGene00013358 | abhd-3.1  | Y60A3A.7    |
| 0.158957948287005    | AGIWUR19672                         |          |                |           |             |
| N2 HS V              | 19959044                            | 19960916 | WBGene00005388 | srh-172   | Y60A3A.6    |
| 0.148316860467041    | AGIWUR7190                          |          |                |           |             |
| N2 HS V              | 19965700                            | 19972559 | WBGene00005387 | srh-171   | Y60A3A.5    |
| -0.0254465175449816  | AGIWUR31131                         |          |                |           |             |
| N2 HS V              | 19973284                            | 19975063 | WBGene00005389 | srh-173   | Y60A3A.4    |
| 0.0215474702804581   | AGIWUR9556                          |          |                |           |             |
| N2 HS V              | 19975610                            | 19978320 | WBGene00005398 | srh-183   | Y60A3A.3    |
| 0.078635666097135    | AGIWUR22288                         |          |                |           |             |
| N2 HS V              | 19978620                            | 19981882 | WBGene00023519 | Y60A3A.24 | Y60A3A.24   |
| 0.292930527689315    | AGIWUR10345;AGIWUR29702             |          |                |           |             |
| N2 HS V              | 19982994                            | 19986313 | WBGene00013357 | cllec-260 | Y60A3A.2    |
| -0.00154863132893013 | AGIWUR17195                         |          |                |           |             |
| N2 HS V              | 19987984                            | 19990504 | WBGene00005579 | sri-67    | Y60A3A.22   |
| -0.129683157672551   | AGIWUR9481                          |          |                |           |             |

|                                                                                                |    |   |                                                                         |          |                |            |                            |
|------------------------------------------------------------------------------------------------|----|---|-------------------------------------------------------------------------|----------|----------------|------------|----------------------------|
| N2                                                                                             | HS | V | 19991207                                                                | 19994189 | WBGene00044211 | Y60A3A.25  | Y60A3A.25                  |
| 0.0240818827931055                                                                             |    |   | AGIWUR18341;AGIWUR26967                                                 |          |                |            |                            |
| N2                                                                                             | HS | V | 19995986                                                                | 20004485 | WBGene00006786 | unc-51     | Y60A3A.1                   |
| -0.14914601171483                                                                              |    |   | AGIWUR2393;AGIWUR4960;AGIWUR34898                                       |          |                |            |                            |
| N2                                                                                             | HS | V | 20007770                                                                | 20009195 | WBGene00013367 | Y60A3A.23  | Y60A3A.23                  |
| -0.0116786407568839                                                                            |    |   |                                                                         |          |                |            |                            |
| AGIWUR2176;AGIWUR14126;AGIWUR19113;AGIWUR24124;AGIWUR28719;AGIWUR29428;AGIWUR33373;AGIWUR41318 |    |   |                                                                         |          |                |            |                            |
| N2                                                                                             | HS | V | 20011959                                                                | 20015077 | WBGene00013366 | Y60A3A.21  | Y60A3A.21                  |
| 0.190858532965533                                                                              |    |   | AGIWUR11192;AGIWUR19356;AGIWUR31108;AGIWUR35001;AGIWUR37667;AGIWUR44305 |          |                |            |                            |
| N2                                                                                             | HS | V | 20023046                                                                | 20036667 | WBGene00013746 | lgc-55     | Y113G7A.5                  |
| 0.102170852168281                                                                              |    |   | AGIWUR17669                                                             |          |                |            |                            |
| N2                                                                                             | HS | V | 20037587                                                                | 20039419 | WBGene00013753 | Y113G7A.16 | Y113G7A.16                 |
| 0.292580560000128                                                                              |    |   | AGIWUR35813                                                             |          |                |            |                            |
| N2                                                                                             | HS | V | 20040927                                                                | 20047398 | WBGene00013747 | spe-19     | Y113G7A.10                 |
| 0.245207303180488                                                                              |    |   | AGIWUR20899                                                             |          |                |            |                            |
| N2                                                                                             | HS | V | 20053733                                                                | 20064174 | WBGene00006652 | ttx-1      | Y113G7A.6                  |
| -0.0999872973414373                                                                            |    |   | AGIWUR13073;AGIWUR31199;AGIWUR39096;AGIWUR43427                         |          |                |            |                            |
| N2                                                                                             | HS | V | 20075935                                                                | 20087733 | WBGene00001485 | fre-1      | Y113G7A.8                  |
| -0.0518397620693882                                                                            |    |   | AGIWUR11871                                                             |          |                |            |                            |
| N2                                                                                             | HS | V | 20087848                                                                | 20090743 | WBGene00000940 | dcs-1      | Y113G7A.9                  |
| 0.200245227960846                                                                              |    |   | AGIWUR19604                                                             |          |                |            |                            |
| N2                                                                                             | HS | V | 20091263                                                                | 20105685 | WBGene00004754 | sec-23     | Y113G7A.3                  |
| 0.00124185613166716                                                                            |    |   | AGIWUR20961;AGIWUR27455                                                 |          |                |            |                            |
| N2                                                                                             | HS | V | 20105632                                                                | 20120675 | WBGene00003566 | ncx-1      | Y113G7A.4                  |
| -0.106515019693466                                                                             |    |   | AGIWUR12631                                                             |          |                |            |                            |
| N2                                                                                             | HS | V | 20128416                                                                | 20133142 | WBGene00013748 | ssu-1      | Y113G7A.11                 |
| -0.216172183050335                                                                             |    |   | AGIWUR9872                                                              |          |                |            |                            |
| N2                                                                                             | HS | V | 20135864                                                                | 20138449 | WBGene00013751 | Y113G7A.14 | Y113G7A.14                 |
| -0.118363242147866                                                                             |    |   | AGIWUR29412                                                             |          |                |            |                            |
| N2                                                                                             | HS | V | 20144247                                                                | 20146805 | WBGene00013749 | Y113G7A.12 | Y113G7A.12                 |
| 0.106595531928509                                                                              |    |   | AGIWUR19626                                                             |          |                |            |                            |
| N2                                                                                             | HS | V | 20148195                                                                | 20150357 | WBGene00013750 | Y113G7A.13 | Y113G7A.13                 |
| -0.144278285850577                                                                             |    |   | AGIWUR30341                                                             |          |                |            |                            |
| N2                                                                                             | HS | V | 20151489                                                                | 20155442 | WBGene00008946 | F19B2.7    | F19B2.7 0.0247482322622448 |
| AGIWUR43667                                                                                    |    |   |                                                                         |          |                |            |                            |
| N2                                                                                             | HS | V | 20158523                                                                | 20161788 | WBGene00008945 | F19B2.6    | F19B2.6 0.10396414661714   |
| AGIWUR9773                                                                                     |    |   |                                                                         |          |                |            |                            |
| N2                                                                                             | HS | V | 20162649                                                                | 20164561 | WBGene00008944 | F19B2.5    | F19B2.5 -0.233081840762118 |
| AGIWUR26790                                                                                    |    |   |                                                                         |          |                |            |                            |

|                                                          |    |   |          |          |                |            |            |                     |
|----------------------------------------------------------|----|---|----------|----------|----------------|------------|------------|---------------------|
| N2                                                       | HS | V | 20167309 | 20169283 | WBGene00008943 | srz-36     | F19B2.4    | 0.149647763781403   |
| AGIWUR19481                                              |    |   |          |          |                |            |            |                     |
| N2                                                       | HS | V | 20172821 | 20173999 | WBGene00008942 | srz-34     | F19B2.2    | 0.00566353458093172 |
| AGIWUR29579                                              |    |   |          |          |                |            |            |                     |
| N2                                                       | HS | V | 20174988 | 20182756 | WBGene00008941 | srz-33     | F19B2.1    | 0.0818687735400947  |
| AGIWUR3249;AGIWUR12827                                   |    |   |          |          |                |            |            |                     |
| N2                                                       | HS | V | 20183843 | 20186679 | WBGene00008947 | srz-16     | F19B2.8    | -0.0473882840466713 |
| AGIWUR22368                                              |    |   |          |          |                |            |            |                     |
| N2                                                       | HS | V | 20187710 | 20188882 | WBGene00013754 | fbxa-116   |            | Y113G7B.1           |
| 0.0615825428633112 AGIWUR41446                           |    |   |          |          |                |            |            |                     |
| N2                                                       | HS | V | 20190535 | 20192152 | WBGene00013755 | fbxa-115   |            | Y113G7B.3           |
| -0.0348558182017493 AGIWUR16439;AGIWUR19447;AGIWUR23667  |    |   |          |          |                |            |            |                     |
| N2                                                       | HS | V | 20193463 | 20195246 | WBGene00005427 | srh-217    | Y113G7B.2  |                     |
| -0.0827047116688924 AGIWUR9761                           |    |   |          |          |                |            |            |                     |
| N2                                                       | HS | V | 20196971 | 20198242 | WBGene00013756 | ftr-1      | Y113G7B.4  |                     |
| -0.255692717286124 AGIWUR13945                           |    |   |          |          |                |            |            |                     |
| N2                                                       | HS | V | 20199262 | 20200640 | WBGene00001482 | fog-2      | Y113G7B.5  |                     |
| -0.00688452074498258 AGIWUR19874;AGIWUR34434;AGIWUR39227 |    |   |          |          |                |            |            |                     |
| N2                                                       | HS | V | 20201616 | 20202874 | WBGene00013758 | fbxa-114   |            | Y113G7B.7           |
| 0.188103213849082 AGIWUR968                              |    |   |          |          |                |            |            |                     |
| N2                                                       | HS | V | 20203422 | 20204503 | WBGene00013757 | fbxa-113   |            | Y113G7B.6           |
| -0.0460071212874773 AGIWUR24213                          |    |   |          |          |                |            |            |                     |
| N2                                                       | HS | V | 20204528 | 20206180 | WBGene00013759 | fbxb-59    | Y113G7B.8  |                     |
| -0.180106593801423 AGIWUR32951                           |    |   |          |          |                |            |            |                     |
| N2                                                       | HS | V | 20206318 | 20207907 | WBGene00013760 | srbc-34    | Y113G7B.9  |                     |
| 0.127268112027556 AGIWUR7968;AGIWUR26183                 |    |   |          |          |                |            |            |                     |
| N2                                                       | HS | V | 20208685 | 20212451 | WBGene00013762 | Y113G7B.12 |            | Y113G7B.12          |
| 0.308170390652956 AGIWUR21855                            |    |   |          |          |                |            |            |                     |
| N2                                                       | HS | V | 20213821 | 20215297 | WBGene00013761 | Y113G7B.11 |            | Y113G7B.11          |
| 0.0874240774866806 AGIWUR23594                           |    |   |          |          |                |            |            |                     |
| N2                                                       | HS | V | 20224856 | 20225458 | WBGene00013770 | Y113G7B.26 |            | Y113G7B.26          |
| 0.025104953201982 AGIWUR25398                            |    |   |          |          |                |            |            |                     |
| N2                                                       | HS | V | 20226835 | 20228829 | WBGene00013763 | Y113G7B.14 |            | Y113G7B.14          |
| 0.314223926352694 AGIWUR17338                            |    |   |          |          |                |            |            |                     |
| N2                                                       | HS | V | 20234807 | 20237743 | WBGene00013768 | sld-5      | Y113G7B.24 |                     |
| 0.0142454248248569 AGIWUR3715                            |    |   |          |          |                |            |            |                     |
| N2                                                       | HS | V | 20239180 | 20249482 | WBGene00004203 | swsn-1     | Y113G7B.23 |                     |
| -0.128189897243953 AGIWUR18515                           |    |   |          |          |                |            |            |                     |
| N2                                                       | HS | V | 20250881 | 20267244 | WBGene00007017 | mdt-17     | Y113G7B.18 |                     |

-0.0985472865319368

AGIWUR2457;AGIWUR2923;AGIWUR6091;AGIWUR7506;AGIWUR11809;AGIWUR15271;AGIWUR20509;AGIWUR33020;AGIWUR33876;AGIWUR41067

|                                                                                            |    |   |          |          |                |           |            |                     |
|--------------------------------------------------------------------------------------------|----|---|----------|----------|----------------|-----------|------------|---------------------|
| N2                                                                                         | HS | V | 20267377 | 20269711 | WBGene00013766 | prmt-1    | Y113G7B.17 |                     |
| -0.235587568757076 AGIWUR18691;AGIWUR32192;AGIWUR35752                                     |    |   |          |          |                |           |            |                     |
| N2                                                                                         | HS | V | 20270107 | 20275732 | WBGene00013765 | cdkr-3    | Y113G7B.16 |                     |
| -0.0523283710967539 AGIWUR3128;AGIWUR11138;AGIWUR23975;AGIWUR24040;AGIWUR28760;AGIWUR35598 |    |   |          |          |                |           |            |                     |
| N2                                                                                         | HS | V | 20278160 | 20279861 | WBGene00004173 | pqn-94    | ZC15.8     | -0.144238099625319  |
| AGIWUR7199                                                                                 |    |   |          |          |                |           |            |                     |
| N2                                                                                         | HS | V | 20281391 | 20289417 | WBGene00013835 | mlt-4     | ZC15.7     | 0.128552675255585   |
| AGIWUR32698                                                                                |    |   |          |          |                |           |            |                     |
| N2                                                                                         | HS | V | 20289939 | 20294488 | WBGene00013834 | cllec-261 |            | ZC15.6              |
| 0.261460278555566 AGIWUR1972                                                               |    |   |          |          |                |           |            |                     |
| N2                                                                                         | HS | V | 20303588 | 20304908 | WBGene00013832 | ZC15.3    | ZC15.3     | -0.378758714739245  |
| AGIWUR43150                                                                                |    |   |          |          |                |           |            |                     |
| N2                                                                                         | HS | V | 20306103 | 20308919 | WBGene00013830 | ZC15.1    | ZC15.1     | -0.386713397518969  |
| AGIWUR7067                                                                                 |    |   |          |          |                |           |            |                     |
| N2                                                                                         | HS | V | 20310148 | 20311656 | WBGene00045050 | ZC15.10   | ZC15.10    | 0.294952880248426   |
| AGIWUR3810;AGIWUR21680;AGIWUR40158                                                         |    |   |          |          |                |           |            |                     |
| N2                                                                                         | HS | V | 20311819 | 20315628 | WBGene00013831 | cllec-262 |            | ZC15.2              |
| -0.208436284386819 AGIWUR18438                                                             |    |   |          |          |                |           |            |                     |
| N2                                                                                         | HS | V | 20317742 | 20324024 | WBGene00013771 | Y113G7C.1 |            | Y113G7C.1           |
| 0.121335327371959 AGIWUR11288                                                              |    |   |          |          |                |           |            |                     |
| N2                                                                                         | HS | V | 20325728 | 20328056 | WBGene00012612 | Y38H6A.1  |            | Y38H6A.1            |
| 0.145956945357475 AGIWUR1354                                                               |    |   |          |          |                |           |            |                     |
| N2                                                                                         | HS | V | 20329705 | 20335364 | WBGene00077669 | Y38H6A.5  |            | Y38H6A.5            |
| -0.0291382800005131 AGIWUR9711;AGIWUR32556;AGIWUR33345;AGIWUR34192                         |    |   |          |          |                |           |            |                     |
| N2                                                                                         | HS | V | 20345203 | 20348127 | WBGene00012614 | Y38H6A.3  |            | Y38H6A.3            |
| 0.258456514303408 AGIWUR19521                                                              |    |   |          |          |                |           |            |                     |
| N2                                                                                         | HS | V | 20348247 | 20349925 | WBGene00014874 | Y38H6A.4  |            | Y38H6A.4            |
| -0.238492487358796 AGIWUR26688                                                             |    |   |          |          |                |           |            |                     |
| N2                                                                                         | HS | V | 20356802 | 20365718 | WBGene00001700 | grd-11    | K02E2.2    | 0.205277181314448   |
| AGIWUR28288                                                                                |    |   |          |          |                |           |            |                     |
| N2                                                                                         | HS | V | 20365708 | 20366939 | WBGene00010509 | K02E2.8   | K02E2.8    | 0.31979313027021    |
| AGIWUR3684                                                                                 |    |   |          |          |                |           |            |                     |
| N2                                                                                         | HS | V | 20367480 | 20369253 | WBGene00005392 | srh-177   | K02E2.3    | -0.0818549366947146 |
| AGIWUR35201                                                                                |    |   |          |          |                |           |            |                     |
| N2                                                                                         | HS | V | 20375536 | 20376301 | WBGene00002118 | ins-35    | K02E2.4    | 0.34718664532951    |
| AGIWUR3688                                                                                 |    |   |          |          |                |           |            |                     |



|                                                                                     |    |   |          |          |                |          |          |                     |
|-------------------------------------------------------------------------------------|----|---|----------|----------|----------------|----------|----------|---------------------|
| N2                                                                                  | HS | V | 20377128 | 20379410 | WBGene00014794 | K02E2.5  | K02E2.5  | 0.0841224718394544  |
| AGIWUR1067;AGIWUR26609                                                              |    |   |          |          |                |          |          |                     |
| N2                                                                                  | HS | V | 20380561 | 20382036 | WBGene00010507 | K02E2.6  | K02E2.6  | -0.0714472946060276 |
| AGIWUR8603                                                                          |    |   |          |          |                |          |          |                     |
| N2                                                                                  | HS | V | 20384769 | 20391009 | WBGene00010508 | K02E2.7  | K02E2.7  | 0.161256928102393   |
| AGIWUR24074                                                                         |    |   |          |          |                |          |          |                     |
| N2                                                                                  | HS | V | 20387715 | 20393367 | WBGene00010004 | F53H2.1  | F53H2.1  | 0.148118088985125   |
| AGIWUR21255                                                                         |    |   |          |          |                |          |          |                     |
| N2                                                                                  | HS | V | 20394073 | 20394700 | WBGene00010005 | cnc-7    | F53H2.2  | 0.0411918099819033  |
| AGIWUR7651;AGIWUR10762;AGIWUR22903;AGIWUR23224;AGIWUR29673;AGIWUR34032              |    |   |          |          |                |          |          |                     |
| N2                                                                                  | HS | V | 20396078 | 20422035 | WBGene00010006 | F53H2.3  | F53H2.3  | -0.0682615130771289 |
| AGIWUR4475;AGIWUR5951;AGIWUR21698;AGIWUR37532;AGIWUR42730;AGIWUR44574               |    |   |          |          |                |          |          |                     |
| N2                                                                                  | HS | V | 20425301 | 20431337 | WBGene00001406 | fce-2    | F48F5.5  | -0.0781617263228025 |
| AGIWUR26833                                                                         |    |   |          |          |                |          |          |                     |
| N2                                                                                  | HS | V | 20440232 | 20446477 | WBGene00009846 | F48F5.2  | F48F5.2  | -0.0410474429411654 |
| AGIWUR27354;AGIWUR31784;AGIWUR32244                                                 |    |   |          |          |                |          |          |                     |
| N2                                                                                  | HS | V | 20448288 | 20453202 | WBGene00009848 | F48F5.6  | F48F5.6  | 0.0262383522880434  |
| AGIWUR15429;AGIWUR17816;AGIWUR19087;AGIWUR20963;AGIWUR27787;AGIWUR35783;AGIWUR39911 |    |   |          |          |                |          |          |                     |
| N2                                                                                  | HS | V | 20454111 | 20456433 | WBGene00005147 | srd-70   | F48F5.4  | -0.256201094234573  |
| AGIWUR34323                                                                         |    |   |          |          |                |          |          |                     |
| N2                                                                                  | HS | V | 20458654 | 20464486 | WBGene00007121 | B0250.4  | B0250.4  | 0.0779107645185464  |
| AGIWUR34256                                                                         |    |   |          |          |                |          |          |                     |
| N2                                                                                  | HS | V | 20469703 | 20470485 | WBGene00007125 | B0250.8  | B0250.8  | -0.0327602578833712 |
| AGIWUR43956                                                                         |    |   |          |          |                |          |          |                     |
| N2                                                                                  | HS | V | 20471566 | 20472496 | WBGene00050926 | B0250.11 |          | B0250.11            |
| -0.0647037513179898 AGIWUR5746                                                      |    |   |          |          |                |          |          |                     |
| N2                                                                                  | HS | V | 20473022 | 20476061 | WBGene00007124 | B0250.7  | B0250.7  | 0.181414414072274   |
| AGIWUR22645                                                                         |    |   |          |          |                |          |          |                     |
| N2                                                                                  | HS | V | 20476748 | 20479089 | WBGene00007119 | calf-1   | B0250.2  | -0.0503540940003226 |
| AGIWUR38425                                                                         |    |   |          |          |                |          |          |                     |
| N2                                                                                  | HS | V | 20480792 | 20485385 | WBGene00007126 | dhcr-7   | B0250.9  | -0.0697338005270165 |
| AGIWUR7054                                                                          |    |   |          |          |                |          |          |                     |
| N2                                                                                  | HS | V | 20487645 | 20489202 | WBGene00007127 | srbc-78  | B0250.10 |                     |
| -0.102578937852629 AGIWUR41033                                                      |    |   |          |          |                |          |          |                     |
| N2                                                                                  | HS | V | 20490771 | 20492485 | WBGene00007123 | srbc-79  | B0250.6  | -0.106609179304828  |
| AGIWUR42298                                                                         |    |   |          |          |                |          |          |                     |
| N2                                                                                  | HS | V | 20493924 | 20497348 | WBGene00007122 | B0250.5  | B0250.5  | 0.0296267621513602  |
| AGIWUR32723;AGIWUR36887                                                             |    |   |          |          |                |          |          |                     |
| N2                                                                                  | HS | V | 20497922 | 20499103 | WBGene00012615 | dct-16   | Y38H6C.1 |                     |

|                                                                                                            |                                    |          |                |           |           |                  |
|------------------------------------------------------------------------------------------------------------|------------------------------------|----------|----------------|-----------|-----------|------------------|
| -0.148438189806804                                                                                         | AGIWUR14745                        |          |                |           |           |                  |
| N2 HS V                                                                                                    | 20499899                           | 20500494 | WBGene00012616 | dct-14    | Y38H6C.3  | 0                |
| AGIWUR9853;AGIWUR19303;AGIWUR24521;AGIWUR25903;AGIWUR28169;AGIWUR28994;AGIWUR29363;AGIWUR33453;AGIWUR38174 |                                    |          |                |           |           |                  |
| N2 HS V                                                                                                    | 20500812                           | 20503228 | WBGene00005812 | srw-65    | Y38H6C.2  |                  |
| -0.103939946712194                                                                                         | AGIWUR2254                         |          |                |           |           |                  |
| N2 HS V                                                                                                    | 20504875                           | 20505097 | WBGene00012617 | Y38H6C.4  |           | Y38H6C.4         |
| -0.218792108189899                                                                                         | AGIWUR9045                         |          |                |           |           |                  |
| N2 HS V                                                                                                    | 20514637                           | 20515706 | WBGene00012621 | Y38H6C.8  |           | Y38H6C.8         |
| 0.046471755068997                                                                                          | AGIWUR10442                        |          |                |           |           |                  |
| N2 HS V                                                                                                    | 20516298                           | 20518036 | WBGene00012623 | fbxa-149  |           | Y38H6C.10        |
| 0.146374775446878                                                                                          | AGIWUR24018                        |          |                |           |           |                  |
| N2 HS V                                                                                                    | 20520250                           | 20522270 | WBGene00012622 | Y38H6C.9  |           | Y38H6C.9         |
| 0.0380508992081525                                                                                         | AGIWUR1386                         |          |                |           |           |                  |
| N2 HS V                                                                                                    | 20522621                           | 20524512 | WBGene00012624 | fbxa-150  |           | Y38H6C.11        |
| 0.119159081661053                                                                                          | AGIWUR3580;AGIWUR15698;AGIWUR27527 |          |                |           |           |                  |
| N2 HS V                                                                                                    | 20524700                           | 20525866 | WBGene00005382 | srh-166   | Y38H6C.12 |                  |
| -0.0305306393336213                                                                                        | AGIWUR14164                        |          |                |           |           |                  |
| N2 HS V                                                                                                    | 20529953                           | 20534169 | WBGene00012626 | famh-161  |           | Y38H6C.14        |
| 0.073614480656933                                                                                          | AGIWUR2469                         |          |                |           |           |                  |
| N2 HS V                                                                                                    | 20534774                           | 20536308 | WBGene00012627 | Y38H6C.15 |           | Y38H6C.15        |
| 0.203284690976849                                                                                          | AGIWUR41427                        |          |                |           |           |                  |
| N2 HS V                                                                                                    | 20536430                           | 20538155 | WBGene00012628 | Y38H6C.16 |           | Y38H6C.16        |
| 0.137296607011388                                                                                          | AGIWUR15764                        |          |                |           |           |                  |
| N2 HS V                                                                                                    | 20540395                           | 20544192 | WBGene00012629 | slc-36.3  |           | Y38H6C.17        |
| -0.0747723239669362                                                                                        | AGIWUR2656                         |          |                |           |           |                  |
| N2 HS V                                                                                                    | 20546626                           | 20547148 | WBGene00012630 | Y38H6C.18 |           | Y38H6C.18        |
| -0.102230141651327                                                                                         | AGIWUR25153                        |          |                |           |           |                  |
| N2 HS V                                                                                                    | 20547261                           | 20551164 | WBGene00012632 | Y38H6C.20 |           | Y38H6C.20        |
| -0.139184110157475                                                                                         | AGIWUR34360                        |          |                |           |           |                  |
| N2 HS V                                                                                                    | 20552294                           | 20553071 | WBGene00012631 | Y38H6C.19 |           | Y38H6C.19        |
| 0.683925940226882                                                                                          | AGIWUR19219                        |          |                |           |           |                  |
| N2 HS V                                                                                                    | 20554116                           | 20555267 | WBGene00012633 | Y38H6C.21 |           | Y38H6C.21        |
| 0.352392652342262                                                                                          | AGIWUR29870                        |          |                |           |           |                  |
| N2 HS V                                                                                                    | 20555629                           | 20556360 | WBGene00012634 | Y38H6C.23 |           | Y38H6C.23        |
| -0.0448925480367954                                                                                        | AGIWUR24290                        |          |                |           |           |                  |
| N2 HS V                                                                                                    | 20557945                           | 20558379 | WBGene00000015 | abf-4     | Y38H6C.22 |                  |
| 0.0535260476042199                                                                                         | AGIWUR5038                         |          |                |           |           |                  |
| N2 HS V                                                                                                    | 20559080                           | 20561895 | WBGene00009166 | F26F2.1   | F26F2.1   | 2.46663616615926 |
| AGIWUR9644;AGIWUR24078;AGIWUR43885                                                                         |                                    |          |                |           |           |                  |

|    |    |   |                                                                        |                                                             |                |          |                             |
|----|----|---|------------------------------------------------------------------------|-------------------------------------------------------------|----------------|----------|-----------------------------|
| N2 | HS | V | 20564383                                                               | 20564666                                                    | WBGene00219309 | F26F2.13 | F26F2.13                    |
|    |    |   | 2.72957423784584                                                       | AGIWUR33359                                                 |                |          |                             |
| N2 | HS | V | 20565410                                                               | 20566541                                                    | WBGene00009168 | F26F2.3  | F26F2.3 3.94049824000608    |
|    |    |   | AGIWUR19294                                                            |                                                             |                |          |                             |
| N2 | HS | V | 20569295                                                               | 20570191                                                    | WBGene00009169 | F26F2.4  | F26F2.4 3.39748523586481    |
|    |    |   | AGIWUR9279;AGIWUR30803;AGIWUR33977;AGIWUR38558;AGIWUR40546;AGIWUR44909 |                                                             |                |          |                             |
| N2 | HS | V | 20573717                                                               | 20574000                                                    | WBGene00009170 | F26F2.5  | F26F2.5 2.50265713280367    |
|    |    |   | AGIWUR38019                                                            |                                                             |                |          |                             |
| N2 | HS | V | 20574625                                                               | 20577636                                                    | WBGene00009171 | clec-263 | F26F2.6                     |
|    |    |   | 0.17344070252412                                                       | AGIWUR15828                                                 |                |          |                             |
| N2 | HS | V | 20579546                                                               | 20580678                                                    | WBGene00023504 | F26F2.8  | F26F2.8                     |
|    |    |   | -0.00197128627334653                                                   | AGIWUR3190;AGIWUR14596;AGIWUR29229;AGIWUR35095              |                |          |                             |
| N2 | HS | V | 20580996                                                               | 20590321                                                    | WBGene00009172 | F26F2.7  | F26F2.7 -0.177220996522248  |
|    |    |   | AGIWUR34182                                                            |                                                             |                |          |                             |
| N2 | HS | V | 20600095                                                               | 20602474                                                    | WBGene00000736 | col-163  | F46B3.17                    |
|    |    |   | -0.140301361105036                                                     | AGIWUR17760                                                 |                |          |                             |
| N2 | HS | V | 20603366                                                               | 20604378                                                    | WBGene00009758 | ttr-11   | F46B3.3 0.109950440760997   |
|    |    |   | AGIWUR5985;AGIWUR15582;AGIWUR37486                                     |                                                             |                |          |                             |
| N2 | HS | V | 20607804                                                               | 20608559                                                    | WBGene00009759 | ttr-12   | F46B3.4 0.219788516322602   |
|    |    |   | AGIWUR28886;AGIWUR29298                                                |                                                             |                |          |                             |
| N2 | HS | V | 20609794                                                               | 20613929                                                    | WBGene00001691 | grd-2    | F46B3.5 -0.227854334996222  |
|    |    |   | AGIWUR11921                                                            |                                                             |                |          |                             |
| N2 | HS | V | 20614382                                                               | 20615054                                                    | WBGene00050932 | F46B3.19 | F46B3.19                    |
|    |    |   | 0.0879939477905536                                                     | AGIWUR5624;AGIWUR19280;AGIWUR21487;AGIWUR28143;AGIWUR35096  |                |          |                             |
| N2 | HS | V | 20618120                                                               | 20618656                                                    | WBGene00009760 | F46B3.7  | F46B3.7 0.12799265473646    |
|    |    |   | AGIWUR21128                                                            |                                                             |                |          |                             |
| N2 | HS | V | 20618910                                                               | 20621966                                                    | WBGene00077434 | F46B3.20 | F46B3.20                    |
|    |    |   | 0.10425041082054                                                       | AGIWUR4884                                                  |                |          |                             |
| N2 | HS | V | 20622650                                                               | 20623160                                                    | WBGene00009761 | F46B3.8  | F46B3.8 -0.0423860355896917 |
|    |    |   | AGIWUR11360                                                            |                                                             |                |          |                             |
| N2 | HS | V | 20623630                                                               | 20624887                                                    | WBGene00077436 | F46B3.22 | F46B3.22                    |
|    |    |   | 0.0638524366697428                                                     | AGIWUR12526;AGIWUR21313;AGIWUR32702;AGIWUR39543;AGIWUR43533 |                |          |                             |
| N2 | HS | V | 20625186                                                               | 20626143                                                    | WBGene00009762 | F46B3.9  | F46B3.9 -0.167959318349094  |
|    |    |   | AGIWUR40468                                                            |                                                             |                |          |                             |
| N2 | HS | V | 20626711                                                               | 20628206                                                    | WBGene00009763 | srz-18   | F46B3.11                    |
|    |    |   | -0.171412158062637                                                     | AGIWUR15575                                                 |                |          |                             |
| N2 | HS | V | 20628422                                                               | 20629802                                                    | WBGene00009764 | srz-17   | F46B3.12                    |
|    |    |   | -0.048320958146439                                                     | AGIWUR21470                                                 |                |          |                             |
| N2 | HS | V | 20630148                                                               | 20631329                                                    | WBGene00009765 | F46B3.14 | F46B3.14                    |

|                                                                       |                                                                        |
|-----------------------------------------------------------------------|------------------------------------------------------------------------|
| 0.0899826512829738                                                    | AGIWUR7603;AGIWUR12522;AGIWUR13428;AGIWUR24567;AGIWUR36158;AGIWUR43491 |
| N2 HS V                                                               | 20632985 20633689 WBGene00009766 F46B3.15 F46B3.15                     |
| 0.155651427111253                                                     | AGIWUR17891;AGIWUR44745;AGIWUR45040                                    |
| N2 HS V                                                               | 20634462 20635313 WBGene00009767 F46B3.16 F46B3.16                     |
| -0.176879565949486                                                    | AGIWUR31887                                                            |
| N2 HS V                                                               | 20635943 20636576 WBGene00012849 ttr-13 Y44A6B.4                       |
| 0.018316754674613                                                     | AGIWUR4635;AGIWUR32172;AGIWUR34647;AGIWUR34876;AGIWUR35235             |
| N2 HS V                                                               | 20636864 20638444 WBGene00012848 Y44A6B.3 Y44A6B.3                     |
| 0.0659226418235015                                                    | AGIWUR39781                                                            |
| N2 HS V                                                               | 20639594 20641049 WBGene00012846 srxa-14 Y44A6B.1                      |
| -0.0878571246513724                                                   | AGIWUR11441;AGIWUR28556;AGIWUR32560                                    |
| N2 HS V                                                               | 20642289 20644356 WBGene00012847 srxa-15 Y44A6B.2                      |
| 0.183732614919634                                                     | AGIWUR6148;AGIWUR10441;AGIWUR28261                                     |
| N2 HS V                                                               | 20654652 20659742 WBGene00012184 mnr-1 W01F3.1 0.0768726349679572      |
| AGIWUR27576                                                           |                                                                        |
| N2 HS V                                                               | 20660325 20662031 WBGene00012185 W01F3.2 W01F3.2 0.155355760644516     |
| AGIWUR21598                                                           |                                                                        |
| N2 HS V                                                               | 20667209 20678513 WBGene00012186 mlt-11 W01F3.3 0.0926216803651814     |
| AGIWUR34807;AGIWUR41668                                               |                                                                        |
| N2 HS V                                                               | 20681420 20683014 WBGene00009999 srsx-35 F53F8.2 -0.105044734193422    |
| AGIWUR5741;AGIWUR37284                                                |                                                                        |
| N2 HS V                                                               | 20685683 20688770 WBGene00009998 klf-2 F53F8.1 -0.0680647079270038     |
| AGIWUR30841                                                           |                                                                        |
| N2 HS V                                                               | 20688734 20689532 WBGene00010000 F53F8.3 F53F8.3 0.265116091557816     |
| AGIWUR22910                                                           |                                                                        |
| N2 HS V                                                               | 20690582 20691685 WBGene00010001 F53F8.4 F53F8.4 0.268231098459381     |
| AGIWUR27499                                                           |                                                                        |
| N2 HS V                                                               | 20700340 20704048 WBGene00010002 F53F8.5 F53F8.5 -0.13047795313665     |
| AGIWUR19422                                                           |                                                                        |
| N2 HS V                                                               | 20708728 20709794 WBGene00010003 F53F8.6 F53F8.6 0.216088174586217     |
| AGIWUR37872                                                           |                                                                        |
| N2 HS V                                                               | 20713920 20716872 WBGene00012850 Y44A6C.1 Y44A6C.1                     |
| 0.111959576849593                                                     | AGIWUR7317                                                             |
| N2 HS V                                                               | 20717872 20729271 WBGene00012319 ip1a-3 W07A8.2 -0.126362725321878     |
| AGIWUR7440                                                            |                                                                        |
| N2 HS V                                                               | 20729948 20744385 WBGene00001043 dnj-25 W07A8.3 0.155000146189956      |
| AGIWUR24301                                                           |                                                                        |
| N2 HS V                                                               | 20752883 20760317 WBGene00004013 pha-4 F38A6.1 0.0024462575956381      |
| AGIWUR4940;AGIWUR7056;AGIWUR10928;AGIWUR11116;AGIWUR33259;AGIWUR39144 |                                                                        |

|                                                                                                |    |   |          |          |                |          |          |                     |
|------------------------------------------------------------------------------------------------|----|---|----------|----------|----------------|----------|----------|---------------------|
| N2                                                                                             | HS | V | 20764955 | 20770161 | WBGene00001248 | elp-1    | F38A6.2  | 0.158455538952701   |
| AGIWUR28578                                                                                    |    |   |          |          |                |          |          |                     |
| N2                                                                                             | HS | V | 20773743 | 20775369 | WBGene00009528 | F38A6.4  | F38A6.4  | 0.255027490059543   |
| AGIWUR3923                                                                                     |    |   |          |          |                |          |          |                     |
| N2                                                                                             | HS | V | 20780413 | 20785259 | WBGene00001851 | hif-1    | F38A6.3  | -0.153281716665864  |
| AGIWUR4461;AGIWUR8388;AGIWUR13579;AGIWUR16367;AGIWUR17143;AGIWUR40614                          |    |   |          |          |                |          |          |                     |
| N2                                                                                             | HS | V | 20789471 | 20790784 | WBGene00012853 | Y44A6D.2 |          | Y44A6D.2            |
| 0.0210247014409131 AGIWUR15098                                                                 |    |   |          |          |                |          |          |                     |
| N2                                                                                             | HS | V | 20790768 | 20792413 | WBGene00012854 | Y44A6D.3 |          | Y44A6D.3            |
| 0.0298989782411532 AGIWUR6196;AGIWUR8125;AGIWUR11022;AGIWUR14203;AGIWUR30558                   |    |   |          |          |                |          |          |                     |
| N2                                                                                             | HS | V | 20798218 | 20801207 | WBGene00004748 | sdf-9    | Y44A6D.4 |                     |
| -0.0657058972960129 AGIWUR37586                                                                |    |   |          |          |                |          |          |                     |
| N2                                                                                             | HS | V | 20801184 | 20803006 | WBGene00012855 | Y44A6D.5 |          | Y44A6D.5            |
| -0.112612544666806 AGIWUR43513                                                                 |    |   |          |          |                |          |          |                     |
| N2                                                                                             | HS | V | 20816142 | 20816553 | WBGene00011394 | T03D8.7  | T03D8.7  | 0.173927825056355   |
| AGIWUR8909                                                                                     |    |   |          |          |                |          |          |                     |
| N2                                                                                             | HS | V | 20816576 | 20820330 | WBGene00011393 | T03D8.6  | T03D8.6  | 0.0342350498039252  |
| AGIWUR11094                                                                                    |    |   |          |          |                |          |          |                     |
| N2                                                                                             | HS | V | 20820366 | 20825028 | WBGene00001547 | gcy-22   | T03D8.5  | 0.285291598267487   |
| AGIWUR38984                                                                                    |    |   |          |          |                |          |          |                     |
| N2                                                                                             | HS | V | 20825559 | 20827740 | WBGene00001723 | grl-14   | T03D8.4  | -0.0986100486593271 |
| AGIWUR2172                                                                                     |    |   |          |          |                |          |          |                     |
| N2                                                                                             | HS | V | 20827715 | 20828939 | WBGene00011392 | sbt-1    | T03D8.3  | -0.103182815429153  |
| AGIWUR26432;AGIWUR35497                                                                        |    |   |          |          |                |          |          |                     |
| N2                                                                                             | HS | V | 20829811 | 20837552 | WBGene00003830 | num-1    | T03D8.1  | 0.039254510366014   |
| AGIWUR3244;AGIWUR15343;AGIWUR24653                                                             |    |   |          |          |                |          |          |                     |
| N2                                                                                             | HS | V | 20838080 | 20838768 | WBGene00011391 | mrps-12  | T03D8.2  | 0.204974484833432   |
| AGIWUR36932                                                                                    |    |   |          |          |                |          |          |                     |
| N2                                                                                             | HS | V | 20838865 | 20841582 | WBGene00009289 | exos-7   | F31D4.1  | 0.0794716672715907  |
| AGIWUR6280                                                                                     |    |   |          |          |                |          |          |                     |
| N2                                                                                             | HS | V | 20841573 | 20845546 | WBGene00009290 | F31D4.2  | F31D4.2  | -0.242235488793431  |
| AGIWUR13395;AGIWUR14102;AGIWUR21065;AGIWUR29128;AGIWUR33661;AGIWUR41259                        |    |   |          |          |                |          |          |                     |
| N2                                                                                             | HS | V | 20846113 | 20847727 | WBGene00001431 | fkf-6    | F31D4.3  | -0.177307425418282  |
| AGIWUR4919;AGIWUR13185;AGIWUR20145;AGIWUR25639;AGIWUR26171;AGIWUR31644;AGIWUR32800;AGIWUR43487 |    |   |          |          |                |          |          |                     |
| N2                                                                                             | HS | V | 20847702 | 20850666 | WBGene00009291 | clcc-264 |          | F31D4.4             |
| -0.167756690307545 AGIWUR35224                                                                 |    |   |          |          |                |          |          |                     |
| N2                                                                                             | HS | V | 20850833 | 20851897 | WBGene00009294 | F31D4.9  | F31D4.9  | 0.119155422676206   |
| AGIWUR30890                                                                                    |    |   |          |          |                |          |          |                     |
| N2                                                                                             | HS | V | 20854143 | 20858576 | WBGene00009292 | F31D4.5  | F31D4.5  | -0.136303148351116  |

|                                                             |    |   |          |          |                |           |           |                     |             |
|-------------------------------------------------------------|----|---|----------|----------|----------------|-----------|-----------|---------------------|-------------|
| AGIWUR42985                                                 |    |   |          |          |                |           |           |                     |             |
| N2                                                          | HS | V | 20859344 | 20861153 | WBGene00006622 | try-4     | F31D4.6   | 0.0194299910387183  |             |
| AGIWUR26925                                                 |    |   |          |          |                |           |           |                     |             |
| N2                                                          | HS | V | 20862969 | 20865743 | WBGene00006687 | twk-35    | F31D4.7   | 0.17768002686131    |             |
| AGIWUR2822                                                  |    |   |          |          |                |           |           |                     |             |
| N2                                                          | HS | V | 20866749 | 20868429 | WBGene00009293 | F31D4.8   | F31D4.8   | -0.25245090054495   |             |
| AGIWUR43069                                                 |    |   |          |          |                |           |           |                     |             |
| N2                                                          | HS | V | 20879854 | 20898906 | WBGene00006812 | unc-80    | F25C8.3   | 0.25039169849936    |             |
| AGIWUR27704                                                 |    |   |          |          |                |           |           |                     |             |
| N2                                                          | HS | V | 20898840 | 20903441 | WBGene00000139 | amx-3     | F25C8.2   | 0.28558233042321    |             |
| AGIWUR6474                                                  |    |   |          |          |                |           |           |                     |             |
| N2                                                          | HS | V | 20903977 | 20907433 | WBGene00009106 | acs-12    | F25C8.4   | 0.349269445834913   |             |
| AGIWUR25618                                                 |    |   |          |          |                |           |           |                     |             |
| N2                                                          | HS | V | 20907470 | 20909746 | WBGene00009104 | F25C8.1   | F25C8.1   | 0.0257832361390893  |             |
| AGIWUR6493                                                  |    |   |          |          |                |           |           |                     |             |
| N2                                                          | HS | V | 20910467 | 20914387 | WBGene00044187 | ttl1-9    | F25C8.5   | 0.00191513397230247 |             |
| AGIWUR11335;AGIWUR21432                                     |    |   |          |          |                |           |           |                     |             |
| N2                                                          | HS | V | 20915486 | 20922738 | WBGene00012857 | pbo-5     | Y44A6E.1  |                     |             |
| 0.121475215754568                                           |    |   |          |          |                |           |           |                     |             |
| N2                                                          | HS | X | 42728    | 46924    | WBGene00022203 | Y73B3A.1  | Y73B3A.1  | -0.246968518514562  |             |
| AGIWUR22888                                                 |    |   |          |          |                |           |           |                     |             |
| N2                                                          | HS | X | 78429    | 80400    | WBGene00022218 | Y73B3A.16 | Y73B3A.16 | 0.0196666442079412  |             |
| AGIWUR23894                                                 |    |   |          |          |                |           |           |                     |             |
| N2                                                          | HS | X | 135793   | 138075   | WBGene00022209 | Y73B3A.7  | Y73B3A.7  | -0.0238587108188124 |             |
| AGIWUR25027                                                 |    |   |          |          |                |           |           |                     |             |
| N2                                                          | HS | X | 140434   | 140683   | WBGene00022210 | Y73B3A.8  | Y73B3A.8  | -0.0388669600758309 |             |
| AGIWUR23454                                                 |    |   |          |          |                |           |           |                     |             |
| N2                                                          | HS | X | 150363   | 157246   | WBGene00022211 | Y73B3A.9  | Y73B3A.9  | -0.0263161146936035 |             |
| AGIWUR23115                                                 |    |   |          |          |                |           |           |                     |             |
| N2                                                          | HS | X | 159638   | 160920   | WBGene00044700 | T08D2.9   | T08D2.9   | 0.00795389829998072 | AGIWUR16884 |
| N2                                                          | HS | X | 164036   | 171839   | WBGene00011607 | T08D2.2   | T08D2.2   | 0.0272633011950916  | AGIWUR17378 |
| N2                                                          | HS | X | 177396   | 177856   | WBGene00011609 | T08D2.4   | T08D2.4   | 0.0219791889293646  |             |
| AGIWUR14158;AGIWUR14916;AGIWUR19089;AGIWUR23194;AGIWUR35007 |    |   |          |          |                |           |           |                     |             |
| N2                                                          | HS | X | 192834   | 197901   | WBGene00011613 | T08D2.8   | T08D2.8   | 0.00702540498804893 | AGIWUR5792  |
| N2                                                          | HS | X | 199262   | 207723   | WBGene00022227 | Y73B3B.5  | Y73B3B.5  | 0.207358956566069   |             |
| AGIWUR22104                                                 |    |   |          |          |                |           |           |                     |             |
| N2                                                          | HS | X | 211441   | 211676   | WBGene00022225 | Y73B3B.3  | Y73B3B.3  | 0.276595718815445   |             |
| AGIWUR18398                                                 |    |   |          |          |                |           |           |                     |             |
| N2                                                          | HS | X | 221017   | 225084   | WBGene00007077 | AC8.5     | AC8.5     | 0.0369182844912403  | AGIWUR44399 |

|                                                                         |    |   |        |        |                |          |          |                      |                     |             |
|-------------------------------------------------------------------------|----|---|--------|--------|----------------|----------|----------|----------------------|---------------------|-------------|
| N2                                                                      | HS | X | 269127 | 270029 | WBGene00022432 | math-43  | Y108F1.4 |                      | -0.158964153343197  |             |
| AGIWUR34721                                                             |    |   |        |        |                |          |          |                      |                     |             |
| N2                                                                      | HS | X | 270408 | 274012 | WBGene00022433 | Y108F1.5 |          | Y108F1.5             | 0.0957157927055157  |             |
| AGIWUR39937                                                             |    |   |        |        |                |          |          |                      |                     |             |
| N2                                                                      | HS | X | 297234 | 299287 | WBGene00020083 | R57.2    | R57.2    | 0.262706618198253    |                     | AGIWUR31539 |
| N2                                                                      | HS | X | 301832 | 308298 | WBGene00020082 | gcp-2.1  | R57.1    | 0.0475888030773977   |                     |             |
| AGIWUR15035;AGIWUR31471                                                 |    |   |        |        |                |          |          |                      |                     |             |
| N2                                                                      | HS | X | 308762 | 311323 | WBGene00019734 | M02E1.2  | M02E1.2  | 0.185489671231577    |                     |             |
| AGIWUR10337;AGIWUR35098;AGIWUR37692                                     |    |   |        |        |                |          |          |                      |                     |             |
| N2                                                                      | HS | X | 326113 | 334600 | WBGene00019733 | M02E1.1  | M02E1.1  | -0.148971944109043   |                     |             |
| AGIWUR13020;AGIWUR36891;AGIWUR38182                                     |    |   |        |        |                |          |          |                      |                     |             |
| N2                                                                      | HS | X | 334580 | 341232 | WBGene00015431 | C04E7.4  | C04E7.4  | 0.0407380100378649   |                     | AGIWUR4709  |
| N2                                                                      | HS | X | 344127 | 346289 | WBGene00015430 | C04E7.3  | C04E7.3  | 0.145718958237587    |                     | AGIWUR11024 |
| N2                                                                      | HS | X | 353619 | 357939 | WBGene00015429 | sor-3    | C04E7.2  | -0.0112627093515876  |                     | AGIWUR32632 |
| N2                                                                      | HS | X | 358092 | 360198 | WBGene00015428 | C04E7.1  | C04E7.1  | -0.0703904880402462  |                     | AGIWUR39667 |
| N2                                                                      | HS | X | 360779 | 362938 | WBGene00045270 | C04E7.5  | C04E7.5  | 0.418443465641204    |                     |             |
| AGIWUR1304;AGIWUR6863;AGIWUR26142;AGIWUR34587                           |    |   |        |        |                |          |          |                      |                     |             |
| N2                                                                      | HS | X | 372235 | 376900 | WBGene00019862 | nrde-3   | R04A9.2  | -0.195144369323687   |                     | AGIWUR34371 |
| N2                                                                      | HS | X | 377133 | 380605 | WBGene00019863 | R04A9.3  | R04A9.3  | 0.0287637240792638   |                     |             |
| AGIWUR1910;AGIWUR27720;AGIWUR39047                                      |    |   |        |        |                |          |          |                      |                     |             |
| N2                                                                      | HS | X | 381338 | 382709 | WBGene00002060 | ife-2    | R04A9.4  | -0.143508089450208   |                     | AGIWUR44493 |
| N2                                                                      | HS | X | 384382 | 388797 | WBGene00019864 | ceh-93   | R04A9.5  | 0.0927664308547964   |                     | AGIWUR4933  |
| N2                                                                      | HS | X | 391360 | 394828 | WBGene00044281 | R04A9.7  | R04A9.7  | -0.00277413412734351 |                     |             |
| AGIWUR15403;AGIWUR22517;AGIWUR22851;AGIWUR29510;AGIWUR35082;AGIWUR39575 |    |   |        |        |                |          |          |                      |                     |             |
| N2                                                                      | HS | X | 397567 | 400687 | WBGene00019865 | R04A9.6  | R04A9.6  | 0.0915336629135659   |                     |             |
| AGIWUR184;AGIWUR3927;AGIWUR6837;AGIWUR17015;AGIWUR38506                 |    |   |        |        |                |          |          |                      |                     |             |
| N2                                                                      | HS | X | 404897 | 405357 | WBGene00019861 | R04A9.1  | R04A9.1  | 0.0807944754028282   |                     | AGIWUR29396 |
| N2                                                                      | HS | X | 406459 | 416633 | WBGene00022858 | ZK1193.2 |          | ZK1193.2             | 0.163135455026037   |             |
| AGIWUR30557                                                             |    |   |        |        |                |          |          |                      |                     |             |
| N2                                                                      | HS | X | 417482 | 420361 | WBGene00022859 | ZK1193.3 |          | ZK1193.3             | -0.0801036150037406 |             |
| AGIWUR31872                                                             |    |   |        |        |                |          |          |                      |                     |             |
| N2                                                                      | HS | X | 421707 | 423033 | WBGene00000608 | col-19   | ZK1193.1 |                      | -0.221831108837799  |             |
| AGIWUR6664;AGIWUR10326                                                  |    |   |        |        |                |          |          |                      |                     |             |
| N2                                                                      | HS | X | 422890 | 425631 | WBGene00022860 | ZK1193.4 |          | ZK1193.4             | -0.0290019699920308 |             |
| AGIWUR10253                                                             |    |   |        |        |                |          |          |                      |                     |             |
| N2                                                                      | HS | X | 427043 | 433799 | WBGene00022861 | dve-1    | ZK1193.5 |                      | 0.11384867376128    |             |
| AGIWUR26243;AGIWUR30037;AGIWUR42054;AGIWUR44587                         |    |   |        |        |                |          |          |                      |                     |             |
| N2                                                                      | HS | X | 446356 | 450212 | WBGene00018683 | F52D1.2  | F52D1.2  | -0.0730064306549423  |                     | AGIWUR11405 |
| N2                                                                      | HS | X | 450446 | 457648 | WBGene00004127 | abu-12   | F52D1.3  | -0.0122479144750152  |                     | AGIWUR18676 |

|                                                                                                                                                                     |    |   |        |        |                |          |          |                     |             |
|---------------------------------------------------------------------------------------------------------------------------------------------------------------------|----|---|--------|--------|----------------|----------|----------|---------------------|-------------|
| N2                                                                                                                                                                  | HS | X | 460651 | 466912 | WBGene00018682 | aagr-4   | F52D1.1  | 0.124224219430399   | AGIWUR38943 |
| N2                                                                                                                                                                  | HS | X | 476561 | 478283 | WBGene00044556 | F38G1.3  | F38G1.3  | 0.0540805286215846  |             |
| AGIWUR21457;AGIWUR27213;AGIWUR30357                                                                                                                                 |    |   |        |        |                |          |          |                     |             |
| N2                                                                                                                                                                  | HS | X | 481378 | 486504 | WBGene00000484 | che-2    | F38G1.1  | -0.0176517453918494 | AGIWUR16263 |
| N2                                                                                                                                                                  | HS | X | 489695 | 492273 | WBGene00001185 | egl-17   | F38G1.2  | -0.0840255122195099 | AGIWUR37293 |
| N2                                                                                                                                                                  | HS | X | 493211 | 497510 | WBGene00015137 | B0310.1  | B0310.1  | 0.124385122549374   | AGIWUR27738 |
| N2                                                                                                                                                                  | HS | X | 501965 | 506943 | WBGene00015138 | B0310.2  | B0310.2  | -0.0698324024471093 | AGIWUR23228 |
| N2                                                                                                                                                                  | HS | X | 510818 | 520880 | WBGene00015139 | B0310.3  | B0310.3  | 0.01582685538866    | AGIWUR20693 |
| N2                                                                                                                                                                  | HS | X | 525929 | 530289 | WBGene00015141 | ugt-46   | B0310.5  | 0.105223390800404   | AGIWUR40037 |
| N2                                                                                                                                                                  | HS | X | 530551 | 531009 | WBGene00015142 | B0310.6  | B0310.6  | 0.214426015674226   | AGIWUR16990 |
| N2                                                                                                                                                                  | HS | X | 531841 | 535834 | WBGene00017898 | F28C10.3 | F28C10.3 | -0.17043985971188   |             |
| AGIWUR13471                                                                                                                                                         |    |   |        |        |                |          |          |                     |             |
| N2                                                                                                                                                                  | HS | X | 537303 | 538910 | WBGene00017899 | F28C10.4 | F28C10.4 | 0.0513428729272416  |             |
| AGIWUR27250                                                                                                                                                         |    |   |        |        |                |          |          |                     |             |
| N2                                                                                                                                                                  | HS | X | 543107 | 544256 | WBGene00017896 | F28C10.1 | F28C10.1 | -0.0377119774465706 |             |
| AGIWUR6343                                                                                                                                                          |    |   |        |        |                |          |          |                     |             |
| N2                                                                                                                                                                  | HS | X | 555788 | 557191 | WBGene00001962 | hlh-19   | F57C12.3 | -0.163425670581017  |             |
| AGIWUR32848                                                                                                                                                         |    |   |        |        |                |          |          |                     |             |
| N2                                                                                                                                                                  | HS | X | 558141 | 563657 | WBGene00003554 | nas-38   | F57C12.1 | 0.325677974993615   |             |
| AGIWUR34589                                                                                                                                                         |    |   |        |        |                |          |          |                     |             |
| N2                                                                                                                                                                  | HS | X | 563719 | 572701 | WBGene00003408 | mrp-2    | F57C12.4 | 0.0123343008469607  |             |
| AGIWUR6975;AGIWUR36018;AGIWUR45099                                                                                                                                  |    |   |        |        |                |          |          |                     |             |
| N2                                                                                                                                                                  | HS | X | 576318 | 587483 | WBGene00003407 | mrp-1    | F57C12.5 | -0.0325826963003948 |             |
| AGIWUR9284;AGIWUR13774;AGIWUR34067                                                                                                                                  |    |   |        |        |                |          |          |                     |             |
| N2                                                                                                                                                                  | HS | X | 593960 | 596289 | WBGene00017423 | F13C5.2  | F13C5.2  | -0.106646256183988  |             |
| AGIWUR10683;AGIWUR13371;AGIWUR22552;AGIWUR22732;AGIWUR31040;AGIWUR35162                                                                                             |    |   |        |        |                |          |          |                     |             |
| N2                                                                                                                                                                  | HS | X | 596314 | 599553 | WBGene00017424 | F13C5.3  | F13C5.3  | 0.127998907993905   |             |
| AGIWUR302;AGIWUR6079;AGIWUR9605;AGIWUR11481;AGIWUR16677;AGIWUR17142;AGIWUR21336;AGIWUR23589;AGIWUR28821;AGIWUR33103;AGIWUR36497;AGIWUR37477;AGIWUR41870;AGIWUR43585 |    |   |        |        |                |          |          |                     |             |
| N2                                                                                                                                                                  | HS | X | 602172 | 604922 | WBGene00017422 | F13C5.1  | F13C5.1  | 0.0288132670217101  | AGIWUR20727 |
| N2                                                                                                                                                                  | HS | X | 604872 | 608492 | WBGene00017426 | F13C5.5  | F13C5.5  | -0.144060918120502  | AGIWUR43112 |
| N2                                                                                                                                                                  | HS | X | 611120 | 621290 | WBGene00006825 | unc-96   | F13C5.6  | -0.105073355812575  | AGIWUR38876 |
| N2                                                                                                                                                                  | HS | X | 629188 | 632868 | WBGene00019776 | M6.4     | M6.4     | -0.150307159289143  | AGIWUR22702 |
| N2                                                                                                                                                                  | HS | X | 633703 | 636993 | WBGene00004011 | pha-2    | M6.3     | -0.104582717099868  |             |
| AGIWUR2968;AGIWUR10208;AGIWUR16900;AGIWUR22412;AGIWUR23724;AGIWUR24946;AGIWUR28447;AGIWUR39161;AGIWUR40151                                                          |    |   |        |        |                |          |          |                     |             |
| N2                                                                                                                                                                  | HS | X | 642156 | 654903 | WBGene00002056 | ifc-2    | M6.1     | -0.0773802353997981 |             |
| AGIWUR13526;AGIWUR33635;AGIWUR35773;AGIWUR42995                                                                                                                     |    |   |        |        |                |          |          |                     |             |
| N2                                                                                                                                                                  | HS | X | 656188 | 658511 | WBGene00020571 | lpr-7    | T19D7.3  | 0.139975054363289   |             |
| AGIWUR18294;AGIWUR27906                                                                                                                                             |    |   |        |        |                |          |          |                     |             |



|                                                                                                                                  |    |   |        |        |                 |          |          |                      |             |
|----------------------------------------------------------------------------------------------------------------------------------|----|---|--------|--------|-----------------|----------|----------|----------------------|-------------|
| N2                                                                                                                               | HS | X | 658477 | 661777 | WBGene00020572  | rund-1   | T19D7.4  | -0.0246207238668106  | AGIWUR36812 |
| N2                                                                                                                               | HS | X | 664714 | 666300 | WBGene00020573  | T19D7.5  | T19D7.5  | 0.0776696143988493   | AGIWUR792   |
| N2                                                                                                                               | HS | X | 669684 | 670800 | WBGene00020574  | T19D7.6  | T19D7.6  | 0.0454696242292076   | AGIWUR37273 |
| N2                                                                                                                               | HS | X | 673027 | 676484 | WBGene00020569  | lgc-32   | T19D7.1  | 0.130340413986529    | AGIWUR27396 |
| N2                                                                                                                               | HS | X | 676435 | 680419 | WBGene00020575  | T19D7.7  | T19D7.7  | 0.19696147367394     | AGIWUR41783 |
| N2                                                                                                                               | HS | X | 681129 | 682780 | WBGene00021185  | Y9C12A.1 | Y9C12A.1 | -0.0685785567740815  |             |
| AGIWUR9671                                                                                                                       |    |   |        |        |                 |          |          |                      |             |
| N2                                                                                                                               | HS | X | 692978 | 703036 | WBGene00017184  | ncam-1   | F02G3.1  | -0.00743744412111047 |             |
| AGIWUR5275;AGIWUR5619;AGIWUR11793;AGIWUR40249                                                                                    |    |   |        |        |                 |          |          |                      |             |
| N2                                                                                                                               | HS | X | 703029 | 714478 | WBGene00002150  | irk-2    | M02A10.2 | 0.0942168135721673   |             |
| AGIWUR28735                                                                                                                      |    |   |        |        |                 |          |          |                      |             |
| N2                                                                                                                               | HS | X | 720330 | 725957 | WBGene00004829  | sli-1    | M02A10.3 | -0.357817430432833   |             |
| AGIWUR16071                                                                                                                      |    |   |        |        |                 |          |          |                      |             |
| N2                                                                                                                               | HS | X | 731160 | 735672 | WBGene00015364  | npr-19   | C02H7.2  | -0.0302872857691359  | AGIWUR36999 |
| N2                                                                                                                               | HS | X | 751211 | 759732 | WBGene00000086  | aex-3    | C02H7.3  | 0.196028267466374    |             |
| AGIWUR9247;AGIWUR24583;AGIWUR31811;AGIWUR33793                                                                                   |    |   |        |        |                 |          |          |                      |             |
| N2                                                                                                                               | HS | X | 763769 | 766713 | WBGene00001127  | dyf-11   | C02H7.1  | -0.127777299470967   | AGIWUR33461 |
| N2                                                                                                                               | HS | X | 767023 | 768069 | WBGene00020216  | trap-2   | T04G9.5  | 0.0518044279132415   |             |
| AGIWUR1311;AGIWUR14535;AGIWUR14666;AGIWUR28463;AGIWUR32471;AGIWUR43584                                                           |    |   |        |        |                 |          |          |                      |             |
| N2                                                                                                                               | HS | X | 768596 | 770776 | WBGene00002071  | ile-2    | T04G9.3  | 0.236608744736635    | AGIWUR20795 |
| N2                                                                                                                               | HS | X | 770833 | 771882 | WBGene00020218  | T04G9.7  | T04G9.7  | -0.112524606846879   |             |
| AGIWUR9050;AGIWUR38408;AGIWUR38566;AGIWUR43698                                                                                   |    |   |        |        |                 |          |          |                      |             |
| N2                                                                                                                               | HS | X | 772353 | 775371 | WBGene00020215  | T04G9.4  | T04G9.4  | -0.174234596663933   | AGIWUR18022 |
| N2                                                                                                                               | HS | X | 777721 | 780514 | WBGene00003534  | nas-15   | T04G9.2  | -0.205711475962893   |             |
| AGIWUR6169;AGIWUR9460                                                                                                            |    |   |        |        |                 |          |          |                      |             |
| N2                                                                                                                               | HS | X | 780528 | 785624 | WBGene00020217  | T04G9.6  | T04G9.6  | -0.231714904148396   | AGIWUR25013 |
| N2                                                                                                                               | HS | X | 788353 | 796142 | WBGene00020214  | attf-5   | T04G9.1  | 0.281810701985673    | AGIWUR24528 |
| N2                                                                                                                               | HS | X | 802796 | 804264 | WBGene00017779  | gtr-1    | F25E2.1  | 0.164604110803396    | AGIWUR19478 |
| N2                                                                                                                               | HS | X | 806993 | 810794 | WBGene00017780  | F25E2.2  | F25E2.2  | 0.243140871127956    | AGIWUR29915 |
| N2                                                                                                                               | HS | X | 811173 | 813163 | WBGene00017781  | F25E2.3  | F25E2.3  | 0.0168050602630085   | AGIWUR9834  |
| N2                                                                                                                               | HS | X | 813852 | 815929 | WBGene00002058  | ifd-2    | F25E2.4  | -0.0775659271323921  | AGIWUR17114 |
| N2                                                                                                                               | HS | X | 817927 | 825475 | WBGene000000899 | daf-3    | F25E2.5  | -0.039149722668343   |             |
| AGIWUR2490;AGIWUR2974;AGIWUR8571;AGIWUR16462;AGIWUR19235;AGIWUR20554;AGIWUR23624;AGIWUR25067;AGIWUR29176;AGIWUR30818;AGIWUR40071 |    |   |        |        |                 |          |          |                      |             |
| N2                                                                                                                               | HS | X | 830258 | 833760 | WBGene00018213  | F39H12.2 | F39H12.2 | 0.0903240320138288   |             |
| AGIWUR39216                                                                                                                      |    |   |        |        |                 |          |          |                      |             |
| N2                                                                                                                               | HS | X | 834778 | 837758 | WBGene00018212  | F39H12.1 | F39H12.1 | 0.126905743162247    |             |
| AGIWUR17434                                                                                                                      |    |   |        |        |                 |          |          |                      |             |
| N2                                                                                                                               | HS | X | 838144 | 841493 | WBGene00018214  | F39H12.3 | F39H12.3 | -0.0225084954379753  |             |

|                                                                                     |    |   |        |        |                |          |          |                      |             |
|-------------------------------------------------------------------------------------|----|---|--------|--------|----------------|----------|----------|----------------------|-------------|
| AGIWUR30604                                                                         |    |   |        |        |                |          |          |                      |             |
| N2                                                                                  | HS | X | 845731 | 851516 | WBGene00018215 | igcm-1   | F39H12.4 | 0.112755039515022    |             |
| AGIWUR40820                                                                         |    |   |        |        |                |          |          |                      |             |
| N2                                                                                  | HS | X | 864925 | 871089 | WBGene00018987 | lgl-1    | F56F10.4 | 0.110824812051705    |             |
| AGIWUR20878                                                                         |    |   |        |        |                |          |          |                      |             |
| N2                                                                                  | HS | X | 872517 | 875948 | WBGene00018984 | F56F10.1 | F56F10.1 | -0.0277688765674959  |             |
| AGIWUR1210;AGIWUR8208;AGIWUR14901;AGIWUR15405;AGIWUR19430;AGIWUR37374               |    |   |        |        |                |          |          |                      |             |
| N2                                                                                  | HS | X | 877239 | 879881 | WBGene00022502 | ZC13.1   | ZC13.1   | -0.0460837961639697  |             |
| AGIWUR4898;AGIWUR18529;AGIWUR36418                                                  |    |   |        |        |                |          |          |                      |             |
| N2                                                                                  | HS | X | 880629 | 883049 | WBGene00022503 | ZC13.2   | ZC13.2   | 0.0666437361346741   | AGIWUR44486 |
| N2                                                                                  | HS | X | 882967 | 888394 | WBGene00022504 | mam-1    | ZC13.3   | -0.041783534744356   |             |
| AGIWUR6310;AGIWUR40476                                                              |    |   |        |        |                |          |          |                      |             |
| N2                                                                                  | HS | X | 892228 | 898117 | WBGene00003104 | mab-7    | ZC13.4   | 0.361691557257029    | AGIWUR18071 |
| N2                                                                                  | HS | X | 899508 | 902599 | WBGene00044557 | ZC13.10  | ZC13.10  | 0.0750745200157299   |             |
| AGIWUR2564;AGIWUR42796                                                              |    |   |        |        |                |          |          |                      |             |
| N2                                                                                  | HS | X | 913290 | 914853 | WBGene00018078 | F35H12.6 | F35H12.6 | 0.159183249117113    |             |
| AGIWUR19934                                                                         |    |   |        |        |                |          |          |                      |             |
| N2                                                                                  | HS | X | 915874 | 918290 | WBGene00004769 | sel-12   | F35H12.3 | -0.0844798244020026  |             |
| AGIWUR8596;AGIWUR15902                                                              |    |   |        |        |                |          |          |                      |             |
| N2                                                                                  | HS | X | 918353 | 920193 | WBGene00018077 | F35H12.5 | F35H12.5 | 0.0564756254837047   |             |
| AGIWUR39745                                                                         |    |   |        |        |                |          |          |                      |             |
| N2                                                                                  | HS | X | 920200 | 924511 | WBGene00018076 | pifk-1   | F35H12.4 | -0.127707401174192   |             |
| AGIWUR39475                                                                         |    |   |        |        |                |          |          |                      |             |
| N2                                                                                  | HS | X | 924964 | 932255 | WBGene00018075 | tbc-11   | F35H12.2 | -0.101051023223508   |             |
| AGIWUR39704                                                                         |    |   |        |        |                |          |          |                      |             |
| N2                                                                                  | HS | X | 933804 | 934906 | WBGene00018079 | F35H12.7 | F35H12.7 | 0.315683216903563    |             |
| AGIWUR12471                                                                         |    |   |        |        |                |          |          |                      |             |
| N2                                                                                  | HS | X | 935460 | 937704 | WBGene00018074 | F35H12.1 | F35H12.1 | 0.149434318440272    |             |
| AGIWUR17036                                                                         |    |   |        |        |                |          |          |                      |             |
| N2                                                                                  | HS | X | 938516 | 942608 | WBGene00018779 | F53H8.3  | F53H8.3  | 0.000235303933720843 | AGIWUR35128 |
| N2                                                                                  | HS | X | 944826 | 948883 | WBGene00004893 | sms-2    | F53H8.4  | -0.161380897148799   |             |
| AGIWUR10675;AGIWUR16059;AGIWUR19890;AGIWUR31185;AGIWUR35157;AGIWUR36174;AGIWUR43169 |    |   |        |        |                |          |          |                      |             |
| N2                                                                                  | HS | X | 950782 | 954233 | WBGene00000195 | arr-1    | F53H8.2  | -0.176304395376144   | AGIWUR32033 |
| N2                                                                                  | HS | X | 954839 | 957762 | WBGene00000164 | apm-3    | F53H8.1  | -0.103552208924178   |             |
| AGIWUR12166;AGIWUR44192;AGIWUR45022                                                 |    |   |        |        |                |          |          |                      |             |
| N2                                                                                  | HS | X | 957881 | 960568 | WBGene00016642 | chil-10  | C44C1.2  | 0.0761465676553641   | AGIWUR31190 |
| N2                                                                                  | HS | X | 960569 | 963202 | WBGene00003563 | ncs-1    | C44C1.3  | -0.0427517137768803  | AGIWUR41639 |
| N2                                                                                  | HS | X | 969074 | 970270 | WBGene00016645 | C44C1.6  | C44C1.6  | -0.279939893515522   | AGIWUR410   |
| N2                                                                                  | HS | X | 970583 | 974816 | WBGene00016643 | vps-45   | C44C1.4  | 0.0941500409464595   |             |

AGIWUR8956;AGIWUR18258;AGIWUR38973

|    |    |   |        |        |                |          |         |                    |  |
|----|----|---|--------|--------|----------------|----------|---------|--------------------|--|
| N2 | HS | X | 975525 | 978445 | WBGene00016644 | abhd-3.2 | C44C1.5 | 0.0163622252507754 |  |
|----|----|---|--------|--------|----------------|----------|---------|--------------------|--|

AGIWUR12864

|    |    |   |        |        |                |         |         |                   |             |
|----|----|---|--------|--------|----------------|---------|---------|-------------------|-------------|
| N2 | HS | X | 980776 | 983030 | WBGene00016641 | C44C1.1 | C44C1.1 | 0.166482028798159 | AGIWUR16266 |
|----|----|---|--------|--------|----------------|---------|---------|-------------------|-------------|

|    |    |   |        |        |                |       |          |                    |  |
|----|----|---|--------|--------|----------------|-------|----------|--------------------|--|
| N2 | HS | X | 984581 | 991456 | WBGene00000958 | dgk-1 | C09E10.2 | -0.235348616867515 |  |
|----|----|---|--------|--------|----------------|-------|----------|--------------------|--|

AGIWUR5498

|    |    |   |         |         |                |         |          |                   |  |
|----|----|---|---------|---------|----------------|---------|----------|-------------------|--|
| N2 | HS | X | 1004337 | 1009412 | WBGene00018861 | cutl-21 | F55A4.10 | 0.109867362351045 |  |
|----|----|---|---------|---------|----------------|---------|----------|-------------------|--|

AGIWUR34441

|    |    |   |         |         |                |        |         |                   |             |
|----|----|---|---------|---------|----------------|--------|---------|-------------------|-------------|
| N2 | HS | X | 1011501 | 1012347 | WBGene00023069 | rncs-1 | F55A4.9 | 0.350240668139177 | AGIWUR25420 |
|----|----|---|---------|---------|----------------|--------|---------|-------------------|-------------|

|    |    |   |         |         |                |       |         |                     |  |
|----|----|---|---------|---------|----------------|-------|---------|---------------------|--|
| N2 | HS | X | 1012731 | 1017567 | WBGene00018854 | nlf-1 | F55A4.2 | -0.0292967137861884 |  |
|----|----|---|---------|---------|----------------|-------|---------|---------------------|--|

AGIWUR3564;AGIWUR4708;AGIWUR21428;AGIWUR23400;AGIWUR32736;AGIWUR41565

|    |    |   |         |         |                |         |         |                     |             |
|----|----|---|---------|---------|----------------|---------|---------|---------------------|-------------|
| N2 | HS | X | 1023477 | 1023780 | WBGene00018855 | F55A4.3 | F55A4.3 | -0.0956117884570151 | AGIWUR33841 |
|----|----|---|---------|---------|----------------|---------|---------|---------------------|-------------|

|    |    |   |         |         |                |         |         |                     |             |
|----|----|---|---------|---------|----------------|---------|---------|---------------------|-------------|
| N2 | HS | X | 1024646 | 1025838 | WBGene00018856 | F55A4.4 | F55A4.4 | 0.00800329061378946 | AGIWUR14930 |
|----|----|---|---------|---------|----------------|---------|---------|---------------------|-------------|

|    |    |   |         |         |                |        |         |                    |  |
|----|----|---|---------|---------|----------------|--------|---------|--------------------|--|
| N2 | HS | X | 1027673 | 1035286 | WBGene00018857 | stau-1 | F55A4.5 | -0.106342544341209 |  |
|----|----|---|---------|---------|----------------|--------|---------|--------------------|--|

AGIWUR10835;AGIWUR23559

|    |    |   |         |         |                |        |         |                   |            |
|----|----|---|---------|---------|----------------|--------|---------|-------------------|------------|
| N2 | HS | X | 1035548 | 1037046 | WBGene00018853 | sec-22 | F55A4.1 | 0.161231203162606 | AGIWUR3979 |
|----|----|---|---------|---------|----------------|--------|---------|-------------------|------------|

|    |    |   |         |         |                |         |         |                     |  |
|----|----|---|---------|---------|----------------|---------|---------|---------------------|--|
| N2 | HS | X | 1037023 | 1038447 | WBGene00018859 | F55A4.7 | F55A4.7 | -0.0467359031343086 |  |
|----|----|---|---------|---------|----------------|---------|---------|---------------------|--|

AGIWUR4952;AGIWUR5421;AGIWUR10067;AGIWUR14857;AGIWUR20097;AGIWUR24312;AGIWUR37548

|    |    |   |         |         |                |        |         |                   |  |
|----|----|---|---------|---------|----------------|--------|---------|-------------------|--|
| N2 | HS | X | 1038514 | 1046206 | WBGene00018860 | vpat-1 | F55A4.8 | 0.344469633303248 |  |
|----|----|---|---------|---------|----------------|--------|---------|-------------------|--|

AGIWUR2518;AGIWUR5258;AGIWUR18590;AGIWUR29451

|    |    |   |         |         |                |       |         |                    |             |
|----|----|---|---------|---------|----------------|-------|---------|--------------------|-------------|
| N2 | HS | X | 1054081 | 1056843 | WBGene00003565 | ncs-3 | K03E6.3 | -0.100837948637514 | AGIWUR18624 |
|----|----|---|---------|---------|----------------|-------|---------|--------------------|-------------|

|    |    |   |         |         |                |       |         |                    |  |
|----|----|---|---------|---------|----------------|-------|---------|--------------------|--|
| N2 | HS | X | 1057487 | 1062447 | WBGene00006741 | unc-1 | K03E6.5 | 0.0289961062117197 |  |
|----|----|---|---------|---------|----------------|-------|---------|--------------------|--|

AGIWUR2302;AGIWUR14006;AGIWUR20781

|    |    |   |         |         |                |        |         |                   |             |
|----|----|---|---------|---------|----------------|--------|---------|-------------------|-------------|
| N2 | HS | X | 1066789 | 1069033 | WBGene00019364 | mksr-1 | K03E6.4 | 0.192810588979446 | AGIWUR31174 |
|----|----|---|---------|---------|----------------|--------|---------|-------------------|-------------|

|    |    |   |         |         |                |       |         |                    |  |
|----|----|---|---------|---------|----------------|-------|---------|--------------------|--|
| N2 | HS | X | 1073908 | 1079451 | WBGene00002988 | lim-6 | K03E6.1 | 0.0162793015765059 |  |
|----|----|---|---------|---------|----------------|-------|---------|--------------------|--|

AGIWUR8993;AGIWUR10111;AGIWUR20616;AGIWUR21171;AGIWUR36958;AGIWUR43242

|    |    |   |         |         |                |       |         |                   |  |
|----|----|---|---------|---------|----------------|-------|---------|-------------------|--|
| N2 | HS | X | 1079446 | 1080653 | WBGene00003991 | pfn-3 | K03E6.6 | 0.105223714685417 |  |
|----|----|---|---------|---------|----------------|-------|---------|-------------------|--|

AGIWUR14050;AGIWUR16785;AGIWUR17554;AGIWUR22606;AGIWUR34446;AGIWUR35978

|    |    |   |         |         |                |       |         |                    |            |
|----|----|---|---------|---------|----------------|-------|---------|--------------------|------------|
| N2 | HS | X | 1084214 | 1088148 | WBGene00019365 | rei-2 | K03E6.7 | 0.0831336100820383 | AGIWUR9250 |
|----|----|---|---------|---------|----------------|-------|---------|--------------------|------------|

|    |    |   |         |         |                |         |         |                    |            |
|----|----|---|---------|---------|----------------|---------|---------|--------------------|------------|
| N2 | HS | X | 1095547 | 1097013 | WBGene00018634 | F49E7.2 | F49E7.2 | -0.150447506391355 | AGIWUR9891 |
|----|----|---|---------|---------|----------------|---------|---------|--------------------|------------|

|    |    |   |         |         |                |       |         |                     |  |
|----|----|---|---------|---------|----------------|-------|---------|---------------------|--|
| N2 | HS | X | 1097152 | 1103320 | WBGene00004377 | rme-6 | F49E7.1 | 0.00720296717292346 |  |
|----|----|---|---------|---------|----------------|-------|---------|---------------------|--|

AGIWUR1339;AGIWUR17283;AGIWUR18352;AGIWUR27630;AGIWUR32031;AGIWUR35210;AGIWUR37190;AGIWUR39437

|    |    |   |         |         |                |       |         |                   |            |
|----|----|---|---------|---------|----------------|-------|---------|-------------------|------------|
| N2 | HS | X | 1104212 | 1106247 | WBGene00002062 | ife-4 | C05D9.5 | 0.168538515871044 | AGIWUR2875 |
|----|----|---|---------|---------|----------------|-------|---------|-------------------|------------|

|    |    |   |         |         |                |         |         |                     |            |
|----|----|---|---------|---------|----------------|---------|---------|---------------------|------------|
| N2 | HS | X | 1107969 | 1110110 | WBGene00015473 | C05D9.4 | C05D9.4 | -0.0212382524646815 | AGIWUR3752 |
|----|----|---|---------|---------|----------------|---------|---------|---------------------|------------|

|    |    |   |         |         |                |         |         |                    |             |
|----|----|---|---------|---------|----------------|---------|---------|--------------------|-------------|
| N2 | HS | X | 1111903 | 1116794 | WBGene00015472 | C05D9.3 | C05D9.3 | -0.291377465262077 | AGIWUR42743 |
|----|----|---|---------|---------|----------------|---------|---------|--------------------|-------------|

|    |    |   |         |         |                |         |         |                   |             |
|----|----|---|---------|---------|----------------|---------|---------|-------------------|-------------|
| N2 | HS | X | 1117192 | 1119405 | WBGene00015474 | C05D9.7 | C05D9.7 | 0.166879305313051 | AGIWUR25615 |
|----|----|---|---------|---------|----------------|---------|---------|-------------------|-------------|

|    |    |   |         |         |                |         |         |                     |  |
|----|----|---|---------|---------|----------------|---------|---------|---------------------|--|
| N2 | HS | X | 1122422 | 1124308 | WBGene00015476 | C05D9.9 | C05D9.9 | -0.0605800743024991 |  |
|----|----|---|---------|---------|----------------|---------|---------|---------------------|--|

AGIWUR28491;AGIWUR45071

|    |    |   |         |         |                |       |         |                   |             |
|----|----|---|---------|---------|----------------|-------|---------|-------------------|-------------|
| N2 | HS | X | 1125170 | 1128288 | WBGene00015471 | lmp-2 | C05D9.2 | 0.252181847691944 | AGIWUR42105 |
|----|----|---|---------|---------|----------------|-------|---------|-------------------|-------------|

|                                                                                                           |    |   |         |         |                |          |          |                      |             |
|-----------------------------------------------------------------------------------------------------------|----|---|---------|---------|----------------|----------|----------|----------------------|-------------|
| N2                                                                                                        | HS | X | 1128986 | 1132925 | WBGene00004927 | snx-1    | C05D9.1  | -0.184918153524048   | AGIWUR40310 |
| N2                                                                                                        | HS | X | 1132993 | 1148585 | WBGene00020128 | R193.2   | R193.2   | -0.00338580678581479 |             |
| AGIWUR619;AGIWUR14015;AGIWUR19955;AGIWUR21988;AGIWUR24806;AGIWUR31506;AGIWUR33612;AGIWUR39536;AGIWUR41598 |    |   |         |         |                |          |          |                      |             |
| N2                                                                                                        | HS | X | 1151547 | 1153545 | WBGene00020129 | R193.3   | R193.3   | 0.204377041107264    | AGIWUR33696 |
| N2                                                                                                        | HS | X | 1154948 | 1155613 | WBGene00020127 | R193.1   | R193.1   | -0.134233284337597   | AGIWUR37642 |
| N2                                                                                                        | HS | X | 1163153 | 1177172 | WBGene00020490 | tmc-1    | T13G4.3  | 0.0834672017382942   | AGIWUR5257  |
| N2                                                                                                        | HS | X | 1180284 | 1187932 | WBGene00020489 | hot-8    | T13G4.2  | -0.124462039827774   | AGIWUR17480 |
| N2                                                                                                        | HS | X | 1188453 | 1190752 | WBGene00020491 | T13G4.4  | T13G4.4  | 0.255829267828817    | AGIWUR41536 |
| N2                                                                                                        | HS | X | 1193148 | 1193858 | WBGene00020488 | T13G4.1  | T13G4.1  | -0.0119898671503158  | AGIWUR44589 |
| N2                                                                                                        | HS | X | 1195108 | 1198481 | WBGene00020492 | T13G4.5  | T13G4.5  | -0.0228596792559976  | AGIWUR28194 |
| N2                                                                                                        | HS | X | 1202606 | 1203763 | WBGene00020494 | T13G4.7  | T13G4.7  | -0.119023076230894   | AGIWUR29871 |
| N2                                                                                                        | HS | X | 1209411 | 1210683 | WBGene00016724 | C46H3.1  | C46H3.1  | -0.0644349413513332  | AGIWUR22802 |
| N2                                                                                                        | HS | X | 1211760 | 1230758 | WBGene00016725 | C46H3.2  | C46H3.2  | -0.048903881178318   |             |
| AGIWUR35176;AGIWUR42826                                                                                   |    |   |         |         |                |          |          |                      |             |
| N2                                                                                                        | HS | X | 1245984 | 1247892 | WBGene00006635 | tsp-9    | C25G6.2  | 0.0548944370117752   | AGIWUR37946 |
| N2                                                                                                        | HS | X | 1247833 | 1249838 | WBGene00016109 | C25G6.4  | C25G6.4  | -0.0239195420600575  |             |
| AGIWUR21889;AGIWUR30220;AGIWUR35983;AGIWUR37039                                                           |    |   |         |         |                |          |          |                      |             |
| N2                                                                                                        | HS | X | 1270898 | 1272561 | WBGene00016107 | C25G6.1  | C25G6.1  | 0.104183571985827    | AGIWUR15410 |
| N2                                                                                                        | HS | X | 1272788 | 1275416 | WBGene00016874 | C52B11.5 | C52B11.5 | -0.0865659038436455  |             |
| AGIWUR34464                                                                                               |    |   |         |         |                |          |          |                      |             |
| N2                                                                                                        | HS | X | 1295278 | 1298823 | WBGene00016872 | dop-4    | C52B11.3 | 0.0738912181033413   |             |
| AGIWUR7407                                                                                                |    |   |         |         |                |          |          |                      |             |
| N2                                                                                                        | HS | X | 1300149 | 1309504 | WBGene00016871 | inso-1   | C52B11.2 | -0.0398389297402311  |             |
| AGIWUR5254;AGIWUR19809;AGIWUR21664;AGIWUR23766;AGIWUR26079;AGIWUR28297;AGIWUR40402                        |    |   |         |         |                |          |          |                      |             |
| N2                                                                                                        | HS | X | 1311605 | 1316634 | WBGene00019272 | H42K12.3 | H42K12.3 | 0.150064154507952    |             |
| AGIWUR33012                                                                                               |    |   |         |         |                |          |          |                      |             |
| N2                                                                                                        | HS | X | 1321353 | 1327985 | WBGene00003965 | pdh-1    | H42K12.1 | -0.0179352020904382  |             |
| AGIWUR29723                                                                                               |    |   |         |         |                |          |          |                      |             |
| N2                                                                                                        | HS | X | 1328143 | 1329947 | WBGene00017666 | F21E9.2  | F21E9.2  | -0.0125647805773959  | AGIWUR18182 |
| N2                                                                                                        | HS | X | 1335363 | 1336915 | WBGene00017667 | ttr-37   | F21E9.3  | 0.286362536459631    | AGIWUR28934 |
| N2                                                                                                        | HS | X | 1343837 | 1344410 | WBGene00017668 | ins-39   | F21E9.4  | -0.0780510550302642  | AGIWUR19013 |
| N2                                                                                                        | HS | X | 1355556 | 1356482 | WBGene00017670 | F21E9.6  | F21E9.6  | 0.0409988971032655   | AGIWUR33293 |
| N2                                                                                                        | HS | X | 1357771 | 1358532 | WBGene00018940 | F56C3.3  | F56C3.3  | -0.164603121450501   | AGIWUR20347 |
| N2                                                                                                        | HS | X | 1359720 | 1362036 | WBGene00018941 | F56C3.4  | F56C3.4  | -0.0799522154809225  | AGIWUR22669 |
| N2                                                                                                        | HS | X | 1362816 | 1363997 | WBGene00018942 | F56C3.5  | F56C3.5  | -0.0815030345662455  | AGIWUR12830 |
| N2                                                                                                        | HS | X | 1365474 | 1367516 | WBGene00018943 | dgn-2    | F56C3.6  | 0.0242928743063739   |             |
| AGIWUR15039;AGIWUR33689                                                                                   |    |   |         |         |                |          |          |                      |             |
| N2                                                                                                        | HS | X | 1370543 | 1370786 | WBGene00018944 | F56C3.7  | F56C3.7  | 0.231311268275594    | AGIWUR3068  |
| N2                                                                                                        | HS | X | 1372012 | 1374630 | WBGene00018939 | fbxa-190 | F56C3.2  | -0.0962971682594613  |             |

|                                                                                                             |    |   |         |         |                |          |          |                                  |
|-------------------------------------------------------------------------------------------------------------|----|---|---------|---------|----------------|----------|----------|----------------------------------|
| AGIWUR11442                                                                                                 |    |   |         |         |                |          |          |                                  |
| N2                                                                                                          | HS | X | 1381375 | 1381665 | WBGene00044558 | F56C3.10 | F56C3.10 | -0.119850970085401               |
| AGIWUR2372;AGIWUR19801;AGIWUR30724;AGIWUR32967;AGIWUR42194                                                  |    |   |         |         |                |          |          |                                  |
| N2                                                                                                          | HS | X | 1384318 | 1384638 | WBGene00018945 | F56C3.8  | F56C3.8  | 0.196259552108755 AGIWUR18707    |
| N2                                                                                                          | HS | X | 1386248 | 1388160 | WBGene00018938 | F56C3.1  | F56C3.1  | 0.0323212093229053 AGIWUR37168   |
| N2                                                                                                          | HS | X | 1391800 | 1393991 | WBGene00018946 | F56C3.9  | F56C3.9  | 0.3488192292871 AGIWUR26315      |
| N2                                                                                                          | HS | X | 1396353 | 1396551 | WBGene00019267 | H39E20.1 | H39E20.1 | -0.0310182555875116              |
| AGIWUR10559                                                                                                 |    |   |         |         |                |          |          |                                  |
| N2                                                                                                          | HS | X | 1398824 | 1400751 | WBGene00022731 | ZK402.5  | ZK402.5  | -0.117570543422042 AGIWUR27189   |
| N2                                                                                                          | HS | X | 1404271 | 1406101 | WBGene00022728 | ZK402.1  | ZK402.1  | -0.128151154287442 AGIWUR22523   |
| N2                                                                                                          | HS | X | 1408836 | 1410652 | WBGene00000025 | abu-2    | F19G12.7 | 0.116354551579132                |
| AGIWUR19145                                                                                                 |    |   |         |         |                |          |          |                                  |
| N2                                                                                                          | HS | X | 1413144 | 1416545 | WBGene00005244 | srh-19   | F19G12.5 | -0.101933950740404               |
| AGIWUR14945                                                                                                 |    |   |         |         |                |          |          |                                  |
| N2                                                                                                          | HS | X | 1417304 | 1417477 | WBGene00017612 | F19G12.4 | F19G12.4 | 0.134771893544016                |
| AGIWUR1694;AGIWUR5185;AGIWUR16213                                                                           |    |   |         |         |                |          |          |                                  |
| N2                                                                                                          | HS | X | 1425727 | 1426164 | WBGene00017611 | F19G12.3 | F19G12.3 | -0.119175595811041               |
| AGIWUR32948                                                                                                 |    |   |         |         |                |          |          |                                  |
| N2                                                                                                          | HS | X | 1427774 | 1430871 | WBGene00017610 | F19G12.2 | F19G12.2 | -0.839543665911197               |
| AGIWUR40163                                                                                                 |    |   |         |         |                |          |          |                                  |
| N2                                                                                                          | HS | X | 1439261 | 1440261 | WBGene00021046 | sed1-1   | W05H7.3  | 0.0240592081102093 AGIWUR2320    |
| N2                                                                                                          | HS | X | 1440366 | 1446643 | WBGene00021047 | zfp-3    | W05H7.4  | -0.0246893210251766              |
| AGIWUR10664;AGIWUR21164;AGIWUR22713;AGIWUR25733;AGIWUR33192;AGIWUR33399;AGIWUR37599;AGIWUR40048;AGIWUR40099 |    |   |         |         |                |          |          |                                  |
| ;AGIWUR40219;AGIWUR42218;AGIWUR42733;AGIWUR43726                                                            |    |   |         |         |                |          |          |                                  |
| N2                                                                                                          | HS | X | 1450768 | 1452306 | WBGene00021044 | W05H7.1  | W05H7.1  | -0.0295158817787318 AGIWUR28997  |
| N2                                                                                                          | HS | X | 1452695 | 1454000 | WBGene00016997 | cebp-1   | D1005.3  | -0.226382237690371 AGIWUR7092    |
| N2                                                                                                          | HS | X | 1459047 | 1462793 | WBGene00016996 | D1005.2  | D1005.2  | -0.0689014473653682 AGIWUR38343  |
| N2                                                                                                          | HS | X | 1463110 | 1464799 | WBGene00017000 | D1005.6  | D1005.6  | 0.0806683713143244 AGIWUR21560   |
| N2                                                                                                          | HS | X | 1470998 | 1472919 | WBGene00016999 | D1005.5  | D1005.5  | -0.00795888793110677 AGIWUR25343 |
| N2                                                                                                          | HS | X | 1479542 | 1484398 | WBGene00016995 | acly-1   | D1005.1  | -0.18203918496538                |
| AGIWUR2651;AGIWUR19932;AGIWUR34267;AGIWUR38476                                                              |    |   |         |         |                |          |          |                                  |
| N2                                                                                                          | HS | X | 1484853 | 1485818 | WBGene00016998 | D1005.4  | D1005.4  | 0.261233680044885                |
| AGIWUR6861;AGIWUR20502;AGIWUR36467;AGIWUR37562                                                              |    |   |         |         |                |          |          |                                  |
| N2                                                                                                          | HS | X | 1486473 | 1489326 | WBGene00000988 | dhs-25   | F09E10.3 | 0.411045203353778                |
| AGIWUR6958                                                                                                  |    |   |         |         |                |          |          |                                  |
| N2                                                                                                          | HS | X | 1489672 | 1494356 | WBGene00017295 | F09E10.5 | F09E10.5 | 0.0413173044508568               |
| AGIWUR22470                                                                                                 |    |   |         |         |                |          |          |                                  |
| N2                                                                                                          | HS | X | 1495074 | 1497681 | WBGene00017296 | F09E10.6 | F09E10.6 | 0.0595117560837908               |
| AGIWUR15544                                                                                                 |    |   |         |         |                |          |          |                                  |

|                                                                                                                                              |    |   |         |         |                |           |           |                     |
|----------------------------------------------------------------------------------------------------------------------------------------------|----|---|---------|---------|----------------|-----------|-----------|---------------------|
| N2                                                                                                                                           | HS | X | 1500180 | 1501852 | WBGene00017297 | F09E10.7  | F09E10.7  | 0.190193443815525   |
| AGIWUR3344;AGIWUR5999;AGIWUR7563;AGIWUR14284;AGIWUR21040;AGIWUR21617;AGIWUR24684;AGIWUR26365;AGIWUR31714;AGIWUR33549;AGIWUR36843;AGIWUR43253 |    |   |         |         |                |           |           |                     |
| N2                                                                                                                                           | HS | X | 1502860 | 1503278 | WBGene00017294 | F09E10.1  | F09E10.1  | -0.262989565742167  |
| AGIWUR40122                                                                                                                                  |    |   |         |         |                |           |           |                     |
| N2                                                                                                                                           | HS | X | 1504131 | 1504841 | WBGene00006650 | tts-1     | F09E10.11 | -0.148915595308069  |
| AGIWUR9901;AGIWUR15248;AGIWUR21990;AGIWUR22247;AGIWUR25378;AGIWUR28345                                                                       |    |   |         |         |                |           |           |                     |
| N2                                                                                                                                           | HS | X | 1505190 | 1505626 | WBGene00022982 | F09E10.10 | F09E10.10 | 0.0656587420490204  |
| AGIWUR1241;AGIWUR1434;AGIWUR10913;AGIWUR26832;AGIWUR36065                                                                                    |    |   |         |         |                |           |           |                     |
| N2                                                                                                                                           | HS | X | 1510480 | 1521487 | WBGene00017298 | toca-1    | F09E10.8  | -0.148863192600993  |
| AGIWUR15186                                                                                                                                  |    |   |         |         |                |           |           |                     |
| N2                                                                                                                                           | HS | X | 1536366 | 1540287 | WBGene00019436 | K06A9.2   | K06A9.2   | -0.0520829587447444 |
| AGIWUR8972                                                                                                                                   |    |   |         |         |                |           |           |                     |
| N2                                                                                                                                           | HS | X | 1547505 | 1560124 | WBGene00019435 | K06A9.1   | K06A9.1   | -0.158855533872211  |
| AGIWUR976;AGIWUR18127                                                                                                                        |    |   |         |         |                |           |           |                     |
| N2                                                                                                                                           | HS | X | 1568678 | 1572854 | WBGene00019146 | H02F09.3  | H02F09.3  | -0.370414516842143  |
| AGIWUR14894                                                                                                                                  |    |   |         |         |                |           |           |                     |
| N2                                                                                                                                           | HS | X | 1573220 | 1574010 | WBGene00019145 | H02F09.2  | H02F09.2  | 0.0125701378011271  |
| AGIWUR30326                                                                                                                                  |    |   |         |         |                |           |           |                     |
| N2                                                                                                                                           | HS | X | 1576637 | 1591296 | WBGene00006955 | wrt-9     | B0344.2   | -0.050795420878627  |
| AGIWUR1818;AGIWUR5585                                                                                                                        |    |   |         |         |                |           |           |                     |
| N2                                                                                                                                           | HS | X | 1604906 | 1619115 | WBGene00019188 | H11E01.3  | H11E01.3  | 0.0957586800265311  |
| AGIWUR2438;AGIWUR14187;AGIWUR17474;AGIWUR31358;AGIWUR41516                                                                                   |    |   |         |         |                |           |           |                     |
| N2                                                                                                                                           | HS | X | 1621481 | 1625247 | WBGene00019187 | H11E01.2  | H11E01.2  | -0.0910161252290855 |
| AGIWUR17159                                                                                                                                  |    |   |         |         |                |           |           |                     |
| N2                                                                                                                                           | HS | X | 1628137 | 1629454 | WBGene00019186 | fbxb-58   | H11E01.1  | 0.386435452812913   |
| AGIWUR41566                                                                                                                                  |    |   |         |         |                |           |           |                     |
| N2                                                                                                                                           | HS | X | 1630615 | 1635727 | WBGene00022723 | ZK380.2   | ZK380.2   | -0.118012020302687  |
| AGIWUR11129                                                                                                                                  |    |   |         |         |                |           |           |                     |
| N2                                                                                                                                           | HS | X | 1651419 | 1653897 | WBGene00022724 | ZK380.4   | ZK380.4   | 0.0122048758527828  |
| AGIWUR12753                                                                                                                                  |    |   |         |         |                |           |           |                     |
| N2                                                                                                                                           | HS | X | 1655522 | 1656936 | WBGene00006551 | tbx-32    | ZK380.1   | 0.0156735635661187  |
| AGIWUR10520                                                                                                                                  |    |   |         |         |                |           |           |                     |
| N2                                                                                                                                           | HS | X | 1667019 | 1668848 | WBGene00019991 | R09H3.3   | R09H3.3   | 0.0924870270476292  |
| AGIWUR16590                                                                                                                                  |    |   |         |         |                |           |           |                     |
| N2                                                                                                                                           | HS | X | 1671148 | 1674165 | WBGene00006550 | tbx-31    | C36C9.2   | 0.19287845081384    |
| AGIWUR28414                                                                                                                                  |    |   |         |         |                |           |           |                     |
| N2                                                                                                                                           | HS | X | 1676205 | 1678121 | WBGene00016486 | fbxa-170  | C36C9.3   | -0.0765198995828538 |
| AGIWUR11766;AGIWUR14810;AGIWUR17800                                                                                                          |    |   |         |         |                |           |           |                     |
| N2                                                                                                                                           | HS | X | 1681752 | 1681886 | WBGene00219849 | C36C9.10  | C36C9.10  | 0.0472420715758961  |
| AGIWUR20054;AGIWUR26371;AGIWUR40994                                                                                                          |    |   |         |         |                |           |           |                     |
| N2                                                                                                                                           | HS | X | 1682954 | 1686419 | WBGene00016485 | meg-4     | C36C9.1   | -0.260682123247983  |
| AGIWUR5290;AGIWUR14478                                                                                                                       |    |   |         |         |                |           |           |                     |
| N2                                                                                                                                           | HS | X | 1699788 | 1703938 | WBGene00016488 | C36C9.5   | C36C9.5   | -0.0267735980717783 |
| AGIWUR25128                                                                                                                                  |    |   |         |         |                |           |           |                     |
| N2                                                                                                                                           | HS | X | 1706370 | 1706638 | WBGene00017224 | F07G6.5   | F07G6.5   | -0.0704313517720472 |
| AGIWUR37961                                                                                                                                  |    |   |         |         |                |           |           |                     |

|                                                                         |    |   |         |         |                |           |           |                     |             |
|-------------------------------------------------------------------------|----|---|---------|---------|----------------|-----------|-----------|---------------------|-------------|
| N2                                                                      | HS | X | 1710293 | 1711212 | WBGene00017225 | fbxa-52   | F07G6.6   | 0.213756565983553   | AGIWUR45205 |
| N2                                                                      | HS | X | 1714351 | 1715487 | WBGene00044583 | F07G6.9   | F07G6.9   | 0.0790617416077048  |             |
| AGIWUR6243;AGIWUR29401;AGIWUR39325;AGIWUR44809                          |    |   |         |         |                |           |           |                     |             |
| N2                                                                      | HS | X | 1716442 | 1718568 | WBGene00017226 | fbxa-53   | F07G6.7   | 0.0647020370811289  |             |
| AGIWUR7155;AGIWUR25529;AGIWUR32530                                      |    |   |         |         |                |           |           |                     |             |
| N2                                                                      | HS | X | 1720093 | 1720428 | WBGene00017227 | F07G6.8   | F07G6.8   | 0.0421921459928125  |             |
| AGIWUR21530;AGIWUR23105;AGIWUR23920;AGIWUR30816;AGIWUR36057;AGIWUR40612 |    |   |         |         |                |           |           |                     |             |
| N2                                                                      | HS | X | 1727356 | 1729154 | WBGene00017222 | F07G6.2   | F07G6.2   | -0.0529565147314539 | AGIWUR44319 |
| N2                                                                      | HS | X | 1729858 | 1731819 | WBGene00017221 | dgn-3     | F07G6.1   | -0.242243822288282  | AGIWUR5604  |
| N2                                                                      | HS | X | 1737906 | 1739229 | WBGene00045271 | F07G6.10  | F07G6.10  | 0.327208407931806   |             |
| AGIWUR31342                                                             |    |   |         |         |                |           |           |                     |             |
| N2                                                                      | HS | X | 1745096 | 1746217 | WBGene00022292 | Y75D11A.3 | Y75D11A.3 | -0.248504896612869  |             |
| AGIWUR1373;AGIWUR2826;AGIWUR4858;AGIWUR13158;AGIWUR41378                |    |   |         |         |                |           |           |                     |             |
| N2                                                                      | HS | X | 1777355 | 1778146 | WBGene00001237 | elc-2     | W03H1.2   | -0.215829408108887  | AGIWUR8069  |
| N2                                                                      | HS | X | 1786907 | 1788405 | WBGene00000185 | arg-1     | F31A9.3   | 0.0916601001193849  |             |
| AGIWUR12589;AGIWUR18681;AGIWUR19310;AGIWUR34927;AGIWUR44042             |    |   |         |         |                |           |           |                     |             |
| N2                                                                      | HS | X | 1794816 | 1795673 | WBGene00017941 | F31A9.2   | F31A9.2   | 0.071318275778836   | AGIWUR2252  |
| N2                                                                      | HS | X | 1806833 | 1807767 | WBGene00015771 | got-1.3   | C14E2.2   | -0.123360713540741  | AGIWUR33854 |
| N2                                                                      | HS | X | 1810686 | 1811536 | WBGene00015772 | C14E2.3   | C14E2.3   | -0.0776053961605863 | AGIWUR15532 |
| N2                                                                      | HS | X | 1816361 | 1816762 | WBGene00044562 | C14E2.7   | C14E2.7   | 0.0333443432927272  |             |
| AGIWUR1121;AGIWUR9109;AGIWUR24714;AGIWUR42117;AGIWUR44298               |    |   |         |         |                |           |           |                     |             |
| N2                                                                      | HS | X | 1823616 | 1825340 | WBGene00015774 | C14E2.5   | C14E2.5   | 0.0806663509306764  | AGIWUR7100  |
| N2                                                                      | HS | X | 1826466 | 1827354 | WBGene00015770 | C14E2.1   | C14E2.1   | 0.390656805847612   | AGIWUR10204 |
| N2                                                                      | HS | X | 1827738 | 1828487 | WBGene00015775 | C14E2.6   | C14E2.6   | 0.0331905132946062  | AGIWUR656   |
| N2                                                                      | HS | X | 1834445 | 1839024 | WBGene00020829 | T26C11.3  | T26C11.3  | 0.225410757159203   |             |
| AGIWUR27549                                                             |    |   |         |         |                |           |           |                     |             |
| N2                                                                      | HS | X | 1840554 | 1845565 | WBGene00020830 | T26C11.4  | T26C11.4  | -0.0766511782889552 |             |
| AGIWUR24882                                                             |    |   |         |         |                |           |           |                     |             |
| N2                                                                      | HS | X | 1846608 | 1848675 | WBGene00000462 | ceh-41    | T26C11.5  | 0.0341387790417897  |             |
| AGIWUR30638                                                             |    |   |         |         |                |           |           |                     |             |
| N2                                                                      | HS | X | 1848795 | 1852736 | WBGene00000444 | ceh-21    | T26C11.6  | -0.217185753400409  |             |
| AGIWUR20034;AGIWUR42019                                                 |    |   |         |         |                |           |           |                     |             |
| N2                                                                      | HS | X | 1853874 | 1856189 | WBGene00000460 | ceh-39    | T26C11.7  | -0.171100297531474  |             |
| AGIWUR17728                                                             |    |   |         |         |                |           |           |                     |             |
| N2                                                                      | HS | X | 1860722 | 1863543 | WBGene00044563 | T26C11.8  | T26C11.8  | -0.0636117755772667 |             |
| AGIWUR13940;AGIWUR41424                                                 |    |   |         |         |                |           |           |                     |             |
| N2                                                                      | HS | X | 1865246 | 1866638 | WBGene00006560 | tbx-41    | T26C11.1  | -0.0475945195961893 |             |
| AGIWUR10415                                                             |    |   |         |         |                |           |           |                     |             |
| N2                                                                      | HS | X | 1892187 | 1893272 | WBGene00015118 | B0294.3   | B0294.3   | -0.0813676633958327 |             |

AGIWUR903;AGIWUR5963;AGIWUR22701;AGIWUR25360;AGIWUR36315

|    |    |   |         |         |                |         |          |                     |             |
|----|----|---|---------|---------|----------------|---------|----------|---------------------|-------------|
| N2 | HS | X | 1896662 | 1897343 | WBGene00015117 | B0294.1 | B0294.1  | -0.215814898262316  | AGIWUR37631 |
| N2 | HS | X | 1910943 | 1913357 | WBGene00022508 | ZC53.1  | ZC53.1   | -0.229936991312313  | AGIWUR16565 |
| N2 | HS | X | 1915258 | 1917162 | WBGene00004352 | rgs-9   | ZC53.7   | -0.248791423020329  | AGIWUR2771  |
| N2 | HS | X | 1917437 | 1919755 | WBGene00022512 | dot-1.5 | ZC53.6   | -0.307146112207834  | AGIWUR38437 |
| N2 | HS | X | 1923723 | 1924238 | WBGene00022509 | ZC53.2  | ZC53.2   | -0.0784630391640908 | AGIWUR14607 |
| N2 | HS | X | 1925750 | 1937689 | WBGene00022511 | ZC53.4  | ZC53.4   | -0.139115362931407  | AGIWUR2275  |
| N2 | HS | X | 1937947 | 1942199 | WBGene00021987 | fbxa-40 | Y59E1A.1 | 0.189480503177533   |             |

AGIWUR6971

|    |    |   |         |         |                |         |          |                     |  |
|----|----|---|---------|---------|----------------|---------|----------|---------------------|--|
| N2 | HS | X | 1955550 | 1956824 | WBGene00018691 | fbxa-17 | F52D2.10 | -0.0244725871806324 |  |
|----|----|---|---------|---------|----------------|---------|----------|---------------------|--|

AGIWUR44400

|    |    |   |         |         |                |         |         |                     |             |
|----|----|---|---------|---------|----------------|---------|---------|---------------------|-------------|
| N2 | HS | X | 1962573 | 1966188 | WBGene00018689 | F52D2.7 | F52D2.7 | 0.0015738349855372  | AGIWUR5190  |
| N2 | HS | X | 1969875 | 1972657 | WBGene00006139 | str-79  | F52D2.9 | 0.0144335245507765  | AGIWUR34890 |
| N2 | HS | X | 1973796 | 1974523 | WBGene00018687 | F52D2.5 | F52D2.5 | -0.0403266138472236 |             |

AGIWUR4221;AGIWUR5847;AGIWUR24939;AGIWUR26041;AGIWUR36663;AGIWUR42686

|    |    |   |         |         |                 |          |          |                    |  |
|----|----|---|---------|---------|-----------------|----------|----------|--------------------|--|
| N2 | HS | X | 1978014 | 1980938 | WBGene000219451 | F52D2.12 | F52D2.12 | -0.435007579530341 |  |
|----|----|---|---------|---------|-----------------|----------|----------|--------------------|--|

AGIWUR34636

|    |    |   |         |         |                |         |         |                     |  |
|----|----|---|---------|---------|----------------|---------|---------|---------------------|--|
| N2 | HS | X | 1983714 | 1984833 | WBGene00018690 | fbxa-46 | F52D2.8 | -0.0378976220091594 |  |
|----|----|---|---------|---------|----------------|---------|---------|---------------------|--|

AGIWUR9476;AGIWUR13269;AGIWUR27954;AGIWUR29303

|    |    |   |         |         |                |          |          |                    |             |
|----|----|---|---------|---------|----------------|----------|----------|--------------------|-------------|
| N2 | HS | X | 1986429 | 1989607 | WBGene00001569 | meg-3    | F52D2.4  | -0.177523332365336 | AGIWUR30104 |
| N2 | HS | X | 1990734 | 1992649 | WBGene00021484 | Y40A1A.2 | Y40A1A.2 | -0.100754275391986 |             |

AGIWUR11963;AGIWUR40969;AGIWUR41408

|    |    |   |         |         |                |          |          |                    |  |
|----|----|---|---------|---------|----------------|----------|----------|--------------------|--|
| N2 | HS | X | 1995731 | 1998112 | WBGene00021485 | Y40A1A.3 | Y40A1A.3 | -0.276719389611755 |  |
|----|----|---|---------|---------|----------------|----------|----------|--------------------|--|

AGIWUR7356;AGIWUR27578

|    |    |   |         |         |                |          |          |                     |  |
|----|----|---|---------|---------|----------------|----------|----------|---------------------|--|
| N2 | HS | X | 2001030 | 2002631 | WBGene00021483 | Y40A1A.1 | Y40A1A.1 | 0.00424639023426021 |  |
|----|----|---|---------|---------|----------------|----------|----------|---------------------|--|

AGIWUR41690

|    |    |   |         |         |                |            |            |                  |  |
|----|----|---|---------|---------|----------------|------------|------------|------------------|--|
| N2 | HS | X | 2013151 | 2018062 | WBGene00022419 | Y102A11A.9 | Y102A11A.9 | 0.13870119214743 |  |
|----|----|---|---------|---------|----------------|------------|------------|------------------|--|

AGIWUR27143

|    |    |   |         |         |                |            |            |                    |  |
|----|----|---|---------|---------|----------------|------------|------------|--------------------|--|
| N2 | HS | X | 2019148 | 2025737 | WBGene00022413 | Y102A11A.3 | Y102A11A.3 | -0.103180168372891 |  |
|----|----|---|---------|---------|----------------|------------|------------|--------------------|--|

AGIWUR42775

|    |    |   |         |         |                |            |            |                    |  |
|----|----|---|---------|---------|----------------|------------|------------|--------------------|--|
| N2 | HS | X | 2026642 | 2031010 | WBGene00022412 | Y102A11A.2 | Y102A11A.2 | 0.0268375390360962 |  |
|----|----|---|---------|---------|----------------|------------|------------|--------------------|--|

AGIWUR41940

|    |    |   |         |         |                |            |            |                   |  |
|----|----|---|---------|---------|----------------|------------|------------|-------------------|--|
| N2 | HS | X | 2030959 | 2031588 | WBGene00022415 | Y102A11A.5 | Y102A11A.5 | 0.522983104882535 |  |
|----|----|---|---------|---------|----------------|------------|------------|-------------------|--|

AGIWUR14358;AGIWUR22481;AGIWUR35764;AGIWUR37140;AGIWUR41055

|    |    |   |         |         |                |            |            |                    |  |
|----|----|---|---------|---------|----------------|------------|------------|--------------------|--|
| N2 | HS | X | 2031963 | 2035245 | WBGene00022416 | Y102A11A.6 | Y102A11A.6 | -0.234093275078118 |  |
|----|----|---|---------|---------|----------------|------------|------------|--------------------|--|

AGIWUR11400

|    |    |   |         |         |                |            |            |                |  |
|----|----|---|---------|---------|----------------|------------|------------|----------------|--|
| N2 | HS | X | 2035943 | 2038220 | WBGene00022417 | Y102A11A.7 | Y102A11A.7 | 0.243476972345 |  |
|----|----|---|---------|---------|----------------|------------|------------|----------------|--|

AGIWUR24151

|    |    |   |         |         |                |        |            |                      |  |
|----|----|---|---------|---------|----------------|--------|------------|----------------------|--|
| N2 | HS | X | 2039397 | 2046360 | WBGene00022418 | igcm-4 | Y102A11A.8 | -0.00959825569525341 |  |
|----|----|---|---------|---------|----------------|--------|------------|----------------------|--|



|                                                                                 |    |   |         |         |                |            |            |                      |             |
|---------------------------------------------------------------------------------|----|---|---------|---------|----------------|------------|------------|----------------------|-------------|
| AGIWUR5133;AGIWUR5331;AGIWUR6948;AGIWUR10058;AGIWUR18787;AGIWUR21402            |    |   |         |         |                |            |            |                      |             |
| N2                                                                              | HS | X | 2051907 | 2054048 | WBGene00022411 | Y102A11A.1 | Y102A11A.1 | 0.157505703081373    |             |
| AGIWUR11614                                                                     |    |   |         |         |                |            |            |                      |             |
| N2                                                                              | HS | X | 2065038 | 2066567 | WBGene00044753 | F49H12.7   | F49H12.7   | 0.167889616037639    |             |
| AGIWUR14793                                                                     |    |   |         |         |                |            |            |                      |             |
| N2                                                                              | HS | X | 2066554 | 2070441 | WBGene00018657 | ac1-4      | F49H12.6   | -0.0681398164051554  |             |
| AGIWUR9065;AGIWUR9826;AGIWUR20288                                               |    |   |         |         |                |            |            |                      |             |
| N2                                                                              | HS | X | 2074448 | 2075944 | WBGene00018656 | F49H12.5   | F49H12.5   | 0.432073065722086    |             |
| AGIWUR5705                                                                      |    |   |         |         |                |            |            |                      |             |
| N2                                                                              | HS | X | 2079836 | 2081487 | WBGene00018655 | F49H12.4   | F49H12.4   | 0.118002355467848    |             |
| AGIWUR5627                                                                      |    |   |         |         |                |            |            |                      |             |
| N2                                                                              | HS | X | 2084375 | 2085057 | WBGene00018654 | F49H12.3   | F49H12.3   | 0.147570352499192    |             |
| AGIWUR30404                                                                     |    |   |         |         |                |            |            |                      |             |
| N2                                                                              | HS | X | 2086057 | 2086730 | WBGene00018653 | F49H12.2   | F49H12.2   | -0.0348302302103116  |             |
| AGIWUR43736                                                                     |    |   |         |         |                |            |            |                      |             |
| N2                                                                              | HS | X | 2089659 | 2093253 | WBGene00003087 | lsy-2      | F49H12.1   | -0.0727030960641386  |             |
| AGIWUR50;AGIWUR1628;AGIWUR22146;AGIWUR28258;AGIWUR28522;AGIWUR33708;AGIWUR37286 |    |   |         |         |                |            |            |                      |             |
| N2                                                                              | HS | X | 2093475 | 2094842 | WBGene00000737 | col-164    | T21D9.1    | -0.116661780976482   | AGIWUR4292  |
| N2                                                                              | HS | X | 2095370 | 2096058 | WBGene00020645 | T21D9.2    | T21D9.2    | -0.0338428983584365  | AGIWUR16571 |
| N2                                                                              | HS | X | 2105629 | 2107170 | WBGene00018736 | F53B1.3    | F53B1.3    | 0.0766320749665601   |             |
| AGIWUR22369;AGIWUR33958                                                         |    |   |         |         |                |            |            |                      |             |
| N2                                                                              | HS | X | 2108982 | 2111441 | WBGene00018735 | F53B1.2    | F53B1.2    | -0.131286936417553   | AGIWUR28367 |
| N2                                                                              | HS | X | 2111397 | 2113103 | WBGene00018737 | F53B1.4    | F53B1.4    | -0.168459516974977   | AGIWUR11271 |
| N2                                                                              | HS | X | 2114629 | 2118257 | WBGene00018738 | swip-10    | F53B1.6    | 0.185122221481149    | AGIWUR20532 |
| N2                                                                              | HS | X | 2118894 | 2121061 | WBGene00001667 | gpa-5      | F53B1.7    | -0.0234132979257096  | AGIWUR2116  |
| N2                                                                              | HS | X | 2123413 | 2130241 | WBGene00018739 | F53B1.8    | F53B1.8    | -0.00447323315736536 |             |
| AGIWUR11157;AGIWUR24254;AGIWUR26319                                             |    |   |         |         |                |            |            |                      |             |
| N2                                                                              | HS | X | 2144605 | 2145647 | WBGene00001065 | dpy-3      | EGAP7.1    | 0.244535509729975    | AGIWUR27602 |
| N2                                                                              | HS | X | 2147614 | 2149252 | WBGene00018591 | npax-2     | F48B9.5    | 0.119260541050696    | AGIWUR4555  |
| N2                                                                              | HS | X | 2163384 | 2164069 | WBGene00018590 | nlp-37     | F48B9.4    | -0.0728164912717233  | AGIWUR34654 |
| N2                                                                              | HS | X | 2165109 | 2173849 | WBGene00018589 | F48B9.3    | F48B9.3    | 0.0257729205278792   |             |
| AGIWUR2612;AGIWUR8870;AGIWUR28980;AGIWUR42374                                   |    |   |         |         |                |            |            |                      |             |
| N2                                                                              | HS | X | 2173890 | 2176411 | WBGene00018593 | F48B9.8    | F48B9.8    | 0.291569138451209    | AGIWUR31971 |
| N2                                                                              | HS | X | 2180888 | 2185854 | WBGene00018587 | F48B9.1    | F48B9.1    | 0.0210641323537599   | AGIWUR27228 |
| N2                                                                              | HS | X | 2192504 | 2195348 | WBGene00001515 | gap-1      | T24C12.2   | -0.0459067795891626  |             |
| AGIWUR24037                                                                     |    |   |         |         |                |            |            |                      |             |
| N2                                                                              | HS | X | 2196525 | 2203961 | WBGene00020765 | T24C12.3   | T24C12.3   |                      |             |
| -0.00318273666453983 AGIWUR34456                                                |    |   |         |         |                |            |            |                      |             |
| N2                                                                              | HS | X | 2204050 | 2205063 | WBGene00020766 | T24C12.4   | T24C12.4   | 0.0177608211828648   |             |

AGIWUR31433  
N2 HS X 2215630 2218980 WBGene00003968 peb-1 T14F9.4 -0.199413964430759  
AGIWUR21146;AGIWUR30492  
N2 HS X 2221150 2226620 WBGene00020509 hex-1 T14F9.3 -0.132540397399303  
AGIWUR1715;AGIWUR24945;AGIWUR26864;AGIWUR32391  
N2 HS X 2229208 2230122 WBGene00003018 lin-32 T14F9.5 -0.171246392262161 AGIWUR33532  
N2 HS X 2234321 2236706 WBGene00020508 T14F9.2 T14F9.2 -0.00289873005450403 AGIWUR30683  
N2 HS X 2237911 2240255 WBGene00020507 vha-15 T14F9.1 0.128007110498622 AGIWUR23485  
N2 HS X 2241738 2242618 WBGene00004423 rpl-11.2 F07D10.1 0.120816415420553  
AGIWUR4463;AGIWUR5995;AGIWUR11434;AGIWUR20528;AGIWUR26031;AGIWUR36131;AGIWUR37677;AGIWUR38852  
N2 HS X 2255852 2258101 WBGene00000797 crn-4 AH9.2 0.0207783434447428 AGIWUR16169  
N2 HS X 2259150 2260526 WBGene00014999 AH9.3 AH9.3 -0.0649111622657799 AGIWUR8206  
N2 HS X 2263176 2267472 WBGene00044701 AH9.6 AH9.6 0.0866412557666654  
AGIWUR1909;AGIWUR4754  
N2 HS X 2271025 2274337 WBGene00015000 AH9.4 AH9.4 0.0269499566144278 AGIWUR29159  
N2 HS X 2283998 2287188 WBGene00020427 sav-1 T10H10.3 -0.0324917070059616  
AGIWUR35953  
N2 HS X 2294750 2298193 WBGene00020426 T10H10.2 T10H10.2 -0.126280898747617  
AGIWUR43952  
N2 HS X 2303082 2314914 WBGene00002039 hum-6 T10H10.1 0.0705123540516706  
AGIWUR38516  
N2 HS X 2314896 2319333 WBGene00020135 aakg-4 T01B6.3 0.10296905477632  
AGIWUR13944;AGIWUR20760  
N2 HS X 2335684 2348635 WBGene00020134 T01B6.1 T01B6.1 0.0312011127524356  
AGIWUR3958;AGIWUR4904;AGIWUR12927;AGIWUR17462;AGIWUR19138;AGIWUR21280;AGIWUR22799;AGIWUR24274;AGIWUR31031;AGIWUR34130;AGIWUR35858;AGIWUR38941;AGIWUR41041;AGIWUR43996  
N2 HS X 2360097 2364818 WBGene00020767 lgc-40 T24D8.1 0.0169910337675478 AGIWUR21614  
N2 HS X 2365700 2365942 WBGene00020769 T24D8.6 T24D8.6 0.0832647315600821  
AGIWUR7743;AGIWUR26204;AGIWUR32420;AGIWUR34389;AGIWUR36696;AGIWUR44279  
N2 HS X 2375997 2379060 WBGene00018578 F47G3.3 F47G3.3 -0.180212291588571 AGIWUR44829  
N2 HS X 2382691 2384764 WBGene00018577 asna-2 F47G3.2 -0.0559408483998753 AGIWUR19401  
N2 HS X 2385765 2392695 WBGene00018576 F47G3.1 F47G3.1 -0.155079241102783 AGIWUR11303  
N2 HS X 2395505 2398826 WBGene00016619 C43H6.6 C43H6.6 -0.0691844746551089  
AGIWUR2029;AGIWUR18869;AGIWUR19237;AGIWUR31119;AGIWUR35215  
N2 HS X 2398812 2402057 WBGene00016620 dhhc-9 C43H6.7 0.12257180458637  
AGIWUR5071;AGIWUR27531;AGIWUR40331  
N2 HS X 2404024 2407364 WBGene00016617 C43H6.4 C43H6.4 0 AGIWUR3069  
N2 HS X 2407467 2409567 WBGene00016616 C43H6.3 C43H6.3 -0.0852661989189145  
AGIWUR6923;AGIWUR21325

|                                                                        |    |   |         |         |                |          |          |                      |             |
|------------------------------------------------------------------------|----|---|---------|---------|----------------|----------|----------|----------------------|-------------|
| N2                                                                     | HS | X | 2409570 | 2412966 | WBGene00016614 | trpp-12  | C43H6.1  | 0.100404936952589    |             |
| AGIWUR4699;AGIWUR9360;AGIWUR22546;AGIWUR25479;AGIWUR36654              |    |   |         |         |                |          |          |                      |             |
| N2                                                                     | HS | X | 2412953 | 2413377 | WBGene00001959 | hlh-15   | C43H6.8  | -0.158926686215517   | AGIWUR16405 |
| N2                                                                     | HS | X | 2413909 | 2417892 | WBGene00001618 | glr-7    | C43H6.9  | -0.161112337426661   | AGIWUR17578 |
| N2                                                                     | HS | X | 2418425 | 2419877 | WBGene00020303 | T07D1.5  | T07D1.5  | -0.218470539640888   | AGIWUR37199 |
| N2                                                                     | HS | X | 2420462 | 2427504 | WBGene00001551 | gcy-31   | T07D1.1  | 0.185757297911814    | AGIWUR2312  |
| N2                                                                     | HS | X | 2429862 | 2439158 | WBGene00020301 | T07D1.2  | T07D1.2  | 0.088194202495897    |             |
| AGIWUR7384;AGIWUR28486;AGIWUR34400                                     |    |   |         |         |                |          |          |                      |             |
| N2                                                                     | HS | X | 2442970 | 2443404 | WBGene00020302 | T07D1.3  | T07D1.3  | -0.0404058905374809  | AGIWUR44069 |
| N2                                                                     | HS | X | 2445500 | 2455949 | WBGene00001484 | fox-1    | T07D1.4  | -0.148486521475143   |             |
| AGIWUR3748;AGIWUR30879;AGIWUR33746                                     |    |   |         |         |                |          |          |                      |             |
| N2                                                                     | HS | X | 2467347 | 2471308 | WBGene00019866 | R04B3.1  | R04B3.1  | 0.064386827951382    | AGIWUR4954  |
| N2                                                                     | HS | X | 2471540 | 2473718 | WBGene00019867 | R04B3.2  | R04B3.2  | 0.320046776652941    | AGIWUR3145  |
| N2                                                                     | HS | X | 2473758 | 2476030 | WBGene00019868 | R04B3.3  | R04B3.3  | 0.304740010990681    | AGIWUR2415  |
| N2                                                                     | HS | X | 2477107 | 2478765 | WBGene00019319 | K02E10.5 | K02E10.5 | 0.0775798042954063   |             |
| AGIWUR29502                                                            |    |   |         |         |                |          |          |                      |             |
| N2                                                                     | HS | X | 2480755 | 2482911 | WBGene00019320 | K02E10.6 | K02E10.6 | 0.0971043849279702   |             |
| AGIWUR36677                                                            |    |   |         |         |                |          |          |                      |             |
| N2                                                                     | HS | X | 2483263 | 2488296 | WBGene00019318 | K02E10.4 | K02E10.4 | -0.0722515852306471  |             |
| AGIWUR8951;AGIWUR15514;AGIWUR32000;AGIWUR32607                         |    |   |         |         |                |          |          |                      |             |
| N2                                                                     | HS | X | 2489044 | 2494339 | WBGene00001844 | hid-1    | K02E10.2 | -0.158505640598783   |             |
| AGIWUR9595;AGIWUR16184;AGIWUR22838;AGIWUR23855;AGIWUR43646;AGIWUR44331 |    |   |         |         |                |          |          |                      |             |
| N2                                                                     | HS | X | 2496180 | 2501001 | WBGene00019317 | K02E10.1 | K02E10.1 | -0.176751943702349   |             |
| AGIWUR9485                                                             |    |   |         |         |                |          |          |                      |             |
| N2                                                                     | HS | X | 2501003 | 2508549 | WBGene00019321 | K02E10.7 | K02E10.7 | 0.0982889729915382   |             |
| AGIWUR45028                                                            |    |   |         |         |                |          |          |                      |             |
| N2                                                                     | HS | X | 2509608 | 2515317 | WBGene00006365 | syg-1    | K02E10.8 | 0.137864136979493    |             |
| AGIWUR8570;AGIWUR29333                                                 |    |   |         |         |                |          |          |                      |             |
| N2                                                                     | HS | X | 2525191 | 2532457 | WBGene00044061 | tbc-12   | R11B5.1  | -0.126055494731956   | AGIWUR30102 |
| N2                                                                     | HS | X | 2540066 | 2541053 | WBGene00018715 | F52H2.3  | F52H2.3  | 0.0166930203112301   | AGIWUR6056  |
| N2                                                                     | HS | X | 2543391 | 2548028 | WBGene00018716 | F52H2.4  | F52H2.4  | 0.111166996254815    | AGIWUR26943 |
| N2                                                                     | HS | X | 2552436 | 2557726 | WBGene00000004 | aat-3    | F52H2.2  | -0.300327640526939   | AGIWUR21672 |
| N2                                                                     | HS | X | 2557976 | 2559638 | WBGene00018717 | F52H2.5  | F52H2.5  | -0.00522882466508889 | AGIWUR7255  |
| N2                                                                     | HS | X | 2559727 | 2564147 | WBGene00018718 | F52H2.6  | F52H2.6  | 0.0643402247481633   |             |
| AGIWUR1964;AGIWUR9945;AGIWUR11343;AGIWUR35339                          |    |   |         |         |                |          |          |                      |             |
| N2                                                                     | HS | X | 2566557 | 2572653 | WBGene00018719 | F52H2.7  | F52H2.7  | -0.496829534028869   | AGIWUR9017  |
| N2                                                                     | HS | X | 2572863 | 2576697 | WBGene00018714 | F52H2.1  | F52H2.1  | -0.0732103133202058  | AGIWUR23592 |
| N2                                                                     | HS | X | 2577742 | 2578262 | WBGene00045268 | ttr-42   | H01M10.3 | 0.278628441261116    |             |
| AGIWUR18181;AGIWUR31853                                                |    |   |         |         |                |          |          |                      |             |

|                                                                                                            |    |   |         |         |                |          |          |                     |
|------------------------------------------------------------------------------------------------------------|----|---|---------|---------|----------------|----------|----------|---------------------|
| N2                                                                                                         | HS | X | 2578211 | 2580574 | WBGene00019143 | H01M10.1 | H01M10.1 | -0.138912516743684  |
| AGIWUR29748                                                                                                |    |   |         |         |                |          |          |                     |
| N2                                                                                                         | HS | X | 2584539 | 2585739 | WBGene00019144 | H01M10.2 | H01M10.2 | 0.170623886509235   |
| AGIWUR43764                                                                                                |    |   |         |         |                |          |          |                     |
| N2                                                                                                         | HS | X | 2594003 | 2606732 | WBGene00003630 | nhr-40   | T03G6.2  | -0.0351073007029514 |
| AGIWUR203;AGIWUR11036;AGIWUR21316;AGIWUR45083                                                              |    |   |         |         |                |          |          |                     |
| N2                                                                                                         | HS | X | 2608228 | 2609989 | WBGene00020194 | T03G6.1  | T03G6.1  | 0.13097570257116    |
|                                                                                                            |    |   |         |         |                |          |          | AGIWUR42652         |
| N2                                                                                                         | HS | X | 2610826 | 2615726 | WBGene00020195 | T03G6.3  | T03G6.3  | -0.212268723667455  |
|                                                                                                            |    |   |         |         |                |          |          | AGIWUR39954         |
| N2                                                                                                         | HS | X | 2621274 | 2664373 | WBGene00018837 | F54G2.1  | F54G2.1  | -0.0273375958780724 |
| AGIWUR21188;AGIWUR34450                                                                                    |    |   |         |         |                |          |          |                     |
| N2                                                                                                         | HS | X | 2672427 | 2672759 | WBGene00022919 | C09B7.4  | C09B7.4  | 0.0913912095504585  |
| AGIWUR472;AGIWUR11888;AGIWUR14220;AGIWUR26186;AGIWUR35518                                                  |    |   |         |         |                |          |          |                     |
| N2                                                                                                         | HS | X | 2673471 | 2682379 | WBGene00004780 | ser-7    | C09B7.1  | -0.075259601869277  |
| AGIWUR21887;AGIWUR40148;AGIWUR40519                                                                        |    |   |         |         |                |          |          |                     |
| N2                                                                                                         | HS | X | 2682754 | 2687184 | WBGene00020511 | immt-1   | T14G11.3 | -0.0395333017991462 |
| AGIWUR21136                                                                                                |    |   |         |         |                |          |          |                     |
| N2                                                                                                         | HS | X | 2688945 | 2692022 | WBGene00020510 | T14G11.1 | T14G11.1 | -0.156593585037142  |
| AGIWUR2431;AGIWUR17996;AGIWUR22135;AGIWUR23764;AGIWUR32517;AGIWUR32564;AGIWUR35471;AGIWUR39291;AGIWUR39542 |    |   |         |         |                |          |          |                     |
| N2                                                                                                         | HS | X | 2694908 | 2698273 | WBGene00020158 | T02C5.1  | T02C5.1  | 0.0211494491701529  |
| AGIWUR40757;AGIWUR43458                                                                                    |    |   |         |         |                |          |          |                     |
| N2                                                                                                         | HS | X | 2698257 | 2705859 | WBGene00020160 | igcm-3   | T02C5.3  | -0.129139640978956  |
| AGIWUR21354;AGIWUR38472;AGIWUR40980                                                                        |    |   |         |         |                |          |          |                     |
| N2                                                                                                         | HS | X | 2710918 | 2748114 | WBGene00006742 | unc-2    | T02C5.5  | -0.0570545928599735 |
| AGIWUR282;AGIWUR15155                                                                                      |    |   |         |         |                |          |          |                     |
| N2                                                                                                         | HS | X | 2769588 | 2770060 | WBGene00018888 | F55F1.2  | F55F1.2  | -0.0335364609906526 |
|                                                                                                            |    |   |         |         |                |          |          | AGIWUR62            |
| N2                                                                                                         | HS | X | 2772042 | 2799247 | WBGene00006496 | cgef-1   | C14A11.3 | -0.0645584647440987 |
| AGIWUR17834;AGIWUR33860;AGIWUR34012;AGIWUR36036                                                            |    |   |         |         |                |          |          |                     |
| N2                                                                                                         | HS | X | 2803112 | 2804830 | WBGene00015748 | C14A11.2 | C14A11.2 |                     |
| 0.000630606357400865 AGIWUR21605                                                                           |    |   |         |         |                |          |          |                     |
| N2                                                                                                         | HS | X | 2805075 | 2807528 | WBGene00015750 | C14A11.5 | C14A11.5 | 0.0730251962178068  |
| AGIWUR28637;AGIWUR29994;AGIWUR33322                                                                        |    |   |         |         |                |          |          |                     |
| N2                                                                                                         | HS | X | 2807911 | 2809635 | WBGene00050944 | C14A11.9 | C14A11.9 | 0.0271561555676172  |
| AGIWUR28185                                                                                                |    |   |         |         |                |          |          |                     |
| N2                                                                                                         | HS | X | 2810484 | 2814125 | WBGene00015751 | C14A11.6 | C14A11.6 | 0.0906050546711001  |
| AGIWUR40572;AGIWUR42224                                                                                    |    |   |         |         |                |          |          |                     |
| N2                                                                                                         | HS | X | 2820431 | 2822433 | WBGene00006632 | tsp-6    | C14A11.1 | -0.0614857438610423 |
| AGIWUR4926;AGIWUR10463;AGIWUR16224;AGIWUR16558                                                             |    |   |         |         |                |          |          |                     |
| N2                                                                                                         | HS | X | 2823501 | 2826827 | WBGene00006055 | ssr-2    | C14A11.7 | -0.0699911665388582 |
| AGIWUR1100                                                                                                 |    |   |         |         |                |          |          |                     |

|                                                                                                        |    |   |         |         |                |           |           |                      |
|--------------------------------------------------------------------------------------------------------|----|---|---------|---------|----------------|-----------|-----------|----------------------|
| N2                                                                                                     | HS | X | 2834222 | 2840292 | WBGene00022201 | Y71H10B.1 | Y71H10B.1 | -0.0537296238748013  |
| AGIWUR944;AGIWUR5971;AGIWUR7849;AGIWUR9130;AGIWUR17991;AGIWUR18894;AGIWUR19077;AGIWUR38626;AGIWUR43058 |    |   |         |         |                |           |           |                      |
| N2                                                                                                     | HS | X | 2843922 | 2852520 | WBGene00002210 | kin-29    | F58H12.1  | 0.133626032717471    |
| AGIWUR5264;AGIWUR14602;AGIWUR16974;AGIWUR23969;AGIWUR32652                                             |    |   |         |         |                |           |           |                      |
| N2                                                                                                     | HS | X | 2853678 | 2857603 | WBGene00018740 | tra-4     | F53B3.1   | -0.0085767130490777  |
| AGIWUR2299;AGIWUR17562                                                                                 |    |   |         |         |                |           |           |                      |
| N2                                                                                                     | HS | X | 2864211 | 2865683 | WBGene00018744 | F53B3.6   | F53B3.6   | -0.235086021508177   |
| N2                                                                                                     | HS | X | 2865960 | 2871060 | WBGene00018742 | F53B3.3   | F53B3.3   | 0.199430206019141    |
| AGIWUR5232;AGIWUR8771;AGIWUR37860                                                                      |    |   |         |         |                |           |           |                      |
| N2                                                                                                     | HS | X | 2872739 | 2879619 | WBGene00018743 | F53B3.5   | F53B3.5   | -0.394228541141445   |
| N2                                                                                                     | HS | X | 2885863 | 2890625 | WBGene00015171 | vang-1    | B0410.2   | -0.00320358179590041 |
| N2                                                                                                     | HS | X | 2890612 | 2891491 | WBGene00015172 | B0410.3   | B0410.3   | 0.324549616694203    |
| N2                                                                                                     | HS | X | 2892484 | 2898356 | WBGene00044304 | F52B10.3  | F52B10.3  | -0.0252968414625343  |
| AGIWUR17121;AGIWUR31609                                                                                |    |   |         |         |                |           |           |                      |
| N2                                                                                                     | HS | X | 2909536 | 2918038 | WBGene00003776 | nmy-1     | F52B10.1  | -0.273205847063299   |
| AGIWUR2608;AGIWUR3742;AGIWUR6745;AGIWUR33243;AGIWUR39326;AGIWUR44379                                   |    |   |         |         |                |           |           |                      |
| N2                                                                                                     | HS | X | 2918730 | 2923984 | WBGene00044303 | hst-3.2   | F52B10.2  | 0.172638110278887    |
| AGIWUR3291;AGIWUR40841                                                                                 |    |   |         |         |                |           |           |                      |
| N2                                                                                                     | HS | X | 2933361 | 2937740 | WBGene00022200 | fard-1    | Y71H10A.2 | 0.0497177248887972   |
| AGIWUR7983;AGIWUR12871;AGIWUR22212                                                                     |    |   |         |         |                |           |           |                      |
| N2                                                                                                     | HS | X | 2940872 | 2945481 | WBGene00022199 | pfk-1.1   | Y71H10A.1 | -0.135237149162528   |
| AGIWUR6779;AGIWUR29236                                                                                 |    |   |         |         |                |           |           |                      |
| N2                                                                                                     | HS | X | 2945803 | 2946570 | WBGene00044901 | Y41G9A.10 | Y41G9A.10 | -0.272696623668491   |
| AGIWUR24427;AGIWUR27514;AGIWUR27676;AGIWUR28212;AGIWUR34418                                            |    |   |         |         |                |           |           |                      |
| N2                                                                                                     | HS | X | 2946667 | 2949025 | WBGene00021529 | Y41G9A.5  | Y41G9A.5  | -0.245259160645585   |
| AGIWUR26260                                                                                            |    |   |         |         |                |           |           |                      |
| N2                                                                                                     | HS | X | 2957934 | 2968167 | WBGene00021528 | gbb-1     | Y41G9A.4  | -0.0420174098723458  |
| AGIWUR24071;AGIWUR30929                                                                                |    |   |         |         |                |           |           |                      |
| N2                                                                                                     | HS | X | 2976457 | 2981008 | WBGene00021527 | aakg-3    | Y41G9A.3  | 0.0946631148581325   |
| AGIWUR36721                                                                                            |    |   |         |         |                |           |           |                      |
| N2                                                                                                     | HS | X | 2982056 | 2984125 | WBGene00021526 | Y41G9A.2  | Y41G9A.2  | -0.0331506350450894  |
| AGIWUR14896                                                                                            |    |   |         |         |                |           |           |                      |
| N2                                                                                                     | HS | X | 2984278 | 2991375 | WBGene00003885 | osm-5     | Y41G9A.1  | 0.0126719456180338   |
| AGIWUR29544                                                                                            |    |   |         |         |                |           |           |                      |
| N2                                                                                                     | HS | X | 2998303 | 3003803 | WBGene00021530 | Y41G9A.6  | Y41G9A.6  | 0.113075525159248    |
| AGIWUR4734                                                                                             |    |   |         |         |                |           |           |                      |
| N2                                                                                                     | HS | X | 3009499 | 3010175 | WBGene00021656 | Y48D7A.1  | Y48D7A.1  | 0.0620387203052237   |
| AGIWUR39448                                                                                            |    |   |         |         |                |           |           |                      |
| N2                                                                                                     | HS | X | 3012190 | 3018555 | WBGene00001461 | flp-18    | Y48D7A.2  | 0.134113893787616    |

AGIWUR22573

|    |    |   |         |         |                |          |         |                           |             |
|----|----|---|---------|---------|----------------|----------|---------|---------------------------|-------------|
| N2 | HS | X | 3025505 | 3026976 | WBGene00000175 | aqp-7    | M02F4.8 | -0.0178186729927674       | AGIWUR18600 |
| N2 | HS | X | 3027253 | 3030762 | WBGene00019735 | M02F4.1  | M02F4.1 | -0.034061249935764        | AGIWUR11119 |
| N2 | HS | X | 3031723 | 3033203 | WBGene00019738 | clcc-265 |         | M02F4.7 0.501817218872237 |             |

AGIWUR442

|    |    |   |         |         |                |         |          |                     |             |
|----|----|---|---------|---------|----------------|---------|----------|---------------------|-------------|
| N2 | HS | X | 3033325 | 3034303 | WBGene00019736 | M02F4.2 | M02F4.2  | 0.325066344071439   | AGIWUR18919 |
| N2 | HS | X | 3036427 | 3045806 | WBGene00016343 | cnm-3   | C33D12.2 | -0.0361055278159212 |             |

AGIWUR2882;AGIWUR5098;AGIWUR5720;AGIWUR7394;AGIWUR24199;AGIWUR24738;AGIWUR31588;AGIWUR39336

|    |    |   |         |         |                |        |          |                   |  |
|----|----|---|---------|---------|----------------|--------|----------|-------------------|--|
| N2 | HS | X | 3050365 | 3054585 | WBGene00006679 | twk-26 | C33D12.3 | 0.277157181424405 |  |
|----|----|---|---------|---------|----------------|--------|----------|-------------------|--|

AGIWUR28243

|    |    |   |         |         |                |        |          |                   |  |
|----|----|---|---------|---------|----------------|--------|----------|-------------------|--|
| N2 | HS | X | 3055257 | 3059385 | WBGene00016344 | rsef-1 | C33D12.6 | 0.130142972353156 |  |
|----|----|---|---------|---------|----------------|--------|----------|-------------------|--|

AGIWUR2392

|    |    |   |         |         |                |        |          |                    |  |
|----|----|---|---------|---------|----------------|--------|----------|--------------------|--|
| N2 | HS | X | 3063585 | 3065551 | WBGene00000451 | ceh-30 | C33D12.7 | -0.205788955514501 |  |
|----|----|---|---------|---------|----------------|--------|----------|--------------------|--|

AGIWUR20536

|    |    |   |         |         |                |        |          |                   |  |
|----|----|---|---------|---------|----------------|--------|----------|-------------------|--|
| N2 | HS | X | 3068650 | 3070396 | WBGene00000452 | ceh-31 | C33D12.1 | 0.116658717239526 |  |
|----|----|---|---------|---------|----------------|--------|----------|-------------------|--|

AGIWUR1382

|    |    |   |         |         |                |        |         |                     |  |
|----|----|---|---------|---------|----------------|--------|---------|---------------------|--|
| N2 | HS | X | 3081125 | 3085336 | WBGene00006670 | twk-16 | F52E4.4 | -0.0139017066674145 |  |
|----|----|---|---------|---------|----------------|--------|---------|---------------------|--|

AGIWUR10197;AGIWUR23264;AGIWUR27801;AGIWUR28179

|    |    |   |         |         |                |         |         |                     |             |
|----|----|---|---------|---------|----------------|---------|---------|---------------------|-------------|
| N2 | HS | X | 3085829 | 3087345 | WBGene00018702 | F52E4.5 | F52E4.5 | -0.0106394464157358 | AGIWUR13956 |
| N2 | HS | X | 3089496 | 3092457 | WBGene00018701 | pccb-1  | F52E4.1 | -0.143550284585494  |             |

AGIWUR1837;AGIWUR6654;AGIWUR9003;AGIWUR12787;AGIWUR20116;AGIWUR32561;AGIWUR32604;AGIWUR40672;AGIWUR41415

|    |    |   |         |         |                |       |         |                     |  |
|----|----|---|---------|---------|----------------|-------|---------|---------------------|--|
| N2 | HS | X | 3092395 | 3094448 | WBGene00006948 | wrt-2 | F52E4.6 | -0.0954755572631845 |  |
|----|----|---|---------|---------|----------------|-------|---------|---------------------|--|

AGIWUR373;AGIWUR722;AGIWUR13619

|    |    |   |         |         |                |         |         |                    |             |
|----|----|---|---------|---------|----------------|---------|---------|--------------------|-------------|
| N2 | HS | X | 3095434 | 3099837 | WBGene00018703 | sec-3   | F52E4.7 | 0.045706319693064  | AGIWUR41191 |
| N2 | HS | X | 3103250 | 3106279 | WBGene00019611 | K10B3.5 | K10B3.5 | 0.0211932752005044 |             |

AGIWUR25536;AGIWUR25538

|    |    |   |         |         |                |        |         |                    |  |
|----|----|---|---------|---------|----------------|--------|---------|--------------------|--|
| N2 | HS | X | 3106543 | 3110630 | WBGene00019612 | gpcp-1 | K10B3.6 | 0.0304222614491829 |  |
|----|----|---|---------|---------|----------------|--------|---------|--------------------|--|

AGIWUR17177;AGIWUR26068;AGIWUR44080

|    |    |   |         |         |                |       |         |                   |  |
|----|----|---|---------|---------|----------------|-------|---------|-------------------|--|
| N2 | HS | X | 3112083 | 3113382 | WBGene00001685 | gpd-3 | K10B3.7 | 0.170590762384828 |  |
|----|----|---|---------|---------|----------------|-------|---------|-------------------|--|

AGIWUR6643;AGIWUR7153;AGIWUR12023;AGIWUR23960;AGIWUR36409;AGIWUR36989

|    |    |   |         |         |                |       |          |                    |             |
|----|----|---|---------|---------|----------------|-------|----------|--------------------|-------------|
| N2 | HS | X | 3113434 | 3114771 | WBGene00001684 | gpd-2 | K10B3.8  | 0.221689730142584  | AGIWUR22539 |
| N2 | HS | X | 3114668 | 3116538 | WBGene00003124 | mai-1 | K10B3.9  | 0.162454121177884  | AGIWUR35840 |
| N2 | HS | X | 3117439 | 3127073 | WBGene00004951 | spc-1 | K10B3.10 | -0.108206428172993 |             |

AGIWUR4438;AGIWUR7942;AGIWUR9370;AGIWUR10005;AGIWUR12089;AGIWUR31510;AGIWUR42440

|    |    |   |         |         |                |         |         |                   |  |
|----|----|---|---------|---------|----------------|---------|---------|-------------------|--|
| N2 | HS | X | 3135486 | 3136663 | WBGene00019609 | K10B3.1 | K10B3.1 | 0.211467619326768 |  |
|----|----|---|---------|---------|----------------|---------|---------|-------------------|--|

AGIWUR7520;AGIWUR7583;AGIWUR12761;AGIWUR22048;AGIWUR25116;AGIWUR44994

|    |    |   |         |         |                |         |         |                    |             |
|----|----|---|---------|---------|----------------|---------|---------|--------------------|-------------|
| N2 | HS | X | 3146573 | 3147088 | WBGene00015790 | C15C7.4 | C15C7.4 | -0.188566585578808 | AGIWUR34652 |
| N2 | HS | X | 3151148 | 3152461 | WBGene00015791 | C15C7.5 | C15C7.5 | -0.102469438289337 |             |

AGIWUR560;AGIWUR19372;AGIWUR23873;AGIWUR28059;AGIWUR30270;AGIWUR39946

|                                                                                   |    |   |         |         |                |          |          |                     |             |
|-----------------------------------------------------------------------------------|----|---|---------|---------|----------------|----------|----------|---------------------|-------------|
| N2                                                                                | HS | X | 3159940 | 3164424 | WBGene00002220 | gcc-1    | C15C7.2  | 0.150470996816528   |             |
| AGIWUR4551;AGIWUR14889;AGIWUR28773;AGIWUR30268;AGIWUR30613;AGIWUR43739            |    |   |         |         |                |          |          |                     |             |
| N2                                                                                | HS | X | 3164525 | 3165650 | WBGene00015789 | syx-6    | C15C7.1  | -0.0132305120275813 |             |
| AGIWUR1944;AGIWUR3669;AGIWUR41127;AGIWUR45171                                     |    |   |         |         |                |          |          |                     |             |
| N2                                                                                | HS | X | 3165796 | 3167579 | WBGene00015793 | C15C7.7  | C15C7.7  | 0.0638095458315959  | AGIWUR40953 |
| N2                                                                                | HS | X | 3167570 | 3170556 | WBGene00015792 | C15C7.6  | C15C7.6  | -0.213919537389669  |             |
| AGIWUR6524;AGIWUR10308;AGIWUR33805;AGIWUR40453                                    |    |   |         |         |                |          |          |                     |             |
| N2                                                                                | HS | X | 3171424 | 3178695 | WBGene00002217 | klp-4    | F56E3.3  | -0.15769842078787   |             |
| AGIWUR3576;AGIWUR7058;AGIWUR15218;AGIWUR26622;AGIWUR30042;AGIWUR32297;AGIWUR33608 |    |   |         |         |                |          |          |                     |             |
| N2                                                                                | HS | X | 3206818 | 3209644 | WBGene00017893 | F28B4.4  | F28B4.4  | 0.0408354140399574  | AGIWUR22272 |
| N2                                                                                | HS | X | 3210470 | 3220367 | WBGene00017891 | rgl-1    | F28B4.2  | 0.123001167156444   |             |
| AGIWUR11313;AGIWUR17316;AGIWUR20300;AGIWUR36614;AGIWUR36742;AGIWUR40752           |    |   |         |         |                |          |          |                     |             |
| N2                                                                                | HS | X | 3227489 | 3235408 | WBGene00017892 | F28B4.3  | F28B4.3  | 0.196246097853408   | AGIWUR28431 |
| N2                                                                                | HS | X | 3235768 | 3243624 | WBGene00018237 | irg-7    | F40F4.6  | 0.0577398205719781  | AGIWUR39079 |
| N2                                                                                | HS | X | 3243886 | 3245980 | WBGene00018238 | F40F4.7  | F40F4.7  | -0.153000501382412  | AGIWUR14512 |
| N2                                                                                | HS | X | 3247045 | 3250529 | WBGene00004124 | pqn-37   | F40F4.8  | 0.197585455737864   | AGIWUR35686 |
| N2                                                                                | HS | X | 3252963 | 3256265 | WBGene00006535 | tba-9    | F40F4.5  | -0.0219806266556155 | AGIWUR37481 |
| N2                                                                                | HS | X | 3257010 | 3258155 | WBGene00002255 | lbp-3    | F40F4.4  | 0.109402188435254   |             |
| AGIWUR4882;AGIWUR22843;AGIWUR31099                                                |    |   |         |         |                |          |          |                     |             |
| N2                                                                                | HS | X | 3259087 | 3259855 | WBGene00002253 | lbp-1    | F40F4.3  | 0.0338471527498641  | AGIWUR15823 |
| N2                                                                                | HS | X | 3260610 | 3261470 | WBGene00002254 | lbp-2    | F40F4.2  | 0.206354624466567   | AGIWUR17137 |
| N2                                                                                | HS | X | 3262900 | 3264161 | WBGene00018236 | fbxb-71  | F40F4.1  | -0.0980688305882982 | AGIWUR33431 |
| N2                                                                                | HS | X | 3267294 | 3270906 | WBGene00006308 | sul-1    | K09C4.8  | 0.0830592404086765  | AGIWUR36553 |
| N2                                                                                | HS | X | 3271353 | 3271773 | WBGene00019553 | K09C4.9  | K09C4.9  | -0.0880768359563131 | AGIWUR12345 |
| N2                                                                                | HS | X | 3272730 | 3273155 | WBGene00019552 | K09C4.7  | K09C4.7  | -0.207393112567239  | AGIWUR7564  |
| N2                                                                                | HS | X | 3274757 | 3275768 | WBGene00019551 | K09C4.6  | K09C4.6  | -0.0502655291841565 | AGIWUR37707 |
| N2                                                                                | HS | X | 3276020 | 3280230 | WBGene00019554 | K09C4.10 | K09C4.10 | -0.0984293963010412 |             |
| AGIWUR18845                                                                       |    |   |         |         |                |          |          |                     |             |
| N2                                                                                | HS | X | 3282602 | 3285721 | WBGene00019550 | K09C4.5  | K09C4.5  | -0.126254338077737  |             |
| AGIWUR1581;AGIWUR33875;AGIWUR44903                                                |    |   |         |         |                |          |          |                     |             |
| N2                                                                                | HS | X | 3289485 | 3292412 | WBGene00019549 | K09C4.4  | K09C4.4  | -0.012893059724524  | AGIWUR18440 |
| N2                                                                                | HS | X | 3293290 | 3294369 | WBGene00002006 | hsp-2    | K09C4.3  | -0.395171201440368  |             |
| AGIWUR17108;AGIWUR24868;AGIWUR30948;AGIWUR37512                                   |    |   |         |         |                |          |          |                     |             |
| N2                                                                                | HS | X | 3296482 | 3297993 | WBGene00019548 | K09C4.2  | K09C4.2  | 0.0409176315075346  | AGIWUR6444  |
| N2                                                                                | HS | X | 3298832 | 3301637 | WBGene00019547 | K09C4.1  | K09C4.1  | -0.0877865110783311 | AGIWUR35316 |
| N2                                                                                | HS | X | 3302070 | 3303927 | WBGene00017382 | F11D5.5  | F11D5.5  | -0.329900160373028  |             |
| AGIWUR19390;AGIWUR29499                                                           |    |   |         |         |                |          |          |                     |             |
| N2                                                                                | HS | X | 3304026 | 3306939 | WBGene00043980 | F11D5.7  | F11D5.7  | -0.229448620294816  |             |
| AGIWUR17430;AGIWUR29001;AGIWUR29773                                               |    |   |         |         |                |          |          |                     |             |

|                                                                                                          |    |   |         |         |                |          |          |                       |             |
|----------------------------------------------------------------------------------------------------------|----|---|---------|---------|----------------|----------|----------|-----------------------|-------------|
| N2                                                                                                       | HS | X | 3315321 | 3324229 | WBGene00017381 | ddr-2    | F11D5.3  | -0.29474638220087     | AGIWUR26574 |
| N2                                                                                                       | HS | X | 3325166 | 3326275 | WBGene00017383 | F11D5.6  | F11D5.6  | -0.0759936035053164   |             |
| AGIWUR6111;AGIWUR19770;AGIWUR19885;AGIWUR31566;AGIWUR31777                                               |    |   |         |         |                |          |          |                       |             |
| N2                                                                                                       | HS | X | 3333130 | 3347302 | WBGene00017380 | F11D5.1  | F11D5.1  | -0.00142894873204114  |             |
| AGIWUR21170;AGIWUR35228;AGIWUR36050                                                                      |    |   |         |         |                |          |          |                       |             |
| N2                                                                                                       | HS | X | 3348121 | 3348642 | WBGene00022826 | ZK816.3  | ZK816.3  | -0.000490769630833832 | AGIWUR28879 |
| N2                                                                                                       | HS | X | 3348878 | 3350401 | WBGene00022827 | ZK816.4  | ZK816.4  | -0.108388507810465    | AGIWUR5143  |
| N2                                                                                                       | HS | X | 3359062 | 3360656 | WBGene00022825 | ZK816.1  | ZK816.1  | -0.0928296661887318   | AGIWUR7579  |
| N2                                                                                                       | HS | X | 3360722 | 3362493 | WBGene00000989 | dhs-26   | ZK816.5  | 0.186172611261552     |             |
| AGIWUR30451;AGIWUR35473                                                                                  |    |   |         |         |                |          |          |                       |             |
| N2                                                                                                       | HS | X | 3368959 | 3373217 | WBGene00022767 | ZK563.2  | ZK563.2  | -0.00490755200054238  | AGIWUR18934 |
| N2                                                                                                       | HS | X | 3373247 | 3374740 | WBGene00000524 | clc-3    | ZK563.4  | -0.102570440603273    | AGIWUR27033 |
| N2                                                                                                       | HS | X | 3376874 | 3379234 | WBGene00022769 | sorf-1   | ZK563.5  | -0.118800657159007    |             |
| AGIWUR5888;AGIWUR12956;AGIWUR13650;AGIWUR25096;AGIWUR33967;AGIWUR43263                                   |    |   |         |         |                |          |          |                       |             |
| N2                                                                                                       | HS | X | 3380480 | 3382838 | WBGene00044355 | ZK563.7  | ZK563.7  | 0.0812605972047216    |             |
| AGIWUR34423;AGIWUR42244                                                                                  |    |   |         |         |                |          |          |                       |             |
| N2                                                                                                       | HS | X | 3382868 | 3385547 | WBGene00022770 | acp-1    | ZK563.6  | -0.192294050554091    | AGIWUR39590 |
| N2                                                                                                       | HS | X | 3393864 | 3397656 | WBGene00006865 | slcf-2   | ZK563.1  | -0.0130618612728126   |             |
| AGIWUR37355;AGIWUR38288                                                                                  |    |   |         |         |                |          |          |                       |             |
| N2                                                                                                       | HS | X | 3397613 | 3400017 | WBGene00000503 | cht-1    | C04F6.3  | -0.00312139947198453  | AGIWUR35268 |
| N2                                                                                                       | HS | X | 3408664 | 3411683 | WBGene00006810 | unc-78   | C04F6.4  | 0.0598193377743597    |             |
| AGIWUR1669;AGIWUR16113;AGIWUR17514;AGIWUR25638                                                           |    |   |         |         |                |          |          |                       |             |
| N2                                                                                                       | HS | X | 3412876 | 3414708 | WBGene00000990 | dhs-27   | C04F6.5  | 0.103388196193857     | AGIWUR29086 |
| N2                                                                                                       | HS | X | 3424816 | 3427337 | WBGene00044564 | ZK813.6  | ZK813.6  | -0.0877416611836628   |             |
| AGIWUR15263;AGIWUR34459                                                                                  |    |   |         |         |                |          |          |                       |             |
| N2                                                                                                       | HS | X | 3427372 | 3430120 | WBGene00022823 | ZK813.4  | ZK813.4  | 0.101241339398634     | AGIWUR25241 |
| N2                                                                                                       | HS | X | 3441839 | 3442458 | WBGene00022822 | ZK813.3  | ZK813.3  | 0.0293908605662594    |             |
| AGIWUR10722;AGIWUR12466;AGIWUR20222;AGIWUR20531;AGIWUR38971                                              |    |   |         |         |                |          |          |                       |             |
| N2                                                                                                       | HS | X | 3443782 | 3444420 | WBGene00022821 | ZK813.2  | ZK813.2  | 0.00798334698068004   | AGIWUR28329 |
| N2                                                                                                       | HS | X | 3444802 | 3445283 | WBGene00045394 | ZK813.7  | ZK813.7  | 0.0797519815444154    |             |
| AGIWUR3984;AGIWUR4660;AGIWUR9902;AGIWUR11733;AGIWUR22422;AGIWUR26236;AGIWUR35956;AGIWUR36513;AGIWUR44011 |    |   |         |         |                |          |          |                       |             |
| N2                                                                                                       | HS | X | 3446311 | 3448253 | WBGene00022820 | ZK813.1  | ZK813.1  | -0.0500373399999816   | AGIWUR8539  |
| N2                                                                                                       | HS | X | 3448744 | 3451222 | WBGene00022824 | ZK813.5  | ZK813.5  | 0.0767540246643854    | AGIWUR14288 |
| N2                                                                                                       | HS | X | 3451945 | 3465925 | WBGene00004729 | sax-3    | ZK377.2  | 0.0227457269741587    |             |
| AGIWUR15391;AGIWUR19547;AGIWUR28949;AGIWUR29051;AGIWUR37636;AGIWUR42492                                  |    |   |         |         |                |          |          |                       |             |
| N2                                                                                                       | HS | X | 3480251 | 3483649 | WBGene00006952 | wrt-6    | ZK377.1  | -0.0341617606650786   |             |
| AGIWUR4539;AGIWUR16131;AGIWUR26666;AGIWUR32164;AGIWUR34901                                               |    |   |         |         |                |          |          |                       |             |
| N2                                                                                                       | HS | X | 3486309 | 3486838 | WBGene00015715 | C12D12.4 | C12D12.4 | -0.104873153189766    |             |
| AGIWUR27243                                                                                              |    |   |         |         |                |          |          |                       |             |



|                                                                        |    |   |         |         |                |          |          |                     |             |
|------------------------------------------------------------------------|----|---|---------|---------|----------------|----------|----------|---------------------|-------------|
| N2                                                                     | HS | X | 3487101 | 3487996 | WBGene00022922 | C12D12.7 | C12D12.7 | 0.0380785734748557  |             |
| AGIWUR17188                                                            |    |   |         |         |                |          |          |                     |             |
| N2                                                                     | HS | X | 3489293 | 3491155 | WBGene00015714 | C12D12.3 | C12D12.3 | 0.0512769954662202  |             |
| AGIWUR20187;AGIWUR27237;AGIWUR28908;AGIWUR33500                        |    |   |         |         |                |          |          |                     |             |
| N2                                                                     | HS | X | 3496026 | 3499165 | WBGene00001620 | glt-1    | C12D12.2 | -0.174257774244568  |             |
| AGIWUR20640;AGIWUR30222                                                |    |   |         |         |                |          |          |                     |             |
| N2                                                                     | HS | X | 3499253 | 3505251 | WBGene00015713 | C12D12.1 | C12D12.1 | -0.0847678419120577 |             |
| AGIWUR17039;AGIWUR19364                                                |    |   |         |         |                |          |          |                     |             |
| N2                                                                     | HS | X | 3505286 | 3511529 | WBGene00015716 | sox-4    | C12D12.5 | 0.165763753470353   |             |
| AGIWUR772;AGIWUR8579;AGIWUR38135                                       |    |   |         |         |                |          |          |                     |             |
| N2                                                                     | HS | X | 3528812 | 3531826 | WBGene00006864 | npr-16   | F56B6.5  | -0.0436028556775661 | AGIWUR9194  |
| N2                                                                     | HS | X | 3531841 | 3532811 | WBGene00018937 | F56B6.6  | F56B6.6  | 0.230574907476205   |             |
| AGIWUR2309;AGIWUR7014;AGIWUR24773;AGIWUR28044;AGIWUR29035;AGIWUR36026  |    |   |         |         |                |          |          |                     |             |
| N2                                                                     | HS | X | 3537641 | 3540940 | WBGene00006863 | gyg-1    | F56B6.4  | 0.0216893314049535  |             |
| AGIWUR4402;AGIWUR40739                                                 |    |   |         |         |                |          |          |                     |             |
| N2                                                                     | HS | X | 3542558 | 3557599 | WBGene00004350 | rgs-7    | F56B6.2  | -0.122579993511016  |             |
| AGIWUR8199;AGIWUR17813;AGIWUR29479;AGIWUR32324;AGIWUR32993;AGIWUR34005 |    |   |         |         |                |          |          |                     |             |
| N2                                                                     | HS | X | 3558839 | 3563974 | WBGene00006928 | vit-4    | F59D8.2  | -0.235678755127884  |             |
| AGIWUR3280;AGIWUR20585                                                 |    |   |         |         |                |          |          |                     |             |
| N2                                                                     | HS | X | 3567355 | 3572549 | WBGene00006927 | vit-3    | F59D8.1  | -0.422441176370299  | AGIWUR15620 |
| N2                                                                     | HS | X | 3573051 | 3573562 | WBGene00020845 | T27A10.5 | T27A10.5 | -0.0274426519808211 |             |
| AGIWUR1640                                                             |    |   |         |         |                |          |          |                     |             |
| N2                                                                     | HS | X | 3576608 | 3578830 | WBGene00000515 | ckc-1    | T27A10.3 | 0.203748284726684   |             |
| AGIWUR449;AGIWUR4215;AGIWUR8145                                        |    |   |         |         |                |          |          |                     |             |
| N2                                                                     | HS | X | 3588858 | 3596497 | WBGene00020846 | T27A10.6 | T27A10.6 | 0.222803475862456   |             |
| AGIWUR4757;AGIWUR15179;AGIWUR15354                                     |    |   |         |         |                |          |          |                     |             |
| N2                                                                     | HS | X | 3597276 | 3600475 | WBGene00020847 | cgr-1    | T27A10.7 | 0.421832616268286   |             |
| AGIWUR2139                                                             |    |   |         |         |                |          |          |                     |             |
| N2                                                                     | HS | X | 3601800 | 3604360 | WBGene00015954 | C18B2.3  | C18B2.3  | -0.0896650878930334 | AGIWUR35650 |
| N2                                                                     | HS | X | 3604291 | 3605741 | WBGene00015955 | C18B2.4  | C18B2.4  | -0.17476083437297   | AGIWUR41181 |
| N2                                                                     | HS | X | 3606668 | 3611092 | WBGene00015956 | C18B2.5  | C18B2.5  | 0.171437214308942   |             |
| AGIWUR14917;AGIWUR15676                                                |    |   |         |         |                |          |          |                     |             |
| N2                                                                     | HS | X | 3613353 | 3617378 | WBGene00015957 | del-9    | C18B2.6  | -0.429204720587296  | AGIWUR40349 |
| N2                                                                     | HS | X | 3623522 | 3628359 | WBGene00015953 | C18B2.2  | C18B2.2  | 0.0391309330215863  | AGIWUR37215 |
| N2                                                                     | HS | X | 3628316 | 3630884 | WBGene00015952 | C18B2.1  | C18B2.1  | 0.0871179106258175  | AGIWUR28851 |
| N2                                                                     | HS | X | 3632367 | 3633747 | WBGene00001759 | gst-11   | R11G1.3  | -0.0115510685283606 |             |
| AGIWUR1123;AGIWUR11838;AGIWUR17670;AGIWUR34809                         |    |   |         |         |                |          |          |                     |             |
| N2                                                                     | HS | X | 3639189 | 3644896 | WBGene00020012 | R11G1.6  | R11G1.6  | 0.21184687226453    |             |
| AGIWUR18151;AGIWUR22592;AGIWUR35254;AGIWUR36233;AGIWUR36775            |    |   |         |         |                |          |          |                     |             |

|                                                                                                                             |    |   |         |         |                |          |           |                      |             |
|-----------------------------------------------------------------------------------------------------------------------------|----|---|---------|---------|----------------|----------|-----------|----------------------|-------------|
| N2                                                                                                                          | HS | X | 3646320 | 3650150 | WBGene00004727 | sax-1    | R11G1.4   | -0.340853242013985   |             |
| AGIWUR3701;AGIWUR7535;AGIWUR44764                                                                                           |    |   |         |         |                |          |           |                      |             |
| N2                                                                                                                          | HS | X | 3652017 | 3655419 | WBGene00020011 | R11G1.2  | R11G1.2   | 0.0666296356152039   |             |
| AGIWUR18566;AGIWUR29373                                                                                                     |    |   |         |         |                |          |           |                      |             |
| N2                                                                                                                          | HS | X | 3656272 | 3657265 | WBGene00044725 | R11G1.7  | R11G1.7   | -0.10869497797619    | AGIWUR18423 |
| N2                                                                                                                          | HS | X | 3659492 | 3666879 | WBGene00020010 | R11G1.1  | R11G1.1   | -0.202531221259147   | AGIWUR9479  |
| N2                                                                                                                          | HS | X | 3668100 | 3668942 | WBGene00015354 | snet-1   | C02F12.3  | -0.2243689925305     |             |
| AGIWUR3210;AGIWUR35056                                                                                                      |    |   |         |         |                |          |           |                      |             |
| N2                                                                                                                          | HS | X | 3670374 | 3672098 | WBGene00015355 | C02F12.5 | C02F12.5  | 0.336642313282265    |             |
| AGIWUR42617                                                                                                                 |    |   |         |         |                |          |           |                      |             |
| N2                                                                                                                          | HS | X | 3672378 | 3673918 | WBGene00045215 | ceh-63   | C02F12.10 | -0.0909213650309297  |             |
| AGIWUR24651;AGIWUR30317;AGIWUR41987                                                                                         |    |   |         |         |                |          |           |                      |             |
| N2                                                                                                                          | HS | X | 3674041 | 3678557 | WBGene00006431 | tag-52   | C02F12.4  | -0.164730780158873   |             |
| AGIWUR35687                                                                                                                 |    |   |         |         |                |          |           |                      |             |
| N2                                                                                                                          | HS | X | 3681170 | 3684232 | WBGene00006643 | tsp-17   | C02F12.1  | -0.0530292595278299  |             |
| AGIWUR71;AGIWUR691;AGIWUR2919;AGIWUR7781;AGIWUR9164;AGIWUR10882;AGIWUR25534;AGIWUR25780;AGIWUR29313;AGIWUR44582;AGIWUR45202 |    |   |         |         |                |          |           |                      |             |
| N2                                                                                                                          | HS | X | 3684212 | 3689205 | WBGene00015356 | tag-278  | C02F12.7  | -0.209232789354969   |             |
| AGIWUR44429                                                                                                                 |    |   |         |         |                |          |           |                      |             |
| N2                                                                                                                          | HS | X | 3690143 | 3693238 | WBGene00015357 | C02F12.8 | C02F12.8  | -0.0776458511081177  |             |
| AGIWUR30932                                                                                                                 |    |   |         |         |                |          |           |                      |             |
| N2                                                                                                                          | HS | X | 3696903 | 3700807 | WBGene00015358 | C02F12.9 | C02F12.9  | -0.0998327190858532  |             |
| AGIWUR8648;AGIWUR21142;AGIWUR37573;AGIWUR38180                                                                              |    |   |         |         |                |          |           |                      |             |
| N2                                                                                                                          | HS | X | 3706551 | 3713382 | WBGene00015293 | C01C4.3  | C01C4.3   | -0.073761890570907   |             |
| AGIWUR101;AGIWUR13011;AGIWUR31216                                                                                           |    |   |         |         |                |          |           |                      |             |
| N2                                                                                                                          | HS | X | 3716314 | 3718566 | WBGene00015292 | C01C4.2  | C01C4.2   | -0.0841398905344195  |             |
| AGIWUR380;AGIWUR7965;AGIWUR10650;AGIWUR12661                                                                                |    |   |         |         |                |          |           |                      |             |
| N2                                                                                                                          | HS | X | 3727553 | 3728446 | WBGene00003739 | nlp-1    | C01C4.1   | 0.10645306484404     | AGIWUR42191 |
| N2                                                                                                                          | HS | X | 3729281 | 3731960 | WBGene00006454 | aex-4    | T14G12.2  | 0.0305475107265174   |             |
| AGIWUR5944                                                                                                                  |    |   |         |         |                |          |           |                      |             |
| N2                                                                                                                          | HS | X | 3731894 | 3733457 | WBGene00006408 | tag-18   | T14G12.3  | 0.0884805754247431   |             |
| AGIWUR26566                                                                                                                 |    |   |         |         |                |          |           |                      |             |
| N2                                                                                                                          | HS | X | 3740208 | 3742323 | WBGene00001434 | fkh-2    | T14G12.4  | -0.00768739860273415 |             |
| AGIWUR928;AGIWUR1294;AGIWUR4150;AGIWUR7793;AGIWUR14765;AGIWUR30544                                                          |    |   |         |         |                |          |           |                      |             |
| N2                                                                                                                          | HS | X | 3763057 | 3764395 | WBGene00018534 | F47B7.3  | F47B7.3   | -0.262481415500291   |             |
| AGIWUR32605;AGIWUR39322                                                                                                     |    |   |         |         |                |          |           |                      |             |
| N2                                                                                                                          | HS | X | 3765324 | 3766626 | WBGene00018535 | F47B7.4  | F47B7.4   | -0.00920257466291652 | AGIWUR9808  |
| N2                                                                                                                          | HS | X | 3767795 | 3768817 | WBGene00018536 | F47B7.5  | F47B7.5   | -0.0637768120458118  | AGIWUR13937 |
| N2                                                                                                                          | HS | X | 3769731 | 3770643 | WBGene00018537 | F47B7.6  | F47B7.6   | -0.0578117800993745  | AGIWUR41486 |

|                                                                                                                                                                                             |    |   |         |         |                |         |         |                      |             |
|---------------------------------------------------------------------------------------------------------------------------------------------------------------------------------------------|----|---|---------|---------|----------------|---------|---------|----------------------|-------------|
| N2                                                                                                                                                                                          | HS | X | 3772763 | 3778080 | WBGene00018533 | F47B7.2 | F47B7.2 | -0.00949675219445201 |             |
| AGIWUR213;AGIWUR9801;AGIWUR15390;AGIWUR19993;AGIWUR23514;AGIWUR24158;AGIWUR34104;AGIWUR34713;AGIWUR37042;AGIWUR44702                                                                        |    |   |         |         |                |         |         |                      |             |
| N2                                                                                                                                                                                          | HS | X | 3778091 | 3781118 | WBGene00018538 | marg-1  | F47B7.7 | -0.460243674469314   | AGIWUR36494 |
| N2                                                                                                                                                                                          | HS | X | 3788026 | 3788532 | WBGene00018532 | F47B7.1 | F47B7.1 | 0.0281830156969645   |             |
| AGIWUR5087;AGIWUR6046                                                                                                                                                                       |    |   |         |         |                |         |         |                      |             |
| N2                                                                                                                                                                                          | HS | X | 3789757 | 3792815 | WBGene00018026 | F35A5.4 | F35A5.4 | -0.0516856508824528  |             |
| AGIWUR3889;AGIWUR9459;AGIWUR9820                                                                                                                                                            |    |   |         |         |                |         |         |                      |             |
| N2                                                                                                                                                                                          | HS | X | 3793912 | 3795395 | WBGene00018027 | F35A5.5 | F35A5.5 | 0.183365402858195    |             |
| AGIWUR230;AGIWUR7864;AGIWUR12138;AGIWUR12675;AGIWUR20530;AGIWUR22072;AGIWUR23940;AGIWUR29917;AGIWUR37314;AGIWUR38248;AGIWUR42205                                                            |    |   |         |         |                |         |         |                      |             |
| N2                                                                                                                                                                                          | HS | X | 3798179 | 3799741 | WBGene00000033 | abu-10  | F35A5.3 | -0.105368767878016   | AGIWUR37428 |
| N2                                                                                                                                                                                          | HS | X | 3800045 | 3802771 | WBGene00001335 | erp-1   | F35A5.8 | -0.235260479827021   |             |
| AGIWUR6029;AGIWUR8627;AGIWUR42411;AGIWUR45109                                                                                                                                               |    |   |         |         |                |         |         |                      |             |
| N2                                                                                                                                                                                          | HS | X | 3805084 | 3805749 | WBGene00018025 | F35A5.2 | F35A5.2 | -0.217465362920581   | AGIWUR43919 |
| N2                                                                                                                                                                                          | HS | X | 3807460 | 3816429 | WBGene00018024 | F35A5.1 | F35A5.1 | 0.102745755229908    |             |
| AGIWUR16665;AGIWUR20440;AGIWUR21793                                                                                                                                                         |    |   |         |         |                |         |         |                      |             |
| N2                                                                                                                                                                                          | HS | X | 3816851 | 3826963 | WBGene00001441 | fkx-9   | K03C7.2 | 0.0542673331092338   |             |
| AGIWUR1451;AGIWUR3258;AGIWUR6593;AGIWUR15006;AGIWUR16658;AGIWUR20846;AGIWUR21069;AGIWUR26982;AGIWUR27201                                                                                    |    |   |         |         |                |         |         |                      |             |
| N2                                                                                                                                                                                          | HS | X | 3827231 | 3829300 | WBGene00019359 | K03C7.3 | K03C7.3 | 0.11152706355126     | AGIWUR5541  |
| N2                                                                                                                                                                                          | HS | X | 3840869 | 3842468 | WBGene00022515 | ttr-48  | ZC64.2  | -0.181135247639281   |             |
| AGIWUR7561;AGIWUR8684;AGIWUR35317;AGIWUR40258                                                                                                                                               |    |   |         |         |                |         |         |                      |             |
| N2                                                                                                                                                                                          | HS | X | 3843367 | 3857797 | WBGene00000441 | ceh-18  | ZC64.3  | 0.037195455084035    |             |
| AGIWUR2095;AGIWUR8429;AGIWUR8825;AGIWUR22735;AGIWUR27675;AGIWUR28338;AGIWUR37278                                                                                                            |    |   |         |         |                |         |         |                      |             |
| N2                                                                                                                                                                                          | HS | X | 3869753 | 3873295 | WBGene00002987 | lim-4   | ZC64.4  | -0.0638982471624949  | AGIWUR27888 |
| N2                                                                                                                                                                                          | HS | X | 3879782 | 3893309 | WBGene00018569 | F47F2.1 | F47F2.1 | 0.0612593146125562   |             |
| AGIWUR8897;AGIWUR10596;AGIWUR21221;AGIWUR41611                                                                                                                                              |    |   |         |         |                |         |         |                      |             |
| N2                                                                                                                                                                                          | HS | X | 3893964 | 3895677 | WBGene00018571 | F47F2.3 | F47F2.3 | 0.0775056630367938   | AGIWUR27605 |
| N2                                                                                                                                                                                          | HS | X | 3904591 | 3907671 | WBGene00006321 | sup-12  | T22B2.4 | -0.0707384234231845  |             |
| AGIWUR4964;AGIWUR13589;AGIWUR35264;AGIWUR37936;AGIWUR39225;AGIWUR40172                                                                                                                      |    |   |         |         |                |         |         |                      |             |
| N2                                                                                                                                                                                          | HS | X | 3908144 | 3911380 | WBGene00020669 | T22B2.5 | T22B2.5 | -0.0199677926911304  |             |
| AGIWUR11095;AGIWUR14481;AGIWUR17029;AGIWUR20075;AGIWUR36801;AGIWUR39173;AGIWUR41209;AGIWUR45062                                                                                             |    |   |         |         |                |         |         |                      |             |
| N2                                                                                                                                                                                          | HS | X | 3914765 | 3915848 | WBGene00020670 | T22B2.6 | T22B2.6 | -0.0113732165368341  |             |
| AGIWUR3107;AGIWUR3588;AGIWUR7204;AGIWUR8957;AGIWUR11412;AGIWUR11915;AGIWUR17333;AGIWUR19664;AGIWUR26137;AGIWUR29664;AGIWUR32235;AGIWUR35489;AGIWUR36229;AGIWUR37239;AGIWUR44863;AGIWUR44904 |    |   |         |         |                |         |         |                      |             |
| N2                                                                                                                                                                                          | HS | X | 3917301 | 3919835 | WBGene00020667 | T22B2.3 | T22B2.3 | 0.051934965986649    | AGIWUR4053  |
| N2                                                                                                                                                                                          | HS | X | 3921068 | 3923233 | WBGene00020666 | T22B2.2 | T22B2.2 | -0.258666910807292   | AGIWUR34034 |
| N2                                                                                                                                                                                          | HS | X | 3926081 | 3929576 | WBGene00020665 | T22B2.1 | T22B2.1 | -0.163482705553838   | AGIWUR13633 |
| N2                                                                                                                                                                                          | HS | X | 3931631 | 3937897 | WBGene00020567 | T19D2.1 | T19D2.1 | -0.0366370824545221  | AGIWUR8958  |

|                                                                                             |    |   |         |         |                 |          |          |                     |                    |
|---------------------------------------------------------------------------------------------|----|---|---------|---------|-----------------|----------|----------|---------------------|--------------------|
| N2                                                                                          | HS | X | 3939401 | 3940092 | WBGene00020568  | T19D2.3  | T19D2.3  | 0.173855920387751   | AGIWUR40361        |
| N2                                                                                          | HS | X | 3940141 | 3943313 | WBGene00004184  | T19D2.2  | T19D2.2  | -0.0902280164914648 |                    |
| AGIWUR288;AGIWUR6348;AGIWUR7010;AGIWUR18174;AGIWUR20877;AGIWUR21653;AGIWUR33189;AGIWUR36185 |    |   |         |         |                 |          |          |                     |                    |
| N2                                                                                          | HS | X | 3958497 | 3961907 | WBGene00003007  | lin-18   | C16B8.1  | 0.00647788449276732 |                    |
| AGIWUR3203;AGIWUR25846;AGIWUR29365                                                          |    |   |         |         |                 |          |          |                     |                    |
| N2                                                                                          | HS | X | 3961930 | 3966432 | WBGene00015822  | C16B8.2  | C16B8.2  | 0.030052015132263   |                    |
| AGIWUR6092;AGIWUR11035;AGIWUR35161                                                          |    |   |         |         |                 |          |          |                     |                    |
| N2                                                                                          | HS | X | 3968036 | 3968637 | WBGene00015823  | C16B8.3  | C16B8.3  | -0.11815885018288   |                    |
| AGIWUR4953;AGIWUR18034;AGIWUR24168;AGIWUR35144                                              |    |   |         |         |                 |          |          |                     |                    |
| N2                                                                                          | HS | X | 3970389 | 3973634 | WBGene00015824  | C16B8.4  | C16B8.4  | 0.0741765097722933  | AGIWUR20367        |
| N2                                                                                          | HS | X | 3985104 | 3985465 | WBGene00022926  | C16B8.5  | C16B8.5  | -0.0572889237942729 |                    |
| AGIWUR6001;AGIWUR7797;AGIWUR14016;AGIWUR21798;AGIWUR33763                                   |    |   |         |         |                 |          |          |                     |                    |
| N2                                                                                          | HS | X | 3997340 | 3999341 | WBGene00019829  | R02E12.5 |          | R02E12.5            | 0.0697164614411125 |
| AGIWUR26862                                                                                 |    |   |         |         |                 |          |          |                     |                    |
| N2                                                                                          | HS | X | 4003532 | 4007634 | WBGene00019828  | R02E12.4 |          | R02E12.4            | 0.0292647972405096 |
| AGIWUR39405                                                                                 |    |   |         |         |                 |          |          |                     |                    |
| N2                                                                                          | HS | X | 4008058 | 4016185 | WBGene00019830  | hrg-1    | R02E12.6 |                     | 0.427231364948852  |
| AGIWUR22265                                                                                 |    |   |         |         |                 |          |          |                     |                    |
| N2                                                                                          | HS | X | 4012219 | 4021956 | WBGene00019827  | mop-25.1 |          | R02E12.2            | 0.0708202665299034 |
| AGIWUR35677                                                                                 |    |   |         |         |                 |          |          |                     |                    |
| N2                                                                                          | HS | X | 4022273 | 4025584 | WBGene00000049  | acr-10   | R02E12.8 |                     | -0.101521250055873 |
| AGIWUR13780                                                                                 |    |   |         |         |                 |          |          |                     |                    |
| N2                                                                                          | HS | X | 4056835 | 4071493 | WBGene00020294  | T06F4.1  | T06F4.1  | -0.046811905964673  |                    |
| AGIWUR12454;AGIWUR40322                                                                     |    |   |         |         |                 |          |          |                     |                    |
| N2                                                                                          | HS | X | 4078236 | 4081045 | WBGene00044566  | T06F4.3  | T06F4.3  | -0.0103154378998616 |                    |
| AGIWUR9614;AGIWUR19207;AGIWUR22647;AGIWUR33199;AGIWUR34873                                  |    |   |         |         |                 |          |          |                     |                    |
| N2                                                                                          | HS | X | 4094867 | 4100573 | WBGene000000531 | clh-4    | T06F4.2  | 0.0632670053671252  |                    |
| AGIWUR7616;AGIWUR14496;AGIWUR23097;AGIWUR26114                                              |    |   |         |         |                 |          |          |                     |                    |
| N2                                                                                          | HS | X | 4101687 | 4102125 | WBGene00044724  | R02E4.3  | R02E4.3  | 0.448859597338355   |                    |
| AGIWUR4745;AGIWUR30953;AGIWUR38166                                                          |    |   |         |         |                 |          |          |                     |                    |
| N2                                                                                          | HS | X | 4103447 | 4104521 | WBGene00019826  | R02E4.1  | R02E4.1  | -0.0769961425523844 |                    |
| AGIWUR13674;AGIWUR27146                                                                     |    |   |         |         |                 |          |          |                     |                    |
| N2                                                                                          | HS | X | 4107476 | 4110496 | WBGene00044021  | R02E4.2  | R02E4.2  | -0.120256408701015  |                    |
| AGIWUR16898;AGIWUR41313                                                                     |    |   |         |         |                 |          |          |                     |                    |
| N2                                                                                          | HS | X | 4110442 | 4111474 | WBGene00017307  | F09F9.2  | F09F9.2  | 0.454624162184636   | AGIWUR15733        |
| N2                                                                                          | HS | X | 4115330 | 4117027 | WBGene00017306  | F09F9.1  | F09F9.1  | 0.00883868143847977 | AGIWUR2150         |
| N2                                                                                          | HS | X | 4117951 | 4119487 | WBGene00045395  | F09F9.5  | F09F9.5  | 0.029718516101179   |                    |
| AGIWUR15072;AGIWUR17778                                                                     |    |   |         |         |                 |          |          |                     |                    |
| N2                                                                                          | HS | X | 4119652 | 4121016 | WBGene00017308  | F09F9.3  | F09F9.3  | -0.0632797621123666 | AGIWUR7987         |

|                                                                                                 |    |   |         |         |                |          |          |                     |             |
|-------------------------------------------------------------------------------------------------|----|---|---------|---------|----------------|----------|----------|---------------------|-------------|
| N2                                                                                              | HS | X | 4121786 | 4128431 | WBGene00017309 | F09F9.4  | F09F9.4  | -0.0175228867076651 | AGIWUR3191  |
| N2                                                                                              | HS | X | 4135133 | 4147662 | WBGene00022745 | ZK470.2  | ZK470.2  | -0.0437460159532117 |             |
| AGIWUR4037;AGIWUR17753;AGIWUR18130                                                              |    |   |         |         |                |          |          |                     |             |
| N2                                                                                              | HS | X | 4148648 | 4153443 | WBGene00006410 | nck-1    | ZK470.5  | -0.101132515643782  |             |
| AGIWUR19892;AGIWUR25883;AGIWUR27962;AGIWUR30810;AGIWUR33783                                     |    |   |         |         |                |          |          |                     |             |
| N2                                                                                              | HS | X | 4167459 | 4169791 | WBGene00219362 | ZK470.14 | ZK470.14 | 0.239837753277086   |             |
| AGIWUR25015                                                                                     |    |   |         |         |                |          |          |                     |             |
| N2                                                                                              | HS | X | 4176065 | 4177494 | WBGene00022747 | ZK470.6  | ZK470.6  | 0.00756023186904642 |             |
| AGIWUR244;AGIWUR9011;AGIWUR18872;AGIWUR21207                                                    |    |   |         |         |                |          |          |                     |             |
| N2                                                                                              | HS | X | 4177917 | 4186756 | WBGene00003412 | mrp-6    | F20B6.3  | -0.0806091496205488 |             |
| AGIWUR11769;AGIWUR13096;AGIWUR28457;AGIWUR31143;AGIWUR32298;AGIWUR35622;AGIWUR38453;AGIWUR40403 |    |   |         |         |                |          |          |                     |             |
| N2                                                                                              | HS | X | 4191094 | 4193144 | WBGene00006921 | vha-12   | F20B6.2  | -0.186473117725569  |             |
| AGIWUR6392;AGIWUR21906;AGIWUR38099                                                              |    |   |         |         |                |          |          |                     |             |
| N2                                                                                              | HS | X | 4194019 | 4194785 | WBGene00017628 | F20B6.4  | F20B6.4  | -0.0699643456686694 | AGIWUR38287 |
| N2                                                                                              | HS | X | 4201650 | 4202214 | WBGene00017630 | F20B6.6  | F20B6.6  | 0.0206082840034707  | AGIWUR43841 |
| N2                                                                                              | HS | X | 4204602 | 4206444 | WBGene00017632 | F20B6.9  | F20B6.9  | -0.0584458365428224 |             |
| AGIWUR5286;AGIWUR38141                                                                          |    |   |         |         |                |          |          |                     |             |
| N2                                                                                              | HS | X | 4210573 | 4217290 | WBGene00001994 | hpk-1    | F20B6.8  | -0.290726626695968  |             |
| AGIWUR1171;AGIWUR11680                                                                          |    |   |         |         |                |          |          |                     |             |
| N2                                                                                              | HS | X | 4218279 | 4218458 | WBGene00020922 | W01H2.2  | W01H2.2  | -0.179266362417781  | AGIWUR21224 |
| N2                                                                                              | HS | X | 4227857 | 4235846 | WBGene00004285 | rab-37   | W01H2.3  | -0.0645195761873363 |             |
| AGIWUR7026;AGIWUR19855;AGIWUR22772;AGIWUR29998;AGIWUR35671;AGIWUR42634                          |    |   |         |         |                |          |          |                     |             |
| N2                                                                                              | HS | X | 4246554 | 4247212 | WBGene00018602 | F48D6.4  | F48D6.4  | -0.0312119269646756 |             |
| AGIWUR4659;AGIWUR14142;AGIWUR26030;AGIWUR44362                                                  |    |   |         |         |                |          |          |                     |             |
| N2                                                                                              | HS | X | 4249249 | 4250764 | WBGene00001957 | hlh-13   | F48D6.3  | -0.117263169532674  |             |
| AGIWUR12271;AGIWUR31055                                                                         |    |   |         |         |                |          |          |                     |             |
| N2                                                                                              | HS | X | 4252356 | 4254174 | WBGene00005716 | srv-5    | F48D6.2  | -0.121901322325321  | AGIWUR32042 |
| N2                                                                                              | HS | X | 4255154 | 4256812 | WBGene00006393 | taf-11.1 | F48D6.1  | -0.405731605432663  |             |
| AGIWUR12189                                                                                     |    |   |         |         |                |          |          |                     |             |
| N2                                                                                              | HS | X | 4257061 | 4259094 | WBGene00005717 | srv-6    | C52B9.5  | -0.0371416992806104 | AGIWUR38894 |
| N2                                                                                              | HS | X | 4260652 | 4264591 | WBGene00016867 | C52B9.4  | C52B9.4  | 0.181852863483012   | AGIWUR2170  |
| N2                                                                                              | HS | X | 4265851 | 4270486 | WBGene00016866 | coel-1   | C52B9.3  | -0.0918269578751492 |             |
| AGIWUR6040;AGIWUR13947;AGIWUR22554;AGIWUR33368;AGIWUR36165;AGIWUR37755;AGIWUR40505              |    |   |         |         |                |          |          |                     |             |
| N2                                                                                              | HS | X | 4271169 | 4274229 | WBGene00003179 | mec-18   | C52B9.9  | 0.0778235813462462  | AGIWUR1282  |
| N2                                                                                              | HS | X | 4273914 | 4274750 | WBGene00016869 | C52B9.10 | C52B9.10 | 0.121747483838205   |             |
| AGIWUR5387                                                                                      |    |   |         |         |                |          |          |                     |             |
| N2                                                                                              | HS | X | 4274786 | 4279344 | WBGene00006680 | twk-28   | C52B9.6  | 0.160703155891087   |             |
| AGIWUR8740;AGIWUR10284;AGIWUR44110                                                              |    |   |         |         |                |          |          |                     |             |
| N2                                                                                              | HS | X | 4280980 | 4284176 | WBGene00016865 | ets-9    | C52B9.2  | -0.0856260765252088 | AGIWUR41782 |

|                                                                        |    |   |         |         |                |           |           |                     |             |
|------------------------------------------------------------------------|----|---|---------|---------|----------------|-----------|-----------|---------------------|-------------|
| N2                                                                     | HS | X | 4284189 | 4284901 | WBGene00016870 | ets-10    | C52B9.11  | 0.624464124061348   |             |
| AGIWUR19859                                                            |    |   |         |         |                |           |           |                     |             |
| N2                                                                     | HS | X | 4286737 | 4291494 | WBGene00000510 | cka-2     | C52B9.1   | -0.0784670774880079 |             |
| AGIWUR4895;AGIWUR24931;AGIWUR37447;AGIWUR37628;AGIWUR39879;AGIWUR42350 |    |   |         |         |                |           |           |                     |             |
| N2                                                                     | HS | X | 4291475 | 4297630 | WBGene00003907 | paf-2     | C52B9.7   | 0.067752682971975   |             |
| AGIWUR1054;AGIWUR26277                                                 |    |   |         |         |                |           |           |                     |             |
| N2                                                                     | HS | X | 4297860 | 4304398 | WBGene00016868 | C52B9.8   | C52B9.8   | 0.238432235241707   | AGIWUR22938 |
| N2                                                                     | HS | X | 4328400 | 4328916 | WBGene00016039 | C24A8.5   | C24A8.5   | -0.133996190787981  | AGIWUR16655 |
| N2                                                                     | HS | X | 4339634 | 4343702 | WBGene00017472 | cst-1     | F14H12.4  | 0.0491454329101231  |             |
| AGIWUR38627                                                            |    |   |         |         |                |           |           |                     |             |
| N2                                                                     | HS | X | 4344215 | 4345644 | WBGene00017471 | F14H12.3  | F14H12.3  | 0.0971561348366805  |             |
| AGIWUR39369                                                            |    |   |         |         |                |           |           |                     |             |
| N2                                                                     | HS | X | 4350498 | 4352744 | WBGene00017470 | F14H12.2  | F14H12.2  | -0.0388128138738892 |             |
| AGIWUR5219                                                             |    |   |         |         |                |           |           |                     |             |
| N2                                                                     | HS | X | 4353618 | 4354820 | WBGene00000738 | col-165   | F14H12.1  | -0.020436915095833  |             |
| AGIWUR4381;AGIWUR38491                                                 |    |   |         |         |                |           |           |                     |             |
| N2                                                                     | HS | X | 4357015 | 4357567 | WBGene00017473 | F14H12.6  | F14H12.6  | 0.0659689344181213  |             |
| AGIWUR27312                                                            |    |   |         |         |                |           |           |                     |             |
| N2                                                                     | HS | X | 4361927 | 4362283 | WBGene00017474 | F14H12.7  | F14H12.7  | -0.184151954247534  |             |
| AGIWUR32261                                                            |    |   |         |         |                |           |           |                     |             |
| N2                                                                     | HS | X | 4362936 | 4363315 | WBGene00219368 | F14H12.17 | F14H12.17 | -0.338112185594589  |             |
| AGIWUR40009                                                            |    |   |         |         |                |           |           |                     |             |
| N2                                                                     | HS | X | 4365305 | 4366332 | WBGene00020120 | R160.3    | R160.3    | 0.0160617300834964  | AGIWUR21678 |
| N2                                                                     | HS | X | 4367159 | 4367514 | WBGene00219369 | R160.10   | R160.10   | -0.213977041733907  | AGIWUR35788 |
| N2                                                                     | HS | X | 4370014 | 4370856 | WBGene00020122 | R160.5    | R160.5    | 0.0240417404571609  | AGIWUR13004 |
| N2                                                                     | HS | X | 4371036 | 4373211 | WBGene00020123 | R160.6    | R160.6    | -0.2927842234631    | AGIWUR26469 |
| N2                                                                     | HS | X | 4376595 | 4376850 | WBGene00020119 | R160.2    | R160.2    | -0.0721717547671066 | AGIWUR27023 |
| N2                                                                     | HS | X | 4378004 | 4383366 | WBGene00003084 | lst-2     | R160.7    | -0.12537007222897   | AGIWUR785   |
| N2                                                                     | HS | X | 4389365 | 4393796 | WBGene00001082 | dpy-23    | R160.1    | -0.0267128916672199 |             |
| AGIWUR4657;AGIWUR6146;AGIWUR37164                                      |    |   |         |         |                |           |           |                     |             |
| N2                                                                     | HS | X | 4403159 | 4407145 | WBGene00017040 | D1079.1   | D1079.1   | -0.0389135612596831 | AGIWUR29911 |
| N2                                                                     | HS | X | 4408089 | 4409133 | WBGene00017477 | F15A8.4   | F15A8.4   | 0.144763176712802   | AGIWUR21412 |
| N2                                                                     | HS | X | 4411359 | 4416079 | WBGene00001052 | dop-1     | F15A8.5   | -0.0405974665780224 |             |
| AGIWUR5927;AGIWUR12192;AGIWUR20100;AGIWUR22632;AGIWUR30934             |    |   |         |         |                |           |           |                     |             |
| N2                                                                     | HS | X | 4430929 | 4437512 | WBGene00017478 | F15A8.6   | F15A8.6   | 0.04862747412621    | AGIWUR33964 |
| N2                                                                     | HS | X | 4440941 | 4441726 | WBGene00017476 | F15A8.1   | F15A8.1   | -0.107381685976529  | AGIWUR39320 |
| N2                                                                     | HS | X | 4442152 | 4448383 | WBGene00017794 | mltn-13   | F25F6.1   | -0.0135105065358188 |             |
| AGIWUR20642;AGIWUR27594                                                |    |   |         |         |                |           |           |                     |             |
| N2                                                                     | HS | X | 4454120 | 4457304 | WBGene00017177 | F02E8.4   | F02E8.4   | 0.0618041621679417  | AGIWUR29684 |

|                                                                                                                        |    |   |         |         |                |          |          |                      |             |
|------------------------------------------------------------------------------------------------------------------------|----|---|---------|---------|----------------|----------|----------|----------------------|-------------|
| N2                                                                                                                     | HS | X | 4458272 | 4459264 | WBGene00000157 | aps-2    | F02E8.3  | -0.206683121871865   |             |
| AGIWUR18349;AGIWUR23286;AGIWUR24757;AGIWUR31667                                                                        |    |   |         |         |                |          |          |                      |             |
| N2                                                                                                                     | HS | X | 4459603 | 4462609 | WBGene00017178 | atg-16.1 | F02E8.5  | -0.105311022971119   |             |
| AGIWUR40988                                                                                                            |    |   |         |         |                |          |          |                      |             |
| N2                                                                                                                     | HS | X | 4466518 | 4469005 | WBGene00017176 | nmur-3   | F02E8.2  | -0.27602295127627    | AGIWUR11312 |
| N2                                                                                                                     | HS | X | 4469743 | 4471476 | WBGene00000207 | asb-2    | F02E8.1  | 0.0415680244366232   |             |
| AGIWUR7405;AGIWUR8491;AGIWUR21740;AGIWUR34730;AGIWUR38595;AGIWUR42226                                                  |    |   |         |         |                |          |          |                      |             |
| N2                                                                                                                     | HS | X | 4472244 | 4488851 | WBGene00003561 | ncr-1    | F02E8.6  | -0.298565470765395   | AGIWUR16168 |
| N2                                                                                                                     | HS | X | 4491651 | 4492208 | WBGene00023460 | F46H6.5  | F46H6.5  | 0.126443888423831    | AGIWUR43882 |
| N2                                                                                                                     | HS | X | 4494914 | 4504388 | WBGene00000959 | dgk-2    | F46H6.2  | 0.0239771825688422   |             |
| AGIWUR8189;AGIWUR8947;AGIWUR12916;AGIWUR22238;AGIWUR23464;AGIWUR25341;AGIWUR27280;AGIWUR28757;AGIWUR30229;AGIWUR42723  |    |   |         |         |                |          |          |                      |             |
| N2                                                                                                                     | HS | X | 4508509 | 4510960 | WBGene00004356 | rhi-1    | F46H6.1  | -0.0889756613683659  |             |
| AGIWUR3599;AGIWUR16396;AGIWUR24273;AGIWUR27364                                                                         |    |   |         |         |                |          |          |                      |             |
| N2                                                                                                                     | HS | X | 4514099 | 4516894 | WBGene00005008 | spr-3    | C07A12.5 | -0.118356453663053   |             |
| AGIWUR19165;AGIWUR42543                                                                                                |    |   |         |         |                |          |          |                      |             |
| N2                                                                                                                     | HS | X | 4517748 | 4521069 | WBGene00015561 | C07A12.7 | C07A12.7 | 0.0327608665806647   |             |
| AGIWUR15126;AGIWUR25240                                                                                                |    |   |         |         |                |          |          |                      |             |
| N2                                                                                                                     | HS | X | 4524155 | 4526536 | WBGene00003963 | pdi-2    | C07A12.4 | -0.328826943119327   |             |
| AGIWUR3408;AGIWUR14954;AGIWUR15713;AGIWUR20132;AGIWUR21475;AGIWUR25287;AGIWUR28983;AGIWUR29415;AGIWUR43162;AGIWUR43873 |    |   |         |         |                |          |          |                      |             |
| N2                                                                                                                     | HS | X | 4532430 | 4537545 | WBGene00003628 | nhr-35   | C07A12.3 | -0.607024017760091   |             |
| AGIWUR12593                                                                                                            |    |   |         |         |                |          |          |                      |             |
| N2                                                                                                                     | HS | X | 4544876 | 4545418 | WBGene00015560 | C07A12.2 | C07A12.2 | -0.307729425588448   |             |
| AGIWUR39936                                                                                                            |    |   |         |         |                |          |          |                      |             |
| N2                                                                                                                     | HS | X | 4562163 | 4562880 | WBGene00015495 | C05E11.6 | C05E11.6 | -0.256660869104552   |             |
| AGIWUR10070                                                                                                            |    |   |         |         |                |          |          |                      |             |
| N2                                                                                                                     | HS | X | 4565302 | 4569393 | WBGene00000136 | amt-4    | C05E11.5 | 0.174125781516235    |             |
| AGIWUR20267                                                                                                            |    |   |         |         |                |          |          |                      |             |
| N2                                                                                                                     | HS | X | 4571448 | 4573914 | WBGene00000133 | amt-1    | C05E11.4 | 0.626650031653977    |             |
| AGIWUR2915                                                                                                             |    |   |         |         |                |          |          |                      |             |
| N2                                                                                                                     | HS | X | 4578249 | 4581724 | WBGene00015494 | C05E11.3 | C05E11.3 | 0.20108511562397     |             |
| AGIWUR36785                                                                                                            |    |   |         |         |                |          |          |                      |             |
| N2                                                                                                                     | HS | X | 4581586 | 4585679 | WBGene00015496 | C05E11.7 | C05E11.7 | 0.118912044060559    |             |
| AGIWUR21270                                                                                                            |    |   |         |         |                |          |          |                      |             |
| N2                                                                                                                     | HS | X | 4586917 | 4587993 | WBGene00015493 | C05E11.2 | C05E11.2 | 0.0605004716950726   |             |
| AGIWUR32772                                                                                                            |    |   |         |         |                |          |          |                      |             |
| N2                                                                                                                     | HS | X | 4588768 | 4590446 | WBGene00015492 | lnp-1    | C05E11.1 | -0.00279733932522674 |             |
| AGIWUR41193                                                                                                            |    |   |         |         |                |          |          |                      |             |

|                                                                                                                                   |    |   |         |         |                |          |          |                      |
|-----------------------------------------------------------------------------------------------------------------------------------|----|---|---------|---------|----------------|----------|----------|----------------------|
| N2                                                                                                                                | HS | X | 4591281 | 4592404 | WBGene00001455 | flp-12   | C05E11.8 | -0.0682021894707354  |
| AGIWUR4207;AGIWUR7649;AGIWUR11808;AGIWUR12376;AGIWUR16211;AGIWUR34929;AGIWUR35398;AGIWUR38482;AGIWUR42059;AGIWUR42237;AGIWUR43382 |    |   |         |         |                |          |          |                      |
| N2                                                                                                                                | HS | X | 4596016 | 4605928 | WBGene00020496 | spat-3   | T13H2.5  | -0.163520711930629   |
| AGIWUR24159;AGIWUR33442                                                                                                           |    |   |         |         |                |          |          |                      |
| N2                                                                                                                                | HS | X | 4610926 | 4620423 | WBGene00004148 | pgn-65   | T13H2.4  | -0.00965867244889473 |
| AGIWUR2057;AGIWUR7236;AGIWUR8289;AGIWUR17805;AGIWUR21667;AGIWUR36009;AGIWUR41841                                                  |    |   |         |         |                |          |          |                      |
| N2                                                                                                                                | HS | X | 4629039 | 4631838 | WBGene00016706 | C46C11.3 | C46C11.3 | 0.267972294408022    |
| AGIWUR15591                                                                                                                       |    |   |         |         |                |          |          |                      |
| N2                                                                                                                                | HS | X | 4632348 | 4635784 | WBGene00016705 | C46C11.2 | C46C11.2 | 0.0674591435422478   |
| AGIWUR36196                                                                                                                       |    |   |         |         |                |          |          |                      |
| N2                                                                                                                                | HS | X | 4637242 | 4643695 | WBGene00016704 | hos1-1   | C46C11.1 | -0.160397481904438   |
| AGIWUR26837                                                                                                                       |    |   |         |         |                |          |          |                      |
| N2                                                                                                                                | HS | X | 4644404 | 4647192 | WBGene00044567 | C46C11.4 | C46C11.4 | -0.312729984244878   |
| AGIWUR25422;AGIWUR33961                                                                                                           |    |   |         |         |                |          |          |                      |
| N2                                                                                                                                | HS | X | 4647526 | 4649197 | WBGene00017532 | ent-5    | F16H11.3 | -0.337819430456658   |
| AGIWUR39877                                                                                                                       |    |   |         |         |                |          |          |                      |
| N2                                                                                                                                | HS | X | 4653434 | 4654157 | WBGene00000428 | ceh-1    | F16H11.4 | 0.10090651350166     |
| AGIWUR10788;AGIWUR22423;AGIWUR26594                                                                                               |    |   |         |         |                |          |          |                      |
| N2                                                                                                                                | HS | X | 4656433 | 4660318 | WBGene00003635 | nhr-45   | F16H11.5 | -0.0999107148905622  |
| AGIWUR1648                                                                                                                        |    |   |         |         |                |          |          |                      |
| N2                                                                                                                                | HS | X | 4668071 | 4673234 | WBGene00017530 | F16H11.1 | F16H11.1 | 0.0457341185159077   |
| AGIWUR30876                                                                                                                       |    |   |         |         |                |          |          |                      |
| N2                                                                                                                                | HS | X | 4673706 | 4677283 | WBGene00019345 | tmem-135 | K02G10.3 | 0.416350006215831    |
| AGIWUR24352                                                                                                                       |    |   |         |         |                |          |          |                      |
| N2                                                                                                                                | HS | X | 4677342 | 4678129 | WBGene00001454 | flp-11   | K02G10.4 | -0.131847091504905   |
| AGIWUR387;AGIWUR13935;AGIWUR23795;AGIWUR25362;AGIWUR33739;AGIWUR34739;AGIWUR35075;AGIWUR44123                                     |    |   |         |         |                |          |          |                      |
| N2                                                                                                                                | HS | X | 4687763 | 4691316 | WBGene00019346 | K02G10.5 | K02G10.5 | -0.140130613728667   |
| AGIWUR44406                                                                                                                       |    |   |         |         |                |          |          |                      |
| N2                                                                                                                                | HS | X | 4696952 | 4699461 | WBGene00002044 | hyl-2    | K02G10.6 | 0.00608998498455549  |
| AGIWUR24282                                                                                                                       |    |   |         |         |                |          |          |                      |
| N2                                                                                                                                | HS | X | 4702965 | 4704970 | WBGene00000176 | aqp-8    | K02G10.7 | -0.183080525016882   |
| AGIWUR14200                                                                                                                       |    |   |         |         |                |          |          |                      |
| N2                                                                                                                                | HS | X | 4707188 | 4709812 | WBGene00019344 | dhhc-10  | K02G10.1 | -0.0823754135680179  |
| AGIWUR41098                                                                                                                       |    |   |         |         |                |          |          |                      |
| N2                                                                                                                                | HS | X | 4709772 | 4711744 | WBGene00001032 | dnj-14   | K02G10.8 | 0.091803756312828    |
| AGIWUR126;AGIWUR12952;AGIWUR18427;AGIWUR29641;AGIWUR38758;AGIWUR40737                                                             |    |   |         |         |                |          |          |                      |
| N2                                                                                                                                | HS | X | 4712279 | 4715080 | WBGene00018878 | glit-1   | F55D10.3 | -0.0555316954701279  |
| AGIWUR8019                                                                                                                        |    |   |         |         |                |          |          |                      |



|                                                                                              |    |   |         |         |                |          |          |                     |             |
|----------------------------------------------------------------------------------------------|----|---|---------|---------|----------------|----------|----------|---------------------|-------------|
| N2                                                                                           | HS | X | 4715178 | 4715801 | WBGene00004438 | rp1-25.1 | F55D10.2 | 0.116867779147752   |             |
| AGIWUR3501;AGIWUR18829                                                                       |    |   |         |         |                |          |          |                     |             |
| N2                                                                                           | HS | X | 4716244 | 4720640 | WBGene00018879 | F55D10.4 | F55D10.4 | -0.193839251664597  |             |
| AGIWUR8758                                                                                   |    |   |         |         |                |          |          |                     |             |
| N2                                                                                           | HS | X | 4722877 | 4727481 | WBGene00018880 | acc-3    | F55D10.5 | 0.214039328728603   |             |
| AGIWUR17945                                                                                  |    |   |         |         |                |          |          |                     |             |
| N2                                                                                           | HS | X | 4732964 | 4738592 | WBGene00018877 | aman-1   | F55D10.1 | 0.221861119631747   |             |
| AGIWUR33927                                                                                  |    |   |         |         |                |          |          |                     |             |
| N2                                                                                           | HS | X | 4738964 | 4749083 | WBGene00003056 | lon-2    | C39E6.1  | 0.280195904524216   | AGIWUR33141 |
| N2                                                                                           | HS | X | 4754678 | 4755160 | WBGene00016537 | C39E6.2  | C39E6.2  | -0.0851727477686524 | AGIWUR13911 |
| N2                                                                                           | HS | X | 4758804 | 4761612 | WBGene00003377 | mls-2    | C39E6.4  | -0.389046103168736  | AGIWUR29708 |
| N2                                                                                           | HS | X | 4767178 | 4769985 | WBGene00003807 | npr-1    | C39E6.6  | 0.0879093850023667  | AGIWUR43511 |
| N2                                                                                           | HS | X | 4777512 | 4782297 | WBGene00018377 | hum-10   | F43C9.3  | 0.0884307931944011  |             |
| AGIWUR36723;AGIWUR38269                                                                      |    |   |         |         |                |          |          |                     |             |
| N2                                                                                           | HS | X | 4786118 | 4790323 | WBGene00018376 | F43C9.2  | F43C9.2  | -0.286025439306462  | AGIWUR33921 |
| N2                                                                                           | HS | X | 4793266 | 4796158 | WBGene00018375 | F43C9.1  | F43C9.1  | -0.0760830934877532 | AGIWUR29075 |
| N2                                                                                           | HS | X | 4796095 | 4800128 | WBGene00003245 | mig-13   | F43C9.4  | 0.0549964388947952  |             |
| AGIWUR2697;AGIWUR29599;AGIWUR30719                                                           |    |   |         |         |                |          |          |                     |             |
| N2                                                                                           | HS | X | 4805998 | 4811536 | WBGene00019960 | ztf-16   | R08E3.4  | -0.132556176290868  |             |
| AGIWUR272;AGIWUR8112;AGIWUR11016;AGIWUR21775;AGIWUR22153;AGIWUR28337;AGIWUR41656;AGIWUR44561 |    |   |         |         |                |          |          |                     |             |
| N2                                                                                           | HS | X | 4818599 | 4821708 | WBGene00019959 | R08E3.3  | R08E3.3  | -0.114625304956967  |             |
| AGIWUR8990;AGIWUR29698;AGIWUR44869                                                           |    |   |         |         |                |          |          |                     |             |
| N2                                                                                           | HS | X | 4822661 | 4824680 | WBGene00019958 | R08E3.2  | R08E3.2  | -0.176858918483455  | AGIWUR35969 |
| N2                                                                                           | HS | X | 4825003 | 4834905 | WBGene00019957 | R08E3.1  | R08E3.1  | -0.142949182635935  |             |
| AGIWUR1704;AGIWUR8945;AGIWUR10834;AGIWUR11213;AGIWUR17358;AGIWUR38709                        |    |   |         |         |                |          |          |                     |             |
| N2                                                                                           | HS | X | 4834881 | 4853065 | WBGene00018193 | F39C12.1 | F39C12.1 | 0.0593372232615259  |             |
| AGIWUR28106                                                                                  |    |   |         |         |                |          |          |                     |             |
| N2                                                                                           | HS | X | 4854069 | 4860036 | WBGene00000072 | add-1    | F39C12.2 | 0.00544996960650934 |             |
| AGIWUR6120;AGIWUR26945;AGIWUR30618;AGIWUR36537;AGIWUR43003                                   |    |   |         |         |                |          |          |                     |             |
| N2                                                                                           | HS | X | 4866075 | 4866690 | WBGene00044568 | ntc-1    | F39C12.4 | 0.0873586664936203  |             |
| AGIWUR14092;AGIWUR17933;AGIWUR25041;AGIWUR26292;AGIWUR29232                                  |    |   |         |         |                |          |          |                     |             |
| N2                                                                                           | HS | X | 4866684 | 4874657 | WBGene00006640 | tsp-14   | F39C12.3 | -0.061236474164172  |             |
| AGIWUR7113;AGIWUR18083;AGIWUR23404;AGIWUR25913;AGIWUR36849;AGIWUR40724;AGIWUR42162           |    |   |         |         |                |          |          |                     |             |
| N2                                                                                           | HS | X | 4885951 | 4889575 | WBGene00020323 | arrd-23  | T07F12.3 | 0.236902748536856   |             |
| AGIWUR14501                                                                                  |    |   |         |         |                |          |          |                     |             |
| N2                                                                                           | HS | X | 4890221 | 4892328 | WBGene00020322 | T07F12.2 | T07F12.2 | -0.119635784423816  |             |
| AGIWUR12321;AGIWUR14348;AGIWUR33947;AGIWUR34000;AGIWUR34056;AGIWUR35997;AGIWUR40084          |    |   |         |         |                |          |          |                     |             |
| N2                                                                                           | HS | X | 4894055 | 4896615 | WBGene00020321 | T07F12.1 | T07F12.1 | 0.240939124720898   |             |
| AGIWUR38934                                                                                  |    |   |         |         |                |          |          |                     |             |

|                                                                                                          |    |   |         |         |                |          |          |                                 |
|----------------------------------------------------------------------------------------------------------|----|---|---------|---------|----------------|----------|----------|---------------------------------|
| N2                                                                                                       | HS | X | 4896602 | 4898163 | WBGene00020324 | T07F12.4 | T07F12.4 | 0.0281645191918187              |
| AGIWUR3036                                                                                               |    |   |         |         |                |          |          |                                 |
| N2                                                                                                       | HS | X | 4907290 | 4912323 | WBGene00019403 | K05B2.2  | K05B2.2  | 0 AGIWUR22809                   |
| N2                                                                                                       | HS | X | 4912308 | 4915979 | WBGene00002052 | ifa-4    | K05B2.3  | 0.1392411428521 AGIWUR8151      |
| N2                                                                                                       | HS | X | 4919019 | 4920988 | WBGene00019404 | K05B2.4  | K05B2.4  | 0.056833425318505 AGIWUR3149    |
| N2                                                                                                       | HS | X | 4921252 | 4929757 | WBGene00003986 | mct-4    | K05B2.5  | 0.160092595010852               |
| AGIWUR1296;AGIWUR2543;AGIWUR5527;AGIWUR10729;AGIWUR18533;AGIWUR21418;AGIWUR25450;AGIWUR28400;AGIWUR39815 |    |   |         |         |                |          |          |                                 |
| N2                                                                                                       | HS | X | 4948049 | 4955331 | WBGene00006475 | tyra-3   | M03F4.3  | -0.0951818829812581 AGIWUR44037 |
| N2                                                                                                       | HS | X | 4957329 | 4958067 | WBGene00019758 | M03F4.4  | M03F4.4  | -0.0732446875785477 AGIWUR32869 |
| N2                                                                                                       | HS | X | 4960553 | 4964416 | WBGene00000066 | act-4    | M03F4.2  | -0.022462695266487              |
| AGIWUR24973;AGIWUR26902                                                                                  |    |   |         |         |                |          |          |                                 |
| N2                                                                                                       | HS | X | 4964413 | 4969459 | WBGene00019759 | M03F4.6  | M03F4.6  | 0.0960784391795642 AGIWUR37710  |
| N2                                                                                                       | HS | X | 4969537 | 4972281 | WBGene00019760 | calu-1   | M03F4.7  | 0.0325819614633254              |
| AGIWUR8128;AGIWUR11525;AGIWUR13302;AGIWUR24024;AGIWUR25793;AGIWUR31221;AGIWUR40414                       |    |   |         |         |                |          |          |                                 |
| N2                                                                                                       | HS | X | 4972575 | 4997598 | WBGene00022501 | ZC8.6    | ZC8.6    | -0.0716606735637946             |
| AGIWUR20769;AGIWUR22221;AGIWUR44515                                                                      |    |   |         |         |                |          |          |                                 |
| N2                                                                                                       | HS | X | 4999270 | 5003515 | WBGene00022499 | set-30   | ZC8.3    | -0.35957980601493 AGIWUR11661   |
| N2                                                                                                       | HS | X | 5005269 | 5007024 | WBGene00022498 | hsd-2    | ZC8.1    | 0.0272031157409032 AGIWUR15242  |
| N2                                                                                                       | HS | X | 5009300 | 5011222 | WBGene00022616 | hsd-3    | ZC449.6  | -0.0920237570624369             |
| AGIWUR21264;AGIWUR39014                                                                                  |    |   |         |         |                |          |          |                                 |
| N2                                                                                                       | HS | X | 5014040 | 5015452 | WBGene00045365 | ZC449.7  | ZC449.7  | -0.139030905621682              |
| AGIWUR2844;AGIWUR39162                                                                                   |    |   |         |         |                |          |          |                                 |
| N2                                                                                                       | HS | X | 5017924 | 5021064 | WBGene00022613 | sek-3    | ZC449.3  | 0.0489692626613287 AGIWUR32402  |
| N2                                                                                                       | HS | X | 5021215 | 5024258 | WBGene00022612 | ZC449.2  | ZC449.2  | 0.281263022742555 AGIWUR16052   |
| N2                                                                                                       | HS | X | 5024420 | 5028165 | WBGene00022611 | ZC449.1  | ZC449.1  | 0.194465987157732               |
| AGIWUR17967;AGIWUR31767                                                                                  |    |   |         |         |                |          |          |                                 |
| N2                                                                                                       | HS | X | 5028184 | 5029568 | WBGene00022614 | ZC449.4  | ZC449.4  | -0.0630540256127894 AGIWUR20026 |
| N2                                                                                                       | HS | X | 5035030 | 5037773 | WBGene00022615 | ZC449.5  | ZC449.5  | -0.072974814838719              |
| AGIWUR9356;AGIWUR13636;AGIWUR22963;AGIWUR25078;AGIWUR32327;AGIWUR36618                                   |    |   |         |         |                |          |          |                                 |
| N2                                                                                                       | HS | X | 5043976 | 5044746 | WBGene00022024 | Y64H9A.2 | Y64H9A.2 | 0.285331363019784               |
| AGIWUR11654                                                                                              |    |   |         |         |                |          |          |                                 |
| N2                                                                                                       | HS | X | 5057273 | 5057581 | WBGene00022023 | Y64H9A.1 | Y64H9A.1 | 0.0164149149267647              |
| AGIWUR12543                                                                                              |    |   |         |         |                |          |          |                                 |
| N2                                                                                                       | HS | X | 5058367 | 5058733 | WBGene00016070 | C24H10.4 | C24H10.4 | -0.0635496797732324             |
| AGIWUR27501                                                                                              |    |   |         |         |                |          |          |                                 |
| N2                                                                                                       | HS | X | 5061056 | 5062209 | WBGene00016069 | C24H10.3 | C24H10.3 | 0.114287442673412               |
| AGIWUR2962;AGIWUR14100                                                                                   |    |   |         |         |                |          |          |                                 |
| N2                                                                                                       | HS | X | 5064602 | 5066663 | WBGene00016068 | C24H10.2 | C24H10.2 | 0.022314684194475               |
| AGIWUR9762                                                                                               |    |   |         |         |                |          |          |                                 |

|                                                                                                |    |   |         |         |                |           |           |                     |             |
|------------------------------------------------------------------------------------------------|----|---|---------|---------|----------------|-----------|-----------|---------------------|-------------|
| N2                                                                                             | HS | X | 5072019 | 5074425 | WBGene00016067 | C24H10.1  | C24H10.1  | 0.156949371525503   |             |
| AGIWUR25124                                                                                    |    |   |         |         |                |           |           |                     |             |
| N2                                                                                             | HS | X | 5074399 | 5078120 | WBGene00006861 | cal-5     | C24H10.5  | 0.144014956957513   |             |
| AGIWUR30530                                                                                    |    |   |         |         |                |           |           |                     |             |
| N2                                                                                             | HS | X | 5079773 | 5084489 | WBGene00016600 | ets-5     | C42D8.4   | -0.0256282035642093 | AGIWUR35943 |
| N2                                                                                             | HS | X | 5087840 | 5092538 | WBGene00006862 | pnk-4     | C42D8.3   | 0.147771468099744   |             |
| AGIWUR20818;AGIWUR40779;AGIWUR44864                                                            |    |   |         |         |                |           |           |                     |             |
| N2                                                                                             | HS | X | 5092458 | 5097067 | WBGene00000039 | acn-1     | C42D8.5   | -0.0367983951828776 | AGIWUR38360 |
| N2                                                                                             | HS | X | 5101032 | 5106173 | WBGene00006926 | vit-2     | C42D8.2   | 0.101338949276636   |             |
| AGIWUR7138;AGIWUR13310;AGIWUR30312                                                             |    |   |         |         |                |           |           |                     |             |
| N2                                                                                             | HS | X | 5106260 | 5107039 | WBGene00044299 | C42D8.9   | C42D8.9   | 0.00573537463351226 |             |
| AGIWUR486;AGIWUR17383;AGIWUR42735                                                              |    |   |         |         |                |           |           |                     |             |
| N2                                                                                             | HS | X | 5109504 | 5112452 | WBGene00016599 | C42D8.1   | C42D8.1   | 0.0766109947018023  | AGIWUR34679 |
| N2                                                                                             | HS | X | 5112422 | 5116866 | WBGene00000149 | apl-1     | C42D8.8   | -0.07188158345688   |             |
| AGIWUR8657;AGIWUR10776;AGIWUR13543;AGIWUR28682;AGIWUR32921;AGIWUR35954;AGIWUR38873;AGIWUR41528 |    |   |         |         |                |           |           |                     |             |
| N2                                                                                             | HS | X | 5138991 | 5146742 | WBGene00016292 | tbc-7     | C31H2.1   | 0.102605782655818   | AGIWUR23489 |
| N2                                                                                             | HS | X | 5148804 | 5150476 | WBGene00001070 | dpy-8     | C31H2.2   | 0.277019446369891   | AGIWUR25466 |
| N2                                                                                             | HS | X | 5151547 | 5154399 | WBGene00016293 | C31H2.3   | C31H2.3   | -0.217486124805421  | AGIWUR40194 |
| N2                                                                                             | HS | X | 5155093 | 5159667 | WBGene00016294 | C31H2.4   | C31H2.4   | -0.138998058138991  | AGIWUR39874 |
| N2                                                                                             | HS | X | 5163055 | 5163439 | WBGene00017150 | EGAP5.1   | EGAP5.1   | -0.09576338387056   | AGIWUR14391 |
| N2                                                                                             | HS | X | 5165395 | 5168778 | WBGene00020197 | mans-3    | T03G11.4  | -0.245209074657847  |             |
| AGIWUR10489                                                                                    |    |   |         |         |                |           |           |                     |             |
| N2                                                                                             | HS | X | 5168739 | 5171119 | WBGene00044732 | T03G11.10 | T03G11.10 | -0.0358161852067771 |             |
| AGIWUR14189;AGIWUR18431                                                                        |    |   |         |         |                |           |           |                     |             |
| N2                                                                                             | HS | X | 5174369 | 5177506 | WBGene00020196 | T03G11.3  | T03G11.3  | -0.228240970495586  |             |
| AGIWUR35567                                                                                    |    |   |         |         |                |           |           |                     |             |
| N2                                                                                             | HS | X | 5177519 | 5179210 | WBGene00020199 | T03G11.6  | T03G11.6  | -0.268345209342844  |             |
| AGIWUR2097;AGIWUR6235;AGIWUR26975                                                              |    |   |         |         |                |           |           |                     |             |
| N2                                                                                             | HS | X | 5180174 | 5181495 | WBGene00005711 | sru-48    | T03G11.2  | -0.108656786617882  |             |
| AGIWUR37034                                                                                    |    |   |         |         |                |           |           |                     |             |
| N2                                                                                             | HS | X | 5183828 | 5186623 | WBGene00044584 | T03G11.9  | T03G11.9  | 0.207556041454741   |             |
| AGIWUR7733;AGIWUR10680                                                                         |    |   |         |         |                |           |           |                     |             |
| N2                                                                                             | HS | X | 5186921 | 5189077 | WBGene00006983 | zig-6     | T03G11.8  | 0.223573813856486   |             |
| AGIWUR17299;AGIWUR28407;AGIWUR44746                                                            |    |   |         |         |                |           |           |                     |             |
| N2                                                                                             | HS | X | 5196110 | 5204250 | WBGene00004145 | pqn-62    | T03G11.1  | -0.0112524753302412 |             |
| AGIWUR4007;AGIWUR5125;AGIWUR30497;AGIWUR31491                                                  |    |   |         |         |                |           |           |                     |             |
| N2                                                                                             | HS | X | 5205760 | 5216230 | WBGene00019250 | H28G03.2  | H28G03.2  | -0.0255856069766178 |             |
| AGIWUR817;AGIWUR31145;AGIWUR37381;AGIWUR43675                                                  |    |   |         |         |                |           |           |                     |             |
| N2                                                                                             | HS | X | 5216363 | 5219095 | WBGene00019249 | H28G03.1  | H28G03.1  | 0.0591339198875893  |             |

|                                                                                                                                                         |    |   |         |         |                |           |           |                      |             |
|---------------------------------------------------------------------------------------------------------------------------------------------------------|----|---|---------|---------|----------------|-----------|-----------|----------------------|-------------|
| AGIWUR804;AGIWUR5930;AGIWUR9399;AGIWUR20705;AGIWUR21613;AGIWUR37275;AGIWUR44938                                                                         |    |   |         |         |                |           |           |                      |             |
| N2                                                                                                                                                      | HS | X | 5220406 | 5222042 | WBGene00019251 | H28G03.3  | H28G03.3  | -0.0159692287363971  |             |
| AGIWUR32465                                                                                                                                             |    |   |         |         |                |           |           |                      |             |
| N2                                                                                                                                                      | HS | X | 5234669 | 5243408 | WBGene00003477 | mtm-5     | H28G03.6  | 0.143314301847072    |             |
| AGIWUR17321                                                                                                                                             |    |   |         |         |                |           |           |                      |             |
| N2                                                                                                                                                      | HS | X | 5244317 | 5246927 | WBGene00021323 | Y34B4A.7  | Y34B4A.7  | 0.116932791606349    |             |
| AGIWUR2665;AGIWUR15980;AGIWUR25310                                                                                                                      |    |   |         |         |                |           |           |                      |             |
| N2                                                                                                                                                      | HS | X | 5249851 | 5252787 | WBGene00021326 | Y34B4A.10 | Y34B4A.10 | 0.0514163969250134   |             |
| AGIWUR18285                                                                                                                                             |    |   |         |         |                |           |           |                      |             |
| N2                                                                                                                                                      | HS | X | 5253001 | 5255068 | WBGene00021322 | Y34B4A.6  | Y34B4A.6  | -0.0227984194745048  |             |
| AGIWUR10605                                                                                                                                             |    |   |         |         |                |           |           |                      |             |
| N2                                                                                                                                                      | HS | X | 5255194 | 5256855 | WBGene00021325 | Y34B4A.9  | Y34B4A.9  | -0.0730301448882216  |             |
| AGIWUR19937;AGIWUR39655                                                                                                                                 |    |   |         |         |                |           |           |                      |             |
| N2                                                                                                                                                      | HS | X | 5257213 | 5258384 | WBGene00021321 | Y34B4A.5  | Y34B4A.5  | 0.111730063913317    |             |
| AGIWUR44254                                                                                                                                             |    |   |         |         |                |           |           |                      |             |
| N2                                                                                                                                                      | HS | X | 5264330 | 5271799 | WBGene00021320 | Y34B4A.4  | Y34B4A.4  | 0.0149907687217583   |             |
| AGIWUR2026;AGIWUR35951                                                                                                                                  |    |   |         |         |                |           |           |                      |             |
| N2                                                                                                                                                      | HS | X | 5271780 | 5275287 | WBGene00021324 | Y34B4A.8  | Y34B4A.8  | -0.237205464309413   |             |
| AGIWUR30828                                                                                                                                             |    |   |         |         |                |           |           |                      |             |
| N2                                                                                                                                                      | HS | X | 5275567 | 5278813 | WBGene00002031 | hst-6     | Y34B4A.3  | -0.00997507111472729 |             |
| AGIWUR663                                                                                                                                               |    |   |         |         |                |           |           |                      |             |
| N2                                                                                                                                                      | HS | X | 5279497 | 5283719 | WBGene00021319 | Y34B4A.2  | Y34B4A.2  | 0.0386538691779572   |             |
| AGIWUR406;AGIWUR7277;AGIWUR8792;AGIWUR10761;AGIWUR15875;AGIWUR21692;AGIWUR24499;AGIWUR25055;AGIWUR26841;AGIWUR29281;AGIWUR29621;AGIWUR37635;AGIWUR41542 |    |   |         |         |                |           |           |                      |             |
| N2                                                                                                                                                      | HS | X | 5283831 | 5289726 | WBGene00017974 | vps-41    | F32A6.3   | 0.0183293033250083   |             |
| AGIWUR24978;AGIWUR33755                                                                                                                                 |    |   |         |         |                |           |           |                      |             |
| N2                                                                                                                                                      | HS | X | 5289728 | 5303512 | WBGene00000092 | ags-3     | F32A6.4   | -0.0618626115303327  |             |
| AGIWUR2762;AGIWUR6181;AGIWUR6713;AGIWUR8007;AGIWUR19964;AGIWUR23829;AGIWUR32302                                                                         |    |   |         |         |                |           |           |                      |             |
| N2                                                                                                                                                      | HS | X | 5298561 | 5306328 | WBGene00017973 | ift-81    | F32A6.2   | 0.0927474834428268   |             |
| AGIWUR4111;AGIWUR6031;AGIWUR6950;AGIWUR10167;AGIWUR11518;AGIWUR17046;AGIWUR17375;AGIWUR22547;AGIWUR23483;AGIWUR35816                                    |    |   |         |         |                |           |           |                      |             |
| N2                                                                                                                                                      | HS | X | 5307489 | 5323385 | WBGene00006064 | sto-2     | F32A6.5   | 0.154259031543846    | AGIWUR30928 |
| N2                                                                                                                                                      | HS | X | 5329455 | 5332339 | WBGene00016134 | C26B9.5   | C26B9.5   | -0.246685553308279   | AGIWUR13099 |
| N2                                                                                                                                                      | HS | X | 5332969 | 5335468 | WBGene00016135 | C26B9.6   | C26B9.6   | 0.0994946940291541   | AGIWUR9069  |
| N2                                                                                                                                                      | HS | X | 5338273 | 5340182 | WBGene00016133 | C26B9.3   | C26B9.3   | -0.0461771190256446  | AGIWUR41485 |
| N2                                                                                                                                                      | HS | X | 5340189 | 5342202 | WBGene00016132 | C26B9.2   | C26B9.2   | 0.481017485845875    | AGIWUR14514 |
| N2                                                                                                                                                      | HS | X | 5342307 | 5342841 | WBGene00016136 | C26B9.7   | C26B9.7   | 0.495233466279962    |             |
| AGIWUR25278;AGIWUR29045;AGIWUR31795;AGIWUR32458;AGIWUR37242;AGIWUR43461                                                                                 |    |   |         |         |                |           |           |                      |             |
| N2                                                                                                                                                      | HS | X | 5344520 | 5348411 | WBGene00016131 | C26B9.1   | C26B9.1   | -0.0589904343394938  | AGIWUR34413 |

|                                                            |    |   |         |         |                |          |          |                     |             |
|------------------------------------------------------------|----|---|---------|---------|----------------|----------|----------|---------------------|-------------|
| N2                                                         | HS | X | 5349098 | 5352423 | WBGene00006371 | syx-3    | F35C8.4  | -0.213812411130562  | AGIWUR7704  |
| N2                                                         | HS | X | 5353033 | 5354144 | WBGene00003990 | pfn-2    | F35C8.6  | -0.243466106308984  |             |
| AGIWUR7182;AGIWUR10564                                     |    |   |         |         |                |          |          |                     |             |
| N2                                                         | HS | X | 5355638 | 5364322 | WBGene00018037 | cht1-1   | F35C8.7  | -0.177746036745331  | AGIWUR15722 |
| N2                                                         | HS | X | 5365808 | 5367619 | WBGene00018036 | F35C8.5  | F35C8.5  | -0.0723627701514413 | AGIWUR38857 |
| N2                                                         | HS | X | 5368468 | 5372059 | WBGene00002177 | jkk-1    | F35C8.3  | 0.0175812842602499  | AGIWUR13137 |
| N2                                                         | HS | X | 5372149 | 5374443 | WBGene00018038 | F35C8.8  | F35C8.8  | -0.103729389261353  | AGIWUR41387 |
| N2                                                         | HS | X | 5375070 | 5376911 | WBGene00018035 | sek-4    | F35C8.2  | 0.255596635469896   | AGIWUR22777 |
| N2                                                         | HS | X | 5377607 | 5379353 | WBGene00018034 | sek-5    | F35C8.1  | 0.0585493138841118  | AGIWUR3165  |
| N2                                                         | HS | X | 5386248 | 5394330 | WBGene00015387 | kcn1-3   | C03F11.1 | 0.0969003261289618  |             |
| AGIWUR24146                                                |    |   |         |         |                |          |          |                     |             |
| N2                                                         | HS | X | 5394508 | 5397400 | WBGene00015388 | C03F11.2 | C03F11.2 | 0.126235804556316   |             |
| AGIWUR26439                                                |    |   |         |         |                |          |          |                     |             |
| N2                                                         | HS | X | 5397676 | 5400626 | WBGene00015389 | scav-1   | C03F11.3 | -0.192872015100818  |             |
| AGIWUR28074                                                |    |   |         |         |                |          |          |                     |             |
| N2                                                         | HS | X | 5401437 | 5406443 | WBGene00015390 | C03F11.4 | C03F11.4 | 0.250037968136478   |             |
| AGIWUR36310                                                |    |   |         |         |                |          |          |                     |             |
| N2                                                         | HS | X | 5406562 | 5414350 | WBGene00016559 | C41A3.2  | C41A3.2  | 0.042622971390474   |             |
| AGIWUR4001;AGIWUR38812                                     |    |   |         |         |                |          |          |                     |             |
| N2                                                         | HS | X | 5413810 | 5441958 | WBGene00016558 | pks-1    | C41A3.1  | -0.121169951030172  |             |
| AGIWUR7593;AGIWUR7992                                      |    |   |         |         |                |          |          |                     |             |
| N2                                                         | HS | X | 5445163 | 5448085 | WBGene00016106 | C25F6.7  | C25F6.7  | 0.175539045774309   |             |
| AGIWUR7887;AGIWUR15484;AGIWUR15991;AGIWUR27938;AGIWUR33932 |    |   |         |         |                |          |          |                     |             |
| N2                                                         | HS | X | 5448241 | 5450010 | WBGene00044569 | C25F6.8  | C25F6.8  | 0.311656356525307   |             |
| AGIWUR13339;AGIWUR22448;AGIWUR37292                        |    |   |         |         |                |          |          |                     |             |
| N2                                                         | HS | X | 5450262 | 5450823 | WBGene00016105 | C25F6.6  | C25F6.6  | 0.109239578021883   | AGIWUR38872 |
| N2                                                         | HS | X | 5461256 | 5466310 | WBGene00016104 | ddr-1    | C25F6.4  | -0.0497982705466491 | AGIWUR44016 |
| N2                                                         | HS | X | 5467870 | 5472684 | WBGene00016103 | dpyd-1   | C25F6.3  | -0.0967571549060455 | AGIWUR8451  |
| N2                                                         | HS | X | 5479700 | 5484941 | WBGene00001006 | d1g-1    | C25F6.2  | -0.121810262511028  |             |
| AGIWUR6452;AGIWUR6973;AGIWUR37028                          |    |   |         |         |                |          |          |                     |             |
| N2                                                         | HS | X | 5486487 | 5488102 | WBGene00016102 | C25F6.1  | C25F6.1  | 0.176682205346756   | AGIWUR28493 |
| N2                                                         | HS | X | 5488777 | 5489111 | WBGene00018876 | F55D1.2  | F55D1.2  | -0.170233098272734  | AGIWUR25880 |
| N2                                                         | HS | X | 5489838 | 5490113 | WBGene00018875 | F55D1.1  | F55D1.1  | -0.0401245590250952 | AGIWUR2924  |
| N2                                                         | HS | X | 5492915 | 5496000 | WBGene00044623 | bus-8    | T23F2.1  | -0.0907544419991151 | AGIWUR8554  |
| N2                                                         | HS | X | 5496122 | 5505248 | WBGene00020735 | T23F2.2  | T23F2.2  | 0.288018315068024   |             |
| AGIWUR3692;AGIWUR12559;AGIWUR23951                         |    |   |         |         |                |          |          |                     |             |
| N2                                                         | HS | X | 5514798 | 5515080 | WBGene00020737 | T23F2.4  | T23F2.4  | -0.102147617292566  | AGIWUR42924 |
| N2                                                         | HS | X | 5516454 | 5517162 | WBGene00020738 | T23F2.5  | T23F2.5  | 0.11016472959081    | AGIWUR17349 |
| N2                                                         | HS | X | 5519876 | 5522819 | WBGene00016934 | mboa-3   | C54G7.2  | -0.308580410496205  | AGIWUR4306  |

|                                                                                                                       |    |   |         |         |                |          |          |                     |             |
|-----------------------------------------------------------------------------------------------------------------------|----|---|---------|---------|----------------|----------|----------|---------------------|-------------|
| N2                                                                                                                    | HS | X | 5525199 | 5538514 | WBGene00002983 | lgx-1    | C54G7.3  | 0.0843350630462245  |             |
| AGIWUR2468;AGIWUR35142                                                                                                |    |   |         |         |                |          |          |                     |             |
| N2                                                                                                                    | HS | X | 5543951 | 5545529 | WBGene00016933 | C54G7.1  | C54G7.1  | 0.141083614977438   | AGIWUR7203  |
| N2                                                                                                                    | HS | X | 5545684 | 5552756 | WBGene00016935 | ifta-1   | C54G7.4  | 0.0397004491754558  | AGIWUR32065 |
| N2                                                                                                                    | HS | X | 5559021 | 5561330 | WBGene00016518 | C38C5.1  | C38C5.1  | 0.0168286853133086  | AGIWUR21309 |
| N2                                                                                                                    | HS | X | 5575932 | 5590815 | WBGene00003166 | mec-2    | F14D12.4 | -0.0537655200322984 |             |
| AGIWUR5405;AGIWUR9147;AGIWUR16683;AGIWUR18760;AGIWUR25075;AGIWUR25491;AGIWUR38095;AGIWUR38202;AGIWUR41977;AGIWUR43004 |    |   |         |         |                |          |          |                     |             |
| N2                                                                                                                    | HS | X | 5593133 | 5594965 | WBGene00006826 | unc-97   | F14D12.2 | 0.0264928196921335  |             |
| AGIWUR3367;AGIWUR8261;AGIWUR9120;AGIWUR12267;AGIWUR12558;AGIWUR39269                                                  |    |   |         |         |                |          |          |                     |             |
| N2                                                                                                                    | HS | X | 5595778 | 5599330 | WBGene00017464 | sulp-2   | F14D12.5 | -0.0780841653398903 |             |
| AGIWUR12101;AGIWUR24371;AGIWUR32052;AGIWUR42406                                                                       |    |   |         |         |                |          |          |                     |             |
| N2                                                                                                                    | HS | X | 5603766 | 5609133 | WBGene00017463 | F14D12.1 | F14D12.1 | -0.185981079577267  |             |
| AGIWUR14060;AGIWUR18971;AGIWUR41801                                                                                   |    |   |         |         |                |          |          |                     |             |
| N2                                                                                                                    | HS | X | 5609155 | 5611250 | WBGene00006411 | octr-1   | F14D12.6 | -0.0465746753817502 |             |
| AGIWUR27771;AGIWUR34399;AGIWUR35742                                                                                   |    |   |         |         |                |          |          |                     |             |
| N2                                                                                                                    | HS | X | 5630356 | 5632302 | WBGene00020658 | T21F4.1  | T21F4.1  | 0.0436364255471897  | AGIWUR14167 |
| N2                                                                                                                    | HS | X | 5637887 | 5638075 | WBGene00044570 | T22B7.8  | T22B7.8  | 0.0140936135728786  |             |
| AGIWUR20092;AGIWUR30776;AGIWUR30830;AGIWUR35628;AGIWUR42724                                                           |    |   |         |         |                |          |          |                     |             |
| N2                                                                                                                    | HS | X | 5638582 | 5641363 | WBGene00020673 | T22B7.4  | T22B7.4  | 0.153229655056332   | AGIWUR17746 |
| N2                                                                                                                    | HS | X | 5642911 | 5644940 | WBGene00005718 | srv-7    | T22B7.5  | -0.0175324189111183 | AGIWUR7545  |
| N2                                                                                                                    | HS | X | 5647378 | 5650213 | WBGene00020672 | T22B7.3  | T22B7.3  | 0.170787414792922   | AGIWUR1146  |
| N2                                                                                                                    | HS | X | 5651869 | 5653925 | WBGene00020674 | T22B7.7  | T22B7.7  | 0.691362423429567   | AGIWUR13647 |
| N2                                                                                                                    | HS | X | 5663837 | 5674060 | WBGene00001182 | egl-13   | T22B7.1  | -0.177976842574674  |             |
| AGIWUR15053;AGIWUR18785;AGIWUR21583;AGIWUR27020                                                                       |    |   |         |         |                |          |          |                     |             |
| N2                                                                                                                    | HS | X | 5675246 | 5680225 | WBGene00020919 | set-19   | W01C8.3  | -0.017855020769336  |             |
| AGIWUR3495;AGIWUR5274;AGIWUR14343;AGIWUR34668                                                                         |    |   |         |         |                |          |          |                     |             |
| N2                                                                                                                    | HS | X | 5680349 | 5684741 | WBGene00020920 | set-20   | W01C8.4  | -0.25095932730618   | AGIWUR11570 |
| N2                                                                                                                    | HS | X | 5692399 | 5694426 | WBGene00020918 | W01C8.1  | W01C8.1  | -0.186000599181418  | AGIWUR23186 |
| N2                                                                                                                    | HS | X | 5694475 | 5697308 | WBGene00020921 | W01C8.5  | W01C8.5  | 0.0537385123293532  |             |
| AGIWUR3723;AGIWUR7945;AGIWUR43807                                                                                     |    |   |         |         |                |          |          |                     |             |
| N2                                                                                                                    | HS | X | 5705719 | 5710625 | WBGene00000295 | cat-1    | W01C8.6  | 0.238128838599925   |             |
| AGIWUR4252;AGIWUR19213;AGIWUR23916                                                                                    |    |   |         |         |                |          |          |                     |             |
| N2                                                                                                                    | HS | X | 5714279 | 5717601 | WBGene00017108 | cyp-43A1 | E03E2.1  | -0.0636289039122175 |             |
| AGIWUR6770;AGIWUR8326;AGIWUR17479;AGIWUR18439;AGIWUR42387;AGIWUR44987                                                 |    |   |         |         |                |          |          |                     |             |
| N2                                                                                                                    | HS | X | 5717538 | 5720268 | WBGene00016568 | C41G11.1 | C41G11.1 | 0.20054087891       |             |
| AGIWUR1606;AGIWUR11627;AGIWUR19917;AGIWUR25682;AGIWUR28142;AGIWUR35183                                                |    |   |         |         |                |          |          |                     |             |
| N2                                                                                                                    | HS | X | 5720438 | 5728656 | WBGene00004349 | rgs-6    | C41G11.3 | -0.107247669692888  |             |
| AGIWUR25314;AGIWUR29193                                                                                               |    |   |         |         |                |          |          |                     |             |

|                                                                                                                                   |    |   |         |         |                |          |          |                     |             |
|-----------------------------------------------------------------------------------------------------------------------------------|----|---|---------|---------|----------------|----------|----------|---------------------|-------------|
| N2                                                                                                                                | HS | X | 5738761 | 5743307 | WBGene00016570 | gnrr-4   | C41G11.4 | 0.0630068225338114  |             |
| AGIWUR39635                                                                                                                       |    |   |         |         |                |          |          |                     |             |
| N2                                                                                                                                | HS | X | 5760281 | 5763392 | WBGene00016937 | tag-294  | C54H2.3  | -0.178993895766736  | AGIWUR6339  |
| N2                                                                                                                                | HS | X | 5766482 | 5770793 | WBGene00016938 | C54H2.4  | C54H2.4  | 0.131383643146156   | AGIWUR15372 |
| N2                                                                                                                                | HS | X | 5776251 | 5778884 | WBGene00006368 | sym-3    | C54H2.1  | -0.0523933861177968 |             |
| AGIWUR2331;AGIWUR18041;AGIWUR20651;AGIWUR23478                                                                                    |    |   |         |         |                |          |          |                     |             |
| N2                                                                                                                                | HS | X | 5778875 | 5780758 | WBGene00004788 | sft-4    | C54H2.5  | -0.192545829339557  |             |
| AGIWUR8477;AGIWUR9575;AGIWUR11346;AGIWUR14701;AGIWUR34782;AGIWUR41146                                                             |    |   |         |         |                |          |          |                     |             |
| N2                                                                                                                                | HS | X | 5783405 | 5786406 | WBGene00018516 | tag-257  | F46G11.3 | -0.338628789244666  |             |
| AGIWUR13771                                                                                                                       |    |   |         |         |                |          |          |                     |             |
| N2                                                                                                                                | HS | X | 5786493 | 5787353 | WBGene00045269 | F46G11.6 | F46G11.6 | 0.482877811597302   |             |
| AGIWUR20936                                                                                                                       |    |   |         |         |                |          |          |                     |             |
| N2                                                                                                                                | HS | X | 5788096 | 5790345 | WBGene00018515 | F46G11.2 | F46G11.2 | 0.0624616442430286  |             |
| AGIWUR4630;AGIWUR41476                                                                                                            |    |   |         |         |                |          |          |                     |             |
| N2                                                                                                                                | HS | X | 5791703 | 5797328 | WBGene00018514 | F46G11.1 | F46G11.1 | 0.00995559434168181 |             |
| AGIWUR14159;AGIWUR16979                                                                                                           |    |   |         |         |                |          |          |                     |             |
| N2                                                                                                                                | HS | X | 5797313 | 5798790 | WBGene00018517 | F46G11.4 | F46G11.4 | 0.0753233682988128  |             |
| AGIWUR28013                                                                                                                       |    |   |         |         |                |          |          |                     |             |
| N2                                                                                                                                | HS | X | 5804379 | 5805922 | WBGene00017428 | F13D11.3 | F13D11.3 | -0.104428892077193  |             |
| AGIWUR8316;AGIWUR8680;AGIWUR33918;AGIWUR37491;AGIWUR38571                                                                         |    |   |         |         |                |          |          |                     |             |
| N2                                                                                                                                | HS | X | 5822277 | 5827755 | WBGene00001824 | hbl-1    | F13D11.2 | -0.096445286517584  |             |
| AGIWUR1043;AGIWUR8461;AGIWUR11581;AGIWUR15453;AGIWUR20933;AGIWUR24101;AGIWUR31648;AGIWUR31830;AGIWUR33022;AGIWUR35804;AGIWUR41028 |    |   |         |         |                |          |          |                     |             |
| N2                                                                                                                                | HS | X | 5829376 | 5832027 | WBGene00017427 | acp-5    | F13D11.1 | -0.0388803066632502 |             |
| AGIWUR5445;AGIWUR11396;AGIWUR23581                                                                                                |    |   |         |         |                |          |          |                     |             |
| N2                                                                                                                                | HS | X | 5831918 | 5834858 | WBGene00017429 | F13D11.4 | F13D11.4 | 0.0848948620316001  |             |
| AGIWUR5892                                                                                                                        |    |   |         |         |                |          |          |                     |             |
| N2                                                                                                                                | HS | X | 5838039 | 5839778 | WBGene00021060 | dct-11   | W06B11.3 | 0.0460177684082854  |             |
| AGIWUR21625                                                                                                                       |    |   |         |         |                |          |          |                     |             |
| N2                                                                                                                                | HS | X | 5841592 | 5845987 | WBGene00004245 | puf-9    | W06B11.2 | 0.00863776888618339 |             |
| AGIWUR6309;AGIWUR16845;AGIWUR30458                                                                                                |    |   |         |         |                |          |          |                     |             |
| N2                                                                                                                                | HS | X | 5849104 | 5851971 | WBGene00021059 | atat-2   | W06B11.1 | 0.218150119781875   |             |
| AGIWUR1959                                                                                                                        |    |   |         |         |                |          |          |                     |             |
| N2                                                                                                                                | HS | X | 5851954 | 5854260 | WBGene00001984 | hog-1    | W06B11.4 | -0.114425843601058  |             |
| AGIWUR9208                                                                                                                        |    |   |         |         |                |          |          |                     |             |
| N2                                                                                                                                | HS | X | 5862708 | 5873320 | WBGene00006424 | ctbp-1   | F49E10.5 | -0.0106914342668252 |             |
| AGIWUR5330;AGIWUR41828                                                                                                            |    |   |         |         |                |          |          |                     |             |
| N2                                                                                                                                | HS | X | 5875898 | 5881716 | WBGene00018641 | F49E10.4 | F49E10.4 | -0.0365384766595298 |             |
| AGIWUR9852;AGIWUR13472;AGIWUR16268;AGIWUR41839                                                                                    |    |   |         |         |                |          |          |                     |             |

|                                                                                    |    |   |         |         |                |          |          |                     |             |
|------------------------------------------------------------------------------------|----|---|---------|---------|----------------|----------|----------|---------------------|-------------|
| N2                                                                                 | HS | X | 5885865 | 5886823 | WBGene00001450 | flp-7    | F49E10.3 | -0.0021449405789018 |             |
| AGIWUR358;AGIWUR2865;AGIWUR4562;AGIWUR35967                                        |    |   |         |         |                |          |          |                     |             |
| N2                                                                                 | HS | X | 5890380 | 5894757 | WBGene00018640 | F49E10.2 | F49E10.2 | -0.0348410386256255 |             |
| AGIWUR32917                                                                        |    |   |         |         |                |          |          |                     |             |
| N2                                                                                 | HS | X | 5897342 | 5902152 | WBGene00018639 | tbc-16   | F49E10.1 | 0.234768894142441   |             |
| AGIWUR22634                                                                        |    |   |         |         |                |          |          |                     |             |
| N2                                                                                 | HS | X | 5904627 | 5905346 | WBGene00019160 | crf-1    | H05L03.3 | -0.0506040667396448 |             |
| AGIWUR36178                                                                        |    |   |         |         |                |          |          |                     |             |
| N2                                                                                 | HS | X | 5919656 | 5920494 | WBGene00021268 | capa-1   | Y23B4A.2 | -0.0381749273440022 |             |
| AGIWUR13010                                                                        |    |   |         |         |                |          |          |                     |             |
| N2                                                                                 | HS | X | 5931122 | 5934532 | WBGene00001175 | egl-6    | C46F4.1  | -0.0020178906758499 | AGIWUR10686 |
| N2                                                                                 | HS | X | 5935780 | 5937549 | WBGene00044571 | C46F4.3  | C46F4.3  | 0.254477621515787   |             |
| AGIWUR3474;AGIWUR15765;AGIWUR18513;AGIWUR32363                                     |    |   |         |         |                |          |          |                     |             |
| N2                                                                                 | HS | X | 5937506 | 5944510 | WBGene00016716 | acs-17   | C46F4.2  | 0.131758170297767   |             |
| AGIWUR6231;AGIWUR17820;AGIWUR20521;AGIWUR20972;AGIWUR22389;AGIWUR29029             |    |   |         |         |                |          |          |                     |             |
| N2                                                                                 | HS | X | 5945821 | 5948869 | WBGene00003254 | mig-23   | R07E4.4  | 0.168048525795539   | AGIWUR10959 |
| N2                                                                                 | HS | X | 5949529 | 5953174 | WBGene00019938 | R07E4.5  | R07E4.5  | -0.375350095393959  | AGIWUR41208 |
| N2                                                                                 | HS | X | 5953450 | 5953815 | WBGene00019937 | R07E4.3  | R07E4.3  | 0.239201320176464   | AGIWUR17110 |
| N2                                                                                 | HS | X | 5959115 | 5970158 | WBGene00019935 | R07E4.1  | R07E4.1  | -0.136852569122181  |             |
| AGIWUR11245;AGIWUR31261                                                            |    |   |         |         |                |          |          |                     |             |
| N2                                                                                 | HS | X | 5970677 | 5977854 | WBGene00002190 | kin-2    | R07E4.6  | -0.0924172835949957 |             |
| AGIWUR8994;AGIWUR10317;AGIWUR10536;AGIWUR14932;AGIWUR15995;AGIWUR34314;AGIWUR35178 |    |   |         |         |                |          |          |                     |             |
| N2                                                                                 | HS | X | 5984975 | 5992103 | WBGene00002224 | klp-13   | F22F4.3  | 0.128321296104401   | AGIWUR36520 |
| N2                                                                                 | HS | X | 5992099 | 5992859 | WBGene00017718 | F22F4.5  | F22F4.5  | 0.445283636868933   |             |
| AGIWUR24185;AGIWUR27325;AGIWUR28641                                                |    |   |         |         |                |          |          |                     |             |
| N2                                                                                 | HS | X | 5996156 | 5998243 | WBGene00002125 | inx-3    | F22F4.2  | -0.296669639038038  |             |
| AGIWUR11328;AGIWUR26870;AGIWUR41549;AGIWUR42844                                    |    |   |         |         |                |          |          |                     |             |
| N2                                                                                 | HS | X | 5998310 | 6001534 | WBGene00017717 | F22F4.4  | F22F4.4  | 0.167878629898579   | AGIWUR30783 |
| N2                                                                                 | HS | X | 6004482 | 6007071 | WBGene00017716 | F22F4.1  | F22F4.1  | 0.373407820950392   | AGIWUR8904  |
| N2                                                                                 | HS | X | 6006969 | 6011310 | WBGene00015622 | C09B8.3  | C09B8.3  | 0.398139101398498   | AGIWUR18158 |
| N2                                                                                 | HS | X | 6015492 | 6017584 | WBGene00015625 | C09B8.8  | C09B8.8  | 0.273693790519097   | AGIWUR25377 |
| N2                                                                                 | HS | X | 6018442 | 6019936 | WBGene00015623 | C09B8.4  | C09B8.4  | 0.776651493681259   | AGIWUR28618 |
| N2                                                                                 | HS | X | 6020866 | 6022569 | WBGene00015624 | C09B8.5  | C09B8.5  | 0.084356300659163   | AGIWUR22489 |
| N2                                                                                 | HS | X | 6031469 | 6034525 | WBGene00002146 | ipp-5    | C09B8.1  | -0.0194187199330411 |             |
| AGIWUR7509;AGIWUR39391;AGIWUR43663                                                 |    |   |         |         |                |          |          |                     |             |
| N2                                                                                 | HS | X | 6034463 | 6039496 | WBGene00002023 | hsp-25   | C09B8.6  | -0.130066155936467  |             |
| AGIWUR3529;AGIWUR6104;AGIWUR20413;AGIWUR30435;AGIWUR39439;AGIWUR42269              |    |   |         |         |                |          |          |                     |             |
| N2                                                                                 | HS | X | 6044309 | 6048610 | WBGene00003911 | pak-1    | C09B8.7  | -0.0499020034399029 |             |
| AGIWUR25778;AGIWUR39887                                                            |    |   |         |         |                |          |          |                     |             |



|                                                                                                                                                                    |    |   |         |         |                 |           |           |                      |             |
|--------------------------------------------------------------------------------------------------------------------------------------------------------------------|----|---|---------|---------|-----------------|-----------|-----------|----------------------|-------------|
| N2                                                                                                                                                                 | HS | X | 6053058 | 6057177 | WBGene00016661  | C45B2.6   | C45B2.6   | -0.0278378544019677  | AGIWUR40366 |
| N2                                                                                                                                                                 | HS | X | 6058255 | 6060242 | WBGene00001602  | gln-1     | C45B2.5   | 0.00885785683384732  |             |
| AGIWUR483;AGIWUR9520;AGIWUR30943                                                                                                                                   |    |   |         |         |                 |           |           |                      |             |
| N2                                                                                                                                                                 | HS | X | 6060754 | 6065986 | WBGene00004219  | ptr-4     | C45B2.7   | 0.0181110065500718   |             |
| AGIWUR7044;AGIWUR10815;AGIWUR13775;AGIWUR35960;AGIWUR42720;AGIWUR44398                                                                                             |    |   |         |         |                 |           |           |                      |             |
| N2                                                                                                                                                                 | HS | X | 6070497 | 6081833 | WBGene00001587  | ggr-2     | C45B2.4   | 0.0248148405448818   | AGIWUR16871 |
| N2                                                                                                                                                                 | HS | X | 6082960 | 6083333 | WBGene00016660  | C45B2.3   | C45B2.3   | -0.47901040018743    | AGIWUR36757 |
| N2                                                                                                                                                                 | HS | X | 6084739 | 6085189 | WBGene00016659  | C45B2.2   | C45B2.2   | -0.210818443683454   |             |
| AGIWUR7351;AGIWUR20052;AGIWUR28037;AGIWUR36337;AGIWUR44487                                                                                                         |    |   |         |         |                 |           |           |                      |             |
| N2                                                                                                                                                                 | HS | X | 6086124 | 6086567 | WBGene00016658  | C45B2.1   | C45B2.1   | 0.125432857203949    | AGIWUR13077 |
| N2                                                                                                                                                                 | HS | X | 6087985 | 6088391 | WBGene00016662  | C45B2.8   | C45B2.8   | 0.00288940103508573  | AGIWUR42228 |
| N2                                                                                                                                                                 | HS | X | 6089033 | 6092124 | WBGene00002007  | hsp-3     | C15H9.6   | -0.0927282403118834  |             |
| AGIWUR794;AGIWUR4634;AGIWUR7413;AGIWUR7841;AGIWUR20115;AGIWUR27420;AGIWUR27912;AGIWUR33491;AGIWUR37727;AGIWUR38048;AGIWUR38338;AGIWUR41750;AGIWUR41826;AGIWUR45001 |    |   |         |         |                 |           |           |                      |             |
| N2                                                                                                                                                                 | HS | X | 6093286 | 6097574 | WBGene00015801  | C15H9.5   | C15H9.5   | 0.0692351847399841   | AGIWUR10532 |
| N2                                                                                                                                                                 | HS | X | 6101158 | 6105526 | WBGene00015800  | C15H9.4   | C15H9.4   | -0.178534580368421   | AGIWUR43548 |
| N2                                                                                                                                                                 | HS | X | 6106926 | 6109338 | WBGene00015802  | kynu-1    | C15H9.7   | 0.217324781925301    | AGIWUR18801 |
| N2                                                                                                                                                                 | HS | X | 6110754 | 6113057 | WBGene00004193  | prx-3     | C15H9.8   | -0.0479057448296061  |             |
| AGIWUR4666;AGIWUR15011;AGIWUR15322;AGIWUR31300;AGIWUR35692                                                                                                         |    |   |         |         |                 |           |           |                      |             |
| N2                                                                                                                                                                 | HS | X | 6115804 | 6118051 | WBGene00015799  | C15H9.3   | C15H9.3   | 0.0214199176716434   |             |
| AGIWUR21830;AGIWUR23000;AGIWUR29763                                                                                                                                |    |   |         |         |                 |           |           |                      |             |
| N2                                                                                                                                                                 | HS | X | 6118776 | 6120436 | WBGene00015798  | C15H9.2   | C15H9.2   | 0.0652439876983815   | AGIWUR29727 |
| N2                                                                                                                                                                 | HS | X | 6122315 | 6127541 | WBGene00003778  | nnt-1     | C15H9.1   | -0.00638338262377758 | AGIWUR7268  |
| N2                                                                                                                                                                 | HS | X | 6127457 | 6128326 | WBGene00015803  | C15H9.9   | C15H9.9   | 0.0561702440717724   | AGIWUR18082 |
| N2                                                                                                                                                                 | HS | X | 6129535 | 6138332 | WBGene00022202  | Y72A10A.1 | Y72A10A.1 | 0.0420302490345499   |             |
| AGIWUR13394                                                                                                                                                        |    |   |         |         |                 |           |           |                      |             |
| N2                                                                                                                                                                 | HS | X | 6142546 | 6150545 | WBGene00016423  | tag-275   | C34H3.1   | 0.0832378239911193   | AGIWUR24326 |
| N2                                                                                                                                                                 | HS | X | 6159388 | 6160523 | WBGene00003846  | odd-2     | C34H3.2   | -0.0418343079255052  | AGIWUR34622 |
| N2                                                                                                                                                                 | HS | X | 6169305 | 6173748 | WBGene00020786  | T25B2.2   | T25B2.2   | -0.0983707586009537  | AGIWUR42133 |
| N2                                                                                                                                                                 | HS | X | 6176129 | 6177154 | WBGene00077592  | T25B2.3   | T25B2.3   | -0.1348422693711     | AGIWUR29729 |
| N2                                                                                                                                                                 | HS | X | 6179241 | 6180140 | WBGene00020484  | T13C5.3   | T13C5.3   | 0.130326542325361    | AGIWUR32692 |
| N2                                                                                                                                                                 | HS | X | 6180650 | 6181425 | WBGene00020487  | T13C5.7   | T13C5.7   | 0.294693163670211    | AGIWUR4318  |
| N2                                                                                                                                                                 | HS | X | 6188148 | 6189422 | WBGene000206360 | T13C5.10  | T13C5.10  | -0.100097126251276   |             |
| AGIWUR3002                                                                                                                                                         |    |   |         |         |                 |           |           |                      |             |
| N2                                                                                                                                                                 | HS | X | 6191590 | 6192948 | WBGene00020485  | ceh-54    | T13C5.4   | -0.0189668206856286  | AGIWUR15363 |
| N2                                                                                                                                                                 | HS | X | 6196927 | 6200818 | WBGene00000905  | daf-9     | T13C5.1   | -0.0719040346966251  | AGIWUR17268 |
| N2                                                                                                                                                                 | HS | X | 6201875 | 6204922 | WBGene00000245  | bca-1     | T13C5.5   | 0.0220873642020436   |             |
| AGIWUR7829;AGIWUR10187;AGIWUR11293;AGIWUR21637                                                                                                                     |    |   |         |         |                 |           |           |                      |             |
| N2                                                                                                                                                                 | HS | X | 6205180 | 6206475 | WBGene00077690  | mtp-18    | T13C5.8   | 0.0266976115126116   |             |

AGIWUR13852;AGIWUR15465

|    |    |   |         |         |                |          |         |                    |                    |
|----|----|---|---------|---------|----------------|----------|---------|--------------------|--------------------|
| N2 | HS | X | 6206581 | 6207626 | WBGene00020486 | T13C5.6  | T13C5.6 | -0.172223105685529 | AGIWUR19108        |
| N2 | HS | X | 6208161 | 6208563 | WBGene00015782 | C14F11.7 |         | C14F11.7           | 0.0885890690540645 |

AGIWUR44304

|    |    |   |         |         |                |        |          |  |                    |
|----|----|---|---------|---------|----------------|--------|----------|--|--------------------|
| N2 | HS | X | 6208761 | 6213911 | WBGene00015779 | lrch-1 | C14F11.2 |  | 0.0808389667201013 |
|----|----|---|---------|---------|----------------|--------|----------|--|--------------------|

AGIWUR15777

|    |    |   |         |         |                |        |          |  |                    |
|----|----|---|---------|---------|----------------|--------|----------|--|--------------------|
| N2 | HS | X | 6226131 | 6230701 | WBGene00001803 | lite-1 | C14F11.3 |  | -0.133772750076269 |
|----|----|---|---------|---------|----------------|--------|----------|--|--------------------|

AGIWUR41630

|    |    |   |         |         |                |          |  |          |                     |
|----|----|---|---------|---------|----------------|----------|--|----------|---------------------|
| N2 | HS | X | 6230920 | 6233048 | WBGene00015780 | C14F11.4 |  | C14F11.4 | -0.0740502457680741 |
|----|----|---|---------|---------|----------------|----------|--|----------|---------------------|

AGIWUR10334;AGIWUR14376;AGIWUR42427

|    |    |   |         |         |                |        |          |  |                     |
|----|----|---|---------|---------|----------------|--------|----------|--|---------------------|
| N2 | HS | X | 6233149 | 6235541 | WBGene00002024 | hsp-43 | C14F11.5 |  | -0.0859602135987187 |
|----|----|---|---------|---------|----------------|--------|----------|--|---------------------|

AGIWUR803;AGIWUR2757;AGIWUR3346;AGIWUR5545;AGIWUR7080;AGIWUR11542;AGIWUR12158;AGIWUR12947;AGIWUR13833;AGIWUR20327;AGIWUR24200;AGIWUR26078;AGIWUR26161;AGIWUR27483;AGIWUR30002;AGIWUR31377;AGIWUR37840;AGIWUR41660

|    |    |   |         |         |                |          |  |          |                   |
|----|----|---|---------|---------|----------------|----------|--|----------|-------------------|
| N2 | HS | X | 6238021 | 6239115 | WBGene00015781 | C14F11.6 |  | C14F11.6 | 0.288272872348575 |
|----|----|---|---------|---------|----------------|----------|--|----------|-------------------|

AGIWUR1730

|    |    |   |         |         |                |         |          |  |                    |
|----|----|---|---------|---------|----------------|---------|----------|--|--------------------|
| N2 | HS | X | 6240955 | 6242709 | WBGene00015778 | got-2.2 | C14F11.1 |  | -0.317203920283005 |
|----|----|---|---------|---------|----------------|---------|----------|--|--------------------|

AGIWUR9797;AGIWUR14781;AGIWUR26879

|    |    |   |         |         |                |         |         |                    |             |
|----|----|---|---------|---------|----------------|---------|---------|--------------------|-------------|
| N2 | HS | X | 6252274 | 6253785 | WBGene00021050 | W05H9.3 | W05H9.3 | 0.0616973148226343 | AGIWUR35259 |
|----|----|---|---------|---------|----------------|---------|---------|--------------------|-------------|

|    |    |   |         |         |                |         |         |                    |             |
|----|----|---|---------|---------|----------------|---------|---------|--------------------|-------------|
| N2 | HS | X | 6263648 | 6266913 | WBGene00021051 | W05H9.4 | W05H9.4 | -0.255620176673098 | AGIWUR44050 |
|----|----|---|---------|---------|----------------|---------|---------|--------------------|-------------|

|    |    |   |         |         |                |         |         |                     |  |
|----|----|---|---------|---------|----------------|---------|---------|---------------------|--|
| N2 | HS | X | 6267043 | 6271087 | WBGene00021049 | W05H9.2 | W05H9.2 | -0.0150931065558222 |  |
|----|----|---|---------|---------|----------------|---------|---------|---------------------|--|

AGIWUR8667;AGIWUR12910;AGIWUR13830;AGIWUR39746;AGIWUR44532

|    |    |   |         |         |                |         |         |                     |             |
|----|----|---|---------|---------|----------------|---------|---------|---------------------|-------------|
| N2 | HS | X | 6272089 | 6273768 | WBGene00021048 | W05H9.1 | W05H9.1 | -0.0497195899215885 | AGIWUR30479 |
|----|----|---|---------|---------|----------------|---------|---------|---------------------|-------------|

|    |    |   |         |         |                |         |         |                    |  |
|----|----|---|---------|---------|----------------|---------|---------|--------------------|--|
| N2 | HS | X | 6279801 | 6281015 | WBGene00000739 | col-166 | T07H6.3 | -0.344632257888859 |  |
|----|----|---|---------|---------|----------------|---------|---------|--------------------|--|

AGIWUR37078;AGIWUR44419

|    |    |   |         |         |                |       |         |                     |  |
|----|----|---|---------|---------|----------------|-------|---------|---------------------|--|
| N2 | HS | X | 6281847 | 6291732 | WBGene00002976 | lev-9 | T07H6.5 | -0.0181821824590669 |  |
|----|----|---|---------|---------|----------------|-------|---------|---------------------|--|

AGIWUR2946;AGIWUR21872;AGIWUR24441;AGIWUR32386

|    |    |   |         |         |                |       |         |                     |            |
|----|----|---|---------|---------|----------------|-------|---------|---------------------|------------|
| N2 | HS | X | 6293124 | 6298195 | WBGene00003394 | mom-1 | T07H6.2 | -0.0885169426842838 | AGIWUR4640 |
|----|----|---|---------|---------|----------------|-------|---------|---------------------|------------|

|    |    |   |         |         |                |         |         |                    |             |
|----|----|---|---------|---------|----------------|---------|---------|--------------------|-------------|
| N2 | HS | X | 6300138 | 6305211 | WBGene00020330 | T07H6.1 | T07H6.1 | 0.0721857221124544 | AGIWUR44690 |
|----|----|---|---------|---------|----------------|---------|---------|--------------------|-------------|

|    |    |   |         |         |                |          |  |          |                    |
|----|----|---|---------|---------|----------------|----------|--|----------|--------------------|
| N2 | HS | X | 6311715 | 6314588 | WBGene00020420 | T10E10.3 |  | T10E10.3 | -0.125496461194825 |
|----|----|---|---------|---------|----------------|----------|--|----------|--------------------|

AGIWUR439

|    |    |   |         |         |                |          |  |          |                   |
|----|----|---|---------|---------|----------------|----------|--|----------|-------------------|
| N2 | HS | X | 6314529 | 6322819 | WBGene00020421 | T10E10.4 |  | T10E10.4 | 0.312515547128498 |
|----|----|---|---------|---------|----------------|----------|--|----------|-------------------|

AGIWUR46

|    |    |   |         |         |                |         |          |  |                    |
|----|----|---|---------|---------|----------------|---------|----------|--|--------------------|
| N2 | HS | X | 6323297 | 6324539 | WBGene00000740 | col-167 | T10E10.2 |  | -0.204464985411462 |
|----|----|---|---------|---------|----------------|---------|----------|--|--------------------|

AGIWUR40205

|    |    |   |         |         |                |         |          |  |                    |
|----|----|---|---------|---------|----------------|---------|----------|--|--------------------|
| N2 | HS | X | 6329160 | 6330127 | WBGene00000742 | col-169 | T10E10.5 |  | -0.193541232137582 |
|----|----|---|---------|---------|----------------|---------|----------|--|--------------------|

AGIWUR18709

|    |    |   |         |         |                |         |          |  |                    |
|----|----|---|---------|---------|----------------|---------|----------|--|--------------------|
| N2 | HS | X | 6331620 | 6332686 | WBGene00000743 | col-170 | T10E10.6 |  | -0.102406721989043 |
|----|----|---|---------|---------|----------------|---------|----------|--|--------------------|

AGIWUR1815

|    |    |   |         |         |                |          |  |          |                   |
|----|----|---|---------|---------|----------------|----------|--|----------|-------------------|
| N2 | HS | X | 6335279 | 6338035 | WBGene00015381 | C03B1.13 |  | C03B1.13 | 0.302887307395267 |
|----|----|---|---------|---------|----------------|----------|--|----------|-------------------|

|                                                                                                            |    |   |         |         |                |          |          |                     |             |
|------------------------------------------------------------------------------------------------------------|----|---|---------|---------|----------------|----------|----------|---------------------|-------------|
| AGIWUR25465                                                                                                |    |   |         |         |                |          |          |                     |             |
| N2                                                                                                         | HS | X | 6341835 | 6345842 | WBGene00015378 | C03B1.7  | C03B1.7  | -0.17609732492514   | AGIWUR27113 |
| N2                                                                                                         | HS | X | 6346359 | 6347113 | WBGene00015379 | C03B1.9  | C03B1.9  | -0.0150647464871163 |             |
| AGIWUR1881;AGIWUR13826;AGIWUR18914;AGIWUR19974;AGIWUR23191;AGIWUR24202;AGIWUR32257;AGIWUR34582;AGIWUR37352 |    |   |         |         |                |          |          |                     |             |
| N2                                                                                                         | HS | X | 6350187 | 6351876 | WBGene00015377 | C03B1.6  | C03B1.6  | -0.186451971346524  |             |
| AGIWUR9258;AGIWUR38721                                                                                     |    |   |         |         |                |          |          |                     |             |
| N2                                                                                                         | HS | X | 6355585 | 6357689 | WBGene00015376 | C03B1.5  | C03B1.5  | -0.0759185542121195 | AGIWUR14829 |
| N2                                                                                                         | HS | X | 6359383 | 6360758 | WBGene00015382 | C03B1.14 | C03B1.14 | 0.249696051024959   |             |
| AGIWUR20078                                                                                                |    |   |         |         |                |          |          |                     |             |
| N2                                                                                                         | HS | X | 6364496 | 6365717 | WBGene00015375 | C03B1.4  | C03B1.4  | 0.0659180635300638  | AGIWUR44475 |
| N2                                                                                                         | HS | X | 6366013 | 6366831 | WBGene00015374 | C03B1.3  | C03B1.3  | -0.0742616321316927 | AGIWUR9747  |
| N2                                                                                                         | HS | X | 6367614 | 6373157 | WBGene00015373 | C03B1.2  | C03B1.2  | 0.156090375928132   | AGIWUR29724 |
| N2                                                                                                         | HS | X | 6374751 | 6375592 | WBGene00015372 | C03B1.1  | C03B1.1  | 0.312506188009913   | AGIWUR17004 |
| N2                                                                                                         | HS | X | 6376459 | 6377684 | WBGene00003053 | lmp-1    | C03B1.12 | -0.118172438390145  |             |
| AGIWUR27222;AGIWUR33434                                                                                    |    |   |         |         |                |          |          |                     |             |
| N2                                                                                                         | HS | X | 6379484 | 6384845 | WBGene00020130 | igcm-2   | S5SD1.1  | 0.0348934793236939  | AGIWUR41163 |
| N2                                                                                                         | HS | X | 6385280 | 6387863 | WBGene00020691 | igdb-3   | T22E5.3  | 0.0504054103971123  | AGIWUR40893 |
| N2                                                                                                         | HS | X | 6388255 | 6391591 | WBGene00044572 | T22E5.7  | T22E5.7  | -0.0445519404077164 |             |
| AGIWUR17271;AGIWUR19093;AGIWUR37241;AGIWUR38134;AGIWUR42347                                                |    |   |         |         |                |          |          |                     |             |
| N2                                                                                                         | HS | X | 6403424 | 6406981 | WBGene00001622 | glt-4    | T22E5.2  | -0.016608464861104  | AGIWUR27019 |
| N2                                                                                                         | HS | X | 6408470 | 6410359 | WBGene00003495 | mup-2    | T22E5.5  | -0.113072188034842  |             |
| AGIWUR2620;AGIWUR15971;AGIWUR21994;AGIWUR30200;AGIWUR36727;AGIWUR40271;AGIWUR41617                         |    |   |         |         |                |          |          |                     |             |
| N2                                                                                                         | HS | X | 6412886 | 6413488 | WBGene00020690 | T22E5.1  | T22E5.1  | 0.0170026971496497  |             |
| AGIWUR4696;AGIWUR12616;AGIWUR17543;AGIWUR17768;AGIWUR31630;AGIWUR44181                                     |    |   |         |         |                |          |          |                     |             |
| N2                                                                                                         | HS | X | 6414148 | 6416400 | WBGene00020692 | T22E5.6  | T22E5.6  | -0.0125936756376621 | AGIWUR27334 |
| N2                                                                                                         | HS | X | 6421036 | 6430610 | WBGene00019617 | K10C2.1  | K10C2.1  | 0.0492100832632332  | AGIWUR13082 |
| N2                                                                                                         | HS | X | 6430695 | 6433788 | WBGene00019618 | K10C2.2  | K10C2.2  | 0.0517463923389627  | AGIWUR31252 |
| N2                                                                                                         | HS | X | 6436440 | 6437645 | WBGene00045265 | K10C2.8  | K10C2.8  | 0.338860355136934   |             |
| AGIWUR11725;AGIWUR42028;AGIWUR42307                                                                        |    |   |         |         |                |          |          |                     |             |
| N2                                                                                                         | HS | X | 6443055 | 6443473 | WBGene00019622 | K10C2.7  | K10C2.7  | 0.447273030025597   |             |
| AGIWUR2183;AGIWUR16937;AGIWUR22507;AGIWUR36334;AGIWUR39501                                                 |    |   |         |         |                |          |          |                     |             |
| N2                                                                                                         | HS | X | 6444189 | 6446664 | WBGene00019619 | asp-14   | K10C2.3  | -0.340465939225867  | AGIWUR11999 |
| N2                                                                                                         | HS | X | 6446649 | 6448999 | WBGene00019620 | fah-1    | K10C2.4  | -0.127998921535385  |             |
| AGIWUR10551;AGIWUR17534;AGIWUR30736;AGIWUR31151                                                            |    |   |         |         |                |          |          |                     |             |
| N2                                                                                                         | HS | X | 6449959 | 6450939 | WBGene00001715 | grl-6    | K10C2.5  | 0.0645375957811547  | AGIWUR35833 |
| N2                                                                                                         | HS | X | 6451363 | 6451859 | WBGene00019621 | K10C2.6  | K10C2.6  | -0.0283599369655789 |             |
| AGIWUR3279;AGIWUR4945;AGIWUR27791;AGIWUR32387;AGIWUR37818                                                  |    |   |         |         |                |          |          |                     |             |
| N2                                                                                                         | HS | X | 6451800 | 6455179 | WBGene00003551 | nas-33   | K04E7.3  | -0.0462173328101834 |             |
| AGIWUR16368;AGIWUR20434;AGIWUR27178;AGIWUR42590                                                            |    |   |         |         |                |          |          |                     |             |

|                                                                                                                     |    |   |         |         |                |          |          |                     |                     |
|---------------------------------------------------------------------------------------------------------------------|----|---|---------|---------|----------------|----------|----------|---------------------|---------------------|
| N2                                                                                                                  | HS | X | 6456687 | 6461767 | WBGene00003877 | pept-1   | K04E7.2  | 0.0778278148247011  | AGIWUR35390         |
| N2                                                                                                                  | HS | X | 6462029 | 6463228 | WBGene00019383 | K04E7.1  | K04E7.1  | 0.241405059486539   | AGIWUR11377         |
| N2                                                                                                                  | HS | X | 6463412 | 6465861 | WBGene00015784 | C15B12.2 |          | C15B12.2            | 0.0617355082434328  |
| AGIWUR19482;AGIWUR23863;AGIWUR31366                                                                                 |    |   |         |         |                |          |          |                     |                     |
| N2                                                                                                                  | HS | X | 6467284 | 6467562 | WBGene00015785 | C15B12.3 |          | C15B12.3            | -0.0384854953637177 |
| AGIWUR35027                                                                                                         |    |   |         |         |                |          |          |                     |                     |
| N2                                                                                                                  | HS | X | 6468799 | 6469803 | WBGene00044573 | C15B12.9 |          | C15B12.9            | 0.116172924940659   |
| AGIWUR12978;AGIWUR17588;AGIWUR32647                                                                                 |    |   |         |         |                |          |          |                     |                     |
| N2                                                                                                                  | HS | X | 6470366 | 6473748 | WBGene00015786 | C15B12.4 |          | C15B12.4            | 0.0707182422903117  |
| AGIWUR18689                                                                                                         |    |   |         |         |                |          |          |                     |                     |
| N2                                                                                                                  | HS | X | 6474274 | 6476645 | WBGene00015788 | C15B12.8 |          | C15B12.8            | -0.311873437862607  |
| AGIWUR9292                                                                                                          |    |   |         |         |                |          |          |                     |                     |
| N2                                                                                                                  | HS | X | 6476738 | 6479086 | WBGene00015783 | C15B12.1 |          | C15B12.1            | 0.0929104579888236  |
| AGIWUR15568                                                                                                         |    |   |         |         |                |          |          |                     |                     |
| N2                                                                                                                  | HS | X | 6479447 | 6484810 | WBGene00001517 | gar-1    | C15B12.5 |                     | -0.0758733785366275 |
| AGIWUR16993;AGIWUR18743;AGIWUR37260                                                                                 |    |   |         |         |                |          |          |                     |                     |
| N2                                                                                                                  | HS | X | 6496823 | 6499836 | WBGene00015787 | C15B12.6 |          | C15B12.6            | 0.121825612607622   |
| AGIWUR17851;AGIWUR20196;AGIWUR43327                                                                                 |    |   |         |         |                |          |          |                     |                     |
| N2                                                                                                                  | HS | X | 6499928 | 6504613 | WBGene00000393 | cdf-1    | C15B12.7 |                     | -0.162076514245324  |
| AGIWUR21474;AGIWUR32017;AGIWUR36111;AGIWUR37609                                                                     |    |   |         |         |                |          |          |                     |                     |
| N2                                                                                                                  | HS | X | 6506884 | 6509882 | WBGene00001619 | glr-8    | F22A3.3  | -0.105567486738076  |                     |
| AGIWUR3455;AGIWUR18484;AGIWUR21797                                                                                  |    |   |         |         |                |          |          |                     |                     |
| N2                                                                                                                  | HS | X | 6510929 | 6512195 | WBGene00044605 | ttr-36   | F22A3.7  | 0.255419896379872   |                     |
| AGIWUR298;AGIWUR5370;AGIWUR19336;AGIWUR19999                                                                        |    |   |         |         |                |          |          |                     |                     |
| N2                                                                                                                  | HS | X | 6512285 | 6512956 | WBGene00017688 | ttr-35   | F22A3.2  | 0.310685540772136   | AGIWUR21619         |
| N2                                                                                                                  | HS | X | 6518883 | 6522656 | WBGene00017687 | ets-4    | F22A3.1  | -0.0944895117247331 |                     |
| AGIWUR889;AGIWUR3485;AGIWUR9857;AGIWUR11604;AGIWUR17443;AGIWUR24709;AGIWUR28144;AGIWUR30453;AGIWUR34260;AGIWUR34579 |    |   |         |         |                |          |          |                     |                     |
| N2                                                                                                                  | HS | X | 6522596 | 6530148 | WBGene00017690 | ceh-60   | F22A3.5  | 0.0070516175053954  |                     |
| AGIWUR4658;AGIWUR39511                                                                                              |    |   |         |         |                |          |          |                     |                     |
| N2                                                                                                                  | HS | X | 6533493 | 6536840 | WBGene00017691 | ilys-5   | F22A3.6  | -0.0633169897639014 |                     |
| AGIWUR4971;AGIWUR38630                                                                                              |    |   |         |         |                |          |          |                     |                     |
| N2                                                                                                                  | HS | X | 6542992 | 6543983 | WBGene00020505 | T14E8.2  | T14E8.2  | -0.11578641586243   | AGIWUR20726         |
| N2                                                                                                                  | HS | X | 6553288 | 6564207 | WBGene00020504 | svh-2    | T14E8.1  | -0.022455734061948  |                     |
| AGIWUR2337;AGIWUR14132;AGIWUR37556                                                                                  |    |   |         |         |                |          |          |                     |                     |
| N2                                                                                                                  | HS | X | 6564175 | 6569518 | WBGene00020506 | dop-3    | T14E8.3  | 0.168381124193841   |                     |
| AGIWUR10355;AGIWUR12156;AGIWUR26923                                                                                 |    |   |         |         |                |          |          |                     |                     |
| N2                                                                                                                  | HS | X | 6582004 | 6585237 | WBGene00020885 | T28B4.2  | T28B4.2  | -0.0334267281960976 | AGIWUR24266         |
| N2                                                                                                                  | HS | X | 6587898 | 6596135 | WBGene00020884 | T28B4.1  | T28B4.1  | 0.100376286365311   | AGIWUR24308         |

|                                                                                              |    |   |         |         |                |          |          |                      |             |
|----------------------------------------------------------------------------------------------|----|---|---------|---------|----------------|----------|----------|----------------------|-------------|
| N2                                                                                           | HS | X | 6596425 | 6597121 | WBGene00020886 | ttr-6    | T28B4.3  | 0.146010389617503    | AGIWUR24030 |
| N2                                                                                           | HS | X | 6597918 | 6598866 | WBGene00020887 | T28B4.4  | T28B4.4  | 0.0755763776208056   | AGIWUR26842 |
| N2                                                                                           | HS | X | 6601558 | 6603212 | WBGene00044574 | F23G4.1  | F23G4.1  | 0.073680571600903    |             |
| AGIWUR10940;AGIWUR25657;AGIWUR37205                                                          |    |   |         |         |                |          |          |                      |             |
| N2                                                                                           | HS | X | 6607203 | 6609045 | WBGene00000786 | cpr-6    | C25B8.3  | -0.0378274323274486  |             |
| AGIWUR4925;AGIWUR5195;AGIWUR8195;AGIWUR11216;AGIWUR11804;AGIWUR20912;AGIWUR28068;AGIWUR28947 |    |   |         |         |                |          |          |                      |             |
| N2                                                                                           | HS | X | 6610054 | 6615343 | WBGene00044297 | C25B8.8  | C25B8.8  | 0.0100677414743657   |             |
| AGIWUR27278;AGIWUR29524                                                                      |    |   |         |         |                |          |          |                      |             |
| N2                                                                                           | HS | X | 6617393 | 6622915 | WBGene00016088 | clcc-266 | C25B8.4  | -0.405233232778334   |             |
| AGIWUR19062;AGIWUR24639;AGIWUR25897;AGIWUR35797;AGIWUR39462;AGIWUR40914                      |    |   |         |         |                |          |          |                      |             |
| N2                                                                                           | HS | X | 6619022 | 6628017 | WBGene00002233 | kqt-1    | C25B8.1  | 0.000791060803663868 | AGIWUR20419 |
| N2                                                                                           | HS | X | 6628041 | 6631537 | WBGene00016090 | aexr-2   | C25B8.7  | -0.117949633663933   |             |
| AGIWUR3032;AGIWUR6225;AGIWUR42800                                                            |    |   |         |         |                |          |          |                      |             |
| N2                                                                                           | HS | X | 6631927 | 6635035 | WBGene00016089 | aexr-1   | C25B8.5  | 0.153032327489442    |             |
| AGIWUR10697;AGIWUR15587;AGIWUR44665                                                          |    |   |         |         |                |          |          |                      |             |
| N2                                                                                           | HS | X | 6636561 | 6640620 | WBGene00003710 | nhr-120  | C25B8.6  | 0.0748443303576707   | AGIWUR24251 |
| N2                                                                                           | HS | X | 6645654 | 6651753 | WBGene00016976 | C56E10.3 | C56E10.3 | 0.180556706388622    |             |
| AGIWUR16579                                                                                  |    |   |         |         |                |          |          |                      |             |
| N2                                                                                           | HS | X | 6655547 | 6659966 | WBGene00016975 | nhr-173  | C56E10.1 | 0.124421397085934    |             |
| AGIWUR38723                                                                                  |    |   |         |         |                |          |          |                      |             |
| N2                                                                                           | HS | X | 6661791 | 6669011 | WBGene00003727 | nhr-137  | C56E10.4 | 0.320540357026081    |             |
| AGIWUR26005                                                                                  |    |   |         |         |                |          |          |                      |             |
| N2                                                                                           | HS | X | 6672830 | 6674407 | WBGene00000745 | col-172  | F38B6.5  | 0.185295948018622    |             |
| AGIWUR2848;AGIWUR4663;AGIWUR37133                                                            |    |   |         |         |                |          |          |                      |             |
| N2                                                                                           | HS | X | 6674869 | 6679848 | WBGene00018174 | F38B6.4  | F38B6.4  | 0.336878406704297    | AGIWUR5569  |
| N2                                                                                           | HS | X | 6680901 | 6682783 | WBGene00044575 | F38B6.8  | F38B6.8  | -0.0203117263803865  |             |
| AGIWUR32608;AGIWUR44990                                                                      |    |   |         |         |                |          |          |                      |             |
| N2                                                                                           | HS | X | 6684440 | 6690085 | WBGene00018175 | F38B6.6  | F38B6.6  | 0.0392824159257792   |             |
| AGIWUR25333;AGIWUR42026                                                                      |    |   |         |         |                |          |          |                      |             |
| N2                                                                                           | HS | X | 6693735 | 6695662 | WBGene00018173 | F38B6.3  | F38B6.3  | -0.0939919598714427  | AGIWUR1165  |
| N2                                                                                           | HS | X | 6695820 | 6698337 | WBGene00018176 | F38B6.7  | F38B6.7  | 0.374648993318808    | AGIWUR20268 |
| N2                                                                                           | HS | X | 6698533 | 6700826 | WBGene00018172 | F38B6.2  | F38B6.2  | 0.0628090196804103   |             |
| AGIWUR8745;AGIWUR28477                                                                       |    |   |         |         |                |          |          |                      |             |
| N2                                                                                           | HS | X | 6702463 | 6709142 | WBGene00000042 | acr-2    | K11G12.2 | 0.0810350365511594   |             |
| AGIWUR12651;AGIWUR15050                                                                      |    |   |         |         |                |          |          |                      |             |
| N2                                                                                           | HS | X | 6709538 | 6712925 | WBGene00000043 | acr-3    | K11G12.7 | 0.0112020593138791   |             |
| AGIWUR1653                                                                                   |    |   |         |         |                |          |          |                      |             |
| N2                                                                                           | HS | X | 6713577 | 6716381 | WBGene00003530 | nas-11   | K11G12.1 | 0.185196757582824    |             |
| AGIWUR25194                                                                                  |    |   |         |         |                |          |          |                      |             |

|                                                                                   |    |   |         |         |                |           |          |                      |             |
|-----------------------------------------------------------------------------------|----|---|---------|---------|----------------|-----------|----------|----------------------|-------------|
| N2                                                                                | HS | X | 6719666 | 6723066 | WBGene00004876 | smf-1     | K11G12.4 | 0.0712941680382606   |             |
| AGIWUR3059                                                                        |    |   |         |         |                |           |          |                      |             |
| N2                                                                                | HS | X | 6723500 | 6725668 | WBGene00019656 | slc-25A10 | K11G12.5 | 0.153310970611752    |             |
| AGIWUR19365                                                                       |    |   |         |         |                |           |          |                      |             |
| N2                                                                                | HS | X | 6725781 | 6729748 | WBGene00019657 | K11G12.6  | K11G12.6 | -0.127851338173326   |             |
| AGIWUR6530;AGIWUR10261;AGIWUR11629                                                |    |   |         |         |                |           |          |                      |             |
| N2                                                                                | HS | X | 6729997 | 6733315 | WBGene00019843 | R03E9.2   | R03E9.2  | 0.103613109023796    | AGIWUR12973 |
| N2                                                                                | HS | X | 6742351 | 6743899 | WBGene00003163 | mdl-1     | R03E9.1  | -0.434211629590701   |             |
| AGIWUR4901;AGIWUR16512;AGIWUR26064;AGIWUR45173                                    |    |   |         |         |                |           |          |                      |             |
| N2                                                                                | HS | X | 6747296 | 6761738 | WBGene00019844 | abts-4    | R03E9.3  | -0.184233588640398   |             |
| AGIWUR6213;AGIWUR6511;AGIWUR21622;AGIWUR27359;AGIWUR31458;AGIWUR35645             |    |   |         |         |                |           |          |                      |             |
| N2                                                                                | HS | X | 6766083 | 6772946 | WBGene00002149 | irk-1     | R03E9.4  | -0.135382649848108   |             |
| AGIWUR5497;AGIWUR11639                                                            |    |   |         |         |                |           |          |                      |             |
| N2                                                                                | HS | X | 6783157 | 6784197 | WBGene00019226 | H22K11.3  | H22K11.3 | 0.136656328449535    |             |
| AGIWUR36514                                                                       |    |   |         |         |                |           |          |                      |             |
| N2                                                                                | HS | X | 6784411 | 6787296 | WBGene00019225 | bgal-2    | H22K11.2 | 0.0953660954323112   |             |
| AGIWUR40471                                                                       |    |   |         |         |                |           |          |                      |             |
| N2                                                                                | HS | X | 6787256 | 6789578 | WBGene00019227 | sgca-1    | H22K11.4 | 0.237552463155891    |             |
| AGIWUR35089                                                                       |    |   |         |         |                |           |          |                      |             |
| N2                                                                                | HS | X | 6791064 | 6792715 | WBGene00000216 | asp-3     | H22K11.1 | 0.0399740118703455   |             |
| AGIWUR6252;AGIWUR11666;AGIWUR14411;AGIWUR14860;AGIWUR31198;AGIWUR36688            |    |   |         |         |                |           |          |                      |             |
| N2                                                                                | HS | X | 6800688 | 6803700 | WBGene00019749 | M03A8.3   | M03A8.3  | 0.0665319941297193   |             |
| AGIWUR7715;AGIWUR32523                                                            |    |   |         |         |                |           |          |                      |             |
| N2                                                                                | HS | X | 6809104 | 6817266 | WBGene00019748 | atg-2     | M03A8.2  | 0.00458790536520937  | AGIWUR4789  |
| N2                                                                                | HS | X | 6818438 | 6820080 | WBGene00000991 | dhs-28    | M03A8.1  | -0.159356372818017   |             |
| AGIWUR7084;AGIWUR8935;AGIWUR10246;AGIWUR13173;AGIWUR15478;AGIWUR33060;AGIWUR33621 |    |   |         |         |                |           |          |                      |             |
| N2                                                                                | HS | X | 6820005 | 6823268 | WBGene00001572 | gei-15    | M03A8.4  | -0.255678610698364   | AGIWUR6969  |
| N2                                                                                | HS | X | 6823890 | 6825862 | WBGene00018257 | F41B4.1   | F41B4.1  | 0.0708461327603196   | AGIWUR30496 |
| N2                                                                                | HS | X | 6831251 | 6835266 | WBGene00018258 | F41B4.2   | F41B4.2  | 0.15775677199295     |             |
| AGIWUR6648;AGIWUR31181                                                            |    |   |         |         |                |           |          |                      |             |
| N2                                                                                | HS | X | 6835487 | 6836115 | WBGene00018259 | F41B4.3   | F41B4.3  | -0.145840544899142   | AGIWUR26760 |
| N2                                                                                | HS | X | 6836386 | 6840615 | WBGene00001617 | glr-6     | F41B4.4  | -0.00218777101645173 |             |
| AGIWUR8107;AGIWUR34692                                                            |    |   |         |         |                |           |          |                      |             |
| N2                                                                                | HS | X | 6841258 | 6842129 | WBGene00000210 | asg-2     | C53B7.4  | 0.242438875449722    | AGIWUR24638 |
| N2                                                                                | HS | X | 6844755 | 6845976 | WBGene00016894 | C53B7.3   | C53B7.3  | -0.33790294770398    |             |
| AGIWUR39143;AGIWUR43670                                                           |    |   |         |         |                |           |          |                      |             |
| N2                                                                                | HS | X | 6846233 | 6847547 | WBGene00016893 | C53B7.2   | C53B7.2  | 0.0729353414483582   |             |
| AGIWUR12377;AGIWUR30277                                                           |    |   |         |         |                |           |          |                      |             |
| N2                                                                                | HS | X | 6853618 | 6860922 | WBGene00004370 | rig-3     | C53B7.1  | 0.149658275078998    | AGIWUR369   |

|                                                                                                                       |    |   |         |         |                |           |          |                     |                     |
|-----------------------------------------------------------------------------------------------------------------------|----|---|---------|---------|----------------|-----------|----------|---------------------|---------------------|
| N2                                                                                                                    | HS | X | 6860946 | 6863414 | WBGene00016896 | nep-4     | C53B7.7  | 0.0378882479759497  |                     |
| AGIWUR10965;AGIWUR15889;AGIWUR21335                                                                                   |    |   |         |         |                |           |          |                     |                     |
| N2                                                                                                                    | HS | X | 6864313 | 6865939 | WBGene00003856 | odr-10    | C53B7.5  | 0.15193349565307    | AGIWUR17818         |
| N2                                                                                                                    | HS | X | 6870354 | 6871670 | WBGene00018276 | F41C6.2   | F41C6.2  | 0.0759393305179792  | AGIWUR21975         |
| N2                                                                                                                    | HS | X | 6873359 | 6874823 | WBGene00018278 | F41C6.4   | F41C6.4  | -0.244884088696535  | AGIWUR42965         |
| N2                                                                                                                    | HS | X | 6875131 | 6877536 | WBGene00000746 | col-173   | F41C6.5  | -0.321437386156314  | AGIWUR44310         |
| N2                                                                                                                    | HS | X | 6880909 | 6881571 | WBGene00018279 | F41C6.6   | F41C6.6  | 0.0686469552481963  | AGIWUR9981          |
| N2                                                                                                                    | HS | X | 6882493 | 6885277 | WBGene00018280 | F41C6.7   | F41C6.7  | 0.0170195120461916  | AGIWUR37348         |
| N2                                                                                                                    | HS | X | 6889689 | 6897147 | WBGene00006746 | unc-6     | F41C6.1  | 0.0248498769896459  | AGIWUR36208         |
| N2                                                                                                                    | HS | X | 6898650 | 6899948 | WBGene00017446 | F14B8.4   | F14B8.4  | 0.180074052843526   | AGIWUR26049         |
| N2                                                                                                                    | HS | X | 6901378 | 6903985 | WBGene00003987 | pes-23    | F14B8.3  | 0.145093530889843   |                     |
| AGIWUR7012;AGIWUR11006;AGIWUR22618                                                                                    |    |   |         |         |                |           |          |                     |                     |
| N2                                                                                                                    | HS | X | 6904721 | 6905849 | WBGene00017445 | sid-5     | F14B8.2  | 0.0879585326436079  | AGIWUR3606          |
| N2                                                                                                                    | HS | X | 6914254 | 6921126 | WBGene00003732 | nhx-4     | F14B8.1  | 0.184535307739282   | AGIWUR24792         |
| N2                                                                                                                    | HS | X | 6921646 | 6924764 | WBGene00017449 | otpl-3    | F14B8.7  | 0.192926413032474   | AGIWUR35094         |
| N2                                                                                                                    | HS | X | 6924804 | 6928704 | WBGene00017447 | F14B8.5   | F14B8.5  | -0.107640123029002  |                     |
| AGIWUR2134;AGIWUR7909;AGIWUR15355;AGIWUR16145;AGIWUR16298;AGIWUR18264;AGIWUR28130;AGIWUR34979;AGIWUR40952;AGIWUR41459 |    |   |         |         |                |           |          |                     |                     |
| N2                                                                                                                    | HS | X | 6929262 | 6932359 | WBGene00017448 | F14B8.6   | F14B8.6  | -0.0161375107994424 | AGIWUR30709         |
| N2                                                                                                                    | HS | X | 6935732 | 6939041 | WBGene00015866 | C16E9.2   | C16E9.2  | 0.0653396689325643  |                     |
| AGIWUR31984;AGIWUR40570;AGIWUR40974                                                                                   |    |   |         |         |                |           |          |                     |                     |
| N2                                                                                                                    | HS | X | 6940253 | 6943713 | WBGene00015865 | C16E9.1   | C16E9.1  | -0.132774759426539  | AGIWUR38169         |
| N2                                                                                                                    | HS | X | 6943740 | 6956399 | WBGene00002123 | inx-1     | C16E9.4  | -0.0191359042331722 |                     |
| AGIWUR1327;AGIWUR4443;AGIWUR41082                                                                                     |    |   |         |         |                |           |          |                     |                     |
| N2                                                                                                                    | HS | X | 6967369 | 6974864 | WBGene00017156 | F01E11.3  |          | F01E11.3            | -0.212437550833346  |
| AGIWUR8518;AGIWUR17384;AGIWUR32545                                                                                    |    |   |         |         |                |           |          |                     |                     |
| N2                                                                                                                    | HS | X | 6980784 | 6983132 | WBGene00219372 | F01E11.17 |          | F01E11.17           | -0.0600611643702269 |
| AGIWUR29020                                                                                                           |    |   |         |         |                |           |          |                     |                     |
| N2                                                                                                                    | HS | X | 6991727 | 6994162 | WBGene00017154 | ugt-57    | F01E11.1 |                     | -0.0447777682260755 |
| AGIWUR1259;AGIWUR9010;AGIWUR39364                                                                                     |    |   |         |         |                |           |          |                     |                     |
| N2                                                                                                                    | HS | X | 6994784 | 6996620 | WBGene00006642 | tsp-16    | F01E11.4 |                     | 0.227818955929944   |
| AGIWUR15782                                                                                                           |    |   |         |         |                |           |          |                     |                     |
| N2                                                                                                                    | HS | X | 6996873 | 7005575 | WBGene00017157 | tyra-2    | F01E11.5 |                     | 0.0201124949898102  |
| AGIWUR1834;AGIWUR19308;AGIWUR32958;AGIWUR34968                                                                        |    |   |         |         |                |           |          |                     |                     |
| N2                                                                                                                    | HS | X | 7020033 | 7023950 | WBGene00000283 | cah-5     | R173.1   | -0.418683937591098  | AGIWUR13092         |
| N2                                                                                                                    | HS | X | 7029136 | 7029638 | WBGene00020126 | flp-26    | R173.4   | 0.232642910870798   | AGIWUR20847         |
| N2                                                                                                                    | HS | X | 7030225 | 7036084 | WBGene00020125 | R173.3    | R173.3   | -0.141447801133435  | AGIWUR11682         |
| N2                                                                                                                    | HS | X | 7050577 | 7055667 | WBGene00006712 | ubc-17    | B0403.2  | 0.0951922281756432  |                     |
| AGIWUR6165;AGIWUR7860;AGIWUR8038;AGIWUR9008;AGIWUR14371;AGIWUR37718                                                   |    |   |         |         |                |           |          |                     |                     |

|                                                                        |    |   |         |         |                |          |          |                      |             |
|------------------------------------------------------------------------|----|---|---------|---------|----------------|----------|----------|----------------------|-------------|
| N2                                                                     | HS | X | 7057731 | 7061190 | WBGene00015169 | B0403.5  | B0403.5  | 0.260435972287828    |             |
| AGIWUR25613;AGIWUR42236                                                |    |   |         |         |                |          |          |                      |             |
| N2                                                                     | HS | X | 7061203 | 7063330 | WBGene00015167 | B0403.3  | B0403.3  | 0.0519460040691486   | AGIWUR23954 |
| N2                                                                     | HS | X | 7066345 | 7068563 | WBGene00015168 | pdi-6    | B0403.4  | -0.201761764677359   |             |
| AGIWUR13446;AGIWUR43810                                                |    |   |         |         |                |          |          |                      |             |
| N2                                                                     | HS | X | 7071410 | 7075337 | WBGene00043982 | B0403.6  | B0403.6  | 0.0109059399509484   |             |
| AGIWUR11703;AGIWUR39969                                                |    |   |         |         |                |          |          |                      |             |
| N2                                                                     | HS | X | 7083417 | 7086008 | WBGene00016467 | C36B7.4  | C36B7.4  | 0.18229377964148     | AGIWUR5620  |
| N2                                                                     | HS | X | 7089228 | 7096449 | WBGene00016468 | C36B7.5  | C36B7.5  | -0.130590183733641   | AGIWUR10931 |
| N2                                                                     | HS | X | 7097434 | 7100338 | WBGene00016469 | C36B7.6  | C36B7.6  | -0.0409074260342068  |             |
| AGIWUR5911;AGIWUR24672;AGIWUR26892;AGIWUR34244;AGIWUR38062             |    |   |         |         |                |          |          |                      |             |
| N2                                                                     | HS | X | 7101777 | 7102136 | WBGene00016466 | C36B7.3  | C36B7.3  | 0.181673877488826    | AGIWUR17906 |
| N2                                                                     | HS | X | 7106407 | 7108436 | WBGene00016465 | C36B7.2  | C36B7.2  | -0.078764574101438   | AGIWUR9259  |
| N2                                                                     | HS | X | 7112889 | 7114863 | WBGene00016464 | C36B7.1  | C36B7.1  | 0.0400504972966491   |             |
| AGIWUR16046;AGIWUR22687                                                |    |   |         |         |                |          |          |                      |             |
| N2                                                                     | HS | X | 7116205 | 7116996 | WBGene00001841 | hen-1    | C36B7.7  | 0.113977564670356    | AGIWUR31932 |
| N2                                                                     | HS | X | 7126648 | 7139646 | WBGene00002163 | ist-1    | C54D1.3  | -0.101225017531642   |             |
| AGIWUR8309;AGIWUR22991;AGIWUR28042;AGIWUR32682;AGIWUR43007;AGIWUR44474 |    |   |         |         |                |          |          |                      |             |
| N2                                                                     | HS | X | 7139875 | 7140566 | WBGene00016912 | clec-86  | C54D1.2  | 0.236320507951167    | AGIWUR21885 |
| N2                                                                     | HS | X | 7140504 | 7143641 | WBGene00000116 | alh-10   | C54D1.4  | -0.37700346903074    | AGIWUR9700  |
| N2                                                                     | HS | X | 7143918 | 7151235 | WBGene00016913 | lam-2    | C54D1.5  | 0.0444799091547337   |             |
| AGIWUR1996;AGIWUR27256                                                 |    |   |         |         |                |          |          |                      |             |
| N2                                                                     | HS | X | 7153889 | 7156035 | WBGene00016914 | C54D1.7  | C54D1.7  | 0.153093347876112    | AGIWUR27463 |
| N2                                                                     | HS | X | 7159036 | 7166021 | WBGene00004004 | pgp-10   | C54D1.1  | 0.237247790922813    | AGIWUR15114 |
| N2                                                                     | HS | X | 7166005 | 7170625 | WBGene00000238 | bar-1    | C54D1.6  | -0.00564687050869495 | AGIWUR1646  |
| N2                                                                     | HS | X | 7177641 | 7178922 | WBGene00044577 | F43E12.1 | F43E12.1 | 0.00641495141309445  |             |
| AGIWUR7496;AGIWUR16469;AGIWUR42022;AGIWUR44522                         |    |   |         |         |                |          |          |                      |             |
| N2                                                                     | HS | X | 7187355 | 7188482 | WBGene00016940 | C55B6.4  | C55B6.4  | -0.0401366750673944  | AGIWUR32410 |
| N2                                                                     | HS | X | 7194564 | 7198291 | WBGene00001025 | dnj-7    | C55B6.2  | -0.139411342242106   |             |
| AGIWUR1962;AGIWUR10779;AGIWUR11340;AGIWUR14618;AGIWUR30335;AGIWUR34569 |    |   |         |         |                |          |          |                      |             |
| N2                                                                     | HS | X | 7200364 | 7204044 | WBGene00016939 | C55B6.1  | C55B6.1  | 0.0210182307388243   | AGIWUR30579 |
| N2                                                                     | HS | X | 7204742 | 7205295 | WBGene00016941 | C55B6.5  | C55B6.5  | -0.0496264482738713  | AGIWUR4101  |
| N2                                                                     | HS | X | 7206719 | 7209985 | WBGene00022829 | ZK867.2  | ZK867.2  | -0.0705317541346595  |             |
| AGIWUR27793;AGIWUR39082                                                |    |   |         |         |                |          |          |                      |             |
| N2                                                                     | HS | X | 7211705 | 7213956 | WBGene00044283 | spp-22   | ZK867.3  | 0.085266078133083    | AGIWUR30676 |
| N2                                                                     | HS | X | 7218109 | 7226825 | WBGene00044068 | syd-9    | ZK867.1  | -0.0830232734690819  |             |
| AGIWUR366;AGIWUR8810;AGIWUR22384;AGIWUR28559                           |    |   |         |         |                |          |          |                      |             |
| N2                                                                     | HS | X | 7230330 | 7238662 | WBGene00018519 | F46H5.3  | F46H5.3  | -0.302828180753531   |             |
| AGIWUR2881;AGIWUR5451;AGIWUR6990;AGIWUR30972;AGIWUR32854               |    |   |         |         |                |          |          |                      |             |



|                                                                                                |    |   |         |         |                |          |          |                      |             |
|------------------------------------------------------------------------------------------------|----|---|---------|---------|----------------|----------|----------|----------------------|-------------|
| N2                                                                                             | HS | X | 7238666 | 7242983 | WBGene00018522 | F46H5.7  | F46H5.7  | -0.0257100285863503  |             |
| AGIWUR9564;AGIWUR9695;AGIWUR14090;AGIWUR18319;AGIWUR19653;AGIWUR23962;AGIWUR26751;AGIWUR36620  |    |   |         |         |                |          |          |                      |             |
| N2                                                                                             | HS | X | 7245057 | 7254792 | WBGene00018520 | F46H5.4  | F46H5.4  | 0.0463854290314742   | AGIWUR39855 |
| N2                                                                                             | HS | X | 7255927 | 7256978 | WBGene00018521 | F46H5.5  | F46H5.5  | 0.119368080471982    | AGIWUR29869 |
| N2                                                                                             | HS | X | 7258116 | 7260377 | WBGene00018523 | lact-1   | F46H5.8  | -0.0543756821164827  |             |
| AGIWUR2426;AGIWUR13200;AGIWUR29644                                                             |    |   |         |         |                |          |          |                      |             |
| N2                                                                                             | HS | X | 7265652 | 7267893 | WBGene00018518 | F46H5.2  | F46H5.2  | -0.0485102041304994  |             |
| AGIWUR7598;AGIWUR15397;AGIWUR17951;AGIWUR27236;AGIWUR37973                                     |    |   |         |         |                |          |          |                      |             |
| N2                                                                                             | HS | X | 7267989 | 7272067 | WBGene00001696 | grd-7    | F46H5.6  | 0.124304373243738    | AGIWUR8059  |
| N2                                                                                             | HS | X | 7272334 | 7280322 | WBGene00006750 | unc-10   | T10A3.1  | 0.0715102491548487   |             |
| AGIWUR1087;AGIWUR8869;AGIWUR23174;AGIWUR43203                                                  |    |   |         |         |                |          |          |                      |             |
| N2                                                                                             | HS | X | 7292138 | 7296035 | WBGene00019351 | Iron-7   | K03A1.2  | 0.180745819945011    | AGIWUR24250 |
| N2                                                                                             | HS | X | 7296098 | 7298751 | WBGene00019352 | K03A1.4  | K03A1.4  | 0.139917328030561    | AGIWUR14580 |
| N2                                                                                             | HS | X | 7301357 | 7305570 | WBGene00006351 | sur-5    | K03A1.5  | -0.0226584867046826  |             |
| AGIWUR8047;AGIWUR19938;AGIWUR20779;AGIWUR21098                                                 |    |   |         |         |                |          |          |                      |             |
| N2                                                                                             | HS | X | 7312175 | 7313976 | WBGene00020338 | T08A9.6  | T08A9.6  | -0.241287853626964   |             |
| AGIWUR11970;AGIWUR20221;AGIWUR32288                                                            |    |   |         |         |                |          |          |                      |             |
| N2                                                                                             | HS | X | 7314969 | 7315353 | WBGene00004988 | spp-3    | T08A9.7  | -0.252703620863251   |             |
| AGIWUR831;AGIWUR28222;AGIWUR42444                                                              |    |   |         |         |                |          |          |                      |             |
| N2                                                                                             | HS | X | 7315995 | 7316818 | WBGene00004987 | spp-2    | T08A9.12 | -0.0315877417158692  |             |
| AGIWUR2832;AGIWUR4441;AGIWUR7152;AGIWUR41734                                                   |    |   |         |         |                |          |          |                      |             |
| N2                                                                                             | HS | X | 7317341 | 7317681 | WBGene00004991 | spp-6    | T08A9.10 | 0.104579257500491    |             |
| AGIWUR3981                                                                                     |    |   |         |         |                |          |          |                      |             |
| N2                                                                                             | HS | X | 7318239 | 7318798 | WBGene00004989 | spp-4    | T08A9.8  | -0.0560551451924329  | AGIWUR39959 |
| N2                                                                                             | HS | X | 7319935 | 7320384 | WBGene00004990 | spp-5    | T08A9.9  | 0.0486424094728655   | AGIWUR16988 |
| N2                                                                                             | HS | X | 7321999 | 7322415 | WBGene00044442 | T08A9.13 | T08A9.13 | 0.17282916801754     |             |
| AGIWUR739;AGIWUR14660;AGIWUR17977;AGIWUR19453;AGIWUR23763                                      |    |   |         |         |                |          |          |                      |             |
| N2                                                                                             | HS | X | 7327605 | 7329677 | WBGene00004912 | sng-1    | T08A9.3  | 0.118253554152879    | AGIWUR19181 |
| N2                                                                                             | HS | X | 7329818 | 7330669 | WBGene00020339 | ttr-59   | T08A9.11 | 0.0697533917383755   |             |
| AGIWUR43881                                                                                    |    |   |         |         |                |          |          |                      |             |
| N2                                                                                             | HS | X | 7331189 | 7331903 | WBGene00020335 | ttr-30   | T08A9.2  | -0.0242445062511862  | AGIWUR26782 |
| N2                                                                                             | HS | X | 7334714 | 7340224 | WBGene00020334 | epg-7    | T08A9.1  | -0.00170556832367197 | AGIWUR13141 |
| N2                                                                                             | HS | X | 7341509 | 7342780 | WBGene00015565 | C07D8.6  | C07D8.6  | -0.0996964940552738  |             |
| AGIWUR2633;AGIWUR25877                                                                         |    |   |         |         |                |          |          |                      |             |
| N2                                                                                             | HS | X | 7344047 | 7344551 | WBGene00015564 | C07D8.5  | C07D8.5  | 0.0751914884675919   | AGIWUR16285 |
| N2                                                                                             | HS | X | 7362082 | 7363663 | WBGene00015562 | C07D8.2  | C07D8.2  | 0.0255665579919766   | AGIWUR2955  |
| N2                                                                                             | HS | X | 7365567 | 7366298 | WBGene00016985 | C56G3.2  | C56G3.2  | -0.062726798113879   |             |
| AGIWUR3048;AGIWUR12259;AGIWUR20965;AGIWUR21589;AGIWUR22826;AGIWUR29368;AGIWUR31432;AGIWUR35429 |    |   |         |         |                |          |          |                      |             |
| N2                                                                                             | HS | X | 7377302 | 7388400 | WBGene00016984 | npr-8    | C56G3.1  | 0.0778476321462858   | AGIWUR30083 |

|                                                                                                                                                        |    |   |         |         |                |          |          |                      |             |
|--------------------------------------------------------------------------------------------------------------------------------------------------------|----|---|---------|---------|----------------|----------|----------|----------------------|-------------|
| N2                                                                                                                                                     | HS | X | 7390574 | 7392276 | WBGene00015667 | C10A4.6  | C10A4.6  | -0.169058356578978   | AGIWUR8450  |
| N2                                                                                                                                                     | HS | X | 7393467 | 7395987 | WBGene00015666 | gad-2    | C10A4.5  | -0.130340228708127   | AGIWUR36308 |
| N2                                                                                                                                                     | HS | X | 7398884 | 7400858 | WBGene00050957 | C10A4.10 | C10A4.10 | 0.103897607949767    |             |
| AGIWUR23007                                                                                                                                            |    |   |         |         |                |          |          |                      |             |
| N2                                                                                                                                                     | HS | X | 7402131 | 7403609 | WBGene00015665 | C10A4.4  | C10A4.4  | 0.144721779638079    | AGIWUR10942 |
| N2                                                                                                                                                     | HS | X | 7407456 | 7408703 | WBGene00015664 | C10A4.3  | C10A4.3  | -0.118509815738308   | AGIWUR6197  |
| N2                                                                                                                                                     | HS | X | 7410235 | 7412749 | WBGene00015663 | C10A4.2  | C10A4.2  | -0.126989627098856   | AGIWUR37959 |
| N2                                                                                                                                                     | HS | X | 7413611 | 7415520 | WBGene00015668 | C10A4.7  | C10A4.7  | 0.0506135085069461   | AGIWUR1003  |
| N2                                                                                                                                                     | HS | X | 7415839 | 7418627 | WBGene00015662 | C10A4.1  | C10A4.1  | -0.15374014878134    | AGIWUR5893  |
| N2                                                                                                                                                     | HS | X | 7420871 | 7422628 | WBGene00045456 | C10A4.9  | C10A4.9  | 0.249869915559315    |             |
| AGIWUR3200;AGIWUR10221;AGIWUR10599;AGIWUR13837;AGIWUR15117                                                                                             |    |   |         |         |                |          |          |                      |             |
| N2                                                                                                                                                     | HS | X | 7422641 | 7424881 | WBGene00003380 | mnx-2    | C10A4.8  | -0.0238680258690573  | AGIWUR7370  |
| N2                                                                                                                                                     | HS | X | 7431472 | 7433548 | WBGene00000523 | clc-2    | C01C10.1 | 0.098406254300841    |             |
| AGIWUR8585;AGIWUR41135                                                                                                                                 |    |   |         |         |                |          |          |                      |             |
| N2                                                                                                                                                     | HS | X | 7433632 | 7435733 | WBGene00000526 | clc-5    | C01C10.4 | -0.240153031085313   |             |
| AGIWUR9626                                                                                                                                             |    |   |         |         |                |          |          |                      |             |
| N2                                                                                                                                                     | HS | X | 7435602 | 7438000 | WBGene00015294 | C01C10.2 | C01C10.2 | -0.0387400250606902  |             |
| AGIWUR10583;AGIWUR28046;AGIWUR41797                                                                                                                    |    |   |         |         |                |          |          |                      |             |
| N2                                                                                                                                                     | HS | X | 7439396 | 7442577 | WBGene00015295 | ac1-12   | C01C10.3 | -0.364254935217406   |             |
| AGIWUR24331                                                                                                                                            |    |   |         |         |                |          |          |                      |             |
| N2                                                                                                                                                     | HS | X | 7458293 | 7463736 | WBGene00004949 | sox-2    | K08A8.2  | -0.0151149129116313  |             |
| AGIWUR580;AGIWUR1927;AGIWUR2157;AGIWUR9025;AGIWUR12690;AGIWUR16873;AGIWUR17998;AGIWUR18918;AGIWUR23196;AGIWUR23402;AGIWUR29307;AGIWUR34708;AGIWUR35922 |    |   |         |         |                |          |          |                      |             |
| N2                                                                                                                                                     | HS | X | 7465193 | 7475014 | WBGene00000591 | coh-1    | K08A8.3  | -0.115558568596918   |             |
| AGIWUR8999;AGIWUR9946;AGIWUR16896;AGIWUR24797;AGIWUR25003;AGIWUR30115                                                                                  |    |   |         |         |                |          |          |                      |             |
| N2                                                                                                                                                     | HS | X | 7479248 | 7481010 | WBGene00003185 | mek-1    | K08A8.1  | 0.00861558742965585  |             |
| AGIWUR4305;AGIWUR11188;AGIWUR43700                                                                                                                     |    |   |         |         |                |          |          |                      |             |
| N2                                                                                                                                                     | HS | X | 7481326 | 7485038 | WBGene00018608 | F48E3.9  | F48E3.9  | -0.0417103644905374  |             |
| AGIWUR4018;AGIWUR26749;AGIWUR26772                                                                                                                     |    |   |         |         |                |          |          |                      |             |
| N2                                                                                                                                                     | HS | X | 7485864 | 7490707 | WBGene00001637 | gly-12   | F48E3.1  | 0.290276355439545    | AGIWUR21551 |
| N2                                                                                                                                                     | HS | X | 7493724 | 7495591 | WBGene00018605 | F48E3.4  | F48E3.4  | 0.146880039128273    | AGIWUR24512 |
| N2                                                                                                                                                     | HS | X | 7495684 | 7500982 | WBGene00018604 | uggt-1   | F48E3.3  | 0.263056538574151    | AGIWUR23074 |
| N2                                                                                                                                                     | HS | X | 7501236 | 7502674 | WBGene00018606 | F48E3.6  | F48E3.6  | -0.0886127377520918  | AGIWUR16467 |
| N2                                                                                                                                                     | HS | X | 7503823 | 7506633 | WBGene00000061 | lgc-11   | F48E3.7  | -0.0728352535798251  | AGIWUR43951 |
| N2                                                                                                                                                     | HS | X | 7507885 | 7517694 | WBGene00018607 | F48E3.8  | F48E3.8  | -0.00181393356067083 |             |
| AGIWUR13250;AGIWUR17401;AGIWUR20280;AGIWUR34154;AGIWUR35820;AGIWUR41858                                                                                |    |   |         |         |                |          |          |                      |             |
| N2                                                                                                                                                     | HS | X | 7525571 | 7527433 | WBGene00018485 | F46C8.3  | F46C8.3  | 0.15418048757803     | AGIWUR15002 |
| N2                                                                                                                                                     | HS | X | 7528616 | 7532732 | WBGene00000438 | ceh-14   | F46C8.5  | -0.204147459962002   | AGIWUR29513 |
| N2                                                                                                                                                     | HS | X | 7536417 | 7537792 | WBGene00001069 | dpy-7    | F46C8.6  | 0.0386728442102804   |             |

AGIWUR4342;AGIWUR38497

|    |    |   |         |         |                |         |         |                      |             |
|----|----|---|---------|---------|----------------|---------|---------|----------------------|-------------|
| N2 | HS | X | 7537844 | 7540129 | WBGene00018486 | glb-16  | F46C8.7 | -0.00197910472683827 | AGIWUR8108  |
| N2 | HS | X | 7546842 | 7548365 | WBGene00000747 | col-174 | F46C8.2 | 0.384297793378863    | AGIWUR17224 |
| N2 | HS | X | 7548458 | 7551218 | WBGene00018484 | F46C8.1 | F46C8.1 | 0.0408184452238167   | AGIWUR21652 |
| N2 | HS | X | 7551204 | 7554426 | WBGene00018487 | F46C8.8 | F46C8.8 | 0.0921895451647021   | AGIWUR23957 |
| N2 | HS | X | 7556788 | 7559085 | WBGene00019803 | PDB1.1  | PDB1.1  | 0.0110837179052377   |             |

AGIWUR8001;AGIWUR9508;AGIWUR11133;AGIWUR16595;AGIWUR20548;AGIWUR26709

|    |    |   |         |         |                |         |         |                     |             |
|----|----|---|---------|---------|----------------|---------|---------|---------------------|-------------|
| N2 | HS | X | 7560024 | 7562093 | WBGene00017243 | F08C6.5 | F08C6.5 | 0.00541322851789339 | AGIWUR31069 |
| N2 | HS | X | 7562831 | 7564805 | WBGene00006063 | sto-1   | F08C6.4 | 0.0975193925405282  | AGIWUR31380 |
| N2 | HS | X | 7565323 | 7568152 | WBGene00007059 | vps-52  | F08C6.3 | 0.0954525398361632  | AGIWUR5089  |
| N2 | HS | X | 7568137 | 7569722 | WBGene00017244 | apy-1   | F08C6.6 | 0.473086031255793   | AGIWUR19261 |
| N2 | HS | X | 7570374 | 7573751 | WBGene00006827 | unc-98  | F08C6.7 | 0.335069448463406   | AGIWUR41594 |
| N2 | HS | X | 7572110 | 7581059 | WBGene00017241 | pcyt-1  | F08C6.2 | 0.0464990030071704  |             |

AGIWUR294;AGIWUR13737

|    |    |   |         |         |                |       |         |                   |  |
|----|----|---|---------|---------|----------------|-------|---------|-------------------|--|
| N2 | HS | X | 7585587 | 7595414 | WBGene00000083 | adt-2 | F08C6.1 | 0.063573748502046 |  |
|----|----|---|---------|---------|----------------|-------|---------|-------------------|--|

AGIWUR10684;AGIWUR11003;AGIWUR15407;AGIWUR18101;AGIWUR19164;AGIWUR21177;AGIWUR26814;AGIWUR40645;AGIWUR40834;AGIWUR41449;AGIWUR42558;AGIWUR43389

|    |    |   |         |         |                |          |          |                     |  |
|----|----|---|---------|---------|----------------|----------|----------|---------------------|--|
| N2 | HS | X | 7596927 | 7599824 | WBGene00016657 | C44E12.1 | C44E12.1 | -0.0245657743468475 |  |
|----|----|---|---------|---------|----------------|----------|----------|---------------------|--|

AGIWUR899;AGIWUR7416;AGIWUR11671;AGIWUR12930;AGIWUR13227;AGIWUR43370

|    |    |   |         |         |                |        |          |                    |  |
|----|----|---|---------|---------|----------------|--------|----------|--------------------|--|
| N2 | HS | X | 7599836 | 7608135 | WBGene00006671 | twk-17 | C44E12.3 | 0.0357120324752831 |  |
|----|----|---|---------|---------|----------------|--------|----------|--------------------|--|

AGIWUR3885;AGIWUR20444;AGIWUR20522;AGIWUR24943;AGIWUR29077;AGIWUR33963;AGIWUR39488

|    |    |   |         |         |                |          |          |  |  |
|----|----|---|---------|---------|----------------|----------|----------|--|--|
| N2 | HS | X | 7627649 | 7627848 | WBGene00017813 | F26A10.1 | F26A10.1 |  |  |
|----|----|---|---------|---------|----------------|----------|----------|--|--|

-0.00137062394216514 AGIWUR2562

|    |    |   |         |         |                |          |          |  |  |
|----|----|---|---------|---------|----------------|----------|----------|--|--|
| N2 | HS | X | 7630905 | 7637172 | WBGene00017814 | F26A10.2 | F26A10.2 |  |  |
|----|----|---|---------|---------|----------------|----------|----------|--|--|

-0.00421379243471298 AGIWUR12816;AGIWUR43740

|    |    |   |         |         |                |         |         |                  |             |
|----|----|---|---------|---------|----------------|---------|---------|------------------|-------------|
| N2 | HS | X | 7651132 | 7651548 | WBGene00017862 | F27D9.3 | F27D9.3 | 0.12096204403713 | AGIWUR33666 |
|----|----|---|---------|---------|----------------|---------|---------|------------------|-------------|

|    |    |   |         |         |                |         |         |                     |             |
|----|----|---|---------|---------|----------------|---------|---------|---------------------|-------------|
| N2 | HS | X | 7653135 | 7654425 | WBGene00017863 | F27D9.4 | F27D9.4 | -0.0114255059548265 | AGIWUR37245 |
|----|----|---|---------|---------|----------------|---------|---------|---------------------|-------------|

|    |    |   |         |         |                |        |         |                    |  |
|----|----|---|---------|---------|----------------|--------|---------|--------------------|--|
| N2 | HS | X | 7657538 | 7687738 | WBGene00017864 | pcca-1 | F27D9.5 | -0.228506043955212 |  |
|----|----|---|---------|---------|----------------|--------|---------|--------------------|--|

AGIWUR2629;AGIWUR3378;AGIWUR6786;AGIWUR14447;AGIWUR31106;AGIWUR38037

|    |    |   |         |         |                |       |         |                     |  |
|----|----|---|---------|---------|----------------|-------|---------|---------------------|--|
| N2 | HS | X | 7690590 | 7707086 | WBGene00002242 | kvs-1 | C53C9.3 | -0.0178010363430108 |  |
|----|----|---|---------|---------|----------------|-------|---------|---------------------|--|

AGIWUR2769;AGIWUR11806;AGIWUR34819

|    |    |   |         |         |                |         |         |                   |             |
|----|----|---|---------|---------|----------------|---------|---------|-------------------|-------------|
| N2 | HS | X | 7710170 | 7710716 | WBGene00019583 | K09F5.4 | K09F5.4 | 0.254900700145315 | AGIWUR25180 |
|----|----|---|---------|---------|----------------|---------|---------|-------------------|-------------|

|    |    |   |         |         |                |         |         |                     |  |
|----|----|---|---------|---------|----------------|---------|---------|---------------------|--|
| N2 | HS | X | 7719272 | 7725583 | WBGene00044698 | K09F5.6 | K09F5.6 | -0.0436078170300078 |  |
|----|----|---|---------|---------|----------------|---------|---------|---------------------|--|

AGIWUR5167;AGIWUR13606;AGIWUR14314;AGIWUR22242;AGIWUR39871

|    |    |   |         |         |                |        |         |                    |             |
|----|----|---|---------|---------|----------------|--------|---------|--------------------|-------------|
| N2 | HS | X | 7725955 | 7726383 | WBGene00004999 | spp-14 | K09F5.3 | -0.249406171798585 | AGIWUR11497 |
|----|----|---|---------|---------|----------------|--------|---------|--------------------|-------------|

|    |    |   |         |         |                |       |         |                    |             |
|----|----|---|---------|---------|----------------|-------|---------|--------------------|-------------|
| N2 | HS | X | 7727889 | 7733168 | WBGene00006925 | vit-1 | K09F5.2 | -0.323413022932268 | AGIWUR31944 |
|----|----|---|---------|---------|----------------|-------|---------|--------------------|-------------|

|    |    |   |         |         |                |        |         |                   |             |
|----|----|---|---------|---------|----------------|--------|---------|-------------------|-------------|
| N2 | HS | X | 7733334 | 7736271 | WBGene00019584 | set-12 | K09F5.5 | -0.10067731345144 | AGIWUR39637 |
|----|----|---|---------|---------|----------------|--------|---------|-------------------|-------------|

|    |    |   |         |         |                |         |         |                    |            |
|----|----|---|---------|---------|----------------|---------|---------|--------------------|------------|
| N2 | HS | X | 7739653 | 7741906 | WBGene00019582 | K09F5.1 | K09F5.1 | -0.112127825627828 | AGIWUR8592 |
|----|----|---|---------|---------|----------------|---------|---------|--------------------|------------|

|    |    |   |         |         |                |       |          |                    |  |
|----|----|---|---------|---------|----------------|-------|----------|--------------------|--|
| N2 | HS | X | 7744239 | 7750010 | WBGene00004335 | ref-2 | C47C12.3 | -0.166801833087614 |  |
|----|----|---|---------|---------|----------------|-------|----------|--------------------|--|

|                                                                                                                               |    |   |         |         |                |          |          |                     |             |
|-------------------------------------------------------------------------------------------------------------------------------|----|---|---------|---------|----------------|----------|----------|---------------------|-------------|
| AGIWUR12202;AGIWUR17761;AGIWUR31512;AGIWUR35474                                                                               |    |   |         |         |                |          |          |                     |             |
| N2                                                                                                                            | HS | X | 7754046 | 7754284 | WBGene00016736 | C47C12.2 | C47C12.2 | -0.0757705515195841 |             |
| AGIWUR14617                                                                                                                   |    |   |         |         |                |          |          |                     |             |
| N2                                                                                                                            | HS | X | 7763187 | 7774915 | WBGene00000950 | deg-1    | C47C12.6 | -0.210601619450732  |             |
| AGIWUR12770                                                                                                                   |    |   |         |         |                |          |          |                     |             |
| N2                                                                                                                            | HS | X | 7774859 | 7776689 | WBGene00003171 | mec-7    | ZK154.3  | -0.144878702347892  |             |
| AGIWUR35991;AGIWUR36555                                                                                                       |    |   |         |         |                |          |          |                     |             |
| N2                                                                                                                            | HS | X | 7777031 | 7782537 | WBGene00022666 | ZK154.4  | ZK154.4  | -0.10152670154668   | AGIWUR35005 |
| N2                                                                                                                            | HS | X | 7783190 | 7787966 | WBGene00022667 | ZK154.5  | ZK154.5  | -0.139690470384213  | AGIWUR30208 |
| N2                                                                                                                            | HS | X | 7790178 | 7793563 | WBGene00022668 | ZK154.6  | ZK154.6  | -0.10256553504472   |             |
| AGIWUR5581;AGIWUR6159;AGIWUR34648                                                                                             |    |   |         |         |                |          |          |                     |             |
| N2                                                                                                                            | HS | X | 7795046 | 7798287 | WBGene00000075 | adm-4    | ZK154.7  | 0.101684493731691   | AGIWUR20603 |
| N2                                                                                                                            | HS | X | 7798955 | 7799780 | WBGene00019846 | gpx-7    | R03G5.5  | 0.337979296841159   |             |
| AGIWUR17391;AGIWUR26627;AGIWUR31329;AGIWUR34737                                                                               |    |   |         |         |                |          |          |                     |             |
| N2                                                                                                                            | HS | X | 7800445 | 7805676 | WBGene00019845 | ir1d-13  | R03G5.3  | -0.0187573336341815 | AGIWUR27593 |
| N2                                                                                                                            | HS | X | 7805629 | 7809134 | WBGene00019847 | R03G5.6  | R03G5.6  | -0.0335043748738104 |             |
| AGIWUR39142;AGIWUR41155                                                                                                       |    |   |         |         |                |          |          |                     |             |
| N2                                                                                                                            | HS | X | 7816720 | 7821045 | WBGene00004758 | sek-1    | R03G5.2  | -0.0550204760709079 | AGIWUR29353 |
| N2                                                                                                                            | HS | X | 7823652 | 7825769 | WBGene00001169 | eef-1A.2 | R03G5.1  | -0.210071652702496  |             |
| AGIWUR8817;AGIWUR13058;AGIWUR15776;AGIWUR20915;AGIWUR23861;AGIWUR35550;AGIWUR38611;AGIWUR39303;AGIWUR41511                    |    |   |         |         |                |          |          |                     |             |
| N2                                                                                                                            | HS | X | 7827085 | 7834535 | WBGene00006310 | su1-3    | C54D2.4  | -0.0567928707400291 | AGIWUR45187 |
| N2                                                                                                                            | HS | X | 7838899 | 7839381 | WBGene00016916 | C54D2.2  | C54D2.2  | -0.0399396794812308 | AGIWUR18655 |
| N2                                                                                                                            | HS | X | 7842632 | 7845438 | WBGene00016915 | C54D2.1  | C54D2.1  | 0.259080296213426   | AGIWUR37793 |
| N2                                                                                                                            | HS | X | 7846190 | 7847460 | WBGene00045210 | C54D2.6  | C54D2.6  | 0.0498963276363993  |             |
| AGIWUR8415;AGIWUR15984                                                                                                        |    |   |         |         |                |          |          |                     |             |
| N2                                                                                                                            | HS | X | 7847682 | 7875954 | WBGene00000367 | cca-1    | C54D2.5  | 0.309197950363688   |             |
| AGIWUR13850;AGIWUR17664;AGIWUR22438;AGIWUR36286                                                                               |    |   |         |         |                |          |          |                     |             |
| N2                                                                                                                            | HS | X | 7879771 | 7880948 | WBGene00016535 | C39D10.8 | C39D10.8 |                     |             |
| -0.00314402528696789                                                                                                          |    |   |         |         |                |          |          |                     |             |
| AGIWUR154;AGIWUR858;AGIWUR1029;AGIWUR1163;AGIWUR17488;AGIWUR25598;AGIWUR25753;AGIWUR30213;AGIWUR39081;AGIWUR39426;AGIWUR44038 |    |   |         |         |                |          |          |                     |             |
| N2                                                                                                                            | HS | X | 7884288 | 7887479 | WBGene00016531 | C39D10.3 | C39D10.3 | 0.157151315210672   |             |
| AGIWUR11017                                                                                                                   |    |   |         |         |                |          |          |                     |             |
| N2                                                                                                                            | HS | X | 7889215 | 7889765 | WBGene00016530 | C39D10.2 | C39D10.2 | 0.0360435968289909  |             |
| AGIWUR927                                                                                                                     |    |   |         |         |                |          |          |                     |             |
| N2                                                                                                                            | HS | X | 7890410 | 7892396 | WBGene00016532 | C39D10.5 | C39D10.5 | 0.109444943804947   |             |
| AGIWUR25921                                                                                                                   |    |   |         |         |                |          |          |                     |             |
| N2                                                                                                                            | HS | X | 7896221 | 7897773 | WBGene00016533 | C39D10.6 | C39D10.6 | -0.0755660374590033 |             |
| AGIWUR42464                                                                                                                   |    |   |         |         |                |          |          |                     |             |

|                                                                                                                                 |    |   |         |         |                |           |           |                     |
|---------------------------------------------------------------------------------------------------------------------------------|----|---|---------|---------|----------------|-----------|-----------|---------------------|
| N2                                                                                                                              | HS | X | 7901631 | 7901990 | WBGene00016536 | C39D10.9  | C39D10.9  | -0.202589002818449  |
| AGIWUR40149                                                                                                                     |    |   |         |         |                |           |           |                     |
| N2                                                                                                                              | HS | X | 7903280 | 7905466 | WBGene00043983 | C39D10.11 | C39D10.11 | 0.0981046563475285  |
| AGIWUR42504;AGIWUR44558                                                                                                         |    |   |         |         |                |           |           |                     |
| N2                                                                                                                              | HS | X | 7906964 | 7907119 | WBGene00016529 | C39D10.1  | C39D10.1  | -0.0918224048886476 |
| AGIWUR8159                                                                                                                      |    |   |         |         |                |           |           |                     |
| N2                                                                                                                              | HS | X | 7907955 | 7913930 | WBGene00016534 | C39D10.7  | C39D10.7  | -0.0778229830005728 |
| AGIWUR28583                                                                                                                     |    |   |         |         |                |           |           |                     |
| N2                                                                                                                              | HS | X | 7925434 | 7926594 | WBGene00006981 | zig-4     | C09C7.1   | 0.193909739751504   |
| AGIWUR17450;AGIWUR19354;AGIWUR30211                                                                                             |    |   |         |         |                |           |           |                     |
| N2                                                                                                                              | HS | X | 7930738 | 7931808 | WBGene00006980 | zig-3     | C14F5.2   | 0.155767870209221   |
| AGIWUR2314                                                                                                                      |    |   |         |         |                |           |           |                     |
| N2                                                                                                                              | HS | X | 7937635 | 7945048 | WBGene00006588 | tnt-3     | C14F5.3   | -0.0195668377786902 |
| AGIWUR26799;AGIWUR31168;AGIWUR36095                                                                                             |    |   |         |         |                |           |           |                     |
| N2                                                                                                                              | HS | X | 7954355 | 7956211 | WBGene00015776 | dct-1     | C14F5.1   | 0.0902688540816072  |
| AGIWUR26731                                                                                                                     |    |   |         |         |                |           |           |                     |
| N2                                                                                                                              | HS | X | 7956196 | 7958303 | WBGene00015777 | sfxn-2    | C14F5.4   | 0.233532007553011   |
| AGIWUR21473                                                                                                                     |    |   |         |         |                |           |           |                     |
| N2                                                                                                                              | HS | X | 7959452 | 7961723 | WBGene00004774 | sem-5     | C14F5.5   | -0.0787408970192764 |
| AGIWUR1438                                                                                                                      |    |   |         |         |                |           |           |                     |
| N2                                                                                                                              | HS | X | 7976700 | 7980657 | WBGene00018466 | F45E1.5   | F45E1.5   | -0.0844979146976916 |
| AGIWUR29946                                                                                                                     |    |   |         |         |                |           |           |                     |
| N2                                                                                                                              | HS | X | 7981382 | 7982070 | WBGene00001945 | his-71    | F45E1.6   | 0.430955070103995   |
| AGIWUR28969                                                                                                                     |    |   |         |         |                |           |           |                     |
| N2                                                                                                                              | HS | X | 7985979 | 7988981 | WBGene00018465 | F45E1.4   | F45E1.4   | 0.208227331969252   |
| AGIWUR3201;AGIWUR6769                                                                                                           |    |   |         |         |                |           |           |                     |
| N2                                                                                                                              | HS | X | 7988931 | 7998229 | WBGene00018467 | sdpn-1    | F45E1.7   | -0.0516118969276    |
| AGIWUR28499                                                                                                                     |    |   |         |         |                |           |           |                     |
| N2                                                                                                                              | HS | X | 8003819 | 8009400 | WBGene00018462 | F45E1.1   | F45E1.1   | 0.0112245134776128  |
| AGIWUR39595                                                                                                                     |    |   |         |         |                |           |           |                     |
| N2                                                                                                                              | HS | X | 8014983 | 8026858 | WBGene00016407 | C34D10.2  | C34D10.2  |                     |
| 0.000956753206556193                                                                                                            |    |   |         |         |                |           |           |                     |
| AGIWUR1066;AGIWUR8041                                                                                                           |    |   |         |         |                |           |           |                     |
| N2                                                                                                                              | HS | X | 8029479 | 8031614 | WBGene00016406 | C34D10.1  | C34D10.1  | -0.135086190138157  |
| AGIWUR27238                                                                                                                     |    |   |         |         |                |           |           |                     |
| N2                                                                                                                              | HS | X | 8041327 | 8044409 | WBGene00006962 | xol-1     | C18A11.5  | 0.241520162837267   |
| AGIWUR19381;AGIWUR39183                                                                                                         |    |   |         |         |                |           |           |                     |
| N2                                                                                                                              | HS | X | 8045552 | 8047416 | WBGene00015950 | C18A11.4  | C18A11.4  | -0.129320222416422  |
| AGIWUR36837                                                                                                                     |    |   |         |         |                |           |           |                     |
| N2                                                                                                                              | HS | X | 8050476 | 8058220 | WBGene00001000 | dim-1     | C18A11.7  | -0.0740299551943231 |
| AGIWUR746;AGIWUR3893;AGIWUR6746;AGIWUR13907;AGIWUR14088;AGIWUR16775;AGIWUR17481;AGIWUR19007;AGIWUR35992;AGIWUR36156;AGIWUR36589 |    |   |         |         |                |           |           |                     |
| N2                                                                                                                              | HS | X | 8061123 | 8065688 | WBGene00015949 | C18A11.3  | C18A11.3  | -0.0700071907725821 |
| AGIWUR9153                                                                                                                      |    |   |         |         |                |           |           |                     |
| N2                                                                                                                              | HS | X | 8067568 | 8068095 | WBGene00015948 | C18A11.2  | C18A11.2  | -0.0637010319294813 |
| AGIWUR31132                                                                                                                     |    |   |         |         |                |           |           |                     |
| N2                                                                                                                              | HS | X | 8069328 | 8070289 | WBGene00015947 | C18A11.1  | C18A11.1  | 0.1003610909949     |
| AGIWUR22349;AGIWUR27090;AGIWUR37350;AGIWUR38997                                                                                 |    |   |         |         |                |           |           |                     |

|                                                                                    |    |   |         |         |                |          |          |                     |             |
|------------------------------------------------------------------------------------|----|---|---------|---------|----------------|----------|----------|---------------------|-------------|
| N2                                                                                 | HS | X | 8078063 | 8080256 | WBGene00016714 | C46F2.1  | C46F2.1  | 0.0599971240176416  | AGIWUR24718 |
| N2                                                                                 | HS | X | 8080869 | 8084018 | WBGene00019492 | K07E3.4  | K07E3.4  | 0.20732404337301    | AGIWUR28196 |
| N2                                                                                 | HS | X | 8084210 | 8086550 | WBGene00000929 | dao-3    | K07E3.3  | 0.239664472916406   | AGIWUR33499 |
| N2                                                                                 | HS | X | 8087554 | 8089427 | WBGene00006890 | vem-1    | K07E3.8  | 0.219052609562478   | AGIWUR5567  |
| N2                                                                                 | HS | X | 8089826 | 8098863 | WBGene00019493 | catp-5   | K07E3.7  | -0.2027310818341    | AGIWUR33219 |
| N2                                                                                 | HS | X | 8104305 | 8107557 | WBGene00019491 | K07E3.2  | K07E3.2  | 0.0814294992076734  |             |
| AGIWUR4890;AGIWUR34188                                                             |    |   |         |         |                |          |          |                     |             |
| N2                                                                                 | HS | X | 8110449 | 8114762 | WBGene00019490 | K07E3.1  | K07E3.1  | -0.30466321560047   | AGIWUR34231 |
| N2                                                                                 | HS | X | 8116636 | 8120133 | WBGene00001953 | h1h-8    | C02B8.4  | -0.0486679040229028 | AGIWUR37979 |
| N2                                                                                 | HS | X | 8120410 | 8123220 | WBGene00219375 | C02B8.12 | C02B8.12 | -0.112518057441891  |             |
| AGIWUR39796                                                                        |    |   |         |         |                |          |          |                     |             |
| N2                                                                                 | HS | X | 8133155 | 8136326 | WBGene00015324 | C02B8.6  | C02B8.6  | 0.0353571357837312  |             |
| AGIWUR5064;AGIWUR14981;AGIWUR16481;AGIWUR17832;AGIWUR30095;AGIWUR30413;AGIWUR42682 |    |   |         |         |                |          |          |                     |             |
| N2                                                                                 | HS | X | 8137721 | 8137879 | WBGene00015325 | C02B8.7  | C02B8.7  | -0.217182498773985  | AGIWUR31418 |
| N2                                                                                 | HS | X | 8139446 | 8140243 | WBGene00015322 | C02B8.3  | C02B8.3  | -0.173076542003956  |             |
| AGIWUR2189;AGIWUR25989                                                             |    |   |         |         |                |          |          |                     |             |
| N2                                                                                 | HS | X | 8147710 | 8148588 | WBGene00015320 | C02B8.1  | C02B8.1  | 0.299756424501666   | AGIWUR14484 |
| N2                                                                                 | HS | X | 8149563 | 8150716 | WBGene00017714 | F22F1.2  | F22F1.2  | -0.121750070985719  | AGIWUR41354 |
| N2                                                                                 | HS | X | 8159153 | 8160084 | WBGene00001854 | hil-3    | F22F1.1  | 0.234371862980467   | AGIWUR7999  |
| N2                                                                                 | HS | X | 8161839 | 8163073 | WBGene00017715 | F22F1.3  | F22F1.3  | 0.183662686638153   | AGIWUR24544 |
| N2                                                                                 | HS | X | 8169930 | 8172913 | WBGene00015922 | C17H11.2 | C17H11.2 | -0.0574478859288536 |             |
| AGIWUR41888                                                                        |    |   |         |         |                |          |          |                     |             |
| N2                                                                                 | HS | X | 8173910 | 8180865 | WBGene00015921 | C17H11.1 | C17H11.1 | 0.117041392796806   |             |
| AGIWUR43707                                                                        |    |   |         |         |                |          |          |                     |             |
| N2                                                                                 | HS | X | 8181031 | 8181640 | WBGene00015924 | C17H11.4 | C17H11.4 | 0.0381035369675349  |             |
| AGIWUR23254                                                                        |    |   |         |         |                |          |          |                     |             |
| N2                                                                                 | HS | X | 8183008 | 8185133 | WBGene00015925 | C17H11.5 | C17H11.5 | 0.0126772672304138  |             |
| AGIWUR38063                                                                        |    |   |         |         |                |          |          |                     |             |
| N2                                                                                 | HS | X | 8185175 | 8203784 | WBGene00015926 | C17H11.6 | C17H11.6 | -0.0585165257552696 |             |
| AGIWUR8111;AGIWUR29624;AGIWUR40357                                                 |    |   |         |         |                |          |          |                     |             |
| N2                                                                                 | HS | X | 8208748 | 8211149 | WBGene00000391 | cdd-1    | C47D2.2  | -0.0743636114688044 | AGIWUR13118 |
| N2                                                                                 | HS | X | 8215050 | 8215668 | WBGene00016738 | C47D2.1  | C47D2.1  | -0.392711652239406  | AGIWUR12024 |
| N2                                                                                 | HS | X | 8219728 | 8220064 | WBGene00019292 | K02A6.1  | K02A6.1  | -0.0569696527480597 | AGIWUR628   |
| N2                                                                                 | HS | X | 8224391 | 8224902 | WBGene00019293 | K02A6.2  | K02A6.2  | -0.137155284470804  | AGIWUR21360 |
| N2                                                                                 | HS | X | 8228068 | 8231934 | WBGene00019294 | K02A6.3  | K02A6.3  | 0.0549204433030148  | AGIWUR36272 |
| N2                                                                                 | HS | X | 8232254 | 8236316 | WBGene00019780 | M60.4    | M60.4    | -0.227534505008954  | AGIWUR8759  |
| N2                                                                                 | HS | X | 8242056 | 8247869 | WBGene00019779 | endu-2   | M60.2    | -0.197417021383053  | AGIWUR28695 |
| N2                                                                                 | HS | X | 8248207 | 8252458 | WBGene00019781 | M60.6    | M60.6    | 0.139754243986632   |             |
| AGIWUR6639;AGIWUR20670;AGIWUR39957                                                 |    |   |         |         |                |          |          |                     |             |

|                                     |    |   |         |         |                |          |           |                     |                     |
|-------------------------------------|----|---|---------|---------|----------------|----------|-----------|---------------------|---------------------|
| N2                                  | HS | X | 8258149 | 8261175 | WBGene00019782 | M60.7    | M60.7     | -0.0792399013037457 | AGIWUR16017         |
| N2                                  | HS | X | 8262421 | 8271021 | WBGene00017421 | cutl-29  | F13B9.6   | -0.0605406570718685 | AGIWUR18221         |
| N2                                  | HS | X | 8275158 | 8283301 | WBGene00002239 | ksr-1    | F13B9.5   | 0.0977810475542711  | AGIWUR15566         |
| N2                                  | HS | X | 8283282 | 8285219 | WBGene00001425 | fis-2    | F13B9.8   | 0.00420585069436363 | AGIWUR29120         |
| N2                                  | HS | X | 8285683 | 8286785 | WBGene00017420 | F13B9.2  | F13B9.2   | 0.425398423484456   | AGIWUR31567         |
| N2                                  | HS | X | 8287261 | 8294514 | WBGene00017419 | F13B9.1  | F13B9.1   | -0.449199818395904  | AGIWUR13018         |
| N2                                  | HS | X | 8294625 | 8296675 | WBGene00019987 | R09F10.3 |           | R09F10.3            | -0.0213734436496953 |
| AGIWUR23087                         |    |   |         |         |                |          |           |                     |                     |
| N2                                  | HS | X | 8299119 | 8299654 | WBGene00000427 | ced-13   | R09F10.9  |                     | 0.0197499978122009  |
| AGIWUR36309                         |    |   |         |         |                |          |           |                     |                     |
| N2                                  | HS | X | 8300030 | 8302395 | WBGene00002127 | inx-5    | R09F10.4  |                     | -0.138904201605651  |
| AGIWUR8644;AGIWUR33230              |    |   |         |         |                |          |           |                     |                     |
| N2                                  | HS | X | 8306225 | 8307700 | WBGene00019988 | R09F10.5 |           | R09F10.5            | 0.310813005687844   |
| AGIWUR18056                         |    |   |         |         |                |          |           |                     |                     |
| N2                                  | HS | X | 8313128 | 8314267 | WBGene00005239 | srh-13   | R09F10.10 |                     | -0.111833745787949  |
| AGIWUR6738                          |    |   |         |         |                |          |           |                     |                     |
| N2                                  | HS | X | 8315524 | 8316278 | WBGene00005238 | srh-12   | R09F10.11 |                     | -0.0358659991363126 |
| AGIWUR16767;AGIWUR22171;AGIWUR31297 |    |   |         |         |                |          |           |                     |                     |
| N2                                  | HS | X | 8317637 | 8319050 | WBGene00005237 | srh-11   | R09F10.6  |                     | -0.0219386748449466 |
| AGIWUR29614                         |    |   |         |         |                |          |           |                     |                     |
| N2                                  | HS | X | 8323592 | 8325046 | WBGene00019986 | R09F10.1 |           | R09F10.1            | -0.135908029127782  |
| AGIWUR41725                         |    |   |         |         |                |          |           |                     |                     |
| N2                                  | HS | X | 8325099 | 8326451 | WBGene00019989 | R09F10.8 |           | R09F10.8            | 0.06870864665437    |
| AGIWUR24471                         |    |   |         |         |                |          |           |                     |                     |
| N2                                  | HS | X | 8327559 | 8327900 | WBGene00018883 | F55E10.4 |           | F55E10.4            | -0.0902098480091853 |
| AGIWUR32061                         |    |   |         |         |                |          |           |                     |                     |
| N2                                  | HS | X | 8333247 | 8337948 | WBGene00018884 | F55E10.5 |           | F55E10.5            | -0.0127785199270445 |
| AGIWUR28678                         |    |   |         |         |                |          |           |                     |                     |
| N2                                  | HS | X | 8340693 | 8340986 | WBGene00018882 | F55E10.2 |           | F55E10.2            | 0.0260819805288302  |
| AGIWUR19603                         |    |   |         |         |                |          |           |                     |                     |
| N2                                  | HS | X | 8341975 | 8342286 | WBGene00018881 | F55E10.1 |           | F55E10.1            | 0.116857195421884   |
| AGIWUR4035                          |    |   |         |         |                |          |           |                     |                     |
| N2                                  | HS | X | 8344700 | 8346408 | WBGene00018885 | dnd-5    | F55E10.6  |                     | 0.432167019632592   |
| AGIWUR1745                          |    |   |         |         |                |          |           |                     |                     |
| N2                                  | HS | X | 8348537 | 8351059 | WBGene00018886 | npr-28   | F55E10.7  |                     | -0.0314145492687672 |
| AGIWUR20796                         |    |   |         |         |                |          |           |                     |                     |
| N2                                  | HS | X | 8368534 | 8371609 | WBGene00018226 | F40B5.2  | F40B5.2   | 0.318385185026624   | AGIWUR10274         |
| N2                                  | HS | X | 8372206 | 8374474 | WBGene00018227 | nep-15   | F40B5.3   | 0.302941231857822   | AGIWUR17266         |
| N2                                  | HS | X | 8375288 | 8377304 | WBGene00018225 | nep-14   | F40B5.1   | -0.089518318050767  | AGIWUR37444         |

|                                                                                                                       |    |   |         |         |                |          |          |                     |             |
|-----------------------------------------------------------------------------------------------------------------------|----|---|---------|---------|----------------|----------|----------|---------------------|-------------|
| N2                                                                                                                    | HS | X | 8378557 | 8382700 | WBGene00018281 | tbc-18   | F41D9.1  | 0.247310110501653   | AGIWUR38939 |
| N2                                                                                                                    | HS | X | 8382706 | 8384945 | WBGene00018282 | F41D9.2  | F41D9.2  | -0.0878374814987364 | AGIWUR19133 |
| N2                                                                                                                    | HS | X | 8387448 | 8392584 | WBGene00006942 | wrk-1    | F41D9.3  | 0.0696529443574541  |             |
| AGIWUR156;AGIWUR6021;AGIWUR13188;AGIWUR13370;AGIWUR19239;AGIWUR28819;AGIWUR37022;AGIWUR41612;AGIWUR41671              |    |   |         |         |                |          |          |                     |             |
| N2                                                                                                                    | HS | X | 8403539 | 8408367 | WBGene00018283 | sulp-3   | F41D9.5  | 0.102137104040531   | AGIWUR24297 |
| N2                                                                                                                    | HS | X | 8411698 | 8414195 | WBGene00017258 | F08F1.4  | F08F1.4  | 0.194854486411668   |             |
| AGIWUR4950;AGIWUR6123;AGIWUR12253;AGIWUR14710;AGIWUR15054;AGIWUR17264;AGIWUR18514;AGIWUR30864;AGIWUR43115;AGIWUR45009 |    |   |         |         |                |          |          |                     |             |
| N2                                                                                                                    | HS | X | 8417424 | 8418524 | WBGene00004998 | spp-13   | F08F1.6  | 0.431535089450369   | AGIWUR2104  |
| N2                                                                                                                    | HS | X | 8418646 | 8422055 | WBGene00006472 | tag-123  | F08F1.7  | 0.00911849061342762 |             |
| AGIWUR752;AGIWUR6564;AGIWUR12444;AGIWUR28314;AGIWUR34981;AGIWUR40903                                                  |    |   |         |         |                |          |          |                     |             |
| N2                                                                                                                    | HS | X | 8422480 | 8423731 | WBGene00006649 | tth-1    | F08F1.8  | 0.155516924046159   | AGIWUR37804 |
| N2                                                                                                                    | HS | X | 8432663 | 8437346 | WBGene00002195 | kin-9    | F08F1.1  | -0.112022159931497  | AGIWUR36818 |
| N2                                                                                                                    | HS | X | 8440192 | 8450417 | WBGene00017513 | F16F9.1  | F16F9.1  | -0.0339547883142153 | AGIWUR30468 |
| N2                                                                                                                    | HS | X | 8450381 | 8455640 | WBGene00001068 | dpy-6    | F16F9.2  | -0.0729459169660505 | AGIWUR35261 |
| N2                                                                                                                    | HS | X | 8457614 | 8459734 | WBGene00017514 | F16F9.3  | F16F9.3  | 0.0456878812092771  | AGIWUR14547 |
| N2                                                                                                                    | HS | X | 8459821 | 8463360 | WBGene00017515 | F16F9.4  | F16F9.4  | 0.285105026543425   | AGIWUR23854 |
| N2                                                                                                                    | HS | X | 8465832 | 8470256 | WBGene00003174 | mec-10   | F16F9.5  | 0.0209090554578371  | AGIWUR42070 |
| N2                                                                                                                    | HS | X | 8473723 | 8476176 | WBGene00003613 | nhr-14   | T01B10.4 | 0.03277445027787    |             |
| AGIWUR1892;AGIWUR2548;AGIWUR14751;AGIWUR15964;AGIWUR19124                                                             |    |   |         |         |                |          |          |                     |             |
| N2                                                                                                                    | HS | X | 8495322 | 8498062 | WBGene00020137 | T01B10.5 | T01B10.5 | -0.151997548113865  |             |
| AGIWUR41525                                                                                                           |    |   |         |         |                |          |          |                     |             |
| N2                                                                                                                    | HS | X | 8499664 | 8501037 | WBGene00001703 | grd-14   | T01B10.2 | 0.055430753263586   |             |
| AGIWUR39755                                                                                                           |    |   |         |         |                |          |          |                     |             |
| N2                                                                                                                    | HS | X | 8501245 | 8502289 | WBGene00001693 | grd-4    | T01B10.1 | 0.126123329032794   |             |
| AGIWUR5512                                                                                                            |    |   |         |         |                |          |          |                     |             |
| N2                                                                                                                    | HS | X | 8507876 | 8514126 | WBGene00019148 | H03E18.1 | H03E18.1 | 0.221008861471535   |             |
| AGIWUR37696                                                                                                           |    |   |         |         |                |          |          |                     |             |
| N2                                                                                                                    | HS | X | 8514088 | 8517830 | WBGene00019149 | H03E18.2 | H03E18.2 | 0.124813774444592   |             |
| AGIWUR17740                                                                                                           |    |   |         |         |                |          |          |                     |             |
| N2                                                                                                                    | HS | X | 8528250 | 8531033 | WBGene00001448 | flp-5    | C03G5.7  | -0.0674032513152802 |             |
| AGIWUR1829;AGIWUR34234                                                                                                |    |   |         |         |                |          |          |                     |             |
| N2                                                                                                                    | HS | X | 8542867 | 8546021 | WBGene00015391 | sdha-1   | C03G5.1  | -0.199765294885075  |             |
| AGIWUR270;AGIWUR5327;AGIWUR26113;AGIWUR26614;AGIWUR30788                                                              |    |   |         |         |                |          |          |                     |             |
| N2                                                                                                                    | HS | X | 8546451 | 8549056 | WBGene00017048 | D2021.4  | D2021.4  | 0.112952266769732   |             |
| AGIWUR6248;AGIWUR11716;AGIWUR20806                                                                                    |    |   |         |         |                |          |          |                     |             |
| N2                                                                                                                    | HS | X | 8552261 | 8556351 | WBGene00044071 | dhhc-14  | D2021.2  | 0.00232155111017285 |             |
| AGIWUR2179;AGIWUR13670;AGIWUR28378;AGIWUR41196                                                                        |    |   |         |         |                |          |          |                     |             |
| N2                                                                                                                    | HS | X | 8557151 | 8563235 | WBGene00017046 | utx-1    | D2021.1  | -0.0788690813361583 |             |



AGIWUR4714;AGIWUR5935;AGIWUR18865;AGIWUR22140;AGIWUR25209;AGIWUR25406;AGIWUR35006  
N2 HS X 8571049 8575451 WBGene00017571 jmj-d-3.1 F18E9.5 -0.0166033995081172  
AGIWUR38593  
N2 HS X 8578585 8580104 WBGene00044780 F18E9.8 F18E9.8 0.00743228897792214  
AGIWUR1800;AGIWUR4650;AGIWUR9990  
N2 HS X 8580656 8583537 WBGene00017570 F18E9.4 F18E9.4 0.182947064041365  
AGIWUR12635;AGIWUR15548;AGIWUR40652  
N2 HS X 8586147 8590290 WBGene00017569 F18E9.3 F18E9.3 -0.123821154038193 AGIWUR42934  
N2 HS X 8593187 8593974 WBGene00003745 nlp-7 F18E9.2 -0.127274788939655 AGIWUR44693  
N2 HS X 8595152 8597747 WBGene00017573 F18E9.7 F18E9.7 0.109219905495889 AGIWUR25588  
N2 HS X 8601535 8602366 WBGene00017568 F18E9.1 F18E9.1 -0.282559129831163 AGIWUR9199  
N2 HS X 8607174 8607753 WBGene00019265 H35N09.1 H35N09.1 -0.039590319883744  
AGIWUR40490  
N2 HS X 8618418 8619756 WBGene00019286 K01A12.2 K01A12.2 0.0649196403918717  
AGIWUR2797;AGIWUR18038;AGIWUR23292;AGIWUR32547;AGIWUR36214  
N2 HS X 8620570 8625240 WBGene00019287 K01A12.3 K01A12.3 0.00940022631821691  
AGIWUR16423;AGIWUR36181;AGIWUR38635  
N2 HS X 8639389 8643431 WBGene00017400 stg-2 F12D9.1 0.0235461509082064 AGIWUR31307  
N2 HS X 8646606 8647097 WBGene00017401 F12D9.2 F12D9.2 -0.132067010198821 AGIWUR2405  
N2 HS X 8660619 8671753 WBGene00004369 rig-1 K09E2.4 0.0507195492411459  
AGIWUR23760;AGIWUR27489;AGIWUR32360  
N2 HS X 8673060 8681653 WBGene00019571 K09E2.2 K09E2.2 -0.0237909539296757 AGIWUR36350  
N2 HS X 8681910 8686146 WBGene00019570 K09E2.1 K09E2.1 -0.0999261236865285  
AGIWUR13311;AGIWUR34731;AGIWUR43898  
N2 HS X 8697817 8702822 WBGene00018728 frpr-8 F53A9.5 0.0293589035801571  
AGIWUR1563;AGIWUR37929  
N2 HS X 8704309 8707197 WBGene00018727 jbt-14 F53A9.4 -0.542763209080548 AGIWUR39170  
N2 HS X 8708365 8709370 WBGene00018726 F53A9.3 F53A9.3 0.192357417294685 AGIWUR22905  
N2 HS X 8709764 8710137 WBGene00018725 kreg-1 F53A9.2 0.334051889836346  
AGIWUR5464;AGIWUR7328;AGIWUR7798;AGIWUR15741;AGIWUR20454;AGIWUR30988  
N2 HS X 8711590 8711911 WBGene00018724 F53A9.1 F53A9.1 0.0549122982301267  
AGIWUR32378;AGIWUR38157  
N2 HS X 8713461 8713952 WBGene00018729 F53A9.6 F53A9.6 0.00183492598294777 AGIWUR26199  
N2 HS X 8716532 8716929 WBGene00018730 F53A9.7 F53A9.7 -0.00219715984214908 AGIWUR11432  
N2 HS X 8718567 8718905 WBGene00018731 F53A9.8 F53A9.8 0.1012516222047 AGIWUR35395  
N2 HS X 8720226 8720758 WBGene00018732 F53A9.9 F53A9.9 -0.355061634620631 AGIWUR40805  
N2 HS X 8721557 8723552 WBGene00006587 tnt-2 F53A9.10 -0.13565895275052  
AGIWUR10214;AGIWUR15235;AGIWUR16730;AGIWUR22902;AGIWUR39188;AGIWUR39856;AGIWUR41250  
N2 HS X 8726798 8727406 WBGene00017149 EGAP4.1 EGAP4.1 -0.299756164827636 AGIWUR37219

|                                                                       |    |   |         |         |                |          |          |                     |             |
|-----------------------------------------------------------------------|----|---|---------|---------|----------------|----------|----------|---------------------|-------------|
| N2                                                                    | HS | X | 8731310 | 8731922 | WBGene00019732 | M02D8.6  | M02D8.6  | -0.0436863979481643 | AGIWUR42632 |
| N2                                                                    | HS | X | 8732958 | 8737015 | WBGene00019729 | M02D8.3  | M02D8.3  | -0.114355616550961  | AGIWUR43043 |
| N2                                                                    | HS | X | 8739048 | 8740171 | WBGene00019728 | M02D8.2  | M02D8.2  | -0.0210960407596996 |             |
| AGIWUR13616;AGIWUR23732;AGIWUR26248;AGIWUR30537;AGIWUR39903           |    |   |         |         |                |          |          |                     |             |
| N2                                                                    | HS | X | 8740789 | 8743057 | WBGene00044313 | M02D8.7  | M02D8.7  | -0.0538574910980651 |             |
| AGIWUR5408;AGIWUR35449                                                |    |   |         |         |                |          |          |                     |             |
| N2                                                                    | HS | X | 8748434 | 8750969 | WBGene00019730 | asns-2   | M02D8.4  | 0.204707091717802   |             |
| AGIWUR19162;AGIWUR20337;AGIWUR21929;AGIWUR23261                       |    |   |         |         |                |          |          |                     |             |
| N2                                                                    | HS | X | 8754576 | 8761580 | WBGene00019731 | M02D8.5  | M02D8.5  | 0.166764374426192   | AGIWUR16000 |
| N2                                                                    | HS | X | 8763907 | 8766280 | WBGene00019727 | zig-12   | M02D8.1  | 0.118893720776558   | AGIWUR26789 |
| N2                                                                    | HS | X | 8778847 | 8784441 | WBGene00022811 | ZK721.4  | ZK721.4  | -0.149822205097495  | AGIWUR21245 |
| N2                                                                    | HS | X | 8784534 | 8787072 | WBGene00022810 | ZK721.3  | ZK721.3  | 0.189422163997376   | AGIWUR959   |
| N2                                                                    | HS | X | 8789456 | 8790621 | WBGene00006764 | unc-27   | ZK721.2  | -0.133059491917388  |             |
| AGIWUR8777;AGIWUR17569                                                |    |   |         |         |                |          |          |                     |             |
| N2                                                                    | HS | X | 8792160 | 8796110 | WBGene00006477 | chup-1   | ZK721.1  | -0.0724909723418898 |             |
| AGIWUR29227;AGIWUR32479                                               |    |   |         |         |                |          |          |                     |             |
| N2                                                                    | HS | X | 8796545 | 8797835 | WBGene00019870 | R04E5.7  | R04E5.7  | -0.0111209329597699 |             |
| AGIWUR14421;AGIWUR36332;AGIWUR37318;AGIWUR40252;AGIWUR40895           |    |   |         |         |                |          |          |                     |             |
| N2                                                                    | HS | X | 8801624 | 8806113 | WBGene00019871 | R04E5.8  | R04E5.8  | -0.0513369743960221 |             |
| AGIWUR27571;AGIWUR40800                                               |    |   |         |         |                |          |          |                     |             |
| N2                                                                    | HS | X | 8806174 | 8811142 | WBGene00019872 | R04E5.9  | R04E5.9  | -0.0851531668559162 |             |
| AGIWUR7613;AGIWUR8776;AGIWUR11944;AGIWUR16588;AGIWUR24497;AGIWUR37816 |    |   |         |         |                |          |          |                     |             |
| N2                                                                    | HS | X | 8812143 | 8816805 | WBGene00019869 | cnm-2    | R04E5.2  | 0.238432406546147   | AGIWUR22058 |
| N2                                                                    | HS | X | 8820703 | 8824448 | WBGene00002057 | ifd-1    | R04E5.10 | 0.0715336092689798  |             |
| AGIWUR7275;AGIWUR21127                                                |    |   |         |         |                |          |          |                     |             |
| N2                                                                    | HS | X | 8826627 | 8828540 | WBGene00016190 | C28G1.5  | C28G1.5  | 0.250112426356271   |             |
| AGIWUR27051;AGIWUR43751                                               |    |   |         |         |                |          |          |                     |             |
| N2                                                                    | HS | X | 8829920 | 8831262 | WBGene00016191 | C28G1.6  | C28G1.6  | 0.111970217348532   | AGIWUR24667 |
| N2                                                                    | HS | X | 8831739 | 8835715 | WBGene00016188 | sec-15   | C28G1.3  | 0.0183641757681126  |             |
| AGIWUR2654;AGIWUR4425                                                 |    |   |         |         |                |          |          |                     |             |
| N2                                                                    | HS | X | 8836644 | 8837661 | WBGene00016187 | C28G1.2  | C28G1.2  | -0.177750582105674  |             |
| AGIWUR6456;AGIWUR30481                                                |    |   |         |         |                |          |          |                     |             |
| N2                                                                    | HS | X | 8847122 | 8848482 | WBGene00219376 | C28G1.10 | C28G1.10 | -0.0228426525749192 |             |
| AGIWUR42745                                                           |    |   |         |         |                |          |          |                     |             |
| N2                                                                    | HS | X | 8849137 | 8853621 | WBGene00016189 | C28G1.4  | C28G1.4  | -0.234316265622249  | AGIWUR32459 |
| N2                                                                    | HS | X | 8857056 | 8857954 | WBGene00015529 | C06E2.5  | C06E2.5  | 0.0765751240187136  | AGIWUR40648 |
| N2                                                                    | HS | X | 8861258 | 8861650 | WBGene00044579 | C06E2.9  | C06E2.9  | 0.140605187527401   |             |
| AGIWUR7776;AGIWUR8306;AGIWUR12019;AGIWUR20105;AGIWUR24625             |    |   |         |         |                |          |          |                     |             |
| N2                                                                    | HS | X | 8866238 | 8866640 | WBGene00002092 | ins-9    | C06E2.8  | 0.2184425609366     |             |

|                                                                        |    |   |         |         |                |         |         |                      |             |
|------------------------------------------------------------------------|----|---|---------|---------|----------------|---------|---------|----------------------|-------------|
| AGIWUR17847;AGIWUR18385;AGIWUR22537;AGIWUR26370;AGIWUR28244            |    |   |         |         |                |         |         |                      |             |
| N2                                                                     | HS | X | 8867603 | 8869153 | WBGene00006717 | ubc-22  | C06E2.7 | -0.128564006968619   | AGIWUR8878  |
| N2                                                                     | HS | X | 8869625 | 8871901 | WBGene00006716 | ubc-21  | C06E2.3 | 0.0427467263859187   |             |
| AGIWUR2345;AGIWUR14287;AGIWUR40115                                     |    |   |         |         |                |         |         |                      |             |
| N2                                                                     | HS | X | 8872933 | 8874848 | WBGene00015527 | C06E2.1 | C06E2.1 | 0.272888393408804    | AGIWUR42187 |
| N2                                                                     | HS | X | 8879649 | 8880406 | WBGene00015528 | C06E2.2 | C06E2.2 | 0.0056860850124929   | AGIWUR44949 |
| N2                                                                     | HS | X | 8893129 | 8898517 | WBGene00015740 | C13E3.1 | C13E3.1 | 0.210501519410147    | AGIWUR22911 |
| N2                                                                     | HS | X | 8908050 | 8910837 | WBGene00017013 | ensh-1  | D1009.3 | 0.0253212478086082   | AGIWUR6361  |
| N2                                                                     | HS | X | 8911293 | 8914261 | WBGene00000884 | cyn-8   | D1009.2 | -0.190085942048905   |             |
| AGIWUR7443;AGIWUR10061;AGIWUR35701;AGIWUR36094;AGIWUR39431;AGIWUR39528 |    |   |         |         |                |         |         |                      |             |
| N2                                                                     | HS | X | 8917421 | 8919423 | WBGene00003752 | nlp-14  | D1009.4 | -0.107936604110229   | AGIWUR2900  |
| N2                                                                     | HS | X | 8931241 | 8939263 | WBGene00017012 | acs-22  | D1009.1 | 0.159850736837972    |             |
| AGIWUR4766;AGIWUR6135;AGIWUR9124;AGIWUR27367;AGIWUR32376               |    |   |         |         |                |         |         |                      |             |
| N2                                                                     | HS | X | 8939389 | 8940143 | WBGene00017014 | dylt-2  | D1009.5 | 0.124625738132076    | AGIWUR21964 |
| N2                                                                     | HS | X | 8941139 | 8950978 | WBGene00017039 | trk-1   | D1073.1 | 0.0528582703010794   |             |
| AGIWUR14010;AGIWUR16072;AGIWUR30714;AGIWUR32171                        |    |   |         |         |                |         |         |                      |             |
| N2                                                                     | HS | X | 8957616 | 8961170 | WBGene00016748 | aexr-3  | C48C5.3 | 0.0381437658226327   | AGIWUR21382 |
| N2                                                                     | HS | X | 8980976 | 8985063 | WBGene00016747 | nmur-1  | C48C5.1 | -0.135237132408106   |             |
| AGIWUR14619;AGIWUR16262;AGIWUR27846                                    |    |   |         |         |                |         |         |                      |             |
| N2                                                                     | HS | X | 8988137 | 8991972 | WBGene00006672 | twk-18  | C24A3.6 | 0.169952239560493    | AGIWUR6794  |
| N2                                                                     | HS | X | 8992406 | 8994763 | WBGene00016034 | C24A3.4 | C24A3.4 | 0.0358601858135499   |             |
| AGIWUR3347;AGIWUR9135;AGIWUR17732;AGIWUR32265;AGIWUR35548;AGIWUR41716  |    |   |         |         |                |         |         |                      |             |
| N2                                                                     | HS | X | 8997479 | 8998909 | WBGene00016033 | C24A3.2 | C24A3.2 | -0.0369153622961242  |             |
| AGIWUR13952;AGIWUR26014;AGIWUR28903                                    |    |   |         |         |                |         |         |                      |             |
| N2                                                                     | HS | X | 9001239 | 9006053 | WBGene00016032 | C24A3.1 | C24A3.1 | -0.00735400800231911 |             |
| AGIWUR17679;AGIWUR40654                                                |    |   |         |         |                |         |         |                      |             |
| N2                                                                     | HS | X | 9009780 | 9010457 | WBGene00044580 | C24A3.9 | C24A3.9 | -0.0262612871078352  |             |
| AGIWUR12458;AGIWUR20948;AGIWUR35053;AGIWUR43393                        |    |   |         |         |                |         |         |                      |             |
| N2                                                                     | HS | X | 9015773 | 9016799 | WBGene00020790 | T25B6.4 | T25B6.4 | 0.096216721766976    | AGIWUR26573 |
| N2                                                                     | HS | X | 9020588 | 9021755 | WBGene00020791 | T25B6.5 | T25B6.5 | -0.00559731185409618 | AGIWUR13577 |
| N2                                                                     | HS | X | 9021922 | 9022833 | WBGene00020792 | T25B6.6 | T25B6.6 | 0.220694538364617    | AGIWUR27292 |
| N2                                                                     | HS | X | 9027604 | 9028285 | WBGene00020789 | T25B6.3 | T25B6.3 | 0.00752440919492603  | AGIWUR28443 |
| N2                                                                     | HS | X | 9029478 | 9033955 | WBGene00004911 | snf-12  | T25B6.7 | -0.27486270268369    | AGIWUR10581 |
| N2                                                                     | HS | X | 9034554 | 9038547 | WBGene00020788 | nep-22  | T25B6.2 | -0.0378936313703973  |             |
| AGIWUR30322;AGIWUR36231                                                |    |   |         |         |                |         |         |                      |             |
| N2                                                                     | HS | X | 9040416 | 9041058 | WBGene00020787 | T25B6.1 | T25B6.1 | -0.192045953061341   | AGIWUR13768 |
| N2                                                                     | HS | X | 9046213 | 9054885 | WBGene00018567 | F47E1.3 | F47E1.3 | 0.106248899204616    | AGIWUR11460 |
| N2                                                                     | HS | X | 9057652 | 9061860 | WBGene00018566 | F47E1.2 | F47E1.2 | 0.0247646738861138   |             |
| AGIWUR23020;AGIWUR28657;AGIWUR33267;AGIWUR44410                        |    |   |         |         |                |         |         |                      |             |

|                                                                                                                                |    |   |         |         |                |           |           |                      |             |
|--------------------------------------------------------------------------------------------------------------------------------|----|---|---------|---------|----------------|-----------|-----------|----------------------|-------------|
| N2                                                                                                                             | HS | X | 9062834 | 9066591 | WBGene00018568 | F47E1.4   | F47E1.4   | 0.240744053384947    | AGIWUR17318 |
| N2                                                                                                                             | HS | X | 9073800 | 9077724 | WBGene00018565 | F47E1.1   | F47E1.1   | 0.126115261441524    | AGIWUR3858  |
| N2                                                                                                                             | HS | X | 9078945 | 9113613 | WBGene00000100 | ajm-1     | C25A11.4  | 0.000472603927000215 |             |
| AGIWUR1659;AGIWUR2586;AGIWUR3751;AGIWUR5431;AGIWUR5755;AGIWUR10369;AGIWUR18886;AGIWUR19046;AGIWUR28888;AGIWUR42397;AGIWUR43790 |    |   |         |         |                |           |           |                      |             |
| N2                                                                                                                             | HS | X | 9114368 | 9116891 | WBGene00016087 | C25A11.2  | C25A11.2  | -0.213836624974221   |             |
| AGIWUR42121                                                                                                                    |    |   |         |         |                |           |           |                      |             |
| N2                                                                                                                             | HS | X | 9119774 | 9121687 | WBGene00016086 | C25A11.1  | C25A11.1  | -0.0703200834956998  |             |
| AGIWUR3468;AGIWUR28257;AGIWUR32811                                                                                             |    |   |         |         |                |           |           |                      |             |
| N2                                                                                                                             | HS | X | 9121884 | 9123505 | WBGene00219374 | C25A11.10 | C25A11.10 |                      |             |
| -0.00813385100472086 AGIWUR17757;AGIWUR19421;AGIWUR20739;AGIWUR22486                                                           |    |   |         |         |                |           |           |                      |             |
| N2                                                                                                                             | HS | X | 9137927 | 9145656 | WBGene00015263 | B0563.6   | B0563.6   | 0.00973479710529723  |             |
| AGIWUR6329;AGIWUR10984;AGIWUR13642;AGIWUR15404;AGIWUR20913;AGIWUR21716;AGIWUR24233;AGIWUR38920;AGIWUR40946                     |    |   |         |         |                |           |           |                      |             |
| N2                                                                                                                             | HS | X | 9146174 | 9147526 | WBGene00015262 | B0563.5   | B0563.5   | 0.127325009416795    |             |
| AGIWUR16724;AGIWUR26839;AGIWUR28523;AGIWUR29996;AGIWUR40814                                                                    |    |   |         |         |                |           |           |                      |             |
| N2                                                                                                                             | HS | X | 9150694 | 9160646 | WBGene00006479 | tmbi-4    | B0563.4   | -0.0103220815522853  | AGIWUR35222 |
| N2                                                                                                                             | HS | X | 9163164 | 9166368 | WBGene00006637 | tsp-11    | B0563.2   | -0.0920556991313273  | AGIWUR39443 |
| N2                                                                                                                             | HS | X | 9168539 | 9169022 | WBGene00044687 | B0563.9   | B0563.9   | 0.0589416748491294   |             |
| AGIWUR1912;AGIWUR5988;AGIWUR17520;AGIWUR27703;AGIWUR42134                                                                      |    |   |         |         |                |           |           |                      |             |
| N2                                                                                                                             | HS | X | 9171562 | 9172204 | WBGene00015261 | B0563.1   | B0563.1   | -0.179023785954074   | AGIWUR20274 |
| N2                                                                                                                             | HS | X | 9173685 | 9174490 | WBGene00015265 | B0563.8   | B0563.8   | -0.144200009231866   | AGIWUR20718 |
| N2                                                                                                                             | HS | X | 9180062 | 9180923 | WBGene00044581 | Y81B9A.4  | Y81B9A.4  | -0.126828817552986   |             |
| AGIWUR2260;AGIWUR26510;AGIWUR39823                                                                                             |    |   |         |         |                |           |           |                      |             |
| N2                                                                                                                             | HS | X | 9182440 | 9182947 | WBGene00022317 | Y81B9A.3  | Y81B9A.3  | 0.0967730866780663   |             |
| AGIWUR13980;AGIWUR14706;AGIWUR18027;AGIWUR19056;AGIWUR43732                                                                    |    |   |         |         |                |           |           |                      |             |
| N2                                                                                                                             | HS | X | 9184163 | 9190717 | WBGene00022316 | Y81B9A.2  | Y81B9A.2  | 0.00152983133788442  |             |
| AGIWUR4160                                                                                                                     |    |   |         |         |                |           |           |                      |             |
| N2                                                                                                                             | HS | X | 9192444 | 9194382 | WBGene00022315 | Y81B9A.1  | Y81B9A.1  |                      |             |
| -0.00489760425799357 AGIWUR1439                                                                                                |    |   |         |         |                |           |           |                      |             |
| N2                                                                                                                             | HS | X | 9211144 | 9212321 | WBGene00044743 | crb-3     | C35B8.4   | 0.00950787326041969  |             |
| AGIWUR10376;AGIWUR17275;AGIWUR17825;AGIWUR28825;AGIWUR37521                                                                    |    |   |         |         |                |           |           |                      |             |
| N2                                                                                                                             | HS | X | 9213953 | 9216856 | WBGene00016438 | C35B8.3   | C35B8.3   | -0.0234357501920535  | AGIWUR18703 |
| N2                                                                                                                             | HS | X | 9216867 | 9232075 | WBGene00006887 | vav-1     | C35B8.2   | -0.115034530337686   |             |
| AGIWUR455;AGIWUR11041;AGIWUR31927                                                                                              |    |   |         |         |                |           |           |                      |             |
| N2                                                                                                                             | HS | X | 9233638 | 9234618 | WBGene00000748 | col-175   | C35B8.1   | 0.180229753883754    | AGIWUR29914 |
| N2                                                                                                                             | HS | X | 9235103 | 9242223 | WBGene00017580 | lgc-4     | F18G5.4   | -0.0437559430613561  | AGIWUR4317  |
| N2                                                                                                                             | HS | X | 9247007 | 9249103 | WBGene00001674 | gpa-12    | F18G5.3   | -0.0915638295754544  | AGIWUR24993 |
| N2                                                                                                                             | HS | X | 9251818 | 9255717 | WBGene00003981 | pes-8     | F18G5.2   | 0.187909369837033    | AGIWUR23852 |
| N2                                                                                                                             | HS | X | 9256008 | 9257456 | WBGene00017581 | F18G5.5   | F18G5.5   | -0.0175405171406267  | AGIWUR27652 |

|                                                                                                                                                                                                                    |    |   |         |         |                |          |          |                      |             |
|--------------------------------------------------------------------------------------------------------------------------------------------------------------------------------------------------------------------|----|---|---------|---------|----------------|----------|----------|----------------------|-------------|
| N2                                                                                                                                                                                                                 | HS | X | 9259852 | 9261066 | WBGene00017579 | F18G5.1  | F18G5.1  | 0.501761954159369    | AGIWUR40631 |
| N2                                                                                                                                                                                                                 | HS | X | 9262027 | 9264331 | WBGene00017582 | F18G5.6  | F18G5.6  | -0.0866005845127393  |             |
| AGIWUR791;AGIWUR2708;AGIWUR11787;AGIWUR38307                                                                                                                                                                       |    |   |         |         |                |          |          |                      |             |
| N2                                                                                                                                                                                                                 | HS | X | 9268626 | 9270855 | WBGene00015181 | B0416.5  | B0416.5  | -0.0685889894151321  |             |
| AGIWUR2846;AGIWUR16098;AGIWUR34193;AGIWUR40626                                                                                                                                                                     |    |   |         |         |                |          |          |                      |             |
| N2                                                                                                                                                                                                                 | HS | X | 9278953 | 9279947 | WBGene00015180 | B0416.4  | B0416.4  | -0.117342448308529   |             |
| AGIWUR25648;AGIWUR36314;AGIWUR39520                                                                                                                                                                                |    |   |         |         |                |          |          |                      |             |
| N2                                                                                                                                                                                                                 | HS | X | 9291651 | 9293366 | WBGene00015179 | B0416.3  | B0416.3  | -0.00863190346086817 | AGIWUR3498  |
| N2                                                                                                                                                                                                                 | HS | X | 9293664 | 9296622 | WBGene00001638 | gly-13   | B0416.6  | 0.240533189416455    | AGIWUR12912 |
| N2                                                                                                                                                                                                                 | HS | X | 9296947 | 9297934 | WBGene00015182 | B0416.7  | B0416.7  | -0.00210219374123177 |             |
| AGIWUR5443;AGIWUR7853;AGIWUR15838;AGIWUR18976;AGIWUR19220;AGIWUR22464;AGIWUR31115;AGIWUR31167;AGIWUR35787;AGIWUR44988                                                                                              |    |   |         |         |                |          |          |                      |             |
| N2                                                                                                                                                                                                                 | HS | X | 9299147 | 9300131 | WBGene00015178 | B0416.2  | B0416.2  | 0.116750805865348    | AGIWUR43083 |
| N2                                                                                                                                                                                                                 | HS | X | 9303724 | 9310439 | WBGene00015177 | tmc-2    | B0416.1  | 0.150819110088943    | AGIWUR21090 |
| N2                                                                                                                                                                                                                 | HS | X | 9310625 | 9311341 | WBGene00045261 | H29C22.1 | H29C22.1 | 0.138853214287211    |             |
| AGIWUR12636;AGIWUR32509                                                                                                                                                                                            |    |   |         |         |                |          |          |                      |             |
| N2                                                                                                                                                                                                                 | HS | X | 9312648 | 9314488 | WBGene00044788 | ttr-38   | F35G8.2  | -0.114833422481736   |             |
| AGIWUR1546;AGIWUR7857;AGIWUR16234;AGIWUR24607                                                                                                                                                                      |    |   |         |         |                |          |          |                      |             |
| N2                                                                                                                                                                                                                 | HS | X | 9315436 | 9319180 | WBGene00018067 | npr-7    | F35G8.1  | 0.188737858000787    | AGIWUR12994 |
| N2                                                                                                                                                                                                                 | HS | X | 9331133 | 9336632 | WBGene00020595 | T20B5.2  | T20B5.2  | 0.0526206186774161   | AGIWUR5555  |
| N2                                                                                                                                                                                                                 | HS | X | 9336819 | 9342970 | WBGene00000161 | apa-2    | T20B5.1  | 0.00459379376857072  |             |
| AGIWUR7529;AGIWUR19739;AGIWUR28855;AGIWUR36115                                                                                                                                                                     |    |   |         |         |                |          |          |                      |             |
| N2                                                                                                                                                                                                                 | HS | X | 9343333 | 9347430 | WBGene00020596 | oga-1    | T20B5.3  | -0.00401616419369777 |             |
| AGIWUR5115;AGIWUR11833;AGIWUR13581;AGIWUR24006;AGIWUR40314;AGIWUR45209                                                                                                                                             |    |   |         |         |                |          |          |                      |             |
| N2                                                                                                                                                                                                                 | HS | X | 9349276 | 9349890 | WBGene00001463 | flp-20   | E01H11.3 | -0.032054615486782   |             |
| AGIWUR17940                                                                                                                                                                                                        |    |   |         |         |                |          |          |                      |             |
| N2                                                                                                                                                                                                                 | HS | X | 9364818 | 9386035 | WBGene00004033 | pkc-2    | E01H11.1 | -0.0532479091861564  |             |
| AGIWUR4394;AGIWUR5483;AGIWUR5665;AGIWUR8696;AGIWUR9373;AGIWUR10115;AGIWUR11392;AGIWUR16641;AGIWUR18117;AGIWUR27326;AGIWUR30526;AGIWUR33176;AGIWUR34297;AGIWUR34365;AGIWUR35659;AGIWUR38093;AGIWUR40292;AGIWUR44936 |    |   |         |         |                |          |          |                      |             |
| N2                                                                                                                                                                                                                 | HS | X | 9387341 | 9389189 | WBGene00016009 | C23F12.4 | C23F12.4 | 0.105449153141384    |             |
| AGIWUR5651                                                                                                                                                                                                         |    |   |         |         |                |          |          |                      |             |
| N2                                                                                                                                                                                                                 | HS | X | 9391645 | 9394702 | WBGene00016008 | C23F12.3 | C23F12.3 | -0.0419452757598888  |             |
| AGIWUR22232                                                                                                                                                                                                        |    |   |         |         |                |          |          |                      |             |
| N2                                                                                                                                                                                                                 | HS | X | 9397701 | 9427246 | WBGene00016006 | fln-2    | C23F12.1 | -0.0870385476203097  |             |
| AGIWUR2768;AGIWUR3524;AGIWUR4234;AGIWUR6327;AGIWUR11527;AGIWUR13067;AGIWUR19340;AGIWUR21140;AGIWUR21986;AGIWUR27693;AGIWUR28234;AGIWUR33002;AGIWUR33525;AGIWUR36069;AGIWUR40435                                    |    |   |         |         |                |          |          |                      |             |
| N2                                                                                                                                                                                                                 | HS | X | 9428431 | 9430424 | WBGene00007130 | B0272.4  | B0272.4  | 0.18909693518972     | AGIWUR26263 |
| N2                                                                                                                                                                                                                 | HS | X | 9431432 | 9432745 | WBGene00007129 | B0272.3  | B0272.3  | 0.0785963119004158   | AGIWUR18153 |
| N2                                                                                                                                                                                                                 | HS | X | 9434452 | 9436893 | WBGene00006538 | tbb-4    | B0272.1  | 0.0404059146964935   | AGIWUR39009 |

|                                                                                                                                                                                                                                                        |    |   |         |         |                |          |          |                      |             |
|--------------------------------------------------------------------------------------------------------------------------------------------------------------------------------------------------------------------------------------------------------|----|---|---------|---------|----------------|----------|----------|----------------------|-------------|
| N2                                                                                                                                                                                                                                                     | HS | X | 9440079 | 9441571 | WBGene00007128 | memb-1   | B0272.2  | -0.119474982433836   | AGIWUR29736 |
| N2                                                                                                                                                                                                                                                     | HS | X | 9446664 | 9447612 | WBGene00014140 | ZK899.1  | ZK899.1  | 0.0298041546856638   | AGIWUR2353  |
| N2                                                                                                                                                                                                                                                     | HS | X | 9447861 | 9449399 | WBGene00014145 | ZK899.7  | ZK899.7  | -0.0745649799292227  |             |
| AGIWUR17130;AGIWUR28669;AGIWUR36863                                                                                                                                                                                                                    |    |   |         |         |                |          |          |                      |             |
| N2                                                                                                                                                                                                                                                     | HS | X | 9450225 | 9451994 | WBGene00014141 | ZK899.2  | ZK899.2  | 0.14915060017468     | AGIWUR13325 |
| N2                                                                                                                                                                                                                                                     | HS | X | 9453959 | 9454660 | WBGene00014142 | ZK899.3  | ZK899.3  | -0.0433359290903992  | AGIWUR1908  |
| N2                                                                                                                                                                                                                                                     | HS | X | 9455485 | 9458348 | WBGene00006534 | tba-8    | ZK899.4  | 0.200467408430542    | AGIWUR42441 |
| N2                                                                                                                                                                                                                                                     | HS | X | 9459911 | 9460934 | WBGene00014143 | ZK899.5  | ZK899.5  | -0.0541187083017158  | AGIWUR26787 |
| N2                                                                                                                                                                                                                                                     | HS | X | 9463356 | 9464725 | WBGene00014144 | ZK899.6  | ZK899.6  | 0.131576421706253    | AGIWUR21764 |
| N2                                                                                                                                                                                                                                                     | HS | X | 9472469 | 9516440 | WBGene00001516 | gap-2    | ZK899.8  | -0.0139141299338998  |             |
| AGIWUR1390;AGIWUR6256;AGIWUR8578;AGIWUR9282;AGIWUR9686;AGIWUR16619;AGIWUR19702;AGIWUR20064;AGIWUR20762;AGIWUR20894;AGIWUR23198;AGIWUR23501;AGIWUR24911;AGIWUR25718;AGIWUR26474;AGIWUR27862;AGIWUR29312;AGIWUR30264;AGIWUR32349;AGIWUR35911;AGIWUR40375 |    |   |         |         |                |          |          |                      |             |
| N2                                                                                                                                                                                                                                                     | HS | X | 9516393 | 9517187 | WBGene00007407 | C07B5.2  | C07B5.2  | 0.0338709551687097   | AGIWUR35949 |
| N2                                                                                                                                                                                                                                                     | HS | X | 9519022 | 9521486 | WBGene00007410 | C07B5.6  | C07B5.6  | -0.0725319857044138  | AGIWUR16034 |
| N2                                                                                                                                                                                                                                                     | HS | X | 9522488 | 9523173 | WBGene00007408 | C07B5.3  | C07B5.3  | 0.102917825331113    | AGIWUR31308 |
| N2                                                                                                                                                                                                                                                     | HS | X | 9529533 | 9536631 | WBGene00007409 | C07B5.4  | C07B5.4  | 0.019823974965441    |             |
| AGIWUR3621;AGIWUR11381;AGIWUR27991;AGIWUR28114;AGIWUR31629;AGIWUR35020;AGIWUR36150;AGIWUR43450                                                                                                                                                         |    |   |         |         |                |          |          |                      |             |
| N2                                                                                                                                                                                                                                                     | HS | X | 9539905 | 9542430 | WBGene00003828 | nuc-1    | C07B5.5  | 0.0816339591640762   |             |
| AGIWUR8544;AGIWUR19630;AGIWUR27016                                                                                                                                                                                                                     |    |   |         |         |                |          |          |                      |             |
| N2                                                                                                                                                                                                                                                     | HS | X | 9543670 | 9560801 | WBGene00009888 | F49E2.5  | F49E2.5  | 0.0725651728024328   |             |
| AGIWUR1096;AGIWUR1611;AGIWUR2644;AGIWUR2838;AGIWUR7511;AGIWUR8364;AGIWUR10828;AGIWUR14219;AGIWUR16672;AGIWUR19009;AGIWUR21819;AGIWUR23167;AGIWUR25326;AGIWUR29705;AGIWUR30817;AGIWUR35031;AGIWUR35540;AGIWUR35753;AGIWUR35876;AGIWUR42913              |    |   |         |         |                |          |          |                      |             |
| N2                                                                                                                                                                                                                                                     | HS | X | 9561850 | 9565981 | WBGene00009885 | F49E2.1  | F49E2.1  | -0.145193285011388   |             |
| AGIWUR6116;AGIWUR6559;AGIWUR10854;AGIWUR20850;AGIWUR30883;AGIWUR39455;AGIWUR42055                                                                                                                                                                      |    |   |         |         |                |          |          |                      |             |
| N2                                                                                                                                                                                                                                                     | HS | X | 9567296 | 9573723 | WBGene00009886 | F49E2.2  | F49E2.2  | -0.125207833920433   | AGIWUR6164  |
| N2                                                                                                                                                                                                                                                     | HS | X | 9573741 | 9575866 | WBGene00009887 | glb-17   | F49E2.4  | 0.197770876980791    |             |
| AGIWUR11201;AGIWUR15486;AGIWUR23651;AGIWUR27022;AGIWUR34920;AGIWUR45030                                                                                                                                                                                |    |   |         |         |                |          |          |                      |             |
| N2                                                                                                                                                                                                                                                     | HS | X | 9584664 | 9586344 | WBGene00007516 | gpx-5    | C11E4.1  | -0.00764540361897659 |             |
| AGIWUR26679;AGIWUR40806                                                                                                                                                                                                                                |    |   |         |         |                |          |          |                      |             |
| N2                                                                                                                                                                                                                                                     | HS | X | 9587942 | 9588879 | WBGene00007517 | gpx-3    | C11E4.2  | 0.089785742394719    |             |
| AGIWUR13307;AGIWUR43368                                                                                                                                                                                                                                |    |   |         |         |                |          |          |                      |             |
| N2                                                                                                                                                                                                                                                     | HS | X | 9589423 | 9595459 | WBGene00007518 | del-8    | C11E4.3  | -0.0338821658655242  | AGIWUR15310 |
| N2                                                                                                                                                                                                                                                     | HS | X | 9595770 | 9595902 | WBGene00201289 | C11E4.14 | C11E4.14 | 0.0810325582509712   |             |
| AGIWUR2498                                                                                                                                                                                                                                             |    |   |         |         |                |          |          |                      |             |
| N2                                                                                                                                                                                                                                                     | HS | X | 9610563 | 9617045 | WBGene00007520 | C11E4.6  | C11E4.6  | 0.102304605037247    | AGIWUR27647 |
| N2                                                                                                                                                                                                                                                     | HS | X | 9617219 | 9619122 | WBGene00007521 | C11E4.7  | C11E4.7  | -0.601241915557464   | AGIWUR9290  |
| N2                                                                                                                                                                                                                                                     | HS | X | 9623304 | 9624714 | WBGene00007522 | C11E4.8  | C11E4.8  | -0.164532960080244   | AGIWUR4440  |

|                                                                                                |    |   |         |         |                |          |          |                       |             |
|------------------------------------------------------------------------------------------------|----|---|---------|---------|----------------|----------|----------|-----------------------|-------------|
| N2                                                                                             | HS | X | 9626135 | 9626849 | WBGene00009378 | F34H10.1 | F34H10.1 | 0.149072036592361     |             |
| AGIWUR24854                                                                                    |    |   |         |         |                |          |          |                       |             |
| N2                                                                                             | HS | X | 9630423 | 9630875 | WBGene00009379 | F34H10.2 | F34H10.2 | -0.29848857808085     |             |
| AGIWUR32767                                                                                    |    |   |         |         |                |          |          |                       |             |
| N2                                                                                             | HS | X | 9633284 | 9635647 | WBGene00009380 | F34H10.3 | F34H10.3 | 0.0349940282850341    |             |
| AGIWUR9257                                                                                     |    |   |         |         |                |          |          |                       |             |
| N2                                                                                             | HS | X | 9635693 | 9636884 | WBGene00009382 | F34H10.5 | F34H10.5 | 0.125516514014309     |             |
| AGIWUR44097                                                                                    |    |   |         |         |                |          |          |                       |             |
| N2                                                                                             | HS | X | 9648532 | 9650928 | WBGene00009381 | F34H10.4 | F34H10.4 | -0.0489267047600652   |             |
| AGIWUR38929                                                                                    |    |   |         |         |                |          |          |                       |             |
| N2                                                                                             | HS | X | 9650999 | 9653116 | WBGene00000085 | aex-2    | T14B1.2  | -0.357656099706589    | AGIWUR10230 |
| N2                                                                                             | HS | X | 9664499 | 9668755 | WBGene00011763 | T14B1.1  | T14B1.1  | -0.181715924285313    |             |
| AGIWUR14041;AGIWUR17060;AGIWUR21205;AGIWUR41237                                                |    |   |         |         |                |          |          |                       |             |
| N2                                                                                             | HS | X | 9675844 | 9680169 | WBGene00002067 | ifp-1    | C43C3.1  | -0.0026932284967911   |             |
| AGIWUR39748;AGIWUR42431                                                                        |    |   |         |         |                |          |          |                       |             |
| N2                                                                                             | HS | X | 9690745 | 9696718 | WBGene00008065 | npr-18   | C43C3.2  | -0.0576058004385844   | AGIWUR12539 |
| N2                                                                                             | HS | X | 9698678 | 9701679 | WBGene00001123 | dyf-7    | C43C3.3  | -0.0289383848986287   |             |
| AGIWUR6186;AGIWUR13488;AGIWUR37978;AGIWUR40328                                                 |    |   |         |         |                |          |          |                       |             |
| N2                                                                                             | HS | X | 9706926 | 9708563 | WBGene00008865 | F15G9.1  | F15G9.1  | 0.168133124767309     |             |
| AGIWUR2786;AGIWUR18819;AGIWUR20324;AGIWUR23067;AGIWUR27181;AGIWUR28533;AGIWUR42907;AGIWUR43564 |    |   |         |         |                |          |          |                       |             |
| N2                                                                                             | HS | X | 9708590 | 9713713 | WBGene00008866 | F15G9.2  | F15G9.2  | 0.00983921416935107   | AGIWUR38649 |
| N2                                                                                             | HS | X | 9717589 | 9753764 | WBGene00001863 | him-4    | F15G9.4  | 0.123544160119785     | AGIWUR31653 |
| N2                                                                                             | HS | X | 9757271 | 9759306 | WBGene00011642 | T09B9.1  | T09B9.1  | 0.101912608973291     |             |
| AGIWUR27426;AGIWUR32169                                                                        |    |   |         |         |                |          |          |                       |             |
| N2                                                                                             | HS | X | 9759297 | 9761281 | WBGene00011644 | T09B9.3  | T09B9.3  | -0.0379211625786908   | AGIWUR17627 |
| N2                                                                                             | HS | X | 9761483 | 9764922 | WBGene00011643 | slc-17.9 | T09B9.2  | -0.0538478922368384   |             |
| AGIWUR19015                                                                                    |    |   |         |         |                |          |          |                       |             |
| N2                                                                                             | HS | X | 9771697 | 9774352 | WBGene00011645 | T09B9.4  | T09B9.4  | -0.371066600064356    | AGIWUR6173  |
| N2                                                                                             | HS | X | 9777831 | 9780251 | WBGene00011646 | T09B9.5  | T09B9.5  | -0.000665828702556048 | AGIWUR31885 |
| N2                                                                                             | HS | X | 9780375 | 9789275 | WBGene00009482 | F36G3.1  | F36G3.1  | 0.247849147822328     |             |
| AGIWUR802;AGIWUR15540;AGIWUR16093;AGIWUR37210;AGIWUR42245;AGIWUR44981                          |    |   |         |         |                |          |          |                       |             |
| N2                                                                                             | HS | X | 9792407 | 9794273 | WBGene00009483 | F36G3.2  | F36G3.2  | 0.0264335465700452    |             |
| AGIWUR11079;AGIWUR15033;AGIWUR31455                                                            |    |   |         |         |                |          |          |                       |             |
| N2                                                                                             | HS | X | 9798839 | 9801038 | WBGene00009484 | F36G3.3  | F36G3.3  | 0.0833035173807293    | AGIWUR26906 |
| N2                                                                                             | HS | X | 9801091 | 9807662 | WBGene00009799 | lgc-47   | F47A4.1  | -0.00433947422534953  |             |
| AGIWUR528;AGIWUR6353;AGIWUR10171;AGIWUR29701                                                   |    |   |         |         |                |          |          |                       |             |
| N2                                                                                             | HS | X | 9810202 | 9822273 | WBGene00001081 | dpy-22   | F47A4.2  | -0.166946296613659    | AGIWUR4384  |
| N2                                                                                             | HS | X | 9823752 | 9831249 | WBGene00009800 | rrc-1    | F47A4.3  | -0.102958594756048    | AGIWUR44440 |
| N2                                                                                             | HS | X | 9833352 | 9838039 | WBGene00009801 | ipla-2   | F47A4.5  | -0.25820941022358     | AGIWUR8383  |

|                                                                                                                                                                       |    |   |         |         |                |          |          |                     |             |
|-----------------------------------------------------------------------------------------------------------------------------------------------------------------------|----|---|---------|---------|----------------|----------|----------|---------------------|-------------|
| N2                                                                                                                                                                    | HS | X | 9847275 | 9849518 | WBGene00006881 | vab-15   | R07B1.1  | 0.0725645242965056  | AGIWUR21372 |
| N2                                                                                                                                                                    | HS | X | 9850209 | 9851375 | WBGene00002271 | lec-8    | R07B1.10 | 0.191016709564769   |             |
| AGIWUR25560                                                                                                                                                           |    |   |         |         |                |          |          |                     |             |
| N2                                                                                                                                                                    | HS | X | 9852139 | 9852909 | WBGene00002270 | lec-7    | R07B1.2  | -0.0193103201406122 |             |
| AGIWUR5220;AGIWUR7200;AGIWUR12362;AGIWUR21935;AGIWUR22868;AGIWUR25023;AGIWUR25252;AGIWUR25319;AGIWUR27786;AGIWUR29709;AGIWUR37997;AGIWUR39507;AGIWUR43141;AGIWUR43727 |    |   |         |         |                |          |          |                     |             |
| N2                                                                                                                                                                    | HS | X | 9856918 | 9858083 | WBGene00011082 | R07B1.11 | R07B1.11 | -0.121791281724523  |             |
| AGIWUR37912                                                                                                                                                           |    |   |         |         |                |          |          |                     |             |
| N2                                                                                                                                                                    | HS | X | 9858339 | 9861735 | WBGene00011076 | scav-5   | R07B1.3  | 0.0800139224770842  | AGIWUR27332 |
| N2                                                                                                                                                                    | HS | X | 9861646 | 9862960 | WBGene00001784 | gst-36   | R07B1.4  | 0.381558725105787   | AGIWUR21795 |
| N2                                                                                                                                                                    | HS | X | 9864069 | 9866531 | WBGene00011077 | R07B1.5  | R07B1.5  | 0.43136702830014    | AGIWUR7300  |
| N2                                                                                                                                                                    | HS | X | 9866660 | 9867921 | WBGene00011078 | R07B1.6  | R07B1.6  | 0.0319709331747458  | AGIWUR39602 |
| N2                                                                                                                                                                    | HS | X | 9869836 | 9870792 | WBGene00138711 | R07B1.13 | R07B1.13 | 0.0432010793867139  |             |
| AGIWUR34623                                                                                                                                                           |    |   |         |         |                |          |          |                     |             |
| N2                                                                                                                                                                    | HS | X | 9870804 | 9872654 | WBGene00001608 | R07B1.8  | R07B1.8  | 0.0962896379090168  | AGIWUR28705 |
| N2                                                                                                                                                                    | HS | X | 9872884 | 9882212 | WBGene00011083 | glo-1    | R07B1.12 | 0.185215190268121   |             |
| AGIWUR13929;AGIWUR23649;AGIWUR27945                                                                                                                                   |    |   |         |         |                |          |          |                     |             |
| N2                                                                                                                                                                    | HS | X | 9884278 | 9889704 | WBGene00003410 | mrp-4    | F21G4.2  | 0.0116773971204012  | AGIWUR18807 |
| N2                                                                                                                                                                    | HS | X | 9889618 | 9892328 | WBGene00009023 | F21G4.1  | F21G4.1  | -0.0653296678351341 |             |
| AGIWUR23391;AGIWUR33969                                                                                                                                               |    |   |         |         |                |          |          |                     |             |
| N2                                                                                                                                                                    | HS | X | 9895144 | 9897057 | WBGene00009024 | F21G4.3  | F21G4.3  | 0.137067972493698   | AGIWUR28779 |
| N2                                                                                                                                                                    | HS | X | 9897313 | 9899476 | WBGene00009025 | phf-34   | F21G4.4  | -0.128403264765804  | AGIWUR3666  |
| N2                                                                                                                                                                    | HS | X | 9906148 | 9908116 | WBGene00009026 | F21G4.5  | F21G4.5  | -0.0453738796505831 | AGIWUR38645 |
| N2                                                                                                                                                                    | HS | X | 9908794 | 9917448 | WBGene00009027 | F21G4.6  | F21G4.6  | 0.236696936263094   | AGIWUR1469  |
| N2                                                                                                                                                                    | HS | X | 9919302 | 9920346 | WBGene00007648 | folr-1   | C17G1.1  | 0.323672241411725   | AGIWUR26776 |
| N2                                                                                                                                                                    | HS | X | 9921557 | 9922843 | WBGene00007649 | C17G1.2  | C17G1.2  | 0.129394568676576   | AGIWUR25661 |
| N2                                                                                                                                                                    | HS | X | 9922910 | 9925173 | WBGene00007650 | ugt-23   | C17G1.3  | 0.106532998571492   | AGIWUR28073 |
| N2                                                                                                                                                                    | HS | X | 9925728 | 9931460 | WBGene00007651 | nra-3    | C17G1.4  | -0.213712958215282  | AGIWUR9330  |
| N2                                                                                                                                                                    | HS | X | 9932371 | 9937133 | WBGene00023491 | tsp-21   | C17G1.8  | 0.277522081341756   | AGIWUR15686 |
| N2                                                                                                                                                                    | HS | X | 9941630 | 9944838 | WBGene00007652 | C17G1.5  | C17G1.5  | -0.0157663030107598 |             |
| AGIWUR28795;AGIWUR36756                                                                                                                                               |    |   |         |         |                |          |          |                     |             |
| N2                                                                                                                                                                    | HS | X | 9944844 | 9949060 | WBGene00003553 | nas-37   | C17G1.6  | 0.0973874059938886  | AGIWUR4277  |
| N2                                                                                                                                                                    | HS | X | 9952579 | 9954533 | WBGene00007653 | cysl-1   | C17G1.7  | 0.0863322647999141  | AGIWUR28040 |
| N2                                                                                                                                                                    | HS | X | 9958899 | 9964747 | WBGene00013919 | ZC506.1  | ZC506.1  | -0.0576733926029989 |             |
| AGIWUR8213;AGIWUR11908;AGIWUR12251;AGIWUR17485;AGIWUR19519;AGIWUR24133;AGIWUR24710;AGIWUR28753;AGIWUR35520;AGIWUR35766                                                |    |   |         |         |                |          |          |                     |             |
| N2                                                                                                                                                                    | HS | X | 9965495 | 9968584 | WBGene00013920 | pssy-1   | ZC506.3  | 0.0217381731730484  | AGIWUR5773  |
| N2                                                                                                                                                                    | HS | X | 9968517 | 9976392 | WBGene00003232 | mg1-1    | ZC506.4  | -0.072454775927941  | AGIWUR6179  |
| N2                                                                                                                                                                    | HS | X | 9982402 | 9985005 | WBGene00008954 | F19C6.5  | F19C6.5  | 0.154958537529239   | AGIWUR12405 |



|                                                                                                                      |    |   |          |          |                |          |          |                     |
|----------------------------------------------------------------------------------------------------------------------|----|---|----------|----------|----------------|----------|----------|---------------------|
| N2                                                                                                                   | HS | X | 9991255  | 9999178  | WBGene00001708 | grk-1    | F19C6.1  | -0.0910598773085063 |
| AGIWUR3423;AGIWUR6594;AGIWUR9252;AGIWUR19484;AGIWUR28775;AGIWUR30119;AGIWUR30987;AGIWUR31580;AGIWUR34424;AGIWUR36707 |    |   |          |          |                |          |          |                     |
| N2                                                                                                                   | HS | X | 10000935 | 10005408 | WBGene00008951 | F19C6.2  | F19C6.2  | 0.162904130964175   |
| AGIWUR14774;AGIWUR18317;AGIWUR21208;AGIWUR23874;AGIWUR24789;AGIWUR25351                                              |    |   |          |          |                |          |          |                     |
| N2                                                                                                                   | HS | X | 10005733 | 10008755 | WBGene00008952 | F19C6.3  | F19C6.3  | 0.0155067314231143  |
| AGIWUR9397                                                                                                           |    |   |          |          |                |          |          |                     |
| N2                                                                                                                   | HS | X | 10015045 | 10018025 | WBGene00008953 | F19C6.4  | F19C6.4  | 0.0675965861476033  |
| AGIWUR11952;AGIWUR20470;AGIWUR31977                                                                                  |    |   |          |          |                |          |          |                     |
| N2                                                                                                                   | HS | X | 10018046 | 10022304 | WBGene00009645 | F42G10.1 |          | F42G10.1            |
| 0.124496499763744 AGIWUR7303                                                                                         |    |   |          |          |                |          |          |                     |
| N2                                                                                                                   | HS | X | 10027856 | 10030130 | WBGene00003368 | mkk-4    |          | F42G10.2            |
| 0.00790614909650333 AGIWUR7431;AGIWUR19589                                                                           |    |   |          |          |                |          |          |                     |
| N2                                                                                                                   | HS | X | 10031088 | 10033283 | WBGene00012162 | sek-6    |          | VZC374L.1           |
| 0.0657425539899972 AGIWUR30961                                                                                       |    |   |          |          |                |          |          |                     |
| N2                                                                                                                   | HS | X | 10034836 | 10047417 | WBGene00013872 | ZC374.2  | ZC374.2  | -0.072681492742019  |
| AGIWUR28487                                                                                                          |    |   |          |          |                |          |          |                     |
| N2                                                                                                                   | HS | X | 10049460 | 10052481 | WBGene00013871 | gnrr-3   | ZC374.1  | 0.201746160133162   |
| AGIWUR25668                                                                                                          |    |   |          |          |                |          |          |                     |
| N2                                                                                                                   | HS | X | 10054281 | 10057524 | WBGene00013866 | cbs-1    | ZC373.1  | -0.0657358628441269 |
| AGIWUR2325                                                                                                           |    |   |          |          |                |          |          |                     |
| N2                                                                                                                   | HS | X | 10057925 | 10058437 | WBGene00013867 | ZC373.2  | ZC373.2  | 0.160137546587938   |
| AGIWUR24519                                                                                                          |    |   |          |          |                |          |          |                     |
| N2                                                                                                                   | HS | X | 10060525 | 10061681 | WBGene00013868 | ZC373.3  | ZC373.3  | 0.136500914847009   |
| AGIWUR8982                                                                                                           |    |   |          |          |                |          |          |                     |
| N2                                                                                                                   | HS | X | 10062451 | 10069783 | WBGene00013869 | mlck-1   | ZC373.4  | 0.129312393906167   |
| AGIWUR28216                                                                                                          |    |   |          |          |                |          |          |                     |
| N2                                                                                                                   | HS | X | 10072507 | 10074391 | WBGene00013870 | ZC373.5  | ZC373.5  | 0.0469715843687966  |
| AGIWUR835;AGIWUR27101;AGIWUR42518;AGIWUR42861                                                                        |    |   |          |          |                |          |          |                     |
| N2                                                                                                                   | HS | X | 10075288 | 10076357 | WBGene00000930 | dao-4    | ZC373.6  | 0.133005328723222   |
| AGIWUR28509                                                                                                          |    |   |          |          |                |          |          |                     |
| N2                                                                                                                   | HS | X | 10084627 | 10104252 | WBGene00012326 | W07E11.1 |          | W07E11.1            |
| -0.340366744435359 AGIWUR4175;AGIWUR11508                                                                            |    |   |          |          |                |          |          |                     |
| N2                                                                                                                   | HS | X | 10104612 | 10125483 | WBGene00006792 | unc-58   | T06H11.1 |                     |
| -0.026628296872234 AGIWUR26360                                                                                       |    |   |          |          |                |          |          |                     |
| N2                                                                                                                   | HS | X | 10129588 | 10130267 | WBGene00011552 | T06H11.2 |          | T06H11.2            |
| 0.155717675185444 AGIWUR38332                                                                                        |    |   |          |          |                |          |          |                     |
| N2                                                                                                                   | HS | X | 10136129 | 10138620 | WBGene00003384 | moc-1    | T06H11.4 |                     |
| 0.11721088456871 AGIWUR25632                                                                                         |    |   |          |          |                |          |          |                     |

|                                                                                                                                            |    |   |          |          |                |          |          |                     |
|--------------------------------------------------------------------------------------------------------------------------------------------|----|---|----------|----------|----------------|----------|----------|---------------------|
| N2                                                                                                                                         | HS | X | 10139374 | 10142013 | WBGene00008602 | oac-14   | F09B9.1  | -0.0550889583631884 |
| AGIWUR6547;AGIWUR23375;AGIWUR30796;AGIWUR39301                                                                                             |    |   |          |          |                |          |          |                     |
| N2                                                                                                                                         | HS | X | 10146889 | 10153142 | WBGene00006839 | unc-115  | F09B9.2  | 0.0204640307909791  |
| AGIWUR531;AGIWUR1683;AGIWUR2406;AGIWUR8737;AGIWUR14699;AGIWUR17750;AGIWUR18007;AGIWUR32621;AGIWUR35554;AGIWUR37555;AGIWUR37856;AGIWUR38833 |    |   |          |          |                |          |          |                     |
| N2                                                                                                                                         | HS | X | 10154821 | 10156856 | WBGene00008604 | F09B9.5  | F09B9.5  |                     |
| -0.00693546650757426 AGIWUR13866;AGIWUR15513;AGIWUR24575                                                                                   |    |   |          |          |                |          |          |                     |
| N2                                                                                                                                         | HS | X | 10156858 | 10160438 | WBGene00001331 | erd-2    | F09B9.3  | -0.115890027980033  |
| AGIWUR12862                                                                                                                                |    |   |          |          |                |          |          |                     |
| N2                                                                                                                                         | HS | X | 10160631 | 10161809 | WBGene00008603 | F09B9.4  | F09B9.4  | 0.0072824622391181  |
| AGIWUR18927                                                                                                                                |    |   |          |          |                |          |          |                     |
| N2                                                                                                                                         | HS | X | 10167096 | 10171668 | WBGene00007396 | tiar-3   | C07A4.1  | 0.167616481890391   |
| AGIWUR7064                                                                                                                                 |    |   |          |          |                |          |          |                     |
| N2                                                                                                                                         | HS | X | 10172326 | 10174185 | WBGene00007397 | C07A4.2  | C07A4.2  | -0.093353608148151  |
| AGIWUR12417                                                                                                                                |    |   |          |          |                |          |          |                     |
| N2                                                                                                                                         | HS | X | 10174985 | 10175896 | WBGene00007398 | C07A4.3  | C07A4.3  | 0.198400860040605   |
| AGIWUR13464                                                                                                                                |    |   |          |          |                |          |          |                     |
| N2                                                                                                                                         | HS | X | 10177237 | 10180662 | WBGene00008998 | ncs-4    | F21A10.1 |                     |
| 0.360778485381531 AGIWUR31188                                                                                                              |    |   |          |          |                |          |          |                     |
| N2                                                                                                                                         | HS | X | 10180953 | 10194377 | WBGene00008999 | myrf-2   | F21A10.2 |                     |
| -0.0832064668803745 AGIWUR8406;AGIWUR20315;AGIWUR22227;AGIWUR36013;AGIWUR42903;AGIWUR43892                                                 |    |   |          |          |                |          |          |                     |
| N2                                                                                                                                         | HS | X | 10197706 | 10200407 | WBGene00009674 | nucb-1   | F44A6.1  | 0.191737608494599   |
| AGIWUR17889;AGIWUR21581                                                                                                                    |    |   |          |          |                |          |          |                     |
| N2                                                                                                                                         | HS | X | 10201329 | 10205433 | WBGene00004786 | sex-1    | F44A6.2  | -0.213703476908769  |
| AGIWUR14694;AGIWUR24896;AGIWUR30249                                                                                                        |    |   |          |          |                |          |          |                     |
| N2                                                                                                                                         | HS | X | 10212771 | 10214165 | WBGene00009675 | F44A6.3  | F44A6.3  | 0.354927023809088   |
| AGIWUR25082                                                                                                                                |    |   |          |          |                |          |          |                     |
| N2                                                                                                                                         | HS | X | 10214443 | 10215495 | WBGene00009676 | F44A6.4  | F44A6.4  | 0.261724938596537   |
| AGIWUR34767                                                                                                                                |    |   |          |          |                |          |          |                     |
| N2                                                                                                                                         | HS | X | 10217310 | 10218760 | WBGene00009677 | F44A6.5  | F44A6.5  | 0.43772173544428    |
| AGIWUR29850                                                                                                                                |    |   |          |          |                |          |          |                     |
| N2                                                                                                                                         | HS | X | 10220644 | 10228137 | WBGene00007593 | C14H10.3 |          | C14H10.3            |
| -0.102401843475802 AGIWUR41483                                                                                                             |    |   |          |          |                |          |          |                     |
| N2                                                                                                                                         | HS | X | 10233739 | 10236944 | WBGene00007591 | zipt-13  | C14H10.1 |                     |
| 0.161898421712355 AGIWUR24523                                                                                                              |    |   |          |          |                |          |          |                     |
| N2                                                                                                                                         | HS | X | 10239805 | 10241039 | WBGene00006135 | str-74   | C14H10.4 |                     |
| -0.00879457115479543 AGIWUR42696                                                                                                           |    |   |          |          |                |          |          |                     |
| N2                                                                                                                                         | HS | X | 10242325 | 10252879 | WBGene00007592 | C14H10.2 |          | C14H10.2            |
| 0.0340967947278781 AGIWUR33394                                                                                                             |    |   |          |          |                |          |          |                     |

|                                                            |    |   |          |          |                |           |           |                     |
|------------------------------------------------------------|----|---|----------|----------|----------------|-----------|-----------|---------------------|
| N2                                                         | HS | X | 10258733 | 10260135 | WBGene00007861 | C32A9.1   | C32A9.1   | -0.236872570627316  |
| AGIWUR8449;AGIWUR16047;AGIWUR35637                         |    |   |          |          |                |           |           |                     |
| N2                                                         | HS | X | 10273692 | 10278261 | WBGene00009618 | F41E7.2   | F41E7.2   | 0.0355024588855475  |
| AGIWUR12392;AGIWUR25610;AGIWUR37597                        |    |   |          |          |                |           |           |                     |
| N2                                                         | HS | X | 10279599 | 10282842 | WBGene00009617 | F41E7.1   | F41E7.1   | -0.0378150611087396 |
| AGIWUR907                                                  |    |   |          |          |                |           |           |                     |
| N2                                                         | HS | X | 10282825 | 10285734 | WBGene00009619 | npr-6     | F41E7.3   | -0.0398185338816104 |
| AGIWUR28581                                                |    |   |          |          |                |           |           |                     |
| N2                                                         | HS | X | 10302622 | 10303143 | WBGene00009620 | fip-5     | F41E7.4   | 0.117836920485004   |
| AGIWUR13840                                                |    |   |          |          |                |           |           |                     |
| N2                                                         | HS | X | 10304507 | 10304947 | WBGene00009621 | fipr-21   | F41E7.5   | -0.0620770927995196 |
| AGIWUR20588                                                |    |   |          |          |                |           |           |                     |
| N2                                                         | HS | X | 10306595 | 10306951 | WBGene00009624 | cnc-8     | F41E7.8   | 0.116601092824414   |
| AGIWUR9182;AGIWUR11541;AGIWUR16122;AGIWUR19341;AGIWUR43020 |    |   |          |          |                |           |           |                     |
| N2                                                         | HS | X | 10307137 | 10310466 | WBGene00009622 | F41E7.6   | F41E7.6   | 0.0124928436368927  |
| AGIWUR756                                                  |    |   |          |          |                |           |           |                     |
| N2                                                         | HS | X | 10307873 | 10312182 | WBGene00009623 | F41E7.7   | F41E7.7   | 0.0885653309089243  |
| AGIWUR28863                                                |    |   |          |          |                |           |           |                     |
| N2                                                         | HS | X | 10312756 | 10316005 | WBGene00009625 | F41E7.9   | F41E7.9   | 0.207804909247028   |
| AGIWUR37898                                                |    |   |          |          |                |           |           |                     |
| N2                                                         | HS | X | 10317722 | 10321857 | WBGene00011107 | R07E3.6   | R07E3.6   | 0.146214120713273   |
| AGIWUR11980                                                |    |   |          |          |                |           |           |                     |
| N2                                                         | HS | X | 10324183 | 10327642 | WBGene00011106 | ac1-5     | R07E3.5   | -0.0473723777015138 |
| AGIWUR7281                                                 |    |   |          |          |                |           |           |                     |
| N2                                                         | HS | X | 10330547 | 10331900 | WBGene00011105 | R07E3.4   | R07E3.4   | 0.112414810920118   |
| AGIWUR25740                                                |    |   |          |          |                |           |           |                     |
| N2                                                         | HS | X | 10333861 | 10338200 | WBGene00011104 | cut-5     | R07E3.3   | 0.198373531438564   |
| AGIWUR41403                                                |    |   |          |          |                |           |           |                     |
| N2                                                         | HS | X | 10339225 | 10341161 | WBGene00011102 | R07E3.1   | R07E3.1   | 0.0613205864702415  |
| AGIWUR22504;AGIWUR33913;AGIWUR44194                        |    |   |          |          |                |           |           |                     |
| N2                                                         | HS | X | 10341732 | 10344080 | WBGene00011108 | R07E3.7   | R07E3.7   | -0.0322000184381652 |
| AGIWUR39580                                                |    |   |          |          |                |           |           |                     |
| N2                                                         | HS | X | 10358476 | 10360550 | WBGene00013028 | efhc-1    | Y49A10A.1 |                     |
| -0.255600750435969 AGIWUR39558                             |    |   |          |          |                |           |           |                     |
| N2                                                         | HS | X | 10371077 | 10372664 | WBGene00044949 | Y49A10A.2 | Y49A10A.2 |                     |
| -0.0645186816361814 AGIWUR32528;AGIWUR34902                |    |   |          |          |                |           |           |                     |
| N2                                                         | HS | X | 10373235 | 10377832 | WBGene00004375 | rme-4     | F46F6.1   | -0.0302416982388749 |
| AGIWUR4542;AGIWUR14043;AGIWUR15056                         |    |   |          |          |                |           |           |                     |
| N2                                                         | HS | X | 10379693 | 10386508 | WBGene00001122 | dyf-6     | F46F6.4   | 0.00773832874244107 |

AGIWUR18040;AGIWUR18179

|                         |    |   |          |          |                |          |          |                     |
|-------------------------|----|---|----------|----------|----------------|----------|----------|---------------------|
| N2                      | HS | X | 10397243 | 10402573 | WBGene00009793 | pkn-1    | F46F6.2  | 0.190754753072323   |
| AGIWUR21969             |    |   |          |          |                |          |          |                     |
| N2                      | HS | X | 10402526 | 10406303 | WBGene00001804 | gur-3    | ZC504.5  | 0.0576164058136674  |
| AGIWUR5039              |    |   |          |          |                |          |          |                     |
| N2                      | HS | X | 10407150 | 10409774 | WBGene00013916 | ZC504.1  | ZC504.1  | -0.167994215743637  |
| AGIWUR13279             |    |   |          |          |                |          |          |                     |
| N2                      | HS | X | 10412725 | 10416630 | WBGene00000047 | acr-8    | ZC504.2  | 0.254418009245228   |
| AGIWUR5108              |    |   |          |          |                |          |          |                     |
| N2                      | HS | X | 10416639 | 10419764 | WBGene00013917 | cdk-11.2 |          | ZC504.3             |
| 0.0667494371701807      |    |   |          |          |                |          |          |                     |
| AGIWUR41614             |    |   |          |          |                |          |          |                     |
| N2                      | HS | X | 10421655 | 10428650 | WBGene00003247 | mig-15   | ZC504.4  |                     |
| -0.00390795059171722    |    |   |          |          |                |          |          |                     |
| N2                      | HS | X | 10444169 | 10444674 | WBGene00008023 | C39B10.3 |          | C39B10.3            |
| 0.00753767430368057     |    |   |          |          |                |          |          |                     |
| N2                      | HS | X | 10447351 | 10447755 | WBGene00008025 | C39B10.5 |          | C39B10.5            |
| 0.0806162375743611      |    |   |          |          |                |          |          |                     |
| N2                      | HS | X | 10454309 | 10460341 | WBGene00008022 | lgc-41   | C39B10.2 |                     |
| -0.0490352097269806     |    |   |          |          |                |          |          |                     |
| N2                      | HS | X | 10460546 | 10463580 | WBGene00008021 | C39B10.1 |          | C39B10.1            |
| 0.0431689979912608      |    |   |          |          |                |          |          |                     |
| N2                      | HS | X | 10475527 | 10475959 | WBGene00001252 | elt-4    | C39B10.6 |                     |
| 0.234301490840697       |    |   |          |          |                |          |          |                     |
| N2                      | HS | X | 10481240 | 10483446 | WBGene00001250 | elt-2    | C33D3.1  | 0.183505778767367   |
| AGIWUR16561             |    |   |          |          |                |          |          |                     |
| N2                      | HS | X | 10485350 | 10486757 | WBGene00007894 | C33D3.3  | C33D3.3  | -0.0611432620385237 |
| AGIWUR33607             |    |   |          |          |                |          |          |                     |
| N2                      | HS | X | 10489063 | 10489821 | WBGene00007895 | C33D3.4  | C33D3.4  | 0.0916374764209698  |
| AGIWUR29590             |    |   |          |          |                |          |          |                     |
| N2                      | HS | X | 10491344 | 10497264 | WBGene00007896 | C33D3.5  | C33D3.5  | -0.122079409278729  |
| AGIWUR7459              |    |   |          |          |                |          |          |                     |
| N2                      | HS | X | 10505988 | 10519563 | WBGene00006870 | vab-3    | F14F3.1  | -0.133064152190949  |
| AGIWUR12076;AGIWUR40464 |    |   |          |          |                |          |          |                     |
| N2                      | HS | X | 10520817 | 10521464 | WBGene00008807 | F14F3.4  | F14F3.4  | 0.382092612589941   |
| AGIWUR31682             |    |   |          |          |                |          |          |                     |
| N2                      | HS | X | 10521806 | 10524565 | WBGene00008806 | mboa-7   | F14F3.3  | 0.0849175056835367  |
| AGIWUR17910             |    |   |          |          |                |          |          |                     |
| N2                      | HS | X | 10529294 | 10532677 | WBGene00010340 | slcf-1   | F59F5.1  | 0.0902533338710354  |
| AGIWUR21115             |    |   |          |          |                |          |          |                     |

|    |    |   |                                                           |          |                |         |         |                     |
|----|----|---|-----------------------------------------------------------|----------|----------------|---------|---------|---------------------|
| N2 | HS | X | 10533699                                                  | 10537114 | WBGene00010341 | glo-3   | F59F5.2 |                     |
|    |    |   | -0.00244601844781345 AGIWUR8372;AGIWUR13035               |          |                |         |         |                     |
| N2 | HS | X | 10537141                                                  | 10542423 | WBGene00010342 | F59F5.3 | F59F5.3 | 0.201109255633153   |
|    |    |   | AGIWUR4860                                                |          |                |         |         |                     |
| N2 | HS | X | 10543042                                                  | 10543410 | WBGene00010343 | F59F5.4 | F59F5.4 | 0.150469126373983   |
|    |    |   | AGIWUR21219                                               |          |                |         |         |                     |
| N2 | HS | X | 10546062                                                  | 10548962 | WBGene00010344 | F59F5.5 | F59F5.5 | -0.0318188642400656 |
|    |    |   | AGIWUR26280;AGIWUR29271;AGIWUR42979                       |          |                |         |         |                     |
| N2 | HS | X | 10549123                                                  | 10555239 | WBGene00006364 | syd-2   | F59F5.6 | -0.0769102898056957 |
|    |    |   | AGIWUR15662                                               |          |                |         |         |                     |
| N2 | HS | X | 10559503                                                  | 10566668 | WBGene00010345 | F59F5.7 | F59F5.7 | 0.0543680745784361  |
|    |    |   | AGIWUR27353                                               |          |                |         |         |                     |
| N2 | HS | X | 10569273                                                  | 10575718 | WBGene00010199 | bet-2   | F57C7.1 | -0.0892726353254414 |
|    |    |   | AGIWUR1403;AGIWUR28323;AGIWUR41548                        |          |                |         |         |                     |
| N2 | HS | X | 10576960                                                  | 10581054 | WBGene00003733 | nhx-5   | F57C7.2 | 0.0449780636927013  |
|    |    |   | AGIWUR6590                                                |          |                |         |         |                     |
| N2 | HS | X | 10581062                                                  | 10589538 | WBGene00010200 | F57C7.4 | F57C7.4 | -0.0989035998231214 |
|    |    |   | AGIWUR2002;AGIWUR10895;AGIWUR23278;AGIWUR24655            |          |                |         |         |                     |
| N2 | HS | X | 10589780                                                  | 10593334 | WBGene00004749 | sdn-1   | F57C7.3 | -0.178474752759925  |
|    |    |   | AGIWUR10022;AGIWUR15527                                   |          |                |         |         |                     |
| N2 | HS | X | 10604686                                                  | 10605828 | WBGene00001462 | flp-19  | M79.4   | -0.262282648980879  |
|    |    |   | AGIWUR2445                                                |          |                |         |         |                     |
| N2 | HS | X | 10605832                                                  | 10624185 | WBGene00000018 | abl-1   | M79.1   | -0.0405795805436036 |
|    |    |   | AGIWUR5979                                                |          |                |         |         |                     |
| N2 | HS | X | 10626518                                                  | 10628807 | WBGene00010902 | M79.2   | M79.2   | 0.0709167880212602  |
|    |    |   | AGIWUR502;AGIWUR38051                                     |          |                |         |         |                     |
| N2 | HS | X | 10644409                                                  | 10666874 | WBGene00000908 | daf-12  | F11A1.3 | -0.177821851646337  |
|    |    |   | AGIWUR11162;AGIWUR39761;AGIWUR45021                       |          |                |         |         |                     |
| N2 | HS | X | 10668280                                                  | 10674293 | WBGene00008746 | F13E6.2 | F13E6.2 | 0.134591997427568   |
|    |    |   | AGIWUR25415                                               |          |                |         |         |                     |
| N2 | HS | X | 10675706                                                  | 10677109 | WBGene00008745 | F13E6.1 | F13E6.1 | -0.0191614839591878 |
|    |    |   | AGIWUR32239                                               |          |                |         |         |                     |
| N2 | HS | X | 10681998                                                  | 10682963 | WBGene00008747 | phf-31  | F13E6.3 | -0.142453735443098  |
|    |    |   | AGIWUR20577                                               |          |                |         |         |                     |
| N2 | HS | X | 10691943                                                  | 10694461 | WBGene00008748 | yap-1   | F13E6.4 | -0.0854332142194192 |
|    |    |   | AGIWUR873;AGIWUR11673;AGIWUR18252;AGIWUR23825;AGIWUR32484 |          |                |         |         |                     |
| N2 | HS | X | 10695312                                                  | 10697894 | WBGene00008749 | F13E6.5 | F13E6.5 | 0.125604727772094   |
|    |    |   | AGIWUR22704                                               |          |                |         |         |                     |
| N2 | HS | X | 10697854                                                  | 10711869 | WBGene00006468 | rhgf-1  | F13E6.6 | -0.0511991362508706 |



|                                                                                                                 |    |   |          |          |                |          |          |                     |
|-----------------------------------------------------------------------------------------------------------------|----|---|----------|----------|----------------|----------|----------|---------------------|
| N2                                                                                                              | HS | X | 10886278 | 10887052 | WBGene00011903 | T21E8.5  | T21E8.5  | -0.0535284893518462 |
| AGIWUR38749                                                                                                     |    |   |          |          |                |          |          |                     |
| N2                                                                                                              | HS | X | 10888506 | 10889028 | WBGene00009817 | F47B10.6 |          | F47B10.6            |
| 0.343064439199003 AGIWUR35274                                                                                   |    |   |          |          |                |          |          |                     |
| N2                                                                                                              | HS | X | 10889041 | 10890556 | WBGene00009816 | F47B10.5 |          | F47B10.5            |
| 0.297594118080451 AGIWUR1819;AGIWUR3353;AGIWUR3360;AGIWUR9921;AGIWUR11152;AGIWUR16718                           |    |   |          |          |                |          |          |                     |
| N2                                                                                                              | HS | X | 10891295 | 10891707 | WBGene00009815 | F47B10.4 |          | F47B10.4            |
| -0.0619806707910779 AGIWUR4612                                                                                  |    |   |          |          |                |          |          |                     |
| N2                                                                                                              | HS | X | 10892190 | 10893569 | WBGene00009814 | F47B10.3 |          | F47B10.3            |
| -0.0433085804622264 AGIWUR42103                                                                                 |    |   |          |          |                |          |          |                     |
| N2                                                                                                              | HS | X | 10893567 | 10896598 | WBGene00009813 | haly-1   | F47B10.2 |                     |
| -0.0625765216760223 AGIWUR18039;AGIWUR18232;AGIWUR21187;AGIWUR30251;AGIWUR42699                                 |    |   |          |          |                |          |          |                     |
| N2                                                                                                              | HS | X | 10897678 | 10900114 | WBGene00009812 | suca-1   | F47B10.1 |                     |
| -0.318536786659558 AGIWUR2889;AGIWUR3616;AGIWUR8658;AGIWUR11415;AGIWUR11812;AGIWUR16981;AGIWUR23660;AGIWUR26155 |    |   |          |          |                |          |          |                     |
| N2                                                                                                              | HS | X | 10903278 | 10905107 | WBGene00009818 | acbp-3   | F47B10.7 |                     |
| 0.333098377650725 AGIWUR21895                                                                                   |    |   |          |          |                |          |          |                     |
| N2                                                                                                              | HS | X | 10905181 | 10910768 | WBGene00009819 | F47B10.8 |          | F47B10.8            |
| 0.269651753565859 AGIWUR25552                                                                                   |    |   |          |          |                |          |          |                     |
| N2                                                                                                              | HS | X | 10912118 | 10914081 | WBGene00009820 | F47B10.9 |          | F47B10.9            |
| -0.0605749927798986 AGIWUR3929;AGIWUR11878;AGIWUR12314;AGIWUR32006                                              |    |   |          |          |                |          |          |                     |
| N2                                                                                                              | HS | X | 10916765 | 10920013 | WBGene00011882 | nstp-9   | T21B6.5  | -0.0375803763382665 |
| AGIWUR28758                                                                                                     |    |   |          |          |                |          |          |                     |
| N2                                                                                                              | HS | X | 10920533 | 10928998 | WBGene00000961 | dgn-1    | T21B6.1  | -0.311361602744946  |
| AGIWUR5992;AGIWUR6010;AGIWUR9266;AGIWUR31210;AGIWUR32355;AGIWUR39633                                            |    |   |          |          |                |          |          |                     |
| N2                                                                                                              | HS | X | 10938197 | 10941355 | WBGene00011879 | pho-7    | T21B6.2  | -0.341983258262665  |
| AGIWUR9383                                                                                                      |    |   |          |          |                |          |          |                     |
| N2                                                                                                              | HS | X | 10945160 | 10948970 | WBGene00011880 | T21B6.3  | T21B6.3  | -0.100451312796368  |
| AGIWUR12433                                                                                                     |    |   |          |          |                |          |          |                     |
| N2                                                                                                              | HS | X | 10950708 | 10951393 | WBGene00010717 | K09C8.7  | K09C8.7  | 0.264135314406435   |
| AGIWUR37457                                                                                                     |    |   |          |          |                |          |          |                     |
| N2                                                                                                              | HS | X | 10954134 | 10958236 | WBGene00003943 | pbo-4    | K09C8.1  | -0.129815674066576  |
| AGIWUR5694;AGIWUR21821                                                                                          |    |   |          |          |                |          |          |                     |
| N2                                                                                                              | HS | X | 10958761 | 10959178 | WBGene00003757 | nlp-19   | K09C8.6  | 0.00307568334813979 |
| AGIWUR20445                                                                                                     |    |   |          |          |                |          |          |                     |
| N2                                                                                                              | HS | X | 10959568 | 10960937 | WBGene00010715 | K09C8.2  | K09C8.2  | -0.0606092700102341 |
| AGIWUR14659                                                                                                     |    |   |          |          |                |          |          |                     |
| N2                                                                                                              | HS | X | 10960982 | 10964725 | WBGene00003529 | nas-10   | K09C8.3  | -0.230936729891569  |
| AGIWUR21993                                                                                                     |    |   |          |          |                |          |          |                     |

|                                                                                                                                                                                                            |    |   |          |          |                |          |                             |
|------------------------------------------------------------------------------------------------------------------------------------------------------------------------------------------------------------|----|---|----------|----------|----------------|----------|-----------------------------|
| N2                                                                                                                                                                                                         | HS | X | 10966551 | 10969898 | WBGene00010716 | lge-1    | K09C8.4                     |
| -0.00797462303225593 AGIWUR23818                                                                                                                                                                           |    |   |          |          |                |          |                             |
| N2                                                                                                                                                                                                         | HS | X | 10970963 | 10972107 | WBGene00010718 | K09C8.8  | K09C8.8 -0.0571364197482307 |
| AGIWUR18755                                                                                                                                                                                                |    |   |          |          |                |          |                             |
| N2                                                                                                                                                                                                         | HS | X | 10972172 | 10979265 | WBGene00004257 | pxn-2    | K09C8.5 0.0917951501984096  |
| AGIWUR22501                                                                                                                                                                                                |    |   |          |          |                |          |                             |
| N2                                                                                                                                                                                                         | HS | X | 10982351 | 10987928 | WBGene00006897 | ver-4    | F59F3.5 -0.319555221689058  |
| AGIWUR40866                                                                                                                                                                                                |    |   |          |          |                |          |                             |
| N2                                                                                                                                                                                                         | HS | X | 10992483 | 10997846 | WBGene00006896 | ver-3    | F59F3.1 -0.0580479882454945 |
| AGIWUR5042;AGIWUR8537;AGIWUR18078;AGIWUR18120;AGIWUR18428;AGIWUR22182;AGIWUR33911;AGIWUR34669;AGIWUR39163;AGIWUR39571;AGIWUR44850                                                                          |    |   |          |          |                |          |                             |
| N2                                                                                                                                                                                                         | HS | X | 10998004 | 10999276 | WBGene00010335 | F59F3.6  | F59F3.6 0.246821255935549   |
| AGIWUR13384                                                                                                                                                                                                |    |   |          |          |                |          |                             |
| N2                                                                                                                                                                                                         | HS | X | 10999742 | 11001850 | WBGene00000750 | col-177  | F59F3.2 -0.291215187875807  |
| AGIWUR10969                                                                                                                                                                                                |    |   |          |          |                |          |                             |
| N2                                                                                                                                                                                                         | HS | X | 11004984 | 11008181 | WBGene00010334 | del-5    | F59F3.4 0.164582905707038   |
| AGIWUR36770                                                                                                                                                                                                |    |   |          |          |                |          |                             |
| N2                                                                                                                                                                                                         | HS | X | 11008266 | 11009070 | WBGene00010225 | ttr-31   | F58A3.5 0.24558323705743    |
| AGIWUR22294                                                                                                                                                                                                |    |   |          |          |                |          |                             |
| N2                                                                                                                                                                                                         | HS | X | 11009558 | 11010640 | WBGene00010224 | F58A3.4  | F58A3.4 0.0273091792465152  |
| AGIWUR33904                                                                                                                                                                                                |    |   |          |          |                |          |                             |
| N2                                                                                                                                                                                                         | HS | X | 11012662 | 11014412 | WBGene00010223 | F58A3.3  | F58A3.3 -0.098325358845968  |
| AGIWUR21004                                                                                                                                                                                                |    |   |          |          |                |          |                             |
| N2                                                                                                                                                                                                         | HS | X | 11016410 | 11023421 | WBGene00001184 | egl-15   | F58A3.2                     |
| -0.00492608533361594                                                                                                                                                                                       |    |   |          |          |                |          |                             |
| AGIWUR2025;AGIWUR14387;AGIWUR17579;AGIWUR18150;AGIWUR22661;AGIWUR22831;AGIWUR23615;AGIWUR26322;AGIWUR26361;AGIWUR28249;AGIWUR28413;AGIWUR33328;AGIWUR34362;AGIWUR35573;AGIWUR38056;AGIWUR39477;AGIWUR40101 |    |   |          |          |                |          |                             |
| N2                                                                                                                                                                                                         | HS | X | 11028917 | 11040612 | WBGene00002261 | ldb-1    | F58A3.1 -0.132312634673274  |
| AGIWUR12215;AGIWUR18780;AGIWUR20417;AGIWUR26587;AGIWUR32684;AGIWUR42410                                                                                                                                    |    |   |          |          |                |          |                             |
| N2                                                                                                                                                                                                         | HS | X | 11041032 | 11042877 | WBGene00007483 | C09F12.3 | C09F12.3                    |
| -0.0394827263417037 AGIWUR12921                                                                                                                                                                            |    |   |          |          |                |          |                             |
| N2                                                                                                                                                                                                         | HS | X | 11047446 | 11049271 | WBGene00000522 | clc-1    | C09F12.1                    |
| -0.0836155627390784 AGIWUR37251                                                                                                                                                                            |    |   |          |          |                |          |                             |
| N2                                                                                                                                                                                                         | HS | X | 11053915 | 11056970 | WBGene00007482 | C09F12.2 | C09F12.2                    |
| -0.125940252165867 AGIWUR5748                                                                                                                                                                              |    |   |          |          |                |          |                             |
| N2                                                                                                                                                                                                         | HS | X | 11057401 | 11059794 | WBGene00012261 | lpr-3    | W04G3.8 -0.349679968242183  |
| AGIWUR11517                                                                                                                                                                                                |    |   |          |          |                |          |                             |
| N2                                                                                                                                                                                                         | HS | X | 11059994 | 11061868 | WBGene00012255 | lpr-6    | W04G3.1 0.10243656084832    |
| AGIWUR6825                                                                                                                                                                                                 |    |   |          |          |                |          |                             |



|                                                                               |    |   |          |          |                |          |          |                     |
|-------------------------------------------------------------------------------|----|---|----------|----------|----------------|----------|----------|---------------------|
| N2                                                                            | HS | X | 11062132 | 11064539 | WBGene00012256 | lpr-5    | W04G3.2  | 0.0685866274065177  |
| AGIWUR12969;AGIWUR25508                                                       |    |   |          |          |                |          |          |                     |
| N2                                                                            | HS | X | 11065133 | 11066811 | WBGene00012257 | lpr-4    | W04G3.3  | 0.220235692547647   |
| AGIWUR5276                                                                    |    |   |          |          |                |          |          |                     |
| N2                                                                            | HS | X | 11068527 | 11071925 | WBGene00000166 | apt-9    | W04G3.4  | 0.264564970579731   |
| AGIWUR18454                                                                   |    |   |          |          |                |          |          |                     |
| N2                                                                            | HS | X | 11076182 | 11076767 | WBGene00044151 | W04G3.12 | W04G3.12 |                     |
| 0.0464938543666329 AGIWUR19796;AGIWUR23344;AGIWUR40941;AGIWUR43619            |    |   |          |          |                |          |          |                     |
| N2                                                                            | HS | X | 11077772 | 11078243 | WBGene00044152 | W04G3.10 | W04G3.10 |                     |
| 0.0641465038949689 AGIWUR9600;AGIWUR14595;AGIWUR20255;AGIWUR39365             |    |   |          |          |                |          |          |                     |
| N2                                                                            | HS | X | 11080678 | 11087474 | WBGene00012259 | sulp-7   | W04G3.6  | -0.0976268527093449 |
| AGIWUR14526;AGIWUR17899;AGIWUR25281;AGIWUR25544;AGIWUR43216                   |    |   |          |          |                |          |          |                     |
| N2                                                                            | HS | X | 11089243 | 11090679 | WBGene00044153 | W04G3.11 | W04G3.11 |                     |
| 0.0927221118136234 AGIWUR7780;AGIWUR10269;AGIWUR27223;AGIWUR30755;AGIWUR42818 |    |   |          |          |                |          |          |                     |
| N2                                                                            | HS | X | 11096158 | 11096935 | WBGene00012218 | W02H3.2  | W02H3.2  | 0.0902131428732007  |
| AGIWUR16182                                                                   |    |   |          |          |                |          |          |                     |
| N2                                                                            | HS | X | 11102587 | 11105460 | WBGene00012217 | W02H3.1  | W02H3.1  | 0.274010188566765   |
| AGIWUR14835                                                                   |    |   |          |          |                |          |          |                     |
| N2                                                                            | HS | X | 11107376 | 11109316 | WBGene00011140 | R08B4.4  | R08B4.4  | -0.128089334647056  |
| AGIWUR1513                                                                    |    |   |          |          |                |          |          |                     |
| N2                                                                            | HS | X | 11109440 | 11115887 | WBGene00001690 | grd-1    | R08B4.1  | 0.195743582884374   |
| AGIWUR17903                                                                   |    |   |          |          |                |          |          |                     |
| N2                                                                            | HS | X | 11116107 | 11116823 | WBGene00011141 | R08B4.5  | R08B4.5  | 0.0817910951767633  |
| AGIWUR24780;AGIWUR26045;AGIWUR30649;AGIWUR32569                               |    |   |          |          |                |          |          |                     |
| N2                                                                            | HS | X | 11118959 | 11121005 | WBGene00011139 | R08B4.3  | R08B4.3  | -0.0324987950918461 |
| AGIWUR26481;AGIWUR44332                                                       |    |   |          |          |                |          |          |                     |
| N2                                                                            | HS | X | 11121916 | 11125615 | WBGene00044330 | alr-1    | R08B4.2  | 0.00684471510006546 |
| AGIWUR30021                                                                   |    |   |          |          |                |          |          |                     |
| N2                                                                            | HS | X | 11142971 | 11152820 | WBGene00007327 | C05C9.3  | C05C9.3  | -0.0612320891083566 |
| AGIWUR5280                                                                    |    |   |          |          |                |          |          |                     |
| N2                                                                            | HS | X | 11153065 | 11157643 | WBGene00007326 | C05C9.2  | C05C9.2  | -0.0139084303052428 |
| AGIWUR6141;AGIWUR40885                                                        |    |   |          |          |                |          |          |                     |
| N2                                                                            | HS | X | 11160981 | 11164006 | WBGene00007325 | C05C9.1  | C05C9.1  | -0.0417690678435028 |
| AGIWUR37380                                                                   |    |   |          |          |                |          |          |                     |
| N2                                                                            | HS | X | 11163958 | 11189591 | WBGene00008735 | F13D2.1  | F13D2.1  | 0.0697135858606153  |
| AGIWUR9368;AGIWUR31805;AGIWUR34326                                            |    |   |          |          |                |          |          |                     |
| N2                                                                            | HS | X | 11192485 | 11196841 | WBGene00007938 | C34F6.1  | C34F6.1  | 0.184003994161811   |
| AGIWUR23731                                                                   |    |   |          |          |                |          |          |                     |
| N2                                                                            | HS | X | 11199455 | 11200464 | WBGene00000751 | col-178  | C34F6.2  | -0.96526543617729   |

|                                                                                                                       |    |   |          |          |                |          |                             |
|-----------------------------------------------------------------------------------------------------------------------|----|---|----------|----------|----------------|----------|-----------------------------|
| AGIWUR40880                                                                                                           |    |   |          |          |                |          |                             |
| N2                                                                                                                    | HS | X | 11201465 | 11202488 | WBGene00000752 | col-179  | C34F6.3 -0.0505871157615472 |
| AGIWUR3484;AGIWUR4228;AGIWUR11395;AGIWUR12859;AGIWUR18664;AGIWUR21635;AGIWUR24699;AGIWUR30009;AGIWUR35779;AGIWUR37272 |    |   |          |          |                |          |                             |
| N2                                                                                                                    | HS | X | 11202476 | 11203990 | WBGene00007945 | C34F6.11 | C34F6.11                    |
| 0.303674389766137 AGIWUR32368                                                                                         |    |   |          |          |                |          |                             |
| N2                                                                                                                    | HS | X | 11204117 | 11207155 | WBGene00002029 | hst-2    | C34F6.4 -0.0115561747445714 |
| AGIWUR28552                                                                                                           |    |   |          |          |                |          |                             |
| N2                                                                                                                    | HS | X | 11207250 | 11208994 | WBGene00007939 | C34F6.5  | C34F6.5 0.142783139437232   |
| AGIWUR21;AGIWUR994                                                                                                    |    |   |          |          |                |          |                             |
| N2                                                                                                                    | HS | X | 11210107 | 11215470 | WBGene00007941 | C34F6.7  | C34F6.7 -0.0345378337810232 |
| AGIWUR6467;AGIWUR32311;AGIWUR32877                                                                                    |    |   |          |          |                |          |                             |
| N2                                                                                                                    | HS | X | 11215696 | 11218305 | WBGene00007942 | idh-2    | C34F6.8 0.125922765036741   |
| AGIWUR3586                                                                                                            |    |   |          |          |                |          |                             |
| N2                                                                                                                    | HS | X | 11218135 | 11222811 | WBGene00007943 | C34F6.9  | C34F6.9 0.19337792258095    |
| AGIWUR23073                                                                                                           |    |   |          |          |                |          |                             |
| N2                                                                                                                    | HS | X | 11229213 | 11237383 | WBGene00007944 | C34F6.10 | C34F6.10                    |
| -0.25083161364126 AGIWUR42553                                                                                         |    |   |          |          |                |          |                             |
| N2                                                                                                                    | HS | X | 11257361 | 11260225 | WBGene00007266 | C03A3.1  | C03A3.1 0.0154891156562096  |
| AGIWUR11397;AGIWUR29952;AGIWUR39266                                                                                   |    |   |          |          |                |          |                             |
| N2                                                                                                                    | HS | X | 11262848 | 11266324 | WBGene00007267 | C03A3.2  | C03A3.2 -0.279120303888838  |
| AGIWUR4732;AGIWUR8292                                                                                                 |    |   |          |          |                |          |                             |
| N2                                                                                                                    | HS | X | 11267391 | 11269023 | WBGene00007268 | C03A3.3  | C03A3.3 -0.0376128529542186 |
| AGIWUR44225                                                                                                           |    |   |          |          |                |          |                             |
| N2                                                                                                                    | HS | X | 11271184 | 11275482 | WBGene00002050 | ifa-1    | F38B2.1 -0.0278791713391149 |
| AGIWUR2245;AGIWUR4997;AGIWUR15389;AGIWUR25371;AGIWUR31125;AGIWUR33213;AGIWUR38221;AGIWUR40353;AGIWUR40580;AGIWUR43826 |    |   |          |          |                |          |                             |
| N2                                                                                                                    | HS | X | 11278401 | 11279376 | WBGene00009529 | F38B2.2  | F38B2.2 -0.0579411229546105 |
| AGIWUR2233;AGIWUR17353;AGIWUR22429;AGIWUR23640;AGIWUR40315;AGIWUR40760                                                |    |   |          |          |                |          |                             |
| N2                                                                                                                    | HS | X | 11281716 | 11286346 | WBGene00009530 | F38B2.3  | F38B2.3 0.068051013382064   |
| AGIWUR4915                                                                                                            |    |   |          |          |                |          |                             |
| N2                                                                                                                    | HS | X | 11286443 | 11287717 | WBGene00009531 | F38B2.4  | F38B2.4 0.0436423976128384  |
| AGIWUR5307;AGIWUR5637;AGIWUR26506;AGIWUR39548                                                                         |    |   |          |          |                |          |                             |
| N2                                                                                                                    | HS | X | 11294962 | 11296731 | WBGene00002124 | inx-2    | F08G12.10                   |
| 0.0114487909213956 AGIWUR1732                                                                                         |    |   |          |          |                |          |                             |
| N2                                                                                                                    | HS | X | 11298036 | 11299784 | WBGene00008586 | F08G12.2 | F08G12.2                    |
| 0.049362051150629 AGIWUR40930                                                                                         |    |   |          |          |                |          |                             |
| N2                                                                                                                    | HS | X | 11300283 | 11302094 | WBGene00008587 | F08G12.3 | F08G12.3                    |
| -0.0109237907391524 AGIWUR19748                                                                                       |    |   |          |          |                |          |                             |

|                                                 |    |   |                                                                                     |          |                |           |                             |
|-------------------------------------------------|----|---|-------------------------------------------------------------------------------------|----------|----------------|-----------|-----------------------------|
| N2                                              | HS | X | 11302074                                                                            | 11305873 | WBGene00008585 | F08G12.1  | F08G12.1                    |
| 0.0320709591317012                              |    |   | AGIWUR19035                                                                         |          |                |           |                             |
| N2                                              | HS | X | 11307360                                                                            | 11308400 | WBGene00006922 | vh1-1     | F08G12.4                    |
| 0.187515716415094                               |    |   | AGIWUR501                                                                           |          |                |           |                             |
| N2                                              | HS | X | 11308864                                                                            | 11310285 | WBGene00008588 | F08G12.5  | F08G12.5                    |
| 0.0732363609469662                              |    |   | AGIWUR36011                                                                         |          |                |           |                             |
| N2                                              | HS | X | 11313385                                                                            | 11315612 | WBGene00044135 | F08G12.11 | F08G12.11                   |
| -0.0226712143644998                             |    |   | AGIWUR2107;AGIWUR11925;AGIWUR30415;AGIWUR39046                                      |          |                |           |                             |
| N2                                              | HS | X | 11317050                                                                            | 11318036 | WBGene00008589 | nlp-57    | F08G12.8                    |
| -0.0233157006055507                             |    |   | AGIWUR25391                                                                         |          |                |           |                             |
| N2                                              | HS | X | 11318278                                                                            | 11321085 | WBGene00013976 | hizr-1    | ZK455.6 0.0225458863382428  |
| AGIWUR3772                                      |    |   |                                                                                     |          |                |           |                             |
| N2                                              | HS | X | 11321079                                                                            | 11324251 | WBGene00000212 | asm-2     | ZK455.4 -0.0813986754408451 |
| AGIWUR12179;AGIWUR20805;AGIWUR30554;AGIWUR45075 |    |   |                                                                                     |          |                |           |                             |
| N2                                              | HS | X | 11324517                                                                            | 11326901 | WBGene00013975 | ZK455.5   | ZK455.5 0.0718207181326962  |
| AGIWUR16779                                     |    |   |                                                                                     |          |                |           |                             |
| N2                                              | HS | X | 11328591                                                                            | 11332072 | WBGene00013974 | npr-9     | ZK455.3 -0.111001565266375  |
| AGIWUR11847                                     |    |   |                                                                                     |          |                |           |                             |
| N2                                              | HS | X | 11332553                                                                            | 11338301 | WBGene00001536 | gcy-9     | ZK455.2 -0.103517377891031  |
| AGIWUR15202                                     |    |   |                                                                                     |          |                |           |                             |
| N2                                              | HS | X | 11339874                                                                            | 11343568 | WBGene00000040 | aco-1     | ZK455.1 -0.215276174468562  |
| AGIWUR15192;AGIWUR20633;AGIWUR21869;AGIWUR30301 |    |   |                                                                                     |          |                |           |                             |
| N2                                              | HS | X | 11346455                                                                            | 11350244 | WBGene00003843 | oct-2     | ZK455.8 -0.0259216753902773 |
| AGIWUR2167;AGIWUR14035                          |    |   |                                                                                     |          |                |           |                             |
| N2                                              | HS | X | 11352136                                                                            | 11357094 | WBGene00003997 | pgp-3     | ZK455.7 0.0438911602764902  |
| AGIWUR11749;AGIWUR17389;AGIWUR20480;AGIWUR22101 |    |   |                                                                                     |          |                |           |                             |
| N2                                              | HS | X | 11358395                                                                            | 11364049 | WBGene00003998 | pgp-4     | F42E11.1                    |
| 0.0512158420340825                              |    |   | AGIWUR28989;AGIWUR41306;AGIWUR44841                                                 |          |                |           |                             |
| N2                                              | HS | X | 11368719                                                                            | 11374358 | WBGene00009632 | ttyh-1    | F42E11.2                    |
| -0.0960195585742776                             |    |   | AGIWUR10181;AGIWUR19745;AGIWUR21649;AGIWUR22469;AGIWUR28938;AGIWUR38032;AGIWUR44333 |          |                |           |                             |
| N2                                              | HS | X | 11374599                                                                            | 11375609 | WBGene00009633 | F42E11.3  | F42E11.3                    |
| 0.0014089805422195                              |    |   | AGIWUR39282                                                                         |          |                |           |                             |
| N2                                              | HS | X | 11375887                                                                            | 11377470 | WBGene00006584 | tni-1     | F42E11.4                    |
| 0.228939530340313                               |    |   | AGIWUR8414                                                                          |          |                |           |                             |
| N2                                              | HS | X | 11384773                                                                            | 11392779 | WBGene00008571 | prmn-1    | F08B12.1                    |
| -0.0975571429145639                             |    |   | AGIWUR2776                                                                          |          |                |           |                             |
| N2                                              | HS | X | 11393293                                                                            | 11394619 | WBGene00004197 | prx-12    | F08B12.2                    |
| 0.149166185302866                               |    |   | AGIWUR27319                                                                         |          |                |           |                             |
| N2                                              | HS | X | 11394605                                                                            | 11405931 | WBGene00004831 | slo-2     | F08B12.3                    |

|                                                                                              |    |   |                                                           |          |                |                                     |
|----------------------------------------------------------------------------------------------|----|---|-----------------------------------------------------------|----------|----------------|-------------------------------------|
| 0.182768611119982                                                                            |    |   | AGIWUR1051;AGIWUR7985;AGIWUR23787;AGIWUR24004;AGIWUR26341 |          |                |                                     |
| N2                                                                                           | HS | X | 11407054                                                  | 11407730 | WBGene00008572 | F08B12.4 F08B12.4                   |
| 0.0608401191252312                                                                           |    |   | AGIWUR9647                                                |          |                |                                     |
| N2                                                                                           | HS | X | 11410181                                                  | 11414887 | WBGene00003970 | pek-1 F46C3.1 -0.113045964433486    |
| AGIWUR522;AGIWUR2937;AGIWUR17263                                                             |    |   |                                                           |          |                |                                     |
| N2                                                                                           | HS | X | 11416653                                                  | 11418740 | WBGene00009777 | F46C3.2 F46C3.2 0.125986381578663   |
| AGIWUR20393                                                                                  |    |   |                                                           |          |                |                                     |
| N2                                                                                           | HS | X | 11419108                                                  | 11420074 | WBGene00045253 | F46C3.6 F46C3.6 -0.015662167940782  |
| AGIWUR6859;AGIWUR19299;AGIWUR25267;AGIWUR33107;AGIWUR35145;AGIWUR36021                       |    |   |                                                           |          |                |                                     |
| N2                                                                                           | HS | X | 11420474                                                  | 11433524 | WBGene00002037 | hum-4 F46C3.3                       |
| 0.000317169512379589                                                                         |    |   |                                                           |          |                |                                     |
| AGIWUR1757;AGIWUR4067;AGIWUR4936;AGIWUR18116;AGIWUR18323;AGIWUR19638;AGIWUR21461;AGIWUR22845 |    |   |                                                           |          |                |                                     |
| N2                                                                                           | HS | X | 11434792                                                  | 11435899 | WBGene00044703 | F46C3.5 F46C3.5 -0.330623148209364  |
| AGIWUR7105                                                                                   |    |   |                                                           |          |                |                                     |
| N2                                                                                           | HS | X | 11436124                                                  | 11437747 | WBGene00044702 | F46C3.4 F46C3.4 -0.244840423921209  |
| AGIWUR7674                                                                                   |    |   |                                                           |          |                |                                     |
| N2                                                                                           | HS | X | 11444424                                                  | 11446635 | WBGene00009842 | igeg-2 F48C5.1 0.0115752210373321   |
| AGIWUR24691                                                                                  |    |   |                                                           |          |                |                                     |
| N2                                                                                           | HS | X | 11451617                                                  | 11454195 | WBGene00009843 | F48C5.2 F48C5.2 0.150698428582806   |
| AGIWUR39842                                                                                  |    |   |                                                           |          |                |                                     |
| N2                                                                                           | HS | X | 11465557                                                  | 11484368 | WBGene00003003 | lin-14 T25C12.1                     |
| -0.0819792456262549                                                                          |    |   | AGIWUR25830                                               |          |                |                                     |
| N2                                                                                           | HS | X | 11491087                                                  | 11499999 | WBGene00012018 | T25C12.3 T25C12.3                   |
| 0.0544060974123344                                                                           |    |   | AGIWUR2452                                                |          |                |                                     |
| N2                                                                                           | HS | X | 11502267                                                  | 11509432 | WBGene00009257 | F29G6.1 F29G6.1 0.378143448452561   |
| AGIWUR18243                                                                                  |    |   |                                                           |          |                |                                     |
| N2                                                                                           | HS | X | 11509446                                                  | 11511451 | WBGene00009258 | ccdc-149 F29G6.2                    |
| 0.0312554750229674                                                                           |    |   | AGIWUR15047;AGIWUR17433;AGIWUR35296                       |          |                |                                     |
| N2                                                                                           | HS | X | 11511558                                                  | 11519062 | WBGene00009259 | hpo-34 F29G6.3 -0.203296196690969   |
| AGIWUR844;AGIWUR23574;AGIWUR44644;AGIWUR44749                                                |    |   |                                                           |          |                |                                     |
| N2                                                                                           | HS | X | 11522707                                                  | 11533450 | WBGene00004746 | sdc-2 C35C5.1 0.270068390290866     |
| AGIWUR6463                                                                                   |    |   |                                                           |          |                |                                     |
| N2                                                                                           | HS | X | 11534004                                                  | 11536574 | WBGene00007957 | C35C5.8 C35C5.8 0.0850606324525494  |
| AGIWUR3917;AGIWUR30581;AGIWUR36963                                                           |    |   |                                                           |          |                |                                     |
| N2                                                                                           | HS | X | 11536568                                                  | 11537124 | WBGene00007958 | C35C5.9 C35C5.9 -0.0278365438378669 |
| AGIWUR9875;AGIWUR17639;AGIWUR34507;AGIWUR35227;AGIWUR43027;AGIWUR44311                       |    |   |                                                           |          |                |                                     |
| N2                                                                                           | HS | X | 11537714                                                  | 11541417 | WBGene00007954 | gcp-2.2 C35C5.2 -0.038875027304254  |
| AGIWUR19973;AGIWUR28266                                                                      |    |   |                                                           |          |                |                                     |
| N2                                                                                           | HS | X | 11542129                                                  | 11545061 | WBGene00044121 | gcp-2.3 C35C5.11                    |

|                                                                                                             |    |   |             |          |                |          |          |                    |
|-------------------------------------------------------------------------------------------------------------|----|---|-------------|----------|----------------|----------|----------|--------------------|
| 0.182403431670254                                                                                           |    |   | AGIWUR24227 |          |                |          |          |                    |
| N2                                                                                                          | HS | X | 11545091    | 11546495 | WBGene00007955 | selt-1.1 | C35C5.3  |                    |
| 0.155896928447048                                                                                           |    |   | AGIWUR22821 |          |                |          |          |                    |
| N2                                                                                                          | HS | X | 11548608    | 11550740 | WBGene00003239 | mig-2    | C35C5.4  | 0.11565180348595   |
| AGIWUR1331;AGIWUR5810;AGIWUR8838;AGIWUR17531;AGIWUR43904;AGIWUR44479                                        |    |   |             |          |                |          |          |                    |
| N2                                                                                                          | HS | X | 11554795    | 11559858 | WBGene00007959 | C35C5.10 | C35C5.10 |                    |
| 0.170249351150671                                                                                           |    |   | AGIWUR2588  |          |                |          |          |                    |
| N2                                                                                                          | HS | X | 11560915    | 11563697 | WBGene00002975 | lev-8    | C35C5.5  | 0.146075974784742  |
| AGIWUR35817                                                                                                 |    |   |             |          |                |          |          |                    |
| N2                                                                                                          | HS | X | 11563923    | 11569531 | WBGene00007956 | trpp-9   | C35C5.6  | -0.463421577862396 |
| AGIWUR43921                                                                                                 |    |   |             |          |                |          |          |                    |
| N2                                                                                                          | HS | X | 11576247    | 11581727 | WBGene00001490 | frm-3    | H05G16.1 |                    |
| -0.000195517700193548                                                                                       |    |   |             |          |                |          |          |                    |
| AGIWUR18461;AGIWUR18670;AGIWUR20783;AGIWUR25861;AGIWUR28199;AGIWUR29720;AGIWUR33619;AGIWUR37114;AGIWUR40164 |    |   |             |          |                |          |          |                    |
| ;AGIWUR40423;AGIWUR43229                                                                                    |    |   |             |          |                |          |          |                    |
| N2                                                                                                          | HS | X | 11581751    | 11584960 | WBGene00009932 | F52D10.6 | F52D10.6 |                    |
| -0.220497030405967                                                                                          |    |   |             |          |                |          |          |                    |
| N2                                                                                                          | HS | X | 11585675    | 11589757 | WBGene00009929 | abts-2   | F52D10.1 |                    |
| 0.151725164500323                                                                                           |    |   |             |          |                |          |          |                    |
| N2                                                                                                          | HS | X | 11589686    | 11591719 | WBGene00009930 | F52D10.2 | F52D10.2 |                    |
| 0.0379792147835563                                                                                          |    |   |             |          |                |          |          |                    |
| N2                                                                                                          | HS | X | 11603709    | 11605451 | WBGene00001502 | ftt-2    | F52D10.3 |                    |
| -0.255087972310356                                                                                          |    |   |             |          |                |          |          |                    |
| N2                                                                                                          | HS | X | 11617462    | 11619795 | WBGene00009931 | F52D10.4 | F52D10.4 |                    |
| 0.0175925421741043                                                                                          |    |   |             |          |                |          |          |                    |
| N2                                                                                                          | HS | X | 11620047    | 11621996 | WBGene00006065 | sto-3    | F52D10.5 |                    |
| 0.0805211358195894                                                                                          |    |   |             |          |                |          |          |                    |
| N2                                                                                                          | HS | X | 11622967    | 11627113 | WBGene00006694 | twk-44   | Y71H9A.1 |                    |
| 0.0103856666771223                                                                                          |    |   |             |          |                |          |          |                    |
| N2                                                                                                          | HS | X | 11632407    | 11636508 | WBGene00006068 | sto-6    | Y71H9A.2 |                    |
| -0.0511071771349059                                                                                         |    |   |             |          |                |          |          |                    |
| N2                                                                                                          | HS | X | 11644143    | 11647425 | WBGene00006066 | sto-4    | Y71H9A.3 |                    |
| 0.017677567879165                                                                                           |    |   |             |          |                |          |          |                    |
| N2                                                                                                          | HS | X | 11647423    | 11648196 | WBGene00011446 | T04F8.8  | T04F8.8  | 0.0656701445886618 |
| AGIWUR18677                                                                                                 |    |   |             |          |                |          |          |                    |
| N2                                                                                                          | HS | X | 11648358    | 11650918 | WBGene00011443 | cutl-11  | T04F8.4  | 0.139706550712571  |
| AGIWUR19813                                                                                                 |    |   |             |          |                |          |          |                    |
| N2                                                                                                          | HS | X | 11653570    | 11656569 | WBGene00011441 | T04F8.2  | T04F8.2  | 0.108246402567096  |
| AGIWUR2428;AGIWUR19123                                                                                      |    |   |             |          |                |          |          |                    |

|                                                                                                |    |   |          |          |                |           |                            |
|------------------------------------------------------------------------------------------------|----|---|----------|----------|----------------|-----------|----------------------------|
| N2                                                                                             | HS | X | 11659510 | 11661660 | WBGene00011440 | sfxn-1.5  | T04F8.1                    |
| 0.00310037138406472 AGIWUR30329                                                                |    |   |          |          |                |           |                            |
| N2                                                                                             | HS | X | 11667127 | 11672309 | WBGene00011444 | T04F8.6   | T04F8.6                    |
| -0.00701075171127519                                                                           |    |   |          |          |                |           |                            |
| AGIWUR7225;AGIWUR17517;AGIWUR18050;AGIWUR18678;AGIWUR18752;AGIWUR29417;AGIWUR31500;AGIWUR34985 |    |   |          |          |                |           |                            |
| N2                                                                                             | HS | X | 11674416 | 11677090 | WBGene00011447 | T04F8.9   | T04F8.9 -0.182526709774723 |
| AGIWUR34736                                                                                    |    |   |          |          |                |           |                            |
| N2                                                                                             | HS | X | 11677515 | 11680980 | WBGene00011445 | T04F8.7   | T04F8.7 0.0148010975485207 |
| AGIWUR5669;AGIWUR31052;AGIWUR38300                                                             |    |   |          |          |                |           |                            |
| N2                                                                                             | HS | X | 11684661 | 11685778 | WBGene00001981 | hnd-1     | C44C10.8                   |
| -0.40079131035378 AGIWUR25505                                                                  |    |   |          |          |                |           |                            |
| N2                                                                                             | HS | X | 11687000 | 11688269 | WBGene00008088 | C44C10.7  | C44C10.7                   |
| 0.119770954770714 AGIWUR36171                                                                  |    |   |          |          |                |           |                            |
| N2                                                                                             | HS | X | 11690314 | 11690789 | WBGene00008090 | C44C10.10 | C44C10.10                  |
| -0.110331442390866 AGIWUR42468                                                                 |    |   |          |          |                |           |                            |
| N2                                                                                             | HS | X | 11691109 | 11692456 | WBGene00008086 | C44C10.5  | C44C10.5                   |
| -0.245803483860431 AGIWUR26240                                                                 |    |   |          |          |                |           |                            |
| N2                                                                                             | HS | X | 11693464 | 11695750 | WBGene00008085 | C44C10.4  | C44C10.4                   |
| -0.180839407482875 AGIWUR6646                                                                  |    |   |          |          |                |           |                            |
| N2                                                                                             | HS | X | 11696996 | 11698065 | WBGene00044133 | C44C10.12 | C44C10.12                  |
| 0.0313296138730852 AGIWUR37824;AGIWUR38613;AGIWUR42182                                         |    |   |          |          |                |           |                            |
| N2                                                                                             | HS | X | 11698384 | 11699098 | WBGene00008087 | C44C10.6  | C44C10.6                   |
| -0.0357280528959958 AGIWUR36681                                                                |    |   |          |          |                |           |                            |
| N2                                                                                             | HS | X | 11702525 | 11704500 | WBGene00008084 | C44C10.3  | C44C10.3                   |
| 0.144117934869033 AGIWUR21455;AGIWUR29164;AGIWUR41440                                          |    |   |          |          |                |           |                            |
| N2                                                                                             | HS | X | 11704888 | 11707238 | WBGene00008083 | cyp-29A1  | C44C10.2                   |
| 0.00677614730024079 AGIWUR6870                                                                 |    |   |          |          |                |           |                            |
| N2                                                                                             | HS | X | 11707903 | 11710190 | WBGene00043985 | C44C10.11 | C44C10.11                  |
| -0.190797882218687 AGIWUR5144;AGIWUR21747;AGIWUR26369;AGIWUR35133;AGIWUR35582;AGIWUR40080      |    |   |          |          |                |           |                            |
| N2                                                                                             | HS | X | 11711307 | 11712280 | WBGene00000753 | col-180   | C44C10.1                   |
| -0.145443147587457 AGIWUR19530                                                                 |    |   |          |          |                |           |                            |
| N2                                                                                             | HS | X | 11713240 | 11716511 | WBGene00008089 | C44C10.9  | C44C10.9                   |
| 0.146090343474179 AGIWUR1389;AGIWUR14021                                                       |    |   |          |          |                |           |                            |
| N2                                                                                             | HS | X | 11721724 | 11724195 | WBGene00008369 | D1053.4   | D1053.4 0.16454452399155   |
| AGIWUR22031                                                                                    |    |   |          |          |                |           |                            |
| N2                                                                                             | HS | X | 11726271 | 11727936 | WBGene00001790 | gst-42    | D1053.1                    |
| -0.00866356534267432 AGIWUR39657                                                               |    |   |          |          |                |           |                            |
| N2                                                                                             | HS | X | 11728151 | 11728891 | WBGene00008367 | D1053.2   | D1053.2 0.147400605511799  |
| AGIWUR4100                                                                                     |    |   |          |          |                |           |                            |

|                                                                 |    |   |          |          |                |           |          |                     |
|-----------------------------------------------------------------|----|---|----------|----------|----------------|-----------|----------|---------------------|
| N2                                                              | HS | X | 11729586 | 11733698 | WBGene00008368 | D1053.3   | D1053.3  | 0.0959239953599296  |
| AGIWUR22019;AGIWUR42744                                         |    |   |          |          |                |           |          |                     |
| N2                                                              | HS | X | 11746076 | 11747249 | WBGene00008049 | C40H5.7   | C40H5.7  | 0.244935413109027   |
| AGIWUR42587                                                     |    |   |          |          |                |           |          |                     |
| N2                                                              | HS | X | 11754776 | 11756762 | WBGene00008045 | C40H5.2   | C40H5.2  | 0.0391890056753752  |
| AGIWUR45000                                                     |    |   |          |          |                |           |          |                     |
| N2                                                              | HS | X | 11759198 | 11764535 | WBGene00008047 | lact-7    | C40H5.4  | 0.116513223283562   |
| AGIWUR2323;AGIWUR6946;AGIWUR12305;AGIWUR29315                   |    |   |          |          |                |           |          |                     |
| N2                                                              | HS | X | 11764456 | 11769378 | WBGene00006654 | ttx-3     | C40H5.5  | -0.0610823416398385 |
| AGIWUR3181;AGIWUR40976                                          |    |   |          |          |                |           |          |                     |
| N2                                                              | HS | X | 11775190 | 11775728 | WBGene00008048 | hpo-41    | C40H5.6  | -0.135849761646824  |
| AGIWUR7235                                                      |    |   |          |          |                |           |          |                     |
| N2                                                              | HS | X | 11781463 | 11784330 | WBGene00013631 | Y102F5A.1 |          | Y102F5A.1           |
| -0.0104078565470225 AGIWUR41265                                 |    |   |          |          |                |           |          |                     |
| N2                                                              | HS | X | 11798505 | 11803656 | WBGene00004682 | rsd-3     | C34E11.1 |                     |
| -0.164464150937828 AGIWUR12992                                  |    |   |          |          |                |           |          |                     |
| N2                                                              | HS | X | 11804210 | 11805306 | WBGene00007937 | C34E11.4  |          | C34E11.4            |
| 0.346363453485239 AGIWUR29254                                   |    |   |          |          |                |           |          |                     |
| N2                                                              | HS | X | 11805378 | 11814653 | WBGene00007935 | C34E11.2  |          | C34E11.2            |
| 0.17518081396025 AGIWUR6735;AGIWUR17971;AGIWUR18770;AGIWUR41165 |    |   |          |          |                |           |          |                     |
| N2                                                              | HS | X | 11826093 | 11836162 | WBGene00044079 | tag-241   | C34E11.3 |                     |
| 0.00755806253087243 AGIWUR21066                                 |    |   |          |          |                |           |          |                     |
| N2                                                              | HS | X | 11836068 | 11837478 | WBGene00006388 | taf-7.1   | F54F7.1  | 0.059344629720524   |
| AGIWUR43977                                                     |    |   |          |          |                |           |          |                     |
| N2                                                              | HS | X | 11843663 | 11845337 | WBGene00010064 | F54F7.2   | F54F7.2  | -0.11653958237156   |
| AGIWUR20596                                                     |    |   |          |          |                |           |          |                     |
| N2                                                              | HS | X | 11847856 | 11848695 | WBGene00045251 | F54F7.9   | F54F7.9  | 0.114083845439101   |
| AGIWUR36255                                                     |    |   |          |          |                |           |          |                     |
| N2                                                              | HS | X | 11849392 | 11850182 | WBGene00010065 | F54F7.3   | F54F7.3  | 0.400810848186888   |
| AGIWUR44650                                                     |    |   |          |          |                |           |          |                     |
| N2                                                              | HS | X | 11852794 | 11853729 | WBGene00006965 | xtr-1     | F54F7.4  |                     |
| -0.00220521489644376 AGIWUR11219                                |    |   |          |          |                |           |          |                     |
| N2                                                              | HS | X | 11853818 | 11854996 | WBGene00010068 | F54F7.8   | F54F7.8  | -0.142913328919862  |
| AGIWUR34989                                                     |    |   |          |          |                |           |          |                     |
| N2                                                              | HS | X | 11857478 | 11862373 | WBGene00003219 | mes-1     | F54F7.5  | -0.235202648395656  |
| AGIWUR34339                                                     |    |   |          |          |                |           |          |                     |
| N2                                                              | HS | X | 11865383 | 11866827 | WBGene00010066 | F54F7.6   | F54F7.6  | -0.236691684579345  |
| AGIWUR14467                                                     |    |   |          |          |                |           |          |                     |
| N2                                                              | HS | X | 11867971 | 11869360 | WBGene00010067 | dot-1.2   | F54F7.7  | -0.0542828295392024 |

| AGIWUR12110             |    |   |                         |          |                |           |                             |
|-------------------------|----|---|-------------------------|----------|----------------|-----------|-----------------------------|
| N2                      | HS | X | 11875654                | 11877242 | WBGene00013389 | Y62H9A.1  | Y62H9A.1                    |
| 0.148326225094235       |    |   | AGIWUR11046             |          |                |           |                             |
| N2                      | HS | X | 11877418                | 11878196 | WBGene00013390 | Y62H9A.2  | Y62H9A.2                    |
| 0.053599032990574       |    |   | AGIWUR43304             |          |                |           |                             |
| N2                      | HS | X | 11879110                | 11879971 | WBGene00013391 | Y62H9A.3  | Y62H9A.3                    |
| -0.0335690419853485     |    |   | AGIWUR45025             |          |                |           |                             |
| N2                      | HS | X | 11880124                | 11881264 | WBGene00013392 | Y62H9A.4  | Y62H9A.4                    |
| 0.0961113241055571      |    |   | AGIWUR33966             |          |                |           |                             |
| N2                      | HS | X | 11882144                | 11882917 | WBGene00013393 | Y62H9A.5  | Y62H9A.5                    |
| 0.127963545787948       |    |   | AGIWUR33524             |          |                |           |                             |
| N2                      | HS | X | 11883127                | 11884043 | WBGene00013394 | ule-5     | Y62H9A.6                    |
| 0.113068179541521       |    |   | AGIWUR14679             |          |                |           |                             |
| N2                      | HS | X | 11884330                | 11886438 | WBGene00013395 | Y62H9A.7  | Y62H9A.7                    |
| -0.295505495535897      |    |   | AGIWUR35290             |          |                |           |                             |
| N2                      | HS | X | 11891259                | 11892422 | WBGene00013396 | Y62H9A.8  | Y62H9A.8                    |
| -0.00527600817611074    |    |   | AGIWUR19602             |          |                |           |                             |
| N2                      | HS | X | 11895585                | 11898140 | WBGene00013397 | Y62H9A.9  | Y62H9A.9                    |
| 0.0457557776400996      |    |   | AGIWUR45120             |          |                |           |                             |
| N2                      | HS | X | 11904924                | 11907022 | WBGene00013399 | Y62H9A.11 | Y62H9A.11                   |
| -0.0204848066323775     |    |   | AGIWUR40597             |          |                |           |                             |
| N2                      | HS | X | 11907267                | 11910145 | WBGene00045252 | Y62H9A.15 | Y62H9A.15                   |
| 0.103179129219689       |    |   | AGIWUR37686;AGIWUR42152 |          |                |           |                             |
| N2                      | HS | X | 11914124                | 11915558 | WBGene00013400 | Y62H9A.12 | Y62H9A.12                   |
| -0.0435216489654664     |    |   | AGIWUR36585             |          |                |           |                             |
| N2                      | HS | X | 11917005                | 11920158 | WBGene00013401 | Y62H9A.13 | Y62H9A.13                   |
| 0.0621381296581127      |    |   | AGIWUR26048             |          |                |           |                             |
| N2                      | HS | X | 11921252                | 11923138 | WBGene00013402 | Y62H9A.14 | Y62H9A.14                   |
| 0.152918409034772       |    |   | AGIWUR30338             |          |                |           |                             |
| N2                      | HS | X | 11924461                | 11927032 | WBGene00010119 | F55G7.1   | F55G7.1 -0.0709430648800948 |
| AGIWUR11372;AGIWUR22511 |    |   |                         |          |                |           |                             |
| N2                      | HS | X | 11928107                | 11929372 | WBGene00045493 | F55G7.4   | F55G7.4 -0.0978860506182251 |
| AGIWUR39073             |    |   |                         |          |                |           |                             |
| N2                      | HS | X | 11929899                | 11931646 | WBGene00010120 | dot-1.4   | F55G7.2 0.0978051372640518  |
| AGIWUR9664              |    |   |                         |          |                |           |                             |
| N2                      | HS | X | 11940336                | 11942051 | WBGene00010121 | F55G7.3   | F55G7.3 0.103844369456921   |
| AGIWUR19193             |    |   |                         |          |                |           |                             |
| N2                      | HS | X | 11944313                | 11946834 | WBGene00011614 | nfya-1    | T08D10.1                    |
| -0.172908372598087      |    |   | AGIWUR28467             |          |                |           |                             |



|                                                                       |    |   |                                                                                  |          |                |          |           |                     |
|-----------------------------------------------------------------------|----|---|----------------------------------------------------------------------------------|----------|----------------|----------|-----------|---------------------|
| N2                                                                    | HS | X | 11948843                                                                         | 11951893 | WBGene00011615 | lsd-1    | T08D10.2  |                     |
| -0.135911056502108                                                    |    |   | AGIWUR18850                                                                      |          |                |          |           |                     |
| N2                                                                    | HS | X | 11952085                                                                         | 11953329 | WBGene00044148 | T08D10.4 |           | T08D10.4            |
| 0.0680791075538099                                                    |    |   | AGIWUR17215;AGIWUR24785                                                          |          |                |          |           |                     |
| N2                                                                    | HS | X | 11957563                                                                         | 11958395 | WBGene00206466 | T08D10.5 |           | T08D10.5            |
| 0.111661149586674                                                     |    |   | AGIWUR1122                                                                       |          |                |          |           |                     |
| N2                                                                    | HS | X | 11960145                                                                         | 11961509 | WBGene00008212 | C49F5.8  | C49F5.8   | 0.0992856069834662  |
| AGIWUR44049                                                           |    |   |                                                                                  |          |                |          |           |                     |
| N2                                                                    | HS | X | 11961443                                                                         | 11961777 | WBGene00268214 | C49F5.12 |           | C49F5.12            |
| 0.112802372967357                                                     |    |   | AGIWUR950;AGIWUR15616;AGIWUR43673                                                |          |                |          |           |                     |
| N2                                                                    | HS | X | 11962413                                                                         | 11962646 | WBGene00045316 | C49F5.9  | C49F5.9   | 0.283038678097064   |
| AGIWUR18274;AGIWUR34913;AGIWUR35638;AGIWUR35757;AGIWUR44815           |    |   |                                                                                  |          |                |          |           |                     |
| N2                                                                    | HS | X | 11965962                                                                         | 11969784 | WBGene00008205 | sams-1   | C49F5.1   | -0.282178232782914  |
| AGIWUR1947;AGIWUR7219;AGIWUR10862;AGIWUR24028;AGIWUR26342;AGIWUR32238 |    |   |                                                                                  |          |                |          |           |                     |
| N2                                                                    | HS | X | 11968034                                                                         | 12021212 | WBGene00012158 | ucr-2.1  | VW06B3R.1 |                     |
| -0.12338315211062                                                     |    |   | AGIWUR8278;AGIWUR8939;AGIWUR16170;AGIWUR31443                                    |          |                |          |           |                     |
| N2                                                                    | HS | X | 12028711                                                                         | 12031498 | WBGene00007115 | B0198.2  | B0198.2   | -0.0646707686030012 |
| AGIWUR5120                                                            |    |   |                                                                                  |          |                |          |           |                     |
| N2                                                                    | HS | X | 12031598                                                                         | 12034037 | WBGene00006646 | tsp-20   | B0198.1   |                     |
| -0.00430890579561183                                                  |    |   | AGIWUR7276                                                                       |          |                |          |           |                     |
| N2                                                                    | HS | X | 12042593                                                                         | 12057049 | WBGene00007116 | B0198.3  | B0198.3   | -0.164020831400505  |
| AGIWUR8482                                                            |    |   |                                                                                  |          |                |          |           |                     |
| N2                                                                    | HS | X | 12065264                                                                         | 12067432 | WBGene00007594 | lgc-23   | C15A7.1   | 0.104268362516162   |
| AGIWUR16523                                                           |    |   |                                                                                  |          |                |          |           |                     |
| N2                                                                    | HS | X | 12068550                                                                         | 12070563 | WBGene00045385 | lgc-24   | C15A7.4   | 0.0452597384795848  |
| AGIWUR25344                                                           |    |   |                                                                                  |          |                |          |           |                     |
| N2                                                                    | HS | X | 12070743                                                                         | 12073863 | WBGene00007595 | C15A7.2  | C15A7.2   | -0.172215897141466  |
| AGIWUR26829;AGIWUR37909                                               |    |   |                                                                                  |          |                |          |           |                     |
| N2                                                                    | HS | X | 12076553                                                                         | 12093083 | WBGene00012226 | W03G11.4 |           | W03G11.4            |
| -0.162192629126404                                                    |    |   | AGIWUR19534;AGIWUR32595                                                          |          |                |          |           |                     |
| N2                                                                    | HS | X | 12100196                                                                         | 12103812 | WBGene00012225 | W03G11.3 |           | W03G11.3            |
| -0.0169152398100856                                                   |    |   | AGIWUR6598;AGIWUR7282;AGIWUR8929;AGIWUR16839;AGIWUR22839;AGIWUR23249;AGIWUR41917 |          |                |          |           |                     |
| N2                                                                    | HS | X | 12104930                                                                         | 12106081 | WBGene00000754 | col-181  | W03G11.1  |                     |
| -0.127751914539342                                                    |    |   | AGIWUR30503                                                                      |          |                |          |           |                     |
| N2                                                                    | HS | X | 12106407                                                                         | 12108617 | WBGene00012224 | W03G11.2 |           | W03G11.2            |
| 0.263747011778111                                                     |    |   | AGIWUR7267                                                                       |          |                |          |           |                     |
| N2                                                                    | HS | X | 12109135                                                                         | 12111185 | WBGene00011354 | lgc-13   | T01H10.1  |                     |
| 0.00733029743591374                                                   |    |   | AGIWUR15109                                                                      |          |                |          |           |                     |
| N2                                                                    | HS | X | 12111513                                                                         | 12113475 | WBGene00011355 | lgc-14   | T01H10.2  |                     |

|                                                                                                 |    |   |                                                |          |                |          |          |                     |
|-------------------------------------------------------------------------------------------------|----|---|------------------------------------------------|----------|----------------|----------|----------|---------------------|
| -0.0442024271612573                                                                             |    |   | AGIWUR6157;AGIWUR14058;AGIWUR33985;AGIWUR40554 |          |                |          |          |                     |
| N2                                                                                              | HS | X | 12114324                                       | 12115923 | WBGene00011356 | lgc-15   | T01H10.3 |                     |
| -0.395097574006348                                                                              |    |   | AGIWUR16903                                    |          |                |          |          |                     |
| N2                                                                                              | HS | X | 12116615                                       | 12117763 | WBGene00011357 | T01H10.4 |          | T01H10.4            |
| 0.189919330652815                                                                               |    |   | AGIWUR10006;AGIWUR28978;AGIWUR33766            |          |                |          |          |                     |
| N2                                                                                              | HS | X | 12118640                                       | 12120661 | WBGene00011358 | lgc-16   | T01H10.5 |                     |
| 0.0654481674824501                                                                              |    |   | AGIWUR10023                                    |          |                |          |          |                     |
| N2                                                                                              | HS | X | 12121585                                       | 12125048 | WBGene00011359 | lgc-17   | T01H10.6 |                     |
| -0.0544825987997815                                                                             |    |   | AGIWUR31474                                    |          |                |          |          |                     |
| N2                                                                                              | HS | X | 12125608                                       | 12128000 | WBGene00011360 | lgc-18   | T01H10.7 |                     |
| -0.140132484741791                                                                              |    |   | AGIWUR397                                      |          |                |          |          |                     |
| N2                                                                                              | HS | X | 12128144                                       | 12141151 | WBGene00011361 | lyst-1   | T01H10.8 |                     |
| -0.0226462199195181                                                                             |    |   | AGIWUR42346                                    |          |                |          |          |                     |
| N2                                                                                              | HS | X | 12142869                                       | 12143819 | WBGene00010926 | M153.3   | M153.3   | 0.13599926286446    |
| AGIWUR36470                                                                                     |    |   |                                                |          |                |          |          |                     |
| N2                                                                                              | HS | X | 12144114                                       | 12145940 | WBGene00045481 | M153.5   | M153.5   | 0.0999449021619325  |
| AGIWUR15412                                                                                     |    |   |                                                |          |                |          |          |                     |
| N2                                                                                              | HS | X | 12146832                                       | 12148529 | WBGene00010924 | M153.1   | M153.1   | 0.0218771530689317  |
| AGIWUR36000                                                                                     |    |   |                                                |          |                |          |          |                     |
| N2                                                                                              | HS | X | 12150080                                       | 12151474 | WBGene00044144 | M153.4   | M153.4   | -0.0369578978440863 |
| AGIWUR5719;AGIWUR7960;AGIWUR16127;AGIWUR32416;AGIWUR43557                                       |    |   |                                                |          |                |          |          |                     |
| N2                                                                                              | HS | X | 12151359                                       | 12154105 | WBGene00010925 | M153.2   | M153.2   | 0.357811779004864   |
| AGIWUR13412                                                                                     |    |   |                                                |          |                |          |          |                     |
| N2                                                                                              | HS | X | 12156407                                       | 12160039 | WBGene00010222 | F57G12.2 |          | F57G12.2            |
| 0.0703564157434022                                                                              |    |   | AGIWUR6500;AGIWUR11956;AGIWUR12822;AGIWUR28178 |          |                |          |          |                     |
| N2                                                                                              | HS | X | 12169092                                       | 12171681 | WBGene00010221 | F57G12.1 |          | F57G12.1            |
| -0.197652194292804                                                                              |    |   | AGIWUR24594;AGIWUR27372                        |          |                |          |          |                     |
| N2                                                                                              | HS | X | 12199655                                       | 12213049 | WBGene00000277 | cab-1    | C23H4.1  | -0.0969775299814115 |
| AGIWUR10784;AGIWUR10818;AGIWUR15448;AGIWUR17107;AGIWUR18304;AGIWUR36949;AGIWUR39077;AGIWUR41971 |    |   |                                                |          |                |          |          |                     |
| N2                                                                                              | HS | X | 12217243                                       | 12219312 | WBGene00044132 | C23H4.8  | C23H4.8  | 0.179442670536915   |
| AGIWUR18650;AGIWUR25954                                                                         |    |   |                                                |          |                |          |          |                     |
| N2                                                                                              | HS | X | 12219710                                       | 12222745 | WBGene00007691 | C23H4.2  | C23H4.2  | 0.134514249014852   |
| AGIWUR31189;AGIWUR35320;AGIWUR36580                                                             |    |   |                                                |          |                |          |          |                     |
| N2                                                                                              | HS | X | 12222869                                       | 12226047 | WBGene00007695 | C23H4.7  | C23H4.7  | 0.236459369360322   |
| AGIWUR32273                                                                                     |    |   |                                                |          |                |          |          |                     |
| N2                                                                                              | HS | X | 12226203                                       | 12229861 | WBGene00007692 | C23H4.3  | C23H4.3  | 0.195183515562244   |
| AGIWUR37430                                                                                     |    |   |                                                |          |                |          |          |                     |
| N2                                                                                              | HS | X | 12229951                                       | 12233244 | WBGene00007693 | C23H4.4  | C23H4.4  | 0.252556918536536   |
| AGIWUR7406                                                                                      |    |   |                                                |          |                |          |          |                     |

|                                   |    |   |          |          |                |          |          |                     |
|-----------------------------------|----|---|----------|----------|----------------|----------|----------|---------------------|
| N2                                | HS | X | 12235621 | 12240781 | WBGene00007694 | C23H4.6  | C23H4.6  | 0.166464890166505   |
| AGIWUR31706                       |    |   |          |          |                |          |          |                     |
| N2                                | HS | X | 12241627 | 12244637 | WBGene00008451 | E01G6.3  | E01G6.3  |                     |
| -0.000496614082848623 AGIWUR14402 |    |   |          |          |                |          |          |                     |
| N2                                | HS | X | 12256644 | 12258971 | WBGene00008450 | E01G6.2  | E01G6.2  | -0.0494817270593391 |
| AGIWUR5313                        |    |   |          |          |                |          |          |                     |
| N2                                | HS | X | 12260881 | 12266537 | WBGene00008449 | E01G6.1  | E01G6.1  | 0.258467863104986   |
| AGIWUR6911                        |    |   |          |          |                |          |          |                     |
| N2                                | HS | X | 12266912 | 12270941 | WBGene00010403 | otpl-8   | H19J13.1 |                     |
| 0.112476733032 AGIWUR20322        |    |   |          |          |                |          |          |                     |
| N2                                | HS | X | 12273638 | 12274691 | WBGene00010404 | H19J13.2 | H19J13.2 |                     |
| -0.114166276146951 AGIWUR32478    |    |   |          |          |                |          |          |                     |
| N2                                | HS | X | 12275042 | 12275677 | WBGene00007294 | C04B4.6  | C04B4.6  | -0.118076891195344  |
| AGIWUR31570                       |    |   |          |          |                |          |          |                     |
| N2                                | HS | X | 12280707 | 12282559 | WBGene00007289 | C04B4.1  | C04B4.1  | 0.00310220065386524 |
| AGIWUR36736                       |    |   |          |          |                |          |          |                     |
| N2                                | HS | X | 12283285 | 12285307 | WBGene00007290 | C04B4.2  | C04B4.2  | -0.0806766463001622 |
| AGIWUR10264                       |    |   |          |          |                |          |          |                     |
| N2                                | HS | X | 12285824 | 12287253 | WBGene00007291 | lips-2   | C04B4.3  | 0.16111559797834    |
| AGIWUR12086                       |    |   |          |          |                |          |          |                     |
| N2                                | HS | X | 12287659 | 12288354 | WBGene00007293 | C04B4.5  | C04B4.5  | 0.0743576255355638  |
| AGIWUR44214                       |    |   |          |          |                |          |          |                     |
| N2                                | HS | X | 12290839 | 12293267 | WBGene00007292 | C04B4.4  | C04B4.4  | -0.167127507522435  |
| AGIWUR37988                       |    |   |          |          |                |          |          |                     |
| N2                                | HS | X | 12293767 | 12295311 | WBGene00012299 | W06D11.1 | W06D11.1 |                     |
| -0.0888148659236112 AGIWUR23674   |    |   |          |          |                |          |          |                     |
| N2                                | HS | X | 12296047 | 12296644 | WBGene00012300 | W06D11.2 | W06D11.2 |                     |
| -0.282923518951826 AGIWUR11296    |    |   |          |          |                |          |          |                     |
| N2                                | HS | X | 12298683 | 12300022 | WBGene00012301 | W06D11.3 | W06D11.3 |                     |
| -0.0462298013427951 AGIWUR2184    |    |   |          |          |                |          |          |                     |
| N2                                | HS | X | 12300134 | 12301282 | WBGene00012303 | W06D11.5 | W06D11.5 |                     |
| 0.0468199286643358 AGIWUR42832    |    |   |          |          |                |          |          |                     |
| N2                                | HS | X | 12301488 | 12302817 | WBGene00012302 | dot-1.3  | W06D11.4 |                     |
| -0.00198500705670757 AGIWUR8566   |    |   |          |          |                |          |          |                     |
| N2                                | HS | X | 12306865 | 12309482 | WBGene00008902 | phf-32   | F17A2.3  | 0.00622513164194061 |
| AGIWUR35016                       |    |   |          |          |                |          |          |                     |
| N2                                | HS | X | 12310812 | 12312730 | WBGene00008903 | F17A2.4  | F17A2.4  | 0.00944010602289502 |
| AGIWUR27669                       |    |   |          |          |                |          |          |                     |
| N2                                | HS | X | 12315568 | 12317673 | WBGene00006966 | xtr-2    | F17A2.1  | 0.147327033248457   |

AGIWUR2512;AGIWUR9538;AGIWUR16671;AGIWUR33859;AGIWUR44395

|             |    |   |                      |                                                            |                |           |           |                     |
|-------------|----|---|----------------------|------------------------------------------------------------|----------------|-----------|-----------|---------------------|
| N2          | HS | X | 12318240             | 12320777                                                   | WBGene00000461 | ceh-40    | F17A2.5   | 0.0411582530032204  |
| AGIWUR40436 |    |   |                      |                                                            |                |           |           |                     |
| N2          | HS | X | 12321657             | 12322993                                                   | WBGene00008904 | F17A2.13  | F17A2.13  |                     |
|             |    |   | -0.00185848012166545 | AGIWUR36689                                                |                |           |           |                     |
| N2          | HS | X | 12323739             | 12325432                                                   | WBGene00005118 | srd-40    | F17A2.12  |                     |
|             |    |   | 0.0739570647043877   | AGIWUR31745                                                |                |           |           |                     |
| N2          | HS | X | 12326724             | 12328365                                                   | WBGene00005119 | srd-41    | F17A2.6   | -0.091499955014438  |
| AGIWUR18512 |    |   |                      |                                                            |                |           |           |                     |
| N2          | HS | X | 12328976             | 12330526                                                   | WBGene00005123 | srd-45    | F17A2.7   | -0.0115921893592219 |
| AGIWUR44137 |    |   |                      |                                                            |                |           |           |                     |
| N2          | HS | X | 12332095             | 12333302                                                   | WBGene00005124 | srd-46    | F17A2.10  |                     |
|             |    |   | -0.0871276099333951  | AGIWUR16372                                                |                |           |           |                     |
| N2          | HS | X | 12333642             | 12335290                                                   | WBGene00005125 | srd-47    | F17A2.11  |                     |
|             |    |   | 0.0335919134960987   | AGIWUR33221                                                |                |           |           |                     |
| N2          | HS | X | 12336108             | 12337752                                                   | WBGene00005126 | srd-48    | F17A2.9   | -0.0306191201517843 |
| AGIWUR11538 |    |   |                      |                                                            |                |           |           |                     |
| N2          | HS | X | 12338440             | 12340248                                                   | WBGene00005122 | srd-44    | F17A2.8   | -0.162118776594586  |
| AGIWUR32586 |    |   |                      |                                                            |                |           |           |                     |
| N2          | HS | X | 12340378             | 12341438                                                   | WBGene00006979 | zig-2     | F42F12.2  |                     |
|             |    |   | -0.159117185090594   | AGIWUR17101                                                |                |           |           |                     |
| N2          | HS | X | 12342289             | 12342597                                                   | WBGene00044397 | nspc-8    | F42F12.12 |                     |
|             |    |   | 0.180268752203737    | AGIWUR3560;AGIWUR10811;AGIWUR34815;AGIWUR41515             |                |           |           |                     |
| N2          | HS | X | 12343609             | 12344043                                                   | WBGene00009640 | nspc-10   | F42F12.9  |                     |
|             |    |   | 0.100631599265927    | AGIWUR20803;AGIWUR25081                                    |                |           |           |                     |
| N2          | HS | X | 12347029             | 12347899                                                   | WBGene00044140 | F42F12.11 | F42F12.11 |                     |
|             |    |   | 0.135561136564844    | AGIWUR23806;AGIWUR30383;AGIWUR41994                        |                |           |           |                     |
| N2          | HS | X | 12350578             | 12351788                                                   | WBGene00009635 | F42F12.3  | F42F12.3  |                     |
|             |    |   | 0.0258393211796637   | AGIWUR13631                                                |                |           |           |                     |
| N2          | HS | X | 12351978             | 12352949                                                   | WBGene00009636 | F42F12.4  | F42F12.4  |                     |
|             |    |   | 0.0218938970788307   | AGIWUR9513;AGIWUR25004;AGIWUR33036;AGIWUR42098             |                |           |           |                     |
| N2          | HS | X | 12353550             | 12353768                                                   | WBGene00044398 | nspc-11   | F42F12.13 |                     |
|             |    |   | 0.352159533822213    | AGIWUR7590;AGIWUR24310;AGIWUR29559;AGIWUR37495;AGIWUR41829 |                |           |           |                     |
| N2          | HS | X | 12356194             | 12356681                                                   | WBGene00023493 | nspc-12   | F42F12.10 |                     |
|             |    |   | -0.0328642486267214  | AGIWUR20494;AGIWUR24317                                    |                |           |           |                     |
| N2          | HS | X | 12362397             | 12363102                                                   | WBGene00008961 | F19H6.6   | F19H6.6   | 0.0990598135580214  |
| AGIWUR43762 |    |   |                      |                                                            |                |           |           |                     |
| N2          | HS | X | 12363713             | 12364904                                                   | WBGene00008960 | F19H6.5   | F19H6.5   | 0.133528901479689   |
| AGIWUR22825 |    |   |                      |                                                            |                |           |           |                     |

|                                                                                                                       |    |   |          |          |                |         |         |                     |
|-----------------------------------------------------------------------------------------------------------------------|----|---|----------|----------|----------------|---------|---------|---------------------|
| N2                                                                                                                    | HS | X | 12365688 | 12367255 | WBGene00008959 | F19H6.4 | F19H6.4 | -0.341487301387328  |
| AGIWUR8462                                                                                                            |    |   |          |          |                |         |         |                     |
| N2                                                                                                                    | HS | X | 12374223 | 12378393 | WBGene00008957 | glb-13  | F19H6.2 | 0.0787726400375108  |
| AGIWUR12885;AGIWUR35693                                                                                               |    |   |          |          |                |         |         |                     |
| N2                                                                                                                    | HS | X | 12389594 | 12391474 | WBGene00008956 | nek1-3  | F19H6.1 | -0.380087438752639  |
| AGIWUR10988                                                                                                           |    |   |          |          |                |         |         |                     |
| N2                                                                                                                    | HS | X | 12394265 | 12399534 | WBGene00008924 | F17E5.2 | F17E5.2 | 0.0772642658278242  |
| AGIWUR1387                                                                                                            |    |   |          |          |                |         |         |                     |
| N2                                                                                                                    | HS | X | 12399517 | 12414037 | WBGene00002991 | lin-2   | F17E5.1 | 0.253997789718399   |
| AGIWUR13913                                                                                                           |    |   |          |          |                |         |         |                     |
| N2                                                                                                                    | HS | X | 12425730 | 12426631 | WBGene00023492 | T24D3.2 | T24D3.2 | 0.230974156919178   |
| AGIWUR6201;AGIWUR10096;AGIWUR16437;AGIWUR21018;AGIWUR30257;AGIWUR31249;AGIWUR40680;AGIWUR42163                        |    |   |          |          |                |         |         |                     |
| N2                                                                                                                    | HS | X | 12434154 | 12443915 | WBGene00011824 | T18D3.7 | T18D3.7 | 0.0682621879069458  |
| AGIWUR6965;AGIWUR18290;AGIWUR21788                                                                                    |    |   |          |          |                |         |         |                     |
| N2                                                                                                                    | HS | X | 12449896 | 12451360 | WBGene00011823 | T18D3.6 | T18D3.6 | -0.308728078706167  |
| AGIWUR27988                                                                                                           |    |   |          |          |                |         |         |                     |
| N2                                                                                                                    | HS | X | 12451356 | 12454328 | WBGene00011826 | T18D3.9 | T18D3.9 | 0.21155764472689    |
| AGIWUR23848                                                                                                           |    |   |          |          |                |         |         |                     |
| N2                                                                                                                    | HS | X | 12454745 | 12457934 | WBGene00011820 | T18D3.1 | T18D3.1 | -0.0715544722690602 |
| AGIWUR4299;AGIWUR13787;AGIWUR22278;AGIWUR22796                                                                        |    |   |          |          |                |         |         |                     |
| N2                                                                                                                    | HS | X | 12459069 | 12461639 | WBGene00003854 | odr-7   | T18D3.2 | -0.118254535468005  |
| AGIWUR22267;AGIWUR41458                                                                                               |    |   |          |          |                |         |         |                     |
| N2                                                                                                                    | HS | X | 12463815 | 12464378 | WBGene00011822 | T18D3.5 | T18D3.5 | -0.177348678888427  |
| AGIWUR17653                                                                                                           |    |   |          |          |                |         |         |                     |
| N2                                                                                                                    | HS | X | 12464640 | 12466917 | WBGene00011821 | cdf-2   | T18D3.3 | 0.160921271660918   |
| AGIWUR23602                                                                                                           |    |   |          |          |                |         |         |                     |
| N2                                                                                                                    | HS | X | 12468061 | 12475348 | WBGene00003514 | myo-2   | T18D3.4 | -0.051263301096081  |
| AGIWUR3996;AGIWUR9670;AGIWUR14689;AGIWUR15589;AGIWUR19019;AGIWUR21820;AGIWUR26437;AGIWUR30907;AGIWUR33713;AGIWUR36921 |    |   |          |          |                |         |         |                     |
| N2                                                                                                                    | HS | X | 12475659 | 12477441 | WBGene00009725 | F45E6.1 | F45E6.1 | -0.124415544786359  |
| AGIWUR32552                                                                                                           |    |   |          |          |                |         |         |                     |
| N2                                                                                                                    | HS | X | 12480948 | 12484904 | WBGene00000222 | atf-6   | F45E6.2 | -0.113126614478516  |
| AGIWUR6080;AGIWUR36726;AGIWUR42069                                                                                    |    |   |          |          |                |         |         |                     |
| N2                                                                                                                    | HS | X | 12485054 | 12491102 | WBGene00009726 | tbc-13  | F45E6.3 | -0.244225355382603  |
| AGIWUR42166                                                                                                           |    |   |          |          |                |         |         |                     |
| N2                                                                                                                    | HS | X | 12492865 | 12495862 | WBGene00009727 | lips-1  | F45E6.4 | -0.0549577928535605 |
| AGIWUR2685;AGIWUR6093;AGIWUR33965                                                                                     |    |   |          |          |                |         |         |                     |
| N2                                                                                                                    | HS | X | 12502802 | 12503338 | WBGene00009728 | sdz-19  | F45E6.6 | -0.073673580970997  |
| AGIWUR3292                                                                                                            |    |   |          |          |                |         |         |                     |

|                                                                    |    |   |          |          |                |          |          |                     |
|--------------------------------------------------------------------|----|---|----------|----------|----------------|----------|----------|---------------------|
| N2                                                                 | HS | X | 12503885 | 12514048 | WBGene00004739 | scd-1    | H20J18.1 |                     |
| 0.0677499384141771 AGIWUR11901;AGIWUR30749;AGIWUR31931;AGIWUR42881 |    |   |          |          |                |          |          |                     |
| N2                                                                 | HS | X | 12525344 | 12525783 | WBGene00007634 | C16D6.1  | C16D6.1  | -0.0959286584915944 |
| AGIWUR33758                                                        |    |   |          |          |                |          |          |                     |
| N2                                                                 | HS | X | 12526660 | 12527286 | WBGene00007636 | C16D6.3  | C16D6.3  | -0.141301054293194  |
| AGIWUR38101                                                        |    |   |          |          |                |          |          |                     |
| N2                                                                 | HS | X | 12537014 | 12551677 | WBGene00007635 | npr-4    | C16D6.2  | 0.0358167557051727  |
| AGIWUR4513;AGIWUR13566;AGIWUR38713                                 |    |   |          |          |                |          |          |                     |
| N2                                                                 | HS | X | 12574069 | 12577209 | WBGene00011989 | T24D5.1  | T24D5.1  | 0.0243971710589941  |
| AGIWUR44564                                                        |    |   |          |          |                |          |          |                     |
| N2                                                                 | HS | X | 12580074 | 12583213 | WBGene00011991 | T24D5.3  | T24D5.3  | -0.10991895362449   |
| AGIWUR29259                                                        |    |   |          |          |                |          |          |                     |
| N2                                                                 | HS | X | 12583799 | 12586439 | WBGene00011990 | T24D5.2  | T24D5.2  | -0.0661582472752364 |
| AGIWUR2904                                                         |    |   |          |          |                |          |          |                     |
| N2                                                                 | HS | X | 12597168 | 12597437 | WBGene00011992 | T24D5.4  | T24D5.4  | 0.172856218418417   |
| AGIWUR12113                                                        |    |   |          |          |                |          |          |                     |
| N2                                                                 | HS | X | 12598031 | 12599297 | WBGene00011993 | T24D5.5  | T24D5.5  | -0.244333517128308  |
| AGIWUR9730                                                         |    |   |          |          |                |          |          |                     |
| N2                                                                 | HS | X | 12603622 | 12604708 | WBGene00044149 | T24D5.6  | T24D5.6  | -0.269357965105536  |
| AGIWUR9923                                                         |    |   |          |          |                |          |          |                     |
| N2                                                                 | HS | X | 12612727 | 12617880 | WBGene00011152 | R09A8.1  | R09A8.1  | -0.348882984449315  |
| AGIWUR12254                                                        |    |   |          |          |                |          |          |                     |
| N2                                                                 | HS | X | 12619472 | 12623531 | WBGene00011153 | R09A8.2  | R09A8.2  | -0.2846700508331    |
| AGIWUR3121                                                         |    |   |          |          |                |          |          |                     |
| N2                                                                 | HS | X | 12624655 | 12634354 | WBGene00006493 | tag-147  | R09A8.3  | -0.050200770078753  |
| AGIWUR18950                                                        |    |   |          |          |                |          |          |                     |
| N2                                                                 | HS | X | 12636153 | 12637056 | WBGene00000755 | col-182  | R09A8.4  | 0.124733121491648   |
| AGIWUR23947                                                        |    |   |          |          |                |          |          |                     |
| N2                                                                 | HS | X | 12638461 | 12640559 | WBGene00011154 | R09A8.5  | R09A8.5  | 0.0152803972213036  |
| AGIWUR17053                                                        |    |   |          |          |                |          |          |                     |
| N2                                                                 | HS | X | 12647117 | 12651487 | WBGene00010423 | zmp-5    | H36L18.1 |                     |
| -0.178380240332411 AGIWUR29634                                     |    |   |          |          |                |          |          |                     |
| N2                                                                 | HS | X | 12652591 | 12653520 | WBGene00010424 | H36L18.2 |          | H36L18.2            |
| -0.0698072577334852 AGIWUR30293;AGIWUR43830                        |    |   |          |          |                |          |          |                     |
| N2                                                                 | HS | X | 12658476 | 12661062 | WBGene00007259 | C02B4.3  | C02B4.3  | -0.0111887297039868 |
| AGIWUR16012;AGIWUR23291;AGIWUR23948                                |    |   |          |          |                |          |          |                     |
| N2                                                                 | HS | X | 12662478 | 12663627 | WBGene00045386 | C02B4.4  | C02B4.4  | 0.0974218723751576  |
| AGIWUR3227;AGIWUR7068;AGIWUR16049;AGIWUR39735;AGIWUR42448          |    |   |          |          |                |          |          |                     |
| N2                                                                 | HS | X | 12663760 | 12667854 | WBGene00003616 | nhr-17   | C02B4.2  | 0.39784483670198    |

|                                                                                                                                               |    |   |            |          |                |         |         |                     |  |
|-----------------------------------------------------------------------------------------------------------------------------------------------|----|---|------------|----------|----------------|---------|---------|---------------------|--|
| AGIWUR26583                                                                                                                                   |    |   |            |          |                |         |         |                     |  |
| N2                                                                                                                                            | HS | X | 12678832   | 12689279 | WBGene00000082 | adt-1   | C02B4.1 | -0.0150860942603535 |  |
| AGIWUR3895                                                                                                                                    |    |   |            |          |                |         |         |                     |  |
| N2                                                                                                                                            | HS | X | 12691573   | 12695652 | WBGene00011564 | ugt-50  | T07C5.1 | 0.0849928025947126  |  |
| AGIWUR20308;AGIWUR44327                                                                                                                       |    |   |            |          |                |         |         |                     |  |
| N2                                                                                                                                            | HS | X | 12695589   | 12699921 | WBGene00011568 | nhr-26  | T07C5.5 |                     |  |
| -0.00645451626913385                                                                                                                          |    |   | AGIWUR5518 |          |                |         |         |                     |  |
| N2                                                                                                                                            | HS | X | 12700393   | 12702063 | WBGene00011566 | nhr-214 | T07C5.3 | -0.0219676985303714 |  |
| AGIWUR19201                                                                                                                                   |    |   |            |          |                |         |         |                     |  |
| N2                                                                                                                                            | HS | X | 12703330   | 12704821 | WBGene00011565 | nhr-272 | T07C5.2 | 0.0501977967452394  |  |
| AGIWUR25523                                                                                                                                   |    |   |            |          |                |         |         |                     |  |
| N2                                                                                                                                            | HS | X | 12705624   | 12808249 | WBGene00008901 | nhr-27  | F16H9.2 | -0.0714732248284324 |  |
| AGIWUR34047                                                                                                                                   |    |   |            |          |                |         |         |                     |  |
| N2                                                                                                                                            | HS | X | 12843311   | 12845384 | WBGene00008260 | C52G5.2 | C52G5.2 | 0.0501070412827378  |  |
| AGIWUR37494                                                                                                                                   |    |   |            |          |                |         |         |                     |  |
| N2                                                                                                                                            | HS | X | 12845811   | 12846143 | WBGene00008261 | C52G5.3 | C52G5.3 | 0.0323905773051081  |  |
| AGIWUR24543                                                                                                                                   |    |   |            |          |                |         |         |                     |  |
| N2                                                                                                                                            | HS | X | 12846437   | 12852601 | WBGene00000482 | chd-3   | T14G8.1 | -0.215251122154218  |  |
| AGIWUR26268                                                                                                                                   |    |   |            |          |                |         |         |                     |  |
| N2                                                                                                                                            | HS | X | 12858019   | 12859541 | WBGene00011770 | T14G8.2 | T14G8.2 | 0.0214789882007382  |  |
| AGIWUR412;AGIWUR3957;AGIWUR34879                                                                                                              |    |   |            |          |                |         |         |                     |  |
| N2                                                                                                                                            | HS | X | 12861237   | 12870025 | WBGene00011771 | T14G8.3 | T14G8.3 | 0.0596341351935479  |  |
| AGIWUR16719;AGIWUR30205;AGIWUR33411                                                                                                           |    |   |            |          |                |         |         |                     |  |
| N2                                                                                                                                            | HS | X | 12877480   | 12880328 | WBGene00001149 | bcat-1  | K02A4.1 | -0.169966298651733  |  |
| AGIWUR877;AGIWUR9819;AGIWUR12847;AGIWUR19912;AGIWUR22343;AGIWUR25440;AGIWUR26337                                                              |    |   |            |          |                |         |         |                     |  |
| N2                                                                                                                                            | HS | X | 12881126   | 12884989 | WBGene00001681 | gpc-1   | K02A4.2 | 0.0428693960748916  |  |
| AGIWUR1065;AGIWUR7269;AGIWUR12147;AGIWUR13497;AGIWUR17193;AGIWUR18451;AGIWUR20353;AGIWUR22933;AGIWUR33009;AGIWUR36230;AGIWUR36878;AGIWUR41561 |    |   |            |          |                |         |         |                     |  |
| N2                                                                                                                                            | HS | X | 12907832   | 12920176 | WBGene00004108 | pqn-18  | C34E7.1 | -0.517086406378212  |  |
| AGIWUR11251                                                                                                                                   |    |   |            |          |                |         |         |                     |  |
| N2                                                                                                                                            | HS | X | 12930336   | 12932025 | WBGene00007933 | C34E7.3 | C34E7.3 | 0.0228517900687226  |  |
| AGIWUR5962                                                                                                                                    |    |   |            |          |                |         |         |                     |  |
| N2                                                                                                                                            | HS | X | 12932205   | 12934978 | WBGene00007934 | C34E7.4 | C34E7.4 | 0.0603058821701374  |  |
| AGIWUR24073                                                                                                                                   |    |   |            |          |                |         |         |                     |  |
| N2                                                                                                                                            | HS | X | 12938695   | 12940792 | WBGene00007344 | C05E7.2 | C05E7.2 | 0.272308830878789   |  |
| AGIWUR43111                                                                                                                                   |    |   |            |          |                |         |         |                     |  |
| N2                                                                                                                                            | HS | X | 12941441   | 12943547 | WBGene00007343 | C05E7.1 | C05E7.1 | 0.3976855962808     |  |
| AGIWUR5159                                                                                                                                    |    |   |            |          |                |         |         |                     |  |
| N2                                                                                                                                            | HS | X | 12945616   | 12946562 | WBGene00007345 | C05E7.3 | C05E7.3 | 0.0028752405033643  |  |

|                                                                                                                                             |    |   |          |          |                |                                     |
|---------------------------------------------------------------------------------------------------------------------------------------------|----|---|----------|----------|----------------|-------------------------------------|
| AGIWUR44102                                                                                                                                 |    |   |          |          |                |                                     |
| N2                                                                                                                                          | HS | X | 12965485 | 12968731 | WBGene00007346 | frpr-2 C05E7.4 0.0189949767774493   |
| AGIWUR15330                                                                                                                                 |    |   |          |          |                |                                     |
| N2                                                                                                                                          | HS | X | 12968950 | 12975643 | WBGene00004089 | ppk-3 VF11C1L.1                     |
| -0.138740555609974 AGIWUR4084                                                                                                               |    |   |          |          |                |                                     |
| N2                                                                                                                                          | HS | X | 12978505 | 12979854 | WBGene00008693 | F11C1.4 F11C1.4 -0.0704664299829911 |
| AGIWUR4772                                                                                                                                  |    |   |          |          |                |                                     |
| N2                                                                                                                                          | HS | X | 12981775 | 12985852 | WBGene00008692 | scav-4 F11C1.3 -0.0857245890414742  |
| AGIWUR5437;AGIWUR7703;AGIWUR24766                                                                                                           |    |   |          |          |                |                                     |
| N2                                                                                                                                          | HS | X | 12985790 | 12987219 | WBGene00008691 | mff-1 F11C1.2 -0.179736567718741    |
| AGIWUR7567                                                                                                                                  |    |   |          |          |                |                                     |
| N2                                                                                                                                          | HS | X | 12987334 | 12990365 | WBGene00008690 | F11C1.1 F11C1.1 0.0684381500162861  |
| AGIWUR38893                                                                                                                                 |    |   |          |          |                |                                     |
| N2                                                                                                                                          | HS | X | 12991447 | 12999638 | WBGene00008694 | F11C1.5 F11C1.5 0.00471179153989265 |
| AGIWUR955;AGIWUR6921;AGIWUR7291;AGIWUR14107;AGIWUR25945;AGIWUR27374;AGIWUR28924;AGIWUR31966;AGIWUR38085;AGIWUR39778;AGIWUR43066;AGIWUR44053 |    |   |          |          |                |                                     |
| N2                                                                                                                                          | HS | X | 13008493 | 13013962 | WBGene00003623 | nhr-25 F11C1.6 -0.164260012359799   |
| AGIWUR112;AGIWUR11229;AGIWUR18735;AGIWUR26216;AGIWUR33480                                                                                   |    |   |          |          |                |                                     |
| N2                                                                                                                                          | HS | X | 13018848 | 13022023 | WBGene00008278 | npr-10 C53C7.1 -0.0661500910796766  |
| AGIWUR30677                                                                                                                                 |    |   |          |          |                |                                     |
| N2                                                                                                                                          | HS | X | 13042182 | 13046220 | WBGene00014294 | C53C7.5 C53C7.5 -0.121097125619613  |
| AGIWUR1468;AGIWUR8123;AGIWUR9304;AGIWUR26719;AGIWUR29429;AGIWUR43147;AGIWUR43738;AGIWUR43899                                                |    |   |          |          |                |                                     |
| N2                                                                                                                                          | HS | X | 13048558 | 13050885 | WBGene00008279 | C53C7.3 C53C7.3 -0.07090402654093   |
| AGIWUR43;AGIWUR783;AGIWUR5332;AGIWUR23440                                                                                                   |    |   |          |          |                |                                     |
| N2                                                                                                                                          | HS | X | 13051796 | 13055395 | WBGene00010519 | K03A11.1 K03A11.1                   |
| -0.106881899163932 AGIWUR3726;AGIWUR10438;AGIWUR18953;AGIWUR28685                                                                           |    |   |          |          |                |                                     |
| N2                                                                                                                                          | HS | X | 13055860 | 13058381 | WBGene00045497 | K03A11.6 K03A11.6                   |
| 0.0623389069361222 AGIWUR8903                                                                                                               |    |   |          |          |                |                                     |
| N2                                                                                                                                          | HS | X | 13064168 | 13066936 | WBGene00010522 | K03A11.5 K03A11.5                   |
| 0.0596950268442047 AGIWUR31110                                                                                                              |    |   |          |          |                |                                     |
| N2                                                                                                                                          | HS | X | 13067279 | 13068239 | WBGene00010520 | cpx-2 K03A11.2                      |
| -0.243176759743711 AGIWUR9477                                                                                                               |    |   |          |          |                |                                     |
| N2                                                                                                                                          | HS | X | 13074682 | 13076092 | WBGene00000450 | ceh-28 K03A11.3                     |
| -0.00457363386218468 AGIWUR30609                                                                                                            |    |   |          |          |                |                                     |
| N2                                                                                                                                          | HS | X | 13078172 | 13082045 | WBGene00010521 | K03A11.4 K03A11.4                   |
| 0.0260034929214141 AGIWUR28119;AGIWUR42048                                                                                                  |    |   |          |          |                |                                     |
| N2                                                                                                                                          | HS | X | 13082626 | 13084235 | WBGene00006078 | str-10 R03G8.5 -0.0319464731787926  |
| AGIWUR10323                                                                                                                                 |    |   |          |          |                |                                     |
| N2                                                                                                                                          | HS | X | 13084573 | 13087646 | WBGene00010996 | R03G8.1 R03G8.1 -0.0418947151854834 |



|                                                             |    |   |             |          |                |          |                             |
|-------------------------------------------------------------|----|---|-------------|----------|----------------|----------|-----------------------------|
| AGIWUR40244                                                 |    |   |             |          |                |          |                             |
| N2                                                          | HS | X | 13091131    | 13094424 | WBGene00010998 | R03G8.3  | R03G8.3 0.0489311914399551  |
| AGIWUR44752                                                 |    |   |             |          |                |          |                             |
| N2                                                          | HS | X | 13094558    | 13100445 | WBGene00011000 | R03G8.6  | R03G8.6 -0.0296034090588861 |
| AGIWUR41046                                                 |    |   |             |          |                |          |                             |
| N2                                                          | HS | X | 13101306    | 13104205 | WBGene00010999 | R03G8.4  | R03G8.4 -0.142534685678372  |
| AGIWUR30157                                                 |    |   |             |          |                |          |                             |
| N2                                                          | HS | X | 13105184    | 13108543 | WBGene00008925 | F17H10.1 | F17H10.1                    |
| 0.387967997095764                                           |    |   | AGIWUR29715 |          |                |          |                             |
| N2                                                          | HS | X | 13113772    | 13116390 | WBGene00008926 | F17H10.2 | F17H10.2                    |
| 0.22496527849891                                            |    |   | AGIWUR44308 |          |                |          |                             |
| N2                                                          | HS | X | 13116352    | 13122291 | WBGene00008927 | snx-17   | F17H10.3                    |
| 0.193854388998822                                           |    |   | AGIWUR19757 |          |                |          |                             |
| N2                                                          | HS | X | 13125976    | 13126520 | WBGene00008928 | F17H10.4 | F17H10.4                    |
| -0.0818545280149765                                         |    |   | AGIWUR6044  |          |                |          |                             |
| N2                                                          | HS | X | 13130263    | 13134124 | WBGene00008598 | spin-3   | F09A5.1 -0.0767963452468736 |
| AGIWUR37383                                                 |    |   |             |          |                |          |                             |
| N2                                                          | HS | X | 13135107    | 13139771 | WBGene00008599 | F09A5.2  | F09A5.2 0.0522206624481054  |
| AGIWUR40861                                                 |    |   |             |          |                |          |                             |
| N2                                                          | HS | X | 13139847    | 13140886 | WBGene00045245 | ttr-34   | F09A5.9 -0.0242722651162364 |
| AGIWUR16227;AGIWUR16758;AGIWUR16976;AGIWUR31415;AGIWUR32230 |    |   |             |          |                |          |                             |
| N2                                                          | HS | X | 13141601    | 13152474 | WBGene00008600 | F09A5.3  | F09A5.3 0.0786467065589562  |
| AGIWUR19338                                                 |    |   |             |          |                |          |                             |
| N2                                                          | HS | X | 13152821    | 13170113 | WBGene00008601 | F09A5.4  | F09A5.4 -0.216447556437394  |
| AGIWUR4543;AGIWUR20864;AGIWUR23880;AGIWUR28567;AGIWUR41955  |    |   |             |          |                |          |                             |
| N2                                                          | HS | X | 13177856    | 13178447 | WBGene00003741 | nlp-3    | F48C11.3                    |
| 0.0732755428296876                                          |    |   | AGIWUR24480 |          |                |          |                             |
| N2                                                          | HS | X | 13182463    | 13189961 | WBGene00009844 | cwp-5    | F48C11.2                    |
| 0.00843109310301315                                         |    |   | AGIWUR38605 |          |                |          |                             |
| N2                                                          | HS | X | 13191246    | 13193955 | WBGene00001668 | gpa-6    | F48C11.1                    |
| -0.0659139164821418                                         |    |   | AGIWUR8673  |          |                |          |                             |
| N2                                                          | HS | X | 13212390    | 13216707 | WBGene00006749 | unc-9    | R12H7.1 0.00867289825641038 |
| AGIWUR37395                                                 |    |   |             |          |                |          |                             |
| N2                                                          | HS | X | 13217101    | 13219019 | WBGene00011255 | R12H7.4  | R12H7.4 0.0113972409128404  |
| AGIWUR1046                                                  |    |   |             |          |                |          |                             |
| N2                                                          | HS | X | 13218977    | 13221462 | WBGene00000217 | asp-4    | R12H7.2 -0.0704737745915653 |
| AGIWUR834;AGIWUR4136;AGIWUR14681;AGIWUR36693                |    |   |             |          |                |          |                             |
| N2                                                          | HS | X | 13222920    | 13223546 | WBGene00004826 | skr-20   | R12H7.5 0.177568241293558   |
| AGIWUR8378                                                  |    |   |             |          |                |          |                             |

|                                                                                                                                               |    |   |          |          |                |          |          |                     |
|-----------------------------------------------------------------------------------------------------------------------------------------------|----|---|----------|----------|----------------|----------|----------|---------------------|
| N2                                                                                                                                            | HS | X | 13223644 | 13224712 | WBGene00004825 | skr-19   | R12H7.3  | -0.0175059500616488 |
| AGIWUR5557;AGIWUR9972;AGIWUR11033;AGIWUR13815;AGIWUR20375;AGIWUR21446;AGIWUR30438;AGIWUR31990;AGIWUR35512;AGIWUR36622;AGIWUR42278;AGIWUR42725 |    |   |          |          |                |          |          |                     |
| N2                                                                                                                                            | HS | X | 13225818 | 13226678 | WBGene00004827 | skr-21   | K08H2.1  | -0.132128028431535  |
| AGIWUR33637                                                                                                                                   |    |   |          |          |                |          |          |                     |
| N2                                                                                                                                            | HS | X | 13228669 | 13232328 | WBGene00010694 | bgnt-1.5 | K08H2.9  |                     |
| -0.0164295091905924 AGIWUR41025                                                                                                               |    |   |          |          |                |          |          |                     |
| N2                                                                                                                                            | HS | X | 13234099 | 13234957 | WBGene00010689 | K08H2.2  | K08H2.2  | -0.0475961856642106 |
| AGIWUR39457                                                                                                                                   |    |   |          |          |                |          |          |                     |
| N2                                                                                                                                            | HS | X | 13237389 | 13238476 | WBGene00010690 | K08H2.3  | K08H2.3  | -0.350484971912014  |
| AGIWUR24564                                                                                                                                   |    |   |          |          |                |          |          |                     |
| N2                                                                                                                                            | HS | X | 13238651 | 13240003 | WBGene00010691 | K08H2.4  | K08H2.4  | -0.214202295405597  |
| AGIWUR38828                                                                                                                                   |    |   |          |          |                |          |          |                     |
| N2                                                                                                                                            | HS | X | 13241109 | 13242278 | WBGene00010692 | K08H2.5  | K08H2.5  |                     |
| -0.00464475320354651 AGIWUR37660                                                                                                              |    |   |          |          |                |          |          |                     |
| N2                                                                                                                                            | HS | X | 13245390 | 13247044 | WBGene00001995 | hp1-1    | K08H2.6  | -0.0180573616545274 |
| AGIWUR30567                                                                                                                                   |    |   |          |          |                |          |          |                     |
| N2                                                                                                                                            | HS | X | 13247263 | 13248426 | WBGene00010693 | K08H2.7  | K08H2.7  | -0.0754530215407074 |
| AGIWUR16768                                                                                                                                   |    |   |          |          |                |          |          |                     |
| N2                                                                                                                                            | HS | X | 13251964 | 13256282 | WBGene00003626 | nhf-32   | K08H2.8  | 0.0409437857205308  |
| AGIWUR38246                                                                                                                                   |    |   |          |          |                |          |          |                     |
| N2                                                                                                                                            | HS | X | 13262495 | 13264589 | WBGene00010704 | K09A11.1 | K09A11.1 |                     |
| 0.0396949752488265 AGIWUR5726                                                                                                                 |    |   |          |          |                |          |          |                     |
| N2                                                                                                                                            | HS | X | 13265041 | 13267338 | WBGene00010705 | cyp-14A1 | K09A11.2 |                     |
| 0.359135699361342 AGIWUR19431                                                                                                                 |    |   |          |          |                |          |          |                     |
| N2                                                                                                                                            | HS | X | 13267562 | 13269697 | WBGene00010706 | cyp-14A2 | K09A11.3 |                     |
| 0.12621963039175 AGIWUR19995                                                                                                                  |    |   |          |          |                |          |          |                     |
| N2                                                                                                                                            | HS | X | 13271877 | 13274218 | WBGene00010707 | cyp-14A3 | K09A11.4 |                     |
| -0.0454302505703996 AGIWUR28698                                                                                                               |    |   |          |          |                |          |          |                     |
| N2                                                                                                                                            | HS | X | 13275315 | 13278976 | WBGene00010708 | phf-33   | K09A11.5 |                     |
| -0.225572593738123 AGIWUR28036;AGIWUR30720                                                                                                    |    |   |          |          |                |          |          |                     |
| N2                                                                                                                                            | HS | X | 13282096 | 13284204 | WBGene00011009 | cyp-14A4 | R04D3.1  |                     |
| 0.158233985781008 AGIWUR8120                                                                                                                  |    |   |          |          |                |          |          |                     |
| N2                                                                                                                                            | HS | X | 13285122 | 13286633 | WBGene00011010 | R04D3.2  | R04D3.2  | 0.0363460430216467  |
| AGIWUR41426                                                                                                                                   |    |   |          |          |                |          |          |                     |
| N2                                                                                                                                            | HS | X | 13287779 | 13288815 | WBGene00011012 | R04D3.4  | R04D3.4  | -0.13739583869452   |
| AGIWUR39895                                                                                                                                   |    |   |          |          |                |          |          |                     |
| N2                                                                                                                                            | HS | X | 13288917 | 13290631 | WBGene00011011 | R04D3.3  | R04D3.3  | -0.031482634293587  |
| AGIWUR37441                                                                                                                                   |    |   |          |          |                |          |          |                     |

|                                                                                                             |    |   |                                     |          |                |          |                             |
|-------------------------------------------------------------------------------------------------------------|----|---|-------------------------------------|----------|----------------|----------|-----------------------------|
| N2                                                                                                          | HS | X | 13291806                            | 13292984 | WBGene00005116 | srd-38   | R04D3.12                    |
| -0.139452417464498                                                                                          |    |   | AGIWUR42329                         |          |                |          |                             |
| N2                                                                                                          | HS | X | 13293415                            | 13294773 | WBGene00005114 | srd-36   | R04D3.6 0.0730666010212202  |
| AGIWUR23630                                                                                                 |    |   |                                     |          |                |          |                             |
| N2                                                                                                          | HS | X | 13295164                            | 13297885 | WBGene00005115 | srd-37   | R04D3.11                    |
| -0.0471465167930343                                                                                         |    |   | AGIWUR7041;AGIWUR21547              |          |                |          |                             |
| N2                                                                                                          | HS | X | 13298994                            | 13300523 | WBGene00005117 | srd-39   | R04D3.8 0.3793727247989     |
| AGIWUR39585                                                                                                 |    |   |                                     |          |                |          |                             |
| N2                                                                                                          | HS | X | 13301599                            | 13303457 | WBGene00005120 | srd-42   | R04D3.7 -0.0677294633183436 |
| AGIWUR25173                                                                                                 |    |   |                                     |          |                |          |                             |
| N2                                                                                                          | HS | X | 13303905                            | 13305844 | WBGene00005121 | srd-43   | R04D3.9 -0.165796291685408  |
| AGIWUR19251                                                                                                 |    |   |                                     |          |                |          |                             |
| N2                                                                                                          | HS | X | 13307282                            | 13308845 | WBGene00011013 | srxa-8   | R04D3.10                    |
| -0.0374125342496949                                                                                         |    |   | AGIWUR10861                         |          |                |          |                             |
| N2                                                                                                          | HS | X | 13310227                            | 13311830 | WBGene00009796 | F46G10.1 | F46G10.1                    |
| 0.15626602502506                                                                                            |    |   |                                     |          |                |          |                             |
| AGIWUR13809;AGIWUR18540;AGIWUR23251;AGIWUR24687;AGIWUR30484;AGIWUR34867;AGIWUR35204;AGIWUR37443;AGIWUR41431 |    |   |                                     |          |                |          |                             |
| N2                                                                                                          | HS | X | 13322963                            | 13327854 | WBGene00009797 | F46G10.2 | F46G10.2                    |
| -0.0178476965464647                                                                                         |    |   | AGIWUR27847                         |          |                |          |                             |
| N2                                                                                                          | HS | X | 13328252                            | 13331248 | WBGene00004801 | sir-2.2  | F46G10.7                    |
| 0.204675555138497                                                                                           |    |   | AGIWUR11869;AGIWUR16128;AGIWUR41063 |          |                |          |                             |
| N2                                                                                                          | HS | X | 13332014                            | 13333825 | WBGene00004802 | sir-2.3  | F46G10.3                    |
| 0.294482144448923                                                                                           |    |   | AGIWUR25984                         |          |                |          |                             |
| N2                                                                                                          | HS | X | 13334046                            | 13336784 | WBGene00009798 | F46G10.4 | F46G10.4                    |
| 0.189370884989357                                                                                           |    |   | AGIWUR3389                          |          |                |          |                             |
| N2                                                                                                          | HS | X | 13338052                            | 13348118 | WBGene00004238 | ptr-24   | F46G10.5                    |
| 0.158047267606134                                                                                           |    |   | AGIWUR39309                         |          |                |          |                             |
| N2                                                                                                          | HS | X | 13349639                            | 13350804 | WBGene00003511 | mxl-3    | F46G10.6                    |
| 0.258455536204753                                                                                           |    |   | AGIWUR27752                         |          |                |          |                             |
| N2                                                                                                          | HS | X | 13361201                            | 13365294 | WBGene00008213 | C49F8.1  | C49F8.1 0.164439832517264   |
| AGIWUR21450                                                                                                 |    |   |                                     |          |                |          |                             |
| N2                                                                                                          | HS | X | 13371612                            | 13376992 | WBGene00008214 | gem-1    | C49F8.2 0.0486457355743903  |
| AGIWUR7625;AGIWUR28459;AGIWUR33570                                                                          |    |   |                                     |          |                |          |                             |
| N2                                                                                                          | HS | X | 13386057                            | 13387547 | WBGene00008215 | C49F8.3  | C49F8.3 -0.110273973816872  |
| AGIWUR11465                                                                                                 |    |   |                                     |          |                |          |                             |
| N2                                                                                                          | HS | X | 13391949                            | 13395149 | WBGene00008518 | irld-2   | F02C12.4                    |
| 0.00604881065120111                                                                                         |    |   | AGIWUR29427                         |          |                |          |                             |
| N2                                                                                                          | HS | X | 13397323                            | 13397710 | WBGene00008517 | F02C12.3 | F02C12.3                    |
| 0.0248353648467745                                                                                          |    |   | AGIWUR41613                         |          |                |          |                             |

|                                                 |    |   |                                                                                   |          |                |          |                             |
|-------------------------------------------------|----|---|-----------------------------------------------------------------------------------|----------|----------------|----------|-----------------------------|
| N2                                              | HS | X | 13398198                                                                          | 13399230 | WBGene00008516 | F02C12.2 | F02C12.2                    |
| 0.268618964136111                               |    |   | AGIWUR19214                                                                       |          |                |          |                             |
| N2                                              | HS | X | 13402083                                                                          | 13406415 | WBGene00008515 | F02C12.1 | F02C12.1                    |
| 0.122462366893194                               |    |   | AGIWUR866;AGIWUR5397;AGIWUR16048;AGIWUR28399                                      |          |                |          |                             |
| N2                                              | HS | X | 13406674                                                                          | 13409644 | WBGene00008519 | cyp-13B1 | F02C12.5                    |
| -0.241563768599454                              |    |   | AGIWUR29779;AGIWUR30525;AGIWUR31387;AGIWUR37308                                   |          |                |          |                             |
| N2                                              | HS | X | 13410720                                                                          | 13411285 | WBGene00044405 | C29F7.8  | C29F7.8 -0.0377516859604241 |
| AGIWUR23372;AGIWUR24426;AGIWUR24459;AGIWUR39234 |    |   |                                                                                   |          |                |          |                             |
| N2                                              | HS | X | 13412463                                                                          | 13414617 | WBGene00007810 | C29F7.1  | C29F7.1 0.15041106821436    |
| AGIWUR1665                                      |    |   |                                                                                   |          |                |          |                             |
| N2                                              | HS | X | 13416078                                                                          | 13418220 | WBGene00007811 | C29F7.2  | C29F7.2 0.0666872325040586  |
| AGIWUR15482                                     |    |   |                                                                                   |          |                |          |                             |
| N2                                              | HS | X | 13418841                                                                          | 13419934 | WBGene00007812 | C29F7.3  | C29F7.3 0.163681266105986   |
| AGIWUR27922                                     |    |   |                                                                                   |          |                |          |                             |
| N2                                              | HS | X | 13421824                                                                          | 13423427 | WBGene00001435 | fkh-3    | C29F7.4 -0.123161441144232  |
| AGIWUR12036                                     |    |   |                                                                                   |          |                |          |                             |
| N2                                              | HS | X | 13427062                                                                          | 13428842 | WBGene00001436 | fkh-4    | C29F7.5                     |
| -0.00722201792976573                            |    |   | AGIWUR33148                                                                       |          |                |          |                             |
| N2                                              | HS | X | 13436454                                                                          | 13441883 | WBGene00007813 | jmjd-3.3 | C29F7.6                     |
| 0.04127173719281                                |    |   | AGIWUR14123;AGIWUR19403;AGIWUR21987;AGIWUR37163;AGIWUR41094;AGIWUR41742           |          |                |          |                             |
| N2                                              | HS | X | 13444980                                                                          | 13448230 | WBGene00008527 | set-8    | F02D10.7                    |
| -0.0435345154597098                             |    |   | AGIWUR29127                                                                       |          |                |          |                             |
| N2                                              | HS | X | 13449586                                                                          | 13451678 | WBGene00008526 | F02D10.6 | F02D10.6                    |
| -0.00205539672944255                            |    |   | AGIWUR32178                                                                       |          |                |          |                             |
| N2                                              | HS | X | 13452667                                                                          | 13456658 | WBGene00001465 | flr-1    | F02D10.5                    |
| 0.0513603450363878                              |    |   | AGIWUR14339                                                                       |          |                |          |                             |
| N2                                              | HS | X | 13456889                                                                          | 13462619 | WBGene00008524 | F02D10.3 | F02D10.3                    |
| -0.0567453648128406                             |    |   | AGIWUR2362;AGIWUR5227;AGIWUR11181;AGIWUR31334;AGIWUR31422;AGIWUR33407;AGIWUR35404 |          |                |          |                             |
| N2                                              | HS | X | 13462668                                                                          | 13463893 | WBGene00008523 | F02D10.2 | F02D10.2                    |
| -0.0697101540088063                             |    |   | AGIWUR28889                                                                       |          |                |          |                             |
| N2                                              | HS | X | 13466737                                                                          | 13467736 | WBGene00000756 | col-183  | F02D10.1                    |
| 0.105365519489591                               |    |   | AGIWUR28871                                                                       |          |                |          |                             |
| N2                                              | HS | X | 13469387                                                                          | 13470471 | WBGene00000757 | col-184  | F15A2.1 -0.120917587798375  |
| AGIWUR23058;AGIWUR31053                         |    |   |                                                                                   |          |                |          |                             |
| N2                                              | HS | X | 13472155                                                                          | 13475899 | WBGene00006610 | tre-4    | F15A2.2 0.193654420109134   |
| AGIWUR43735                                     |    |   |                                                                                   |          |                |          |                             |
| N2                                              | HS | X | 13475964                                                                          | 13477456 | WBGene00001164 | efn-3    | F15A2.5 0.0986908957568211  |
| AGIWUR588                                       |    |   |                                                                                   |          |                |          |                             |
| N2                                              | HS | X | 13478621                                                                          | 13481804 | WBGene00005128 | srd-50   | F15A2.4 0.0416463741960058  |

|                                                                                                |    |   |          |          |                |           |          |                     |  |
|------------------------------------------------------------------------------------------------|----|---|----------|----------|----------------|-----------|----------|---------------------|--|
| AGIWUR36687                                                                                    |    |   |          |          |                |           |          |                     |  |
| N2                                                                                             | HS | X | 13482649 | 13484913 | WBGene00005129 | srd-51    | F15A2.3  | 0.0210032780961775  |  |
| AGIWUR37248                                                                                    |    |   |          |          |                |           |          |                     |  |
| N2                                                                                             | HS | X | 13487555 | 13500662 | WBGene00004719 | sad-1     | F15A2.6  | -0.122648990728377  |  |
| AGIWUR4261;AGIWUR17936;AGIWUR25295;AGIWUR32392;AGIWUR36840;AGIWUR39256;AGIWUR39714;AGIWUR43372 |    |   |          |          |                |           |          |                     |  |
| N2                                                                                             | HS | X | 13507564 | 13510094 | WBGene00010368 | H06A10.1  |          | H06A10.1            |  |
| 0.0800522879148033 AGIWUR2679                                                                  |    |   |          |          |                |           |          |                     |  |
| N2                                                                                             | HS | X | 13515871 | 13518911 | WBGene00000406 | cdk-4     | F18H3.5  | -0.213689058165945  |  |
| AGIWUR9653;AGIWUR20273;AGIWUR41553                                                             |    |   |          |          |                |           |          |                     |  |
| N2                                                                                             | HS | X | 13519663 | 13521537 | WBGene00008939 | F18H3.1   | F18H3.1  | 0.121519118475345   |  |
| AGIWUR19712;AGIWUR23248;AGIWUR25409;AGIWUR28478                                                |    |   |          |          |                |           |          |                     |  |
| N2                                                                                             | HS | X | 13522264 | 13527483 | WBGene00003903 | pab-2     | F18H3.3  | -0.0224008481388625 |  |
| AGIWUR4780;AGIWUR26610;AGIWUR29191;AGIWUR43409                                                 |    |   |          |          |                |           |          |                     |  |
| N2                                                                                             | HS | X | 13529088 | 13532032 | WBGene00008940 | F18H3.4   | F18H3.4  | -0.215514047575843  |  |
| AGIWUR15998                                                                                    |    |   |          |          |                |           |          |                     |  |
| N2                                                                                             | HS | X | 13532871 | 13536433 | WBGene00000051 | acr-12    | R01E6.4  | 0.0688897025079527  |  |
| AGIWUR42149                                                                                    |    |   |          |          |                |           |          |                     |  |
| N2                                                                                             | HS | X | 13542574 | 13544599 | WBGene00000282 | cah-4     | R01E6.3  | -0.320623321825595  |  |
| AGIWUR2019;AGIWUR5716;AGIWUR6607;AGIWUR16164;AGIWUR22877;AGIWUR22998;AGIWUR40387               |    |   |          |          |                |           |          |                     |  |
| N2                                                                                             | HS | X | 13544822 | 13550824 | WBGene00003848 | odr-1     | R01E6.1  | -0.277686702310512  |  |
| AGIWUR40730                                                                                    |    |   |          |          |                |           |          |                     |  |
| N2                                                                                             | HS | X | 13552549 | 13556166 | WBGene00010970 | glb-20    | R01E6.6  | -0.0361625874827611 |  |
| AGIWUR23177;AGIWUR32303                                                                        |    |   |          |          |                |           |          |                     |  |
| N2                                                                                             | HS | X | 13565486 | 13566536 | WBGene00010968 | R01E6.2   | R01E6.2  | 0.16805920358132    |  |
| AGIWUR977;AGIWUR6356;AGIWUR8398;AGIWUR33428;AGIWUR35834                                        |    |   |          |          |                |           |          |                     |  |
| N2                                                                                             | HS | X | 13567441 | 13569954 | WBGene00010971 | R01E6.7   | R01E6.7  | 0.0706353025518034  |  |
| AGIWUR15289                                                                                    |    |   |          |          |                |           |          |                     |  |
| N2                                                                                             | HS | X | 13578783 | 13581728 | WBGene00010034 | F54B11.11 |          | F54B11.11           |  |
| 0.139923901938811 AGIWUR26327                                                                  |    |   |          |          |                |           |          |                     |  |
| N2                                                                                             | HS | X | 13582120 | 13582757 | WBGene00010033 | F54B11.10 |          | F54B11.10           |  |
| 0.171287136382857 AGIWUR11190                                                                  |    |   |          |          |                |           |          |                     |  |
| N2                                                                                             | HS | X | 13584775 | 13589820 | WBGene00006816 | unc-84    | F54B11.3 |                     |  |
| -0.0683057917230787 AGIWUR1516;AGIWUR14318                                                     |    |   |          |          |                |           |          |                     |  |
| N2                                                                                             | HS | X | 13590035 | 13591207 | WBGene00000598 | col-9     | F54B11.1 |                     |  |
| 0.17808645772153 AGIWUR20177                                                                   |    |   |          |          |                |           |          |                     |  |
| N2                                                                                             | HS | X | 13591498 | 13592461 | WBGene00000621 | col-44    | F54B11.2 |                     |  |
| -0.0360079840483447 AGIWUR41919                                                                |    |   |          |          |                |           |          |                     |  |
| N2                                                                                             | HS | X | 13592618 | 13593643 | WBGene00010027 | F54B11.4  |          | F54B11.4            |  |
| -0.116648181635511 AGIWUR34481                                                                 |    |   |          |          |                |           |          |                     |  |

|                                                                                                          |    |   |                                     |          |                |          |                             |
|----------------------------------------------------------------------------------------------------------|----|---|-------------------------------------|----------|----------------|----------|-----------------------------|
| N2                                                                                                       | HS | X | 13594121                            | 13596068 | WBGene00010028 | F54B11.5 | F54B11.5                    |
| -0.0548580353487491                                                                                      |    |   | AGIWUR24045                         |          |                |          |                             |
| N2                                                                                                       | HS | X | 13598449                            | 13599687 | WBGene00000262 | bra-1    | F54B11.6                    |
| 0.00124848031186353                                                                                      |    |   | AGIWUR17923                         |          |                |          |                             |
| N2                                                                                                       | HS | X | 13600436                            | 13601534 | WBGene00010030 | F54B11.7 | F54B11.7                    |
| -0.0862247220906429                                                                                      |    |   | AGIWUR7344                          |          |                |          |                             |
| N2                                                                                                       | HS | X | 13602200                            | 13603918 | WBGene00010031 | F54B11.8 | F54B11.8                    |
| 0.288824497589952                                                                                        |    |   | AGIWUR12031                         |          |                |          |                             |
| N2                                                                                                       | HS | X | 13605567                            | 13608369 | WBGene00010032 | F54B11.9 | F54B11.9                    |
| -0.109919873648137                                                                                       |    |   | AGIWUR14120                         |          |                |          |                             |
| N2                                                                                                       | HS | X | 13618874                            | 13619930 | WBGene00012440 | nlp-53   | Y12A6A.2                    |
| -0.222884330763033                                                                                       |    |   | AGIWUR14392;AGIWUR15716;AGIWUR43825 |          |                |          |                             |
| N2                                                                                                       | HS | X | 13619938                            | 13621728 | WBGene00012439 | Y12A6A.1 | Y12A6A.1                    |
| 0.0450061056751512                                                                                       |    |   | AGIWUR40926                         |          |                |          |                             |
| N2                                                                                                       | HS | X | 13625373                            | 13631166 | WBGene00006412 | nlg-1    | C40C9.5 -0.109065304894388  |
| AGIWUR3446;AGIWUR3519;AGIWUR6253;AGIWUR16584;AGIWUR23334;AGIWUR27866;AGIWUR33301;AGIWUR34573;AGIWUR38156 |    |   |                                     |          |                |          |                             |
| N2                                                                                                       | HS | X | 13639877                            | 13642256 | WBGene00006673 | twk-20   | C40C9.1 0.377530123906093   |
| AGIWUR19296                                                                                              |    |   |                                     |          |                |          |                             |
| N2                                                                                                       | HS | X | 13642348                            | 13646898 | WBGene00000048 | acr-9    | C40C9.2 0.180401787119379   |
| AGIWUR24132                                                                                              |    |   |                                     |          |                |          |                             |
| N2                                                                                                       | HS | X | 13647605                            | 13648334 | WBGene00008036 | C40C9.3  | C40C9.3 -0.131220556511538  |
| AGIWUR12524                                                                                              |    |   |                                     |          |                |          |                             |
| N2                                                                                                       | HS | X | 13651149                            | 13651737 | WBGene00008037 | C40C9.4  | C40C9.4 -0.109203462871963  |
| AGIWUR34524                                                                                              |    |   |                                     |          |                |          |                             |
| N2                                                                                                       | HS | X | 13660519                            | 13662963 | WBGene00007285 | C04A11.1 | C04A11.1                    |
| -0.107712513033729                                                                                       |    |   | AGIWUR15658                         |          |                |          |                             |
| N2                                                                                                       | HS | X | 13664589                            | 13665352 | WBGene00007288 | C04A11.5 | C04A11.5                    |
| -0.0705009612136376                                                                                      |    |   | AGIWUR3797                          |          |                |          |                             |
| N2                                                                                                       | HS | X | 13665958                            | 13668830 | WBGene00007286 | C04A11.2 | C04A11.2                    |
| -0.262962055500202                                                                                       |    |   | AGIWUR10297                         |          |                |          |                             |
| N2                                                                                                       | HS | X | 13677192                            | 13682340 | WBGene00007287 | gck-4    | C04A11.3                    |
| -0.171687622194752                                                                                       |    |   | AGIWUR34555                         |          |                |          |                             |
| N2                                                                                                       | HS | X | 13687973                            | 13695771 | WBGene00000074 | adm-2    | C04A11.4                    |
| -0.43696906947244                                                                                        |    |   | AGIWUR12265                         |          |                |          |                             |
| N2                                                                                                       | HS | X | 13706928                            | 13708002 | WBGene00010504 | K02D3.1  | K02D3.1 -0.0497612630949553 |
| AGIWUR309;AGIWUR7863;AGIWUR9204;AGIWUR36261                                                              |    |   |                                     |          |                |          |                             |
| N2                                                                                                       | HS | X | 13708619                            | 13711964 | WBGene00010505 | K02D3.2  | K02D3.2 0.169035808718027   |
| AGIWUR3853                                                                                               |    |   |                                     |          |                |          |                             |
| N2                                                                                                       | HS | X | 13714157                            | 13716298 | WBGene00010773 | K11E4.1  | K11E4.1 -0.0430090201743614 |



|                                                 |    |   |          |          |                |          |          |                     |
|-------------------------------------------------|----|---|----------|----------|----------------|----------|----------|---------------------|
| N2                                              | HS | X | 13901064 | 13903428 | WBGene00005065 | sra-39   | T21H8.4  | 0.0630071052624634  |
| AGIWUR27466                                     |    |   |          |          |                |          |          |                     |
| N2                                              | HS | X | 13908414 | 13909950 | WBGene00012514 | Y26E6A.3 |          | Y26E6A.3            |
| 0.0209741172665723                              |    |   |          |          |                |          |          |                     |
| N2                                              | HS | X | 13910937 | 13912978 | WBGene00012513 | Y26E6A.2 |          | Y26E6A.2            |
| -0.0341149139803081                             |    |   |          |          |                |          |          |                     |
| N2                                              | HS | X | 13914806 | 13917171 | WBGene00012512 | ek1-5    | Y26E6A.1 |                     |
| -0.182768737464202                              |    |   |          |          |                |          |          |                     |
| N2                                              | HS | X | 13922663 | 13926129 | WBGene00010493 | meg-2    | K02B9.2  | -0.280472621375006  |
| AGIWUR13859;AGIWUR26357                         |    |   |          |          |                |          |          |                     |
| N2                                              | HS | X | 13927036 | 13929634 | WBGene00010492 | meg-1    | K02B9.1  | -0.173906375745466  |
| AGIWUR13817;AGIWUR14669;AGIWUR19975;AGIWUR29958 |    |   |          |          |                |          |          |                     |
| N2                                              | HS | X | 13930898 | 13932033 | WBGene00010494 | K02B9.3  | K02B9.3  | 0.105042583211135   |
| AGIWUR43343                                     |    |   |          |          |                |          |          |                     |
| N2                                              | HS | X | 13934883 | 13941247 | WBGene00001251 | elt-3    | K02B9.4  | -0.0711652826666178 |
| AGIWUR40564                                     |    |   |          |          |                |          |          |                     |
| N2                                              | HS | X | 13949114 | 13956261 | WBGene00000105 | alg-1    | F48F7.1  | -0.3038042603014    |
| AGIWUR8665;AGIWUR12306                          |    |   |          |          |                |          |          |                     |
| N2                                              | HS | X | 13960064 | 13962830 | WBGene00006372 | syx-2    | F48F7.2  | 0.0753730175920797  |
| AGIWUR10497;AGIWUR23467;AGIWUR37424             |    |   |          |          |                |          |          |                     |
| N2                                              | HS | X | 13963509 | 13965718 | WBGene00009849 | F48F7.3  | F48F7.3  | 0.0786492894927751  |
| AGIWUR33231                                     |    |   |          |          |                |          |          |                     |
| N2                                              | HS | X | 13965676 | 13968672 | WBGene00004126 | pqn-39   | F48F7.4  | 0.333706825463217   |
| AGIWUR28707                                     |    |   |          |          |                |          |          |                     |
| N2                                              | HS | X | 13975660 | 13976920 | WBGene00009850 | F48F7.5  | F48F7.5  | -0.0479850337506633 |
| AGIWUR26316                                     |    |   |          |          |                |          |          |                     |
| N2                                              | HS | X | 13977829 | 13979031 | WBGene00009851 | F48F7.6  | F48F7.6  | 0.0128369679977567  |
| AGIWUR4649                                      |    |   |          |          |                |          |          |                     |
| N2                                              | HS | X | 13979240 | 13980515 | WBGene00009852 | arrd-24  | F48F7.7  | 0.128691992602301   |
| AGIWUR27486                                     |    |   |          |          |                |          |          |                     |
| N2                                              | HS | X | 13980840 | 13981629 | WBGene00009853 | arrd-27  | F48F7.8  | -0.0885671886281099 |
| AGIWUR645                                       |    |   |          |          |                |          |          |                     |
| N2                                              | HS | X | 13984491 | 13985692 | WBGene00007842 | C31E10.1 |          | C31E10.1            |
| -0.0641446287199878                             |    |   |          |          |                |          |          |                     |
| N2                                              | HS | X | 13986607 | 13989009 | WBGene00007844 | ir1d-24  | C31E10.3 |                     |
| -0.173162964617273                              |    |   |          |          |                |          |          |                     |
| N2                                              | HS | X | 13989496 | 13990180 | WBGene00007845 | C31E10.4 |          | C31E10.4            |
| 0.0297471987381019                              |    |   |          |          |                |          |          |                     |
| N2                                              | HS | X | 13991458 | 13995834 | WBGene00007846 | C31E10.5 |          | C31E10.5            |
| AGIWUR9160                                      |    |   |          |          |                |          |          |                     |



|                                     |             |          |                |          |                             |
|-------------------------------------|-------------|----------|----------------|----------|-----------------------------|
| -0.197222291803287                  | AGIWUR2218  |          |                |          |                             |
| N2 HS X                             | 13996307    | 13999351 | WBGene00007847 | C31E10.6 | C31E10.6                    |
| -0.032928093861786                  | AGIWUR19852 |          |                |          |                             |
| N2 HS X                             | 14001902    | 14003080 | WBGene00007848 | cytb-5.1 | C31E10.7                    |
| 0.107131826061526                   | AGIWUR2725  |          |                |          |                             |
| N2 HS X                             | 14003020    | 14012595 | WBGene00007849 | tbc-19   | C31E10.8                    |
| 0.072186810051452                   | AGIWUR26465 |          |                |          |                             |
| N2 HS X                             | 14020590    | 14022409 | WBGene00007295 | C04C11.1 | C04C11.1                    |
| 0.284961814367421                   | AGIWUR2716  |          |                |          |                             |
| N2 HS X                             | 14033794    | 14037447 | WBGene00007296 | arrd-25  | C04C11.2                    |
| 0.0536795348638517                  | AGIWUR25327 |          |                |          |                             |
| N2 HS X                             | 14049535    | 14063884 | WBGene00001116 | dyc-1    | C33G3.1 -0.276461844100341  |
| AGIWUR42602                         |             |          |                |          |                             |
| N2 HS X                             | 14064313    | 14067984 | WBGene00007903 | lgc-21   | C33G3.3 0.244612616843538   |
| AGIWUR27168;AGIWUR31618;AGIWUR31972 |             |          |                |          |                             |
| N2 HS X                             | 14071162    | 14076295 | WBGene00007904 | C33G3.4  | C33G3.4 0.199267173371886   |
| AGIWUR35084                         |             |          |                |          |                             |
| N2 HS X                             | 14076316    | 14078674 | WBGene00007905 | C33G3.5  | C33G3.5 0.16152020442903    |
| AGIWUR10367                         |             |          |                |          |                             |
| N2 HS X                             | 14080381    | 14084318 | WBGene00007906 | C33G3.6  | C33G3.6 -0.0783374843618372 |
| AGIWUR4232                          |             |          |                |          |                             |
| N2 HS X                             | 14085508    | 14089581 | WBGene00008879 | F16B12.1 | F16B12.1                    |
| -0.082584495069943                  | AGIWUR33817 |          |                |          |                             |
| N2 HS X                             | 14090389    | 14095490 | WBGene00001106 | dsl-4    | F16B12.2                    |
| -0.34014220226325                   | AGIWUR31319 |          |                |          |                             |
| N2 HS X                             | 14095738    | 14098664 | WBGene00008880 | F16B12.4 | F16B12.4                    |
| 0.167811054462433                   | AGIWUR37367 |          |                |          |                             |
| N2 HS X                             | 14100555    | 14101568 | WBGene00008881 | F16B12.5 | F16B12.5                    |
| 0.0220356904854508                  | AGIWUR24008 |          |                |          |                             |
| N2 HS X                             | 14102359    | 14107905 | WBGene00008882 | F16B12.6 | F16B12.6                    |
| 0.0650615315845684                  | AGIWUR3685  |          |                |          |                             |
| N2 HS X                             | 14108545    | 14109714 | WBGene00008883 | F16B12.7 | F16B12.7                    |
| 0.00784389216303527                 | AGIWUR44349 |          |                |          |                             |
| N2 HS X                             | 14111263    | 14113447 | WBGene00008884 | nhr-281  | F16B12.8                    |
| -0.0711764851925096                 | AGIWUR28687 |          |                |          |                             |
| N2 HS X                             | 14116111    | 14116751 | WBGene00009235 | F28H6.7  | F28H6.7 0.089952771005696   |
| AGIWUR42982                         |             |          |                |          |                             |
| N2 HS X                             | 14117069    | 14125879 | WBGene00009234 | F28H6.6  | F28H6.6 -0.0548557686860338 |
| AGIWUR36143                         |             |          |                |          |                             |

|                                                             |    |   |          |          |                |          |         |                     |
|-------------------------------------------------------------|----|---|----------|----------|----------------|----------|---------|---------------------|
| N2                                                          | HS | X | 14127877 | 14133525 | WBGene00009233 | F28H6.4  | F28H6.4 | -0.227645769126632  |
| AGIWUR14483                                                 |    |   |          |          |                |          |         |                     |
| N2                                                          | HS | X | 14133896 | 14134344 | WBGene00044137 | F28H6.8  | F28H6.8 | -0.0206582988192086 |
| AGIWUR12025;AGIWUR19471;AGIWUR27893;AGIWUR39148;AGIWUR39947 |    |   |          |          |                |          |         |                     |
| N2                                                          | HS | X | 14137997 | 14140070 | WBGene00009232 | nkat-1   | F28H6.3 | 0.198091222213942   |
| AGIWUR5953;AGIWUR24988;AGIWUR37065                          |    |   |          |          |                |          |         |                     |
| N2                                                          | HS | X | 14141946 | 14144889 | WBGene00009231 | ceh-89   | F28H6.2 | -0.110926839921119  |
| AGIWUR17574                                                 |    |   |          |          |                |          |         |                     |
| N2                                                          | HS | X | 14147700 | 14152070 | WBGene00000103 | akt-2    | F28H6.1 | 0.0326112190338534  |
| AGIWUR27380;AGIWUR32868                                     |    |   |          |          |                |          |         |                     |
| N2                                                          | HS | X | 14155115 | 14157013 | WBGene00010995 | ceh-90   | R03E1.4 | 0.226235175796055   |
| AGIWUR14794                                                 |    |   |          |          |                |          |         |                     |
| N2                                                          | HS | X | 14158870 | 14161734 | WBGene00010994 | lgc-25   | R03E1.3 | 0.183497529294117   |
| AGIWUR25418;AGIWUR42901                                     |    |   |          |          |                |          |         |                     |
| N2                                                          | HS | X | 14163099 | 14164506 | WBGene00010993 | vha-20   | R03E1.2 | 0.0618299859310572  |
| AGIWUR39470                                                 |    |   |          |          |                |          |         |                     |
| N2                                                          | HS | X | 14164634 | 14169779 | WBGene00006369 | sym-4    | R03E1.1 | -0.05251773190039   |
| AGIWUR24140;AGIWUR27190                                     |    |   |          |          |                |          |         |                     |
| N2                                                          | HS | X | 14170864 | 14174063 | WBGene00007993 | idhb-1   | C37E2.1 | -0.346285786852702  |
| AGIWUR20911;AGIWUR23240;AGIWUR25532;AGIWUR37250;AGIWUR43320 |    |   |          |          |                |          |         |                     |
| N2                                                          | HS | X | 14176050 | 14178608 | WBGene00007994 | C37E2.2  | C37E2.2 | 0.284248718697758   |
| AGIWUR24144;AGIWUR39279                                     |    |   |          |          |                |          |         |                     |
| N2                                                          | HS | X | 14178988 | 14181705 | WBGene00007995 | C37E2.3  | C37E2.3 | -0.176142032819068  |
| AGIWUR218                                                   |    |   |          |          |                |          |         |                     |
| N2                                                          | HS | X | 14183449 | 14185597 | WBGene00000457 | ceh-36   | C37E2.4 | -0.27409282787664   |
| AGIWUR21190                                                 |    |   |          |          |                |          |         |                     |
| N2                                                          | HS | X | 14197373 | 14209153 | WBGene00000458 | ceh-37   | C37E2.5 | 0.0933736333043811  |
| AGIWUR10198;AGIWUR11270                                     |    |   |          |          |                |          |         |                     |
| N2                                                          | HS | X | 14214939 | 14219089 | WBGene00010605 | K06G5.1  | K06G5.1 | -0.0528326911609369 |
| AGIWUR42150                                                 |    |   |          |          |                |          |         |                     |
| N2                                                          | HS | X | 14219568 | 14223256 | WBGene00010607 | K06G5.3  | K06G5.3 | 0.0434650607567342  |
| AGIWUR23179                                                 |    |   |          |          |                |          |         |                     |
| N2                                                          | HS | X | 14225573 | 14228768 | WBGene00010606 | cyp-13B2 | K06G5.2 |                     |
| -0.0391604277501152 AGIWUR19930                             |    |   |          |          |                |          |         |                     |
| N2                                                          | HS | X | 14229668 | 14230876 | WBGene00005193 | srg-36   | K04C1.6 | 0.0172775439992621  |
| AGIWUR2949;AGIWUR2975;AGIWUR10474;AGIWUR34604               |    |   |          |          |                |          |         |                     |
| N2                                                          | HS | X | 14233944 | 14235285 | WBGene00005194 | srg-37   | K04C1.1 | -0.188903023556144  |
| AGIWUR37515                                                 |    |   |          |          |                |          |         |                     |
| N2                                                          | HS | X | 14238695 | 14241350 | WBGene00010552 | K04C1.2  | K04C1.2 | -0.234240460569488  |



|                     |    |   |                                                             |          |                |           |                             |
|---------------------|----|---|-------------------------------------------------------------|----------|----------------|-----------|-----------------------------|
| N2                  | HS | X | 14376955                                                    | 14377330 | WBGene00013371 | Y60A9A.1  | Y60A9A.1                    |
| -0.141459943660534  |    |   | AGIWUR24349                                                 |          |                |           |                             |
| N2                  | HS | X | 14381289                                                    | 14381891 | WBGene00013369 | Y60A9.2   | Y60A9.2 -0.258343221013781  |
| AGIWUR37910         |    |   |                                                             |          |                |           |                             |
| N2                  | HS | X | 14383251                                                    | 14383901 | WBGene00013370 | Y60A9.3   | Y60A9.3 -0.113608592739862  |
| AGIWUR33592         |    |   |                                                             |          |                |           |                             |
| N2                  | HS | X | 14392867                                                    | 14394615 | WBGene00013368 | Y60A9.1   | Y60A9.1 -0.133359321263763  |
| AGIWUR26091         |    |   |                                                             |          |                |           |                             |
| N2                  | HS | X | 14406117                                                    | 14411181 | WBGene00011765 | frpr-17   | T14C1.1 -0.0184905736245504 |
| AGIWUR14528         |    |   |                                                             |          |                |           |                             |
| N2                  | HS | X | 14411418                                                    | 14412855 | WBGene00045292 | fbxa-179  | T14C1.3                     |
| -0.0749209300310891 |    |   | AGIWUR28226                                                 |          |                |           |                             |
| N2                  | HS | X | 14413578                                                    | 14415746 | WBGene00045291 | F23D12.10 | F23D12.10                   |
| -0.180799362798433  |    |   | AGIWUR194;AGIWUR17650                                       |          |                |           |                             |
| N2                  | HS | X | 14416121                                                    | 14421579 | WBGene00009086 | F23D12.2  | F23D12.2                    |
| -0.0953485239399385 |    |   | AGIWUR25607;AGIWUR31917                                     |          |                |           |                             |
| N2                  | HS | X | 14423405                                                    | 14423883 | WBGene00009090 | fipr-3    | F23D12.6                    |
| 0.108127646291916   |    |   | AGIWUR10622                                                 |          |                |           |                             |
| N2                  | HS | X | 14423871                                                    | 14424751 | WBGene00194674 | F23D12.11 | F23D12.11                   |
| 0.260923963897325   |    |   | AGIWUR21628                                                 |          |                |           |                             |
| N2                  | HS | X | 14434212                                                    | 14435363 | WBGene00044136 | F23D12.8  | F23D12.8                    |
| 0.159787858848409   |    |   | AGIWUR11013;AGIWUR44943                                     |          |                |           |                             |
| N2                  | HS | X | 14436751                                                    | 14437656 | WBGene00044217 | F23D12.9  | F23D12.9                    |
| -0.123167347415555  |    |   | AGIWUR4688;AGIWUR9629;AGIWUR20087;AGIWUR24983;AGIWUR37527   |          |                |           |                             |
| N2                  | HS | X | 14442621                                                    | 14443446 | WBGene00009087 | F23D12.3  | F23D12.3                    |
| -0.276597174987705  |    |   | AGIWUR16391                                                 |          |                |           |                             |
| N2                  | HS | X | 14445001                                                    | 14446165 | WBGene00009088 | F23D12.4  | F23D12.4                    |
| -0.133042552679102  |    |   | AGIWUR15283                                                 |          |                |           |                             |
| N2                  | HS | X | 14448224                                                    | 14453562 | WBGene00009089 | jmjd-3.2  | F23D12.5                    |
| 0.00612405179696829 |    |   | AGIWUR4166                                                  |          |                |           |                             |
| N2                  | HS | X | 14453557                                                    | 14453835 | WBGene00009091 | F23D12.7  | F23D12.7                    |
| -0.0950877264786243 |    |   | AGIWUR43008                                                 |          |                |           |                             |
| N2                  | HS | X | 14454689                                                    | 14455519 | WBGene00044156 | Y66C5A.1  | Y66C5A.1                    |
| 0.0700907368072503  |    |   | AGIWUR11294;AGIWUR16226;AGIWUR28674;AGIWUR35288;AGIWUR38878 |          |                |           |                             |
| N2                  | HS | X | 14460349                                                    | 14462139 | WBGene00044157 | Y66C5A.2  | Y66C5A.2                    |
| 0.1062191224831     |    |   | AGIWUR12487;AGIWUR13381                                     |          |                |           |                             |
| N2                  | HS | X | 14462857                                                    | 14464400 | WBGene00010938 | M163.6    | M163.6 0.219715466893237    |
| AGIWUR2660          |    |   |                                                             |          |                |           |                             |
| N2                  | HS | X | 14464809                                                    | 14467615 | WBGene00010939 | M163.7    | M163.7 0.074560474589533    |

|                                                                         |    |   |          |          |                |          |         |                     |
|-------------------------------------------------------------------------|----|---|----------|----------|----------------|----------|---------|---------------------|
| AGIWUR35597                                                             |    |   |          |          |                |          |         |                     |
| N2                                                                      | HS | X | 14469647 | 14470066 | WBGene00044145 | M163.9   | M163.9  | -0.149129542759819  |
| AGIWUR4009;AGIWUR5904;AGIWUR14096;AGIWUR15601;AGIWUR37296               |    |   |          |          |                |          |         |                     |
| N2                                                                      | HS | X | 14470987 | 14471772 | WBGene00044146 | M163.10  | M163.10 | 0.0203551093227254  |
| AGIWUR3264;AGIWUR8009;AGIWUR20332;AGIWUR23335;AGIWUR40949               |    |   |          |          |                |          |         |                     |
| N2                                                                      | HS | X | 14474038 | 14476153 | WBGene00010937 | M163.5   | M163.5  | -0.0507398589118875 |
| AGIWUR14359                                                             |    |   |          |          |                |          |         |                     |
| N2                                                                      | HS | X | 14479378 | 14480256 | WBGene00044147 | M163.11  | M163.11 | 0.0786738620777521  |
| AGIWUR2389;AGIWUR15730                                                  |    |   |          |          |                |          |         |                     |
| N2                                                                      | HS | X | 14480572 | 14484702 | WBGene00001583 | gfi-3    | M163.4  | 0.0263232699859728  |
| AGIWUR16280                                                             |    |   |          |          |                |          |         |                     |
| N2                                                                      | HS | X | 14485127 | 14485955 | WBGene00010940 | M163.8   | M163.8  | 0.0402002448664334  |
| AGIWUR1287;AGIWUR14317;AGIWUR22925                                      |    |   |          |          |                |          |         |                     |
| N2                                                                      | HS | X | 14490094 | 14491115 | WBGene00001898 | his-24   | M163.3  | -0.0690180624928978 |
| AGIWUR14069;AGIWUR31222;AGIWUR32696;AGIWUR34761;AGIWUR38474;AGIWUR42369 |    |   |          |          |                |          |         |                     |
| N2                                                                      | HS | X | 14496085 | 14499434 | WBGene00010936 | ztf-14   | M163.2  | -0.41910498624645   |
| AGIWUR43318                                                             |    |   |          |          |                |          |         |                     |
| N2                                                                      | HS | X | 14502487 | 14503862 | WBGene00010935 | M163.1   | M163.1  | -0.145913348246381  |
| AGIWUR26347                                                             |    |   |          |          |                |          |         |                     |
| N2                                                                      | HS | X | 14511248 | 14512912 | WBGene00008355 | fbxa-141 |         | D1025.3             |
| -0.0668889384454321 AGIWUR19594                                         |    |   |          |          |                |          |         |                     |
| N2                                                                      | HS | X | 14514136 | 14515073 | WBGene00008354 | gcsh-1   | D1025.2 | 0.30908310788406    |
| AGIWUR34839                                                             |    |   |          |          |                |          |         |                     |
| N2                                                                      | HS | X | 14516860 | 14519229 | WBGene00044134 | D1025.10 |         | D1025.10            |
| -0.20507412771559 AGIWUR9627;AGIWUR37647                                |    |   |          |          |                |          |         |                     |
| N2                                                                      | HS | X | 14520763 | 14522705 | WBGene00008353 | D1025.1  | D1025.1 | 0.0998860589249695  |
| AGIWUR28702                                                             |    |   |          |          |                |          |         |                     |
| N2                                                                      | HS | X | 14529788 | 14530214 | WBGene00008356 | nspc-20  | D1025.4 | -0.0953307783248132 |
| AGIWUR10733                                                             |    |   |          |          |                |          |         |                     |
| N2                                                                      | HS | X | 14537897 | 14539522 | WBGene00011984 | T24C2.5  | T24C2.5 | -0.0327685095715111 |
| AGIWUR13511;AGIWUR22752;AGIWUR23045;AGIWUR27229;AGIWUR29830             |    |   |          |          |                |          |         |                     |
| N2                                                                      | HS | X | 14540686 | 14542058 | WBGene00011983 | fbxa-81  | T24C2.4 | -0.107744821413708  |
| AGIWUR13255;AGIWUR27010;AGIWUR35307                                     |    |   |          |          |                |          |         |                     |
| N2                                                                      | HS | X | 14543557 | 14544643 | WBGene00011982 | T24C2.3  | T24C2.3 | -0.0880406807717806 |
| AGIWUR4174                                                              |    |   |          |          |                |          |         |                     |
| N2                                                                      | HS | X | 14545855 | 14546720 | WBGene00011981 | T24C2.2  | T24C2.2 | 0.0306602781866872  |
| AGIWUR37499                                                             |    |   |          |          |                |          |         |                     |
| N2                                                                      | HS | X | 14550138 | 14556297 | WBGene00004301 | ram-5    | T24C2.1 | 0.142872444556442   |
| AGIWUR1673                                                              |    |   |          |          |                |          |         |                     |

|                                                                                               |    |   |          |          |                |          |          |                     |
|-----------------------------------------------------------------------------------------------|----|---|----------|----------|----------------|----------|----------|---------------------|
| N2                                                                                            | HS | X | 14558504 | 14561425 | WBGene00003602 | nhr-3    | H01A20.1 |                     |
| -0.0829461932587696 AGIWUR7464;AGIWUR8593;AGIWUR12537;AGIWUR17322;AGIWUR28309;AGIWUR36939     |    |   |          |          |                |          |          |                     |
| N2                                                                                            | HS | X | 14568854 | 14589101 | WBGene00008094 | C44H4.4  | C44H4.4  | 0.0796968889364962  |
| AGIWUR6592                                                                                    |    |   |          |          |                |          |          |                     |
| N2                                                                                            | HS | X | 14589624 | 14591821 | WBGene00006524 | tap-1    | C44H4.5  | 0.120536721803727   |
| AGIWUR24906                                                                                   |    |   |          |          |                |          |          |                     |
| N2                                                                                            | HS | X | 14595125 | 14595944 | WBGene00008096 | C44H4.8  | C44H4.8  | 0.0152207708550218  |
| AGIWUR29980                                                                                   |    |   |          |          |                |          |          |                     |
| N2                                                                                            | HS | X | 14596476 | 14599158 | WBGene00008095 | C44H4.6  | C44H4.6  | -0.0691382928196749 |
| AGIWUR42695                                                                                   |    |   |          |          |                |          |          |                     |
| N2                                                                                            | HS | X | 14603017 | 14608655 | WBGene00001325 | eor-2    | C44H4.7  | 0.0029818617221915  |
| AGIWUR23295;AGIWUR35594                                                                       |    |   |          |          |                |          |          |                     |
| N2                                                                                            | HS | X | 14611380 | 14624824 | WBGene00004313 | rbc-1    | F54E4.1  | -0.148405601789804  |
| AGIWUR32837                                                                                   |    |   |          |          |                |          |          |                     |
| N2                                                                                            | HS | X | 14625452 | 14628916 | WBGene00010058 | F54E4.2  | F54E4.2  | 0.115044447807142   |
| AGIWUR4544                                                                                    |    |   |          |          |                |          |          |                     |
| N2                                                                                            | HS | X | 14632092 | 14636472 | WBGene00010059 | F54E4.3  | F54E4.3  | 0.113272867664119   |
| AGIWUR5252;AGIWUR17296;AGIWUR18189;AGIWUR22420;AGIWUR35079                                    |    |   |          |          |                |          |          |                     |
| N2                                                                                            | HS | X | 14641391 | 14645486 | WBGene00010060 | F54E4.4  | F54E4.4  | 0.119267868495568   |
| AGIWUR13807                                                                                   |    |   |          |          |                |          |          |                     |
| N2                                                                                            | HS | X | 14654972 | 14662841 | WBGene00007750 | syg-2    | C26G2.1  | 0.101166026579712   |
| AGIWUR31608                                                                                   |    |   |          |          |                |          |          |                     |
| N2                                                                                            | HS | X | 14664289 | 14671336 | WBGene00007751 | C26G2.2  | C26G2.2  | -0.09199216137542   |
| AGIWUR16366;AGIWUR33426;AGIWUR34201;AGIWUR40630                                               |    |   |          |          |                |          |          |                     |
| N2                                                                                            | HS | X | 14674328 | 14683326 | WBGene00004854 | slt-1    | F40E10.4 |                     |
| 0.0590768027955733 AGIWUR17273                                                                |    |   |          |          |                |          |          |                     |
| N2                                                                                            | HS | X | 14684877 | 14688322 | WBGene00000822 | csq-1    | F40E10.3 |                     |
| 0.0648320328401351 AGIWUR5990;AGIWUR26198;AGIWUR34544                                         |    |   |          |          |                |          |          |                     |
| N2                                                                                            | HS | X | 14690846 | 14692999 | WBGene00004950 | sox-3    | F40E10.2 |                     |
| -0.231853031560126 AGIWUR31056                                                                |    |   |          |          |                |          |          |                     |
| N2                                                                                            | HS | X | 14696412 | 14699977 | WBGene00001828 | hch-1    | F40E10.1 |                     |
| -0.317775215885352 AGIWUR35024                                                                |    |   |          |          |                |          |          |                     |
| N2                                                                                            | HS | X | 14701790 | 14703682 | WBGene00009573 | F40E10.5 |          | F40E10.5            |
| -0.246708777932252 AGIWUR38084                                                                |    |   |          |          |                |          |          |                     |
| N2                                                                                            | HS | X | 14703715 | 14706859 | WBGene00009574 | F40E10.6 |          | F40E10.6            |
| -0.0125258168547595                                                                           |    |   |          |          |                |          |          |                     |
| AGIWUR5715;AGIWUR7899;AGIWUR16909;AGIWUR27026;AGIWUR32719;AGIWUR36500;AGIWUR39306;AGIWUR39932 |    |   |          |          |                |          |          |                     |
| N2                                                                                            | HS | X | 14710475 | 14718779 | WBGene00006432 | tag-53   | F33C8.1  | -0.34986179274293   |
| AGIWUR8626;AGIWUR8942                                                                         |    |   |          |          |                |          |          |                     |

|                                                                                             |    |   |          |          |                |          |          |                     |
|---------------------------------------------------------------------------------------------|----|---|----------|----------|----------------|----------|----------|---------------------|
| N2                                                                                          | HS | X | 14721398 | 14723437 | WBGene00009357 | F33C8.2  | F33C8.2  | -0.137890328726137  |
| AGIWUR10908                                                                                 |    |   |          |          |                |          |          |                     |
| N2                                                                                          | HS | X | 14726626 | 14729482 | WBGene00006634 | tsp-8    | F33C8.3  | 0.123874410217411   |
| AGIWUR40963                                                                                 |    |   |          |          |                |          |          |                     |
| N2                                                                                          | HS | X | 14732283 | 14734457 | WBGene00009358 | F33C8.4  | F33C8.4  | 0.415927923435955   |
| AGIWUR25047                                                                                 |    |   |          |          |                |          |          |                     |
| N2                                                                                          | HS | X | 14734443 | 14740088 | WBGene00007347 | C05G5.1  | C05G5.1  | -0.0371928213815593 |
| AGIWUR4992                                                                                  |    |   |          |          |                |          |          |                     |
| N2                                                                                          | HS | X | 14747320 | 14750390 | WBGene00007348 | C05G5.2  | C05G5.2  | -0.206647051096004  |
| AGIWUR26168                                                                                 |    |   |          |          |                |          |          |                     |
| N2                                                                                          | HS | X | 14750849 | 14752011 | WBGene00007349 | C05G5.3  | C05G5.3  | -0.249552501329067  |
| AGIWUR43661                                                                                 |    |   |          |          |                |          |          |                     |
| N2                                                                                          | HS | X | 14754026 | 14756459 | WBGene00007350 | suc1-1   | C05G5.4  | 0.0671843059431456  |
| AGIWUR12280                                                                                 |    |   |          |          |                |          |          |                     |
| N2                                                                                          | HS | X | 14761966 | 14771885 | WBGene00012445 | Y16B4A.2 |          | Y16B4A.2            |
| 0.149489210150996 AGIWUR21626                                                               |    |   |          |          |                |          |          |                     |
| N2                                                                                          | HS | X | 14773538 | 14783564 | WBGene00006743 | unc-3    | Y16B4A.1 |                     |
| -0.150127127968718 AGIWUR11747                                                              |    |   |          |          |                |          |          |                     |
| N2                                                                                          | HS | X | 14791008 | 14792980 | WBGene00009628 | tatn-1   | F42D1.2  | -0.126764036411201  |
| AGIWUR9033;AGIWUR21070;AGIWUR35338;AGIWUR43426                                              |    |   |          |          |                |          |          |                     |
| N2                                                                                          | HS | X | 14794217 | 14804359 | WBGene00009629 | spr-2    | F42D1.3  | -0.110922886047319  |
| AGIWUR11796                                                                                 |    |   |          |          |                |          |          |                     |
| N2                                                                                          | HS | X | 14807236 | 14807944 | WBGene00044139 | F42D1.4  | F42D1.4  | -0.0314584718256832 |
| AGIWUR12997;AGIWUR16902;AGIWUR28233;AGIWUR41590;AGIWUR44828                                 |    |   |          |          |                |          |          |                     |
| N2                                                                                          | HS | X | 14808846 | 14810849 | WBGene00000221 | atf-5    | T04C10.4 |                     |
| 0.0669659005384329 AGIWUR6034                                                               |    |   |          |          |                |          |          |                     |
| N2                                                                                          | HS | X | 14812361 | 14814380 | WBGene00011426 | T04C10.3 |          | T04C10.3            |
| 0.0292037476455853 AGIWUR41380                                                              |    |   |          |          |                |          |          |                     |
| N2                                                                                          | HS | X | 14815828 | 14818507 | WBGene00001329 | epn-1    | T04C10.2 |                     |
| -0.0485620833220284 AGIWUR14802;AGIWUR28806;AGIWUR30004;AGIWUR40253;AGIWUR42773;AGIWUR45112 |    |   |          |          |                |          |          |                     |
| N2                                                                                          | HS | X | 14819909 | 14824540 | WBGene00003149 | mbk-1    | T04C10.1 |                     |
| 0.222052214362733 AGIWUR20624                                                               |    |   |          |          |                |          |          |                     |
| N2                                                                                          | HS | X | 14831824 | 14838241 | WBGene00001055 | dpf-2    | C27C12.7 |                     |
| 0.150730688713502 AGIWUR6732                                                                |    |   |          |          |                |          |          |                     |
| N2                                                                                          | HS | X | 14845937 | 14849217 | WBGene00007772 | egrh-1   | C27C12.2 |                     |
| -0.0194525383781605 AGIWUR3860;AGIWUR36066                                                  |    |   |          |          |                |          |          |                     |
| N2                                                                                          | HS | X | 14849275 | 14852619 | WBGene00007775 | acd-3    | C27C12.5 |                     |
| 0.000774615238624321 AGIWUR43410                                                            |    |   |          |          |                |          |          |                     |
| N2                                                                                          | HS | X | 14852552 | 14853762 | WBGene00007771 | C27C12.1 |          | C27C12.1            |

|                                                                                                                                             |    |   |                                                            |          |                |          |          |                     |
|---------------------------------------------------------------------------------------------------------------------------------------------|----|---|------------------------------------------------------------|----------|----------------|----------|----------|---------------------|
| -0.181264865470981                                                                                                                          |    |   | AGIWUR16057                                                |          |                |          |          |                     |
| N2                                                                                                                                          | HS | X | 14854131                                                   | 14856518 | WBGene00007774 | C27C12.4 | C27C12.4 |                     |
| 0.204976086668008                                                                                                                           |    |   | AGIWUR24339                                                |          |                |          |          |                     |
| N2                                                                                                                                          | HS | X | 14857303                                                   | 14861801 | WBGene00007776 | dmd-4    | C27C12.6 |                     |
| -0.193389833308657                                                                                                                          |    |   | AGIWUR9518                                                 |          |                |          |          |                     |
| N2                                                                                                                                          | HS | X | 14863678                                                   | 14865844 | WBGene00007773 | C27C12.3 | C27C12.3 |                     |
| -0.126760496987195                                                                                                                          |    |   | AGIWUR1471;AGIWUR20813;AGIWUR29142;AGIWUR41215;AGIWUR43019 |          |                |          |          |                     |
| N2                                                                                                                                          | HS | X | 14867101                                                   | 14868300 | WBGene00009300 | F31F6.1  | F31F6.1  | -0.244014882071262  |
| AGIWUR36444                                                                                                                                 |    |   |                                                            |          |                |          |          |                     |
| N2                                                                                                                                          | HS | X | 14869606                                                   | 14870675 | WBGene00009301 | F31F6.2  | F31F6.2  | -0.189965791289971  |
| AGIWUR24956                                                                                                                                 |    |   |                                                            |          |                |          |          |                     |
| N2                                                                                                                                          | HS | X | 14876150                                                   | 14878855 | WBGene00044138 | sssh-1   | F31F6.8  | 0.185174128959083   |
| AGIWUR19406;AGIWUR20525;AGIWUR31034                                                                                                         |    |   |                                                            |          |                |          |          |                     |
| N2                                                                                                                                          | HS | X | 14881419                                                   | 14882300 | WBGene00001451 | flp-8    | F31F6.4  | 0.184786448916457   |
| AGIWUR4453;AGIWUR7526;AGIWUR9122;AGIWUR9925;AGIWUR14557;AGIWUR15832;AGIWUR15891;AGIWUR25652;AGIWUR25878;AGIWUR34263;AGIWUR37944;AGIWUR44175 |    |   |                                                            |          |                |          |          |                     |
| N2                                                                                                                                          | HS | X | 14888488                                                   | 14894297 | WBGene00000902 | daf-6    | F31F6.5  | 0.312934180881149   |
| AGIWUR20854                                                                                                                                 |    |   |                                                            |          |                |          |          |                     |
| N2                                                                                                                                          | HS | X | 14895145                                                   | 14898449 | WBGene00003517 | nac-1    | F31F6.6  | -0.242212716598242  |
| AGIWUR44277                                                                                                                                 |    |   |                                                            |          |                |          |          |                     |
| N2                                                                                                                                          | HS | X | 14898505                                                   | 14900772 | WBGene00009303 | lips-8   | F31F6.7  | -0.0972448182019185 |
| AGIWUR20024                                                                                                                                 |    |   |                                                            |          |                |          |          |                     |
| N2                                                                                                                                          | HS | X | 14901881                                                   | 14905261 | WBGene00013497 | hex-5    | Y70D2A.2 |                     |
| 0.108872264653993                                                                                                                           |    |   | AGIWUR37112                                                |          |                |          |          |                     |
| N2                                                                                                                                          | HS | X | 14918836                                                   | 14923942 | WBGene00013496 | Y70D2A.1 | Y70D2A.1 |                     |
| 0.427566155288374                                                                                                                           |    |   | AGIWUR20397                                                |          |                |          |          |                     |
| N2                                                                                                                                          | HS | X | 14925031                                                   | 14928934 | WBGene00008808 | ntr-2    | F14F4.1  | 0.0752803319165078  |
| AGIWUR24360                                                                                                                                 |    |   |                                                            |          |                |          |          |                     |
| N2                                                                                                                                          | HS | X | 14938502                                                   | 14946317 | WBGene00003411 | mrp-5    | F14F4.3  | 0.0496074655472665  |
| AGIWUR40460                                                                                                                                 |    |   |                                                            |          |                |          |          |                     |
| N2                                                                                                                                          | HS | X | 14951200                                                   | 14954544 | WBGene00003909 | pag-3    | F45B8.4  | 0.040153004082601   |
| AGIWUR17163                                                                                                                                 |    |   |                                                            |          |                |          |          |                     |
| N2                                                                                                                                          | HS | X | 14960544                                                   | 14961571 | WBGene00009720 | F45B8.3  | F45B8.3  | 0.151768264189721   |
| AGIWUR17468                                                                                                                                 |    |   |                                                            |          |                |          |          |                     |
| N2                                                                                                                                          | HS | X | 14962922                                                   | 14963995 | WBGene00004353 | rgs-10   | F45B8.2  | -0.318259968075722  |
| AGIWUR38642                                                                                                                                 |    |   |                                                            |          |                |          |          |                     |
| N2                                                                                                                                          | HS | X | 14964553                                                   | 14965976 | WBGene00004354 | rgs-11   | F45B8.1  | 0.02851080483277    |
| AGIWUR19167                                                                                                                                 |    |   |                                                            |          |                |          |          |                     |
| N2                                                                                                                                          | HS | X | 14968900                                                   | 14970271 | WBGene00008973 | F20D1.1  | F20D1.1  | -0.436468948052873  |



|                                                                                            |    |   |          |          |                |          |          |                     |
|--------------------------------------------------------------------------------------------|----|---|----------|----------|----------------|----------|----------|---------------------|
| AGIWUR33104                                                                                |    |   |          |          |                |          |          |                     |
| N2                                                                                         | HS | X | 14970751 | 14974779 | WBGene00008974 | tbc-1    | F20D1.2  | 0.0913912290696821  |
| AGIWUR5402                                                                                 |    |   |          |          |                |          |          |                     |
| N2                                                                                         | HS | X | 14976117 | 14978714 | WBGene00008975 | F20D1.3  | F20D1.3  | -0.0923958098044118 |
| AGIWUR25553;AGIWUR44272                                                                    |    |   |          |          |                |          |          |                     |
| N2                                                                                         | HS | X | 14979374 | 14980435 | WBGene00008980 | emre-1   | F20D1.10 |                     |
| 0.0190725922987092 AGIWUR21288;AGIWUR30966;AGIWUR38147;AGIWUR40911;AGIWUR42285;AGIWUR44747 |    |   |          |          |                |          |          |                     |
| N2                                                                                         | HS | X | 14980954 | 14981675 | WBGene00000191 | arl-7    | F20D1.5  | 0.344932456693558   |
| AGIWUR40958                                                                                |    |   |          |          |                |          |          |                     |
| N2                                                                                         | HS | X | 14983533 | 14987365 | WBGene00004317 | rbg-1    | F20D1.6  | -0.427905362729739  |
| AGIWUR12759                                                                                |    |   |          |          |                |          |          |                     |
| N2                                                                                         | HS | X | 14987369 | 14991380 | WBGene00008977 | iglr-1   | F20D1.7  | 0.312805602307112   |
| AGIWUR17966                                                                                |    |   |          |          |                |          |          |                     |
| N2                                                                                         | HS | X | 14994752 | 14999198 | WBGene00008978 | cutl-3   | F20D1.8  | -0.0725556102618143 |
| AGIWUR15768;AGIWUR27261                                                                    |    |   |          |          |                |          |          |                     |
| N2                                                                                         | HS | X | 15002034 | 15003941 | WBGene00008979 | F20D1.9  | F20D1.9  | 0.0988753751006364  |
| AGIWUR33263                                                                                |    |   |          |          |                |          |          |                     |
| N2                                                                                         | HS | X | 15004064 | 15007308 | WBGene00007668 | C18B12.6 |          | C18B12.6            |
| 0.13820095326157 AGIWUR25292                                                               |    |   |          |          |                |          |          |                     |
| N2                                                                                         | HS | X | 15012684 | 15012926 | WBGene00007663 | C18B12.1 |          | C18B12.1            |
| 0.193596301788038 AGIWUR22784                                                              |    |   |          |          |                |          |          |                     |
| N2                                                                                         | HS | X | 15026308 | 15031084 | WBGene00007664 | seb-3    | C18B12.2 |                     |
| 0.0295074903030734 AGIWUR15522                                                             |    |   |          |          |                |          |          |                     |
| N2                                                                                         | HS | X | 15031353 | 15034541 | WBGene00001096 | dsc-1    | C18B12.3 |                     |
| -0.0354567826965244 AGIWUR482;AGIWUR35604;AGIWUR37220                                      |    |   |          |          |                |          |          |                     |
| N2                                                                                         | HS | X | 15036662 | 15040602 | WBGene00007666 | C18B12.4 |          | C18B12.4            |
| -0.34076283617998 AGIWUR41884                                                              |    |   |          |          |                |          |          |                     |
| N2                                                                                         | HS | X | 15042956 | 15045353 | WBGene00007667 | fbxa-97  | C18B12.5 |                     |
| -0.0622992616621652 AGIWUR7812                                                             |    |   |          |          |                |          |          |                     |
| N2                                                                                         | HS | X | 15051688 | 15052870 | WBGene00044141 | H03G16.6 |          | H03G16.6            |
| -0.00567588235610472 AGIWUR568;AGIWUR19092;AGIWUR31424                                     |    |   |          |          |                |          |          |                     |
| N2                                                                                         | HS | X | 15053883 | 15054652 | WBGene00010358 | H03G16.1 |          | H03G16.1            |
| 0.171975296893224 AGIWUR16692                                                              |    |   |          |          |                |          |          |                     |
| N2                                                                                         | HS | X | 15055500 | 15056822 | WBGene00010361 | H03G16.5 |          | H03G16.5            |
| 0.337185418602617 AGIWUR32198                                                              |    |   |          |          |                |          |          |                     |
| N2                                                                                         | HS | X | 15058509 | 15060399 | WBGene00010360 | fbxa-96  | H03G16.4 |                     |
| 0.108847086613387 AGIWUR9111;AGIWUR12914;AGIWUR33212                                       |    |   |          |          |                |          |          |                     |
| N2                                                                                         | HS | X | 15064015 | 15067184 | WBGene00014790 | H03G16.3 |          | H03G16.3            |
| -0.0634928741826206                                                                        |    |   |          |          |                |          |          |                     |

AGIWUR4038;AGIWUR23558;AGIWUR24798;AGIWUR30039;AGIWUR30542;AGIWUR41463;AGIWUR44210;AGIWUR44463  
 N2 HS X 15067476 15069342 WBGene00010359 mam-6 H03G16.2  
 -0.0222382536974095 AGIWUR3512  
 N2 HS X 15069743 15076480 WBGene00010434 H40L08.3 H40L08.3  
 0.0365066018031008 AGIWUR4784;AGIWUR22840;AGIWUR44346  
 N2 HS X 15076696 15077748 WBGene00014793 H40L08.2 H40L08.2  
 0.0316496459254125  
 AGIWUR965;AGIWUR4962;AGIWUR10059;AGIWUR15584;AGIWUR34346;AGIWUR35856;AGIWUR36602;AGIWUR42221;AGIWUR43395  
 N2 HS X 15080779 15084086 WBGene00010433 H40L08.1 H40L08.1  
 0.0499650494954658 AGIWUR31733  
 N2 HS X 15084749 15088135 WBGene00008609 F09B12.5 F09B12.5  
 -0.0405652283208822 AGIWUR32756  
 N2 HS X 15089397 15093585 WBGene00001468 flr-4 F09B12.6  
 0.152441315702896 AGIWUR41102  
 N2 HS X 15095343 15097954 WBGene00008607 F09B12.3 F09B12.3  
 0.0318614084263071 AGIWUR25770;AGIWUR36606  
 N2 HS X 15098066 15100416 WBGene00008606 dhhc-1 F09B12.2  
 -0.508172066218023 AGIWUR10831  
 N2 HS X 15101787 15107967 WBGene00008605 mlt-9 F09B12.1  
 0.0402089358556807 AGIWUR4062;AGIWUR7385;AGIWUR36793;AGIWUR39663  
 N2 HS X 15109951 15116618 WBGene00011101 R07D5.2 R07D5.2 -0.0286437101572861  
 AGIWUR37283;AGIWUR44061  
 N2 HS X 15120975 15147742 WBGene00006747 unc-7 R07D5.1 0.0182018058456714  
 AGIWUR3980;AGIWUR16987;AGIWUR30189;AGIWUR31952  
 N2 HS X 15157359 15158749 WBGene00007525 C11G10.1 C11G10.1  
 -0.0543336021887324 AGIWUR32660;AGIWUR37230  
 N2 HS X 15161283 15166222 WBGene00011684 T10B10.8 T10B10.8  
 -0.0331027058538496 AGIWUR1307;AGIWUR8812;AGIWUR19532  
 N2 HS X 15168722 15173621 WBGene00003840 ocr-3 T10B10.7  
 0.0250327214848562 AGIWUR24640  
 N2 HS X 15173904 15178145 WBGene00011679 ucr-2.2 T10B10.2  
 -0.171398676596882 AGIWUR11998  
 N2 HS X 15178096 15181501 WBGene00011680 T10B10.3 T10B10.3  
 -0.133010184292198  
 AGIWUR1243;AGIWUR7773;AGIWUR9134;AGIWUR10929;AGIWUR14582;AGIWUR18013;AGIWUR19217;AGIWUR23455;AGIWUR26069;AGIWUR36469  
 N2 HS X 15190100 15193066 WBGene00011681 T10B10.4 T10B10.4  
 0.00393671844762267 AGIWUR16848;AGIWUR22935;AGIWUR44845  
 N2 HS X 15193086 15194324 WBGene00011683 phat-6 T10B10.6

|                                                                         |                                                                                  |          |                |          |                             |  |
|-------------------------------------------------------------------------|----------------------------------------------------------------------------------|----------|----------------|----------|-----------------------------|--|
| -0.0508723563371873                                                     | AGIWUR8369                                                                       |          |                |          |                             |  |
| N2 HS X                                                                 | 15195922                                                                         | 15199136 | WBGene00011682 | snt-7    | T10B10.5                    |  |
| -0.0774714750054102                                                     | AGIWUR39833;AGIWUR42120;AGIWUR44905                                              |          |                |          |                             |  |
| N2 HS X                                                                 | 15209289                                                                         | 15213259 | WBGene00010356 | H03A11.1 | H03A11.1                    |  |
| 0.175893755625466                                                       | AGIWUR17022;AGIWUR32933;AGIWUR43737                                              |          |                |          |                             |  |
| N2 HS X                                                                 | 15225869                                                                         | 15230645 | WBGene00010357 | H03A11.2 | H03A11.2                    |  |
| -0.0227438674937641                                                     | AGIWUR34239                                                                      |          |                |          |                             |  |
| N2 HS X                                                                 | 15234829                                                                         | 15246365 | WBGene00009552 | piki-1   | F39B1.1 0.309807185952424   |  |
| AGIWUR23824                                                             |                                                                                  |          |                |          |                             |  |
| N2 HS X                                                                 | 15250809                                                                         | 15253877 | WBGene00009786 | F46F2.1  | F46F2.1 -0.0391259709339602 |  |
| AGIWUR14648                                                             |                                                                                  |          |                |          |                             |  |
| N2 HS X                                                                 | 15257597                                                                         | 15259048 | WBGene00009788 | F46F2.4  | F46F2.4 -0.131535327931381  |  |
| AGIWUR36542                                                             |                                                                                  |          |                |          |                             |  |
| N2 HS X                                                                 | 15259579                                                                         | 15260290 | WBGene00009787 | F46F2.3  | F46F2.3 0.0862377865645438  |  |
| AGIWUR720;AGIWUR8033;AGIWUR37485                                        |                                                                                  |          |                |          |                             |  |
| N2 HS X                                                                 | 15262727                                                                         | 15267857 | WBGene00009789 | F46F2.5  | F46F2.5 -0.052391922744222  |  |
| AGIWUR14029;AGIWUR19544                                                 |                                                                                  |          |                |          |                             |  |
| N2 HS X                                                                 | 15269074                                                                         | 15281110 | WBGene00002203 | kin-20   | F46F2.2 -0.0727312204686821 |  |
| AGIWUR2546;AGIWUR3876;AGIWUR6680;AGIWUR29853                            |                                                                                  |          |                |          |                             |  |
| N2 HS X                                                                 | 15284182                                                                         | 15286227 | WBGene00007262 | jud-4    | C02D4.1 0.194665226748877   |  |
| AGIWUR1289;AGIWUR4849;AGIWUR9307;AGIWUR20816;AGIWUR37557;AGIWUR44498    |                                                                                  |          |                |          |                             |  |
| N2 HS X                                                                 | 15286579                                                                         | 15302963 | WBGene00004777 | ser-2    | C02D4.2 -0.0694012594157218 |  |
| AGIWUR10251;AGIWUR15917;AGIWUR16808;AGIWUR28601;AGIWUR35275;AGIWUR36199 |                                                                                  |          |                |          |                             |  |
| N2 HS X                                                                 | 15309374                                                                         | 15314899 | WBGene00003681 | nhr-91   | Y15E3A.1                    |  |
| 0.0677104535039037                                                      | AGIWUR391;AGIWUR8575;AGIWUR11164;AGIWUR30048;AGIWUR32782;AGIWUR38239;AGIWUR40936 |          |                |          |                             |  |
| N2 HS X                                                                 | 15314874                                                                         | 15317223 | WBGene00012441 | glb-28   | Y15E3A.2                    |  |
| 0.0445321303368056                                                      | AGIWUR2433                                                                       |          |                |          |                             |  |
| N2 HS X                                                                 | 15322249                                                                         | 15325809 | WBGene00012442 | Y15E3A.3 | Y15E3A.3                    |  |
| 0.0115090414228041                                                      | AGIWUR223                                                                        |          |                |          |                             |  |
| N2 HS X                                                                 | 15330964                                                                         | 15333960 | WBGene00012443 | Y15E3A.4 | Y15E3A.4                    |  |
| 0.0663152528670032                                                      | AGIWUR986                                                                        |          |                |          |                             |  |
| N2 HS X                                                                 | 15343154                                                                         | 15344146 | WBGene00012444 | Y15E3A.5 | Y15E3A.5                    |  |
| -0.393320759299055                                                      | AGIWUR9705                                                                       |          |                |          |                             |  |
| N2 HS X                                                                 | 15355238                                                                         | 15363861 | WBGene00007877 | nfki-1   | C33A11.1                    |  |
| -0.0831052112333301                                                     | AGIWUR2664;AGIWUR3693;AGIWUR5288;AGIWUR9684;AGIWUR18915;AGIWUR44109;AGIWUR44590  |          |                |          |                             |  |
| N2 HS X                                                                 | 15365994                                                                         | 15369999 | WBGene00007878 | C33A11.2 | C33A11.2                    |  |
| -0.250927631199573                                                      | AGIWUR11040                                                                      |          |                |          |                             |  |
| N2 HS X                                                                 | 15369974                                                                         | 15377685 | WBGene00006462 | tag-97   | C33A11.4                    |  |
| -0.0489541235712521                                                     | AGIWUR20474                                                                      |          |                |          |                             |  |

|                                                                                                 |    |   |                                                |          |                |          |          |                    |
|-------------------------------------------------------------------------------------------------|----|---|------------------------------------------------|----------|----------------|----------|----------|--------------------|
| N2                                                                                              | HS | X | 15407931                                       | 15419290 | WBGene00009560 | psa-3    | F39D8.2  | 0.0594103324696693 |
| AGIWUR22299                                                                                     |    |   |                                                |          |                |          |          |                    |
| N2                                                                                              | HS | X | 15420979                                       | 15425114 | WBGene00009561 | F39D8.3  | F39D8.3  | 0.133782855118111  |
| AGIWUR19493;AGIWUR26499;AGIWUR35456                                                             |    |   |                                                |          |                |          |          |                    |
| N2                                                                                              | HS | X | 15425274                                       | 15428180 | WBGene00003532 | nas-13   | F39D8.4  | 0.0288003872563398 |
| AGIWUR20338;AGIWUR23299;AGIWUR24853;AGIWUR25911;AGIWUR28890;AGIWUR32864;AGIWUR35977;AGIWUR42757 |    |   |                                                |          |                |          |          |                    |
| N2                                                                                              | HS | X | 15429925                                       | 15431198 | WBGene00010981 | blos-8   | R03A10.1 |                    |
| -0.345083745479645                                                                              |    |   | AGIWUR39615                                    |          |                |          |          |                    |
| N2                                                                                              | HS | X | 15433787                                       | 15434972 | WBGene00010982 | flp-32   | R03A10.2 |                    |
| 0.10980164930259                                                                                |    |   | AGIWUR41012                                    |          |                |          |          |                    |
| N2                                                                                              | HS | X | 15435665                                       | 15440794 | WBGene00010983 | mocs-1   | R03A10.3 |                    |
| 0.24695795657297                                                                                |    |   | AGIWUR38137                                    |          |                |          |          |                    |
| N2                                                                                              | HS | X | 15441731                                       | 15443641 | WBGene00010984 | nkat-3   | R03A10.4 |                    |
| 0.0245137810968394                                                                              |    |   | AGIWUR9337                                     |          |                |          |          |                    |
| N2                                                                                              | HS | X | 15446724                                       | 15450362 | WBGene00010985 | R03A10.5 | R03A10.5 |                    |
| 0.101223663724333                                                                               |    |   | AGIWUR6587;AGIWUR27742;AGIWUR43903             |          |                |          |          |                    |
| N2                                                                                              | HS | X | 15461843                                       | 15470758 | WBGene00010986 | spr-1    | R03A10.6 |                    |
| -0.0362074960895962                                                                             |    |   | AGIWUR15270;AGIWUR41095                        |          |                |          |          |                    |
| N2                                                                                              | HS | X | 15470795                                       | 15477402 | WBGene00008116 | C46E1.3  | C46E1.3  | 0.105463246082484  |
| AGIWUR34412                                                                                     |    |   |                                                |          |                |          |          |                    |
| N2                                                                                              | HS | X | 15479017                                       | 15485700 | WBGene00001556 | gcy-36   | C46E1.2  | 0.0939578354275366 |
| AGIWUR6436                                                                                      |    |   |                                                |          |                |          |          |                    |
| N2                                                                                              | HS | X | 15488106                                       | 15491987 | WBGene00010396 | H13N06.2 | H13N06.2 |                    |
| 0.371851688790368                                                                               |    |   | AGIWUR20767                                    |          |                |          |          |                    |
| N2                                                                                              | HS | X | 15493536                                       | 15497504 | WBGene00001649 | gob-1    | H13N06.3 |                    |
| 0.0837676939060046                                                                              |    |   | AGIWUR19792                                    |          |                |          |          |                    |
| N2                                                                                              | HS | X | 15497555                                       | 15500279 | WBGene00010397 | suox-1   | H13N06.4 |                    |
| -0.0167801281361806                                                                             |    |   |                                                |          |                |          |          |                    |
| AGIWUR8075;AGIWUR8146;AGIWUR13927;AGIWUR21239;AGIWUR21902;AGIWUR25339;AGIWUR31516;AGIWUR38931   |    |   |                                                |          |                |          |          |                    |
| N2                                                                                              | HS | X | 15500259                                       | 15504895 | WBGene00006541 | tbh-1    | H13N06.6 |                    |
| 0.0870931078593493                                                                              |    |   | AGIWUR32109                                    |          |                |          |          |                    |
| N2                                                                                              | HS | X | 15506037                                       | 15507880 | WBGene00006494 | zipt-7.2 | H13N06.5 |                    |
| 0.0701311380016971                                                                              |    |   | AGIWUR4074                                     |          |                |          |          |                    |
| N2                                                                                              | HS | X | 15516655                                       | 15524020 | WBGene00001148 | eat-20   | H30A04.1 |                    |
| -0.175890808541511                                                                              |    |   | AGIWUR2763;AGIWUR32677;AGIWUR39473;AGIWUR44821 |          |                |          |          |                    |
| N2                                                                                              | HS | X | 15537662                                       | 15546323 | WBGene00007260 | olrn-1   | C02C6.2  | -0.135585387506335 |
| AGIWUR33886                                                                                     |    |   |                                                |          |                |          |          |                    |
| N2                                                                                              | HS | X | 15546688                                       | 15552233 | WBGene00007261 | lron-3   | C02C6.3  | 0.0101752920453233 |
| AGIWUR11376;AGIWUR19492;AGIWUR26257;AGIWUR26685;AGIWUR42061;AGIWUR42454                         |    |   |                                                |          |                |          |          |                    |

|                                                                                                                                  |    |   |          |          |                |          |          |                     |
|----------------------------------------------------------------------------------------------------------------------------------|----|---|----------|----------|----------------|----------|----------|---------------------|
| N2                                                                                                                               | HS | X | 15568890 | 15573693 | WBGene00001130 | dyn-1    | C02C6.1  | -0.0300048341972392 |
| AGIWUR28101                                                                                                                      |    |   |          |          |                |          |          |                     |
| N2                                                                                                                               | HS | X | 15577470 | 15586803 | WBGene00010703 | K09A9.6  | K09A9.6  | 0.0628372210946679  |
| AGIWUR16950;AGIWUR34178                                                                                                          |    |   |          |          |                |          |          |                     |
| N2                                                                                                                               | HS | X | 15586812 | 15590397 | WBGene00001520 | gas-1    | K09A9.5  | -0.097659244469007  |
| AGIWUR9283                                                                                                                       |    |   |          |          |                |          |          |                     |
| N2                                                                                                                               | HS | X | 15591368 | 15595387 | WBGene00010702 | usp-33   | K09A9.4  | 0.00225532874340129 |
| AGIWUR41099                                                                                                                      |    |   |          |          |                |          |          |                     |
| N2                                                                                                                               | HS | X | 15601067 | 15603763 | WBGene00010701 | ent-2    | K09A9.3  | -0.228068501493015  |
| AGIWUR33953;AGIWUR41849;AGIWUR43615                                                                                              |    |   |          |          |                |          |          |                     |
| N2                                                                                                                               | HS | X | 15604635 | 15606635 | WBGene00004276 | rab-14   | K09A9.2  | -0.0618265311796939 |
| AGIWUR725;AGIWUR4364;AGIWUR12647;AGIWUR19104;AGIWUR21129;AGIWUR22392;AGIWUR24016;AGIWUR29023;AGIWUR34364;AGIWUR36569;AGIWUR41345 |    |   |          |          |                |          |          |                     |
| N2                                                                                                                               | HS | X | 15607969 | 15610631 | WBGene00010700 | nipi-3   | K09A9.1  | -0.0627094149150249 |
| AGIWUR1159;AGIWUR16805;AGIWUR18397;AGIWUR23922;AGIWUR33732                                                                       |    |   |          |          |                |          |          |                     |
| N2                                                                                                                               | HS | X | 15611824 | 15613791 | WBGene00010726 | K09E9.3  | K09E9.3  | -0.0312257945979564 |
| AGIWUR4427;AGIWUR26149;AGIWUR27156;AGIWUR34050;AGIWUR38990;AGIWUR42599;AGIWUR43032                                               |    |   |          |          |                |          |          |                     |
| N2                                                                                                                               | HS | X | 15613805 | 15616519 | WBGene00010725 | erv-46   | K09E9.2  | -0.0632433110797948 |
| AGIWUR44606                                                                                                                      |    |   |          |          |                |          |          |                     |
| N2                                                                                                                               | HS | X | 15620489 | 15626629 | WBGene00010724 | K09E9.1  | K09E9.1  | 0.0238259472638944  |
| AGIWUR33744                                                                                                                      |    |   |          |          |                |          |          |                     |
| N2                                                                                                                               | HS | X | 15628606 | 15630440 | WBGene00044143 | K09E9.4  | K09E9.4  | -0.162493533613612  |
| AGIWUR15297                                                                                                                      |    |   |          |          |                |          |          |                     |
| N2                                                                                                                               | HS | X | 15642938 | 15644336 | WBGene00010372 | H08J19.1 |          | H08J19.1            |
| 0.177060380535716 AGIWUR25204                                                                                                    |    |   |          |          |                |          |          |                     |
| N2                                                                                                                               | HS | X | 15646380 | 15647369 | WBGene00010332 | F59D12.5 |          | F59D12.5            |
| -0.173698859174735 AGIWUR28052                                                                                                   |    |   |          |          |                |          |          |                     |
| N2                                                                                                                               | HS | X | 15648263 | 15650905 | WBGene00010331 | F59D12.3 |          | F59D12.3            |
| 0.136339847928806 AGIWUR18081                                                                                                    |    |   |          |          |                |          |          |                     |
| N2                                                                                                                               | HS | X | 15666761 | 15672363 | WBGene00010329 | F59D12.1 |          | F59D12.1            |
| -0.17835826512486 AGIWUR31048                                                                                                    |    |   |          |          |                |          |          |                     |
| N2                                                                                                                               | HS | X | 15672743 | 15675722 | WBGene00010330 | F59D12.2 |          | F59D12.2            |
| 0.114717910471454 AGIWUR14911;AGIWUR32565;AGIWUR34025                                                                            |    |   |          |          |                |          |          |                     |
| N2                                                                                                                               | HS | X | 15681693 | 15687477 | WBGene00001687 | gpn-1    | F59D12.4 |                     |
| 0.140098175422116 AGIWUR21149                                                                                                    |    |   |          |          |                |          |          |                     |
| N2                                                                                                                               | HS | X | 15689449 | 15696423 | WBGene00007284 | C03H12.1 |          | C03H12.1            |
| 0.13823789259531 AGIWUR27399                                                                                                     |    |   |          |          |                |          |          |                     |
| N2                                                                                                                               | HS | X | 15696700 | 15698062 | WBGene00014039 | ZK662.2  | ZK662.2  | 0.0910198224176568  |
| AGIWUR7417                                                                                                                       |    |   |          |          |                |          |          |                     |

|                                                                                           |    |   |          |          |                |          |         |                     |
|-------------------------------------------------------------------------------------------|----|---|----------|----------|----------------|----------|---------|---------------------|
| N2                                                                                        | HS | X | 15708195 | 15716444 | WBGene00003638 | nhr-48   | ZK662.3 | -0.125818808456912  |
| AGIWUR7223;AGIWUR14331                                                                    |    |   |          |          |                |          |         |                     |
| N2                                                                                        | HS | X | 15718625 | 15720415 | WBGene00045494 | ZK662.6  | ZK662.6 | 0.326897245682558   |
| AGIWUR9757;AGIWUR29907;AGIWUR30215                                                        |    |   |          |          |                |          |         |                     |
| N2                                                                                        | HS | X | 15721270 | 15723776 | WBGene00014040 | ZK662.5  | ZK662.5 | -0.236647238413906  |
| AGIWUR6125                                                                                |    |   |          |          |                |          |         |                     |
| N2                                                                                        | HS | X | 15726129 | 15732025 | WBGene00023497 | lin-15B  | ZK662.4 | -0.0221030950624836 |
| AGIWUR30716                                                                               |    |   |          |          |                |          |         |                     |
| N2                                                                                        | HS | X | 15731968 | 15735386 | WBGene00023498 | lin-15A  | ZK678.1 | -0.0744855314740924 |
| AGIWUR22541                                                                               |    |   |          |          |                |          |         |                     |
| N2                                                                                        | HS | X | 15736844 | 15740626 | WBGene00005221 | srg-64   | ZK678.6 | 0.104579276222166   |
| AGIWUR2265                                                                                |    |   |          |          |                |          |         |                     |
| N2                                                                                        | HS | X | 15742610 | 15744298 | WBGene00014068 | nhr-255  | ZK678.2 | -0.161503025392625  |
| AGIWUR24393                                                                               |    |   |          |          |                |          |         |                     |
| N2                                                                                        | HS | X | 15747005 | 15752138 | WBGene00014070 | srxa-9   | ZK678.4 | -0.131312525262568  |
| AGIWUR15499;AGIWUR41953                                                                   |    |   |          |          |                |          |         |                     |
| N2                                                                                        | HS | X | 15752258 | 15757269 | WBGene00006950 | wrt-4    | ZK678.5 | -0.0498052548296375 |
| AGIWUR23427                                                                               |    |   |          |          |                |          |         |                     |
| N2                                                                                        | HS | X | 15757868 | 15766354 | WBGene00044630 | bus-17   | ZK678.8 | 0.0324487821446278  |
| AGIWUR31074                                                                               |    |   |          |          |                |          |         |                     |
| N2                                                                                        | HS | X | 15767437 | 15771509 | WBGene00012407 | Y7A5A.1  | Y7A5A.1 | 0.201631647272606   |
| AGIWUR19392                                                                               |    |   |          |          |                |          |         |                     |
| N2                                                                                        | HS | X | 15771707 | 15772735 | WBGene00012408 | Y7A5A.2  | Y7A5A.2 | 0.229412039819902   |
| AGIWUR23529                                                                               |    |   |          |          |                |          |         |                     |
| N2                                                                                        | HS | X | 15781625 | 15784670 | WBGene00012409 | Y7A5A.3  | Y7A5A.3 |                     |
| -0.00425483832230622 AGIWUR2339;AGIWUR3012;AGIWUR5234;AGIWUR21524;AGIWUR35525;AGIWUR37483 |    |   |          |          |                |          |         |                     |
| N2                                                                                        | HS | X | 15786529 | 15786826 | WBGene00012411 | Y7A5A.5  | Y7A5A.5 | -0.0427027095119978 |
| AGIWUR3965                                                                                |    |   |          |          |                |          |         |                     |
| N2                                                                                        | HS | X | 15793767 | 15794936 | WBGene00044154 | Y7A5A.10 |         | Y7A5A.10            |
| -0.0990025807730577 AGIWUR21480                                                           |    |   |          |          |                |          |         |                     |
| N2                                                                                        | HS | X | 15797332 | 15799695 | WBGene00012412 | Y7A5A.6  | Y7A5A.6 | -0.042492492512447  |
| AGIWUR10682                                                                               |    |   |          |          |                |          |         |                     |
| N2                                                                                        | HS | X | 15801310 | 15804172 | WBGene00012413 | Y7A5A.7  | Y7A5A.7 | -0.0625576061822457 |
| AGIWUR35640                                                                               |    |   |          |          |                |          |         |                     |
| N2                                                                                        | HS | X | 15811967 | 15819541 | WBGene00044155 | Y7A5A.11 |         | Y7A5A.11            |
| -0.0641180001646871 AGIWUR7266;AGIWUR26732;AGIWUR30174;AGIWUR38493                        |    |   |          |          |                |          |         |                     |
| N2                                                                                        | HS | X | 15828626 | 15829772 | WBGene00219351 | Y7A5A.20 |         | Y7A5A.20            |
| 0.0590214908302347 AGIWUR33281                                                            |    |   |          |          |                |          |         |                     |
| N2                                                                                        | HS | X | 15834052 | 15838546 | WBGene00010336 | acox-1.6 |         | F59F4.1             |

|                                                                                                |    |   |                                     |          |                |         |         |                     |  |
|------------------------------------------------------------------------------------------------|----|---|-------------------------------------|----------|----------------|---------|---------|---------------------|--|
| -0.0611292057889141                                                                            |    |   | AGIWUR14537;AGIWUR31659;AGIWUR44657 |          |                |         |         |                     |  |
| N2                                                                                             | HS | X | 15841572                            | 15842379 | WBGene00010337 | F59F4.2 | F59F4.2 | -0.247779092790761  |  |
| AGIWUR22010;AGIWUR24003;AGIWUR27657;AGIWUR44124;AGIWUR44610;AGIWUR45157                        |    |   |                                     |          |                |         |         |                     |  |
| N2                                                                                             | HS | X | 15842356                            | 15847593 | WBGene00010338 | F59F4.3 | F59F4.3 | -0.418905013790047  |  |
| AGIWUR13623                                                                                    |    |   |                                     |          |                |         |         |                     |  |
| N2                                                                                             | HS | X | 15849885                            | 15851771 | WBGene00010339 | ac1-1   | F59F4.4 | -0.146465967435429  |  |
| AGIWUR14275                                                                                    |    |   |                                     |          |                |         |         |                     |  |
| N2                                                                                             | HS | X | 15852935                            | 15860608 | WBGene00010011 | F53H4.6 | F53H4.6 | -0.177377018543007  |  |
| AGIWUR5968;AGIWUR38837                                                                         |    |   |                                     |          |                |         |         |                     |  |
| N2                                                                                             | HS | X | 15861294                            | 15865918 | WBGene00000803 | csb-1   | F53H4.1 | -0.138074728640559  |  |
| AGIWUR4195;AGIWUR10825;AGIWUR17135;AGIWUR21736;AGIWUR30198;AGIWUR37770;AGIWUR40998             |    |   |                                     |          |                |         |         |                     |  |
| N2                                                                                             | HS | X | 15866411                            | 15868764 | WBGene00010009 | F53H4.4 | F53H4.4 | -0.0776385854598116 |  |
| AGIWUR4350;AGIWUR10553;AGIWUR14414;AGIWUR24536;AGIWUR27418;AGIWUR30318;AGIWUR40238;AGIWUR43408 |    |   |                                     |          |                |         |         |                     |  |
| N2                                                                                             | HS | X | 15879096                            | 15885617 | WBGene00010010 | gmeh-2  | F53H4.5 | 0.00246100548151418 |  |
| AGIWUR17153                                                                                    |    |   |                                     |          |                |         |         |                     |  |
| N2                                                                                             | HS | X | 15885604                            | 15887593 | WBGene00010008 | F53H4.3 | F53H4.3 | 0.0847239696627557  |  |
| AGIWUR23300;AGIWUR37269;AGIWUR39299                                                            |    |   |                                     |          |                |         |         |                     |  |
| N2                                                                                             | HS | X | 15910638                            | 15914159 | WBGene00009278 | npr-33  | F31B9.1 | -0.118753707791452  |  |
| AGIWUR32643                                                                                    |    |   |                                     |          |                |         |         |                     |  |
| N2                                                                                             | HS | X | 15915699                            | 15917100 | WBGene00009281 | F31B9.4 | F31B9.4 | 0.666425552086482   |  |
| AGIWUR20462                                                                                    |    |   |                                     |          |                |         |         |                     |  |
| N2                                                                                             | HS | X | 15918137                            | 15920423 | WBGene00009279 | F31B9.2 | F31B9.2 | -0.184908543634483  |  |
| AGIWUR3218                                                                                     |    |   |                                     |          |                |         |         |                     |  |
| N2                                                                                             | HS | X | 15923738                            | 15925169 | WBGene00009280 | F31B9.3 | F31B9.3 | -0.143026440219188  |  |
| AGIWUR36631                                                                                    |    |   |                                     |          |                |         |         |                     |  |
| N2                                                                                             | HS | X | 15929958                            | 15939324 | WBGene00003409 | mrp-3   | E03G2.2 | 0.170414170644932   |  |
| AGIWUR9771                                                                                     |    |   |                                     |          |                |         |         |                     |  |
| N2                                                                                             | HS | X | 15944009                            | 15948951 | WBGene00003169 | mec-5   | E03G2.3 | 0.372904023611923   |  |
| AGIWUR25286                                                                                    |    |   |                                     |          |                |         |         |                     |  |
| N2                                                                                             | HS | X | 15951503                            | 15954570 | WBGene00000759 | col-186 | E03G2.4 | -0.268371876051502  |  |
| AGIWUR20885                                                                                    |    |   |                                     |          |                |         |         |                     |  |
| N2                                                                                             | HS | X | 15959100                            | 15962344 | WBGene00007487 | C09G1.5 | C09G1.5 | -0.127005391538802  |  |
| AGIWUR1392;AGIWUR19086;AGIWUR25667;AGIWUR31963;AGIWUR45188                                     |    |   |                                     |          |                |         |         |                     |  |
| N2                                                                                             | HS | X | 15966112                            | 15972300 | WBGene00004103 | pqn-11  | C09G1.1 | 0.0526802499916519  |  |
| AGIWUR17453                                                                                    |    |   |                                     |          |                |         |         |                     |  |
| N2                                                                                             | HS | X | 15977762                            | 15982600 | WBGene00007484 | C09G1.2 | C09G1.2 | -0.0253294366843608 |  |
| AGIWUR5714                                                                                     |    |   |                                     |          |                |         |         |                     |  |
| N2                                                                                             | HS | X | 15986163                            | 15987594 | WBGene00007485 | C09G1.3 | C09G1.3 | -0.157934452741436  |  |
| AGIWUR19963                                                                                    |    |   |                                     |          |                |         |         |                     |  |

|                                                                                                 |    |   |          |          |                |           |           |                     |
|-------------------------------------------------------------------------------------------------|----|---|----------|----------|----------------|-----------|-----------|---------------------|
| N2                                                                                              | HS | X | 15987971 | 15996936 | WBGene00007486 | C09G1.4   | C09G1.4   | 0.0351541002728073  |
| AGIWUR10955;AGIWUR15110;AGIWUR18823;AGIWUR19674                                                 |    |   |          |          |                |           |           |                     |
| N2                                                                                              | HS | X | 16013605 | 16016920 | WBGene00044150 | VB0395L.1 | VB0395L.1 |                     |
| -0.100760219789522 AGIWUR4504;AGIWUR43845                                                       |    |   |          |          |                |           |           |                     |
| N2                                                                                              | HS | X | 16017263 | 16021776 | WBGene00003729 | nhx-1     | B0395.1   | 0.0897869019692621  |
| AGIWUR28160                                                                                     |    |   |          |          |                |           |           |                     |
| N2                                                                                              | HS | X | 16030806 | 16034816 | WBGene00007174 | mboa-1    | B0395.2   | 0.284894795741568   |
| AGIWUR19203                                                                                     |    |   |          |          |                |           |           |                     |
| N2                                                                                              | HS | X | 16035055 | 16039514 | WBGene00007175 | B0395.3   | B0395.3   | 0.0983274762903559  |
| AGIWUR3904                                                                                      |    |   |          |          |                |           |           |                     |
| N2                                                                                              | HS | X | 16049844 | 16054623 | WBGene00012073 | cpd-2     | T27A8.1   | -0.0604980233989671 |
| AGIWUR31375                                                                                     |    |   |          |          |                |           |           |                     |
| N2                                                                                              | HS | X | 16057719 | 16058934 | WBGene00012074 | T27A8.2   | T27A8.2   | -0.0415444075068017 |
| AGIWUR20370                                                                                     |    |   |          |          |                |           |           |                     |
| N2                                                                                              | HS | X | 16067069 | 16067463 | WBGene00012076 | T27A8.4   | T27A8.4   | 0.0266701692813989  |
| AGIWUR150                                                                                       |    |   |          |          |                |           |           |                     |
| N2                                                                                              | HS | X | 16072903 | 16074852 | WBGene00000760 | col-187   | C30F2.1   | 0.209512380068613   |
| AGIWUR23970                                                                                     |    |   |          |          |                |           |           |                     |
| N2                                                                                              | HS | X | 16075061 | 16075668 | WBGene00007818 | C30F2.4   | C30F2.4   | 0.0386695179301695  |
| AGIWUR33122                                                                                     |    |   |          |          |                |           |           |                     |
| N2                                                                                              | HS | X | 16076809 | 16085215 | WBGene00007816 | C30F2.2   | C30F2.2   | 0.0817251013552971  |
| AGIWUR27373                                                                                     |    |   |          |          |                |           |           |                     |
| N2                                                                                              | HS | X | 16082435 | 16085799 | WBGene00007817 | C30F2.3   | C30F2.3   | 0.0305313623732513  |
| AGIWUR22979                                                                                     |    |   |          |          |                |           |           |                     |
| N2                                                                                              | HS | X | 16094067 | 16096497 | WBGene00007819 | C30F2.5   | C30F2.5   | 0.10849905971501    |
| AGIWUR16587                                                                                     |    |   |          |          |                |           |           |                     |
| N2                                                                                              | HS | X | 16103643 | 16123903 | WBGene00014214 | ZK1073.2  | ZK1073.2  |                     |
| -0.13540956948337 AGIWUR10513                                                                   |    |   |          |          |                |           |           |                     |
| N2                                                                                              | HS | X | 16123942 | 16128865 | WBGene00014213 | ZK1073.1  | ZK1073.1  |                     |
| 0.0951710932108147                                                                              |    |   |          |          |                |           |           |                     |
| AGIWUR12484;AGIWUR13643;AGIWUR17965;AGIWUR20567;AGIWUR22715;AGIWUR27247;AGIWUR37118;AGIWUR42707 |    |   |          |          |                |           |           |                     |
| N2                                                                                              | HS | X | 16140507 | 16147022 | WBGene00008622 | F09C8.2   | F09C8.2   | -0.0188517054357167 |
| AGIWUR3954;AGIWUR39843                                                                          |    |   |          |          |                |           |           |                     |
| N2                                                                                              | HS | X | 16159648 | 16163548 | WBGene00008621 | F09C8.1   | F09C8.1   | -0.300054236122589  |
| AGIWUR27457                                                                                     |    |   |          |          |                |           |           |                     |
| N2                                                                                              | HS | X | 16184370 | 16185419 | WBGene00011227 | R11.2     | R11.2     | -0.0429281900416196 |
| AGIWUR38968                                                                                     |    |   |          |          |                |           |           |                     |
| N2                                                                                              | HS | X | 16189856 | 16195007 | WBGene00011226 | slc-25A21 | R11.1     |                     |
| 0.168142747367593 AGIWUR3436                                                                    |    |   |          |          |                |           |           |                     |



|                                                                                                |    |   |          |          |                |          |          |                     |
|------------------------------------------------------------------------------------------------|----|---|----------|----------|----------------|----------|----------|---------------------|
| N2                                                                                             | HS | X | 16196911 | 16199932 | WBGene00011228 | R11.3    | R11.3    |                     |
| -0.00617917011017255 AGIWUR13201                                                               |    |   |          |          |                |          |          |                     |
| N2                                                                                             | HS | X | 16210303 | 16210651 | WBGene00011229 | R11.4    | R11.4    | 0.0288606005980481  |
| AGIWUR11349;AGIWUR39105                                                                        |    |   |          |          |                |          |          |                     |
| N2                                                                                             | HS | X | 16212606 | 16213072 | WBGene00009069 | F23A7.4  | F23A7.4  | 0.138437588382999   |
| AGIWUR4574;AGIWUR7844;AGIWUR21278;AGIWUR27048;AGIWUR39685                                      |    |   |          |          |                |          |          |                     |
| N2                                                                                             | HS | X | 16217392 | 16217666 | WBGene00009067 | F23A7.1  | F23A7.1  | 0.113267110499391   |
| AGIWUR12165                                                                                    |    |   |          |          |                |          |          |                     |
| N2                                                                                             | HS | X | 16220010 | 16223519 | WBGene00009068 | F23A7.3  | F23A7.3  | -0.0905191106147383 |
| AGIWUR44777                                                                                    |    |   |          |          |                |          |          |                     |
| N2                                                                                             | HS | X | 16229463 | 16236856 | WBGene00009070 | F23A7.5  | F23A7.5  | -0.094490356186979  |
| AGIWUR14137;AGIWUR17393;AGIWUR33960                                                            |    |   |          |          |                |          |          |                     |
| N2                                                                                             | HS | X | 16237273 | 16240702 | WBGene00009071 | F23A7.6  | F23A7.6  | -0.0402748569757954 |
| AGIWUR2598;AGIWUR4477;AGIWUR16594;AGIWUR39535;AGIWUR42446                                      |    |   |          |          |                |          |          |                     |
| N2                                                                                             | HS | X | 16245194 | 16245559 | WBGene00012378 | W10G6.1  | W10G6.1  | -0.0859692480696062 |
| AGIWUR30616                                                                                    |    |   |          |          |                |          |          |                     |
| N2                                                                                             | HS | X | 16254843 | 16262151 | WBGene00004789 | sgk-1    | W10G6.2  | 0.0174050832670538  |
| AGIWUR40954                                                                                    |    |   |          |          |                |          |          |                     |
| N2                                                                                             | HS | X | 16262295 | 16265686 | WBGene00003485 | mua-6    | W10G6.3  | -0.0222066301258108 |
| AGIWUR3794;AGIWUR30679                                                                         |    |   |          |          |                |          |          |                     |
| N2                                                                                             | HS | X | 16275769 | 16282436 | WBGene00004745 | sdc-1    | F52E10.1 |                     |
| -0.282652042121672 AGIWUR7891                                                                  |    |   |          |          |                |          |          |                     |
| N2                                                                                             | HS | X | 16282806 | 16283203 | WBGene00009933 | F52E10.2 |          | F52E10.2            |
| -0.139587610808726 AGIWUR8938                                                                  |    |   |          |          |                |          |          |                     |
| N2                                                                                             | HS | X | 16283803 | 16284069 | WBGene00009934 | F52E10.3 |          | F52E10.3            |
| -0.195245296481313 AGIWUR4159                                                                  |    |   |          |          |                |          |          |                     |
| N2                                                                                             | HS | X | 16285598 | 16292990 | WBGene00009935 | F52E10.4 |          | F52E10.4            |
| -0.0168791270809328 AGIWUR2646;AGIWUR2750;AGIWUR18312;AGIWUR22395;AGIWUR30979;AGIWUR44314      |    |   |          |          |                |          |          |                     |
| N2                                                                                             | HS | X | 16299904 | 16304122 | WBGene00006674 | twk-21   | T01B4.1  | -0.166744659345043  |
| AGIWUR9363                                                                                     |    |   |          |          |                |          |          |                     |
| N2                                                                                             | HS | X | 16306464 | 16314998 | WBGene00006675 | twk-22   | T01B4.2  | -0.192741412751036  |
| AGIWUR18542                                                                                    |    |   |          |          |                |          |          |                     |
| N2                                                                                             | HS | X | 16315356 | 16317729 | WBGene00011310 | T01B4.3  | T01B4.3  | 0.053025508182424   |
| AGIWUR34216                                                                                    |    |   |          |          |                |          |          |                     |
| N2                                                                                             | HS | X | 16329217 | 16329997 | WBGene00007523 | C11G6.2  | C11G6.2  | 0.102341733790176   |
| AGIWUR40547                                                                                    |    |   |          |          |                |          |          |                     |
| N2                                                                                             | HS | X | 16332440 | 16346027 | WBGene00006384 | taf-3    | C11G6.1  | -0.0515775156080966 |
| AGIWUR1561;AGIWUR11199;AGIWUR12052;AGIWUR16051;AGIWUR19008;AGIWUR33712;AGIWUR35393;AGIWUR37423 |    |   |          |          |                |          |          |                     |
| N2                                                                                             | HS | X | 16354976 | 16359654 | WBGene00003624 | nhr-28   | C11G6.4  | 0.0153523461112766  |

AGIWUR8488;AGIWUR9598;AGIWUR9927;AGIWUR16883;AGIWUR19635;AGIWUR27806;AGIWUR38710;AGIWUR39679;AGIWUR41588  
 N2 HS X 16367229 16373789 WBGene000000035 ace-1 W09B12.1  
 0.0379937489111177 AGIWUR15181;AGIWUR18087;AGIWUR34105;AGIWUR44165  
 N2 HS X 16376595 16380047 WBGene000006353 sur-7 F01G12.2  
 -0.0116998794686065 AGIWUR24885  
 N2 HS X 16380597 16389371 WBGene00002280 let-2 F01G12.5  
 -0.13719028747299 AGIWUR2727  
 N2 HS X 16395076 16396949 WBGene00017170 F01G12.1 F01G12.1  
 0.0685073859525014 AGIWUR33324  
 N2 HS X 16398958 16417063 WBGene00020770 eat-17 T24D11.1  
 -0.168176503184533 AGIWUR9558;AGIWUR40096  
 N2 HS X 16446197 16451336 WBGene00018187 F38E9.5 F38E9.5 0.0431676807661177  
 AGIWUR22680  
 N2 HS X 16451942 16452559 WBGene00018186 F38E9.4 F38E9.4 -0.11474509242279  
 AGIWUR17619;AGIWUR24265;AGIWUR42297  
 N2 HS X 16471058 16474819 WBGene00018184 F38E9.1 F38E9.1 -0.14200744244207  
 AGIWUR22012  
 N2 HS X 16487481 16489397 WBGene00000281 cah-3 K05G3.3 -0.0882691235320046  
 AGIWUR12628  
 N2 HS X 16494930 16499875 WBGene00019423 K05G3.2 K05G3.2 -0.148568234299058  
 AGIWUR7369  
 N2 HS X 16501332 16501943 WBGene00019422 K05G3.1 K05G3.1 0.0827455880233066  
 AGIWUR29717  
 N2 HS X 16505248 16507411 WBGene00020795 T25D1.3 T25D1.3 0.295808715801856  
 AGIWUR19131  
 N2 HS X 16518137 16522295 WBGene00020793 T25D1.1 T25D1.1 -0.197041350628744  
 AGIWUR34205  
 N2 HS X 16536837 16540207 WBGene00003933 pat-9 T27B1.2 -0.234014131768156  
 AGIWUR33944  
 N2 HS X 16541330 16551211 WBGene00003883 osm-1 T27B1.1 0.120463108112668  
 AGIWUR26249  
 N2 HS X 16551166 16553887 WBGene00019519 K08B5.2 K08B5.2 -0.0205657468020544  
 AGIWUR30619  
 N2 HS X 16558444 16562549 WBGene00019518 K08B5.1 K08B5.1 0.0184813341957746  
 AGIWUR3014  
 N2 HS X 16595238 16602238 WBGene00000401 cdh-9 F59C12.1  
 0.0912526866035321 AGIWUR44322  
 N2 HS X 16602445 16602717 WBGene00045272 F59C12.4 F59C12.4  
 0.0333538631507579 AGIWUR17690;AGIWUR23844;AGIWUR25643;AGIWUR31519;AGIWUR37069

|                                                                                                |    |   |          |          |                |                  |                     |
|------------------------------------------------------------------------------------------------|----|---|----------|----------|----------------|------------------|---------------------|
| N2                                                                                             | HS | X | 16603364 | 16609524 | WBGene00019102 | F59C12.3         | F59C12.3            |
| 0.040503911457618 AGIWUR17001                                                                  |    |   |          |          |                |                  |                     |
| N2                                                                                             | HS | X | 16613451 | 16617675 | WBGene00015547 | ain-1 C06G1.4    | -0.136483083701789  |
| AGIWUR1288;AGIWUR16458;AGIWUR27740;AGIWUR30057;AGIWUR30412;AGIWUR32412;AGIWUR32875;AGIWUR44566 |    |   |          |          |                |                  |                     |
| N2                                                                                             | HS | X | 16621807 | 16622739 | WBGene00015546 | C06G1.2 C06G1.2  | -0.188534227857488  |
| AGIWUR30202                                                                                    |    |   |          |          |                |                  |                     |
| N2                                                                                             | HS | X | 16633363 | 16637633 | WBGene00015545 | C06G1.1 C06G1.1  | 0.135393987251213   |
| AGIWUR18757                                                                                    |    |   |          |          |                |                  |                     |
| N2                                                                                             | HS | X | 16638226 | 16662823 | WBGene00018373 | F43B10.1         | F43B10.1            |
| -0.0761586592712709 AGIWUR10226;AGIWUR36301                                                    |    |   |          |          |                |                  |                     |
| N2                                                                                             | HS | X | 16665116 | 16674732 | WBGene00018374 | tag-343 F43B10.2 |                     |
| -0.071901250729308 AGIWUR39613                                                                 |    |   |          |          |                |                  |                     |
| N2                                                                                             | HS | X | 16677340 | 16677738 | WBGene00017727 | F22H10.3         | F22H10.3            |
| 0.0264713868007682 AGIWUR1554;AGIWUR10098;AGIWUR15778;AGIWUR17954;AGIWUR19306;AGIWUR23009      |    |   |          |          |                |                  |                     |
| N2                                                                                             | HS | X | 16678488 | 16679823 | WBGene00017726 | F22H10.2         | F22H10.2            |
| 0.229091383803599 AGIWUR52                                                                     |    |   |          |          |                |                  |                     |
| N2                                                                                             | HS | X | 16684414 | 16687196 | WBGene00017729 | F22H10.5         | F22H10.5            |
| -0.203944049279303 AGIWUR34045;AGIWUR34560                                                     |    |   |          |          |                |                  |                     |
| N2                                                                                             | HS | X | 16689366 | 16690860 | WBGene00017730 | F22H10.6         | F22H10.6            |
| -0.0755942663337645 AGIWUR18260                                                                |    |   |          |          |                |                  |                     |
| N2                                                                                             | HS | X | 16702442 | 16703440 | WBGene00017725 | F22H10.1         | F22H10.1            |
| 0.242401350173519 AGIWUR35049                                                                  |    |   |          |          |                |                  |                     |
| N2                                                                                             | HS | X | 16711681 | 16720658 | WBGene00020657 | lgc-53 T21F2.1   | 0.0171194377414459  |
| AGIWUR6827;AGIWUR10514;AGIWUR34398                                                             |    |   |          |          |                |                  |                     |
| N2                                                                                             | HS | X | 16729559 | 16744698 | WBGene00001837 | hda-4 C10E2.3    | 0.00401869303387592 |
| AGIWUR10698;AGIWUR13477;AGIWUR38203;AGIWUR41406                                                |    |   |          |          |                |                  |                     |
| N2                                                                                             | HS | X | 16745753 | 16748208 | WBGene00015673 | C10E2.2 C10E2.2  | -0.0945728951979881 |
| AGIWUR3308                                                                                     |    |   |          |          |                |                  |                     |
| N2                                                                                             | HS | X | 16749755 | 16751110 | WBGene00015674 | C10E2.4 C10E2.4  | 0.00188791875543526 |
| AGIWUR16706                                                                                    |    |   |          |          |                |                  |                     |
| N2                                                                                             | HS | X | 16751864 | 16753673 | WBGene00015675 | C10E2.5 C10E2.5  |                     |
| 0.000550617735922465 AGIWUR2100;AGIWUR3033;AGIWUR11634                                         |    |   |          |          |                |                  |                     |
| N2                                                                                             | HS | X | 16763153 | 16766656 | WBGene00015672 | C10E2.1 C10E2.1  | -0.0407036089810706 |
| AGIWUR44107                                                                                    |    |   |          |          |                |                  |                     |
| N2                                                                                             | HS | X | 16767422 | 16770498 | WBGene00015676 | mct-6 C10E2.6    | -0.368631741379168  |
| AGIWUR17867                                                                                    |    |   |          |          |                |                  |                     |
| N2                                                                                             | HS | X | 16780994 | 16782894 | WBGene00020144 | T01C8.3 T01C8.3  | -0.071859066310056  |
| AGIWUR41175                                                                                    |    |   |          |          |                |                  |                     |
| N2                                                                                             | HS | X | 16786438 | 16787620 | WBGene00020143 | T01C8.2 T01C8.2  | 0.154827744649815   |

|                                                                         |    |   |          |          |                                                    |
|-------------------------------------------------------------------------|----|---|----------|----------|----------------------------------------------------|
| AGIWUR42620                                                             |    |   |          |          |                                                    |
| N2                                                                      | HS | X | 16787632 | 16790412 | WBGene00020145 got-1.1 T01C8.4 0.117916754291403   |
| AGIWUR3969                                                              |    |   |          |          |                                                    |
| N2                                                                      | HS | X | 16791347 | 16793137 | WBGene00020146 got-1.2 T01C8.5 0.0158671232492047  |
| AGIWUR11961;AGIWUR17870;AGIWUR30233                                     |    |   |          |          |                                                    |
| N2                                                                      | HS | X | 16796087 | 16803357 | WBGene00020142 aak-2 T01C8.1 -0.0615216599920192   |
| AGIWUR2222;AGIWUR6304;AGIWUR17730;AGIWUR36784;AGIWUR37853;AGIWUR43105   |    |   |          |          |                                                    |
| N2                                                                      | HS | X | 16803368 | 16807125 | WBGene00003168 mec-4 T01C8.7 0.254570208660612     |
| AGIWUR16250                                                             |    |   |          |          |                                                    |
| N2                                                                      | HS | X | 16807461 | 16813673 | WBGene00000294 cas-1 F41G4.2 -0.0750902126078614   |
| AGIWUR13644;AGIWUR15303;AGIWUR21211;AGIWUR24406                         |    |   |          |          |                                                    |
| N2                                                                      | HS | X | 16816260 | 16819268 | WBGene00006067 sto-5 F41G4.3 0.0199821965902878    |
| AGIWUR11224;AGIWUR13982;AGIWUR15700;AGIWUR16568;AGIWUR30756;AGIWUR40541 |    |   |          |          |                                                    |
| N2                                                                      | HS | X | 16829767 | 16830672 | WBGene00018308 F41G4.4 F41G4.4 -0.104171806632927  |
| AGIWUR34367                                                             |    |   |          |          |                                                    |
| N2                                                                      | HS | X | 16833588 | 16836404 | WBGene00018310 F41G4.7 F41G4.7 -0.145752782622762  |
| AGIWUR8357;AGIWUR33677                                                  |    |   |          |          |                                                    |
| N2                                                                      | HS | X | 16841105 | 16842975 | WBGene00018307 dyla-1 F41G4.1 0.0299325585228214   |
| AGIWUR325                                                               |    |   |          |          |                                                    |
| N2                                                                      | HS | X | 16843355 | 16845024 | WBGene00018311 F41G4.8 F41G4.8 -0.0107903785956935 |
| AGIWUR7728                                                              |    |   |          |          |                                                    |
| N2                                                                      | HS | X | 16845374 | 16862005 | WBGene00020632 T20F7.5 T20F7.5 -0.0136138922820703 |
| AGIWUR8382;AGIWUR14936                                                  |    |   |          |          |                                                    |
| N2                                                                      | HS | X | 16866069 | 16869031 | WBGene00020633 aakg-2 T20F7.6 -0.169439080511783   |
| AGIWUR36879                                                             |    |   |          |          |                                                    |
| N2                                                                      | HS | X | 16872926 | 16878351 | WBGene00020630 T20F7.1 T20F7.1 0.0394654853028236  |
| AGIWUR4889                                                              |    |   |          |          |                                                    |
| N2                                                                      | HS | X | 16878148 | 16880526 | WBGene00020634 acs-9 T20F7.7 -0.14109845454458     |
| AGIWUR18018;AGIWUR22812                                                 |    |   |          |          |                                                    |
| N2                                                                      | HS | X | 16891991 | 16893148 | WBGene00018203 F39F10.3 F39F10.3                   |
| -0.236714289453655 AGIWUR33743                                          |    |   |          |          |                                                    |
| N2                                                                      | HS | X | 16894884 | 16895916 | WBGene00018202 F39F10.2 F39F10.2                   |
| 0.152573156446602 AGIWUR36126                                           |    |   |          |          |                                                    |
| N2                                                                      | HS | X | 16902391 | 16904332 | WBGene00018204 F39F10.4 F39F10.4                   |
| -0.15060177337492 AGIWUR4716                                            |    |   |          |          |                                                    |
| N2                                                                      | HS | X | 16913906 | 16916800 | WBGene00016255 C30E1.6 C30E1.6 0.0440920657588069  |
| AGIWUR22467;AGIWUR29826                                                 |    |   |          |          |                                                    |
| N2                                                                      | HS | X | 16916812 | 16919319 | WBGene00016257 C30E1.8 C30E1.8 -0.351115824338697  |
| AGIWUR41597                                                             |    |   |          |          |                                                    |

|                                                                                            |    |   |          |          |                |                 |                     |
|--------------------------------------------------------------------------------------------|----|---|----------|----------|----------------|-----------------|---------------------|
| N2                                                                                         | HS | X | 16921853 | 16922861 | WBGene00016254 | fbxb-114        | C30E1.5             |
| 0.105172709755343 AGIWUR31156                                                              |    |   |          |          |                |                 |                     |
| N2                                                                                         | HS | X | 16923936 | 16925917 | WBGene00016253 | C30E1.4 C30E1.4 | 0.0907275537428243  |
| AGIWUR42296                                                                                |    |   |          |          |                |                 |                     |
| N2                                                                                         | HS | X | 16925954 | 16926821 | WBGene00016252 | C30E1.3 C30E1.3 |                     |
| -0.00454312524148737 AGIWUR41174                                                           |    |   |          |          |                |                 |                     |
| N2                                                                                         | HS | X | 16926964 | 16928023 | WBGene00016251 | C30E1.2 C30E1.2 | 0.144614182729393   |
| AGIWUR28158                                                                                |    |   |          |          |                |                 |                     |
| N2                                                                                         | HS | X | 16929914 | 16931619 | WBGene00022951 | C30E1.9 C30E1.9 | -0.0976275335960572 |
| AGIWUR1340;AGIWUR1400;AGIWUR9127;AGIWUR14609;AGIWUR33336                                   |    |   |          |          |                |                 |                     |
| N2                                                                                         | HS | X | 16943323 | 16943517 | WBGene00219964 | F52G3.6 F52G3.6 | -0.128226983244248  |
| AGIWUR34273                                                                                |    |   |          |          |                |                 |                     |
| N2                                                                                         | HS | X | 16944877 | 16948026 | WBGene00018711 | F52G3.3 F52G3.3 | -0.216320573810046  |
| AGIWUR8520                                                                                 |    |   |          |          |                |                 |                     |
| N2                                                                                         | HS | X | 16948355 | 16952113 | WBGene00018712 | F52G3.4 F52G3.4 | -0.209192150811393  |
| AGIWUR27777                                                                                |    |   |          |          |                |                 |                     |
| N2                                                                                         | HS | X | 16963871 | 16972808 | WBGene00018710 | F52G3.1 F52G3.1 | -0.155963185527021  |
| AGIWUR3424                                                                                 |    |   |          |          |                |                 |                     |
| N2                                                                                         | HS | X | 16973227 | 16976130 | WBGene00018713 | F52G3.5 F52G3.5 | 0.183248457270448   |
| AGIWUR17329                                                                                |    |   |          |          |                |                 |                     |
| N2                                                                                         | HS | X | 16986629 | 17008462 | WBGene00019347 | mb1-1 K02H8.1   | -0.038717314084844  |
| AGIWUR10094;AGIWUR21006;AGIWUR27337;AGIWUR28511;AGIWUR33493;AGIWUR40744                    |    |   |          |          |                |                 |                     |
| N2                                                                                         | HS | X | 17013462 | 17014028 | WBGene00018030 | F35B3.3 F35B3.3 | 0.0956761223765685  |
| AGIWUR40040                                                                                |    |   |          |          |                |                 |                     |
| N2                                                                                         | HS | X | 17015297 | 17017814 | WBGene00018028 | F35B3.1 F35B3.1 | -0.310107865438409  |
| AGIWUR12954                                                                                |    |   |          |          |                |                 |                     |
| N2                                                                                         | HS | X | 17019616 | 17020958 | WBGene00018031 | F35B3.4 F35B3.4 | 0.0802917738455946  |
| AGIWUR6234                                                                                 |    |   |          |          |                |                 |                     |
| N2                                                                                         | HS | X | 17021821 | 17030219 | WBGene00004121 | ptrn-1 F35B3.5  | -0.0247785862227712 |
| AGIWUR2363;AGIWUR37820                                                                     |    |   |          |          |                |                 |                     |
| N2                                                                                         | HS | X | 17035206 | 17042985 | WBGene00018033 | F35B3.7 F35B3.7 | 0.0660194628125916  |
| AGIWUR16065                                                                                |    |   |          |          |                |                 |                     |
| N2                                                                                         | HS | X | 17044115 | 17045497 | WBGene00016268 | C30G4.2 C30G4.2 | -0.0483869446597724 |
| AGIWUR30899                                                                                |    |   |          |          |                |                 |                     |
| N2                                                                                         | HS | X | 17046261 | 17055581 | WBGene00001537 | gcy-11 C30G4.3  | -0.299104907783772  |
| AGIWUR42669                                                                                |    |   |          |          |                |                 |                     |
| N2                                                                                         | HS | X | 17056925 | 17072188 | WBGene00016269 | C30G4.4 C30G4.4 | -0.138810582947306  |
| AGIWUR709;AGIWUR4881;AGIWUR5058;AGIWUR8872;AGIWUR31858;AGIWUR31945;AGIWUR37580;AGIWUR41091 |    |   |          |          |                |                 |                     |
| N2                                                                                         | HS | X | 17073810 | 17080685 | WBGene00016271 | irld-23 C30G4.6 | 0.0891057934930499  |

AGIWUR155;AGIWUR11710;AGIWUR29104;AGIWUR29756;AGIWUR34987;AGIWUR36342;AGIWUR39395;AGIWUR43306  
 N2 HS X 17081128 17082042 WBGene00044773 C08A9.10 C08A9.10  
 0.233323539538924 AGIWUR19873;AGIWUR22703  
 N2 HS X 17083162 17083742 WBGene00045273 C08A9.11 C08A9.11  
 0.198140199305779 AGIWUR28514  
 N2 HS X 17087882 17093299 WBGene00015583 C08A9.3 C08A9.3 -0.0821988813663381  
 AGIWUR10031;AGIWUR22743;AGIWUR23148;AGIWUR31283;AGIWUR39427  
 N2 HS X 17092718 17094223 WBGene00004932 sod-3 C08A9.1 0.139570333882505  
 AGIWUR31330  
 N2 HS X 17094288 17096537 WBGene00015586 C08A9.6 C08A9.6 0.0404058628154988  
 AGIWUR30672  
 N2 HS X 17099112 17100752 WBGene00015587 sdz-2 C08A9.7 -0.134151664750768  
 AGIWUR13578;AGIWUR33350;AGIWUR38756  
 N2 HS X 17102845 17104871 WBGene00015588 C08A9.8 C08A9.8 -0.0987971440509532  
 AGIWUR24190;AGIWUR42370  
 N2 HS X 17109282 17110655 WBGene00019576 K09E3.5 K09E3.5 -0.0371270029887292  
 AGIWUR9689  
 N2 HS X 17113965 17115189 WBGene00019577 K09E3.6 K09E3.6 0.0651272770232962  
 AGIWUR35743  
 N2 HS X 17117659 17117988 WBGene00019574 K09E3.2 K09E3.2 -0.0891421339131933  
 AGIWUR2162  
 N2 HS X 17119269 17120263 WBGene00019575 K09E3.4 K09E3.4 -0.050677159507591  
 AGIWUR1080;AGIWUR6845;AGIWUR22791;AGIWUR24492  
 N2 HS X 17131348 17134527 WBGene00019578 K09E3.7 K09E3.7 -0.250330396612595  
 AGIWUR19317  
 N2 HS X 17135975 17138110 WBGene00020725 cnp-3 T23C6.3 -0.559651820744454  
 AGIWUR12081  
 N2 HS X 17147531 17149927 WBGene00020726 T23C6.4 T23C6.4 -0.0686169892128845  
 AGIWUR19464  
 N2 HS X 17151522 17154595 WBGene00007011 mdt-1.2 T23C6.1 -0.0636167353129693  
 AGIWUR698  
 N2 HS X 17155088 17157957 WBGene00020727 npr-21 T23C6.5 -0.273262575147938  
 AGIWUR19735  
 N2 HS X 17176490 17176777 WBGene00015121 B0302.4 B0302.4 -0.0611916881161569  
 AGIWUR31228  
 N2 HS X 17178539 17178992 WBGene00015119 B0302.2 B0302.2 -0.21933135346479  
 AGIWUR36023  
 N2 HS X 17186380 17193289 WBGene00002207 sid-3 B0302.1 -0.389688527988342  
 AGIWUR9881

|                                                                                            |    |   |          |          |                |           |          |                     |
|--------------------------------------------------------------------------------------------|----|---|----------|----------|----------------|-----------|----------|---------------------|
| N2                                                                                         | HS | X | 17193300 | 17195137 | WBGene00015122 | B0302.5   | B0302.5  | 0.0551157253566306  |
| AGIWUR15536                                                                                |    |   |          |          |                |           |          |                     |
| N2                                                                                         | HS | X | 17205243 | 17209365 | WBGene00020365 | T08G2.2   | T08G2.2  | 0.0367777621668317  |
| AGIWUR13064                                                                                |    |   |          |          |                |           |          |                     |
| N2                                                                                         | HS | X | 17213144 | 17214929 | WBGene00020366 | acdH-10   | T08G2.3  | -0.0672060280109186 |
| AGIWUR21557;AGIWUR26581;AGIWUR38674                                                        |    |   |          |          |                |           |          |                     |
| N2                                                                                         | HS | X | 17215018 | 17217105 | WBGene00020812 | acdH-7    | T25G12.5 |                     |
| -0.449940679591162 AGIWUR35641                                                             |    |   |          |          |                |           |          |                     |
| N2                                                                                         | HS | X | 17222475 | 17224464 | WBGene00004270 | rab-6.2   | T25G12.4 |                     |
| -0.0881674162382482 AGIWUR5495;AGIWUR12185;AGIWUR18195;AGIWUR26907;AGIWUR33675;AGIWUR33764 |    |   |          |          |                |           |          |                     |
| N2                                                                                         | HS | X | 17225197 | 17230208 | WBGene00020813 | T25G12.6  |          | T25G12.6            |
| -0.181009191369995 AGIWUR6172;AGIWUR9894                                                   |    |   |          |          |                |           |          |                     |
| N2                                                                                         | HS | X | 17230719 | 17235838 | WBGene00000993 | dhs-30    | T25G12.7 |                     |
| 0.069992190189641 AGIWUR20085;AGIWUR42792                                                  |    |   |          |          |                |           |          |                     |
| N2                                                                                         | HS | X | 17236933 | 17237855 | WBGene00020817 | T25G12.11 |          | T25G12.11           |
| -0.293214771531952 AGIWUR8755                                                              |    |   |          |          |                |           |          |                     |
| N2                                                                                         | HS | X | 17247674 | 17248972 | WBGene00020810 | T25G12.2  |          | T25G12.2            |
| -0.111172495338021 AGIWUR33125                                                             |    |   |          |          |                |           |          |                     |
| N2                                                                                         | HS | X | 17248837 | 17250007 | WBGene00020809 | T25G12.1  |          | T25G12.1            |
| -0.0636516811012857 AGIWUR1918                                                             |    |   |          |          |                |           |          |                     |
| N2                                                                                         | HS | X | 17256235 | 17256780 | WBGene00021500 | Y40C7B.4  |          | Y40C7B.4            |
| 0.174752967828574 AGIWUR5826;AGIWUR10870;AGIWUR23992                                       |    |   |          |          |                |           |          |                     |
| N2                                                                                         | HS | X | 17258335 | 17259585 | WBGene00021499 | Y40C7B.3  |          | Y40C7B.3            |
| 0.0595705285097683 AGIWUR34942                                                             |    |   |          |          |                |           |          |                     |
| N2                                                                                         | HS | X | 17259889 | 17263584 | WBGene00021498 | Y40C7B.1  |          | Y40C7B.1            |
| 0.065851928149256 AGIWUR9091;AGIWUR15084                                                   |    |   |          |          |                |           |          |                     |
| N2                                                                                         | HS | X | 17263831 | 17266460 | WBGene00021501 | Y40C7B.5  |          | Y40C7B.5            |
| -0.0641865115273932 AGIWUR40180                                                            |    |   |          |          |                |           |          |                     |
| N2                                                                                         | HS | X | 17266695 | 17269960 | WBGene00016348 | C33E10.6  |          | C33E10.6            |
| 0.0170814307901459 AGIWUR39517                                                             |    |   |          |          |                |           |          |                     |
| N2                                                                                         | HS | X | 17272934 | 17279532 | WBGene00016347 | C33E10.5  |          | C33E10.5            |
| 0.0899236710386662 AGIWUR31699                                                             |    |   |          |          |                |           |          |                     |
| N2                                                                                         | HS | X | 17280761 | 17283574 | WBGene00023246 | C33E10.4  |          | C33E10.4            |
| 0.315465810458051 AGIWUR11057                                                              |    |   |          |          |                |           |          |                     |
| N2                                                                                         | HS | X | 17284339 | 17285449 | WBGene00023245 | C33E10.3  |          | C33E10.3            |
| -0.140515146394934 AGIWUR20722;AGIWUR33047                                                 |    |   |          |          |                |           |          |                     |
| N2                                                                                         | HS | X | 17286274 | 17287564 | WBGene00023247 | C33E10.7  |          | C33E10.7            |
| -0.147013573823978 AGIWUR28214                                                             |    |   |          |          |                |           |          |                     |
| N2                                                                                         | HS | X | 17293094 | 17294828 | WBGene00016349 | C33E10.8  |          | C33E10.8            |

|                                                                                    |                                                                        |          |                |                                     |           |
|------------------------------------------------------------------------------------|------------------------------------------------------------------------|----------|----------------|-------------------------------------|-----------|
| -0.0492604683070805                                                                | AGIWUR14047                                                            |          |                |                                     |           |
| N2 HS X                                                                            | 17296644                                                               | 17297231 | WBGene00023248 | C33E10.9                            | C33E10.9  |
| -0.0976240057820537                                                                | AGIWUR4144;AGIWUR19105;AGIWUR19349;AGIWUR39258                         |          |                |                                     |           |
| N2 HS X                                                                            | 17301374                                                               | 17301923 | WBGene00016350 | C33E10.10                           | C33E10.10 |
| 0.035761188107978                                                                  | AGIWUR15483;AGIWUR32562                                                |          |                |                                     |           |
| N2 HS X                                                                            | 17302719                                                               | 17303994 | WBGene00016346 | fbxa-120                            | C33E10.2  |
| -0.11059879841739                                                                  | AGIWUR18344                                                            |          |                |                                     |           |
| N2 HS X                                                                            | 17305325                                                               | 17306164 | WBGene00016345 | C33E10.1                            | C33E10.1  |
| -0.251391567077615                                                                 | AGIWUR34159                                                            |          |                |                                     |           |
| N2 HS X                                                                            | 17318584                                                               | 17326603 | WBGene00004220 | ptr-5 C53C11.3                      |           |
| 0.0406829605036796                                                                 | AGIWUR18738                                                            |          |                |                                     |           |
| N2 HS X                                                                            | 17334052                                                               | 17336169 | WBGene00044770 | C53C11.5                            | C53C11.5  |
| 0.0379144428922151                                                                 | AGIWUR36267;AGIWUR38496                                                |          |                |                                     |           |
| N2 HS X                                                                            | 17337279                                                               | 17338632 | WBGene00016900 | C53C11.2                            | C53C11.2  |
| 0.240402620264051                                                                  | AGIWUR1053;AGIWUR10129;AGIWUR13719;AGIWUR15294;AGIWUR20496;AGIWUR31951 |          |                |                                     |           |
| N2 HS X                                                                            | 17339907                                                               | 17342220 | WBGene00016899 | C53C11.1                            | C53C11.1  |
| -0.289915397740443                                                                 | AGIWUR10071                                                            |          |                |                                     |           |
| N2 HS X                                                                            | 17359770                                                               | 17364764 | WBGene00017338 | F10D7.1 F10D7.1 0.00273006755604044 |           |
| AGIWUR43231                                                                        |                                                                        |          |                |                                     |           |
| N2 HS X                                                                            | 17364646                                                               | 17368642 | WBGene00017339 | F10D7.2 F10D7.2 -0.043476272507819  |           |
| AGIWUR12776                                                                        |                                                                        |          |                |                                     |           |
| N2 HS X                                                                            | 17372318                                                               | 17374877 | WBGene00017340 | F10D7.3 F10D7.3 -0.0571397092971448 |           |
| AGIWUR41425                                                                        |                                                                        |          |                |                                     |           |
| N2 HS X                                                                            | 17378569                                                               | 17381818 | WBGene00017341 | F10D7.4 F10D7.4 -0.0848248786232686 |           |
| AGIWUR22452                                                                        |                                                                        |          |                |                                     |           |
| N2 HS X                                                                            | 17383125                                                               | 17391615 | WBGene00017342 | F10D7.5 F10D7.5 -0.135151853508333  |           |
| AGIWUR1506;AGIWUR16573;AGIWUR19528;AGIWUR20197;AGIWUR29819;AGIWUR37849;AGIWUR44662 |                                                                        |          |                |                                     |           |
| N2 HS X                                                                            | 17393789                                                               | 17396556 | WBGene00006886 | vap-1 F11C7.3 0.0487105276630171    |           |
| AGIWUR25126                                                                        |                                                                        |          |                |                                     |           |
| N2 HS X                                                                            | 17396814                                                               | 17397798 | WBGene00017376 | F11C7.2 F11C7.2 0.169816072542698   |           |
| AGIWUR22548                                                                        |                                                                        |          |                |                                     |           |
| N2 HS X                                                                            | 17398593                                                               | 17399357 | WBGene00017379 | F11C7.7 F11C7.7 0.245598596416036   |           |
| AGIWUR29574                                                                        |                                                                        |          |                |                                     |           |
| N2 HS X                                                                            | 17401571                                                               | 17402581 | WBGene00017378 | F11C7.6 F11C7.6 -0.0814173178891746 |           |
| AGIWUR43595                                                                        |                                                                        |          |                |                                     |           |
| N2 HS X                                                                            | 17402540                                                               | 17414014 | WBGene00000792 | crb-1 F11C7.4 -0.132314742231268    |           |
| AGIWUR8685;AGIWUR17055;AGIWUR28897                                                 |                                                                        |          |                |                                     |           |
| N2 HS X                                                                            | 17420211                                                               | 17421582 | WBGene00003891 | osm-11 F11C7.5 -0.0349747598078114  |           |
| AGIWUR67;AGIWUR19910;AGIWUR40771                                                   |                                                                        |          |                |                                     |           |



|                                                                         |    |   |          |          |                 |          |          |                     |
|-------------------------------------------------------------------------|----|---|----------|----------|-----------------|----------|----------|---------------------|
| N2                                                                      | HS | X | 17429042 | 17433103 | WBGene00017375  | pbo-6    | F11C7.1  | -0.0310785922598313 |
| AGIWUR26634                                                             |    |   |          |          |                 |          |          |                     |
| N2                                                                      | HS | X | 17434445 | 17438080 | WBGene00016489  | C36E6.1  | C36E6.1  | -0.343939488033709  |
| AGIWUR10631;AGIWUR13541;AGIWUR41270                                     |    |   |          |          |                 |          |          |                     |
| N2                                                                      | HS | X | 17438619 | 17439751 | WBGene00044683  | C36E6.8  | C36E6.8  | 0.0668785125853315  |
| AGIWUR4420;AGIWUR11987;AGIWUR31569;AGIWUR37832                          |    |   |          |          |                 |          |          |                     |
| N2                                                                      | HS | X | 17452392 | 17455861 | WBGene00016490  | C36E6.2  | C36E6.2  | 0.0476147672933749  |
| AGIWUR29514                                                             |    |   |          |          |                 |          |          |                     |
| N2                                                                      | HS | X | 17459115 | 17460778 | WBGene00003369  | mlc-1    | C36E6.3  | 0.18355516931841    |
| AGIWUR8479;AGIWUR21106;AGIWUR22126;AGIWUR26754;AGIWUR37052              |    |   |          |          |                 |          |          |                     |
| N2                                                                      | HS | X | 17460778 | 17464966 | WBGene00022647  | slc-17.1 |          | ZK54.1              |
| -0.0942503002420558 AGIWUR15167;AGIWUR35072;AGIWUR40379;AGIWUR43365     |    |   |          |          |                 |          |          |                     |
| N2                                                                      | HS | X | 17467121 | 17474585 | WBGene00006602  | tps-1    | ZK54.2   | -0.0341234777842594 |
| AGIWUR3579;AGIWUR8084;AGIWUR16998                                       |    |   |          |          |                 |          |          |                     |
| N2                                                                      | HS | X | 17479842 | 17480309 | WBGene00020085  | R106.1   | R106.1   | -0.212904036872029  |
| AGIWUR7948                                                              |    |   |          |          |                 |          |          |                     |
| N2                                                                      | HS | X | 17480653 | 17481960 | WBGene000206419 | R106.5   | R106.5   | -0.0525312014109698 |
| AGIWUR6816;AGIWUR8226;AGIWUR12105;AGIWUR15357;AGIWUR25111;AGIWUR39075   |    |   |          |          |                 |          |          |                     |
| N2                                                                      | HS | X | 17483012 | 17486831 | WBGene00020086  | npr-24   | R106.2   | 0.115282399059064   |
| AGIWUR20558                                                             |    |   |          |          |                 |          |          |                     |
| N2                                                                      | HS | X | 17518445 | 17528197 | WBGene00003600  | nhr-1    | R09G11.2 |                     |
| 0.0468756375875774 AGIWUR2950;AGIWUR4048;AGIWUR32468;AGIWUR39789        |    |   |          |          |                 |          |          |                     |
| N2                                                                      | HS | X | 17528344 | 17531980 | WBGene00006319  | sup-10   | R09G11.1 |                     |
| 0.101062660557035 AGIWUR22302;AGIWUR35729;AGIWUR37633                   |    |   |          |          |                 |          |          |                     |
| N2                                                                      | HS | X | 17532976 | 17534064 | WBGene00017938  | F31A3.3  | F31A3.3  | -0.476195928240509  |
| AGIWUR14131                                                             |    |   |          |          |                 |          |          |                     |
| N2                                                                      | HS | X | 17553419 | 17554449 | WBGene00000026  | abu-3    | F31A3.1  | 0.045596124018811   |
| AGIWUR19465                                                             |    |   |          |          |                 |          |          |                     |
| N2                                                                      | HS | X | 17554946 | 17561464 | WBGene00017939  | F31A3.5  | F31A3.5  | -0.104073537133035  |
| AGIWUR11105;AGIWUR12739;AGIWUR19710;AGIWUR33019;AGIWUR35493;AGIWUR43788 |    |   |          |          |                 |          |          |                     |
| N2                                                                      | HS | X | 17567643 | 17571923 | WBGene00018191  | frpr-7   | F39B3.2  | 0.0606234367493013  |
| AGIWUR17280                                                             |    |   |          |          |                 |          |          |                     |
| N2                                                                      | HS | X | 17578692 | 17579111 | WBGene00018192  | F39B3.3  | F39B3.3  | 0.134694261861849   |
| AGIWUR14256                                                             |    |   |          |          |                 |          |          |                     |
| N2                                                                      | HS | X | 17600412 | 17601503 | WBGene00002272  | lec-9    | C16H3.2  | 0.129388252319984   |
| AGIWUR23352                                                             |    |   |          |          |                 |          |          |                     |
| N2                                                                      | HS | X | 17601607 | 17610048 | WBGene00015868  | C16H3.3  | C16H3.3  | -0.360890924247096  |
| AGIWUR8937;AGIWUR32768                                                  |    |   |          |          |                 |          |          |                     |
| N2                                                                      | HS | X | 17617827 | 17619458 | WBGene00015867  | ncs-7    | C16H3.1  | -0.156743248852903  |

|            |    |   |                                                                                                                                                                                 |          |                |                                     |
|------------|----|---|---------------------------------------------------------------------------------------------------------------------------------------------------------------------------------|----------|----------------|-------------------------------------|
| AGIWUR9806 |    |   |                                                                                                                                                                                 |          |                |                                     |
| N2         | HS | X | 17622778                                                                                                                                                                        | 17640743 | WBGene00019211 | H18N23.2 H18N23.2                   |
|            |    |   | -0.197953830287231 AGIWUR637;AGIWUR9448;AGIWUR16628                                                                                                                             |          |                |                                     |
| N2         | HS | X | 17650178                                                                                                                                                                        | 17651594 | WBGene00044771 | tmem-218 T23E7.5                    |
|            |    |   | -0.0155873956908232 AGIWUR2801;AGIWUR33791                                                                                                                                      |          |                |                                     |
| N2         | HS | X | 17662458                                                                                                                                                                        | 17665357 | WBGene00003744 | nlp-6 T23E7.4 -0.0805808203592067   |
|            |    |   | AGIWUR7630;AGIWUR25902;AGIWUR28626;AGIWUR43164                                                                                                                                  |          |                |                                     |
| N2         | HS | X | 17671029                                                                                                                                                                        | 17680793 | WBGene00020732 | T23E7.2 T23E7.2 0.00282781315437219 |
|            |    |   | AGIWUR357;AGIWUR3225;AGIWUR7696;AGIWUR15128;AGIWUR17786;AGIWUR19744;AGIWUR22848;AGIWUR23185;AGIWUR24830;AGIWUR31754;AGIWUR36428;AGIWUR39375;AGIWUR41150;AGIWUR42827;AGIWUR42893 |          |                |                                     |
| N2         | HS | X | 17680873                                                                                                                                                                        | 17682294 | WBGene00044772 | T23E7.6 T23E7.6 0.0258727230059712  |
|            |    |   | AGIWUR7154;AGIWUR11579;AGIWUR12544;AGIWUR17726;AGIWUR31690;AGIWUR35251;AGIWUR36341;AGIWUR39773;AGIWUR40382;AGIWUR41037                                                          |          |                |                                     |
| N2         | HS | X | 17695232                                                                                                                                                                        | 17701744 | WBGene00017625 | cgt-2 F20B4.6 -0.0166258555716183   |
|            |    |   | AGIWUR4948;AGIWUR24597                                                                                                                                                          |          |                |                                     |
| N2         | HS | X | 17710286                                                                                                                                                                        | 17711674 | WBGene00019189 | H11L12.1 H11L12.1                   |
|            |    |   | -0.257597109793991 AGIWUR6383                                                                                                                                                   |          |                |                                     |
| N2         | HS | X | 17714456                                                                                                                                                                        | 17714832 | WBGene00007069 | 6R55.2 6R55.2 -0.0144658367909809   |
|            |    |   | AGIWUR33343                                                                                                                                                                     |          |                |                                     |
| N2         | HS | X | 17714968                                                                                                                                                                        | 17718720 | WBGene00007068 | cTel155X.1 cTel155X.1               |
|            |    |   | -0.317862765375585 AGIWUR19047;AGIWUR34189;AGIWUR43038                                                                                                                          |          |                |                                     |
